# Supplementary material for: Reactions of chemically activated C9H9 species II: The reaction of phenyl radicals with allene and cyclopropene, and of benzyl radicals with acetyleneElectronic supplementary information (ESI) available: Full [C9H9] reaction scheme. Additional quantum chemical calculations not reported yet in earlier publications. Full product distribution and over-all rate coefficient listings, both uncorrected and effective data, for all reaction conditions examined. For the most important products, tables are included listing the yield as function of temperature and pressure. Modified Arrhenius fits for the over-all TST rate coefficient and the TST rate coefficient of the different entrance channels are listed for different temperature intervals. See http://www.rsc.org/suppdata/cp/b3/b303908k/ or contact the authors directly, or download from the website http://arrhenius.chem.kuleuven.ac.be.
Source: Royal Society of Chemistry journal article supplement (doi:10.1039/b303908k), 2003-01-01
Supplement: benzylacetylene.pdf [file benzylacetylene.pdf]

**Reactions of chemically activated C<sub>9</sub>H<sub>9</sub> species II:**  
**The reaction of phenyl radicals with allene and cyclopropopene,**  
**and of benzyl with acetylene**

- Supporting information -

Luc Vereecken, Jozef Peeters

Submitted to Phys. Chem. Chem. Phys

---

## Content

Page 2 : Modified Arrhenius expressions for the rate coefficient of the benzyl + acetylene reaction, and the partial rate coefficients for the three entrance channels, as derived in the TST calculations.

Page 3 : Temperature and pressure-dependent product yields (all products)

Page 963 : Tabulated effective product yields for the major products

Product species needed to obtain a product fraction of 0.995

| species                              | maximum contribution |
|--------------------------------------|----------------------|
| Indene+H                             | 1.00000              |
| rad20                                | 0.999996             |
| PhCH <sub>2</sub> CCH+H              | 0.595618             |
| rad22                                | 0.572686             |
| rad21                                | 0.263695             |
| rad18                                | 0.171125             |
| PhCHCCH <sub>2</sub> +H              | 0.161819             |
| Ph+Allene                            | 0.104926             |
| rad23                                | 0.101050             |
| rad45                                | 0.0705181            |
| rad6                                 | 0.0345606            |
| PAH <sub>3</sub> +H                  | 0.0332896            |
| rad11                                | 0.0225527            |
| rad50                                | 0.0215186            |
| rad9                                 | 0.0195022            |
| PAH <sub>9</sub> +H                  | 0.0186062            |
| rad39                                | 0.0178671            |
| rad51                                | 0.0173912            |
| rad71                                | 0.0153456            |
| PAH <sub>7</sub> +H                  | 0.0151909            |
| rad38                                | 0.0140360            |
| rad36                                | 0.00692738           |
| rad46                                | 0.00642053           |
| rad19anti                            | 0.00632991           |
| PhCCH+CH <sub>3</sub>                | 0.00627731           |
| rad73                                | 0.00478529           |
| rad30                                | 0.00419530           |
| Ph+MeAc                              | 0.00395008           |
| rad35                                | 0.00346264           |
| Benzyl+C <sub>2</sub> H <sub>2</sub> | 0.00000              |

More information is available (population-averaged unimolecular rate coefficients, relative concentrations of intermediates,...), which is not included here due to the volume of the data. Contact the authors directly for obtaining additional supporting information.

## Modified Arrhenius expressions

Modified Arrhenius expressions for the total and partial rate coefficients of the initial reaction of benzyl + acetylene, as obtained in the TST calculations. As redissociation is a very important channel at temperatures above 1000K, it needs to be taken into account to get the effective rate coefficient of this reactions. See main text for a modified Arrhenius expression for T=1000-4000K including redissociation corrections.

10-300 K :  $k_{\text{rad20}}(T) = 1.036 \times 10^{-11} \cdot T^{-0.590} \cdot \exp(-55.183 \text{ kJ mol}^{-1} / kT)$   
reproduces TST calculations within factor of 1.4

200-2000 K :  $k_{\text{rad20}}(T) = 3.391 \times 10^{-18} \cdot T^{1.842} \cdot \exp(-51.819 \text{ kJ mol}^{-1} / kT)$   
reproduces TST calculations within factor of 1.04

1000-4000 K :  $k_{\text{rad20}}(T) = 8.067 \times 10^{-19} \cdot T^{2.022} \cdot \exp(-50.289 \text{ kJ mol}^{-1} / kT)$   
reproduces TST calculations within factor of 1.0002

## Temperature and pressure-dependent product yields (all products)

- Pressure range spans 1E-9 to 1E8 Pa, in steps of 1 order of magnitude.
- Temperature starts at 20K, increases in steps of 10K to 300K, then in steps of 100K to 1500K, and finally in steps of 250K up to 4000K.
- Rate constants are in units of  $\text{cm}^3 \text{ molecule}^{-1} \text{ s}^{-1}$ , product yields (PY) in fractions.
- The "effective" rate constants and product yields are corrected for redissociation to the original reactants, the columns denoted "true" are the original values prior to correction.
- Products are listed in order of importance. The columns marked "Cumul" give the cumulative sum of all product yields, to facilitate the selection of major versus minor products.

```

100000000. Pa, 20.0000000 K
=====
Rate constant | True (fraction)          Effective (fraction)
-----
Total         | 1.343336e-156 (1.00 )  1.343336e-156 (1.00 )
-----
species       | PYtrue      Cumul      | PYeffective  Cumul
-----
rad20         | 0.999996    0.999996    | 0.999996    0.999996
rad21         | 3.64035e-06 1.000000    | 3.64035e-06 1.000000
rad18         | 5.08657e-07 1.000000    | 5.08657e-07 1.000000
rad22         | 4.00050e-12 1.000000    | 4.00050e-12 1.000000
Benzy1+C2H2  | 8.63868e-13 1.000000    | 0.00000      1.000000
rad24         | 1.47758e-13 1.000000    | 1.47758e-13 1.000000
Indene+H     | 1.18838e-13 1.000000    | 1.18838e-13 1.000000
rad11         | 4.10061e-16 1.000000    | 4.10061e-16 1.000000
rad45         | 8.69426e-17 1.000000    | 8.69426e-17 1.000000
rad36         | 8.16642e-18 1.000000    | 8.16642e-18 1.000000
rad23         | 3.38759e-21 1.000000    | 3.38759e-21 1.000000
rad6          | 4.56654e-25 1.000000    | 4.56654e-25 1.000000
rad30         | 4.07086e-27 1.000000    | 4.07086e-27 1.000000
rad15         | 8.39424e-30 1.000000    | 8.39424e-30 1.000000
rad8          | 9.98060e-35 1.000000    | 9.98060e-35 1.000000
rad25         | 5.10770e-36 1.000000    | 5.10770e-36 1.000000
rad13         | 3.49524e-37 1.000000    | 3.49524e-37 1.000000
rad7          | 6.35993e-38 1.000000    | 6.35993e-38 1.000000
rad33         | 4.48585e-40 1.000000    | 4.48585e-40 1.000000
rad38         | 2.92319e-40 1.000000    | 2.92319e-40 1.000000
PhCHCCH2+H  | 5.91399e-41 1.000000    | 5.91399e-41 1.000000
rad60syn     | 1.16287e-41 1.000000    | 1.16287e-41 1.000000
rad35         | 3.57958e-42 1.000000    | 3.57958e-42 1.000000
PAH9+H       | 1.59579e-42 1.000000    | 1.59579e-42 1.000000
rad60anti    | 5.37796e-43 1.000000    | 5.37796e-43 1.000000
rad9         | 3.65947e-43 1.000000    | 3.65947e-43 1.000000
rad28         | 1.23506e-44 1.000000    | 1.23506e-44 1.000000
PhCH2CCH+H  | 8.27399e-45 1.000000    | 8.27399e-45 1.000000
rad46         | 2.05236e-45 1.000000    | 2.05236e-45 1.000000
Ph+Allene    | 1.27002e-46 1.000000    | 1.27002e-46 1.000000
rad3          | 1.29103e-48 1.000000    | 1.29103e-48 1.000000
PAH7+H       | 9.05508e-49 1.000000    | 9.05508e-49 1.000000
rad4         | 1.39034e-49 1.000000    | 1.39034e-49 1.000000
PAH3+H       | 5.19573e-50 1.000000    | 5.19573e-50 1.000000
rad59        | 2.55002e-50 1.000000    | 2.55002e-50 1.000000
rad26        | 1.03848e-52 1.000000    | 1.03848e-52 1.000000
rad31        | 1.85634e-58 1.000000    | 1.85634e-58 1.000000
rad39        | 1.17641e-59 1.000000    | 1.17641e-59 1.000000
rad50        | 5.92591e-60 1.000000    | 5.92591e-60 1.000000
rad2         | 3.52590e-60 1.000000    | 3.52590e-60 1.000000
rad1         | 2.21508e-61 1.000000    | 2.21508e-61 1.000000
rad10        | 4.39737e-62 1.000000    | 4.39737e-62 1.000000
rad14        | 3.16334e-64 1.000000    | 3.16334e-64 1.000000
PhCCH+CH3   | 2.48045e-64 1.000000    | 2.48045e-64 1.000000
rad12        | 3.42679e-65 1.000000    | 3.42679e-65 1.000000
rad37        | 7.66161e-67 1.000000    | 7.66161e-67 1.000000
rad58        | 1.02444e-68 1.000000    | 1.02444e-68 1.000000
rad52        | 3.73627e-69 1.000000    | 3.73627e-69 1.000000
Ph+MeAc     | 7.91728e-71 1.000000    | 7.91728e-71 1.000000
rad51        | 1.20233e-73 1.000000    | 1.20233e-73 1.000000
rad27        | 1.52234e-74 1.000000    | 1.52234e-74 1.000000
PhCCCH3+H   | 1.93006e-76 1.000000    | 1.93006e-76 1.000000

```

|               |              |         |              |         |
|---------------|--------------|---------|--------------|---------|
| rad70         | 4.85658e-77  | 1.00000 | 4.85658e-77  | 1.00000 |
| PAH10+CH3     | 1.34523e-77  | 1.00000 | 1.34523e-77  | 1.00000 |
| rad19syn      | 1.26012e-78  | 1.00000 | 1.26012e-78  | 1.00000 |
| rad47         | 1.90699e-79  | 1.00000 | 1.90699e-79  | 1.00000 |
| rad54         | 1.57450e-79  | 1.00000 | 1.57450e-79  | 1.00000 |
| rad65         | 3.91997e-80  | 1.00000 | 3.91997e-80  | 1.00000 |
| rad34         | 4.49173e-82  | 1.00000 | 4.49173e-82  | 1.00000 |
| rad5          | 3.64897e-82  | 1.00000 | 3.64897e-82  | 1.00000 |
| PAH1+H        | 2.23264e-84  | 1.00000 | 2.23264e-84  | 1.00000 |
| rad55         | 1.93832e-85  | 1.00000 | 1.93832e-85  | 1.00000 |
| PhcycC3H3_A+H | 4.86150e-87  | 1.00000 | 4.86150e-87  | 1.00000 |
| rad62         | 3.18154e-93  | 1.00000 | 3.18154e-93  | 1.00000 |
| rad43         | 1.01678e-96  | 1.00000 | 1.01678e-96  | 1.00000 |
| rad42         | 8.86649e-101 | 1.00000 | 8.86649e-101 | 1.00000 |
| rad41         | 1.37502e-103 | 1.00000 | 1.37502e-103 | 1.00000 |

100000000. Pa, 30.0000000 K

| Rate constant | True (fraction)      | Effective (fraction) |
|---------------|----------------------|----------------------|
| Total         | 1.15918e-108 (1.00 ) | 1.15918e-108 (1.00 ) |

| species     | PYtrue      | Cumul    | PYeffective | Cumul    |
|-------------|-------------|----------|-------------|----------|
| rad20       | 0.999992    | 0.999992 | 0.999992    | 0.999992 |
| rad21       | 7.36733e-06 | 0.999999 | 7.36733e-06 | 0.999999 |
| rad18       | 1.03027e-06 | 1.00000  | 1.03027e-06 | 1.00000  |
| rad22       | 1.63960e-11 | 1.00000  | 1.63960e-11 | 1.00000  |
| Benzyl+C2H2 | 2.02165e-12 | 1.00000  | 0.00000     | 1.00000  |
| rad24       | 6.07632e-13 | 1.00000  | 6.07632e-13 | 1.00000  |
| Indene+H    | 4.87498e-13 | 1.00000  | 4.87498e-13 | 1.00000  |
| rad11       | 1.71394e-15 | 1.00000  | 1.71394e-15 | 1.00000  |
| rad45       | 6.85944e-16 | 1.00000  | 6.85944e-16 | 1.00000  |
| rad36       | 1.03761e-16 | 1.00000  | 1.03761e-16 | 1.00000  |
| rad23       | 2.81496e-20 | 1.00000  | 2.81496e-20 | 1.00000  |
| rad6        | 3.91085e-24 | 1.00000  | 3.91085e-24 | 1.00000  |
| rad30       | 1.96240e-26 | 1.00000  | 1.96240e-26 | 1.00000  |
| rad15       | 4.13425e-29 | 1.00000  | 4.13425e-29 | 1.00000  |
| rad8        | 2.71911e-34 | 1.00000  | 2.71911e-34 | 1.00000  |
| rad25       | 5.05415e-35 | 1.00000  | 5.05415e-35 | 1.00000  |
| rad13       | 1.04377e-35 | 1.00000  | 1.04377e-35 | 1.00000  |
| rad7        | 1.91824e-36 | 1.00000  | 1.91824e-36 | 1.00000  |
| rad33       | 1.38626e-38 | 1.00000  | 1.38626e-38 | 1.00000  |
| rad38       | 1.09158e-38 | 1.00000  | 1.09158e-38 | 1.00000  |
| PhCHCCH2+H  | 6.15499e-40 | 1.00000  | 6.15499e-40 | 1.00000  |
| rad35       | 6.61880e-41 | 1.00000  | 6.61880e-41 | 1.00000  |
| rad60syn    | 6.28489e-41 | 1.00000  | 6.28489e-41 | 1.00000  |
| PAH9+H      | 2.98909e-41 | 1.00000  | 2.98909e-41 | 1.00000  |
| rad9        | 3.08226e-42 | 1.00000  | 3.08226e-42 | 1.00000  |
| rad60anti   | 2.93609e-42 | 1.00000  | 2.93609e-42 | 1.00000  |
| rad28       | 1.36530e-43 | 1.00000  | 1.36530e-43 | 1.00000  |
| rad46       | 4.24110e-44 | 1.00000  | 4.24110e-44 | 1.00000  |
| PhCH2CCH+H  | 2.44302e-44 | 1.00000  | 2.44302e-44 | 1.00000  |
| Ph+Allene   | 1.40283e-45 | 1.00000  | 1.40283e-45 | 1.00000  |
| rad3        | 7.82100e-47 | 1.00000  | 7.82100e-47 | 1.00000  |
| rad4        | 1.62919e-47 | 1.00000  | 1.62919e-47 | 1.00000  |
| PAH7+H      | 1.03441e-47 | 1.00000  | 1.03441e-47 | 1.00000  |
| PAH3+H      | 3.01240e-49 | 1.00000  | 3.01240e-49 | 1.00000  |
| rad59       | 1.47680e-49 | 1.00000  | 1.47680e-49 | 1.00000  |
| rad26       | 1.22442e-51 | 1.00000  | 1.22442e-51 | 1.00000  |
| rad31       | 2.44288e-56 | 1.00000  | 2.44288e-56 | 1.00000  |
| rad2        | 9.03964e-58 | 1.00000  | 9.03964e-58 | 1.00000  |
| rad39       | 2.64247e-58 | 1.00000  | 2.64247e-58 | 1.00000  |
| rad50       | 1.41281e-58 | 1.00000  | 1.41281e-58 | 1.00000  |
| rad1        | 1.02112e-58 | 1.00000  | 1.02112e-58 | 1.00000  |
| rad10       | 1.04306e-60 | 1.00000  | 1.04306e-60 | 1.00000  |
| rad14       | 4.48646e-62 | 1.00000  | 4.48646e-62 | 1.00000  |
| PhCCH+CH3   | 3.64997e-62 | 1.00000  | 3.64997e-62 | 1.00000  |
| rad12       | 8.14225e-64 | 1.00000  | 8.14225e-64 | 1.00000  |
| rad37       | 1.82639e-65 | 1.00000  | 1.82639e-65 | 1.00000  |
| rad52       | 1.81947e-67 | 1.00000  | 1.81947e-67 | 1.00000  |
| rad58       | 6.81730e-68 | 1.00000  | 6.81730e-68 | 1.00000  |
| Ph+MeAc     | 8.20016e-69 | 1.00000  | 8.20016e-69 | 1.00000  |
| rad27       | 8.48571e-72 | 1.00000  | 8.48571e-72 | 1.00000  |
| rad51       | 6.10150e-72 | 1.00000  | 6.10150e-72 | 1.00000  |
| PhCCCH3+H   | 1.12773e-73 | 1.00000  | 1.12773e-73 | 1.00000  |
| rad70       | 1.31834e-75 | 1.00000  | 1.31834e-75 | 1.00000  |
| PAH10+CH3   | 3.52815e-76 | 1.00000  | 3.52815e-76 | 1.00000  |
| rad19syn    | 1.05998e-76 | 1.00000  | 1.05998e-76 | 1.00000  |
| rad54       | 1.35152e-77 | 1.00000  | 1.35152e-77 | 1.00000  |

|               |              |         |              |         |
|---------------|--------------|---------|--------------|---------|
| rad47         | 5.49481e-78  | 1.00000 | 5.49481e-78  | 1.00000 |
| rad65         | 1.02933e-78  | 1.00000 | 1.02933e-78  | 1.00000 |
| rad5          | 1.84176e-80  | 1.00000 | 1.84176e-80  | 1.00000 |
| rad34         | 1.26925e-80  | 1.00000 | 1.26925e-80  | 1.00000 |
| PAH1+H        | 6.31872e-83  | 1.00000 | 6.31872e-83  | 1.00000 |
| rad55         | 1.72711e-83  | 1.00000 | 1.72711e-83  | 1.00000 |
| PhcycC3H3_A+H | 4.32542e-85  | 1.00000 | 4.32542e-85  | 1.00000 |
| rad62         | 9.77111e-91  | 1.00000 | 9.77111e-91  | 1.00000 |
| rad43         | 5.93049e-95  | 1.00000 | 5.93049e-95  | 1.00000 |
| rad42         | 5.47679e-99  | 1.00000 | 5.47679e-99  | 1.00000 |
| rad41         | 8.11056e-102 | 1.00000 | 8.11056e-102 | 1.00000 |

100000000. Pa, 40.0000000 K

| Rate constant | True (fraction)     | Effective (fraction) |
|---------------|---------------------|----------------------|
| Total         | 1.02415e-84 (1.00 ) | 1.02415e-84 (1.00 )  |

| species     | PYtrue      | Cumul    | PYeffective | Cumul    |
|-------------|-------------|----------|-------------|----------|
| rad20       | 0.999987    | 0.999987 | 0.999987    | 0.999987 |
| rad21       | 1.10374e-05 | 0.999998 | 1.10374e-05 | 0.999998 |
| rad18       | 1.54603e-06 | 1.000000 | 1.54603e-06 | 1.000000 |
| rad22       | 3.68510e-11 | 1.000000 | 3.68510e-11 | 1.000000 |
| Benzyl+C2H2 | 3.92745e-12 | 1.000000 | 0.000000    | 1.000000 |
| rad24       | 1.37591e-12 | 1.000000 | 1.37591e-12 | 1.000000 |
| Indene+H    | 1.09769e-12 | 1.000000 | 1.09769e-12 | 1.000000 |
| rad11       | 4.00566e-15 | 1.000000 | 4.00566e-15 | 1.000000 |
| rad45       | 2.25600e-15 | 1.000000 | 2.25600e-15 | 1.000000 |
| rad36       | 4.10078e-16 | 1.000000 | 4.10078e-16 | 1.000000 |
| rad23       | 9.51322e-20 | 1.000000 | 9.51322e-20 | 1.000000 |
| rad6        | 1.40428e-23 | 1.000000 | 1.40428e-23 | 1.000000 |
| rad30       | 6.13680e-26 | 1.000000 | 6.13680e-26 | 1.000000 |
| rad15       | 1.35244e-28 | 1.000000 | 1.35244e-28 | 1.000000 |
| rad8        | 7.51194e-34 | 1.000000 | 7.51194e-34 | 1.000000 |
| rad25       | 2.44042e-34 | 1.000000 | 2.44042e-34 | 1.000000 |
| rad13       | 7.43090e-35 | 1.000000 | 7.43090e-35 | 1.000000 |
| rad7        | 1.38042e-35 | 1.000000 | 1.38042e-35 | 1.000000 |
| rad38       | 1.04125e-37 | 1.000000 | 1.04125e-37 | 1.000000 |
| rad33       | 1.02676e-37 | 1.000000 | 1.02676e-37 | 1.000000 |
| PhCHCCH2+H  | 3.30395e-39 | 1.000000 | 3.30395e-39 | 1.000000 |
| rad35       | 4.05240e-40 | 1.000000 | 4.05240e-40 | 1.000000 |
| rad60syn    | 2.49800e-40 | 1.000000 | 2.49800e-40 | 1.000000 |
| PAH9+H      | 1.88083e-40 | 1.000000 | 1.88083e-40 | 1.000000 |
| rad9        | 1.61672e-41 | 1.000000 | 1.61672e-41 | 1.000000 |
| rad60anti   | 1.19193e-41 | 1.000000 | 1.19193e-41 | 1.000000 |
| rad28       | 8.32938e-43 | 1.000000 | 8.32938e-43 | 1.000000 |
| rad46       | 3.32842e-43 | 1.000000 | 3.32842e-43 | 1.000000 |
| PhCH2CCH+H  | 7.98747e-44 | 1.000000 | 7.98747e-44 | 1.000000 |
| Ph+Allene   | 8.52998e-45 | 1.000000 | 8.52998e-45 | 1.000000 |
| rad3        | 8.82278e-46 | 1.000000 | 8.82278e-46 | 1.000000 |
| rad4        | 2.60606e-46 | 1.000000 | 2.60606e-46 | 1.000000 |
| PAH7+H      | 6.76346e-47 | 1.000000 | 6.76346e-47 | 1.000000 |
| PAH3+H      | 1.38730e-48 | 1.000000 | 1.38730e-48 | 1.000000 |
| rad59       | 6.78488e-49 | 1.000000 | 6.78488e-49 | 1.000000 |
| rad26       | 8.55888e-51 | 1.000000 | 8.55888e-51 | 1.000000 |
| rad31       | 4.52827e-55 | 1.000000 | 4.52827e-55 | 1.000000 |
| rad2        | 2.46689e-56 | 1.000000 | 2.46689e-56 | 1.000000 |
| rad1        | 3.69740e-57 | 1.000000 | 3.69740e-57 | 1.000000 |
| rad39       | 2.43879e-57 | 1.000000 | 2.43879e-57 | 1.000000 |
| rad50       | 1.51000e-57 | 1.000000 | 1.51000e-57 | 1.000000 |
| rad10       | 1.07975e-59 | 1.000000 | 1.07975e-59 | 1.000000 |
| rad14       | 9.63330e-61 | 1.000000 | 9.63330e-61 | 1.000000 |
| PhCCH+CH3   | 8.34242e-61 | 1.000000 | 8.34242e-61 | 1.000000 |
| rad12       | 8.45961e-63 | 1.000000 | 8.45961e-63 | 1.000000 |
| rad37       | 1.91094e-64 | 1.000000 | 1.91094e-64 | 1.000000 |
| rad52       | 3.19758e-66 | 1.000000 | 3.19758e-66 | 1.000000 |
| rad58       | 4.19346e-67 | 1.000000 | 4.19346e-67 | 1.000000 |
| Ph+MeAc     | 2.02796e-67 | 1.000000 | 2.02796e-67 | 1.000000 |
| rad27       | 3.90153e-70 | 1.000000 | 3.90153e-70 | 1.000000 |
| rad51       | 1.18040e-70 | 1.000000 | 1.18040e-70 | 1.000000 |
| PhCCCH3+H   | 5.69331e-72 | 1.000000 | 5.69331e-72 | 1.000000 |
| rad70       | 1.80557e-74 | 1.000000 | 1.80557e-74 | 1.000000 |
| PAH10+CH3   | 4.52042e-75 | 1.000000 | 4.52042e-75 | 1.000000 |
| rad19syn    | 2.37677e-75 | 1.000000 | 2.37677e-75 | 1.000000 |
| rad54       | 3.19423e-76 | 1.000000 | 3.19423e-76 | 1.000000 |
| rad47       | 8.79735e-77 | 1.000000 | 8.79735e-77 | 1.000000 |
| rad65       | 1.31677e-77 | 1.000000 | 1.31677e-77 | 1.000000 |
| rad5        | 3.18072e-79 | 1.000000 | 3.18072e-79 | 1.000000 |
| rad34       | 1.89123e-79 | 1.000000 | 1.89123e-79 | 1.000000 |

|               |              |          |              |          |
|---------------|--------------|----------|--------------|----------|
| PAH1+H        | 9.52252e-82  | 1.000000 | 9.52252e-82  | 1.000000 |
| rad55         | 4.50667e-82  | 1.000000 | 4.50667e-82  | 1.000000 |
| PhcycC3H3_A+H | 1.12571e-83  | 1.000000 | 1.12571e-83  | 1.000000 |
| rad62         | 5.02723e-89  | 1.000000 | 5.02723e-89  | 1.000000 |
| rad43         | 1.36919e-93  | 1.000000 | 1.36919e-93  | 1.000000 |
| rad42         | 1.42801e-97  | 1.000000 | 1.42801e-97  | 1.000000 |
| rad41         | 1.95215e-100 | 1.000000 | 1.95215e-100 | 1.000000 |

100000000. Pa, 50.0000000 K

| =====         |                     |          |                      |          |
|---------------|---------------------|----------|----------------------|----------|
| Rate constant | True (fraction)     |          | Effective (fraction) |          |
| -----         |                     |          |                      |          |
| Total         | 2.31816e-70 (1.00 ) |          | 2.31816e-70 (1.00 )  |          |
| species       | PYtrue              | Cumul    | PYeffective          | Cumul    |
| -----         |                     |          |                      |          |
| rad20         | 0.999983            | 0.999983 | 0.999983             | 0.999983 |
| rad21         | 1.47309e-05         | 0.999998 | 1.47309e-05          | 0.999998 |
| rad18         | 2.06796e-06         | 1.000000 | 2.06796e-06          | 1.000000 |
| rad22         | 6.57746e-11         | 1.000000 | 6.57746e-11          | 1.000000 |
| Benzyl+C2H2   | 7.12724e-12         | 1.000000 | 0.000000             | 1.000000 |
| rad24         | 2.48146e-12         | 1.000000 | 2.48146e-12          | 1.000000 |
| Indene+H      | 1.96413e-12         | 1.000000 | 1.96413e-12          | 1.000000 |
| rad11         | 7.53559e-15         | 1.000000 | 7.53559e-15          | 1.000000 |
| rad45         | 5.32645e-15         | 1.000000 | 5.32645e-15          | 1.000000 |
| rad36         | 1.05054e-15         | 1.000000 | 1.05054e-15          | 1.000000 |
| rad23         | 2.27833e-19         | 1.000000 | 2.27833e-19          | 1.000000 |
| rad6          | 3.65294e-23         | 1.000000 | 3.65294e-23          | 1.000000 |
| rad30         | 1.74698e-25         | 1.000000 | 1.74698e-25          | 1.000000 |
| rad15         | 4.10734e-28         | 1.000000 | 4.10734e-28          | 1.000000 |
| rad8          | 2.37912e-33         | 1.000000 | 2.37912e-33          | 1.000000 |
| rad25         | 9.68012e-34         | 1.000000 | 9.68012e-34          | 1.000000 |
| rad13         | 3.12658e-34         | 1.000000 | 3.12658e-34          | 1.000000 |
| rad7          | 5.87647e-35         | 1.000000 | 5.87647e-35          | 1.000000 |
| rad38         | 6.22474e-37         | 1.000000 | 6.22474e-37          | 1.000000 |
| rad33         | 4.51697e-37         | 1.000000 | 4.51697e-37          | 1.000000 |
| PhCHCCH2+H    | 1.52381e-38         | 1.000000 | 1.52381e-38          | 1.000000 |
| rad35         | 1.68050e-39         | 1.000000 | 1.68050e-39          | 1.000000 |
| rad60syn      | 9.99456e-40         | 1.000000 | 9.99456e-40          | 1.000000 |
| PAH9+H        | 8.13443e-40         | 1.000000 | 8.13443e-40          | 1.000000 |
| rad9          | 7.81088e-41         | 1.000000 | 7.81088e-41          | 1.000000 |
| rad60anti     | 4.91345e-41         | 1.000000 | 4.91345e-41          | 1.000000 |
| rad28         | 4.60279e-42         | 1.000000 | 4.60279e-42          | 1.000000 |
| rad46         | 1.98995e-42         | 1.000000 | 1.98995e-42          | 1.000000 |
| PhCH2CCH+H    | 3.20616e-43         | 1.000000 | 3.20616e-43          | 1.000000 |
| Ph+Allene     | 4.69128e-44         | 1.000000 | 4.69128e-44          | 1.000000 |
| rad3          | 5.47752e-45         | 1.000000 | 5.47752e-45          | 1.000000 |
| rad4          | 2.03044e-45         | 1.000000 | 2.03044e-45          | 1.000000 |
| PAH7+H        | 4.12176e-46         | 1.000000 | 4.12176e-46          | 1.000000 |
| PAH3+H        | 6.83364e-48         | 1.000000 | 6.83364e-48          | 1.000000 |
| rad59         | 3.33068e-48         | 1.000000 | 3.33068e-48          | 1.000000 |
| rad26         | 5.73163e-50         | 1.000000 | 5.73163e-50          | 1.000000 |
| rad31         | 4.20107e-54         | 1.000000 | 4.20107e-54          | 1.000000 |
| rad2          | 3.05292e-55         | 1.000000 | 3.05292e-55          | 1.000000 |
| rad1          | 5.40713e-56         | 1.000000 | 5.40713e-56          | 1.000000 |
| rad39         | 1.82728e-56         | 1.000000 | 1.82728e-56          | 1.000000 |
| rad50         | 1.40448e-56         | 1.000000 | 1.40448e-56          | 1.000000 |
| rad10         | 9.50614e-59         | 1.000000 | 9.50614e-59          | 1.000000 |
| rad14         | 1.09719e-59         | 1.000000 | 1.09719e-59          | 1.000000 |
| PhCCH+CH3     | 1.03164e-59         | 1.000000 | 1.03164e-59          | 1.000000 |
| rad12         | 7.48788e-62         | 1.000000 | 7.48788e-62          | 1.000000 |
| rad37         | 1.70877e-63         | 1.000000 | 1.70877e-63          | 1.000000 |
| rad52         | 4.68500e-65         | 1.000000 | 4.68500e-65          | 1.000000 |
| Ph+MeAc       | 3.18621e-66         | 1.000000 | 3.18621e-66          | 1.000000 |
| rad58         | 3.10879e-66         | 1.000000 | 3.10879e-66          | 1.000000 |
| rad27         | 7.54022e-69         | 1.000000 | 7.54022e-69          | 1.000000 |
| rad51         | 1.99017e-69         | 1.000000 | 1.99017e-69          | 1.000000 |
| PhCCCH3+H     | 1.25140e-70         | 1.000000 | 1.25140e-70          | 1.000000 |
| rad70         | 2.35626e-73         | 1.000000 | 2.35626e-73          | 1.000000 |
| PAH10+CH3     | 5.38234e-74         | 1.000000 | 5.38234e-74          | 1.000000 |
| rad19syn      | 3.87178e-74         | 1.000000 | 3.87178e-74          | 1.000000 |
| rad54         | 5.61875e-75         | 1.000000 | 5.61875e-75          | 1.000000 |
| rad47         | 1.45627e-75         | 1.000000 | 1.45627e-75          | 1.000000 |
| rad65         | 1.56845e-76         | 1.000000 | 1.56845e-76          | 1.000000 |
| rad5          | 4.36071e-78         | 1.000000 | 4.36071e-78          | 1.000000 |
| rad34         | 2.77910e-78         | 1.000000 | 2.77910e-78          | 1.000000 |
| PAH1+H        | 1.42648e-80         | 1.000000 | 1.42648e-80          | 1.000000 |
| rad55         | 9.16557e-81         | 1.000000 | 9.16557e-81          | 1.000000 |
| PhcycC3H3_A+H | 2.28201e-82         | 1.000000 | 2.28201e-82          | 1.000000 |
| rad62         | 1.56606e-87         | 1.000000 | 1.56606e-87          | 1.000000 |

|       |             |          |             |          |
|-------|-------------|----------|-------------|----------|
| rad43 | 2.80323e-92 | 1.000000 | 2.80323e-92 | 1.000000 |
| rad42 | 3.46310e-96 | 1.000000 | 3.46310e-96 | 1.000000 |
| rad41 | 4.27758e-99 | 1.000000 | 4.27758e-99 | 1.000000 |

100000000. Pa, 60.0000000 K

| =====         |                     |          |                      |          |
|---------------|---------------------|----------|----------------------|----------|
| Rate constant | True (fraction)     |          | Effective (fraction) |          |
| -----         |                     |          |                      |          |
| Total         | 8.44107e-61 (1.00 ) |          | 8.44107e-61 (1.00 )  |          |
| species       | PYtrue              | Cumul    | PYeffective          | Cumul    |
| -----         |                     |          |                      |          |
| rad20         | 0.999979            | 0.999979 | 0.999979             | 0.999979 |
| rad21         | 1.84988e-05         | 0.999997 | 1.84988e-05          | 0.999997 |
| rad18         | 2.60361e-06         | 1.00000  | 2.60361e-06          | 1.00000  |
| rad22         | 1.04004e-10         | 1.00000  | 1.04004e-10          | 1.00000  |
| Benzyl+C2H2   | 1.23358e-11         | 1.00000  | 0.00000              | 1.00000  |
| rad24         | 3.97310e-12         | 1.00000  | 3.97310e-12          | 1.00000  |
| Indene+H      | 3.11510e-12         | 1.00000  | 3.11510e-12          | 1.00000  |
| rad11         | 1.26790e-14         | 1.00000  | 1.26790e-14          | 1.00000  |
| rad45         | 1.05728e-14         | 1.00000  | 1.05728e-14          | 1.00000  |
| rad36         | 2.16089e-15         | 1.00000  | 2.16089e-15          | 1.00000  |
| rad23         | 4.55620e-19         | 1.00000  | 4.55620e-19          | 1.00000  |
| rad6          | 8.07044e-23         | 1.00000  | 8.07044e-23          | 1.00000  |
| rad30         | 5.00128e-25         | 1.00000  | 5.00128e-25          | 1.00000  |
| rad15         | 1.27618e-27         | 1.00000  | 1.27618e-27          | 1.00000  |
| rad8          | 8.78002e-33         | 1.00000  | 8.78002e-33          | 1.00000  |
| rad25         | 3.66523e-33         | 1.00000  | 3.66523e-33          | 1.00000  |
| rad13         | 1.01268e-33         | 1.00000  | 1.01268e-33          | 1.00000  |
| rad7          | 1.92785e-34         | 1.00000  | 1.92785e-34          | 1.00000  |
| rad38         | 3.01419e-36         | 1.00000  | 3.01419e-36          | 1.00000  |
| rad33         | 1.53770e-36         | 1.00000  | 1.53770e-36          | 1.00000  |
| PhCHCCH2+H    | 6.95278e-38         | 1.00000  | 6.95278e-38          | 1.00000  |
| rad35         | 5.77429e-39         | 1.00000  | 5.77429e-39          | 1.00000  |
| rad60syn      | 4.34426e-39         | 1.00000  | 4.34426e-39          | 1.00000  |
| PAH9+H        | 2.96699e-39         | 1.00000  | 2.96699e-39          | 1.00000  |
| rad9          | 3.88407e-40         | 1.00000  | 3.88407e-40          | 1.00000  |
| rad60anti     | 2.21400e-40         | 1.00000  | 2.21400e-40          | 1.00000  |
| rad28         | 2.61191e-41         | 1.00000  | 2.61191e-41          | 1.00000  |
| rad46         | 1.10014e-41         | 1.00000  | 1.10014e-41          | 1.00000  |
| PhCH2CCH+H    | 1.57212e-42         | 1.00000  | 1.57212e-42          | 1.00000  |
| Ph+Allene     | 2.64938e-43         | 1.00000  | 2.64938e-43          | 1.00000  |
| rad3          | 2.56574e-44         | 1.00000  | 2.56574e-44          | 1.00000  |
| rad4          | 1.11851e-44         | 1.00000  | 1.11851e-44          | 1.00000  |
| PAH7+H        | 2.63233e-45         | 1.00000  | 2.63233e-45          | 1.00000  |
| PAH3+H        | 3.81701e-47         | 1.00000  | 3.81701e-47          | 1.00000  |
| rad59         | 1.85249e-47         | 1.00000  | 1.85249e-47          | 1.00000  |
| rad26         | 4.10073e-49         | 1.00000  | 4.10073e-49          | 1.00000  |
| rad31         | 2.83229e-53         | 1.00000  | 2.83229e-53          | 1.00000  |
| rad2          | 2.62405e-54         | 1.00000  | 2.62405e-54          | 1.00000  |
| rad1          | 5.17579e-55         | 1.00000  | 5.17579e-55          | 1.00000  |
| rad50         | 1.33591e-55         | 1.00000  | 1.33591e-55          | 1.00000  |
| rad39         | 1.33034e-55         | 1.00000  | 1.33034e-55          | 1.00000  |
| rad10         | 8.39616e-58         | 1.00000  | 8.39616e-58          | 1.00000  |
| PhCCH+CH3     | 9.89601e-59         | 1.00000  | 9.89601e-59          | 1.00000  |
| rad14         | 9.54627e-59         | 1.00000  | 9.54627e-59          | 1.00000  |
| rad12         | 6.65826e-61         | 1.00000  | 6.65826e-61          | 1.00000  |
| rad37         | 1.53893e-62         | 1.00000  | 1.53893e-62          | 1.00000  |
| rad52         | 7.00722e-64         | 1.00000  | 7.00722e-64          | 1.00000  |
| Ph+MeAc       | 4.18211e-65         | 1.00000  | 4.18211e-65          | 1.00000  |
| rad58         | 2.84179e-65         | 1.00000  | 2.84179e-65          | 1.00000  |
| rad27         | 9.87456e-68         | 1.00000  | 9.87456e-68          | 1.00000  |
| rad51         | 3.54125e-68         | 1.00000  | 3.54125e-68          | 1.00000  |
| PhCCCH3+H     | 1.91241e-69         | 1.00000  | 1.91241e-69          | 1.00000  |
| rad70         | 3.34025e-72         | 1.00000  | 3.34025e-72          | 1.00000  |
| PAH10+CH3     | 6.84361e-73         | 1.00000  | 6.84361e-73          | 1.00000  |
| rad19syn      | 5.89534e-73         | 1.00000  | 5.89534e-73          | 1.00000  |
| rad54         | 9.39225e-74         | 1.00000  | 9.39225e-74          | 1.00000  |
| rad47         | 2.80239e-74         | 1.00000  | 2.80239e-74          | 1.00000  |
| rad65         | 2.00827e-75         | 1.00000  | 2.00827e-75          | 1.00000  |
| rad5          | 5.83892e-77         | 1.00000  | 5.83892e-77          | 1.00000  |
| rad34         | 4.54303e-77         | 1.00000  | 4.54303e-77          | 1.00000  |
| PAH1+H        | 2.39109e-79         | 1.00000  | 2.39109e-79          | 1.00000  |
| rad55         | 1.82901e-79         | 1.00000  | 1.82901e-79          | 1.00000  |
| PhcycC3H3_A+H | 4.53919e-81         | 1.00000  | 4.53919e-81          | 1.00000  |
| rad62         | 4.16622e-86         | 1.00000  | 4.16622e-86          | 1.00000  |
| rad43         | 6.02392e-91         | 1.00000  | 6.02392e-91          | 1.00000  |
| rad42         | 9.10648e-95         | 1.00000  | 9.10648e-95          | 1.00000  |
| rad41         | 1.00609e-97         | 1.00000  | 1.00609e-97          | 1.00000  |

100000000. Pa, 70.0000000 K

=====  
Rate constant | True (fraction)                      Effective (fraction)  
-----

Total            | 5.61998e-54 (1.00     ) 5.61998e-54 (1.00     )

| species       | PYtrue      | Cumul    | PYeffective | Cumul    |
|---------------|-------------|----------|-------------|----------|
| rad20         | 0.999974    | 0.999974 | 0.999974    | 0.999974 |
| rad21         | 2.23832e-05 | 0.999996 | 2.23832e-05 | 0.999996 |
| rad18         | 3.15942e-06 | 1.000000 | 3.15942e-06 | 1.000000 |
| rad22         | 1.52792e-10 | 1.000000 | 1.52792e-10 | 1.000000 |
| Benzyl+C2H2   | 2.06313e-11 | 1.000000 | 0.000000    | 1.000000 |
| rad24         | 5.92123e-12 | 1.000000 | 5.92123e-12 | 1.000000 |
| Indene+H      | 4.59247e-12 | 1.000000 | 4.59247e-12 | 1.000000 |
| rad11         | 1.99808e-14 | 1.000000 | 1.99808e-14 | 1.000000 |
| rad45         | 1.88925e-14 | 1.000000 | 1.88925e-14 | 1.000000 |
| rad36         | 3.91002e-15 | 1.000000 | 3.91002e-15 | 1.000000 |
| rad23         | 8.17339e-19 | 1.000000 | 8.17339e-19 | 1.000000 |
| rad6          | 1.62479e-22 | 1.000000 | 1.62479e-22 | 1.000000 |
| rad30         | 1.53288e-24 | 1.000000 | 1.53288e-24 | 1.000000 |
| rad15         | 4.34095e-27 | 1.000000 | 4.34095e-27 | 1.000000 |
| rad8          | 3.90244e-32 | 1.000000 | 3.90244e-32 | 1.000000 |
| rad25         | 1.44202e-32 | 1.000000 | 1.44202e-32 | 1.000000 |
| rad13         | 2.83769e-33 | 1.000000 | 2.83769e-33 | 1.000000 |
| rad7          | 5.47975e-34 | 1.000000 | 5.47975e-34 | 1.000000 |
| rad38         | 1.32334e-35 | 1.000000 | 1.32334e-35 | 1.000000 |
| rad33         | 4.55809e-36 | 1.000000 | 4.55809e-36 | 1.000000 |
| PhCHCCH2+H    | 3.41917e-37 | 1.000000 | 3.41917e-37 | 1.000000 |
| rad60syn      | 2.17650e-38 | 1.000000 | 2.17650e-38 | 1.000000 |
| rad35         | 1.79299e-38 | 1.000000 | 1.79299e-38 | 1.000000 |
| PAH9+H        | 9.97119e-39 | 1.000000 | 9.97119e-39 | 1.000000 |
| rad9          | 2.14712e-39 | 1.000000 | 2.14712e-39 | 1.000000 |
| rad60anti     | 1.15508e-39 | 1.000000 | 1.15508e-39 | 1.000000 |
| rad28         | 1.64306e-40 | 1.000000 | 1.64306e-40 | 1.000000 |
| rad46         | 6.22767e-41 | 1.000000 | 6.22767e-41 | 1.000000 |
| PhCH2CCH+H    | 9.58849e-42 | 1.000000 | 9.58849e-42 | 1.000000 |
| Ph+Allene     | 1.66169e-42 | 1.000000 | 1.66169e-42 | 1.000000 |
| rad3          | 1.04594e-43 | 1.000000 | 1.04594e-43 | 1.000000 |
| rad4          | 5.15420e-44 | 1.000000 | 5.15420e-44 | 1.000000 |
| PAH7+H        | 1.89248e-44 | 1.000000 | 1.89248e-44 | 1.000000 |
| PAH3+H        | 2.53429e-46 | 1.000000 | 2.53429e-46 | 1.000000 |
| rad59         | 1.22393e-46 | 1.000000 | 1.22393e-46 | 1.000000 |
| rad26         | 3.34954e-48 | 1.000000 | 3.34954e-48 | 1.000000 |
| rad31         | 1.65231e-52 | 1.000000 | 1.65231e-52 | 1.000000 |
| rad2          | 1.91291e-53 | 1.000000 | 1.91291e-53 | 1.000000 |
| rad1          | 4.05885e-54 | 1.000000 | 4.05885e-54 | 1.000000 |
| rad50         | 1.41902e-54 | 1.000000 | 1.41902e-54 | 1.000000 |
| rad39         | 1.04011e-54 | 1.000000 | 1.04011e-54 | 1.000000 |
| rad10         | 8.14625e-57 | 1.000000 | 8.14625e-57 | 1.000000 |
| PhCCH+CH3     | 8.81610e-58 | 1.000000 | 8.81610e-58 | 1.000000 |
| rad14         | 7.59804e-58 | 1.000000 | 7.59804e-58 | 1.000000 |
| rad12         | 6.51160e-60 | 1.000000 | 6.51160e-60 | 1.000000 |
| rad37         | 1.52766e-61 | 1.000000 | 1.52766e-61 | 1.000000 |
| rad52         | 1.18543e-62 | 1.000000 | 1.18543e-62 | 1.000000 |
| Ph+MeAc       | 5.32864e-64 | 1.000000 | 5.32864e-64 | 1.000000 |
| rad58         | 3.27449e-64 | 1.000000 | 3.27449e-64 | 1.000000 |
| rad27         | 1.10313e-66 | 1.000000 | 1.10313e-66 | 1.000000 |
| rad51         | 7.32008e-67 | 1.000000 | 7.32008e-67 | 1.000000 |
| PhCCCH3+H     | 2.55072e-68 | 1.000000 | 2.55072e-68 | 1.000000 |
| rad70         | 5.50448e-71 | 1.000000 | 5.50448e-71 | 1.000000 |
| PAH10+CH3     | 9.99771e-72 | 1.000000 | 9.99771e-72 | 1.000000 |
| rad19syn      | 9.53629e-72 | 1.000000 | 9.53629e-72 | 1.000000 |
| rad54         | 1.68757e-72 | 1.000000 | 1.68757e-72 | 1.000000 |
| rad47         | 6.67140e-73 | 1.000000 | 6.67140e-73 | 1.000000 |
| rad65         | 2.98660e-74 | 1.000000 | 2.98660e-74 | 1.000000 |
| rad34         | 8.77562e-76 | 1.000000 | 8.77562e-76 | 1.000000 |
| rad5          | 8.48807e-76 | 1.000000 | 8.48807e-76 | 1.000000 |
| PAH1+H        | 4.75673e-78 | 1.000000 | 4.75673e-78 | 1.000000 |
| rad55         | 4.01525e-78 | 1.000000 | 4.01525e-78 | 1.000000 |
| PhcycC3H3_A+H | 9.93903e-80 | 1.000000 | 9.93903e-80 | 1.000000 |
| rad62         | 1.11810e-84 | 1.000000 | 1.11810e-84 | 1.000000 |
| rad43         | 1.46946e-89 | 1.000000 | 1.46946e-89 | 1.000000 |
| rad42         | 2.78856e-93 | 1.000000 | 2.78856e-93 | 1.000000 |
| rad41         | 2.74142e-96 | 1.000000 | 2.74142e-96 | 1.000000 |

100000000. Pa, 80.0000000 K

=====  
Rate constant | True (fraction)                      Effective (fraction)  
-----



Total | 7.28864e-49 (1.00 ) 7.28864e-49 (1.00 )

| species       | PYtrue      | Cumul    | PYeffective | Cumul    |
|---------------|-------------|----------|-------------|----------|
| rad20         | 0.999970    | 0.999970 | 0.999970    | 0.999970 |
| rad21         | 2.64266e-05 | 0.999996 | 2.64266e-05 | 0.999996 |
| rad18         | 3.74194e-06 | 1.00000  | 3.74194e-06 | 1.00000  |
| rad22         | 2.13897e-10 | 1.00000  | 2.13897e-10 | 1.00000  |
| Benzyl+C2H2   | 3.36684e-11 | 1.00000  | 0.00000     | 1.00000  |
| rad24         | 8.42429e-12 | 1.00000  | 8.42429e-12 | 1.00000  |
| Indene+H      | 6.45503e-12 | 1.00000  | 6.45503e-12 | 1.00000  |
| rad45         | 3.15191e-14 | 1.00000  | 3.15191e-14 | 1.00000  |
| rad11         | 3.02387e-14 | 1.00000  | 3.02387e-14 | 1.00000  |
| rad36         | 6.52559e-15 | 1.00000  | 6.52559e-15 | 1.00000  |
| rad23         | 1.36659e-18 | 1.00000  | 1.36659e-18 | 1.00000  |
| rad6          | 3.09856e-22 | 1.00000  | 3.09856e-22 | 1.00000  |
| rad30         | 5.23379e-24 | 1.00000  | 5.23379e-24 | 1.00000  |
| rad15         | 1.72976e-26 | 1.00000  | 1.72976e-26 | 1.00000  |
| rad8          | 2.25109e-31 | 1.00000  | 2.25109e-31 | 1.00000  |
| rad25         | 6.29180e-32 | 1.00000  | 6.29180e-32 | 1.00000  |
| rad13         | 7.33561e-33 | 1.00000  | 7.33561e-33 | 1.00000  |
| rad7          | 1.43966e-33 | 1.00000  | 1.43966e-33 | 1.00000  |
| rad38         | 5.57023e-35 | 1.00000  | 5.57023e-35 | 1.00000  |
| rad33         | 1.25647e-35 | 1.00000  | 1.25647e-35 | 1.00000  |
| PhCHCCH2+H    | 1.97893e-36 | 1.00000  | 1.97893e-36 | 1.00000  |
| rad60syn      | 1.36974e-37 | 1.00000  | 1.36974e-37 | 1.00000  |
| rad35         | 5.27133e-38 | 1.00000  | 5.27133e-38 | 1.00000  |
| PAH9+H        | 3.22396e-38 | 1.00000  | 3.22396e-38 | 1.00000  |
| rad9          | 1.44702e-38 | 1.00000  | 1.44702e-38 | 1.00000  |
| rad60anti     | 7.59924e-39 | 1.00000  | 7.59924e-39 | 1.00000  |
| rad28         | 1.25095e-39 | 1.00000  | 1.25095e-39 | 1.00000  |
| rad46         | 3.91265e-40 | 1.00000  | 3.91265e-40 | 1.00000  |
| PhCH2CCH+H    | 7.76210e-41 | 1.00000  | 7.76210e-41 | 1.00000  |
| Ph+Allene     | 1.26856e-41 | 1.00000  | 1.26856e-41 | 1.00000  |
| rad3          | 4.02612e-43 | 1.00000  | 4.02612e-43 | 1.00000  |
| rad4          | 2.18501e-43 | 1.00000  | 2.18501e-43 | 1.00000  |
| PAH7+H        | 1.67130e-43 | 1.00000  | 1.67130e-43 | 1.00000  |
| PAH3+H        | 2.16662e-45 | 1.00000  | 2.16662e-45 | 1.00000  |
| rad59         | 1.04064e-45 | 1.00000  | 1.04064e-45 | 1.00000  |
| rad26         | 3.40245e-47 | 1.00000  | 3.40245e-47 | 1.00000  |
| rad31         | 9.26857e-52 | 1.00000  | 9.26857e-52 | 1.00000  |
| rad2          | 1.33666e-52 | 1.00000  | 1.33666e-52 | 1.00000  |
| rad1          | 2.98551e-53 | 1.00000  | 2.98551e-53 | 1.00000  |
| rad50         | 1.84916e-53 | 1.00000  | 1.84916e-53 | 1.00000  |
| rad39         | 9.66464e-54 | 1.00000  | 9.66464e-54 | 1.00000  |
| rad10         | 9.58005e-56 | 1.00000  | 9.58005e-56 | 1.00000  |
| PhCCH+CH3     | 8.33498e-57 | 1.00000  | 8.33498e-57 | 1.00000  |
| rad14         | 6.27703e-57 | 1.00000  | 6.27703e-57 | 1.00000  |
| rad12         | 7.72812e-59 | 1.00000  | 7.72812e-59 | 1.00000  |
| rad37         | 1.84424e-60 | 1.00000  | 1.84424e-60 | 1.00000  |
| rad52         | 2.51326e-61 | 1.00000  | 2.51326e-61 | 1.00000  |
| Ph+MeAc       | 7.52457e-63 | 1.00000  | 7.52457e-63 | 1.00000  |
| rad58         | 5.07016e-63 | 1.00000  | 5.07016e-63 | 1.00000  |
| rad51         | 1.94392e-65 | 1.00000  | 1.94392e-65 | 1.00000  |
| rad27         | 1.22861e-65 | 1.00000  | 1.22861e-65 | 1.00000  |
| PhCCCH3+H     | 3.49388e-67 | 1.00000  | 3.49388e-67 | 1.00000  |
| rad70         | 1.15004e-69 | 1.00000  | 1.15004e-69 | 1.00000  |
| rad19syn      | 1.85202e-70 | 1.00000  | 1.85202e-70 | 1.00000  |
| PAH10+CH3     | 1.83519e-70 | 1.00000  | 1.83519e-70 | 1.00000  |
| rad54         | 3.67455e-71 | 1.00000  | 3.67455e-71 | 1.00000  |
| rad47         | 2.14368e-71 | 1.00000  | 2.14368e-71 | 1.00000  |
| rad65         | 5.67205e-73 | 1.00000  | 5.67205e-73 | 1.00000  |
| rad34         | 2.17459e-74 | 1.00000  | 2.17459e-74 | 1.00000  |
| rad5          | 1.49082e-74 | 1.00000  | 1.49082e-74 | 1.00000  |
| PAH1+H        | 1.21766e-76 | 1.00000  | 1.21766e-76 | 1.00000  |
| rad55         | 1.08877e-76 | 1.00000  | 1.08877e-76 | 1.00000  |
| PhcycC3H3_A+H | 2.69122e-78 | 1.00000  | 2.69122e-78 | 1.00000  |
| rad62         | 3.49175e-83 | 1.00000  | 3.49175e-83 | 1.00000  |
| rad43         | 4.45953e-88 | 1.00000  | 4.45953e-88 | 1.00000  |
| rad42         | 1.08964e-91 | 1.00000  | 1.08964e-91 | 1.00000  |
| rad41         | 9.46216e-95 | 1.00000  | 9.46216e-95 | 1.00000  |

100000000. Pa, 90.0000000 K

=====

| Rate constant | True (fraction)     | Effective (fraction) |
|---------------|---------------------|----------------------|
| Total         | 6.85154e-45 (1.00 ) | 6.85154e-45 (1.00 )  |

| species | PYtrue | Cumul | PYeffective | Cumul |
|---------|--------|-------|-------------|-------|
|---------|--------|-------|-------------|-------|

|               |             |          |             |          |
|---------------|-------------|----------|-------------|----------|
| rad20         | 0.999965    | 0.999965 | 0.999965    | 0.999965 |
| rad21         | 3.06740e-05 | 0.999996 | 3.06740e-05 | 0.999996 |
| rad18         | 4.35827e-06 | 1.00000  | 4.35827e-06 | 1.00000  |
| rad22         | 2.89702e-10 | 1.00000  | 2.89702e-10 | 1.00000  |
| Benzyl+C2H2   | 5.39888e-11 | 1.00000  | 0.00000     | 1.00000  |
| rad24         | 1.16177e-11 | 1.00000  | 1.16177e-11 | 1.00000  |
| Indene+H      | 8.78315e-12 | 1.00000  | 8.78315e-12 | 1.00000  |
| rad45         | 5.01919e-14 | 1.00000  | 5.01919e-14 | 1.00000  |
| rad11         | 4.46250e-14 | 1.00000  | 4.46250e-14 | 1.00000  |
| rad36         | 1.03274e-14 | 1.00000  | 1.03274e-14 | 1.00000  |
| rad23         | 2.17953e-18 | 1.00000  | 2.17953e-18 | 1.00000  |
| rad6          | 5.73411e-22 | 1.00000  | 5.73411e-22 | 1.00000  |
| rad30         | 1.95518e-23 | 1.00000  | 1.95518e-23 | 1.00000  |
| rad15         | 8.35495e-26 | 1.00000  | 8.35495e-26 | 1.00000  |
| rad8          | 1.93487e-30 | 1.00000  | 1.93487e-30 | 1.00000  |
| rad25         | 3.13158e-31 | 1.00000  | 3.13158e-31 | 1.00000  |
| rad13         | 1.82127e-32 | 1.00000  | 1.82127e-32 | 1.00000  |
| rad7          | 3.64120e-33 | 1.00000  | 3.64120e-33 | 1.00000  |
| rad38         | 2.30089e-34 | 1.00000  | 2.30089e-34 | 1.00000  |
| rad33         | 3.35804e-35 | 1.00000  | 3.35804e-35 | 1.00000  |
| PhCHCCH2+H    | 1.48360e-35 | 1.00000  | 1.48360e-35 | 1.00000  |
| rad60syn      | 1.23882e-36 | 1.00000  | 1.23882e-36 | 1.00000  |
| rad35         | 1.51027e-37 | 1.00000  | 1.51027e-37 | 1.00000  |
| rad9          | 1.34733e-37 | 1.00000  | 1.34733e-37 | 1.00000  |
| PAH9+H        | 1.02483e-37 | 1.00000  | 1.02483e-37 | 1.00000  |
| rad60anti     | 7.22424e-38 | 1.00000  | 7.22424e-38 | 1.00000  |
| rad28         | 1.29566e-38 | 1.00000  | 1.29566e-38 | 1.00000  |
| rad46         | 2.89852e-39 | 1.00000  | 2.89852e-39 | 1.00000  |
| PhCH2CCH+H    | 9.51451e-40 | 1.00000  | 9.51451e-40 | 1.00000  |
| Ph+Allene     | 1.33873e-40 | 1.00000  | 1.33873e-40 | 1.00000  |
| PAH7+H        | 2.05440e-42 | 1.00000  | 2.05440e-42 | 1.00000  |
| rad3          | 1.54171e-42 | 1.00000  | 1.54171e-42 | 1.00000  |
| rad4          | 9.04895e-43 | 1.00000  | 9.04895e-43 | 1.00000  |
| PAH3+H        | 2.73855e-44 | 1.00000  | 2.73855e-44 | 1.00000  |
| rad59         | 1.30739e-44 | 1.00000  | 1.30739e-44 | 1.00000  |
| rad26         | 4.89019e-46 | 1.00000  | 4.89019e-46 | 1.00000  |
| rad31         | 5.35613e-51 | 1.00000  | 5.35613e-51 | 1.00000  |
| rad2          | 9.71658e-52 | 1.00000  | 9.71658e-52 | 1.00000  |
| rad50         | 3.34290e-52 | 1.00000  | 3.34290e-52 | 1.00000  |
| rad1          | 2.25247e-52 | 1.00000  | 2.25247e-52 | 1.00000  |
| rad39         | 1.21464e-52 | 1.00000  | 1.21464e-52 | 1.00000  |
| rad10         | 1.56606e-54 | 1.00000  | 1.56606e-54 | 1.00000  |
| PhCCH+CH3     | 9.37358e-56 | 1.00000  | 9.37358e-56 | 1.00000  |
| rad14         | 5.92143e-56 | 1.00000  | 5.92143e-56 | 1.00000  |
| rad12         | 1.27689e-57 | 1.00000  | 1.27689e-57 | 1.00000  |
| rad37         | 3.10774e-59 | 1.00000  | 3.10774e-59 | 1.00000  |
| rad52         | 7.62577e-60 | 1.00000  | 7.62577e-60 | 1.00000  |
| Ph+MeAc       | 1.36423e-61 | 1.00000  | 1.36423e-61 | 1.00000  |
| rad58         | 1.20102e-61 | 1.00000  | 1.20102e-61 | 1.00000  |
| rad51         | 7.60268e-64 | 1.00000  | 7.60268e-64 | 1.00000  |
| rad27         | 1.54259e-64 | 1.00000  | 1.54259e-64 | 1.00000  |
| PhCCCH3+H     | 5.67695e-66 | 1.00000  | 5.67695e-66 | 1.00000  |
| rad70         | 3.50426e-68 | 1.00000  | 3.50426e-68 | 1.00000  |
| rad19syn      | 5.07102e-69 | 1.00000  | 5.07102e-69 | 1.00000  |
| PAH10+CH3     | 4.86399e-69 | 1.00000  | 4.86399e-69 | 1.00000  |
| rad54         | 1.13887e-69 | 1.00000  | 1.13887e-69 | 1.00000  |
| rad47         | 1.06779e-69 | 1.00000  | 1.06779e-69 | 1.00000  |
| rad65         | 1.59565e-71 | 1.00000  | 1.59565e-71 | 1.00000  |
| rad34         | 7.93402e-73 | 1.00000  | 7.93402e-73 | 1.00000  |
| rad5          | 3.66572e-73 | 1.00000  | 3.66572e-73 | 1.00000  |
| PAH1+H        | 4.59383e-75 | 1.00000  | 4.59383e-75 | 1.00000  |
| rad55         | 4.28632e-75 | 1.00000  | 4.28632e-75 | 1.00000  |
| PhcycC3H3_A+H | 1.06004e-76 | 1.00000  | 1.06004e-76 | 1.00000  |
| rad62         | 1.51143e-81 | 1.00000  | 1.51143e-81 | 1.00000  |
| rad43         | 1.94362e-86 | 1.00000  | 1.94362e-86 | 1.00000  |
| rad42         | 6.31121e-90 | 1.00000  | 6.31121e-90 | 1.00000  |
| rad41         | 4.76364e-93 | 1.00000  | 4.76364e-93 | 1.00000  |

100000000. Pa, 100.000000 K

=====

| Rate constant | True (fraction)     | Effective (fraction) |
|---------------|---------------------|----------------------|
| Total         | 1.02671e-41 (1.00 ) | 1.02671e-41 (1.00 )  |

| species | PYtrue      | Cumul    | PYeffective | Cumul    |
|---------|-------------|----------|-------------|----------|
| rad20   | 0.999960    | 0.999960 | 0.999960    | 0.999960 |
| rad21   | 3.51748e-05 | 0.999995 | 3.51748e-05 | 0.999995 |
| rad18   | 5.01629e-06 | 1.00000  | 5.01629e-06 | 1.00000  |
| rad22   | 3.83390e-10 | 1.00000  | 3.83390e-10 | 1.00000  |

|               |             |         |             |         |
|---------------|-------------|---------|-------------|---------|
| Benzyl+C2H2   | 8.54966e-11 | 1.00000 | 0.00000     | 1.00000 |
| rad24         | 1.56866e-11 | 1.00000 | 1.56866e-11 | 1.00000 |
| Indene+H      | 1.16851e-11 | 1.00000 | 1.16851e-11 | 1.00000 |
| rad45         | 7.74108e-14 | 1.00000 | 7.74108e-14 | 1.00000 |
| rad11         | 6.48728e-14 | 1.00000 | 6.48728e-14 | 1.00000 |
| rad36         | 1.57744e-14 | 1.00000 | 1.57744e-14 | 1.00000 |
| rad23         | 3.36667e-18 | 1.00000 | 3.36667e-18 | 1.00000 |
| rad6          | 1.04657e-21 | 1.00000 | 1.04657e-21 | 1.00000 |
| rad30         | 7.42785e-23 | 1.00000 | 7.42785e-23 | 1.00000 |
| rad15         | 4.56762e-25 | 1.00000 | 4.56762e-25 | 1.00000 |
| rad8          | 2.97828e-29 | 1.00000 | 2.97828e-29 | 1.00000 |
| rad25         | 1.70595e-30 | 1.00000 | 1.70595e-30 | 1.00000 |
| rad13         | 4.46224e-32 | 1.00000 | 4.46224e-32 | 1.00000 |
| rad7          | 9.11204e-33 | 1.00000 | 9.11204e-33 | 1.00000 |
| rad38         | 9.37201e-34 | 1.00000 | 9.37201e-34 | 1.00000 |
| PhCHCCH2+H    | 1.49589e-34 | 1.00000 | 1.49589e-34 | 1.00000 |
| rad33         | 8.94799e-35 | 1.00000 | 8.94799e-35 | 1.00000 |
| rad60syn      | 1.87487e-35 | 1.00000 | 1.87487e-35 | 1.00000 |
| rad9          | 1.96807e-36 | 1.00000 | 1.96807e-36 | 1.00000 |
| rad60anti     | 1.16444e-36 | 1.00000 | 1.16444e-36 | 1.00000 |
| rad35         | 4.29880e-37 | 1.00000 | 4.29880e-37 | 1.00000 |
| PAH9+H        | 3.24064e-37 | 1.00000 | 3.24064e-37 | 1.00000 |
| rad28         | 2.03438e-37 | 1.00000 | 2.03438e-37 | 1.00000 |
| rad46         | 2.52987e-38 | 1.00000 | 2.52987e-38 | 1.00000 |
| PhCH2CCH+H    | 2.11336e-38 | 1.00000 | 2.11336e-38 | 1.00000 |
| Ph+Allene     | 2.22575e-39 | 1.00000 | 2.22575e-39 | 1.00000 |
| PAH7+H        | 4.01685e-41 | 1.00000 | 4.01685e-41 | 1.00000 |
| rad3          | 6.06974e-42 | 1.00000 | 6.06974e-42 | 1.00000 |
| rad4          | 3.80095e-42 | 1.00000 | 3.80095e-42 | 1.00000 |
| PAH3+H        | 6.11474e-43 | 1.00000 | 6.11474e-43 | 1.00000 |
| rad59         | 2.89934e-43 | 1.00000 | 2.89934e-43 | 1.00000 |
| rad26         | 1.15280e-44 | 1.00000 | 1.15280e-44 | 1.00000 |
| rad31         | 3.30864e-50 | 1.00000 | 3.30864e-50 | 1.00000 |
| rad50         | 9.43873e-51 | 1.00000 | 9.43873e-51 | 1.00000 |
| rad2          | 7.67890e-51 | 1.00000 | 7.67890e-51 | 1.00000 |
| rad39         | 2.34586e-51 | 1.00000 | 2.34586e-51 | 1.00000 |
| rad1          | 1.82960e-51 | 1.00000 | 1.82960e-51 | 1.00000 |
| rad10         | 4.14992e-53 | 1.00000 | 4.14992e-53 | 1.00000 |
| PhCCH+CH3     | 1.33062e-54 | 1.00000 | 1.33062e-54 | 1.00000 |
| rad14         | 6.62820e-55 | 1.00000 | 6.62820e-55 | 1.00000 |
| rad12         | 3.42835e-56 | 1.00000 | 3.42835e-56 | 1.00000 |
| rad37         | 8.54569e-58 | 1.00000 | 8.54569e-58 | 1.00000 |
| rad52         | 3.77703e-58 | 1.00000 | 3.77703e-58 | 1.00000 |
| rad58         | 5.19684e-60 | 1.00000 | 5.19684e-60 | 1.00000 |
| Ph+MeAc       | 3.61611e-60 | 1.00000 | 3.61611e-60 | 1.00000 |
| rad51         | 5.04447e-62 | 1.00000 | 5.04447e-62 | 1.00000 |
| rad27         | 2.34914e-63 | 1.00000 | 2.34914e-63 | 1.00000 |
| PhCCCH3+H     | 1.20758e-64 | 1.00000 | 1.20758e-64 | 1.00000 |
| rad70         | 1.86098e-66 | 1.00000 | 1.86098e-66 | 1.00000 |
| rad19syn      | 2.35508e-67 | 1.00000 | 2.35508e-67 | 1.00000 |
| PAH10+CH3     | 2.20905e-67 | 1.00000 | 2.20905e-67 | 1.00000 |
| rad47         | 9.63943e-68 | 1.00000 | 9.63943e-68 | 1.00000 |
| rad54         | 6.06616e-68 | 1.00000 | 6.06616e-68 | 1.00000 |
| rad65         | 8.00022e-70 | 1.00000 | 8.00022e-70 | 1.00000 |
| rad34         | 5.09294e-71 | 1.00000 | 5.09294e-71 | 1.00000 |
| rad5          | 1.49900e-71 | 1.00000 | 1.49900e-71 | 1.00000 |
| PAH1+H        | 3.03860e-73 | 1.00000 | 3.03860e-73 | 1.00000 |
| rad55         | 2.97978e-73 | 1.00000 | 2.97978e-73 | 1.00000 |
| PhcycC3H3_A+H | 7.39748e-75 | 1.00000 | 7.39748e-75 | 1.00000 |
| rad62         | 1.10590e-79 | 1.00000 | 1.10590e-79 | 1.00000 |
| rad43         | 1.45536e-84 | 1.00000 | 1.45536e-84 | 1.00000 |
| rad42         | 6.57879e-88 | 1.00000 | 6.57879e-88 | 1.00000 |
| rad41         | 4.18079e-91 | 1.00000 | 4.18079e-91 | 1.00000 |

100000000. Pa, 110.000000 K

=====

| Rate constant | True (fraction)     | Effective (fraction) |
|---------------|---------------------|----------------------|
| Total         | 4.04932e-39 (1.00 ) | 4.04932e-39 (1.00 )  |

| species     | PYtrue      | Cumul    | PYeffective | Cumul    |
|-------------|-------------|----------|-------------|----------|
| rad20       | 0.999954    | 0.999954 | 0.999954    | 0.999954 |
| rad21       | 3.99840e-05 | 0.999994 | 3.99840e-05 | 0.999994 |
| rad18       | 5.72490e-06 | 1.000000 | 5.72490e-06 | 1.000000 |
| rad22       | 4.99168e-10 | 1.000000 | 4.99168e-10 | 1.000000 |
| Benzyl+C2H2 | 1.34180e-10 | 1.000000 | 0.000000    | 1.000000 |
| rad24       | 2.08830e-11 | 1.000000 | 2.08830e-11 | 1.000000 |
| Indene+H    | 1.53062e-11 | 1.000000 | 1.53062e-11 | 1.000000 |
| rad45       | 1.16823e-13 | 1.000000 | 1.16823e-13 | 1.000000 |

|               |             |          |             |          |
|---------------|-------------|----------|-------------|----------|
| rad11         | 9.35581e-14 | 1.000000 | 9.35581e-14 | 1.000000 |
| rad36         | 2.35352e-14 | 1.000000 | 2.35352e-14 | 1.000000 |
| rad23         | 5.09109e-18 | 1.000000 | 5.09109e-18 | 1.000000 |
| rad6          | 1.90535e-21 | 1.000000 | 1.90535e-21 | 1.000000 |
| rad30         | 2.68296e-22 | 1.000000 | 2.68296e-22 | 1.000000 |
| rad15         | 2.48283e-24 | 1.000000 | 2.48283e-24 | 1.000000 |
| rad8          | 8.95044e-28 | 1.000000 | 8.95044e-28 | 1.000000 |
| rad25         | 9.36819e-30 | 1.000000 | 9.36819e-30 | 1.000000 |
| rad13         | 1.09890e-31 | 1.000000 | 1.09890e-31 | 1.000000 |
| rad7          | 2.29818e-32 | 1.000000 | 2.29818e-32 | 1.000000 |
| rad38         | 3.75528e-33 | 1.000000 | 3.75528e-33 | 1.000000 |
| PhCHCCH2+H    | 1.80997e-33 | 1.000000 | 1.80997e-33 | 1.000000 |
| rad60syn      | 4.77779e-34 | 1.000000 | 4.77779e-34 | 1.000000 |
| rad33         | 2.42082e-34 | 1.000000 | 2.42082e-34 | 1.000000 |
| rad9          | 4.78044e-35 | 1.000000 | 4.78044e-35 | 1.000000 |
| rad60anti     | 3.35015e-35 | 1.000000 | 3.35015e-35 | 1.000000 |
| rad28         | 4.72536e-36 | 1.000000 | 4.72536e-36 | 1.000000 |
| rad35         | 1.23392e-36 | 1.000000 | 1.23392e-36 | 1.000000 |
| PAH9+H        | 1.02655e-36 | 1.000000 | 1.02655e-36 | 1.000000 |
| PhCH2CCH+H    | 9.60142e-37 | 1.000000 | 9.60142e-37 | 1.000000 |
| rad46         | 2.39171e-37 | 1.000000 | 2.39171e-37 | 1.000000 |
| Ph+Allene     | 5.87471e-38 | 1.000000 | 5.87471e-38 | 1.000000 |
| PAH7+H        | 1.29394e-39 | 1.000000 | 1.29394e-39 | 1.000000 |
| PAH3+H        | 2.69229e-41 | 1.000000 | 2.69229e-41 | 1.000000 |
| rad3          | 2.49885e-41 | 1.000000 | 2.49885e-41 | 1.000000 |
| rad4          | 1.65103e-41 | 1.000000 | 1.65103e-41 | 1.000000 |
| rad59         | 1.26630e-41 | 1.000000 | 1.26630e-41 | 1.000000 |
| rad26         | 4.75615e-43 | 1.000000 | 4.75615e-43 | 1.000000 |
| rad50         | 4.24845e-49 | 1.000000 | 4.24845e-49 | 1.000000 |
| rad31         | 2.19612e-49 | 1.000000 | 2.19612e-49 | 1.000000 |
| rad39         | 7.08433e-50 | 1.000000 | 7.08433e-50 | 1.000000 |
| rad2          | 6.62758e-50 | 1.000000 | 6.62758e-50 | 1.000000 |
| rad1          | 1.61105e-50 | 1.000000 | 1.61105e-50 | 1.000000 |
| rad10         | 1.91302e-51 | 1.000000 | 1.91302e-51 | 1.000000 |
| PhCCH+CH3     | 2.28647e-53 | 1.000000 | 2.28647e-53 | 1.000000 |
| rad14         | 8.49180e-54 | 1.000000 | 8.49180e-54 | 1.000000 |
| rad12         | 1.60833e-54 | 1.000000 | 1.60833e-54 | 1.000000 |
| rad37         | 4.13637e-56 | 1.000000 | 4.13637e-56 | 1.000000 |
| rad52         | 3.15573e-56 | 1.000000 | 3.15573e-56 | 1.000000 |
| rad58         | 4.62634e-58 | 1.000000 | 4.62634e-58 | 1.000000 |
| Ph+MeAc       | 1.41049e-58 | 1.000000 | 1.41049e-58 | 1.000000 |
| rad51         | 5.92819e-60 | 1.000000 | 5.92819e-60 | 1.000000 |
| rad27         | 4.31440e-62 | 1.000000 | 4.31440e-62 | 1.000000 |
| PhCCCH3+H     | 3.32758e-63 | 1.000000 | 3.32758e-63 | 1.000000 |
| rad70         | 1.93265e-64 | 1.000000 | 1.93265e-64 | 1.000000 |
| rad19syn      | 2.06148e-65 | 1.000000 | 2.06148e-65 | 1.000000 |
| PAH10+CH3     | 1.90698e-65 | 1.000000 | 1.90698e-65 | 1.000000 |
| rad47         | 1.67193e-65 | 1.000000 | 1.67193e-65 | 1.000000 |
| rad54         | 6.21512e-66 | 1.000000 | 6.21512e-66 | 1.000000 |
| rad65         | 7.98818e-68 | 1.000000 | 7.98818e-68 | 1.000000 |
| rad34         | 6.46116e-69 | 1.000000 | 6.46116e-69 | 1.000000 |
| rad5          | 1.12654e-69 | 1.000000 | 1.12654e-69 | 1.000000 |
| rad55         | 4.15567e-71 | 1.000000 | 4.15567e-71 | 1.000000 |
| PAH1+H        | 3.93204e-71 | 1.000000 | 3.93204e-71 | 1.000000 |
| PhcycC3H3_A+H | 1.04148e-72 | 1.000000 | 1.04148e-72 | 1.000000 |
| rad62         | 1.54403e-77 | 1.000000 | 1.54403e-77 | 1.000000 |
| rad43         | 2.09385e-82 | 1.000000 | 2.09385e-82 | 1.000000 |
| rad42         | 1.41472e-85 | 1.000000 | 1.41472e-85 | 1.000000 |
| rad41         | 7.16806e-89 | 1.000000 | 7.16806e-89 | 1.000000 |

100000000. Pa, 120.000000 K

=====

| Rate constant | True (fraction)     | Effective (fraction) |
|---------------|---------------------|----------------------|
| Total         | 5.87106e-37 (1.00 ) | 5.87106e-37 (1.00 )  |

| species     | PYtrue      | Cumul    | PYeffective | Cumul    |
|-------------|-------------|----------|-------------|----------|
| rad20       | 0.999948    | 0.999948 | 0.999948    | 0.999948 |
| rad21       | 4.51635e-05 | 0.999993 | 4.51635e-05 | 0.999993 |
| rad18       | 6.49423e-06 | 1.000000 | 6.49423e-06 | 1.000000 |
| rad22       | 6.42585e-10 | 1.000000 | 6.42585e-10 | 1.000000 |
| Benzyl+C2H2 | 2.09193e-10 | 1.000000 | 0.000000    | 1.000000 |
| rad24       | 2.75506e-11 | 1.000000 | 2.75506e-11 | 1.000000 |
| Indene+H    | 1.98403e-11 | 1.000000 | 1.98403e-11 | 1.000000 |
| rad45       | 1.73815e-13 | 1.000000 | 1.73815e-13 | 1.000000 |
| rad11       | 1.34529e-13 | 1.000000 | 1.34529e-13 | 1.000000 |
| rad36       | 3.45924e-14 | 1.000000 | 3.45924e-14 | 1.000000 |
| rad23       | 7.59670e-18 | 1.000000 | 7.59670e-18 | 1.000000 |
| rad6        | 3.48677e-21 | 1.000000 | 3.48677e-21 | 1.000000 |

|               |             |          |             |          |
|---------------|-------------|----------|-------------|----------|
| rad30         | 8.93476e-22 | 1.000000 | 8.93476e-22 | 1.000000 |
| rad15         | 1.22892e-23 | 1.000000 | 1.22892e-23 | 1.000000 |
| rad8          | 2.89193e-26 | 1.000000 | 2.89193e-26 | 1.000000 |
| rad25         | 4.86845e-29 | 1.000000 | 4.86845e-29 | 1.000000 |
| rad13         | 2.75167e-31 | 1.000000 | 2.75167e-31 | 1.000000 |
| rad7          | 5.90817e-32 | 1.000000 | 5.90817e-32 | 1.000000 |
| PhCHCCH2+H    | 2.18159e-32 | 1.000000 | 2.18159e-32 | 1.000000 |
| rad38         | 1.47545e-32 | 1.000000 | 1.47545e-32 | 1.000000 |
| rad60syn      | 1.37010e-32 | 1.000000 | 1.37010e-32 | 1.000000 |
| rad9          | 1.74813e-33 | 1.000000 | 1.74813e-33 | 1.000000 |
| rad60anti     | 1.15981e-33 | 1.000000 | 1.15981e-33 | 1.000000 |
| rad33         | 6.71701e-34 | 1.000000 | 6.71701e-34 | 1.000000 |
| rad28         | 1.24314e-34 | 1.000000 | 1.24314e-34 | 1.000000 |
| PhCH2CCH+H    | 6.85796e-35 | 1.000000 | 6.85796e-35 | 1.000000 |
| rad35         | 3.79051e-36 | 1.000000 | 3.79051e-36 | 1.000000 |
| PAH9+H        | 3.27071e-36 | 1.000000 | 3.27071e-36 | 1.000000 |
| rad46         | 2.19940e-36 | 1.000000 | 2.19940e-36 | 1.000000 |
| Ph+Allene     | 1.84509e-36 | 1.000000 | 1.84509e-36 | 1.000000 |
| PAH7+H        | 5.42608e-38 | 1.000000 | 5.42608e-38 | 1.000000 |
| PAH3+H        | 1.80869e-39 | 1.000000 | 1.80869e-39 | 1.000000 |
| rad59         | 8.42621e-40 | 1.000000 | 8.42621e-40 | 1.000000 |
| rad3          | 1.07948e-40 | 1.000000 | 1.07948e-40 | 1.000000 |
| rad4          | 7.45135e-41 | 1.000000 | 7.45135e-41 | 1.000000 |
| rad26         | 2.73764e-41 | 1.000000 | 2.73764e-41 | 1.000000 |
| rad50         | 2.47533e-47 | 1.000000 | 2.47533e-47 | 1.000000 |
| rad39         | 2.64849e-48 | 1.000000 | 2.64849e-48 | 1.000000 |
| rad31         | 1.53799e-48 | 1.000000 | 1.53799e-48 | 1.000000 |
| rad2          | 6.09934e-49 | 1.000000 | 6.09934e-49 | 1.000000 |
| rad1          | 1.50343e-49 | 1.000000 | 1.50343e-49 | 1.000000 |
| rad10         | 1.22735e-49 | 1.000000 | 1.22735e-49 | 1.000000 |
| PhCCH+CH3     | 4.27035e-52 | 1.000000 | 4.27035e-52 | 1.000000 |
| rad14         | 1.15752e-52 | 1.000000 | 1.15752e-52 | 1.000000 |
| rad12         | 1.05574e-52 | 1.000000 | 1.05574e-52 | 1.000000 |
| rad52         | 3.55925e-54 | 1.000000 | 3.55925e-54 | 1.000000 |
| rad37         | 2.82534e-54 | 1.000000 | 2.82534e-54 | 1.000000 |
| rad58         | 6.51409e-56 | 1.000000 | 6.51409e-56 | 1.000000 |
| Ph+MeAc       | 6.60779e-57 | 1.000000 | 6.60779e-57 | 1.000000 |
| rad51         | 9.73798e-58 | 1.000000 | 9.73798e-58 | 1.000000 |
| rad27         | 8.91486e-61 | 1.000000 | 8.91486e-61 | 1.000000 |
| PhCCCH3+H     | 1.05490e-61 | 1.000000 | 1.05490e-61 | 1.000000 |
| rad70         | 3.06918e-62 | 1.000000 | 3.06918e-62 | 1.000000 |
| rad47         | 4.29912e-63 | 1.000000 | 4.29912e-63 | 1.000000 |
| rad19syn      | 2.68907e-63 | 1.000000 | 2.68907e-63 | 1.000000 |
| PAH10+CH3     | 2.46840e-63 | 1.000000 | 2.46840e-63 | 1.000000 |
| rad54         | 9.68252e-64 | 1.000000 | 9.68252e-64 | 1.000000 |
| rad65         | 1.23845e-65 | 1.000000 | 1.23845e-65 | 1.000000 |
| rad34         | 1.26156e-66 | 1.000000 | 1.26156e-66 | 1.000000 |
| rad5          | 1.24125e-67 | 1.000000 | 1.24125e-67 | 1.000000 |
| rad55         | 9.23998e-69 | 1.000000 | 9.23998e-69 | 1.000000 |
| PAH1+H        | 7.77036e-69 | 1.000000 | 7.77036e-69 | 1.000000 |
| PhcycC3H3_A+H | 2.35561e-70 | 1.000000 | 2.35561e-70 | 1.000000 |
| rad62         | 3.27287e-75 | 1.000000 | 3.27287e-75 | 1.000000 |
| rad43         | 4.55051e-80 | 1.000000 | 4.55051e-80 | 1.000000 |
| rad42         | 5.04540e-83 | 1.000000 | 5.04540e-83 | 1.000000 |
| rad41         | 1.87167e-86 | 1.000000 | 1.87167e-86 | 1.000000 |

100000000. Pa, 130.000000 K

=====

| Rate constant | True (fraction)     | Effective (fraction) |
|---------------|---------------------|----------------------|
| Total         | 3.94360e-35 (1.00 ) | 3.94360e-35 (1.00 )  |

| species     | PYtrue      | Cumul    | PYeffective | Cumul    |
|-------------|-------------|----------|-------------|----------|
| rad20       | 0.999942    | 0.999942 | 0.999942    | 0.999942 |
| rad21       | 5.07832e-05 | 0.999993 | 5.07832e-05 | 0.999993 |
| rad18       | 7.33589e-06 | 1.00000  | 7.33589e-06 | 1.00000  |
| rad22       | 8.20932e-10 | 1.00000  | 8.20932e-10 | 1.00000  |
| Benzyl+C2H2 | 3.24450e-10 | 1.00000  | 0.00000     | 1.00000  |
| rad24       | 3.61578e-11 | 1.00000  | 3.61578e-11 | 1.00000  |
| Indene+H    | 2.55471e-11 | 1.00000  | 2.55471e-11 | 1.00000  |
| rad45       | 2.56406e-13 | 1.00000  | 2.56406e-13 | 1.00000  |
| rad11       | 1.93558e-13 | 1.00000  | 1.93558e-13 | 1.00000  |
| rad36       | 5.04027e-14 | 1.00000  | 5.04027e-14 | 1.00000  |
| rad23       | 1.12524e-17 | 1.00000  | 1.12524e-17 | 1.00000  |
| rad6        | 6.44488e-21 | 1.00000  | 6.44488e-21 | 1.00000  |
| rad30       | 2.73267e-21 | 1.00000  | 2.73267e-21 | 1.00000  |
| rad15       | 5.37857e-23 | 1.00000  | 5.37857e-23 | 1.00000  |
| rad8        | 7.17037e-25 | 1.00000  | 7.17037e-25 | 1.00000  |
| rad25       | 2.33020e-28 | 1.00000  | 2.33020e-28 | 1.00000  |

|               |             |         |             |         |
|---------------|-------------|---------|-------------|---------|
| rad13         | 7.04670e-31 | 1.00000 | 7.04670e-31 | 1.00000 |
| rad60syn      | 3.26217e-31 | 1.00000 | 3.26217e-31 | 1.00000 |
| PhCHCCH2+H    | 2.32756e-31 | 1.00000 | 2.32756e-31 | 1.00000 |
| rad7          | 1.55640e-31 | 1.00000 | 1.55640e-31 | 1.00000 |
| rad9          | 7.21050e-32 | 1.00000 | 7.21050e-32 | 1.00000 |
| rad38         | 5.67270e-32 | 1.00000 | 5.67270e-32 | 1.00000 |
| rad60anti     | 3.34537e-32 | 1.00000 | 3.34537e-32 | 1.00000 |
| PhCH2CCH+H    | 6.24693e-33 | 1.00000 | 6.24693e-33 | 1.00000 |
| rad28         | 2.89961e-33 | 1.00000 | 2.89961e-33 | 1.00000 |
| rad33         | 1.91796e-33 | 1.00000 | 1.91796e-33 | 1.00000 |
| Ph+Allene     | 5.18947e-35 | 1.00000 | 5.18947e-35 | 1.00000 |
| rad35         | 2.44721e-35 | 1.00000 | 2.44721e-35 | 1.00000 |
| rad46         | 1.83712e-35 | 1.00000 | 1.83712e-35 | 1.00000 |
| PAH9+H        | 1.04971e-35 | 1.00000 | 1.04971e-35 | 1.00000 |
| PAH7+H        | 2.17022e-36 | 1.00000 | 2.17022e-36 | 1.00000 |
| PAH3+H        | 1.47561e-37 | 1.00000 | 1.47561e-37 | 1.00000 |
| rad59         | 6.79043e-38 | 1.00000 | 6.79043e-38 | 1.00000 |
| rad26         | 1.73146e-39 | 1.00000 | 1.73146e-39 | 1.00000 |
| rad3          | 4.86377e-40 | 1.00000 | 4.86377e-40 | 1.00000 |
| rad4          | 3.47603e-40 | 1.00000 | 3.47603e-40 | 1.00000 |
| rad50         | 1.50473e-45 | 1.00000 | 1.50473e-45 | 1.00000 |
| rad39         | 9.58244e-47 | 1.00000 | 9.58244e-47 | 1.00000 |
| rad31         | 1.10541e-47 | 1.00000 | 1.10541e-47 | 1.00000 |
| rad10         | 8.69014e-48 | 1.00000 | 8.69014e-48 | 1.00000 |
| rad2          | 5.78788e-48 | 1.00000 | 5.78788e-48 | 1.00000 |
| rad1          | 1.43926e-48 | 1.00000 | 1.43926e-48 | 1.00000 |
| PhCCH+CH3     | 7.91647e-51 | 1.00000 | 7.91647e-51 | 1.00000 |
| rad12         | 7.71730e-51 | 1.00000 | 7.71730e-51 | 1.00000 |
| rad14         | 1.57863e-51 | 1.00000 | 1.57863e-51 | 1.00000 |
| rad52         | 4.38385e-52 | 1.00000 | 4.38385e-52 | 1.00000 |
| rad37         | 2.17847e-52 | 1.00000 | 2.17847e-52 | 1.00000 |
| rad58         | 1.17509e-53 | 1.00000 | 1.17509e-53 | 1.00000 |
| Ph+MeAc       | 3.04929e-55 | 1.00000 | 3.04929e-55 | 1.00000 |
| rad51         | 1.79971e-55 | 1.00000 | 1.79971e-55 | 1.00000 |
| rad27         | 1.91978e-59 | 1.00000 | 1.91978e-59 | 1.00000 |
| rad70         | 6.05938e-60 | 1.00000 | 6.05938e-60 | 1.00000 |
| PhCCCH3+H     | 3.42722e-60 | 1.00000 | 3.42722e-60 | 1.00000 |
| rad47         | 1.30545e-60 | 1.00000 | 1.30545e-60 | 1.00000 |
| rad19syn      | 4.16523e-61 | 1.00000 | 4.16523e-61 | 1.00000 |
| PAH10+CH3     | 3.89239e-61 | 1.00000 | 3.89239e-61 | 1.00000 |
| rad54         | 1.83332e-61 | 1.00000 | 1.83332e-61 | 1.00000 |
| rad65         | 2.39105e-63 | 1.00000 | 2.39105e-63 | 1.00000 |
| rad34         | 3.08060e-64 | 1.00000 | 3.08060e-64 | 1.00000 |
| rad5          | 1.63167e-65 | 1.00000 | 1.63167e-65 | 1.00000 |
| rad55         | 2.64731e-66 | 1.00000 | 2.64731e-66 | 1.00000 |
| PAH1+H        | 1.90325e-66 | 1.00000 | 1.90325e-66 | 1.00000 |
| PhcycC3H3_A+H | 6.93631e-68 | 1.00000 | 6.93631e-68 | 1.00000 |
| rad62         | 8.48785e-73 | 1.00000 | 8.48785e-73 | 1.00000 |
| rad43         | 1.21139e-77 | 1.00000 | 1.21139e-77 | 1.00000 |
| rad42         | 2.46411e-80 | 1.00000 | 2.46411e-80 | 1.00000 |
| rad41         | 6.04778e-84 | 1.00000 | 6.04778e-84 | 1.00000 |

100000000. Pa, 140.000000 K

=====

| Rate constant | True (fraction)     | Effective (fraction) |
|---------------|---------------------|----------------------|
| Total         | 1.44756e-33 (1.00 ) | 1.44756e-33 (1.00 )  |

| species     | PYtrue      | Cumul    | PYeffective | Cumul    |
|-------------|-------------|----------|-------------|----------|
| rad20       | 0.999935    | 0.999935 | 0.999935    | 0.999935 |
| rad21       | 5.69228e-05 | 0.999992 | 5.69228e-05 | 0.999992 |
| rad18       | 8.26315e-06 | 1.00000  | 8.26315e-06 | 1.00000  |
| rad22       | 1.04378e-09 | 1.00000  | 1.04378e-09 | 1.00000  |
| Benzyl+C2H2 | 5.00981e-10 | 1.00000  | 0.00000     | 1.00000  |
| rad24       | 4.73437e-11 | 1.00000  | 4.73437e-11 | 1.00000  |
| Indene+H    | 3.27731e-11 | 1.00000  | 3.27731e-11 | 1.00000  |
| rad45       | 3.76630e-13 | 1.00000  | 3.76630e-13 | 1.00000  |
| rad11       | 2.79325e-13 | 1.00000  | 2.79325e-13 | 1.00000  |
| rad36       | 7.31372e-14 | 1.00000  | 7.31372e-14 | 1.00000  |
| rad23       | 1.66216e-17 | 1.00000  | 1.66216e-17 | 1.00000  |
| rad6        | 1.20619e-20 | 1.00000  | 1.20619e-20 | 1.00000  |
| rad30       | 7.73718e-21 | 1.00000  | 7.73718e-21 | 1.00000  |
| rad15       | 2.08581e-22 | 1.00000  | 2.08581e-22 | 1.00000  |
| rad8        | 1.25982e-23 | 1.00000  | 1.25982e-23 | 1.00000  |
| rad25       | 1.02336e-27 | 1.00000  | 1.02336e-27 | 1.00000  |
| rad60syn    | 5.80764e-30 | 1.00000  | 5.80764e-30 | 1.00000  |
| rad9        | 2.27592e-30 | 1.00000  | 2.27592e-30 | 1.00000  |
| PhCHCCH2+H  | 2.11255e-30 | 1.00000  | 2.11255e-30 | 1.00000  |
| rad13       | 1.84785e-30 | 1.00000  | 1.84785e-30 | 1.00000  |

|               |             |         |             |         |
|---------------|-------------|---------|-------------|---------|
| rad60anti     | 7.07654e-31 | 1.00000 | 7.07654e-31 | 1.00000 |
| PhCH2CCH+H    | 5.38241e-31 | 1.00000 | 5.38241e-31 | 1.00000 |
| rad7          | 4.20376e-31 | 1.00000 | 4.20376e-31 | 1.00000 |
| rad38         | 2.13224e-31 | 1.00000 | 2.13224e-31 | 1.00000 |
| rad28         | 5.35542e-32 | 1.00000 | 5.35542e-32 | 1.00000 |
| rad33         | 5.62696e-33 | 1.00000 | 5.62696e-33 | 1.00000 |
| Ph+Allene     | 1.14225e-33 | 1.00000 | 1.14225e-33 | 1.00000 |
| rad35         | 5.97210e-34 | 1.00000 | 5.97210e-34 | 1.00000 |
| rad46         | 1.35966e-34 | 1.00000 | 1.35966e-34 | 1.00000 |
| PAH7+H        | 6.59477e-35 | 1.00000 | 6.59477e-35 | 1.00000 |
| PAH9+H        | 3.39178e-35 | 1.00000 | 3.39178e-35 | 1.00000 |
| PAH3+H        | 1.08356e-35 | 1.00000 | 1.08356e-35 | 1.00000 |
| rad59         | 4.90746e-36 | 1.00000 | 4.90746e-36 | 1.00000 |
| rad26         | 9.01875e-38 | 1.00000 | 9.01875e-38 | 1.00000 |
| rad3          | 2.26062e-39 | 1.00000 | 2.26062e-39 | 1.00000 |
| rad4          | 1.65929e-39 | 1.00000 | 1.65929e-39 | 1.00000 |
| rad50         | 7.65519e-44 | 1.00000 | 7.65519e-44 | 1.00000 |
| rad39         | 2.87209e-45 | 1.00000 | 2.87209e-45 | 1.00000 |
| rad10         | 5.14199e-46 | 1.00000 | 5.14199e-46 | 1.00000 |
| rad31         | 7.94120e-47 | 1.00000 | 7.94120e-47 | 1.00000 |
| rad2          | 5.49508e-47 | 1.00000 | 5.49508e-47 | 1.00000 |
| rad1          | 1.37272e-47 | 1.00000 | 1.37272e-47 | 1.00000 |
| rad12         | 4.78350e-49 | 1.00000 | 4.78350e-49 | 1.00000 |
| PhCCH+CH3     | 1.38178e-49 | 1.00000 | 1.38178e-49 | 1.00000 |
| rad52         | 4.68922e-50 | 1.00000 | 4.68922e-50 | 1.00000 |
| rad14         | 2.07394e-50 | 1.00000 | 2.07394e-50 | 1.00000 |
| rad37         | 1.45263e-50 | 1.00000 | 1.45263e-50 | 1.00000 |
| rad58         | 2.01398e-51 | 1.00000 | 2.01398e-51 | 1.00000 |
| rad51         | 2.93392e-53 | 1.00000 | 2.93392e-53 | 1.00000 |
| Ph+MeAc       | 1.21045e-53 | 1.00000 | 1.21045e-53 | 1.00000 |
| rad70         | 1.11596e-57 | 1.00000 | 1.11596e-57 | 1.00000 |
| rad27         | 4.06083e-58 | 1.00000 | 4.06083e-58 | 1.00000 |
| rad47         | 3.59504e-58 | 1.00000 | 3.59504e-58 | 1.00000 |
| PhCCCH3+H     | 1.05187e-58 | 1.00000 | 1.05187e-58 | 1.00000 |
| rad19syn      | 5.77362e-59 | 1.00000 | 5.77362e-59 | 1.00000 |
| PAH10+CH3     | 5.66779e-59 | 1.00000 | 5.66779e-59 | 1.00000 |
| rad54         | 3.15900e-59 | 1.00000 | 3.15900e-59 | 1.00000 |
| rad65         | 4.31982e-61 | 1.00000 | 4.31982e-61 | 1.00000 |
| rad34         | 7.03872e-62 | 1.00000 | 7.03872e-62 | 1.00000 |
| rad5          | 1.95908e-63 | 1.00000 | 1.95908e-63 | 1.00000 |
| rad55         | 7.25867e-64 | 1.00000 | 7.25867e-64 | 1.00000 |
| PAH1+H        | 4.34003e-64 | 1.00000 | 4.34003e-64 | 1.00000 |
| PhcycC3H3_A+H | 1.97571e-65 | 1.00000 | 1.97571e-65 | 1.00000 |
| rad62         | 2.02926e-70 | 1.00000 | 2.02926e-70 | 1.00000 |
| rad43         | 2.98057e-75 | 1.00000 | 2.98057e-75 | 1.00000 |
| rad42         | 1.22756e-77 | 1.00000 | 1.22756e-77 | 1.00000 |
| rad41         | 1.81482e-81 | 1.00000 | 1.81482e-81 | 1.00000 |

100000000. Pa, 150.000000 K

=====

| Rate constant | True (fraction)     | Effective (fraction) |
|---------------|---------------------|----------------------|
| Total         | 3.27736e-32 (1.00 ) | 3.27736e-32 (1.00 )  |

| species     | PYtrue      | Cumul    | PYeffective | Cumul    |
|-------------|-------------|----------|-------------|----------|
| rad20       | 0.999927    | 0.999927 | 0.999927    | 0.999927 |
| rad21       | 6.36722e-05 | 0.999991 | 6.36722e-05 | 0.999991 |
| rad18       | 9.29122e-06 | 1.000000 | 9.29122e-06 | 1.000000 |
| rad22       | 1.32368e-09 | 1.000000 | 1.32368e-09 | 1.000000 |
| Benzyl+C2H2 | 7.70343e-10 | 1.000000 | 0.000000    | 1.000000 |
| rad24       | 6.19809e-11 | 1.000000 | 6.19809e-11 | 1.000000 |
| Indene+H    | 4.19821e-11 | 1.000000 | 4.19821e-11 | 1.000000 |
| rad45       | 5.52626e-13 | 1.000000 | 5.52626e-13 | 1.000000 |
| rad11       | 4.04904e-13 | 1.000000 | 4.04904e-13 | 1.000000 |
| rad36       | 1.06049e-13 | 1.000000 | 1.06049e-13 | 1.000000 |
| rad23       | 2.45715e-17 | 1.000000 | 2.45715e-17 | 1.000000 |
| rad6        | 2.28705e-20 | 1.000000 | 2.28705e-20 | 1.000000 |
| rad30       | 2.05079e-20 | 1.000000 | 2.05079e-20 | 1.000000 |
| rad15       | 7.26297e-22 | 1.000000 | 7.26297e-22 | 1.000000 |
| rad8        | 1.60446e-22 | 1.000000 | 1.60446e-22 | 1.000000 |
| rad25       | 4.14982e-27 | 1.000000 | 4.14982e-27 | 1.000000 |
| rad60syn    | 7.73783e-29 | 1.000000 | 7.73783e-29 | 1.000000 |
| rad9        | 5.18231e-29 | 1.000000 | 5.18231e-29 | 1.000000 |
| PhCH2CCH+H  | 4.90044e-29 | 1.000000 | 4.90044e-29 | 1.000000 |
| PhCHCCH2+H  | 1.63145e-29 | 1.000000 | 1.63145e-29 | 1.000000 |
| rad60anti   | 1.09804e-29 | 1.000000 | 1.09804e-29 | 1.000000 |
| rad13       | 4.95191e-30 | 1.000000 | 4.95191e-30 | 1.000000 |
| rad7        | 1.16105e-30 | 1.000000 | 1.16105e-30 | 1.000000 |
| rad38       | 7.83318e-31 | 1.000000 | 7.83318e-31 | 1.000000 |

|               |             |          |             |          |
|---------------|-------------|----------|-------------|----------|
| rad28         | 7.69144e-31 | 1.000000 | 7.69144e-31 | 1.000000 |
| Ph+Allene     | 1.93404e-32 | 1.000000 | 1.93404e-32 | 1.000000 |
| rad33         | 1.68839e-32 | 1.000000 | 1.68839e-32 | 1.000000 |
| rad35         | 1.52975e-32 | 1.000000 | 1.52975e-32 | 1.000000 |
| PAH7+H        | 1.48386e-33 | 1.000000 | 1.48386e-33 | 1.000000 |
| rad46         | 8.91769e-34 | 1.000000 | 8.91769e-34 | 1.000000 |
| PAH3+H        | 6.20699e-34 | 1.000000 | 6.20699e-34 | 1.000000 |
| rad59         | 2.63037e-34 | 1.000000 | 2.63037e-34 | 1.000000 |
| PAH9+H        | 1.10124e-34 | 1.000000 | 1.10124e-34 | 1.000000 |
| rad26         | 3.39736e-36 | 1.000000 | 3.39736e-36 | 1.000000 |
| rad3          | 1.07062e-38 | 1.000000 | 1.07062e-38 | 1.000000 |
| rad4          | 8.01492e-39 | 1.000000 | 8.01492e-39 | 1.000000 |
| rad50         | 3.07047e-42 | 1.000000 | 3.07047e-42 | 1.000000 |
| rad39         | 6.99974e-44 | 1.000000 | 6.99974e-44 | 1.000000 |
| rad10         | 2.33904e-44 | 1.000000 | 2.33904e-44 | 1.000000 |
| rad31         | 5.58653e-46 | 1.000000 | 5.58653e-46 | 1.000000 |
| rad2          | 5.10740e-46 | 1.000000 | 5.10740e-46 | 1.000000 |
| rad1          | 1.27742e-46 | 1.000000 | 1.27742e-46 | 1.000000 |
| rad12         | 2.39053e-47 | 1.000000 | 2.39053e-47 | 1.000000 |
| rad52         | 4.58623e-48 | 1.000000 | 4.58623e-48 | 1.000000 |
| PhCCH+CH3     | 2.22764e-48 | 1.000000 | 2.22764e-48 | 1.000000 |
| rad37         | 8.32234e-49 | 1.000000 | 8.32234e-49 | 1.000000 |
| rad58         | 4.46562e-49 | 1.000000 | 4.46562e-49 | 1.000000 |
| rad14         | 2.57780e-49 | 1.000000 | 2.57780e-49 | 1.000000 |
| rad51         | 4.62350e-51 | 1.000000 | 4.62350e-51 | 1.000000 |
| Ph+MeAc       | 4.09341e-52 | 1.000000 | 4.09341e-52 | 1.000000 |
| rad70         | 2.51510e-55 | 1.000000 | 2.51510e-55 | 1.000000 |
| rad47         | 1.02500e-55 | 1.000000 | 1.02500e-55 | 1.000000 |
| PAH10+CH3     | 9.55040e-57 | 1.000000 | 9.55040e-57 | 1.000000 |
| rad27         | 8.21402e-57 | 1.000000 | 8.21402e-57 | 1.000000 |
| rad19syn      | 8.04811e-57 | 1.000000 | 8.04811e-57 | 1.000000 |
| rad54         | 5.64153e-57 | 1.000000 | 5.64153e-57 | 1.000000 |
| PhCCCH3+H     | 2.99653e-57 | 1.000000 | 2.99653e-57 | 1.000000 |
| rad65         | 8.89518e-59 | 1.000000 | 8.89518e-59 | 1.000000 |
| rad34         | 1.99857e-59 | 1.000000 | 1.99857e-59 | 1.000000 |
| rad5          | 2.58158e-61 | 1.000000 | 2.58158e-61 | 1.000000 |
| rad55         | 2.18975e-61 | 1.000000 | 2.18975e-61 | 1.000000 |
| PAH1+H        | 1.19888e-61 | 1.000000 | 1.19888e-61 | 1.000000 |
| PhcycC3H3_A+H | 6.26228e-63 | 1.000000 | 6.26228e-63 | 1.000000 |
| rad62         | 5.15626e-68 | 1.000000 | 5.15626e-68 | 1.000000 |
| rad43         | 8.50877e-73 | 1.000000 | 8.50877e-73 | 1.000000 |
| rad42         | 7.12664e-75 | 1.000000 | 7.12664e-75 | 1.000000 |
| rad41         | 6.64650e-79 | 1.000000 | 6.64650e-79 | 1.000000 |

100000000. Pa, 160.000000 K

=====

| Rate constant | True (fraction)     | Effective (fraction) |
|---------------|---------------------|----------------------|
| Total         | 5.01169e-31 (1.00 ) | 5.01169e-31 (1.00 )  |

| species     | PYtrue      | Cumul    | PYeffective | Cumul    |
|-------------|-------------|----------|-------------|----------|
| rad20       | 0.999918    | 0.999918 | 0.999918    | 0.999918 |
| rad21       | 7.11338e-05 | 0.999989 | 7.11338e-05 | 0.999989 |
| rad18       | 1.04375e-05 | 1.000000 | 1.04375e-05 | 1.000000 |
| rad22       | 1.67706e-09 | 1.000000 | 1.67706e-09 | 1.000000 |
| Benzyl+C2H2 | 1.17955e-09 | 1.000000 | 0.000000    | 1.000000 |
| rad24       | 8.12604e-11 | 1.000000 | 8.12604e-11 | 1.000000 |
| Indene+H    | 5.37939e-11 | 1.000000 | 5.37939e-11 | 1.000000 |
| rad45       | 8.11859e-13 | 1.000000 | 8.11859e-13 | 1.000000 |
| rad11       | 5.90007e-13 | 1.000000 | 5.90007e-13 | 1.000000 |
| rad36       | 1.54029e-13 | 1.000000 | 1.54029e-13 | 1.000000 |
| rad23       | 3.64461e-17 | 1.000000 | 3.64461e-17 | 1.000000 |
| rad30       | 5.14365e-20 | 1.000000 | 5.14365e-20 | 1.000000 |
| rad6        | 4.38963e-20 | 1.000000 | 4.38963e-20 | 1.000000 |
| rad15       | 2.30611e-21 | 1.000000 | 2.30611e-21 | 1.000000 |
| rad8        | 1.54444e-21 | 1.000000 | 1.54444e-21 | 1.000000 |
| rad25       | 1.56815e-26 | 1.000000 | 1.56815e-26 | 1.000000 |
| PhCH2CCH+H  | 1.69755e-27 | 1.000000 | 1.69755e-27 | 1.000000 |
| rad9        | 8.59079e-28 | 1.000000 | 8.59079e-28 | 1.000000 |
| rad60syn    | 7.94676e-28 | 1.000000 | 7.94676e-28 | 1.000000 |
| rad60anti   | 1.28835e-28 | 1.000000 | 1.28835e-28 | 1.000000 |
| PhCHCCH2+H  | 1.08761e-28 | 1.000000 | 1.08761e-28 | 1.000000 |
| rad13       | 1.35087e-29 | 1.000000 | 1.35087e-29 | 1.000000 |
| rad28       | 8.72352e-30 | 1.000000 | 8.72352e-30 | 1.000000 |
| rad7        | 3.26448e-30 | 1.000000 | 3.26448e-30 | 1.000000 |
| rad38       | 2.81255e-30 | 1.000000 | 2.81255e-30 | 1.000000 |
| rad35       | 2.83593e-31 | 1.000000 | 2.83593e-31 | 1.000000 |
| Ph+Allene   | 2.55709e-31 | 1.000000 | 2.55709e-31 | 1.000000 |
| rad33       | 5.15022e-32 | 1.000000 | 5.15022e-32 | 1.000000 |



|               |             |          |             |          |
|---------------|-------------|----------|-------------|----------|
| PAH7+H        | 2.49283e-32 | 1.000000 | 2.49283e-32 | 1.000000 |
| PAH3+H        | 1.87956e-32 | 1.000000 | 1.87956e-32 | 1.000000 |
| rad59         | 7.55040e-33 | 1.000000 | 7.55040e-33 | 1.000000 |
| rad46         | 5.23724e-33 | 1.000000 | 5.23724e-33 | 1.000000 |
| PAH9+H        | 3.58324e-34 | 1.000000 | 3.58324e-34 | 1.000000 |
| rad26         | 8.51575e-35 | 1.000000 | 8.51575e-35 | 1.000000 |
| rad3          | 5.10802e-38 | 1.000000 | 5.10802e-38 | 1.000000 |
| rad4          | 3.87790e-38 | 1.000000 | 3.87790e-38 | 1.000000 |
| rad50         | 8.74407e-41 | 1.000000 | 8.74407e-41 | 1.000000 |
| rad39         | 1.36385e-42 | 1.000000 | 1.36385e-42 | 1.000000 |
| rad10         | 7.13961e-43 | 1.000000 | 7.13961e-43 | 1.000000 |
| rad2          | 4.58032e-45 | 1.000000 | 4.58032e-45 | 1.000000 |
| rad31         | 3.79382e-45 | 1.000000 | 3.79382e-45 | 1.000000 |
| rad1          | 1.14401e-45 | 1.000000 | 1.14401e-45 | 1.000000 |
| rad12         | 8.11783e-46 | 1.000000 | 8.11783e-46 | 1.000000 |
| rad52         | 3.24124e-46 | 1.000000 | 3.24124e-46 | 1.000000 |
| rad58         | 8.01416e-47 | 1.000000 | 8.01416e-47 | 1.000000 |
| PhCCH+CH3     | 3.28201e-47 | 1.000000 | 3.28201e-47 | 1.000000 |
| rad37         | 3.27793e-47 | 1.000000 | 3.27793e-47 | 1.000000 |
| rad14         | 3.00228e-48 | 1.000000 | 3.00228e-48 | 1.000000 |
| rad51         | 5.37865e-49 | 1.000000 | 5.37865e-49 | 1.000000 |
| Ph+MeAc       | 1.13526e-50 | 1.000000 | 1.13526e-50 | 1.000000 |
| rad70         | 4.49083e-53 | 1.000000 | 4.49083e-53 | 1.000000 |
| rad47         | 2.20755e-53 | 1.000000 | 2.20755e-53 | 1.000000 |
| PAH10+CH3     | 1.25010e-54 | 1.000000 | 1.25010e-54 | 1.000000 |
| rad19syn      | 8.05494e-55 | 1.000000 | 8.05494e-55 | 1.000000 |
| rad54         | 7.28084e-55 | 1.000000 | 7.28084e-55 | 1.000000 |
| rad27         | 1.55231e-55 | 1.000000 | 1.55231e-55 | 1.000000 |
| PhCCCH3+H     | 7.68394e-56 | 1.000000 | 7.68394e-56 | 1.000000 |
| rad65         | 1.42338e-56 | 1.000000 | 1.42338e-56 | 1.000000 |
| rad34         | 4.52511e-57 | 1.000000 | 4.52511e-57 | 1.000000 |
| rad55         | 4.83874e-59 | 1.000000 | 4.83874e-59 | 1.000000 |
| PAH1+H        | 2.61830e-59 | 1.000000 | 2.61830e-59 | 1.000000 |
| rad5          | 2.57617e-59 | 1.000000 | 2.57617e-59 | 1.000000 |
| PhcycC3H3_A+H | 1.46333e-60 | 1.000000 | 1.46333e-60 | 1.000000 |
| rad62         | 9.69035e-66 | 1.000000 | 9.69035e-66 | 1.000000 |
| rad43         | 1.90130e-70 | 1.000000 | 1.90130e-70 | 1.000000 |
| rad42         | 3.06048e-72 | 1.000000 | 3.06048e-72 | 1.000000 |
| rad41         | 1.92455e-76 | 1.000000 | 1.92455e-76 | 1.000000 |

100000000. Pa, 170.000000 K

=====

| Rate constant | True (fraction)     | Effective (fraction) |
|---------------|---------------------|----------------------|
| Total         | 5.54821e-30 (1.00 ) | 5.54821e-30 (1.00 )  |

| species     | PYtrue      | Cumul    | PYeffective | Cumul    |
|-------------|-------------|----------|-------------|----------|
| rad20       | 0.999909    | 0.999909 | 0.999909    | 0.999909 |
| rad21       | 7.94230e-05 | 0.999988 | 7.94230e-05 | 0.999988 |
| rad18       | 1.17218e-05 | 1.00000  | 1.17218e-05 | 1.00000  |
| rad22       | 2.12543e-09 | 1.00000  | 2.12543e-09 | 1.00000  |
| Benzyl+C2H2 | 1.79813e-09 | 1.00000  | 0.00000     | 1.00000  |
| rad24       | 1.06809e-10 | 1.00000  | 1.06809e-10 | 1.00000  |
| Indene+H    | 6.90387e-11 | 1.00000  | 6.90387e-11 | 1.00000  |
| rad45       | 1.19602e-12 | 1.00000  | 1.19602e-12 | 1.00000  |
| rad11       | 8.64345e-13 | 1.00000  | 8.64345e-13 | 1.00000  |
| rad36       | 2.24454e-13 | 1.00000  | 2.24454e-13 | 1.00000  |
| rad23       | 5.43420e-17 | 1.00000  | 5.43420e-17 | 1.00000  |
| rad30       | 1.23194e-19 | 1.00000  | 1.23194e-19 | 1.00000  |
| rad6        | 8.51361e-20 | 1.00000  | 8.51361e-20 | 1.00000  |
| rad8        | 1.17128e-20 | 1.00000  | 1.17128e-20 | 1.00000  |
| rad15       | 6.77278e-21 | 1.00000  | 6.77278e-21 | 1.00000  |
| rad25       | 5.57184e-26 | 1.00000  | 5.57184e-26 | 1.00000  |
| PhCH2CCH+H  | 3.59092e-26 | 1.00000  | 3.59092e-26 | 1.00000  |
| rad9        | 1.08182e-26 | 1.00000  | 1.08182e-26 | 1.00000  |
| rad60syn    | 6.51534e-27 | 1.00000  | 6.51534e-27 | 1.00000  |
| rad60anti   | 1.18669e-27 | 1.00000  | 1.18669e-27 | 1.00000  |
| PhCHCCH2+H  | 6.37083e-28 | 1.00000  | 6.37083e-28 | 1.00000  |
| rad28       | 8.02423e-29 | 1.00000  | 8.02423e-29 | 1.00000  |
| rad13       | 3.73357e-29 | 1.00000  | 3.73357e-29 | 1.00000  |
| rad38       | 9.87124e-30 | 1.00000  | 9.87124e-30 | 1.00000  |
| rad7        | 9.29549e-30 | 1.00000  | 9.29549e-30 | 1.00000  |
| rad35       | 3.91311e-30 | 1.00000  | 3.91311e-30 | 1.00000  |
| Ph+Allene   | 2.71780e-30 | 1.00000  | 2.71780e-30 | 1.00000  |
| PAH3+H      | 3.80712e-31 | 1.00000  | 3.80712e-31 | 1.00000  |
| PAH7+H      | 3.24346e-31 | 1.00000  | 3.24346e-31 | 1.00000  |
| rad33       | 1.58717e-31 | 1.00000  | 1.58717e-31 | 1.00000  |
| rad59       | 1.46839e-31 | 1.00000  | 1.46839e-31 | 1.00000  |
| rad46       | 2.79035e-32 | 1.00000  | 2.79035e-32 | 1.00000  |

|               |             |         |             |         |
|---------------|-------------|---------|-------------|---------|
| rad26         | 1.55029e-33 | 1.00000 | 1.55029e-33 | 1.00000 |
| PAH9+H        | 1.16502e-33 | 1.00000 | 1.16502e-33 | 1.00000 |
| rad3          | 2.43179e-37 | 1.00000 | 2.43179e-37 | 1.00000 |
| rad4          | 1.86377e-37 | 1.00000 | 1.86377e-37 | 1.00000 |
| rad50         | 1.85490e-39 | 1.00000 | 1.85490e-39 | 1.00000 |
| rad39         | 2.17376e-41 | 1.00000 | 2.17376e-41 | 1.00000 |
| rad10         | 1.58595e-41 | 1.00000 | 1.58595e-41 | 1.00000 |
| rad2          | 3.92973e-44 | 1.00000 | 3.92973e-44 | 1.00000 |
| rad31         | 2.46466e-44 | 1.00000 | 2.46466e-44 | 1.00000 |
| rad12         | 2.01377e-44 | 1.00000 | 2.01377e-44 | 1.00000 |
| rad52         | 1.61331e-44 | 1.00000 | 1.61331e-44 | 1.00000 |
| rad58         | 1.11857e-44 | 1.00000 | 1.11857e-44 | 1.00000 |
| rad1          | 9.78253e-45 | 1.00000 | 9.78253e-45 | 1.00000 |
| rad37         | 9.39964e-46 | 1.00000 | 9.39964e-46 | 1.00000 |
| PhCCH+CH3     | 4.41396e-46 | 1.00000 | 4.41396e-46 | 1.00000 |
| rad51         | 4.49349e-47 | 1.00000 | 4.49349e-47 | 1.00000 |
| rad14         | 3.26548e-47 | 1.00000 | 3.26548e-47 | 1.00000 |
| Ph+MeAc       | 2.61867e-49 | 1.00000 | 2.61867e-49 | 1.00000 |
| rad70         | 6.11260e-51 | 1.00000 | 6.11260e-51 | 1.00000 |
| rad47         | 3.47712e-51 | 1.00000 | 3.47712e-51 | 1.00000 |
| PAH10+CH3     | 1.22309e-52 | 1.00000 | 1.22309e-52 | 1.00000 |
| rad54         | 6.60442e-53 | 1.00000 | 6.60442e-53 | 1.00000 |
| rad19syn      | 5.65285e-53 | 1.00000 | 5.65285e-53 | 1.00000 |
| rad27         | 2.71637e-54 | 1.00000 | 2.71637e-54 | 1.00000 |
| PhCCCH3+H     | 1.76532e-54 | 1.00000 | 1.76532e-54 | 1.00000 |
| rad65         | 1.71160e-54 | 1.00000 | 1.71160e-54 | 1.00000 |
| rad34         | 7.86613e-55 | 1.00000 | 7.86613e-55 | 1.00000 |
| rad55         | 7.48890e-57 | 1.00000 | 7.48890e-57 | 1.00000 |
| PAH1+H        | 4.35635e-57 | 1.00000 | 4.35635e-57 | 1.00000 |
| rad5          | 1.87040e-57 | 1.00000 | 1.87040e-57 | 1.00000 |
| PhcycC3H3_A+H | 2.40461e-58 | 1.00000 | 2.40461e-58 | 1.00000 |
| rad62         | 1.31113e-63 | 1.00000 | 1.31113e-63 | 1.00000 |
| rad43         | 3.23789e-68 | 1.00000 | 3.23789e-68 | 1.00000 |
| rad42         | 9.04523e-70 | 1.00000 | 9.04523e-70 | 1.00000 |
| rad41         | 4.24083e-74 | 1.00000 | 4.24083e-74 | 1.00000 |

100000000. Pa, 180.000000 K

=====

| Rate constant | True (fraction)     | Effective (fraction) |
|---------------|---------------------|----------------------|
| Total         | 4.69315e-29 (1.00 ) | 4.69315e-29 (1.00 )  |

| species     | PYtrue      | Cumul    | PYeffective | Cumul    |
|-------------|-------------|----------|-------------|----------|
| rad20       | 0.999898    | 0.999898 | 0.999898    | 0.999898 |
| rad21       | 8.86705e-05 | 0.999987 | 8.86705e-05 | 0.999987 |
| rad18       | 1.31669e-05 | 1.000000 | 1.31669e-05 | 1.000000 |
| Benzyl+C2H2 | 2.72808e-09 | 1.000000 | 0.000000    | 1.000000 |
| rad22       | 2.69694e-09 | 1.000000 | 2.69694e-09 | 1.000000 |
| rad24       | 1.40846e-10 | 1.000000 | 1.40846e-10 | 1.000000 |
| Indene+H    | 8.88277e-11 | 1.000000 | 8.88277e-11 | 1.000000 |
| rad45       | 1.76854e-12 | 1.000000 | 1.76854e-12 | 1.000000 |
| rad11       | 1.27267e-12 | 1.000000 | 1.27267e-12 | 1.000000 |
| rad36       | 3.28471e-13 | 1.000000 | 3.28471e-13 | 1.000000 |
| rad23       | 8.15462e-17 | 1.000000 | 8.15462e-17 | 1.000000 |
| rad30       | 2.83824e-19 | 1.000000 | 2.83824e-19 | 1.000000 |
| rad6        | 1.66476e-19 | 1.000000 | 1.66476e-19 | 1.000000 |
| rad8        | 7.25579e-20 | 1.000000 | 7.25579e-20 | 1.000000 |
| rad15       | 1.86229e-20 | 1.000000 | 1.86229e-20 | 1.000000 |
| PhCH2CCH+H  | 5.41563e-25 | 1.000000 | 5.41563e-25 | 1.000000 |
| rad25       | 1.87595e-25 | 1.000000 | 1.87595e-25 | 1.000000 |
| rad9        | 1.07418e-25 | 1.000000 | 1.07418e-25 | 1.000000 |
| rad60syn    | 4.40514e-26 | 1.000000 | 4.40514e-26 | 1.000000 |
| rad60anti   | 8.88361e-27 | 1.000000 | 8.88361e-27 | 1.000000 |
| PhCHCCH2+H  | 3.33480e-27 | 1.000000 | 3.33480e-27 | 1.000000 |
| rad28       | 6.15081e-28 | 1.000000 | 6.15081e-28 | 1.000000 |
| rad13       | 1.04040e-28 | 1.000000 | 1.04040e-28 | 1.000000 |
| rad35       | 4.19277e-29 | 1.000000 | 4.19277e-29 | 1.000000 |
| rad38       | 3.38707e-29 | 1.000000 | 3.38707e-29 | 1.000000 |
| rad7        | 2.66676e-29 | 1.000000 | 2.66676e-29 | 1.000000 |
| Ph+Allene   | 2.38957e-29 | 1.000000 | 2.38957e-29 | 1.000000 |
| PAH3+H      | 5.67374e-30 | 1.000000 | 5.67374e-30 | 1.000000 |
| PAH7+H      | 3.38107e-30 | 1.000000 | 3.38107e-30 | 1.000000 |
| rad59       | 2.11218e-30 | 1.000000 | 2.11218e-30 | 1.000000 |
| rad33       | 4.91301e-31 | 1.000000 | 4.91301e-31 | 1.000000 |
| rad46       | 1.36583e-31 | 1.000000 | 1.36583e-31 | 1.000000 |
| rad26       | 2.15934e-32 | 1.000000 | 2.15934e-32 | 1.000000 |
| PAH9+H      | 3.77413e-33 | 1.000000 | 3.77413e-33 | 1.000000 |
| rad3        | 1.14653e-36 | 1.000000 | 1.14653e-36 | 1.000000 |
| rad4        | 8.84060e-37 | 1.000000 | 8.84060e-37 | 1.000000 |

|               |             |          |             |          |
|---------------|-------------|----------|-------------|----------|
| rad50         | 3.05347e-38 | 1.000000 | 3.05347e-38 | 1.000000 |
| rad39         | 2.89663e-40 | 1.000000 | 2.89663e-40 | 1.000000 |
| rad10         | 2.70279e-40 | 1.000000 | 2.70279e-40 | 1.000000 |
| rad58         | 1.33344e-42 | 1.000000 | 1.33344e-42 | 1.000000 |
| rad52         | 5.62864e-43 | 1.000000 | 5.62864e-43 | 1.000000 |
| rad12         | 3.83639e-43 | 1.000000 | 3.83639e-43 | 1.000000 |
| rad2          | 3.21072e-43 | 1.000000 | 3.21072e-43 | 1.000000 |
| rad31         | 1.52379e-43 | 1.000000 | 1.52379e-43 | 1.000000 |
| rad1          | 7.95493e-44 | 1.000000 | 7.95493e-44 | 1.000000 |
| rad37         | 2.05416e-44 | 1.000000 | 2.05416e-44 | 1.000000 |
| PhCCH+CH3     | 5.42413e-45 | 1.000000 | 5.42413e-45 | 1.000000 |
| rad51         | 2.69940e-45 | 1.000000 | 2.69940e-45 | 1.000000 |
| rad14         | 3.31378e-46 | 1.000000 | 3.31378e-46 | 1.000000 |
| Ph+MeAc       | 5.09602e-48 | 1.000000 | 5.09602e-48 | 1.000000 |
| rad70         | 6.76191e-49 | 1.000000 | 6.76191e-49 | 1.000000 |
| rad47         | 4.06624e-49 | 1.000000 | 4.06624e-49 | 1.000000 |
| PAH10+CH3     | 9.18786e-51 | 1.000000 | 9.18786e-51 | 1.000000 |
| rad54         | 4.27331e-51 | 1.000000 | 4.27331e-51 | 1.000000 |
| rad19syn      | 2.79225e-51 | 1.000000 | 2.79225e-51 | 1.000000 |
| rad65         | 1.62264e-52 | 1.000000 | 1.62264e-52 | 1.000000 |
| rad34         | 1.13546e-52 | 1.000000 | 1.13546e-52 | 1.000000 |
| rad27         | 4.37788e-53 | 1.000000 | 4.37788e-53 | 1.000000 |
| PhCCCH3+H     | 3.62440e-53 | 1.000000 | 3.62440e-53 | 1.000000 |
| rad55         | 8.22722e-55 | 1.000000 | 8.22722e-55 | 1.000000 |
| PAH1+H        | 5.89928e-55 | 1.000000 | 5.89928e-55 | 1.000000 |
| rad5          | 9.97688e-56 | 1.000000 | 9.97688e-56 | 1.000000 |
| PhcycC3H3_A+H | 2.81092e-56 | 1.000000 | 2.81092e-56 | 1.000000 |
| rad62         | 1.30331e-61 | 1.000000 | 1.30331e-61 | 1.000000 |
| rad43         | 4.48107e-66 | 1.000000 | 4.48107e-66 | 1.000000 |
| rad42         | 1.83164e-67 | 1.000000 | 1.83164e-67 | 1.000000 |
| rad41         | 7.61612e-72 | 1.000000 | 7.61612e-72 | 1.000000 |

100000000. Pa, 190.000000 K

=====

| Rate constant | True (fraction)     | Effective (fraction) |
|---------------|---------------------|----------------------|
| Total         | 3.16530e-28 (1.00 ) | 3.16530e-28 (1.00 )  |

| species     | PYtrue      | Cumul    | PYeffective | Cumul    |
|-------------|-------------|----------|-------------|----------|
| rad20       | 0.999886    | 0.999886 | 0.999886    | 0.999886 |
| rad21       | 9.90240e-05 | 0.999985 | 9.90240e-05 | 0.999985 |
| rad18       | 1.47984e-05 | 1.000000 | 1.47984e-05 | 1.000000 |
| Benzyl+C2H2 | 4.11785e-09 | 1.000000 | 0.000000    | 1.000000 |
| rad22       | 3.42835e-09 | 1.000000 | 3.42835e-09 | 1.000000 |
| rad24       | 1.86402e-10 | 1.000000 | 1.86402e-10 | 1.000000 |
| Indene+H    | 1.14650e-10 | 1.000000 | 1.14650e-10 | 1.000000 |
| rad45       | 2.62599e-12 | 1.000000 | 2.62599e-12 | 1.000000 |
| rad11       | 1.88226e-12 | 1.000000 | 1.88226e-12 | 1.000000 |
| rad36       | 4.82946e-13 | 1.000000 | 4.82946e-13 | 1.000000 |
| rad23       | 1.23236e-16 | 1.000000 | 1.23236e-16 | 1.000000 |
| rad30       | 6.32583e-19 | 1.000000 | 6.32583e-19 | 1.000000 |
| rad8        | 3.78431e-19 | 1.000000 | 3.78431e-19 | 1.000000 |
| rad6        | 3.27396e-19 | 1.000000 | 3.27396e-19 | 1.000000 |
| rad15       | 4.84231e-20 | 1.000000 | 4.84231e-20 | 1.000000 |
| PhCH2CCH+H  | 6.27545e-24 | 1.000000 | 6.27545e-24 | 1.000000 |
| rad9        | 8.69299e-25 | 1.000000 | 8.69299e-25 | 1.000000 |
| rad25       | 6.02272e-25 | 1.000000 | 6.02272e-25 | 1.000000 |
| rad60syn    | 2.52623e-25 | 1.000000 | 2.52623e-25 | 1.000000 |
| rad60anti   | 5.57028e-26 | 1.000000 | 5.57028e-26 | 1.000000 |
| PhCHCCH2+H  | 1.58309e-26 | 1.000000 | 1.58309e-26 | 1.000000 |
| rad28       | 4.02743e-27 | 1.000000 | 4.02743e-27 | 1.000000 |
| rad35       | 3.62353e-28 | 1.000000 | 3.62353e-28 | 1.000000 |
| rad13       | 2.90990e-28 | 1.000000 | 2.90990e-28 | 1.000000 |
| Ph+Allene   | 1.78397e-28 | 1.000000 | 1.78397e-28 | 1.000000 |
| rad38       | 1.13646e-28 | 1.000000 | 1.13646e-28 | 1.000000 |
| rad7        | 7.67179e-29 | 1.000000 | 7.67179e-29 | 1.000000 |
| PAH3+H      | 6.60443e-29 | 1.000000 | 6.60443e-29 | 1.000000 |
| PAH7+H      | 2.91253e-29 | 1.000000 | 2.91253e-29 | 1.000000 |
| rad59       | 2.37594e-29 | 1.000000 | 2.37594e-29 | 1.000000 |
| rad33       | 1.51987e-30 | 1.000000 | 1.51987e-30 | 1.000000 |
| rad46       | 6.21043e-31 | 1.000000 | 6.21043e-31 | 1.000000 |
| rad26       | 2.40196e-31 | 1.000000 | 2.40196e-31 | 1.000000 |
| PAH9+H      | 1.21504e-32 | 1.000000 | 1.21504e-32 | 1.000000 |
| rad3        | 5.32316e-36 | 1.000000 | 5.32316e-36 | 1.000000 |
| rad4        | 4.11907e-36 | 1.000000 | 4.11907e-36 | 1.000000 |
| rad50       | 4.07442e-37 | 1.000000 | 4.07442e-37 | 1.000000 |
| rad10       | 3.73345e-39 | 1.000000 | 3.73345e-39 | 1.000000 |
| rad39       | 3.32271e-39 | 1.000000 | 3.32271e-39 | 1.000000 |
| rad58       | 1.82652e-40 | 1.000000 | 1.82652e-40 | 1.000000 |

|               |             |          |             |          |
|---------------|-------------|----------|-------------|----------|
| rad52         | 1.49712e-41 | 1.000000 | 1.49712e-41 | 1.000000 |
| rad12         | 5.98906e-42 | 1.000000 | 5.98906e-42 | 1.000000 |
| rad2          | 2.49660e-42 | 1.000000 | 2.49660e-42 | 1.000000 |
| rad31         | 8.94634e-43 | 1.000000 | 8.94634e-43 | 1.000000 |
| rad1          | 6.15058e-43 | 1.000000 | 6.15058e-43 | 1.000000 |
| rad37         | 3.70208e-43 | 1.000000 | 3.70208e-43 | 1.000000 |
| rad51         | 1.29406e-43 | 1.000000 | 1.29406e-43 | 1.000000 |
| PhCCH+CH3     | 6.14784e-44 | 1.000000 | 6.14784e-44 | 1.000000 |
| rad14         | 3.15016e-45 | 1.000000 | 3.15016e-45 | 1.000000 |
| Ph+MeAc       | 8.70118e-47 | 1.000000 | 8.70118e-47 | 1.000000 |
| rad70         | 7.76767e-47 | 1.000000 | 7.76767e-47 | 1.000000 |
| rad47         | 4.14487e-47 | 1.000000 | 4.14487e-47 | 1.000000 |
| PAH10+CH3     | 6.21039e-49 | 1.000000 | 6.21039e-49 | 1.000000 |
| rad54         | 2.24127e-49 | 1.000000 | 2.24127e-49 | 1.000000 |
| rad19syn      | 1.08978e-49 | 1.000000 | 1.08978e-49 | 1.000000 |
| rad34         | 1.79810e-50 | 1.000000 | 1.79810e-50 | 1.000000 |
| rad65         | 1.51702e-50 | 1.000000 | 1.51702e-50 | 1.000000 |
| PhCCCH3+H     | 6.85866e-52 | 1.000000 | 6.85866e-52 | 1.000000 |
| rad27         | 6.61443e-52 | 1.000000 | 6.61443e-52 | 1.000000 |
| PAH1+H        | 8.43496e-53 | 1.000000 | 8.43496e-53 | 1.000000 |
| rad55         | 7.47549e-53 | 1.000000 | 7.47549e-53 | 1.000000 |
| rad5          | 4.60642e-54 | 1.000000 | 4.60642e-54 | 1.000000 |
| PhcycC3H3_A+H | 2.71913e-54 | 1.000000 | 2.71913e-54 | 1.000000 |
| rad62         | 1.10687e-59 | 1.000000 | 1.10687e-59 | 1.000000 |
| rad43         | 6.54318e-64 | 1.000000 | 6.54318e-64 | 1.000000 |
| rad42         | 2.92827e-65 | 1.000000 | 2.92827e-65 | 1.000000 |
| rad41         | 1.45384e-69 | 1.000000 | 1.45384e-69 | 1.000000 |

100000000. Pa, 200.000000 K

| Rate constant | True (fraction)     | Effective (fraction) |
|---------------|---------------------|----------------------|
| Total         | 1.76115e-27 (1.00 ) | 1.76115e-27 (1.00 )  |

| species     | PYtrue      | Cumul    | PYeffective | Cumul    |
|-------------|-------------|----------|-------------|----------|
| rad20       | 0.999873    | 0.999873 | 0.999873    | 0.999873 |
| rad21       | 0.000110650 | 0.999984 | 0.000110650 | 0.999984 |
| rad18       | 1.66458e-05 | 1.00000  | 1.66458e-05 | 1.00000  |
| Benzyl+C2H2 | 6.18178e-09 | 1.00000  | 0.00000     | 1.00000  |
| rad22       | 4.36770e-09 | 1.00000  | 4.36770e-09 | 1.00000  |
| rad24       | 2.47603e-10 | 1.00000  | 2.47603e-10 | 1.00000  |
| Indene+H    | 1.48502e-10 | 1.00000  | 1.48502e-10 | 1.00000  |
| rad45       | 3.91543e-12 | 1.00000  | 3.91543e-12 | 1.00000  |
| rad11       | 2.79406e-12 | 1.00000  | 2.79406e-12 | 1.00000  |
| rad36       | 7.13408e-13 | 1.00000  | 7.13408e-13 | 1.00000  |
| rad23       | 1.87594e-16 | 1.00000  | 1.87594e-16 | 1.00000  |
| rad8        | 1.70392e-18 | 1.00000  | 1.70392e-18 | 1.00000  |
| rad30       | 1.36992e-18 | 1.00000  | 1.36992e-18 | 1.00000  |
| rad6        | 6.45998e-19 | 1.00000  | 6.45998e-19 | 1.00000  |
| rad15       | 1.20026e-19 | 1.00000  | 1.20026e-19 | 1.00000  |
| PhCH2CCH+H  | 5.78698e-23 | 1.00000  | 5.78698e-23 | 1.00000  |
| rad9        | 5.89447e-24 | 1.00000  | 5.89447e-24 | 1.00000  |
| rad25       | 1.85313e-24 | 1.00000  | 1.85313e-24 | 1.00000  |
| rad60syn    | 1.25822e-24 | 1.00000  | 1.25822e-24 | 1.00000  |
| rad60anti   | 3.00068e-25 | 1.00000  | 3.00068e-25 | 1.00000  |
| PhCHCCH2+H  | 6.90085e-26 | 1.00000  | 6.90085e-26 | 1.00000  |
| rad28       | 2.30109e-26 | 1.00000  | 2.30109e-26 | 1.00000  |
| rad35       | 2.60421e-27 | 1.00000  | 2.60421e-27 | 1.00000  |
| Ph+Allene   | 1.15577e-27 | 1.00000  | 1.15577e-27 | 1.00000  |
| rad13       | 8.13620e-28 | 1.00000  | 8.13620e-28 | 1.00000  |
| PAH3+H      | 6.19579e-28 | 1.00000  | 6.19579e-28 | 1.00000  |
| rad38       | 3.72976e-28 | 1.00000  | 3.72976e-28 | 1.00000  |
| rad7        | 2.20409e-28 | 1.00000  | 2.20409e-28 | 1.00000  |
| rad59       | 2.15840e-28 | 1.00000  | 2.15840e-28 | 1.00000  |
| PAH7+H      | 2.12643e-28 | 1.00000  | 2.12643e-28 | 1.00000  |
| rad33       | 4.67919e-30 | 1.00000  | 4.67919e-30 | 1.00000  |
| rad46       | 2.64775e-30 | 1.00000  | 2.64775e-30 | 1.00000  |
| rad26       | 2.19425e-30 | 1.00000  | 2.19425e-30 | 1.00000  |
| PAH9+H      | 3.87854e-32 | 1.00000  | 3.87854e-32 | 1.00000  |
| rad3        | 2.42358e-35 | 1.00000  | 2.42358e-35 | 1.00000  |
| rad4        | 1.87859e-35 | 1.00000  | 1.87859e-35 | 1.00000  |
| rad50       | 4.50193e-36 | 1.00000  | 4.50193e-36 | 1.00000  |
| rad10       | 4.25705e-38 | 1.00000  | 4.25705e-38 | 1.00000  |
| rad39       | 3.31869e-38 | 1.00000  | 3.31869e-38 | 1.00000  |
| rad58       | 2.03548e-38 | 1.00000  | 2.03548e-38 | 1.00000  |
| rad52       | 2.98595e-40 | 1.00000  | 2.98595e-40 | 1.00000  |
| rad12       | 7.71004e-41 | 1.00000  | 7.71004e-41 | 1.00000  |
| rad2        | 1.84673e-41 | 1.00000  | 1.84673e-41 | 1.00000  |
| rad37       | 5.44510e-42 | 1.00000  | 5.44510e-42 | 1.00000  |

|               |             |         |             |         |
|---------------|-------------|---------|-------------|---------|
| rad31         | 4.98529e-42 | 1.00000 | 4.98529e-42 | 1.00000 |
| rad1          | 4.52102e-42 | 1.00000 | 4.52102e-42 | 1.00000 |
| rad51         | 4.32362e-42 | 1.00000 | 4.32362e-42 | 1.00000 |
| PhCCH+CH3     | 6.42608e-43 | 1.00000 | 6.42608e-43 | 1.00000 |
| rad14         | 2.80599e-44 | 1.00000 | 2.80599e-44 | 1.00000 |
| rad70         | 6.55344e-45 | 1.00000 | 6.55344e-45 | 1.00000 |
| rad47         | 3.05690e-45 | 1.00000 | 3.05690e-45 | 1.00000 |
| Ph+MeAc       | 1.29756e-45 | 1.00000 | 1.29756e-45 | 1.00000 |
| PAH10+CH3     | 2.78232e-47 | 1.00000 | 2.78232e-47 | 1.00000 |
| rad54         | 8.12139e-48 | 1.00000 | 8.12139e-48 | 1.00000 |
| rad19syn      | 3.06702e-48 | 1.00000 | 3.06702e-48 | 1.00000 |
| rad34         | 2.27754e-48 | 1.00000 | 2.27754e-48 | 1.00000 |
| rad65         | 1.03514e-48 | 1.00000 | 1.03514e-48 | 1.00000 |
| PhCCCH3+H     | 1.17551e-50 | 1.00000 | 1.17551e-50 | 1.00000 |
| rad27         | 9.45788e-51 | 1.00000 | 9.45788e-51 | 1.00000 |
| PAH1+H        | 9.41564e-51 | 1.00000 | 9.41564e-51 | 1.00000 |
| rad55         | 4.72369e-51 | 1.00000 | 4.72369e-51 | 1.00000 |
| PhcycC3H3_A+H | 1.82781e-52 | 1.00000 | 1.82781e-52 | 1.00000 |
| rad5          | 1.57774e-52 | 1.00000 | 1.57774e-52 | 1.00000 |
| rad62         | 6.79453e-58 | 1.00000 | 6.79453e-58 | 1.00000 |
| rad43         | 7.72166e-62 | 1.00000 | 7.72166e-62 | 1.00000 |
| rad42         | 3.08799e-63 | 1.00000 | 3.08799e-63 | 1.00000 |
| rad41         | 2.19741e-67 | 1.00000 | 2.19741e-67 | 1.00000 |

100000000. Pa, 210.000000 K

| Rate constant | True (fraction)     | Effective (fraction) |
|---------------|---------------------|----------------------|
| Total         | 8.30956e-27 (1.00 ) | 8.30956e-27 (1.00 )  |

| species     | PYtrue      | Cumul    | PYeffective | Cumul    |
|-------------|-------------|----------|-------------|----------|
| rad20       | 0.999858    | 0.999858 | 0.999858    | 0.999858 |
| rad21       | 0.000123735 | 0.999982 | 0.000123735 | 0.999982 |
| rad18       | 1.87422e-05 | 1.00000  | 1.87422e-05 | 1.00000  |
| Benzyl+C2H2 | 9.22675e-09 | 1.00000  | 0.00000     | 1.00000  |
| rad22       | 5.57761e-09 | 1.00000  | 5.57761e-09 | 1.00000  |
| rad24       | 3.30066e-10 | 1.00000  | 3.30066e-10 | 1.00000  |
| Indene+H    | 1.93057e-10 | 1.00000  | 1.93057e-10 | 1.00000  |
| rad45       | 5.86073e-12 | 1.00000  | 5.86073e-12 | 1.00000  |
| rad11       | 4.15902e-12 | 1.00000  | 4.15902e-12 | 1.00000  |
| rad36       | 1.05849e-12 | 1.00000  | 1.05849e-12 | 1.00000  |
| rad23       | 2.87595e-16 | 1.00000  | 2.87595e-16 | 1.00000  |
| rad8        | 6.76202e-18 | 1.00000  | 6.76202e-18 | 1.00000  |
| rad30       | 2.89231e-18 | 1.00000  | 2.89231e-18 | 1.00000  |
| rad6        | 1.27597e-18 | 1.00000  | 1.27597e-18 | 1.00000  |
| rad15       | 2.85437e-19 | 1.00000  | 2.85437e-19 | 1.00000  |
| PhCH2CCH+H  | 4.39425e-22 | 1.00000  | 4.39425e-22 | 1.00000  |
| rad9        | 3.42958e-23 | 1.00000  | 3.42958e-23 | 1.00000  |
| rad60syn    | 5.55146e-24 | 1.00000  | 5.55146e-24 | 1.00000  |
| rad25       | 5.48659e-24 | 1.00000  | 5.48659e-24 | 1.00000  |
| rad60anti   | 1.41861e-24 | 1.00000  | 1.41861e-24 | 1.00000  |
| PhCHCCH2+H  | 2.79094e-25 | 1.00000  | 2.79094e-25 | 1.00000  |
| rad28       | 1.16822e-25 | 1.00000  | 1.16822e-25 | 1.00000  |
| rad35       | 1.59782e-26 | 1.00000  | 1.59782e-26 | 1.00000  |
| Ph+Allene   | 6.62045e-27 | 1.00000  | 6.62045e-27 | 1.00000  |
| PAH3+H      | 4.83442e-27 | 1.00000  | 4.83442e-27 | 1.00000  |
| rad13       | 2.26651e-27 | 1.00000  | 2.26651e-27 | 1.00000  |
| rad59       | 1.63324e-27 | 1.00000  | 1.63324e-27 | 1.00000  |
| PAH7+H      | 1.34526e-27 | 1.00000  | 1.34526e-27 | 1.00000  |
| rad38       | 1.19777e-27 | 1.00000  | 1.19777e-27 | 1.00000  |
| rad7        | 6.30214e-28 | 1.00000  | 6.30214e-28 | 1.00000  |
| rad26       | 1.69135e-29 | 1.00000  | 1.69135e-29 | 1.00000  |
| rad33       | 1.42874e-29 | 1.00000  | 1.42874e-29 | 1.00000  |
| rad46       | 1.06665e-29 | 1.00000  | 1.06665e-29 | 1.00000  |
| PAH9+H      | 1.22522e-31 | 1.00000  | 1.22522e-31 | 1.00000  |
| rad3        | 1.07879e-34 | 1.00000  | 1.07879e-34 | 1.00000  |
| rad4        | 8.36593e-35 | 1.00000  | 8.36593e-35 | 1.00000  |
| rad50       | 4.22734e-35 | 1.00000  | 4.22734e-35 | 1.00000  |
| rad58       | 1.50852e-36 | 1.00000  | 1.50852e-36 | 1.00000  |
| rad10       | 4.11584e-37 | 1.00000  | 4.11584e-37 | 1.00000  |
| rad39       | 2.93058e-37 | 1.00000  | 2.93058e-37 | 1.00000  |
| rad52       | 4.69922e-39 | 1.00000  | 4.69922e-39 | 1.00000  |
| rad12       | 8.39465e-40 | 1.00000  | 8.39465e-40 | 1.00000  |
| rad2        | 1.30035e-40 | 1.00000  | 1.30035e-40 | 1.00000  |
| rad51       | 1.03573e-40 | 1.00000  | 1.03573e-40 | 1.00000  |
| rad37       | 6.69910e-41 | 1.00000  | 6.69910e-41 | 1.00000  |
| rad1        | 3.16238e-41 | 1.00000  | 3.16238e-41 | 1.00000  |
| rad31       | 2.63906e-41 | 1.00000  | 2.63906e-41 | 1.00000  |
| PhCCH+CH3   | 6.21139e-42 | 1.00000  | 6.21139e-42 | 1.00000  |

|               |             |         |             |         |
|---------------|-------------|---------|-------------|---------|
| rad70         | 3.42764e-43 | 1.00000 | 3.42764e-43 | 1.00000 |
| rad14         | 2.34596e-43 | 1.00000 | 2.34596e-43 | 1.00000 |
| rad47         | 1.57992e-43 | 1.00000 | 1.57992e-43 | 1.00000 |
| Ph+MeAc       | 1.70664e-44 | 1.00000 | 1.70664e-44 | 1.00000 |
| PAH10+CH3     | 8.38733e-46 | 1.00000 | 8.38733e-46 | 1.00000 |
| rad34         | 2.14987e-46 | 1.00000 | 2.14987e-46 | 1.00000 |
| rad54         | 2.10684e-46 | 1.00000 | 2.10684e-46 | 1.00000 |
| rad19syn      | 6.53659e-47 | 1.00000 | 6.53659e-47 | 1.00000 |
| rad65         | 4.28307e-47 | 1.00000 | 4.28307e-47 | 1.00000 |
| PAH1+H        | 7.65925e-49 | 1.00000 | 7.65925e-49 | 1.00000 |
| rad55         | 2.04197e-49 | 1.00000 | 2.04197e-49 | 1.00000 |
| PhCCCH3+H     | 1.81933e-49 | 1.00000 | 1.81933e-49 | 1.00000 |
| rad27         | 1.38656e-49 | 1.00000 | 1.38656e-49 | 1.00000 |
| PhcycC3H3_A+H | 8.42866e-51 | 1.00000 | 8.42866e-51 | 1.00000 |
| rad5          | 4.09838e-51 | 1.00000 | 4.09838e-51 | 1.00000 |
| rad62         | 2.99250e-56 | 1.00000 | 2.99250e-56 | 1.00000 |
| rad43         | 6.93487e-60 | 1.00000 | 6.93487e-60 | 1.00000 |
| rad42         | 2.14941e-61 | 1.00000 | 2.14941e-61 | 1.00000 |
| rad41         | 2.51361e-65 | 1.00000 | 2.51361e-65 | 1.00000 |

100000000. Pa, 220.000000 K

| Rate constant | True (fraction)     | Effective (fraction) |
|---------------|---------------------|----------------------|
| Total         | 3.40057e-26 (1.00 ) | 3.40057e-26 (1.00 )  |

| species     | PYtrue      | Cumul    | PYeffective | Cumul    |
|-------------|-------------|----------|-------------|----------|
| rad20       | 0.999840    | 0.999840 | 0.999840    | 0.999840 |
| rad21       | 0.000138490 | 0.999978 | 0.000138490 | 0.999978 |
| rad18       | 2.11255e-05 | 1.000000 | 2.11255e-05 | 1.000000 |
| Benzyl+C2H2 | 1.36886e-08 | 1.000000 | 0.000000    | 1.000000 |
| rad22       | 7.13973e-09 | 1.000000 | 7.13973e-09 | 1.000000 |
| rad24       | 4.41417e-10 | 1.000000 | 4.41417e-10 | 1.000000 |
| Indene+H    | 2.51899e-10 | 1.000000 | 2.51899e-10 | 1.000000 |
| rad45       | 8.80215e-12 | 1.000000 | 8.80215e-12 | 1.000000 |
| rad11       | 6.20215e-12 | 1.000000 | 6.20215e-12 | 1.000000 |
| rad36       | 1.57657e-12 | 1.000000 | 1.57657e-12 | 1.000000 |
| rad23       | 4.43854e-16 | 1.000000 | 4.43854e-16 | 1.000000 |
| rad8        | 2.40617e-17 | 1.000000 | 2.40617e-17 | 1.000000 |
| rad30       | 5.96885e-18 | 1.000000 | 5.96885e-18 | 1.000000 |
| rad6        | 2.51781e-18 | 1.000000 | 2.51781e-18 | 1.000000 |
| rad15       | 6.54628e-19 | 1.000000 | 6.54628e-19 | 1.000000 |
| PhCH2CCH+H  | 2.82248e-21 | 1.000000 | 2.82248e-21 | 1.000000 |
| rad9        | 1.74693e-22 | 1.000000 | 1.74693e-22 | 1.000000 |
| rad60syn    | 2.20595e-23 | 1.000000 | 2.20595e-23 | 1.000000 |
| rad25       | 1.56813e-23 | 1.000000 | 1.56813e-23 | 1.000000 |
| rad60anti   | 5.99148e-24 | 1.000000 | 5.99148e-24 | 1.000000 |
| PhCHCCH2+H  | 1.05627e-24 | 1.000000 | 1.05627e-24 | 1.000000 |
| rad28       | 5.35114e-25 | 1.000000 | 5.35114e-25 | 1.000000 |
| rad35       | 8.55428e-26 | 1.000000 | 8.55428e-26 | 1.000000 |
| Ph+Allene   | 3.40619e-26 | 1.000000 | 3.40619e-26 | 1.000000 |
| PAH3+H      | 3.21930e-26 | 1.000000 | 3.21930e-26 | 1.000000 |
| rad59       | 1.05589e-26 | 1.000000 | 1.05589e-26 | 1.000000 |
| PAH7+H      | 7.51413e-27 | 1.000000 | 7.51413e-27 | 1.000000 |
| rad13       | 6.27293e-27 | 1.000000 | 6.27293e-27 | 1.000000 |
| rad38       | 3.76573e-27 | 1.000000 | 3.76573e-27 | 1.000000 |
| rad7        | 1.78834e-27 | 1.000000 | 1.78834e-27 | 1.000000 |
| rad26       | 1.12545e-28 | 1.000000 | 1.12545e-28 | 1.000000 |
| rad33       | 4.31499e-29 | 1.000000 | 4.31499e-29 | 1.000000 |
| rad46       | 4.08642e-29 | 1.000000 | 4.08642e-29 | 1.000000 |
| PAH9+H      | 3.82432e-31 | 1.000000 | 3.82432e-31 | 1.000000 |
| rad3        | 4.68518e-34 | 1.000000 | 4.68518e-34 | 1.000000 |
| rad4        | 3.63195e-34 | 1.000000 | 3.63195e-34 | 1.000000 |
| rad50       | 3.45219e-34 | 1.000000 | 3.45219e-34 | 1.000000 |
| rad58       | 4.18929e-35 | 1.000000 | 4.18929e-35 | 1.000000 |
| rad10       | 3.45588e-36 | 1.000000 | 3.45588e-36 | 1.000000 |
| rad39       | 2.32276e-36 | 1.000000 | 2.32276e-36 | 1.000000 |
| rad52       | 6.10387e-38 | 1.000000 | 6.10387e-38 | 1.000000 |
| rad12       | 7.91946e-39 | 1.000000 | 7.91946e-39 | 1.000000 |
| rad51       | 1.89258e-39 | 1.000000 | 1.89258e-39 | 1.000000 |
| rad2        | 8.72999e-40 | 1.000000 | 8.73000e-40 | 1.000000 |
| rad37       | 7.07073e-40 | 1.000000 | 7.07073e-40 | 1.000000 |
| rad1        | 2.10881e-40 | 1.000000 | 2.10881e-40 | 1.000000 |
| rad31       | 1.32976e-40 | 1.000000 | 1.32976e-40 | 1.000000 |
| PhCCH+CH3   | 5.57607e-41 | 1.000000 | 5.57607e-41 | 1.000000 |
| rad70       | 9.26548e-42 | 1.000000 | 9.26548e-42 | 1.000000 |
| rad47       | 5.13473e-42 | 1.000000 | 5.13473e-42 | 1.000000 |
| rad14       | 1.84632e-42 | 1.000000 | 1.84632e-42 | 1.000000 |
| Ph+MeAc     | 2.00182e-43 | 1.000000 | 2.00182e-43 | 1.000000 |

|               |             |          |             |          |
|---------------|-------------|----------|-------------|----------|
| PAH10+CH3     | 1.73078e-44 | 1.000000 | 1.73078e-44 | 1.000000 |
| rad34         | 9.78476e-45 | 1.000000 | 9.78477e-45 | 1.000000 |
| rad54         | 4.08744e-45 | 1.000000 | 4.08744e-45 | 1.000000 |
| rad19syn      | 1.09998e-45 | 1.000000 | 1.09998e-45 | 1.000000 |
| rad65         | 1.02540e-45 | 1.000000 | 1.02540e-45 | 1.000000 |
| PAH1+H        | 3.15743e-47 | 1.000000 | 3.15743e-47 | 1.000000 |
| rad55         | 5.72433e-48 | 1.000000 | 5.72433e-48 | 1.000000 |
| PhCCCH3+H     | 2.53327e-48 | 1.000000 | 2.53327e-48 | 1.000000 |
| rad27         | 2.17169e-48 | 1.000000 | 2.17169e-48 | 1.000000 |
| PhcycC3H3_A+H | 2.49718e-49 | 1.000000 | 2.49718e-49 | 1.000000 |
| rad5          | 7.99826e-50 | 1.000000 | 7.99826e-50 | 1.000000 |
| rad62         | 9.03841e-55 | 1.000000 | 9.03841e-55 | 1.000000 |
| rad43         | 3.23935e-58 | 1.000000 | 3.23935e-58 | 1.000000 |
| rad42         | 9.12963e-60 | 1.000000 | 9.12963e-60 | 1.000000 |
| rad41         | 1.42462e-63 | 1.000000 | 1.42462e-63 | 1.000000 |

100000000. Pa, 230.000000 K

| Rate constant | True (fraction)     | Effective (fraction) |
|---------------|---------------------|----------------------|
| Total         | 1.22972e-25 (1.00 ) | 1.22972e-25 (1.00 )  |

| species     | PYtrue      | Cumul    | PYeffective | Cumul    |
|-------------|-------------|----------|-------------|----------|
| rad20       | 0.999821    | 0.999821 | 0.999821    | 0.999821 |
| rad21       | 0.000155152 | 0.999976 | 0.000155152 | 0.999976 |
| rad18       | 2.38383e-05 | 1.000000 | 2.38383e-05 | 1.000000 |
| Benzyl+C2H2 | 2.01812e-08 | 1.000000 | 0.000000    | 1.000000 |
| rad22       | 9.16026e-09 | 1.000000 | 9.16026e-09 | 1.000000 |
| rad24       | 5.91989e-10 | 1.000000 | 5.91989e-10 | 1.000000 |
| Indene+H    | 3.29824e-10 | 1.000000 | 3.29824e-10 | 1.000000 |
| rad45       | 1.32558e-11 | 1.000000 | 1.32558e-11 | 1.000000 |
| rad11       | 9.25743e-12 | 1.000000 | 9.25743e-12 | 1.000000 |
| rad36       | 2.35578e-12 | 1.000000 | 2.35578e-12 | 1.000000 |
| rad23       | 6.89171e-16 | 1.000000 | 6.89171e-16 | 1.000000 |
| rad8        | 7.78773e-17 | 1.000000 | 7.78773e-17 | 1.000000 |
| rad30       | 1.20645e-17 | 1.000000 | 1.20645e-17 | 1.000000 |
| rad6        | 4.95462e-18 | 1.000000 | 4.95462e-18 | 1.000000 |
| rad15       | 1.45385e-18 | 1.000000 | 1.45385e-18 | 1.000000 |
| PhCH2CCH+H  | 1.56684e-20 | 1.000000 | 1.56684e-20 | 1.000000 |
| rad9        | 7.92274e-22 | 1.000000 | 7.92274e-22 | 1.000000 |
| rad60syn    | 8.00377e-23 | 1.000000 | 8.00377e-23 | 1.000000 |
| rad25       | 4.33795e-23 | 1.000000 | 4.33795e-23 | 1.000000 |
| rad60anti   | 2.29451e-23 | 1.000000 | 2.29451e-23 | 1.000000 |
| PhCHCCH2+H  | 3.76755e-24 | 1.000000 | 3.76755e-24 | 1.000000 |
| rad28       | 2.24003e-24 | 1.000000 | 2.24003e-24 | 1.000000 |
| rad35       | 4.06919e-25 | 1.000000 | 4.06919e-25 | 1.000000 |
| PAH3+H      | 1.86778e-25 | 1.000000 | 1.86778e-25 | 1.000000 |
| Ph+Allene   | 1.59485e-25 | 1.000000 | 1.59485e-25 | 1.000000 |
| rad59       | 5.95347e-26 | 1.000000 | 5.95347e-26 | 1.000000 |
| PAH7+H      | 3.76416e-26 | 1.000000 | 3.76416e-26 | 1.000000 |
| rad13       | 1.72098e-26 | 1.000000 | 1.72098e-26 | 1.000000 |
| rad38       | 1.15979e-26 | 1.000000 | 1.15979e-26 | 1.000000 |
| rad7        | 5.02512e-27 | 1.000000 | 5.02512e-27 | 1.000000 |
| rad26       | 6.58759e-28 | 1.000000 | 6.58759e-28 | 1.000000 |
| rad46       | 1.49690e-28 | 1.000000 | 1.49690e-28 | 1.000000 |
| rad33       | 1.28631e-28 | 1.000000 | 1.28631e-28 | 1.000000 |
| PAH9+H      | 1.17806e-30 | 1.000000 | 1.17806e-30 | 1.000000 |
| rad50       | 2.50001e-33 | 1.000000 | 2.50001e-33 | 1.000000 |
| rad3        | 1.98281e-33 | 1.000000 | 1.98281e-33 | 1.000000 |
| rad4        | 1.53567e-33 | 1.000000 | 1.53567e-33 | 1.000000 |
| rad58       | 9.15712e-34 | 1.000000 | 9.15712e-34 | 1.000000 |
| rad10       | 2.57352e-35 | 1.000000 | 2.57352e-35 | 1.000000 |
| rad39       | 1.67917e-35 | 1.000000 | 1.67917e-35 | 1.000000 |
| rad52       | 6.79940e-37 | 1.000000 | 6.79940e-37 | 1.000000 |
| rad12       | 6.64392e-38 | 1.000000 | 6.64392e-38 | 1.000000 |
| rad51       | 2.90363e-38 | 1.000000 | 2.90363e-38 | 1.000000 |
| rad37       | 6.63729e-39 | 1.000000 | 6.63729e-39 | 1.000000 |
| rad2        | 5.60685e-39 | 1.000000 | 5.60685e-39 | 1.000000 |
| rad1        | 1.34537e-39 | 1.000000 | 1.34537e-39 | 1.000000 |
| rad31       | 6.39522e-40 | 1.000000 | 6.39522e-40 | 1.000000 |
| PhCCH+CH3   | 4.69873e-40 | 1.000000 | 4.69873e-40 | 1.000000 |
| rad70       | 2.21014e-40 | 1.000000 | 2.21014e-40 | 1.000000 |
| rad47       | 1.45079e-40 | 1.000000 | 1.45079e-40 | 1.000000 |
| rad14       | 1.37697e-41 | 1.000000 | 1.37697e-41 | 1.000000 |
| Ph+MeAc     | 2.15419e-42 | 1.000000 | 2.15419e-42 | 1.000000 |
| rad34       | 4.88310e-43 | 1.000000 | 4.88310e-43 | 1.000000 |
| PAH10+CH3   | 3.27557e-43 | 1.000000 | 3.27557e-43 | 1.000000 |
| rad54       | 6.85533e-44 | 1.000000 | 6.85533e-44 | 1.000000 |
| rad65       | 2.15270e-44 | 1.000000 | 2.15270e-44 | 1.000000 |

|               |             |         |             |         |
|---------------|-------------|---------|-------------|---------|
| rad19syn      | 1.61807e-44 | 1.00000 | 1.61807e-44 | 1.00000 |
| PAH1+H        | 1.35154e-45 | 1.00000 | 1.35154e-45 | 1.00000 |
| rad55         | 1.37065e-46 | 1.00000 | 1.37065e-46 | 1.00000 |
| rad27         | 4.48029e-47 | 1.00000 | 4.48029e-47 | 1.00000 |
| PhCCCH3+H     | 3.30196e-47 | 1.00000 | 3.30196e-47 | 1.00000 |
| PhcycC3H3_A+H | 6.36280e-48 | 1.00000 | 6.36280e-48 | 1.00000 |
| rad5          | 1.47381e-48 | 1.00000 | 1.47381e-48 | 1.00000 |
| rad62         | 2.42624e-53 | 1.00000 | 2.42624e-53 | 1.00000 |
| rad43         | 1.77268e-56 | 1.00000 | 1.77268e-56 | 1.00000 |
| rad42         | 3.47120e-58 | 1.00000 | 3.47120e-58 | 1.00000 |
| rad41         | 1.05248e-61 | 1.00000 | 1.05248e-61 | 1.00000 |

100000000. Pa, 240.000000 K

| Rate constant | True (fraction)     | Effective (fraction) |
|---------------|---------------------|----------------------|
| Total         | 3.99091e-25 (1.00 ) | 3.99091e-25 (1.00 )  |

| species     | PYtrue      | Cumul    | PYeffective | Cumul    |
|-------------|-------------|----------|-------------|----------|
| rad20       | 0.999799    | 0.999799 | 0.999799    | 0.999799 |
| rad21       | 0.000173987 | 0.999973 | 0.000173987 | 0.999973 |
| rad18       | 2.69290e-05 | 1.000000 | 2.69290e-05 | 1.000000 |
| Benzyl+C2H2 | 2.95620e-08 | 1.000000 | 0.000000    | 1.000000 |
| rad22       | 1.17771e-08 | 1.000000 | 1.17771e-08 | 1.000000 |
| rad24       | 7.95741e-10 | 1.000000 | 7.95741e-10 | 1.000000 |
| Indene+H    | 4.33247e-10 | 1.000000 | 4.33247e-10 | 1.000000 |
| rad45       | 2.00026e-11 | 1.000000 | 2.00026e-11 | 1.000000 |
| rad11       | 1.38184e-11 | 1.000000 | 1.38184e-11 | 1.000000 |
| rad36       | 3.52881e-12 | 1.000000 | 3.52881e-12 | 1.000000 |
| rad23       | 1.07578e-15 | 1.000000 | 1.07578e-15 | 1.000000 |
| rad8        | 2.32018e-16 | 1.000000 | 2.32018e-16 | 1.000000 |
| rad30       | 2.39219e-17 | 1.000000 | 2.39219e-17 | 1.000000 |
| rad6        | 9.70848e-18 | 1.000000 | 9.70848e-18 | 1.000000 |
| rad15       | 3.13708e-18 | 1.000000 | 3.13708e-18 | 1.000000 |
| PhCH2CCH+H  | 7.65314e-20 | 1.000000 | 7.65315e-20 | 1.000000 |
| rad9        | 3.24500e-21 | 1.000000 | 3.24500e-21 | 1.000000 |
| rad60syn    | 2.68226e-22 | 1.000000 | 2.68226e-22 | 1.000000 |
| rad25       | 1.16402e-22 | 1.000000 | 1.16402e-22 | 1.000000 |
| rad60anti   | 8.06740e-23 | 1.000000 | 8.06740e-23 | 1.000000 |
| PhCHCCH2+H  | 1.27401e-23 | 1.000000 | 1.27401e-23 | 1.000000 |
| rad28       | 8.66172e-24 | 1.000000 | 8.66172e-24 | 1.000000 |
| rad35       | 1.74596e-24 | 1.000000 | 1.74596e-24 | 1.000000 |
| PAH3+H      | 9.60229e-25 | 1.000000 | 9.60229e-25 | 1.000000 |
| Ph+Allene   | 6.87031e-25 | 1.000000 | 6.87031e-25 | 1.000000 |
| rad59       | 2.97768e-25 | 1.000000 | 2.97768e-25 | 1.000000 |
| PAH7+H      | 1.71334e-25 | 1.000000 | 1.71334e-25 | 1.000000 |
| rad13       | 4.67193e-26 | 1.000000 | 4.67193e-26 | 1.000000 |
| rad38       | 3.50194e-26 | 1.000000 | 3.50194e-26 | 1.000000 |
| rad7        | 1.39578e-26 | 1.000000 | 1.39578e-26 | 1.000000 |
| rad26       | 3.44448e-27 | 1.000000 | 3.44448e-27 | 1.000000 |
| rad46       | 5.26718e-28 | 1.000000 | 5.26718e-28 | 1.000000 |
| rad33       | 3.77894e-28 | 1.000000 | 3.77894e-28 | 1.000000 |
| PAH9+H      | 3.57825e-30 | 1.000000 | 3.57825e-30 | 1.000000 |
| rad50       | 1.62814e-32 | 1.000000 | 1.62814e-32 | 1.000000 |
| rad58       | 1.24089e-32 | 1.000000 | 1.24089e-32 | 1.000000 |
| rad3        | 8.17038e-33 | 1.000000 | 8.17038e-33 | 1.000000 |
| rad4        | 6.32011e-33 | 1.000000 | 6.32011e-33 | 1.000000 |
| rad10       | 1.71669e-34 | 1.000000 | 1.71669e-34 | 1.000000 |
| rad39       | 1.11259e-34 | 1.000000 | 1.11259e-34 | 1.000000 |
| rad52       | 6.54320e-36 | 1.000000 | 6.54320e-36 | 1.000000 |
| rad12       | 4.96735e-37 | 1.000000 | 4.96735e-37 | 1.000000 |
| rad51       | 3.63063e-37 | 1.000000 | 3.63063e-37 | 1.000000 |
| rad37       | 5.49215e-38 | 1.000000 | 5.49215e-38 | 1.000000 |
| rad2        | 3.44258e-38 | 1.000000 | 3.44258e-38 | 1.000000 |
| rad1        | 8.20706e-39 | 1.000000 | 8.20706e-39 | 1.000000 |
| PhCCH+CH3   | 3.69434e-39 | 1.000000 | 3.69434e-39 | 1.000000 |
| rad70       | 3.45439e-39 | 1.000000 | 3.45439e-39 | 1.000000 |
| rad31       | 2.94361e-39 | 1.000000 | 2.94361e-39 | 1.000000 |
| rad47       | 2.67992e-39 | 1.000000 | 2.67992e-39 | 1.000000 |
| rad14       | 9.70819e-41 | 1.000000 | 9.70819e-41 | 1.000000 |
| Ph+MeAc     | 2.08608e-41 | 1.000000 | 2.08608e-41 | 1.000000 |
| rad34       | 1.15471e-41 | 1.000000 | 1.15471e-41 | 1.000000 |
| PAH10+CH3   | 4.60949e-42 | 1.000000 | 4.60949e-42 | 1.000000 |
| rad54       | 9.09262e-43 | 1.000000 | 9.09262e-43 | 1.000000 |
| rad65       | 3.16819e-43 | 1.000000 | 3.16819e-43 | 1.000000 |
| rad19syn    | 1.95643e-43 | 1.000000 | 1.95643e-43 | 1.000000 |
| PAH1+H      | 3.01887e-44 | 1.000000 | 3.01887e-44 | 1.000000 |
| rad55       | 2.30521e-45 | 1.000000 | 2.30521e-45 | 1.000000 |
| rad27       | 7.72713e-46 | 1.000000 | 7.72713e-46 | 1.000000 |



|               |             |          |             |          |
|---------------|-------------|----------|-------------|----------|
| PhCCCH3+H     | 3.82770e-46 | 1.000000 | 3.82770e-46 | 1.000000 |
| PhcycC3H3_A+H | 1.11969e-46 | 1.000000 | 1.11969e-46 | 1.000000 |
| rad5          | 2.10394e-47 | 1.000000 | 2.10394e-47 | 1.000000 |
| rad62         | 4.64263e-52 | 1.000000 | 4.64263e-52 | 1.000000 |
| rad43         | 5.09324e-55 | 1.000000 | 5.09324e-55 | 1.000000 |
| rad42         | 8.66810e-57 | 1.000000 | 8.66810e-57 | 1.000000 |
| rad41         | 3.99796e-60 | 1.000000 | 3.99796e-60 | 1.000000 |

100000000. Pa, 250.000000 K

| Rate constant | True (fraction)     | Effective (fraction) |
|---------------|---------------------|----------------------|
| Total         | 1.17763e-24 (1.00 ) | 1.17763e-24 (1.00 )  |

| species       | PYtrue      | Cumul    | PYeffective | Cumul    |
|---------------|-------------|----------|-------------|----------|
| rad20         | 0.999774    | 0.999774 | 0.999774    | 0.999774 |
| rad21         | 0.000195292 | 0.999969 | 0.000195292 | 0.999969 |
| rad18         | 3.04521e-05 | 1.000000 | 3.04521e-05 | 1.000000 |
| Benzyl+C2H2   | 4.30192e-08 | 1.000000 | 0.00000     | 1.000000 |
| rad22         | 1.51692e-08 | 1.000000 | 1.51692e-08 | 1.000000 |
| rad24         | 1.07147e-09 | 1.000000 | 1.07147e-09 | 1.000000 |
| Indene+H      | 5.70738e-10 | 1.000000 | 5.70738e-10 | 1.000000 |
| rad45         | 3.02200e-11 | 1.000000 | 3.02201e-11 | 1.000000 |
| rad11         | 2.06110e-11 | 1.000000 | 2.06110e-11 | 1.000000 |
| rad36         | 5.29488e-12 | 1.000000 | 5.29488e-12 | 1.000000 |
| rad23         | 1.68692e-15 | 1.000000 | 1.68692e-15 | 1.000000 |
| rad8          | 6.42715e-16 | 1.000000 | 6.42715e-16 | 1.000000 |
| rad30         | 4.65917e-17 | 1.000000 | 4.65917e-17 | 1.000000 |
| rad6          | 1.89190e-17 | 1.000000 | 1.89190e-17 | 1.000000 |
| rad15         | 6.59466e-18 | 1.000000 | 6.59466e-18 | 1.000000 |
| PhCH2CCH+H    | 3.33954e-19 | 1.000000 | 3.33954e-19 | 1.000000 |
| rad9          | 1.21487e-20 | 1.000000 | 1.21487e-20 | 1.000000 |
| rad60syn      | 8.38300e-22 | 1.000000 | 8.38300e-22 | 1.000000 |
| rad25         | 3.03535e-22 | 1.000000 | 3.03535e-22 | 1.000000 |
| rad60anti     | 2.63153e-22 | 1.000000 | 2.63153e-22 | 1.000000 |
| PhCHCCH2+H    | 4.10461e-23 | 1.000000 | 4.10461e-23 | 1.000000 |
| rad28         | 3.12185e-23 | 1.000000 | 3.12185e-23 | 1.000000 |
| rad35         | 6.84292e-24 | 1.000000 | 6.84292e-24 | 1.000000 |
| PAH3+H        | 4.43817e-24 | 1.000000 | 4.43817e-24 | 1.000000 |
| Ph+Allene     | 2.74802e-24 | 1.000000 | 2.74802e-24 | 1.000000 |
| rad59         | 1.34038e-24 | 1.000000 | 1.34038e-24 | 1.000000 |
| PAH7+H        | 7.16482e-25 | 1.000000 | 7.16482e-25 | 1.000000 |
| rad13         | 1.25324e-25 | 1.000000 | 1.25324e-25 | 1.000000 |
| rad38         | 1.03763e-25 | 1.000000 | 1.03763e-25 | 1.000000 |
| rad7          | 3.82724e-26 | 1.000000 | 3.82724e-26 | 1.000000 |
| rad26         | 1.63027e-26 | 1.000000 | 1.63027e-26 | 1.000000 |
| rad46         | 1.78757e-27 | 1.000000 | 1.78757e-27 | 1.000000 |
| rad33         | 1.09284e-27 | 1.000000 | 1.09284e-27 | 1.000000 |
| PAH9+H        | 1.07108e-29 | 1.000000 | 1.07108e-29 | 1.000000 |
| rad58         | 1.17684e-31 | 1.000000 | 1.17684e-31 | 1.000000 |
| rad50         | 9.66065e-32 | 1.000000 | 9.66065e-32 | 1.000000 |
| rad3          | 3.27637e-32 | 1.000000 | 3.27637e-32 | 1.000000 |
| rad4          | 2.53087e-32 | 1.000000 | 2.53087e-32 | 1.000000 |
| rad10         | 1.03578e-33 | 1.000000 | 1.03578e-33 | 1.000000 |
| rad39         | 6.78917e-34 | 1.000000 | 6.78917e-34 | 1.000000 |
| rad52         | 5.53547e-35 | 1.000000 | 5.53547e-35 | 1.000000 |
| rad51         | 3.80629e-36 | 1.000000 | 3.80629e-36 | 1.000000 |
| rad12         | 3.32778e-36 | 1.000000 | 3.32778e-36 | 1.000000 |
| rad37         | 4.00935e-37 | 1.000000 | 4.00935e-37 | 1.000000 |
| rad2          | 2.01633e-37 | 1.000000 | 2.01633e-37 | 1.000000 |
| rad1          | 4.77728e-38 | 1.000000 | 4.77728e-38 | 1.000000 |
| rad70         | 3.64605e-38 | 1.000000 | 3.64605e-38 | 1.000000 |
| rad47         | 3.41346e-38 | 1.000000 | 3.41346e-38 | 1.000000 |
| PhCCH+CH3     | 2.69313e-38 | 1.000000 | 2.69313e-38 | 1.000000 |
| rad31         | 1.30044e-38 | 1.000000 | 1.30044e-38 | 1.000000 |
| rad14         | 6.44285e-40 | 1.000000 | 6.44285e-40 | 1.000000 |
| Ph+MeAc       | 1.79979e-40 | 1.000000 | 1.79979e-40 | 1.000000 |
| rad34         | 1.35182e-40 | 1.000000 | 1.35182e-40 | 1.000000 |
| PAH10+CH3     | 4.68923e-41 | 1.000000 | 4.68923e-41 | 1.000000 |
| rad54         | 9.58789e-42 | 1.000000 | 9.58790e-42 | 1.000000 |
| rad65         | 3.32747e-42 | 1.000000 | 3.32747e-42 | 1.000000 |
| rad19syn      | 1.94248e-42 | 1.000000 | 1.94248e-42 | 1.000000 |
| PAH1+H        | 3.53120e-43 | 1.000000 | 3.53120e-43 | 1.000000 |
| rad55         | 2.77024e-44 | 1.000000 | 2.77024e-44 | 1.000000 |
| rad27         | 8.53026e-45 | 1.000000 | 8.53026e-45 | 1.000000 |
| PhCCCH3+H     | 3.83404e-45 | 1.000000 | 3.83404e-45 | 1.000000 |
| PhcycC3H3_A+H | 1.37116e-45 | 1.000000 | 1.37116e-45 | 1.000000 |
| rad5          | 2.19615e-46 | 1.000000 | 2.19615e-46 | 1.000000 |
| rad62         | 6.13121e-51 | 1.000000 | 6.13122e-51 | 1.000000 |

|       |             |          |             |          |
|-------|-------------|----------|-------------|----------|
| rad43 | 6.42093e-54 | 1.000000 | 6.42093e-54 | 1.000000 |
| rad42 | 1.26236e-55 | 1.000000 | 1.26236e-55 | 1.000000 |
| rad41 | 5.23621e-59 | 1.000000 | 5.23621e-59 | 1.000000 |

100000000. Pa, 260.000000 K

| Rate constant | True (fraction)     | Effective (fraction) |
|---------------|---------------------|----------------------|
| Total         | 3.19452e-24 (1.00 ) | 3.19452e-24 (1.00 )  |

| species       | PYtrue      | Cumul    | PYeffective | Cumul    |
|---------------|-------------|----------|-------------|----------|
| rad20         | 0.999746    | 0.999746 | 0.999746    | 0.999746 |
| rad21         | 0.000219401 | 0.999965 | 0.000219401 | 0.999965 |
| rad18         | 3.44692e-05 | 1.000000 | 3.44692e-05 | 1.000000 |
| Benzyl+C2H2   | 6.21857e-08 | 1.000000 | 0.00000     | 1.000000 |
| rad22         | 1.95679e-08 | 1.000000 | 1.95679e-08 | 1.000000 |
| rad24         | 1.44441e-09 | 1.000000 | 1.44441e-09 | 1.000000 |
| Indene+H      | 7.53726e-10 | 1.000000 | 7.53726e-10 | 1.000000 |
| rad45         | 4.56774e-11 | 1.000000 | 4.56774e-11 | 1.000000 |
| rad11         | 3.06974e-11 | 1.000000 | 3.06975e-11 | 1.000000 |
| rad36         | 7.95222e-12 | 1.000000 | 7.95222e-12 | 1.000000 |
| rad23         | 2.65511e-15 | 1.000000 | 2.65511e-15 | 1.000000 |
| rad8          | 1.66950e-15 | 1.000000 | 1.66950e-15 | 1.000000 |
| rad30         | 8.92293e-17 | 1.000000 | 8.92293e-17 | 1.000000 |
| rad6          | 3.66274e-17 | 1.000000 | 3.66274e-17 | 1.000000 |
| rad15         | 1.35357e-17 | 1.000000 | 1.35357e-17 | 1.000000 |
| PhCH2CCH+H    | 1.31871e-18 | 1.000000 | 1.31871e-18 | 1.000000 |
| rad9          | 4.20016e-20 | 1.000000 | 4.20016e-20 | 1.000000 |
| rad60syn      | 2.46327e-21 | 1.000000 | 2.46327e-21 | 1.000000 |
| rad60anti     | 8.03412e-22 | 1.000000 | 8.03412e-22 | 1.000000 |
| rad25         | 7.70428e-22 | 1.000000 | 7.70428e-22 | 1.000000 |
| PhCHCCH2+H    | 1.26524e-22 | 1.000000 | 1.26524e-22 | 1.000000 |
| rad28         | 1.05675e-22 | 1.000000 | 1.05675e-22 | 1.000000 |
| rad35         | 2.47579e-23 | 1.000000 | 2.47579e-23 | 1.000000 |
| PAH3+H        | 1.86687e-23 | 1.000000 | 1.86687e-23 | 1.000000 |
| Ph+Allene     | 1.02848e-23 | 1.000000 | 1.02848e-23 | 1.000000 |
| rad59         | 5.49676e-24 | 1.000000 | 5.49676e-24 | 1.000000 |
| PAH7+H        | 2.77840e-24 | 1.000000 | 2.77840e-24 | 1.000000 |
| rad13         | 3.31851e-25 | 1.000000 | 3.31851e-25 | 1.000000 |
| rad38         | 3.02042e-25 | 1.000000 | 3.02042e-25 | 1.000000 |
| rad7          | 1.03498e-25 | 1.000000 | 1.03498e-25 | 1.000000 |
| rad26         | 7.06291e-26 | 1.000000 | 7.06291e-26 | 1.000000 |
| rad46         | 5.87278e-27 | 1.000000 | 5.87278e-27 | 1.000000 |
| rad33         | 3.10858e-27 | 1.000000 | 3.10858e-27 | 1.000000 |
| PAH9+H        | 3.15867e-29 | 1.000000 | 3.15867e-29 | 1.000000 |
| rad58         | 9.28615e-31 | 1.000000 | 9.28615e-31 | 1.000000 |
| rad50         | 5.28407e-31 | 1.000000 | 5.28407e-31 | 1.000000 |
| rad3          | 1.27819e-31 | 1.000000 | 1.27819e-31 | 1.000000 |
| rad4          | 9.85925e-32 | 1.000000 | 9.85925e-32 | 1.000000 |
| rad10         | 5.70922e-33 | 1.000000 | 5.70922e-33 | 1.000000 |
| rad39         | 3.84293e-33 | 1.000000 | 3.84293e-33 | 1.000000 |
| rad52         | 4.19294e-34 | 1.000000 | 4.19294e-34 | 1.000000 |
| rad51         | 3.47498e-35 | 1.000000 | 3.47498e-35 | 1.000000 |
| rad12         | 2.02062e-35 | 1.000000 | 2.02062e-35 | 1.000000 |
| rad37         | 2.62500e-36 | 1.000000 | 2.62500e-36 | 1.000000 |
| rad2          | 1.12518e-36 | 1.000000 | 1.12518e-36 | 1.000000 |
| rad47         | 3.63316e-37 | 1.000000 | 3.63316e-37 | 1.000000 |
| rad70         | 3.19036e-37 | 1.000000 | 3.19036e-37 | 1.000000 |
| rad1          | 2.65052e-37 | 1.000000 | 2.65052e-37 | 1.000000 |
| PhCCH+CH3     | 1.82259e-37 | 1.000000 | 1.82259e-37 | 1.000000 |
| rad31         | 5.52980e-38 | 1.000000 | 5.52980e-38 | 1.000000 |
| rad14         | 4.02267e-39 | 1.000000 | 4.02267e-39 | 1.000000 |
| Ph+MeAc       | 1.39994e-39 | 1.000000 | 1.39994e-39 | 1.000000 |
| rad34         | 1.27965e-39 | 1.000000 | 1.27965e-39 | 1.000000 |
| PAH10+CH3     | 4.00891e-40 | 1.000000 | 4.00891e-40 | 1.000000 |
| rad54         | 8.61365e-41 | 1.000000 | 8.61365e-41 | 1.000000 |
| rad65         | 2.93980e-41 | 1.000000 | 2.93980e-41 | 1.000000 |
| rad19syn      | 1.66419e-41 | 1.000000 | 1.66419e-41 | 1.000000 |
| PAH1+H        | 3.35163e-42 | 1.000000 | 3.35163e-42 | 1.000000 |
| rad55         | 2.75922e-43 | 1.000000 | 2.75922e-43 | 1.000000 |
| rad27         | 7.84548e-44 | 1.000000 | 7.84548e-44 | 1.000000 |
| PhCCCH3+H     | 3.40538e-44 | 1.000000 | 3.40538e-44 | 1.000000 |
| PhcycC3H3_A+H | 1.38583e-44 | 1.000000 | 1.38583e-44 | 1.000000 |
| rad5          | 1.93328e-45 | 1.000000 | 1.93328e-45 | 1.000000 |
| rad62         | 6.69634e-50 | 1.000000 | 6.69634e-50 | 1.000000 |
| rad43         | 6.51453e-53 | 1.000000 | 6.51453e-53 | 1.000000 |
| rad42         | 1.49319e-54 | 1.000000 | 1.49319e-54 | 1.000000 |
| rad41         | 5.47955e-58 | 1.000000 | 5.47955e-58 | 1.000000 |

100000000. Pa, 270.000000 K

=====

| Rate constant | True (fraction)     | Effective (fraction) |
|---------------|---------------------|----------------------|
| Total         | 8.04141e-24 (1.00 ) | 8.04141e-24 (1.00 )  |

| species       | PYtrue      | Cumul    | PYeffective | Cumul    |
|---------------|-------------|----------|-------------|----------|
| rad20         | 0.999714    | 0.999714 | 0.999714    | 0.999714 |
| rad21         | 0.000246686 | 0.999961 | 0.000246686 | 0.999961 |
| rad18         | 3.90494e-05 | 1.000000 | 3.90494e-05 | 1.000000 |
| Benzyl+C2H2   | 8.92885e-08 | 1.000000 | 0.000000    | 1.000000 |
| rad22         | 2.52719e-08 | 1.000000 | 2.52719e-08 | 1.000000 |
| rad24         | 1.94829e-09 | 1.000000 | 1.94829e-09 | 1.000000 |
| Indene+H      | 9.97425e-10 | 1.000000 | 9.97425e-10 | 1.000000 |
| rad45         | 6.90218e-11 | 1.000000 | 6.90218e-11 | 1.000000 |
| rad11         | 4.56240e-11 | 1.000000 | 4.56240e-11 | 1.000000 |
| rad36         | 1.19456e-11 | 1.000000 | 1.19456e-11 | 1.000000 |
| rad23         | 4.19136e-15 | 1.000000 | 4.19136e-15 | 1.000000 |
| rad8          | 4.09594e-15 | 1.000000 | 4.09594e-15 | 1.000000 |
| rad30         | 1.68181e-16 | 1.000000 | 1.68181e-16 | 1.000000 |
| rad6          | 7.03901e-17 | 1.000000 | 7.03901e-17 | 1.000000 |
| rad15         | 2.71769e-17 | 1.000000 | 2.71769e-17 | 1.000000 |
| PhCH2CCH+H    | 4.76407e-18 | 1.000000 | 4.76407e-18 | 1.000000 |
| rad9          | 1.35273e-19 | 1.000000 | 1.35273e-19 | 1.000000 |
| rad60syn      | 6.85179e-21 | 1.000000 | 6.85179e-21 | 1.000000 |
| rad60anti     | 2.31286e-21 | 1.000000 | 2.31286e-21 | 1.000000 |
| rad25         | 1.90608e-21 | 1.000000 | 1.90608e-21 | 1.000000 |
| PhCHCCH2+H    | 3.74473e-22 | 1.000000 | 3.74473e-22 | 1.000000 |
| rad28         | 3.38116e-22 | 1.000000 | 3.38116e-22 | 1.000000 |
| rad35         | 8.34261e-23 | 1.000000 | 8.34261e-23 | 1.000000 |
| PAH3+H        | 7.22036e-23 | 1.000000 | 7.22036e-23 | 1.000000 |
| Ph+Allene     | 3.62489e-23 | 1.000000 | 3.62489e-23 | 1.000000 |
| rad59         | 2.07480e-23 | 1.000000 | 2.07480e-23 | 1.000000 |
| PAH7+H        | 1.00696e-23 | 1.000000 | 1.00696e-23 | 1.000000 |
| rad13         | 8.66746e-25 | 1.000000 | 8.66746e-25 | 1.000000 |
| rad38         | 8.64875e-25 | 1.000000 | 8.64875e-25 | 1.000000 |
| rad26         | 2.82723e-25 | 1.000000 | 2.82723e-25 | 1.000000 |
| rad7          | 2.75840e-25 | 1.000000 | 2.75840e-25 | 1.000000 |
| rad46         | 1.87414e-26 | 1.000000 | 1.87414e-26 | 1.000000 |
| rad33         | 8.69261e-27 | 1.000000 | 8.69261e-27 | 1.000000 |
| PAH9+H        | 9.17726e-29 | 1.000000 | 9.17726e-29 | 1.000000 |
| rad58         | 6.30608e-30 | 1.000000 | 6.30608e-30 | 1.000000 |
| rad50         | 2.69035e-30 | 1.000000 | 2.69035e-30 | 1.000000 |
| rad3          | 4.84881e-31 | 1.000000 | 4.84881e-31 | 1.000000 |
| rad4          | 3.73477e-31 | 1.000000 | 3.73477e-31 | 1.000000 |
| rad10         | 2.89515e-32 | 1.000000 | 2.89515e-32 | 1.000000 |
| rad39         | 2.02736e-32 | 1.000000 | 2.02736e-32 | 1.000000 |
| rad52         | 2.87833e-33 | 1.000000 | 2.87833e-33 | 1.000000 |
| rad51         | 2.80800e-34 | 1.000000 | 2.80800e-34 | 1.000000 |
| rad12         | 1.11952e-34 | 1.000000 | 1.11952e-34 | 1.000000 |
| rad37         | 1.55359e-35 | 1.000000 | 1.55359e-35 | 1.000000 |
| rad2          | 5.96491e-36 | 1.000000 | 5.96491e-36 | 1.000000 |
| rad47         | 3.33903e-36 | 1.000000 | 3.33903e-36 | 1.000000 |
| rad70         | 2.39747e-36 | 1.000000 | 2.39747e-36 | 1.000000 |
| rad1          | 1.39770e-36 | 1.000000 | 1.39770e-36 | 1.000000 |
| PhCCH+CH3     | 1.14272e-36 | 1.000000 | 1.14272e-36 | 1.000000 |
| rad31         | 2.26850e-37 | 1.000000 | 2.26850e-37 | 1.000000 |
| rad14         | 2.35582e-38 | 1.000000 | 2.35582e-38 | 1.000000 |
| rad34         | 1.03089e-38 | 1.000000 | 1.03089e-38 | 1.000000 |
| Ph+MeAc       | 9.84302e-39 | 1.000000 | 9.84302e-39 | 1.000000 |
| PAH10+CH3     | 2.96541e-39 | 1.000000 | 2.96541e-39 | 1.000000 |
| rad54         | 6.71201e-40 | 1.000000 | 6.71201e-40 | 1.000000 |
| rad65         | 2.25805e-40 | 1.000000 | 2.25805e-40 | 1.000000 |
| rad19syn      | 1.24777e-40 | 1.000000 | 1.24777e-40 | 1.000000 |
| PAH1+H        | 2.70960e-41 | 1.000000 | 2.70960e-41 | 1.000000 |
| rad55         | 2.34067e-42 | 1.000000 | 2.34067e-42 | 1.000000 |
| rad27         | 6.21796e-43 | 1.000000 | 6.21796e-43 | 1.000000 |
| PhCCCH3+H     | 2.69671e-43 | 1.000000 | 2.69671e-43 | 1.000000 |
| PhcycC3H3_A+H | 1.18986e-43 | 1.000000 | 1.18986e-43 | 1.000000 |
| rad5          | 1.47504e-44 | 1.000000 | 1.47504e-44 | 1.000000 |
| rad62         | 6.22755e-49 | 1.000000 | 6.22755e-49 | 1.000000 |
| rad43         | 5.61606e-52 | 1.000000 | 5.61606e-52 | 1.000000 |
| rad42         | 1.48968e-53 | 1.000000 | 1.48968e-53 | 1.000000 |
| rad41         | 4.86531e-57 | 1.000000 | 4.86531e-57 | 1.000000 |

100000000. Pa, 280.000000 K

=====

| Rate constant | True (fraction) | Effective (fraction) |
|---------------|-----------------|----------------------|
|---------------|-----------------|----------------------|

Total | 1.89357e-23 (1.00 ) 1.89357e-23 (1.00 )

| species       | PYtrue      | Cumul    | PYeffective | Cumul    |
|---------------|-------------|----------|-------------|----------|
| rad20         | 0.999678    | 0.999678 | 0.999678    | 0.999678 |
| rad21         | 0.000277564 | 0.999956 | 0.000277564 | 0.999956 |
| rad18         | 4.42705e-05 | 1.000000 | 4.42705e-05 | 1.000000 |
| Benzyl+C2H2   | 1.27341e-07 | 1.000000 | 0.00000     | 1.000000 |
| rad22         | 3.26658e-08 | 1.000000 | 3.26658e-08 | 1.000000 |
| rad24         | 2.62801e-09 | 1.000000 | 2.62801e-09 | 1.000000 |
| Indene+H      | 1.32205e-09 | 1.000000 | 1.32205e-09 | 1.000000 |
| rad45         | 1.04196e-10 | 1.000000 | 1.04196e-10 | 1.000000 |
| rad11         | 6.76292e-11 | 1.000000 | 6.76292e-11 | 1.000000 |
| rad36         | 1.79361e-11 | 1.000000 | 1.79361e-11 | 1.000000 |
| rad8          | 9.54953e-15 | 1.000000 | 9.54953e-15 | 1.000000 |
| rad23         | 6.63124e-15 | 1.000000 | 6.63124e-15 | 1.000000 |
| rad30         | 3.12213e-16 | 1.000000 | 3.12213e-16 | 1.000000 |
| rad6          | 1.34193e-16 | 1.000000 | 1.34193e-16 | 1.000000 |
| rad15         | 5.34592e-17 | 1.000000 | 5.34592e-17 | 1.000000 |
| PhCH2CCH+H    | 1.58932e-17 | 1.000000 | 1.58932e-17 | 1.000000 |
| rad9          | 4.08870e-19 | 1.000000 | 4.08870e-19 | 1.000000 |
| rad60syn      | 1.81461e-20 | 1.000000 | 1.81461e-20 | 1.000000 |
| rad60anti     | 6.31784e-21 | 1.000000 | 6.31784e-21 | 1.000000 |
| rad25         | 4.60238e-21 | 1.000000 | 4.60238e-21 | 1.000000 |
| PhCHCCH2+H    | 1.06735e-21 | 1.000000 | 1.06735e-21 | 1.000000 |
| rad28         | 1.02807e-21 | 1.000000 | 1.02807e-21 | 1.000000 |
| rad35         | 2.63766e-22 | 1.000000 | 2.63766e-22 | 1.000000 |
| PAH3+H        | 2.58959e-22 | 1.000000 | 2.58959e-22 | 1.000000 |
| Ph+Allene     | 1.20951e-22 | 1.000000 | 1.20951e-22 | 1.000000 |
| rad59         | 7.27028e-23 | 1.000000 | 7.27029e-23 | 1.000000 |
| PAH7+H        | 3.43308e-23 | 1.000000 | 3.43308e-23 | 1.000000 |
| rad38         | 2.43975e-24 | 1.000000 | 2.43975e-24 | 1.000000 |
| rad13         | 2.23170e-24 | 1.000000 | 2.23170e-24 | 1.000000 |
| rad26         | 1.05376e-24 | 1.000000 | 1.05376e-24 | 1.000000 |
| rad7          | 7.24155e-25 | 1.000000 | 7.24155e-25 | 1.000000 |
| rad46         | 5.82824e-26 | 1.000000 | 5.82824e-26 | 1.000000 |
| rad33         | 2.38860e-26 | 1.000000 | 2.38860e-26 | 1.000000 |
| PAH9+H        | 2.62745e-28 | 1.000000 | 2.62746e-28 | 1.000000 |
| rad58         | 3.72348e-29 | 1.000000 | 3.72348e-29 | 1.000000 |
| rad50         | 1.28507e-29 | 1.000000 | 1.28507e-29 | 1.000000 |
| rad3          | 1.78655e-30 | 1.000000 | 1.78655e-30 | 1.000000 |
| rad4          | 1.37424e-30 | 1.000000 | 1.37424e-30 | 1.000000 |
| rad10         | 1.35666e-31 | 1.000000 | 1.35666e-31 | 1.000000 |
| rad39         | 9.99465e-32 | 1.000000 | 9.99465e-32 | 1.000000 |
| rad52         | 1.80590e-32 | 1.000000 | 1.80590e-32 | 1.000000 |
| rad51         | 2.02877e-33 | 1.000000 | 2.02877e-33 | 1.000000 |
| rad12         | 5.67914e-34 | 1.000000 | 5.67914e-34 | 1.000000 |
| rad37         | 8.34145e-35 | 1.000000 | 8.34145e-35 | 1.000000 |
| rad2          | 2.99015e-35 | 1.000000 | 2.99015e-35 | 1.000000 |
| rad47         | 2.68492e-35 | 1.000000 | 2.68492e-35 | 1.000000 |
| rad70         | 1.56201e-35 | 1.000000 | 1.56201e-35 | 1.000000 |
| rad1          | 6.97353e-36 | 1.000000 | 6.97353e-36 | 1.000000 |
| PhCCH+CH3     | 6.61236e-36 | 1.000000 | 6.61236e-36 | 1.000000 |
| rad31         | 8.98920e-37 | 1.000000 | 8.98920e-37 | 1.000000 |
| rad14         | 1.28786e-37 | 1.000000 | 1.28786e-37 | 1.000000 |
| rad34         | 7.12353e-38 | 1.000000 | 7.12353e-38 | 1.000000 |
| Ph+MeAc       | 6.25333e-38 | 1.000000 | 6.25333e-38 | 1.000000 |
| PAH10+CH3     | 1.91366e-38 | 1.000000 | 1.91366e-38 | 1.000000 |
| rad54         | 4.57114e-39 | 1.000000 | 4.57115e-39 | 1.000000 |
| rad65         | 1.52607e-39 | 1.000000 | 1.52607e-39 | 1.000000 |
| rad19syn      | 8.23604e-40 | 1.000000 | 8.23604e-40 | 1.000000 |
| PAH1+H        | 1.88168e-40 | 1.000000 | 1.88168e-40 | 1.000000 |
| rad55         | 1.70866e-41 | 1.000000 | 1.70866e-41 | 1.000000 |
| rad27         | 4.26966e-42 | 1.000000 | 4.26966e-42 | 1.000000 |
| PhCCCH3+H     | 1.90561e-42 | 1.000000 | 1.90561e-42 | 1.000000 |
| PhcycC3H3_A+H | 8.76906e-43 | 1.000000 | 8.76906e-43 | 1.000000 |
| rad5          | 9.82483e-44 | 1.000000 | 9.82483e-44 | 1.000000 |
| rad62         | 4.98217e-48 | 1.000000 | 4.98217e-48 | 1.000000 |
| rad43         | 4.14228e-51 | 1.000000 | 4.14228e-51 | 1.000000 |
| rad42         | 1.26705e-52 | 1.000000 | 1.26705e-52 | 1.000000 |
| rad41         | 3.68295e-56 | 1.000000 | 3.68295e-56 | 1.000000 |

100000000. Pa, 290.000000 K

| Rate constant | True (fraction)     | Effective (fraction) |
|---------------|---------------------|----------------------|
| Total         | 4.20015e-23 (1.00 ) | 4.20015e-23 (1.00 )  |

| species | PYtrue | Cumul | PYeffective | Cumul |
|---------|--------|-------|-------------|-------|
|---------|--------|-------|-------------|-------|

|               |             |          |             |          |
|---------------|-------------|----------|-------------|----------|
| rad20         | 0.999637    | 0.999637 | 0.999637    | 0.999637 |
| rad21         | 0.000312496 | 0.999949 | 0.000312496 | 0.999949 |
| rad18         | 5.02196e-05 | 1.000000 | 5.02196e-05 | 1.000000 |
| Benzyl+C2H2   | 1.80388e-07 | 1.000000 | 0.000000    | 1.000000 |
| rad22         | 4.22439e-08 | 1.000000 | 4.22439e-08 | 1.000000 |
| rad24         | 3.54311e-09 | 1.000000 | 3.54311e-09 | 1.000000 |
| Indene+H      | 1.75440e-09 | 1.000000 | 1.75440e-09 | 1.000000 |
| rad45         | 1.57046e-10 | 1.000000 | 1.57046e-10 | 1.000000 |
| rad11         | 9.99361e-11 | 1.000000 | 9.99362e-11 | 1.000000 |
| rad36         | 2.69019e-11 | 1.000000 | 2.69019e-11 | 1.000000 |
| rad8          | 2.12693e-14 | 1.000000 | 2.12693e-14 | 1.000000 |
| rad23         | 1.05079e-14 | 1.000000 | 1.05079e-14 | 1.000000 |
| rad30         | 5.71235e-16 | 1.000000 | 5.71235e-16 | 1.000000 |
| rad6          | 2.53655e-16 | 1.000000 | 2.53655e-16 | 1.000000 |
| rad15         | 1.03164e-16 | 1.000000 | 1.03164e-16 | 1.000000 |
| PhCH2CCH+H    | 4.93508e-17 | 1.000000 | 4.93508e-17 | 1.000000 |
| rad9          | 1.16719e-18 | 1.000000 | 1.16719e-18 | 1.000000 |
| rad60syn      | 4.59791e-20 | 1.000000 | 4.59792e-20 | 1.000000 |
| rad60anti     | 1.64625e-20 | 1.000000 | 1.64625e-20 | 1.000000 |
| rad25         | 1.08576e-20 | 1.000000 | 1.08576e-20 | 1.000000 |
| rad28         | 2.98400e-21 | 1.000000 | 2.98400e-21 | 1.000000 |
| PhCHCCH2+H    | 2.93705e-21 | 1.000000 | 2.93706e-21 | 1.000000 |
| PAH3+H        | 8.67371e-22 | 1.000000 | 8.67372e-22 | 1.000000 |
| rad35         | 7.87321e-22 | 1.000000 | 7.87321e-22 | 1.000000 |
| Ph+Allene     | 3.83705e-22 | 1.000000 | 3.83705e-22 | 1.000000 |
| rad59         | 2.38194e-22 | 1.000000 | 2.38194e-22 | 1.000000 |
| PAH7+H        | 1.10699e-22 | 1.000000 | 1.10699e-22 | 1.000000 |
| rad38         | 6.79132e-24 | 1.000000 | 6.79132e-24 | 1.000000 |
| rad13         | 5.66189e-24 | 1.000000 | 5.66189e-24 | 1.000000 |
| rad26         | 3.68033e-24 | 1.000000 | 3.68033e-24 | 1.000000 |
| rad7          | 1.87180e-24 | 1.000000 | 1.87180e-24 | 1.000000 |
| rad46         | 1.77167e-25 | 1.000000 | 1.77167e-25 | 1.000000 |
| rad33         | 6.44707e-26 | 1.000000 | 6.44707e-26 | 1.000000 |
| PAH9+H        | 7.41519e-28 | 1.000000 | 7.41519e-28 | 1.000000 |
| rad58         | 1.93706e-28 | 1.000000 | 1.93706e-28 | 1.000000 |
| rad50         | 5.79619e-29 | 1.000000 | 5.79619e-29 | 1.000000 |
| rad3          | 6.38113e-30 | 1.000000 | 6.38113e-30 | 1.000000 |
| rad4          | 4.90256e-30 | 1.000000 | 4.90256e-30 | 1.000000 |
| rad10         | 5.89573e-31 | 1.000000 | 5.89573e-31 | 1.000000 |
| rad39         | 4.61737e-31 | 1.000000 | 4.61737e-31 | 1.000000 |
| rad52         | 1.04270e-31 | 1.000000 | 1.04270e-31 | 1.000000 |
| rad51         | 1.32244e-32 | 1.000000 | 1.32244e-32 | 1.000000 |
| rad12         | 2.64702e-33 | 1.000000 | 2.64703e-33 | 1.000000 |
| rad37         | 4.08069e-34 | 1.000000 | 4.08069e-34 | 1.000000 |
| rad47         | 1.91541e-34 | 1.000000 | 1.91541e-34 | 1.000000 |
| rad2          | 1.41102e-34 | 1.000000 | 1.41102e-34 | 1.000000 |
| rad70         | 8.94173e-35 | 1.000000 | 8.94173e-35 | 1.000000 |
| PhCCH+CH3     | 3.52300e-35 | 1.000000 | 3.52300e-35 | 1.000000 |
| rad1          | 3.27736e-35 | 1.000000 | 3.27736e-35 | 1.000000 |
| rad31         | 3.44151e-36 | 1.000000 | 3.44151e-36 | 1.000000 |
| rad14         | 6.54628e-37 | 1.000000 | 6.54628e-37 | 1.000000 |
| rad34         | 4.28881e-37 | 1.000000 | 4.28881e-37 | 1.000000 |
| Ph+MeAc       | 3.59519e-37 | 1.000000 | 3.59519e-37 | 1.000000 |
| PAH10+CH3     | 1.09018e-37 | 1.000000 | 1.09018e-37 | 1.000000 |
| rad54         | 2.74505e-38 | 1.000000 | 2.74505e-38 | 1.000000 |
| rad65         | 9.21283e-39 | 1.000000 | 9.21283e-39 | 1.000000 |
| rad19syn      | 4.82036e-39 | 1.000000 | 4.82036e-39 | 1.000000 |
| PAH1+H        | 1.13998e-39 | 1.000000 | 1.13998e-39 | 1.000000 |
| rad55         | 1.08632e-40 | 1.000000 | 1.08632e-40 | 1.000000 |
| rad27         | 2.57252e-41 | 1.000000 | 2.57252e-41 | 1.000000 |
| PhCCCH3+H     | 1.20614e-41 | 1.000000 | 1.20614e-41 | 1.000000 |
| PhcycC3H3_A+H | 5.61637e-42 | 1.000000 | 5.61637e-42 | 1.000000 |
| rad5          | 5.77734e-43 | 1.000000 | 5.77734e-43 | 1.000000 |
| rad62         | 3.47214e-47 | 1.000000 | 3.47214e-47 | 1.000000 |
| rad43         | 2.65695e-50 | 1.000000 | 2.65696e-50 | 1.000000 |
| rad42         | 9.32155e-52 | 1.000000 | 9.32156e-52 | 1.000000 |
| rad41         | 2.41798e-55 | 1.000000 | 2.41798e-55 | 1.000000 |

100000000. Pa, 300.000000 K

=====

| Rate constant | True (fraction)     | Effective (fraction) |
|---------------|---------------------|----------------------|
| Total         | 1.17740e-22 (1.00 ) | 1.17740e-22 (1.00 )  |

| species     | PYtrue      | Cumul    | PYeffective | Cumul    |
|-------------|-------------|----------|-------------|----------|
| rad20       | 0.999343    | 0.999343 | 0.999344    | 0.999344 |
| rad21       | 0.000560862 | 0.999904 | 0.000560862 | 0.999905 |
| rad18       | 9.44830e-05 | 0.999998 | 9.44831e-05 | 0.999999 |
| Benzyl+C2H2 | 1.05339e-06 | 0.999999 | 0.000000    | 0.999999 |

|               |             |          |             |          |
|---------------|-------------|----------|-------------|----------|
| rad22         | 1.95620e-07 | 1.000000 | 1.95620e-07 | 1.000000 |
| rad24         | 1.96244e-08 | 1.000000 | 1.96244e-08 | 1.000000 |
| Indene+H      | 9.39514e-09 | 1.000000 | 9.39515e-09 | 1.000000 |
| rad45         | 2.31574e-09 | 1.000000 | 2.31575e-09 | 1.000000 |
| rad11         | 9.89839e-10 | 1.000000 | 9.89840e-10 | 1.000000 |
| rad36         | 2.82668e-10 | 1.000000 | 2.82669e-10 | 1.000000 |
| rad8          | 4.77162e-13 | 1.000000 | 4.77162e-13 | 1.000000 |
| rad9          | 3.30623e-13 | 1.000000 | 3.30624e-13 | 1.000000 |
| rad23         | 2.86013e-13 | 1.000000 | 2.86013e-13 | 1.000000 |
| rad6          | 2.21021e-14 | 1.000000 | 2.21021e-14 | 1.000000 |
| rad30         | 2.05683e-14 | 1.000000 | 2.05684e-14 | 1.000000 |
| PhCH2CCH+H    | 1.81270e-14 | 1.000000 | 1.81271e-14 | 1.000000 |
| rad15         | 5.10585e-15 | 1.000000 | 5.10586e-15 | 1.000000 |
| rad60syn      | 1.36683e-17 | 1.000000 | 1.36683e-17 | 1.000000 |
| rad28         | 6.75910e-18 | 1.000000 | 6.75910e-18 | 1.000000 |
| rad60anti     | 6.02022e-18 | 1.000000 | 6.02022e-18 | 1.000000 |
| PhCHCCH2+H    | 5.44095e-18 | 1.000000 | 5.44096e-18 | 1.000000 |
| rad25         | 5.34497e-18 | 1.000000 | 5.34497e-18 | 1.000000 |
| PAH3+H        | 2.75471e-18 | 1.000000 | 2.75472e-18 | 1.000000 |
| rad12         | 1.88174e-18 | 1.000000 | 1.88174e-18 | 1.000000 |
| Ph+Allene     | 1.66631e-18 | 1.000000 | 1.66631e-18 | 1.000000 |
| rad35         | 8.03065e-19 | 1.000000 | 8.03066e-19 | 1.000000 |
| PAH7+H        | 6.46004e-19 | 1.000000 | 6.46004e-19 | 1.000000 |
| rad59         | 5.28839e-19 | 1.000000 | 5.28839e-19 | 1.000000 |
| rad38         | 8.00124e-20 | 1.000000 | 8.00125e-20 | 1.000000 |
| rad26         | 3.93271e-20 | 1.000000 | 3.93271e-20 | 1.000000 |
| rad13         | 1.06357e-20 | 1.000000 | 1.06357e-20 | 1.000000 |
| rad46         | 6.43797e-21 | 1.000000 | 6.43798e-21 | 1.000000 |
| rad7          | 4.28554e-21 | 1.000000 | 4.28554e-21 | 1.000000 |
| rad19anti     | 1.37099e-21 | 1.000000 | 1.37099e-21 | 1.000000 |
| rad19syn      | 1.34387e-21 | 1.000000 | 1.34387e-21 | 1.000000 |
| rad50         | 2.21861e-22 | 1.000000 | 2.21861e-22 | 1.000000 |
| rad33         | 2.05004e-22 | 1.000000 | 2.05004e-22 | 1.000000 |
| rad58         | 7.85613e-23 | 1.000000 | 7.85614e-23 | 1.000000 |
| PAH9+H        | 6.67905e-23 | 1.000000 | 6.67905e-23 | 1.000000 |
| rad39         | 1.48723e-23 | 1.000000 | 1.48723e-23 | 1.000000 |
| rad51         | 8.60430e-24 | 1.000000 | 8.60431e-24 | 1.000000 |
| rad52         | 7.20634e-24 | 1.000000 | 7.20635e-24 | 1.000000 |
| rad47         | 6.06867e-24 | 1.000000 | 6.06868e-24 | 1.000000 |
| rad2          | 2.47957e-24 | 1.000000 | 2.47957e-24 | 1.000000 |
| rad5          | 1.19292e-24 | 1.000000 | 1.19292e-24 | 1.000000 |
| rad3          | 5.67900e-25 | 1.000000 | 5.67901e-25 | 1.000000 |
| rad1          | 5.52966e-25 | 1.000000 | 5.52966e-25 | 1.000000 |
| rad4          | 4.32756e-25 | 1.000000 | 4.32756e-25 | 1.000000 |
| rad10         | 2.13752e-25 | 1.000000 | 2.13753e-25 | 1.000000 |
| rad67         | 1.97354e-25 | 1.000000 | 1.97354e-25 | 1.000000 |
| rad70         | 8.03095e-27 | 1.000000 | 8.03096e-27 | 1.000000 |
| PhCCH+CH3     | 1.91044e-27 | 1.000000 | 1.91044e-27 | 1.000000 |
| rad37         | 1.73250e-27 | 1.000000 | 1.73250e-27 | 1.000000 |
| rad73         | 9.55887e-28 | 1.000000 | 9.55888e-28 | 1.000000 |
| rad65         | 5.93904e-28 | 1.000000 | 5.93904e-28 | 1.000000 |
| rad34         | 5.02188e-28 | 1.000000 | 5.02188e-28 | 1.000000 |
| rad71         | 4.31416e-28 | 1.000000 | 4.31416e-28 | 1.000000 |
| Ph+MeAc       | 1.48410e-28 | 1.000000 | 1.48410e-28 | 1.000000 |
| PAH10+CH3     | 9.69287e-29 | 1.000000 | 9.69288e-29 | 1.000000 |
| PhCCCH3+H     | 6.75116e-29 | 1.000000 | 6.75117e-29 | 1.000000 |
| PAH1+H        | 4.02527e-29 | 1.000000 | 4.02527e-29 | 1.000000 |
| rad14         | 1.98475e-29 | 1.000000 | 1.98475e-29 | 1.000000 |
| rad54         | 6.43184e-30 | 1.000000 | 6.43185e-30 | 1.000000 |
| rad27         | 5.34294e-30 | 1.000000 | 5.34294e-30 | 1.000000 |
| rad72         | 1.22117e-30 | 1.000000 | 1.22117e-30 | 1.000000 |
| rad31         | 5.58825e-31 | 1.000000 | 5.58825e-31 | 1.000000 |
| rad68syn      | 4.66793e-31 | 1.000000 | 4.66793e-31 | 1.000000 |
| rad64         | 3.29925e-31 | 1.000000 | 3.29925e-31 | 1.000000 |
| rad68anti     | 3.17528e-31 | 1.000000 | 3.17528e-31 | 1.000000 |
| PAH8+H        | 2.15608e-31 | 1.000000 | 2.15609e-31 | 1.000000 |
| rad55         | 1.87758e-31 | 1.000000 | 1.87758e-31 | 1.000000 |
| PhcycC3H3_A+H | 6.94419e-32 | 1.000000 | 6.94420e-32 | 1.000000 |
| rad40syn      | 4.84426e-32 | 1.000000 | 4.84426e-32 | 1.000000 |
| rad40anti     | 2.14009e-32 | 1.000000 | 2.14010e-32 | 1.000000 |
| rad61         | 1.56200e-32 | 1.000000 | 1.56200e-32 | 1.000000 |
| rad62         | 1.31310e-32 | 1.000000 | 1.31310e-32 | 1.000000 |
| rad53         | 2.07839e-33 | 1.000000 | 2.07839e-33 | 1.000000 |
| rad43         | 7.41508e-34 | 1.000000 | 7.41509e-34 | 1.000000 |
| rad42         | 6.14677e-34 | 1.000000 | 6.14678e-34 | 1.000000 |
| rad56         | 4.28263e-34 | 1.000000 | 4.28264e-34 | 1.000000 |
| rad41         | 2.86173e-35 | 1.000000 | 2.86173e-35 | 1.000000 |

100000000. Pa, 310.000000 K

=====

| Rate constant | True (fraction)     | Effective (fraction) |
|---------------|---------------------|----------------------|
| Total         | 2.44453e-22 (1.00 ) | 2.44453e-22 (1.00 )  |

| species       | PYtrue      | Cumul    | PYeffective | Cumul    |
|---------------|-------------|----------|-------------|----------|
| rad20         | 0.999538    | 0.999538 | 0.999539    | 0.999539 |
| rad21         | 0.000396646 | 0.999935 | 0.000396646 | 0.999936 |
| rad18         | 6.47037e-05 | 0.999999 | 6.47037e-05 | 1.00000  |
| Benzyl+C2H2   | 3.54785e-07 | 1.000000 | 0.00000     | 1.00000  |
| rad22         | 7.06615e-08 | 1.000000 | 7.06615e-08 | 1.00000  |
| rad24         | 6.41841e-09 | 1.000000 | 6.41841e-09 | 1.00000  |
| Indene+H      | 3.09528e-09 | 1.000000 | 3.09529e-09 | 1.00000  |
| rad45         | 3.54276e-10 | 1.000000 | 3.54276e-10 | 1.00000  |
| rad11         | 2.15869e-10 | 1.000000 | 2.15869e-10 | 1.00000  |
| rad36         | 6.02017e-11 | 1.000000 | 6.02017e-11 | 1.00000  |
| rad8          | 9.36057e-14 | 1.000000 | 9.36057e-14 | 1.00000  |
| rad23         | 2.64511e-14 | 1.000000 | 2.64512e-14 | 1.00000  |
| rad30         | 1.83494e-15 | 1.000000 | 1.83494e-15 | 1.00000  |
| rad6          | 8.82113e-16 | 1.000000 | 8.82114e-16 | 1.00000  |
| PhCH2CCH+H    | 3.93848e-16 | 1.000000 | 3.93848e-16 | 1.00000  |
| rad15         | 3.64351e-16 | 1.000000 | 3.64352e-16 | 1.00000  |
| rad9          | 8.18036e-18 | 1.000000 | 8.18036e-18 | 1.00000  |
| rad60syn      | 2.62629e-19 | 1.000000 | 2.62629e-19 | 1.00000  |
| rad60anti     | 9.86929e-20 | 1.000000 | 9.86929e-20 | 1.00000  |
| rad25         | 5.65659e-20 | 1.000000 | 5.65659e-20 | 1.00000  |
| rad28         | 2.21797e-20 | 1.000000 | 2.21797e-20 | 1.00000  |
| PhCHCCH2+H    | 2.01601e-20 | 1.000000 | 2.01601e-20 | 1.00000  |
| PAH3+H        | 8.10417e-21 | 1.000000 | 8.10418e-21 | 1.00000  |
| rad35         | 6.01928e-21 | 1.000000 | 6.01928e-21 | 1.00000  |
| Ph+Allene     | 3.36098e-21 | 1.000000 | 3.36098e-21 | 1.00000  |
| rad59         | 2.13743e-21 | 1.000000 | 2.13743e-21 | 1.00000  |
| PAH7+H        | 9.90074e-22 | 1.000000 | 9.90074e-22 | 1.00000  |
| rad38         | 5.09005e-23 | 1.000000 | 5.09005e-23 | 1.00000  |
| rad26         | 3.76756e-23 | 1.000000 | 3.76757e-23 | 1.00000  |
| rad13         | 3.47824e-23 | 1.000000 | 3.47824e-23 | 1.00000  |
| rad7          | 1.19082e-23 | 1.000000 | 1.19082e-23 | 1.00000  |
| rad46         | 1.54607e-24 | 1.000000 | 1.54607e-24 | 1.00000  |
| rad33         | 4.43921e-25 | 1.000000 | 4.43921e-25 | 1.00000  |
| PAH9+H        | 5.66725e-27 | 1.000000 | 5.66726e-27 | 1.00000  |
| rad58         | 3.74830e-27 | 1.000000 | 3.74830e-27 | 1.00000  |
| rad50         | 1.01205e-27 | 1.000000 | 1.01205e-27 | 1.00000  |
| rad3          | 7.32952e-29 | 1.000000 | 7.32952e-29 | 1.00000  |
| rad4          | 5.62088e-29 | 1.000000 | 5.62088e-29 | 1.00000  |
| rad10         | 8.98569e-30 | 1.000000 | 8.98569e-30 | 1.00000  |
| rad39         | 8.21178e-30 | 1.000000 | 8.21179e-30 | 1.00000  |
| rad52         | 2.76019e-30 | 1.000000 | 2.76019e-30 | 1.00000  |
| rad51         | 4.23877e-31 | 1.000000 | 4.23877e-31 | 1.00000  |
| rad12         | 4.52182e-32 | 1.000000 | 4.52182e-32 | 1.00000  |
| rad37         | 7.52006e-33 | 1.000000 | 7.52006e-33 | 1.00000  |
| rad47         | 7.09586e-33 | 1.000000 | 7.09586e-33 | 1.00000  |
| rad2          | 2.58401e-33 | 1.000000 | 2.58401e-33 | 1.00000  |
| rad70         | 2.07961e-33 | 1.000000 | 2.07961e-33 | 1.00000  |
| PhCCH+CH3     | 7.78557e-34 | 1.000000 | 7.78557e-34 | 1.00000  |
| rad1          | 5.96700e-34 | 1.000000 | 5.96700e-34 | 1.00000  |
| rad31         | 4.53165e-35 | 1.000000 | 4.53165e-35 | 1.00000  |
| rad14         | 1.34713e-35 | 1.000000 | 1.34713e-35 | 1.00000  |
| rad34         | 1.08250e-35 | 1.000000 | 1.08250e-35 | 1.00000  |
| Ph+MeAc       | 8.90435e-36 | 1.000000 | 8.90436e-36 | 1.00000  |
| PAH10+CH3     | 2.53714e-36 | 1.000000 | 2.53714e-36 | 1.00000  |
| rad54         | 7.00733e-37 | 1.000000 | 7.00733e-37 | 1.00000  |
| rad65         | 2.51944e-37 | 1.000000 | 2.51944e-37 | 1.00000  |
| rad19syn      | 1.18272e-37 | 1.000000 | 1.18272e-37 | 1.00000  |
| PAH1+H        | 2.92371e-38 | 1.000000 | 2.92372e-38 | 1.00000  |
| rad55         | 3.02313e-39 | 1.000000 | 3.02313e-39 | 1.00000  |
| rad27         | 6.59979e-40 | 1.000000 | 6.59980e-40 | 1.00000  |
| PhCCCH3+H     | 3.53871e-40 | 1.000000 | 3.53871e-40 | 1.00000  |
| PhcycC3H3_A+H | 1.57753e-40 | 1.000000 | 1.57753e-40 | 1.00000  |
| rad5          | 1.43099e-41 | 1.000000 | 1.43099e-41 | 1.00000  |
| rad62         | 1.16385e-45 | 1.000000 | 1.16385e-45 | 1.00000  |
| rad43         | 7.58239e-49 | 1.000000 | 7.58239e-49 | 1.00000  |
| rad42         | 3.42586e-50 | 1.000000 | 3.42587e-50 | 1.00000  |
| rad41         | 7.18471e-54 | 1.000000 | 7.18471e-54 | 1.00000  |

100000000. Pa, 400.000000 K

| Rate constant | True (fraction)     | Effective (fraction) |
|---------------|---------------------|----------------------|
| Total         | 3.60269e-20 (1.00 ) | 3.60261e-20 (1.00 )  |

| species       | PYtrue      | Cumul    | PYeffective | Cumul    |
|---------------|-------------|----------|-------------|----------|
| rad20         | 0.997743    | 0.997743 | 0.997763    | 0.997763 |
| rad21         | 0.00189055  | 0.999634 | 0.00189059  | 0.999654 |
| rad18         | 0.000343633 | 0.999977 | 0.000343640 | 0.999997 |
| Benzyl+C2H2   | 2.00243e-05 | 0.999997 | 0.00000     | 0.999997 |
| rad22         | 2.58875e-06 | 1.000000 | 2.58880e-06 | 1.000000 |
| rad24         | 3.15151e-07 | 1.00000  | 3.15157e-07 | 1.00000  |
| Indene+H      | 1.66294e-07 | 1.00000  | 1.66297e-07 | 1.00000  |
| rad45         | 1.10214e-07 | 1.00000  | 1.10216e-07 | 1.00000  |
| rad11         | 3.62749e-08 | 1.00000  | 3.62756e-08 | 1.00000  |
| rad36         | 1.11129e-08 | 1.00000  | 1.11132e-08 | 1.00000  |
| rad23         | 8.72973e-11 | 1.00000  | 8.72991e-11 | 1.00000  |
| rad9          | 8.48005e-11 | 1.00000  | 8.48022e-11 | 1.00000  |
| rad8          | 6.17404e-11 | 1.00000  | 6.17416e-11 | 1.00000  |
| PhCH2CCH+H    | 1.30678e-11 | 1.00000  | 1.30680e-11 | 1.00000  |
| rad6          | 6.22000e-12 | 1.00000  | 6.22012e-12 | 1.00000  |
| rad30         | 2.79525e-12 | 1.00000  | 2.79531e-12 | 1.00000  |
| rad15         | 8.81750e-13 | 1.00000  | 8.81768e-13 | 1.00000  |
| rad38         | 2.73863e-14 | 1.00000  | 2.73869e-14 | 1.00000  |
| rad28         | 1.35668e-14 | 1.00000  | 1.35671e-14 | 1.00000  |
| PhCHCCH2+H    | 1.06623e-14 | 1.00000  | 1.06625e-14 | 1.00000  |
| rad60syn      | 7.24333e-15 | 1.00000  | 7.24348e-15 | 1.00000  |
| rad46         | 7.02768e-15 | 1.00000  | 7.02782e-15 | 1.00000  |
| Ph+Allene     | 6.17266e-15 | 1.00000  | 6.17278e-15 | 1.00000  |
| rad25         | 4.79774e-15 | 1.00000  | 4.79784e-15 | 1.00000  |
| PAH9+H        | 4.72327e-15 | 1.00000  | 4.72337e-15 | 1.00000  |
| PAH3+H        | 4.26210e-15 | 1.00000  | 4.26218e-15 | 1.00000  |
| rad50         | 4.06330e-15 | 1.00000  | 4.06338e-15 | 1.00000  |
| PAH7+H        | 3.89715e-15 | 1.00000  | 3.89723e-15 | 1.00000  |
| rad60anti     | 3.53051e-15 | 1.00000  | 3.53058e-15 | 1.00000  |
| rad35         | 1.53861e-15 | 1.00000  | 1.53864e-15 | 1.00000  |
| rad12         | 1.45235e-15 | 1.00000  | 1.45238e-15 | 1.00000  |
| rad39         | 1.24639e-15 | 1.00000  | 1.24641e-15 | 1.00000  |
| rad51         | 1.00072e-15 | 1.00000  | 1.00074e-15 | 1.00000  |
| rad59         | 7.37427e-16 | 1.00000  | 7.37442e-16 | 1.00000  |
| rad52         | 3.33581e-16 | 1.00000  | 3.33588e-16 | 1.00000  |
| rad26         | 3.30873e-16 | 1.00000  | 3.30880e-16 | 1.00000  |
| rad47         | 1.27580e-16 | 1.00000  | 1.27583e-16 | 1.00000  |
| rad13         | 3.82574e-17 | 1.00000  | 3.82581e-17 | 1.00000  |
| rad7          | 2.89283e-17 | 1.00000  | 2.89289e-17 | 1.00000  |
| rad71         | 1.64340e-17 | 1.00000  | 1.64343e-17 | 1.00000  |
| rad73         | 1.33486e-17 | 1.00000  | 1.33488e-17 | 1.00000  |
| rad10         | 1.12966e-17 | 1.00000  | 1.12969e-17 | 1.00000  |
| rad19anti     | 6.95639e-18 | 1.00000  | 6.95653e-18 | 1.00000  |
| PAH10+CH3     | 6.39992e-18 | 1.00000  | 6.40005e-18 | 1.00000  |
| PhCCH+CH3     | 6.25466e-18 | 1.00000  | 6.25479e-18 | 1.00000  |
| PAH1+H        | 5.57905e-18 | 1.00000  | 5.57916e-18 | 1.00000  |
| rad65         | 4.26053e-18 | 1.00000  | 4.26062e-18 | 1.00000  |
| rad37         | 3.20674e-18 | 1.00000  | 3.20680e-18 | 1.00000  |
| Ph+MeAc       | 2.12750e-18 | 1.00000  | 2.12754e-18 | 1.00000  |
| rad19syn      | 2.10036e-18 | 1.00000  | 2.10041e-18 | 1.00000  |
| rad70         | 1.89215e-18 | 1.00000  | 1.89219e-18 | 1.00000  |
| rad2          | 1.44141e-18 | 1.00000  | 1.44144e-18 | 1.00000  |
| rad33         | 8.73579e-19 | 1.00000  | 8.73596e-19 | 1.00000  |
| rad58         | 8.20392e-19 | 1.00000  | 8.20408e-19 | 1.00000  |
| PhCCCH3+H     | 5.38371e-19 | 1.00000  | 5.38382e-19 | 1.00000  |
| rad34         | 4.89792e-19 | 1.00000  | 4.89801e-19 | 1.00000  |
| rad72         | 4.40243e-19 | 1.00000  | 4.40252e-19 | 1.00000  |
| rad3          | 3.88163e-19 | 1.00000  | 3.88171e-19 | 1.00000  |
| rad1          | 3.57580e-19 | 1.00000  | 3.57587e-19 | 1.00000  |
| rad4          | 3.05575e-19 | 1.00000  | 3.05581e-19 | 1.00000  |
| rad67         | 1.19455e-19 | 1.00000  | 1.19458e-19 | 1.00000  |
| PAH8+H        | 1.15649e-19 | 1.00000  | 1.15652e-19 | 1.00000  |
| rad64         | 1.03792e-19 | 1.00000  | 1.03794e-19 | 1.00000  |
| rad14         | 5.22153e-20 | 1.00000  | 5.22164e-20 | 1.00000  |
| rad68syn      | 3.75783e-20 | 1.00000  | 3.75790e-20 | 1.00000  |
| rad54         | 2.78892e-20 | 1.00000  | 2.78898e-20 | 1.00000  |
| rad62         | 2.63517e-20 | 1.00000  | 2.63522e-20 | 1.00000  |
| rad68anti     | 2.44583e-20 | 1.00000  | 2.44588e-20 | 1.00000  |
| PhcycC3H3_A+H | 2.06303e-20 | 1.00000  | 2.06307e-20 | 1.00000  |
| rad5          | 1.50108e-20 | 1.00000  | 1.50111e-20 | 1.00000  |
| rad40syn      | 1.38475e-20 | 1.00000  | 1.38477e-20 | 1.00000  |
| rad61         | 1.18842e-20 | 1.00000  | 1.18845e-20 | 1.00000  |
| rad40anti     | 8.13625e-21 | 1.00000  | 8.13641e-21 | 1.00000  |
| rad27         | 3.36188e-21 | 1.00000  | 3.36195e-21 | 1.00000  |
| rad42         | 2.39845e-21 | 1.00000  | 2.39850e-21 | 1.00000  |
| rad43         | 2.16130e-21 | 1.00000  | 2.16134e-21 | 1.00000  |
| rad55         | 2.13837e-21 | 1.00000  | 2.13841e-21 | 1.00000  |
| rad56         | 7.26755e-22 | 1.00000  | 7.26770e-22 | 1.00000  |



|       |             |         |             |         |
|-------|-------------|---------|-------------|---------|
| rad53 | 6.67492e-22 | 1.00000 | 6.67506e-22 | 1.00000 |
| rad41 | 1.82294e-22 | 1.00000 | 1.82297e-22 | 1.00000 |
| rad31 | 1.88222e-24 | 1.00000 | 1.88226e-24 | 1.00000 |

100000000. Pa, 500.000000 K

| Rate constant | True (fraction)     | Effective (fraction) |
|---------------|---------------------|----------------------|
| Total         | 1.22595e-18 (1.00 ) | 1.22559e-18 (1.00 )  |

| species       | PYtrue      | Cumul    | PYeffective | Cumul    |
|---------------|-------------|----------|-------------|----------|
| rad20         | 0.992074    | 0.992074 | 0.992365    | 0.992365 |
| rad21         | 0.00634359  | 0.998418 | 0.00634544  | 0.998710 |
| rad18         | 0.00124141  | 0.999659 | 0.00124178  | 0.999952 |
| Benzyl+C2H2   | 0.000292689 | 0.999952 | 0.00000     | 0.999952 |
| rad22         | 3.51056e-05 | 0.999987 | 3.51159e-05 | 0.999987 |
| rad45         | 4.16053e-06 | 0.999991 | 4.16175e-06 | 0.999991 |
| rad24         | 3.90474e-06 | 0.999995 | 3.90588e-06 | 0.999995 |
| Indene+H      | 3.13509e-06 | 0.999998 | 3.13601e-06 | 0.999999 |
| rad11         | 1.27057e-06 | 0.999999 | 1.27094e-06 | 1.000000 |
| rad36         | 3.86226e-07 | 1.000000 | 3.86339e-07 | 1.000000 |
| rad23         | 1.16388e-07 | 1.000000 | 1.16422e-07 | 1.000000 |
| rad9          | 1.02556e-08 | 1.000000 | 1.02586e-08 | 1.000000 |
| PhCH2CCH+H    | 4.18086e-09 | 1.000000 | 4.18209e-09 | 1.000000 |
| rad8          | 2.98794e-09 | 1.000000 | 2.98882e-09 | 1.000000 |
| rad6          | 2.04979e-09 | 1.000000 | 2.05039e-09 | 1.000000 |
| rad38         | 1.10318e-09 | 1.000000 | 1.10350e-09 | 1.000000 |
| PAH9+H        | 7.84850e-10 | 1.000000 | 7.85080e-10 | 1.000000 |
| rad50         | 4.13390e-10 | 1.000000 | 4.13511e-10 | 1.000000 |
| rad46         | 3.84842e-10 | 1.000000 | 3.84955e-10 | 1.000000 |
| rad30         | 3.24362e-10 | 1.000000 | 3.24457e-10 | 1.000000 |
| PAH7+H        | 2.94559e-10 | 1.000000 | 2.94645e-10 | 1.000000 |
| rad28         | 1.72387e-10 | 1.000000 | 1.72437e-10 | 1.000000 |
| rad39         | 1.71794e-10 | 1.000000 | 1.71845e-10 | 1.000000 |
| Ph+Allene     | 1.71541e-10 | 1.000000 | 1.71591e-10 | 1.000000 |
| rad51         | 1.36761e-10 | 1.000000 | 1.36801e-10 | 1.000000 |
| rad15         | 1.25240e-10 | 1.000000 | 1.25277e-10 | 1.000000 |
| PhCHCCH2+H    | 1.18843e-10 | 1.000000 | 1.18878e-10 | 1.000000 |
| rad35         | 1.10415e-10 | 1.000000 | 1.10447e-10 | 1.000000 |
| rad52         | 3.87722e-11 | 1.000000 | 3.87836e-11 | 1.000000 |
| rad47         | 3.36163e-11 | 1.000000 | 3.36262e-11 | 1.000000 |
| rad26         | 1.71300e-11 | 1.000000 | 1.71350e-11 | 1.000000 |
| PAH3+H        | 8.59472e-12 | 1.000000 | 8.59723e-12 | 1.000000 |
| rad25         | 4.62469e-12 | 1.000000 | 4.62604e-12 | 1.000000 |
| rad71         | 3.74201e-12 | 1.000000 | 3.74311e-12 | 1.000000 |
| rad60syn      | 3.00984e-12 | 1.000000 | 3.01072e-12 | 1.000000 |
| rad73         | 2.81557e-12 | 1.000000 | 2.81639e-12 | 1.000000 |
| rad7          | 2.66468e-12 | 1.000000 | 2.66546e-12 | 1.000000 |
| PAH10+CH3     | 2.46182e-12 | 1.000000 | 2.46254e-12 | 1.000000 |
| rad10         | 2.42524e-12 | 1.000000 | 2.42595e-12 | 1.000000 |
| PAH1+H        | 2.08096e-12 | 1.000000 | 2.08157e-12 | 1.000000 |
| PhCCH+CH3     | 2.03156e-12 | 1.000000 | 2.03216e-12 | 1.000000 |
| rad60anti     | 1.62656e-12 | 1.000000 | 1.62703e-12 | 1.000000 |
| rad65         | 1.20163e-12 | 1.000000 | 1.20198e-12 | 1.000000 |
| rad19anti     | 1.06224e-12 | 1.000000 | 1.06255e-12 | 1.000000 |
| rad59         | 1.04878e-12 | 1.000000 | 1.04909e-12 | 1.000000 |
| rad37         | 1.03579e-12 | 1.000000 | 1.03609e-12 | 1.000000 |
| Ph+MeAc       | 9.54740e-13 | 1.000000 | 9.55020e-13 | 1.000000 |
| rad12         | 6.10354e-13 | 1.000000 | 6.10532e-13 | 1.000000 |
| rad13         | 4.88894e-13 | 1.000000 | 4.89037e-13 | 1.000000 |
| rad70         | 4.75321e-13 | 1.000000 | 4.75460e-13 | 1.000000 |
| rad2          | 3.21539e-13 | 1.000000 | 3.21633e-13 | 1.000000 |
| PhCCCH3+H     | 2.75714e-13 | 1.000000 | 2.75794e-13 | 1.000000 |
| rad34         | 1.32689e-13 | 1.000000 | 1.32728e-13 | 1.000000 |
| rad72         | 1.15171e-13 | 1.000000 | 1.15205e-13 | 1.000000 |
| rad1          | 9.84605e-14 | 1.000000 | 9.84894e-14 | 1.000000 |
| rad67         | 6.35443e-14 | 1.000000 | 6.35629e-14 | 1.000000 |
| rad19syn      | 5.36940e-14 | 1.000000 | 5.37097e-14 | 1.000000 |
| rad58         | 5.32798e-14 | 1.000000 | 5.32954e-14 | 1.000000 |
| PAH8+H        | 4.34996e-14 | 1.000000 | 4.35124e-14 | 1.000000 |
| rad64         | 4.04854e-14 | 1.000000 | 4.04973e-14 | 1.000000 |
| rad3          | 3.84324e-14 | 1.000000 | 3.84437e-14 | 1.000000 |
| rad4          | 3.16942e-14 | 1.000000 | 3.17035e-14 | 1.000000 |
| rad54         | 1.36491e-14 | 1.000000 | 1.36531e-14 | 1.000000 |
| PhcycC3H3_A+H | 1.30212e-14 | 1.000000 | 1.30250e-14 | 1.000000 |
| rad68syn      | 1.24523e-14 | 1.000000 | 1.24560e-14 | 1.000000 |
| rad62         | 1.19381e-14 | 1.000000 | 1.19416e-14 | 1.000000 |
| rad33         | 9.39395e-15 | 1.000000 | 9.39670e-15 | 1.000000 |
| rad68anti     | 8.08518e-15 | 1.000000 | 8.08754e-15 | 1.000000 |

|           |             |          |             |         |
|-----------|-------------|----------|-------------|---------|
| rad14     | 5.93533e-15 | 1.000000 | 5.93707e-15 | 1.00000 |
| rad61     | 5.31858e-15 | 1.000000 | 5.32014e-15 | 1.00000 |
| rad40syn  | 4.96050e-15 | 1.000000 | 4.96195e-15 | 1.00000 |
| rad40anti | 2.97635e-15 | 1.000000 | 2.97722e-15 | 1.00000 |
| rad5      | 1.49486e-15 | 1.000000 | 1.49530e-15 | 1.00000 |
| rad42     | 1.16122e-15 | 1.000000 | 1.16156e-15 | 1.00000 |
| rad43     | 1.11389e-15 | 1.000000 | 1.11422e-15 | 1.00000 |
| rad55     | 1.07359e-15 | 1.000000 | 1.07390e-15 | 1.00000 |
| rad27     | 6.13396e-16 | 1.000000 | 6.13575e-16 | 1.00000 |
| rad56     | 4.16495e-16 | 1.000000 | 4.16617e-16 | 1.00000 |
| rad53     | 3.67337e-16 | 1.000000 | 3.67444e-16 | 1.00000 |
| rad41     | 1.00390e-16 | 1.000000 | 1.00420e-16 | 1.00000 |
| rad31     | 3.33524e-18 | 1.000000 | 3.33622e-18 | 1.00000 |

100000000. Pa, 600.000000 K

| Rate constant | True (fraction)     | Effective (fraction) |
|---------------|---------------------|----------------------|
| Total         | 1.36947e-17 (1.00 ) | 1.36393e-17 (1.00 )  |

| species     | PYtrue      | Cumul    | PYeffective | Cumul    |
|-------------|-------------|----------|-------------|----------|
| rad20       | 0.969802    | 0.969802 | 0.973741    | 0.973741 |
| rad21       | 0.0207797   | 0.990582 | 0.0208641   | 0.994605 |
| rad18       | 0.00453274  | 0.995114 | 0.00455115  | 0.999156 |
| Benzyl+C2H2 | 0.000404484 | 0.999159 | 0.000000    | 0.999156 |
| rad22       | 0.000528057 | 0.999687 | 0.000530201 | 0.999686 |
| rad45       | 0.000123383 | 0.999811 | 0.000123884 | 0.999810 |
| Indene+H    | 7.65438e-05 | 0.999887 | 7.68547e-05 | 0.999887 |
| rad11       | 4.85126e-05 | 0.999936 | 4.87096e-05 | 0.999936 |
| rad24       | 3.81396e-05 | 0.999974 | 3.82945e-05 | 0.999974 |
| rad36       | 1.14607e-05 | 0.999985 | 1.15073e-05 | 0.999986 |
| rad23       | 1.10061e-05 | 0.999996 | 1.10508e-05 | 0.999997 |
| rad9        | 3.7776e-07  | 0.999997 | 9.41585e-07 | 0.999998 |
| PhCH2CCH+H  | 7.59236e-07 | 0.999998 | 7.62320e-07 | 0.999998 |
| rad6        | 6.62760e-07 | 0.999999 | 6.65452e-07 | 0.999999 |
| rad38       | 1.61427e-07 | 0.999999 | 1.62083e-07 | 0.999999 |
| PAH9+H      | 1.37760e-07 | 0.999999 | 1.38319e-07 | 0.999999 |
| rad8        | 7.48950e-08 | 0.999999 | 7.51991e-08 | 0.999999 |
| rad50       | 6.63347e-08 | 0.999999 | 6.66041e-08 | 1.000000 |
| Ph+Allene   | 6.00745e-08 | 0.999999 | 6.03185e-08 | 1.000000 |
| rad46       | 5.89039e-08 | 0.999999 | 5.91431e-08 | 1.000000 |
| PAH7+H      | 5.09445e-08 | 0.999999 | 5.11514e-08 | 1.000000 |
| PhCHCCH2+H  | 4.70615e-08 | 0.999999 | 4.72526e-08 | 1.000000 |
| rad30       | 4.01030e-08 | 0.999999 | 4.02659e-08 | 1.000000 |
| rad39       | 2.84447e-08 | 0.999999 | 2.85602e-08 | 1.000000 |
| rad28       | 2.64030e-08 | 0.999999 | 2.65102e-08 | 1.000000 |
| rad51       | 2.18571e-08 | 1.000000 | 2.19458e-08 | 1.000000 |
| rad35       | 1.94836e-08 | 1.000000 | 1.95627e-08 | 1.000000 |
| rad47       | 1.88259e-08 | 1.000000 | 1.89024e-08 | 1.000000 |
| rad15       | 1.82350e-08 | 1.000000 | 1.83091e-08 | 1.000000 |
| rad52       | 6.12271e-09 | 1.000000 | 6.14757e-09 | 1.000000 |
| PAH3+H      | 3.87905e-09 | 1.000000 | 3.89480e-09 | 1.000000 |
| rad25       | 2.67326e-09 | 1.000000 | 2.68412e-09 | 1.000000 |
| rad26       | 2.65303e-09 | 1.000000 | 2.66381e-09 | 1.000000 |
| rad60syn    | 9.29888e-10 | 1.000000 | 9.33665e-10 | 1.000000 |
| rad7        | 9.26264e-10 | 1.000000 | 9.30026e-10 | 1.000000 |
| rad60anti   | 5.29974e-10 | 1.000000 | 5.32126e-10 | 1.000000 |
| PAH10+CH3   | 4.91721e-10 | 1.000000 | 4.93718e-10 | 1.000000 |
| rad59       | 4.78783e-10 | 1.000000 | 4.80727e-10 | 1.000000 |
| rad71       | 4.64324e-10 | 1.000000 | 4.66209e-10 | 1.000000 |
| PhCCH+CH3   | 4.46529e-10 | 1.000000 | 4.48342e-10 | 1.000000 |
| rad10       | 4.15235e-10 | 1.000000 | 4.16922e-10 | 1.000000 |
| PAH1+H      | 4.01920e-10 | 1.000000 | 4.03552e-10 | 1.000000 |
| rad19anti   | 3.84335e-10 | 1.000000 | 3.85895e-10 | 1.000000 |
| rad73       | 3.60672e-10 | 1.000000 | 3.62136e-10 | 1.000000 |
| Ph+MeAc     | 2.33343e-10 | 1.000000 | 2.34291e-10 | 1.000000 |
| rad13       | 2.24492e-10 | 1.000000 | 2.25404e-10 | 1.000000 |
| rad65       | 2.21631e-10 | 1.000000 | 2.22531e-10 | 1.000000 |
| rad12       | 2.14881e-10 | 1.000000 | 2.15754e-10 | 1.000000 |
| rad37       | 2.02048e-10 | 1.000000 | 2.02869e-10 | 1.000000 |
| rad70       | 8.46779e-11 | 1.000000 | 8.50218e-11 | 1.000000 |
| PhCCCH3+H   | 6.83229e-11 | 1.000000 | 6.86004e-11 | 1.000000 |
| rad2        | 5.50480e-11 | 1.000000 | 5.52716e-11 | 1.000000 |
| rad34       | 2.37625e-11 | 1.000000 | 2.38590e-11 | 1.000000 |
| rad67       | 2.00241e-11 | 1.000000 | 2.01054e-11 | 1.000000 |
| rad1        | 1.85296e-11 | 1.000000 | 1.86048e-11 | 1.000000 |
| rad58       | 1.61684e-11 | 1.000000 | 1.62341e-11 | 1.000000 |
| rad19syn    | 1.39633e-11 | 1.000000 | 1.40200e-11 | 1.000000 |
| rad72       | 1.37615e-11 | 1.000000 | 1.38174e-11 | 1.000000 |

|               |             |          |             |          |
|---------------|-------------|----------|-------------|----------|
| rad3          | 1.02224e-11 | 1.000000 | 1.02640e-11 | 1.000000 |
| rad4          | 8.45441e-12 | 1.000000 | 8.48874e-12 | 1.000000 |
| PAH8+H        | 8.10030e-12 | 1.000000 | 8.13320e-12 | 1.000000 |
| rad64         | 7.86419e-12 | 1.000000 | 7.89613e-12 | 1.000000 |
| rad33         | 6.10146e-12 | 1.000000 | 6.12624e-12 | 1.000000 |
| PhcycC3H3_A+H | 4.12458e-12 | 1.000000 | 4.14133e-12 | 1.000000 |
| rad54         | 3.86132e-12 | 1.000000 | 3.87700e-12 | 1.000000 |
| rad62         | 2.41339e-12 | 1.000000 | 2.42319e-12 | 1.000000 |
| rad68syn      | 2.27778e-12 | 1.000000 | 2.28703e-12 | 1.000000 |
| rad68anti     | 1.47848e-12 | 1.000000 | 1.48449e-12 | 1.000000 |
| rad61         | 1.08682e-12 | 1.000000 | 1.09124e-12 | 1.000000 |
| rad40syn      | 9.17405e-13 | 1.000000 | 9.21131e-13 | 1.000000 |
| rad14         | 7.95153e-13 | 1.000000 | 7.98382e-13 | 1.000000 |
| rad40anti     | 5.52278e-13 | 1.000000 | 5.54521e-13 | 1.000000 |
| rad5          | 4.52126e-13 | 1.000000 | 4.53962e-13 | 1.000000 |
| rad55         | 3.04127e-13 | 1.000000 | 3.05362e-13 | 1.000000 |
| rad43         | 2.47008e-13 | 1.000000 | 2.48011e-13 | 1.000000 |
| rad42         | 2.38510e-13 | 1.000000 | 2.39479e-13 | 1.000000 |
| rad56         | 1.19707e-13 | 1.000000 | 1.20193e-13 | 1.000000 |
| rad53         | 1.04988e-13 | 1.000000 | 1.05414e-13 | 1.000000 |
| rad27         | 8.65116e-14 | 1.000000 | 8.68630e-14 | 1.000000 |
| rad41         | 2.27037e-14 | 1.000000 | 2.27959e-14 | 1.000000 |
| rad31         | 1.23752e-14 | 1.000000 | 1.24254e-14 | 1.000000 |

100000000. Pa, 700.000000 K

| Rate constant | True (fraction)     | Effective (fraction) |
|---------------|---------------------|----------------------|
| Total         | 8.02260e-17 (1.00 ) | 7.67505e-17 (1.00 )  |

| species     | PYtrue      | Cumul    | PYeffective | Cumul    |
|-------------|-------------|----------|-------------|----------|
| rad20       | 0.880417    | 0.880417 | 0.920285    | 0.920285 |
| rad21       | 0.0514831   | 0.931900 | 0.0538144   | 0.974099 |
| Benzyl+C2H2 | 0.0433217   | 0.975222 | 0.000000    | 0.974099 |
| rad18       | 0.0140119   | 0.989234 | 0.0146464   | 0.988746 |
| rad22       | 0.00531595  | 0.994550 | 0.00555667  | 0.994302 |
| rad45       | 0.00192909  | 0.996479 | 0.00201644  | 0.996319 |
| Indene+H    | 0.00161040  | 0.998089 | 0.00168333  | 0.998002 |
| rad11       | 0.000997485 | 0.999087 | 0.00104265  | 0.999045 |
| rad24       | 0.000261020 | 0.999348 | 0.000272840 | 0.999318 |
| rad23       | 0.000225742 | 0.999573 | 0.000235964 | 0.999554 |
| rad36       | 0.000202876 | 0.999776 | 0.000212062 | 0.999766 |
| rad6        | 7.56747e-05 | 0.999852 | 7.91016e-05 | 0.999845 |
| PhCH2CCH+H  | 5.85147e-05 | 0.999910 | 6.11645e-05 | 0.999906 |
| rad9        | 4.53288e-05 | 0.999956 | 4.73815e-05 | 0.999953 |
| Ph+Allene   | 1.40178e-05 | 0.999970 | 1.46526e-05 | 0.999968 |
| PhCHCCH2+H  | 1.12597e-05 | 0.999981 | 1.17696e-05 | 0.999980 |
| rad38       | 3.07875e-06 | 0.999984 | 3.21816e-06 | 0.999983 |
| PAH9+H      | 2.88597e-06 | 0.999987 | 3.01666e-06 | 0.999986 |
| rad30       | 2.43268e-06 | 0.999989 | 2.54284e-06 | 0.999989 |
| PAH7+H      | 1.38829e-06 | 0.999991 | 1.45116e-06 | 0.999990 |
| rad50       | 1.31293e-06 | 0.999992 | 1.37239e-06 | 0.999991 |
| rad46       | 1.15840e-06 | 0.999993 | 1.21085e-06 | 0.999993 |
| rad15       | 1.13039e-06 | 0.999994 | 1.18158e-06 | 0.999994 |
| rad28       | 1.06891e-06 | 0.999996 | 1.11731e-06 | 0.999995 |
| rad8        | 9.58106e-07 | 0.999996 | 1.00149e-06 | 0.999996 |
| PAH3+H      | 6.19018e-07 | 0.999997 | 6.47049e-07 | 0.999997 |
| rad39       | 5.74736e-07 | 0.999998 | 6.00762e-07 | 0.999997 |
| rad47       | 5.63614e-07 | 0.999998 | 5.89137e-07 | 0.999998 |
| rad35       | 4.56542e-07 | 0.999999 | 4.77216e-07 | 0.999998 |
| rad51       | 4.24327e-07 | 0.999999 | 4.43542e-07 | 0.999999 |
| rad25       | 3.07910e-07 | 0.999999 | 3.21853e-07 | 0.999999 |
| rad7        | 2.16974e-07 | 1.000000 | 2.26799e-07 | 0.999999 |
| rad19anti   | 1.98879e-07 | 1.000000 | 2.07884e-07 | 0.999999 |
| rad52       | 1.18484e-07 | 1.000000 | 1.23849e-07 | 1.000000 |
| rad60syn    | 1.01838e-07 | 1.000000 | 1.06450e-07 | 1.000000 |
| rad26       | 8.47907e-08 | 1.000000 | 8.86303e-08 | 1.000000 |
| rad59       | 7.20269e-08 | 1.000000 | 7.52885e-08 | 1.000000 |
| rad60anti   | 6.01216e-08 | 1.000000 | 6.28441e-08 | 1.000000 |
| rad12       | 5.02067e-08 | 1.000000 | 5.24802e-08 | 1.000000 |
| PhCCH+CH3   | 4.30523e-08 | 1.000000 | 4.50019e-08 | 1.000000 |
| rad13       | 4.24877e-08 | 1.000000 | 4.44116e-08 | 1.000000 |
| Ph+MeAc     | 3.67058e-08 | 1.000000 | 3.83679e-08 | 1.000000 |
| PAH10+CH3   | 1.20845e-08 | 1.000000 | 1.26317e-08 | 1.000000 |
| rad67       | 1.18621e-08 | 1.000000 | 1.23992e-08 | 1.000000 |
| PhCCCH3+H   | 1.11419e-08 | 1.000000 | 1.16464e-08 | 1.000000 |
| rad10       | 1.07419e-08 | 1.000000 | 1.12283e-08 | 1.000000 |
| PAH1+H      | 9.03176e-09 | 1.000000 | 9.44075e-09 | 1.000000 |
| rad2        | 8.80414e-09 | 1.000000 | 9.20282e-09 | 1.000000 |

|               |             |         |             |         |
|---------------|-------------|---------|-------------|---------|
| rad71         | 8.06137e-09 | 1.00000 | 8.42641e-09 | 1.00000 |
| rad73         | 6.32499e-09 | 1.00000 | 6.61141e-09 | 1.00000 |
| rad37         | 5.01203e-09 | 1.00000 | 5.23900e-09 | 1.00000 |
| rad65         | 4.73808e-09 | 1.00000 | 4.95264e-09 | 1.00000 |
| rad70         | 3.42569e-09 | 1.00000 | 3.58082e-09 | 1.00000 |
| rad1          | 2.91062e-09 | 1.00000 | 3.04242e-09 | 1.00000 |
| rad58         | 2.78836e-09 | 1.00000 | 2.91463e-09 | 1.00000 |
| rad19syn      | 1.93187e-09 | 1.00000 | 2.01935e-09 | 1.00000 |
| rad33         | 1.49891e-09 | 1.00000 | 1.56679e-09 | 1.00000 |
| rad3          | 1.41046e-09 | 1.00000 | 1.47433e-09 | 1.00000 |
| rad4          | 1.17150e-09 | 1.00000 | 1.22455e-09 | 1.00000 |
| rad34         | 8.62049e-10 | 1.00000 | 9.01085e-10 | 1.00000 |
| PhcycC3H3_A+H | 6.60896e-10 | 1.00000 | 6.90824e-10 | 1.00000 |
| rad54         | 5.70227e-10 | 1.00000 | 5.96048e-10 | 1.00000 |
| rad72         | 2.37358e-10 | 1.00000 | 2.48106e-10 | 1.00000 |
| PAH8+H        | 2.11471e-10 | 1.00000 | 2.21047e-10 | 1.00000 |
| rad64         | 1.76058e-10 | 1.00000 | 1.84030e-10 | 1.00000 |
| rad5          | 9.76019e-11 | 1.00000 | 1.02022e-10 | 1.00000 |
| rad68syn      | 6.53990e-11 | 1.00000 | 6.83605e-11 | 1.00000 |
| rad62         | 5.88541e-11 | 1.00000 | 6.15192e-11 | 1.00000 |
| rad55         | 4.45358e-11 | 1.00000 | 4.65525e-11 | 1.00000 |
| rad68anti     | 4.25444e-11 | 1.00000 | 4.44710e-11 | 1.00000 |
| rad61         | 2.66885e-11 | 1.00000 | 2.78970e-11 | 1.00000 |
| rad14         | 2.60433e-11 | 1.00000 | 2.72226e-11 | 1.00000 |
| rad40syn      | 2.47992e-11 | 1.00000 | 2.59222e-11 | 1.00000 |
| rad56         | 1.70664e-11 | 1.00000 | 1.78392e-11 | 1.00000 |
| rad53         | 1.50494e-11 | 1.00000 | 1.57309e-11 | 1.00000 |
| rad40anti     | 1.47470e-11 | 1.00000 | 1.54147e-11 | 1.00000 |
| rad43         | 1.31592e-11 | 1.00000 | 1.37550e-11 | 1.00000 |
| rad31         | 9.40983e-12 | 1.00000 | 9.83594e-12 | 1.00000 |
| rad27         | 6.21427e-12 | 1.00000 | 6.49568e-12 | 1.00000 |
| rad42         | 5.82969e-12 | 1.00000 | 6.09368e-12 | 1.00000 |
| rad41         | 1.21486e-12 | 1.00000 | 1.26987e-12 | 1.00000 |

100000000. Pa, 800.000000 K

| Rate constant | True (fraction)     | Effective (fraction) |
|---------------|---------------------|----------------------|
| Total         | 3.12228e-16 (1.00 ) | 2.57683e-16 (1.00 )  |

| species     | PYtrue      | Cumul    | PYeffective | Cumul    |
|-------------|-------------|----------|-------------|----------|
| rad20       | 0.702935    | 0.702935 | 0.851728    | 0.851728 |
| Benzyl+C2H2 | 0.174695    | 0.877630 | 0.000000    | 0.851728 |
| rad21       | 0.0620012   | 0.939631 | 0.0751252   | 0.926853 |
| rad18       | 0.0202432   | 0.959874 | 0.0245281   | 0.951381 |
| rad22       | 0.0132987   | 0.973173 | 0.0161137   | 0.967495 |
| Indene+H    | 0.0100743   | 0.983247 | 0.0122067   | 0.979702 |
| rad45       | 0.00726274  | 0.990510 | 0.00880007  | 0.988502 |
| rad11       | 0.00364824  | 0.994158 | 0.00442048  | 0.992922 |
| rad23       | 0.00108324  | 0.995242 | 0.00131253  | 0.994235 |
| PhCH2CCH+H  | 0.000962956 | 0.996205 | 0.00116679  | 0.995402 |
| rad6        | 0.000928596 | 0.997133 | 0.00112515  | 0.996527 |
| rad36       | 0.000857854 | 0.997991 | 0.00103944  | 0.997566 |
| rad24       | 0.000694461 | 0.998685 | 0.000841460 | 0.998408 |
| rad9        | 0.000509039 | 0.999195 | 0.000616788 | 0.999024 |
| Ph+Allene   | 0.000379142 | 0.999574 | 0.000459396 | 0.999484 |
| PhCHCCH2+H  | 0.000275699 | 0.999849 | 0.000334057 | 0.999818 |
| rad30       | 2.72746e-05 | 0.999877 | 3.30479e-05 | 0.999851 |
| PAH7+H      | 1.53139e-05 | 0.999892 | 1.85555e-05 | 0.999869 |
| PAH3+H      | 1.48133e-05 | 0.999907 | 1.79489e-05 | 0.999887 |
| PAH9+H      | 1.22854e-05 | 0.999919 | 1.48859e-05 | 0.999902 |
| rad38       | 1.14935e-05 | 0.999931 | 1.39263e-05 | 0.999916 |
| rad28       | 1.06208e-05 | 0.999941 | 1.28689e-05 | 0.999929 |
| rad15       | 8.63372e-06 | 0.999950 | 1.04613e-05 | 0.999940 |
| rad8        | 5.89207e-06 | 0.999956 | 7.13926e-06 | 0.999947 |
| rad7        | 5.41931e-06 | 0.999961 | 6.56643e-06 | 0.999953 |
| rad50       | 4.98818e-06 | 0.999966 | 6.04405e-06 | 0.999959 |
| rad46       | 4.35377e-06 | 0.999970 | 5.27535e-06 | 0.999965 |
| rad19anti   | 4.22882e-06 | 0.999975 | 5.12395e-06 | 0.999970 |
| rad35       | 2.93431e-06 | 0.999978 | 3.55542e-06 | 0.999973 |
| rad25       | 2.71868e-06 | 0.999980 | 3.29416e-06 | 0.999977 |
| rad39       | 2.66505e-06 | 0.999983 | 3.22917e-06 | 0.999980 |
| rad47       | 2.58190e-06 | 0.999986 | 3.12842e-06 | 0.999983 |
| rad12       | 2.45820e-06 | 0.999988 | 2.97854e-06 | 0.999986 |
| rad60syn    | 1.72071e-06 | 0.999990 | 2.08494e-06 | 0.999988 |
| rad51       | 1.62284e-06 | 0.999991 | 1.96636e-06 | 0.999990 |
| rad59       | 1.57833e-06 | 0.999993 | 1.91242e-06 | 0.999992 |
| PhCCH+CH3   | 1.19325e-06 | 0.999994 | 1.44583e-06 | 0.999993 |
| rad60anti   | 1.04284e-06 | 0.999995 | 1.26359e-06 | 0.999995 |

|               |             |          |             |          |
|---------------|-------------|----------|-------------|----------|
| rad26         | 9.28297e-07 | 0.999996 | 1.12479e-06 | 0.999996 |
| Ph+MeAc       | 8.34262e-07 | 0.999997 | 1.01085e-06 | 0.999997 |
| rad13         | 7.77100e-07 | 0.999998 | 9.41591e-07 | 0.999998 |
| rad52         | 4.51271e-07 | 0.999998 | 5.46793e-07 | 0.999998 |
| rad67         | 2.95040e-07 | 0.999998 | 3.57492e-07 | 0.999999 |
| rad2          | 2.45864e-07 | 0.999999 | 2.97907e-07 | 0.999999 |
| PhCCCH3+H     | 2.38709e-07 | 0.999999 | 2.89237e-07 | 0.999999 |
| rad10         | 1.28723e-07 | 0.999999 | 1.55970e-07 | 0.999999 |
| PAH10+CH3     | 1.27045e-07 | 0.999999 | 1.53937e-07 | 0.999999 |
| rad70         | 1.11354e-07 | 0.999999 | 1.34925e-07 | 1.000000 |
| rad58         | 1.00986e-07 | 0.999999 | 1.22362e-07 | 1.000000 |
| rad1          | 8.70748e-08 | 1.000000 | 1.05506e-07 | 1.000000 |
| PAH1+H        | 8.59500e-08 | 1.000000 | 1.04143e-07 | 1.000000 |
| rad19syn      | 7.77610e-08 | 1.000000 | 9.42209e-08 | 1.000000 |
| rad37         | 5.46410e-08 | 1.000000 | 6.62071e-08 | 1.000000 |
| rad33         | 4.57183e-08 | 1.000000 | 5.53956e-08 | 1.000000 |
| rad3          | 4.08410e-08 | 1.000000 | 4.94859e-08 | 1.000000 |
| rad4          | 3.51587e-08 | 1.000000 | 4.26009e-08 | 1.000000 |
| rad71         | 3.08267e-08 | 1.000000 | 3.73519e-08 | 1.000000 |
| rad34         | 2.82366e-08 | 1.000000 | 3.42135e-08 | 1.000000 |
| rad73         | 2.40010e-08 | 1.000000 | 2.90813e-08 | 1.000000 |
| PhcycC3H3_A+H | 2.19966e-08 | 1.000000 | 2.66528e-08 | 1.000000 |
| rad65         | 2.02156e-08 | 1.000000 | 2.44947e-08 | 1.000000 |
| rad54         | 1.89759e-08 | 1.000000 | 2.29926e-08 | 1.000000 |
| PAH8+H        | 6.24074e-09 | 1.000000 | 7.56173e-09 | 1.000000 |
| rad68syn      | 2.06480e-09 | 1.000000 | 2.50186e-09 | 1.000000 |
| rad64         | 1.64726e-09 | 1.000000 | 1.99594e-09 | 1.000000 |
| rad55         | 1.48200e-09 | 1.000000 | 1.79570e-09 | 1.000000 |
| rad5          | 1.42771e-09 | 1.000000 | 1.72992e-09 | 1.000000 |
| rad68anti     | 1.34453e-09 | 1.000000 | 1.62913e-09 | 1.000000 |
| rad72         | 9.22209e-10 | 1.000000 | 1.11742e-09 | 1.000000 |
| rad40syn      | 7.52618e-10 | 1.000000 | 9.11927e-10 | 1.000000 |
| rad62         | 6.54485e-10 | 1.000000 | 7.93022e-10 | 1.000000 |
| rad56         | 5.64921e-10 | 1.000000 | 6.84500e-10 | 1.000000 |
| rad31         | 5.01138e-10 | 1.000000 | 6.07216e-10 | 1.000000 |
| rad53         | 4.99247e-10 | 1.000000 | 6.04924e-10 | 1.000000 |
| rad14         | 4.92221e-10 | 1.000000 | 5.96411e-10 | 1.000000 |
| rad40anti     | 4.41642e-10 | 1.000000 | 5.35126e-10 | 1.000000 |
| rad61         | 2.71927e-10 | 1.000000 | 3.29487e-10 | 1.000000 |
| rad43         | 2.27500e-10 | 1.000000 | 2.75656e-10 | 1.000000 |
| rad27         | 1.42090e-10 | 1.000000 | 1.72166e-10 | 1.000000 |
| rad42         | 6.38241e-11 | 1.000000 | 7.73340e-11 | 1.000000 |
| rad41         | 2.10616e-11 | 1.000000 | 2.55197e-11 | 1.000000 |

100000000. Pa, 900.000000 K

=====  
Rate constant | True (fraction) | Effective (fraction)  
-----

Total | 9.21769e-16 (1.00) | 6.24579e-16 (1.00)

| species     | PYtrue      | Cumul    | PYeffective | Cumul    |
|-------------|-------------|----------|-------------|----------|
| rad20       | 0.549924    | 0.549924 | 0.811591    | 0.811591 |
| Benzyl+C2H2 | 0.322413    | 0.872337 | 0.000000    | 0.811591 |
| rad21       | 0.0502794   | 0.922616 | 0.0742036   | 0.885795 |
| Indene+H    | 0.0217579   | 0.944374 | 0.0321108   | 0.917905 |
| rad18       | 0.0146133   | 0.958988 | 0.0215666   | 0.939472 |
| rad22       | 0.0115300   | 0.970518 | 0.0170163   | 0.956488 |
| rad45       | 0.0108258   | 0.981343 | 0.0159770   | 0.972465 |
| PhCH2CCH+H  | 0.00405348  | 0.985397 | 0.00598222  | 0.978448 |
| rad11       | 0.00354298  | 0.988940 | 0.00522882  | 0.983676 |
| rad6        | 0.00223366  | 0.991174 | 0.00329648  | 0.986973 |
| rad23       | 0.00181552  | 0.992989 | 0.00267939  | 0.989652 |
| rad9        | 0.00180351  | 0.994793 | 0.00266166  | 0.992314 |
| Ph+Allene   | 0.00162192  | 0.996414 | 0.00239367  | 0.994708 |
| rad36       | 0.00122164  | 0.997636 | 0.00180292  | 0.996510 |
| PhCHCCH2+H  | 0.00106016  | 0.998696 | 0.00156461  | 0.998075 |
| rad24       | 0.000839605 | 0.999536 | 0.00123911  | 0.999314 |
| rad30       | 9.11167e-05 | 0.999627 | 0.000134472 | 0.999449 |
| PAH3+H      | 8.44918e-05 | 0.999711 | 0.000124695 | 0.999573 |
| PAH7+H      | 5.37990e-05 | 0.999765 | 7.93979e-05 | 0.999653 |
| PAH9+H      | 2.47913e-05 | 0.999790 | 3.65877e-05 | 0.999689 |
| rad8        | 2.40115e-05 | 0.999814 | 3.54367e-05 | 0.999725 |
| rad28       | 2.35276e-05 | 0.999838 | 3.47226e-05 | 0.999759 |
| rad7        | 2.01737e-05 | 0.999858 | 2.97728e-05 | 0.999789 |
| rad12       | 1.69171e-05 | 0.999875 | 2.49666e-05 | 0.999814 |
| rad38       | 1.66479e-05 | 0.999891 | 2.45693e-05 | 0.999839 |
| rad15       | 1.52973e-05 | 0.999907 | 2.25762e-05 | 0.999861 |
| rad35       | 9.65230e-06 | 0.999916 | 1.42451e-05 | 0.999876 |
| rad19anti   | 9.18246e-06 | 0.999925 | 1.35517e-05 | 0.999889 |

|               |             |          |             |          |
|---------------|-------------|----------|-------------|----------|
| rad59         | 8.42619e-06 | 0.999934 | 1.24356e-05 | 0.999902 |
| rad60syn      | 7.70006e-06 | 0.999942 | 1.13639e-05 | 0.999913 |
| rad50         | 7.49398e-06 | 0.999949 | 1.10598e-05 | 0.999924 |
| PhCCH+CH3     | 6.57057e-06 | 0.999956 | 9.69701e-06 | 0.999934 |
| rad46         | 6.46082e-06 | 0.999962 | 9.53504e-06 | 0.999943 |
| rad39         | 5.90123e-06 | 0.999968 | 8.70918e-06 | 0.999952 |
| rad25         | 5.24948e-06 | 0.999973 | 7.74731e-06 | 0.999960 |
| rad60anti     | 4.75216e-06 | 0.999978 | 7.01336e-06 | 0.999967 |
| rad47         | 3.93830e-06 | 0.999982 | 5.81224e-06 | 0.999973 |
| rad13         | 3.24429e-06 | 0.999985 | 4.78801e-06 | 0.999977 |
| Ph+MeAc       | 2.59738e-06 | 0.999988 | 3.83327e-06 | 0.999981 |
| rad51         | 2.39181e-06 | 0.999990 | 3.52990e-06 | 0.999985 |
| rad26         | 2.38689e-06 | 0.999993 | 3.52263e-06 | 0.999988 |
| rad58         | 7.56601e-07 | 0.999993 | 1.11661e-06 | 0.999989 |
| rad67         | 7.20628e-07 | 0.999994 | 1.06352e-06 | 0.999990 |
| rad52         | 6.63132e-07 | 0.999995 | 9.78666e-07 | 0.999991 |
| rad2          | 6.60176e-07 | 0.999995 | 9.74304e-07 | 0.999992 |
| rad70         | 6.41887e-07 | 0.999996 | 9.47312e-07 | 0.999993 |
| PhCCCH3+H     | 5.86396e-07 | 0.999997 | 8.65417e-07 | 0.999994 |
| rad19syn      | 5.79462e-07 | 0.999997 | 8.55185e-07 | 0.999995 |
| PAH10+CH3     | 5.23745e-07 | 0.999998 | 7.72956e-07 | 0.999996 |
| rad10         | 3.97062e-07 | 0.999998 | 5.85993e-07 | 0.999996 |
| PAH1+H        | 3.80362e-07 | 0.999999 | 5.61347e-07 | 0.999997 |
| rad33         | 3.75237e-07 | 0.999999 | 5.53784e-07 | 0.999997 |
| rad1          | 2.47425e-07 | 0.999999 | 3.65156e-07 | 0.999998 |
| rad3          | 2.37652e-07 | 0.999999 | 3.50732e-07 | 0.999998 |
| rad37         | 2.16410e-07 | 1.000000 | 3.19383e-07 | 0.999999 |
| rad4          | 2.03966e-07 | 1.000000 | 3.01018e-07 | 0.999999 |
| PhcycC3H3_A+H | 1.82784e-07 | 1.000000 | 2.69758e-07 | 0.999999 |
| rad34         | 1.72979e-07 | 1.000000 | 2.55286e-07 | 0.999999 |
| rad54         | 1.35472e-07 | 1.000000 | 1.99933e-07 | 1.000000 |
| PAH8+H        | 4.95857e-08 | 1.000000 | 7.31798e-08 | 1.000000 |
| rad71         | 4.75936e-08 | 1.000000 | 7.02399e-08 | 1.000000 |
| rad65         | 4.05123e-08 | 1.000000 | 5.97890e-08 | 1.000000 |
| rad73         | 3.67906e-08 | 1.000000 | 5.42964e-08 | 1.000000 |
| rad68syn      | 1.48867e-08 | 1.000000 | 2.19702e-08 | 1.000000 |
| rad55         | 1.07495e-08 | 1.000000 | 1.58644e-08 | 1.000000 |
| rad68anti     | 9.67511e-09 | 1.000000 | 1.42788e-08 | 1.000000 |
| rad64         | 7.38143e-09 | 1.000000 | 1.08937e-08 | 1.000000 |
| rad40syn      | 5.75162e-09 | 1.000000 | 8.48838e-09 | 1.000000 |
| rad56         | 4.43259e-09 | 1.000000 | 6.54172e-09 | 1.000000 |
| rad53         | 3.82721e-09 | 1.000000 | 5.64830e-09 | 1.000000 |
| rad40anti     | 3.42313e-09 | 1.000000 | 5.05193e-09 | 1.000000 |
| rad62         | 3.24510e-09 | 1.000000 | 4.78920e-09 | 1.000000 |
| rad5          | 3.12675e-09 | 1.000000 | 4.61453e-09 | 1.000000 |
| rad14         | 2.70633e-09 | 1.000000 | 3.99406e-09 | 1.000000 |
| rad31         | 2.66856e-09 | 1.000000 | 3.93832e-09 | 1.000000 |
| rad72         | 1.44240e-09 | 1.000000 | 2.12873e-09 | 1.000000 |
| rad61         | 1.15925e-09 | 1.000000 | 1.71085e-09 | 1.000000 |
| rad43         | 6.50728e-10 | 1.000000 | 9.60360e-10 | 1.000000 |
| rad27         | 5.59586e-10 | 1.000000 | 8.25851e-10 | 1.000000 |
| rad42         | 3.20669e-10 | 1.000000 | 4.73251e-10 | 1.000000 |
| rad41         | 6.07278e-11 | 1.000000 | 8.96235e-11 | 1.000000 |

100000000. Pa, 1000.00000 K

=====

Rate constant | True (fraction) | Effective (fraction)

-----  
Total | 2.23691e-15 (1.00 ) | 1.23074e-15 (1.00 )

| species     | PYtrue      | Cumul    | PYeffective | Cumul    |
|-------------|-------------|----------|-------------|----------|
| Benzyl+C2H2 | 0.449803    | 0.449803 | 0.00000     | 0.00000  |
| rad20       | 0.428117    | 0.877920 | 0.778116    | 0.778116 |
| rad21       | 0.0406101   | 0.918530 | 0.0738100   | 0.851926 |
| Indene+H    | 0.0278498   | 0.946380 | 0.0506179   | 0.902544 |
| rad45       | 0.0115535   | 0.957933 | 0.0209988   | 0.923543 |
| PhCH2CCH+H  | 0.00860312  | 0.966537 | 0.0156364   | 0.939179 |
| rad18       | 0.00832636  | 0.974863 | 0.0151334   | 0.954313 |
| rad22       | 0.00730138  | 0.982164 | 0.0132705   | 0.967583 |
| rad9        | 0.00318527  | 0.985350 | 0.00578932  | 0.973372 |
| Ph+Allene   | 0.00277749  | 0.988127 | 0.00504817  | 0.978420 |
| rad6        | 0.00266796  | 0.990795 | 0.00484909  | 0.983270 |
| rad11       | 0.00242092  | 0.993216 | 0.00440009  | 0.987670 |
| rad23       | 0.00193108  | 0.995147 | 0.00350980  | 0.991179 |
| PhCHCCH2+H  | 0.00171363  | 0.996861 | 0.00311458  | 0.994294 |
| rad36       | 0.00123549  | 0.998096 | 0.00224555  | 0.996540 |
| rad24       | 0.000991702 | 0.999088 | 0.00180245  | 0.998342 |
| PAH3+H      | 0.000236661 | 0.999324 | 0.000430138 | 0.998772 |
| rad30       | 0.000174336 | 0.999499 | 0.000316861 | 0.999089 |

|               |             |          |             |          |
|---------------|-------------|----------|-------------|----------|
| rad8          | 9.65198e-05 | 0.999595 | 0.000175428 | 0.999264 |
| PAH7+H        | 7.75104e-05 | 0.999673 | 0.000140878 | 0.999405 |
| PAH9+H        | 3.61996e-05 | 0.999709 | 6.57939e-05 | 0.999471 |
| rad12         | 3.27059e-05 | 0.999742 | 5.94439e-05 | 0.999531 |
| rad7          | 3.09829e-05 | 0.999773 | 5.63124e-05 | 0.999587 |
| rad28         | 2.62560e-05 | 0.999799 | 4.77210e-05 | 0.999635 |
| rad59         | 2.25402e-05 | 0.999822 | 4.09675e-05 | 0.999676 |
| rad35         | 2.12462e-05 | 0.999843 | 3.86157e-05 | 0.999714 |
| rad60syn      | 1.82810e-05 | 0.999861 | 3.32263e-05 | 0.999747 |
| rad38         | 1.78981e-05 | 0.999879 | 3.25303e-05 | 0.999780 |
| rad15         | 1.56652e-05 | 0.999895 | 2.84719e-05 | 0.999808 |
| PhCCH+CH3     | 1.39760e-05 | 0.999909 | 2.54019e-05 | 0.999834 |
| rad60anti     | 1.14260e-05 | 0.999920 | 2.07671e-05 | 0.999855 |
| rad19anti     | 1.01473e-05 | 0.999930 | 1.84430e-05 | 0.999873 |
| rad13         | 9.36027e-06 | 0.999940 | 1.70126e-05 | 0.999890 |
| rad25         | 8.45298e-06 | 0.999948 | 1.53635e-05 | 0.999905 |
| rad50         | 8.26318e-06 | 0.999956 | 1.50186e-05 | 0.999920 |
| rad39         | 7.78025e-06 | 0.999964 | 1.41408e-05 | 0.999935 |
| rad46         | 7.07419e-06 | 0.999971 | 1.28576e-05 | 0.999947 |
| rad47         | 4.18560e-06 | 0.999975 | 7.60745e-06 | 0.999955 |
| Ph+MeAc       | 4.15059e-06 | 0.999979 | 7.54381e-06 | 0.999963 |
| rad26         | 2.79502e-06 | 0.999982 | 5.08003e-06 | 0.999968 |
| rad51         | 2.59314e-06 | 0.999985 | 4.71311e-06 | 0.999972 |
| rad58         | 2.50878e-06 | 0.999987 | 4.55978e-06 | 0.999977 |
| rad33         | 1.69240e-06 | 0.999989 | 3.07599e-06 | 0.999980 |
| rad19syn      | 1.39878e-06 | 0.999990 | 2.54232e-06 | 0.999983 |
| rad70         | 1.15500e-06 | 0.999992 | 2.09924e-06 | 0.999985 |
| rad67         | 1.01557e-06 | 0.999993 | 1.84583e-06 | 0.999987 |
| rad2          | 8.93132e-07 | 0.999993 | 1.62329e-06 | 0.999988 |
| PAH10+CH3     | 8.26703e-07 | 0.999994 | 1.50256e-06 | 0.999990 |
| PhCCCH3+H     | 7.47034e-07 | 0.999995 | 1.35776e-06 | 0.999991 |
| rad52         | 7.17901e-07 | 0.999996 | 1.30481e-06 | 0.999992 |
| PAH1+H        | 6.11771e-07 | 0.999996 | 1.11191e-06 | 0.999993 |
| PhcycC3H3_A+H | 5.06842e-07 | 0.999997 | 9.21201e-07 | 0.999994 |
| rad10         | 5.05839e-07 | 0.999997 | 9.19378e-07 | 0.999995 |
| rad3          | 5.02565e-07 | 0.999998 | 9.13427e-07 | 0.999996 |
| rad4          | 4.19842e-07 | 0.999998 | 7.63076e-07 | 0.999997 |
| rad37         | 3.31406e-07 | 0.999999 | 6.02340e-07 | 0.999998 |
| rad34         | 3.18714e-07 | 0.999999 | 5.79272e-07 | 0.999998 |
| rad1          | 3.12882e-07 | 0.999999 | 5.68673e-07 | 0.999999 |
| rad54         | 2.99921e-07 | 1.000000 | 5.45115e-07 | 0.999999 |
| PAH8+H        | 1.00904e-07 | 1.000000 | 1.83395e-07 | 0.999999 |
| rad65         | 6.02509e-08 | 1.000000 | 1.09508e-07 | 1.000000 |
| rad71         | 5.36108e-08 | 1.000000 | 9.74393e-08 | 1.000000 |
| rad73         | 4.12682e-08 | 1.000000 | 7.50063e-08 | 1.000000 |
| rad68syn      | 2.91833e-08 | 1.000000 | 5.30416e-08 | 1.000000 |
| rad55         | 2.39660e-08 | 1.000000 | 4.35589e-08 | 1.000000 |
| rad68anti     | 1.89528e-08 | 1.000000 | 3.44473e-08 | 1.000000 |
| rad64         | 1.19608e-08 | 1.000000 | 2.17390e-08 | 1.000000 |
| rad40syn      | 1.15324e-08 | 1.000000 | 2.09605e-08 | 1.000000 |
| rad56         | 1.02554e-08 | 1.000000 | 1.86395e-08 | 1.000000 |
| rad14         | 8.80068e-09 | 1.000000 | 1.59955e-08 | 1.000000 |
| rad53         | 8.75511e-09 | 1.000000 | 1.59127e-08 | 1.000000 |
| rad40anti     | 6.90272e-09 | 1.000000 | 1.25459e-08 | 1.000000 |
| rad62         | 5.64731e-09 | 1.000000 | 1.02642e-08 | 1.000000 |
| rad31         | 5.25333e-09 | 1.000000 | 9.54809e-09 | 1.000000 |
| rad5          | 3.70042e-09 | 1.000000 | 6.72563e-09 | 1.000000 |
| rad61         | 1.88212e-09 | 1.000000 | 3.42080e-09 | 1.000000 |
| rad27         | 1.68349e-09 | 1.000000 | 3.05980e-09 | 1.000000 |
| rad72         | 1.63690e-09 | 1.000000 | 2.97512e-09 | 1.000000 |
| rad43         | 8.56480e-10 | 1.000000 | 1.55668e-09 | 1.000000 |
| rad42         | 5.59509e-10 | 1.000000 | 1.01693e-09 | 1.000000 |
| rad41         | 7.98854e-11 | 1.000000 | 1.45194e-10 | 1.000000 |

100000000. Pa, 1100.00000 K

=====

| Rate constant | True (fraction)     | Effective (fraction) |
|---------------|---------------------|----------------------|
| Total         | 4.69847e-15 (1.00 ) | 2.07032e-15 (1.00 )  |

| species     | PYtrue     | Cumul    | PYeffective | Cumul    |
|-------------|------------|----------|-------------|----------|
| Benzyl+C2H2 | 0.559364   | 0.559364 | 0.00000     | 0.00000  |
| rad20       | 0.315430   | 0.874794 | 0.715851    | 0.715851 |
| rad21       | 0.0415513  | 0.916345 | 0.0942984   | 0.810149 |
| Indene+H    | 0.0293847  | 0.945730 | 0.0666869   | 0.876836 |
| PhCH2CCH+H  | 0.0127910  | 0.958521 | 0.0290286   | 0.905865 |
| rad45       | 0.0110830  | 0.969604 | 0.0251523   | 0.931017 |
| rad18       | 0.00578615 | 0.975390 | 0.0131314   | 0.944149 |
| rad22       | 0.00516016 | 0.980550 | 0.0117107   | 0.955859 |

|               |             |          |             |          |
|---------------|-------------|----------|-------------|----------|
| rad9          | 0.00392074  | 0.984471 | 0.00889791  | 0.964757 |
| Ph+Allene     | 0.00323211  | 0.987703 | 0.00733509  | 0.972092 |
| rad6          | 0.00249507  | 0.990198 | 0.00566242  | 0.977755 |
| rad11         | 0.00228016  | 0.992478 | 0.00517469  | 0.982929 |
| PhCHCCH2+H    | 0.00193243  | 0.994411 | 0.00438553  | 0.987315 |
| rad23         | 0.00179191  | 0.996203 | 0.00406665  | 0.991382 |
| rad24         | 0.00116266  | 0.997365 | 0.00263859  | 0.994020 |
| rad36         | 0.00115312  | 0.998519 | 0.00261695  | 0.996637 |
| PAH3+H        | 0.000420740 | 0.998939 | 0.000954847 | 0.997592 |
| rad8          | 0.000299875 | 0.999239 | 0.000680551 | 0.998273 |
| rad30         | 0.000247535 | 0.999487 | 0.000561768 | 0.998834 |
| PAH7+H        | 8.20217e-05 | 0.999569 | 0.000186144 | 0.999020 |
| PAH9+H        | 4.33030e-05 | 0.999612 | 9.82738e-05 | 0.999119 |
| rad12         | 4.02243e-05 | 0.999652 | 9.12868e-05 | 0.999210 |
| rad59         | 3.90250e-05 | 0.999691 | 8.85651e-05 | 0.999299 |
| rad7          | 3.85804e-05 | 0.999730 | 8.75560e-05 | 0.999386 |
| rad35         | 3.39015e-05 | 0.999764 | 7.69375e-05 | 0.999463 |
| rad60syn      | 2.95838e-05 | 0.999793 | 6.71389e-05 | 0.999530 |
| rad13         | 2.47934e-05 | 0.999818 | 5.62672e-05 | 0.999586 |
| rad28         | 2.40724e-05 | 0.999842 | 5.46311e-05 | 0.999641 |
| PhCCH+CH3     | 1.88728e-05 | 0.999861 | 4.28309e-05 | 0.999684 |
| rad60anti     | 1.86263e-05 | 0.999880 | 4.22714e-05 | 0.999726 |
| rad38         | 1.78767e-05 | 0.999898 | 4.05701e-05 | 0.999767 |
| rad25         | 1.64508e-05 | 0.999914 | 3.73342e-05 | 0.999804 |
| rad15         | 1.59899e-05 | 0.999930 | 3.62883e-05 | 0.999840 |
| rad19anti     | 1.01069e-05 | 0.999940 | 2.29370e-05 | 0.999863 |
| rad39         | 8.34277e-06 | 0.999948 | 1.89335e-05 | 0.999882 |
| rad50         | 8.33631e-06 | 0.999957 | 1.89188e-05 | 0.999901 |
| rad46         | 7.11480e-06 | 0.999964 | 1.61467e-05 | 0.999917 |
| Ph+MeAc       | 5.09094e-06 | 0.999969 | 1.15536e-05 | 0.999929 |
| rad58         | 4.88415e-06 | 0.999974 | 1.10843e-05 | 0.999940 |
| rad33         | 4.43472e-06 | 0.999978 | 1.00643e-05 | 0.999950 |
| rad47         | 4.01160e-06 | 0.999982 | 9.10410e-06 | 0.999959 |
| rad26         | 2.60272e-06 | 0.999985 | 5.90674e-06 | 0.999965 |
| rad51         | 2.59944e-06 | 0.999988 | 5.89929e-06 | 0.999971 |
| rad19syn      | 1.96662e-06 | 0.999989 | 4.46313e-06 | 0.999975 |
| rad67         | 1.32337e-06 | 0.999991 | 3.00332e-06 | 0.999978 |
| rad70         | 1.20171e-06 | 0.999992 | 2.72723e-06 | 0.999981 |
| rad2          | 9.79082e-07 | 0.999993 | 2.22197e-06 | 0.999983 |
| PAH10+CH3     | 9.59073e-07 | 0.999994 | 2.17656e-06 | 0.999986 |
| PhCCCH3+H     | 8.12968e-07 | 0.999995 | 1.84499e-06 | 0.999987 |
| PhcycC3H3_A+H | 7.99936e-07 | 0.999996 | 1.81541e-06 | 0.999989 |
| rad52         | 7.19186e-07 | 0.999996 | 1.63215e-06 | 0.999991 |
| PAH1+H        | 7.06750e-07 | 0.999997 | 1.60393e-06 | 0.999992 |
| rad3          | 6.49549e-07 | 0.999998 | 1.47412e-06 | 0.999994 |
| rad10         | 5.49604e-07 | 0.999998 | 1.24730e-06 | 0.999995 |
| rad4          | 5.34410e-07 | 0.999999 | 1.21282e-06 | 0.999996 |
| rad54         | 3.80598e-07 | 0.999999 | 8.63746e-07 | 0.999997 |
| rad37         | 3.75895e-07 | 0.999999 | 8.53073e-07 | 0.999998 |
| rad34         | 3.33575e-07 | 1.000000 | 7.57030e-07 | 0.999999 |
| rad1          | 3.20846e-07 | 1.000000 | 7.28143e-07 | 1.000000 |
| PAH8+H        | 1.08577e-07 | 1.000000 | 2.46411e-07 | 1.000000 |
| rad65         | 7.39821e-08 | 1.000000 | 1.67898e-07 | 1.000000 |
| rad71         | 5.50792e-08 | 1.000000 | 1.24999e-07 | 1.000000 |
| rad73         | 4.22833e-08 | 1.000000 | 9.59596e-08 | 1.000000 |
| rad68syn      | 3.10549e-08 | 1.000000 | 7.04774e-08 | 1.000000 |
| rad55         | 3.04885e-08 | 1.000000 | 6.91921e-08 | 1.000000 |
| rad14         | 2.43604e-08 | 1.000000 | 5.52846e-08 | 1.000000 |
| rad68anti     | 2.01641e-08 | 1.000000 | 4.57613e-08 | 1.000000 |
| rad64         | 1.38869e-08 | 1.000000 | 3.15155e-08 | 1.000000 |
| rad56         | 1.32533e-08 | 1.000000 | 3.00776e-08 | 1.000000 |
| rad40syn      | 1.23537e-08 | 1.000000 | 2.80360e-08 | 1.000000 |
| rad53         | 1.12558e-08 | 1.000000 | 2.55445e-08 | 1.000000 |
| rad40anti     | 7.40725e-09 | 1.000000 | 1.68104e-08 | 1.000000 |
| rad31         | 6.60083e-09 | 1.000000 | 1.49802e-08 | 1.000000 |
| rad62         | 6.18650e-09 | 1.000000 | 1.40399e-08 | 1.000000 |
| rad27         | 4.53486e-09 | 1.000000 | 1.02916e-08 | 1.000000 |
| rad5          | 3.90490e-09 | 1.000000 | 8.86196e-09 | 1.000000 |
| rad61         | 2.23080e-09 | 1.000000 | 5.06268e-09 | 1.000000 |
| rad72         | 1.68976e-09 | 1.000000 | 3.83482e-09 | 1.000000 |
| rad43         | 8.33548e-10 | 1.000000 | 1.89169e-09 | 1.000000 |
| rad42         | 6.10674e-10 | 1.000000 | 1.38589e-09 | 1.000000 |
| rad41         | 7.73066e-11 | 1.000000 | 1.75443e-10 | 1.000000 |

100000000. Pa, 1200.00000 K

=====

Rate constant | True (fraction) | Effective (fraction)

-----  
Total | 8.84330e-15 (1.00) | 3.41763e-15 (1.00)



| species       | PYtrue      | Cumul    | PYeffective | Cumul    |
|---------------|-------------|----------|-------------|----------|
| Benzyl+C2H2   | 0.613535    | 0.613535 | 0.00000     | 0.00000  |
| rad20         | 0.256989    | 0.870524 | 0.664972    | 0.664972 |
| rad21         | 0.0461105   | 0.916635 | 0.119314    | 0.784286 |
| Indene+H      | 0.0286552   | 0.945290 | 0.0741470   | 0.858433 |
| PhCH2CCH+H    | 0.0148396   | 0.960129 | 0.0383983   | 0.896831 |
| rad45         | 0.0103286   | 0.970458 | 0.0267259   | 0.923557 |
| rad18         | 0.00571732  | 0.976175 | 0.0147939   | 0.938351 |
| rad9          | 0.00406624  | 0.980241 | 0.0105216   | 0.948873 |
| rad22         | 0.00388979  | 0.984131 | 0.0100651   | 0.958938 |
| Ph+Allene     | 0.00312777  | 0.987259 | 0.00809329  | 0.967031 |
| rad11         | 0.00306665  | 0.990326 | 0.00793512  | 0.974966 |
| rad6          | 0.00207132  | 0.992397 | 0.00535965  | 0.980326 |
| PhCHCCH2+H    | 0.00183317  | 0.994230 | 0.00474342  | 0.985069 |
| rad23         | 0.00157276  | 0.995803 | 0.00406960  | 0.989139 |
| rad24         | 0.00118743  | 0.996990 | 0.00307254  | 0.992211 |
| rad36         | 0.00106177  | 0.998052 | 0.00274739  | 0.994959 |
| rad8          | 0.000531537 | 0.998584 | 0.00137538  | 0.996334 |
| PAH3+H        | 0.000530050 | 0.999114 | 0.00137153  | 0.997706 |
| rad30         | 0.000280069 | 0.999394 | 0.000724694 | 0.998430 |
| PAH7+H        | 7.94155e-05 | 0.999473 | 0.000205492 | 0.998636 |
| rad7          | 5.50627e-05 | 0.999528 | 0.000142478 | 0.998778 |
| rad13         | 5.22726e-05 | 0.999581 | 0.000135258 | 0.998914 |
| rad59         | 4.85486e-05 | 0.999629 | 0.000125622 | 0.999039 |
| PAH9+H        | 4.84676e-05 | 0.999678 | 0.000125413 | 0.999165 |
| rad12         | 4.15908e-05 | 0.999719 | 0.000107618 | 0.999272 |
| rad35         | 4.13296e-05 | 0.999760 | 0.000106943 | 0.999379 |
| rad60syn      | 3.56572e-05 | 0.999796 | 9.22649e-05 | 0.999472 |
| rad25         | 2.64744e-05 | 0.999823 | 6.85039e-05 | 0.999540 |
| rad15         | 2.27350e-05 | 0.999845 | 5.88281e-05 | 0.999599 |
| rad60anti     | 2.25280e-05 | 0.999868 | 5.82924e-05 | 0.999657 |
| rad28         | 2.08745e-05 | 0.999889 | 5.40140e-05 | 0.999711 |
| PhCCH+CH3     | 2.01278e-05 | 0.999909 | 5.20817e-05 | 0.999763 |
| rad38         | 1.75749e-05 | 0.999926 | 4.54761e-05 | 0.999809 |
| rad19anti     | 9.84350e-06 | 0.999936 | 2.54706e-05 | 0.999834 |
| rad39         | 8.42794e-06 | 0.999945 | 2.18078e-05 | 0.999856 |
| rad50         | 8.21732e-06 | 0.999953 | 2.12628e-05 | 0.999877 |
| rad46         | 7.00386e-06 | 0.999960 | 1.81229e-05 | 0.999895 |
| rad33         | 6.86788e-06 | 0.999967 | 1.77710e-05 | 0.999913 |
| rad58         | 6.41632e-06 | 0.999973 | 1.66026e-05 | 0.999930 |
| Ph+MeAc       | 5.31473e-06 | 0.999979 | 1.37521e-05 | 0.999943 |
| rad47         | 3.74884e-06 | 0.999982 | 9.70033e-06 | 0.999953 |
| rad51         | 2.55957e-06 | 0.999985 | 6.62302e-06 | 0.999960 |
| rad26         | 2.32201e-06 | 0.999987 | 6.00833e-06 | 0.999966 |
| rad19syn      | 2.12184e-06 | 0.999989 | 5.49037e-06 | 0.999971 |
| rad67         | 1.45008e-06 | 0.999991 | 3.75216e-06 | 0.999975 |
| PAH10+CH3     | 1.02223e-06 | 0.999992 | 2.64507e-06 | 0.999978 |
| rad70         | 9.64014e-07 | 0.999993 | 2.49444e-06 | 0.999980 |
| rad2          | 9.46842e-07 | 0.999994 | 2.45001e-06 | 0.999983 |
| PhcycC3H3_A+H | 8.83741e-07 | 0.999995 | 2.28673e-06 | 0.999985 |
| PhCCCH3+H     | 8.12473e-07 | 0.999995 | 2.10232e-06 | 0.999987 |
| PAH1+H        | 7.45313e-07 | 0.999996 | 1.92854e-06 | 0.999989 |
| rad52         | 7.07948e-07 | 0.999997 | 1.83186e-06 | 0.999991 |
| rad10         | 7.04586e-07 | 0.999998 | 1.82316e-06 | 0.999993 |
| rad3          | 6.52953e-07 | 0.999998 | 1.68955e-06 | 0.999994 |
| rad4          | 5.34902e-07 | 0.999999 | 1.38409e-06 | 0.999996 |
| rad54         | 3.98382e-07 | 0.999999 | 1.03083e-06 | 0.999997 |
| rad37         | 3.93369e-07 | 0.999999 | 1.01786e-06 | 0.999998 |
| rad1          | 3.00044e-07 | 1.000000 | 7.76380e-07 | 0.999999 |
| rad34         | 2.68040e-07 | 1.000000 | 6.93568e-07 | 0.999999 |
| PAH8+H        | 8.83313e-08 | 1.000000 | 2.28562e-07 | 0.999999 |
| rad65         | 8.51813e-08 | 1.000000 | 2.20411e-07 | 1.000000 |
| rad71         | 5.51757e-08 | 1.000000 | 1.42770e-07 | 1.000000 |
| rad14         | 4.84378e-08 | 1.000000 | 1.25336e-07 | 1.000000 |
| rad73         | 4.22694e-08 | 1.000000 | 1.09374e-07 | 1.000000 |
| rad55         | 3.20026e-08 | 1.000000 | 8.28086e-08 | 1.000000 |
| rad68syn      | 2.51161e-08 | 1.000000 | 6.49892e-08 | 1.000000 |
| rad68anti     | 1.63063e-08 | 1.000000 | 4.21936e-08 | 1.000000 |
| rad64         | 1.47081e-08 | 1.000000 | 3.80581e-08 | 1.000000 |
| rad56         | 1.41399e-08 | 1.000000 | 3.65877e-08 | 1.000000 |
| rad53         | 1.19466e-08 | 1.000000 | 3.09124e-08 | 1.000000 |
| rad40syn      | 1.00255e-08 | 1.000000 | 2.59415e-08 | 1.000000 |
| rad27         | 8.29050e-09 | 1.000000 | 2.14521e-08 | 1.000000 |
| rad31         | 6.56073e-09 | 1.000000 | 1.69763e-08 | 1.000000 |
| rad40anti     | 6.01730e-09 | 1.000000 | 1.55701e-08 | 1.000000 |
| rad62         | 5.31706e-09 | 1.000000 | 1.37582e-08 | 1.000000 |
| rad5          | 4.03704e-09 | 1.000000 | 1.04461e-08 | 1.000000 |
| rad61         | 2.41772e-09 | 1.000000 | 6.25598e-09 | 1.000000 |
| rad72         | 1.69881e-09 | 1.000000 | 4.39576e-09 | 1.000000 |

|       |             |         |             |         |
|-------|-------------|---------|-------------|---------|
| rad43 | 7.07018e-10 | 1.00000 | 1.82945e-09 | 1.00000 |
| rad42 | 5.23941e-10 | 1.00000 | 1.35573e-09 | 1.00000 |
| rad41 | 6.55015e-11 | 1.00000 | 1.69489e-10 | 1.00000 |

100000000. Pa, 1300.00000 K

| =====         |                     |          |                      |          |
|---------------|---------------------|----------|----------------------|----------|
| Rate constant | True (fraction)     |          | Effective (fraction) |          |
| -----         |                     |          |                      |          |
| Total         | 1.52810e-14 (1.00 ) |          | 5.63647e-15 (1.00 )  |          |
| species       | PYtrue              | Cumul    | PYeffective          | Cumul    |
| -----         |                     |          |                      |          |
| Benzyl+C2H2   | 0.631145            | 0.631145 | 0.00000              | 0.00000  |
| rad20         | 0.237440            | 0.868585 | 0.643721             | 0.643721 |
| rad21         | 0.0487368           | 0.917322 | 0.132130             | 0.775851 |
| Indene+H      | 0.0269960           | 0.944318 | 0.0731887            | 0.849040 |
| PhCH2CCH+H    | 0.0152177           | 0.959535 | 0.0412567            | 0.890296 |
| rad45         | 0.00985247          | 0.969388 | 0.0267109            | 0.917007 |
| rad18         | 0.00716066          | 0.976549 | 0.0194132            | 0.936420 |
| rad11         | 0.00479246          | 0.981341 | 0.0129928            | 0.949413 |
| rad9          | 0.00400688          | 0.985348 | 0.0108630            | 0.960276 |
| rad22         | 0.00313892          | 0.988487 | 0.00850990           | 0.968786 |
| Ph+Allene     | 0.00268764          | 0.991175 | 0.00728643           | 0.976073 |
| rad6          | 0.00158362          | 0.992758 | 0.00429335           | 0.980366 |
| PhCHCCH2+H    | 0.00155810          | 0.994316 | 0.00422415           | 0.984590 |
| rad23         | 0.00136028          | 0.995677 | 0.00368784           | 0.988278 |
| rad24         | 0.00114796          | 0.996824 | 0.00311221           | 0.991390 |
| rad36         | 0.00100748          | 0.997832 | 0.00273138           | 0.994122 |
| rad8          | 0.000674798         | 0.998507 | 0.00182944           | 0.995951 |
| PAH3+H        | 0.000539966         | 0.999047 | 0.00146389           | 0.997415 |
| rad30         | 0.000273047         | 0.999320 | 0.000740256          | 0.998155 |
| rad7          | 8.44387e-05         | 0.999404 | 0.000228921          | 0.998384 |
| PAH7+H        | 7.64823e-05         | 0.999481 | 0.000207350          | 0.998591 |
| rad13         | 7.35439e-05         | 0.999554 | 0.000199384          | 0.998791 |
| PAH9+H        | 5.40975e-05         | 0.999608 | 0.000146663          | 0.998937 |
| rad59         | 4.91940e-05         | 0.999658 | 0.000133369          | 0.999071 |
| rad15         | 4.28444e-05         | 0.999700 | 0.000116155          | 0.999187 |
| rad35         | 4.24927e-05         | 0.999743 | 0.000115202          | 0.999302 |
| rad12         | 4.10212e-05         | 0.999784 | 0.000112121          | 0.999413 |
| rad60syn      | 3.56652e-05         | 0.999820 | 9.66916e-05          | 0.999510 |
| rad25         | 2.99426e-05         | 0.999850 | 8.11770e-05          | 0.999591 |
| rad60anti     | 2.25649e-05         | 0.999872 | 6.11755e-05          | 0.999652 |
| PhCCH+CH3     | 1.86240e-05         | 0.999891 | 5.04913e-05          | 0.999703 |
| rad28         | 1.83739e-05         | 0.999909 | 4.98131e-05          | 0.999753 |
| rad38         | 1.77246e-05         | 0.999927 | 4.80529e-05          | 0.999801 |
| rad19anti     | 9.74302e-06         | 0.999937 | 2.64142e-05          | 0.999827 |
| rad39         | 8.48009e-06         | 0.999945 | 2.29903e-05          | 0.999850 |
| rad50         | 8.28595e-06         | 0.999953 | 2.24639e-05          | 0.999873 |
| rad33         | 7.50666e-06         | 0.999961 | 2.03512e-05          | 0.999893 |
| rad46         | 7.05812e-06         | 0.999968 | 1.91352e-05          | 0.999912 |
| rad58         | 6.65383e-06         | 0.999975 | 1.80391e-05          | 0.999930 |
| Ph+MeAc       | 5.01692e-06         | 0.999980 | 1.36013e-05          | 0.999944 |
| rad47         | 3.59020e-06         | 0.999983 | 9.73336e-06          | 0.999954 |
| rad51         | 2.58388e-06         | 0.999986 | 7.00513e-06          | 0.999961 |
| rad26         | 2.22698e-06         | 0.999988 | 6.03754e-06          | 0.999967 |
| rad19syn      | 1.94798e-06         | 0.999990 | 5.28115e-06          | 0.999972 |
| rad67         | 1.33959e-06         | 0.999991 | 3.63174e-06          | 0.999975 |
| PAH10+CH3     | 1.03480e-06         | 0.999992 | 2.80544e-06          | 0.999978 |
| rad10         | 9.60414e-07         | 0.999993 | 2.60377e-06          | 0.999981 |
| rad2          | 8.61224e-07         | 0.999994 | 2.33486e-06          | 0.999983 |
| PhCCCH3+H     | 7.80548e-07         | 0.999995 | 2.11614e-06          | 0.999985 |
| PAH1+H        | 7.66205e-07         | 0.999996 | 2.07725e-06          | 0.999987 |
| rad70         | 7.21160e-07         | 0.999996 | 1.95513e-06          | 0.999989 |
| rad52         | 7.14568e-07         | 0.999997 | 1.93726e-06          | 0.999991 |
| PhcycC3H3_A+H | 7.11007e-07         | 0.999998 | 1.92760e-06          | 0.999993 |
| rad3          | 5.62376e-07         | 0.999998 | 1.52465e-06          | 0.999995 |
| rad4          | 4.60905e-07         | 0.999999 | 1.24955e-06          | 0.999996 |
| rad37         | 3.92463e-07         | 0.999999 | 1.06400e-06          | 0.999997 |
| rad54         | 3.77105e-07         | 1.000000 | 1.02237e-06          | 0.999998 |
| rad1          | 2.70215e-07         | 1.000000 | 7.32576e-07          | 0.999999 |
| rad34         | 2.01081e-07         | 1.000000 | 5.45148e-07          | 0.999999 |
| rad65         | 9.77585e-08         | 1.000000 | 2.65032e-07          | 1.000000 |
| PAH8+H        | 6.73536e-08         | 1.000000 | 1.82602e-07          | 1.000000 |
| rad14         | 6.56392e-08         | 1.000000 | 1.77954e-07          | 1.000000 |
| rad71         | 5.64530e-08         | 1.000000 | 1.53049e-07          | 1.000000 |
| rad73         | 4.31713e-08         | 1.000000 | 1.17041e-07          | 1.000000 |
| rad55         | 3.03870e-08         | 1.000000 | 8.23818e-08          | 1.000000 |
| rad68syn      | 1.90140e-08         | 1.000000 | 5.15487e-08          | 1.000000 |
| rad64         | 1.51809e-08         | 1.000000 | 4.11567e-08          | 1.000000 |
| rad56         | 1.36455e-08         | 1.000000 | 3.69943e-08          | 1.000000 |

|           |             |         |             |         |
|-----------|-------------|---------|-------------|---------|
| rad68anti | 1.23431e-08 | 1.00000 | 3.34633e-08 | 1.00000 |
| rad53     | 1.14721e-08 | 1.00000 | 3.11019e-08 | 1.00000 |
| rad27     | 1.06265e-08 | 1.00000 | 2.88095e-08 | 1.00000 |
| rad40syn  | 7.62263e-09 | 1.00000 | 2.06656e-08 | 1.00000 |
| rad31     | 5.68634e-09 | 1.00000 | 1.54162e-08 | 1.00000 |
| rad5      | 4.82967e-09 | 1.00000 | 1.30937e-08 | 1.00000 |
| rad40anti | 4.58086e-09 | 1.00000 | 1.24191e-08 | 1.00000 |
| rad62     | 4.29729e-09 | 1.00000 | 1.16503e-08 | 1.00000 |
| rad61     | 2.47687e-09 | 1.00000 | 6.71501e-09 | 1.00000 |
| rad72     | 1.74342e-09 | 1.00000 | 4.72657e-09 | 1.00000 |
| rad43     | 6.04304e-10 | 1.00000 | 1.63832e-09 | 1.00000 |
| rad42     | 4.25210e-10 | 1.00000 | 1.15278e-09 | 1.00000 |
| rad41     | 5.63005e-11 | 1.00000 | 1.52636e-10 | 1.00000 |

100000000. Pa, 1400.00000 K

| Rate constant | True (fraction)     | Effective (fraction) |
|---------------|---------------------|----------------------|
| Total         | 2.46691e-14 (1.00 ) | 8.88812e-15 (1.00 )  |

| species       | PYtrue      | Cumul    | PYeffective | Cumul    |
|---------------|-------------|----------|-------------|----------|
| Benzyl+C2H2   | 0.639707    | 0.639707 | 0.00000     | 0.00000  |
| rad20         | 0.227498    | 0.867205 | 0.631423    | 0.631423 |
| rad21         | 0.0497583   | 0.916963 | 0.138105    | 0.769528 |
| Indene+H      | 0.0205075   | 0.942021 | 0.0695476   | 0.839076 |
| PhCH2CCH+H    | 0.0149905   | 0.957011 | 0.0416065   | 0.880682 |
| rad45         | 0.00969892  | 0.966710 | 0.0269195   | 0.907602 |
| rad18         | 0.00939237  | 0.976103 | 0.0260687   | 0.933670 |
| rad11         | 0.00667962  | 0.982782 | 0.0185394   | 0.952210 |
| rad9          | 0.00393844  | 0.986721 | 0.0109312   | 0.963141 |
| rad22         | 0.00303736  | 0.989758 | 0.00843023  | 0.971571 |
| Ph+Allene     | 0.00220039  | 0.991958 | 0.00610721  | 0.977678 |
| PhCHCCH2+H    | 0.00128180  | 0.993240 | 0.00355766  | 0.981236 |
| rad23         | 0.00122816  | 0.994468 | 0.00340879  | 0.984645 |
| rad6          | 0.00122478  | 0.995693 | 0.00339940  | 0.988044 |
| rad24         | 0.00111074  | 0.996804 | 0.00308289  | 0.991127 |
| rad36         | 0.000989160 | 0.997793 | 0.00274543  | 0.993873 |
| rad8          | 0.000739050 | 0.998532 | 0.00205125  | 0.995924 |
| PAH3+H        | 0.000501721 | 0.999034 | 0.00139253  | 0.997316 |
| rad30         | 0.000248929 | 0.999283 | 0.000690907 | 0.998007 |
| rad7          | 0.000103607 | 0.999386 | 0.000287563 | 0.998295 |
| rad15         | 7.79094e-05 | 0.999464 | 0.000216239 | 0.998511 |
| PAH7+H        | 7.43042e-05 | 0.999539 | 0.000206233 | 0.998717 |
| rad13         | 7.17846e-05 | 0.999610 | 0.000199239 | 0.998916 |
| PAH9+H        | 5.92883e-05 | 0.999670 | 0.000164556 | 0.999081 |
| rad59         | 4.55921e-05 | 0.999715 | 0.000126542 | 0.999208 |
| rad35         | 4.05639e-05 | 0.999756 | 0.000112586 | 0.999320 |
| rad12         | 4.04068e-05 | 0.999796 | 0.000112150 | 0.999432 |
| rad60syn      | 3.28612e-05 | 0.999829 | 9.12068e-05 | 0.999524 |
| rad25         | 2.78874e-05 | 0.999857 | 7.74019e-05 | 0.999601 |
| rad60anti     | 2.08037e-05 | 0.999878 | 5.77411e-05 | 0.999659 |
| rad38         | 1.84018e-05 | 0.999896 | 5.10744e-05 | 0.999710 |
| rad28         | 1.81997e-05 | 0.999914 | 5.05135e-05 | 0.999760 |
| PhCCH+CH3     | 1.52210e-05 | 0.999930 | 4.22461e-05 | 0.999802 |
| rad19anti     | 9.87673e-06 | 0.999939 | 2.74130e-05 | 0.999830 |
| rad50         | 8.59748e-06 | 0.999948 | 2.38624e-05 | 0.999854 |
| rad39         | 8.48190e-06 | 0.999957 | 2.35416e-05 | 0.999877 |
| rad46         | 7.32147e-06 | 0.999964 | 2.03209e-05 | 0.999898 |
| rad33         | 6.38718e-06 | 0.999970 | 1.77277e-05 | 0.999915 |
| rad58         | 6.23806e-06 | 0.999976 | 1.73138e-05 | 0.999933 |
| Ph+MeAc       | 4.38881e-06 | 0.999981 | 1.21812e-05 | 0.999945 |
| rad47         | 3.54785e-06 | 0.999984 | 9.84712e-06 | 0.999955 |
| rad51         | 2.68572e-06 | 0.999987 | 7.45425e-06 | 0.999962 |
| rad26         | 2.55521e-06 | 0.999990 | 7.09202e-06 | 0.999969 |
| rad19syn      | 1.63903e-06 | 0.999991 | 4.54915e-06 | 0.999974 |
| rad67         | 1.11166e-06 | 0.999992 | 3.08542e-06 | 0.999977 |
| rad10         | 1.08510e-06 | 0.999993 | 3.01171e-06 | 0.999980 |
| PAH10+CH3     | 9.43308e-07 | 0.999994 | 2.61817e-06 | 0.999983 |
| rad2          | 7.72492e-07 | 0.999995 | 2.14406e-06 | 0.999985 |
| PAH1+H        | 7.61755e-07 | 0.999996 | 2.11426e-06 | 0.999987 |
| PhCCCH3+H     | 7.45982e-07 | 0.999997 | 2.07049e-06 | 0.999989 |
| rad52         | 7.42669e-07 | 0.999997 | 2.06129e-06 | 0.999991 |
| rad70         | 5.63222e-07 | 0.999998 | 1.56323e-06 | 0.999992 |
| PhcycC3H3_A+H | 4.29647e-07 | 0.999998 | 1.19249e-06 | 0.999994 |
| rad3          | 4.24127e-07 | 0.999999 | 1.17717e-06 | 0.999995 |
| rad37         | 3.54473e-07 | 0.999999 | 9.83846e-07 | 0.999996 |
| rad4          | 3.47920e-07 | 1.000000 | 9.65656e-07 | 0.999997 |
| rad54         | 3.12921e-07 | 1.000000 | 8.68516e-07 | 0.999998 |
| rad1          | 2.42962e-07 | 1.00000  | 6.74345e-07 | 0.999998 |

|           |             |         |             |          |
|-----------|-------------|---------|-------------|----------|
| rad34     | 1.57620e-07 | 1.00000 | 4.37475e-07 | 0.999999 |
| rad65     | 1.09934e-07 | 1.00000 | 3.05122e-07 | 0.999999 |
| rad14     | 6.86445e-08 | 1.00000 | 1.90524e-07 | 0.999999 |
| rad71     | 5.93563e-08 | 1.00000 | 1.64744e-07 | 0.999999 |
| PAH8+H    | 5.37520e-08 | 1.00000 | 1.49190e-07 | 1.000000 |
| rad73     | 4.53187e-08 | 1.00000 | 1.25783e-07 | 1.000000 |
| rad55     | 2.52758e-08 | 1.00000 | 7.01533e-08 | 1.000000 |
| rad64     | 1.51606e-08 | 1.00000 | 4.20785e-08 | 1.000000 |
| rad68syn  | 1.50622e-08 | 1.00000 | 4.18053e-08 | 1.000000 |
| rad56     | 1.14893e-08 | 1.00000 | 3.18886e-08 | 1.000000 |
| rad27     | 1.10728e-08 | 1.00000 | 3.07327e-08 | 1.000000 |
| rad68anti | 9.77643e-09 | 1.00000 | 2.71346e-08 | 1.000000 |
| rad53     | 9.62432e-09 | 1.00000 | 2.67124e-08 | 1.000000 |
| rad5      | 7.86971e-09 | 1.00000 | 2.18425e-08 | 1.000000 |
| rad40syn  | 6.06573e-09 | 1.00000 | 1.68355e-08 | 1.000000 |
| rad31     | 4.41564e-09 | 1.00000 | 1.22557e-08 | 1.000000 |
| rad40anti | 3.64988e-09 | 1.00000 | 1.01303e-08 | 1.000000 |
| rad62     | 3.54247e-09 | 1.00000 | 9.83219e-09 | 1.000000 |
| rad61     | 2.27400e-09 | 1.00000 | 6.31151e-09 | 1.000000 |
| rad72     | 1.83808e-09 | 1.00000 | 5.10162e-09 | 1.000000 |
| rad43     | 5.31074e-10 | 1.00000 | 1.47400e-09 | 1.000000 |
| rad42     | 3.53131e-10 | 1.00000 | 9.80120e-10 | 1.000000 |
| rad41     | 4.98250e-11 | 1.00000 | 1.38290e-10 | 1.000000 |

100000000. Pa, 1500.00000 K

=====

| Rate constant | True (fraction)     | Effective (fraction) |
|---------------|---------------------|----------------------|
| Total         | 3.76908e-14 (1.00 ) | 1.32524e-14 (1.00 )  |

| species     | PYtrue      | Cumul    | PYeffective | Cumul    |
|-------------|-------------|----------|-------------|----------|
| Benzyl+C2H2 | 0.648393    | 0.648393 | 0.00000     | 0.00000  |
| rad20       | 0.217546    | 0.865939 | 0.618720    | 0.618720 |
| rad21       | 0.0499730   | 0.915912 | 0.142128    | 0.760848 |
| Indene+H    | 0.0232372   | 0.939149 | 0.0660887   | 0.826937 |
| PhCH2CCH+H  | 0.0147527   | 0.953902 | 0.0419579   | 0.868895 |
| rad18       | 0.0112638   | 0.965166 | 0.0320353   | 0.900930 |
| rad45       | 0.00965095  | 0.974817 | 0.0274481   | 0.928378 |
| rad11       | 0.00792968  | 0.982746 | 0.0225527   | 0.950931 |
| rad9        | 0.00391389  | 0.986660 | 0.0111314   | 0.962062 |
| rad22       | 0.00371131  | 0.990372 | 0.0105553   | 0.972617 |
| Ph+Allene   | 0.00187187  | 0.992243 | 0.00532375  | 0.977941 |
| rad23       | 0.00129344  | 0.993537 | 0.00367865  | 0.981620 |
| PhCHCCH2+H  | 0.00111996  | 0.994657 | 0.00318526  | 0.984805 |
| rad6        | 0.00111048  | 0.995767 | 0.00315830  | 0.987963 |
| rad24       | 0.00108486  | 0.996852 | 0.00308545  | 0.991049 |
| rad36       | 0.000982432 | 0.997835 | 0.00279412  | 0.993843 |
| rad8        | 0.000759028 | 0.998594 | 0.00215874  | 0.996002 |
| PAH3+H      | 0.000469522 | 0.999063 | 0.00133536  | 0.997337 |
| rad30       | 0.000229920 | 0.999293 | 0.000653913 | 0.997991 |
| rad15       | 0.000114279 | 0.999407 | 0.000325019 | 0.998316 |
| rad7        | 9.06093e-05 | 0.999498 | 0.000257701 | 0.998574 |
| PAH7+H      | 7.13593e-05 | 0.999569 | 0.000202952 | 0.998777 |
| PAH9+H      | 5.90405e-05 | 0.999628 | 0.000167916 | 0.998945 |
| rad13       | 5.42348e-05 | 0.999683 | 0.000154249 | 0.999099 |
| rad59       | 4.25878e-05 | 0.999725 | 0.000121123 | 0.999220 |
| rad12       | 4.02331e-05 | 0.999765 | 0.000114426 | 0.999334 |
| rad35       | 3.83319e-05 | 0.999804 | 0.000109019 | 0.999443 |
| rad60syn    | 3.05707e-05 | 0.999834 | 8.69456e-05 | 0.999530 |
| rad25       | 2.54537e-05 | 0.999860 | 7.23926e-05 | 0.999603 |
| rad28       | 2.21566e-05 | 0.999882 | 6.30152e-05 | 0.999666 |
| rad60anti   | 1.93619e-05 | 0.999901 | 5.50671e-05 | 0.999721 |
| rad38       | 1.92288e-05 | 0.999920 | 5.46883e-05 | 0.999775 |
| PhCCH+CH3   | 1.09887e-05 | 0.999931 | 3.12530e-05 | 0.999807 |
| rad19anti   | 1.02140e-05 | 0.999942 | 2.90494e-05 | 0.999836 |
| rad50       | 8.98646e-06 | 0.999951 | 2.55583e-05 | 0.999861 |
| rad39       | 8.17013e-06 | 0.999959 | 2.32366e-05 | 0.999885 |
| rad46       | 7.65181e-06 | 0.999967 | 2.17624e-05 | 0.999906 |
| rad58       | 5.87538e-06 | 0.999972 | 1.67101e-05 | 0.999923 |
| rad33       | 4.47731e-06 | 0.999977 | 1.27339e-05 | 0.999936 |
| Ph+MeAc     | 3.65031e-06 | 0.999981 | 1.03818e-05 | 0.999946 |
| rad47       | 3.54137e-06 | 0.999984 | 1.00720e-05 | 0.999956 |
| rad26       | 3.32893e-06 | 0.999987 | 9.46778e-06 | 0.999966 |
| rad51       | 2.81045e-06 | 0.999990 | 7.99315e-06 | 0.999974 |
| rad19syn    | 1.41682e-06 | 0.999992 | 4.02957e-06 | 0.999978 |
| rad10       | 9.38754e-07 | 0.999993 | 2.66990e-06 | 0.999980 |
| rad67       | 9.23382e-07 | 0.999993 | 2.62618e-06 | 0.999983 |
| rad52       | 7.77125e-07 | 0.999994 | 2.21021e-06 | 0.999985 |
| PhCCCH3+H   | 7.26795e-07 | 0.999995 | 2.06707e-06 | 0.999987 |

|               |             |          |             |          |
|---------------|-------------|----------|-------------|----------|
| PAH10+CH3     | 7.22164e-07 | 0.999996 | 2.05390e-06 | 0.999989 |
| rad2          | 7.06954e-07 | 0.999996 | 2.01064e-06 | 0.999991 |
| PAH1+H        | 6.98694e-07 | 0.999997 | 1.98715e-06 | 0.999993 |
| rad70         | 4.87433e-07 | 0.999998 | 1.38630e-06 | 0.999995 |
| rad3          | 2.81345e-07 | 0.999998 | 8.00169e-07 | 0.999996 |
| rad37         | 2.70238e-07 | 0.999998 | 7.68580e-07 | 0.999996 |
| rad4          | 2.30739e-07 | 0.999998 | 6.56242e-07 | 0.999997 |
| PhcycC3H3_A+H | 2.25697e-07 | 0.999999 | 6.41902e-07 | 0.999998 |
| rad1          | 2.23809e-07 | 0.999999 | 6.36531e-07 | 0.999998 |
| rad54         | 2.23505e-07 | 0.999999 | 6.35667e-07 | 0.999999 |
| rad34         | 1.36820e-07 | 0.999999 | 3.89127e-07 | 0.999999 |
| rad65         | 1.11493e-07 | 0.999999 | 3.17096e-07 | 1.000000 |
| rad71         | 6.27869e-08 | 0.999999 | 1.78571e-07 | 1.000000 |
| rad14         | 6.03233e-08 | 0.999999 | 1.71565e-07 | 1.000000 |
| rad73         | 4.78663e-08 | 0.999999 | 1.36136e-07 | 1.000000 |
| PAH8+H        | 4.73104e-08 | 1.000000 | 1.34555e-07 | 1.000000 |
| rad55         | 1.80792e-08 | 1.000000 | 5.14190e-08 | 1.000000 |
| rad5          | 1.73564e-08 | 1.000000 | 4.93630e-08 | 1.000000 |
| rad64         | 1.39743e-08 | 1.000000 | 3.97441e-08 | 1.000000 |
| rad68syn      | 1.31837e-08 | 1.000000 | 3.74957e-08 | 1.000000 |
| rad27         | 1.02377e-08 | 1.000000 | 2.91170e-08 | 1.000000 |
| rad68anti     | 8.55629e-09 | 1.000000 | 2.43348e-08 | 1.000000 |
| rad56         | 8.27759e-09 | 1.000000 | 2.35422e-08 | 1.000000 |
| rad53         | 6.91908e-09 | 1.000000 | 1.96785e-08 | 1.000000 |
| rad40syn      | 5.32706e-09 | 1.000000 | 1.51506e-08 | 1.000000 |
| rad40anti     | 3.20829e-09 | 1.000000 | 9.12466e-09 | 1.000000 |
| rad31         | 3.10989e-09 | 1.000000 | 8.84480e-09 | 1.000000 |
| rad62         | 2.85492e-09 | 1.000000 | 8.11964e-09 | 1.000000 |
| rad72         | 1.94921e-09 | 1.000000 | 5.54372e-09 | 1.000000 |
| rad61         | 1.74764e-09 | 1.000000 | 4.97045e-09 | 1.000000 |
| rad43         | 4.63324e-10 | 1.000000 | 1.31774e-09 | 1.000000 |
| rad42         | 2.86422e-10 | 1.000000 | 8.14609e-10 | 1.000000 |
| rad41         | 4.36705e-11 | 1.000000 | 1.24203e-10 | 1.000000 |

100000000. Pa, 1750.00000 K

| Rate constant | True (fraction)     | Effective (fraction) |
|---------------|---------------------|----------------------|
| Total         | 9.18604e-14 (1.00 ) | 2.04095e-14 (1.00 )  |

| species     | PYtrue      | Cumul    | PYeffective | Cumul    |
|-------------|-------------|----------|-------------|----------|
| Benzyl+C2H2 | 0.777821    | 0.777821 | 0.00000     | 0.00000  |
| PhCH2CCH+H  | 0.102397    | 0.880218 | 0.460876    | 0.460876 |
| PhCHCCH2+H  | 0.0342961   | 0.914514 | 0.154362    | 0.615238 |
| rad20       | 0.0213062   | 0.935820 | 0.0958965   | 0.711135 |
| Ph+Allene   | 0.0199506   | 0.955771 | 0.0897954   | 0.800930 |
| Indene+H    | 0.0173608   | 0.973132 | 0.0781390   | 0.879069 |
| PAH3+H      | 0.00606057  | 0.979192 | 0.0272779   | 0.906347 |
| rad21       | 0.00247722  | 0.981669 | 0.0111496   | 0.917496 |
| PAH7+H      | 0.00200493  | 0.983674 | 0.00902394  | 0.926520 |
| PhCCH+CH3   | 0.00133814  | 0.985013 | 0.00602281  | 0.932543 |
| rad50       | 0.00109130  | 0.986104 | 0.00491181  | 0.937455 |
| rad39       | 0.00100741  | 0.987111 | 0.00453421  | 0.941989 |
| rad51       | 0.000882931 | 0.987994 | 0.00397396  | 0.945963 |
| rad18       | 0.000882165 | 0.988876 | 0.00397051  | 0.949934 |
| PAH9+H      | 0.000826833 | 0.989703 | 0.00372147  | 0.953655 |
| Ph+MeAc     | 0.000778335 | 0.990482 | 0.00350319  | 0.957158 |
| rad22       | 0.000731338 | 0.991213 | 0.00329166  | 0.960450 |
| rad71       | 0.000642304 | 0.991855 | 0.00289093  | 0.963341 |
| rad11       | 0.000568052 | 0.992423 | 0.00255673  | 0.965898 |
| rad30       | 0.000556263 | 0.992979 | 0.00250367  | 0.968401 |
| rad38       | 0.000549595 | 0.993529 | 0.00247366  | 0.970875 |
| rad9        | 0.000532321 | 0.994061 | 0.00239591  | 0.973271 |
| rad19anti   | 0.000518186 | 0.994580 | 0.00233229  | 0.975603 |
| rad35       | 0.000471419 | 0.995051 | 0.00212180  | 0.977725 |
| rad45       | 0.000453401 | 0.995504 | 0.00204070  | 0.979766 |
| rad47       | 0.000406734 | 0.995911 | 0.00183066  | 0.981596 |
| rad59       | 0.000401991 | 0.996313 | 0.00180931  | 0.983406 |
| rad8        | 0.000324422 | 0.996638 | 0.00146018  | 0.984866 |
| PhCCH3+H    | 0.000318705 | 0.996956 | 0.00143445  | 0.986300 |
| rad46       | 0.000281698 | 0.997238 | 0.00126789  | 0.987568 |
| rad67       | 0.000258502 | 0.997496 | 0.00116348  | 0.988732 |
| rad19syn    | 0.000256776 | 0.997753 | 0.00115572  | 0.989887 |
| PAH1+H      | 0.000211905 | 0.997965 | 0.000953756 | 0.990841 |
| rad73       | 0.000207778 | 0.998173 | 0.000935186 | 0.991776 |
| rad6        | 0.000187792 | 0.998361 | 0.000845230 | 0.992622 |
| PAH10+CH3   | 0.000183534 | 0.998544 | 0.000826063 | 0.993448 |
| rad60syn    | 0.000172193 | 0.998716 | 0.000775018 | 0.994223 |
| rad58       | 0.000170068 | 0.998887 | 0.000765455 | 0.994988 |

|               |             |          |             |          |
|---------------|-------------|----------|-------------|----------|
| rad23         | 0.000146314 | 0.999033 | 0.000658540 | 0.995647 |
| rad52         | 0.000143536 | 0.999176 | 0.000646036 | 0.996293 |
| rad60anti     | 0.000129670 | 0.999306 | 0.000583628 | 0.996876 |
| rad72         | 0.000119769 | 0.999426 | 0.000539067 | 0.997415 |
| PAH8+H        | 8.91906e-05 | 0.999515 | 0.000401436 | 0.997817 |
| rad36         | 8.26993e-05 | 0.999598 | 0.000372219 | 0.998189 |
| rad24         | 7.47893e-05 | 0.999672 | 0.000336618 | 0.998526 |
| rad70         | 4.79504e-05 | 0.999720 | 0.000215819 | 0.998741 |
| rad15         | 4.64197e-05 | 0.999767 | 0.000208929 | 0.998950 |
| rad12         | 4.55743e-05 | 0.999812 | 0.000205124 | 0.999155 |
| PhcycC3H3_A+H | 4.51393e-05 | 0.999858 | 0.000203166 | 0.999359 |
| rad34         | 2.25210e-05 | 0.999880 | 0.000101364 | 0.999460 |
| rad65         | 1.90400e-05 | 0.999899 | 8.56969e-05 | 0.999546 |
| rad37         | 1.23122e-05 | 0.999911 | 5.54157e-05 | 0.999601 |
| rad7          | 1.08486e-05 | 0.999922 | 4.88282e-05 | 0.999650 |
| rad54         | 1.00744e-05 | 0.999932 | 4.53438e-05 | 0.999695 |
| rad68syn      | 8.61330e-06 | 0.999941 | 3.87674e-05 | 0.999734 |
| rad28         | 7.45072e-06 | 0.999948 | 3.33390e-05 | 0.999767 |
| rad64         | 6.35496e-06 | 0.999955 | 2.86029e-05 | 0.999796 |
| rad40syn      | 6.22853e-06 | 0.999961 | 2.80339e-05 | 0.999824 |
| rad25         | 6.15719e-06 | 0.999967 | 2.77128e-05 | 0.999852 |
| rad68anti     | 5.47091e-06 | 0.999973 | 2.46239e-05 | 0.999876 |
| rad40anti     | 4.90763e-06 | 0.999977 | 2.20886e-05 | 0.999898 |
| rad13         | 3.69214e-06 | 0.999981 | 1.66179e-05 | 0.999915 |
| rad56         | 3.21782e-06 | 0.999984 | 1.44830e-05 | 0.999930 |
| rad10         | 2.53687e-06 | 0.999987 | 1.14181e-05 | 0.999941 |
| rad62         | 2.46797e-06 | 0.999989 | 1.11080e-05 | 0.999952 |
| rad26         | 2.46417e-06 | 0.999992 | 1.10909e-05 | 0.999963 |
| rad61         | 2.12523e-06 | 0.999994 | 9.56538e-06 | 0.999973 |
| rad53         | 1.74386e-06 | 0.999996 | 7.84891e-06 | 0.999981 |
| rad55         | 1.25526e-06 | 0.999997 | 5.64977e-06 | 0.999986 |
| rad42         | 6.29147e-07 | 0.999998 | 2.83171e-06 | 0.999989 |
| rad43         | 5.47509e-07 | 0.999998 | 2.46427e-06 | 0.999992 |
| rad33         | 4.77617e-07 | 0.999999 | 2.14970e-06 | 0.999994 |
| rad2          | 4.58082e-07 | 0.999999 | 2.06177e-06 | 0.999996 |
| rad5          | 2.06185e-07 | 0.999999 | 9.28015e-07 | 0.999997 |
| rad1          | 2.00855e-07 | 1.000000 | 9.04024e-07 | 0.999998 |
| rad14         | 1.97236e-07 | 1.000000 | 8.87735e-07 | 0.999998 |
| rad41         | 1.57448e-07 | 1.000000 | 7.08654e-07 | 0.999999 |
| rad27         | 5.46371e-08 | 1.000000 | 2.45915e-07 | 0.999999 |
| rad3          | 1.36655e-08 | 1.000000 | 6.15066e-08 | 0.999999 |
| rad4          | 7.47177e-09 | 1.000000 | 3.36295e-08 | 1.000000 |

10000000. Pa, 2000.00000 K

=====

| Rate constant | True (fraction)     | Effective (fraction) |
|---------------|---------------------|----------------------|
| Total         | 1.85359e-13 (1.00 ) | 3.79905e-14 (1.00 )  |

| species     | PYtrue      | Cumul    | PYeffective | Cumul    |
|-------------|-------------|----------|-------------|----------|
| Benzyl+C2H2 | 0.795044    | 0.795044 | 0.00000     | 0.00000  |
| PhCH2CCH+H  | 0.0912342   | 0.886278 | 0.445140    | 0.445140 |
| PhCHCCH2+H  | 0.0326124   | 0.918891 | 0.159119    | 0.604259 |
| Indene+H    | 0.0183694   | 0.937260 | 0.0896257   | 0.693885 |
| Ph+Allene   | 0.0182267   | 0.955487 | 0.0889295   | 0.782814 |
| rad20       | 0.0170114   | 0.972498 | 0.0830003   | 0.865815 |
| PAH3+H      | 0.00639769  | 0.978896 | 0.0312149   | 0.897029 |
| rad21       | 0.00248776  | 0.981384 | 0.0121380   | 0.909167 |
| PAH7+H      | 0.00204702  | 0.983431 | 0.00998758  | 0.919155 |
| PhCCH+CH3   | 0.00127314  | 0.984704 | 0.00621178  | 0.925367 |
| rad50       | 0.00115447  | 0.985858 | 0.00563276  | 0.931000 |
| rad39       | 0.00106122  | 0.986919 | 0.00517780  | 0.936177 |
| rad51       | 0.000937502 | 0.987857 | 0.00457415  | 0.940751 |
| PAH9+H      | 0.000931244 | 0.988788 | 0.00454362  | 0.945295 |
| rad18       | 0.000797104 | 0.989585 | 0.00388914  | 0.949184 |
| Ph+MeAc     | 0.000760447 | 0.990346 | 0.00371029  | 0.952895 |
| rad71       | 0.000687019 | 0.991033 | 0.00335202  | 0.956247 |
| rad22       | 0.000685762 | 0.991718 | 0.00334589  | 0.959592 |
| rad11       | 0.000587343 | 0.992306 | 0.00286570  | 0.962458 |
| rad38       | 0.000584806 | 0.992891 | 0.00285332  | 0.965311 |
| rad30       | 0.000578998 | 0.993470 | 0.00282498  | 0.968136 |
| rad19anti   | 0.000509088 | 0.993979 | 0.00248388  | 0.970620 |
| rad35       | 0.000496700 | 0.994475 | 0.00242344  | 0.973044 |
| rad9        | 0.000489976 | 0.994965 | 0.00239063  | 0.975434 |
| rad45       | 0.000445707 | 0.995411 | 0.00217464  | 0.977609 |
| rad59       | 0.000422656 | 0.995834 | 0.00206217  | 0.979671 |
| rad47       | 0.000390798 | 0.996225 | 0.00190674  | 0.981578 |
| PhCCCH3+H   | 0.000305898 | 0.996530 | 0.00149250  | 0.983070 |
| rad46       | 0.000298578 | 0.996829 | 0.00145679  | 0.984527 |

|               |             |          |             |          |
|---------------|-------------|----------|-------------|----------|
| rad8          | 0.000293778 | 0.997123 | 0.00143337  | 0.985961 |
| rad67         | 0.000258645 | 0.997381 | 0.00126195  | 0.987223 |
| rad19syn      | 0.000240734 | 0.997622 | 0.00117456  | 0.988397 |
| rad23         | 0.000233480 | 0.997856 | 0.00113917  | 0.989536 |
| rad73         | 0.000221774 | 0.998077 | 0.00108205  | 0.990618 |
| PAH1+H        | 0.000217935 | 0.998295 | 0.00106332  | 0.991682 |
| PAH10+CH3     | 0.000184572 | 0.998480 | 0.000900543 | 0.992582 |
| rad58         | 0.000181476 | 0.998661 | 0.000885437 | 0.993468 |
| rad60syn      | 0.000180103 | 0.998842 | 0.000878736 | 0.994346 |
| rad6          | 0.000167937 | 0.999009 | 0.000819381 | 0.995166 |
| rad52         | 0.000152494 | 0.999162 | 0.000744032 | 0.995910 |
| rad60anti     | 0.000135733 | 0.999298 | 0.000662251 | 0.996572 |
| rad72         | 0.000128449 | 0.999426 | 0.000626716 | 0.997199 |
| PAH8+H        | 8.63665e-05 | 0.999513 | 0.000421389 | 0.997620 |
| rad36         | 8.10880e-05 | 0.999594 | 0.000395635 | 0.998016 |
| rad24         | 7.46221e-05 | 0.999668 | 0.000364088 | 0.998380 |
| rad15         | 5.11780e-05 | 0.999719 | 0.000249702 | 0.998630 |
| rad70         | 4.63397e-05 | 0.999766 | 0.000226095 | 0.998856 |
| PhcycC3H3_A+H | 4.17895e-05 | 0.999808 | 0.000203895 | 0.999060 |
| rad12         | 4.08562e-05 | 0.999848 | 0.000199341 | 0.999259 |
| rad65         | 2.23640e-05 | 0.999871 | 0.000109116 | 0.999368 |
| rad34         | 2.17705e-05 | 0.999893 | 0.000106220 | 0.999474 |
| rad28         | 1.57661e-05 | 0.999908 | 7.69239e-05 | 0.999551 |
| rad37         | 1.22791e-05 | 0.999921 | 5.99106e-05 | 0.999611 |
| rad54         | 9.48529e-06 | 0.999930 | 4.62795e-05 | 0.999657 |
| rad7          | 9.48290e-06 | 0.999940 | 4.62679e-05 | 0.999704 |
| rad68syn      | 8.33306e-06 | 0.999948 | 4.06577e-05 | 0.999744 |
| rad64         | 6.54807e-06 | 0.999954 | 3.19486e-05 | 0.999776 |
| rad40syn      | 6.03005e-06 | 0.999960 | 2.94211e-05 | 0.999806 |
| rad25         | 5.64569e-06 | 0.999966 | 2.75458e-05 | 0.999833 |
| rad68anti     | 5.29288e-06 | 0.999971 | 2.58244e-05 | 0.999859 |
| rad40anti     | 4.75214e-06 | 0.999976 | 2.31861e-05 | 0.999882 |
| rad26         | 4.31990e-06 | 0.999980 | 2.10771e-05 | 0.999903 |
| rad56         | 3.09940e-06 | 0.999984 | 1.51222e-05 | 0.999918 |
| rad13         | 2.83096e-06 | 0.999986 | 1.38125e-05 | 0.999932 |
| rad10         | 2.80489e-06 | 0.999989 | 1.36853e-05 | 0.999946 |
| rad62         | 2.50064e-06 | 0.999992 | 1.22008e-05 | 0.999958 |
| rad61         | 2.14660e-06 | 0.999994 | 1.04734e-05 | 0.999969 |
| rad53         | 1.67231e-06 | 0.999996 | 8.15933e-06 | 0.999977 |
| rad5          | 1.18861e-06 | 0.999997 | 5.79931e-06 | 0.999983 |
| rad55         | 1.18685e-06 | 0.999998 | 5.79076e-06 | 0.999988 |
| rad42         | 6.38765e-07 | 0.999999 | 3.11659e-06 | 0.999991 |
| rad43         | 5.34350e-07 | 0.999999 | 2.60714e-06 | 0.999994 |
| rad2          | 3.98256e-07 | 0.999999 | 1.94313e-06 | 0.999996 |
| rad33         | 3.70536e-07 | 1.000000 | 1.80788e-06 | 0.999998 |
| rad14         | 1.87916e-07 | 1.000000 | 9.16859e-07 | 0.999999 |
| rad1          | 1.78625e-07 | 1.000000 | 8.71529e-07 | 1.000000 |
| rad41         | 1.53880e-07 | 1.000000 | 7.50796e-07 | 1.000000 |
| rad27         | 4.94420e-08 | 1.000000 | 2.41232e-07 | 1.000000 |
| rad3          | 1.06841e-08 | 1.000000 | 5.21285e-08 | 1.000000 |
| rad4          | 5.74106e-09 | 1.000000 | 2.80111e-08 | 1.000000 |

100000000. Pa, 2250.00000 K

=====

| Rate constant | True (fraction)     | Effective (fraction) |
|---------------|---------------------|----------------------|
| Total         | 3.29136e-13 (1.00 ) | 6.15926e-14 (1.00 )  |

| species     | PYtrue      | Cumul    | PYeffective | Cumul    |
|-------------|-------------|----------|-------------|----------|
| Benzyl+C2H2 | 0.812866    | 0.812866 | 0.00000     | 0.00000  |
| PhCH2CCH+H  | 0.0815652   | 0.894431 | 0.435866    | 0.435866 |
| PhCHCCH2+H  | 0.0302551   | 0.924686 | 0.161676    | 0.597542 |
| Indene+H    | 0.0188718   | 0.943558 | 0.100846    | 0.698388 |
| Ph+Allene   | 0.0164509   | 0.960009 | 0.0879099   | 0.786298 |
| rad20       | 0.0131985   | 0.973208 | 0.0705299   | 0.856828 |
| PAH3+H      | 0.00609184  | 0.979299 | 0.0325534   | 0.889381 |
| rad21       | 0.00235371  | 0.981653 | 0.0125777   | 0.901959 |
| PAH7+H      | 0.00199974  | 0.983653 | 0.0106862   | 0.912645 |
| rad50       | 0.00118020  | 0.984833 | 0.00630671  | 0.918952 |
| PhCCH+CH3   | 0.00117470  | 0.986008 | 0.00627731  | 0.925229 |
| rad39       | 0.00107984  | 0.987088 | 0.00577042  | 0.931000 |
| PAH9+H      | 0.000978450 | 0.988066 | 0.00522861  | 0.936228 |
| rad51       | 0.000962031 | 0.989028 | 0.00514087  | 0.941369 |
| rad18       | 0.000734367 | 0.989762 | 0.00392429  | 0.945293 |
| Ph+MeAc     | 0.000723382 | 0.990486 | 0.00386559  | 0.949159 |
| rad71       | 0.000709321 | 0.991195 | 0.00379045  | 0.952949 |
| rad22       | 0.000671076 | 0.991866 | 0.00358608  | 0.956535 |
| rad11       | 0.000610342 | 0.992476 | 0.00326153  | 0.959797 |
| rad38       | 0.000601297 | 0.993078 | 0.00321319  | 0.963010 |

|               |             |          |             |          |
|---------------|-------------|----------|-------------|----------|
| rad30         | 0.000569166 | 0.993647 | 0.00304149  | 0.966052 |
| rad19anti     | 0.000487818 | 0.994135 | 0.00260679  | 0.968658 |
| rad35         | 0.000483845 | 0.994619 | 0.00258556  | 0.971244 |
| rad9          | 0.000452645 | 0.995071 | 0.00241883  | 0.973663 |
| rad45         | 0.000428678 | 0.995500 | 0.00229076  | 0.975954 |
| rad59         | 0.000403645 | 0.995904 | 0.00215698  | 0.978111 |
| rad47         | 0.000367138 | 0.996271 | 0.00196190  | 0.980072 |
| rad46         | 0.000305797 | 0.996577 | 0.00163411  | 0.981707 |
| rad23         | 0.000294429 | 0.996871 | 0.00157336  | 0.983280 |
| PhCCCH3+H     | 0.000284749 | 0.997156 | 0.00152163  | 0.984802 |
| rad8          | 0.000267691 | 0.997423 | 0.00143048  | 0.986232 |
| rad67         | 0.000248380 | 0.997672 | 0.00132729  | 0.987559 |
| rad73         | 0.000228543 | 0.997900 | 0.00122128  | 0.988781 |
| rad19syn      | 0.000219425 | 0.998120 | 0.00117256  | 0.989953 |
| PAH1+H        | 0.000213743 | 0.998333 | 0.00114219  | 0.991095 |
| PAH10+CH3     | 0.000178980 | 0.998512 | 0.000956428 | 0.992052 |
| rad60syn      | 0.000173307 | 0.998686 | 0.000926114 | 0.992978 |
| rad58         | 0.000171937 | 0.998858 | 0.000918791 | 0.993897 |
| rad6          | 0.000169019 | 0.999027 | 0.000903196 | 0.994800 |
| rad52         | 0.000156563 | 0.999183 | 0.000836637 | 0.995637 |
| rad72         | 0.000132932 | 0.999316 | 0.000710360 | 0.996347 |
| rad60anti     | 0.000130436 | 0.999447 | 0.000697022 | 0.997044 |
| PAH8+H        | 8.06393e-05 | 0.999527 | 0.000430918 | 0.997475 |
| rad36         | 7.78646e-05 | 0.999605 | 0.000416090 | 0.997891 |
| rad24         | 7.20985e-05 | 0.999677 | 0.000385278 | 0.998276 |
| rad15         | 4.89980e-05 | 0.999726 | 0.000261834 | 0.998538 |
| rad70         | 4.34532e-05 | 0.999770 | 0.000232204 | 0.998770 |
| PhcycC3H3_A+H | 3.97384e-05 | 0.999809 | 0.000212353 | 0.998983 |
| rad12         | 3.62829e-05 | 0.999846 | 0.000193887 | 0.999176 |
| rad65         | 2.40989e-05 | 0.999870 | 0.000128779 | 0.999305 |
| rad28         | 2.12781e-05 | 0.999891 | 0.000113705 | 0.999419 |
| rad34         | 2.03893e-05 | 0.999912 | 0.000108955 | 0.999528 |
| rad37         | 1.18678e-05 | 0.999923 | 6.34185e-05 | 0.999591 |
| rad54         | 8.96772e-06 | 0.999932 | 4.79214e-05 | 0.999639 |
| rad7          | 8.50003e-06 | 0.999941 | 4.54222e-05 | 0.999685 |
| rad68syn      | 7.78699e-06 | 0.999949 | 4.16119e-05 | 0.999726 |
| rad64         | 6.42824e-06 | 0.999955 | 3.43510e-05 | 0.999761 |
| rad40syn      | 5.63303e-06 | 0.999961 | 3.01016e-05 | 0.999791 |
| rad25         | 5.11732e-06 | 0.999966 | 2.73458e-05 | 0.999818 |
| rad26         | 5.08692e-06 | 0.999971 | 2.71833e-05 | 0.999845 |
| rad68anti     | 4.94609e-06 | 0.999976 | 2.64308e-05 | 0.999872 |
| rad40anti     | 4.43887e-06 | 0.999980 | 2.37203e-05 | 0.999895 |
| rad56         | 2.95025e-06 | 0.999983 | 1.57655e-05 | 0.999911 |
| rad10         | 2.59399e-06 | 0.999986 | 1.38617e-05 | 0.999925 |
| rad62         | 2.43531e-06 | 0.999988 | 1.30137e-05 | 0.999938 |
| rad13         | 2.43199e-06 | 0.999991 | 1.29960e-05 | 0.999951 |
| rad61         | 2.08539e-06 | 0.999993 | 1.11438e-05 | 0.999962 |
| rad5          | 1.99938e-06 | 0.999995 | 1.06842e-05 | 0.999973 |
| rad53         | 1.58957e-06 | 0.999996 | 8.49431e-06 | 0.999981 |
| rad55         | 1.12339e-06 | 0.999997 | 6.00314e-06 | 0.999987 |
| rad42         | 6.22835e-07 | 0.999998 | 3.32829e-06 | 0.999991 |
| rad43         | 5.04483e-07 | 0.999999 | 2.69584e-06 | 0.999993 |
| rad2          | 3.43874e-07 | 0.999999 | 1.83758e-06 | 0.999995 |
| rad33         | 3.15677e-07 | 0.999999 | 1.68691e-06 | 0.999997 |
| rad14         | 1.68143e-07 | 0.999999 | 8.98518e-07 | 0.999998 |
| rad1          | 1.57835e-07 | 1.000000 | 8.43433e-07 | 0.999999 |
| rad41         | 1.45287e-07 | 1.000000 | 7.76381e-07 | 0.999999 |
| rad27         | 4.30368e-08 | 1.000000 | 2.29979e-07 | 1.000000 |
| rad3          | 9.11103e-09 | 1.000000 | 4.86872e-08 | 1.000000 |
| rad4          | 4.89445e-09 | 1.000000 | 2.61548e-08 | 1.000000 |

10000000. Pa, 2500.00000 K

| Rate constant | True (fraction)    | Effective (fraction) |
|---------------|--------------------|----------------------|
| Total         | 5.32896e-13 (1.00) | 9.22501e-14 (1.00)   |

| species     | PYtrue     | Cumul    | PYeffective | Cumul    |
|-------------|------------|----------|-------------|----------|
| Benzyl+C2H2 | 0.826889   | 0.826889 | 0.00000     | 0.00000  |
| PhCH2CCH+H  | 0.0759766  | 0.902866 | 0.438888    | 0.438888 |
| PhCHCCH2+H  | 0.0280127  | 0.930878 | 0.161819    | 0.600707 |
| Indene+H    | 0.0187349  | 0.949613 | 0.108225    | 0.708932 |
| Ph+Allene   | 0.0151549  | 0.964768 | 0.0875443   | 0.796476 |
| rad20       | 0.00997875 | 0.974747 | 0.0576435   | 0.854120 |
| PAH3+H      | 0.00550624 | 0.980253 | 0.0318075   | 0.885927 |
| rad21       | 0.00210828 | 0.982361 | 0.0121787   | 0.898106 |
| PAH7+H      | 0.00189066 | 0.984252 | 0.0109217   | 0.909028 |
| rad50       | 0.00116860 | 0.985421 | 0.00675059  | 0.915778 |
| PhCCH+CH3   | 0.00107324 | 0.986494 | 0.00619970  | 0.921978 |



|               |             |          |             |          |
|---------------|-------------|----------|-------------|----------|
| rad39         | 0.00106467  | 0.987559 | 0.00615020  | 0.928128 |
| PAH9+H        | 0.000978935 | 0.988537 | 0.00565494  | 0.933783 |
| rad51         | 0.000955830 | 0.989493 | 0.00552148  | 0.939305 |
| rad71         | 0.000708508 | 0.990202 | 0.00409279  | 0.943397 |
| Ph+MeAc       | 0.000683032 | 0.990885 | 0.00394562  | 0.947343 |
| rad22         | 0.000652647 | 0.991537 | 0.00377010  | 0.951113 |
| rad18         | 0.000640268 | 0.992178 | 0.00369859  | 0.954812 |
| rad11         | 0.000637804 | 0.992816 | 0.00368436  | 0.958496 |
| rad38         | 0.000598861 | 0.993414 | 0.00345940  | 0.961955 |
| rad30         | 0.000542597 | 0.993957 | 0.00313438  | 0.965090 |
| rad19anti     | 0.000464998 | 0.994422 | 0.00268612  | 0.967776 |
| rad35         | 0.000452845 | 0.994875 | 0.00261592  | 0.970392 |
| rad9          | 0.000427122 | 0.995302 | 0.00246733  | 0.972859 |
| rad45         | 0.000403059 | 0.995705 | 0.00232832  | 0.975188 |
| rad59         | 0.000367451 | 0.996072 | 0.00212263  | 0.977310 |
| rad47         | 0.000337134 | 0.996410 | 0.00194750  | 0.979258 |
| rad23         | 0.000317035 | 0.996727 | 0.00183139  | 0.981089 |
| rad46         | 0.000303361 | 0.997030 | 0.00175240  | 0.982841 |
| PhCCCH3+H     | 0.000262256 | 0.997292 | 0.00151496  | 0.984356 |
| rad8          | 0.000249871 | 0.997542 | 0.00144341  | 0.985800 |
| rad67         | 0.000235036 | 0.997777 | 0.00135772  | 0.987158 |
| rad73         | 0.000227900 | 0.998005 | 0.00131649  | 0.988474 |
| PAH1+H        | 0.000202021 | 0.998207 | 0.00116700  | 0.989641 |
| rad19syn      | 0.000198738 | 0.998406 | 0.00114803  | 0.990789 |
| rad6          | 0.000181200 | 0.998587 | 0.00104673  | 0.991836 |
| PAH10+CH3     | 0.000169477 | 0.998757 | 0.000979006 | 0.992815 |
| rad60syn      | 0.000160062 | 0.998917 | 0.000924618 | 0.993739 |
| rad52         | 0.000155638 | 0.999072 | 0.000899060 | 0.994638 |
| rad58         | 0.000153120 | 0.999225 | 0.000884520 | 0.995523 |
| rad72         | 0.000133055 | 0.999358 | 0.000768611 | 0.996292 |
| rad60anti     | 0.000120175 | 0.999479 | 0.000694208 | 0.996986 |
| PAH8+H        | 7.38036e-05 | 0.999552 | 0.000426336 | 0.997412 |
| rad36         | 7.31430e-05 | 0.999626 | 0.000422520 | 0.997835 |
| rad24         | 6.72827e-05 | 0.999693 | 0.000388667 | 0.998223 |
| rad15         | 4.59927e-05 | 0.999739 | 0.000265682 | 0.998489 |
| rad70         | 4.02201e-05 | 0.999779 | 0.000232336 | 0.998721 |
| PhcycC3H3_A+H | 3.96045e-05 | 0.999819 | 0.000228781 | 0.998950 |
| rad12         | 3.25735e-05 | 0.999851 | 0.000188165 | 0.999138 |
| rad65         | 2.43021e-05 | 0.999875 | 0.000140384 | 0.999279 |
| rad28         | 2.26799e-05 | 0.999898 | 0.000131013 | 0.999410 |
| rad34         | 1.88146e-05 | 0.999917 | 0.000108685 | 0.999518 |
| rad37         | 1.12634e-05 | 0.999928 | 6.50643e-05 | 0.999583 |
| rad54         | 8.66281e-06 | 0.999937 | 5.00418e-05 | 0.999633 |
| rad7          | 8.20171e-06 | 0.999945 | 4.73782e-05 | 0.999681 |
| rad68syn      | 7.14496e-06 | 0.999952 | 4.12737e-05 | 0.999722 |
| rad64         | 6.07464e-06 | 0.999958 | 3.50909e-05 | 0.999757 |
| rad40syn      | 5.16152e-06 | 0.999964 | 2.98162e-05 | 0.999787 |
| rad26         | 5.00257e-06 | 0.999969 | 2.88980e-05 | 0.999816 |
| rad25         | 4.76595e-06 | 0.999973 | 2.75311e-05 | 0.999843 |
| rad68anti     | 4.53844e-06 | 0.999978 | 2.62169e-05 | 0.999870 |
| rad40anti     | 4.06587e-06 | 0.999982 | 2.34870e-05 | 0.999893 |
| rad56         | 2.83791e-06 | 0.999985 | 1.63935e-05 | 0.999910 |
| rad62         | 2.31416e-06 | 0.999987 | 1.33681e-05 | 0.999923 |
| rad10         | 2.30742e-06 | 0.999989 | 1.33291e-05 | 0.999936 |
| rad13         | 2.29870e-06 | 0.999992 | 1.32787e-05 | 0.999950 |
| rad5          | 2.06842e-06 | 0.999994 | 1.19485e-05 | 0.999962 |
| rad61         | 1.97244e-06 | 0.999996 | 1.13940e-05 | 0.999973 |
| rad53         | 1.53017e-06 | 0.999997 | 8.83921e-06 | 0.999982 |
| rad55         | 1.08425e-06 | 0.999998 | 6.26331e-06 | 0.999988 |
| rad42         | 5.91978e-07 | 0.999999 | 3.41963e-06 | 0.999991 |
| rad43         | 4.68179e-07 | 0.999999 | 2.70450e-06 | 0.999994 |
| rad2          | 3.01645e-07 | 1.000000 | 1.74249e-06 | 0.999996 |
| rad33         | 2.91929e-07 | 1.000000 | 1.68636e-06 | 0.999998 |
| rad14         | 1.48122e-07 | 1.000000 | 8.55647e-07 | 0.999998 |
| rad1          | 1.41382e-07 | 1.000000 | 8.16713e-07 | 0.999999 |
| rad41         | 1.34647e-07 | 1.000000 | 7.77806e-07 | 1.000000 |
| rad27         | 3.73447e-08 | 1.000000 | 2.15727e-07 | 1.000000 |
| rad3          | 8.32768e-09 | 1.000000 | 4.81059e-08 | 1.000000 |
| rad4          | 4.53738e-09 | 1.000000 | 2.62108e-08 | 1.000000 |

100000000. Pa, 2750.00000 K

=====

| Rate constant | True (fraction)     | Effective (fraction) |             |          |
|---------------|---------------------|----------------------|-------------|----------|
| Total         | 8.05113e-13 (1.00 ) | 1.32743e-13 (1.00 )  |             |          |
| species       | PYtrue              | Cumul                | PYeffective | Cumul    |
| Benzyl+C2H2   | 0.835125            | 0.835125             | 0.00000     | 0.00000  |
| PhCH2CCH+H    | 0.0749908           | 0.910116             | 0.454835    | 0.454835 |

|               |             |          |             |          |
|---------------|-------------|----------|-------------|----------|
| PhCHCCH2+H    | 0.0263774   | 0.936493 | 0.159985    | 0.614820 |
| Indene+H      | 0.0180956   | 0.954589 | 0.109754    | 0.724574 |
| Ph+Allene     | 0.0145523   | 0.969141 | 0.0882624   | 0.812836 |
| rad20         | 0.00745398  | 0.976595 | 0.0452099   | 0.858046 |
| PAH3+H        | 0.00489149  | 0.981487 | 0.0296679   | 0.887714 |
| rad21         | 0.00181432  | 0.983301 | 0.0110042   | 0.898718 |
| PAH7+H        | 0.00175585  | 0.985057 | 0.0106496   | 0.909368 |
| rad50         | 0.00112924  | 0.986186 | 0.00684906  | 0.916217 |
| rad39         | 0.00102524  | 0.987211 | 0.00621830  | 0.922435 |
| PhCCH+CH3     | 0.000987540 | 0.988199 | 0.00598963  | 0.928425 |
| PAH9+H        | 0.000949649 | 0.989148 | 0.00575982  | 0.934185 |
| rad51         | 0.000926414 | 0.990075 | 0.00561889  | 0.939804 |
| rad71         | 0.000689904 | 0.990765 | 0.00418441  | 0.943988 |
| Ph+MeAc       | 0.000651268 | 0.991416 | 0.00395008  | 0.947938 |
| rad11         | 0.000649903 | 0.992066 | 0.00394180  | 0.951880 |
| rad22         | 0.000603236 | 0.992669 | 0.00365875  | 0.955539 |
| rad38         | 0.000582106 | 0.993251 | 0.00353059  | 0.959069 |
| rad18         | 0.000529545 | 0.993781 | 0.00321180  | 0.962281 |
| rad30         | 0.000511522 | 0.994292 | 0.00310249  | 0.965384 |
| rad19anti     | 0.000449205 | 0.994742 | 0.00272452  | 0.968108 |
| rad35         | 0.000418437 | 0.995160 | 0.00253791  | 0.970646 |
| rad9          | 0.000415211 | 0.995575 | 0.00251834  | 0.973164 |
| rad45         | 0.000372307 | 0.995947 | 0.00225812  | 0.975423 |
| rad59         | 0.000329692 | 0.996277 | 0.00199965  | 0.977422 |
| rad23         | 0.000311050 | 0.996588 | 0.00188659  | 0.979309 |
| rad47         | 0.000304327 | 0.996893 | 0.00184581  | 0.981155 |
| rad46         | 0.000293725 | 0.997186 | 0.00178150  | 0.982936 |
| PhCCCH3+H     | 0.000243235 | 0.997429 | 0.00147527  | 0.984411 |
| rad8          | 0.000238945 | 0.997668 | 0.00144925  | 0.985861 |
| rad67         | 0.000223692 | 0.997892 | 0.00135674  | 0.987217 |
| rad73         | 0.000221585 | 0.998114 | 0.00134396  | 0.988561 |
| rad6          | 0.000198371 | 0.998312 | 0.00120316  | 0.989764 |
| PAH1+H        | 0.000186527 | 0.998499 | 0.00113132  | 0.990896 |
| rad19syn      | 0.000182352 | 0.998681 | 0.00110600  | 0.992002 |
| PAH10+CH3     | 0.000158971 | 0.998840 | 0.000964194 | 0.992966 |
| rad52         | 0.000150934 | 0.998991 | 0.000915443 | 0.993881 |
| rad60syn      | 0.000146171 | 0.999137 | 0.000886560 | 0.994768 |
| rad58         | 0.000132945 | 0.999270 | 0.000806339 | 0.995574 |
| rad72         | 0.000129798 | 0.999400 | 0.000787252 | 0.996362 |
| rad60anti     | 0.000109434 | 0.999509 | 0.000663738 | 0.997025 |
| rad36         | 6.75290e-05 | 0.999577 | 0.000409577 | 0.997435 |
| PAH8+H        | 6.70577e-05 | 0.999644 | 0.000406719 | 0.997842 |
| rad24         | 6.10051e-05 | 0.999705 | 0.000370009 | 0.998212 |
| rad15         | 4.39413e-05 | 0.999749 | 0.000266513 | 0.998478 |
| PhcycC3H3_A+H | 4.11443e-05 | 0.999790 | 0.000249549 | 0.998728 |
| rad70         | 3.73509e-05 | 0.999827 | 0.000226541 | 0.998954 |
| rad12         | 3.00829e-05 | 0.999857 | 0.000182459 | 0.999137 |
| rad65         | 2.35559e-05 | 0.999881 | 0.000142872 | 0.999280 |
| rad28         | 2.21523e-05 | 0.999903 | 0.000134359 | 0.999414 |
| rad34         | 1.73747e-05 | 0.999920 | 0.000105381 | 0.999519 |
| rad37         | 1.60365e-05 | 0.999931 | 6.45123e-05 | 0.999584 |
| rad54         | 8.58695e-06 | 0.999940 | 5.20816e-05 | 0.999636 |
| rad7          | 8.46787e-06 | 0.999948 | 5.13594e-05 | 0.999687 |
| rad68syn      | 6.52625e-06 | 0.999955 | 3.95831e-05 | 0.999727 |
| rad64         | 5.60083e-06 | 0.999960 | 3.39702e-05 | 0.999761 |
| rad26         | 4.72277e-06 | 0.999965 | 2.86446e-05 | 0.999789 |
| rad40syn      | 4.70046e-06 | 0.999970 | 2.85093e-05 | 0.999818 |
| rad25         | 4.58757e-06 | 0.999974 | 2.78246e-05 | 0.999846 |
| rad68anti     | 4.14572e-06 | 0.999978 | 2.51446e-05 | 0.999871 |
| rad40anti     | 3.69980e-06 | 0.999982 | 2.24400e-05 | 0.999893 |
| rad56         | 2.78019e-06 | 0.999985 | 1.68624e-05 | 0.999910 |
| rad13         | 2.32312e-06 | 0.999987 | 1.40902e-05 | 0.999924 |
| rad62         | 2.17459e-06 | 0.999989 | 1.31893e-05 | 0.999937 |
| rad10         | 2.06429e-06 | 0.999991 | 1.25203e-05 | 0.999950 |
| rad5          | 1.93218e-06 | 0.999993 | 1.17191e-05 | 0.999962 |
| rad61         | 1.84393e-06 | 0.999995 | 1.11838e-05 | 0.999973 |
| rad53         | 1.50230e-06 | 0.999997 | 9.11175e-06 | 0.999982 |
| rad55         | 1.07230e-06 | 0.999998 | 6.50374e-06 | 0.999989 |
| rad42         | 5.55919e-07 | 0.999998 | 3.37177e-06 | 0.999992 |
| rad43         | 4.33930e-07 | 0.999999 | 2.63188e-06 | 0.999995 |
| rad33         | 2.88151e-07 | 0.999999 | 1.74769e-06 | 0.999996 |
| rad2          | 2.74477e-07 | 0.999999 | 1.66476e-06 | 0.999998 |
| rad14         | 1.30816e-07 | 0.999999 | 7.93428e-07 | 0.999999 |
| rad1          | 1.30766e-07 | 1.000000 | 7.93124e-07 | 1.000000 |
| rad41         | 1.24411e-07 | 1.000000 | 7.54581e-07 | 1.000000 |
| rad27         | 3.29737e-08 | 1.000000 | 1.99992e-07 | 1.000000 |
| rad3          | 8.06393e-09 | 1.000000 | 4.89094e-08 | 1.000000 |
| rad4          | 4.48467e-09 | 1.000000 | 2.72005e-08 | 1.000000 |

10000000. Pa, 3000.00000 K

=====

Rate constant | True (fraction)                      Effective (fraction)

Total | 1.15309e-12 (1.00 ) 1.87351e-13 (1.00 )

| species       | PYtrue      | Cumul    | PYeffective | Cumul    |
|---------------|-------------|----------|-------------|----------|
| Benzyl+C2H2   | 0.837523    | 0.837523 | 0.00000     | 0.00000  |
| PhCH2CCH+H    | 0.0780128   | 0.915536 | 0.480146    | 0.480146 |
| PhCHCCH2+H    | 0.0255322   | 0.941068 | 0.157143    | 0.637289 |
| Indene+H      | 0.0171271   | 0.958195 | 0.105412    | 0.742701 |
| Ph+Allene     | 0.0146289   | 0.972824 | 0.0900366   | 0.832738 |
| rad20         | 0.00556762  | 0.978392 | 0.0342671   | 0.867005 |
| PAH3+H        | 0.00438470  | 0.982776 | 0.0269865   | 0.893991 |
| PAH7+H        | 0.00162322  | 0.984400 | 0.00999043  | 0.903982 |
| rad21         | 0.00152100  | 0.985921 | 0.00936133  | 0.913343 |
| rad50         | 0.00107210  | 0.986993 | 0.00659848  | 0.919941 |
| rad39         | 0.000971082 | 0.987964 | 0.00597672  | 0.925918 |
| PhCCH+CH3     | 0.000926664 | 0.988890 | 0.00570334  | 0.931621 |
| PAH9+H        | 0.000902187 | 0.989793 | 0.00555270  | 0.937174 |
| rad51         | 0.000881674 | 0.990674 | 0.00542644  | 0.942601 |
| rad71         | 0.000659312 | 0.991334 | 0.00405787  | 0.946659 |
| rad11         | 0.000635519 | 0.991969 | 0.00391143  | 0.950570 |
| Ph+MeAc       | 0.000633231 | 0.992602 | 0.00389735  | 0.954467 |
| rad38         | 0.000555895 | 0.993158 | 0.00342137  | 0.957889 |
| rad22         | 0.000531371 | 0.993690 | 0.00327043  | 0.961159 |
| rad30         | 0.000482060 | 0.994172 | 0.00296694  | 0.964126 |
| rad19anti     | 0.000444210 | 0.994616 | 0.00273398  | 0.966860 |
| rad18         | 0.000421477 | 0.995037 | 0.00259406  | 0.969454 |
| rad9          | 0.000413264 | 0.995451 | 0.00254352  | 0.971998 |
| rad35         | 0.000388579 | 0.995839 | 0.00239159  | 0.974389 |
| rad45         | 0.000339416 | 0.996179 | 0.00208900  | 0.976478 |
| rad59         | 0.000298693 | 0.996477 | 0.00183836  | 0.978317 |
| rad23         | 0.000293124 | 0.996770 | 0.00180409  | 0.980121 |
| rad46         | 0.000279472 | 0.997050 | 0.00172007  | 0.981841 |
| rad47         | 0.000271482 | 0.997321 | 0.00167089  | 0.983512 |
| rad8          | 0.000232233 | 0.997554 | 0.00142932  | 0.984941 |
| PhCCCH3+H     | 0.000230123 | 0.997784 | 0.00141634  | 0.986357 |
| rad67         | 0.000216590 | 0.998000 | 0.00133305  | 0.987690 |
| rad6          | 0.000213977 | 0.998214 | 0.00131697  | 0.989007 |
| rad73         | 0.000211478 | 0.998426 | 0.00130159  | 0.990309 |
| rad19syn      | 0.000172105 | 0.998598 | 0.00105925  | 0.991368 |
| PAH1+H        | 0.000170366 | 0.998768 | 0.00104855  | 0.992417 |
| PAH10+CH3     | 0.000149559 | 0.998918 | 0.000920491 | 0.993337 |
| rad52         | 0.000143731 | 0.999062 | 0.000884624 | 0.994222 |
| rad60syn      | 0.000134604 | 0.999196 | 0.000828449 | 0.995050 |
| rad72         | 0.000124241 | 0.999320 | 0.000764668 | 0.995815 |
| rad58         | 0.000115972 | 0.999436 | 0.000713775 | 0.996529 |
| rad60anti     | 0.000100520 | 0.999537 | 0.000618673 | 0.997147 |
| rad36         | 6.15483e-05 | 0.999598 | 0.000378812 | 0.997526 |
| PAH8+H        | 6.11257e-05 | 0.999660 | 0.000376210 | 0.997902 |
| rad24         | 5.41378e-05 | 0.999714 | 0.000333202 | 0.998236 |
| PhcycC3H3_A+H | 4.35670e-05 | 0.999757 | 0.000268142 | 0.998504 |
| rad15         | 4.29296e-05 | 0.999800 | 0.000264219 | 0.998768 |
| rad70         | 3.52629e-05 | 0.999835 | 0.000217033 | 0.998985 |
| rad12         | 2.87426e-05 | 0.999864 | 0.000176902 | 0.999162 |
| rad65         | 2.22775e-05 | 0.999886 | 0.000137111 | 0.999299 |
| rad28         | 2.11167e-05 | 0.999908 | 0.000129967 | 0.999429 |
| rad34         | 1.62687e-05 | 0.999924 | 0.000100129 | 0.999529 |
| rad37         | 1.01181e-05 | 0.999934 | 6.22736e-05 | 0.999591 |
| rad7          | 9.03833e-06 | 0.999943 | 5.56282e-05 | 0.999647 |
| rad54         | 8.67948e-06 | 0.999952 | 5.34196e-05 | 0.999700 |
| rad68syn      | 6.00511e-06 | 0.999958 | 3.69597e-05 | 0.999737 |
| rad64         | 5.10252e-06 | 0.999963 | 3.14045e-05 | 0.999769 |
| rad25         | 4.50098e-06 | 0.999967 | 2.77022e-05 | 0.999796 |
| rad26         | 4.48723e-06 | 0.999972 | 2.76176e-05 | 0.999824 |
| rad40syn      | 4.30203e-06 | 0.999976 | 2.64777e-05 | 0.999851 |
| rad68anti     | 3.81509e-06 | 0.999980 | 2.34807e-05 | 0.999874 |
| rad40anti     | 3.38135e-06 | 0.999983 | 2.08112e-05 | 0.999895 |
| rad56         | 2.75908e-06 | 0.999986 | 1.69813e-05 | 0.999912 |
| rad13         | 2.41673e-06 | 0.999988 | 1.48743e-05 | 0.999927 |
| rad62         | 2.03680e-06 | 0.999990 | 1.25359e-05 | 0.999939 |
| rad10         | 1.89458e-06 | 0.999992 | 1.16606e-05 | 0.999951 |
| rad5          | 1.81570e-06 | 0.999994 | 1.11751e-05 | 0.999962 |
| rad61         | 1.72478e-06 | 0.999996 | 1.06155e-05 | 0.999973 |
| rad53         | 1.49609e-06 | 0.999997 | 9.20800e-06 | 0.999982 |
| rad55         | 1.08012e-06 | 0.999998 | 6.64784e-06 | 0.999989 |
| rad42         | 5.19813e-07 | 0.999999 | 3.19929e-06 | 0.999992 |
| rad43         | 4.07322e-07 | 0.999999 | 2.50694e-06 | 0.999994 |
| rad33         | 2.95414e-07 | 1.000000 | 1.81819e-06 | 0.999996 |

|       |             |          |             |          |
|-------|-------------|----------|-------------|----------|
| rad2  | 2.61232e-07 | 1.000000 | 1.60780e-06 | 0.999998 |
| rad1  | 1.25559e-07 | 1.00000  | 7.72776e-07 | 0.999998 |
| rad14 | 1.16855e-07 | 1.00000  | 7.19210e-07 | 0.999999 |
| rad41 | 1.16128e-07 | 1.00000  | 7.14733e-07 | 1.000000 |
| rad27 | 3.00914e-08 | 1.00000  | 1.85203e-07 | 1.00000  |
| rad3  | 8.09393e-09 | 1.00000  | 4.98157e-08 | 1.00000  |
| rad4  | 4.58696e-09 | 1.00000  | 2.82314e-08 | 1.00000  |

100000000. Pa, 3250.00000 K

| Rate constant | True (fraction)     | Effective (fraction) |
|---------------|---------------------|----------------------|
| Total         | 1.58309e-12 (1.00 ) | 2.61172e-13 (1.00 )  |

| species       | PYtrue      | Cumul    | PYeffective | Cumul    |
|---------------|-------------|----------|-------------|----------|
| Benzyl+C2H2   | 0.835024    | 0.835024 | 0.00000     | 0.00000  |
| PhCH2CCH+H    | 0.0840477   | 0.919072 | 0.509454    | 0.509454 |
| PhCHCCH2+H    | 0.0254516   | 0.944523 | 0.154275    | 0.663729 |
| Indene+H      | 0.0159815   | 0.960505 | 0.0968718   | 0.760601 |
| Ph+Allene     | 0.0152621   | 0.975767 | 0.0925112   | 0.853112 |
| rad20         | 0.00419267  | 0.979960 | 0.0254138   | 0.878526 |
| PAH3+H        | 0.00403121  | 0.983991 | 0.0244351   | 0.902961 |
| PAH7+H        | 0.00150881  | 0.985500 | 0.00914564  | 0.912107 |
| rad21         | 0.00125559  | 0.986755 | 0.00761076  | 0.919717 |
| rad50         | 0.00100550  | 0.987761 | 0.00609481  | 0.925812 |
| rad39         | 0.000909791 | 0.988670 | 0.00551469  | 0.931327 |
| PhCCH+CH3     | 0.000893531 | 0.989564 | 0.00541613  | 0.936743 |
| PAH9+H        | 0.000845262 | 0.990409 | 0.00512354  | 0.941866 |
| rad51         | 0.000828225 | 0.991237 | 0.00502028  | 0.946887 |
| Ph+MeAc       | 0.000628864 | 0.991866 | 0.00381185  | 0.950699 |
| rad71         | 0.000621683 | 0.992488 | 0.00376832  | 0.954467 |
| rad11         | 0.000596773 | 0.993085 | 0.00361733  | 0.958084 |
| rad38         | 0.000524304 | 0.993609 | 0.00317806  | 0.961262 |
| rad30         | 0.000455792 | 0.994065 | 0.00276278  | 0.964025 |
| rad22         | 0.000450583 | 0.994515 | 0.00273121  | 0.966756 |
| rad19anti     | 0.000449447 | 0.994965 | 0.00272432  | 0.969481 |
| rad9          | 0.000414834 | 0.995380 | 0.00251451  | 0.971995 |
| rad35         | 0.000366026 | 0.995746 | 0.00221866  | 0.974214 |
| rad18         | 0.000327261 | 0.996073 | 0.00198369  | 0.976197 |
| rad45         | 0.000306509 | 0.996380 | 0.00185790  | 0.978055 |
| rad59         | 0.000276948 | 0.996657 | 0.00167872  | 0.979734 |
| rad23         | 0.000270204 | 0.996927 | 0.00163784  | 0.981372 |
| rad46         | 0.000262742 | 0.997189 | 0.00159261  | 0.982965 |
| rad47         | 0.000240366 | 0.997430 | 0.00145698  | 0.984422 |
| rad8          | 0.000227176 | 0.997657 | 0.00137703  | 0.985799 |
| PhCCCH3+H     | 0.000223601 | 0.997881 | 0.00135536  | 0.987154 |
| rad6          | 0.000222034 | 0.998103 | 0.00134586  | 0.988500 |
| rad67         | 0.000213846 | 0.998316 | 0.00129623  | 0.989796 |
| rad73         | 0.000199178 | 0.998516 | 0.00120731  | 0.991003 |
| rad19syn      | 0.000168645 | 0.998684 | 0.00102224  | 0.992026 |
| PAH1+H        | 0.000155501 | 0.998840 | 0.000942570 | 0.992968 |
| PAH10+CH3     | 0.000142238 | 0.998982 | 0.000862172 | 0.993830 |
| rad52         | 0.000135108 | 0.999117 | 0.000818953 | 0.994649 |
| rad60syn      | 0.000126125 | 0.999243 | 0.000764508 | 0.995414 |
| rad72         | 0.000117311 | 0.999361 | 0.000711080 | 0.996125 |
| rad58         | 0.000104019 | 0.999465 | 0.000630511 | 0.996755 |
| rad60anti     | 9.40458e-05 | 0.999559 | 0.000570057 | 0.997325 |
| PAH8+H        | 5.64908e-05 | 0.999615 | 0.000342418 | 0.997668 |
| rad36         | 5.55771e-05 | 0.999671 | 0.000336880 | 0.998005 |
| rad24         | 4.73309e-05 | 0.999718 | 0.000286896 | 0.998292 |
| PhcycC3H3_A+H | 4.60555e-05 | 0.999764 | 0.000279165 | 0.998571 |
| rad15         | 4.24687e-05 | 0.999807 | 0.000257424 | 0.998828 |
| rad70         | 3.41414e-05 | 0.999841 | 0.000206948 | 0.999035 |
| rad12         | 2.82003e-05 | 0.999869 | 0.000170936 | 0.999206 |
| rad65         | 2.07342e-05 | 0.999890 | 0.000125680 | 0.999332 |
| rad28         | 1.98693e-05 | 0.999910 | 0.000120437 | 0.999452 |
| rad34         | 1.56001e-05 | 0.999925 | 9.45596e-05 | 0.999547 |
| rad37         | 9.76768e-06 | 0.999935 | 5.92066e-05 | 0.999606 |
| rad7          | 9.63331e-06 | 0.999945 | 5.83922e-05 | 0.999664 |
| rad54         | 8.87348e-06 | 0.999953 | 5.37865e-05 | 0.999718 |
| rad68syn      | 5.62887e-06 | 0.999959 | 3.41193e-05 | 0.999752 |
| rad64         | 4.64137e-06 | 0.999964 | 2.81336e-05 | 0.999780 |
| rad25         | 4.42311e-06 | 0.999968 | 2.68107e-05 | 0.999807 |
| rad26         | 4.32019e-06 | 0.999972 | 2.61868e-05 | 0.999833 |
| rad40syn      | 4.00043e-06 | 0.999976 | 2.42486e-05 | 0.999858 |
| rad68anti     | 3.57661e-06 | 0.999980 | 2.16796e-05 | 0.999879 |
| rad40anti     | 3.13734e-06 | 0.999983 | 1.90169e-05 | 0.999898 |
| rad56         | 2.75488e-06 | 0.999986 | 1.66987e-05 | 0.999915 |
| rad13         | 2.50373e-06 | 0.999988 | 1.51763e-05 | 0.999930 |

|       |             |          |             |          |
|-------|-------------|----------|-------------|----------|
| rad62 | 1.91122e-06 | 0.999990 | 1.15849e-05 | 0.999942 |
| rad10 | 1.79636e-06 | 0.999992 | 1.08886e-05 | 0.999953 |
| rad5  | 1.75949e-06 | 0.999994 | 1.06651e-05 | 0.999963 |
| rad61 | 1.62658e-06 | 0.999995 | 9.85951e-06 | 0.999973 |
| rad53 | 1.50090e-06 | 0.999997 | 9.09768e-06 | 0.999982 |
| rad55 | 1.09964e-06 | 0.999998 | 6.66548e-06 | 0.999989 |
| rad42 | 4.86197e-07 | 0.999999 | 2.94708e-06 | 0.999992 |
| rad43 | 3.91257e-07 | 0.999999 | 2.37160e-06 | 0.999994 |
| rad33 | 3.05421e-07 | 0.999999 | 1.85131e-06 | 0.999996 |
| rad2  | 2.58080e-07 | 1.000000 | 1.56435e-06 | 0.999998 |
| rad1  | 1.24015e-07 | 1.000000 | 7.51715e-07 | 0.999998 |
| rad41 | 1.10579e-07 | 1.000000 | 6.70275e-07 | 0.999999 |
| rad14 | 1.06051e-07 | 1.000000 | 6.42829e-07 | 1.000000 |
| rad27 | 2.85609e-08 | 1.000000 | 1.73121e-07 | 1.000000 |
| rad3  | 8.20779e-09 | 1.000000 | 4.97514e-08 | 1.000000 |
| rad4  | 4.71389e-09 | 1.000000 | 2.85732e-08 | 1.000000 |

100000000. Pa, 3500.00000 K

=====

| Rate constant | True (fraction)     | Effective (fraction) |
|---------------|---------------------|----------------------|
| Total         | 2.10046e-12 (1.00 ) | 3.59487e-13 (1.00 )  |

| species       | PYtrue      | Cumul    | PYeffective | Cumul    |
|---------------|-------------|----------|-------------|----------|
| Benzyl+C2H2   | 0.828853    | 0.828853 | 0.00000     | 0.00000  |
| PhCH2CCH+H    | 0.0921118   | 0.920965 | 0.538202    | 0.538202 |
| PhCHCCH2+H    | 0.0260141   | 0.946979 | 0.151998    | 0.690200 |
| Ph+Allene     | 0.0163056   | 0.963284 | 0.0952722   | 0.785472 |
| Indene+H      | 0.0147703   | 0.978055 | 0.0863018   | 0.871774 |
| PAH3+H        | 0.00382081  | 0.981876 | 0.0223247   | 0.894099 |
| rad20         | 0.00319854  | 0.985074 | 0.0186888   | 0.912787 |
| PAH7+H        | 0.00141856  | 0.986493 | 0.00828853  | 0.921076 |
| rad21         | 0.00102858  | 0.987521 | 0.00600991  | 0.927086 |
| rad50         | 0.000935346 | 0.988457 | 0.00546515  | 0.932551 |
| PhCCH+CH3     | 0.000888319 | 0.989345 | 0.00519037  | 0.937741 |
| rad39         | 0.000846532 | 0.990191 | 0.00494621  | 0.942688 |
| PAH9+H        | 0.000785053 | 0.990977 | 0.00458700  | 0.947275 |
| rad51         | 0.000770888 | 0.991747 | 0.00450424  | 0.951779 |
| Ph+MeAc       | 0.000635279 | 0.992383 | 0.00371188  | 0.955491 |
| rad71         | 0.000580694 | 0.992963 | 0.00339295  | 0.958884 |
| rad11         | 0.000542642 | 0.993506 | 0.00317061  | 0.962054 |
| rad38         | 0.000490247 | 0.993996 | 0.00286447  | 0.964919 |
| rad19anti     | 0.000461594 | 0.994458 | 0.00269706  | 0.967616 |
| rad30         | 0.000432201 | 0.994890 | 0.00252531  | 0.970141 |
| rad9          | 0.000413606 | 0.995304 | 0.00241666  | 0.972558 |
| rad22         | 0.000371830 | 0.995676 | 0.00217257  | 0.974730 |
| rad35         | 0.000350424 | 0.996026 | 0.00204750  | 0.976778 |
| rad45         | 0.000274859 | 0.996301 | 0.00160598  | 0.978384 |
| rad59         | 0.000263562 | 0.996564 | 0.00153997  | 0.979924 |
| rad18         | 0.000250597 | 0.996815 | 0.00146422  | 0.981388 |
| rad23         | 0.000245076 | 0.997060 | 0.00143196  | 0.982820 |
| rad46         | 0.000245041 | 0.997305 | 0.00143176  | 0.984252 |
| PhCCCH3+H     | 0.000223409 | 0.997528 | 0.00130536  | 0.985557 |
| rad8          | 0.000221873 | 0.997750 | 0.00129638  | 0.986854 |
| rad6          | 0.000220052 | 0.997970 | 0.00128575  | 0.988139 |
| rad67         | 0.000214418 | 0.998185 | 0.00125283  | 0.989392 |
| rad47         | 0.000211894 | 0.998397 | 0.00123808  | 0.990630 |
| rad73         | 0.000185863 | 0.998583 | 0.00108598  | 0.991716 |
| rad19syn      | 0.000171953 | 0.998755 | 0.00100471  | 0.992721 |
| PAH1+H        | 0.000143004 | 0.998898 | 0.000835563 | 0.993556 |
| PAH10+CH3     | 0.000137164 | 0.999035 | 0.000801440 | 0.994358 |
| rad52         | 0.000125846 | 0.999161 | 0.000735306 | 0.995093 |
| rad60syn      | 0.000120308 | 0.999281 | 0.000702951 | 0.995796 |
| rad72         | 0.000109699 | 0.999391 | 0.000640962 | 0.996437 |
| rad58         | 9.71081e-05 | 0.999488 | 0.000567394 | 0.997005 |
| rad60anti     | 8.96902e-05 | 0.999577 | 0.000524052 | 0.997529 |
| PAH8+H        | 5.35371e-05 | 0.999631 | 0.000312813 | 0.997841 |
| rad36         | 4.98403e-05 | 0.999681 | 0.000291213 | 0.998133 |
| PhcycC3H3_A+H | 4.80856e-05 | 0.999729 | 0.000280960 | 0.998414 |
| rad15         | 4.19610e-05 | 0.999771 | 0.000245174 | 0.998659 |
| rad24         | 4.09770e-05 | 0.999812 | 0.000239425 | 0.998898 |
| rad70         | 3.40110e-05 | 0.999846 | 0.000198724 | 0.999097 |
| rad12         | 2.80023e-05 | 0.999874 | 0.000163615 | 0.999260 |
| rad65         | 1.91041e-05 | 0.999893 | 0.000111624 | 0.999372 |
| rad28         | 1.84048e-05 | 0.999911 | 0.000107538 | 0.999480 |
| rad34         | 1.54050e-05 | 0.999927 | 9.00101e-05 | 0.999570 |
| rad7          | 1.00280e-05 | 0.999937 | 5.85930e-05 | 0.999628 |
| rad37         | 9.57824e-06 | 0.999946 | 5.59648e-05 | 0.999684 |
| rad54         | 9.12659e-06 | 0.999955 | 5.33259e-05 | 0.999738 |

|           |             |          |             |          |
|-----------|-------------|----------|-------------|----------|
| rad68syn  | 5.42878e-06 | 0.999961 | 3.17199e-05 | 0.999769 |
| rad25     | 4.30416e-06 | 0.999965 | 2.51489e-05 | 0.999794 |
| rad64     | 4.25195e-06 | 0.999969 | 2.48438e-05 | 0.999819 |
| rad26     | 4.17938e-06 | 0.999974 | 2.44198e-05 | 0.999844 |
| rad40syn  | 3.82087e-06 | 0.999977 | 2.23250e-05 | 0.999866 |
| rad68anti | 3.45006e-06 | 0.999981 | 2.01584e-05 | 0.999886 |
| rad40anti | 2.98806e-06 | 0.999984 | 1.74590e-05 | 0.999904 |
| rad56     | 2.76186e-06 | 0.999987 | 1.61373e-05 | 0.999920 |
| rad13     | 2.53327e-06 | 0.999989 | 1.48017e-05 | 0.999935 |
| rad62     | 1.80507e-06 | 0.999991 | 1.05468e-05 | 0.999945 |
| rad5      | 1.75213e-06 | 0.999993 | 1.02375e-05 | 0.999955 |
| rad10     | 1.75208e-06 | 0.999994 | 1.02373e-05 | 0.999966 |
| rad61     | 1.55216e-06 | 0.999996 | 9.06913e-06 | 0.999975 |
| rad53     | 1.51303e-06 | 0.999998 | 8.84048e-06 | 0.999983 |
| rad55     | 1.12630e-06 | 0.999999 | 6.58086e-06 | 0.999990 |
| rad42     | 4.56937e-07 | 0.999999 | 2.66985e-06 | 0.999993 |
| rad43     | 3.86667e-07 | 0.999999 | 2.25926e-06 | 0.999995 |
| rad33     | 3.11708e-07 | 1.000000 | 1.82128e-06 | 0.999997 |
| rad2      | 2.60310e-07 | 1.000000 | 1.52097e-06 | 0.999998 |
| rad1      | 1.23953e-07 | 1.000000 | 7.24245e-07 | 0.999999 |
| rad41     | 1.08077e-07 | 1.000000 | 6.31485e-07 | 1.000000 |
| rad14     | 9.78339e-08 | 1.000000 | 5.71635e-07 | 1.000000 |
| rad27     | 2.80282e-08 | 1.000000 | 1.63766e-07 | 1.000000 |
| rad3      | 8.24958e-09 | 1.000000 | 4.82016e-08 | 1.000000 |
| rad4      | 4.77430e-09 | 1.000000 | 2.78958e-08 | 1.000000 |

100000000. Pa, 3750.00000 K

=====  
Rate constant | True (fraction) | Effective (fraction)  
-----

Total | 2.70978e-12 (1.00 ) | 4.87370e-13 (1.00 )

| species       | PYtrue      | Cumul    | PYeffective | Cumul    |
|---------------|-------------|----------|-------------|----------|
| Benzyl+C2H2   | 0.820144    | 0.820144 | 0.000000    | 0.000000 |
| PhCH2CCH+H    | 0.101396    | 0.921540 | 0.563761    | 0.563761 |
| PhCHCCH2+H    | 0.0270732   | 0.948613 | 0.150527    | 0.714288 |
| Ph+Allene     | 0.0176304   | 0.966244 | 0.0980254   | 0.812313 |
| Indene+H      | 0.0135666   | 0.979810 | 0.0754305   | 0.887744 |
| PAH3+H        | 0.00371992  | 0.983530 | 0.0206828   | 0.908427 |
| rad20         | 0.00247791  | 0.986008 | 0.0137772   | 0.922204 |
| PAH7+H        | 0.00135207  | 0.987360 | 0.00751750  | 0.929721 |
| PhCCH+CH3     | 0.000910370 | 0.988270 | 0.00506166  | 0.934783 |
| rad50         | 0.000865574 | 0.989136 | 0.00481260  | 0.939596 |
| rad21         | 0.000840705 | 0.989977 | 0.00467433  | 0.944270 |
| rad39         | 0.000784538 | 0.990761 | 0.00436204  | 0.948632 |
| PAH9+H        | 0.000725633 | 0.991487 | 0.00403452  | 0.952667 |
| rad51         | 0.000712980 | 0.992200 | 0.00396417  | 0.956631 |
| Ph+MeAc       | 0.000648546 | 0.992848 | 0.00360592  | 0.960237 |
| rad71         | 0.000538953 | 0.993387 | 0.00299658  | 0.963233 |
| rad11         | 0.000482558 | 0.993870 | 0.00268302  | 0.965916 |
| rad19anti     | 0.000476239 | 0.994346 | 0.00264789  | 0.968564 |
| rad38         | 0.000455643 | 0.994802 | 0.00253338  | 0.971098 |
| rad30         | 0.000410329 | 0.995212 | 0.00228143  | 0.973379 |
| rad9          | 0.000405329 | 0.995617 | 0.00225363  | 0.975563 |
| rad35         | 0.000340112 | 0.995958 | 0.00189102  | 0.977524 |
| rad22         | 0.000301545 | 0.996259 | 0.00167659  | 0.979200 |
| rad59         | 0.000256333 | 0.996515 | 0.00142521  | 0.980625 |
| rad45         | 0.000245157 | 0.996761 | 0.00136307  | 0.981988 |
| PhCCCH3+H     | 0.000228897 | 0.996990 | 0.00127267  | 0.983261 |
| rad46         | 0.000227345 | 0.997217 | 0.00126404  | 0.984525 |
| rad23         | 0.000219334 | 0.997436 | 0.00121950  | 0.985745 |
| rad67         | 0.000216897 | 0.997653 | 0.00120595  | 0.986951 |
| rad8          | 0.000215173 | 0.997868 | 0.00119637  | 0.988147 |
| rad6          | 0.000208901 | 0.998077 | 0.00116149  | 0.989308 |
| rad18         | 0.000190801 | 0.998268 | 0.00106085  | 0.990369 |
| rad47         | 0.000186430 | 0.998454 | 0.00103655  | 0.991406 |
| rad19syn      | 0.000181587 | 0.998636 | 0.00100962  | 0.992416 |
| rad73         | 0.000172364 | 0.998808 | 0.000958347 | 0.993374 |
| PAH10+CH3     | 0.000134030 | 0.998942 | 0.000745207 | 0.994119 |
| PAH1+H        | 0.000133357 | 0.999076 | 0.000741465 | 0.994861 |
| rad52         | 0.000116482 | 0.999192 | 0.000647640 | 0.995508 |
| rad60syn      | 0.000116341 | 0.999309 | 0.000646855 | 0.996155 |
| rad72         | 0.000101900 | 0.999410 | 0.000566562 | 0.996722 |
| rad58         | 9.43747e-05 | 0.999505 | 0.000524724 | 0.997246 |
| rad60anti     | 8.68227e-05 | 0.999592 | 0.000482735 | 0.997729 |
| PAH8+H        | 5.25759e-05 | 0.999644 | 0.000292323 | 0.998021 |
| PhcycC3H3_A+H | 4.94939e-05 | 0.999694 | 0.000275186 | 0.998297 |
| rad36         | 4.44595e-05 | 0.999738 | 0.000247195 | 0.998544 |
| rad15         | 4.09447e-05 | 0.999779 | 0.000227653 | 0.998771 |

|           |             |          |             |          |
|-----------|-------------|----------|-------------|----------|
| rad24     | 3.52670e-05 | 0.999814 | 0.000196085 | 0.998967 |
| rad70     | 3.47893e-05 | 0.999849 | 0.000193429 | 0.999161 |
| rad12     | 2.77428e-05 | 0.999877 | 0.000154250 | 0.999315 |
| rad65     | 1.75083e-05 | 0.999894 | 9.73464e-05 | 0.999413 |
| rad28     | 1.67403e-05 | 0.999911 | 9.30761e-05 | 0.999506 |
| rad34     | 1.56708e-05 | 0.999927 | 8.71295e-05 | 0.999593 |
| rad7      | 1.00987e-05 | 0.999937 | 5.61490e-05 | 0.999649 |
| rad37     | 9.50202e-06 | 0.999946 | 5.28313e-05 | 0.999702 |
| rad54     | 9.41907e-06 | 0.999956 | 5.23701e-05 | 0.999754 |
| rad68syn  | 5.42252e-06 | 0.999961 | 3.01493e-05 | 0.999784 |
| rad25     | 4.12911e-06 | 0.999965 | 2.29579e-05 | 0.999807 |
| rad26     | 4.01864e-06 | 0.999969 | 2.23437e-05 | 0.999830 |
| rad64     | 3.95045e-06 | 0.999973 | 2.19645e-05 | 0.999851 |
| rad40syn  | 3.78133e-06 | 0.999977 | 2.10242e-05 | 0.999872 |
| rad68anti | 3.44660e-06 | 0.999981 | 1.91631e-05 | 0.999892 |
| rad40anti | 2.94877e-06 | 0.999984 | 1.63952e-05 | 0.999908 |
| rad56     | 2.78739e-06 | 0.999986 | 1.54979e-05 | 0.999924 |
| rad13     | 2.48528e-06 | 0.999989 | 1.38181e-05 | 0.999937 |
| rad5      | 1.77185e-06 | 0.999991 | 9.85148e-06 | 0.999947 |
| rad10     | 1.73860e-06 | 0.999992 | 9.66661e-06 | 0.999957 |
| rad62     | 1.72505e-06 | 0.999994 | 9.59127e-06 | 0.999966 |
| rad53     | 1.53512e-06 | 0.999996 | 8.53527e-06 | 0.999975 |
| rad61     | 1.50024e-06 | 0.999997 | 8.34133e-06 | 0.999983 |
| rad55     | 1.15865e-06 | 0.999998 | 6.44208e-06 | 0.999990 |
| rad42     | 4.34037e-07 | 0.999999 | 2.41325e-06 | 0.999992 |
| rad43     | 3.93030e-07 | 0.999999 | 2.18525e-06 | 0.999994 |
| rad33     | 3.10679e-07 | 0.999999 | 1.72738e-06 | 0.999996 |
| rad2      | 2.63749e-07 | 1.000000 | 1.46645e-06 | 0.999998 |
| rad1      | 1.23471e-07 | 1.000000 | 6.86499e-07 | 0.999998 |
| rad41     | 1.08648e-07 | 1.000000 | 6.04084e-07 | 0.999999 |
| rad14     | 9.15346e-08 | 1.000000 | 5.08933e-07 | 0.999999 |
| rad27     | 2.80437e-08 | 1.000000 | 1.55923e-07 | 1.000000 |
| rad3      | 8.14049e-09 | 1.000000 | 4.52612e-08 | 1.000000 |
| rad4      | 4.72628e-09 | 1.000000 | 2.62781e-08 | 1.000000 |

100000000. Pa, 4000.00000 K

=====

| Rate constant | True (fraction)     | Effective (fraction) |
|---------------|---------------------|----------------------|
| Total         | 3.41497e-12 (1.00 ) | 6.49449e-13 (1.00 )  |

| species     | PYtrue      | Cumul    | PYeffective | Cumul    |
|-------------|-------------|----------|-------------|----------|
| Benzyl+C2H2 | 0.809823    | 0.809823 | 0.00000     | 0.00000  |
| PhCH2CCH+H  | 0.111289    | 0.921112 | 0.585189    | 0.585189 |
| PhCHCCH2+H  | 0.0284923   | 0.949604 | 0.149820    | 0.735009 |
| Ph+Allene   | 0.0191356   | 0.968740 | 0.100620    | 0.835629 |
| Indene+H    | 0.0124144   | 0.981154 | 0.0652782   | 0.900907 |
| PAH3+H      | 0.00369179  | 0.984846 | 0.0194124   | 0.920320 |
| rad20       | 0.00195089  | 0.986797 | 0.0102583   | 0.930578 |
| PAH7+H      | 0.00130582  | 0.988103 | 0.00686637  | 0.937444 |
| PhCCH+CH3   | 0.000958637 | 0.989061 | 0.00504077  | 0.942485 |
| rad50       | 0.000798663 | 0.989860 | 0.00419959  | 0.946685 |
| rad39       | 0.000725738 | 0.990586 | 0.00381613  | 0.950501 |
| rad21       | 0.000688143 | 0.991274 | 0.00361844  | 0.954119 |
| PAH9+H      | 0.000669431 | 0.991943 | 0.00352005  | 0.957639 |
| Ph+MeAc     | 0.000664775 | 0.992608 | 0.00349556  | 0.961135 |
| rad51       | 0.000656716 | 0.993265 | 0.00345319  | 0.964588 |
| rad71       | 0.000498289 | 0.993763 | 0.00262014  | 0.967208 |
| rad19anti   | 0.000489245 | 0.994252 | 0.00257258  | 0.969781 |
| rad11       | 0.000423382 | 0.994676 | 0.00222626  | 0.972007 |
| rad38       | 0.000421710 | 0.995098 | 0.00221746  | 0.974224 |
| rad30       | 0.000389485 | 0.995487 | 0.00204802  | 0.976272 |
| rad9        | 0.000388474 | 0.995875 | 0.00204270  | 0.978315 |
| rad35       | 0.000333233 | 0.996209 | 0.00175223  | 0.980067 |
| rad59       | 0.000252997 | 0.996462 | 0.00133033  | 0.981398 |
| rad22       | 0.000242276 | 0.996704 | 0.00127395  | 0.982672 |
| PhCCCH3+H   | 0.000239284 | 0.996943 | 0.00125822  | 0.983930 |
| rad67       | 0.000219981 | 0.997163 | 0.00115672  | 0.985087 |
| rad45       | 0.000217754 | 0.997381 | 0.00114501  | 0.986232 |
| rad46       | 0.000210251 | 0.997591 | 0.00110556  | 0.987337 |
| rad8        | 0.000206594 | 0.997798 | 0.00108633  | 0.988424 |
| rad19syn    | 0.000196760 | 0.997995 | 0.00103462  | 0.989458 |
| rad23       | 0.000194168 | 0.998189 | 0.00102099  | 0.990479 |
| rad6        | 0.000191322 | 0.998380 | 0.00100602  | 0.991485 |
| rad47       | 0.000164022 | 0.998544 | 0.000862471 | 0.992348 |
| rad73       | 0.000159256 | 0.998703 | 0.000837410 | 0.993185 |
| rad18       | 0.000145326 | 0.998849 | 0.000764164 | 0.993949 |
| PAH10+CH3   | 0.000132343 | 0.998981 | 0.000695897 | 0.994645 |
| PAH1+H      | 0.000126655 | 0.999108 | 0.000665987 | 0.995311 |

|               |             |          |             |          |
|---------------|-------------|----------|-------------|----------|
| rad60syn      | 0.000113463 | 0.999221 | 0.000596617 | 0.995908 |
| rad52         | 0.000107371 | 0.999329 | 0.000564585 | 0.996472 |
| rad58         | 9.46939e-05 | 0.999423 | 0.000497926 | 0.996970 |
| rad72         | 9.42668e-05 | 0.999518 | 0.000495680 | 0.997466 |
| rad60anti     | 8.48436e-05 | 0.999602 | 0.000446130 | 0.997912 |
| PAH8+H        | 5.38171e-05 | 0.999656 | 0.000282985 | 0.998195 |
| PhcycC3H3_A+H | 5.03747e-05 | 0.999707 | 0.000264884 | 0.998460 |
| rad36         | 3.94959e-05 | 0.999746 | 0.000207680 | 0.998668 |
| rad15         | 3.91985e-05 | 0.999785 | 0.000206116 | 0.998874 |
| rad70         | 3.63277e-05 | 0.999822 | 0.000191021 | 0.999065 |
| rad24         | 3.02608e-05 | 0.999852 | 0.000159119 | 0.999224 |
| rad12         | 2.71528e-05 | 0.999879 | 0.000142777 | 0.999367 |
| rad34         | 1.63485e-05 | 0.999895 | 8.59647e-05 | 0.999453 |
| rad65         | 1.60254e-05 | 0.999911 | 8.42656e-05 | 0.999537 |
| rad28         | 1.49573e-05 | 0.999926 | 7.86496e-05 | 0.999615 |
| rad7          | 9.82631e-06 | 0.999936 | 5.16693e-05 | 0.999667 |
| rad54         | 9.74046e-06 | 0.999946 | 5.12180e-05 | 0.999718 |
| rad37         | 9.47794e-06 | 0.999955 | 4.98375e-05 | 0.999768 |
| rad68syn      | 5.61379e-06 | 0.999961 | 2.95188e-05 | 0.999798 |
| rad25         | 3.90500e-06 | 0.999965 | 2.05336e-05 | 0.999818 |
| rad40syn      | 3.89121e-06 | 0.999969 | 2.04610e-05 | 0.999839 |
| rad26         | 3.81121e-06 | 0.999973 | 2.00404e-05 | 0.999859 |
| rad64         | 3.74048e-06 | 0.999976 | 1.96685e-05 | 0.999878 |
| rad68anti     | 3.56845e-06 | 0.999980 | 1.87639e-05 | 0.999897 |
| rad40anti     | 3.02839e-06 | 0.999983 | 1.59241e-05 | 0.999913 |
| rad56         | 2.84375e-06 | 0.999986 | 1.49532e-05 | 0.999928 |
| rad13         | 2.36508e-06 | 0.999988 | 1.24362e-05 | 0.999940 |
| rad5          | 1.79882e-06 | 0.999990 | 9.45868e-06 | 0.999950 |
| rad10         | 1.73439e-06 | 0.999992 | 9.11990e-06 | 0.999959 |
| rad62         | 1.67705e-06 | 0.999993 | 8.81836e-06 | 0.999968 |
| rad53         | 1.57203e-06 | 0.999995 | 8.26614e-06 | 0.999976 |
| rad61         | 1.46824e-06 | 0.999996 | 7.72041e-06 | 0.999984 |
| rad55         | 1.19639e-06 | 0.999998 | 6.29092e-06 | 0.999990 |
| rad42         | 4.19519e-07 | 0.999998 | 2.20594e-06 | 0.999992 |
| rad43         | 4.08681e-07 | 0.999998 | 2.14895e-06 | 0.999995 |
| rad33         | 3.01573e-07 | 0.999999 | 1.58575e-06 | 0.999996 |
| rad2          | 2.65493e-07 | 0.999999 | 1.39603e-06 | 0.999998 |
| rad1          | 1.21352e-07 | 0.999999 | 6.38104e-07 | 0.999998 |
| rad41         | 1.12091e-07 | 0.999999 | 5.89406e-07 | 0.999999 |
| rad14         | 8.65510e-08 | 0.999999 | 4.55108e-07 | 0.999999 |
| rad27         | 2.81837e-08 | 0.999999 | 1.48197e-07 | 0.999999 |
| rad3          | 7.87042e-09 | 0.999999 | 4.13848e-08 | 0.999999 |
| rad4          | 4.56942e-09 | 0.999999 | 2.40272e-08 | 0.999999 |

10000000.0 Pa, 20.0000000 K

=====

| Rate constant | True (fraction)      | Effective (fraction) |
|---------------|----------------------|----------------------|
| Total         | 1.34336e-156 (1.00 ) | 1.34336e-156 (1.00 ) |

| species     | PYtrue      | Cumul    | PYeffective | Cumul    |
|-------------|-------------|----------|-------------|----------|
| rad20       | 0.999959    | 0.999959 | 0.999959    | 0.999959 |
| rad21       | 3.64013e-05 | 0.999995 | 3.64013e-05 | 0.999995 |
| rad18       | 5.08644e-06 | 1.00000  | 5.08644e-06 | 1.00000  |
| rad22       | 4.00031e-10 | 1.00000  | 4.00031e-10 | 1.00000  |
| rad24       | 1.46899e-11 | 1.00000  | 1.46899e-11 | 1.00000  |
| Indene+H    | 1.18835e-11 | 1.00000  | 1.18835e-11 | 1.00000  |
| Benzyl+C2H2 | 8.63849e-12 | 1.00000  | 0.00000     | 1.00000  |
| rad45       | 7.92036e-14 | 1.00000  | 7.92036e-14 | 1.00000  |
| rad11       | 4.10044e-14 | 1.00000  | 4.10044e-14 | 1.00000  |
| rad36       | 1.55471e-14 | 1.00000  | 1.55471e-14 | 1.00000  |
| rad23       | 3.40139e-18 | 1.00000  | 3.40139e-18 | 1.00000  |
| rad6        | 4.56331e-22 | 1.00000  | 4.56331e-22 | 1.00000  |
| rad30       | 4.07057e-25 | 1.00000  | 4.07057e-25 | 1.00000  |
| rad15       | 8.39333e-28 | 1.00000  | 8.39333e-28 | 1.00000  |
| rad13       | 1.31475e-32 | 1.00000  | 1.31475e-32 | 1.00000  |
| rad25       | 5.10669e-33 | 1.00000  | 5.10669e-33 | 1.00000  |
| rad7        | 2.46608e-33 | 1.00000  | 2.46608e-33 | 1.00000  |
| rad8        | 9.97343e-34 | 1.00000  | 9.97343e-34 | 1.00000  |
| rad38       | 2.19715e-35 | 1.00000  | 2.19715e-35 | 1.00000  |
| rad33       | 1.86247e-35 | 1.00000  | 1.86247e-35 | 1.00000  |
| PhCHCCH2+H  | 5.91146e-38 | 1.00000  | 5.91146e-38 | 1.00000  |
| rad35       | 3.58365e-38 | 1.00000  | 3.58365e-38 | 1.00000  |
| PAH9+H      | 1.59790e-38 | 1.00000  | 1.59790e-38 | 1.00000  |
| rad60syn    | 1.16230e-39 | 1.00000  | 1.16230e-39 | 1.00000  |
| rad9        | 2.19117e-40 | 1.00000  | 2.19117e-40 | 1.00000  |
| rad60anti   | 5.37498e-41 | 1.00000  | 5.37498e-41 | 1.00000  |
| rad46       | 1.88102e-41 | 1.00000  | 1.88102e-41 | 1.00000  |
| rad28       | 1.21612e-41 | 1.00000  | 1.21612e-41 | 1.00000  |



|               |             |         |             |         |
|---------------|-------------|---------|-------------|---------|
| rad3          | 3.96780e-43 | 1.00000 | 3.96780e-43 | 1.00000 |
| rad4          | 2.55855e-43 | 1.00000 | 2.55855e-43 | 1.00000 |
| Ph+Allene     | 1.26884e-43 | 1.00000 | 1.26884e-43 | 1.00000 |
| PhCH2CCH+H    | 8.25897e-44 | 1.00000 | 8.25897e-44 | 1.00000 |
| PAH7+H        | 8.87627e-46 | 1.00000 | 8.87627e-46 | 1.00000 |
| PAH3+H        | 5.18976e-48 | 1.00000 | 5.18976e-48 | 1.00000 |
| rad59         | 2.54712e-48 | 1.00000 | 2.54712e-48 | 1.00000 |
| rad26         | 1.01279e-49 | 1.00000 | 1.01279e-49 | 1.00000 |
| rad31         | 5.85799e-52 | 1.00000 | 5.85799e-52 | 1.00000 |
| rad2          | 9.86243e-53 | 1.00000 | 9.86243e-53 | 1.00000 |
| rad1          | 2.34164e-53 | 1.00000 | 2.34164e-53 | 1.00000 |
| rad39         | 1.15663e-55 | 1.00000 | 1.15663e-55 | 1.00000 |
| rad50         | 5.21664e-56 | 1.00000 | 5.21664e-56 | 1.00000 |
| rad14         | 1.14830e-57 | 1.00000 | 1.14830e-57 | 1.00000 |
| PhCCH+CH3     | 1.01019e-57 | 1.00000 | 1.01019e-57 | 1.00000 |
| rad10         | 4.28757e-58 | 1.00000 | 4.28757e-58 | 1.00000 |
| rad12         | 3.33994e-61 | 1.00000 | 3.33994e-61 | 1.00000 |
| rad37         | 7.46333e-63 | 1.00000 | 7.46333e-63 | 1.00000 |
| Ph+MeAc       | 2.70547e-64 | 1.00000 | 2.70547e-64 | 1.00000 |
| rad52         | 2.12762e-64 | 1.00000 | 2.12762e-64 | 1.00000 |
| rad27         | 4.31756e-66 | 1.00000 | 4.31756e-66 | 1.00000 |
| rad58         | 1.01999e-66 | 1.00000 | 1.01999e-66 | 1.00000 |
| PhCCCH3+H     | 5.85778e-68 | 1.00000 | 5.85778e-68 | 1.00000 |
| rad51         | 6.54115e-69 | 1.00000 | 6.54115e-69 | 1.00000 |
| rad70         | 4.82836e-73 | 1.00000 | 4.82836e-73 | 1.00000 |
| rad19syn      | 3.96257e-73 | 1.00000 | 3.96257e-73 | 1.00000 |
| PAH10+CH3     | 1.28382e-73 | 1.00000 | 1.28382e-73 | 1.00000 |
| rad54         | 4.80380e-74 | 1.00000 | 4.80380e-74 | 1.00000 |
| rad47         | 1.63275e-75 | 1.00000 | 1.63275e-75 | 1.00000 |
| rad65         | 4.00036e-76 | 1.00000 | 4.00036e-76 | 1.00000 |
| rad5          | 3.56728e-77 | 1.00000 | 3.56728e-77 | 1.00000 |
| rad34         | 4.45640e-78 | 1.00000 | 4.45640e-78 | 1.00000 |
| rad55         | 5.58759e-80 | 1.00000 | 5.58759e-80 | 1.00000 |
| PAH1+H        | 2.08315e-80 | 1.00000 | 2.08315e-80 | 1.00000 |
| PhcycC3H3_A+H | 1.40392e-81 | 1.00000 | 1.40392e-81 | 1.00000 |
| rad62         | 6.50968e-86 | 1.00000 | 6.50968e-86 | 1.00000 |
| rad43         | 4.57853e-91 | 1.00000 | 4.57853e-91 | 1.00000 |
| rad42         | 2.62045e-95 | 1.00000 | 2.62045e-95 | 1.00000 |
| rad41         | 1.26729e-98 | 1.00000 | 1.26729e-98 | 1.00000 |

10000000.0 Pa, 30.0000000 K

=====

| Rate constant | True (fraction)     | Effective (fraction) |
|---------------|---------------------|----------------------|
| Total         | 1.15918e-108 (1.00) | 1.15918e-108 (1.00)  |

| species     | PYtrue      | Cumul    | PYeffective | Cumul    |
|-------------|-------------|----------|-------------|----------|
| rad20       | 0.999916    | 0.999916 | 0.999916    | 0.999916 |
| rad21       | 7.36642e-05 | 0.999990 | 7.36642e-05 | 0.999990 |
| rad18       | 1.03021e-05 | 1.000000 | 1.03021e-05 | 1.000000 |
| rad22       | 1.63944e-09 | 1.000000 | 1.63944e-09 | 1.000000 |
| rad24       | 6.00526e-11 | 1.000000 | 6.00526e-11 | 1.000000 |
| Indene+H    | 4.87480e-11 | 1.000000 | 4.87480e-11 | 1.000000 |
| Benzyl+C2H2 | 2.02156e-11 | 1.000000 | 0.000000    | 1.000000 |
| rad45       | 6.70759e-13 | 1.000000 | 6.70759e-13 | 1.000000 |
| rad11       | 1.71380e-13 | 1.000000 | 1.71380e-13 | 1.000000 |
| rad36       | 1.12956e-13 | 1.000000 | 1.12956e-13 | 1.000000 |
| rad23       | 2.84665e-17 | 1.000000 | 2.84665e-17 | 1.000000 |
| rad6        | 3.90808e-21 | 1.000000 | 3.90808e-21 | 1.000000 |
| rad30       | 1.96212e-24 | 1.000000 | 1.96212e-24 | 1.000000 |
| rad15       | 4.13336e-27 | 1.000000 | 4.13336e-27 | 1.000000 |
| rad13       | 2.71679e-31 | 1.000000 | 2.71679e-31 | 1.000000 |
| rad7        | 5.15085e-32 | 1.000000 | 5.15085e-32 | 1.000000 |
| rad25       | 5.05215e-32 | 1.000000 | 5.05215e-32 | 1.000000 |
| rad8        | 2.71519e-33 | 1.000000 | 2.71519e-33 | 1.000000 |
| rad38       | 6.63428e-34 | 1.000000 | 6.63428e-34 | 1.000000 |
| rad33       | 3.99862e-34 | 1.000000 | 3.99862e-34 | 1.000000 |
| rad35       | 6.64368e-37 | 1.000000 | 6.64368e-37 | 1.000000 |
| PhCHCCH2+H  | 6.14968e-37 | 1.000000 | 6.14968e-37 | 1.000000 |
| PAH9+H      | 3.00200e-37 | 1.000000 | 3.00200e-37 | 1.000000 |
| rad60syn    | 6.27876e-39 | 1.000000 | 6.27876e-39 | 1.000000 |
| rad9        | 2.24581e-39 | 1.000000 | 2.24581e-39 | 1.000000 |
| rad46       | 3.71000e-40 | 1.000000 | 3.71000e-40 | 1.000000 |
| rad60anti   | 2.93281e-40 | 1.000000 | 2.93281e-40 | 1.000000 |
| rad28       | 1.32373e-40 | 1.000000 | 1.32373e-40 | 1.000000 |
| rad3        | 1.74252e-41 | 1.000000 | 1.74252e-41 | 1.000000 |
| rad4        | 1.28229e-41 | 1.000000 | 1.28229e-41 | 1.000000 |
| Ph+Allene   | 1.40022e-42 | 1.000000 | 1.40022e-42 | 1.000000 |
| PhCH2CCH+H  | 2.43425e-43 | 1.000000 | 2.43425e-43 | 1.000000 |

|               |             |          |             |          |
|---------------|-------------|----------|-------------|----------|
| PAH7+H        | 9.93987e-45 | 1.000000 | 9.93987e-45 | 1.000000 |
| PAH3+H        | 3.00541e-47 | 1.000000 | 3.00541e-47 | 1.000000 |
| rad59         | 1.47342e-47 | 1.000000 | 1.47342e-47 | 1.000000 |
| rad26         | 1.16471e-48 | 1.000000 | 1.16471e-48 | 1.000000 |
| rad31         | 4.12939e-50 | 1.000000 | 4.12939e-50 | 1.000000 |
| rad2          | 1.49242e-50 | 1.000000 | 1.49242e-50 | 1.000000 |
| rad1          | 3.32514e-51 | 1.000000 | 3.32514e-51 | 1.000000 |
| rad39         | 2.55426e-54 | 1.000000 | 2.55426e-54 | 1.000000 |
| rad50         | 1.16855e-54 | 1.000000 | 1.16855e-54 | 1.000000 |
| rad14         | 1.04252e-55 | 1.000000 | 1.04252e-55 | 1.000000 |
| PhCCH+CH3     | 1.02986e-55 | 1.000000 | 1.02986e-55 | 1.000000 |
| rad10         | 9.92780e-57 | 1.000000 | 9.92780e-57 | 1.000000 |
| rad12         | 7.73556e-60 | 1.000000 | 7.73556e-60 | 1.000000 |
| rad37         | 1.73325e-61 | 1.000000 | 1.73325e-61 | 1.000000 |
| Ph+MeAc       | 4.00263e-62 | 1.000000 | 4.00263e-62 | 1.000000 |
| rad52         | 7.32425e-63 | 1.000000 | 7.32425e-63 | 1.000000 |
| rad27         | 1.27941e-63 | 1.000000 | 1.27941e-63 | 1.000000 |
| PhCCCH3+H     | 1.93410e-65 | 1.000000 | 1.93410e-65 | 1.000000 |
| rad58         | 6.75761e-66 | 1.000000 | 6.75761e-66 | 1.000000 |
| rad51         | 2.30047e-67 | 1.000000 | 2.30047e-67 | 1.000000 |
| rad19syn      | 2.27081e-71 | 1.000000 | 2.27081e-71 | 1.000000 |
| rad70         | 1.30299e-71 | 1.000000 | 1.30299e-71 | 1.000000 |
| PAH10+CH3     | 3.21552e-72 | 1.000000 | 3.21552e-72 | 1.000000 |
| rad54         | 2.80201e-72 | 1.000000 | 2.80201e-72 | 1.000000 |
| rad47         | 4.32234e-74 | 1.000000 | 4.32234e-74 | 1.000000 |
| rad65         | 1.08936e-74 | 1.000000 | 1.08936e-74 | 1.000000 |
| rad5          | 1.94520e-75 | 1.000000 | 1.94520e-75 | 1.000000 |
| rad34         | 1.24932e-76 | 1.000000 | 1.24932e-76 | 1.000000 |
| rad55         | 3.38015e-78 | 1.000000 | 3.38015e-78 | 1.000000 |
| PAH1+H        | 5.51061e-79 | 1.000000 | 5.51061e-79 | 1.000000 |
| PhcycC3H3_A+H | 8.51269e-80 | 1.000000 | 8.51269e-80 | 1.000000 |
| rad62         | 1.35277e-83 | 1.000000 | 1.35277e-83 | 1.000000 |
| rad43         | 1.84735e-88 | 1.000000 | 1.84735e-88 | 1.000000 |
| rad42         | 4.37170e-93 | 1.000000 | 4.37170e-93 | 1.000000 |
| rad41         | 6.95100e-97 | 1.000000 | 6.95100e-97 | 1.000000 |

10000000.0 Pa, 40.0000000 K

=====

| Rate constant | True (fraction)     | Effective (fraction) |
|---------------|---------------------|----------------------|
| Total         | 1.02415e-84 (1.00 ) | 1.02415e-84 (1.00 )  |

| species     | PYtrue      | Cumul    | PYeffective | Cumul    |
|-------------|-------------|----------|-------------|----------|
| rad20       | 0.999874    | 0.999874 | 0.999874    | 0.999874 |
| rad21       | 0.000110353 | 0.999984 | 0.000110353 | 0.999984 |
| rad18       | 1.54591e-05 | 1.000000 | 1.54591e-05 | 1.000000 |
| rad22       | 3.68455e-09 | 1.000000 | 3.68455e-09 | 1.000000 |
| rad24       | 1.35202e-10 | 1.000000 | 1.35202e-10 | 1.000000 |
| Indene+H    | 1.09762e-10 | 1.000000 | 1.09762e-10 | 1.000000 |
| Benzyl+C2H2 | 3.92722e-11 | 1.000000 | 0.00000     | 1.000000 |
| rad45       | 2.28543e-12 | 1.000000 | 2.28543e-12 | 1.000000 |
| rad11       | 4.00515e-13 | 1.000000 | 4.00515e-13 | 1.000000 |
| rad36       | 3.50568e-13 | 1.000000 | 3.50568e-13 | 1.000000 |
| rad23       | 9.69338e-17 | 1.000000 | 9.69338e-17 | 1.000000 |
| rad6        | 1.40331e-20 | 1.000000 | 1.40331e-20 | 1.000000 |
| rad30       | 6.13552e-24 | 1.000000 | 6.13552e-24 | 1.000000 |
| rad15       | 1.35201e-26 | 1.000000 | 1.35201e-26 | 1.000000 |
| rad13       | 1.58789e-30 | 1.000000 | 1.58789e-30 | 1.000000 |
| rad7        | 3.03617e-31 | 1.000000 | 3.03617e-31 | 1.000000 |
| rad25       | 2.43900e-31 | 1.000000 | 2.43900e-31 | 1.000000 |
| rad8        | 7.49601e-33 | 1.000000 | 7.49601e-33 | 1.000000 |
| rad38       | 5.40197e-33 | 1.000000 | 5.40197e-33 | 1.000000 |
| rad33       | 2.41448e-33 | 1.000000 | 2.41448e-33 | 1.000000 |
| rad35       | 4.08072e-36 | 1.000000 | 4.08072e-36 | 1.000000 |
| PhCHCCH2+H  | 3.29974e-36 | 1.000000 | 3.29974e-36 | 1.000000 |
| PAH9+H      | 1.89589e-36 | 1.000000 | 1.89589e-36 | 1.000000 |
| rad60syn    | 2.49437e-38 | 1.000000 | 2.49437e-38 | 1.000000 |
| rad9        | 1.24652e-38 | 1.000000 | 1.24652e-38 | 1.000000 |
| rad46       | 2.82945e-39 | 1.000000 | 2.82945e-39 | 1.000000 |
| rad60anti   | 1.18995e-39 | 1.000000 | 1.18995e-39 | 1.000000 |
| rad28       | 7.95800e-40 | 1.000000 | 7.95800e-40 | 1.000000 |
| rad3        | 1.71141e-40 | 1.000000 | 1.71141e-40 | 1.000000 |
| rad4        | 1.25602e-40 | 1.000000 | 1.25602e-40 | 1.000000 |
| Ph+Allene   | 8.50650e-42 | 1.000000 | 8.50650e-42 | 1.000000 |
| PhCH2CCH+H  | 7.94571e-43 | 1.000000 | 7.94571e-43 | 1.000000 |
| PAH7+H      | 6.37750e-44 | 1.000000 | 6.37750e-44 | 1.000000 |
| PAH3+H      | 1.38250e-46 | 1.000000 | 1.38250e-46 | 1.000000 |
| rad59       | 6.76172e-47 | 1.000000 | 6.76172e-47 | 1.000000 |
| rad26       | 7.95140e-48 | 1.000000 | 7.95140e-48 | 1.000000 |

|               |             |          |             |          |
|---------------|-------------|----------|-------------|----------|
| rad31         | 5.00321e-49 | 1.000000 | 5.00321e-49 | 1.000000 |
| rad2          | 2.90437e-49 | 1.000000 | 2.90437e-49 | 1.000000 |
| rad1          | 5.91790e-50 | 1.000000 | 5.91790e-50 | 1.000000 |
| rad39         | 2.31946e-53 | 1.000000 | 2.31946e-53 | 1.000000 |
| rad50         | 1.19950e-53 | 1.000000 | 1.19950e-53 | 1.000000 |
| PhCCH+CH3     | 1.89873e-54 | 1.000000 | 1.89873e-54 | 1.000000 |
| rad14         | 1.72317e-54 | 1.000000 | 1.72317e-54 | 1.000000 |
| rad10         | 1.00573e-55 | 1.000000 | 1.00573e-55 | 1.000000 |
| rad12         | 7.84447e-59 | 1.000000 | 7.84447e-59 | 1.000000 |
| rad37         | 1.76905e-60 | 1.000000 | 1.76905e-60 | 1.000000 |
| Ph+MeAc       | 9.81582e-61 | 1.000000 | 9.81582e-61 | 1.000000 |
| rad52         | 1.01223e-61 | 1.000000 | 1.01223e-61 | 1.000000 |
| rad27         | 3.91417e-62 | 1.000000 | 3.91417e-62 | 1.000000 |
| PhCCCH3+H     | 6.74546e-64 | 1.000000 | 6.74546e-64 | 1.000000 |
| rad58         | 4.13868e-65 | 1.000000 | 4.13868e-65 | 1.000000 |
| rad51         | 3.45652e-66 | 1.000000 | 3.45652e-66 | 1.000000 |
| rad19syn      | 4.07497e-70 | 1.000000 | 4.07497e-70 | 1.000000 |
| rad70         | 1.77447e-70 | 1.000000 | 1.77447e-70 | 1.000000 |
| rad54         | 5.28595e-71 | 1.000000 | 5.28595e-71 | 1.000000 |
| PAH10+CH3     | 3.94451e-71 | 1.000000 | 3.94451e-71 | 1.000000 |
| rad47         | 6.47935e-73 | 1.000000 | 6.47935e-73 | 1.000000 |
| rad65         | 1.45574e-73 | 1.000000 | 1.45574e-73 | 1.000000 |
| rad5          | 3.99616e-74 | 1.000000 | 3.99616e-74 | 1.000000 |
| rad34         | 1.84739e-75 | 1.000000 | 1.84739e-75 | 1.000000 |
| rad55         | 7.02600e-77 | 1.000000 | 7.02600e-77 | 1.000000 |
| PAH1+H        | 7.79492e-78 | 1.000000 | 7.79492e-78 | 1.000000 |
| PhcycC3H3_A+H | 1.77077e-78 | 1.000000 | 1.77077e-78 | 1.000000 |
| rad62         | 5.38761e-82 | 1.000000 | 5.38761e-82 | 1.000000 |
| rad43         | 1.16131e-86 | 1.000000 | 1.16131e-86 | 1.000000 |
| rad42         | 1.95109e-91 | 1.000000 | 1.95109e-91 | 1.000000 |
| rad41         | 1.58185e-95 | 1.000000 | 1.58185e-95 | 1.000000 |

10000000.0 Pa, 50.0000000 K

=====

| Rate constant | True (fraction)     | Effective (fraction) |
|---------------|---------------------|----------------------|
| Total         | 2.31816e-70 (1.00 ) | 2.31816e-70 (1.00 )  |

| species     | PYtrue      | Cumul    | PYeffective | Cumul    |
|-------------|-------------|----------|-------------|----------|
| rad20       | 0.999832    | 0.999832 | 0.999832    | 0.999832 |
| rad21       | 0.000147273 | 0.999979 | 0.000147273 | 0.999979 |
| rad18       | 2.06775e-05 | 1.000000 | 2.06775e-05 | 1.000000 |
| rad22       | 6.57614e-09 | 1.000000 | 6.57614e-09 | 1.000000 |
| rad24       | 2.42454e-10 | 1.000000 | 2.42454e-10 | 1.000000 |
| Indene+H    | 1.96398e-10 | 1.000000 | 1.96398e-10 | 1.000000 |
| Benzyl+C2H2 | 7.12668e-11 | 1.000000 | 0.000000    | 1.000000 |
| rad45       | 5.49161e-12 | 1.000000 | 5.49161e-12 | 1.000000 |
| rad36       | 7.90156e-13 | 1.000000 | 7.90156e-13 | 1.000000 |
| rad11       | 7.53431e-13 | 1.000000 | 7.53431e-13 | 1.000000 |
| rad23       | 2.33933e-16 | 1.000000 | 2.33933e-16 | 1.000000 |
| rad6        | 3.65044e-20 | 1.000000 | 3.65044e-20 | 1.000000 |
| rad30       | 1.74651e-23 | 1.000000 | 1.74651e-23 | 1.000000 |
| rad15       | 4.10561e-26 | 1.000000 | 4.10561e-26 | 1.000000 |
| rad13       | 5.88722e-30 | 1.000000 | 5.88722e-30 | 1.000000 |
| rad7        | 1.13590e-30 | 1.000000 | 1.13590e-30 | 1.000000 |
| rad25       | 9.67274e-31 | 1.000000 | 9.67274e-31 | 1.000000 |
| rad38       | 2.85075e-32 | 1.000000 | 2.85075e-32 | 1.000000 |
| rad8        | 2.37255e-32 | 1.000000 | 2.37255e-32 | 1.000000 |
| rad33       | 9.27865e-33 | 1.000000 | 9.27865e-33 | 1.000000 |
| rad35       | 1.69829e-35 | 1.000000 | 1.69829e-35 | 1.000000 |
| PhCHCCH2+H  | 1.52126e-35 | 1.000000 | 1.52126e-35 | 1.000000 |
| PAH9+H      | 8.23292e-36 | 1.000000 | 8.23292e-36 | 1.000000 |
| rad60syn    | 9.97538e-38 | 1.000000 | 9.97538e-38 | 1.000000 |
| rad9        | 6.09256e-38 | 1.000000 | 6.09256e-38 | 1.000000 |
| rad46       | 1.65774e-38 | 1.000000 | 1.65774e-38 | 1.000000 |
| rad60anti   | 4.90264e-39 | 1.000000 | 4.90264e-39 | 1.000000 |
| rad28       | 4.33574e-39 | 1.000000 | 4.33574e-39 | 1.000000 |
| rad3        | 9.79734e-40 | 1.000000 | 9.79734e-40 | 1.000000 |
| rad4        | 7.08427e-40 | 1.000000 | 7.08427e-40 | 1.000000 |
| Ph+Allene   | 4.67432e-41 | 1.000000 | 4.67432e-41 | 1.000000 |
| PhCH2CCH+H  | 3.18446e-42 | 1.000000 | 3.18446e-42 | 1.000000 |
| PAH7+H      | 3.81638e-43 | 1.000000 | 3.81638e-43 | 1.000000 |
| PAH3+H      | 6.80227e-46 | 1.000000 | 6.80227e-46 | 1.000000 |
| rad59       | 3.31560e-46 | 1.000000 | 3.31560e-46 | 1.000000 |
| rad26       | 5.20494e-47 | 1.000000 | 5.20494e-47 | 1.000000 |
| rad31       | 3.32444e-48 | 1.000000 | 3.32444e-48 | 1.000000 |
| rad2        | 2.77496e-48 | 1.000000 | 2.77496e-48 | 1.000000 |
| rad1        | 5.28499e-49 | 1.000000 | 5.28499e-49 | 1.000000 |
| rad39       | 1.71070e-52 | 1.000000 | 1.71070e-52 | 1.000000 |

|               |             |          |             |          |
|---------------|-------------|----------|-------------|----------|
| rad50         | 1.08124e-52 | 1.000000 | 1.08124e-52 | 1.000000 |
| PhCCH+CH3     | 2.02124e-53 | 1.000000 | 2.02124e-53 | 1.000000 |
| rad14         | 1.64127e-53 | 1.000000 | 1.64127e-53 | 1.000000 |
| rad10         | 8.66863e-55 | 1.000000 | 8.66863e-55 | 1.000000 |
| rad12         | 6.78251e-58 | 1.000000 | 6.78251e-58 | 1.000000 |
| rad37         | 1.54434e-59 | 1.000000 | 1.54434e-59 | 1.000000 |
| Ph+MeAc       | 1.38939e-59 | 1.000000 | 1.38939e-59 | 1.000000 |
| rad52         | 1.22837e-60 | 1.000000 | 1.22837e-60 | 1.000000 |
| rad27         | 5.59610e-61 | 1.000000 | 5.59610e-61 | 1.000000 |
| PhCCCH3+H     | 1.12352e-62 | 1.000000 | 1.12352e-62 | 1.000000 |
| rad58         | 3.05483e-64 | 1.000000 | 3.05483e-64 | 1.000000 |
| rad51         | 4.77879e-65 | 1.000000 | 4.77879e-65 | 1.000000 |
| rad19syn      | 5.64668e-69 | 1.000000 | 5.64668e-69 | 1.000000 |
| rad70         | 2.30294e-69 | 1.000000 | 2.30294e-69 | 1.000000 |
| rad54         | 7.88265e-70 | 1.000000 | 7.88265e-70 | 1.000000 |
| PAH10+CH3     | 4.50317e-70 | 1.000000 | 4.50317e-70 | 1.000000 |
| rad47         | 1.01310e-71 | 1.000000 | 1.01310e-71 | 1.000000 |
| rad65         | 1.83344e-72 | 1.000000 | 1.83344e-72 | 1.000000 |
| rad5          | 6.58298e-73 | 1.000000 | 6.58298e-73 | 1.000000 |
| rad34         | 2.69455e-74 | 1.000000 | 2.69455e-74 | 1.000000 |
| rad55         | 1.20653e-75 | 1.000000 | 1.20653e-75 | 1.000000 |
| PAH1+H        | 1.09854e-76 | 1.000000 | 1.09854e-76 | 1.000000 |
| PhcycC3H3_A+H | 3.03998e-77 | 1.000000 | 3.03998e-77 | 1.000000 |
| rad62         | 1.40178e-80 | 1.000000 | 1.40178e-80 | 1.000000 |
| rad43         | 4.10604e-85 | 1.000000 | 4.10604e-85 | 1.000000 |
| rad42         | 6.41686e-90 | 1.000000 | 6.41686e-90 | 1.000000 |
| rad41         | 3.33499e-94 | 1.000000 | 3.33499e-94 | 1.000000 |

10000000.0 Pa, 60.0000000 K

| Rate constant | True (fraction)    | Effective (fraction) |
|---------------|--------------------|----------------------|
| Total         | 8.44107e-61 (1.00) | 8.44107e-61 (1.00)   |

| species     | PYtrue      | Cumul    | PYeffective | Cumul    |
|-------------|-------------|----------|-------------|----------|
| rad20       | 0.999789    | 0.999789 | 0.999789    | 0.999789 |
| rad21       | 0.000184930 | 0.999974 | 0.000184930 | 0.999974 |
| rad18       | 2.60328e-05 | 1.000000 | 2.60328e-05 | 1.000000 |
| rad22       | 1.03978e-08 | 1.000000 | 1.03978e-08 | 1.000000 |
| rad24       | 3.85990e-10 | 1.000000 | 3.85990e-10 | 1.000000 |
| Indene+H    | 3.11480e-10 | 1.000000 | 3.11480e-10 | 1.000000 |
| Benzyl+C2H2 | 1.23347e-10 | 1.000000 | 0.000000    | 1.000000 |
| rad45       | 1.09898e-11 | 1.000000 | 1.09898e-11 | 1.000000 |
| rad36       | 1.50706e-12 | 1.000000 | 1.50706e-12 | 1.000000 |
| rad11       | 1.26762e-12 | 1.000000 | 1.26762e-12 | 1.000000 |
| rad23       | 4.71451e-16 | 1.000000 | 4.71451e-16 | 1.000000 |
| rad6        | 8.06484e-20 | 1.000000 | 8.06484e-20 | 1.000000 |
| rad30       | 4.99965e-23 | 1.000000 | 4.99965e-23 | 1.000000 |
| rad15       | 1.27553e-25 | 1.000000 | 1.27553e-25 | 1.000000 |
| rad13       | 1.74347e-29 | 1.000000 | 1.74347e-29 | 1.000000 |
| rad25       | 3.66182e-30 | 1.000000 | 3.66182e-30 | 1.000000 |
| rad7        | 3.39860e-30 | 1.000000 | 3.39860e-30 | 1.000000 |
| rad38       | 1.24702e-31 | 1.000000 | 1.24702e-31 | 1.000000 |
| rad8        | 8.75043e-32 | 1.000000 | 8.75043e-32 | 1.000000 |
| rad33       | 2.86343e-32 | 1.000000 | 2.86343e-32 | 1.000000 |
| PhCHCCH2+H  | 6.93851e-35 | 1.000000 | 6.93851e-35 | 1.000000 |
| rad35       | 5.85817e-35 | 1.000000 | 5.85817e-35 | 1.000000 |
| PAH9+H      | 3.01602e-35 | 1.000000 | 3.01602e-35 | 1.000000 |
| rad60syn    | 4.33392e-37 | 1.000000 | 4.33392e-37 | 1.000000 |
| rad9        | 2.99450e-37 | 1.000000 | 2.99450e-37 | 1.000000 |
| rad46       | 9.02723e-38 | 1.000000 | 9.02723e-38 | 1.000000 |
| rad28       | 2.42675e-38 | 1.000000 | 2.42675e-38 | 1.000000 |
| rad60anti   | 2.20795e-38 | 1.000000 | 2.20795e-38 | 1.000000 |
| rad3        | 4.34226e-39 | 1.000000 | 4.34226e-39 | 1.000000 |
| rad4        | 3.09626e-39 | 1.000000 | 3.09626e-39 | 1.000000 |
| Ph+Allene   | 2.63758e-40 | 1.000000 | 2.63758e-40 | 1.000000 |
| PhCH2CCH+H  | 1.55918e-41 | 1.000000 | 1.55918e-41 | 1.000000 |
| PAH7+H      | 2.39447e-42 | 1.000000 | 2.39447e-42 | 1.000000 |
| PAH3+H      | 3.79518e-45 | 1.000000 | 3.79518e-45 | 1.000000 |
| rad59       | 1.84204e-45 | 1.000000 | 1.84204e-45 | 1.000000 |
| rad26       | 3.64220e-46 | 1.000000 | 3.64220e-46 | 1.000000 |
| rad2        | 1.92160e-47 | 1.000000 | 1.92160e-47 | 1.000000 |
| rad31       | 1.68362e-47 | 1.000000 | 1.68362e-47 | 1.000000 |
| rad1        | 3.47557e-48 | 1.000000 | 3.47557e-48 | 1.000000 |
| rad39       | 1.22633e-51 | 1.000000 | 1.22633e-51 | 1.000000 |
| rad50       | 1.00251e-51 | 1.000000 | 1.00251e-51 | 1.000000 |
| PhCCH+CH3   | 1.72980e-52 | 1.000000 | 1.72980e-52 | 1.000000 |
| rad14       | 1.25123e-52 | 1.000000 | 1.25123e-52 | 1.000000 |
| rad10       | 7.48846e-54 | 1.000000 | 7.48846e-54 | 1.000000 |

|               |             |          |             |          |
|---------------|-------------|----------|-------------|----------|
| rad12         | 5.89435e-57 | 1.000000 | 5.89435e-57 | 1.000000 |
| Ph+MeAc       | 1.60399e-58 | 1.000000 | 1.60399e-58 | 1.000000 |
| rad37         | 1.35845e-58 | 1.000000 | 1.35845e-58 | 1.000000 |
| rad52         | 1.56545e-59 | 1.000000 | 1.56545e-59 | 1.000000 |
| rad27         | 5.76371e-60 | 1.000000 | 5.76371e-60 | 1.000000 |
| PhCCH3+H      | 1.37204e-61 | 1.000000 | 1.37204e-61 | 1.000000 |
| rad58         | 2.78021e-63 | 1.000000 | 2.78021e-63 | 1.000000 |
| rad51         | 7.18114e-64 | 1.000000 | 7.18114e-64 | 1.000000 |
| rad19syn      | 7.54186e-68 | 1.000000 | 7.54186e-68 | 1.000000 |
| rad70         | 3.24700e-68 | 1.000000 | 3.24700e-68 | 1.000000 |
| rad54         | 1.15113e-68 | 1.000000 | 1.15113e-68 | 1.000000 |
| PAH10+CH3     | 5.49403e-69 | 1.000000 | 5.49403e-69 | 1.000000 |
| rad47         | 1.85675e-70 | 1.000000 | 1.85675e-70 | 1.000000 |
| rad65         | 2.52869e-71 | 1.000000 | 2.52869e-71 | 1.000000 |
| rad5          | 1.01787e-71 | 1.000000 | 1.01787e-71 | 1.000000 |
| rad34         | 4.37268e-73 | 1.000000 | 4.37268e-73 | 1.000000 |
| rad55         | 2.09121e-74 | 1.000000 | 2.09121e-74 | 1.000000 |
| PAH1+H        | 1.73441e-75 | 1.000000 | 1.73441e-75 | 1.000000 |
| PhcycC3H3_A+H | 5.26588e-76 | 1.000000 | 5.26588e-76 | 1.000000 |
| rad62         | 3.24290e-79 | 1.000000 | 3.24290e-79 | 1.000000 |
| rad43         | 1.18840e-83 | 1.000000 | 1.18840e-83 | 1.000000 |
| rad42         | 2.00926e-88 | 1.000000 | 2.00926e-88 | 1.000000 |
| rad41         | 7.68352e-93 | 1.000000 | 7.68352e-93 | 1.000000 |

10000000.0 Pa, 70.0000000 K

=====

| Rate constant | True (fraction)     | Effective (fraction) |
|---------------|---------------------|----------------------|
| Total         | 5.61998e-54 (1.00 ) | 5.61998e-54 (1.00 )  |

| species     | PYtrue      | Cumul    | PYeffective | Cumul    |
|-------------|-------------|----------|-------------|----------|
| rad20       | 0.999745    | 0.999745 | 0.999745    | 0.999745 |
| rad21       | 0.000223748 | 0.999969 | 0.000223748 | 0.999969 |
| rad18       | 3.15893e-05 | 1.00000  | 3.15893e-05 | 1.00000  |
| rad22       | 1.52745e-08 | 1.00000  | 1.52745e-08 | 1.00000  |
| rad24       | 5.71934e-10 | 1.00000  | 5.71934e-10 | 1.00000  |
| Indene+H    | 4.59192e-10 | 1.00000  | 4.59192e-10 | 1.00000  |
| Benzyl+C2H2 | 2.06289e-10 | 1.00000  | 0.00000     | 1.00000  |
| rad45       | 1.96940e-11 | 1.00000  | 1.96940e-11 | 1.00000  |
| rad36       | 2.59957e-12 | 1.00000  | 2.59957e-12 | 1.00000  |
| rad11       | 1.99755e-12 | 1.00000  | 1.99755e-12 | 1.00000  |
| rad23       | 8.52423e-16 | 1.00000  | 8.52423e-16 | 1.00000  |
| rad6        | 1.62363e-19 | 1.00000  | 1.62363e-19 | 1.00000  |
| rad30       | 1.53230e-22 | 1.00000  | 1.53230e-22 | 1.00000  |
| rad15       | 4.33837e-25 | 1.00000  | 4.33837e-25 | 1.00000  |
| rad13       | 4.56537e-29 | 1.00000  | 4.56537e-29 | 1.00000  |
| rad25       | 1.44046e-29 | 1.00000  | 1.44046e-29 | 1.00000  |
| rad7        | 9.00629e-30 | 1.00000  | 9.00629e-30 | 1.00000  |
| rad38       | 5.03174e-31 | 1.00000  | 5.03174e-31 | 1.00000  |
| rad8        | 3.88709e-31 | 1.00000  | 3.88709e-31 | 1.00000  |
| rad33       | 7.86798e-32 | 1.00000  | 7.86798e-32 | 1.00000  |
| PhCHCCH2+H  | 3.41091e-34 | 1.00000  | 3.41091e-34 | 1.00000  |
| rad35       | 1.82686e-34 | 1.00000  | 1.82686e-34 | 1.00000  |
| PAH9+H      | 1.01832e-34 | 1.00000  | 1.01832e-34 | 1.00000  |
| rad60syn    | 2.17034e-36 | 1.00000  | 2.17034e-36 | 1.00000  |
| rad9        | 1.60783e-36 | 1.00000  | 1.60783e-36 | 1.00000  |
| rad46       | 5.05365e-37 | 1.00000  | 5.05365e-37 | 1.00000  |
| rad28       | 1.50638e-37 | 1.00000  | 1.50638e-37 | 1.00000  |
| rad60anti   | 1.15132e-37 | 1.00000  | 1.15132e-37 | 1.00000  |
| rad3        | 1.69797e-38 | 1.00000  | 1.69797e-38 | 1.00000  |
| rad4        | 1.19651e-38 | 1.00000  | 1.19651e-38 | 1.00000  |
| Ph+Allene   | 1.65295e-39 | 1.00000  | 1.65295e-39 | 1.00000  |
| PhCH2CCH+H  | 9.49612e-41 | 1.00000  | 9.49612e-41 | 1.00000  |
| PAH7+H      | 1.69201e-41 | 1.00000  | 1.69201e-41 | 1.00000  |
| PAH3+H      | 2.51694e-44 | 1.00000  | 2.51694e-44 | 1.00000  |
| rad59       | 1.21567e-44 | 1.00000  | 1.21567e-44 | 1.00000  |
| rad26       | 2.91122e-45 | 1.00000  | 2.91122e-45 | 1.00000  |
| rad2        | 1.15562e-46 | 1.00000  | 1.15562e-46 | 1.00000  |
| rad31       | 7.54288e-47 | 1.00000  | 7.54288e-47 | 1.00000  |
| rad1        | 2.00604e-47 | 1.00000  | 2.00604e-47 | 1.00000  |
| rad50       | 1.04362e-50 | 1.00000  | 1.04362e-50 | 1.00000  |
| rad39       | 9.44309e-51 | 1.00000  | 9.44309e-51 | 1.00000  |
| PhCCH+CH3   | 1.40553e-51 | 1.00000  | 1.40553e-51 | 1.00000  |
| rad14       | 8.98835e-52 | 1.00000  | 8.98835e-52 | 1.00000  |
| rad10       | 7.10001e-53 | 1.00000  | 7.10001e-53 | 1.00000  |
| rad12       | 5.63622e-56 | 1.00000  | 5.63622e-56 | 1.00000  |
| Ph+MeAc     | 1.79169e-57 | 1.00000  | 1.79169e-57 | 1.00000  |
| rad37       | 1.31756e-57 | 1.00000  | 1.31756e-57 | 1.00000  |
| rad52       | 2.29616e-58 | 1.00000  | 2.29616e-58 | 1.00000  |

|               |             |         |             |         |
|---------------|-------------|---------|-------------|---------|
| rad27         | 5.26407e-59 | 1.00000 | 5.26407e-59 | 1.00000 |
| PhCCCH3+H     | 1.51205e-60 | 1.00000 | 1.51205e-60 | 1.00000 |
| rad58         | 3.18935e-62 | 1.00000 | 3.18935e-62 | 1.00000 |
| rad51         | 1.27669e-62 | 1.00000 | 1.27669e-62 | 1.00000 |
| rad19syn      | 1.08610e-66 | 1.00000 | 1.08610e-66 | 1.00000 |
| rad70         | 5.32221e-67 | 1.00000 | 5.32221e-67 | 1.00000 |
| rad54         | 1.83225e-67 | 1.00000 | 1.83225e-67 | 1.00000 |
| PAH10+CH3     | 7.70422e-68 | 1.00000 | 7.70422e-68 | 1.00000 |
| rad47         | 4.25390e-69 | 1.00000 | 4.25390e-69 | 1.00000 |
| rad65         | 4.15975e-70 | 1.00000 | 4.15975e-70 | 1.00000 |
| rad5          | 1.62461e-70 | 1.00000 | 1.62461e-70 | 1.00000 |
| rad34         | 8.38561e-72 | 1.00000 | 8.38561e-72 | 1.00000 |
| rad55         | 4.03443e-73 | 1.00000 | 4.03443e-73 | 1.00000 |
| PAH1+H        | 3.25171e-74 | 1.00000 | 3.25171e-74 | 1.00000 |
| PhcycC3H3_A+H | 1.01553e-74 | 1.00000 | 1.01553e-74 | 1.00000 |
| rad62         | 7.72304e-78 | 1.00000 | 7.72304e-78 | 1.00000 |
| rad43         | 3.36744e-82 | 1.00000 | 3.36744e-82 | 1.00000 |
| rad42         | 6.77046e-87 | 1.00000 | 6.77046e-87 | 1.00000 |
| rad41         | 2.08853e-91 | 1.00000 | 2.08853e-91 | 1.00000 |

10000000.0 Pa, 80.0000000 K

| Rate constant | True (fraction)     | Effective (fraction) |
|---------------|---------------------|----------------------|
| Total         | 7.28864e-49 (1.00 ) | 7.28864e-49 (1.00 )  |

| species     | PYtrue      | Cumul    | PYeffective | Cumul    |
|-------------|-------------|----------|-------------|----------|
| rad20       | 0.999698    | 0.999698 | 0.999698    | 0.999698 |
| rad21       | 0.000264148 | 0.999962 | 0.000264148 | 0.999962 |
| rad18       | 3.74125e-05 | 1.000000 | 3.74125e-05 | 1.000000 |
| rad22       | 2.13818e-08 | 1.000000 | 2.13818e-08 | 1.000000 |
| rad24       | 8.08884e-10 | 1.000000 | 8.08884e-10 | 1.000000 |
| Indene+H    | 6.45411e-10 | 1.000000 | 6.45411e-10 | 1.000000 |
| Benzyl+C2H2 | 3.36638e-10 | 1.000000 | 0.000000    | 1.000000 |
| rad45       | 3.28480e-11 | 1.000000 | 3.28480e-11 | 1.000000 |
| rad36       | 4.20164e-12 | 1.000000 | 4.20164e-12 | 1.000000 |
| rad11       | 3.02290e-12 | 1.000000 | 3.02290e-12 | 1.000000 |
| rad23       | 1.43685e-15 | 1.000000 | 1.43685e-15 | 1.000000 |
| rad6        | 3.09623e-19 | 1.000000 | 3.09623e-19 | 1.000000 |
| rad30       | 5.23166e-22 | 1.000000 | 5.23166e-22 | 1.000000 |
| rad15       | 1.72863e-24 | 1.000000 | 1.72863e-24 | 1.000000 |
| rad13       | 1.11830e-28 | 1.000000 | 1.11830e-28 | 1.000000 |
| rad25       | 6.28418e-29 | 1.000000 | 6.28418e-29 | 1.000000 |
| rad7        | 2.23728e-29 | 1.000000 | 2.23728e-29 | 1.000000 |
| rad8        | 2.24114e-30 | 1.000000 | 2.24114e-30 | 1.000000 |
| rad38       | 1.97134e-30 | 1.000000 | 1.97134e-30 | 1.000000 |
| rad33       | 2.03960e-31 | 1.000000 | 2.03960e-31 | 1.000000 |
| PhCHCCH2+H  | 1.97352e-33 | 1.000000 | 1.97352e-33 | 1.000000 |
| rad35       | 5.39699e-34 | 1.000000 | 5.39699e-34 | 1.000000 |
| PAH9+H      | 3.30923e-34 | 1.000000 | 3.30923e-34 | 1.000000 |
| rad60syn    | 1.36530e-35 | 1.000000 | 1.36530e-35 | 1.000000 |
| rad9        | 1.03299e-35 | 1.000000 | 1.03299e-35 | 1.000000 |
| rad46       | 3.15183e-36 | 1.000000 | 3.15183e-36 | 1.000000 |
| rad28       | 1.13263e-36 | 1.000000 | 1.13263e-36 | 1.000000 |
| rad60anti   | 7.57088e-37 | 1.000000 | 7.57088e-37 | 1.000000 |
| rad3        | 6.31896e-38 | 1.000000 | 6.31896e-38 | 1.000000 |
| rad4        | 4.40872e-38 | 1.000000 | 4.40872e-38 | 1.000000 |
| Ph+Allene   | 1.26093e-38 | 1.000000 | 1.26093e-38 | 1.000000 |
| PhCH2CCH+H  | 7.67709e-40 | 1.000000 | 7.67709e-40 | 1.000000 |
| PAH7+H      | 1.46983e-40 | 1.000000 | 1.46983e-40 | 1.000000 |
| PAH3+H      | 2.14942e-43 | 1.000000 | 2.14942e-43 | 1.000000 |
| rad59       | 1.03251e-43 | 1.000000 | 1.03251e-43 | 1.000000 |
| rad26       | 2.89604e-44 | 1.000000 | 2.89604e-44 | 1.000000 |
| rad2        | 6.73338e-46 | 1.000000 | 6.73338e-46 | 1.000000 |
| rad31       | 3.25615e-46 | 1.000000 | 3.25615e-46 | 1.000000 |
| rad1        | 1.13006e-46 | 1.000000 | 1.13006e-46 | 1.000000 |
| rad50       | 1.34088e-49 | 1.000000 | 1.34088e-49 | 1.000000 |
| rad39       | 8.64690e-50 | 1.000000 | 8.64690e-50 | 1.000000 |
| PhCCH+CH3   | 1.23092e-50 | 1.000000 | 1.23092e-50 | 1.000000 |
| rad14       | 6.84642e-51 | 1.000000 | 6.84642e-51 | 1.000000 |
| rad10       | 8.15998e-52 | 1.000000 | 8.15998e-52 | 1.000000 |
| rad12       | 6.54461e-55 | 1.000000 | 6.54461e-55 | 1.000000 |
| Ph+MeAc     | 2.22318e-56 | 1.000000 | 2.22318e-56 | 1.000000 |
| rad37       | 1.55499e-56 | 1.000000 | 1.55499e-56 | 1.000000 |
| rad52       | 4.27736e-57 | 1.000000 | 4.27736e-57 | 1.000000 |
| rad27       | 4.91691e-58 | 1.000000 | 4.91691e-58 | 1.000000 |
| PhCCCH3+H   | 1.75007e-59 | 1.000000 | 1.75007e-59 | 1.000000 |
| rad58       | 4.91654e-61 | 1.000000 | 4.91654e-61 | 1.000000 |
| rad51       | 2.95808e-61 | 1.000000 | 2.95808e-61 | 1.000000 |

|               |             |          |             |          |
|---------------|-------------|----------|-------------|----------|
| rad19syn      | 1.88432e-65 | 1.000000 | 1.88432e-65 | 1.000000 |
| rad70         | 1.10610e-65 | 1.000000 | 1.10610e-65 | 1.000000 |
| rad54         | 3.54142e-66 | 1.000000 | 3.54142e-66 | 1.000000 |
| PAH10+CH3     | 1.35798e-66 | 1.000000 | 1.35798e-66 | 1.000000 |
| rad47         | 1.33408e-67 | 1.000000 | 1.33408e-67 | 1.000000 |
| rad65         | 9.05871e-69 | 1.000000 | 9.05871e-69 | 1.000000 |
| rad5          | 2.99087e-69 | 1.000000 | 2.99087e-69 | 1.000000 |
| rad34         | 2.06313e-70 | 1.000000 | 2.06313e-70 | 1.000000 |
| rad55         | 9.59972e-72 | 1.000000 | 9.59972e-72 | 1.000000 |
| PAH1+H        | 7.84727e-73 | 1.000000 | 7.84727e-73 | 1.000000 |
| PhcycC3H3_A+H | 2.41705e-73 | 1.000000 | 2.41705e-73 | 1.000000 |
| rad62         | 2.15306e-76 | 1.000000 | 2.15306e-76 | 1.000000 |
| rad43         | 1.08068e-80 | 1.000000 | 1.08068e-80 | 1.000000 |
| rad42         | 2.75677e-85 | 1.000000 | 2.75677e-85 | 1.000000 |
| rad41         | 7.32712e-90 | 1.000000 | 7.32712e-90 | 1.000000 |

10000000.0 Pa, 90.0000000 K

| Rate constant | True (fraction)     | Effective (fraction) |
|---------------|---------------------|----------------------|
| Total         | 6.85154e-45 (1.00 ) | 6.85154e-45 (1.00 )  |

| species     | PYtrue      | Cumul    | PYeffective | Cumul    |
|-------------|-------------|----------|-------------|----------|
| rad20       | 0.999650    | 0.999650 | 0.999650    | 0.999650 |
| rad21       | 0.000306580 | 0.999957 | 0.000306580 | 0.999957 |
| rad18       | 4.35732e-05 | 1.00000  | 4.35732e-05 | 1.00000  |
| rad22       | 2.89577e-08 | 1.00000  | 2.89577e-08 | 1.00000  |
| rad24       | 1.10864e-09 | 1.00000  | 1.10864e-09 | 1.00000  |
| Indene+H    | 8.78168e-10 | 1.00000  | 8.78168e-10 | 1.00000  |
| Benzyl+C2H2 | 5.39800e-10 | 1.00000  | 0.00000     | 1.00000  |
| rad45       | 5.21930e-11 | 1.00000  | 5.21930e-11 | 1.00000  |
| rad36       | 6.50079e-12 | 1.00000  | 6.50079e-12 | 1.00000  |
| rad11       | 4.46080e-12 | 1.00000  | 4.46080e-12 | 1.00000  |
| rad23       | 2.31102e-15 | 1.00000  | 2.31102e-15 | 1.00000  |
| rad6        | 5.72949e-19 | 1.00000  | 5.72949e-19 | 1.00000  |
| rad30       | 1.95434e-21 | 1.00000  | 1.95434e-21 | 1.00000  |
| rad15       | 8.34926e-24 | 1.00000  | 8.34926e-24 | 1.00000  |
| rad25       | 3.12747e-28 | 1.00000  | 3.12747e-28 | 1.00000  |
| rad13       | 2.65557e-28 | 1.00000  | 2.65557e-28 | 1.00000  |
| rad7        | 5.40131e-29 | 1.00000  | 5.40131e-29 | 1.00000  |
| rad8        | 1.92573e-29 | 1.00000  | 1.92573e-29 | 1.00000  |
| rad38       | 7.63776e-30 | 1.00000  | 7.63776e-30 | 1.00000  |
| rad33       | 5.17639e-31 | 1.00000  | 5.17639e-31 | 1.00000  |
| PhCHCCH2+H  | 1.47920e-32 | 1.00000  | 1.47920e-32 | 1.00000  |
| rad35       | 1.55495e-33 | 1.00000  | 1.55495e-33 | 1.00000  |
| PAH9+H      | 1.05797e-33 | 1.00000  | 1.05797e-33 | 1.00000  |
| rad60syn    | 1.23443e-34 | 1.00000  | 1.23443e-34 | 1.00000  |
| rad9        | 8.89804e-35 | 1.00000  | 8.89804e-35 | 1.00000  |
| rad46       | 2.32652e-35 | 1.00000  | 2.32652e-35 | 1.00000  |
| rad28       | 1.16087e-35 | 1.00000  | 1.16087e-35 | 1.00000  |
| rad60anti   | 7.19460e-36 | 1.00000  | 7.19460e-36 | 1.00000  |
| rad3        | 2.35060e-37 | 1.00000  | 2.35060e-37 | 1.00000  |
| rad4        | 1.62616e-37 | 1.00000  | 1.62616e-37 | 1.00000  |
| Ph+Allene   | 1.32984e-37 | 1.00000  | 1.32984e-37 | 1.00000  |
| PhCH2CCH+H  | 9.39944e-39 | 1.00000  | 9.39944e-39 | 1.00000  |
| PAH7+H      | 1.78082e-39 | 1.00000  | 1.78082e-39 | 1.00000  |
| PAH3+H      | 2.71416e-42 | 1.00000  | 2.71416e-42 | 1.00000  |
| rad59       | 1.29593e-42 | 1.00000  | 1.29593e-42 | 1.00000  |
| rad26       | 4.08430e-43 | 1.00000  | 4.08430e-43 | 1.00000  |
| rad2        | 4.08590e-45 | 1.00000  | 4.08590e-45 | 1.00000  |
| rad31       | 1.42636e-45 | 1.00000  | 1.42636e-45 | 1.00000  |
| rad1        | 6.66512e-46 | 1.00000  | 6.66512e-46 | 1.00000  |
| rad50       | 2.40711e-48 | 1.00000  | 2.40711e-48 | 1.00000  |
| rad39       | 1.07277e-48 | 1.00000  | 1.07277e-48 | 1.00000  |
| PhCCH+CH3   | 1.30127e-49 | 1.00000  | 1.30127e-49 | 1.00000  |
| rad14       | 6.06491e-50 | 1.00000  | 6.06491e-50 | 1.00000  |
| rad10       | 1.30603e-50 | 1.00000  | 1.30603e-50 | 1.00000  |
| rad12       | 1.05988e-53 | 1.00000  | 1.05988e-53 | 1.00000  |
| Ph+MeAc     | 3.56209e-55 | 1.00000  | 3.56209e-55 | 1.00000  |
| rad37       | 2.56600e-55 | 1.00000  | 2.56600e-55 | 1.00000  |
| rad52       | 1.15769e-55 | 1.00000  | 1.15769e-55 | 1.00000  |
| rad27       | 5.26494e-57 | 1.00000  | 5.26494e-57 | 1.00000  |
| PhCCCH3+H   | 2.44466e-58 | 1.00000  | 2.44466e-58 | 1.00000  |
| rad58       | 1.15963e-59 | 1.00000  | 1.15963e-59 | 1.00000  |
| rad51       | 1.02583e-59 | 1.00000  | 1.02583e-59 | 1.00000  |
| rad19syn    | 4.58562e-64 | 1.00000  | 4.58562e-64 | 1.00000  |
| rad70       | 3.35315e-64 | 1.00000  | 3.35315e-64 | 1.00000  |
| rad54       | 9.66883e-65 | 1.00000  | 9.66883e-65 | 1.00000  |
| PAH10+CH3   | 3.46038e-65 | 1.00000  | 3.46038e-65 | 1.00000  |

|               |             |         |             |         |
|---------------|-------------|---------|-------------|---------|
| rad47         | 6.60475e-66 | 1.00000 | 6.60475e-66 | 1.00000 |
| rad65         | 3.04663e-67 | 1.00000 | 3.04663e-67 | 1.00000 |
| rad5          | 7.39778e-68 | 1.00000 | 7.39778e-68 | 1.00000 |
| rad34         | 7.47500e-69 | 1.00000 | 7.47500e-69 | 1.00000 |
| rad55         | 3.27101e-70 | 1.00000 | 3.27101e-70 | 1.00000 |
| PAH1+H        | 2.79370e-71 | 1.00000 | 2.79370e-71 | 1.00000 |
| PhcycC3H3_A+H | 8.24697e-72 | 1.00000 | 8.24697e-72 | 1.00000 |
| rad62         | 8.27421e-75 | 1.00000 | 8.27421e-75 | 1.00000 |
| rad43         | 4.66887e-79 | 1.00000 | 4.66887e-79 | 1.00000 |
| rad42         | 1.58891e-83 | 1.00000 | 1.58891e-83 | 1.00000 |
| rad41         | 3.82501e-88 | 1.00000 | 3.82501e-88 | 1.00000 |

10000000.0 Pa, 100.000000 K

| Rate constant | True (fraction)     | Effective (fraction) |
|---------------|---------------------|----------------------|
| Total         | 1.02671e-41 (1.00 ) | 1.02671e-41 (1.00 )  |

| species     | PYtrue      | Cumul    | PYeffective | Cumul    |
|-------------|-------------|----------|-------------|----------|
| rad20       | 0.999598    | 0.999598 | 0.999598    | 0.999598 |
| rad21       | 0.000351537 | 0.999950 | 0.000351537 | 0.999950 |
| rad18       | 5.01503e-05 | 1.000000 | 5.01503e-05 | 1.000000 |
| rad22       | 3.83197e-08 | 1.000000 | 3.83197e-08 | 1.000000 |
| rad24       | 1.48723e-09 | 1.000000 | 1.48723e-09 | 1.000000 |
| Indene+H    | 1.16829e-09 | 1.000000 | 1.16829e-09 | 1.000000 |
| Benzyl+C2H2 | 8.54801e-10 | 1.000000 | 0.000000    | 1.000000 |
| rad45       | 8.02149e-11 | 1.000000 | 8.02149e-11 | 1.000000 |
| rad36       | 9.76419e-12 | 1.000000 | 9.76419e-12 | 1.000000 |
| rad11       | 6.48435e-12 | 1.000000 | 6.48435e-12 | 1.000000 |
| rad23       | 3.60176e-15 | 1.000000 | 3.60176e-15 | 1.000000 |
| rad6        | 1.04565e-18 | 1.000000 | 1.04565e-18 | 1.000000 |
| rad30       | 7.42448e-21 | 1.000000 | 7.42448e-21 | 1.000000 |
| rad15       | 4.56446e-23 | 1.000000 | 4.56446e-23 | 1.000000 |
| rad25       | 1.70356e-27 | 1.000000 | 1.70356e-27 | 1.000000 |
| rad13       | 6.26388e-28 | 1.000000 | 6.26388e-28 | 1.000000 |
| rad8        | 2.96469e-28 | 1.000000 | 2.96469e-28 | 1.000000 |
| rad7        | 1.29886e-28 | 1.000000 | 1.29886e-28 | 1.000000 |
| rad38       | 2.92705e-29 | 1.000000 | 2.92705e-29 | 1.000000 |
| rad33       | 1.31891e-30 | 1.000000 | 1.31891e-30 | 1.000000 |
| PhCHCCH2+H  | 1.49129e-31 | 1.000000 | 1.49129e-31 | 1.000000 |
| rad35       | 4.45441e-33 | 1.000000 | 4.45441e-33 | 1.000000 |
| PAH9+H      | 3.36786e-33 | 1.000000 | 3.36786e-33 | 1.000000 |
| rad60syn    | 1.86813e-33 | 1.000000 | 1.86813e-33 | 1.000000 |
| rad9        | 1.12024e-33 | 1.000000 | 1.12024e-33 | 1.000000 |
| rad46       | 2.02905e-34 | 1.000000 | 2.02905e-34 | 1.000000 |
| rad28       | 1.81201e-34 | 1.000000 | 1.81201e-34 | 1.000000 |
| rad60anti   | 1.15954e-34 | 1.000000 | 1.15954e-34 | 1.000000 |
| Ph+Allene   | 2.21024e-36 | 1.000000 | 2.21024e-36 | 1.000000 |
| rad3        | 9.01724e-37 | 1.000000 | 9.01724e-37 | 1.000000 |
| rad4        | 6.19264e-37 | 1.000000 | 6.19264e-37 | 1.000000 |
| PhCH2CCH+H  | 2.08628e-37 | 1.000000 | 2.08628e-37 | 1.000000 |
| PAH7+H      | 3.44890e-38 | 1.000000 | 3.44890e-38 | 1.000000 |
| PAH3+H      | 6.05637e-41 | 1.000000 | 6.05637e-41 | 1.000000 |
| rad59       | 2.87215e-41 | 1.000000 | 2.87215e-41 | 1.000000 |
| rad26       | 9.49465e-42 | 1.000000 | 9.49465e-42 | 1.000000 |
| rad2        | 2.68521e-44 | 1.000000 | 2.68521e-44 | 1.000000 |
| rad31       | 6.50410e-45 | 1.000000 | 6.50410e-45 | 1.000000 |
| rad1        | 4.27469e-45 | 1.000000 | 4.27469e-45 | 1.000000 |
| rad50       | 6.79975e-47 | 1.000000 | 6.79975e-47 | 1.000000 |
| rad39       | 2.05388e-47 | 1.000000 | 2.05388e-47 | 1.000000 |
| PhCCH+CH3   | 1.76524e-48 | 1.000000 | 1.76524e-48 | 1.000000 |
| rad14       | 6.47982e-49 | 1.000000 | 6.47982e-49 | 1.000000 |
| rad10       | 3.40640e-49 | 1.000000 | 3.40640e-49 | 1.000000 |
| rad12       | 2.80246e-52 | 1.000000 | 2.80246e-52 | 1.000000 |
| Ph+MeAc     | 8.46588e-54 | 1.000000 | 8.46588e-54 | 1.000000 |
| rad37       | 6.94134e-54 | 1.000000 | 6.94134e-54 | 1.000000 |
| rad52       | 5.23073e-54 | 1.000000 | 5.23073e-54 | 1.000000 |
| rad27       | 6.90855e-56 | 1.000000 | 6.90855e-56 | 1.000000 |
| PhCCCH3+H   | 4.54168e-57 | 1.000000 | 4.54168e-57 | 1.000000 |
| rad51       | 6.17181e-58 | 1.000000 | 6.17181e-58 | 1.000000 |
| rad58       | 4.99811e-58 | 1.000000 | 4.99811e-58 | 1.000000 |
| rad19syn    | 1.87518e-62 | 1.000000 | 1.87518e-62 | 1.000000 |
| rad70       | 1.77235e-62 | 1.000000 | 1.77235e-62 | 1.000000 |
| rad54       | 4.47318e-63 | 1.000000 | 4.47318e-63 | 1.000000 |
| PAH10+CH3   | 1.51680e-63 | 1.000000 | 1.51680e-63 | 1.000000 |
| rad47       | 6.04300e-64 | 1.000000 | 6.04300e-64 | 1.000000 |
| rad65       | 1.87855e-65 | 1.000000 | 1.87855e-65 | 1.000000 |
| rad5        | 2.92161e-66 | 1.000000 | 2.92161e-66 | 1.000000 |
| rad34       | 4.76687e-67 | 1.000000 | 4.76687e-67 | 1.000000 |



|               |             |          |             |          |
|---------------|-------------|----------|-------------|----------|
| rad55         | 1.91841e-68 | 1.000000 | 1.91841e-68 | 1.000000 |
| PAH1+H        | 1.74947e-69 | 1.000000 | 1.74947e-69 | 1.000000 |
| PhcycC3H3_A+H | 4.85155e-70 | 1.000000 | 4.85155e-70 | 1.000000 |
| rad62         | 5.30037e-73 | 1.000000 | 5.30037e-73 | 1.000000 |
| rad43         | 3.29798e-77 | 1.000000 | 3.29798e-77 | 1.000000 |
| rad42         | 1.56947e-81 | 1.000000 | 1.56947e-81 | 1.000000 |
| rad41         | 3.56032e-86 | 1.000000 | 3.56032e-86 | 1.000000 |

10000000.0 Pa, 110.000000 K

| Rate constant | True (fraction)     | Effective (fraction) |
|---------------|---------------------|----------------------|
| Total         | 4.04932e-39 (1.00 ) | 4.04932e-39 (1.00 )  |

| species       | PYtrue      | Cumul    | PYeffective | Cumul    |
|---------------|-------------|----------|-------------|----------|
| rad20         | 0.999543    | 0.999543 | 0.999543    | 0.999543 |
| rad21         | 0.000399565 | 0.999943 | 0.000399565 | 0.999943 |
| rad18         | 5.72325e-05 | 1.000000 | 5.72325e-05 | 1.000000 |
| rad22         | 4.98878e-08 | 1.000000 | 4.98878e-08 | 1.000000 |
| rad24         | 1.96626e-09 | 1.000000 | 1.96626e-09 | 1.000000 |
| Indene+H      | 1.53027e-09 | 1.000000 | 1.53027e-09 | 1.000000 |
| Benzyl+C2H2   | 1.34150e-09 | 1.000000 | 0.000000    | 1.000000 |
| rad45         | 1.20514e-10 | 1.000000 | 1.20514e-10 | 1.000000 |
| rad36         | 1.43773e-11 | 1.000000 | 1.43773e-11 | 1.000000 |
| rad11         | 9.35082e-12 | 1.000000 | 9.35082e-12 | 1.000000 |
| rad23         | 5.49876e-15 | 1.000000 | 5.49876e-15 | 1.000000 |
| rad6          | 1.90349e-18 | 1.000000 | 1.90349e-18 | 1.000000 |
| rad30         | 2.68164e-20 | 1.000000 | 2.68164e-20 | 1.000000 |
| rad15         | 2.48106e-22 | 1.000000 | 2.48106e-22 | 1.000000 |
| rad25         | 9.35390e-27 | 1.000000 | 9.35390e-27 | 1.000000 |
| rad8          | 8.91785e-27 | 1.000000 | 8.91785e-27 | 1.000000 |
| rad13         | 1.49221e-27 | 1.000000 | 1.49221e-27 | 1.000000 |
| rad7          | 3.16337e-28 | 1.000000 | 3.16337e-28 | 1.000000 |
| rad38         | 1.10371e-28 | 1.000000 | 1.10371e-28 | 1.000000 |
| rad33         | 3.42950e-30 | 1.000000 | 3.42950e-30 | 1.000000 |
| PhCHCCH2+H    | 1.80426e-30 | 1.000000 | 1.80426e-30 | 1.000000 |
| rad60syn      | 4.76203e-32 | 1.000000 | 4.76203e-32 | 1.000000 |
| rad9          | 1.95526e-32 | 1.000000 | 1.95526e-32 | 1.000000 |
| rad35         | 1.28474e-32 | 1.000000 | 1.28474e-32 | 1.000000 |
| PAH9+H        | 1.07535e-32 | 1.000000 | 1.07535e-32 | 1.000000 |
| rad28         | 4.21032e-33 | 1.000000 | 4.21032e-33 | 1.000000 |
| rad60anti     | 3.33723e-33 | 1.000000 | 3.33723e-33 | 1.000000 |
| rad46         | 1.91812e-33 | 1.000000 | 1.91812e-33 | 1.000000 |
| Ph+Allene     | 5.83429e-35 | 1.000000 | 5.83429e-35 | 1.000000 |
| PhCH2CCH+H    | 9.47903e-36 | 1.000000 | 9.47903e-36 | 1.000000 |
| rad3          | 3.62399e-36 | 1.000000 | 3.62399e-36 | 1.000000 |
| rad4          | 2.47290e-36 | 1.000000 | 2.47290e-36 | 1.000000 |
| PAH7+H        | 1.10995e-36 | 1.000000 | 1.10995e-36 | 1.000000 |
| PAH3+H        | 2.66649e-39 | 1.000000 | 2.66649e-39 | 1.000000 |
| rad59         | 1.25440e-39 | 1.000000 | 1.25440e-39 | 1.000000 |
| rad26         | 3.89892e-40 | 1.000000 | 3.89892e-40 | 1.000000 |
| rad2          | 1.92327e-43 | 1.000000 | 1.92327e-43 | 1.000000 |
| rad31         | 3.09815e-44 | 1.000000 | 3.09815e-44 | 1.000000 |
| rad1          | 2.99742e-44 | 1.000000 | 2.99742e-44 | 1.000000 |
| rad50         | 3.07807e-45 | 1.000000 | 3.07807e-45 | 1.000000 |
| rad39         | 6.18885e-46 | 1.000000 | 6.18885e-46 | 1.000000 |
| PhCCH+CH3     | 2.93669e-47 | 1.000000 | 2.93669e-47 | 1.000000 |
| rad10         | 1.56064e-47 | 1.000000 | 1.56064e-47 | 1.000000 |
| rad14         | 8.01512e-48 | 1.000000 | 8.01512e-48 | 1.000000 |
| rad12         | 1.30633e-50 | 1.000000 | 1.30633e-50 | 1.000000 |
| rad52         | 4.10961e-52 | 1.000000 | 4.10961e-52 | 1.000000 |
| rad37         | 3.33408e-52 | 1.000000 | 3.33408e-52 | 1.000000 |
| Ph+MeAc       | 3.03849e-52 | 1.000000 | 3.03849e-52 | 1.000000 |
| rad27         | 1.09984e-54 | 1.000000 | 1.09984e-54 | 1.000000 |
| PhCCCH3+H     | 1.10554e-55 | 1.000000 | 1.10554e-55 | 1.000000 |
| rad51         | 6.75936e-56 | 1.000000 | 6.75936e-56 | 1.000000 |
| rad58         | 4.43532e-56 | 1.000000 | 4.43532e-56 | 1.000000 |
| rad70         | 1.83333e-60 | 1.000000 | 1.83333e-60 | 1.000000 |
| rad19syn      | 1.44034e-60 | 1.000000 | 1.44034e-60 | 1.000000 |
| rad54         | 3.93218e-61 | 1.000000 | 3.93218e-61 | 1.000000 |
| PAH10+CH3     | 1.27397e-61 | 1.000000 | 1.27397e-61 | 1.000000 |
| rad47         | 1.07659e-61 | 1.000000 | 1.07659e-61 | 1.000000 |
| rad65         | 2.26938e-63 | 1.000000 | 2.26938e-63 | 1.000000 |
| rad5          | 2.02264e-64 | 1.000000 | 2.02264e-64 | 1.000000 |
| rad34         | 6.01261e-65 | 1.000000 | 6.01261e-65 | 1.000000 |
| rad55         | 2.18173e-66 | 1.000000 | 2.18173e-66 | 1.000000 |
| PAH1+H        | 2.15872e-67 | 1.000000 | 2.15872e-67 | 1.000000 |
| PhcycC3H3_A+H | 5.54863e-68 | 1.000000 | 5.54863e-68 | 1.000000 |
| rad62         | 6.37891e-71 | 1.000000 | 6.37891e-71 | 1.000000 |

|       |             |          |             |          |
|-------|-------------|----------|-------------|----------|
| rad43 | 4.29701e-75 | 1.000000 | 4.29701e-75 | 1.000000 |
| rad42 | 3.01060e-79 | 1.000000 | 3.01060e-79 | 1.000000 |
| rad41 | 6.64517e-84 | 1.000000 | 6.64517e-84 | 1.000000 |

10000000.0 Pa, 120.000000 K

| Rate constant | True (fraction)     | Effective (fraction) |
|---------------|---------------------|----------------------|
| Total         | 5.87106e-37 (1.00 ) | 5.87106e-37 (1.00 )  |

| species       | PYtrue      | Cumul    | PYeffective | Cumul    |
|---------------|-------------|----------|-------------|----------|
| rad20         | 0.999484    | 0.999484 | 0.999484    | 0.999484 |
| rad21         | 0.000451280 | 0.999935 | 0.000451280 | 0.999935 |
| rad18         | 6.49209e-05 | 1.00000  | 6.49209e-05 | 1.00000  |
| rad22         | 6.42154e-08 | 1.00000  | 6.42154e-08 | 1.00000  |
| rad24         | 2.57482e-09 | 1.00000  | 2.57482e-09 | 1.00000  |
| Benzyl+C2H2   | 2.09136e-09 | 1.00000  | 0.00000     | 1.00000  |
| Indene+H      | 1.98351e-09 | 1.00000  | 1.98351e-09 | 1.00000  |
| rad45         | 1.78358e-10 | 1.00000  | 1.78358e-10 | 1.00000  |
| rad36         | 2.09018e-11 | 1.00000  | 2.09018e-11 | 1.00000  |
| rad11         | 1.34445e-11 | 1.00000  | 1.34445e-11 | 1.00000  |
| rad23         | 8.29002e-15 | 1.00000  | 8.29002e-15 | 1.00000  |
| rad6          | 3.48296e-18 | 1.00000  | 3.48296e-18 | 1.00000  |
| rad30         | 8.92990e-20 | 1.00000  | 8.92990e-20 | 1.00000  |
| rad15         | 1.22798e-21 | 1.00000  | 1.22798e-21 | 1.00000  |
| rad8          | 2.88312e-25 | 1.00000  | 2.88312e-25 | 1.00000  |
| rad25         | 4.86019e-26 | 1.00000  | 4.86019e-26 | 1.00000  |
| rad13         | 3.62769e-27 | 1.00000  | 3.62769e-27 | 1.00000  |
| rad7          | 7.88269e-28 | 1.00000  | 7.88269e-28 | 1.00000  |
| rad38         | 4.07719e-28 | 1.00000  | 4.07719e-28 | 1.00000  |
| PhCHCCH2+H    | 2.17438e-29 | 1.00000  | 2.17438e-29 | 1.00000  |
| rad33         | 9.18285e-30 | 1.00000  | 9.18285e-30 | 1.00000  |
| rad60syn      | 1.36591e-30 | 1.00000  | 1.36591e-30 | 1.00000  |
| rad9          | 4.18681e-31 | 1.00000  | 4.18681e-31 | 1.00000  |
| rad60anti     | 1.15575e-31 | 1.00000  | 1.15575e-31 | 1.00000  |
| rad28         | 1.10930e-31 | 1.00000  | 1.10930e-31 | 1.00000  |
| rad35         | 3.75863e-32 | 1.00000  | 3.75863e-32 | 1.00000  |
| PAH9+H        | 3.45871e-32 | 1.00000  | 3.45871e-32 | 1.00000  |
| rad46         | 1.76203e-32 | 1.00000  | 1.76203e-32 | 1.00000  |
| Ph+Allene     | 1.83265e-33 | 1.00000  | 1.83265e-33 | 1.00000  |
| PhCH2CCH+H    | 6.77488e-34 | 1.00000  | 6.77488e-34 | 1.00000  |
| PAH7+H        | 4.67868e-35 | 1.00000  | 4.67868e-35 | 1.00000  |
| rad3          | 1.52989e-35 | 1.00000  | 1.52989e-35 | 1.00000  |
| rad4          | 1.03806e-35 | 1.00000  | 1.03806e-35 | 1.00000  |
| PAH3+H        | 1.79203e-37 | 1.00000  | 1.79203e-37 | 1.00000  |
| rad59         | 8.35039e-38 | 1.00000  | 8.35039e-38 | 1.00000  |
| rad26         | 2.25001e-38 | 1.00000  | 2.25001e-38 | 1.00000  |
| rad2          | 1.47557e-42 | 1.00000  | 1.47557e-42 | 1.00000  |
| rad1          | 2.25716e-43 | 1.00000  | 2.25716e-43 | 1.00000  |
| rad50         | 1.80475e-43 | 1.00000  | 1.80475e-43 | 1.00000  |
| rad31         | 1.52533e-43 | 1.00000  | 1.52533e-43 | 1.00000  |
| rad39         | 2.31369e-44 | 1.00000  | 2.31369e-44 | 1.00000  |
| rad10         | 1.00252e-45 | 1.00000  | 1.00252e-45 | 1.00000  |
| PhCCH+CH3     | 5.33300e-46 | 1.00000  | 5.33300e-46 | 1.00000  |
| rad14         | 1.06121e-46 | 1.00000  | 1.06121e-46 | 1.00000  |
| rad12         | 8.57860e-49 | 1.00000  | 8.57860e-49 | 1.00000  |
| rad52         | 4.45039e-50 | 1.00000  | 4.45039e-50 | 1.00000  |
| rad37         | 2.27473e-50 | 1.00000  | 2.27473e-50 | 1.00000  |
| Ph+MeAc       | 1.32937e-50 | 1.00000  | 1.32937e-50 | 1.00000  |
| rad27         | 1.98016e-53 | 1.00000  | 1.98016e-53 | 1.00000  |
| rad51         | 1.05281e-53 | 1.00000  | 1.05281e-53 | 1.00000  |
| rad58         | 6.22862e-54 | 1.00000  | 6.22862e-54 | 1.00000  |
| PhCCCH3+H     | 3.10764e-54 | 1.00000  | 3.10764e-54 | 1.00000  |
| rad70         | 2.90148e-58 | 1.00000  | 2.90148e-58 | 1.00000  |
| rad19syn      | 1.64968e-58 | 1.00000  | 1.64968e-58 | 1.00000  |
| rad54         | 5.19433e-59 | 1.00000  | 5.19433e-59 | 1.00000  |
| rad47         | 2.85691e-59 | 1.00000  | 2.85691e-59 | 1.00000  |
| PAH10+CH3     | 1.61445e-59 | 1.00000  | 1.61445e-59 | 1.00000  |
| rad65         | 4.11582e-61 | 1.00000  | 4.11582e-61 | 1.00000  |
| rad5          | 1.98376e-62 | 1.00000  | 1.98376e-62 | 1.00000  |
| rad34         | 1.16786e-62 | 1.00000  | 1.16786e-62 | 1.00000  |
| rad55         | 3.78122e-64 | 1.00000  | 3.78122e-64 | 1.00000  |
| PAH1+H        | 4.09096e-65 | 1.00000  | 4.09096e-65 | 1.00000  |
| PhcycC3H3_A+H | 9.69497e-66 | 1.00000  | 9.69497e-66 | 1.00000  |
| rad62         | 1.14396e-68 | 1.00000  | 1.14396e-68 | 1.00000  |
| rad43         | 8.23017e-73 | 1.00000  | 8.23017e-73 | 1.00000  |
| rad42         | 8.81007e-77 | 1.00000  | 8.81007e-77 | 1.00000  |
| rad41         | 1.93972e-81 | 1.00000  | 1.93972e-81 | 1.00000  |

10000000.0 Pa, 130.000000 K

=====

| Rate constant | True (fraction) | Effective (fraction) |
|---------------|-----------------|----------------------|
|---------------|-----------------|----------------------|

-----

|       |                     |                     |
|-------|---------------------|---------------------|
| Total | 3.94360e-35 (1.00 ) | 3.94360e-35 (1.00 ) |
|-------|---------------------|---------------------|

| species       | PYtrue      | Cumul    | PYeffective | Cumul    |
|---------------|-------------|----------|-------------|----------|
| rad20         | 0.999419    | 0.999419 | 0.999419    | 0.999419 |
| rad21         | 0.000507379 | 0.999926 | 0.000507379 | 0.999926 |
| rad18         | 7.33314e-05 | 1.000000 | 7.33314e-05 | 1.000000 |
| rad22         | 8.20299e-08 | 1.000000 | 8.20299e-08 | 1.000000 |
| rad24         | 3.35201e-09 | 1.000000 | 3.35201e-09 | 1.000000 |
| Benzyl+C2H2   | 3.24345e-09 | 1.000000 | 0.00000     | 1.000000 |
| Indene+H      | 2.55393e-09 | 1.000000 | 2.55393e-09 | 1.000000 |
| rad45         | 2.61518e-10 | 1.000000 | 2.61518e-10 | 1.000000 |
| rad36         | 3.01617e-11 | 1.000000 | 3.01617e-11 | 1.000000 |
| rad11         | 1.93414e-11 | 1.000000 | 1.93414e-11 | 1.000000 |
| rad23         | 1.24183e-14 | 1.000000 | 1.24183e-14 | 1.000000 |
| rad6          | 6.43686e-18 | 1.000000 | 6.43686e-18 | 1.000000 |
| rad30         | 2.73099e-19 | 1.000000 | 2.73099e-19 | 1.000000 |
| rad15         | 5.37407e-21 | 1.000000 | 5.37407e-21 | 1.000000 |
| rad8          | 7.15024e-24 | 1.000000 | 7.15024e-24 | 1.000000 |
| rad25         | 2.32571e-25 | 1.000000 | 2.32571e-25 | 1.000000 |
| rad13         | 9.04578e-27 | 1.000000 | 9.04578e-27 | 1.000000 |
| rad7          | 2.01894e-27 | 1.000000 | 2.01894e-27 | 1.000000 |
| rad38         | 1.47249e-27 | 1.000000 | 1.47249e-27 | 1.000000 |
| PhCHCCH2+H    | 2.31927e-28 | 1.000000 | 2.31927e-28 | 1.000000 |
| rad60syn      | 3.25245e-29 | 1.000000 | 3.25245e-29 | 1.000000 |
| rad33         | 2.53876e-29 | 1.000000 | 2.53876e-29 | 1.000000 |
| rad9          | 1.06969e-29 | 1.000000 | 1.06969e-29 | 1.000000 |
| rad60anti     | 3.33408e-30 | 1.000000 | 3.33408e-30 | 1.000000 |
| rad28         | 2.58478e-30 | 1.000000 | 2.58478e-30 | 1.000000 |
| rad46         | 1.46801e-31 | 1.000000 | 1.46801e-31 | 1.000000 |
| rad35         | 1.13024e-31 | 1.000000 | 1.13024e-31 | 1.000000 |
| PAH9+H        | 1.12250e-31 | 1.000000 | 1.12250e-31 | 1.000000 |
| PhCH2CCH+H    | 6.17918e-32 | 1.000000 | 6.17918e-32 | 1.000000 |
| Ph+Allene     | 5.15402e-32 | 1.000000 | 5.15402e-32 | 1.000000 |
| PAH7+H        | 1.87902e-33 | 1.000000 | 1.87902e-33 | 1.000000 |
| rad3          | 6.73892e-35 | 1.000000 | 6.73892e-35 | 1.000000 |
| rad4          | 4.54948e-35 | 1.000000 | 4.54948e-35 | 1.000000 |
| PAH3+H        | 1.46313e-35 | 1.000000 | 1.46313e-35 | 1.000000 |
| rad59         | 6.73464e-36 | 1.000000 | 6.73464e-36 | 1.000000 |
| rad26         | 1.43530e-36 | 1.000000 | 1.43530e-36 | 1.000000 |
| rad2          | 1.18117e-41 | 1.000000 | 1.18117e-41 | 1.000000 |
| rad50         | 1.10219e-41 | 1.000000 | 1.10219e-41 | 1.000000 |
| rad1          | 1.77715e-42 | 1.000000 | 1.77715e-42 | 1.000000 |
| rad39         | 8.35067e-43 | 1.000000 | 8.35067e-43 | 1.000000 |
| rad31         | 7.64198e-43 | 1.000000 | 7.64198e-43 | 1.000000 |
| rad10         | 7.14850e-44 | 1.000000 | 7.14850e-44 | 1.000000 |
| PhCCH+CH3     | 9.59636e-45 | 1.000000 | 9.59636e-45 | 1.000000 |
| rad14         | 1.41000e-45 | 1.000000 | 1.41000e-45 | 1.000000 |
| rad12         | 6.30781e-47 | 1.000000 | 6.30781e-47 | 1.000000 |
| rad52         | 5.35517e-48 | 1.000000 | 5.35517e-48 | 1.000000 |
| rad37         | 1.76113e-48 | 1.000000 | 1.76113e-48 | 1.000000 |
| Ph+MeAc       | 5.71672e-49 | 1.000000 | 5.71672e-49 | 1.000000 |
| rad51         | 1.86895e-51 | 1.000000 | 1.86895e-51 | 1.000000 |
| rad58         | 1.12126e-51 | 1.000000 | 1.12126e-51 | 1.000000 |
| rad27         | 3.73807e-52 | 1.000000 | 3.73807e-52 | 1.000000 |
| PhCCCH3+H     | 8.94672e-53 | 1.000000 | 8.94672e-53 | 1.000000 |
| rad70         | 5.71197e-56 | 1.000000 | 5.71197e-56 | 1.000000 |
| rad19syn      | 2.28966e-56 | 1.000000 | 2.28966e-56 | 1.000000 |
| rad47         | 8.93466e-57 | 1.000000 | 8.93466e-57 | 1.000000 |
| rad54         | 8.39301e-57 | 1.000000 | 8.39301e-57 | 1.000000 |
| PAH10+CH3     | 2.50851e-57 | 1.000000 | 2.50851e-57 | 1.000000 |
| rad65         | 8.86873e-59 | 1.000000 | 8.86873e-59 | 1.000000 |
| rad34         | 2.83865e-60 | 1.000000 | 2.83865e-60 | 1.000000 |
| rad5          | 2.25143e-60 | 1.000000 | 2.25143e-60 | 1.000000 |
| rad55         | 8.14645e-62 | 1.000000 | 8.14645e-62 | 1.000000 |
| PAH1+H        | 9.66980e-63 | 1.000000 | 9.66980e-63 | 1.000000 |
| PhcycC3H3_A+H | 2.11220e-63 | 1.000000 | 2.11220e-63 | 1.000000 |
| rad62         | 2.49384e-66 | 1.000000 | 2.49384e-66 | 1.000000 |
| rad43         | 1.89157e-70 | 1.000000 | 1.89157e-70 | 1.000000 |
| rad42         | 3.21476e-74 | 1.000000 | 3.21476e-74 | 1.000000 |
| rad41         | 7.20345e-79 | 1.000000 | 7.20345e-79 | 1.000000 |

10000000.0 Pa, 140.000000 K

=====

| Rate constant | True (fraction) | Effective (fraction) |
|---------------|-----------------|----------------------|
|---------------|-----------------|----------------------|

-----

Total | 1.44756e-33 (1.00 ) 1.44756e-33 (1.00 )

| species       | PYtrue      | Cumul    | PYeffective | Cumul    |
|---------------|-------------|----------|-------------|----------|
| rad20         | 0.999349    | 0.999349 | 0.999349    | 0.999349 |
| rad21         | 0.000568652 | 0.999918 | 0.000568652 | 0.999918 |
| rad18         | 8.25963e-05 | 1.00000  | 8.25963e-05 | 1.00000  |
| rad22         | 1.04285e-07 | 1.00000  | 1.04285e-07 | 1.00000  |
| Benzy1+C2H2   | 5.00788e-09 | 1.00000  | 0.00000     | 1.00000  |
| rad24         | 4.35024e-09 | 1.00000  | 4.35024e-09 | 1.00000  |
| Indene+H      | 3.27616e-09 | 1.00000  | 3.27616e-09 | 1.00000  |
| rad45         | 3.81518e-10 | 1.00000  | 3.81518e-10 | 1.00000  |
| rad36         | 4.33722e-11 | 1.00000  | 4.33722e-11 | 1.00000  |
| rad11         | 2.79079e-11 | 1.00000  | 2.79079e-11 | 1.00000  |
| rad23         | 1.85720e-14 | 1.00000  | 1.85720e-14 | 1.00000  |
| rad6          | 1.20446e-17 | 1.00000  | 1.20446e-17 | 1.00000  |
| rad30         | 7.73170e-19 | 1.00000  | 7.73170e-19 | 1.00000  |
| rad15         | 2.08386e-20 | 1.00000  | 2.08386e-20 | 1.00000  |
| rad8          | 1.25632e-22 | 1.00000  | 1.25632e-22 | 1.00000  |
| rad25         | 1.02107e-24 | 1.00000  | 1.02107e-24 | 1.00000  |
| rad13         | 2.31526e-26 | 1.00000  | 2.31526e-26 | 1.00000  |
| rad7          | 5.31547e-27 | 1.00000  | 5.31547e-27 | 1.00000  |
| rad38         | 5.19614e-27 | 1.00000  | 5.19614e-27 | 1.00000  |
| PhCHCCH2+H    | 2.10424e-27 | 1.00000  | 2.10424e-27 | 1.00000  |
| rad60syn      | 5.78995e-28 | 1.00000  | 5.78995e-28 | 1.00000  |
| rad9          | 2.67676e-28 | 1.00000  | 2.67676e-28 | 1.00000  |
| rad33         | 7.23214e-29 | 1.00000  | 7.23214e-29 | 1.00000  |
| rad60anti     | 7.05235e-29 | 1.00000  | 7.05235e-29 | 1.00000  |
| rad28         | 4.75445e-29 | 1.00000  | 4.75445e-29 | 1.00000  |
| PhCH2CCH+H    | 5.33300e-30 | 1.00000  | 5.33300e-30 | 1.00000  |
| Ph+Allene     | 1.13406e-30 | 1.00000  | 1.13406e-30 | 1.00000  |
| rad46         | 1.08211e-30 | 1.00000  | 1.08211e-30 | 1.00000  |
| rad35         | 3.93294e-31 | 1.00000  | 3.93294e-31 | 1.00000  |
| PAH9+H        | 3.67455e-31 | 1.00000  | 3.67455e-31 | 1.00000  |
| PAH7+H        | 5.70113e-32 | 1.00000  | 5.70113e-32 | 1.00000  |
| PAH3+H        | 1.07546e-33 | 1.00000  | 1.07546e-33 | 1.00000  |
| rad59         | 4.87207e-34 | 1.00000  | 4.87207e-34 | 1.00000  |
| rad3          | 3.06201e-34 | 1.00000  | 3.06201e-34 | 1.00000  |
| rad4          | 2.05786e-34 | 1.00000  | 2.05786e-34 | 1.00000  |
| rad26         | 7.53872e-35 | 1.00000  | 7.53872e-35 | 1.00000  |
| rad50         | 5.61841e-40 | 1.00000  | 5.61841e-40 | 1.00000  |
| rad2          | 9.61921e-41 | 1.00000  | 9.61921e-41 | 1.00000  |
| rad39         | 2.48641e-41 | 1.00000  | 2.48641e-41 | 1.00000  |
| rad1          | 1.42609e-41 | 1.00000  | 1.42609e-41 | 1.00000  |
| rad10         | 4.25886e-42 | 1.00000  | 4.25886e-42 | 1.00000  |
| rad31         | 3.84060e-42 | 1.00000  | 3.84060e-42 | 1.00000  |
| PhCCH+CH3     | 1.61940e-43 | 1.00000  | 1.61940e-43 | 1.00000  |
| rad14         | 1.80777e-44 | 1.00000  | 1.80777e-44 | 1.00000  |
| rad12         | 3.93197e-45 | 1.00000  | 3.93197e-45 | 1.00000  |
| rad52         | 5.63994e-46 | 1.00000  | 5.63994e-46 | 1.00000  |
| rad37         | 1.17911e-46 | 1.00000  | 1.17911e-46 | 1.00000  |
| Ph+MeAc       | 2.09479e-47 | 1.00000  | 2.09479e-47 | 1.00000  |
| rad51         | 2.94278e-49 | 1.00000  | 2.94278e-49 | 1.00000  |
| rad58         | 1.91837e-49 | 1.00000  | 1.91837e-49 | 1.00000  |
| rad27         | 6.98137e-51 | 1.00000  | 6.98137e-51 | 1.00000  |
| PhCCCH3+H     | 2.43115e-51 | 1.00000  | 2.43115e-51 | 1.00000  |
| rad70         | 1.04929e-53 | 1.00000  | 1.04929e-53 | 1.00000  |
| rad19syn      | 2.91753e-54 | 1.00000  | 2.91753e-54 | 1.00000  |
| rad47         | 2.52401e-54 | 1.00000  | 2.52401e-54 | 1.00000  |
| rad54         | 1.25375e-54 | 1.00000  | 1.25375e-54 | 1.00000  |
| PAH10+CH3     | 3.61099e-55 | 1.00000  | 3.61099e-55 | 1.00000  |
| rad65         | 1.73465e-56 | 1.00000  | 1.73465e-56 | 1.00000  |
| rad34         | 6.45812e-58 | 1.00000  | 6.45812e-58 | 1.00000  |
| rad5          | 2.32566e-58 | 1.00000  | 2.32566e-58 | 1.00000  |
| rad55         | 1.64403e-59 | 1.00000  | 1.64403e-59 | 1.00000  |
| PAH1+H        | 2.13588e-60 | 1.00000  | 2.13588e-60 | 1.00000  |
| PhcycC3H3_A+H | 4.32407e-61 | 1.00000  | 4.32407e-61 | 1.00000  |
| rad62         | 5.00526e-64 | 1.00000  | 5.00526e-64 | 1.00000  |
| rad43         | 3.96647e-68 | 1.00000  | 3.96647e-68 | 1.00000  |
| rad42         | 1.10216e-71 | 1.00000  | 1.10216e-71 | 1.00000  |
| rad41         | 2.55249e-76 | 1.00000  | 2.55249e-76 | 1.00000  |

10000000.0 Pa, 150.000000 K

=====

| Rate constant | True (fraction)     | Effective (fraction) |
|---------------|---------------------|----------------------|
| Total         | 3.27736e-32 (1.00 ) | 3.27736e-32 (1.00 )  |

| species | PYtrue | Cumul | PYeffective | Cumul |
|---------|--------|-------|-------------|-------|
|---------|--------|-------|-------------|-------|

-----

|               |             |          |             |          |
|---------------|-------------|----------|-------------|----------|
| rad20         | 0.999271    | 0.999271 | 0.999271    | 0.999271 |
| rad21         | 0.000635992 | 0.999907 | 0.000635992 | 0.999907 |
| rad18         | 9.28672e-05 | 1.000000 | 9.28672e-05 | 1.000000 |
| rad22         | 1.32232e-07 | 1.000000 | 1.32232e-07 | 1.000000 |
| Benzyl+C2H2   | 7.69988e-09 | 1.000000 | 0.000000    | 1.000000 |
| rad24         | 5.63969e-09 | 1.000000 | 5.63969e-09 | 1.000000 |
| Indene+H      | 4.19650e-09 | 1.000000 | 4.19650e-09 | 1.000000 |
| rad45         | 5.55513e-10 | 1.000000 | 5.55513e-10 | 1.000000 |
| rad36         | 6.23319e-11 | 1.000000 | 6.23319e-11 | 1.000000 |
| rad11         | 4.04480e-11 | 1.000000 | 4.04480e-11 | 1.000000 |
| rad23         | 2.78316e-14 | 1.000000 | 2.78316e-14 | 1.000000 |
| rad6          | 2.28321e-17 | 1.000000 | 2.28321e-17 | 1.000000 |
| rad30         | 2.04910e-18 | 1.000000 | 2.04910e-18 | 1.000000 |
| rad15         | 7.25522e-20 | 1.000000 | 7.25522e-20 | 1.000000 |
| rad8          | 1.59989e-21 | 1.000000 | 1.59989e-21 | 1.000000 |
| rad25         | 4.13896e-24 | 1.000000 | 4.13896e-24 | 1.000000 |
| rad13         | 6.06832e-26 | 1.000000 | 6.06832e-26 | 1.000000 |
| rad38         | 1.79179e-26 | 1.000000 | 1.79179e-26 | 1.000000 |
| PhCHCCH2+H    | 1.62422e-26 | 1.000000 | 1.62422e-26 | 1.000000 |
| rad7          | 1.43422e-26 | 1.000000 | 1.43422e-26 | 1.000000 |
| rad60syn      | 7.71298e-27 | 1.000000 | 7.71298e-27 | 1.000000 |
| rad9          | 5.54215e-27 | 1.000000 | 5.54215e-27 | 1.000000 |
| rad60anti     | 1.09411e-27 | 1.000000 | 1.09411e-27 | 1.000000 |
| rad28         | 6.78275e-28 | 1.000000 | 6.78275e-28 | 1.000000 |
| PhCH2CCH+H    | 4.86837e-28 | 1.000000 | 4.86837e-28 | 1.000000 |
| rad33         | 2.11218e-28 | 1.000000 | 2.11218e-28 | 1.000000 |
| Ph+Allene     | 1.91908e-29 | 1.000000 | 1.91908e-29 | 1.000000 |
| rad46         | 7.05954e-30 | 1.000000 | 7.05954e-30 | 1.000000 |
| rad35         | 2.54330e-30 | 1.000000 | 2.54330e-30 | 1.000000 |
| PAH7+H        | 1.27548e-30 | 1.000000 | 1.27548e-30 | 1.000000 |
| PAH9+H        | 1.21108e-30 | 1.000000 | 1.21108e-30 | 1.000000 |
| PAH3+H        | 6.16490e-32 | 1.000000 | 6.16490e-32 | 1.000000 |
| rad59         | 2.61301e-32 | 1.000000 | 2.61301e-32 | 1.000000 |
| rad26         | 2.84061e-33 | 1.000000 | 2.84061e-33 | 1.000000 |
| rad3          | 1.41728e-33 | 1.000000 | 1.41728e-33 | 1.000000 |
| rad4          | 9.48632e-34 | 1.000000 | 9.48632e-34 | 1.000000 |
| rad50         | 2.24849e-38 | 1.000000 | 2.24849e-38 | 1.000000 |
| rad2          | 7.81301e-40 | 1.000000 | 7.81301e-40 | 1.000000 |
| rad39         | 5.99635e-40 | 1.000000 | 5.99635e-40 | 1.000000 |
| rad10         | 1.93843e-40 | 1.000000 | 1.93843e-40 | 1.000000 |
| rad1          | 1.14312e-40 | 1.000000 | 1.14312e-40 | 1.000000 |
| rad31         | 1.91544e-41 | 1.000000 | 1.91544e-41 | 1.000000 |
| PhCCH+CH3     | 2.51313e-42 | 1.000000 | 2.51313e-42 | 1.000000 |
| rad14         | 2.19502e-43 | 1.000000 | 2.19502e-43 | 1.000000 |
| rad12         | 1.96652e-43 | 1.000000 | 1.96652e-43 | 1.000000 |
| rad52         | 5.60803e-44 | 1.000000 | 5.60803e-44 | 1.000000 |
| rad37         | 6.76715e-45 | 1.000000 | 6.76715e-45 | 1.000000 |
| Ph+MeAc       | 6.47494e-46 | 1.000000 | 6.47494e-46 | 1.000000 |
| rad51         | 4.58686e-47 | 1.000000 | 4.58686e-47 | 1.000000 |
| rad58         | 4.25268e-47 | 1.000000 | 4.25268e-47 | 1.000000 |
| rad27         | 1.25391e-49 | 1.000000 | 1.25391e-49 | 1.000000 |
| PhCCCH3+H     | 6.11613e-50 | 1.000000 | 6.11613e-50 | 1.000000 |
| rad70         | 2.36237e-51 | 1.000000 | 2.36237e-51 | 1.000000 |
| rad47         | 7.28239e-52 | 1.000000 | 7.28239e-52 | 1.000000 |
| rad19syn      | 4.17610e-52 | 1.000000 | 4.17610e-52 | 1.000000 |
| rad54         | 2.17598e-52 | 1.000000 | 2.17598e-52 | 1.000000 |
| PAH10+CH3     | 6.10700e-53 | 1.000000 | 6.10700e-53 | 1.000000 |
| rad65         | 3.52080e-54 | 1.000000 | 3.52080e-54 | 1.000000 |
| rad34         | 1.82883e-55 | 1.000000 | 1.82883e-55 | 1.000000 |
| rad5          | 2.57922e-56 | 1.000000 | 2.57922e-56 | 1.000000 |
| rad55         | 4.05774e-57 | 1.000000 | 4.05774e-57 | 1.000000 |
| PAH1+H        | 5.80862e-58 | 1.000000 | 5.80862e-58 | 1.000000 |
| PhcycC3H3_A+H | 1.09065e-58 | 1.000000 | 1.09065e-58 | 1.000000 |
| rad62         | 1.16395e-61 | 1.000000 | 1.16395e-61 | 1.000000 |
| rad43         | 9.40831e-66 | 1.000000 | 9.40831e-66 | 1.000000 |
| rad42         | 4.67152e-69 | 1.000000 | 4.67152e-69 | 1.000000 |
| rad41         | 1.12998e-73 | 1.000000 | 1.12998e-73 | 1.000000 |

10000000.0 Pa, 160.000000 K

=====

| Rate constant | True (fraction)     | Effective (fraction) |
|---------------|---------------------|----------------------|
| Total         | 5.01169e-31 (1.00 ) | 5.01169e-31 (1.00 )  |

| species | PYtrue      | Cumul    | PYeffective | Cumul    |
|---------|-------------|----------|-------------|----------|
| rad20   | 0.999185    | 0.999185 | 0.999185    | 0.999185 |
| rad21   | 0.000710413 | 0.999895 | 0.000710413 | 0.999895 |
| rad18   | 0.000104317 | 1.000000 | 0.000104317 | 1.000000 |
| rad22   | 1.67507e-07 | 1.000000 | 1.67507e-07 | 1.000000 |

|               |             |          |             |          |
|---------------|-------------|----------|-------------|----------|
| Benzyl+C2H2   | 1.17891e-08 | 1.000000 | 0.00000     | 1.000000 |
| rad24         | 7.31399e-09 | 1.000000 | 7.31399e-09 | 1.000000 |
| Indene+H      | 5.37684e-09 | 1.000000 | 5.37684e-09 | 1.000000 |
| rad45         | 8.09096e-10 | 1.000000 | 8.09096e-10 | 1.000000 |
| rad36         | 8.97096e-11 | 1.000000 | 8.97096e-11 | 1.000000 |
| rad11         | 5.89271e-11 | 1.000000 | 5.89271e-11 | 1.000000 |
| rad23         | 4.19076e-14 | 1.000000 | 4.19076e-14 | 1.000000 |
| rad6          | 4.38097e-17 | 1.000000 | 4.38097e-17 | 1.000000 |
| rad30         | 5.13867e-18 | 1.000000 | 5.13867e-18 | 1.000000 |
| rad15         | 2.30328e-19 | 1.000000 | 2.30328e-19 | 1.000000 |
| rad8          | 1.53979e-20 | 1.000000 | 1.53979e-20 | 1.000000 |
| rad25         | 1.56330e-23 | 1.000000 | 1.56330e-23 | 1.000000 |
| rad13         | 1.62191e-25 | 1.000000 | 1.62191e-25 | 1.000000 |
| PhCHCCH2+H    | 1.08211e-25 | 1.000000 | 1.08211e-25 | 1.000000 |
| rad9          | 8.83413e-26 | 1.000000 | 8.83413e-26 | 1.000000 |
| rad60syn      | 7.91930e-26 | 1.000000 | 7.91930e-26 | 1.000000 |
| rad38         | 6.03930e-26 | 1.000000 | 6.03930e-26 | 1.000000 |
| rad7          | 3.94705e-26 | 1.000000 | 3.94705e-26 | 1.000000 |
| PhCH2CCH+H    | 1.68656e-26 | 1.000000 | 1.68656e-26 | 1.000000 |
| rad60anti     | 1.28341e-26 | 1.000000 | 1.28341e-26 | 1.000000 |
| rad28         | 7.62497e-27 | 1.000000 | 7.62497e-27 | 1.000000 |
| rad33         | 6.28401e-28 | 1.000000 | 6.28401e-28 | 1.000000 |
| Ph+Allene     | 2.53541e-28 | 1.000000 | 2.53541e-28 | 1.000000 |
| rad46         | 4.11886e-29 | 1.000000 | 4.11886e-29 | 1.000000 |
| rad35         | 3.13625e-29 | 1.000000 | 3.13625e-29 | 1.000000 |
| PAH7+H        | 2.12426e-29 | 1.000000 | 2.12426e-29 | 1.000000 |
| PAH9+H        | 4.00824e-30 | 1.000000 | 4.00824e-30 | 1.000000 |
| PAH3+H        | 1.86638e-30 | 1.000000 | 1.86638e-30 | 1.000000 |
| rad59         | 7.49869e-31 | 1.000000 | 7.49869e-31 | 1.000000 |
| rad26         | 7.06818e-32 | 1.000000 | 7.06818e-32 | 1.000000 |
| rad3          | 6.60564e-33 | 1.000000 | 6.60564e-33 | 1.000000 |
| rad4          | 4.40516e-33 | 1.000000 | 4.40516e-33 | 1.000000 |
| rad50         | 6.36652e-37 | 1.000000 | 6.36652e-37 | 1.000000 |
| rad39         | 1.15232e-38 | 1.000000 | 1.15232e-38 | 1.000000 |
| rad2          | 6.23601e-39 | 1.000000 | 6.23601e-39 | 1.000000 |
| rad10         | 5.86793e-39 | 1.000000 | 5.86793e-39 | 1.000000 |
| rad1          | 9.01650e-40 | 1.000000 | 9.01650e-40 | 1.000000 |
| rad31         | 9.41201e-41 | 1.000000 | 9.41201e-41 | 1.000000 |
| PhCCH+CH3     | 3.54993e-41 | 1.000000 | 3.54993e-41 | 1.000000 |
| rad12         | 6.62025e-42 | 1.000000 | 6.62025e-42 | 1.000000 |
| rad52         | 4.04285e-42 | 1.000000 | 4.04285e-42 | 1.000000 |
| rad14         | 2.49791e-42 | 1.000000 | 2.49791e-42 | 1.000000 |
| rad37         | 2.64356e-43 | 1.000000 | 2.64356e-43 | 1.000000 |
| Ph+MeAc       | 1.63483e-44 | 1.000000 | 1.63483e-44 | 1.000000 |
| rad58         | 7.63441e-45 | 1.000000 | 7.63441e-45 | 1.000000 |
| rad51         | 5.31285e-45 | 1.000000 | 5.31285e-45 | 1.000000 |
| rad27         | 2.11445e-48 | 1.000000 | 2.11445e-48 | 1.000000 |
| PhCCCH3+H     | 1.38307e-48 | 1.000000 | 1.38307e-48 | 1.000000 |
| rad70         | 4.21562e-49 | 1.000000 | 4.21562e-49 | 1.000000 |
| rad47         | 1.57628e-49 | 1.000000 | 1.57628e-49 | 1.000000 |
| rad19syn      | 4.47971e-50 | 1.000000 | 4.47971e-50 | 1.000000 |
| rad54         | 2.89500e-50 | 1.000000 | 2.89500e-50 | 1.000000 |
| PAH10+CH3     | 8.04990e-51 | 1.000000 | 8.04990e-51 | 1.000000 |
| rad65         | 5.40635e-52 | 1.000000 | 5.40635e-52 | 1.000000 |
| rad34         | 4.13204e-53 | 1.000000 | 4.13204e-53 | 1.000000 |
| rad5          | 2.28233e-54 | 1.000000 | 2.28233e-54 | 1.000000 |
| rad55         | 7.93832e-55 | 1.000000 | 7.93832e-55 | 1.000000 |
| PAH1+H        | 1.25588e-55 | 1.000000 | 1.25588e-55 | 1.000000 |
| PhcycC3H3_A+H | 2.19454e-56 | 1.000000 | 2.19454e-56 | 1.000000 |
| rad62         | 2.08254e-59 | 1.000000 | 2.08254e-59 | 1.000000 |
| rad43         | 1.70371e-63 | 1.000000 | 1.70371e-63 | 1.000000 |
| rad42         | 1.57857e-66 | 1.000000 | 1.57857e-66 | 1.000000 |
| rad41         | 4.00696e-71 | 1.000000 | 4.00696e-71 | 1.000000 |

10000000.0 Pa, 170.000000 K

=====

| Rate constant | True (fraction)     | Effective (fraction) |
|---------------|---------------------|----------------------|
| Total         | 5.54821e-30 (1.00 ) | 5.54821e-30 (1.00 )  |

| species     | PYtrue      | Cumul    | PYeffective | Cumul    |
|-------------|-------------|----------|-------------|----------|
| rad20       | 0.999090    | 0.999090 | 0.999090    | 0.999090 |
| rad21       | 0.000793057 | 0.999883 | 0.000793057 | 0.999883 |
| rad18       | 0.000117145 | 1.00000  | 0.000117145 | 1.00000  |
| rad22       | 2.12252e-07 | 1.00000  | 2.12252e-07 | 1.00000  |
| Benzyl+C2H2 | 1.79696e-08 | 1.00000  | 0.00000     | 1.00000  |
| rad24       | 9.49782e-09 | 1.00000  | 9.49782e-09 | 1.00000  |
| Indene+H    | 6.90005e-09 | 1.00000  | 6.90005e-09 | 1.00000  |
| rad45       | 1.18049e-09 | 1.00000  | 1.18049e-09 | 1.00000  |

|               |             |         |             |         |
|---------------|-------------|---------|-------------|---------|
| rad36         | 1.29470e-10 | 1.00000 | 1.29470e-10 | 1.00000 |
| rad11         | 8.63060e-11 | 1.00000 | 8.63060e-11 | 1.00000 |
| rad23         | 6.35289e-14 | 1.00000 | 6.35289e-14 | 1.00000 |
| rad6          | 8.49369e-17 | 1.00000 | 8.49369e-17 | 1.00000 |
| rad30         | 1.23053e-17 | 1.00000 | 1.23053e-17 | 1.00000 |
| rad15         | 6.76315e-19 | 1.00000 | 6.76315e-19 | 1.00000 |
| rad8          | 1.16751e-19 | 1.00000 | 1.16751e-19 | 1.00000 |
| rad25         | 5.55136e-23 | 1.00000 | 5.55136e-23 | 1.00000 |
| rad9          | 1.09270e-24 | 1.00000 | 1.09270e-24 | 1.00000 |
| rad60syn      | 6.49077e-25 | 1.00000 | 6.49077e-25 | 1.00000 |
| PhCHCCH2+H    | 6.33380e-25 | 1.00000 | 6.33380e-25 | 1.00000 |
| rad13         | 4.39840e-25 | 1.00000 | 4.39840e-25 | 1.00000 |
| PhCH2CCH+H    | 3.56652e-25 | 1.00000 | 3.56652e-25 | 1.00000 |
| rad38         | 1.99014e-25 | 1.00000 | 1.99014e-25 | 1.00000 |
| rad60anti     | 1.18175e-25 | 1.00000 | 1.18175e-25 | 1.00000 |
| rad7          | 1.10189e-25 | 1.00000 | 1.10189e-25 | 1.00000 |
| rad28         | 6.93830e-26 | 1.00000 | 6.93830e-26 | 1.00000 |
| Ph+Allene     | 2.69224e-27 | 1.00000 | 2.69224e-27 | 1.00000 |
| rad33         | 1.89198e-27 | 1.00000 | 1.89198e-27 | 1.00000 |
| rad35         | 3.98870e-28 | 1.00000 | 3.98870e-28 | 1.00000 |
| PAH7+H        | 2.73363e-28 | 1.00000 | 2.73363e-28 | 1.00000 |
| rad46         | 2.17750e-28 | 1.00000 | 2.17750e-28 | 1.00000 |
| PAH3+H        | 3.77859e-29 | 1.00000 | 3.77859e-29 | 1.00000 |
| rad59         | 1.45766e-29 | 1.00000 | 1.45766e-29 | 1.00000 |
| PAH9+H        | 1.32826e-29 | 1.00000 | 1.32826e-29 | 1.00000 |
| rad26         | 1.27301e-30 | 1.00000 | 1.27301e-30 | 1.00000 |
| rad3          | 3.07023e-32 | 1.00000 | 3.07023e-32 | 1.00000 |
| rad4          | 2.04068e-32 | 1.00000 | 2.04068e-32 | 1.00000 |
| rad50         | 1.34004e-35 | 1.00000 | 1.34004e-35 | 1.00000 |
| rad39         | 1.80626e-37 | 1.00000 | 1.80626e-37 | 1.00000 |
| rad10         | 1.28683e-37 | 1.00000 | 1.28683e-37 | 1.00000 |
| rad2          | 4.84023e-38 | 1.00000 | 4.84023e-38 | 1.00000 |
| rad1          | 6.92451e-39 | 1.00000 | 6.92451e-39 | 1.00000 |
| PhCCH+CH3     | 4.56130e-40 | 1.00000 | 4.56130e-40 | 1.00000 |
| rad31         | 4.53634e-40 | 1.00000 | 4.53634e-40 | 1.00000 |
| rad52         | 2.04027e-40 | 1.00000 | 2.04027e-40 | 1.00000 |
| rad12         | 1.61960e-40 | 1.00000 | 1.61960e-40 | 1.00000 |
| rad14         | 2.65311e-41 | 1.00000 | 2.65311e-41 | 1.00000 |
| rad37         | 7.47353e-42 | 1.00000 | 7.47353e-42 | 1.00000 |
| rad58         | 1.06643e-42 | 1.00000 | 1.06643e-42 | 1.00000 |
| rad51         | 4.44131e-43 | 1.00000 | 4.44131e-43 | 1.00000 |
| Ph+MeAc       | 3.43066e-43 | 1.00000 | 3.43066e-43 | 1.00000 |
| rad70         | 5.73681e-47 | 1.00000 | 5.73681e-47 | 1.00000 |
| rad27         | 3.31150e-47 | 1.00000 | 3.31150e-47 | 1.00000 |
| PhCCCH3+H     | 2.79840e-47 | 1.00000 | 2.79840e-47 | 1.00000 |
| rad47         | 2.47920e-47 | 1.00000 | 2.47920e-47 | 1.00000 |
| rad19syn      | 3.42416e-48 | 1.00000 | 3.42416e-48 | 1.00000 |
| rad54         | 2.82195e-48 | 1.00000 | 2.82195e-48 | 1.00000 |
| PAH10+CH3     | 7.94570e-49 | 1.00000 | 7.94570e-49 | 1.00000 |
| rad65         | 6.10067e-50 | 1.00000 | 6.10067e-50 | 1.00000 |
| rad34         | 7.17126e-51 | 1.00000 | 7.17126e-51 | 1.00000 |
| rad5          | 1.53735e-52 | 1.00000 | 1.53735e-52 | 1.00000 |
| rad55         | 1.17779e-52 | 1.00000 | 1.17779e-52 | 1.00000 |
| PAH1+H        | 2.07881e-53 | 1.00000 | 2.07881e-53 | 1.00000 |
| PhcycC3H3_A+H | 3.37263e-54 | 1.00000 | 3.37263e-54 | 1.00000 |
| rad62         | 2.76114e-57 | 1.00000 | 2.76114e-57 | 1.00000 |
| rad43         | 2.28374e-61 | 1.00000 | 2.28374e-61 | 1.00000 |
| rad42         | 4.06735e-64 | 1.00000 | 4.06735e-64 | 1.00000 |
| rad41         | 1.08436e-68 | 1.00000 | 1.08436e-68 | 1.00000 |

10000000.0 Pa, 180.000000 K

=====

| Rate constant | True (fraction)     | Effective (fraction) |
|---------------|---------------------|----------------------|
| Total         | 4.69315e-29 (1.00 ) | 4.69315e-29 (1.00 )  |

| species     | PYtrue      | Cumul    | PYeffective | Cumul    |
|-------------|-------------|----------|-------------|----------|
| rad20       | 0.998983    | 0.998983 | 0.998983    | 0.998983 |
| rad21       | 0.000885218 | 0.999868 | 0.000885218 | 0.999868 |
| rad18       | 0.000131574 | 1.000000 | 0.000131574 | 1.000000 |
| rad22       | 2.69265e-07 | 1.00000  | 2.69265e-07 | 1.00000  |
| Benzyl+C2H2 | 2.72596e-08 | 1.00000  | 0.00000     | 1.00000  |
| rad24       | 1.23566e-08 | 1.00000  | 1.23566e-08 | 1.00000  |
| Indene+H    | 8.87703e-09 | 1.00000  | 8.87703e-09 | 1.00000  |
| rad45       | 1.72679e-09 | 1.00000  | 1.72679e-09 | 1.00000  |
| rad36       | 1.87503e-10 | 1.00000  | 1.87503e-10 | 1.00000  |
| rad11       | 1.27041e-10 | 1.00000  | 1.27041e-10 | 1.00000  |
| rad23       | 9.70778e-14 | 1.00000  | 9.70778e-14 | 1.00000  |
| rad6        | 1.66012e-16 | 1.00000  | 1.66012e-16 | 1.00000  |

|               |             |         |             |         |
|---------------|-------------|---------|-------------|---------|
| rad30         | 2.83439e-17 | 1.00000 | 2.83439e-17 | 1.00000 |
| rad15         | 1.85920e-18 | 1.00000 | 1.85920e-18 | 1.00000 |
| rad8          | 7.23049e-19 | 1.00000 | 7.23049e-19 | 1.00000 |
| rad25         | 1.86773e-22 | 1.00000 | 1.86773e-22 | 1.00000 |
| rad9          | 1.07499e-23 | 1.00000 | 1.07499e-23 | 1.00000 |
| PhCH2CCH+H    | 5.37638e-24 | 1.00000 | 5.37638e-24 | 1.00000 |
| rad60syn      | 4.38683e-24 | 1.00000 | 4.38683e-24 | 1.00000 |
| PhCHCCH2+H    | 3.31238e-24 | 1.00000 | 3.31238e-24 | 1.00000 |
| rad13         | 1.20408e-24 | 1.00000 | 1.20408e-24 | 1.00000 |
| rad60anti     | 8.84311e-25 | 1.00000 | 8.84311e-25 | 1.00000 |
| rad38         | 6.41288e-25 | 1.00000 | 6.41288e-25 | 1.00000 |
| rad28         | 5.25151e-25 | 1.00000 | 5.25151e-25 | 1.00000 |
| rad7          | 3.10359e-25 | 1.00000 | 3.10359e-25 | 1.00000 |
| Ph+Allene     | 2.36441e-26 | 1.00000 | 2.36441e-26 | 1.00000 |
| rad33         | 5.72922e-27 | 1.00000 | 5.72922e-27 | 1.00000 |
| rad35         | 4.19719e-27 | 1.00000 | 4.19719e-27 | 1.00000 |
| PAH7+H        | 2.81251e-27 | 1.00000 | 2.81251e-27 | 1.00000 |
| rad46         | 1.05628e-27 | 1.00000 | 1.05628e-27 | 1.00000 |
| PAH3+H        | 5.62778e-28 | 1.00000 | 5.62778e-28 | 1.00000 |
| rad59         | 2.09552e-28 | 1.00000 | 2.09552e-28 | 1.00000 |
| PAH9+H        | 4.39452e-29 | 1.00000 | 4.39452e-29 | 1.00000 |
| rad26         | 1.75004e-29 | 1.00000 | 1.75004e-29 | 1.00000 |
| rad3          | 1.41214e-31 | 1.00000 | 1.41214e-31 | 1.00000 |
| rad4          | 9.35790e-32 | 1.00000 | 9.35790e-32 | 1.00000 |
| rad50         | 2.18567e-34 | 1.00000 | 2.18567e-34 | 1.00000 |
| rad39         | 2.36098e-36 | 1.00000 | 2.36098e-36 | 1.00000 |
| rad10         | 2.15824e-36 | 1.00000 | 2.15824e-36 | 1.00000 |
| rad2          | 3.62658e-37 | 1.00000 | 3.62658e-37 | 1.00000 |
| rad1          | 5.13925e-38 | 1.00000 | 5.13925e-38 | 1.00000 |
| rad52         | 7.05393e-39 | 1.00000 | 7.05393e-39 | 1.00000 |
| PhCCH+CH3     | 5.33893e-39 | 1.00000 | 5.33893e-39 | 1.00000 |
| rad12         | 3.03185e-39 | 1.00000 | 3.03185e-39 | 1.00000 |
| rad31         | 2.13897e-39 | 1.00000 | 2.13897e-39 | 1.00000 |
| rad14         | 2.62547e-40 | 1.00000 | 2.62547e-40 | 1.00000 |
| rad37         | 1.60346e-40 | 1.00000 | 1.60346e-40 | 1.00000 |
| rad58         | 1.27398e-40 | 1.00000 | 1.27398e-40 | 1.00000 |
| rad51         | 2.68951e-41 | 1.00000 | 2.68951e-41 | 1.00000 |
| Ph+MeAc       | 6.08053e-42 | 1.00000 | 6.08053e-42 | 1.00000 |
| rad70         | 6.35158e-45 | 1.00000 | 6.35158e-45 | 1.00000 |
| rad47         | 2.87173e-45 | 1.00000 | 2.87173e-45 | 1.00000 |
| PhCCCH3+H     | 5.05524e-46 | 1.00000 | 5.05524e-46 | 1.00000 |
| rad27         | 4.78290e-46 | 1.00000 | 4.78290e-46 | 1.00000 |
| rad54         | 2.04219e-46 | 1.00000 | 2.04219e-46 | 1.00000 |
| rad19syn      | 1.82471e-46 | 1.00000 | 1.82471e-46 | 1.00000 |
| PAH10+CH3     | 6.05002e-47 | 1.00000 | 6.05002e-47 | 1.00000 |
| rad65         | 5.18021e-48 | 1.00000 | 5.18021e-48 | 1.00000 |
| rad34         | 1.03488e-48 | 1.00000 | 1.03488e-48 | 1.00000 |
| rad55         | 1.38839e-50 | 1.00000 | 1.38839e-50 | 1.00000 |
| rad5          | 7.79628e-51 | 1.00000 | 7.79628e-51 | 1.00000 |
| PAH1+H        | 2.83452e-51 | 1.00000 | 2.83452e-51 | 1.00000 |
| PhcycC3H3_A+H | 4.15762e-52 | 1.00000 | 4.15762e-52 | 1.00000 |
| rad62         | 2.80431e-55 | 1.00000 | 2.80431e-55 | 1.00000 |
| rad43         | 2.34386e-59 | 1.00000 | 2.34386e-59 | 1.00000 |
| rad42         | 8.35514e-62 | 1.00000 | 8.35514e-62 | 1.00000 |
| rad41         | 2.33638e-66 | 1.00000 | 2.33638e-66 | 1.00000 |

10000000.0 Pa, 190.000000 K

=====

| Rate constant | True (fraction)     | Effective (fraction) |
|---------------|---------------------|----------------------|
| Total         | 3.16530e-28 (1.00 ) | 3.16530e-28 (1.00 )  |

| species     | PYtrue      | Cumul    | PYeffective | Cumul    |
|-------------|-------------|----------|-------------|----------|
| rad20       | 0.998863    | 0.998863 | 0.998863    | 0.998863 |
| rad21       | 0.000988348 | 0.999851 | 0.000988348 | 0.999851 |
| rad18       | 0.000147863 | 0.999999 | 0.000147863 | 0.999999 |
| rad22       | 3.42201e-07 | 1.000000 | 3.42201e-07 | 1.000000 |
| Benzyl+C2H2 | 4.11406e-08 | 1.000000 | 0.000000    | 1.000000 |
| rad24       | 1.61088e-08 | 1.000000 | 1.61088e-08 | 1.000000 |
| Indene+H    | 1.14563e-08 | 1.000000 | 1.14563e-08 | 1.000000 |
| rad45       | 2.53314e-09 | 1.000000 | 2.53314e-09 | 1.000000 |
| rad36       | 2.72558e-10 | 1.000000 | 2.72558e-10 | 1.000000 |
| rad11       | 1.87827e-10 | 1.000000 | 1.87827e-10 | 1.000000 |
| rad23       | 1.49632e-13 | 1.000000 | 1.49632e-13 | 1.000000 |
| rad6        | 3.26307e-16 | 1.000000 | 3.26307e-16 | 1.000000 |
| rad30       | 6.31562e-17 | 1.000000 | 6.31562e-17 | 1.000000 |
| rad15       | 4.83289e-18 | 1.000000 | 4.83289e-18 | 1.000000 |
| rad8        | 3.76991e-18 | 1.000000 | 3.76991e-18 | 1.000000 |
| rad25       | 5.99121e-22 | 1.000000 | 5.99121e-22 | 1.000000 |



|               |             |          |             |          |
|---------------|-------------|----------|-------------|----------|
| rad9          | 8.65181e-23 | 1.000000 | 8.65181e-23 | 1.000000 |
| PhCH2CCH+H    | 6.22642e-23 | 1.000000 | 6.22642e-23 | 1.000000 |
| rad60syn      | 2.51456e-23 | 1.000000 | 2.51456e-23 | 1.000000 |
| PhCHCCH2+H    | 1.57072e-23 | 1.000000 | 1.57072e-23 | 1.000000 |
| rad60anti     | 5.54221e-24 | 1.000000 | 5.54221e-24 | 1.000000 |
| rad28         | 3.38909e-24 | 1.000000 | 3.38909e-24 | 1.000000 |
| rad13         | 3.31160e-24 | 1.000000 | 3.31160e-24 | 1.000000 |
| rad38         | 2.02094e-24 | 1.000000 | 2.02094e-24 | 1.000000 |
| rad7          | 8.77589e-25 | 1.000000 | 8.77589e-25 | 1.000000 |
| Ph+Allene     | 1.76281e-25 | 1.000000 | 1.76281e-25 | 1.000000 |
| rad35         | 3.60829e-26 | 1.000000 | 3.60829e-26 | 1.000000 |
| PAH7+H        | 2.38629e-26 | 1.000000 | 2.38629e-26 | 1.000000 |
| rad33         | 1.73550e-26 | 1.000000 | 1.73550e-26 | 1.000000 |
| PAH3+H        | 6.54598e-27 | 1.000000 | 6.54598e-27 | 1.000000 |
| rad46         | 4.75362e-27 | 1.000000 | 4.75362e-27 | 1.000000 |
| rad59         | 2.35552e-27 | 1.000000 | 2.35552e-27 | 1.000000 |
| rad26         | 1.91685e-28 | 1.000000 | 1.91685e-28 | 1.000000 |
| PAH9+H        | 1.44769e-28 | 1.000000 | 1.44769e-28 | 1.000000 |
| rad3          | 6.38972e-31 | 1.000000 | 6.38972e-31 | 1.000000 |
| rad4          | 4.22289e-31 | 1.000000 | 4.22289e-31 | 1.000000 |
| rad50         | 2.88432e-33 | 1.000000 | 2.88432e-33 | 1.000000 |
| rad10         | 2.92421e-35 | 1.000000 | 2.92421e-35 | 1.000000 |
| rad39         | 2.64830e-35 | 1.000000 | 2.64830e-35 | 1.000000 |
| rad2          | 2.61257e-36 | 1.000000 | 2.61257e-36 | 1.000000 |
| rad1          | 3.67119e-37 | 1.000000 | 3.67119e-37 | 1.000000 |
| rad52         | 1.82673e-37 | 1.000000 | 1.82673e-37 | 1.000000 |
| PhCCH+CH3     | 5.74630e-38 | 1.000000 | 5.74630e-38 | 1.000000 |
| rad12         | 4.63291e-38 | 1.000000 | 4.63291e-38 | 1.000000 |
| rad58         | 1.75294e-38 | 1.000000 | 1.75294e-38 | 1.000000 |
| rad31         | 9.85336e-39 | 1.000000 | 9.85336e-39 | 1.000000 |
| rad37         | 2.82499e-39 | 1.000000 | 2.82499e-39 | 1.000000 |
| rad14         | 2.42874e-39 | 1.000000 | 2.42874e-39 | 1.000000 |
| rad51         | 1.32132e-39 | 1.000000 | 1.32132e-39 | 1.000000 |
| Ph+MeAc       | 9.45480e-41 | 1.000000 | 9.45480e-41 | 1.000000 |
| rad70         | 7.31663e-43 | 1.000000 | 7.31663e-43 | 1.000000 |
| rad47         | 2.86126e-43 | 1.000000 | 2.86126e-43 | 1.000000 |
| rad54         | 1.24679e-44 | 1.000000 | 1.24679e-44 | 1.000000 |
| PhCCCH3+H     | 8.37995e-45 | 1.000000 | 8.37995e-45 | 1.000000 |
| rad19syn      | 7.62065e-45 | 1.000000 | 7.62065e-45 | 1.000000 |
| rad27         | 6.44177e-45 | 1.000000 | 6.44177e-45 | 1.000000 |
| PAH10+CH3     | 4.15685e-45 | 1.000000 | 4.15685e-45 | 1.000000 |
| rad65         | 3.95429e-46 | 1.000000 | 3.95429e-46 | 1.000000 |
| rad34         | 1.64265e-46 | 1.000000 | 1.64265e-46 | 1.000000 |
| rad55         | 1.62220e-48 | 1.000000 | 1.62220e-48 | 1.000000 |
| PAH1+H        | 4.17360e-49 | 1.000000 | 4.17360e-49 | 1.000000 |
| rad5          | 3.44975e-49 | 1.000000 | 3.44975e-49 | 1.000000 |
| PhcycC3H3_A+H | 5.15202e-50 | 1.000000 | 5.15202e-50 | 1.000000 |
| rad62         | 2.64607e-53 | 1.000000 | 2.64607e-53 | 1.000000 |
| rad43         | 2.24118e-57 | 1.000000 | 2.24118e-57 | 1.000000 |
| rad42         | 1.69474e-59 | 1.000000 | 1.69474e-59 | 1.000000 |
| rad41         | 4.96614e-64 | 1.000000 | 4.96614e-64 | 1.000000 |

10000000.0 Pa, 200.000000 K

=====

| Rate constant | True (fraction)     | Effective (fraction) |
|---------------|---------------------|----------------------|
| Total         | 1.76115e-27 (1.00 ) | 1.76115e-27 (1.00 )  |

| species     | PYtrue      | Cumul    | PYeffective | Cumul    |
|-------------|-------------|----------|-------------|----------|
| rad20       | 0.998729    | 0.998729 | 0.998729    | 0.998729 |
| rad21       | 0.00110408  | 0.999833 | 0.00110408  | 0.999833 |
| rad18       | 0.000166301 | 0.999999 | 0.000166301 | 0.999999 |
| rad22       | 4.35826e-07 | 1.000000 | 4.35826e-07 | 1.000000 |
| Benzyl+C2H2 | 6.17502e-08 | 1.000000 | 0.000000    | 1.000000 |
| rad24       | 2.10418e-08 | 1.000000 | 2.10418e-08 | 1.000000 |
| Indene+H    | 1.48369e-08 | 1.000000 | 1.48369e-08 | 1.000000 |
| rad45       | 3.72631e-09 | 1.000000 | 3.72631e-09 | 1.000000 |
| rad36       | 3.97604e-10 | 1.000000 | 3.97604e-10 | 1.000000 |
| rad11       | 2.78697e-10 | 1.000000 | 2.78697e-10 | 1.000000 |
| rad23       | 2.32676e-13 | 1.000000 | 2.32677e-13 | 1.000000 |
| rad6        | 6.43427e-16 | 1.000000 | 6.43427e-16 | 1.000000 |
| rad30       | 1.36729e-16 | 1.000000 | 1.36729e-16 | 1.000000 |
| rad8        | 1.69680e-17 | 1.000000 | 1.69680e-17 | 1.000000 |
| rad15       | 1.19752e-17 | 1.000000 | 1.19752e-17 | 1.000000 |
| rad25       | 1.84155e-21 | 1.000000 | 1.84155e-21 | 1.000000 |
| rad9        | 5.84444e-22 | 1.000000 | 5.84444e-22 | 1.000000 |
| PhCH2CCH+H  | 5.73800e-22 | 1.000000 | 5.73800e-22 | 1.000000 |
| rad60syn    | 1.25172e-22 | 1.000000 | 1.25172e-22 | 1.000000 |
| PhCHCCH2+H  | 6.83805e-23 | 1.000000 | 6.83805e-23 | 1.000000 |

|               |             |          |             |          |
|---------------|-------------|----------|-------------|----------|
| rad60anti     | 2.98386e-23 | 1.000000 | 2.98386e-23 | 1.000000 |
| rad28         | 1.90498e-23 | 1.000000 | 1.90498e-23 | 1.000000 |
| rad13         | 9.11174e-24 | 1.000000 | 9.11174e-24 | 1.000000 |
| rad38         | 6.22942e-24 | 1.000000 | 6.22942e-24 | 1.000000 |
| rad7          | 2.48049e-24 | 1.000000 | 2.48049e-24 | 1.000000 |
| Ph+Allene     | 1.14026e-24 | 1.000000 | 1.14026e-24 | 1.000000 |
| rad35         | 2.58754e-25 | 1.000000 | 2.58754e-25 | 1.000000 |
| PAH7+H        | 1.71263e-25 | 1.000000 | 1.71263e-25 | 1.000000 |
| PAH3+H        | 6.13559e-26 | 1.000000 | 6.13559e-26 | 1.000000 |
| rad33         | 5.23499e-26 | 1.000000 | 5.23499e-26 | 1.000000 |
| rad59         | 2.13806e-26 | 1.000000 | 2.13806e-26 | 1.000000 |
| rad46         | 2.00310e-26 | 1.000000 | 2.00310e-26 | 1.000000 |
| rad26         | 1.72083e-27 | 1.000000 | 1.72083e-27 | 1.000000 |
| PAH9+H        | 4.73758e-28 | 1.000000 | 4.73758e-28 | 1.000000 |
| rad3          | 2.83180e-30 | 1.000000 | 2.83180e-30 | 1.000000 |
| rad4          | 1.86697e-30 | 1.000000 | 1.86697e-30 | 1.000000 |
| rad50         | 3.14815e-32 | 1.000000 | 3.14815e-32 | 1.000000 |
| rad10         | 3.26188e-34 | 1.000000 | 3.26188e-34 | 1.000000 |
| rad39         | 2.57936e-34 | 1.000000 | 2.57936e-34 | 1.000000 |
| rad2          | 1.80331e-35 | 1.000000 | 1.80331e-35 | 1.000000 |
| rad52         | 3.47826e-36 | 1.000000 | 3.47826e-36 | 1.000000 |
| rad1          | 2.51524e-36 | 1.000000 | 2.51524e-36 | 1.000000 |
| rad58         | 1.96549e-36 | 1.000000 | 1.96549e-36 | 1.000000 |
| rad12         | 5.82083e-37 | 1.000000 | 5.82084e-37 | 1.000000 |
| PhCCH+CH3     | 5.68832e-37 | 1.000000 | 5.68832e-37 | 1.000000 |
| rad31         | 4.43145e-38 | 1.000000 | 4.43145e-38 | 1.000000 |
| rad51         | 4.39986e-38 | 1.000000 | 4.39986e-38 | 1.000000 |
| rad37         | 4.04878e-38 | 1.000000 | 4.04878e-38 | 1.000000 |
| rad14         | 2.09923e-38 | 1.000000 | 2.09923e-38 | 1.000000 |
| Ph+MeAc       | 1.28665e-39 | 1.000000 | 1.28665e-39 | 1.000000 |
| rad70         | 6.19275e-41 | 1.000000 | 6.19275e-41 | 1.000000 |
| rad47         | 2.04975e-41 | 1.000000 | 2.04975e-41 | 1.000000 |
| rad54         | 4.86771e-43 | 1.000000 | 4.86771e-43 | 1.000000 |
| rad19syn      | 2.18613e-43 | 1.000000 | 2.18613e-43 | 1.000000 |
| PAH10+CH3     | 1.85551e-43 | 1.000000 | 1.85551e-43 | 1.000000 |
| PhCCCH3+H     | 1.25754e-43 | 1.000000 | 1.25754e-43 | 1.000000 |
| rad27         | 8.02311e-44 | 1.000000 | 8.02311e-44 | 1.000000 |
| rad65         | 2.21486e-44 | 1.000000 | 2.21486e-44 | 1.000000 |
| rad34         | 2.08908e-44 | 1.000000 | 2.08908e-44 | 1.000000 |
| rad55         | 1.37351e-46 | 1.000000 | 1.37351e-46 | 1.000000 |
| PAH1+H        | 4.86046e-47 | 1.000000 | 4.86046e-47 | 1.000000 |
| rad5          | 1.13772e-47 | 1.000000 | 1.13772e-47 | 1.000000 |
| PhcycC3H3_A+H | 4.70605e-48 | 1.000000 | 4.70605e-48 | 1.000000 |
| rad62         | 1.78698e-51 | 1.000000 | 1.78698e-51 | 1.000000 |
| rad43         | 1.59475e-55 | 1.000000 | 1.59475e-55 | 1.000000 |
| rad42         | 2.49162e-57 | 1.000000 | 2.49162e-57 | 1.000000 |
| rad41         | 7.66049e-62 | 1.000000 | 7.66049e-62 | 1.000000 |

10000000.0 Pa, 210.000000 K

=====

| Rate constant | True (fraction)     | Effective (fraction) |
|---------------|---------------------|----------------------|
| Total         | 8.30956e-27 (1.00 ) | 8.30956e-27 (1.00 )  |

| species     | PYtrue      | Cumul    | PYeffective | Cumul    |
|-------------|-------------|----------|-------------|----------|
| rad20       | 0.998578    | 0.998578 | 0.998578    | 0.998578 |
| rad21       | 0.00123427  | 0.999812 | 0.00123427  | 0.999812 |
| rad18       | 0.000187220 | 0.999999 | 0.000187220 | 0.999999 |
| rad22       | 5.56353e-07 | 1.00000  | 5.56353e-07 | 1.00000  |
| Benzyl+C2H2 | 9.21480e-08 | 1.00000  | 0.00000     | 1.00000  |
| rad24       | 2.75317e-08 | 1.00000  | 2.75317e-08 | 1.00000  |
| Indene+H    | 1.92854e-08 | 1.00000  | 1.92854e-08 | 1.00000  |
| rad45       | 5.49442e-09 | 1.00000  | 5.49442e-09 | 1.00000  |
| rad36       | 5.81823e-10 | 1.00000  | 5.81823e-10 | 1.00000  |
| rad11       | 4.14643e-10 | 1.00000  | 4.14643e-10 | 1.00000  |
| rad23       | 3.64912e-13 | 1.00000  | 3.64912e-13 | 1.00000  |
| rad6        | 1.26990e-15 | 1.00000  | 1.26990e-15 | 1.00000  |
| rad30       | 2.88571e-16 | 1.00000  | 2.88571e-16 | 1.00000  |
| rad8        | 6.73087e-17 | 1.00000  | 6.73087e-17 | 1.00000  |
| rad15       | 2.84670e-17 | 1.00000  | 2.84670e-17 | 1.00000  |
| rad25       | 5.44569e-21 | 1.00000  | 5.44569e-21 | 1.00000  |
| PhCH2CCH+H  | 4.35379e-21 | 1.00000  | 4.35379e-21 | 1.00000  |
| rad9        | 3.39034e-21 | 1.00000  | 3.39034e-21 | 1.00000  |
| rad60syn    | 5.51927e-22 | 1.00000  | 5.51927e-22 | 1.00000  |
| PhCHCCH2+H  | 2.76133e-22 | 1.00000  | 2.76133e-22 | 1.00000  |
| rad60anti   | 1.40972e-22 | 1.00000  | 1.40972e-22 | 1.00000  |
| rad28       | 9.49645e-23 | 1.00000  | 9.49645e-23 | 1.00000  |
| rad13       | 2.49903e-23 | 1.00000  | 2.49903e-23 | 1.00000  |
| rad38       | 1.87854e-23 | 1.00000  | 1.87854e-23 | 1.00000  |

|               |             |         |             |         |
|---------------|-------------|---------|-------------|---------|
| rad7          | 6.98253e-24 | 1.00000 | 6.98254e-24 | 1.00000 |
| Ph+Allene     | 6.51956e-24 | 1.00000 | 6.51956e-24 | 1.00000 |
| rad35         | 1.58537e-24 | 1.00000 | 1.58537e-24 | 1.00000 |
| PAH7+H        | 1.06298e-24 | 1.00000 | 1.06298e-24 | 1.00000 |
| PAH3+H        | 4.78263e-25 | 1.00000 | 4.78263e-25 | 1.00000 |
| rad59         | 1.61630e-25 | 1.00000 | 1.61630e-25 | 1.00000 |
| rad33         | 1.56651e-25 | 1.00000 | 1.56651e-25 | 1.00000 |
| rad46         | 7.96424e-26 | 1.00000 | 7.96424e-26 | 1.00000 |
| rad26         | 1.30096e-26 | 1.00000 | 1.30096e-26 | 1.00000 |
| PAH9+H        | 1.53701e-27 | 1.00000 | 1.53701e-27 | 1.00000 |
| rad3          | 1.22521e-29 | 1.00000 | 1.22521e-29 | 1.00000 |
| rad4          | 8.06031e-30 | 1.00000 | 8.06031e-30 | 1.00000 |
| rad50         | 2.91704e-31 | 1.00000 | 2.91704e-31 | 1.00000 |
| rad10         | 3.07763e-33 | 1.00000 | 3.07763e-33 | 1.00000 |
| rad39         | 2.21515e-33 | 1.00000 | 2.21515e-33 | 1.00000 |
| rad58         | 1.46554e-34 | 1.00000 | 1.46554e-34 | 1.00000 |
| rad2          | 1.19012e-34 | 1.00000 | 1.19012e-34 | 1.00000 |
| rad52         | 5.17217e-35 | 1.00000 | 5.17217e-35 | 1.00000 |
| rad1          | 1.64926e-35 | 1.00000 | 1.64926e-35 | 1.00000 |
| rad12         | 6.16967e-36 | 1.00000 | 6.16968e-36 | 1.00000 |
| PhCCH+CH3     | 5.19296e-36 | 1.00000 | 5.19296e-36 | 1.00000 |
| rad51         | 1.01682e-36 | 1.00000 | 1.01682e-36 | 1.00000 |
| rad37         | 4.84115e-37 | 1.00000 | 4.84115e-37 | 1.00000 |
| rad31         | 1.94531e-37 | 1.00000 | 1.94531e-37 | 1.00000 |
| rad14         | 1.69693e-37 | 1.00000 | 1.69693e-37 | 1.00000 |
| Ph+MeAc       | 1.54702e-38 | 1.00000 | 1.54702e-38 | 1.00000 |
| rad70         | 3.24166e-39 | 1.00000 | 3.24166e-39 | 1.00000 |
| rad47         | 1.02543e-39 | 1.00000 | 1.02543e-39 | 1.00000 |
| rad54         | 1.28266e-41 | 1.00000 | 1.28266e-41 | 1.00000 |
| PAH10+CH3     | 5.48505e-42 | 1.00000 | 5.48505e-42 | 1.00000 |
| rad19syn      | 4.60573e-42 | 1.00000 | 4.60573e-42 | 1.00000 |
| rad34         | 1.98296e-42 | 1.00000 | 1.98296e-42 | 1.00000 |
| PhCCCH3+H     | 1.70694e-42 | 1.00000 | 1.70694e-42 | 1.00000 |
| rad27         | 9.22191e-43 | 1.00000 | 9.22191e-43 | 1.00000 |
| rad65         | 8.20394e-43 | 1.00000 | 8.20394e-43 | 1.00000 |
| rad55         | 7.61295e-45 | 1.00000 | 7.61295e-45 | 1.00000 |
| PAH1+H        | 4.16738e-45 | 1.00000 | 4.16738e-45 | 1.00000 |
| PhcycC3H3_A+H | 2.89981e-46 | 1.00000 | 2.89981e-46 | 1.00000 |
| rad5          | 2.84743e-46 | 1.00000 | 2.84743e-46 | 1.00000 |
| rad62         | 8.45971e-50 | 1.00000 | 8.45971e-50 | 1.00000 |
| rad43         | 8.35722e-54 | 1.00000 | 8.35722e-54 | 1.00000 |
| rad42         | 2.52409e-55 | 1.00000 | 2.52409e-55 | 1.00000 |
| rad41         | 8.15316e-60 | 1.00000 | 8.15316e-60 | 1.00000 |

10000000.0 Pa, 220.000000 K

=====

| Rate constant | True (fraction)     | Effective (fraction) |
|---------------|---------------------|----------------------|
| Total         | 3.40057e-26 (1.00 ) | 3.40057e-26 (1.00 )  |

| species     | PYtrue      | Cumul    | PYeffective | Cumul    |
|-------------|-------------|----------|-------------|----------|
| rad20       | 0.998407    | 0.998407 | 0.998407    | 0.998407 |
| rad21       | 0.00138095  | 0.999788 | 0.00138095  | 0.999788 |
| rad18       | 0.000210993 | 0.999999 | 0.000210993 | 0.999999 |
| rad22       | 7.11863e-07 | 1.000000 | 7.11863e-07 | 1.000000 |
| Benzyl+C2H2 | 1.36676e-07 | 1.000000 | 0.000000    | 1.000000 |
| rad24       | 3.60670e-08 | 1.000000 | 3.60670e-08 | 1.000000 |
| Indene+H    | 2.51585e-08 | 1.000000 | 2.51585e-08 | 1.000000 |
| rad45       | 8.11552e-09 | 1.000000 | 8.11552e-09 | 1.000000 |
| rad36       | 8.53494e-10 | 1.000000 | 8.53494e-10 | 1.000000 |
| rad11       | 6.17975e-10 | 1.000000 | 6.17976e-10 | 1.000000 |
| rad23       | 5.76875e-13 | 1.000000 | 5.76875e-13 | 1.000000 |
| rad6        | 2.50348e-15 | 1.000000 | 2.50348e-15 | 1.000000 |
| rad30       | 5.95263e-16 | 1.000000 | 5.95263e-16 | 1.000000 |
| rad8        | 2.39392e-16 | 1.000000 | 2.39392e-16 | 1.000000 |
| rad15       | 6.52557e-17 | 1.000000 | 6.52557e-17 | 1.000000 |
| PhCH2CCH+H  | 2.79410e-20 | 1.000000 | 2.79410e-20 | 1.000000 |
| rad9        | 1.72237e-20 | 1.000000 | 1.72237e-20 | 1.000000 |
| rad25       | 1.55421e-20 | 1.000000 | 1.55421e-20 | 1.000000 |
| rad60syn    | 2.19152e-21 | 1.000000 | 2.19152e-21 | 1.000000 |
| PhCHCCH2+H  | 1.04320e-21 | 1.000000 | 1.04320e-21 | 1.000000 |
| rad60anti   | 5.94933e-22 | 1.000000 | 5.94934e-22 | 1.000000 |
| rad28       | 4.26295e-22 | 1.000000 | 4.26295e-22 | 1.000000 |
| rad13       | 6.81127e-23 | 1.000000 | 6.81127e-23 | 1.000000 |
| rad38       | 5.54369e-23 | 1.000000 | 5.54369e-23 | 1.000000 |
| Ph+Allene   | 3.34712e-23 | 1.000000 | 3.34712e-23 | 1.000000 |
| rad7        | 1.95165e-23 | 1.000000 | 1.95165e-23 | 1.000000 |
| rad35       | 8.47737e-24 | 1.000000 | 8.47737e-24 | 1.000000 |
| PAH7+H      | 5.81331e-24 | 1.000000 | 5.81331e-24 | 1.000000 |

|              |             |          |             |          |
|--------------|-------------|----------|-------------|----------|
| PAH3+H       | 3.18113e-24 | 1.000000 | 3.18113e-24 | 1.000000 |
| rad59        | 1.04378e-24 | 1.000000 | 1.04378e-24 | 1.000000 |
| rad33        | 4.63608e-25 | 1.000000 | 4.63608e-25 | 1.000000 |
| rad46        | 3.00690e-25 | 1.000000 | 3.00690e-25 | 1.000000 |
| rad26        | 8.47324e-26 | 1.000000 | 8.47324e-26 | 1.000000 |
| PAH9+H       | 4.93549e-27 | 1.000000 | 4.93549e-27 | 1.000000 |
| rad3         | 5.16341e-29 | 1.000000 | 5.16341e-29 | 1.000000 |
| rad4         | 3.39046e-29 | 1.000000 | 3.39046e-29 | 1.000000 |
| rad50        | 2.34804e-30 | 1.000000 | 2.34804e-30 | 1.000000 |
| rad10        | 2.51562e-32 | 1.000000 | 2.51562e-32 | 1.000000 |
| rad39        | 1.70301e-32 | 1.000000 | 1.70301e-32 | 1.000000 |
| rad58        | 4.06883e-33 | 1.000000 | 4.06883e-33 | 1.000000 |
| rad2         | 7.50367e-34 | 1.000000 | 7.50367e-34 | 1.000000 |
| rad52        | 6.31422e-34 | 1.000000 | 6.31422e-34 | 1.000000 |
| rad1         | 1.03414e-34 | 1.000000 | 1.03414e-34 | 1.000000 |
| rad12        | 5.65300e-35 | 1.000000 | 5.65300e-35 | 1.000000 |
| PhCCH+CH3    | 4.39009e-35 | 1.000000 | 4.39009e-35 | 1.000000 |
| rad51        | 1.76002e-35 | 1.000000 | 1.76002e-35 | 1.000000 |
| rad37        | 4.95608e-36 | 1.000000 | 4.95609e-36 | 1.000000 |
| rad14        | 1.28579e-36 | 1.000000 | 1.28579e-36 | 1.000000 |
| rad31        | 8.33612e-37 | 1.000000 | 8.33612e-37 | 1.000000 |
| Ph+MeAc      | 1.66116e-37 | 1.000000 | 1.66116e-37 | 1.000000 |
| rad70        | 8.73487e-38 | 1.000000 | 8.73487e-38 | 1.000000 |
| rad47        | 3.24929e-38 | 1.000000 | 3.24929e-38 | 1.000000 |
| rad54        | 2.42138e-40 | 1.000000 | 2.42138e-40 | 1.000000 |
| PAH10+CH3    | 1.10213e-40 | 1.000000 | 1.10213e-40 | 1.000000 |
| rad34        | 9.04391e-41 | 1.000000 | 9.04392e-41 | 1.000000 |
| rad19syn     | 7.49012e-41 | 1.000000 | 7.49012e-41 | 1.000000 |
| PhCCCH3+H    | 2.09572e-41 | 1.000000 | 2.09573e-41 | 1.000000 |
| rad65        | 1.93083e-41 | 1.000000 | 1.93083e-41 | 1.000000 |
| rad27        | 9.78276e-42 | 1.000000 | 9.78276e-42 | 1.000000 |
| rad55        | 2.30479e-43 | 1.000000 | 2.30479e-43 | 1.000000 |
| PAH1+H       | 1.75748e-43 | 1.000000 | 1.75748e-43 | 1.000000 |
| PhycC3H3_A+H | 9.56186e-45 | 1.000000 | 9.56186e-45 | 1.000000 |
| rad5         | 5.37008e-45 | 1.000000 | 5.37008e-45 | 1.000000 |
| rad62        | 2.57749e-48 | 1.000000 | 2.57749e-48 | 1.000000 |
| rad43        | 2.86259e-52 | 1.000000 | 2.86259e-52 | 1.000000 |
| rad42        | 1.33063e-53 | 1.000000 | 1.33063e-53 | 1.000000 |
| rad41        | 4.51850e-58 | 1.000000 | 4.51850e-58 | 1.000000 |

10000000.0 Pa, 230.000000 K

=====

| Rate constant | True (fraction)     | Effective (fraction) |
|---------------|---------------------|----------------------|
| Total         | 1.22972e-25 (1.00 ) | 1.22972e-25 (1.00 )  |

| species     | PYtrue      | Cumul    | PYeffective | Cumul    |
|-------------|-------------|----------|-------------|----------|
| rad20       | 0.998214    | 0.998214 | 0.998214    | 0.998214 |
| rad21       | 0.00154646  | 0.999760 | 0.00154646  | 0.999760 |
| rad18       | 0.000238042 | 0.999999 | 0.000238042 | 0.999999 |
| rad22       | 9.12853e-07 | 0.999999 | 9.12853e-07 | 0.999999 |
| Benzyl+C2H2 | 2.01447e-07 | 1.000000 | 0.000000    | 0.999999 |
| rad24       | 4.72791e-08 | 1.000000 | 4.72791e-08 | 0.999999 |
| Indene+H    | 3.29336e-08 | 1.000000 | 3.29336e-08 | 0.999999 |
| rad45       | 1.19987e-08 | 1.000000 | 1.19987e-08 | 1.000000 |
| rad36       | 1.25415e-09 | 1.000000 | 1.25415e-09 | 1.000000 |
| rad11       | 9.21762e-10 | 1.000000 | 9.21762e-10 | 1.000000 |
| rad23       | 9.18502e-13 | 1.000000 | 9.18502e-13 | 1.000000 |
| rad6        | 4.92098e-15 | 1.000000 | 4.92098e-15 | 1.000000 |
| rad30       | 1.20256e-15 | 1.000000 | 1.20256e-15 | 1.000000 |
| rad8        | 7.74374e-16 | 1.000000 | 7.74374e-16 | 1.000000 |
| rad15       | 1.44843e-16 | 1.000000 | 1.44843e-16 | 1.000000 |
| PhCH2CCH+H  | 1.54958e-19 | 1.000000 | 1.54958e-19 | 1.000000 |
| rad9        | 7.79129e-20 | 1.000000 | 7.79129e-20 | 1.000000 |
| rad25       | 4.29217e-20 | 1.000000 | 4.29217e-20 | 1.000000 |
| rad60syn    | 7.94458e-21 | 1.000000 | 7.94458e-21 | 1.000000 |
| PhCHCCH2+H  | 3.71323e-21 | 1.000000 | 3.71323e-21 | 1.000000 |
| rad60anti   | 2.27633e-21 | 1.000000 | 2.27633e-21 | 1.000000 |
| rad28       | 1.74530e-21 | 1.000000 | 1.74530e-21 | 1.000000 |
| rad13       | 1.84030e-22 | 1.000000 | 1.84030e-22 | 1.000000 |
| rad38       | 1.60162e-22 | 1.000000 | 1.60162e-22 | 1.000000 |
| Ph+Allene   | 1.56333e-22 | 1.000000 | 1.56334e-22 | 1.000000 |
| rad7        | 5.40309e-23 | 1.000000 | 5.40309e-23 | 1.000000 |
| rad35       | 4.02762e-23 | 1.000000 | 4.02762e-23 | 1.000000 |
| PAH7+H      | 2.84533e-23 | 1.000000 | 2.84533e-23 | 1.000000 |
| PAH3+H      | 1.84317e-23 | 1.000000 | 1.84317e-23 | 1.000000 |
| rad59       | 5.87770e-24 | 1.000000 | 5.87770e-24 | 1.000000 |
| rad33       | 1.35365e-24 | 1.000000 | 1.35365e-24 | 1.000000 |
| rad46       | 1.08382e-24 | 1.000000 | 1.08382e-24 | 1.000000 |

|               |             |          |             |          |
|---------------|-------------|----------|-------------|----------|
| rad26         | 4.84419e-25 | 1.000000 | 4.84419e-25 | 1.000000 |
| PAH9+H        | 1.56664e-26 | 1.000000 | 1.56664e-26 | 1.000000 |
| rad3          | 2.11633e-28 | 1.000000 | 2.11633e-28 | 1.000000 |
| rad4          | 1.38740e-28 | 1.000000 | 1.38740e-28 | 1.000000 |
| rad50         | 1.67380e-29 | 1.000000 | 1.67380e-29 | 1.000000 |
| rad10         | 1.81801e-31 | 1.000000 | 1.81801e-31 | 1.000000 |
| rad39         | 1.19020e-31 | 1.000000 | 1.19020e-31 | 1.000000 |
| rad58         | 8.87292e-32 | 1.000000 | 8.87292e-32 | 1.000000 |
| rad52         | 6.58404e-33 | 1.000000 | 6.58405e-33 | 1.000000 |
| rad2          | 4.52464e-33 | 1.000000 | 4.52464e-33 | 1.000000 |
| rad1          | 6.20753e-34 | 1.000000 | 6.20753e-34 | 1.000000 |
| rad12         | 4.58932e-34 | 1.000000 | 4.58932e-34 | 1.000000 |
| PhCCH+CH3     | 3.47318e-34 | 1.000000 | 3.47318e-34 | 1.000000 |
| rad51         | 2.55036e-34 | 1.000000 | 2.55037e-34 | 1.000000 |
| rad37         | 4.49353e-35 | 1.000000 | 4.49353e-35 | 1.000000 |
| rad14         | 9.18753e-36 | 1.000000 | 9.18753e-36 | 1.000000 |
| rad31         | 3.48854e-36 | 1.000000 | 3.48854e-36 | 1.000000 |
| rad70         | 2.07203e-36 | 1.000000 | 2.07203e-36 | 1.000000 |
| Ph+MeAc       | 1.63952e-36 | 1.000000 | 1.63952e-36 | 1.000000 |
| rad47         | 8.84295e-37 | 1.000000 | 8.84295e-37 | 1.000000 |
| rad34         | 4.53049e-39 | 1.000000 | 4.53049e-39 | 1.000000 |
| rad54         | 4.05626e-39 | 1.000000 | 4.05626e-39 | 1.000000 |
| PAH10+CH3     | 2.02182e-39 | 1.000000 | 2.02182e-39 | 1.000000 |
| rad19syn      | 1.08276e-39 | 1.000000 | 1.08276e-39 | 1.000000 |
| rad65         | 3.90347e-40 | 1.000000 | 3.90347e-40 | 1.000000 |
| PhCCCH3+H     | 2.41896e-40 | 1.000000 | 2.41896e-40 | 1.000000 |
| rad27         | 9.79481e-41 | 1.000000 | 9.79481e-41 | 1.000000 |
| PAH1+H        | 7.80662e-42 | 1.000000 | 7.80662e-42 | 1.000000 |
| rad55         | 6.49405e-42 | 1.000000 | 6.49405e-42 | 1.000000 |
| PhcycC3H3_A+H | 3.04023e-43 | 1.000000 | 3.04023e-43 | 1.000000 |
| rad5          | 9.52688e-44 | 1.000000 | 9.52688e-44 | 1.000000 |
| rad62         | 7.57960e-47 | 1.000000 | 7.57960e-47 | 1.000000 |
| rad43         | 9.78412e-51 | 1.000000 | 9.78413e-51 | 1.000000 |
| rad42         | 7.40483e-52 | 1.000000 | 7.40483e-52 | 1.000000 |
| rad41         | 2.67321e-56 | 1.000000 | 2.67321e-56 | 1.000000 |

10000000.0 Pa, 240.000000 K

=====

| Rate constant | True (fraction)     | Effective (fraction) |
|---------------|---------------------|----------------------|
| Total         | 3.99091e-25 (1.00 ) | 3.99091e-25 (1.00 )  |

| species     | PYtrue      | Cumul    | PYeffective | Cumul    |
|-------------|-------------|----------|-------------|----------|
| rad20       | 0.997996    | 0.997996 | 0.997996    | 0.997996 |
| rad21       | 0.00173336  | 0.999729 | 0.00173336  | 0.999729 |
| rad18       | 0.000268847 | 0.999998 | 0.000268847 | 0.999998 |
| rad22       | 1.17293e-06 | 0.999999 | 1.17293e-06 | 0.999999 |
| Benzyl+C2H2 | 2.94991e-07 | 1.000000 | 0.00000     | 0.999999 |
| rad24       | 6.19770e-08 | 1.000000 | 6.19770e-08 | 0.999999 |
| Indene+H    | 4.32489e-08 | 1.000000 | 4.32489e-08 | 0.999999 |
| rad45       | 1.77422e-08 | 1.000000 | 1.77422e-08 | 1.000000 |
| rad36       | 1.84449e-09 | 1.000000 | 1.84449e-09 | 1.000000 |
| rad11       | 1.37478e-09 | 1.000000 | 1.37478e-09 | 1.000000 |
| rad23       | 1.47152e-12 | 1.000000 | 1.47152e-12 | 1.000000 |
| rad6        | 9.62998e-15 | 1.000000 | 9.62998e-15 | 1.000000 |
| rad30       | 2.38303e-15 | 1.000000 | 2.38303e-15 | 1.000000 |
| rad8        | 2.30561e-15 | 1.000000 | 2.30561e-15 | 1.000000 |
| rad15       | 3.12334e-16 | 1.000000 | 3.12334e-16 | 1.000000 |
| PhCH2CCH+H  | 7.56063e-19 | 1.000000 | 7.56063e-19 | 1.000000 |
| rad9        | 3.18276e-19 | 1.000000 | 3.18276e-19 | 1.000000 |
| rad25       | 1.14945e-19 | 1.000000 | 1.14945e-19 | 1.000000 |
| rad60syn    | 2.65977e-20 | 1.000000 | 2.65977e-20 | 1.000000 |
| PhCHCCH2+H  | 1.25263e-20 | 1.000000 | 1.25263e-20 | 1.000000 |
| rad60anti   | 7.99523e-21 | 1.000000 | 7.99523e-21 | 1.000000 |
| rad28       | 6.58680e-21 | 1.000000 | 6.58680e-21 | 1.000000 |
| Ph+Allene   | 6.71548e-22 | 1.000000 | 6.71548e-22 | 1.000000 |
| rad13       | 4.91892e-22 | 1.000000 | 4.91892e-22 | 1.000000 |
| rad38       | 4.53260e-22 | 1.000000 | 4.53261e-22 | 1.000000 |
| rad35       | 1.72580e-22 | 1.000000 | 1.72580e-22 | 1.000000 |
| rad7        | 1.47871e-22 | 1.000000 | 1.47871e-22 | 1.000000 |
| PAH7+H      | 1.26274e-22 | 1.000000 | 1.26275e-22 | 1.000000 |
| PAH3+H      | 9.46138e-23 | 1.000000 | 9.46139e-23 | 1.000000 |
| rad59       | 2.93551e-23 | 1.000000 | 2.93551e-23 | 1.000000 |
| rad33       | 3.89190e-24 | 1.000000 | 3.89190e-24 | 1.000000 |
| rad46       | 3.74684e-24 | 1.000000 | 3.74684e-24 | 1.000000 |
| rad26       | 2.46881e-24 | 1.000000 | 2.46881e-24 | 1.000000 |
| PAH9+H      | 4.91151e-26 | 1.000000 | 4.91151e-26 | 1.000000 |
| rad3        | 8.42700e-28 | 1.000000 | 8.42700e-28 | 1.000000 |
| rad4        | 5.51709e-28 | 1.000000 | 5.51709e-28 | 1.000000 |

|               |             |          |             |          |
|---------------|-------------|----------|-------------|----------|
| rad50         | 1.07208e-28 | 1.000000 | 1.07208e-28 | 1.000000 |
| rad58         | 1.19887e-30 | 1.000000 | 1.19887e-30 | 1.000000 |
| rad10         | 1.17420e-30 | 1.000000 | 1.17420e-30 | 1.000000 |
| rad39         | 7.60786e-31 | 1.000000 | 7.60787e-31 | 1.000000 |
| rad52         | 5.91400e-32 | 1.000000 | 5.91400e-32 | 1.000000 |
| rad2          | 2.60570e-32 | 1.000000 | 2.60570e-32 | 1.000000 |
| rad1          | 3.56222e-33 | 1.000000 | 3.56222e-33 | 1.000000 |
| rad12         | 3.31411e-33 | 1.000000 | 3.31411e-33 | 1.000000 |
| rad51         | 2.99264e-33 | 1.000000 | 2.99265e-33 | 1.000000 |
| PhCCH+CH3     | 2.55937e-33 | 1.000000 | 2.55937e-33 | 1.000000 |
| rad37         | 3.58692e-34 | 1.000000 | 3.58692e-34 | 1.000000 |
| rad14         | 6.17618e-35 | 1.000000 | 6.17618e-35 | 1.000000 |
| rad70         | 3.21986e-35 | 1.000000 | 3.21986e-35 | 1.000000 |
| rad47         | 1.58633e-35 | 1.000000 | 1.58633e-35 | 1.000000 |
| Ph+MeAc       | 1.46356e-35 | 1.000000 | 1.46356e-35 | 1.000000 |
| rad31         | 1.42632e-35 | 1.000000 | 1.42632e-35 | 1.000000 |
| rad34         | 1.06992e-37 | 1.000000 | 1.06992e-37 | 1.000000 |
| rad54         | 5.27916e-38 | 1.000000 | 5.27916e-38 | 1.000000 |
| PAH10+CH3     | 2.76544e-38 | 1.000000 | 2.76545e-38 | 1.000000 |
| rad19syn      | 1.27553e-38 | 1.000000 | 1.27553e-38 | 1.000000 |
| rad65         | 5.72166e-39 | 1.000000 | 5.72167e-39 | 1.000000 |
| PhCCCH3+H     | 2.52353e-39 | 1.000000 | 2.52353e-39 | 1.000000 |
| rad27         | 9.05158e-40 | 1.000000 | 9.05158e-40 | 1.000000 |
| PAH1+H        | 1.75721e-40 | 1.000000 | 1.75721e-40 | 1.000000 |
| rad55         | 1.16760e-40 | 1.000000 | 1.16760e-40 | 1.000000 |
| PhcycC3H3_A+H | 5.93471e-42 | 1.000000 | 5.93471e-42 | 1.000000 |
| rad5          | 1.31981e-42 | 1.000000 | 1.31981e-42 | 1.000000 |
| rad62         | 1.50796e-45 | 1.000000 | 1.50796e-45 | 1.000000 |
| rad43         | 2.21243e-49 | 1.000000 | 2.21243e-49 | 1.000000 |
| rad42         | 2.21555e-50 | 1.000000 | 2.21555e-50 | 1.000000 |
| rad41         | 8.70425e-55 | 1.000000 | 8.70425e-55 | 1.000000 |

10000000.0 Pa, 250.000000 K

=====

| Rate constant | True (fraction)     | Effective (fraction) |
|---------------|---------------------|----------------------|
| Total         | 1.17763e-24 (1.00 ) | 1.17763e-24 (1.00 )  |

| species     | PYtrue      | Cumul    | PYeffective | Cumul    |
|-------------|-------------|----------|-------------|----------|
| rad20       | 0.997749    | 0.997749 | 0.997750    | 0.997750 |
| rad21       | 0.00194453  | 0.999694 | 0.00194453  | 0.999695 |
| rad18       | 0.000303943 | 0.999997 | 0.000303943 | 0.999998 |
| rad22       | 1.50970e-06 | 0.999999 | 1.50970e-06 | 1.000000 |
| Benzyl+C2H2 | 4.29115e-07 | 0.999999 | 0.000000    | 1.000000 |
| rad24       | 8.11898e-08 | 0.999999 | 8.11898e-08 | 1.000000 |
| Indene+H    | 5.69555e-08 | 1.000000 | 5.69555e-08 | 1.000000 |
| rad45       | 2.62163e-08 | 1.000000 | 2.62163e-08 | 1.000000 |
| rad36       | 2.71284e-09 | 1.000000 | 2.71284e-09 | 1.000000 |
| rad11       | 2.04862e-09 | 1.000000 | 2.04862e-09 | 1.000000 |
| rad23       | 2.36967e-12 | 1.000000 | 2.36968e-12 | 1.000000 |
| rad6        | 1.87373e-14 | 1.000000 | 1.87373e-14 | 1.000000 |
| rad8        | 6.38226e-15 | 1.000000 | 6.38226e-15 | 1.000000 |
| rad30       | 4.63806e-15 | 1.000000 | 4.63807e-15 | 1.000000 |
| rad15       | 6.56071e-16 | 1.000000 | 6.56071e-16 | 1.000000 |
| PhCH2CCH+H  | 3.29516e-18 | 1.000000 | 3.29516e-18 | 1.000000 |
| rad9        | 1.18824e-18 | 1.000000 | 1.18824e-18 | 1.000000 |
| rad25       | 2.99044e-19 | 1.000000 | 2.99044e-19 | 1.000000 |
| rad60syn    | 8.30315e-20 | 1.000000 | 8.30316e-20 | 1.000000 |
| PhCHCCH2+H  | 4.02456e-20 | 1.000000 | 4.02456e-20 | 1.000000 |
| rad60anti   | 2.60489e-20 | 1.000000 | 2.60489e-20 | 1.000000 |
| rad28       | 2.31215e-20 | 1.000000 | 2.31215e-20 | 1.000000 |
| Ph+Allene   | 2.67740e-21 | 1.000000 | 2.67741e-21 | 1.000000 |
| rad13       | 1.29859e-21 | 1.000000 | 1.29859e-21 | 1.000000 |
| rad38       | 1.25740e-21 | 1.000000 | 1.25740e-21 | 1.000000 |
| rad35       | 6.75371e-22 | 1.000000 | 6.75371e-22 | 1.000000 |
| PAH7+H      | 5.13756e-22 | 1.000000 | 5.13756e-22 | 1.000000 |
| PAH3+H      | 4.36553e-22 | 1.000000 | 4.36553e-22 | 1.000000 |
| rad7        | 3.99446e-22 | 1.000000 | 3.99446e-22 | 1.000000 |
| rad59       | 1.31922e-22 | 1.000000 | 1.31922e-22 | 1.000000 |
| rad46       | 1.24741e-23 | 1.000000 | 1.24741e-23 | 1.000000 |
| rad26       | 1.13656e-23 | 1.000000 | 1.13656e-23 | 1.000000 |
| rad33       | 1.10018e-23 | 1.000000 | 1.10018e-23 | 1.000000 |
| PAH9+H      | 1.52003e-25 | 1.000000 | 1.52003e-25 | 1.000000 |
| rad3        | 3.25744e-27 | 1.000000 | 3.25744e-27 | 1.000000 |
| rad4        | 2.13037e-27 | 1.000000 | 2.13037e-27 | 1.000000 |
| rad50       | 6.25310e-28 | 1.000000 | 6.25311e-28 | 1.000000 |
| rad58       | 1.13459e-29 | 1.000000 | 1.13459e-29 | 1.000000 |
| rad10       | 6.84844e-30 | 1.000000 | 6.84844e-30 | 1.000000 |
| rad39       | 4.47556e-30 | 1.000000 | 4.47556e-30 | 1.000000 |

|               |             |          |             |         |
|---------------|-------------|----------|-------------|---------|
| rad52         | 4.66189e-31 | 1.000000 | 4.66190e-31 | 1.00000 |
| rad2          | 1.43013e-31 | 1.000000 | 1.43013e-31 | 1.00000 |
| rad51         | 2.93253e-32 | 1.000000 | 2.93253e-32 | 1.00000 |
| rad12         | 2.14338e-32 | 1.000000 | 2.14338e-32 | 1.00000 |
| rad1          | 1.95022e-32 | 1.000000 | 1.95022e-32 | 1.00000 |
| PhCCH+CH3     | 1.74599e-32 | 1.000000 | 1.74599e-32 | 1.00000 |
| rad37         | 2.52806e-33 | 1.000000 | 2.52806e-33 | 1.00000 |
| rad14         | 3.89104e-34 | 1.000000 | 3.89104e-34 | 1.00000 |
| rad70         | 3.38367e-34 | 1.000000 | 3.38367e-34 | 1.00000 |
| rad47         | 1.98715e-34 | 1.000000 | 1.98715e-34 | 1.00000 |
| Ph+MeAc       | 1.16690e-34 | 1.000000 | 1.16690e-34 | 1.00000 |
| rad31         | 5.70023e-35 | 1.000000 | 5.70024e-35 | 1.00000 |
| rad34         | 1.24809e-36 | 1.000000 | 1.24809e-36 | 1.00000 |
| rad54         | 5.26523e-37 | 1.000000 | 5.26523e-37 | 1.00000 |
| PAH10+CH3     | 2.73943e-37 | 1.000000 | 2.73943e-37 | 1.00000 |
| rad19syn      | 1.20320e-37 | 1.000000 | 1.20320e-37 | 1.00000 |
| rad65         | 6.26934e-38 | 1.000000 | 6.26934e-38 | 1.00000 |
| PhCCCH3+H     | 2.30483e-38 | 1.000000 | 2.30483e-38 | 1.00000 |
| rad27         | 7.53811e-39 | 1.000000 | 7.53811e-39 | 1.00000 |
| PAH1+H        | 2.01333e-39 | 1.000000 | 2.01334e-39 | 1.00000 |
| rad55         | 1.32989e-39 | 1.000000 | 1.32990e-39 | 1.00000 |
| PhcycC3H3_A+H | 6.90762e-41 | 1.000000 | 6.90762e-41 | 1.00000 |
| rad5          | 1.34479e-41 | 1.000000 | 1.34479e-41 | 1.00000 |
| rad62         | 1.92715e-44 | 1.000000 | 1.92715e-44 | 1.00000 |
| rad43         | 3.02061e-48 | 1.000000 | 3.02062e-48 | 1.00000 |
| rad42         | 3.20011e-49 | 1.000000 | 3.20011e-49 | 1.00000 |
| rad41         | 1.29214e-53 | 1.000000 | 1.29214e-53 | 1.00000 |

10000000.0 Pa, 260.000000 K

| Rate constant | True (fraction)     | Effective (fraction) |
|---------------|---------------------|----------------------|
| Total         | 3.19452e-24 (1.00 ) | 3.19452e-24 (1.00 )  |

| species     | PYtrue      | Cumul    | PYeffective | Cumul    |
|-------------|-------------|----------|-------------|----------|
| rad20       | 0.997470    | 0.997470 | 0.997471    | 0.997471 |
| rad21       | 0.00218318  | 0.999653 | 0.00218318  | 0.999654 |
| rad18       | 0.000343936 | 0.999997 | 0.000343936 | 0.999998 |
| rad22       | 1.94587e-06 | 0.999999 | 1.94587e-06 | 1.00000  |
| Benzyl+C2H2 | 6.20033e-07 | 1.000000 | 0.00000     | 1.00000  |
| rad24       | 1.06215e-07 | 1.000000 | 1.06215e-07 | 1.00000  |
| Indene+H    | 7.51876e-08 | 1.000000 | 7.51877e-08 | 1.00000  |
| rad45       | 3.86771e-08 | 1.000000 | 3.86772e-08 | 1.00000  |
| rad36       | 3.98695e-09 | 1.000000 | 3.98695e-09 | 1.00000  |
| rad11       | 3.04776e-09 | 1.000000 | 3.04776e-09 | 1.00000  |
| rad23       | 3.83163e-12 | 1.000000 | 3.83163e-12 | 1.00000  |
| rad6        | 3.62107e-14 | 1.000000 | 3.62108e-14 | 1.00000  |
| rad8        | 1.65651e-14 | 1.000000 | 1.65651e-14 | 1.00000  |
| rad30       | 8.87520e-15 | 1.000000 | 8.87520e-15 | 1.00000  |
| rad15       | 1.34540e-15 | 1.000000 | 1.34540e-15 | 1.00000  |
| PhCH2CCH+H  | 1.29942e-17 | 1.000000 | 1.29942e-17 | 1.00000  |
| rad9        | 4.09563e-18 | 1.000000 | 4.09564e-18 | 1.00000  |
| rad25       | 7.56987e-19 | 1.000000 | 7.56987e-19 | 1.00000  |
| rad60syn    | 2.43658e-19 | 1.000000 | 2.43659e-19 | 1.00000  |
| PhCHCCH2+H  | 1.23663e-19 | 1.000000 | 1.23663e-19 | 1.00000  |
| rad60anti   | 7.94195e-20 | 1.000000 | 7.94196e-20 | 1.00000  |
| rad28       | 7.60627e-20 | 1.000000 | 7.60628e-20 | 1.00000  |
| Ph+Allene   | 9.98366e-21 | 1.000000 | 9.98366e-21 | 1.00000  |
| rad38       | 3.42244e-21 | 1.000000 | 3.42244e-21 | 1.00000  |
| rad13       | 3.38169e-21 | 1.000000 | 3.38169e-21 | 1.00000  |
| rad35       | 2.43937e-21 | 1.000000 | 2.43937e-21 | 1.00000  |
| PAH7+H      | 1.93416e-21 | 1.000000 | 1.93416e-21 | 1.00000  |
| PAH3+H      | 1.83275e-21 | 1.000000 | 1.83275e-21 | 1.00000  |
| rad7        | 1.06378e-21 | 1.000000 | 1.06378e-21 | 1.00000  |
| rad59       | 5.39991e-22 | 1.000000 | 5.39991e-22 | 1.00000  |
| rad26       | 4.77948e-23 | 1.000000 | 4.77948e-23 | 1.00000  |
| rad46       | 4.01428e-23 | 1.000000 | 4.01428e-23 | 1.00000  |
| rad33       | 3.05423e-23 | 1.000000 | 3.05423e-23 | 1.00000  |
| PAH9+H      | 4.64348e-25 | 1.000000 | 4.64348e-25 | 1.00000  |
| rad3        | 1.22166e-26 | 1.000000 | 1.22166e-26 | 1.00000  |
| rad4        | 7.98372e-27 | 1.000000 | 7.98372e-27 | 1.00000  |
| rad50       | 3.36102e-27 | 1.000000 | 3.36102e-27 | 1.00000  |
| rad58       | 8.93390e-29 | 1.000000 | 8.93390e-29 | 1.00000  |
| rad10       | 3.64333e-29 | 1.000000 | 3.64333e-29 | 1.00000  |
| rad39       | 2.44196e-29 | 1.000000 | 2.44196e-29 | 1.00000  |
| rad52       | 3.28682e-30 | 1.000000 | 3.28682e-30 | 1.00000  |
| rad2        | 7.47350e-31 | 1.000000 | 7.47350e-31 | 1.00000  |
| rad51       | 2.50102e-31 | 1.000000 | 2.50103e-31 | 1.00000  |
| rad12       | 1.25549e-31 | 1.000000 | 1.25549e-31 | 1.00000  |

|               |             |          |             |          |
|---------------|-------------|----------|-------------|----------|
| PhCCH+CH3     | 1.10557e-31 | 1.000000 | 1.10557e-31 | 1.000000 |
| rad1          | 1.01770e-31 | 1.000000 | 1.01770e-31 | 1.000000 |
| rad37         | 1.59788e-32 | 1.000000 | 1.59788e-32 | 1.000000 |
| rad70         | 2.94789e-33 | 1.000000 | 2.94789e-33 | 1.000000 |
| rad14         | 2.29881e-33 | 1.000000 | 2.29881e-33 | 1.000000 |
| rad47         | 2.08065e-33 | 1.000000 | 2.08065e-33 | 1.000000 |
| Ph+MeAc       | 8.41977e-34 | 1.000000 | 8.41978e-34 | 1.000000 |
| rad31         | 2.22788e-34 | 1.000000 | 2.22789e-34 | 1.000000 |
| rad34         | 1.17705e-35 | 1.000000 | 1.17705e-35 | 1.000000 |
| rad54         | 4.45663e-36 | 1.000000 | 4.45663e-36 | 1.000000 |
| PAH10+CH3     | 2.28086e-36 | 1.000000 | 2.28086e-36 | 1.000000 |
| rad19syn      | 9.75852e-37 | 1.000000 | 9.75853e-37 | 1.000000 |
| rad65         | 5.83217e-37 | 1.000000 | 5.83217e-37 | 1.000000 |
| PhCCCH3+H     | 1.88541e-37 | 1.000000 | 1.88541e-37 | 1.000000 |
| rad27         | 5.71577e-38 | 1.000000 | 5.71577e-38 | 1.000000 |
| PAH1+H        | 1.86887e-38 | 1.000000 | 1.86887e-38 | 1.000000 |
| rad55         | 1.24675e-38 | 1.000000 | 1.24675e-38 | 1.000000 |
| PhcycC3H3_A+H | 6.58330e-40 | 1.000000 | 6.58330e-40 | 1.000000 |
| rad5          | 1.15762e-40 | 1.000000 | 1.15762e-40 | 1.000000 |
| rad62         | 2.03322e-43 | 1.000000 | 2.03322e-43 | 1.000000 |
| rad43         | 3.39314e-47 | 1.000000 | 3.39314e-47 | 1.000000 |
| rad42         | 3.72945e-48 | 1.000000 | 3.72945e-48 | 1.000000 |
| rad41         | 1.55579e-52 | 1.000000 | 1.55579e-52 | 1.000000 |

10000000.0 Pa, 270.000000 K

=====

| Rate constant | True (fraction)     | Effective (fraction) |
|---------------|---------------------|----------------------|
| Total         | 8.04141e-24 (1.00 ) | 8.04140e-24 (1.00 )  |

| species     | PYtrue      | Cumul    | PYeffective | Cumul    |
|-------------|-------------|----------|-------------|----------|
| rad20       | 0.997154    | 0.997154 | 0.997155    | 0.997155 |
| rad21       | 0.00245287  | 0.999607 | 0.00245287  | 0.999608 |
| rad18       | 0.000389505 | 0.999996 | 0.000389505 | 0.999997 |
| rad22       | 2.51068e-06 | 0.999999 | 2.51068e-06 | 1.000000 |
| Benzyl+C2H2 | 8.89822e-07 | 1.000000 | 0.000000    | 1.000000 |
| rad24       | 1.38674e-07 | 1.000000 | 1.38674e-07 | 1.000000 |
| Indene+H    | 9.94531e-08 | 1.000000 | 9.94532e-08 | 1.000000 |
| rad45       | 5.69260e-08 | 1.000000 | 5.69261e-08 | 1.000000 |
| rad36       | 5.85055e-09 | 1.000000 | 5.85055e-09 | 1.000000 |
| rad11       | 4.52387e-09 | 1.000000 | 4.52388e-09 | 1.000000 |
| rad23       | 6.21438e-12 | 1.000000 | 6.21439e-12 | 1.000000 |
| rad6        | 6.94447e-14 | 1.000000 | 6.94447e-14 | 1.000000 |
| rad8        | 4.06041e-14 | 1.000000 | 4.06041e-14 | 1.000000 |
| rad30       | 1.67122e-14 | 1.000000 | 1.67122e-14 | 1.000000 |
| rad15       | 2.69847e-15 | 1.000000 | 2.69847e-15 | 1.000000 |
| PhCH2CCH+H  | 4.68727e-17 | 1.000000 | 4.68728e-17 | 1.000000 |
| rad9        | 1.31468e-17 | 1.000000 | 1.31468e-17 | 1.000000 |
| rad25       | 1.86699e-18 | 1.000000 | 1.86700e-18 | 1.000000 |
| rad60syn    | 6.76732e-19 | 1.000000 | 6.76733e-19 | 1.000000 |
| PhCHCCH2+H  | 3.64679e-19 | 1.000000 | 3.64679e-19 | 1.000000 |
| rad28       | 2.36001e-19 | 1.000000 | 2.36002e-19 | 1.000000 |
| rad60anti   | 2.28276e-19 | 1.000000 | 2.28277e-19 | 1.000000 |
| Ph+Allene   | 3.50417e-20 | 1.000000 | 3.50417e-20 | 1.000000 |
| rad38       | 9.14993e-21 | 1.000000 | 9.14994e-21 | 1.000000 |
| rad13       | 8.67794e-21 | 1.000000 | 8.67795e-21 | 1.000000 |
| rad35       | 8.20414e-21 | 1.000000 | 8.20415e-21 | 1.000000 |
| PAH3+H      | 7.07300e-21 | 1.000000 | 7.07300e-21 | 1.000000 |
| PAH7+H      | 6.79095e-21 | 1.000000 | 6.79095e-21 | 1.000000 |
| rad7        | 2.79043e-21 | 1.000000 | 2.79043e-21 | 1.000000 |
| rad59       | 2.03398e-21 | 1.000000 | 2.03398e-21 | 1.000000 |
| rad26       | 1.85329e-22 | 1.000000 | 1.85329e-22 | 1.000000 |
| rad46       | 1.25308e-22 | 1.000000 | 1.25308e-22 | 1.000000 |
| rad33       | 8.31922e-23 | 1.000000 | 8.31923e-23 | 1.000000 |
| PAH9+H      | 1.40064e-24 | 1.000000 | 1.40064e-24 | 1.000000 |
| rad3        | 4.44264e-26 | 1.000000 | 4.44264e-26 | 1.000000 |
| rad4        | 2.90212e-26 | 1.000000 | 2.90213e-26 | 1.000000 |
| rad50       | 1.68155e-26 | 1.000000 | 1.68155e-26 | 1.000000 |
| rad58       | 6.05381e-28 | 1.000000 | 6.05381e-28 | 1.000000 |
| rad10       | 1.78105e-28 | 1.000000 | 1.78105e-28 | 1.000000 |
| rad39       | 1.24280e-28 | 1.000000 | 1.24280e-28 | 1.000000 |
| rad52       | 2.10000e-29 | 1.000000 | 2.10000e-29 | 1.000000 |
| rad2        | 3.71197e-30 | 1.000000 | 3.71198e-30 | 1.000000 |
| rad51       | 1.88965e-30 | 1.000000 | 1.88965e-30 | 1.000000 |
| rad12       | 6.70751e-31 | 1.000000 | 6.70751e-31 | 1.000000 |
| PhCCH+CH3   | 6.49730e-31 | 1.000000 | 6.49730e-31 | 1.000000 |
| rad1        | 5.05357e-31 | 1.000000 | 5.05358e-31 | 1.000000 |
| rad37       | 9.13038e-32 | 1.000000 | 9.13039e-32 | 1.000000 |
| rad70       | 2.20548e-32 | 1.000000 | 2.20548e-32 | 1.000000 |



|               |             |         |             |         |
|---------------|-------------|---------|-------------|---------|
| rad47         | 1.87957e-32 | 1.00000 | 1.87957e-32 | 1.00000 |
| rad14         | 1.27231e-32 | 1.00000 | 1.27231e-32 | 1.00000 |
| Ph+MeAc       | 5.52182e-33 | 1.00000 | 5.52182e-33 | 1.00000 |
| rad31         | 8.51844e-34 | 1.00000 | 8.51845e-34 | 1.00000 |
| rad34         | 9.44617e-35 | 1.00000 | 9.44618e-35 | 1.00000 |
| rad54         | 3.27915e-35 | 1.00000 | 3.27915e-35 | 1.00000 |
| PAH10+CH3     | 1.64331e-35 | 1.00000 | 1.64331e-35 | 1.00000 |
| rad19syn      | 6.93696e-36 | 1.00000 | 6.93697e-36 | 1.00000 |
| rad65         | 4.73962e-36 | 1.00000 | 4.73963e-36 | 1.00000 |
| PhCCCH3+H     | 1.38917e-36 | 1.00000 | 1.38917e-36 | 1.00000 |
| rad27         | 3.95215e-37 | 1.00000 | 3.95215e-37 | 1.00000 |
| PAH1+H        | 1.47731e-37 | 1.00000 | 1.47732e-37 | 1.00000 |
| rad55         | 9.99928e-38 | 1.00000 | 9.99929e-38 | 1.00000 |
| PhcycC3H3_A+H | 5.35747e-39 | 1.00000 | 5.35747e-39 | 1.00000 |
| rad5          | 8.64975e-40 | 1.00000 | 8.64976e-40 | 1.00000 |
| rad62         | 1.83789e-42 | 1.00000 | 1.83789e-42 | 1.00000 |
| rad43         | 3.26439e-46 | 1.00000 | 3.26439e-46 | 1.00000 |
| rad42         | 3.68636e-47 | 1.00000 | 3.68637e-47 | 1.00000 |
| rad41         | 1.59770e-51 | 1.00000 | 1.59770e-51 | 1.00000 |

10000000.0 Pa, 280.000000 K

| Rate constant | True (fraction)     | Effective (fraction) |
|---------------|---------------------|----------------------|
| Total         | 1.89357e-23 (1.00 ) | 1.89357e-23 (1.00 )  |

| species     | PYtrue      | Cumul    | PYeffective | Cumul    |
|-------------|-------------|----------|-------------|----------|
| rad20       | 0.996796    | 0.996796 | 0.996797    | 0.996797 |
| rad21       | 0.00275754  | 0.999554 | 0.00275754  | 0.999555 |
| rad18       | 0.000441409 | 0.999995 | 0.000441409 | 0.999996 |
| rad22       | 3.24163e-06 | 0.999998 | 3.24164e-06 | 0.999999 |
| Benzyl+C2H2 | 1.26831e-06 | 0.999999 | 0.00000     | 0.999999 |
| rad24       | 1.80574e-07 | 1.000000 | 1.80574e-07 | 0.999999 |
| Indene+H    | 1.31752e-07 | 1.000000 | 1.31752e-07 | 1.000000 |
| rad45       | 8.35255e-08 | 1.000000 | 8.35256e-08 | 1.000000 |
| rad36       | 8.56631e-09 | 1.000000 | 8.56632e-09 | 1.000000 |
| rad11       | 6.69577e-09 | 1.000000 | 6.69578e-09 | 1.000000 |
| rad23       | 1.00997e-11 | 1.000000 | 1.00997e-11 | 1.000000 |
| rad6        | 1.32072e-13 | 1.000000 | 1.32072e-13 | 1.000000 |
| rad8        | 9.45712e-14 | 1.000000 | 9.45713e-14 | 1.000000 |
| rad30       | 3.09901e-14 | 1.000000 | 3.09902e-14 | 1.000000 |
| rad15       | 5.30173e-15 | 1.000000 | 5.30174e-15 | 1.000000 |
| PhCH2CCH+H  | 1.56109e-16 | 1.000000 | 1.56109e-16 | 1.000000 |
| rad9        | 3.95914e-17 | 1.000000 | 3.95915e-17 | 1.000000 |
| rad25       | 4.49180e-18 | 1.000000 | 4.49180e-18 | 1.000000 |
| rad60syn    | 1.78914e-18 | 1.000000 | 1.78914e-18 | 1.000000 |
| PhCHCCH2+H  | 1.03517e-18 | 1.000000 | 1.03517e-18 | 1.000000 |
| rad28       | 6.94360e-19 | 1.000000 | 6.94361e-19 | 1.000000 |
| rad60anti   | 6.22454e-19 | 1.000000 | 6.22455e-19 | 1.000000 |
| Ph+Allene   | 1.16381e-19 | 1.000000 | 1.16381e-19 | 1.000000 |
| rad35       | 2.58831e-20 | 1.000000 | 2.58831e-20 | 1.000000 |
| PAH3+H      | 2.53062e-20 | 1.000000 | 2.53062e-20 | 1.000000 |
| rad38       | 2.40606e-20 | 1.000000 | 2.40606e-20 | 1.000000 |
| PAH7+H      | 2.23835e-20 | 1.000000 | 2.23836e-20 | 1.000000 |
| rad13       | 2.19263e-20 | 1.000000 | 2.19264e-20 | 1.000000 |
| rad7        | 7.20440e-21 | 1.000000 | 7.20441e-21 | 1.000000 |
| rad59       | 7.11060e-21 | 1.000000 | 7.11061e-21 | 1.000000 |
| rad26       | 6.67855e-22 | 1.000000 | 6.67855e-22 | 1.000000 |
| rad46       | 3.80703e-22 | 1.000000 | 3.80704e-22 | 1.000000 |
| rad33       | 2.22171e-22 | 1.000000 | 2.22171e-22 | 1.000000 |
| PAH9+H      | 4.17447e-24 | 1.000000 | 4.17448e-24 | 1.000000 |
| rad3        | 1.56512e-25 | 1.000000 | 1.56512e-25 | 1.000000 |
| rad4        | 1.02235e-25 | 1.000000 | 1.02235e-25 | 1.000000 |
| rad50       | 7.89544e-26 | 1.000000 | 7.89545e-26 | 1.000000 |
| rad58       | 3.56674e-27 | 1.000000 | 3.56675e-27 | 1.000000 |
| rad10       | 8.04050e-28 | 1.000000 | 8.04051e-28 | 1.000000 |
| rad39       | 5.92212e-28 | 1.000000 | 5.92213e-28 | 1.000000 |
| rad52       | 1.22764e-28 | 1.000000 | 1.22764e-28 | 1.000000 |
| rad2        | 1.74714e-29 | 1.000000 | 1.74714e-29 | 1.000000 |
| rad51       | 1.27898e-29 | 1.000000 | 1.27898e-29 | 1.000000 |
| PhCCH+CH3   | 3.53663e-30 | 1.000000 | 3.53663e-30 | 1.000000 |
| rad12       | 3.28139e-30 | 1.000000 | 3.28140e-30 | 1.000000 |
| rad1        | 2.38102e-30 | 1.000000 | 2.38102e-30 | 1.000000 |
| rad37       | 4.73514e-31 | 1.000000 | 4.73515e-31 | 1.000000 |
| rad47       | 1.48467e-31 | 1.000000 | 1.48467e-31 | 1.000000 |
| rad70       | 1.43051e-31 | 1.000000 | 1.43051e-31 | 1.000000 |
| rad14       | 6.57955e-32 | 1.000000 | 6.57956e-32 | 1.000000 |
| Ph+MeAc     | 3.29294e-32 | 1.000000 | 3.29294e-32 | 1.000000 |
| rad31       | 3.18601e-33 | 1.000000 | 3.18601e-33 | 1.000000 |

|               |             |          |             |          |
|---------------|-------------|----------|-------------|----------|
| rad34         | 6.50178e-34 | 1.000000 | 6.50179e-34 | 1.000000 |
| rad54         | 2.11427e-34 | 1.000000 | 2.11427e-34 | 1.000000 |
| PAH10+CH3     | 1.03285e-34 | 1.000000 | 1.03285e-34 | 1.000000 |
| rad19syn      | 4.35077e-35 | 1.000000 | 4.35078e-35 | 1.000000 |
| rad65         | 3.40677e-35 | 1.000000 | 3.40677e-35 | 1.000000 |
| PhCCCH3+H     | 9.22303e-36 | 1.000000 | 9.22304e-36 | 1.000000 |
| rad27         | 2.48780e-36 | 1.000000 | 2.48780e-36 | 1.000000 |
| PAH1+H        | 1.00236e-36 | 1.000000 | 1.00236e-36 | 1.000000 |
| rad55         | 6.92412e-37 | 1.000000 | 6.92413e-37 | 1.000000 |
| PhcycC3H3_A+H | 3.75543e-38 | 1.000000 | 3.75544e-38 | 1.000000 |
| rad5          | 5.65030e-39 | 1.000000 | 5.65031e-39 | 1.000000 |
| rad62         | 1.43688e-41 | 1.000000 | 1.43688e-41 | 1.000000 |
| rad43         | 2.71539e-45 | 1.000000 | 2.71539e-45 | 1.000000 |
| rad42         | 3.11895e-46 | 1.000000 | 3.11895e-46 | 1.000000 |
| rad41         | 1.41085e-50 | 1.000000 | 1.41085e-50 | 1.000000 |

10000000.0 Pa, 290.000000 K

| Rate constant | True (fraction)     | Effective (fraction) |
|---------------|---------------------|----------------------|
| Total         | 4.20015e-23 (1.00 ) | 4.20014e-23 (1.00 )  |

| species     | PYtrue      | Cumul    | PYeffective | Cumul    |
|-------------|-------------|----------|-------------|----------|
| rad20       | 0.996391    | 0.996391 | 0.996393    | 0.996393 |
| rad21       | 0.00310154  | 0.999493 | 0.00310155  | 0.999495 |
| rad18       | 0.000500497 | 0.999993 | 0.000500498 | 0.999995 |
| rad22       | 4.18672e-06 | 0.999997 | 4.18673e-06 | 0.999999 |
| Benzyl+C2H2 | 1.79548e-06 | 0.999999 | 0.00000     | 0.999999 |
| rad24       | 2.34376e-07 | 0.999999 | 2.34377e-07 | 0.999999 |
| Indene+H    | 1.74731e-07 | 0.999999 | 1.74731e-07 | 1.000000 |
| rad45       | 1.22092e-07 | 1.000000 | 1.22093e-07 | 1.000000 |
| rad36       | 1.25073e-08 | 1.000000 | 1.25073e-08 | 1.000000 |
| rad11       | 9.87728e-09 | 1.000000 | 9.87729e-09 | 1.000000 |
| rad23       | 1.64335e-11 | 1.000000 | 1.64335e-11 | 1.000000 |
| rad6        | 2.48952e-13 | 1.000000 | 2.48953e-13 | 1.000000 |
| rad8        | 2.10397e-13 | 1.000000 | 2.10397e-13 | 1.000000 |
| rad30       | 5.66280e-14 | 1.000000 | 5.66281e-14 | 1.000000 |
| rad15       | 1.02170e-14 | 1.000000 | 1.02170e-14 | 1.000000 |
| PhCH2CCH+H  | 4.83850e-16 | 1.000000 | 4.83851e-16 | 1.000000 |
| rad9        | 1.12564e-16 | 1.000000 | 1.12564e-16 | 1.000000 |
| rad25       | 1.05530e-17 | 1.000000 | 1.05531e-17 | 1.000000 |
| rad60syn    | 4.52450e-18 | 1.000000 | 4.52451e-18 | 1.000000 |
| PhCHCCH2+H  | 2.83529e-18 | 1.000000 | 2.83530e-18 | 1.000000 |
| rad28       | 1.94608e-18 | 1.000000 | 1.94608e-18 | 1.000000 |
| rad60anti   | 1.61867e-18 | 1.000000 | 1.61867e-18 | 1.000000 |
| Ph+Allene   | 3.67310e-19 | 1.000000 | 3.67310e-19 | 1.000000 |
| PAH3+H      | 8.45367e-20 | 1.000000 | 8.45369e-20 | 1.000000 |
| rad35       | 7.70734e-20 | 1.000000 | 7.70735e-20 | 1.000000 |
| PAH7+H      | 6.96441e-20 | 1.000000 | 6.96442e-20 | 1.000000 |
| rad38       | 6.23280e-20 | 1.000000 | 6.23281e-20 | 1.000000 |
| rad13       | 5.45102e-20 | 1.000000 | 5.45103e-20 | 1.000000 |
| rad59       | 2.32362e-20 | 1.000000 | 2.32362e-20 | 1.000000 |
| rad7        | 1.82963e-20 | 1.000000 | 1.82963e-20 | 1.000000 |
| rad26       | 2.25137e-21 | 1.000000 | 2.25137e-21 | 1.000000 |
| rad46       | 1.12941e-21 | 1.000000 | 1.12941e-21 | 1.000000 |
| rad33       | 5.81339e-22 | 1.000000 | 5.81340e-22 | 1.000000 |
| PAH9+H      | 1.23057e-23 | 1.000000 | 1.23057e-23 | 1.000000 |
| rad3        | 5.33458e-25 | 1.000000 | 5.33459e-25 | 1.000000 |
| rad50       | 3.50274e-25 | 1.000000 | 3.50275e-25 | 1.000000 |
| rad4        | 3.48583e-25 | 1.000000 | 3.48584e-25 | 1.000000 |
| rad58       | 1.85144e-26 | 1.000000 | 1.85144e-26 | 1.000000 |
| rad10       | 3.36569e-27 | 1.000000 | 3.36570e-27 | 1.000000 |
| rad39       | 2.65197e-27 | 1.000000 | 2.65198e-27 | 1.000000 |
| rad52       | 6.62015e-28 | 1.000000 | 6.62017e-28 | 1.000000 |
| rad51       | 7.83409e-29 | 1.000000 | 7.83410e-29 | 1.000000 |
| rad2        | 7.77110e-29 | 1.000000 | 7.77112e-29 | 1.000000 |
| PhCCH+CH3   | 1.78190e-29 | 1.000000 | 1.78190e-29 | 1.000000 |
| rad12       | 1.47553e-29 | 1.000000 | 1.47554e-29 | 1.000000 |
| rad1        | 1.06157e-29 | 1.000000 | 1.06158e-29 | 1.000000 |
| rad37       | 2.23881e-30 | 1.000000 | 2.23882e-30 | 1.000000 |
| rad47       | 1.03981e-30 | 1.000000 | 1.03981e-30 | 1.000000 |
| rad70       | 8.15189e-31 | 1.000000 | 8.15190e-31 | 1.000000 |
| rad14       | 3.17387e-31 | 1.000000 | 3.17388e-31 | 1.000000 |
| Ph+MeAc     | 1.79025e-31 | 1.000000 | 1.79025e-31 | 1.000000 |
| rad31       | 1.16493e-32 | 1.000000 | 1.16493e-32 | 1.000000 |
| rad34       | 3.89864e-33 | 1.000000 | 3.89864e-33 | 1.000000 |
| rad54       | 1.20719e-33 | 1.000000 | 1.20719e-33 | 1.000000 |
| PAH10+CH3   | 5.72963e-34 | 1.000000 | 5.72964e-34 | 1.000000 |
| rad19syn    | 2.42906e-34 | 1.000000 | 2.42907e-34 | 1.000000 |

|               |             |          |             |          |
|---------------|-------------|----------|-------------|----------|
| rad65         | 2.19521e-34 | 1.000000 | 2.19521e-34 | 1.000000 |
| PhCCCH3+H     | 5.53860e-35 | 1.000000 | 5.53861e-35 | 1.000000 |
| rad27         | 1.42781e-35 | 1.000000 | 1.42781e-35 | 1.000000 |
| PAH1+H        | 5.92844e-36 | 1.000000 | 5.92845e-36 | 1.000000 |
| rad55         | 4.19723e-36 | 1.000000 | 4.19724e-36 | 1.000000 |
| PhcycC3H3_A+H | 2.29999e-37 | 1.000000 | 2.29999e-37 | 1.000000 |
| rad5          | 3.26309e-38 | 1.000000 | 3.26310e-38 | 1.000000 |
| rad62         | 9.85152e-41 | 1.000000 | 9.85154e-41 | 1.000000 |
| rad43         | 1.98112e-44 | 1.000000 | 1.98112e-44 | 1.000000 |
| rad42         | 2.29549e-45 | 1.000000 | 2.29549e-45 | 1.000000 |
| rad41         | 1.08815e-49 | 1.000000 | 1.08815e-49 | 1.000000 |

10000000.0 Pa, 300.000000 K

| Rate constant | True (fraction)     | Effective (fraction) |
|---------------|---------------------|----------------------|
| Total         | 1.17740e-22 (1.00 ) | 1.17739e-22 (1.00 )  |

| species     | PYtrue      | Cumul    | PYeffective | Cumul    |
|-------------|-------------|----------|-------------|----------|
| rad20       | 0.993526    | 0.993526 | 0.993536    | 0.993536 |
| rad21       | 0.00550514  | 0.999031 | 0.00550520  | 0.999041 |
| rad18       | 0.000936443 | 0.999968 | 0.000936453 | 0.999978 |
| rad22       | 1.89728e-05 | 0.999987 | 1.89730e-05 | 0.999997 |
| Benzyl+C2H2 | 1.03274e-05 | 0.999997 | 0.00000     | 0.999997 |
| rad45       | 1.20282e-06 | 0.999998 | 1.20283e-06 | 0.999998 |
| Indene+H    | 9.24330e-07 | 0.999999 | 9.24340e-07 | 0.999999 |
| rad24       | 8.66545e-07 | 1.000000 | 8.66554e-07 | 1.000000 |
| rad11       | 9.40478e-08 | 1.000000 | 9.40488e-08 | 1.000000 |
| rad36       | 7.01838e-08 | 1.000000 | 7.01846e-08 | 1.000000 |
| rad23       | 5.25307e-10 | 1.000000 | 5.25313e-10 | 1.000000 |
| rad6        | 1.96080e-11 | 1.000000 | 1.96082e-11 | 1.000000 |
| rad9        | 7.43251e-12 | 1.000000 | 7.43259e-12 | 1.000000 |
| rad30       | 1.94335e-12 | 1.000000 | 1.94337e-12 | 1.000000 |
| rad15       | 4.69174e-13 | 1.000000 | 4.69178e-13 | 1.000000 |
| PhCH2CCH+H  | 1.52595e-13 | 1.000000 | 1.52597e-13 | 1.000000 |
| rad8        | 1.47877e-13 | 1.000000 | 1.47878e-13 | 1.000000 |
| rad25       | 4.27835e-15 | 1.000000 | 4.27839e-15 | 1.000000 |
| PhCHCCH2+H  | 4.11829e-15 | 1.000000 | 4.11833e-15 | 1.000000 |
| rad28       | 1.66765e-15 | 1.000000 | 1.66767e-15 | 1.000000 |
| rad60syn    | 1.20801e-15 | 1.000000 | 1.20802e-15 | 1.000000 |
| Ph+Allene   | 1.17220e-15 | 1.000000 | 1.17221e-15 | 1.000000 |
| rad60anti   | 5.28234e-16 | 1.000000 | 5.28239e-16 | 1.000000 |
| rad38       | 2.67274e-16 | 1.000000 | 2.67276e-16 | 1.000000 |
| PAH3+H      | 2.22013e-16 | 1.000000 | 2.22016e-16 | 1.000000 |
| PAH7+H      | 1.38272e-16 | 1.000000 | 1.38273e-16 | 1.000000 |
| rad35       | 6.77345e-17 | 1.000000 | 6.77352e-17 | 1.000000 |
| rad13       | 6.56635e-17 | 1.000000 | 6.56642e-17 | 1.000000 |
| rad12       | 4.92559e-17 | 1.000000 | 4.92564e-17 | 1.000000 |
| rad59       | 4.30323e-17 | 1.000000 | 4.30328e-17 | 1.000000 |
| rad7        | 3.10283e-17 | 1.000000 | 3.10286e-17 | 1.000000 |
| rad46       | 2.23945e-17 | 1.000000 | 2.23948e-17 | 1.000000 |
| rad26       | 7.75311e-18 | 1.000000 | 7.75319e-18 | 1.000000 |
| PAH9+H      | 1.74034e-18 | 1.000000 | 1.74036e-18 | 1.000000 |
| rad33       | 9.41698e-19 | 1.000000 | 9.41708e-19 | 1.000000 |
| rad50       | 7.17925e-19 | 1.000000 | 7.17933e-19 | 1.000000 |
| rad19anti   | 4.53110e-19 | 1.000000 | 4.53115e-19 | 1.000000 |
| rad39       | 4.58723e-20 | 1.000000 | 4.58728e-20 | 1.000000 |
| rad19syn    | 4.41425e-20 | 1.000000 | 4.41430e-20 | 1.000000 |
| rad51       | 2.24345e-20 | 1.000000 | 2.24347e-20 | 1.000000 |
| rad3        | 2.20097e-20 | 1.000000 | 2.20100e-20 | 1.000000 |
| rad52       | 1.93389e-20 | 1.000000 | 1.93391e-20 | 1.000000 |
| rad4        | 1.41910e-20 | 1.000000 | 1.41911e-20 | 1.000000 |
| rad58       | 4.88457e-21 | 1.000000 | 4.88462e-21 | 1.000000 |
| rad47       | 7.44846e-22 | 1.000000 | 7.44854e-22 | 1.000000 |
| rad2        | 4.05576e-22 | 1.000000 | 4.05580e-22 | 1.000000 |
| rad10       | 3.56940e-22 | 1.000000 | 3.56944e-22 | 1.000000 |
| PhCCH+CH3   | 2.37163e-22 | 1.000000 | 2.37165e-22 | 1.000000 |
| rad67       | 1.24818e-22 | 1.000000 | 1.24819e-22 | 1.000000 |
| rad1        | 5.39404e-23 | 1.000000 | 5.39410e-23 | 1.000000 |
| rad5        | 3.15806e-23 | 1.000000 | 3.15809e-23 | 1.000000 |
| rad70       | 2.93511e-23 | 1.000000 | 2.93514e-23 | 1.000000 |
| rad65       | 1.33580e-23 | 1.000000 | 1.33582e-23 | 1.000000 |
| Ph+MeAc     | 1.13289e-23 | 1.000000 | 1.13291e-23 | 1.000000 |
| rad37       | 7.36332e-24 | 1.000000 | 7.36340e-24 | 1.000000 |
| rad73       | 3.83293e-24 | 1.000000 | 3.83297e-24 | 1.000000 |
| PAH10+CH3   | 1.90789e-24 | 1.000000 | 1.90791e-24 | 1.000000 |
| rad34       | 1.78425e-24 | 1.000000 | 1.78427e-24 | 1.000000 |
| rad71       | 1.62817e-24 | 1.000000 | 1.62819e-24 | 1.000000 |
| rad14       | 1.58856e-24 | 1.000000 | 1.58857e-24 | 1.000000 |

|               |             |         |             |          |
|---------------|-------------|---------|-------------|----------|
| PAH1+H        | 9.96818e-25 | 1.00000 | 9.96829e-25 | 1.000000 |
| PhCCCH3+H     | 5.59651e-25 | 1.00000 | 5.59656e-25 | 1.000000 |
| rad54         | 1.01157e-25 | 1.00000 | 1.01158e-25 | 1.000000 |
| rad64         | 9.38968e-27 | 1.00000 | 9.38978e-27 | 1.000000 |
| rad27         | 8.79662e-27 | 1.00000 | 8.79671e-27 | 1.000000 |
| PhcycC3H3_A+H | 7.60383e-27 | 1.00000 | 7.60391e-27 | 1.000000 |
| rad68syn      | 4.21258e-27 | 1.00000 | 4.21262e-27 | 1.000000 |
| rad72         | 3.75358e-27 | 1.00000 | 3.75362e-27 | 1.000000 |
| rad55         | 3.05813e-27 | 1.00000 | 3.05816e-27 | 1.000000 |
| rad68anti     | 2.82466e-27 | 1.00000 | 2.82469e-27 | 1.000000 |
| PAH8+H        | 2.80405e-27 | 1.00000 | 2.80408e-27 | 1.000000 |
| rad62         | 1.27613e-27 | 1.00000 | 1.27615e-27 | 1.000000 |
| rad31         | 7.64936e-28 | 1.00000 | 7.64944e-28 | 1.000000 |
| rad40syn      | 6.07135e-28 | 1.00000 | 6.07141e-28 | 1.000000 |
| rad61         | 4.51423e-28 | 1.00000 | 4.51428e-28 | 1.000000 |
| rad40anti     | 2.76930e-28 | 1.00000 | 2.76933e-28 | 1.000000 |
| rad53         | 1.02568e-28 | 1.00000 | 1.02570e-28 | 1.000000 |
| rad43         | 8.89354e-29 | 1.00000 | 8.89363e-29 | 1.000000 |
| rad56         | 5.33170e-29 | 1.00000 | 5.33175e-29 | 1.000000 |
| rad42         | 5.12459e-29 | 1.00000 | 5.12464e-29 | 1.000000 |
| rad41         | 3.03164e-30 | 1.00000 | 3.03167e-30 | 1.000000 |

10000000.0 Pa, 310.000000 K

| Rate constant | True (fraction)     | Effective (fraction) |
|---------------|---------------------|----------------------|
| Total         | 2.44453e-22 (1.00 ) | 2.44452e-22 (1.00 )  |

| species     | PYtrue      | Cumul    | PYeffective | Cumul    |
|-------------|-------------|----------|-------------|----------|
| rad20       | 0.995417    | 0.995417 | 0.995421    | 0.995421 |
| rad21       | 0.00392725  | 0.999344 | 0.00392726  | 0.999348 |
| rad18       | 0.000644120 | 0.999988 | 0.000644123 | 0.999992 |
| rad22       | 6.98069e-06 | 0.999995 | 6.98072e-06 | 0.999999 |
| Benzyl+C2H2 | 3.52564e-06 | 0.999999 | 0.00000     | 0.999999 |
| rad24       | 3.90234e-07 | 0.999999 | 3.90236e-07 | 1.000000 |
| Indene+H    | 3.07799e-07 | 1.000000 | 3.07800e-07 | 1.000000 |
| rad45       | 2.57347e-07 | 1.000000 | 2.57347e-07 | 1.000000 |
| rad36       | 2.63830e-08 | 1.000000 | 2.63831e-08 | 1.000000 |
| rad11       | 2.12445e-08 | 1.000000 | 2.12446e-08 | 1.000000 |
| rad23       | 4.35338e-11 | 1.000000 | 4.35339e-11 | 1.000000 |
| rad8        | 9.23483e-13 | 1.000000 | 9.23486e-13 | 1.000000 |
| rad6        | 8.59851e-13 | 1.000000 | 8.59854e-13 | 1.000000 |
| rad30       | 1.81326e-13 | 1.000000 | 1.81327e-13 | 1.000000 |
| rad15       | 3.59611e-14 | 1.000000 | 3.59612e-14 | 1.000000 |
| PhCH2CCH+H  | 3.84524e-15 | 1.000000 | 3.84526e-15 | 1.000000 |
| rad9        | 7.81590e-16 | 1.000000 | 7.81592e-16 | 1.000000 |
| rad25       | 5.44293e-17 | 1.000000 | 5.44295e-17 | 1.000000 |
| rad60syn    | 2.57223e-17 | 1.000000 | 2.57224e-17 | 1.000000 |
| PhCHCCH2+H  | 1.92510e-17 | 1.000000 | 1.92511e-17 | 1.000000 |
| rad28       | 1.34095e-17 | 1.000000 | 1.34095e-17 | 1.000000 |
| rad60anti   | 9.65731e-18 | 1.000000 | 9.65734e-18 | 1.000000 |
| Ph+Allene   | 3.18002e-18 | 1.000000 | 3.18003e-18 | 1.000000 |
| PAH3+H      | 7.85151e-19 | 1.000000 | 7.85154e-19 | 1.000000 |
| rad35       | 5.85975e-19 | 1.000000 | 5.85977e-19 | 1.000000 |
| PAH7+H      | 5.77134e-19 | 1.000000 | 5.77136e-19 | 1.000000 |
| rad38       | 4.02760e-19 | 1.000000 | 4.02761e-19 | 1.000000 |
| rad13       | 3.20036e-19 | 1.000000 | 3.20037e-19 | 1.000000 |
| rad59       | 2.07294e-19 | 1.000000 | 2.07294e-19 | 1.000000 |
| rad7        | 1.12010e-19 | 1.000000 | 1.12010e-19 | 1.000000 |
| rad26       | 2.13840e-20 | 1.000000 | 2.13840e-20 | 1.000000 |
| rad46       | 9.36863e-21 | 1.000000 | 9.36866e-21 | 1.000000 |
| rad33       | 3.73376e-21 | 1.000000 | 3.73377e-21 | 1.000000 |
| PAH9+H      | 1.03959e-22 | 1.000000 | 1.03959e-22 | 1.000000 |
| rad50       | 5.92841e-24 | 1.000000 | 5.92843e-24 | 1.000000 |
| rad3        | 5.57254e-24 | 1.000000 | 5.57256e-24 | 1.000000 |
| rad4        | 3.64893e-24 | 1.000000 | 3.64894e-24 | 1.000000 |
| rad58       | 3.56656e-25 | 1.000000 | 3.56658e-25 | 1.000000 |
| rad10       | 4.76227e-26 | 1.000000 | 4.76229e-26 | 1.000000 |
| rad39       | 4.47869e-26 | 1.000000 | 4.47871e-26 | 1.000000 |
| rad52       | 1.54739e-26 | 1.000000 | 1.54739e-26 | 1.000000 |
| rad51       | 2.24729e-27 | 1.000000 | 2.24730e-27 | 1.000000 |
| rad2        | 1.28687e-27 | 1.000000 | 1.28688e-27 | 1.000000 |
| PhCCH+CH3   | 3.59750e-28 | 1.000000 | 3.59752e-28 | 1.000000 |
| rad12       | 2.34977e-28 | 1.000000 | 2.34978e-28 | 1.000000 |
| rad1        | 1.77427e-28 | 1.000000 | 1.77428e-28 | 1.000000 |
| rad37       | 3.85999e-29 | 1.000000 | 3.86000e-29 | 1.000000 |
| rad47       | 3.70693e-29 | 1.000000 | 3.70694e-29 | 1.000000 |
| rad70       | 1.87834e-29 | 1.000000 | 1.87834e-29 | 1.000000 |
| rad14       | 5.98308e-30 | 1.000000 | 5.98310e-30 | 1.000000 |

|               |             |          |             |         |
|---------------|-------------|----------|-------------|---------|
| Ph+MeAc       | 4.06656e-30 | 1.000000 | 4.06657e-30 | 1.00000 |
| rad31         | 1.44854e-31 | 1.000000 | 1.44854e-31 | 1.00000 |
| rad34         | 9.75668e-32 | 1.000000 | 9.75672e-32 | 1.00000 |
| rad54         | 2.83658e-32 | 1.000000 | 2.83659e-32 | 1.00000 |
| PAH10+CH3     | 1.26297e-32 | 1.000000 | 1.26298e-32 | 1.00000 |
| rad65         | 6.84742e-33 | 1.000000 | 6.84744e-33 | 1.00000 |
| rad19syn      | 5.51718e-33 | 1.000000 | 5.51720e-33 | 1.00000 |
| PhCCCH3+H     | 1.50710e-33 | 1.000000 | 1.50710e-33 | 1.00000 |
| rad27         | 3.60973e-34 | 1.000000 | 3.60974e-34 | 1.00000 |
| PAH1+H        | 1.44544e-34 | 1.000000 | 1.44545e-34 | 1.00000 |
| rad55         | 1.08350e-34 | 1.000000 | 1.08350e-34 | 1.00000 |
| PhcycC3H3_A+H | 6.03226e-36 | 1.000000 | 6.03228e-36 | 1.00000 |
| rad5          | 7.83006e-37 | 1.000000 | 7.83009e-37 | 1.00000 |
| rad62         | 3.27223e-39 | 1.000000 | 3.27225e-39 | 1.00000 |
| rad43         | 7.45843e-43 | 1.000000 | 7.45845e-43 | 1.00000 |
| rad42         | 8.62198e-44 | 1.000000 | 8.62201e-44 | 1.00000 |
| rad41         | 4.53124e-48 | 1.000000 | 4.53125e-48 | 1.00000 |

10000000.0 Pa, 400.000000 K

| Rate constant | True (fraction)     | Effective (fraction) |
|---------------|---------------------|----------------------|
| Total         | 3.60269e-20 (1.00 ) | 3.60201e-20 (1.00 )  |

| species     | PYtrue      | Cumul    | PYeffective | Cumul    |
|-------------|-------------|----------|-------------|----------|
| rad20       | 0.978589    | 0.978589 | 0.978773    | 0.978773 |
| rad21       | 0.0176204   | 0.996209 | 0.0176237   | 0.996397 |
| rad18       | 0.00331727  | 0.999527 | 0.00331789  | 0.999715 |
| rad22       | 0.000229481 | 0.999756 | 0.000229524 | 0.999944 |
| Benzyl+C2H2 | 0.000187250 | 0.999943 | 0.00000     | 0.999944 |
| rad45       | 2.92848e-05 | 0.999973 | 2.92903e-05 | 0.999973 |
| Indene+H    | 1.55091e-05 | 0.999988 | 1.55120e-05 | 0.999989 |
| rad24       | 6.69204e-06 | 0.999995 | 6.69329e-06 | 0.999996 |
| rad11       | 3.01039e-06 | 0.999998 | 3.01095e-06 | 0.999999 |
| rad36       | 1.66979e-06 | 1.000000 | 1.67010e-06 | 1.00000  |
| rad23       | 1.52890e-07 | 1.000000 | 1.52918e-07 | 1.00000  |
| rad6        | 4.19334e-09 | 1.000000 | 4.19412e-09 | 1.00000  |
| rad9        | 1.28337e-09 | 1.000000 | 1.28361e-09 | 1.00000  |
| rad30       | 2.30712e-10 | 1.000000 | 2.30755e-10 | 1.00000  |
| PhCH2CCH+H  | 9.95967e-11 | 1.000000 | 9.96154e-11 | 1.00000  |
| rad15       | 6.71564e-11 | 1.000000 | 6.71690e-11 | 1.00000  |
| rad38       | 4.29916e-11 | 1.000000 | 4.29997e-11 | 1.00000  |
| PAH9+H      | 2.77734e-11 | 1.000000 | 2.77786e-11 | 1.00000  |
| rad46       | 1.11225e-11 | 1.000000 | 1.11246e-11 | 1.00000  |
| PhCHCCH2+H  | 7.90582e-12 | 1.000000 | 7.90730e-12 | 1.00000  |
| Ph+Allene   | 6.73654e-12 | 1.000000 | 6.73780e-12 | 1.00000  |
| rad8        | 5.72961e-12 | 1.000000 | 5.73068e-12 | 1.00000  |
| rad50       | 5.56819e-12 | 1.000000 | 5.56923e-12 | 1.00000  |
| rad28       | 5.08116e-12 | 1.000000 | 5.08211e-12 | 1.00000  |
| PAH7+H      | 4.82091e-12 | 1.000000 | 4.82181e-12 | 1.00000  |
| rad35       | 4.40278e-12 | 1.000000 | 4.40360e-12 | 1.00000  |
| rad25       | 2.42828e-12 | 1.000000 | 2.42874e-12 | 1.00000  |
| rad39       | 1.78432e-12 | 1.000000 | 1.78466e-12 | 1.00000  |
| rad51       | 1.17465e-12 | 1.000000 | 1.17487e-12 | 1.00000  |
| rad60syn    | 5.25215e-13 | 1.000000 | 5.25313e-13 | 1.00000  |
| rad52       | 4.10637e-13 | 1.000000 | 4.10714e-13 | 1.00000  |
| PAH3+H      | 3.43486e-13 | 1.000000 | 3.43550e-13 | 1.00000  |
| rad60anti   | 2.53709e-13 | 1.000000 | 2.53757e-13 | 1.00000  |
| rad26       | 2.46750e-13 | 1.000000 | 2.46796e-13 | 1.00000  |
| rad7        | 1.47554e-13 | 1.000000 | 1.47582e-13 | 1.00000  |
| rad13       | 7.85178e-14 | 1.000000 | 7.85325e-14 | 1.00000  |
| PhCCH+CH3   | 6.54135e-14 | 1.000000 | 6.54257e-14 | 1.00000  |
| rad59       | 5.40164e-14 | 1.000000 | 5.40265e-14 | 1.00000  |
| rad19anti   | 3.73379e-14 | 1.000000 | 3.73449e-14 | 1.00000  |
| Ph+MeAc     | 3.54922e-14 | 1.000000 | 3.54988e-14 | 1.00000  |
| PAH10+CH3   | 3.15244e-14 | 1.000000 | 3.15303e-14 | 1.00000  |
| rad10       | 2.51497e-14 | 1.000000 | 2.51544e-14 | 1.00000  |
| PAH1+H      | 1.86593e-14 | 1.000000 | 1.86628e-14 | 1.00000  |
| rad71       | 1.83725e-14 | 1.000000 | 1.83760e-14 | 1.00000  |
| rad37       | 1.77320e-14 | 1.000000 | 1.77353e-14 | 1.00000  |
| rad65       | 1.68595e-14 | 1.000000 | 1.68626e-14 | 1.00000  |
| rad73       | 1.52732e-14 | 1.000000 | 1.52760e-14 | 1.00000  |
| PhCCCH3+H   | 1.15145e-14 | 1.000000 | 1.15166e-14 | 1.00000  |
| rad12       | 1.01714e-14 | 1.000000 | 1.01733e-14 | 1.00000  |
| rad2        | 8.58901e-15 | 1.000000 | 8.59062e-15 | 1.00000  |
| rad70       | 3.45046e-15 | 1.000000 | 3.45110e-15 | 1.00000  |
| rad67       | 1.76381e-15 | 1.000000 | 1.76414e-15 | 1.00000  |
| rad1        | 1.34097e-15 | 1.000000 | 1.34122e-15 | 1.00000  |
| rad19syn    | 1.33202e-15 | 1.000000 | 1.33227e-15 | 1.00000  |

|               |             |          |             |         |
|---------------|-------------|----------|-------------|---------|
| rad33         | 1.08576e-15 | 1.000000 | 1.08597e-15 | 1.00000 |
| rad3          | 1.01865e-15 | 1.000000 | 1.01884e-15 | 1.00000 |
| rad34         | 8.60108e-16 | 1.000000 | 8.60269e-16 | 1.00000 |
| rad58         | 8.08078e-16 | 1.000000 | 8.08230e-16 | 1.00000 |
| PhcycC3H3_A+H | 7.06552e-16 | 1.000000 | 7.06684e-16 | 1.00000 |
| rad4          | 6.84008e-16 | 1.000000 | 6.84136e-16 | 1.00000 |
| rad47         | 6.45152e-16 | 1.000000 | 6.45273e-16 | 1.00000 |
| rad54         | 5.11944e-16 | 1.000000 | 5.12040e-16 | 1.00000 |
| rad72         | 4.68621e-16 | 1.000000 | 4.68709e-16 | 1.00000 |
| rad64         | 3.31744e-16 | 1.000000 | 3.31806e-16 | 1.00000 |
| PAH8+H        | 1.75743e-16 | 1.000000 | 1.75776e-16 | 1.00000 |
| rad62         | 1.02998e-16 | 1.000000 | 1.03017e-16 | 1.00000 |
| rad68syn      | 5.99363e-17 | 1.000000 | 5.99476e-17 | 1.00000 |
| rad61         | 5.34615e-17 | 1.000000 | 5.34715e-17 | 1.00000 |
| rad68anti     | 3.90521e-17 | 1.000000 | 3.90594e-17 | 1.00000 |
| rad55         | 3.83513e-17 | 1.000000 | 3.83585e-17 | 1.00000 |
| rad40syn      | 2.14964e-17 | 1.000000 | 2.15004e-17 | 1.00000 |
| rad43         | 1.61008e-17 | 1.000000 | 1.61039e-17 | 1.00000 |
| rad40anti     | 1.25762e-17 | 1.000000 | 1.25785e-17 | 1.00000 |
| rad56         | 1.16809e-17 | 1.000000 | 1.16831e-17 | 1.00000 |
| rad53         | 1.10723e-17 | 1.000000 | 1.10744e-17 | 1.00000 |
| rad42         | 9.28312e-18 | 1.000000 | 9.28486e-18 | 1.00000 |
| rad14         | 6.81344e-18 | 1.000000 | 6.81472e-18 | 1.00000 |
| rad5          | 6.58921e-18 | 1.000000 | 6.59045e-18 | 1.00000 |
| rad27         | 2.28478e-18 | 1.000000 | 2.28521e-18 | 1.00000 |
| rad41         | 1.31743e-18 | 1.000000 | 1.31768e-18 | 1.00000 |
| rad31         | 3.67177e-22 | 1.000000 | 3.67246e-22 | 1.00000 |

10000000.0 Pa, 500.000000 K

=====

| Rate constant | True (fraction)     | Effective (fraction) |
|---------------|---------------------|----------------------|
| Total         | 1.22595e-18 (1.00 ) | 1.22308e-18 (1.00 )  |

| species     | PYtrue      | Cumul    | PYeffective | Cumul    |
|-------------|-------------|----------|-------------|----------|
| rad20       | 0.933815    | 0.933815 | 0.936009    | 0.936009 |
| rad21       | 0.0498195   | 0.983634 | 0.0499365   | 0.985946 |
| rad18       | 0.0109013   | 0.994536 | 0.0109269   | 0.996872 |
| Benzyl+C2H2 | 0.00234336  | 0.996879 | 0.000000    | 0.996872 |
| rad22       | 0.00229281  | 0.999172 | 0.00229820  | 0.999171 |
| rad45       | 0.000407846 | 0.999580 | 0.000408804 | 0.999579 |
| Indene+H    | 0.000254722 | 0.999835 | 0.000255320 | 0.999835 |
| rad11       | 6.81468e-05 | 0.999903 | 6.83069e-05 | 0.999903 |
| rad24       | 3.44861e-05 | 0.999937 | 3.45671e-05 | 0.999938 |
| rad23       | 3.40376e-05 | 0.999971 | 3.41175e-05 | 0.999972 |
| rad36       | 2.50455e-05 | 0.999996 | 2.51043e-05 | 0.999997 |
| PAH9+H      | 8.76937e-07 | 0.999997 | 8.78997e-07 | 0.999998 |
| rad6        | 6.47558e-07 | 0.999998 | 6.49079e-07 | 0.999998 |
| rad38       | 5.26830e-07 | 0.999998 | 5.28068e-07 | 0.999999 |
| rad50       | 1.94022e-07 | 0.999998 | 1.94478e-07 | 0.999999 |
| rad46       | 1.86029e-07 | 0.999999 | 1.86466e-07 | 0.999999 |
| PAH7+H      | 1.84400e-07 | 0.999999 | 1.84833e-07 | 0.999999 |
| PhCH2CCH+H  | 1.74434e-07 | 0.999999 | 1.74843e-07 | 1.000000 |
| Ph+Allene   | 1.43865e-07 | 0.999999 | 1.44203e-07 | 1.000000 |
| rad9        | 1.34829e-07 | 0.999999 | 1.35146e-07 | 1.000000 |
| rad35       | 1.23309e-07 | 0.999999 | 1.23599e-07 | 1.000000 |
| PhCHCCH2+H  | 9.13353e-08 | 1.000000 | 9.15498e-08 | 1.000000 |
| rad39       | 8.69799e-08 | 1.000000 | 8.71842e-08 | 1.000000 |
| rad51       | 6.13462e-08 | 1.000000 | 6.14903e-08 | 1.000000 |
| rad30       | 1.96177e-08 | 1.000000 | 1.96638e-08 | 1.000000 |
| rad52       | 1.75378e-08 | 1.000000 | 1.75790e-08 | 1.000000 |
| rad28       | 1.48260e-08 | 1.000000 | 1.48608e-08 | 1.000000 |
| rad15       | 5.52048e-09 | 1.000000 | 5.53345e-09 | 1.000000 |
| PAH3+H      | 5.31203e-09 | 1.000000 | 5.32450e-09 | 1.000000 |
| PhCCH+CH3   | 4.40030e-09 | 1.000000 | 4.41063e-09 | 1.000000 |
| rad19anti   | 3.71261e-09 | 1.000000 | 3.72133e-09 | 1.000000 |
| PAH10+CH3   | 3.59831e-09 | 1.000000 | 3.60676e-09 | 1.000000 |
| Ph+MeAc     | 3.04712e-09 | 1.000000 | 3.05428e-09 | 1.000000 |
| rad71       | 2.21441e-09 | 1.000000 | 2.21961e-09 | 1.000000 |
| PAH1+H      | 2.02457e-09 | 1.000000 | 2.02932e-09 | 1.000000 |
| rad26       | 1.77804e-09 | 1.000000 | 1.78222e-09 | 1.000000 |
| rad73       | 1.59367e-09 | 1.000000 | 1.59741e-09 | 1.000000 |
| rad37       | 1.43859e-09 | 1.000000 | 1.44197e-09 | 1.000000 |
| rad65       | 1.33339e-09 | 1.000000 | 1.33652e-09 | 1.000000 |
| PhCCCH3+H   | 9.96281e-10 | 1.000000 | 9.98621e-10 | 1.000000 |
| rad7        | 9.12725e-10 | 1.000000 | 9.14869e-10 | 1.000000 |
| rad25       | 6.13687e-10 | 1.000000 | 6.15128e-10 | 1.000000 |
| rad59       | 4.94475e-10 | 1.000000 | 4.95636e-10 | 1.000000 |
| rad60syn    | 4.52189e-10 | 1.000000 | 4.53251e-10 | 1.000000 |

|               |             |          |             |         |
|---------------|-------------|----------|-------------|---------|
| rad10         | 3.46575e-10 | 1.000000 | 3.47389e-10 | 1.00000 |
| rad60anti     | 2.73880e-10 | 1.000000 | 2.74524e-10 | 1.00000 |
| rad70         | 2.70573e-10 | 1.000000 | 2.71209e-10 | 1.00000 |
| rad67         | 2.65604e-10 | 1.000000 | 2.66228e-10 | 1.00000 |
| rad19syn      | 1.57975e-10 | 1.000000 | 1.58346e-10 | 1.00000 |
| rad2          | 1.28196e-10 | 1.000000 | 1.28497e-10 | 1.00000 |
| PhcycC3H3_A+H | 1.05823e-10 | 1.000000 | 1.06071e-10 | 1.00000 |
| rad8          | 8.15117e-11 | 1.000000 | 8.17032e-11 | 1.00000 |
| rad34         | 7.62656e-11 | 1.000000 | 7.64448e-11 | 1.00000 |
| rad72         | 7.31271e-11 | 1.000000 | 7.32989e-11 | 1.00000 |
| rad54         | 6.34294e-11 | 1.000000 | 6.35784e-11 | 1.00000 |
| rad58         | 6.28664e-11 | 1.000000 | 6.30141e-11 | 1.00000 |
| rad13         | 5.71446e-11 | 1.000000 | 5.72788e-11 | 1.00000 |
| rad47         | 4.61329e-11 | 1.000000 | 4.62412e-11 | 1.00000 |
| rad64         | 3.93905e-11 | 1.000000 | 3.94830e-11 | 1.00000 |
| PAH8+H        | 2.64856e-11 | 1.000000 | 2.65478e-11 | 1.00000 |
| rad1          | 2.45096e-11 | 1.000000 | 2.45672e-11 | 1.00000 |
| rad62         | 1.39655e-11 | 1.000000 | 1.39983e-11 | 1.00000 |
| rad61         | 8.18977e-12 | 1.000000 | 8.20900e-12 | 1.00000 |
| rad3          | 7.67538e-12 | 1.000000 | 7.69341e-12 | 1.00000 |
| rad68syn      | 7.37290e-12 | 1.000000 | 7.39022e-12 | 1.00000 |
| rad4          | 5.37672e-12 | 1.000000 | 5.38934e-12 | 1.00000 |
| rad55         | 5.02641e-12 | 1.000000 | 5.03822e-12 | 1.00000 |
| rad68anti     | 4.78521e-12 | 1.000000 | 4.79645e-12 | 1.00000 |
| rad40syn      | 3.00217e-12 | 1.000000 | 3.00922e-12 | 1.00000 |
| rad43         | 2.47015e-12 | 1.000000 | 2.47595e-12 | 1.00000 |
| rad56         | 2.03719e-12 | 1.000000 | 2.04198e-12 | 1.00000 |
| rad40anti     | 1.81782e-12 | 1.000000 | 1.82208e-12 | 1.00000 |
| rad53         | 1.77133e-12 | 1.000000 | 1.77549e-12 | 1.00000 |
| rad12         | 1.64418e-12 | 1.000000 | 1.64805e-12 | 1.00000 |
| rad42         | 1.42897e-12 | 1.000000 | 1.43232e-12 | 1.00000 |
| rad33         | 6.68225e-13 | 1.000000 | 6.69795e-13 | 1.00000 |
| rad41         | 2.33058e-13 | 1.000000 | 2.33605e-13 | 1.00000 |
| rad5          | 9.89302e-14 | 1.000000 | 9.91625e-14 | 1.00000 |
| rad14         | 4.70176e-14 | 1.000000 | 4.71281e-14 | 1.00000 |
| rad27         | 3.24832e-14 | 1.000000 | 3.25595e-14 | 1.00000 |
| rad31         | 9.92737e-17 | 1.000000 | 9.95069e-17 | 1.00000 |

10000000.0 Pa, 600.000000 K

=====

| Rate constant | True (fraction)     | Effective (fraction) |
|---------------|---------------------|----------------------|
| Total         | 1.36947e-17 (1.00 ) | 1.34095e-17 (1.00 )  |

| species     | PYtrue      | Cumul    | PYeffective | Cumul    |
|-------------|-------------|----------|-------------|----------|
| rad20       | 0.822083    | 0.822083 | 0.839564    | 0.839564 |
| rad21       | 0.103690    | 0.925773 | 0.105895    | 0.945459 |
| rad18       | 0.0295279   | 0.955301 | 0.0301558   | 0.975615 |
| Benzyl+C2H2 | 0.0208214   | 0.976122 | 0.00000     | 0.975615 |
| rad22       | 0.0153977   | 0.991520 | 0.0157251   | 0.991340 |
| Indene+H    | 0.00366575  | 0.995186 | 0.00374370  | 0.995084 |
| rad45       | 0.00283665  | 0.998022 | 0.00289697  | 0.997981 |
| rad11       | 0.000902371 | 0.998925 | 0.000921559 | 0.998902 |
| rad23       | 0.000548112 | 0.999473 | 0.000559768 | 0.999462 |
| rad36       | 0.000200407 | 0.999673 | 0.000204668 | 0.999667 |
| rad24       | 0.000137997 | 0.999811 | 0.000140931 | 0.999807 |
| PAH9+H      | 4.60199e-05 | 0.999857 | 4.69985e-05 | 0.999854 |
| rad6        | 3.93386e-05 | 0.999897 | 4.01751e-05 | 0.999895 |
| rad38       | 2.56673e-05 | 0.999922 | 2.62131e-05 | 0.999921 |
| rad50       | 1.04846e-05 | 0.999933 | 1.07076e-05 | 0.999932 |
| PAH7+H      | 1.00172e-05 | 0.999943 | 1.02302e-05 | 0.999942 |
| PhCH2CCH+H  | 9.71069e-06 | 0.999953 | 9.91718e-06 | 0.999952 |
| rad46       | 9.36458e-06 | 0.999962 | 9.56371e-06 | 0.999961 |
| Ph+Allene   | 8.09519e-06 | 0.999970 | 8.26733e-06 | 0.999970 |
| rad35       | 6.38482e-06 | 0.999976 | 6.52058e-06 | 0.999976 |
| PhCHCCH2+H  | 5.32802e-06 | 0.999982 | 5.44132e-06 | 0.999982 |
| rad9        | 5.28978e-06 | 0.999987 | 5.40226e-06 | 0.999987 |
| rad39       | 4.82416e-06 | 0.999992 | 4.92675e-06 | 0.999992 |
| rad51       | 3.42981e-06 | 0.999995 | 3.50274e-06 | 0.999995 |
| rad52       | 9.62538e-07 | 0.999996 | 9.83006e-07 | 0.999996 |
| rad30       | 8.23058e-07 | 0.999997 | 8.40559e-07 | 0.999997 |
| rad28       | 3.89816e-07 | 0.999997 | 3.98105e-07 | 0.999998 |
| PAH3+H      | 3.13071e-07 | 0.999998 | 3.19728e-07 | 0.999998 |
| PhCCH+CH3   | 2.56970e-07 | 0.999998 | 2.62434e-07 | 0.999998 |
| rad19anti   | 2.36328e-07 | 0.999998 | 2.41354e-07 | 0.999998 |
| PAH10+CH3   | 2.17553e-07 | 0.999998 | 2.22179e-07 | 0.999999 |
| rad15       | 1.93838e-07 | 0.999999 | 1.97960e-07 | 0.999999 |
| Ph+MeAc     | 1.80758e-07 | 0.999999 | 1.84602e-07 | 0.999999 |
| PAH1+H      | 1.21052e-07 | 0.999999 | 1.23626e-07 | 0.999999 |

|               |             |          |             |          |
|---------------|-------------|----------|-------------|----------|
| rad71         | 1.19690e-07 | 0.999999 | 1.22235e-07 | 0.999999 |
| rad73         | 8.63653e-08 | 0.999999 | 8.82018e-08 | 0.999999 |
| rad37         | 8.30827e-08 | 0.999999 | 8.48494e-08 | 0.999999 |
| rad47         | 7.94650e-08 | 0.999999 | 8.11547e-08 | 1.000000 |
| rad65         | 7.77349e-08 | 0.999999 | 7.93879e-08 | 1.000000 |
| PhCCH3+H      | 5.86582e-08 | 0.999999 | 5.99055e-08 | 1.000000 |
| rad26         | 5.54494e-08 | 0.999999 | 5.66285e-08 | 1.000000 |
| rad7          | 4.96407e-08 | 1.000000 | 5.06962e-08 | 1.000000 |
| rad25         | 4.64110e-08 | 1.000000 | 4.73979e-08 | 1.000000 |
| rad59         | 2.93926e-08 | 1.000000 | 3.00176e-08 | 1.000000 |
| rad60syn      | 2.78607e-08 | 1.000000 | 2.84531e-08 | 1.000000 |
| rad67         | 1.80160e-08 | 1.000000 | 1.83991e-08 | 1.000000 |
| rad60anti     | 1.68728e-08 | 1.000000 | 1.72316e-08 | 1.000000 |
| rad70         | 1.57368e-08 | 1.000000 | 1.60714e-08 | 1.000000 |
| rad10         | 1.13942e-08 | 1.000000 | 1.16365e-08 | 1.000000 |
| rad19syn      | 1.00517e-08 | 1.000000 | 1.02655e-08 | 1.000000 |
| PhcycC3H3_A+H | 6.94958e-09 | 1.000000 | 7.09735e-09 | 1.000000 |
| rad13         | 5.18794e-09 | 1.000000 | 5.29826e-09 | 1.000000 |
| rad2          | 4.88865e-09 | 1.000000 | 4.99260e-09 | 1.000000 |
| rad34         | 4.48838e-09 | 1.000000 | 4.58383e-09 | 1.000000 |
| rad54         | 4.04454e-09 | 1.000000 | 4.13054e-09 | 1.000000 |
| rad72         | 3.96770e-09 | 1.000000 | 4.05207e-09 | 1.000000 |
| rad58         | 3.70372e-09 | 1.000000 | 3.78248e-09 | 1.000000 |
| rad64         | 2.37874e-09 | 1.000000 | 2.42932e-09 | 1.000000 |
| PAH8+H        | 1.64419e-09 | 1.000000 | 1.67916e-09 | 1.000000 |
| rad1          | 1.05074e-09 | 1.000000 | 1.07308e-09 | 1.000000 |
| rad62         | 8.58819e-10 | 1.000000 | 8.77081e-10 | 1.000000 |
| rad8          | 7.97798e-10 | 1.000000 | 8.14763e-10 | 1.000000 |
| rad61         | 5.14635e-10 | 1.000000 | 5.25579e-10 | 1.000000 |
| rad3          | 4.67825e-10 | 1.000000 | 4.77773e-10 | 1.000000 |
| rad68syn      | 4.48050e-10 | 1.000000 | 4.57577e-10 | 1.000000 |
| rad4          | 3.37112e-10 | 1.000000 | 3.44281e-10 | 1.000000 |
| rad55         | 3.22824e-10 | 1.000000 | 3.29689e-10 | 1.000000 |
| rad68anti     | 2.90682e-10 | 1.000000 | 2.96863e-10 | 1.000000 |
| rad40syn      | 1.84928e-10 | 1.000000 | 1.88860e-10 | 1.000000 |
| rad12         | 1.71978e-10 | 1.000000 | 1.75635e-10 | 1.000000 |
| rad43         | 1.56880e-10 | 1.000000 | 1.60216e-10 | 1.000000 |
| rad56         | 1.35943e-10 | 1.000000 | 1.38833e-10 | 1.000000 |
| rad53         | 1.16817e-10 | 1.000000 | 1.19301e-10 | 1.000000 |
| rad40anti     | 1.12411e-10 | 1.000000 | 1.14801e-10 | 1.000000 |
| rad42         | 8.92788e-11 | 1.000000 | 9.11772e-11 | 1.000000 |
| rad33         | 6.56415e-11 | 1.000000 | 6.70373e-11 | 1.000000 |
| rad41         | 1.51211e-11 | 1.000000 | 1.54427e-11 | 1.000000 |
| rad5          | 3.44691e-12 | 1.000000 | 3.52021e-12 | 1.000000 |
| rad14         | 1.75197e-12 | 1.000000 | 1.78923e-12 | 1.000000 |
| rad27         | 8.75030e-13 | 1.000000 | 8.93637e-13 | 1.000000 |
| rad31         | 1.74750e-13 | 1.000000 | 1.78466e-13 | 1.000000 |

10000000.0 Pa, 700.000000 K

=====

| Rate constant | True (fraction)     | Effective (fraction) |
|---------------|---------------------|----------------------|
| Total         | 8.02260e-17 (1.00 ) | 7.17134e-17 (1.00 )  |

| species     | PYtrue      | Cumul    | PYeffective | Cumul    |
|-------------|-------------|----------|-------------|----------|
| rad20       | 0.623505    | 0.623505 | 0.697517    | 0.697517 |
| rad21       | 0.128285    | 0.751790 | 0.143513    | 0.841030 |
| Benzyl+C2H2 | 0.106108    | 0.857898 | 0.000000    | 0.841030 |
| rad18       | 0.0498585   | 0.907756 | 0.0557769   | 0.896807 |
| rad22       | 0.0481427   | 0.955899 | 0.0538574   | 0.950664 |
| Indene+H    | 0.0231270   | 0.979026 | 0.0258722   | 0.976537 |
| rad45       | 0.0105016   | 0.989528 | 0.0117481   | 0.988285 |
| rad11       | 0.00466924  | 0.994197 | 0.00522350  | 0.993508 |
| rad23       | 0.00276981  | 0.996967 | 0.00309859  | 0.996607 |
| rad36       | 0.000908653 | 0.997876 | 0.00101651  | 0.997623 |
| rad6        | 0.000742733 | 0.998618 | 0.000830898 | 0.998454 |
| rad24       | 0.000400811 | 0.999019 | 0.000448388 | 0.998902 |
| PAH9+H      | 0.000259055 | 0.999278 | 0.000289806 | 0.999192 |
| rad38       | 0.000141852 | 0.999420 | 0.000158690 | 0.999351 |
| PhCH2CCH+H  | 9.90915e-05 | 0.999519 | 0.000110854 | 0.999462 |
| Ph+Allene   | 7.48644e-05 | 0.999594 | 8.37511e-05 | 0.999546 |
| rad9        | 5.93428e-05 | 0.999653 | 6.63870e-05 | 0.999612 |
| rad50       | 5.90267e-05 | 0.999712 | 6.60333e-05 | 0.999678 |
| PhCHCCH2+H  | 5.86976e-05 | 0.999771 | 6.56651e-05 | 0.999744 |
| PAH7+H      | 5.66987e-05 | 0.999828 | 6.34290e-05 | 0.999807 |
| rad46       | 5.21323e-05 | 0.999880 | 5.83206e-05 | 0.999865 |
| rad35       | 3.59361e-05 | 0.999916 | 4.02018e-05 | 0.999906 |
| rad39       | 2.72931e-05 | 0.999943 | 3.05328e-05 | 0.999936 |
| rad51       | 1.94013e-05 | 0.999962 | 2.17043e-05 | 0.999958 |



|               |             |          |             |          |
|---------------|-------------|----------|-------------|----------|
| rad30         | 1.07491e-05 | 0.999973 | 1.20251e-05 | 0.999970 |
| rad52         | 5.42399e-06 | 0.999979 | 6.06784e-06 | 0.999976 |
| PAH3+H        | 2.40894e-06 | 0.999981 | 2.69488e-06 | 0.999979 |
| rad28         | 2.29351e-06 | 0.999983 | 2.56575e-06 | 0.999981 |
| rad19anti     | 2.11920e-06 | 0.999985 | 2.37076e-06 | 0.999984 |
| rad15         | 1.84689e-06 | 0.999987 | 2.06613e-06 | 0.999986 |
| rad47         | 1.81780e-06 | 0.999989 | 2.03357e-06 | 0.999988 |
| PhCCH+CH3     | 1.66992e-06 | 0.999991 | 1.86814e-06 | 0.999990 |
| rad7          | 1.38958e-06 | 0.999992 | 1.55453e-06 | 0.999991 |
| PAH10+CH3     | 1.26794e-06 | 0.999993 | 1.41844e-06 | 0.999993 |
| Ph+MeAc       | 1.17115e-06 | 0.999995 | 1.31017e-06 | 0.999994 |
| rad25         | 7.05389e-07 | 0.999995 | 7.89121e-07 | 0.999995 |
| PAH1+H        | 6.98566e-07 | 0.999996 | 7.81488e-07 | 0.999995 |
| rad71         | 6.20001e-07 | 0.999997 | 6.93597e-07 | 0.999996 |
| rad37         | 4.77563e-07 | 0.999997 | 5.34251e-07 | 0.999997 |
| rad73         | 4.48985e-07 | 0.999998 | 5.02281e-07 | 0.999997 |
| rad65         | 4.47514e-07 | 0.999998 | 5.00636e-07 | 0.999998 |
| PhCCCH3+H     | 3.74968e-07 | 0.999998 | 4.19477e-07 | 0.999998 |
| rad60syn      | 3.25419e-07 | 0.999999 | 3.64047e-07 | 0.999998 |
| rad26         | 2.73751e-07 | 0.999999 | 3.06246e-07 | 0.999999 |
| rad59         | 2.49037e-07 | 0.999999 | 2.78598e-07 | 0.999999 |
| rad60anti     | 1.91245e-07 | 0.999999 | 2.13947e-07 | 0.999999 |
| rad67         | 1.51322e-07 | 1.000000 | 1.69285e-07 | 0.999999 |
| rad13         | 1.35574e-07 | 1.000000 | 1.51667e-07 | 1.000000 |
| rad70         | 9.13885e-08 | 1.000000 | 1.02237e-07 | 1.000000 |
| rad19syn      | 6.51061e-08 | 1.000000 | 7.28344e-08 | 1.000000 |
| rad10         | 5.31008e-08 | 1.000000 | 5.94040e-08 | 1.000000 |
| PhcycC3H3_A+H | 4.58174e-08 | 1.000000 | 5.12561e-08 | 1.000000 |
| rad2          | 3.96439e-08 | 1.000000 | 4.43498e-08 | 1.000000 |
| rad54         | 2.64007e-08 | 1.000000 | 2.95346e-08 | 1.000000 |
| rad34         | 2.59725e-08 | 1.000000 | 2.90555e-08 | 1.000000 |
| rad58         | 2.26417e-08 | 1.000000 | 2.53294e-08 | 1.000000 |
| rad72         | 2.06378e-08 | 1.000000 | 2.30875e-08 | 1.000000 |
| rad64         | 1.37635e-08 | 1.000000 | 1.53972e-08 | 1.000000 |
| PAH8+H        | 9.59084e-09 | 1.000000 | 1.07293e-08 | 1.000000 |
| rad1          | 9.22445e-09 | 1.000000 | 1.03194e-08 | 1.000000 |
| rad12         | 8.90014e-09 | 1.000000 | 9.95661e-09 | 1.000000 |
| rad8          | 7.95666e-09 | 1.000000 | 8.90114e-09 | 1.000000 |
| rad3          | 6.80116e-09 | 1.000000 | 7.60847e-09 | 1.000000 |
| rad4          | 5.14280e-09 | 1.000000 | 5.75326e-09 | 1.000000 |
| rad62         | 5.02140e-09 | 1.000000 | 5.61745e-09 | 1.000000 |
| rad61         | 3.04138e-09 | 1.000000 | 3.40240e-09 | 1.000000 |
| rad68syn      | 2.59732e-09 | 1.000000 | 2.90563e-09 | 1.000000 |
| rad33         | 2.32213e-09 | 1.000000 | 2.59777e-09 | 1.000000 |
| rad55         | 2.10856e-09 | 1.000000 | 2.35885e-09 | 1.000000 |
| rad68anti     | 1.68492e-09 | 1.000000 | 1.88493e-09 | 1.000000 |
| rad40syn      | 1.07639e-09 | 1.000000 | 1.20416e-09 | 1.000000 |
| rad43         | 9.58868e-10 | 1.000000 | 1.07269e-09 | 1.000000 |
| rad56         | 8.95927e-10 | 1.000000 | 1.00228e-09 | 1.000000 |
| rad53         | 7.67169e-10 | 1.000000 | 8.58234e-10 | 1.000000 |
| rad40anti     | 6.55282e-10 | 1.000000 | 7.33066e-10 | 1.000000 |
| rad42         | 5.24658e-10 | 1.000000 | 5.86936e-10 | 1.000000 |
| rad41         | 9.30840e-11 | 1.000000 | 1.04133e-10 | 1.000000 |
| rad5          | 2.80553e-11 | 1.000000 | 3.13855e-11 | 1.000000 |
| rad31         | 2.00063e-11 | 1.000000 | 2.23811e-11 | 1.000000 |
| rad14         | 1.90235e-11 | 1.000000 | 2.12816e-11 | 1.000000 |
| rad27         | 4.62870e-12 | 1.000000 | 5.17815e-12 | 1.000000 |

10000000.0 Pa, 800.000000 K

=====

| Rate constant | True (fraction)     | Effective (fraction) |
|---------------|---------------------|----------------------|
| Total         | 3.12228e-16 (1.00 ) | 2.31971e-16 (1.00 )  |

| species     | PYtrue      | Cumul    | PYeffective | Cumul    |
|-------------|-------------|----------|-------------|----------|
| rad20       | 0.441379    | 0.441379 | 0.594088    | 0.594088 |
| Benzyl+C2H2 | 0.257047    | 0.698426 | 0.000000    | 0.594088 |
| rad21       | 0.103285    | 0.801711 | 0.139020    | 0.733108 |
| rad22       | 0.0580401   | 0.859751 | 0.0781209   | 0.811229 |
| Indene+H    | 0.0573672   | 0.917118 | 0.0772151   | 0.888444 |
| rad18       | 0.0423219   | 0.959440 | 0.0569644   | 0.945408 |
| rad45       | 0.0179051   | 0.977345 | 0.0241000   | 0.969508 |
| rad11       | 0.00762242  | 0.984968 | 0.0102596   | 0.979768 |
| rad23       | 0.00572426  | 0.990692 | 0.00770474  | 0.987473 |
| rad6        | 0.00364568  | 0.994338 | 0.00490702  | 0.992380 |
| rad36       | 0.00187459  | 0.996212 | 0.00252316  | 0.994903 |
| rad24       | 0.000661843 | 0.996874 | 0.000890828 | 0.995794 |
| PhCH2CCH+H  | 0.000637881 | 0.997512 | 0.000858575 | 0.996652 |
| PAH9+H      | 0.000481486 | 0.997993 | 0.000648071 | 0.997300 |

|               |             |          |             |          |
|---------------|-------------|----------|-------------|----------|
| Ph+Allene     | 0.000471452 | 0.998465 | 0.000634565 | 0.997935 |
| PhCHCCH2+H    | 0.000404484 | 0.998869 | 0.000544428 | 0.998479 |
| rad38         | 0.000260493 | 0.999130 | 0.000350618 | 0.998830 |
| rad9          | 0.000257588 | 0.999387 | 0.000346708 | 0.999177 |
| rad50         | 0.000110458 | 0.999498 | 0.000148674 | 0.999325 |
| PAH7+H        | 0.000109460 | 0.999607 | 0.000147331 | 0.999473 |
| rad46         | 9.63819e-05 | 0.999704 | 0.000129728 | 0.999602 |
| rad35         | 6.74013e-05 | 0.999771 | 9.07209e-05 | 0.999693 |
| rad39         | 5.14472e-05 | 0.999823 | 6.92469e-05 | 0.999762 |
| rad30         | 4.73366e-05 | 0.999870 | 6.37142e-05 | 0.999826 |
| rad51         | 3.65179e-05 | 0.999906 | 4.91523e-05 | 0.999875 |
| rad7          | 1.30531e-05 | 0.999920 | 1.75693e-05 | 0.999893 |
| rad19anti     | 1.23303e-05 | 0.999932 | 1.65964e-05 | 0.999909 |
| PAH3+H        | 1.06485e-05 | 0.999943 | 1.43327e-05 | 0.999924 |
| rad52         | 1.01666e-05 | 0.999953 | 1.36840e-05 | 0.999937 |
| rad28         | 7.65284e-06 | 0.999960 | 1.03006e-05 | 0.999948 |
| PhCCH+CH3     | 5.84406e-06 | 0.999966 | 7.86599e-06 | 0.999956 |
| rad47         | 5.25899e-06 | 0.999971 | 7.07851e-06 | 0.999963 |
| rad15         | 4.53341e-06 | 0.999976 | 6.10189e-06 | 0.999969 |
| Ph+MeAc       | 4.06521e-06 | 0.999980 | 5.47170e-06 | 0.999974 |
| PAH10+CH3     | 2.51799e-06 | 0.999983 | 3.38917e-06 | 0.999978 |
| rad25         | 2.39479e-06 | 0.999985 | 3.22335e-06 | 0.999981 |
| rad60syn      | 1.72712e-06 | 0.999987 | 2.32466e-06 | 0.999983 |
| PAH1+H        | 1.33755e-06 | 0.999988 | 1.80032e-06 | 0.999985 |
| PhCCCH3+H     | 1.24182e-06 | 0.999989 | 1.67146e-06 | 0.999987 |
| rad59         | 1.20292e-06 | 0.999990 | 1.61911e-06 | 0.999988 |
| rad71         | 1.15714e-06 | 0.999992 | 1.55749e-06 | 0.999990 |
| rad13         | 1.01984e-06 | 0.999993 | 1.37268e-06 | 0.999991 |
| rad60anti     | 1.01446e-06 | 0.999994 | 1.36544e-06 | 0.999993 |
| rad37         | 9.40915e-07 | 0.999995 | 1.26645e-06 | 0.999994 |
| rad67         | 8.99293e-07 | 0.999995 | 1.21043e-06 | 0.999995 |
| rad65         | 8.51202e-07 | 0.999996 | 1.14570e-06 | 0.999996 |
| rad73         | 8.34030e-07 | 0.999997 | 1.12259e-06 | 0.999997 |
| rad26         | 6.36185e-07 | 0.999998 | 8.56293e-07 | 0.999998 |
| rad70         | 2.10275e-07 | 0.999998 | 2.83027e-07 | 0.999998 |
| rad12         | 1.90124e-07 | 0.999998 | 2.55904e-07 | 0.999999 |
| rad19syn      | 1.76006e-07 | 0.999998 | 2.36901e-07 | 0.999999 |
| rad2          | 1.58458e-07 | 0.999999 | 2.13281e-07 | 0.999999 |
| PhcycC3H3_A+H | 1.20451e-07 | 0.999999 | 1.62124e-07 | 0.999999 |
| rad10         | 1.10630e-07 | 0.999999 | 1.48906e-07 | 1.000000 |
| rad8          | 9.23678e-08 | 0.999999 | 1.24325e-07 | 1.000000 |
| rad54         | 7.21908e-08 | 0.999999 | 9.71675e-08 | 1.000000 |
| rad58         | 6.52956e-08 | 0.999999 | 8.78866e-08 | 1.000000 |
| rad34         | 5.65826e-08 | 0.999999 | 7.61591e-08 | 1.000000 |
| rad3          | 4.61305e-08 | 0.999999 | 6.20908e-08 | 1.000000 |
| rad1          | 4.26697e-08 | 0.999999 | 5.74326e-08 | 1.000000 |
| rad72         | 3.89870e-08 | 0.999999 | 5.24758e-08 | 1.000000 |
| rad4          | 3.69787e-08 | 0.999999 | 4.97726e-08 | 1.000000 |
| rad33         | 3.41031e-08 | 0.999999 | 4.59021e-08 | 1.000000 |
| rad64         | 2.63731e-08 | 0.999999 | 3.54977e-08 | 1.000000 |
| PAH8+H        | 1.89006e-08 | 0.999999 | 2.54399e-08 | 1.000000 |
| rad62         | 9.94436e-09 | 0.999999 | 1.33849e-08 | 1.000000 |
| rad61         | 6.09953e-09 | 0.999999 | 8.20985e-09 | 1.000000 |
| rad55         | 5.66187e-09 | 0.999999 | 7.62077e-09 | 1.000000 |
| rad68syn      | 5.20448e-09 | 0.999999 | 7.00513e-09 | 1.000000 |
| rad68anti     | 3.37807e-09 | 0.999999 | 4.54682e-09 | 1.000000 |
| rad43         | 2.32994e-09 | 0.999999 | 3.13605e-09 | 1.000000 |
| rad56         | 2.27578e-09 | 0.999999 | 3.06316e-09 | 1.000000 |
| rad40syn      | 2.13446e-09 | 0.999999 | 2.87295e-09 | 1.000000 |
| rad53         | 1.97114e-09 | 0.999999 | 2.65311e-09 | 1.000000 |
| rad40anti     | 1.29873e-09 | 0.999999 | 1.74806e-09 | 1.000000 |
| rad42         | 1.03812e-09 | 0.999999 | 1.39729e-09 | 1.000000 |
| rad31         | 2.28659e-10 | 0.999999 | 3.07771e-10 | 1.000000 |
| rad41         | 2.26050e-10 | 0.999999 | 3.04260e-10 | 1.000000 |
| rad14         | 1.45859e-10 | 0.999999 | 1.96324e-10 | 1.000000 |
| rad5          | 1.01205e-10 | 0.999999 | 1.36220e-10 | 1.000000 |
| rad27         | 2.00170e-11 | 0.999999 | 2.69424e-11 | 1.000000 |

10000000.0 Pa, 900.000000 K

=====

| Rate constant | True (fraction) |          | Effective (fraction) |          |
|---------------|-----------------|----------|----------------------|----------|
| Total         | 9.21769e-16     | (1.00 )  | 5.56007e-16          | (1.00 )  |
| species       | PYtrue          | Cumul    | PYeffective          | Cumul    |
| Benzyl+C2H2   | 0.396804        | 0.396804 | 0.00000              | 0.00000  |
| rad20         | 0.333423        | 0.730227 | 0.552760             | 0.552760 |
| Indene+H      | 0.0815834       | 0.811810 | 0.135252             | 0.688012 |
| rad21         | 0.0747514       | 0.886562 | 0.123925             | 0.811937 |

|               |             |          |             |          |
|---------------|-------------|----------|-------------|----------|
| rad22         | 0.0390317   | 0.925593 | 0.0647081   | 0.876645 |
| rad18         | 0.0236953   | 0.949289 | 0.0392829   | 0.915928 |
| rad45         | 0.0204403   | 0.969729 | 0.0338867   | 0.949815 |
| rad6          | 0.00675983  | 0.976489 | 0.0112067   | 0.961021 |
| rad23         | 0.00675785  | 0.983247 | 0.0112034   | 0.972225 |
| rad11         | 0.00575098  | 0.988998 | 0.00953417  | 0.981759 |
| PhCH2CCH+H    | 0.00247337  | 0.991471 | 0.00410044  | 0.985859 |
| rad36         | 0.00215873  | 0.993630 | 0.00357882  | 0.989438 |
| Ph+Allene     | 0.00176620  | 0.995396 | 0.00292807  | 0.992366 |
| PhCHCCH2+H    | 0.00134226  | 0.996738 | 0.00222524  | 0.994592 |
| rad9          | 0.000824669 | 0.997563 | 0.00136717  | 0.995959 |
| rad24         | 0.000631903 | 0.998195 | 0.00104759  | 0.997006 |
| PAH9+H        | 0.000575304 | 0.998770 | 0.000953759 | 0.997960 |
| rad38         | 0.000304159 | 0.999074 | 0.000504245 | 0.998464 |
| PAH7+H        | 0.000154111 | 0.999228 | 0.000255491 | 0.998720 |
| rad50         | 0.000131726 | 0.999360 | 0.000218380 | 0.998938 |
| rad46         | 0.000113650 | 0.999474 | 0.000188414 | 0.999127 |
| rad30         | 0.000108105 | 0.999582 | 0.000179220 | 0.999306 |
| rad35         | 8.30092e-05 | 0.999665 | 0.000137615 | 0.999443 |
| rad39         | 6.33526e-05 | 0.999728 | 0.000105028 | 0.999548 |
| rad51         | 4.35505e-05 | 0.999772 | 7.21996e-05 | 0.999621 |
| PAH3+H        | 3.90948e-05 | 0.999811 | 6.48128e-05 | 0.999685 |
| rad7          | 3.69118e-05 | 0.999848 | 6.11937e-05 | 0.999747 |
| rad19anti     | 3.30500e-05 | 0.999881 | 5.47914e-05 | 0.999801 |
| PhCCH+CH3     | 2.38943e-05 | 0.999905 | 3.96128e-05 | 0.999841 |
| rad28         | 1.62916e-05 | 0.999921 | 2.70087e-05 | 0.999868 |
| rad52         | 1.20838e-05 | 0.999933 | 2.00329e-05 | 0.999888 |
| Ph+MeAc       | 1.11058e-05 | 0.999944 | 1.84116e-05 | 0.999907 |
| rad47         | 6.77604e-06 | 0.999951 | 1.12336e-05 | 0.999918 |
| rad15         | 5.47949e-06 | 0.999957 | 9.08410e-06 | 0.999927 |
| rad60syn      | 5.34495e-06 | 0.999962 | 8.86105e-06 | 0.999936 |
| rad59         | 4.31343e-06 | 0.999966 | 7.15096e-06 | 0.999943 |
| rad13         | 3.92669e-06 | 0.999970 | 6.50981e-06 | 0.999949 |
| rad25         | 3.81348e-06 | 0.999974 | 6.32211e-06 | 0.999956 |
| PAH10+CH3     | 3.46676e-06 | 0.999977 | 5.74732e-06 | 0.999961 |
| rad60anti     | 3.19417e-06 | 0.999981 | 5.29541e-06 | 0.999967 |
| PhCCCH3+H     | 2.87369e-06 | 0.999983 | 4.76410e-06 | 0.999971 |
| rad67         | 2.49638e-06 | 0.999986 | 4.13859e-06 | 0.999976 |
| rad12         | 2.38377e-06 | 0.999988 | 3.95189e-06 | 0.999980 |
| PAH1+H        | 1.75250e-06 | 0.999990 | 2.90536e-06 | 0.999982 |
| rad71         | 1.41860e-06 | 0.999992 | 2.35181e-06 | 0.999985 |
| rad37         | 1.31404e-06 | 0.999993 | 2.17846e-06 | 0.999987 |
| rad26         | 1.12767e-06 | 0.999994 | 1.86950e-06 | 0.999989 |
| rad65         | 1.03134e-06 | 0.999995 | 1.70979e-06 | 0.999991 |
| rad73         | 1.01640e-06 | 0.999996 | 1.68503e-06 | 0.999992 |
| rad8          | 8.60520e-07 | 0.999997 | 1.42660e-06 | 0.999994 |
| rad19syn      | 6.63590e-07 | 0.999998 | 1.10012e-06 | 0.999995 |
| rad70         | 5.20440e-07 | 0.999998 | 8.62803e-07 | 0.999996 |
| PhcycC3H3_A+H | 4.01428e-07 | 0.999998 | 6.65502e-07 | 0.999996 |
| rad2          | 3.86757e-07 | 0.999999 | 6.41179e-07 | 0.999997 |
| rad33         | 2.75549e-07 | 0.999999 | 4.56815e-07 | 0.999997 |
| rad54         | 2.70484e-07 | 0.999999 | 4.48417e-07 | 0.999998 |
| rad58         | 2.37895e-07 | 1.000000 | 3.94390e-07 | 0.999998 |
| rad3          | 2.01076e-07 | 1.000000 | 3.33351e-07 | 0.999999 |
| rad10         | 1.95838e-07 | 1.000000 | 3.24666e-07 | 0.999999 |
| rad4          | 1.65636e-07 | 1.000000 | 2.74597e-07 | 0.999999 |
| rad34         | 1.30362e-07 | 1.000000 | 2.16119e-07 | 0.999999 |
| rad1          | 1.19935e-07 | 1.000000 | 1.98833e-07 | 1.000000 |
| rad72         | 4.83208e-08 | 1.000000 | 8.01079e-08 | 1.000000 |
| rad64         | 3.43141e-08 | 1.000000 | 5.68871e-08 | 1.000000 |
| PAH8+H        | 3.16298e-08 | 1.000000 | 5.24369e-08 | 1.000000 |
| rad55         | 2.04219e-08 | 1.000000 | 3.38561e-08 | 1.000000 |
| rad62         | 1.48751e-08 | 1.000000 | 2.46604e-08 | 1.000000 |
| rad68syn      | 9.75564e-09 | 1.000000 | 1.61732e-08 | 1.000000 |
| rad61         | 8.34534e-09 | 1.000000 | 1.38352e-08 | 1.000000 |
| rad56         | 6.71607e-09 | 1.000000 | 1.11341e-08 | 1.000000 |
| rad68anti     | 6.34718e-09 | 1.000000 | 1.05226e-08 | 1.000000 |
| rad53         | 6.17821e-09 | 1.000000 | 1.02424e-08 | 1.000000 |
| rad43         | 4.15152e-09 | 1.000000 | 6.88254e-09 | 1.000000 |
| rad40syn      | 3.72326e-09 | 1.000000 | 6.17256e-09 | 1.000000 |
| rad40anti     | 2.22680e-09 | 1.000000 | 3.69167e-09 | 1.000000 |
| rad42         | 1.51016e-09 | 1.000000 | 2.50360e-09 | 1.000000 |
| rad31         | 1.08701e-09 | 1.000000 | 1.80208e-09 | 1.000000 |
| rad14         | 8.43481e-10 | 1.000000 | 1.39835e-09 | 1.000000 |
| rad41         | 4.00264e-10 | 1.000000 | 6.63572e-10 | 1.000000 |
| rad5          | 2.09516e-10 | 1.000000 | 3.47343e-10 | 1.000000 |
| rad27         | 9.06409e-11 | 1.000000 | 1.50268e-10 | 1.000000 |

10000000.0 Pa, 1000.00000 K

=====

| Rate constant | True (fraction) |          | Effective (fraction) |          |
|---------------|-----------------|----------|----------------------|----------|
| -----         | -----           |          | -----                |          |
| Total         | 2.23691e-15     | (1.00 )  | 1.07412e-15          | (1.00 )  |
| species       | PYtrue          | Cumul    | PYeffective          | Cumul    |
| -----         | -----           | -----    | -----                | -----    |
| Benzyl+C2H2   | 0.519820        | 0.519820 | 0.00000              | 0.00000  |
| rad20         | 0.251306        | 0.771126 | 0.523359             | 0.523359 |
| Indene+H      | 0.0881225       | 0.859248 | 0.183520             | 0.706879 |
| rad21         | 0.0503969       | 0.909645 | 0.104954             | 0.811833 |
| rad45         | 0.0205177       | 0.930163 | 0.0427293            | 0.854562 |
| rad22         | 0.0204567       | 0.950620 | 0.0426022            | 0.897165 |
| rad18         | 0.0128486       | 0.963468 | 0.0267579            | 0.923922 |
| rad6          | 0.00693106      | 0.970399 | 0.0144343            | 0.938357 |
| PhCH2CCH+H    | 0.00638299      | 0.976782 | 0.0132929            | 0.951650 |
| rad23         | 0.00595928      | 0.982742 | 0.0124105            | 0.964060 |
| Ph+Allene     | 0.00418143      | 0.986923 | 0.00870805           | 0.972768 |
| rad11         | 0.00338827      | 0.990311 | 0.00705624           | 0.979824 |
| PhCHCCH2+H    | 0.00270851      | 0.993020 | 0.00564062           | 0.985465 |
| rad36         | 0.00209471      | 0.995115 | 0.00436235           | 0.989827 |
| rad9          | 0.00209145      | 0.997206 | 0.00435555           | 0.994183 |
| PAH9+H        | 0.000621620     | 0.997828 | 0.00129456           | 0.995477 |
| rad24         | 0.000490027     | 0.998318 | 0.00102051           | 0.996498 |
| rad38         | 0.000315408     | 0.998633 | 0.000656853          | 0.997155 |
| PAH7+H        | 0.000226123     | 0.998859 | 0.000470913          | 0.997626 |
| rad30         | 0.000184066     | 0.999043 | 0.000383327          | 0.998009 |
| rad50         | 0.000138229     | 0.999182 | 0.000287870          | 0.998297 |
| PAH3+H        | 0.000119919     | 0.999301 | 0.000249737          | 0.998547 |
| rad46         | 0.000118554     | 0.999420 | 0.000246896          | 0.998794 |
| rad35         | 9.58771e-05     | 0.999516 | 0.000199669          | 0.998993 |
| PhCCH+CH3     | 7.50034e-05     | 0.999591 | 0.000156199          | 0.999149 |
| rad39         | 7.21629e-05     | 0.999663 | 0.000150283          | 0.999300 |
| rad19anti     | 6.12202e-05     | 0.999724 | 0.000127494          | 0.999427 |
| rad7          | 5.23905e-05     | 0.999777 | 0.000109106          | 0.999536 |
| rad51         | 4.56440e-05     | 0.999822 | 9.50560e-05          | 0.999631 |
| Ph+MeAc       | 2.55774e-05     | 0.999848 | 5.32664e-05          | 0.999685 |
| rad28         | 2.12605e-05     | 0.999869 | 4.42761e-05          | 0.999729 |
| rad12         | 1.27518e-05     | 0.999882 | 2.65563e-05          | 0.999755 |
| rad52         | 1.26436e-05     | 0.999895 | 2.63309e-05          | 0.999782 |
| rad60syn      | 1.25680e-05     | 0.999907 | 2.61736e-05          | 0.999808 |
| rad59         | 1.23685e-05     | 0.999920 | 2.57581e-05          | 0.999834 |
| rad13         | 1.17339e-05     | 0.999931 | 2.44364e-05          | 0.999858 |
| rad60anti     | 7.66592e-06     | 0.999939 | 1.59647e-05          | 0.999874 |
| rad47         | 6.95269e-06     | 0.999946 | 1.44793e-05          | 0.999889 |
| rad15         | 6.18331e-06     | 0.999952 | 1.28771e-05          | 0.999902 |
| PhCCCH3+H     | 5.38433e-06     | 0.999957 | 1.12132e-05          | 0.999913 |
| rad8          | 5.23797e-06     | 0.999963 | 1.09084e-05          | 0.999924 |
| rad25         | 4.97084e-06     | 0.999968 | 1.03520e-05          | 0.999934 |
| PAH10+CH3     | 4.83617e-06     | 0.999972 | 1.00716e-05          | 0.999944 |
| rad67         | 4.77940e-06     | 0.999977 | 9.95335e-06          | 0.999954 |
| rad19syn      | 3.01678e-06     | 0.999980 | 6.28260e-06          | 0.999960 |
| PAH1+H        | 2.46623e-06     | 0.999983 | 5.13605e-06          | 0.999965 |
| PhcycC3H3_A+H | 1.89814e-06     | 0.999985 | 3.95298e-06          | 0.999969 |
| rad37         | 1.86178e-06     | 0.999987 | 3.87725e-06          | 0.999973 |
| rad71         | 1.52177e-06     | 0.999988 | 3.16918e-06          | 0.999976 |
| rad26         | 1.47651e-06     | 0.999989 | 3.07492e-06          | 0.999979 |
| rad70         | 1.36071e-06     | 0.999991 | 2.83375e-06          | 0.999982 |
| rad33         | 1.27887e-06     | 0.999992 | 2.66332e-06          | 0.999985 |
| rad54         | 1.19105e-06     | 0.999993 | 2.48043e-06          | 0.999987 |
| rad65         | 1.11536e-06     | 0.999994 | 2.32279e-06          | 0.999990 |
| rad73         | 1.08611e-06     | 0.999996 | 2.26189e-06          | 0.999992 |
| rad58         | 9.57133e-07     | 0.999996 | 1.99328e-06          | 0.999994 |
| rad2          | 7.43608e-07     | 0.999997 | 1.54860e-06          | 0.999996 |
| rad3          | 4.89503e-07     | 0.999998 | 1.01942e-06          | 0.999997 |
| rad4          | 4.00214e-07     | 0.999998 | 8.33468e-07          | 0.999997 |
| rad34         | 3.53198e-07     | 0.999998 | 7.35554e-07          | 0.999998 |
| rad10         | 3.00319e-07     | 0.999999 | 6.25430e-07          | 0.999999 |
| rad1          | 2.31204e-07     | 0.999999 | 4.81496e-07          | 0.999999 |
| rad55         | 9.19951e-08     | 0.999999 | 1.91585e-07          | 0.999999 |
| PAH8+H        | 8.91287e-08     | 0.999999 | 1.85615e-07          | 1.000000 |
| rad72         | 5.21686e-08     | 0.999999 | 1.08644e-07          | 1.000000 |
| rad64         | 4.78430e-08     | 0.999999 | 9.96357e-08          | 1.000000 |
| rad56         | 3.32024e-08     | 0.999999 | 6.91457e-08          | 1.000000 |
| rad53         | 2.98163e-08     | 0.999999 | 6.20940e-08          | 1.000000 |
| rad68syn      | 2.78074e-08     | 0.999999 | 5.79103e-08          | 1.000000 |
| rad62         | 2.71263e-08     | 0.999999 | 5.64919e-08          | 1.000000 |
| rad68anti     | 1.80893e-08     | 0.999999 | 3.76719e-08          | 1.000000 |
| rad61         | 1.14998e-08     | 0.999999 | 2.39490e-08          | 1.000000 |
| rad40syn      | 1.05311e-08     | 0.999999 | 2.19317e-08          | 1.000000 |
| rad43         | 6.88337e-09     | 0.999999 | 1.43350e-08          | 1.000000 |

|           |             |          |             |         |
|-----------|-------------|----------|-------------|---------|
| rad40anti | 6.25829e-09 | 0.999999 | 1.30332e-08 | 1.00000 |
| rad14     | 3.88407e-09 | 0.999999 | 8.08877e-09 | 1.00000 |
| rad31     | 3.07353e-09 | 0.999999 | 6.40078e-09 | 1.00000 |
| rad42     | 2.66959e-09 | 0.999999 | 5.55957e-09 | 1.00000 |
| rad41     | 6.59898e-10 | 0.999999 | 1.37427e-09 | 1.00000 |
| rad27     | 4.86219e-10 | 0.999999 | 1.01258e-09 | 1.00000 |
| rad5      | 3.47494e-10 | 0.999999 | 7.23674e-10 | 1.00000 |

10000000.0 Pa, 1100.00000 K

| Rate constant | True (fraction)     | Effective (fraction) |
|---------------|---------------------|----------------------|
| Total         | 4.69847e-15 (1.00 ) | 1.73166e-15 (1.00 )  |

| species       | PYtrue      | Cumul    | PYeffective | Cumul    |
|---------------|-------------|----------|-------------|----------|
| Benzyl+C2H2   | 0.631441    | 0.631441 | 0.00000     | 0.00000  |
| rad20         | 0.168045    | 0.799486 | 0.455952    | 0.455952 |
| Indene+H      | 0.0857625   | 0.885248 | 0.232697    | 0.688649 |
| rad21         | 0.0322015   | 0.917450 | 0.0873713   | 0.776020 |
| rad45         | 0.0197424   | 0.937192 | 0.0535664   | 0.829587 |
| PhCH2CCH+H    | 0.0115053   | 0.948698 | 0.0312170   | 0.860804 |
| rad22         | 0.0106419   | 0.959340 | 0.0288743   | 0.889678 |
| rad18         | 0.00873782  | 0.968077 | 0.0237081   | 0.913386 |
| Ph+Allene     | 0.00662932  | 0.974707 | 0.0179871   | 0.931373 |
| rad6          | 0.00525607  | 0.979963 | 0.0142611   | 0.945624 |
| rad23         | 0.00481167  | 0.984774 | 0.0130554   | 0.958690 |
| PhCHCCH2+H    | 0.00387088  | 0.988645 | 0.0105027   | 0.969192 |
| rad9          | 0.00359238  | 0.992238 | 0.00974708  | 0.978939 |
| rad11         | 0.00244145  | 0.994679 | 0.00662431  | 0.985564 |
| rad36         | 0.00197443  | 0.996654 | 0.00535715  | 0.990921 |
| PAH9+H        | 0.000659673 | 0.997313 | 0.00178987  | 0.992711 |
| rad24         | 0.000445135 | 0.997758 | 0.00120777  | 0.993919 |
| rad38         | 0.000320089 | 0.998079 | 0.000868488 | 0.994787 |
| PAH7+H        | 0.000302350 | 0.998381 | 0.000820356 | 0.995607 |
| PAH3+H        | 0.000268564 | 0.998649 | 0.000728686 | 0.996336 |
| rad30         | 0.000265273 | 0.998915 | 0.000719757 | 0.997056 |
| rad50         | 0.000140986 | 0.999056 | 0.000382534 | 0.997438 |
| PhCCH+CH3     | 0.000136373 | 0.999192 | 0.000370017 | 0.997808 |
| rad46         | 0.000120582 | 0.999313 | 0.000327172 | 0.998136 |
| rad35         | 0.000111754 | 0.999424 | 0.000303220 | 0.998439 |
| rad19anti     | 8.94647e-05 | 0.999514 | 0.000242742 | 0.998682 |
| rad39         | 8.01230e-05 | 0.999594 | 0.000217395 | 0.998899 |
| rad7          | 6.20945e-05 | 0.999656 | 0.000168479 | 0.999067 |
| rad51         | 4.65403e-05 | 0.999703 | 0.000126276 | 0.999194 |
| Ph+MeAc       | 4.24555e-05 | 0.999745 | 0.000115193 | 0.999309 |
| rad12         | 2.85502e-05 | 0.999774 | 7.74645e-05 | 0.999386 |
| rad13         | 2.79001e-05 | 0.999802 | 7.57005e-05 | 0.999462 |
| rad59         | 2.63171e-05 | 0.999828 | 7.14054e-05 | 0.999533 |
| rad60syn      | 2.32252e-05 | 0.999851 | 6.30162e-05 | 0.999596 |
| rad28         | 1.98503e-05 | 0.999871 | 5.38592e-05 | 0.999650 |
| rad8          | 1.97004e-05 | 0.999891 | 5.34524e-05 | 0.999704 |
| rad60anti     | 1.43791e-05 | 0.999905 | 3.90142e-05 | 0.999743 |
| rad52         | 1.28822e-05 | 0.999918 | 3.49529e-05 | 0.999778 |
| rad15         | 8.40418e-06 | 0.999926 | 2.28028e-05 | 0.999801 |
| PhCCCH3+H     | 8.05416e-06 | 0.999934 | 2.18531e-05 | 0.999822 |
| rad67         | 7.30530e-06 | 0.999942 | 1.98212e-05 | 0.999842 |
| rad19syn      | 7.10917e-06 | 0.999949 | 1.92891e-05 | 0.999862 |
| rad47         | 6.72579e-06 | 0.999955 | 1.82489e-05 | 0.999880 |
| rad25         | 6.45882e-06 | 0.999962 | 1.75245e-05 | 0.999897 |
| PAH10+CH3     | 6.44441e-06 | 0.999968 | 1.74854e-05 | 0.999915 |
| PhcycC3H3_A+H | 4.72363e-06 | 0.999973 | 1.28165e-05 | 0.999928 |
| PAH1+H        | 3.42721e-06 | 0.999977 | 9.29896e-06 | 0.999937 |
| rad33         | 3.39676e-06 | 0.999980 | 9.21631e-06 | 0.999946 |
| rad54         | 2.62720e-06 | 0.999983 | 7.12829e-06 | 0.999953 |
| rad58         | 2.59612e-06 | 0.999985 | 7.04396e-06 | 0.999960 |
| rad37         | 2.45930e-06 | 0.999988 | 6.67274e-06 | 0.999967 |
| rad70         | 2.35095e-06 | 0.999990 | 6.37877e-06 | 0.999973 |
| rad71         | 1.57858e-06 | 0.999992 | 4.28310e-06 | 0.999978 |
| rad26         | 1.50419e-06 | 0.999993 | 4.08126e-06 | 0.999982 |
| rad65         | 1.18679e-06 | 0.999994 | 3.22009e-06 | 0.999985 |
| rad73         | 1.12371e-06 | 0.999995 | 3.04892e-06 | 0.999988 |
| rad2          | 1.07300e-06 | 0.999996 | 2.91133e-06 | 0.999991 |
| rad3          | 6.90108e-07 | 0.999997 | 1.87245e-06 | 0.999993 |
| rad34         | 6.34163e-07 | 0.999998 | 1.72065e-06 | 0.999994 |
| rad4          | 5.57805e-07 | 0.999998 | 1.51347e-06 | 0.999996 |
| rad10         | 4.36282e-07 | 0.999999 | 1.18375e-06 | 0.999997 |
| rad1          | 3.22468e-07 | 0.999999 | 8.74942e-07 | 0.999998 |
| rad55         | 2.06827e-07 | 0.999999 | 5.61177e-07 | 0.999999 |
| PAH8+H        | 1.84558e-07 | 0.999999 | 5.00756e-07 | 0.999999 |

|           |             |          |             |          |
|-----------|-------------|----------|-------------|----------|
| rad56     | 8.20647e-08 | 1.000000 | 2.22664e-07 | 0.999999 |
| rad53     | 7.16542e-08 | 1.000000 | 1.94417e-07 | 1.000000 |
| rad64     | 6.65305e-08 | 1.000000 | 1.80515e-07 | 1.000000 |
| rad68syn  | 5.48763e-08 | 1.000000 | 1.48894e-07 | 1.000000 |
| rad72     | 5.43331e-08 | 1.000000 | 1.47420e-07 | 1.000000 |
| rad62     | 4.39995e-08 | 1.000000 | 1.19382e-07 | 1.000000 |
| rad68anti | 3.56614e-08 | 1.000000 | 9.67589e-08 | 1.000000 |
| rad40syn  | 2.13856e-08 | 1.000000 | 5.80248e-08 | 1.000000 |
| rad61     | 1.54062e-08 | 1.000000 | 4.18011e-08 | 1.000000 |
| rad14     | 1.38088e-08 | 1.000000 | 3.74669e-08 | 1.000000 |
| rad40anti | 1.27835e-08 | 1.000000 | 3.46852e-08 | 1.000000 |
| rad43     | 9.73245e-09 | 1.000000 | 2.64067e-08 | 1.000000 |
| rad31     | 5.01142e-09 | 1.000000 | 1.35973e-08 | 1.000000 |
| rad42     | 4.33831e-09 | 1.000000 | 1.17710e-08 | 1.000000 |
| rad27     | 2.42757e-09 | 1.000000 | 6.58664e-09 | 1.000000 |
| rad41     | 9.32194e-10 | 1.000000 | 2.52929e-09 | 1.000000 |
| rad5      | 4.63037e-10 | 1.000000 | 1.25635e-09 | 1.000000 |

10000000.0 Pa, 1200.00000 K

| Rate constant | True (fraction)     | Effective (fraction) |
|---------------|---------------------|----------------------|
| Total         | 8.84330e-15 (1.00 ) | 2.65875e-15 (1.00 )  |

| species       | PYtrue      | Cumul    | PYeffective | Cumul    |
|---------------|-------------|----------|-------------|----------|
| Benzyl+C2H2   | 0.699349    | 0.699349 | 0.000000    | 0.000000 |
| rad20         | 0.113743    | 0.813092 | 0.378322    | 0.378322 |
| Indene+H      | 0.0818069   | 0.894899 | 0.272099    | 0.650421 |
| rad21         | 0.0246576   | 0.919556 | 0.0820142   | 0.732435 |
| rad45         | 0.0186674   | 0.938224 | 0.0620899   | 0.794525 |
| PhCH2CCH+H    | 0.0150276   | 0.953252 | 0.0499834   | 0.844508 |
| Ph+Allene     | 0.00794228  | 0.961194 | 0.0264169   | 0.870925 |
| rad18         | 0.00764751  | 0.968841 | 0.0254365   | 0.896362 |
| rad22         | 0.00658641  | 0.975428 | 0.0219072   | 0.918269 |
| rad9          | 0.00445176  | 0.979879 | 0.0148071   | 0.933076 |
| PhCHCCH2+H    | 0.00438975  | 0.984269 | 0.0146008   | 0.947677 |
| rad23         | 0.00396623  | 0.988235 | 0.0131921   | 0.960869 |
| rad6          | 0.00361813  | 0.991854 | 0.0120343   | 0.972903 |
| rad11         | 0.00245160  | 0.994305 | 0.00815432  | 0.981058 |
| rad36         | 0.00184880  | 0.996154 | 0.00614933  | 0.987207 |
| PAH9+H        | 0.000682064 | 0.996836 | 0.00226862  | 0.989476 |
| rad24         | 0.000438854 | 0.997275 | 0.00145968  | 0.990935 |
| PAH3+H        | 0.000428609 | 0.997703 | 0.00142560  | 0.992361 |
| PAH7+H        | 0.000342709 | 0.998046 | 0.00113989  | 0.993501 |
| rad30         | 0.000331889 | 0.998378 | 0.00110390  | 0.994605 |
| rad38         | 0.000320934 | 0.998699 | 0.00106746  | 0.995672 |
| PhCCH+CH3     | 0.000171926 | 0.998871 | 0.000571847 | 0.996244 |
| rad50         | 0.000141620 | 0.999013 | 0.000471045 | 0.996715 |
| rad35         | 0.000125574 | 0.999138 | 0.000417672 | 0.997133 |
| rad46         | 0.000120959 | 0.999259 | 0.000402323 | 0.997535 |
| rad19anti     | 0.000105698 | 0.999365 | 0.000351562 | 0.997887 |
| rad39         | 8.41491e-05 | 0.999449 | 0.000279889 | 0.998167 |
| rad7          | 8.29084e-05 | 0.999532 | 0.000275763 | 0.998442 |
| Ph+MeAc       | 5.25857e-05 | 0.999584 | 0.000174906 | 0.998617 |
| rad13         | 5.10287e-05 | 0.999635 | 0.000169727 | 0.998787 |
| rad8          | 4.68481e-05 | 0.999682 | 0.000155822 | 0.998943 |
| rad51         | 4.67691e-05 | 0.999729 | 0.000155559 | 0.999098 |
| rad59         | 4.08937e-05 | 0.999770 | 0.000136017 | 0.999234 |
| rad12         | 3.86355e-05 | 0.999809 | 0.000128506 | 0.999363 |
| rad60syn      | 3.35340e-05 | 0.999842 | 0.000111538 | 0.999474 |
| rad60anti     | 2.09284e-05 | 0.999863 | 6.96104e-05 | 0.999544 |
| rad28         | 1.64226e-05 | 0.999880 | 5.46236e-05 | 0.999599 |
| rad15         | 1.42409e-05 | 0.999894 | 4.73668e-05 | 0.999646 |
| rad52         | 1.29408e-05 | 0.999907 | 4.30424e-05 | 0.999689 |
| rad19syn      | 1.03405e-05 | 0.999917 | 3.43937e-05 | 0.999723 |
| PhCCCH3+H     | 9.59053e-06 | 0.999927 | 3.18992e-05 | 0.999755 |
| rad25         | 9.10331e-06 | 0.999936 | 3.02787e-05 | 0.999786 |
| rad67         | 8.94127e-06 | 0.999945 | 2.97397e-05 | 0.999815 |
| PAH10+CH3     | 7.41623e-06 | 0.999952 | 2.46672e-05 | 0.999840 |
| PhcycC3H3_A+H | 7.14497e-06 | 0.999959 | 2.37650e-05 | 0.999864 |
| rad47         | 6.36280e-06 | 0.999966 | 2.11634e-05 | 0.999885 |
| rad33         | 5.85168e-06 | 0.999971 | 1.94634e-05 | 0.999904 |
| rad58         | 4.54207e-06 | 0.999976 | 1.51074e-05 | 0.999919 |
| PAH1+H        | 4.07319e-06 | 0.999980 | 1.35479e-05 | 0.999933 |
| rad54         | 3.64504e-06 | 0.999984 | 1.21238e-05 | 0.999945 |
| rad70         | 2.82126e-06 | 0.999987 | 9.38384e-06 | 0.999955 |
| rad37         | 2.79337e-06 | 0.999989 | 9.29105e-06 | 0.999964 |
| rad71         | 1.60794e-06 | 0.999991 | 5.34820e-06 | 0.999969 |
| rad26         | 1.41342e-06 | 0.999992 | 4.70119e-06 | 0.999974 |

|           |             |          |             |          |
|-----------|-------------|----------|-------------|----------|
| rad65     | 1.23263e-06 | 0.999994 | 4.09987e-06 | 0.999978 |
| rad2      | 1.19978e-06 | 0.999995 | 3.99061e-06 | 0.999982 |
| rad73     | 1.14232e-06 | 0.999996 | 3.79949e-06 | 0.999986 |
| rad34     | 7.74664e-07 | 0.999997 | 2.57662e-06 | 0.999988 |
| rad10     | 7.49080e-07 | 0.999997 | 2.49153e-06 | 0.999991 |
| rad3      | 7.15721e-07 | 0.999998 | 2.38057e-06 | 0.999993 |
| rad4      | 5.74543e-07 | 0.999999 | 1.91100e-06 | 0.999995 |
| rad1      | 3.52750e-07 | 0.999999 | 1.17329e-06 | 0.999996 |
| rad55     | 2.90033e-07 | 0.999999 | 9.64682e-07 | 0.999997 |
| PAH8+H    | 2.42467e-07 | 1.000000 | 8.06473e-07 | 0.999998 |
| rad56     | 1.21452e-07 | 1.000000 | 4.03963e-07 | 0.999998 |
| rad53     | 1.04352e-07 | 1.000000 | 3.47086e-07 | 0.999999 |
| rad64     | 7.94200e-08 | 1.000000 | 2.64160e-07 | 0.999999 |
| rad68syn  | 7.01898e-08 | 1.000000 | 2.33459e-07 | 0.999999 |
| rad72     | 5.55052e-08 | 1.000000 | 1.84617e-07 | 1.000000 |
| rad62     | 5.36947e-08 | 1.000000 | 1.78595e-07 | 1.000000 |
| rad68anti | 4.55884e-08 | 1.000000 | 1.51632e-07 | 1.000000 |
| rad14     | 3.75632e-08 | 1.000000 | 1.24940e-07 | 1.000000 |
| rad40syn  | 2.77946e-08 | 1.000000 | 9.24482e-08 | 1.000000 |
| rad61     | 1.79055e-08 | 1.000000 | 5.95559e-08 | 1.000000 |
| rad40anti | 1.66779e-08 | 1.000000 | 5.54727e-08 | 1.000000 |
| rad43     | 1.10572e-08 | 1.000000 | 3.67776e-08 | 1.000000 |
| rad27     | 7.69670e-09 | 1.000000 | 2.56001e-08 | 1.000000 |
| rad31     | 5.75510e-09 | 1.000000 | 1.91421e-08 | 1.000000 |
| rad42     | 5.33232e-09 | 1.000000 | 1.77359e-08 | 1.000000 |
| rad41     | 1.05986e-09 | 1.000000 | 3.52520e-09 | 1.000000 |
| rad5      | 5.67933e-10 | 1.000000 | 1.88901e-09 | 1.000000 |

10000000.0 Pa, 1300.00000 K

| Rate constant | True (fraction)    | Effective (fraction) |
|---------------|--------------------|----------------------|
| Total         | 1.52810e-14 (1.00) | 4.10864e-15 (1.00)   |

| species       | PYtrue      | Cumul    | PYeffective | Cumul    |
|---------------|-------------|----------|-------------|----------|
| Benzyl+C2H2   | 0.731127    | 0.731127 | 0.00000     | 0.00000  |
| rad20         | 0.0877399   | 0.818867 | 0.326325    | 0.326325 |
| Indene+H      | 0.0796144   | 0.898481 | 0.296104    | 0.622429 |
| rad21         | 0.0223381   | 0.920819 | 0.0830805   | 0.705509 |
| rad45         | 0.0179037   | 0.938723 | 0.0665878   | 0.772097 |
| PhCH2CCH+H    | 0.0163004   | 0.955023 | 0.0606247   | 0.832722 |
| Ph+Allene     | 0.00836593  | 0.963389 | 0.0311148   | 0.863837 |
| rad18         | 0.00734953  | 0.970739 | 0.0273346   | 0.891171 |
| rad22         | 0.00505578  | 0.975795 | 0.0188036   | 0.909975 |
| rad9          | 0.00472515  | 0.980520 | 0.0175739   | 0.927549 |
| PhCHCCH2+H    | 0.00449448  | 0.985014 | 0.0167160   | 0.944265 |
| rad23         | 0.00338002  | 0.988394 | 0.0125711   | 0.956836 |
| rad11         | 0.00298288  | 0.991377 | 0.0110940   | 0.967930 |
| rad6          | 0.00257749  | 0.993955 | 0.00958627  | 0.977516 |
| rad36         | 0.00176515  | 0.995720 | 0.00656498  | 0.984081 |
| PAH9+H        | 0.000708748 | 0.996429 | 0.00263600  | 0.986717 |
| PAH3+H        | 0.000575095 | 0.997004 | 0.00213891  | 0.988856 |
| rad24         | 0.000431987 | 0.997436 | 0.00160666  | 0.990463 |
| rad30         | 0.000386140 | 0.997822 | 0.00143614  | 0.991899 |
| PAH7+H        | 0.000358582 | 0.998180 | 0.00133365  | 0.993233 |
| rad38         | 0.000325816 | 0.998506 | 0.00121178  | 0.994444 |
| PhCCH+CH3     | 0.000183934 | 0.998690 | 0.000684093 | 0.995128 |
| rad50         | 0.000143832 | 0.998834 | 0.000534946 | 0.995663 |
| rad35         | 0.000138678 | 0.998973 | 0.000515774 | 0.996179 |
| rad7          | 0.000128604 | 0.999101 | 0.000478309 | 0.996658 |
| rad46         | 0.000122771 | 0.999224 | 0.000456613 | 0.997114 |
| rad19anti     | 0.000113101 | 0.999337 | 0.000420648 | 0.997535 |
| rad39         | 8.65033e-05 | 0.999424 | 0.000321725 | 0.997856 |
| rad13         | 7.36974e-05 | 0.999497 | 0.000274097 | 0.998131 |
| rad8          | 7.10000e-05 | 0.999568 | 0.000264065 | 0.998395 |
| Ph+MeAc       | 5.65103e-05 | 0.999625 | 0.000210175 | 0.998605 |
| rad59         | 5.40203e-05 | 0.999679 | 0.000200914 | 0.998806 |
| rad51         | 4.75328e-05 | 0.999726 | 0.000176785 | 0.998983 |
| rad60syn      | 4.24735e-05 | 0.999769 | 0.000157969 | 0.999141 |
| rad12         | 4.22768e-05 | 0.999811 | 0.000157237 | 0.999298 |
| rad15         | 2.89033e-05 | 0.999840 | 0.000107498 | 0.999405 |
| rad60anti     | 2.66305e-05 | 0.999867 | 9.90450e-05 | 0.999504 |
| rad28         | 1.39563e-05 | 0.999881 | 5.19066e-05 | 0.999556 |
| rad52         | 1.31498e-05 | 0.999894 | 4.89071e-05 | 0.999605 |
| rad25         | 1.23093e-05 | 0.999906 | 4.57811e-05 | 0.999651 |
| rad19syn      | 1.17360e-05 | 0.999918 | 4.36489e-05 | 0.999695 |
| PhCCCH3+H     | 1.01626e-05 | 0.999928 | 3.77969e-05 | 0.999732 |
| rad67         | 9.73307e-06 | 0.999938 | 3.61995e-05 | 0.999769 |
| PhcycC3H3_A+H | 8.29085e-06 | 0.999946 | 3.08356e-05 | 0.999799 |

|           |             |          |             |          |
|-----------|-------------|----------|-------------|----------|
| PAH10+CH3 | 7.82381e-06 | 0.999954 | 2.90985e-05 | 0.999828 |
| rad33     | 7.28265e-06 | 0.999961 | 2.70858e-05 | 0.999856 |
| rad58     | 6.42083e-06 | 0.999968 | 2.38805e-05 | 0.999879 |
| rad47     | 6.08947e-06 | 0.999974 | 2.26481e-05 | 0.999902 |
| PAH1+H    | 4.40930e-06 | 0.999978 | 1.63992e-05 | 0.999918 |
| rad54     | 4.18374e-06 | 0.999982 | 1.55603e-05 | 0.999934 |
| rad37     | 2.92007e-06 | 0.999985 | 1.08604e-05 | 0.999945 |
| rad70     | 2.91315e-06 | 0.999988 | 1.08347e-05 | 0.999956 |
| rad71     | 1.65251e-06 | 0.999990 | 6.14608e-06 | 0.999962 |
| rad10     | 1.50873e-06 | 0.999991 | 5.61129e-06 | 0.999967 |
| rad26     | 1.47656e-06 | 0.999993 | 5.49165e-06 | 0.999973 |
| rad65     | 1.28495e-06 | 0.999994 | 4.77904e-06 | 0.999978 |
| rad2      | 1.18836e-06 | 0.999995 | 4.41980e-06 | 0.999982 |
| rad73     | 1.17208e-06 | 0.999996 | 4.35923e-06 | 0.999987 |
| rad34     | 8.06797e-07 | 0.999997 | 3.00066e-06 | 0.999990 |
| rad3      | 6.54195e-07 | 0.999998 | 2.43310e-06 | 0.999992 |
| rad4      | 5.23353e-07 | 0.999998 | 1.94647e-06 | 0.999994 |
| rad1      | 3.45988e-07 | 0.999999 | 1.28681e-06 | 0.999995 |
| rad55     | 3.35348e-07 | 0.999999 | 1.24724e-06 | 0.999996 |
| PAH8+H    | 2.62259e-07 | 0.999999 | 9.75401e-07 | 0.999997 |
| rad56     | 1.45746e-07 | 0.999999 | 5.42062e-07 | 0.999998 |
| rad53     | 1.23844e-07 | 1.000000 | 4.60603e-07 | 0.999998 |
| rad64     | 8.63410e-08 | 1.000000 | 3.21122e-07 | 0.999999 |
| rad68syn  | 7.48194e-08 | 1.000000 | 2.78270e-07 | 0.999999 |
| rad14     | 6.98534e-08 | 1.000000 | 2.59801e-07 | 0.999999 |
| rad72     | 5.71742e-08 | 1.000000 | 2.12644e-07 | 0.999999 |
| rad62     | 5.67346e-08 | 1.000000 | 2.11009e-07 | 1.000000 |
| rad68anti | 4.85816e-08 | 1.000000 | 1.80686e-07 | 1.000000 |
| rad40syn  | 2.98886e-08 | 1.000000 | 1.11163e-07 | 1.000000 |
| rad61     | 1.90170e-08 | 1.000000 | 7.07287e-08 | 1.000000 |
| rad40anti | 1.79743e-08 | 1.000000 | 6.68504e-08 | 1.000000 |
| rad27     | 1.39652e-08 | 1.000000 | 5.19397e-08 | 1.000000 |
| rad43     | 1.13761e-08 | 1.000000 | 4.23102e-08 | 1.000000 |
| rad42     | 5.67610e-09 | 1.000000 | 2.11107e-08 | 1.000000 |
| rad31     | 5.67331e-09 | 1.000000 | 2.11003e-08 | 1.000000 |
| rad41     | 1.09345e-09 | 1.000000 | 4.06679e-09 | 1.000000 |
| rad5      | 8.07330e-10 | 1.000000 | 3.00264e-09 | 1.000000 |

10000000.0 Pa, 1400.00000 K

=====

| Rate constant | True (fraction)     | Effective (fraction) |
|---------------|---------------------|----------------------|
| Total         | 2.46691e-14 (1.00 ) | 6.16640e-15 (1.00 )  |

| species     | PYtrue      | Cumul    | PYeffective | Cumul    |
|-------------|-------------|----------|-------------|----------|
| Benzyl+C2H2 | 0.750036    | 0.750036 | 0.00000     | 0.00000  |
| Indene+H    | 0.0782245   | 0.828261 | 0.312943    | 0.312943 |
| rad20       | 0.0727881   | 0.901049 | 0.291194    | 0.604137 |
| rad21       | 0.0210846   | 0.922133 | 0.0843503   | 0.688487 |
| rad45       | 0.0172814   | 0.939415 | 0.0691353   | 0.757623 |
| PhCH2CCH+H  | 0.0162832   | 0.955698 | 0.0651421   | 0.822765 |
| Ph+Allene   | 0.00821971  | 0.963918 | 0.0328835   | 0.855648 |
| rad18       | 0.00701967  | 0.970937 | 0.0280827   | 0.883731 |
| rad22       | 0.00476041  | 0.975698 | 0.0190444   | 0.902775 |
| rad9        | 0.00470220  | 0.980400 | 0.0188115   | 0.921587 |
| PhCHCCH2+H  | 0.00438738  | 0.984787 | 0.0175520   | 0.939139 |
| rad11       | 0.00377004  | 0.988557 | 0.0150823   | 0.954221 |
| rad23       | 0.00304661  | 0.991604 | 0.0121882   | 0.966409 |
| rad6        | 0.00207970  | 0.993684 | 0.00831999  | 0.974729 |
| rad36       | 0.00169991  | 0.995383 | 0.00680063  | 0.981530 |
| PAH9+H      | 0.000738932 | 0.996122 | 0.00295615  | 0.984486 |
| PAH3+H      | 0.000684046 | 0.996806 | 0.00273657  | 0.987223 |
| rad30       | 0.000423061 | 0.997229 | 0.00169249  | 0.988915 |
| rad24       | 0.000419016 | 0.997648 | 0.00167631  | 0.990591 |
| PAH7+H      | 0.000358806 | 0.998007 | 0.00143543  | 0.992027 |
| rad38       | 0.000331734 | 0.998339 | 0.00132713  | 0.993354 |
| rad7        | 0.000204781 | 0.998544 | 0.000819242 | 0.994173 |
| PhCCH+CH3   | 0.000178211 | 0.998722 | 0.000712945 | 0.994886 |
| rad35       | 0.000149570 | 0.998872 | 0.000598366 | 0.995485 |
| rad50       | 0.000146407 | 0.999018 | 0.000585714 | 0.996070 |
| rad46       | 0.000124938 | 0.999143 | 0.000499823 | 0.996570 |
| rad19anti   | 0.000115936 | 0.999259 | 0.000463810 | 0.997034 |
| rad39       | 8.73991e-05 | 0.999346 | 0.000349646 | 0.997384 |
| rad8        | 8.32556e-05 | 0.999430 | 0.000333070 | 0.997717 |
| rad13       | 8.24519e-05 | 0.999512 | 0.000329855 | 0.998046 |
| rad59       | 6.36485e-05 | 0.999576 | 0.000254631 | 0.998301 |
| rad15       | 6.11422e-05 | 0.999637 | 0.000244604 | 0.998546 |
| Ph+MeAc     | 5.59334e-05 | 0.999693 | 0.000223766 | 0.998769 |
| rad60syn    | 4.88399e-05 | 0.999742 | 0.000195388 | 0.998965 |



|               |             |          |             |          |
|---------------|-------------|----------|-------------|----------|
| rad51         | 4.84217e-05 | 0.999790 | 0.000193715 | 0.999159 |
| rad12         | 4.24346e-05 | 0.999832 | 0.000169763 | 0.999328 |
| rad60anti     | 3.07038e-05 | 0.999863 | 0.000122833 | 0.999451 |
| rad25         | 1.41909e-05 | 0.999877 | 5.67718e-05 | 0.999508 |
| rad28         | 1.34758e-05 | 0.999891 | 5.39109e-05 | 0.999562 |
| rad52         | 1.33948e-05 | 0.999904 | 5.35868e-05 | 0.999615 |
| rad19syn      | 1.12874e-05 | 0.999915 | 4.51561e-05 | 0.999661 |
| PhCCCH3+H     | 1.01100e-05 | 0.999926 | 4.04460e-05 | 0.999701 |
| rad67         | 9.93083e-06 | 0.999935 | 3.97290e-05 | 0.999741 |
| PhcycC3H3_A+H | 8.00602e-06 | 0.999943 | 3.20287e-05 | 0.999773 |
| rad58         | 7.88532e-06 | 0.999951 | 3.15458e-05 | 0.999804 |
| PAH10+CH3     | 7.75133e-06 | 0.999959 | 3.10097e-05 | 0.999835 |
| rad33         | 7.23309e-06 | 0.999966 | 2.89365e-05 | 0.999864 |
| rad47         | 5.85783e-06 | 0.999972 | 2.34347e-05 | 0.999888 |
| PAH1+H        | 4.49687e-06 | 0.999977 | 1.79900e-05 | 0.999906 |
| rad54         | 4.28588e-06 | 0.999981 | 1.71460e-05 | 0.999923 |
| rad37         | 2.87956e-06 | 0.999984 | 1.15199e-05 | 0.999934 |
| rad70         | 2.85308e-06 | 0.999987 | 1.14139e-05 | 0.999946 |
| rad10         | 2.76574e-06 | 0.999990 | 1.10645e-05 | 0.999957 |
| rad26         | 1.93897e-06 | 0.999991 | 7.75698e-06 | 0.999965 |
| rad71         | 1.69944e-06 | 0.999993 | 6.79873e-06 | 0.999971 |
| rad65         | 1.34470e-06 | 0.999994 | 5.37957e-06 | 0.999977 |
| rad73         | 1.20372e-06 | 0.999996 | 4.81555e-06 | 0.999982 |
| rad2          | 1.10143e-06 | 0.999997 | 4.40635e-06 | 0.999986 |
| rad34         | 7.93959e-07 | 0.999998 | 3.17629e-06 | 0.999989 |
| rad3          | 5.48680e-07 | 0.999998 | 2.19503e-06 | 0.999991 |
| rad4          | 4.38075e-07 | 0.999999 | 1.75255e-06 | 0.999993 |
| rad55         | 3.45469e-07 | 0.999999 | 1.38207e-06 | 0.999995 |
| rad1          | 3.20056e-07 | 0.999999 | 1.28041e-06 | 0.999996 |
| PAH8+H        | 2.63793e-07 | 1.000000 | 1.05532e-06 | 0.999997 |
| rad56         | 1.54431e-07 | 1.000000 | 6.17813e-07 | 0.999997 |
| rad53         | 1.30133e-07 | 1.000000 | 5.20606e-07 | 0.999998 |
| rad14         | 9.05147e-08 | 1.000000 | 3.62111e-07 | 0.999998 |
| rad64         | 8.83794e-08 | 1.000000 | 3.53568e-07 | 0.999999 |
| rad68syn      | 7.46102e-08 | 1.000000 | 2.98484e-07 | 0.999999 |
| rad72         | 5.89073e-08 | 1.000000 | 2.35663e-07 | 0.999999 |
| rad62         | 5.60543e-08 | 1.000000 | 2.24249e-07 | 0.999999 |
| rad68anti     | 4.84378e-08 | 1.000000 | 1.93779e-07 | 1.000000 |
| rad40syn      | 2.99602e-08 | 1.000000 | 1.19858e-07 | 1.000000 |
| rad61         | 1.88995e-08 | 1.000000 | 7.56090e-08 | 1.000000 |
| rad40anti     | 1.80417e-08 | 1.000000 | 7.21772e-08 | 1.000000 |
| rad27         | 1.75495e-08 | 1.000000 | 7.02079e-08 | 1.000000 |
| rad43         | 1.11833e-08 | 1.000000 | 4.47395e-08 | 1.000000 |
| rad42         | 5.65487e-09 | 1.000000 | 2.26227e-08 | 1.000000 |
| rad31         | 5.11337e-09 | 1.000000 | 2.04564e-08 | 1.000000 |
| rad5          | 1.52287e-09 | 1.000000 | 6.09237e-09 | 1.000000 |
| rad41         | 1.07904e-09 | 1.000000 | 4.31677e-09 | 1.000000 |

10000000.0 Pa, 1500.00000 K

=====

| Rate constant | True (fraction)     | Effective (fraction) |
|---------------|---------------------|----------------------|
| Total         | 3.76908e-14 (1.00 ) | 8.81230e-15 (1.00 )  |

| species     | PYtrue      | Cumul    | PYeffective | Cumul    |
|-------------|-------------|----------|-------------|----------|
| Benzyl+C2H2 | 0.766195    | 0.766195 | 0.00000     | 0.00000  |
| Indene+H    | 0.0760375   | 0.842232 | 0.325217    | 0.325217 |
| rad20       | 0.0612784   | 0.903511 | 0.262092    | 0.587309 |
| rad21       | 0.0196905   | 0.923201 | 0.0842175   | 0.671526 |
| rad45       | 0.0164875   | 0.939689 | 0.0705181   | 0.742045 |
| PhCH2CCH+H  | 0.0158773   | 0.955566 | 0.0679084   | 0.809953 |
| Ph+Allene   | 0.00772477  | 0.963291 | 0.0330394   | 0.842992 |
| rad18       | 0.00675924  | 0.970050 | 0.0289097   | 0.871902 |
| rad22       | 0.00518864  | 0.975239 | 0.0221921   | 0.894094 |
| rad9        | 0.00455970  | 0.979799 | 0.0195022   | 0.913596 |
| rad11       | 0.00443337  | 0.984232 | 0.0189618   | 0.932558 |
| PhCHCCH2+H  | 0.00420276  | 0.988435 | 0.0179755   | 0.950534 |
| rad23       | 0.00313426  | 0.991569 | 0.0134055   | 0.963939 |
| rad6        | 0.00204615  | 0.993615 | 0.00875152  | 0.972691 |
| rad36       | 0.00161966  | 0.995235 | 0.00692738  | 0.979618 |
| PAH9+H      | 0.000758110 | 0.995993 | 0.00324249  | 0.982861 |
| PAH3+H      | 0.000732167 | 0.996725 | 0.00313153  | 0.985992 |
| rad30       | 0.000436252 | 0.997161 | 0.00186588  | 0.987858 |
| rad24       | 0.000398644 | 0.997560 | 0.00170503  | 0.989563 |
| PAH7+H      | 0.000345163 | 0.997905 | 0.00147629  | 0.991039 |
| rad38       | 0.000332692 | 0.998238 | 0.00142295  | 0.992462 |
| rad7        | 0.000272021 | 0.998510 | 0.00116345  | 0.993626 |
| PhCCH+CH3   | 0.000158237 | 0.998668 | 0.000676791 | 0.994303 |
| rad35       | 0.000154920 | 0.998823 | 0.000662602 | 0.994965 |

|               |             |          |             |          |
|---------------|-------------|----------|-------------|----------|
| rad50         | 0.000146761 | 0.998970 | 0.000627705 | 0.995593 |
| rad46         | 0.000125229 | 0.999095 | 0.000535615 | 0.996128 |
| rad19anti     | 0.000116527 | 0.999211 | 0.000498393 | 0.996627 |
| rad15         | 0.000109522 | 0.999321 | 0.000468435 | 0.997095 |
| rad8          | 8.70726e-05 | 0.999408 | 0.000372415 | 0.997468 |
| rad39         | 8.59415e-05 | 0.999494 | 0.000367578 | 0.997835 |
| rad13         | 7.57786e-05 | 0.999570 | 0.000324110 | 0.998159 |
| rad59         | 6.78214e-05 | 0.999638 | 0.000290077 | 0.998449 |
| Ph+MeAc       | 5.20524e-05 | 0.999690 | 0.000222632 | 0.998672 |
| rad60syn      | 5.14698e-05 | 0.999741 | 0.000220140 | 0.998892 |
| rad51         | 4.85780e-05 | 0.999790 | 0.000207771 | 0.999100 |
| rad12         | 4.11129e-05 | 0.999831 | 0.000175843 | 0.999276 |
| rad60anti     | 3.23959e-05 | 0.999863 | 0.000138560 | 0.999414 |
| rad28         | 1.61666e-05 | 0.999879 | 6.91457e-05 | 0.999484 |
| rad25         | 1.45460e-05 | 0.999894 | 6.22142e-05 | 0.999546 |
| rad52         | 1.34377e-05 | 0.999907 | 5.74739e-05 | 0.999603 |
| rad67         | 9.79389e-06 | 0.999917 | 4.18891e-05 | 0.999645 |
| PhCCCH3+H     | 9.71554e-06 | 0.999927 | 4.15968e-05 | 0.999687 |
| rad19syn      | 9.71708e-06 | 0.999937 | 4.15606e-05 | 0.999728 |
| rad58         | 8.57150e-06 | 0.999945 | 3.66609e-05 | 0.999765 |
| PAH10+CH3     | 7.17291e-06 | 0.999952 | 3.06790e-05 | 0.999796 |
| PhcycC3H3_A+H | 6.81322e-06 | 0.999959 | 2.91406e-05 | 0.999825 |
| rad33         | 6.20912e-06 | 0.999965 | 2.65568e-05 | 0.999851 |
| rad47         | 5.56833e-06 | 0.999971 | 2.38161e-05 | 0.999875 |
| PAH1+H        | 4.32425e-06 | 0.999975 | 1.84951e-05 | 0.999894 |
| rad54         | 3.94494e-06 | 0.999979 | 1.68728e-05 | 0.999910 |
| rad10         | 3.80969e-06 | 0.999983 | 1.62943e-05 | 0.999927 |
| rad26         | 3.15004e-06 | 0.999986 | 1.34730e-05 | 0.999940 |
| rad70         | 2.73775e-06 | 0.999989 | 1.17095e-05 | 0.999952 |
| rad37         | 2.66198e-06 | 0.999992 | 1.13855e-05 | 0.999963 |
| rad71         | 1.71913e-06 | 0.999993 | 7.35283e-06 | 0.999971 |
| rad65         | 1.39167e-06 | 0.999995 | 5.95225e-06 | 0.999977 |
| rad73         | 1.21622e-06 | 0.999996 | 5.20184e-06 | 0.999982 |
| rad2          | 9.85476e-07 | 0.999997 | 4.21495e-06 | 0.999986 |
| rad34         | 7.63814e-07 | 0.999998 | 3.26688e-06 | 0.999989 |
| rad3          | 4.30481e-07 | 0.999998 | 1.84120e-06 | 0.999991 |
| rad4          | 3.43220e-07 | 0.999998 | 1.46797e-06 | 0.999993 |
| rad55         | 3.19225e-07 | 0.999999 | 1.36535e-06 | 0.999994 |
| rad1          | 2.87117e-07 | 0.999999 | 1.22802e-06 | 0.999995 |
| PAH8+H        | 2.56808e-07 | 0.999999 | 1.09838e-06 | 0.999996 |
| rad56         | 1.45502e-07 | 0.999999 | 6.22322e-07 | 0.999997 |
| rad53         | 1.21904e-07 | 1.000000 | 5.21392e-07 | 0.999997 |
| rad14         | 9.25478e-08 | 1.000000 | 3.95833e-07 | 0.999998 |
| rad64         | 8.52426e-08 | 1.000000 | 3.64588e-07 | 0.999998 |
| rad68syn      | 7.22921e-08 | 1.000000 | 3.09198e-07 | 0.999999 |
| rad72         | 5.96844e-08 | 1.000000 | 2.55274e-07 | 0.999999 |
| rad62         | 5.19200e-08 | 1.000000 | 2.22065e-07 | 0.999999 |
| rad68anti     | 4.69287e-08 | 1.000000 | 2.00717e-07 | 0.999999 |
| rad40syn      | 2.91107e-08 | 1.000000 | 1.24508e-07 | 0.999999 |
| rad27         | 1.81667e-08 | 1.000000 | 7.77001e-08 | 0.999999 |
| rad40anti     | 1.75426e-08 | 1.000000 | 7.50310e-08 | 1.000000 |
| rad61         | 1.75059e-08 | 1.000000 | 7.48738e-08 | 1.000000 |
| rad43         | 1.06092e-08 | 1.000000 | 4.53764e-08 | 1.000000 |
| rad42         | 5.27475e-09 | 1.000000 | 2.25605e-08 | 1.000000 |
| rad31         | 4.28990e-09 | 1.000000 | 1.83482e-08 | 1.000000 |
| rad5          | 3.86207e-09 | 1.000000 | 1.65183e-08 | 1.000000 |
| rad41         | 1.02704e-09 | 1.000000 | 4.39271e-09 | 1.000000 |

10000000.0 Pa, 1750.00000 K

=====

| Rate constant | True (fraction)     | Effective (fraction) |
|---------------|---------------------|----------------------|
| Total         | 9.18604e-14 (1.00 ) | 1.71775e-14 (1.00 )  |

| species     | PYtrue     | Cumul    | PYeffective | Cumul    |
|-------------|------------|----------|-------------|----------|
| Benzyl+C2H2 | 0.813004   | 0.813004 | 0.00000     | 0.00000  |
| PhCH2CCH+H  | 0.0530245  | 0.866028 | 0.283560    | 0.283560 |
| Indene+H    | 0.0469887  | 0.913017 | 0.251282    | 0.534842 |
| PhCHCCH2+H  | 0.0270781  | 0.940095 | 0.144806    | 0.679648 |
| Ph+Allene   | 0.0152601  | 0.955355 | 0.0816064   | 0.761254 |
| rad20       | 0.00705639 | 0.962412 | 0.0377355   | 0.798990 |
| PAH3+H      | 0.00622502 | 0.968637 | 0.0332896   | 0.832280 |
| rad22       | 0.00301041 | 0.971647 | 0.0160988   | 0.848378 |
| PAH7+H      | 0.00284064 | 0.974488 | 0.0151909   | 0.863569 |
| rad50       | 0.00263682 | 0.977125 | 0.0141010   | 0.877670 |
| rad39       | 0.00229425 | 0.979419 | 0.0122690   | 0.889939 |
| rad51       | 0.00217036 | 0.981589 | 0.0116065   | 0.901546 |
| PAH9+H      | 0.00197671 | 0.983566 | 0.0105709   | 0.912117 |
| rad71       | 0.00190234 | 0.985468 | 0.0101732   | 0.922290 |

|               |             |          |             |          |
|---------------|-------------|----------|-------------|----------|
| rad21         | 0.00188645  | 0.987355 | 0.0100882   | 0.932378 |
| rad38         | 0.00151160  | 0.988866 | 0.00808360  | 0.940462 |
| rad18         | 0.00108251  | 0.989949 | 0.00578895  | 0.946251 |
| PhCCH+CH3     | 0.00101653  | 0.990965 | 0.00543609  | 0.951687 |
| rad30         | 0.000753605 | 0.991719 | 0.00403006  | 0.955717 |
| rad46         | 0.000725462 | 0.992444 | 0.00387957  | 0.959596 |
| Ph+MeAc       | 0.000694599 | 0.993139 | 0.00371452  | 0.963311 |
| rad35         | 0.000605552 | 0.993745 | 0.00323832  | 0.966549 |
| rad73         | 0.000591849 | 0.994336 | 0.00316504  | 0.969714 |
| rad19anti     | 0.000532844 | 0.994869 | 0.00284950  | 0.972564 |
| rad11         | 0.000487704 | 0.995357 | 0.00260810  | 0.975172 |
| rad23         | 0.000468163 | 0.995825 | 0.00250360  | 0.977675 |
| rad59         | 0.000424032 | 0.996249 | 0.00226760  | 0.979943 |
| rad6          | 0.000409908 | 0.996659 | 0.00219207  | 0.982135 |
| rad72         | 0.000369850 | 0.997029 | 0.00197785  | 0.984113 |
| rad52         | 0.000360358 | 0.997389 | 0.00192709  | 0.986040 |
| PAH1+H        | 0.000280841 | 0.997670 | 0.00150186  | 0.987542 |
| PhCCCH3+H     | 0.000250561 | 0.997921 | 0.00133993  | 0.988882 |
| rad45         | 0.000243087 | 0.998164 | 0.00129996  | 0.990182 |
| rad67         | 0.000239560 | 0.998403 | 0.00128110  | 0.991463 |
| PAH10+CH3     | 0.000228099 | 0.998632 | 0.00121981  | 0.992683 |
| rad60syn      | 0.000193478 | 0.998825 | 0.00103466  | 0.993717 |
| rad19syn      | 0.000179203 | 0.999004 | 0.000958327 | 0.994676 |
| rad58         | 0.000165537 | 0.999170 | 0.000885244 | 0.995561 |
| rad60anti     | 0.000144088 | 0.999314 | 0.000770543 | 0.996331 |
| rad9          | 0.000133591 | 0.999447 | 0.000714405 | 0.997046 |
| rad47         | 8.81905e-05 | 0.999536 | 0.000471618 | 0.997517 |
| PAH8+H        | 8.37944e-05 | 0.999619 | 0.000448108 | 0.997966 |
| PhcycC3H3_A+H | 5.14375e-05 | 0.999671 | 0.000275073 | 0.998241 |
| rad70         | 4.85203e-05 | 0.999719 | 0.000259473 | 0.998500 |
| rad36         | 4.35765e-05 | 0.999763 | 0.000233035 | 0.998733 |
| rad65         | 3.89632e-05 | 0.999802 | 0.000208364 | 0.998941 |
| rad24         | 3.31821e-05 | 0.999835 | 0.000177448 | 0.999119 |
| rad8          | 2.98669e-05 | 0.999865 | 0.000159719 | 0.999279 |
| rad34         | 2.24100e-05 | 0.999887 | 0.000119842 | 0.999398 |
| rad37         | 1.69444e-05 | 0.999904 | 9.06139e-05 | 0.999489 |
| rad15         | 1.23924e-05 | 0.999917 | 6.62712e-05 | 0.999555 |
| rad54         | 1.14610e-05 | 0.999928 | 6.12900e-05 | 0.999617 |
| rad7          | 8.58155e-06 | 0.999937 | 4.58917e-05 | 0.999663 |
| rad64         | 8.46922e-06 | 0.999945 | 4.52910e-05 | 0.999708 |
| rad68syn      | 8.27438e-06 | 0.999953 | 4.42490e-05 | 0.999752 |
| rad28         | 7.34261e-06 | 0.999961 | 3.92662e-05 | 0.999791 |
| rad40syn      | 5.90565e-06 | 0.999967 | 3.15817e-05 | 0.999823 |
| rad12         | 5.51203e-06 | 0.999972 | 2.94768e-05 | 0.999852 |
| rad68anti     | 5.25684e-06 | 0.999977 | 2.81121e-05 | 0.999881 |
| rad40anti     | 4.63625e-06 | 0.999982 | 2.47933e-05 | 0.999905 |
| rad62         | 3.03937e-06 | 0.999985 | 1.62537e-05 | 0.999922 |
| rad56         | 3.00203e-06 | 0.999988 | 1.60540e-05 | 0.999938 |
| rad61         | 2.49425e-06 | 0.999991 | 1.33385e-05 | 0.999951 |
| rad13         | 1.69972e-06 | 0.999992 | 9.08964e-06 | 0.999960 |
| rad53         | 1.68648e-06 | 0.999994 | 9.01881e-06 | 0.999969 |
| rad55         | 1.37300e-06 | 0.999995 | 7.34244e-06 | 0.999976 |
| rad25         | 1.13617e-06 | 0.999997 | 6.07589e-06 | 0.999982 |
| rad26         | 1.02987e-06 | 0.999998 | 5.50746e-06 | 0.999988 |
| rad42         | 7.56988e-07 | 0.999998 | 4.04816e-06 | 0.999992 |
| rad43         | 5.55602e-07 | 0.999999 | 2.97120e-06 | 0.999995 |
| rad10         | 4.92347e-07 | 0.999999 | 2.63293e-06 | 0.999998 |
| rad41         | 1.54287e-07 | 1.000000 | 8.25083e-07 | 0.999998 |
| rad33         | 1.51690e-07 | 1.000000 | 8.11193e-07 | 0.999999 |
| rad2          | 5.08074e-08 | 1.000000 | 2.71704e-07 | 1.000000 |
| rad14         | 2.54533e-08 | 1.000000 | 1.36117e-07 | 1.000000 |
| rad1          | 2.45204e-08 | 1.000000 | 1.31128e-07 | 1.000000 |
| rad5          | 1.70021e-08 | 1.000000 | 9.09223e-08 | 1.000000 |
| rad27         | 5.93166e-09 | 1.000000 | 3.17208e-08 | 1.000000 |
| rad3          | 4.63199e-09 | 1.000000 | 2.47706e-08 | 1.000000 |
| rad4          | 2.70037e-09 | 1.000000 | 1.44408e-08 | 1.000000 |

10000000.0 Pa, 2000.00000 K

=====  
Rate constant | True (fraction) | Effective (fraction)  
-----  
Total | 1.85359e-13 (1.00) | 2.92291e-14 (1.00)

-----  
species | PYtrue | Cumul | PYeffective | Cumul  
-----  
Benzyl+C2H2 | 0.842311 | 0.842311 | 0.00000 | 0.00000  
Indene+H | 0.0437562 | 0.886067 | 0.277484 | 0.277484  
PhCH2CCH+H | 0.0436790 | 0.929746 | 0.276995 | 0.554479  
PhCHCCH2+H | 0.0216552 | 0.951401 | 0.137328 | 0.691807  
Ph+Allene | 0.0130963 | 0.964498 | 0.0830512 | 0.774858

|               |             |          |             |          |
|---------------|-------------|----------|-------------|----------|
| PAH3+H        | 0.00515550  | 0.969653 | 0.0326941   | 0.807552 |
| rad20         | 0.00411726  | 0.973770 | 0.0261100   | 0.833662 |
| rad50         | 0.00242742  | 0.976198 | 0.0153937   | 0.849056 |
| PAH7+H        | 0.00238276  | 0.978581 | 0.0151105   | 0.864166 |
| rad39         | 0.00209915  | 0.980680 | 0.0133119   | 0.877478 |
| PAH9+H        | 0.00204580  | 0.982726 | 0.0129737   | 0.890452 |
| rad51         | 0.00201098  | 0.984737 | 0.0127528   | 0.903205 |
| rad71         | 0.00176287  | 0.986499 | 0.0111794   | 0.914384 |
| rad22         | 0.00153830  | 0.988038 | 0.00975528  | 0.924140 |
| rad38         | 0.00140583  | 0.989444 | 0.00891518  | 0.933055 |
| rad21         | 0.00132528  | 0.990769 | 0.00840437  | 0.941459 |
| PhCCH+CH3     | 0.000783385 | 0.991552 | 0.00496791  | 0.946427 |
| rad46         | 0.000669662 | 0.992222 | 0.00424673  | 0.950674 |
| rad30         | 0.000661552 | 0.992883 | 0.00419530  | 0.954869 |
| rad18         | 0.000607519 | 0.993491 | 0.00385264  | 0.958722 |
| Ph+MeAc       | 0.000568026 | 0.994059 | 0.00360219  | 0.962324 |
| rad73         | 0.000548113 | 0.994607 | 0.00347591  | 0.965800 |
| rad35         | 0.000546020 | 0.995153 | 0.00346264  | 0.969262 |
| rad19anti     | 0.000444002 | 0.995597 | 0.00281568  | 0.972078 |
| rad23         | 0.000433530 | 0.996031 | 0.00274927  | 0.974827 |
| rad11         | 0.000415503 | 0.996446 | 0.00263496  | 0.977462 |
| rad59         | 0.000351922 | 0.996798 | 0.00223175  | 0.979694 |
| rad72         | 0.000342865 | 0.997141 | 0.00217431  | 0.981868 |
| rad52         | 0.000334135 | 0.997475 | 0.00211895  | 0.983987 |
| rad6          | 0.000308821 | 0.997784 | 0.00195842  | 0.985946 |
| PAH1+H        | 0.000235758 | 0.998020 | 0.00149508  | 0.987441 |
| rad45         | 0.000216023 | 0.998236 | 0.00136993  | 0.988811 |
| rad67         | 0.000199561 | 0.998435 | 0.00126553  | 0.990076 |
| PhCCCH3+H     | 0.000193908 | 0.998629 | 0.00122969  | 0.991306 |
| PAH10+CH3     | 0.000189270 | 0.998818 | 0.00120027  | 0.992506 |
| rad60syn      | 0.000162635 | 0.998981 | 0.00103137  | 0.993538 |
| rad58         | 0.000137379 | 0.999118 | 0.000871201 | 0.994409 |
| rad19syn      | 0.000135914 | 0.999254 | 0.000861911 | 0.995271 |
| rad9          | 0.000134744 | 0.999389 | 0.000854494 | 0.996125 |
| rad60anti     | 0.000120829 | 0.999510 | 0.000766248 | 0.996892 |
| rad47         | 7.36040e-05 | 0.999584 | 0.000466767 | 0.997358 |
| PAH8+H        | 6.77360e-05 | 0.999651 | 0.000429554 | 0.997788 |
| PhcycC3H3_A+H | 5.58841e-05 | 0.999707 | 0.000354394 | 0.998142 |
| rad65         | 4.12961e-05 | 0.999748 | 0.000261883 | 0.998404 |
| rad70         | 3.95650e-05 | 0.999788 | 0.000250905 | 0.998655 |
| rad36         | 3.87010e-05 | 0.999827 | 0.000245426 | 0.998900 |
| rad24         | 2.72786e-05 | 0.999854 | 0.000172990 | 0.999073 |
| rad8          | 2.70639e-05 | 0.999881 | 0.000171628 | 0.999245 |
| rad34         | 1.82113e-05 | 0.999899 | 0.000115489 | 0.999361 |
| rad37         | 1.40469e-05 | 0.999913 | 8.90798e-05 | 0.999450 |
| rad15         | 1.24529e-05 | 0.999926 | 7.89712e-05 | 0.999529 |
| rad54         | 1.13163e-05 | 0.999937 | 7.17633e-05 | 0.999600 |
| rad28         | 9.38852e-06 | 0.999946 | 5.95382e-05 | 0.999660 |
| rad64         | 7.10601e-06 | 0.999954 | 4.50635e-05 | 0.999705 |
| rad68syn      | 6.69650e-06 | 0.999960 | 4.24665e-05 | 0.999747 |
| rad7          | 6.06418e-06 | 0.999966 | 3.84566e-05 | 0.999786 |
| rad40syn      | 4.77480e-06 | 0.999971 | 3.02798e-05 | 0.999816 |
| rad12         | 4.54969e-06 | 0.999976 | 2.88523e-05 | 0.999845 |
| rad68anti     | 4.25447e-06 | 0.999980 | 2.69801e-05 | 0.999872 |
| rad40anti     | 3.74766e-06 | 0.999984 | 2.37661e-05 | 0.999896 |
| rad56         | 3.05720e-06 | 0.999987 | 1.93876e-05 | 0.999915 |
| rad62         | 2.66830e-06 | 0.999989 | 1.69213e-05 | 0.999932 |
| rad61         | 2.07049e-06 | 0.999991 | 1.31302e-05 | 0.999945 |
| rad53         | 1.71023e-06 | 0.999993 | 1.08456e-05 | 0.999956 |
| rad55         | 1.36568e-06 | 0.999995 | 8.66062e-06 | 0.999965 |
| rad13         | 1.21540e-06 | 0.999996 | 7.70760e-06 | 0.999972 |
| rad26         | 1.21311e-06 | 0.999997 | 7.69306e-06 | 0.999980 |
| rad25         | 1.09934e-06 | 0.999998 | 6.97155e-06 | 0.999987 |
| rad42         | 6.65097e-07 | 0.999999 | 4.21778e-06 | 0.999991 |
| rad43         | 4.45833e-07 | 0.999999 | 2.82730e-06 | 0.999994 |
| rad10         | 4.39430e-07 | 1.000000 | 2.78669e-06 | 0.999997 |
| rad41         | 1.23495e-07 | 1.000000 | 7.83156e-07 | 0.999998 |
| rad33         | 1.11460e-07 | 1.000000 | 7.06832e-07 | 0.999998 |
| rad5          | 8.15510e-08 | 1.000000 | 5.17164e-07 | 0.999999 |
| rad2          | 4.11684e-08 | 1.000000 | 2.61074e-07 | 0.999999 |
| rad14         | 2.11244e-08 | 1.000000 | 1.33962e-07 | 0.999999 |
| rad1          | 1.99805e-08 | 1.000000 | 1.26708e-07 | 0.999999 |
| rad27         | 4.59514e-09 | 1.000000 | 2.91405e-08 | 0.999999 |
| rad3          | 3.34301e-09 | 1.000000 | 2.12000e-08 | 0.999999 |
| rad4          | 1.96676e-09 | 1.000000 | 1.24724e-08 | 1.000000 |

10000000.0 Pa, 2250.00000 K

=====

Rate constant | True (fraction) | Effective (fraction)

-----

Total | 3.29136e-13 (1.00 ) 4.58849e-14 (1.00 )

| species       | PYtrue      | Cumul    | PYeffective | Cumul    |
|---------------|-------------|----------|-------------|----------|
| Benzyl+C2H2   | 0.860590    | 0.860590 | 0.00000     | 0.00000  |
| PhCH2CCH+H    | 0.0418596   | 0.902450 | 0.300263    | 0.300263 |
| Indene+H      | 0.0388952   | 0.941345 | 0.278999    | 0.579262 |
| PhCHCCH2+H    | 0.0183536   | 0.959698 | 0.131652    | 0.710914 |
| Ph+Allene     | 0.0120511   | 0.971749 | 0.0864434   | 0.797357 |
| PAH3+H        | 0.00384110  | 0.975591 | 0.0275526   | 0.824910 |
| rad20         | 0.00244499  | 0.978036 | 0.0175382   | 0.842448 |
| rad50         | 0.00214330  | 0.980179 | 0.0153741   | 0.857822 |
| PAH7+H        | 0.00196941  | 0.982148 | 0.0141267   | 0.871949 |
| PAH9+H        | 0.00196546  | 0.984114 | 0.0140984   | 0.886047 |
| rad39         | 0.00184649  | 0.985960 | 0.0132450   | 0.899292 |
| rad51         | 0.00178696  | 0.987747 | 0.0128180   | 0.912110 |
| rad71         | 0.00156705  | 0.989314 | 0.0112406   | 0.923351 |
| rad38         | 0.00125360  | 0.990568 | 0.00899218  | 0.932343 |
| rad21         | 0.000889302 | 0.991457 | 0.00637904  | 0.938722 |
| rad22         | 0.000854940 | 0.992312 | 0.00613256  | 0.944855 |
| PhCCH+CH3     | 0.000620826 | 0.992933 | 0.00445324  | 0.949308 |
| rad46         | 0.000593005 | 0.993526 | 0.00425368  | 0.953562 |
| rad30         | 0.000574037 | 0.994100 | 0.00411762  | 0.957679 |
| Ph+MeAc       | 0.000492353 | 0.994592 | 0.00353169  | 0.961211 |
| rad73         | 0.000486853 | 0.995079 | 0.00349224  | 0.964703 |
| rad35         | 0.000466065 | 0.995545 | 0.00334312  | 0.968046 |
| rad19anti     | 0.000406275 | 0.995952 | 0.00291425  | 0.970961 |
| rad18         | 0.000367255 | 0.996319 | 0.00263435  | 0.973595 |
| rad11         | 0.000345049 | 0.996664 | 0.00247507  | 0.976070 |
| rad23         | 0.000331219 | 0.996995 | 0.00237586  | 0.978446 |
| rad72         | 0.000305010 | 0.997300 | 0.00218786  | 0.980634 |
| rad52         | 0.000297024 | 0.997597 | 0.00213058  | 0.982764 |
| rad59         | 0.000268048 | 0.997865 | 0.00192273  | 0.984687 |
| rad6          | 0.000259350 | 0.998124 | 0.00186034  | 0.986547 |
| PAH1+H        | 0.000193607 | 0.998318 | 0.00138876  | 0.987936 |
| rad45         | 0.000185156 | 0.998503 | 0.00132814  | 0.989264 |
| rad67         | 0.000171757 | 0.998675 | 0.00123203  | 0.990496 |
| PAH10+CH3     | 0.000157417 | 0.998832 | 0.00112917  | 0.991626 |
| PhCCCH3+H     | 0.000156373 | 0.998989 | 0.00112168  | 0.992747 |
| rad9          | 0.000149667 | 0.999138 | 0.00107357  | 0.993821 |
| rad60syn      | 0.000129728 | 0.999268 | 0.000930549 | 0.994751 |
| rad19syn      | 0.000105298 | 0.999373 | 0.000755312 | 0.995507 |
| rad58         | 9.78103e-05 | 0.999471 | 0.000701602 | 0.996208 |
| rad60anti     | 9.56661e-05 | 0.999567 | 0.000686221 | 0.996894 |
| PhcycC3H3_A+H | 6.00516e-05 | 0.999627 | 0.000430755 | 0.997325 |
| rad47         | 5.96591e-05 | 0.999687 | 0.000427940 | 0.997753 |
| PAH8+H        | 5.32110e-05 | 0.999740 | 0.000381687 | 0.998135 |
| rad65         | 4.13139e-05 | 0.999781 | 0.000296348 | 0.998431 |
| rad36         | 3.31974e-05 | 0.999814 | 0.000238128 | 0.998669 |
| rad70         | 3.20521e-05 | 0.999846 | 0.000229912 | 0.998899 |
| rad8          | 2.58721e-05 | 0.999872 | 0.000185583 | 0.999085 |
| rad24         | 2.11756e-05 | 0.999893 | 0.000151895 | 0.999237 |
| rad34         | 1.46007e-05 | 0.999908 | 0.000104732 | 0.999341 |
| rad15         | 1.32294e-05 | 0.999921 | 9.48959e-05 | 0.999436 |
| rad37         | 1.18770e-05 | 0.999933 | 8.51947e-05 | 0.999522 |
| rad54         | 1.10648e-05 | 0.999944 | 7.93689e-05 | 0.999601 |
| rad28         | 8.87406e-06 | 0.999953 | 6.36544e-05 | 0.999665 |
| rad7          | 5.86524e-06 | 0.999959 | 4.20719e-05 | 0.999707 |
| rad64         | 5.82154e-06 | 0.999965 | 4.17584e-05 | 0.999748 |
| rad68syn      | 5.28571e-06 | 0.999970 | 3.79149e-05 | 0.999786 |
| rad12         | 4.38741e-06 | 0.999974 | 3.14713e-05 | 0.999818 |
| rad40syn      | 3.75807e-06 | 0.999978 | 2.69570e-05 | 0.999845 |
| rad68anti     | 3.35842e-06 | 0.999982 | 2.40903e-05 | 0.999869 |
| rad56         | 3.04520e-06 | 0.999985 | 2.18435e-05 | 0.999891 |
| rad40anti     | 2.94776e-06 | 0.999988 | 2.11445e-05 | 0.999912 |
| rad62         | 2.32300e-06 | 0.999990 | 1.66631e-05 | 0.999928 |
| rad61         | 1.71141e-06 | 0.999992 | 1.22761e-05 | 0.999941 |
| rad53         | 1.69605e-06 | 0.999993 | 1.21659e-05 | 0.999953 |
| rad55         | 1.33877e-06 | 0.999995 | 9.60314e-06 | 0.999962 |
| rad26         | 1.27928e-06 | 0.999996 | 9.17642e-06 | 0.999972 |
| rad13         | 1.13885e-06 | 0.999997 | 8.16905e-06 | 0.999980 |
| rad25         | 1.06257e-06 | 0.999998 | 7.62188e-06 | 0.999987 |
| rad42         | 5.80286e-07 | 0.999999 | 4.16244e-06 | 0.999992 |
| rad10         | 3.95711e-07 | 0.999999 | 2.83847e-06 | 0.999994 |
| rad43         | 3.62141e-07 | 0.999999 | 2.59767e-06 | 0.999997 |
| rad5          | 1.24554e-07 | 1.000000 | 8.93438e-07 | 0.999998 |
| rad33         | 1.03323e-07 | 1.000000 | 7.41142e-07 | 0.999999 |
| rad41         | 9.94571e-08 | 1.000000 | 7.13415e-07 | 0.999999 |
| rad2          | 4.03523e-08 | 1.000000 | 2.89450e-07 | 1.000000 |
| rad1          | 1.93461e-08 | 1.000000 | 1.38771e-07 | 1.000000 |

|       |             |          |             |          |
|-------|-------------|----------|-------------|----------|
| rad14 | 1.72052e-08 | 1.000000 | 1.23414e-07 | 1.000000 |
| rad27 | 3.81804e-09 | 1.000000 | 2.73872e-08 | 1.000000 |
| rad3  | 3.12226e-09 | 1.000000 | 2.23963e-08 | 1.000000 |
| rad4  | 1.85286e-09 | 1.000000 | 1.32908e-08 | 1.000000 |

10000000.0 Pa, 2500.00000 K

=====

| Rate constant | True (fraction)     | Effective (fraction) |
|---------------|---------------------|----------------------|
| Total         | 5.32896e-13 (1.00 ) | 7.02714e-14 (1.00 )  |

| species       | PYtrue      | Cumul    | PYeffective | Cumul    |
|---------------|-------------|----------|-------------|----------|
| Benzyl+C2H2   | 0.868133    | 0.868133 | 0.00000     | 0.00000  |
| PhCH2CCH+H    | 0.0458519   | 0.913985 | 0.347714    | 0.347714 |
| Indene+H      | 0.0338222   | 0.947807 | 0.256488    | 0.604202 |
| PhCHCCH2+H    | 0.0171107   | 0.964918 | 0.129758    | 0.733960 |
| Ph+Allene     | 0.0119063   | 0.976824 | 0.0902905   | 0.824250 |
| PAH3+H        | 0.00302166  | 0.979846 | 0.0229145   | 0.847165 |
| rad50         | 0.00185586  | 0.981702 | 0.0140737   | 0.861239 |
| PAH9+H        | 0.00174350  | 0.983445 | 0.0132217   | 0.874460 |
| PAH7+H        | 0.00166599  | 0.985111 | 0.0126339   | 0.887094 |
| rad39         | 0.00159613  | 0.986707 | 0.0121041   | 0.899198 |
| rad51         | 0.00155027  | 0.988258 | 0.0117563   | 0.910955 |
| rad20         | 0.00149841  | 0.989756 | 0.0113630   | 0.922318 |
| rad71         | 0.00135989  | 0.991116 | 0.0103126   | 0.932630 |
| rad38         | 0.00109731  | 0.992213 | 0.00832133  | 0.940952 |
| rad21         | 0.000588358 | 0.992801 | 0.00446176  | 0.945413 |
| rad22         | 0.000529793 | 0.993331 | 0.00401764  | 0.949431 |
| PhCCH+CH3     | 0.000528397 | 0.993860 | 0.00400705  | 0.953438 |
| rad30         | 0.000520030 | 0.994380 | 0.00394360  | 0.957382 |
| rad46         | 0.000516289 | 0.994896 | 0.00391523  | 0.961297 |
| Ph+MeAc       | 0.000465631 | 0.995362 | 0.00353107  | 0.964828 |
| rad73         | 0.000422305 | 0.995784 | 0.00320252  | 0.968031 |
| rad19anti     | 0.000419582 | 0.996204 | 0.00318186  | 0.971212 |
| rad35         | 0.000401930 | 0.996605 | 0.00304800  | 0.974260 |
| rad23         | 0.000277423 | 0.996883 | 0.00210381  | 0.976364 |
| rad11         | 0.000266351 | 0.997149 | 0.00201985  | 0.978384 |
| rad72         | 0.000264792 | 0.997414 | 0.00200803  | 0.980392 |
| rad52         | 0.000257947 | 0.997672 | 0.00195611  | 0.982348 |
| rad6          | 0.000236810 | 0.997909 | 0.00179583  | 0.984144 |
| rad18         | 0.000222106 | 0.998131 | 0.00168432  | 0.985828 |
| rad59         | 0.000217569 | 0.998348 | 0.00164992  | 0.987478 |
| rad9          | 0.000166654 | 0.998515 | 0.00126381  | 0.988742 |
| rad67         | 0.000161154 | 0.998676 | 0.00122209  | 0.989964 |
| PAH1+H        | 0.000159263 | 0.998836 | 0.00120775  | 0.991172 |
| rad45         | 0.000156269 | 0.998992 | 0.00118505  | 0.992357 |
| PhCCCH3+H     | 0.000138580 | 0.999130 | 0.00105091  | 0.993408 |
| PAH10+CH3     | 0.000136338 | 0.999267 | 0.00103391  | 0.994442 |
| rad60syn      | 0.000110738 | 0.999377 | 0.000839775 | 0.995282 |
| rad19syn      | 8.76396e-05 | 0.999465 | 0.000664607 | 0.995946 |
| rad60anti     | 8.10612e-05 | 0.999546 | 0.000614720 | 0.996561 |
| rad58         | 7.10673e-05 | 0.999617 | 0.000538932 | 0.997100 |
| PhcycC3H3_A+H | 6.06395e-05 | 0.999678 | 0.000459854 | 0.997560 |
| rad47         | 4.77640e-05 | 0.999726 | 0.000362214 | 0.997922 |
| PAH8+H        | 4.20425e-05 | 0.999768 | 0.000318826 | 0.998241 |
| rad65         | 3.68792e-05 | 0.999805 | 0.000279670 | 0.998520 |
| rad36         | 2.80716e-05 | 0.999833 | 0.000212878 | 0.998733 |
| rad70         | 2.70078e-05 | 0.999860 | 0.000204811 | 0.998938 |
| rad8          | 2.55001e-05 | 0.999885 | 0.000193378 | 0.999131 |
| rad24         | 1.60801e-05 | 0.999901 | 0.000121942 | 0.999253 |
| rad15         | 1.44271e-05 | 0.999916 | 0.000109407 | 0.999363 |
| rad34         | 1.20753e-05 | 0.999928 | 9.15717e-05 | 0.999454 |
| rad37         | 1.07243e-05 | 0.999938 | 8.13265e-05 | 0.999536 |
| rad54         | 1.05938e-05 | 0.999949 | 8.03369e-05 | 0.999616 |
| rad28         | 8.44126e-06 | 0.999957 | 6.40135e-05 | 0.999680 |
| rad7          | 6.18518e-06 | 0.999964 | 4.69048e-05 | 0.999727 |
| rad64         | 4.76784e-06 | 0.999968 | 3.61564e-05 | 0.999763 |
| rad12         | 4.76238e-06 | 0.999973 | 3.61151e-05 | 0.999799 |
| rad68syn      | 4.22888e-06 | 0.999977 | 3.20693e-05 | 0.999831 |
| rad40syn      | 2.98484e-06 | 0.999980 | 2.26352e-05 | 0.999854 |
| rad56         | 2.83995e-06 | 0.999983 | 2.15365e-05 | 0.999875 |
| rad68anti     | 2.68743e-06 | 0.999986 | 2.03799e-05 | 0.999896 |
| rad40anti     | 2.33721e-06 | 0.999988 | 1.77240e-05 | 0.999914 |
| rad62         | 1.98753e-06 | 0.999990 | 1.50723e-05 | 0.999929 |
| rad53         | 1.58767e-06 | 0.999992 | 1.20400e-05 | 0.999941 |
| rad61         | 1.45603e-06 | 0.999993 | 1.10416e-05 | 0.999952 |
| rad26         | 1.37120e-06 | 0.999995 | 1.03984e-05 | 0.999962 |
| rad55         | 1.27387e-06 | 0.999996 | 9.66031e-06 | 0.999972 |
| rad13         | 1.15145e-06 | 0.999997 | 8.73191e-06 | 0.999980 |

|       |             |          |             |          |
|-------|-------------|----------|-------------|----------|
| rad25 | 9.86944e-07 | 0.999998 | 7.48440e-06 | 0.999988 |
| rad42 | 4.95186e-07 | 0.999999 | 3.75520e-06 | 0.999992 |
| rad10 | 4.03326e-07 | 0.999999 | 3.05859e-06 | 0.999995 |
| rad43 | 3.10899e-07 | 0.999999 | 2.35767e-06 | 0.999997 |
| rad5  | 1.37383e-07 | 0.999999 | 1.04183e-06 | 0.999998 |
| rad33 | 1.05379e-07 | 1.000000 | 7.99132e-07 | 0.999999 |
| rad41 | 8.36710e-08 | 1.000000 | 6.34511e-07 | 1.000000 |
| rad2  | 4.47439e-08 | 1.000000 | 3.39311e-07 | 1.000000 |
| rad1  | 2.12629e-08 | 1.000000 | 1.61245e-07 | 1.000000 |
| rad14 | 1.45969e-08 | 1.000000 | 1.10695e-07 | 1.000000 |
| rad27 | 3.64378e-09 | 1.000000 | 2.76323e-08 | 1.000000 |
| rad3  | 3.15859e-09 | 1.000000 | 2.39529e-08 | 1.000000 |
| rad4  | 1.87252e-09 | 1.000000 | 1.42001e-08 | 1.000000 |

10000000.0 Pa, 2750.00000 K

| Rate constant | True (fraction)     | Effective (fraction) |
|---------------|---------------------|----------------------|
| Total         | 8.05113e-13 (1.00 ) | 1.06558e-13 (1.00 )  |

| species       | PYtrue      | Cumul    | PYeffective | Cumul    |
|---------------|-------------|----------|-------------|----------|
| Benzyl+C2H2   | 0.867648    | 0.867648 | 0.000000    | 0.000000 |
| PhCH2CCH+H    | 0.0535987   | 0.921247 | 0.404971    | 0.404971 |
| Indene+H      | 0.0292428   | 0.950489 | 0.220947    | 0.625918 |
| PhCHCCH2+H    | 0.0173313   | 0.967821 | 0.130949    | 0.756867 |
| Ph+Allene     | 0.0124024   | 0.980223 | 0.0937074   | 0.850574 |
| PAH3+H        | 0.00268080  | 0.982904 | 0.0202551   | 0.870829 |
| rad50         | 0.00159554  | 0.984500 | 0.0120553   | 0.882885 |
| PAH9+H        | 0.00150460  | 0.986004 | 0.0113682   | 0.894253 |
| PAH7+H        | 0.00146680  | 0.987471 | 0.0110826   | 0.905336 |
| rad39         | 0.00137211  | 0.988843 | 0.0103671   | 0.915703 |
| rad51         | 0.00133033  | 0.990173 | 0.0100515   | 0.925754 |
| rad71         | 0.00116491  | 0.991338 | 0.00880159  | 0.934556 |
| rad20         | 0.000957256 | 0.992296 | 0.00723266  | 0.941788 |
| rad38         | 0.000956186 | 0.993252 | 0.00722457  | 0.949013 |
| rad30         | 0.000489661 | 0.993741 | 0.00369969  | 0.952713 |
| PhCCH+CH3     | 0.000487242 | 0.994229 | 0.00368141  | 0.956394 |
| Ph+MeAc       | 0.000473404 | 0.994702 | 0.00357686  | 0.959971 |
| rad19anti     | 0.000467099 | 0.995169 | 0.00352922  | 0.963500 |
| rad46         | 0.000447719 | 0.995617 | 0.00338279  | 0.966883 |
| rad21         | 0.000392523 | 0.996009 | 0.00296576  | 0.969849 |
| rad35         | 0.000362850 | 0.996372 | 0.00274155  | 0.972590 |
| rad73         | 0.000361812 | 0.996734 | 0.00273371  | 0.975324 |
| rad22         | 0.000331308 | 0.997065 | 0.00250324  | 0.977827 |
| rad23         | 0.000230590 | 0.997296 | 0.00174225  | 0.979569 |
| rad72         | 0.000226755 | 0.997523 | 0.00171328  | 0.981283 |
| rad52         | 0.000221796 | 0.997744 | 0.00167581  | 0.982959 |
| rad6          | 0.000205566 | 0.997950 | 0.00155318  | 0.984512 |
| rad59         | 0.000197734 | 0.998148 | 0.00149400  | 0.986006 |
| rad11         | 0.000196394 | 0.998344 | 0.00148388  | 0.987490 |
| rad9          | 0.000175634 | 0.998520 | 0.00132702  | 0.988817 |
| rad67         | 0.000163072 | 0.998683 | 0.00123211  | 0.990049 |
| PhCCCH3+H     | 0.000135366 | 0.998818 | 0.00102277  | 0.991072 |
| rad18         | 0.000135237 | 0.998953 | 0.00102180  | 0.992093 |
| PAH1+H        | 0.000133429 | 0.999087 | 0.00100814  | 0.993101 |
| rad45         | 0.000130583 | 0.999218 | 0.000986637 | 0.994088 |
| PAH10+CH3     | 0.000124435 | 0.999342 | 0.000940180 | 0.995028 |
| rad60syn      | 0.000103407 | 0.999445 | 0.000781303 | 0.995810 |
| rad19syn      | 8.08192e-05 | 0.999526 | 0.000610639 | 0.996420 |
| rad60anti     | 7.54352e-05 | 0.999602 | 0.000569960 | 0.996990 |
| rad58         | 5.83254e-05 | 0.999660 | 0.000440685 | 0.997431 |
| PhcycC3H3_A+H | 5.80525e-05 | 0.999718 | 0.000438623 | 0.997870 |
| rad47         | 3.81572e-05 | 0.999756 | 0.000288301 | 0.998158 |
| PAH8+H        | 3.42465e-05 | 0.999790 | 0.000258753 | 0.998417 |
| rad65         | 3.13416e-05 | 0.999822 | 0.000236805 | 0.998653 |
| rad8          | 2.52667e-05 | 0.999847 | 0.000190905 | 0.998844 |
| rad70         | 2.43533e-05 | 0.999871 | 0.000184004 | 0.999028 |
| rad36         | 2.35116e-05 | 0.999895 | 0.000177644 | 0.999206 |
| rad15         | 1.52401e-05 | 0.999910 | 0.000115149 | 0.999321 |
| rad24         | 1.21941e-05 | 0.999922 | 9.21336e-05 | 0.999413 |
| rad34         | 1.06295e-05 | 0.999933 | 8.03126e-05 | 0.999494 |
| rad37         | 1.04152e-05 | 0.999943 | 7.86935e-05 | 0.999572 |
| rad54         | 1.00964e-05 | 0.999953 | 7.62847e-05 | 0.999649 |
| rad28         | 7.68145e-06 | 0.999961 | 5.80381e-05 | 0.999707 |
| rad7          | 6.20530e-06 | 0.999967 | 4.68849e-05 | 0.999753 |
| rad12         | 5.29263e-06 | 0.999973 | 3.99891e-05 | 0.999793 |
| rad64         | 3.96943e-06 | 0.999977 | 2.99915e-05 | 0.999823 |
| rad68syn      | 3.53391e-06 | 0.999980 | 2.67009e-05 | 0.999850 |
| rad56         | 2.55168e-06 | 0.999983 | 1.92795e-05 | 0.999869 |

|           |             |          |             |          |
|-----------|-------------|----------|-------------|----------|
| rad40syn  | 2.45775e-06 | 0.999985 | 1.85698e-05 | 0.999888 |
| rad68anti | 2.24652e-06 | 0.999987 | 1.69738e-05 | 0.999905 |
| rad40anti | 1.91723e-06 | 0.999989 | 1.44859e-05 | 0.999919 |
| rad62     | 1.69746e-06 | 0.999991 | 1.28254e-05 | 0.999932 |
| rad26     | 1.44930e-06 | 0.999992 | 1.09504e-05 | 0.999943 |
| rad53     | 1.44198e-06 | 0.999994 | 1.08951e-05 | 0.999954 |
| rad61     | 1.28680e-06 | 0.999995 | 9.72253e-06 | 0.999964 |
| rad55     | 1.20039e-06 | 0.999996 | 9.06970e-06 | 0.999973 |
| rad13     | 1.11365e-06 | 0.999997 | 8.41431e-06 | 0.999981 |
| rad25     | 8.81861e-07 | 0.999998 | 6.66301e-06 | 0.999988 |
| rad10     | 4.40544e-07 | 0.999999 | 3.32858e-06 | 0.999991 |
| rad42     | 4.18954e-07 | 0.999999 | 3.16545e-06 | 0.999994 |
| rad43     | 2.88005e-07 | 1.000000 | 2.17606e-06 | 0.999997 |
| rad5      | 1.50024e-07 | 1.000000 | 1.13353e-06 | 0.999998 |
| rad33     | 1.04967e-07 | 1.000000 | 7.93092e-07 | 0.999999 |
| rad41     | 7.48854e-08 | 1.000000 | 5.65805e-07 | 0.999999 |
| rad2      | 4.98954e-08 | 1.000000 | 3.76990e-07 | 0.999999 |
| rad1      | 2.38687e-08 | 1.000000 | 1.80343e-07 | 1.000000 |
| rad14     | 1.29740e-08 | 1.000000 | 9.80263e-08 | 1.000000 |
| rad27     | 3.83183e-09 | 1.000000 | 2.89518e-08 | 1.000000 |
| rad3      | 3.07814e-09 | 1.000000 | 2.32572e-08 | 1.000000 |
| rad4      | 1.81381e-09 | 1.000000 | 1.37045e-08 | 1.000000 |

10000000.0 Pa, 3000.00000 K

=====

| Rate constant | True (fraction)     | Effective (fraction) |
|---------------|---------------------|----------------------|
| Total         | 1.15309e-12 (1.00 ) | 1.59410e-13 (1.00 )  |

| species       | PYtrue      | Cumul    | PYeffective | Cumul    |
|---------------|-------------|----------|-------------|----------|
| Benzyl+C2H2   | 0.861754    | 0.861754 | 0.00000     | 0.00000  |
| PhCH2CCH+H    | 0.0635572   | 0.925311 | 0.459739    | 0.459739 |
| Indene+H      | 0.0253129   | 0.950624 | 0.183100    | 0.642839 |
| PhCHCCH2+H    | 0.0184895   | 0.969114 | 0.133743    | 0.776582 |
| Ph+Allene     | 0.0133378   | 0.982451 | 0.0964782   | 0.873060 |
| PAH3+H        | 0.00264379  | 0.985095 | 0.0191238   | 0.892184 |
| rad50         | 0.00137174  | 0.986467 | 0.00992240  | 0.902106 |
| PAH7+H        | 0.00134662  | 0.987814 | 0.00974072  | 0.911847 |
| PAH9+H        | 0.00129579  | 0.989109 | 0.00937308  | 0.921220 |
| rad39         | 0.00118077  | 0.990290 | 0.00854108  | 0.929761 |
| rad51         | 0.00113794  | 0.991428 | 0.00823124  | 0.937993 |
| rad71         | 0.000991094 | 0.992419 | 0.00716904  | 0.945162 |
| rad38         | 0.000835400 | 0.993255 | 0.00604283  | 0.951204 |
| rad20         | 0.000638752 | 0.993893 | 0.00462039  | 0.955825 |
| rad19anti     | 0.000527619 | 0.994421 | 0.00381651  | 0.959641 |
| Ph+MeAc       | 0.000502432 | 0.994923 | 0.00363432  | 0.963276 |
| PhCCH+CH3     | 0.000483266 | 0.995407 | 0.00349569  | 0.966771 |
| rad30         | 0.000469789 | 0.995876 | 0.00339820  | 0.970170 |
| rad46         | 0.000389389 | 0.996266 | 0.00281663  | 0.972986 |
| rad35         | 0.000342983 | 0.996609 | 0.00248096  | 0.975467 |
| rad73         | 0.000308138 | 0.996917 | 0.00222891  | 0.977696 |
| rad21         | 0.000267157 | 0.997184 | 0.00193247  | 0.979628 |
| rad22         | 0.000207068 | 0.997391 | 0.00149782  | 0.981126 |
| rad59         | 0.000196445 | 0.997588 | 0.00142098  | 0.982547 |
| rad72         | 0.000192647 | 0.997780 | 0.00139351  | 0.983941 |
| rad52         | 0.000190315 | 0.997971 | 0.00137664  | 0.985317 |
| rad23         | 0.000186102 | 0.998157 | 0.00134616  | 0.986664 |
| rad9          | 0.000172166 | 0.998329 | 0.00124536  | 0.987909 |
| rad67         | 0.000172095 | 0.998501 | 0.00124484  | 0.989154 |
| rad6          | 0.000166341 | 0.998667 | 0.00120322  | 0.990357 |
| rad11         | 0.000142797 | 0.998810 | 0.00103292  | 0.991390 |
| PhCCCH3+H     | 0.000141839 | 0.998952 | 0.00102599  | 0.992416 |
| PAH10+CH3     | 0.000119153 | 0.999071 | 0.000861890 | 0.993278 |
| PAH1+H        | 0.000115241 | 0.999186 | 0.000833594 | 0.994111 |
| rad45         | 0.000108227 | 0.999295 | 0.000782854 | 0.994894 |
| rad60syn      | 0.000102498 | 0.999397 | 0.000741419 | 0.995636 |
| rad18         | 8.39330e-05 | 0.999481 | 0.000607126 | 0.996243 |
| rad19syn      | 8.33741e-05 | 0.999564 | 0.000603084 | 0.996846 |
| rad60anti     | 7.48397e-05 | 0.999639 | 0.000541350 | 0.997387 |
| rad58         | 5.53511e-05 | 0.999695 | 0.000400380 | 0.997788 |
| PhcycC3H3_A+H | 5.39694e-05 | 0.999748 | 0.000390386 | 0.998178 |
| rad47         | 3.05881e-05 | 0.999779 | 0.000221258 | 0.998399 |
| PAH8+H        | 2.94756e-05 | 0.999809 | 0.000213211 | 0.998612 |
| rad65         | 2.62682e-05 | 0.999835 | 0.000190010 | 0.998802 |
| rad8          | 2.48317e-05 | 0.999860 | 0.000179619 | 0.998982 |
| rad70         | 2.36885e-05 | 0.999883 | 0.000171350 | 0.999153 |
| rad36         | 1.95296e-05 | 0.999903 | 0.000141266 | 0.999295 |
| rad15         | 1.51473e-05 | 0.999918 | 0.000109568 | 0.999404 |
| rad37         | 1.06378e-05 | 0.999929 | 7.69480e-05 | 0.999481 |



|           |             |          |             |          |
|-----------|-------------|----------|-------------|----------|
| rad34     | 1.01136e-05 | 0.999939 | 7.31566e-05 | 0.999554 |
| rad54     | 9.74458e-06 | 0.999948 | 7.04871e-05 | 0.999625 |
| rad24     | 9.32481e-06 | 0.999958 | 6.74506e-05 | 0.999692 |
| rad28     | 6.60004e-06 | 0.999964 | 4.77411e-05 | 0.999740 |
| rad7      | 5.74822e-06 | 0.999970 | 4.15795e-05 | 0.999782 |
| rad12     | 5.66280e-06 | 0.999976 | 4.09616e-05 | 0.999823 |
| rad64     | 3.40315e-06 | 0.999979 | 2.46165e-05 | 0.999847 |
| rad68syn  | 3.16528e-06 | 0.999982 | 2.28959e-05 | 0.999870 |
| rad56     | 2.28533e-06 | 0.999985 | 1.65308e-05 | 0.999887 |
| rad40syn  | 2.15225e-06 | 0.999987 | 1.55682e-05 | 0.999902 |
| rad68anti | 2.01306e-06 | 0.999989 | 1.45614e-05 | 0.999917 |
| rad40anti | 1.66846e-06 | 0.999991 | 1.20688e-05 | 0.999929 |
| rad62     | 1.47296e-06 | 0.999992 | 1.06546e-05 | 0.999939 |
| rad26     | 1.45519e-06 | 0.999993 | 1.05261e-05 | 0.999950 |
| rad53     | 1.31242e-06 | 0.999995 | 9.49336e-06 | 0.999960 |
| rad61     | 1.18031e-06 | 0.999996 | 8.53771e-06 | 0.999968 |
| rad55     | 1.14470e-06 | 0.999997 | 8.28013e-06 | 0.999976 |
| rad13     | 1.00608e-06 | 0.999998 | 7.27747e-06 | 0.999984 |
| rad25     | 7.69582e-07 | 0.999999 | 5.56674e-06 | 0.999989 |
| rad10     | 4.74828e-07 | 0.999999 | 3.43465e-06 | 0.999993 |
| rad42     | 3.57489e-07 | 1.000000 | 2.58588e-06 | 0.999995 |
| rad43     | 2.87725e-07 | 1.000000 | 2.08125e-06 | 0.999997 |
| rad5      | 1.65532e-07 | 1.000000 | 1.19737e-06 | 0.999998 |
| rad33     | 9.86603e-08 | 1.000000 | 7.13656e-07 | 0.999999 |
| rad41     | 7.17288e-08 | 1.000000 | 5.18847e-07 | 1.000000 |
| rad2      | 5.27609e-08 | 1.000000 | 3.81644e-07 | 1.000000 |
| rad1      | 2.56702e-08 | 1.000000 | 1.85684e-07 | 1.000000 |
| rad14     | 1.18951e-08 | 1.000000 | 8.60427e-08 | 1.000000 |
| rad27     | 4.11580e-09 | 1.000000 | 2.97715e-08 | 1.000000 |
| rad3      | 2.81715e-09 | 1.000000 | 2.03777e-08 | 1.000000 |
| rad4      | 1.64866e-09 | 1.000000 | 1.19255e-08 | 1.000000 |

10000000.0 Pa, 3250.00000 K

=====

| Rate constant | True (fraction)     | Effective (fraction) |
|---------------|---------------------|----------------------|
| Total         | 1.58309e-12 (1.00 ) | 2.33642e-13 (1.00 )  |

| species     | PYtrue      | Cumul    | PYeffective | Cumul    |
|-------------|-------------|----------|-------------|----------|
| Benzyl+C2H2 | 0.852414    | 0.852414 | 0.000000    | 0.000000 |
| PhCH2CCH+H  | 0.0746978   | 0.927112 | 0.506130    | 0.506130 |
| Indene+H    | 0.0219818   | 0.949094 | 0.148942    | 0.655072 |
| PhCHCCH2+H  | 0.0202302   | 0.969324 | 0.137074    | 0.792146 |
| Ph+Allene   | 0.0145745   | 0.983898 | 0.0987526   | 0.890899 |
| PAH3+H      | 0.00276545  | 0.986664 | 0.0187379   | 0.909636 |
| PAH7+H      | 0.00128120  | 0.987945 | 0.00868103  | 0.918318 |
| rad50       | 0.00118517  | 0.989130 | 0.00803035  | 0.926348 |
| PAH9+H      | 0.00112551  | 0.990256 | 0.00762612  | 0.933974 |
| rad39       | 0.00102183  | 0.991277 | 0.00692364  | 0.940898 |
| rad51       | 0.000975494 | 0.992253 | 0.00660965  | 0.947507 |
| rad71       | 0.000841182 | 0.993094 | 0.00569959  | 0.953207 |
| rad38       | 0.000734199 | 0.993828 | 0.00497471  | 0.958182 |
| rad19anti   | 0.000582787 | 0.994411 | 0.00394879  | 0.962130 |
| Ph+MeAc     | 0.000542884 | 0.994954 | 0.00367842  | 0.965809 |
| PhCCH+CH3   | 0.000510411 | 0.995464 | 0.00345839  | 0.969267 |
| rad30       | 0.000452601 | 0.995917 | 0.00306669  | 0.972334 |
| rad20       | 0.000444034 | 0.996361 | 0.00300864  | 0.975343 |
| rad46       | 0.000340916 | 0.996702 | 0.00230995  | 0.977652 |
| rad35       | 0.000334852 | 0.997037 | 0.00226886  | 0.979921 |
| rad73       | 0.000262107 | 0.997299 | 0.00177596  | 0.981697 |
| rad59       | 0.000204095 | 0.997503 | 0.00138289  | 0.983080 |
| rad21       | 0.000186370 | 0.997689 | 0.00126279  | 0.984343 |
| rad67       | 0.000184264 | 0.997874 | 0.00124852  | 0.985591 |
| rad52       | 0.000163832 | 0.998037 | 0.00111008  | 0.986702 |
| rad72       | 0.000162996 | 0.998200 | 0.00110441  | 0.987806 |
| rad9        | 0.000157502 | 0.998358 | 0.00106718  | 0.988873 |
| PhCCCH3+H   | 0.000154686 | 0.998513 | 0.00104811  | 0.989921 |
| rad23       | 0.000146671 | 0.998659 | 0.000993799 | 0.990915 |
| rad22       | 0.000130855 | 0.998790 | 0.000886635 | 0.991802 |
| rad6        | 0.000127078 | 0.998917 | 0.000861039 | 0.992663 |
| PAH10+CH3   | 0.000118357 | 0.999036 | 0.000801954 | 0.993465 |
| rad11       | 0.000104650 | 0.999140 | 0.000709077 | 0.994174 |
| rad60syn    | 0.000104207 | 0.999244 | 0.000706077 | 0.994880 |
| PAH1+H      | 0.000103596 | 0.999348 | 0.000701938 | 0.995582 |
| rad19syn    | 9.44729e-05 | 0.999443 | 0.000640120 | 0.996222 |
| rad45       | 8.89865e-05 | 0.999532 | 0.000602946 | 0.996825 |
| rad60anti   | 7.63616e-05 | 0.999608 | 0.000517403 | 0.997342 |
| rad58       | 5.82572e-05 | 0.999666 | 0.000394733 | 0.997737 |
| rad18       | 5.34720e-05 | 0.999720 | 0.000362310 | 0.998099 |

|               |             |          |             |          |
|---------------|-------------|----------|-------------|----------|
| PhcycC3H3_A+H | 5.00646e-05 | 0.999770 | 0.000339222 | 0.998439 |
| PAH8+H        | 2.74718e-05 | 0.999797 | 0.000186141 | 0.998625 |
| rad47         | 2.47086e-05 | 0.999822 | 0.000167418 | 0.998792 |
| rad70         | 2.45811e-05 | 0.999846 | 0.000166554 | 0.998959 |
| rad8          | 2.40762e-05 | 0.999871 | 0.000163133 | 0.999122 |
| rad65         | 2.20867e-05 | 0.999893 | 0.000149653 | 0.999271 |
| rad36         | 1.60880e-05 | 0.999909 | 0.000109008 | 0.999380 |
| rad15         | 1.41041e-05 | 0.999923 | 9.55651e-05 | 0.999476 |
| rad37         | 1.10790e-05 | 0.999934 | 7.50681e-05 | 0.999551 |
| rad34         | 1.03601e-05 | 0.999944 | 7.01971e-05 | 0.999621 |
| rad54         | 9.61564e-06 | 0.999954 | 6.51527e-05 | 0.999686 |
| rad24         | 7.21391e-06 | 0.999961 | 4.88793e-05 | 0.999735 |
| rad12         | 5.71668e-06 | 0.999967 | 3.87345e-05 | 0.999774 |
| rad28         | 5.41126e-06 | 0.999972 | 3.66651e-05 | 0.999811 |
| rad7          | 4.95391e-06 | 0.999977 | 3.35662e-05 | 0.999844 |
| rad68syn      | 3.08711e-06 | 0.999980 | 2.09173e-05 | 0.999865 |
| rad64         | 3.03761e-06 | 0.999983 | 2.05819e-05 | 0.999886 |
| rad56         | 2.11079e-06 | 0.999985 | 1.43021e-05 | 0.999900 |
| rad40syn      | 2.04766e-06 | 0.999987 | 1.38743e-05 | 0.999914 |
| rad68anti     | 1.96416e-06 | 0.999989 | 1.33085e-05 | 0.999927 |
| rad40anti     | 1.57553e-06 | 0.999991 | 1.06753e-05 | 0.999938 |
| rad26         | 1.37166e-06 | 0.999992 | 9.29396e-06 | 0.999947 |
| rad62         | 1.32326e-06 | 0.999994 | 8.96600e-06 | 0.999956 |
| rad53         | 1.23306e-06 | 0.999995 | 8.35487e-06 | 0.999965 |
| rad61         | 1.12288e-06 | 0.999996 | 7.60830e-06 | 0.999972 |
| rad55         | 1.12025e-06 | 0.999997 | 7.59047e-06 | 0.999980 |
| rad13         | 8.55984e-07 | 0.999998 | 5.79989e-06 | 0.999986 |
| rad25         | 6.64706e-07 | 0.999999 | 4.50385e-06 | 0.999990 |
| rad10         | 4.85377e-07 | 0.999999 | 3.28877e-06 | 0.999993 |
| rad42         | 3.14122e-07 | 0.999999 | 2.12839e-06 | 0.999995 |
| rad43         | 3.04865e-07 | 1.000000 | 2.06567e-06 | 0.999998 |
| rad5          | 1.79965e-07 | 1.000000 | 1.21939e-06 | 0.999999 |
| rad33         | 8.76287e-08 | 1.000000 | 5.93746e-07 | 0.999999 |
| rad41         | 7.33374e-08 | 1.000000 | 4.96912e-07 | 1.000000 |
| rad2          | 5.23945e-08 | 1.000000 | 3.55010e-07 | 1.000000 |
| rad1          | 2.59607e-08 | 1.000000 | 1.75902e-07 | 1.000000 |
| rad14         | 1.10655e-08 | 1.000000 | 7.49766e-08 | 1.000000 |
| rad27         | 4.30655e-09 | 1.000000 | 2.91799e-08 | 1.000000 |
| rad3          | 2.43846e-09 | 1.000000 | 1.65223e-08 | 1.000000 |
| rad4          | 1.41870e-09 | 1.000000 | 9.61268e-09 | 1.000000 |

10000000.0 Pa, 3500.00000 K

=====

| Rate constant | True (fraction)     | Effective (fraction) |
|---------------|---------------------|----------------------|
| Total         | 2.10046e-12 (1.00 ) | 3.33994e-13 (1.00 )  |

| species     | PYtrue      | Cumul    | PYeffective | Cumul    |
|-------------|-------------|----------|-------------|----------|
| Benzyl+C2H2 | 0.840990    | 0.840990 | 0.00000     | 0.00000  |
| PhCH2CCH+H  | 0.0863541   | 0.927344 | 0.543073    | 0.543073 |
| PhCHCCH2+H  | 0.0223229   | 0.949667 | 0.140386    | 0.683459 |
| Indene+H    | 0.0191495   | 0.968817 | 0.120429    | 0.803888 |
| Ph+Allene   | 0.0160151   | 0.984832 | 0.100717    | 0.904605 |
| PAH3+H      | 0.00295304  | 0.987785 | 0.0185714   | 0.923176 |
| PAH7+H      | 0.00125151  | 0.989036 | 0.00787063  | 0.931047 |
| rad50       | 0.00103278  | 0.990069 | 0.00649503  | 0.937542 |
| PAH9+H      | 0.000988951 | 0.991058 | 0.00621942  | 0.943761 |
| rad39       | 0.000892489 | 0.991950 | 0.00561278  | 0.949374 |
| rad51       | 0.000841773 | 0.992792 | 0.00529383  | 0.954668 |
| rad71       | 0.000715665 | 0.993508 | 0.00450075  | 0.959169 |
| rad38       | 0.000649504 | 0.994157 | 0.00408467  | 0.963254 |
| rad19anti   | 0.000621158 | 0.994778 | 0.00390641  | 0.967160 |
| Ph+MeAc     | 0.000587211 | 0.995366 | 0.00369291  | 0.970853 |
| PhCCH+CH3   | 0.000567243 | 0.995933 | 0.00356734  | 0.974420 |
| rad30       | 0.000434788 | 0.996368 | 0.00273434  | 0.977155 |
| rad35       | 0.000332744 | 0.996700 | 0.00209260  | 0.979247 |
| rad20       | 0.000320174 | 0.997021 | 0.00201354  | 0.981261 |
| rad46       | 0.000300897 | 0.997322 | 0.00189231  | 0.983153 |
| rad73       | 0.000223797 | 0.997545 | 0.00140744  | 0.984560 |
| rad59       | 0.000214801 | 0.997760 | 0.00135086  | 0.985911 |
| rad67       | 0.000196929 | 0.997957 | 0.00123847  | 0.987150 |
| PhCCCH3+H   | 0.000171940 | 0.998129 | 0.00108132  | 0.988231 |
| rad52       | 0.000142051 | 0.998271 | 0.000893348 | 0.989124 |
| rad72       | 0.000137934 | 0.998409 | 0.000867456 | 0.989992 |
| rad9        | 0.000136021 | 0.998545 | 0.000855421 | 0.990847 |
| rad21       | 0.000133378 | 0.998678 | 0.000838802 | 0.991686 |
| PAH10+CH3   | 0.000120374 | 0.998799 | 0.000757020 | 0.992443 |
| rad23       | 0.000113841 | 0.998913 | 0.000715936 | 0.993159 |
| rad19syn    | 0.000113270 | 0.999026 | 0.000712346 | 0.993871 |

|               |             |          |             |          |
|---------------|-------------|----------|-------------|----------|
| rad60syn      | 0.000106405 | 0.999132 | 0.000669170 | 0.994541 |
| PAH1+H        | 9.74217e-05 | 0.999230 | 0.000612676 | 0.995153 |
| rad6          | 9.33349e-05 | 0.999323 | 0.000586975 | 0.995740 |
| rad22         | 8.44992e-05 | 0.999408 | 0.000531408 | 0.996272 |
| rad60anti     | 7.83449e-05 | 0.999486 | 0.000492704 | 0.996764 |
| rad11         | 7.82084e-05 | 0.999564 | 0.000491845 | 0.997256 |
| rad45         | 7.25770e-05 | 0.999637 | 0.000456430 | 0.997713 |
| rad58         | 6.43560e-05 | 0.999701 | 0.000404729 | 0.998117 |
| PhcycC3H3_A+H | 4.73346e-05 | 0.999748 | 0.000297683 | 0.998415 |
| rad18         | 3.50574e-05 | 0.999783 | 0.000220472 | 0.998635 |
| PAH8+H        | 2.81027e-05 | 0.999812 | 0.000176736 | 0.998812 |
| rad70         | 2.66383e-05 | 0.999838 | 0.000167526 | 0.998980 |
| rad8          | 2.29963e-05 | 0.999861 | 0.000144622 | 0.999124 |
| rad47         | 2.01911e-05 | 0.999881 | 0.000126980 | 0.999251 |
| rad65         | 1.88133e-05 | 0.999900 | 0.000118315 | 0.999370 |
| rad36         | 1.31402e-05 | 0.999913 | 8.26376e-05 | 0.999452 |
| rad15         | 1.23979e-05 | 0.999926 | 7.79693e-05 | 0.999530 |
| rad37         | 1.14969e-05 | 0.999937 | 7.23027e-05 | 0.999603 |
| rad34         | 1.12128e-05 | 0.999948 | 7.05164e-05 | 0.999673 |
| rad54         | 9.69619e-06 | 0.999958 | 6.09784e-05 | 0.999734 |
| rad24         | 5.64528e-06 | 0.999964 | 3.55026e-05 | 0.999770 |
| rad12         | 5.45345e-06 | 0.999969 | 3.42962e-05 | 0.999804 |
| rad28         | 4.29955e-06 | 0.999973 | 2.70395e-05 | 0.999831 |
| rad7          | 4.03960e-06 | 0.999978 | 2.54047e-05 | 0.999856 |
| rad68syn      | 3.26876e-06 | 0.999981 | 2.05569e-05 | 0.999877 |
| rad64         | 2.84122e-06 | 0.999984 | 1.78681e-05 | 0.999895 |
| rad40syn      | 2.12990e-06 | 0.999986 | 1.33947e-05 | 0.999908 |
| rad68anti     | 2.08023e-06 | 0.999988 | 1.30824e-05 | 0.999921 |
| rad56         | 2.05669e-06 | 0.999990 | 1.29343e-05 | 0.999934 |
| rad40anti     | 1.62898e-06 | 0.999992 | 1.02445e-05 | 0.999944 |
| rad62         | 1.24857e-06 | 0.999993 | 7.85213e-06 | 0.999952 |
| rad26         | 1.22011e-06 | 0.999994 | 7.67314e-06 | 0.999960 |
| rad53         | 1.21574e-06 | 0.999995 | 7.64568e-06 | 0.999968 |
| rad55         | 1.12742e-06 | 0.999996 | 7.09026e-06 | 0.999975 |
| rad61         | 1.10727e-06 | 0.999997 | 6.96353e-06 | 0.999982 |
| rad13         | 6.96845e-07 | 0.999998 | 4.38240e-06 | 0.999986 |
| rad25         | 5.72756e-07 | 0.999999 | 3.60201e-06 | 0.999990 |
| rad10         | 4.67954e-07 | 0.999999 | 2.94292e-06 | 0.999993 |
| rad43         | 3.34613e-07 | 1.000000 | 2.10435e-06 | 0.999995 |
| rad42         | 2.90046e-07 | 1.000000 | 1.82407e-06 | 0.999996 |
| rad5          | 1.90449e-07 | 1.000000 | 1.19772e-06 | 0.999998 |
| rad41         | 7.90790e-08 | 1.000000 | 4.97321e-07 | 0.999998 |
| rad33         | 7.44802e-08 | 1.000000 | 4.68399e-07 | 0.999999 |
| rad2          | 4.93913e-08 | 1.000000 | 3.10617e-07 | 0.999999 |
| rad1          | 2.47689e-08 | 1.000000 | 1.55769e-07 | 0.999999 |
| rad14         | 1.03334e-08 | 1.000000 | 6.49856e-08 | 0.999999 |
| rad27         | 4.32461e-09 | 1.000000 | 2.71971e-08 | 0.999999 |
| rad3          | 2.02749e-09 | 1.000000 | 1.27507e-08 | 0.999999 |
| rad4          | 1.17442e-09 | 1.000000 | 7.38584e-09 | 0.999999 |

10000000.0 Pa, 3750.00000 K

=====

| Rate constant | True (fraction)     | Effective (fraction) |
|---------------|---------------------|----------------------|
| Total         | 2.70978e-12 (1.00 ) | 4.64987e-13 (1.00 )  |

| species     | PYtrue      | Cumul    | PYeffective | Cumul    |
|-------------|-------------|----------|-------------|----------|
| Benzyl+C2H2 | 0.828404    | 0.828404 | 0.00000     | 0.00000  |
| PhCH2CCH+H  | 0.0980949   | 0.926499 | 0.571662    | 0.571662 |
| PhCHCCH2+H  | 0.0246122   | 0.951111 | 0.143431    | 0.715093 |
| Ph+Allene   | 0.0175882   | 0.968699 | 0.102498    | 0.817591 |
| Indene+H    | 0.0167268   | 0.985426 | 0.0974780   | 0.915069 |
| PAH3+H      | 0.00315370  | 0.988580 | 0.0183786   | 0.933448 |
| PAH7+H      | 0.00124355  | 0.989823 | 0.00724698  | 0.940695 |
| rad50       | 0.000909739 | 0.990733 | 0.00530163  | 0.945996 |
| PAH9+H      | 0.000878144 | 0.991611 | 0.00511751  | 0.951114 |
| rad39       | 0.000788815 | 0.992400 | 0.00459693  | 0.955711 |
| rad51       | 0.000733741 | 0.993134 | 0.00427598  | 0.959987 |
| PhCCH+CH3   | 0.000653226 | 0.993787 | 0.00380677  | 0.963793 |
| rad19anti   | 0.000638743 | 0.994426 | 0.00372237  | 0.967516 |
| Ph+MeAc     | 0.000629508 | 0.995055 | 0.00366855  | 0.971184 |
| rad71       | 0.000613950 | 0.995669 | 0.00357788  | 0.974762 |
| rad38       | 0.000577722 | 0.996247 | 0.00336676  | 0.978129 |
| rad30       | 0.000415542 | 0.996662 | 0.00242163  | 0.980551 |
| rad35       | 0.000332892 | 0.996995 | 0.00193998  | 0.982491 |
| rad46       | 0.000267640 | 0.997263 | 0.00155971  | 0.984050 |
| rad20       | 0.000238359 | 0.997501 | 0.00138907  | 0.985439 |
| rad59       | 0.000225406 | 0.997727 | 0.00131358  | 0.986753 |
| rad67       | 0.000208342 | 0.997935 | 0.00121414  | 0.987967 |

|               |             |          |             |          |
|---------------|-------------|----------|-------------|----------|
| rad73         | 0.000192896 | 0.998128 | 0.00112413  | 0.989091 |
| PhCCCH3+H     | 0.000192490 | 0.998321 | 0.00112176  | 0.990213 |
| rad19syn      | 0.000138552 | 0.998459 | 0.000807431 | 0.991020 |
| rad52         | 0.000124384 | 0.998583 | 0.000724863 | 0.991745 |
| PAH10+CH3     | 0.000123877 | 0.998707 | 0.000721909 | 0.992467 |
| rad72         | 0.000117440 | 0.998825 | 0.000684397 | 0.993152 |
| rad9          | 0.000112411 | 0.998937 | 0.000655090 | 0.993807 |
| rad60syn      | 0.000108096 | 0.999045 | 0.000629947 | 0.994437 |
| rad21         | 9.78275e-05 | 0.999143 | 0.000570104 | 0.995007 |
| PAH1+H        | 9.56736e-05 | 0.999239 | 0.000557552 | 0.995564 |
| rad23         | 8.76059e-05 | 0.999326 | 0.000510536 | 0.996075 |
| rad60anti     | 7.99946e-05 | 0.999406 | 0.000466180 | 0.996541 |
| rad58         | 7.19382e-05 | 0.999478 | 0.000419230 | 0.996960 |
| rad6          | 6.70439e-05 | 0.999545 | 0.000390708 | 0.997351 |
| rad11         | 5.98648e-05 | 0.999605 | 0.000348871 | 0.997700 |
| rad45         | 5.87335e-05 | 0.999664 | 0.000342278 | 0.998042 |
| rad22         | 5.60900e-05 | 0.999720 | 0.000326872 | 0.998369 |
| PhcycC3H3_A+H | 4.60513e-05 | 0.999766 | 0.000268373 | 0.998637 |
| PAH8+H        | 3.12862e-05 | 0.999797 | 0.000182325 | 0.998820 |
| rad70         | 2.95166e-05 | 0.999827 | 0.000172012 | 0.998992 |
| rad18         | 2.36536e-05 | 0.999851 | 0.000137845 | 0.999129 |
| rad8          | 2.16437e-05 | 0.999872 | 0.000126132 | 0.999256 |
| rad47         | 1.67494e-05 | 0.999889 | 9.76096e-05 | 0.999353 |
| rad65         | 1.63263e-05 | 0.999905 | 9.51441e-05 | 0.999448 |
| rad34         | 1.25290e-05 | 0.999918 | 7.30143e-05 | 0.999521 |
| rad37         | 1.17488e-05 | 0.999930 | 6.84679e-05 | 0.999590 |
| rad36         | 1.06438e-05 | 0.999940 | 6.20281e-05 | 0.999652 |
| rad15         | 1.04107e-05 | 0.999951 | 6.06697e-05 | 0.999713 |
| rad54         | 9.92874e-06 | 0.999961 | 5.78612e-05 | 0.999770 |
| rad12         | 4.96314e-06 | 0.999965 | 2.89234e-05 | 0.999799 |
| rad24         | 4.46223e-06 | 0.999970 | 2.60043e-05 | 0.999825 |
| rad68syn      | 3.68103e-06 | 0.999974 | 2.14517e-05 | 0.999847 |
| rad28         | 3.35506e-06 | 0.999977 | 1.95521e-05 | 0.999866 |
| rad7          | 3.17113e-06 | 0.999980 | 1.84802e-05 | 0.999885 |
| rad64         | 2.78240e-06 | 0.999983 | 1.62148e-05 | 0.999901 |
| rad40syn      | 2.38686e-06 | 0.999985 | 1.39098e-05 | 0.999915 |
| rad68anti     | 2.34261e-06 | 0.999988 | 1.36519e-05 | 0.999929 |
| rad56         | 2.12035e-06 | 0.999990 | 1.23567e-05 | 0.999941 |
| rad40anti     | 1.82132e-06 | 0.999992 | 1.06140e-05 | 0.999952 |
| rad53         | 1.25635e-06 | 0.999993 | 7.32156e-06 | 0.999959 |
| rad62         | 1.24205e-06 | 0.999994 | 7.23822e-06 | 0.999966 |
| rad55         | 1.15936e-06 | 0.999995 | 6.75632e-06 | 0.999973 |
| rad61         | 1.12709e-06 | 0.999996 | 6.56830e-06 | 0.999979 |
| rad26         | 1.03591e-06 | 0.999997 | 6.03689e-06 | 0.999985 |
| rad13         | 5.51528e-07 | 0.999998 | 3.21411e-06 | 0.999989 |
| rad25         | 4.94202e-07 | 0.999998 | 2.88003e-06 | 0.999992 |
| rad10         | 4.29387e-07 | 0.999999 | 2.50232e-06 | 0.999994 |
| rad43         | 3.72425e-07 | 0.999999 | 2.17036e-06 | 0.999996 |
| rad42         | 2.84604e-07 | 1.000000 | 1.65857e-06 | 0.999998 |
| rad5          | 1.96096e-07 | 1.000000 | 1.14278e-06 | 0.999999 |
| rad41         | 8.82598e-08 | 1.000000 | 5.14347e-07 | 1.000000 |
| rad33         | 6.14645e-08 | 1.000000 | 3.58193e-07 | 1.000000 |
| rad2          | 4.49154e-08 | 1.000000 | 2.61751e-07 | 1.000000 |
| rad1          | 2.25354e-08 | 1.000000 | 1.31328e-07 | 1.000000 |
| rad14         | 9.63746e-09 | 1.000000 | 5.61637e-08 | 1.000000 |
| rad27         | 4.17595e-09 | 1.000000 | 2.43360e-08 | 1.000000 |
| rad3          | 1.64576e-09 | 1.000000 | 9.59092e-09 | 1.000000 |
| rad4          | 9.50352e-10 | 1.000000 | 5.53831e-09 | 1.000000 |

10000000.0 Pa, 4000.00000 K

=====

| Rate constant | True (fraction)     | Effective (fraction) |
|---------------|---------------------|----------------------|
| Total         | 3.41497e-12 (1.00 ) | 6.30803e-13 (1.00 )  |

| species     | PYtrue      | Cumul    | PYeffective | Cumul    |
|-------------|-------------|----------|-------------|----------|
| Benzyl+C2H2 | 0.815283    | 0.815283 | 0.00000     | 0.00000  |
| PhCH2CCH+H  | 0.109636    | 0.924919 | 0.593539    | 0.593539 |
| PhCHCCH2+H  | 0.0269891   | 0.951908 | 0.146111    | 0.739650 |
| Ph+Allene   | 0.0192405   | 0.971149 | 0.104162    | 0.843812 |
| Indene+H    | 0.0146481   | 0.985797 | 0.0793006   | 0.923113 |
| PAH3+H      | 0.00334009  | 0.989137 | 0.0180822   | 0.941195 |
| PAH7+H      | 0.00124742  | 0.990384 | 0.00675315  | 0.947948 |
| rad50       | 0.000810634 | 0.991195 | 0.00438853  | 0.952336 |
| PAH9+H      | 0.000785876 | 0.991981 | 0.00425450  | 0.956591 |
| PhCCH+CH3   | 0.000766519 | 0.992747 | 0.00414970  | 0.960741 |
| rad39       | 0.000706394 | 0.993454 | 0.00382421  | 0.964565 |
| Ph+MeAc     | 0.000665569 | 0.994119 | 0.00360319  | 0.968168 |
| rad51       | 0.000647431 | 0.994767 | 0.00350500  | 0.971673 |

|               |              |          |             |          |
|---------------|--------------|----------|-------------|----------|
| rad19anti     | 0.000637022  | 0.995404 | 0.00344864  | 0.975122 |
| rad71         | 0.000534484  | 0.995938 | 0.00289354  | 0.978015 |
| rad38         | 0.000515691  | 0.996454 | 0.00279179  | 0.980807 |
| rad30         | 0.000395172  | 0.996849 | 0.00213934  | 0.982946 |
| rad35         | 0.000333071  | 0.997182 | 0.00180314  | 0.984750 |
| rad46         | 0.000239567  | 0.997422 | 0.00129694  | 0.986046 |
| rad59         | 0.000234436  | 0.997656 | 0.00126917  | 0.987316 |
| rad67         | 0.000217443  | 0.997874 | 0.00117717  | 0.988493 |
| PhCCCH3+H     | 0.000215641  | 0.998089 | 0.00116742  | 0.989660 |
| rad20         | 0.000182438  | 0.998272 | 0.000987663 | 0.990648 |
| rad73         | 0.000168772  | 0.998440 | 0.000913681 | 0.991562 |
| rad19syn      | 0.000168708  | 0.998609 | 0.000913334 | 0.992475 |
| PAH10+CH3     | 0.000127848  | 0.998737 | 0.000692133 | 0.993167 |
| rad52         | 0.000110116  | 0.998847 | 0.000596133 | 0.993763 |
| rad60syn      | 0.000108932  | 0.998956 | 0.000589724 | 0.994353 |
| rad72         | 0.000101348  | 0.999057 | 0.000548668 | 0.994902 |
| PAH1+H        | 9.73456e-05  | 0.999155 | 0.000527000 | 0.995429 |
| rad9          | 9.000131e-05 | 0.999245 | 0.000487575 | 0.995916 |
| rad60anti     | 8.10130e-05  | 0.999326 | 0.000438580 | 0.996355 |
| rad58         | 7.99581e-05  | 0.999406 | 0.000432869 | 0.996788 |
| rad21         | 7.34090e-05  | 0.999479 | 0.000397415 | 0.997185 |
| rad23         | 6.71738e-05  | 0.999546 | 0.000363659 | 0.997549 |
| rad6          | 4.77910e-05  | 0.999594 | 0.000258726 | 0.997807 |
| rad45         | 4.72149e-05  | 0.999641 | 0.000255607 | 0.998063 |
| rad11         | 4.69459e-05  | 0.999688 | 0.000254151 | 0.998317 |
| PhcycC3H3_A+H | 4.60266e-05  | 0.999734 | 0.000249174 | 0.998566 |
| rad22         | 3.83566e-05  | 0.999773 | 0.000207651 | 0.998774 |
| PAH8+H        | 3.69108e-05  | 0.999810 | 0.000199824 | 0.998974 |
| rad70         | 3.29190e-05  | 0.999842 | 0.000178213 | 0.999152 |
| rad8          | 2.00946e-05  | 0.999863 | 0.000108786 | 0.999261 |
| rad18         | 1.64052e-05  | 0.999879 | 8.88126e-05 | 0.999350 |
| rad65         | 1.44688e-05  | 0.999893 | 7.83298e-05 | 0.999428 |
| rad34         | 1.41778e-05  | 0.999908 | 7.67541e-05 | 0.999505 |
| rad47         | 1.41381e-05  | 0.999922 | 7.65393e-05 | 0.999581 |
| rad37         | 1.17830e-05  | 0.999934 | 6.37897e-05 | 0.999645 |
| rad54         | 1.02500e-05  | 0.999944 | 5.54906e-05 | 0.999701 |
| rad36         | 8.55996e-06  | 0.999952 | 4.63410e-05 | 0.999747 |
| rad15         | 8.45351e-06  | 0.999961 | 4.57648e-05 | 0.999793 |
| rad12         | 4.35793e-06  | 0.999965 | 2.35925e-05 | 0.999816 |
| rad68syn      | 4.29239e-06  | 0.999969 | 2.32377e-05 | 0.999839 |
| rad24         | 3.55714e-06  | 0.999973 | 1.92573e-05 | 0.999859 |
| rad64         | 2.83010e-06  | 0.999976 | 1.53213e-05 | 0.999874 |
| rad40syn      | 2.80404e-06  | 0.999979 | 1.51803e-05 | 0.999889 |
| rad68anti     | 2.73118e-06  | 0.999981 | 1.47858e-05 | 0.999904 |
| rad28         | 2.59623e-06  | 0.999984 | 1.40552e-05 | 0.999918 |
| rad7          | 2.43276e-06  | 0.999986 | 1.31702e-05 | 0.999931 |
| rad56         | 2.28251e-06  | 0.999989 | 1.23568e-05 | 0.999944 |
| rad40anti     | 2.14312e-06  | 0.999991 | 1.16022e-05 | 0.999955 |
| rad53         | 1.34312e-06  | 0.999992 | 7.27126e-06 | 0.999962 |
| rad62         | 1.29264e-06  | 0.999993 | 6.99798e-06 | 0.999969 |
| rad55         | 1.20734e-06  | 0.999995 | 6.53617e-06 | 0.999976 |
| rad61         | 1.17444e-06  | 0.999996 | 6.35808e-06 | 0.999982 |
| rad26         | 8.49839e-07  | 0.999997 | 4.60077e-06 | 0.999987 |
| rad13         | 4.30206e-07  | 0.999997 | 2.32901e-06 | 0.999989 |
| rad25         | 4.27630e-07  | 0.999998 | 2.31506e-06 | 0.999992 |
| rad43         | 4.14150e-07  | 0.999998 | 2.24208e-06 | 0.999994 |
| rad10         | 3.79921e-07  | 0.999998 | 2.05678e-06 | 0.999996 |
| rad42         | 2.95841e-07  | 0.999999 | 1.60159e-06 | 0.999997 |
| rad5          | 1.97284e-07  | 0.999999 | 1.06803e-06 | 0.999999 |
| rad41         | 1.00025e-07  | 0.999999 | 5.41507e-07 | 0.999999 |
| rad33         | 4.98921e-08  | 0.999999 | 2.70101e-07 | 0.999999 |
| rad2          | 4.00044e-08  | 0.999999 | 2.16572e-07 | 1.000000 |
| rad1          | 1.97879e-08  | 0.999999 | 1.07126e-07 | 1.000000 |
| rad14         | 8.96221e-09  | 0.999999 | 4.85187e-08 | 1.000000 |
| rad27         | 3.90758e-09  | 0.999999 | 2.11545e-08 | 1.000000 |
| rad3          | 1.32277e-09  | 0.999999 | 7.16106e-09 | 1.000000 |
| rad4          | 7.62078e-10  | 0.999999 | 4.12566e-09 | 1.000000 |

1000000.00 Pa, 20.0000000 K

=====

| Rate constant | True (fraction)      | Effective (fraction) |
|---------------|----------------------|----------------------|
| Total         | 1.34336e-156 (1.00 ) | 1.34336e-156 (1.00 ) |

| species | PYtrue      | Cumul    | PYeffective | Cumul    |
|---------|-------------|----------|-------------|----------|
| rad20   | 0.999585    | 0.999585 | 0.999585    | 0.999585 |
| rad21   | 0.000363792 | 0.999949 | 0.000363792 | 0.999949 |
| rad18   | 5.08516e-05 | 1.000000 | 5.08516e-05 | 1.000000 |
| rad22   | 3.99833e-08 | 1.000000 | 3.99833e-08 | 1.000000 |

|               |             |          |             |          |
|---------------|-------------|----------|-------------|----------|
| rad24         | 1.38648e-09 | 1.000000 | 1.38648e-09 | 1.000000 |
| Indene+H      | 1.18813e-09 | 1.000000 | 1.18813e-09 | 1.000000 |
| Benzyl+C2H2   | 8.63662e-11 | 1.000000 | 0.000000    | 1.000000 |
| rad45         | 8.18467e-11 | 1.000000 | 8.18467e-11 | 1.000000 |
| rad36         | 9.43727e-12 | 1.000000 | 9.43727e-12 | 1.000000 |
| rad11         | 4.09876e-12 | 1.000000 | 4.09876e-12 | 1.000000 |
| rad23         | 3.65210e-15 | 1.000000 | 3.65210e-15 | 1.000000 |
| rad6          | 4.56020e-19 | 1.000000 | 4.56020e-19 | 1.000000 |
| rad30         | 4.06771e-23 | 1.000000 | 4.06771e-23 | 1.000000 |
| rad15         | 8.38426e-26 | 1.000000 | 8.38426e-26 | 1.000000 |
| rad13         | 1.79591e-28 | 1.000000 | 1.79591e-28 | 1.000000 |
| rad7          | 3.42717e-29 | 1.000000 | 3.42717e-29 | 1.000000 |
| rad25         | 5.09666e-30 | 1.000000 | 5.09666e-30 | 1.000000 |
| rad38         | 6.07207e-31 | 1.000000 | 6.07207e-31 | 1.000000 |
| rad33         | 2.69791e-31 | 1.000000 | 2.69791e-31 | 1.000000 |
| rad8          | 9.90229e-33 | 1.000000 | 9.90229e-33 | 1.000000 |
| rad35         | 3.70710e-34 | 1.000000 | 3.70710e-34 | 1.000000 |
| PAH9+H        | 1.65976e-34 | 1.000000 | 1.65976e-34 | 1.000000 |
| PhCHCCH2+H    | 5.88620e-35 | 1.000000 | 5.88620e-35 | 1.000000 |
| rad9          | 2.03301e-37 | 1.000000 | 2.03301e-37 | 1.000000 |
| rad46         | 1.49819e-37 | 1.000000 | 1.49819e-37 | 1.000000 |
| rad60syn      | 1.15671e-37 | 1.000000 | 1.15671e-37 | 1.000000 |
| rad3          | 6.05412e-38 | 1.000000 | 6.05412e-38 | 1.000000 |
| rad4          | 4.08254e-38 | 1.000000 | 4.08254e-38 | 1.000000 |
| rad28         | 1.05132e-38 | 1.000000 | 1.05132e-38 | 1.000000 |
| rad60anti     | 5.34539e-39 | 1.000000 | 5.34539e-39 | 1.000000 |
| Ph+Allene     | 1.25718e-40 | 1.000000 | 1.25718e-40 | 1.000000 |
| PhCH2CCH+H    | 8.13041e-43 | 1.000000 | 8.13041e-43 | 1.000000 |
| PAH7+H        | 7.36784e-43 | 1.000000 | 7.36784e-43 | 1.000000 |
| PAH3+H        | 5.13084e-46 | 1.000000 | 5.13084e-46 | 1.000000 |
| rad2          | 4.27045e-46 | 1.000000 | 4.27045e-46 | 1.000000 |
| rad59         | 2.51858e-46 | 1.000000 | 2.51858e-46 | 1.000000 |
| rad31         | 1.72898e-46 | 1.000000 | 1.72898e-46 | 1.000000 |
| rad26         | 8.04170e-47 | 1.000000 | 8.04170e-47 | 1.000000 |
| rad1          | 6.39430e-47 | 1.000000 | 6.39430e-47 | 1.000000 |
| PhCCH+CH3     | 1.46386e-51 | 1.000000 | 1.46386e-51 | 1.000000 |
| rad14         | 1.18987e-51 | 1.000000 | 1.18987e-51 | 1.000000 |
| rad39         | 9.86040e-52 | 1.000000 | 9.86040e-52 | 1.000000 |
| rad50         | 3.65523e-52 | 1.000000 | 3.65523e-52 | 1.000000 |
| rad10         | 4.92121e-54 | 1.000000 | 4.92121e-54 | 1.000000 |
| rad12         | 2.63816e-57 | 1.000000 | 2.63816e-57 | 1.000000 |
| Ph+MeAc       | 7.90534e-58 | 1.000000 | 7.90534e-58 | 1.000000 |
| rad27         | 1.44620e-58 | 1.000000 | 1.44620e-58 | 1.000000 |
| rad37         | 5.86787e-59 | 1.000000 | 5.86787e-59 | 1.000000 |
| rad52         | 3.01088e-60 | 1.000000 | 3.01088e-60 | 1.000000 |
| PhCCCH3+H     | 2.51609e-60 | 1.000000 | 2.51609e-60 | 1.000000 |
| rad58         | 9.77452e-65 | 1.000000 | 9.77452e-65 | 1.000000 |
| rad51         | 8.23348e-65 | 1.000000 | 8.23348e-65 | 1.000000 |
| rad19syn      | 4.88233e-68 | 1.000000 | 4.88233e-68 | 1.000000 |
| rad54         | 5.67455e-69 | 1.000000 | 5.67455e-69 | 1.000000 |
| rad70         | 4.55875e-69 | 1.000000 | 4.55875e-69 | 1.000000 |
| PAH10+CH3     | 8.54552e-70 | 1.000000 | 8.54552e-70 | 1.000000 |
| rad5          | 3.69079e-71 | 1.000000 | 3.69079e-71 | 1.000000 |
| rad47         | 8.89129e-72 | 1.000000 | 8.89129e-72 | 1.000000 |
| rad65         | 4.97737e-72 | 1.000000 | 4.97737e-72 | 1.000000 |
| rad34         | 4.12544e-74 | 1.000000 | 4.12544e-74 | 1.000000 |
| rad55         | 6.28805e-75 | 1.000000 | 6.28805e-75 | 1.000000 |
| PhcycC3H3_A+H | 1.63887e-76 | 1.000000 | 1.63887e-76 | 1.000000 |
| PAH1+H        | 1.17286e-76 | 1.000000 | 1.17286e-76 | 1.000000 |
| rad62         | 5.12821e-79 | 1.000000 | 5.12821e-79 | 1.000000 |
| rad43         | 4.42263e-83 | 1.000000 | 4.42263e-83 | 1.000000 |
| rad42         | 1.25752e-88 | 1.000000 | 1.25752e-88 | 1.000000 |
| rad41         | 1.59722e-93 | 1.000000 | 1.59722e-93 | 1.000000 |

1000000.00 Pa, 30.0000000 K

=====

| Rate constant | True (fraction)      | Effective (fraction) |
|---------------|----------------------|----------------------|
| Total         | 1.15918e-108 (1.00 ) | 1.15918e-108 (1.00 ) |

| species     | PYtrue      | Cumul    | PYeffective | Cumul    |
|-------------|-------------|----------|-------------|----------|
| rad20       | 0.999161    | 0.999161 | 0.999161    | 0.999161 |
| rad21       | 0.000735737 | 0.999897 | 0.000735737 | 0.999897 |
| rad18       | 0.000102969 | 1.000000 | 0.000102969 | 1.000000 |
| rad22       | 1.63780e-07 | 1.000000 | 1.63780e-07 | 1.000000 |
| rad24       | 5.35019e-09 | 1.000000 | 5.35019e-09 | 1.000000 |
| Indene+H    | 4.87292e-09 | 1.000000 | 4.87292e-09 | 1.000000 |
| rad45       | 6.61967e-10 | 1.000000 | 6.61967e-10 | 1.000000 |
| Benzyl+C2H2 | 2.02070e-10 | 1.000000 | 0.000000    | 1.000000 |

|               |             |          |             |          |
|---------------|-------------|----------|-------------|----------|
| rad36         | 6.56881e-11 | 1.000000 | 6.56881e-11 | 1.000000 |
| rad11         | 1.71237e-11 | 1.000000 | 1.71237e-11 | 1.000000 |
| rad23         | 3.26664e-14 | 1.000000 | 3.26664e-14 | 1.000000 |
| rad6          | 3.90421e-18 | 1.000000 | 3.90421e-18 | 1.000000 |
| rad30         | 1.95936e-22 | 1.000000 | 1.95936e-22 | 1.000000 |
| rad15         | 4.12440e-25 | 1.000000 | 4.12440e-25 | 1.000000 |
| rad13         | 3.21330e-27 | 1.000000 | 3.21330e-27 | 1.000000 |
| rad7          | 6.15664e-28 | 1.000000 | 6.15664e-28 | 1.000000 |
| rad25         | 5.03224e-29 | 1.000000 | 5.03224e-29 | 1.000000 |
| rad38         | 1.25440e-29 | 1.000000 | 1.25440e-29 | 1.000000 |
| rad33         | 4.89982e-30 | 1.000000 | 4.89982e-30 | 1.000000 |
| rad8          | 2.67666e-32 | 1.000000 | 2.67666e-32 | 1.000000 |
| rad35         | 7.14232e-33 | 1.000000 | 7.14232e-33 | 1.000000 |
| PAH9+H        | 3.25320e-33 | 1.000000 | 3.25320e-33 | 1.000000 |
| PhCHCCH2+H    | 6.09702e-34 | 1.000000 | 6.09702e-34 | 1.000000 |
| rad46         | 2.82622e-36 | 1.000000 | 2.82622e-36 | 1.000000 |
| rad3          | 2.35926e-36 | 1.000000 | 2.35926e-36 | 1.000000 |
| rad9          | 2.13808e-36 | 1.000000 | 2.13808e-36 | 1.000000 |
| rad4          | 1.51406e-36 | 1.000000 | 1.51406e-36 | 1.000000 |
| rad60syn      | 6.21819e-37 | 1.000000 | 6.21819e-37 | 1.000000 |
| rad28         | 1.00544e-37 | 1.000000 | 1.00544e-37 | 1.000000 |
| rad60anti     | 2.90046e-38 | 1.000000 | 2.90046e-38 | 1.000000 |
| Ph+Allene     | 1.37451e-39 | 1.000000 | 1.37451e-39 | 1.000000 |
| PAH7+H        | 7.00769e-42 | 1.000000 | 7.00769e-42 | 1.000000 |
| PhCH2CCH+H    | 2.37120e-42 | 1.000000 | 2.37120e-42 | 1.000000 |
| rad2          | 3.71145e-44 | 1.000000 | 3.71145e-44 | 1.000000 |
| rad31         | 5.65644e-45 | 1.000000 | 5.65644e-45 | 1.000000 |
| rad1          | 4.72069e-45 | 1.000000 | 4.72069e-45 | 1.000000 |
| PAH3+H        | 2.93744e-45 | 1.000000 | 2.93744e-45 | 1.000000 |
| rad59         | 1.44052e-45 | 1.000000 | 1.44052e-45 | 1.000000 |
| rad26         | 7.59716e-46 | 1.000000 | 7.59716e-46 | 1.000000 |
| PhCCH+CH3     | 1.25718e-49 | 1.000000 | 1.25718e-49 | 1.000000 |
| rad14         | 9.32897e-50 | 1.000000 | 9.32897e-50 | 1.000000 |
| rad39         | 1.88861e-50 | 1.000000 | 1.88861e-50 | 1.000000 |
| rad50         | 7.11509e-51 | 1.000000 | 7.11509e-51 | 1.000000 |
| rad10         | 3.35092e-52 | 1.000000 | 3.35092e-52 | 1.000000 |
| Ph+MeAc       | 7.74461e-56 | 1.000000 | 7.74461e-56 | 1.000000 |
| rad12         | 5.00050e-56 | 1.000000 | 5.00050e-56 | 1.000000 |
| rad27         | 2.60990e-56 | 1.000000 | 2.60990e-56 | 1.000000 |
| rad37         | 1.11152e-57 | 1.000000 | 1.11152e-57 | 1.000000 |
| PhCCCH3+H     | 4.97219e-58 | 1.000000 | 4.97219e-58 | 1.000000 |
| rad52         | 6.24057e-59 | 1.000000 | 6.24057e-59 | 1.000000 |
| rad51         | 1.68287e-63 | 1.000000 | 1.68287e-63 | 1.000000 |
| rad58         | 6.21239e-64 | 1.000000 | 6.21239e-64 | 1.000000 |
| rad19syn      | 2.41885e-66 | 1.000000 | 2.41885e-66 | 1.000000 |
| rad54         | 2.78640e-67 | 1.000000 | 2.78640e-67 | 1.000000 |
| rad70         | 1.16242e-67 | 1.000000 | 1.16242e-67 | 1.000000 |
| PAH10+CH3     | 1.56486e-68 | 1.000000 | 1.56486e-68 | 1.000000 |
| rad5          | 7.81729e-69 | 1.000000 | 7.81729e-69 | 1.000000 |
| rad47         | 1.68238e-70 | 1.000000 | 1.68238e-70 | 1.000000 |
| rad65         | 1.44938e-70 | 1.000000 | 1.44938e-70 | 1.000000 |
| rad34         | 1.07248e-72 | 1.000000 | 1.07248e-72 | 1.000000 |
| rad55         | 3.14152e-73 | 1.000000 | 3.14152e-73 | 1.000000 |
| PhcycC3H3_A+H | 8.51314e-75 | 1.000000 | 8.51314e-75 | 1.000000 |
| PAH1+H        | 2.06655e-75 | 1.000000 | 2.06655e-75 | 1.000000 |
| rad62         | 9.94110e-77 | 1.000000 | 9.94110e-77 | 1.000000 |
| rad43         | 1.78598e-80 | 1.000000 | 1.78598e-80 | 1.000000 |
| rad42         | 2.52401e-86 | 1.000000 | 2.52401e-86 | 1.000000 |
| rad41         | 4.13244e-91 | 1.000000 | 4.13244e-91 | 1.000000 |

1000000.00 Pa, 40.0000000 K

=====

| Rate constant | True (fraction)     | Effective (fraction) |
|---------------|---------------------|----------------------|
| Total         | 1.02415e-84 (1.00 ) | 1.02415e-84 (1.00 )  |

| species     | PYtrue      | Cumul    | PYeffective | Cumul    |
|-------------|-------------|----------|-------------|----------|
| rad20       | 0.998744    | 0.998744 | 0.998744    | 0.998744 |
| rad21       | 0.00110150  | 0.999845 | 0.00110150  | 0.999845 |
| rad18       | 0.000154473 | 1.000000 | 0.000154473 | 1.000000 |
| rad22       | 3.67903e-07 | 1.000000 | 3.67903e-07 | 1.000000 |
| rad24       | 1.14009e-08 | 1.000000 | 1.14009e-08 | 1.000000 |
| Indene+H    | 1.09699e-08 | 1.000000 | 1.09699e-08 | 1.000000 |
| rad45       | 2.16436e-09 | 1.000000 | 2.16436e-09 | 1.000000 |
| Benzyl+C2H2 | 3.92484e-10 | 1.000000 | 0.000000    | 1.000000 |
| rad36       | 1.98850e-10 | 1.000000 | 1.98850e-10 | 1.000000 |
| rad11       | 4.00013e-11 | 1.000000 | 4.00013e-11 | 1.000000 |
| rad23       | 1.17581e-13 | 1.000000 | 1.17581e-13 | 1.000000 |
| rad6        | 1.40138e-17 | 1.000000 | 1.40138e-17 | 1.000000 |

|               |             |         |             |         |
|---------------|-------------|---------|-------------|---------|
| rad30         | 6.12281e-22 | 1.00000 | 6.12281e-22 | 1.00000 |
| rad15         | 1.34768e-24 | 1.00000 | 1.34768e-24 | 1.00000 |
| rad13         | 1.78200e-26 | 1.00000 | 1.78200e-26 | 1.00000 |
| rad7          | 3.43370e-27 | 1.00000 | 3.43370e-27 | 1.00000 |
| rad25         | 2.42484e-28 | 1.00000 | 2.42484e-28 | 1.00000 |
| rad38         | 8.39297e-29 | 1.00000 | 8.39297e-29 | 1.00000 |
| rad33         | 2.77837e-29 | 1.00000 | 2.77837e-29 | 1.00000 |
| rad8          | 7.34056e-32 | 1.00000 | 7.34056e-32 | 1.00000 |
| rad35         | 4.53974e-32 | 1.00000 | 4.53974e-32 | 1.00000 |
| PAH9+H        | 2.13286e-32 | 1.00000 | 2.13286e-32 | 1.00000 |
| PhCHCCH2+H    | 3.25808e-33 | 1.00000 | 3.25808e-33 | 1.00000 |
| rad3          | 2.16786e-35 | 1.00000 | 2.16786e-35 | 1.00000 |
| rad46         | 2.06780e-35 | 1.00000 | 2.06780e-35 | 1.00000 |
| rad4          | 1.35558e-35 | 1.00000 | 1.35558e-35 | 1.00000 |
| rad9          | 1.18963e-35 | 1.00000 | 1.18963e-35 | 1.00000 |
| rad60syn      | 2.45877e-36 | 1.00000 | 2.45877e-36 | 1.00000 |
| rad28         | 5.41047e-37 | 1.00000 | 5.41047e-37 | 1.00000 |
| rad60anti     | 1.17054e-37 | 1.00000 | 1.17054e-37 | 1.00000 |
| Ph+Allene     | 8.27676e-39 | 1.00000 | 8.27676e-39 | 1.00000 |
| PAH7+H        | 3.91657e-41 | 1.00000 | 3.91657e-41 | 1.00000 |
| PhCH2CCH+H    | 7.69048e-42 | 1.00000 | 7.69048e-42 | 1.00000 |
| rad2          | 5.51918e-43 | 1.00000 | 5.51918e-43 | 1.00000 |
| rad1          | 6.45430e-44 | 1.00000 | 6.45430e-44 | 1.00000 |
| rad31         | 4.53790e-44 | 1.00000 | 4.53790e-44 | 1.00000 |
| PAH3+H        | 1.33643e-44 | 1.00000 | 1.33643e-44 | 1.00000 |
| rad59         | 6.53927e-45 | 1.00000 | 6.53927e-45 | 1.00000 |
| rad26         | 4.40761e-45 | 1.00000 | 4.40761e-45 | 1.00000 |
| PhCCH+CH3     | 2.16113e-48 | 1.00000 | 2.16113e-48 | 1.00000 |
| rad14         | 1.49250e-48 | 1.00000 | 1.49250e-48 | 1.00000 |
| rad39         | 1.51741e-49 | 1.00000 | 1.51741e-49 | 1.00000 |
| rad50         | 6.46925e-50 | 1.00000 | 6.46925e-50 | 1.00000 |
| rad10         | 6.85663e-51 | 1.00000 | 6.85663e-51 | 1.00000 |
| Ph+MeAc       | 1.56259e-54 | 1.00000 | 1.56259e-54 | 1.00000 |
| rad27         | 6.44837e-55 | 1.00000 | 6.44837e-55 | 1.00000 |
| rad12         | 4.29662e-55 | 1.00000 | 4.29662e-55 | 1.00000 |
| PhCCCH3+H     | 1.36133e-56 | 1.00000 | 1.36133e-56 | 1.00000 |
| rad37         | 9.58779e-57 | 1.00000 | 9.58779e-57 | 1.00000 |
| rad52         | 6.39609e-58 | 1.00000 | 6.39609e-58 | 1.00000 |
| rad51         | 1.83316e-62 | 1.00000 | 1.83316e-62 | 1.00000 |
| rad58         | 3.65914e-63 | 1.00000 | 3.65914e-63 | 1.00000 |
| rad19syn      | 4.03362e-65 | 1.00000 | 4.03362e-65 | 1.00000 |
| rad54         | 4.75314e-66 | 1.00000 | 4.75314e-66 | 1.00000 |
| rad70         | 1.50100e-66 | 1.00000 | 1.50100e-66 | 1.00000 |
| rad5          | 2.67842e-67 | 1.00000 | 2.67842e-67 | 1.00000 |
| PAH10+CH3     | 1.50537e-67 | 1.00000 | 1.50537e-67 | 1.00000 |
| rad65         | 1.98764e-69 | 1.00000 | 1.98764e-69 | 1.00000 |
| rad47         | 1.97106e-69 | 1.00000 | 1.97106e-69 | 1.00000 |
| rad34         | 1.47811e-71 | 1.00000 | 1.47811e-71 | 1.00000 |
| rad55         | 5.77385e-72 | 1.00000 | 5.77385e-72 | 1.00000 |
| PhcycC3H3_A+H | 1.61892e-73 | 1.00000 | 1.61892e-73 | 1.00000 |
| PAH1+H        | 2.16032e-74 | 1.00000 | 2.16032e-74 | 1.00000 |
| rad62         | 3.84948e-75 | 1.00000 | 3.84948e-75 | 1.00000 |
| rad43         | 1.02639e-78 | 1.00000 | 1.02639e-78 | 1.00000 |
| rad42         | 1.12848e-84 | 1.00000 | 1.12848e-84 | 1.00000 |
| rad41         | 2.68841e-89 | 1.00000 | 2.68841e-89 | 1.00000 |

1000000.00 Pa, 50.0000000 K

=====

| Rate constant | True (fraction)     | Effective (fraction) |
|---------------|---------------------|----------------------|
| Total         | 2.31816e-70 (1.00 ) | 2.31816e-70 (1.00 )  |

| species     | PYtrue      | Cumul    | PYeffective | Cumul    |
|-------------|-------------|----------|-------------|----------|
| rad20       | 0.998324    | 0.998324 | 0.998324    | 0.998324 |
| rad21       | 0.00146911  | 0.999793 | 0.00146911  | 0.999793 |
| rad18       | 0.000206563 | 1.000000 | 0.000206563 | 1.000000 |
| rad22       | 6.56293e-07 | 1.000000 | 6.56293e-07 | 1.000000 |
| Indene+H    | 1.96246e-08 | 1.000000 | 1.96246e-08 | 1.000000 |
| rad24       | 1.93818e-08 | 1.000000 | 1.93818e-08 | 1.000000 |
| rad45       | 5.00636e-09 | 1.000000 | 5.00636e-09 | 1.000000 |
| Benzyl+C2H2 | 7.12115e-10 | 1.000000 | 0.000000    | 1.000000 |
| rad36       | 4.37683e-10 | 1.000000 | 4.37683e-10 | 1.000000 |
| rad11       | 7.52158e-11 | 1.000000 | 7.52158e-11 | 1.000000 |
| rad23       | 2.97717e-13 | 1.000000 | 2.97717e-13 | 1.000000 |
| rad6        | 3.64386e-17 | 1.000000 | 3.64386e-17 | 1.000000 |
| rad30       | 1.74181e-21 | 1.000000 | 1.74181e-21 | 1.000000 |
| rad15       | 4.08846e-24 | 1.000000 | 4.08846e-24 | 1.000000 |
| rad13       | 6.42590e-26 | 1.000000 | 6.42590e-26 | 1.000000 |
| rad7        | 1.24754e-26 | 1.000000 | 1.24754e-26 | 1.000000 |



|               |             |         |             |         |
|---------------|-------------|---------|-------------|---------|
| rad25         | 9.59946e-28 | 1.00000 | 9.59946e-28 | 1.00000 |
| rad38         | 3.89988e-28 | 1.00000 | 3.89988e-28 | 1.00000 |
| rad33         | 1.03224e-28 | 1.00000 | 1.03224e-28 | 1.00000 |
| rad8          | 2.30888e-31 | 1.00000 | 2.30888e-31 | 1.00000 |
| rad35         | 1.94945e-31 | 1.00000 | 1.94945e-31 | 1.00000 |
| PAH9+H        | 9.58264e-32 | 1.00000 | 9.58264e-32 | 1.00000 |
| PhCHCCH2+H    | 1.49614e-32 | 1.00000 | 1.49614e-32 | 1.00000 |
| rad3          | 1.19092e-34 | 1.00000 | 1.19092e-34 | 1.00000 |
| rad46         | 1.16355e-34 | 1.00000 | 1.16355e-34 | 1.00000 |
| rad4          | 7.32120e-35 | 1.00000 | 7.32120e-35 | 1.00000 |
| rad9          | 5.79364e-35 | 1.00000 | 5.79364e-35 | 1.00000 |
| rad60syn      | 9.78812e-36 | 1.00000 | 9.78812e-36 | 1.00000 |
| rad28         | 2.67103e-36 | 1.00000 | 2.67103e-36 | 1.00000 |
| rad60anti     | 4.79748e-37 | 1.00000 | 4.79748e-37 | 1.00000 |
| Ph+Allene     | 4.50951e-38 | 1.00000 | 4.50951e-38 | 1.00000 |
| PAH7+H        | 2.07792e-40 | 1.00000 | 2.07792e-40 | 1.00000 |
| PhCH2CCH+H    | 3.06825e-41 | 1.00000 | 3.06825e-41 | 1.00000 |
| rad2          | 4.46681e-42 | 1.00000 | 4.46681e-42 | 1.00000 |
| rad1          | 4.94742e-43 | 1.00000 | 4.94742e-43 | 1.00000 |
| rad31         | 2.26684e-43 | 1.00000 | 2.26684e-43 | 1.00000 |
| PAH3+H        | 6.50501e-44 | 1.00000 | 6.50501e-44 | 1.00000 |
| rad59         | 3.17258e-44 | 1.00000 | 3.17258e-44 | 1.00000 |
| rad26         | 2.50877e-44 | 1.00000 | 2.50877e-44 | 1.00000 |
| PhCCH+CH3     | 2.20852e-47 | 1.00000 | 2.20852e-47 | 1.00000 |
| rad14         | 1.41008e-47 | 1.00000 | 1.41008e-47 | 1.00000 |
| rad39         | 1.00405e-48 | 1.00000 | 1.00405e-48 | 1.00000 |
| rad50         | 5.25492e-49 | 1.00000 | 5.25492e-49 | 1.00000 |
| rad10         | 7.69663e-50 | 1.00000 | 7.69663e-50 | 1.00000 |
| Ph+MeAc       | 1.96431e-53 | 1.00000 | 1.96431e-53 | 1.00000 |
| rad27         | 8.14184e-54 | 1.00000 | 8.14184e-54 | 1.00000 |
| rad12         | 3.22180e-54 | 1.00000 | 3.22180e-54 | 1.00000 |
| PhCCCH3+H     | 1.95371e-55 | 1.00000 | 1.95371e-55 | 1.00000 |
| rad37         | 7.24245e-56 | 1.00000 | 7.24245e-56 | 1.00000 |
| rad52         | 6.27176e-57 | 1.00000 | 6.27176e-57 | 1.00000 |
| rad51         | 2.01910e-61 | 1.00000 | 2.01910e-61 | 1.00000 |
| rad58         | 2.60147e-62 | 1.00000 | 2.60147e-62 | 1.00000 |
| rad19syn      | 5.29926e-64 | 1.00000 | 5.29926e-64 | 1.00000 |
| rad54         | 6.54451e-65 | 1.00000 | 6.54451e-65 | 1.00000 |
| rad70         | 1.85153e-65 | 1.00000 | 1.85153e-65 | 1.00000 |
| rad5          | 5.30404e-66 | 1.00000 | 5.30404e-66 | 1.00000 |
| PAH10+CH3     | 1.40538e-66 | 1.00000 | 1.40538e-66 | 1.00000 |
| rad47         | 2.56360e-68 | 1.00000 | 2.56360e-68 | 1.00000 |
| rad65         | 2.55912e-68 | 1.00000 | 2.55912e-68 | 1.00000 |
| rad34         | 2.01658e-70 | 1.00000 | 2.01658e-70 | 1.00000 |
| rad55         | 8.95199e-71 | 1.00000 | 8.95199e-71 | 1.00000 |
| PhcycC3H3_A+H | 2.58768e-72 | 1.00000 | 2.58768e-72 | 1.00000 |
| PAH1+H        | 2.38223e-73 | 1.00000 | 2.38223e-73 | 1.00000 |
| rad62         | 9.75286e-74 | 1.00000 | 9.75286e-74 | 1.00000 |
| rad43         | 3.38726e-77 | 1.00000 | 3.38726e-77 | 1.00000 |
| rad42         | 3.58268e-83 | 1.00000 | 3.58268e-83 | 1.00000 |
| rad41         | 1.15000e-87 | 1.00000 | 1.15000e-87 | 1.00000 |

1000000.00 Pa, 60.0000000 K

=====

| Rate constant | True (fraction)     | Effective (fraction) |
|---------------|---------------------|----------------------|
| Total         | 8.44107e-61 (1.00 ) | 8.44107e-61 (1.00 )  |

| species     | PYtrue      | Cumul    | PYeffective | Cumul    |
|-------------|-------------|----------|-------------|----------|
| rad20       | 0.997895    | 0.997895 | 0.997895    | 0.997895 |
| rad21       | 0.00184357  | 0.999739 | 0.00184357  | 0.999739 |
| rad18       | 0.000259993 | 0.999999 | 0.000259993 | 0.999999 |
| rad22       | 1.03714e-06 | 1.000000 | 1.03714e-06 | 1.000000 |
| Indene+H    | 3.11174e-08 | 1.000000 | 3.11174e-08 | 1.000000 |
| rad24       | 2.92762e-08 | 1.000000 | 2.92762e-08 | 1.000000 |
| rad45       | 9.66076e-09 | 1.000000 | 9.66076e-09 | 1.000000 |
| Benzyl+C2H2 | 1.23229e-09 | 1.000000 | 0.000000    | 1.000000 |
| rad36       | 8.15053e-10 | 1.000000 | 8.15053e-10 | 1.000000 |
| rad11       | 1.26490e-10 | 1.000000 | 1.26490e-10 | 1.000000 |
| rad23       | 6.26090e-13 | 1.000000 | 6.26090e-13 | 1.000000 |
| rad6        | 8.04657e-17 | 1.000000 | 8.04657e-17 | 1.000000 |
| rad30       | 4.98336e-21 | 1.000000 | 4.98336e-21 | 1.000000 |
| rad15       | 1.26903e-23 | 1.000000 | 1.26903e-23 | 1.000000 |
| rad13       | 1.86984e-25 | 1.000000 | 1.86984e-25 | 1.000000 |
| rad7        | 3.66420e-26 | 1.000000 | 3.66420e-26 | 1.000000 |
| rad25       | 3.62799e-27 | 1.000000 | 3.62799e-27 | 1.000000 |
| rad38       | 1.55584e-27 | 1.000000 | 1.55584e-27 | 1.000000 |
| rad33       | 3.11742e-28 | 1.000000 | 3.11742e-28 | 1.000000 |
| rad8        | 8.46592e-31 | 1.000000 | 8.46592e-31 | 1.000000 |

|               |             |          |             |          |
|---------------|-------------|----------|-------------|----------|
| rad35         | 6.92680e-31 | 1.000000 | 6.92680e-31 | 1.000000 |
| PAH9+H        | 3.62313e-31 | 1.000000 | 3.62313e-31 | 1.000000 |
| PhCHCCH2+H    | 6.79815e-32 | 1.000000 | 6.79815e-32 | 1.000000 |
| rad46         | 6.10049e-34 | 1.000000 | 6.10049e-34 | 1.000000 |
| rad3          | 5.13250e-34 | 1.000000 | 5.13250e-34 | 1.000000 |
| rad4          | 3.11636e-34 | 1.000000 | 3.11636e-34 | 1.000000 |
| rad9          | 2.82918e-34 | 1.000000 | 2.82918e-34 | 1.000000 |
| rad60syn      | 4.23354e-35 | 1.000000 | 4.23354e-35 | 1.000000 |
| rad28         | 1.36651e-35 | 1.000000 | 1.36651e-35 | 1.000000 |
| rad60anti     | 2.14951e-36 | 1.000000 | 2.14951e-36 | 1.000000 |
| Ph+Allene     | 2.52371e-37 | 1.000000 | 2.52371e-37 | 1.000000 |
| PAH7+H        | 1.17120e-39 | 1.000000 | 1.17120e-39 | 1.000000 |
| PhCH2CCH+H    | 1.49592e-40 | 1.000000 | 1.49592e-40 | 1.000000 |
| rad2          | 2.75246e-41 | 1.000000 | 2.75246e-41 | 1.000000 |
| rad1          | 2.93196e-42 | 1.000000 | 2.93196e-42 | 1.000000 |
| rad31         | 9.15175e-43 | 1.000000 | 9.15175e-43 | 1.000000 |
| PAH3+H        | 3.59088e-43 | 1.000000 | 3.59088e-43 | 1.000000 |
| rad59         | 1.74420e-43 | 1.000000 | 1.74420e-43 | 1.000000 |
| rad26         | 1.55204e-43 | 1.000000 | 1.55204e-43 | 1.000000 |
| PhCCH+CH3     | 1.83771e-46 | 1.000000 | 1.83771e-46 | 1.000000 |
| rad14         | 1.07438e-46 | 1.000000 | 1.07438e-46 | 1.000000 |
| rad39         | 6.52488e-48 | 1.000000 | 6.52488e-48 | 1.000000 |
| rad50         | 4.46413e-48 | 1.000000 | 4.46413e-48 | 1.000000 |
| rad10         | 6.48102e-49 | 1.000000 | 6.48102e-49 | 1.000000 |
| Ph+MeAc       | 2.08784e-52 | 1.000000 | 2.08784e-52 | 1.000000 |
| rad27         | 7.71020e-53 | 1.000000 | 7.71020e-53 | 1.000000 |
| rad12         | 2.46909e-53 | 1.000000 | 2.46909e-53 | 1.000000 |
| PhCCCH3+H     | 2.14933e-54 | 1.000000 | 2.14933e-54 | 1.000000 |
| rad37         | 5.60605e-55 | 1.000000 | 5.60605e-55 | 1.000000 |
| rad52         | 6.79867e-56 | 1.000000 | 6.79867e-56 | 1.000000 |
| rad51         | 2.56295e-60 | 1.000000 | 2.56295e-60 | 1.000000 |
| rad58         | 2.28321e-61 | 1.000000 | 2.28321e-61 | 1.000000 |
| rad19syn      | 6.76906e-63 | 1.000000 | 6.76906e-63 | 1.000000 |
| rad54         | 8.90970e-64 | 1.000000 | 8.90970e-64 | 1.000000 |
| rad70         | 2.48571e-64 | 1.000000 | 2.48571e-64 | 1.000000 |
| rad5          | 8.61792e-65 | 1.000000 | 8.61792e-65 | 1.000000 |
| PAH10+CH3     | 1.44130e-65 | 1.000000 | 1.44130e-65 | 1.000000 |
| rad47         | 4.11651e-67 | 1.000000 | 4.11651e-67 | 1.000000 |
| rad65         | 3.63852e-67 | 1.000000 | 3.63852e-67 | 1.000000 |
| rad34         | 3.06910e-69 | 1.000000 | 3.06910e-69 | 1.000000 |
| rad55         | 1.41523e-69 | 1.000000 | 1.41523e-69 | 1.000000 |
| PhcycC3H3_A+H | 4.20703e-71 | 1.000000 | 4.20703e-71 | 1.000000 |
| PAH1+H        | 3.05011e-72 | 1.000000 | 3.05011e-72 | 1.000000 |
| rad62         | 2.19298e-72 | 1.000000 | 2.19298e-72 | 1.000000 |
| rad43         | 9.26279e-76 | 1.000000 | 9.26279e-76 | 1.000000 |
| rad42         | 1.06919e-81 | 1.000000 | 1.06919e-81 | 1.000000 |
| rad41         | 4.39917e-86 | 1.000000 | 4.39917e-86 | 1.000000 |

1000000.00 Pa, 70.0000000 K

=====

| Rate constant | True (fraction)     | Effective (fraction) |
|---------------|---------------------|----------------------|
| Total         | 5.61998e-54 (1.00 ) | 5.61998e-54 (1.00 )  |

| species     | PYtrue      | Cumul    | PYeffective | Cumul    |
|-------------|-------------|----------|-------------|----------|
| rad20       | 0.997454    | 0.997454 | 0.997454    | 0.997454 |
| rad21       | 0.00222906  | 0.999683 | 0.00222906  | 0.999683 |
| rad18       | 0.000315399 | 0.999998 | 0.000315399 | 0.999998 |
| rad22       | 1.52274e-06 | 1.000000 | 1.52274e-06 | 1.000000 |
| Indene+H    | 4.58642e-08 | 1.000000 | 4.58642e-08 | 1.000000 |
| rad24       | 4.11674e-08 | 1.000000 | 4.11674e-08 | 1.000000 |
| rad45       | 1.67076e-08 | 1.000000 | 1.67076e-08 | 1.000000 |
| Benzyl+C2H2 | 2.06052e-09 | 1.000000 | 0.000000    | 1.000000 |
| rad36       | 1.37176e-09 | 1.000000 | 1.37176e-09 | 1.000000 |
| rad11       | 1.99226e-10 | 1.000000 | 1.99226e-10 | 1.000000 |
| rad23       | 1.17642e-12 | 1.000000 | 1.17642e-12 | 1.000000 |
| rad6        | 1.61911e-16 | 1.000000 | 1.61911e-16 | 1.000000 |
| rad30       | 1.52659e-20 | 1.000000 | 1.52659e-20 | 1.000000 |
| rad15       | 4.31279e-23 | 1.000000 | 4.31279e-23 | 1.000000 |
| rad13       | 4.83578e-25 | 1.000000 | 4.83578e-25 | 1.000000 |
| rad7        | 9.58445e-26 | 1.000000 | 9.58445e-26 | 1.000000 |
| rad25       | 1.42499e-26 | 1.000000 | 1.42499e-26 | 1.000000 |
| rad38       | 5.84875e-27 | 1.000000 | 5.84875e-27 | 1.000000 |
| rad33       | 8.43444e-28 | 1.000000 | 8.43444e-28 | 1.000000 |
| rad8        | 3.74049e-30 | 1.000000 | 3.74049e-30 | 1.000000 |
| rad35       | 2.22379e-30 | 1.000000 | 2.22379e-30 | 1.000000 |
| PAH9+H      | 1.26041e-30 | 1.000000 | 1.26041e-30 | 1.000000 |
| PhCHCCH2+H  | 3.33001e-31 | 1.000000 | 3.33001e-31 | 1.000000 |
| rad46       | 3.30038e-33 | 1.000000 | 3.30038e-33 | 1.000000 |

|               |             |         |             |         |
|---------------|-------------|---------|-------------|---------|
| rad3          | 1.96600e-33 | 1.00000 | 1.96600e-33 | 1.00000 |
| rad9          | 1.50601e-33 | 1.00000 | 1.50601e-33 | 1.00000 |
| rad4          | 1.18235e-33 | 1.00000 | 1.18235e-33 | 1.00000 |
| rad60syn      | 2.11091e-34 | 1.00000 | 2.11091e-34 | 1.00000 |
| rad28         | 7.81214e-35 | 1.00000 | 7.81214e-35 | 1.00000 |
| rad60anti     | 1.11527e-35 | 1.00000 | 1.11527e-35 | 1.00000 |
| Ph+Allene     | 1.56910e-36 | 1.00000 | 1.56910e-36 | 1.00000 |
| PAH7+H        | 7.51595e-39 | 1.00000 | 7.51595e-39 | 1.00000 |
| PhCH2CCH+H    | 9.06649e-40 | 1.00000 | 9.06649e-40 | 1.00000 |
| rad2          | 1.51318e-40 | 1.00000 | 1.51318e-40 | 1.00000 |
| rad1          | 1.56459e-41 | 1.00000 | 1.56459e-41 | 1.00000 |
| rad31         | 3.35922e-42 | 1.00000 | 3.35922e-42 | 1.00000 |
| PAH3+H        | 2.35668e-42 | 1.00000 | 2.35668e-42 | 1.00000 |
| rad59         | 1.13932e-42 | 1.00000 | 1.13932e-42 | 1.00000 |
| rad26         | 1.11122e-42 | 1.00000 | 1.11122e-42 | 1.00000 |
| PhCCH+CH3     | 1.46164e-45 | 1.00000 | 1.46164e-45 | 1.00000 |
| rad14         | 7.73374e-46 | 1.00000 | 7.73374e-46 | 1.00000 |
| rad39         | 4.59490e-47 | 1.00000 | 4.59490e-47 | 1.00000 |
| rad50         | 4.32823e-47 | 1.00000 | 4.32823e-47 | 1.00000 |
| rad10         | 4.88473e-48 | 1.00000 | 4.88473e-48 | 1.00000 |
| Ph+MeAc       | 2.19026e-51 | 1.00000 | 2.19026e-51 | 1.00000 |
| rad27         | 6.61495e-52 | 1.00000 | 6.61495e-52 | 1.00000 |
| rad12         | 2.10936e-52 | 1.00000 | 2.10936e-52 | 1.00000 |
| PhCCCH3+H     | 2.18781e-53 | 1.00000 | 2.18781e-53 | 1.00000 |
| rad37         | 4.84754e-54 | 1.00000 | 4.84754e-54 | 1.00000 |
| rad52         | 8.81583e-55 | 1.00000 | 8.81583e-55 | 1.00000 |
| rad51         | 4.02960e-59 | 1.00000 | 4.02960e-59 | 1.00000 |
| rad58         | 2.52903e-60 | 1.00000 | 2.52903e-60 | 1.00000 |
| rad19syn      | 9.36308e-62 | 1.00000 | 9.36308e-62 | 1.00000 |
| rad54         | 1.32894e-62 | 1.00000 | 1.32894e-62 | 1.00000 |
| rad70         | 3.88536e-63 | 1.00000 | 3.88536e-63 | 1.00000 |
| rad5          | 1.36372e-63 | 1.00000 | 1.36372e-63 | 1.00000 |
| PAH10+CH3     | 1.73276e-64 | 1.00000 | 1.73276e-64 | 1.00000 |
| rad47         | 8.68409e-66 | 1.00000 | 8.68409e-66 | 1.00000 |
| rad65         | 6.27037e-66 | 1.00000 | 6.27037e-66 | 1.00000 |
| rad34         | 5.53217e-68 | 1.00000 | 5.53217e-68 | 1.00000 |
| rad55         | 2.50477e-68 | 1.00000 | 2.50477e-68 | 1.00000 |
| PhcycC3H3_A+H | 7.64489e-70 | 1.00000 | 7.64489e-70 | 1.00000 |
| rad62         | 5.06594e-71 | 1.00000 | 5.06594e-71 | 1.00000 |
| PAH1+H        | 4.75383e-71 | 1.00000 | 4.75383e-71 | 1.00000 |
| rad43         | 2.49594e-74 | 1.00000 | 2.49594e-74 | 1.00000 |
| rad42         | 3.41550e-80 | 1.00000 | 3.41550e-80 | 1.00000 |
| rad41         | 1.74625e-84 | 1.00000 | 1.74625e-84 | 1.00000 |

1000000.00 Pa, 80.0000000 K

=====

| Rate constant | True (fraction)     | Effective (fraction) |
|---------------|---------------------|----------------------|
| Total         | 7.28864e-49 (1.00 ) | 7.28864e-49 (1.00 )  |

| species     | PYtrue      | Cumul    | PYeffective | Cumul    |
|-------------|-------------|----------|-------------|----------|
| rad20       | 0.996995    | 0.996995 | 0.996995    | 0.996995 |
| rad21       | 0.00262971  | 0.999625 | 0.00262971  | 0.999625 |
| rad18       | 0.000373431 | 0.999998 | 0.000373431 | 0.999998 |
| rad22       | 2.13032e-06 | 1.00000  | 2.13032e-06 | 1.00000  |
| Indene+H    | 6.44490e-08 | 1.00000  | 6.44490e-08 | 1.00000  |
| rad24       | 5.52344e-08 | 1.00000  | 5.52344e-08 | 1.00000  |
| rad45       | 2.68988e-08 | 1.00000  | 2.68988e-08 | 1.00000  |
| Benzyl+C2H2 | 3.36177e-09 | 1.00000  | 0.00000     | 1.00000  |
| rad36       | 2.16121e-09 | 1.00000  | 2.16121e-09 | 1.00000  |
| rad11       | 3.01325e-10 | 1.00000  | 3.01325e-10 | 1.00000  |
| rad23       | 2.05428e-12 | 1.00000  | 2.05428e-12 | 1.00000  |
| rad6        | 3.08579e-16 | 1.00000  | 3.08579e-16 | 1.00000  |
| rad30       | 5.21047e-20 | 1.00000  | 5.21047e-20 | 1.00000  |
| rad15       | 1.71744e-22 | 1.00000  | 1.71744e-22 | 1.00000  |
| rad13       | 1.17326e-24 | 1.00000  | 1.17326e-24 | 1.00000  |
| rad7        | 2.35737e-25 | 1.00000  | 2.35737e-25 | 1.00000  |
| rad25       | 6.20882e-26 | 1.00000  | 6.20882e-26 | 1.00000  |
| rad38       | 2.16312e-26 | 1.00000  | 2.16312e-26 | 1.00000  |
| rad33       | 2.16028e-27 | 1.00000  | 2.16028e-27 | 1.00000  |
| rad8        | 2.14664e-29 | 1.00000  | 2.14664e-29 | 1.00000  |
| rad35       | 6.76614e-30 | 1.00000  | 6.76614e-30 | 1.00000  |
| PAH9+H      | 4.21712e-30 | 1.00000  | 4.21712e-30 | 1.00000  |
| PhCHCCH2+H  | 1.92065e-30 | 1.00000  | 1.92065e-30 | 1.00000  |
| rad46       | 1.99908e-32 | 1.00000  | 1.99908e-32 | 1.00000  |
| rad9        | 9.57022e-33 | 1.00000  | 9.57022e-33 | 1.00000  |
| rad3        | 7.19816e-33 | 1.00000  | 7.19816e-33 | 1.00000  |
| rad4        | 4.29583e-33 | 1.00000  | 4.29583e-33 | 1.00000  |
| rad60syn    | 1.32267e-33 | 1.00000  | 1.32267e-33 | 1.00000  |

|               |             |         |             |         |
|---------------|-------------|---------|-------------|---------|
| rad28         | 5.45775e-34 | 1.00000 | 5.45775e-34 | 1.00000 |
| rad60anti     | 7.30015e-35 | 1.00000 | 7.30015e-35 | 1.00000 |
| Ph+Allene     | 1.18819e-35 | 1.00000 | 1.18819e-35 | 1.00000 |
| PAH7+H        | 5.99447e-38 | 1.00000 | 5.99447e-38 | 1.00000 |
| PhCH2CCH+H    | 7.28619e-39 | 1.00000 | 7.28619e-39 | 1.00000 |
| rad2          | 8.18958e-40 | 1.00000 | 8.18958e-40 | 1.00000 |
| rad1          | 8.27024e-41 | 1.00000 | 8.27024e-41 | 1.00000 |
| PAH3+H        | 1.99250e-41 | 1.00000 | 1.99250e-41 | 1.00000 |
| rad31         | 1.19977e-41 | 1.00000 | 1.19977e-41 | 1.00000 |
| rad26         | 1.00228e-41 | 1.00000 | 1.00228e-41 | 1.00000 |
| rad59         | 9.58183e-42 | 1.00000 | 9.58183e-42 | 1.00000 |
| PhCCH+CH3     | 1.25825e-44 | 1.00000 | 1.25825e-44 | 1.00000 |
| rad14         | 5.90932e-45 | 1.00000 | 5.90932e-45 | 1.00000 |
| rad50         | 5.26645e-46 | 1.00000 | 5.26645e-46 | 1.00000 |
| rad39         | 3.88401e-46 | 1.00000 | 3.88401e-46 | 1.00000 |
| rad10         | 3.74192e-47 | 1.00000 | 3.74192e-47 | 1.00000 |
| Ph+MeAc       | 2.58401e-50 | 1.00000 | 2.58401e-50 | 1.00000 |
| rad27         | 5.87560e-51 | 1.00000 | 5.87560e-51 | 1.00000 |
| rad12         | 2.21465e-51 | 1.00000 | 2.21465e-51 | 1.00000 |
| PhCCCH3+H     | 2.37518e-52 | 1.00000 | 2.37518e-52 | 1.00000 |
| rad37         | 5.16137e-53 | 1.00000 | 5.16137e-53 | 1.00000 |
| rad52         | 1.50181e-53 | 1.00000 | 1.50181e-53 | 1.00000 |
| rad51         | 8.60856e-58 | 1.00000 | 8.60856e-58 | 1.00000 |
| rad58         | 3.77027e-59 | 1.00000 | 3.77027e-59 | 1.00000 |
| rad19syn      | 1.56384e-60 | 1.00000 | 1.56384e-60 | 1.00000 |
| rad54         | 2.41435e-61 | 1.00000 | 2.41435e-61 | 1.00000 |
| rad70         | 7.71204e-62 | 1.00000 | 7.71204e-62 | 1.00000 |
| rad5          | 2.42070e-62 | 1.00000 | 2.42070e-62 | 1.00000 |
| PAH10+CH3     | 2.65983e-63 | 1.00000 | 2.65983e-63 | 1.00000 |
| rad47         | 2.63798e-64 | 1.00000 | 2.63798e-64 | 1.00000 |
| rad65         | 1.46293e-64 | 1.00000 | 1.46293e-64 | 1.00000 |
| rad34         | 1.28209e-66 | 1.00000 | 1.28209e-66 | 1.00000 |
| rad55         | 5.48717e-67 | 1.00000 | 5.48717e-67 | 1.00000 |
| PhcycC3H3_A+H | 1.71784e-68 | 1.00000 | 1.71784e-68 | 1.00000 |
| rad62         | 1.36758e-69 | 1.00000 | 1.36758e-69 | 1.00000 |
| PAH1+H        | 9.71985e-70 | 1.00000 | 9.71985e-70 | 1.00000 |
| rad43         | 7.64450e-73 | 1.00000 | 7.64450e-73 | 1.00000 |
| rad42         | 1.31561e-78 | 1.00000 | 1.31561e-78 | 1.00000 |
| rad41         | 8.19098e-83 | 1.00000 | 8.19098e-83 | 1.00000 |

1000000.00 Pa, 90.0000000 K

=====

| Rate constant | True (fraction)     | Effective (fraction) |
|---------------|---------------------|----------------------|
| Total         | 6.85154e-45 (1.00 ) | 6.85154e-45 (1.00 )  |

| species     | PYtrue      | Cumul    | PYeffective | Cumul    |
|-------------|-------------|----------|-------------|----------|
| rad20       | 0.996512    | 0.996512 | 0.996512    | 0.996512 |
| rad21       | 0.00304988  | 0.999562 | 0.00304988  | 0.999562 |
| rad18       | 0.000434788 | 0.999997 | 0.000434788 | 0.999997 |
| rad22       | 2.88328e-06 | 1.000000 | 2.88328e-06 | 1.000000 |
| Indene+H    | 8.76694e-08 | 1.000000 | 8.76694e-08 | 1.000000 |
| rad24       | 7.17518e-08 | 1.000000 | 7.17518e-08 | 1.000000 |
| rad45       | 4.12411e-08 | 1.000000 | 4.12411e-08 | 1.000000 |
| Benzyl+C2H2 | 5.38923e-09 | 1.000000 | 0.000000    | 1.000000 |
| rad36       | 3.25532e-09 | 1.000000 | 3.25532e-09 | 1.000000 |
| rad11       | 4.44383e-10 | 1.000000 | 4.44383e-10 | 1.000000 |
| rad23       | 3.41447e-12 | 1.000000 | 3.41447e-12 | 1.000000 |
| rad6        | 5.70624e-16 | 1.000000 | 5.70624e-16 | 1.000000 |
| rad30       | 1.94599e-19 | 1.000000 | 1.94599e-19 | 1.000000 |
| rad15       | 8.29300e-22 | 1.000000 | 8.29300e-22 | 1.000000 |
| rad13       | 2.76422e-24 | 1.000000 | 2.76422e-24 | 1.000000 |
| rad7        | 5.64542e-25 | 1.000000 | 5.64542e-25 | 1.000000 |
| rad25       | 3.08694e-25 | 1.000000 | 3.08694e-25 | 1.000000 |
| rad38       | 7.96154e-26 | 1.000000 | 7.96154e-26 | 1.000000 |
| rad33       | 5.42764e-27 | 1.000000 | 5.42764e-27 | 1.000000 |
| rad8        | 1.83937e-28 | 1.000000 | 1.83937e-28 | 1.000000 |
| rad35       | 2.01001e-29 | 1.000000 | 2.01001e-29 | 1.000000 |
| PhCHCCH2+H  | 1.43630e-29 | 1.000000 | 1.43630e-29 | 1.000000 |
| PAH9+H      | 1.38863e-29 | 1.000000 | 1.38863e-29 | 1.000000 |
| rad46       | 1.44199e-31 | 1.000000 | 1.44199e-31 | 1.000000 |
| rad9        | 8.12141e-32 | 1.000000 | 8.12141e-32 | 1.000000 |
| rad3        | 2.64130e-32 | 1.000000 | 2.64130e-32 | 1.000000 |
| rad4        | 1.56637e-32 | 1.000000 | 1.56637e-32 | 1.000000 |
| rad60syn    | 1.19242e-32 | 1.000000 | 1.19242e-32 | 1.000000 |
| rad28       | 5.27848e-33 | 1.000000 | 5.27848e-33 | 1.000000 |
| rad60anti   | 6.91303e-34 | 1.000000 | 6.91303e-34 | 1.000000 |
| Ph+Allene   | 1.24557e-34 | 1.000000 | 1.24557e-34 | 1.000000 |
| PAH7+H      | 6.77473e-37 | 1.000000 | 6.77473e-37 | 1.000000 |

|               |             |          |             |          |
|---------------|-------------|----------|-------------|----------|
| PhCH2CCH+H    | 8.85703e-38 | 1.000000 | 8.85703e-38 | 1.000000 |
| rad2          | 4.66702e-39 | 1.000000 | 4.66702e-39 | 1.000000 |
| rad1          | 4.62327e-40 | 1.000000 | 4.62327e-40 | 1.000000 |
| PAH3+H        | 2.49405e-40 | 1.000000 | 2.49405e-40 | 1.000000 |
| rad26         | 1.30198e-40 | 1.000000 | 1.30198e-40 | 1.000000 |
| rad59         | 1.19238e-40 | 1.000000 | 1.19238e-40 | 1.000000 |
| rad31         | 4.35331e-41 | 1.000000 | 4.35331e-41 | 1.000000 |
| PhCCH+CH3     | 1.31194e-43 | 1.000000 | 1.31194e-43 | 1.000000 |
| rad14         | 5.25649e-44 | 1.000000 | 5.25649e-44 | 1.000000 |
| rad50         | 9.10580e-45 | 1.000000 | 9.10580e-45 | 1.000000 |
| rad39         | 4.51421e-45 | 1.000000 | 4.51421e-45 | 1.000000 |
| rad10         | 3.26461e-46 | 1.000000 | 3.26461e-46 | 1.000000 |
| Ph+MeAc       | 3.97258e-49 | 1.000000 | 3.97258e-49 | 1.000000 |
| rad27         | 6.02320e-50 | 1.000000 | 6.02320e-50 | 1.000000 |
| rad12         | 3.29296e-50 | 1.000000 | 3.29296e-50 | 1.000000 |
| PhCCCH3+H     | 3.14380e-51 | 1.000000 | 3.14380e-51 | 1.000000 |
| rad37         | 7.80014e-52 | 1.000000 | 7.80014e-52 | 1.000000 |
| rad52         | 3.83552e-52 | 1.000000 | 3.83552e-52 | 1.000000 |
| rad51         | 2.86123e-56 | 1.000000 | 2.86123e-56 | 1.000000 |
| rad58         | 8.62025e-58 | 1.000000 | 8.62025e-58 | 1.000000 |
| rad19syn      | 3.67032e-59 | 1.000000 | 3.67032e-59 | 1.000000 |
| rad54         | 6.21128e-60 | 1.000000 | 6.21128e-60 | 1.000000 |
| rad70         | 2.23792e-60 | 1.000000 | 2.23792e-60 | 1.000000 |
| rad5          | 5.67873e-61 | 1.000000 | 5.67873e-61 | 1.000000 |
| PAH10+CH3     | 5.99477e-62 | 1.000000 | 5.99477e-62 | 1.000000 |
| rad47         | 1.32626e-62 | 1.000000 | 1.32626e-62 | 1.000000 |
| rad65         | 5.39204e-63 | 1.000000 | 5.39204e-63 | 1.000000 |
| rad34         | 4.38774e-65 | 1.000000 | 4.38774e-65 | 1.000000 |
| rad55         | 1.72636e-65 | 1.000000 | 1.72636e-65 | 1.000000 |
| PhcycC3H3_A+H | 5.54120e-67 | 1.000000 | 5.54120e-67 | 1.000000 |
| rad62         | 5.08469e-68 | 1.000000 | 5.08469e-68 | 1.000000 |
| PAH1+H        | 2.98231e-68 | 1.000000 | 2.98231e-68 | 1.000000 |
| rad43         | 3.16022e-71 | 1.000000 | 3.16022e-71 | 1.000000 |
| rad42         | 7.17376e-77 | 1.000000 | 7.17376e-77 | 1.000000 |
| rad41         | 5.36462e-81 | 1.000000 | 5.36462e-81 | 1.000000 |

1000000.00 Pa, 100.000000 K

=====

| Rate constant | True (fraction)     | Effective (fraction) |
|---------------|---------------------|----------------------|
| Total         | 1.02671e-41 (1.00 ) | 1.02671e-41 (1.00 )  |

| species     | PYtrue      | Cumul    | PYeffective | Cumul    |
|-------------|-------------|----------|-------------|----------|
| rad20       | 0.996001    | 0.996001 | 0.996001    | 0.996001 |
| rad21       | 0.00349431  | 0.999495 | 0.00349431  | 0.999495 |
| rad18       | 0.000500248 | 0.999996 | 0.000500248 | 0.999996 |
| rad22       | 3.81276e-06 | 0.999999 | 3.81276e-06 | 0.999999 |
| Indene+H    | 1.16600e-07 | 0.999999 | 1.16600e-07 | 0.999999 |
| rad24       | 9.10948e-08 | 1.000000 | 9.10948e-08 | 1.000000 |
| rad45       | 6.11082e-08 | 1.000000 | 6.11082e-08 | 1.000000 |
| Benzyl+C2H2 | 8.53154e-09 | 1.000000 | 0.000000    | 1.000000 |
| rad36       | 4.75250e-09 | 1.000000 | 4.75250e-09 | 1.000000 |
| rad11       | 6.45516e-10 | 1.000000 | 6.45516e-10 | 1.000000 |
| rad23       | 5.48843e-12 | 1.000000 | 5.48843e-12 | 1.000000 |
| rad6        | 1.04056e-15 | 1.000000 | 1.04056e-15 | 1.000000 |
| rad30       | 7.39099e-19 | 1.000000 | 7.39099e-19 | 1.000000 |
| rad15       | 4.53318e-21 | 1.000000 | 4.53318e-21 | 1.000000 |
| rad13       | 6.47519e-24 | 1.000000 | 6.47519e-24 | 1.000000 |
| rad25       | 1.67993e-24 | 1.000000 | 1.67993e-24 | 1.000000 |
| rad7        | 1.34815e-24 | 1.000000 | 1.34815e-24 | 1.000000 |
| rad38       | 2.90087e-25 | 1.000000 | 2.90087e-25 | 1.000000 |
| rad33       | 1.37046e-26 | 1.000000 | 1.37046e-26 | 1.000000 |
| rad8        | 2.83638e-27 | 1.000000 | 2.83638e-27 | 1.000000 |
| PhCHCCH2+H  | 1.44645e-28 | 1.000000 | 1.44645e-28 | 1.000000 |
| rad35       | 5.94566e-29 | 1.000000 | 5.94566e-29 | 1.000000 |
| PAH9+H      | 4.55810e-29 | 1.000000 | 4.55810e-29 | 1.000000 |
| rad46       | 1.23512e-30 | 1.000000 | 1.23512e-30 | 1.000000 |
| rad9        | 9.95190e-31 | 1.000000 | 9.95190e-31 | 1.000000 |
| rad60syn    | 1.80380e-31 | 1.000000 | 1.80380e-31 | 1.000000 |
| rad3        | 1.00103e-31 | 1.000000 | 1.00103e-31 | 1.000000 |
| rad28       | 8.01379e-32 | 1.000000 | 8.01379e-32 | 1.000000 |
| rad4        | 5.90493e-32 | 1.000000 | 5.90493e-32 | 1.000000 |
| rad60anti   | 1.11318e-32 | 1.000000 | 1.11318e-32 | 1.000000 |
| Ph+Allene   | 2.06374e-33 | 1.000000 | 2.06374e-33 | 1.000000 |
| PAH7+H      | 1.26012e-35 | 1.000000 | 1.26012e-35 | 1.000000 |
| PhCH2CCH+H  | 1.95009e-36 | 1.000000 | 1.95009e-36 | 1.000000 |
| rad2        | 2.90958e-38 | 1.000000 | 2.90958e-38 | 1.000000 |
| PAH3+H      | 5.53381e-39 | 1.000000 | 5.53381e-39 | 1.000000 |
| rad26       | 2.86445e-39 | 1.000000 | 2.86445e-39 | 1.000000 |

|               |             |          |             |          |
|---------------|-------------|----------|-------------|----------|
| rad1          | 2.83677e-39 | 1.000000 | 2.83677e-39 | 1.000000 |
| rad59         | 2.62825e-39 | 1.000000 | 2.62825e-39 | 1.000000 |
| rad31         | 1.64657e-40 | 1.000000 | 1.64657e-40 | 1.000000 |
| PhCCH+CH3     | 1.76054e-42 | 1.000000 | 1.76054e-42 | 1.000000 |
| rad14         | 5.64493e-43 | 1.000000 | 5.64493e-43 | 1.000000 |
| rad50         | 2.51456e-43 | 1.000000 | 2.51456e-43 | 1.000000 |
| rad39         | 8.32280e-44 | 1.000000 | 8.32280e-44 | 1.000000 |
| rad10         | 3.73889e-45 | 1.000000 | 3.73889e-45 | 1.000000 |
| Ph+MeAc       | 9.14177e-48 | 1.000000 | 9.14177e-48 | 1.000000 |
| rad12         | 8.20592e-49 | 1.000000 | 8.20592e-49 | 1.000000 |
| rad27         | 7.59147e-49 | 1.000000 | 7.59147e-49 | 1.000000 |
| PhCCCH3+H     | 5.56956e-50 | 1.000000 | 5.56957e-50 | 1.000000 |
| rad37         | 1.98220e-50 | 1.000000 | 1.98220e-50 | 1.000000 |
| rad52         | 1.67617e-50 | 1.000000 | 1.67617e-50 | 1.000000 |
| rad51         | 1.69677e-54 | 1.000000 | 1.69677e-54 | 1.000000 |
| rad58         | 3.61598e-56 | 1.000000 | 3.61598e-56 | 1.000000 |
| rad19syn      | 1.45207e-57 | 1.000000 | 1.45207e-57 | 1.000000 |
| rad54         | 2.71823e-58 | 1.000000 | 2.71823e-58 | 1.000000 |
| rad70         | 1.13713e-58 | 1.000000 | 1.13713e-58 | 1.000000 |
| rad5          | 2.09570e-59 | 1.000000 | 2.09570e-59 | 1.000000 |
| PAH10+CH3     | 2.37242e-60 | 1.000000 | 2.37242e-60 | 1.000000 |
| rad47         | 1.26718e-60 | 1.000000 | 1.26718e-60 | 1.000000 |
| rad65         | 3.66574e-61 | 1.000000 | 3.66574e-61 | 1.000000 |
| rad34         | 2.65547e-63 | 1.000000 | 2.65547e-63 | 1.000000 |
| rad55         | 9.38620e-64 | 1.000000 | 9.38620e-64 | 1.000000 |
| PhcycC3H3_A+H | 3.08917e-65 | 1.000000 | 3.08917e-65 | 1.000000 |
| rad62         | 3.15442e-66 | 1.000000 | 3.15442e-66 | 1.000000 |
| PAH1+H        | 1.64134e-66 | 1.000000 | 1.64134e-66 | 1.000000 |
| rad43         | 2.14324e-69 | 1.000000 | 2.14324e-69 | 1.000000 |
| rad42         | 6.72180e-75 | 1.000000 | 6.72180e-75 | 1.000000 |
| rad41         | 5.97671e-79 | 1.000000 | 5.97671e-79 | 1.000000 |

1000000.00 Pa, 110.000000 K

=====

| Rate constant | True (fraction)     | Effective (fraction) |
|---------------|---------------------|----------------------|
| Total         | 4.04932e-39 (1.00 ) | 4.04932e-39 (1.00 )  |

| species     | PYtrue      | Cumul    | PYeffective | Cumul    |
|-------------|-------------|----------|-------------|----------|
| rad20       | 0.995456    | 0.995456 | 0.995456    | 0.995456 |
| rad21       | 0.00396826  | 0.999424 | 0.00396826  | 0.999424 |
| rad18       | 0.000570682 | 0.999995 | 0.000570682 | 0.999995 |
| rad22       | 4.95990e-06 | 1.000000 | 4.95990e-06 | 1.000000 |
| Indene+H    | 1.52680e-07 | 1.000000 | 1.52680e-07 | 1.000000 |
| rad24       | 1.13748e-07 | 1.000000 | 1.13748e-07 | 1.000000 |
| rad45       | 8.83952e-08 | 1.000000 | 8.83952e-08 | 1.000000 |
| Benzyl+C2H2 | 1.33843e-08 | 1.000000 | 0.000000    | 1.000000 |
| rad36       | 6.78865e-09 | 1.000000 | 6.78865e-09 | 1.000000 |
| rad11       | 9.30115e-10 | 1.000000 | 9.30115e-10 | 1.000000 |
| rad23       | 8.62774e-12 | 1.000000 | 8.62774e-12 | 1.000000 |
| rad6        | 1.89234e-15 | 1.000000 | 1.89234e-15 | 1.000000 |
| rad30       | 2.66858e-18 | 1.000000 | 2.66858e-18 | 1.000000 |
| rad15       | 2.46349e-20 | 1.000000 | 2.46349e-20 | 1.000000 |
| rad13       | 1.53263e-23 | 1.000000 | 1.53263e-23 | 1.000000 |
| rad25       | 9.21315e-24 | 1.000000 | 9.21315e-24 | 1.000000 |
| rad7        | 3.26276e-24 | 1.000000 | 3.26276e-24 | 1.000000 |
| rad38       | 1.03745e-24 | 1.000000 | 1.03745e-24 | 1.000000 |
| rad8        | 8.60920e-26 | 1.000000 | 8.60920e-26 | 1.000000 |
| rad33       | 3.53275e-26 | 1.000000 | 3.53275e-26 | 1.000000 |
| PhCHCCH2+H  | 1.74877e-27 | 1.000000 | 1.74877e-27 | 1.000000 |
| rad35       | 1.77297e-28 | 1.000000 | 1.77297e-28 | 1.000000 |
| PAH9+H      | 1.50260e-28 | 1.000000 | 1.50260e-28 | 1.000000 |
| rad9        | 1.60826e-29 | 1.000000 | 1.60826e-29 | 1.000000 |
| rad46       | 1.14681e-29 | 1.000000 | 1.14681e-29 | 1.000000 |
| rad60syn    | 4.61163e-30 | 1.000000 | 4.61163e-30 | 1.000000 |
| rad28       | 1.88625e-30 | 1.000000 | 1.88625e-30 | 1.000000 |
| rad3        | 3.97787e-31 | 1.000000 | 3.97787e-31 | 1.000000 |
| rad60anti   | 3.21473e-31 | 1.000000 | 3.21473e-31 | 1.000000 |
| rad4        | 2.33589e-31 | 1.000000 | 2.33589e-31 | 1.000000 |
| Ph+Allene   | 5.45316e-32 | 1.000000 | 5.45316e-32 | 1.000000 |
| PAH7+H      | 4.08449e-34 | 1.000000 | 4.08449e-34 | 1.000000 |
| PhCH2CCH+H  | 8.79436e-35 | 1.000000 | 8.79436e-35 | 1.000000 |
| PAH3+H      | 2.43619e-37 | 1.000000 | 2.43619e-37 | 1.000000 |
| rad2        | 1.99836e-37 | 1.000000 | 1.99836e-37 | 1.000000 |
| rad26       | 1.16388e-37 | 1.000000 | 1.16388e-37 | 1.000000 |
| rad59       | 1.14801e-37 | 1.000000 | 1.14801e-37 | 1.000000 |
| rad1        | 1.92254e-38 | 1.000000 | 1.92254e-38 | 1.000000 |
| rad31       | 6.56280e-40 | 1.000000 | 6.56280e-40 | 1.000000 |
| PhCCH+CH3   | 2.90084e-41 | 1.000000 | 2.90084e-41 | 1.000000 |

|               |             |         |             |         |
|---------------|-------------|---------|-------------|---------|
| rad50         | 1.12394e-41 | 1.00000 | 1.12394e-41 | 1.00000 |
| rad14         | 7.01768e-42 | 1.00000 | 7.01768e-42 | 1.00000 |
| rad39         | 2.51337e-42 | 1.00000 | 2.51337e-42 | 1.00000 |
| rad10         | 7.59976e-44 | 1.00000 | 7.59976e-44 | 1.00000 |
| Ph+MeAc       | 3.20782e-46 | 1.00000 | 3.20782e-46 | 1.00000 |
| rad12         | 3.76165e-47 | 1.00000 | 3.76165e-47 | 1.00000 |
| rad27         | 1.16310e-47 | 1.00000 | 1.16310e-47 | 1.00000 |
| PhCCCH3+H     | 1.29643e-48 | 1.00000 | 1.29643e-48 | 1.00000 |
| rad52         | 1.28815e-48 | 1.00000 | 1.28815e-48 | 1.00000 |
| rad37         | 9.32008e-49 | 1.00000 | 9.32008e-49 | 1.00000 |
| rad51         | 1.84431e-52 | 1.00000 | 1.84431e-52 | 1.00000 |
| rad58         | 3.14180e-54 | 1.00000 | 3.14180e-54 | 1.00000 |
| rad19syn      | 1.08555e-55 | 1.00000 | 1.08555e-55 | 1.00000 |
| rad54         | 2.27557e-56 | 1.00000 | 2.27557e-56 | 1.00000 |
| rad70         | 1.13901e-56 | 1.00000 | 1.13901e-56 | 1.00000 |
| rad5          | 1.32551e-57 | 1.00000 | 1.32551e-57 | 1.00000 |
| rad47         | 2.34213e-58 | 1.00000 | 2.34213e-58 | 1.00000 |
| PAH10+CH3     | 1.85231e-58 | 1.00000 | 1.85231e-58 | 1.00000 |
| rad65         | 4.75760e-59 | 1.00000 | 4.75760e-59 | 1.00000 |
| rad34         | 3.20285e-61 | 1.00000 | 3.20285e-61 | 1.00000 |
| rad55         | 9.95911e-62 | 1.00000 | 9.95911e-62 | 1.00000 |
| PhcycC3H3_A+H | 3.36334e-63 | 1.00000 | 3.36334e-63 | 1.00000 |
| rad62         | 3.68964e-64 | 1.00000 | 3.68964e-64 | 1.00000 |
| PAH1+H        | 1.82458e-64 | 1.00000 | 1.82458e-64 | 1.00000 |
| rad43         | 2.69487e-67 | 1.00000 | 2.69487e-67 | 1.00000 |
| rad42         | 1.22986e-72 | 1.00000 | 1.22986e-72 | 1.00000 |
| rad41         | 1.28913e-76 | 1.00000 | 1.28913e-76 | 1.00000 |

1000000.00 Pa, 120.000000 K

| Rate constant | True (fraction)     | Effective (fraction) |
|---------------|---------------------|----------------------|
| Total         | 5.87106e-37 (1.00 ) | 5.87106e-37 (1.00 )  |

| species     | PYtrue      | Cumul    | PYeffective | Cumul    |
|-------------|-------------|----------|-------------|----------|
| rad20       | 0.994868    | 0.994868 | 0.994868    | 0.994868 |
| rad21       | 0.00447758  | 0.999346 | 0.00447758  | 0.999346 |
| rad18       | 0.000647083 | 0.999993 | 0.000647083 | 0.999993 |
| rad22       | 6.37876e-06 | 0.999999 | 6.37876e-06 | 0.999999 |
| Indene+H    | 1.97832e-07 | 0.999999 | 1.97832e-07 | 0.999999 |
| rad24       | 1.40313e-07 | 0.999999 | 1.40313e-07 | 0.999999 |
| rad45       | 1.25734e-07 | 1.000000 | 1.25734e-07 | 1.000000 |
| Benzyl+C2H2 | 2.08569e-08 | 1.000000 | 0.000000    | 1.000000 |
| rad36       | 9.55245e-09 | 1.000000 | 9.55245e-09 | 1.000000 |
| rad11       | 1.33603e-09 | 1.000000 | 1.33603e-09 | 1.000000 |
| rad23       | 1.33735e-11 | 1.000000 | 1.33735e-11 | 1.000000 |
| rad6        | 3.45831e-15 | 1.000000 | 3.45831e-15 | 1.000000 |
| rad30       | 8.88178e-18 | 1.000000 | 8.88178e-18 | 1.000000 |
| rad15       | 1.21872e-19 | 1.000000 | 1.21872e-19 | 1.000000 |
| rad25       | 4.77897e-23 | 1.000000 | 4.77897e-23 | 1.000000 |
| rad13       | 3.70238e-23 | 1.000000 | 3.70238e-23 | 1.000000 |
| rad7        | 8.08175e-24 | 1.000000 | 8.08175e-24 | 1.000000 |
| rad38       | 3.62132e-24 | 1.000000 | 3.62132e-24 | 1.000000 |
| rad8        | 2.79941e-24 | 1.000000 | 2.79941e-24 | 1.000000 |
| rad33       | 9.37590e-26 | 1.000000 | 9.37590e-26 | 1.000000 |
| PhCHCCH2+H  | 2.10458e-26 | 1.000000 | 2.10458e-26 | 1.000000 |
| rad35       | 5.36350e-28 | 1.000000 | 5.36350e-28 | 1.000000 |
| PAH9+H      | 4.99332e-28 | 1.000000 | 4.99332e-28 | 1.000000 |
| rad9        | 2.74958e-28 | 1.000000 | 2.74958e-28 | 1.000000 |
| rad60syn    | 1.32597e-28 | 1.000000 | 1.32597e-28 | 1.000000 |
| rad46       | 1.02985e-28 | 1.000000 | 1.02985e-28 | 1.000000 |
| rad28       | 5.06457e-29 | 1.000000 | 5.06457e-29 | 1.000000 |
| rad60anti   | 1.11718e-29 | 1.000000 | 1.11718e-29 | 1.000000 |
| Ph+Allene   | 1.71554e-30 | 1.000000 | 1.71554e-30 | 1.000000 |
| rad3        | 1.66076e-30 | 1.000000 | 1.66076e-30 | 1.000000 |
| rad4        | 9.71466e-31 | 1.000000 | 9.71466e-31 | 1.000000 |
| PAH7+H      | 1.79587e-32 | 1.000000 | 1.79587e-32 | 1.000000 |
| PhCH2CCH+H  | 6.25390e-33 | 1.000000 | 6.25390e-33 | 1.000000 |
| PAH3+H      | 1.64312e-35 | 1.000000 | 1.64312e-35 | 1.000000 |
| rad59       | 7.67119e-36 | 1.000000 | 7.67119e-36 | 1.000000 |
| rad26       | 6.87496e-36 | 1.000000 | 6.87496e-36 | 1.000000 |
| rad2        | 1.48563e-36 | 1.000000 | 1.48563e-36 | 1.000000 |
| rad1        | 1.41328e-37 | 1.000000 | 1.41328e-37 | 1.000000 |
| rad31       | 2.75346e-39 | 1.000000 | 2.75346e-39 | 1.000000 |
| rad50       | 6.52832e-40 | 1.000000 | 6.52832e-40 | 1.000000 |
| PhCCH+CH3   | 5.21115e-40 | 1.000000 | 5.21115e-40 | 1.000000 |
| rad39       | 9.53279e-41 | 1.000000 | 9.53279e-41 | 1.000000 |
| rad14       | 9.32173e-41 | 1.000000 | 9.32173e-41 | 1.000000 |
| rad10       | 3.36615e-42 | 1.000000 | 3.36615e-42 | 1.000000 |

|               |             |          |             |          |
|---------------|-------------|----------|-------------|----------|
| Ph+MeAc       | 1.37743e-44 | 1.000000 | 1.37743e-44 | 1.000000 |
| rad12         | 2.50678e-45 | 1.000000 | 2.50678e-45 | 1.000000 |
| rad27         | 2.01935e-46 | 1.000000 | 2.01935e-46 | 1.000000 |
| rad52         | 1.36492e-46 | 1.000000 | 1.36492e-46 | 1.000000 |
| rad37         | 6.41297e-47 | 1.000000 | 6.41297e-47 | 1.000000 |
| PhCCH3+H      | 3.48747e-47 | 1.000000 | 3.48747e-47 | 1.000000 |
| rad51         | 2.83589e-50 | 1.000000 | 2.83589e-50 | 1.000000 |
| rad58         | 4.33744e-52 | 1.000000 | 4.33744e-52 | 1.000000 |
| rad19syn      | 1.21453e-53 | 1.000000 | 1.21453e-53 | 1.000000 |
| rad54         | 2.87374e-54 | 1.000000 | 2.87374e-54 | 1.000000 |
| rad70         | 1.75456e-54 | 1.000000 | 1.75456e-54 | 1.000000 |
| rad5          | 1.15630e-55 | 1.000000 | 1.15630e-55 | 1.000000 |
| rad47         | 6.32395e-56 | 1.000000 | 6.32396e-56 | 1.000000 |
| PAH10+CH3     | 2.22687e-56 | 1.000000 | 2.22687e-56 | 1.000000 |
| rad65         | 8.98973e-57 | 1.000000 | 8.98973e-57 | 1.000000 |
| rad34         | 5.98114e-59 | 1.000000 | 5.98114e-59 | 1.000000 |
| rad55         | 1.61479e-59 | 1.000000 | 1.61479e-59 | 1.000000 |
| PhcycC3H3_A+H | 5.60094e-61 | 1.000000 | 5.60094e-61 | 1.000000 |
| rad62         | 6.43928e-62 | 1.000000 | 6.43928e-62 | 1.000000 |
| PAH1+H        | 3.17081e-62 | 1.000000 | 3.17081e-62 | 1.000000 |
| rad43         | 4.99347e-65 | 1.000000 | 4.99347e-65 | 1.000000 |
| rad42         | 3.44344e-70 | 1.000000 | 3.44344e-70 | 1.000000 |
| rad41         | 4.22635e-74 | 1.000000 | 4.22635e-74 | 1.000000 |

1000000.00 Pa, 130.000000 K

| Rate constant | True (fraction)     | Effective (fraction) |
|---------------|---------------------|----------------------|
| Total         | 3.94360e-35 (1.00 ) | 3.94360e-35 (1.00 )  |

| species     | PYtrue      | Cumul    | PYeffective | Cumul    |
|-------------|-------------|----------|-------------|----------|
| rad20       | 0.994232    | 0.994232 | 0.994232    | 0.994232 |
| rad21       | 0.00502885  | 0.999261 | 0.00502885  | 0.999261 |
| rad18       | 0.000730581 | 0.999991 | 0.000730581 | 0.999991 |
| rad22       | 8.14015e-06 | 1.000000 | 8.14015e-06 | 1.000000 |
| Indene+H    | 2.54621e-07 | 1.000000 | 2.54621e-07 | 1.000000 |
| rad45       | 1.76789e-07 | 1.000000 | 1.76789e-07 | 1.000000 |
| rad24       | 1.71524e-07 | 1.000000 | 1.71524e-07 | 1.000000 |
| Benzyl+C2H2 | 3.23301e-08 | 1.000000 | 0.000000    | 1.000000 |
| rad36       | 1.33065e-08 | 1.000000 | 1.33065e-08 | 1.000000 |
| rad11       | 1.91985e-09 | 1.000000 | 1.91985e-09 | 1.000000 |
| rad23       | 2.05675e-11 | 1.000000 | 2.05675e-11 | 1.000000 |
| rad6        | 6.38160e-15 | 1.000000 | 6.38160e-15 | 1.000000 |
| rad30       | 2.71436e-17 | 1.000000 | 2.71436e-17 | 1.000000 |
| rad15       | 5.32970e-19 | 1.000000 | 5.32970e-19 | 1.000000 |
| rad25       | 2.28161e-22 | 1.000000 | 2.28161e-22 | 1.000000 |
| rad13       | 9.17151e-23 | 1.000000 | 9.17151e-23 | 1.000000 |
| rad8        | 6.95872e-23 | 1.000000 | 6.95872e-23 | 1.000000 |
| rad7        | 2.05765e-23 | 1.000000 | 2.05765e-23 | 1.000000 |
| rad38       | 1.23081e-23 | 1.000000 | 1.23081e-23 | 1.000000 |
| rad33       | 2.56750e-25 | 1.000000 | 2.56750e-25 | 1.000000 |
| PhCHCCH2+H  | 2.23925e-25 | 1.000000 | 2.23925e-25 | 1.000000 |
| rad9        | 4.39596e-27 | 1.000000 | 4.39596e-27 | 1.000000 |
| rad60syn    | 3.15965e-27 | 1.000000 | 3.15965e-27 | 1.000000 |
| PAH9+H      | 1.67389e-27 | 1.000000 | 1.67389e-27 | 1.000000 |
| rad35       | 1.64867e-27 | 1.000000 | 1.64867e-27 | 1.000000 |
| rad28       | 1.18359e-27 | 1.000000 | 1.18359e-27 | 1.000000 |
| rad46       | 8.33130e-28 | 1.000000 | 8.33130e-28 | 1.000000 |
| rad60anti   | 3.22692e-28 | 1.000000 | 3.22692e-28 | 1.000000 |
| Ph+Allene   | 4.82123e-29 | 1.000000 | 4.82123e-29 | 1.000000 |
| rad3        | 7.23264e-30 | 1.000000 | 7.23264e-30 | 1.000000 |
| rad4        | 4.21666e-30 | 1.000000 | 4.21666e-30 | 1.000000 |
| PAH7+H      | 7.46461e-31 | 1.000000 | 7.46461e-31 | 1.000000 |
| PhCH2CCH+H  | 5.70185e-31 | 1.000000 | 5.70185e-31 | 1.000000 |
| PAH3+H      | 1.35113e-33 | 1.000000 | 1.35113e-33 | 1.000000 |
| rad59       | 6.23244e-34 | 1.000000 | 6.23244e-34 | 1.000000 |
| rad26       | 4.63246e-34 | 1.000000 | 4.63246e-34 | 1.000000 |
| rad2        | 1.16177e-35 | 1.000000 | 1.16177e-35 | 1.000000 |
| rad1        | 1.09477e-36 | 1.000000 | 1.09477e-36 | 1.000000 |
| rad50       | 3.95892e-38 | 1.000000 | 3.95892e-38 | 1.000000 |
| rad31       | 1.20562e-38 | 1.000000 | 1.20562e-38 | 1.000000 |
| PhCCH+CH3   | 9.25062e-39 | 1.000000 | 9.25062e-39 | 1.000000 |
| rad39       | 3.43967e-39 | 1.000000 | 3.43967e-39 | 1.000000 |
| rad14       | 1.23868e-39 | 1.000000 | 1.23868e-39 | 1.000000 |
| rad10       | 2.28617e-40 | 1.000000 | 2.28617e-40 | 1.000000 |
| Ph+MeAc     | 5.80102e-43 | 1.000000 | 5.80102e-43 | 1.000000 |
| rad12       | 1.92390e-43 | 1.000000 | 1.92390e-43 | 1.000000 |
| rad52       | 1.60499e-44 | 1.000000 | 1.60499e-44 | 1.000000 |
| rad37       | 5.14135e-45 | 1.000000 | 5.14135e-45 | 1.000000 |



|               |             |         |             |         |
|---------------|-------------|---------|-------------|---------|
| rad27         | 3.68209e-45 | 1.00000 | 3.68209e-45 | 1.00000 |
| PhCCCH3+H     | 9.60784e-46 | 1.00000 | 9.60784e-46 | 1.00000 |
| rad51         | 4.92976e-48 | 1.00000 | 4.92976e-48 | 1.00000 |
| rad58         | 7.70741e-50 | 1.00000 | 7.70741e-50 | 1.00000 |
| rad19syn      | 1.65355e-51 | 1.00000 | 1.65355e-51 | 1.00000 |
| rad54         | 4.45665e-52 | 1.00000 | 4.45665e-52 | 1.00000 |
| rad70         | 3.37976e-52 | 1.00000 | 3.37976e-52 | 1.00000 |
| rad47         | 1.96869e-53 | 1.00000 | 1.96869e-53 | 1.00000 |
| rad5          | 1.11362e-53 | 1.00000 | 1.11362e-53 | 1.00000 |
| PAH10+CH3     | 3.34848e-54 | 1.00000 | 3.34848e-54 | 1.00000 |
| rad65         | 1.96081e-54 | 1.00000 | 1.96081e-54 | 1.00000 |
| rad34         | 1.40553e-56 | 1.00000 | 1.40553e-56 | 1.00000 |
| rad55         | 3.25986e-57 | 1.00000 | 3.25986e-57 | 1.00000 |
| PhcycC3H3_A+H | 1.16278e-58 | 1.00000 | 1.16278e-58 | 1.00000 |
| rad62         | 1.36716e-59 | 1.00000 | 1.36716e-59 | 1.00000 |
| PAH1+H        | 6.99155e-60 | 1.00000 | 6.99155e-60 | 1.00000 |
| rad43         | 1.11203e-62 | 1.00000 | 1.11203e-62 | 1.00000 |
| rad42         | 1.20427e-67 | 1.00000 | 1.20427e-67 | 1.00000 |
| rad41         | 1.71913e-71 | 1.00000 | 1.71913e-71 | 1.00000 |

1000000.00 Pa, 140.000000 K

| Rate constant | True (fraction)     | Effective (fraction) |
|---------------|---------------------|----------------------|
| Total         | 1.44756e-33 (1.00 ) | 1.44756e-33 (1.00 )  |

| species     | PYtrue      | Cumul    | PYeffective | Cumul    |
|-------------|-------------|----------|-------------|----------|
| rad20       | 0.993537    | 0.993537 | 0.993537    | 0.993537 |
| rad21       | 0.00562945  | 0.999166 | 0.00562945  | 0.999166 |
| rad18       | 0.000822464 | 0.999989 | 0.000822464 | 0.999989 |
| rad22       | 1.03367e-05 | 0.999999 | 1.03367e-05 | 0.999999 |
| Indene+H    | 3.26472e-07 | 1.000000 | 3.26472e-07 | 1.000000 |
| rad45       | 2.46668e-07 | 1.000000 | 2.46668e-07 | 1.000000 |
| rad24       | 2.08255e-07 | 1.000000 | 2.08255e-07 | 1.000000 |
| Benzyl+C2H2 | 4.98871e-08 | 1.000000 | 0.000000    | 1.000000 |
| rad36       | 1.84167e-08 | 1.000000 | 1.84167e-08 | 1.000000 |
| rad11       | 2.76639e-09 | 1.000000 | 2.76639e-09 | 1.000000 |
| rad23       | 3.15293e-11 | 1.000000 | 3.15293e-11 | 1.000000 |
| rad6        | 1.19187e-14 | 1.000000 | 1.19187e-14 | 1.000000 |
| rad30       | 7.67763e-17 | 1.000000 | 7.67763e-17 | 1.000000 |
| rad15       | 2.06463e-18 | 1.000000 | 2.06463e-18 | 1.000000 |
| rad8        | 1.22314e-21 | 1.000000 | 1.22314e-21 | 1.000000 |
| rad25       | 9.98741e-22 | 1.000000 | 9.98741e-22 | 1.000000 |
| rad13       | 2.33082e-22 | 1.000000 | 2.33082e-22 | 1.000000 |
| rad7        | 5.38424e-23 | 1.000000 | 5.38424e-23 | 1.000000 |
| rad38       | 4.07132e-23 | 1.000000 | 4.07132e-23 | 1.000000 |
| PhCHCCH2+H  | 2.02430e-24 | 1.000000 | 2.02430e-24 | 1.000000 |
| rad33       | 7.23574e-25 | 1.000000 | 7.23574e-25 | 1.000000 |
| rad9        | 6.49093e-26 | 1.000000 | 6.49093e-26 | 1.000000 |
| rad60syn    | 5.62142e-26 | 1.000000 | 5.62142e-26 | 1.000000 |
| rad28       | 2.14628e-26 | 1.000000 | 2.14628e-26 | 1.000000 |
| rad60anti   | 6.82306e-27 | 1.000000 | 6.82306e-27 | 1.000000 |
| rad46       | 5.92220e-27 | 1.000000 | 5.92220e-27 | 1.000000 |
| PAH9+H      | 5.65125e-27 | 1.000000 | 5.65125e-27 | 1.000000 |
| rad35       | 5.14427e-27 | 1.000000 | 5.14427e-27 | 1.000000 |
| Ph+Allene   | 1.05750e-27 | 1.000000 | 1.05750e-27 | 1.000000 |
| PhCH2CCH+H  | 4.94765e-29 | 1.000000 | 4.94765e-29 | 1.000000 |
| rad3        | 3.24665e-29 | 1.000000 | 3.24665e-29 | 1.000000 |
| PAH7+H      | 2.26867e-29 | 1.000000 | 2.26867e-29 | 1.000000 |
| rad4        | 1.88739e-29 | 1.000000 | 1.88739e-29 | 1.000000 |
| PAH3+H      | 1.00233e-31 | 1.000000 | 1.00233e-31 | 1.000000 |
| rad59       | 4.55178e-32 | 1.000000 | 4.55178e-32 | 1.000000 |
| rad26       | 2.58099e-32 | 1.000000 | 2.58099e-32 | 1.000000 |
| rad2        | 9.28870e-35 | 1.000000 | 9.28870e-35 | 1.000000 |
| rad1        | 8.68363e-36 | 1.000000 | 8.68363e-36 | 1.000000 |
| rad50       | 1.99895e-36 | 1.000000 | 1.99895e-36 | 1.000000 |
| PhCCH+CH3   | 1.53483e-37 | 1.000000 | 1.53483e-37 | 1.000000 |
| rad39       | 1.00153e-37 | 1.000000 | 1.00153e-37 | 1.000000 |
| rad31       | 5.44411e-38 | 1.000000 | 5.44411e-38 | 1.000000 |
| rad14       | 1.58192e-38 | 1.000000 | 1.58192e-38 | 1.000000 |
| rad10       | 1.41018e-38 | 1.000000 | 1.41018e-38 | 1.000000 |
| Ph+MeAc     | 2.07199e-41 | 1.000000 | 2.07199e-41 | 1.000000 |
| rad12       | 1.25635e-41 | 1.000000 | 1.25635e-41 | 1.000000 |
| rad52       | 1.65128e-42 | 1.000000 | 1.65128e-42 | 1.000000 |
| rad37       | 3.57905e-43 | 1.000000 | 3.57905e-43 | 1.000000 |
| rad27       | 6.64703e-44 | 1.000000 | 6.64703e-44 | 1.000000 |
| PhCCCH3+H   | 2.49837e-44 | 1.000000 | 2.49837e-44 | 1.000000 |
| rad51       | 7.56988e-46 | 1.000000 | 7.56988e-46 | 1.000000 |
| rad58       | 1.30473e-47 | 1.000000 | 1.30473e-47 | 1.000000 |

|               |             |         |             |         |
|---------------|-------------|---------|-------------|---------|
| rad19syn      | 2.07136e-49 | 1.00000 | 2.07136e-49 | 1.00000 |
| rad54         | 6.39707e-50 | 1.00000 | 6.39707e-50 | 1.00000 |
| rad70         | 6.09242e-50 | 1.00000 | 6.09242e-50 | 1.00000 |
| rad47         | 5.46397e-51 | 1.00000 | 5.46397e-51 | 1.00000 |
| rad5          | 9.26101e-52 | 1.00000 | 9.26102e-52 | 1.00000 |
| PAH10+CH3     | 4.71543e-52 | 1.00000 | 4.71543e-52 | 1.00000 |
| rad65         | 3.82508e-52 | 1.00000 | 3.82508e-52 | 1.00000 |
| rad34         | 3.10155e-54 | 1.00000 | 3.10155e-54 | 1.00000 |
| rad55         | 6.14487e-55 | 1.00000 | 6.14487e-55 | 1.00000 |
| PhcycC3H3_A+H | 2.25713e-56 | 1.00000 | 2.25713e-56 | 1.00000 |
| rad62         | 2.66707e-57 | 1.00000 | 2.66707e-57 | 1.00000 |
| PAH1+H        | 1.45645e-57 | 1.00000 | 1.45645e-57 | 1.00000 |
| rad43         | 2.25632e-60 | 1.00000 | 2.25632e-60 | 1.00000 |
| rad42         | 3.94488e-65 | 1.00000 | 3.94488e-65 | 1.00000 |
| rad41         | 6.50839e-69 | 1.00000 | 6.50839e-69 | 1.00000 |

1000000.00 Pa, 150.000000 K

| Rate constant | True (fraction)     | Effective (fraction) |
|---------------|---------------------|----------------------|
| Total         | 3.27736e-32 (1.00 ) | 3.27736e-32 (1.00 )  |

| species     | PYtrue      | Cumul    | PYeffective | Cumul    |
|-------------|-------------|----------|-------------|----------|
| rad20       | 0.992774    | 0.992774 | 0.992774    | 0.992774 |
| rad21       | 0.00628765  | 0.999062 | 0.00628765  | 0.999062 |
| rad18       | 0.000924203 | 0.999986 | 0.000924203 | 0.999986 |
| rad22       | 1.30891e-05 | 0.999999 | 1.30891e-05 | 0.999999 |
| Indene+H    | 4.17952e-07 | 0.999999 | 4.17952e-07 | 0.999999 |
| rad45       | 3.42484e-07 | 1.000000 | 3.42484e-07 | 1.000000 |
| rad24       | 2.51529e-07 | 1.000000 | 2.51529e-07 | 1.000000 |
| Benzyl+C2H2 | 7.66485e-08 | 1.000000 | 0.000000    | 1.000000 |
| rad36       | 2.53920e-08 | 1.000000 | 2.53920e-08 | 1.000000 |
| rad11       | 4.00289e-09 | 1.000000 | 4.00289e-09 | 1.000000 |
| rad23       | 4.83416e-11 | 1.000000 | 4.83416e-11 | 1.000000 |
| rad6        | 2.25406e-14 | 1.000000 | 2.25406e-14 | 1.000000 |
| rad30       | 2.03246e-16 | 1.000000 | 2.03246e-16 | 1.000000 |
| rad15       | 7.17929e-18 | 1.000000 | 7.17929e-18 | 1.000000 |
| rad8        | 1.55654e-20 | 1.000000 | 1.55654e-20 | 1.000000 |
| rad25       | 4.03335e-21 | 1.000000 | 4.03335e-21 | 1.000000 |
| rad13       | 6.06079e-22 | 1.000000 | 6.06079e-22 | 1.000000 |
| rad7        | 1.44332e-22 | 1.000000 | 1.44332e-22 | 1.000000 |
| rad38       | 1.31106e-22 | 1.000000 | 1.31106e-22 | 1.000000 |
| PhCHCCH2+H  | 1.55511e-23 | 1.000000 | 1.55511e-23 | 1.000000 |
| rad33       | 2.08691e-24 | 1.000000 | 2.08691e-24 | 1.000000 |
| rad9        | 8.95813e-25 | 1.000000 | 8.95813e-25 | 1.000000 |
| rad60syn    | 7.47703e-25 | 1.000000 | 7.47703e-25 | 1.000000 |
| rad28       | 2.97967e-25 | 1.000000 | 2.97968e-25 | 1.000000 |
| rad60anti   | 1.05697e-25 | 1.000000 | 1.05697e-25 | 1.000000 |
| rad46       | 3.70162e-26 | 1.000000 | 3.70162e-26 | 1.000000 |
| PAH9+H      | 1.91551e-26 | 1.000000 | 1.91551e-26 | 1.000000 |
| Ph+Allene   | 1.78024e-26 | 1.000000 | 1.78024e-26 | 1.000000 |
| rad35       | 1.63304e-26 | 1.000000 | 1.63304e-26 | 1.000000 |
| PhCH2CCH+H  | 4.59780e-27 | 1.000000 | 4.59780e-27 | 1.000000 |
| PAH7+H      | 4.97963e-28 | 1.000000 | 4.97964e-28 | 1.000000 |
| rad3        | 1.48272e-28 | 1.000000 | 1.48272e-28 | 1.000000 |
| rad4        | 8.59837e-29 | 1.000000 | 8.59838e-29 | 1.000000 |
| PAH3+H      | 5.78372e-30 | 1.000000 | 5.78373e-30 | 1.000000 |
| rad59       | 2.45535e-30 | 1.000000 | 2.45535e-30 | 1.000000 |
| rad26       | 9.85537e-31 | 1.000000 | 9.85537e-31 | 1.000000 |
| rad2        | 7.42010e-34 | 1.000000 | 7.42010e-34 | 1.000000 |
| rad50       | 7.83302e-35 | 1.000000 | 7.83302e-35 | 1.000000 |
| rad1        | 6.89106e-35 | 1.000000 | 6.89106e-35 | 1.000000 |
| PhCCH+CH3   | 2.33251e-36 | 1.000000 | 2.33251e-36 | 1.000000 |
| rad39       | 2.32039e-36 | 1.000000 | 2.32039e-36 | 1.000000 |
| rad10       | 6.50739e-37 | 1.000000 | 6.50739e-37 | 1.000000 |
| rad31       | 2.50481e-37 | 1.000000 | 2.50481e-37 | 1.000000 |
| rad14       | 1.90434e-37 | 1.000000 | 1.90434e-37 | 1.000000 |
| rad12       | 6.40945e-40 | 1.000000 | 6.40946e-40 | 1.000000 |
| Ph+MeAc     | 6.20595e-40 | 1.000000 | 6.20595e-40 | 1.000000 |
| rad52       | 1.61360e-40 | 1.000000 | 1.61360e-40 | 1.000000 |
| rad37       | 2.10921e-41 | 1.000000 | 2.10921e-41 | 1.000000 |
| rad27       | 1.15231e-42 | 1.000000 | 1.15231e-42 | 1.000000 |
| PhCCCH3+H   | 6.00177e-43 | 1.000000 | 6.00178e-43 | 1.000000 |
| rad51       | 1.13800e-43 | 1.000000 | 1.13800e-43 | 1.000000 |
| rad58       | 2.89005e-45 | 1.000000 | 2.89005e-45 | 1.000000 |
| rad19syn    | 2.97104e-47 | 1.000000 | 2.97104e-47 | 1.000000 |
| rad70       | 1.36367e-47 | 1.000000 | 1.36367e-47 | 1.000000 |
| rad54       | 1.08786e-47 | 1.000000 | 1.08786e-47 | 1.000000 |
| rad47       | 1.50165e-48 | 1.000000 | 1.50165e-48 | 1.000000 |

|               |             |         |             |          |
|---------------|-------------|---------|-------------|----------|
| PAH10+CH3     | 8.16898e-50 | 1.00000 | 8.16898e-50 | 1.000000 |
| rad65         | 7.45321e-50 | 1.00000 | 7.45321e-50 | 1.000000 |
| rad5          | 7.02352e-50 | 1.00000 | 7.02352e-50 | 1.000000 |
| rad34         | 8.63415e-52 | 1.00000 | 8.63415e-52 | 1.000000 |
| rad55         | 1.43341e-52 | 1.00000 | 1.43341e-52 | 1.000000 |
| PhcycC3H3_A+H | 5.44085e-54 | 1.00000 | 5.44085e-54 | 1.000000 |
| rad62         | 6.07577e-55 | 1.00000 | 6.07577e-55 | 1.000000 |
| PAH1+H        | 3.85926e-55 | 1.00000 | 3.85926e-55 | 1.000000 |
| rad43         | 5.21165e-58 | 1.00000 | 5.21165e-58 | 1.000000 |
| rad42         | 1.60161e-62 | 1.00000 | 1.60161e-62 | 1.000000 |
| rad41         | 3.01159e-66 | 1.00000 | 3.01159e-66 | 1.000000 |

1000000.00 Pa, 160.000000 K

| Rate constant | True (fraction)     | Effective (fraction) |
|---------------|---------------------|----------------------|
| Total         | 5.01169e-31 (1.00 ) | 5.01169e-31 (1.00 )  |

| species     | PYtrue      | Cumul    | PYeffective | Cumul    |
|-------------|-------------|----------|-------------|----------|
| rad20       | 0.991932    | 0.991932 | 0.991932    | 0.991932 |
| rad21       | 0.00701271  | 0.998945 | 0.00701271  | 0.998945 |
| rad18       | 0.00103747  | 0.999982 | 0.00103747  | 0.999982 |
| rad22       | 1.65548e-05 | 0.999999 | 1.65548e-05 | 0.999999 |
| Indene+H    | 5.35159e-07 | 0.999999 | 5.35159e-07 | 0.999999 |
| rad45       | 4.74122e-07 | 1.000000 | 4.74122e-07 | 1.000000 |
| rad24       | 3.02522e-07 | 1.000000 | 3.02522e-07 | 1.000000 |
| Benzyl+C2H2 | 1.17253e-07 | 1.000000 | 0.000000    | 1.000000 |
| rad36       | 3.49398e-08 | 1.000000 | 3.49399e-08 | 1.000000 |
| rad11       | 5.82018e-09 | 1.000000 | 5.82018e-09 | 1.000000 |
| rad23       | 7.43063e-11 | 1.000000 | 7.43063e-11 | 1.000000 |
| rad6        | 4.31256e-14 | 1.000000 | 4.31256e-14 | 1.000000 |
| rad30       | 5.08980e-16 | 1.000000 | 5.08980e-16 | 1.000000 |
| rad15       | 2.27564e-17 | 1.000000 | 2.27564e-17 | 1.000000 |
| rad8        | 1.49596e-19 | 1.000000 | 1.49596e-19 | 1.000000 |
| rad25       | 1.51639e-20 | 1.000000 | 1.51639e-20 | 1.000000 |
| rad13       | 1.60522e-21 | 1.000000 | 1.60522e-21 | 1.000000 |
| rad38       | 4.11217e-22 | 1.000000 | 4.11217e-22 | 1.000000 |
| rad7        | 3.94380e-22 | 1.000000 | 3.94380e-22 | 1.000000 |
| PhCHCCH2+H  | 1.02994e-22 | 1.000000 | 1.02994e-22 | 1.000000 |
| rad9        | 1.11456e-23 | 1.000000 | 1.11456e-23 | 1.000000 |
| rad60syn    | 7.65974e-24 | 1.000000 | 7.65974e-24 | 1.000000 |
| rad33       | 6.11688e-24 | 1.000000 | 6.11689e-24 | 1.000000 |
| rad28       | 3.22934e-24 | 1.000000 | 3.22934e-24 | 1.000000 |
| rad60anti   | 1.23701e-24 | 1.000000 | 1.23701e-24 | 1.000000 |
| Ph+Allene   | 2.33574e-25 | 1.000000 | 2.33574e-25 | 1.000000 |
| rad46       | 2.05683e-25 | 1.000000 | 2.05683e-25 | 1.000000 |
| PhCH2CCH+H  | 1.59218e-25 | 1.000000 | 1.59218e-25 | 1.000000 |
| PAH9+H      | 6.49381e-26 | 1.000000 | 6.49381e-26 | 1.000000 |
| rad35       | 5.39611e-26 | 1.000000 | 5.39611e-26 | 1.000000 |
| PAH7+H      | 8.03363e-27 | 1.000000 | 8.03363e-27 | 1.000000 |
| rad3        | 6.80656e-28 | 1.000000 | 6.80656e-28 | 1.000000 |
| rad4        | 3.93892e-28 | 1.000000 | 3.93892e-28 | 1.000000 |
| PAH3+H      | 1.74745e-28 | 1.000000 | 1.74745e-28 | 1.000000 |
| rad59       | 7.03122e-29 | 1.000000 | 7.03123e-29 | 1.000000 |
| rad26       | 2.39607e-29 | 1.000000 | 2.39607e-29 | 1.000000 |
| rad2        | 5.82022e-33 | 1.000000 | 5.82022e-33 | 1.000000 |
| rad50       | 2.13841e-33 | 1.000000 | 2.13841e-33 | 1.000000 |
| rad1        | 5.37625e-34 | 1.000000 | 5.37626e-34 | 1.000000 |
| rad39       | 4.23034e-35 | 1.000000 | 4.23035e-35 | 1.000000 |
| PhCCH+CH3   | 3.21284e-35 | 1.000000 | 3.21284e-35 | 1.000000 |
| rad10       | 1.91918e-35 | 1.000000 | 1.91918e-35 | 1.000000 |
| rad14       | 2.13752e-36 | 1.000000 | 2.13752e-36 | 1.000000 |
| rad31       | 1.16156e-36 | 1.000000 | 1.16156e-36 | 1.000000 |
| rad12       | 2.10371e-38 | 1.000000 | 2.10371e-38 | 1.000000 |
| Ph+MeAc     | 1.51115e-38 | 1.000000 | 1.51115e-38 | 1.000000 |
| rad52       | 1.14989e-38 | 1.000000 | 1.14989e-38 | 1.000000 |
| rad37       | 8.06512e-40 | 1.000000 | 8.06512e-40 | 1.000000 |
| rad27       | 1.87052e-41 | 1.000000 | 1.87052e-41 | 1.000000 |
| PhCCCH3+H   | 1.29344e-41 | 1.000000 | 1.29344e-41 | 1.000000 |
| rad51       | 1.27235e-41 | 1.000000 | 1.27235e-41 | 1.000000 |
| rad58       | 5.20254e-43 | 1.000000 | 5.20254e-43 | 1.000000 |
| rad19syn    | 3.21950e-45 | 1.000000 | 3.21950e-45 | 1.000000 |
| rad70       | 2.42891e-45 | 1.000000 | 2.42891e-45 | 1.000000 |
| rad54       | 1.43241e-45 | 1.000000 | 1.43241e-45 | 1.000000 |
| rad47       | 3.07177e-46 | 1.000000 | 3.07177e-46 | 1.000000 |
| PAH10+CH3   | 1.11830e-47 | 1.000000 | 1.11830e-47 | 1.000000 |
| rad65       | 1.09064e-47 | 1.000000 | 1.09064e-47 | 1.000000 |
| rad5        | 3.96163e-48 | 1.000000 | 3.96163e-48 | 1.000000 |
| rad34       | 1.92657e-49 | 1.000000 | 1.92657e-49 | 1.000000 |

|               |             |         |             |         |
|---------------|-------------|---------|-------------|---------|
| rad55         | 2.65892e-50 | 1.00000 | 2.65892e-50 | 1.00000 |
| PhcycC3H3_A+H | 1.04612e-51 | 1.00000 | 1.04612e-51 | 1.00000 |
| rad62         | 1.06504e-52 | 1.00000 | 1.06504e-52 | 1.00000 |
| PAH1+H        | 8.22866e-53 | 1.00000 | 8.22866e-53 | 1.00000 |
| rad43         | 9.16966e-56 | 1.00000 | 9.16966e-56 | 1.00000 |
| rad42         | 5.14720e-60 | 1.00000 | 5.14720e-60 | 1.00000 |
| rad41         | 1.09013e-63 | 1.00000 | 1.09013e-63 | 1.00000 |

1000000.00 Pa, 170.000000 K

| Rate constant | True (fraction)     | Effective (fraction) |
|---------------|---------------------|----------------------|
| Total         | 5.54821e-30 (1.00 ) | 5.54821e-30 (1.00 )  |

| species       | PYtrue      | Cumul    | PYeffective | Cumul    |
|---------------|-------------|----------|-------------|----------|
| rad20         | 0.990998    | 0.990998 | 0.990998    | 0.990998 |
| rad21         | 0.00781492  | 0.998813 | 0.00781492  | 0.998813 |
| rad18         | 0.00116416  | 0.999977 | 0.00116416  | 0.999977 |
| rad22         | 2.09383e-05 | 0.999998 | 2.09383e-05 | 0.999998 |
| Indene+H      | 6.86231e-07 | 0.999999 | 6.86231e-07 | 0.999999 |
| rad45         | 6.55280e-07 | 0.999999 | 6.55280e-07 | 0.999999 |
| rad24         | 3.62573e-07 | 1.000000 | 3.62573e-07 | 1.000000 |
| Benzyl+C2H2   | 1.78542e-07 | 1.000000 | 0.000000    | 1.000000 |
| rad36         | 4.80413e-08 | 1.000000 | 4.80413e-08 | 1.000000 |
| rad11         | 8.50423e-09 | 1.000000 | 8.50423e-09 | 1.000000 |
| rad23         | 1.14676e-10 | 1.000000 | 1.14676e-10 | 1.000000 |
| rad6          | 8.33151e-14 | 1.000000 | 8.33151e-14 | 1.000000 |
| rad30         | 1.21676e-15 | 1.000000 | 1.21676e-15 | 1.000000 |
| rad15         | 6.66938e-17 | 1.000000 | 6.66939e-17 | 1.000000 |
| rad8          | 1.13207e-18 | 1.000000 | 1.13207e-18 | 1.000000 |
| rad25         | 5.35464e-20 | 1.000000 | 5.35464e-20 | 1.000000 |
| rad13         | 4.30722e-21 | 1.000000 | 4.30722e-21 | 1.000000 |
| rad38         | 1.25687e-21 | 1.000000 | 1.25687e-21 | 1.000000 |
| rad7          | 1.09223e-21 | 1.000000 | 1.09223e-21 | 1.000000 |
| PhCHCCH2+H    | 5.98520e-22 | 1.000000 | 5.98520e-22 | 1.000000 |
| rad9          | 1.19770e-22 | 1.000000 | 1.19770e-22 | 1.000000 |
| rad60syn      | 6.25983e-23 | 1.000000 | 6.25984e-23 | 1.000000 |
| rad28         | 2.81280e-23 | 1.000000 | 2.81280e-23 | 1.000000 |
| rad33         | 1.80887e-23 | 1.000000 | 1.80887e-23 | 1.000000 |
| rad60anti     | 1.13563e-23 | 1.000000 | 1.13563e-23 | 1.000000 |
| PhCH2CCH+H    | 3.35630e-24 | 1.000000 | 3.35630e-24 | 1.000000 |
| Ph+Allene     | 2.45904e-24 | 1.000000 | 2.45904e-24 | 1.000000 |
| rad46         | 1.02994e-24 | 1.000000 | 1.02994e-24 | 1.000000 |
| PAH9+H        | 2.19329e-25 | 1.000000 | 2.19330e-25 | 1.000000 |
| rad35         | 1.99533e-25 | 1.000000 | 1.99533e-25 | 1.000000 |
| PAH7+H        | 9.92782e-26 | 1.000000 | 9.92783e-26 | 1.000000 |
| PAH3+H        | 3.52309e-27 | 1.000000 | 3.52309e-27 | 1.000000 |
| rad3          | 3.10885e-27 | 1.000000 | 3.10885e-27 | 1.000000 |
| rad4          | 1.79594e-27 | 1.000000 | 1.79594e-27 | 1.000000 |
| rad59         | 1.36135e-27 | 1.000000 | 1.36135e-27 | 1.000000 |
| rad26         | 4.16225e-28 | 1.000000 | 4.16225e-28 | 1.000000 |
| rad2          | 4.42772e-32 | 1.000000 | 4.42772e-32 | 1.000000 |
| rad50         | 4.30402e-32 | 1.000000 | 4.30402e-32 | 1.000000 |
| rad1          | 4.07271e-33 | 1.000000 | 4.07271e-33 | 1.000000 |
| rad39         | 6.23536e-34 | 1.000000 | 6.23536e-34 | 1.000000 |
| rad10         | 4.03194e-34 | 1.000000 | 4.03194e-34 | 1.000000 |
| PhCCH+CH3     | 4.00688e-34 | 1.000000 | 4.00688e-34 | 1.000000 |
| rad14         | 2.22683e-35 | 1.000000 | 2.22683e-35 | 1.000000 |
| rad31         | 5.38010e-36 | 1.000000 | 5.38010e-36 | 1.000000 |
| rad52         | 5.74883e-37 | 1.000000 | 5.74883e-37 | 1.000000 |
| rad12         | 4.91777e-37 | 1.000000 | 4.91777e-37 | 1.000000 |
| Ph+MeAc       | 3.04456e-37 | 1.000000 | 3.04456e-37 | 1.000000 |
| rad37         | 2.17948e-38 | 1.000000 | 2.17948e-38 | 1.000000 |
| rad51         | 1.02847e-39 | 1.000000 | 1.02847e-39 | 1.000000 |
| rad27         | 2.80847e-40 | 1.000000 | 2.80847e-40 | 1.000000 |
| PhCCCH3+H     | 2.48672e-40 | 1.000000 | 2.48672e-40 | 1.000000 |
| rad58         | 7.31155e-41 | 1.000000 | 7.31155e-41 | 1.000000 |
| rad70         | 3.31019e-43 | 1.000000 | 3.31019e-43 | 1.000000 |
| rad19syn      | 2.49473e-43 | 1.000000 | 2.49473e-43 | 1.000000 |
| rad54         | 1.39545e-43 | 1.000000 | 1.39545e-43 | 1.000000 |
| rad47         | 4.53359e-44 | 1.000000 | 4.53359e-44 | 1.000000 |
| rad65         | 1.16556e-45 | 1.000000 | 1.16556e-45 | 1.000000 |
| PAH10+CH3     | 1.15821e-45 | 1.000000 | 1.15821e-45 | 1.000000 |
| rad5          | 1.70522e-46 | 1.000000 | 1.70522e-46 | 1.000000 |
| rad34         | 3.31570e-47 | 1.000000 | 3.31571e-47 | 1.000000 |
| rad55         | 3.77100e-48 | 1.000000 | 3.77100e-48 | 1.000000 |
| PhcycC3H3_A+H | 1.54361e-49 | 1.000000 | 1.54361e-49 | 1.000000 |
| rad62         | 1.38320e-50 | 1.000000 | 1.38320e-50 | 1.000000 |
| PAH1+H        | 1.35775e-50 | 1.000000 | 1.35775e-50 | 1.000000 |

|       |             |          |             |          |
|-------|-------------|----------|-------------|----------|
| rad43 | 1.18941e-53 | 1.000000 | 1.18941e-53 | 1.000000 |
| rad42 | 1.25389e-57 | 1.000000 | 1.25389e-57 | 1.000000 |
| rad41 | 2.95273e-61 | 1.000000 | 2.95273e-61 | 1.000000 |

1000000.00 Pa, 180.000000 K

| =====         |                     |          |                      |          |
|---------------|---------------------|----------|----------------------|----------|
| Rate constant | True (fraction)     |          | Effective (fraction) |          |
| -----         |                     |          |                      |          |
| Total         | 4.69315e-29 (1.00 ) |          | 4.69315e-29 (1.00 )  |          |
| species       | PYtrue              | Cumul    | PYeffective          | Cumul    |
| -----         |                     |          |                      |          |
| rad20         | 0.989959            | 0.989959 | 0.989959             | 0.989959 |
| rad21         | 0.00870572          | 0.998665 | 0.00870573           | 0.998665 |
| rad18         | 0.00130641          | 0.999971 | 0.00130641           | 0.999971 |
| rad22         | 2.65049e-05         | 0.999998 | 2.65049e-05          | 0.999998 |
| rad45         | 9.04877e-07         | 0.999999 | 9.04877e-07          | 0.999999 |
| Indene+H      | 8.82031e-07         | 0.999999 | 8.82031e-07          | 0.999999 |
| rad24         | 4.33174e-07         | 1.000000 | 4.33174e-07          | 1.000000 |
| Benzyl+C2H2   | 2.70520e-07         | 1.000000 | 0.000000             | 1.000000 |
| rad36         | 6.60527e-08         | 1.000000 | 6.60527e-08          | 1.000000 |
| rad11         | 1.24827e-08         | 1.000000 | 1.24827e-08          | 1.000000 |
| rad23         | 1.77820e-10         | 1.000000 | 1.77820e-10          | 1.000000 |
| rad6          | 1.62142e-13         | 1.000000 | 1.62142e-13          | 1.000000 |
| rad30         | 2.79691e-15         | 1.000000 | 2.79691e-15          | 1.000000 |
| rad15         | 1.82927e-16         | 1.000000 | 1.82927e-16          | 1.000000 |
| rad8          | 6.99407e-18         | 1.000000 | 6.99407e-18          | 1.000000 |
| rad25         | 1.78939e-19         | 1.000000 | 1.78939e-19          | 1.000000 |
| rad13         | 1.16448e-20         | 1.000000 | 1.16448e-20          | 1.000000 |
| rad38         | 3.74523e-21         | 1.000000 | 3.74523e-21          | 1.000000 |
| PhCHCCH2+H    | 3.10329e-21         | 1.000000 | 3.10329e-21          | 1.000000 |
| rad7          | 3.04866e-21         | 1.000000 | 3.04866e-21          | 1.000000 |
| rad9          | 1.08631e-21         | 1.000000 | 1.08631e-21          | 1.000000 |
| rad60syn      | 4.21583e-22         | 1.000000 | 4.21583e-22          | 1.000000 |
| rad28         | 2.02628e-22         | 1.000000 | 2.02628e-22          | 1.000000 |
| rad60anti     | 8.46698e-23         | 1.000000 | 8.46698e-23          | 1.000000 |
| rad33         | 5.35986e-23         | 1.000000 | 5.35986e-23          | 1.000000 |
| PhCH2CCH+H    | 5.03935e-23         | 1.000000 | 5.03935e-23          | 1.000000 |
| Ph+Allene     | 2.13760e-23         | 1.000000 | 2.13761e-23          | 1.000000 |
| rad46         | 4.70895e-24         | 1.000000 | 4.70895e-24          | 1.000000 |
| PAH7+H        | 9.74491e-25         | 1.000000 | 9.74491e-25          | 1.000000 |
| rad35         | 9.07537e-25         | 1.000000 | 9.07537e-25          | 1.000000 |
| PAH9+H        | 7.35370e-25         | 1.000000 | 7.35370e-25          | 1.000000 |
| PAH3+H        | 5.21984e-26         | 1.000000 | 5.21984e-26          | 1.000000 |
| rad59         | 1.94732e-26         | 1.000000 | 1.94732e-26          | 1.000000 |
| rad3          | 1.40118e-26         | 1.000000 | 1.40118e-26          | 1.000000 |
| rad4          | 8.08297e-27         | 1.000000 | 8.08298e-27          | 1.000000 |
| rad26         | 5.47795e-27         | 1.000000 | 5.47795e-27          | 1.000000 |
| rad50         | 6.67783e-31         | 1.000000 | 6.67783e-31          | 1.000000 |
| rad2          | 3.23846e-31         | 1.000000 | 3.23846e-31          | 1.000000 |
| rad1          | 2.96950e-32         | 1.000000 | 2.96950e-32          | 1.000000 |
| rad39         | 7.61434e-33         | 1.000000 | 7.61434e-33          | 1.000000 |
| rad10         | 6.41658e-33         | 1.000000 | 6.41658e-33          | 1.000000 |
| PhCCH+CH3     | 4.52981e-33         | 1.000000 | 4.52981e-33          | 1.000000 |
| rad14         | 2.14863e-34         | 1.000000 | 2.14863e-34          | 1.000000 |
| rad31         | 2.47095e-35         | 1.000000 | 2.47095e-35          | 1.000000 |
| rad52         | 1.93209e-35         | 1.000000 | 1.93209e-35          | 1.000000 |
| rad12         | 8.69832e-36         | 1.000000 | 8.69832e-36          | 1.000000 |
| Ph+MeAc       | 5.15808e-36         | 1.000000 | 5.15808e-36          | 1.000000 |
| rad37         | 4.41064e-37         | 1.000000 | 4.41064e-37          | 1.000000 |
| rad51         | 6.04507e-38         | 1.000000 | 6.04507e-38          | 1.000000 |
| rad58         | 8.86715e-39         | 1.000000 | 8.86715e-39          | 1.000000 |
| PhCCCH3+H     | 4.25293e-39         | 1.000000 | 4.25293e-39          | 1.000000 |
| rad27         | 3.86883e-39         | 1.000000 | 3.86883e-39          | 1.000000 |
| rad70         | 3.70353e-41         | 1.000000 | 3.70353e-41          | 1.000000 |
| rad19syn      | 1.34019e-41         | 1.000000 | 1.34019e-41          | 1.000000 |
| rad54         | 1.02182e-41         | 1.000000 | 1.02182e-41          | 1.000000 |
| rad47         | 4.87539e-42         | 1.000000 | 4.87539e-42          | 1.000000 |
| PAH10+CH3     | 9.48003e-44         | 1.000000 | 9.48003e-44          | 1.000000 |
| rad65         | 9.24373e-44         | 1.000000 | 9.24374e-44          | 1.000000 |
| rad5          | 5.75682e-45         | 1.000000 | 5.75682e-45          | 1.000000 |
| rad34         | 4.79627e-45         | 1.000000 | 4.79627e-45          | 1.000000 |
| rad55         | 4.37533e-46         | 1.000000 | 4.37533e-46          | 1.000000 |
| PhcycC3H3_A+H | 1.87615e-47         | 1.000000 | 1.87616e-47          | 1.000000 |
| PAH1+H        | 1.89564e-48         | 1.000000 | 1.89564e-48          | 1.000000 |
| rad62         | 1.37987e-48         | 1.000000 | 1.37987e-48          | 1.000000 |
| rad43         | 1.17568e-51         | 1.000000 | 1.17568e-51          | 1.000000 |
| rad42         | 2.45887e-55         | 1.000000 | 2.45887e-55          | 1.000000 |
| rad41         | 6.31501e-59         | 1.000000 | 6.31501e-59          | 1.000000 |

1000000.00 Pa, 190.000000 K

=====

| Rate constant | True (fraction)     | Effective (fraction) |
|---------------|---------------------|----------------------|
| Total         | 3.16530e-28 (1.00 ) | 3.16530e-28 (1.00 )  |

| species       | PYtrue      | Cumul    | PYeffective | Cumul    |
|---------------|-------------|----------|-------------|----------|
| rad20         | 0.988799    | 0.988799 | 0.988799    | 0.988799 |
| rad21         | 0.00969775  | 0.998497 | 0.00969775  | 0.998497 |
| rad18         | 0.00146666  | 0.999963 | 0.00146666  | 0.999963 |
| rad22         | 3.35980e-05 | 0.999997 | 3.35980e-05 | 0.999997 |
| rad45         | 1.24894e-06 | 0.999998 | 1.24894e-06 | 0.999998 |
| Indene+H      | 1.13706e-06 | 0.999999 | 1.13706e-06 | 0.999999 |
| rad24         | 5.15971e-07 | 1.000000 | 5.15971e-07 | 1.000000 |
| Benzyl+C2H2   | 4.07695e-07 | 1.000000 | 0.000000    | 1.000000 |
| rad36         | 9.08440e-08 | 1.000000 | 9.08440e-08 | 1.000000 |
| rad11         | 1.83930e-08 | 1.000000 | 1.83930e-08 | 1.000000 |
| rad23         | 2.77093e-10 | 1.000000 | 2.77093e-10 | 1.000000 |
| rad6          | 3.17048e-13 | 1.000000 | 3.17048e-13 | 1.000000 |
| rad30         | 6.21684e-15 | 1.000000 | 6.21685e-15 | 1.000000 |
| rad15         | 4.74223e-16 | 1.000000 | 4.74223e-16 | 1.000000 |
| rad8          | 3.63623e-17 | 1.000000 | 3.63623e-17 | 1.000000 |
| rad25         | 5.69381e-19 | 1.000000 | 5.69382e-19 | 1.000000 |
| rad13         | 3.15563e-20 | 1.000000 | 3.15563e-20 | 1.000000 |
| PhCHCCH2+H    | 1.45674e-20 | 1.000000 | 1.45674e-20 | 1.000000 |
| rad38         | 1.08848e-20 | 1.000000 | 1.08848e-20 | 1.000000 |
| rad7          | 8.53174e-21 | 1.000000 | 8.53175e-21 | 1.000000 |
| rad9          | 8.31025e-21 | 1.000000 | 8.31025e-21 | 1.000000 |
| rad60syn      | 2.40645e-21 | 1.000000 | 2.40645e-21 | 1.000000 |
| rad28         | 1.23863e-21 | 1.000000 | 1.23863e-21 | 1.000000 |
| PhCH2CCH+H    | 5.80841e-22 | 1.000000 | 5.80841e-22 | 1.000000 |
| rad60anti     | 5.28356e-22 | 1.000000 | 5.28356e-22 | 1.000000 |
| rad33         | 1.58161e-22 | 1.000000 | 1.58161e-22 | 1.000000 |
| Ph+Allene     | 1.57463e-22 | 1.000000 | 1.57463e-22 | 1.000000 |
| rad46         | 1.98856e-23 | 1.000000 | 1.98856e-23 | 1.000000 |
| PAH7+H        | 7.84519e-24 | 1.000000 | 7.84520e-24 | 1.000000 |
| rad35         | 4.99326e-24 | 1.000000 | 4.99326e-24 | 1.000000 |
| PAH9+H        | 2.43982e-24 | 1.000000 | 2.43982e-24 | 1.000000 |
| PAH3+H        | 6.03289e-25 | 1.000000 | 6.03289e-25 | 1.000000 |
| rad59         | 2.17568e-25 | 1.000000 | 2.17568e-25 | 1.000000 |
| rad3          | 6.19171e-26 | 1.000000 | 6.19171e-26 | 1.000000 |
| rad26         | 5.70834e-26 | 1.000000 | 5.70834e-26 | 1.000000 |
| rad4          | 3.56789e-26 | 1.000000 | 3.56790e-26 | 1.000000 |
| rad50         | 8.33594e-30 | 1.000000 | 8.33595e-30 | 1.000000 |
| rad2          | 2.26546e-30 | 1.000000 | 2.26546e-30 | 1.000000 |
| rad1          | 2.07303e-31 | 1.000000 | 2.07303e-31 | 1.000000 |
| rad10         | 8.17785e-32 | 1.000000 | 8.17785e-32 | 1.000000 |
| rad39         | 7.92546e-32 | 1.000000 | 7.92546e-32 | 1.000000 |
| PhCCH+CH3     | 4.67922e-32 | 1.000000 | 4.67923e-32 | 1.000000 |
| rad14         | 1.92475e-33 | 1.000000 | 1.92475e-33 | 1.000000 |
| rad52         | 4.75426e-34 | 1.000000 | 4.75427e-34 | 1.000000 |
| rad12         | 1.24315e-34 | 1.000000 | 1.24315e-34 | 1.000000 |
| rad31         | 1.11895e-34 | 1.000000 | 1.11895e-34 | 1.000000 |
| Ph+MeAc       | 7.61092e-35 | 1.000000 | 7.61093e-35 | 1.000000 |
| rad37         | 7.24567e-36 | 1.000000 | 7.24567e-36 | 1.000000 |
| rad51         | 2.90234e-36 | 1.000000 | 2.90234e-36 | 1.000000 |
| rad58         | 1.25976e-36 | 1.000000 | 1.25976e-36 | 1.000000 |
| PhCCCH3+H     | 6.62186e-38 | 1.000000 | 6.62186e-38 | 1.000000 |
| rad27         | 4.92735e-38 | 1.000000 | 4.92735e-38 | 1.000000 |
| rad70         | 4.38218e-39 | 1.000000 | 4.38218e-39 | 1.000000 |
| rad54         | 6.30026e-40 | 1.000000 | 6.30026e-40 | 1.000000 |
| rad19syn      | 5.56981e-40 | 1.000000 | 5.56981e-40 | 1.000000 |
| rad47         | 4.41524e-40 | 1.000000 | 4.41524e-40 | 1.000000 |
| PAH10+CH3     | 7.10133e-42 | 1.000000 | 7.10133e-42 | 1.000000 |
| rad65         | 6.36418e-42 | 1.000000 | 6.36418e-42 | 1.000000 |
| rad34         | 7.78620e-43 | 1.000000 | 7.78620e-43 | 1.000000 |
| rad5          | 1.69900e-43 | 1.000000 | 1.69900e-43 | 1.000000 |
| rad55         | 5.33522e-44 | 1.000000 | 5.33523e-44 | 1.000000 |
| PhcycC3H3_A+H | 2.43061e-45 | 1.000000 | 2.43061e-45 | 1.000000 |
| PAH1+H        | 3.01099e-46 | 1.000000 | 3.01099e-46 | 1.000000 |
| rad62         | 1.28479e-46 | 1.000000 | 1.28479e-46 | 1.000000 |
| rad43         | 1.07464e-49 | 1.000000 | 1.07464e-49 | 1.000000 |
| rad42         | 4.95218e-53 | 1.000000 | 4.95219e-53 | 1.000000 |
| rad41         | 1.34681e-56 | 1.000000 | 1.34681e-56 | 1.000000 |

1000000.00 Pa, 200.000000 K

=====

| Rate constant | True (fraction) | Effective (fraction) |
|---------------|-----------------|----------------------|
|---------------|-----------------|----------------------|

Total | 1.76115e-27 (1.00 ) 1.76115e-27 (1.00 )

| species       | PYtrue      | Cumul    | PYeffective | Cumul    |
|---------------|-------------|----------|-------------|----------|
| rad20         | 0.987500    | 0.987500 | 0.987501    | 0.987501 |
| rad21         | 0.0108049   | 0.998305 | 0.0108049   | 0.998306 |
| rad18         | 0.00164763  | 0.999953 | 0.00164763  | 0.999954 |
| rad22         | 4.26614e-05 | 0.999995 | 4.26614e-05 | 0.999996 |
| rad45         | 1.72312e-06 | 0.999997 | 1.72312e-06 | 0.999998 |
| Indene+H      | 1.47066e-06 | 0.999998 | 1.47066e-06 | 0.999999 |
| rad24         | 6.12756e-07 | 0.999999 | 6.12756e-07 | 1.000000 |
| Benzyl+C2H2   | 6.10919e-07 | 1.000000 | 0.000000    | 1.000000 |
| rad36         | 1.24984e-07 | 1.000000 | 1.24984e-07 | 1.000000 |
| rad11         | 2.71820e-08 | 1.000000 | 2.71820e-08 | 1.000000 |
| rad23         | 4.33783e-10 | 1.000000 | 4.33784e-10 | 1.000000 |
| rad6          | 6.21287e-13 | 1.000000 | 6.21287e-13 | 1.000000 |
| rad30         | 1.34199e-14 | 1.000000 | 1.34199e-14 | 1.000000 |
| rad15         | 1.17129e-15 | 1.000000 | 1.17129e-15 | 1.000000 |
| rad8          | 1.63125e-16 | 1.000000 | 1.63125e-16 | 1.000000 |
| rad25         | 1.73351e-18 | 1.000000 | 1.73351e-18 | 1.000000 |
| rad13         | 8.53165e-20 | 1.000000 | 8.53165e-20 | 1.000000 |
| PhCHCCH2+H    | 6.26730e-20 | 1.000000 | 6.26730e-20 | 1.000000 |
| rad9          | 5.41896e-20 | 1.000000 | 5.41897e-20 | 1.000000 |
| rad38         | 3.08684e-20 | 1.000000 | 3.08684e-20 | 1.000000 |
| rad7          | 2.38292e-20 | 1.000000 | 2.38293e-20 | 1.000000 |
| rad60syn      | 1.19208e-20 | 1.000000 | 1.19208e-20 | 1.000000 |
| rad28         | 6.56755e-21 | 1.000000 | 6.56755e-21 | 1.000000 |
| PhCH2CCH+H    | 5.32430e-21 | 1.000000 | 5.32431e-21 | 1.000000 |
| rad60anti     | 2.83029e-21 | 1.000000 | 2.83029e-21 | 1.000000 |
| Ph+Allene     | 1.00444e-21 | 1.000000 | 1.00444e-21 | 1.000000 |
| rad33         | 4.62306e-22 | 1.000000 | 4.62307e-22 | 1.000000 |
| rad46         | 7.83243e-23 | 1.000000 | 7.83244e-23 | 1.000000 |
| PAH7+H        | 5.31901e-23 | 1.000000 | 5.31901e-23 | 1.000000 |
| rad35         | 2.91322e-23 | 1.000000 | 2.91322e-23 | 1.000000 |
| PAH9+H        | 7.98940e-24 | 1.000000 | 7.98941e-24 | 1.000000 |
| PAH3+H        | 5.61353e-24 | 1.000000 | 5.61353e-24 | 1.000000 |
| rad59         | 1.96109e-24 | 1.000000 | 1.96109e-24 | 1.000000 |
| rad26         | 4.85372e-25 | 1.000000 | 4.85372e-25 | 1.000000 |
| rad3          | 2.66921e-25 | 1.000000 | 2.66922e-25 | 1.000000 |
| rad4          | 1.53690e-25 | 1.000000 | 1.53690e-25 | 1.000000 |
| rad50         | 8.57740e-29 | 1.000000 | 8.57741e-29 | 1.000000 |
| rad2          | 1.50935e-29 | 1.000000 | 1.50935e-29 | 1.000000 |
| rad1          | 1.37976e-30 | 1.000000 | 1.37976e-30 | 1.000000 |
| rad10         | 8.53400e-31 | 1.000000 | 8.53400e-31 | 1.000000 |
| rad39         | 7.13035e-31 | 1.000000 | 7.13036e-31 | 1.000000 |
| PhCCH+CH3     | 4.41759e-31 | 1.000000 | 4.41759e-31 | 1.000000 |
| rad14         | 1.59957e-32 | 1.000000 | 1.59957e-32 | 1.000000 |
| rad52         | 8.49304e-33 | 1.000000 | 8.49304e-33 | 1.000000 |
| rad12         | 1.45229e-33 | 1.000000 | 1.45229e-33 | 1.000000 |
| Ph+MeAc       | 9.76957e-34 | 1.000000 | 9.76957e-34 | 1.000000 |
| rad31         | 4.97448e-34 | 1.000000 | 4.97448e-34 | 1.000000 |
| rad58         | 1.47834e-34 | 1.000000 | 1.47834e-34 | 1.000000 |
| rad37         | 9.62069e-35 | 1.000000 | 9.62069e-35 | 1.000000 |
| rad51         | 9.28894e-35 | 1.000000 | 9.28895e-35 | 1.000000 |
| PhCCCH3+H     | 9.27131e-37 | 1.000000 | 9.27131e-37 | 1.000000 |
| rad27         | 5.75385e-37 | 1.000000 | 5.75385e-37 | 1.000000 |
| rad70         | 3.82604e-37 | 1.000000 | 3.82605e-37 | 1.000000 |
| rad47         | 2.85920e-38 | 1.000000 | 2.85920e-38 | 1.000000 |
| rad54         | 2.37489e-38 | 1.000000 | 2.37489e-38 | 1.000000 |
| rad19syn      | 1.56154e-38 | 1.000000 | 1.56154e-38 | 1.000000 |
| rad65         | 3.19558e-40 | 1.000000 | 3.19558e-40 | 1.000000 |
| PAH10+CH3     | 3.19364e-40 | 1.000000 | 3.19364e-40 | 1.000000 |
| rad34         | 1.02654e-40 | 1.000000 | 1.02654e-40 | 1.000000 |
| rad55         | 4.82655e-42 | 1.000000 | 4.82656e-42 | 1.000000 |
| rad5          | 4.11676e-42 | 1.000000 | 4.11676e-42 | 1.000000 |
| PhcycC3H3_A+H | 2.39045e-43 | 1.000000 | 2.39045e-43 | 1.000000 |
| PAH1+H        | 3.94966e-44 | 1.000000 | 3.94966e-44 | 1.000000 |
| rad62         | 8.43469e-45 | 1.000000 | 8.43469e-45 | 1.000000 |
| rad43         | 7.16534e-48 | 1.000000 | 7.16535e-48 | 1.000000 |
| rad42         | 7.47918e-51 | 1.000000 | 7.47918e-51 | 1.000000 |
| rad41         | 2.10081e-54 | 1.000000 | 2.10081e-54 | 1.000000 |

1000000.00 Pa, 210.000000 K

=====

| Rate constant | True (fraction)     | Effective (fraction) |
|---------------|---------------------|----------------------|
| Total         | 8.30956e-27 (1.00 ) | 8.30955e-27 (1.00 )  |

| species | PYtrue | Cumul | PYeffective | Cumul |
|---------|--------|-------|-------------|-------|
|---------|--------|-------|-------------|-------|

-----

|               |             |          |             |          |
|---------------|-------------|----------|-------------|----------|
| rad20         | 0.986045    | 0.986045 | 0.986046    | 0.986046 |
| rad21         | 0.0120423   | 0.998087 | 0.0120423   | 0.998088 |
| rad18         | 0.00185238  | 0.999940 | 0.00185238  | 0.999941 |
| rad22         | 5.42662e-05 | 0.999994 | 5.42662e-05 | 0.999995 |
| rad45         | 2.37600e-06 | 0.999996 | 2.37600e-06 | 0.999997 |
| Indene+H      | 1.90861e-06 | 0.999998 | 1.90861e-06 | 0.999999 |
| Benzyl+C2H2   | 9.09897e-07 | 0.999999 | 0.00000     | 0.999999 |
| rad24         | 7.25450e-07 | 1.000000 | 7.25451e-07 | 1.000000 |
| rad36         | 1.71986e-07 | 1.00000  | 1.71986e-07 | 1.00000  |
| rad11         | 4.02493e-08 | 1.00000  | 4.02493e-08 | 1.00000  |
| rad23         | 6.81798e-10 | 1.00000  | 6.81799e-10 | 1.00000  |
| rad6          | 1.21715e-12 | 1.00000  | 1.21715e-12 | 1.00000  |
| rad30         | 2.82259e-14 | 1.00000  | 2.82259e-14 | 1.00000  |
| rad15         | 2.77389e-15 | 1.00000  | 2.77390e-15 | 1.00000  |
| rad8          | 6.44661e-16 | 1.00000  | 6.44661e-16 | 1.00000  |
| rad25         | 5.06907e-18 | 1.00000  | 5.06908e-18 | 1.00000  |
| rad9          | 3.05795e-19 | 1.00000  | 3.05796e-19 | 1.00000  |
| PhCHCCH2+H    | 2.49644e-19 | 1.00000  | 2.49645e-19 | 1.00000  |
| rad13         | 2.29190e-19 | 1.00000  | 2.29190e-19 | 1.00000  |
| rad38         | 8.54642e-20 | 1.00000  | 8.54643e-20 | 1.00000  |
| rad7          | 6.61642e-20 | 1.00000  | 6.61642e-20 | 1.00000  |
| rad60syn      | 5.22673e-20 | 1.00000  | 5.22674e-20 | 1.00000  |
| PhCH2CCH+H    | 4.01596e-20 | 1.00000  | 4.01596e-20 | 1.00000  |
| rad28         | 3.07729e-20 | 1.00000  | 3.07729e-20 | 1.00000  |
| rad60anti     | 1.32941e-20 | 1.00000  | 1.32941e-20 | 1.00000  |
| Ph+Allene     | 5.65203e-21 | 1.00000  | 5.65204e-21 | 1.00000  |
| rad33         | 1.33257e-21 | 1.00000  | 1.33257e-21 | 1.00000  |
| PAH7+H        | 3.10697e-22 | 1.00000  | 3.10697e-22 | 1.00000  |
| rad46         | 2.90101e-22 | 1.00000  | 2.90101e-22 | 1.00000  |
| rad35         | 1.62177e-22 | 1.00000  | 1.62177e-22 | 1.00000  |
| PAH3+H        | 4.33964e-23 | 1.00000  | 4.33964e-23 | 1.00000  |
| PAH9+H        | 2.57680e-23 | 1.00000  | 2.57681e-23 | 1.00000  |
| rad59         | 1.47080e-23 | 1.00000  | 1.47080e-23 | 1.00000  |
| rad26         | 3.46226e-24 | 1.00000  | 3.46226e-24 | 1.00000  |
| rad3          | 1.11831e-24 | 1.00000  | 1.11831e-24 | 1.00000  |
| rad4          | 6.43613e-25 | 1.00000  | 6.43613e-25 | 1.00000  |
| rad50         | 7.47176e-28 | 1.00000  | 7.47177e-28 | 1.00000  |
| rad2          | 9.55148e-29 | 1.00000  | 9.55149e-29 | 1.00000  |
| rad1          | 8.73204e-30 | 1.00000  | 8.73205e-30 | 1.00000  |
| rad10         | 7.50098e-30 | 1.00000  | 7.50098e-30 | 1.00000  |
| rad39         | 5.63627e-30 | 1.00000  | 5.63628e-30 | 1.00000  |
| PhCCH+CH3     | 3.82146e-30 | 1.00000  | 3.82147e-30 | 1.00000  |
| rad14         | 1.23415e-31 | 1.00000  | 1.23415e-31 | 1.00000  |
| rad52         | 1.18039e-31 | 1.00000  | 1.18039e-31 | 1.00000  |
| rad12         | 1.42566e-32 | 1.00000  | 1.42566e-32 | 1.00000  |
| rad58         | 1.15634e-32 | 1.00000  | 1.15634e-32 | 1.00000  |
| Ph+MeAc       | 1.10163e-32 | 1.00000  | 1.10164e-32 | 1.00000  |
| rad31         | 2.16405e-33 | 1.00000  | 2.16405e-33 | 1.00000  |
| rad51         | 2.01982e-33 | 1.00000  | 2.01982e-33 | 1.00000  |
| rad37         | 1.06179e-33 | 1.00000  | 1.06179e-33 | 1.00000  |
| rad70         | 2.02601e-35 | 1.00000  | 2.02601e-35 | 1.00000  |
| PhCCCH3+H     | 1.16661e-35 | 1.00000  | 1.16662e-35 | 1.00000  |
| rad27         | 6.14619e-36 | 1.00000  | 6.14619e-36 | 1.00000  |
| rad47         | 1.29250e-36 | 1.00000  | 1.29250e-36 | 1.00000  |
| rad54         | 5.86350e-37 | 1.00000  | 5.86350e-37 | 1.00000  |
| rad19syn      | 3.18031e-37 | 1.00000  | 3.18031e-37 | 1.00000  |
| rad65         | 1.08006e-38 | 1.00000  | 1.08007e-38 | 1.00000  |
| rad34         | 1.02264e-38 | 1.00000  | 1.02264e-38 | 1.00000  |
| PAH10+CH3     | 9.01299e-39 | 1.00000  | 9.01300e-39 | 1.00000  |
| rad55         | 2.77873e-40 | 1.00000  | 2.77873e-40 | 1.00000  |
| rad5          | 8.24963e-41 | 1.00000  | 8.24964e-41 | 1.00000  |
| PhcycC3H3_A+H | 1.57182e-41 | 1.00000  | 1.57182e-41 | 1.00000  |
| PAH1+H        | 3.99493e-42 | 1.00000  | 3.99494e-42 | 1.00000  |
| rad62         | 3.80955e-43 | 1.00000  | 3.80956e-43 | 1.00000  |
| rad43         | 3.44301e-46 | 1.00000  | 3.44301e-46 | 1.00000  |
| rad42         | 7.98302e-49 | 1.00000  | 7.98302e-49 | 1.00000  |
| rad41         | 2.25520e-52 | 1.00000  | 2.25521e-52 | 1.00000  |

1000000.00 Pa, 220.000000 K

=====

| Rate constant | True (fraction)     | Effective (fraction) |
|---------------|---------------------|----------------------|
| Total         | 3.40057e-26 (1.00 ) | 3.40057e-26 (1.00 )  |

| species | PYtrue      | Cumul    | PYeffective | Cumul    |
|---------|-------------|----------|-------------|----------|
| rad20   | 0.984412    | 0.984412 | 0.984413    | 0.984413 |
| rad21   | 0.0134265   | 0.997838 | 0.0134265   | 0.997839 |
| rad18   | 0.00208433  | 0.999923 | 0.00208434  | 0.999924 |
| rad22   | 6.91455e-05 | 0.999992 | 6.91456e-05 | 0.999993 |



|               |             |          |             |          |
|---------------|-------------|----------|-------------|----------|
| rad45         | 3.27345e-06 | 0.999995 | 3.27346e-06 | 0.999996 |
| Indene+H      | 2.48525e-06 | 0.999998 | 2.48526e-06 | 0.999999 |
| Benzyl+C2H2   | 1.34656e-06 | 0.999999 | 0.00000     | 0.999999 |
| rad24         | 8.56092e-07 | 1.000000 | 8.56093e-07 | 1.000000 |
| rad36         | 2.36641e-07 | 1.000000 | 2.36641e-07 | 1.000000 |
| rad11         | 5.96521e-08 | 1.000000 | 5.96522e-08 | 1.000000 |
| rad23         | 1.07501e-09 | 1.000000 | 1.07501e-09 | 1.000000 |
| rad6          | 2.37862e-12 | 1.000000 | 2.37862e-12 | 1.000000 |
| rad30         | 5.79901e-14 | 1.000000 | 5.79902e-14 | 1.000000 |
| rad15         | 6.33075e-15 | 1.000000 | 6.33076e-15 | 1.000000 |
| rad8          | 2.28315e-15 | 1.000000 | 2.28315e-15 | 1.000000 |
| rad25         | 1.42794e-17 | 1.000000 | 1.42794e-17 | 1.000000 |
| rad9          | 1.51674e-18 | 1.000000 | 1.51675e-18 | 1.000000 |
| PhCHCCH2+H    | 9.28412e-19 | 1.000000 | 9.28413e-19 | 1.000000 |
| rad13         | 6.09599e-19 | 1.000000 | 6.09599e-19 | 1.000000 |
| PhCH2CCH+H    | 2.56034e-19 | 1.000000 | 2.56034e-19 | 1.000000 |
| rad38         | 2.31149e-19 | 1.000000 | 2.31149e-19 | 1.000000 |
| rad60syn      | 2.06199e-19 | 1.000000 | 2.06200e-19 | 1.000000 |
| rad7          | 1.82032e-19 | 1.000000 | 1.82033e-19 | 1.000000 |
| rad28         | 1.29426e-19 | 1.000000 | 1.29426e-19 | 1.000000 |
| rad60anti     | 5.57318e-20 | 1.000000 | 5.57319e-20 | 1.000000 |
| Ph+Allene     | 2.84951e-20 | 1.000000 | 2.84952e-20 | 1.000000 |
| rad33         | 3.77350e-21 | 1.000000 | 3.77351e-21 | 1.000000 |
| PAH7+H        | 1.59376e-21 | 1.000000 | 1.59376e-21 | 1.000000 |
| rad46         | 1.01736e-21 | 1.000000 | 1.01736e-21 | 1.000000 |
| rad35         | 8.25273e-22 | 1.000000 | 8.25274e-22 | 1.000000 |
| PAH3+H        | 2.85959e-22 | 1.000000 | 2.85959e-22 | 1.000000 |
| rad59         | 9.41320e-23 | 1.000000 | 9.41321e-23 | 1.000000 |
| PAH9+H        | 8.17325e-23 | 1.000000 | 8.17327e-23 | 1.000000 |
| rad26         | 2.12032e-23 | 1.000000 | 2.12033e-23 | 1.000000 |
| rad3          | 4.54070e-24 | 1.000000 | 4.54071e-24 | 1.000000 |
| rad4          | 2.61292e-24 | 1.000000 | 2.61293e-24 | 1.000000 |
| rad50         | 5.63925e-27 | 1.000000 | 5.63926e-27 | 1.000000 |
| rad2          | 5.73377e-28 | 1.000000 | 5.73378e-28 | 1.000000 |
| rad10         | 5.68975e-29 | 1.000000 | 5.68976e-29 | 1.000000 |
| rad1          | 5.24795e-29 | 1.000000 | 5.24795e-29 | 1.000000 |
| rad39         | 3.97579e-29 | 1.000000 | 3.97579e-29 | 1.000000 |
| PhCCH+CH3     | 3.04148e-29 | 1.000000 | 3.04149e-29 | 1.000000 |
| rad52         | 1.34555e-30 | 1.000000 | 1.34555e-30 | 1.000000 |
| rad14         | 8.85835e-31 | 1.000000 | 8.85836e-31 | 1.000000 |
| rad58         | 3.20610e-31 | 1.000000 | 3.20611e-31 | 1.000000 |
| rad12         | 1.20608e-31 | 1.000000 | 1.20608e-31 | 1.000000 |
| Ph+MeAc       | 1.10396e-31 | 1.000000 | 1.10396e-31 | 1.000000 |
| rad51         | 3.27758e-32 | 1.000000 | 3.27759e-32 | 1.000000 |
| rad37         | 1.00130e-32 | 1.000000 | 1.00130e-32 | 1.000000 |
| rad31         | 9.19099e-33 | 1.000000 | 9.19100e-33 | 1.000000 |
| rad70         | 5.34107e-34 | 1.000000 | 5.34108e-34 | 1.000000 |
| PhCCCH3+H     | 1.32230e-34 | 1.000000 | 1.32230e-34 | 1.000000 |
| rad27         | 6.01096e-35 | 1.000000 | 6.01096e-35 | 1.000000 |
| rad47         | 3.74895e-35 | 1.000000 | 3.74896e-35 | 1.000000 |
| rad54         | 1.02981e-35 | 1.000000 | 1.02981e-35 | 1.000000 |
| rad19syn      | 4.97882e-36 | 1.000000 | 4.97883e-36 | 1.000000 |
| rad34         | 4.76380e-37 | 1.000000 | 4.76381e-37 | 1.000000 |
| rad65         | 2.40512e-37 | 1.000000 | 2.40512e-37 | 1.000000 |
| PAH10+CH3     | 1.69720e-37 | 1.000000 | 1.69720e-37 | 1.000000 |
| rad55         | 8.14681e-39 | 1.000000 | 8.14682e-39 | 1.000000 |
| rad5          | 1.36718e-39 | 1.000000 | 1.36719e-39 | 1.000000 |
| PhcycC3H3_A+H | 5.19496e-40 | 1.000000 | 5.19497e-40 | 1.000000 |
| PAH1+H        | 1.85240e-40 | 1.000000 | 1.85241e-40 | 1.000000 |
| rad62         | 1.09810e-41 | 1.000000 | 1.09810e-41 | 1.000000 |
| rad43         | 1.08451e-44 | 1.000000 | 1.08451e-44 | 1.000000 |
| rad42         | 4.29477e-47 | 1.000000 | 4.29477e-47 | 1.000000 |
| rad41         | 1.24315e-50 | 1.000000 | 1.24315e-50 | 1.000000 |

1000000.00 Pa, 230.000000 K

=====

| Rate constant | True (fraction)     | Effective (fraction) |
|---------------|---------------------|----------------------|
| Total         | 1.22972e-25 (1.00 ) | 1.22971e-25 (1.00 )  |

| species     | PYtrue      | Cumul    | PYeffective | Cumul    |
|-------------|-------------|----------|-------------|----------|
| rad20       | 0.982578    | 0.982578 | 0.982580    | 0.982580 |
| rad21       | 0.0149753   | 0.997553 | 0.0149753   | 0.997555 |
| rad18       | 0.00234731  | 0.999901 | 0.00234731  | 0.999903 |
| rad22       | 8.82364e-05 | 0.999989 | 8.82366e-05 | 0.999991 |
| rad45       | 4.50428e-06 | 0.999993 | 4.50429e-06 | 0.999995 |
| Indene+H    | 3.24620e-06 | 0.999997 | 3.24621e-06 | 0.999999 |
| Benzyl+C2H2 | 1.97955e-06 | 0.999999 | 0.00000     | 0.999999 |
| rad24       | 1.00681e-06 | 1.000000 | 1.00682e-06 | 1.000000 |

|               |             |          |             |          |
|---------------|-------------|----------|-------------|----------|
| rad36         | 3.25444e-07 | 1.000000 | 3.25445e-07 | 1.000000 |
| rad11         | 8.83954e-08 | 1.000000 | 8.83956e-08 | 1.000000 |
| rad23         | 1.69877e-09 | 1.000000 | 1.69877e-09 | 1.000000 |
| rad6          | 4.62793e-12 | 1.000000 | 4.62794e-12 | 1.000000 |
| rad30         | 1.16603e-13 | 1.000000 | 1.16603e-13 | 1.000000 |
| rad15         | 1.39803e-14 | 1.000000 | 1.39803e-14 | 1.000000 |
| rad8          | 7.35061e-15 | 1.000000 | 7.35063e-15 | 1.000000 |
| rad25         | 3.88425e-17 | 1.000000 | 3.88426e-17 | 1.000000 |
| rad9          | 6.70824e-18 | 1.000000 | 6.70825e-18 | 1.000000 |
| PhCHCCH2+H    | 3.24588e-18 | 1.000000 | 3.24588e-18 | 1.000000 |
| rad13         | 1.60060e-18 | 1.000000 | 1.60060e-18 | 1.000000 |
| PhCH2CCH+H    | 1.40962e-18 | 1.000000 | 1.40963e-18 | 1.000000 |
| rad60syn      | 7.42011e-19 | 1.000000 | 7.42012e-19 | 1.000000 |
| rad38         | 6.11143e-19 | 1.000000 | 6.11145e-19 | 1.000000 |
| rad28         | 4.95044e-19 | 1.000000 | 4.95044e-19 | 1.000000 |
| rad7          | 4.94889e-19 | 1.000000 | 4.94890e-19 | 1.000000 |
| rad60anti     | 2.11630e-19 | 1.000000 | 2.11630e-19 | 1.000000 |
| Ph+Allene     | 1.30387e-19 | 1.000000 | 1.30387e-19 | 1.000000 |
| rad33         | 1.04654e-20 | 1.000000 | 1.04654e-20 | 1.000000 |
| PAH7+H        | 7.29486e-21 | 1.000000 | 7.29487e-21 | 1.000000 |
| rad35         | 3.80484e-21 | 1.000000 | 3.80485e-21 | 1.000000 |
| rad46         | 3.39783e-21 | 1.000000 | 3.39784e-21 | 1.000000 |
| PAH3+H        | 1.63946e-21 | 1.000000 | 1.63946e-21 | 1.000000 |
| rad59         | 5.24724e-22 | 1.000000 | 5.24725e-22 | 1.000000 |
| PAH9+H        | 2.54690e-22 | 1.000000 | 2.54691e-22 | 1.000000 |
| rad26         | 1.13621e-22 | 1.000000 | 1.13622e-22 | 1.000000 |
| rad3          | 1.78307e-23 | 1.000000 | 1.78307e-23 | 1.000000 |
| rad4          | 1.02627e-23 | 1.000000 | 1.02627e-23 | 1.000000 |
| rad50         | 3.75926e-26 | 1.000000 | 3.75927e-26 | 1.000000 |
| rad2          | 3.26529e-27 | 1.000000 | 3.26529e-27 | 1.000000 |
| rad10         | 3.79821e-28 | 1.000000 | 3.79822e-28 | 1.000000 |
| rad1          | 2.99546e-28 | 1.000000 | 2.99546e-28 | 1.000000 |
| rad39         | 2.53883e-28 | 1.000000 | 2.53883e-28 | 1.000000 |
| PhCCH+CH3     | 2.24446e-28 | 1.000000 | 2.24446e-28 | 1.000000 |
| rad52         | 1.30472e-29 | 1.000000 | 1.30472e-29 | 1.000000 |
| rad58         | 6.87444e-30 | 1.000000 | 6.87444e-30 | 1.000000 |
| rad14         | 5.93936e-30 | 1.000000 | 5.93937e-30 | 1.000000 |
| Ph+MeAc       | 1.00563e-30 | 1.000000 | 1.00563e-30 | 1.000000 |
| rad12         | 8.98997e-31 | 1.000000 | 8.98999e-31 | 1.000000 |
| rad51         | 4.41497e-31 | 1.000000 | 4.41497e-31 | 1.000000 |
| rad37         | 8.30534e-32 | 1.000000 | 8.30536e-32 | 1.000000 |
| rad31         | 3.80494e-32 | 1.000000 | 3.80495e-32 | 1.000000 |
| rad70         | 1.21748e-32 | 1.000000 | 1.21749e-32 | 1.000000 |
| PhCCCH3+H     | 1.38985e-33 | 1.000000 | 1.38985e-33 | 1.000000 |
| rad47         | 9.10374e-34 | 1.000000 | 9.10376e-34 | 1.000000 |
| rad27         | 5.45830e-34 | 1.000000 | 5.45831e-34 | 1.000000 |
| rad54         | 1.57306e-34 | 1.000000 | 1.57306e-34 | 1.000000 |
| rad19syn      | 6.86974e-35 | 1.000000 | 6.86976e-35 | 1.000000 |
| rad34         | 2.46692e-35 | 1.000000 | 2.46693e-35 | 1.000000 |
| rad65         | 4.50527e-36 | 1.000000 | 4.50528e-36 | 1.000000 |
| PAH10+CH3     | 2.87378e-36 | 1.000000 | 2.87379e-36 | 1.000000 |
| rad55         | 2.19422e-37 | 1.000000 | 2.19423e-37 | 1.000000 |
| rad5          | 2.09731e-38 | 1.000000 | 2.09731e-38 | 1.000000 |
| PhcycC3H3_A+H | 1.67338e-38 | 1.000000 | 1.67339e-38 | 1.000000 |
| PAH1+H        | 9.23665e-39 | 1.000000 | 9.23667e-39 | 1.000000 |
| rad62         | 3.04215e-40 | 1.000000 | 3.04216e-40 | 1.000000 |
| rad43         | 3.31034e-43 | 1.000000 | 3.31035e-43 | 1.000000 |
| rad42         | 2.55750e-45 | 1.000000 | 2.55751e-45 | 1.000000 |
| rad41         | 7.09342e-49 | 1.000000 | 7.09344e-49 | 1.000000 |

1000000.00 Pa, 240.000000 K

=====

| Rate constant | True (fraction)     | Effective (fraction) |
|---------------|---------------------|----------------------|
| Total         | 3.99091e-25 (1.00 ) | 3.99090e-25 (1.00 )  |

| species     | PYtrue      | Cumul    | PYeffective | Cumul    |
|-------------|-------------|----------|-------------|----------|
| rad20       | 0.980519    | 0.980519 | 0.980522    | 0.980522 |
| rad21       | 0.0167077   | 0.997227 | 0.0167078   | 0.997230 |
| rad18       | 0.00264554  | 0.999872 | 0.00264555  | 0.999875 |
| rad22       | 0.000112732 | 0.999985 | 0.000112732 | 0.999988 |
| rad45       | 6.18745e-06 | 0.999991 | 6.18747e-06 | 0.999994 |
| Indene+H    | 4.25198e-06 | 0.999995 | 4.25200e-06 | 0.999999 |
| Benzyl+C2H2 | 2.89014e-06 | 0.999998 | 0.00000     | 0.999999 |
| rad24       | 1.17983e-06 | 0.999999 | 1.17983e-06 | 1.000000 |
| rad36       | 4.47165e-07 | 1.000000 | 4.47166e-07 | 1.000000 |
| rad11       | 1.30838e-07 | 1.000000 | 1.30838e-07 | 1.000000 |
| rad23       | 2.68775e-09 | 1.000000 | 2.68775e-09 | 1.000000 |
| rad6        | 8.94932e-12 | 1.000000 | 8.94934e-12 | 1.000000 |

|               |             |         |             |         |
|---------------|-------------|---------|-------------|---------|
| rad30         | 2.29810e-13 | 1.00000 | 2.29811e-13 | 1.00000 |
| rad15         | 2.99690e-14 | 1.00000 | 2.99691e-14 | 1.00000 |
| rad8          | 2.17709e-14 | 1.00000 | 2.17709e-14 | 1.00000 |
| rad25         | 1.02226e-16 | 1.00000 | 1.02226e-16 | 1.00000 |
| rad9          | 2.67963e-17 | 1.00000 | 2.67963e-17 | 1.00000 |
| PhCHCCH2+H    | 1.07294e-17 | 1.00000 | 1.07294e-17 | 1.00000 |
| PhCH2CCH+H    | 6.82307e-18 | 1.00000 | 6.82309e-18 | 1.00000 |
| rad13         | 4.13829e-18 | 1.00000 | 4.13830e-18 | 1.00000 |
| rad60syn      | 2.46348e-18 | 1.00000 | 2.46349e-18 | 1.00000 |
| rad28         | 1.74101e-18 | 1.00000 | 1.74102e-18 | 1.00000 |
| rad38         | 1.58088e-18 | 1.00000 | 1.58089e-18 | 1.00000 |
| rad7          | 1.32660e-18 | 1.00000 | 1.32660e-18 | 1.00000 |
| rad60anti     | 7.36957e-19 | 1.00000 | 7.36959e-19 | 1.00000 |
| Ph+Allene     | 5.47338e-19 | 1.00000 | 5.47340e-19 | 1.00000 |
| PAH7+H        | 3.01949e-20 | 1.00000 | 3.01950e-20 | 1.00000 |
| rad33         | 2.83561e-20 | 1.00000 | 2.83562e-20 | 1.00000 |
| rad35         | 1.59546e-20 | 1.00000 | 1.59547e-20 | 1.00000 |
| rad46         | 1.08622e-20 | 1.00000 | 1.08622e-20 | 1.00000 |
| PAH3+H        | 8.31719e-21 | 1.00000 | 8.31721e-21 | 1.00000 |
| rad59         | 2.59111e-21 | 1.00000 | 2.59112e-21 | 1.00000 |
| PAH9+H        | 7.79289e-22 | 1.00000 | 7.79292e-22 | 1.00000 |
| rad26         | 5.41299e-22 | 1.00000 | 5.41301e-22 | 1.00000 |
| rad3          | 6.76138e-23 | 1.00000 | 6.76140e-23 | 1.00000 |
| rad4          | 3.89380e-23 | 1.00000 | 3.89381e-23 | 1.00000 |
| rad50         | 2.24837e-25 | 1.00000 | 2.24837e-25 | 1.00000 |
| rad2          | 1.76234e-26 | 1.00000 | 1.76234e-26 | 1.00000 |
| rad10         | 2.26017e-27 | 1.00000 | 2.26018e-27 | 1.00000 |
| rad1          | 1.62230e-27 | 1.00000 | 1.62230e-27 | 1.00000 |
| PhCCH+CH3     | 1.53288e-27 | 1.00000 | 1.53288e-27 | 1.00000 |
| rad39         | 1.48029e-27 | 1.00000 | 1.48029e-27 | 1.00000 |
| rad52         | 1.09123e-28 | 1.00000 | 1.09123e-28 | 1.00000 |
| rad58         | 9.10037e-29 | 1.00000 | 9.10039e-29 | 1.00000 |
| rad14         | 3.71696e-29 | 1.00000 | 3.71697e-29 | 1.00000 |
| Ph+MeAc       | 8.25537e-30 | 1.00000 | 8.25539e-30 | 1.00000 |
| rad12         | 5.95207e-30 | 1.00000 | 5.95209e-30 | 1.00000 |
| rad51         | 4.84462e-30 | 1.00000 | 4.84463e-30 | 1.00000 |
| rad37         | 6.06547e-31 | 1.00000 | 6.06548e-31 | 1.00000 |
| rad70         | 1.81557e-31 | 1.00000 | 1.81557e-31 | 1.00000 |
| rad31         | 1.53379e-31 | 1.00000 | 1.53379e-31 | 1.00000 |
| rad47         | 1.47008e-32 | 1.00000 | 1.47008e-32 | 1.00000 |
| PhCCCH3+H     | 1.31990e-32 | 1.00000 | 1.31991e-32 | 1.00000 |
| rad27         | 4.54284e-33 | 1.00000 | 4.54285e-33 | 1.00000 |
| rad54         | 1.87621e-33 | 1.00000 | 1.87622e-33 | 1.00000 |
| rad19syn      | 7.73120e-34 | 1.00000 | 7.73122e-34 | 1.00000 |
| rad34         | 5.77670e-34 | 1.00000 | 5.77672e-34 | 1.00000 |
| rad65         | 6.26519e-35 | 1.00000 | 6.26521e-35 | 1.00000 |
| PAH10+CH3     | 3.66102e-35 | 1.00000 | 3.66103e-35 | 1.00000 |
| rad55         | 3.72708e-36 | 1.00000 | 3.72709e-36 | 1.00000 |
| PhcycC3H3_A+H | 3.24356e-37 | 1.00000 | 3.24357e-37 | 1.00000 |
| rad5          | 2.69083e-37 | 1.00000 | 2.69084e-37 | 1.00000 |
| PAH1+H        | 2.13008e-37 | 1.00000 | 2.13008e-37 | 1.00000 |
| rad62         | 5.74343e-39 | 1.00000 | 5.74344e-39 | 1.00000 |
| rad43         | 6.81928e-42 | 1.00000 | 6.81930e-42 | 1.00000 |
| rad42         | 7.85210e-44 | 1.00000 | 7.85212e-44 | 1.00000 |
| rad41         | 2.15512e-47 | 1.00000 | 2.15513e-47 | 1.00000 |

1000000.00 Pa, 250.000000 K

=====

| Rate constant | True (fraction)     | Effective (fraction) |
|---------------|---------------------|----------------------|
| Total         | 1.17763e-24 (1.00 ) | 1.17763e-24 (1.00 )  |

| species     | PYtrue      | Cumul    | PYeffective | Cumul    |
|-------------|-------------|----------|-------------|----------|
| rad20       | 0.978208    | 0.978208 | 0.978212    | 0.978212 |
| rad21       | 0.0186441   | 0.996852 | 0.0186441   | 0.996856 |
| rad18       | 0.00298372  | 0.999836 | 0.00298373  | 0.999840 |
| rad22       | 0.000144142 | 0.999980 | 0.000144143 | 0.999984 |
| rad45       | 8.48135e-06 | 0.999988 | 8.48139e-06 | 0.999992 |
| Indene+H    | 5.58264e-06 | 0.999994 | 5.58266e-06 | 0.999998 |
| Benzyl+C2H2 | 4.18986e-06 | 0.999998 | 0.00000     | 0.999998 |
| rad24       | 1.37740e-06 | 1.000000 | 1.37740e-06 | 0.999999 |
| rad36       | 6.13578e-07 | 1.00000  | 6.13580e-07 | 1.00000  |
| rad11       | 1.93254e-07 | 1.00000  | 1.93255e-07 | 1.00000  |
| rad23       | 4.25358e-09 | 1.00000  | 4.25360e-09 | 1.00000  |
| rad6        | 1.71752e-11 | 1.00000  | 1.71753e-11 | 1.00000  |
| rad30       | 4.44479e-13 | 1.00000  | 4.44481e-13 | 1.00000  |
| rad15       | 6.25259e-14 | 1.00000  | 6.25262e-14 | 1.00000  |
| rad8        | 5.99152e-14 | 1.00000  | 5.99154e-14 | 1.00000  |
| rad25       | 2.60714e-16 | 1.00000  | 2.60715e-16 | 1.00000  |

|               |             |         |             |         |
|---------------|-------------|---------|-------------|---------|
| rad9          | 9.77589e-17 | 1.00000 | 9.77594e-17 | 1.00000 |
| PhCHCCH2+H    | 3.36926e-17 | 1.00000 | 3.36927e-17 | 1.00000 |
| PhCH2CCH+H    | 2.94796e-17 | 1.00000 | 2.94797e-17 | 1.00000 |
| rad13         | 1.05136e-17 | 1.00000 | 1.05136e-17 | 1.00000 |
| rad60syn      | 7.61808e-18 | 1.00000 | 7.61811e-18 | 1.00000 |
| rad28         | 5.68203e-18 | 1.00000 | 5.68205e-18 | 1.00000 |
| rad38         | 4.00484e-18 | 1.00000 | 4.00486e-18 | 1.00000 |
| rad7          | 3.50000e-18 | 1.00000 | 3.50002e-18 | 1.00000 |
| rad60anti     | 2.37790e-18 | 1.00000 | 2.37791e-18 | 1.00000 |
| Ph+Allene     | 2.12691e-18 | 1.00000 | 2.12692e-18 | 1.00000 |
| PAH7+H        | 1.14308e-19 | 1.00000 | 1.14308e-19 | 1.00000 |
| rad33         | 7.49149e-20 | 1.00000 | 7.49152e-20 | 1.00000 |
| rad35         | 6.13190e-20 | 1.00000 | 6.13193e-20 | 1.00000 |
| PAH3+H        | 3.78783e-20 | 1.00000 | 3.78785e-20 | 1.00000 |
| rad46         | 3.33861e-20 | 1.00000 | 3.33862e-20 | 1.00000 |
| rad59         | 1.14988e-20 | 1.00000 | 1.14989e-20 | 1.00000 |
| PAH9+H        | 2.34115e-21 | 1.00000 | 2.34116e-21 | 1.00000 |
| rad26         | 2.32381e-21 | 1.00000 | 2.32382e-21 | 1.00000 |
| rad3          | 2.47321e-22 | 1.00000 | 2.47322e-22 | 1.00000 |
| rad4          | 1.42563e-22 | 1.00000 | 1.42563e-22 | 1.00000 |
| rad50         | 1.22376e-24 | 1.00000 | 1.22376e-24 | 1.00000 |
| rad2          | 9.00753e-26 | 1.00000 | 9.00757e-26 | 1.00000 |
| rad10         | 1.21311e-26 | 1.00000 | 1.21312e-26 | 1.00000 |
| PhCCH+CH3     | 9.67308e-27 | 1.00000 | 9.67312e-27 | 1.00000 |
| rad1          | 8.33055e-27 | 1.00000 | 8.33059e-27 | 1.00000 |
| rad39         | 7.94819e-27 | 1.00000 | 7.94822e-27 | 1.00000 |
| rad58         | 8.49240e-28 | 1.00000 | 8.49243e-28 | 1.00000 |
| rad52         | 8.03458e-28 | 1.00000 | 8.03461e-28 | 1.00000 |
| rad14         | 2.16961e-28 | 1.00000 | 2.16961e-28 | 1.00000 |
| Ph+MeAc       | 6.07874e-29 | 1.00000 | 6.07876e-29 | 1.00000 |
| rad51         | 4.48345e-29 | 1.00000 | 4.48347e-29 | 1.00000 |
| rad12         | 3.53409e-29 | 1.00000 | 3.53410e-29 | 1.00000 |
| rad37         | 3.92824e-30 | 1.00000 | 3.92825e-30 | 1.00000 |
| rad70         | 1.85132e-30 | 1.00000 | 1.85132e-30 | 1.00000 |
| rad31         | 6.01673e-31 | 1.00000 | 6.01675e-31 | 1.00000 |
| rad47         | 1.72356e-31 | 1.00000 | 1.72357e-31 | 1.00000 |
| PhCCCH3+H     | 1.11045e-31 | 1.00000 | 1.11045e-31 | 1.00000 |
| rad27         | 3.42923e-32 | 1.00000 | 3.42925e-32 | 1.00000 |
| rad54         | 1.74560e-32 | 1.00000 | 1.74560e-32 | 1.00000 |
| rad19syn      | 7.00329e-33 | 1.00000 | 7.00332e-33 | 1.00000 |
| rad34         | 6.58014e-33 | 1.00000 | 6.58017e-33 | 1.00000 |
| rad65         | 6.74084e-34 | 1.00000 | 6.74086e-34 | 1.00000 |
| PAH10+CH3     | 3.41794e-34 | 1.00000 | 3.41796e-34 | 1.00000 |
| rad55         | 4.01666e-35 | 1.00000 | 4.01668e-35 | 1.00000 |
| PhcycC3H3_A+H | 3.66057e-36 | 1.00000 | 3.66058e-36 | 1.00000 |
| rad5          | 2.76792e-36 | 1.00000 | 2.76793e-36 | 1.00000 |
| PAH1+H        | 2.34058e-36 | 1.00000 | 2.34059e-36 | 1.00000 |
| rad62         | 7.01493e-38 | 1.00000 | 7.01496e-38 | 1.00000 |
| rad43         | 9.00893e-41 | 1.00000 | 9.00897e-41 | 1.00000 |
| rad42         | 1.09654e-42 | 1.00000 | 1.09655e-42 | 1.00000 |
| rad41         | 3.23852e-46 | 1.00000 | 3.23854e-46 | 1.00000 |

1000000.00 Pa, 260.000000 K

=====

| Rate constant | True (fraction)     | Effective (fraction) |
|---------------|---------------------|----------------------|
| Total         | 3.19452e-24 (1.00 ) | 3.19450e-24 (1.00 )  |

| species     | PYtrue      | Cumul    | PYeffective | Cumul    |
|-------------|-------------|----------|-------------|----------|
| rad20       | 0.975615    | 0.975615 | 0.975621    | 0.975621 |
| rad21       | 0.0208055   | 0.996421 | 0.0208056   | 0.996427 |
| rad18       | 0.00336700  | 0.999788 | 0.00336702  | 0.999794 |
| rad22       | 0.000184370 | 0.999972 | 0.000184371 | 0.999978 |
| rad45       | 1.15953e-05 | 0.999983 | 1.15954e-05 | 0.999990 |
| Indene+H    | 7.34375e-06 | 0.999991 | 7.34379e-06 | 0.999997 |
| Benzyl+C2H2 | 6.30341e-06 | 0.999997 | 0.00000     | 0.999997 |
| rad24       | 1.60181e-06 | 0.999998 | 1.60182e-06 | 0.999999 |
| rad36       | 8.40406e-07 | 0.999999 | 8.40411e-07 | 0.999999 |
| rad11       | 2.84601e-07 | 1.000000 | 2.84603e-07 | 1.000000 |
| rad23       | 6.72722e-09 | 1.000000 | 6.72726e-09 | 1.000000 |
| rad6        | 3.26729e-11 | 1.000000 | 3.26731e-11 | 1.000000 |
| rad30       | 8.44441e-13 | 1.000000 | 8.44446e-13 | 1.000000 |
| rad8        | 1.54515e-13 | 1.000000 | 1.54516e-13 | 1.000000 |
| rad15       | 1.27233e-13 | 1.000000 | 1.27233e-13 | 1.000000 |
| rad25       | 6.45205e-16 | 1.000000 | 6.45209e-16 | 1.000000 |
| rad9        | 3.28884e-16 | 1.000000 | 3.28886e-16 | 1.000000 |
| PhCH2CCH+H  | 1.15159e-16 | 1.000000 | 1.15160e-16 | 1.000000 |
| PhCHCCH2+H  | 1.00914e-16 | 1.000000 | 1.00914e-16 | 1.000000 |
| rad13       | 2.62013e-17 | 1.000000 | 2.62015e-17 | 1.000000 |

|               |             |          |             |          |
|---------------|-------------|----------|-------------|----------|
| rad60syn      | 2.21193e-17 | 1.000000 | 2.21194e-17 | 1.000000 |
| rad28         | 1.73433e-17 | 1.000000 | 1.73434e-17 | 1.000000 |
| rad38         | 9.94704e-18 | 1.000000 | 9.94710e-18 | 1.000000 |
| rad7          | 9.07562e-18 | 1.000000 | 9.07567e-18 | 1.000000 |
| Ph+Allene     | 7.70897e-18 | 1.000000 | 7.70902e-18 | 1.000000 |
| rad60anti     | 7.17148e-18 | 1.000000 | 7.17152e-18 | 1.000000 |
| PAH7+H        | 3.99569e-19 | 1.000000 | 3.99571e-19 | 1.000000 |
| rad35         | 2.17792e-19 | 1.000000 | 2.17793e-19 | 1.000000 |
| rad33         | 1.92698e-19 | 1.000000 | 1.92699e-19 | 1.000000 |
| PAH3+H        | 1.56751e-19 | 1.000000 | 1.56752e-19 | 1.000000 |
| rad46         | 9.90662e-20 | 1.000000 | 9.90668e-20 | 1.000000 |
| rad59         | 4.64182e-20 | 1.000000 | 4.64184e-20 | 1.000000 |
| rad26         | 9.09306e-21 | 1.000000 | 9.09312e-21 | 1.000000 |
| PAH9+H        | 6.90855e-21 | 1.000000 | 6.90859e-21 | 1.000000 |
| rad3          | 8.72030e-22 | 1.000000 | 8.72035e-22 | 1.000000 |
| rad4          | 5.03337e-22 | 1.000000 | 5.03340e-22 | 1.000000 |
| rad50         | 6.13832e-24 | 1.000000 | 6.13836e-24 | 1.000000 |
| rad2          | 4.35962e-25 | 1.000000 | 4.35965e-25 | 1.000000 |
| rad10         | 5.93404e-26 | 1.000000 | 5.93408e-26 | 1.000000 |
| PhCCH+CH3     | 5.65634e-26 | 1.000000 | 5.65638e-26 | 1.000000 |
| rad1          | 4.05597e-26 | 1.000000 | 4.05599e-26 | 1.000000 |
| rad39         | 3.96440e-26 | 1.000000 | 3.96443e-26 | 1.000000 |
| rad58         | 6.59564e-27 | 1.000000 | 6.59568e-27 | 1.000000 |
| rad52         | 5.30455e-27 | 1.000000 | 5.30458e-27 | 1.000000 |
| rad14         | 1.18287e-27 | 1.000000 | 1.18288e-27 | 1.000000 |
| Ph+MeAc       | 4.05706e-28 | 1.000000 | 4.05709e-28 | 1.000000 |
| rad51         | 3.62745e-28 | 1.000000 | 3.62747e-28 | 1.000000 |
| rad12         | 1.90221e-28 | 1.000000 | 1.90222e-28 | 1.000000 |
| rad37         | 2.28694e-29 | 1.000000 | 2.28695e-29 | 1.000000 |
| rad70         | 1.56601e-29 | 1.000000 | 1.56602e-29 | 1.000000 |
| rad31         | 2.29633e-30 | 1.000000 | 2.29635e-30 | 1.000000 |
| rad47         | 1.69889e-30 | 1.000000 | 1.69890e-30 | 1.000000 |
| PhCCH3+H      | 8.40998e-31 | 1.000000 | 8.41003e-31 | 1.000000 |
| rad27         | 2.36299e-31 | 1.000000 | 2.36300e-31 | 1.000000 |
| rad54         | 1.38164e-31 | 1.000000 | 1.38165e-31 | 1.000000 |
| rad34         | 6.05425e-32 | 1.000000 | 6.05429e-32 | 1.000000 |
| rad19syn      | 5.45757e-32 | 1.000000 | 5.45760e-32 | 1.000000 |
| rad65         | 6.19487e-33 | 1.000000 | 6.19491e-33 | 1.000000 |
| PAH10+CH3     | 2.68949e-33 | 1.000000 | 2.68951e-33 | 1.000000 |
| rad55         | 3.56222e-34 | 1.000000 | 3.56224e-34 | 1.000000 |
| PhcycC3H3_A+H | 3.37627e-35 | 1.000000 | 3.37629e-35 | 1.000000 |
| rad5          | 2.45940e-35 | 1.000000 | 2.45942e-35 | 1.000000 |
| PAH1+H        | 2.07945e-35 | 1.000000 | 2.07947e-35 | 1.000000 |
| rad62         | 7.07745e-37 | 1.000000 | 7.07749e-37 | 1.000000 |
| rad43         | 9.81515e-40 | 1.000000 | 9.81521e-40 | 1.000000 |
| rad42         | 1.23235e-41 | 1.000000 | 1.23236e-41 | 1.000000 |
| rad41         | 3.92389e-45 | 1.000000 | 3.92391e-45 | 1.000000 |

1000000.00 Pa, 270.000000 K

=====

| Rate constant | True (fraction)     | Effective (fraction) |
|---------------|---------------------|----------------------|
| Total         | 8.04141e-24 (1.00 ) | 8.04134e-24 (1.00 )  |

| species     | PYtrue      | Cumul    | PYeffective | Cumul    |
|-------------|-------------|----------|-------------|----------|
| rad20       | 0.972712    | 0.972712 | 0.972720    | 0.972720 |
| rad21       | 0.0232140   | 0.995926 | 0.0232142   | 0.995934 |
| rad18       | 0.00380103  | 0.999727 | 0.00380107  | 0.999735 |
| rad22       | 0.000235798 | 0.999963 | 0.000235800 | 0.999971 |
| rad45       | 1.58041e-05 | 0.999979 | 1.58042e-05 | 0.999987 |
| Indene+H    | 9.67407e-06 | 0.999988 | 9.67416e-06 | 0.999997 |
| Benzyl+C2H2 | 8.61615e-06 | 0.999997 | 0.00000     | 0.999997 |
| rad24       | 1.85535e-06 | 0.999999 | 1.85537e-06 | 0.999998 |
| rad36       | 1.14852e-06 | 1.000000 | 1.14852e-06 | 1.000000 |
| rad11       | 4.17556e-07 | 1.000000 | 4.17559e-07 | 1.000000 |
| rad23       | 1.06235e-08 | 1.000000 | 1.06236e-08 | 1.000000 |
| rad6        | 6.15454e-11 | 1.000000 | 6.15459e-11 | 1.000000 |
| rad30       | 1.57712e-12 | 1.000000 | 1.57713e-12 | 1.000000 |
| rad8        | 3.76087e-13 | 1.000000 | 3.76090e-13 | 1.000000 |
| rad15       | 2.52957e-13 | 1.000000 | 2.52959e-13 | 1.000000 |
| rad25       | 1.55118e-15 | 1.000000 | 1.55119e-15 | 1.000000 |
| rad9        | 1.02883e-15 | 1.000000 | 1.02883e-15 | 1.000000 |
| PhCH2CCH+H  | 4.11197e-16 | 1.000000 | 4.11200e-16 | 1.000000 |
| PhCHCCH2+H  | 2.89262e-16 | 1.000000 | 2.89264e-16 | 1.000000 |
| rad13       | 6.39633e-17 | 1.000000 | 6.39638e-17 | 1.000000 |
| rad60syn    | 6.07078e-17 | 1.000000 | 6.07083e-17 | 1.000000 |
| rad28       | 4.98373e-17 | 1.000000 | 4.98377e-17 | 1.000000 |
| Ph+Allene   | 2.62275e-17 | 1.000000 | 2.62278e-17 | 1.000000 |
| rad38       | 2.42552e-17 | 1.000000 | 2.42554e-17 | 1.000000 |

|               |             |         |             |          |
|---------------|-------------|---------|-------------|----------|
| rad7          | 2.31035e-17 | 1.00000 | 2.31037e-17 | 1.000000 |
| rad60anti     | 2.03641e-17 | 1.00000 | 2.03643e-17 | 1.000000 |
| PAH7+H        | 1.30015e-18 | 1.00000 | 1.30016e-18 | 1.000000 |
| rad35         | 7.20382e-19 | 1.00000 | 7.20389e-19 | 1.000000 |
| PAH3+H        | 5.95479e-19 | 1.00000 | 5.95484e-19 | 1.000000 |
| rad33         | 4.82070e-19 | 1.00000 | 4.82074e-19 | 1.000000 |
| rad46         | 2.84896e-19 | 1.00000 | 2.84898e-19 | 1.000000 |
| rad59         | 1.72195e-19 | 1.00000 | 1.72197e-19 | 1.000000 |
| rad26         | 3.27469e-20 | 1.00000 | 3.27472e-20 | 1.000000 |
| PAH9+H        | 2.00440e-20 | 1.00000 | 2.00441e-20 | 1.000000 |
| rad3          | 2.96236e-21 | 1.00000 | 2.96238e-21 | 1.000000 |
| rad4          | 1.71289e-21 | 1.00000 | 1.71290e-21 | 1.000000 |
| rad50         | 2.86885e-23 | 1.00000 | 2.86887e-23 | 1.000000 |
| rad2          | 1.99755e-24 | 1.00000 | 1.99757e-24 | 1.000000 |
| PhCCH+CH3     | 3.06896e-25 | 1.00000 | 3.06898e-25 | 1.000000 |
| rad10         | 2.66713e-25 | 1.00000 | 2.66715e-25 | 1.000000 |
| rad1          | 1.87196e-25 | 1.00000 | 1.87197e-25 | 1.000000 |
| rad39         | 1.85046e-25 | 1.00000 | 1.85048e-25 | 1.000000 |
| rad58         | 4.40790e-26 | 1.00000 | 4.40793e-26 | 1.000000 |
| rad52         | 3.18442e-26 | 1.00000 | 3.18445e-26 | 1.000000 |
| rad14         | 6.02740e-27 | 1.00000 | 6.02745e-27 | 1.000000 |
| rad51         | 2.61123e-27 | 1.00000 | 2.61126e-27 | 1.000000 |
| Ph+MeAc       | 2.46593e-27 | 1.00000 | 2.46595e-27 | 1.000000 |
| rad12         | 9.35294e-28 | 1.00000 | 9.35302e-28 | 1.000000 |
| rad37         | 1.20682e-28 | 1.00000 | 1.20683e-28 | 1.000000 |
| rad70         | 1.13760e-28 | 1.00000 | 1.13761e-28 | 1.000000 |
| rad47         | 1.45033e-29 | 1.00000 | 1.45034e-29 | 1.000000 |
| rad31         | 8.52699e-30 | 1.00000 | 8.52706e-30 | 1.000000 |
| PhCCCH3+H     | 5.76186e-30 | 1.00000 | 5.76191e-30 | 1.000000 |
| rad27         | 1.48938e-30 | 1.00000 | 1.48939e-30 | 1.000000 |
| rad54         | 9.51869e-31 | 1.00000 | 9.51877e-31 | 1.000000 |
| rad34         | 4.74000e-31 | 1.00000 | 4.74005e-31 | 1.000000 |
| rad19syn      | 3.72906e-31 | 1.00000 | 3.72910e-31 | 1.000000 |
| rad65         | 4.98885e-32 | 1.00000 | 4.98889e-32 | 1.000000 |
| PAH10+CH3     | 1.83535e-32 | 1.00000 | 1.83536e-32 | 1.000000 |
| rad55         | 2.70369e-33 | 1.00000 | 2.70372e-33 | 1.000000 |
| PhcycC3H3_A+H | 2.65901e-34 | 1.00000 | 2.65903e-34 | 1.000000 |
| rad5          | 1.92207e-34 | 1.00000 | 1.92209e-34 | 1.000000 |
| PAH1+H        | 1.57509e-34 | 1.00000 | 1.57510e-34 | 1.000000 |
| rad62         | 6.12110e-36 | 1.00000 | 6.12115e-36 | 1.000000 |
| rad43         | 9.15315e-39 | 1.00000 | 9.15323e-39 | 1.000000 |
| rad42         | 1.17461e-40 | 1.00000 | 1.17462e-40 | 1.000000 |
| rad41         | 4.02617e-44 | 1.00000 | 4.02621e-44 | 1.000000 |

1000000.00 Pa, 280.000000 K

=====

| Rate constant | True (fraction)     | Effective (fraction) |
|---------------|---------------------|----------------------|
| Total         | 1.89357e-23 (1.00 ) | 1.89355e-23 (1.00 )  |

| species     | PYtrue      | Cumul    | PYeffective | Cumul    |
|-------------|-------------|----------|-------------|----------|
| rad20       | 0.969464    | 0.969464 | 0.969476    | 0.969476 |
| rad21       | 0.0258920   | 0.995356 | 0.0258923   | 0.995368 |
| rad18       | 0.00429196  | 0.999648 | 0.00429201  | 0.999660 |
| rad22       | 0.000301387 | 0.999949 | 0.000301391 | 0.999962 |
| rad45       | 2.14652e-05 | 0.999971 | 2.14655e-05 | 0.999983 |
| Indene+H    | 1.27553e-05 | 0.999984 | 1.27554e-05 | 0.999996 |
| Benzyl+C2H2 | 1.22198e-05 | 0.999996 | 0.00000     | 0.999996 |
| rad24       | 2.14029e-06 | 0.999998 | 2.14032e-06 | 0.999998 |
| rad36       | 1.56542e-06 | 0.999999 | 1.56544e-06 | 1.000000 |
| rad11       | 6.09890e-07 | 1.00000  | 6.09898e-07 | 1.00000  |
| rad23       | 1.67390e-08 | 1.00000  | 1.67392e-08 | 1.00000  |
| rad6        | 1.14697e-10 | 1.00000  | 1.14698e-10 | 1.00000  |
| rad30       | 2.89748e-12 | 1.00000  | 2.89752e-12 | 1.00000  |
| rad8        | 8.69226e-13 | 1.00000  | 8.69237e-13 | 1.00000  |
| rad15       | 4.92077e-13 | 1.00000  | 4.92083e-13 | 1.00000  |
| rad25       | 3.62654e-15 | 1.00000  | 3.62658e-15 | 1.00000  |
| rad9        | 3.01408e-15 | 1.00000  | 3.01412e-15 | 1.00000  |
| PhCH2CCH+H  | 1.35461e-15 | 1.00000  | 1.35462e-15 | 1.00000  |
| PhCHCCH2+H  | 7.95805e-16 | 1.00000  | 7.95815e-16 | 1.00000  |
| rad60syn    | 1.58390e-16 | 1.00000  | 1.58392e-16 | 1.00000  |
| rad13       | 1.52787e-16 | 1.00000  | 1.52788e-16 | 1.00000  |
| rad28       | 1.35583e-16 | 1.00000  | 1.35585e-16 | 1.00000  |
| Ph+Allene   | 8.42043e-17 | 1.00000  | 8.42053e-17 | 1.00000  |
| rad38       | 5.81570e-17 | 1.00000  | 5.81577e-17 | 1.00000  |
| rad7        | 5.76882e-17 | 1.00000  | 5.76889e-17 | 1.00000  |
| rad60anti   | 5.47833e-17 | 1.00000  | 5.47839e-17 | 1.00000  |
| PAH7+H      | 3.96521e-18 | 1.00000  | 3.96526e-18 | 1.00000  |
| rad35       | 2.23414e-18 | 1.00000  | 2.23416e-18 | 1.00000  |

|               |             |         |             |         |
|---------------|-------------|---------|-------------|---------|
| PAH3+H        | 2.09443e-18 | 1.00000 | 2.09445e-18 | 1.00000 |
| rad33         | 1.17208e-18 | 1.00000 | 1.17209e-18 | 1.00000 |
| rad46         | 7.97070e-19 | 1.00000 | 7.97080e-19 | 1.00000 |
| rad59         | 5.92063e-19 | 1.00000 | 5.92070e-19 | 1.00000 |
| rad26         | 1.09432e-19 | 1.00000 | 1.09433e-19 | 1.00000 |
| PAH9+H        | 5.72613e-20 | 1.00000 | 5.72620e-20 | 1.00000 |
| rad3          | 9.69166e-21 | 1.00000 | 9.69178e-21 | 1.00000 |
| rad4          | 5.61628e-21 | 1.00000 | 5.61635e-21 | 1.00000 |
| rad50         | 1.26117e-22 | 1.00000 | 1.26118e-22 | 1.00000 |
| rad2          | 8.65699e-24 | 1.00000 | 8.65710e-24 | 1.00000 |
| PhCCH+CH3     | 1.54467e-24 | 1.00000 | 1.54469e-24 | 1.00000 |
| rad10         | 1.10822e-24 | 1.00000 | 1.10824e-24 | 1.00000 |
| rad1          | 8.18303e-25 | 1.00000 | 8.18313e-25 | 1.00000 |
| rad39         | 8.13170e-25 | 1.00000 | 8.13180e-25 | 1.00000 |
| rad58         | 2.56154e-25 | 1.00000 | 2.56157e-25 | 1.00000 |
| rad52         | 1.75711e-25 | 1.00000 | 1.75713e-25 | 1.00000 |
| rad14         | 2.86917e-26 | 1.00000 | 2.86920e-26 | 1.00000 |
| rad51         | 1.69207e-26 | 1.00000 | 1.69209e-26 | 1.00000 |
| Ph+MeAc       | 1.36713e-26 | 1.00000 | 1.36715e-26 | 1.00000 |
| rad12         | 4.22217e-27 | 1.00000 | 4.22223e-27 | 1.00000 |
| rad70         | 7.16571e-28 | 1.00000 | 7.16580e-28 | 1.00000 |
| rad37         | 5.80019e-28 | 1.00000 | 5.80026e-28 | 1.00000 |
| rad47         | 1.08770e-28 | 1.00000 | 1.08771e-28 | 1.00000 |
| PhCCCH3+H     | 3.57393e-29 | 1.00000 | 3.57398e-29 | 1.00000 |
| rad31         | 3.08095e-29 | 1.00000 | 3.08099e-29 | 1.00000 |
| rad27         | 8.58463e-30 | 1.00000 | 8.58473e-30 | 1.00000 |
| rad54         | 5.75609e-30 | 1.00000 | 5.75616e-30 | 1.00000 |
| rad34         | 3.18164e-30 | 1.00000 | 3.18168e-30 | 1.00000 |
| rad19syn      | 2.24937e-30 | 1.00000 | 2.24940e-30 | 1.00000 |
| rad65         | 3.56564e-31 | 1.00000 | 3.56568e-31 | 1.00000 |
| PAH10+CH3     | 1.09471e-31 | 1.00000 | 1.09472e-31 | 1.00000 |
| rad55         | 1.77203e-32 | 1.00000 | 1.77205e-32 | 1.00000 |
| PhcycC3H3_A+H | 1.80275e-33 | 1.00000 | 1.80277e-33 | 1.00000 |
| rad5          | 1.32883e-33 | 1.00000 | 1.32885e-33 | 1.00000 |
| PAH1+H        | 1.02388e-33 | 1.00000 | 1.02390e-33 | 1.00000 |
| rad62         | 4.58059e-35 | 1.00000 | 4.58065e-35 | 1.00000 |
| rad43         | 7.37716e-38 | 1.00000 | 7.37725e-38 | 1.00000 |
| rad42         | 9.57595e-40 | 1.00000 | 9.57607e-40 | 1.00000 |
| rad41         | 3.53228e-43 | 1.00000 | 3.53233e-43 | 1.00000 |

1000000.00 Pa, 290.000000 K

=====

| Rate constant | True (fraction)     | Effective (fraction) |
|---------------|---------------------|----------------------|
| Total         | 4.20015e-23 (1.00 ) | 4.20008e-23 (1.00 )  |

| species     | PYtrue      | Cumul    | PYeffective | Cumul    |
|-------------|-------------|----------|-------------|----------|
| rad20       | 0.965838    | 0.965838 | 0.965855    | 0.965855 |
| rad21       | 0.0288621   | 0.994700 | 0.0288626   | 0.994718 |
| rad18       | 0.00484644  | 0.999547 | 0.00484652  | 0.999564 |
| rad22       | 0.000384797 | 0.999931 | 0.000384803 | 0.999949 |
| rad45       | 2.90407e-05 | 0.999960 | 2.90412e-05 | 0.999978 |
| Benzyl+C2H2 | 1.72020e-05 | 0.999978 | 0.00000     | 0.999978 |
| Indene+H    | 1.68242e-05 | 0.999994 | 1.68245e-05 | 0.999995 |
| rad24       | 2.45884e-06 | 0.999997 | 2.45888e-06 | 0.999997 |
| rad36       | 2.12718e-06 | 0.999999 | 2.12721e-06 | 0.999999 |
| rad11       | 8.86285e-07 | 1.000000 | 8.86300e-07 | 1.000000 |
| rad23       | 2.62996e-08 | 1.000000 | 2.63001e-08 | 1.000000 |
| rad6        | 2.11325e-10 | 1.000000 | 2.11328e-10 | 1.000000 |
| rad30       | 5.23938e-12 | 1.000000 | 5.23948e-12 | 1.000000 |
| rad8        | 1.91766e-12 | 1.000000 | 1.91769e-12 | 1.000000 |
| rad15       | 9.37756e-13 | 1.000000 | 9.37772e-13 | 1.000000 |
| rad9        | 8.32050e-15 | 1.000000 | 8.32064e-15 | 1.000000 |
| rad25       | 8.25221e-15 | 1.000000 | 8.25235e-15 | 1.000000 |
| PhCH2CCH+H  | 4.14992e-15 | 1.000000 | 4.14999e-15 | 1.000000 |
| PhCHCCH2+H  | 2.10648e-15 | 1.000000 | 2.10651e-15 | 1.000000 |
| rad60syn    | 3.94726e-16 | 1.000000 | 3.94733e-16 | 1.000000 |
| rad13       | 3.56783e-16 | 1.000000 | 3.56789e-16 | 1.000000 |
| rad28       | 3.50888e-16 | 1.000000 | 3.50894e-16 | 1.000000 |
| Ph+Allene   | 2.56239e-16 | 1.000000 | 2.56243e-16 | 1.000000 |
| rad7        | 1.41188e-16 | 1.000000 | 1.41191e-16 | 1.000000 |
| rad60anti   | 1.40352e-16 | 1.000000 | 1.40354e-16 | 1.000000 |
| rad38       | 1.37367e-16 | 1.000000 | 1.37369e-16 | 1.000000 |
| PAH7+H      | 1.14011e-17 | 1.000000 | 1.14013e-17 | 1.000000 |
| PAH3+H      | 6.86930e-18 | 1.000000 | 6.86942e-18 | 1.000000 |
| rad35       | 6.53478e-18 | 1.000000 | 6.53489e-18 | 1.000000 |
| rad33       | 2.76848e-18 | 1.000000 | 2.76852e-18 | 1.000000 |
| rad46       | 2.17777e-18 | 1.000000 | 2.17781e-18 | 1.000000 |
| rad59       | 1.90042e-18 | 1.000000 | 1.90045e-18 | 1.000000 |

|               |             |          |             |         |
|---------------|-------------|----------|-------------|---------|
| rad26         | 3.41703e-19 | 1.000000 | 3.41709e-19 | 1.00000 |
| PAH9+H        | 1.61398e-19 | 1.000000 | 1.61400e-19 | 1.00000 |
| rad3          | 3.05239e-20 | 1.000000 | 3.05244e-20 | 1.00000 |
| rad4          | 1.77359e-20 | 1.000000 | 1.77362e-20 | 1.00000 |
| rad50         | 5.25674e-22 | 1.000000 | 5.25683e-22 | 1.00000 |
| rad2          | 3.54554e-23 | 1.000000 | 3.54560e-23 | 1.00000 |
| PhCCH+CH3     | 7.21584e-24 | 1.000000 | 7.21596e-24 | 1.00000 |
| rad10         | 4.27817e-24 | 1.000000 | 4.27824e-24 | 1.00000 |
| rad1          | 3.38532e-24 | 1.000000 | 3.38537e-24 | 1.00000 |
| rad39         | 3.38341e-24 | 1.000000 | 3.38347e-24 | 1.00000 |
| rad58         | 1.31161e-24 | 1.000000 | 1.31163e-24 | 1.00000 |
| rad52         | 8.99065e-25 | 1.000000 | 8.99081e-25 | 1.00000 |
| rad14         | 1.27581e-25 | 1.000000 | 1.27583e-25 | 1.00000 |
| rad51         | 9.97091e-26 | 1.000000 | 9.97108e-26 | 1.00000 |
| Ph+MeAc       | 6.93359e-26 | 1.000000 | 6.93371e-26 | 1.00000 |
| rad12         | 1.75768e-26 | 1.000000 | 1.75771e-26 | 1.00000 |
| rad70         | 3.96606e-27 | 1.000000 | 3.96613e-27 | 1.00000 |
| rad37         | 2.55103e-27 | 1.000000 | 2.55107e-27 | 1.00000 |
| rad47         | 7.26515e-28 | 1.000000 | 7.26528e-28 | 1.00000 |
| PhCCCH3+H     | 2.01379e-28 | 1.000000 | 2.01383e-28 | 1.00000 |
| rad31         | 1.08331e-28 | 1.000000 | 1.08333e-28 | 1.00000 |
| rad27         | 4.53264e-29 | 1.000000 | 4.53271e-29 | 1.00000 |
| rad54         | 3.08735e-29 | 1.000000 | 3.08741e-29 | 1.00000 |
| rad34         | 1.85979e-29 | 1.000000 | 1.85983e-29 | 1.00000 |
| rad19syn      | 1.20856e-29 | 1.000000 | 1.20858e-29 | 1.00000 |
| rad65         | 2.29045e-30 | 1.000000 | 2.29049e-30 | 1.00000 |
| PAH10+CH3     | 5.77240e-31 | 1.000000 | 5.77250e-31 | 1.00000 |
| rad55         | 1.01690e-31 | 1.000000 | 1.01692e-31 | 1.00000 |
| PhcycC3H3_A+H | 1.06746e-32 | 1.000000 | 1.06748e-32 | 1.00000 |
| rad5          | 8.19893e-33 | 1.000000 | 8.19907e-33 | 1.00000 |
| PAH1+H        | 5.80147e-33 | 1.000000 | 5.80157e-33 | 1.00000 |
| rad62         | 3.00724e-34 | 1.000000 | 3.00729e-34 | 1.00000 |
| rad43         | 5.21100e-37 | 1.000000 | 5.21109e-37 | 1.00000 |
| rad42         | 6.78773e-39 | 1.000000 | 6.78785e-39 | 1.00000 |
| rad41         | 2.69278e-42 | 1.000000 | 2.69283e-42 | 1.00000 |

1000000.00 Pa, 300.000000 K

=====

| Rate constant | True (fraction)     | Effective (fraction) |
|---------------|---------------------|----------------------|
| Total         | 1.17740e-22 (1.00 ) | 1.17730e-22 (1.00 )  |

| species     | PYtrue      | Cumul    | PYeffective | Cumul    |
|-------------|-------------|----------|-------------|----------|
| rad20       | 0.942584    | 0.942584 | 0.942669    | 0.942669 |
| rad21       | 0.0469097   | 0.989494 | 0.0469139   | 0.989583 |
| rad18       | 0.00867765  | 0.998171 | 0.00867843  | 0.998261 |
| rad22       | 0.00148983  | 0.999661 | 0.00148997  | 0.999751 |
| rad45       | 0.000150509 | 0.999812 | 0.000150522 | 0.999902 |
| Benzyl+C2H2 | 8.93208e-05 | 0.999901 | 0.00000     | 0.999902 |
| Indene+H    | 8.15114e-05 | 0.999983 | 8.15187e-05 | 0.999983 |
| rad11       | 6.49101e-06 | 0.999989 | 6.49159e-06 | 0.999990 |
| rad36       | 5.73744e-06 | 0.999995 | 5.73795e-06 | 0.999996 |
| rad24       | 4.43519e-06 | 0.999999 | 4.43559e-06 | 1.00000  |
| rad23       | 4.85004e-07 | 1.000000 | 4.85047e-07 | 1.00000  |
| rad6        | 9.55362e-09 | 1.000000 | 9.55448e-09 | 1.00000  |
| rad30       | 1.36519e-10 | 1.000000 | 1.36531e-10 | 1.00000  |
| rad9        | 5.56740e-11 | 1.000000 | 5.56789e-11 | 1.00000  |
| rad15       | 2.71978e-11 | 1.000000 | 2.72002e-11 | 1.00000  |
| rad25       | 1.32752e-12 | 1.000000 | 1.32764e-12 | 1.00000  |
| PhCHCCH2+H  | 1.02985e-12 | 1.000000 | 1.02994e-12 | 1.00000  |
| PhCH2CCH+H  | 7.20936e-13 | 1.000000 | 7.21000e-13 | 1.00000  |
| Ph+Allene   | 2.21498e-13 | 1.000000 | 2.21517e-13 | 1.00000  |
| rad38       | 1.98179e-13 | 1.000000 | 1.98197e-13 | 1.00000  |
| rad13       | 8.88351e-14 | 1.000000 | 8.88430e-14 | 1.00000  |
| rad7        | 7.61548e-14 | 1.000000 | 7.61616e-14 | 1.00000  |
| rad28       | 6.30004e-14 | 1.000000 | 6.30060e-14 | 1.00000  |
| rad60syn    | 6.23372e-14 | 1.000000 | 6.23427e-14 | 1.00000  |
| rad60anti   | 2.64098e-14 | 1.000000 | 2.64122e-14 | 1.00000  |
| rad46       | 1.58684e-14 | 1.000000 | 1.58698e-14 | 1.00000  |
| PAH9+H      | 9.97968e-15 | 1.000000 | 9.98057e-15 | 1.00000  |
| PAH3+H      | 7.92162e-15 | 1.000000 | 7.92233e-15 | 1.00000  |
| rad35       | 5.16098e-15 | 1.000000 | 5.16144e-15 | 1.00000  |
| PAH7+H      | 4.32966e-15 | 1.000000 | 4.33005e-15 | 1.00000  |
| rad59       | 1.58756e-15 | 1.000000 | 1.58770e-15 | 1.00000  |
| rad33       | 6.06992e-16 | 1.000000 | 6.07046e-16 | 1.00000  |
| rad50       | 4.50355e-16 | 1.000000 | 4.50395e-16 | 1.00000  |
| rad26       | 2.20589e-16 | 1.000000 | 2.20609e-16 | 1.00000  |
| rad3        | 1.24527e-16 | 1.000000 | 1.24538e-16 | 1.00000  |
| rad4        | 7.01380e-17 | 1.000000 | 7.01443e-17 | 1.00000  |



|               |             |          |             |         |
|---------------|-------------|----------|-------------|---------|
| rad12         | 3.46006e-17 | 1.000000 | 3.46037e-17 | 1.00000 |
| rad19anti     | 3.43893e-17 | 1.000000 | 3.43923e-17 | 1.00000 |
| rad39         | 2.75761e-17 | 1.000000 | 2.75786e-17 | 1.00000 |
| rad51         | 1.23672e-17 | 1.000000 | 1.23683e-17 | 1.00000 |
| rad52         | 1.12581e-17 | 1.000000 | 1.12591e-17 | 1.00000 |
| PhCCH+CH3     | 3.59342e-18 | 1.000000 | 3.59374e-18 | 1.00000 |
| rad8          | 3.41049e-18 | 1.000000 | 3.41079e-18 | 1.00000 |
| rad2          | 2.73529e-18 | 1.000000 | 2.73553e-18 | 1.00000 |
| rad10         | 4.97534e-19 | 1.000000 | 4.97578e-19 | 1.00000 |
| rad19syn      | 3.08298e-19 | 1.000000 | 3.08326e-19 | 1.00000 |
| rad1          | 2.51067e-19 | 1.000000 | 2.51089e-19 | 1.00000 |
| Ph+MeAc       | 1.88879e-19 | 1.000000 | 1.88896e-19 | 1.00000 |
| rad58         | 7.06551e-20 | 1.000000 | 7.06614e-20 | 1.00000 |
| rad65         | 4.66261e-20 | 1.000000 | 4.66302e-20 | 1.00000 |
| PhCCCH3+H     | 2.84625e-20 | 1.000000 | 2.84650e-20 | 1.00000 |
| rad37         | 2.56191e-20 | 1.000000 | 2.56214e-20 | 1.00000 |
| rad67         | 1.92691e-20 | 1.000000 | 1.92708e-20 | 1.00000 |
| rad14         | 1.69360e-20 | 1.000000 | 1.69375e-20 | 1.00000 |
| rad70         | 1.15420e-20 | 1.000000 | 1.15431e-20 | 1.00000 |
| rad47         | 6.08161e-21 | 1.000000 | 6.08216e-21 | 1.00000 |
| PAH10+CH3     | 6.01992e-21 | 1.000000 | 6.02046e-21 | 1.00000 |
| PAH1+H        | 2.69954e-21 | 1.000000 | 2.69978e-21 | 1.00000 |
| rad73         | 1.53801e-21 | 1.000000 | 1.53814e-21 | 1.00000 |
| rad34         | 9.23807e-22 | 1.000000 | 9.23890e-22 | 1.00000 |
| rad71         | 5.75282e-22 | 1.000000 | 5.75334e-22 | 1.00000 |
| rad54         | 4.46614e-22 | 1.000000 | 4.46654e-22 | 1.00000 |
| PhcycC3H3_A+H | 1.97437e-22 | 1.000000 | 1.97455e-22 | 1.00000 |
| rad5          | 1.68772e-22 | 1.000000 | 1.68787e-22 | 1.00000 |
| rad27         | 7.20022e-23 | 1.000000 | 7.20086e-23 | 1.00000 |
| rad64         | 2.16678e-23 | 1.000000 | 2.16698e-23 | 1.00000 |
| rad55         | 2.00698e-23 | 1.000000 | 2.00715e-23 | 1.00000 |
| rad62         | 8.91414e-24 | 1.000000 | 8.91494e-24 | 1.00000 |
| rad68syn      | 4.50978e-24 | 1.000000 | 4.51019e-24 | 1.00000 |
| rad68anti     | 3.03266e-24 | 1.000000 | 3.03293e-24 | 1.00000 |
| PAH8+H        | 2.16927e-24 | 1.000000 | 2.16947e-24 | 1.00000 |
| rad43         | 1.61271e-24 | 1.000000 | 1.61285e-24 | 1.00000 |
| rad53         | 1.09383e-24 | 1.000000 | 1.09393e-24 | 1.00000 |
| rad31         | 1.01231e-24 | 1.000000 | 1.01240e-24 | 1.00000 |
| rad61         | 9.66913e-25 | 1.000000 | 9.67000e-25 | 1.00000 |
| rad72         | 8.90132e-25 | 1.000000 | 8.90211e-25 | 1.00000 |
| rad40syn      | 5.48064e-25 | 1.000000 | 5.48113e-25 | 1.00000 |
| rad56         | 4.94666e-25 | 1.000000 | 4.94710e-25 | 1.00000 |
| rad42         | 2.37047e-25 | 1.000000 | 2.37068e-25 | 1.00000 |
| rad40anti     | 2.34238e-25 | 1.000000 | 2.34259e-25 | 1.00000 |
| rad41         | 3.49037e-26 | 1.000000 | 3.49068e-26 | 1.00000 |

1000000.00 Pa, 310.000000 K

=====

| Rate constant | True (fraction)     | Effective (fraction) |
|---------------|---------------------|----------------------|
| Total         | 2.44453e-22 (1.00 ) | 2.44445e-22 (1.00 )  |

| species     | PYtrue      | Cumul    | PYeffective | Cumul    |
|-------------|-------------|----------|-------------|----------|
| rad20       | 0.957311    | 0.957311 | 0.957343    | 0.957343 |
| rad21       | 0.0357657   | 0.993077 | 0.0357669   | 0.993110 |
| rad18       | 0.00617513  | 0.999252 | 0.00617534  | 0.999285 |
| rad22       | 0.000623974 | 0.999876 | 0.000623994 | 0.999909 |
| rad45       | 5.24586e-05 | 0.999928 | 5.24604e-05 | 0.999962 |
| Benzyl+C2H2 | 3.33323e-05 | 0.999962 | 0.00000     | 0.999962 |
| Indene+H    | 2.92444e-05 | 0.999991 | 2.92454e-05 | 0.999991 |
| rad36       | 3.88625e-06 | 0.999995 | 3.88638e-06 | 0.999995 |
| rad24       | 3.20521e-06 | 0.999998 | 3.20532e-06 | 0.999998 |
| rad11       | 1.83919e-06 | 1.000000 | 1.83925e-06 | 1.000000 |
| rad23       | 6.42468e-08 | 1.000000 | 6.42489e-08 | 1.000000 |
| rad6        | 6.91731e-10 | 1.000000 | 6.91754e-10 | 1.000000 |
| rad30       | 1.63652e-11 | 1.000000 | 1.63657e-11 | 1.000000 |
| rad8        | 8.25922e-12 | 1.000000 | 8.25950e-12 | 1.000000 |
| rad15       | 3.21481e-12 | 1.000000 | 3.21492e-12 | 1.000000 |
| rad9        | 5.41419e-14 | 1.000000 | 5.41437e-14 | 1.000000 |
| rad25       | 3.95163e-14 | 1.000000 | 3.95176e-14 | 1.000000 |
| PhCH2CCH+H  | 3.21565e-14 | 1.000000 | 3.21576e-14 | 1.000000 |
| PhCHCCH2+H  | 1.32486e-14 | 1.000000 | 1.32491e-14 | 1.000000 |
| rad60syn    | 2.16976e-15 | 1.000000 | 2.16984e-15 | 1.000000 |
| rad28       | 2.05530e-15 | 1.000000 | 2.05537e-15 | 1.000000 |
| Ph+Allene   | 2.04883e-15 | 1.000000 | 2.04890e-15 | 1.000000 |
| rad13       | 1.81312e-15 | 1.000000 | 1.81318e-15 | 1.000000 |
| rad60anti   | 8.09202e-16 | 1.000000 | 8.09229e-16 | 1.000000 |
| rad7        | 7.94519e-16 | 1.000000 | 7.94545e-16 | 1.000000 |
| rad38       | 7.39092e-16 | 1.000000 | 7.39117e-16 | 1.000000 |

|               |             |          |             |          |
|---------------|-------------|----------|-------------|----------|
| PAH7+H        | 8.05079e-17 | 1.000000 | 8.05106e-17 | 1.000000 |
| PAH3+H        | 6.13029e-17 | 1.000000 | 6.13049e-17 | 1.000000 |
| rad35         | 4.78148e-17 | 1.000000 | 4.78164e-17 | 1.000000 |
| rad59         | 1.63016e-17 | 1.000000 | 1.63021e-17 | 1.000000 |
| rad46         | 1.53722e-17 | 1.000000 | 1.53727e-17 | 1.000000 |
| rad33         | 1.41562e-17 | 1.000000 | 1.41567e-17 | 1.000000 |
| rad26         | 2.78049e-18 | 1.000000 | 2.78058e-18 | 1.000000 |
| PAH9+H        | 1.24393e-18 | 1.000000 | 1.24397e-18 | 1.000000 |
| rad3          | 2.69633e-19 | 1.000000 | 2.69642e-19 | 1.000000 |
| rad4          | 1.57748e-19 | 1.000000 | 1.57753e-19 | 1.000000 |
| rad50         | 7.96525e-21 | 1.000000 | 7.96552e-21 | 1.000000 |
| rad2          | 5.00770e-22 | 1.000000 | 5.00787e-22 | 1.000000 |
| PhCCH+CH3     | 1.26511e-22 | 1.000000 | 1.26515e-22 | 1.000000 |
| rad10         | 5.19274e-23 | 1.000000 | 5.19292e-23 | 1.000000 |
| rad39         | 5.07444e-23 | 1.000000 | 5.07461e-23 | 1.000000 |
| rad1          | 4.90033e-23 | 1.000000 | 4.90049e-23 | 1.000000 |
| rad58         | 2.45919e-23 | 1.000000 | 2.45927e-23 | 1.000000 |
| rad52         | 1.92274e-23 | 1.000000 | 1.92281e-23 | 1.000000 |
| rad51         | 2.68032e-24 | 1.000000 | 2.68041e-24 | 1.000000 |
| rad14         | 2.06030e-24 | 1.000000 | 2.06037e-24 | 1.000000 |
| Ph+MeAc       | 1.38465e-24 | 1.000000 | 1.38470e-24 | 1.000000 |
| rad12         | 2.42508e-25 | 1.000000 | 2.42516e-25 | 1.000000 |
| rad70         | 8.62068e-26 | 1.000000 | 8.62097e-26 | 1.000000 |
| rad37         | 3.84792e-26 | 1.000000 | 3.84805e-26 | 1.000000 |
| rad47         | 2.38252e-26 | 1.000000 | 2.38260e-26 | 1.000000 |
| PhCCCH3+H     | 4.87808e-27 | 1.000000 | 4.87824e-27 | 1.000000 |
| rad31         | 1.23457e-27 | 1.000000 | 1.23461e-27 | 1.000000 |
| rad27         | 9.82545e-28 | 1.000000 | 9.82577e-28 | 1.000000 |
| rad54         | 6.43061e-28 | 1.000000 | 6.43083e-28 | 1.000000 |
| rad34         | 4.41732e-28 | 1.000000 | 4.41747e-28 | 1.000000 |
| rad19syn      | 2.54745e-28 | 1.000000 | 2.54754e-28 | 1.000000 |
| rad65         | 7.12076e-29 | 1.000000 | 7.12100e-29 | 1.000000 |
| PAH10+CH3     | 1.15390e-29 | 1.000000 | 1.15394e-29 | 1.000000 |
| rad55         | 2.35527e-30 | 1.000000 | 2.35535e-30 | 1.000000 |
| PhcycC3H3_A+H | 2.61639e-31 | 1.000000 | 2.61648e-31 | 1.000000 |
| rad5          | 2.29348e-31 | 1.000000 | 2.29355e-31 | 1.000000 |
| PAH1+H        | 1.29785e-31 | 1.000000 | 1.29790e-31 | 1.000000 |
| rad62         | 9.17212e-33 | 1.000000 | 9.17243e-33 | 1.000000 |
| rad43         | 1.83417e-35 | 1.000000 | 1.83423e-35 | 1.000000 |
| rad42         | 2.36393e-37 | 1.000000 | 2.36401e-37 | 1.000000 |
| rad41         | 1.08150e-40 | 1.000000 | 1.08154e-40 | 1.000000 |

1000000.00 Pa, 400.000000 K

=====

| Rate constant | True (fraction)     | Effective (fraction) |
|---------------|---------------------|----------------------|
| Total         | 3.60269e-20 (1.00 ) | 3.59793e-20 (1.00 )  |

| species     | PYtrue      | Cumul    | PYeffective | Cumul    |
|-------------|-------------|----------|-------------|----------|
| rad20       | 0.847207    | 0.847207 | 0.848328    | 0.848328 |
| rad21       | 0.110648    | 0.957855 | 0.110794    | 0.959122 |
| rad18       | 0.0262645   | 0.984120 | 0.0262993   | 0.985421 |
| rad22       | 0.0116257   | 0.995745 | 0.0116411   | 0.997062 |
| rad45       | 0.00162396  | 0.997369 | 0.00162611  | 0.998689 |
| Benzyl+C2H2 | 0.00132131  | 0.998690 | 0.000000    | 0.998689 |
| Indene+H    | 0.00105645  | 0.999747 | 0.00105785  | 0.999746 |
| rad11       | 0.000118635 | 0.999866 | 0.000118792 | 0.999865 |
| rad36       | 6.75212e-05 | 0.999933 | 6.76105e-05 | 0.999933 |
| rad23       | 5.30698e-05 | 0.999986 | 5.31400e-05 | 0.999986 |
| rad24       | 1.29685e-05 | 0.999999 | 1.29856e-05 | 0.999999 |
| rad6        | 8.87116e-07 | 1.00000  | 8.88290e-07 | 1.000000 |
| rad30       | 1.02168e-08 | 1.00000  | 1.02303e-08 | 1.000000 |
| PAH9+H      | 9.19463e-09 | 1.00000  | 9.20680e-09 | 1.000000 |
| rad9        | 8.01784e-09 | 1.00000  | 8.02845e-09 | 1.000000 |
| rad38       | 7.71174e-09 | 1.00000  | 7.72195e-09 | 1.000000 |
| rad15       | 1.96811e-09 | 1.00000  | 1.97071e-09 | 1.000000 |
| rad46       | 1.74045e-09 | 1.00000  | 1.74275e-09 | 1.000000 |
| rad35       | 1.58784e-09 | 1.00000  | 1.58994e-09 | 1.000000 |
| PhCH2CCH+H  | 1.26700e-09 | 1.00000  | 1.26868e-09 | 1.000000 |
| Ph+Allene   | 1.13866e-09 | 1.00000  | 1.14017e-09 | 1.000000 |
| PhCHCCH2+H  | 1.12047e-09 | 1.00000  | 1.12195e-09 | 1.000000 |
| PAH7+H      | 6.11735e-10 | 1.00000  | 6.12544e-10 | 1.000000 |
| rad50       | 5.78104e-10 | 1.00000  | 5.78869e-10 | 1.000000 |
| rad28       | 4.21156e-10 | 1.00000  | 4.21714e-10 | 1.000000 |
| rad25       | 2.44815e-10 | 1.00000  | 2.45139e-10 | 1.000000 |
| rad39       | 1.72277e-10 | 1.00000  | 1.72505e-10 | 1.000000 |
| rad51       | 8.96149e-11 | 1.00000  | 8.97335e-11 | 1.000000 |
| rad7        | 6.01439e-11 | 1.00000  | 6.02235e-11 | 1.000000 |
| rad52       | 3.65116e-11 | 1.00000  | 3.65599e-11 | 1.000000 |

|               |             |         |             |          |
|---------------|-------------|---------|-------------|----------|
| PhCCH+CH3     | 3.14652e-11 | 1.00000 | 3.15068e-11 | 1.000000 |
| rad13         | 1.94516e-11 | 1.00000 | 1.94773e-11 | 1.000000 |
| PAH3+H        | 1.84576e-11 | 1.00000 | 1.84820e-11 | 1.000000 |
| rad26         | 1.82671e-11 | 1.00000 | 1.82913e-11 | 1.000000 |
| rad60syn      | 1.65483e-11 | 1.00000 | 1.65702e-11 | 1.000000 |
| Ph+MeAc       | 1.12989e-11 | 1.00000 | 1.13139e-11 | 1.000000 |
| rad19anti     | 1.06002e-11 | 1.00000 | 1.06143e-11 | 1.000000 |
| rad60anti     | 7.90363e-12 | 1.00000 | 7.91409e-12 | 1.000000 |
| PhCCCH3+H     | 3.57646e-12 | 1.00000 | 3.58119e-12 | 1.000000 |
| PAH10+CH3     | 2.87355e-12 | 1.00000 | 2.87735e-12 | 1.000000 |
| rad37         | 2.59970e-12 | 1.00000 | 2.60314e-12 | 1.000000 |
| rad59         | 2.36818e-12 | 1.00000 | 2.37132e-12 | 1.000000 |
| rad65         | 1.95861e-12 | 1.00000 | 1.96120e-12 | 1.000000 |
| rad10         | 1.74397e-12 | 1.00000 | 1.74628e-12 | 1.000000 |
| rad2          | 1.72621e-12 | 1.00000 | 1.72850e-12 | 1.000000 |
| PAH1+H        | 1.33093e-12 | 1.00000 | 1.33270e-12 | 1.000000 |
| rad73         | 5.72319e-13 | 1.00000 | 5.73076e-13 | 1.000000 |
| rad71         | 5.65881e-13 | 1.00000 | 5.66629e-13 | 1.000000 |
| rad19syn      | 3.45387e-13 | 1.00000 | 3.45844e-13 | 1.000000 |
| rad3          | 3.34651e-13 | 1.00000 | 3.35094e-13 | 1.000000 |
| rad67         | 2.80582e-13 | 1.00000 | 2.80953e-13 | 1.000000 |
| rad70         | 2.39639e-13 | 1.00000 | 2.39957e-13 | 1.000000 |
| rad4          | 1.97315e-13 | 1.00000 | 1.97576e-13 | 1.000000 |
| rad1          | 1.90838e-13 | 1.00000 | 1.91091e-13 | 1.000000 |
| PhcycC3H3_A+H | 1.65368e-13 | 1.00000 | 1.65587e-13 | 1.000000 |
| rad54         | 1.37497e-13 | 1.00000 | 1.37679e-13 | 1.000000 |
| rad33         | 1.12244e-13 | 1.00000 | 1.12392e-13 | 1.000000 |
| rad58         | 8.32413e-14 | 1.00000 | 8.33514e-14 | 1.000000 |
| rad34         | 5.15994e-14 | 1.00000 | 5.16677e-14 | 1.000000 |
| rad64         | 2.00776e-14 | 1.00000 | 2.01041e-14 | 1.000000 |
| rad72         | 9.51877e-15 | 1.00000 | 9.53137e-15 | 1.000000 |
| rad55         | 9.27537e-15 | 1.00000 | 9.28764e-15 | 1.000000 |
| rad62         | 6.37968e-15 | 1.00000 | 6.38812e-15 | 1.000000 |
| rad12         | 5.38949e-15 | 1.00000 | 5.39663e-15 | 1.000000 |
| PAH8+H        | 4.92744e-15 | 1.00000 | 4.93396e-15 | 1.000000 |
| rad61         | 2.93355e-15 | 1.00000 | 2.93743e-15 | 1.000000 |
| rad68syn      | 2.29899e-15 | 1.00000 | 2.30203e-15 | 1.000000 |
| rad53         | 1.79546e-15 | 1.00000 | 1.79783e-15 | 1.000000 |
| rad56         | 1.55934e-15 | 1.00000 | 1.56140e-15 | 1.000000 |
| rad68anti     | 1.50656e-15 | 1.00000 | 1.50855e-15 | 1.000000 |
| rad43         | 1.48931e-15 | 1.00000 | 1.49128e-15 | 1.000000 |
| rad40syn      | 6.83856e-16 | 1.00000 | 6.84761e-16 | 1.000000 |
| rad47         | 6.32206e-16 | 1.00000 | 6.33043e-16 | 1.000000 |
| rad14         | 5.04332e-16 | 1.00000 | 5.04999e-16 | 1.000000 |
| rad42         | 4.44940e-16 | 1.00000 | 4.45528e-16 | 1.000000 |
| rad40anti     | 3.80551e-16 | 1.00000 | 3.81054e-16 | 1.000000 |
| rad5          | 2.22608e-16 | 1.00000 | 2.22903e-16 | 1.000000 |
| rad27         | 1.06106e-16 | 1.00000 | 1.06247e-16 | 1.000000 |
| rad41         | 8.68381e-17 | 1.00000 | 8.69530e-17 | 1.000000 |
| rad8          | 6.22580e-17 | 1.00000 | 6.23404e-17 | 1.000000 |
| rad31         | 3.77151e-20 | 1.00000 | 3.77650e-20 | 1.000000 |

1000000.00 Pa, 500.000000 K

=====

| Rate constant | True (fraction)     | Effective (fraction) |
|---------------|---------------------|----------------------|
| Total         | 1.22595e-18 (1.00 ) | 1.21209e-18 (1.00 )  |

| species     | PYtrue      | Cumul    | PYeffective | Cumul    |
|-------------|-------------|----------|-------------|----------|
| rad20       | 0.676008    | 0.676008 | 0.683738    | 0.683738 |
| rad21       | 0.177019    | 0.853027 | 0.179043    | 0.862781 |
| rad18       | 0.0611974   | 0.914224 | 0.0618971   | 0.924678 |
| rad22       | 0.0535866   | 0.967811 | 0.0541993   | 0.978877 |
| Benzyl+C2H2 | 0.0113051   | 0.979116 | 0.00000     | 0.978877 |
| Indene+H    | 0.0102320   | 0.989348 | 0.0103490   | 0.989226 |
| rad45       | 0.00749358  | 0.996842 | 0.00757926  | 0.996806 |
| rad23       | 0.00158842  | 0.998430 | 0.00160658  | 0.998412 |
| rad11       | 0.00106070  | 0.999491 | 0.00107283  | 0.999485 |
| rad36       | 0.000368280 | 0.999859 | 0.000372491 | 0.999858 |
| rad6        | 3.52378e-05 | 0.999894 | 3.56407e-05 | 0.999893 |
| rad24       | 3.14476e-05 | 0.999926 | 3.18072e-05 | 0.999925 |
| PAH9+H      | 2.72565e-05 | 0.999953 | 2.75682e-05 | 0.999953 |
| rad38       | 1.38957e-05 | 0.999967 | 1.40545e-05 | 0.999967 |
| Ph+Allene   | 4.61708e-06 | 0.999972 | 4.66988e-06 | 0.999971 |
| rad46       | 4.53166e-06 | 0.999976 | 4.58347e-06 | 0.999976 |
| PhCH2CCH+H  | 4.08002e-06 | 0.999980 | 4.12667e-06 | 0.999980 |
| rad35       | 4.03608e-06 | 0.999984 | 4.08223e-06 | 0.999984 |
| PAH7+H      | 4.02732e-06 | 0.999988 | 4.07337e-06 | 0.999988 |
| rad50       | 3.85579e-06 | 0.999992 | 3.89988e-06 | 0.999992 |

|               |             |          |             |          |
|---------------|-------------|----------|-------------|----------|
| PhCHCCH2+H    | 2.69737e-06 | 0.999995 | 2.72822e-06 | 0.999995 |
| rad39         | 1.66686e-06 | 0.999996 | 1.68591e-06 | 0.999996 |
| rad51         | 1.08546e-06 | 0.999998 | 1.09787e-06 | 0.999998 |
| rad9          | 6.53772e-07 | 0.999998 | 6.61248e-07 | 0.999998 |
| rad30         | 3.91340e-07 | 0.999999 | 3.95815e-07 | 0.999999 |
| rad52         | 3.28517e-07 | 0.999999 | 3.32274e-07 | 0.999999 |
| PhCCH+CH3     | 2.02944e-07 | 0.999999 | 2.05264e-07 | 0.999999 |
| rad28         | 1.39249e-07 | 0.999999 | 1.40841e-07 | 0.999999 |
| rad19anti     | 1.36209e-07 | 0.999999 | 1.37766e-07 | 0.999999 |
| PAH3+H        | 1.20321e-07 | 0.999999 | 1.21697e-07 | 1.000000 |
| Ph+MeAc       | 1.01349e-07 | 1.000000 | 1.02508e-07 | 1.000000 |
| PAH10+CH3     | 7.19231e-08 | 1.000000 | 7.27455e-08 | 1.000000 |
| rad15         | 4.66347e-08 | 1.000000 | 4.71680e-08 | 1.000000 |
| PAH1+H        | 3.59712e-08 | 1.000000 | 3.63825e-08 | 1.000000 |
| rad37         | 3.28620e-08 | 1.000000 | 3.32377e-08 | 1.000000 |
| rad71         | 3.21579e-08 | 1.000000 | 3.25256e-08 | 1.000000 |
| PhCCCH3+H     | 3.05498e-08 | 1.000000 | 3.08992e-08 | 1.000000 |
| rad65         | 2.78206e-08 | 1.000000 | 2.81387e-08 | 1.000000 |
| rad73         | 2.39438e-08 | 1.000000 | 2.42176e-08 | 1.000000 |
| rad7          | 1.77253e-08 | 1.000000 | 1.79279e-08 | 1.000000 |
| rad25         | 1.17428e-08 | 1.000000 | 1.18771e-08 | 1.000000 |
| rad59         | 1.14496e-08 | 1.000000 | 1.15805e-08 | 1.000000 |
| rad60syn      | 1.00786e-08 | 1.000000 | 1.01939e-08 | 1.000000 |
| rad26         | 9.76479e-09 | 1.000000 | 9.87644e-09 | 1.000000 |
| rad67         | 8.33758e-09 | 1.000000 | 8.43291e-09 | 1.000000 |
| rad60anti     | 6.17355e-09 | 1.000000 | 6.24414e-09 | 1.000000 |
| rad19syn      | 6.04401e-09 | 1.000000 | 6.11312e-09 | 1.000000 |
| rad70         | 4.56845e-09 | 1.000000 | 4.62069e-09 | 1.000000 |
| PhcycC3H3_A+H | 4.01807e-09 | 1.000000 | 4.06402e-09 | 1.000000 |
| rad54         | 2.47522e-09 | 1.000000 | 2.50353e-09 | 1.000000 |
| rad58         | 1.28956e-09 | 1.000000 | 1.30431e-09 | 1.000000 |
| rad13         | 1.27859e-09 | 1.000000 | 1.29321e-09 | 1.000000 |
| rad34         | 1.23954e-09 | 1.000000 | 1.25371e-09 | 1.000000 |
| rad2          | 1.23729e-09 | 1.000000 | 1.25144e-09 | 1.000000 |
| rad10         | 1.18549e-09 | 1.000000 | 1.19905e-09 | 1.000000 |
| rad72         | 9.98196e-10 | 1.000000 | 1.00961e-09 | 1.000000 |
| rad64         | 6.73470e-10 | 1.000000 | 6.81171e-10 | 1.000000 |
| PAH8+H        | 3.67309e-10 | 1.000000 | 3.71509e-10 | 1.000000 |
| rad62         | 2.43053e-10 | 1.000000 | 2.45832e-10 | 1.000000 |
| rad55         | 1.89069e-10 | 1.000000 | 1.91231e-10 | 1.000000 |
| rad1          | 1.70661e-10 | 1.000000 | 1.72612e-10 | 1.000000 |
| rad3          | 1.56223e-10 | 1.000000 | 1.58009e-10 | 1.000000 |
| rad61         | 1.47302e-10 | 1.000000 | 1.48987e-10 | 1.000000 |
| rad68syn      | 1.08436e-10 | 1.000000 | 1.09676e-10 | 1.000000 |
| rad4          | 9.68266e-11 | 1.000000 | 9.79338e-11 | 1.000000 |
| rad68anti     | 7.04614e-11 | 1.000000 | 7.12671e-11 | 1.000000 |
| rad56         | 6.43760e-11 | 1.000000 | 6.51121e-11 | 1.000000 |
| rad53         | 5.88492e-11 | 1.000000 | 5.95221e-11 | 1.000000 |
| rad43         | 5.06078e-11 | 1.000000 | 5.11864e-11 | 1.000000 |
| rad40syn      | 4.26771e-11 | 1.000000 | 4.31651e-11 | 1.000000 |
| rad40anti     | 2.56483e-11 | 1.000000 | 2.59415e-11 | 1.000000 |
| rad42         | 2.36505e-11 | 1.000000 | 2.39209e-11 | 1.000000 |
| rad47         | 1.16908e-11 | 1.000000 | 1.18245e-11 | 1.000000 |
| rad33         | 6.75623e-12 | 1.000000 | 6.83348e-12 | 1.000000 |
| rad41         | 4.53629e-12 | 1.000000 | 4.58816e-12 | 1.000000 |
| rad12         | 7.58425e-13 | 1.000000 | 7.67097e-13 | 1.000000 |
| rad14         | 2.65630e-13 | 1.000000 | 2.68668e-13 | 1.000000 |
| rad5          | 1.67346e-13 | 1.000000 | 1.69259e-13 | 1.000000 |
| rad27         | 6.99407e-14 | 1.000000 | 7.07404e-14 | 1.000000 |
| rad8          | 1.15093e-15 | 1.000000 | 1.16409e-15 | 1.000000 |
| rad31         | 7.43237e-16 | 1.000000 | 7.51735e-16 | 1.000000 |

1000000.00 Pa, 600.000000 K

=====

Rate constant | True (fraction) | Effective (fraction)

-----  
 Total | 1.36947e-17 (1.00) | 1.29377e-17 (1.00)

species | PYtrue | Cumul | PYeffective | Cumul

-----  
 rad20 | 0.457658 | 0.457658 | 0.484436 | 0.484436  
 rad21 | 0.178037 | 0.635695 | 0.188454 | 0.672890  
 rad22 | 0.134016 | 0.769711 | 0.141857 | 0.814747  
 rad18 | 0.0925727 | 0.862284 | 0.0979892 | 0.912736  
 Indene+H | 0.0575354 | 0.919819 | 0.0609019 | 0.973638  
 Benzyl+C2H2 | 0.0552765 | 0.975096 | 0.000000 | 0.973638  
 rad45 | 0.0124601 | 0.987556 | 0.0131892 | 0.986827  
 rad23 | 0.00478330 | 0.992339 | 0.00506317 | 0.991890  
 rad11 | 0.00443328 | 0.996772 | 0.00469267 | 0.996583  
 rad36 | 0.000760397 | 0.997533 | 0.000804889 | 0.997388

|               |             |          |             |          |
|---------------|-------------|----------|-------------|----------|
| PAH9+H        | 0.000661373 | 0.998194 | 0.000700070 | 0.998088 |
| rad6          | 0.000487601 | 0.998682 | 0.000516131 | 0.998604 |
| rad38         | 0.000328778 | 0.999010 | 0.000348015 | 0.998952 |
| rad50         | 0.000125305 | 0.999136 | 0.000132637 | 0.999085 |
| PAH7+H        | 0.000124812 | 0.999261 | 0.000132115 | 0.999217 |
| Ph+Allene     | 0.000121825 | 0.999382 | 0.000128953 | 0.999346 |
| rad46         | 0.000117548 | 0.999500 | 0.000124426 | 0.999470 |
| PhCH2CCH+H    | 0.000108918 | 0.999609 | 0.000115291 | 0.999586 |
| rad35         | 9.29761e-05 | 0.999702 | 9.84162e-05 | 0.999684 |
| PhCHCCH2+H    | 7.35810e-05 | 0.999775 | 7.78863e-05 | 0.999762 |
| rad24         | 7.19564e-05 | 0.999847 | 7.61667e-05 | 0.999838 |
| rad39         | 5.74732e-05 | 0.999905 | 6.08360e-05 | 0.999899 |
| rad51         | 3.99211e-05 | 0.999945 | 4.22569e-05 | 0.999941 |
| rad52         | 1.13524e-05 | 0.999956 | 1.20166e-05 | 0.999953 |
| rad9          | 7.86434e-06 | 0.999964 | 8.32449e-06 | 0.999962 |
| rad30         | 5.59817e-06 | 0.999970 | 5.92573e-06 | 0.999967 |
| PhCCH+CH3     | 5.09685e-06 | 0.999975 | 5.39507e-06 | 0.999973 |
| rad19anti     | 4.36272e-06 | 0.999979 | 4.61799e-06 | 0.999978 |
| PAH3+H        | 3.98836e-06 | 0.999983 | 4.22172e-06 | 0.999982 |
| Ph+MeAc       | 2.96477e-06 | 0.999986 | 3.13824e-06 | 0.999985 |
| PAH10+CH3     | 2.86242e-06 | 0.999989 | 3.02990e-06 | 0.999988 |
| rad71         | 1.53068e-06 | 0.999990 | 1.62024e-06 | 0.999990 |
| PAH1+H        | 1.48941e-06 | 0.999992 | 1.57656e-06 | 0.999991 |
| rad37         | 1.09743e-06 | 0.999993 | 1.16164e-06 | 0.999992 |
| rad73         | 1.08683e-06 | 0.999994 | 1.15042e-06 | 0.999993 |
| rad65         | 1.02381e-06 | 0.999995 | 1.08371e-06 | 0.999994 |
| PhCCCH3+H     | 9.01837e-07 | 0.999996 | 9.54605e-07 | 0.999995 |
| rad28         | 6.86085e-07 | 0.999997 | 7.26229e-07 | 0.999996 |
| rad59         | 3.65452e-07 | 0.999997 | 3.86835e-07 | 0.999997 |
| rad15         | 3.37543e-07 | 0.999997 | 3.57293e-07 | 0.999997 |
| rad67         | 3.35219e-07 | 0.999998 | 3.54833e-07 | 0.999997 |
| rad7          | 3.33216e-07 | 0.999998 | 3.52713e-07 | 0.999998 |
| rad60syn      | 2.84747e-07 | 0.999998 | 3.01408e-07 | 0.999998 |
| rad19syn      | 2.06188e-07 | 0.999999 | 2.18252e-07 | 0.999998 |
| rad70         | 1.84250e-07 | 0.999999 | 1.95031e-07 | 0.999998 |
| rad60anti     | 1.77542e-07 | 0.999999 | 1.87930e-07 | 0.999999 |
| PhcycC3H3_A+H | 1.49397e-07 | 0.999999 | 1.58138e-07 | 0.999999 |
| rad25         | 1.48143e-07 | 0.999999 | 1.56811e-07 | 0.999999 |
| rad54         | 8.43314e-08 | 0.999999 | 8.92657e-08 | 0.999999 |
| rad26         | 5.44860e-08 | 0.999999 | 5.76741e-08 | 0.999999 |
| rad34         | 5.21736e-08 | 0.999999 | 5.52263e-08 | 0.999999 |
| rad72         | 5.18618e-08 | 0.999999 | 5.48963e-08 | 0.999999 |
| rad58         | 4.86334e-08 | 0.999999 | 5.14790e-08 | 0.999999 |
| rad64         | 2.90472e-08 | 0.999999 | 3.07468e-08 | 0.999999 |
| rad13         | 2.20353e-08 | 1.000000 | 2.33246e-08 | 0.999999 |
| rad47         | 2.05863e-08 | 1.000000 | 2.17908e-08 | 0.999999 |
| PAH8+H        | 1.85838e-08 | 1.000000 | 1.96712e-08 | 0.999999 |
| rad62         | 1.08069e-08 | 1.000000 | 1.14392e-08 | 0.999999 |
| rad2          | 9.21809e-09 | 1.000000 | 9.75745e-09 | 0.999999 |
| rad61         | 6.77234e-09 | 1.000000 | 7.16859e-09 | 0.999999 |
| rad55         | 6.68180e-09 | 1.000000 | 7.07276e-09 | 0.999999 |
| rad10         | 6.65947e-09 | 1.000000 | 7.04913e-09 | 0.999999 |
| rad68syn      | 5.11117e-09 | 1.000000 | 5.41023e-09 | 0.999999 |
| rad68anti     | 3.31672e-09 | 1.000000 | 3.51078e-09 | 0.999999 |
| rad56         | 2.73959e-09 | 1.000000 | 2.89989e-09 | 0.999999 |
| rad53         | 2.36861e-09 | 1.000000 | 2.50719e-09 | 0.999999 |
| rad43         | 2.20826e-09 | 1.000000 | 2.33747e-09 | 0.999999 |
| rad3          | 2.14469e-09 | 1.000000 | 2.27018e-09 | 0.999999 |
| rad40syn      | 2.10179e-09 | 1.000000 | 2.22477e-09 | 0.999999 |
| rad1          | 1.51456e-09 | 1.000000 | 1.60318e-09 | 0.999999 |
| rad4          | 1.40222e-09 | 1.000000 | 1.48427e-09 | 0.999999 |
| rad40anti     | 1.27792e-09 | 1.000000 | 1.35269e-09 | 0.999999 |
| rad42         | 1.11757e-09 | 1.000000 | 1.18296e-09 | 0.999999 |
| rad41         | 2.14073e-10 | 1.000000 | 2.26598e-10 | 0.999999 |
| rad33         | 1.33371e-10 | 1.000000 | 1.41175e-10 | 0.999999 |
| rad12         | 3.11985e-11 | 1.000000 | 3.30239e-11 | 0.999999 |
| rad14         | 2.50328e-12 | 1.000000 | 2.64974e-12 | 0.999999 |
| rad5          | 1.01803e-12 | 1.000000 | 1.07760e-12 | 0.999999 |
| rad27         | 3.50920e-13 | 1.000000 | 3.71452e-13 | 0.999999 |
| rad31         | 3.19788e-13 | 1.000000 | 3.38499e-13 | 0.999999 |
| rad8          | 3.94935e-14 | 1.000000 | 4.18043e-14 | 0.999999 |

1000000.00 Pa, 700.000000 K

=====

| Rate constant | True (fraction)     | Effective (fraction) |
|---------------|---------------------|----------------------|
| Total         | 8.02260e-17 (1.00 ) | 6.78190e-17 (1.00 )  |

| species | PYtrue | Cumul | PYeffective | Cumul |
|---------|--------|-------|-------------|-------|
| -----   |        |       |             |       |

|               |             |          |             |          |
|---------------|-------------|----------|-------------|----------|
| rad20         | 0.271527    | 0.271527 | 0.321200    | 0.321200 |
| rad22         | 0.181795    | 0.453322 | 0.215053    | 0.536253 |
| Benzyl+C2H2   | 0.154650    | 0.607972 | 0.000000    | 0.536253 |
| Indene+H      | 0.145428    | 0.753400 | 0.172033    | 0.708286 |
| rad21         | 0.126536    | 0.879936 | 0.149684    | 0.857970 |
| rad18         | 0.0813157   | 0.961252 | 0.0961917   | 0.954162 |
| rad45         | 0.0119048   | 0.973156 | 0.0140827   | 0.968244 |
| rad11         | 0.00871062  | 0.981867 | 0.0103042   | 0.978549 |
| rad23         | 0.00836778  | 0.990235 | 0.00989860  | 0.988447 |
| rad6          | 0.00287065  | 0.993106 | 0.00339581  | 0.991843 |
| PAH9+H        | 0.00195958  | 0.995065 | 0.00231807  | 0.994161 |
| rad38         | 0.000972682 | 0.996038 | 0.00115063  | 0.995312 |
| rad36         | 0.000920144 | 0.996958 | 0.00108848  | 0.996400 |
| rad50         | 0.000394762 | 0.997353 | 0.000466981 | 0.996867 |
| PAH7+H        | 0.000388881 | 0.997742 | 0.000460024 | 0.997327 |
| Ph+Allene     | 0.000384200 | 0.998126 | 0.000454486 | 0.997782 |
| rad46         | 0.000354342 | 0.998480 | 0.000419165 | 0.998201 |
| PhCH2CCH+H    | 0.000345650 | 0.998826 | 0.000408884 | 0.998610 |
| rad35         | 0.000272481 | 0.999098 | 0.000322329 | 0.998932 |
| PhCHCCH2+H    | 0.000247034 | 0.999345 | 0.000292227 | 0.999224 |
| rad39         | 0.000183126 | 0.999528 | 0.000216627 | 0.999441 |
| rad24         | 0.000151129 | 0.999680 | 0.000178777 | 0.999620 |
| rad51         | 0.000128764 | 0.999808 | 0.000152320 | 0.999772 |
| rad52         | 3.61667e-05 | 0.999844 | 4.27831e-05 | 0.999815 |
| rad9          | 3.42820e-05 | 0.999879 | 4.05536e-05 | 0.999855 |
| rad30         | 2.38130e-05 | 0.999903 | 2.81694e-05 | 0.999884 |
| PhCCH+CH3     | 1.52525e-05 | 0.999918 | 1.80429e-05 | 0.999902 |
| rad19anti     | 1.41210e-05 | 0.999932 | 1.67043e-05 | 0.999918 |
| PAH3+H        | 1.28134e-05 | 0.999945 | 1.51575e-05 | 0.999933 |
| PAH10+CH3     | 9.35749e-06 | 0.999954 | 1.10694e-05 | 0.999944 |
| Ph+MeAc       | 9.14043e-06 | 0.999963 | 1.08126e-05 | 0.999955 |
| rad71         | 5.13356e-06 | 0.999968 | 6.07270e-06 | 0.999961 |
| PAH1+H        | 4.91788e-06 | 0.999973 | 5.81756e-06 | 0.999967 |
| rad73         | 3.60797e-06 | 0.999977 | 4.26802e-06 | 0.999971 |
| rad7          | 3.57771e-06 | 0.999981 | 4.23222e-06 | 0.999976 |
| rad37         | 3.45560e-06 | 0.999984 | 4.08778e-06 | 0.999980 |
| rad65         | 3.30094e-06 | 0.999987 | 3.90481e-06 | 0.999984 |
| PhCCCH3+H     | 2.78885e-06 | 0.999990 | 3.29904e-06 | 0.999987 |
| rad28         | 1.23930e-06 | 0.999991 | 1.46602e-06 | 0.999988 |
| rad59         | 1.17793e-06 | 0.999992 | 1.39342e-06 | 0.999990 |
| rad67         | 1.11124e-06 | 0.999994 | 1.31453e-06 | 0.999991 |
| rad60syn      | 9.88193e-07 | 0.999995 | 1.16897e-06 | 0.999992 |
| rad15         | 8.67695e-07 | 0.999995 | 1.02643e-06 | 0.999993 |
| rad47         | 6.76365e-07 | 0.999996 | 8.00100e-07 | 0.999994 |
| rad19syn      | 6.53759e-07 | 0.999997 | 7.73359e-07 | 0.999995 |
| rad25         | 6.09595e-07 | 0.999997 | 7.21115e-07 | 0.999996 |
| rad60anti     | 6.08400e-07 | 0.999998 | 7.19702e-07 | 0.999996 |
| rad70         | 6.06404e-07 | 0.999999 | 7.17341e-07 | 0.999997 |
| PhcycC3H3_A+H | 4.82650e-07 | 0.999999 | 5.70947e-07 | 0.999998 |
| rad54         | 2.67055e-07 | 0.999999 | 3.15911e-07 | 0.999998 |
| rad72         | 1.77685e-07 | 1.000000 | 2.10190e-07 | 0.999998 |
| rad34         | 1.73184e-07 | 1.000000 | 2.04867e-07 | 0.999998 |
| rad13         | 1.65738e-07 | 1.000000 | 1.96058e-07 | 0.999999 |
| rad58         | 1.57746e-07 | 1.000000 | 1.86604e-07 | 0.999999 |
| rad64         | 9.67273e-08 | 1.000000 | 1.14423e-07 | 0.999999 |
| rad26         | 8.88968e-08 | 1.000000 | 1.05160e-07 | 0.999999 |
| PAH8+H        | 6.42223e-08 | 1.000000 | 7.59712e-08 | 0.999999 |
| rad62         | 3.62701e-08 | 1.000000 | 4.29054e-08 | 0.999999 |
| rad2          | 2.87425e-08 | 1.000000 | 3.40006e-08 | 0.999999 |
| rad61         | 2.28550e-08 | 1.000000 | 2.70362e-08 | 0.999999 |
| rad55         | 2.13320e-08 | 1.000000 | 2.52345e-08 | 0.999999 |
| rad68syn      | 1.73776e-08 | 1.000000 | 2.05567e-08 | 0.999999 |
| rad3          | 1.13841e-08 | 1.000000 | 1.34668e-08 | 0.999999 |
| rad68anti     | 1.12732e-08 | 1.000000 | 1.33355e-08 | 0.999999 |
| rad10         | 1.08832e-08 | 1.000000 | 1.28742e-08 | 0.999999 |
| rad56         | 9.11983e-09 | 1.000000 | 1.07882e-08 | 0.999999 |
| rad4          | 8.01484e-09 | 1.000000 | 9.48108e-09 | 0.999999 |
| rad53         | 7.78589e-09 | 1.000000 | 9.21025e-09 | 0.999999 |
| rad43         | 7.38740e-09 | 1.000000 | 8.73886e-09 | 0.999999 |
| rad40syn      | 7.21752e-09 | 1.000000 | 8.53790e-09 | 0.999999 |
| rad1          | 5.52230e-09 | 1.000000 | 6.53256e-09 | 0.999999 |
| rad40anti     | 4.40026e-09 | 1.000000 | 5.20524e-09 | 0.999999 |
| rad42         | 3.80161e-09 | 1.000000 | 4.49708e-09 | 0.999999 |
| rad33         | 1.56013e-09 | 1.000000 | 1.84555e-09 | 0.999999 |
| rad12         | 7.85388e-10 | 1.000000 | 9.29067e-10 | 0.999999 |
| rad41         | 7.28282e-10 | 1.000000 | 8.61515e-10 | 0.999999 |
| rad31         | 1.47329e-11 | 1.000000 | 1.74281e-11 | 0.999999 |
| rad14         | 1.27480e-11 | 1.000000 | 1.50802e-11 | 0.999999 |
| rad8          | 2.74579e-12 | 1.000000 | 3.24810e-12 | 0.999999 |
| rad5          | 2.53419e-12 | 1.000000 | 2.99780e-12 | 0.999999 |

rad27 | 7.86372e-13 1.00000 | 9.30232e-13 0.999999

1000000.00 Pa, 800.000000 K

=====  
Rate constant | True (fraction) | Effective (fraction)  
-----  
Total | 3.12228e-16 (1.00 ) | 2.24061e-16 (1.00 )

| species       | PYtrue      | Cumul    | PYeffective | Cumul    |
|---------------|-------------|----------|-------------|----------|
| Benzyl+C2H2   | 0.282380    | 0.282380 | 0.000000    | 0.000000 |
| Indene+H      | 0.211431    | 0.493811 | 0.294629    | 0.294629 |
| rad20         | 0.176600    | 0.670411 | 0.246091    | 0.540720 |
| rad22         | 0.147595    | 0.818006 | 0.205673    | 0.746393 |
| rad21         | 0.0860514   | 0.904057 | 0.119912    | 0.866305 |
| rad18         | 0.0457946   | 0.949852 | 0.0638145   | 0.930119 |
| rad23         | 0.0121182   | 0.961970 | 0.0168867   | 0.947006 |
| rad45         | 0.0113932   | 0.973363 | 0.0158763   | 0.962882 |
| rad11         | 0.00886875  | 0.982232 | 0.0123585   | 0.975241 |
| rad6          | 0.00795243  | 0.990185 | 0.0110817   | 0.986323 |
| PAH9+H        | 0.00264737  | 0.992832 | 0.00368910  | 0.990012 |
| rad38         | 0.00131429  | 0.994146 | 0.00183145  | 0.991843 |
| rad36         | 0.00110177  | 0.995248 | 0.00153531  | 0.993379 |
| Ph+Allene     | 0.000667191 | 0.995915 | 0.000929727 | 0.994308 |
| PhCH2CCH+H    | 0.000611083 | 0.996526 | 0.000851541 | 0.995160 |
| rad50         | 0.000548501 | 0.997075 | 0.000764333 | 0.995924 |
| PAH7+H        | 0.000537897 | 0.997613 | 0.000749556 | 0.996674 |
| PhCHCCH2+H    | 0.000495200 | 0.998108 | 0.000690059 | 0.997364 |
| rad46         | 0.000482820 | 0.998591 | 0.000672807 | 0.998037 |
| rad35         | 0.000366739 | 0.998957 | 0.000511049 | 0.998548 |
| rad39         | 0.000255841 | 0.999213 | 0.000356512 | 0.998904 |
| rad24         | 0.000247635 | 0.999461 | 0.000345078 | 0.999249 |
| rad51         | 0.000180815 | 0.999642 | 0.000251964 | 0.999501 |
| rad9          | 8.98951e-05 | 0.999732 | 0.000125268 | 0.999626 |
| rad30         | 5.58626e-05 | 0.999787 | 7.78442e-05 | 0.999704 |
| rad52         | 5.04793e-05 | 0.999838 | 7.03426e-05 | 0.999775 |
| rad19anti     | 2.40915e-05 | 0.999862 | 3.35714e-05 | 0.999808 |
| PhCCH+CH3     | 2.32983e-05 | 0.999885 | 3.24661e-05 | 0.999841 |
| PAH3+H        | 1.93274e-05 | 0.999905 | 2.69884e-05 | 0.999868 |
| rad7          | 1.66135e-05 | 0.999921 | 2.31508e-05 | 0.999891 |
| Ph+MeAc       | 1.35073e-05 | 0.999935 | 1.88224e-05 | 0.999910 |
| PAH10+CH3     | 1.32489e-05 | 0.999948 | 1.84622e-05 | 0.999928 |
| rad71         | 7.38146e-06 | 0.999955 | 1.02860e-05 | 0.999938 |
| PAH1+H        | 6.98821e-06 | 0.999962 | 9.73803e-06 | 0.999948 |
| rad73         | 5.15342e-06 | 0.999968 | 7.18127e-06 | 0.999955 |
| rad37         | 4.80529e-06 | 0.999972 | 6.69615e-06 | 0.999962 |
| rad65         | 4.63235e-06 | 0.999977 | 6.45515e-06 | 0.999968 |
| PhCCCH3+H     | 4.08958e-06 | 0.999981 | 5.69881e-06 | 0.999974 |
| rad28         | 2.86189e-06 | 0.999984 | 3.98803e-06 | 0.999978 |
| rad47         | 1.95588e-06 | 0.999986 | 2.72551e-06 | 0.999981 |
| rad60syn      | 1.88144e-06 | 0.999988 | 2.62177e-06 | 0.999983 |
| rad59         | 1.84577e-06 | 0.999990 | 2.57207e-06 | 0.999986 |
| rad67         | 1.80627e-06 | 0.999991 | 2.51703e-06 | 0.999989 |
| rad25         | 1.21395e-06 | 0.999993 | 1.69163e-06 | 0.999990 |
| rad60anti     | 1.13061e-06 | 0.999994 | 1.57550e-06 | 0.999992 |
| rad15         | 1.07119e-06 | 0.999995 | 1.49270e-06 | 0.999993 |
| rad19syn      | 9.21688e-07 | 0.999996 | 1.28437e-06 | 0.999995 |
| rad70         | 8.65265e-07 | 0.999997 | 1.20574e-06 | 0.999996 |
| rad13         | 7.49507e-07 | 0.999997 | 1.04443e-06 | 0.999997 |
| PhcycC3H3_A+H | 6.84158e-07 | 0.999998 | 9.53371e-07 | 0.999998 |
| rad54         | 3.75973e-07 | 0.999999 | 5.23916e-07 | 0.999998 |
| rad72         | 2.59010e-07 | 0.999999 | 3.60929e-07 | 0.999999 |
| rad34         | 2.47552e-07 | 0.999999 | 3.44963e-07 | 0.999999 |
| rad58         | 2.24312e-07 | 0.999999 | 3.12578e-07 | 0.999999 |
| rad64         | 1.38053e-07 | 0.999999 | 1.92376e-07 | 1.000000 |
| rad26         | 1.19899e-07 | 0.999999 | 1.67078e-07 | 1.000000 |
| PAH8+H        | 9.36318e-08 | 1.000000 | 1.30475e-07 | 1.000000 |
| rad2          | 6.17694e-08 | 1.000000 | 8.60754e-08 | 1.000000 |
| rad62         | 5.21525e-08 | 1.000000 | 7.26743e-08 | 1.000000 |
| rad3          | 4.34902e-08 | 1.000000 | 6.06033e-08 | 1.000000 |
| rad61         | 3.29039e-08 | 1.000000 | 4.58513e-08 | 1.000000 |
| rad4          | 3.27722e-08 | 1.000000 | 4.56679e-08 | 1.000000 |
| rad55         | 3.00966e-08 | 1.000000 | 4.19394e-08 | 1.000000 |
| rad68syn      | 2.51054e-08 | 1.000000 | 3.49842e-08 | 1.000000 |
| rad68anti     | 1.62837e-08 | 1.000000 | 2.26913e-08 | 1.000000 |
| rad10         | 1.47955e-08 | 1.000000 | 2.06174e-08 | 1.000000 |
| rad33         | 1.47942e-08 | 1.000000 | 2.06157e-08 | 1.000000 |
| rad1          | 1.43948e-08 | 1.000000 | 2.00591e-08 | 1.000000 |
| rad12         | 1.35475e-08 | 1.000000 | 1.88783e-08 | 1.000000 |
| rad56         | 1.31009e-08 | 1.000000 | 1.82560e-08 | 1.000000 |

|           |             |          |             |         |
|-----------|-------------|----------|-------------|---------|
| rad53     | 1.11157e-08 | 1.000000 | 1.54897e-08 | 1.00000 |
| rad43     | 1.07359e-08 | 1.000000 | 1.49604e-08 | 1.00000 |
| rad40syn  | 1.04856e-08 | 1.000000 | 1.46116e-08 | 1.00000 |
| rad40anti | 6.40293e-09 | 1.000000 | 8.92244e-09 | 1.00000 |
| rad42     | 5.50243e-09 | 1.000000 | 7.66760e-09 | 1.00000 |
| rad41     | 1.06500e-09 | 1.000000 | 1.48407e-09 | 1.00000 |
| rad8      | 2.59210e-10 | 1.000000 | 3.61207e-10 | 1.00000 |
| rad31     | 8.49354e-11 | 1.000000 | 1.18357e-10 | 1.00000 |
| rad14     | 6.84681e-11 | 1.000000 | 9.54099e-11 | 1.00000 |
| rad5      | 4.86286e-12 | 1.000000 | 6.77636e-12 | 1.00000 |
| rad27     | 2.25422e-12 | 1.000000 | 3.14125e-12 | 1.00000 |

1000000.00 Pa, 900.000000 K

| Rate constant | True (fraction)     | Effective (fraction) |
|---------------|---------------------|----------------------|
| Total         | 9.21769e-16 (1.00 ) | 5.48148e-16 (1.00 )  |

| species       | PYtrue      | Cumul    | PYeffective | Cumul    |
|---------------|-------------|----------|-------------|----------|
| Benzyl+C2H2   | 0.405330    | 0.405330 | 0.00000     | 0.00000  |
| Indene+H      | 0.236261    | 0.641591 | 0.397297    | 0.397297 |
| rad20         | 0.131647    | 0.773238 | 0.221378    | 0.618675 |
| rad22         | 0.0884697   | 0.861708 | 0.148771    | 0.767446 |
| rad21         | 0.0615243   | 0.923232 | 0.103460    | 0.870906 |
| rad18         | 0.0217757   | 0.945008 | 0.0366181   | 0.907524 |
| rad23         | 0.0128985   | 0.957906 | 0.0216901   | 0.929214 |
| rad6          | 0.0126112   | 0.970517 | 0.0212070   | 0.950421 |
| rad45         | 0.0110144   | 0.981532 | 0.0185219   | 0.968943 |
| rad11         | 0.00603455  | 0.987566 | 0.0101477   | 0.979091 |
| PAH9+H        | 0.00283296  | 0.990399 | 0.00476392  | 0.983855 |
| rad38         | 0.00140479  | 0.991804 | 0.00236230  | 0.986217 |
| Ph+Allene     | 0.00132149  | 0.993126 | 0.00222223  | 0.988439 |
| PhCH2CCH+H    | 0.00127037  | 0.994396 | 0.00213626  | 0.990576 |
| rad36         | 0.00111214  | 0.995508 | 0.00187018  | 0.992446 |
| PhCHCCH2+H    | 0.00104780  | 0.996556 | 0.00176198  | 0.994208 |
| rad50         | 0.000597367 | 0.997153 | 0.00100454  | 0.995212 |
| PAH7+H        | 0.000590988 | 0.997744 | 0.000993808 | 0.996206 |
| rad46         | 0.000519134 | 0.998263 | 0.000872979 | 0.997079 |
| rad35         | 0.000392419 | 0.998656 | 0.000659894 | 0.997739 |
| rad39         | 0.000280387 | 0.998936 | 0.000471499 | 0.998210 |
| rad24         | 0.000257786 | 0.999194 | 0.000433493 | 0.998644 |
| rad51         | 0.000198162 | 0.999392 | 0.000333230 | 0.998977 |
| rad9          | 0.000192976 | 0.999585 | 0.000324509 | 0.999302 |
| rad30         | 9.82388e-05 | 0.999683 | 0.000165199 | 0.999467 |
| rad52         | 5.51072e-05 | 0.999738 | 9.26686e-05 | 0.999559 |
| PhCCH+CH3     | 4.76434e-05 | 0.999786 | 8.01174e-05 | 0.999640 |
| rad19anti     | 4.20257e-05 | 0.999828 | 7.06707e-05 | 0.999710 |
| rad7          | 3.75802e-05 | 0.999866 | 6.31951e-05 | 0.999773 |
| PAH3+H        | 2.79212e-05 | 0.999894 | 4.69524e-05 | 0.999820 |
| Ph+MeAc       | 2.07102e-05 | 0.999914 | 3.48264e-05 | 0.999855 |
| PAH10+CH3     | 1.47816e-05 | 0.999929 | 2.48568e-05 | 0.999880 |
| rad28         | 8.39351e-06 | 0.999938 | 1.41146e-05 | 0.999894 |
| rad71         | 8.25830e-06 | 0.999946 | 1.38872e-05 | 0.999908 |
| PAH1+H        | 7.73847e-06 | 0.999954 | 1.30131e-05 | 0.999921 |
| rad73         | 5.74036e-06 | 0.999959 | 9.65301e-06 | 0.999931 |
| PhCCCH3+H     | 5.72471e-06 | 0.999965 | 9.62671e-06 | 0.999940 |
| rad37         | 5.31416e-06 | 0.999970 | 8.93632e-06 | 0.999949 |
| rad65         | 5.07763e-06 | 0.999975 | 8.53858e-06 | 0.999958 |
| rad60syn      | 3.44399e-06 | 0.999979 | 5.79143e-06 | 0.999964 |
| rad67         | 3.07261e-06 | 0.999982 | 5.16692e-06 | 0.999969 |
| rad59         | 2.84796e-06 | 0.999985 | 4.78915e-06 | 0.999974 |
| rad13         | 2.80177e-06 | 0.999988 | 4.71147e-06 | 0.999978 |
| rad47         | 2.51400e-06 | 0.999990 | 4.22756e-06 | 0.999983 |
| rad60anti     | 2.04304e-06 | 0.999992 | 3.43558e-06 | 0.999986 |
| rad25         | 1.77731e-06 | 0.999994 | 2.98873e-06 | 0.999989 |
| rad19syn      | 1.18397e-06 | 0.999995 | 1.99097e-06 | 0.999991 |
| rad70         | 1.00257e-06 | 0.999996 | 1.68592e-06 | 0.999993 |
| rad15         | 9.59021e-07 | 0.999997 | 1.61269e-06 | 0.999994 |
| PhcycC3H3_A+H | 8.28888e-07 | 0.999998 | 1.39386e-06 | 0.999996 |
| rad54         | 4.79118e-07 | 0.999998 | 8.05688e-07 | 0.999996 |
| rad72         | 2.92221e-07 | 0.999999 | 4.91400e-07 | 0.999997 |
| rad34         | 2.82683e-07 | 0.999999 | 4.75361e-07 | 0.999997 |
| rad58         | 2.68526e-07 | 0.999999 | 4.51555e-07 | 0.999998 |
| rad26         | 1.91719e-07 | 0.999999 | 3.22396e-07 | 0.999998 |
| rad12         | 1.64734e-07 | 1.000000 | 2.77017e-07 | 0.999998 |
| rad64         | 1.53145e-07 | 1.000000 | 2.57530e-07 | 0.999999 |
| rad3          | 1.50520e-07 | 1.000000 | 2.53115e-07 | 0.999999 |
| rad2          | 1.26935e-07 | 1.000000 | 2.13455e-07 | 0.999999 |
| rad4          | 1.18975e-07 | 1.000000 | 2.00069e-07 | 0.999999 |



|           |             |         |             |          |
|-----------|-------------|---------|-------------|----------|
| rad33     | 1.15217e-07 | 1.00000 | 1.93749e-07 | 1.000000 |
| PAH8+H    | 1.05420e-07 | 1.00000 | 1.77275e-07 | 1.000000 |
| rad62     | 5.94045e-08 | 1.00000 | 9.98948e-08 | 1.000000 |
| rad55     | 3.73800e-08 | 1.00000 | 6.28585e-08 | 1.000000 |
| rad61     | 3.70420e-08 | 1.00000 | 6.22901e-08 | 1.000000 |
| rad1      | 3.44026e-08 | 1.00000 | 5.78516e-08 | 1.000000 |
| rad68syn  | 2.82363e-08 | 1.00000 | 4.74823e-08 | 1.000000 |
| rad10     | 2.55230e-08 | 1.00000 | 4.29197e-08 | 1.000000 |
| rad68anti | 1.83152e-08 | 1.00000 | 3.07990e-08 | 1.000000 |
| rad56     | 1.52032e-08 | 1.00000 | 2.55659e-08 | 1.000000 |
| rad53     | 1.30582e-08 | 1.00000 | 2.19587e-08 | 1.000000 |
| rad43     | 1.29344e-08 | 1.00000 | 2.17506e-08 | 1.000000 |
| rad8      | 1.20369e-08 | 1.00000 | 2.02413e-08 | 1.000000 |
| rad40syn  | 1.18027e-08 | 1.00000 | 1.98476e-08 | 1.000000 |
| rad40anti | 7.21343e-09 | 1.00000 | 1.21301e-08 | 1.000000 |
| rad42     | 6.24573e-09 | 1.00000 | 1.05029e-08 | 1.000000 |
| rad41     | 1.28021e-09 | 1.00000 | 2.15280e-09 | 1.000000 |
| rad14     | 4.02341e-10 | 1.00000 | 6.76579e-10 | 1.000000 |
| rad31     | 2.73139e-10 | 1.00000 | 4.59313e-10 | 1.000000 |
| rad27     | 1.12085e-11 | 1.00000 | 1.88482e-11 | 1.000000 |
| rad5      | 8.44124e-12 | 1.00000 | 1.41948e-11 | 1.000000 |

1000000.00 Pa, 1000.00000 K

| Rate constant | True (fraction)     | Effective (fraction) |
|---------------|---------------------|----------------------|
| Total         | 2.23691e-15 (1.00 ) | 1.07981e-15 (1.00 )  |

| species       | PYtrue      | Cumul    | PYeffective | Cumul    |
|---------------|-------------|----------|-------------|----------|
| Benzyl+C2H2   | 0.517279    | 0.517279 | 0.00000     | 0.00000  |
| Indene+H      | 0.230714    | 0.747993 | 0.477944    | 0.477944 |
| rad20         | 0.0969832   | 0.844976 | 0.200909    | 0.678853 |
| rad22         | 0.0460879   | 0.891064 | 0.0954752   | 0.774328 |
| rad21         | 0.0410927   | 0.932157 | 0.0851271   | 0.859455 |
| rad6          | 0.0133345   | 0.945491 | 0.0276236   | 0.887079 |
| rad18         | 0.0118137   | 0.957305 | 0.0244731   | 0.911552 |
| rad23         | 0.0107305   | 0.968036 | 0.0222292   | 0.933781 |
| rad45         | 0.0103602   | 0.978396 | 0.0214620   | 0.955243 |
| rad11         | 0.00396838  | 0.982364 | 0.00822085  | 0.963464 |
| PhCH2CCH+H    | 0.00314639  | 0.985510 | 0.00651803  | 0.969982 |
| Ph+Allene     | 0.00313277  | 0.988643 | 0.00648982  | 0.976472 |
| PAH9+H        | 0.00281650  | 0.991460 | 0.00583462  | 0.982307 |
| PhCHCCH2+H    | 0.00219364  | 0.993653 | 0.00454431  | 0.986851 |
| rad38         | 0.00139068  | 0.995044 | 0.00288091  | 0.989732 |
| rad36         | 0.00102616  | 0.996070 | 0.00212578  | 0.991858 |
| PAH7+H        | 0.000629218 | 0.996699 | 0.00130348  | 0.993161 |
| rad50         | 0.000596354 | 0.997296 | 0.00123540  | 0.994396 |
| rad46         | 0.000515301 | 0.997811 | 0.00106749  | 0.995464 |
| rad9          | 0.000410788 | 0.998222 | 0.000850983 | 0.996315 |
| rad35         | 0.000392965 | 0.998615 | 0.000814061 | 0.997129 |
| rad39         | 0.000285104 | 0.998900 | 0.000590619 | 0.997720 |
| rad24         | 0.000199142 | 0.999099 | 0.000412540 | 0.998132 |
| rad51         | 0.000198355 | 0.999297 | 0.000410909 | 0.998543 |
| rad30         | 0.000149685 | 0.999447 | 0.000310087 | 0.998853 |
| PhCCH+CH3     | 0.000137143 | 0.999584 | 0.000284104 | 0.999137 |
| rad19anti     | 8.51770e-05 | 0.999669 | 0.000176452 | 0.999314 |
| rad7          | 5.66313e-05 | 0.999726 | 0.000117317 | 0.999431 |
| rad52         | 5.50656e-05 | 0.999781 | 0.000114073 | 0.999545 |
| PAH3+H        | 5.31507e-05 | 0.999834 | 0.000110106 | 0.999655 |
| Ph+MeAc       | 4.25820e-05 | 0.999877 | 8.82123e-05 | 0.999743 |
| rad28         | 1.57449e-05 | 0.999893 | 3.26170e-05 | 0.999776 |
| PAH10+CH3     | 1.56431e-05 | 0.999908 | 3.24060e-05 | 0.999808 |
| PhCCCH3+H     | 9.71728e-06 | 0.999918 | 2.01302e-05 | 0.999829 |
| rad13         | 9.44552e-06 | 0.999927 | 1.95672e-05 | 0.999848 |
| rad71         | 8.35967e-06 | 0.999936 | 1.73178e-05 | 0.999865 |
| PAH1+H        | 8.00362e-06 | 0.999944 | 1.65802e-05 | 0.999882 |
| rad60syn      | 6.62693e-06 | 0.999950 | 1.37283e-05 | 0.999896 |
| rad67         | 6.27726e-06 | 0.999957 | 1.30039e-05 | 0.999909 |
| rad73         | 5.79876e-06 | 0.999962 | 1.20126e-05 | 0.999921 |
| rad37         | 5.66258e-06 | 0.999968 | 1.17305e-05 | 0.999932 |
| rad59         | 5.58860e-06 | 0.999974 | 1.15773e-05 | 0.999944 |
| rad65         | 5.09122e-06 | 0.999979 | 1.05469e-05 | 0.999955 |
| rad60anti     | 3.96062e-06 | 0.999983 | 8.20478e-06 | 0.999963 |
| rad19syn      | 2.71399e-06 | 0.999986 | 5.62227e-06 | 0.999968 |
| rad47         | 2.52711e-06 | 0.999988 | 5.23513e-06 | 0.999974 |
| rad25         | 2.42128e-06 | 0.999990 | 5.01590e-06 | 0.999979 |
| PhcycC3H3_A+H | 1.64859e-06 | 0.999992 | 3.41520e-06 | 0.999982 |
| rad70         | 1.29330e-06 | 0.999993 | 2.67918e-06 | 0.999985 |
| rad12         | 1.22902e-06 | 0.999995 | 2.54603e-06 | 0.999987 |

|           |             |          |             |          |
|-----------|-------------|----------|-------------|----------|
| rad54     | 1.09654e-06 | 0.999996 | 2.27157e-06 | 0.999990 |
| rad15     | 1.03621e-06 | 0.999997 | 2.14659e-06 | 0.999992 |
| rad33     | 5.90204e-07 | 0.999997 | 1.22266e-06 | 0.999993 |
| rad58     | 4.31000e-07 | 0.999998 | 8.92854e-07 | 0.999994 |
| rad34     | 3.49894e-07 | 0.999998 | 7.24837e-07 | 0.999995 |
| rad3      | 3.47631e-07 | 0.999998 | 7.20149e-07 | 0.999995 |
| rad26     | 2.98670e-07 | 0.999999 | 6.18721e-07 | 0.999996 |
| rad72     | 2.96938e-07 | 0.999999 | 6.15134e-07 | 0.999997 |
| rad4      | 2.78726e-07 | 0.999999 | 5.77405e-07 | 0.999997 |
| rad2      | 2.68004e-07 | 1.000000 | 5.55195e-07 | 0.999998 |
| rad8      | 1.84786e-07 | 1.000000 | 3.82801e-07 | 0.999998 |
| rad64     | 1.57753e-07 | 1.000000 | 3.26799e-07 | 0.999998 |
| PAH8+H    | 1.16286e-07 | 1.000000 | 2.40897e-07 | 0.999999 |
| rad55     | 8.09009e-08 | 1.000000 | 1.67593e-07 | 0.999999 |
| rad1      | 7.51704e-08 | 1.000000 | 1.55722e-07 | 0.999999 |
| rad62     | 6.79307e-08 | 1.000000 | 1.40724e-07 | 0.999999 |
| rad10     | 5.10488e-08 | 1.000000 | 1.05752e-07 | 0.999999 |
| rad61     | 3.91173e-08 | 1.000000 | 8.10350e-08 | 0.999999 |
| rad68syn  | 3.21441e-08 | 1.000000 | 6.65892e-08 | 0.999999 |
| rad56     | 2.51226e-08 | 1.000000 | 5.20436e-08 | 0.999999 |
| rad53     | 2.32796e-08 | 1.000000 | 4.82258e-08 | 0.999999 |
| rad68anti | 2.08658e-08 | 1.000000 | 4.32253e-08 | 0.999999 |
| rad43     | 1.63760e-08 | 1.000000 | 3.39242e-08 | 0.999999 |
| rad40syn  | 1.31739e-08 | 1.000000 | 2.72908e-08 | 1.000000 |
| rad40anti | 8.02209e-09 | 1.000000 | 1.66185e-08 | 1.000000 |
| rad42     | 6.90593e-09 | 1.000000 | 1.43062e-08 | 1.000000 |
| rad14     | 2.07257e-09 | 1.000000 | 4.29351e-09 | 1.000000 |
| rad41     | 1.59858e-09 | 1.000000 | 3.31159e-09 | 1.000000 |
| rad31     | 7.69557e-10 | 1.000000 | 1.59420e-09 | 1.000000 |
| rad27     | 8.13722e-11 | 1.000000 | 1.68570e-10 | 1.000000 |
| rad5      | 1.47675e-11 | 1.000000 | 3.05922e-11 | 1.000000 |

1000000.00 Pa, 1100.00000 K

=====

| Rate constant | True (fraction)     | Effective (fraction) |
|---------------|---------------------|----------------------|
| Total         | 4.69847e-15 (1.00 ) | 1.81843e-15 (1.00 )  |

| species     | PYtrue      | Cumul    | PYeffective | Cumul    |
|-------------|-------------|----------|-------------|----------|
| Benzyl+C2H2 | 0.612974    | 0.612974 | 0.000000    | 0.000000 |
| Indene+H    | 0.213102    | 0.826076 | 0.550614    | 0.550614 |
| rad20       | 0.0612867   | 0.887363 | 0.158353    | 0.708967 |
| rad21       | 0.0240258   | 0.911389 | 0.0620779   | 0.771045 |
| rad22       | 0.0233360   | 0.934725 | 0.0602955   | 0.831340 |
| rad6        | 0.0105195   | 0.945244 | 0.0271803   | 0.858521 |
| rad45       | 0.00939248  | 0.954636 | 0.0242683   | 0.882789 |
| rad18       | 0.00822922  | 0.962866 | 0.0212627   | 0.904052 |
| rad23       | 0.00800528  | 0.970871 | 0.0206841   | 0.924736 |
| PhCH2CCH+H  | 0.00647889  | 0.977350 | 0.0167402   | 0.941476 |
| Ph+Allene   | 0.00603107  | 0.983381 | 0.0155831   | 0.957059 |
| PhCHCCH2+H  | 0.00374589  | 0.987127 | 0.00967866  | 0.966738 |
| rad11       | 0.00319202  | 0.990319 | 0.00824756  | 0.974985 |
| PAH9+H      | 0.00272786  | 0.993047 | 0.00704826  | 0.982034 |
| rad38       | 0.00133605  | 0.994383 | 0.00345210  | 0.985486 |
| rad36       | 0.000916705 | 0.995299 | 0.00236859  | 0.987854 |
| rad9        | 0.000778946 | 0.996078 | 0.00201265  | 0.989867 |
| PAH7+H      | 0.000688916 | 0.996767 | 0.00178002  | 0.991647 |
| rad50       | 0.000574367 | 0.997342 | 0.00148405  | 0.993131 |
| rad46       | 0.000495449 | 0.997837 | 0.00128014  | 0.994411 |
| rad35       | 0.000387099 | 0.998224 | 0.00100019  | 0.995411 |
| rad39       | 0.000284049 | 0.998508 | 0.000733928 | 0.996145 |
| PhCCH+CH3   | 0.000272656 | 0.998781 | 0.000704489 | 0.996850 |
| rad30       | 0.000207208 | 0.998988 | 0.000535384 | 0.997385 |
| rad51       | 0.000191178 | 0.999179 | 0.000493965 | 0.997879 |
| rad19anti   | 0.000158458 | 0.999338 | 0.000409424 | 0.998289 |
| rad24       | 0.000156772 | 0.999495 | 0.000405067 | 0.998694 |
| PAH3+H      | 0.000113411 | 0.999608 | 0.000293032 | 0.998987 |
| Ph+MeAc     | 7.86176e-05 | 0.999687 | 0.000203133 | 0.999190 |
| rad7        | 7.62611e-05 | 0.999763 | 0.000197044 | 0.999387 |
| rad52       | 5.30462e-05 | 0.999816 | 0.000137061 | 0.999524 |
| rad13       | 2.37004e-05 | 0.999840 | 6.12372e-05 | 0.999585 |
| rad28       | 1.72956e-05 | 0.999857 | 4.46884e-05 | 0.999630 |
| PAH10+CH3   | 1.69946e-05 | 0.999874 | 4.39108e-05 | 0.999674 |
| PhCCCH3+H   | 1.61979e-05 | 0.999890 | 4.18523e-05 | 0.999716 |
| rad67       | 1.20623e-05 | 0.999902 | 3.11667e-05 | 0.999747 |
| rad60syn    | 1.20337e-05 | 0.999914 | 3.10928e-05 | 0.999778 |
| rad59       | 1.15649e-05 | 0.999926 | 2.98815e-05 | 0.999808 |
| PAH1+H      | 8.45970e-06 | 0.999934 | 2.18582e-05 | 0.999830 |
| rad71       | 8.09909e-06 | 0.999942 | 2.09265e-05 | 0.999850 |

|               |             |          |             |          |
|---------------|-------------|----------|-------------|----------|
| rad60anti     | 7.30261e-06 | 0.999950 | 1.88685e-05 | 0.999869 |
| rad19syn      | 6.83064e-06 | 0.999956 | 1.76490e-05 | 0.999887 |
| rad37         | 6.22704e-06 | 0.999963 | 1.60895e-05 | 0.999903 |
| rad73         | 5.61357e-06 | 0.999968 | 1.45044e-05 | 0.999918 |
| rad65         | 4.93408e-06 | 0.999973 | 1.27487e-05 | 0.999930 |
| PhcycC3H3_A+H | 4.18524e-06 | 0.999977 | 1.08138e-05 | 0.999941 |
| rad12         | 4.01801e-06 | 0.999981 | 1.03818e-05 | 0.999952 |
| rad25         | 2.97465e-06 | 0.999984 | 7.68592e-06 | 0.999959 |
| rad54         | 2.74458e-06 | 0.999987 | 7.09145e-06 | 0.999966 |
| rad47         | 2.33271e-06 | 0.999989 | 6.02728e-06 | 0.999972 |
| rad70         | 1.97384e-06 | 0.999991 | 5.10001e-06 | 0.999977 |
| rad15         | 1.65223e-06 | 0.999993 | 4.26904e-06 | 0.999982 |
| rad33         | 1.52507e-06 | 0.999995 | 3.94048e-06 | 0.999986 |
| rad58         | 9.90770e-07 | 0.999996 | 2.55996e-06 | 0.999988 |
| rad8          | 9.57079e-07 | 0.999997 | 2.47290e-06 | 0.999991 |
| rad34         | 5.25670e-07 | 0.999997 | 1.35823e-06 | 0.999992 |
| rad3          | 4.73623e-07 | 0.999998 | 1.22375e-06 | 0.999993 |
| rad2          | 4.07323e-07 | 0.999998 | 1.05247e-06 | 0.999994 |
| rad4          | 3.79603e-07 | 0.999998 | 9.80819e-07 | 0.999995 |
| rad26         | 3.38460e-07 | 0.999999 | 8.74515e-07 | 0.999996 |
| rad72         | 2.88068e-07 | 0.999999 | 7.44312e-07 | 0.999997 |
| rad55         | 2.04088e-07 | 0.999999 | 5.27324e-07 | 0.999997 |
| rad64         | 1.65375e-07 | 0.999999 | 4.27296e-07 | 0.999998 |
| PAH8+H        | 1.58442e-07 | 1.000000 | 4.09383e-07 | 0.999998 |
| rad1          | 1.13640e-07 | 1.000000 | 2.93624e-07 | 0.999999 |
| rad10         | 9.27510e-08 | 1.000000 | 2.39650e-07 | 0.999999 |
| rad62         | 8.49395e-08 | 1.000000 | 2.19467e-07 | 0.999999 |
| rad56         | 6.29986e-08 | 1.000000 | 1.62776e-07 | 0.999999 |
| rad53         | 5.89157e-08 | 1.000000 | 1.52227e-07 | 0.999999 |
| rad68syn      | 4.55910e-08 | 1.000000 | 1.17798e-07 | 0.999999 |
| rad61         | 4.21577e-08 | 1.000000 | 1.08927e-07 | 1.000000 |
| rad68anti     | 2.96173e-08 | 1.000000 | 7.65253e-08 | 1.000000 |
| rad43         | 2.21384e-08 | 1.000000 | 5.72013e-08 | 1.000000 |
| rad40syn      | 1.82202e-08 | 1.000000 | 4.70775e-08 | 1.000000 |
| rad40anti     | 1.10205e-08 | 1.000000 | 2.84748e-08 | 1.000000 |
| rad42         | 8.29167e-09 | 1.000000 | 2.14241e-08 | 1.000000 |
| rad14         | 6.94727e-09 | 1.000000 | 1.79504e-08 | 1.000000 |
| rad41         | 2.13766e-09 | 1.000000 | 5.52329e-09 | 1.000000 |
| rad31         | 1.33692e-09 | 1.000000 | 3.45434e-09 | 1.000000 |
| rad27         | 4.22907e-10 | 1.000000 | 1.09271e-09 | 1.000000 |
| rad5          | 2.22738e-11 | 1.000000 | 5.75511e-11 | 1.000000 |

1000000.00 Pa, 1200.00000 K

=====

| Rate constant | True (fraction)     | Effective (fraction) |
|---------------|---------------------|----------------------|
| Total         | 8.84330e-15 (1.00 ) | 2.85314e-15 (1.00 )  |

| species     | PYtrue      | Cumul    | PYeffective | Cumul    |
|-------------|-------------|----------|-------------|----------|
| Benzyl+C2H2 | 0.677367    | 0.677367 | 0.00000     | 0.00000  |
| Indene+H    | 0.194953    | 0.872320 | 0.604255    | 0.604255 |
| rad20       | 0.0367926   | 0.909113 | 0.114039    | 0.718294 |
| rad21       | 0.0146800   | 0.923793 | 0.0455006   | 0.763795 |
| rad22       | 0.0128949   | 0.936688 | 0.0399676   | 0.803762 |
| PhCH2CCH+H  | 0.00912267  | 0.945810 | 0.0282757   | 0.832038 |
| rad45       | 0.00838910  | 0.954199 | 0.0260020   | 0.858040 |
| Ph+Allene   | 0.00820271  | 0.962402 | 0.0254243   | 0.883464 |
| rad6        | 0.00711925  | 0.969521 | 0.0220661   | 0.905530 |
| rad18       | 0.00686104  | 0.976382 | 0.0212658   | 0.926796 |
| rad23       | 0.00582404  | 0.982206 | 0.0180516   | 0.944848 |
| PhCHCCH2+H  | 0.00474729  | 0.986954 | 0.0147142   | 0.959562 |
| rad11       | 0.00308231  | 0.990036 | 0.00955363  | 0.969116 |
| PAH9+H      | 0.00260612  | 0.992642 | 0.00807766  | 0.977193 |
| rad38       | 0.00126705  | 0.993909 | 0.00392721  | 0.981120 |
| rad9        | 0.00104205  | 0.994951 | 0.00322983  | 0.984350 |
| rad36       | 0.000812927 | 0.995764 | 0.00251967  | 0.986870 |
| PAH7+H      | 0.000725204 | 0.996489 | 0.00224777  | 0.989118 |
| rad50       | 0.000545246 | 0.997035 | 0.00168999  | 0.990808 |
| rad46       | 0.000469980 | 0.997504 | 0.00145670  | 0.992264 |
| rad35       | 0.000376890 | 0.997881 | 0.00116817  | 0.993433 |
| PhCCH+CH3   | 0.000367679 | 0.998249 | 0.00113962  | 0.994572 |
| rad39       | 0.000277461 | 0.998527 | 0.000859990 | 0.995432 |
| rad30       | 0.000259263 | 0.998786 | 0.000803585 | 0.996236 |
| rad19anti   | 0.000211637 | 0.998997 | 0.000655969 | 0.996892 |
| PAH3+H      | 0.000185128 | 0.999183 | 0.000573803 | 0.997465 |
| rad51       | 0.000181540 | 0.999364 | 0.000562682 | 0.998028 |
| rad24       | 0.000134836 | 0.999499 | 0.000417925 | 0.998446 |
| rad7        | 0.000105972 | 0.999605 | 0.000328459 | 0.998775 |
| Ph+MeAc     | 0.000105417 | 0.999710 | 0.000326739 | 0.999101 |

|               |             |          |             |          |
|---------------|-------------|----------|-------------|----------|
| rad52         | 5.03619e-05 | 0.999761 | 0.000156097 | 0.999257 |
| rad13         | 3.82393e-05 | 0.999799 | 0.000118523 | 0.999376 |
| PhCCCH3+H     | 2.08036e-05 | 0.999820 | 6.44808e-05 | 0.999440 |
| rad59         | 1.84844e-05 | 0.999838 | 5.72923e-05 | 0.999498 |
| PAH10+CH3     | 1.79080e-05 | 0.999856 | 5.55058e-05 | 0.999553 |
| rad60syn      | 1.78181e-05 | 0.999874 | 5.52271e-05 | 0.999608 |
| rad67         | 1.65698e-05 | 0.999890 | 5.13580e-05 | 0.999660 |
| rad28         | 1.43936e-05 | 0.999905 | 4.46131e-05 | 0.999704 |
| rad19syn      | 1.13208e-05 | 0.999916 | 3.50887e-05 | 0.999739 |
| rad60anti     | 1.09094e-05 | 0.999927 | 3.38138e-05 | 0.999773 |
| PAH1+H        | 8.84595e-06 | 0.999936 | 2.74180e-05 | 0.999801 |
| rad71         | 7.71609e-06 | 0.999944 | 2.39160e-05 | 0.999825 |
| PhcycC3H3_A+H | 7.23693e-06 | 0.999951 | 2.24309e-05 | 0.999847 |
| rad37         | 6.57846e-06 | 0.999957 | 2.03899e-05 | 0.999867 |
| rad12         | 6.51512e-06 | 0.999964 | 2.01936e-05 | 0.999888 |
| rad73         | 5.34596e-06 | 0.999969 | 1.65698e-05 | 0.999904 |
| rad65         | 4.71409e-06 | 0.999974 | 1.46113e-05 | 0.999919 |
| rad54         | 4.44525e-06 | 0.999979 | 1.37781e-05 | 0.999933 |
| rad15         | 3.22633e-06 | 0.999982 | 1.00000e-05 | 0.999943 |
| rad25         | 3.16521e-06 | 0.999985 | 9.81057e-06 | 0.999952 |
| rad70         | 2.57095e-06 | 0.999987 | 7.96865e-06 | 0.999960 |
| rad8          | 2.50497e-06 | 0.999990 | 7.76415e-06 | 0.999968 |
| rad33         | 2.31687e-06 | 0.999992 | 7.18115e-06 | 0.999975 |
| rad47         | 2.09494e-06 | 0.999994 | 6.49327e-06 | 0.999982 |
| rad58         | 1.72433e-06 | 0.999996 | 5.34457e-06 | 0.999987 |
| rad34         | 6.89352e-07 | 0.999997 | 2.13665e-06 | 0.999989 |
| rad3          | 4.64859e-07 | 0.999997 | 1.44083e-06 | 0.999991 |
| rad2          | 4.49223e-07 | 0.999998 | 1.39237e-06 | 0.999992 |
| rad4          | 3.71611e-07 | 0.999998 | 1.15181e-06 | 0.999993 |
| rad55         | 3.35208e-07 | 0.999998 | 1.03898e-06 | 0.999994 |
| rad26         | 3.29958e-07 | 0.999999 | 1.02271e-06 | 0.999995 |
| rad72         | 2.74609e-07 | 0.999999 | 8.51149e-07 | 0.999996 |
| PAH8+H        | 2.07586e-07 | 0.999999 | 6.43414e-07 | 0.999997 |
| rad64         | 1.72093e-07 | 0.999999 | 5.33401e-07 | 0.999997 |
| rad10         | 1.71301e-07 | 1.000000 | 5.30948e-07 | 0.999998 |
| rad1          | 1.24326e-07 | 1.000000 | 3.85349e-07 | 0.999998 |
| rad56         | 1.09418e-07 | 1.000000 | 3.39142e-07 | 0.999999 |
| rad53         | 1.00876e-07 | 1.000000 | 3.12666e-07 | 0.999999 |
| rad62         | 1.00806e-07 | 1.000000 | 3.12448e-07 | 0.999999 |
| rad68syn      | 6.00866e-08 | 1.000000 | 1.86238e-07 | 0.999999 |
| rad61         | 4.43178e-08 | 1.000000 | 1.37363e-07 | 1.000000 |
| rad68anti     | 3.90359e-08 | 1.000000 | 1.20992e-07 | 1.000000 |
| rad43         | 2.63710e-08 | 1.000000 | 8.17369e-08 | 1.000000 |
| rad40syn      | 2.39146e-08 | 1.000000 | 7.41234e-08 | 1.000000 |
| rad40anti     | 1.44361e-08 | 1.000000 | 4.47448e-08 | 1.000000 |
| rad14         | 1.43875e-08 | 1.000000 | 4.45939e-08 | 1.000000 |
| rad42         | 9.69321e-09 | 1.000000 | 3.00441e-08 | 1.000000 |
| rad41         | 2.54303e-09 | 1.000000 | 7.88213e-09 | 1.000000 |
| rad31         | 1.59013e-09 | 1.000000 | 4.92862e-09 | 1.000000 |
| rad27         | 1.32905e-09 | 1.000000 | 4.11938e-09 | 1.000000 |
| rad5          | 3.09183e-11 | 1.000000 | 9.58312e-11 | 1.000000 |

1000000.00 Pa, 1300.00000 K

=====

| Rate constant | True (fraction)    | Effective (fraction) |
|---------------|--------------------|----------------------|
| Total         | 1.52810e-14 (1.00) | 4.30138e-15 (1.00)   |

| species     | PYtrue      | Cumul    | PYeffective | Cumul    |
|-------------|-------------|----------|-------------|----------|
| Benzyl+C2H2 | 0.718514    | 0.718514 | 0.00000     | 0.00000  |
| Indene+H    | 0.179277    | 0.897791 | 0.636897    | 0.636897 |
| rad20       | 0.0239463   | 0.921737 | 0.0850712   | 0.721968 |
| rad21       | 0.0102286   | 0.931966 | 0.0363378   | 0.758306 |
| PhCH2CCH+H  | 0.0102020   | 0.942168 | 0.0362433   | 0.794549 |
| Ph+Allene   | 0.00927403  | 0.951442 | 0.0329468   | 0.827496 |
| rad22       | 0.00849060  | 0.959933 | 0.0301635   | 0.857660 |
| rad45       | 0.00751092  | 0.967443 | 0.0266831   | 0.884343 |
| rad18       | 0.00569967  | 0.973143 | 0.0202485   | 0.904591 |
| PhCHCCH2+H  | 0.00505955  | 0.978203 | 0.0179745   | 0.922566 |
| rad6        | 0.00465762  | 0.982860 | 0.0165466   | 0.939112 |
| rad23       | 0.00424974  | 0.987110 | 0.0150975   | 0.954210 |
| rad11       | 0.00299726  | 0.990107 | 0.0106480   | 0.964858 |
| PAH9+H      | 0.00247399  | 0.992581 | 0.00878903  | 0.973647 |
| rad38       | 0.00119615  | 0.993777 | 0.00424941  | 0.977896 |
| rad9        | 0.00110967  | 0.994887 | 0.00394219  | 0.981838 |
| rad36       | 0.000725506 | 0.995613 | 0.00257742  | 0.984416 |
| PAH7+H      | 0.000720779 | 0.996333 | 0.00256063  | 0.986976 |
| rad50       | 0.000514795 | 0.996848 | 0.00182885  | 0.988805 |
| rad46       | 0.000443658 | 0.997292 | 0.00157613  | 0.990381 |

|               |             |          |             |          |
|---------------|-------------|----------|-------------|----------|
| PhCCH+CH3     | 0.000408370 | 0.997700 | 0.00145077  | 0.991832 |
| rad35         | 0.000364715 | 0.998065 | 0.00129568  | 0.993128 |
| rad30         | 0.000309140 | 0.998374 | 0.00109824  | 0.994226 |
| rad39         | 0.000265977 | 0.998640 | 0.000944903 | 0.995171 |
| PAH3+H        | 0.000264413 | 0.998904 | 0.000939349 | 0.996110 |
| rad19anti     | 0.000227392 | 0.999132 | 0.000807829 | 0.996918 |
| rad51         | 0.000171427 | 0.999303 | 0.000609006 | 0.997527 |
| rad7          | 0.000138977 | 0.999442 | 0.000493727 | 0.998021 |
| rad24         | 0.000118489 | 0.999561 | 0.000420940 | 0.998442 |
| Ph+MeAc       | 0.000116218 | 0.999677 | 0.000412872 | 0.998855 |
| rad52         | 4.75533e-05 | 0.999725 | 0.000168937 | 0.999024 |
| rad13         | 4.29175e-05 | 0.999767 | 0.000152468 | 0.999176 |
| rad59         | 2.60553e-05 | 0.999793 | 9.25635e-05 | 0.999269 |
| rad60syn      | 2.39054e-05 | 0.999817 | 8.49257e-05 | 0.999354 |
| PhCCCH3+H     | 2.20612e-05 | 0.999839 | 7.83743e-05 | 0.999432 |
| rad67         | 1.80726e-05 | 0.999858 | 6.42045e-05 | 0.999496 |
| PAH10+CH3     | 1.76908e-05 | 0.999875 | 6.28478e-05 | 0.999559 |
| rad19syn      | 1.48897e-05 | 0.999890 | 5.28967e-05 | 0.999612 |
| rad60anti     | 1.47229e-05 | 0.999905 | 5.23041e-05 | 0.999664 |
| rad28         | 1.10421e-05 | 0.999916 | 3.92278e-05 | 0.999704 |
| PhcycC3H3_A+H | 1.00185e-05 | 0.999926 | 3.55917e-05 | 0.999739 |
| PAH1+H        | 8.86296e-06 | 0.999935 | 3.14864e-05 | 0.999771 |
| rad12         | 7.37773e-06 | 0.999942 | 2.62100e-05 | 0.999797 |
| rad71         | 7.30359e-06 | 0.999949 | 2.59466e-05 | 0.999823 |
| rad15         | 6.61337e-06 | 0.999956 | 2.34945e-05 | 0.999846 |
| rad37         | 6.49429e-06 | 0.999963 | 2.30715e-05 | 0.999869 |
| rad54         | 5.70593e-06 | 0.999968 | 2.02708e-05 | 0.999890 |
| rad73         | 5.05886e-06 | 0.999973 | 1.79720e-05 | 0.999908 |
| rad65         | 4.46885e-06 | 0.999978 | 1.58760e-05 | 0.999923 |
| rad8          | 4.09288e-06 | 0.999982 | 1.45403e-05 | 0.999938 |
| rad25         | 3.20511e-06 | 0.999985 | 1.13864e-05 | 0.999949 |
| rad70         | 2.82058e-06 | 0.999988 | 1.00203e-05 | 0.999959 |
| rad33         | 2.58153e-06 | 0.999990 | 9.17110e-06 | 0.999969 |
| rad58         | 2.55609e-06 | 0.999993 | 9.08071e-06 | 0.999978 |
| rad47         | 1.86846e-06 | 0.999995 | 6.63785e-06 | 0.999984 |
| rad34         | 7.60702e-07 | 0.999996 | 2.70245e-06 | 0.999987 |
| rad55         | 4.34981e-07 | 0.999996 | 1.54530e-06 | 0.999989 |
| rad2          | 4.13463e-07 | 0.999997 | 1.46886e-06 | 0.999990 |
| rad3          | 3.83012e-07 | 0.999997 | 1.36068e-06 | 0.999991 |
| rad26         | 3.51264e-07 | 0.999997 | 1.24789e-06 | 0.999993 |
| rad10         | 3.36644e-07 | 0.999998 | 1.19596e-06 | 0.999994 |
| rad4          | 3.05443e-07 | 0.999998 | 1.08511e-06 | 0.999995 |
| rad72         | 2.60018e-07 | 0.999998 | 9.23734e-07 | 0.999996 |
| PAH8+H        | 2.31604e-07 | 0.999998 | 8.22792e-07 | 0.999997 |
| rad64         | 1.72145e-07 | 0.999999 | 6.11558e-07 | 0.999997 |
| rad56         | 1.48178e-07 | 0.999999 | 5.26414e-07 | 0.999998 |
| rad53         | 1.35158e-07 | 0.999999 | 4.80161e-07 | 0.999998 |
| rad1          | 1.13959e-07 | 0.999999 | 4.04850e-07 | 0.999999 |
| rad62         | 1.09548e-07 | 0.999999 | 3.89179e-07 | 0.999999 |
| rad68syn      | 6.69487e-08 | 0.999999 | 2.37841e-07 | 0.999999 |
| rad61         | 4.37766e-08 | 0.999999 | 1.55520e-07 | 0.999999 |
| rad68anti     | 4.34910e-08 | 0.999999 | 1.54505e-07 | 1.000000 |
| rad43         | 2.73214e-08 | 0.999999 | 9.70613e-08 | 1.000000 |
| rad40syn      | 2.66572e-08 | 0.999999 | 9.47018e-08 | 1.000000 |
| rad14         | 2.10965e-08 | 0.999999 | 7.49469e-08 | 1.000000 |
| rad40anti     | 1.60842e-08 | 0.999999 | 5.71403e-08 | 1.000000 |
| rad42         | 1.05100e-08 | 0.999999 | 3.73376e-08 | 1.000000 |
| rad41         | 2.63635e-09 | 0.999999 | 9.36584e-09 | 1.000000 |
| rad27         | 2.55638e-09 | 0.999999 | 9.08176e-09 | 1.000000 |
| rad31         | 1.56615e-09 | 0.999999 | 5.56389e-09 | 1.000000 |
| rad5          | 4.95586e-11 | 0.999999 | 1.76061e-10 | 1.000000 |

1000000.00 Pa, 1400.00000 K

=====

Rate constant | True (fraction) | Effective (fraction)

-----  
Total | 2.46691e-14 (1.00) | 6.16035e-15 (1.00)

| species     | PYtrue     | Cumul    | PYeffective | Cumul    |
|-------------|------------|----------|-------------|----------|
| Benzyl+C2H2 | 0.750281   | 0.750281 | 0.00000     | 0.00000  |
| Indene+H    | 0.163750   | 0.914031 | 0.655736    | 0.655736 |
| rad20       | 0.0166250  | 0.930656 | 0.0665751   | 0.722311 |
| PhCH2CCH+H  | 0.0105292  | 0.941185 | 0.0421641   | 0.764475 |
| Ph+Allene   | 0.00960584 | 0.950791 | 0.0384667   | 0.802942 |
| rad21       | 0.00758169 | 0.958373 | 0.0303609   | 0.833303 |
| rad22       | 0.00672046 | 0.965093 | 0.0269121   | 0.860215 |
| rad45       | 0.00666580 | 0.971759 | 0.0266933   | 0.886908 |
| PhCHCCH2+H  | 0.00502225 | 0.976781 | 0.0201116   | 0.907020 |
| rad18       | 0.00426975 | 0.981051 | 0.0170982   | 0.924118 |

|               |             |          |             |          |
|---------------|-------------|----------|-------------|----------|
| rad6          | 0.00335839  | 0.984409 | 0.0134487   | 0.937567 |
| rad23         | 0.00333433  | 0.987744 | 0.0133524   | 0.950919 |
| rad11         | 0.00271200  | 0.990456 | 0.0108602   | 0.961779 |
| PAH9+H        | 0.00231626  | 0.992772 | 0.00927548  | 0.971055 |
| rad38         | 0.00111247  | 0.993884 | 0.00445490  | 0.975510 |
| rad9          | 0.00109726  | 0.994982 | 0.00439400  | 0.979904 |
| PAH7+H        | 0.000684325 | 0.995666 | 0.00274038  | 0.982644 |
| rad36         | 0.000643002 | 0.996309 | 0.00257491  | 0.985219 |
| rad50         | 0.000478353 | 0.996787 | 0.00191557  | 0.987135 |
| rad46         | 0.000412466 | 0.997200 | 0.00165172  | 0.988786 |
| PhCCH+CH3     | 0.000406012 | 0.997606 | 0.00162588  | 0.990412 |
| rad30         | 0.000349770 | 0.997956 | 0.00140066  | 0.991813 |
| rad35         | 0.000348621 | 0.998304 | 0.00139606  | 0.993209 |
| PAH3+H        | 0.000346577 | 0.998651 | 0.00138787  | 0.994597 |
| rad39         | 0.000248577 | 0.998899 | 0.000995429 | 0.995592 |
| rad19anti     | 0.000226845 | 0.999126 | 0.000908402 | 0.996501 |
| rad51         | 0.000159271 | 0.999286 | 0.000637803 | 0.997138 |
| rad7          | 0.000155880 | 0.999441 | 0.000624222 | 0.997763 |
| Ph+MeAc       | 0.000116408 | 0.999558 | 0.000466155 | 0.998229 |
| rad24         | 0.000102388 | 0.999660 | 0.000410013 | 0.998639 |
| rad52         | 4.41861e-05 | 0.999704 | 0.000176944 | 0.998816 |
| rad13         | 3.88563e-05 | 0.999743 | 0.000155600 | 0.998971 |
| rad59         | 3.37017e-05 | 0.999777 | 0.000134959 | 0.999106 |
| rad60syn      | 2.96508e-05 | 0.999807 | 0.000118737 | 0.999225 |
| PhCCCH3+H     | 2.15169e-05 | 0.999828 | 8.61644e-05 | 0.999311 |
| rad60anti     | 1.83490e-05 | 0.999846 | 7.34789e-05 | 0.999385 |
| rad67         | 1.81264e-05 | 0.999865 | 7.25871e-05 | 0.999457 |
| rad19syn      | 1.70931e-05 | 0.999882 | 6.84494e-05 | 0.999526 |
| PAH10+CH3     | 1.66727e-05 | 0.999898 | 6.67658e-05 | 0.999592 |
| rad15         | 1.29565e-05 | 0.999911 | 5.18842e-05 | 0.999644 |
| PhcycC3H3_A+H | 1.21061e-05 | 0.999923 | 4.84791e-05 | 0.999693 |
| rad28         | 9.07017e-06 | 0.999932 | 3.63215e-05 | 0.999729 |
| PAH1+H        | 8.54292e-06 | 0.999941 | 3.42102e-05 | 0.999763 |
| rad12         | 7.36651e-06 | 0.999948 | 2.94992e-05 | 0.999793 |
| rad71         | 6.79542e-06 | 0.999955 | 2.72123e-05 | 0.999820 |
| rad54         | 6.56533e-06 | 0.999962 | 2.62909e-05 | 0.999846 |
| rad37         | 6.12034e-06 | 0.999968 | 2.45090e-05 | 0.999871 |
| rad8          | 5.07661e-06 | 0.999973 | 2.03293e-05 | 0.999891 |
| rad73         | 4.70634e-06 | 0.999978 | 1.88466e-05 | 0.999910 |
| rad65         | 4.16789e-06 | 0.999982 | 1.66903e-05 | 0.999927 |
| rad58         | 3.49670e-06 | 0.999985 | 1.40026e-05 | 0.999941 |
| rad25         | 3.19057e-06 | 0.999989 | 1.27767e-05 | 0.999953 |
| rad70         | 2.83212e-06 | 0.999991 | 1.13412e-05 | 0.999965 |
| rad33         | 2.34483e-06 | 0.999994 | 9.38987e-06 | 0.999974 |
| rad47         | 1.64322e-06 | 0.999995 | 6.58028e-06 | 0.999981 |
| rad34         | 7.66445e-07 | 0.999996 | 3.06924e-06 | 0.999984 |
| rad10         | 6.51817e-07 | 0.999997 | 2.61021e-06 | 0.999986 |
| rad55         | 5.06747e-07 | 0.999997 | 2.02927e-06 | 0.999989 |
| rad26         | 4.56875e-07 | 0.999998 | 1.82956e-06 | 0.999990 |
| rad2          | 3.48057e-07 | 0.999998 | 1.39380e-06 | 0.999992 |
| rad3          | 2.81020e-07 | 0.999998 | 1.12535e-06 | 0.999993 |
| rad72         | 2.41950e-07 | 0.999999 | 9.68890e-07 | 0.999994 |
| PAH8+H        | 2.35471e-07 | 0.999999 | 9.42943e-07 | 0.999995 |
| rad4          | 2.23561e-07 | 0.999999 | 8.95253e-07 | 0.999996 |
| rad56         | 1.82304e-07 | 0.999999 | 7.30037e-07 | 0.999996 |
| rad64         | 1.65989e-07 | 0.999999 | 6.64702e-07 | 0.999997 |
| rad53         | 1.63831e-07 | 1.000000 | 6.56063e-07 | 0.999998 |
| rad62         | 1.12081e-07 | 1.000000 | 4.48831e-07 | 0.999998 |
| rad1          | 9.59397e-08 | 1.000000 | 3.84191e-07 | 0.999999 |
| rad68syn      | 6.79218e-08 | 1.000000 | 2.71993e-07 | 0.999999 |
| rad68anti     | 4.41204e-08 | 1.000000 | 1.76681e-07 | 0.999999 |
| rad61         | 4.12297e-08 | 1.000000 | 1.65105e-07 | 0.999999 |
| rad40syn      | 2.70728e-08 | 1.000000 | 1.08413e-07 | 0.999999 |
| rad43         | 2.64747e-08 | 1.000000 | 1.06018e-07 | 0.999999 |
| rad14         | 2.40981e-08 | 1.000000 | 9.65010e-08 | 0.999999 |
| rad40anti     | 1.63340e-08 | 1.000000 | 6.54095e-08 | 1.000000 |
| rad42         | 1.08200e-08 | 1.000000 | 4.33288e-08 | 1.000000 |
| rad27         | 3.31558e-09 | 1.000000 | 1.32773e-08 | 1.000000 |
| rad41         | 2.55760e-09 | 1.000000 | 1.02419e-08 | 1.000000 |
| rad31         | 1.38521e-09 | 1.000000 | 5.54710e-09 | 1.000000 |
| rad5          | 1.07236e-10 | 1.000000 | 4.29428e-10 | 1.000000 |

1000000.00 Pa, 1500.00000 K

=====

| Rate constant | True (fraction)     | Effective (fraction) |
|---------------|---------------------|----------------------|
| Total         | 3.76908e-14 (1.00 ) | 8.38316e-15 (1.00 )  |
| species       | PYtrue Cumul        | PYeffective Cumul    |

-----

|               |             |          |             |          |
|---------------|-------------|----------|-------------|----------|
| Benzyl+C2H2   | 0.777581    | 0.777581 | 0.00000     | 0.00000  |
| Indene+H      | 0.147524    | 0.925105 | 0.663269    | 0.663269 |
| rad20         | 0.0118343   | 0.936939 | 0.0532072   | 0.716476 |
| PhCH2CCH+H    | 0.0107858   | 0.947725 | 0.0484930   | 0.764969 |
| Ph+Allene     | 0.00950581  | 0.957231 | 0.0427383   | 0.807708 |
| rad22         | 0.00601001  | 0.963241 | 0.0270211   | 0.834729 |
| rad45         | 0.00582086  | 0.969062 | 0.0261707   | 0.860899 |
| rad21         | 0.00568601  | 0.974748 | 0.0255644   | 0.886464 |
| PhCHCCH2+H    | 0.00486936  | 0.979617 | 0.0218927   | 0.908356 |
| rad18         | 0.00308450  | 0.982702 | 0.0138680   | 0.922224 |
| rad23         | 0.00303732  | 0.985739 | 0.0136558   | 0.935880 |
| rad6          | 0.00286447  | 0.988603 | 0.0128787   | 0.948759 |
| rad11         | 0.00239845  | 0.991002 | 0.0107835   | 0.959542 |
| PAH9+H        | 0.00213605  | 0.993138 | 0.00960375  | 0.969146 |
| rad9          | 0.00108679  | 0.994225 | 0.00488623  | 0.974032 |
| rad38         | 0.00101519  | 0.995240 | 0.00456432  | 0.978597 |
| PAH7+H        | 0.000631067 | 0.995871 | 0.00283729  | 0.981434 |
| rad36         | 0.000561215 | 0.996432 | 0.00252324  | 0.983957 |
| rad50         | 0.000435726 | 0.996868 | 0.00195903  | 0.985916 |
| PAH3+H        | 0.000386860 | 0.997255 | 0.00173933  | 0.987656 |
| PhCCH+CH3     | 0.000381079 | 0.997636 | 0.00171334  | 0.989369 |
| rad46         | 0.000376152 | 0.998012 | 0.00169119  | 0.991060 |
| rad30         | 0.000365761 | 0.998378 | 0.00164447  | 0.992705 |
| rad35         | 0.000326581 | 0.998704 | 0.00146831  | 0.994173 |
| rad39         | 0.000226852 | 0.998931 | 0.00101993  | 0.995193 |
| rad19anti     | 0.000226161 | 0.999157 | 0.00101682  | 0.996210 |
| rad7          | 0.000155175 | 0.999313 | 0.000697671 | 0.996907 |
| rad51         | 0.000145013 | 0.999458 | 0.000651983 | 0.997559 |
| Ph+MeAc       | 0.000112280 | 0.999570 | 0.000504812 | 0.998064 |
| rad24         | 8.65339e-05 | 0.999656 | 0.000389058 | 0.998453 |
| rad52         | 4.02421e-05 | 0.999697 | 0.000180930 | 0.998634 |
| rad59         | 3.74568e-05 | 0.999734 | 0.000168407 | 0.998803 |
| rad60syn      | 3.24277e-05 | 0.999767 | 0.000145796 | 0.998948 |
| rad13         | 3.11708e-05 | 0.999798 | 0.000140145 | 0.999088 |
| rad15         | 2.26874e-05 | 0.999820 | 0.000102003 | 0.999190 |
| PhCCCH3+H     | 2.06140e-05 | 0.999841 | 9.26808e-05 | 0.999283 |
| rad60anti     | 2.01075e-05 | 0.999861 | 9.04036e-05 | 0.999374 |
| rad67         | 1.79725e-05 | 0.999879 | 8.08047e-05 | 0.999454 |
| rad19syn      | 1.78716e-05 | 0.999897 | 8.03510e-05 | 0.999535 |
| PAH10+CH3     | 1.53109e-05 | 0.999912 | 6.88383e-05 | 0.999604 |
| PhcycC3H3_A+H | 1.31928e-05 | 0.999925 | 5.93151e-05 | 0.999663 |
| rad28         | 8.81860e-06 | 0.999934 | 3.96486e-05 | 0.999702 |
| PAH1+H        | 8.02051e-06 | 0.999942 | 3.60604e-05 | 0.999739 |
| rad12         | 7.22388e-06 | 0.999949 | 3.24787e-05 | 0.999771 |
| rad54         | 7.09532e-06 | 0.999957 | 3.19007e-05 | 0.999803 |
| rad71         | 6.18980e-06 | 0.999963 | 2.78295e-05 | 0.999831 |
| rad37         | 5.62935e-06 | 0.999968 | 2.53097e-05 | 0.999856 |
| rad8          | 5.61844e-06 | 0.999974 | 2.52606e-05 | 0.999881 |
| rad73         | 4.28709e-06 | 0.999978 | 1.92748e-05 | 0.999901 |
| rad58         | 3.95356e-06 | 0.999982 | 1.77753e-05 | 0.999918 |
| rad65         | 3.82298e-06 | 0.999986 | 1.71882e-05 | 0.999936 |
| rad25         | 3.07818e-06 | 0.999989 | 1.38396e-05 | 0.999949 |
| rad70         | 2.70411e-06 | 0.999992 | 1.21577e-05 | 0.999962 |
| rad33         | 1.91034e-06 | 0.999994 | 8.58893e-06 | 0.999970 |
| rad47         | 1.42055e-06 | 0.999995 | 6.38685e-06 | 0.999977 |
| rad10         | 1.05228e-06 | 0.999996 | 4.73107e-06 | 0.999981 |
| rad34         | 7.31968e-07 | 0.999997 | 3.29094e-06 | 0.999985 |
| rad26         | 7.21751e-07 | 0.999998 | 3.24501e-06 | 0.999988 |
| rad55         | 5.54979e-07 | 0.999998 | 2.49520e-06 | 0.999990 |
| rad2          | 2.87760e-07 | 0.999999 | 1.29378e-06 | 0.999992 |
| PAH8+H        | 2.25282e-07 | 0.999999 | 1.01287e-06 | 0.999993 |
| rad72         | 2.20351e-07 | 0.999999 | 9.90705e-07 | 0.999994 |
| rad56         | 2.12820e-07 | 0.999999 | 9.56842e-07 | 0.999995 |
| rad3          | 1.95737e-07 | 0.999999 | 8.80036e-07 | 0.999995 |
| rad53         | 1.87751e-07 | 1.000000 | 8.44131e-07 | 0.999996 |
| rad64         | 1.56083e-07 | 1.000000 | 7.01750e-07 | 0.999997 |
| rad4          | 1.55303e-07 | 1.000000 | 6.98247e-07 | 0.999998 |
| rad62         | 1.10747e-07 | 1.000000 | 4.97920e-07 | 0.999998 |
| rad1          | 7.95753e-08 | 1.000000 | 3.57772e-07 | 0.999999 |
| rad68syn      | 6.49278e-08 | 1.000000 | 2.91917e-07 | 0.999999 |
| rad68anti     | 4.21750e-08 | 1.000000 | 1.89620e-07 | 0.999999 |
| rad61         | 3.77983e-08 | 1.000000 | 1.69942e-07 | 0.999999 |
| rad40syn      | 2.58919e-08 | 1.000000 | 1.16411e-07 | 0.999999 |
| rad43         | 2.52072e-08 | 1.000000 | 1.13332e-07 | 0.999999 |
| rad14         | 2.32589e-08 | 1.000000 | 1.04573e-07 | 1.000000 |
| rad40anti     | 1.56234e-08 | 1.000000 | 7.02430e-08 | 1.000000 |
| rad42         | 1.08213e-08 | 1.000000 | 4.86527e-08 | 1.000000 |
| rad27         | 3.50255e-09 | 1.000000 | 1.57475e-08 | 1.000000 |
| rad41         | 2.43891e-09 | 1.000000 | 1.09654e-08 | 1.000000 |
| rad31         | 1.16705e-09 | 1.000000 | 5.24710e-09 | 1.000000 |

rad5 | 3.17618e-10 1.00000 | 1.42802e-09 1.000000

1000000.00 Pa, 1750.00000 K

=====  
Rate constant | True (fraction) | Effective (fraction)  
-----  
Total | 9.18604e-14 (1.00 ) | 1.54264e-14 (1.00 )

| species       | PYtrue      | Cumul    | PYeffective | Cumul    |
|---------------|-------------|----------|-------------|----------|
| Benzyl+C2H2   | 0.832067    | 0.832067 | 0.00000     | 0.00000  |
| Indene+H      | 0.0859603   | 0.918027 | 0.511873    | 0.511873 |
| PhCH2CCH+H    | 0.0215264   | 0.939554 | 0.128185    | 0.640058 |
| PhCHCCH2+H    | 0.0119394   | 0.951493 | 0.0710964   | 0.711154 |
| Ph+Allene     | 0.0114520   | 0.962945 | 0.0681939   | 0.779348 |
| rad50         | 0.00361367  | 0.966559 | 0.0215186   | 0.800867 |
| rad22         | 0.00304234  | 0.969601 | 0.0181164   | 0.818983 |
| rad39         | 0.00300048  | 0.972602 | 0.0178671   | 0.836850 |
| rad51         | 0.00292055  | 0.975522 | 0.0173912   | 0.854242 |
| PAH9+H        | 0.00291912  | 0.978441 | 0.0173826   | 0.871624 |
| rad71         | 0.00257704  | 0.981018 | 0.0153456   | 0.886970 |
| PAH7+H        | 0.00251916  | 0.983537 | 0.0150010   | 0.901971 |
| PAH3+H        | 0.00239865  | 0.985936 | 0.0142834   | 0.916254 |
| rad38         | 0.00235711  | 0.988293 | 0.0140360   | 0.930290 |
| rad6          | 0.00144127  | 0.989734 | 0.00858240  | 0.938873 |
| rad20         | 0.00117918  | 0.990914 | 0.00702174  | 0.945894 |
| rad23         | 0.00110698  | 0.992021 | 0.00659181  | 0.952486 |
| rad46         | 0.00107822  | 0.993099 | 0.00642053  | 0.958907 |
| rad73         | 0.000803607 | 0.993902 | 0.00478529  | 0.963692 |
| rad21         | 0.000536757 | 0.994439 | 0.00319626  | 0.966888 |
| PhCCH+CH3     | 0.000519137 | 0.994958 | 0.00309134  | 0.969980 |
| rad30         | 0.000509505 | 0.995468 | 0.00303398  | 0.973014 |
| rad72         | 0.000496665 | 0.995965 | 0.00295752  | 0.975971 |
| rad52         | 0.000496115 | 0.996461 | 0.00295425  | 0.978925 |
| rad35         | 0.000485399 | 0.996946 | 0.00289044  | 0.981816 |
| rad18         | 0.000418173 | 0.997364 | 0.00249012  | 0.984306 |
| rad11         | 0.000391185 | 0.997755 | 0.00232941  | 0.986635 |
| Ph+MeAc       | 0.000325917 | 0.998081 | 0.00194076  | 0.988576 |
| rad19anti     | 0.000288134 | 0.998369 | 0.00171577  | 0.990292 |
| PAH1+H        | 0.000224216 | 0.998594 | 0.00133515  | 0.991627 |
| rad45         | 0.000174367 | 0.998768 | 0.00103831  | 0.992665 |
| rad59         | 0.000170610 | 0.998939 | 0.00101594  | 0.993681 |
| PAH10+CH3     | 0.000163163 | 0.999102 | 0.000971597 | 0.994653 |
| rad67         | 9.85466e-05 | 0.999200 | 0.000586822 | 0.995240 |
| PhCCCH3+H     | 9.37549e-05 | 0.999294 | 0.000558288 | 0.995798 |
| rad60syn      | 8.86642e-05 | 0.999383 | 0.000527974 | 0.996326 |
| rad19syn      | 7.75919e-05 | 0.999460 | 0.000462041 | 0.996788 |
| PhcycC3H3_A+H | 6.64484e-05 | 0.999527 | 0.000395685 | 0.997184 |
| rad60anti     | 6.45267e-05 | 0.999591 | 0.000384241 | 0.997568 |
| rad58         | 5.92167e-05 | 0.999651 | 0.000352622 | 0.997920 |
| rad9          | 5.88879e-05 | 0.999709 | 0.000350663 | 0.998271 |
| PAH8+H        | 5.17368e-05 | 0.999761 | 0.000308080 | 0.998579 |
| rad65         | 4.84369e-05 | 0.999810 | 0.000288430 | 0.998868 |
| rad70         | 3.24237e-05 | 0.999842 | 0.000193075 | 0.999061 |
| rad36         | 3.03588e-05 | 0.999872 | 0.000180779 | 0.999242 |
| rad7          | 1.70656e-05 | 0.999889 | 0.000101622 | 0.999343 |
| rad34         | 1.46768e-05 | 0.999904 | 8.73969e-05 | 0.999431 |
| rad37         | 1.36492e-05 | 0.999918 | 8.12777e-05 | 0.999512 |
| rad54         | 1.34646e-05 | 0.999931 | 8.01785e-05 | 0.999592 |
| rad47         | 1.09068e-05 | 0.999942 | 6.49473e-05 | 0.999657 |
| rad24         | 8.12261e-06 | 0.999950 | 4.83682e-05 | 0.999705 |
| rad28         | 6.91985e-06 | 0.999957 | 4.12060e-05 | 0.999747 |
| rad64         | 6.77987e-06 | 0.999964 | 4.03725e-05 | 0.999787 |
| rad68syn      | 5.22924e-06 | 0.999969 | 3.11389e-05 | 0.999818 |
| rad15         | 4.60010e-06 | 0.999974 | 2.73925e-05 | 0.999845 |
| rad40syn      | 3.67379e-06 | 0.999978 | 2.18766e-05 | 0.999867 |
| rad68anti     | 3.32295e-06 | 0.999981 | 1.97874e-05 | 0.999887 |
| rad40anti     | 2.87165e-06 | 0.999984 | 1.71000e-05 | 0.999904 |
| rad62         | 2.44355e-06 | 0.999986 | 1.45508e-05 | 0.999919 |
| rad56         | 2.28783e-06 | 0.999988 | 1.36235e-05 | 0.999932 |
| rad8          | 2.17954e-06 | 0.999991 | 1.29787e-05 | 0.999945 |
| rad13         | 1.91774e-06 | 0.999993 | 1.14197e-05 | 0.999957 |
| rad61         | 1.68119e-06 | 0.999994 | 1.00111e-05 | 0.999967 |
| rad55         | 1.47788e-06 | 0.999996 | 8.80044e-06 | 0.999976 |
| rad53         | 1.38790e-06 | 0.999997 | 8.26461e-06 | 0.999984 |
| rad12         | 6.13253e-07 | 0.999998 | 3.65177e-06 | 0.999987 |
| rad42         | 5.85006e-07 | 0.999998 | 3.48357e-06 | 0.999991 |
| rad26         | 5.10362e-07 | 0.999999 | 3.03908e-06 | 0.999994 |
| rad25         | 3.87893e-07 | 0.999999 | 2.30981e-06 | 0.999996 |
| rad43         | 3.27478e-07 | 0.999999 | 1.95005e-06 | 0.999998 |



|       |             |          |             |          |
|-------|-------------|----------|-------------|----------|
| rad10 | 1.20220e-07 | 1.000000 | 7.15880e-07 | 0.999999 |
| rad33 | 1.13225e-07 | 1.000000 | 6.74228e-07 | 1.000000 |
| rad41 | 8.66197e-08 | 1.000000 | 5.15800e-07 | 1.000000 |
| rad2  | 1.11529e-08 | 1.000000 | 6.64128e-08 | 1.000000 |
| rad3  | 5.39555e-09 | 1.000000 | 3.21292e-08 | 1.000000 |
| rad1  | 3.88678e-09 | 1.000000 | 2.31448e-08 | 1.000000 |
| rad14 | 3.55232e-09 | 1.000000 | 2.11532e-08 | 1.000000 |
| rad4  | 3.33258e-09 | 1.000000 | 1.98447e-08 | 1.000000 |
| rad5  | 2.40949e-09 | 1.000000 | 1.43479e-08 | 1.000000 |
| rad27 | 5.31994e-10 | 1.000000 | 3.16790e-09 | 1.000000 |

1000000.00 Pa, 2000.00000 K

=====

| Rate constant | True (fraction)     | Effective (fraction) |
|---------------|---------------------|----------------------|
| Total         | 1.85359e-13 (1.00 ) | 2.56003e-14 (1.00 )  |

| species       | PYtrue      | Cumul    | PYeffective | Cumul    |
|---------------|-------------|----------|-------------|----------|
| Benzyl+C2H2   | 0.861888    | 0.861888 | 0.00000     | 0.00000  |
| Indene+H      | 0.0671529   | 0.929041 | 0.486221    | 0.486221 |
| PhCH2CCH+H    | 0.0233035   | 0.952344 | 0.168729    | 0.654950 |
| Ph+Allene     | 0.0113127   | 0.963657 | 0.0819093   | 0.736859 |
| PhCHCCH2+H    | 0.0103777   | 0.974035 | 0.0751394   | 0.811999 |
| rad50         | 0.00273583  | 0.976771 | 0.0198088   | 0.831807 |
| PAH9+H        | 0.00256974  | 0.979340 | 0.0186062   | 0.850414 |
| rad39         | 0.00226413  | 0.981604 | 0.0163934   | 0.866807 |
| rad51         | 0.00221043  | 0.983815 | 0.0160046   | 0.882812 |
| rad71         | 0.00193044  | 0.985745 | 0.0139773   | 0.896789 |
| PAH7+H        | 0.00189571  | 0.987641 | 0.0137259   | 0.910515 |
| rad38         | 0.00182937  | 0.989470 | 0.0132455   | 0.923760 |
| PAH3+H        | 0.00172723  | 0.991198 | 0.0125060   | 0.936266 |
| rad22         | 0.000898210 | 0.992096 | 0.00650349  | 0.942770 |
| rad46         | 0.000827686 | 0.992924 | 0.00599286  | 0.948763 |
| rad23         | 0.000730523 | 0.993654 | 0.00528935  | 0.954052 |
| rad6          | 0.000659235 | 0.994313 | 0.00477319  | 0.958825 |
| rad73         | 0.000602805 | 0.994916 | 0.00436461  | 0.963190 |
| rad20         | 0.000544228 | 0.995460 | 0.00394049  | 0.967130 |
| rad30         | 0.000465177 | 0.995926 | 0.00336811  | 0.970498 |
| rad35         | 0.000412367 | 0.996338 | 0.00298574  | 0.973484 |
| PhCCH+CH3     | 0.000402705 | 0.996741 | 0.00291578  | 0.976400 |
| rad52         | 0.000376555 | 0.997117 | 0.00272645  | 0.979126 |
| rad72         | 0.000371314 | 0.997488 | 0.00268850  | 0.981815 |
| rad19anti     | 0.000315898 | 0.997804 | 0.00228726  | 0.984102 |
| Ph+MeAc       | 0.000290995 | 0.998095 | 0.00210695  | 0.986209 |
| rad21         | 0.000257729 | 0.998353 | 0.00186609  | 0.988075 |
| rad11         | 0.000185932 | 0.998539 | 0.00134624  | 0.989422 |
| PAH1+H        | 0.000164488 | 0.998704 | 0.00119098  | 0.990612 |
| rad18         | 0.000147601 | 0.998851 | 0.00106870  | 0.991681 |
| rad59         | 0.000128550 | 0.998980 | 0.000930768 | 0.992612 |
| rad45         | 0.000128249 | 0.999108 | 0.000928585 | 0.993541 |
| PAH10+CH3     | 0.000123553 | 0.999231 | 0.000894587 | 0.994435 |
| rad67         | 8.73489e-05 | 0.999319 | 0.000632450 | 0.995068 |
| PhcycC3H3_A+H | 8.05531e-05 | 0.999399 | 0.000583245 | 0.995651 |
| PhCCH3+H      | 7.52350e-05 | 0.999475 | 0.000544739 | 0.996196 |
| rad9          | 7.42310e-05 | 0.999549 | 0.000537470 | 0.996733 |
| rad60syn      | 7.31458e-05 | 0.999622 | 0.000529612 | 0.997263 |
| rad19syn      | 6.31497e-05 | 0.999685 | 0.000457235 | 0.997720 |
| rad60anti     | 5.25329e-05 | 0.999738 | 0.000380364 | 0.998100 |
| rad65         | 4.20232e-05 | 0.999780 | 0.000304269 | 0.998405 |
| rad58         | 3.87366e-05 | 0.999818 | 0.000280472 | 0.998685 |
| PAH8+H        | 3.60216e-05 | 0.999854 | 0.000260815 | 0.998946 |
| rad70         | 2.35591e-05 | 0.999878 | 0.000170580 | 0.999116 |
| rad36         | 2.25319e-05 | 0.999901 | 0.000163142 | 0.999280 |
| rad54         | 1.48386e-05 | 0.999915 | 0.000107439 | 0.999387 |
| rad37         | 1.09043e-05 | 0.999926 | 7.89523e-05 | 0.999466 |
| rad34         | 1.04926e-05 | 0.999937 | 7.59717e-05 | 0.999542 |
| rad7          | 8.43180e-06 | 0.999945 | 6.10505e-05 | 0.999603 |
| rad47         | 7.46344e-06 | 0.999953 | 5.40391e-05 | 0.999657 |
| rad28         | 5.83668e-06 | 0.999959 | 4.22605e-05 | 0.999699 |
| rad15         | 5.15800e-06 | 0.999964 | 3.73465e-05 | 0.999737 |
| rad24         | 5.10541e-06 | 0.999969 | 3.69657e-05 | 0.999774 |
| rad64         | 4.94588e-06 | 0.999974 | 3.58107e-05 | 0.999809 |
| rad68syn      | 3.65949e-06 | 0.999977 | 2.64965e-05 | 0.999836 |
| rad56         | 3.03243e-06 | 0.999980 | 2.19563e-05 | 0.999858 |
| rad40syn      | 2.56383e-06 | 0.999983 | 1.85634e-05 | 0.999876 |
| rad68anti     | 2.32567e-06 | 0.999985 | 1.68390e-05 | 0.999893 |
| rad8          | 2.25160e-06 | 0.999988 | 1.63027e-05 | 0.999910 |
| rad62         | 2.05144e-06 | 0.999990 | 1.48535e-05 | 0.999924 |
| rad40anti     | 2.00289e-06 | 0.999992 | 1.45019e-05 | 0.999939 |

|       |             |          |             |          |
|-------|-------------|----------|-------------|----------|
| rad53 | 1.78273e-06 | 0.999993 | 1.29079e-05 | 0.999952 |
| rad55 | 1.69107e-06 | 0.999995 | 1.22442e-05 | 0.999964 |
| rad61 | 1.24798e-06 | 0.999996 | 9.03602e-06 | 0.999973 |
| rad13 | 1.05852e-06 | 0.999997 | 7.66421e-06 | 0.999981 |
| rad12 | 8.13757e-07 | 0.999998 | 5.89201e-06 | 0.999987 |
| rad26 | 5.26388e-07 | 0.999999 | 3.81132e-06 | 0.999990 |
| rad42 | 4.92286e-07 | 0.999999 | 3.56440e-06 | 0.999994 |
| rad25 | 2.91849e-07 | 1.000000 | 2.11314e-06 | 0.999996 |
| rad43 | 2.49215e-07 | 1.000000 | 1.80444e-06 | 0.999998 |
| rad10 | 1.23302e-07 | 1.000000 | 8.92771e-07 | 0.999999 |
| rad33 | 6.82183e-08 | 1.000000 | 4.93934e-07 | 0.999999 |
| rad41 | 6.44356e-08 | 1.000000 | 4.66546e-07 | 1.000000 |
| rad2  | 1.24489e-08 | 1.000000 | 9.01362e-08 | 1.000000 |
| rad5  | 8.23435e-09 | 1.000000 | 5.96208e-08 | 1.000000 |
| rad1  | 4.42508e-09 | 1.000000 | 3.20398e-08 | 1.000000 |
| rad3  | 3.01211e-09 | 1.000000 | 2.18092e-08 | 1.000000 |
| rad14 | 2.61576e-09 | 1.000000 | 1.89394e-08 | 1.000000 |
| rad4  | 1.85287e-09 | 1.000000 | 1.34157e-08 | 1.000000 |
| rad27 | 5.09316e-10 | 1.000000 | 3.68770e-09 | 1.000000 |

1000000.00 Pa, 2250.00000 K

| Rate constant | True (fraction)     | Effective (fraction) |
|---------------|---------------------|----------------------|
| Total         | 3.29136e-13 (1.00 ) | 4.10571e-14 (1.00 )  |

| species       | PYtrue      | Cumul    | PYeffective | Cumul    |
|---------------|-------------|----------|-------------|----------|
| Benzyl+C2H2   | 0.875258    | 0.875258 | 0.000000    | 0.000000 |
| Indene+H      | 0.0532641   | 0.928522 | 0.426996    | 0.426996 |
| PhCH2CCH+H    | 0.0297154   | 0.958237 | 0.238216    | 0.665212 |
| Ph+Allene     | 0.0112685   | 0.969506 | 0.0903348   | 0.755547 |
| PhCHCCH2+H    | 0.0106512   | 0.980157 | 0.0853865   | 0.840933 |
| PAH9+H        | 0.00224489  | 0.982402 | 0.0179963   | 0.858930 |
| rad50         | 0.00208185  | 0.984484 | 0.0166893   | 0.875619 |
| rad39         | 0.00172126  | 0.986205 | 0.0137986   | 0.889418 |
| rad51         | 0.00168242  | 0.987888 | 0.0134872   | 0.902905 |
| PAH7+H        | 0.00150481  | 0.989392 | 0.0120634   | 0.914968 |
| rad71         | 0.00145679  | 0.990849 | 0.0116785   | 0.926647 |
| PAH3+H        | 0.00145649  | 0.992306 | 0.0116761   | 0.938323 |
| rad38         | 0.00143718  | 0.993743 | 0.0115212   | 0.949844 |
| rad46         | 0.000641586 | 0.994384 | 0.00514332  | 0.954987 |
| rad73         | 0.000455096 | 0.994840 | 0.00364831  | 0.958636 |
| rad30         | 0.000453562 | 0.995293 | 0.00363601  | 0.962272 |
| rad19anti     | 0.000413152 | 0.995706 | 0.00331207  | 0.965584 |
| rad23         | 0.000377797 | 0.996084 | 0.00302863  | 0.968612 |
| rad35         | 0.000366270 | 0.996450 | 0.00293623  | 0.971548 |
| PhCCH+CH3     | 0.000344246 | 0.996795 | 0.00275968  | 0.974308 |
| rad6          | 0.000336075 | 0.997131 | 0.00269417  | 0.977002 |
| rad22         | 0.000300651 | 0.997431 | 0.00241019  | 0.979413 |
| Ph+MeAc       | 0.000296277 | 0.997728 | 0.00237513  | 0.981788 |
| rad52         | 0.000287402 | 0.998015 | 0.00230398  | 0.984092 |
| rad72         | 0.000280098 | 0.998295 | 0.00224543  | 0.986337 |
| rad20         | 0.000279280 | 0.998574 | 0.00223887  | 0.988576 |
| rad21         | 0.000133409 | 0.998708 | 0.00106948  | 0.989645 |
| PAH1+H        | 0.000124476 | 0.998832 | 0.000997869 | 0.990643 |
| rad59         | 0.000114721 | 0.998947 | 0.000919673 | 0.991563 |
| PAH10+CH3     | 0.000100895 | 0.999048 | 0.000808834 | 0.992372 |
| rad11         | 9.59131e-05 | 0.999144 | 0.000768895 | 0.993141 |
| rad45         | 9.40153e-05 | 0.999238 | 0.000753681 | 0.993894 |
| rad67         | 9.09250e-05 | 0.999329 | 0.000728907 | 0.994623 |
| rad9          | 8.06324e-05 | 0.999409 | 0.000646396 | 0.995270 |
| PhCCCH3+H     | 7.54350e-05 | 0.999485 | 0.000604731 | 0.995874 |
| PhcycC3H3_A+H | 7.21355e-05 | 0.999557 | 0.000578280 | 0.996453 |
| rad60syn      | 7.00593e-05 | 0.999627 | 0.000561635 | 0.997014 |
| rad18         | 6.42065e-05 | 0.999691 | 0.000514716 | 0.997529 |
| rad19syn      | 5.14949e-05 | 0.999743 | 0.000412813 | 0.997942 |
| rad60anti     | 4.98935e-05 | 0.999793 | 0.000399975 | 0.998342 |
| rad65         | 3.79530e-05 | 0.999831 | 0.000304253 | 0.998646 |
| rad58         | 2.74155e-05 | 0.999858 | 0.000219778 | 0.998866 |
| PAH8+H        | 2.58366e-05 | 0.999884 | 0.000207121 | 0.999073 |
| rad70         | 1.85363e-05 | 0.999902 | 0.000148597 | 0.999222 |
| rad36         | 1.66527e-05 | 0.999919 | 0.000133498 | 0.999355 |
| rad54         | 1.28810e-05 | 0.999932 | 0.000103261 | 0.999458 |
| rad37         | 9.88492e-06 | 0.999942 | 7.92432e-05 | 0.999538 |
| rad34         | 8.01123e-06 | 0.999950 | 6.42226e-05 | 0.999602 |
| rad7          | 5.97885e-06 | 0.999956 | 4.79299e-05 | 0.999650 |
| rad15         | 5.64854e-06 | 0.999961 | 4.52819e-05 | 0.999695 |
| rad47         | 5.19268e-06 | 0.999967 | 4.16275e-05 | 0.999737 |
| rad28         | 3.87074e-06 | 0.999970 | 3.10301e-05 | 0.999768 |

|           |             |          |             |          |
|-----------|-------------|----------|-------------|----------|
| rad64     | 3.71527e-06 | 0.999974 | 2.97838e-05 | 0.999979 |
| rad24     | 3.35883e-06 | 0.999978 | 2.69263e-05 | 0.999824 |
| rad56     | 2.78303e-06 | 0.999980 | 2.23104e-05 | 0.999847 |
| rad68syn  | 2.66205e-06 | 0.999983 | 2.13405e-05 | 0.999868 |
| rad8      | 2.34824e-06 | 0.999985 | 1.88249e-05 | 0.999887 |
| rad40syn  | 1.84977e-06 | 0.999987 | 1.48288e-05 | 0.999902 |
| rad68anti | 1.69221e-06 | 0.999989 | 1.35657e-05 | 0.999915 |
| rad62     | 1.68883e-06 | 0.999991 | 1.35386e-05 | 0.999929 |
| rad53     | 1.61063e-06 | 0.999992 | 1.29117e-05 | 0.999942 |
| rad55     | 1.47618e-06 | 0.999994 | 1.18339e-05 | 0.999954 |
| rad40anti | 1.44252e-06 | 0.999995 | 1.15641e-05 | 0.999965 |
| rad12     | 1.05573e-06 | 0.999996 | 8.46336e-06 | 0.999974 |
| rad61     | 9.78863e-07 | 0.999997 | 7.84713e-06 | 0.999981 |
| rad13     | 7.65899e-07 | 0.999998 | 6.13989e-06 | 0.999988 |
| rad26     | 5.25649e-07 | 0.999998 | 4.21391e-06 | 0.999992 |
| rad42     | 4.07051e-07 | 0.999999 | 3.26315e-06 | 0.999995 |
| rad25     | 2.12882e-07 | 0.999999 | 1.70659e-06 | 0.999997 |
| rad43     | 2.10524e-07 | 0.999999 | 1.68768e-06 | 0.999998 |
| rad10     | 1.45673e-07 | 0.999999 | 1.16780e-06 | 1.000000 |
| rad33     | 5.25303e-08 | 0.999999 | 4.21113e-07 | 1.000000 |
| rad41     | 5.19510e-08 | 0.999999 | 4.16469e-07 | 1.000000 |
| rad2      | 1.48232e-08 | 1.000000 | 1.18831e-07 | 1.000000 |
| rad5      | 1.31182e-08 | 1.000000 | 1.05163e-07 | 1.000000 |
| rad1      | 5.42998e-09 | 1.000000 | 4.35298e-08 | 1.000000 |
| rad3      | 2.16005e-09 | 1.000000 | 1.73162e-08 | 1.000000 |
| rad14     | 2.10353e-09 | 1.000000 | 1.68631e-08 | 1.000000 |
| rad4      | 1.31635e-09 | 1.000000 | 1.05526e-08 | 1.000000 |
| rad27     | 5.81556e-10 | 1.000000 | 4.66209e-09 | 1.000000 |

1000000.00 Pa, 2500.00000 K

| =====         |                     |          |                      |          |
|---------------|---------------------|----------|----------------------|----------|
| Rate constant | True (fraction)     |          | Effective (fraction) |          |
| -----         |                     |          |                      |          |
| Total         | 5.32896e-13 (1.00 ) |          | 6.50154e-14 (1.00 )  |          |
| species       | PYtrue              | Cumul    | PYeffective          | Cumul    |
| -----         |                     |          |                      |          |
| Benzyl+C2H2   | 0.877996            | 0.877996 | 0.00000              | 0.00000  |
| Indene+H      | 0.0433630           | 0.921359 | 0.355422             | 0.355422 |
| PhCH2CCH+H    | 0.0388971           | 0.960256 | 0.318817             | 0.674239 |
| PhCHCCH2+H    | 0.0119287           | 0.972185 | 0.0977723            | 0.772011 |
| Ph+Allene     | 0.0115502           | 0.983735 | 0.0946699            | 0.866681 |
| PAH9+H        | 0.00184658          | 0.985582 | 0.0151354            | 0.881817 |
| rad50         | 0.00159957          | 0.987181 | 0.0131107            | 0.894927 |
| PAH3+H        | 0.00153818          | 0.988719 | 0.0126076            | 0.907535 |
| rad39         | 0.00131894          | 0.990038 | 0.0108106            | 0.918346 |
| rad51         | 0.00127775          | 0.991316 | 0.0104730            | 0.928819 |
| PAH7+H        | 0.00127710          | 0.992593 | 0.0104676            | 0.939286 |
| rad38         | 0.00116093          | 0.993754 | 0.00951544           | 0.948802 |
| rad71         | 0.00108842          | 0.994842 | 0.00892111           | 0.957723 |
| rad19anti     | 0.000534904         | 0.995377 | 0.00438430           | 0.962107 |
| rad46         | 0.000510330         | 0.995888 | 0.00418288           | 0.966290 |
| rad30         | 0.000456512         | 0.996344 | 0.00374177           | 0.970032 |
| rad73         | 0.000340589         | 0.996685 | 0.00279161           | 0.972823 |
| rad35         | 0.000333650         | 0.997018 | 0.00273474           | 0.975558 |
| Ph+MeAc       | 0.000326386         | 0.997345 | 0.00267520           | 0.978233 |
| PhCCH+CH3     | 0.000320005         | 0.997665 | 0.00262290           | 0.980856 |
| rad23         | 0.000227916         | 0.997893 | 0.00186809           | 0.982724 |
| rad52         | 0.000219861         | 0.998113 | 0.00180207           | 0.984526 |
| rad72         | 0.000208967         | 0.998322 | 0.00171279           | 0.986239 |
| rad6          | 0.000194903         | 0.998516 | 0.00159751           | 0.987837 |
| rad20         | 0.000157069         | 0.998674 | 0.00128740           | 0.989124 |
| rad22         | 0.000126260         | 0.998800 | 0.00103488           | 0.990159 |
| rad59         | 0.000123631         | 0.998923 | 0.00101333           | 0.991172 |
| rad67         | 0.000103665         | 0.999027 | 0.000849684          | 0.992022 |
| PAH1+H        | 9.59607e-05         | 0.999123 | 0.000786535          | 0.992808 |
| PAH10+CH3     | 8.93162e-05         | 0.999212 | 0.000732073          | 0.993540 |
| PhCCCH3+H     | 8.58581e-05         | 0.999298 | 0.000703729          | 0.994244 |
| rad60syn      | 7.54006e-05         | 0.999374 | 0.000618015          | 0.994862 |
| rad9          | 7.53278e-05         | 0.999449 | 0.000617419          | 0.995480 |
| rad21         | 7.43532e-05         | 0.999523 | 0.000609430          | 0.996089 |
| rad45         | 6.91957e-05         | 0.999593 | 0.000567157          | 0.996656 |
| PhcycC3H3_A+H | 5.56810e-05         | 0.999648 | 0.000456385          | 0.997113 |
| rad60anti     | 5.37857e-05         | 0.999702 | 0.000440850          | 0.997553 |
| rad11         | 5.13059e-05         | 0.999753 | 0.000420525          | 0.997974 |
| rad19syn      | 4.53898e-05         | 0.999799 | 0.000372034          | 0.998346 |
| rad18         | 3.11404e-05         | 0.999830 | 0.000255240          | 0.998601 |
| rad65         | 2.99523e-05         | 0.999860 | 0.000245502          | 0.998847 |
| rad58         | 2.59847e-05         | 0.999886 | 0.000212981          | 0.999060 |
| PAH8+H        | 1.91968e-05         | 0.999905 | 0.000157345          | 0.999217 |

|           |             |          |             |          |
|-----------|-------------|----------|-------------|----------|
| rad70     | 1.62096e-05 | 0.999921 | 0.000132860 | 0.999350 |
| rad36     | 1.23475e-05 | 0.999934 | 0.000101205 | 0.999451 |
| rad54     | 1.06853e-05 | 0.999944 | 8.75815e-05 | 0.999539 |
| rad37     | 1.00806e-05 | 0.999954 | 8.26250e-05 | 0.999621 |
| rad34     | 6.73007e-06 | 0.999961 | 5.51625e-05 | 0.999676 |
| rad15     | 5.48291e-06 | 0.999967 | 4.49402e-05 | 0.999721 |
| rad7      | 4.35783e-06 | 0.999971 | 3.57186e-05 | 0.999757 |
| rad47     | 3.64154e-06 | 0.999975 | 2.98476e-05 | 0.999787 |
| rad64     | 2.83761e-06 | 0.999977 | 2.32582e-05 | 0.999810 |
| rad28     | 2.76372e-06 | 0.999980 | 2.26526e-05 | 0.999833 |
| rad8      | 2.40734e-06 | 0.999983 | 1.97315e-05 | 0.999853 |
| rad24     | 2.32737e-06 | 0.999985 | 1.90761e-05 | 0.999872 |
| rad56     | 2.08409e-06 | 0.999987 | 1.70821e-05 | 0.999889 |
| rad68syn  | 2.05317e-06 | 0.999989 | 1.68286e-05 | 0.999906 |
| rad40syn  | 1.39493e-06 | 0.999990 | 1.14335e-05 | 0.999917 |
| rad68anti | 1.30585e-06 | 0.999992 | 1.07033e-05 | 0.999928 |
| rad62     | 1.29068e-06 | 0.999993 | 1.05790e-05 | 0.999938 |
| rad53     | 1.22710e-06 | 0.999994 | 1.00579e-05 | 0.999948 |
| rad12     | 1.20138e-06 | 0.999995 | 9.84705e-06 | 0.999958 |
| rad55     | 1.19983e-06 | 0.999997 | 9.83430e-06 | 0.999968 |
| rad40anti | 1.08190e-06 | 0.999998 | 8.86772e-06 | 0.999977 |
| rad61     | 8.00027e-07 | 0.999998 | 6.55736e-06 | 0.999983 |
| rad13     | 5.65740e-07 | 0.999999 | 4.63705e-06 | 0.999988 |
| rad26     | 5.15859e-07 | 1.000000 | 4.22820e-06 | 0.999992 |
| rad42     | 3.05992e-07 | 1.000000 | 2.50804e-06 | 0.999995 |
| rad43     | 1.97860e-07 | 1.000000 | 1.62174e-06 | 0.999996 |
| rad10     | 1.61254e-07 | 1.000000 | 1.32170e-06 | 0.999998 |
| rad25     | 1.54706e-07 | 1.000000 | 1.26804e-06 | 0.999999 |
| rad41     | 4.49760e-08 | 1.000000 | 3.68642e-07 | 0.999999 |
| rad33     | 4.18816e-08 | 1.000000 | 3.43280e-07 | 1.000000 |
| rad5      | 1.68566e-08 | 1.000000 | 1.38164e-07 | 1.000000 |
| rad2      | 1.55907e-08 | 1.000000 | 1.27788e-07 | 1.000000 |
| rad1      | 5.97867e-09 | 1.000000 | 4.90037e-08 | 1.000000 |
| rad14     | 1.77649e-09 | 1.000000 | 1.45608e-08 | 1.000000 |
| rad3      | 1.58183e-09 | 1.000000 | 1.29653e-08 | 1.000000 |
| rad4      | 9.50367e-10 | 1.000000 | 7.78961e-09 | 1.000000 |
| rad27     | 6.68257e-10 | 1.000000 | 5.47731e-09 | 1.000000 |

1000000.00 Pa, 2750.00000 K

| Rate constant | True (fraction)     | Effective (fraction) |
|---------------|---------------------|----------------------|
| Total         | 8.05113e-13 (1.00 ) | 1.01425e-13 (1.00 )  |

| species     | PYtrue      | Cumul    | PYeffective | Cumul    |
|-------------|-------------|----------|-------------|----------|
| Benzyl+C2H2 | 0.874024    | 0.874024 | 0.00000     | 0.00000  |
| PhCH2CCH+H  | 0.0496915   | 0.923716 | 0.394450    | 0.394450 |
| Indene+H    | 0.0360113   | 0.959727 | 0.285858    | 0.680308 |
| PhCHCCH2+H  | 0.0138323   | 0.973559 | 0.109801    | 0.790109 |
| Ph+Allene   | 0.0122494   | 0.985808 | 0.0972354   | 0.887344 |
| PAH3+H      | 0.00180293  | 0.987611 | 0.0143117   | 0.901656 |
| PAH9+H      | 0.00153432  | 0.989146 | 0.0121795   | 0.913836 |
| rad50       | 0.00125658  | 0.990402 | 0.00997472  | 0.923810 |
| PAH7+H      | 0.00116174  | 0.991564 | 0.00922185  | 0.933032 |
| rad39       | 0.00102971  | 0.992594 | 0.00817382  | 0.941206 |
| rad51       | 0.000979993 | 0.993574 | 0.00777918  | 0.948985 |
| rad38       | 0.000972341 | 0.994546 | 0.00771844  | 0.956704 |
| rad71       | 0.000804999 | 0.995351 | 0.00639008  | 0.963094 |
| rad19anti   | 0.000642340 | 0.995993 | 0.00509889  | 0.968193 |
| rad30       | 0.000459580 | 0.996453 | 0.00364814  | 0.971841 |
| rad46       | 0.000420675 | 0.996874 | 0.00333932  | 0.975180 |
| Ph+MeAc     | 0.000375149 | 0.997249 | 0.00297793  | 0.978158 |
| rad35       | 0.000320542 | 0.997569 | 0.00254446  | 0.980702 |
| PhCCH+CH3   | 0.000320228 | 0.997890 | 0.00254197  | 0.983244 |
| rad73       | 0.000253276 | 0.998143 | 0.00201050  | 0.985255 |
| rad52       | 0.000170923 | 0.998314 | 0.00135678  | 0.986612 |
| rad72       | 0.000153645 | 0.998467 | 0.00121963  | 0.987831 |
| rad23       | 0.000145863 | 0.998613 | 0.00115786  | 0.988989 |
| rad59       | 0.000143179 | 0.998757 | 0.00113655  | 0.990126 |
| rad67       | 0.000122173 | 0.998879 | 0.000969806 | 0.991096 |
| rad6        | 0.000112039 | 0.998991 | 0.000889364 | 0.991985 |
| PhCCCH3+H   | 0.000101908 | 0.999093 | 0.000808946 | 0.992794 |
| rad20       | 9.55156e-05 | 0.999188 | 0.000758203 | 0.993552 |
| PAH10+CH3   | 8.62000e-05 | 0.999274 | 0.000684255 | 0.994236 |
| rad60syn    | 8.37122e-05 | 0.999358 | 0.000664507 | 0.994901 |
| PAH1+H      | 7.74757e-05 | 0.999436 | 0.000615001 | 0.995516 |
| rad9        | 6.23816e-05 | 0.999498 | 0.000495185 | 0.996011 |
| rad60anti   | 6.01177e-05 | 0.999558 | 0.000477214 | 0.996488 |
| rad22       | 5.97924e-05 | 0.999618 | 0.000474632 | 0.996963 |

|               |             |          |             |          |
|---------------|-------------|----------|-------------|----------|
| rad45         | 5.03575e-05 | 0.999668 | 0.000399737 | 0.997363 |
| rad19syn      | 4.73308e-05 | 0.999716 | 0.000375712 | 0.997738 |
| rad21         | 4.43441e-05 | 0.999760 | 0.000352004 | 0.998090 |
| PhcycC3H3_A+H | 4.32539e-05 | 0.999803 | 0.000343349 | 0.998434 |
| rad58         | 3.06770e-05 | 0.999834 | 0.000243514 | 0.998677 |
| rad11         | 2.89915e-05 | 0.999863 | 0.000230135 | 0.998907 |
| rad65         | 2.27154e-05 | 0.999885 | 0.000180315 | 0.999088 |
| rad18         | 1.64281e-05 | 0.999902 | 0.000130406 | 0.999218 |
| rad70         | 1.59115e-05 | 0.999918 | 0.000126305 | 0.999344 |
| PAH8+H        | 1.52643e-05 | 0.999933 | 0.000121168 | 0.999465 |
| rad37         | 1.08972e-05 | 0.999944 | 8.65017e-05 | 0.999552 |
| rad54         | 9.40287e-06 | 0.999953 | 7.46399e-05 | 0.999627 |
| rad36         | 9.04263e-06 | 0.999962 | 7.17804e-05 | 0.999698 |
| rad34         | 6.37551e-06 | 0.999969 | 5.06088e-05 | 0.999749 |
| rad15         | 4.73750e-06 | 0.999974 | 3.76063e-05 | 0.999787 |
| rad7          | 2.96834e-06 | 0.999977 | 2.35626e-05 | 0.999810 |
| rad47         | 2.59436e-06 | 0.999979 | 2.05940e-05 | 0.999831 |
| rad8          | 2.41488e-06 | 0.999982 | 1.91693e-05 | 0.999850 |
| rad64         | 2.26153e-06 | 0.999984 | 1.79520e-05 | 0.999868 |
| rad28         | 1.97450e-06 | 0.999986 | 1.56736e-05 | 0.999884 |
| rad68syn      | 1.74941e-06 | 0.999988 | 1.38868e-05 | 0.999897 |
| rad24         | 1.67595e-06 | 0.999989 | 1.33037e-05 | 0.999911 |
| rad56         | 1.56940e-06 | 0.999991 | 1.24579e-05 | 0.999923 |
| rad12         | 1.20557e-06 | 0.999992 | 9.56984e-06 | 0.999933 |
| rad40syn      | 1.14177e-06 | 0.999993 | 9.06335e-06 | 0.999942 |
| rad68anti     | 1.11354e-06 | 0.999994 | 8.83929e-06 | 0.999951 |
| rad55         | 1.03322e-06 | 0.999995 | 8.20173e-06 | 0.999959 |
| rad62         | 1.00558e-06 | 0.999996 | 7.98231e-06 | 0.999967 |
| rad53         | 9.58588e-07 | 0.999997 | 7.60926e-06 | 0.999974 |
| rad40anti     | 8.75952e-07 | 0.999998 | 6.95330e-06 | 0.999981 |
| rad61         | 6.95349e-07 | 0.999999 | 5.51968e-06 | 0.999987 |
| rad26         | 4.61784e-07 | 0.999999 | 3.66564e-06 | 0.999991 |
| rad13         | 3.93493e-07 | 1.000000 | 3.12354e-06 | 0.999994 |
| rad42         | 2.29634e-07 | 1.000000 | 1.82283e-06 | 0.999996 |
| rad43         | 2.07932e-07 | 1.000000 | 1.65056e-06 | 0.999997 |
| rad10         | 1.57658e-07 | 1.000000 | 1.25149e-06 | 0.999998 |
| rad25         | 1.15302e-07 | 1.000000 | 9.15268e-07 | 0.999999 |
| rad41         | 4.33757e-08 | 1.000000 | 3.44316e-07 | 1.000000 |
| rad33         | 3.15099e-08 | 1.000000 | 2.50125e-07 | 1.000000 |
| rad5          | 1.94660e-08 | 1.000000 | 1.54521e-07 | 1.000000 |
| rad2          | 1.44156e-08 | 1.000000 | 1.14431e-07 | 1.000000 |
| rad1          | 5.85408e-09 | 1.000000 | 4.64696e-08 | 1.000000 |
| rad14         | 1.54398e-09 | 1.000000 | 1.22561e-08 | 1.000000 |
| rad3          | 1.09846e-09 | 1.000000 | 8.71957e-09 | 1.000000 |
| rad27         | 7.11413e-10 | 1.000000 | 5.64719e-09 | 1.000000 |
| rad4          | 6.50079e-10 | 1.000000 | 5.16033e-09 | 1.000000 |

1000000.00 Pa, 3000.00000 K

=====

| Rate constant | True (fraction)     | Effective (fraction) |
|---------------|---------------------|----------------------|
| Total         | 1.15309e-12 (1.00 ) | 1.54714e-13 (1.00 )  |

| species     | PYtrue      | Cumul    | PYeffective | Cumul    |
|-------------|-------------|----------|-------------|----------|
| Benzyl+C2H2 | 0.865827    | 0.865827 | 0.000000    | 0.000000 |
| PhCH2CCH+H  | 0.0613941   | 0.927221 | 0.457575    | 0.457575 |
| Indene+H    | 0.0302404   | 0.957461 | 0.225384    | 0.682959 |
| PhCHCCH2+H  | 0.0161498   | 0.973611 | 0.120366    | 0.803325 |
| Ph+Allene   | 0.0132932   | 0.986904 | 0.0990751   | 0.902400 |
| PAH3+H      | 0.00213623  | 0.989041 | 0.0159215   | 0.918322 |
| PAH9+H      | 0.00131778  | 0.990359 | 0.00982152  | 0.928143 |
| PAH7+H      | 0.00112120  | 0.991480 | 0.00835636  | 0.936499 |
| rad50       | 0.00102430  | 0.992504 | 0.00763422  | 0.944134 |
| rad38       | 0.000842867 | 0.993347 | 0.00628195  | 0.950416 |
| rad39       | 0.000832311 | 0.994179 | 0.00620328  | 0.956619 |
| rad51       | 0.000773561 | 0.994953 | 0.00576541  | 0.962384 |
| rad19anti   | 0.000714687 | 0.995667 | 0.00532662  | 0.967711 |
| rad71       | 0.000596902 | 0.996264 | 0.00444875  | 0.972160 |
| rad30       | 0.000457091 | 0.996721 | 0.00340673  | 0.975566 |
| Ph+MeAc     | 0.000436198 | 0.997158 | 0.00325102  | 0.978817 |
| rad46       | 0.000360241 | 0.997518 | 0.00268490  | 0.981502 |
| PhCCH+CH3   | 0.000345737 | 0.997864 | 0.00257680  | 0.984079 |
| rad35       | 0.000320707 | 0.998184 | 0.00239025  | 0.986469 |
| rad73       | 0.000189978 | 0.998374 | 0.00141592  | 0.987885 |
| rad59       | 0.000165620 | 0.998540 | 0.00123438  | 0.989120 |
| rad67       | 0.000143690 | 0.998684 | 0.00107093  | 0.990191 |
| rad52       | 0.000137437 | 0.998821 | 0.00102433  | 0.991215 |
| PhCCCH3+H   | 0.000121026 | 0.998942 | 0.000902018 | 0.992117 |
| rad72       | 0.000112333 | 0.999054 | 0.000837229 | 0.992954 |

|               |             |          |             |          |
|---------------|-------------|----------|-------------|----------|
| rad23         | 9.38973e-05 | 0.999148 | 0.000699824 | 0.993654 |
| rad60syn      | 9.19152e-05 | 0.999240 | 0.000685051 | 0.994339 |
| PAH10+CH3     | 8.94138e-05 | 0.999330 | 0.000666408 | 0.995006 |
| PAH1+H        | 6.77053e-05 | 0.999397 | 0.000504612 | 0.995510 |
| rad60anti     | 6.65299e-05 | 0.999464 | 0.000495852 | 0.996006 |
| rad6          | 6.26172e-05 | 0.999526 | 0.000466691 | 0.996473 |
| rad20         | 6.19578e-05 | 0.999588 | 0.000461777 | 0.996934 |
| rad19syn      | 5.75899e-05 | 0.999646 | 0.000429222 | 0.997364 |
| rad9          | 4.74142e-05 | 0.999693 | 0.000353382 | 0.997717 |
| rad58         | 3.86554e-05 | 0.999732 | 0.000288102 | 0.998005 |
| PhcycC3H3_A+H | 3.68047e-05 | 0.999769 | 0.000274308 | 0.998279 |
| rad45         | 3.60395e-05 | 0.999805 | 0.000268605 | 0.998548 |
| rad22         | 3.08544e-05 | 0.999836 | 0.000229960 | 0.998778 |
| rad21         | 2.80372e-05 | 0.999864 | 0.000208963 | 0.998987 |
| rad65         | 1.76557e-05 | 0.999881 | 0.000131589 | 0.999119 |
| rad11         | 1.75528e-05 | 0.999899 | 0.000130822 | 0.999249 |
| rad70         | 1.72124e-05 | 0.999916 | 0.000128285 | 0.999378 |
| PAH8+H        | 1.37623e-05 | 0.999930 | 0.000102571 | 0.999480 |
| rad37         | 1.18353e-05 | 0.999942 | 8.82094e-05 | 0.999568 |
| rad18         | 9.30255e-06 | 0.999951 | 6.93327e-05 | 0.999638 |
| rad54         | 8.93719e-06 | 0.999960 | 6.66095e-05 | 0.999704 |
| rad34         | 6.78290e-06 | 0.999967 | 5.05535e-05 | 0.999755 |
| rad36         | 6.50494e-06 | 0.999973 | 4.84818e-05 | 0.999803 |
| rad15         | 3.75062e-06 | 0.999977 | 2.79536e-05 | 0.999831 |
| rad8          | 2.37348e-06 | 0.999979 | 1.76898e-05 | 0.999849 |
| rad64         | 1.94840e-06 | 0.999981 | 1.45216e-05 | 0.999864 |
| rad7          | 1.91321e-06 | 0.999983 | 1.42593e-05 | 0.999878 |
| rad47         | 1.91028e-06 | 0.999985 | 1.42375e-05 | 0.999892 |
| rad68syn      | 1.71522e-06 | 0.999987 | 1.27836e-05 | 0.999905 |
| rad28         | 1.38261e-06 | 0.999988 | 1.03047e-05 | 0.999915 |
| rad56         | 1.33655e-06 | 0.999990 | 9.96141e-06 | 0.999925 |
| rad24         | 1.23575e-06 | 0.999991 | 9.21014e-06 | 0.999934 |
| rad12         | 1.10067e-06 | 0.999992 | 8.20339e-06 | 0.999943 |
| rad68anti     | 1.09260e-06 | 0.999993 | 8.14325e-06 | 0.999951 |
| rad40syn      | 1.06970e-06 | 0.999994 | 7.97252e-06 | 0.999959 |
| rad55         | 9.74319e-07 | 0.999995 | 7.26167e-06 | 0.999966 |
| rad62         | 8.56816e-07 | 0.999996 | 6.38592e-06 | 0.999972 |
| rad53         | 8.46157e-07 | 0.999997 | 6.30648e-06 | 0.999979 |
| rad40anti     | 8.09261e-07 | 0.999998 | 6.03148e-06 | 0.999985 |
| rad61         | 6.61670e-07 | 0.999998 | 4.93148e-06 | 0.999990 |
| rad26         | 3.78587e-07 | 0.999999 | 2.82164e-06 | 0.999992 |
| rad13         | 2.61164e-07 | 0.999999 | 1.94648e-06 | 0.999994 |
| rad43         | 2.35813e-07 | 0.999999 | 1.75753e-06 | 0.999996 |
| rad42         | 1.86034e-07 | 0.999999 | 1.38652e-06 | 0.999997 |
| rad10         | 1.38606e-07 | 1.000000 | 1.03304e-06 | 0.999999 |
| rad25         | 8.90443e-08 | 1.000000 | 6.63654e-07 | 0.999999 |
| rad41         | 4.69128e-08 | 1.000000 | 3.49645e-07 | 1.000000 |
| rad33         | 2.25651e-08 | 1.000000 | 1.68179e-07 | 1.000000 |
| rad5          | 2.08678e-08 | 1.000000 | 1.55529e-07 | 1.000000 |
| rad2          | 1.21227e-08 | 1.000000 | 9.03512e-08 | 1.000000 |
| rad1          | 5.24375e-09 | 1.000000 | 3.90821e-08 | 1.000000 |
| rad14         | 1.36916e-09 | 1.000000 | 1.02044e-08 | 1.000000 |
| rad3          | 7.33081e-10 | 1.000000 | 5.46371e-09 | 1.000000 |
| rad27         | 6.98328e-10 | 1.000000 | 5.20469e-09 | 1.000000 |
| rad4          | 4.27770e-10 | 1.000000 | 3.18821e-09 | 1.000000 |

1000000.00 Pa, 3250.00000 K

=====

| Rate constant | True (fraction)     | Effective (fraction) |
|---------------|---------------------|----------------------|
| Total         | 1.58309e-12 (1.00 ) | 2.29534e-13 (1.00 )  |

| species     | PYtrue      | Cumul    | PYeffective | Cumul    |
|-------------|-------------|----------|-------------|----------|
| Benzyl+C2H2 | 0.855009    | 0.855009 | 0.00000     | 0.00000  |
| PhCH2CCH+H  | 0.0735315   | 0.928540 | 0.507146    | 0.507146 |
| Indene+H    | 0.0255357   | 0.954076 | 0.176120    | 0.683266 |
| PhCHCCH2+H  | 0.0187147   | 0.972791 | 0.129075    | 0.812341 |
| Ph+Allene   | 0.0145884   | 0.987379 | 0.100616    | 0.912957 |
| PAH3+H      | 0.00247633  | 0.989856 | 0.0170793   | 0.930036 |
| PAH9+H      | 0.00116369  | 0.991019 | 0.00802599  | 0.938062 |
| PAH7+H      | 0.00112654  | 0.992146 | 0.00776977  | 0.945832 |
| rad50       | 0.000874465 | 0.993020 | 0.00603118  | 0.951863 |
| rad38       | 0.000749330 | 0.993770 | 0.00516813  | 0.957031 |
| rad19anti   | 0.000748902 | 0.994519 | 0.00516518  | 0.962197 |
| rad39       | 0.000705626 | 0.995224 | 0.00486670  | 0.967063 |
| rad51       | 0.000639464 | 0.995864 | 0.00441038  | 0.971474 |
| Ph+MeAc     | 0.000501947 | 0.996366 | 0.00346193  | 0.974936 |
| rad71       | 0.000453644 | 0.996819 | 0.00312879  | 0.978064 |
| rad30       | 0.000448233 | 0.997267 | 0.00309146  | 0.981156 |

|               |             |          |             |          |
|---------------|-------------|----------|-------------|----------|
| PhCCH+CH3     | 0.000399105 | 0.997667 | 0.00275263  | 0.983908 |
| rad35         | 0.000326680 | 0.997993 | 0.00225311  | 0.986162 |
| rad46         | 0.000318688 | 0.998312 | 0.00219799  | 0.988360 |
| rad59         | 0.000187021 | 0.998499 | 0.00128988  | 0.989649 |
| rad67         | 0.000165557 | 0.998665 | 0.00114185  | 0.990791 |
| rad73         | 0.000147145 | 0.998812 | 0.00101486  | 0.991806 |
| PhCCCH3+H     | 0.000141971 | 0.998954 | 0.000979174 | 0.992785 |
| rad52         | 0.000115779 | 0.999069 | 0.000798524 | 0.993584 |
| rad60syn      | 9.86982e-05 | 0.999168 | 0.000680721 | 0.994265 |
| PAH10+CH3     | 9.66682e-05 | 0.999265 | 0.000666720 | 0.994931 |
| rad72         | 8.31639e-05 | 0.999348 | 0.000573582 | 0.995505 |
| rad19syn      | 7.55846e-05 | 0.999424 | 0.000521307 | 0.996026 |
| rad60anti     | 7.19829e-05 | 0.999496 | 0.000496466 | 0.996523 |
| PAH1+H        | 6.50013e-05 | 0.999561 | 0.000448314 | 0.996971 |
| rad23         | 6.02806e-05 | 0.999621 | 0.000415755 | 0.997387 |
| rad58         | 4.82427e-05 | 0.999669 | 0.000332730 | 0.997719 |
| rad20         | 4.23680e-05 | 0.999711 | 0.000292212 | 0.998012 |
| PhcycC3H3_A+H | 3.49137e-05 | 0.999746 | 0.000240800 | 0.998252 |
| rad6          | 3.46224e-05 | 0.999781 | 0.000238791 | 0.998491 |
| rad9          | 3.41184e-05 | 0.999815 | 0.000235315 | 0.998727 |
| rad45         | 2.53818e-05 | 0.999840 | 0.000175058 | 0.998902 |
| rad70         | 1.97567e-05 | 0.999860 | 0.000136262 | 0.999038 |
| rad21         | 1.86174e-05 | 0.999879 | 0.000128404 | 0.999166 |
| rad22         | 1.71460e-05 | 0.999896 | 0.000118256 | 0.999285 |
| PAH8+H        | 1.46343e-05 | 0.999911 | 0.000100933 | 0.999385 |
| rad65         | 1.44891e-05 | 0.999925 | 9.99310e-05 | 0.999485 |
| rad37         | 1.25806e-05 | 0.999938 | 8.67685e-05 | 0.999572 |
| rad11         | 1.13993e-05 | 0.999949 | 7.86207e-05 | 0.999651 |
| rad54         | 8.97567e-06 | 0.999958 | 6.19052e-05 | 0.999713 |
| rad34         | 7.81847e-06 | 0.999966 | 5.39240e-05 | 0.999767 |
| rad18         | 5.58959e-06 | 0.999971 | 3.85514e-05 | 0.999805 |
| rad36         | 4.59994e-06 | 0.999976 | 3.17258e-05 | 0.999837 |
| rad15         | 2.80217e-06 | 0.999979 | 1.93266e-05 | 0.999856 |
| rad8          | 2.29035e-06 | 0.999981 | 1.57965e-05 | 0.999872 |
| rad68syn      | 1.93005e-06 | 0.999983 | 1.33115e-05 | 0.999885 |
| rad64         | 1.85148e-06 | 0.999985 | 1.27697e-05 | 0.999898 |
| rad47         | 1.48092e-06 | 0.999986 | 1.02139e-05 | 0.999908 |
| rad56         | 1.32753e-06 | 0.999988 | 9.15597e-06 | 0.999917 |
| rad68anti     | 1.22988e-06 | 0.999989 | 8.48246e-06 | 0.999926 |
| rad7          | 1.20005e-06 | 0.999990 | 8.27677e-06 | 0.999934 |
| rad40syn      | 1.17108e-06 | 0.999991 | 8.07694e-06 | 0.999942 |
| rad55         | 9.85354e-07 | 0.999992 | 6.79599e-06 | 0.999949 |
| rad28         | 9.57675e-07 | 0.999993 | 6.60508e-06 | 0.999956 |
| rad12         | 9.42944e-07 | 0.999994 | 6.50348e-06 | 0.999962 |
| rad24         | 9.23310e-07 | 0.999995 | 6.36807e-06 | 0.999969 |
| rad40anti     | 8.77167e-07 | 0.999996 | 6.04982e-06 | 0.999975 |
| rad53         | 8.52286e-07 | 0.999997 | 5.87822e-06 | 0.999980 |
| rad62         | 8.22297e-07 | 0.999998 | 5.67138e-06 | 0.999986 |
| rad61         | 6.91282e-07 | 0.999998 | 4.76777e-06 | 0.999991 |
| rad26         | 2.91241e-07 | 0.999999 | 2.00869e-06 | 0.999993 |
| rad43         | 2.75725e-07 | 0.999999 | 1.90168e-06 | 0.999995 |
| rad42         | 1.71194e-07 | 0.999999 | 1.18072e-06 | 0.999996 |
| rad13         | 1.69966e-07 | 0.999999 | 1.17226e-06 | 0.999997 |
| rad10         | 1.13083e-07 | 0.999999 | 7.79935e-07 | 0.999998 |
| rad25         | 7.10666e-08 | 0.999999 | 4.90147e-07 | 0.999998 |
| rad41         | 5.49177e-08 | 1.000000 | 3.78768e-07 | 0.999999 |
| rad5          | 2.13097e-08 | 1.000000 | 1.46973e-07 | 0.999999 |
| rad33         | 1.57826e-08 | 1.000000 | 1.08852e-07 | 0.999999 |
| rad2          | 9.61763e-09 | 1.000000 | 6.63328e-08 | 0.999999 |
| rad1          | 4.42601e-09 | 1.000000 | 3.05262e-08 | 0.999999 |
| rad14         | 1.22975e-09 | 1.000000 | 8.48162e-09 | 0.999999 |
| rad27         | 6.44628e-10 | 1.000000 | 4.44600e-09 | 0.999999 |
| rad3          | 4.82685e-10 | 1.000000 | 3.32908e-09 | 0.999999 |
| rad4          | 2.78320e-10 | 1.000000 | 1.91957e-09 | 0.999999 |

1000000.00 Pa, 3500.00000 K

=====  
Rate constant | True (fraction) | Effective (fraction)  
-----  
Total | 2.10046e-12 (1.00) | 3.30535e-13 (1.00)

-----  
species | PYtrue | Cumul | PYeffective | Cumul  
-----  
Benzyl+C2H2 | 0.842637 | 0.842637 | 0.000000 | 0.000000  
PhCH2CCH+H | 0.0857620 | 0.928399 | 0.544994 | 0.544994  
Indene+H | 0.0216370 | 0.950036 | 0.137497 | 0.682491  
PhCHCCH2+H | 0.0213919 | 0.971428 | 0.135940 | 0.818431  
Ph+Allene | 0.0160572 | 0.987485 | 0.102039 | 0.920470  
PAH3+H | 0.00279119 | 0.990276 | 0.0177372 | 0.938207  
PAH7+H | 0.00115543 | 0.991432 | 0.00734242 | 0.945550

|               |             |          |             |          |
|---------------|-------------|----------|-------------|----------|
| PAH9+H        | 0.00104326  | 0.992475 | 0.00662965  | 0.952179 |
| rad50         | 0.000780477 | 0.993255 | 0.00495972  | 0.957139 |
| rad19anti     | 0.000751697 | 0.994007 | 0.00477683  | 0.961916 |
| rad38         | 0.000675164 | 0.994682 | 0.00429048  | 0.966206 |
| rad39         | 0.000628924 | 0.995311 | 0.00399664  | 0.970203 |
| Ph+MeAc       | 0.000565083 | 0.995876 | 0.00359094  | 0.973794 |
| rad51         | 0.000557686 | 0.996434 | 0.00354394  | 0.977338 |
| PhCCH+CH3     | 0.000481270 | 0.996915 | 0.00305834  | 0.980396 |
| rad30         | 0.000434080 | 0.997349 | 0.00275846  | 0.983155 |
| rad71         | 0.000363540 | 0.997713 | 0.00231020  | 0.985465 |
| rad35         | 0.000333357 | 0.998046 | 0.00211839  | 0.987583 |
| rad46         | 0.000288062 | 0.998334 | 0.00183055  | 0.989414 |
| rad59         | 0.000205567 | 0.998540 | 0.00130632  | 0.990720 |
| rad67         | 0.000185521 | 0.998725 | 0.00117894  | 0.991899 |
| PhCCCH3+H     | 0.000164361 | 0.998890 | 0.00104447  | 0.992943 |
| rad73         | 0.000120756 | 0.999011 | 0.000767370 | 0.993711 |
| PAH10+CH3     | 0.000105762 | 0.999116 | 0.000672090 | 0.994383 |
| rad60syn      | 0.000103654 | 0.999220 | 0.000658696 | 0.995042 |
| rad52         | 0.000102327 | 0.999322 | 0.000650262 | 0.995692 |
| rad19syn      | 0.000100321 | 0.999423 | 0.000637509 | 0.996329 |
| rad60anti     | 7.61225e-05 | 0.999499 | 0.000483738 | 0.996813 |
| PAH1+H        | 6.75847e-05 | 0.999566 | 0.000429482 | 0.997243 |
| rad72         | 6.41571e-05 | 0.999630 | 0.000407701 | 0.997650 |
| rad58         | 5.83976e-05 | 0.999689 | 0.000371100 | 0.998021 |
| rad23         | 3.86804e-05 | 0.999728 | 0.000245803 | 0.998267 |
| PhcycC3H3_A+H | 3.57687e-05 | 0.999763 | 0.000227301 | 0.998495 |
| rad20         | 3.02532e-05 | 0.999794 | 0.000192250 | 0.998687 |
| rad9          | 2.38283e-05 | 0.999817 | 0.000151422 | 0.998838 |
| rad70         | 2.31987e-05 | 0.999841 | 0.000147421 | 0.998986 |
| rad6          | 1.93614e-05 | 0.999860 | 0.000123037 | 0.999109 |
| PAH8+H        | 1.78666e-05 | 0.999878 | 0.000113537 | 0.999222 |
| rad45         | 1.76532e-05 | 0.999895 | 0.000112181 | 0.999334 |
| rad37         | 1.29964e-05 | 0.999908 | 8.25887e-05 | 0.999417 |
| rad21         | 1.28790e-05 | 0.999921 | 8.18424e-05 | 0.999499 |
| rad65         | 1.26487e-05 | 0.999934 | 8.03792e-05 | 0.999579 |
| rad22         | 1.01680e-05 | 0.999944 | 6.46148e-05 | 0.999644 |
| rad34         | 9.34632e-06 | 0.999953 | 5.93933e-05 | 0.999703 |
| rad54         | 9.27314e-06 | 0.999963 | 5.89283e-05 | 0.999762 |
| rad11         | 7.88300e-06 | 0.999971 | 5.00943e-05 | 0.999812 |
| rad18         | 3.52934e-06 | 0.999974 | 2.24280e-05 | 0.999835 |
| rad36         | 3.20903e-06 | 0.999977 | 2.03925e-05 | 0.999855 |
| rad68syn      | 2.37217e-06 | 0.999980 | 1.50745e-05 | 0.999870 |
| rad8          | 2.17390e-06 | 0.999982 | 1.38145e-05 | 0.999884 |
| rad15         | 2.02402e-06 | 0.999984 | 1.28621e-05 | 0.999897 |
| rad64         | 1.91927e-06 | 0.999986 | 1.21964e-05 | 0.999909 |
| rad68anti     | 1.51143e-06 | 0.999987 | 9.60469e-06 | 0.999919 |
| rad56         | 1.46965e-06 | 0.999989 | 9.33923e-06 | 0.999928 |
| rad40syn      | 1.43902e-06 | 0.999990 | 9.14459e-06 | 0.999937 |
| rad47         | 1.22092e-06 | 0.999992 | 7.75864e-06 | 0.999945 |
| rad40anti     | 1.07610e-06 | 0.999993 | 6.83832e-06 | 0.999952 |
| rad55         | 1.03420e-06 | 0.999994 | 6.57203e-06 | 0.999958 |
| rad53         | 9.34647e-07 | 0.999995 | 5.93942e-06 | 0.999964 |
| rad62         | 8.71969e-07 | 0.999995 | 5.54113e-06 | 0.999970 |
| rad12         | 7.76668e-07 | 0.999996 | 4.93551e-06 | 0.999975 |
| rad61         | 7.69688e-07 | 0.999997 | 4.89116e-06 | 0.999980 |
| rad7          | 7.50506e-07 | 0.999998 | 4.76926e-06 | 0.999984 |
| rad24         | 6.95177e-07 | 0.999998 | 4.41766e-06 | 0.999989 |
| rad28         | 6.62941e-07 | 0.999999 | 4.21281e-06 | 0.999993 |
| rad43         | 3.22421e-07 | 0.999999 | 2.04890e-06 | 0.999995 |
| rad26         | 2.15201e-07 | 1.000000 | 1.36755e-06 | 0.999996 |
| rad42         | 1.78910e-07 | 1.000000 | 1.13692e-06 | 0.999998 |
| rad13         | 1.11000e-07 | 1.000000 | 7.05372e-07 | 0.999998 |
| rad10         | 8.80840e-08 | 1.000000 | 5.59750e-07 | 0.999999 |
| rad41         | 6.64458e-08 | 1.000000 | 4.22245e-07 | 0.999999 |
| rad25         | 5.81771e-08 | 1.000000 | 3.69699e-07 | 1.000000 |
| rad5          | 2.11430e-08 | 1.000000 | 1.34358e-07 | 1.000000 |
| rad33         | 1.10252e-08 | 1.000000 | 7.00620e-08 | 1.000000 |
| rad2          | 7.43205e-09 | 1.000000 | 4.72286e-08 | 1.000000 |
| rad1          | 3.60402e-09 | 1.000000 | 2.29025e-08 | 1.000000 |
| rad14         | 1.11074e-09 | 1.000000 | 7.05847e-09 | 1.000000 |
| rad27         | 5.71907e-10 | 1.000000 | 3.63431e-09 | 1.000000 |
| rad3          | 3.20673e-10 | 1.000000 | 2.03779e-09 | 1.000000 |
| rad4          | 1.83253e-10 | 1.000000 | 1.16452e-09 | 1.000000 |

1000000.00 Pa, 3750.00000 K

=====

| Rate constant | True (fraction)     | Effective (fraction) |
|---------------|---------------------|----------------------|
| Total         | 2.70978e-12 (1.00 ) | 4.62190e-13 (1.00 )  |



| species       | PYtrue      | Cumul    | PYeffective | Cumul    |
|---------------|-------------|----------|-------------|----------|
| Benzyl+C2H2   | 0.829436    | 0.829436 | 0.00000     | 0.00000  |
| PhCH2CCH+H    | 0.0978364   | 0.927272 | 0.573604    | 0.573604 |
| PhCHCCH2+H    | 0.0240842   | 0.951357 | 0.141203    | 0.714807 |
| Indene+H      | 0.0183976   | 0.969754 | 0.107863    | 0.822670 |
| Ph+Allene     | 0.0176402   | 0.987394 | 0.103423    | 0.926093 |
| PAH3+H        | 0.00306565  | 0.990460 | 0.0179735   | 0.944067 |
| PAH7+H        | 0.00119213  | 0.991652 | 0.00698934  | 0.951056 |
| PAH9+H        | 0.000939416 | 0.992592 | 0.00550769  | 0.956564 |
| rad19anti     | 0.000732368 | 0.993324 | 0.00429380  | 0.960857 |
| rad50         | 0.000720256 | 0.994044 | 0.00422278  | 0.965080 |
| Ph+MeAc       | 0.000620076 | 0.994664 | 0.00363543  | 0.968716 |
| rad38         | 0.000610338 | 0.995275 | 0.00357834  | 0.972294 |
| PhCCH+CH3     | 0.000591060 | 0.995866 | 0.00346532  | 0.975759 |
| rad39         | 0.000583988 | 0.996450 | 0.00342386  | 0.979183 |
| rad51         | 0.000509939 | 0.996960 | 0.00298972  | 0.982173 |
| rad30         | 0.000416221 | 0.997376 | 0.00244026  | 0.984613 |
| rad35         | 0.000338039 | 0.997714 | 0.00198189  | 0.986595 |
| rad71         | 0.000314327 | 0.998028 | 0.00184287  | 0.988438 |
| rad46         | 0.000263035 | 0.998291 | 0.00154214  | 0.989980 |
| rad59         | 0.000220600 | 0.998512 | 0.00129335  | 0.991273 |
| rad67         | 0.000202073 | 0.998714 | 0.00118473  | 0.992458 |
| PhCCCH3+H     | 0.000188216 | 0.998902 | 0.00110349  | 0.993562 |
| rad19syn      | 0.000130479 | 0.999033 | 0.000764984 | 0.994326 |
| PAH10+CH3     | 0.000114958 | 0.999148 | 0.000673988 | 0.995000 |
| rad60syn      | 0.000106817 | 0.999254 | 0.000626255 | 0.995627 |
| rad73         | 0.000106634 | 0.999361 | 0.000625182 | 0.996252 |
| rad52         | 9.39532e-05 | 0.999455 | 0.000550837 | 0.996803 |
| rad60anti     | 7.89348e-05 | 0.999534 | 0.000462786 | 0.997266 |
| PAH1+H        | 7.37743e-05 | 0.999608 | 0.000432531 | 0.997698 |
| rad58         | 6.84496e-05 | 0.999676 | 0.000401313 | 0.998099 |
| rad72         | 5.32768e-05 | 0.999729 | 0.000312356 | 0.998412 |
| PhcycC3H3_A+H | 3.80214e-05 | 0.999767 | 0.000222915 | 0.998635 |
| rad70         | 2.72090e-05 | 0.999795 | 0.000159524 | 0.998794 |
| rad23         | 2.49150e-05 | 0.999820 | 0.000146074 | 0.998940 |
| PAH8+H        | 2.34004e-05 | 0.999843 | 0.000137194 | 0.999077 |
| rad20         | 2.23900e-05 | 0.999865 | 0.000131270 | 0.999209 |
| rad9          | 1.64530e-05 | 0.999882 | 9.64619e-05 | 0.999305 |
| rad37         | 1.30699e-05 | 0.999895 | 7.66272e-05 | 0.999382 |
| rad45         | 1.21830e-05 | 0.999907 | 7.14277e-05 | 0.999453 |
| rad65         | 1.16329e-05 | 0.999919 | 6.82023e-05 | 0.999521 |
| rad34         | 1.12279e-05 | 0.999930 | 6.58280e-05 | 0.999587 |
| rad6          | 1.11511e-05 | 0.999941 | 6.53775e-05 | 0.999653 |
| rad54         | 9.68322e-06 | 0.999951 | 5.67717e-05 | 0.999709 |
| rad21         | 9.22112e-06 | 0.999960 | 5.40624e-05 | 0.999763 |
| rad22         | 6.37887e-06 | 0.999966 | 3.73986e-05 | 0.999801 |
| rad11         | 5.74502e-06 | 0.999972 | 3.36824e-05 | 0.999835 |
| rad68syn      | 3.01355e-06 | 0.999975 | 1.76681e-05 | 0.999852 |
| rad18         | 2.32376e-06 | 0.999977 | 1.36240e-05 | 0.999866 |
| rad36         | 2.21919e-06 | 0.999980 | 1.30109e-05 | 0.999879 |
| rad64         | 2.10150e-06 | 0.999982 | 1.23209e-05 | 0.999891 |
| rad8          | 2.03289e-06 | 0.999984 | 1.19186e-05 | 0.999903 |
| rad68anti     | 1.91932e-06 | 0.999986 | 1.12527e-05 | 0.999914 |
| rad40syn      | 1.86230e-06 | 0.999988 | 1.09184e-05 | 0.999925 |
| rad56         | 1.70869e-06 | 0.999989 | 1.00179e-05 | 0.999935 |
| rad15         | 1.43890e-06 | 0.999991 | 8.43611e-06 | 0.999944 |
| rad40anti     | 1.39932e-06 | 0.999992 | 8.20405e-06 | 0.999952 |
| rad55         | 1.10069e-06 | 0.999993 | 6.45320e-06 | 0.999958 |
| rad47         | 1.06566e-06 | 0.999994 | 6.24782e-06 | 0.999965 |
| rad53         | 1.06275e-06 | 0.999995 | 6.23080e-06 | 0.999971 |
| rad62         | 9.79077e-07 | 0.999996 | 5.74022e-06 | 0.999977 |
| rad61         | 8.79565e-07 | 0.999997 | 5.15680e-06 | 0.999982 |
| rad12         | 6.25767e-07 | 0.999998 | 3.66880e-06 | 0.999985 |
| rad24         | 5.26435e-07 | 0.999998 | 3.08643e-06 | 0.999989 |
| rad7          | 4.76008e-07 | 0.999999 | 2.79078e-06 | 0.999991 |
| rad28         | 4.61576e-07 | 0.999999 | 2.70617e-06 | 0.999994 |
| rad43         | 3.71745e-07 | 1.000000 | 2.17950e-06 | 0.999996 |
| rad42         | 2.03487e-07 | 1.000000 | 1.19302e-06 | 0.999997 |
| rad26         | 1.55528e-07 | 1.000000 | 9.11843e-07 | 0.999998 |
| rad41         | 8.04744e-08 | 1.000000 | 4.71813e-07 | 0.999999 |
| rad13         | 7.38876e-08 | 1.000000 | 4.33195e-07 | 0.999999 |
| rad10         | 6.69875e-08 | 1.000000 | 3.92741e-07 | 1.000000 |
| rad25         | 4.84920e-08 | 1.000000 | 2.84303e-07 | 1.000000 |
| rad5          | 2.06404e-08 | 1.000000 | 1.21012e-07 | 1.000000 |
| rad33         | 7.80982e-09 | 1.000000 | 4.57881e-08 | 1.000000 |
| rad2          | 5.73702e-09 | 1.000000 | 3.36355e-08 | 1.000000 |
| rad1          | 2.87898e-09 | 1.000000 | 1.68791e-08 | 1.000000 |
| rad14         | 1.00395e-09 | 1.000000 | 5.88607e-09 | 1.000000 |
| rad27         | 4.96179e-10 | 1.000000 | 2.90904e-09 | 1.000000 |

|      |             |         |             |         |
|------|-------------|---------|-------------|---------|
| rad3 | 2.18296e-10 | 1.00000 | 1.27985e-09 | 1.00000 |
| rad4 | 1.24023e-10 | 1.00000 | 7.27136e-10 | 1.00000 |

1000000.00 Pa, 4000.00000 K

=====

| Rate constant | True (fraction)     | Effective (fraction) |
|---------------|---------------------|----------------------|
| Total         | 3.41497e-12 (1.00 ) | 6.28659e-13 (1.00 )  |

| species       | PYtrue      | Cumul    | PYeffective | Cumul    |
|---------------|-------------|----------|-------------|----------|
| Benzyl+C2H2   | 0.815911    | 0.815911 | 0.00000     | 0.00000  |
| PhCH2CCH+H    | 0.109572    | 0.925483 | 0.595212    | 0.595212 |
| PhCHCCH2+H    | 0.0267281   | 0.952211 | 0.145191    | 0.740403 |
| Ph+Allene     | 0.0192925   | 0.971504 | 0.104800    | 0.845203 |
| Indene+H      | 0.0157151   | 0.987219 | 0.0853671   | 0.930570 |
| PAH3+H        | 0.00329460  | 0.990513 | 0.0178968   | 0.948467 |
| PAH7+H        | 0.00122712  | 0.991740 | 0.00666589  | 0.955133 |
| PAH9+H        | 0.000844400 | 0.992585 | 0.00458692  | 0.959720 |
| PhCCH+CH3     | 0.000725438 | 0.993310 | 0.00394070  | 0.963660 |
| rad19anti     | 0.000699210 | 0.994009 | 0.00379822  | 0.967459 |
| rad50         | 0.000677823 | 0.994687 | 0.00368204  | 0.971141 |
| Ph+MeAc       | 0.000663740 | 0.995351 | 0.00360555  | 0.974746 |
| rad39         | 0.000556776 | 0.995908 | 0.00302450  | 0.977771 |
| rad38         | 0.000550014 | 0.996458 | 0.00298777  | 0.980758 |
| rad51         | 0.000481687 | 0.996940 | 0.00261660  | 0.983375 |
| rad30         | 0.000396194 | 0.997336 | 0.00215219  | 0.985527 |
| rad35         | 0.000339757 | 0.997675 | 0.00184561  | 0.987373 |
| rad71         | 0.000294347 | 0.997970 | 0.00159894  | 0.988972 |
| rad46         | 0.000240611 | 0.998210 | 0.00130704  | 0.990279 |
| rad59         | 0.000232106 | 0.998443 | 0.00126084  | 0.991540 |
| rad67         | 0.000214505 | 0.998657 | 0.00116523  | 0.992705 |
| PhCCCH3+H     | 0.000213577 | 0.998871 | 0.00116018  | 0.993865 |
| rad19syn      | 0.000164468 | 0.999035 | 0.000893415 | 0.994759 |
| PAH10+CH3     | 0.000123133 | 0.999158 | 0.000668880 | 0.995427 |
| rad60syn      | 0.000108417 | 0.999267 | 0.000588938 | 0.996016 |
| rad73         | 0.000100908 | 0.999368 | 0.000548147 | 0.996565 |
| rad52         | 8.83102e-05 | 0.999456 | 0.000479716 | 0.997044 |
| PAH1+H        | 8.21571e-05 | 0.999538 | 0.000446291 | 0.997491 |
| rad60anti     | 8.05665e-05 | 0.999619 | 0.000437650 | 0.997928 |
| rad58         | 7.79782e-05 | 0.999697 | 0.000423590 | 0.998352 |
| rad72         | 4.85604e-05 | 0.999745 | 0.000263788 | 0.998616 |
| PhcycC3H3_A+H | 4.08375e-05 | 0.999786 | 0.000221836 | 0.998837 |
| rad70         | 3.14990e-05 | 0.999817 | 0.000171108 | 0.999008 |
| PAH8+H        | 3.11012e-05 | 0.999849 | 0.000168947 | 0.999177 |
| rad20         | 1.70752e-05 | 0.999866 | 9.27554e-05 | 0.999270 |
| rad23         | 1.61860e-05 | 0.999882 | 8.79252e-05 | 0.999358 |
| rad34         | 1.33327e-05 | 0.999895 | 7.24256e-05 | 0.999431 |
| rad37         | 1.28538e-05 | 0.999908 | 6.98240e-05 | 0.999500 |
| rad9          | 1.13768e-05 | 0.999919 | 6.18006e-05 | 0.999562 |
| rad65         | 1.10748e-05 | 0.999930 | 6.01603e-05 | 0.999622 |
| rad54         | 1.01273e-05 | 0.999941 | 5.50131e-05 | 0.999677 |
| rad45         | 8.38676e-06 | 0.999949 | 4.55583e-05 | 0.999723 |
| rad21         | 6.79844e-06 | 0.999956 | 3.69302e-05 | 0.999760 |
| rad6          | 6.69554e-06 | 0.999962 | 3.63713e-05 | 0.999796 |
| rad11         | 4.36827e-06 | 0.999967 | 2.37292e-05 | 0.999820 |
| rad22         | 4.20073e-06 | 0.999971 | 2.28190e-05 | 0.999843 |
| rad68syn      | 3.82063e-06 | 0.999975 | 2.07543e-05 | 0.999863 |
| rad68anti     | 2.43214e-06 | 0.999977 | 1.32118e-05 | 0.999877 |
| rad40syn      | 2.42446e-06 | 0.999980 | 1.31701e-05 | 0.999890 |
| rad64         | 2.35457e-06 | 0.999982 | 1.27904e-05 | 0.999903 |
| rad56         | 2.00889e-06 | 0.999984 | 1.09126e-05 | 0.999914 |
| rad8          | 1.87604e-06 | 0.999986 | 1.01909e-05 | 0.999924 |
| rad40anti     | 1.83583e-06 | 0.999988 | 9.97252e-06 | 0.999934 |
| rad18         | 1.58606e-06 | 0.999989 | 8.61572e-06 | 0.999942 |
| rad36         | 1.52930e-06 | 0.999991 | 8.30739e-06 | 0.999951 |
| rad53         | 1.21714e-06 | 0.999992 | 6.61171e-06 | 0.999957 |
| rad55         | 1.17351e-06 | 0.999993 | 6.37469e-06 | 0.999964 |
| rad62         | 1.12295e-06 | 0.999994 | 6.10006e-06 | 0.999970 |
| rad15         | 1.01934e-06 | 0.999995 | 5.53721e-06 | 0.999975 |
| rad61         | 1.00486e-06 | 0.999996 | 5.45855e-06 | 0.999981 |
| rad47         | 9.69761e-07 | 0.999997 | 5.26790e-06 | 0.999986 |
| rad12         | 4.98917e-07 | 0.999998 | 2.71020e-06 | 0.999989 |
| rad43         | 4.20527e-07 | 0.999998 | 2.28437e-06 | 0.999991 |
| rad24         | 4.01091e-07 | 0.999999 | 2.17879e-06 | 0.999993 |
| rad28         | 3.24425e-07 | 0.999999 | 1.76233e-06 | 0.999995 |
| rad7          | 3.09313e-07 | 0.999999 | 1.68024e-06 | 0.999997 |
| rad42         | 2.40331e-07 | 1.000000 | 1.30551e-06 | 0.999998 |
| rad26         | 1.11377e-07 | 1.000000 | 6.05019e-07 | 0.999999 |
| rad41         | 9.60074e-08 | 1.000000 | 5.21528e-07 | 0.999999 |

|       |             |          |             |          |
|-------|-------------|----------|-------------|----------|
| rad10 | 5.05771e-08 | 1.000000 | 2.74743e-07 | 0.999999 |
| rad13 | 5.05633e-08 | 1.000000 | 2.74668e-07 | 1.000000 |
| rad25 | 4.09359e-08 | 1.000000 | 2.22370e-07 | 1.000000 |
| rad5  | 1.99616e-08 | 1.000000 | 1.08434e-07 | 1.000000 |
| rad33 | 5.65692e-09 | 1.000000 | 3.07293e-08 | 1.000000 |
| rad2  | 4.50235e-09 | 1.000000 | 2.44575e-08 | 1.000000 |
| rad1  | 2.28143e-09 | 1.000000 | 1.23931e-08 | 1.000000 |
| rad14 | 9.06383e-10 | 1.000000 | 4.92362e-09 | 1.000000 |
| rad27 | 4.26001e-10 | 1.000000 | 2.31411e-09 | 1.000000 |
| rad3  | 1.53615e-10 | 1.000000 | 8.34462e-10 | 1.000000 |
| rad4  | 8.69943e-11 | 1.000000 | 4.72567e-10 | 1.000000 |

100000.000 Pa, 20.0000000 K

| Rate constant | True (fraction)      | Effective (fraction) |
|---------------|----------------------|----------------------|
| Total         | 1.34336e-156 (1.00 ) | 1.34336e-156 (1.00 ) |

| species     | PYtrue      | Cumul    | PYeffective | Cumul    |
|-------------|-------------|----------|-------------|----------|
| rad20       | 0.995873    | 0.995873 | 0.995873    | 0.995873 |
| rad21       | 0.00361593  | 0.999489 | 0.00361593  | 0.999489 |
| rad18       | 0.000507242 | 0.999996 | 0.000507242 | 0.999996 |
| rad22       | 3.97871e-06 | 1.000000 | 3.97871e-06 | 1.000000 |
| Indene+H    | 1.18588e-07 | 1.000000 | 1.18588e-07 | 1.000000 |
| rad24       | 8.15269e-08 | 1.000000 | 8.15269e-08 | 1.000000 |
| rad45       | 6.09627e-08 | 1.000000 | 6.09627e-08 | 1.000000 |
| rad36       | 4.59559e-09 | 1.000000 | 4.59559e-09 | 1.000000 |
| Benzyl+C2H2 | 8.61794e-10 | 1.000000 | 0.000000    | 1.000000 |
| rad11       | 4.08204e-10 | 1.000000 | 4.08204e-10 | 1.000000 |
| rad23       | 5.60670e-12 | 1.000000 | 5.60670e-12 | 1.000000 |
| rad6        | 4.54130e-16 | 1.000000 | 4.54130e-16 | 1.000000 |
| rad30       | 4.03941e-21 | 1.000000 | 4.03941e-21 | 1.000000 |
| rad15       | 8.29500e-24 | 1.000000 | 8.29500e-24 | 1.000000 |
| rad13       | 1.85224e-24 | 1.000000 | 1.85224e-24 | 1.000000 |
| rad7        | 3.54802e-25 | 1.000000 | 3.54802e-25 | 1.000000 |
| rad38       | 5.45902e-27 | 1.000000 | 5.45902e-27 | 1.000000 |
| rad25       | 4.99795e-27 | 1.000000 | 4.99795e-27 | 1.000000 |
| rad33       | 2.80374e-27 | 1.000000 | 2.80374e-27 | 1.000000 |
| rad35       | 4.83834e-30 | 1.000000 | 4.83834e-30 | 1.000000 |
| PAH9+H      | 2.20606e-30 | 1.000000 | 2.20606e-30 | 1.000000 |
| rad8        | 9.24637e-32 | 1.000000 | 9.24637e-32 | 1.000000 |
| PhCHCCH2+H  | 5.64226e-32 | 1.000000 | 5.64226e-32 | 1.000000 |
| rad3        | 6.73258e-33 | 1.000000 | 6.73258e-33 | 1.000000 |
| rad4        | 3.91322e-33 | 1.000000 | 3.91322e-33 | 1.000000 |
| rad46       | 8.15424e-34 | 1.000000 | 8.15424e-34 | 1.000000 |
| rad9        | 1.90893e-34 | 1.000000 | 1.90893e-34 | 1.000000 |
| rad60syn    | 1.10405e-35 | 1.000000 | 1.10405e-35 | 1.000000 |
| rad28       | 4.74516e-36 | 1.000000 | 4.74516e-36 | 1.000000 |
| rad60anti   | 5.06896e-37 | 1.000000 | 5.06896e-37 | 1.000000 |
| Ph+Allene   | 1.14865e-37 | 1.000000 | 1.14865e-37 | 1.000000 |
| rad2        | 5.07743e-40 | 1.000000 | 5.07743e-40 | 1.000000 |
| PAH7+H      | 2.32944e-40 | 1.000000 | 2.32944e-40 | 1.000000 |
| rad1        | 4.72280e-41 | 1.000000 | 4.72280e-41 | 1.000000 |
| PhCH2CCH+H  | 8.69865e-42 | 1.000000 | 8.69865e-42 | 1.000000 |
| rad31       | 7.03745e-42 | 1.000000 | 7.03745e-42 | 1.000000 |
| PAH3+H      | 4.61333e-44 | 1.000000 | 4.61333e-44 | 1.000000 |
| rad59       | 2.26742e-44 | 1.000000 | 2.26742e-44 | 1.000000 |
| rad26       | 2.11625e-44 | 1.000000 | 2.11625e-44 | 1.000000 |
| PhCCH+CH3   | 1.47215e-45 | 1.000000 | 1.47215e-45 | 1.000000 |
| rad14       | 1.04994e-45 | 1.000000 | 1.04994e-45 | 1.000000 |
| rad10       | 1.81687e-47 | 1.000000 | 1.81687e-47 | 1.000000 |
| rad39       | 3.52554e-48 | 1.000000 | 3.52554e-48 | 1.000000 |
| rad50       | 1.05252e-48 | 1.000000 | 1.05252e-48 | 1.000000 |
| rad27       | 1.66367e-51 | 1.000000 | 1.66367e-51 | 1.000000 |
| Ph+MeAc     | 8.54770e-52 | 1.000000 | 8.54770e-52 | 1.000000 |
| PhCCH3+H    | 3.14717e-53 | 1.000000 | 3.14717e-53 | 1.000000 |
| rad12       | 6.81104e-54 | 1.000000 | 6.81104e-54 | 1.000000 |
| rad37       | 1.48946e-55 | 1.000000 | 1.48946e-55 | 1.000000 |
| rad52       | 6.86665e-57 | 1.000000 | 6.86665e-57 | 1.000000 |
| rad51       | 1.45366e-61 | 1.000000 | 1.45366e-61 | 1.000000 |
| rad58       | 6.87835e-63 | 1.000000 | 6.87835e-63 | 1.000000 |
| rad19syn    | 3.85313e-63 | 1.000000 | 3.85313e-63 | 1.000000 |
| rad5        | 3.98764e-64 | 1.000000 | 3.98764e-64 | 1.000000 |
| rad54       | 3.37237e-64 | 1.000000 | 3.37237e-64 | 1.000000 |
| rad70       | 2.72739e-65 | 1.000000 | 2.72739e-65 | 1.000000 |
| PAH10+CH3   | 1.22227e-66 | 1.000000 | 1.22227e-66 | 1.000000 |
| rad65       | 4.75789e-68 | 1.000000 | 4.75789e-68 | 1.000000 |
| rad47       | 9.41462e-69 | 1.000000 | 9.41462e-69 | 1.000000 |
| rad55       | 2.95782e-70 | 1.000000 | 2.95782e-70 | 1.000000 |

|               |             |         |             |         |
|---------------|-------------|---------|-------------|---------|
| rad34         | 2.11249e-70 | 1.00000 | 2.11249e-70 | 1.00000 |
| PhcycC3H3_A+H | 1.06658e-71 | 1.00000 | 1.06658e-71 | 1.00000 |
| rad62         | 3.01439e-72 | 1.00000 | 3.01439e-72 | 1.00000 |
| PAH1+H        | 1.01615e-73 | 1.00000 | 1.01615e-73 | 1.00000 |
| rad43         | 2.87632e-75 | 1.00000 | 2.87632e-75 | 1.00000 |
| rad42         | 5.06864e-82 | 1.00000 | 5.06864e-82 | 1.00000 |
| rad41         | 3.83281e-86 | 1.00000 | 3.83281e-86 | 1.00000 |

100000.000 Pa, 30.0000000 K

| Rate constant | True (fraction)      | Effective (fraction) |
|---------------|----------------------|----------------------|
| Total         | 1.15918e-108 (1.00 ) | 1.15918e-108 (1.00 ) |

| species       | PYtrue      | Cumul    | PYeffective | Cumul    |
|---------------|-------------|----------|-------------|----------|
| rad20         | 0.991690    | 0.991690 | 0.991690    | 0.991690 |
| rad21         | 0.00726776  | 0.998958 | 0.00726776  | 0.998958 |
| rad18         | 0.00102448  | 0.999982 | 0.00102448  | 0.999982 |
| rad22         | 1.62158e-05 | 0.999998 | 1.62158e-05 | 0.999998 |
| Indene+H      | 4.85428e-07 | 0.999999 | 4.85428e-07 | 0.999999 |
| rad45         | 3.75781e-07 | 0.999999 | 3.75781e-07 | 0.999999 |
| rad24         | 2.00029e-07 | 1.000000 | 2.00029e-07 | 1.000000 |
| rad36         | 2.62313e-08 | 1.000000 | 2.62313e-08 | 1.000000 |
| Benzyl+C2H2   | 2.01219e-09 | 1.000000 | 0.000000    | 1.000000 |
| rad11         | 1.69824e-09 | 1.000000 | 1.69824e-09 | 1.000000 |
| rad23         | 5.73555e-11 | 1.000000 | 5.73555e-11 | 1.000000 |
| rad6          | 3.87165e-15 | 1.000000 | 3.87165e-15 | 1.000000 |
| rad30         | 1.93230e-20 | 1.000000 | 1.93230e-20 | 1.000000 |
| rad15         | 4.03754e-23 | 1.000000 | 4.03754e-23 | 1.000000 |
| rad13         | 3.23441e-23 | 1.000000 | 3.23441e-23 | 1.000000 |
| rad7          | 6.22127e-24 | 1.000000 | 6.22127e-24 | 1.000000 |
| rad38         | 8.15086e-26 | 1.000000 | 8.15086e-26 | 1.000000 |
| rad33         | 4.94227e-26 | 1.000000 | 4.94227e-26 | 1.000000 |
| rad25         | 4.83969e-26 | 1.000000 | 4.83969e-26 | 1.000000 |
| rad35         | 1.04424e-28 | 1.000000 | 1.04424e-28 | 1.000000 |
| PAH9+H        | 4.83387e-29 | 1.000000 | 4.83387e-29 | 1.000000 |
| PhCHCCH2+H    | 5.60564e-31 | 1.000000 | 5.60564e-31 | 1.000000 |
| rad3          | 2.51168e-31 | 1.000000 | 2.51168e-31 | 1.000000 |
| rad8          | 2.34772e-31 | 1.000000 | 2.34772e-31 | 1.000000 |
| rad4          | 1.40976e-31 | 1.000000 | 1.40976e-31 | 1.000000 |
| rad46         | 1.11164e-32 | 1.000000 | 1.11164e-32 | 1.000000 |
| rad9          | 1.90727e-33 | 1.000000 | 1.90727e-33 | 1.000000 |
| rad60syn      | 5.68000e-35 | 1.000000 | 5.68000e-35 | 1.000000 |
| rad28         | 5.29083e-35 | 1.000000 | 5.29083e-35 | 1.000000 |
| rad60anti     | 2.61726e-36 | 1.000000 | 2.61726e-36 | 1.000000 |
| Ph+Allene     | 1.15129e-36 | 1.000000 | 1.15129e-36 | 1.000000 |
| rad2          | 3.88999e-38 | 1.000000 | 3.88999e-38 | 1.000000 |
| rad1          | 3.26249e-39 | 1.000000 | 3.26249e-39 | 1.000000 |
| PAH7+H        | 1.30483e-39 | 1.000000 | 1.30483e-39 | 1.000000 |
| rad31         | 1.82995e-40 | 1.000000 | 1.82995e-40 | 1.000000 |
| PhCH2CCH+H    | 3.55107e-41 | 1.000000 | 3.55107e-41 | 1.000000 |
| PAH3+H        | 2.40605e-43 | 1.000000 | 2.40605e-43 | 1.000000 |
| rad59         | 1.18259e-43 | 1.000000 | 1.18259e-43 | 1.000000 |
| PhCCH+CH3     | 1.18198e-43 | 1.000000 | 1.18198e-43 | 1.000000 |
| rad26         | 1.12568e-43 | 1.000000 | 1.12568e-43 | 1.000000 |
| rad14         | 8.26423e-44 | 1.000000 | 8.26423e-44 | 1.000000 |
| rad10         | 2.86466e-45 | 1.000000 | 2.86466e-45 | 1.000000 |
| rad39         | 4.10476e-47 | 1.000000 | 4.10476e-47 | 1.000000 |
| rad50         | 1.23231e-47 | 1.000000 | 1.23231e-47 | 1.000000 |
| rad27         | 2.67223e-49 | 1.000000 | 2.67223e-49 | 1.000000 |
| Ph+MeAc       | 6.97167e-50 | 1.000000 | 6.97167e-50 | 1.000000 |
| PhCCCH3+H     | 5.18349e-51 | 1.000000 | 5.18349e-51 | 1.000000 |
| rad12         | 7.23702e-53 | 1.000000 | 7.23702e-53 | 1.000000 |
| rad37         | 1.57541e-54 | 1.000000 | 1.57541e-54 | 1.000000 |
| rad52         | 7.43254e-56 | 1.000000 | 7.43254e-56 | 1.000000 |
| rad51         | 1.47646e-60 | 1.000000 | 1.47646e-60 | 1.000000 |
| rad19syn      | 1.49223e-61 | 1.000000 | 1.49223e-61 | 1.000000 |
| rad5          | 6.48007e-62 | 1.000000 | 6.48007e-62 | 1.000000 |
| rad58         | 3.39344e-62 | 1.000000 | 3.39344e-62 | 1.000000 |
| rad54         | 1.03168e-62 | 1.000000 | 1.03168e-62 | 1.000000 |
| rad70         | 4.58442e-64 | 1.000000 | 4.58442e-64 | 1.000000 |
| PAH10+CH3     | 1.07717e-65 | 1.000000 | 1.07717e-65 | 1.000000 |
| rad65         | 9.27085e-67 | 1.000000 | 9.27085e-67 | 1.000000 |
| rad47         | 8.38884e-68 | 1.000000 | 8.38884e-68 | 1.000000 |
| rad55         | 7.92927e-69 | 1.000000 | 7.92927e-69 | 1.000000 |
| rad34         | 3.27580e-69 | 1.000000 | 3.27580e-69 | 1.000000 |
| rad62         | 4.12705e-70 | 1.000000 | 4.12705e-70 | 1.000000 |
| PhcycC3H3_A+H | 3.79894e-70 | 1.000000 | 3.79894e-70 | 1.000000 |
| rad43         | 8.14080e-73 | 1.000000 | 8.14080e-73 | 1.000000 |

|        |             |          |             |          |
|--------|-------------|----------|-------------|----------|
| PAH1+H | 7.50580e-73 | 1.000000 | 7.50580e-73 | 1.000000 |
| rad42  | 5.64385e-80 | 1.000000 | 5.64385e-80 | 1.000000 |
| rad41  | 8.50073e-84 | 1.000000 | 8.50073e-84 | 1.000000 |

100000.000 Pa, 40.0000000 K

| =====         |                     |          |                      |          |
|---------------|---------------------|----------|----------------------|----------|
| Rate constant | True (fraction)     |          | Effective (fraction) |          |
| -----         |                     |          |                      |          |
| Total         | 1.02415e-84 (1.00 ) |          | 1.02415e-84 (1.00 )  |          |
| species       | PYtrue              | Cumul    | PYeffective          | Cumul    |
| -----         |                     |          |                      |          |
| rad20         | 0.987614            | 0.987614 | 0.987614             | 0.987614 |
| rad21         | 0.0108147           | 0.998429 | 0.0108147            | 0.998429 |
| rad18         | 0.00153306          | 0.999962 | 0.00153306           | 0.999962 |
| rad22         | 3.62453e-05         | 0.999998 | 3.62453e-05          | 0.999998 |
| Indene+H      | 1.09070e-06         | 0.999999 | 1.09070e-06          | 0.999999 |
| rad45         | 9.96836e-07         | 1.00000  | 9.96836e-07          | 1.00000  |
| rad24         | 2.92665e-07         | 1.00000  | 2.92665e-07          | 1.00000  |
| rad36         | 6.74325e-08         | 1.00000  | 6.74325e-08          | 1.00000  |
| rad11         | 3.95054e-09         | 1.00000  | 3.95054e-09          | 1.00000  |
| Benzyl+C2H2   | 3.90137e-09         | 1.00000  | 0.00000              | 1.00000  |
| rad23         | 2.15758e-10         | 1.00000  | 2.15758e-10          | 1.00000  |
| rad6          | 1.38381e-14         | 1.00000  | 1.38381e-14          | 1.00000  |
| rad30         | 5.99959e-20         | 1.00000  | 5.99959e-20          | 1.00000  |
| rad13         | 1.77220e-22         | 1.00000  | 1.77220e-22          | 1.00000  |
| rad15         | 1.30637e-22         | 1.00000  | 1.30637e-22          | 1.00000  |
| rad7          | 3.43145e-23         | 1.00000  | 3.43145e-23          | 1.00000  |
| rad38         | 4.45217e-25         | 1.00000  | 4.45217e-25          | 1.00000  |
| rad33         | 2.76122e-25         | 1.00000  | 2.76122e-25          | 1.00000  |
| rad25         | 2.29003e-25         | 1.00000  | 2.29003e-25          | 1.00000  |
| rad35         | 7.00148e-28         | 1.00000  | 7.00148e-28          | 1.00000  |
| PAH9+H        | 3.32837e-28         | 1.00000  | 3.32837e-28          | 1.00000  |
| PhCHCCH2+H    | 2.88154e-30         | 1.00000  | 2.88154e-30          | 1.00000  |
| rad3          | 2.25834e-30         | 1.00000  | 2.25834e-30          | 1.00000  |
| rad4          | 1.24617e-30         | 1.00000  | 1.24617e-30          | 1.00000  |
| rad8          | 6.10223e-31         | 1.00000  | 6.10223e-31          | 1.00000  |
| rad46         | 6.50099e-32         | 1.00000  | 6.50099e-32          | 1.00000  |
| rad9          | 1.00980e-32         | 1.00000  | 1.00980e-32          | 1.00000  |
| rad28         | 3.90354e-34         | 1.00000  | 3.90354e-34          | 1.00000  |
| rad60syn      | 2.15864e-34         | 1.00000  | 2.15864e-34          | 1.00000  |
| rad60anti     | 1.01026e-35         | 1.00000  | 1.01026e-35          | 1.00000  |
| Ph+Allene     | 6.40399e-36         | 1.00000  | 6.40399e-36          | 1.00000  |
| rad2          | 5.52835e-37         | 1.00000  | 5.52835e-37          | 1.00000  |
| rad1          | 4.41671e-38         | 1.00000  | 4.41671e-38          | 1.00000  |
| PAH7+H        | 5.23903e-39         | 1.00000  | 5.23903e-39          | 1.00000  |
| rad31         | 1.39044e-39         | 1.00000  | 1.39044e-39          | 1.00000  |
| PhCH2CCH+H    | 1.55337e-40         | 1.00000  | 1.55337e-40          | 1.00000  |
| PhCCH+CH3     | 1.93448e-42         | 1.00000  | 1.93448e-42          | 1.00000  |
| rad14         | 1.30281e-42         | 1.00000  | 1.30281e-42          | 1.00000  |
| PAH3+H        | 1.01089e-42         | 1.00000  | 1.01089e-42          | 1.00000  |
| rad59         | 4.96145e-43         | 1.00000  | 4.96145e-43          | 1.00000  |
| rad26         | 4.56036e-43         | 1.00000  | 4.56036e-43          | 1.00000  |
| rad10         | 6.32521e-44         | 1.00000  | 6.32521e-44          | 1.00000  |
| rad39         | 2.41016e-46         | 1.00000  | 2.41016e-46          | 1.00000  |
| rad50         | 8.22887e-47         | 1.00000  | 8.22887e-47          | 1.00000  |
| rad27         | 6.22467e-48         | 1.00000  | 6.22467e-48          | 1.00000  |
| Ph+MeAc       | 1.24868e-48         | 1.00000  | 1.24868e-48          | 1.00000  |
| PhCCH3+H      | 1.28988e-49         | 1.00000  | 1.28988e-49          | 1.00000  |
| rad12         | 4.32758e-52         | 1.00000  | 4.32758e-52          | 1.00000  |
| rad37         | 9.42923e-54         | 1.00000  | 9.42923e-54          | 1.00000  |
| rad52         | 5.26293e-55         | 1.00000  | 5.26293e-55          | 1.00000  |
| rad51         | 1.08480e-59         | 1.00000  | 1.08480e-59          | 1.00000  |
| rad19syn      | 2.02884e-60         | 1.00000  | 2.02884e-60          | 1.00000  |
| rad5          | 1.82493e-60         | 1.00000  | 1.82493e-60          | 1.00000  |
| rad58         | 1.63830e-61         | 1.00000  | 1.63830e-61          | 1.00000  |
| rad54         | 1.20055e-61         | 1.00000  | 1.20055e-61          | 1.00000  |
| rad70         | 4.23394e-63         | 1.00000  | 4.23394e-63          | 1.00000  |
| PAH10+CH3     | 6.48445e-65         | 1.00000  | 6.48445e-65          | 1.00000  |
| rad65         | 9.50501e-66         | 1.00000  | 9.50501e-66          | 1.00000  |
| rad47         | 6.40599e-67         | 1.00000  | 6.40599e-67          | 1.00000  |
| rad55         | 9.00170e-68         | 1.00000  | 9.00170e-68          | 1.00000  |
| rad34         | 3.01273e-68         | 1.00000  | 3.01273e-68          | 1.00000  |
| rad62         | 1.17285e-68         | 1.00000  | 1.17285e-68          | 1.00000  |
| PhcycC3H3_A+H | 5.35086e-69         | 1.00000  | 5.35086e-69          | 1.00000  |
| rad43         | 3.46096e-71         | 1.00000  | 3.46096e-71          | 1.00000  |
| PAH1+H        | 4.48499e-72         | 1.00000  | 4.48499e-72          | 1.00000  |
| rad42         | 1.56053e-78         | 1.00000  | 1.56053e-78          | 1.00000  |
| rad41         | 3.49800e-82         | 1.00000  | 3.49800e-82          | 1.00000  |

100000.000 Pa, 50.0000000 K

=====  
Rate constant | True (fraction)                      Effective (fraction)  
-----

Total            | 2.31816e-70 (1.00     ) 2.31816e-70 (1.00     )

| species       | PYtrue      | Cumul    | PYeffective | Cumul    |
|---------------|-------------|----------|-------------|----------|
| rad20         | 0.983551    | 0.983551 | 0.983551    | 0.983551 |
| rad21         | 0.0143356   | 0.997887 | 0.0143356   | 0.997887 |
| rad18         | 0.00204484  | 0.999931 | 0.00204484  | 0.999931 |
| rad22         | 6.43323e-05 | 0.999996 | 6.43323e-05 | 0.999996 |
| Indene+H      | 1.94743e-06 | 0.999998 | 1.94743e-06 | 0.999998 |
| rad45         | 1.94618e-06 | 1.000000 | 1.94618e-06 | 1.000000 |
| rad24         | 3.60130e-07 | 1.000000 | 3.60130e-07 | 1.000000 |
| rad36         | 1.29359e-07 | 1.000000 | 1.29359e-07 | 1.000000 |
| rad11         | 7.39635e-09 | 1.000000 | 7.39635e-09 | 1.000000 |
| Benzyl+C2H2   | 7.06674e-09 | 1.000000 | 0.000000    | 1.000000 |
| rad23         | 5.51392e-10 | 1.000000 | 5.51392e-10 | 1.000000 |
| rad6          | 3.58234e-14 | 1.000000 | 3.58234e-14 | 1.000000 |
| rad30         | 1.69664e-19 | 1.000000 | 1.69664e-19 | 1.000000 |
| rad13         | 6.33070e-22 | 1.000000 | 6.33070e-22 | 1.000000 |
| rad15         | 3.92683e-22 | 1.000000 | 3.92683e-22 | 1.000000 |
| rad7          | 1.23660e-22 | 1.000000 | 1.23660e-22 | 1.000000 |
| rad38         | 1.78203e-24 | 1.000000 | 1.78203e-24 | 1.000000 |
| rad33         | 1.01398e-24 | 1.000000 | 1.01398e-24 | 1.000000 |
| rad25         | 8.91232e-25 | 1.000000 | 8.91232e-25 | 1.000000 |
| rad35         | 3.09082e-27 | 1.000000 | 3.09082e-27 | 1.000000 |
| PAH9+H        | 1.53102e-27 | 1.000000 | 1.53102e-27 | 1.000000 |
| PhCHCCH2+H    | 1.27587e-29 | 1.000000 | 1.27587e-29 | 1.000000 |
| rad3          | 1.22065e-29 | 1.000000 | 1.22065e-29 | 1.000000 |
| rad4          | 6.66489e-30 | 1.000000 | 6.66489e-30 | 1.000000 |
| rad8          | 1.83245e-30 | 1.000000 | 1.83245e-30 | 1.000000 |
| rad46         | 3.10046e-31 | 1.000000 | 3.10046e-31 | 1.000000 |
| rad9          | 4.69195e-32 | 1.000000 | 4.69195e-32 | 1.000000 |
| rad28         | 2.29027e-33 | 1.000000 | 2.29027e-33 | 1.000000 |
| rad60syn      | 8.28507e-34 | 1.000000 | 8.28507e-34 | 1.000000 |
| rad60anti     | 3.97509e-35 | 1.000000 | 3.97509e-35 | 1.000000 |
| Ph+Allene     | 3.24211e-35 | 1.000000 | 3.24211e-35 | 1.000000 |
| rad2          | 4.35195e-36 | 1.000000 | 4.35195e-36 | 1.000000 |
| rad1          | 3.37634e-37 | 1.000000 | 3.37634e-37 | 1.000000 |
| PAH7+H        | 2.17948e-38 | 1.000000 | 2.17948e-38 | 1.000000 |
| rad31         | 6.84844e-39 | 1.000000 | 6.84844e-39 | 1.000000 |
| PhCH2CCH+H    | 7.59385e-40 | 1.000000 | 7.59385e-40 | 1.000000 |
| PhCCH+CH3     | 1.89204e-41 | 1.000000 | 1.89204e-41 | 1.000000 |
| rad14         | 1.20543e-41 | 1.000000 | 1.20543e-41 | 1.000000 |
| PAH3+H        | 4.58609e-42 | 1.000000 | 4.58609e-42 | 1.000000 |
| rad59         | 2.24507e-42 | 1.000000 | 2.24507e-42 | 1.000000 |
| rad26         | 1.98922e-42 | 1.000000 | 1.98922e-42 | 1.000000 |
| rad10         | 7.03636e-43 | 1.000000 | 7.03636e-43 | 1.000000 |
| rad39         | 1.26563e-45 | 1.000000 | 1.26563e-45 | 1.000000 |
| rad50         | 5.41092e-46 | 1.000000 | 5.41092e-46 | 1.000000 |
| rad27         | 7.51267e-47 | 1.000000 | 7.51267e-47 | 1.000000 |
| Ph+MeAc       | 1.42095e-47 | 1.000000 | 1.42095e-47 | 1.000000 |
| PhCCCH3+H     | 1.72207e-48 | 1.000000 | 1.72207e-48 | 1.000000 |
| rad12         | 2.47865e-51 | 1.000000 | 2.47865e-51 | 1.000000 |
| rad37         | 5.42508e-53 | 1.000000 | 5.42508e-53 | 1.000000 |
| rad52         | 4.06193e-54 | 1.000000 | 4.06193e-54 | 1.000000 |
| rad51         | 9.36257e-59 | 1.000000 | 9.36257e-59 | 1.000000 |
| rad5          | 3.07061e-59 | 1.000000 | 3.07061e-59 | 1.000000 |
| rad19syn      | 2.22598e-59 | 1.000000 | 2.22598e-59 | 1.000000 |
| rad54         | 1.19344e-60 | 1.000000 | 1.19344e-60 | 1.000000 |
| rad58         | 9.82079e-61 | 1.000000 | 9.82079e-61 | 1.000000 |
| rad70         | 3.93056e-62 | 1.000000 | 3.93056e-62 | 1.000000 |
| PAH10+CH3     | 4.24871e-64 | 1.000000 | 4.24871e-64 | 1.000000 |
| rad65         | 9.88272e-65 | 1.000000 | 9.88272e-65 | 1.000000 |
| rad47         | 6.50023e-66 | 1.000000 | 6.50023e-66 | 1.000000 |
| rad55         | 9.37548e-67 | 1.000000 | 9.37548e-67 | 1.000000 |
| rad34         | 2.92944e-67 | 1.000000 | 2.92944e-67 | 1.000000 |
| rad62         | 2.26075e-67 | 1.000000 | 2.26075e-67 | 1.000000 |
| PhcycC3H3_A+H | 6.61487e-68 | 1.000000 | 6.61487e-68 | 1.000000 |
| rad43         | 8.76989e-70 | 1.000000 | 8.76989e-70 | 1.000000 |
| PAH1+H        | 3.24124e-71 | 1.000000 | 3.24124e-71 | 1.000000 |
| rad42         | 3.31510e-77 | 1.000000 | 3.31510e-77 | 1.000000 |
| rad41         | 9.96154e-81 | 1.000000 | 9.96154e-81 | 1.000000 |

100000.000 Pa, 60.0000000 K

=====  
Rate constant | True (fraction)                      Effective (fraction)  
-----

Total | 8.44107e-61 (1.00 ) 8.44107e-61 (1.00 )

| species       | PYtrue      | Cumul    | PYeffective | Cumul    |
|---------------|-------------|----------|-------------|----------|
| rad20         | 0.979448    | 0.979448 | 0.979448    | 0.979448 |
| rad21         | 0.0178770   | 0.997325 | 0.0178770   | 0.997325 |
| rad18         | 0.00256709  | 0.999892 | 0.00256709  | 0.999892 |
| rad22         | 0.000101138 | 0.999993 | 0.000101138 | 0.999993 |
| rad45         | 3.25736e-06 | 0.999996 | 3.25736e-06 | 0.999996 |
| Indene+H      | 3.08174e-06 | 1.000000 | 3.08174e-06 | 1.000000 |
| rad24         | 4.09252e-07 | 1.000000 | 4.09252e-07 | 1.000000 |
| rad36         | 2.14045e-07 | 1.000000 | 2.14045e-07 | 1.000000 |
| rad11         | 1.23821e-08 | 1.000000 | 1.23821e-08 | 1.000000 |
| Benzyl+C2H2   | 1.22077e-08 | 1.000000 | 0.000000    | 1.000000 |
| rad23         | 1.15131e-09 | 1.000000 | 1.15131e-09 | 1.000000 |
| rad6          | 7.87356e-14 | 1.000000 | 7.87356e-14 | 1.000000 |
| rad30         | 4.82836e-19 | 1.000000 | 4.82836e-19 | 1.000000 |
| rad13         | 1.82601e-21 | 1.000000 | 1.82601e-21 | 1.000000 |
| rad15         | 1.20860e-21 | 1.000000 | 1.20860e-21 | 1.000000 |
| rad7          | 3.60568e-22 | 1.000000 | 3.60568e-22 | 1.000000 |
| rad38         | 6.33069e-24 | 1.000000 | 6.33069e-24 | 1.000000 |
| rad25         | 3.31528e-24 | 1.000000 | 3.31528e-24 | 1.000000 |
| rad33         | 3.02857e-24 | 1.000000 | 3.02857e-24 | 1.000000 |
| rad35         | 1.11390e-26 | 1.000000 | 1.11390e-26 | 1.000000 |
| PAH9+H        | 5.85020e-27 | 1.000000 | 5.85020e-27 | 1.000000 |
| PhCHCCH2+H    | 5.60204e-29 | 1.000000 | 5.60204e-29 | 1.000000 |
| rad3          | 5.18521e-29 | 1.000000 | 5.18521e-29 | 1.000000 |
| rad4          | 2.81057e-29 | 1.000000 | 2.81057e-29 | 1.000000 |
| rad8          | 6.45480e-30 | 1.000000 | 6.45480e-30 | 1.000000 |
| rad46         | 1.43177e-30 | 1.000000 | 1.43177e-30 | 1.000000 |
| rad9          | 2.19172e-31 | 1.000000 | 2.19172e-31 | 1.000000 |
| rad28         | 1.19470e-32 | 1.000000 | 1.19470e-32 | 1.000000 |
| rad60syn      | 3.46407e-33 | 1.000000 | 3.46407e-33 | 1.000000 |
| rad60anti     | 1.71517e-34 | 1.000000 | 1.71517e-34 | 1.000000 |
| Ph+Allene     | 1.69431e-34 | 1.000000 | 1.69431e-34 | 1.000000 |
| rad2          | 2.62329e-35 | 1.000000 | 2.62329e-35 | 1.000000 |
| rad1          | 1.99535e-36 | 1.000000 | 1.99535e-36 | 1.000000 |
| PAH7+H        | 1.01218e-37 | 1.000000 | 1.01218e-37 | 1.000000 |
| rad31         | 2.75943e-38 | 1.000000 | 2.75943e-38 | 1.000000 |
| PhCH2CCH+H    | 4.18688e-39 | 1.000000 | 4.18688e-39 | 1.000000 |
| PhCCH+CH3     | 1.51046e-40 | 1.000000 | 1.51046e-40 | 1.000000 |
| rad14         | 8.97060e-41 | 1.000000 | 8.97060e-41 | 1.000000 |
| PAH3+H        | 2.37636e-41 | 1.000000 | 2.37636e-41 | 1.000000 |
| rad59         | 1.15933e-41 | 1.000000 | 1.15933e-41 | 1.000000 |
| rad26         | 9.94162e-42 | 1.000000 | 9.94162e-42 | 1.000000 |
| rad10         | 5.76607e-42 | 1.000000 | 5.76607e-42 | 1.000000 |
| rad39         | 6.83896e-45 | 1.000000 | 6.83896e-45 | 1.000000 |
| rad50         | 3.96372e-45 | 1.000000 | 3.96372e-45 | 1.000000 |
| rad27         | 6.83427e-46 | 1.000000 | 6.83427e-46 | 1.000000 |
| Ph+MeAc       | 1.38078e-46 | 1.000000 | 1.38078e-46 | 1.000000 |
| PhCCH3+H      | 1.77941e-47 | 1.000000 | 1.77941e-47 | 1.000000 |
| rad12         | 1.52936e-50 | 1.000000 | 1.52936e-50 | 1.000000 |
| rad37         | 3.37120e-52 | 1.000000 | 3.37120e-52 | 1.000000 |
| rad52         | 3.78529e-53 | 1.000000 | 3.78529e-53 | 1.000000 |
| rad51         | 1.03618e-57 | 1.000000 | 1.03618e-57 | 1.000000 |
| rad5          | 4.32050e-58 | 1.000000 | 4.32050e-58 | 1.000000 |
| rad19syn      | 2.41402e-58 | 1.000000 | 2.41402e-58 | 1.000000 |
| rad54         | 1.22045e-59 | 1.000000 | 1.22045e-59 | 1.000000 |
| rad58         | 7.40060e-60 | 1.000000 | 7.40060e-60 | 1.000000 |
| rad70         | 4.11026e-61 | 1.000000 | 4.11026e-61 | 1.000000 |
| PAH10+CH3     | 3.26902e-63 | 1.000000 | 3.26902e-63 | 1.000000 |
| rad65         | 1.22062e-63 | 1.000000 | 1.22062e-63 | 1.000000 |
| rad47         | 9.33637e-65 | 1.000000 | 9.33637e-65 | 1.000000 |
| rad55         | 1.05260e-65 | 1.000000 | 1.05260e-65 | 1.000000 |
| rad62         | 3.98142e-66 | 1.000000 | 3.98142e-66 | 1.000000 |
| rad34         | 3.31574e-66 | 1.000000 | 3.31574e-66 | 1.000000 |
| PhcycC3H3_A+H | 8.55262e-67 | 1.000000 | 8.55262e-67 | 1.000000 |
| rad43         | 1.89469e-68 | 1.000000 | 1.89469e-68 | 1.000000 |
| PAH1+H        | 2.94350e-70 | 1.000000 | 2.94350e-70 | 1.000000 |
| rad42         | 7.01020e-76 | 1.000000 | 7.01020e-76 | 1.000000 |
| rad41         | 2.68534e-79 | 1.000000 | 2.68534e-79 | 1.000000 |

100000.000 Pa, 70.0000000 K

=====

| Rate constant | True (fraction)     | Effective (fraction) |
|---------------|---------------------|----------------------|
| Total         | 5.61998e-54 (1.00 ) | 5.61998e-54 (1.00 )  |

| species | PYtrue | Cumul | PYeffective | Cumul |
|---------|--------|-------|-------------|-------|
|---------|--------|-------|-------------|-------|

-----

|               |             |          |             |          |
|---------------|-------------|----------|-------------|----------|
| rad20         | 0.975261    | 0.975261 | 0.975261    | 0.975261 |
| rad21         | 0.0214749   | 0.996736 | 0.0214749   | 0.996736 |
| rad18         | 0.00310580  | 0.999842 | 0.00310580  | 0.999842 |
| rad22         | 0.000147687 | 0.999989 | 0.000147687 | 0.999989 |
| rad45         | 4.98287e-06 | 0.999994 | 4.98287e-06 | 0.999994 |
| Indene+H      | 4.53268e-06 | 0.999999 | 4.53268e-06 | 0.999999 |
| rad24         | 4.45844e-07 | 0.999999 | 4.45844e-07 | 0.999999 |
| rad36         | 3.24774e-07 | 1.000000 | 3.24774e-07 | 1.000000 |
| Benzyl+C2H2   | 2.03744e-08 | 1.000000 | 0.000000    | 1.000000 |
| rad11         | 1.94075e-08 | 1.000000 | 1.94075e-08 | 1.000000 |
| rad23         | 2.12917e-09 | 1.000000 | 2.12917e-09 | 1.000000 |
| rad6          | 1.57616e-13 | 1.000000 | 1.57616e-13 | 1.000000 |
| rad30         | 1.47269e-18 | 1.000000 | 1.47269e-18 | 1.000000 |
| rad13         | 4.67973e-21 | 1.000000 | 4.67973e-21 | 1.000000 |
| rad15         | 4.07767e-21 | 1.000000 | 4.07767e-21 | 1.000000 |
| rad7          | 9.36276e-22 | 1.000000 | 9.36276e-22 | 1.000000 |
| rad38         | 2.16940e-23 | 1.000000 | 2.16940e-23 | 1.000000 |
| rad25         | 1.28385e-23 | 1.000000 | 1.28385e-23 | 1.000000 |
| rad33         | 8.09858e-24 | 1.000000 | 8.09858e-24 | 1.000000 |
| rad35         | 3.59665e-26 | 1.000000 | 3.59665e-26 | 1.000000 |
| PAH9+H        | 2.04039e-26 | 1.000000 | 2.04039e-26 | 1.000000 |
| PhCHCCH2+H    | 2.65879e-28 | 1.000000 | 2.65879e-28 | 1.000000 |
| rad3          | 1.95797e-28 | 1.000000 | 1.95797e-28 | 1.000000 |
| rad4          | 1.05562e-28 | 1.000000 | 1.05562e-28 | 1.000000 |
| rad8          | 2.75599e-29 | 1.000000 | 2.75599e-29 | 1.000000 |
| rad46         | 7.02060e-30 | 1.000000 | 7.02060e-30 | 1.000000 |
| rad9          | 1.11950e-30 | 1.000000 | 1.11950e-30 | 1.000000 |
| rad28         | 6.10180e-32 | 1.000000 | 6.10180e-32 | 1.000000 |
| rad60syn      | 1.67443e-32 | 1.000000 | 1.67443e-32 | 1.000000 |
| Ph+Allene     | 9.88582e-34 | 1.000000 | 9.88582e-34 | 1.000000 |
| rad60anti     | 8.59741e-34 | 1.000000 | 8.59741e-34 | 1.000000 |
| rad2          | 1.41307e-34 | 1.000000 | 1.41307e-34 | 1.000000 |
| rad1          | 1.05974e-35 | 1.000000 | 1.05974e-35 | 1.000000 |
| PAH7+H        | 5.53368e-37 | 1.000000 | 5.53368e-37 | 1.000000 |
| rad31         | 1.01373e-37 | 1.000000 | 1.01373e-37 | 1.000000 |
| PhCH2CCH+H    | 2.70451e-38 | 1.000000 | 2.70451e-38 | 1.000000 |
| PhCCH+CH3     | 1.15458e-39 | 1.000000 | 1.15458e-39 | 1.000000 |
| rad14         | 6.29944e-40 | 1.000000 | 6.29944e-40 | 1.000000 |
| PAH3+H        | 1.47308e-40 | 1.000000 | 1.47308e-40 | 1.000000 |
| rad59         | 7.15714e-41 | 1.000000 | 7.15714e-41 | 1.000000 |
| rad26         | 5.95805e-41 | 1.000000 | 5.95805e-41 | 1.000000 |
| rad10         | 4.18642e-41 | 1.000000 | 4.18642e-41 | 1.000000 |
| rad39         | 4.13206e-44 | 1.000000 | 4.13206e-44 | 1.000000 |
| rad50         | 3.48021e-44 | 1.000000 | 3.48021e-44 | 1.000000 |
| rad27         | 5.64334e-45 | 1.000000 | 5.64334e-45 | 1.000000 |
| Ph+MeAc       | 1.33335e-45 | 1.000000 | 1.33335e-45 | 1.000000 |
| PhCCH3+H      | 1.70997e-46 | 1.000000 | 1.70997e-46 | 1.000000 |
| rad12         | 1.08973e-49 | 1.000000 | 1.08973e-49 | 1.000000 |
| rad37         | 2.42408e-51 | 1.000000 | 2.42408e-51 | 1.000000 |
| rad52         | 4.53422e-52 | 1.000000 | 4.53422e-52 | 1.000000 |
| rad51         | 1.55369e-56 | 1.000000 | 1.55369e-56 | 1.000000 |
| rad5          | 6.00113e-57 | 1.000000 | 6.00113e-57 | 1.000000 |
| rad19syn      | 2.87134e-57 | 1.000000 | 2.87134e-57 | 1.000000 |
| rad54         | 1.40899e-58 | 1.000000 | 1.40899e-58 | 1.000000 |
| rad58         | 7.13373e-59 | 1.000000 | 7.13373e-59 | 1.000000 |
| rad70         | 5.13198e-60 | 1.000000 | 5.13198e-60 | 1.000000 |
| PAH10+CH3     | 3.08434e-62 | 1.000000 | 3.08434e-62 | 1.000000 |
| rad65         | 1.98685e-62 | 1.000000 | 1.98685e-62 | 1.000000 |
| rad47         | 1.97693e-63 | 1.000000 | 1.97693e-63 | 1.000000 |
| rad55         | 1.37695e-64 | 1.000000 | 1.37695e-64 | 1.000000 |
| rad62         | 7.38143e-65 | 1.000000 | 7.38143e-65 | 1.000000 |
| rad34         | 4.58085e-65 | 1.000000 | 4.58085e-65 | 1.000000 |
| PhcycC3H3_A+H | 1.26093e-65 | 1.000000 | 1.26093e-65 | 1.000000 |
| rad43         | 4.13028e-67 | 1.000000 | 4.13028e-67 | 1.000000 |
| PAH1+H        | 3.43575e-69 | 1.000000 | 3.43575e-69 | 1.000000 |
| rad42         | 1.66038e-74 | 1.000000 | 1.66038e-74 | 1.000000 |
| rad41         | 7.88822e-78 | 1.000000 | 7.88822e-78 | 1.000000 |

100000.000 Pa, 80.0000000 K

=====

| Rate constant | True (fraction)     | Effective (fraction) |
|---------------|---------------------|----------------------|
| Total         | 7.28864e-49 (1.00 ) | 7.28864e-49 (1.00 )  |

| species | PYtrue      | Cumul    | PYeffective | Cumul    |
|---------|-------------|----------|-------------|----------|
| rad20   | 0.970951    | 0.970951 | 0.970951    | 0.970951 |
| rad21   | 0.0251626   | 0.996114 | 0.0251626   | 0.996114 |
| rad18   | 0.00366690  | 0.999781 | 0.00366690  | 0.999781 |
| rad22   | 0.000205428 | 0.999986 | 0.000205428 | 0.999986 |



|               |             |          |             |          |
|---------------|-------------|----------|-------------|----------|
| rad45         | 7.19962e-06 | 0.999993 | 7.19962e-06 | 0.999993 |
| Indene+H      | 6.35517e-06 | 0.999999 | 6.35517e-06 | 0.999999 |
| rad24         | 4.74125e-07 | 1.000000 | 4.74125e-07 | 1.000000 |
| rad36         | 4.66399e-07 | 1.000000 | 4.66399e-07 | 1.000000 |
| Benzyl+C2H2   | 3.31709e-08 | 1.000000 | 0.000000    | 1.000000 |
| rad11         | 2.91973e-08 | 1.000000 | 2.91974e-08 | 1.000000 |
| rad23         | 3.64022e-09 | 1.000000 | 3.64022e-09 | 1.000000 |
| rad6          | 2.98660e-13 | 1.000000 | 2.98660e-13 | 1.000000 |
| rad30         | 5.01168e-18 | 1.000000 | 5.01168e-18 | 1.000000 |
| rad15         | 1.61559e-20 | 1.000000 | 1.61559e-20 | 1.000000 |
| rad13         | 1.12406e-20 | 1.000000 | 1.12406e-20 | 1.000000 |
| rad7          | 2.28479e-21 | 1.000000 | 2.28479e-21 | 1.000000 |
| rad38         | 7.42629e-23 | 1.000000 | 7.42629e-23 | 1.000000 |
| rad25         | 5.52980e-23 | 1.000000 | 5.52980e-23 | 1.000000 |
| rad33         | 2.04667e-23 | 1.000000 | 2.04667e-23 | 1.000000 |
| rad35         | 1.09336e-25 | 1.000000 | 1.09336e-25 | 1.000000 |
| PAH9+H        | 6.80230e-26 | 1.000000 | 6.80230e-26 | 1.000000 |
| PhCHCCH2+H    | 1.49262e-27 | 1.000000 | 1.49262e-27 | 1.000000 |
| rad3          | 7.05914e-28 | 1.000000 | 7.05914e-28 | 1.000000 |
| rad4          | 3.79040e-28 | 1.000000 | 3.79040e-28 | 1.000000 |
| rad8          | 1.53938e-28 | 1.000000 | 1.53938e-28 | 1.000000 |
| rad46         | 3.95036e-29 | 1.000000 | 3.95036e-29 | 1.000000 |
| rad9          | 6.86095e-30 | 1.000000 | 6.86095e-30 | 1.000000 |
| rad28         | 3.31496e-31 | 1.000000 | 3.31496e-31 | 1.000000 |
| rad60syn      | 1.02135e-31 | 1.000000 | 1.02135e-31 | 1.000000 |
| Ph+Allene     | 7.07267e-33 | 1.000000 | 7.07267e-33 | 1.000000 |
| rad60anti     | 5.46092e-33 | 1.000000 | 5.46092e-33 | 1.000000 |
| rad2          | 7.48868e-34 | 1.000000 | 7.48868e-34 | 1.000000 |
| rad1          | 5.55795e-35 | 1.000000 | 5.55795e-35 | 1.000000 |
| PAH7+H        | 3.86574e-36 | 1.000000 | 3.86574e-36 | 1.000000 |
| rad31         | 3.61968e-37 | 1.000000 | 3.61968e-37 | 1.000000 |
| PhCH2CCH+H    | 2.21503e-37 | 1.000000 | 2.21503e-37 | 1.000000 |
| PhCCH+CH3     | 9.57297e-39 | 1.000000 | 9.57297e-39 | 1.000000 |
| rad14         | 4.69502e-39 | 1.000000 | 4.69502e-39 | 1.000000 |
| PAH3+H        | 1.18408e-39 | 1.000000 | 1.18408e-39 | 1.000000 |
| rad59         | 5.72621e-40 | 1.000000 | 5.72621e-40 | 1.000000 |
| rad26         | 4.62971e-40 | 1.000000 | 4.62971e-40 | 1.000000 |
| rad10         | 3.04249e-40 | 1.000000 | 3.04249e-40 | 1.000000 |
| rad50         | 3.99612e-43 | 1.000000 | 3.99612e-43 | 1.000000 |
| rad39         | 3.07684e-43 | 1.000000 | 3.07684e-43 | 1.000000 |
| rad27         | 4.82631e-44 | 1.000000 | 4.82631e-44 | 1.000000 |
| Ph+MeAc       | 1.45798e-44 | 1.000000 | 1.45798e-44 | 1.000000 |
| PhCCCH3+H     | 1.75939e-45 | 1.000000 | 1.75939e-45 | 1.000000 |
| rad12         | 9.81823e-49 | 1.000000 | 9.81823e-49 | 1.000000 |
| rad37         | 2.20784e-50 | 1.000000 | 2.20784e-50 | 1.000000 |
| rad52         | 7.58826e-51 | 1.000000 | 7.58826e-51 | 1.000000 |
| rad51         | 3.41487e-55 | 1.000000 | 3.41487e-55 | 1.000000 |
| rad5          | 9.46495e-56 | 1.000000 | 9.46495e-56 | 1.000000 |
| rad19syn      | 4.17305e-56 | 1.000000 | 4.17305e-56 | 1.000000 |
| rad54         | 2.03157e-57 | 1.000000 | 2.03157e-57 | 1.000000 |
| rad58         | 9.35885e-58 | 1.000000 | 9.35885e-58 | 1.000000 |
| rad70         | 8.30581e-59 | 1.000000 | 8.30581e-59 | 1.000000 |
| rad65         | 4.79842e-61 | 1.000000 | 4.79842e-61 | 1.000000 |
| PAH10+CH3     | 3.84722e-61 | 1.000000 | 3.84722e-61 | 1.000000 |
| rad47         | 6.58975e-62 | 1.000000 | 6.58975e-62 | 1.000000 |
| rad55         | 2.30074e-63 | 1.000000 | 2.30074e-63 | 1.000000 |
| rad62         | 1.63573e-63 | 1.000000 | 1.63573e-63 | 1.000000 |
| rad34         | 8.33150e-64 | 1.000000 | 8.33150e-64 | 1.000000 |
| PhcycC3H3_A+H | 2.33677e-64 | 1.000000 | 2.33677e-64 | 1.000000 |
| rad43         | 1.04608e-65 | 1.000000 | 1.04608e-65 | 1.000000 |
| PAH1+H        | 5.51600e-68 | 1.000000 | 5.51600e-68 | 1.000000 |
| rad42         | 4.93465e-73 | 1.000000 | 4.93465e-73 | 1.000000 |
| rad41         | 2.86177e-76 | 1.000000 | 2.86177e-76 | 1.000000 |

100000.000 Pa, 90.0000000 K

=====

| Rate constant | True (fraction)    | Effective (fraction) |
|---------------|--------------------|----------------------|
| Total         | 6.85154e-45 (1.00) | 6.85153e-45 (1.00)   |

| species  | PYtrue      | Cumul    | PYeffective | Cumul    |
|----------|-------------|----------|-------------|----------|
| rad20    | 0.966474    | 0.966474 | 0.966474    | 0.966474 |
| rad21    | 0.0289730   | 0.995447 | 0.0289730   | 0.995447 |
| rad18    | 0.00425666  | 0.999704 | 0.00425666  | 0.999704 |
| rad22    | 0.000276317 | 0.999980 | 0.000276317 | 0.999980 |
| rad45    | 1.00151e-05 | 0.999990 | 1.00151e-05 | 0.999990 |
| Indene+H | 8.62405e-06 | 0.999999 | 8.62405e-06 | 0.999999 |
| rad36    | 6.45728e-07 | 0.999999 | 6.45728e-07 | 0.999999 |
| rad24    | 4.97041e-07 | 1.000000 | 4.97041e-07 | 1.000000 |

|               |             |          |             |          |
|---------------|-------------|----------|-------------|----------|
| Benzyl+C2H2   | 5.30464e-08 | 1.000000 | 0.00000     | 1.000000 |
| rad11         | 4.28043e-08 | 1.000000 | 4.28043e-08 | 1.000000 |
| rad23         | 5.90318e-09 | 1.000000 | 5.90318e-09 | 1.000000 |
| rad6          | 5.48615e-13 | 1.000000 | 5.48615e-13 | 1.000000 |
| rad30         | 1.86817e-17 | 1.000000 | 1.86817e-17 | 1.000000 |
| rad15         | 7.78463e-20 | 1.000000 | 7.78463e-20 | 1.000000 |
| rad13         | 2.61747e-20 | 1.000000 | 2.61747e-20 | 1.000000 |
| rad7          | 5.42264e-21 | 1.000000 | 5.42264e-21 | 1.000000 |
| rad25         | 2.72579e-22 | 1.000000 | 2.72579e-22 | 1.000000 |
| rad38         | 2.54502e-22 | 1.000000 | 2.54502e-22 | 1.000000 |
| rad33         | 5.05947e-23 | 1.000000 | 5.05947e-23 | 1.000000 |
| rad35         | 3.22430e-25 | 1.000000 | 3.22430e-25 | 1.000000 |
| PAH9+H        | 2.21841e-25 | 1.000000 | 2.21841e-25 | 1.000000 |
| PhCHCCH2+H    | 1.09598e-26 | 1.000000 | 1.09598e-26 | 1.000000 |
| rad3          | 2.54444e-27 | 1.000000 | 2.54444e-27 | 1.000000 |
| rad4          | 1.36194e-27 | 1.000000 | 1.36194e-27 | 1.000000 |
| rad8          | 1.30082e-27 | 1.000000 | 1.30082e-27 | 1.000000 |
| rad46         | 2.70983e-28 | 1.000000 | 2.70983e-28 | 1.000000 |
| rad9          | 5.67318e-29 | 1.000000 | 5.67318e-29 | 1.000000 |
| rad28         | 2.06810e-30 | 1.000000 | 2.06810e-30 | 1.000000 |
| rad60syn      | 9.04108e-31 | 1.000000 | 9.04108e-31 | 1.000000 |
| Ph+Allene     | 7.09758e-32 | 1.000000 | 7.09758e-32 | 1.000000 |
| rad60anti     | 5.06249e-32 | 1.000000 | 5.06249e-32 | 1.000000 |
| rad2          | 4.16714e-33 | 1.000000 | 4.16714e-33 | 1.000000 |
| rad1          | 3.06882e-34 | 1.000000 | 3.06882e-34 | 1.000000 |
| PAH7+H        | 3.95757e-35 | 1.000000 | 3.95757e-35 | 1.000000 |
| PhCH2CCH+H    | 2.63839e-36 | 1.000000 | 2.63839e-36 | 1.000000 |
| rad31         | 1.30938e-36 | 1.000000 | 1.30938e-36 | 1.000000 |
| PhCCH+CH3     | 9.64375e-38 | 1.000000 | 9.64375e-38 | 1.000000 |
| rad14         | 4.07369e-38 | 1.000000 | 4.07369e-38 | 1.000000 |
| PAH3+H        | 1.42248e-38 | 1.000000 | 1.42248e-38 | 1.000000 |
| rad59         | 6.84339e-39 | 1.000000 | 6.84339e-39 | 1.000000 |
| rad26         | 5.35290e-39 | 1.000000 | 5.35290e-39 | 1.000000 |
| rad10         | 2.42162e-39 | 1.000000 | 2.42162e-39 | 1.000000 |
| rad50         | 6.73197e-42 | 1.000000 | 6.73197e-42 | 1.000000 |
| rad39         | 3.25684e-42 | 1.000000 | 3.25684e-42 | 1.000000 |
| rad27         | 4.75652e-43 | 1.000000 | 4.75652e-43 | 1.000000 |
| Ph+MeAc       | 2.10020e-43 | 1.000000 | 2.10020e-43 | 1.000000 |
| PhCCH3+H      | 2.21606e-44 | 1.000000 | 2.21606e-44 | 1.000000 |
| rad12         | 1.29349e-47 | 1.000000 | 1.29349e-47 | 1.000000 |
| rad37         | 2.94558e-49 | 1.000000 | 2.94558e-49 | 1.000000 |
| rad52         | 1.98948e-49 | 1.000000 | 1.98948e-49 | 1.000000 |
| rad51         | 1.22705e-53 | 1.000000 | 1.22705e-53 | 1.000000 |
| rad5          | 2.00428e-54 | 1.000000 | 2.00428e-54 | 1.000000 |
| rad19syn      | 8.65514e-55 | 1.000000 | 8.65514e-55 | 1.000000 |
| rad54         | 4.25700e-56 | 1.000000 | 4.25700e-56 | 1.000000 |
| rad58         | 1.90383e-56 | 1.000000 | 1.90383e-56 | 1.000000 |
| rad70         | 2.00680e-57 | 1.000000 | 2.00680e-57 | 1.000000 |
| rad65         | 1.96722e-59 | 1.000000 | 1.96722e-59 | 1.000000 |
| PAH10+CH3     | 7.28737e-60 | 1.000000 | 7.28737e-60 | 1.000000 |
| rad47         | 3.79473e-60 | 1.000000 | 3.79473e-60 | 1.000000 |
| rad55         | 5.68593e-62 | 1.000000 | 5.68593e-62 | 1.000000 |
| rad62         | 5.11996e-62 | 1.000000 | 5.11996e-62 | 1.000000 |
| rad34         | 2.28880e-62 | 1.000000 | 2.28880e-62 | 1.000000 |
| PhcycC3H3_A+H | 6.32622e-63 | 1.000000 | 6.32622e-63 | 1.000000 |
| rad43         | 3.66518e-64 | 1.000000 | 3.66518e-64 | 1.000000 |
| PAH1+H        | 1.41326e-66 | 1.000000 | 1.41326e-66 | 1.000000 |
| rad42         | 2.16182e-71 | 1.000000 | 2.16182e-71 | 1.000000 |
| rad41         | 1.51586e-74 | 1.000000 | 1.51586e-74 | 1.000000 |

100000.000 Pa, 100.000000 K

=====

| Rate constant | True (fraction)     | Effective (fraction) |
|---------------|---------------------|----------------------|
| Total         | 1.02671e-41 (1.00 ) | 1.02671e-41 (1.00 )  |

| species     | PYtrue      | Cumul    | PYeffective | Cumul    |
|-------------|-------------|----------|-------------|----------|
| rad20       | 0.961789    | 0.961789 | 0.961789    | 0.961789 |
| rad21       | 0.0329393   | 0.994728 | 0.0329393   | 0.994728 |
| rad18       | 0.00488185  | 0.999610 | 0.00488185  | 0.999610 |
| rad22       | 0.000362930 | 0.999973 | 0.000362930 | 0.999973 |
| rad45       | 1.35761e-05 | 0.999987 | 1.35761e-05 | 0.999987 |
| Indene+H    | 1.14397e-05 | 0.999998 | 1.14397e-05 | 0.999998 |
| rad36       | 8.72065e-07 | 0.999999 | 8.72065e-07 | 0.999999 |
| rad24       | 5.16644e-07 | 0.999999 | 5.16644e-07 | 0.999999 |
| Benzyl+C2H2 | 8.37379e-08 | 1.000000 | 0.00000     | 0.999999 |
| rad11       | 6.17611e-08 | 1.000000 | 6.17611e-08 | 1.000000 |
| rad23       | 9.23267e-09 | 1.000000 | 9.23267e-09 | 1.000000 |
| rad6        | 9.92605e-13 | 1.000000 | 9.92606e-13 | 1.000000 |

|               |             |          |             |          |
|---------------|-------------|----------|-------------|----------|
| rad30         | 7.08077e-17 | 1.000000 | 7.08077e-17 | 1.000000 |
| rad15         | 4.25233e-19 | 1.000000 | 4.25233e-19 | 1.000000 |
| rad13         | 6.04484e-20 | 1.000000 | 6.04484e-20 | 1.000000 |
| rad7          | 1.28115e-20 | 1.000000 | 1.28115e-20 | 1.000000 |
| rad25         | 1.47184e-21 | 1.000000 | 1.47184e-21 | 1.000000 |
| rad38         | 8.61746e-22 | 1.000000 | 8.61746e-22 | 1.000000 |
| rad33         | 1.25153e-22 | 1.000000 | 1.25153e-22 | 1.000000 |
| rad35         | 9.40092e-25 | 1.000000 | 9.40092e-25 | 1.000000 |
| PAH9+H        | 7.16294e-25 | 1.000000 | 7.16294e-25 | 1.000000 |
| PhCHCCH2+H    | 1.09602e-25 | 1.000000 | 1.09602e-25 | 1.000000 |
| rad8          | 2.03798e-26 | 1.000000 | 2.03798e-26 | 1.000000 |
| rad3          | 9.43456e-27 | 1.000000 | 9.43456e-27 | 1.000000 |
| rad4          | 5.03754e-27 | 1.000000 | 5.03754e-27 | 1.000000 |
| rad46         | 2.24653e-27 | 1.000000 | 2.24653e-27 | 1.000000 |
| rad9          | 6.88451e-28 | 1.000000 | 6.88451e-28 | 1.000000 |
| rad28         | 1.67433e-29 | 1.000000 | 1.67433e-29 | 1.000000 |
| rad60syn      | 1.36742e-29 | 1.000000 | 1.36742e-29 | 1.000000 |
| Ph+Allene     | 1.15585e-30 | 1.000000 | 1.15585e-30 | 1.000000 |
| rad60anti     | 8.12818e-31 | 1.000000 | 8.12818e-31 | 1.000000 |
| rad2          | 2.52310e-32 | 1.000000 | 2.52310e-32 | 1.000000 |
| rad1          | 1.84739e-33 | 1.000000 | 1.84739e-33 | 1.000000 |
| PAH7+H        | 7.05573e-34 | 1.000000 | 7.05573e-34 | 1.000000 |
| PhCH2CCH+H    | 5.43998e-35 | 1.000000 | 5.43998e-35 | 1.000000 |
| rad31         | 4.92066e-36 | 1.000000 | 4.92066e-36 | 1.000000 |
| PhCCH+CH3     | 1.25195e-36 | 1.000000 | 1.25195e-36 | 1.000000 |
| rad14         | 4.25491e-37 | 1.000000 | 4.25491e-37 | 1.000000 |
| PAH3+H        | 3.08052e-37 | 1.000000 | 3.08052e-37 | 1.000000 |
| rad59         | 1.47337e-37 | 1.000000 | 1.47337e-37 | 1.000000 |
| rad26         | 1.10332e-37 | 1.000000 | 1.10332e-37 | 1.000000 |
| rad10         | 2.22010e-38 | 1.000000 | 2.22010e-38 | 1.000000 |
| rad50         | 1.83784e-40 | 1.000000 | 1.83784e-40 | 1.000000 |
| rad39         | 5.78997e-41 | 1.000000 | 5.78997e-41 | 1.000000 |
| rad27         | 5.73107e-42 | 1.000000 | 5.73107e-42 | 1.000000 |
| Ph+MeAc       | 4.61211e-42 | 1.000000 | 4.61211e-42 | 1.000000 |
| PhCCCH3+H     | 3.74388e-43 | 1.000000 | 3.74388e-43 | 1.000000 |
| rad12         | 3.00184e-46 | 1.000000 | 3.00184e-46 | 1.000000 |
| rad52         | 9.00706e-48 | 1.000000 | 9.00706e-48 | 1.000000 |
| rad37         | 6.93843e-48 | 1.000000 | 6.93843e-48 | 1.000000 |
| rad51         | 7.87921e-52 | 1.000000 | 7.87921e-52 | 1.000000 |
| rad5          | 6.84872e-53 | 1.000000 | 6.84872e-53 | 1.000000 |
| rad19syn      | 3.10715e-53 | 1.000000 | 3.10715e-53 | 1.000000 |
| rad54         | 1.57152e-54 | 1.000000 | 1.57152e-54 | 1.000000 |
| rad58         | 7.20576e-55 | 1.000000 | 7.20576e-55 | 1.000000 |
| rad70         | 8.73414e-56 | 1.000000 | 8.73415e-56 | 1.000000 |
| rad65         | 1.50336e-57 | 1.000000 | 1.50336e-57 | 1.000000 |
| rad47         | 4.05294e-58 | 1.000000 | 4.05294e-58 | 1.000000 |
| PAH10+CH3     | 2.52940e-58 | 1.000000 | 2.52940e-58 | 1.000000 |
| rad62         | 2.76842e-60 | 1.000000 | 2.76842e-60 | 1.000000 |
| rad55         | 2.51587e-60 | 1.000000 | 2.51587e-60 | 1.000000 |
| rad34         | 1.14382e-60 | 1.000000 | 1.14382e-60 | 1.000000 |
| PhcycC3H3_A+H | 3.03569e-61 | 1.000000 | 3.03569e-61 | 1.000000 |
| rad43         | 2.17915e-62 | 1.000000 | 2.17915e-62 | 1.000000 |
| PAH1+H        | 7.20403e-65 | 1.000000 | 7.20403e-65 | 1.000000 |
| rad42         | 1.70793e-69 | 1.000000 | 1.70793e-69 | 1.000000 |
| rad41         | 1.43843e-72 | 1.000000 | 1.43843e-72 | 1.000000 |

100000.000 Pa, 110.000000 K

=====

| Rate constant | True (fraction)     | Effective (fraction) |
|---------------|---------------------|----------------------|
| Total         | 4.04932e-39 (1.00 ) | 4.04932e-39 (1.00 )  |

| species     | PYtrue      | Cumul    | PYeffective | Cumul    |
|-------------|-------------|----------|-------------|----------|
| rad20       | 0.956851    | 0.956851 | 0.956851    | 0.956851 |
| rad21       | 0.0370955   | 0.993946 | 0.0370955   | 0.993946 |
| rad18       | 0.00554989  | 0.999496 | 0.00554989  | 0.999496 |
| rad22       | 0.000468609 | 0.999965 | 0.000468609 | 0.999965 |
| rad45       | 1.80800e-05 | 0.999983 | 1.80801e-05 | 0.999983 |
| Indene+H    | 1.49356e-05 | 0.999998 | 1.49356e-05 | 0.999998 |
| rad36       | 1.15796e-06 | 0.999999 | 1.15796e-06 | 0.999999 |
| rad24       | 5.34375e-07 | 1.000000 | 5.34375e-07 | 1.000000 |
| Benzyl+C2H2 | 1.30930e-07 | 1.000000 | 0.000000    | 1.000000 |
| rad11       | 8.83045e-08 | 1.000000 | 8.83045e-08 | 1.000000 |
| rad23       | 1.40879e-08 | 1.000000 | 1.40879e-08 | 1.000000 |
| rad6        | 1.78822e-12 | 1.000000 | 1.78822e-12 | 1.000000 |
| rad30       | 2.54859e-16 | 1.000000 | 2.54859e-16 | 1.000000 |
| rad15       | 2.30691e-18 | 1.000000 | 2.30691e-18 | 1.000000 |
| rad13       | 1.40557e-19 | 1.000000 | 1.40557e-19 | 1.000000 |
| rad7        | 3.06013e-20 | 1.000000 | 3.06013e-20 | 1.000000 |

|               |             |          |             |          |
|---------------|-------------|----------|-------------|----------|
| rad25         | 7.99061e-21 | 1.000000 | 7.99061e-21 | 1.000000 |
| rad38         | 2.84690e-21 | 1.000000 | 2.84690e-21 | 1.000000 |
| rad33         | 3.14123e-22 | 1.000000 | 3.14123e-22 | 1.000000 |
| rad35         | 2.74129e-24 | 1.000000 | 2.74129e-24 | 1.000000 |
| PAH9+H        | 2.30463e-24 | 1.000000 | 2.30463e-24 | 1.000000 |
| PhCHCCH2+H    | 1.32100e-24 | 1.000000 | 1.32100e-24 | 1.000000 |
| rad8          | 6.61909e-25 | 1.000000 | 6.61909e-25 | 1.000000 |
| rad3          | 3.64671e-26 | 1.000000 | 3.64671e-26 | 1.000000 |
| rad46         | 2.02446e-26 | 1.000000 | 2.02446e-26 | 1.000000 |
| rad4          | 1.94343e-26 | 1.000000 | 1.94343e-26 | 1.000000 |
| rad9          | 1.10753e-26 | 1.000000 | 1.10753e-26 | 1.000000 |
| rad60syn      | 3.58079e-28 | 1.000000 | 3.58079e-28 | 1.000000 |
| rad28         | 2.31830e-28 | 1.000000 | 2.31830e-28 | 1.000000 |
| Ph+Allene     | 3.11129e-29 | 1.000000 | 3.11129e-29 | 1.000000 |
| rad60anti     | 2.41116e-29 | 1.000000 | 2.41116e-29 | 1.000000 |
| rad2          | 1.66901e-31 | 1.000000 | 1.66901e-31 | 1.000000 |
| PAH7+H        | 2.40631e-32 | 1.000000 | 2.40631e-32 | 1.000000 |
| rad1          | 1.21693e-32 | 1.000000 | 1.21693e-32 | 1.000000 |
| PhCH2CCH+H    | 2.15204e-33 | 1.000000 | 2.15204e-33 | 1.000000 |
| PhCCH+CH3     | 1.98283e-35 | 1.000000 | 1.98283e-35 | 1.000000 |
| rad31         | 1.94145e-35 | 1.000000 | 1.94145e-35 | 1.000000 |
| PAH3+H        | 1.36000e-35 | 1.000000 | 1.36000e-35 | 1.000000 |
| rad59         | 6.46018e-36 | 1.000000 | 6.46018e-36 | 1.000000 |
| rad14         | 5.09946e-36 | 1.000000 | 5.09946e-36 | 1.000000 |
| rad26         | 4.55660e-36 | 1.000000 | 4.55660e-36 | 1.000000 |
| rad10         | 2.34135e-37 | 1.000000 | 2.34135e-37 | 1.000000 |
| rad50         | 8.08736e-39 | 1.000000 | 8.08737e-39 | 1.000000 |
| rad39         | 1.83942e-39 | 1.000000 | 1.83942e-39 | 1.000000 |
| Ph+MeAc       | 1.57262e-40 | 1.000000 | 1.57262e-40 | 1.000000 |
| rad27         | 8.29480e-41 | 1.000000 | 8.29480e-41 | 1.000000 |
| PhCCCH3+H     | 8.25325e-42 | 1.000000 | 8.25325e-42 | 1.000000 |
| rad12         | 1.38614e-44 | 1.000000 | 1.38614e-44 | 1.000000 |
| rad52         | 6.95988e-46 | 1.000000 | 6.95988e-46 | 1.000000 |
| rad37         | 3.26362e-46 | 1.000000 | 3.26362e-46 | 1.000000 |
| rad51         | 8.84485e-50 | 1.000000 | 8.84486e-50 | 1.000000 |
| rad5          | 4.14789e-51 | 1.000000 | 4.14789e-51 | 1.000000 |
| rad19syn      | 2.19738e-51 | 1.000000 | 2.19738e-51 | 1.000000 |
| rad54         | 1.16590e-52 | 1.000000 | 1.16590e-52 | 1.000000 |
| rad58         | 5.76410e-53 | 1.000000 | 5.76410e-53 | 1.000000 |
| rad70         | 7.80246e-54 | 1.000000 | 7.80246e-54 | 1.000000 |
| rad65         | 2.07351e-55 | 1.000000 | 2.07351e-55 | 1.000000 |
| rad47         | 7.73255e-56 | 1.000000 | 7.73255e-56 | 1.000000 |
| PAH10+CH3     | 1.83044e-56 | 1.000000 | 1.83044e-56 | 1.000000 |
| rad62         | 2.95787e-58 | 1.000000 | 2.95787e-58 | 1.000000 |
| rad55         | 2.27602e-58 | 1.000000 | 2.27602e-58 | 1.000000 |
| rad34         | 1.18418e-58 | 1.000000 | 1.18418e-58 | 1.000000 |
| PhcycC3H3_A+H | 2.95294e-59 | 1.000000 | 2.95294e-59 | 1.000000 |
| rad43         | 2.51221e-60 | 1.000000 | 2.51221e-60 | 1.000000 |
| PAH1+H        | 8.44171e-63 | 1.000000 | 8.44171e-63 | 1.000000 |
| rad42         | 2.79782e-67 | 1.000000 | 2.79782e-67 | 1.000000 |
| rad41         | 2.81139e-70 | 1.000000 | 2.81139e-70 | 1.000000 |

100000.000 Pa, 120.000000 K

=====

| Rate constant | True (fraction)     | Effective (fraction) |
|---------------|---------------------|----------------------|
| Total         | 5.87106e-37 (1.00 ) | 5.87105e-37 (1.00 )  |

| species     | PYtrue      | Cumul    | PYeffective | Cumul    |
|-------------|-------------|----------|-------------|----------|
| rad20       | 0.951611    | 0.951611 | 0.951612    | 0.951612 |
| rad21       | 0.0414765   | 0.993088 | 0.0414765   | 0.993089 |
| rad18       | 0.00626902  | 0.999357 | 0.00626903  | 0.999358 |
| rad22       | 0.000597650 | 0.999954 | 0.000597650 | 0.999955 |
| rad45       | 2.37912e-05 | 0.999978 | 2.37912e-05 | 0.999979 |
| Indene+H    | 1.92887e-05 | 0.999997 | 1.92887e-05 | 0.999998 |
| rad36       | 1.52021e-06 | 0.999999 | 1.52021e-06 | 1.000000 |
| rad24       | 5.51267e-07 | 0.999999 | 5.51267e-07 | 1.000000 |
| Benzyl+C2H2 | 2.03230e-07 | 1.000000 | 0.000000    | 1.000000 |
| rad11       | 1.25703e-07 | 1.000000 | 1.25703e-07 | 1.000000 |
| rad23       | 2.11463e-08 | 1.000000 | 2.11463e-08 | 1.000000 |
| rad6        | 3.23094e-12 | 1.000000 | 3.23094e-12 | 1.000000 |
| rad30       | 8.44411e-16 | 1.000000 | 8.44411e-16 | 1.000000 |
| rad15       | 1.13699e-17 | 1.000000 | 1.13699e-17 | 1.000000 |
| rad13       | 3.31980e-19 | 1.000000 | 3.31980e-19 | 1.000000 |
| rad7        | 7.45687e-20 | 1.000000 | 7.45687e-20 | 1.000000 |
| rad25       | 4.08620e-20 | 1.000000 | 4.08620e-20 | 1.000000 |
| rad38       | 9.11785e-21 | 1.000000 | 9.11785e-21 | 1.000000 |
| rad33       | 8.05035e-22 | 1.000000 | 8.05035e-22 | 1.000000 |
| rad8        | 2.24303e-23 | 1.000000 | 2.24303e-23 | 1.000000 |

|               |             |          |             |         |
|---------------|-------------|----------|-------------|---------|
| PhCHCCH2+H    | 1.57588e-23 | 1.000000 | 1.57588e-23 | 1.00000 |
| rad35         | 8.03955e-24 | 1.000000 | 8.03955e-24 | 1.00000 |
| PAH9+H        | 7.41048e-24 | 1.000000 | 7.41048e-24 | 1.00000 |
| rad9          | 1.83645e-25 | 1.000000 | 1.83645e-25 | 1.00000 |
| rad46         | 1.74737e-25 | 1.000000 | 1.74737e-25 | 1.00000 |
| rad3          | 1.46969e-25 | 1.000000 | 1.46969e-25 | 1.00000 |
| rad4          | 7.82099e-26 | 1.000000 | 7.82099e-26 | 1.00000 |
| rad60syn      | 1.04928e-26 | 1.000000 | 1.04928e-26 | 1.00000 |
| rad28         | 5.18122e-27 | 1.000000 | 5.18122e-27 | 1.00000 |
| Ph+Allene     | 9.99715e-28 | 1.000000 | 9.99715e-28 | 1.00000 |
| rad60anti     | 8.59952e-28 | 1.000000 | 8.59952e-28 | 1.00000 |
| PAH7+H        | 1.20712e-30 | 1.000000 | 1.20712e-30 | 1.00000 |
| rad2          | 1.18185e-30 | 1.000000 | 1.18185e-30 | 1.00000 |
| PhCH2CCH+H    | 1.27279e-31 | 1.000000 | 1.27279e-31 | 1.00000 |
| rad1          | 8.59267e-32 | 1.000000 | 8.59267e-32 | 1.00000 |
| PAH3+H        | 9.36312e-34 | 1.000000 | 9.36313e-34 | 1.00000 |
| rad59         | 4.41171e-34 | 1.000000 | 4.41171e-34 | 1.00000 |
| PhCCH+CH3     | 3.37593e-34 | 1.000000 | 3.37593e-34 | 1.00000 |
| rad26         | 2.90124e-34 | 1.000000 | 2.90124e-34 | 1.00000 |
| rad31         | 8.02768e-35 | 1.000000 | 8.02768e-35 | 1.00000 |
| rad14         | 6.44004e-35 | 1.000000 | 6.44004e-35 | 1.00000 |
| rad10         | 2.72475e-36 | 1.000000 | 2.72475e-36 | 1.00000 |
| rad50         | 4.59179e-37 | 1.000000 | 4.59180e-37 | 1.00000 |
| rad39         | 7.47194e-38 | 1.000000 | 7.47194e-38 | 1.00000 |
| Ph+MeAc       | 6.53381e-39 | 1.000000 | 6.53381e-39 | 1.00000 |
| rad27         | 1.33769e-39 | 1.000000 | 1.33769e-39 | 1.00000 |
| PhCCCH3+H     | 2.06829e-40 | 1.000000 | 2.06829e-40 | 1.00000 |
| rad12         | 9.82923e-43 | 1.000000 | 9.82923e-43 | 1.00000 |
| rad52         | 7.19657e-44 | 1.000000 | 7.19657e-44 | 1.00000 |
| rad37         | 2.36672e-44 | 1.000000 | 2.36672e-44 | 1.00000 |
| rad51         | 1.34633e-47 | 1.000000 | 1.34634e-47 | 1.00000 |
| rad5          | 3.50973e-49 | 1.000000 | 3.50974e-49 | 1.00000 |
| rad19syn      | 2.38678e-49 | 1.000000 | 2.38678e-49 | 1.00000 |
| rad54         | 1.34802e-50 | 1.000000 | 1.34802e-50 | 1.00000 |
| rad58         | 7.43598e-51 | 1.000000 | 7.43599e-51 | 1.00000 |
| rad70         | 1.10089e-51 | 1.000000 | 1.10089e-51 | 1.00000 |
| rad65         | 3.95079e-53 | 1.000000 | 3.95079e-53 | 1.00000 |
| rad47         | 2.02119e-53 | 1.000000 | 2.02119e-53 | 1.00000 |
| PAH10+CH3     | 2.11029e-54 | 1.000000 | 2.11029e-54 | 1.00000 |
| rad62         | 4.86092e-56 | 1.000000 | 4.86092e-56 | 1.00000 |
| rad55         | 3.24643e-56 | 1.000000 | 3.24643e-56 | 1.00000 |
| rad34         | 1.94899e-56 | 1.000000 | 1.94899e-56 | 1.00000 |
| PhcycC3H3_A+H | 4.49994e-57 | 1.000000 | 4.49994e-57 | 1.00000 |
| rad43         | 4.38471e-58 | 1.000000 | 4.38471e-58 | 1.00000 |
| PAH1+H        | 1.70404e-60 | 1.000000 | 1.70404e-60 | 1.00000 |
| rad42         | 7.36137e-65 | 1.000000 | 7.36137e-65 | 1.00000 |
| rad41         | 8.76309e-68 | 1.000000 | 8.76309e-68 | 1.00000 |

100000.000 Pa, 130.000000 K

=====

| Rate constant | True (fraction)     | Effective (fraction) |
|---------------|---------------------|----------------------|
| Total         | 3.94360e-35 (1.00 ) | 3.94360e-35 (1.00 )  |

| species     | PYtrue      | Cumul    | PYeffective | Cumul    |
|-------------|-------------|----------|-------------|----------|
| rad20       | 0.946020    | 0.946020 | 0.946020    | 0.946020 |
| rad21       | 0.0461176   | 0.992138 | 0.0461176   | 0.992138 |
| rad18       | 0.00704834  | 0.999186 | 0.00704835  | 0.999186 |
| rad22       | 0.000755525 | 0.999941 | 0.000755525 | 0.999941 |
| rad45       | 3.10606e-05 | 0.999973 | 3.10607e-05 | 0.999973 |
| Indene+H    | 2.47327e-05 | 0.999997 | 2.47327e-05 | 0.999997 |
| rad36       | 1.98118e-06 | 0.999999 | 1.98118e-06 | 0.999999 |
| rad24       | 5.68066e-07 | 1.000000 | 5.68066e-07 | 1.000000 |
| Benzyl+C2H2 | 3.13575e-07 | 1.000000 | 0.000000    | 1.000000 |
| rad11       | 1.78732e-07 | 1.000000 | 1.78732e-07 | 1.000000 |
| rad23       | 3.14138e-08 | 1.000000 | 3.14138e-08 | 1.000000 |
| rad6        | 5.87965e-12 | 1.000000 | 5.87966e-12 | 1.000000 |
| rad30       | 2.56507e-15 | 1.000000 | 2.56507e-15 | 1.000000 |
| rad15       | 4.94327e-17 | 1.000000 | 4.94327e-17 | 1.000000 |
| rad13       | 7.99185e-19 | 1.000000 | 7.99185e-19 | 1.000000 |
| rad25       | 1.91406e-19 | 1.000000 | 1.91406e-19 | 1.000000 |
| rad7        | 1.86022e-19 | 1.000000 | 1.86022e-19 | 1.000000 |
| rad38       | 2.82673e-20 | 1.000000 | 2.82673e-20 | 1.000000 |
| rad33       | 2.10641e-21 | 1.000000 | 2.10641e-21 | 1.000000 |
| rad8        | 5.67135e-22 | 1.000000 | 5.67135e-22 | 1.000000 |
| PhCHCCH2+H  | 1.64775e-22 | 1.000000 | 1.64775e-22 | 1.000000 |
| PAH9+H      | 2.38208e-23 | 1.000000 | 2.38208e-23 | 1.000000 |
| rad35       | 2.37416e-23 | 1.000000 | 2.37416e-23 | 1.000000 |
| rad9        | 2.64239e-24 | 1.000000 | 2.64239e-24 | 1.000000 |

|               |             |         |             |         |
|---------------|-------------|---------|-------------|---------|
| rad46         | 1.34097e-24 | 1.00000 | 1.34097e-24 | 1.00000 |
| rad3          | 6.12096e-25 | 1.00000 | 6.12096e-25 | 1.00000 |
| rad4          | 3.25381e-25 | 1.00000 | 3.25381e-25 | 1.00000 |
| rad60syn      | 2.51677e-25 | 1.00000 | 2.51677e-25 | 1.00000 |
| rad28         | 1.16686e-25 | 1.00000 | 1.16686e-25 | 1.00000 |
| Ph+Allene     | 2.81645e-26 | 1.00000 | 2.81645e-26 | 1.00000 |
| rad60anti     | 2.50927e-26 | 1.00000 | 2.50927e-26 | 1.00000 |
| PAH7+H        | 5.54462e-29 | 1.00000 | 5.54462e-29 | 1.00000 |
| PhCH2CCH+H    | 8.89520e-30 | 1.00000 | 8.89520e-30 | 1.00000 |
| rad2          | 8.68727e-30 | 1.00000 | 8.68727e-30 | 1.00000 |
| rad1          | 6.30523e-31 | 1.00000 | 6.30524e-31 | 1.00000 |
| PAH3+H        | 8.01250e-32 | 1.00000 | 8.01251e-32 | 1.00000 |
| rad59         | 3.73568e-32 | 1.00000 | 3.73568e-32 | 1.00000 |
| rad26         | 2.24927e-32 | 1.00000 | 2.24927e-32 | 1.00000 |
| PhCCH+CH3     | 5.57983e-33 | 1.00000 | 5.57983e-33 | 1.00000 |
| rad14         | 8.00269e-34 | 1.00000 | 8.00269e-34 | 1.00000 |
| rad31         | 3.44381e-34 | 1.00000 | 3.44381e-34 | 1.00000 |
| rad10         | 3.32339e-35 | 1.00000 | 3.32340e-35 | 1.00000 |
| rad50         | 2.72753e-35 | 1.00000 | 2.72753e-35 | 1.00000 |
| rad39         | 2.76978e-36 | 1.00000 | 2.76978e-36 | 1.00000 |
| Ph+MeAc       | 2.60707e-37 | 1.00000 | 2.60707e-37 | 1.00000 |
| rad27         | 2.22123e-38 | 1.00000 | 2.22123e-38 | 1.00000 |
| PhCCCH3+H     | 5.19727e-39 | 1.00000 | 5.19727e-39 | 1.00000 |
| rad12         | 8.51131e-41 | 1.00000 | 8.51131e-41 | 1.00000 |
| rad52         | 8.08996e-42 | 1.00000 | 8.08996e-42 | 1.00000 |
| rad37         | 2.11165e-42 | 1.00000 | 2.11165e-42 | 1.00000 |
| rad51         | 2.24733e-45 | 1.00000 | 2.24733e-45 | 1.00000 |
| rad5          | 3.26977e-47 | 1.00000 | 3.26977e-47 | 1.00000 |
| rad19syn      | 3.23032e-47 | 1.00000 | 3.23032e-47 | 1.00000 |
| rad54         | 1.97413e-48 | 1.00000 | 1.97413e-48 | 1.00000 |
| rad58         | 1.25488e-48 | 1.00000 | 1.25488e-48 | 1.00000 |
| rad70         | 1.99373e-49 | 1.00000 | 1.99373e-49 | 1.00000 |
| rad65         | 8.35842e-51 | 1.00000 | 8.35843e-51 | 1.00000 |
| rad47         | 5.81635e-51 | 1.00000 | 5.81635e-51 | 1.00000 |
| PAH10+CH3     | 3.13837e-52 | 1.00000 | 3.13837e-52 | 1.00000 |
| rad62         | 9.95753e-54 | 1.00000 | 9.95753e-54 | 1.00000 |
| rad55         | 5.94018e-54 | 1.00000 | 5.94018e-54 | 1.00000 |
| rad34         | 4.14346e-54 | 1.00000 | 4.14346e-54 | 1.00000 |
| PhcycC3H3_A+H | 8.74896e-55 | 1.00000 | 8.74897e-55 | 1.00000 |
| rad43         | 9.37010e-56 | 1.00000 | 9.37010e-56 | 1.00000 |
| PAH1+H        | 4.51933e-58 | 1.00000 | 4.51933e-58 | 1.00000 |
| rad42         | 2.52951e-62 | 1.00000 | 2.52951e-62 | 1.00000 |
| rad41         | 3.53133e-65 | 1.00000 | 3.53134e-65 | 1.00000 |

100000.000 Pa, 140.000000 K

=====

| Rate constant | True (fraction)     | Effective (fraction) |
|---------------|---------------------|----------------------|
| Total         | 1.44756e-33 (1.00 ) | 1.44756e-33 (1.00 )  |

| species     | PYtrue      | Cumul    | PYeffective | Cumul    |
|-------------|-------------|----------|-------------|----------|
| rad20       | 0.940023    | 0.940023 | 0.940023    | 0.940023 |
| rad21       | 0.0510544   | 0.991077 | 0.0510544   | 0.991077 |
| rad18       | 0.00789791  | 0.998975 | 0.00789792  | 0.998975 |
| rad22       | 0.000949154 | 0.999924 | 0.000949155 | 0.999924 |
| rad45       | 4.03526e-05 | 0.999965 | 4.03527e-05 | 0.999965 |
| Indene+H    | 3.15757e-05 | 0.999996 | 3.15757e-05 | 0.999996 |
| rad36       | 2.57053e-06 | 0.999999 | 2.57053e-06 | 0.999999 |
| rad24       | 5.85318e-07 | 1.000000 | 5.85319e-07 | 1.000000 |
| Benzyl+C2H2 | 4.81257e-07 | 1.000000 | 0.000000    | 1.000000 |
| rad11       | 2.54349e-07 | 1.000000 | 2.54350e-07 | 1.000000 |
| rad23       | 4.63909e-08 | 1.000000 | 4.63909e-08 | 1.000000 |
| rad6        | 1.07968e-11 | 1.000000 | 1.07968e-11 | 1.000000 |
| rad30       | 7.20024e-15 | 1.000000 | 7.20025e-15 | 1.000000 |
| rad15       | 1.89995e-16 | 1.000000 | 1.89995e-16 | 1.000000 |
| rad13       | 1.95907e-18 | 1.000000 | 1.95907e-18 | 1.000000 |
| rad25       | 8.17856e-19 | 1.000000 | 8.17856e-19 | 1.000000 |
| rad7        | 4.74630e-19 | 1.000000 | 4.74630e-19 | 1.000000 |
| rad38       | 8.48973e-20 | 1.000000 | 8.48973e-20 | 1.000000 |
| rad8        | 1.00088e-20 | 1.000000 | 1.00088e-20 | 1.000000 |
| rad33       | 5.59987e-21 | 1.000000 | 5.59987e-21 | 1.000000 |
| PhCHCCH2+H  | 1.45187e-21 | 1.000000 | 1.45187e-21 | 1.000000 |
| PAH9+H      | 7.64211e-23 | 1.000000 | 7.64211e-23 | 1.000000 |
| rad35       | 7.04706e-23 | 1.000000 | 7.04707e-23 | 1.000000 |
| rad9        | 3.12539e-23 | 1.000000 | 3.12539e-23 | 1.000000 |
| rad46       | 8.93707e-24 | 1.000000 | 8.93708e-24 | 1.000000 |
| rad60syn    | 4.46575e-24 | 1.000000 | 4.46575e-24 | 1.000000 |
| rad3        | 2.59915e-24 | 1.000000 | 2.59915e-24 | 1.000000 |
| rad28       | 2.06436e-24 | 1.000000 | 2.06436e-24 | 1.000000 |

|               |             |         |             |          |
|---------------|-------------|---------|-------------|----------|
| rad4          | 1.38067e-24 | 1.00000 | 1.38067e-24 | 1.000000 |
| Ph+Allene     | 6.08255e-25 | 1.00000 | 6.08255e-25 | 1.000000 |
| rad60anti     | 5.29991e-25 | 1.00000 | 5.29991e-25 | 1.000000 |
| PAH7+H        | 1.72326e-27 | 1.00000 | 1.72326e-27 | 1.000000 |
| PhCH2CCH+H    | 5.54821e-28 | 1.00000 | 5.54821e-28 | 1.000000 |
| rad2          | 6.43258e-29 | 1.00000 | 6.43259e-29 | 1.000000 |
| PAH3+H        | 6.28574e-30 | 1.00000 | 6.28574e-30 | 1.000000 |
| rad1          | 4.66553e-30 | 1.00000 | 4.66553e-30 | 1.000000 |
| rad59         | 2.89124e-30 | 1.00000 | 2.89124e-30 | 1.000000 |
| rad26         | 1.49284e-30 | 1.00000 | 1.49284e-30 | 1.000000 |
| PhCCH+CH3     | 8.46581e-32 | 1.00000 | 8.46582e-32 | 1.000000 |
| rad14         | 9.39328e-33 | 1.00000 | 9.39328e-33 | 1.000000 |
| rad31         | 1.51163e-33 | 1.00000 | 1.51163e-33 | 1.000000 |
| rad50         | 1.35581e-33 | 1.00000 | 1.35581e-33 | 1.000000 |
| rad10         | 4.09906e-34 | 1.00000 | 4.09906e-34 | 1.000000 |
| rad39         | 7.89673e-35 | 1.00000 | 7.89673e-35 | 1.000000 |
| Ph+MeAc       | 8.61628e-36 | 1.00000 | 8.61628e-36 | 1.000000 |
| rad27         | 3.57803e-37 | 1.00000 | 3.57803e-37 | 1.000000 |
| PhCCCH3+H     | 1.20835e-37 | 1.00000 | 1.20835e-37 | 1.000000 |
| rad12         | 6.45777e-39 | 1.00000 | 6.45778e-39 | 1.000000 |
| rad52         | 7.91903e-40 | 1.00000 | 7.91903e-40 | 1.000000 |
| rad37         | 1.67999e-40 | 1.00000 | 1.67999e-40 | 1.000000 |
| rad51         | 3.28227e-43 | 1.00000 | 3.28227e-43 | 1.000000 |
| rad19syn      | 4.05886e-45 | 1.00000 | 4.05886e-45 | 1.000000 |
| rad5          | 2.57686e-45 | 1.00000 | 2.57686e-45 | 1.000000 |
| rad54         | 2.71850e-46 | 1.00000 | 2.71850e-46 | 1.000000 |
| rad58         | 2.03902e-46 | 1.00000 | 2.03902e-46 | 1.000000 |
| rad70         | 3.42584e-47 | 1.00000 | 3.42584e-47 | 1.000000 |
| rad65         | 1.56025e-48 | 1.00000 | 1.56025e-48 | 1.000000 |
| rad47         | 1.46297e-48 | 1.00000 | 1.46297e-48 | 1.000000 |
| PAH10+CH3     | 4.44213e-50 | 1.00000 | 4.44214e-50 | 1.000000 |
| rad62         | 1.88887e-51 | 1.00000 | 1.88887e-51 | 1.000000 |
| rad55         | 1.03183e-51 | 1.00000 | 1.03183e-51 | 1.000000 |
| rad34         | 8.39792e-52 | 1.00000 | 8.39792e-52 | 1.000000 |
| PhcycC3H3_A+H | 1.60823e-52 | 1.00000 | 1.60823e-52 | 1.000000 |
| rad43         | 1.82705e-53 | 1.00000 | 1.82706e-53 | 1.000000 |
| PAH1+H        | 1.14872e-55 | 1.00000 | 1.14872e-55 | 1.000000 |
| rad42         | 8.37757e-60 | 1.00000 | 8.37757e-60 | 1.000000 |
| rad41         | 1.35532e-62 | 1.00000 | 1.35532e-62 | 1.000000 |

100000.000 Pa, 150.000000 K

=====

| Rate constant | True (fraction)     | Effective (fraction) |
|---------------|---------------------|----------------------|
| Total         | 3.27736e-32 (1.00 ) | 3.27736e-32 (1.00 )  |

| species     | PYtrue      | Cumul    | PYeffective | Cumul    |
|-------------|-------------|----------|-------------|----------|
| rad20       | 0.933565    | 0.933565 | 0.933566    | 0.933566 |
| rad21       | 0.0563213   | 0.989886 | 0.0563213   | 0.989887 |
| rad18       | 0.00882879  | 0.998715 | 0.00882880  | 0.998716 |
| rad22       | 0.00118722  | 0.999902 | 0.00118722  | 0.999903 |
| rad45       | 5.22775e-05 | 0.999955 | 5.22776e-05 | 0.999956 |
| Indene+H    | 4.02230e-05 | 0.999995 | 4.02230e-05 | 0.999996 |
| rad36       | 3.32734e-06 | 0.999998 | 3.32734e-06 | 0.999999 |
| Benzyl+C2H2 | 7.34786e-07 | 0.999999 | 0.000000    | 0.999999 |
| rad24       | 6.03425e-07 | 0.999999 | 6.03425e-07 | 1.000000 |
| rad11       | 3.62658e-07 | 1.000000 | 3.62659e-07 | 1.000000 |
| rad23       | 6.83206e-08 | 1.000000 | 6.83206e-08 | 1.000000 |
| rad6        | 2.00046e-11 | 1.000000 | 2.00046e-11 | 1.000000 |
| rad30       | 1.88838e-14 | 1.000000 | 1.88838e-14 | 1.000000 |
| rad15       | 6.54207e-16 | 1.000000 | 6.54207e-16 | 1.000000 |
| rad13       | 4.87044e-18 | 1.000000 | 4.87044e-18 | 1.000000 |
| rad25       | 3.20676e-18 | 1.000000 | 3.20677e-18 | 1.000000 |
| rad7        | 1.23368e-18 | 1.000000 | 1.23368e-18 | 1.000000 |
| rad38       | 2.47371e-19 | 1.000000 | 2.47372e-19 | 1.000000 |
| rad8        | 1.27003e-19 | 1.000000 | 1.27003e-19 | 1.000000 |
| rad33       | 1.50109e-20 | 1.000000 | 1.50109e-20 | 1.000000 |
| PhCHCCH2+H  | 1.07909e-20 | 1.000000 | 1.07909e-20 | 1.000000 |
| rad9        | 3.06575e-22 | 1.000000 | 3.06575e-22 | 1.000000 |
| PAH9+H      | 2.43999e-22 | 1.000000 | 2.43999e-22 | 1.000000 |
| rad35       | 2.09530e-22 | 1.000000 | 2.09530e-22 | 1.000000 |
| rad60syn    | 5.88805e-23 | 1.000000 | 5.88805e-23 | 1.000000 |
| rad46       | 5.18811e-23 | 1.000000 | 5.18811e-23 | 1.000000 |
| rad28       | 2.76085e-23 | 1.000000 | 2.76086e-23 | 1.000000 |
| rad3        | 1.10924e-23 | 1.000000 | 1.10924e-23 | 1.000000 |
| Ph+Allene   | 9.94874e-24 | 1.000000 | 9.94875e-24 | 1.000000 |
| rad60anti   | 8.14384e-24 | 1.000000 | 8.14384e-24 | 1.000000 |
| rad4        | 5.88987e-24 | 1.000000 | 5.88988e-24 | 1.000000 |
| PhCH2CCH+H  | 3.99334e-26 | 1.000000 | 3.99334e-26 | 1.000000 |

|               |             |          |             |         |
|---------------|-------------|----------|-------------|---------|
| PAH7+H        | 3.71649e-26 | 1.000000 | 3.71649e-26 | 1.00000 |
| rad2          | 4.68361e-28 | 1.000000 | 4.68361e-28 | 1.00000 |
| PAH3+H        | 3.77791e-28 | 1.000000 | 3.77792e-28 | 1.00000 |
| rad59         | 1.61700e-28 | 1.000000 | 1.61700e-28 | 1.00000 |
| rad26         | 5.97329e-29 | 1.000000 | 5.97329e-29 | 1.00000 |
| rad1          | 3.39784e-29 | 1.000000 | 3.39785e-29 | 1.00000 |
| PhCCH+CH3     | 1.15435e-30 | 1.000000 | 1.15436e-30 | 1.00000 |
| rad14         | 1.02059e-31 | 1.000000 | 1.02060e-31 | 1.00000 |
| rad50         | 5.14366e-32 | 1.000000 | 5.14366e-32 | 1.00000 |
| rad31         | 6.69304e-33 | 1.000000 | 6.69305e-33 | 1.00000 |
| rad10         | 5.09575e-33 | 1.000000 | 5.09576e-33 | 1.00000 |
| rad39         | 1.73240e-33 | 1.000000 | 1.73241e-33 | 1.00000 |
| Ph+MeAc       | 2.32375e-34 | 1.000000 | 2.32375e-34 | 1.00000 |
| rad27         | 5.40869e-36 | 1.000000 | 5.40870e-36 | 1.00000 |
| PhCCCH3+H     | 2.53474e-36 | 1.000000 | 2.53474e-36 | 1.00000 |
| rad12         | 3.52669e-37 | 1.000000 | 3.52669e-37 | 1.00000 |
| rad52         | 7.25698e-38 | 1.000000 | 7.25699e-38 | 1.00000 |
| rad37         | 1.08045e-38 | 1.000000 | 1.08046e-38 | 1.00000 |
| rad51         | 4.53508e-41 | 1.000000 | 4.53508e-41 | 1.00000 |
| rad19syn      | 6.15833e-43 | 1.000000 | 6.15833e-43 | 1.00000 |
| rad5          | 1.79428e-43 | 1.000000 | 1.79428e-43 | 1.00000 |
| rad54         | 4.75535e-44 | 1.000000 | 4.75535e-44 | 1.00000 |
| rad58         | 4.51015e-44 | 1.000000 | 4.51015e-44 | 1.00000 |
| rad70         | 7.76558e-45 | 1.000000 | 7.76558e-45 | 1.00000 |
| rad47         | 3.46698e-46 | 1.000000 | 3.46698e-46 | 1.00000 |
| rad65         | 2.78096e-46 | 1.000000 | 2.78096e-46 | 1.00000 |
| PAH10+CH3     | 8.33548e-48 | 1.000000 | 8.33549e-48 | 1.00000 |
| rad62         | 4.30881e-49 | 1.000000 | 4.30881e-49 | 1.00000 |
| rad55         | 2.36763e-49 | 1.000000 | 2.36763e-49 | 1.00000 |
| rad34         | 2.27642e-49 | 1.000000 | 2.27642e-49 | 1.00000 |
| PhcycC3H3_A+H | 3.88044e-50 | 1.000000 | 3.88044e-50 | 1.00000 |
| rad43         | 4.11842e-51 | 1.000000 | 4.11842e-51 | 1.00000 |
| PAH1+H        | 3.14968e-53 | 1.000000 | 3.14968e-53 | 1.00000 |
| rad42         | 3.57441e-57 | 1.000000 | 3.57441e-57 | 1.00000 |
| rad41         | 6.54875e-60 | 1.000000 | 6.54876e-60 | 1.00000 |

100000.000 Pa, 160.000000 K

=====

| Rate constant | True (fraction)     | Effective (fraction) |
|---------------|---------------------|----------------------|
| Total         | 5.01169e-31 (1.00 ) | 5.01168e-31 (1.00 )  |

| species     | PYtrue      | Cumul    | PYeffective | Cumul    |
|-------------|-------------|----------|-------------|----------|
| rad20       | 0.926590    | 0.926590 | 0.926591    | 0.926591 |
| rad21       | 0.0619507   | 0.988541 | 0.0619507   | 0.988542 |
| rad18       | 0.00985303  | 0.998394 | 0.00985304  | 0.998395 |
| rad22       | 0.00148052  | 0.999874 | 0.00148052  | 0.999875 |
| rad45       | 6.76326e-05 | 0.999942 | 6.76327e-05 | 0.999943 |
| Indene+H    | 5.12067e-05 | 0.999993 | 5.12068e-05 | 0.999994 |
| rad36       | 4.30285e-06 | 0.999997 | 4.30285e-06 | 0.999998 |
| Benzyl+C2H2 | 1.11589e-06 | 0.999999 | 0.00000     | 0.999998 |
| rad24       | 6.22672e-07 | 0.999999 | 6.22673e-07 | 0.999999 |
| rad11       | 5.18245e-07 | 1.000000 | 5.18245e-07 | 1.000000 |
| rad23       | 1.00556e-07 | 1.000000 | 1.00556e-07 | 1.000000 |
| rad6        | 3.73450e-11 | 1.000000 | 3.73450e-11 | 1.000000 |
| rad30       | 4.67649e-14 | 1.000000 | 4.67649e-14 | 1.000000 |
| rad15       | 2.04926e-15 | 1.000000 | 2.04926e-15 | 1.000000 |
| rad13       | 1.22088e-17 | 1.000000 | 1.22088e-17 | 1.000000 |
| rad25       | 1.16396e-17 | 1.000000 | 1.16396e-17 | 1.000000 |
| rad7        | 3.24823e-18 | 1.000000 | 3.24823e-18 | 1.000000 |
| rad8        | 1.21205e-18 | 1.000000 | 1.21205e-18 | 1.000000 |
| rad38       | 7.00229e-19 | 1.000000 | 7.00230e-19 | 1.000000 |
| PhCHCCH2+H  | 6.86702e-20 | 1.000000 | 6.86703e-20 | 1.000000 |
| rad33       | 4.02220e-20 | 1.000000 | 4.02221e-20 | 1.000000 |
| rad9        | 2.56535e-21 | 1.000000 | 2.56536e-21 | 1.000000 |
| PAH9+H      | 7.72731e-22 | 1.000000 | 7.72732e-22 | 1.000000 |
| rad35       | 6.21634e-22 | 1.000000 | 6.21635e-22 | 1.000000 |
| rad60syn    | 5.95334e-22 | 1.000000 | 5.95335e-22 | 1.000000 |
| rad28       | 2.84625e-22 | 1.000000 | 2.84625e-22 | 1.000000 |
| rad46       | 2.65741e-22 | 1.000000 | 2.65741e-22 | 1.000000 |
| Ph+Allene   | 1.25608e-22 | 1.000000 | 1.25608e-22 | 1.000000 |
| rad60anti   | 9.40908e-23 | 1.000000 | 9.40909e-23 | 1.000000 |
| rad3        | 4.69588e-23 | 1.000000 | 4.69588e-23 | 1.000000 |
| rad4        | 2.49315e-23 | 1.000000 | 2.49315e-23 | 1.000000 |
| PhCH2CCH+H  | 1.28525e-24 | 1.000000 | 1.28525e-24 | 1.000000 |
| PAH7+H      | 5.76574e-25 | 1.000000 | 5.76574e-25 | 1.000000 |
| PAH3+H      | 1.13074e-26 | 1.000000 | 1.13074e-26 | 1.000000 |
| rad59       | 4.58392e-27 | 1.000000 | 4.58393e-27 | 1.000000 |
| rad2        | 3.29396e-27 | 1.000000 | 3.29396e-27 | 1.000000 |



|               |             |          |             |          |
|---------------|-------------|----------|-------------|----------|
| rad26         | 1.41594e-27 | 1.000000 | 1.41595e-27 | 1.000000 |
| rad1          | 2.39241e-28 | 1.000000 | 2.39242e-28 | 1.000000 |
| PhCCH+CH3     | 1.40203e-29 | 1.000000 | 1.40203e-29 | 1.000000 |
| rad50         | 1.32770e-30 | 1.000000 | 1.32770e-30 | 1.000000 |
| rad14         | 1.01585e-30 | 1.000000 | 1.01585e-30 | 1.000000 |
| rad10         | 6.30981e-32 | 1.000000 | 6.30982e-32 | 1.000000 |
| rad31         | 2.95150e-32 | 1.000000 | 2.95151e-32 | 1.000000 |
| rad39         | 2.92931e-32 | 1.000000 | 2.92932e-32 | 1.000000 |
| Ph+MeAc       | 4.99768e-33 | 1.000000 | 4.99769e-33 | 1.000000 |
| rad27         | 7.49317e-35 | 1.000000 | 7.49318e-35 | 1.000000 |
| PhCCCH3+H     | 4.68365e-35 | 1.000000 | 4.68365e-35 | 1.000000 |
| rad12         | 1.12532e-35 | 1.000000 | 1.12532e-35 | 1.000000 |
| rad52         | 4.91183e-36 | 1.000000 | 4.91183e-36 | 1.000000 |
| rad37         | 4.04865e-37 | 1.000000 | 4.04865e-37 | 1.000000 |
| rad51         | 4.67175e-39 | 1.000000 | 4.67176e-39 | 1.000000 |
| rad19syn      | 7.07114e-41 | 1.000000 | 7.07115e-41 | 1.000000 |
| rad5          | 8.95025e-42 | 1.000000 | 8.95026e-42 | 1.000000 |
| rad58         | 8.24154e-42 | 1.000000 | 8.24155e-42 | 1.000000 |
| rad54         | 6.55369e-42 | 1.000000 | 6.55369e-42 | 1.000000 |
| rad70         | 1.42454e-42 | 1.000000 | 1.42454e-42 | 1.000000 |
| rad47         | 6.07404e-44 | 1.000000 | 6.07405e-44 | 1.000000 |
| rad65         | 3.71851e-44 | 1.000000 | 3.71851e-44 | 1.000000 |
| PAH10+CH3     | 1.27377e-45 | 1.000000 | 1.27377e-45 | 1.000000 |
| rad62         | 7.47850e-47 | 1.000000 | 7.47851e-47 | 1.000000 |
| rad34         | 5.04044e-47 | 1.000000 | 5.04044e-47 | 1.000000 |
| rad55         | 4.40778e-47 | 1.000000 | 4.40778e-47 | 1.000000 |
| PhcycC3H3_A+H | 7.56923e-48 | 1.000000 | 7.56924e-48 | 1.000000 |
| rad43         | 6.92682e-49 | 1.000000 | 6.92682e-49 | 1.000000 |
| PAH1+H        | 6.63716e-51 | 1.000000 | 6.63717e-51 | 1.000000 |
| rad42         | 1.20102e-54 | 1.000000 | 1.20102e-54 | 1.000000 |
| rad41         | 2.44775e-57 | 1.000000 | 2.44776e-57 | 1.000000 |

100000.000 Pa, 170.000000 K

=====

| Rate constant | True (fraction)     | Effective (fraction) |
|---------------|---------------------|----------------------|
| Total         | 5.54821e-30 (1.00 ) | 5.54820e-30 (1.00 )  |

| species     | PYtrue      | Cumul    | PYeffective | Cumul    |
|-------------|-------------|----------|-------------|----------|
| rad20       | 0.919041    | 0.919041 | 0.919043    | 0.919043 |
| rad21       | 0.0679714   | 0.987012 | 0.0679715   | 0.987015 |
| rad18       | 0.0109837   | 0.997996 | 0.0109837   | 0.997998 |
| rad22       | 0.00184236  | 0.999838 | 0.00184236  | 0.999841 |
| rad45       | 8.74516e-05 | 0.999926 | 8.74517e-05 | 0.999928 |
| Indene+H    | 6.52238e-05 | 0.999991 | 6.52240e-05 | 0.999993 |
| rad36       | 5.56377e-06 | 0.999997 | 5.56378e-06 | 0.999999 |
| Benzyl+C2H2 | 1.68501e-06 | 0.999998 | 0.000000    | 0.999999 |
| rad11       | 7.42020e-07 | 0.999999 | 7.42022e-07 | 1.000000 |
| rad24       | 6.43257e-07 | 1.000000 | 6.43258e-07 | 1.000000 |
| rad23       | 1.48102e-07 | 1.000000 | 1.48102e-07 | 1.000000 |
| rad6        | 7.00785e-11 | 1.000000 | 7.00786e-11 | 1.000000 |
| rad30       | 1.10336e-13 | 1.000000 | 1.10336e-13 | 1.000000 |
| rad15       | 5.92272e-15 | 1.000000 | 5.92273e-15 | 1.000000 |
| rad25       | 3.94471e-17 | 1.000000 | 3.94472e-17 | 1.000000 |
| rad13       | 3.06574e-17 | 1.000000 | 3.06575e-17 | 1.000000 |
| rad8        | 9.08204e-18 | 1.000000 | 9.08206e-18 | 1.000000 |
| rad7        | 8.60979e-18 | 1.000000 | 8.60981e-18 | 1.000000 |
| rad38       | 1.92765e-18 | 1.000000 | 1.92766e-18 | 1.000000 |
| PhCHCCH2+H  | 3.80931e-19 | 1.000000 | 3.80932e-19 | 1.000000 |
| rad33       | 1.06830e-19 | 1.000000 | 1.06830e-19 | 1.000000 |
| rad9        | 1.88278e-20 | 1.000000 | 1.88279e-20 | 1.000000 |
| rad60syn    | 4.78509e-21 | 1.000000 | 4.78510e-21 | 1.000000 |
| PAH9+H      | 2.41923e-21 | 1.000000 | 2.41923e-21 | 1.000000 |
| rad28       | 2.33496e-21 | 1.000000 | 2.33497e-21 | 1.000000 |
| rad35       | 1.83395e-21 | 1.000000 | 1.83396e-21 | 1.000000 |
| Ph+Allene   | 1.26248e-21 | 1.000000 | 1.26248e-21 | 1.000000 |
| rad46       | 1.21922e-21 | 1.000000 | 1.21922e-21 | 1.000000 |
| rad60anti   | 8.49560e-22 | 1.000000 | 8.49561e-22 | 1.000000 |
| rad3        | 1.95060e-22 | 1.000000 | 1.95061e-22 | 1.000000 |
| rad4        | 1.03579e-22 | 1.000000 | 1.03579e-22 | 1.000000 |
| PhCH2CCH+H  | 2.59789e-23 | 1.000000 | 2.59789e-23 | 1.000000 |
| PAH7+H      | 6.75911e-24 | 1.000000 | 6.75912e-24 | 1.000000 |
| PAH3+H      | 2.23458e-25 | 1.000000 | 2.23458e-25 | 1.000000 |
| rad59       | 8.70693e-26 | 1.000000 | 8.70695e-26 | 1.000000 |
| rad26       | 2.35043e-26 | 1.000000 | 2.35043e-26 | 1.000000 |
| rad2        | 2.21026e-26 | 1.000000 | 2.21027e-26 | 1.000000 |
| rad1        | 1.60855e-27 | 1.000000 | 1.60855e-27 | 1.000000 |
| PhCCH+CH3   | 1.51685e-28 | 1.000000 | 1.51685e-28 | 1.000000 |
| rad50       | 2.50027e-29 | 1.000000 | 2.50027e-29 | 1.000000 |

|               |             |          |             |         |
|---------------|-------------|----------|-------------|---------|
| rad14         | 9.22584e-30 | 1.000000 | 9.22585e-30 | 1.00000 |
| rad10         | 7.54515e-31 | 1.000000 | 7.54517e-31 | 1.00000 |
| rad39         | 3.95133e-31 | 1.000000 | 3.95134e-31 | 1.00000 |
| rad31         | 1.28281e-31 | 1.000000 | 1.28281e-31 | 1.00000 |
| Ph+MeAc       | 8.74635e-32 | 1.000000 | 8.74637e-32 | 1.00000 |
| rad27         | 9.40482e-34 | 1.000000 | 9.40484e-34 | 1.00000 |
| PhCCCH3+H     | 7.59751e-34 | 1.000000 | 7.59752e-34 | 1.00000 |
| rad12         | 2.47245e-34 | 1.000000 | 2.47246e-34 | 1.00000 |
| rad52         | 2.37180e-34 | 1.000000 | 2.37180e-34 | 1.00000 |
| rad37         | 1.02793e-35 | 1.000000 | 1.02793e-35 | 1.00000 |
| rad51         | 3.49193e-37 | 1.000000 | 3.49193e-37 | 1.00000 |
| rad19syn      | 5.75163e-39 | 1.000000 | 5.75164e-39 | 1.00000 |
| rad58         | 1.19354e-39 | 1.000000 | 1.19354e-39 | 1.00000 |
| rad54         | 6.76211e-40 | 1.000000 | 6.76212e-40 | 1.00000 |
| rad5          | 3.31431e-40 | 1.000000 | 3.31432e-40 | 1.00000 |
| rad70         | 2.02730e-40 | 1.000000 | 2.02730e-40 | 1.00000 |
| rad47         | 7.63016e-42 | 1.000000 | 7.63017e-42 | 1.00000 |
| rad65         | 3.62999e-42 | 1.000000 | 3.63000e-42 | 1.00000 |
| PAH10+CH3     | 1.51357e-43 | 1.000000 | 1.51358e-43 | 1.00000 |
| rad62         | 9.47080e-45 | 1.000000 | 9.47081e-45 | 1.00000 |
| rad34         | 8.74959e-45 | 1.000000 | 8.74960e-45 | 1.00000 |
| rad55         | 6.38442e-45 | 1.000000 | 6.38443e-45 | 1.00000 |
| PhcycC3H3_A+H | 1.14556e-45 | 1.000000 | 1.14556e-45 | 1.00000 |
| rad43         | 8.38508e-47 | 1.000000 | 8.38510e-47 | 1.00000 |
| PAH1+H        | 1.04242e-48 | 1.000000 | 1.04242e-48 | 1.00000 |
| rad42         | 3.01167e-52 | 1.000000 | 3.01167e-52 | 1.00000 |
| rad41         | 6.71631e-55 | 1.000000 | 6.71632e-55 | 1.00000 |

100000.000 Pa, 180.000000 K

=====

| Rate constant | True (fraction)     | Effective (fraction) |
|---------------|---------------------|----------------------|
| Total         | 4.69315e-29 (1.00 ) | 4.69314e-29 (1.00 )  |

| species     | PYtrue      | Cumul    | PYeffective | Cumul    |
|-------------|-------------|----------|-------------|----------|
| rad20       | 0.910861    | 0.910861 | 0.910864    | 0.910864 |
| rad21       | 0.0744068   | 0.985268 | 0.0744070   | 0.985271 |
| rad18       | 0.0122348   | 0.997503 | 0.0122348   | 0.997506 |
| rad22       | 0.00228899  | 0.999792 | 0.00228900  | 0.999795 |
| rad45       | 0.000113064 | 0.999905 | 0.000113065 | 0.999908 |
| Indene+H    | 8.31849e-05 | 0.999988 | 8.31851e-05 | 0.999991 |
| rad36       | 7.19638e-06 | 0.999995 | 7.19640e-06 | 0.999998 |
| Benzyl+C2H2 | 2.52881e-06 | 0.999998 | 0.00000     | 0.999998 |
| rad11       | 1.06371e-06 | 0.999999 | 1.06372e-06 | 0.999999 |
| rad24       | 6.65302e-07 | 0.999999 | 6.65304e-07 | 1.000000 |
| rad23       | 2.18407e-07 | 1.000000 | 2.18408e-07 | 1.00000  |
| rad6        | 1.31817e-10 | 1.000000 | 1.31817e-10 | 1.00000  |
| rad30       | 2.49784e-13 | 1.000000 | 2.49785e-13 | 1.00000  |
| rad15       | 1.59843e-14 | 1.000000 | 1.59843e-14 | 1.00000  |
| rad25       | 1.25744e-16 | 1.000000 | 1.25745e-16 | 1.00000  |
| rad13       | 7.66229e-17 | 1.000000 | 7.66231e-17 | 1.00000  |
| rad8        | 5.54394e-17 | 1.000000 | 5.54395e-17 | 1.00000  |
| rad7        | 2.28359e-17 | 1.000000 | 2.28360e-17 | 1.00000  |
| rad38       | 5.16487e-18 | 1.000000 | 5.16488e-18 | 1.00000  |
| PhCHCCH2+H  | 1.87346e-18 | 1.000000 | 1.87347e-18 | 1.00000  |
| rad33       | 2.79176e-19 | 1.000000 | 2.79176e-19 | 1.00000  |
| rad9        | 1.23315e-19 | 1.000000 | 1.23315e-19 | 1.00000  |
| rad60syn    | 3.15971e-20 | 1.000000 | 3.15972e-20 | 1.00000  |
| rad28       | 1.57221e-20 | 1.000000 | 1.57221e-20 | 1.00000  |
| Ph+Allene   | 1.04055e-20 | 1.000000 | 1.04055e-20 | 1.00000  |
| PAH9+H      | 7.46462e-21 | 1.000000 | 7.46464e-21 | 1.00000  |
| rad60anti   | 6.20969e-21 | 1.000000 | 6.20971e-21 | 1.00000  |
| rad35       | 5.36953e-21 | 1.000000 | 5.36954e-21 | 1.00000  |
| rad46       | 5.08203e-21 | 1.000000 | 5.08205e-21 | 1.00000  |
| rad3        | 7.88250e-22 | 1.000000 | 7.88252e-22 | 1.00000  |
| rad4        | 4.18755e-22 | 1.000000 | 4.18756e-22 | 1.00000  |
| PhCH2CCH+H  | 3.77972e-22 | 1.000000 | 3.77973e-22 | 1.00000  |
| PAH7+H      | 6.23363e-23 | 1.000000 | 6.23364e-23 | 1.00000  |
| PAH3+H      | 3.23064e-24 | 1.000000 | 3.23064e-24 | 1.00000  |
| rad59       | 1.21661e-24 | 1.000000 | 1.21661e-24 | 1.00000  |
| rad26       | 2.92443e-25 | 1.000000 | 2.92443e-25 | 1.00000  |
| rad2        | 1.40358e-25 | 1.000000 | 1.40358e-25 | 1.00000  |
| rad1        | 1.02440e-26 | 1.000000 | 1.02440e-26 | 1.00000  |
| PhCCH+CH3   | 1.46617e-27 | 1.000000 | 1.46617e-27 | 1.00000  |
| rad50       | 3.60786e-28 | 1.000000 | 3.60787e-28 | 1.00000  |
| rad14       | 7.63807e-29 | 1.000000 | 7.63809e-29 | 1.00000  |
| rad10       | 8.33754e-30 | 1.000000 | 8.33756e-30 | 1.00000  |
| rad39       | 4.37628e-30 | 1.000000 | 4.37629e-30 | 1.00000  |
| Ph+MeAc     | 1.26968e-30 | 1.000000 | 1.26968e-30 | 1.00000  |

|               |             |          |             |         |
|---------------|-------------|----------|-------------|---------|
| rad31         | 5.45086e-31 | 1.000000 | 5.45088e-31 | 1.00000 |
| PhCCCH3+H     | 1.08226e-32 | 1.000000 | 1.08226e-32 | 1.00000 |
| rad27         | 1.06279e-32 | 1.000000 | 1.06279e-32 | 1.00000 |
| rad52         | 7.58874e-33 | 1.000000 | 7.58876e-33 | 1.00000 |
| rad12         | 4.04373e-33 | 1.000000 | 4.04374e-33 | 1.00000 |
| rad37         | 1.91561e-34 | 1.000000 | 1.91562e-34 | 1.00000 |
| rad51         | 1.90426e-35 | 1.000000 | 1.90426e-35 | 1.00000 |
| rad19syn      | 3.13575e-37 | 1.000000 | 3.13575e-37 | 1.00000 |
| rad58         | 1.55023e-37 | 1.000000 | 1.55023e-37 | 1.00000 |
| rad54         | 5.38032e-38 | 1.000000 | 5.38033e-38 | 1.00000 |
| rad70         | 2.46903e-38 | 1.000000 | 2.46903e-38 | 1.00000 |
| rad5          | 9.41595e-39 | 1.000000 | 9.41598e-39 | 1.00000 |
| rad47         | 6.89772e-40 | 1.000000 | 6.89774e-40 | 1.00000 |
| rad65         | 2.61272e-40 | 1.000000 | 2.61272e-40 | 1.00000 |
| PAH10+CH3     | 1.52627e-41 | 1.000000 | 1.52627e-41 | 1.00000 |
| rad34         | 1.33520e-42 | 1.000000 | 1.33521e-42 | 1.00000 |
| rad62         | 9.09701e-43 | 1.000000 | 9.09703e-43 | 1.00000 |
| rad55         | 7.94380e-43 | 1.000000 | 7.94382e-43 | 1.00000 |
| PhcycC3H3_A+H | 1.48228e-43 | 1.000000 | 1.48228e-43 | 1.00000 |
| rad43         | 7.52781e-45 | 1.000000 | 7.52783e-45 | 1.00000 |
| PAH1+H        | 1.29701e-46 | 1.000000 | 1.29701e-46 | 1.00000 |
| rad42         | 5.96882e-50 | 1.000000 | 5.96884e-50 | 1.00000 |
| rad41         | 1.42447e-52 | 1.000000 | 1.42447e-52 | 1.00000 |

100000.000 Pa, 190.000000 K

=====

| Rate constant | True (fraction)     | Effective (fraction) |
|---------------|---------------------|----------------------|
| Total         | 3.16530e-28 (1.00 ) | 3.16529e-28 (1.00 )  |

| species     | PYtrue      | Cumul    | PYeffective | Cumul    |
|-------------|-------------|----------|-------------|----------|
| rad20       | 0.901998    | 0.901998 | 0.902001    | 0.902001 |
| rad21       | 0.0812731   | 0.983271 | 0.0812734   | 0.983274 |
| rad18       | 0.0136213   | 0.996892 | 0.0136213   | 0.996896 |
| rad22       | 0.00284004  | 0.999732 | 0.00284005  | 0.999736 |
| rad45       | 0.000146165 | 0.999879 | 0.000146165 | 0.999882 |
| Indene+H    | 0.000106276 | 0.999985 | 0.000106276 | 0.999988 |
| rad36       | 9.31130e-06 | 0.999994 | 9.31133e-06 | 0.999998 |
| Benzyl+C2H2 | 3.77017e-06 | 0.999998 | 0.00000     | 0.999998 |
| rad11       | 1.52516e-06 | 0.999999 | 1.52517e-06 | 0.999999 |
| rad24       | 6.88863e-07 | 1.00000  | 6.88865e-07 | 1.00000  |
| rad23       | 3.22508e-07 | 1.00000  | 3.22509e-07 | 1.00000  |
| rad6        | 2.47811e-10 | 1.00000  | 2.47812e-10 | 1.00000  |
| rad30       | 5.45573e-13 | 1.00000  | 5.45575e-13 | 1.00000  |
| rad15       | 4.06785e-14 | 1.00000  | 4.06786e-14 | 1.00000  |
| rad25       | 3.79276e-16 | 1.00000  | 3.79278e-16 | 1.00000  |
| rad8        | 2.84279e-16 | 1.00000  | 2.84280e-16 | 1.00000  |
| rad13       | 1.89492e-16 | 1.00000  | 1.89493e-16 | 1.00000  |
| rad7        | 6.02791e-17 | 1.00000  | 6.02793e-17 | 1.00000  |
| rad38       | 1.34773e-17 | 1.00000  | 1.34773e-17 | 1.00000  |
| PhCHCCH2+H  | 8.29044e-18 | 1.00000  | 8.29047e-18 | 1.00000  |
| rad9        | 7.25847e-19 | 1.00000  | 7.25850e-19 | 1.00000  |
| rad33       | 7.13482e-19 | 1.00000  | 7.13485e-19 | 1.00000  |
| rad60syn    | 1.76323e-19 | 1.00000  | 1.76324e-19 | 1.00000  |
| rad28       | 8.92876e-20 | 1.00000  | 8.92879e-20 | 1.00000  |
| Ph+Allene   | 7.22130e-20 | 1.00000  | 7.22133e-20 | 1.00000  |
| rad60anti   | 3.78744e-20 | 1.00000  | 3.78746e-20 | 1.00000  |
| PAH9+H      | 2.26412e-20 | 1.00000  | 2.26413e-20 | 1.00000  |
| rad46       | 1.94842e-20 | 1.00000  | 1.94842e-20 | 1.00000  |
| rad35       | 1.56056e-20 | 1.00000  | 1.56057e-20 | 1.00000  |
| PhCH2CCH+H  | 4.23736e-21 | 1.00000  | 4.23738e-21 | 1.00000  |
| rad3        | 3.07916e-21 | 1.00000  | 3.07917e-21 | 1.00000  |
| rad4        | 1.63697e-21 | 1.00000  | 1.63698e-21 | 1.00000  |
| PAH7+H      | 4.68031e-22 | 1.00000  | 4.68033e-22 | 1.00000  |
| PAH3+H      | 3.62688e-23 | 1.00000  | 3.62689e-23 | 1.00000  |
| rad59       | 1.32200e-23 | 1.00000  | 1.32200e-23 | 1.00000  |
| rad26       | 2.85633e-24 | 1.00000  | 2.85634e-24 | 1.00000  |
| rad2        | 8.39572e-25 | 1.00000  | 8.39575e-25 | 1.00000  |
| rad1        | 6.15046e-26 | 1.00000  | 6.15048e-26 | 1.00000  |
| PhCCH+CH3   | 1.27469e-26 | 1.00000  | 1.27469e-26 | 1.00000  |
| rad50       | 4.16172e-27 | 1.00000  | 4.16173e-27 | 1.00000  |
| rad14       | 5.77596e-28 | 1.00000  | 5.77598e-28 | 1.00000  |
| rad10       | 8.28033e-29 | 1.00000  | 8.28036e-29 | 1.00000  |
| rad39       | 4.09558e-29 | 1.00000  | 4.09560e-29 | 1.00000  |
| Ph+MeAc     | 1.57378e-29 | 1.00000  | 1.57379e-29 | 1.00000  |
| rad31       | 2.25100e-30 | 1.00000  | 2.25101e-30 | 1.00000  |
| rad52       | 1.72998e-31 | 1.00000  | 1.72999e-31 | 1.00000  |
| PhCCCH3+H   | 1.37507e-31 | 1.00000  | 1.37508e-31 | 1.00000  |
| rad27       | 1.08369e-31 | 1.00000  | 1.08369e-31 | 1.00000  |

|               |             |         |             |         |
|---------------|-------------|---------|-------------|---------|
| rad12         | 5.26849e-32 | 1.00000 | 5.26851e-32 | 1.00000 |
| rad37         | 2.85036e-33 | 1.00000 | 2.85037e-33 | 1.00000 |
| rad51         | 8.52936e-34 | 1.00000 | 8.52939e-34 | 1.00000 |
| rad58         | 2.53364e-35 | 1.00000 | 2.53365e-35 | 1.00000 |
| rad19syn      | 1.25097e-35 | 1.00000 | 1.25098e-35 | 1.00000 |
| rad54         | 3.50456e-36 | 1.00000 | 3.50457e-36 | 1.00000 |
| rad70         | 3.42442e-36 | 1.00000 | 3.42444e-36 | 1.00000 |
| rad5          | 2.25371e-37 | 1.00000 | 2.25372e-37 | 1.00000 |
| rad47         | 5.08461e-38 | 1.00000 | 5.08463e-38 | 1.00000 |
| rad65         | 1.59626e-38 | 1.00000 | 1.59627e-38 | 1.00000 |
| PAH10+CH3     | 1.46052e-39 | 1.00000 | 1.46053e-39 | 1.00000 |
| rad34         | 2.47774e-40 | 1.00000 | 2.47775e-40 | 1.00000 |
| rad55         | 1.13369e-40 | 1.00000 | 1.13370e-40 | 1.00000 |
| rad62         | 7.99158e-41 | 1.00000 | 7.99161e-41 | 1.00000 |
| PhcycC3H3_A+H | 2.18506e-41 | 1.00000 | 2.18507e-41 | 1.00000 |
| rad43         | 5.98347e-43 | 1.00000 | 5.98349e-43 | 1.00000 |
| PAH1+H        | 1.73959e-44 | 1.00000 | 1.73960e-44 | 1.00000 |
| rad42         | 1.18872e-47 | 1.00000 | 1.18872e-47 | 1.00000 |
| rad41         | 2.93546e-50 | 1.00000 | 2.93547e-50 | 1.00000 |

100000.000 Pa, 200.000000 K

| Rate constant | True (fraction)     | Effective (fraction) |
|---------------|---------------------|----------------------|
| Total         | 1.76115e-27 (1.00 ) | 1.76114e-27 (1.00 )  |

| species     | PYtrue      | Cumul    | PYeffective | Cumul    |
|-------------|-------------|----------|-------------|----------|
| rad20       | 0.892399    | 0.892399 | 0.892404    | 0.892404 |
| rad21       | 0.0885771   | 0.980976 | 0.0885776   | 0.980982 |
| rad18       | 0.0151587   | 0.996135 | 0.0151588   | 0.996140 |
| rad22       | 0.00351891  | 0.999654 | 0.00351893  | 0.999659 |
| rad45       | 0.000188890 | 0.999843 | 0.000188891 | 0.999848 |
| Indene+H    | 0.000136036 | 0.999979 | 0.000136036 | 0.999984 |
| rad36       | 1.20491e-05 | 0.999991 | 1.20491e-05 | 0.999996 |
| Benzyl+C2H2 | 5.58139e-06 | 0.999996 | 0.00000     | 0.999996 |
| rad11       | 2.18462e-06 | 0.999998 | 2.18463e-06 | 0.999998 |
| rad24       | 7.13933e-07 | 0.999999 | 7.13937e-07 | 0.999999 |
| rad23       | 4.76663e-07 | 1.000000 | 4.76665e-07 | 1.000000 |
| rad6        | 4.64311e-10 | 1.000000 | 4.64314e-10 | 1.000000 |
| rad30       | 1.15451e-12 | 1.000000 | 1.15452e-12 | 1.000000 |
| rad15       | 9.83897e-14 | 1.000000 | 9.83902e-14 | 1.000000 |
| rad8        | 1.25587e-15 | 1.000000 | 1.25587e-15 | 1.000000 |
| rad25       | 1.08765e-15 | 1.000000 | 1.08765e-15 | 1.000000 |
| rad13       | 4.61350e-16 | 1.000000 | 4.61353e-16 | 1.000000 |
| rad7        | 1.57622e-16 | 1.000000 | 1.57623e-16 | 1.000000 |
| rad38       | 3.42686e-17 | 1.000000 | 3.42688e-17 | 1.000000 |
| PhCHCCH2+H  | 3.34239e-17 | 1.000000 | 3.34241e-17 | 1.000000 |
| rad9        | 3.84592e-18 | 1.000000 | 3.84595e-18 | 1.000000 |
| rad33       | 1.77500e-18 | 1.000000 | 1.77501e-18 | 1.000000 |
| rad60syn    | 8.51443e-19 | 1.000000 | 8.51448e-19 | 1.000000 |
| rad28       | 4.37674e-19 | 1.000000 | 4.37676e-19 | 1.000000 |
| Ph+Allene   | 4.31475e-19 | 1.000000 | 4.31477e-19 | 1.000000 |
| rad60anti   | 1.97726e-19 | 1.000000 | 1.97727e-19 | 1.000000 |
| rad46       | 6.94287e-20 | 1.000000 | 6.94291e-20 | 1.000000 |
| PAH9+H      | 6.73699e-20 | 1.000000 | 6.73703e-20 | 1.000000 |
| rad35       | 4.51426e-20 | 1.000000 | 4.51429e-20 | 1.000000 |
| PhCH2CCH+H  | 3.78692e-20 | 1.000000 | 3.78694e-20 | 1.000000 |
| rad3        | 1.15748e-20 | 1.000000 | 1.15749e-20 | 1.000000 |
| rad4        | 6.15964e-21 | 1.000000 | 6.15967e-21 | 1.000000 |
| PAH7+H      | 2.94278e-21 | 1.000000 | 2.94280e-21 | 1.000000 |
| PAH3+H      | 3.26730e-22 | 1.000000 | 3.26732e-22 | 1.000000 |
| rad59       | 1.15510e-22 | 1.000000 | 1.15510e-22 | 1.000000 |
| rad26       | 2.26317e-23 | 1.000000 | 2.26318e-23 | 1.000000 |
| rad2        | 4.71793e-24 | 1.000000 | 4.71796e-24 | 1.000000 |
| rad1        | 3.47213e-25 | 1.000000 | 3.47215e-25 | 1.000000 |
| PhCCH+CH3   | 1.00067e-25 | 1.000000 | 1.00068e-25 | 1.000000 |
| rad50       | 3.94369e-26 | 1.000000 | 3.94371e-26 | 1.000000 |
| rad14       | 3.99615e-27 | 1.000000 | 3.99617e-27 | 1.000000 |
| rad10       | 7.25902e-28 | 1.000000 | 7.25906e-28 | 1.000000 |
| rad39       | 3.29579e-28 | 1.000000 | 3.29581e-28 | 1.000000 |
| Ph+MeAc     | 1.67810e-28 | 1.000000 | 1.67811e-28 | 1.000000 |
| rad31       | 8.99752e-30 | 1.000000 | 8.99757e-30 | 1.000000 |
| rad52       | 2.84485e-30 | 1.000000 | 2.84487e-30 | 1.000000 |
| PhCCCH3+H   | 1.55343e-30 | 1.000000 | 1.55344e-30 | 1.000000 |
| rad27       | 9.94381e-31 | 1.000000 | 9.94387e-31 | 1.000000 |
| rad12       | 5.57274e-31 | 1.000000 | 5.57277e-31 | 1.000000 |
| rad37       | 3.40421e-32 | 1.000000 | 3.40423e-32 | 1.000000 |
| rad51       | 2.53539e-32 | 1.000000 | 2.53541e-32 | 1.000000 |
| rad58       | 3.65435e-33 | 1.000000 | 3.65437e-33 | 1.000000 |

|               |             |          |             |          |
|---------------|-------------|----------|-------------|----------|
| rad70         | 3.61253e-34 | 1.000000 | 3.61255e-34 | 1.000000 |
| rad19syn      | 3.21834e-34 | 1.000000 | 3.21835e-34 | 1.000000 |
| rad54         | 1.20904e-34 | 1.000000 | 1.20905e-34 | 1.000000 |
| rad5          | 4.37006e-36 | 1.000000 | 4.37008e-36 | 1.000000 |
| rad47         | 2.66709e-36 | 1.000000 | 2.66711e-36 | 1.000000 |
| rad65         | 7.26802e-37 | 1.000000 | 7.26806e-37 | 1.000000 |
| PAH10+CH3     | 6.81072e-38 | 1.000000 | 6.81076e-38 | 1.000000 |
| rad34         | 3.94638e-38 | 1.000000 | 3.94640e-38 | 1.000000 |
| rad55         | 1.24822e-38 | 1.000000 | 1.24823e-38 | 1.000000 |
| rad62         | 4.67739e-39 | 1.000000 | 4.67742e-39 | 1.000000 |
| PhcycC3H3_A+H | 2.49650e-39 | 1.000000 | 2.49652e-39 | 1.000000 |
| rad43         | 3.28368e-41 | 1.000000 | 3.28370e-41 | 1.000000 |
| PAH1+H        | 2.32405e-42 | 1.000000 | 2.32406e-42 | 1.000000 |
| rad42         | 1.74120e-45 | 1.000000 | 1.74120e-45 | 1.000000 |
| rad41         | 4.31978e-48 | 1.000000 | 4.31980e-48 | 1.000000 |

100000.000 Pa, 210.000000 K

| Rate constant | True (fraction)     | Effective (fraction) |
|---------------|---------------------|----------------------|
| Total         | 8.30956e-27 (1.00 ) | 8.30949e-27 (1.00 )  |

| species     | PYtrue      | Cumul    | PYeffective | Cumul    |
|-------------|-------------|----------|-------------|----------|
| rad20       | 0.882022    | 0.882022 | 0.882029    | 0.882029 |
| rad21       | 0.0963147   | 0.978337 | 0.0963154   | 0.978344 |
| rad18       | 0.0168633   | 0.995200 | 0.0168635   | 0.995208 |
| rad22       | 0.00435320  | 0.999553 | 0.00435324  | 0.999561 |
| rad45       | 0.000243905 | 0.999797 | 0.000243907 | 0.999805 |
| Indene+H    | 0.000174454 | 0.999972 | 0.000174456 | 0.999980 |
| rad36       | 1.55865e-05 | 0.999987 | 1.55866e-05 | 0.999995 |
| Benzyl+C2H2 | 8.20134e-06 | 0.999995 | 0.000000    | 0.999995 |
| rad11       | 3.12215e-06 | 0.999998 | 3.12218e-06 | 0.999998 |
| rad24       | 7.40454e-07 | 0.999999 | 7.40460e-07 | 0.999999 |
| rad23       | 7.04657e-07 | 1.000000 | 7.04663e-07 | 1.000000 |
| rad6        | 8.64805e-10 | 1.000000 | 8.64812e-10 | 1.000000 |
| rad30       | 2.37455e-12 | 1.000000 | 2.37457e-12 | 1.000000 |
| rad15       | 2.27597e-13 | 1.000000 | 2.27598e-13 | 1.000000 |
| rad8        | 4.88053e-15 | 1.000000 | 4.88057e-15 | 1.000000 |
| rad25       | 2.97671e-15 | 1.000000 | 2.97674e-15 | 1.000000 |
| rad13       | 1.10120e-15 | 1.000000 | 1.10121e-15 | 1.000000 |
| rad7        | 4.06733e-16 | 1.000000 | 4.06736e-16 | 1.000000 |
| PhCHCCH2+H  | 1.24052e-16 | 1.000000 | 1.24053e-16 | 1.000000 |
| rad38       | 8.49550e-17 | 1.000000 | 8.49557e-17 | 1.000000 |
| rad9        | 1.83675e-17 | 1.000000 | 1.83677e-17 | 1.000000 |
| rad33       | 4.28443e-18 | 1.000000 | 4.28446e-18 | 1.000000 |
| rad60syn    | 3.62866e-18 | 1.000000 | 3.62869e-18 | 1.000000 |
| Ph+Allene   | 2.26203e-18 | 1.000000 | 2.26205e-18 | 1.000000 |
| rad28       | 1.88803e-18 | 1.000000 | 1.88804e-18 | 1.000000 |
| rad60anti   | 9.02475e-19 | 1.000000 | 9.02482e-19 | 1.000000 |
| PhCH2CCH+H  | 2.78766e-19 | 1.000000 | 2.78768e-19 | 1.000000 |
| rad46       | 2.31952e-19 | 1.000000 | 2.31953e-19 | 1.000000 |
| PAH9+H      | 1.96367e-19 | 1.000000 | 1.96369e-19 | 1.000000 |
| rad35       | 1.30510e-19 | 1.000000 | 1.30511e-19 | 1.000000 |
| rad3        | 4.17460e-20 | 1.000000 | 4.17463e-20 | 1.000000 |
| rad4        | 2.22441e-20 | 1.000000 | 2.22443e-20 | 1.000000 |
| PAH7+H      | 1.58681e-20 | 1.000000 | 1.58683e-20 | 1.000000 |
| PAH3+H      | 2.43732e-21 | 1.000000 | 2.43734e-21 | 1.000000 |
| rad59       | 8.36990e-22 | 1.000000 | 8.36997e-22 | 1.000000 |
| rad26       | 1.49719e-22 | 1.000000 | 1.49721e-22 | 1.000000 |
| rad2        | 2.48847e-23 | 1.000000 | 2.48849e-23 | 1.000000 |
| rad1        | 1.84145e-24 | 1.000000 | 1.84146e-24 | 1.000000 |
| PhCCH+CH3   | 7.13099e-25 | 1.000000 | 7.13105e-25 | 1.000000 |
| rad50       | 3.15527e-25 | 1.000000 | 3.15529e-25 | 1.000000 |
| rad14       | 2.53657e-26 | 1.000000 | 2.53659e-26 | 1.000000 |
| rad10       | 5.62036e-27 | 1.000000 | 5.62041e-27 | 1.000000 |
| rad39       | 2.32144e-27 | 1.000000 | 2.32146e-27 | 1.000000 |
| Ph+MeAc     | 1.56049e-27 | 1.000000 | 1.56050e-27 | 1.000000 |
| rad52       | 3.64536e-29 | 1.000000 | 3.64539e-29 | 1.000000 |
| rad31       | 3.47217e-29 | 1.000000 | 3.47220e-29 | 1.000000 |
| PhCCCH3+H   | 1.56717e-29 | 1.000000 | 1.56718e-29 | 1.000000 |
| rad27       | 8.22204e-30 | 1.000000 | 8.22211e-30 | 1.000000 |
| rad12       | 4.93265e-30 | 1.000000 | 4.93269e-30 | 1.000000 |
| rad51       | 5.05766e-31 | 1.000000 | 5.05770e-31 | 1.000000 |
| rad58       | 3.62805e-31 | 1.000000 | 3.62808e-31 | 1.000000 |
| rad37       | 3.36917e-31 | 1.000000 | 3.36920e-31 | 1.000000 |
| rad70       | 2.11916e-32 | 1.000000 | 2.11918e-32 | 1.000000 |
| rad19syn    | 5.90218e-33 | 1.000000 | 5.90223e-33 | 1.000000 |
| rad54       | 2.57569e-33 | 1.000000 | 2.57571e-33 | 1.000000 |
| rad47       | 9.81244e-35 | 1.000000 | 9.81252e-35 | 1.000000 |

|               |             |          |             |          |
|---------------|-------------|----------|-------------|----------|
| rad5          | 6.98566e-35 | 1.000000 | 6.98572e-35 | 1.000000 |
| rad65         | 2.24720e-35 | 1.000000 | 2.24722e-35 | 1.000000 |
| rad34         | 5.02256e-36 | 1.000000 | 5.02260e-36 | 1.000000 |
| PAH10+CH3     | 1.80315e-36 | 1.000000 | 1.80316e-36 | 1.000000 |
| rad55         | 8.09991e-37 | 1.000000 | 8.09997e-37 | 1.000000 |
| PhcycC3H3_A+H | 1.82602e-37 | 1.000000 | 1.82604e-37 | 1.000000 |
| rad62         | 1.77334e-37 | 1.000000 | 1.77336e-37 | 1.000000 |
| rad43         | 1.24392e-39 | 1.000000 | 1.24393e-39 | 1.000000 |
| PAH1+H        | 3.08793e-40 | 1.000000 | 3.08796e-40 | 1.000000 |
| rad42         | 1.78969e-43 | 1.000000 | 1.78970e-43 | 1.000000 |
| rad41         | 4.30765e-46 | 1.000000 | 4.30768e-46 | 1.000000 |

100000.000 Pa, 220.000000 K

| Rate constant | True (fraction)     | Effective (fraction) |
|---------------|---------------------|----------------------|
| Total         | 3.40057e-26 (1.00 ) | 3.40053e-26 (1.00 )  |

| species     | PYtrue      | Cumul    | PYeffective | Cumul    |
|-------------|-------------|----------|-------------|----------|
| rad20       | 0.870828    | 0.870828 | 0.870839    | 0.870839 |
| rad21       | 0.104468    | 0.975296 | 0.104469    | 0.975308 |
| rad18       | 0.0187518   | 0.994048 | 0.0187520   | 0.994060 |
| rad22       | 0.00537501  | 0.999423 | 0.00537508  | 0.999435 |
| rad45       | 0.000314489 | 0.999737 | 0.000314493 | 0.999750 |
| Indene+H    | 0.000224092 | 0.999961 | 0.000224094 | 0.999975 |
| rad36       | 2.01435e-05 | 0.999982 | 2.01437e-05 | 0.999994 |
| Benzyl+C2H2 | 1.19574e-05 | 0.999993 | 0.000000    | 0.999994 |
| rad11       | 4.44644e-06 | 0.999998 | 4.44649e-06 | 0.999998 |
| rad23       | 1.04102e-06 | 0.999999 | 1.04103e-06 | 0.999999 |
| rad24       | 7.68315e-07 | 1.000000 | 7.68324e-07 | 1.000000 |
| rad6        | 1.59762e-09 | 1.000000 | 1.59763e-09 | 1.000000 |
| rad30       | 4.75829e-12 | 1.000000 | 4.75834e-12 | 1.000000 |
| rad15       | 5.06025e-13 | 1.000000 | 5.06031e-13 | 1.000000 |
| rad8        | 1.69747e-14 | 1.000000 | 1.69749e-14 | 1.000000 |
| rad25       | 7.79883e-15 | 1.000000 | 7.79892e-15 | 1.000000 |
| rad13       | 2.56841e-15 | 1.000000 | 2.56844e-15 | 1.000000 |
| rad7        | 1.03257e-15 | 1.000000 | 1.03258e-15 | 1.000000 |
| PhCHCCH2+H  | 4.27547e-16 | 1.000000 | 4.27552e-16 | 1.000000 |
| rad38       | 2.05477e-16 | 1.000000 | 2.05479e-16 | 1.000000 |
| rad9        | 7.93134e-17 | 1.000000 | 7.93144e-17 | 1.000000 |
| rad60syn    | 1.38733e-17 | 1.000000 | 1.38734e-17 | 1.000000 |
| Ph+Allene   | 1.05717e-17 | 1.000000 | 1.05718e-17 | 1.000000 |
| rad33       | 1.00124e-17 | 1.000000 | 1.00125e-17 | 1.000000 |
| rad28       | 7.28459e-18 | 1.000000 | 7.28467e-18 | 1.000000 |
| rad60anti   | 3.66541e-18 | 1.000000 | 3.66546e-18 | 1.000000 |
| PhCH2CCH+H  | 1.73494e-18 | 1.000000 | 1.73496e-18 | 1.000000 |
| rad46       | 7.31888e-19 | 1.000000 | 7.31897e-19 | 1.000000 |
| PAH9+H      | 5.60153e-19 | 1.000000 | 5.60160e-19 | 1.000000 |
| rad35       | 3.78342e-19 | 1.000000 | 3.78347e-19 | 1.000000 |
| rad3        | 1.44207e-19 | 1.000000 | 1.44208e-19 | 1.000000 |
| rad4        | 7.69610e-20 | 1.000000 | 7.69619e-20 | 1.000000 |
| PAH7+H      | 7.48512e-20 | 1.000000 | 7.48521e-20 | 1.000000 |
| PAH3+H      | 1.54430e-20 | 1.000000 | 1.54432e-20 | 1.000000 |
| rad59       | 5.15750e-21 | 1.000000 | 5.15756e-21 | 1.000000 |
| rad26       | 8.46873e-22 | 1.000000 | 8.46883e-22 | 1.000000 |
| rad2        | 1.23251e-22 | 1.000000 | 1.23253e-22 | 1.000000 |
| rad1        | 9.17909e-24 | 1.000000 | 9.17920e-24 | 1.000000 |
| PhCCH+CH3   | 4.64078e-24 | 1.000000 | 4.64084e-24 | 1.000000 |
| rad50       | 2.18201e-24 | 1.000000 | 2.18203e-24 | 1.000000 |
| rad14       | 1.48241e-25 | 1.000000 | 1.48243e-25 | 1.000000 |
| rad10       | 3.87815e-26 | 1.000000 | 3.87820e-26 | 1.000000 |
| rad39       | 1.45444e-26 | 1.000000 | 1.45446e-26 | 1.000000 |
| Ph+MeAc     | 1.28375e-26 | 1.000000 | 1.28377e-26 | 1.000000 |
| rad52       | 3.83673e-28 | 1.000000 | 3.83678e-28 | 1.000000 |
| PhCCCH3+H   | 1.42252e-28 | 1.000000 | 1.42253e-28 | 1.000000 |
| rad31       | 1.29196e-28 | 1.000000 | 1.29198e-28 | 1.000000 |
| rad27       | 6.14984e-29 | 1.000000 | 6.14991e-29 | 1.000000 |
| rad12       | 3.74968e-29 | 1.000000 | 3.74973e-29 | 1.000000 |
| rad58       | 1.00442e-29 | 1.000000 | 1.00443e-29 | 1.000000 |
| rad51       | 7.58212e-30 | 1.000000 | 7.58221e-30 | 1.000000 |
| rad37       | 2.84460e-30 | 1.000000 | 2.84463e-30 | 1.000000 |
| rad70       | 5.26194e-31 | 1.000000 | 5.26201e-31 | 1.000000 |
| rad19syn    | 8.32756e-32 | 1.000000 | 8.32766e-32 | 1.000000 |
| rad54       | 3.91623e-32 | 1.000000 | 3.91628e-32 | 1.000000 |
| rad47       | 2.39294e-33 | 1.000000 | 2.39297e-33 | 1.000000 |
| rad5        | 9.38547e-34 | 1.000000 | 9.38558e-34 | 1.000000 |
| rad65       | 4.62239e-34 | 1.000000 | 4.62245e-34 | 1.000000 |
| rad34       | 2.68762e-34 | 1.000000 | 2.68766e-34 | 1.000000 |
| PAH10+CH3   | 3.11465e-35 | 1.000000 | 3.11468e-35 | 1.000000 |

|               |             |          |             |         |
|---------------|-------------|----------|-------------|---------|
| rad55         | 2.24126e-35 | 1.000000 | 2.24129e-35 | 1.00000 |
| PhcycC3H3_A+H | 5.90976e-36 | 1.000000 | 5.90983e-36 | 1.00000 |
| rad62         | 4.28790e-36 | 1.000000 | 4.28795e-36 | 1.00000 |
| rad43         | 3.15541e-38 | 1.000000 | 3.15545e-38 | 1.00000 |
| PAH1+H        | 1.85493e-38 | 1.000000 | 1.85495e-38 | 1.00000 |
| rad42         | 9.20497e-42 | 1.000000 | 9.20508e-42 | 1.00000 |
| rad41         | 2.20164e-44 | 1.000000 | 2.20166e-44 | 1.00000 |

100000.000 Pa, 230.000000 K

| Rate constant | True (fraction)     | Effective (fraction) |
|---------------|---------------------|----------------------|
| Total         | 1.22972e-25 (1.00 ) | 1.22969e-25 (1.00 )  |

| species       | PYtrue      | Cumul    | PYeffective | Cumul    |
|---------------|-------------|----------|-------------|----------|
| rad20         | 0.858788    | 0.858788 | 0.858803    | 0.858803 |
| rad21         | 0.113005    | 0.971793 | 0.113007    | 0.971810 |
| rad18         | 0.0208409   | 0.992634 | 0.0208412   | 0.992651 |
| rad22         | 0.00662109  | 0.999255 | 0.00662121  | 0.999272 |
| rad45         | 0.000404630 | 0.999660 | 0.000404637 | 0.999677 |
| Indene+H      | 0.000288224 | 0.999948 | 0.000288229 | 0.999965 |
| rad36         | 2.59908e-05 | 0.999974 | 2.59912e-05 | 0.999991 |
| Benzyl+C2H2   | 1.72931e-05 | 0.999991 | 0.00000     | 0.999991 |
| rad11         | 6.30286e-06 | 0.999997 | 6.30297e-06 | 0.999998 |
| rad23         | 1.53546e-06 | 0.999999 | 1.53549e-06 | 0.999999 |
| rad24         | 7.97358e-07 | 1.000000 | 7.97372e-07 | 1.000000 |
| rad6          | 2.92178e-09 | 1.000000 | 2.92183e-09 | 1.000000 |
| rad30         | 9.30698e-12 | 1.000000 | 9.30714e-12 | 1.000000 |
| rad15         | 1.08563e-12 | 1.000000 | 1.08565e-12 | 1.000000 |
| rad8          | 5.36005e-14 | 1.000000 | 5.36015e-14 | 1.000000 |
| rad25         | 1.96089e-14 | 1.000000 | 1.96092e-14 | 1.000000 |
| rad13         | 5.83929e-15 | 1.000000 | 5.83939e-15 | 1.000000 |
| rad7          | 2.57292e-15 | 1.000000 | 2.57296e-15 | 1.000000 |
| PhCHCCH2+H    | 1.37832e-15 | 1.000000 | 1.37834e-15 | 1.000000 |
| rad38         | 4.85242e-16 | 1.000000 | 4.85250e-16 | 1.000000 |
| rad9          | 3.11218e-16 | 1.000000 | 3.11223e-16 | 1.000000 |
| rad60syn      | 4.82335e-17 | 1.000000 | 4.82343e-17 | 1.000000 |
| Ph+Allene     | 4.46339e-17 | 1.000000 | 4.46346e-17 | 1.000000 |
| rad28         | 2.54818e-17 | 1.000000 | 2.54822e-17 | 1.000000 |
| rad33         | 2.26269e-17 | 1.000000 | 2.26273e-17 | 1.000000 |
| rad60anti     | 1.34432e-17 | 1.000000 | 1.34434e-17 | 1.000000 |
| PhCH2CCH+H    | 9.32355e-18 | 1.000000 | 9.32371e-18 | 1.000000 |
| rad46         | 2.19485e-18 | 1.000000 | 2.19489e-18 | 1.000000 |
| PAH9+H        | 1.56319e-18 | 1.000000 | 1.56322e-18 | 1.000000 |
| rad35         | 1.09979e-18 | 1.000000 | 1.09981e-18 | 1.000000 |
| rad3          | 4.76752e-19 | 1.000000 | 4.76761e-19 | 1.000000 |
| PAH7+H        | 3.14030e-19 | 1.000000 | 3.14036e-19 | 1.000000 |
| rad4          | 2.54915e-19 | 1.000000 | 2.54919e-19 | 1.000000 |
| PAH3+H        | 8.48232e-20 | 1.000000 | 8.48246e-20 | 1.000000 |
| rad59         | 2.75820e-20 | 1.000000 | 2.75825e-20 | 1.000000 |
| rad26         | 4.17705e-21 | 1.000000 | 4.17712e-21 | 1.000000 |
| rad2          | 5.73970e-22 | 1.000000 | 5.73980e-22 | 1.000000 |
| rad1          | 4.30618e-23 | 1.000000 | 4.30626e-23 | 1.000000 |
| PhCCH+CH3     | 2.77525e-23 | 1.000000 | 2.77530e-23 | 1.000000 |
| rad50         | 1.33017e-23 | 1.000000 | 1.33019e-23 | 1.000000 |
| rad14         | 8.00585e-25 | 1.000000 | 8.00599e-25 | 1.000000 |
| rad10         | 2.41366e-25 | 1.000000 | 2.41370e-25 | 1.000000 |
| Ph+MeAc       | 9.47945e-26 | 1.000000 | 9.47962e-26 | 1.000000 |
| rad39         | 8.21912e-26 | 1.000000 | 8.21926e-26 | 1.000000 |
| rad52         | 3.42642e-27 | 1.000000 | 3.42648e-27 | 1.000000 |
| PhCCCH3+H     | 1.17828e-27 | 1.000000 | 1.17830e-27 | 1.000000 |
| rad31         | 4.63371e-28 | 1.000000 | 4.63379e-28 | 1.000000 |
| rad27         | 4.18198e-28 | 1.000000 | 4.18205e-28 | 1.000000 |
| rad12         | 2.49821e-28 | 1.000000 | 2.49826e-28 | 1.000000 |
| rad58         | 2.01839e-28 | 1.000000 | 2.01843e-28 | 1.000000 |
| rad51         | 9.36557e-29 | 1.000000 | 9.36573e-29 | 1.000000 |
| rad37         | 2.09874e-29 | 1.000000 | 2.09877e-29 | 1.000000 |
| rad70         | 1.05412e-29 | 1.000000 | 1.05414e-29 | 1.000000 |
| rad19syn      | 1.01119e-30 | 1.000000 | 1.01121e-30 | 1.000000 |
| rad54         | 5.01249e-31 | 1.000000 | 5.01258e-31 | 1.000000 |
| rad47         | 4.56965e-32 | 1.000000 | 4.56973e-32 | 1.000000 |
| rad34         | 1.64952e-32 | 1.000000 | 1.64955e-32 | 1.000000 |
| rad5          | 1.12927e-32 | 1.000000 | 1.12929e-32 | 1.000000 |
| rad65         | 7.82476e-33 | 1.000000 | 7.82489e-33 | 1.000000 |
| rad55         | 5.34738e-34 | 1.000000 | 5.34747e-34 | 1.000000 |
| PAH10+CH3     | 4.70464e-34 | 1.000000 | 4.70472e-34 | 1.000000 |
| PhcycC3H3_A+H | 1.79818e-34 | 1.000000 | 1.79821e-34 | 1.000000 |
| rad62         | 9.42048e-35 | 1.000000 | 9.42064e-35 | 1.000000 |
| PAH1+H        | 1.14746e-36 | 1.000000 | 1.14748e-36 | 1.000000 |

|       |             |          |             |          |
|-------|-------------|----------|-------------|----------|
| rad43 | 7.34268e-37 | 1.000000 | 7.34281e-37 | 1.000000 |
| rad42 | 5.40570e-40 | 1.000000 | 5.40580e-40 | 1.000000 |
| rad41 | 1.16139e-42 | 1.000000 | 1.16141e-42 | 1.000000 |

100000.000 Pa, 240.000000 K

| =====         |                     |          |                      |          |
|---------------|---------------------|----------|----------------------|----------|
| Rate constant | True (fraction)     |          | Effective (fraction) |          |
| -----         |                     |          |                      |          |
| Total         | 3.99091e-25 (1.00 ) |          | 3.99081e-25 (1.00 )  |          |
| species       | PYtrue              | Cumul    | PYeffective          | Cumul    |
| -----         |                     |          |                      |          |
| rad20         | 0.845881            | 0.845881 | 0.845902             | 0.845902 |
| rad21         | 0.121879            | 0.967760 | 0.121882             | 0.967784 |
| rad18         | 0.0231471           | 0.990907 | 0.0231476            | 0.990932 |
| rad22         | 0.00813287          | 0.999040 | 0.00813307           | 0.999065 |
| rad45         | 0.000519105         | 0.999559 | 0.000519118          | 0.999584 |
| Indene+H      | 0.000371021         | 0.999930 | 0.000371030          | 0.999955 |
| rad36         | 3.34572e-05         | 0.999964 | 3.34580e-05          | 0.999988 |
| Benzyl+C2H2   | 2.48023e-05         | 0.999988 | 0.00000              | 0.999988 |
| rad11         | 8.88310e-06         | 0.999997 | 8.88332e-06          | 0.999997 |
| rad23         | 2.25888e-06         | 0.999999 | 2.25894e-06          | 0.999999 |
| rad24         | 8.27385e-07         | 1.00000  | 8.27405e-07          | 1.00000  |
| rad6          | 5.28168e-09         | 1.00000  | 5.28181e-09          | 1.00000  |
| rad30         | 1.77941e-11         | 1.00000  | 1.77945e-11          | 1.00000  |
| rad15         | 2.25458e-12         | 1.00000  | 2.25464e-12          | 1.00000  |
| rad8          | 1.55509e-13         | 1.00000  | 1.55513e-13          | 1.00000  |
| rad25         | 4.74149e-14         | 1.00000  | 4.74161e-14          | 1.00000  |
| rad13         | 1.29181e-14         | 1.00000  | 1.29184e-14          | 1.00000  |
| rad7          | 6.28141e-15         | 1.00000  | 6.28157e-15          | 1.00000  |
| PhCHCCH2+H    | 4.18168e-15         | 1.00000  | 4.18179e-15          | 1.00000  |
| rad38         | 1.11992e-15         | 1.00000  | 1.11995e-15          | 1.00000  |
| rad9          | 1.11666e-15         | 1.00000  | 1.11669e-15          | 1.00000  |
| Ph+Allene     | 1.72148e-16         | 1.00000  | 1.72152e-16          | 1.00000  |
| rad60syn      | 1.54228e-16         | 1.00000  | 1.54232e-16          | 1.00000  |
| rad28         | 8.17386e-17         | 1.00000  | 8.17406e-17          | 1.00000  |
| rad33         | 4.94288e-17         | 1.00000  | 4.94300e-17          | 1.00000  |
| rad60anti     | 4.50703e-17         | 1.00000  | 4.50715e-17          | 1.00000  |
| PhCH2CCH+H    | 4.40377e-17         | 1.00000  | 4.40388e-17          | 1.00000  |
| rad46         | 6.29012e-18         | 1.00000  | 6.29027e-18          | 1.00000  |
| PAH9+H        | 4.26816e-18         | 1.00000  | 4.26826e-18          | 1.00000  |
| rad35         | 3.19184e-18         | 1.00000  | 3.19192e-18          | 1.00000  |
| rad3          | 1.50843e-18         | 1.00000  | 1.50846e-18          | 1.00000  |
| PAH7+H        | 1.18819e-18         | 1.00000  | 1.18822e-18          | 1.00000  |
| rad4          | 8.08317e-19         | 1.00000  | 8.08337e-19          | 1.00000  |
| PAH3+H        | 4.10818e-19         | 1.00000  | 4.10829e-19          | 1.00000  |
| rad59         | 1.30217e-19         | 1.00000  | 1.30220e-19          | 1.00000  |
| rad26         | 1.82640e-20         | 1.00000  | 1.82645e-20          | 1.00000  |
| rad2          | 2.51738e-21         | 1.00000  | 2.51744e-21          | 1.00000  |
| rad1          | 1.90448e-22         | 1.00000  | 1.90452e-22          | 1.00000  |
| PhCCH+CH3     | 1.53135e-22         | 1.00000  | 1.53139e-22          | 1.00000  |
| rad50         | 7.27004e-23         | 1.00000  | 7.27022e-23          | 1.00000  |
| rad14         | 4.00782e-24         | 1.00000  | 4.00792e-24          | 1.00000  |
| rad10         | 1.36912e-24         | 1.00000  | 1.36915e-24          | 1.00000  |
| Ph+MeAc       | 6.31326e-25         | 1.00000  | 6.31342e-25          | 1.00000  |
| rad39         | 4.23568e-25         | 1.00000  | 4.23579e-25          | 1.00000  |
| rad52         | 2.64809e-26         | 1.00000  | 2.64816e-26          | 1.00000  |
| PhCCCH3+H     | 8.87474e-27         | 1.00000  | 8.87496e-27          | 1.00000  |
| rad27         | 2.59060e-27         | 1.00000  | 2.59067e-27          | 1.00000  |
| rad58         | 2.48323e-27         | 1.00000  | 2.48329e-27          | 1.00000  |
| rad31         | 1.60260e-27         | 1.00000  | 1.60264e-27          | 1.00000  |
| rad12         | 1.47691e-27         | 1.00000  | 1.47695e-27          | 1.00000  |
| rad51         | 9.55226e-28         | 1.00000  | 9.55250e-28          | 1.00000  |
| rad70         | 1.37894e-28         | 1.00000  | 1.37898e-28          | 1.00000  |
| rad37         | 1.36467e-28         | 1.00000  | 1.36470e-28          | 1.00000  |
| rad19syn      | 1.00947e-29         | 1.00000  | 1.00949e-29          | 1.00000  |
| rad54         | 5.10583e-30         | 1.00000  | 5.10595e-30          | 1.00000  |
| rad47         | 5.97014e-31         | 1.00000  | 5.97028e-31          | 1.00000  |
| rad34         | 3.73003e-31         | 1.00000  | 3.73013e-31          | 1.00000  |
| rad5          | 1.16803e-31         | 1.00000  | 1.16805e-31          | 1.00000  |
| rad65         | 1.00677e-31         | 1.00000  | 1.00680e-31          | 1.00000  |
| rad55         | 8.02985e-33         | 1.00000  | 8.03005e-33          | 1.00000  |
| PAH10+CH3     | 5.41944e-33         | 1.00000  | 5.41957e-33          | 1.00000  |
| PhcycC3H3_A+H | 3.25591e-33         | 1.00000  | 3.25599e-33          | 1.00000  |
| rad62         | 1.46874e-33         | 1.00000  | 1.46878e-33          | 1.00000  |
| PAH1+H        | 2.71442e-35         | 1.00000  | 2.71448e-35          | 1.00000  |
| rad43         | 1.21953e-35         | 1.00000  | 1.21956e-35          | 1.00000  |
| rad42         | 1.64054e-38         | 1.00000  | 1.64058e-38          | 1.00000  |
| rad41         | 3.30762e-41         | 1.00000  | 3.30770e-41          | 1.00000  |



100000.000 Pa, 250.000000 K

=====

| Rate constant | True (fraction)     | Effective (fraction) |
|---------------|---------------------|----------------------|
| Total         | 1.17763e-24 (1.00 ) | 1.17759e-24 (1.00 )  |

| species       | PYtrue      | Cumul    | PYeffective | Cumul    |
|---------------|-------------|----------|-------------|----------|
| rad20         | 0.832098    | 0.832098 | 0.832128    | 0.832128 |
| rad21         | 0.131023    | 0.963121 | 0.131028    | 0.963156 |
| rad18         | 0.0256863   | 0.988807 | 0.0256872   | 0.988843 |
| rad22         | 0.00995627  | 0.998764 | 0.00995662  | 0.998800 |
| rad45         | 0.000663550 | 0.999427 | 0.000663573 | 0.999463 |
| Indene+H      | 0.000477749 | 0.999905 | 0.000477765 | 0.999941 |
| rad36         | 4.29372e-05 | 0.999948 | 4.29387e-05 | 0.999984 |
| Benzyl+C2H2   | 3.52709e-05 | 0.999983 | 0.00000     | 0.999984 |
| rad11         | 1.24360e-05 | 0.999996 | 1.24365e-05 | 0.999997 |
| rad23         | 3.31147e-06 | 0.999999 | 3.31159e-06 | 1.000000 |
| rad24         | 8.58161e-07 | 1.000000 | 8.58191e-07 | 1.000000 |
| rad6          | 9.42568e-09 | 1.000000 | 9.42601e-09 | 1.000000 |
| rad30         | 3.32915e-11 | 1.000000 | 3.32927e-11 | 1.000000 |
| rad15         | 4.54380e-12 | 1.000000 | 4.54396e-12 | 1.000000 |
| rad8          | 4.18711e-13 | 1.000000 | 4.18726e-13 | 1.000000 |
| rad25         | 1.10456e-13 | 1.000000 | 1.10460e-13 | 1.000000 |
| rad13         | 2.77778e-14 | 1.000000 | 2.77788e-14 | 1.000000 |
| rad7          | 1.50059e-14 | 1.000000 | 1.50064e-14 | 1.000000 |
| PhCHCCH2+H    | 1.20017e-14 | 1.000000 | 1.20021e-14 | 1.000000 |
| rad9          | 3.68854e-15 | 1.000000 | 3.68867e-15 | 1.000000 |
| rad38         | 2.52898e-15 | 1.000000 | 2.52907e-15 | 1.000000 |
| Ph+Allene     | 6.12281e-16 | 1.000000 | 6.12303e-16 | 1.000000 |
| rad60syn      | 4.57843e-16 | 1.000000 | 4.57859e-16 | 1.000000 |
| rad28         | 2.42754e-16 | 1.000000 | 2.42763e-16 | 1.000000 |
| PhCH2CCH+H    | 1.85587e-16 | 1.000000 | 1.85593e-16 | 1.000000 |
| rad60anti     | 1.39552e-16 | 1.000000 | 1.39557e-16 | 1.000000 |
| rad33         | 1.04397e-16 | 1.000000 | 1.04401e-16 | 1.000000 |
| rad46         | 1.73118e-17 | 1.000000 | 1.73124e-17 | 1.000000 |
| PAH9+H        | 1.14096e-17 | 1.000000 | 1.14100e-17 | 1.000000 |
| rad35         | 9.17967e-18 | 1.000000 | 9.18000e-18 | 1.000000 |
| rad3          | 4.56989e-18 | 1.000000 | 4.57006e-18 | 1.000000 |
| PAH7+H        | 4.10249e-18 | 1.000000 | 4.10263e-18 | 1.000000 |
| rad4          | 2.45506e-18 | 1.000000 | 2.45514e-18 | 1.000000 |
| PAH3+H        | 1.77990e-18 | 1.000000 | 1.77996e-18 | 1.000000 |
| rad59         | 5.50556e-19 | 1.000000 | 5.50575e-19 | 1.000000 |
| rad26         | 7.17888e-20 | 1.000000 | 7.17913e-20 | 1.000000 |
| rad2          | 1.04198e-20 | 1.000000 | 1.04201e-20 | 1.000000 |
| rad1          | 7.95708e-22 | 1.000000 | 7.95736e-22 | 1.000000 |
| PhCCH+CH3     | 7.82981e-22 | 1.000000 | 7.83009e-22 | 1.000000 |
| rad50         | 3.61693e-22 | 1.000000 | 3.61705e-22 | 1.000000 |
| rad14         | 1.86594e-23 | 1.000000 | 1.86600e-23 | 1.000000 |
| rad10         | 7.15035e-24 | 1.000000 | 7.15060e-24 | 1.000000 |
| Ph+MeAc       | 3.81516e-24 | 1.000000 | 3.81530e-24 | 1.000000 |
| rad39         | 2.01195e-24 | 1.000000 | 2.01202e-24 | 1.000000 |
| rad52         | 1.80978e-25 | 1.000000 | 1.80984e-25 | 1.000000 |
| PhCCCH3+H     | 6.07289e-26 | 1.000000 | 6.07310e-26 | 1.000000 |
| rad58         | 2.21114e-26 | 1.000000 | 2.21122e-26 | 1.000000 |
| rad27         | 1.46714e-26 | 1.000000 | 1.46719e-26 | 1.000000 |
| rad51         | 8.34167e-27 | 1.000000 | 8.34196e-27 | 1.000000 |
| rad12         | 7.84167e-27 | 1.000000 | 7.84195e-27 | 1.000000 |
| rad31         | 5.35029e-27 | 1.000000 | 5.35048e-27 | 1.000000 |
| rad70         | 1.29020e-27 | 1.000000 | 1.29025e-27 | 1.000000 |
| rad37         | 7.90845e-28 | 1.000000 | 7.90873e-28 | 1.000000 |
| rad19syn      | 8.31465e-29 | 1.000000 | 8.31494e-29 | 1.000000 |
| rad54         | 4.21734e-29 | 1.000000 | 4.21749e-29 | 1.000000 |
| rad47         | 6.22344e-30 | 1.000000 | 6.22366e-30 | 1.000000 |
| rad34         | 3.99095e-30 | 1.000000 | 3.99109e-30 | 1.000000 |
| rad65         | 1.03747e-30 | 1.000000 | 1.03750e-30 | 1.000000 |
| rad5          | 1.02662e-30 | 1.000000 | 1.02666e-30 | 1.000000 |
| rad55         | 7.95113e-32 | 1.000000 | 7.95141e-32 | 1.000000 |
| PAH10+CH3     | 4.70285e-32 | 1.000000 | 4.70302e-32 | 1.000000 |
| PhcycC3H3_A+H | 3.46392e-32 | 1.000000 | 3.46404e-32 | 1.000000 |
| rad62         | 1.59401e-32 | 1.000000 | 1.59406e-32 | 1.000000 |
| PAH1+H        | 2.85828e-34 | 1.000000 | 2.85838e-34 | 1.000000 |
| rad43         | 1.41297e-34 | 1.000000 | 1.41302e-34 | 1.000000 |
| rad42         | 2.11900e-37 | 1.000000 | 2.11908e-37 | 1.000000 |
| rad41         | 4.56034e-40 | 1.000000 | 4.56050e-40 | 1.000000 |

100000.000 Pa, 260.000000 K

=====

| Rate constant | True (fraction) | Effective (fraction) |
|---------------|-----------------|----------------------|
|---------------|-----------------|----------------------|

Total | 3.19452e-24 (1.00 ) 3.19436e-24 (1.00 )

| species       | PYtrue      | Cumul    | PYeffective | Cumul    |
|---------------|-------------|----------|-------------|----------|
| rad20         | 0.817439    | 0.817439 | 0.817480    | 0.817480 |
| rad21         | 0.140359    | 0.957798 | 0.140366    | 0.957846 |
| rad18         | 0.0284735   | 0.986272 | 0.0284749   | 0.986321 |
| rad22         | 0.0121413   | 0.998413 | 0.0121419   | 0.998463 |
| rad45         | 0.000844510 | 0.999257 | 0.000844552 | 0.999307 |
| Indene+H      | 0.000615014 | 0.999872 | 0.000615045 | 0.999922 |
| rad36         | 5.48978e-05 | 0.999927 | 5.49006e-05 | 0.999977 |
| Benzyl+C2H2   | 4.97274e-05 | 0.999977 | 0.00000     | 0.999977 |
| rad11         | 1.72798e-05 | 0.999994 | 1.72806e-05 | 0.999995 |
| rad23         | 4.83351e-06 | 0.999999 | 4.83375e-06 | 0.999999 |
| rad24         | 8.89426e-07 | 1.000000 | 8.89470e-07 | 1.000000 |
| rad6          | 1.65906e-08 | 1.000000 | 1.65914e-08 | 1.000000 |
| rad30         | 6.10052e-11 | 1.000000 | 6.10083e-11 | 1.000000 |
| rad15         | 8.90494e-12 | 1.000000 | 8.90538e-12 | 1.000000 |
| rad8          | 1.05515e-12 | 1.000000 | 1.05521e-12 | 1.000000 |
| rad25         | 2.48286e-13 | 1.000000 | 2.48298e-13 | 1.000000 |
| rad13         | 5.80242e-14 | 1.000000 | 5.80271e-14 | 1.000000 |
| rad7          | 3.50473e-14 | 1.000000 | 3.50491e-14 | 1.000000 |
| PhCHCCH2+H    | 3.27308e-14 | 1.000000 | 3.27324e-14 | 1.000000 |
| rad9          | 1.12928e-14 | 1.000000 | 1.12934e-14 | 1.000000 |
| rad38         | 5.59530e-15 | 1.000000 | 5.59558e-15 | 1.000000 |
| Ph+Allene     | 2.02434e-15 | 1.000000 | 2.02444e-15 | 1.000000 |
| rad60syn      | 1.27186e-15 | 1.000000 | 1.27193e-15 | 1.000000 |
| PhCH2CCH+H    | 7.06777e-16 | 1.000000 | 7.06812e-16 | 1.000000 |
| rad28         | 6.72949e-16 | 1.000000 | 6.72983e-16 | 1.000000 |
| rad60anti     | 4.02511e-16 | 1.000000 | 4.02531e-16 | 1.000000 |
| rad33         | 2.13314e-16 | 1.000000 | 2.13325e-16 | 1.000000 |
| rad46         | 4.59666e-17 | 1.000000 | 4.59689e-17 | 1.000000 |
| PAH9+H        | 2.98958e-17 | 1.000000 | 2.98973e-17 | 1.000000 |
| rad35         | 2.59439e-17 | 1.000000 | 2.59452e-17 | 1.000000 |
| rad3          | 1.32689e-17 | 1.000000 | 1.32696e-17 | 1.000000 |
| PAH7+H        | 1.30552e-17 | 1.000000 | 1.30559e-17 | 1.000000 |
| rad4          | 7.14886e-18 | 1.000000 | 7.14922e-18 | 1.000000 |
| PAH3+H        | 6.98268e-18 | 1.000000 | 6.98302e-18 | 1.000000 |
| rad59         | 2.11001e-18 | 1.000000 | 2.11012e-18 | 1.000000 |
| rad26         | 2.56676e-19 | 1.000000 | 2.56689e-19 | 1.000000 |
| rad2          | 4.07927e-20 | 1.000000 | 4.07947e-20 | 1.000000 |
| PhCCH+CH3     | 3.72563e-21 | 1.000000 | 3.72582e-21 | 1.000000 |
| rad1          | 3.14780e-21 | 1.000000 | 3.14796e-21 | 1.000000 |
| rad50         | 1.66041e-21 | 1.000000 | 1.66049e-21 | 1.000000 |
| rad14         | 8.10517e-23 | 1.000000 | 8.10557e-23 | 1.000000 |
| rad10         | 3.47045e-23 | 1.000000 | 3.47062e-23 | 1.000000 |
| Ph+MeAc       | 2.10820e-23 | 1.000000 | 2.10830e-23 | 1.000000 |
| rad39         | 8.89989e-24 | 1.000000 | 8.90033e-24 | 1.000000 |
| rad52         | 1.11400e-24 | 1.000000 | 1.11406e-24 | 1.000000 |
| PhCCCH3+H     | 3.80187e-25 | 1.000000 | 3.80205e-25 | 1.000000 |
| rad58         | 1.64176e-25 | 1.000000 | 1.64184e-25 | 1.000000 |
| rad27         | 7.62949e-26 | 1.000000 | 7.62987e-26 | 1.000000 |
| rad51         | 6.41908e-26 | 1.000000 | 6.41939e-26 | 1.000000 |
| rad12         | 3.78018e-26 | 1.000000 | 3.78037e-26 | 1.000000 |
| rad31         | 1.72661e-26 | 1.000000 | 1.72670e-26 | 1.000000 |
| rad70         | 1.00596e-26 | 1.000000 | 1.00601e-26 | 1.000000 |
| rad37         | 4.13456e-27 | 1.000000 | 4.13477e-27 | 1.000000 |
| rad19syn      | 5.92852e-28 | 1.000000 | 5.92882e-28 | 1.000000 |
| rad54         | 2.99076e-28 | 1.000000 | 2.99091e-28 | 1.000000 |
| rad47         | 5.53405e-29 | 1.000000 | 5.53432e-29 | 1.000000 |
| rad34         | 3.44713e-29 | 1.000000 | 3.44730e-29 | 1.000000 |
| rad65         | 9.22682e-30 | 1.000000 | 9.22727e-30 | 1.000000 |
| rad5          | 7.94037e-30 | 1.000000 | 7.94077e-30 | 1.000000 |
| rad55         | 6.51171e-31 | 1.000000 | 6.51203e-31 | 1.000000 |
| PAH10+CH3     | 3.46095e-31 | 1.000000 | 3.46112e-31 | 1.000000 |
| PhcycC3H3_A+H | 3.01722e-31 | 1.000000 | 3.01737e-31 | 1.000000 |
| rad62         | 1.44217e-31 | 1.000000 | 1.44225e-31 | 1.000000 |
| PAH1+H        | 2.43180e-33 | 1.000000 | 2.43193e-33 | 1.000000 |
| rad43         | 1.36498e-33 | 1.000000 | 1.36504e-33 | 1.000000 |
| rad42         | 2.20096e-36 | 1.000000 | 2.20107e-36 | 1.000000 |
| rad41         | 5.07264e-39 | 1.000000 | 5.07289e-39 | 1.000000 |

100000.000 Pa, 270.000000 K

=====

| Rate constant | True (fraction)     | Effective (fraction) |
|---------------|---------------------|----------------------|
| Total         | 8.04141e-24 (1.00 ) | 8.04085e-24 (1.00 )  |

| species | PYtrue | Cumul | PYeffective | Cumul |
|---------|--------|-------|-------------|-------|
|---------|--------|-------|-------------|-------|

-----

|               |             |          |             |          |
|---------------|-------------|----------|-------------|----------|
| rad20         | 0.801916    | 0.801916 | 0.801972    | 0.801972 |
| rad21         | 0.149789    | 0.951705 | 0.149800    | 0.951772 |
| rad18         | 0.0315218   | 0.983227 | 0.0315240   | 0.983296 |
| rad22         | 0.0147411   | 0.997968 | 0.0147421   | 0.998038 |
| rad45         | 0.00106946  | 0.999037 | 0.00106954  | 0.999108 |
| Indene+H      | 0.000791036 | 0.999828 | 0.000791091 | 0.999899 |
| rad36         | 6.98845e-05 | 0.999898 | 6.98894e-05 | 0.999969 |
| Benzyl+C2H2   | 6.95010e-05 | 0.999968 | 0.00000     | 0.999969 |
| rad11         | 2.38144e-05 | 0.999992 | 2.38161e-05 | 0.999992 |
| rad23         | 7.01960e-06 | 0.999999 | 7.02009e-06 | 0.999999 |
| rad24         | 9.20901e-07 | 1.000000 | 9.20965e-07 | 1.00000  |
| rad6          | 2.87821e-08 | 1.000000 | 2.87841e-08 | 1.00000  |
| rad30         | 1.09568e-10 | 1.000000 | 1.09576e-10 | 1.00000  |
| rad15         | 1.69991e-11 | 1.000000 | 1.70003e-11 | 1.00000  |
| rad8          | 2.50648e-12 | 1.000000 | 2.50666e-12 | 1.00000  |
| rad25         | 5.39258e-13 | 1.000000 | 5.39296e-13 | 1.00000  |
| rad13         | 1.17725e-13 | 1.000000 | 1.17733e-13 | 1.00000  |
| PhCHCCH2+H    | 8.51455e-14 | 1.000000 | 8.51514e-14 | 1.00000  |
| rad7          | 7.99825e-14 | 1.000000 | 7.99881e-14 | 1.00000  |
| rad9          | 3.22520e-14 | 1.000000 | 3.22542e-14 | 1.00000  |
| rad38         | 1.21484e-14 | 1.000000 | 1.21492e-14 | 1.00000  |
| Ph+Allene     | 6.26409e-15 | 1.000000 | 6.26453e-15 | 1.00000  |
| rad60syn      | 3.32829e-15 | 1.000000 | 3.32852e-15 | 1.00000  |
| PhCH2CCH+H    | 2.45898e-15 | 1.000000 | 2.45915e-15 | 1.00000  |
| rad28         | 1.75341e-15 | 1.000000 | 1.75353e-15 | 1.00000  |
| rad60anti     | 1.08932e-15 | 1.000000 | 1.08940e-15 | 1.00000  |
| rad33         | 4.22072e-16 | 1.000000 | 4.22101e-16 | 1.00000  |
| rad46         | 1.18267e-16 | 1.000000 | 1.18275e-16 | 1.00000  |
| PAH9+H        | 7.69184e-17 | 1.000000 | 7.69238e-17 | 1.00000  |
| rad35         | 7.15408e-17 | 1.000000 | 7.15458e-17 | 1.00000  |
| PAH7+H        | 3.86187e-17 | 1.000000 | 3.86214e-17 | 1.00000  |
| rad3          | 3.69677e-17 | 1.000000 | 3.69703e-17 | 1.00000  |
| PAH3+H        | 2.50611e-17 | 1.000000 | 2.50628e-17 | 1.00000  |
| rad4          | 1.99813e-17 | 1.000000 | 1.99827e-17 | 1.00000  |
| rad59         | 7.40585e-18 | 1.000000 | 7.40637e-18 | 1.00000  |
| rad26         | 8.43262e-19 | 1.000000 | 8.43321e-19 | 1.00000  |
| rad2          | 1.51384e-19 | 1.000000 | 1.51394e-19 | 1.00000  |
| PhCCH+CH3     | 1.65579e-20 | 1.000000 | 1.65591e-20 | 1.00000  |
| rad1          | 1.18171e-20 | 1.000000 | 1.18179e-20 | 1.00000  |
| rad50         | 7.12023e-21 | 1.000000 | 7.12072e-21 | 1.00000  |
| rad14         | 3.29449e-22 | 1.000000 | 3.29472e-22 | 1.00000  |
| rad10         | 1.57683e-22 | 1.000000 | 1.57694e-22 | 1.00000  |
| Ph+MeAc       | 1.07130e-22 | 1.000000 | 1.07138e-22 | 1.00000  |
| rad39         | 3.70300e-23 | 1.000000 | 3.70325e-23 | 1.00000  |
| rad52         | 6.27067e-24 | 1.000000 | 6.27111e-24 | 1.00000  |
| PhCCCH3+H     | 2.18587e-24 | 1.000000 | 2.18602e-24 | 1.00000  |
| rad58         | 1.04928e-24 | 1.000000 | 1.04935e-24 | 1.00000  |
| rad51         | 4.42839e-25 | 1.000000 | 4.42869e-25 | 1.00000  |
| rad27         | 3.65765e-25 | 1.000000 | 3.65790e-25 | 1.00000  |
| rad12         | 1.66897e-25 | 1.000000 | 1.66909e-25 | 1.00000  |
| rad70         | 6.74839e-26 | 1.000000 | 6.74886e-26 | 1.00000  |
| rad31         | 5.39522e-26 | 1.000000 | 5.39560e-26 | 1.00000  |
| rad37         | 1.96764e-26 | 1.000000 | 1.96778e-26 | 1.00000  |
| rad19syn      | 3.72259e-27 | 1.000000 | 3.72285e-27 | 1.00000  |
| rad54         | 1.85744e-27 | 1.000000 | 1.85757e-27 | 1.00000  |
| rad47         | 4.30150e-28 | 1.000000 | 4.30180e-28 | 1.00000  |
| rad34         | 2.53696e-28 | 1.000000 | 2.53713e-28 | 1.00000  |
| rad65         | 7.24932e-29 | 1.000000 | 7.24982e-29 | 1.00000  |
| rad5          | 5.46966e-29 | 1.000000 | 5.47004e-29 | 1.00000  |
| rad55         | 4.57904e-30 | 1.000000 | 4.57936e-30 | 1.00000  |
| PhcycC3H3_A+H | 2.24826e-30 | 1.000000 | 2.24841e-30 | 1.00000  |
| PAH10+CH3     | 2.21958e-30 | 1.000000 | 2.21974e-30 | 1.00000  |
| rad62         | 1.12348e-30 | 1.000000 | 1.12356e-30 | 1.00000  |
| PAH1+H        | 1.76962e-32 | 1.000000 | 1.76975e-32 | 1.00000  |
| rad43         | 1.13472e-32 | 1.000000 | 1.13480e-32 | 1.00000  |
| rad42         | 1.94079e-35 | 1.000000 | 1.94092e-35 | 1.00000  |
| rad41         | 4.78208e-38 | 1.000000 | 4.78241e-38 | 1.00000  |

100000.000 Pa, 280.000000 K

=====

| Rate constant | True (fraction)     | Effective (fraction) |
|---------------|---------------------|----------------------|
| Total         | 1.89357e-23 (1.00 ) | 1.89339e-23 (1.00 )  |

| species | PYtrue    | Cumul    | PYeffective | Cumul    |
|---------|-----------|----------|-------------|----------|
| rad20   | 0.785549  | 0.785549 | 0.785625    | 0.785625 |
| rad21   | 0.159206  | 0.944755 | 0.159221    | 0.944846 |
| rad18   | 0.0348422 | 0.979597 | 0.0348456   | 0.979692 |
| rad22   | 0.0178115 | 0.997409 | 0.0178132   | 0.997505 |

|               |             |          |             |          |
|---------------|-------------|----------|-------------|----------|
| rad45         | 0.00134680  | 0.998756 | 0.00134693  | 0.998852 |
| Indene+H      | 0.00101594  | 0.999771 | 0.00101604  | 0.999868 |
| Benzyl+C2H2   | 9.62908e-05 | 0.999868 | 0.000000    | 0.999868 |
| rad36         | 8.85249e-05 | 0.999956 | 8.85335e-05 | 0.999956 |
| rad11         | 3.25353e-05 | 0.999989 | 3.25385e-05 | 0.999989 |
| rad23         | 1.01373e-05 | 0.999999 | 1.01383e-05 | 0.999999 |
| rad24         | 9.52299e-07 | 1.000000 | 9.52390e-07 | 1.000000 |
| rad6          | 4.91915e-08 | 1.000000 | 4.91963e-08 | 1.000000 |
| rad30         | 1.92991e-10 | 1.000000 | 1.93009e-10 | 1.000000 |
| rad15         | 3.16520e-11 | 1.000000 | 3.16550e-11 | 1.000000 |
| rad8          | 5.64685e-12 | 1.000000 | 5.64739e-12 | 1.000000 |
| rad25         | 1.13308e-12 | 1.000000 | 1.13319e-12 | 1.000000 |
| rad13         | 2.32039e-13 | 1.000000 | 2.32061e-13 | 1.000000 |
| PhCHCCH2+H    | 2.11989e-13 | 1.000000 | 2.12009e-13 | 1.000000 |
| rad7          | 1.78297e-13 | 1.000000 | 1.78314e-13 | 1.000000 |
| rad9          | 8.64386e-14 | 1.000000 | 8.64469e-14 | 1.000000 |
| rad38         | 2.59330e-14 | 1.000000 | 2.59355e-14 | 1.000000 |
| Ph+Allene     | 1.82477e-14 | 1.000000 | 1.82494e-14 | 1.000000 |
| rad60syn      | 8.25082e-15 | 1.000000 | 8.25162e-15 | 1.000000 |
| PhCH2CCH+H    | 7.88869e-15 | 1.000000 | 7.88945e-15 | 1.000000 |
| rad28         | 4.31970e-15 | 1.000000 | 4.32012e-15 | 1.000000 |
| rad60anti     | 2.78318e-15 | 1.000000 | 2.78344e-15 | 1.000000 |
| rad33         | 8.09636e-16 | 1.000000 | 8.09714e-16 | 1.000000 |
| rad46         | 2.96142e-16 | 1.000000 | 2.96170e-16 | 1.000000 |
| PAH9+H        | 1.94799e-16 | 1.000000 | 1.94818e-16 | 1.000000 |
| rad35         | 1.91535e-16 | 1.000000 | 1.91554e-16 | 1.000000 |
| PAH7+H        | 1.06970e-16 | 1.000000 | 1.06981e-16 | 1.000000 |
| rad3          | 9.89565e-17 | 1.000000 | 9.89660e-17 | 1.000000 |
| PAH3+H        | 8.30087e-17 | 1.000000 | 8.30167e-17 | 1.000000 |
| rad4          | 5.36791e-17 | 1.000000 | 5.36843e-17 | 1.000000 |
| rad59         | 2.40135e-17 | 1.000000 | 2.40158e-17 | 1.000000 |
| rad26         | 2.56768e-18 | 1.000000 | 2.56792e-18 | 1.000000 |
| rad2          | 5.33593e-19 | 1.000000 | 5.33644e-19 | 1.000000 |
| PhCCH+CH3     | 6.89199e-20 | 1.000000 | 6.89265e-20 | 1.000000 |
| rad1          | 4.21829e-20 | 1.000000 | 4.21870e-20 | 1.000000 |
| rad50         | 2.88378e-20 | 1.000000 | 2.88406e-20 | 1.000000 |
| rad14         | 1.25630e-21 | 1.000000 | 1.25642e-21 | 1.000000 |
| rad10         | 6.73988e-22 | 1.000000 | 6.74053e-22 | 1.000000 |
| Ph+MeAc       | 5.02507e-22 | 1.000000 | 5.02555e-22 | 1.000000 |
| rad39         | 1.46322e-22 | 1.000000 | 1.46336e-22 | 1.000000 |
| rad52         | 3.26793e-23 | 1.000000 | 3.26824e-23 | 1.000000 |
| PhCCCH3+H     | 1.15604e-23 | 1.000000 | 1.15615e-23 | 1.000000 |
| rad58         | 5.83742e-24 | 1.000000 | 5.83798e-24 | 1.000000 |
| rad51         | 2.77276e-24 | 1.000000 | 2.77303e-24 | 1.000000 |
| rad27         | 1.62196e-24 | 1.000000 | 1.62211e-24 | 1.000000 |
| rad12         | 6.79372e-25 | 1.000000 | 6.79437e-25 | 1.000000 |
| rad70         | 3.93607e-25 | 1.000000 | 3.93645e-25 | 1.000000 |
| rad31         | 1.63541e-25 | 1.000000 | 1.63557e-25 | 1.000000 |
| rad37         | 8.57802e-26 | 1.000000 | 8.57885e-26 | 1.000000 |
| rad19syn      | 2.07385e-26 | 1.000000 | 2.07405e-26 | 1.000000 |
| rad54         | 1.01943e-26 | 1.000000 | 1.01953e-26 | 1.000000 |
| rad47         | 2.96876e-27 | 1.000000 | 2.96905e-27 | 1.000000 |
| rad34         | 1.60192e-27 | 1.000000 | 1.60208e-27 | 1.000000 |
| rad65         | 5.09757e-28 | 1.000000 | 5.09806e-28 | 1.000000 |
| rad5          | 3.37232e-28 | 1.000000 | 3.37264e-28 | 1.000000 |
| rad55         | 2.78986e-29 | 1.000000 | 2.79012e-29 | 1.000000 |
| PhcycC3H3_A+H | 1.44431e-29 | 1.000000 | 1.44445e-29 | 1.000000 |
| PAH10+CH3     | 1.25058e-29 | 1.000000 | 1.25070e-29 | 1.000000 |
| rad62         | 7.60749e-30 | 1.000000 | 7.60822e-30 | 1.000000 |
| PAH1+H        | 1.10752e-31 | 1.000000 | 1.10763e-31 | 1.000000 |
| rad43         | 8.19679e-32 | 1.000000 | 8.19758e-32 | 1.000000 |
| rad42         | 1.46379e-34 | 1.000000 | 1.46393e-34 | 1.000000 |
| rad41         | 3.85659e-37 | 1.000000 | 3.85696e-37 | 1.000000 |

100000.000 Pa, 290.000000 K

=====

| Rate constant | True (fraction)     | Effective (fraction) |
|---------------|---------------------|----------------------|
| Total         | 4.20015e-23 (1.00 ) | 4.19960e-23 (1.00 )  |

| species     | PYtrue      | Cumul    | PYeffective | Cumul    |
|-------------|-------------|----------|-------------|----------|
| rad20       | 0.768369    | 0.768369 | 0.768471    | 0.768471 |
| rad21       | 0.168488    | 0.936857 | 0.168510    | 0.936981 |
| rad18       | 0.0384429   | 0.975300 | 0.0384480   | 0.975429 |
| rad22       | 0.0214090   | 0.996709 | 0.0214118   | 0.996841 |
| rad45       | 0.00168577  | 0.998395 | 0.00168599  | 0.998527 |
| Indene+H    | 0.00130210  | 0.999697 | 0.00130227  | 0.999829 |
| Benzyl+C2H2 | 0.000132242 | 0.999829 | 0.000000    | 0.999829 |
| rad36       | 0.000111531 | 0.999941 | 0.000111546 | 0.999941 |

|               |             |          |             |          |
|---------------|-------------|----------|-------------|----------|
| rad11         | 4.40453e-05 | 0.999985 | 4.40512e-05 | 0.999985 |
| rad23         | 1.45516e-05 | 0.999999 | 1.45536e-05 | 0.999999 |
| rad24         | 9.83332e-07 | 1.00000  | 9.83462e-07 | 1.00000  |
| rad6          | 8.28019e-08 | 1.00000  | 8.28129e-08 | 1.00000  |
| rad30         | 3.33531e-10 | 1.00000  | 3.33575e-10 | 1.00000  |
| rad15         | 5.75519e-11 | 1.00000  | 5.75595e-11 | 1.00000  |
| rad8          | 1.21283e-11 | 1.00000  | 1.21299e-11 | 1.00000  |
| rad25         | 2.30589e-12 | 1.00000  | 2.30619e-12 | 1.00000  |
| PhCHCCH2+H    | 5.06626e-13 | 1.00000  | 5.06693e-13 | 1.00000  |
| rad13         | 4.44517e-13 | 1.00000  | 4.44576e-13 | 1.00000  |
| rad7          | 3.88195e-13 | 1.00000  | 3.88246e-13 | 1.00000  |
| rad9          | 2.18581e-13 | 1.00000  | 2.18609e-13 | 1.00000  |
| rad38         | 5.45497e-14 | 1.00000  | 5.45569e-14 | 1.00000  |
| Ph+Allene     | 5.02926e-14 | 1.00000  | 5.02992e-14 | 1.00000  |
| PhCH2CCH+H    | 2.35234e-14 | 1.00000  | 2.35265e-14 | 1.00000  |
| rad60syn      | 1.94688e-14 | 1.00000  | 1.94714e-14 | 1.00000  |
| rad28         | 1.01140e-14 | 1.00000  | 1.01153e-14 | 1.00000  |
| rad60anti     | 6.74824e-15 | 1.00000  | 6.74913e-15 | 1.00000  |
| rad33         | 1.50761e-15 | 1.00000  | 1.50781e-15 | 1.00000  |
| rad46         | 7.24916e-16 | 1.00000  | 7.25012e-16 | 1.00000  |
| rad35         | 4.96641e-16 | 1.00000  | 4.96707e-16 | 1.00000  |
| PAH9+H        | 4.87156e-16 | 1.00000  | 4.87221e-16 | 1.00000  |
| PAH7+H        | 2.79209e-16 | 1.00000  | 2.79246e-16 | 1.00000  |
| PAH3+H        | 2.55644e-16 | 1.00000  | 2.55678e-16 | 1.00000  |
| rad3          | 2.54863e-16 | 1.00000  | 2.54896e-16 | 1.00000  |
| rad4          | 1.38800e-16 | 1.00000  | 1.38818e-16 | 1.00000  |
| rad59         | 7.24705e-17 | 1.00000  | 7.24801e-17 | 1.00000  |
| rad26         | 7.30051e-18 | 1.00000  | 7.30147e-18 | 1.00000  |
| rad2          | 1.78951e-18 | 1.00000  | 1.78975e-18 | 1.00000  |
| PhCCH+CH3     | 2.69287e-19 | 1.00000  | 2.69323e-19 | 1.00000  |
| rad1          | 1.43436e-19 | 1.00000  | 1.43455e-19 | 1.00000  |
| rad50         | 1.11377e-19 | 1.00000  | 1.11391e-19 | 1.00000  |
| rad14         | 4.50493e-21 | 1.00000  | 4.50552e-21 | 1.00000  |
| rad10         | 2.71902e-21 | 1.00000  | 2.71938e-21 | 1.00000  |
| Ph+MeAc       | 2.18323e-21 | 1.00000  | 2.18352e-21 | 1.00000  |
| rad39         | 5.54420e-22 | 1.00000  | 5.54493e-22 | 1.00000  |
| rad52         | 1.59216e-22 | 1.00000  | 1.59237e-22 | 1.00000  |
| PhCCCH3+H     | 5.63681e-23 | 1.00000  | 5.63756e-23 | 1.00000  |
| rad58         | 2.86450e-23 | 1.00000  | 2.86488e-23 | 1.00000  |
| rad51         | 1.59108e-23 | 1.00000  | 1.59129e-23 | 1.00000  |
| rad27         | 6.67480e-24 | 1.00000  | 6.67568e-24 | 1.00000  |
| rad12         | 2.56427e-24 | 1.00000  | 2.56461e-24 | 1.00000  |
| rad70         | 2.02223e-24 | 1.00000  | 2.02250e-24 | 1.00000  |
| rad31         | 4.81820e-25 | 1.00000  | 4.81884e-25 | 1.00000  |
| rad37         | 3.44531e-25 | 1.00000  | 3.44577e-25 | 1.00000  |
| rad19syn      | 1.03390e-25 | 1.00000  | 1.03404e-25 | 1.00000  |
| rad54         | 4.99349e-26 | 1.00000  | 4.99415e-26 | 1.00000  |
| rad47         | 1.84330e-26 | 1.00000  | 1.84354e-26 | 1.00000  |
| rad34         | 8.81498e-27 | 1.00000  | 8.81614e-27 | 1.00000  |
| rad65         | 3.24511e-27 | 1.00000  | 3.24554e-27 | 1.00000  |
| rad5          | 1.87350e-27 | 1.00000  | 1.87374e-27 | 1.00000  |
| rad55         | 1.49266e-28 | 1.00000  | 1.49285e-28 | 1.00000  |
| PhcycC3H3_A+H | 8.11401e-29 | 1.00000  | 8.11509e-29 | 1.00000  |
| PAH10+CH3     | 6.26147e-29 | 1.00000  | 6.26230e-29 | 1.00000  |
| rad62         | 4.53594e-29 | 1.00000  | 4.53654e-29 | 1.00000  |
| PAH1+H        | 6.05911e-31 | 1.00000  | 6.05991e-31 | 1.00000  |
| rad43         | 5.21187e-31 | 1.00000  | 5.21256e-31 | 1.00000  |
| rad42         | 9.60003e-34 | 1.00000  | 9.60130e-34 | 1.00000  |
| rad41         | 2.70384e-36 | 1.00000  | 2.70420e-36 | 1.00000  |

100000.000 Pa, 300.000000 K

=====

| Rate constant | True (fraction)     | Effective (fraction) |
|---------------|---------------------|----------------------|
| Total         | 1.17740e-22 (1.00 ) | 1.17681e-22 (1.00 )  |

| species     | PYtrue      | Cumul    | PYeffective | Cumul    |
|-------------|-------------|----------|-------------|----------|
| rad20       | 0.687397    | 0.687397 | 0.687743    | 0.687743 |
| rad21       | 0.195560    | 0.882957 | 0.195659    | 0.883402 |
| rad18       | 0.0573864   | 0.940343 | 0.0574153   | 0.940817 |
| rad22       | 0.0496002   | 0.989944 | 0.0496252   | 0.990443 |
| Indene+H    | 0.00457962  | 0.994523 | 0.00458193  | 0.995024 |
| rad45       | 0.00455245  | 0.999076 | 0.00455474  | 0.999579 |
| Benzyl+C2H2 | 0.000503375 | 0.999579 | 0.00000     | 0.999579 |
| rad36       | 0.000157201 | 0.999736 | 0.000157280 | 0.999736 |
| rad11       | 0.000153513 | 0.999890 | 0.000153590 | 0.999890 |
| rad23       | 0.000107946 | 0.999998 | 0.000108000 | 0.999998 |
| rad24       | 1.33207e-06 | 0.999999 | 1.33274e-06 | 0.999999 |
| rad6        | 1.09061e-06 | 1.00000  | 1.09116e-06 | 1.00000  |

|               |             |         |             |         |
|---------------|-------------|---------|-------------|---------|
| rad30         | 3.95592e-09 | 1.00000 | 3.95791e-09 | 1.00000 |
| rad9          | 5.78406e-10 | 1.00000 | 5.78697e-10 | 1.00000 |
| rad15         | 3.47580e-10 | 1.00000 | 3.47755e-10 | 1.00000 |
| rad25         | 6.12834e-11 | 1.00000 | 6.13143e-11 | 1.00000 |
| PhCHCCH2+H    | 3.35758e-11 | 1.00000 | 3.35927e-11 | 1.00000 |
| rad7          | 2.74189e-11 | 1.00000 | 2.74327e-11 | 1.00000 |
| rad38         | 2.28904e-11 | 1.00000 | 2.29020e-11 | 1.00000 |
| rad13         | 9.92520e-12 | 1.00000 | 9.93020e-12 | 1.00000 |
| PAH9+H        | 5.71573e-12 | 1.00000 | 5.71861e-12 | 1.00000 |
| Ph+Allene     | 4.29841e-12 | 1.00000 | 4.30058e-12 | 1.00000 |
| rad46         | 1.57783e-12 | 1.00000 | 1.57862e-12 | 1.00000 |
| rad35         | 1.47853e-12 | 1.00000 | 1.47927e-12 | 1.00000 |
| PhCH2CCH+H    | 1.19944e-12 | 1.00000 | 1.20004e-12 | 1.00000 |
| rad60syn      | 7.60319e-13 | 1.00000 | 7.60702e-13 | 1.00000 |
| rad28         | 4.28482e-13 | 1.00000 | 4.28698e-13 | 1.00000 |
| rad60anti     | 2.92565e-13 | 1.00000 | 2.92712e-13 | 1.00000 |
| PAH7+H        | 4.74857e-14 | 1.00000 | 4.75096e-14 | 1.00000 |
| rad3          | 4.73383e-14 | 1.00000 | 4.73622e-14 | 1.00000 |
| PAH3+H        | 3.47906e-14 | 1.00000 | 3.48081e-14 | 1.00000 |
| rad50         | 2.93256e-14 | 1.00000 | 2.93404e-14 | 1.00000 |
| rad33         | 2.89795e-14 | 1.00000 | 2.89940e-14 | 1.00000 |
| rad4          | 2.43905e-14 | 1.00000 | 2.44028e-14 | 1.00000 |
| rad59         | 7.49551e-15 | 1.00000 | 7.49929e-15 | 1.00000 |
| rad26         | 3.08518e-15 | 1.00000 | 3.08673e-15 | 1.00000 |
| rad2          | 3.03935e-15 | 1.00000 | 3.04088e-15 | 1.00000 |
| PhCCH+CH3     | 2.70219e-15 | 1.00000 | 2.70355e-15 | 1.00000 |
| rad39         | 1.57321e-15 | 1.00000 | 1.57401e-15 | 1.00000 |
| rad19anti     | 1.11857e-15 | 1.00000 | 1.11914e-15 | 1.00000 |
| rad52         | 5.91527e-16 | 1.00000 | 5.91825e-16 | 1.00000 |
| rad51         | 5.38413e-16 | 1.00000 | 5.38684e-16 | 1.00000 |
| rad1          | 2.36887e-16 | 1.00000 | 2.37006e-16 | 1.00000 |
| Ph+MeAc       | 1.43786e-16 | 1.00000 | 1.43859e-16 | 1.00000 |
| rad10         | 1.08762e-16 | 1.00000 | 1.08817e-16 | 1.00000 |
| rad12         | 4.51265e-17 | 1.00000 | 4.51492e-17 | 1.00000 |
| PhCCCH3+H     | 4.06916e-17 | 1.00000 | 4.07121e-17 | 1.00000 |
| rad14         | 7.19367e-18 | 1.00000 | 7.19729e-18 | 1.00000 |
| rad65         | 6.32163e-18 | 1.00000 | 6.32481e-18 | 1.00000 |
| rad37         | 4.33715e-18 | 1.00000 | 4.33934e-18 | 1.00000 |
| rad19syn      | 8.61886e-19 | 1.00000 | 8.62320e-19 | 1.00000 |
| PAH10+CH3     | 5.45982e-19 | 1.00000 | 5.46257e-19 | 1.00000 |
| rad70         | 4.70668e-19 | 1.00000 | 4.70905e-19 | 1.00000 |
| rad58         | 2.65285e-19 | 1.00000 | 2.65418e-19 | 1.00000 |
| rad67         | 2.65043e-19 | 1.00000 | 2.65176e-19 | 1.00000 |
| PAH1+H        | 1.94590e-19 | 1.00000 | 1.94688e-19 | 1.00000 |
| rad54         | 1.27830e-19 | 1.00000 | 1.27895e-19 | 1.00000 |
| PhcycC3H3_A+H | 5.72283e-20 | 1.00000 | 5.72571e-20 | 1.00000 |
| rad34         | 4.26741e-20 | 1.00000 | 4.26956e-20 | 1.00000 |
| rad27         | 3.83902e-20 | 1.00000 | 3.84095e-20 | 1.00000 |
| rad73         | 2.02613e-20 | 1.00000 | 2.02715e-20 | 1.00000 |
| rad47         | 1.26271e-20 | 1.00000 | 1.26335e-20 | 1.00000 |
| rad71         | 5.42251e-21 | 1.00000 | 5.42524e-21 | 1.00000 |
| rad55         | 5.15529e-21 | 1.00000 | 5.15788e-21 | 1.00000 |
| rad5          | 4.89075e-21 | 1.00000 | 4.89321e-21 | 1.00000 |
| rad62         | 2.80520e-21 | 1.00000 | 2.80661e-21 | 1.00000 |
| rad64         | 1.07404e-21 | 1.00000 | 1.07458e-21 | 1.00000 |
| rad43         | 6.86662e-22 | 1.00000 | 6.87007e-22 | 1.00000 |
| rad31         | 2.69391e-22 | 1.00000 | 2.69526e-22 | 1.00000 |
| rad53         | 1.55614e-22 | 1.00000 | 1.55693e-22 | 1.00000 |
| rad68syn      | 1.06896e-22 | 1.00000 | 1.06950e-22 | 1.00000 |
| rad68anti     | 7.26963e-23 | 1.00000 | 7.27329e-23 | 1.00000 |
| rad56         | 4.85442e-23 | 1.00000 | 4.85686e-23 | 1.00000 |
| rad42         | 4.07392e-23 | 1.00000 | 4.07597e-23 | 1.00000 |
| rad61         | 3.43677e-23 | 1.00000 | 3.43850e-23 | 1.00000 |
| PAH8+H        | 2.60984e-23 | 1.00000 | 2.61116e-23 | 1.00000 |
| rad40syn      | 8.67981e-24 | 1.00000 | 8.68418e-24 | 1.00000 |
| rad41         | 7.28281e-24 | 1.00000 | 7.28648e-24 | 1.00000 |
| rad40anti     | 3.28927e-24 | 1.00000 | 3.29093e-24 | 1.00000 |
| rad72         | 2.93861e-24 | 1.00000 | 2.94009e-24 | 1.00000 |
| rad8          | 5.82431e-26 | 1.00000 | 5.82724e-26 | 1.00000 |

100000.000 Pa, 310.000000 K

=====

| Rate constant | True (fraction)     | Effective (fraction) |             |          |
|---------------|---------------------|----------------------|-------------|----------|
| Total         | 2.44453e-22 (1.00 ) | 2.44394e-22 (1.00 )  |             |          |
| species       | PYtrue              | Cumul                | PYeffective | Cumul    |
| rad20         | 0.731729            | 0.731729             | 0.731907    | 0.731907 |
| rad21         | 0.186130            | 0.917859             | 0.186175    | 0.918082 |

|               |             |          |             |          |
|---------------|-------------|----------|-------------|----------|
| rad18         | 0.0464980   | 0.964357 | 0.0465093   | 0.964591 |
| rad22         | 0.0304079   | 0.994765 | 0.0304153   | 0.995007 |
| rad45         | 0.00258908  | 0.997354 | 0.00258971  | 0.997596 |
| Indene+H      | 0.00212072  | 0.999475 | 0.00212124  | 0.999718 |
| Benzyl+C2H2   | 0.000242966 | 0.999718 | 0.00000     | 0.999718 |
| rad36         | 0.000173897 | 0.999892 | 0.000173939 | 0.999891 |
| rad11         | 7.84483e-05 | 0.999970 | 7.84674e-05 | 0.999970 |
| rad23         | 2.94185e-05 | 0.999999 | 2.94257e-05 | 0.999999 |
| rad24         | 1.04323e-06 | 1.00000  | 1.04349e-06 | 1.00000  |
| rad6          | 2.24022e-07 | 1.00000  | 2.24076e-07 | 1.00000  |
| rad30         | 9.42514e-10 | 1.00000  | 9.42743e-10 | 1.00000  |
| rad15         | 1.77859e-10 | 1.00000  | 1.77902e-10 | 1.00000  |
| rad8          | 4.93216e-11 | 1.00000  | 4.93336e-11 | 1.00000  |
| rad25         | 8.71210e-12 | 1.00000  | 8.71421e-12 | 1.00000  |
| PhCHCCH2+H    | 2.58511e-12 | 1.00000  | 2.58574e-12 | 1.00000  |
| rad7          | 1.71472e-12 | 1.00000  | 1.71514e-12 | 1.00000  |
| rad13         | 1.50201e-12 | 1.00000  | 1.50238e-12 | 1.00000  |
| rad9          | 1.19659e-12 | 1.00000  | 1.19688e-12 | 1.00000  |
| Ph+Allene     | 3.28965e-13 | 1.00000  | 3.29045e-13 | 1.00000  |
| rad38         | 2.33425e-13 | 1.00000  | 2.33482e-13 | 1.00000  |
| PhCH2CCH+H    | 1.72484e-13 | 1.00000  | 1.72526e-13 | 1.00000  |
| rad60syn      | 9.49622e-14 | 1.00000  | 9.49853e-14 | 1.00000  |
| rad28         | 4.84242e-14 | 1.00000  | 4.84360e-14 | 1.00000  |
| rad60anti     | 3.44948e-14 | 1.00000  | 3.45032e-14 | 1.00000  |
| rad33         | 4.80791e-15 | 1.00000  | 4.80908e-15 | 1.00000  |
| rad46         | 4.13379e-15 | 1.00000  | 4.13479e-15 | 1.00000  |
| rad35         | 3.03526e-15 | 1.00000  | 3.03600e-15 | 1.00000  |
| PAH9+H        | 2.98236e-15 | 1.00000  | 2.98309e-15 | 1.00000  |
| PAH3+H        | 1.99770e-15 | 1.00000  | 1.99818e-15 | 1.00000  |
| PAH7+H        | 1.62601e-15 | 1.00000  | 1.62640e-15 | 1.00000  |
| rad3          | 1.51399e-15 | 1.00000  | 1.51436e-15 | 1.00000  |
| rad4          | 8.32046e-16 | 1.00000  | 8.32249e-16 | 1.00000  |
| rad59         | 5.45418e-16 | 1.00000  | 5.45551e-16 | 1.00000  |
| rad26         | 4.92647e-17 | 1.00000  | 4.92767e-17 | 1.00000  |
| rad2          | 1.74342e-17 | 1.00000  | 1.74384e-17 | 1.00000  |
| PhCCH+CH3     | 3.42667e-18 | 1.00000  | 3.42750e-18 | 1.00000  |
| rad50         | 1.48168e-18 | 1.00000  | 1.48204e-18 | 1.00000  |
| rad1          | 1.44165e-18 | 1.00000  | 1.44200e-18 | 1.00000  |
| rad14         | 4.85710e-20 | 1.00000  | 4.85828e-20 | 1.00000  |
| rad10         | 3.74765e-20 | 1.00000  | 3.74856e-20 | 1.00000  |
| Ph+MeAc       | 3.31606e-20 | 1.00000  | 3.31687e-20 | 1.00000  |
| rad39         | 7.26040e-21 | 1.00000  | 7.26217e-21 | 1.00000  |
| rad52         | 3.16120e-21 | 1.00000  | 3.16196e-21 | 1.00000  |
| PhCCCH3+H     | 1.06166e-21 | 1.00000  | 1.06191e-21 | 1.00000  |
| rad58         | 4.94818e-22 | 1.00000  | 4.94938e-22 | 1.00000  |
| rad51         | 4.12851e-22 | 1.00000  | 4.12951e-22 | 1.00000  |
| rad27         | 9.14950e-23 | 1.00000  | 9.15172e-23 | 1.00000  |
| rad70         | 3.81233e-23 | 1.00000  | 3.81326e-23 | 1.00000  |
| rad12         | 2.96885e-23 | 1.00000  | 2.96957e-23 | 1.00000  |
| rad37         | 4.43446e-24 | 1.00000  | 4.43553e-24 | 1.00000  |
| rad31         | 3.86911e-24 | 1.00000  | 3.87005e-24 | 1.00000  |
| rad19syn      | 1.89921e-24 | 1.00000  | 1.89967e-24 | 1.00000  |
| rad54         | 8.81538e-25 | 1.00000  | 8.81752e-25 | 1.00000  |
| rad47         | 5.35955e-25 | 1.00000  | 5.36085e-25 | 1.00000  |
| rad34         | 1.85878e-25 | 1.00000  | 1.85923e-25 | 1.00000  |
| rad65         | 1.00466e-25 | 1.00000  | 1.00491e-25 | 1.00000  |
| rad5          | 4.34162e-26 | 1.00000  | 4.34267e-26 | 1.00000  |
| rad55         | 3.02737e-27 | 1.00000  | 3.02810e-27 | 1.00000  |
| PhcycC3H3_A+H | 1.79584e-27 | 1.00000  | 1.79627e-27 | 1.00000  |
| rad62         | 1.15064e-27 | 1.00000  | 1.15092e-27 | 1.00000  |
| PAH10+CH3     | 1.14752e-27 | 1.00000  | 1.14780e-27 | 1.00000  |
| rad43         | 1.50127e-29 | 1.00000  | 1.50163e-29 | 1.00000  |
| PAH1+H        | 1.27872e-29 | 1.00000  | 1.27904e-29 | 1.00000  |
| rad42         | 2.86258e-32 | 1.00000  | 2.86328e-32 | 1.00000  |
| rad41         | 9.19558e-35 | 1.00000  | 9.19782e-35 | 1.00000  |

100000.000 Pa, 400.000000 K

=====  
Rate constant | True (fraction) | Effective (fraction)  
-----  
Total | 3.60269e-20 (1.00 ) | 3.58501e-20 (1.00 )

-----  
species | PYtrue | Cumul | PYeffective | Cumul  
-----  
rad20 | 0.466012 | 0.466012 | 0.468310 | 0.468310  
rad21 | 0.210172 | 0.676184 | 0.211208 | 0.679518  
rad22 | 0.158118 | 0.834302 | 0.158898 | 0.838416  
rad18 | 0.107830 | 0.942132 | 0.108361 | 0.946777  
Indene+H | 0.0307148 | 0.972847 | 0.0308663 | 0.977643  
rad45 | 0.0177214 | 0.990568 | 0.0178088 | 0.995452

|               |             |          |             |          |
|---------------|-------------|----------|-------------|----------|
| Benzyl+C2H2   | 0.00490731  | 0.995476 | 0.00000     | 0.995452 |
| rad23         | 0.00272491  | 0.998200 | 0.00273835  | 0.998190 |
| rad11         | 0.00107837  | 0.999279 | 0.00108369  | 0.999274 |
| rad36         | 0.000685440 | 0.999964 | 0.000688820 | 0.999963 |
| rad6          | 3.48727e-05 | 0.999999 | 3.50447e-05 | 0.999998 |
| rad24         | 1.94257e-06 | 1.00000  | 1.95215e-06 | 1.000000 |
| PAH9+H        | 1.70630e-07 | 1.00000  | 1.71471e-07 | 1.00000  |
| rad30         | 1.23637e-07 | 1.00000  | 1.24247e-07 | 1.00000  |
| rad38         | 1.05065e-07 | 1.00000  | 1.05583e-07 | 1.00000  |
| rad9          | 3.77735e-08 | 1.00000  | 3.79598e-08 | 1.00000  |
| rad35         | 3.37259e-08 | 1.00000  | 3.38922e-08 | 1.00000  |
| rad46         | 1.82982e-08 | 1.00000  | 1.83884e-08 | 1.00000  |
| PhCHCCH2+H    | 1.27096e-08 | 1.00000  | 1.27722e-08 | 1.00000  |
| Ph+Allene     | 1.08728e-08 | 1.00000  | 1.09265e-08 | 1.00000  |
| PhCH2CCH+H    | 7.56292e-09 | 1.00000  | 7.60021e-09 | 1.00000  |
| rad15         | 6.49534e-09 | 1.00000  | 6.52737e-09 | 1.00000  |
| rad7          | 4.00656e-09 | 1.00000  | 4.02632e-09 | 1.00000  |
| PAH7+H        | 3.80566e-09 | 1.00000  | 3.82443e-09 | 1.00000  |
| rad25         | 3.16638e-09 | 1.00000  | 3.18200e-09 | 1.00000  |
| rad28         | 3.07449e-09 | 1.00000  | 3.08966e-09 | 1.00000  |
| rad50         | 2.95944e-09 | 1.00000  | 2.97404e-09 | 1.00000  |
| PhCCH+CH3     | 7.75586e-10 | 1.00000  | 7.79411e-10 | 1.00000  |
| rad39         | 7.54371e-10 | 1.00000  | 7.58091e-10 | 1.00000  |
| rad13         | 4.27552e-10 | 1.00000  | 4.29661e-10 | 1.00000  |
| rad51         | 2.62620e-10 | 1.00000  | 2.63915e-10 | 1.00000  |
| Ph+MeAc       | 1.50483e-10 | 1.00000  | 1.51225e-10 | 1.00000  |
| rad52         | 1.40916e-10 | 1.00000  | 1.41611e-10 | 1.00000  |
| rad60syn      | 9.43132e-11 | 1.00000  | 9.47783e-11 | 1.00000  |
| rad19anti     | 9.42767e-11 | 1.00000  | 9.47416e-11 | 1.00000  |
| PAH3+H        | 9.16184e-11 | 1.00000  | 9.20702e-11 | 1.00000  |
| rad26         | 8.21376e-11 | 1.00000  | 8.25426e-11 | 1.00000  |
| PhCCCH3+H     | 4.60455e-11 | 1.00000  | 4.62726e-11 | 1.00000  |
| rad60anti     | 4.30302e-11 | 1.00000  | 4.32424e-11 | 1.00000  |
| rad2          | 2.69738e-11 | 1.00000  | 2.71068e-11 | 1.00000  |
| rad3          | 1.35802e-11 | 1.00000  | 1.36472e-11 | 1.00000  |
| rad59         | 1.21232e-11 | 1.00000  | 1.21830e-11 | 1.00000  |
| rad37         | 1.10166e-11 | 1.00000  | 1.10710e-11 | 1.00000  |
| rad4          | 7.37456e-12 | 1.00000  | 7.41093e-12 | 1.00000  |
| rad10         | 7.07018e-12 | 1.00000  | 7.10504e-12 | 1.00000  |
| rad65         | 6.83536e-12 | 1.00000  | 6.86907e-12 | 1.00000  |
| PAH10+CH3     | 5.48758e-12 | 1.00000  | 5.51464e-12 | 1.00000  |
| rad19syn      | 2.63033e-12 | 1.00000  | 2.64330e-12 | 1.00000  |
| rad1          | 2.58181e-12 | 1.00000  | 2.59454e-12 | 1.00000  |
| PAH1+H        | 2.21376e-12 | 1.00000  | 2.22468e-12 | 1.00000  |
| rad33         | 1.14068e-12 | 1.00000  | 1.14630e-12 | 1.00000  |
| rad54         | 9.32638e-13 | 1.00000  | 9.37237e-13 | 1.00000  |
| rad67         | 8.61049e-13 | 1.00000  | 8.65296e-13 | 1.00000  |
| PhcycC3H3_A+H | 8.00850e-13 | 1.00000  | 8.04799e-13 | 1.00000  |
| rad70         | 5.83826e-13 | 1.00000  | 5.86705e-13 | 1.00000  |
| rad73         | 3.84501e-13 | 1.00000  | 3.86397e-13 | 1.00000  |
| rad58         | 2.48148e-13 | 1.00000  | 2.49372e-13 | 1.00000  |
| rad71         | 2.47273e-13 | 1.00000  | 2.48492e-13 | 1.00000  |
| rad34         | 9.65590e-14 | 1.00000  | 9.70352e-14 | 1.00000  |
| rad55         | 5.27204e-14 | 1.00000  | 5.29804e-14 | 1.00000  |
| rad64         | 2.37629e-14 | 1.00000  | 2.38800e-14 | 1.00000  |
| rad62         | 1.68185e-14 | 1.00000  | 1.69015e-14 | 1.00000  |
| rad14         | 7.16510e-15 | 1.00000  | 7.20044e-15 | 1.00000  |
| rad53         | 5.11572e-15 | 1.00000  | 5.14095e-15 | 1.00000  |
| rad43         | 4.42339e-15 | 1.00000  | 4.44520e-15 | 1.00000  |
| rad12         | 3.79630e-15 | 1.00000  | 3.81503e-15 | 1.00000  |
| rad56         | 3.04711e-15 | 1.00000  | 3.06214e-15 | 1.00000  |
| rad61         | 2.06283e-15 | 1.00000  | 2.07301e-15 | 1.00000  |
| PAH8+H        | 1.79526e-15 | 1.00000  | 1.80411e-15 | 1.00000  |
| rad68syn      | 1.73222e-15 | 1.00000  | 1.74076e-15 | 1.00000  |
| rad72         | 1.41341e-15 | 1.00000  | 1.42038e-15 | 1.00000  |
| rad68anti     | 1.14928e-15 | 1.00000  | 1.15494e-15 | 1.00000  |
| rad42         | 6.34060e-16 | 1.00000  | 6.37186e-16 | 1.00000  |
| rad5          | 5.84382e-16 | 1.00000  | 5.87264e-16 | 1.00000  |
| rad27         | 4.60607e-16 | 1.00000  | 4.62878e-16 | 1.00000  |
| rad47         | 3.67721e-16 | 1.00000  | 3.69534e-16 | 1.00000  |
| rad40syn      | 3.35838e-16 | 1.00000  | 3.37494e-16 | 1.00000  |
| rad40anti     | 1.65025e-16 | 1.00000  | 1.65839e-16 | 1.00000  |
| rad41         | 1.26273e-16 | 1.00000  | 1.26896e-16 | 1.00000  |
| rad31         | 1.07088e-18 | 1.00000  | 1.07616e-18 | 1.00000  |
| rad8          | 8.12747e-24 | 1.00000  | 8.16755e-24 | 1.00000  |

100000.000 Pa, 500.000000 K

=====

Rate constant | True (fraction) | Effective (fraction)

-----



Total | 1.22595e-18 (1.00 ) 1.19538e-18 (1.00 )

| species       | PYtrue      | Cumul    | PYeffective | Cumul    |
|---------------|-------------|----------|-------------|----------|
| rad22         | 0.288200    | 0.288200 | 0.295572    | 0.295572 |
| rad20         | 0.253569    | 0.541769 | 0.260056    | 0.555628 |
| rad21         | 0.143329    | 0.685098 | 0.146996    | 0.702624 |
| rad18         | 0.124234    | 0.809332 | 0.127412    | 0.830036 |
| Indene+H      | 0.117730    | 0.927062 | 0.120742    | 0.950778 |
| rad45         | 0.0273267   | 0.954389 | 0.0280258   | 0.978804 |
| Benzyl+C2H2   | 0.0249417   | 0.979330 | 0.000000    | 0.978804 |
| rad23         | 0.0151686   | 0.994499 | 0.0155566   | 0.994360 |
| rad11         | 0.00363532  | 0.998134 | 0.00372831  | 0.998089 |
| rad36         | 0.00127882  | 0.999413 | 0.00131154  | 0.999400 |
| rad6          | 0.000448749 | 0.999862 | 0.000460228 | 0.999860 |
| PAH9+H        | 5.72788e-05 | 0.999919 | 5.87440e-05 | 0.999919 |
| rad38         | 2.68188e-05 | 0.999946 | 2.75048e-05 | 0.999947 |
| rad35         | 9.61387e-06 | 0.999956 | 9.85979e-06 | 0.999957 |
| Ph+Allene     | 8.77236e-06 | 0.999964 | 8.99676e-06 | 0.999966 |
| rad46         | 7.00338e-06 | 0.999971 | 7.18252e-06 | 0.999973 |
| PhCH2CCH+H    | 5.99580e-06 | 0.999977 | 6.14917e-06 | 0.999979 |
| PhCHCCH2+H    | 4.72465e-06 | 0.999982 | 4.84551e-06 | 0.999984 |
| PAH7+H        | 4.05836e-06 | 0.999986 | 4.16217e-06 | 0.999988 |
| rad50         | 3.23810e-06 | 0.999989 | 3.32093e-06 | 0.999991 |
| rad24         | 3.08840e-06 | 0.999992 | 3.16740e-06 | 0.999994 |
| rad30         | 1.51658e-06 | 0.999994 | 1.55537e-06 | 0.999996 |
| rad39         | 1.22398e-06 | 0.999995 | 1.25529e-06 | 0.999997 |
| rad9          | 9.22723e-07 | 0.999996 | 9.46325e-07 | 0.999998 |
| PhCCH+CH3     | 7.20731e-07 | 0.999997 | 7.39167e-07 | 0.999999 |
| rad51         | 6.10104e-07 | 0.999997 | 6.25710e-07 | 1.000000 |
| rad52         | 2.26287e-07 | 0.999998 | 2.32075e-07 | 1.000000 |
| rad28         | 2.08907e-07 | 0.999998 | 2.14251e-07 | 1.000000 |
| Ph+MeAc       | 1.82045e-07 | 0.999998 | 1.86702e-07 | 1.000000 |
| rad19anti     | 1.66946e-07 | 0.999998 | 1.71216e-07 | 1.000000 |
| rad7          | 1.63602e-07 | 0.999998 | 1.67787e-07 | 1.000000 |
| PAH3+H        | 1.03110e-07 | 0.999999 | 1.05748e-07 | 1.000000 |
| PhCCCH3+H     | 4.71642e-08 | 0.999999 | 4.83707e-08 | 1.000000 |
| rad25         | 3.84043e-08 | 0.999999 | 3.93867e-08 | 1.000000 |
| rad15         | 3.36131e-08 | 0.999999 | 3.44729e-08 | 1.000000 |
| PAH10+CH3     | 3.22720e-08 | 0.999999 | 3.30975e-08 | 1.000000 |
| rad37         | 2.59426e-08 | 0.999999 | 2.66062e-08 | 1.000000 |
| rad65         | 1.68254e-08 | 0.999999 | 1.72558e-08 | 1.000000 |
| PAH1+H        | 1.40834e-08 | 0.999999 | 1.44436e-08 | 1.000000 |
| rad60syn      | 1.35953e-08 | 0.999999 | 1.39431e-08 | 1.000000 |
| rad59         | 1.09665e-08 | 0.999999 | 1.12471e-08 | 1.000000 |
| rad60anti     | 7.96249e-09 | 0.999999 | 8.16617e-09 | 1.000000 |
| rad19syn      | 7.86727e-09 | 0.999999 | 8.06851e-09 | 1.000000 |
| rad26         | 7.01864e-09 | 0.999999 | 7.19817e-09 | 1.000000 |
| rad13         | 6.24880e-09 | 0.999999 | 6.40864e-09 | 1.000000 |
| rad71         | 6.23180e-09 | 0.999999 | 6.39121e-09 | 1.000000 |
| rad73         | 5.73809e-09 | 0.999999 | 5.88487e-09 | 1.000000 |
| rad67         | 4.74241e-09 | 0.999999 | 4.86372e-09 | 1.000000 |
| PhcycC3H3_A+H | 3.71990e-09 | 0.999999 | 3.81506e-09 | 1.000000 |
| rad54         | 3.08234e-09 | 0.999999 | 3.16119e-09 | 1.000000 |
| rad2          | 2.85315e-09 | 0.999999 | 2.92613e-09 | 1.000000 |
| rad70         | 2.04475e-09 | 0.999999 | 2.09705e-09 | 1.000000 |
| rad3          | 8.03993e-10 | 0.999999 | 8.24559e-10 | 1.000000 |
| rad10         | 7.26378e-10 | 0.999999 | 7.44958e-10 | 1.000000 |
| rad58         | 7.08485e-10 | 0.999999 | 7.26607e-10 | 1.000000 |
| rad34         | 4.67143e-10 | 0.999999 | 4.79092e-10 | 1.000000 |
| rad4          | 4.64018e-10 | 0.999999 | 4.75887e-10 | 1.000000 |
| rad1          | 3.48396e-10 | 0.999999 | 3.57308e-10 | 1.000000 |
| rad64         | 2.21320e-10 | 0.999999 | 2.26982e-10 | 1.000000 |
| rad55         | 2.05226e-10 | 0.999999 | 2.10475e-10 | 1.000000 |
| rad72         | 1.27695e-10 | 0.999999 | 1.30962e-10 | 1.000000 |
| rad62         | 9.03545e-11 | 0.999999 | 9.26658e-11 | 1.000000 |
| PAH8+H        | 6.08632e-11 | 0.999999 | 6.24200e-11 | 1.000000 |
| rad53         | 3.80800e-11 | 0.999999 | 3.90541e-11 | 1.000000 |
| rad61         | 3.76907e-11 | 0.999999 | 3.86548e-11 | 1.000000 |
| rad56         | 3.25539e-11 | 0.999999 | 3.33866e-11 | 1.000000 |
| rad68syn      | 2.49206e-11 | 0.999999 | 2.55581e-11 | 1.000000 |
| rad43         | 2.02709e-11 | 0.999999 | 2.07894e-11 | 1.000000 |
| rad33         | 1.76505e-11 | 0.999999 | 1.81020e-11 | 1.000000 |
| rad68anti     | 1.62930e-11 | 0.999999 | 1.67098e-11 | 1.000000 |
| rad40syn      | 8.03098e-12 | 0.999999 | 8.23641e-12 | 1.000000 |
| rad42         | 6.34762e-12 | 0.999999 | 6.50999e-12 | 1.000000 |
| rad40anti     | 4.57529e-12 | 0.999999 | 4.69233e-12 | 1.000000 |
| rad47         | 2.42458e-12 | 0.999999 | 2.48660e-12 | 1.000000 |
| rad41         | 1.24320e-12 | 0.999999 | 1.27500e-12 | 1.000000 |
| rad14         | 5.22881e-13 | 0.999999 | 5.36256e-13 | 1.000000 |

|       |             |          |             |         |
|-------|-------------|----------|-------------|---------|
| rad12 | 1.94605e-13 | 0.999999 | 1.99583e-13 | 1.00000 |
| rad5  | 6.60940e-14 | 0.999999 | 6.77847e-14 | 1.00000 |
| rad27 | 4.47433e-14 | 0.999999 | 4.58878e-14 | 1.00000 |
| rad31 | 2.36872e-15 | 0.999999 | 2.42931e-15 | 1.00000 |
| rad8  | 1.91321e-21 | 0.999999 | 1.96215e-21 | 1.00000 |

100000.000 Pa, 600.000000 K

| Rate constant | True (fraction)     | Effective (fraction) |
|---------------|---------------------|----------------------|
| Total         | 1.36947e-17 (1.00 ) | 1.26556e-17 (1.00 )  |

| species       | PYtrue      | Cumul    | PYeffective | Cumul    |
|---------------|-------------|----------|-------------|----------|
| rad22         | 0.330404    | 0.330404 | 0.357531    | 0.357531 |
| Indene+H      | 0.266095    | 0.596499 | 0.287942    | 0.645473 |
| rad20         | 0.115572    | 0.712071 | 0.125061    | 0.770534 |
| rad18         | 0.0867063   | 0.798777 | 0.0938251   | 0.864359 |
| Benzyl+C2H2   | 0.0758740   | 0.874651 | 0.00000     | 0.864359 |
| rad21         | 0.0730212   | 0.947673 | 0.0790164   | 0.943375 |
| rad23         | 0.0203036   | 0.967976 | 0.0219705   | 0.965346 |
| rad45         | 0.0195511   | 0.987527 | 0.0211563   | 0.986502 |
| rad11         | 0.00649779  | 0.994025 | 0.00703128  | 0.993534 |
| rad6          | 0.00245678  | 0.996482 | 0.00265849  | 0.996192 |
| rad36         | 0.00115454  | 0.997636 | 0.00124933  | 0.997441 |
| PAH9+H        | 0.000889309 | 0.998526 | 0.000962324 | 0.998404 |
| rad38         | 0.000422479 | 0.998948 | 0.000457166 | 0.998861 |
| Ph+Allene     | 0.000172349 | 0.999120 | 0.000186499 | 0.999047 |
| rad46         | 0.000136985 | 0.999257 | 0.000148232 | 0.999196 |
| rad35         | 0.000133025 | 0.999390 | 0.000143946 | 0.999340 |
| PhCH2CCH+H    | 0.000131354 | 0.999522 | 0.000142138 | 0.999482 |
| PAH7+H        | 0.000123350 | 0.999645 | 0.000133477 | 0.999615 |
| rad50         | 0.000114727 | 0.999760 | 0.000124146 | 0.999739 |
| PhCHCCH2+H    | 9.24311e-05 | 0.999852 | 0.000100020 | 0.999839 |
| rad39         | 4.99518e-05 | 0.999902 | 5.40530e-05 | 0.999893 |
| rad51         | 3.20089e-05 | 0.999934 | 3.46370e-05 | 0.999928 |
| PhCCH+CH3     | 1.01451e-05 | 0.999944 | 1.09780e-05 | 0.999939 |
| rad52         | 9.73059e-06 | 0.999954 | 1.05295e-05 | 0.999950 |
| rad30         | 9.27822e-06 | 0.999963 | 1.00400e-05 | 0.999960 |
| rad24         | 6.33134e-06 | 0.999970 | 6.85117e-06 | 0.999966 |
| rad9          | 5.51715e-06 | 0.999975 | 5.97013e-06 | 0.999972 |
| rad19anti     | 4.89757e-06 | 0.999980 | 5.29968e-06 | 0.999978 |
| Ph+MeAc       | 3.84506e-06 | 0.999984 | 4.16075e-06 | 0.999982 |
| PAH3+H        | 3.70941e-06 | 0.999988 | 4.01396e-06 | 0.999986 |
| PAH10+CH3     | 2.19946e-06 | 0.999990 | 2.38004e-06 | 0.999988 |
| rad7          | 1.64889e-06 | 0.999992 | 1.78427e-06 | 0.999990 |
| PAH1+H        | 1.08127e-06 | 0.999993 | 1.17004e-06 | 0.999991 |
| PhCCCH3+H     | 1.05704e-06 | 0.999994 | 1.14383e-06 | 0.999992 |
| rad37         | 1.02177e-06 | 0.999995 | 1.10566e-06 | 0.999993 |
| rad71         | 9.34792e-07 | 0.999996 | 1.01154e-06 | 0.999994 |
| rad65         | 8.49619e-07 | 0.999997 | 9.19376e-07 | 0.999995 |
| rad73         | 6.97380e-07 | 0.999997 | 7.54637e-07 | 0.999996 |
| rad28         | 4.84753e-07 | 0.999998 | 5.24553e-07 | 0.999997 |
| rad59         | 3.54070e-07 | 0.999998 | 3.83141e-07 | 0.999997 |
| rad60syn      | 3.05748e-07 | 0.999998 | 3.30851e-07 | 0.999997 |
| rad67         | 2.85031e-07 | 0.999999 | 3.08433e-07 | 0.999998 |
| rad19syn      | 2.46623e-07 | 0.999999 | 2.66871e-07 | 0.999998 |
| rad60anti     | 1.88320e-07 | 0.999999 | 2.03781e-07 | 0.999998 |
| PhcycC3H3_A+H | 1.56252e-07 | 0.999999 | 1.69081e-07 | 0.999998 |
| rad25         | 1.48105e-07 | 0.999999 | 1.60265e-07 | 0.999998 |
| rad70         | 1.35981e-07 | 1.000000 | 1.47145e-07 | 0.999999 |
| rad54         | 1.00411e-07 | 1.000000 | 1.08655e-07 | 0.999999 |
| rad15         | 7.20269e-08 | 1.000000 | 7.79406e-08 | 0.999999 |
| rad58         | 3.92265e-08 | 1.000000 | 4.24471e-08 | 0.999999 |
| rad13         | 3.84197e-08 | 1.000000 | 4.15741e-08 | 0.999999 |
| rad34         | 3.67165e-08 | 1.000000 | 3.97310e-08 | 0.999999 |
| rad72         | 2.89432e-08 | 1.000000 | 3.13196e-08 | 0.999999 |
| rad64         | 2.01353e-08 | 1.000000 | 2.17885e-08 | 0.999999 |
| rad26         | 1.63360e-08 | 1.000000 | 1.76772e-08 | 0.999999 |
| rad2          | 1.12347e-08 | 1.000000 | 1.21571e-08 | 0.999999 |
| PAH8+H        | 1.07159e-08 | 1.000000 | 1.15957e-08 | 0.999999 |
| rad62         | 7.49502e-09 | 1.000000 | 8.11038e-09 | 0.999999 |
| rad55         | 7.49004e-09 | 1.000000 | 8.10500e-09 | 0.999999 |
| rad3          | 6.32286e-09 | 1.000000 | 6.84199e-09 | 0.999999 |
| rad61         | 4.44768e-09 | 1.000000 | 4.81285e-09 | 0.999999 |
| rad4          | 3.92132e-09 | 1.000000 | 4.24327e-09 | 0.999999 |
| rad68syn      | 3.17758e-09 | 1.000000 | 3.43847e-09 | 0.999999 |
| rad56         | 2.30151e-09 | 1.000000 | 2.49047e-09 | 0.999999 |
| rad53         | 2.16357e-09 | 1.000000 | 2.34121e-09 | 0.999999 |
| rad68anti     | 2.06500e-09 | 1.000000 | 2.23454e-09 | 0.999999 |

|           |             |          |             |          |
|-----------|-------------|----------|-------------|----------|
| rad10     | 1.83387e-09 | 1.000000 | 1.98444e-09 | 0.999999 |
| rad1      | 1.68960e-09 | 1.000000 | 1.82832e-09 | 0.999999 |
| rad47     | 1.59154e-09 | 1.000000 | 1.72222e-09 | 0.999999 |
| rad43     | 1.57977e-09 | 1.000000 | 1.70948e-09 | 0.999999 |
| rad40syn  | 1.24750e-09 | 1.000000 | 1.34993e-09 | 0.999999 |
| rad40anti | 7.49507e-10 | 1.000000 | 8.11045e-10 | 0.999999 |
| rad42     | 7.18037e-10 | 1.000000 | 7.76991e-10 | 0.999999 |
| rad33     | 1.41356e-10 | 1.000000 | 1.52962e-10 | 0.999999 |
| rad41     | 1.40050e-10 | 1.000000 | 1.51548e-10 | 0.999999 |
| rad12     | 4.84052e-12 | 1.000000 | 5.23794e-12 | 0.999999 |
| rad14     | 3.26604e-12 | 1.000000 | 3.53419e-12 | 0.999999 |
| rad31     | 3.26459e-13 | 1.000000 | 3.53263e-13 | 0.999999 |
| rad5      | 1.83033e-13 | 1.000000 | 1.98061e-13 | 0.999999 |
| rad27     | 1.20861e-13 | 1.000000 | 1.30784e-13 | 0.999999 |
| rad8      | 1.15534e-18 | 1.000000 | 1.25019e-18 | 0.999999 |

100000.000 Pa, 700.000000 K

| Rate constant | True (fraction)     | Effective (fraction) |
|---------------|---------------------|----------------------|
| Total         | 8.02260e-17 (1.00 ) | 6.74064e-17 (1.00 )  |

| species       | PYtrue      | Cumul    | PYeffective | Cumul    |
|---------------|-------------|----------|-------------|----------|
| Indene+H      | 0.390152    | 0.390152 | 0.464352    | 0.464352 |
| rad22         | 0.263945    | 0.654097 | 0.314142    | 0.778494 |
| Benzyl+C2H2   | 0.159793    | 0.813890 | 0.000000    | 0.778494 |
| rad20         | 0.0546332   | 0.868523 | 0.0650235   | 0.843518 |
| rad18         | 0.0416423   | 0.910165 | 0.0495619   | 0.893079 |
| rad21         | 0.0372072   | 0.947373 | 0.0442834   | 0.937363 |
| rad23         | 0.0219179   | 0.969291 | 0.0260863   | 0.963449 |
| rad45         | 0.00847898  | 0.977770 | 0.0100915   | 0.973541 |
| rad6          | 0.00707674  | 0.984846 | 0.00842261  | 0.981963 |
| rad11         | 0.00689524  | 0.991742 | 0.00820660  | 0.990170 |
| PAH9+H        | 0.00269280  | 0.994434 | 0.00320493  | 0.993375 |
| rad38         | 0.00130403  | 0.995738 | 0.00155203  | 0.994927 |
| rad36         | 0.000615543 | 0.996354 | 0.000732609 | 0.995659 |
| Ph+Allene     | 0.000534590 | 0.996889 | 0.000636259 | 0.996296 |
| PAH7+H        | 0.000472094 | 0.997361 | 0.000561879 | 0.996858 |
| rad50         | 0.000464694 | 0.997825 | 0.000553071 | 0.997411 |
| rad46         | 0.000457189 | 0.998283 | 0.000544138 | 0.997955 |
| PhCH2CCH+H    | 0.000439101 | 0.998722 | 0.000522610 | 0.998477 |
| rad35         | 0.000383991 | 0.999106 | 0.000457019 | 0.998934 |
| PhCHCCH2+H    | 0.000314917 | 0.999421 | 0.000374808 | 0.999309 |
| rad39         | 0.000211331 | 0.999632 | 0.000251522 | 0.999561 |
| rad51         | 0.000144369 | 0.999776 | 0.000171825 | 0.999733 |
| rad52         | 4.15664e-05 | 0.999818 | 4.94716e-05 | 0.999782 |
| rad30         | 2.73162e-05 | 0.999845 | 3.25113e-05 | 0.999814 |
| PhCCH+CH3     | 2.61280e-05 | 0.999871 | 3.10970e-05 | 0.999846 |
| rad19anti     | 1.80557e-05 | 0.999889 | 2.14896e-05 | 0.999867 |
| rad24         | 1.58746e-05 | 0.999905 | 1.88937e-05 | 0.999886 |
| rad9          | 1.53744e-05 | 0.999921 | 1.82983e-05 | 0.999904 |
| PAH3+H        | 1.50644e-05 | 0.999936 | 1.79294e-05 | 0.999922 |
| Ph+MeAc       | 1.25536e-05 | 0.999948 | 1.49410e-05 | 0.999937 |
| PAH10+CH3     | 1.04130e-05 | 0.999959 | 1.23934e-05 | 0.999950 |
| rad7          | 7.26908e-06 | 0.999966 | 8.65154e-06 | 0.999958 |
| rad71         | 5.35514e-06 | 0.999971 | 6.37359e-06 | 0.999965 |
| PAH1+H        | 5.33815e-06 | 0.999977 | 6.35337e-06 | 0.999971 |
| rad37         | 4.12544e-06 | 0.999981 | 4.91002e-06 | 0.999976 |
| rad73         | 3.82173e-06 | 0.999984 | 4.54856e-06 | 0.999980 |
| rad65         | 3.77406e-06 | 0.999988 | 4.49182e-06 | 0.999985 |
| PhCCCH3+H     | 3.63954e-06 | 0.999992 | 4.33171e-06 | 0.999989 |
| rad59         | 1.39389e-06 | 0.999993 | 1.65899e-06 | 0.999991 |
| rad67         | 1.29899e-06 | 0.999995 | 1.54604e-06 | 0.999992 |
| rad60syn      | 1.13294e-06 | 0.999996 | 1.34840e-06 | 0.999994 |
| rad19syn      | 8.89837e-07 | 0.999997 | 1.05907e-06 | 0.999995 |
| rad60anti     | 7.01803e-07 | 0.999997 | 8.35273e-07 | 0.999996 |
| rad70         | 6.58997e-07 | 0.999998 | 7.84327e-07 | 0.999996 |
| PhcycC3H3_A+H | 6.24114e-07 | 0.999999 | 7.42809e-07 | 0.999997 |
| rad28         | 5.59690e-07 | 0.999999 | 6.66133e-07 | 0.999998 |
| rad54         | 3.63886e-07 | 1.000000 | 4.33090e-07 | 0.999998 |
| rad25         | 2.76570e-07 | 1.000000 | 3.29169e-07 | 0.999999 |
| rad34         | 1.85042e-07 | 1.000000 | 2.20234e-07 | 0.999999 |
| rad72         | 1.79885e-07 | 1.000000 | 2.14096e-07 | 0.999999 |
| rad58         | 1.78433e-07 | 1.000000 | 2.12368e-07 | 0.999999 |
| rad13         | 1.43305e-07 | 1.000000 | 1.70559e-07 | 0.999999 |
| rad64         | 1.03262e-07 | 1.000000 | 1.22900e-07 | 1.000000 |
| rad15         | 8.93128e-08 | 1.000000 | 1.06299e-07 | 1.000000 |
| PAH8+H        | 6.38527e-08 | 1.000000 | 7.59963e-08 | 1.000000 |
| rad47         | 6.30467e-08 | 1.000000 | 7.50371e-08 | 1.000000 |

|           |             |         |             |          |
|-----------|-------------|---------|-------------|----------|
| rad62     | 3.86917e-08 | 1.00000 | 4.60502e-08 | 1.000000 |
| rad55     | 2.83405e-08 | 1.00000 | 3.37304e-08 | 1.000000 |
| rad61     | 2.40390e-08 | 1.00000 | 2.86108e-08 | 1.000000 |
| rad2      | 2.28638e-08 | 1.00000 | 2.72121e-08 | 1.000000 |
| rad3      | 2.12314e-08 | 1.00000 | 2.52693e-08 | 1.000000 |
| rad68syn  | 1.77576e-08 | 1.00000 | 2.11348e-08 | 1.000000 |
| rad4      | 1.43078e-08 | 1.00000 | 1.70289e-08 | 1.000000 |
| rad26     | 1.29201e-08 | 1.00000 | 1.53773e-08 | 1.000000 |
| rad68anti | 1.15258e-08 | 1.00000 | 1.37178e-08 | 1.000000 |
| rad56     | 1.07992e-08 | 1.00000 | 1.28530e-08 | 1.000000 |
| rad53     | 9.52240e-09 | 1.00000 | 1.13334e-08 | 1.000000 |
| rad43     | 8.01433e-09 | 1.00000 | 9.53852e-09 | 1.000000 |
| rad40syn  | 7.25331e-09 | 1.00000 | 8.63276e-09 | 1.000000 |
| rad40anti | 4.40343e-09 | 1.00000 | 5.24089e-09 | 1.000000 |
| rad1      | 4.11585e-09 | 1.00000 | 4.89861e-09 | 1.000000 |
| rad42     | 3.94818e-09 | 1.00000 | 4.69905e-09 | 1.000000 |
| rad10     | 2.08330e-09 | 1.00000 | 2.47950e-09 | 1.000000 |
| rad33     | 9.09406e-10 | 1.00000 | 1.08236e-09 | 1.000000 |
| rad41     | 7.66876e-10 | 1.00000 | 9.12723e-10 | 1.000000 |
| rad12     | 1.02009e-10 | 1.00000 | 1.21410e-10 | 1.000000 |
| rad14     | 1.21362e-11 | 1.00000 | 1.44443e-11 | 1.000000 |
| rad31     | 4.47715e-12 | 1.00000 | 5.32862e-12 | 1.000000 |
| rad5      | 2.84211e-13 | 1.00000 | 3.38263e-13 | 1.000000 |
| rad27     | 2.07560e-13 | 1.00000 | 2.47034e-13 | 1.000000 |
| rad8      | 1.33505e-15 | 1.00000 | 1.58895e-15 | 1.000000 |

100000.000 Pa, 800.000000 K

| Rate constant | True (fraction)     | Effective (fraction) |
|---------------|---------------------|----------------------|
| Total         | 3.12228e-16 (1.00 ) | 2.29666e-16 (1.00 )  |

| species       | PYtrue      | Cumul    | PYeffective | Cumul    |
|---------------|-------------|----------|-------------|----------|
| Indene+H      | 0.441112    | 0.441112 | 0.599685    | 0.599685 |
| Benzyl+C2H2   | 0.264427    | 0.705539 | 0.000000    | 0.599685 |
| rad22         | 0.160997    | 0.866536 | 0.218873    | 0.818558 |
| rad20         | 0.0348096   | 0.901346 | 0.0473231   | 0.865881 |
| rad21         | 0.0244637   | 0.925809 | 0.0332580   | 0.899139 |
| rad23         | 0.0228200   | 0.948629 | 0.0310235   | 0.930163 |
| rad18         | 0.0173253   | 0.965955 | 0.0235534   | 0.953716 |
| rad6          | 0.0127021   | 0.978657 | 0.0172684   | 0.970984 |
| rad11         | 0.00506427  | 0.983721 | 0.00688480  | 0.977869 |
| rad45         | 0.00466209  | 0.988383 | 0.00633805  | 0.984207 |
| PAH9+H        | 0.00378953  | 0.992173 | 0.00515180  | 0.989359 |
| rad38         | 0.00184850  | 0.994021 | 0.00251301  | 0.991872 |
| Ph+Allene     | 0.000800311 | 0.994821 | 0.00108801  | 0.992960 |
| rad50         | 0.000716892 | 0.995538 | 0.000974604 | 0.993935 |
| PAH7+H        | 0.000715590 | 0.996254 | 0.000972834 | 0.994908 |
| PhCH2CCH+H    | 0.000673816 | 0.996928 | 0.000916043 | 0.995824 |
| rad46         | 0.000664556 | 0.997592 | 0.000903455 | 0.996727 |
| rad35         | 0.000532133 | 0.998124 | 0.000723426 | 0.997450 |
| PhCHCCH2+H    | 0.000519979 | 0.998644 | 0.000706903 | 0.998157 |
| rad36         | 0.000408421 | 0.999053 | 0.000555242 | 0.998713 |
| rad39         | 0.000330601 | 0.999383 | 0.000449447 | 0.999162 |
| rad51         | 0.000229861 | 0.999613 | 0.000312493 | 0.999475 |
| rad52         | 6.50959e-05 | 0.999678 | 8.84969e-05 | 0.999563 |
| rad30         | 5.17025e-05 | 0.999730 | 7.02888e-05 | 0.999633 |
| PhCCH+CH3     | 3.84704e-05 | 0.999769 | 5.22999e-05 | 0.999686 |
| rad24         | 3.51442e-05 | 0.999804 | 4.77781e-05 | 0.999733 |
| rad9          | 3.21564e-05 | 0.999836 | 4.37162e-05 | 0.999777 |
| rad19anti     | 2.90478e-05 | 0.999865 | 3.94900e-05 | 0.999817 |
| PAH3+H        | 2.36527e-05 | 0.999889 | 3.21555e-05 | 0.999849 |
| Ph+MeAc       | 1.88504e-05 | 0.999907 | 2.56269e-05 | 0.999874 |
| rad7          | 1.75991e-05 | 0.999925 | 2.39258e-05 | 0.999898 |
| PAH10+CH3     | 1.68093e-05 | 0.999942 | 2.28520e-05 | 0.999921 |
| rad71         | 9.18449e-06 | 0.999951 | 1.24862e-05 | 0.999934 |
| PAH1+H        | 8.74105e-06 | 0.999960 | 1.18833e-05 | 0.999946 |
| rad73         | 6.46178e-06 | 0.999966 | 8.78469e-06 | 0.999954 |
| rad37         | 6.33575e-06 | 0.999973 | 8.61336e-06 | 0.999963 |
| rad65         | 5.97789e-06 | 0.999978 | 8.12686e-06 | 0.999971 |
| PhCCCH3+H     | 5.53094e-06 | 0.999984 | 7.51923e-06 | 0.999979 |
| rad59         | 2.19155e-06 | 0.999986 | 2.97937e-06 | 0.999982 |
| rad67         | 2.13146e-06 | 0.999988 | 2.89769e-06 | 0.999984 |
| rad60syn      | 1.90683e-06 | 0.999990 | 2.59231e-06 | 0.999987 |
| rad28         | 1.77341e-06 | 0.999992 | 2.41092e-06 | 0.999989 |
| rad19syn      | 1.31897e-06 | 0.999993 | 1.79312e-06 | 0.999991 |
| rad60anti     | 1.16776e-06 | 0.999995 | 1.58755e-06 | 0.999993 |
| rad70         | 1.07553e-06 | 0.999996 | 1.46216e-06 | 0.999994 |
| PhcycC3H3_A+H | 9.53852e-07 | 0.999997 | 1.29675e-06 | 0.999996 |

|           |             |          |             |          |
|-----------|-------------|----------|-------------|----------|
| rad54     | 5.38798e-07 | 0.999997 | 7.32488e-07 | 0.999996 |
| rad13     | 4.60082e-07 | 0.999998 | 6.25474e-07 | 0.999997 |
| rad25     | 3.83527e-07 | 0.999998 | 5.21400e-07 | 0.999997 |
| rad72     | 3.16889e-07 | 0.999998 | 4.30805e-07 | 0.999998 |
| rad34     | 3.05499e-07 | 0.999999 | 4.15321e-07 | 0.999998 |
| rad58     | 2.85030e-07 | 0.999999 | 3.87494e-07 | 0.999999 |
| rad47     | 2.21977e-07 | 0.999999 | 3.01774e-07 | 0.999999 |
| rad64     | 1.71043e-07 | 0.999999 | 2.32530e-07 | 0.999999 |
| PAH8+H    | 1.11035e-07 | 0.999999 | 1.50951e-07 | 0.999999 |
| rad15     | 8.19360e-08 | 0.999999 | 1.11391e-07 | 0.999999 |
| rad62     | 6.45480e-08 | 0.999999 | 8.77520e-08 | 1.000000 |
| rad3      | 5.30289e-08 | 1.000000 | 7.20921e-08 | 1.000000 |
| rad2      | 5.02198e-08 | 1.000000 | 6.82730e-08 | 1.000000 |
| rad55     | 4.25433e-08 | 1.000000 | 5.78370e-08 | 1.000000 |
| rad61     | 4.04525e-08 | 1.000000 | 5.49946e-08 | 1.000000 |
| rad4      | 3.80736e-08 | 1.000000 | 5.17606e-08 | 1.000000 |
| rad68syn  | 3.02553e-08 | 1.000000 | 4.11316e-08 | 1.000000 |
| rad68anti | 1.96301e-08 | 1.000000 | 2.66868e-08 | 1.000000 |
| rad56     | 1.73693e-08 | 1.000000 | 2.36133e-08 | 1.000000 |
| rad26     | 1.52285e-08 | 1.000000 | 2.07029e-08 | 1.000000 |
| rad53     | 1.50072e-08 | 1.000000 | 2.04020e-08 | 1.000000 |
| rad43     | 1.33285e-08 | 1.000000 | 1.81199e-08 | 1.000000 |
| rad40syn  | 1.25141e-08 | 1.000000 | 1.70128e-08 | 1.000000 |
| rad1      | 1.04531e-08 | 1.000000 | 1.42108e-08 | 1.000000 |
| rad40anti | 7.62266e-09 | 1.000000 | 1.03629e-08 | 1.000000 |
| rad42     | 6.70812e-09 | 1.000000 | 9.11960e-09 | 1.000000 |
| rad33     | 6.31005e-09 | 1.000000 | 8.57842e-09 | 1.000000 |
| rad10     | 4.04383e-09 | 1.000000 | 5.49753e-09 | 1.000000 |
| rad12     | 1.85045e-09 | 1.000000 | 2.51566e-09 | 1.000000 |
| rad41     | 1.30287e-09 | 1.000000 | 1.77123e-09 | 1.000000 |
| rad14     | 4.78027e-11 | 1.000000 | 6.49871e-11 | 1.000000 |
| rad31     | 1.98256e-11 | 1.000000 | 2.69526e-11 | 1.000000 |
| rad8      | 1.16932e-12 | 1.000000 | 1.58967e-12 | 1.000000 |
| rad27     | 7.45483e-13 | 1.000000 | 1.01347e-12 | 1.000000 |
| rad5      | 6.46094e-13 | 1.000000 | 8.78355e-13 | 1.000000 |

100000.000 Pa, 900.000000 K

=====

| Rate constant | True (fraction)     | Effective (fraction) |
|---------------|---------------------|----------------------|
| Total         | 9.21769e-16 (1.00 ) | 5.76749e-16 (1.00 )  |

| species     | PYtrue      | Cumul    | PYeffective | Cumul    |
|-------------|-------------|----------|-------------|----------|
| Indene+H    | 0.436887    | 0.436887 | 0.698239    | 0.698239 |
| Benzyl+C2H2 | 0.374302    | 0.811189 | 0.000000    | 0.698239 |
| rad22       | 0.0808204   | 0.892009 | 0.129168    | 0.827407 |
| rad20       | 0.0264319   | 0.918441 | 0.0422439   | 0.869651 |
| rad23       | 0.0193069   | 0.937748 | 0.0308566   | 0.900508 |
| rad21       | 0.0178840   | 0.955632 | 0.0285825   | 0.929090 |
| rad6        | 0.0166511   | 0.972283 | 0.0266120   | 0.955702 |
| rad18       | 0.00747108  | 0.979754 | 0.0119404   | 0.967642 |
| PAH9+H      | 0.00414285  | 0.983897 | 0.00662116  | 0.974264 |
| rad45       | 0.00366319  | 0.987560 | 0.00585457  | 0.980118 |
| rad11       | 0.00313629  | 0.990697 | 0.00501247  | 0.985131 |
| rad38       | 0.00202601  | 0.992723 | 0.00323800  | 0.988369 |
| Ph+Allene   | 0.00110443  | 0.993827 | 0.00176512  | 0.990134 |
| PhCH2CCH+H  | 0.000925075 | 0.994752 | 0.00147847  | 0.991612 |
| rad50       | 0.000812059 | 0.995564 | 0.00129784  | 0.992910 |
| PAH7+H      | 0.000808660 | 0.996373 | 0.00129241  | 0.994202 |
| PhCHCCH2+H  | 0.000782234 | 0.997155 | 0.00125018  | 0.995453 |
| rad46       | 0.000735512 | 0.997891 | 0.00117551  | 0.996628 |
| rad35       | 0.000578744 | 0.998469 | 0.000924957 | 0.997553 |
| rad39       | 0.000377236 | 0.998847 | 0.000602904 | 0.998156 |
| rad36       | 0.000345901 | 0.999193 | 0.000552825 | 0.998709 |
| rad51       | 0.000263595 | 0.999456 | 0.000421282 | 0.999130 |
| rad30       | 8.12203e-05 | 0.999537 | 0.000129808 | 0.999260 |
| rad52       | 7.41580e-05 | 0.999612 | 0.000118520 | 0.999378 |
| PhCCH+CH3   | 6.96564e-05 | 0.999681 | 0.000111326 | 0.999490 |
| rad9        | 5.42104e-05 | 0.999735 | 8.66399e-05 | 0.999576 |
| rad24       | 4.52571e-05 | 0.999781 | 7.23306e-05 | 0.999649 |
| rad19anti   | 4.00974e-05 | 0.999821 | 6.40843e-05 | 0.999713 |
| rad7        | 2.99104e-05 | 0.999851 | 4.78032e-05 | 0.999761 |
| PAH3+H      | 2.86876e-05 | 0.999879 | 4.58490e-05 | 0.999806 |
| Ph+MeAc     | 2.59443e-05 | 0.999905 | 4.14646e-05 | 0.999848 |
| PAH10+CH3   | 1.94356e-05 | 0.999925 | 3.10622e-05 | 0.999879 |
| rad71       | 1.08624e-05 | 0.999936 | 1.73604e-05 | 0.999896 |
| PAH1+H      | 1.01444e-05 | 0.999946 | 1.62129e-05 | 0.999913 |
| rad73       | 7.59691e-06 | 0.999953 | 1.21415e-05 | 0.999925 |
| PhCCCH3+H   | 7.26161e-06 | 0.999961 | 1.16056e-05 | 0.999936 |

|               |             |          |             |          |
|---------------|-------------|----------|-------------|----------|
| rad37         | 7.18913e-06 | 0.999968 | 1.14898e-05 | 0.999948 |
| rad65         | 6.84099e-06 | 0.999975 | 1.09334e-05 | 0.999959 |
| rad28         | 6.34524e-06 | 0.999981 | 1.01411e-05 | 0.999969 |
| rad67         | 2.80948e-06 | 0.999984 | 4.49015e-06 | 0.999973 |
| rad60syn      | 2.73506e-06 | 0.999987 | 4.37122e-06 | 0.999978 |
| rad59         | 2.72985e-06 | 0.999989 | 4.36288e-06 | 0.999982 |
| rad60anti     | 1.64683e-06 | 0.999991 | 2.63198e-06 | 0.999985 |
| rad13         | 1.57000e-06 | 0.999992 | 2.50919e-06 | 0.999987 |
| rad19syn      | 1.53820e-06 | 0.999994 | 2.45837e-06 | 0.999990 |
| rad70         | 1.25316e-06 | 0.999995 | 2.00282e-06 | 0.999992 |
| PhcycC3H3_A+H | 1.09666e-06 | 0.999996 | 1.75270e-06 | 0.999993 |
| rad54         | 6.23668e-07 | 0.999997 | 9.96756e-07 | 0.999994 |
| rad25         | 5.03740e-07 | 0.999997 | 8.05085e-07 | 0.999995 |
| rad72         | 3.79014e-07 | 0.999998 | 6.05746e-07 | 0.999996 |
| rad34         | 3.56736e-07 | 0.999998 | 5.70141e-07 | 0.999996 |
| rad58         | 3.30635e-07 | 0.999999 | 5.28426e-07 | 0.999997 |
| rad47         | 3.07323e-07 | 0.999999 | 4.91169e-07 | 0.999997 |
| rad64         | 1.99373e-07 | 0.999999 | 3.18641e-07 | 0.999998 |
| PAH8+H        | 1.32086e-07 | 0.999999 | 2.11103e-07 | 0.999998 |
| rad3          | 1.28671e-07 | 0.999999 | 2.05644e-07 | 0.999998 |
| rad2          | 1.23774e-07 | 0.999999 | 1.97817e-07 | 0.999998 |
| rad4          | 9.78468e-08 | 1.000000 | 1.56380e-07 | 0.999999 |
| rad62         | 7.63229e-08 | 1.000000 | 1.21980e-07 | 0.999999 |
| rad15         | 7.35342e-08 | 1.000000 | 1.17523e-07 | 0.999999 |
| rad55         | 4.89687e-08 | 1.000000 | 7.82626e-08 | 0.999999 |
| rad61         | 4.75450e-08 | 1.000000 | 7.59871e-08 | 0.999999 |
| rad33         | 4.44126e-08 | 1.000000 | 7.09809e-08 | 0.999999 |
| rad68syn      | 3.56969e-08 | 1.000000 | 5.70514e-08 | 0.999999 |
| rad26         | 3.48236e-08 | 1.000000 | 5.56555e-08 | 0.999999 |
| rad1          | 2.91498e-08 | 1.000000 | 4.65877e-08 | 0.999999 |
| rad68anti     | 2.31573e-08 | 1.000000 | 3.70103e-08 | 0.999999 |
| rad56         | 2.01070e-08 | 1.000000 | 3.21354e-08 | 0.999999 |
| rad12         | 1.90679e-08 | 1.000000 | 3.04746e-08 | 0.999999 |
| rad53         | 1.72861e-08 | 1.000000 | 2.76269e-08 | 0.999999 |
| rad43         | 1.60283e-08 | 1.000000 | 2.56166e-08 | 0.999999 |
| rad40syn      | 1.48415e-08 | 1.000000 | 2.37200e-08 | 0.999999 |
| rad10         | 1.09809e-08 | 1.000000 | 1.75498e-08 | 0.999999 |
| rad40anti     | 9.05394e-09 | 1.000000 | 1.44701e-08 | 0.999999 |
| rad42         | 7.95945e-09 | 1.000000 | 1.27209e-08 | 0.999999 |
| rad41         | 1.57056e-09 | 1.000000 | 2.51010e-09 | 0.999999 |
| rad14         | 2.39303e-10 | 1.000000 | 3.82458e-10 | 0.999999 |
| rad8          | 2.28916e-10 | 1.000000 | 3.65856e-10 | 0.999999 |
| rad31         | 6.17873e-11 | 1.000000 | 9.87495e-11 | 0.999999 |
| rad27         | 5.53598e-12 | 1.000000 | 8.84769e-12 | 0.999999 |
| rad5          | 1.62022e-12 | 1.000000 | 2.58946e-12 | 0.999999 |

100000.000 Pa, 1000.00000 K

=====

| Rate constant | True (fraction)     | Effective (fraction) |
|---------------|---------------------|----------------------|
| Total         | 2.23691e-15 (1.00 ) | 1.16731e-15 (1.00 )  |

| species     | PYtrue      | Cumul    | PYeffective | Cumul    |
|-------------|-------------|----------|-------------|----------|
| Benzyl+C2H2 | 0.478163    | 0.478163 | 0.00000     | 0.00000  |
| Indene+H    | 0.398740    | 0.876903 | 0.764108    | 0.764108 |
| rad22       | 0.0363436   | 0.913247 | 0.0696455   | 0.833754 |
| rad20       | 0.0192987   | 0.932545 | 0.0369822   | 0.870736 |
| rad6        | 0.0173328   | 0.949878 | 0.0332149   | 0.903951 |
| rad23       | 0.0133895   | 0.963268 | 0.0256583   | 0.929609 |
| rad21       | 0.0118942   | 0.975162 | 0.0227929   | 0.952402 |
| PAH9+H      | 0.00406238  | 0.979224 | 0.00778477  | 0.960187 |
| rad18       | 0.00403737  | 0.983262 | 0.00773683  | 0.967923 |
| rad45       | 0.00320699  | 0.986469 | 0.00614558  | 0.974069 |
| rad11       | 0.00216755  | 0.988636 | 0.00415369  | 0.978223 |
| rad38       | 0.00198655  | 0.990623 | 0.00380684  | 0.982030 |
| Ph+Allene   | 0.00190970  | 0.992532 | 0.00365958  | 0.985689 |
| PhCH2CCH+H  | 0.00153202  | 0.994064 | 0.00293581  | 0.988625 |
| PhCHCCH2+H  | 0.00129730  | 0.995362 | 0.00248603  | 0.991111 |
| PAH7+H      | 0.000821427 | 0.996183 | 0.00157411  | 0.992685 |
| rad50       | 0.000805364 | 0.996988 | 0.00154332  | 0.994228 |
| rad46       | 0.000723549 | 0.997712 | 0.00138654  | 0.995615 |
| rad35       | 0.000567626 | 0.998280 | 0.00108775  | 0.996703 |
| rad39       | 0.000378458 | 0.998658 | 0.000725242 | 0.997428 |
| rad36       | 0.000304342 | 0.998962 | 0.000583212 | 0.998011 |
| rad51       | 0.000262581 | 0.999225 | 0.000503186 | 0.998514 |
| PhCCH+CH3   | 0.000172114 | 0.999397 | 0.000329824 | 0.998844 |
| rad30       | 0.000115122 | 0.999512 | 0.000220608 | 0.999065 |
| rad9        | 7.57440e-05 | 0.999588 | 0.000145149 | 0.999210 |
| rad52       | 7.36953e-05 | 0.999662 | 0.000141223 | 0.999351 |

|               |             |          |             |          |
|---------------|-------------|----------|-------------|----------|
| rad19anti     | 6.00522e-05 | 0.999722 | 0.000115078 | 0.999466 |
| rad7          | 4.54845e-05 | 0.999767 | 8.71623e-05 | 0.999553 |
| Ph+MeAc       | 4.37747e-05 | 0.999811 | 8.38857e-05 | 0.999637 |
| rad24         | 3.82980e-05 | 0.999849 | 7.33907e-05 | 0.999711 |
| PAH3+H        | 3.52249e-05 | 0.999885 | 6.75017e-05 | 0.999778 |
| PAH10+CH3     | 1.96543e-05 | 0.999904 | 3.76637e-05 | 0.999816 |
| rad28         | 1.34349e-05 | 0.999918 | 2.57454e-05 | 0.999842 |
| rad71         | 1.09478e-05 | 0.999929 | 2.09794e-05 | 0.999863 |
| PhCCCH3+H     | 1.06512e-05 | 0.999939 | 2.04109e-05 | 0.999883 |
| PAH1+H        | 1.02052e-05 | 0.999949 | 1.95564e-05 | 0.999902 |
| rad73         | 7.63945e-06 | 0.999957 | 1.46395e-05 | 0.999917 |
| rad37         | 7.25505e-06 | 0.999964 | 1.39029e-05 | 0.999931 |
| rad65         | 6.81085e-06 | 0.999971 | 1.30517e-05 | 0.999944 |
| rad13         | 5.54111e-06 | 0.999977 | 1.06185e-05 | 0.999955 |
| rad67         | 4.02009e-06 | 0.999981 | 7.70373e-06 | 0.999962 |
| rad60syn      | 4.01981e-06 | 0.999985 | 7.70319e-06 | 0.999970 |
| rad59         | 3.51626e-06 | 0.999988 | 6.73824e-06 | 0.999977 |
| rad60anti     | 2.39481e-06 | 0.999991 | 4.58919e-06 | 0.999981 |
| rad19syn      | 2.08761e-06 | 0.999993 | 4.00051e-06 | 0.999985 |
| PhcycC3H3_A+H | 1.31375e-06 | 0.999994 | 2.51755e-06 | 0.999988 |
| rad70         | 1.31123e-06 | 0.999995 | 2.51271e-06 | 0.999990 |
| rad54         | 8.28283e-07 | 0.999996 | 1.58725e-06 | 0.999992 |
| rad25         | 6.86681e-07 | 0.999997 | 1.31589e-06 | 0.999993 |
| rad72         | 3.83626e-07 | 0.999997 | 7.35145e-07 | 0.999994 |
| rad34         | 3.69313e-07 | 0.999998 | 7.07717e-07 | 0.999995 |
| rad58         | 3.58295e-07 | 0.999998 | 6.86604e-07 | 0.999995 |
| rad47         | 3.10811e-07 | 0.999998 | 5.95609e-07 | 0.999996 |
| rad2          | 2.59564e-07 | 0.999999 | 4.97404e-07 | 0.999997 |
| rad3          | 2.48940e-07 | 0.999999 | 4.77046e-07 | 0.999997 |
| rad33         | 2.27543e-07 | 0.999999 | 4.36041e-07 | 0.999997 |
| rad64         | 2.00566e-07 | 0.999999 | 3.84345e-07 | 0.999998 |
| rad4          | 1.94689e-07 | 0.999999 | 3.73084e-07 | 0.999998 |
| PAH8+H        | 1.34777e-07 | 1.000000 | 2.58274e-07 | 0.999999 |
| rad12         | 1.02636e-07 | 1.000000 | 1.96683e-07 | 0.999999 |
| rad15         | 8.76635e-08 | 1.000000 | 1.67990e-07 | 0.999999 |
| rad62         | 8.03125e-08 | 1.000000 | 1.53903e-07 | 0.999999 |
| rad26         | 7.40741e-08 | 1.000000 | 1.41949e-07 | 0.999999 |
| rad1          | 6.55723e-08 | 1.000000 | 1.25657e-07 | 0.999999 |
| rad55         | 6.17359e-08 | 1.000000 | 1.18305e-07 | 0.999999 |
| rad61         | 4.82736e-08 | 1.000000 | 9.25071e-08 | 0.999999 |
| rad68syn      | 3.64718e-08 | 1.000000 | 6.98911e-08 | 1.000000 |
| rad10         | 2.82317e-08 | 1.000000 | 5.41005e-08 | 1.000000 |
| rad68anti     | 2.36615e-08 | 1.000000 | 4.53427e-08 | 1.000000 |
| rad56         | 2.18883e-08 | 1.000000 | 4.19447e-08 | 1.000000 |
| rad53         | 1.93610e-08 | 1.000000 | 3.71016e-08 | 1.000000 |
| rad43         | 1.77729e-08 | 1.000000 | 3.40584e-08 | 1.000000 |
| rad40syn      | 1.51561e-08 | 1.000000 | 2.90438e-08 | 1.000000 |
| rad40anti     | 9.24963e-09 | 1.000000 | 1.77251e-08 | 1.000000 |
| rad42         | 8.23736e-09 | 1.000000 | 1.57853e-08 | 1.000000 |
| rad8          | 7.36531e-09 | 1.000000 | 1.41142e-08 | 1.000000 |
| rad41         | 1.71849e-09 | 1.000000 | 3.29315e-09 | 1.000000 |
| rad14         | 1.19794e-09 | 1.000000 | 2.29562e-09 | 1.000000 |
| rad31         | 1.61399e-10 | 1.000000 | 3.09291e-10 | 1.000000 |
| rad27         | 4.98754e-11 | 1.000000 | 9.55765e-11 | 1.000000 |
| rad5          | 3.32099e-12 | 1.000000 | 6.36403e-12 | 1.000000 |

100000.000 Pa, 1100.00000 K

=====

| Rate constant | True (fraction)     | Effective (fraction) |
|---------------|---------------------|----------------------|
| Total         | 4.69847e-15 (1.00 ) | 2.02861e-15 (1.00 )  |

| species     | PYtrue      | Cumul    | PYeffective | Cumul    |
|-------------|-------------|----------|-------------|----------|
| Benzyl+C2H2 | 0.568241    | 0.568241 | 0.00000     | 0.00000  |
| Indene+H    | 0.348784    | 0.917025 | 0.807820    | 0.807820 |
| rad22       | 0.0155690   | 0.932594 | 0.0360593   | 0.843879 |
| rad6        | 0.0149219   | 0.947516 | 0.0345606   | 0.878440 |
| rad20       | 0.0116470   | 0.959163 | 0.0269756   | 0.905416 |
| rad23       | 0.00820379  | 0.967367 | 0.0190008   | 0.924416 |
| rad21       | 0.00656894  | 0.973936 | 0.0152144   | 0.939631 |
| PAH9+H      | 0.00375947  | 0.977695 | 0.00870734  | 0.948338 |
| Ph+Allene   | 0.00348630  | 0.981181 | 0.00807464  | 0.956413 |
| rad45       | 0.00278652  | 0.983968 | 0.00645388  | 0.962867 |
| PhCH2CCH+H  | 0.00274581  | 0.986714 | 0.00635959  | 0.969226 |
| rad18       | 0.00273618  | 0.989450 | 0.00633728  | 0.975563 |
| PhCHCCH2+H  | 0.00211211  | 0.991562 | 0.00489188  | 0.980455 |
| rad11       | 0.00183847  | 0.993400 | 0.00425808  | 0.984713 |
| rad38       | 0.00183478  | 0.995235 | 0.00424954  | 0.988963 |
| PAH7+H      | 0.000811221 | 0.996046 | 0.00187887  | 0.990842 |

|              |             |          |             |          |
|--------------|-------------|----------|-------------|----------|
| rad50        | 0.000745099 | 0.996792 | 0.00172573  | 0.992568 |
| rad46        | 0.000668515 | 0.997460 | 0.00154835  | 0.994116 |
| rad35        | 0.000527697 | 0.997988 | 0.00122220  | 0.995338 |
| rad39        | 0.000358485 | 0.998346 | 0.000830290 | 0.996168 |
| PhCCH+CH3    | 0.000355918 | 0.998702 | 0.000824344 | 0.996993 |
| rad36        | 0.000263546 | 0.998966 | 0.000610401 | 0.997603 |
| rad51        | 0.000243138 | 0.999209 | 0.000563132 | 0.998166 |
| rad30        | 0.000151439 | 0.999360 | 0.000350750 | 0.998517 |
| rad9         | 0.000107006 | 0.999467 | 0.000247838 | 0.998765 |
| rad19anti    | 9.40320e-05 | 0.999561 | 0.000218020 | 0.998983 |
| Ph+MeAc      | 7.57449e-05 | 0.999637 | 0.000175433 | 0.999158 |
| rad7         | 7.20888e-05 | 0.999709 | 0.000166965 | 0.999325 |
| rad52        | 6.82044e-05 | 0.999778 | 0.000157969 | 0.999483 |
| PAH3+H       | 4.99423e-05 | 0.999827 | 0.000115672 | 0.999599 |
| rad24        | 2.91810e-05 | 0.999857 | 6.75864e-05 | 0.999666 |
| PAH10+CH3    | 1.88646e-05 | 0.999875 | 4.36923e-05 | 0.999710 |
| rad28        | 1.78843e-05 | 0.999893 | 4.14220e-05 | 0.999752 |
| PhCCCH3+H    | 1.60916e-05 | 0.999909 | 3.72698e-05 | 0.999789 |
| rad13        | 1.54720e-05 | 0.999925 | 3.58348e-05 | 0.999825 |
| rad71        | 1.01668e-05 | 0.999935 | 2.35473e-05 | 0.999848 |
| PAH1+H       | 9.67287e-06 | 0.999945 | 2.24034e-05 | 0.999871 |
| rad73        | 7.09043e-06 | 0.999952 | 1.64222e-05 | 0.999887 |
| rad37        | 7.02625e-06 | 0.999959 | 1.62735e-05 | 0.999903 |
| rad65        | 6.31125e-06 | 0.999965 | 1.46175e-05 | 0.999918 |
| rad67        | 6.29016e-06 | 0.999971 | 1.45687e-05 | 0.999933 |
| rad60syn     | 6.06066e-06 | 0.999978 | 1.40371e-05 | 0.999947 |
| rad59        | 5.14091e-06 | 0.999983 | 1.19069e-05 | 0.999958 |
| rad19syn     | 3.68894e-06 | 0.999986 | 8.54397e-06 | 0.999967 |
| rad60anti    | 3.61400e-06 | 0.999990 | 8.37041e-06 | 0.999975 |
| PhycC3H3_A+H | 2.03895e-06 | 0.999992 | 4.72243e-06 | 0.999980 |
| rad54        | 1.44473e-06 | 0.999993 | 3.34614e-06 | 0.999983 |
| rad70        | 1.40662e-06 | 0.999995 | 3.25788e-06 | 0.999987 |
| rad25        | 8.63852e-07 | 0.999996 | 2.00077e-06 | 0.999989 |
| rad33        | 6.20479e-07 | 0.999996 | 1.43709e-06 | 0.999990 |
| rad58        | 4.51414e-07 | 0.999997 | 1.04552e-06 | 0.999991 |
| rad2         | 4.02911e-07 | 0.999997 | 9.33185e-07 | 0.999992 |
| rad34        | 3.87667e-07 | 0.999998 | 8.97878e-07 | 0.999993 |
| rad72        | 3.56638e-07 | 0.999998 | 8.26011e-07 | 0.999994 |
| rad3         | 3.50147e-07 | 0.999998 | 8.10979e-07 | 0.999995 |
| rad12        | 2.83171e-07 | 0.999999 | 6.55853e-07 | 0.999995 |
| rad47        | 2.77017e-07 | 0.999999 | 6.41600e-07 | 0.999996 |
| rad4         | 2.76588e-07 | 0.999999 | 6.40606e-07 | 0.999997 |
| rad64        | 1.89313e-07 | 0.999999 | 4.38470e-07 | 0.999997 |
| rad15        | 1.55752e-07 | 1.000000 | 3.60739e-07 | 0.999997 |
| PAH8+H       | 1.34337e-07 | 1.000000 | 3.11138e-07 | 0.999998 |
| rad26        | 1.11873e-07 | 1.000000 | 2.59110e-07 | 0.999998 |
| rad1         | 1.03895e-07 | 1.000000 | 2.40631e-07 | 0.999998 |
| rad55        | 1.02502e-07 | 1.000000 | 2.37406e-07 | 0.999998 |
| rad62        | 8.36510e-08 | 1.000000 | 1.93745e-07 | 0.999999 |
| rad10        | 6.71888e-08 | 1.000000 | 1.55616e-07 | 0.999999 |
| rad8         | 5.16237e-08 | 1.000000 | 1.19566e-07 | 0.999999 |
| rad61        | 4.61850e-08 | 1.000000 | 1.06969e-07 | 0.999999 |
| rad68syn     | 3.68405e-08 | 1.000000 | 8.53264e-08 | 0.999999 |
| rad56        | 2.94260e-08 | 1.000000 | 6.81536e-08 | 0.999999 |
| rad53        | 2.74644e-08 | 1.000000 | 6.36104e-08 | 0.999999 |
| rad68anti    | 2.39085e-08 | 1.000000 | 5.53747e-08 | 0.999999 |
| rad43        | 1.98133e-08 | 1.000000 | 4.58898e-08 | 0.999999 |
| rad40syn     | 1.51873e-08 | 1.000000 | 3.51754e-08 | 0.999999 |
| rad40anti    | 9.25655e-09 | 1.000000 | 2.14391e-08 | 0.999999 |
| rad42        | 8.23112e-09 | 1.000000 | 1.90641e-08 | 0.999999 |
| rad14        | 4.20491e-09 | 1.000000 | 9.73901e-09 | 0.999999 |
| rad41        | 1.87393e-09 | 1.000000 | 4.34023e-09 | 0.999999 |
| rad31        | 2.96272e-10 | 1.000000 | 6.86197e-10 | 0.999999 |
| rad27        | 2.62807e-10 | 1.000000 | 6.08689e-10 | 0.999999 |
| rad5         | 5.52588e-12 | 1.000000 | 1.27985e-11 | 0.999999 |

100000.000 Pa, 1200.00000 K

=====

| Rate constant | True (fraction)     | Effective (fraction) |
|---------------|---------------------|----------------------|
| Total         | 8.84330e-15 (1.00 ) | 3.18945e-15 (1.00 )  |

| species     | PYtrue     | Cumul    | PYeffective | Cumul    |
|-------------|------------|----------|-------------|----------|
| Benzyl+C2H2 | 0.639337   | 0.639337 | 0.00000     | 0.00000  |
| Indene+H    | 0.299634   | 0.938971 | 0.830786    | 0.830786 |
| rad6        | 0.0108602  | 0.949831 | 0.0301118   | 0.860898 |
| rad22       | 0.00713771 | 0.956969 | 0.0197905   | 0.880688 |
| rad20       | 0.00635682 | 0.963326 | 0.0176254   | 0.898314 |
| Ph+Allene   | 0.00538469 | 0.968710 | 0.0149300   | 0.913244 |



|               |             |          |             |          |
|---------------|-------------|----------|-------------|----------|
| rad23         | 0.00478397  | 0.973494 | 0.0132644   | 0.926508 |
| PhCH2CCH+H    | 0.00408190  | 0.977576 | 0.0113178   | 0.937826 |
| rad21         | 0.00347902  | 0.981055 | 0.00964619  | 0.947472 |
| PAH9+H        | 0.00336346  | 0.984419 | 0.00932577  | 0.956798 |
| PhCHCCH2+H    | 0.00290051  | 0.987319 | 0.00804217  | 0.964840 |
| rad45         | 0.00237751  | 0.989697 | 0.00659206  | 0.971432 |
| rad18         | 0.00208749  | 0.991784 | 0.00578791  | 0.977220 |
| rad11         | 0.00171749  | 0.993502 | 0.00476204  | 0.981982 |
| rad38         | 0.00163712  | 0.995139 | 0.00453918  | 0.986521 |
| PAH7+H        | 0.000793210 | 0.995932 | 0.00219931  | 0.988721 |
| rad50         | 0.000663893 | 0.996596 | 0.00184076  | 0.990561 |
| rad46         | 0.000596118 | 0.997192 | 0.00165284  | 0.992214 |
| PhCCH+CH3     | 0.000564306 | 0.997756 | 0.00156463  | 0.993779 |
| rad35         | 0.000475450 | 0.998232 | 0.00131827  | 0.995097 |
| rad39         | 0.000330695 | 0.998563 | 0.000916909 | 0.996014 |
| rad36         | 0.000224519 | 0.998787 | 0.000622518 | 0.996636 |
| rad51         | 0.000216602 | 0.999004 | 0.000600566 | 0.997237 |
| rad30         | 0.000186148 | 0.999190 | 0.000516127 | 0.997753 |
| rad9          | 0.000140500 | 0.999330 | 0.000389559 | 0.998143 |
| rad19anti     | 0.000125023 | 0.999455 | 0.000346648 | 0.998489 |
| rad7          | 0.000112909 | 0.999568 | 0.000313058 | 0.998802 |
| Ph+MeAc       | 0.000111262 | 0.999680 | 0.000308493 | 0.999111 |
| PAH3+H        | 6.94323e-05 | 0.999749 | 0.000192513 | 0.999303 |
| rad52         | 6.07634e-05 | 0.999810 | 0.000168477 | 0.999472 |
| rad13         | 2.62235e-05 | 0.999836 | 7.27091e-05 | 0.999545 |
| rad24         | 2.28069e-05 | 0.999859 | 6.32361e-05 | 0.999608 |
| PhCCCH3+H     | 2.11428e-05 | 0.999880 | 5.86219e-05 | 0.999666 |
| PAH10+CH3     | 1.75792e-05 | 0.999897 | 4.87413e-05 | 0.999715 |
| rad28         | 1.69895e-05 | 0.999914 | 4.71062e-05 | 0.999762 |
| rad71         | 9.06055e-06 | 0.999924 | 2.51219e-05 | 0.999787 |
| PAH1+H        | 8.93885e-06 | 0.999932 | 2.47845e-05 | 0.999812 |
| rad60syn      | 8.49574e-06 | 0.999941 | 2.35559e-05 | 0.999836 |
| rad67         | 8.45054e-06 | 0.999949 | 2.34305e-05 | 0.999859 |
| rad59         | 7.25566e-06 | 0.999957 | 2.01175e-05 | 0.999879 |
| rad37         | 6.63289e-06 | 0.999963 | 1.83908e-05 | 0.999898 |
| rad73         | 6.31854e-06 | 0.999970 | 1.75192e-05 | 0.999915 |
| rad19syn      | 6.22925e-06 | 0.999976 | 1.72717e-05 | 0.999933 |
| rad65         | 5.62921e-06 | 0.999981 | 1.56079e-05 | 0.999948 |
| rad60anti     | 5.08415e-06 | 0.999987 | 1.40967e-05 | 0.999962 |
| PhcycC3H3_A+H | 3.24256e-06 | 0.999990 | 8.99055e-06 | 0.999971 |
| rad54         | 2.40910e-06 | 0.999992 | 6.67964e-06 | 0.999978 |
| rad70         | 1.50069e-06 | 0.999994 | 4.16092e-06 | 0.999982 |
| rad33         | 9.65614e-07 | 0.999995 | 2.67733e-06 | 0.999985 |
| rad25         | 9.00546e-07 | 0.999996 | 2.49692e-06 | 0.999987 |
| rad58         | 5.80814e-07 | 0.999996 | 1.61041e-06 | 0.999989 |
| rad12         | 4.67469e-07 | 0.999997 | 1.29614e-06 | 0.999990 |
| rad2          | 4.59165e-07 | 0.999997 | 1.27311e-06 | 0.999991 |
| rad34         | 4.04751e-07 | 0.999997 | 1.12224e-06 | 0.999993 |
| rad3          | 3.68107e-07 | 0.999998 | 1.02064e-06 | 0.999994 |
| rad15         | 3.62939e-07 | 0.999998 | 1.00631e-06 | 0.999995 |
| rad72         | 3.17872e-07 | 0.999999 | 8.81354e-07 | 0.999995 |
| rad4          | 2.91955e-07 | 0.999999 | 8.09496e-07 | 0.999996 |
| rad47         | 2.34077e-07 | 0.999999 | 6.49018e-07 | 0.999997 |
| rad64         | 1.73685e-07 | 0.999999 | 4.81570e-07 | 0.999997 |
| rad55         | 1.67021e-07 | 0.999999 | 4.63093e-07 | 0.999998 |
| rad8          | 1.45589e-07 | 1.000000 | 4.03671e-07 | 0.999998 |
| rad10         | 1.40044e-07 | 1.000000 | 3.88295e-07 | 0.999999 |
| rad26         | 1.32997e-07 | 1.000000 | 3.68756e-07 | 0.999999 |
| PAH8+H        | 1.32698e-07 | 1.000000 | 3.67927e-07 | 0.999999 |
| rad1          | 1.19132e-07 | 1.000000 | 3.30314e-07 | 1.000000 |
| rad62         | 8.82913e-08 | 1.000000 | 2.44803e-07 | 1.000000 |
| rad61         | 4.28217e-08 | 1.000000 | 1.18731e-07 | 1.000000 |
| rad56         | 4.14416e-08 | 1.000000 | 1.14904e-07 | 1.000000 |
| rad53         | 4.04186e-08 | 1.000000 | 1.12067e-07 | 1.000000 |
| rad68syn      | 3.69234e-08 | 1.000000 | 1.02376e-07 | 1.000000 |
| rad68anti     | 2.39708e-08 | 1.000000 | 6.64631e-08 | 1.000000 |
| rad43         | 2.12905e-08 | 1.000000 | 5.90316e-08 | 1.000000 |
| rad40syn      | 1.50839e-08 | 1.000000 | 4.18228e-08 | 1.000000 |
| rad40anti     | 9.17821e-09 | 1.000000 | 2.54481e-08 | 1.000000 |
| rad14         | 8.34696e-09 | 1.000000 | 2.31434e-08 | 1.000000 |
| rad42         | 8.21116e-09 | 1.000000 | 2.27668e-08 | 1.000000 |
| rad41         | 1.97273e-09 | 1.000000 | 5.46974e-09 | 1.000000 |
| rad27         | 6.30786e-10 | 1.000000 | 1.74896e-09 | 1.000000 |
| rad31         | 4.01765e-10 | 1.000000 | 1.11396e-09 | 1.000000 |
| rad5          | 8.21963e-12 | 1.000000 | 2.27903e-11 | 1.000000 |

100000.000 Pa, 1300.00000 K

=====

Rate constant | True (fraction) | Effective (fraction)

-----

Total | 1.52810e-14 (1.00 ) 4.66614e-15 (1.00 )

| species       | PYtrue      | Cumul    | PYeffective | Cumul    |
|---------------|-------------|----------|-------------|----------|
| Benzyl+C2H2   | 0.694644    | 0.694644 | 0.00000     | 0.00000  |
| Indene+H      | 0.255760    | 0.950404 | 0.837580    | 0.837580 |
| rad6          | 0.00712164  | 0.957526 | 0.0233224   | 0.860902 |
| Ph+Allene     | 0.00710797  | 0.964634 | 0.0232776   | 0.884180 |
| PhCH2CCH+H    | 0.00525359  | 0.969887 | 0.0172048   | 0.901385 |
| rad22         | 0.00394340  | 0.973831 | 0.0129141   | 0.914299 |
| rad20         | 0.00363465  | 0.977465 | 0.0119030   | 0.926202 |
| PhCHCCH2+H    | 0.00345676  | 0.980922 | 0.0113204   | 0.937522 |
| PAH9+H        | 0.00293681  | 0.983859 | 0.00961764  | 0.947140 |
| rad23         | 0.00292602  | 0.986785 | 0.00958232  | 0.956722 |
| rad21         | 0.00200315  | 0.988788 | 0.00656003  | 0.963282 |
| rad45         | 0.00199908  | 0.990787 | 0.00654670  | 0.969829 |
| rad18         | 0.00151418  | 0.992301 | 0.00495872  | 0.974788 |
| rad11         | 0.00147109  | 0.993772 | 0.00481762  | 0.979605 |
| rad38         | 0.00142475  | 0.995197 | 0.00466586  | 0.984271 |
| PAH7+H        | 0.000755356 | 0.995952 | 0.00247369  | 0.986745 |
| PhCCH+CH3     | 0.000701006 | 0.996653 | 0.00229570  | 0.989041 |
| rad50         | 0.000575401 | 0.997229 | 0.00188436  | 0.990925 |
| rad46         | 0.000517973 | 0.997747 | 0.00169629  | 0.992621 |
| rad35         | 0.000419255 | 0.998166 | 0.00137300  | 0.993994 |
| rad39         | 0.000297123 | 0.998463 | 0.000973038 | 0.994967 |
| rad30         | 0.000219516 | 0.998683 | 0.000718885 | 0.995686 |
| rad36         | 0.000188847 | 0.998872 | 0.000618447 | 0.996305 |
| rad51         | 0.000187576 | 0.999059 | 0.000614284 | 0.996919 |
| rad9          | 0.000171299 | 0.999230 | 0.000560981 | 0.997480 |
| rad7          | 0.000146034 | 0.999376 | 0.000478240 | 0.997958 |
| rad19anti     | 0.000145992 | 0.999522 | 0.000478103 | 0.998436 |
| Ph+MeAc       | 0.000135111 | 0.999658 | 0.000442470 | 0.998879 |
| PAH3+H        | 9.49179e-05 | 0.999752 | 0.000310843 | 0.999190 |
| rad52         | 5.26399e-05 | 0.999805 | 0.000172388 | 0.999362 |
| rad13         | 2.73242e-05 | 0.999832 | 8.94830e-05 | 0.999451 |
| PhCCCH3+H     | 2.32808e-05 | 0.999856 | 7.62413e-05 | 0.999528 |
| rad24         | 1.79627e-05 | 0.999874 | 5.88254e-05 | 0.999586 |
| PAH10+CH3     | 1.58347e-05 | 0.999890 | 5.18566e-05 | 0.999638 |
| rad28         | 1.29877e-05 | 0.999903 | 4.25330e-05 | 0.999681 |
| rad60syn      | 1.13840e-05 | 0.999914 | 3.72810e-05 | 0.999718 |
| rad59         | 9.98285e-06 | 0.999924 | 3.26924e-05 | 0.999751 |
| rad67         | 9.71840e-06 | 0.999934 | 3.18264e-05 | 0.999783 |
| rad19syn      | 9.45587e-06 | 0.999943 | 3.09667e-05 | 0.999814 |
| PAH1+H        | 8.09166e-06 | 0.999951 | 2.64991e-05 | 0.999840 |
| rad71         | 7.84091e-06 | 0.999959 | 2.56779e-05 | 0.999866 |
| rad60anti     | 6.84565e-06 | 0.999966 | 2.24186e-05 | 0.999888 |
| rad37         | 6.06849e-06 | 0.999972 | 1.98735e-05 | 0.999908 |
| rad73         | 5.46850e-06 | 0.999977 | 1.79086e-05 | 0.999926 |
| PhcycC3H3_A+H | 5.00169e-06 | 0.999982 | 1.63798e-05 | 0.999942 |
| rad65         | 4.87951e-06 | 0.999987 | 1.59797e-05 | 0.999958 |
| rad54         | 3.57332e-06 | 0.999991 | 1.17021e-05 | 0.999970 |
| rad70         | 1.54314e-06 | 0.999992 | 5.05357e-06 | 0.999975 |
| rad33         | 1.03117e-06 | 0.999993 | 3.37693e-06 | 0.999978 |
| rad15         | 9.32390e-07 | 0.999994 | 3.05345e-06 | 0.999982 |
| rad25         | 8.13787e-07 | 0.999995 | 2.66504e-06 | 0.999984 |
| rad58         | 7.50139e-07 | 0.999996 | 2.45660e-06 | 0.999987 |
| rad12         | 6.03527e-07 | 0.999997 | 1.97647e-06 | 0.999989 |
| rad34         | 4.07403e-07 | 0.999997 | 1.33419e-06 | 0.999990 |
| rad2          | 3.87302e-07 | 0.999997 | 1.26836e-06 | 0.999991 |
| rad3          | 2.93973e-07 | 0.999998 | 9.62722e-07 | 0.999992 |
| rad72         | 2.75043e-07 | 0.999998 | 9.00727e-07 | 0.999993 |
| rad8          | 2.53646e-07 | 0.999998 | 8.30656e-07 | 0.999994 |
| rad55         | 2.47072e-07 | 0.999998 | 8.09125e-07 | 0.999995 |
| rad4          | 2.33634e-07 | 0.999999 | 7.65118e-07 | 0.999996 |
| rad10         | 2.18062e-07 | 0.999999 | 7.14121e-07 | 0.999996 |
| rad47         | 1.91851e-07 | 0.999999 | 6.28287e-07 | 0.999997 |
| rad64         | 1.55733e-07 | 0.999999 | 5.10003e-07 | 0.999997 |
| rad26         | 1.43122e-07 | 0.999999 | 4.68706e-07 | 0.999998 |
| PAH8+H        | 1.25196e-07 | 0.999999 | 4.10000e-07 | 0.999998 |
| rad1          | 1.00877e-07 | 1.000000 | 3.30357e-07 | 0.999999 |
| rad62         | 9.26054e-08 | 1.000000 | 3.03270e-07 | 0.999999 |
| rad53         | 5.68068e-08 | 1.000000 | 1.86034e-07 | 0.999999 |
| rad56         | 5.61098e-08 | 1.000000 | 1.83752e-07 | 0.999999 |
| rad61         | 3.82890e-08 | 1.000000 | 1.25391e-07 | 0.999999 |
| rad68syn      | 3.54837e-08 | 1.000000 | 1.16204e-07 | 0.999999 |
| rad68anti     | 2.30461e-08 | 1.000000 | 7.54726e-08 | 1.000000 |
| rad43         | 2.12275e-08 | 1.000000 | 6.95173e-08 | 1.000000 |
| rad40syn      | 1.43238e-08 | 1.000000 | 4.69084e-08 | 1.000000 |
| rad14         | 9.93221e-09 | 1.000000 | 3.25266e-08 | 1.000000 |
| rad40anti     | 8.69387e-09 | 1.000000 | 2.84712e-08 | 1.000000 |

|       |             |          |             |          |
|-------|-------------|----------|-------------|----------|
| rad42 | 8.16468e-09 | 1.000000 | 2.67382e-08 | 1.000000 |
| rad41 | 1.93294e-09 | 1.000000 | 6.33013e-09 | 1.000000 |
| rad27 | 8.38407e-10 | 1.000000 | 2.74567e-09 | 1.000000 |
| rad31 | 4.18620e-10 | 1.000000 | 1.37092e-09 | 1.000000 |
| rad5  | 1.20191e-11 | 1.000000 | 3.93610e-11 | 1.000000 |

100000.000 Pa, 1400.00000 K

| Rate constant | True (fraction)     | Effective (fraction) |
|---------------|---------------------|----------------------|
| Total         | 2.46691e-14 (1.00 ) | 6.44195e-15 (1.00 )  |

| species       | PYtrue      | Cumul    | PYeffective | Cumul    |
|---------------|-------------|----------|-------------|----------|
| Benzyl+C2H2   | 0.738866    | 0.738866 | 0.000000    | 0.000000 |
| Indene+H      | 0.217631    | 0.956497 | 0.833406    | 0.833406 |
| Ph+Allene     | 0.00827492  | 0.964772 | 0.0316884   | 0.865094 |
| PhCH2CCH+H    | 0.00637750  | 0.971149 | 0.0244223   | 0.889517 |
| rad6          | 0.00484956  | 0.975999 | 0.0185712   | 0.908088 |
| PhCHCCH2+H    | 0.00379192  | 0.979791 | 0.0145210   | 0.922609 |
| rad22         | 0.00266439  | 0.982455 | 0.0102031   | 0.932812 |
| PAH9+H        | 0.00252207  | 0.984977 | 0.00965813  | 0.942470 |
| rad20         | 0.00222284  | 0.987200 | 0.00851225  | 0.950982 |
| rad23         | 0.00208328  | 0.989283 | 0.00797783  | 0.958960 |
| rad45         | 0.00165305  | 0.990937 | 0.00633027  | 0.965290 |
| rad21         | 0.00123818  | 0.992175 | 0.00474154  | 0.970032 |
| rad38         | 0.00121732  | 0.993392 | 0.00466167  | 0.974694 |
| rad11         | 0.00109070  | 0.994483 | 0.00417680  | 0.978870 |
| rad18         | 0.000961825 | 0.995445 | 0.00368326  | 0.982554 |
| PhCCH+CH3     | 0.000724414 | 0.996169 | 0.00277411  | 0.985328 |
| PAH7+H        | 0.000693640 | 0.996863 | 0.00265626  | 0.987984 |
| rad50         | 0.000487741 | 0.997350 | 0.00186778  | 0.989852 |
| rad46         | 0.000441328 | 0.997792 | 0.00169004  | 0.991542 |
| rad35         | 0.000365269 | 0.998157 | 0.00139878  | 0.992941 |
| rad39         | 0.000259061 | 0.998416 | 0.000992061 | 0.993933 |
| rad30         | 0.000249657 | 0.998666 | 0.000956049 | 0.994889 |
| rad9          | 0.000201395 | 0.998867 | 0.000771230 | 0.995660 |
| rad19anti     | 0.000167225 | 0.999034 | 0.000640379 | 0.996300 |
| rad51         | 0.000158693 | 0.999193 | 0.000607707 | 0.996908 |
| rad36         | 0.000156385 | 0.999349 | 0.000598869 | 0.997507 |
| Ph+MeAc       | 0.000142499 | 0.999492 | 0.000545691 | 0.998053 |
| rad7          | 0.000142447 | 0.999634 | 0.000545492 | 0.998598 |
| PAH3+H        | 0.000128718 | 0.999763 | 0.000492920 | 0.999091 |
| rad52         | 4.45744e-05 | 0.999808 | 0.000170695 | 0.999262 |
| PhCCCH3+H     | 2.29794e-05 | 0.999831 | 8.79985e-05 | 0.999350 |
| rad13         | 2.16644e-05 | 0.999852 | 8.29629e-05 | 0.999433 |
| rad60syn      | 1.46710e-05 | 0.999867 | 5.61818e-05 | 0.999489 |
| rad24         | 1.40645e-05 | 0.999881 | 5.38593e-05 | 0.999543 |
| PAH10+CH3     | 1.39836e-05 | 0.999895 | 5.35493e-05 | 0.999596 |
| rad59         | 1.34629e-05 | 0.999908 | 5.15555e-05 | 0.999648 |
| rad19syn      | 1.26561e-05 | 0.999921 | 4.84660e-05 | 0.999696 |
| rad67         | 1.07459e-05 | 0.999932 | 4.11507e-05 | 0.999738 |
| rad28         | 9.63487e-06 | 0.999941 | 3.68963e-05 | 0.999774 |
| rad60anti     | 8.87490e-06 | 0.999950 | 3.39860e-05 | 0.999808 |
| PAH1+H        | 7.23041e-06 | 0.999958 | 2.76885e-05 | 0.999836 |
| PhcycC3H3_A+H | 7.14523e-06 | 0.999965 | 2.73623e-05 | 0.999863 |
| rad71         | 6.61814e-06 | 0.999971 | 2.53438e-05 | 0.999889 |
| rad37         | 5.44648e-06 | 0.999977 | 2.08570e-05 | 0.999910 |
| rad54         | 4.71776e-06 | 0.999981 | 1.80664e-05 | 0.999928 |
| rad73         | 4.61713e-06 | 0.999986 | 1.76810e-05 | 0.999945 |
| rad65         | 4.13417e-06 | 0.999990 | 1.58316e-05 | 0.999961 |
| rad15         | 2.18293e-06 | 0.999992 | 8.35944e-06 | 0.999970 |
| rad70         | 1.55158e-06 | 0.999994 | 5.94169e-06 | 0.999976 |
| rad58         | 1.01210e-06 | 0.999995 | 3.87579e-06 | 0.999979 |
| rad33         | 8.69762e-07 | 0.999996 | 3.33071e-06 | 0.999983 |
| rad12         | 7.24485e-07 | 0.999997 | 2.77438e-06 | 0.999986 |
| rad25         | 6.98402e-07 | 0.999997 | 2.67450e-06 | 0.999988 |
| rad34         | 4.02679e-07 | 0.999998 | 1.54204e-06 | 0.999990 |
| rad8          | 3.46130e-07 | 0.999998 | 1.32549e-06 | 0.999991 |
| rad55         | 3.31135e-07 | 0.999998 | 1.26806e-06 | 0.999992 |
| rad2          | 2.65537e-07 | 0.999999 | 1.01686e-06 | 0.999993 |
| rad10         | 2.51544e-07 | 0.999999 | 9.63274e-07 | 0.999994 |
| rad72         | 2.32041e-07 | 0.999999 | 8.88589e-07 | 0.999995 |
| rad3          | 1.94177e-07 | 0.999999 | 7.43589e-07 | 0.999996 |
| rad26         | 1.62807e-07 | 0.999999 | 6.23463e-07 | 0.999997 |
| rad4          | 1.54469e-07 | 1.000000 | 5.91533e-07 | 0.999997 |
| rad47         | 1.53866e-07 | 1.000000 | 5.89223e-07 | 0.999998 |
| rad64         | 1.37833e-07 | 1.000000 | 5.27823e-07 | 0.999998 |
| PAH8+H        | 1.15920e-07 | 1.000000 | 4.43911e-07 | 0.999999 |
| rad62         | 9.47139e-08 | 1.000000 | 3.62702e-07 | 0.999999 |

|           |             |         |             |          |
|-----------|-------------|---------|-------------|----------|
| rad53     | 7.77428e-08 | 1.00000 | 2.97712e-07 | 0.999999 |
| rad56     | 7.61995e-08 | 1.00000 | 2.91802e-07 | 1.000000 |
| rad1      | 6.94579e-08 | 1.00000 | 2.65986e-07 | 1.000000 |
| rad68syn  | 3.35573e-08 | 1.00000 | 1.28506e-07 | 1.000000 |
| rad61     | 3.34610e-08 | 1.00000 | 1.28137e-07 | 1.000000 |
| rad68anti | 2.18051e-08 | 1.00000 | 8.35014e-08 | 1.000000 |
| rad43     | 2.03793e-08 | 1.00000 | 7.80417e-08 | 1.000000 |
| rad40syn  | 1.33623e-08 | 1.00000 | 5.11703e-08 | 1.000000 |
| rad14     | 8.92299e-09 | 1.00000 | 3.41702e-08 | 1.000000 |
| rad42     | 8.08967e-09 | 1.00000 | 3.09790e-08 | 1.000000 |
| rad40anti | 8.08493e-09 | 1.00000 | 3.09608e-08 | 1.000000 |
| rad41     | 1.83383e-09 | 1.00000 | 7.02255e-09 | 1.000000 |
| rad27     | 8.08145e-10 | 1.00000 | 3.09475e-09 | 1.000000 |
| rad31     | 3.62608e-10 | 1.00000 | 1.38859e-09 | 1.000000 |
| rad5      | 2.00997e-11 | 1.00000 | 7.69709e-11 | 1.000000 |

100000.000 Pa, 1500.00000 K

| Rate constant | True (fraction)     | Effective (fraction) |
|---------------|---------------------|----------------------|
| Total         | 3.76908e-14 (1.00 ) | 8.50693e-15 (1.00 )  |

| species       | PYtrue      | Cumul    | PYeffective | Cumul    |
|---------------|-------------|----------|-------------|----------|
| Benzyl+C2H2   | 0.774297    | 0.774297 | 0.00000     | 0.00000  |
| Indene+H      | 0.185301    | 0.959598 | 0.820997    | 0.820997 |
| Ph+Allene     | 0.00891765  | 0.968516 | 0.0395106   | 0.860508 |
| PhCH2CCH+H    | 0.00760162  | 0.976117 | 0.0336798   | 0.894187 |
| PhCHCCH2+H    | 0.00400146  | 0.980119 | 0.0177289   | 0.911916 |
| rad6          | 0.00371302  | 0.983832 | 0.0164509   | 0.928367 |
| PAH9+H        | 0.00215380  | 0.985986 | 0.00954263  | 0.937910 |
| rad22         | 0.00205513  | 0.988041 | 0.00910547  | 0.947015 |
| rad23         | 0.00179902  | 0.989840 | 0.00797075  | 0.954986 |
| rad20         | 0.00142076  | 0.991260 | 0.00629485  | 0.961281 |
| rad45         | 0.00134537  | 0.992606 | 0.00596082  | 0.967242 |
| rad38         | 0.00103090  | 0.993637 | 0.00456751  | 0.971809 |
| rad21         | 0.000796608 | 0.994433 | 0.00352946  | 0.975339 |
| rad11         | 0.000765264 | 0.995199 | 0.00339058  | 0.978729 |
| PhCCH+CH3     | 0.000678532 | 0.995877 | 0.00300631  | 0.981736 |
| PAH7+H        | 0.000622301 | 0.996499 | 0.00275717  | 0.984493 |
| rad18         | 0.000579600 | 0.997079 | 0.00256798  | 0.987061 |
| rad50         | 0.000407817 | 0.997487 | 0.00180688  | 0.988868 |
| rad46         | 0.000372198 | 0.997859 | 0.00164906  | 0.990517 |
| rad35         | 0.000317720 | 0.998177 | 0.00140769  | 0.991924 |
| rad30         | 0.000272878 | 0.998450 | 0.00120902  | 0.993133 |
| rad9          | 0.000230299 | 0.998680 | 0.00102036  | 0.994154 |
| rad39         | 0.000221154 | 0.998901 | 0.000979847 | 0.995134 |
| rad19anti     | 0.000195158 | 0.999096 | 0.000864669 | 0.995998 |
| PAH3+H        | 0.000161703 | 0.999258 | 0.000716440 | 0.996715 |
| Ph+MeAc       | 0.000140327 | 0.999398 | 0.000621735 | 0.997336 |
| rad51         | 0.000132204 | 0.999530 | 0.000585744 | 0.997922 |
| rad36         | 0.000127537 | 0.999658 | 0.000565064 | 0.998487 |
| rad7          | 0.000112412 | 0.999770 | 0.000498053 | 0.998985 |
| rad52         | 3.71991e-05 | 0.999808 | 0.000164815 | 0.999150 |
| PhCCCH3+H     | 2.20291e-05 | 0.999830 | 9.76022e-05 | 0.999248 |
| rad60syn      | 1.77233e-05 | 0.999847 | 7.85250e-05 | 0.999326 |
| rad59         | 1.68480e-05 | 0.999864 | 7.46470e-05 | 0.999401 |
| rad13         | 1.51498e-05 | 0.999879 | 6.71228e-05 | 0.999468 |
| rad19syn      | 1.50908e-05 | 0.999894 | 6.68612e-05 | 0.999535 |
| PAH10+CH3     | 1.23350e-05 | 0.999907 | 5.46517e-05 | 0.999590 |
| rad67         | 1.20043e-05 | 0.999919 | 5.31862e-05 | 0.999643 |
| rad24         | 1.09832e-05 | 0.999930 | 4.86623e-05 | 0.999691 |
| rad60anti     | 1.07714e-05 | 0.999941 | 4.77237e-05 | 0.999739 |
| PhcycC3H3_A+H | 9.10213e-06 | 0.999950 | 4.03280e-05 | 0.999779 |
| rad28         | 7.86301e-06 | 0.999958 | 3.48379e-05 | 0.999814 |
| PAH1+H        | 6.46229e-06 | 0.999964 | 2.86319e-05 | 0.999843 |
| rad54         | 5.74347e-06 | 0.999970 | 2.54471e-05 | 0.999868 |
| rad71         | 5.48457e-06 | 0.999975 | 2.43000e-05 | 0.999893 |
| rad37         | 4.88503e-06 | 0.999980 | 2.16436e-05 | 0.999914 |
| rad15         | 4.16233e-06 | 0.999984 | 1.84417e-05 | 0.999933 |
| rad73         | 3.82905e-06 | 0.999988 | 1.69650e-05 | 0.999950 |
| rad65         | 3.45615e-06 | 0.999992 | 1.53128e-05 | 0.999965 |
| rad70         | 1.53248e-06 | 0.999993 | 6.78982e-06 | 0.999972 |
| rad58         | 1.25875e-06 | 0.999994 | 5.57702e-06 | 0.999977 |
| rad12         | 8.53167e-07 | 0.999995 | 3.78005e-06 | 0.999981 |
| rad33         | 6.49892e-07 | 0.999996 | 2.87941e-06 | 0.999984 |
| rad25         | 5.86247e-07 | 0.999996 | 2.59743e-06 | 0.999987 |
| rad8          | 4.20566e-07 | 0.999997 | 1.86336e-06 | 0.999988 |
| rad55         | 4.12718e-07 | 0.999997 | 1.82859e-06 | 0.999990 |
| rad34         | 3.91841e-07 | 0.999998 | 1.73609e-06 | 0.999992 |

|           |             |          |             |          |
|-----------|-------------|----------|-------------|----------|
| rad10     | 2.53251e-07 | 0.999998 | 1.12205e-06 | 0.999993 |
| rad26     | 2.09130e-07 | 0.999998 | 9.26572e-07 | 0.999994 |
| rad72     | 1.92088e-07 | 0.999998 | 8.51064e-07 | 0.999995 |
| rad2      | 1.67568e-07 | 0.999998 | 7.42426e-07 | 0.999996 |
| rad64     | 1.22251e-07 | 0.999999 | 5.41645e-07 | 0.999996 |
| rad47     | 1.21818e-07 | 0.999999 | 5.39726e-07 | 0.999997 |
| rad3      | 1.17707e-07 | 0.999999 | 5.21515e-07 | 0.999997 |
| PAH8+H    | 1.05277e-07 | 0.999999 | 4.66442e-07 | 0.999998 |
| rad53     | 1.03643e-07 | 0.999999 | 4.59202e-07 | 0.999998 |
| rad56     | 1.03583e-07 | 0.999999 | 4.58934e-07 | 0.999999 |
| rad62     | 9.54306e-08 | 0.999999 | 4.22815e-07 | 0.999999 |
| rad4      | 9.36444e-08 | 0.999999 | 4.14901e-07 | 1.000000 |
| rad1      | 4.40709e-08 | 0.999999 | 1.95261e-07 | 1.000000 |
| rad68syn  | 3.12306e-08 | 0.999999 | 1.38370e-07 | 1.000000 |
| rad61     | 2.91139e-08 | 0.999999 | 1.28992e-07 | 1.000000 |
| rad68anti | 2.03037e-08 | 0.999999 | 8.99578e-08 | 1.000000 |
| rad43     | 1.96197e-08 | 0.999999 | 8.69270e-08 | 1.000000 |
| rad40syn  | 1.22479e-08 | 1.000000 | 5.42658e-08 | 1.000000 |
| rad42     | 8.09603e-09 | 1.000000 | 3.58703e-08 | 1.000000 |
| rad40anti | 7.38532e-09 | 1.000000 | 3.27214e-08 | 1.000000 |
| rad14     | 7.04506e-09 | 1.000000 | 3.12139e-08 | 1.000000 |
| rad41     | 1.75310e-09 | 1.000000 | 7.76732e-09 | 1.000000 |
| rad27     | 6.81935e-10 | 1.000000 | 3.02138e-09 | 1.000000 |
| rad31     | 2.87672e-10 | 1.000000 | 1.27456e-09 | 1.000000 |
| rad5      | 4.57523e-11 | 1.000000 | 2.02711e-10 | 1.000000 |

100000.000 Pa, 1750.00000 K

=====

| Rate constant | True (fraction)     | Effective (fraction) |
|---------------|---------------------|----------------------|
| Total         | 9.18604e-14 (1.00 ) | 1.50282e-14 (1.00 )  |

| species       | PYtrue      | Cumul    | PYeffective | Cumul    |
|---------------|-------------|----------|-------------|----------|
| Benzyl+C2H2   | 0.836402    | 0.836402 | 0.000000    | 0.000000 |
| Indene+H      | 0.109681    | 0.946083 | 0.670428    | 0.670428 |
| PhCH2CCH+H    | 0.0132550   | 0.959338 | 0.0810214   | 0.751449 |
| Ph+Allene     | 0.0106673   | 0.970005 | 0.0652042   | 0.816654 |
| PhCHCCH2+H    | 0.00629592  | 0.976301 | 0.0384841   | 0.855138 |
| rad50         | 0.00258492  | 0.978886 | 0.0158004   | 0.870938 |
| PAH9+H        | 0.00247881  | 0.981365 | 0.0151518   | 0.886090 |
| rad39         | 0.00210915  | 0.983474 | 0.0128922   | 0.898982 |
| rad51         | 0.00203484  | 0.985509 | 0.0124380   | 0.911420 |
| rad38         | 0.00193235  | 0.987441 | 0.0118115   | 0.923232 |
| rad71         | 0.00173863  | 0.989180 | 0.0106274   | 0.933859 |
| PAH7+H        | 0.00172845  | 0.990908 | 0.0105652   | 0.944424 |
| rad6          | 0.00170885  | 0.992617 | 0.0104454   | 0.954870 |
| rad23         | 0.00106857  | 0.993686 | 0.00653166  | 0.961401 |
| rad46         | 0.000841536 | 0.994527 | 0.00514392  | 0.966545 |
| rad22         | 0.000768471 | 0.995296 | 0.00469730  | 0.971242 |
| PAH3+H        | 0.000614397 | 0.995910 | 0.00375552  | 0.974998 |
| rad73         | 0.000545187 | 0.996455 | 0.00333247  | 0.978330 |
| PhCCH+CH3     | 0.000525010 | 0.996980 | 0.00320914  | 0.981540 |
| rad30         | 0.000356294 | 0.997337 | 0.00217786  | 0.983717 |
| rad52         | 0.000351314 | 0.997688 | 0.00214742  | 0.985865 |
| rad35         | 0.000342173 | 0.998030 | 0.00209155  | 0.987956 |
| rad72         | 0.000332567 | 0.998363 | 0.00203283  | 0.989989 |
| rad19anti     | 0.000252285 | 0.998615 | 0.00154210  | 0.991531 |
| Ph+MeAc       | 0.000200011 | 0.998815 | 0.00122257  | 0.992754 |
| PAH1+H        | 0.000133275 | 0.998948 | 0.000814647 | 0.993569 |
| rad20         | 0.000131102 | 0.999079 | 0.000801365 | 0.994370 |
| rad45         | 0.000108859 | 0.999188 | 0.000665406 | 0.995035 |
| rad11         | 9.57990e-05 | 0.999284 | 0.000585574 | 0.995621 |
| PAH10+CH3     | 9.43295e-05 | 0.999378 | 0.000576593 | 0.996198 |
| rad21         | 6.73409e-05 | 0.999446 | 0.000411623 | 0.996609 |
| rad18         | 6.21633e-05 | 0.999508 | 0.000379976 | 0.996989 |
| PhcycC3H3_A+H | 5.09339e-05 | 0.999559 | 0.000311335 | 0.997300 |
| rad59         | 5.04970e-05 | 0.999609 | 0.000308665 | 0.997609 |
| PhCCCH3+H     | 4.00501e-05 | 0.999649 | 0.000244808 | 0.997854 |
| rad19syn      | 3.99195e-05 | 0.999689 | 0.000244009 | 0.998098 |
| rad67         | 3.78669e-05 | 0.999727 | 0.000231463 | 0.998329 |
| rad60syn      | 3.65544e-05 | 0.999764 | 0.000223440 | 0.998553 |
| rad65         | 3.34117e-05 | 0.999797 | 0.000204230 | 0.998757 |
| rad9          | 3.26130e-05 | 0.999830 | 0.000199348 | 0.998956 |
| PAH8+H        | 2.60872e-05 | 0.999856 | 0.000159459 | 0.999116 |
| rad60anti     | 2.53271e-05 | 0.999881 | 0.000154813 | 0.999271 |
| rad36         | 1.85397e-05 | 0.999900 | 0.000113325 | 0.999384 |
| rad70         | 1.75160e-05 | 0.999917 | 0.000107067 | 0.999491 |
| rad7          | 1.45376e-05 | 0.999932 | 8.88618e-05 | 0.999580 |
| rad54         | 1.17783e-05 | 0.999944 | 7.19955e-05 | 0.999652 |

|           |             |          |             |          |
|-----------|-------------|----------|-------------|----------|
| rad58     | 1.10576e-05 | 0.999955 | 6.75900e-05 | 0.999720 |
| rad37     | 9.29713e-06 | 0.999964 | 5.68290e-05 | 0.999776 |
| rad34     | 7.74395e-06 | 0.999972 | 4.73352e-05 | 0.999824 |
| rad28     | 4.97067e-06 | 0.999977 | 3.03834e-05 | 0.999854 |
| rad64     | 4.01608e-06 | 0.999981 | 2.45485e-05 | 0.999879 |
| rad68syn  | 2.67344e-06 | 0.999983 | 1.63415e-05 | 0.999895 |
| rad15     | 1.99022e-06 | 0.999985 | 1.21653e-05 | 0.999907 |
| rad40syn  | 1.86108e-06 | 0.999987 | 1.13759e-05 | 0.999919 |
| rad68anti | 1.69913e-06 | 0.999989 | 1.03860e-05 | 0.999929 |
| rad62     | 1.47288e-06 | 0.999990 | 9.00303e-06 | 0.999938 |
| rad40anti | 1.45123e-06 | 0.999992 | 8.87071e-06 | 0.999947 |
| rad56     | 1.32036e-06 | 0.999993 | 8.07072e-06 | 0.999955 |
| rad55     | 1.18444e-06 | 0.999994 | 7.23992e-06 | 0.999962 |
| rad24     | 1.16660e-06 | 0.999995 | 7.13087e-06 | 0.999969 |
| rad13     | 1.14436e-06 | 0.999997 | 6.99492e-06 | 0.999976 |
| rad61     | 9.18244e-07 | 0.999998 | 5.61280e-06 | 0.999982 |
| rad53     | 8.59934e-07 | 0.999998 | 5.25638e-06 | 0.999987 |
| rad47     | 7.42401e-07 | 0.999999 | 4.53795e-06 | 0.999992 |
| rad42     | 3.38853e-07 | 0.999999 | 2.07125e-06 | 0.999994 |
| rad26     | 2.43584e-07 | 1.000000 | 1.48891e-06 | 0.999995 |
| rad8      | 1.86018e-07 | 1.000000 | 1.13704e-06 | 0.999996 |
| rad43     | 1.70761e-07 | 1.000000 | 1.04378e-06 | 0.999997 |
| rad12     | 1.63311e-07 | 1.000000 | 9.98244e-07 | 0.999998 |
| rad25     | 7.24257e-08 | 1.000000 | 4.42704e-07 | 0.999999 |
| rad10     | 5.73310e-08 | 1.000000 | 3.50438e-07 | 0.999999 |
| rad33     | 4.94840e-08 | 1.000000 | 3.02473e-07 | 0.999999 |
| rad41     | 4.28116e-08 | 1.000000 | 2.61688e-07 | 1.000000 |
| rad2      | 8.42175e-09 | 1.000000 | 5.14782e-08 | 1.000000 |
| rad3      | 3.84810e-09 | 1.000000 | 2.35216e-08 | 1.000000 |
| rad1      | 2.47287e-09 | 1.000000 | 1.51155e-08 | 1.000000 |
| rad4      | 2.43425e-09 | 1.000000 | 1.48794e-08 | 1.000000 |
| rad14     | 8.10926e-10 | 1.000000 | 4.95681e-09 | 1.000000 |
| rad5      | 6.18993e-10 | 1.000000 | 3.78362e-09 | 1.000000 |
| rad27     | 9.38061e-11 | 1.000000 | 5.73393e-10 | 1.000000 |

100000.000 Pa, 2000.00000 K

=====

| Rate constant | True (fraction)     | Effective (fraction) |
|---------------|---------------------|----------------------|
| Total         | 1.85359e-13 (1.00 ) | 2.49158e-14 (1.00 )  |

| species       | PYtrue      | Cumul    | PYeffective | Cumul    |
|---------------|-------------|----------|-------------|----------|
| Benzyl+C2H2   | 0.865581    | 0.865581 | 0.000000    | 0.000000 |
| Indene+H      | 0.0816308   | 0.947212 | 0.607286    | 0.607286 |
| PhCH2CCH+H    | 0.0193993   | 0.966611 | 0.144320    | 0.751606 |
| Ph+Allene     | 0.0110470   | 0.977658 | 0.0821829   | 0.833789 |
| PhCHCCH2+H    | 0.00696590  | 0.984624 | 0.0518223   | 0.885611 |
| PAH9+H        | 0.00196553  | 0.986590 | 0.0146224   | 0.900234 |
| rad50         | 0.00159075  | 0.988180 | 0.0118343   | 0.912068 |
| rad38         | 0.00132309  | 0.989503 | 0.00984306  | 0.921911 |
| rad39         | 0.00128757  | 0.990791 | 0.00957878  | 0.931490 |
| rad51         | 0.00123034  | 0.992021 | 0.00915301  | 0.940643 |
| PAH7+H        | 0.00118237  | 0.993204 | 0.00879615  | 0.949439 |
| rad71         | 0.00102461  | 0.994228 | 0.00762249  | 0.957061 |
| PAH3+H        | 0.000699009 | 0.994927 | 0.00520022  | 0.962262 |
| rad23         | 0.000576025 | 0.995503 | 0.00428530  | 0.966547 |
| rad46         | 0.000554948 | 0.996058 | 0.00412849  | 0.970675 |
| rad6          | 0.000537898 | 0.996596 | 0.00400165  | 0.974677 |
| PhCCH+CH3     | 0.000401691 | 0.996998 | 0.00298835  | 0.977665 |
| rad19anti     | 0.000398087 | 0.997396 | 0.00296153  | 0.980627 |
| rad30         | 0.000391528 | 0.997787 | 0.00291274  | 0.983540 |
| rad73         | 0.000322252 | 0.998110 | 0.00239737  | 0.985937 |
| rad35         | 0.000295520 | 0.998405 | 0.00219850  | 0.988136 |
| rad52         | 0.000214822 | 0.998620 | 0.00159815  | 0.989734 |
| Ph+MeAc       | 0.000200920 | 0.998821 | 0.00149473  | 0.991228 |
| rad72         | 0.000195282 | 0.999016 | 0.00145279  | 0.992681 |
| rad22         | 0.000165903 | 0.999182 | 0.00123422  | 0.993915 |
| PAH1+H        | 8.28159e-05 | 0.999265 | 0.000616103 | 0.994532 |
| PAH10+CH3     | 6.38258e-05 | 0.999329 | 0.000474827 | 0.995006 |
| rad45         | 6.25305e-05 | 0.999391 | 0.000465191 | 0.995472 |
| rad59         | 6.06879e-05 | 0.999452 | 0.000451483 | 0.995923 |
| PhcycC3H3_A+H | 5.84615e-05 | 0.999510 | 0.000434920 | 0.996358 |
| rad20         | 5.57607e-05 | 0.999566 | 0.000414827 | 0.996773 |
| rad60syn      | 4.49529e-05 | 0.999611 | 0.000334424 | 0.997107 |
| rad67         | 4.45416e-05 | 0.999656 | 0.000331364 | 0.997439 |
| PhCCCH3+H     | 4.40875e-05 | 0.999700 | 0.000327986 | 0.997767 |
| rad19syn      | 3.79910e-05 | 0.999738 | 0.000282631 | 0.998049 |
| rad11         | 3.18159e-05 | 0.999770 | 0.000236692 | 0.998286 |
| rad60anti     | 3.11646e-05 | 0.999801 | 0.000231846 | 0.998518 |

|           |             |          |             |          |
|-----------|-------------|----------|-------------|----------|
| rad9      | 3.11339e-05 | 0.999832 | 0.000231618 | 0.998749 |
| rad21     | 2.83362e-05 | 0.999860 | 0.000210805 | 0.998960 |
| rad65     | 2.33797e-05 | 0.999884 | 0.000173932 | 0.999134 |
| rad18     | 1.78425e-05 | 0.999901 | 0.000132738 | 0.999267 |
| PAH8+H    | 1.54048e-05 | 0.999917 | 0.000114602 | 0.999381 |
| rad54     | 1.24318e-05 | 0.999929 | 9.24853e-05 | 0.999474 |
| rad70     | 1.17064e-05 | 0.999941 | 8.70892e-05 | 0.999561 |
| rad36     | 1.08186e-05 | 0.999952 | 8.04840e-05 | 0.999641 |
| rad58     | 9.81776e-06 | 0.999962 | 7.30385e-05 | 0.999715 |
| rad37     | 7.64107e-06 | 0.999969 | 5.68452e-05 | 0.999771 |
| rad7      | 5.24973e-06 | 0.999975 | 3.90549e-05 | 0.999810 |
| rad34     | 4.94800e-06 | 0.999979 | 3.68102e-05 | 0.999847 |
| rad28     | 2.75845e-06 | 0.999982 | 2.05212e-05 | 0.999868 |
| rad64     | 2.46579e-06 | 0.999985 | 1.83440e-05 | 0.999886 |
| rad56     | 1.93467e-06 | 0.999987 | 1.43928e-05 | 0.999900 |
| rad15     | 1.82005e-06 | 0.999988 | 1.35401e-05 | 0.999914 |
| rad68syn  | 1.60328e-06 | 0.999990 | 1.19275e-05 | 0.999926 |
| rad55     | 1.32646e-06 | 0.999991 | 9.86807e-06 | 0.999936 |
| rad53     | 1.18278e-06 | 0.999993 | 8.79919e-06 | 0.999945 |
| rad62     | 1.11716e-06 | 0.999994 | 8.31106e-06 | 0.999953 |
| rad40syn  | 1.10591e-06 | 0.999995 | 8.22737e-06 | 0.999961 |
| rad68anti | 1.01929e-06 | 0.999996 | 7.58293e-06 | 0.999969 |
| rad40anti | 8.60756e-07 | 0.999997 | 6.40353e-06 | 0.999975 |
| rad24     | 7.09726e-07 | 0.999997 | 5.27995e-06 | 0.999980 |
| rad61     | 5.80099e-07 | 0.999998 | 4.31560e-06 | 0.999985 |
| rad13     | 5.09832e-07 | 0.999998 | 3.79286e-06 | 0.999989 |
| rad47     | 4.05000e-07 | 0.999999 | 3.01297e-06 | 0.999992 |
| rad42     | 2.57806e-07 | 0.999999 | 1.91793e-06 | 0.999993 |
| rad12     | 2.13864e-07 | 0.999999 | 1.59103e-06 | 0.999995 |
| rad8      | 2.08867e-07 | 1.000000 | 1.55385e-06 | 0.999997 |
| rad26     | 1.95269e-07 | 1.000000 | 1.45269e-06 | 0.999998 |
| rad43     | 1.25176e-07 | 1.000000 | 9.31237e-07 | 0.999999 |
| rad10     | 4.53397e-08 | 1.000000 | 3.37301e-07 | 0.999999 |
| rad25     | 4.16643e-08 | 1.000000 | 3.09958e-07 | 1.000000 |
| rad41     | 2.92147e-08 | 1.000000 | 2.17341e-07 | 1.000000 |
| rad33     | 2.55683e-08 | 1.000000 | 1.90213e-07 | 1.000000 |
| rad2      | 5.51635e-09 | 1.000000 | 4.10385e-08 | 1.000000 |
| rad1      | 1.71163e-09 | 1.000000 | 1.27336e-08 | 1.000000 |
| rad3      | 1.63582e-09 | 1.000000 | 1.21696e-08 | 1.000000 |
| rad5      | 1.54327e-09 | 1.000000 | 1.14811e-08 | 1.000000 |
| rad4      | 1.02821e-09 | 1.000000 | 7.64927e-09 | 1.000000 |
| rad14     | 4.55931e-10 | 1.000000 | 3.39187e-09 | 1.000000 |
| rad27     | 9.10951e-11 | 1.000000 | 6.77695e-10 | 1.000000 |

100000.000 Pa, 2250.00000 K

=====

| Rate constant | True (fraction)     | Effective (fraction) |
|---------------|---------------------|----------------------|
| Total         | 3.29136e-13 (1.00 ) | 4.02566e-14 (1.00 )  |

| species     | PYtrue      | Cumul    | PYeffective | Cumul    |
|-------------|-------------|----------|-------------|----------|
| Benzyl+C2H2 | 0.877690    | 0.877690 | 0.00000     | 0.00000  |
| Indene+H    | 0.0633747   | 0.941065 | 0.518150    | 0.518150 |
| PhCH2CCH+H  | 0.0279131   | 0.968978 | 0.228217    | 0.746367 |
| Ph+Allene   | 0.0110469   | 0.980025 | 0.0903193   | 0.836686 |
| PhCHCCH2+H  | 0.00838683  | 0.988412 | 0.0685705   | 0.905257 |
| PAH9+H      | 0.00166797  | 0.990079 | 0.0136373   | 0.918894 |
| rad50       | 0.00103691  | 0.991116 | 0.00847771  | 0.927372 |
| rad38       | 0.00100034  | 0.992117 | 0.00817873  | 0.935551 |
| PAH3+H      | 0.000939168 | 0.993056 | 0.00767861  | 0.943229 |
| PAH7+H      | 0.000920777 | 0.993977 | 0.00752825  | 0.950757 |
| rad39       | 0.000828224 | 0.994805 | 0.00677154  | 0.957529 |
| rad51       | 0.000776157 | 0.995581 | 0.00634584  | 0.963875 |
| rad71       | 0.000618866 | 0.996200 | 0.00505983  | 0.968935 |
| rad19anti   | 0.000555996 | 0.996756 | 0.00454581  | 0.973480 |
| rad30       | 0.000422421 | 0.997178 | 0.00345371  | 0.976934 |
| rad46       | 0.000401522 | 0.997580 | 0.00328283  | 0.980217 |
| PhCCH+CH3   | 0.000331675 | 0.997912 | 0.00271177  | 0.982929 |
| rad35       | 0.000281121 | 0.998193 | 0.00229844  | 0.985227 |
| Ph+MeAc     | 0.000224662 | 0.998417 | 0.00183683  | 0.987064 |
| rad23       | 0.000218554 | 0.998636 | 0.00178689  | 0.988851 |
| rad73       | 0.000195340 | 0.998831 | 0.00159710  | 0.990448 |
| rad6        | 0.000182424 | 0.999014 | 0.00149150  | 0.991939 |
| rad52       | 0.000138322 | 0.999152 | 0.00113092  | 0.993070 |
| rad72       | 0.000117589 | 0.999270 | 0.000961402 | 0.994032 |
| rad59       | 8.11219e-05 | 0.999351 | 0.000663250 | 0.994695 |
| rad67       | 5.88480e-05 | 0.999410 | 0.000481140 | 0.995176 |
| PhCCCH3+H   | 5.68133e-05 | 0.999466 | 0.000464504 | 0.995641 |
| rad60syn    | 5.66155e-05 | 0.999523 | 0.000462887 | 0.996104 |

|               |             |          |             |          |
|---------------|-------------|----------|-------------|----------|
| PAH1+H        | 5.40721e-05 | 0.999577 | 0.000442092 | 0.996546 |
| PAH10+CH3     | 5.05810e-05 | 0.999628 | 0.000413549 | 0.996959 |
| rad22         | 4.34635e-05 | 0.999671 | 0.000355357 | 0.997315 |
| PhcycC3H3_A+H | 4.25600e-05 | 0.999714 | 0.000347969 | 0.997663 |
| rad60anti     | 3.96351e-05 | 0.999753 | 0.000324056 | 0.997987 |
| rad45         | 3.60808e-05 | 0.999789 | 0.000294995 | 0.998282 |
| rad19syn      | 3.09843e-05 | 0.999820 | 0.000253327 | 0.998535 |
| rad20         | 2.75761e-05 | 0.999848 | 0.000225462 | 0.998760 |
| rad9          | 2.44171e-05 | 0.999872 | 0.000199633 | 0.998960 |
| rad65         | 1.84275e-05 | 0.999891 | 0.000150662 | 0.999111 |
| rad21         | 1.37168e-05 | 0.999904 | 0.000112148 | 0.999223 |
| rad11         | 1.30083e-05 | 0.999917 | 0.000106355 | 0.999329 |
| rad58         | 1.24103e-05 | 0.999930 | 0.000101466 | 0.999431 |
| rad54         | 9.73327e-06 | 0.999940 | 7.95790e-05 | 0.999510 |
| PAH8+H        | 9.51712e-06 | 0.999949 | 7.78117e-05 | 0.999588 |
| rad70         | 9.31397e-06 | 0.999958 | 7.61507e-05 | 0.999664 |
| rad37         | 7.82640e-06 | 0.999966 | 6.39884e-05 | 0.999728 |
| rad18         | 6.95400e-06 | 0.999973 | 5.68557e-05 | 0.999785 |
| rad36         | 6.32432e-06 | 0.999980 | 5.17074e-05 | 0.999837 |
| rad34         | 3.66997e-06 | 0.999983 | 3.00056e-05 | 0.999867 |
| rad7          | 2.57459e-06 | 0.999986 | 2.10498e-05 | 0.999888 |
| rad64         | 1.58092e-06 | 0.999987 | 1.29256e-05 | 0.999901 |
| rad15         | 1.50026e-06 | 0.999989 | 1.22661e-05 | 0.999913 |
| rad56         | 1.45290e-06 | 0.999990 | 1.18789e-05 | 0.999925 |
| rad28         | 1.23061e-06 | 0.999992 | 1.00615e-05 | 0.999935 |
| rad68syn      | 1.03849e-06 | 0.999993 | 8.49064e-06 | 0.999943 |
| rad55         | 1.02498e-06 | 0.999994 | 8.38023e-06 | 0.999952 |
| rad53         | 8.88042e-07 | 0.999995 | 7.26061e-06 | 0.999959 |
| rad62         | 7.88190e-07 | 0.999995 | 6.44422e-06 | 0.999966 |
| rad40syn      | 6.95351e-07 | 0.999996 | 5.68517e-06 | 0.999971 |
| rad68anti     | 6.60739e-07 | 0.999997 | 5.40219e-06 | 0.999977 |
| rad40anti     | 5.37618e-07 | 0.999997 | 4.39555e-06 | 0.999981 |
| rad24         | 4.62171e-07 | 0.999998 | 3.77870e-06 | 0.999985 |
| rad61         | 3.95208e-07 | 0.999998 | 3.23121e-06 | 0.999988 |
| rad13         | 2.73358e-07 | 0.999998 | 2.23497e-06 | 0.999990 |
| rad47         | 2.31728e-07 | 0.999999 | 1.89461e-06 | 0.999992 |
| rad12         | 2.25848e-07 | 0.999999 | 1.84653e-06 | 0.999994 |
| rad8          | 2.24323e-07 | 0.999999 | 1.83406e-06 | 0.999996 |
| rad42         | 1.79858e-07 | 0.999999 | 1.47051e-06 | 0.999997 |
| rad26         | 1.44809e-07 | 0.999999 | 1.18396e-06 | 0.999998 |
| rad43         | 1.10837e-07 | 0.999999 | 9.06201e-07 | 0.999999 |
| rad10         | 4.08869e-08 | 1.000000 | 3.34290e-07 | 1.000000 |
| rad25         | 2.57065e-08 | 1.000000 | 2.10176e-07 | 1.000000 |
| rad41         | 2.24266e-08 | 1.000000 | 1.83359e-07 | 1.000000 |
| rad33         | 1.54721e-08 | 1.000000 | 1.26500e-07 | 1.000000 |
| rad2          | 4.27527e-09 | 1.000000 | 3.49545e-08 | 1.000000 |
| rad5          | 1.97555e-09 | 1.000000 | 1.61520e-08 | 1.000000 |
| rad1          | 1.40529e-09 | 1.000000 | 1.14896e-08 | 1.000000 |
| rad3          | 8.31237e-10 | 1.000000 | 6.79617e-09 | 1.000000 |
| rad4          | 5.16577e-10 | 1.000000 | 4.22352e-09 | 1.000000 |
| rad14         | 3.06916e-10 | 1.000000 | 2.50934e-09 | 1.000000 |
| rad27         | 9.72758e-11 | 1.000000 | 7.95324e-10 | 1.000000 |

100000.000 Pa, 2500.00000 K

| Rate constant | True (fraction)    | Effective (fraction) |
|---------------|--------------------|----------------------|
| Total         | 5.32896e-13 (1.00) | 6.41942e-14 (1.00)   |

| species     | PYtrue      | Cumul    | PYeffective | Cumul    |
|-------------|-------------|----------|-------------|----------|
| Benzyl+C2H2 | 0.879537    | 0.879537 | 0.00000     | 0.00000  |
| Indene+H    | 0.0505703   | 0.930107 | 0.419800    | 0.419800 |
| PhCH2CCH+H  | 0.0380449   | 0.968152 | 0.315823    | 0.735623 |
| Ph+Allene   | 0.0114066   | 0.979559 | 0.0946897   | 0.830313 |
| PhCHCCH2+H  | 0.0104048   | 0.989964 | 0.0863737   | 0.916686 |
| PAH9+H      | 0.00142185  | 0.991385 | 0.0118032   | 0.928490 |
| PAH3+H      | 0.00128201  | 0.992667 | 0.0106424   | 0.939132 |
| rad38       | 0.000843306 | 0.993511 | 0.00700055  | 0.946133 |
| PAH7+H      | 0.000834844 | 0.994346 | 0.00693031  | 0.953063 |
| rad50       | 0.000741108 | 0.995087 | 0.00615217  | 0.959215 |
| rad19anti   | 0.000682423 | 0.995769 | 0.00566501  | 0.964880 |
| rad39       | 0.000575934 | 0.996345 | 0.00478102  | 0.969661 |
| rad51       | 0.000516216 | 0.996861 | 0.00428527  | 0.973946 |
| rad30       | 0.000444093 | 0.997305 | 0.00368656  | 0.977633 |
| rad71       | 0.000370366 | 0.997676 | 0.00307453  | 0.980707 |
| rad46       | 0.000327074 | 0.998003 | 0.00271515  | 0.983423 |
| PhCCH+CH3   | 0.000296726 | 0.998300 | 0.00246322  | 0.985886 |
| rad35       | 0.000279699 | 0.998579 | 0.00232187  | 0.988208 |
| Ph+MeAc     | 0.000272823 | 0.998852 | 0.00226479  | 0.990472 |



|               |             |          |             |          |
|---------------|-------------|----------|-------------|----------|
| rad73         | 0.000118394 | 0.998970 | 0.000982823 | 0.991455 |
| rad59         | 0.000107289 | 0.999078 | 0.000890638 | 0.992346 |
| rad23         | 9.59312e-05 | 0.999174 | 0.000796356 | 0.993142 |
| rad52         | 9.58992e-05 | 0.999270 | 0.000796090 | 0.993938 |
| rad67         | 8.04811e-05 | 0.999350 | 0.000668100 | 0.994606 |
| PhCCCH3+H     | 7.50113e-05 | 0.999425 | 0.000622693 | 0.995229 |
| rad6          | 7.15798e-05 | 0.999497 | 0.000594207 | 0.995823 |
| rad72         | 6.95608e-05 | 0.999566 | 0.000577447 | 0.996401 |
| rad60syn      | 6.91357e-05 | 0.999635 | 0.000573917 | 0.996975 |
| PAH10+CH3     | 4.96089e-05 | 0.999685 | 0.000411819 | 0.997387 |
| rad60anti     | 4.89677e-05 | 0.999734 | 0.000406496 | 0.997793 |
| PAH1+H        | 3.87319e-05 | 0.999773 | 0.000321526 | 0.998115 |
| rad19syn      | 3.01677e-05 | 0.999803 | 0.000250431 | 0.998365 |
| PhcycC3H3_A+H | 2.96935e-05 | 0.999833 | 0.000246495 | 0.998611 |
| rad45         | 2.08763e-05 | 0.999853 | 0.000173301 | 0.998785 |
| rad58         | 1.83037e-05 | 0.999872 | 0.000151945 | 0.998937 |
| rad9          | 1.68254e-05 | 0.999889 | 0.000139673 | 0.999076 |
| rad22         | 1.57320e-05 | 0.999904 | 0.000130596 | 0.999207 |
| rad20         | 1.52557e-05 | 0.999920 | 0.000126643 | 0.999334 |
| rad65         | 1.28757e-05 | 0.999932 | 0.000106886 | 0.999441 |
| rad70         | 9.15439e-06 | 0.999942 | 7.59935e-05 | 0.999517 |
| rad37         | 9.05736e-06 | 0.999951 | 7.51880e-05 | 0.999592 |
| rad54         | 8.13028e-06 | 0.999959 | 6.74921e-05 | 0.999659 |
| rad21         | 7.38516e-06 | 0.999966 | 6.13066e-05 | 0.999721 |
| PAH8+H        | 6.37802e-06 | 0.999972 | 5.29460e-05 | 0.999773 |
| rad11         | 5.98677e-06 | 0.999978 | 4.96981e-05 | 0.999823 |
| rad36         | 3.69988e-06 | 0.999982 | 3.07139e-05 | 0.999854 |
| rad34         | 3.38263e-06 | 0.999986 | 2.80803e-05 | 0.999882 |
| rad18         | 3.18984e-06 | 0.999989 | 2.64799e-05 | 0.999908 |
| rad7          | 1.28633e-06 | 0.999990 | 1.06783e-05 | 0.999919 |
| rad15         | 1.10460e-06 | 0.999991 | 9.16964e-06 | 0.999928 |
| rad64         | 1.09978e-06 | 0.999992 | 9.12960e-06 | 0.999937 |
| rad56         | 9.40384e-07 | 0.999993 | 7.80643e-06 | 0.999945 |
| rad55         | 8.30829e-07 | 0.999994 | 6.89698e-06 | 0.999952 |
| rad68syn      | 7.84694e-07 | 0.999995 | 6.51399e-06 | 0.999959 |
| rad28         | 6.27569e-07 | 0.999995 | 5.20966e-06 | 0.999964 |
| rad53         | 6.13173e-07 | 0.999996 | 5.09015e-06 | 0.999969 |
| rad62         | 5.35427e-07 | 0.999997 | 4.44475e-06 | 0.999973 |
| rad68anti     | 5.00026e-07 | 0.999997 | 4.15087e-06 | 0.999978 |
| rad40syn      | 4.89040e-07 | 0.999998 | 4.05968e-06 | 0.999982 |
| rad40anti     | 3.71091e-07 | 0.999998 | 3.08055e-06 | 0.999985 |
| rad24         | 3.13593e-07 | 0.999998 | 2.60324e-06 | 0.999987 |
| rad61         | 3.11955e-07 | 0.999999 | 2.58964e-06 | 0.999990 |
| rad8          | 2.32249e-07 | 0.999999 | 1.92797e-06 | 0.999992 |
| rad12         | 2.05876e-07 | 0.999999 | 1.70904e-06 | 0.999993 |
| rad13         | 1.45028e-07 | 0.999999 | 1.20393e-06 | 0.999995 |
| rad47         | 1.40039e-07 | 0.999999 | 1.16251e-06 | 0.999996 |
| rad43         | 1.22635e-07 | 0.999999 | 1.01804e-06 | 0.999997 |
| rad42         | 1.13813e-07 | 1.000000 | 9.44799e-07 | 0.999998 |
| rad26         | 1.08298e-07 | 1.000000 | 8.99020e-07 | 0.999999 |
| rad10         | 3.42641e-08 | 1.000000 | 2.84438e-07 | 0.999999 |
| rad41         | 2.12637e-08 | 1.000000 | 1.76517e-07 | 0.999999 |
| rad25         | 1.68996e-08 | 1.000000 | 1.40289e-07 | 0.999999 |
| rad33         | 9.23320e-09 | 1.000000 | 7.66478e-08 | 0.999999 |
| rad2          | 3.21414e-09 | 1.000000 | 2.66816e-08 | 0.999999 |
| rad5          | 2.20166e-09 | 1.000000 | 1.82767e-08 | 0.999999 |
| rad1          | 1.12931e-09 | 1.000000 | 9.37479e-09 | 0.999999 |
| rad3          | 4.24266e-10 | 1.000000 | 3.52197e-09 | 0.999999 |
| rad4          | 2.59556e-10 | 1.000000 | 2.15466e-09 | 0.999999 |
| rad14         | 2.21963e-10 | 1.000000 | 1.84258e-09 | 0.999999 |
| rad27         | 9.78236e-11 | 1.000000 | 8.12066e-10 | 0.999999 |

100000.000 Pa, 2750.00000 K

=====

| Rate constant | True (fraction) | Effective (fraction) |
|---------------|-----------------|----------------------|
|---------------|-----------------|----------------------|

|       |                     |                     |
|-------|---------------------|---------------------|
| Total | 8.05113e-13 (1.00 ) | 1.00635e-13 (1.00 ) |
|-------|---------------------|---------------------|

| species     | PYtrue      | Cumul    | PYeffective | Cumul    |
|-------------|-------------|----------|-------------|----------|
| Benzyl+C2H2 | 0.875005    | 0.875005 | 0.00000     | 0.00000  |
| PhCH2CCH+H  | 0.0492752   | 0.924280 | 0.394218    | 0.394218 |
| Indene+H    | 0.0409206   | 0.965201 | 0.327378    | 0.721596 |
| PhCHCCH2+H  | 0.0128606   | 0.978061 | 0.102889    | 0.824485 |
| Ph+Allene   | 0.0121852   | 0.990247 | 0.0974859   | 0.921971 |
| PAH3+H      | 0.00167257  | 0.991919 | 0.0133811   | 0.935352 |
| PAH9+H      | 0.00128235  | 0.993202 | 0.0102592   | 0.945611 |
| PAH7+H      | 0.000855108 | 0.994057 | 0.00684114  | 0.952452 |
| rad38       | 0.000773008 | 0.994830 | 0.00618431  | 0.958637 |
| rad19anti   | 0.000761717 | 0.995591 | 0.00609398  | 0.964731 |

|               |             |          |             |          |
|---------------|-------------|----------|-------------|----------|
| rad50         | 0.000613264 | 0.996205 | 0.00490631  | 0.969637 |
| rad39         | 0.000461775 | 0.996666 | 0.00369435  | 0.973331 |
| rad30         | 0.000454913 | 0.997121 | 0.00363945  | 0.976971 |
| rad51         | 0.000392246 | 0.997514 | 0.00313809  | 0.980109 |
| Ph+MeAc       | 0.000339461 | 0.997853 | 0.00271580  | 0.982825 |
| rad46         | 0.000296583 | 0.998150 | 0.00237276  | 0.985197 |
| PhCCH+CH3     | 0.000293180 | 0.998443 | 0.00234554  | 0.987543 |
| rad35         | 0.000291992 | 0.998735 | 0.00233603  | 0.989879 |
| rad71         | 0.000230455 | 0.998965 | 0.00184371  | 0.991723 |
| rad59         | 0.000135051 | 0.999100 | 0.00108045  | 0.992803 |
| rad67         | 0.000106842 | 0.999207 | 0.000854768 | 0.993658 |
| PhCCCH3+H     | 9.59768e-05 | 0.999303 | 0.000767846 | 0.994426 |
| rad60syn      | 8.07585e-05 | 0.999384 | 0.000646094 | 0.995072 |
| rad52         | 7.67612e-05 | 0.999461 | 0.000614115 | 0.995686 |
| rad73         | 7.62868e-05 | 0.999537 | 0.000610319 | 0.996296 |
| rad60anti     | 5.78233e-05 | 0.999595 | 0.000462605 | 0.996759 |
| PAH10+CH3     | 5.75312e-05 | 0.999652 | 0.000460268 | 0.997219 |
| rad23         | 4.64708e-05 | 0.999699 | 0.000371782 | 0.997591 |
| rad72         | 4.16219e-05 | 0.999740 | 0.000332989 | 0.997924 |
| rad19syn      | 3.72586e-05 | 0.999778 | 0.000298081 | 0.998222 |
| PAH1+H        | 3.41290e-05 | 0.999812 | 0.000273043 | 0.998495 |
| rad6          | 2.91013e-05 | 0.999841 | 0.000232820 | 0.998728 |
| rad58         | 2.66000e-05 | 0.999867 | 0.000212809 | 0.998941 |
| PhcycC3H3_A+H | 2.53974e-05 | 0.999893 | 0.000203188 | 0.999144 |
| rad45         | 1.20601e-05 | 0.999905 | 9.64845e-05 | 0.999240 |
| rad9          | 1.07822e-05 | 0.999916 | 8.62613e-05 | 0.999327 |
| rad70         | 1.07372e-05 | 0.999926 | 8.59008e-05 | 0.999412 |
| rad37         | 1.05938e-05 | 0.999937 | 8.47535e-05 | 0.999497 |
| rad65         | 9.68007e-06 | 0.999947 | 7.74437e-05 | 0.999575 |
| rad20         | 9.20797e-06 | 0.999956 | 7.36668e-05 | 0.999648 |
| rad54         | 7.77956e-06 | 0.999964 | 6.22390e-05 | 0.999711 |
| rad22         | 6.86339e-06 | 0.999971 | 5.49093e-05 | 0.999766 |
| PAH8+H        | 5.48168e-06 | 0.999976 | 4.38552e-05 | 0.999809 |
| rad21         | 4.32163e-06 | 0.999980 | 3.45744e-05 | 0.999844 |
| rad34         | 3.89349e-06 | 0.999984 | 3.11492e-05 | 0.999875 |
| rad11         | 3.06918e-06 | 0.999987 | 2.45545e-05 | 0.999900 |
| rad36         | 2.15755e-06 | 0.999989 | 1.72611e-05 | 0.999917 |
| rad18         | 1.63574e-06 | 0.999991 | 1.30865e-05 | 0.999930 |
| rad64         | 9.39140e-07 | 0.999992 | 7.51342e-06 | 0.999938 |
| rad55         | 7.93749e-07 | 0.999993 | 6.35025e-06 | 0.999944 |
| rad68syn      | 7.89956e-07 | 0.999994 | 6.31990e-06 | 0.999950 |
| rad56         | 7.75684e-07 | 0.999994 | 6.20573e-06 | 0.999956 |
| rad15         | 7.55649e-07 | 0.999995 | 6.04544e-06 | 0.999962 |
| rad7          | 6.29172e-07 | 0.999996 | 5.03358e-06 | 0.999967 |
| rad53         | 5.38191e-07 | 0.999996 | 4.30570e-06 | 0.999972 |
| rad68anti     | 5.04095e-07 | 0.999997 | 4.03292e-06 | 0.999976 |
| rad40syn      | 4.52373e-07 | 0.999997 | 3.61993e-06 | 0.999979 |
| rad62         | 4.45591e-07 | 0.999998 | 3.56488e-06 | 0.999983 |
| rad28         | 3.47381e-07 | 0.999998 | 2.77916e-06 | 0.999986 |
| rad40anti     | 3.34312e-07 | 0.999998 | 2.67461e-06 | 0.999988 |
| rad61         | 3.16351e-07 | 0.999999 | 2.53091e-06 | 0.999991 |
| rad8          | 2.33737e-07 | 0.999999 | 1.86997e-06 | 0.999993 |
| rad24         | 2.17128e-07 | 0.999999 | 1.73710e-06 | 0.999995 |
| rad12         | 1.71891e-07 | 0.999999 | 1.37518e-06 | 0.999996 |
| rad43         | 1.56394e-07 | 0.999999 | 1.25120e-06 | 0.999997 |
| rad47         | 9.68494e-08 | 1.000000 | 7.74827e-07 | 0.999998 |
| rad42         | 8.54149e-08 | 1.000000 | 6.83347e-07 | 0.999999 |
| rad26         | 7.73958e-08 | 1.000000 | 6.19192e-07 | 0.999999 |
| rad13         | 7.51183e-08 | 1.000000 | 6.00970e-07 | 1.000000 |
| rad10         | 2.64480e-08 | 1.000000 | 2.11592e-07 | 1.000000 |
| rad41         | 2.57969e-08 | 1.000000 | 2.06384e-07 | 1.000000 |
| rad25         | 1.19020e-08 | 1.000000 | 9.52200e-08 | 1.000000 |
| rad33         | 5.36309e-09 | 1.000000 | 4.29065e-08 | 1.000000 |
| rad2          | 2.30508e-09 | 1.000000 | 1.84414e-08 | 1.000000 |
| rad5          | 2.27917e-09 | 1.000000 | 1.82341e-08 | 1.000000 |
| rad1          | 8.75791e-10 | 1.000000 | 7.00661e-09 | 1.000000 |
| rad3          | 2.14652e-10 | 1.000000 | 1.71728e-09 | 1.000000 |
| rad14         | 1.72872e-10 | 1.000000 | 1.38303e-09 | 1.000000 |
| rad4          | 1.28894e-10 | 1.000000 | 1.03120e-09 | 1.000000 |
| rad27         | 9.16043e-11 | 1.000000 | 7.32864e-10 | 1.000000 |

100000.000 Pa, 3000.00000 K

| Rate constant | True (fraction)    | Effective (fraction) |             |         |
|---------------|--------------------|----------------------|-------------|---------|
| Total         | 1.15309e-12 (1.00) | 1.53990e-13 (1.00)   |             |         |
| species       | PYtrue             | Cumul                | PYeffective | Cumul   |
| Benzyl+C2H2   | 0.866455           | 0.866455             | 0.00000     | 0.00000 |

|               |             |          |             |          |
|---------------|-------------|----------|-------------|----------|
| PhCH2CCH+H    | 0.0611903   | 0.927645 | 0.458201    | 0.458201 |
| Indene+H      | 0.0333944   | 0.961040 | 0.250062    | 0.708263 |
| PhCHCCH2+H    | 0.0155762   | 0.976616 | 0.116636    | 0.824899 |
| Ph+Allene     | 0.0132776   | 0.989894 | 0.0994242   | 0.924323 |
| PAH3+H        | 0.00206837  | 0.991962 | 0.0154883   | 0.939812 |
| PAH9+H        | 0.00119638  | 0.993158 | 0.00895866  | 0.948770 |
| PAH7+H        | 0.000926793 | 0.994085 | 0.00693995  | 0.955710 |
| rad19anti     | 0.000797756 | 0.994883 | 0.00597370  | 0.961684 |
| rad38         | 0.000734984 | 0.995618 | 0.00550366  | 0.967187 |
| rad50         | 0.000578609 | 0.996196 | 0.00433270  | 0.971520 |
| rad30         | 0.000455587 | 0.996652 | 0.00341149  | 0.974932 |
| rad39         | 0.000428737 | 0.997081 | 0.00321044  | 0.978142 |
| Ph+MeAc       | 0.000415139 | 0.997496 | 0.00310861  | 0.981251 |
| rad51         | 0.000351460 | 0.997847 | 0.00263178  | 0.983882 |
| PhCCH+CH3     | 0.000321414 | 0.998169 | 0.00240679  | 0.986289 |
| rad35         | 0.000308933 | 0.998478 | 0.00231333  | 0.988603 |
| rad46         | 0.000284796 | 0.998762 | 0.00213259  | 0.990735 |
| rad71         | 0.000162772 | 0.998925 | 0.00121885  | 0.991954 |
| rad59         | 0.000161510 | 0.999087 | 0.00120941  | 0.993163 |
| rad67         | 0.000134502 | 0.999221 | 0.00100717  | 0.994171 |
| PhCCCH3+H     | 0.000117999 | 0.999339 | 0.000883595 | 0.995054 |
| rad60syn      | 9.05200e-05 | 0.999430 | 0.000677825 | 0.995732 |
| rad52         | 7.11811e-05 | 0.999501 | 0.000533013 | 0.996265 |
| PAH10+CH3     | 7.04452e-05 | 0.999571 | 0.000527502 | 0.996793 |
| rad60anti     | 6.54317e-05 | 0.999637 | 0.000489961 | 0.997283 |
| rad73         | 5.72398e-05 | 0.999694 | 0.000428619 | 0.997711 |
| rad19syn      | 5.13889e-05 | 0.999745 | 0.000384806 | 0.998096 |
| PAH1+H        | 3.69129e-05 | 0.999782 | 0.000276409 | 0.998372 |
| rad58         | 3.64182e-05 | 0.999819 | 0.000272704 | 0.998645 |
| rad72         | 2.69974e-05 | 0.999846 | 0.000202160 | 0.998847 |
| PhcycC3H3_A+H | 2.60608e-05 | 0.999872 | 0.000195147 | 0.999042 |
| rad23         | 2.35317e-05 | 0.999895 | 0.000176208 | 0.999219 |
| rad70         | 1.36142e-05 | 0.999909 | 0.000101945 | 0.999321 |
| rad6          | 1.21438e-05 | 0.999921 | 9.09346e-05 | 0.999411 |
| rad37         | 1.19315e-05 | 0.999933 | 8.93444e-05 | 0.999501 |
| rad65         | 8.54514e-06 | 0.999942 | 6.39871e-05 | 0.999565 |
| rad54         | 8.02647e-06 | 0.999950 | 6.01033e-05 | 0.999625 |
| rad45         | 6.99927e-06 | 0.999957 | 5.24114e-05 | 0.999677 |
| rad9          | 6.69543e-06 | 0.999963 | 5.01363e-05 | 0.999727 |
| PAH8+H        | 6.56099e-06 | 0.999970 | 4.91295e-05 | 0.999777 |
| rad20         | 5.95186e-06 | 0.999976 | 4.45683e-05 | 0.999821 |
| rad34         | 5.03077e-06 | 0.999981 | 3.76711e-05 | 0.999859 |
| rad22         | 3.38559e-06 | 0.999984 | 2.53517e-05 | 0.999884 |
| rad21         | 2.70118e-06 | 0.999987 | 2.02268e-05 | 0.999904 |
| rad11         | 1.74839e-06 | 0.999989 | 1.30922e-05 | 0.999917 |
| rad36         | 1.26213e-06 | 0.999990 | 9.45097e-06 | 0.999927 |
| rad68syn      | 1.01842e-06 | 0.999991 | 7.62604e-06 | 0.999935 |
| rad64         | 1.00298e-06 | 0.999992 | 7.51048e-06 | 0.999942 |
| rad18         | 9.12460e-07 | 0.999993 | 6.83262e-06 | 0.999949 |
| rad56         | 8.42541e-07 | 0.999994 | 6.30906e-06 | 0.999955 |
| rad55         | 8.36359e-07 | 0.999995 | 6.26276e-06 | 0.999961 |
| rad68anti     | 6.50069e-07 | 0.999995 | 4.86780e-06 | 0.999966 |
| rad53         | 5.88456e-07 | 0.999996 | 4.40643e-06 | 0.999971 |
| rad40syn      | 5.64963e-07 | 0.999996 | 4.23052e-06 | 0.999975 |
| rad15         | 4.98697e-07 | 0.999997 | 3.73431e-06 | 0.999979 |
| rad62         | 4.74664e-07 | 0.999997 | 3.55434e-06 | 0.999982 |
| rad40anti     | 4.11821e-07 | 0.999998 | 3.08377e-06 | 0.999985 |
| rad61         | 3.88353e-07 | 0.999998 | 2.90804e-06 | 0.999988 |
| rad7          | 3.10480e-07 | 0.999998 | 2.32491e-06 | 0.999991 |
| rad8          | 2.29938e-07 | 0.999999 | 1.72181e-06 | 0.999992 |
| rad43         | 2.03824e-07 | 0.999999 | 1.52626e-06 | 0.999994 |
| rad28         | 2.01789e-07 | 0.999999 | 1.51102e-06 | 0.999995 |
| rad24         | 1.52273e-07 | 0.999999 | 1.14024e-06 | 0.999996 |
| rad12         | 1.36927e-07 | 0.999999 | 1.02533e-06 | 0.999998 |
| rad42         | 8.57578e-08 | 0.999999 | 6.42166e-07 | 0.999998 |
| rad47         | 8.01412e-08 | 1.000000 | 6.00108e-07 | 0.999999 |
| rad26         | 5.31817e-08 | 1.000000 | 3.98231e-07 | 0.999999 |
| rad13         | 3.93873e-08 | 1.000000 | 2.94937e-07 | 0.999999 |
| rad41         | 3.48798e-08 | 1.000000 | 2.61184e-07 | 1.000000 |
| rad10         | 1.93408e-08 | 1.000000 | 1.44826e-07 | 1.000000 |
| rad25         | 8.91768e-09 | 1.000000 | 6.67767e-08 | 1.000000 |
| rad33         | 3.13868e-09 | 1.000000 | 2.35029e-08 | 1.000000 |
| rad5          | 2.25812e-09 | 1.000000 | 1.69091e-08 | 1.000000 |
| rad2          | 1.60818e-09 | 1.000000 | 1.20422e-08 | 1.000000 |
| rad1          | 6.65940e-10 | 1.000000 | 4.98665e-09 | 1.000000 |
| rad14         | 1.44203e-10 | 1.000000 | 1.07981e-09 | 1.000000 |
| rad3          | 1.11449e-10 | 1.000000 | 8.34548e-10 | 1.000000 |
| rad27         | 8.13747e-11 | 1.000000 | 6.09344e-10 | 1.000000 |
| rad4          | 6.56111e-11 | 1.000000 | 4.91304e-10 | 1.000000 |

100000.000 Pa, 3250.00000 K

| =====         |                     |          |                      |          |
|---------------|---------------------|----------|----------------------|----------|
| Rate constant | True (fraction)     |          | Effective (fraction) |          |
| -----         |                     |          |                      |          |
| Total         | 1.58309e-12 (1.00 ) |          | 2.28899e-13 (1.00 )  |          |
| species       | PYtrue              | Cumul    | PYeffective          | Cumul    |
| -----         |                     |          |                      |          |
| Benzyl+C2H2   | 0.855410            | 0.855410 | 0.000000             | 0.000000 |
| PhCH2CCH+H    | 0.0734370           | 0.928847 | 0.507897             | 0.507897 |
| Indene+H      | 0.0274525           | 0.956299 | 0.189864             | 0.697761 |
| PhCHCCH2+H    | 0.0184023           | 0.974702 | 0.127272             | 0.825033 |
| Ph+Allene     | 0.0145945           | 0.989296 | 0.100937             | 0.925970 |
| PAH3+H        | 0.00244083          | 0.991737 | 0.0168810            | 0.942851 |
| PAH9+H        | 0.00112139          | 0.992859 | 0.00775566           | 0.950607 |
| PAH7+H        | 0.00101402          | 0.993873 | 0.00701303           | 0.957620 |
| rad19anti     | 0.000801135         | 0.994674 | 0.00554072           | 0.963160 |
| rad38         | 0.000701102         | 0.995375 | 0.00484888           | 0.968009 |
| rad50         | 0.000585772         | 0.995961 | 0.00405125           | 0.972061 |
| Ph+MeAc       | 0.000490983         | 0.996452 | 0.00339568           | 0.975456 |
| rad30         | 0.000447969         | 0.996900 | 0.00309820           | 0.978554 |
| rad39         | 0.000436101         | 0.997336 | 0.00301612           | 0.981571 |
| PhCCH+CH3     | 0.000380348         | 0.997716 | 0.00263052           | 0.984201 |
| rad51         | 0.000354172         | 0.998070 | 0.00244948           | 0.986651 |
| rad35         | 0.000324147         | 0.998394 | 0.00224183           | 0.988892 |
| rad46         | 0.000277490         | 0.998672 | 0.00191914           | 0.990812 |
| rad59         | 0.000184948         | 0.998857 | 0.00127912           | 0.992091 |
| rad67         | 0.000160559         | 0.999017 | 0.00111044           | 0.993201 |
| rad71         | 0.000140647         | 0.999158 | 0.000972729          | 0.994174 |
| PhCCCH3+H     | 0.000140519         | 0.999298 | 0.000971845          | 0.995146 |
| rad60syn      | 9.80549e-05         | 0.999396 | 0.000678157          | 0.995824 |
| PAH10+CH3     | 8.50935e-05         | 0.999482 | 0.000588515          | 0.996412 |
| rad52         | 7.20902e-05         | 0.999554 | 0.000498582          | 0.996911 |
| rad19syn      | 7.19289e-05         | 0.999626 | 0.000497467          | 0.997408 |
| rad60anti     | 7.14673e-05         | 0.999697 | 0.000494275          | 0.997903 |
| rad73         | 5.24558e-05         | 0.999750 | 0.000362789          | 0.998265 |
| rad58         | 4.69943e-05         | 0.999797 | 0.000325017          | 0.998590 |
| PAH1+H        | 4.43265e-05         | 0.999841 | 0.000306566          | 0.998897 |
| PhcycC3H3_A+H | 2.89070e-05         | 0.999870 | 0.000199924          | 0.999097 |
| rad72         | 2.08582e-05         | 0.999891 | 0.000144257          | 0.999241 |
| rad70         | 1.73917e-05         | 0.999908 | 0.000120283          | 0.999361 |
| rad37         | 1.28421e-05         | 0.999921 | 8.88170e-05          | 0.999450 |
| rad23         | 1.23112e-05         | 0.999933 | 8.51454e-05          | 0.999535 |
| PAH8+H        | 9.52128e-06         | 0.999943 | 6.58501e-05          | 0.999601 |
| rad65         | 8.51403e-06         | 0.999951 | 5.88839e-05          | 0.999660 |
| rad54         | 8.49516e-06         | 0.999960 | 5.87533e-05          | 0.999719 |
| rad34         | 6.64356e-06         | 0.999966 | 4.59475e-05          | 0.999765 |
| rad6          | 5.31886e-06         | 0.999972 | 3.67857e-05          | 0.999802 |
| rad9          | 4.13988e-06         | 0.999976 | 2.86318e-05          | 0.999830 |
| rad45         | 4.10802e-06         | 0.999980 | 2.84114e-05          | 0.999859 |
| rad20         | 4.06312e-06         | 0.999984 | 2.81009e-05          | 0.999887 |
| rad22         | 1.83413e-06         | 0.999986 | 1.26850e-05          | 0.999899 |
| rad21         | 1.77997e-06         | 0.999988 | 1.23105e-05          | 0.999912 |
| rad68syn      | 1.44467e-06         | 0.999989 | 9.99149e-06          | 0.999922 |
| rad64         | 1.21204e-06         | 0.999990 | 8.38260e-06          | 0.999930 |
| rad11         | 1.09519e-06         | 0.999991 | 7.57447e-06          | 0.999938 |
| rad56         | 1.03561e-06         | 0.999992 | 7.16240e-06          | 0.999945 |
| rad68anti     | 9.21686e-07         | 0.999993 | 6.37447e-06          | 0.999951 |
| rad55         | 9.10436e-07         | 0.999994 | 6.29666e-06          | 0.999958 |
| rad40syn      | 8.15547e-07         | 0.999995 | 5.64040e-06          | 0.999963 |
| rad36         | 7.45629e-07         | 0.999996 | 5.15684e-06          | 0.999968 |
| rad53         | 7.02565e-07         | 0.999996 | 4.85900e-06          | 0.999973 |
| rad40anti     | 5.96393e-07         | 0.999997 | 4.12471e-06          | 0.999977 |
| rad62         | 5.77309e-07         | 0.999998 | 3.99272e-06          | 0.999981 |
| rad18         | 5.43664e-07         | 0.999998 | 3.76003e-06          | 0.999985 |
| rad61         | 5.06581e-07         | 0.999999 | 3.50356e-06          | 0.999989 |
| rad15         | 3.25817e-07         | 0.999999 | 2.25338e-06          | 0.999991 |
| rad43         | 2.57835e-07         | 0.999999 | 1.78321e-06          | 0.999993 |
| rad8          | 2.21891e-07         | 0.999999 | 1.53462e-06          | 0.999994 |
| rad7          | 1.59237e-07         | 1.000000 | 1.10130e-06          | 0.999995 |
| rad28         | 1.22136e-07         | 1.000000 | 8.44703e-07          | 0.999996 |
| rad24         | 1.08015e-07         | 1.000000 | 7.47039e-07          | 0.999997 |
| rad12         | 1.06734e-07         | 1.000000 | 7.38181e-07          | 0.999998 |
| rad42         | 1.05113e-07         | 1.000000 | 7.26970e-07          | 0.999998 |
| rad47         | 7.62828e-08         | 1.000000 | 5.27579e-07          | 0.999999 |
| rad41         | 4.72681e-08         | 1.000000 | 3.26911e-07          | 0.999999 |
| rad26         | 3.58032e-08         | 1.000000 | 2.47619e-07          | 0.999999 |
| rad13         | 2.15472e-08         | 1.000000 | 1.49023e-07          | 1.000000 |
| rad10         | 1.37485e-08         | 1.000000 | 9.50861e-08          | 1.000000 |
| rad25         | 7.00210e-09         | 1.000000 | 4.84272e-08          | 1.000000 |

|       |             |         |             |          |
|-------|-------------|---------|-------------|----------|
| rad5  | 2.19000e-09 | 1.00000 | 1.51462e-08 | 1.000000 |
| rad33 | 1.90119e-09 | 1.00000 | 1.31488e-08 | 1.000000 |
| rad2  | 1.11609e-09 | 1.00000 | 7.71896e-09 | 1.000000 |
| rad1  | 5.03501e-10 | 1.00000 | 3.48226e-09 | 1.000000 |
| rad14 | 1.25540e-10 | 1.00000 | 8.68245e-10 | 1.000000 |
| rad27 | 6.99570e-11 | 1.00000 | 4.83829e-10 | 1.000000 |
| rad3  | 6.10983e-11 | 1.00000 | 4.22561e-10 | 1.000000 |
| rad4  | 3.53135e-11 | 1.00000 | 2.44232e-10 | 1.000000 |

100000.000 Pa, 3500.00000 K

=====

| Rate constant | True (fraction)     | Effective (fraction) |
|---------------|---------------------|----------------------|
| Total         | 2.10046e-12 (1.00 ) | 3.30007e-13 (1.00 )  |

| species       | PYtrue      | Cumul    | PYeffective | Cumul    |
|---------------|-------------|----------|-------------|----------|
| Benzyl+C2H2   | 0.842888    | 0.842888 | 0.00000     | 0.00000  |
| PhCH2CCH+H    | 0.0857254   | 0.928613 | 0.545634    | 0.545634 |
| Indene+H      | 0.0227425   | 0.951356 | 0.144754    | 0.690388 |
| PhCHCCH2+H    | 0.0212367   | 0.972593 | 0.135170    | 0.825558 |
| Ph+Allene     | 0.0160699   | 0.988662 | 0.102283    | 0.927841 |
| PAH3+H        | 0.00277289  | 0.991435 | 0.0176492   | 0.945490 |
| PAH7+H        | 0.00109668  | 0.992532 | 0.00698025  | 0.952470 |
| PAH9+H        | 0.00104079  | 0.993573 | 0.00662453  | 0.959095 |
| rad19anti     | 0.000782223 | 0.994355 | 0.00497878  | 0.964074 |
| rad38         | 0.000660626 | 0.995016 | 0.00420482  | 0.968279 |
| rad50         | 0.000604401 | 0.995620 | 0.00384696  | 0.972126 |
| Ph+MeAc       | 0.000560223 | 0.996180 | 0.00356577  | 0.975691 |
| PhCCH+CH3     | 0.000468216 | 0.996649 | 0.00298015  | 0.978671 |
| rad39         | 0.000458429 | 0.997107 | 0.00291786  | 0.981589 |
| rad30         | 0.000434248 | 0.997541 | 0.00276394  | 0.984353 |
| rad51         | 0.000374752 | 0.997916 | 0.00238526  | 0.986739 |
| rad35         | 0.000334972 | 0.998251 | 0.00213206  | 0.988871 |
| rad46         | 0.000268275 | 0.998519 | 0.00170755  | 0.990578 |
| rad59         | 0.000204549 | 0.998724 | 0.00130193  | 0.991880 |
| rad67         | 0.000183082 | 0.998907 | 0.00116530  | 0.993045 |
| PhCCCH3+H     | 0.000163713 | 0.999071 | 0.00104202  | 0.994087 |
| rad71         | 0.000146587 | 0.999217 | 0.000933015 | 0.995020 |
| rad60syn      | 0.000103377 | 0.999321 | 0.000657983 | 0.995678 |
| PAH10+CH3     | 9.92476e-05 | 0.999420 | 0.000631702 | 0.996310 |
| rad19syn      | 9.82500e-05 | 0.999518 | 0.000625352 | 0.996935 |
| rad60anti     | 7.58935e-05 | 0.999594 | 0.000483055 | 0.997418 |
| rad52         | 7.51238e-05 | 0.999669 | 0.000478156 | 0.997897 |
| rad58         | 5.77012e-05 | 0.999727 | 0.000367262 | 0.998264 |
| rad73         | 5.60307e-05 | 0.999783 | 0.000356630 | 0.998621 |
| PAH1+H        | 5.43977e-05 | 0.999837 | 0.000346237 | 0.998967 |
| PhcycC3H3_A+H | 3.25456e-05 | 0.999870 | 0.000207149 | 0.999174 |
| rad70         | 2.17330e-05 | 0.999891 | 0.000138328 | 0.999312 |
| rad72         | 2.02042e-05 | 0.999912 | 0.000128598 | 0.999441 |
| PAH8+H        | 1.43607e-05 | 0.999926 | 9.14045e-05 | 0.999532 |
| rad37         | 1.32868e-05 | 0.999939 | 8.45692e-05 | 0.999617 |
| rad54         | 9.02661e-06 | 0.999948 | 5.74535e-05 | 0.999674 |
| rad65         | 8.92566e-06 | 0.999957 | 5.68110e-05 | 0.999731 |
| rad34         | 8.59879e-06 | 0.999966 | 5.47305e-05 | 0.999786 |
| rad23         | 6.65386e-06 | 0.999973 | 4.23512e-05 | 0.999828 |
| rad20         | 2.89903e-06 | 0.999975 | 1.84521e-05 | 0.999847 |
| rad9          | 2.59114e-06 | 0.999978 | 1.64923e-05 | 0.999863 |
| rad6          | 2.49892e-06 | 0.999981 | 1.59054e-05 | 0.999879 |
| rad45         | 2.44952e-06 | 0.999983 | 1.55910e-05 | 0.999895 |
| rad68syn      | 2.04775e-06 | 0.999985 | 1.30337e-05 | 0.999908 |
| rad64         | 1.50821e-06 | 0.999987 | 9.59961e-06 | 0.999917 |
| rad68anti     | 1.30549e-06 | 0.999988 | 8.30933e-06 | 0.999926 |
| rad56         | 1.30089e-06 | 0.999989 | 8.28001e-06 | 0.999934 |
| rad21         | 1.22463e-06 | 0.999990 | 7.79465e-06 | 0.999942 |
| rad40syn      | 1.19788e-06 | 0.999992 | 7.62438e-06 | 0.999949 |
| rad22         | 1.07217e-06 | 0.999993 | 6.82424e-06 | 0.999956 |
| rad55         | 9.94598e-07 | 0.999994 | 6.33052e-06 | 0.999962 |
| rad40anti     | 8.84918e-07 | 0.999994 | 5.63242e-06 | 0.999968 |
| rad53         | 8.49663e-07 | 0.999995 | 5.40802e-06 | 0.999973 |
| rad11         | 7.42193e-07 | 0.999996 | 4.72399e-06 | 0.999978 |
| rad62         | 7.23485e-07 | 0.999997 | 4.60492e-06 | 0.999983 |
| rad61         | 6.51816e-07 | 0.999997 | 4.14875e-06 | 0.999987 |
| rad36         | 4.46913e-07 | 0.999998 | 2.84456e-06 | 0.999990 |
| rad18         | 3.41552e-07 | 0.999998 | 2.17395e-06 | 0.999992 |
| rad43         | 3.13696e-07 | 0.999999 | 1.99665e-06 | 0.999994 |
| rad15         | 2.14024e-07 | 0.999999 | 1.36224e-06 | 0.999995 |
| rad8          | 2.10551e-07 | 0.999999 | 1.34014e-06 | 0.999997 |
| rad42         | 1.37293e-07 | 0.999999 | 8.73859e-07 | 0.999998 |
| rad7          | 8.63508e-08 | 0.999999 | 5.49615e-07 | 0.999998 |

|       |             |          |             |          |
|-------|-------------|----------|-------------|----------|
| rad12 | 8.26015e-08 | 0.999999 | 5.25751e-07 | 0.999999 |
| rad47 | 7.75808e-08 | 0.999999 | 4.93795e-07 | 0.999999 |
| rad24 | 7.75418e-08 | 0.999999 | 4.93546e-07 | 1.000000 |
| rad28 | 7.66846e-08 | 1.000000 | 4.88090e-07 | 1.000000 |
| rad41 | 6.19341e-08 | 1.000000 | 3.94205e-07 | 1.000000 |
| rad26 | 2.39764e-08 | 1.000000 | 1.52607e-07 | 1.000000 |
| rad13 | 1.24928e-08 | 1.000000 | 7.95152e-08 | 1.000000 |
| rad10 | 9.68252e-09 | 1.000000 | 6.16283e-08 | 1.000000 |
| rad25 | 5.67689e-09 | 1.000000 | 3.61329e-08 | 1.000000 |
| rad5  | 2.10614e-09 | 1.000000 | 1.34054e-08 | 1.000000 |
| rad33 | 1.20744e-09 | 1.000000 | 7.68522e-09 | 1.000000 |
| rad2  | 7.85865e-10 | 1.000000 | 5.00196e-09 | 1.000000 |
| rad1  | 3.81766e-10 | 1.000000 | 2.42991e-09 | 1.000000 |
| rad14 | 1.11371e-10 | 1.000000 | 7.08863e-10 | 1.000000 |
| rad27 | 5.91290e-11 | 1.000000 | 3.76350e-10 | 1.000000 |
| rad3  | 3.58492e-11 | 1.000000 | 2.28177e-10 | 1.000000 |
| rad4  | 2.04212e-11 | 1.000000 | 1.29979e-10 | 1.000000 |

100000.000 Pa, 3750.00000 K

| Rate constant | True (fraction)     | Effective (fraction) |
|---------------|---------------------|----------------------|
| Total         | 2.70978e-12 (1.00 ) | 4.61773e-13 (1.00 )  |

| species       | PYtrue      | Cumul    | PYeffective | Cumul    |
|---------------|-------------|----------|-------------|----------|
| Benzyl+C2H2   | 0.829590    | 0.829590 | 0.000000    | 0.000000 |
| PhCH2CCH+H    | 0.0978302   | 0.927420 | 0.574088    | 0.574088 |
| PhCHCCH2+H    | 0.0240172   | 0.951437 | 0.140938    | 0.715026 |
| Indene+H      | 0.0190010   | 0.970438 | 0.111502    | 0.826528 |
| Ph+Allene     | 0.0176529   | 0.988091 | 0.103591    | 0.930119 |
| PAH3+H        | 0.00305659  | 0.991148 | 0.0179367   | 0.948056 |
| PAH7+H        | 0.00116561  | 0.992314 | 0.00684006  | 0.954896 |
| PAH9+H        | 0.000952626 | 0.993266 | 0.00559021  | 0.960486 |
| rad19anti     | 0.000749139 | 0.994015 | 0.00439610  | 0.964882 |
| rad50         | 0.000618982 | 0.994634 | 0.00363232  | 0.968514 |
| Ph+MeAc       | 0.000618521 | 0.995253 | 0.00362961  | 0.972144 |
| rad38         | 0.000612077 | 0.995865 | 0.00359180  | 0.975736 |
| PhCCH+CH3     | 0.000582715 | 0.996448 | 0.00341950  | 0.979155 |
| rad39         | 0.000481466 | 0.996929 | 0.00282534  | 0.981981 |
| rad30         | 0.000416489 | 0.997346 | 0.00244404  | 0.984425 |
| rad51         | 0.000398208 | 0.997744 | 0.00233677  | 0.986761 |
| rad35         | 0.000340927 | 0.998085 | 0.00200063  | 0.988762 |
| rad46         | 0.000255315 | 0.998340 | 0.00149825  | 0.990260 |
| rad59         | 0.000220130 | 0.998560 | 0.00129177  | 0.991552 |
| rad67         | 0.000201063 | 0.998761 | 0.00117988  | 0.992732 |
| PhCCCH3+H     | 0.000187973 | 0.998949 | 0.00110307  | 0.993835 |
| rad71         | 0.000169119 | 0.999118 | 0.000992425 | 0.994827 |
| rad19syn      | 0.000129388 | 0.999248 | 0.000759274 | 0.995587 |
| PAH10+CH3     | 0.000111628 | 0.999359 | 0.000655055 | 0.996242 |
| rad60syn      | 0.000106714 | 0.999466 | 0.000626221 | 0.996868 |
| rad60anti     | 7.88454e-05 | 0.999545 | 0.000462682 | 0.997331 |
| rad52         | 7.79131e-05 | 0.999623 | 0.000457211 | 0.997788 |
| rad58         | 6.80681e-05 | 0.999691 | 0.000399438 | 0.998187 |
| PAH1+H        | 6.57776e-05 | 0.999757 | 0.000385997 | 0.998573 |
| rad73         | 6.40613e-05 | 0.999821 | 0.000375925 | 0.998949 |
| PhcycC3H3_A+H | 3.63355e-05 | 0.999857 | 0.000213225 | 0.999163 |
| rad70         | 2.63587e-05 | 0.999883 | 0.000154678 | 0.999317 |
| rad72         | 2.31743e-05 | 0.999907 | 0.000135991 | 0.999453 |
| PAH8+H        | 2.10800e-05 | 0.999928 | 0.000123702 | 0.999577 |
| rad37         | 1.33253e-05 | 0.999941 | 7.81959e-05 | 0.999655 |
| rad34         | 1.07787e-05 | 0.999952 | 6.32518e-05 | 0.999718 |
| rad54         | 9.55885e-06 | 0.999961 | 5.60934e-05 | 0.999774 |
| rad65         | 9.41491e-06 | 0.999971 | 5.52487e-05 | 0.999830 |
| rad23         | 3.72064e-06 | 0.999974 | 2.18335e-05 | 0.999851 |
| rad68syn      | 2.80580e-06 | 0.999977 | 1.64650e-05 | 0.999868 |
| rad20         | 2.14490e-06 | 0.999979 | 1.25867e-05 | 0.999881 |
| rad64         | 1.85015e-06 | 0.999981 | 1.08571e-05 | 0.999891 |
| rad68anti     | 1.78749e-06 | 0.999983 | 1.04894e-05 | 0.999902 |
| rad40syn      | 1.70494e-06 | 0.999985 | 1.00050e-05 | 0.999912 |
| rad9          | 1.65630e-06 | 0.999986 | 9.71955e-06 | 0.999922 |
| rad56         | 1.61204e-06 | 0.999988 | 9.45977e-06 | 0.999931 |
| rad45         | 1.48801e-06 | 0.999989 | 8.73193e-06 | 0.999940 |
| rad6          | 1.27500e-06 | 0.999991 | 7.48200e-06 | 0.999947 |
| rad40anti     | 1.27393e-06 | 0.999992 | 7.47570e-06 | 0.999955 |
| rad55         | 1.08007e-06 | 0.999993 | 6.33811e-06 | 0.999961 |
| rad53         | 1.01504e-06 | 0.999994 | 5.95645e-06 | 0.999967 |
| rad62         | 8.94328e-07 | 0.999995 | 5.24811e-06 | 0.999972 |
| rad21         | 8.73299e-07 | 0.999996 | 5.12470e-06 | 0.999977 |
| rad61         | 8.08362e-07 | 0.999997 | 4.74364e-06 | 0.999982 |

|       |             |          |             |          |
|-------|-------------|----------|-------------|----------|
| rad22 | 6.67749e-07 | 0.999997 | 3.91850e-06 | 0.999986 |
| rad11 | 5.35090e-07 | 0.999998 | 3.14002e-06 | 0.999989 |
| rad43 | 3.68480e-07 | 0.999998 | 2.16232e-06 | 0.999991 |
| rad36 | 2.72521e-07 | 0.999999 | 1.59921e-06 | 0.999993 |
| rad18 | 2.24175e-07 | 0.999999 | 1.31551e-06 | 0.999994 |
| rad8  | 1.96825e-07 | 0.999999 | 1.15501e-06 | 0.999995 |
| rad42 | 1.78457e-07 | 0.999999 | 1.04723e-06 | 0.999997 |
| rad15 | 1.42525e-07 | 0.999999 | 8.36368e-07 | 0.999997 |
| rad47 | 8.00080e-08 | 0.999999 | 4.69504e-07 | 0.999998 |
| rad41 | 7.80486e-08 | 0.999999 | 4.58006e-07 | 0.999998 |
| rad12 | 6.39609e-08 | 0.999999 | 3.75336e-07 | 0.999999 |
| rad24 | 5.63935e-08 | 1.000000 | 3.30929e-07 | 0.999999 |
| rad7  | 4.97693e-08 | 1.000000 | 2.92057e-07 | 0.999999 |
| rad28 | 4.97069e-08 | 1.000000 | 2.91691e-07 | 1.000000 |
| rad26 | 1.61305e-08 | 1.000000 | 9.46571e-08 | 1.000000 |
| rad13 | 7.70151e-09 | 1.000000 | 4.51941e-08 | 1.000000 |
| rad10 | 6.84779e-09 | 1.000000 | 4.01843e-08 | 1.000000 |
| rad25 | 4.70105e-09 | 1.000000 | 2.75868e-08 | 1.000000 |
| rad5  | 2.01989e-09 | 1.000000 | 1.18531e-08 | 1.000000 |
| rad33 | 8.05952e-10 | 1.000000 | 4.72950e-09 | 1.000000 |
| rad2  | 5.70206e-10 | 1.000000 | 3.34609e-09 | 1.000000 |
| rad1  | 2.91530e-10 | 1.000000 | 1.71076e-09 | 1.000000 |
| rad14 | 9.93760e-11 | 1.000000 | 5.83159e-10 | 1.000000 |
| rad27 | 4.96790e-11 | 1.000000 | 2.91527e-10 | 1.000000 |
| rad3  | 2.25429e-11 | 1.000000 | 1.32286e-10 | 1.000000 |
| rad4  | 1.27190e-11 | 1.000000 | 7.46379e-11 | 1.000000 |

100000.000 Pa, 4000.00000 K

=====

| Rate constant | True (fraction)     | Effective (fraction) |
|---------------|---------------------|----------------------|
| Total         | 3.41497e-12 (1.00 ) | 6.28344e-13 (1.00 )  |

| species       | PYtrue      | Cumul    | PYeffective | Cumul    |
|---------------|-------------|----------|-------------|----------|
| Benzyl+C2H2   | 0.816003    | 0.816003 | 0.00000     | 0.00000  |
| PhCH2CCH+H    | 0.109581    | 0.925584 | 0.595561    | 0.595561 |
| PhCHCCH2+H    | 0.0267079   | 0.952292 | 0.145154    | 0.740715 |
| Ph+Allene     | 0.0193029   | 0.971595 | 0.104909    | 0.845624 |
| Indene+H      | 0.0160218   | 0.987617 | 0.0870766   | 0.932701 |
| PAH3+H        | 0.00329050  | 0.990907 | 0.0178834   | 0.950584 |
| PAH7+H        | 0.00121827  | 0.992125 | 0.00662116  | 0.957205 |
| PAH9+H        | 0.000860710 | 0.992986 | 0.00467785  | 0.961883 |
| PhCCH+CH3     | 0.000720621 | 0.993707 | 0.00391649  | 0.965800 |
| rad19anti     | 0.000707796 | 0.994414 | 0.00384678  | 0.969646 |
| Ph+MeAc       | 0.000663777 | 0.995078 | 0.00360754  | 0.973254 |
| rad50         | 0.000623293 | 0.995702 | 0.00338752  | 0.976641 |
| rad38         | 0.000557911 | 0.996259 | 0.00303218  | 0.979674 |
| rad39         | 0.000498331 | 0.996758 | 0.00270837  | 0.982382 |
| rad51         | 0.000416789 | 0.997175 | 0.00226520  | 0.984647 |
| rad30         | 0.000396437 | 0.997571 | 0.00215459  | 0.986802 |
| rad35         | 0.000342550 | 0.997914 | 0.00186171  | 0.988663 |
| rad46         | 0.000238994 | 0.998153 | 0.00129890  | 0.989962 |
| rad59         | 0.000231917 | 0.998384 | 0.00126044  | 0.991223 |
| rad67         | 0.000214229 | 0.998599 | 0.00116431  | 0.992387 |
| PhCCCH3+H     | 0.000213548 | 0.998812 | 0.00116061  | 0.993548 |
| rad71         | 0.000200475 | 0.999013 | 0.00108956  | 0.994637 |
| rad19syn      | 0.000163989 | 0.999177 | 0.000891258 | 0.995528 |
| PAH10+CH3     | 0.000121669 | 0.999298 | 0.000661258 | 0.996190 |
| rad60syn      | 0.000108395 | 0.999407 | 0.000589113 | 0.996779 |
| rad60anti     | 8.05429e-05 | 0.999487 | 0.000437740 | 0.997217 |
| rad52         | 7.93951e-05 | 0.999567 | 0.000431502 | 0.997648 |
| rad58         | 7.77777e-05 | 0.999645 | 0.000422712 | 0.998071 |
| PAH1+H        | 7.75751e-05 | 0.999722 | 0.000421611 | 0.998492 |
| rad73         | 7.39681e-05 | 0.999796 | 0.000402007 | 0.998894 |
| PhcycC3H3_A+H | 3.99767e-05 | 0.999836 | 0.000217269 | 0.999112 |
| rad70         | 3.10467e-05 | 0.999867 | 0.000168735 | 0.999280 |
| PAH8+H        | 2.96255e-05 | 0.999897 | 0.000161011 | 0.999441 |
| rad72         | 2.85268e-05 | 0.999925 | 0.000155040 | 0.999596 |
| rad34         | 1.30814e-05 | 0.999938 | 7.10959e-05 | 0.999668 |
| rad37         | 1.30536e-05 | 0.999951 | 7.09448e-05 | 0.999739 |
| rad54         | 1.00662e-05 | 0.999961 | 5.47088e-05 | 0.999793 |
| rad65         | 9.80956e-06 | 0.999971 | 5.33137e-05 | 0.999847 |
| rad68syn      | 3.69405e-06 | 0.999975 | 2.00767e-05 | 0.999867 |
| rad68anti     | 2.35186e-06 | 0.999977 | 1.27820e-05 | 0.999879 |
| rad40syn      | 2.32622e-06 | 0.999980 | 1.26427e-05 | 0.999892 |
| rad64         | 2.20921e-06 | 0.999982 | 1.20068e-05 | 0.999904 |
| rad23         | 2.15518e-06 | 0.999984 | 1.17132e-05 | 0.999916 |
| rad56         | 1.95414e-06 | 0.999986 | 1.06205e-05 | 0.999926 |
| rad40anti     | 1.75704e-06 | 0.999988 | 9.54928e-06 | 0.999936 |

|       |             |          |             |          |
|-------|-------------|----------|-------------|----------|
| rad20 | 1.63571e-06 | 0.999989 | 8.88988e-06 | 0.999945 |
| rad53 | 1.19070e-06 | 0.999991 | 6.47128e-06 | 0.999951 |
| rad55 | 1.16302e-06 | 0.999992 | 6.32087e-06 | 0.999958 |
| rad9  | 1.08559e-06 | 0.999993 | 5.90002e-06 | 0.999964 |
| rad62 | 1.07819e-06 | 0.999994 | 5.85982e-06 | 0.999969 |
| rad61 | 9.64431e-07 | 0.999995 | 5.24156e-06 | 0.999975 |
| rad45 | 9.22375e-07 | 0.999996 | 5.01299e-06 | 0.999980 |
| rad6  | 7.08031e-07 | 0.999996 | 3.84806e-06 | 0.999983 |
| rad21 | 6.41941e-07 | 0.999997 | 3.48887e-06 | 0.999987 |
| rad22 | 4.38871e-07 | 0.999998 | 2.38467e-06 | 0.999989 |
| rad43 | 4.20242e-07 | 0.999998 | 2.28396e-06 | 0.999992 |
| rad11 | 4.04645e-07 | 0.999998 | 2.19919e-06 | 0.999994 |
| rad42 | 2.26093e-07 | 0.999999 | 1.22878e-06 | 0.999995 |
| rad8  | 1.81581e-07 | 0.999999 | 9.86868e-07 | 0.999996 |
| rad36 | 1.69335e-07 | 0.999999 | 9.20317e-07 | 0.999997 |
| rad18 | 1.52698e-07 | 0.999999 | 8.29894e-07 | 0.999998 |
| rad15 | 9.65845e-08 | 0.999999 | 5.24924e-07 | 0.999998 |
| rad41 | 9.48873e-08 | 0.999999 | 5.15700e-07 | 0.999999 |
| rad47 | 8.16850e-08 | 0.999999 | 4.43948e-07 | 0.999999 |
| rad12 | 4.97499e-08 | 0.999999 | 2.70385e-07 | 1.000000 |
| rad24 | 4.15913e-08 | 0.999999 | 2.26043e-07 | 1.000000 |
| rad28 | 3.31316e-08 | 0.999999 | 1.80066e-07 | 1.000000 |
| rad7  | 3.04055e-08 | 1.000000 | 1.65250e-07 | 1.000000 |
| rad26 | 1.09678e-08 | 1.000000 | 5.96086e-08 | 1.000000 |
| rad13 | 5.02692e-09 | 1.000000 | 2.73207e-08 | 1.000000 |
| rad10 | 4.91009e-09 | 1.000000 | 2.66858e-08 | 1.000000 |
| rad25 | 3.94959e-09 | 1.000000 | 2.14655e-08 | 1.000000 |
| rad5  | 1.93472e-09 | 1.000000 | 1.05150e-08 | 1.000000 |
| rad33 | 5.63464e-10 | 1.000000 | 3.06236e-09 | 1.000000 |
| rad2  | 4.30548e-10 | 1.000000 | 2.33997e-09 | 1.000000 |
| rad1  | 2.24615e-10 | 1.000000 | 1.22075e-09 | 1.000000 |
| rad14 | 8.87850e-11 | 1.000000 | 4.82535e-10 | 1.000000 |
| rad27 | 4.17726e-11 | 1.000000 | 2.27029e-10 | 1.000000 |
| rad3  | 1.51096e-11 | 1.000000 | 8.21189e-11 | 1.000000 |
| rad4  | 8.48096e-12 | 1.000000 | 4.60929e-11 | 1.000000 |

10000.0000 Pa, 20.0000000 K

=====

| Rate constant | True (fraction)      | Effective (fraction) |
|---------------|----------------------|----------------------|
| Total         | 1.34336e-156 (1.00 ) | 1.34336e-156 (1.00 ) |

| species     | PYtrue      | Cumul    | PYeffective | Cumul    |
|-------------|-------------|----------|-------------|----------|
| rad20       | 0.960581    | 0.960581 | 0.960581    | 0.960581 |
| rad21       | 0.0340646   | 0.994646 | 0.0340646   | 0.994646 |
| rad18       | 0.00494986  | 0.999595 | 0.00494986  | 0.999595 |
| rad22       | 0.000379079 | 0.999975 | 0.000379079 | 0.999975 |
| rad45       | 1.28463e-05 | 0.999987 | 1.28463e-05 | 0.999987 |
| Indene+H    | 1.16413e-05 | 0.999999 | 1.16413e-05 | 0.999999 |
| rad36       | 8.22739e-07 | 1.000000 | 8.22739e-07 | 1.000000 |
| rad24       | 3.76295e-07 | 1.000000 | 3.76295e-07 | 1.000000 |
| rad11       | 3.92135e-08 | 1.000000 | 3.92135e-08 | 1.000000 |
| rad23       | 9.27875e-09 | 1.000000 | 9.27875e-09 | 1.000000 |
| Benzyl+C2H2 | 8.43911e-09 | 1.000000 | 0.000000    | 1.000000 |
| rad6        | 4.36146e-13 | 1.000000 | 4.36146e-13 | 1.000000 |
| rad30       | 3.78359e-19 | 1.000000 | 3.78359e-19 | 1.000000 |
| rad13       | 1.75587e-20 | 1.000000 | 1.75587e-20 | 1.000000 |
| rad7        | 3.40787e-21 | 1.000000 | 3.40787e-21 | 1.000000 |
| rad15       | 7.52308e-22 | 1.000000 | 7.52308e-22 | 1.000000 |
| rad33       | 2.63160e-23 | 1.000000 | 2.63160e-23 | 1.000000 |
| rad38       | 1.38039e-23 | 1.000000 | 1.38039e-23 | 1.000000 |
| rad25       | 4.15544e-24 | 1.000000 | 4.15544e-24 | 1.000000 |
| rad35       | 7.34480e-26 | 1.000000 | 7.34480e-26 | 1.000000 |
| PAH9+H      | 3.27925e-26 | 1.000000 | 3.27925e-26 | 1.000000 |
| rad3        | 6.47992e-28 | 1.000000 | 6.47992e-28 | 1.000000 |
| rad4        | 3.42473e-28 | 1.000000 | 3.42473e-28 | 1.000000 |
| PhCHCCH2+H  | 3.85690e-29 | 1.000000 | 3.85690e-29 | 1.000000 |
| rad46       | 1.13546e-30 | 1.000000 | 1.13546e-30 | 1.000000 |
| rad8        | 5.77227e-31 | 1.000000 | 5.77227e-31 | 1.000000 |
| rad9        | 1.17023e-31 | 1.000000 | 1.17023e-31 | 1.000000 |
| rad28       | 6.37734e-32 | 1.000000 | 6.37734e-32 | 1.000000 |
| rad60syn    | 7.76494e-34 | 1.000000 | 7.76494e-34 | 1.000000 |
| rad2        | 4.54282e-34 | 1.000000 | 4.54282e-34 | 1.000000 |
| Ph+Allene   | 5.46782e-35 | 1.000000 | 5.46782e-35 | 1.000000 |
| rad60anti   | 3.42910e-35 | 1.000000 | 3.42910e-35 | 1.000000 |
| rad1        | 3.22233e-35 | 1.000000 | 3.22233e-35 | 1.000000 |
| rad31       | 2.52951e-37 | 1.000000 | 2.52951e-37 | 1.000000 |
| PAH7+H      | 9.57365e-39 | 1.000000 | 9.57365e-39 | 1.000000 |
| PhCCH+CH3   | 1.00188e-39 | 1.000000 | 1.00188e-39 | 1.000000 |



|               |             |         |             |         |
|---------------|-------------|---------|-------------|---------|
| rad14         | 7.72458e-40 | 1.00000 | 7.72458e-40 | 1.00000 |
| PhCH2CCH+H    | 6.56911e-40 | 1.00000 | 6.56911e-40 | 1.00000 |
| rad10         | 1.54084e-40 | 1.00000 | 1.54084e-40 | 1.00000 |
| PAH3+H        | 2.35624e-42 | 1.00000 | 2.35624e-42 | 1.00000 |
| rad59         | 1.16510e-42 | 1.00000 | 1.16510e-42 | 1.00000 |
| rad26         | 5.87176e-43 | 1.00000 | 5.87176e-43 | 1.00000 |
| rad27         | 1.28035e-44 | 1.00000 | 1.28035e-44 | 1.00000 |
| rad39         | 1.89255e-45 | 1.00000 | 1.89255e-45 | 1.00000 |
| rad50         | 4.23536e-46 | 1.00000 | 4.23536e-46 | 1.00000 |
| Ph+MeAc       | 3.79160e-46 | 1.00000 | 3.79160e-46 | 1.00000 |
| PhCCCH3+H     | 2.04870e-46 | 1.00000 | 2.04870e-46 | 1.00000 |
| rad12         | 1.82165e-51 | 1.00000 | 1.82165e-51 | 1.00000 |
| rad37         | 3.85460e-53 | 1.00000 | 3.85460e-53 | 1.00000 |
| rad52         | 1.41277e-54 | 1.00000 | 1.41277e-54 | 1.00000 |
| rad5          | 1.08173e-57 | 1.00000 | 1.08173e-57 | 1.00000 |
| rad19syn      | 7.41848e-59 | 1.00000 | 7.41848e-59 | 1.00000 |
| rad51         | 1.90034e-59 | 1.00000 | 1.90034e-59 | 1.00000 |
| rad54         | 1.56245e-60 | 1.00000 | 1.56245e-60 | 1.00000 |
| rad58         | 1.05411e-61 | 1.00000 | 1.05411e-61 | 1.00000 |
| rad70         | 1.70898e-62 | 1.00000 | 1.70898e-62 | 1.00000 |
| PAH10+CH3     | 9.16679e-65 | 1.00000 | 9.16679e-65 | 1.00000 |
| rad65         | 6.82036e-65 | 1.00000 | 6.82036e-65 | 1.00000 |
| rad62         | 1.98112e-66 | 1.00000 | 1.98112e-66 | 1.00000 |
| rad55         | 6.67081e-67 | 1.00000 | 6.67081e-67 | 1.00000 |
| rad47         | 5.34250e-67 | 1.00000 | 5.34250e-67 | 1.00000 |
| PhcycC3H3_A+H | 1.01132e-67 | 1.00000 | 1.01132e-67 | 1.00000 |
| rad34         | 7.46620e-68 | 1.00000 | 7.46620e-68 | 1.00000 |
| rad43         | 2.13868e-68 | 1.00000 | 2.13868e-68 | 1.00000 |
| PAH1+H        | 2.73285e-72 | 1.00000 | 2.73285e-72 | 1.00000 |
| rad42         | 8.73424e-77 | 1.00000 | 8.73424e-77 | 1.00000 |
| rad41         | 5.45393e-80 | 1.00000 | 5.45393e-80 | 1.00000 |

10000.0000 Pa, 30.0000000 K

=====

| Rate constant | True (fraction)      | Effective (fraction) |
|---------------|----------------------|----------------------|
| Total         | 1.15918e-108 (1.00 ) | 1.15918e-108 (1.00 ) |

| species     | PYtrue      | Cumul    | PYeffective | Cumul    |
|-------------|-------------|----------|-------------|----------|
| rad20       | 0.924121    | 0.924121 | 0.924121    | 0.924121 |
| rad21       | 0.0645408   | 0.988662 | 0.0645408   | 0.988662 |
| rad18       | 0.00976289  | 0.998425 | 0.00976289  | 0.998425 |
| rad22       | 0.00147283  | 0.999898 | 0.00147283  | 0.999898 |
| rad45       | 5.14243e-05 | 0.999949 | 5.14243e-05 | 0.999949 |
| Indene+H    | 4.68001e-05 | 0.999996 | 4.68001e-05 | 0.999996 |
| rad36       | 3.24830e-06 | 0.999999 | 3.24830e-06 | 0.999999 |
| rad24       | 2.53307e-07 | 0.999999 | 2.53307e-07 | 0.999999 |
| rad11       | 1.56773e-07 | 0.999999 | 1.56773e-07 | 0.999999 |
| rad23       | 7.79688e-08 | 0.999999 | 7.79688e-08 | 0.999999 |
| Benzyl+C2H2 | 1.93401e-08 | 1.000000 | 0.000000    | 0.999999 |
| rad6        | 3.57270e-12 | 1.000000 | 3.57270e-12 | 0.999999 |
| rad30       | 1.70894e-18 | 1.000000 | 1.70894e-18 | 0.999999 |
| rad13       | 2.89163e-19 | 1.000000 | 2.89163e-19 | 0.999999 |
| rad7        | 5.70924e-20 | 1.000000 | 5.70924e-20 | 0.999999 |
| rad15       | 3.37475e-21 | 1.000000 | 3.37475e-21 | 0.999999 |
| rad33       | 4.32711e-22 | 1.000000 | 4.32711e-22 | 0.999999 |
| rad38       | 1.31958e-22 | 1.000000 | 1.31958e-22 | 0.999999 |
| rad25       | 3.41224e-23 | 1.000000 | 3.41224e-23 | 0.999999 |
| rad35       | 1.37607e-24 | 1.000000 | 1.37607e-24 | 0.999999 |
| PAH9+H      | 6.11603e-25 | 1.000000 | 6.11603e-25 | 0.999999 |
| rad3        | 2.22043e-26 | 1.000000 | 2.22043e-26 | 0.999999 |
| rad4        | 1.15408e-26 | 1.000000 | 1.15408e-26 | 0.999999 |
| PhCHCCH2+H  | 2.81192e-28 | 1.000000 | 2.81192e-28 | 0.999999 |
| rad46       | 9.34632e-30 | 1.000000 | 9.34632e-30 | 0.999999 |
| rad28       | 2.08238e-30 | 1.000000 | 2.08238e-30 | 0.999999 |
| rad8        | 1.15789e-30 | 1.000000 | 1.15789e-30 | 0.999999 |
| rad9        | 8.00813e-31 | 1.000000 | 8.00813e-31 | 0.999999 |
| rad2        | 3.08775e-32 | 1.000000 | 3.08775e-32 | 0.999999 |
| rad60syn    | 3.19633e-33 | 1.000000 | 3.19633e-33 | 0.999999 |
| rad1        | 2.09598e-33 | 1.000000 | 2.09598e-33 | 0.999999 |
| Ph+Allene   | 3.27288e-34 | 1.000000 | 3.27288e-34 | 0.999999 |
| rad60anti   | 1.38997e-34 | 1.000000 | 1.38997e-34 | 0.999999 |
| rad31       | 7.51282e-36 | 1.000000 | 7.51282e-36 | 0.999999 |
| PhCCH+CH3   | 5.79604e-38 | 1.000000 | 5.79604e-38 | 0.999999 |
| rad14       | 4.75197e-38 | 1.000000 | 4.75197e-38 | 0.999999 |
| PAH7+H      | 2.26408e-38 | 1.000000 | 2.26408e-38 | 0.999999 |
| rad10       | 2.04204e-38 | 1.000000 | 2.04204e-38 | 0.999999 |
| PhCH2CCH+H  | 3.29029e-39 | 1.000000 | 3.29029e-39 | 0.999999 |
| PAH3+H      | 8.26642e-42 | 1.000000 | 8.26642e-42 | 0.999999 |

|               |             |          |             |          |
|---------------|-------------|----------|-------------|----------|
| rad59         | 4.10265e-42 | 1.000000 | 4.10265e-42 | 0.999999 |
| rad27         | 1.60394e-42 | 1.000000 | 1.60394e-42 | 0.999999 |
| rad26         | 1.18553e-42 | 1.000000 | 1.18553e-42 | 0.999999 |
| PhCCCH3+H     | 2.29156e-44 | 1.000000 | 2.29156e-44 | 0.999999 |
| Ph+MeAc       | 1.67307e-44 | 1.000000 | 1.67307e-44 | 0.999999 |
| rad39         | 1.01487e-44 | 1.000000 | 1.01487e-44 | 0.999999 |
| rad50         | 2.31918e-45 | 1.000000 | 2.31918e-45 | 0.999999 |
| rad12         | 7.29117e-51 | 1.000000 | 7.29117e-51 | 0.999999 |
| rad37         | 1.52522e-52 | 1.000000 | 1.52522e-52 | 0.999999 |
| rad52         | 6.50425e-54 | 1.000000 | 6.50425e-54 | 0.999999 |
| rad5          | 7.45408e-56 | 1.000000 | 7.45408e-56 | 0.999999 |
| rad19syn      | 1.27997e-57 | 1.000000 | 1.27997e-57 | 0.999999 |
| rad51         | 7.97842e-59 | 1.000000 | 7.97842e-59 | 0.999999 |
| rad54         | 1.36247e-59 | 1.000000 | 1.36247e-59 | 0.999999 |
| rad58         | 1.45245e-61 | 1.000000 | 1.45245e-61 | 0.999999 |
| rad70         | 8.37453e-62 | 1.000000 | 8.37453e-62 | 0.999999 |
| rad65         | 5.99419e-64 | 1.000000 | 5.99419e-64 | 0.999999 |
| PAH10+CH3     | 2.19865e-64 | 1.000000 | 2.19865e-64 | 0.999999 |
| rad62         | 7.62076e-65 | 1.000000 | 7.62076e-65 | 0.999999 |
| rad55         | 4.81457e-66 | 1.000000 | 4.81457e-66 | 0.999999 |
| rad47         | 1.80663e-66 | 1.000000 | 1.80663e-66 | 0.999999 |
| rad43         | 1.66033e-66 | 1.000000 | 1.66033e-66 | 0.999999 |
| PhcycC3H3_A+H | 1.36916e-66 | 1.000000 | 1.36916e-66 | 0.999999 |
| rad34         | 2.84068e-67 | 1.000000 | 2.84068e-67 | 0.999999 |
| PAH1+H        | 5.12567e-72 | 1.000000 | 5.12567e-72 | 0.999999 |
| rad42         | 2.09913e-75 | 1.000000 | 2.09913e-75 | 0.999999 |
| rad41         | 2.31635e-78 | 1.000000 | 2.31635e-78 | 0.999999 |

10000.0000 Pa, 40.0000000 K

| Rate constant | True (fraction)     | Effective (fraction) |
|---------------|---------------------|----------------------|
| Total         | 1.02415e-84 (1.00 ) | 1.02415e-84 (1.00 )  |

| species     | PYtrue      | Cumul    | PYeffective | Cumul    |
|-------------|-------------|----------|-------------|----------|
| rad20       | 0.891567    | 0.891567 | 0.891567    | 0.891567 |
| rad21       | 0.0907773   | 0.982344 | 0.0907773   | 0.982344 |
| rad18       | 0.0142881   | 0.996632 | 0.0142882   | 0.996633 |
| rad22       | 0.00314495  | 0.999777 | 0.00314495  | 0.999777 |
| rad45       | 0.000111338 | 0.999889 | 0.000111338 | 0.999889 |
| Indene+H    | 0.000103377 | 0.999992 | 0.000103377 | 0.999992 |
| rad36       | 6.99732e-06 | 0.999999 | 6.99732e-06 | 0.999999 |
| rad11       | 3.50958e-07 | 0.999999 | 3.50958e-07 | 1.000000 |
| rad23       | 2.56751e-07 | 1.000000 | 2.56751e-07 | 1.000000 |
| rad24       | 1.73248e-07 | 1.000000 | 1.73248e-07 | 1.000000 |
| Benzyl+C2H2 | 3.69331e-08 | 1.000000 | 0.000000    | 1.000000 |
| rad6        | 1.22860e-11 | 1.000000 | 1.22860e-11 | 1.000000 |
| rad30       | 5.05802e-18 | 1.000000 | 5.05802e-18 | 1.000000 |
| rad13       | 1.49825e-18 | 1.000000 | 1.49825e-18 | 1.000000 |
| rad7        | 3.01734e-19 | 1.000000 | 3.01734e-19 | 1.000000 |
| rad15       | 1.02206e-20 | 1.000000 | 1.02206e-20 | 1.000000 |
| rad33       | 2.26175e-21 | 1.000000 | 2.26175e-21 | 1.000000 |
| rad38       | 5.65814e-22 | 1.000000 | 5.65814e-22 | 1.000000 |
| rad25       | 1.40372e-22 | 1.000000 | 1.40372e-22 | 1.000000 |
| rad35       | 8.21873e-24 | 1.000000 | 8.21873e-24 | 1.000000 |
| PAH9+H      | 3.71400e-24 | 1.000000 | 3.71400e-24 | 1.000000 |
| rad3        | 1.85086e-25 | 1.000000 | 1.85086e-25 | 1.000000 |
| rad4        | 9.55507e-26 | 1.000000 | 9.55507e-26 | 1.000000 |
| PhCHCCH2+H  | 1.13002e-27 | 1.000000 | 1.13002e-27 | 1.000000 |
| rad46       | 4.06687e-29 | 1.000000 | 4.06687e-29 | 1.000000 |
| rad28       | 1.81683e-29 | 1.000000 | 1.81683e-29 | 1.000000 |
| rad9        | 3.16709e-30 | 1.000000 | 3.16709e-30 | 1.000000 |
| rad8        | 2.57067e-30 | 1.000000 | 2.57067e-30 | 1.000000 |
| rad2        | 3.94209e-31 | 1.000000 | 3.94209e-31 | 1.000000 |
| rad1        | 2.63016e-32 | 1.000000 | 2.63016e-32 | 1.000000 |
| rad60syn    | 1.02702e-32 | 1.000000 | 1.02702e-32 | 1.000000 |
| Ph+Allene   | 1.25246e-33 | 1.000000 | 1.25246e-33 | 1.000000 |
| rad60anti   | 4.46426e-34 | 1.000000 | 4.46426e-34 | 1.000000 |
| rad31       | 5.99636e-35 | 1.000000 | 5.99636e-35 | 1.000000 |
| PhCCH+CH3   | 7.24491e-37 | 1.000000 | 7.24491e-37 | 1.000000 |
| rad14       | 6.05769e-37 | 1.000000 | 6.05769e-37 | 1.000000 |
| rad10       | 3.88228e-37 | 1.000000 | 3.88228e-37 | 1.000000 |
| PAH7+H      | 5.22663e-38 | 1.000000 | 5.22663e-38 | 1.000000 |
| PhCH2CCH+H  | 1.20792e-38 | 1.000000 | 1.20792e-38 | 1.000000 |
| rad27       | 3.03352e-41 | 1.000000 | 3.03352e-41 | 1.000000 |
| PAH3+H      | 2.50528e-41 | 1.000000 | 2.50528e-41 | 1.000000 |
| rad59       | 1.24592e-41 | 1.000000 | 1.24592e-41 | 1.000000 |
| rad26       | 2.57944e-42 | 1.000000 | 2.57944e-42 | 1.000000 |
| PhCCCH3+H   | 4.19496e-43 | 1.000000 | 4.19496e-43 | 1.000000 |

|               |             |          |             |          |
|---------------|-------------|----------|-------------|----------|
| Ph+MeAc       | 1.89264e-43 | 1.000000 | 1.89264e-43 | 1.000000 |
| rad39         | 3.64833e-44 | 1.000000 | 3.64833e-44 | 1.000000 |
| rad50         | 1.01861e-44 | 1.000000 | 1.01861e-44 | 1.000000 |
| rad12         | 2.32722e-50 | 1.000000 | 2.32722e-50 | 1.000000 |
| rad37         | 4.84760e-52 | 1.000000 | 4.84760e-52 | 1.000000 |
| rad52         | 3.02973e-53 | 1.000000 | 3.02973e-53 | 1.000000 |
| rad5          | 1.15894e-54 | 1.000000 | 1.15894e-54 | 1.000000 |
| rad19syn      | 1.01696e-56 | 1.000000 | 1.01696e-56 | 1.000000 |
| rad51         | 3.98527e-58 | 1.000000 | 3.98527e-58 | 1.000000 |
| rad54         | 7.44335e-59 | 1.000000 | 7.44335e-59 | 1.000000 |
| rad70         | 3.38808e-61 | 1.000000 | 3.38808e-61 | 1.000000 |
| rad58         | 2.42944e-61 | 1.000000 | 2.42944e-61 | 1.000000 |
| rad65         | 3.93220e-63 | 1.000000 | 3.93220e-63 | 1.000000 |
| rad62         | 9.63791e-64 | 1.000000 | 9.63791e-64 | 1.000000 |
| PAH10+CH3     | 5.59639e-64 | 1.000000 | 5.59639e-64 | 1.000000 |
| rad43         | 3.04215e-65 | 1.000000 | 3.04215e-65 | 1.000000 |
| rad55         | 2.53586e-65 | 1.000000 | 2.53586e-65 | 1.000000 |
| PhcycC3H3_A+H | 1.02560e-65 | 1.000000 | 1.02560e-65 | 1.000000 |
| rad47         | 9.46327e-66 | 1.000000 | 9.46327e-66 | 1.000000 |
| rad34         | 1.03854e-66 | 1.000000 | 1.03854e-66 | 1.000000 |
| PAH1+H        | 1.69118e-71 | 1.000000 | 1.69118e-71 | 1.000000 |
| rad42         | 2.26181e-74 | 1.000000 | 2.26181e-74 | 1.000000 |
| rad41         | 3.51155e-77 | 1.000000 | 3.51155e-77 | 1.000000 |

10000.0000 Pa, 50.0000000 K

=====

| Rate constant | True (fraction)     | Effective (fraction) |
|---------------|---------------------|----------------------|
| Total         | 2.31816e-70 (1.00 ) | 2.31816e-70 (1.00 )  |

| species     | PYtrue      | Cumul    | PYeffective | Cumul    |
|-------------|-------------|----------|-------------|----------|
| rad20       | 0.861736    | 0.861736 | 0.861736    | 0.861736 |
| rad21       | 0.113885    | 0.975621 | 0.113885    | 0.975621 |
| rad18       | 0.0186547   | 0.994276 | 0.0186547   | 0.994276 |
| rad22       | 0.00533735  | 0.999613 | 0.00533735  | 0.999613 |
| rad45       | 0.000191650 | 0.999805 | 0.000191650 | 0.999805 |
| Indene+H    | 0.000181548 | 0.999986 | 0.000181548 | 0.999986 |
| rad36       | 1.20086e-05 | 0.999998 | 1.20086e-05 | 0.999998 |
| rad11       | 6.32450e-07 | 0.999999 | 6.32450e-07 | 0.999999 |
| rad23       | 5.93965e-07 | 0.999999 | 5.93965e-07 | 0.999999 |
| rad24       | 1.26060e-07 | 1.000000 | 1.26060e-07 | 1.000000 |
| Benzyl+C2H2 | 6.60017e-08 | 1.000000 | 0.000000    | 1.000000 |
| rad6        | 3.06003e-11 | 1.000000 | 3.06003e-11 | 1.000000 |
| rad30       | 1.37381e-17 | 1.000000 | 1.37381e-17 | 1.000000 |
| rad13       | 5.05834e-18 | 1.000000 | 5.05834e-18 | 1.000000 |
| rad7        | 1.04203e-18 | 1.000000 | 1.04203e-18 | 1.000000 |
| rad15       | 2.90744e-20 | 1.000000 | 2.90744e-20 | 1.000000 |
| rad33       | 7.75966e-21 | 1.000000 | 7.75966e-21 | 1.000000 |
| rad38       | 1.92531e-21 | 1.000000 | 1.92531e-21 | 1.000000 |
| rad25       | 4.84306e-22 | 1.000000 | 4.84306e-22 | 1.000000 |
| rad35       | 3.30422e-23 | 1.000000 | 3.30422e-23 | 1.000000 |
| PAH9+H      | 1.54642e-23 | 1.000000 | 1.54642e-23 | 1.000000 |
| rad3        | 9.29739e-25 | 1.000000 | 9.29739e-25 | 1.000000 |
| rad4        | 4.78276e-25 | 1.000000 | 4.78276e-25 | 1.000000 |
| PhCHCCH2+H  | 4.08225e-27 | 1.000000 | 4.08225e-27 | 1.000000 |
| rad46       | 1.57782e-28 | 1.000000 | 1.57782e-28 | 1.000000 |
| rad28       | 1.03063e-28 | 1.000000 | 1.03063e-28 | 1.000000 |
| rad9        | 1.16169e-29 | 1.000000 | 1.16169e-29 | 1.000000 |
| rad8        | 6.78832e-30 | 1.000000 | 6.78832e-30 | 1.000000 |
| rad2        | 2.80202e-30 | 1.000000 | 2.80202e-30 | 1.000000 |
| rad1        | 1.85346e-31 | 1.000000 | 1.85346e-31 | 1.000000 |
| rad60syn    | 3.41844e-32 | 1.000000 | 3.41844e-32 | 1.000000 |
| Ph+Allene   | 4.72383e-33 | 1.000000 | 4.72383e-33 | 1.000000 |
| rad60anti   | 1.50023e-33 | 1.000000 | 1.50023e-33 | 1.000000 |
| rad31       | 2.98217e-34 | 1.000000 | 2.98217e-34 | 1.000000 |
| PhCCH+CH3   | 5.61724e-36 | 1.000000 | 5.61724e-36 | 1.000000 |
| rad14       | 4.64595e-36 | 1.000000 | 4.64595e-36 | 1.000000 |
| rad10       | 3.75904e-36 | 1.000000 | 3.75904e-36 | 1.000000 |
| PAH7+H      | 1.43769e-37 | 1.000000 | 1.43769e-37 | 1.000000 |
| PhCH2CCH+H  | 4.67023e-38 | 1.000000 | 4.67023e-38 | 1.000000 |
| rad27       | 3.03880e-40 | 1.000000 | 3.03880e-40 | 1.000000 |
| PAH3+H      | 8.47416e-41 | 1.000000 | 8.47416e-41 | 1.000000 |
| rad59       | 4.21763e-41 | 1.000000 | 4.21763e-41 | 1.000000 |
| rad26       | 7.05355e-42 | 1.000000 | 7.05355e-42 | 1.000000 |
| PhCCCH3+H   | 4.31215e-42 | 1.000000 | 4.31215e-42 | 1.000000 |
| Ph+MeAc     | 1.48653e-42 | 1.000000 | 1.48653e-42 | 1.000000 |
| rad39       | 1.34105e-43 | 1.000000 | 1.34105e-43 | 1.000000 |
| rad50       | 5.27437e-44 | 1.000000 | 5.27437e-44 | 1.000000 |
| rad12       | 8.29448e-50 | 1.000000 | 8.29448e-50 | 1.000000 |

|               |             |          |             |          |
|---------------|-------------|----------|-------------|----------|
| rad37         | 1.72705e-51 | 1.000000 | 1.72705e-51 | 1.000000 |
| rad52         | 1.95346e-52 | 1.000000 | 1.95346e-52 | 1.000000 |
| rad5          | 1.23435e-53 | 1.000000 | 1.23435e-53 | 1.000000 |
| rad19syn      | 7.33057e-56 | 1.000000 | 7.33057e-56 | 1.000000 |
| rad51         | 3.06871e-57 | 1.000000 | 3.06871e-57 | 1.000000 |
| rad54         | 4.25434e-58 | 1.000000 | 4.25434e-58 | 1.000000 |
| rad70         | 1.64869e-60 | 1.000000 | 1.64869e-60 | 1.000000 |
| rad58         | 5.83628e-61 | 1.000000 | 5.83628e-61 | 1.000000 |
| rad65         | 3.19113e-62 | 1.000000 | 3.19113e-62 | 1.000000 |
| rad62         | 1.01707e-62 | 1.000000 | 1.01707e-62 | 1.000000 |
| PAH10+CH3     | 1.92826e-63 | 1.000000 | 1.92826e-63 | 1.000000 |
| rad43         | 4.11111e-64 | 1.000000 | 4.11112e-64 | 1.000000 |
| rad55         | 1.50335e-64 | 1.000000 | 1.50335e-64 | 1.000000 |
| rad47         | 8.89036e-65 | 1.000000 | 8.89036e-65 | 1.000000 |
| PhcycC3H3_A+H | 7.70000e-65 | 1.000000 | 7.70000e-65 | 1.000000 |
| rad34         | 4.94541e-66 | 1.000000 | 4.94541e-66 | 1.000000 |
| PAH1+H        | 1.02064e-70 | 1.000000 | 1.02064e-70 | 1.000000 |
| rad42         | 2.38218e-73 | 1.000000 | 2.38218e-73 | 1.000000 |
| rad41         | 4.87216e-76 | 1.000000 | 4.87217e-76 | 1.000000 |

10000.0000 Pa, 60.0000000 K

| Rate constant | True (fraction)     | Effective (fraction) |
|---------------|---------------------|----------------------|
| Total         | 8.44107e-61 (1.00 ) | 8.44107e-61 (1.00 )  |

| species     | PYtrue      | Cumul    | PYeffective | Cumul    |
|-------------|-------------|----------|-------------|----------|
| rad20       | 0.833971    | 0.833971 | 0.833971    | 0.833971 |
| rad21       | 0.134474    | 0.968445 | 0.134474    | 0.968445 |
| rad18       | 0.0229346   | 0.991380 | 0.0229346   | 0.991380 |
| rad22       | 0.00802423  | 0.999404 | 0.00802423  | 0.999404 |
| rad45       | 0.000292645 | 0.999696 | 0.000292645 | 0.999696 |
| Indene+H    | 0.000282627 | 0.999979 | 0.000282627 | 0.999979 |
| rad36       | 1.82972e-05 | 0.999997 | 1.82972e-05 | 0.999997 |
| rad23       | 1.14296e-06 | 0.999999 | 1.14296e-06 | 0.999999 |
| rad11       | 1.01846e-06 | 1.000000 | 1.01846e-06 | 1.000000 |
| Benzyl+C2H2 | 1.12517e-07 | 1.000000 | 0.000000    | 1.000000 |
| rad24       | 9.65583e-08 | 1.000000 | 9.65583e-08 | 1.000000 |
| rad6        | 6.46400e-11 | 1.000000 | 6.46400e-11 | 1.000000 |
| rad30       | 3.78182e-17 | 1.000000 | 3.78182e-17 | 1.000000 |
| rad13       | 1.37534e-17 | 1.000000 | 1.37534e-17 | 1.000000 |
| rad7        | 2.90751e-18 | 1.000000 | 2.90751e-18 | 1.000000 |
| rad15       | 8.54643e-20 | 1.000000 | 8.54643e-20 | 1.000000 |
| rad33       | 2.15597e-20 | 1.000000 | 2.15597e-20 | 1.000000 |
| rad38       | 6.07465e-21 | 1.000000 | 6.07465e-21 | 1.000000 |
| rad25       | 1.62549e-21 | 1.000000 | 1.62549e-21 | 1.000000 |
| rad35       | 1.09865e-22 | 1.000000 | 1.09865e-22 | 1.000000 |
| PAH9+H      | 5.43710e-23 | 1.000000 | 5.43710e-23 | 1.000000 |
| rad3        | 3.66626e-24 | 1.000000 | 3.66626e-24 | 1.000000 |
| rad4        | 1.88214e-24 | 1.000000 | 1.88214e-24 | 1.000000 |
| PhCHCCH2+H  | 1.51053e-26 | 1.000000 | 1.51053e-26 | 1.000000 |
| rad46       | 6.26413e-28 | 1.000000 | 6.26413e-28 | 1.000000 |
| rad28       | 4.93642e-28 | 1.000000 | 4.93642e-28 | 1.000000 |
| rad9        | 4.45664e-29 | 1.000000 | 4.45664e-29 | 1.000000 |
| rad8        | 2.13633e-29 | 1.000000 | 2.13633e-29 | 1.000000 |
| rad2        | 1.52700e-29 | 1.000000 | 1.52700e-29 | 1.000000 |
| rad1        | 1.00547e-30 | 1.000000 | 1.00547e-30 | 1.000000 |
| rad60syn    | 1.25883e-31 | 1.000000 | 1.25883e-31 | 1.000000 |
| Ph+Allene   | 1.93648e-32 | 1.000000 | 1.93648e-32 | 1.000000 |
| rad60anti   | 5.61710e-33 | 1.000000 | 5.61710e-33 | 1.000000 |
| rad31       | 1.18468e-33 | 1.000000 | 1.18468e-33 | 1.000000 |
| PhCCH+CH3   | 3.65438e-35 | 1.000000 | 3.65438e-35 | 1.000000 |
| rad14       | 2.92225e-35 | 1.000000 | 2.92225e-35 | 1.000000 |
| rad10       | 2.69572e-35 | 1.000000 | 2.69572e-35 | 1.000000 |
| PAH7+H      | 4.79399e-37 | 1.000000 | 4.79399e-37 | 1.000000 |
| PhCH2CCH+H  | 2.04174e-37 | 1.000000 | 2.04174e-37 | 1.000000 |
| rad27       | 2.32882e-39 | 1.000000 | 2.32883e-39 | 1.000000 |
| PAH3+H      | 3.34817e-40 | 1.000000 | 3.34817e-40 | 1.000000 |
| rad59       | 1.66616e-40 | 1.000000 | 1.66616e-40 | 1.000000 |
| PhCCCH3+H   | 3.54126e-41 | 1.000000 | 3.54126e-41 | 1.000000 |
| rad26       | 2.42471e-41 | 1.000000 | 2.42471e-41 | 1.000000 |
| Ph+MeAc     | 1.05808e-41 | 1.000000 | 1.05808e-41 | 1.000000 |
| rad39       | 5.50072e-43 | 1.000000 | 5.50072e-43 | 1.000000 |
| rad50       | 3.45266e-43 | 1.000000 | 3.45266e-43 | 1.000000 |
| rad12       | 3.48544e-49 | 1.000000 | 3.48544e-49 | 1.000000 |
| rad37       | 7.27387e-51 | 1.000000 | 7.27387e-51 | 1.000000 |
| rad52       | 1.79363e-51 | 1.000000 | 1.79363e-51 | 1.000000 |
| rad5        | 1.19775e-52 | 1.000000 | 1.19775e-52 | 1.000000 |
| rad19syn    | 5.56831e-55 | 1.000000 | 5.56831e-55 | 1.000000 |

|               |             |          |             |          |
|---------------|-------------|----------|-------------|----------|
| rad51         | 3.61570e-56 | 1.000000 | 3.61570e-56 | 1.000000 |
| rad54         | 2.77866e-57 | 1.000000 | 2.77866e-57 | 1.000000 |
| rad70         | 9.98539e-60 | 1.000000 | 9.98540e-60 | 1.000000 |
| rad58         | 1.96309e-60 | 1.000000 | 1.96309e-60 | 1.000000 |
| rad65         | 3.74344e-61 | 1.000000 | 3.74344e-61 | 1.000000 |
| rad62         | 1.10364e-61 | 1.000000 | 1.10364e-61 | 1.000000 |
| PAH10+CH3     | 9.49231e-63 | 1.000000 | 9.49231e-63 | 1.000000 |
| rad43         | 5.37400e-63 | 1.000000 | 5.37400e-63 | 1.000000 |
| rad47         | 1.40297e-63 | 1.000000 | 1.40297e-63 | 1.000000 |
| rad55         | 1.06149e-63 | 1.000000 | 1.06149e-63 | 1.000000 |
| PhcycC3H3_A+H | 6.46983e-64 | 1.000000 | 6.46983e-64 | 1.000000 |
| rad34         | 3.06913e-65 | 1.000000 | 3.06913e-65 | 1.000000 |
| PAH1+H        | 1.03238e-69 | 1.000000 | 1.03238e-69 | 1.000000 |
| rad42         | 2.84917e-72 | 1.000000 | 2.84917e-72 | 1.000000 |
| rad41         | 7.49931e-75 | 1.000000 | 7.49931e-75 | 1.000000 |

10000.0000 Pa, 70.0000000 K

| Rate constant | True (fraction)     | Effective (fraction) |
|---------------|---------------------|----------------------|
| Total         | 5.61998e-54 (1.00 ) | 5.61998e-54 (1.00 )  |

| species     | PYtrue      | Cumul    | PYeffective | Cumul    |
|-------------|-------------|----------|-------------|----------|
| rad20       | 0.807831    | 0.807831 | 0.807831    | 0.807831 |
| rad21       | 0.152936    | 0.960767 | 0.152936    | 0.960767 |
| rad18       | 0.0271792   | 0.987946 | 0.0271792   | 0.987946 |
| rad22       | 0.0112001   | 0.999146 | 0.0112001   | 0.999146 |
| rad45       | 0.000415477 | 0.999562 | 0.000415477 | 0.999562 |
| Indene+H    | 0.000408911 | 0.999971 | 0.000408911 | 0.999971 |
| rad36       | 2.59335e-05 | 0.999997 | 2.59335e-05 | 0.999997 |
| rad23       | 1.96753e-06 | 0.999999 | 1.96753e-06 | 0.999999 |
| rad11       | 1.53347e-06 | 1.00000  | 1.53347e-06 | 1.00000  |
| Benzyl+C2H2 | 1.85211e-07 | 1.00000  | 0.00000     | 1.00000  |
| rad24       | 7.69883e-08 | 1.00000  | 7.69883e-08 | 1.00000  |
| rad6        | 1.24114e-10 | 1.00000  | 1.24114e-10 | 1.00000  |
| rad30       | 1.12537e-16 | 1.00000  | 1.12537e-16 | 1.00000  |
| rad13       | 3.30693e-17 | 1.00000  | 3.30693e-17 | 1.00000  |
| rad7        | 7.20402e-18 | 1.00000  | 7.20402e-18 | 1.00000  |
| rad15       | 2.78153e-19 | 1.00000  | 2.78154e-19 | 1.00000  |
| rad33       | 5.32301e-20 | 1.00000  | 5.32301e-20 | 1.00000  |
| rad38       | 1.90285e-20 | 1.00000  | 1.90285e-20 | 1.00000  |
| rad25       | 5.79226e-21 | 1.00000  | 5.79226e-21 | 1.00000  |
| rad35       | 3.29171e-22 | 1.00000  | 3.29171e-22 | 1.00000  |
| PAH9+H      | 1.76109e-22 | 1.00000  | 1.76109e-22 | 1.00000  |
| rad3        | 1.27926e-23 | 1.00000  | 1.27926e-23 | 1.00000  |
| rad4        | 6.55943e-24 | 1.00000  | 6.55943e-24 | 1.00000  |
| PhCHCCH2+H  | 6.22437e-26 | 1.00000  | 6.22437e-26 | 1.00000  |
| rad46       | 2.75274e-27 | 1.00000  | 2.75274e-27 | 1.00000  |
| rad28       | 2.27618e-27 | 1.00000  | 2.27618e-27 | 1.00000  |
| rad9        | 1.93390e-28 | 1.00000  | 1.93390e-28 | 1.00000  |
| rad8        | 8.25590e-29 | 1.00000  | 8.25590e-29 | 1.00000  |
| rad2        | 7.41887e-29 | 1.00000  | 7.41887e-29 | 1.00000  |
| rad1        | 4.87400e-30 | 1.00000  | 4.87400e-30 | 1.00000  |
| rad60syn    | 5.42757e-31 | 1.00000  | 5.42757e-31 | 1.00000  |
| Ph+Allene   | 9.22202e-32 | 1.00000  | 9.22202e-32 | 1.00000  |
| rad60anti   | 2.47541e-32 | 1.00000  | 2.47541e-32 | 1.00000  |
| rad31       | 4.21219e-33 | 1.00000  | 4.21220e-33 | 1.00000  |
| PhCCH+CH3   | 2.33331e-34 | 1.00000  | 2.33331e-34 | 1.00000  |
| rad14       | 1.76649e-34 | 1.00000  | 1.76650e-34 | 1.00000  |
| rad10       | 1.71615e-34 | 1.00000  | 1.71615e-34 | 1.00000  |
| PAH7+H      | 1.99602e-36 | 1.00000  | 1.99602e-36 | 1.00000  |
| PhCH2CCH+H  | 1.06434e-36 | 1.00000  | 1.06434e-36 | 1.00000  |
| rad27       | 1.63990e-38 | 1.00000  | 1.63990e-38 | 1.00000  |
| PAH3+H      | 1.61319e-39 | 1.00000  | 1.61319e-39 | 1.00000  |
| rad59       | 8.02108e-40 | 1.00000  | 8.02108e-40 | 1.00000  |
| PhCCCH3+H   | 2.77805e-40 | 1.00000  | 2.77805e-40 | 1.00000  |
| rad26       | 1.07005e-40 | 1.00000  | 1.07005e-40 | 1.00000  |
| Ph+MeAc     | 7.84069e-41 | 1.00000  | 7.84069e-41 | 1.00000  |
| rad50       | 2.98170e-42 | 1.00000  | 2.98170e-42 | 1.00000  |
| rad39       | 2.67169e-42 | 1.00000  | 2.67169e-42 | 1.00000  |
| rad12       | 1.80672e-48 | 1.00000  | 1.80672e-48 | 1.00000  |
| rad37       | 3.78803e-50 | 1.00000  | 3.78803e-50 | 1.00000  |
| rad52       | 2.36915e-50 | 1.00000  | 2.36915e-50 | 1.00000  |
| rad5        | 1.22159e-51 | 1.00000  | 1.22159e-51 | 1.00000  |
| rad19syn    | 4.84015e-54 | 1.00000  | 4.84015e-54 | 1.00000  |
| rad51       | 6.42442e-55 | 1.00000  | 6.42442e-55 | 1.00000  |
| rad54       | 2.18631e-56 | 1.00000  | 2.18631e-56 | 1.00000  |
| rad70       | 7.71026e-59 | 1.00000  | 7.71027e-59 | 1.00000  |
| rad58       | 9.21585e-60 | 1.00000  | 9.21585e-60 | 1.00000  |

|               |             |         |             |         |
|---------------|-------------|---------|-------------|---------|
| rad65         | 6.95060e-60 | 1.00000 | 6.95061e-60 | 1.00000 |
| rad62         | 1.36757e-60 | 1.00000 | 1.36757e-60 | 1.00000 |
| rad43         | 7.74780e-62 | 1.00000 | 7.74781e-62 | 1.00000 |
| PAH10+CH3     | 7.72698e-62 | 1.00000 | 7.72698e-62 | 1.00000 |
| rad47         | 3.54702e-62 | 1.00000 | 3.54702e-62 | 1.00000 |
| rad55         | 9.26369e-63 | 1.00000 | 9.26369e-63 | 1.00000 |
| PhcycC3H3_A+H | 6.46739e-63 | 1.00000 | 6.46739e-63 | 1.00000 |
| rad34         | 2.50004e-64 | 1.00000 | 2.50004e-64 | 1.00000 |
| PAH1+H        | 1.91964e-68 | 1.00000 | 1.91964e-68 | 1.00000 |
| rad42         | 4.18615e-71 | 1.00000 | 4.18615e-71 | 1.00000 |
| rad41         | 1.40866e-73 | 1.00000 | 1.40866e-73 | 1.00000 |

10000.0000 Pa, 80.0000000 K

| Rate constant | True (fraction)     | Effective (fraction) |
|---------------|---------------------|----------------------|
| Total         | 7.28864e-49 (1.00 ) | 7.28864e-49 (1.00 )  |

| species     | PYtrue      | Cumul    | PYeffective | Cumul    |
|-------------|-------------|----------|-------------|----------|
| rad20       | 0.782983    | 0.782983 | 0.782983    | 0.782983 |
| rad21       | 0.169543    | 0.952526 | 0.169543    | 0.952526 |
| rad18       | 0.0314314   | 0.983957 | 0.0314314   | 0.983957 |
| rad22       | 0.0148761   | 0.998833 | 0.0148761   | 0.998833 |
| Indene+H    | 0.000563799 | 0.999397 | 0.000563799 | 0.999397 |
| rad45       | 0.000562149 | 0.999959 | 0.000562149 | 0.999959 |
| rad36       | 3.50420e-05 | 0.999994 | 3.50420e-05 | 0.999994 |
| rad23       | 3.14814e-06 | 0.999998 | 3.14814e-06 | 0.999998 |
| rad11       | 2.21162e-06 | 1.000000 | 2.21162e-06 | 1.000000 |
| Benzyl+C2H2 | 2.97081e-07 | 1.00000  | 0.00000     | 1.000000 |
| rad24       | 6.33580e-08 | 1.00000  | 6.33581e-08 | 1.000000 |
| rad6        | 2.24875e-10 | 1.00000  | 2.24875e-10 | 1.000000 |
| rad30       | 3.77577e-16 | 1.00000  | 3.77577e-16 | 1.000000 |
| rad13       | 7.39844e-17 | 1.00000  | 7.39845e-17 | 1.000000 |
| rad7        | 1.66987e-17 | 1.00000  | 1.66987e-17 | 1.000000 |
| rad15       | 1.07838e-18 | 1.00000  | 1.07838e-18 | 1.000000 |
| rad33       | 1.22800e-19 | 1.00000  | 1.22800e-19 | 1.000000 |
| rad38       | 6.05825e-20 | 1.00000  | 6.05825e-20 | 1.000000 |
| rad25       | 2.35500e-20 | 1.00000  | 2.35500e-20 | 1.000000 |
| rad35       | 9.28542e-22 | 1.00000  | 9.28542e-22 | 1.000000 |
| PAH9+H      | 5.46626e-22 | 1.00000  | 5.46626e-22 | 1.000000 |
| rad3        | 4.22446e-23 | 1.00000  | 4.22446e-23 | 1.000000 |
| rad4        | 2.16469e-23 | 1.00000  | 2.16469e-23 | 1.000000 |
| PhCHCCH2+H  | 3.14990e-25 | 1.00000  | 3.14990e-25 | 1.000000 |
| rad46       | 1.43837e-26 | 1.00000  | 1.43837e-26 | 1.000000 |
| rad28       | 1.09915e-26 | 1.00000  | 1.09915e-26 | 1.000000 |
| rad9        | 1.04785e-27 | 1.00000  | 1.04785e-27 | 1.000000 |
| rad8        | 4.24996e-28 | 1.00000  | 4.24996e-28 | 1.000000 |
| rad2        | 3.51964e-28 | 1.00000  | 3.51964e-28 | 1.000000 |
| rad1        | 2.31055e-29 | 1.00000  | 2.31055e-29 | 1.000000 |
| rad60syn    | 3.00106e-30 | 1.00000  | 3.00106e-30 | 1.000000 |
| Ph+Allene   | 5.61348e-31 | 1.00000  | 5.61348e-31 | 1.000000 |
| rad60anti   | 1.40543e-31 | 1.00000  | 1.40543e-31 | 1.000000 |
| rad31       | 1.42966e-32 | 1.00000  | 1.42966e-32 | 1.000000 |
| PhCCH+CH3   | 1.66230e-33 | 1.00000  | 1.66230e-33 | 1.000000 |
| rad14       | 1.15672e-33 | 1.00000  | 1.15672e-33 | 1.000000 |
| rad10       | 1.09088e-33 | 1.00000  | 1.09088e-33 | 1.000000 |
| PAH7+H      | 1.12272e-35 | 1.00000  | 1.12272e-35 | 1.000000 |
| PhCH2CCH+H  | 7.23299e-36 | 1.00000  | 7.23299e-36 | 1.000000 |
| rad27       | 1.20926e-37 | 1.00000  | 1.20926e-37 | 1.000000 |
| PAH3+H      | 1.03095e-38 | 1.00000  | 1.03096e-38 | 1.000000 |
| rad59       | 5.11897e-39 | 1.00000  | 5.11897e-39 | 1.000000 |
| PhCCCH3+H   | 2.40271e-39 | 1.00000  | 2.40271e-39 | 1.000000 |
| Ph+MeAc     | 6.89398e-40 | 1.00000  | 6.89398e-40 | 1.000000 |
| rad26       | 6.52563e-40 | 1.00000  | 6.52563e-40 | 1.000000 |
| rad50       | 3.59346e-41 | 1.00000  | 3.59346e-41 | 1.000000 |
| rad39       | 1.68495e-41 | 1.00000  | 1.68495e-41 | 1.000000 |
| rad12       | 1.26276e-47 | 1.00000  | 1.26276e-47 | 1.000000 |
| rad52       | 4.63854e-49 | 1.00000  | 4.63854e-49 | 1.000000 |
| rad37       | 2.66741e-49 | 1.00000  | 2.66741e-49 | 1.000000 |
| rad5        | 1.49804e-50 | 1.00000  | 1.49804e-50 | 1.000000 |
| rad19syn    | 5.33939e-53 | 1.00000  | 5.33939e-53 | 1.000000 |
| rad51       | 1.74544e-53 | 1.00000  | 1.74544e-53 | 1.000000 |
| rad54       | 2.26161e-55 | 1.00000  | 2.26161e-55 | 1.000000 |
| rad70       | 8.14741e-58 | 1.00000  | 8.14741e-58 | 1.000000 |
| rad65       | 2.11831e-58 | 1.00000  | 2.11831e-58 | 1.000000 |
| rad58       | 6.40591e-59 | 1.00000  | 6.40592e-59 | 1.000000 |
| rad62       | 2.17371e-59 | 1.00000  | 2.17371e-59 | 1.000000 |
| rad47       | 1.42815e-60 | 1.00000  | 1.42815e-60 | 1.000000 |
| rad43       | 1.40169e-60 | 1.00000  | 1.40169e-60 | 1.000000 |

|               |             |         |             |          |
|---------------|-------------|---------|-------------|----------|
| PAH10+CH3     | 1.29032e-60 | 1.00000 | 1.29032e-60 | 1.000000 |
| rad55         | 1.08133e-61 | 1.00000 | 1.08133e-61 | 1.000000 |
| PhcycC3H3_A+H | 8.42887e-62 | 1.00000 | 8.42888e-62 | 1.000000 |
| rad34         | 2.84801e-63 | 1.00000 | 2.84801e-63 | 1.000000 |
| PAH1+H        | 7.27765e-67 | 1.00000 | 7.27765e-67 | 1.000000 |
| rad42         | 8.40680e-70 | 1.00000 | 8.40681e-70 | 1.000000 |
| rad41         | 3.61888e-72 | 1.00000 | 3.61888e-72 | 1.000000 |

10000.0000 Pa, 90.0000000 K

| Rate constant | True (fraction)     | Effective (fraction) |
|---------------|---------------------|----------------------|
| Total         | 6.85154e-45 (1.00 ) | 6.85153e-45 (1.00 )  |

| species       | PYtrue      | Cumul    | PYeffective | Cumul    |
|---------------|-------------|----------|-------------|----------|
| rad20         | 0.759164    | 0.759164 | 0.759165    | 0.759165 |
| rad21         | 0.184487    | 0.943651 | 0.184487    | 0.943652 |
| rad18         | 0.0357297   | 0.979381 | 0.0357297   | 0.979382 |
| rad22         | 0.0190769   | 0.998458 | 0.0190769   | 0.998459 |
| Indene+H      | 0.000751964 | 0.999210 | 0.000751964 | 0.999211 |
| rad45         | 0.000735513 | 0.999945 | 0.000735513 | 0.999946 |
| rad36         | 4.58012e-05 | 0.999991 | 4.58012e-05 | 0.999992 |
| rad23         | 4.78948e-06 | 0.999996 | 4.78948e-06 | 0.999997 |
| rad11         | 3.09949e-06 | 0.999999 | 3.09949e-06 | 1.000000 |
| Benzyl+C2H2   | 4.67412e-07 | 0.999999 | 0.000000    | 1.000000 |
| rad24         | 5.34823e-08 | 0.999999 | 5.34823e-08 | 1.000000 |
| rad6          | 3.93290e-10 | 0.999999 | 3.93290e-10 | 1.000000 |
| rad30         | 1.39762e-15 | 0.999999 | 1.39762e-15 | 1.000000 |
| rad13         | 1.58823e-16 | 0.999999 | 1.58823e-16 | 1.000000 |
| rad7          | 3.74030e-17 | 0.999999 | 3.74030e-17 | 1.000000 |
| rad15         | 5.17273e-18 | 0.999999 | 5.17273e-18 | 1.000000 |
| rad33         | 2.72693e-19 | 0.999999 | 2.72694e-19 | 1.000000 |
| rad38         | 1.93932e-19 | 0.999999 | 1.93932e-19 | 1.000000 |
| rad25         | 1.12460e-19 | 0.999999 | 1.12460e-19 | 1.000000 |
| rad35         | 2.52971e-21 | 0.999999 | 2.52971e-21 | 1.000000 |
| PAH9+H        | 1.65369e-21 | 0.999999 | 1.65369e-21 | 1.000000 |
| rad3          | 1.37528e-22 | 0.999999 | 1.37528e-22 | 1.000000 |
| rad4          | 7.04528e-23 | 0.999999 | 7.04528e-23 | 1.000000 |
| PhCHCCH2+H    | 2.21490e-24 | 0.999999 | 2.21490e-24 | 1.000000 |
| rad46         | 9.46172e-26 | 0.999999 | 9.46173e-26 | 1.000000 |
| rad28         | 5.78371e-26 | 0.999999 | 5.78371e-26 | 1.000000 |
| rad9          | 8.19534e-27 | 0.999999 | 8.19534e-27 | 1.000000 |
| rad8          | 3.45733e-27 | 0.999999 | 3.45733e-27 | 1.000000 |
| rad2          | 1.72708e-27 | 0.999999 | 1.72708e-27 | 1.000000 |
| rad1          | 1.13413e-28 | 0.999999 | 1.13413e-28 | 1.000000 |
| rad60syn      | 2.49085e-29 | 0.999999 | 2.49086e-29 | 1.000000 |
| Ph+Allene     | 5.13136e-30 | 0.999999 | 5.13137e-30 | 1.000000 |
| rad60anti     | 1.20553e-30 | 0.999999 | 1.20553e-30 | 1.000000 |
| rad31         | 4.81633e-32 | 0.999999 | 4.81633e-32 | 1.000000 |
| PhCCH+CH3     | 1.48970e-32 | 0.999999 | 1.48970e-32 | 1.000000 |
| rad14         | 8.98953e-33 | 0.999999 | 8.98954e-33 | 1.000000 |
| rad10         | 7.51194e-33 | 0.999999 | 7.51195e-33 | 1.000000 |
| PAH7+H        | 1.00691e-34 | 0.999999 | 1.00691e-34 | 1.000000 |
| PhCH2CCH+H    | 7.54931e-35 | 0.999999 | 7.54931e-35 | 1.000000 |
| rad27         | 1.03306e-36 | 0.999999 | 1.03306e-36 | 1.000000 |
| PAH3+H        | 1.02780e-37 | 0.999999 | 1.02780e-37 | 1.000000 |
| rad59         | 5.09339e-38 | 0.999999 | 5.09339e-38 | 1.000000 |
| PhCCCH3+H     | 2.63928e-38 | 0.999999 | 2.63928e-38 | 1.000000 |
| Ph+MeAc       | 8.53469e-39 | 0.999999 | 8.53470e-39 | 1.000000 |
| rad26         | 6.45110e-39 | 0.999999 | 6.45110e-39 | 1.000000 |
| rad50         | 6.48775e-40 | 0.999999 | 6.48776e-40 | 1.000000 |
| rad39         | 1.63158e-40 | 0.999999 | 1.63158e-40 | 1.000000 |
| rad12         | 1.41460e-46 | 0.999999 | 1.41460e-46 | 1.000000 |
| rad52         | 1.41656e-47 | 0.999999 | 1.41656e-47 | 1.000000 |
| rad37         | 3.02213e-48 | 0.999999 | 3.02213e-48 | 1.000000 |
| rad5          | 2.65774e-49 | 0.999999 | 2.65774e-49 | 1.000000 |
| rad19syn      | 8.89387e-52 | 0.999999 | 8.89387e-52 | 1.000000 |
| rad51         | 7.55437e-52 | 0.999999 | 7.55438e-52 | 1.000000 |
| rad54         | 3.62779e-54 | 0.999999 | 3.62779e-54 | 1.000000 |
| rad70         | 1.37766e-56 | 0.999999 | 1.37766e-56 | 1.000000 |
| rad65         | 1.07989e-56 | 0.999999 | 1.07989e-56 | 1.000000 |
| rad58         | 7.81944e-58 | 0.999999 | 7.81944e-58 | 1.000000 |
| rad62         | 5.32431e-58 | 0.999999 | 5.32431e-58 | 1.000000 |
| rad47         | 9.41770e-59 | 0.999999 | 9.41770e-59 | 1.000000 |
| PAH10+CH3     | 4.62503e-59 | 0.999999 | 4.62503e-59 | 1.000000 |
| rad43         | 3.84478e-59 | 0.999999 | 3.84478e-59 | 1.000000 |
| rad55         | 1.98335e-60 | 0.999999 | 1.98335e-60 | 1.000000 |
| PhcycC3H3_A+H | 1.69447e-60 | 0.999999 | 1.69447e-60 | 1.000000 |
| rad34         | 5.32755e-62 | 0.999999 | 5.32756e-62 | 1.000000 |

|        |             |          |             |          |
|--------|-------------|----------|-------------|----------|
| PAH1+H | 5.36292e-65 | 0.999999 | 5.36292e-65 | 1.000000 |
| rad42  | 2.77896e-68 | 0.999999 | 2.77896e-68 | 1.000000 |
| rad41  | 1.53191e-70 | 0.999999 | 1.53191e-70 | 1.000000 |

10000.0000 Pa, 100.000000 K

| Rate constant | True (fraction)     | Effective (fraction) |
|---------------|---------------------|----------------------|
| Total         | 1.02671e-41 (1.00 ) | 1.02671e-41 (1.00 )  |

| species       | PYtrue      | Cumul    | PYeffective | Cumul    |
|---------------|-------------|----------|-------------|----------|
| rad20         | 0.736164    | 0.736164 | 0.736165    | 0.736165 |
| rad21         | 0.197898    | 0.934062 | 0.197898    | 0.934063 |
| rad18         | 0.0401093   | 0.974171 | 0.0401093   | 0.974172 |
| rad22         | 0.0238389   | 0.998010 | 0.0238389   | 0.998011 |
| Indene+H      | 0.000979601 | 0.998990 | 0.000979602 | 0.998991 |
| rad45         | 0.000939287 | 0.999929 | 0.000939288 | 0.999930 |
| rad36         | 5.84446e-05 | 0.999988 | 5.84447e-05 | 0.999989 |
| rad23         | 7.02983e-06 | 0.999995 | 7.02983e-06 | 0.999996 |
| rad11         | 4.25984e-06 | 0.999999 | 4.25984e-06 | 1.000000 |
| Benzyl+C2H2   | 7.24718e-07 | 1.000000 | 0.000000    | 1.000000 |
| rad24         | 4.60914e-08 | 1.000000 | 4.60914e-08 | 1.000000 |
| rad6          | 6.73736e-10 | 1.000000 | 6.73736e-10 | 1.000000 |
| rad30         | 5.25614e-15 | 1.000000 | 5.25615e-15 | 1.000000 |
| rad13         | 3.33522e-16 | 1.000000 | 3.33522e-16 | 1.000000 |
| rad7          | 8.26879e-17 | 1.000000 | 8.26880e-17 | 1.000000 |
| rad15         | 2.83347e-17 | 1.000000 | 2.83347e-17 | 1.000000 |
| rad38         | 6.09553e-19 | 1.000000 | 6.09554e-19 | 1.000000 |
| rad25         | 5.93702e-19 | 1.000000 | 5.93703e-19 | 1.000000 |
| rad33         | 5.93209e-19 | 1.000000 | 5.93210e-19 | 1.000000 |
| rad35         | 6.76193e-21 | 1.000000 | 6.76194e-21 | 1.000000 |
| PAH9+H        | 4.91213e-21 | 1.000000 | 4.91214e-21 | 1.000000 |
| rad3          | 4.51639e-22 | 1.000000 | 4.51640e-22 | 1.000000 |
| rad4          | 2.31370e-22 | 1.000000 | 2.31371e-22 | 1.000000 |
| PhCHCCH2+H    | 2.27351e-23 | 1.000000 | 2.27351e-23 | 1.000000 |
| rad46         | 7.68177e-25 | 1.000000 | 7.68177e-25 | 1.000000 |
| rad28         | 3.26916e-25 | 1.000000 | 3.26916e-25 | 1.000000 |
| rad9          | 1.03938e-25 | 1.000000 | 1.03938e-25 | 1.000000 |
| rad8          | 5.83822e-26 | 1.000000 | 5.83823e-26 | 1.000000 |
| rad2          | 9.00451e-27 | 1.000000 | 9.00451e-27 | 1.000000 |
| rad1          | 5.91978e-28 | 1.000000 | 5.91979e-28 | 1.000000 |
| rad60syn      | 3.81360e-28 | 1.000000 | 3.81361e-28 | 1.000000 |
| Ph+Allene     | 8.64079e-29 | 1.000000 | 8.64080e-29 | 1.000000 |
| rad60anti     | 1.93826e-29 | 1.000000 | 1.93826e-29 | 1.000000 |
| PhCCH+CH3     | 1.76098e-31 | 1.000000 | 1.76099e-31 | 1.000000 |
| rad31         | 1.64539e-31 | 1.000000 | 1.64539e-31 | 1.000000 |
| rad14         | 8.42275e-32 | 1.000000 | 8.42276e-32 | 1.000000 |
| rad10         | 5.81967e-32 | 1.000000 | 5.81967e-32 | 1.000000 |
| PAH7+H        | 1.85717e-33 | 1.000000 | 1.85717e-33 | 1.000000 |
| PhCH2CCH+H    | 1.52324e-33 | 1.000000 | 1.52325e-33 | 1.000000 |
| rad27         | 1.06562e-35 | 1.000000 | 1.06562e-35 | 1.000000 |
| PAH3+H        | 2.03187e-36 | 1.000000 | 2.03187e-36 | 1.000000 |
| rad59         | 1.00423e-36 | 1.000000 | 1.00423e-36 | 1.000000 |
| PhCCCH3+H     | 4.00149e-37 | 1.000000 | 4.00150e-37 | 1.000000 |
| Ph+MeAc       | 1.77942e-37 | 1.000000 | 1.77942e-37 | 1.000000 |
| rad26         | 1.31098e-37 | 1.000000 | 1.31098e-37 | 1.000000 |
| rad50         | 1.83464e-38 | 1.000000 | 1.83464e-38 | 1.000000 |
| rad39         | 3.07831e-39 | 1.000000 | 3.07831e-39 | 1.000000 |
| rad12         | 3.24758e-45 | 1.000000 | 3.24758e-45 | 1.000000 |
| rad52         | 6.95775e-46 | 1.000000 | 6.95775e-46 | 1.000000 |
| rad37         | 7.03198e-47 | 1.000000 | 7.03198e-47 | 1.000000 |
| rad5          | 8.53820e-48 | 1.000000 | 8.53821e-48 | 1.000000 |
| rad51         | 5.33691e-50 | 1.000000 | 5.33692e-50 | 1.000000 |
| rad19syn      | 2.85151e-50 | 1.000000 | 2.85151e-50 | 1.000000 |
| rad54         | 1.14721e-52 | 1.000000 | 1.14721e-52 | 1.000000 |
| rad65         | 9.23594e-55 | 1.000000 | 9.23595e-55 | 1.000000 |
| rad70         | 4.72945e-55 | 1.000000 | 4.72945e-55 | 1.000000 |
| rad62         | 2.57784e-56 | 1.000000 | 2.57784e-56 | 1.000000 |
| rad58         | 2.26302e-56 | 1.000000 | 2.26303e-56 | 1.000000 |
| rad47         | 1.03281e-56 | 1.000000 | 1.03281e-56 | 1.000000 |
| PAH10+CH3     | 3.12414e-57 | 1.000000 | 3.12415e-57 | 1.000000 |
| rad43         | 2.04948e-57 | 1.000000 | 2.04948e-57 | 1.000000 |
| rad55         | 7.26507e-59 | 1.000000 | 7.26507e-59 | 1.000000 |
| PhcycC3H3_A+H | 6.70326e-59 | 1.000000 | 6.70326e-59 | 1.000000 |
| rad34         | 2.12275e-60 | 1.000000 | 2.12275e-60 | 1.000000 |
| PAH1+H        | 7.00647e-63 | 1.000000 | 7.00647e-63 | 1.000000 |
| rad42         | 1.96176e-66 | 1.000000 | 1.96176e-66 | 1.000000 |
| rad41         | 1.37688e-68 | 1.000000 | 1.37688e-68 | 1.000000 |



10000.0000 Pa, 110.000000 K

=====

| Rate constant | True (fraction)     | Effective (fraction) |
|---------------|---------------------|----------------------|
| Total         | 4.04932e-39 (1.00 ) | 4.04931e-39 (1.00 )  |

| species       | PYtrue      | Cumul    | PYeffective | Cumul    |
|---------------|-------------|----------|-------------|----------|
| rad20         | 0.713807    | 0.713807 | 0.713807    | 0.713807 |
| rad21         | 0.209859    | 0.923666 | 0.209860    | 0.923667 |
| rad18         | 0.0446030   | 0.968269 | 0.0446031   | 0.968270 |
| rad22         | 0.0292079   | 0.997477 | 0.0292080   | 0.997478 |
| Indene+H      | 0.00125475  | 0.998732 | 0.00125475  | 0.998733 |
| rad45         | 0.00117809  | 0.999910 | 0.00117809  | 0.999911 |
| rad36         | 7.32641e-05 | 0.999983 | 7.32641e-05 | 0.999984 |
| rad23         | 1.00531e-05 | 0.999993 | 1.00531e-05 | 0.999994 |
| rad11         | 5.77621e-06 | 0.999999 | 5.77621e-06 | 1.00000  |
| Benzyl+C2H2   | 1.11094e-06 | 1.000000 | 0.00000     | 1.00000  |
| rad24         | 4.04085e-08 | 1.000000 | 4.04085e-08 | 1.00000  |
| rad6          | 1.14140e-09 | 1.000000 | 1.14140e-09 | 1.00000  |
| rad30         | 1.86635e-14 | 1.000000 | 1.86635e-14 | 1.00000  |
| rad13         | 6.93094e-16 | 1.000000 | 6.93094e-16 | 1.00000  |
| rad7          | 1.82874e-16 | 1.000000 | 1.82874e-16 | 1.00000  |
| rad15         | 1.53217e-16 | 1.000000 | 1.53217e-16 | 1.00000  |
| rad25         | 3.11746e-18 | 1.000000 | 3.11746e-18 | 1.00000  |
| rad38         | 1.84831e-18 | 1.000000 | 1.84832e-18 | 1.00000  |
| rad33         | 1.27577e-18 | 1.000000 | 1.27578e-18 | 1.00000  |
| rad35         | 1.79001e-20 | 1.000000 | 1.79001e-20 | 1.00000  |
| PAH9+H        | 1.43790e-20 | 1.000000 | 1.43790e-20 | 1.00000  |
| rad3          | 1.50916e-21 | 1.000000 | 1.50916e-21 | 1.00000  |
| rad4          | 7.73329e-22 | 1.000000 | 7.73330e-22 | 1.00000  |
| PhCHCCH2+H    | 2.85750e-22 | 1.000000 | 2.85751e-22 | 1.00000  |
| rad46         | 6.76456e-24 | 1.000000 | 6.76457e-24 | 1.00000  |
| rad8          | 2.51109e-24 | 1.000000 | 2.51109e-24 | 1.00000  |
| rad28         | 1.89522e-24 | 1.000000 | 1.89522e-24 | 1.00000  |
| rad9          | 1.82759e-24 | 1.000000 | 1.82759e-24 | 1.00000  |
| rad2          | 4.97634e-26 | 1.000000 | 4.97635e-26 | 1.00000  |
| rad60syn      | 1.12756e-26 | 1.000000 | 1.12756e-26 | 1.00000  |
| rad1          | 3.27758e-27 | 1.000000 | 3.27759e-27 | 1.00000  |
| Ph+Allene     | 2.81466e-27 | 1.000000 | 2.81466e-27 | 1.00000  |
| rad60anti     | 6.61985e-28 | 1.000000 | 6.61985e-28 | 1.00000  |
| PhCCH+CH3     | 2.50005e-30 | 1.000000 | 2.50005e-30 | 1.00000  |
| rad14         | 8.81740e-31 | 1.000000 | 8.81741e-31 | 1.00000  |
| rad31         | 5.74172e-31 | 1.000000 | 5.74172e-31 | 1.00000  |
| rad10         | 5.01082e-31 | 1.000000 | 5.01082e-31 | 1.00000  |
| PAH7+H        | 8.65023e-32 | 1.000000 | 8.65024e-32 | 1.00000  |
| PhCH2CCH+H    | 6.87766e-32 | 1.000000 | 6.87767e-32 | 1.00000  |
| rad27         | 1.27455e-34 | 1.000000 | 1.27455e-34 | 1.00000  |
| PAH3+H        | 9.63192e-35 | 1.000000 | 9.63193e-35 | 1.00000  |
| rad59         | 4.74196e-35 | 1.000000 | 4.74196e-35 | 1.00000  |
| PhCCCH3+H     | 7.80741e-36 | 1.000000 | 7.80742e-36 | 1.00000  |
| rad26         | 6.64275e-36 | 1.000000 | 6.64275e-36 | 1.00000  |
| Ph+MeAc       | 6.25576e-36 | 1.000000 | 6.25576e-36 | 1.00000  |
| rad50         | 7.83541e-37 | 1.000000 | 7.83542e-37 | 1.00000  |
| rad39         | 1.32070e-37 | 1.000000 | 1.32070e-37 | 1.00000  |
| rad12         | 1.83606e-43 | 1.000000 | 1.83607e-43 | 1.00000  |
| rad52         | 5.25430e-44 | 1.000000 | 5.25431e-44 | 1.00000  |
| rad37         | 4.00844e-45 | 1.000000 | 4.00844e-45 | 1.00000  |
| rad5          | 5.51582e-46 | 1.000000 | 5.51583e-46 | 1.00000  |
| rad51         | 5.85842e-48 | 1.000000 | 5.85843e-48 | 1.00000  |
| rad19syn      | 2.09025e-48 | 1.000000 | 2.09025e-48 | 1.00000  |
| rad54         | 8.52272e-51 | 1.000000 | 8.52273e-51 | 1.00000  |
| rad65         | 1.24800e-52 | 1.000000 | 1.24800e-52 | 1.00000  |
| rad70         | 3.92479e-53 | 1.000000 | 3.92479e-53 | 1.00000  |
| rad62         | 2.91306e-54 | 1.000000 | 2.91306e-54 | 1.00000  |
| rad58         | 1.85607e-54 | 1.000000 | 1.85607e-54 | 1.00000  |
| rad47         | 1.78098e-54 | 1.000000 | 1.78098e-54 | 1.00000  |
| PAH10+CH3     | 3.43791e-55 | 1.000000 | 3.43792e-55 | 1.00000  |
| rad43         | 2.48598e-55 | 1.000000 | 2.48598e-55 | 1.00000  |
| rad55         | 6.33758e-57 | 1.000000 | 6.33759e-57 | 1.00000  |
| PhcycC3H3_A+H | 6.23652e-57 | 1.000000 | 6.23653e-57 | 1.00000  |
| rad34         | 2.14961e-58 | 1.000000 | 2.14961e-58 | 1.00000  |
| PAH1+H        | 1.46676e-60 | 1.000000 | 1.46676e-60 | 1.00000  |
| rad42         | 3.52255e-64 | 1.000000 | 3.52255e-64 | 1.00000  |
| rad41         | 3.09733e-66 | 1.000000 | 3.09733e-66 | 1.00000  |

10000.0000 Pa, 120.000000 K

=====

| Rate constant | True (fraction) | Effective (fraction) |
|---------------|-----------------|----------------------|
|---------------|-----------------|----------------------|

Total | 5.87106e-37 (1.00 ) 5.87105e-37 (1.00 )

| species       | PYtrue      | Cumul    | PYeffective | Cumul    |
|---------------|-------------|----------|-------------|----------|
| rad20         | 0.691944    | 0.691944 | 0.691945    | 0.691945 |
| rad21         | 0.220417    | 0.912361 | 0.220418    | 0.912363 |
| rad18         | 0.0492413   | 0.961602 | 0.0492414   | 0.961604 |
| rad22         | 0.0352378   | 0.996840 | 0.0352378   | 0.996842 |
| Indene+H      | 0.00158771  | 0.998428 | 0.00158771  | 0.998430 |
| rad45         | 0.00145748  | 0.999885 | 0.00145748  | 0.999887 |
| rad36         | 9.06114e-05 | 0.999976 | 9.06115e-05 | 0.999978 |
| rad23         | 1.41044e-05 | 0.999990 | 1.41044e-05 | 0.999992 |
| rad11         | 7.75853e-06 | 0.999998 | 7.75855e-06 | 1.000000 |
| Benzyl+C2H2   | 1.68730e-06 | 0.999999 | 0.00000     | 1.000000 |
| rad24         | 3.59375e-08 | 0.999999 | 3.59375e-08 | 1.000000 |
| rad6          | 1.92399e-09 | 0.999999 | 1.92399e-09 | 1.000000 |
| rad30         | 6.05879e-14 | 0.999999 | 6.05880e-14 | 1.000000 |
| rad13         | 1.43355e-15 | 0.999999 | 1.43355e-15 | 1.000000 |
| rad15         | 7.45001e-16 | 0.999999 | 7.45002e-16 | 1.000000 |
| rad7          | 4.07661e-16 | 0.999999 | 4.07661e-16 | 1.000000 |
| rad25         | 1.51366e-17 | 0.999999 | 1.51367e-17 | 1.000000 |
| rad38         | 5.36759e-18 | 0.999999 | 5.36760e-18 | 1.000000 |
| rad33         | 2.72079e-18 | 0.999999 | 2.72080e-18 | 1.000000 |
| rad35         | 4.71406e-20 | 0.999999 | 4.71407e-20 | 1.000000 |
| PAH9+H        | 4.15551e-20 | 0.999999 | 4.15552e-20 | 1.000000 |
| rad3          | 5.12004e-21 | 0.999999 | 5.12005e-21 | 1.000000 |
| PhCHCCH2+H    | 3.43792e-21 | 0.999999 | 3.43793e-21 | 1.000000 |
| rad4          | 2.62486e-21 | 0.999999 | 2.62487e-21 | 1.000000 |
| rad8          | 9.78918e-23 | 0.999999 | 9.78919e-23 | 1.000000 |
| rad46         | 5.59990e-23 | 0.999999 | 5.59991e-23 | 1.000000 |
| rad9          | 3.18219e-23 | 0.999999 | 3.18219e-23 | 1.000000 |
| rad28         | 1.08086e-23 | 0.999999 | 1.08086e-23 | 1.000000 |
| rad60syn      | 3.60182e-25 | 0.999999 | 3.60183e-25 | 1.000000 |
| rad2          | 2.85203e-25 | 0.999999 | 2.85204e-25 | 1.000000 |
| Ph+Allene     | 1.05774e-25 | 0.999999 | 1.05775e-25 | 1.000000 |
| rad60anti     | 2.66386e-26 | 0.999999 | 2.66386e-26 | 1.000000 |
| rad1          | 1.88306e-26 | 0.999999 | 1.88307e-26 | 1.000000 |
| PhCCH+CH3     | 3.65610e-29 | 0.999999 | 3.65611e-29 | 1.000000 |
| rad14         | 9.33983e-30 | 0.999999 | 9.33984e-30 | 1.000000 |
| PAH7+H        | 7.66797e-30 | 0.999999 | 7.66799e-30 | 1.000000 |
| PhCH2CCH+H    | 4.82654e-30 | 0.999999 | 4.82655e-30 | 1.000000 |
| rad10         | 4.58751e-30 | 0.999999 | 4.58752e-30 | 1.000000 |
| rad31         | 2.03998e-30 | 0.999999 | 2.03998e-30 | 1.000000 |
| PAH3+H        | 7.78066e-33 | 0.999999 | 7.78067e-33 | 1.000000 |
| rad59         | 3.81137e-33 | 0.999999 | 3.81138e-33 | 1.000000 |
| rad27         | 1.62385e-33 | 0.999999 | 1.62385e-33 | 1.000000 |
| rad26         | 5.86804e-34 | 0.999999 | 5.86805e-34 | 1.000000 |
| Ph+MeAc       | 2.60235e-34 | 0.999999 | 2.60236e-34 | 1.000000 |
| PhCCCH3+H     | 1.65216e-34 | 0.999999 | 1.65216e-34 | 1.000000 |
| rad50         | 4.16903e-35 | 0.999999 | 4.16904e-35 | 1.000000 |
| rad39         | 6.95236e-36 | 0.999999 | 6.95237e-36 | 1.000000 |
| rad12         | 1.77694e-41 | 0.999999 | 1.77694e-41 | 1.000000 |
| rad52         | 5.00301e-42 | 0.999999 | 5.00302e-42 | 1.000000 |
| rad37         | 3.89814e-43 | 0.999999 | 3.89815e-43 | 1.000000 |
| rad5          | 5.04708e-44 | 0.999999 | 5.04709e-44 | 1.000000 |
| rad51         | 8.16946e-46 | 0.999999 | 8.16947e-46 | 1.000000 |
| rad19syn      | 2.46876e-46 | 0.999999 | 2.46877e-46 | 1.000000 |
| rad54         | 1.04196e-48 | 0.999999 | 1.04196e-48 | 1.000000 |
| rad65         | 2.16724e-50 | 0.999999 | 2.16725e-50 | 1.000000 |
| rad70         | 5.46218e-51 | 0.999999 | 5.46219e-51 | 1.000000 |
| rad62         | 5.34419e-52 | 0.999999 | 5.34420e-52 | 1.000000 |
| rad47         | 3.92680e-52 | 0.999999 | 3.92681e-52 | 1.000000 |
| rad58         | 2.74703e-52 | 0.999999 | 2.74704e-52 | 1.000000 |
| PAH10+CH3     | 4.87381e-53 | 0.999999 | 4.87382e-53 | 1.000000 |
| rad43         | 4.77081e-53 | 0.999999 | 4.77082e-53 | 1.000000 |
| PhcycC3H3_A+H | 9.54941e-55 | 0.999999 | 9.54943e-55 | 1.000000 |
| rad55         | 9.18196e-55 | 0.999999 | 9.18197e-55 | 1.000000 |
| rad34         | 3.76629e-56 | 0.999999 | 3.76630e-56 | 1.000000 |
| PAH1+H        | 3.95525e-58 | 0.999999 | 3.95526e-58 | 1.000000 |
| rad42         | 1.10696e-61 | 0.999999 | 1.10696e-61 | 1.000000 |
| rad41         | 1.19327e-63 | 0.999999 | 1.19327e-63 | 1.000000 |

10000.0000 Pa, 130.000000 K

| Rate constant | True (fraction)     | Effective (fraction) |
|---------------|---------------------|----------------------|
| Total         | 3.94360e-35 (1.00 ) | 3.94359e-35 (1.00 )  |

| species | PYtrue | Cumul | PYeffective | Cumul |
|---------|--------|-------|-------------|-------|
|---------|--------|-------|-------------|-------|

|               |             |          |             |          |
|---------------|-------------|----------|-------------|----------|
| rad20         | 0.670451    | 0.670451 | 0.670453    | 0.670453 |
| rad21         | 0.229591    | 0.900042 | 0.229591    | 0.900044 |
| rad18         | 0.0540518   | 0.954094 | 0.0540520   | 0.954096 |
| rad22         | 0.0419877   | 0.996081 | 0.0419878   | 0.996084 |
| Indene+H      | 0.00199152  | 0.998073 | 0.00199153  | 0.998075 |
| rad45         | 0.00178395  | 0.999857 | 0.00178396  | 0.999859 |
| rad36         | 0.000110901 | 0.999968 | 0.000110901 | 0.999970 |
| rad23         | 1.95095e-05 | 0.999987 | 1.95095e-05 | 0.999990 |
| rad11         | 1.03498e-05 | 0.999998 | 1.03498e-05 | 1.00000  |
| Benzyl+C2H2   | 2.54228e-06 | 1.00000  | 0.00000     | 1.00000  |
| rad24         | 3.23493e-08 | 1.00000  | 3.23493e-08 | 1.00000  |
| rad6          | 3.23801e-09 | 1.00000  | 3.23802e-09 | 1.00000  |
| rad30         | 1.79168e-13 | 1.00000  | 1.79168e-13 | 1.00000  |
| rad15         | 3.16572e-15 | 1.00000  | 3.16572e-15 | 1.00000  |
| rad13         | 2.95510e-15 | 1.00000  | 2.95511e-15 | 1.00000  |
| rad7          | 9.18486e-16 | 1.00000  | 9.18488e-16 | 1.00000  |
| rad25         | 6.61291e-17 | 1.00000  | 6.61293e-17 | 1.00000  |
| rad38         | 1.49208e-17 | 1.00000  | 1.49209e-17 | 1.00000  |
| rad33         | 5.74801e-18 | 1.00000  | 5.74803e-18 | 1.00000  |
| rad35         | 1.23635e-19 | 1.00000  | 1.23636e-19 | 1.00000  |
| PAH9+H        | 1.18614e-19 | 1.00000  | 1.18615e-19 | 1.00000  |
| PhCHCCH2+H    | 3.49044e-20 | 1.00000  | 3.49045e-20 | 1.00000  |
| rad3          | 1.74839e-20 | 1.00000  | 1.74840e-20 | 1.00000  |
| rad4          | 8.96929e-21 | 1.00000  | 8.96932e-21 | 1.00000  |
| rad8          | 2.61629e-21 | 1.00000  | 2.61630e-21 | 1.00000  |
| rad9          | 4.54251e-22 | 1.00000  | 4.54252e-22 | 1.00000  |
| rad46         | 4.03555e-22 | 1.00000  | 4.03556e-22 | 1.00000  |
| rad28         | 5.96383e-23 | 1.00000  | 5.96385e-23 | 1.00000  |
| rad60syn      | 8.91921e-24 | 1.00000  | 8.91924e-24 | 1.00000  |
| Ph+Allene     | 3.17278e-24 | 1.00000  | 3.17279e-24 | 1.00000  |
| rad2          | 1.64867e-24 | 1.00000  | 1.64867e-24 | 1.00000  |
| rad60anti     | 8.14536e-25 | 1.00000  | 8.14538e-25 | 1.00000  |
| rad1          | 1.09184e-25 | 1.00000  | 1.09184e-25 | 1.00000  |
| PhCCH+CH3     | 4.97149e-28 | 1.00000  | 4.97151e-28 | 1.00000  |
| PAH7+H        | 4.73718e-28 | 1.00000  | 4.73719e-28 | 1.00000  |
| PhCH2CCH+H    | 3.88308e-28 | 1.00000  | 3.88309e-28 | 1.00000  |
| rad14         | 9.36930e-29 | 1.00000  | 9.36933e-29 | 1.00000  |
| rad10         | 4.25545e-29 | 1.00000  | 4.25546e-29 | 1.00000  |
| rad31         | 7.31149e-30 | 1.00000  | 7.31151e-30 | 1.00000  |
| PAH3+H        | 8.52868e-31 | 1.00000  | 8.52870e-31 | 1.00000  |
| rad59         | 4.14861e-31 | 1.00000  | 4.14862e-31 | 1.00000  |
| rad26         | 7.35847e-32 | 1.00000  | 7.35849e-32 | 1.00000  |
| rad27         | 2.04354e-32 | 1.00000  | 2.04354e-32 | 1.00000  |
| Ph+MeAc       | 9.66976e-33 | 1.00000  | 9.66978e-33 | 1.00000  |
| PhCCCH3+H     | 3.34110e-33 | 1.00000  | 3.34111e-33 | 1.00000  |
| rad50         | 2.32462e-33 | 1.00000  | 2.32462e-33 | 1.00000  |
| rad39         | 2.87917e-34 | 1.00000  | 2.87918e-34 | 1.00000  |
| rad12         | 2.41887e-39 | 1.00000  | 2.41887e-39 | 1.00000  |
| rad52         | 5.04891e-40 | 1.00000  | 5.04892e-40 | 1.00000  |
| rad37         | 5.33744e-41 | 1.00000  | 5.33745e-41 | 1.00000  |
| rad5          | 4.93625e-42 | 1.00000  | 4.93626e-42 | 1.00000  |
| rad51         | 1.21364e-43 | 1.00000  | 1.21364e-43 | 1.00000  |
| rad19syn      | 3.75469e-44 | 1.00000  | 3.75470e-44 | 1.00000  |
| rad54         | 1.68124e-46 | 1.00000  | 1.68124e-46 | 1.00000  |
| rad65         | 4.04559e-48 | 1.00000  | 4.04561e-48 | 1.00000  |
| rad70         | 1.01967e-48 | 1.00000  | 1.01967e-48 | 1.00000  |
| rad62         | 1.24121e-49 | 1.00000  | 1.24121e-49 | 1.00000  |
| rad47         | 9.24189e-50 | 1.00000  | 9.24192e-50 | 1.00000  |
| rad58         | 5.40253e-50 | 1.00000  | 5.40254e-50 | 1.00000  |
| rad43         | 1.12413e-50 | 1.00000  | 1.12413e-50 | 1.00000  |
| PAH10+CH3     | 7.46380e-51 | 1.00000  | 7.46382e-51 | 1.00000  |
| PhcycC3H3_A+H | 1.93198e-52 | 1.00000  | 1.93199e-52 | 1.00000  |
| rad55         | 1.77114e-52 | 1.00000  | 1.77115e-52 | 1.00000  |
| rad34         | 8.76874e-54 | 1.00000  | 8.76876e-54 | 1.00000  |
| PAH1+H        | 1.14637e-55 | 1.00000  | 1.14637e-55 | 1.00000  |
| rad42         | 4.69044e-59 | 1.00000  | 4.69045e-59 | 1.00000  |
| rad41         | 6.04152e-61 | 1.00000  | 6.04154e-61 | 1.00000  |

10000.0000 Pa, 140.000000 K

=====

| Rate constant | True (fraction) |          | Effective (fraction) |          |
|---------------|-----------------|----------|----------------------|----------|
| Total         | 1.44756e-33     | (1.00 )  | 1.44755e-33          | (1.00 )  |
| species       | PYtrue          | Cumul    | PYeffective          | Cumul    |
| rad20         | 0.649216        | 0.649216 | 0.649219             | 0.649219 |
| rad21         | 0.237378        | 0.886594 | 0.237379             | 0.886598 |
| rad18         | 0.0590589       | 0.945653 | 0.0590591            | 0.945657 |
| rad22         | 0.0495201       | 0.995173 | 0.0495203            | 0.995177 |

|               |             |          |             |          |
|---------------|-------------|----------|-------------|----------|
| Indene+H      | 0.00248254  | 0.997656 | 0.00248255  | 0.997660 |
| rad45         | 0.00216492  | 0.999820 | 0.00216493  | 0.999825 |
| rad36         | 0.000134608 | 0.999955 | 0.000134609 | 0.999959 |
| rad23         | 2.66995e-05 | 0.999982 | 2.66996e-05 | 0.999986 |
| rad11         | 1.37334e-05 | 0.999996 | 1.37335e-05 | 1.000000 |
| Benzyl+C2H2   | 3.80238e-06 | 0.999999 | 0.000000    | 1.000000 |
| rad24         | 2.94187e-08 | 0.999999 | 2.94188e-08 | 1.000000 |
| rad6          | 5.44870e-09 | 0.999999 | 5.44872e-09 | 1.000000 |
| rad30         | 4.86657e-13 | 0.999999 | 4.86659e-13 | 1.000000 |
| rad15         | 1.17988e-14 | 0.999999 | 1.17988e-14 | 1.000000 |
| rad13         | 6.06113e-15 | 0.999999 | 6.06115e-15 | 1.000000 |
| rad7          | 2.08989e-15 | 0.999999 | 2.08990e-15 | 1.000000 |
| rad25         | 2.59561e-16 | 0.999999 | 2.59562e-16 | 1.000000 |
| rad38         | 3.97955e-17 | 0.999999 | 3.97956e-17 | 1.000000 |
| rad33         | 1.19902e-17 | 0.999999 | 1.19902e-17 | 1.000000 |
| PAH9+H        | 3.34167e-19 | 0.999999 | 3.34168e-19 | 1.000000 |
| rad35         | 3.22540e-19 | 0.999999 | 3.22541e-19 | 1.000000 |
| PhCHCCH2+H    | 2.90389e-19 | 0.999999 | 2.90390e-19 | 1.000000 |
| rad3          | 5.94366e-20 | 0.999999 | 5.94369e-20 | 1.000000 |
| rad8          | 4.69257e-20 | 0.999999 | 4.69258e-20 | 1.000000 |
| rad4          | 3.05167e-20 | 0.999999 | 3.05168e-20 | 1.000000 |
| rad9          | 5.07596e-21 | 0.999999 | 5.07598e-21 | 1.000000 |
| rad46         | 2.48136e-21 | 0.999999 | 2.48137e-21 | 1.000000 |
| rad28         | 3.22396e-22 | 0.999999 | 3.22397e-22 | 1.000000 |
| rad60syn      | 1.57651e-22 | 0.999999 | 1.57652e-22 | 1.000000 |
| Ph+Allene     | 6.84325e-23 | 0.999999 | 6.84327e-23 | 1.000000 |
| rad60anti     | 1.72503e-23 | 0.999999 | 1.72503e-23 | 1.000000 |
| rad2          | 9.38138e-24 | 0.999999 | 9.38141e-24 | 1.000000 |
| rad1          | 6.23521e-25 | 0.999999 | 6.23523e-25 | 1.000000 |
| PhCH2CCH+H    | 1.98489e-26 | 0.999999 | 1.98490e-26 | 1.000000 |
| PAH7+H        | 1.59888e-26 | 0.999999 | 1.59889e-26 | 1.000000 |
| PhCCH+CH3     | 6.01153e-27 | 0.999999 | 6.01156e-27 | 1.000000 |
| rad14         | 8.62142e-28 | 0.999999 | 8.62145e-28 | 1.000000 |
| rad10         | 3.85294e-28 | 0.999999 | 3.85296e-28 | 1.000000 |
| PAH3+H        | 9.32149e-29 | 0.999999 | 9.32153e-29 | 1.000000 |
| rad59         | 4.49919e-29 | 0.999999 | 4.49920e-29 | 1.000000 |
| rad31         | 2.61442e-29 | 0.999999 | 2.61443e-29 | 1.000000 |
| rad26         | 9.31638e-30 | 0.999999 | 9.31642e-30 | 1.000000 |
| Ph+MeAc       | 2.80578e-31 | 0.999999 | 2.80579e-31 | 1.000000 |
| rad27         | 2.41678e-31 | 0.999999 | 2.41679e-31 | 1.000000 |
| rad50         | 1.12176e-31 | 0.999999 | 1.12176e-31 | 1.000000 |
| PhCCCH3+H     | 6.05619e-32 | 0.999999 | 6.05621e-32 | 1.000000 |
| rad39         | 8.27293e-33 | 0.999999 | 8.27296e-33 | 1.000000 |
| rad12         | 3.36757e-37 | 0.999999 | 3.36758e-37 | 1.000000 |
| rad52         | 4.46434e-38 | 0.999999 | 4.46436e-38 | 1.000000 |
| rad37         | 7.54020e-39 | 0.999999 | 7.54023e-39 | 1.000000 |
| rad5          | 3.82512e-40 | 0.999999 | 3.82513e-40 | 1.000000 |
| rad51         | 1.58479e-41 | 0.999999 | 1.58480e-41 | 1.000000 |
| rad19syn      | 5.26456e-42 | 0.999999 | 5.26458e-42 | 1.000000 |
| rad54         | 2.55200e-44 | 0.999999 | 2.55201e-44 | 1.000000 |
| rad65         | 6.68462e-46 | 0.999999 | 6.68464e-46 | 1.000000 |
| rad70         | 1.81495e-46 | 0.999999 | 1.81496e-46 | 1.000000 |
| rad62         | 2.58547e-47 | 0.999999 | 2.58548e-47 | 1.000000 |
| rad47         | 1.90812e-47 | 0.999999 | 1.90813e-47 | 1.000000 |
| rad58         | 1.01605e-47 | 0.999999 | 1.01605e-47 | 1.000000 |
| rad43         | 2.32074e-48 | 0.999999 | 2.32074e-48 | 1.000000 |
| PAH10+CH3     | 1.01969e-48 | 0.999999 | 1.01969e-48 | 1.000000 |
| PhcycC3H3_A+H | 3.68411e-50 | 0.999999 | 3.68412e-50 | 1.000000 |
| rad55         | 3.23965e-50 | 0.999999 | 3.23966e-50 | 1.000000 |
| rad34         | 1.94636e-51 | 0.999999 | 1.94636e-51 | 1.000000 |
| PAH1+H        | 2.93660e-53 | 0.999999 | 2.93661e-53 | 1.000000 |
| rad42         | 1.86045e-56 | 0.999999 | 1.86046e-56 | 1.000000 |
| rad41         | 2.79642e-58 | 0.999999 | 2.79643e-58 | 1.000000 |

10000.0000 Pa, 150.000000 K

=====

| Rate constant | True (fraction)     | Effective (fraction) |
|---------------|---------------------|----------------------|
| Total         | 3.27736e-32 (1.00 ) | 3.27735e-32 (1.00 )  |

| species  | PYtrue      | Cumul    | PYeffective | Cumul    |
|----------|-------------|----------|-------------|----------|
| rad20    | 0.628143    | 0.628143 | 0.628147    | 0.628147 |
| rad21    | 0.243765    | 0.871908 | 0.243767    | 0.871914 |
| rad18    | 0.0642819   | 0.936190 | 0.0642823   | 0.936196 |
| rad22    | 0.0578975   | 0.994087 | 0.0578978   | 0.994094 |
| Indene+H | 0.00308106  | 0.997168 | 0.00308107  | 0.997175 |
| rad45    | 0.00260865  | 0.999777 | 0.00260866  | 0.999784 |
| rad36    | 0.000162269 | 0.999939 | 0.000162270 | 0.999946 |
| rad23    | 3.62413e-05 | 0.999976 | 3.62415e-05 | 0.999982 |

|               |             |          |             |         |
|---------------|-------------|----------|-------------|---------|
| rad11         | 1.81415e-05 | 0.999994 | 1.81416e-05 | 1.00000 |
| Benzyl+C2H2   | 5.64625e-06 | 0.999999 | 0.00000     | 1.00000 |
| rad24         | 2.69875e-08 | 0.999999 | 2.69877e-08 | 1.00000 |
| rad6          | 9.16739e-09 | 0.999999 | 9.16744e-09 | 1.00000 |
| rad30         | 1.22797e-12 | 0.999999 | 1.22798e-12 | 1.00000 |
| rad15         | 3.91247e-14 | 0.999999 | 3.91249e-14 | 1.00000 |
| rad13         | 1.23281e-14 | 0.999999 | 1.23282e-14 | 1.00000 |
| rad7          | 4.78771e-15 | 0.999999 | 4.78774e-15 | 1.00000 |
| rad25         | 9.23117e-16 | 0.999999 | 9.23122e-16 | 1.00000 |
| rad38         | 1.02146e-16 | 0.999999 | 1.02146e-16 | 1.00000 |
| rad33         | 2.45988e-17 | 0.999999 | 2.45989e-17 | 1.00000 |
| PhCHCCH2+H    | 1.99883e-18 | 0.999999 | 1.99884e-18 | 1.00000 |
| PAH9+H        | 9.27888e-19 | 0.999999 | 9.27893e-19 | 1.00000 |
| rad35         | 8.35060e-19 | 0.999999 | 8.35065e-19 | 1.00000 |
| rad8          | 5.93535e-19 | 0.999999 | 5.93538e-19 | 1.00000 |
| rad3          | 1.99064e-19 | 0.999999 | 1.99065e-19 | 1.00000 |
| rad4          | 1.02310e-19 | 0.999999 | 1.02310e-19 | 1.00000 |
| rad9          | 4.49169e-20 | 0.999999 | 4.49171e-20 | 1.00000 |
| rad46         | 1.31086e-20 | 0.999999 | 1.31087e-20 | 1.00000 |
| rad60syn      | 2.02597e-21 | 0.999999 | 2.02599e-21 | 1.00000 |
| rad28         | 1.75460e-21 | 0.999999 | 1.75461e-21 | 1.00000 |
| Ph+Allene     | 1.07753e-21 | 0.999999 | 1.07754e-21 | 1.00000 |
| rad60anti     | 2.59179e-22 | 0.999999 | 2.59181e-22 | 1.00000 |
| rad2          | 5.16268e-23 | 0.999999 | 5.16270e-23 | 1.00000 |
| rad1          | 3.44554e-24 | 0.999999 | 3.44556e-24 | 1.00000 |
| PhCH2CCH+H    | 7.12665e-25 | 0.999999 | 7.12669e-25 | 1.00000 |
| PAH7+H        | 3.47366e-25 | 0.999999 | 3.47368e-25 | 1.00000 |
| PhCCH+CH3     | 6.39095e-26 | 0.999999 | 6.39099e-26 | 1.00000 |
| rad14         | 7.19248e-27 | 0.999999 | 7.19252e-27 | 1.00000 |
| PAH3+H        | 6.90310e-27 | 0.999999 | 6.90314e-27 | 1.00000 |
| rad10         | 3.32487e-27 | 0.999999 | 3.32489e-27 | 1.00000 |
| rad59         | 3.03002e-27 | 0.999999 | 3.03004e-27 | 1.00000 |
| rad26         | 4.24826e-28 | 0.999999 | 4.24829e-28 | 1.00000 |
| rad31         | 9.23263e-29 | 0.999999 | 9.23269e-29 | 1.00000 |
| Ph+MeAc       | 6.34952e-30 | 0.999999 | 6.34956e-30 | 1.00000 |
| rad50         | 4.09006e-30 | 0.999999 | 4.09009e-30 | 1.00000 |
| rad27         | 2.61360e-30 | 0.999999 | 2.61361e-30 | 1.00000 |
| PhCCCH3+H     | 9.67035e-31 | 0.999999 | 9.67041e-31 | 1.00000 |
| rad39         | 1.73300e-31 | 0.999999 | 1.73301e-31 | 1.00000 |
| rad12         | 2.25519e-35 | 0.999999 | 2.25520e-35 | 1.00000 |
| rad52         | 3.64108e-36 | 0.999999 | 3.64110e-36 | 1.00000 |
| rad37         | 6.35301e-37 | 0.999999 | 6.35304e-37 | 1.00000 |
| rad5          | 2.44887e-38 | 0.999999 | 2.44889e-38 | 1.00000 |
| rad51         | 1.91210e-39 | 0.999999 | 1.91211e-39 | 1.00000 |
| rad19syn      | 9.90753e-40 | 0.999999 | 9.90759e-40 | 1.00000 |
| rad54         | 5.58396e-42 | 0.999999 | 5.58400e-42 | 1.00000 |
| rad65         | 1.02652e-43 | 0.999999 | 1.02652e-43 | 1.00000 |
| rad70         | 4.83294e-44 | 0.999999 | 4.83297e-44 | 1.00000 |
| rad62         | 6.52688e-45 | 0.999999 | 6.52692e-45 | 1.00000 |
| rad47         | 3.61964e-45 | 0.999999 | 3.61966e-45 | 1.00000 |
| rad58         | 2.59463e-45 | 0.999999 | 2.59464e-45 | 1.00000 |
| rad43         | 5.49641e-46 | 0.999999 | 5.49644e-46 | 1.00000 |
| PAH10+CH3     | 1.38370e-46 | 0.999999 | 1.38370e-46 | 1.00000 |
| PhcycC3H3_A+H | 1.02751e-47 | 0.999999 | 1.02752e-47 | 1.00000 |
| rad55         | 8.75939e-48 | 0.999999 | 8.75944e-48 | 1.00000 |
| rad34         | 5.44951e-49 | 0.999999 | 5.44954e-49 | 1.00000 |
| PAH1+H        | 6.97954e-51 | 0.999999 | 6.97958e-51 | 1.00000 |
| rad42         | 9.30213e-54 | 0.999999 | 9.30218e-54 | 1.00000 |
| rad41         | 1.58249e-55 | 0.999999 | 1.58250e-55 | 1.00000 |

10000.0000 Pa, 160.000000 K

=====

| Rate constant | True (fraction)     | Effective (fraction) |
|---------------|---------------------|----------------------|
| Total         | 5.01169e-31 (1.00 ) | 5.01165e-31 (1.00 )  |

| species     | PYtrue      | Cumul    | PYeffective | Cumul    |
|-------------|-------------|----------|-------------|----------|
| rad20       | 0.607144    | 0.607144 | 0.607149    | 0.607149 |
| rad21       | 0.248731    | 0.855875 | 0.248733    | 0.855882 |
| rad18       | 0.0697343   | 0.925609 | 0.0697348   | 0.925617 |
| rad22       | 0.0671792   | 0.992789 | 0.0671797   | 0.992796 |
| Indene+H    | 0.00381198  | 0.996600 | 0.00381202  | 0.996609 |
| rad45       | 0.00312412  | 0.999725 | 0.00312414  | 0.999733 |
| rad36       | 0.000194473 | 0.999919 | 0.000194475 | 0.999927 |
| rad23       | 4.88742e-05 | 0.999968 | 4.88746e-05 | 0.999976 |
| rad11       | 2.38630e-05 | 0.999992 | 2.38632e-05 | 1.000000 |
| Benzyl+C2H2 | 8.32301e-06 | 1.00000  | 0.00000     | 1.000000 |
| rad24       | 2.49420e-08 | 1.00000  | 2.49422e-08 | 1.000000 |
| rad6        | 1.54070e-08 | 1.00000  | 1.54071e-08 | 1.000000 |

|               |             |         |             |          |
|---------------|-------------|---------|-------------|----------|
| rad30         | 2.90935e-12 | 1.00000 | 2.90937e-12 | 1.000000 |
| rad15         | 1.17272e-13 | 1.00000 | 1.17273e-13 | 1.000000 |
| rad13         | 2.47678e-14 | 1.00000 | 2.47680e-14 | 1.000000 |
| rad7          | 1.09969e-14 | 1.00000 | 1.09970e-14 | 1.000000 |
| rad25         | 3.00728e-15 | 1.00000 | 3.00731e-15 | 1.000000 |
| rad38         | 2.53047e-16 | 1.00000 | 2.53049e-16 | 1.000000 |
| rad33         | 4.94563e-17 | 1.00000 | 4.94567e-17 | 1.000000 |
| PhCHCCH2+H    | 1.16212e-17 | 1.00000 | 1.16213e-17 | 1.000000 |
| rad8          | 5.58460e-18 | 1.00000 | 5.58465e-18 | 1.000000 |
| PAH9+H        | 2.53523e-18 | 1.00000 | 2.53525e-18 | 1.000000 |
| rad35         | 2.13997e-18 | 1.00000 | 2.13999e-18 | 1.000000 |
| rad3          | 6.51317e-19 | 1.00000 | 6.51323e-19 | 1.000000 |
| rad4          | 3.35146e-19 | 1.00000 | 3.35148e-19 | 1.000000 |
| rad9          | 3.23506e-19 | 1.00000 | 3.23509e-19 | 1.000000 |
| rad46         | 6.04627e-20 | 1.00000 | 6.04632e-20 | 1.000000 |
| rad60syn      | 1.96800e-20 | 1.00000 | 1.96802e-20 | 1.000000 |
| Ph+Allene     | 1.28170e-20 | 1.00000 | 1.28171e-20 | 1.000000 |
| rad28         | 9.67746e-21 | 1.00000 | 9.67754e-21 | 1.000000 |
| rad60anti     | 2.88197e-21 | 1.00000 | 2.88199e-21 | 1.000000 |
| rad2          | 2.71656e-22 | 1.00000 | 2.71659e-22 | 1.000000 |
| rad1          | 1.82157e-23 | 1.00000 | 1.82158e-23 | 1.000000 |
| PhCH2CCH+H    | 1.62980e-23 | 1.00000 | 1.62981e-23 | 1.000000 |
| PAH7+H        | 5.24736e-24 | 1.00000 | 5.24740e-24 | 1.000000 |
| PhCCH+CH3     | 5.98183e-25 | 1.00000 | 5.98188e-25 | 1.000000 |
| PAH3+H        | 2.02945e-25 | 1.00000 | 2.02947e-25 | 1.000000 |
| rad59         | 8.41023e-26 | 1.00000 | 8.41030e-26 | 1.000000 |
| rad14         | 5.42744e-26 | 1.00000 | 5.42748e-26 | 1.000000 |
| rad10         | 2.69669e-26 | 1.00000 | 2.69672e-26 | 1.000000 |
| rad26         | 1.00002e-26 | 1.00000 | 1.00003e-26 | 1.000000 |
| rad31         | 3.19444e-28 | 1.00000 | 3.19446e-28 | 1.000000 |
| Ph+MeAc       | 1.12242e-28 | 1.00000 | 1.12243e-28 | 1.000000 |
| rad50         | 9.89824e-29 | 1.00000 | 9.89832e-29 | 1.000000 |
| rad27         | 2.54643e-29 | 1.00000 | 2.54645e-29 | 1.000000 |
| PhCCCH3+H     | 1.35000e-29 | 1.00000 | 1.35001e-29 | 1.000000 |
| rad39         | 2.72244e-30 | 1.00000 | 2.72246e-30 | 1.000000 |
| rad12         | 7.17351e-34 | 1.00000 | 7.17357e-34 | 1.000000 |
| rad52         | 2.25573e-34 | 1.00000 | 2.25575e-34 | 1.000000 |
| rad37         | 2.41356e-35 | 1.00000 | 2.41358e-35 | 1.000000 |
| rad5          | 1.05227e-36 | 1.00000 | 1.05228e-36 | 1.000000 |
| rad51         | 1.75248e-37 | 1.00000 | 1.75250e-37 | 1.000000 |
| rad19syn      | 1.38230e-37 | 1.00000 | 1.38231e-37 | 1.000000 |
| rad54         | 9.60535e-40 | 1.00000 | 9.60543e-40 | 1.000000 |
| rad65         | 1.20292e-41 | 1.00000 | 1.20293e-41 | 1.000000 |
| rad70         | 1.05174e-41 | 1.00000 | 1.05175e-41 | 1.000000 |
| rad62         | 1.18123e-42 | 1.00000 | 1.18124e-42 | 1.000000 |
| rad58         | 6.08946e-43 | 1.00000 | 6.08951e-43 | 1.000000 |
| rad47         | 5.16881e-43 | 1.00000 | 5.16885e-43 | 1.000000 |
| rad43         | 9.11394e-44 | 1.00000 | 9.11401e-44 | 1.000000 |
| PAH10+CH3     | 1.63033e-44 | 1.00000 | 1.63034e-44 | 1.000000 |
| PhcycC3H3_A+H | 2.29921e-45 | 1.00000 | 2.29923e-45 | 1.000000 |
| rad55         | 1.91567e-45 | 1.00000 | 1.91569e-45 | 1.000000 |
| rad34         | 1.23796e-46 | 1.00000 | 1.23797e-46 | 1.000000 |
| PAH1+H        | 1.26145e-48 | 1.00000 | 1.26146e-48 | 1.000000 |
| rad42         | 3.38440e-51 | 1.00000 | 3.38443e-51 | 1.000000 |
| rad41         | 6.38769e-53 | 1.00000 | 6.38774e-53 | 1.000000 |

10000.0000 Pa, 170.000000 K

=====

| Rate constant | True (fraction)     | Effective (fraction) |
|---------------|---------------------|----------------------|
| Total         | 5.54821e-30 (1.00 ) | 5.54814e-30 (1.00 )  |

| species     | PYtrue      | Cumul    | PYeffective | Cumul    |
|-------------|-------------|----------|-------------|----------|
| rad20       | 0.586141    | 0.586141 | 0.586149    | 0.586149 |
| rad21       | 0.252253    | 0.838394 | 0.252256    | 0.838405 |
| rad22       | 0.0774173   | 0.915811 | 0.0774182   | 0.915823 |
| rad18       | 0.0754211   | 0.991232 | 0.0754220   | 0.991245 |
| Indene+H    | 0.00470553  | 0.995938 | 0.00470559  | 0.995951 |
| rad45       | 0.00372084  | 0.999659 | 0.00372089  | 0.999672 |
| rad36       | 0.000231854 | 0.999891 | 0.000231857 | 0.999904 |
| rad23       | 6.55544e-05 | 0.999956 | 6.55552e-05 | 0.999969 |
| rad11       | 3.12526e-05 | 0.999987 | 3.12530e-05 | 1.00000  |
| Benzyl+C2H2 | 1.21753e-05 | 1.000000 | 0.00000     | 1.00000  |
| rad6        | 2.58254e-08 | 1.000000 | 2.58257e-08 | 1.00000  |
| rad24       | 2.31985e-08 | 1.000000 | 2.31988e-08 | 1.00000  |
| rad30       | 6.53013e-12 | 1.000000 | 6.53021e-12 | 1.00000  |
| rad15       | 3.22326e-13 | 1.000000 | 3.22330e-13 | 1.00000  |
| rad13       | 4.89660e-14 | 1.000000 | 4.89666e-14 | 1.00000  |
| rad7        | 2.52130e-14 | 1.000000 | 2.52133e-14 | 1.00000  |

|               |             |          |             |         |
|---------------|-------------|----------|-------------|---------|
| rad25         | 9.06706e-15 | 1.000000 | 9.06717e-15 | 1.00000 |
| rad38         | 6.06535e-16 | 1.000000 | 6.06543e-16 | 1.00000 |
| rad33         | 9.71751e-17 | 1.000000 | 9.71763e-17 | 1.00000 |
| PhCHCCH2+H    | 5.83242e-17 | 1.000000 | 5.83249e-17 | 1.00000 |
| rad8          | 4.09685e-17 | 1.000000 | 4.09690e-17 | 1.00000 |
| PAH9+H        | 6.80520e-18 | 1.000000 | 6.80528e-18 | 1.00000 |
| rad35         | 5.41498e-18 | 1.000000 | 5.41504e-18 | 1.00000 |
| rad3          | 2.06925e-18 | 1.000000 | 2.06928e-18 | 1.00000 |
| rad9          | 1.95248e-18 | 1.000000 | 1.95250e-18 | 1.00000 |
| rad4          | 1.06623e-18 | 1.000000 | 1.06624e-18 | 1.00000 |
| rad46         | 2.47796e-19 | 1.000000 | 2.47799e-19 | 1.00000 |
| rad60syn      | 1.50358e-19 | 1.000000 | 1.50360e-19 | 1.00000 |
| Ph+Allene     | 1.19682e-19 | 1.000000 | 1.19684e-19 | 1.00000 |
| rad28         | 5.24494e-20 | 1.000000 | 5.24500e-20 | 1.00000 |
| rad60anti     | 2.47613e-20 | 1.000000 | 2.47616e-20 | 1.00000 |
| rad2          | 1.35793e-21 | 1.000000 | 1.35795e-21 | 1.00000 |
| PhCH2CCH+H    | 2.65068e-22 | 1.000000 | 2.65072e-22 | 1.00000 |
| rad1          | 9.15373e-23 | 1.000000 | 9.15384e-23 | 1.00000 |
| PAH7+H        | 5.87626e-23 | 1.000000 | 5.87634e-23 | 1.00000 |
| PhCCH+CH3     | 4.96441e-24 | 1.000000 | 4.96447e-24 | 1.00000 |
| PAH3+H        | 3.81669e-24 | 1.000000 | 3.81673e-24 | 1.00000 |
| rad59         | 1.52348e-24 | 1.000000 | 1.52350e-24 | 1.00000 |
| rad14         | 3.71180e-25 | 1.000000 | 3.71184e-25 | 1.00000 |
| rad10         | 2.04132e-25 | 1.000000 | 2.04135e-25 | 1.00000 |
| rad26         | 1.60447e-25 | 1.000000 | 1.60449e-25 | 1.00000 |
| rad50         | 1.73307e-27 | 1.000000 | 1.73309e-27 | 1.00000 |
| Ph+MeAc       | 1.59668e-27 | 1.000000 | 1.59670e-27 | 1.00000 |
| rad31         | 1.07688e-27 | 1.000000 | 1.07689e-27 | 1.00000 |
| rad27         | 2.22128e-28 | 1.000000 | 2.22131e-28 | 1.00000 |
| PhCCCH3+H     | 1.65461e-28 | 1.000000 | 1.65463e-28 | 1.00000 |
| rad39         | 3.36271e-29 | 1.000000 | 3.36275e-29 | 1.00000 |
| rad12         | 1.49908e-32 | 1.000000 | 1.49910e-32 | 1.00000 |
| rad52         | 1.04410e-32 | 1.000000 | 1.04411e-32 | 1.00000 |
| rad37         | 5.83377e-34 | 1.000000 | 5.83384e-34 | 1.00000 |
| rad5          | 3.25560e-35 | 1.000000 | 3.25564e-35 | 1.00000 |
| rad19syn      | 1.33042e-35 | 1.000000 | 1.33043e-35 | 1.00000 |
| rad51         | 1.18424e-35 | 1.000000 | 1.18425e-35 | 1.00000 |
| rad54         | 1.23874e-37 | 1.000000 | 1.23876e-37 | 1.00000 |
| rad70         | 1.79874e-39 | 1.000000 | 1.79876e-39 | 1.00000 |
| rad65         | 1.04332e-39 | 1.000000 | 1.04334e-39 | 1.00000 |
| rad62         | 1.49394e-40 | 1.000000 | 1.49396e-40 | 1.00000 |
| rad58         | 1.25683e-40 | 1.000000 | 1.25685e-40 | 1.00000 |
| rad47         | 5.37445e-41 | 1.000000 | 5.37452e-41 | 1.00000 |
| rad43         | 1.03632e-41 | 1.000000 | 1.03633e-41 | 1.00000 |
| PAH10+CH3     | 1.80885e-42 | 1.000000 | 1.80887e-42 | 1.00000 |
| PhcycC3H3_A+H | 3.97632e-43 | 1.000000 | 3.97636e-43 | 1.00000 |
| rad55         | 3.26184e-43 | 1.000000 | 3.26188e-43 | 1.00000 |
| rad34         | 2.22935e-44 | 1.000000 | 2.22938e-44 | 1.00000 |
| PAH1+H        | 1.67912e-46 | 1.000000 | 1.67914e-46 | 1.00000 |
| rad42         | 8.65354e-49 | 1.000000 | 8.65365e-49 | 1.00000 |
| rad41         | 1.78268e-50 | 1.000000 | 1.78270e-50 | 1.00000 |

10000.0000 Pa, 180.000000 K

=====

| Rate constant | True (fraction)     | Effective (fraction) |
|---------------|---------------------|----------------------|
| Total         | 4.69315e-29 (1.00 ) | 4.69307e-29 (1.00 )  |

| species     | PYtrue      | Cumul    | PYeffective | Cumul    |
|-------------|-------------|----------|-------------|----------|
| rad20       | 0.565067    | 0.565067 | 0.565077    | 0.565077 |
| rad21       | 0.254315    | 0.819382 | 0.254320    | 0.819397 |
| rad22       | 0.0886531   | 0.908035 | 0.0886547   | 0.908052 |
| rad18       | 0.0813376   | 0.989373 | 0.0813390   | 0.989391 |
| Indene+H    | 0.00579782  | 0.995171 | 0.00579792  | 0.995189 |
| rad45       | 0.00440860  | 0.999579 | 0.00440868  | 0.999597 |
| rad36       | 0.000275078 | 0.999854 | 0.000275082 | 0.999872 |
| rad23       | 8.75074e-05 | 0.999942 | 8.75089e-05 | 0.999960 |
| rad11       | 4.07377e-05 | 0.999982 | 4.07384e-05 | 1.00000  |
| Benzyl+C2H2 | 1.76679e-05 | 1.00000  | 0.00000     | 1.00000  |
| rad6        | 4.31004e-08 | 1.00000  | 4.31011e-08 | 1.00000  |
| rad24       | 2.16949e-08 | 1.00000  | 2.16953e-08 | 1.00000  |
| rad30       | 1.39840e-11 | 1.00000  | 1.39842e-11 | 1.00000  |
| rad15       | 8.22207e-13 | 1.00000  | 8.22222e-13 | 1.00000  |
| rad13       | 9.49630e-14 | 1.00000  | 9.49647e-14 | 1.00000  |
| rad7        | 5.74598e-14 | 1.00000  | 5.74608e-14 | 1.00000  |
| rad25       | 2.55245e-14 | 1.00000  | 2.55249e-14 | 1.00000  |
| rad38       | 1.40962e-15 | 1.00000  | 1.40965e-15 | 1.00000  |
| PhCHCCH2+H  | 2.57673e-16 | 1.00000  | 2.57678e-16 | 1.00000  |
| rad8        | 2.43633e-16 | 1.00000  | 2.43637e-16 | 1.00000  |

|               |             |         |             |         |
|---------------|-------------|---------|-------------|---------|
| rad33         | 1.86270e-16 | 1.00000 | 1.86274e-16 | 1.00000 |
| PAH9+H        | 1.79226e-17 | 1.00000 | 1.79229e-17 | 1.00000 |
| rad35         | 1.35023e-17 | 1.00000 | 1.35025e-17 | 1.00000 |
| rad9          | 1.01370e-17 | 1.00000 | 1.01371e-17 | 1.00000 |
| rad3          | 6.35828e-18 | 1.00000 | 6.35839e-18 | 1.00000 |
| rad4          | 3.28136e-18 | 1.00000 | 3.28142e-18 | 1.00000 |
| rad60syn      | 9.35678e-19 | 1.00000 | 9.35695e-19 | 1.00000 |
| rad46         | 9.17044e-19 | 1.00000 | 9.17060e-19 | 1.00000 |
| Ph+Allene     | 9.07779e-19 | 1.00000 | 9.07795e-19 | 1.00000 |
| rad28         | 2.67388e-19 | 1.00000 | 2.67393e-19 | 1.00000 |
| rad60anti     | 1.70697e-19 | 1.00000 | 1.70700e-19 | 1.00000 |
| rad2          | 6.42809e-21 | 1.00000 | 6.42820e-21 | 1.00000 |
| PhCH2CCH+H    | 3.27240e-21 | 1.00000 | 3.27245e-21 | 1.00000 |
| PAH7+H        | 5.11621e-22 | 1.00000 | 5.11630e-22 | 1.00000 |
| rad1          | 4.35874e-22 | 1.00000 | 4.35882e-22 | 1.00000 |
| PAH3+H        | 5.19639e-23 | 1.00000 | 5.19648e-23 | 1.00000 |
| PhCCH+CH3     | 3.68417e-23 | 1.00000 | 3.68424e-23 | 1.00000 |
| rad59         | 2.00917e-23 | 1.00000 | 2.00921e-23 | 1.00000 |
| rad14         | 2.30892e-24 | 1.00000 | 2.30896e-24 | 1.00000 |
| rad26         | 1.90410e-24 | 1.00000 | 1.90413e-24 | 1.00000 |
| rad10         | 1.43795e-24 | 1.00000 | 1.43798e-24 | 1.00000 |
| rad50         | 2.31478e-26 | 1.00000 | 2.31482e-26 | 1.00000 |
| Ph+MeAc       | 1.87638e-26 | 1.00000 | 1.87641e-26 | 1.00000 |
| rad31         | 3.52501e-27 | 1.00000 | 3.52507e-27 | 1.00000 |
| PhCCCH3+H     | 1.79160e-27 | 1.00000 | 1.79163e-27 | 1.00000 |
| rad27         | 1.73228e-27 | 1.00000 | 1.73231e-27 | 1.00000 |
| rad39         | 3.38568e-28 | 1.00000 | 3.38574e-28 | 1.00000 |
| rad52         | 3.19012e-31 | 1.00000 | 3.19018e-31 | 1.00000 |
| rad12         | 2.29096e-31 | 1.00000 | 2.29100e-31 | 1.00000 |
| rad37         | 1.01211e-32 | 1.00000 | 1.01213e-32 | 1.00000 |
| rad19syn      | 7.86109e-34 | 1.00000 | 7.86123e-34 | 1.00000 |
| rad5          | 7.61520e-34 | 1.00000 | 7.61533e-34 | 1.00000 |
| rad51         | 5.91320e-34 | 1.00000 | 5.91330e-34 | 1.00000 |
| rad54         | 1.30803e-35 | 1.00000 | 1.30805e-35 | 1.00000 |
| rad70         | 2.88517e-37 | 1.00000 | 2.88522e-37 | 1.00000 |
| rad65         | 6.71765e-38 | 1.00000 | 6.71777e-38 | 1.00000 |
| rad58         | 2.87775e-38 | 1.00000 | 2.87780e-38 | 1.00000 |
| rad62         | 1.40042e-38 | 1.00000 | 1.40044e-38 | 1.00000 |
| rad47         | 4.06285e-39 | 1.00000 | 4.06292e-39 | 1.00000 |
| rad43         | 8.38987e-40 | 1.00000 | 8.39002e-40 | 1.00000 |
| PAH10+CH3     | 2.42729e-40 | 1.00000 | 2.42733e-40 | 1.00000 |
| PhcycC3H3_A+H | 6.20696e-41 | 1.00000 | 6.20707e-41 | 1.00000 |
| rad55         | 5.09018e-41 | 1.00000 | 5.09027e-41 | 1.00000 |
| rad34         | 3.78506e-42 | 1.00000 | 3.78512e-42 | 1.00000 |
| PAH1+H        | 1.65006e-44 | 1.00000 | 1.65009e-44 | 1.00000 |
| rad42         | 1.67312e-46 | 1.00000 | 1.67315e-46 | 1.00000 |
| rad41         | 3.66939e-48 | 1.00000 | 3.66946e-48 | 1.00000 |

10000.0000 Pa, 190.000000 K

=====

| Rate constant | True (fraction)     | Effective (fraction) |
|---------------|---------------------|----------------------|
| Total         | 3.16530e-28 (1.00 ) | 3.16522e-28 (1.00 )  |

| species     | PYtrue      | Cumul    | PYeffective | Cumul    |
|-------------|-------------|----------|-------------|----------|
| rad20       | 0.543861    | 0.543861 | 0.543874    | 0.543874 |
| rad21       | 0.254912    | 0.798773 | 0.254918    | 0.798792 |
| rad22       | 0.100913    | 0.899686 | 0.100916    | 0.899708 |
| rad18       | 0.0874667   | 0.987153 | 0.0874690   | 0.987177 |
| Indene+H    | 0.00713142  | 0.994284 | 0.00713160  | 0.994309 |
| rad45       | 0.00519710  | 0.999481 | 0.00519723  | 0.999506 |
| rad36       | 0.000324824 | 0.999806 | 0.000324833 | 0.999831 |
| rad23       | 0.000116288 | 0.999922 | 0.000116291 | 0.999947 |
| rad11       | 5.28251e-05 | 0.999975 | 5.28264e-05 | 1.000000 |
| Benzyl+C2H2 | 2.54215e-05 | 1.00000  | 0.00000     | 1.000000 |
| rad6        | 7.14924e-08 | 1.00000  | 7.14942e-08 | 1.000000 |
| rad24       | 2.03841e-08 | 1.00000  | 2.03846e-08 | 1.000000 |
| rad30       | 2.87261e-11 | 1.00000  | 2.87268e-11 | 1.000000 |
| rad15       | 1.96566e-12 | 1.00000  | 1.96571e-12 | 1.000000 |
| rad13       | 1.80242e-13 | 1.00000  | 1.80246e-13 | 1.000000 |
| rad7        | 1.29686e-13 | 1.00000  | 1.29689e-13 | 1.000000 |
| rad25       | 6.75714e-14 | 1.00000  | 6.75731e-14 | 1.000000 |
| rad38       | 3.18229e-15 | 1.00000  | 3.18238e-15 | 1.000000 |
| rad8        | 1.21249e-15 | 1.00000  | 1.21253e-15 | 1.000000 |
| PhCHCCH2+H  | 1.01903e-15 | 1.00000  | 1.01905e-15 | 1.000000 |
| rad33       | 3.48019e-16 | 1.00000  | 3.48028e-16 | 1.000000 |
| rad9        | 4.62863e-17 | 1.00000  | 4.62875e-17 | 1.000000 |
| PAH9+H      | 4.62681e-17 | 1.00000  | 4.62692e-17 | 1.000000 |
| rad35       | 3.31271e-17 | 1.00000  | 3.31279e-17 | 1.000000 |



|               |             |         |             |          |
|---------------|-------------|---------|-------------|----------|
| rad3          | 1.88539e-17 | 1.00000 | 1.88544e-17 | 1.000000 |
| rad4          | 9.74716e-18 | 1.00000 | 9.74741e-18 | 1.000000 |
| Ph+Allene     | 5.75837e-18 | 1.00000 | 5.75852e-18 | 1.000000 |
| rad60syn      | 4.88474e-18 | 1.00000 | 4.88486e-18 | 1.000000 |
| rad46         | 3.10779e-18 | 1.00000 | 3.10787e-18 | 1.000000 |
| rad28         | 1.24455e-18 | 1.00000 | 1.24458e-18 | 1.000000 |
| rad60anti     | 9.74637e-19 | 1.00000 | 9.74662e-19 | 1.000000 |
| PhCH2CCH+H    | 3.20481e-20 | 1.00000 | 3.20489e-20 | 1.000000 |
| rad2          | 2.87892e-20 | 1.00000 | 2.87899e-20 | 1.000000 |
| PAH7+H        | 3.59914e-21 | 1.00000 | 3.59924e-21 | 1.000000 |
| rad1          | 1.96491e-21 | 1.00000 | 1.96496e-21 | 1.000000 |
| PAH3+H        | 5.44300e-22 | 1.00000 | 5.44314e-22 | 1.000000 |
| PhCCH+CH3     | 2.46678e-22 | 1.00000 | 2.46684e-22 | 1.000000 |
| rad59         | 2.04171e-22 | 1.00000 | 2.04176e-22 | 1.000000 |
| rad26         | 1.75777e-23 | 1.00000 | 1.75781e-23 | 1.000000 |
| rad14         | 1.31184e-23 | 1.00000 | 1.31187e-23 | 1.000000 |
| rad10         | 9.42593e-24 | 1.00000 | 9.42617e-24 | 1.000000 |
| rad50         | 2.45934e-25 | 1.00000 | 2.45940e-25 | 1.000000 |
| Ph+MeAc       | 1.87170e-25 | 1.00000 | 1.87174e-25 | 1.000000 |
| PhCCCH3+H     | 1.73335e-26 | 1.00000 | 1.73340e-26 | 1.000000 |
| rad27         | 1.21007e-26 | 1.00000 | 1.21010e-26 | 1.000000 |
| rad31         | 1.11849e-26 | 1.00000 | 1.11852e-26 | 1.000000 |
| rad39         | 2.86767e-27 | 1.00000 | 2.86774e-27 | 1.000000 |
| rad52         | 6.74542e-30 | 1.00000 | 6.74560e-30 | 1.000000 |
| rad12         | 2.75532e-30 | 1.00000 | 2.75539e-30 | 1.000000 |
| rad37         | 1.38288e-31 | 1.00000 | 1.38291e-31 | 1.000000 |
| rad19syn      | 2.97527e-32 | 1.00000 | 2.97534e-32 | 1.000000 |
| rad51         | 2.49235e-32 | 1.00000 | 2.49241e-32 | 1.000000 |
| rad5          | 1.46264e-32 | 1.00000 | 1.46268e-32 | 1.000000 |
| rad54         | 1.07895e-33 | 1.00000 | 1.07897e-33 | 1.000000 |
| rad70         | 6.22307e-35 | 1.00000 | 6.22323e-35 | 1.000000 |
| rad58         | 1.10756e-35 | 1.00000 | 1.10759e-35 | 1.000000 |
| rad65         | 3.65489e-36 | 1.00000 | 3.65498e-36 | 1.000000 |
| rad62         | 1.17839e-36 | 1.00000 | 1.17842e-36 | 1.000000 |
| rad47         | 2.50342e-37 | 1.00000 | 2.50349e-37 | 1.000000 |
| rad43         | 5.66034e-38 | 1.00000 | 5.66048e-38 | 1.000000 |
| PAH10+CH3     | 3.88500e-38 | 1.00000 | 3.88510e-38 | 1.000000 |
| PhcycC3H3_A+H | 1.21476e-38 | 1.00000 | 1.21479e-38 | 1.000000 |
| rad55         | 1.02400e-38 | 1.00000 | 1.02403e-38 | 1.000000 |
| rad34         | 9.19273e-40 | 1.00000 | 9.19296e-40 | 1.000000 |
| PAH1+H        | 1.37165e-42 | 1.00000 | 1.37169e-42 | 1.000000 |
| rad42         | 3.14329e-44 | 1.00000 | 3.14337e-44 | 1.000000 |
| rad41         | 7.02265e-46 | 1.00000 | 7.02283e-46 | 1.000000 |

10000.0000 Pa, 200.000000 K

=====

| Rate constant | True (fraction)     | Effective (fraction) |
|---------------|---------------------|----------------------|
| Total         | 1.76115e-27 (1.00 ) | 1.76109e-27 (1.00 )  |

| species     | PYtrue      | Cumul    | PYeffective | Cumul    |
|-------------|-------------|----------|-------------|----------|
| rad20       | 0.522476    | 0.522476 | 0.522495    | 0.522495 |
| rad21       | 0.254050    | 0.776526 | 0.254059    | 0.776554 |
| rad22       | 0.114205    | 0.890731 | 0.114209    | 0.890763 |
| rad18       | 0.0937776   | 0.984509 | 0.0937810   | 0.984544 |
| Indene+H    | 0.00875560  | 0.993264 | 0.00875592  | 0.993300 |
| rad45       | 0.00609561  | 0.999360 | 0.00609583  | 0.999396 |
| rad36       | 0.000381771 | 0.999742 | 0.000381784 | 0.999778 |
| rad23       | 0.000153852 | 0.999895 | 0.000153858 | 0.999931 |
| rad11       | 6.81045e-05 | 0.999964 | 6.81070e-05 | 0.999999 |
| Benzyl+C2H2 | 3.62533e-05 | 1.000000 | 0.000000    | 0.999999 |
| rad6        | 1.17676e-07 | 1.000000 | 1.17680e-07 | 1.000000 |
| rad24       | 1.92301e-08 | 1.000000 | 1.92308e-08 | 1.000000 |
| rad30       | 5.68402e-11 | 1.000000 | 5.68423e-11 | 1.000000 |
| rad15       | 4.43908e-12 | 1.000000 | 4.43924e-12 | 1.000000 |
| rad13       | 3.34295e-13 | 1.000000 | 3.34307e-13 | 1.000000 |
| rad7        | 2.88981e-13 | 1.000000 | 2.88991e-13 | 1.000000 |
| rad25       | 1.69192e-13 | 1.000000 | 1.69199e-13 | 1.000000 |
| rad38       | 6.99017e-15 | 1.000000 | 6.99042e-15 | 1.000000 |
| rad8        | 5.18296e-15 | 1.000000 | 5.18315e-15 | 1.000000 |
| PhCHCCH2+H  | 3.65835e-15 | 1.000000 | 3.65848e-15 | 1.000000 |
| rad33       | 6.33664e-16 | 1.000000 | 6.33687e-16 | 1.000000 |
| rad9        | 1.89241e-16 | 1.000000 | 1.89247e-16 | 1.000000 |
| PAH9+H      | 1.17014e-16 | 1.000000 | 1.17018e-16 | 1.000000 |
| rad35       | 7.98907e-17 | 1.000000 | 7.98936e-17 | 1.000000 |
| rad3        | 5.38983e-17 | 1.000000 | 5.39003e-17 | 1.000000 |
| Ph+Allene   | 3.12997e-17 | 1.000000 | 3.13008e-17 | 1.000000 |
| rad4        | 2.79193e-17 | 1.000000 | 2.79203e-17 | 1.000000 |
| rad60syn    | 2.19240e-17 | 1.000000 | 2.19248e-17 | 1.000000 |

|              |             |          |             |          |
|--------------|-------------|----------|-------------|----------|
| rad46        | 9.75913e-18 | 1.000000 | 9.75948e-18 | 1.000000 |
| rad28        | 5.22803e-18 | 1.000000 | 5.22822e-18 | 1.000000 |
| rad60anti    | 4.73255e-18 | 1.000000 | 4.73272e-18 | 1.000000 |
| PhCH2CCH+H   | 2.56114e-19 | 1.000000 | 2.56123e-19 | 1.000000 |
| rad2         | 1.22035e-19 | 1.000000 | 1.22039e-19 | 1.000000 |
| PAH7+H       | 2.11065e-20 | 1.000000 | 2.11073e-20 | 1.000000 |
| rad1         | 8.38924e-21 | 1.000000 | 8.38955e-21 | 1.000000 |
| PAH3+H       | 4.54906e-21 | 1.000000 | 4.54923e-21 | 1.000000 |
| rad59        | 1.65832e-21 | 1.000000 | 1.65838e-21 | 1.000000 |
| PhCCH+CH3    | 1.50147e-21 | 1.000000 | 1.50153e-21 | 1.000000 |
| rad26        | 1.30910e-22 | 1.000000 | 1.30914e-22 | 1.000000 |
| rad14        | 6.83457e-23 | 1.000000 | 6.83481e-23 | 1.000000 |
| rad10        | 5.75347e-23 | 1.000000 | 5.75368e-23 | 1.000000 |
| rad50        | 2.14123e-24 | 1.000000 | 2.14130e-24 | 1.000000 |
| Ph+MeAc      | 1.61005e-24 | 1.000000 | 1.61011e-24 | 1.000000 |
| PhCCCH3+H    | 1.50473e-25 | 1.000000 | 1.50479e-25 | 1.000000 |
| rad27        | 7.59568e-26 | 1.000000 | 7.59595e-26 | 1.000000 |
| rad31        | 3.43865e-26 | 1.000000 | 3.43877e-26 | 1.000000 |
| rad39        | 2.08823e-26 | 1.000000 | 2.08830e-26 | 1.000000 |
| rad52        | 1.02508e-28 | 1.000000 | 1.02512e-28 | 1.000000 |
| rad12        | 2.67944e-29 | 1.000000 | 2.67954e-29 | 1.000000 |
| rad37        | 1.51215e-30 | 1.000000 | 1.51220e-30 | 1.000000 |
| rad51        | 6.98547e-31 | 1.000000 | 6.98572e-31 | 1.000000 |
| rad19syn     | 6.75590e-31 | 1.000000 | 6.75615e-31 | 1.000000 |
| rad5         | 2.27051e-31 | 1.000000 | 2.27059e-31 | 1.000000 |
| rad54        | 3.57780e-32 | 1.000000 | 3.57793e-32 | 1.000000 |
| rad70        | 1.16333e-32 | 1.000000 | 1.16337e-32 | 1.000000 |
| rad58        | 4.51024e-33 | 1.000000 | 4.51041e-33 | 1.000000 |
| rad65        | 1.54966e-34 | 1.000000 | 1.54972e-34 | 1.000000 |
| rad62        | 6.01698e-35 | 1.000000 | 6.01720e-35 | 1.000000 |
| rad47        | 1.11836e-35 | 1.000000 | 1.11840e-35 | 1.000000 |
| rad43        | 2.43711e-36 | 1.000000 | 2.43720e-36 | 1.000000 |
| PAH10+CH3    | 1.95466e-36 | 1.000000 | 1.95473e-36 | 1.000000 |
| PhycC3H3_A+H | 1.90403e-36 | 1.000000 | 1.90410e-36 | 1.000000 |
| rad55        | 1.70114e-36 | 1.000000 | 1.70121e-36 | 1.000000 |
| rad34        | 2.26551e-37 | 1.000000 | 2.26559e-37 | 1.000000 |
| PAH1+H       | 9.34952e-41 | 1.000000 | 9.34986e-41 | 1.000000 |
| rad42        | 4.30538e-42 | 1.000000 | 4.30554e-42 | 1.000000 |
| rad41        | 9.37303e-44 | 1.000000 | 9.37337e-44 | 1.000000 |

10000.0000 Pa, 210.000000 K

=====

| Rate constant | True (fraction)     | Effective (fraction) |
|---------------|---------------------|----------------------|
| Total         | 8.30956e-27 (1.00 ) | 8.30913e-27 (1.00 )  |

| species     | PYtrue      | Cumul    | PYeffective | Cumul    |
|-------------|-------------|----------|-------------|----------|
| rad20       | 0.500879    | 0.500879 | 0.500905    | 0.500905 |
| rad21       | 0.251755    | 0.752634 | 0.251768    | 0.752673 |
| rad22       | 0.128515    | 0.881149 | 0.128522    | 0.881195 |
| rad18       | 0.100224    | 0.981373 | 0.100229    | 0.981424 |
| Indene+H    | 0.0107263   | 0.992099 | 0.0107269   | 0.992151 |
| rad45       | 0.00711250  | 0.999212 | 0.00711286  | 0.999264 |
| rad36       | 0.000446564 | 0.999658 | 0.000446587 | 0.999710 |
| rad23       | 0.000202631 | 0.999861 | 0.000202642 | 0.999913 |
| rad11       | 8.72497e-05 | 0.999948 | 8.72542e-05 | 1.000000 |
| Benzyl+C2H2 | 5.12212e-05 | 0.999999 | 0.000000    | 1.000000 |
| rad6        | 1.91936e-07 | 1.000000 | 1.91946e-07 | 1.000000 |
| rad24       | 1.82052e-08 | 1.000000 | 1.82062e-08 | 1.000000 |
| rad30       | 1.08678e-10 | 1.000000 | 1.08683e-10 | 1.000000 |
| rad15       | 9.52971e-12 | 1.000000 | 9.53020e-12 | 1.000000 |
| rad7        | 6.34175e-13 | 1.000000 | 6.34208e-13 | 1.000000 |
| rad13       | 6.05372e-13 | 1.000000 | 6.05403e-13 | 1.000000 |
| rad25       | 4.02525e-13 | 1.000000 | 4.02546e-13 | 1.000000 |
| rad8        | 1.94399e-14 | 1.000000 | 1.94408e-14 | 1.000000 |
| rad38       | 1.49630e-14 | 1.000000 | 1.49637e-14 | 1.000000 |
| PhCHCCH2+H  | 1.20623e-14 | 1.000000 | 1.20630e-14 | 1.000000 |
| rad33       | 1.12479e-15 | 1.000000 | 1.12485e-15 | 1.000000 |
| rad9        | 7.02709e-16 | 1.000000 | 7.02745e-16 | 1.000000 |
| PAH9+H      | 2.89854e-16 | 1.000000 | 2.89869e-16 | 1.000000 |
| rad35       | 1.89288e-16 | 1.000000 | 1.89298e-16 | 1.000000 |
| Ph+Allene   | 1.48770e-16 | 1.000000 | 1.48778e-16 | 1.000000 |
| rad3        | 1.48532e-16 | 1.000000 | 1.48540e-16 | 1.000000 |
| rad60syn    | 8.63357e-17 | 1.000000 | 8.63401e-17 | 1.000000 |
| rad4        | 7.71077e-17 | 1.000000 | 7.71117e-17 | 1.000000 |
| rad46       | 2.86799e-17 | 1.000000 | 2.86813e-17 | 1.000000 |
| rad60anti   | 1.99755e-17 | 1.000000 | 1.99766e-17 | 1.000000 |
| rad28       | 1.98284e-17 | 1.000000 | 1.98294e-17 | 1.000000 |
| PhCH2CCH+H  | 1.71457e-18 | 1.000000 | 1.71466e-18 | 1.000000 |

|               |             |          |             |          |
|---------------|-------------|----------|-------------|----------|
| rad2          | 4.90161e-19 | 1.000000 | 4.90187e-19 | 1.000000 |
| PAH7+H        | 1.05880e-19 | 1.000000 | 1.05885e-19 | 1.000000 |
| rad1          | 3.39636e-20 | 1.000000 | 3.39653e-20 | 1.000000 |
| PAH3+H        | 3.13288e-20 | 1.000000 | 3.13304e-20 | 1.000000 |
| rad59         | 1.11130e-20 | 1.000000 | 1.11136e-20 | 1.000000 |
| PhCCH+CH3     | 8.36653e-21 | 1.000000 | 8.36696e-21 | 1.000000 |
| rad26         | 8.11016e-22 | 1.000000 | 8.11057e-22 | 1.000000 |
| rad14         | 3.27744e-22 | 1.000000 | 3.27761e-22 | 1.000000 |
| rad10         | 3.27495e-22 | 1.000000 | 3.27512e-22 | 1.000000 |
| rad50         | 1.57088e-23 | 1.000000 | 1.57096e-23 | 1.000000 |
| Ph+MeAc       | 1.21383e-23 | 1.000000 | 1.21390e-23 | 1.000000 |
| PhCCCH3+H     | 1.17926e-24 | 1.000000 | 1.17932e-24 | 1.000000 |
| rad27         | 4.30415e-25 | 1.000000 | 4.30437e-25 | 1.000000 |
| rad39         | 1.33357e-25 | 1.000000 | 1.33364e-25 | 1.000000 |
| rad31         | 1.02471e-25 | 1.000000 | 1.02476e-25 | 1.000000 |
| rad52         | 1.21635e-27 | 1.000000 | 1.21642e-27 | 1.000000 |
| rad12         | 2.17761e-28 | 1.000000 | 2.17772e-28 | 1.000000 |
| rad37         | 1.37127e-29 | 1.000000 | 1.37134e-29 | 1.000000 |
| rad51         | 1.28792e-29 | 1.000000 | 1.28799e-29 | 1.000000 |
| rad19syn      | 1.07315e-29 | 1.000000 | 1.07321e-29 | 1.000000 |
| rad5          | 2.91684e-30 | 1.000000 | 2.91699e-30 | 1.000000 |
| rad58         | 1.47025e-30 | 1.000000 | 1.47033e-30 | 1.000000 |
| rad70         | 1.01834e-30 | 1.000000 | 1.01840e-30 | 1.000000 |
| rad54         | 6.85821e-31 | 1.000000 | 6.85856e-31 | 1.000000 |
| rad65         | 4.49420e-33 | 1.000000 | 4.49443e-33 | 1.000000 |
| rad62         | 1.79532e-33 | 1.000000 | 1.79541e-33 | 1.000000 |
| rad47         | 3.58695e-34 | 1.000000 | 3.58713e-34 | 1.000000 |
| PhcycC3H3_A+H | 1.75276e-34 | 1.000000 | 1.75285e-34 | 1.000000 |
| rad55         | 1.50025e-34 | 1.000000 | 1.50033e-34 | 1.000000 |
| rad43         | 6.89767e-35 | 1.000000 | 6.89802e-35 | 1.000000 |
| rad34         | 5.27230e-35 | 1.000000 | 5.27257e-35 | 1.000000 |
| PAH10+CH3     | 4.98667e-35 | 1.000000 | 4.98692e-35 | 1.000000 |
| PAH1+H        | 7.25085e-39 | 1.000000 | 7.25122e-39 | 1.000000 |
| rad42         | 4.21306e-40 | 1.000000 | 4.21327e-40 | 1.000000 |
| rad41         | 8.41740e-42 | 1.000000 | 8.41783e-42 | 1.000000 |

10000.0000 Pa, 220.000000 K

=====

| Rate constant | True (fraction)     | Effective (fraction) |
|---------------|---------------------|----------------------|
| Total         | 3.40057e-26 (1.00 ) | 3.40033e-26 (1.00 )  |

| species     | PYtrue      | Cumul    | PYeffective | Cumul    |
|-------------|-------------|----------|-------------|----------|
| rad20       | 0.479051    | 0.479051 | 0.479086    | 0.479086 |
| rad21       | 0.248071    | 0.727122 | 0.248089    | 0.727175 |
| rad22       | 0.143806    | 0.870928 | 0.143816    | 0.870991 |
| rad18       | 0.106743    | 0.977671 | 0.106751    | 0.977742 |
| Indene+H    | 0.0131057   | 0.990777 | 0.0131067   | 0.990849 |
| rad45       | 0.00825476  | 0.999031 | 0.00825536  | 0.999104 |
| rad36       | 0.000519798 | 0.999551 | 0.000519835 | 0.999624 |
| rad23       | 0.000265623 | 0.999817 | 0.000265642 | 0.999890 |
| rad11       | 0.000111015 | 0.999928 | 0.000111023 | 1.000000 |
| Benzyl+C2H2 | 7.16746e-05 | 1.000000 | 0.000000    | 1.000000 |
| rad6        | 3.09862e-07 | 1.000000 | 3.09885e-07 | 1.000000 |
| rad24       | 1.72879e-08 | 1.000000 | 1.72891e-08 | 1.000000 |
| rad30       | 2.01281e-10 | 1.000000 | 2.01295e-10 | 1.000000 |
| rad15       | 1.95469e-11 | 1.000000 | 1.95483e-11 | 1.000000 |
| rad7        | 1.36790e-12 | 1.000000 | 1.36800e-12 | 1.000000 |
| rad13       | 1.07010e-12 | 1.000000 | 1.07018e-12 | 1.000000 |
| rad25       | 9.13229e-13 | 1.000000 | 9.13294e-13 | 1.000000 |
| rad8        | 6.51128e-14 | 1.000000 | 6.51174e-14 | 1.000000 |
| PhCHCCH2+H  | 3.68839e-14 | 1.000000 | 3.68865e-14 | 1.000000 |
| rad38       | 3.12597e-14 | 1.000000 | 3.12619e-14 | 1.000000 |
| rad9        | 2.39655e-15 | 1.000000 | 2.39672e-15 | 1.000000 |
| rad33       | 1.94784e-15 | 1.000000 | 1.94798e-15 | 1.000000 |
| PAH9+H      | 7.03343e-16 | 1.000000 | 7.03393e-16 | 1.000000 |
| Ph+Allene   | 6.28882e-16 | 1.000000 | 6.28927e-16 | 1.000000 |
| rad35       | 4.40582e-16 | 1.000000 | 4.40614e-16 | 1.000000 |
| rad3        | 3.94769e-16 | 1.000000 | 3.94798e-16 | 1.000000 |
| rad60syn    | 3.03382e-16 | 1.000000 | 3.03404e-16 | 1.000000 |
| rad4        | 2.05432e-16 | 1.000000 | 2.05447e-16 | 1.000000 |
| rad46       | 7.95386e-17 | 1.000000 | 7.95443e-17 | 1.000000 |
| rad60anti   | 7.46394e-17 | 1.000000 | 7.46447e-17 | 1.000000 |
| rad28       | 6.83185e-17 | 1.000000 | 6.83234e-17 | 1.000000 |
| PhCH2CCH+H  | 9.82810e-18 | 1.000000 | 9.82880e-18 | 1.000000 |
| rad2        | 1.86838e-18 | 1.000000 | 1.86852e-18 | 1.000000 |
| PAH7+H      | 4.64169e-19 | 1.000000 | 4.64202e-19 | 1.000000 |
| PAH3+H      | 1.82471e-19 | 1.000000 | 1.82484e-19 | 1.000000 |
| rad1        | 1.30587e-19 | 1.000000 | 1.30597e-19 | 1.000000 |

|               |             |          |             |         |
|---------------|-------------|----------|-------------|---------|
| rad59         | 6.30505e-20 | 1.000000 | 6.30550e-20 | 1.00000 |
| PhCCH+CH3     | 4.29498e-20 | 1.000000 | 4.29529e-20 | 1.00000 |
| rad26         | 4.28573e-21 | 1.000000 | 4.28604e-21 | 1.00000 |
| rad10         | 1.74179e-21 | 1.000000 | 1.74192e-21 | 1.00000 |
| rad14         | 1.45170e-21 | 1.000000 | 1.45180e-21 | 1.00000 |
| rad50         | 9.94314e-23 | 1.000000 | 9.94386e-23 | 1.00000 |
| Ph+MeAc       | 8.13665e-23 | 1.000000 | 8.13724e-23 | 1.00000 |
| PhCCCH3+H     | 8.40031e-24 | 1.000000 | 8.40091e-24 | 1.00000 |
| rad27         | 2.21363e-24 | 1.000000 | 2.21379e-24 | 1.00000 |
| rad39         | 7.59806e-25 | 1.000000 | 7.59860e-25 | 1.00000 |
| rad31         | 2.96278e-25 | 1.000000 | 2.96300e-25 | 1.00000 |
| rad52         | 1.18531e-26 | 1.000000 | 1.18539e-26 | 1.00000 |
| rad12         | 1.51945e-27 | 1.000000 | 1.51956e-27 | 1.00000 |
| rad51         | 1.78651e-28 | 1.000000 | 1.78664e-28 | 1.00000 |
| rad19syn      | 1.31958e-28 | 1.000000 | 1.31968e-28 | 1.00000 |
| rad37         | 1.06252e-28 | 1.000000 | 1.06260e-28 | 1.00000 |
| rad58         | 4.23721e-29 | 1.000000 | 4.23752e-29 | 1.00000 |
| rad5          | 3.18246e-29 | 1.000000 | 3.18269e-29 | 1.00000 |
| rad70         | 2.36226e-29 | 1.000000 | 2.36243e-29 | 1.00000 |
| rad54         | 9.41284e-30 | 1.000000 | 9.41351e-30 | 1.00000 |
| rad65         | 8.52769e-32 | 1.000000 | 8.52830e-32 | 1.00000 |
| rad62         | 3.42477e-32 | 1.000000 | 3.42501e-32 | 1.00000 |
| rad47         | 7.90155e-33 | 1.000000 | 7.90212e-33 | 1.00000 |
| PhcycC3H3_A+H | 5.50704e-33 | 1.000000 | 5.50744e-33 | 1.00000 |
| rad34         | 4.35196e-33 | 1.000000 | 4.35227e-33 | 1.00000 |
| rad55         | 4.07543e-33 | 1.000000 | 4.07572e-33 | 1.00000 |
| rad43         | 1.35039e-33 | 1.000000 | 1.35048e-33 | 1.00000 |
| PAH10+CH3     | 8.18108e-34 | 1.000000 | 8.18166e-34 | 1.00000 |
| PAH1+H        | 4.62953e-37 | 1.000000 | 4.62986e-37 | 1.00000 |
| rad42         | 2.07640e-38 | 1.000000 | 2.07655e-38 | 1.00000 |
| rad41         | 3.93444e-40 | 1.000000 | 3.93472e-40 | 1.00000 |

10000.0000 Pa, 230.000000 K

=====

| Rate constant | True (fraction)     | Effective (fraction) |
|---------------|---------------------|----------------------|
| Total         | 1.22972e-25 (1.00 ) | 1.22959e-25 (1.00 )  |

| species     | PYtrue      | Cumul    | PYeffective | Cumul    |
|-------------|-------------|----------|-------------|----------|
| rad20       | 0.456992    | 0.456992 | 0.457038    | 0.457038 |
| rad21       | 0.243063    | 0.700055 | 0.243087    | 0.700125 |
| rad22       | 0.160011    | 0.860066 | 0.160027    | 0.860152 |
| rad18       | 0.113256    | 0.973322 | 0.113268    | 0.973420 |
| Indene+H    | 0.0159612   | 0.989283 | 0.0159628   | 0.989383 |
| rad45       | 0.00952754  | 0.998811 | 0.00952849  | 0.998911 |
| rad36       | 0.000601985 | 0.999413 | 0.000602045 | 0.999513 |
| rad23       | 0.000346487 | 0.999759 | 0.000346522 | 0.999860 |
| rad11       | 0.000140229 | 0.999899 | 0.000140243 | 1.00000  |
| Benzyl+C2H2 | 9.93062e-05 | 0.999999 | 0.00000     | 1.00000  |
| rad6        | 4.94687e-07 | 0.999999 | 4.94737e-07 | 1.00000  |
| rad24       | 1.64611e-08 | 0.999999 | 1.64628e-08 | 1.00000  |
| rad30       | 3.61824e-10 | 0.999999 | 3.61860e-10 | 1.00000  |
| rad15       | 3.84676e-11 | 0.999999 | 3.84715e-11 | 1.00000  |
| rad7        | 2.89557e-12 | 0.999999 | 2.89586e-12 | 1.00000  |
| rad25       | 1.98161e-12 | 0.999999 | 1.98181e-12 | 1.00000  |
| rad13       | 1.84684e-12 | 0.999999 | 1.84702e-12 | 1.00000  |
| rad8        | 1.97624e-13 | 0.999999 | 1.97643e-13 | 1.00000  |
| PhCHCCH2+H  | 1.05442e-13 | 0.999999 | 1.05453e-13 | 1.00000  |
| rad38       | 6.38318e-14 | 0.999999 | 6.38381e-14 | 1.00000  |
| rad9        | 7.57304e-15 | 0.999999 | 7.57379e-15 | 1.00000  |
| rad33       | 3.29402e-15 | 0.999999 | 3.29434e-15 | 1.00000  |
| Ph+Allene   | 2.39785e-15 | 0.999999 | 2.39809e-15 | 1.00000  |
| PAH9+H      | 1.67260e-15 | 0.999999 | 1.67276e-15 | 1.00000  |
| rad3        | 1.01273e-15 | 0.999999 | 1.01283e-15 | 1.00000  |
| rad35       | 1.00768e-15 | 0.999999 | 1.00778e-15 | 1.00000  |
| rad60syn    | 9.64810e-16 | 0.999999 | 9.64906e-16 | 1.00000  |
| rad4        | 5.28410e-16 | 0.999999 | 5.28462e-16 | 1.00000  |
| rad60anti   | 2.50677e-16 | 0.999999 | 2.50702e-16 | 1.00000  |
| rad28       | 2.15622e-16 | 0.999999 | 2.15643e-16 | 1.00000  |
| rad46       | 2.09651e-16 | 0.999999 | 2.09672e-16 | 1.00000  |
| PhCH2CCH+H  | 4.91272e-17 | 0.999999 | 4.91320e-17 | 1.00000  |
| rad2        | 6.77001e-18 | 0.999999 | 6.77068e-18 | 1.00000  |
| PAH7+H      | 1.81027e-18 | 0.999999 | 1.81045e-18 | 1.00000  |
| PAH3+H      | 9.18171e-19 | 0.999999 | 9.18263e-19 | 1.00000  |
| rad1        | 4.77671e-19 | 0.999999 | 4.77719e-19 | 1.00000  |
| rad59       | 3.09361e-19 | 0.999999 | 3.09392e-19 | 1.00000  |
| PhCCH+CH3   | 2.04240e-19 | 0.999999 | 2.04260e-19 | 1.00000  |
| rad26       | 1.97221e-20 | 0.999999 | 1.97241e-20 | 1.00000  |
| rad10       | 8.67286e-21 | 0.999999 | 8.67372e-21 | 1.00000  |

|               |             |          |             |         |
|---------------|-------------|----------|-------------|---------|
| rad14         | 5.95862e-21 | 0.999999 | 5.95921e-21 | 1.00000 |
| rad50         | 5.53965e-22 | 0.999999 | 5.54020e-22 | 1.00000 |
| Ph+MeAc       | 4.90726e-22 | 0.999999 | 4.90775e-22 | 1.00000 |
| PhCCCH3+H     | 5.47568e-23 | 0.999999 | 5.47623e-23 | 1.00000 |
| rad27         | 1.03907e-23 | 0.999999 | 1.03917e-23 | 1.00000 |
| rad39         | 3.91892e-24 | 0.999999 | 3.91931e-24 | 1.00000 |
| rad31         | 8.32251e-25 | 0.999999 | 8.32333e-25 | 1.00000 |
| rad52         | 9.77536e-26 | 0.999999 | 9.77633e-26 | 1.00000 |
| rad12         | 9.29288e-27 | 0.999999 | 9.29380e-27 | 1.00000 |
| rad51         | 2.03123e-27 | 0.999999 | 2.03143e-27 | 1.00000 |
| rad19syn      | 1.35900e-27 | 0.999999 | 1.35913e-27 | 1.00000 |
| rad58         | 7.90137e-28 | 0.999999 | 7.90215e-28 | 1.00000 |
| rad37         | 7.19700e-28 | 0.999999 | 7.19772e-28 | 1.00000 |
| rad70         | 3.99502e-28 | 0.999999 | 3.99542e-28 | 1.00000 |
| rad5          | 3.04817e-28 | 0.999999 | 3.04847e-28 | 1.00000 |
| rad54         | 1.06546e-28 | 0.999999 | 1.06556e-28 | 1.00000 |
| rad65         | 1.31005e-30 | 0.999999 | 1.31018e-30 | 1.00000 |
| rad62         | 5.47808e-31 | 0.999999 | 5.47863e-31 | 1.00000 |
| rad34         | 4.47352e-31 | 0.999999 | 4.47396e-31 | 1.00000 |
| PhcycC3H3_A+H | 1.47148e-31 | 0.999999 | 1.47163e-31 | 1.00000 |
| rad47         | 1.22280e-31 | 0.999999 | 1.22293e-31 | 1.00000 |
| rad55         | 8.84891e-32 | 0.999999 | 8.84979e-32 | 1.00000 |
| rad43         | 2.27870e-32 | 0.999999 | 2.27893e-32 | 1.00000 |
| PAH10+CH3     | 1.15414e-32 | 0.999999 | 1.15425e-32 | 1.00000 |
| PAH1+H        | 3.19809e-35 | 0.999999 | 3.19841e-35 | 1.00000 |
| rad42         | 1.30830e-36 | 0.999999 | 1.30843e-36 | 1.00000 |
| rad41         | 1.91654e-38 | 0.999999 | 1.91673e-38 | 1.00000 |

10000.0000 Pa, 240.000000 K

| Rate constant | True (fraction)     | Effective (fraction) |
|---------------|---------------------|----------------------|
| Total         | 3.99091e-25 (1.00 ) | 3.99037e-25 (1.00 )  |

| species     | PYtrue      | Cumul    | PYeffective | Cumul    |
|-------------|-------------|----------|-------------|----------|
| rad20       | 0.434721    | 0.434721 | 0.434780    | 0.434780 |
| rad21       | 0.236816    | 0.671537 | 0.236849    | 0.671629 |
| rad22       | 0.177040    | 0.848577 | 0.177064    | 0.848693 |
| rad18       | 0.119669    | 0.968246 | 0.119685    | 0.968378 |
| Indene+H    | 0.0193638   | 0.987610 | 0.0193665   | 0.987745 |
| rad45       | 0.0109336   | 0.998543 | 0.0109351   | 0.998680 |
| rad36       | 0.000693531 | 0.999237 | 0.000693625 | 0.999373 |
| rad23       | 0.000449649 | 0.999687 | 0.000449710 | 0.999823 |
| rad11       | 0.000175780 | 0.999862 | 0.000175804 | 0.999999 |
| Benzyl+C2H2 | 0.000136206 | 0.999999 | 0.000000    | 0.999999 |
| rad6        | 7.80449e-07 | 0.999999 | 7.80556e-07 | 1.000000 |
| rad24       | 1.57118e-08 | 0.999999 | 1.57139e-08 | 1.000000 |
| rad30       | 6.32319e-10 | 0.999999 | 6.32405e-10 | 1.000000 |
| rad15       | 7.28831e-11 | 0.999999 | 7.28930e-11 | 1.000000 |
| rad7        | 6.00815e-12 | 0.999999 | 6.00897e-12 | 1.000000 |
| rad25       | 4.12252e-12 | 0.999999 | 4.12309e-12 | 1.000000 |
| rad13       | 3.11358e-12 | 0.999999 | 3.11401e-12 | 1.000000 |
| rad8        | 5.50187e-13 | 0.999999 | 5.50262e-13 | 1.000000 |
| PhCHCCH2+H  | 2.83734e-13 | 0.999999 | 2.83773e-13 | 1.000000 |
| rad38       | 1.27595e-13 | 0.999999 | 1.27613e-13 | 1.000000 |
| rad9        | 2.23302e-14 | 0.999999 | 2.23332e-14 | 1.000000 |
| Ph+Allene   | 8.34459e-15 | 0.999999 | 8.34573e-15 | 1.000000 |
| rad33       | 5.44572e-15 | 0.999999 | 5.44646e-15 | 1.000000 |
| PAH9+H      | 3.90096e-15 | 0.999999 | 3.90149e-15 | 1.000000 |
| rad60syn    | 2.80987e-15 | 0.999999 | 2.81025e-15 | 1.000000 |
| rad3        | 2.51008e-15 | 0.999999 | 2.51042e-15 | 1.000000 |
| rad35       | 2.26592e-15 | 0.999999 | 2.26623e-15 | 1.000000 |
| rad4        | 1.31351e-15 | 0.999999 | 1.31369e-15 | 1.000000 |
| rad60anti   | 7.66468e-16 | 0.999999 | 7.66572e-16 | 1.000000 |
| rad28       | 6.28801e-16 | 0.999999 | 6.28887e-16 | 1.000000 |
| rad46       | 5.28440e-16 | 0.999999 | 5.28512e-16 | 1.000000 |
| PhCH2CCH+H  | 2.17528e-16 | 0.999999 | 2.17557e-16 | 1.000000 |
| rad2        | 2.33574e-17 | 0.999999 | 2.33606e-17 | 1.000000 |
| PAH7+H      | 6.37541e-18 | 0.999999 | 6.37628e-18 | 1.000000 |
| PAH3+H      | 4.06345e-18 | 0.999999 | 4.06401e-18 | 1.000000 |
| rad1        | 1.66507e-18 | 0.999999 | 1.66530e-18 | 1.000000 |
| rad59       | 1.33630e-18 | 0.999999 | 1.33649e-18 | 1.000000 |
| PhCCH+CH3   | 9.03802e-19 | 0.999999 | 9.03925e-19 | 1.000000 |
| rad26       | 8.04169e-20 | 0.999999 | 8.04278e-20 | 1.000000 |
| rad10       | 4.04954e-20 | 0.999999 | 4.05009e-20 | 1.000000 |
| rad14       | 2.27343e-20 | 0.999999 | 2.27374e-20 | 1.000000 |
| rad50       | 2.76374e-21 | 0.999999 | 2.76412e-21 | 1.000000 |
| Ph+MeAc     | 2.68556e-21 | 0.999999 | 2.68593e-21 | 1.000000 |
| PhCCCH3+H   | 3.27549e-22 | 0.999999 | 3.27594e-22 | 1.000000 |

|               |             |          |             |          |
|---------------|-------------|----------|-------------|----------|
| rad27         | 4.47645e-23 | 0.999999 | 4.47706e-23 | 1.000000 |
| rad39         | 1.85173e-23 | 0.999999 | 1.85198e-23 | 1.000000 |
| rad31         | 2.27463e-24 | 0.999999 | 2.27494e-24 | 1.000000 |
| rad52         | 6.97163e-25 | 0.999999 | 6.97258e-25 | 1.000000 |
| rad12         | 5.05682e-26 | 0.999999 | 5.05751e-26 | 1.000000 |
| rad51         | 1.91558e-26 | 0.999999 | 1.91584e-26 | 1.000000 |
| rad19syn      | 1.16106e-26 | 0.999999 | 1.16122e-26 | 1.000000 |
| rad58         | 8.96916e-27 | 0.999999 | 8.97038e-27 | 1.000000 |
| rad70         | 4.47620e-27 | 0.999999 | 4.47681e-27 | 1.000000 |
| rad37         | 4.31539e-27 | 0.999999 | 4.31598e-27 | 1.000000 |
| rad5          | 2.54535e-27 | 0.999999 | 2.54570e-27 | 1.000000 |
| rad54         | 9.71371e-28 | 0.999999 | 9.71503e-28 | 1.000000 |
| rad65         | 1.54274e-29 | 0.999999 | 1.54295e-29 | 1.000000 |
| rad34         | 9.37592e-30 | 0.999999 | 9.37720e-30 | 1.000000 |
| rad62         | 6.52187e-30 | 0.999999 | 6.52276e-30 | 1.000000 |
| PhcycC3H3_A+H | 2.31018e-30 | 0.999999 | 2.31050e-30 | 1.000000 |
| rad47         | 1.35996e-30 | 0.999999 | 1.36014e-30 | 1.000000 |
| rad55         | 1.20013e-30 | 0.999999 | 1.20153e-30 | 1.000000 |
| rad43         | 2.91815e-31 | 0.999999 | 2.91854e-31 | 1.000000 |
| PAH10+CH3     | 1.25651e-31 | 0.999999 | 1.25668e-31 | 1.000000 |
| PAH1+H        | 7.81932e-34 | 0.999999 | 7.82039e-34 | 1.000000 |
| rad42         | 4.19396e-35 | 0.999999 | 4.19453e-35 | 1.000000 |
| rad41         | 5.20388e-37 | 0.999999 | 5.20459e-37 | 1.000000 |

10000.0000 Pa, 250.000000 K

=====

| Rate constant | True (fraction)     | Effective (fraction) |
|---------------|---------------------|----------------------|
| Total         | 1.17763e-24 (1.00 ) | 1.17742e-24 (1.00 )  |

| species     | PYtrue      | Cumul    | PYeffective | Cumul    |
|-------------|-------------|----------|-------------|----------|
| rad20       | 0.412277    | 0.412277 | 0.412353    | 0.412353 |
| rad21       | 0.229434    | 0.641711 | 0.229477    | 0.641830 |
| rad22       | 0.194775    | 0.836486 | 0.194811    | 0.836641 |
| rad18       | 0.125874    | 0.962360 | 0.125898    | 0.962539 |
| Indene+H    | 0.0233862   | 0.985746 | 0.0233905   | 0.985930 |
| rad45       | 0.0124731   | 0.998219 | 0.0124754   | 0.998405 |
| rad36       | 0.000794703 | 0.999014 | 0.000794850 | 0.999200 |
| rad23       | 0.000580415 | 0.999594 | 0.000580523 | 0.999780 |
| rad11       | 0.000218601 | 0.999813 | 0.000218642 | 0.999999 |
| Benzyl+C2H2 | 0.000184917 | 0.999998 | 0.000000    | 0.999999 |
| rad6        | 1.21618e-06 | 0.999999 | 1.21641e-06 | 1.00000  |
| rad24       | 1.50294e-08 | 0.999999 | 1.50322e-08 | 1.00000  |
| rad30       | 1.07581e-09 | 0.999999 | 1.07601e-09 | 1.00000  |
| rad15       | 1.33333e-10 | 0.999999 | 1.33358e-10 | 1.00000  |
| rad7        | 1.22092e-11 | 0.999999 | 1.22115e-11 | 1.00000  |
| rad25       | 8.23960e-12 | 0.999999 | 8.24112e-12 | 1.00000  |
| rad13       | 5.13153e-12 | 0.999999 | 5.13248e-12 | 1.00000  |
| rad8        | 1.41950e-12 | 0.999999 | 1.41976e-12 | 1.00000  |
| PhCHCCH2+H  | 7.22798e-13 | 0.999999 | 7.22932e-13 | 1.00000  |
| rad38       | 2.50069e-13 | 0.999999 | 2.50115e-13 | 1.00000  |
| rad9        | 6.18009e-14 | 0.999999 | 6.18123e-14 | 1.00000  |
| Ph+Allene   | 2.67692e-14 | 0.999999 | 2.67742e-14 | 1.00000  |
| PAH9+H      | 8.93190e-15 | 0.999999 | 8.93355e-15 | 1.00000  |
| rad33       | 8.81125e-15 | 0.999999 | 8.81288e-15 | 1.00000  |
| rad60syn    | 7.56944e-15 | 0.999999 | 7.57084e-15 | 1.00000  |
| rad3        | 6.01693e-15 | 0.999999 | 6.01805e-15 | 1.00000  |
| rad35       | 5.01336e-15 | 0.999999 | 5.01428e-15 | 1.00000  |
| rad4        | 3.15868e-15 | 0.999999 | 3.15926e-15 | 1.00000  |
| rad60anti   | 2.15674e-15 | 0.999999 | 2.15714e-15 | 1.00000  |
| rad28       | 1.70838e-15 | 0.999999 | 1.70870e-15 | 1.00000  |
| rad46       | 1.28058e-15 | 0.999999 | 1.28082e-15 | 1.00000  |
| PhCH2CCH+H  | 8.64768e-16 | 0.999999 | 8.64928e-16 | 1.00000  |
| rad2        | 7.68513e-17 | 0.999999 | 7.68655e-17 | 1.00000  |
| PAH7+H      | 2.05336e-17 | 0.999999 | 2.05374e-17 | 1.00000  |
| PAH3+H      | 1.60571e-17 | 0.999999 | 1.60601e-17 | 1.00000  |
| rad1        | 5.54001e-18 | 0.999999 | 5.54104e-18 | 1.00000  |
| rad59       | 5.15871e-18 | 0.999999 | 5.15967e-18 | 1.00000  |
| PhCCH+CH3   | 3.73704e-18 | 0.999999 | 3.73773e-18 | 1.00000  |
| rad26       | 2.94824e-19 | 0.999999 | 2.94879e-19 | 1.00000  |
| rad10       | 1.77606e-19 | 0.999999 | 1.77638e-19 | 1.00000  |
| rad14       | 8.08685e-20 | 0.999999 | 8.08834e-20 | 1.00000  |
| Ph+MeAc     | 1.34412e-20 | 0.999999 | 1.34436e-20 | 1.00000  |
| rad50       | 1.25354e-20 | 0.999999 | 1.25377e-20 | 1.00000  |
| PhCCCH3+H   | 1.80466e-21 | 0.999999 | 1.80499e-21 | 1.00000  |
| rad27       | 1.77979e-22 | 0.999999 | 1.78012e-22 | 1.00000  |
| rad39       | 8.10152e-23 | 0.999999 | 8.10301e-23 | 1.00000  |
| rad31       | 6.05821e-24 | 0.999999 | 6.05933e-24 | 1.00000  |
| rad52       | 4.39074e-24 | 0.999999 | 4.39155e-24 | 1.00000  |

|               |             |          |             |         |
|---------------|-------------|----------|-------------|---------|
| rad12         | 2.48160e-25 | 0.999999 | 2.48206e-25 | 1.00000 |
| rad51         | 1.55101e-25 | 0.999999 | 1.55130e-25 | 1.00000 |
| rad19syn      | 8.40544e-26 | 0.999999 | 8.40699e-26 | 1.00000 |
| rad58         | 7.59268e-26 | 0.999999 | 7.59409e-26 | 1.00000 |
| rad70         | 3.80684e-26 | 0.999999 | 3.80754e-26 | 1.00000 |
| rad37         | 2.32060e-26 | 0.999999 | 2.32103e-26 | 1.00000 |
| rad5          | 1.86598e-26 | 0.999999 | 1.86633e-26 | 1.00000 |
| rad54         | 7.34689e-27 | 0.999999 | 7.34825e-27 | 1.00000 |
| rad65         | 1.47641e-28 | 0.999999 | 1.47668e-28 | 1.00000 |
| rad34         | 9.43644e-29 | 0.999999 | 9.43818e-29 | 1.00000 |
| rad62         | 5.97807e-29 | 0.999999 | 5.97917e-29 | 1.00000 |
| PhcycC3H3_A+H | 2.27326e-29 | 0.999999 | 2.27368e-29 | 1.00000 |
| rad47         | 1.25387e-29 | 0.999999 | 1.25410e-29 | 1.00000 |
| rad55         | 1.11929e-29 | 0.999999 | 1.11950e-29 | 1.00000 |
| rad43         | 2.87824e-30 | 0.999999 | 2.87877e-30 | 1.00000 |
| PAH10+CH3     | 1.05419e-30 | 0.999999 | 1.05438e-30 | 1.00000 |
| PAH1+H        | 8.26416e-33 | 0.999999 | 8.26569e-33 | 1.00000 |
| rad42         | 4.93040e-34 | 0.999999 | 4.93131e-34 | 1.00000 |
| rad41         | 6.57829e-36 | 0.999999 | 6.57950e-36 | 1.00000 |

10000.0000 Pa, 260.000000 K

| Rate constant | True (fraction)     | Effective (fraction) |
|---------------|---------------------|----------------------|
| Total         | 3.19452e-24 (1.00 ) | 3.19373e-24 (1.00 )  |

| species     | PYtrue      | Cumul    | PYeffective | Cumul    |
|-------------|-------------|----------|-------------|----------|
| rad20       | 0.389719    | 0.389719 | 0.389816    | 0.389816 |
| rad21       | 0.221038    | 0.610757 | 0.221093    | 0.610909 |
| rad22       | 0.213074    | 0.823831 | 0.213127    | 0.824036 |
| rad18       | 0.131755    | 0.955586 | 0.131788    | 0.955824 |
| Indene+H    | 0.0280998   | 0.983686 | 0.0281068   | 0.983931 |
| rad45       | 0.0141428   | 0.997829 | 0.0141463   | 0.998077 |
| rad36       | 0.000905613 | 0.998734 | 0.000905838 | 0.998983 |
| rad23       | 0.000745101 | 0.999479 | 0.000745286 | 0.999728 |
| rad11       | 0.000269648 | 0.999749 | 0.000269715 | 0.999998 |
| Benzyl+C2H2 | 0.000248482 | 0.999997 | 0.000000    | 0.999998 |
| rad6        | 1.87135e-06 | 0.999999 | 1.87182e-06 | 1.000000 |
| rad24       | 1.44059e-08 | 0.999999 | 1.44094e-08 | 1.000000 |
| rad30       | 1.78422e-09 | 0.999999 | 1.78466e-09 | 1.000000 |
| rad15       | 2.36111e-10 | 0.999999 | 2.36170e-10 | 1.000000 |
| rad7        | 2.42825e-11 | 0.999999 | 2.42886e-11 | 1.000000 |
| rad25       | 1.58500e-11 | 0.999999 | 1.58539e-11 | 1.000000 |
| rad13       | 8.27510e-12 | 0.999999 | 8.27716e-12 | 1.000000 |
| rad8        | 3.42358e-12 | 0.999999 | 3.42443e-12 | 1.000000 |
| PhCHCCH2+H  | 1.75163e-12 | 0.999999 | 1.75207e-12 | 1.000000 |
| rad38       | 4.81298e-13 | 0.999999 | 4.81418e-13 | 1.000000 |
| rad9        | 1.61343e-13 | 0.999999 | 1.61383e-13 | 1.000000 |
| Ph+Allene   | 7.98301e-14 | 0.999999 | 7.98500e-14 | 1.000000 |
| PAH9+H      | 2.01033e-14 | 0.999999 | 2.01083e-14 | 1.000000 |
| rad60syn    | 1.90225e-14 | 0.999999 | 1.90272e-14 | 1.000000 |
| rad33       | 1.39690e-14 | 0.999999 | 1.39725e-14 | 1.000000 |
| rad3        | 1.39632e-14 | 0.999999 | 1.39667e-14 | 1.000000 |
| rad35       | 1.09242e-14 | 0.999999 | 1.09269e-14 | 1.000000 |
| rad4        | 7.35572e-15 | 0.999999 | 7.35755e-15 | 1.000000 |
| rad60anti   | 5.63658e-15 | 0.999999 | 5.63798e-15 | 1.000000 |
| rad28       | 4.35696e-15 | 0.999999 | 4.35805e-15 | 1.000000 |
| PhCH2CCH+H  | 3.12251e-15 | 0.999999 | 3.12328e-15 | 1.000000 |
| rad46       | 2.99796e-15 | 0.999999 | 2.99870e-15 | 1.000000 |
| rad2        | 2.41486e-16 | 0.999999 | 2.41546e-16 | 1.000000 |
| PAH7+H      | 6.11331e-17 | 0.999999 | 6.11483e-17 | 1.000000 |
| PAH3+H      | 5.73859e-17 | 0.999999 | 5.74001e-17 | 1.000000 |
| rad59       | 1.80267e-17 | 0.999999 | 1.80312e-17 | 1.000000 |
| rad1        | 1.76199e-17 | 0.999999 | 1.76243e-17 | 1.000000 |
| PhCCH+CH3   | 1.44893e-17 | 0.999999 | 1.44929e-17 | 1.000000 |
| rad26       | 9.84022e-19 | 0.999999 | 9.84267e-19 | 1.000000 |
| rad10       | 7.32848e-19 | 0.999999 | 7.33030e-19 | 1.000000 |
| rad14       | 2.68973e-19 | 0.999999 | 2.69040e-19 | 1.000000 |
| Ph+MeAc     | 6.19446e-20 | 0.999999 | 6.19600e-20 | 1.000000 |
| rad50       | 5.23824e-20 | 0.999999 | 5.23954e-20 | 1.000000 |
| PhCCCH3+H   | 9.19475e-21 | 0.999999 | 9.19703e-21 | 1.000000 |
| rad27       | 6.56485e-22 | 0.999999 | 6.56649e-22 | 1.000000 |
| rad39       | 3.31350e-22 | 0.999999 | 3.31433e-22 | 1.000000 |
| rad52       | 2.48576e-23 | 0.999999 | 2.48638e-23 | 1.000000 |
| rad31       | 1.57478e-23 | 0.999999 | 1.57517e-23 | 1.000000 |
| rad12       | 1.11127e-24 | 0.999999 | 1.11154e-24 | 1.000000 |
| rad51       | 1.10648e-24 | 0.999999 | 1.10675e-24 | 1.000000 |
| rad58       | 5.37852e-25 | 0.999999 | 5.37985e-25 | 1.000000 |
| rad19syn    | 5.30454e-25 | 0.999999 | 5.30586e-25 | 1.000000 |

|               |             |          |             |          |
|---------------|-------------|----------|-------------|----------|
| rad70         | 2.71790e-25 | 0.999999 | 2.71857e-25 | 1.000000 |
| rad5          | 1.22031e-25 | 0.999999 | 1.22061e-25 | 1.000000 |
| rad37         | 1.13312e-25 | 0.999999 | 1.13341e-25 | 1.000000 |
| rad54         | 4.79911e-26 | 0.999999 | 4.80030e-26 | 1.000000 |
| rad65         | 1.22155e-27 | 0.999999 | 1.22186e-27 | 1.000000 |
| rad34         | 7.67553e-28 | 0.999999 | 7.67744e-28 | 1.000000 |
| rad62         | 4.63238e-28 | 0.999999 | 4.63353e-28 | 1.000000 |
| PhcycC3H3_A+H | 1.84198e-28 | 0.999999 | 1.84244e-28 | 1.000000 |
| rad47         | 9.90793e-29 | 0.999999 | 9.91039e-29 | 1.000000 |
| rad55         | 8.66538e-29 | 0.999999 | 8.66754e-29 | 1.000000 |
| rad43         | 2.40640e-29 | 0.999999 | 2.40700e-29 | 1.000000 |
| PAH10+CH3     | 7.56055e-30 | 0.999999 | 7.56243e-30 | 1.000000 |
| PAH1+H        | 7.06967e-32 | 0.999999 | 7.07143e-32 | 1.000000 |
| rad42         | 4.64764e-33 | 0.999999 | 4.64880e-33 | 1.000000 |
| rad41         | 6.71353e-35 | 0.999999 | 6.71520e-35 | 1.000000 |

10000.0000 Pa, 270.000000 K

| Rate constant | True (fraction)     | Effective (fraction) |
|---------------|---------------------|----------------------|
| Total         | 8.04141e-24 (1.00 ) | 8.03875e-24 (1.00 )  |

| species     | PYtrue      | Cumul    | PYeffective | Cumul    |
|-------------|-------------|----------|-------------|----------|
| rad20       | 0.367125    | 0.367125 | 0.367247    | 0.367247 |
| rad22       | 0.231774    | 0.598899 | 0.231850    | 0.599097 |
| rad21       | 0.211764    | 0.810663 | 0.211834    | 0.810931 |
| rad18       | 0.137188    | 0.947851 | 0.137234    | 0.948165 |
| Indene+H    | 0.0335722   | 0.981423 | 0.0335833   | 0.981748 |
| rad45       | 0.0159362   | 0.997359 | 0.0159415   | 0.997690 |
| rad36       | 0.00102619  | 0.998386 | 0.00102653  | 0.998716 |
| rad23       | 0.000951167 | 0.999337 | 0.000951482 | 0.999668 |
| Benzyl+C2H2 | 0.000330492 | 0.999667 | 0.000000    | 0.999668 |
| rad11       | 0.000329873 | 0.999997 | 0.000329982 | 0.999998 |
| rad6        | 2.84273e-06 | 1.000000 | 2.84367e-06 | 1.000000 |
| rad24       | 1.38346e-08 | 1.000000 | 1.38392e-08 | 1.000000 |
| rad30       | 2.88793e-09 | 1.000000 | 2.88889e-09 | 1.000000 |
| rad15       | 4.05624e-10 | 1.000000 | 4.05759e-10 | 1.000000 |
| rad7        | 4.72446e-11 | 1.000000 | 4.72602e-11 | 1.000000 |
| rad25       | 2.93926e-11 | 1.000000 | 2.94024e-11 | 1.000000 |
| rad13       | 1.30695e-11 | 1.000000 | 1.30738e-11 | 1.000000 |
| rad8        | 7.77596e-12 | 1.000000 | 7.77853e-12 | 1.000000 |
| PhCHCCH2+H  | 4.05506e-12 | 1.000000 | 4.05640e-12 | 1.000000 |
| rad38       | 9.11257e-13 | 1.000000 | 9.11558e-13 | 1.000000 |
| rad9        | 3.99090e-13 | 1.000000 | 3.99222e-13 | 1.000000 |
| Ph+Allene   | 2.22896e-13 | 1.000000 | 2.22970e-13 | 1.000000 |
| rad60syn    | 4.49214e-14 | 1.000000 | 4.49362e-14 | 1.000000 |
| PAH9+H      | 4.45475e-14 | 1.000000 | 4.45623e-14 | 1.000000 |
| rad3        | 3.13995e-14 | 1.000000 | 3.14099e-14 | 1.000000 |
| rad35       | 2.34711e-14 | 1.000000 | 2.34788e-14 | 1.000000 |
| rad33       | 2.17230e-14 | 1.000000 | 2.17302e-14 | 1.000000 |
| rad4        | 1.66035e-14 | 1.000000 | 1.66090e-14 | 1.000000 |
| rad60anti   | 1.37899e-14 | 1.000000 | 1.37945e-14 | 1.000000 |
| rad28       | 1.05015e-14 | 1.000000 | 1.05050e-14 | 1.000000 |
| PhCH2CCH+H  | 1.03434e-14 | 1.000000 | 1.03468e-14 | 1.000000 |
| rad46       | 6.81027e-15 | 1.000000 | 6.81252e-15 | 1.000000 |
| rad2        | 7.25625e-16 | 1.000000 | 7.25865e-16 | 1.000000 |
| PAH3+H      | 1.87523e-16 | 1.000000 | 1.87585e-16 | 1.000000 |
| PAH7+H      | 1.69797e-16 | 1.000000 | 1.69853e-16 | 1.000000 |
| rad59       | 5.76447e-17 | 1.000000 | 5.76638e-17 | 1.000000 |
| rad1        | 5.36405e-17 | 1.000000 | 5.36583e-17 | 1.000000 |
| PhCCH+CH3   | 5.28427e-17 | 1.000000 | 5.28601e-17 | 1.000000 |
| rad26       | 3.02211e-18 | 1.000000 | 3.02311e-18 | 1.000000 |
| rad10       | 2.84933e-18 | 1.000000 | 2.85027e-18 | 1.000000 |
| rad14       | 8.38915e-19 | 1.000000 | 8.39193e-19 | 1.000000 |
| Ph+MeAc     | 2.64378e-19 | 1.000000 | 2.64465e-19 | 1.000000 |
| rad50       | 2.04076e-19 | 1.000000 | 2.04144e-19 | 1.000000 |
| PhCCCH3+H   | 4.34683e-20 | 1.000000 | 4.34827e-20 | 1.000000 |
| rad27       | 2.25756e-21 | 1.000000 | 2.25831e-21 | 1.000000 |
| rad39       | 1.27771e-21 | 1.000000 | 1.27814e-21 | 1.000000 |
| rad52       | 1.28435e-22 | 1.000000 | 1.28477e-22 | 1.000000 |
| rad31       | 4.00108e-23 | 1.000000 | 4.00241e-23 | 1.000000 |
| rad51       | 7.07674e-24 | 1.000000 | 7.07908e-24 | 1.000000 |
| rad12       | 4.58624e-24 | 1.000000 | 4.58776e-24 | 1.000000 |
| rad58       | 3.28550e-24 | 1.000000 | 3.28658e-24 | 1.000000 |
| rad19syn    | 2.96262e-24 | 1.000000 | 2.96360e-24 | 1.000000 |
| rad70       | 1.67506e-24 | 1.000000 | 1.67561e-24 | 1.000000 |
| rad5        | 7.18394e-25 | 1.000000 | 7.18631e-25 | 1.000000 |
| rad37       | 5.07505e-25 | 1.000000 | 5.07672e-25 | 1.000000 |
| rad54       | 2.75672e-25 | 1.000000 | 2.75764e-25 | 1.000000 |



|               |             |          |             |         |
|---------------|-------------|----------|-------------|---------|
| rad65         | 8.93843e-27 | 1.000000 | 8.94139e-27 | 1.00000 |
| rad34         | 5.33103e-27 | 1.000000 | 5.33279e-27 | 1.00000 |
| rad62         | 3.11114e-27 | 1.000000 | 3.11217e-27 | 1.00000 |
| PhcycC3H3_A+H | 1.28042e-27 | 1.000000 | 1.28085e-27 | 1.00000 |
| rad47         | 6.85610e-28 | 1.000000 | 6.85837e-28 | 1.00000 |
| rad55         | 5.77539e-28 | 1.000000 | 5.77730e-28 | 1.00000 |
| rad43         | 1.74688e-28 | 1.000000 | 1.74746e-28 | 1.00000 |
| PAH10+CH3     | 4.76135e-29 | 1.000000 | 4.76293e-29 | 1.00000 |
| PAH1+H        | 5.19182e-31 | 1.000000 | 5.19354e-31 | 1.00000 |
| rad42         | 3.72668e-32 | 1.000000 | 3.72791e-32 | 1.00000 |
| rad41         | 5.81661e-34 | 1.000000 | 5.81854e-34 | 1.00000 |

10000.0000 Pa, 280.000000 K

| Rate constant | True (fraction)     | Effective (fraction) |
|---------------|---------------------|----------------------|
| Total         | 1.89357e-23 (1.00 ) | 1.89275e-23 (1.00 )  |

| species       | PYtrue      | Cumul    | PYeffective | Cumul    |
|---------------|-------------|----------|-------------|----------|
| rad20         | 0.344591    | 0.344591 | 0.344741    | 0.344741 |
| rad22         | 0.250692    | 0.595283 | 0.250801    | 0.595542 |
| rad21         | 0.201756    | 0.797039 | 0.201844    | 0.797386 |
| rad18         | 0.142051    | 0.939090 | 0.142113    | 0.939499 |
| Indene+H      | 0.0398634   | 0.978953 | 0.0398808   | 0.979380 |
| rad45         | 0.0178432   | 0.996797 | 0.0178510   | 0.997231 |
| rad23         | 0.00120737  | 0.998004 | 0.00120790  | 0.998439 |
| rad36         | 0.00115616  | 0.999160 | 0.00115666  | 0.999595 |
| Benzyl+C2H2   | 0.000435124 | 0.999595 | 0.000000    | 0.999595 |
| rad11         | 0.000400193 | 0.999995 | 0.000400367 | 0.999996 |
| rad6          | 4.26294e-06 | 1.000000 | 4.26479e-06 | 1.000000 |
| rad24         | 1.33106e-08 | 1.000000 | 1.33164e-08 | 1.00000  |
| rad30         | 4.56709e-09 | 1.000000 | 4.56908e-09 | 1.00000  |
| rad15         | 6.77353e-10 | 1.000000 | 6.77648e-10 | 1.00000  |
| rad7          | 8.98928e-11 | 1.000000 | 8.99319e-11 | 1.00000  |
| rad25         | 5.26252e-11 | 1.000000 | 5.26481e-11 | 1.00000  |
| rad13         | 2.02364e-11 | 1.000000 | 2.02452e-11 | 1.00000  |
| rad8          | 1.67378e-11 | 1.000000 | 1.67451e-11 | 1.00000  |
| PhCHCCH2+H    | 8.99985e-12 | 1.000000 | 9.00377e-12 | 1.00000  |
| rad38         | 1.70026e-12 | 1.000000 | 1.70100e-12 | 1.00000  |
| rad9          | 9.39027e-13 | 1.000000 | 9.39436e-13 | 1.00000  |
| Ph+Allene     | 5.86272e-13 | 1.000000 | 5.86527e-13 | 1.00000  |
| rad60syn      | 1.00309e-13 | 1.000000 | 1.00352e-13 | 1.00000  |
| PAH9+H        | 9.73729e-14 | 1.000000 | 9.74153e-14 | 1.00000  |
| rad3          | 6.84770e-14 | 1.000000 | 6.85068e-14 | 1.00000  |
| rad35         | 4.97916e-14 | 1.000000 | 4.98132e-14 | 1.00000  |
| rad4          | 3.63575e-14 | 1.000000 | 3.63733e-14 | 1.00000  |
| rad33         | 3.31706e-14 | 1.000000 | 3.31850e-14 | 1.00000  |
| rad60anti     | 3.17957e-14 | 1.000000 | 3.18095e-14 | 1.00000  |
| PhCH2CCH+H    | 3.17046e-14 | 1.000000 | 3.17184e-14 | 1.00000  |
| rad28         | 2.40666e-14 | 1.000000 | 2.40770e-14 | 1.00000  |
| rad46         | 1.50734e-14 | 1.000000 | 1.50800e-14 | 1.00000  |
| rad2          | 2.08745e-15 | 1.000000 | 2.08836e-15 | 1.00000  |
| PAH3+H        | 5.65569e-16 | 1.000000 | 5.65815e-16 | 1.00000  |
| PAH7+H        | 4.43451e-16 | 1.000000 | 4.43644e-16 | 1.00000  |
| PhCCH+CH3     | 1.81762e-16 | 1.000000 | 1.81841e-16 | 1.00000  |
| rad59         | 1.70265e-16 | 1.000000 | 1.70339e-16 | 1.00000  |
| rad1          | 1.56495e-16 | 1.000000 | 1.56563e-16 | 1.00000  |
| rad10         | 1.04532e-17 | 1.000000 | 1.04577e-17 | 1.00000  |
| rad26         | 8.61981e-18 | 1.000000 | 8.62356e-18 | 1.00000  |
| rad14         | 2.46059e-18 | 1.000000 | 2.46166e-18 | 1.00000  |
| Ph+MeAc       | 1.04983e-18 | 1.000000 | 1.05029e-18 | 1.00000  |
| rad50         | 7.49094e-19 | 1.000000 | 7.49420e-19 | 1.00000  |
| PhCCCH3+H     | 1.91167e-19 | 1.000000 | 1.91250e-19 | 1.00000  |
| rad27         | 7.27074e-21 | 1.000000 | 7.27390e-21 | 1.00000  |
| rad39         | 4.67977e-21 | 1.000000 | 4.68181e-21 | 1.00000  |
| rad52         | 6.13396e-22 | 1.000000 | 6.13663e-22 | 1.00000  |
| rad31         | 9.94993e-23 | 1.000000 | 9.95426e-23 | 1.00000  |
| rad51         | 4.11154e-23 | 1.000000 | 4.11333e-23 | 1.00000  |
| rad12         | 1.75895e-23 | 1.000000 | 1.75972e-23 | 1.00000  |
| rad58         | 1.75136e-23 | 1.000000 | 1.75212e-23 | 1.00000  |
| rad19syn      | 1.47783e-23 | 1.000000 | 1.47847e-23 | 1.00000  |
| rad70         | 9.01750e-24 | 1.000000 | 9.02143e-24 | 1.00000  |
| rad5          | 3.82837e-24 | 1.000000 | 3.83004e-24 | 1.00000  |
| rad37         | 2.10165e-24 | 1.000000 | 2.10256e-24 | 1.00000  |
| rad54         | 1.40640e-24 | 1.000000 | 1.40702e-24 | 1.00000  |
| rad65         | 5.86441e-26 | 1.000000 | 5.86696e-26 | 1.00000  |
| rad34         | 3.18371e-26 | 1.000000 | 3.18509e-26 | 1.00000  |
| rad62         | 1.82991e-26 | 1.000000 | 1.83071e-26 | 1.00000  |
| PhcycC3H3_A+H | 7.70031e-27 | 1.000000 | 7.70367e-27 | 1.00000  |

|           |             |          |             |         |
|-----------|-------------|----------|-------------|---------|
| rad47     | 4.22397e-27 | 1.000000 | 4.22581e-27 | 1.00000 |
| rad55     | 3.34528e-27 | 1.000000 | 3.34674e-27 | 1.00000 |
| rad43     | 1.11202e-27 | 1.000000 | 1.11250e-27 | 1.00000 |
| PAH10+CH3 | 2.65809e-28 | 1.000000 | 2.65924e-28 | 1.00000 |
| PAH1+H    | 3.29148e-30 | 1.000000 | 3.29291e-30 | 1.00000 |
| rad42     | 2.55518e-31 | 1.000000 | 2.55630e-31 | 1.00000 |
| rad41     | 4.31589e-33 | 1.000000 | 4.31777e-33 | 1.00000 |

10000.0000 Pa, 290.000000 K

| Rate constant | True (fraction)     | Effective (fraction) |
|---------------|---------------------|----------------------|
| Total         | 4.20015e-23 (1.00 ) | 4.19777e-23 (1.00 )  |

| species       | PYtrue      | Cumul    | PYeffective | Cumul    |
|---------------|-------------|----------|-------------|----------|
| rad20         | 0.322224    | 0.322224 | 0.322407    | 0.322407 |
| rad22         | 0.269635    | 0.591859 | 0.269788    | 0.592195 |
| rad21         | 0.191168    | 0.783027 | 0.191277    | 0.783472 |
| rad18         | 0.146226    | 0.929253 | 0.146309    | 0.929781 |
| Indene+H      | 0.0470232   | 0.976276 | 0.0470499   | 0.976831 |
| rad45         | 0.0198500   | 0.996126 | 0.0198613   | 0.996692 |
| rad23         | 0.00152395  | 0.997650 | 0.00152481  | 0.998217 |
| rad36         | 0.00129503  | 0.998945 | 0.00129576  | 0.999513 |
| Benzyl+C2H2   | 0.000567170 | 0.999512 | 0.000000    | 0.999513 |
| rad11         | 0.000481461 | 0.999994 | 0.000481734 | 0.999995 |
| rad6          | 6.31078e-06 | 1.00000  | 6.31436e-06 | 1.00000  |
| rad24         | 1.28297e-08 | 1.00000  | 1.28370e-08 | 1.00000  |
| rad30         | 7.06437e-09 | 1.00000  | 7.06838e-09 | 1.00000  |
| rad15         | 1.10145e-09 | 1.00000  | 1.10208e-09 | 1.00000  |
| rad7          | 1.67235e-10 | 1.00000  | 1.67330e-10 | 1.00000  |
| rad25         | 9.11004e-11 | 1.00000  | 9.11521e-11 | 1.00000  |
| rad8          | 3.43304e-11 | 1.00000  | 3.43499e-11 | 1.00000  |
| rad13         | 3.07484e-11 | 1.00000  | 3.07658e-11 | 1.00000  |
| PhCHCCH2+H    | 1.92090e-11 | 1.00000  | 1.92199e-11 | 1.00000  |
| rad38         | 3.13223e-12 | 1.00000  | 3.13401e-12 | 1.00000  |
| rad9          | 2.10929e-12 | 1.00000  | 2.11048e-12 | 1.00000  |
| Ph+Allene     | 1.46028e-12 | 1.00000  | 1.46111e-12 | 1.00000  |
| rad60syn      | 2.12950e-13 | 1.00000  | 2.13070e-13 | 1.00000  |
| PAH9+H        | 2.10417e-13 | 1.00000  | 2.10537e-13 | 1.00000  |
| rad3          | 1.44933e-13 | 1.00000  | 1.45016e-13 | 1.00000  |
| rad35         | 1.04468e-13 | 1.00000  | 1.04527e-13 | 1.00000  |
| PhCH2CCH+H    | 9.05990e-14 | 1.00000  | 9.06504e-14 | 1.00000  |
| rad4          | 7.72906e-14 | 1.00000  | 7.73345e-14 | 1.00000  |
| rad60anti     | 6.94983e-14 | 1.00000  | 6.95377e-14 | 1.00000  |
| rad28         | 5.27223e-14 | 1.00000  | 5.27522e-14 | 1.00000  |
| rad33         | 4.97841e-14 | 1.00000  | 4.98123e-14 | 1.00000  |
| rad46         | 3.26336e-14 | 1.00000  | 3.26521e-14 | 1.00000  |
| rad2          | 5.75523e-15 | 1.00000  | 5.75849e-15 | 1.00000  |
| PAH3+H        | 1.58711e-15 | 1.00000  | 1.58801e-15 | 1.00000  |
| PAH7+H        | 1.09640e-15 | 1.00000  | 1.09703e-15 | 1.00000  |
| PhCCH+CH3     | 5.91067e-16 | 1.00000  | 5.91403e-16 | 1.00000  |
| rad59         | 4.68281e-16 | 1.00000  | 4.68547e-16 | 1.00000  |
| rad1          | 4.38021e-16 | 1.00000  | 4.38270e-16 | 1.00000  |
| rad10         | 3.62349e-17 | 1.00000  | 3.62555e-17 | 1.00000  |
| rad26         | 2.30199e-17 | 1.00000  | 2.30330e-17 | 1.00000  |
| rad14         | 6.80586e-18 | 1.00000  | 6.80972e-18 | 1.00000  |
| Ph+MeAc       | 3.89441e-18 | 1.00000  | 3.89662e-18 | 1.00000  |
| rad50         | 2.61474e-18 | 1.00000  | 2.61622e-18 | 1.00000  |
| PhCCCH3+H     | 7.84047e-19 | 1.00000  | 7.84492e-19 | 1.00000  |
| rad27         | 2.20211e-20 | 1.00000  | 2.20336e-20 | 1.00000  |
| rad39         | 1.63898e-20 | 1.00000  | 1.63991e-20 | 1.00000  |
| rad52         | 2.73635e-21 | 1.00000  | 2.73790e-21 | 1.00000  |
| rad31         | 2.42496e-22 | 1.00000  | 2.42634e-22 | 1.00000  |
| rad51         | 2.19315e-22 | 1.00000  | 2.19440e-22 | 1.00000  |
| rad58         | 8.25508e-23 | 1.00000  | 8.25977e-23 | 1.00000  |
| rad19syn      | 6.64229e-23 | 1.00000  | 6.64606e-23 | 1.00000  |
| rad12         | 6.31615e-23 | 1.00000  | 6.31974e-23 | 1.00000  |
| rad70         | 4.29519e-23 | 1.00000  | 4.29763e-23 | 1.00000  |
| rad5          | 1.85761e-23 | 1.00000  | 1.85866e-23 | 1.00000  |
| rad37         | 8.10676e-24 | 1.00000  | 8.11136e-24 | 1.00000  |
| rad54         | 6.43543e-24 | 1.00000  | 6.43909e-24 | 1.00000  |
| rad65         | 3.49178e-25 | 1.00000  | 3.49376e-25 | 1.00000  |
| rad34         | 1.66041e-25 | 1.00000  | 1.66136e-25 | 1.00000  |
| rad62         | 9.53837e-26 | 1.00000  | 9.54378e-26 | 1.00000  |
| PhcycC3H3_A+H | 4.06226e-26 | 1.00000  | 4.06457e-26 | 1.00000  |
| rad47         | 2.34870e-26 | 1.00000  | 2.35004e-26 | 1.00000  |
| rad55         | 1.70634e-26 | 1.00000  | 1.70731e-26 | 1.00000  |
| rad43         | 6.27893e-27 | 1.00000  | 6.28249e-27 | 1.00000  |
| PAH10+CH3     | 1.33228e-27 | 1.00000  | 1.33304e-27 | 1.00000  |

|        |             |         |             |         |
|--------|-------------|---------|-------------|---------|
| PAH1+H | 1.83264e-29 | 1.00000 | 1.83368e-29 | 1.00000 |
| rad42  | 1.52333e-30 | 1.00000 | 1.52419e-30 | 1.00000 |
| rad41  | 2.78727e-32 | 1.00000 | 2.78885e-32 | 1.00000 |

10000.0000 Pa, 300.000000 K

| =====         |                     |          |                      |          |
|---------------|---------------------|----------|----------------------|----------|
| Rate constant | True (fraction)     |          | Effective (fraction) |          |
| -----         |                     |          |                      |          |
| Total         | 1.17740e-22 (1.00 ) |          | 1.17590e-22 (1.00 )  |          |
| species       | PYtrue              | Cumul    | PYeffective          | Cumul    |
| -----         |                     |          |                      |          |
| rad22         | 0.342784            | 0.342784 | 0.343223             | 0.343223 |
| rad20         | 0.242561            | 0.585345 | 0.242872             | 0.586095 |
| rad21         | 0.148223            | 0.733568 | 0.148413             | 0.734508 |
| rad18         | 0.145241            | 0.878809 | 0.145427             | 0.879935 |
| Indene+H      | 0.0877805           | 0.966589 | 0.0878929            | 0.967828 |
| rad45         | 0.0261506           | 0.992740 | 0.0261840            | 0.994012 |
| rad23         | 0.00432471          | 0.997065 | 0.00433025           | 0.998342 |
| Benzyl+C2H2   | 0.00127802          | 0.998343 | 0.000000             | 0.998342 |
| rad36         | 0.000892472         | 0.999235 | 0.000893614          | 0.999236 |
| rad11         | 0.000739648         | 0.999975 | 0.000740595          | 0.999976 |
| rad6          | 2.49937e-05         | 1.000000 | 2.50257e-05          | 1.000000 |
| rad24         | 3.86725e-08         | 1.000000 | 3.87220e-08          | 1.000000 |
| rad30         | 2.33065e-08         | 1.000000 | 2.33364e-08          | 1.000000 |
| rad9          | 3.59367e-09         | 1.000000 | 3.59827e-09          | 1.000000 |
| rad7          | 1.82876e-09         | 1.000000 | 1.83110e-09          | 1.000000 |
| rad25         | 4.42834e-10         | 1.000000 | 4.43401e-10          | 1.000000 |
| rad38         | 2.62825e-10         | 1.000000 | 2.63161e-10          | 1.000000 |
| PhCHCCH2+H    | 2.02638e-10         | 1.000000 | 2.02897e-10          | 1.000000 |
| PAH9+H        | 1.90262e-10         | 1.000000 | 1.90505e-10          | 1.000000 |
| rad15         | 1.88222e-10         | 1.000000 | 1.88463e-10          | 1.000000 |
| rad13         | 1.21411e-10         | 1.000000 | 1.21566e-10          | 1.000000 |
| rad35         | 5.59404e-11         | 1.000000 | 5.60120e-11          | 1.000000 |
| Ph+Allene     | 1.42519e-11         | 1.000000 | 1.42701e-11          | 1.000000 |
| rad46         | 1.25917e-11         | 1.000000 | 1.26078e-11          | 1.000000 |
| rad3          | 2.80468e-12         | 1.000000 | 2.80827e-12          | 1.000000 |
| rad28         | 1.58524e-12         | 1.000000 | 1.58727e-12          | 1.000000 |
| PhCH2CCH+H    | 1.45714e-12         | 1.000000 | 1.45901e-12          | 1.000000 |
| rad4          | 1.40147e-12         | 1.000000 | 1.40326e-12          | 1.000000 |
| rad60syn      | 1.03663e-12         | 1.000000 | 1.03796e-12          | 1.000000 |
| rad2          | 5.22928e-13         | 1.000000 | 5.23597e-13          | 1.000000 |
| rad60anti     | 3.32142e-13         | 1.000000 | 3.32567e-13          | 1.000000 |
| rad33         | 2.04783e-13         | 1.000000 | 2.05045e-13          | 1.000000 |
| PhCCH+CH3     | 1.79172e-13         | 1.000000 | 1.79402e-13          | 1.000000 |
| PAH7+H        | 1.60932e-13         | 1.000000 | 1.61138e-13          | 1.000000 |
| rad50         | 9.06716e-14         | 1.000000 | 9.07877e-14          | 1.000000 |
| rad1          | 3.95506e-14         | 1.000000 | 3.96012e-14          | 1.000000 |
| rad19anti     | 1.78874e-14         | 1.000000 | 1.79103e-14          | 1.000000 |
| rad10         | 1.47863e-14         | 1.000000 | 1.48052e-14          | 1.000000 |
| PAH3+H        | 1.31251e-14         | 1.000000 | 1.31419e-14          | 1.000000 |
| rad26         | 9.47139e-15         | 1.000000 | 9.48351e-15          | 1.000000 |
| Ph+MeAc       | 5.45528e-15         | 1.000000 | 5.46226e-15          | 1.000000 |
| rad39         | 3.96911e-15         | 1.000000 | 3.97419e-15          | 1.000000 |
| PhCCCH3+H     | 2.97297e-15         | 1.000000 | 2.97678e-15          | 1.000000 |
| rad59         | 2.91511e-15         | 1.000000 | 2.91884e-15          | 1.000000 |
| rad52         | 1.16661e-15         | 1.000000 | 1.16810e-15          | 1.000000 |
| rad51         | 7.30978e-16         | 1.000000 | 7.31913e-16          | 1.000000 |
| rad14         | 3.95399e-16         | 1.000000 | 3.95905e-16          | 1.000000 |
| rad12         | 7.98445e-17         | 1.000000 | 7.99467e-17          | 1.000000 |
| rad37         | 1.54295e-17         | 1.000000 | 1.54492e-17          | 1.000000 |
| rad65         | 1.46041e-17         | 1.000000 | 1.46228e-17          | 1.000000 |
| rad19syn      | 2.90651e-18         | 1.000000 | 2.91023e-18          | 1.000000 |
| rad27         | 2.81874e-18         | 1.000000 | 2.82235e-18          | 1.000000 |
| PAH10+CH3     | 6.82831e-19         | 1.000000 | 6.83705e-19          | 1.000000 |
| rad54         | 5.96744e-19         | 1.000000 | 5.97508e-19          | 1.000000 |
| rad70         | 5.93232e-19         | 1.000000 | 5.93991e-19          | 1.000000 |
| rad67         | 5.03224e-19         | 1.000000 | 5.03868e-19          | 1.000000 |
| rad58         | 3.58912e-19         | 1.000000 | 3.59371e-19          | 1.000000 |
| PAH1+H        | 1.87934e-19         | 1.000000 | 1.88174e-19          | 1.000000 |
| PhcycC3H3_A+H | 1.78967e-19         | 1.000000 | 1.79196e-19          | 1.000000 |
| rad5          | 1.08667e-19         | 1.000000 | 1.08806e-19          | 1.000000 |
| rad34         | 3.85550e-20         | 1.000000 | 3.86044e-20          | 1.000000 |
| rad62         | 1.80729e-20         | 1.000000 | 1.80961e-20          | 1.000000 |
| rad55         | 1.80088e-20         | 1.000000 | 1.80319e-20          | 1.000000 |
| rad31         | 1.50692e-20         | 1.000000 | 1.50885e-20          | 1.000000 |
| rad43         | 6.34765e-21         | 1.000000 | 6.35577e-21          | 1.000000 |
| rad47         | 4.05333e-21         | 1.000000 | 4.05851e-21          | 1.000000 |
| rad73         | 2.54161e-21         | 1.000000 | 2.54486e-21          | 1.000000 |
| rad64         | 5.17928e-22         | 1.000000 | 5.18590e-22          | 1.000000 |

|           |             |         |             |         |
|-----------|-------------|---------|-------------|---------|
| rad71     | 3.57020e-22 | 1.00000 | 3.57476e-22 | 1.00000 |
| rad53     | 1.96869e-22 | 1.00000 | 1.97121e-22 | 1.00000 |
| rad42     | 1.17191e-22 | 1.00000 | 1.17341e-22 | 1.00000 |
| rad56     | 3.23935e-23 | 1.00000 | 3.24350e-23 | 1.00000 |
| rad68syn  | 2.40030e-23 | 1.00000 | 2.40337e-23 | 1.00000 |
| rad41     | 2.23944e-23 | 1.00000 | 2.24230e-23 | 1.00000 |
| rad68anti | 1.66158e-23 | 1.00000 | 1.66370e-23 | 1.00000 |
| rad61     | 8.02229e-24 | 1.00000 | 8.03255e-24 | 1.00000 |
| PAH8+H    | 1.92961e-24 | 1.00000 | 1.93208e-24 | 1.00000 |
| rad40syn  | 1.00799e-24 | 1.00000 | 1.00928e-24 | 1.00000 |
| rad40anti | 3.14102e-25 | 1.00000 | 3.14504e-25 | 1.00000 |
| rad72     | 2.21849e-26 | 1.00000 | 2.22133e-26 | 1.00000 |
| rad8      | 6.48060e-32 | 1.00000 | 6.48889e-32 | 1.00000 |

10000.0000 Pa, 310.000000 K

| Rate constant | True (fraction)     | Effective (fraction) |
|---------------|---------------------|----------------------|
| Total         | 2.44453e-22 (1.00 ) | 2.44224e-22 (1.00 )  |

| species     | PYtrue      | Cumul    | PYeffective | Cumul    |
|-------------|-------------|----------|-------------|----------|
| rad22       | 0.306785    | 0.306785 | 0.307073    | 0.307073 |
| rad20       | 0.278464    | 0.585249 | 0.278725    | 0.585798 |
| rad21       | 0.168873    | 0.754122 | 0.169031    | 0.754829 |
| rad18       | 0.152098    | 0.906220 | 0.152240    | 0.907069 |
| Indene+H    | 0.0640779   | 0.970298 | 0.0641379   | 0.971207 |
| rad45       | 0.0240891   | 0.994387 | 0.0241116   | 0.995318 |
| rad23       | 0.00238757  | 0.996775 | 0.00238981  | 0.997708 |
| rad36       | 0.00159635  | 0.998371 | 0.00159785  | 0.999306 |
| Benzyl+C2H2 | 0.000935862 | 0.999307 | 0.000000    | 0.999306 |
| rad11       | 0.000679730 | 0.999987 | 0.000680367 | 0.999987 |
| rad6        | 1.33104e-05 | 1.000000 | 1.33228e-05 | 1.000000 |
| rad30       | 1.58817e-08 | 1.000000 | 1.58966e-08 | 1.000000 |
| rad24       | 1.19856e-08 | 1.000000 | 1.19968e-08 | 1.000000 |
| rad15       | 2.70677e-09 | 1.000000 | 2.70931e-09 | 1.000000 |
| rad7        | 5.40892e-10 | 1.000000 | 5.41399e-10 | 1.000000 |
| rad25       | 2.48141e-10 | 1.000000 | 2.48373e-10 | 1.000000 |
| rad8        | 1.27244e-10 | 1.000000 | 1.27363e-10 | 1.000000 |
| PhCHCCH2+H  | 7.86509e-11 | 1.000000 | 7.87246e-11 | 1.000000 |
| rad13       | 6.73389e-11 | 1.000000 | 6.74019e-11 | 1.000000 |
| rad38       | 1.03129e-11 | 1.000000 | 1.03226e-11 | 1.000000 |
| rad9        | 9.37995e-12 | 1.000000 | 9.38874e-12 | 1.000000 |
| Ph+Allene   | 7.82961e-12 | 1.000000 | 7.83694e-12 | 1.000000 |
| PAH9+H      | 9.59487e-13 | 1.000000 | 9.60386e-13 | 1.000000 |
| rad60syn    | 8.39937e-13 | 1.000000 | 8.40724e-13 | 1.000000 |
| PhCH2CCH+H  | 6.14641e-13 | 1.000000 | 6.15217e-13 | 1.000000 |
| rad3        | 5.94956e-13 | 1.000000 | 5.95514e-13 | 1.000000 |
| rad35       | 4.48583e-13 | 1.000000 | 4.49003e-13 | 1.000000 |
| rad4        | 3.20393e-13 | 1.000000 | 3.20693e-13 | 1.000000 |
| rad60anti   | 2.88488e-13 | 1.000000 | 2.88759e-13 | 1.000000 |
| rad28       | 2.25145e-13 | 1.000000 | 2.25356e-13 | 1.000000 |
| rad46       | 1.45278e-13 | 1.000000 | 1.45414e-13 | 1.000000 |
| rad33       | 1.06857e-13 | 1.000000 | 1.06958e-13 | 1.000000 |
| rad2        | 3.86558e-14 | 1.000000 | 3.86920e-14 | 1.000000 |
| PAH3+H      | 1.03429e-14 | 1.000000 | 1.03526e-14 | 1.000000 |
| PAH7+H      | 5.81762e-15 | 1.000000 | 5.82307e-15 | 1.000000 |
| PhCCH+CH3   | 5.32526e-15 | 1.000000 | 5.33025e-15 | 1.000000 |
| rad1        | 3.04175e-15 | 1.000000 | 3.04460e-15 | 1.000000 |
| rad59       | 2.93762e-15 | 1.000000 | 2.94037e-15 | 1.000000 |
| rad10       | 3.69312e-16 | 1.000000 | 3.69658e-16 | 1.000000 |
| rad26       | 1.38657e-16 | 1.000000 | 1.38787e-16 | 1.000000 |
| Ph+MeAc     | 4.42891e-17 | 1.000000 | 4.43306e-17 | 1.000000 |
| rad14       | 4.41387e-17 | 1.000000 | 4.41801e-17 | 1.000000 |
| rad50       | 2.81989e-17 | 1.000000 | 2.82253e-17 | 1.000000 |
| PhCCCH3+H   | 1.08007e-17 | 1.000000 | 1.08108e-17 | 1.000000 |
| rad39       | 1.79855e-19 | 1.000000 | 1.80024e-19 | 1.000000 |
| rad27       | 1.70476e-19 | 1.000000 | 1.70635e-19 | 1.000000 |
| rad52       | 4.56486e-20 | 1.000000 | 4.56914e-20 | 1.000000 |
| rad51       | 4.96253e-21 | 1.000000 | 4.96718e-21 | 1.000000 |
| rad31       | 1.36215e-21 | 1.000000 | 1.36342e-21 | 1.000000 |
| rad58       | 1.32502e-21 | 1.000000 | 1.32626e-21 | 1.000000 |
| rad19syn    | 1.01171e-21 | 1.000000 | 1.01266e-21 | 1.000000 |
| rad70       | 7.04668e-22 | 1.000000 | 7.05328e-22 | 1.000000 |
| rad12       | 6.86861e-22 | 1.000000 | 6.87505e-22 | 1.000000 |
| rad5        | 3.37382e-22 | 1.000000 | 3.37698e-22 | 1.000000 |
| rad54       | 1.00523e-22 | 1.000000 | 1.00617e-22 | 1.000000 |
| rad37       | 1.00192e-22 | 1.000000 | 1.00286e-22 | 1.000000 |
| rad65       | 9.54996e-24 | 1.000000 | 9.55891e-24 | 1.000000 |
| rad34       | 3.16324e-24 | 1.000000 | 3.16620e-24 | 1.000000 |

|               |             |          |             |          |
|---------------|-------------|----------|-------------|----------|
| rad62         | 1.87850e-24 | 1.000000 | 1.88026e-24 | 1.000000 |
| PhcycC3H3_A+H | 7.99211e-25 | 1.000000 | 7.99960e-25 | 1.000000 |
| rad47         | 5.54851e-25 | 1.000000 | 5.55370e-25 | 1.000000 |
| rad55         | 3.16863e-25 | 1.000000 | 3.17159e-25 | 1.000000 |
| rad43         | 1.45319e-25 | 1.000000 | 1.45455e-25 | 1.000000 |
| PAH10+CH3     | 2.53849e-26 | 1.000000 | 2.54087e-26 | 1.000000 |
| PAH1+H        | 4.07722e-28 | 1.000000 | 4.08104e-28 | 1.000000 |
| rad42         | 3.75494e-29 | 1.000000 | 3.75846e-29 | 1.000000 |
| rad41         | 8.07400e-31 | 1.000000 | 8.08156e-31 | 1.000000 |

10000.0000 Pa, 400.000000 K

| Rate constant | True (fraction)     | Effective (fraction) |
|---------------|---------------------|----------------------|
| Total         | 3.60269e-20 (1.00 ) | 3.57382e-20 (1.00 )  |

| species       | PYtrue      | Cumul    | PYeffective | Cumul    |
|---------------|-------------|----------|-------------|----------|
| rad22         | 0.440688    | 0.440688 | 0.444248    | 0.444248 |
| Indene+H      | 0.225607    | 0.666295 | 0.227430    | 0.671678 |
| rad18         | 0.108046    | 0.774341 | 0.108918    | 0.780596 |
| rad20         | 0.0928215   | 0.867163 | 0.0935713   | 0.874167 |
| rad21         | 0.0606052   | 0.927768 | 0.0610948   | 0.935262 |
| rad45         | 0.0356791   | 0.963447 | 0.0359673   | 0.971229 |
| rad23         | 0.0246243   | 0.988071 | 0.0248232   | 0.996053 |
| Benzyl+C2H2   | 0.00801313  | 0.996084 | 0.000000    | 0.996053 |
| rad11         | 0.00218501  | 0.998269 | 0.00220266  | 0.998255 |
| rad36         | 0.00136830  | 0.999638 | 0.00137935  | 0.999635 |
| rad6          | 0.000361236 | 0.999999 | 0.000364154 | 0.999999 |
| rad30         | 3.25872e-07 | 0.999999 | 3.28504e-07 | 0.999999 |
| PAH9+H        | 2.72004e-07 | 0.999999 | 2.74201e-07 | 0.999999 |
| rad38         | 1.34594e-07 | 1.000000 | 1.35681e-07 | 1.000000 |
| rad7          | 8.70528e-08 | 1.000000 | 8.77561e-08 | 1.000000 |
| rad9          | 8.03800e-08 | 1.000000 | 8.10293e-08 | 1.000000 |
| rad35         | 6.33875e-08 | 1.000000 | 6.38995e-08 | 1.000000 |
| rad24         | 4.12071e-08 | 1.000000 | 4.15400e-08 | 1.000000 |
| PhCHCCH2+H    | 2.60782e-08 | 1.000000 | 2.62888e-08 | 1.000000 |
| rad46         | 1.60635e-08 | 1.000000 | 1.61933e-08 | 1.000000 |
| Ph+Allene     | 8.62529e-09 | 1.000000 | 8.69496e-09 | 1.000000 |
| rad25         | 8.02859e-09 | 1.000000 | 8.09344e-09 | 1.000000 |
| PhCH2CCH+H    | 3.62458e-09 | 1.000000 | 3.65386e-09 | 1.000000 |
| rad28         | 2.09307e-09 | 1.000000 | 2.10998e-09 | 1.000000 |
| rad13         | 1.80999e-09 | 1.000000 | 1.82461e-09 | 1.000000 |
| PAH7+H        | 1.54055e-09 | 1.000000 | 1.55299e-09 | 1.000000 |
| PhCCH+CH3     | 1.37201e-09 | 1.000000 | 1.38309e-09 | 1.000000 |
| rad50         | 9.63669e-10 | 1.000000 | 9.71453e-10 | 1.000000 |
| rad15         | 8.02828e-10 | 1.000000 | 8.09314e-10 | 1.000000 |
| rad3          | 2.31953e-10 | 1.000000 | 2.33827e-10 | 1.000000 |
| rad2          | 2.16459e-10 | 1.000000 | 2.18208e-10 | 1.000000 |
| rad39         | 2.15657e-10 | 1.000000 | 2.17399e-10 | 1.000000 |
| Ph+MeAc       | 1.79278e-10 | 1.000000 | 1.80726e-10 | 1.000000 |
| rad4          | 1.22649e-10 | 1.000000 | 1.23640e-10 | 1.000000 |
| rad60syn      | 1.08015e-10 | 1.000000 | 1.08888e-10 | 1.000000 |
| PhCCCH3+H     | 7.51305e-11 | 1.000000 | 7.57374e-11 | 1.000000 |
| rad19anti     | 5.19824e-11 | 1.000000 | 5.24023e-11 | 1.000000 |
| rad60anti     | 4.51928e-11 | 1.000000 | 4.55579e-11 | 1.000000 |
| rad51         | 3.88809e-11 | 1.000000 | 3.91950e-11 | 1.000000 |
| PAH3+H        | 3.52514e-11 | 1.000000 | 3.55361e-11 | 1.000000 |
| rad52         | 3.02943e-11 | 1.000000 | 3.05391e-11 | 1.000000 |
| rad26         | 2.98738e-11 | 1.000000 | 3.01151e-11 | 1.000000 |
| rad1          | 2.02059e-11 | 1.000000 | 2.03691e-11 | 1.000000 |
| rad10         | 1.79484e-11 | 1.000000 | 1.80934e-11 | 1.000000 |
| rad59         | 5.48273e-12 | 1.000000 | 5.52702e-12 | 1.000000 |
| rad33         | 3.19178e-12 | 1.000000 | 3.21756e-12 | 1.000000 |
| rad37         | 2.19108e-12 | 1.000000 | 2.20878e-12 | 1.000000 |
| rad65         | 1.09574e-12 | 1.000000 | 1.10459e-12 | 1.000000 |
| rad19syn      | 8.86080e-13 | 1.000000 | 8.93237e-13 | 1.000000 |
| PAH10+CH3     | 3.90098e-13 | 1.000000 | 3.93249e-13 | 1.000000 |
| rad54         | 2.61059e-13 | 1.000000 | 2.63168e-13 | 1.000000 |
| PAH1+H        | 1.50606e-13 | 1.000000 | 1.51823e-13 | 1.000000 |
| PhcycC3H3_A+H | 1.46994e-13 | 1.000000 | 1.48181e-13 | 1.000000 |
| rad67         | 1.12625e-13 | 1.000000 | 1.13535e-13 | 1.000000 |
| rad70         | 7.54894e-14 | 1.000000 | 7.60992e-14 | 1.000000 |
| rad14         | 6.53981e-14 | 1.000000 | 6.59264e-14 | 1.000000 |
| rad58         | 3.28355e-14 | 1.000000 | 3.31007e-14 | 1.000000 |
| rad55         | 1.16252e-14 | 1.000000 | 1.17191e-14 | 1.000000 |
| rad34         | 8.99495e-15 | 1.000000 | 9.06761e-15 | 1.000000 |
| rad73         | 7.19628e-15 | 1.000000 | 7.25441e-15 | 1.000000 |
| rad62         | 5.20706e-15 | 1.000000 | 5.24912e-15 | 1.000000 |
| rad71         | 2.68345e-15 | 1.000000 | 2.70513e-15 | 1.000000 |

|           |             |          |             |          |
|-----------|-------------|----------|-------------|----------|
| rad12     | 2.63099e-15 | 1.000000 | 2.65224e-15 | 1.000000 |
| rad43     | 1.35917e-15 | 1.000000 | 1.37015e-15 | 1.000000 |
| rad27     | 1.27463e-15 | 1.000000 | 1.28493e-15 | 1.000000 |
| rad64     | 9.61818e-16 | 1.000000 | 9.69587e-16 | 1.000000 |
| rad53     | 4.64509e-16 | 1.000000 | 4.68261e-16 | 1.000000 |
| rad5      | 4.52464e-16 | 1.000000 | 4.56119e-16 | 1.000000 |
| rad56     | 1.65882e-16 | 1.000000 | 1.67222e-16 | 1.000000 |
| rad42     | 9.41416e-17 | 1.000000 | 9.49021e-17 | 1.000000 |
| rad68syn  | 4.95024e-17 | 1.000000 | 4.99023e-17 | 1.000000 |
| rad47     | 4.43815e-17 | 1.000000 | 4.47400e-17 | 1.000000 |
| rad61     | 3.78270e-17 | 1.000000 | 3.81326e-17 | 1.000000 |
| rad68anti | 3.33609e-17 | 1.000000 | 3.36304e-17 | 1.000000 |
| PAH8+H    | 2.02826e-17 | 1.000000 | 2.04464e-17 | 1.000000 |
| rad31     | 1.56671e-17 | 1.000000 | 1.57937e-17 | 1.000000 |
| rad41     | 1.50414e-17 | 1.000000 | 1.51629e-17 | 1.000000 |
| rad40syn  | 5.54342e-18 | 1.000000 | 5.58820e-18 | 1.000000 |
| rad72     | 3.61012e-18 | 1.000000 | 3.63928e-18 | 1.000000 |
| rad40anti | 2.32190e-18 | 1.000000 | 2.34066e-18 | 1.000000 |
| rad8      | 9.26154e-29 | 1.000000 | 9.33636e-29 | 1.000000 |

10000.0000 Pa, 500.000000 K

| Rate constant | True (fraction)     | Effective (fraction) |
|---------------|---------------------|----------------------|
| Total         | 1.22595e-18 (1.00 ) | 1.18902e-18 (1.00 )  |

| species       | PYtrue      | Cumul    | PYeffective | Cumul    |
|---------------|-------------|----------|-------------|----------|
| Indene+H      | 0.397769    | 0.397769 | 0.410124    | 0.410124 |
| rad22         | 0.391792    | 0.789561 | 0.403962    | 0.814086 |
| rad23         | 0.0494395   | 0.839000 | 0.0509751   | 0.865061 |
| rad18         | 0.0485993   | 0.887600 | 0.0501088   | 0.915170 |
| Benzyl+C2H2   | 0.0301247   | 0.917724 | 0.000000    | 0.915170 |
| rad20         | 0.0284272   | 0.946152 | 0.0293102   | 0.944480 |
| rad45         | 0.0275311   | 0.973683 | 0.0283862   | 0.972866 |
| rad21         | 0.0192643   | 0.992947 | 0.0198627   | 0.992729 |
| rad11         | 0.00352641  | 0.996474 | 0.00363594  | 0.996365 |
| rad6          | 0.00219002  | 0.998664 | 0.00225805  | 0.998623 |
| rad36         | 0.00128102  | 0.999945 | 0.00132081  | 0.999944 |
| PAH9+H        | 2.48645e-05 | 0.999969 | 2.56368e-05 | 0.999969 |
| rad38         | 1.06898e-05 | 0.999980 | 1.10219e-05 | 0.999980 |
| rad35         | 4.84256e-06 | 0.999985 | 4.99298e-06 | 0.999985 |
| Ph+Allene     | 2.77772e-06 | 0.999988 | 2.86400e-06 | 0.999988 |
| rad30         | 2.10609e-06 | 0.999990 | 2.17151e-06 | 0.999990 |
| rad46         | 2.07658e-06 | 0.999992 | 2.14107e-06 | 0.999993 |
| PhCHCCH2+H    | 1.96179e-06 | 0.999994 | 2.02272e-06 | 0.999995 |
| PhCH2CCH+H    | 1.42240e-06 | 0.999995 | 1.46658e-06 | 0.999996 |
| rad7          | 1.03048e-06 | 0.999996 | 1.06249e-06 | 0.999997 |
| rad9          | 8.18973e-07 | 0.999997 | 8.44410e-07 | 0.999998 |
| PAH7+H        | 7.03132e-07 | 0.999998 | 7.24972e-07 | 0.999999 |
| PhCCH+CH3     | 5.20473e-07 | 0.999998 | 5.36639e-07 | 0.999999 |
| rad50         | 4.42470e-07 | 0.999999 | 4.56213e-07 | 1.000000 |
| rad39         | 1.56474e-07 | 0.999999 | 1.61334e-07 | 1.000000 |
| Ph+MeAc       | 8.24537e-08 | 0.999999 | 8.50148e-08 | 1.000000 |
| rad28         | 7.37078e-08 | 0.999999 | 7.59972e-08 | 1.000000 |
| rad24         | 6.71652e-08 | 0.999999 | 6.92514e-08 | 1.000000 |
| rad51         | 4.90708e-08 | 0.999999 | 5.05949e-08 | 1.000000 |
| rad25         | 3.35574e-08 | 0.999999 | 3.45997e-08 | 1.000000 |
| rad19anti     | 3.12107e-08 | 0.999999 | 3.21801e-08 | 1.000000 |
| PhCCCH3+H     | 2.36313e-08 | 0.999999 | 2.43653e-08 | 1.000000 |
| rad52         | 2.35512e-08 | 0.999999 | 2.42827e-08 | 1.000000 |
| PAH3+H        | 1.45015e-08 | 0.999999 | 1.49519e-08 | 1.000000 |
| rad13         | 1.13864e-08 | 0.999999 | 1.17400e-08 | 1.000000 |
| rad2          | 7.23242e-09 | 0.999999 | 7.45706e-09 | 1.000000 |
| rad60syn      | 4.77402e-09 | 0.999999 | 4.92230e-09 | 1.000000 |
| rad3          | 3.82213e-09 | 0.999999 | 3.94084e-09 | 1.000000 |
| rad37         | 2.73813e-09 | 0.999999 | 2.82318e-09 | 1.000000 |
| rad60anti     | 2.50289e-09 | 0.999999 | 2.58063e-09 | 1.000000 |
| rad15         | 2.46125e-09 | 0.999999 | 2.53770e-09 | 1.000000 |
| rad4          | 2.15856e-09 | 0.999999 | 2.22561e-09 | 1.000000 |
| rad59         | 1.77589e-09 | 0.999999 | 1.83105e-09 | 1.000000 |
| PAH10+CH3     | 1.71475e-09 | 0.999999 | 1.76801e-09 | 1.000000 |
| rad19syn      | 1.52814e-09 | 0.999999 | 1.57561e-09 | 1.000000 |
| rad65         | 1.42546e-09 | 0.999999 | 1.46974e-09 | 1.000000 |
| rad26         | 1.18659e-09 | 0.999999 | 1.22344e-09 | 1.000000 |
| rad1          | 8.65719e-10 | 0.999999 | 8.92608e-10 | 1.000000 |
| rad10         | 7.75579e-10 | 0.999999 | 7.99669e-10 | 1.000000 |
| PAH1+H        | 7.15744e-10 | 0.999999 | 7.37975e-10 | 1.000000 |
| rad54         | 5.33488e-10 | 0.999999 | 5.50059e-10 | 1.000000 |
| PhcycC3H3_A+H | 4.59762e-10 | 0.999999 | 4.74042e-10 | 1.000000 |

|           |             |          |             |         |
|-----------|-------------|----------|-------------|---------|
| rad67     | 3.32594e-10 | 0.999999 | 3.42924e-10 | 1.00000 |
| rad73     | 1.50852e-10 | 0.999999 | 1.55538e-10 | 1.00000 |
| rad70     | 1.50508e-10 | 0.999999 | 1.55183e-10 | 1.00000 |
| rad71     | 1.26758e-10 | 0.999999 | 1.30696e-10 | 1.00000 |
| rad58     | 5.29084e-11 | 0.999999 | 5.45518e-11 | 1.00000 |
| rad55     | 2.99378e-11 | 0.999999 | 3.08677e-11 | 1.00000 |
| rad34     | 2.71636e-11 | 0.999999 | 2.80073e-11 | 1.00000 |
| rad33     | 2.35845e-11 | 0.999999 | 2.43171e-11 | 1.00000 |
| rad62     | 9.09106e-12 | 0.999999 | 9.37344e-12 | 1.00000 |
| rad64     | 8.68306e-12 | 0.999999 | 8.95276e-12 | 1.00000 |
| rad53     | 2.96701e-12 | 0.999999 | 3.05917e-12 | 1.00000 |
| rad56     | 1.85225e-12 | 0.999999 | 1.90978e-12 | 1.00000 |
| rad43     | 1.85214e-12 | 0.999999 | 1.90967e-12 | 1.00000 |
| rad72     | 1.57516e-12 | 0.999999 | 1.62409e-12 | 1.00000 |
| rad14     | 1.22717e-12 | 0.999999 | 1.26529e-12 | 1.00000 |
| PAH8+H    | 1.11885e-12 | 0.999999 | 1.15361e-12 | 1.00000 |
| rad61     | 9.96115e-13 | 0.999999 | 1.02705e-12 | 1.00000 |
| rad68syn  | 7.16151e-13 | 0.999999 | 7.38395e-13 | 1.00000 |
| rad68anti | 4.72223e-13 | 0.999999 | 4.86890e-13 | 1.00000 |
| rad42     | 3.51191e-13 | 0.999999 | 3.62099e-13 | 1.00000 |
| rad40syn  | 1.75155e-13 | 0.999999 | 1.80596e-13 | 1.00000 |
| rad47     | 1.13285e-13 | 0.999999 | 1.16803e-13 | 1.00000 |
| rad40anti | 9.27449e-14 | 0.999999 | 9.56255e-14 | 1.00000 |
| rad12     | 6.37120e-14 | 0.999999 | 6.56910e-14 | 1.00000 |
| rad41     | 5.69984e-14 | 0.999999 | 5.87688e-14 | 1.00000 |
| rad27     | 4.00941e-14 | 0.999999 | 4.13394e-14 | 1.00000 |
| rad5      | 2.63574e-14 | 0.999999 | 2.71761e-14 | 1.00000 |
| rad31     | 5.60614e-15 | 0.999999 | 5.78027e-15 | 1.00000 |
| rad8      | 1.85794e-25 | 0.999999 | 1.91565e-25 | 1.00000 |

10000.0000 Pa, 600.000000 K

| Rate constant | True (fraction)     | Effective (fraction) |
|---------------|---------------------|----------------------|
| Total         | 1.36947e-17 (1.00 ) | 1.26196e-17 (1.00 )  |

| species     | PYtrue      | Cumul    | PYeffective | Cumul    |
|-------------|-------------|----------|-------------|----------|
| Indene+H    | 0.559454    | 0.559454 | 0.607113    | 0.607113 |
| rad22       | 0.254308    | 0.813762 | 0.275972    | 0.883085 |
| Benzyl+C2H2 | 0.0785005   | 0.892262 | 0.00000     | 0.883085 |
| rad23       | 0.0494669   | 0.941729 | 0.0536809   | 0.936766 |
| rad18       | 0.0161038   | 0.957833 | 0.0174757   | 0.954242 |
| rad45       | 0.0152489   | 0.973082 | 0.0165479   | 0.970789 |
| rad20       | 0.00897127  | 0.982053 | 0.00973552  | 0.980525 |
| rad6        | 0.00646222  | 0.988516 | 0.00701272  | 0.987538 |
| rad21       | 0.00636492  | 0.994881 | 0.00690713  | 0.994445 |
| rad11       | 0.00332503  | 0.998206 | 0.00360828  | 0.998053 |
| rad36       | 0.000894283 | 0.999100 | 0.000970465 | 0.999024 |
| PAH9+H      | 0.000366350 | 0.999466 | 0.000397559 | 0.999421 |
| rad38       | 0.000165416 | 0.999632 | 0.000179507 | 0.999601 |
| Ph+Allene   | 7.16583e-05 | 0.999703 | 7.77627e-05 | 0.999678 |
| rad35       | 6.04275e-05 | 0.999764 | 6.55751e-05 | 0.999744 |
| rad46       | 4.56301e-05 | 0.999809 | 4.95172e-05 | 0.999794 |
| PhCH2CCH+H  | 4.44923e-05 | 0.999854 | 4.82825e-05 | 0.999842 |
| PhCHCCH2+H  | 3.81287e-05 | 0.999892 | 4.13768e-05 | 0.999883 |
| PAH7+H      | 3.18401e-05 | 0.999924 | 3.45525e-05 | 0.999918 |
| rad50       | 2.64125e-05 | 0.999950 | 2.86625e-05 | 0.999946 |
| rad39       | 1.08808e-05 | 0.999961 | 1.18077e-05 | 0.999958 |
| rad30       | 8.48587e-06 | 0.999970 | 9.20877e-06 | 0.999967 |
| PhCCH+CH3   | 7.74811e-06 | 0.999977 | 8.40815e-06 | 0.999976 |
| rad51       | 6.10290e-06 | 0.999983 | 6.62279e-06 | 0.999982 |
| rad7        | 4.29780e-06 | 0.999988 | 4.66392e-06 | 0.999987 |
| rad9        | 3.72062e-06 | 0.999991 | 4.03757e-06 | 0.999991 |
| rad52       | 2.03120e-06 | 0.999993 | 2.20423e-06 | 0.999993 |
| Ph+MeAc     | 1.72465e-06 | 0.999995 | 1.87157e-06 | 0.999995 |
| rad19anti   | 1.40754e-06 | 0.999997 | 1.52745e-06 | 0.999997 |
| PAH3+H      | 8.63504e-07 | 0.999997 | 9.37064e-07 | 0.999998 |
| PhCCCH3+H   | 4.44824e-07 | 0.999998 | 4.82717e-07 | 0.999998 |
| PAH10+CH3   | 3.82895e-07 | 0.999998 | 4.15513e-07 | 0.999999 |
| rad28       | 2.62642e-07 | 0.999999 | 2.85016e-07 | 0.999999 |
| rad37       | 2.27505e-07 | 0.999999 | 2.46886e-07 | 0.999999 |
| rad24       | 1.99518e-07 | 0.999999 | 2.16514e-07 | 0.999999 |
| PAH1+H      | 1.80029e-07 | 0.999999 | 1.95365e-07 | 1.000000 |
| rad65       | 1.66196e-07 | 0.999999 | 1.80354e-07 | 1.000000 |
| rad71       | 1.27258e-07 | 0.999999 | 1.38099e-07 | 1.000000 |
| rad60syn    | 1.01728e-07 | 1.000000 | 1.10394e-07 | 1.000000 |
| rad73       | 9.99931e-08 | 1.000000 | 1.08511e-07 | 1.000000 |
| rad59       | 8.79524e-08 | 1.000000 | 9.54449e-08 | 1.000000 |
| rad19syn    | 7.61177e-08 | 1.000000 | 8.26020e-08 | 1.000000 |

|               |             |          |             |         |
|---------------|-------------|----------|-------------|---------|
| rad60anti     | 5.99461e-08 | 1.000000 | 6.50528e-08 | 1.00000 |
| rad25         | 5.52159e-08 | 1.000000 | 5.99196e-08 | 1.00000 |
| rad67         | 5.38425e-08 | 1.000000 | 5.84292e-08 | 1.00000 |
| rad2          | 4.17680e-08 | 1.000000 | 4.53261e-08 | 1.00000 |
| PhcycC3H3_A+H | 3.85849e-08 | 1.000000 | 4.18719e-08 | 1.00000 |
| rad13         | 3.83033e-08 | 1.000000 | 4.15662e-08 | 1.00000 |
| rad54         | 2.98069e-08 | 1.000000 | 3.23461e-08 | 1.00000 |
| rad70         | 2.39406e-08 | 1.000000 | 2.59801e-08 | 1.00000 |
| rad3          | 2.26899e-08 | 1.000000 | 2.46228e-08 | 1.00000 |
| rad4          | 1.38502e-08 | 1.000000 | 1.50300e-08 | 1.00000 |
| rad15         | 7.87532e-09 | 1.000000 | 8.54620e-09 | 1.00000 |
| rad58         | 7.36647e-09 | 1.000000 | 7.99401e-09 | 1.00000 |
| rad1          | 6.19337e-09 | 1.000000 | 6.72097e-09 | 1.00000 |
| rad34         | 6.05783e-09 | 1.000000 | 6.57389e-09 | 1.00000 |
| rad72         | 3.61925e-09 | 1.000000 | 3.92757e-09 | 1.00000 |
| rad26         | 3.58895e-09 | 1.000000 | 3.89468e-09 | 1.00000 |
| rad10         | 3.32474e-09 | 1.000000 | 3.60796e-09 | 1.00000 |
| rad64         | 3.16186e-09 | 1.000000 | 3.43121e-09 | 1.00000 |
| rad55         | 2.03468e-09 | 1.000000 | 2.20801e-09 | 1.00000 |
| PAH8+H        | 1.40746e-09 | 1.000000 | 1.52736e-09 | 1.00000 |
| rad62         | 1.27466e-09 | 1.000000 | 1.38325e-09 | 1.00000 |
| rad61         | 6.47663e-10 | 1.000000 | 7.02836e-10 | 1.00000 |
| rad68syn      | 4.50731e-10 | 1.000000 | 4.89127e-10 | 1.00000 |
| rad53         | 4.42624e-10 | 1.000000 | 4.80331e-10 | 1.00000 |
| rad56         | 4.21678e-10 | 1.000000 | 4.57600e-10 | 1.00000 |
| rad68anti     | 2.93383e-10 | 1.000000 | 3.18375e-10 | 1.00000 |
| rad43         | 2.69192e-10 | 1.000000 | 2.92124e-10 | 1.00000 |
| rad40syn      | 1.68514e-10 | 1.000000 | 1.82869e-10 | 1.00000 |
| rad33         | 1.11642e-10 | 1.000000 | 1.21152e-10 | 1.00000 |
| rad42         | 1.07794e-10 | 1.000000 | 1.16977e-10 | 1.00000 |
| rad40anti     | 1.00027e-10 | 1.000000 | 1.08548e-10 | 1.00000 |
| rad47         | 4.75692e-11 | 1.000000 | 5.16216e-11 | 1.00000 |
| rad41         | 2.08239e-11 | 1.000000 | 2.25978e-11 | 1.00000 |
| rad14         | 6.10828e-12 | 1.000000 | 6.62863e-12 | 1.00000 |
| rad12         | 1.40801e-12 | 1.000000 | 1.52796e-12 | 1.00000 |
| rad31         | 3.04146e-13 | 1.000000 | 3.30056e-13 | 1.00000 |
| rad27         | 1.68489e-13 | 1.000000 | 1.82842e-13 | 1.00000 |
| rad5          | 1.32344e-13 | 1.000000 | 1.43618e-13 | 1.00000 |
| rad8          | 9.03131e-22 | 1.000000 | 9.80067e-22 | 1.00000 |

10000.0000 Pa, 700.000000 K

=====

| Rate constant | True (fraction)     | Effective (fraction) |
|---------------|---------------------|----------------------|
| Total         | 8.02260e-17 (1.00 ) | 6.76837e-17 (1.00 )  |

| species     | PYtrue      | Cumul    | PYeffective | Cumul    |
|-------------|-------------|----------|-------------|----------|
| Indene+H    | 0.642382    | 0.642382 | 0.761421    | 0.761421 |
| Benzyl+C2H2 | 0.156337    | 0.798719 | 0.00000     | 0.761421 |
| rad22       | 0.126502    | 0.925221 | 0.149944    | 0.911365 |
| rad23       | 0.0381024   | 0.963323 | 0.0451631   | 0.956528 |
| rad6        | 0.0118111   | 0.975134 | 0.0139998   | 0.970528 |
| rad45       | 0.00615526  | 0.981290 | 0.00729588  | 0.977824 |
| rad18       | 0.00488483  | 0.986175 | 0.00579002  | 0.983614 |
| rad20       | 0.00390567  | 0.990080 | 0.00462942  | 0.988243 |
| rad21       | 0.00293600  | 0.993016 | 0.00348007  | 0.991723 |
| rad11       | 0.00210482  | 0.995121 | 0.00249486  | 0.994218 |
| PAH9+H      | 0.00164061  | 0.996762 | 0.00194462  | 0.996163 |
| rad38       | 0.000774212 | 0.997536 | 0.000917679 | 0.997080 |
| rad36       | 0.000429838 | 0.997966 | 0.000509490 | 0.997590 |
| Ph+Allene   | 0.000342415 | 0.998308 | 0.000405868 | 0.997996 |
| rad46       | 0.000252505 | 0.998561 | 0.000299297 | 0.998295 |
| PhCH2CCH+H  | 0.000251124 | 0.998812 | 0.000297659 | 0.998593 |
| rad35       | 0.000245551 | 0.999057 | 0.000291054 | 0.998884 |
| PAH7+H      | 0.000234000 | 0.999291 | 0.000277362 | 0.999161 |
| rad50       | 0.000219729 | 0.999511 | 0.000260446 | 0.999422 |
| PhCHCCH2+H  | 0.000193508 | 0.999705 | 0.000229367 | 0.999651 |
| rad39       | 9.72580e-05 | 0.999802 | 0.000115281 | 0.999766 |
| rad51       | 6.34520e-05 | 0.999865 | 7.52102e-05 | 0.999841 |
| PhCCH+CH3   | 2.60434e-05 | 0.999891 | 3.08695e-05 | 0.999872 |
| rad30       | 2.37431e-05 | 0.999915 | 2.81429e-05 | 0.999900 |
| rad52       | 1.89327e-05 | 0.999934 | 2.24411e-05 | 0.999923 |
| rad19anti   | 9.67015e-06 | 0.999944 | 1.14621e-05 | 0.999934 |
| rad7        | 9.52147e-06 | 0.999953 | 1.12859e-05 | 0.999946 |
| rad9        | 8.50827e-06 | 0.999962 | 1.00849e-05 | 0.999956 |
| Ph+MeAc     | 8.28822e-06 | 0.999970 | 9.82410e-06 | 0.999966 |
| PAH3+H      | 7.18504e-06 | 0.999977 | 8.51648e-06 | 0.999974 |
| PAH10+CH3   | 4.44473e-06 | 0.999982 | 5.26838e-06 | 0.999979 |
| PhCCCH3+H   | 2.33301e-06 | 0.999984 | 2.76533e-06 | 0.999982 |



|               |             |          |             |          |
|---------------|-------------|----------|-------------|----------|
| PAH1+H        | 2.22593e-06 | 0.999986 | 2.63841e-06 | 0.999985 |
| rad71         | 2.06785e-06 | 0.999988 | 2.45103e-06 | 0.999987 |
| rad37         | 1.95298e-06 | 0.999990 | 2.31488e-06 | 0.999990 |
| rad65         | 1.67871e-06 | 0.999992 | 1.98979e-06 | 0.999992 |
| rad73         | 1.50694e-06 | 0.999993 | 1.78619e-06 | 0.999993 |
| rad28         | 1.02424e-06 | 0.999994 | 1.21405e-06 | 0.999995 |
| rad24         | 8.53849e-07 | 0.999995 | 1.01207e-06 | 0.999996 |
| rad59         | 6.83988e-07 | 0.999996 | 8.10737e-07 | 0.999996 |
| rad60syn      | 6.27839e-07 | 0.999997 | 7.44183e-07 | 0.999997 |
| rad67         | 5.72738e-07 | 0.999997 | 6.78870e-07 | 0.999998 |
| rad19syn      | 4.86847e-07 | 0.999998 | 5.77064e-07 | 0.999998 |
| rad60anti     | 3.81966e-07 | 0.999998 | 4.52747e-07 | 0.999999 |
| PhcycC3H3_A+H | 3.09393e-07 | 0.999998 | 3.66726e-07 | 0.999999 |
| rad70         | 2.78437e-07 | 0.999999 | 3.30034e-07 | 1.000000 |
| rad54         | 1.97000e-07 | 0.999999 | 2.33505e-07 | 1.000000 |
| rad2          | 1.28200e-07 | 0.999999 | 1.51956e-07 | 1.000000 |
| rad13         | 9.77730e-08 | 0.999999 | 1.15891e-07 | 1.000000 |
| rad58         | 7.81540e-08 | 0.999999 | 9.26366e-08 | 1.000000 |
| rad34         | 7.63660e-08 | 0.999999 | 9.05172e-08 | 1.000000 |
| rad72         | 6.70555e-08 | 0.999999 | 7.94814e-08 | 1.000000 |
| rad3          | 6.08068e-08 | 0.999999 | 7.20748e-08 | 1.000000 |
| rad25         | 5.80055e-08 | 0.999999 | 6.87544e-08 | 1.000000 |
| rad64         | 4.21279e-08 | 0.999999 | 4.99345e-08 | 1.000000 |
| rad4          | 4.02477e-08 | 0.999999 | 4.77059e-08 | 1.000000 |
| PAH8+H        | 2.41831e-08 | 0.999999 | 2.86644e-08 | 1.000000 |
| rad1          | 2.25420e-08 | 0.999999 | 2.67193e-08 | 1.000000 |
| rad62         | 1.59306e-08 | 1.000000 | 1.88826e-08 | 1.000000 |
| rad55         | 1.47140e-08 | 1.000000 | 1.74406e-08 | 1.000000 |
| rad15         | 1.22012e-08 | 1.000000 | 1.44622e-08 | 1.000000 |
| rad61         | 9.54092e-09 | 1.000000 | 1.13089e-08 | 1.000000 |
| rad10         | 7.60763e-09 | 1.000000 | 9.01738e-09 | 1.000000 |
| rad26         | 7.43910e-09 | 1.000000 | 8.81763e-09 | 1.000000 |
| rad68syn      | 6.93135e-09 | 1.000000 | 8.21579e-09 | 1.000000 |
| rad56         | 4.72036e-09 | 1.000000 | 5.59508e-09 | 1.000000 |
| rad68anti     | 4.50165e-09 | 1.000000 | 5.33584e-09 | 1.000000 |
| rad53         | 4.35719e-09 | 1.000000 | 5.16461e-09 | 1.000000 |
| rad43         | 3.33229e-09 | 1.000000 | 3.94979e-09 | 1.000000 |
| rad40syn      | 2.77802e-09 | 1.000000 | 3.29281e-09 | 1.000000 |
| rad47         | 2.74937e-09 | 1.000000 | 3.25885e-09 | 1.000000 |
| rad40anti     | 1.67849e-09 | 1.000000 | 1.98953e-09 | 1.000000 |
| rad42         | 1.56342e-09 | 1.000000 | 1.85314e-09 | 1.000000 |
| rad33         | 5.15798e-10 | 1.000000 | 6.11380e-10 | 1.000000 |
| rad41         | 3.04319e-10 | 1.000000 | 3.60711e-10 | 1.000000 |
| rad12         | 3.08685e-11 | 1.000000 | 3.65886e-11 | 1.000000 |
| rad14         | 1.80301e-11 | 1.000000 | 2.13712e-11 | 1.000000 |
| rad31         | 2.62096e-12 | 1.000000 | 3.10665e-12 | 1.000000 |
| rad27         | 4.90794e-13 | 1.000000 | 5.81742e-13 | 1.000000 |
| rad5          | 3.63164e-13 | 1.000000 | 4.30461e-13 | 1.000000 |
| rad8          | 6.48817e-18 | 1.000000 | 7.69048e-18 | 1.000000 |

10000.0000 Pa, 800.000000 K

=====

| Rate constant | True (fraction)     | Effective (fraction) |
|---------------|---------------------|----------------------|
| Total         | 3.12228e-16 (1.00 ) | 2.32618e-16 (1.00 )  |

| species     | PYtrue      | Cumul    | PYeffective | Cumul    |
|-------------|-------------|----------|-------------|----------|
| Indene+H    | 0.630903    | 0.630903 | 0.846819    | 0.846819 |
| Benzyl+C2H2 | 0.254973    | 0.885876 | 0.000000    | 0.846819 |
| rad22       | 0.0534445   | 0.939321 | 0.0717350   | 0.918554 |
| rad23       | 0.0249807   | 0.964301 | 0.0335299   | 0.952084 |
| rad6        | 0.0161354   | 0.980437 | 0.0216575   | 0.973741 |
| PAH9+H      | 0.00299043  | 0.983427 | 0.00401386  | 0.977755 |
| rad45       | 0.00295131  | 0.986378 | 0.00396134  | 0.981717 |
| rad20       | 0.00277022  | 0.989149 | 0.00371829  | 0.985435 |
| rad21       | 0.00214445  | 0.991293 | 0.00287836  | 0.988313 |
| rad18       | 0.00174526  | 0.993038 | 0.00234254  | 0.990656 |
| rad38       | 0.00143598  | 0.994474 | 0.00192742  | 0.992583 |
| rad11       | 0.00112525  | 0.995599 | 0.00151035  | 0.994094 |
| Ph+Allene   | 0.000660397 | 0.996260 | 0.000886407 | 0.994980 |
| PhCH2CCH+H  | 0.000512598 | 0.996772 | 0.000688027 | 0.995668 |
| PAH7+H      | 0.000502792 | 0.997275 | 0.000674864 | 0.996343 |
| rad46       | 0.000495602 | 0.997771 | 0.000665213 | 0.997008 |
| rad50       | 0.000489360 | 0.998260 | 0.000656835 | 0.997665 |
| rad35       | 0.000431885 | 0.998692 | 0.000579691 | 0.998245 |
| PhCHCCH2+H  | 0.000409102 | 0.999101 | 0.000549111 | 0.998794 |
| rad36       | 0.000236104 | 0.999337 | 0.000316906 | 0.999111 |
| rad39       | 0.000222134 | 0.999559 | 0.000298156 | 0.999409 |
| rad51       | 0.000150390 | 0.999710 | 0.000201858 | 0.999611 |

|               |             |          |             |          |
|---------------|-------------|----------|-------------|----------|
| PhCCH+CH3     | 5.67914e-05 | 0.999767 | 7.62274e-05 | 0.999687 |
| rad30         | 4.63850e-05 | 0.999813 | 6.22595e-05 | 0.999749 |
| rad52         | 4.34912e-05 | 0.999857 | 5.83753e-05 | 0.999807 |
| rad19anti     | 2.13338e-05 | 0.999878 | 2.86350e-05 | 0.999836 |
| Ph+MeAc       | 1.80514e-05 | 0.999896 | 2.42291e-05 | 0.999860 |
| rad9          | 1.64116e-05 | 0.999912 | 2.20283e-05 | 0.999882 |
| PAH3+H        | 1.62314e-05 | 0.999929 | 2.17863e-05 | 0.999904 |
| rad7          | 1.51853e-05 | 0.999944 | 2.03822e-05 | 0.999925 |
| PAH10+CH3     | 1.08313e-05 | 0.999955 | 1.45382e-05 | 0.999939 |
| rad71         | 5.56316e-06 | 0.999960 | 7.46707e-06 | 0.999947 |
| PAH1+H        | 5.54501e-06 | 0.999966 | 7.44270e-06 | 0.999954 |
| PhCCCH3+H     | 5.38589e-06 | 0.999971 | 7.22912e-06 | 0.999961 |
| rad37         | 4.34634e-06 | 0.999975 | 5.83380e-06 | 0.999967 |
| rad28         | 4.13336e-06 | 0.999980 | 5.54794e-06 | 0.999973 |
| rad73         | 3.96686e-06 | 0.999984 | 5.32445e-06 | 0.999978 |
| rad65         | 3.94154e-06 | 0.999987 | 5.29047e-06 | 0.999983 |
| rad24         | 2.84045e-06 | 0.999990 | 3.81254e-06 | 0.999987 |
| rad59         | 1.52832e-06 | 0.999992 | 2.05136e-06 | 0.999989 |
| rad60syn      | 1.41481e-06 | 0.999993 | 1.89900e-06 | 0.999991 |
| rad67         | 1.37834e-06 | 0.999995 | 1.85005e-06 | 0.999993 |
| rad19syn      | 9.87960e-07 | 0.999996 | 1.32607e-06 | 0.999994 |
| rad60anti     | 8.59040e-07 | 0.999996 | 1.15303e-06 | 0.999995 |
| rad70         | 6.86179e-07 | 0.999997 | 9.21012e-07 | 0.999996 |
| PhcycC3H3_A+H | 6.72561e-07 | 0.999998 | 9.02735e-07 | 0.999997 |
| rad54         | 4.01430e-07 | 0.999998 | 5.38813e-07 | 0.999998 |
| rad13         | 2.63442e-07 | 0.999998 | 3.53601e-07 | 0.999998 |
| rad2          | 2.59065e-07 | 0.999999 | 3.47726e-07 | 0.999998 |
| rad34         | 1.92237e-07 | 0.999999 | 2.58028e-07 | 0.999999 |
| rad72         | 1.87482e-07 | 0.999999 | 2.51645e-07 | 0.999999 |
| rad58         | 1.86268e-07 | 0.999999 | 2.50015e-07 | 0.999999 |
| rad3          | 1.07661e-07 | 0.999999 | 1.44506e-07 | 0.999999 |
| rad64         | 1.07092e-07 | 1.000000 | 1.43743e-07 | 0.999999 |
| rad4          | 7.53689e-08 | 1.000000 | 1.01163e-07 | 1.000000 |
| PAH8+H        | 6.62492e-08 | 1.000000 | 8.89220e-08 | 1.000000 |
| rad25         | 5.93592e-08 | 1.000000 | 7.96740e-08 | 1.000000 |
| rad1          | 5.03717e-08 | 1.000000 | 6.76106e-08 | 1.000000 |
| rad62         | 4.06178e-08 | 1.000000 | 5.45186e-08 | 1.000000 |
| rad55         | 3.08718e-08 | 1.000000 | 4.14371e-08 | 1.000000 |
| rad61         | 2.49156e-08 | 1.000000 | 3.34425e-08 | 1.000000 |
| rad26         | 2.06802e-08 | 1.000000 | 2.77576e-08 | 1.000000 |
| rad68syn      | 1.84048e-08 | 1.000000 | 2.47036e-08 | 1.000000 |
| rad10         | 1.48015e-08 | 1.000000 | 1.98670e-08 | 1.000000 |
| rad47         | 1.41040e-08 | 1.000000 | 1.89309e-08 | 1.000000 |
| rad15         | 1.24192e-08 | 1.000000 | 1.66695e-08 | 1.000000 |
| rad68anti     | 1.19459e-08 | 1.000000 | 1.60342e-08 | 1.000000 |
| rad56         | 1.13586e-08 | 1.000000 | 1.52459e-08 | 1.000000 |
| rad53         | 1.00869e-08 | 1.000000 | 1.35390e-08 | 1.000000 |
| rad43         | 8.53596e-09 | 1.000000 | 1.14573e-08 | 1.000000 |
| rad40syn      | 7.52178e-09 | 1.000000 | 1.00960e-08 | 1.000000 |
| rad40anti     | 4.56784e-09 | 1.000000 | 6.13110e-09 | 1.000000 |
| rad42         | 4.12276e-09 | 1.000000 | 5.53370e-09 | 1.000000 |
| rad33         | 3.15932e-09 | 1.000000 | 4.24054e-09 | 1.000000 |
| rad41         | 8.07781e-10 | 1.000000 | 1.08423e-09 | 1.000000 |
| rad12         | 5.74550e-10 | 1.000000 | 7.71181e-10 | 1.000000 |
| rad14         | 5.31808e-11 | 1.000000 | 7.13811e-11 | 1.000000 |
| rad31         | 1.02929e-11 | 1.000000 | 1.38155e-11 | 1.000000 |
| rad27         | 1.77070e-12 | 1.000000 | 2.37669e-12 | 1.000000 |
| rad5          | 8.42826e-13 | 1.000000 | 1.13127e-12 | 1.000000 |
| rad8          | 2.09987e-14 | 1.000000 | 2.81851e-14 | 1.000000 |

10000.0000 Pa, 900.000000 K

=====

| Rate constant | True (fraction)     | Effective (fraction) |
|---------------|---------------------|----------------------|
| Total         | 9.21769e-16 (1.00 ) | 5.89196e-16 (1.00 )  |

| species     | PYtrue      | Cumul    | PYeffective | Cumul    |
|-------------|-------------|----------|-------------|----------|
| Indene+H    | 0.568496    | 0.568496 | 0.889386    | 0.889386 |
| Benzyl+C2H2 | 0.360799    | 0.929295 | 0.00000     | 0.889386 |
| rad22       | 0.0198189   | 0.949114 | 0.0310057   | 0.920392 |
| rad6        | 0.0182668   | 0.967381 | 0.0285775   | 0.948969 |
| rad23       | 0.0141264   | 0.981507 | 0.0221002   | 0.971069 |
| PAH9+H      | 0.00348050  | 0.984988 | 0.00544509  | 0.976514 |
| rad20       | 0.00238032  | 0.987368 | 0.00372390  | 0.980238 |
| rad45       | 0.00198581  | 0.989354 | 0.00310670  | 0.983345 |
| rad21       | 0.00177118  | 0.991125 | 0.00277093  | 0.986116 |
| rad38       | 0.00168186  | 0.992807 | 0.00263119  | 0.988747 |
| Ph+Allene   | 0.000975043 | 0.993782 | 0.00152541  | 0.990273 |
| rad18       | 0.000768428 | 0.994550 | 0.00120217  | 0.991475 |

|               |             |          |             |          |
|---------------|-------------|----------|-------------|----------|
| PhCH2CCH+H    | 0.000728828 | 0.995279 | 0.00114022  | 0.992615 |
| PhCHCCH2+H    | 0.000646084 | 0.995925 | 0.00101077  | 0.993626 |
| PAH7+H        | 0.000628247 | 0.996553 | 0.000982864 | 0.994609 |
| rad50         | 0.000612724 | 0.997166 | 0.000958579 | 0.995567 |
| rad11         | 0.000608451 | 0.997775 | 0.000951894 | 0.996519 |
| rad46         | 0.000592354 | 0.998367 | 0.000926711 | 0.997446 |
| rad35         | 0.000496533 | 0.998863 | 0.000776802 | 0.998223 |
| rad39         | 0.000282452 | 0.999146 | 0.000441884 | 0.998665 |
| rad51         | 0.000192756 | 0.999339 | 0.000301558 | 0.998966 |
| rad36         | 0.000173299 | 0.999512 | 0.000271118 | 0.999237 |
| PhCCH+CH3     | 0.000142589 | 0.999655 | 0.000223075 | 0.999460 |
| rad30         | 7.28611e-05 | 0.999727 | 0.000113988 | 0.999574 |
| rad52         | 5.50786e-05 | 0.999782 | 8.61679e-05 | 0.999660 |
| Ph+MeAc       | 3.34445e-05 | 0.999816 | 5.23223e-05 | 0.999713 |
| rad19anti     | 3.12416e-05 | 0.999847 | 4.88760e-05 | 0.999762 |
| rad9          | 2.55550e-05 | 0.999873 | 3.99797e-05 | 0.999802 |
| PAH3+H        | 2.14598e-05 | 0.999894 | 3.35728e-05 | 0.999835 |
| rad7          | 2.13568e-05 | 0.999916 | 3.34117e-05 | 0.999869 |
| PAH10+CH3     | 1.40454e-05 | 0.999930 | 2.19733e-05 | 0.999891 |
| rad28         | 1.07238e-05 | 0.999940 | 1.67770e-05 | 0.999907 |
| PhCCCH3+H     | 1.00909e-05 | 0.999950 | 1.57868e-05 | 0.999923 |
| rad71         | 7.50183e-06 | 0.999958 | 1.17363e-05 | 0.999935 |
| PAH1+H        | 7.24966e-06 | 0.999965 | 1.13418e-05 | 0.999946 |
| rad37         | 5.45131e-06 | 0.999971 | 8.52833e-06 | 0.999955 |
| rad73         | 5.30089e-06 | 0.999976 | 8.29300e-06 | 0.999963 |
| rad65         | 5.03260e-06 | 0.999981 | 7.87327e-06 | 0.999971 |
| rad24         | 4.60465e-06 | 0.999986 | 7.20376e-06 | 0.999978 |
| rad60syn      | 2.14730e-06 | 0.999988 | 3.35936e-06 | 0.999981 |
| rad59         | 2.05956e-06 | 0.999990 | 3.22209e-06 | 0.999985 |
| rad67         | 1.91336e-06 | 0.999992 | 2.99336e-06 | 0.999988 |
| rad60anti     | 1.28542e-06 | 0.999993 | 2.01097e-06 | 0.999990 |
| rad19syn      | 1.25343e-06 | 0.999994 | 1.96094e-06 | 0.999992 |
| rad70         | 8.96581e-07 | 0.999995 | 1.40266e-06 | 0.999993 |
| rad13         | 8.55784e-07 | 0.999996 | 1.33883e-06 | 0.999994 |
| PhcycC3H3_A+H | 8.44041e-07 | 0.999997 | 1.32046e-06 | 0.999996 |
| rad54         | 5.02961e-07 | 0.999997 | 7.86859e-07 | 0.999996 |
| rad2          | 4.50213e-07 | 0.999998 | 7.04337e-07 | 0.999997 |
| rad72         | 2.57004e-07 | 0.999998 | 4.02071e-07 | 0.999998 |
| rad34         | 2.52853e-07 | 0.999998 | 3.95577e-07 | 0.999998 |
| rad58         | 2.40591e-07 | 0.999999 | 3.76393e-07 | 0.999998 |
| rad3          | 1.77036e-07 | 0.999999 | 2.76965e-07 | 0.999999 |
| rad64         | 1.41092e-07 | 0.999999 | 2.20733e-07 | 0.999999 |
| rad4          | 1.31301e-07 | 0.999999 | 2.05415e-07 | 0.999999 |
| rad1          | 9.73996e-08 | 0.999999 | 1.52377e-07 | 0.999999 |
| PAH8+H        | 9.00757e-08 | 0.999999 | 1.40919e-07 | 0.999999 |
| rad25         | 6.91527e-08 | 0.999999 | 1.08186e-07 | 0.999999 |
| rad62         | 5.45701e-08 | 0.999999 | 8.53724e-08 | 1.000000 |
| rad26         | 5.23382e-08 | 0.999999 | 8.18808e-08 | 1.000000 |
| rad55         | 3.85406e-08 | 0.999999 | 6.02949e-08 | 1.000000 |
| rad61         | 3.32071e-08 | 0.999999 | 5.19509e-08 | 1.000000 |
| rad10         | 2.91485e-08 | 0.999999 | 4.56016e-08 | 1.000000 |
| rad68syn      | 2.46971e-08 | 0.999999 | 3.86375e-08 | 1.000000 |
| rad33         | 2.25400e-08 | 0.999999 | 3.52627e-08 | 1.000000 |
| rad47         | 2.18960e-08 | 0.999999 | 3.42552e-08 | 1.000000 |
| rad68anti     | 1.60261e-08 | 1.000000 | 2.50720e-08 | 1.000000 |
| rad56         | 1.46574e-08 | 1.000000 | 2.29308e-08 | 1.000000 |
| rad53         | 1.28443e-08 | 1.000000 | 2.00942e-08 | 1.000000 |
| rad15         | 1.28325e-08 | 1.000000 | 2.00759e-08 | 1.000000 |
| rad43         | 1.19853e-08 | 1.000000 | 1.87505e-08 | 1.000000 |
| rad40syn      | 1.01796e-08 | 1.000000 | 1.59255e-08 | 1.000000 |
| rad40anti     | 6.19696e-09 | 1.000000 | 9.69486e-09 | 1.000000 |
| rad42         | 5.57475e-09 | 1.000000 | 8.72144e-09 | 1.000000 |
| rad12         | 4.66719e-09 | 1.000000 | 7.30161e-09 | 1.000000 |
| rad41         | 1.13301e-09 | 1.000000 | 1.77255e-09 | 1.000000 |
| rad14         | 2.13209e-10 | 1.000000 | 3.33555e-10 | 1.000000 |
| rad31         | 3.00879e-11 | 1.000000 | 4.70712e-11 | 1.000000 |
| rad27         | 1.09226e-11 | 1.000000 | 1.70880e-11 | 1.000000 |
| rad8          | 9.13754e-12 | 1.000000 | 1.42953e-11 | 1.000000 |
| rad5          | 1.66981e-12 | 1.000000 | 2.61233e-12 | 1.000000 |

10000.0000 Pa, 1000.00000 K

=====

| Rate constant | True (fraction)     | Effective (fraction) |             |          |
|---------------|---------------------|----------------------|-------------|----------|
| Total         | 2.23691e-15 (1.00 ) | 1.20247e-15 (1.00 )  |             |          |
| species       | PYtrue              | Cumul                | PYeffective | Cumul    |
| Indene+H      | 0.487899            | 0.487899             | 0.907621    | 0.907621 |
| Benzy1+C2H2   | 0.462442            | 0.950341             | 0.00000     | 0.907621 |

|               |             |          |             |          |
|---------------|-------------|----------|-------------|----------|
| rad6          | 0.0174541   | 0.967795 | 0.0324693   | 0.940090 |
| rad23         | 0.00727997  | 0.975075 | 0.0135427   | 0.953633 |
| rad22         | 0.00707511  | 0.982150 | 0.0131616   | 0.966795 |
| PAH9+H        | 0.00328153  | 0.985432 | 0.00610452  | 0.972899 |
| rad20         | 0.00190435  | 0.987336 | 0.00354259  | 0.976442 |
| Ph+Allene     | 0.00161311  | 0.988949 | 0.00300081  | 0.979443 |
| rad38         | 0.00158769  | 0.990537 | 0.00295353  | 0.982396 |
| rad45         | 0.00154438  | 0.992081 | 0.00287296  | 0.985269 |
| rad21         | 0.00128772  | 0.993369 | 0.00239551  | 0.987665 |
| PhCH2CCH+H    | 0.00106676  | 0.994436 | 0.00198445  | 0.989649 |
| PhCHCCH2+H    | 0.00103773  | 0.995473 | 0.00193045  | 0.991579 |
| PAH7+H        | 0.000631125 | 0.996105 | 0.00117406  | 0.992753 |
| rad50         | 0.000590960 | 0.996696 | 0.00109934  | 0.993853 |
| rad46         | 0.000562525 | 0.997258 | 0.00104645  | 0.994899 |
| rad35         | 0.000467241 | 0.997725 | 0.000869192 | 0.995768 |
| rad18         | 0.000445715 | 0.998171 | 0.000829148 | 0.996598 |
| rad11         | 0.000417272 | 0.998588 | 0.000776236 | 0.997374 |
| PhCCH+CH3     | 0.000354658 | 0.998943 | 0.000659759 | 0.998034 |
| rad39         | 0.000279229 | 0.999222 | 0.000519440 | 0.998553 |
| rad51         | 0.000187471 | 0.999410 | 0.000348746 | 0.998902 |
| rad36         | 0.000138891 | 0.999549 | 0.000258374 | 0.999160 |
| rad30         | 0.000101935 | 0.999650 | 0.000189626 | 0.999350 |
| Ph+MeAc       | 6.43636e-05 | 0.999715 | 0.000119733 | 0.999470 |
| rad52         | 5.33363e-05 | 0.999768 | 9.92197e-05 | 0.999569 |
| rad19anti     | 4.29929e-05 | 0.999811 | 7.99783e-05 | 0.999649 |
| rad7          | 3.08850e-05 | 0.999842 | 5.74542e-05 | 0.999706 |
| rad9          | 3.04445e-05 | 0.999872 | 5.66347e-05 | 0.999763 |
| PAH3+H        | 2.41836e-05 | 0.999897 | 4.49878e-05 | 0.999808 |
| PhCCCH3+H     | 1.84184e-05 | 0.999915 | 3.42631e-05 | 0.999842 |
| rad28         | 1.73914e-05 | 0.999932 | 3.23527e-05 | 0.999874 |
| PAH10+CH3     | 1.38122e-05 | 0.999946 | 2.56944e-05 | 0.999900 |
| rad71         | 7.43590e-06 | 0.999954 | 1.38327e-05 | 0.999914 |
| PAH1+H        | 7.11970e-06 | 0.999961 | 1.32445e-05 | 0.999927 |
| rad37         | 5.33412e-06 | 0.999966 | 9.92288e-06 | 0.999937 |
| rad73         | 5.23610e-06 | 0.999971 | 9.74054e-06 | 0.999947 |
| rad65         | 4.88777e-06 | 0.999976 | 9.09255e-06 | 0.999956 |
| rad24         | 4.42232e-06 | 0.999981 | 8.22669e-06 | 0.999964 |
| rad13         | 3.03971e-06 | 0.999984 | 5.65466e-06 | 0.999970 |
| rad60syn      | 2.99604e-06 | 0.999987 | 5.57343e-06 | 0.999975 |
| rad59         | 2.43806e-06 | 0.999989 | 4.53543e-06 | 0.999980 |
| rad67         | 2.40056e-06 | 0.999992 | 4.46569e-06 | 0.999984 |
| rad60anti     | 1.76763e-06 | 0.999993 | 3.28826e-06 | 0.999988 |
| rad19syn      | 1.52053e-06 | 0.999995 | 2.82859e-06 | 0.999991 |
| rad70         | 8.93526e-07 | 0.999996 | 1.66220e-06 | 0.999992 |
| PhcycC3H3_A+H | 8.87995e-07 | 0.999997 | 1.65191e-06 | 0.999994 |
| rad2          | 6.75021e-07 | 0.999997 | 1.25572e-06 | 0.999995 |
| rad54         | 5.84644e-07 | 0.999998 | 1.08759e-06 | 0.999996 |
| rad72         | 2.56367e-07 | 0.999998 | 4.76910e-07 | 0.999997 |
| rad3          | 2.53489e-07 | 0.999998 | 4.71557e-07 | 0.999997 |
| rad34         | 2.50829e-07 | 0.999999 | 4.66608e-07 | 0.999998 |
| rad58         | 2.42221e-07 | 0.999999 | 4.50595e-07 | 0.999998 |
| rad4          | 1.94463e-07 | 0.999999 | 3.61752e-07 | 0.999998 |
| rad1          | 1.59171e-07 | 0.999999 | 2.96099e-07 | 0.999999 |
| rad64         | 1.38778e-07 | 0.999999 | 2.58163e-07 | 0.999999 |
| rad33         | 1.12777e-07 | 1.000000 | 2.09796e-07 | 0.999999 |
| rad25         | 9.58767e-08 | 1.000000 | 1.78356e-07 | 0.999999 |
| rad26         | 9.25117e-08 | 1.000000 | 1.72096e-07 | 1.000000 |
| PAH8+H        | 8.98069e-08 | 1.000000 | 1.67065e-07 | 1.000000 |
| rad10         | 6.12920e-08 | 1.000000 | 1.14019e-07 | 1.000000 |
| rad62         | 5.63358e-08 | 1.000000 | 1.04799e-07 | 1.000000 |
| rad55         | 4.22471e-08 | 1.000000 | 7.85908e-08 | 1.000000 |
| rad61         | 3.29393e-08 | 1.000000 | 6.12759e-08 | 1.000000 |
| rad68syn      | 2.45087e-08 | 1.000000 | 4.55927e-08 | 1.000000 |
| rad47         | 2.16706e-08 | 1.000000 | 4.03130e-08 | 1.000000 |
| rad12         | 1.71950e-08 | 1.000000 | 3.19873e-08 | 1.000000 |
| rad68anti     | 1.59028e-08 | 1.000000 | 2.95835e-08 | 1.000000 |
| rad15         | 1.57243e-08 | 1.000000 | 2.92513e-08 | 1.000000 |
| rad56         | 1.45875e-08 | 1.000000 | 2.71367e-08 | 1.000000 |
| rad43         | 1.36304e-08 | 1.000000 | 2.53562e-08 | 1.000000 |
| rad53         | 1.28997e-08 | 1.000000 | 2.39970e-08 | 1.000000 |
| rad40syn      | 1.01404e-08 | 1.000000 | 1.88637e-08 | 1.000000 |
| rad40anti     | 6.18310e-09 | 1.000000 | 1.15022e-08 | 1.000000 |
| rad42         | 5.64082e-09 | 1.000000 | 1.04934e-08 | 1.000000 |
| rad41         | 1.25587e-09 | 1.000000 | 2.33625e-09 | 1.000000 |
| rad14         | 9.01651e-10 | 1.000000 | 1.67731e-09 | 1.000000 |
| rad8          | 4.43966e-10 | 1.000000 | 8.25895e-10 | 1.000000 |
| rad27         | 8.16943e-11 | 1.000000 | 1.51973e-10 | 1.000000 |
| rad31         | 6.56762e-11 | 1.000000 | 1.22175e-10 | 1.000000 |
| rad5          | 2.80007e-12 | 1.000000 | 5.20887e-12 | 1.000000 |

10000.0000 Pa, 1100.00000 K

=====

| Rate constant | True (fraction)     | Effective (fraction) |
|---------------|---------------------|----------------------|
| Total         | 4.69847e-15 (1.00 ) | 2.10168e-15 (1.00 )  |

| species       | PYtrue      | Cumul    | PYeffective | Cumul    |
|---------------|-------------|----------|-------------|----------|
| Benzyl+C2H2   | 0.552689    | 0.552689 | 0.00000     | 0.00000  |
| Indene+H      | 0.409143    | 0.961832 | 0.914672    | 0.914672 |
| rad6          | 0.0138548   | 0.975687 | 0.0309736   | 0.945646 |
| rad23         | 0.00368272  | 0.979370 | 0.00823301  | 0.953879 |
| Ph+Allene     | 0.00289278  | 0.982262 | 0.00646705  | 0.960346 |
| PAH9+H        | 0.00279285  | 0.985055 | 0.00624365  | 0.966589 |
| rad22         | 0.00257024  | 0.987625 | 0.00574597  | 0.972335 |
| PhCH2CCH+H    | 0.00173635  | 0.989362 | 0.00388174  | 0.976217 |
| PhCHCCH2+H    | 0.00166830  | 0.991030 | 0.00372963  | 0.979947 |
| rad38         | 0.00134899  | 0.992379 | 0.00301577  | 0.982962 |
| rad45         | 0.00121357  | 0.993593 | 0.00271304  | 0.985675 |
| rad20         | 0.00120982  | 0.994802 | 0.00270464  | 0.988380 |
| rad21         | 0.000742832 | 0.995545 | 0.00166066  | 0.990041 |
| PhCCH+CH3     | 0.000693008 | 0.996238 | 0.00154928  | 0.991590 |
| PAH7+H        | 0.000598647 | 0.996837 | 0.00133832  | 0.992928 |
| rad50         | 0.000502916 | 0.997340 | 0.00112431  | 0.994053 |
| rad46         | 0.000477652 | 0.997817 | 0.00106783  | 0.995121 |
| rad35         | 0.000399412 | 0.998217 | 0.000892919 | 0.996013 |
| rad11         | 0.000367862 | 0.998585 | 0.000822385 | 0.996836 |
| rad18         | 0.000312017 | 0.998897 | 0.000697540 | 0.997533 |
| rad39         | 0.000250351 | 0.999147 | 0.000559680 | 0.998093 |
| rad51         | 0.000159907 | 0.999307 | 0.000357486 | 0.998451 |
| rad30         | 0.000132709 | 0.999440 | 0.000296681 | 0.998747 |
| Ph+MeAc       | 0.000111592 | 0.999551 | 0.000249472 | 0.998997 |
| rad36         | 0.000110413 | 0.999662 | 0.000246837 | 0.999244 |
| rad19anti     | 6.00984e-05 | 0.999722 | 0.000134355 | 0.999378 |
| rad7          | 4.72811e-05 | 0.999769 | 0.000105701 | 0.999484 |
| rad52         | 4.54363e-05 | 0.999815 | 0.000101576 | 0.999585 |
| rad9          | 3.77324e-05 | 0.999852 | 8.43538e-05 | 0.999669 |
| PhCCCH3+H     | 2.90724e-05 | 0.999881 | 6.49937e-05 | 0.999734 |
| PAH3+H        | 2.87740e-05 | 0.999910 | 6.43265e-05 | 0.999799 |
| rad28         | 1.90321e-05 | 0.999929 | 4.25478e-05 | 0.999841 |
| PAH10+CH3     | 1.20200e-05 | 0.999941 | 2.68717e-05 | 0.999868 |
| rad13         | 8.28225e-06 | 0.999949 | 1.85156e-05 | 0.999887 |
| rad71         | 6.38289e-06 | 0.999956 | 1.42695e-05 | 0.999901 |
| PAH1+H        | 6.14942e-06 | 0.999962 | 1.37475e-05 | 0.999915 |
| rad37         | 4.71150e-06 | 0.999967 | 1.05329e-05 | 0.999925 |
| rad73         | 4.48917e-06 | 0.999971 | 1.00359e-05 | 0.999935 |
| rad60syn      | 4.23577e-06 | 0.999975 | 9.46942e-06 | 0.999945 |
| rad65         | 4.16798e-06 | 0.999980 | 9.31787e-06 | 0.999954 |
| rad24         | 3.51749e-06 | 0.999983 | 7.86364e-06 | 0.999962 |
| rad67         | 3.11031e-06 | 0.999986 | 6.95335e-06 | 0.999969 |
| rad59         | 3.07977e-06 | 0.999989 | 6.88508e-06 | 0.999976 |
| rad60anti     | 2.48455e-06 | 0.999992 | 5.55442e-06 | 0.999981 |
| rad19syn      | 2.25524e-06 | 0.999994 | 5.04177e-06 | 0.999986 |
| PhcycC3H3_A+H | 1.02709e-06 | 0.999995 | 2.29615e-06 | 0.999989 |
| rad54         | 8.26217e-07 | 0.999996 | 1.84708e-06 | 0.999991 |
| rad70         | 8.15928e-07 | 0.999997 | 1.82407e-06 | 0.999992 |
| rad2          | 8.03609e-07 | 0.999998 | 1.79653e-06 | 0.999994 |
| rad3          | 2.86066e-07 | 0.999998 | 6.39523e-07 | 0.999995 |
| rad33         | 2.75364e-07 | 0.999998 | 6.15599e-07 | 0.999995 |
| rad58         | 2.36000e-07 | 0.999998 | 5.27598e-07 | 0.999996 |
| rad34         | 2.24317e-07 | 0.999999 | 5.01479e-07 | 0.999996 |
| rad4          | 2.22831e-07 | 0.999999 | 4.98157e-07 | 0.999997 |
| rad72         | 2.20555e-07 | 0.999999 | 4.93069e-07 | 0.999997 |
| rad1          | 1.96791e-07 | 0.999999 | 4.39943e-07 | 0.999998 |
| rad25         | 1.33185e-07 | 0.999999 | 2.97747e-07 | 0.999998 |
| rad10         | 1.30542e-07 | 0.999999 | 2.91837e-07 | 0.999998 |
| rad64         | 1.19447e-07 | 1.000000 | 2.67034e-07 | 0.999999 |
| rad26         | 1.15792e-07 | 1.000000 | 2.58862e-07 | 0.999999 |
| PAH8+H        | 7.83960e-08 | 1.000000 | 1.75261e-07 | 0.999999 |
| rad55         | 5.40542e-08 | 1.000000 | 1.20843e-07 | 0.999999 |
| rad62         | 5.39121e-08 | 1.000000 | 1.20525e-07 | 0.999999 |
| rad12         | 3.90026e-08 | 1.000000 | 8.71935e-08 | 1.000000 |
| rad15         | 2.89082e-08 | 1.000000 | 6.46266e-08 | 1.000000 |
| rad61         | 2.86505e-08 | 1.000000 | 6.40504e-08 | 1.000000 |
| rad68syn      | 2.14307e-08 | 1.000000 | 4.79102e-08 | 1.000000 |
| rad47         | 1.78155e-08 | 1.000000 | 3.98280e-08 | 1.000000 |
| rad43         | 1.42400e-08 | 1.000000 | 3.18346e-08 | 1.000000 |
| rad56         | 1.40517e-08 | 1.000000 | 3.14137e-08 | 1.000000 |
| rad68anti     | 1.39070e-08 | 1.000000 | 3.10903e-08 | 1.000000 |
| rad53         | 1.30350e-08 | 1.000000 | 2.91408e-08 | 1.000000 |

|           |             |         |             |          |
|-----------|-------------|---------|-------------|----------|
| rad40syn  | 8.86681e-09 | 1.00000 | 1.98225e-08 | 1.000000 |
| rad40anti | 5.41210e-09 | 1.00000 | 1.20992e-08 | 1.000000 |
| rad42     | 5.07152e-09 | 1.00000 | 1.13378e-08 | 1.000000 |
| rad8      | 3.78117e-09 | 1.00000 | 8.45311e-09 | 1.000000 |
| rad14     | 2.63087e-09 | 1.00000 | 5.88153e-09 | 1.000000 |
| rad41     | 1.25872e-09 | 1.00000 | 2.81396e-09 | 1.000000 |
| rad27     | 3.26457e-10 | 1.00000 | 7.29820e-10 | 1.000000 |
| rad31     | 1.04137e-10 | 1.00000 | 2.32808e-10 | 1.000000 |
| rad5      | 4.09977e-12 | 1.00000 | 9.16538e-12 | 1.000000 |

10000.0000 Pa, 1200.00000 K

| Rate constant | True (fraction)     | Effective (fraction) |
|---------------|---------------------|----------------------|
| Total         | 8.84330e-15 (1.00 ) | 3.28943e-15 (1.00 )  |

| species       | PYtrue      | Cumul    | PYeffective | Cumul    |
|---------------|-------------|----------|-------------|----------|
| Benzyl+C2H2   | 0.628031    | 0.628031 | 0.00000     | 0.00000  |
| Indene+H      | 0.340247    | 0.968278 | 0.914719    | 0.914719 |
| rad6          | 0.00915141  | 0.977429 | 0.0246026   | 0.939322 |
| Ph+Allene     | 0.00465222  | 0.982082 | 0.0125070   | 0.951829 |
| PhCH2CCH+H    | 0.00273273  | 0.984814 | 0.00734667  | 0.959175 |
| PhCHCCH2+H    | 0.00239500  | 0.987209 | 0.00643871  | 0.965614 |
| PAH9+H        | 0.00225635  | 0.989466 | 0.00606597  | 0.971680 |
| rad23         | 0.00197679  | 0.991442 | 0.00531440  | 0.976994 |
| rad38         | 0.00108524  | 0.992528 | 0.00291756  | 0.979912 |
| rad22         | 0.00105889  | 0.993587 | 0.00284672  | 0.982759 |
| PhCCH+CH3     | 0.00101595  | 0.994603 | 0.00273128  | 0.985490 |
| rad45         | 0.000931344 | 0.995534 | 0.00250382  | 0.987994 |
| rad20         | 0.000665074 | 0.996199 | 0.00178798  | 0.989782 |
| PAH7+H        | 0.000566039 | 0.996765 | 0.00152174  | 0.991303 |
| rad50         | 0.000400106 | 0.997165 | 0.00107564  | 0.992379 |
| rad21         | 0.000389406 | 0.997555 | 0.00104688  | 0.993426 |
| rad46         | 0.000382274 | 0.997937 | 0.00102770  | 0.994454 |
| rad11         | 0.000352224 | 0.998289 | 0.000946917 | 0.995401 |
| rad35         | 0.000326065 | 0.998615 | 0.000876591 | 0.996277 |
| rad18         | 0.000237321 | 0.998852 | 0.000638012 | 0.996915 |
| rad39         | 0.000216376 | 0.999069 | 0.000581705 | 0.997497 |
| rad30         | 0.000163784 | 0.999233 | 0.000440317 | 0.997937 |
| Ph+MeAc       | 0.000156560 | 0.999389 | 0.000420896 | 0.998358 |
| rad51         | 0.000127122 | 0.999516 | 0.000341754 | 0.998700 |
| rad36         | 8.53291e-05 | 0.999602 | 0.000229398 | 0.998929 |
| rad19anti     | 8.16184e-05 | 0.999683 | 0.000219422 | 0.999149 |
| rad7          | 6.82177e-05 | 0.999751 | 0.000183396 | 0.999332 |
| rad9          | 4.83423e-05 | 0.999800 | 0.000129963 | 0.999462 |
| PAH3+H        | 3.78558e-05 | 0.999838 | 0.000101771 | 0.999564 |
| PhCCCH3+H     | 3.63289e-05 | 0.999874 | 9.76665e-05 | 0.999661 |
| rad52         | 3.61267e-05 | 0.999910 | 9.71230e-05 | 0.999759 |
| rad28         | 1.53216e-05 | 0.999925 | 4.11905e-05 | 0.999800 |
| rad13         | 1.26845e-05 | 0.999938 | 3.41010e-05 | 0.999834 |
| PAH10+CH3     | 9.86180e-06 | 0.999948 | 2.65124e-05 | 0.999860 |
| rad60syn      | 5.97307e-06 | 0.999954 | 1.60580e-05 | 0.999876 |
| rad71         | 5.08074e-06 | 0.999959 | 1.36590e-05 | 0.999890 |
| PAH1+H        | 5.01567e-06 | 0.999964 | 1.34841e-05 | 0.999904 |
| rad59         | 4.22494e-06 | 0.999968 | 1.13583e-05 | 0.999915 |
| rad37         | 3.99388e-06 | 0.999972 | 1.07371e-05 | 0.999926 |
| rad67         | 3.87339e-06 | 0.999976 | 1.04132e-05 | 0.999936 |
| rad19syn      | 3.67408e-06 | 0.999980 | 9.87737e-06 | 0.999946 |
| rad73         | 3.57201e-06 | 0.999983 | 9.60298e-06 | 0.999956 |
| rad60anti     | 3.51092e-06 | 0.999987 | 9.43875e-06 | 0.999965 |
| rad65         | 3.31445e-06 | 0.999990 | 8.91056e-06 | 0.999974 |
| rad24         | 2.72384e-06 | 0.999993 | 7.32276e-06 | 0.999981 |
| PhcycC3H3_A+H | 1.41799e-06 | 0.999994 | 3.81212e-06 | 0.999985 |
| rad54         | 1.31831e-06 | 0.999996 | 3.54414e-06 | 0.999989 |
| rad70         | 7.45941e-07 | 0.999996 | 2.00539e-06 | 0.999991 |
| rad2          | 7.09574e-07 | 0.999997 | 1.90762e-06 | 0.999993 |
| rad33         | 3.61778e-07 | 0.999997 | 9.72603e-07 | 0.999994 |
| rad58         | 2.49158e-07 | 0.999998 | 6.69836e-07 | 0.999994 |
| rad3          | 2.44609e-07 | 0.999998 | 6.57606e-07 | 0.999995 |
| rad10         | 2.31908e-07 | 0.999998 | 6.23461e-07 | 0.999995 |
| rad34         | 1.96654e-07 | 0.999998 | 5.28683e-07 | 0.999996 |
| rad4          | 1.92002e-07 | 0.999999 | 5.16178e-07 | 0.999997 |
| rad1          | 1.76642e-07 | 0.999999 | 4.74883e-07 | 0.999997 |
| rad72         | 1.75691e-07 | 0.999999 | 4.72326e-07 | 0.999997 |
| rad25         | 1.50360e-07 | 0.999999 | 4.04228e-07 | 0.999998 |
| rad26         | 1.13265e-07 | 0.999999 | 3.04500e-07 | 0.999998 |
| rad64         | 9.64422e-08 | 0.999999 | 2.59275e-07 | 0.999998 |
| rad55         | 8.10841e-08 | 0.999999 | 2.17986e-07 | 0.999999 |
| rad15         | 7.58563e-08 | 0.999999 | 2.03932e-07 | 0.999999 |

|           |             |          |             |          |
|-----------|-------------|----------|-------------|----------|
| rad12     | 6.59565e-08 | 1.000000 | 1.77317e-07 | 0.999999 |
| PAH8+H    | 6.43351e-08 | 1.000000 | 1.72958e-07 | 0.999999 |
| rad62     | 5.23129e-08 | 1.000000 | 1.40638e-07 | 0.999999 |
| rad61     | 2.33439e-08 | 1.000000 | 6.27576e-08 | 0.999999 |
| rad68syn  | 1.77559e-08 | 1.000000 | 4.77350e-08 | 0.999999 |
| rad53     | 1.49786e-08 | 1.000000 | 4.02684e-08 | 0.999999 |
| rad56     | 1.47346e-08 | 1.000000 | 3.96124e-08 | 1.000000 |
| rad43     | 1.37457e-08 | 1.000000 | 3.69538e-08 | 1.000000 |
| rad47     | 1.34420e-08 | 1.000000 | 3.61375e-08 | 1.000000 |
| rad68anti | 1.15260e-08 | 1.000000 | 3.09865e-08 | 1.000000 |
| rad8      | 1.15077e-08 | 1.000000 | 3.09373e-08 | 1.000000 |
| rad40syn  | 7.30369e-09 | 1.000000 | 1.96352e-08 | 1.000000 |
| rad40anti | 4.45703e-09 | 1.000000 | 1.19822e-08 | 1.000000 |
| rad42     | 4.41482e-09 | 1.000000 | 1.18688e-08 | 1.000000 |
| rad14     | 4.17729e-09 | 1.000000 | 1.12302e-08 | 1.000000 |
| rad41     | 1.15568e-09 | 1.000000 | 3.10691e-09 | 1.000000 |
| rad27     | 5.57392e-10 | 1.000000 | 1.49849e-09 | 1.000000 |
| rad31     | 1.21607e-10 | 1.000000 | 3.26926e-10 | 1.000000 |
| rad5      | 5.47795e-12 | 1.000000 | 1.47269e-11 | 1.000000 |

10000.0000 Pa, 1300.00000 K

| Rate constant | True (fraction)     | Effective (fraction) |
|---------------|---------------------|----------------------|
| Total         | 1.52810e-14 (1.00 ) | 4.75870e-15 (1.00 )  |

| species       | PYtrue      | Cumul    | PYeffective | Cumul    |
|---------------|-------------|----------|-------------|----------|
| Benzyl+C2H2   | 0.688587    | 0.688587 | 0.00000     | 0.00000  |
| Indene+H      | 0.282800    | 0.971387 | 0.908119    | 0.908119 |
| Ph+Allene     | 0.00632913  | 0.977716 | 0.0203239   | 0.928443 |
| rad6          | 0.00550372  | 0.983220 | 0.0176734   | 0.946116 |
| PhCH2CCH+H    | 0.00393335  | 0.987153 | 0.0126307   | 0.958747 |
| PhCHCCH2+H    | 0.00299459  | 0.990148 | 0.00961613  | 0.968363 |
| PAH9+H        | 0.00178122  | 0.991929 | 0.00571981  | 0.974083 |
| rad23         | 0.00121297  | 0.993142 | 0.00389505  | 0.977978 |
| PhCCH+CH3     | 0.00116138  | 0.994303 | 0.00372940  | 0.981707 |
| rad38         | 0.000850347 | 0.995154 | 0.00273061  | 0.984438 |
| rad45         | 0.000694455 | 0.995848 | 0.00223001  | 0.986668 |
| rad22         | 0.000548909 | 0.996397 | 0.00176264  | 0.988431 |
| PAH7+H        | 0.000525607 | 0.996923 | 0.00168781  | 0.990118 |
| rad20         | 0.000371249 | 0.997294 | 0.00119214  | 0.991311 |
| rad50         | 0.000305464 | 0.997599 | 0.000980897 | 0.992291 |
| rad46         | 0.000296467 | 0.997896 | 0.000952007 | 0.993244 |
| rad11         | 0.000294527 | 0.998190 | 0.000945776 | 0.994189 |
| rad35         | 0.000262125 | 0.998453 | 0.000841728 | 0.995031 |
| rad21         | 0.000214819 | 0.998667 | 0.000689821 | 0.995721 |
| rad30         | 0.000194332 | 0.998862 | 0.000624032 | 0.996345 |
| rad39         | 0.000181666 | 0.999043 | 0.000583361 | 0.996928 |
| Ph+MeAc       | 0.000178336 | 0.999222 | 0.000572666 | 0.997501 |
| rad18         | 0.000169367 | 0.999391 | 0.000543868 | 0.998045 |
| rad19anti     | 0.000107241 | 0.999498 | 0.000344370 | 0.998389 |
| rad51         | 9.66483e-05 | 0.999595 | 0.000310354 | 0.998699 |
| rad7          | 7.94627e-05 | 0.999674 | 0.000255168 | 0.998955 |
| rad36         | 6.40014e-05 | 0.999738 | 0.000205519 | 0.999160 |
| rad9          | 5.79097e-05 | 0.999796 | 0.000185958 | 0.999346 |
| PAH3+H        | 5.39194e-05 | 0.999850 | 0.000173144 | 0.999519 |
| PhCCCH3+H     | 3.64908e-05 | 0.999887 | 0.000117178 | 0.999636 |
| rad52         | 2.75133e-05 | 0.999914 | 8.83498e-05 | 0.999725 |
| rad13         | 1.15547e-05 | 0.999926 | 3.71041e-05 | 0.999762 |
| rad28         | 1.04257e-05 | 0.999936 | 3.34786e-05 | 0.999795 |
| rad60syn      | 8.27987e-06 | 0.999944 | 2.65881e-05 | 0.999822 |
| PAH10+CH3     | 7.83376e-06 | 0.999952 | 2.51555e-05 | 0.999847 |
| rad59         | 6.09023e-06 | 0.999958 | 1.95568e-05 | 0.999867 |
| rad19syn      | 5.61734e-06 | 0.999964 | 1.80382e-05 | 0.999885 |
| rad60anti     | 4.89984e-06 | 0.999969 | 1.57342e-05 | 0.999900 |
| rad67         | 4.54441e-06 | 0.999973 | 1.45929e-05 | 0.999915 |
| PAH1+H        | 4.00146e-06 | 0.999977 | 1.28494e-05 | 0.999928 |
| rad71         | 3.85290e-06 | 0.999981 | 1.23723e-05 | 0.999940 |
| rad37         | 3.32951e-06 | 0.999985 | 1.06916e-05 | 0.999951 |
| rad73         | 2.70897e-06 | 0.999987 | 8.69895e-06 | 0.999960 |
| rad65         | 2.52218e-06 | 0.999990 | 8.09915e-06 | 0.999968 |
| PhcycC3H3_A+H | 2.15311e-06 | 0.999992 | 6.91400e-06 | 0.999975 |
| rad24         | 2.09437e-06 | 0.999994 | 6.72537e-06 | 0.999981 |
| rad54         | 2.00308e-06 | 0.999996 | 6.43221e-06 | 0.999988 |
| rad70         | 7.14351e-07 | 0.999997 | 2.29390e-06 | 0.999990 |
| rad2          | 4.72997e-07 | 0.999997 | 1.51887e-06 | 0.999992 |
| rad33         | 3.28652e-07 | 0.999998 | 1.05536e-06 | 0.999993 |
| rad58         | 3.09033e-07 | 0.999998 | 9.92358e-07 | 0.999994 |
| rad10         | 2.85658e-07 | 0.999998 | 9.17295e-07 | 0.999995 |

|           |             |          |             |          |
|-----------|-------------|----------|-------------|----------|
| rad15     | 2.25990e-07 | 0.999998 | 7.25693e-07 | 0.999995 |
| rad34     | 1.77805e-07 | 0.999999 | 5.70963e-07 | 0.999996 |
| rad3      | 1.62816e-07 | 0.999999 | 5.22828e-07 | 0.999996 |
| rad25     | 1.34495e-07 | 0.999999 | 4.31886e-07 | 0.999997 |
| rad72     | 1.33241e-07 | 0.999999 | 4.27859e-07 | 0.999997 |
| rad4      | 1.28425e-07 | 0.999999 | 4.12395e-07 | 0.999998 |
| rad55     | 1.22394e-07 | 0.999999 | 3.93028e-07 | 0.999998 |
| rad1      | 1.18865e-07 | 0.999999 | 3.81697e-07 | 0.999998 |
| rad26     | 9.95434e-08 | 1.000000 | 3.19651e-07 | 0.999999 |
| rad12     | 9.35967e-08 | 1.000000 | 3.00555e-07 | 0.999999 |
| rad64     | 7.55233e-08 | 1.000000 | 2.42518e-07 | 0.999999 |
| rad62     | 5.22115e-08 | 1.000000 | 1.67660e-07 | 1.000000 |
| PAH8+H    | 5.10733e-08 | 1.000000 | 1.64005e-07 | 1.000000 |
| rad8      | 2.11179e-08 | 1.000000 | 6.78132e-08 | 1.000000 |
| rad53     | 1.95642e-08 | 1.000000 | 6.28239e-08 | 1.000000 |
| rad61     | 1.82522e-08 | 1.000000 | 5.86111e-08 | 1.000000 |
| rad56     | 1.74159e-08 | 1.000000 | 5.59254e-08 | 1.000000 |
| rad68syn  | 1.44743e-08 | 1.000000 | 4.64793e-08 | 1.000000 |
| rad43     | 1.23874e-08 | 1.000000 | 3.97781e-08 | 1.000000 |
| rad47     | 9.67141e-09 | 1.000000 | 3.10565e-08 | 1.000000 |
| rad68anti | 9.40273e-09 | 1.000000 | 3.01937e-08 | 1.000000 |
| rad40syn  | 5.84671e-09 | 1.000000 | 1.87748e-08 | 1.000000 |
| rad14     | 3.95709e-09 | 1.000000 | 1.27069e-08 | 1.000000 |
| rad42     | 3.90625e-09 | 1.000000 | 1.25436e-08 | 1.000000 |
| rad40anti | 3.55694e-09 | 1.000000 | 1.14219e-08 | 1.000000 |
| rad41     | 9.87948e-10 | 1.000000 | 3.17247e-09 | 1.000000 |
| rad27     | 5.24552e-10 | 1.000000 | 1.68443e-09 | 1.000000 |
| rad31     | 1.10306e-10 | 1.000000 | 3.54210e-10 | 1.000000 |
| rad5      | 7.11098e-12 | 1.000000 | 2.28345e-11 | 1.000000 |

10000.0000 Pa, 1400.00000 K

| Rate constant | True (fraction)     | Effective (fraction) |
|---------------|---------------------|----------------------|
| Total         | 2.46691e-14 (1.00 ) | 6.50343e-15 (1.00 )  |

| species       | PYtrue      | Cumul    | PYeffective | Cumul    |
|---------------|-------------|----------|-------------|----------|
| Benzyl+C2H2   | 0.736374    | 0.736374 | 0.00000     | 0.00000  |
| Indene+H      | 0.235975    | 0.972349 | 0.895110    | 0.895110 |
| Ph+Allene     | 0.00756558  | 0.979915 | 0.0286981   | 0.923808 |
| PhCH2CCH+H    | 0.00528649  | 0.985201 | 0.0200530   | 0.943861 |
| rad6          | 0.00347675  | 0.988678 | 0.0131882   | 0.957049 |
| PhCHCCH2+H    | 0.00340588  | 0.992084 | 0.0129193   | 0.969969 |
| PAH9+H        | 0.00141129  | 0.993495 | 0.00535336  | 0.975322 |
| PhCCH+CH3     | 0.00113019  | 0.994625 | 0.00428709  | 0.979609 |
| rad23         | 0.000889958 | 0.995515 | 0.00337583  | 0.982985 |
| rad38         | 0.000665927 | 0.996181 | 0.00252602  | 0.985511 |
| rad45         | 0.000504285 | 0.996685 | 0.00191288  | 0.987424 |
| PAH7+H        | 0.000475752 | 0.997161 | 0.00180464  | 0.989228 |
| rad22         | 0.000356653 | 0.997518 | 0.00135287  | 0.990581 |
| rad50         | 0.000228531 | 0.997746 | 0.000866873 | 0.991448 |
| rad46         | 0.000228478 | 0.997975 | 0.000866672 | 0.992315 |
| rad30         | 0.000223591 | 0.998198 | 0.000848136 | 0.993163 |
| rad20         | 0.000220315 | 0.998419 | 0.000835708 | 0.993999 |
| rad35         | 0.000213580 | 0.998632 | 0.000810161 | 0.994809 |
| rad11         | 0.000202647 | 0.998835 | 0.000768688 | 0.995578 |
| Ph+MeAc       | 0.000177619 | 0.999013 | 0.000673753 | 0.996251 |
| rad39         | 0.000148735 | 0.999161 | 0.000564188 | 0.996815 |
| rad19anti     | 0.000139202 | 0.999300 | 0.000528027 | 0.997343 |
| rad21         | 0.000126900 | 0.999427 | 0.000481362 | 0.997825 |
| rad18         | 0.000104855 | 0.999532 | 0.000397741 | 0.998223 |
| PAH3+H        | 7.91480e-05 | 0.999611 | 0.000300228 | 0.998523 |
| rad51         | 7.15798e-05 | 0.999683 | 0.000271520 | 0.998794 |
| rad7          | 6.93985e-05 | 0.999752 | 0.000263246 | 0.999058 |
| rad9          | 6.37224e-05 | 0.999816 | 0.000241715 | 0.999299 |
| rad36         | 4.67386e-05 | 0.999863 | 0.000177291 | 0.999477 |
| PhCCCH3+H     | 3.22622e-05 | 0.999895 | 0.000122378 | 0.999599 |
| rad52         | 2.04677e-05 | 0.999916 | 7.76391e-05 | 0.999677 |
| rad60syn      | 1.11630e-05 | 0.999927 | 4.23439e-05 | 0.999719 |
| rad59         | 8.83709e-06 | 0.999936 | 3.35213e-05 | 0.999752 |
| rad13         | 8.08825e-06 | 0.999944 | 3.06807e-05 | 0.999783 |
| rad19syn      | 7.74309e-06 | 0.999951 | 2.93714e-05 | 0.999813 |
| rad28         | 7.10383e-06 | 0.999958 | 2.69466e-05 | 0.999839 |
| rad60anti     | 6.66366e-06 | 0.999965 | 2.52769e-05 | 0.999865 |
| PAH10+CH3     | 6.19381e-06 | 0.999971 | 2.34946e-05 | 0.999888 |
| rad67         | 5.30236e-06 | 0.999977 | 2.01131e-05 | 0.999908 |
| PhcycC3H3_A+H | 3.22097e-06 | 0.999980 | 1.22179e-05 | 0.999921 |
| PAH1+H        | 3.21659e-06 | 0.999983 | 1.22013e-05 | 0.999933 |
| rad71         | 2.82633e-06 | 0.999986 | 1.07210e-05 | 0.999944 |



|           |             |          |             |          |
|-----------|-------------|----------|-------------|----------|
| rad37     | 2.80106e-06 | 0.999989 | 1.06251e-05 | 0.999954 |
| rad54     | 2.77114e-06 | 0.999991 | 1.05116e-05 | 0.999965 |
| rad73     | 1.98878e-06 | 0.999993 | 7.54393e-06 | 0.999972 |
| rad65     | 1.87245e-06 | 0.999995 | 7.10265e-06 | 0.999979 |
| rad24     | 1.60439e-06 | 0.999997 | 6.08585e-06 | 0.999985 |
| rad70     | 7.30849e-07 | 0.999998 | 2.77229e-06 | 0.999988 |
| rad15     | 5.63695e-07 | 0.999998 | 2.13823e-06 | 0.999990 |
| rad58     | 4.50479e-07 | 0.999999 | 1.70878e-06 | 0.999992 |
| rad2      | 2.62128e-07 | 0.999999 | 9.94315e-07 | 0.999993 |
| rad33     | 2.46467e-07 | 0.999999 | 9.34908e-07 | 0.999994 |
| rad10     | 2.38180e-07 | 0.999999 | 9.03476e-07 | 0.999995 |
| rad55     | 1.73409e-07 | 1.000000 | 6.57781e-07 | 0.999995 |
| rad34     | 1.72386e-07 | 1.000000 | 6.53904e-07 | 0.999996 |
| rad12     | 1.19055e-07 | 1.000000 | 4.51606e-07 | 0.999997 |
| rad25     | 1.07563e-07 | 1.000000 | 4.08011e-07 | 0.999997 |
| rad72     | 9.76555e-08 | 1.000000 | 3.70431e-07 | 0.999997 |
| rad3      | 9.29052e-08 | 1.000000 | 3.52412e-07 | 0.999998 |
| rad26     | 8.98865e-08 | 1.000000 | 3.40962e-07 | 0.999998 |
| rad4      | 7.35492e-08 | 1.000000 | 2.78990e-07 | 0.999998 |
| rad1      | 6.63581e-08 | 1.000000 | 2.51712e-07 | 0.999999 |
| rad64     | 5.91066e-08 | 1.000000 | 2.24206e-07 | 0.999999 |
| rad62     | 5.29624e-08 | 1.000000 | 2.00899e-07 | 0.999999 |
| PAH8+H    | 4.08228e-08 | 1.000000 | 1.54851e-07 | 0.999999 |
| rad8      | 3.02560e-08 | 1.000000 | 1.14768e-07 | 0.999999 |
| rad53     | 2.77265e-08 | 1.000000 | 1.05173e-07 | 0.999999 |
| rad56     | 2.34931e-08 | 1.000000 | 8.91153e-08 | 0.999999 |
| rad61     | 1.39978e-08 | 1.000000 | 5.30969e-08 | 1.000000 |
| rad68syn  | 1.22036e-08 | 1.000000 | 4.62913e-08 | 1.000000 |
| rad43     | 1.10082e-08 | 1.000000 | 4.17566e-08 | 1.000000 |
| rad68anti | 7.93813e-09 | 1.000000 | 3.01113e-08 | 1.000000 |
| rad47     | 6.78129e-09 | 1.000000 | 2.57231e-08 | 1.000000 |
| rad40syn  | 4.75373e-09 | 1.000000 | 1.80321e-08 | 1.000000 |
| rad42     | 3.62058e-09 | 1.000000 | 1.37338e-08 | 1.000000 |
| rad14     | 2.91034e-09 | 1.000000 | 1.10396e-08 | 1.000000 |
| rad40anti | 2.87025e-09 | 1.000000 | 1.08876e-08 | 1.000000 |
| rad41     | 8.36186e-10 | 1.000000 | 3.17186e-09 | 1.000000 |
| rad27     | 3.71520e-10 | 1.000000 | 1.40926e-09 | 1.000000 |
| rad31     | 8.57195e-11 | 1.000000 | 3.25155e-10 | 1.000000 |
| rad5      | 9.67861e-12 | 1.000000 | 3.67134e-11 | 1.000000 |

10000.0000 Pa, 1500.00000 K

=====  
Rate constant | True (fraction) | Effective (fraction)  
-----  
Total | 3.76908e-14 (1.00) | 8.53034e-15 (1.00)

| species     | PYtrue      | Cumul    | PYeffective | Cumul    |
|-------------|-------------|----------|-------------|----------|
| Benzyl+C2H2 | 0.773676    | 0.773676 | 0.00000     | 0.00000  |
| Indene+H    | 0.198318    | 0.971994 | 0.876255    | 0.876255 |
| Ph+Allene   | 0.00838788  | 0.980382 | 0.0370614   | 0.913316 |
| PhCH2CCH+H  | 0.00683000  | 0.987212 | 0.0301780   | 0.943494 |
| PhCHCCH2+H  | 0.00370327  | 0.990915 | 0.0163627   | 0.959857 |
| rad6        | 0.00245628  | 0.993371 | 0.0108530   | 0.970710 |
| PAH9+H      | 0.00115406  | 0.994525 | 0.00509917  | 0.975809 |
| PhCCH+CH3   | 0.00101273  | 0.995538 | 0.00447470  | 0.980284 |
| rad23       | 0.000769700 | 0.996308 | 0.00340088  | 0.983685 |
| rad38       | 0.000535883 | 0.996844 | 0.00236777  | 0.986053 |
| PAH7+H      | 0.000427607 | 0.997271 | 0.00188936  | 0.987942 |
| rad45       | 0.000358504 | 0.997630 | 0.00158403  | 0.989526 |
| rad22       | 0.000267561 | 0.997897 | 0.00118220  | 0.990708 |
| rad30       | 0.000250855 | 0.998148 | 0.00110839  | 0.991817 |
| rad35       | 0.000181318 | 0.998330 | 0.000801144 | 0.992618 |
| rad46       | 0.000180134 | 0.998510 | 0.000795914 | 0.993414 |
| rad19anti   | 0.000179235 | 0.998689 | 0.000791942 | 0.994206 |
| rad50       | 0.000171989 | 0.998861 | 0.000759926 | 0.994966 |
| Ph+MeAc     | 0.000166514 | 0.999028 | 0.000735732 | 0.995701 |
| rad20       | 0.000137301 | 0.999165 | 0.000606658 | 0.996308 |
| rad11       | 0.000127588 | 0.999292 | 0.000563742 | 0.996872 |
| rad39       | 0.000120983 | 0.999413 | 0.000534559 | 0.997406 |
| PAH3+H      | 0.000114042 | 0.999527 | 0.000503888 | 0.997910 |
| rad21       | 7.86711e-05 | 0.999606 | 0.000347604 | 0.998258 |
| rad9        | 6.52170e-05 | 0.999671 | 0.000288158 | 0.998546 |
| rad18       | 6.08406e-05 | 0.999732 | 0.000268821 | 0.998815 |
| rad51       | 5.28100e-05 | 0.999785 | 0.000233338 | 0.999048 |
| rad7        | 4.83694e-05 | 0.999833 | 0.000213718 | 0.999262 |
| rad36       | 3.34144e-05 | 0.999867 | 0.000147640 | 0.999409 |
| PhCCCH3+H   | 2.75860e-05 | 0.999894 | 0.000121887 | 0.999531 |
| rad52       | 1.52408e-05 | 0.999910 | 6.73405e-05 | 0.999599 |
| rad60syn    | 1.45309e-05 | 0.999924 | 6.42038e-05 | 0.999663 |

|               |             |          |             |          |
|---------------|-------------|----------|-------------|----------|
| rad59         | 1.24659e-05 | 0.999937 | 5.50800e-05 | 0.999718 |
| rad19syn      | 9.72268e-06 | 0.999946 | 4.29591e-05 | 0.999761 |
| rad60anti     | 8.75011e-06 | 0.999955 | 3.86619e-05 | 0.999800 |
| rad67         | 6.41786e-06 | 0.999961 | 2.83570e-05 | 0.999828 |
| rad28         | 5.29962e-06 | 0.999967 | 2.34161e-05 | 0.999851 |
| rad13         | 5.11443e-06 | 0.999972 | 2.25978e-05 | 0.999874 |
| PAH10+CH3     | 5.06509e-06 | 0.999977 | 2.23798e-05 | 0.999896 |
| PhcycC3H3_A+H | 4.44142e-06 | 0.999981 | 1.96242e-05 | 0.999916 |
| rad54         | 3.57081e-06 | 0.999985 | 1.57774e-05 | 0.999932 |
| PAH1+H        | 2.69827e-06 | 0.999988 | 1.19221e-05 | 0.999944 |
| rad37         | 2.46286e-06 | 0.999990 | 1.08820e-05 | 0.999954 |
| rad71         | 2.03437e-06 | 0.999992 | 8.98874e-06 | 0.999963 |
| rad73         | 1.43536e-06 | 0.999994 | 6.34207e-06 | 0.999970 |
| rad65         | 1.38973e-06 | 0.999995 | 6.14046e-06 | 0.999976 |
| rad24         | 1.23122e-06 | 0.999996 | 5.44006e-06 | 0.999981 |
| rad15         | 1.00623e-06 | 0.999997 | 4.44598e-06 | 0.999986 |
| rad70         | 7.96980e-07 | 0.999998 | 3.52141e-06 | 0.999989 |
| rad58         | 6.93249e-07 | 0.999999 | 3.06308e-06 | 0.999992 |
| rad55         | 2.31648e-07 | 0.999999 | 1.02352e-06 | 0.999993 |
| rad34         | 1.81648e-07 | 0.999999 | 8.02600e-07 | 0.999994 |
| rad33         | 1.69359e-07 | 0.999999 | 7.48304e-07 | 0.999995 |
| rad10         | 1.56344e-07 | 0.999999 | 6.90797e-07 | 0.999996 |
| rad12         | 1.40428e-07 | 1.000000 | 6.20472e-07 | 0.999996 |
| rad2          | 1.33999e-07 | 1.000000 | 5.92068e-07 | 0.999997 |
| rad26         | 8.82730e-08 | 1.000000 | 3.90029e-07 | 0.999997 |
| rad25         | 8.27296e-08 | 1.000000 | 3.65536e-07 | 0.999998 |
| rad72         | 7.00515e-08 | 1.000000 | 3.09519e-07 | 0.999998 |
| rad62         | 5.46960e-08 | 1.000000 | 2.41672e-07 | 0.999998 |
| rad3          | 4.99091e-08 | 1.000000 | 2.20521e-07 | 0.999998 |
| rad64         | 4.80761e-08 | 1.000000 | 2.12422e-07 | 0.999999 |
| rad53         | 4.04752e-08 | 1.000000 | 1.78838e-07 | 0.999999 |
| rad4          | 3.96201e-08 | 1.000000 | 1.75059e-07 | 0.999999 |
| rad8          | 3.80738e-08 | 1.000000 | 1.68227e-07 | 0.999999 |
| rad56         | 3.46097e-08 | 1.000000 | 1.52921e-07 | 0.999999 |
| PAH8+H        | 3.42028e-08 | 1.000000 | 1.51123e-07 | 0.999999 |
| rad1          | 3.41538e-08 | 1.000000 | 1.50907e-07 | 1.000000 |
| rad68syn      | 1.11518e-08 | 1.000000 | 4.92736e-08 | 1.000000 |
| rad61         | 1.08584e-08 | 1.000000 | 4.79774e-08 | 1.000000 |
| rad43         | 1.01835e-08 | 1.000000 | 4.49951e-08 | 1.000000 |
| rad68anti     | 7.26726e-09 | 1.000000 | 3.21100e-08 | 1.000000 |
| rad47         | 4.73783e-09 | 1.000000 | 2.09338e-08 | 1.000000 |
| rad40syn      | 4.10613e-09 | 1.000000 | 1.81427e-08 | 1.000000 |
| rad42         | 3.60121e-09 | 1.000000 | 1.59118e-08 | 1.000000 |
| rad40anti     | 2.44605e-09 | 1.000000 | 1.08077e-08 | 1.000000 |
| rad14         | 1.96098e-09 | 1.000000 | 8.66447e-09 | 1.000000 |
| rad41         | 7.44707e-10 | 1.000000 | 3.29045e-09 | 1.000000 |
| rad27         | 2.37967e-10 | 1.000000 | 1.05144e-09 | 1.000000 |
| rad31         | 6.22591e-11 | 1.000000 | 2.75088e-10 | 1.000000 |
| rad5          | 1.49483e-11 | 1.000000 | 6.60484e-11 | 1.000000 |

10000.0000 Pa, 1750.00000 K

=====

| Rate constant | True (fraction)     | Effective (fraction) |
|---------------|---------------------|----------------------|
| Total         | 9.18604e-14 (1.00 ) | 1.49570e-14 (1.00 )  |

| species     | PYtrue      | Cumul    | PYeffective | Cumul    |
|-------------|-------------|----------|-------------|----------|
| Benzyl+C2H2 | 0.837177    | 0.837177 | 0.00000     | 0.00000  |
| Indene+H    | 0.125624    | 0.962801 | 0.771537    | 0.771537 |
| PhCH2CCH+H  | 0.0120264   | 0.974827 | 0.0738615   | 0.845399 |
| Ph+Allene   | 0.0101834   | 0.985011 | 0.0625425   | 0.907941 |
| PhCHCCH2+H  | 0.00481353  | 0.989824 | 0.0295629   | 0.937504 |
| PAH9+H      | 0.00122310  | 0.991047 | 0.00751180  | 0.945016 |
| rad6        | 0.000956885 | 0.992004 | 0.00587683  | 0.950893 |
| rad50       | 0.000860376 | 0.992865 | 0.00528411  | 0.956177 |
| rad38       | 0.000844472 | 0.993709 | 0.00518643  | 0.961363 |
| PAH7+H      | 0.000747498 | 0.994457 | 0.00459086  | 0.965954 |
| rad39       | 0.000712038 | 0.995169 | 0.00437308  | 0.970327 |
| PhCCH+CH3   | 0.000670823 | 0.995840 | 0.00411995  | 0.974447 |
| rad51       | 0.000655482 | 0.996495 | 0.00402573  | 0.978473 |
| rad71       | 0.000549853 | 0.997045 | 0.00337700  | 0.981850 |
| rad23       | 0.000447551 | 0.997492 | 0.00274869  | 0.984598 |
| rad46       | 0.000329673 | 0.997822 | 0.00202473  | 0.986623 |
| rad30       | 0.000329162 | 0.998151 | 0.00202159  | 0.988645 |
| PAH3+H      | 0.000319380 | 0.998471 | 0.00196151  | 0.990606 |
| rad19anti   | 0.000302401 | 0.998773 | 0.00185724  | 0.992463 |
| rad35       | 0.000187979 | 0.998961 | 0.00115450  | 0.993618 |
| rad73       | 0.000172657 | 0.999134 | 0.00106040  | 0.994678 |
| Ph+MeAc     | 0.000166535 | 0.999300 | 0.00102279  | 0.995701 |

|               |             |          |             |          |
|---------------|-------------|----------|-------------|----------|
| rad52         | 0.000114885 | 0.999415 | 0.000705583 | 0.996407 |
| rad72         | 0.000105033 | 0.999520 | 0.000645072 | 0.997052 |
| rad22         | 9.43787e-05 | 0.999614 | 0.000579639 | 0.997631 |
| PAH1+H        | 4.23079e-05 | 0.999657 | 0.000259839 | 0.997891 |
| rad45         | 3.43368e-05 | 0.999691 | 0.000210884 | 0.998102 |
| PAH10+CH3     | 3.08972e-05 | 0.999722 | 0.000189759 | 0.998292 |
| rad59         | 3.05350e-05 | 0.999753 | 0.000187535 | 0.998479 |
| PhCCCH3+H     | 2.85439e-05 | 0.999781 | 0.000175306 | 0.998655 |
| rad60syn      | 2.77825e-05 | 0.999809 | 0.000170630 | 0.998825 |
| PhcycC3H3_A+H | 2.29327e-05 | 0.999832 | 0.000140844 | 0.998966 |
| rad19syn      | 2.03404e-05 | 0.999852 | 0.000124923 | 0.999091 |
| rad60anti     | 1.87437e-05 | 0.999871 | 0.000115117 | 0.999206 |
| rad67         | 1.70846e-05 | 0.999888 | 0.000104927 | 0.999311 |
| rad11         | 1.36960e-05 | 0.999902 | 8.41158e-05 | 0.999395 |
| rad20         | 1.30211e-05 | 0.999915 | 7.99710e-05 | 0.999475 |
| rad65         | 1.08434e-05 | 0.999926 | 6.65960e-05 | 0.999542 |
| rad9          | 9.25653e-06 | 0.999935 | 5.68502e-05 | 0.999599 |
| PAH8+H        | 7.78430e-06 | 0.999943 | 4.78083e-05 | 0.999647 |
| rad54         | 6.98695e-06 | 0.999950 | 4.29113e-05 | 0.999689 |
| rad21         | 6.80599e-06 | 0.999956 | 4.17999e-05 | 0.999731 |
| rad18         | 6.43815e-06 | 0.999963 | 3.95407e-05 | 0.999771 |
| rad70         | 6.02705e-06 | 0.999969 | 3.70159e-05 | 0.999808 |
| rad7          | 5.85140e-06 | 0.999975 | 3.59372e-05 | 0.999844 |
| rad36         | 5.76362e-06 | 0.999980 | 3.53980e-05 | 0.999879 |
| rad37         | 4.18146e-06 | 0.999985 | 2.56810e-05 | 0.999905 |
| rad58         | 3.17839e-06 | 0.999988 | 1.95205e-05 | 0.999924 |
| rad28         | 2.60264e-06 | 0.999990 | 1.59845e-05 | 0.999940 |
| rad34         | 2.49824e-06 | 0.999993 | 1.53433e-05 | 0.999956 |
| rad64         | 1.26242e-06 | 0.999994 | 7.75332e-06 | 0.999963 |
| rad68syn      | 8.06622e-07 | 0.999995 | 4.95397e-06 | 0.999968 |
| rad55         | 6.33660e-07 | 0.999996 | 3.89171e-06 | 0.999972 |
| rad40syn      | 5.57101e-07 | 0.999996 | 3.42151e-06 | 0.999976 |
| rad68anti     | 5.12783e-07 | 0.999997 | 3.14932e-06 | 0.999979 |
| rad15         | 4.99502e-07 | 0.999997 | 3.06776e-06 | 0.999982 |
| rad62         | 4.95776e-07 | 0.999998 | 3.04487e-06 | 0.999985 |
| rad56         | 4.84275e-07 | 0.999998 | 2.97424e-06 | 0.999988 |
| rad40anti     | 4.33761e-07 | 0.999999 | 2.66400e-06 | 0.999991 |
| rad13         | 3.81192e-07 | 0.999999 | 2.34114e-06 | 0.999993 |
| rad53         | 3.41411e-07 | 0.999999 | 2.09682e-06 | 0.999995 |
| rad61         | 2.81049e-07 | 1.000000 | 1.72610e-06 | 0.999997 |
| rad24         | 1.51438e-07 | 1.000000 | 9.30079e-07 | 0.999998 |
| rad42         | 1.07416e-07 | 1.000000 | 6.59708e-07 | 0.999998 |
| rad26         | 6.89058e-08 | 1.000000 | 4.23194e-07 | 0.999999 |
| rad43         | 5.76203e-08 | 1.000000 | 3.53883e-07 | 0.999999 |
| rad12         | 3.30990e-08 | 1.000000 | 2.03282e-07 | 0.999999 |
| rad47         | 2.37282e-08 | 1.000000 | 1.45730e-07 | 0.999999 |
| rad10         | 2.06791e-08 | 1.000000 | 1.27003e-07 | 1.000000 |
| rad8          | 1.78023e-08 | 1.000000 | 1.09335e-07 | 1.000000 |
| rad41         | 1.31568e-08 | 1.000000 | 8.08039e-08 | 1.000000 |
| rad33         | 1.30028e-08 | 1.000000 | 7.98586e-08 | 1.000000 |
| rad25         | 9.31420e-09 | 1.000000 | 5.72044e-08 | 1.000000 |
| rad2          | 4.87344e-09 | 1.000000 | 2.99308e-08 | 1.000000 |
| rad3          | 1.52982e-09 | 1.000000 | 9.39556e-09 | 1.000000 |
| rad1          | 1.36375e-09 | 1.000000 | 8.37566e-09 | 1.000000 |
| rad4          | 9.75262e-10 | 1.000000 | 5.98970e-09 | 1.000000 |
| rad14         | 1.86689e-10 | 1.000000 | 1.14658e-09 | 1.000000 |
| rad5          | 1.08555e-10 | 1.000000 | 6.66705e-10 | 1.000000 |
| rad27         | 2.14031e-11 | 1.000000 | 1.31450e-10 | 1.000000 |

10000.0000 Pa, 2000.00000 K

=====

| Rate constant | True (fraction)     | Effective (fraction) |
|---------------|---------------------|----------------------|
| Total         | 1.85359e-13 (1.00 ) | 2.47986e-14 (1.00 )  |

| species     | PYtrue      | Cumul    | PYeffective | Cumul    |
|-------------|-------------|----------|-------------|----------|
| Benzyl+C2H2 | 0.866213    | 0.866213 | 0.00000     | 0.00000  |
| Indene+H    | 0.0912728   | 0.957486 | 0.682226    | 0.682226 |
| PhCH2CCH+H  | 0.0189585   | 0.976444 | 0.141707    | 0.823933 |
| Ph+Allene   | 0.0105508   | 0.986995 | 0.0788630   | 0.902796 |
| PhCHCCH2+H  | 0.00596275  | 0.992958 | 0.0445691   | 0.947365 |
| PAH9+H      | 0.00108219  | 0.994040 | 0.00808889  | 0.955454 |
| rad38       | 0.000642291 | 0.994682 | 0.00480085  | 0.960255 |
| PAH3+H      | 0.000547667 | 0.995230 | 0.00409358  | 0.964348 |
| PAH7+H      | 0.000547433 | 0.995777 | 0.00409183  | 0.968440 |
| PhCCH+CH3   | 0.000476965 | 0.996254 | 0.00356511  | 0.972005 |
| rad19anti   | 0.000469302 | 0.996724 | 0.00350783  | 0.975513 |
| rad50       | 0.000450138 | 0.997174 | 0.00336459  | 0.978878 |
| rad30       | 0.000379994 | 0.997554 | 0.00284030  | 0.981718 |

|               |             |          |             |          |
|---------------|-------------|----------|-------------|----------|
| rad39         | 0.000361656 | 0.997915 | 0.00270322  | 0.984421 |
| rad51         | 0.000310537 | 0.998226 | 0.00232113  | 0.986742 |
| rad71         | 0.000237735 | 0.998464 | 0.00177697  | 0.988519 |
| rad46         | 0.000227537 | 0.998691 | 0.00170074  | 0.990220 |
| rad6          | 0.000220528 | 0.998912 | 0.00164835  | 0.991868 |
| rad35         | 0.000191867 | 0.999104 | 0.00143412  | 0.993303 |
| rad23         | 0.000180592 | 0.999284 | 0.00134985  | 0.994652 |
| Ph+MeAc       | 0.000168741 | 0.999453 | 0.00126126  | 0.995914 |
| rad73         | 7.52080e-05 | 0.999528 | 0.000562148 | 0.996476 |
| rad52         | 5.73952e-05 | 0.999586 | 0.000429005 | 0.996905 |
| rad59         | 5.06369e-05 | 0.999636 | 0.000378489 | 0.997283 |
| rad72         | 4.50987e-05 | 0.999681 | 0.000337094 | 0.997620 |
| rad60syn      | 4.07232e-05 | 0.999722 | 0.000304389 | 0.997925 |
| PhCCCH3+H     | 3.60938e-05 | 0.999758 | 0.000269786 | 0.998195 |
| rad67         | 2.84020e-05 | 0.999787 | 0.000212293 | 0.998407 |
| rad60anti     | 2.79659e-05 | 0.999815 | 0.000209034 | 0.998616 |
| PhcycC3H3_A+H | 2.56183e-05 | 0.999840 | 0.000191486 | 0.998807 |
| PAH1+H        | 2.15740e-05 | 0.999862 | 0.000161257 | 0.998969 |
| rad19syn      | 2.08595e-05 | 0.999883 | 0.000155916 | 0.999125 |
| PAH10+CH3     | 2.06052e-05 | 0.999903 | 0.000154015 | 0.999279 |
| rad22         | 1.89961e-05 | 0.999922 | 0.000141987 | 0.999421 |
| rad45         | 1.43487e-05 | 0.999937 | 0.000107250 | 0.999528 |
| rad54         | 7.47446e-06 | 0.999944 | 5.58684e-05 | 0.999584 |
| rad65         | 6.18656e-06 | 0.999950 | 4.62419e-05 | 0.999630 |
| rad9          | 6.17110e-06 | 0.999956 | 4.61264e-05 | 0.999676 |
| rad58         | 5.61988e-06 | 0.999962 | 4.20062e-05 | 0.999718 |
| rad20         | 5.46658e-06 | 0.999967 | 4.08604e-05 | 0.999759 |
| rad37         | 4.47757e-06 | 0.999972 | 3.34679e-05 | 0.999792 |
| rad70         | 4.28063e-06 | 0.999976 | 3.19959e-05 | 0.999824 |
| rad11         | 3.96584e-06 | 0.999980 | 2.96430e-05 | 0.999854 |
| PAH8+H        | 3.52538e-06 | 0.999984 | 2.63507e-05 | 0.999880 |
| rad21         | 2.80397e-06 | 0.999987 | 2.09585e-05 | 0.999901 |
| rad36         | 2.45844e-06 | 0.999989 | 1.83758e-05 | 0.999920 |
| rad18         | 1.77870e-06 | 0.999991 | 1.32951e-05 | 0.999933 |
| rad7          | 1.60449e-06 | 0.999992 | 1.19929e-05 | 0.999945 |
| rad34         | 1.54713e-06 | 0.999994 | 1.15641e-05 | 0.999957 |
| rad28         | 9.35901e-07 | 0.999995 | 6.99547e-06 | 0.999964 |
| rad56         | 7.25829e-07 | 0.999996 | 5.42527e-06 | 0.999969 |
| rad55         | 7.17705e-07 | 0.999996 | 5.36454e-06 | 0.999974 |
| rad64         | 6.19435e-07 | 0.999997 | 4.63002e-06 | 0.999979 |
| rad53         | 4.76248e-07 | 0.999997 | 3.55975e-06 | 0.999983 |
| rad68syn      | 3.91123e-07 | 0.999998 | 2.92348e-06 | 0.999986 |
| rad62         | 3.41622e-07 | 0.999998 | 2.55348e-06 | 0.999988 |
| rad15         | 3.28437e-07 | 0.999998 | 2.45493e-06 | 0.999991 |
| rad40syn      | 2.58358e-07 | 0.999999 | 1.93112e-06 | 0.999992 |
| rad68anti     | 2.48971e-07 | 0.999999 | 1.86095e-06 | 0.999994 |
| rad40anti     | 1.99311e-07 | 0.999999 | 1.48977e-06 | 0.999996 |
| rad61         | 1.42064e-07 | 0.999999 | 1.06187e-06 | 0.999997 |
| rad13         | 1.37822e-07 | 0.999999 | 1.03016e-06 | 0.999998 |
| rad24         | 8.87356e-08 | 1.000000 | 6.63261e-07 | 0.999999 |
| rad42         | 7.17353e-08 | 1.000000 | 5.36191e-07 | 0.999999 |
| rad43         | 4.59858e-08 | 1.000000 | 3.43725e-07 | 0.999999 |
| rad26         | 3.76213e-08 | 1.000000 | 2.81204e-07 | 1.000000 |
| rad12         | 3.33581e-08 | 1.000000 | 2.49338e-07 | 1.000000 |
| rad8          | 2.03559e-08 | 1.000000 | 1.52152e-07 | 1.000000 |
| rad47         | 9.95431e-09 | 1.000000 | 7.44042e-08 | 1.000000 |
| rad10         | 9.10382e-09 | 1.000000 | 6.80472e-08 | 1.000000 |
| rad41         | 8.22570e-09 | 1.000000 | 6.14836e-08 | 1.000000 |
| rad33         | 5.74216e-09 | 1.000000 | 4.29202e-08 | 1.000000 |
| rad25         | 4.78921e-09 | 1.000000 | 3.57973e-08 | 1.000000 |
| rad2          | 1.60843e-09 | 1.000000 | 1.20224e-08 | 1.000000 |
| rad3          | 4.98362e-10 | 1.000000 | 3.72504e-09 | 1.000000 |
| rad1          | 4.71791e-10 | 1.000000 | 3.52644e-09 | 1.000000 |
| rad4          | 3.16765e-10 | 1.000000 | 2.36768e-09 | 1.000000 |
| rad5          | 2.02808e-10 | 1.000000 | 1.51590e-09 | 1.000000 |
| rad14         | 8.15781e-11 | 1.000000 | 6.09762e-10 | 1.000000 |
| rad27         | 1.39338e-11 | 1.000000 | 1.04150e-10 | 1.000000 |

10000.0000 Pa, 2250.00000 K

=====

| Rate constant | True (fraction)     | Effective (fraction) |
|---------------|---------------------|----------------------|
| Total         | 3.29136e-13 (1.00 ) | 4.01181e-14 (1.00 )  |

| species     | PYtrue    | Cumul    | PYeffective | Cumul    |
|-------------|-----------|----------|-------------|----------|
| Benzyl+C2H2 | 0.878111  | 0.878111 | 0.00000     | 0.00000  |
| Indene+H    | 0.0689915 | 0.947102 | 0.566017    | 0.566017 |
| PhCH2CCH+H  | 0.0277475 | 0.974850 | 0.227645    | 0.793662 |
| Ph+Allene   | 0.0107545 | 0.985604 | 0.0882320   | 0.881894 |

|               |             |          |             |          |
|---------------|-------------|----------|-------------|----------|
| PhCHCCH2+H    | 0.00775132  | 0.993356 | 0.0635930   | 0.945487 |
| PAH9+H        | 0.00109467  | 0.994450 | 0.00898082  | 0.954468 |
| PAH3+H        | 0.000867061 | 0.995318 | 0.00711351  | 0.961581 |
| rad38         | 0.000618991 | 0.995937 | 0.00507830  | 0.966660 |
| rad19anti     | 0.000617959 | 0.996555 | 0.00506983  | 0.971729 |
| PAH7+H        | 0.000540602 | 0.997095 | 0.00443519  | 0.976165 |
| rad30         | 0.000417901 | 0.997513 | 0.00342853  | 0.979593 |
| PhCCH+CH3     | 0.000362196 | 0.997875 | 0.00297152  | 0.982565 |
| rad50         | 0.000330483 | 0.998206 | 0.00271133  | 0.985276 |
| rad39         | 0.000247936 | 0.998454 | 0.00203411  | 0.987310 |
| rad35         | 0.000217609 | 0.998671 | 0.00178530  | 0.989095 |
| rad46         | 0.000211654 | 0.998883 | 0.00173644  | 0.990832 |
| Ph+MeAc       | 0.000201253 | 0.999084 | 0.00165111  | 0.992483 |
| rad51         | 0.000192362 | 0.999276 | 0.00157817  | 0.994061 |
| rad71         | 0.000114322 | 0.999391 | 0.000937916 | 0.994999 |
| rad59         | 7.64144e-05 | 0.999467 | 0.000626916 | 0.995626 |
| rad60syn      | 5.47144e-05 | 0.999522 | 0.000448886 | 0.996075 |
| PhCCCH3+H     | 5.20056e-05 | 0.999574 | 0.000426941 | 0.996502 |
| rad6          | 5.20056e-05 | 0.999626 | 0.000426663 | 0.996928 |
| rad23         | 4.99984e-05 | 0.999676 | 0.000410195 | 0.997339 |
| rad67         | 4.81753e-05 | 0.999724 | 0.000395238 | 0.997734 |
| rad52         | 3.93284e-05 | 0.999763 | 0.000322657 | 0.998057 |
| rad60anti     | 3.81868e-05 | 0.999802 | 0.000313291 | 0.998370 |
| rad73         | 3.71080e-05 | 0.999839 | 0.000304440 | 0.998674 |
| PAH10+CH3     | 2.31651e-05 | 0.999862 | 0.000190050 | 0.998864 |
| rad72         | 2.12286e-05 | 0.999883 | 0.000174163 | 0.999039 |
| rad19syn      | 2.02096e-05 | 0.999903 | 0.000165803 | 0.999204 |
| PhcycC3H3_A+H | 1.94478e-05 | 0.999923 | 0.000159553 | 0.999364 |
| PAH1+H        | 1.48038e-05 | 0.999938 | 0.000121453 | 0.999485 |
| rad58         | 1.03437e-05 | 0.999948 | 8.48618e-05 | 0.999570 |
| rad54         | 6.65115e-06 | 0.999955 | 5.45671e-05 | 0.999625 |
| rad45         | 6.35236e-06 | 0.999961 | 5.21158e-05 | 0.999677 |
| rad37         | 6.13725e-06 | 0.999967 | 5.03510e-05 | 0.999727 |
| rad65         | 4.91624e-06 | 0.999972 | 4.03336e-05 | 0.999768 |
| rad70         | 4.69727e-06 | 0.999977 | 3.85372e-05 | 0.999806 |
| rad22         | 4.68390e-06 | 0.999981 | 3.84275e-05 | 0.999845 |
| rad9          | 3.68579e-06 | 0.999985 | 3.02388e-05 | 0.999875 |
| rad20         | 2.69055e-06 | 0.999988 | 2.20737e-05 | 0.999897 |
| PAH8+H        | 1.99359e-06 | 0.999990 | 1.63558e-05 | 0.999913 |
| rad34         | 1.54341e-06 | 0.999991 | 1.26624e-05 | 0.999926 |
| rad11         | 1.47023e-06 | 0.999993 | 1.20620e-05 | 0.999938 |
| rad21         | 1.34405e-06 | 0.999994 | 1.10268e-05 | 0.999949 |
| rad36         | 1.10773e-06 | 0.999995 | 9.08799e-06 | 0.999958 |
| rad18         | 6.80299e-07 | 0.999996 | 5.58128e-06 | 0.999964 |
| rad55         | 6.28634e-07 | 0.999997 | 5.15741e-06 | 0.999969 |
| rad7          | 5.68102e-07 | 0.999997 | 4.66080e-06 | 0.999973 |
| rad56         | 5.17628e-07 | 0.999998 | 4.24670e-06 | 0.999978 |
| rad64         | 3.97958e-07 | 0.999998 | 3.26491e-06 | 0.999981 |
| rad53         | 3.62260e-07 | 0.999998 | 2.97204e-06 | 0.999984 |
| rad68syn      | 2.73818e-07 | 0.999999 | 2.24645e-06 | 0.999986 |
| rad28         | 2.69935e-07 | 0.999999 | 2.21459e-06 | 0.999988 |
| rad62         | 2.41245e-07 | 0.999999 | 1.97921e-06 | 0.999990 |
| rad15         | 2.11598e-07 | 0.999999 | 1.73599e-06 | 0.999992 |
| rad68anti     | 1.74819e-07 | 1.000000 | 1.43425e-06 | 0.999994 |
| rad40syn      | 1.58796e-07 | 1.000000 | 1.30279e-06 | 0.999995 |
| rad40anti     | 1.18528e-07 | 1.000000 | 9.72425e-07 | 0.999996 |
| rad61         | 1.07104e-07 | 1.000000 | 8.78701e-07 | 0.999997 |
| rad43         | 5.96982e-08 | 1.000000 | 4.89774e-07 | 0.999997 |
| rad13         | 5.53131e-08 | 1.000000 | 4.53797e-07 | 0.999998 |
| rad24         | 5.49400e-08 | 1.000000 | 4.50737e-07 | 0.999998 |
| rad42         | 4.58748e-08 | 1.000000 | 3.76364e-07 | 0.999998 |
| rad12         | 2.91700e-08 | 1.000000 | 2.39315e-07 | 0.999999 |
| rad8          | 2.20048e-08 | 1.000000 | 1.80531e-07 | 0.999999 |
| rad26         | 2.10722e-08 | 1.000000 | 1.72879e-07 | 0.999999 |
| rad41         | 8.42962e-09 | 1.000000 | 6.91580e-08 | 0.999999 |
| rad10         | 5.90173e-09 | 1.000000 | 4.84187e-08 | 0.999999 |
| rad47         | 5.35540e-09 | 1.000000 | 4.39366e-08 | 0.999999 |
| rad25         | 2.74140e-09 | 1.000000 | 2.24909e-08 | 0.999999 |
| rad33         | 2.71226e-09 | 1.000000 | 2.22518e-08 | 0.999999 |
| rad2          | 7.46268e-10 | 1.000000 | 6.12250e-09 | 0.999999 |
| rad1          | 2.33510e-10 | 1.000000 | 1.91575e-09 | 0.999999 |
| rad5          | 2.23506e-10 | 1.000000 | 1.83368e-09 | 0.999999 |
| rad3          | 1.82234e-10 | 1.000000 | 1.49508e-09 | 0.999999 |
| rad4          | 1.14766e-10 | 1.000000 | 9.41557e-10 | 0.999999 |
| rad14         | 4.24355e-11 | 1.000000 | 3.48147e-10 | 0.999999 |
| rad27         | 1.18752e-11 | 1.000000 | 9.74258e-11 | 0.999999 |

10000.0000 Pa, 2500.00000 K

=====

Rate constant | True (fraction)                      Effective (fraction)

-----  
 Total | 5.32896e-13 (1.00 ) 6.40546e-14 (1.00 )  
 -----

| species       | PYtrue      | Cumul    | PYeffective | Cumul    |
|---------------|-------------|----------|-------------|----------|
| Benzyl+C2H2   | 0.879799    | 0.879799 | 0.00000     | 0.00000  |
| Indene+H      | 0.0536199   | 0.933419 | 0.446087    | 0.446087 |
| PhCH2CCH+H    | 0.0379710   | 0.971390 | 0.315897    | 0.761984 |
| Ph+Allene     | 0.0112871   | 0.982677 | 0.0939024   | 0.855886 |
| PhCHCCH2+H    | 0.0100427   | 0.992720 | 0.0835498   | 0.939436 |
| PAH3+H        | 0.00124790  | 0.993968 | 0.0103818   | 0.949818 |
| PAH9+H        | 0.00112608  | 0.995094 | 0.00936833  | 0.959186 |
| rad19anti     | 0.000724713 | 0.995818 | 0.00602920  | 0.965216 |
| rad38         | 0.000650678 | 0.996469 | 0.00541327  | 0.970629 |
| PAH7+H        | 0.000624155 | 0.997093 | 0.00519261  | 0.975821 |
| rad30         | 0.000442420 | 0.997536 | 0.00368068  | 0.979502 |
| rad50         | 0.000333443 | 0.997869 | 0.00277406  | 0.982276 |
| PhCCH+CH3     | 0.000304176 | 0.998173 | 0.00253057  | 0.984807 |
| Ph+MeAc       | 0.000258829 | 0.998432 | 0.00215331  | 0.986960 |
| rad35         | 0.000248538 | 0.998681 | 0.00206770  | 0.989028 |
| rad39         | 0.000235086 | 0.998916 | 0.00195578  | 0.990984 |
| rad46         | 0.000226360 | 0.999142 | 0.00188318  | 0.992867 |
| rad51         | 0.000169943 | 0.999312 | 0.00141383  | 0.994281 |
| rad59         | 0.000105104 | 0.999417 | 0.000874409 | 0.995155 |
| rad67         | 7.43680e-05 | 0.999491 | 0.000618699 | 0.995774 |
| PhCCCH3+H     | 7.25591e-05 | 0.999564 | 0.000603650 | 0.996377 |
| rad60syn      | 6.82939e-05 | 0.999632 | 0.000568166 | 0.996945 |
| rad71         | 6.33983e-05 | 0.999696 | 0.000527437 | 0.997473 |
| rad60anti     | 4.83208e-05 | 0.999744 | 0.000402002 | 0.997875 |
| rad52         | 3.79688e-05 | 0.999782 | 0.000315878 | 0.998191 |
| PAH10+CH3     | 3.36290e-05 | 0.999816 | 0.000279774 | 0.998471 |
| rad19syn      | 2.47748e-05 | 0.999840 | 0.000206112 | 0.998677 |
| rad73         | 2.24182e-05 | 0.999863 | 0.000186507 | 0.998863 |
| PhcycC3H3_A+H | 1.78694e-05 | 0.999881 | 0.000148663 | 0.999012 |
| rad58         | 1.72912e-05 | 0.999898 | 0.000143853 | 0.999156 |
| rad23         | 1.68059e-05 | 0.999915 | 0.000139816 | 0.999295 |
| PAH1+H        | 1.53742e-05 | 0.999930 | 0.000127905 | 0.999423 |
| rad6          | 1.47365e-05 | 0.999945 | 0.000122599 | 0.999546 |
| rad72         | 1.07545e-05 | 0.999956 | 8.94711e-05 | 0.999635 |
| rad37         | 8.27989e-06 | 0.999964 | 6.88839e-05 | 0.999704 |
| rad54         | 6.67836e-06 | 0.999971 | 5.55602e-05 | 0.999760 |
| rad70         | 6.43536e-06 | 0.999977 | 5.35385e-05 | 0.999813 |
| rad65         | 4.44853e-06 | 0.999982 | 3.70092e-05 | 0.999850 |
| rad45         | 2.98590e-06 | 0.999985 | 2.48410e-05 | 0.999875 |
| rad34         | 2.12075e-06 | 0.999987 | 1.76434e-05 | 0.999893 |
| rad9          | 2.10124e-06 | 0.999989 | 1.74811e-05 | 0.999910 |
| PAH8+H        | 1.82831e-06 | 0.999991 | 1.52105e-05 | 0.999926 |
| rad22         | 1.63240e-06 | 0.999992 | 1.35806e-05 | 0.999939 |
| rad20         | 1.48587e-06 | 0.999994 | 1.23616e-05 | 0.999952 |
| rad21         | 7.19723e-07 | 0.999994 | 5.98768e-06 | 0.999958 |
| rad55         | 6.38331e-07 | 0.999995 | 5.31055e-06 | 0.999963 |
| rad11         | 6.27832e-07 | 0.999996 | 5.22320e-06 | 0.999968 |
| rad36         | 5.28575e-07 | 0.999996 | 4.39744e-06 | 0.999972 |
| rad56         | 4.42149e-07 | 0.999997 | 3.67843e-06 | 0.999976 |
| rad64         | 3.93439e-07 | 0.999997 | 3.27319e-06 | 0.999979 |
| rad53         | 3.38128e-07 | 0.999997 | 2.81303e-06 | 0.999982 |
| rad68syn      | 3.24944e-07 | 0.999998 | 2.70335e-06 | 0.999985 |
| rad18         | 3.08983e-07 | 0.999998 | 2.57056e-06 | 0.999988 |
| rad62         | 2.17330e-07 | 0.999998 | 1.80806e-06 | 0.999989 |
| rad7          | 2.12929e-07 | 0.999998 | 1.77145e-06 | 0.999991 |
| rad68anti     | 2.07892e-07 | 0.999999 | 1.72955e-06 | 0.999993 |
| rad40syn      | 1.65149e-07 | 0.999999 | 1.37395e-06 | 0.999994 |
| rad61         | 1.35034e-07 | 0.999999 | 1.12341e-06 | 0.999995 |
| rad15         | 1.31967e-07 | 0.999999 | 1.09789e-06 | 0.999996 |
| rad40anti     | 1.17860e-07 | 0.999999 | 9.80527e-07 | 0.999997 |
| rad28         | 9.78861e-08 | 0.999999 | 8.14356e-07 | 0.999998 |
| rad43         | 9.31094e-08 | 0.999999 | 7.74617e-07 | 0.999999 |
| rad24         | 3.53828e-08 | 0.999999 | 2.94365e-07 | 0.999999 |
| rad42         | 3.50895e-08 | 0.999999 | 2.91924e-07 | 1.000000 |
| rad12         | 2.36060e-08 | 0.999999 | 1.96388e-07 | 1.000000 |
| rad8          | 2.28397e-08 | 1.000000 | 1.90014e-07 | 1.000000 |
| rad13         | 2.25818e-08 | 1.000000 | 1.87867e-07 | 1.000000 |
| rad26         | 1.31968e-08 | 1.000000 | 1.09790e-07 | 1.000000 |
| rad41         | 1.28248e-08 | 1.000000 | 1.06695e-07 | 1.000000 |
| rad47         | 4.14977e-09 | 1.000000 | 3.45237e-08 | 1.000000 |
| rad10         | 4.10639e-09 | 1.000000 | 3.41628e-08 | 1.000000 |
| rad25         | 1.72094e-09 | 1.000000 | 1.43173e-08 | 1.000000 |
| rad33         | 1.29473e-09 | 1.000000 | 1.07714e-08 | 1.000000 |
| rad2          | 4.17774e-10 | 1.000000 | 3.47564e-09 | 1.000000 |
| rad5          | 2.31243e-10 | 1.000000 | 1.92381e-09 | 1.000000 |

|       |             |          |             |         |
|-------|-------------|----------|-------------|---------|
| rad1  | 1.41925e-10 | 1.000000 | 1.18074e-09 | 1.00000 |
| rad3  | 6.93284e-11 | 1.000000 | 5.76773e-10 | 1.00000 |
| rad4  | 4.29883e-11 | 1.000000 | 3.57638e-10 | 1.00000 |
| rad14 | 2.53936e-11 | 1.000000 | 2.11260e-10 | 1.00000 |
| rad27 | 1.06811e-11 | 1.000000 | 8.88610e-11 | 1.00000 |

10000.0000 Pa, 2750.00000 K

| Rate constant | True (fraction)     | Effective (fraction) |
|---------------|---------------------|----------------------|
| Total         | 8.05113e-13 (1.00 ) | 1.00506e-13 (1.00 )  |

| species       | PYtrue      | Cumul    | PYeffective | Cumul    |
|---------------|-------------|----------|-------------|----------|
| Benzyl+C2H2   | 0.875165    | 0.875165 | 0.00000     | 0.00000  |
| PhCH2CCH+H    | 0.0492394   | 0.924404 | 0.394437    | 0.394437 |
| Indene+H      | 0.0424892   | 0.966894 | 0.340364    | 0.734801 |
| PhCHCCH2+H    | 0.0126740   | 0.979568 | 0.101526    | 0.836327 |
| Ph+Allene     | 0.0121462   | 0.991714 | 0.0972987   | 0.933626 |
| PAH3+H        | 0.00165608  | 0.993370 | 0.0132662   | 0.946892 |
| PAH9+H        | 0.00115097  | 0.994521 | 0.00921999  | 0.956112 |
| rad19anti     | 0.000786776 | 0.995308 | 0.00630255  | 0.962414 |
| PAH7+H        | 0.000745482 | 0.996053 | 0.00597176  | 0.968386 |
| rad38         | 0.000684072 | 0.996737 | 0.00547983  | 0.973866 |
| rad30         | 0.000454347 | 0.997192 | 0.00363959  | 0.977506 |
| rad50         | 0.000389585 | 0.997581 | 0.00312081  | 0.980626 |
| Ph+MeAc       | 0.000332154 | 0.997913 | 0.00266076  | 0.983287 |
| PhCCH+CH3     | 0.000292556 | 0.998206 | 0.00234355  | 0.985631 |
| rad35         | 0.000279011 | 0.998485 | 0.00223504  | 0.987866 |
| rad39         | 0.000270494 | 0.998755 | 0.00216682  | 0.990033 |
| rad46         | 0.000246842 | 0.999002 | 0.00197736  | 0.992010 |
| rad51         | 0.000196082 | 0.999198 | 0.00157074  | 0.993581 |
| rad59         | 0.000134021 | 0.999332 | 0.00107359  | 0.994654 |
| rad67         | 0.000103696 | 0.999436 | 0.000830667 | 0.995485 |
| PhCCCH3+H     | 9.48750e-05 | 0.999531 | 0.000760006 | 0.996245 |
| rad60syn      | 8.03844e-05 | 0.999611 | 0.000643927 | 0.996889 |
| rad60anti     | 5.75325e-05 | 0.999669 | 0.000460870 | 0.997350 |
| rad71         | 4.98141e-05 | 0.999719 | 0.000399041 | 0.997749 |
| PAH10+CH3     | 4.88021e-05 | 0.999767 | 0.000390934 | 0.998140 |
| rad52         | 4.45118e-05 | 0.999812 | 0.000356566 | 0.998496 |
| rad19syn      | 3.47842e-05 | 0.999847 | 0.000278643 | 0.998775 |
| rad58         | 2.60878e-05 | 0.999873 | 0.000208979 | 0.998984 |
| PAH1+H        | 2.08550e-05 | 0.999894 | 0.000167061 | 0.999151 |
| PhcycC3H3_A+H | 2.00854e-05 | 0.999914 | 0.000160897 | 0.999312 |
| rad73         | 2.00728e-05 | 0.999934 | 0.000160795 | 0.999473 |
| rad37         | 1.02942e-05 | 0.999944 | 8.24625e-05 | 0.999555 |
| rad70         | 9.19566e-06 | 0.999953 | 7.36628e-05 | 0.999629 |
| rad54         | 7.17060e-06 | 0.999960 | 5.74408e-05 | 0.999686 |
| rad72         | 6.85409e-06 | 0.999967 | 5.49054e-05 | 0.999741 |
| rad23         | 6.70597e-06 | 0.999974 | 5.37189e-05 | 0.999795 |
| rad65         | 4.99453e-06 | 0.999979 | 4.00092e-05 | 0.999835 |
| rad6          | 4.61373e-06 | 0.999984 | 3.69588e-05 | 0.999872 |
| rad34         | 3.17052e-06 | 0.999987 | 2.53978e-05 | 0.999897 |
| PAH8+H        | 2.80320e-06 | 0.999990 | 2.24554e-05 | 0.999920 |
| rad45         | 1.48245e-06 | 0.999991 | 1.18753e-05 | 0.999932 |
| rad9          | 1.18943e-06 | 0.999992 | 9.52805e-06 | 0.999941 |
| rad20         | 8.96324e-07 | 0.999993 | 7.18010e-06 | 0.999948 |
| rad55         | 7.10631e-07 | 0.999994 | 5.69258e-06 | 0.999954 |
| rad22         | 6.96224e-07 | 0.999995 | 5.57717e-06 | 0.999960 |
| rad56         | 5.42093e-07 | 0.999995 | 4.34249e-06 | 0.999964 |
| rad64         | 5.35283e-07 | 0.999996 | 4.28794e-06 | 0.999968 |
| rad68syn      | 5.21508e-07 | 0.999996 | 4.17759e-06 | 0.999972 |
| rad21         | 4.19768e-07 | 0.999997 | 3.36260e-06 | 0.999976 |
| rad53         | 4.11204e-07 | 0.999997 | 3.29399e-06 | 0.999979 |
| rad68anti     | 3.33537e-07 | 0.999997 | 2.67183e-06 | 0.999982 |
| rad11         | 3.06203e-07 | 0.999998 | 2.45287e-06 | 0.999984 |
| rad62         | 2.74185e-07 | 0.999998 | 2.19639e-06 | 0.999986 |
| rad36         | 2.65805e-07 | 0.999998 | 2.12926e-06 | 0.999988 |
| rad40syn      | 2.62367e-07 | 0.999998 | 2.10172e-06 | 0.999991 |
| rad61         | 2.12880e-07 | 0.999999 | 1.70530e-06 | 0.999992 |
| rad40anti     | 1.85490e-07 | 0.999999 | 1.48588e-06 | 0.999994 |
| rad18         | 1.57470e-07 | 0.999999 | 1.26143e-06 | 0.999995 |
| rad43         | 1.40610e-07 | 0.999999 | 1.12637e-06 | 0.999996 |
| rad7          | 8.38039e-08 | 0.999999 | 6.71320e-07 | 0.999997 |
| rad15         | 8.12986e-08 | 0.999999 | 6.51251e-07 | 0.999997 |
| rad28         | 4.34373e-08 | 0.999999 | 3.47959e-07 | 0.999998 |
| rad42         | 4.25382e-08 | 0.999999 | 3.40757e-07 | 0.999998 |
| rad24         | 2.34741e-08 | 0.999999 | 1.88042e-07 | 0.999998 |
| rad8          | 2.30102e-08 | 0.999999 | 1.84326e-07 | 0.999999 |
| rad41         | 2.10124e-08 | 0.999999 | 1.68322e-07 | 0.999999 |

|       |             |          |             |          |
|-------|-------------|----------|-------------|----------|
| rad12 | 1.83860e-08 | 0.999999 | 1.47283e-07 | 0.999999 |
| rad13 | 9.63024e-09 | 0.999999 | 7.71440e-08 | 0.999999 |
| rad26 | 8.47475e-09 | 0.999999 | 6.78879e-08 | 0.999999 |
| rad47 | 4.42089e-09 | 0.999999 | 3.54140e-08 | 0.999999 |
| rad10 | 2.85454e-09 | 0.999999 | 2.28666e-08 | 0.999999 |
| rad25 | 1.18467e-09 | 0.999999 | 9.48994e-09 | 0.999999 |
| rad33 | 6.42962e-10 | 0.999999 | 5.15051e-09 | 0.999999 |
| rad2  | 2.57086e-10 | 0.999999 | 2.05942e-09 | 0.999999 |
| rad5  | 2.30400e-10 | 0.999999 | 1.84564e-09 | 0.999999 |
| rad1  | 9.60076e-11 | 0.999999 | 7.69079e-10 | 0.999999 |
| rad3  | 2.81426e-11 | 0.999999 | 2.25439e-10 | 0.999999 |
| rad14 | 1.79242e-11 | 0.999999 | 1.43584e-10 | 0.999999 |
| rad4  | 1.70826e-11 | 0.999999 | 1.36842e-10 | 0.999999 |
| rad27 | 9.47845e-12 | 0.999999 | 7.59281e-11 | 0.999999 |

10000.0000 Pa, 3000.00000 K

| Rate constant | True (fraction)     | Effective (fraction) |
|---------------|---------------------|----------------------|
| Total         | 1.15309e-12 (1.00 ) | 1.53877e-13 (1.00 )  |

| species       | PYtrue      | Cumul    | PYeffective | Cumul    |
|---------------|-------------|----------|-------------|----------|
| Benzyl+C2H2   | 0.866553    | 0.866553 | 0.00000     | 0.00000  |
| PhCH2CCH+H    | 0.0611737   | 0.927727 | 0.458411    | 0.458411 |
| Indene+H      | 0.0341712   | 0.961898 | 0.256065    | 0.714476 |
| PhCHCCH2+H    | 0.0154879   | 0.977386 | 0.116060    | 0.830536 |
| Ph+Allene     | 0.0132680   | 0.990654 | 0.0994253   | 0.929961 |
| PAH3+H        | 0.00206029  | 0.992714 | 0.0154390   | 0.945400 |
| PAH9+H        | 0.00114511  | 0.993859 | 0.00858096  | 0.953981 |
| PAH7+H        | 0.000872983 | 0.994732 | 0.00654177  | 0.960523 |
| rad19anti     | 0.000811384 | 0.995544 | 0.00608018  | 0.966603 |
| rad38         | 0.000697860 | 0.996241 | 0.00522947  | 0.971833 |
| rad50         | 0.000460272 | 0.996702 | 0.00344909  | 0.975282 |
| rad30         | 0.000455439 | 0.997157 | 0.00341287  | 0.978695 |
| Ph+MeAc       | 0.000411724 | 0.997569 | 0.00308529  | 0.981780 |
| rad39         | 0.000324631 | 0.997893 | 0.00243265  | 0.984213 |
| PhCCH+CH3     | 0.000319150 | 0.998213 | 0.00239158  | 0.986604 |
| rad35         | 0.000304413 | 0.998517 | 0.00228115  | 0.988885 |
| rad46         | 0.000261839 | 0.998779 | 0.00196212  | 0.990847 |
| rad51         | 0.000243465 | 0.999022 | 0.00182443  | 0.992672 |
| rad59         | 0.000161020 | 0.999183 | 0.00120662  | 0.993878 |
| rad67         | 0.000133017 | 0.999316 | 0.000996771 | 0.994875 |
| PhCCCH3+H     | 0.000117562 | 0.999434 | 0.000880965 | 0.995756 |
| rad60syn      | 9.03558e-05 | 0.999524 | 0.000677089 | 0.996433 |
| PAH10+CH3     | 6.59188e-05 | 0.999590 | 0.000493969 | 0.996927 |
| rad60anti     | 6.53022e-05 | 0.999656 | 0.000489348 | 0.997417 |
| rad71         | 5.78290e-05 | 0.999713 | 0.000433347 | 0.997850 |
| rad52         | 5.38222e-05 | 0.999767 | 0.000403321 | 0.998253 |
| rad19syn      | 5.02640e-05 | 0.999817 | 0.000376658 | 0.998630 |
| rad58         | 3.61519e-05 | 0.999854 | 0.000270908 | 0.998901 |
| PAH1+H        | 2.95631e-05 | 0.999883 | 0.000221534 | 0.999122 |
| rad73         | 2.48258e-05 | 0.999908 | 0.000186034 | 0.999308 |
| PhcycC3H3_A+H | 2.37735e-05 | 0.999932 | 0.000178149 | 0.999487 |
| rad70         | 1.27641e-05 | 0.999945 | 9.56489e-05 | 0.999582 |
| rad37         | 1.18508e-05 | 0.999956 | 8.88050e-05 | 0.999671 |
| rad54         | 7.78053e-06 | 0.999964 | 5.83041e-05 | 0.999729 |
| rad72         | 6.63730e-06 | 0.999971 | 4.97372e-05 | 0.999779 |
| rad65         | 6.05222e-06 | 0.999977 | 4.53528e-05 | 0.999824 |
| PAH8+H        | 4.99764e-06 | 0.999982 | 3.74503e-05 | 0.999862 |
| rad34         | 4.62589e-06 | 0.999986 | 3.46645e-05 | 0.999897 |
| rad23         | 2.96411e-06 | 0.999989 | 2.22118e-05 | 0.999919 |
| rad6          | 1.58238e-06 | 0.999991 | 1.18577e-05 | 0.999931 |
| rad68syn      | 8.63762e-07 | 0.999992 | 6.47268e-06 | 0.999937 |
| rad55         | 8.01706e-07 | 0.999993 | 6.00766e-06 | 0.999943 |
| rad64         | 7.77689e-07 | 0.999993 | 5.82768e-06 | 0.999949 |
| rad45         | 7.73830e-07 | 0.999994 | 5.79877e-06 | 0.999955 |
| rad56         | 7.35843e-07 | 0.999995 | 5.51411e-06 | 0.999960 |
| rad9          | 6.83380e-07 | 0.999996 | 5.12097e-06 | 0.999965 |
| rad20         | 5.79331e-07 | 0.999996 | 4.34127e-06 | 0.999970 |
| rad68anti     | 5.51825e-07 | 0.999997 | 4.13515e-06 | 0.999974 |
| rad53         | 5.31449e-07 | 0.999997 | 3.98246e-06 | 0.999978 |
| rad40syn      | 4.54570e-07 | 0.999998 | 3.40636e-06 | 0.999981 |
| rad62         | 3.84636e-07 | 0.999998 | 2.88231e-06 | 0.999984 |
| rad22         | 3.38802e-07 | 0.999998 | 2.53884e-06 | 0.999987 |
| rad61         | 3.29756e-07 | 0.999999 | 2.47106e-06 | 0.999989 |
| rad40anti     | 3.25227e-07 | 0.999999 | 2.43712e-06 | 0.999992 |
| rad21         | 2.61811e-07 | 0.999999 | 1.96191e-06 | 0.999994 |
| rad43         | 1.95897e-07 | 1.000000 | 1.46797e-06 | 0.999995 |
| rad11         | 1.69672e-07 | 1.000000 | 1.27145e-06 | 0.999996 |



|       |             |          |             |          |
|-------|-------------|----------|-------------|----------|
| rad36 | 1.40238e-07 | 1.000000 | 1.05089e-06 | 0.999997 |
| rad18 | 8.74375e-08 | 1.00000  | 6.55221e-07 | 0.999998 |
| rad42 | 6.28248e-08 | 1.00000  | 4.70784e-07 | 0.999998 |
| rad15 | 5.03821e-08 | 1.00000  | 3.77543e-07 | 0.999999 |
| rad7  | 3.56546e-08 | 1.00000  | 2.67181e-07 | 0.999999 |
| rad41 | 3.22739e-08 | 1.00000  | 2.41848e-07 | 0.999999 |
| rad8  | 2.26471e-08 | 1.00000  | 1.69708e-07 | 0.999999 |
| rad28 | 2.22016e-08 | 1.00000  | 1.66370e-07 | 1.000000 |
| rad24 | 1.59586e-08 | 1.00000  | 1.19587e-07 | 1.000000 |
| rad12 | 1.40936e-08 | 1.00000  | 1.05612e-07 | 1.000000 |
| rad26 | 5.46293e-09 | 1.00000  | 4.09369e-08 | 1.000000 |
| rad47 | 5.25553e-09 | 1.00000  | 3.93828e-08 | 1.000000 |
| rad13 | 4.44323e-09 | 1.00000  | 3.32958e-08 | 1.000000 |
| rad10 | 1.96662e-09 | 1.00000  | 1.47370e-08 | 1.000000 |
| rad25 | 8.79301e-10 | 1.00000  | 6.58912e-09 | 1.00000  |
| rad33 | 3.41733e-10 | 1.00000  | 2.56081e-09 | 1.00000  |
| rad5  | 2.23804e-10 | 1.00000  | 1.67710e-09 | 1.00000  |
| rad2  | 1.65888e-10 | 1.00000  | 1.24310e-09 | 1.00000  |
| rad1  | 6.84737e-11 | 1.00000  | 5.13114e-10 | 1.00000  |
| rad14 | 1.43985e-11 | 1.00000  | 1.07897e-10 | 1.00000  |
| rad3  | 1.26319e-11 | 1.00000  | 9.46582e-11 | 1.00000  |
| rad27 | 8.19815e-12 | 1.00000  | 6.14336e-11 | 1.00000  |
| rad4  | 7.48213e-12 | 1.00000  | 5.60680e-11 | 1.00000  |

10000.0000 Pa, 3250.00000 K

=====

| Rate constant | True (fraction)     | Effective (fraction) |
|---------------|---------------------|----------------------|
| Total         | 1.58309e-12 (1.00 ) | 2.28807e-13 (1.00 )  |

| species       | PYtrue      | Cumul    | PYeffective | Cumul    |
|---------------|-------------|----------|-------------|----------|
| Benzyl+C2H2   | 0.855468    | 0.855468 | 0.00000     | 0.00000  |
| PhCH2CCH+H    | 0.0734305   | 0.928898 | 0.508058    | 0.508058 |
| Indene+H      | 0.0278246   | 0.956723 | 0.192515    | 0.700573 |
| PhCHCCH2+H    | 0.0183641   | 0.975087 | 0.127059    | 0.827632 |
| Ph+Allene     | 0.0145941   | 0.989681 | 0.100975    | 0.928607 |
| PAH3+H        | 0.00243687  | 0.992118 | 0.0168605   | 0.945468 |
| PAH9+H        | 0.00110507  | 0.993223 | 0.00764589  | 0.953113 |
| PAH7+H        | 0.000989314 | 0.994213 | 0.00684496  | 0.959958 |
| rad19anti     | 0.000808141 | 0.995021 | 0.00559144  | 0.965550 |
| rad38         | 0.000687913 | 0.995709 | 0.00475960  | 0.970309 |
| rad50         | 0.000525133 | 0.996234 | 0.00363334  | 0.973943 |
| Ph+MeAc       | 0.000489578 | 0.996723 | 0.00338734  | 0.977330 |
| rad30         | 0.000447968 | 0.997171 | 0.00309945  | 0.980430 |
| rad39         | 0.000380817 | 0.997552 | 0.00263483  | 0.983064 |
| PhCCH+CH3     | 0.000378386 | 0.997930 | 0.00261802  | 0.985682 |
| rad35         | 0.000323099 | 0.998254 | 0.00223549  | 0.987918 |
| rad51         | 0.000295997 | 0.998550 | 0.00204798  | 0.989966 |
| rad46         | 0.000267747 | 0.998817 | 0.00185251  | 0.991818 |
| rad59         | 0.000184719 | 0.999002 | 0.00127805  | 0.993096 |
| rad67         | 0.000159920 | 0.999162 | 0.00110647  | 0.994203 |
| PhCCCH3+H     | 0.000140371 | 0.999302 | 0.000971216 | 0.995174 |
| rad60syn      | 9.79859e-05 | 0.999400 | 0.000677954 | 0.995852 |
| PAH10+CH3     | 8.28638e-05 | 0.999483 | 0.000573326 | 0.996425 |
| rad71         | 7.98901e-05 | 0.999563 | 0.000552751 | 0.996978 |
| rad60anti     | 7.14116e-05 | 0.999634 | 0.000494089 | 0.997472 |
| rad19syn      | 7.14041e-05 | 0.999706 | 0.000494037 | 0.997966 |
| rad52         | 6.30031e-05 | 0.999769 | 0.000435912 | 0.998402 |
| rad58         | 4.68540e-05 | 0.999816 | 0.000324178 | 0.998726 |
| PAH1+H        | 4.03371e-05 | 0.999856 | 0.000279088 | 0.999005 |
| rad73         | 3.38984e-05 | 0.999890 | 0.000234539 | 0.999240 |
| PhcycC3H3_A+H | 2.79211e-05 | 0.999918 | 0.000193184 | 0.999433 |
| rad70         | 1.69352e-05 | 0.999935 | 0.000117173 | 0.999550 |
| rad37         | 1.28476e-05 | 0.999948 | 8.88915e-05 | 0.999639 |
| rad72         | 8.91775e-06 | 0.999957 | 6.17010e-05 | 0.999701 |
| PAH8+H        | 8.61005e-06 | 0.999965 | 5.95721e-05 | 0.999760 |
| rad54         | 8.39538e-06 | 0.999974 | 5.80868e-05 | 0.999819 |
| rad65         | 7.21711e-06 | 0.999981 | 4.99344e-05 | 0.999869 |
| rad34         | 6.42139e-06 | 0.999987 | 4.44290e-05 | 0.999913 |
| rad23         | 1.41151e-06 | 0.999989 | 9.76606e-06 | 0.999923 |
| rad68syn      | 1.35630e-06 | 0.999990 | 9.38409e-06 | 0.999932 |
| rad64         | 1.08870e-06 | 0.999991 | 7.53260e-06 | 0.999940 |
| rad56         | 9.85895e-07 | 0.999992 | 6.82131e-06 | 0.999946 |
| rad55         | 8.95875e-07 | 0.999993 | 6.19847e-06 | 0.999953 |
| rad68anti     | 8.65560e-07 | 0.999994 | 5.98872e-06 | 0.999959 |
| rad40syn      | 7.51718e-07 | 0.999995 | 5.20106e-06 | 0.999964 |
| rad53         | 6.76532e-07 | 0.999995 | 4.68086e-06 | 0.999969 |
| rad6          | 6.04701e-07 | 0.999996 | 4.18387e-06 | 0.999973 |
| rad40anti     | 5.46171e-07 | 0.999996 | 3.77890e-06 | 0.999976 |

|       |             |          |             |          |
|-------|-------------|----------|-------------|----------|
| rad62 | 5.30721e-07 | 0.999997 | 3.67200e-06 | 0.999980 |
| rad61 | 4.74226e-07 | 0.999997 | 3.28112e-06 | 0.999983 |
| rad45 | 4.22242e-07 | 0.999998 | 2.92145e-06 | 0.999986 |
| rad9  | 4.03000e-07 | 0.999998 | 2.78832e-06 | 0.999989 |
| rad20 | 3.95552e-07 | 0.999999 | 2.73678e-06 | 0.999992 |
| rad43 | 2.54131e-07 | 0.999999 | 1.75831e-06 | 0.999994 |
| rad22 | 1.82147e-07 | 0.999999 | 1.26025e-06 | 0.999995 |
| rad21 | 1.72279e-07 | 0.999999 | 1.19198e-06 | 0.999996 |
| rad11 | 1.04902e-07 | 0.999999 | 7.25804e-07 | 0.999997 |
| rad42 | 9.28900e-08 | 0.999999 | 6.42696e-07 | 0.999997 |
| rad36 | 7.71889e-08 | 1.000000 | 5.34062e-07 | 0.999998 |
| rad18 | 5.18917e-08 | 1.000000 | 3.59033e-07 | 0.999998 |
| rad41 | 4.59006e-08 | 1.000000 | 3.17582e-07 | 0.999999 |
| rad15 | 3.17384e-08 | 1.000000 | 2.19595e-07 | 0.999999 |
| rad8  | 2.18601e-08 | 1.000000 | 1.51248e-07 | 0.999999 |
| rad7  | 1.66774e-08 | 1.000000 | 1.15389e-07 | 0.999999 |
| rad28 | 1.25412e-08 | 1.000000 | 8.67710e-08 | 0.999999 |
| rad24 | 1.10811e-08 | 1.000000 | 7.66692e-08 | 0.999999 |
| rad12 | 1.07632e-08 | 1.000000 | 7.44697e-08 | 0.999999 |
| rad47 | 6.20093e-09 | 1.000000 | 4.29036e-08 | 0.999999 |
| rad26 | 3.53987e-09 | 1.000000 | 2.44920e-08 | 0.999999 |
| rad13 | 2.25331e-09 | 1.000000 | 1.55904e-08 | 0.999999 |
| rad10 | 1.35047e-09 | 1.000000 | 9.34378e-09 | 0.999999 |
| rad25 | 6.87922e-10 | 1.000000 | 4.75966e-09 | 0.999999 |
| rad5  | 2.14920e-10 | 1.000000 | 1.48701e-09 | 0.999999 |
| rad33 | 1.96218e-10 | 1.000000 | 1.35761e-09 | 0.999999 |
| rad2  | 1.10515e-10 | 1.000000 | 7.64639e-10 | 0.999999 |
| rad1  | 5.02491e-11 | 1.000000 | 3.47668e-10 | 0.999999 |
| rad14 | 1.23846e-11 | 1.000000 | 8.56878e-11 | 0.999999 |
| rad27 | 6.95119e-12 | 1.000000 | 4.80946e-11 | 0.999999 |
| rad3  | 6.35660e-12 | 1.000000 | 4.39807e-11 | 0.999999 |
| rad4  | 3.67856e-12 | 1.000000 | 2.54516e-11 | 0.999999 |

10000.0000 Pa, 3500.00000 K

| Rate constant | True (fraction)     |          | Effective (fraction) |          |
|---------------|---------------------|----------|----------------------|----------|
| -----         |                     |          |                      |          |
| Total         | 2.10046e-12 (1.00 ) |          | 3.29934e-13 (1.00 )  |          |
| species       | PYtrue              | Cumul    | PYeffective          | Cumul    |
| -----         |                     |          |                      |          |
| Benzyl+C2H2   | 0.842923            | 0.842923 | 0.00000              | 0.00000  |
| PhCH2CCH+H    | 0.0857240           | 0.928647 | 0.545746             | 0.545746 |
| Indene+H      | 0.0229133           | 0.951560 | 0.145873             | 0.691619 |
| PhCHCCH2+H    | 0.0212224           | 0.972783 | 0.135109             | 0.826728 |
| Ph+Allene     | 0.0160716           | 0.988854 | 0.102317             | 0.929045 |
| PAH3+H        | 0.00277099          | 0.991625 | 0.0176410            | 0.946686 |
| PAH7+H        | 0.00108642          | 0.992712 | 0.00691651           | 0.953603 |
| PAH9+H        | 0.00103818          | 0.993750 | 0.00660938           | 0.960212 |
| rad19anti     | 0.000785660         | 0.994536 | 0.00500176           | 0.965214 |
| rad38         | 0.000657604         | 0.995193 | 0.00418652           | 0.969400 |
| rad50         | 0.000574429         | 0.995768 | 0.00365700           | 0.973057 |
| Ph+MeAc       | 0.000559773         | 0.996327 | 0.00356370           | 0.976621 |
| PhCCH+CH3     | 0.000466884         | 0.996794 | 0.00297233           | 0.979593 |
| rad30         | 0.000434288         | 0.997229 | 0.00276481           | 0.982358 |
| rad39         | 0.000429819         | 0.997658 | 0.00273636           | 0.985094 |
| rad51         | 0.000344106         | 0.998002 | 0.00219069           | 0.987285 |
| rad35         | 0.000335150         | 0.998338 | 0.00213367           | 0.989419 |
| rad46         | 0.000264692         | 0.998602 | 0.00168512           | 0.991104 |
| rad59         | 0.000204445         | 0.998807 | 0.00130156           | 0.992405 |
| rad67         | 0.000182847         | 0.998990 | 0.00116406           | 0.993569 |
| PhCCCH3+H     | 0.000163680         | 0.999153 | 0.00104204           | 0.994612 |
| rad71         | 0.000111456         | 0.999265 | 0.000709564          | 0.995321 |
| rad60syn      | 0.000103351         | 0.999368 | 0.000657963          | 0.995979 |
| PAH10+CH3     | 9.82200e-05         | 0.999466 | 0.000625300          | 0.996604 |
| rad19syn      | 9.79998e-05         | 0.999564 | 0.000623898          | 0.997228 |
| rad60anti     | 7.58716e-05         | 0.999640 | 0.000483023          | 0.997711 |
| rad52         | 7.05087e-05         | 0.999711 | 0.000448881          | 0.998160 |
| rad58         | 5.76273e-05         | 0.999768 | 0.000366874          | 0.998527 |
| PAH1+H        | 5.22801e-05         | 0.999821 | 0.000332832          | 0.998860 |
| rad73         | 4.54671e-05         | 0.999866 | 0.000289458          | 0.999149 |
| PhcycC3H3_A+H | 3.21124e-05         | 0.999898 | 0.000204438          | 0.999354 |
| rad70         | 2.14962e-05         | 0.999920 | 0.000136851          | 0.999491 |
| PAH8+H        | 1.38305e-05         | 0.999933 | 8.80493e-05          | 0.999579 |
| rad37         | 1.33183e-05         | 0.999947 | 8.47884e-05          | 0.999663 |
| rad72         | 1.31663e-05         | 0.999960 | 8.38206e-05          | 0.999747 |
| rad54         | 8.98523e-06         | 0.999969 | 5.72028e-05          | 0.999804 |
| rad34         | 8.47998e-06         | 0.999977 | 5.39863e-05          | 0.999858 |
| rad65         | 8.26354e-06         | 0.999986 | 5.26084e-05          | 0.999911 |
| rad68syn      | 1.99777e-06         | 0.999988 | 1.27184e-05          | 0.999924 |

|           |             |          |             |          |
|-----------|-------------|----------|-------------|----------|
| rad64     | 1.44210e-06 | 0.999989 | 9.18086e-06 | 0.999933 |
| rad56     | 1.27685e-06 | 0.999990 | 8.12885e-06 | 0.999941 |
| rad68anti | 1.27376e-06 | 0.999992 | 8.10915e-06 | 0.999949 |
| rad40syn  | 1.16117e-06 | 0.999993 | 7.39239e-06 | 0.999957 |
| rad55     | 9.88322e-07 | 0.999994 | 6.29198e-06 | 0.999963 |
| rad40anti | 8.55911e-07 | 0.999995 | 5.44900e-06 | 0.999968 |
| rad53     | 8.37363e-07 | 0.999996 | 5.33092e-06 | 0.999974 |
| rad23     | 7.14961e-07 | 0.999996 | 4.55167e-06 | 0.999978 |
| rad62     | 6.99919e-07 | 0.999997 | 4.45591e-06 | 0.999983 |
| rad61     | 6.34419e-07 | 0.999998 | 4.03891e-06 | 0.999987 |
| rad43     | 3.12161e-07 | 0.999998 | 1.98731e-06 | 0.999989 |
| rad20     | 2.82300e-07 | 0.999998 | 1.79721e-06 | 0.999990 |
| rad6      | 2.60462e-07 | 0.999998 | 1.65818e-06 | 0.999992 |
| rad9      | 2.45110e-07 | 0.999999 | 1.56045e-06 | 0.999994 |
| rad45     | 2.39450e-07 | 0.999999 | 1.52442e-06 | 0.999995 |
| rad42     | 1.30831e-07 | 0.999999 | 8.32910e-07 | 0.999996 |
| rad21     | 1.18416e-07 | 0.999999 | 7.53873e-07 | 0.999997 |
| rad22     | 1.16089e-07 | 0.999999 | 6.75397e-07 | 0.999997 |
| rad11     | 7.07082e-08 | 0.999999 | 4.50151e-07 | 0.999998 |
| rad41     | 6.12515e-08 | 0.999999 | 3.89947e-07 | 0.999998 |
| rad36     | 4.40731e-08 | 0.999999 | 2.80584e-07 | 0.999999 |
| rad18     | 3.24797e-08 | 0.999999 | 2.06776e-07 | 0.999999 |
| rad8      | 2.07463e-08 | 1.000000 | 1.32077e-07 | 0.999999 |
| rad15     | 2.04220e-08 | 1.000000 | 1.30013e-07 | 0.999999 |
| rad7      | 8.58052e-09 | 1.000000 | 5.46263e-08 | 0.999999 |
| rad12     | 8.24204e-09 | 1.000000 | 5.24715e-08 | 0.999999 |
| rad24     | 7.84284e-09 | 1.000000 | 4.99300e-08 | 0.999999 |
| rad28     | 7.59046e-09 | 1.000000 | 4.83233e-08 | 0.999999 |
| rad47     | 7.02844e-09 | 1.000000 | 4.47453e-08 | 0.999999 |
| rad26     | 2.31654e-09 | 1.000000 | 1.47478e-08 | 0.999999 |
| rad13     | 1.25402e-09 | 1.000000 | 7.98351e-09 | 0.999999 |
| rad10     | 9.31906e-10 | 1.000000 | 5.93281e-09 | 0.999999 |
| rad25     | 5.56884e-10 | 1.000000 | 3.54530e-09 | 0.999999 |
| rad5      | 2.05717e-10 | 1.000000 | 1.30966e-09 | 0.999999 |
| rad33     | 1.21249e-10 | 1.000000 | 7.71911e-10 | 0.999999 |
| rad2      | 7.61207e-11 | 1.000000 | 4.84609e-10 | 0.999999 |
| rad1      | 3.75722e-11 | 1.000000 | 2.39197e-10 | 0.999999 |
| rad14     | 1.09417e-11 | 1.000000 | 6.96587e-11 | 0.999999 |
| rad27     | 5.83207e-12 | 1.000000 | 3.71288e-11 | 0.999999 |
| rad3      | 3.56363e-12 | 1.000000 | 2.26872e-11 | 0.999999 |
| rad4      | 2.02508e-12 | 1.000000 | 1.28923e-11 | 0.999999 |

10000.0000 Pa, 3750.00000 K

=====

| Rate constant | True (fraction)     | Effective (fraction) |
|---------------|---------------------|----------------------|
| Total         | 2.70978e-12 (1.00 ) | 4.61716e-13 (1.00 )  |

| species     | PYtrue      | Cumul    | PYeffective | Cumul    |
|-------------|-------------|----------|-------------|----------|
| Benzyl+C2H2 | 0.829611    | 0.829611 | 0.00000     | 0.00000  |
| PhCH2CCH+H  | 0.0978313   | 0.927442 | 0.574164    | 0.574164 |
| PhCHCCH2+H  | 0.0240138   | 0.951456 | 0.140935    | 0.715099 |
| Indene+H    | 0.0190739   | 0.970530 | 0.111943    | 0.827042 |
| Ph+Allene   | 0.0176547   | 0.988185 | 0.103614    | 0.930656 |
| PAH3+H      | 0.00305573  | 0.991240 | 0.0179338   | 0.948590 |
| PAH7+H      | 0.00116216  | 0.992403 | 0.00682065  | 0.955410 |
| PAH9+H      | 0.000954530 | 0.993357 | 0.00560206  | 0.961013 |
| rad19anti   | 0.000750724 | 0.994108 | 0.00440594  | 0.965418 |
| Ph+MeAc     | 0.000618487 | 0.994726 | 0.00362985  | 0.969048 |
| rad38       | 0.000612861 | 0.995339 | 0.00359683  | 0.972645 |
| rad50       | 0.000604924 | 0.995944 | 0.00355025  | 0.976195 |
| PhCCH+CH3   | 0.000581914 | 0.996526 | 0.00341521  | 0.979611 |
| rad39       | 0.000467174 | 0.996993 | 0.00274181  | 0.982352 |
| rad30       | 0.000416532 | 0.997410 | 0.00244459  | 0.984797 |
| rad51       | 0.000382544 | 0.997792 | 0.00224512  | 0.987042 |
| rad35       | 0.000341414 | 0.998134 | 0.00200373  | 0.989046 |
| rad46       | 0.000254420 | 0.998388 | 0.00149317  | 0.990539 |
| rad59       | 0.000220087 | 0.998608 | 0.00129168  | 0.991831 |
| rad67       | 0.000201010 | 0.998809 | 0.00117971  | 0.993010 |
| PhCCCH3+H   | 0.000187982 | 0.998997 | 0.00110325  | 0.994114 |
| rad71       | 0.000148897 | 0.999146 | 0.000873864 | 0.994988 |
| rad19syn    | 0.000129272 | 0.999275 | 0.000758689 | 0.995746 |
| PAH10+CH3   | 0.000111206 | 0.999387 | 0.000652659 | 0.996399 |
| rad60syn    | 0.000106707 | 0.999493 | 0.000626255 | 0.997025 |
| rad60anti   | 7.88386e-05 | 0.999572 | 0.000462697 | 0.997488 |
| rad52       | 7.56664e-05 | 0.999648 | 0.000444080 | 0.997932 |
| rad58       | 6.80299e-05 | 0.999716 | 0.000399262 | 0.998331 |
| PAH1+H      | 6.46899e-05 | 0.999780 | 0.000379660 | 0.998711 |
| rad73       | 5.81070e-05 | 0.999839 | 0.000341025 | 0.999052 |

|               |             |          |             |          |
|---------------|-------------|----------|-------------|----------|
| PhcycC3H3_A+H | 3.61416e-05 | 0.999875 | 0.000212112 | 0.999264 |
| rad70         | 2.62423e-05 | 0.999901 | 0.000154014 | 0.999418 |
| PAH8+H        | 2.07740e-05 | 0.999922 | 0.000121921 | 0.999540 |
| rad72         | 1.90132e-05 | 0.999941 | 0.000111587 | 0.999651 |
| rad37         | 1.33586e-05 | 0.999954 | 7.84006e-05 | 0.999730 |
| rad34         | 1.07177e-05 | 0.999965 | 6.29015e-05 | 0.999793 |
| rad54         | 9.54139e-06 | 0.999974 | 5.59977e-05 | 0.999849 |
| rad65         | 9.08499e-06 | 0.999983 | 5.33191e-05 | 0.999902 |
| rad68syn      | 2.77807e-06 | 0.999986 | 1.63043e-05 | 0.999918 |
| rad64         | 1.81581e-06 | 0.999988 | 1.06569e-05 | 0.999929 |
| rad68anti     | 1.76989e-06 | 0.999990 | 1.03873e-05 | 0.999939 |
| rad40syn      | 1.68411e-06 | 0.999992 | 9.88388e-06 | 0.999949 |
| rad56         | 1.60002e-06 | 0.999993 | 9.39037e-06 | 0.999959 |
| rad40anti     | 1.25737e-06 | 0.999994 | 7.37938e-06 | 0.999966 |
| rad55         | 1.07731e-06 | 0.999995 | 6.32266e-06 | 0.999972 |
| rad53         | 1.00904e-06 | 0.999996 | 5.92197e-06 | 0.999978 |
| rad62         | 8.82924e-07 | 0.999997 | 5.18181e-06 | 0.999984 |
| rad61         | 7.99350e-07 | 0.999998 | 4.69132e-06 | 0.999988 |
| rad23         | 3.82185e-07 | 0.999999 | 2.24301e-06 | 0.999990 |
| rad43         | 3.68008e-07 | 0.999999 | 2.15981e-06 | 0.999993 |
| rad20         | 2.08928e-07 | 0.999999 | 1.22618e-06 | 0.999994 |
| rad42         | 1.75118e-07 | 0.999999 | 1.02775e-06 | 0.999995 |
| rad9          | 1.53931e-07 | 0.999999 | 9.03407e-07 | 0.999996 |
| rad45         | 1.40430e-07 | 1.000000 | 8.24170e-07 | 0.999997 |
| rad6          | 1.26332e-07 | 1.000000 | 7.41430e-07 | 0.999997 |
| rad21         | 8.43878e-08 | 1.000000 | 4.95265e-07 | 0.999998 |
| rad41         | 7.77367e-08 | 1.000000 | 4.56230e-07 | 0.999998 |
| rad22         | 6.60046e-08 | 1.000000 | 3.87376e-07 | 0.999999 |
| rad11         | 5.08839e-08 | 1.000000 | 2.98634e-07 | 0.999999 |
| rad36         | 2.59788e-08 | 1.000000 | 1.52468e-07 | 0.999999 |
| rad18         | 2.12393e-08 | 1.000000 | 1.24652e-07 | 0.999999 |
| rad8          | 1.93964e-08 | 1.000000 | 1.13836e-07 | 0.999999 |
| rad15         | 1.34413e-08 | 1.000000 | 7.88862e-08 | 0.999999 |
| rad47         | 7.63387e-09 | 1.000000 | 4.48026e-08 | 0.999999 |
| rad12         | 6.34818e-09 | 1.000000 | 3.72570e-08 | 1.000000 |
| rad24         | 5.65122e-09 | 1.000000 | 3.31666e-08 | 1.000000 |
| rad28         | 4.82245e-09 | 1.000000 | 2.83026e-08 | 1.000000 |
| rad7          | 4.80773e-09 | 1.000000 | 2.82162e-08 | 1.000000 |
| rad26         | 1.53669e-09 | 1.000000 | 9.01872e-09 | 1.000000 |
| rad13         | 7.57303e-10 | 1.000000 | 4.44456e-09 | 1.000000 |
| rad10         | 6.51151e-10 | 1.000000 | 3.82156e-09 | 1.000000 |
| rad25         | 4.60807e-10 | 1.000000 | 2.70444e-09 | 1.000000 |
| rad5          | 1.96871e-10 | 1.000000 | 1.15542e-09 | 1.000000 |
| rad33         | 7.98689e-11 | 1.000000 | 4.68744e-10 | 1.000000 |
| rad2          | 5.45865e-11 | 1.000000 | 3.20364e-10 | 1.000000 |
| rad1          | 2.85030e-11 | 1.000000 | 1.67282e-10 | 1.000000 |
| rad14         | 9.74398e-12 | 1.000000 | 5.71866e-11 | 1.000000 |
| rad27         | 4.88034e-12 | 1.000000 | 2.86423e-11 | 1.000000 |
| rad3          | 2.19055e-12 | 1.000000 | 1.28562e-11 | 1.000000 |
| rad4          | 1.23028e-12 | 1.000000 | 7.22041e-12 | 1.000000 |

10000.0000 Pa, 4000.00000 K

=====

| Rate constant | True (fraction)     | Effective (fraction) |
|---------------|---------------------|----------------------|
| Total         | 3.41497e-12 (1.00 ) | 6.28303e-13 (1.00 )  |

| species     | PYtrue      | Cumul    | PYeffective | Cumul    |
|-------------|-------------|----------|-------------|----------|
| Benzyl+C2H2 | 0.816015    | 0.816015 | 0.00000     | 0.00000  |
| PhCH2CCH+H  | 0.109584    | 0.925599 | 0.595611    | 0.595611 |
| PhCHCCH2+H  | 0.0267092   | 0.952308 | 0.145170    | 0.740781 |
| Ph+Allene   | 0.0193044   | 0.971613 | 0.104924    | 0.845705 |
| Indene+H    | 0.0160479   | 0.987661 | 0.0872242   | 0.932929 |
| PAH3+H      | 0.00329015  | 0.990951 | 0.0178827   | 0.950812 |
| PAH7+H      | 0.00121782  | 0.992168 | 0.00661913  | 0.957431 |
| PAH9+H      | 0.000863487 | 0.993032 | 0.00469325  | 0.962124 |
| PhCCH+CH3   | 0.000720196 | 0.993752 | 0.00391443  | 0.966039 |
| rad19anti   | 0.000708442 | 0.994461 | 0.00385055  | 0.969889 |
| Ph+MeAc     | 0.000663902 | 0.995124 | 0.00360846  | 0.973498 |
| rad50       | 0.000617300 | 0.995742 | 0.00335516  | 0.976853 |
| rad38       | 0.000559765 | 0.996302 | 0.00304245  | 0.979895 |
| rad39       | 0.000491607 | 0.996793 | 0.00267199  | 0.982567 |
| rad51       | 0.000409176 | 0.997202 | 0.00222397  | 0.984791 |
| rad30       | 0.000396473 | 0.997599 | 0.00215492  | 0.986946 |
| rad35       | 0.000343017 | 0.997942 | 0.00186437  | 0.988811 |
| rad46       | 0.000239158 | 0.998181 | 0.00129988  | 0.990110 |
| rad59       | 0.000231904 | 0.998413 | 0.00126045  | 0.991371 |
| rad67       | 0.000214251 | 0.998627 | 0.00116450  | 0.992535 |
| PhCCCH3+H   | 0.000213573 | 0.998841 | 0.00116082  | 0.993696 |

|               |             |          |             |          |
|---------------|-------------|----------|-------------|----------|
| rad71         | 0.000188995 | 0.999030 | 0.00102723  | 0.994723 |
| rad19syn      | 0.000163945 | 0.999194 | 0.000891080 | 0.995615 |
| PAH10+CH3     | 0.000121540 | 0.999315 | 0.000660599 | 0.996275 |
| rad60syn      | 0.000108395 | 0.999424 | 0.000589154 | 0.996864 |
| rad60anti     | 8.05425e-05 | 0.999504 | 0.000437767 | 0.997302 |
| rad52         | 7.83789e-05 | 0.999583 | 0.000426007 | 0.997728 |
| rad58         | 7.77589e-05 | 0.999660 | 0.000422638 | 0.998151 |
| PAH1+H        | 7.70478e-05 | 0.999737 | 0.000418772 | 0.998569 |
| rad73         | 7.06802e-05 | 0.999808 | 0.000384163 | 0.998954 |
| PhcycC3H3_A+H | 3.98897e-05 | 0.999848 | 0.000216810 | 0.999170 |
| rad70         | 3.09952e-05 | 0.999879 | 0.000168466 | 0.999339 |
| PAH8+H        | 2.94528e-05 | 0.999908 | 0.000160083 | 0.999499 |
| rad72         | 2.60773e-05 | 0.999934 | 0.000141736 | 0.999641 |
| rad37         | 1.30808e-05 | 0.999948 | 7.10974e-05 | 0.999712 |
| rad34         | 1.30524e-05 | 0.999961 | 7.09426e-05 | 0.999783 |
| rad54         | 1.00590e-05 | 0.999971 | 5.46730e-05 | 0.999837 |
| rad65         | 9.65149e-06 | 0.999980 | 5.24580e-05 | 0.999890 |
| rad68syn      | 3.67923e-06 | 0.999984 | 1.99975e-05 | 0.999910 |
| rad68anti     | 2.34246e-06 | 0.999986 | 1.27318e-05 | 0.999923 |
| rad40syn      | 2.31473e-06 | 0.999989 | 1.25811e-05 | 0.999935 |
| rad64         | 2.19232e-06 | 0.999991 | 1.19158e-05 | 0.999947 |
| rad56         | 1.94803e-06 | 0.999993 | 1.05880e-05 | 0.999958 |
| rad40anti     | 1.74782e-06 | 0.999994 | 9.49983e-06 | 0.999967 |
| rad53         | 1.18773e-06 | 0.999996 | 6.45560e-06 | 0.999974 |
| rad55         | 1.16181e-06 | 0.999997 | 6.31470e-06 | 0.999980 |
| rad62         | 1.07315e-06 | 0.999998 | 5.83281e-06 | 0.999986 |
| rad61         | 9.60055e-07 | 0.999999 | 5.21812e-06 | 0.999991 |
| rad43         | 4.20258e-07 | 0.999999 | 2.28420e-06 | 0.999993 |
| rad42         | 2.24453e-07 | 1.000000 | 1.21996e-06 | 0.999995 |
| rad23         | 2.14437e-07 | 1.000000 | 1.16551e-06 | 0.999996 |
| rad20         | 1.59379e-07 | 1.000000 | 8.66264e-07 | 0.999997 |
| rad9          | 9.97318e-08 | 1.000000 | 5.42065e-07 | 0.999997 |
| rad41         | 9.47714e-08 | 1.000000 | 5.15104e-07 | 0.999998 |
| rad45         | 8.48435e-08 | 1.000000 | 4.61144e-07 | 0.999998 |
| rad6          | 6.82627e-08 | 1.000000 | 3.71023e-07 | 0.999998 |
| rad21         | 6.20020e-08 | 1.000000 | 3.36995e-07 | 0.999999 |
| rad22         | 4.33949e-08 | 1.000000 | 2.35861e-07 | 0.999999 |
| rad11         | 3.84672e-08 | 1.000000 | 2.09078e-07 | 0.999999 |
| rad8          | 1.78963e-08 | 1.000000 | 9.72706e-08 | 0.999999 |
| rad36         | 1.57487e-08 | 1.000000 | 8.55980e-08 | 0.999999 |
| rad18         | 1.44127e-08 | 1.000000 | 7.83364e-08 | 1.000000 |
| rad15         | 9.04667e-09 | 1.000000 | 4.91707e-08 | 1.000000 |
| rad47         | 7.98888e-09 | 1.000000 | 4.34214e-08 | 1.000000 |
| rad12         | 4.92490e-09 | 1.000000 | 2.67680e-08 | 1.000000 |
| rad24         | 4.14303e-09 | 1.000000 | 2.25183e-08 | 1.000000 |
| rad28         | 3.17760e-09 | 1.000000 | 1.72710e-08 | 1.000000 |
| rad7          | 2.89389e-09 | 1.000000 | 1.57290e-08 | 1.000000 |
| rad26         | 1.03572e-09 | 1.000000 | 5.62939e-09 | 1.000000 |
| rad13         | 4.89411e-10 | 1.000000 | 2.66006e-09 | 1.000000 |
| rad10         | 4.63584e-10 | 1.000000 | 2.51968e-09 | 1.000000 |
| rad25         | 3.86977e-10 | 1.000000 | 2.10331e-09 | 1.000000 |
| rad5          | 1.88401e-10 | 1.000000 | 1.02400e-09 | 1.000000 |
| rad33         | 5.54974e-11 | 1.000000 | 3.01641e-10 | 1.000000 |
| rad2          | 4.09852e-11 | 1.000000 | 2.22764e-10 | 1.000000 |
| rad1          | 2.18897e-11 | 1.000000 | 1.18975e-10 | 1.000000 |
| rad14         | 8.69390e-12 | 1.000000 | 4.72533e-11 | 1.000000 |
| rad27         | 4.09465e-12 | 1.000000 | 2.22554e-11 | 1.000000 |
| rad3          | 1.45177e-12 | 1.000000 | 7.89068e-12 | 1.000000 |
| rad4          | 8.10267e-13 | 1.000000 | 4.40398e-12 | 1.000000 |

1000.00000 Pa, 20.0000000 K

=====

| Rate constant | True (fraction)      | Effective (fraction) |
|---------------|----------------------|----------------------|
| Total         | 1.34336e-156 (1.00 ) | 1.34336e-156 (1.00 ) |

| species     | PYtrue      | Cumul    | PYeffective | Cumul    |
|-------------|-------------|----------|-------------|----------|
| rad20       | 0.729617    | 0.729617 | 0.729617    | 0.729617 |
| rad21       | 0.202823    | 0.932440 | 0.202823    | 0.932440 |
| rad18       | 0.0406223   | 0.973062 | 0.0406223   | 0.973062 |
| rad22       | 0.0249838   | 0.998046 | 0.0249838   | 0.998046 |
| Indene+H    | 0.00100011  | 0.999046 | 0.00100011  | 0.999046 |
| rad45       | 0.000888226 | 0.999934 | 0.000888226 | 0.999934 |
| rad36       | 5.54915e-05 | 0.999990 | 5.54916e-05 | 0.999990 |
| rad23       | 7.09304e-06 | 0.999997 | 7.09304e-06 | 0.999997 |
| rad11       | 2.77813e-06 | 1.000000 | 2.77813e-06 | 1.000000 |
| Benzyl+C2H2 | 7.17762e-08 | 1.000000 | 0.000000    | 1.000000 |
| rad24       | 2.39031e-08 | 1.000000 | 2.39031e-08 | 1.000000 |
| rad6        | 3.09656e-10 | 1.000000 | 3.09656e-10 | 1.000000 |

|               |             |          |             |          |
|---------------|-------------|----------|-------------|----------|
| rad13         | 1.07911e-16 | 1.000000 | 1.07911e-16 | 1.000000 |
| rad30         | 2.47703e-17 | 1.000000 | 2.47703e-17 | 1.000000 |
| rad7          | 2.36171e-17 | 1.000000 | 2.36171e-17 | 1.000000 |
| rad33         | 1.49632e-19 | 1.000000 | 1.49632e-19 | 1.000000 |
| rad15         | 4.25282e-20 | 1.000000 | 4.25282e-20 | 1.000000 |
| rad38         | 7.82365e-21 | 1.000000 | 7.82365e-21 | 1.000000 |
| rad25         | 1.20680e-21 | 1.000000 | 1.20680e-21 | 1.000000 |
| rad35         | 5.20810e-22 | 1.000000 | 5.20810e-22 | 1.000000 |
| PAH9+H        | 2.12244e-22 | 1.000000 | 2.12244e-22 | 1.000000 |
| rad3          | 3.56262e-23 | 1.000000 | 3.56262e-23 | 1.000000 |
| rad4          | 1.81419e-23 | 1.000000 | 1.81419e-23 | 1.000000 |
| PhCHCCH2+H    | 4.95517e-27 | 1.000000 | 4.95517e-27 | 1.000000 |
| rad28         | 1.77037e-27 | 1.000000 | 1.77037e-27 | 1.000000 |
| rad46         | 2.26497e-28 | 1.000000 | 2.26497e-28 | 1.000000 |
| rad2          | 1.87440e-28 | 1.000000 | 1.87440e-28 | 1.000000 |
| rad1          | 1.20662e-29 | 1.000000 | 1.20662e-29 | 1.000000 |
| rad9          | 1.05023e-29 | 1.000000 | 1.05023e-29 | 1.000000 |
| rad8          | 9.55211e-31 | 1.000000 | 9.55212e-31 | 1.000000 |
| rad60syn      | 1.50520e-32 | 1.000000 | 1.50520e-32 | 1.000000 |
| rad31         | 1.01462e-32 | 1.000000 | 1.01462e-32 | 1.000000 |
| Ph+Allene     | 2.46507e-33 | 1.000000 | 2.46507e-33 | 1.000000 |
| rad60anti     | 5.54077e-34 | 1.000000 | 5.54077e-34 | 1.000000 |
| rad10         | 4.65976e-34 | 1.000000 | 4.65976e-34 | 1.000000 |
| rad14         | 1.25498e-34 | 1.000000 | 1.25498e-34 | 1.000000 |
| PhCCH+CH3     | 1.06627e-34 | 1.000000 | 1.06627e-34 | 1.000000 |
| rad27         | 2.37629e-38 | 1.000000 | 2.37629e-38 | 1.000000 |
| PhCH2CCH+H    | 1.38105e-38 | 1.000000 | 1.38105e-38 | 1.000000 |
| PAH7+H        | 1.05164e-38 | 1.000000 | 1.05164e-38 | 1.000000 |
| PhCCCH3+H     | 1.72645e-40 | 1.000000 | 1.72645e-40 | 1.000000 |
| Ph+MeAc       | 8.98408e-42 | 1.000000 | 8.98408e-42 | 1.000000 |
| PAH3+H        | 8.89549e-42 | 1.000000 | 8.89549e-42 | 1.000000 |
| rad59         | 4.52586e-42 | 1.000000 | 4.52586e-42 | 1.000000 |
| rad26         | 2.63583e-42 | 1.000000 | 2.63583e-42 | 1.000000 |
| rad39         | 8.35336e-44 | 1.000000 | 8.35336e-44 | 1.000000 |
| rad50         | 1.02276e-44 | 1.000000 | 1.02276e-44 | 1.000000 |
| rad12         | 7.64384e-51 | 1.000000 | 7.64384e-51 | 1.000000 |
| rad37         | 1.52516e-52 | 1.000000 | 1.52516e-52 | 1.000000 |
| rad5          | 8.04818e-53 | 1.000000 | 8.04818e-53 | 1.000000 |
| rad52         | 1.54540e-53 | 1.000000 | 1.54540e-53 | 1.000000 |
| rad19syn      | 6.55674e-56 | 1.000000 | 6.55674e-56 | 1.000000 |
| rad51         | 1.40557e-58 | 1.000000 | 1.40557e-58 | 1.000000 |
| rad54         | 1.24530e-58 | 1.000000 | 1.24530e-58 | 1.000000 |
| rad70         | 9.59883e-62 | 1.000000 | 9.59883e-62 | 1.000000 |
| rad62         | 1.28838e-62 | 1.000000 | 1.28838e-62 | 1.000000 |
| rad65         | 7.84885e-63 | 1.000000 | 7.84885e-63 | 1.000000 |
| rad58         | 1.84763e-63 | 1.000000 | 1.84763e-63 | 1.000000 |
| rad43         | 1.18960e-63 | 1.000000 | 1.18960e-63 | 1.000000 |
| PAH10+CH3     | 4.54408e-65 | 1.000000 | 4.54408e-65 | 1.000000 |
| PhcycC3H3_A+H | 2.92210e-65 | 1.000000 | 2.92210e-65 | 1.000000 |
| rad55         | 2.77050e-65 | 1.000000 | 2.77050e-65 | 1.000000 |
| rad47         | 1.41417e-66 | 1.000000 | 1.41417e-66 | 1.000000 |
| rad34         | 1.59959e-67 | 1.000000 | 1.59959e-67 | 1.000000 |
| PAH1+H        | 2.36764e-71 | 1.000000 | 2.36764e-71 | 1.000000 |
| rad42         | 7.74049e-74 | 1.000000 | 7.74049e-74 | 1.000000 |
| rad41         | 3.10002e-76 | 1.000000 | 3.10002e-76 | 1.000000 |

1000.00000 Pa, 30.0000000 K

=====

| Rate constant | True (fraction)      | Effective (fraction) |
|---------------|----------------------|----------------------|
| Total         | 1.15918e-108 (1.00 ) | 1.15918e-108 (1.00 ) |

| species     | PYtrue      | Cumul    | PYeffective | Cumul    |
|-------------|-------------|----------|-------------|----------|
| rad20       | 0.596076    | 0.596076 | 0.596076    | 0.596076 |
| rad21       | 0.257143    | 0.853219 | 0.257143    | 0.853219 |
| rad22       | 0.0705316   | 0.923751 | 0.0705316   | 0.923751 |
| rad18       | 0.0698750   | 0.993626 | 0.0698750   | 0.993626 |
| Indene+H    | 0.00360551  | 0.997231 | 0.00360551  | 0.997231 |
| rad45       | 0.00255852  | 0.999790 | 0.00255852  | 0.999790 |
| rad36       | 0.000159561 | 0.999949 | 0.000159561 | 0.999949 |
| rad23       | 4.24151e-05 | 0.999992 | 4.24151e-05 | 0.999992 |
| rad11       | 8.52167e-06 | 1.00000  | 8.52167e-06 | 1.00000  |
| Benzyl+C2H2 | 1.49406e-07 | 1.00000  | 0.00000     | 1.00000  |
| rad24       | 5.52206e-09 | 1.00000  | 5.52206e-09 | 1.00000  |
| rad6        | 1.95686e-09 | 1.00000  | 1.95686e-09 | 1.00000  |
| rad13       | 1.21509e-15 | 1.00000  | 1.21509e-15 | 1.00000  |
| rad7        | 3.02016e-16 | 1.00000  | 3.02016e-16 | 1.00000  |
| rad30       | 8.86220e-17 | 1.00000  | 8.86220e-17 | 1.00000  |
| rad33       | 1.60572e-18 | 1.00000  | 1.60572e-18 | 1.00000  |

|               |             |         |             |         |
|---------------|-------------|---------|-------------|---------|
| rad15         | 1.40446e-19 | 1.00000 | 1.40446e-19 | 1.00000 |
| rad38         | 4.33756e-20 | 1.00000 | 4.33756e-20 | 1.00000 |
| rad35         | 6.57234e-21 | 1.00000 | 6.57234e-21 | 1.00000 |
| rad25         | 5.19710e-21 | 1.00000 | 5.19710e-21 | 1.00000 |
| PAH9+H        | 2.58267e-21 | 1.00000 | 2.58267e-21 | 1.00000 |
| rad3          | 7.98244e-22 | 1.00000 | 7.98244e-22 | 1.00000 |
| rad4          | 4.05140e-22 | 1.00000 | 4.05140e-22 | 1.00000 |
| rad28         | 2.77827e-26 | 1.00000 | 2.77827e-26 | 1.00000 |
| PhCHCCH2+H    | 1.55276e-26 | 1.00000 | 1.55276e-26 | 1.00000 |
| rad2          | 7.43115e-27 | 1.00000 | 7.43115e-27 | 1.00000 |
| rad46         | 8.69737e-28 | 1.00000 | 8.69737e-28 | 1.00000 |
| rad1          | 4.74443e-28 | 1.00000 | 4.74443e-28 | 1.00000 |
| rad9          | 2.88831e-29 | 1.00000 | 2.88831e-29 | 1.00000 |
| rad8          | 6.31965e-31 | 1.00000 | 6.31966e-31 | 1.00000 |
| rad31         | 2.21810e-31 | 1.00000 | 2.21810e-31 | 1.00000 |
| rad10         | 3.22204e-32 | 1.00000 | 3.22204e-32 | 1.00000 |
| rad60syn      | 2.23885e-32 | 1.00000 | 2.23885e-32 | 1.00000 |
| Ph+Allene     | 5.40729e-33 | 1.00000 | 5.40729e-33 | 1.00000 |
| rad14         | 3.11487e-33 | 1.00000 | 3.11487e-33 | 1.00000 |
| PhCCH+CH3     | 2.21218e-33 | 1.00000 | 2.21218e-33 | 1.00000 |
| rad60anti     | 7.20284e-34 | 1.00000 | 7.20284e-34 | 1.00000 |
| rad27         | 1.29573e-36 | 1.00000 | 1.29573e-36 | 1.00000 |
| PhCH2CCH+H    | 2.50797e-38 | 1.00000 | 2.50797e-38 | 1.00000 |
| PhCCCH3+H     | 6.68593e-39 | 1.00000 | 6.68593e-39 | 1.00000 |
| PAH7+H        | 4.62725e-39 | 1.00000 | 4.62725e-39 | 1.00000 |
| rad26         | 2.20750e-40 | 1.00000 | 2.20750e-40 | 1.00000 |
| Ph+MeAc       | 1.10927e-40 | 1.00000 | 1.10927e-40 | 1.00000 |
| PAH3+H        | 4.42304e-42 | 1.00000 | 4.42304e-42 | 1.00000 |
| rad59         | 2.28091e-42 | 1.00000 | 2.28091e-42 | 1.00000 |
| rad39         | 6.30436e-43 | 1.00000 | 6.30436e-43 | 1.00000 |
| rad50         | 2.56819e-44 | 1.00000 | 2.56819e-44 | 1.00000 |
| rad12         | 5.65613e-51 | 1.00000 | 5.65613e-51 | 1.00000 |
| rad5          | 1.52062e-51 | 1.00000 | 1.52062e-51 | 1.00000 |
| rad37         | 1.01228e-52 | 1.00000 | 1.01228e-52 | 1.00000 |
| rad52         | 3.81597e-53 | 1.00000 | 3.81597e-53 | 1.00000 |
| rad19syn      | 3.78728e-55 | 1.00000 | 3.78728e-55 | 1.00000 |
| rad54         | 3.89646e-58 | 1.00000 | 3.89646e-58 | 1.00000 |
| rad51         | 3.56281e-58 | 1.00000 | 3.56281e-58 | 1.00000 |
| rad62         | 1.14195e-61 | 1.00000 | 1.14195e-61 | 1.00000 |
| rad70         | 9.35612e-62 | 1.00000 | 9.35612e-62 | 1.00000 |
| rad65         | 3.45122e-62 | 1.00000 | 3.45122e-62 | 1.00000 |
| rad43         | 1.94927e-62 | 1.00000 | 1.94927e-62 | 1.00000 |
| rad58         | 1.24371e-63 | 1.00000 | 1.24371e-63 | 1.00000 |
| PhcycC3H3_A+H | 1.16009e-64 | 1.00000 | 1.16009e-64 | 1.00000 |
| PAH10+CH3     | 1.15091e-64 | 1.00000 | 1.15091e-64 | 1.00000 |
| rad55         | 7.60905e-65 | 1.00000 | 7.60905e-65 | 1.00000 |
| rad47         | 2.83045e-66 | 1.00000 | 2.83045e-66 | 1.00000 |
| rad34         | 1.09203e-67 | 1.00000 | 1.09203e-67 | 1.00000 |
| PAH1+H        | 1.28412e-70 | 1.00000 | 1.28412e-70 | 1.00000 |
| rad42         | 3.47933e-73 | 1.00000 | 3.47933e-73 | 1.00000 |
| rad41         | 2.83893e-75 | 1.00000 | 2.83893e-75 | 1.00000 |

1000.00000 Pa, 40.0000000 K

=====

| Rate constant | True (fraction)     | Effective (fraction) |
|---------------|---------------------|----------------------|
| Total         | 1.02415e-84 (1.00 ) | 1.02415e-84 (1.00 )  |

| species     | PYtrue      | Cumul    | PYeffective | Cumul    |
|-------------|-------------|----------|-------------|----------|
| rad20       | 0.514849    | 0.514849 | 0.514849    | 0.514849 |
| rad21       | 0.263695    | 0.778544 | 0.263695    | 0.778544 |
| rad22       | 0.117269    | 0.895813 | 0.117269    | 0.895813 |
| rad18       | 0.0921400   | 0.987953 | 0.0921401   | 0.987953 |
| Indene+H    | 0.00731423  | 0.995267 | 0.00731423  | 0.995267 |
| rad45       | 0.00433743  | 0.999605 | 0.00433744  | 0.999605 |
| rad36       | 0.000270211 | 0.999875 | 0.000270211 | 0.999875 |
| rad23       | 0.000109413 | 0.999984 | 0.000109413 | 0.999984 |
| rad11       | 1.54505e-05 | 1.000000 | 1.54505e-05 | 1.000000 |
| Benzyl+C2H2 | 2.68642e-07 | 1.00000  | 0.00000     | 1.000000 |
| rad6        | 5.47668e-09 | 1.00000  | 5.47668e-09 | 1.000000 |
| rad24       | 2.34937e-09 | 1.00000  | 2.34938e-09 | 1.000000 |
| rad13       | 4.60074e-15 | 1.00000  | 4.60074e-15 | 1.000000 |
| rad7        | 1.29102e-15 | 1.00000  | 1.29102e-15 | 1.000000 |
| rad30       | 2.20755e-16 | 1.00000  | 2.20755e-16 | 1.000000 |
| rad33       | 5.92210e-18 | 1.00000  | 5.92210e-18 | 1.000000 |
| rad15       | 3.34954e-19 | 1.00000  | 3.34954e-19 | 1.000000 |
| rad38       | 1.33441e-19 | 1.00000  | 1.33441e-19 | 1.000000 |
| rad35       | 3.02525e-20 | 1.00000  | 3.02525e-20 | 1.000000 |
| rad25       | 1.41616e-20 | 1.00000  | 1.41616e-20 | 1.000000 |

|               |             |         |             |          |
|---------------|-------------|---------|-------------|----------|
| PAH9+H        | 1.18615e-20 | 1.00000 | 1.18615e-20 | 1.000000 |
| rad3          | 4.80980e-21 | 1.00000 | 4.80980e-21 | 1.000000 |
| rad4          | 2.43904e-21 | 1.00000 | 2.43904e-21 | 1.000000 |
| rad28         | 1.47040e-25 | 1.00000 | 1.47040e-25 | 1.000000 |
| rad2          | 6.44313e-26 | 1.00000 | 6.44313e-26 | 1.000000 |
| PhCHCCH2+H    | 3.71868e-26 | 1.00000 | 3.71868e-26 | 1.000000 |
| rad1          | 4.10637e-27 | 1.00000 | 4.10637e-27 | 1.000000 |
| rad46         | 2.48488e-27 | 1.00000 | 2.48488e-27 | 1.000000 |
| rad9          | 6.59205e-29 | 1.00000 | 6.59205e-29 | 1.000000 |
| rad31         | 1.34002e-30 | 1.00000 | 1.34002e-30 | 1.000000 |
| rad8          | 6.02070e-31 | 1.00000 | 6.02071e-31 | 1.000000 |
| rad10         | 3.91258e-31 | 1.00000 | 3.91258e-31 | 1.000000 |
| rad60syn      | 3.21196e-32 | 1.00000 | 3.21196e-32 | 1.000000 |
| rad14         | 2.20265e-32 | 1.00000 | 2.20265e-32 | 1.000000 |
| PhCCH+CH3     | 1.44954e-32 | 1.00000 | 1.44954e-32 | 1.000000 |
| Ph+Allene     | 1.15819e-32 | 1.00000 | 1.15819e-32 | 1.000000 |
| rad60anti     | 9.50512e-34 | 1.00000 | 9.50512e-34 | 1.000000 |
| rad27         | 1.41810e-35 | 1.00000 | 1.41810e-35 | 1.000000 |
| PhCCCH3+H     | 6.34287e-38 | 1.00000 | 6.34287e-38 | 1.000000 |
| PhCH2CCH+H    | 5.20908e-38 | 1.00000 | 5.20908e-38 | 1.000000 |
| PAH7+H        | 4.17426e-39 | 1.00000 | 4.17426e-39 | 1.000000 |
| rad26         | 3.33620e-39 | 1.00000 | 3.33620e-39 | 1.000000 |
| Ph+MeAc       | 6.10194e-40 | 1.00000 | 6.10195e-40 | 1.000000 |
| PAH3+H        | 3.34889e-42 | 1.00000 | 3.34889e-42 | 1.000000 |
| rad39         | 3.25265e-42 | 1.00000 | 3.25265e-42 | 1.000000 |
| rad59         | 1.73719e-42 | 1.00000 | 1.73719e-42 | 1.000000 |
| rad50         | 8.62377e-44 | 1.00000 | 8.62377e-44 | 1.000000 |
| rad12         | 1.95162e-50 | 1.00000 | 1.95162e-50 | 1.000000 |
| rad5          | 1.19001e-50 | 1.00000 | 1.19001e-50 | 1.000000 |
| rad37         | 1.83366e-52 | 1.00000 | 1.83366e-52 | 1.000000 |
| rad52         | 1.49761e-52 | 1.00000 | 1.49761e-52 | 1.000000 |
| rad19syn      | 1.56136e-54 | 1.00000 | 1.56136e-54 | 1.000000 |
| rad51         | 1.54265e-57 | 1.00000 | 1.54265e-57 | 1.000000 |
| rad54         | 1.22700e-57 | 1.00000 | 1.22700e-57 | 1.000000 |
| rad62         | 6.19980e-61 | 1.00000 | 6.19980e-61 | 1.000000 |
| rad43         | 1.55286e-61 | 1.00000 | 1.55286e-61 | 1.000000 |
| rad65         | 1.52399e-61 | 1.00000 | 1.52399e-61 | 1.000000 |
| rad70         | 1.42849e-61 | 1.00000 | 1.42849e-61 | 1.000000 |
| rad58         | 2.03140e-63 | 1.00000 | 2.03140e-63 | 1.000000 |
| PAH10+CH3     | 6.86880e-64 | 1.00000 | 6.86880e-64 | 1.000000 |
| PhcycC3H3_A+H | 4.06829e-64 | 1.00000 | 4.06829e-64 | 1.000000 |
| rad55         | 2.32734e-64 | 1.00000 | 2.32734e-64 | 1.000000 |
| rad47         | 1.10799e-65 | 1.00000 | 1.10799e-65 | 1.000000 |
| rad34         | 1.33816e-67 | 1.00000 | 1.33816e-67 | 1.000000 |
| PAH1+H        | 6.11344e-70 | 1.00000 | 6.11344e-70 | 1.000000 |
| rad42         | 1.38473e-72 | 1.00000 | 1.38473e-72 | 1.000000 |
| rad41         | 1.83973e-74 | 1.00000 | 1.83973e-74 | 1.000000 |

1000.00000 Pa, 50.0000000 K

=====

| Rate constant | True (fraction)     | Effective (fraction) |
|---------------|---------------------|----------------------|
| Total         | 2.31816e-70 (1.00 ) | 2.31816e-70 (1.00 )  |

| species     | PYtrue      | Cumul    | PYeffective | Cumul    |
|-------------|-------------|----------|-------------|----------|
| rad20       | 0.455714    | 0.455714 | 0.455715    | 0.455715 |
| rad21       | 0.254053    | 0.709767 | 0.254053    | 0.709768 |
| rad22       | 0.161498    | 0.871265 | 0.161498    | 0.871266 |
| rad18       | 0.110100    | 0.981365 | 0.110100    | 0.981366 |
| Indene+H    | 0.0119358   | 0.993301 | 0.0119359   | 0.993302 |
| rad45       | 0.00608952  | 0.999390 | 0.00608952  | 0.999391 |
| rad36       | 0.000378977 | 0.999769 | 0.000378977 | 0.999770 |
| rad23       | 0.000207265 | 0.999977 | 0.000207265 | 0.999978 |
| rad11       | 2.32646e-05 | 1.000000 | 2.32646e-05 | 1.000000 |
| Benzyl+C2H2 | 4.58400e-07 | 1.00000  | 0.00000     | 1.00000  |
| rad6        | 1.14369e-08 | 1.00000  | 1.14369e-08 | 1.00000  |
| rad24       | 1.33100e-09 | 1.00000  | 1.33100e-09 | 1.00000  |
| rad13       | 1.17470e-14 | 1.00000  | 1.17470e-14 | 1.00000  |
| rad7        | 3.71876e-15 | 1.00000  | 3.71876e-15 | 1.00000  |
| rad30       | 5.20809e-16 | 1.00000  | 5.20809e-16 | 1.00000  |
| rad33       | 1.48918e-17 | 1.00000  | 1.48918e-17 | 1.00000  |
| rad15       | 7.78316e-19 | 1.00000  | 7.78316e-19 | 1.00000  |
| rad38       | 3.61470e-19 | 1.00000  | 3.61470e-19 | 1.00000  |
| rad35       | 9.99969e-20 | 1.00000  | 9.99970e-20 | 1.00000  |
| PAH9+H      | 4.01669e-20 | 1.00000  | 4.01669e-20 | 1.00000  |
| rad25       | 3.64540e-20 | 1.00000  | 3.64540e-20 | 1.00000  |
| rad3        | 1.83395e-20 | 1.00000  | 1.83395e-20 | 1.00000  |
| rad4        | 9.29851e-21 | 1.00000  | 9.29851e-21 | 1.00000  |
| rad28       | 5.73728e-25 | 1.00000  | 5.73728e-25 | 1.00000  |



|               |             |         |             |         |
|---------------|-------------|---------|-------------|---------|
| rad2          | 3.34982e-25 | 1.00000 | 3.34982e-25 | 1.00000 |
| PhCHCCH2+H    | 9.30865e-26 | 1.00000 | 9.30865e-26 | 1.00000 |
| rad1          | 2.13544e-26 | 1.00000 | 2.13544e-26 | 1.00000 |
| rad46         | 7.48790e-27 | 1.00000 | 7.48791e-27 | 1.00000 |
| rad9          | 1.64308e-28 | 1.00000 | 1.64308e-28 | 1.00000 |
| rad31         | 5.18941e-30 | 1.00000 | 5.18941e-30 | 1.00000 |
| rad10         | 2.66403e-30 | 1.00000 | 2.66403e-30 | 1.00000 |
| rad8          | 8.24942e-31 | 1.00000 | 8.24943e-31 | 1.00000 |
| rad14         | 1.09744e-31 | 1.00000 | 1.09744e-31 | 1.00000 |
| PhCCH+CH3     | 7.06156e-32 | 1.00000 | 7.06157e-32 | 1.00000 |
| rad60syn      | 5.48417e-32 | 1.00000 | 5.48417e-32 | 1.00000 |
| Ph+Allene     | 2.92619e-32 | 1.00000 | 2.92619e-32 | 1.00000 |
| rad60anti     | 1.54013e-33 | 1.00000 | 1.54013e-33 | 1.00000 |
| rad27         | 9.42511e-35 | 1.00000 | 9.42511e-35 | 1.00000 |
| PhCCCH3+H     | 4.07360e-37 | 1.00000 | 4.07360e-37 | 1.00000 |
| PhCH2CCH+H    | 1.35870e-37 | 1.00000 | 1.35870e-37 | 1.00000 |
| rad26         | 2.85680e-38 | 1.00000 | 2.85680e-38 | 1.00000 |
| PAH7+H        | 7.68663e-39 | 1.00000 | 7.68663e-39 | 1.00000 |
| Ph+MeAc       | 2.94568e-39 | 1.00000 | 2.94568e-39 | 1.00000 |
| rad39         | 1.47893e-41 | 1.00000 | 1.47893e-41 | 1.00000 |
| PAH3+H        | 3.95796e-42 | 1.00000 | 3.95796e-42 | 1.00000 |
| rad59         | 2.05698e-42 | 1.00000 | 2.05698e-42 | 1.00000 |
| rad50         | 4.23047e-43 | 1.00000 | 4.23048e-43 | 1.00000 |
| rad12         | 1.55722e-49 | 1.00000 | 1.55722e-49 | 1.00000 |
| rad5          | 8.05646e-50 | 1.00000 | 8.05647e-50 | 1.00000 |
| rad52         | 9.41941e-52 | 1.00000 | 9.41941e-52 | 1.00000 |
| rad37         | 8.24117e-52 | 1.00000 | 8.24118e-52 | 1.00000 |
| rad19syn      | 6.85987e-54 | 1.00000 | 6.85988e-54 | 1.00000 |
| rad51         | 1.10908e-56 | 1.00000 | 1.10908e-56 | 1.00000 |
| rad54         | 4.68807e-57 | 1.00000 | 4.68807e-57 | 1.00000 |
| rad62         | 3.51933e-60 | 1.00000 | 3.51934e-60 | 1.00000 |
| rad43         | 1.18744e-60 | 1.00000 | 1.18745e-60 | 1.00000 |
| rad65         | 9.82038e-61 | 1.00000 | 9.82039e-61 | 1.00000 |
| rad70         | 3.29084e-61 | 1.00000 | 3.29084e-61 | 1.00000 |
| PAH10+CH3     | 6.18699e-63 | 1.00000 | 6.18699e-63 | 1.00000 |
| rad58         | 4.54916e-63 | 1.00000 | 4.54916e-63 | 1.00000 |
| PhcycC3H3_A+H | 1.71040e-63 | 1.00000 | 1.71040e-63 | 1.00000 |
| rad55         | 9.13355e-64 | 1.00000 | 9.13356e-64 | 1.00000 |
| rad47         | 7.77669e-65 | 1.00000 | 7.77669e-65 | 1.00000 |
| rad34         | 2.72649e-67 | 1.00000 | 2.72649e-67 | 1.00000 |
| PAH1+H        | 3.55154e-69 | 1.00000 | 3.55154e-69 | 1.00000 |
| rad42         | 6.88507e-72 | 1.00000 | 6.88507e-72 | 1.00000 |
| rad41         | 1.39776e-73 | 1.00000 | 1.39776e-73 | 1.00000 |

1000.00000 Pa, 60.0000000 K

=====

| Rate constant | True (fraction)     | Effective (fraction) |
|---------------|---------------------|----------------------|
| Total         | 8.44107e-61 (1.00 ) | 8.44106e-61 (1.00 )  |

| species     | PYtrue      | Cumul    | PYeffective | Cumul    |
|-------------|-------------|----------|-------------|----------|
| rad20       | 0.408146    | 0.408146 | 0.408146    | 0.408146 |
| rad21       | 0.238469    | 0.646615 | 0.238469    | 0.646615 |
| rad22       | 0.202477    | 0.849092 | 0.202477    | 0.849092 |
| rad18       | 0.124901    | 0.973993 | 0.124901    | 0.973993 |
| Indene+H    | 0.0173740   | 0.991367 | 0.0173740   | 0.991367 |
| rad45       | 0.00778184  | 0.999149 | 0.00778184  | 0.999149 |
| rad36       | 0.000483830 | 0.999633 | 0.000483831 | 0.999633 |
| rad23       | 0.000335405 | 0.999968 | 0.000335405 | 0.999968 |
| rad11       | 3.19323e-05 | 1.00000  | 3.19323e-05 | 1.00000  |
| Benzyl+C2H2 | 7.49480e-07 | 1.00000  | 0.00000     | 1.00000  |
| rad6        | 2.06264e-08 | 1.00000  | 2.06264e-08 | 1.00000  |
| rad24       | 8.95133e-10 | 1.00000  | 8.95133e-10 | 1.00000  |
| rad13       | 2.45961e-14 | 1.00000  | 2.45962e-14 | 1.00000  |
| rad7        | 8.80810e-15 | 1.00000  | 8.80810e-15 | 1.00000  |
| rad30       | 1.27917e-15 | 1.00000  | 1.27918e-15 | 1.00000  |
| rad33       | 3.08959e-17 | 1.00000  | 3.08960e-17 | 1.00000  |
| rad15       | 1.92899e-18 | 1.00000  | 1.92899e-18 | 1.00000  |
| rad38       | 9.72189e-19 | 1.00000  | 9.72190e-19 | 1.00000  |
| rad35       | 2.83330e-19 | 1.00000  | 2.83330e-19 | 1.00000  |
| PAH9+H      | 1.20122e-19 | 1.00000  | 1.20122e-19 | 1.00000  |
| rad25       | 9.91513e-20 | 1.00000  | 9.91513e-20 | 1.00000  |
| rad3        | 5.62622e-20 | 1.00000  | 5.62623e-20 | 1.00000  |
| rad4        | 2.85315e-20 | 1.00000  | 2.85315e-20 | 1.00000  |
| rad28       | 2.06037e-24 | 1.00000  | 2.06037e-24 | 1.00000  |
| rad2        | 1.39129e-24 | 1.00000  | 1.39129e-24 | 1.00000  |
| PhCHCCH2+H  | 2.62918e-25 | 1.00000  | 2.62918e-25 | 1.00000  |
| rad1        | 8.88020e-26 | 1.00000  | 8.88021e-26 | 1.00000  |
| rad46       | 2.56791e-26 | 1.00000  | 2.56791e-26 | 1.00000  |

|               |             |         |             |         |
|---------------|-------------|---------|-------------|---------|
| rad9          | 4.74253e-28 | 1.00000 | 4.74253e-28 | 1.00000 |
| rad31         | 1.63134e-29 | 1.00000 | 1.63134e-29 | 1.00000 |
| rad10         | 1.42182e-29 | 1.00000 | 1.42182e-29 | 1.00000 |
| rad8          | 1.55371e-30 | 1.00000 | 1.55371e-30 | 1.00000 |
| rad14         | 4.97256e-31 | 1.00000 | 4.97256e-31 | 1.00000 |
| PhCCH+CH3     | 3.23921e-31 | 1.00000 | 3.23921e-31 | 1.00000 |
| rad60syn      | 1.15120e-31 | 1.00000 | 1.15120e-31 | 1.00000 |
| Ph+Allene     | 8.92375e-32 | 1.00000 | 8.92376e-32 | 1.00000 |
| rad60anti     | 3.13217e-33 | 1.00000 | 3.13217e-33 | 1.00000 |
| rad27         | 5.22856e-34 | 1.00000 | 5.22856e-34 | 1.00000 |
| PhCCCH3+H     | 2.34919e-36 | 1.00000 | 2.34920e-36 | 1.00000 |
| PhCH2CCH+H    | 4.41738e-37 | 1.00000 | 4.41739e-37 | 1.00000 |
| rad26         | 1.98240e-37 | 1.00000 | 1.98240e-37 | 1.00000 |
| PAH7+H        | 2.70508e-38 | 1.00000 | 2.70508e-38 | 1.00000 |
| Ph+MeAc       | 1.47594e-38 | 1.00000 | 1.47595e-38 | 1.00000 |
| rad39         | 6.85202e-41 | 1.00000 | 6.85202e-41 | 1.00000 |
| PAH3+H        | 6.89811e-42 | 1.00000 | 6.89811e-42 | 1.00000 |
| rad59         | 3.58218e-42 | 1.00000 | 3.58218e-42 | 1.00000 |
| rad50         | 2.90728e-42 | 1.00000 | 2.90729e-42 | 1.00000 |
| rad12         | 1.38502e-48 | 1.00000 | 1.38502e-48 | 1.00000 |
| rad5          | 5.65328e-49 | 1.00000 | 5.65329e-49 | 1.00000 |
| rad52         | 8.91643e-51 | 1.00000 | 8.91644e-51 | 1.00000 |
| rad37         | 6.33315e-51 | 1.00000 | 6.33315e-51 | 1.00000 |
| rad19syn      | 3.47822e-53 | 1.00000 | 3.47823e-53 | 1.00000 |
| rad51         | 1.25656e-55 | 1.00000 | 1.25656e-55 | 1.00000 |
| rad54         | 2.20910e-56 | 1.00000 | 2.20910e-56 | 1.00000 |
| rad62         | 2.33168e-59 | 1.00000 | 2.33168e-59 | 1.00000 |
| rad65         | 1.03877e-59 | 1.00000 | 1.03877e-59 | 1.00000 |
| rad43         | 1.01649e-59 | 1.00000 | 1.01649e-59 | 1.00000 |
| rad70         | 1.08011e-60 | 1.00000 | 1.08011e-60 | 1.00000 |
| PAH10+CH3     | 7.94094e-62 | 1.00000 | 7.94094e-62 | 1.00000 |
| rad58         | 1.52790e-62 | 1.00000 | 1.52790e-62 | 1.00000 |
| PhcycC3H3_A+H | 8.93550e-63 | 1.00000 | 8.93551e-63 | 1.00000 |
| rad55         | 4.57902e-63 | 1.00000 | 4.57902e-63 | 1.00000 |
| rad47         | 9.48641e-64 | 1.00000 | 9.48641e-64 | 1.00000 |
| rad34         | 8.99245e-67 | 1.00000 | 8.99245e-67 | 1.00000 |
| PAH1+H        | 2.87838e-68 | 1.00000 | 2.87838e-68 | 1.00000 |
| rad42         | 4.43251e-71 | 1.00000 | 4.43251e-71 | 1.00000 |
| rad41         | 1.36849e-72 | 1.00000 | 1.36849e-72 | 1.00000 |

1000.00000 Pa, 70.0000000 K

=====

| Rate constant | True (fraction)     | Effective (fraction) |
|---------------|---------------------|----------------------|
| Total         | 5.61998e-54 (1.00 ) | 5.61998e-54 (1.00 )  |

| species     | PYtrue      | Cumul    | PYeffective | Cumul    |
|-------------|-------------|----------|-------------|----------|
| rad20       | 0.367637    | 0.367637 | 0.367638    | 0.367638 |
| rad22       | 0.240216    | 0.607853 | 0.240216    | 0.607854 |
| rad21       | 0.220883    | 0.828736 | 0.220883    | 0.828737 |
| rad18       | 0.137154    | 0.965890 | 0.137155    | 0.965892 |
| Indene+H    | 0.0235783   | 0.989468 | 0.0235783   | 0.989470 |
| rad45       | 0.00940986  | 0.998878 | 0.00940987  | 0.998880 |
| rad36       | 0.000584540 | 0.999463 | 0.000584541 | 0.999465 |
| rad23       | 0.000494111 | 0.999957 | 0.000494112 | 0.999959 |
| rad11       | 4.15250e-05 | 0.999998 | 4.15251e-05 | 1.00000  |
| Benzyl+C2H2 | 1.18404e-06 | 1.000000 | 0.000000    | 1.00000  |
| rad6        | 3.41894e-08 | 1.000000 | 3.41894e-08 | 1.00000  |
| rad24       | 6.75519e-10 | 1.000000 | 6.75520e-10 | 1.00000  |
| rad13       | 4.58938e-14 | 1.000000 | 4.58939e-14 | 1.00000  |
| rad7        | 1.87026e-14 | 1.000000 | 1.87026e-14 | 1.00000  |
| rad30       | 3.51516e-15 | 1.000000 | 3.51516e-15 | 1.00000  |
| rad33       | 5.73285e-17 | 1.000000 | 5.73286e-17 | 1.00000  |
| rad15       | 5.51402e-18 | 1.000000 | 5.51403e-18 | 1.00000  |
| rad38       | 2.73396e-18 | 1.000000 | 2.73397e-18 | 1.00000  |
| rad35       | 7.36078e-19 | 1.000000 | 7.36079e-19 | 1.00000  |
| PAH9+H      | 3.40136e-19 | 1.000000 | 3.40136e-19 | 1.00000  |
| rad25       | 3.10368e-19 | 1.000000 | 3.10368e-19 | 1.00000  |
| rad3        | 1.54131e-19 | 1.000000 | 1.54131e-19 | 1.00000  |
| rad4        | 7.81928e-20 | 1.000000 | 7.81929e-20 | 1.00000  |
| rad28       | 7.66436e-24 | 1.000000 | 7.66437e-24 | 1.00000  |
| rad2        | 5.26044e-24 | 1.000000 | 5.26045e-24 | 1.00000  |
| PhCHCCH2+H  | 9.03065e-25 | 1.000000 | 9.03067e-25 | 1.00000  |
| rad1        | 3.36386e-25 | 1.000000 | 3.36386e-25 | 1.00000  |
| rad46       | 1.04862e-25 | 1.000000 | 1.04862e-25 | 1.00000  |
| rad9        | 1.69354e-27 | 1.000000 | 1.69354e-27 | 1.00000  |
| rad10       | 6.98613e-29 | 1.000000 | 6.98614e-29 | 1.00000  |
| rad31       | 4.61201e-29 | 1.000000 | 4.61201e-29 | 1.00000  |
| rad8        | 4.10428e-30 | 1.000000 | 4.10428e-30 | 1.00000  |

|               |             |          |             |         |
|---------------|-------------|----------|-------------|---------|
| rad14         | 2.36526e-30 | 1.000000 | 2.36527e-30 | 1.00000 |
| PhCCH+CH3     | 1.60758e-30 | 1.000000 | 1.60758e-30 | 1.00000 |
| Ph+Allene     | 3.45209e-31 | 1.000000 | 3.45209e-31 | 1.00000 |
| rad60syn      | 3.12528e-31 | 1.000000 | 3.12528e-31 | 1.00000 |
| rad60anti     | 8.36151e-33 | 1.000000 | 8.36152e-33 | 1.00000 |
| rad27         | 2.85898e-33 | 1.000000 | 2.85898e-33 | 1.00000 |
| PhCCCH3+H     | 1.42681e-35 | 1.000000 | 1.42681e-35 | 1.00000 |
| PhCH2CCH+H    | 1.85705e-36 | 1.000000 | 1.85706e-36 | 1.00000 |
| rad26         | 1.34791e-36 | 1.000000 | 1.34791e-36 | 1.00000 |
| PAH7+H        | 1.62207e-37 | 1.000000 | 1.62207e-37 | 1.00000 |
| Ph+MeAc       | 8.57658e-38 | 1.000000 | 8.57659e-38 | 1.00000 |
| rad39         | 3.61865e-40 | 1.000000 | 3.61865e-40 | 1.00000 |
| rad50         | 2.74200e-41 | 1.000000 | 2.74201e-41 | 1.00000 |
| PAH3+H        | 1.76650e-41 | 1.000000 | 1.76650e-41 | 1.00000 |
| rad59         | 9.15037e-42 | 1.000000 | 9.15038e-42 | 1.00000 |
| rad12         | 1.35991e-47 | 1.000000 | 1.35992e-47 | 1.00000 |
| rad5          | 4.62115e-48 | 1.000000 | 4.62115e-48 | 1.00000 |
| rad52         | 1.23185e-49 | 1.000000 | 1.23185e-49 | 1.00000 |
| rad37         | 6.92474e-50 | 1.000000 | 6.92475e-50 | 1.00000 |
| rad19syn      | 2.18426e-52 | 1.000000 | 2.18426e-52 | 1.00000 |
| rad51         | 2.17852e-54 | 1.000000 | 2.17853e-54 | 1.00000 |
| rad54         | 1.34131e-55 | 1.000000 | 1.34131e-55 | 1.00000 |
| rad62         | 1.96211e-58 | 1.000000 | 1.96211e-58 | 1.00000 |
| rad65         | 1.82034e-58 | 1.000000 | 1.82034e-58 | 1.00000 |
| rad43         | 1.08092e-58 | 1.000000 | 1.08092e-58 | 1.00000 |
| rad70         | 5.25237e-60 | 1.000000 | 5.25238e-60 | 1.00000 |
| PAH10+CH3     | 1.45392e-60 | 1.000000 | 1.45392e-60 | 1.00000 |
| rad58         | 1.14384e-61 | 1.000000 | 1.14384e-61 | 1.00000 |
| PhcycC3H3_A+H | 6.08696e-62 | 1.000000 | 6.08697e-62 | 1.00000 |
| rad55         | 3.03492e-62 | 1.000000 | 3.03493e-62 | 1.00000 |
| rad47         | 1.93394e-62 | 1.000000 | 1.93395e-62 | 1.00000 |
| rad34         | 6.05574e-66 | 1.000000 | 6.05575e-66 | 1.00000 |
| PAH1+H        | 4.10909e-67 | 1.000000 | 4.10909e-67 | 1.00000 |
| rad42         | 3.91682e-70 | 1.000000 | 3.91683e-70 | 1.00000 |
| rad41         | 1.88127e-71 | 1.000000 | 1.88127e-71 | 1.00000 |

1000.00000 Pa, 80.0000000 K

=====

| Rate constant | True (fraction)     | Effective (fraction) |
|---------------|---------------------|----------------------|
| Total         | 7.28864e-49 (1.00 ) | 7.28863e-49 (1.00 )  |

| species     | PYtrue      | Cumul    | PYeffective | Cumul    |
|-------------|-------------|----------|-------------|----------|
| rad20       | 0.331953    | 0.331953 | 0.331953    | 0.331953 |
| rad22       | 0.274933    | 0.606886 | 0.274933    | 0.606886 |
| rad21       | 0.202955    | 0.809841 | 0.202956    | 0.809842 |
| rad18       | 0.147232    | 0.957073 | 0.147232    | 0.957074 |
| Indene+H    | 0.0305288   | 0.987602 | 0.0305288   | 0.987603 |
| rad45       | 0.0109784   | 0.998580 | 0.0109784   | 0.998581 |
| rad23       | 0.000684657 | 0.999265 | 0.000684659 | 0.999266 |
| rad36       | 0.000681468 | 0.999946 | 0.000681469 | 0.999947 |
| rad11       | 5.21795e-05 | 0.999999 | 5.21796e-05 | 1.000000 |
| Benzyl+C2H2 | 1.82101e-06 | 1.00000  | 0.00000     | 1.000000 |
| rad6        | 5.38141e-08 | 1.00000  | 5.38142e-08 | 1.000000 |
| rad24       | 5.53134e-10 | 1.00000  | 5.53135e-10 | 1.000000 |
| rad13       | 7.96798e-14 | 1.00000  | 7.96800e-14 | 1.000000 |
| rad7        | 3.72931e-14 | 1.00000  | 3.72931e-14 | 1.000000 |
| rad30       | 1.13979e-14 | 1.00000  | 1.13980e-14 | 1.000000 |
| rad33       | 9.91949e-17 | 1.00000  | 9.91950e-17 | 1.000000 |
| rad15       | 2.01300e-17 | 1.00000  | 2.01300e-17 | 1.000000 |
| rad38       | 8.07253e-18 | 1.00000  | 8.07254e-18 | 1.000000 |
| rad35       | 1.80913e-18 | 1.00000  | 1.80913e-18 | 1.000000 |
| rad25       | 1.22435e-18 | 1.00000  | 1.22435e-18 | 1.000000 |
| PAH9+H      | 9.33738e-19 | 1.00000  | 9.33740e-19 | 1.000000 |
| rad3        | 3.98517e-19 | 1.00000  | 3.98518e-19 | 1.000000 |
| rad4        | 2.02283e-19 | 1.00000  | 2.02283e-19 | 1.000000 |
| rad28       | 3.18278e-23 | 1.00000  | 3.18278e-23 | 1.000000 |
| rad2        | 1.94974e-23 | 1.00000  | 1.94974e-23 | 1.000000 |
| PhCHCCH2+H  | 4.30717e-24 | 1.00000  | 4.30717e-24 | 1.000000 |
| rad1        | 1.24971e-24 | 1.00000  | 1.24971e-24 | 1.000000 |
| rad46       | 5.35590e-25 | 1.00000  | 5.35591e-25 | 1.000000 |
| rad9        | 8.54071e-27 | 1.00000  | 8.54073e-27 | 1.000000 |
| rad10       | 3.49493e-28 | 1.00000  | 3.49494e-28 | 1.000000 |
| rad31       | 1.23796e-28 | 1.00000  | 1.23796e-28 | 1.000000 |
| rad8        | 1.76506e-29 | 1.00000  | 1.76506e-29 | 1.000000 |
| rad14       | 1.33834e-29 | 1.00000  | 1.33834e-29 | 1.000000 |
| PhCCH+CH3   | 9.95007e-30 | 1.00000  | 9.95009e-30 | 1.000000 |
| Ph+Allene   | 1.92213e-30 | 1.00000  | 1.92213e-30 | 1.000000 |
| rad60syn    | 1.25174e-30 | 1.00000  | 1.25175e-30 | 1.000000 |

|               |             |         |             |          |
|---------------|-------------|---------|-------------|----------|
| rad60anti     | 3.33381e-32 | 1.00000 | 3.33382e-32 | 1.000000 |
| rad27         | 1.74375e-32 | 1.00000 | 1.74376e-32 | 1.000000 |
| PhCCCH3+H     | 1.06839e-34 | 1.00000 | 1.06840e-34 | 1.000000 |
| PhCH2CCH+H    | 1.13834e-35 | 1.00000 | 1.13834e-35 | 1.000000 |
| rad26         | 1.05056e-35 | 1.00000 | 1.05057e-35 | 1.000000 |
| PAH7+H        | 1.51258e-36 | 1.00000 | 1.51258e-36 | 1.000000 |
| Ph+MeAc       | 6.72927e-37 | 1.00000 | 6.72928e-37 | 1.000000 |
| rad39         | 2.54094e-39 | 1.00000 | 2.54094e-39 | 1.000000 |
| rad50         | 3.58394e-40 | 1.00000 | 3.58395e-40 | 1.000000 |
| PAH3+H        | 7.28455e-41 | 1.00000 | 7.28456e-41 | 1.000000 |
| rad59         | 3.76097e-41 | 1.00000 | 3.76098e-41 | 1.000000 |
| rad12         | 1.70659e-46 | 1.00000 | 1.70660e-46 | 1.000000 |
| rad5          | 5.16144e-47 | 1.00000 | 5.16145e-47 | 1.000000 |
| rad52         | 2.47575e-48 | 1.00000 | 2.47576e-48 | 1.000000 |
| rad37         | 1.04930e-48 | 1.00000 | 1.04930e-48 | 1.000000 |
| rad19syn      | 1.94605e-51 | 1.00000 | 1.94606e-51 | 1.000000 |
| rad51         | 5.70101e-53 | 1.00000 | 5.70102e-53 | 1.000000 |
| rad54         | 1.18695e-54 | 1.00000 | 1.18695e-54 | 1.000000 |
| rad65         | 5.09260e-57 | 1.00000 | 5.09261e-57 | 1.000000 |
| rad62         | 2.43214e-57 | 1.00000 | 2.43214e-57 | 1.000000 |
| rad43         | 1.67047e-57 | 1.00000 | 1.67047e-57 | 1.000000 |
| rad70         | 4.72562e-59 | 1.00000 | 4.72562e-59 | 1.000000 |
| PAH10+CH3     | 3.90138e-59 | 1.00000 | 3.90138e-59 | 1.000000 |
| rad58         | 2.54999e-60 | 1.00000 | 2.54999e-60 | 1.000000 |
| rad47         | 6.34193e-61 | 1.00000 | 6.34195e-61 | 1.000000 |
| PhcycC3H3_A+H | 6.15797e-61 | 1.00000 | 6.15798e-61 | 1.000000 |
| rad55         | 3.01338e-61 | 1.00000 | 3.01339e-61 | 1.000000 |
| rad34         | 1.24521e-64 | 1.00000 | 1.24521e-64 | 1.000000 |
| PAH1+H        | 1.24075e-65 | 1.00000 | 1.24075e-65 | 1.000000 |
| rad42         | 5.60746e-69 | 1.00000 | 5.60747e-69 | 1.000000 |
| rad41         | 4.26248e-70 | 1.00000 | 4.26249e-70 | 1.000000 |

1000.00000 Pa, 90.0000000 K

=====

| Rate constant | True (fraction)     | Effective (fraction) |
|---------------|---------------------|----------------------|
| Total         | 6.85154e-45 (1.00 ) | 6.85152e-45 (1.00 )  |

| species     | PYtrue      | Cumul    | PYeffective | Cumul    |
|-------------|-------------|----------|-------------|----------|
| rad22       | 0.306873    | 0.306873 | 0.306874    | 0.306874 |
| rad20       | 0.299862    | 0.606735 | 0.299863    | 0.606737 |
| rad21       | 0.185420    | 0.792155 | 0.185421    | 0.792158 |
| rad18       | 0.155373    | 0.947528 | 0.155373    | 0.947531 |
| Indene+H    | 0.0382253   | 0.985753 | 0.0382254   | 0.985756 |
| rad45       | 0.0124947   | 0.998248 | 0.0124948   | 0.998251 |
| rad23       | 0.000909317 | 0.999157 | 0.000909319 | 0.999161 |
| rad36       | 0.000775124 | 0.999932 | 0.000775126 | 0.999936 |
| rad11       | 6.40781e-05 | 0.999997 | 6.40783e-05 | 1.000000 |
| Benzyl+C2H2 | 2.74193e-06 | 0.999999 | 0.000000    | 1.000000 |
| rad6        | 8.19977e-08 | 0.999999 | 8.19979e-08 | 1.000000 |
| rad24       | 4.80493e-10 | 0.999999 | 4.80494e-10 | 1.000000 |
| rad13       | 1.31979e-13 | 0.999999 | 1.31980e-13 | 1.000000 |
| rad7        | 7.18235e-14 | 0.999999 | 7.18237e-14 | 1.000000 |
| rad30       | 4.20357e-14 | 0.999999 | 4.20358e-14 | 1.000000 |
| rad33       | 1.63948e-16 | 0.999999 | 1.63948e-16 | 1.000000 |
| rad15       | 9.92194e-17 | 0.999999 | 9.92197e-17 | 1.000000 |
| rad38       | 2.41132e-17 | 0.999999 | 2.41133e-17 | 1.000000 |
| rad25       | 6.18405e-18 | 0.999999 | 6.18407e-18 | 1.000000 |
| rad35       | 4.28196e-18 | 0.999999 | 4.28197e-18 | 1.000000 |
| PAH9+H      | 2.49537e-18 | 0.999999 | 2.49538e-18 | 1.000000 |
| rad3        | 1.00390e-18 | 0.999999 | 1.00390e-18 | 1.000000 |
| rad4        | 5.09906e-19 | 0.999999 | 5.09907e-19 | 1.000000 |
| rad28       | 1.48792e-22 | 0.999999 | 1.48792e-22 | 1.000000 |
| rad2        | 7.39077e-23 | 0.999999 | 7.39079e-23 | 1.000000 |
| PhCHCCH2+H  | 3.49422e-23 | 0.999999 | 3.49423e-23 | 1.000000 |
| rad1        | 4.75014e-24 | 0.999999 | 4.75015e-24 | 1.000000 |
| rad46       | 3.57068e-24 | 0.999999 | 3.57069e-24 | 1.000000 |
| rad9        | 7.78561e-26 | 0.999999 | 7.78564e-26 | 1.000000 |
| rad10       | 1.89358e-27 | 0.999999 | 1.89358e-27 | 1.000000 |
| rad31       | 3.25365e-28 | 0.999999 | 3.25366e-28 | 1.000000 |
| rad8        | 2.04318e-28 | 0.999999 | 2.04319e-28 | 1.000000 |
| rad14       | 9.76687e-29 | 0.999999 | 9.76689e-29 | 1.000000 |
| PhCCH+CH3   | 8.79559e-29 | 0.999999 | 8.79562e-29 | 1.000000 |
| Ph+Allene   | 2.00152e-29 | 0.999999 | 2.00153e-29 | 1.000000 |
| rad60syn    | 1.04580e-29 | 0.999999 | 1.04580e-29 | 1.000000 |
| rad60anti   | 2.81939e-31 | 0.999999 | 2.81940e-31 | 1.000000 |
| rad27       | 1.28198e-31 | 0.999999 | 1.28199e-31 | 1.000000 |
| PhCCCH3+H   | 1.16062e-33 | 0.999999 | 1.16063e-33 | 1.000000 |
| PhCH2CCH+H  | 1.32081e-34 | 0.999999 | 1.32081e-34 | 1.000000 |

|               |             |          |             |          |
|---------------|-------------|----------|-------------|----------|
| rad26         | 1.06908e-34 | 0.999999 | 1.06908e-34 | 1.000000 |
| PAH7+H        | 2.14968e-35 | 0.999999 | 2.14968e-35 | 1.000000 |
| Ph+MeAc       | 9.08560e-36 | 0.999999 | 9.08563e-36 | 1.000000 |
| rad39         | 3.02791e-38 | 0.999999 | 3.02792e-38 | 1.000000 |
| rad50         | 6.70096e-39 | 0.999999 | 6.70098e-39 | 1.000000 |
| PAH3+H        | 6.57805e-40 | 0.999999 | 6.57807e-40 | 1.000000 |
| rad59         | 3.38985e-40 | 0.999999 | 3.38986e-40 | 1.000000 |
| rad12         | 3.34186e-45 | 0.999999 | 3.34187e-45 | 1.000000 |
| rad5          | 1.02825e-45 | 0.999999 | 1.02825e-45 | 1.000000 |
| rad52         | 7.37721e-47 | 0.999999 | 7.37723e-47 | 1.000000 |
| rad37         | 2.28840e-47 | 0.999999 | 2.28841e-47 | 1.000000 |
| rad19syn      | 3.20992e-50 | 0.999999 | 3.20993e-50 | 1.000000 |
| rad51         | 2.27124e-51 | 0.999999 | 2.27125e-51 | 1.000000 |
| rad54         | 1.98577e-53 | 0.999999 | 1.98577e-53 | 1.000000 |
| rad65         | 2.24311e-55 | 0.999999 | 2.24311e-55 | 1.000000 |
| rad62         | 5.86223e-56 | 0.999999 | 5.86225e-56 | 1.000000 |
| rad43         | 4.95387e-56 | 0.999999 | 4.95388e-56 | 1.000000 |
| PAH10+CH3     | 1.59268e-57 | 0.999999 | 1.59269e-57 | 1.000000 |
| rad70         | 1.11675e-57 | 0.999999 | 1.11675e-57 | 1.000000 |
| rad58         | 1.21013e-58 | 0.999999 | 1.21014e-58 | 1.000000 |
| rad47         | 3.31217e-59 | 0.999999 | 3.31218e-59 | 1.000000 |
| PhcycC3H3_A+H | 1.21505e-59 | 0.999999 | 1.21506e-59 | 1.000000 |
| rad55         | 5.87494e-60 | 0.999999 | 5.87495e-60 | 1.000000 |
| rad34         | 6.62923e-63 | 0.999999 | 6.62925e-63 | 1.000000 |
| PAH1+H        | 7.31529e-64 | 0.999999 | 7.31531e-64 | 1.000000 |
| rad42         | 1.79133e-67 | 0.999999 | 1.79134e-67 | 1.000000 |
| rad41         | 2.10696e-68 | 0.999999 | 2.10697e-68 | 1.000000 |

1000.00000 Pa, 100.000000 K

| Rate constant | True (fraction)     | Effective (fraction) |
|---------------|---------------------|----------------------|
| Total         | 1.02671e-41 (1.00 ) | 1.02671e-41 (1.00 )  |

| species     | PYtrue      | Cumul    | PYeffective | Cumul    |
|-------------|-------------|----------|-------------|----------|
| rad22       | 0.336257    | 0.336257 | 0.336258    | 0.336258 |
| rad20       | 0.270635    | 0.606892 | 0.270636    | 0.606894 |
| rad21       | 0.168609    | 0.775501 | 0.168610    | 0.775504 |
| rad18       | 0.161735    | 0.937236 | 0.161735    | 0.937239 |
| Indene+H    | 0.0466801   | 0.983916 | 0.0466803   | 0.983919 |
| rad45       | 0.0139656   | 0.997882 | 0.0139657   | 0.997885 |
| rad23       | 0.00117136  | 0.999053 | 0.00117136  | 0.999056 |
| rad36       | 0.000865993 | 0.999919 | 0.000865996 | 0.999922 |
| rad11       | 7.74398e-05 | 0.999996 | 7.74401e-05 | 1.000000 |
| Benzyl+C2H2 | 4.05863e-06 | 1.00000  | 0.00000     | 1.000000 |
| rad6        | 1.22430e-07 | 1.00000  | 1.22431e-07 | 1.000000 |
| rad24       | 4.35792e-10 | 1.00000  | 4.35794e-10 | 1.000000 |
| rad13       | 2.11789e-13 | 1.00000  | 2.11790e-13 | 1.000000 |
| rad30       | 1.56800e-13 | 1.00000  | 1.56800e-13 | 1.000000 |
| rad7        | 1.36039e-13 | 1.00000  | 1.36039e-13 | 1.000000 |
| rad15       | 5.74453e-16 | 1.00000  | 5.74456e-16 | 1.000000 |
| rad33       | 2.62678e-16 | 1.00000  | 2.62679e-16 | 1.000000 |
| rad38       | 6.98112e-17 | 1.00000  | 6.98115e-17 | 1.000000 |
| rad25       | 3.48043e-17 | 1.00000  | 3.48044e-17 | 1.000000 |
| rad35       | 9.87585e-18 | 1.00000  | 9.87589e-18 | 1.000000 |
| PAH9+H      | 6.49136e-18 | 1.00000  | 6.49139e-18 | 1.000000 |
| rad3        | 2.50830e-18 | 1.00000  | 2.50831e-18 | 1.000000 |
| rad4        | 1.27502e-18 | 1.00000  | 1.27503e-18 | 1.000000 |
| rad28       | 7.37565e-22 | 1.00000  | 7.37568e-22 | 1.000000 |
| PhCHCCH2+H  | 4.81706e-22 | 1.00000  | 4.81708e-22 | 1.000000 |
| rad2        | 2.91615e-22 | 1.00000  | 2.91617e-22 | 1.000000 |
| rad46       | 2.99416e-23 | 1.00000  | 2.99417e-23 | 1.000000 |
| rad1        | 1.88006e-23 | 1.00000  | 1.88007e-23 | 1.000000 |
| rad9        | 1.45953e-24 | 1.00000  | 1.45953e-24 | 1.000000 |
| rad8        | 1.13646e-26 | 1.00000  | 1.13646e-26 | 1.000000 |
| rad10       | 1.13333e-26 | 1.00000  | 1.13333e-26 | 1.000000 |
| PhCCH+CH3   | 1.08927e-27 | 1.00000  | 1.08927e-27 | 1.000000 |
| rad14       | 8.73520e-28 | 1.00000  | 8.73524e-28 | 1.000000 |
| rad31       | 8.51556e-28 | 1.00000  | 8.51560e-28 | 1.000000 |
| Ph+Allene   | 5.12941e-28 | 1.00000  | 5.12943e-28 | 1.000000 |
| rad60syn    | 3.08068e-28 | 1.00000  | 3.08069e-28 | 1.000000 |
| rad60anti   | 8.67366e-30 | 1.00000  | 8.67370e-30 | 1.000000 |
| rad27       | 1.12514e-30 | 1.00000  | 1.12514e-30 | 1.000000 |
| PhCCCH3+H   | 1.86839e-32 | 1.00000  | 1.86839e-32 | 1.000000 |
| PhCH2CCH+H  | 3.85427e-33 | 1.00000  | 3.85429e-33 | 1.000000 |
| rad26       | 1.45315e-33 | 1.00000  | 1.45316e-33 | 1.000000 |
| PAH7+H      | 4.89070e-34 | 1.00000  | 4.89072e-34 | 1.000000 |
| Ph+MeAc     | 2.53599e-34 | 1.00000  | 2.53600e-34 | 1.000000 |
| rad39       | 7.36994e-37 | 1.00000  | 7.36997e-37 | 1.000000 |

|               |             |         |             |          |
|---------------|-------------|---------|-------------|----------|
| rad50         | 1.83605e-37 | 1.00000 | 1.83605e-37 | 1.000000 |
| PAH3+H        | 2.18486e-38 | 1.00000 | 2.18487e-38 | 1.000000 |
| rad59         | 1.12934e-38 | 1.00000 | 1.12935e-38 | 1.000000 |
| rad12         | 1.16365e-43 | 1.00000 | 1.16366e-43 | 1.000000 |
| rad5          | 4.64323e-44 | 1.00000 | 4.64325e-44 | 1.000000 |
| rad52         | 3.30661e-45 | 1.00000 | 3.30663e-45 | 1.000000 |
| rad37         | 7.56025e-46 | 1.00000 | 7.56028e-46 | 1.000000 |
| rad19syn      | 1.29653e-48 | 1.00000 | 1.29654e-48 | 1.000000 |
| rad51         | 1.38787e-49 | 1.00000 | 1.38788e-49 | 1.000000 |
| rad54         | 8.25261e-52 | 1.00000 | 8.25264e-52 | 1.000000 |
| rad65         | 1.55142e-53 | 1.00000 | 1.55143e-53 | 1.000000 |
| rad43         | 3.69300e-54 | 1.00000 | 3.69302e-54 | 1.000000 |
| rad62         | 3.63242e-54 | 1.00000 | 3.63244e-54 | 1.000000 |
| PAH10+CH3     | 1.02125e-55 | 1.00000 | 1.02126e-55 | 1.000000 |
| rad70         | 6.67253e-56 | 1.00000 | 6.67256e-56 | 1.000000 |
| rad58         | 9.60187e-57 | 1.00000 | 9.60191e-57 | 1.000000 |
| rad47         | 2.74428e-57 | 1.00000 | 2.74429e-57 | 1.000000 |
| PhcycC3H3_A+H | 6.03987e-58 | 1.00000 | 6.03990e-58 | 1.000000 |
| rad55         | 2.89074e-58 | 1.00000 | 2.89075e-58 | 1.000000 |
| rad34         | 6.45380e-61 | 1.00000 | 6.45383e-61 | 1.000000 |
| PAH1+H        | 7.33548e-62 | 1.00000 | 7.33551e-62 | 1.000000 |
| rad42         | 1.60506e-65 | 1.00000 | 1.60506e-65 | 1.000000 |
| rad41         | 2.90485e-66 | 1.00000 | 2.90486e-66 | 1.000000 |

1000.00000 Pa, 110.000000 K

=====

| Rate constant | True (fraction)     | Effective (fraction) |
|---------------|---------------------|----------------------|
| Total         | 4.04932e-39 (1.00 ) | 4.04929e-39 (1.00 )  |

| species     | PYtrue      | Cumul    | PYeffective | Cumul    |
|-------------|-------------|----------|-------------|----------|
| rad22       | 0.363258    | 0.363258 | 0.363260    | 0.363260 |
| rad20       | 0.243812    | 0.607070 | 0.243813    | 0.607073 |
| rad18       | 0.166424    | 0.773494 | 0.166425    | 0.773498 |
| rad21       | 0.152671    | 0.926165 | 0.152672    | 0.926170 |
| Indene+H    | 0.0559111   | 0.982076 | 0.0559114   | 0.982081 |
| rad45       | 0.0153965   | 0.997473 | 0.0153966   | 0.997478 |
| rad23       | 0.00147505  | 0.998948 | 0.00147506  | 0.998953 |
| rad36       | 0.000954469 | 0.999902 | 0.000954475 | 0.999908 |
| rad11       | 9.25154e-05 | 0.999995 | 9.25159e-05 | 1.00000  |
| Benzyl+C2H2 | 5.92276e-06 | 1.00000  | 0.00000     | 1.00000  |
| rad6        | 1.80554e-07 | 1.00000  | 1.80555e-07 | 1.00000  |
| rad24       | 4.07937e-10 | 1.00000  | 4.07939e-10 | 1.00000  |
| rad30       | 5.40035e-13 | 1.00000  | 5.40038e-13 | 1.00000  |
| rad13       | 3.32482e-13 | 1.00000  | 3.32484e-13 | 1.00000  |
| rad7        | 2.56370e-13 | 1.00000  | 2.56372e-13 | 1.00000  |
| rad15       | 3.17516e-15 | 1.00000  | 3.17518e-15 | 1.00000  |
| rad33       | 4.11812e-16 | 1.00000  | 4.11815e-16 | 1.00000  |
| rad38       | 1.91343e-16 | 1.00000  | 1.91344e-16 | 1.00000  |
| rad25       | 1.85968e-16 | 1.00000  | 1.85969e-16 | 1.00000  |
| rad35       | 2.23778e-17 | 1.00000  | 2.23779e-17 | 1.00000  |
| PAH9+H      | 1.64570e-17 | 1.00000  | 1.64571e-17 | 1.00000  |
| rad3        | 6.27011e-18 | 1.00000  | 6.27015e-18 | 1.00000  |
| rad4        | 3.19006e-18 | 1.00000  | 3.19007e-18 | 1.00000  |
| PhCHCCH2+H  | 7.60162e-21 | 1.00000  | 7.60167e-21 | 1.00000  |
| rad28       | 3.61254e-21 | 1.00000  | 3.61256e-21 | 1.00000  |
| rad2        | 1.19546e-21 | 1.00000  | 1.19547e-21 | 1.00000  |
| rad46       | 2.68827e-22 | 1.00000  | 2.68829e-22 | 1.00000  |
| rad1        | 7.73385e-23 | 1.00000  | 7.73389e-23 | 1.00000  |
| rad9        | 3.59143e-23 | 1.00000  | 3.59145e-23 | 1.00000  |
| rad8        | 2.68852e-24 | 1.00000  | 2.68854e-24 | 1.00000  |
| rad10       | 7.36236e-26 | 1.00000  | 7.36240e-26 | 1.00000  |
| Ph+Allene   | 3.08114e-26 | 1.00000  | 3.08116e-26 | 1.00000  |
| rad60syn    | 2.92334e-26 | 1.00000  | 2.92336e-26 | 1.00000  |
| PhCCH+CH3   | 1.53977e-26 | 1.00000  | 1.53978e-26 | 1.00000  |
| rad14       | 8.30691e-27 | 1.00000  | 8.30696e-27 | 1.00000  |
| rad31       | 2.23657e-27 | 1.00000  | 2.23659e-27 | 1.00000  |
| rad60anti   | 1.24752e-27 | 1.00000  | 1.24753e-27 | 1.00000  |
| rad27       | 1.08655e-29 | 1.00000  | 1.08656e-29 | 1.00000  |
| PhCCCH3+H   | 3.67018e-31 | 1.00000  | 3.67020e-31 | 1.00000  |
| PhCH2CCH+H  | 2.87511e-31 | 1.00000  | 2.87513e-31 | 1.00000  |
| PAH7+H      | 2.55120e-32 | 1.00000  | 2.55122e-32 | 1.00000  |
| rad26       | 2.37628e-32 | 1.00000  | 2.37630e-32 | 1.00000  |
| Ph+MeAc     | 1.21944e-32 | 1.00000  | 1.21945e-32 | 1.00000  |
| rad39       | 2.96922e-35 | 1.00000  | 2.96924e-35 | 1.00000  |
| rad50       | 7.27453e-36 | 1.00000  | 7.27458e-36 | 1.00000  |
| PAH3+H      | 3.17910e-36 | 1.00000  | 3.17912e-36 | 1.00000  |
| rad59       | 1.64932e-36 | 1.00000  | 1.64933e-36 | 1.00000  |
| rad12       | 6.52451e-42 | 1.00000  | 6.52455e-42 | 1.00000  |

|               |             |         |             |         |
|---------------|-------------|---------|-------------|---------|
| rad5          | 4.38760e-42 | 1.00000 | 4.38762e-42 | 1.00000 |
| rad52         | 2.18484e-43 | 1.00000 | 2.18485e-43 | 1.00000 |
| rad37         | 3.98823e-44 | 1.00000 | 3.98825e-44 | 1.00000 |
| rad19syn      | 1.29469e-46 | 1.00000 | 1.29470e-46 | 1.00000 |
| rad51         | 1.26906e-47 | 1.00000 | 1.26907e-47 | 1.00000 |
| rad54         | 8.55603e-50 | 1.00000 | 8.55608e-50 | 1.00000 |
| rad65         | 1.63618e-51 | 1.00000 | 1.63619e-51 | 1.00000 |
| rad43         | 6.64658e-52 | 1.00000 | 6.64662e-52 | 1.00000 |
| rad62         | 5.67209e-52 | 1.00000 | 5.67212e-52 | 1.00000 |
| PAH10+CH3     | 1.05883e-53 | 1.00000 | 1.05884e-53 | 1.00000 |
| rad70         | 7.53257e-54 | 1.00000 | 7.53261e-54 | 1.00000 |
| rad58         | 1.17410e-54 | 1.00000 | 1.17411e-54 | 1.00000 |
| rad47         | 3.49168e-55 | 1.00000 | 3.49170e-55 | 1.00000 |
| PhcycC3H3_A+H | 7.25653e-56 | 1.00000 | 7.25658e-56 | 1.00000 |
| rad55         | 3.42707e-56 | 1.00000 | 3.42709e-56 | 1.00000 |
| rad34         | 9.98438e-59 | 1.00000 | 9.98444e-59 | 1.00000 |
| PAH1+H        | 1.15063e-59 | 1.00000 | 1.15064e-59 | 1.00000 |
| rad42         | 3.75060e-63 | 1.00000 | 3.75062e-63 | 1.00000 |
| rad41         | 1.05691e-63 | 1.00000 | 1.05691e-63 | 1.00000 |

1000.00000 Pa, 120.000000 K

| Rate constant | True (fraction)     | Effective (fraction) |
|---------------|---------------------|----------------------|
| Total         | 5.87106e-37 (1.00 ) | 5.87101e-37 (1.00 )  |

| species     | PYtrue      | Cumul    | PYeffective | Cumul    |
|-------------|-------------|----------|-------------|----------|
| rad22       | 0.388012    | 0.388012 | 0.388015    | 0.388015 |
| rad20       | 0.219093    | 0.607105 | 0.219095    | 0.607110 |
| rad18       | 0.169514    | 0.776619 | 0.169515    | 0.776625 |
| rad21       | 0.137669    | 0.914288 | 0.137670    | 0.914295 |
| Indene+H    | 0.0659367   | 0.980225 | 0.0659373   | 0.980232 |
| rad45       | 0.0167910   | 0.997016 | 0.0167911   | 0.997023 |
| rad23       | 0.00182571  | 0.998841 | 0.00182572  | 0.998849 |
| rad36       | 0.00104084  | 0.999882 | 0.00104084  | 0.999890 |
| rad11       | 0.000109584 | 0.999992 | 0.000109585 | 1.000000 |
| Benzyl+C2H2 | 8.53738e-06 | 1.00000  | 0.00000     | 1.000000 |
| rad6        | 2.64371e-07 | 1.00000  | 2.64373e-07 | 1.000000 |
| rad24       | 3.90811e-10 | 1.00000  | 3.90814e-10 | 1.000000 |
| rad30       | 1.66167e-12 | 1.00000  | 1.66168e-12 | 1.000000 |
| rad13       | 5.13789e-13 | 1.00000  | 5.13793e-13 | 1.000000 |
| rad7        | 4.84075e-13 | 1.00000  | 4.84079e-13 | 1.000000 |
| rad15       | 1.51326e-14 | 1.00000  | 1.51328e-14 | 1.000000 |
| rad25       | 8.75490e-16 | 1.00000  | 8.75498e-16 | 1.000000 |
| rad33       | 6.35516e-16 | 1.00000  | 6.35521e-16 | 1.000000 |
| rad38       | 4.93839e-16 | 1.00000  | 4.93843e-16 | 1.000000 |
| rad35       | 5.00793e-17 | 1.00000  | 5.00797e-17 | 1.000000 |
| PAH9+H      | 4.07688e-17 | 1.00000  | 4.07692e-17 | 1.000000 |
| rad3        | 1.57203e-17 | 1.00000  | 1.57204e-17 | 1.000000 |
| rad4        | 8.00600e-18 | 1.00000  | 8.00607e-18 | 1.000000 |
| PhCHCCH2+H  | 1.01216e-19 | 1.00000  | 1.01217e-19 | 1.000000 |
| rad28       | 1.67630e-20 | 1.00000  | 1.67631e-20 | 1.000000 |
| rad2        | 5.02507e-21 | 1.00000  | 5.02511e-21 | 1.000000 |
| rad46       | 2.19703e-21 | 1.00000  | 2.19705e-21 | 1.000000 |
| rad9        | 7.36920e-22 | 1.00000  | 7.36927e-22 | 1.000000 |
| rad1        | 3.26330e-22 | 1.00000  | 3.26333e-22 | 1.000000 |
| rad8        | 1.46404e-22 | 1.00000  | 1.46405e-22 | 1.000000 |
| Ph+Allene   | 1.57479e-24 | 1.00000  | 1.57480e-24 | 1.000000 |
| rad60syn    | 1.41540e-24 | 1.00000  | 1.41541e-24 | 1.000000 |
| rad10       | 5.01053e-25 | 1.00000  | 5.01057e-25 | 1.000000 |
| PhCCH+CH3   | 2.07057e-25 | 1.00000  | 2.07059e-25 | 1.000000 |
| rad60anti   | 8.81112e-26 | 1.00000  | 8.81120e-26 | 1.000000 |
| rad14       | 7.53660e-26 | 1.00000  | 7.53666e-26 | 1.000000 |
| rad31       | 5.90533e-27 | 1.00000  | 5.90538e-27 | 1.000000 |
| rad27       | 1.05647e-28 | 1.00000  | 1.05648e-28 | 1.000000 |
| PhCH2CCH+H  | 3.03927e-29 | 1.00000  | 3.03930e-29 | 1.000000 |
| PAH7+H      | 9.07309e-30 | 1.00000  | 9.07317e-30 | 1.000000 |
| PhCCCH3+H   | 7.14700e-30 | 1.00000  | 7.14707e-30 | 1.000000 |
| Ph+MeAc     | 5.83817e-31 | 1.00000  | 5.83822e-31 | 1.000000 |
| rad26       | 4.10058e-31 | 1.00000  | 4.10061e-31 | 1.000000 |
| rad39       | 1.18088e-33 | 1.00000  | 1.18089e-33 | 1.000000 |
| PAH3+H      | 7.12976e-34 | 1.00000  | 7.12982e-34 | 1.000000 |
| rad59       | 3.69783e-34 | 1.00000  | 3.69786e-34 | 1.000000 |
| rad50       | 3.63684e-34 | 1.00000  | 3.63687e-34 | 1.000000 |
| rad5        | 4.98240e-40 | 1.00000  | 4.98244e-40 | 1.000000 |
| rad12       | 4.19118e-40 | 1.00000  | 4.19122e-40 | 1.000000 |
| rad52       | 1.84744e-41 | 1.00000  | 1.84746e-41 | 1.000000 |
| rad37       | 3.04626e-42 | 1.00000  | 3.04628e-42 | 1.000000 |
| rad19syn    | 1.81069e-44 | 1.00000  | 1.81071e-44 | 1.000000 |

|               |             |         |             |          |
|---------------|-------------|---------|-------------|----------|
| rad51         | 1.50242e-45 | 1.00000 | 1.50243e-45 | 1.000000 |
| rad54         | 1.25478e-47 | 1.00000 | 1.25479e-47 | 1.000000 |
| rad65         | 2.26930e-49 | 1.00000 | 2.26932e-49 | 1.000000 |
| rad43         | 1.59638e-49 | 1.00000 | 1.59640e-49 | 1.000000 |
| rad62         | 1.23592e-49 | 1.00000 | 1.23593e-49 | 1.000000 |
| PAH10+CH3     | 1.58453e-51 | 1.00000 | 1.58454e-51 | 1.000000 |
| rad70         | 1.15257e-51 | 1.00000 | 1.15258e-51 | 1.000000 |
| rad58         | 1.89113e-52 | 1.00000 | 1.89114e-52 | 1.000000 |
| rad47         | 5.86637e-53 | 1.00000 | 5.86642e-53 | 1.000000 |
| PhcycC3H3_A+H | 1.22700e-53 | 1.00000 | 1.22702e-53 | 1.000000 |
| rad55         | 5.71925e-54 | 1.00000 | 5.71930e-54 | 1.000000 |
| rad34         | 2.05931e-56 | 1.00000 | 2.05933e-56 | 1.000000 |
| PAH1+H        | 2.38541e-57 | 1.00000 | 2.38543e-57 | 1.000000 |
| rad42         | 1.40188e-60 | 1.00000 | 1.40190e-60 | 1.000000 |
| rad41         | 5.55048e-61 | 1.00000 | 5.55053e-61 | 1.000000 |

1000.00000 Pa, 130.000000 K

| Rate constant | True (fraction)     | Effective (fraction) |
|---------------|---------------------|----------------------|
| Total         | 3.94360e-35 (1.00 ) | 3.94356e-35 (1.00 )  |

| species     | PYtrue      | Cumul    | PYeffective | Cumul    |
|-------------|-------------|----------|-------------|----------|
| rad22       | 0.410618    | 0.410618 | 0.410623    | 0.410623 |
| rad20       | 0.196277    | 0.606895 | 0.196280    | 0.606903 |
| rad18       | 0.171062    | 0.777957 | 0.171065    | 0.777968 |
| rad21       | 0.123625    | 0.901582 | 0.123627    | 0.901595 |
| Indene+H    | 0.0767704   | 0.978352 | 0.0767713   | 0.978366 |
| rad45       | 0.0181505   | 0.996503 | 0.0181507   | 0.996517 |
| rad23       | 0.00222970  | 0.998733 | 0.00222972  | 0.998747 |
| rad36       | 0.00112526  | 0.999858 | 0.00112527  | 0.999872 |
| rad11       | 0.000128952 | 0.999987 | 0.000128953 | 1.000000 |
| Benzyl+C2H2 | 1.21705e-05 | 0.999999 | 0.000000    | 1.000000 |
| rad6        | 3.85590e-07 | 0.999999 | 3.85595e-07 | 1.000000 |
| rad24       | 3.80819e-10 | 0.999999 | 3.80824e-10 | 1.000000 |
| rad30       | 4.56875e-12 | 0.999999 | 4.56881e-12 | 1.000000 |
| rad7        | 9.18908e-13 | 0.999999 | 9.18920e-13 | 1.000000 |
| rad13       | 7.84561e-13 | 0.999999 | 7.84570e-13 | 1.000000 |
| rad15       | 6.10656e-14 | 0.999999 | 6.10664e-14 | 1.000000 |
| rad25       | 3.58309e-15 | 0.999999 | 3.58313e-15 | 1.000000 |
| rad38       | 1.20469e-15 | 0.999999 | 1.20471e-15 | 1.000000 |
| rad33       | 9.69050e-16 | 0.999999 | 9.69062e-16 | 1.000000 |
| rad35       | 1.11005e-16 | 0.999999 | 1.11006e-16 | 1.000000 |
| PAH9+H      | 9.89698e-17 | 0.999999 | 9.89711e-17 | 1.000000 |
| rad3        | 3.94815e-17 | 0.999999 | 3.94819e-17 | 1.000000 |
| rad4        | 2.01293e-17 | 0.999999 | 2.01296e-17 | 1.000000 |
| PhCHCCH2+H  | 1.04704e-18 | 0.999999 | 1.04705e-18 | 1.000000 |
| rad28       | 7.25574e-20 | 0.999999 | 7.25583e-20 | 1.000000 |
| rad2        | 2.13054e-20 | 0.999999 | 2.13057e-20 | 1.000000 |
| rad46       | 1.51636e-20 | 0.999999 | 1.51638e-20 | 1.000000 |
| rad9        | 1.11064e-20 | 0.999999 | 1.11065e-20 | 1.000000 |
| rad8        | 4.39966e-21 | 0.999999 | 4.39971e-21 | 1.000000 |
| rad1        | 1.38939e-21 | 0.999999 | 1.38941e-21 | 1.000000 |
| Ph+Allene   | 5.28576e-23 | 0.999999 | 5.28582e-23 | 1.000000 |
| rad60syn    | 4.09676e-23 | 0.999999 | 4.09681e-23 | 1.000000 |
| rad10       | 3.45034e-24 | 0.999999 | 3.45038e-24 | 1.000000 |
| rad60anti   | 3.24870e-24 | 0.999999 | 3.24874e-24 | 1.000000 |
| PhCCH+CH3   | 2.45040e-24 | 0.999999 | 2.45043e-24 | 1.000000 |
| rad14       | 6.22204e-25 | 0.999999 | 6.22212e-25 | 1.000000 |
| rad31       | 1.56487e-26 | 0.999999 | 1.56489e-26 | 1.000000 |
| PhCH2CCH+H  | 4.00110e-27 | 0.999999 | 4.00115e-27 | 1.000000 |
| rad27       | 9.72508e-28 | 0.999999 | 9.72520e-28 | 1.000000 |
| PAH7+H      | 7.57432e-28 | 0.999999 | 7.57441e-28 | 1.000000 |
| PhCCCH3+H   | 1.25048e-28 | 0.999999 | 1.25050e-28 | 1.000000 |
| Ph+MeAc     | 2.19166e-29 | 0.999999 | 2.19169e-29 | 1.000000 |
| rad26       | 6.87883e-30 | 0.999999 | 6.87892e-30 | 1.000000 |
| PAH3+H      | 2.34245e-31 | 0.999999 | 2.34248e-31 | 1.000000 |
| rad59       | 1.21250e-31 | 0.999999 | 1.21251e-31 | 1.000000 |
| rad39       | 3.74442e-32 | 0.999999 | 3.74447e-32 | 1.000000 |
| rad50       | 2.00583e-32 | 0.999999 | 2.00586e-32 | 1.000000 |
| rad5        | 5.43357e-38 | 0.999999 | 5.43364e-38 | 1.000000 |
| rad12       | 2.89455e-38 | 0.999999 | 2.89459e-38 | 1.000000 |
| rad52       | 1.74047e-39 | 0.999999 | 1.74049e-39 | 1.000000 |
| rad37       | 3.31781e-40 | 0.999999 | 3.31785e-40 | 1.000000 |
| rad19syn    | 3.12691e-42 | 0.999999 | 3.12695e-42 | 1.000000 |
| rad51       | 1.99982e-43 | 0.999999 | 1.99984e-43 | 1.000000 |
| rad54       | 2.30407e-45 | 0.999999 | 2.30410e-45 | 1.000000 |
| rad43       | 4.21508e-47 | 0.999999 | 4.21513e-47 | 1.000000 |
| rad65       | 3.58514e-47 | 0.999999 | 3.58518e-47 | 1.000000 |



|               |             |          |             |         |
|---------------|-------------|----------|-------------|---------|
| rad62         | 3.12312e-47 | 0.999999 | 3.12316e-47 | 1.00000 |
| PAH10+CH3     | 3.07009e-49 | 0.999999 | 3.07012e-49 | 1.00000 |
| rad70         | 2.08461e-49 | 0.999999 | 2.08463e-49 | 1.00000 |
| rad58         | 3.47118e-50 | 0.999999 | 3.47122e-50 | 1.00000 |
| rad47         | 1.12437e-50 | 0.999999 | 1.12438e-50 | 1.00000 |
| PhcycC3H3_A+H | 2.58159e-51 | 0.999999 | 2.58162e-51 | 1.00000 |
| rad55         | 1.18804e-51 | 0.999999 | 1.18805e-51 | 1.00000 |
| rad34         | 4.88727e-54 | 0.999999 | 4.88733e-54 | 1.00000 |
| PAH1+H        | 5.66707e-55 | 0.999999 | 5.66713e-55 | 1.00000 |
| rad42         | 6.81323e-58 | 0.999999 | 6.81332e-58 | 1.00000 |
| rad41         | 3.38066e-58 | 0.999999 | 3.38070e-58 | 1.00000 |

1000.00000 Pa, 140.000000 K

| Rate constant | True (fraction)     | Effective (fraction) |
|---------------|---------------------|----------------------|
| Total         | 1.44756e-33 (1.00 ) | 1.44753e-33 (1.00 )  |

| species     | PYtrue      | Cumul    | PYeffective | Cumul    |
|-------------|-------------|----------|-------------|----------|
| rad22       | 0.431149    | 0.431149 | 0.431156    | 0.431156 |
| rad20       | 0.175224    | 0.606373 | 0.175227    | 0.606383 |
| rad18       | 0.171122    | 0.777495 | 0.171125    | 0.777508 |
| rad21       | 0.110543    | 0.888038 | 0.110545    | 0.888053 |
| Indene+H    | 0.0884157   | 0.976454 | 0.0884173   | 0.976470 |
| rad45       | 0.0194749   | 0.995929 | 0.0194752   | 0.995946 |
| rad23       | 0.00269450  | 0.998623 | 0.00269455  | 0.998640 |
| rad36       | 0.00120778  | 0.999831 | 0.00120780  | 0.999848 |
| rad11       | 0.000150945 | 0.999982 | 0.000150948 | 0.999999 |
| Benzyl+C2H2 | 1.71706e-05 | 0.999999 | 0.00000     | 0.999999 |
| rad6        | 5.61243e-07 | 1.000000 | 5.61253e-07 | 0.999999 |
| rad24       | 3.75728e-10 | 1.000000 | 3.75734e-10 | 0.999999 |
| rad30       | 1.13595e-11 | 1.000000 | 1.13597e-11 | 0.999999 |
| rad7        | 1.75488e-12 | 1.000000 | 1.75491e-12 | 0.999999 |
| rad13       | 1.18660e-12 | 1.000000 | 1.18662e-12 | 0.999999 |
| rad15       | 2.11395e-13 | 1.000000 | 2.11399e-13 | 0.999999 |
| rad25       | 1.28796e-14 | 1.000000 | 1.28798e-14 | 0.999999 |
| rad38       | 2.79606e-15 | 1.000000 | 2.79611e-15 | 0.999999 |
| rad33       | 1.46344e-15 | 1.000000 | 1.46346e-15 | 0.999999 |
| rad35       | 2.43975e-16 | 1.000000 | 2.43979e-16 | 0.999999 |
| PAH9+H      | 2.35966e-16 | 1.000000 | 2.35970e-16 | 0.999999 |
| rad3        | 9.90186e-17 | 1.000000 | 9.90203e-17 | 0.999999 |
| rad4        | 5.05459e-17 | 1.000000 | 5.05468e-17 | 0.999999 |
| PhCHCCH2+H  | 8.47809e-18 | 1.000000 | 8.47824e-18 | 0.999999 |
| rad28       | 2.92513e-19 | 1.000000 | 2.92518e-19 | 0.999999 |
| rad9        | 1.23610e-19 | 1.000000 | 1.23612e-19 | 0.999999 |
| rad2        | 8.97745e-20 | 1.000000 | 8.97761e-20 | 0.999999 |
| rad46       | 8.73498e-20 | 1.000000 | 8.73513e-20 | 0.999999 |
| rad8        | 8.23044e-20 | 1.000000 | 8.23059e-20 | 0.999999 |
| rad1        | 5.88144e-21 | 1.000000 | 5.88154e-21 | 0.999999 |
| Ph+Allene   | 1.17016e-21 | 1.000000 | 1.17018e-21 | 0.999999 |
| rad60syn    | 7.57612e-22 | 1.000000 | 7.57625e-22 | 0.999999 |
| rad60anti   | 7.29725e-23 | 1.000000 | 7.29738e-23 | 0.999999 |
| PhCCH+CH3   | 2.50591e-23 | 1.000000 | 2.50595e-23 | 0.999999 |
| rad10       | 2.34077e-23 | 1.000000 | 2.34081e-23 | 0.999999 |
| rad14       | 4.61205e-24 | 1.000000 | 4.61213e-24 | 0.999999 |
| PhCH2CCH+H  | 2.33653e-25 | 1.000000 | 2.33657e-25 | 0.999999 |
| rad31       | 4.14860e-26 | 1.000000 | 4.14867e-26 | 0.999999 |
| PAH7+H      | 2.80769e-26 | 1.000000 | 2.80774e-26 | 0.999999 |
| rad27       | 8.18128e-27 | 1.000000 | 8.18142e-27 | 0.999999 |
| PhCCCH3+H   | 1.90186e-27 | 1.000000 | 1.90189e-27 | 0.999999 |
| Ph+MeAc     | 5.98787e-28 | 1.000000 | 5.98797e-28 | 0.999999 |
| PAH3+H      | 1.26947e-28 | 1.000000 | 1.26949e-28 | 0.999999 |
| rad26       | 1.19067e-28 | 1.000000 | 1.19069e-28 | 0.999999 |
| rad59       | 6.45654e-29 | 1.000000 | 6.45665e-29 | 0.999999 |
| rad50       | 1.04324e-30 | 1.000000 | 1.04326e-30 | 0.999999 |
| rad39       | 8.88318e-31 | 1.000000 | 8.88333e-31 | 0.999999 |
| rad12       | 5.16624e-36 | 1.000000 | 5.16633e-36 | 0.999999 |
| rad5        | 4.28576e-36 | 1.000000 | 4.28583e-36 | 0.999999 |
| rad52       | 1.50982e-37 | 1.000000 | 1.50984e-37 | 0.999999 |
| rad37       | 9.57662e-38 | 1.000000 | 9.57679e-38 | 0.999999 |
| rad19syn    | 4.83384e-40 | 1.000000 | 4.83392e-40 | 0.999999 |
| rad51       | 2.46807e-41 | 1.000000 | 2.46811e-41 | 0.999999 |
| rad54       | 3.83951e-43 | 1.000000 | 3.83958e-43 | 0.999999 |
| rad43       | 8.94449e-45 | 1.000000 | 8.94464e-45 | 0.999999 |
| rad62       | 6.58946e-45 | 1.000000 | 6.58957e-45 | 0.999999 |
| rad65       | 5.30810e-45 | 1.000000 | 5.30819e-45 | 0.999999 |
| PAH10+CH3   | 5.81479e-47 | 1.000000 | 5.81489e-47 | 0.999999 |
| rad70       | 3.55409e-47 | 1.000000 | 3.55416e-47 | 0.999999 |
| rad58       | 5.97024e-48 | 1.000000 | 5.97035e-48 | 0.999999 |

|               |             |          |             |          |
|---------------|-------------|----------|-------------|----------|
| rad47         | 2.01833e-48 | 1.000000 | 2.01837e-48 | 0.999999 |
| PhcycC3H3_A+H | 4.96808e-49 | 1.000000 | 4.96817e-49 | 0.999999 |
| rad55         | 2.25970e-49 | 1.000000 | 2.25974e-49 | 0.999999 |
| rad34         | 1.09317e-51 | 1.000000 | 1.09319e-51 | 0.999999 |
| PAH1+H        | 1.26516e-52 | 1.000000 | 1.26518e-52 | 0.999999 |
| rad42         | 2.96554e-55 | 1.000000 | 2.96559e-55 | 0.999999 |
| rad41         | 1.69898e-55 | 1.000000 | 1.69901e-55 | 0.999999 |

1000.00000 Pa, 150.000000 K

| Rate constant | True (fraction)     | Effective (fraction) |
|---------------|---------------------|----------------------|
| Total         | 3.27736e-32 (1.00 ) | 3.27729e-32 (1.00 )  |

| species       | PYtrue      | Cumul    | PYeffective | Cumul    |
|---------------|-------------|----------|-------------|----------|
| rad22         | 0.449658    | 0.449658 | 0.449669    | 0.449669 |
| rad18         | 0.169750    | 0.619408 | 0.169754    | 0.619423 |
| rad20         | 0.155833    | 0.775241 | 0.155837    | 0.775260 |
| Indene+H      | 0.100863    | 0.876104 | 0.100865    | 0.876125 |
| rad21         | 0.0984165   | 0.974521 | 0.0984188   | 0.974544 |
| rad45         | 0.0207619   | 0.995282 | 0.0207624   | 0.995306 |
| rad23         | 0.00322873  | 0.998511 | 0.00322881  | 0.998535 |
| rad36         | 0.00128835  | 0.999799 | 0.00128838  | 0.999823 |
| rad11         | 0.000175908 | 0.999975 | 0.000175913 | 0.999999 |
| Benzyl+C2H2   | 2.39845e-05 | 0.999999 | 0.00000     | 0.999999 |
| rad6          | 8.15937e-07 | 1.00000  | 8.15956e-07 | 1.00000  |
| rad24         | 3.74080e-10 | 1.00000  | 3.74089e-10 | 1.00000  |
| rad30         | 2.59031e-11 | 1.00000  | 2.59038e-11 | 1.00000  |
| rad7          | 3.36757e-12 | 1.00000  | 3.36765e-12 | 1.00000  |
| rad13         | 1.77987e-12 | 1.00000  | 1.77992e-12 | 1.00000  |
| rad15         | 6.40758e-13 | 1.00000  | 6.40773e-13 | 1.00000  |
| rad25         | 4.13166e-14 | 1.00000  | 4.13176e-14 | 1.00000  |
| rad38         | 6.21522e-15 | 1.00000  | 6.21537e-15 | 1.00000  |
| rad33         | 2.19186e-15 | 1.00000  | 2.19192e-15 | 1.00000  |
| PAH9+H        | 5.53323e-16 | 1.00000  | 5.53336e-16 | 1.00000  |
| rad35         | 5.31661e-16 | 1.00000  | 5.31673e-16 | 1.00000  |
| rad3          | 2.47059e-16 | 1.00000  | 2.47065e-16 | 1.00000  |
| rad4          | 1.26287e-16 | 1.00000  | 1.26290e-16 | 1.00000  |
| PhCHCCH2+H    | 5.53617e-17 | 1.00000  | 5.53630e-17 | 1.00000  |
| rad28         | 1.10283e-18 | 1.00000  | 1.10285e-18 | 1.00000  |
| rad9          | 1.05454e-18 | 1.00000  | 1.05457e-18 | 1.00000  |
| rad8          | 1.05094e-18 | 1.00000  | 1.05096e-18 | 1.00000  |
| rad46         | 4.25916e-19 | 1.00000  | 4.25926e-19 | 1.00000  |
| rad2          | 3.71632e-19 | 1.00000  | 3.71641e-19 | 1.00000  |
| rad1          | 2.44695e-20 | 1.00000  | 2.44701e-20 | 1.00000  |
| Ph+Allene     | 1.81488e-20 | 1.00000  | 1.81492e-20 | 1.00000  |
| rad60syn      | 9.66195e-21 | 1.00000  | 9.66218e-21 | 1.00000  |
| rad60anti     | 1.09788e-21 | 1.00000  | 1.09790e-21 | 1.00000  |
| PhCCH+CH3     | 2.22464e-22 | 1.00000  | 2.22470e-22 | 1.00000  |
| rad10         | 1.53576e-22 | 1.00000  | 1.53580e-22 | 1.00000  |
| rad14         | 3.06794e-23 | 1.00000  | 3.06801e-23 | 1.00000  |
| PhCH2CCH+H    | 7.60188e-24 | 1.00000  | 7.60206e-24 | 1.00000  |
| PAH7+H        | 6.31576e-25 | 1.00000  | 6.31591e-25 | 1.00000  |
| rad31         | 1.09642e-25 | 1.00000  | 1.09644e-25 | 1.00000  |
| rad27         | 6.18008e-26 | 1.00000  | 6.18023e-26 | 1.00000  |
| PhCCCH3+H     | 2.50825e-26 | 1.00000  | 2.50831e-26 | 1.00000  |
| PAH3+H        | 1.60601e-26 | 1.00000  | 1.60604e-26 | 1.00000  |
| Ph+MeAc       | 1.22555e-26 | 1.00000  | 1.22558e-26 | 1.00000  |
| rad59         | 7.20509e-27 | 1.00000  | 7.20526e-27 | 1.00000  |
| rad26         | 2.15260e-27 | 1.00000  | 2.15265e-27 | 1.00000  |
| rad50         | 4.00796e-29 | 1.00000  | 4.00805e-29 | 1.00000  |
| rad39         | 1.61762e-29 | 1.00000  | 1.61766e-29 | 1.00000  |
| rad12         | 3.77999e-34 | 1.00000  | 3.78008e-34 | 1.00000  |
| rad5          | 2.57224e-34 | 1.00000  | 2.57230e-34 | 1.00000  |
| rad52         | 1.31846e-35 | 1.00000  | 1.31849e-35 | 1.00000  |
| rad37         | 9.97540e-36 | 1.00000  | 9.97564e-36 | 1.00000  |
| rad19syn      | 1.12337e-37 | 1.00000  | 1.12340e-37 | 1.00000  |
| rad51         | 3.08276e-39 | 1.00000  | 3.08283e-39 | 1.00000  |
| rad54         | 1.00761e-40 | 1.00000  | 1.00764e-40 | 1.00000  |
| rad43         | 2.07697e-42 | 1.00000  | 2.07702e-42 | 1.00000  |
| rad62         | 1.66926e-42 | 1.00000  | 1.66930e-42 | 1.00000  |
| rad65         | 8.02549e-43 | 1.00000  | 8.02568e-43 | 1.00000  |
| PAH10+CH3     | 1.30201e-44 | 1.00000  | 1.30204e-44 | 1.00000  |
| rad70         | 7.79522e-45 | 1.00000  | 7.79541e-45 | 1.00000  |
| rad58         | 1.05060e-45 | 1.00000  | 1.05062e-45 | 1.00000  |
| rad47         | 3.68948e-46 | 1.00000  | 3.68957e-46 | 1.00000  |
| PhcycC3H3_A+H | 1.48029e-46 | 1.00000  | 1.48033e-46 | 1.00000  |
| rad55         | 6.66415e-47 | 1.00000  | 6.66431e-47 | 1.00000  |
| rad34         | 2.52642e-49 | 1.00000  | 2.52648e-49 | 1.00000  |

|        |             |         |             |         |
|--------|-------------|---------|-------------|---------|
| PAH1+H | 2.94539e-50 | 1.00000 | 2.94546e-50 | 1.00000 |
| rad42  | 1.54380e-52 | 1.00000 | 1.54384e-52 | 1.00000 |
| rad41  | 9.63854e-53 | 1.00000 | 9.63877e-53 | 1.00000 |

1000.00000 Pa, 160.000000 K

| =====         |                     |          |                      |          |
|---------------|---------------------|----------|----------------------|----------|
| Rate constant | True (fraction)     |          | Effective (fraction) |          |
| -----         |                     |          |                      |          |
| Total         | 5.01169e-31 (1.00 ) |          | 5.01152e-31 (1.00 )  |          |
| species       | PYtrue              | Cumul    | PYeffective          | Cumul    |
| -----         |                     |          |                      |          |
| rad22         | 0.466187            | 0.466187 | 0.466203             | 0.466203 |
| rad18         | 0.167015            | 0.633202 | 0.167021             | 0.633224 |
| rad20         | 0.138026            | 0.771228 | 0.138030             | 0.771254 |
| Indene+H      | 0.114085            | 0.885313 | 0.114089             | 0.885343 |
| rad21         | 0.0872313           | 0.972544 | 0.0872342            | 0.972577 |
| rad45         | 0.0220076           | 0.994552 | 0.0220083            | 0.994586 |
| rad23         | 0.00384218          | 0.998394 | 0.00384231           | 0.998428 |
| rad36         | 0.00136680          | 0.999761 | 0.00136684           | 0.999795 |
| rad11         | 0.000204197         | 0.999965 | 0.000204204          | 0.999999 |
| Benzyl+C2H2   | 3.31767e-05         | 0.999998 | 0.00000              | 0.999999 |
| rad6          | 1.18495e-06         | 0.999999 | 1.18499e-06          | 1.00000  |
| rad24         | 3.74879e-10         | 0.999999 | 3.74892e-10          | 1.00000  |
| rad30         | 5.48769e-11         | 0.999999 | 5.48787e-11          | 1.00000  |
| rad7          | 6.47784e-12         | 0.999999 | 6.47805e-12          | 1.00000  |
| rad13         | 2.64965e-12         | 0.999999 | 2.64973e-12          | 1.00000  |
| rad15         | 1.73476e-12         | 0.999999 | 1.73482e-12          | 1.00000  |
| rad25         | 1.20114e-13         | 0.999999 | 1.20118e-13          | 1.00000  |
| rad38         | 1.33060e-14         | 0.999999 | 1.33065e-14          | 1.00000  |
| rad33         | 3.25838e-15         | 0.999999 | 3.25849e-15          | 1.00000  |
| PAH9+H        | 1.27700e-15         | 0.999999 | 1.27704e-15          | 1.00000  |
| rad35         | 1.14793e-15         | 0.999999 | 1.14797e-15          | 1.00000  |
| rad3          | 6.10987e-16         | 0.999999 | 6.11008e-16          | 1.00000  |
| rad4          | 3.12780e-16         | 0.999999 | 3.12790e-16          | 1.00000  |
| PhCHCCH2+H    | 3.00844e-16         | 0.999999 | 3.00854e-16          | 1.00000  |
| rad8          | 9.81938e-18         | 0.999999 | 9.81970e-18          | 1.00000  |
| rad9          | 7.17528e-18         | 0.999999 | 7.17552e-18          | 1.00000  |
| rad28         | 3.91035e-18         | 0.999999 | 3.91048e-18          | 1.00000  |
| rad46         | 1.79528e-18         | 0.999999 | 1.79534e-18          | 1.00000  |
| rad2          | 1.49859e-18         | 0.999999 | 1.49864e-18          | 1.00000  |
| Ph+Allene     | 2.07976e-19         | 0.999999 | 2.07983e-19          | 1.00000  |
| rad1          | 9.92146e-20         | 0.999999 | 9.92179e-20          | 1.00000  |
| rad60syn      | 9.05487e-20         | 0.999999 | 9.05517e-20          | 1.00000  |
| rad60anti     | 1.18646e-20         | 0.999999 | 1.18650e-20          | 1.00000  |
| PhCCH+CH3     | 1.73246e-21         | 0.999999 | 1.73251e-21          | 1.00000  |
| rad10         | 9.62116e-22         | 0.999999 | 9.62148e-22          | 1.00000  |
| rad14         | 1.83710e-22         | 0.999999 | 1.83716e-22          | 1.00000  |
| PhCH2CCH+H    | 1.55082e-22         | 0.999999 | 1.55088e-22          | 1.00000  |
| PAH7+H        | 9.65092e-24         | 0.999999 | 9.65124e-24          | 1.00000  |
| PAH3+H        | 4.78412e-25         | 0.999999 | 4.78428e-25          | 1.00000  |
| rad27         | 4.16354e-25         | 0.999999 | 4.16368e-25          | 1.00000  |
| rad31         | 2.87916e-25         | 0.999999 | 2.87925e-25          | 1.00000  |
| PhCCCH3+H     | 2.87665e-25         | 0.999999 | 2.87674e-25          | 1.00000  |
| rad59         | 2.01445e-25         | 0.999999 | 2.01451e-25          | 1.00000  |
| Ph+MeAc       | 1.92261e-25         | 0.999999 | 1.92267e-25          | 1.00000  |
| rad26         | 3.44528e-26         | 0.999999 | 3.44539e-26          | 1.00000  |
| rad50         | 9.55588e-28         | 0.999999 | 9.55619e-28          | 1.00000  |
| rad39         | 2.31144e-28         | 0.999999 | 2.31152e-28          | 1.00000  |
| rad12         | 1.21702e-32         | 0.999999 | 1.21706e-32          | 1.00000  |
| rad5          | 9.72131e-33         | 0.999999 | 9.72164e-33          | 1.00000  |
| rad52         | 9.16635e-34         | 0.999999 | 9.16665e-34          | 1.00000  |
| rad37         | 3.93885e-34         | 0.999999 | 3.93898e-34          | 1.00000  |
| rad19syn      | 1.95811e-35         | 0.999999 | 1.95817e-35          | 1.00000  |
| rad51         | 3.07539e-37         | 0.999999 | 3.07550e-37          | 1.00000  |
| rad54         | 2.08564e-38         | 0.999999 | 2.08571e-38          | 1.00000  |
| rad43         | 3.23062e-40         | 0.999999 | 3.23073e-40          | 1.00000  |
| rad62         | 2.96317e-40         | 0.999999 | 2.96327e-40          | 1.00000  |
| rad65         | 9.76155e-41         | 0.999999 | 9.76187e-41          | 1.00000  |
| PAH10+CH3     | 2.15723e-42         | 0.999999 | 2.15730e-42          | 1.00000  |
| rad70         | 1.61998e-42         | 0.999999 | 1.62004e-42          | 1.00000  |
| rad58         | 1.49763e-43         | 0.999999 | 1.49768e-43          | 1.00000  |
| rad47         | 5.40033e-44         | 0.999999 | 5.40051e-44          | 1.00000  |
| PhcycC3H3_A+H | 3.58690e-44         | 0.999999 | 3.58702e-44          | 1.00000  |
| rad55         | 1.60215e-44         | 0.999999 | 1.60220e-44          | 1.00000  |
| rad34         | 4.73186e-47         | 0.999999 | 4.73201e-47          | 1.00000  |
| PAH1+H        | 5.58278e-48         | 0.999999 | 5.58297e-48          | 1.00000  |
| rad42         | 5.60028e-50         | 0.999999 | 5.60047e-50          | 1.00000  |
| rad41         | 3.69036e-50         | 0.999999 | 3.69048e-50          | 1.00000  |

1000.00000 Pa, 170.000000 K

=====

| Rate constant | True (fraction) | Effective (fraction) |
|---------------|-----------------|----------------------|
|---------------|-----------------|----------------------|

-----

|       |                     |                     |
|-------|---------------------|---------------------|
| Total | 5.54821e-30 (1.00 ) | 5.54795e-30 (1.00 ) |
|-------|---------------------|---------------------|

| species       | PYtrue      | Cumul    | PYeffective | Cumul    |
|---------------|-------------|----------|-------------|----------|
| rad22         | 0.480770    | 0.480770 | 0.480792    | 0.480792 |
| rad18         | 0.163007    | 0.643777 | 0.163014    | 0.643806 |
| Indene+H      | 0.128039    | 0.771816 | 0.128044    | 0.771850 |
| rad20         | 0.121736    | 0.893552 | 0.121742    | 0.893592 |
| rad21         | 0.0769695   | 0.970522 | 0.0769730   | 0.970565 |
| rad45         | 0.0232067   | 0.993728 | 0.0232077   | 0.993773 |
| rad23         | 0.00454582  | 0.998274 | 0.00454603  | 0.998319 |
| rad36         | 0.00144289  | 0.999717 | 0.00144296  | 0.999762 |
| rad11         | 0.000236172 | 0.999953 | 0.000236183 | 0.999998 |
| Benzyl+C2H2   | 4.54518e-05 | 0.999999 | 0.00000     | 0.999998 |
| rad6          | 1.71843e-06 | 1.00000  | 1.71850e-06 | 1.000000 |
| rad24         | 3.77415e-10 | 1.00000  | 3.77432e-10 | 1.000000 |
| rad30         | 1.09197e-10 | 1.00000  | 1.09202e-10 | 1.000000 |
| rad7          | 1.24526e-11 | 1.00000  | 1.24532e-11 | 1.000000 |
| rad15         | 4.26798e-12 | 1.00000  | 4.26817e-12 | 1.000000 |
| rad13         | 3.91592e-12 | 1.00000  | 3.91610e-12 | 1.000000 |
| rad25         | 3.20563e-13 | 1.00000  | 3.20578e-13 | 1.000000 |
| rad38         | 2.75611e-14 | 1.00000  | 2.75623e-14 | 1.000000 |
| rad33         | 4.80958e-15 | 1.00000  | 4.80979e-15 | 1.000000 |
| PAH9+H        | 2.90116e-15 | 1.00000  | 2.90130e-15 | 1.000000 |
| rad35         | 2.45347e-15 | 1.00000  | 2.45358e-15 | 1.000000 |
| rad3          | 1.49262e-15 | 1.00000  | 1.49268e-15 | 1.000000 |
| PhCHCCH2+H    | 1.39865e-15 | 1.00000  | 1.39871e-15 | 1.000000 |
| rad4          | 7.65364e-16 | 1.00000  | 7.65399e-16 | 1.000000 |
| rad8          | 7.08845e-17 | 1.00000  | 7.08877e-17 | 1.000000 |
| rad9          | 4.03260e-17 | 1.00000  | 4.03278e-17 | 1.000000 |
| rad28         | 1.31123e-17 | 1.00000  | 1.31129e-17 | 1.000000 |
| rad46         | 6.67957e-18 | 1.00000  | 6.67987e-18 | 1.000000 |
| rad2          | 5.85036e-18 | 1.00000  | 5.85063e-18 | 1.000000 |
| Ph+Allene     | 1.84598e-18 | 1.00000  | 1.84607e-18 | 1.000000 |
| rad60syn      | 6.56697e-19 | 1.00000  | 6.56727e-19 | 1.000000 |
| rad1          | 3.89649e-19 | 1.00000  | 3.89667e-19 | 1.000000 |
| rad60anti     | 9.74065e-20 | 1.00000  | 9.74110e-20 | 1.000000 |
| PhCCH+CH3     | 1.19671e-20 | 1.00000  | 1.19676e-20 | 1.000000 |
| rad10         | 5.70480e-21 | 1.00000  | 5.70506e-21 | 1.000000 |
| PhCH2CCH+H    | 2.25741e-21 | 1.00000  | 2.25751e-21 | 1.000000 |
| rad14         | 9.93802e-22 | 1.00000  | 9.93847e-22 | 1.000000 |
| PAH7+H        | 1.08211e-22 | 1.00000  | 1.08216e-22 | 1.000000 |
| PAH3+H        | 8.80297e-24 | 1.00000  | 8.80337e-24 | 1.000000 |
| rad59         | 3.57432e-24 | 1.00000  | 3.57448e-24 | 1.000000 |
| PhCCCH3+H     | 2.88933e-24 | 1.00000  | 2.88946e-24 | 1.000000 |
| rad27         | 2.50120e-24 | 1.00000  | 2.50132e-24 | 1.000000 |
| Ph+MeAc       | 2.39857e-24 | 1.00000  | 2.39868e-24 | 1.000000 |
| rad31         | 7.49072e-25 | 1.00000  | 7.49106e-25 | 1.000000 |
| rad26         | 4.60191e-25 | 1.00000  | 4.60212e-25 | 1.000000 |
| rad50         | 1.61327e-26 | 1.00000  | 1.61335e-26 | 1.000000 |
| rad39         | 2.68098e-27 | 1.00000  | 2.68110e-27 | 1.000000 |
| rad12         | 2.57378e-31 | 1.00000  | 2.57389e-31 | 1.000000 |
| rad5          | 2.56492e-31 | 1.00000  | 2.56503e-31 | 1.000000 |
| rad52         | 5.18515e-32 | 1.00000  | 5.18539e-32 | 1.000000 |
| rad37         | 9.77062e-33 | 1.00000  | 9.77107e-33 | 1.000000 |
| rad19syn      | 2.42685e-33 | 1.00000  | 2.42696e-33 | 1.000000 |
| rad51         | 2.33987e-35 | 1.00000  | 2.33998e-35 | 1.000000 |
| rad54         | 3.28909e-36 | 1.00000  | 3.28924e-36 | 1.000000 |
| rad62         | 3.68133e-38 | 1.00000  | 3.68149e-38 | 1.000000 |
| rad43         | 3.36801e-38 | 1.00000  | 3.36816e-38 | 1.000000 |
| rad65         | 9.10954e-39 | 1.00000  | 9.10995e-39 | 1.000000 |
| rad70         | 3.11687e-40 | 1.00000  | 3.11701e-40 | 1.000000 |
| PAH10+CH3     | 2.52788e-40 | 1.00000  | 2.52799e-40 | 1.000000 |
| rad58         | 1.69274e-41 | 1.00000  | 1.69282e-41 | 1.000000 |
| PhcycC3H3_A+H | 6.83137e-42 | 1.00000  | 6.83168e-42 | 1.000000 |
| rad47         | 6.02311e-42 | 1.00000  | 6.02338e-42 | 1.000000 |
| rad55         | 3.03296e-42 | 1.00000  | 3.03310e-42 | 1.000000 |
| rad34         | 6.87934e-45 | 1.00000  | 6.87966e-45 | 1.000000 |
| PAH1+H        | 8.24904e-46 | 1.00000  | 8.24941e-46 | 1.000000 |
| rad42         | 1.39455e-47 | 1.00000  | 1.39461e-47 | 1.000000 |
| rad41         | 9.50381e-48 | 1.00000  | 9.50424e-48 | 1.000000 |

1000.00000 Pa, 180.000000 K

=====

| Rate constant | True (fraction) | Effective (fraction) |
|---------------|-----------------|----------------------|
|---------------|-----------------|----------------------|

-----

Total | 4.69315e-29 (1.00 ) 4.69286e-29 (1.00 )

| species       | PYtrue      | Cumul    | PYeffective | Cumul    |
|---------------|-------------|----------|-------------|----------|
| rad22         | 0.493439    | 0.493439 | 0.493469    | 0.493469 |
| rad18         | 0.157833    | 0.651272 | 0.157843    | 0.651312 |
| Indene+H      | 0.142661    | 0.793933 | 0.142670    | 0.793982 |
| rad20         | 0.106904    | 0.900837 | 0.106910    | 0.900892 |
| rad21         | 0.0676071   | 0.968444 | 0.0676113   | 0.968503 |
| rad45         | 0.0243524   | 0.992797 | 0.0243539   | 0.992857 |
| rad23         | 0.00535179  | 0.998148 | 0.00535212  | 0.998209 |
| rad36         | 0.00151630  | 0.999665 | 0.00151640  | 0.999726 |
| rad11         | 0.000272190 | 0.999937 | 0.000272207 | 0.999998 |
| Benzyl+C2H2   | 6.16779e-05 | 0.999998 | 0.00000     | 0.999998 |
| rad6          | 2.48699e-06 | 1.00000  | 2.48715e-06 | 1.00000  |
| rad24         | 3.81158e-10 | 1.00000  | 3.81181e-10 | 1.00000  |
| rad30         | 2.05916e-10 | 1.00000  | 2.05929e-10 | 1.00000  |
| rad7          | 2.38433e-11 | 1.00000  | 2.38448e-11 | 1.00000  |
| rad15         | 9.67984e-12 | 1.00000  | 9.68044e-12 | 1.00000  |
| rad13         | 5.74597e-12 | 1.00000  | 5.74633e-12 | 1.00000  |
| rad25         | 7.93510e-13 | 1.00000  | 7.93559e-13 | 1.00000  |
| rad38         | 5.54321e-14 | 1.00000  | 5.54355e-14 | 1.00000  |
| rad33         | 7.04996e-15 | 1.00000  | 7.05040e-15 | 1.00000  |
| PAH9+H        | 6.48757e-15 | 1.00000  | 6.48797e-15 | 1.00000  |
| PhCHCCH2+H    | 5.69270e-15 | 1.00000  | 5.69306e-15 | 1.00000  |
| rad35         | 5.18563e-15 | 1.00000  | 5.18595e-15 | 1.00000  |
| rad3          | 3.59135e-15 | 1.00000  | 3.59157e-15 | 1.00000  |
| rad4          | 1.84484e-15 | 1.00000  | 1.84496e-15 | 1.00000  |
| rad8          | 4.12634e-16 | 1.00000  | 4.12660e-16 | 1.00000  |
| rad9          | 1.92753e-16 | 1.00000  | 1.92765e-16 | 1.00000  |
| rad28         | 4.17787e-17 | 1.00000  | 4.17813e-17 | 1.00000  |
| rad46         | 2.23448e-17 | 1.00000  | 2.23462e-17 | 1.00000  |
| rad2          | 2.20111e-17 | 1.00000  | 2.20124e-17 | 1.00000  |
| Ph+Allene     | 1.31930e-17 | 1.00000  | 1.31938e-17 | 1.00000  |
| rad60syn      | 3.84206e-18 | 1.00000  | 3.84229e-18 | 1.00000  |
| rad1          | 1.47558e-18 | 1.00000  | 1.47567e-18 | 1.00000  |
| rad60anti     | 6.35277e-19 | 1.00000  | 6.35316e-19 | 1.00000  |
| PhCCH+CH3     | 7.40440e-20 | 1.00000  | 7.40486e-20 | 1.00000  |
| rad10         | 3.18157e-20 | 1.00000  | 3.18177e-20 | 1.00000  |
| PhCH2CCH+H    | 2.49519e-20 | 1.00000  | 2.49534e-20 | 1.00000  |
| rad14         | 4.87299e-21 | 1.00000  | 4.87329e-21 | 1.00000  |
| PAH7+H        | 9.39405e-22 | 1.00000  | 9.39463e-22 | 1.00000  |
| PAH3+H        | 1.16203e-22 | 1.00000  | 1.16210e-22 | 1.00000  |
| rad59         | 4.57388e-23 | 1.00000  | 4.57417e-23 | 1.00000  |
| PhCCCH3+H     | 2.55931e-23 | 1.00000  | 2.55947e-23 | 1.00000  |
| Ph+MeAc       | 2.45261e-23 | 1.00000  | 2.45276e-23 | 1.00000  |
| rad27         | 1.34476e-23 | 1.00000  | 1.34484e-23 | 1.00000  |
| rad26         | 5.01669e-24 | 1.00000  | 5.01699e-24 | 1.00000  |
| rad31         | 1.92620e-24 | 1.00000  | 1.92632e-24 | 1.00000  |
| rad50         | 2.05416e-25 | 1.00000  | 2.05429e-25 | 1.00000  |
| rad39         | 2.59623e-26 | 1.00000  | 2.59639e-26 | 1.00000  |
| rad5          | 5.02464e-30 | 1.00000  | 5.02495e-30 | 1.00000  |
| rad12         | 4.03483e-30 | 1.00000  | 4.03508e-30 | 1.00000  |
| rad52         | 1.75872e-30 | 1.00000  | 1.75883e-30 | 1.00000  |
| rad37         | 1.76588e-31 | 1.00000  | 1.76598e-31 | 1.00000  |
| rad19syn      | 1.59660e-31 | 1.00000  | 1.59670e-31 | 1.00000  |
| rad51         | 1.37287e-33 | 1.00000  | 1.37295e-33 | 1.00000  |
| rad54         | 4.68306e-34 | 1.00000  | 4.68335e-34 | 1.00000  |
| rad62         | 3.53470e-36 | 1.00000  | 3.53492e-36 | 1.00000  |
| rad43         | 2.46770e-36 | 1.00000  | 2.46785e-36 | 1.00000  |
| rad65         | 6.59749e-37 | 1.00000  | 6.59790e-37 | 1.00000  |
| rad70         | 7.24822e-38 | 1.00000  | 7.24866e-38 | 1.00000  |
| PAH10+CH3     | 2.23754e-38 | 1.00000  | 2.23768e-38 | 1.00000  |
| rad58         | 1.88964e-39 | 1.00000  | 1.88975e-39 | 1.00000  |
| PhcycC3H3_A+H | 1.26728e-39 | 1.00000  | 1.26735e-39 | 1.00000  |
| rad55         | 5.61337e-40 | 1.00000  | 5.61371e-40 | 1.00000  |
| rad47         | 5.15633e-40 | 1.00000  | 5.15665e-40 | 1.00000  |
| rad34         | 8.19586e-43 | 1.00000  | 8.19636e-43 | 1.00000  |
| PAH1+H        | 9.97112e-44 | 1.00000  | 9.97174e-44 | 1.00000  |
| rad42         | 2.58251e-45 | 1.00000  | 2.58267e-45 | 1.00000  |
| rad41         | 1.76611e-45 | 1.00000  | 1.76622e-45 | 1.00000  |

1000.00000 Pa, 190.000000 K

=====  
Rate constant | True (fraction) | Effective (fraction)  
-----  
Total | 3.16530e-28 (1.00 ) | 3.16504e-28 (1.00 )

| species | PYtrue | Cumul | PYeffective | Cumul |
|---------|--------|-------|-------------|-------|
|---------|--------|-------|-------------|-------|

|               |             |          |             |          |
|---------------|-------------|----------|-------------|----------|
| rad22         | 0.504226    | 0.504226 | 0.504268    | 0.504268 |
| Indene+H      | 0.157875    | 0.662101 | 0.157888    | 0.662156 |
| rad18         | 0.151621    | 0.813722 | 0.151634    | 0.813790 |
| rad20         | 0.0934671   | 0.907189 | 0.0934749   | 0.907265 |
| rad21         | 0.0591149   | 0.966304 | 0.0591198   | 0.966385 |
| rad45         | 0.0254369   | 0.991741 | 0.0254390   | 0.991824 |
| rad23         | 0.00627340  | 0.998014 | 0.00627392  | 0.998098 |
| rad36         | 0.00158665  | 0.999601 | 0.00158678  | 0.999684 |
| rad11         | 0.000312595 | 0.999914 | 0.000312621 | 0.999997 |
| Benzyl+C2H2   | 8.29126e-05 | 0.999996 | 0.00000     | 0.999997 |
| rad6          | 3.58909e-06 | 1.00000  | 3.58939e-06 | 1.00000  |
| rad24         | 3.85695e-10 | 1.00000  | 3.85727e-10 | 1.00000  |
| rad30         | 3.70657e-10 | 1.00000  | 3.70688e-10 | 1.00000  |
| rad7          | 4.53211e-11 | 1.00000  | 4.53248e-11 | 1.00000  |
| rad15         | 2.04781e-11 | 1.00000  | 2.04798e-11 | 1.00000  |
| rad13         | 8.37047e-12 | 1.00000  | 8.37117e-12 | 1.00000  |
| rad25         | 1.83651e-12 | 1.00000  | 1.83666e-12 | 1.00000  |
| rad38         | 1.08563e-13 | 1.00000  | 1.08572e-13 | 1.00000  |
| PhCHCCH2+H    | 2.06704e-14 | 1.00000  | 2.06721e-14 | 1.00000  |
| PAH9+H        | 1.42761e-14 | 1.00000  | 1.42773e-14 | 1.00000  |
| rad35         | 1.08286e-14 | 1.00000  | 1.08295e-14 | 1.00000  |
| rad33         | 1.02620e-14 | 1.00000  | 1.02628e-14 | 1.00000  |
| rad3          | 8.48838e-15 | 1.00000  | 8.48909e-15 | 1.00000  |
| rad4          | 4.36902e-15 | 1.00000  | 4.36939e-15 | 1.00000  |
| rad8          | 2.00407e-15 | 1.00000  | 2.00424e-15 | 1.00000  |
| rad9          | 8.02599e-16 | 1.00000  | 8.02665e-16 | 1.00000  |
| rad28         | 1.26958e-16 | 1.00000  | 1.26968e-16 | 1.00000  |
| rad2          | 7.95367e-17 | 1.00000  | 7.95433e-17 | 1.00000  |
| Ph+Allene     | 7.83728e-17 | 1.00000  | 7.83793e-17 | 1.00000  |
| rad46         | 6.82610e-17 | 1.00000  | 6.82667e-17 | 1.00000  |
| rad60syn      | 1.87500e-17 | 1.00000  | 1.87515e-17 | 1.00000  |
| rad1          | 5.36990e-18 | 1.00000  | 5.37035e-18 | 1.00000  |
| rad60anti     | 3.41163e-18 | 1.00000  | 3.41191e-18 | 1.00000  |
| PhCCH+CH3     | 4.13805e-19 | 1.00000  | 4.13840e-19 | 1.00000  |
| PhCH2CCH+H    | 2.18803e-19 | 1.00000  | 2.18821e-19 | 1.00000  |
| rad10         | 1.66162e-19 | 1.00000  | 1.66175e-19 | 1.00000  |
| rad14         | 2.17280e-20 | 1.00000  | 2.17298e-20 | 1.00000  |
| PAH7+H        | 6.58371e-21 | 1.00000  | 6.58425e-21 | 1.00000  |
| PAH3+H        | 1.17311e-21 | 1.00000  | 1.17321e-21 | 1.00000  |
| rad59         | 4.48208e-22 | 1.00000  | 4.48245e-22 | 1.00000  |
| Ph+MeAc       | 2.11081e-22 | 1.00000  | 2.11099e-22 | 1.00000  |
| PhCCCH3+H     | 2.01482e-22 | 1.00000  | 2.01499e-22 | 1.00000  |
| rad27         | 6.50780e-23 | 1.00000  | 6.50834e-23 | 1.00000  |
| rad26         | 4.50254e-23 | 1.00000  | 4.50292e-23 | 1.00000  |
| rad31         | 4.88554e-24 | 1.00000  | 4.88594e-24 | 1.00000  |
| rad50         | 2.06315e-24 | 1.00000  | 2.06333e-24 | 1.00000  |
| rad39         | 2.15357e-25 | 1.00000  | 2.15374e-25 | 1.00000  |
| rad5          | 7.83965e-29 | 1.00000  | 7.84030e-29 | 1.00000  |
| rad12         | 5.10849e-29 | 1.00000  | 5.10891e-29 | 1.00000  |
| rad52         | 3.74237e-29 | 1.00000  | 3.74268e-29 | 1.00000  |
| rad19syn      | 5.37680e-30 | 1.00000  | 5.37725e-30 | 1.00000  |
| rad37         | 2.60061e-30 | 1.00000  | 2.60083e-30 | 1.00000  |
| rad51         | 8.05446e-32 | 1.00000  | 8.05513e-32 | 1.00000  |
| rad54         | 5.09360e-32 | 1.00000  | 5.09402e-32 | 1.00000  |
| rad62         | 3.35938e-34 | 1.00000  | 3.35966e-34 | 1.00000  |
| rad43         | 1.45570e-34 | 1.00000  | 1.45582e-34 | 1.00000  |
| rad65         | 4.51354e-35 | 1.00000  | 4.51391e-35 | 1.00000  |
| rad70         | 3.22353e-35 | 1.00000  | 3.22380e-35 | 1.00000  |
| PAH10+CH3     | 1.94812e-36 | 1.00000  | 1.94828e-36 | 1.00000  |
| rad58         | 6.93143e-37 | 1.00000  | 6.93201e-37 | 1.00000  |
| PhcycC3H3_A+H | 3.36168e-37 | 1.00000  | 3.36196e-37 | 1.00000  |
| rad55         | 1.49817e-37 | 1.00000  | 1.49829e-37 | 1.00000  |
| rad47         | 4.04877e-38 | 1.00000  | 4.04911e-38 | 1.00000  |
| rad34         | 1.25845e-40 | 1.00000  | 1.25856e-40 | 1.00000  |
| PAH1+H        | 1.37042e-41 | 1.00000  | 1.37053e-41 | 1.00000  |
| rad42         | 4.63270e-43 | 1.00000  | 4.63308e-43 | 1.00000  |
| rad41         | 2.98683e-43 | 1.00000  | 2.98708e-43 | 1.00000  |

1000.00000 Pa, 200.000000 K

=====

| Rate constant | True (fraction)     | Effective (fraction) |
|---------------|---------------------|----------------------|
| Total         | 1.76115e-27 (1.00 ) | 1.76095e-27 (1.00 )  |

| species  | PYtrue    | Cumul    | PYeffective | Cumul    |
|----------|-----------|----------|-------------|----------|
| rad22    | 0.513167  | 0.513167 | 0.513223    | 0.513223 |
| Indene+H | 0.173591  | 0.686758 | 0.173610    | 0.686833 |
| rad18    | 0.144520  | 0.831278 | 0.144536    | 0.831369 |
| rad20    | 0.0813613 | 0.912639 | 0.0813703   | 0.912739 |

|               |             |          |             |          |
|---------------|-------------|----------|-------------|----------|
| rad21         | 0.0514577   | 0.964097 | 0.0514633   | 0.964203 |
| rad45         | 0.0264518   | 0.990549 | 0.0264547   | 0.990657 |
| rad23         | 0.00732502  | 0.997874 | 0.00732583  | 0.997983 |
| rad36         | 0.00165350  | 0.999527 | 0.00165368  | 0.999637 |
| rad11         | 0.000357708 | 0.999885 | 0.000357747 | 0.999995 |
| Benzyl+C2H2   | 0.000110431 | 0.999995 | 0.000000    | 0.999995 |
| rad6          | 5.16042e-06 | 1.00000  | 5.16099e-06 | 1.000000 |
| rad30         | 6.40627e-10 | 1.00000  | 6.40698e-10 | 1.000000 |
| rad24         | 3.90696e-10 | 1.00000  | 3.90739e-10 | 1.000000 |
| rad7          | 8.52478e-11 | 1.00000  | 8.52572e-11 | 1.000000 |
| rad15         | 4.08012e-11 | 1.00000  | 4.08057e-11 | 1.000000 |
| rad13         | 1.21040e-11 | 1.00000  | 1.21053e-11 | 1.000000 |
| rad25         | 3.99900e-12 | 1.00000  | 3.99944e-12 | 1.000000 |
| rad38         | 2.07516e-13 | 1.00000  | 2.07539e-13 | 1.000000 |
| PhCHCCH2+H    | 6.79894e-14 | 1.00000  | 6.79969e-14 | 1.000000 |
| PAH9+H        | 3.09035e-14 | 1.00000  | 3.09069e-14 | 1.000000 |
| rad35         | 2.23219e-14 | 1.00000  | 2.23244e-14 | 1.000000 |
| rad3          | 1.96630e-14 | 1.00000  | 1.96651e-14 | 1.000000 |
| rad33         | 1.48314e-14 | 1.00000  | 1.48331e-14 | 1.000000 |
| rad4          | 1.01425e-14 | 1.00000  | 1.01437e-14 | 1.000000 |
| rad8          | 8.34601e-15 | 1.00000  | 8.34693e-15 | 1.000000 |
| rad9          | 2.96866e-15 | 1.00000  | 2.96899e-15 | 1.000000 |
| Ph+Allene     | 3.97163e-16 | 1.00000  | 3.97206e-16 | 1.000000 |
| rad28         | 3.68948e-16 | 1.00000  | 3.68989e-16 | 1.000000 |
| rad2          | 2.75308e-16 | 1.00000  | 2.75339e-16 | 1.000000 |
| rad46         | 1.92901e-16 | 1.00000  | 1.92922e-16 | 1.000000 |
| rad60syn      | 7.84211e-17 | 1.00000  | 7.84297e-17 | 1.000000 |
| rad1          | 1.87312e-17 | 1.00000  | 1.87333e-17 | 1.000000 |
| rad60anti     | 1.55303e-17 | 1.00000  | 1.55321e-17 | 1.000000 |
| PhCCH+CH3     | 2.10326e-18 | 1.00000  | 2.10349e-18 | 1.000000 |
| PhCH2CCH+H    | 1.57194e-18 | 1.00000  | 1.57212e-18 | 1.000000 |
| rad10         | 8.10210e-19 | 1.00000  | 8.10300e-19 | 1.000000 |
| rad14         | 8.83935e-20 | 1.00000  | 8.84033e-20 | 1.000000 |
| PAH7+H        | 3.85009e-20 | 1.00000  | 3.85051e-20 | 1.000000 |
| PAH3+H        | 9.42288e-21 | 1.00000  | 9.42392e-21 | 1.000000 |
| rad59         | 3.49957e-21 | 1.00000  | 3.49996e-21 | 1.000000 |
| Ph+MeAc       | 1.55890e-21 | 1.00000  | 1.55907e-21 | 1.000000 |
| PhCCCH3+H     | 1.41750e-21 | 1.00000  | 1.41765e-21 | 1.000000 |
| rad26         | 3.39228e-22 | 1.00000  | 3.39266e-22 | 1.000000 |
| rad27         | 2.85365e-22 | 1.00000  | 2.85397e-22 | 1.000000 |
| rad50         | 1.68713e-23 | 1.00000  | 1.68732e-23 | 1.000000 |
| rad31         | 1.22012e-23 | 1.00000  | 1.22026e-23 | 1.000000 |
| rad39         | 1.55747e-24 | 1.00000  | 1.55764e-24 | 1.000000 |
| rad5          | 9.80636e-28 | 1.00000  | 9.80744e-28 | 1.000000 |
| rad52         | 5.47905e-28 | 1.00000  | 5.47965e-28 | 1.000000 |
| rad12         | 5.40788e-28 | 1.00000  | 5.40847e-28 | 1.000000 |
| rad19syn      | 1.02988e-28 | 1.00000  | 1.02999e-28 | 1.000000 |
| rad37         | 3.19425e-29 | 1.00000  | 3.19460e-29 | 1.000000 |
| rad51         | 2.68270e-30 | 1.00000  | 2.68299e-30 | 1.000000 |
| rad54         | 1.60384e-30 | 1.00000  | 1.60402e-30 | 1.000000 |
| rad70         | 1.67229e-32 | 1.00000  | 1.67247e-32 | 1.000000 |
| rad62         | 1.63552e-32 | 1.00000  | 1.63570e-32 | 1.000000 |
| rad43         | 5.03825e-33 | 1.00000  | 5.03881e-33 | 1.000000 |
| rad65         | 2.68538e-33 | 1.00000  | 2.68567e-33 | 1.000000 |
| rad58         | 6.65370e-34 | 1.00000  | 6.65443e-34 | 1.000000 |
| PAH10+CH3     | 9.59139e-35 | 1.00000  | 9.59244e-35 | 1.000000 |
| PhcycC3H3_A+H | 8.10265e-35 | 1.00000  | 8.10355e-35 | 1.000000 |
| rad55         | 3.70072e-35 | 1.00000  | 3.70113e-35 | 1.000000 |
| rad47         | 2.43324e-36 | 1.00000  | 2.43350e-36 | 1.000000 |
| rad34         | 3.71335e-38 | 1.00000  | 3.71376e-38 | 1.000000 |
| PAH1+H        | 2.12344e-39 | 1.00000  | 2.12368e-39 | 1.000000 |
| rad42         | 6.37483e-41 | 1.00000  | 6.37554e-41 | 1.000000 |
| rad41         | 3.55301e-41 | 1.00000  | 3.55340e-41 | 1.000000 |

1000.00000 Pa, 210.000000 K

=====

| Rate constant | True (fraction)     | Effective (fraction) |
|---------------|---------------------|----------------------|
| Total         | 8.30956e-27 (1.00 ) | 8.30835e-27 (1.00 )  |

| species  | PYtrue     | Cumul    | PYeffective | Cumul    |
|----------|------------|----------|-------------|----------|
| rad22    | 0.520299   | 0.520299 | 0.520374    | 0.520374 |
| Indene+H | 0.189713   | 0.710012 | 0.189740    | 0.710114 |
| rad18    | 0.136690   | 0.846702 | 0.136710    | 0.846824 |
| rad20    | 0.0705166  | 0.917219 | 0.0705269   | 0.917351 |
| rad21    | 0.0445950  | 0.961814 | 0.0446015   | 0.961952 |
| rad45    | 0.0273878  | 0.989201 | 0.0273918   | 0.989344 |
| rad23    | 0.00852196 | 0.997723 | 0.00852320  | 0.997867 |
| rad36    | 0.00171638 | 0.999440 | 0.00171663  | 0.999584 |

|               |             |          |             |          |
|---------------|-------------|----------|-------------|----------|
| rad11         | 0.000407811 | 0.999848 | 0.000407870 | 0.999992 |
| Benzyl+C2H2   | 0.000145752 | 0.999993 | 0.00000     | 0.999992 |
| rad6          | 7.38568e-06 | 1.00000  | 7.38676e-06 | 0.999999 |
| rad30         | 1.06826e-09 | 1.00000  | 1.06841e-09 | 0.999999 |
| rad24         | 3.95882e-10 | 1.00000  | 3.95939e-10 | 0.999999 |
| rad7          | 1.58214e-10 | 1.00000  | 1.58237e-10 | 0.999999 |
| rad15         | 7.71710e-11 | 1.00000  | 7.71823e-11 | 0.999999 |
| rad13         | 1.73700e-11 | 1.00000  | 1.73726e-11 | 0.999999 |
| rad25         | 8.23335e-12 | 1.00000  | 8.23455e-12 | 0.999999 |
| rad38         | 3.87865e-13 | 1.00000  | 3.87922e-13 | 0.999999 |
| PhCHCCH2+H    | 2.05113e-13 | 1.00000  | 2.05143e-13 | 0.999999 |
| PAH9+H        | 6.57848e-14 | 1.00000  | 6.57944e-14 | 0.999999 |
| rad35         | 4.53893e-14 | 1.00000  | 4.53959e-14 | 0.999999 |
| rad3          | 4.45488e-14 | 1.00000  | 4.45553e-14 | 0.999999 |
| rad8          | 3.04727e-14 | 1.00000  | 3.04772e-14 | 0.999999 |
| rad4          | 2.30334e-14 | 1.00000  | 2.30368e-14 | 0.999999 |
| rad33         | 2.12787e-14 | 1.00000  | 2.12818e-14 | 0.999999 |
| rad9          | 9.91064e-15 | 1.00000  | 9.91208e-15 | 0.999999 |
| Ph+Allene     | 1.75393e-15 | 1.00000  | 1.75419e-15 | 0.999999 |
| rad28         | 1.02729e-15 | 1.00000  | 1.02744e-15 | 0.999999 |
| rad2          | 9.11037e-16 | 1.00000  | 9.11170e-16 | 0.999999 |
| rad46         | 5.09650e-16 | 1.00000  | 5.09724e-16 | 0.999999 |
| rad60syn      | 2.87373e-16 | 1.00000  | 2.87415e-16 | 0.999999 |
| rad1          | 6.25055e-17 | 1.00000  | 6.25146e-17 | 0.999999 |
| rad60anti     | 6.13617e-17 | 1.00000  | 6.13706e-17 | 0.999999 |
| PhCCH+CH3     | 9.78043e-18 | 1.00000  | 9.78186e-18 | 0.999999 |
| PhCH2CCH+H    | 9.50732e-18 | 1.00000  | 9.50870e-18 | 0.999999 |
| rad10         | 3.68201e-18 | 1.00000  | 3.68255e-18 | 0.999999 |
| rad14         | 3.29288e-19 | 1.00000  | 3.29336e-19 | 0.999999 |
| PAH7+H        | 1.92960e-19 | 1.00000  | 1.92988e-19 | 0.999999 |
| PAH3+H        | 6.22794e-20 | 1.00000  | 6.22885e-20 | 0.999999 |
| rad59         | 2.25076e-20 | 1.00000  | 2.25108e-20 | 0.999999 |
| Ph+MeAc       | 1.00519e-20 | 1.00000  | 1.00533e-20 | 0.999999 |
| PhCCCH3+H     | 8.96671e-21 | 1.00000  | 8.96802e-21 | 0.999999 |
| rad26         | 2.19782e-21 | 1.00000  | 2.19814e-21 | 0.999999 |
| rad27         | 1.14161e-21 | 1.00000  | 1.14178e-21 | 0.999999 |
| rad50         | 1.15596e-22 | 1.00000  | 1.15613e-22 | 0.999999 |
| rad31         | 2.99592e-23 | 1.00000  | 2.99635e-23 | 0.999999 |
| rad39         | 9.97861e-24 | 1.00000  | 9.98007e-24 | 0.999999 |
| rad5          | 1.01329e-26 | 1.00000  | 1.01344e-26 | 0.999999 |
| rad52         | 6.16350e-27 | 1.00000  | 6.16440e-27 | 0.999999 |
| rad12         | 4.97185e-27 | 1.00000  | 4.97257e-27 | 0.999999 |
| rad19syn      | 1.39210e-27 | 1.00000  | 1.39230e-27 | 0.999999 |
| rad37         | 3.39442e-28 | 1.00000  | 3.39491e-28 | 0.999999 |
| rad51         | 4.98468e-29 | 1.00000  | 4.98541e-29 | 0.999999 |
| rad54         | 2.81538e-29 | 1.00000  | 2.81579e-29 | 0.999999 |
| rad70         | 3.96572e-30 | 1.00000  | 3.96630e-30 | 0.999999 |
| rad58         | 1.81625e-30 | 1.00000  | 1.81651e-30 | 0.999999 |
| rad62         | 3.91711e-31 | 1.00000  | 3.91768e-31 | 0.999999 |
| rad43         | 1.10236e-31 | 1.00000  | 1.10252e-31 | 0.999999 |
| rad65         | 9.00753e-32 | 1.00000  | 9.00884e-32 | 0.999999 |
| PhcycC3H3_A+H | 1.11404e-32 | 1.00000  | 1.11421e-32 | 0.999999 |
| rad55         | 4.67877e-33 | 1.00000  | 4.67945e-33 | 0.999999 |
| PAH10+CH3     | 2.91172e-33 | 1.00000  | 2.91215e-33 | 0.999999 |
| rad47         | 1.09674e-34 | 1.00000  | 1.09690e-34 | 0.999999 |
| rad34         | 2.12674e-35 | 1.00000  | 2.12705e-35 | 0.999999 |
| PAH1+H        | 3.85989e-37 | 1.00000  | 3.86045e-37 | 0.999999 |
| rad42         | 7.05852e-39 | 1.00000  | 7.05955e-39 | 0.999999 |
| rad41         | 2.91782e-39 | 1.00000  | 2.91825e-39 | 0.999999 |

1000.00000 Pa, 220.000000 K

=====

| Rate constant | True (fraction)     | Effective (fraction) |
|---------------|---------------------|----------------------|
| Total         | 3.40057e-26 (1.00 ) | 3.39993e-26 (1.00 )  |

| species     | PYtrue      | Cumul    | PYeffective | Cumul    |
|-------------|-------------|----------|-------------|----------|
| rad22       | 0.525661    | 0.525661 | 0.525762    | 0.525762 |
| Indene+H    | 0.206142    | 0.731803 | 0.206181    | 0.731943 |
| rad18       | 0.128302    | 0.860105 | 0.128327    | 0.860270 |
| rad20       | 0.0608580   | 0.920963 | 0.0608696   | 0.921140 |
| rad21       | 0.0384815   | 0.959445 | 0.0384889   | 0.959628 |
| rad45       | 0.0282355   | 0.987680 | 0.0282409   | 0.987869 |
| rad23       | 0.00988028  | 0.997560 | 0.00988217  | 0.997752 |
| rad36       | 0.00177480  | 0.999335 | 0.00177514  | 0.999527 |
| rad11       | 0.000463133 | 0.999798 | 0.000463221 | 0.999990 |
| Benzyl+C2H2 | 0.000190675 | 0.999989 | 0.00000     | 0.999990 |
| rad6        | 1.05129e-05 | 0.999999 | 1.05149e-05 | 1.00000  |
| rad30       | 1.72548e-09 | 0.999999 | 1.72580e-09 | 1.00000  |



|               |             |          |             |         |
|---------------|-------------|----------|-------------|---------|
| rad24         | 4.01017e-10 | 0.999999 | 4.01093e-10 | 1.00000 |
| rad7          | 2.88974e-10 | 0.999999 | 2.89029e-10 | 1.00000 |
| rad15         | 1.39468e-10 | 0.999999 | 1.39494e-10 | 1.00000 |
| rad13         | 2.47316e-11 | 0.999999 | 2.47363e-11 | 1.00000 |
| rad25         | 1.60926e-11 | 0.999999 | 1.60956e-11 | 1.00000 |
| rad38         | 7.09977e-13 | 0.999999 | 7.10112e-13 | 1.00000 |
| PhCHCCH2+H    | 5.73348e-13 | 0.999999 | 5.73458e-13 | 1.00000 |
| PAH9+H        | 1.37663e-13 | 0.999999 | 1.37690e-13 | 1.00000 |
| rad8          | 9.93377e-14 | 0.999999 | 9.93567e-14 | 1.00000 |
| rad3          | 9.85353e-14 | 0.999999 | 9.85541e-14 | 1.00000 |
| rad35         | 9.09821e-14 | 0.999999 | 9.09995e-14 | 1.00000 |
| rad4          | 5.10779e-14 | 0.999999 | 5.10876e-14 | 1.00000 |
| rad33         | 3.02969e-14 | 0.999999 | 3.03027e-14 | 1.00000 |
| rad9          | 3.02528e-14 | 0.999999 | 3.02586e-14 | 1.00000 |
| Ph+Allene     | 6.86976e-15 | 0.999999 | 6.87107e-15 | 1.00000 |
| rad2          | 2.87811e-15 | 0.999999 | 2.87866e-15 | 1.00000 |
| rad28         | 2.74439e-15 | 0.999999 | 2.74491e-15 | 1.00000 |
| rad46         | 1.26995e-15 | 0.999999 | 1.27019e-15 | 1.00000 |
| rad60syn      | 9.39548e-16 | 0.999999 | 9.39727e-16 | 1.00000 |
| rad60anti     | 2.14564e-16 | 0.999999 | 2.14605e-16 | 1.00000 |
| rad1          | 1.99266e-16 | 0.999999 | 1.99304e-16 | 1.00000 |
| PhCH2CCH+H    | 4.94987e-17 | 0.999999 | 4.95082e-17 | 1.00000 |
| PhCCH+CH3     | 4.18285e-17 | 0.999999 | 4.18364e-17 | 1.00000 |
| rad10         | 1.55851e-17 | 0.999999 | 1.55880e-17 | 1.00000 |
| rad14         | 1.12771e-18 | 0.999999 | 1.12792e-18 | 1.00000 |
| PAH7+H        | 8.46985e-19 | 0.999999 | 8.47147e-19 | 1.00000 |
| PAH3+H        | 3.47976e-19 | 0.999999 | 3.48042e-19 | 1.00000 |
| rad59         | 1.22487e-19 | 0.999999 | 1.22510e-19 | 1.00000 |
| Ph+MeAc       | 5.74283e-20 | 0.999999 | 5.74393e-20 | 1.00000 |
| PhCCCH3+H     | 5.13186e-20 | 0.999999 | 5.13284e-20 | 1.00000 |
| rad26         | 1.25308e-20 | 0.999999 | 1.25332e-20 | 1.00000 |
| rad27         | 4.19446e-21 | 0.999999 | 4.19526e-21 | 1.00000 |
| rad50         | 6.79698e-22 | 0.999999 | 6.79828e-22 | 1.00000 |
| rad31         | 7.22335e-23 | 0.999999 | 7.22473e-23 | 1.00000 |
| rad39         | 5.74212e-23 | 0.999999 | 5.74321e-23 | 1.00000 |
| rad5          | 8.88987e-26 | 0.999999 | 8.89156e-26 | 1.00000 |
| rad52         | 5.64113e-26 | 0.999999 | 5.64220e-26 | 1.00000 |
| rad12         | 4.08701e-26 | 0.999999 | 4.08779e-26 | 1.00000 |
| rad19syn      | 1.48107e-26 | 0.999999 | 1.48135e-26 | 1.00000 |
| rad37         | 3.20325e-27 | 0.999999 | 3.20386e-27 | 1.00000 |
| rad51         | 6.62444e-28 | 0.999999 | 6.62570e-28 | 1.00000 |
| rad54         | 3.57705e-28 | 0.999999 | 3.57773e-28 | 1.00000 |
| rad70         | 8.81856e-29 | 0.999999 | 8.82024e-29 | 1.00000 |
| rad58         | 5.37101e-29 | 0.999999 | 5.37203e-29 | 1.00000 |
| rad62         | 6.04673e-30 | 0.999999 | 6.04788e-30 | 1.00000 |
| rad43         | 1.72052e-30 | 0.999999 | 1.72085e-30 | 1.00000 |
| rad65         | 1.64607e-30 | 0.999999 | 1.64639e-30 | 1.00000 |
| PhcycC3H3_A+H | 3.35847e-31 | 0.999999 | 3.35911e-31 | 1.00000 |
| rad55         | 1.23982e-31 | 0.999999 | 1.24005e-31 | 1.00000 |
| PAH10+CH3     | 5.91655e-32 | 0.999999 | 5.91767e-32 | 1.00000 |
| rad34         | 3.65573e-33 | 0.999999 | 3.65643e-33 | 1.00000 |
| rad47         | 3.17089e-33 | 0.999999 | 3.17150e-33 | 1.00000 |
| PAH1+H        | 2.93124e-35 | 0.999999 | 2.93180e-35 | 1.00000 |
| rad42         | 4.01994e-37 | 0.999999 | 4.02070e-37 | 1.00000 |
| rad41         | 1.28688e-37 | 0.999999 | 1.28712e-37 | 1.00000 |

1000.00000 Pa, 230.000000 K

=====

| Rate constant | True (fraction)     | Effective (fraction) |
|---------------|---------------------|----------------------|
| Total         | 1.22972e-25 (1.00 ) | 1.22941e-25 (1.00 )  |

| species     | PYtrue      | Cumul    | PYeffective | Cumul    |
|-------------|-------------|----------|-------------|----------|
| rad22       | 0.529296    | 0.529296 | 0.529427    | 0.529427 |
| Indene+H    | 0.222784    | 0.752080 | 0.222839    | 0.752266 |
| rad18       | 0.119530    | 0.871610 | 0.119559    | 0.871825 |
| rad20       | 0.0523057   | 0.923916 | 0.0523186   | 0.924144 |
| rad21       | 0.0330681   | 0.956984 | 0.0330763   | 0.957220 |
| rad45       | 0.0289856   | 0.985969 | 0.0289928   | 0.986213 |
| rad23       | 0.0114165   | 0.997386 | 0.0114193   | 0.997632 |
| rad36       | 0.00182826  | 0.999214 | 0.00182871  | 0.999461 |
| rad11       | 0.000523829 | 0.999738 | 0.000523959 | 0.999985 |
| Benzyl+C2H2 | 0.000247304 | 0.999985 | 0.00000     | 0.999985 |
| rad6        | 1.48702e-05 | 1.00000  | 1.48739e-05 | 1.000000 |
| rad30       | 2.70864e-09 | 1.00000  | 2.70931e-09 | 1.000000 |
| rad7        | 5.18270e-10 | 1.00000  | 5.18398e-10 | 1.000000 |
| rad24       | 4.05895e-10 | 1.00000  | 4.05996e-10 | 1.000000 |
| rad15       | 2.42154e-10 | 1.00000  | 2.42214e-10 | 1.000000 |
| rad13       | 3.49255e-11 | 1.00000  | 3.49341e-11 | 1.000000 |

|               |             |         |             |          |
|---------------|-------------|---------|-------------|----------|
| rad25         | 2.99628e-11 | 1.00000 | 2.99702e-11 | 1.000000 |
| PhCHCCH2+H    | 1.49742e-12 | 1.00000 | 1.49779e-12 | 1.000000 |
| rad38         | 1.27445e-12 | 1.00000 | 1.27476e-12 | 1.000000 |
| rad8          | 2.93505e-13 | 1.00000 | 2.93578e-13 | 1.000000 |
| PAH9+H        | 2.83113e-13 | 1.00000 | 2.83183e-13 | 1.000000 |
| rad3          | 2.12431e-13 | 1.00000 | 2.12484e-13 | 1.000000 |
| rad35         | 1.79681e-13 | 1.00000 | 1.79726e-13 | 1.000000 |
| rad4          | 1.10428e-13 | 1.00000 | 1.10455e-13 | 1.000000 |
| rad9          | 8.53467e-14 | 1.00000 | 8.53678e-14 | 1.000000 |
| rad33         | 4.27958e-14 | 1.00000 | 4.28064e-14 | 1.000000 |
| Ph+Allene     | 2.42159e-14 | 1.00000 | 2.42219e-14 | 1.000000 |
| rad2          | 8.67271e-15 | 1.00000 | 8.67485e-15 | 1.000000 |
| rad28         | 7.04226e-15 | 1.00000 | 7.04401e-15 | 1.000000 |
| rad46         | 3.00625e-15 | 1.00000 | 3.00700e-15 | 1.000000 |
| rad60syn      | 2.78215e-15 | 1.00000 | 2.78284e-15 | 1.000000 |
| rad60anti     | 6.74776e-16 | 1.00000 | 6.74942e-16 | 1.000000 |
| rad1          | 6.06392e-16 | 1.00000 | 6.06542e-16 | 1.000000 |
| PhCH2CCH+H    | 2.25968e-16 | 1.00000 | 2.26024e-16 | 1.000000 |
| PhCCH+CH3     | 1.65310e-16 | 1.00000 | 1.65350e-16 | 1.000000 |
| rad10         | 6.14595e-17 | 1.00000 | 6.14747e-17 | 1.000000 |
| rad14         | 3.56533e-18 | 1.00000 | 3.56621e-18 | 1.000000 |
| PAH7+H        | 3.31423e-18 | 1.00000 | 3.31505e-18 | 1.000000 |
| PAH3+H        | 1.68032e-18 | 1.00000 | 1.68074e-18 | 1.000000 |
| rad59         | 5.76600e-19 | 1.00000 | 5.76743e-19 | 1.000000 |
| Ph+MeAc       | 2.94311e-19 | 1.00000 | 2.94383e-19 | 1.000000 |
| PhCCCH3+H     | 2.67316e-19 | 1.00000 | 2.67382e-19 | 1.000000 |
| rad26         | 6.41258e-20 | 1.00000 | 6.41417e-20 | 1.000000 |
| rad27         | 1.42425e-20 | 1.00000 | 1.42460e-20 | 1.000000 |
| rad50         | 3.49887e-21 | 1.00000 | 3.49974e-21 | 1.000000 |
| rad39         | 3.00187e-22 | 1.00000 | 3.00261e-22 | 1.000000 |
| rad31         | 1.70836e-22 | 1.00000 | 1.70878e-22 | 1.000000 |
| rad5          | 6.76209e-25 | 1.00000 | 6.76376e-25 | 1.000000 |
| rad52         | 4.33234e-25 | 1.00000 | 4.33341e-25 | 1.000000 |
| rad12         | 3.07298e-25 | 1.00000 | 3.07374e-25 | 1.000000 |
| rad19syn      | 1.30745e-25 | 1.00000 | 1.30778e-25 | 1.000000 |
| rad37         | 2.75434e-26 | 1.00000 | 2.75502e-26 | 1.000000 |
| rad51         | 7.11847e-27 | 1.00000 | 7.12024e-27 | 1.000000 |
| rad54         | 3.70995e-27 | 1.00000 | 3.71087e-27 | 1.000000 |
| rad70         | 1.34661e-27 | 1.00000 | 1.34695e-27 | 1.000000 |
| rad58         | 9.84817e-28 | 1.00000 | 9.85061e-28 | 1.000000 |
| rad62         | 7.50897e-29 | 1.00000 | 7.51083e-29 | 1.000000 |
| rad65         | 2.36133e-29 | 1.00000 | 2.36191e-29 | 1.000000 |
| rad43         | 2.22622e-29 | 1.00000 | 2.22677e-29 | 1.000000 |
| PhcycC3H3_A+H | 7.69756e-30 | 1.00000 | 7.69946e-30 | 1.000000 |
| rad55         | 2.47067e-30 | 1.00000 | 2.47128e-30 | 1.000000 |
| rad34         | 1.23883e-30 | 1.00000 | 1.23914e-30 | 1.000000 |
| PAH10+CH3     | 1.06843e-30 | 1.00000 | 1.06869e-30 | 1.000000 |
| rad47         | 4.56702e-32 | 1.00000 | 4.56815e-32 | 1.000000 |
| PAH1+H        | 2.17603e-33 | 1.00000 | 2.17657e-33 | 1.000000 |
| rad42         | 4.77742e-35 | 1.00000 | 4.77860e-35 | 1.000000 |
| rad41         | 6.40127e-36 | 1.00000 | 6.40286e-36 | 1.000000 |

1000.00000 Pa, 240.000000 K

=====

| Rate constant | True (fraction)     | Effective (fraction) |
|---------------|---------------------|----------------------|
| Total         | 3.99091e-25 (1.00 ) | 3.98964e-25 (1.00 )  |

| species     | PYtrue      | Cumul    | PYeffective | Cumul    |
|-------------|-------------|----------|-------------|----------|
| rad22       | 0.531242    | 0.531242 | 0.531411    | 0.531411 |
| Indene+H    | 0.239554    | 0.770796 | 0.239630    | 0.771041 |
| rad18       | 0.110543    | 0.881339 | 0.110579    | 0.881620 |
| rad20       | 0.0447766   | 0.926116 | 0.0447908   | 0.926411 |
| rad45       | 0.0296290   | 0.955745 | 0.0296384   | 0.956049 |
| rad21       | 0.0283028   | 0.984047 | 0.0283118   | 0.984361 |
| rad23       | 0.0131471   | 0.997195 | 0.0131513   | 0.997512 |
| rad36       | 0.00187625  | 0.999071 | 0.00187685  | 0.999389 |
| rad11       | 0.000589961 | 0.999661 | 0.000590148 | 0.999979 |
| Benzyl+C2H2 | 0.000318081 | 0.999979 | 0.00000     | 0.999979 |
| rad6        | 2.08847e-05 | 1.000000 | 2.08913e-05 | 1.000000 |
| rad30       | 4.14407e-09 | 1.000000 | 4.14539e-09 | 1.000000 |
| rad7        | 9.11043e-10 | 1.000000 | 9.11333e-10 | 1.000000 |
| rad24       | 4.10337e-10 | 1.000000 | 4.10467e-10 | 1.000000 |
| rad15       | 4.05774e-10 | 1.000000 | 4.05904e-10 | 1.000000 |
| rad25       | 5.33033e-11 | 1.000000 | 5.33202e-11 | 1.000000 |
| rad13       | 4.89011e-11 | 1.000000 | 4.89166e-11 | 1.000000 |
| PhCHCCH2+H  | 3.67945e-12 | 1.000000 | 3.68062e-12 | 1.000000 |
| rad38       | 2.24609e-12 | 1.000000 | 2.24681e-12 | 1.000000 |
| rad8        | 7.95886e-13 | 1.000000 | 7.96139e-13 | 1.000000 |

|               |             |          |             |          |
|---------------|-------------|----------|-------------|----------|
| PAH9+H        | 5.72081e-13 | 1.000000 | 5.72263e-13 | 1.000000 |
| rad3          | 4.45782e-13 | 1.000000 | 4.45924e-13 | 1.000000 |
| rad35         | 3.49465e-13 | 1.000000 | 3.49576e-13 | 1.000000 |
| rad4          | 2.32438e-13 | 1.000000 | 2.32512e-13 | 1.000000 |
| rad9          | 2.24485e-13 | 1.000000 | 2.24557e-13 | 1.000000 |
| Ph+Allene     | 7.77680e-14 | 1.000000 | 7.77927e-14 | 1.000000 |
| rad33         | 5.99506e-14 | 1.000000 | 5.99697e-14 | 1.000000 |
| rad2          | 2.49184e-14 | 1.000000 | 2.49263e-14 | 1.000000 |
| rad28         | 1.73770e-14 | 1.000000 | 1.73826e-14 | 1.000000 |
| rad60syn      | 7.55573e-15 | 1.000000 | 7.55814e-15 | 1.000000 |
| rad46         | 6.80171e-15 | 1.000000 | 6.80387e-15 | 1.000000 |
| rad60anti     | 1.93441e-15 | 1.000000 | 1.93503e-15 | 1.000000 |
| rad1          | 1.76092e-15 | 1.000000 | 1.76148e-15 | 1.000000 |
| PhCH2CCH+H    | 9.18621e-16 | 1.000000 | 9.18913e-16 | 1.000000 |
| PhCCH+CH3     | 6.06403e-16 | 1.000000 | 6.06596e-16 | 1.000000 |
| rad10         | 2.26044e-16 | 1.000000 | 2.26116e-16 | 1.000000 |
| PAH7+H        | 1.17301e-17 | 1.000000 | 1.17339e-17 | 1.000000 |
| rad14         | 1.04513e-17 | 1.000000 | 1.04546e-17 | 1.000000 |
| PAH3+H        | 7.14293e-18 | 1.000000 | 7.14520e-18 | 1.000000 |
| rad59         | 2.39150e-18 | 1.000000 | 2.39226e-18 | 1.000000 |
| Ph+MeAc       | 1.36722e-18 | 1.000000 | 1.36766e-18 | 1.000000 |
| PhCCCH3+H     | 1.27448e-18 | 1.000000 | 1.27489e-18 | 1.000000 |
| rad26         | 2.99219e-19 | 1.000000 | 2.99315e-19 | 1.000000 |
| rad27         | 4.49516e-20 | 1.000000 | 4.49659e-20 | 1.000000 |
| rad50         | 1.60365e-20 | 1.000000 | 1.60416e-20 | 1.000000 |
| rad39         | 1.43848e-21 | 1.000000 | 1.43894e-21 | 1.000000 |
| rad31         | 3.96004e-22 | 1.000000 | 3.96130e-22 | 1.000000 |
| rad5          | 4.51101e-24 | 1.000000 | 4.51245e-24 | 1.000000 |
| rad52         | 2.85104e-24 | 1.000000 | 2.85195e-24 | 1.000000 |
| rad12         | 2.11593e-24 | 1.000000 | 2.11660e-24 | 1.000000 |
| rad19syn      | 9.70308e-25 | 1.000000 | 9.70617e-25 | 1.000000 |
| rad37         | 2.13519e-25 | 1.000000 | 2.13587e-25 | 1.000000 |
| rad51         | 6.21877e-26 | 1.000000 | 6.22075e-26 | 1.000000 |
| rad54         | 3.13236e-26 | 1.000000 | 3.13336e-26 | 1.000000 |
| rad70         | 1.39181e-26 | 1.000000 | 1.39225e-26 | 1.000000 |
| rad58         | 1.09834e-26 | 1.000000 | 1.09869e-26 | 1.000000 |
| rad62         | 7.24814e-28 | 1.000000 | 7.25045e-28 | 1.000000 |
| rad65         | 2.51045e-28 | 1.000000 | 2.51125e-28 | 1.000000 |
| rad43         | 2.28611e-28 | 1.000000 | 2.28684e-28 | 1.000000 |
| PhcycC3H3_A+H | 1.04946e-28 | 1.000000 | 1.04979e-28 | 1.000000 |
| rad55         | 3.10273e-29 | 1.000000 | 3.10372e-29 | 1.000000 |
| rad34         | 2.44521e-29 | 1.000000 | 2.44599e-29 | 1.000000 |
| PAH10+CH3     | 1.43911e-29 | 1.000000 | 1.43957e-29 | 1.000000 |
| rad47         | 4.56471e-31 | 1.000000 | 4.56617e-31 | 1.000000 |
| PAH1+H        | 5.52895e-32 | 1.000000 | 5.53071e-32 | 1.000000 |
| rad42         | 2.12760e-33 | 1.000000 | 2.12828e-33 | 1.000000 |
| rad41         | 1.86007e-34 | 1.000000 | 1.86067e-34 | 1.000000 |

1000.00000 Pa, 250.000000 K

=====

| Rate constant | True (fraction)    | Effective (fraction) |
|---------------|--------------------|----------------------|
| Total         | 1.17763e-24 (1.00) | 1.17716e-24 (1.00)   |

| species     | PYtrue      | Cumul    | PYeffective | Cumul    |
|-------------|-------------|----------|-------------|----------|
| rad22       | 0.531542    | 0.531542 | 0.531757    | 0.531757 |
| Indene+H    | 0.256377    | 0.787919 | 0.256481    | 0.788238 |
| rad18       | 0.101504    | 0.889423 | 0.101545    | 0.889783 |
| rad20       | 0.0381855   | 0.927609 | 0.0382010   | 0.927984 |
| rad45       | 0.0301573   | 0.957766 | 0.0301696   | 0.958154 |
| rad21       | 0.0241318   | 0.981898 | 0.0241416   | 0.982295 |
| rad23       | 0.0150882   | 0.996986 | 0.0150944   | 0.997390 |
| rad36       | 0.00191832  | 0.998904 | 0.00191909  | 0.999309 |
| rad11       | 0.000661472 | 0.999566 | 0.000661740 | 0.999970 |
| Benzyl+C2H2 | 0.000405821 | 0.999971 | 0.000000    | 0.999970 |
| rad6        | 2.91025e-05 | 1.000000 | 2.91143e-05 | 1.000000 |
| rad30       | 6.19424e-09 | 1.000000 | 6.19675e-09 | 1.000000 |
| rad7        | 1.56743e-09 | 1.000000 | 1.56807e-09 | 1.000000 |
| rad15       | 6.58754e-10 | 1.000000 | 6.59021e-10 | 1.000000 |
| rad24       | 4.14184e-10 | 1.000000 | 4.14352e-10 | 1.000000 |
| rad25       | 9.08491e-11 | 1.000000 | 9.08860e-11 | 1.000000 |
| rad13       | 6.78604e-11 | 1.000000 | 6.78880e-11 | 1.000000 |
| PhCHCCH2+H  | 8.55590e-12 | 1.000000 | 8.55937e-12 | 1.000000 |
| rad38       | 3.89070e-12 | 1.000000 | 3.89228e-12 | 1.000000 |
| rad8        | 2.00158e-12 | 1.000000 | 2.00239e-12 | 1.000000 |
| PAH9+H      | 1.13570e-12 | 1.000000 | 1.13616e-12 | 1.000000 |
| rad3        | 9.09544e-13 | 1.000000 | 9.09913e-13 | 1.000000 |
| rad35       | 6.69143e-13 | 1.000000 | 6.69415e-13 | 1.000000 |
| rad9        | 5.54567e-13 | 1.000000 | 5.54792e-13 | 1.000000 |

|               |             |         |             |          |
|---------------|-------------|---------|-------------|----------|
| rad4          | 4.75823e-13 | 1.00000 | 4.76016e-13 | 1.000000 |
| Ph+Allene     | 2.29888e-13 | 1.00000 | 2.29981e-13 | 1.000000 |
| rad33         | 8.32547e-14 | 1.00000 | 8.32885e-14 | 1.000000 |
| rad2          | 6.82735e-14 | 1.00000 | 6.83013e-14 | 1.000000 |
| rad28         | 4.12815e-14 | 1.00000 | 4.12982e-14 | 1.000000 |
| rad60syn      | 1.90188e-14 | 1.00000 | 1.90265e-14 | 1.000000 |
| rad46         | 1.47837e-14 | 1.00000 | 1.47897e-14 | 1.000000 |
| rad60anti     | 5.11258e-15 | 1.00000 | 5.11466e-15 | 1.000000 |
| rad1          | 4.88048e-15 | 1.00000 | 4.88247e-15 | 1.000000 |
| PhCH2CCH+H    | 3.36936e-15 | 1.00000 | 3.37073e-15 | 1.000000 |
| PhCCH+CH3     | 2.07346e-15 | 1.00000 | 2.07431e-15 | 1.000000 |
| rad10         | 7.76718e-16 | 1.00000 | 7.77033e-16 | 1.000000 |
| PAH7+H        | 3.80067e-17 | 1.00000 | 3.80221e-17 | 1.000000 |
| rad14         | 2.85304e-17 | 1.00000 | 2.85420e-17 | 1.000000 |
| PAH3+H        | 2.71468e-17 | 1.00000 | 2.71578e-17 | 1.000000 |
| rad59         | 8.87522e-18 | 1.00000 | 8.87882e-18 | 1.000000 |
| Ph+MeAc       | 5.81120e-18 | 1.00000 | 5.81356e-18 | 1.000000 |
| PhCCCH3+H     | 5.59321e-18 | 1.00000 | 5.59548e-18 | 1.000000 |
| rad26         | 1.28838e-18 | 1.00000 | 1.28891e-18 | 1.000000 |
| rad27         | 1.32564e-19 | 1.00000 | 1.32618e-19 | 1.000000 |
| rad50         | 6.63942e-20 | 1.00000 | 6.64212e-20 | 1.000000 |
| rad39         | 6.36788e-21 | 1.00000 | 6.37047e-21 | 1.000000 |
| rad31         | 8.99213e-22 | 1.00000 | 8.99578e-22 | 1.000000 |
| rad5          | 2.67426e-23 | 1.00000 | 2.67534e-23 | 1.000000 |
| rad52         | 1.64052e-23 | 1.00000 | 1.64118e-23 | 1.000000 |
| rad12         | 1.33526e-23 | 1.00000 | 1.33580e-23 | 1.000000 |
| rad19syn      | 6.19581e-24 | 1.00000 | 6.19833e-24 | 1.000000 |
| rad37         | 1.48830e-24 | 1.00000 | 1.48891e-24 | 1.000000 |
| rad51         | 4.58554e-25 | 1.00000 | 4.58741e-25 | 1.000000 |
| rad54         | 2.22319e-25 | 1.00000 | 2.22410e-25 | 1.000000 |
| rad70         | 1.12412e-25 | 1.00000 | 1.12458e-25 | 1.000000 |
| rad58         | 9.19586e-26 | 1.00000 | 9.19960e-26 | 1.000000 |
| rad62         | 5.70437e-27 | 1.00000 | 5.70668e-27 | 1.000000 |
| rad65         | 2.13117e-27 | 1.00000 | 2.13203e-27 | 1.000000 |
| rad43         | 1.92388e-27 | 1.00000 | 1.92466e-27 | 1.000000 |
| PhcycC3H3_A+H | 9.66622e-28 | 1.00000 | 9.67014e-28 | 1.000000 |
| rad55         | 2.77333e-28 | 1.00000 | 2.77446e-28 | 1.000000 |
| rad34         | 2.38904e-28 | 1.00000 | 2.39001e-28 | 1.000000 |
| PAH10+CH3     | 1.43492e-28 | 1.00000 | 1.43551e-28 | 1.000000 |
| rad47         | 3.75554e-30 | 1.00000 | 3.75707e-30 | 1.000000 |
| PAH1+H        | 5.88735e-31 | 1.00000 | 5.88974e-31 | 1.000000 |
| rad42         | 2.35427e-32 | 1.00000 | 2.35523e-32 | 1.000000 |
| rad41         | 2.19753e-33 | 1.00000 | 2.19842e-33 | 1.000000 |

1000.00000 Pa, 260.000000 K

| Rate constant | True (fraction)     | Effective (fraction) |
|---------------|---------------------|----------------------|
| Total         | 3.19452e-24 (1.00 ) | 3.19288e-24 (1.00 )  |

| species     | PYtrue      | Cumul    | PYeffective | Cumul    |
|-------------|-------------|----------|-------------|----------|
| rad22       | 0.530231    | 0.530231 | 0.530504    | 0.530504 |
| Indene+H    | 0.273198    | 0.803429 | 0.273339    | 0.803843 |
| rad18       | 0.0925573   | 0.895986 | 0.0926049   | 0.896448 |
| rad20       | 0.0324473   | 0.928434 | 0.0324639   | 0.928912 |
| rad45       | 0.0305634   | 0.958997 | 0.0305791   | 0.959491 |
| rad21       | 0.0205013   | 0.979498 | 0.0205119   | 0.980003 |
| rad23       | 0.0172550   | 0.996753 | 0.0172638   | 0.997267 |
| rad36       | 0.00195401  | 0.998707 | 0.00195501  | 0.999222 |
| rad11       | 0.000738164 | 0.999445 | 0.000738543 | 0.999960 |
| Benzyl+C2H2 | 0.000513738 | 0.999959 | 0.00000     | 0.999960 |
| rad6        | 4.02093e-05 | 0.999999 | 4.02300e-05 | 1.00000  |
| rad30       | 9.06445e-09 | 0.999999 | 9.06911e-09 | 1.00000  |
| rad7        | 2.63666e-09 | 0.999999 | 2.63802e-09 | 1.00000  |
| rad15       | 1.03950e-09 | 0.999999 | 1.04004e-09 | 1.00000  |
| rad24       | 4.17303e-10 | 0.999999 | 4.17518e-10 | 1.00000  |
| rad25       | 1.48723e-10 | 0.999999 | 1.48799e-10 | 1.00000  |
| rad13       | 9.32975e-11 | 0.999999 | 9.33454e-11 | 1.00000  |
| PhCHCCH2+H  | 1.89207e-11 | 0.999999 | 1.89304e-11 | 1.00000  |
| rad38       | 6.63076e-12 | 0.999999 | 6.63417e-12 | 1.00000  |
| rad8        | 4.71003e-12 | 0.999999 | 4.71245e-12 | 1.00000  |
| PAH9+H      | 2.21501e-12 | 0.999999 | 2.21615e-12 | 1.00000  |
| rad3        | 1.80284e-12 | 0.999999 | 1.80377e-12 | 1.00000  |
| rad9        | 1.29468e-12 | 0.999999 | 1.29535e-12 | 1.00000  |
| rad35       | 1.26116e-12 | 0.999999 | 1.26180e-12 | 1.00000  |
| rad4        | 9.46530e-13 | 0.999999 | 9.47016e-13 | 1.00000  |
| Ph+Allene   | 6.31029e-13 | 0.999999 | 6.31353e-13 | 1.00000  |
| rad2        | 1.78477e-13 | 0.999999 | 1.78569e-13 | 1.00000  |
| rad33       | 1.14572e-13 | 0.999999 | 1.14631e-13 | 1.00000  |

|               |             |          |             |         |
|---------------|-------------|----------|-------------|---------|
| rad28         | 9.45419e-14 | 0.999999 | 9.45905e-14 | 1.00000 |
| rad60syn      | 4.47681e-14 | 0.999999 | 4.47911e-14 | 1.00000 |
| rad46         | 3.10039e-14 | 0.999999 | 3.10199e-14 | 1.00000 |
| rad1          | 1.29173e-14 | 0.999999 | 1.29239e-14 | 1.00000 |
| rad60anti     | 1.25773e-14 | 0.999999 | 1.25838e-14 | 1.00000 |
| PhCH2CCH+H    | 1.12752e-14 | 0.999999 | 1.12810e-14 | 1.00000 |
| PhCCH+CH3     | 6.63539e-15 | 0.999999 | 6.63880e-15 | 1.00000 |
| rad10         | 2.49894e-15 | 0.999999 | 2.50023e-15 | 1.00000 |
| PAH7+H        | 1.13871e-16 | 0.999999 | 1.13929e-16 | 1.00000 |
| PAH3+H        | 9.34536e-17 | 0.999999 | 9.35017e-17 | 1.00000 |
| rad14         | 7.28441e-17 | 0.999999 | 7.28815e-17 | 1.00000 |
| rad59         | 2.98580e-17 | 0.999999 | 2.98734e-17 | 1.00000 |
| Ph+MeAc       | 2.27852e-17 | 0.999999 | 2.27969e-17 | 1.00000 |
| PhCCCH3+H     | 2.27189e-17 | 0.999999 | 2.27306e-17 | 1.00000 |
| rad26         | 5.16293e-18 | 0.999999 | 5.16559e-18 | 1.00000 |
| rad27         | 3.67027e-19 | 0.999999 | 3.67216e-19 | 1.00000 |
| rad50         | 2.51403e-19 | 0.999999 | 2.51532e-19 | 1.00000 |
| rad39         | 2.62178e-20 | 0.999999 | 2.62313e-20 | 1.00000 |
| rad31         | 1.99963e-21 | 0.999999 | 2.00066e-21 | 1.00000 |
| rad5          | 1.42569e-22 | 0.999999 | 1.42642e-22 | 1.00000 |
| rad52         | 8.39338e-23 | 0.999999 | 8.39769e-23 | 1.00000 |
| rad12         | 7.74640e-23 | 0.999999 | 7.75039e-23 | 1.00000 |
| rad19syn      | 3.47273e-23 | 0.999999 | 3.47452e-23 | 1.00000 |
| rad37         | 9.39913e-24 | 0.999999 | 9.40396e-24 | 1.00000 |
| rad51         | 2.93765e-24 | 0.999999 | 2.93916e-24 | 1.00000 |
| rad54         | 1.36834e-24 | 0.999999 | 1.36904e-24 | 1.00000 |
| rad70         | 7.65451e-25 | 0.999999 | 7.65844e-25 | 1.00000 |
| rad58         | 6.44870e-25 | 0.999999 | 6.45201e-25 | 1.00000 |
| rad62         | 3.84385e-26 | 0.999999 | 3.84582e-26 | 1.00000 |
| rad65         | 1.54214e-26 | 0.999999 | 1.54293e-26 | 1.00000 |
| rad43         | 1.39253e-26 | 0.999999 | 1.39325e-26 | 1.00000 |
| PhcycC3H3_A+H | 7.38709e-27 | 0.999999 | 7.39089e-27 | 1.00000 |
| rad55         | 2.06870e-27 | 0.999999 | 2.06977e-27 | 1.00000 |
| rad34         | 1.88826e-27 | 0.999999 | 1.88923e-27 | 1.00000 |
| PAH10+CH3     | 1.20732e-27 | 0.999999 | 1.20794e-27 | 1.00000 |
| rad47         | 2.61826e-29 | 0.999999 | 2.61961e-29 | 1.00000 |
| PAH1+H        | 5.05393e-30 | 0.999999 | 5.05652e-30 | 1.00000 |
| rad42         | 2.07461e-31 | 0.999999 | 2.07568e-31 | 1.00000 |
| rad41         | 2.09215e-32 | 0.999999 | 2.09322e-32 | 1.00000 |

1000.00000 Pa, 270.000000 K

=====

| Rate constant | True (fraction)     | Effective (fraction) |
|---------------|---------------------|----------------------|
| Total         | 8.04141e-24 (1.00 ) | 8.03622e-24 (1.00 )  |

| species     | PYtrue      | Cumul    | PYeffective | Cumul    |
|-------------|-------------|----------|-------------|----------|
| rad22       | 0.527348    | 0.527348 | 0.527689    | 0.527689 |
| Indene+H    | 0.289977    | 0.817325 | 0.290165    | 0.817854 |
| rad18       | 0.0838335   | 0.901159 | 0.0838877   | 0.901742 |
| rad45       | 0.0308415   | 0.932000 | 0.0308614   | 0.932603 |
| rad20       | 0.0274777   | 0.959478 | 0.0274954   | 0.960098 |
| rad23       | 0.0196605   | 0.979138 | 0.0196732   | 0.979772 |
| rad21       | 0.0173580   | 0.996496 | 0.0173692   | 0.997141 |
| rad36       | 0.00198295  | 0.998479 | 0.00198423  | 0.999125 |
| rad11       | 0.000819676 | 0.999299 | 0.000820206 | 0.999945 |
| Benzyl+C2H2 | 0.000645475 | 0.999944 | 0.00000     | 0.999945 |
| rad6        | 5.50486e-05 | 0.999999 | 5.50842e-05 | 1.00000  |
| rad30       | 1.30101e-08 | 0.999999 | 1.30185e-08 | 1.00000  |
| rad7        | 4.33360e-09 | 0.999999 | 4.33640e-09 | 1.00000  |
| rad15       | 1.59885e-09 | 0.999999 | 1.59988e-09 | 1.00000  |
| rad24       | 4.19583e-10 | 0.999999 | 4.19854e-10 | 1.00000  |
| rad25       | 2.34398e-10 | 0.999999 | 2.34550e-10 | 1.00000  |
| rad13       | 1.27032e-10 | 0.999999 | 1.27114e-10 | 1.00000  |
| PhCHCCH2+H  | 3.99619e-11 | 0.999999 | 3.99877e-11 | 1.00000  |
| rad38       | 1.11290e-11 | 0.999999 | 1.11362e-11 | 1.00000  |
| rad8        | 1.04487e-11 | 0.999999 | 1.04554e-11 | 1.00000  |
| PAH9+H      | 4.24475e-12 | 0.999999 | 4.24749e-12 | 1.00000  |
| rad3        | 3.46959e-12 | 0.999999 | 3.47184e-12 | 1.00000  |
| rad9        | 2.87141e-12 | 0.999999 | 2.87326e-12 | 1.00000  |
| rad35       | 2.33954e-12 | 0.999999 | 2.34105e-12 | 1.00000  |
| rad4        | 1.82868e-12 | 0.999999 | 1.82986e-12 | 1.00000  |
| Ph+Allene   | 1.62051e-12 | 0.999999 | 1.62156e-12 | 1.00000  |
| rad2        | 4.45552e-13 | 0.999999 | 4.45840e-13 | 1.00000  |
| rad28       | 2.09032e-13 | 0.999999 | 2.09167e-13 | 1.00000  |
| rad33       | 1.56183e-13 | 0.999999 | 1.56284e-13 | 1.00000  |
| rad60syn    | 9.92939e-14 | 0.999999 | 9.93580e-14 | 1.00000  |
| rad46       | 6.29742e-14 | 0.999999 | 6.30149e-14 | 1.00000  |
| PhCH2CCH+H  | 3.47551e-14 | 0.999999 | 3.47776e-14 | 1.00000  |

|               |             |          |             |         |
|---------------|-------------|----------|-------------|---------|
| rad1          | 3.26793e-14 | 0.999999 | 3.27004e-14 | 1.00000 |
| rad60anti     | 2.90354e-14 | 0.999999 | 2.90541e-14 | 1.00000 |
| PhCCH+CH3     | 1.99514e-14 | 0.999999 | 1.99643e-14 | 1.00000 |
| rad10         | 7.54702e-15 | 0.999999 | 7.55190e-15 | 1.00000 |
| PAH7+H        | 3.18142e-16 | 0.999999 | 3.18347e-16 | 1.00000 |
| PAH3+H        | 2.94668e-16 | 0.999999 | 2.94858e-16 | 1.00000 |
| rad14         | 1.74684e-16 | 0.999999 | 1.74797e-16 | 1.00000 |
| rad59         | 9.20722e-17 | 0.999999 | 9.21317e-17 | 1.00000 |
| PhCCCH3+H     | 8.58584e-17 | 0.999999 | 8.59138e-17 | 1.00000 |
| Ph+MeAc       | 8.30176e-17 | 0.999999 | 8.30712e-17 | 1.00000 |
| rad26         | 1.93686e-17 | 0.999999 | 1.93811e-17 | 1.00000 |
| rad27         | 9.58155e-19 | 0.999999 | 9.58774e-19 | 1.00000 |
| rad50         | 8.79982e-19 | 0.999999 | 8.80550e-19 | 1.00000 |
| rad39         | 1.00964e-19 | 0.999999 | 1.01029e-19 | 1.00000 |
| rad31         | 4.35475e-21 | 0.999999 | 4.35756e-21 | 1.00000 |
| rad5          | 6.90148e-22 | 0.999999 | 6.90594e-22 | 1.00000 |
| rad12         | 4.13629e-22 | 0.999999 | 4.13897e-22 | 1.00000 |
| rad52         | 3.87243e-22 | 0.999999 | 3.87493e-22 | 1.00000 |
| rad19syn      | 1.73323e-22 | 0.999999 | 1.73435e-22 | 1.00000 |
| rad37         | 5.39707e-23 | 0.999999 | 5.40055e-23 | 1.00000 |
| rad51         | 1.66412e-23 | 0.999999 | 1.66520e-23 | 1.00000 |
| rad54         | 7.42906e-24 | 0.999999 | 7.43386e-24 | 1.00000 |
| rad70         | 4.50872e-24 | 0.999999 | 4.51163e-24 | 1.00000 |
| rad58         | 3.90190e-24 | 0.999999 | 3.90442e-24 | 1.00000 |
| rad62         | 2.26328e-25 | 0.999999 | 2.26474e-25 | 1.00000 |
| rad65         | 9.73646e-26 | 0.999999 | 9.74275e-26 | 1.00000 |
| rad43         | 8.83527e-26 | 0.999999 | 8.84097e-26 | 1.00000 |
| PhcycC3H3_A+H | 4.86016e-26 | 0.999999 | 4.86330e-26 | 1.00000 |
| rad55         | 1.33122e-26 | 0.999999 | 1.33208e-26 | 1.00000 |
| rad34         | 1.27585e-26 | 0.999999 | 1.27667e-26 | 1.00000 |
| PAH10+CH3     | 8.80688e-27 | 0.999999 | 8.81257e-27 | 1.00000 |
| rad47         | 1.58015e-28 | 0.999999 | 1.58118e-28 | 1.00000 |
| PAH1+H        | 3.70954e-29 | 0.999999 | 3.71194e-29 | 1.00000 |
| rad42         | 1.56167e-30 | 0.999999 | 1.56268e-30 | 1.00000 |
| rad41         | 1.69606e-31 | 0.999999 | 1.69716e-31 | 1.00000 |

1000.00000 Pa, 280.000000 K

=====

| Rate constant | True (fraction)     | Effective (fraction) |
|---------------|---------------------|----------------------|
| Total         | 1.89357e-23 (1.00 ) | 1.89205e-23 (1.00 )  |

| species     | PYtrue      | Cumul    | PYeffective | Cumul    |
|-------------|-------------|----------|-------------|----------|
| rad22       | 0.522927    | 0.522927 | 0.523349    | 0.523349 |
| Indene+H    | 0.306693    | 0.829620 | 0.306940    | 0.830289 |
| rad18       | 0.0754410   | 0.905061 | 0.0755018   | 0.905791 |
| rad45       | 0.0309877   | 0.936049 | 0.0310126   | 0.936803 |
| rad20       | 0.0231954   | 0.959244 | 0.0232141   | 0.960017 |
| rad23       | 0.0223155   | 0.981560 | 0.0223335   | 0.982351 |
| rad21       | 0.0146501   | 0.996210 | 0.0146619   | 0.997013 |
| rad36       | 0.00200485  | 0.998215 | 0.00200647  | 0.999019 |
| rad11       | 0.000905464 | 0.999120 | 0.000906194 | 0.999926 |
| Benzyl+C2H2 | 0.000805133 | 0.999925 | 0.00000     | 0.999926 |
| rad6        | 7.46366e-05 | 1.000000 | 7.46968e-05 | 1.00000  |
| rad30       | 1.83445e-08 | 1.000000 | 1.83593e-08 | 1.00000  |
| rad7        | 6.95707e-09 | 1.000000 | 6.96267e-09 | 1.00000  |
| rad15       | 2.40280e-09 | 1.000000 | 2.40473e-09 | 1.00000  |
| rad24       | 4.20939e-10 | 1.000000 | 4.21278e-10 | 1.00000  |
| rad25       | 3.56470e-10 | 1.000000 | 3.56758e-10 | 1.00000  |
| rad13       | 1.71236e-10 | 1.000000 | 1.71374e-10 | 1.00000  |
| PhCHCCH2+H  | 8.09092e-11 | 1.000000 | 8.09744e-11 | 1.00000  |
| rad8        | 2.19921e-11 | 1.000000 | 2.20098e-11 | 1.00000  |
| rad38       | 1.84130e-11 | 1.000000 | 1.84279e-11 | 1.00000  |
| PAH9+H      | 7.99486e-12 | 1.000000 | 8.00130e-12 | 1.00000  |
| rad3        | 6.48133e-12 | 1.000000 | 6.48655e-12 | 1.00000  |
| rad9        | 6.07723e-12 | 1.000000 | 6.08213e-12 | 1.00000  |
| rad35       | 4.27212e-12 | 1.000000 | 4.27556e-12 | 1.00000  |
| Ph+Allene   | 3.91857e-12 | 1.000000 | 3.92173e-12 | 1.00000  |
| rad4        | 3.43030e-12 | 1.000000 | 3.43306e-12 | 1.00000  |
| rad2        | 1.06346e-12 | 1.000000 | 1.06432e-12 | 1.00000  |
| rad28       | 4.46879e-13 | 1.000000 | 4.47239e-13 | 1.00000  |
| rad33       | 2.10826e-13 | 1.000000 | 2.10996e-13 | 1.00000  |
| rad60syn    | 2.08862e-13 | 1.000000 | 2.09030e-13 | 1.00000  |
| rad46       | 1.24298e-13 | 1.000000 | 1.24399e-13 | 1.00000  |
| PhCH2CCH+H  | 9.94981e-14 | 1.000000 | 9.95782e-14 | 1.00000  |
| rad1        | 7.91229e-14 | 1.000000 | 7.91867e-14 | 1.00000  |
| rad60anti   | 6.33410e-14 | 1.000000 | 6.33920e-14 | 1.00000  |
| PhCCH+CH3   | 5.65793e-14 | 1.000000 | 5.66249e-14 | 1.00000  |
| rad10       | 2.14545e-14 | 1.000000 | 2.14717e-14 | 1.00000  |

|               |             |          |             |         |
|---------------|-------------|----------|-------------|---------|
| PAH3+H        | 8.59109e-16 | 1.000000 | 8.59801e-16 | 1.00000 |
| PAH7+H        | 8.34825e-16 | 1.000000 | 8.35498e-16 | 1.00000 |
| rad14         | 3.95036e-16 | 1.000000 | 3.95354e-16 | 1.00000 |
| PhCCCH3+H     | 3.03365e-16 | 1.000000 | 3.03610e-16 | 1.00000 |
| Ph+MeAc       | 2.82889e-16 | 1.000000 | 2.83117e-16 | 1.00000 |
| rad59         | 2.62718e-16 | 1.000000 | 2.62930e-16 | 1.00000 |
| rad26         | 6.82988e-17 | 1.000000 | 6.83538e-17 | 1.00000 |
| rad50         | 2.87387e-18 | 1.000000 | 2.87618e-18 | 1.00000 |
| rad27         | 2.36782e-18 | 1.000000 | 2.36973e-18 | 1.00000 |
| rad39         | 3.65280e-19 | 1.000000 | 3.65574e-19 | 1.00000 |
| rad31         | 9.29013e-21 | 1.000000 | 9.29762e-21 | 1.00000 |
| rad5          | 3.05714e-21 | 1.000000 | 3.05961e-21 | 1.00000 |
| rad12         | 2.03356e-21 | 1.000000 | 2.03520e-21 | 1.00000 |
| rad52         | 1.63024e-21 | 1.000000 | 1.63155e-21 | 1.00000 |
| rad19syn      | 7.78439e-22 | 1.000000 | 7.79066e-22 | 1.00000 |
| rad37         | 2.82291e-22 | 1.000000 | 2.82519e-22 | 1.00000 |
| rad51         | 8.44252e-23 | 1.000000 | 8.44932e-23 | 1.00000 |
| rad54         | 3.59623e-23 | 1.000000 | 3.59913e-23 | 1.00000 |
| rad70         | 2.32648e-23 | 1.000000 | 2.32835e-23 | 1.00000 |
| rad58         | 2.06169e-23 | 1.000000 | 2.06335e-23 | 1.00000 |
| rad62         | 1.17767e-24 | 1.000000 | 1.17862e-24 | 1.00000 |
| rad65         | 5.43360e-25 | 1.000000 | 5.43798e-25 | 1.00000 |
| rad43         | 4.96562e-25 | 1.000000 | 4.96962e-25 | 1.00000 |
| PhcycC3H3_A+H | 2.77870e-25 | 1.000000 | 2.78094e-25 | 1.00000 |
| rad55         | 7.46474e-26 | 1.000000 | 7.47076e-26 | 1.00000 |
| rad34         | 7.42355e-26 | 1.000000 | 7.42953e-26 | 1.00000 |
| PAH10+CH3     | 5.62004e-26 | 1.000000 | 5.62457e-26 | 1.00000 |
| rad47         | 8.39505e-28 | 1.000000 | 8.40182e-28 | 1.00000 |
| PAH1+H        | 2.33750e-28 | 1.000000 | 2.33938e-28 | 1.00000 |
| rad42         | 1.00490e-29 | 1.000000 | 1.00571e-29 | 1.00000 |
| rad41         | 1.17877e-30 | 1.000000 | 1.17972e-30 | 1.00000 |

1000.00000 Pa, 290.000000 K

=====

| Rate constant | True (fraction)     | Effective (fraction) |
|---------------|---------------------|----------------------|
| Total         | 4.20015e-23 (1.00 ) | 4.19596e-23 (1.00 )  |

| species     | PYtrue      | Cumul    | PYeffective | Cumul    |
|-------------|-------------|----------|-------------|----------|
| rad22       | 0.517004    | 0.517004 | 0.517520    | 0.517520 |
| Indene+H    | 0.323338    | 0.840342 | 0.323661    | 0.841181 |
| rad18       | 0.0674667   | 0.907809 | 0.0675341   | 0.908715 |
| rad45       | 0.0310002   | 0.938809 | 0.0310312   | 0.939746 |
| rad23       | 0.0252272   | 0.964036 | 0.0252524   | 0.964999 |
| rad20       | 0.0195229   | 0.983559 | 0.0195424   | 0.984541 |
| rad21       | 0.0123286   | 0.995888 | 0.0123409   | 0.996882 |
| rad36       | 0.00201952  | 0.997907 | 0.00202154  | 0.998904 |
| Benzyl+C2H2 | 0.000997291 | 0.998904 | 0.00000     | 0.998904 |
| rad11       | 0.000994788 | 0.999899 | 0.000995781 | 0.999899 |
| rad6        | 0.000100171 | 0.999999 | 0.000100271 | 1.000000 |
| rad30       | 2.54468e-08 | 0.999999 | 2.54722e-08 | 1.000000 |
| rad7        | 1.09086e-08 | 0.999999 | 1.09195e-08 | 1.000000 |
| rad15       | 3.53558e-09 | 0.999999 | 3.53911e-09 | 1.000000 |
| rad25       | 5.24212e-10 | 0.999999 | 5.24736e-10 | 1.000000 |
| rad24       | 4.21315e-10 | 0.999999 | 4.21736e-10 | 1.000000 |
| rad13       | 2.28443e-10 | 0.999999 | 2.28671e-10 | 1.000000 |
| PhCHCCH2+H  | 1.57546e-10 | 0.999999 | 1.57704e-10 | 1.000000 |
| rad8        | 4.41594e-11 | 0.999999 | 4.42034e-11 | 1.000000 |
| rad38       | 3.00598e-11 | 0.999999 | 3.00898e-11 | 1.000000 |
| PAH9+H      | 1.48057e-11 | 0.999999 | 1.48205e-11 | 1.000000 |
| rad9        | 1.23226e-11 | 0.999999 | 1.23349e-11 | 1.000000 |
| rad3        | 1.17517e-11 | 0.999999 | 1.17634e-11 | 1.000000 |
| Ph+Allene   | 8.97244e-12 | 0.999999 | 8.98139e-12 | 1.000000 |
| rad35       | 7.68088e-12 | 0.999999 | 7.68855e-12 | 1.000000 |
| rad4        | 6.24754e-12 | 0.999999 | 6.25378e-12 | 1.000000 |
| rad2        | 2.43034e-12 | 0.999999 | 2.43276e-12 | 1.000000 |
| rad28       | 9.25229e-13 | 0.999999 | 9.26153e-13 | 1.000000 |
| rad60syn    | 4.18979e-13 | 0.999999 | 4.19398e-13 | 1.000000 |
| rad33       | 2.81720e-13 | 0.999999 | 2.82001e-13 | 1.000000 |
| PhCH2CCH+H  | 2.66450e-13 | 0.999999 | 2.66716e-13 | 1.000000 |
| rad46       | 2.39119e-13 | 0.999999 | 2.39358e-13 | 1.000000 |
| rad1        | 1.83608e-13 | 0.999999 | 1.83791e-13 | 1.000000 |
| PhCCH+CH3   | 1.51879e-13 | 0.999999 | 1.52030e-13 | 1.000000 |
| rad60anti   | 1.31358e-13 | 0.999999 | 1.31490e-13 | 1.000000 |
| rad10       | 5.75742e-14 | 0.999999 | 5.76316e-14 | 1.000000 |
| PAH3+H      | 2.33496e-15 | 0.999999 | 2.33729e-15 | 1.000000 |
| PAH7+H      | 2.07015e-15 | 0.999999 | 2.07222e-15 | 1.000000 |
| PhCCCH3+H   | 1.00670e-15 | 0.999999 | 1.00770e-15 | 1.000000 |
| Ph+MeAc     | 9.06697e-16 | 0.999999 | 9.07603e-16 | 1.000000 |

|               |             |          |             |          |
|---------------|-------------|----------|-------------|----------|
| rad14         | 8.45675e-16 | 0.999999 | 8.46520e-16 | 1.000000 |
| rad59         | 6.99316e-16 | 0.999999 | 7.00014e-16 | 1.000000 |
| rad26         | 2.27067e-16 | 0.999999 | 2.27294e-16 | 1.000000 |
| rad50         | 8.82808e-18 | 0.999999 | 8.83689e-18 | 1.000000 |
| rad27         | 5.55903e-18 | 0.999999 | 5.56458e-18 | 1.000000 |
| rad39         | 1.24600e-18 | 0.999999 | 1.24725e-18 | 1.000000 |
| rad31         | 1.94248e-20 | 0.999999 | 1.94442e-20 | 1.000000 |
| rad5          | 1.24763e-20 | 0.999999 | 1.24887e-20 | 1.000000 |
| rad12         | 9.22066e-21 | 0.999999 | 9.22986e-21 | 1.000000 |
| rad52         | 6.32701e-21 | 0.999999 | 6.33333e-21 | 1.000000 |
| rad19syn      | 3.17522e-21 | 0.999999 | 3.17839e-21 | 1.000000 |
| rad37         | 1.34951e-21 | 0.999999 | 1.35086e-21 | 1.000000 |
| rad51         | 3.88096e-22 | 0.999999 | 3.88484e-22 | 1.000000 |
| rad54         | 1.56766e-22 | 0.999999 | 1.56922e-22 | 1.000000 |
| rad70         | 1.06515e-22 | 0.999999 | 1.06622e-22 | 1.000000 |
| rad58         | 9.63913e-23 | 0.999999 | 9.64875e-23 | 1.000000 |
| rad62         | 5.47600e-24 | 0.999999 | 5.48147e-24 | 1.000000 |
| rad65         | 2.71576e-24 | 0.999999 | 2.71847e-24 | 1.000000 |
| rad43         | 2.49833e-24 | 0.999999 | 2.50082e-24 | 1.000000 |
| PhcycC3H3_A+H | 1.39912e-24 | 0.999999 | 1.40051e-24 | 1.000000 |
| rad34         | 3.77753e-25 | 0.999999 | 3.78130e-25 | 1.000000 |
| rad55         | 3.69507e-25 | 0.999999 | 3.69876e-25 | 1.000000 |
| PAH10+CH3     | 3.17466e-25 | 0.999999 | 3.17783e-25 | 1.000000 |
| rad47         | 3.98552e-27 | 0.999999 | 3.98950e-27 | 1.000000 |
| PAH1+H        | 1.28461e-27 | 0.999999 | 1.28590e-27 | 1.000000 |
| rad42         | 5.62332e-29 | 0.999999 | 5.62893e-29 | 1.000000 |
| rad41         | 7.14116e-30 | 0.999999 | 7.14829e-30 | 1.000000 |

1000.00000 Pa, 300.000000 K

| Rate constant | True (fraction)     | Effective (fraction) |
|---------------|---------------------|----------------------|
| Total         | 1.17740e-22 (1.00 ) | 1.17551e-22 (1.00 )  |

| species     | PYtrue      | Cumul    | PYeffective | Cumul    |
|-------------|-------------|----------|-------------|----------|
| rad22       | 0.489310    | 0.489310 | 0.490097    | 0.490097 |
| Indene+H    | 0.372606    | 0.861916 | 0.373205    | 0.863302 |
| rad18       | 0.0465476   | 0.908464 | 0.0466225   | 0.909925 |
| rad23       | 0.0362124   | 0.944676 | 0.0362707   | 0.946195 |
| rad45       | 0.0267334   | 0.971409 | 0.0267764   | 0.972972 |
| rad20       | 0.0150322   | 0.986442 | 0.0150564   | 0.988028 |
| rad21       | 0.00986046  | 0.996302 | 0.00987632  | 0.997904 |
| Benzyl+C2H2 | 0.00160525  | 0.997907 | 0.000000    | 0.997904 |
| rad11       | 0.000978578 | 0.998886 | 0.000980152 | 0.998884 |
| rad36       | 0.000911271 | 0.999797 | 0.000912737 | 0.999797 |
| rad6        | 0.000202732 | 1.000000 | 0.000203058 | 1.000000 |
| rad30       | 3.57206e-08 | 1.000000 | 3.57780e-08 | 1.000000 |
| rad7        | 3.53091e-08 | 1.000000 | 3.53658e-08 | 1.000000 |
| rad9        | 4.84816e-09 | 1.000000 | 4.85596e-09 | 1.000000 |
| rad25       | 9.50237e-10 | 1.000000 | 9.51765e-10 | 1.000000 |
| rad24       | 7.46831e-10 | 1.000000 | 7.48031e-10 | 1.000000 |
| PAH9+H      | 7.10429e-10 | 1.000000 | 7.11572e-10 | 1.000000 |
| PhCHCCH2+H  | 5.23627e-10 | 1.000000 | 5.24469e-10 | 1.000000 |
| rad13       | 4.35950e-10 | 1.000000 | 4.36651e-10 | 1.000000 |
| rad38       | 4.10784e-10 | 1.000000 | 4.11445e-10 | 1.000000 |
| rad35       | 2.51697e-10 | 1.000000 | 2.52101e-10 | 1.000000 |
| rad3        | 6.21252e-11 | 1.000000 | 6.22251e-11 | 1.000000 |
| rad2        | 3.70803e-11 | 1.000000 | 3.71399e-11 | 1.000000 |
| rad4        | 3.09104e-11 | 1.000000 | 3.09601e-11 | 1.000000 |
| Ph+Allene   | 1.89612e-11 | 1.000000 | 1.89917e-11 | 1.000000 |
| rad46       | 1.11063e-11 | 1.000000 | 1.11242e-11 | 1.000000 |
| rad28       | 9.29992e-12 | 1.000000 | 9.31487e-12 | 1.000000 |
| rad15       | 7.85848e-12 | 1.000000 | 7.87111e-12 | 1.000000 |
| PhCCH+CH3   | 5.27245e-12 | 1.000000 | 5.28092e-12 | 1.000000 |
| rad1        | 2.79519e-12 | 1.000000 | 2.79969e-12 | 1.000000 |
| rad10       | 1.79430e-12 | 1.000000 | 1.79719e-12 | 1.000000 |
| PhCH2CCH+H  | 1.10338e-12 | 1.000000 | 1.10515e-12 | 1.000000 |
| rad60syn    | 7.50629e-13 | 1.000000 | 7.51836e-13 | 1.000000 |
| rad33       | 6.19372e-13 | 1.000000 | 6.20368e-13 | 1.000000 |
| rad60anti   | 2.26666e-13 | 1.000000 | 2.27030e-13 | 1.000000 |
| PhCCCH3+H   | 1.81054e-13 | 1.000000 | 1.81345e-13 | 1.000000 |
| rad19anti   | 1.56503e-13 | 1.000000 | 1.56754e-13 | 1.000000 |
| Ph+MeAc     | 1.25732e-13 | 1.000000 | 1.25934e-13 | 1.000000 |
| PAH7+H      | 5.49907e-14 | 1.000000 | 5.50791e-14 | 1.000000 |
| rad26       | 3.94139e-14 | 1.000000 | 3.94772e-14 | 1.000000 |
| rad50       | 1.95246e-14 | 1.000000 | 1.95560e-14 | 1.000000 |
| rad14       | 7.19918e-15 | 1.000000 | 7.21075e-15 | 1.000000 |
| PAH3+H      | 7.04778e-15 | 1.000000 | 7.05911e-15 | 1.000000 |
| rad59       | 1.61171e-15 | 1.000000 | 1.61430e-15 | 1.000000 |



|               |             |          |             |         |
|---------------|-------------|----------|-------------|---------|
| rad39         | 1.04911e-15 | 1.000000 | 1.05079e-15 | 1.00000 |
| rad52         | 1.26093e-16 | 1.000000 | 1.26296e-16 | 1.00000 |
| rad27         | 9.31995e-17 | 1.000000 | 9.33493e-17 | 1.00000 |
| rad12         | 6.06476e-17 | 1.000000 | 6.07451e-17 | 1.00000 |
| rad51         | 4.44954e-17 | 1.000000 | 4.45670e-17 | 1.00000 |
| rad37         | 9.83385e-18 | 1.000000 | 9.84966e-18 | 1.00000 |
| rad5          | 1.59803e-18 | 1.000000 | 1.60060e-18 | 1.00000 |
| rad19syn      | 1.37104e-18 | 1.000000 | 1.37324e-18 | 1.00000 |
| rad65         | 9.82869e-19 | 1.000000 | 9.84450e-19 | 1.00000 |
| rad31         | 3.28959e-19 | 1.000000 | 3.29488e-19 | 1.00000 |
| rad67         | 2.52666e-19 | 1.000000 | 2.53072e-19 | 1.00000 |
| rad54         | 1.56010e-19 | 1.000000 | 1.56261e-19 | 1.00000 |
| PAH10+CH3     | 5.74120e-20 | 1.000000 | 5.75043e-20 | 1.00000 |
| rad70         | 2.84151e-20 | 1.000000 | 2.84608e-20 | 1.00000 |
| PhcycC3H3_A+H | 2.05834e-20 | 1.000000 | 2.06165e-20 | 1.00000 |
| rad58         | 1.63042e-20 | 1.000000 | 1.63305e-20 | 1.00000 |
| rad43         | 1.34180e-20 | 1.000000 | 1.34395e-20 | 1.00000 |
| rad62         | 8.84986e-21 | 1.000000 | 8.86409e-21 | 1.00000 |
| PAH1+H        | 5.85968e-21 | 1.000000 | 5.86910e-21 | 1.00000 |
| rad55         | 2.52396e-21 | 1.000000 | 2.52802e-21 | 1.00000 |
| rad34         | 1.08407e-21 | 1.000000 | 1.08581e-21 | 1.00000 |
| rad47         | 9.16082e-23 | 1.000000 | 9.17555e-23 | 1.00000 |
| rad42         | 1.19266e-23 | 1.000000 | 1.19458e-23 | 1.00000 |
| rad53         | 5.63542e-24 | 1.000000 | 5.64448e-24 | 1.00000 |
| rad64         | 5.26919e-24 | 1.000000 | 5.27767e-24 | 1.00000 |
| rad41         | 4.81175e-24 | 1.000000 | 4.81949e-24 | 1.00000 |
| rad73         | 3.47868e-24 | 1.000000 | 3.48427e-24 | 1.00000 |
| rad56         | 3.55813e-25 | 1.000000 | 3.56386e-25 | 1.00000 |
| rad71         | 1.97759e-25 | 1.000000 | 1.98077e-25 | 1.00000 |
| rad68syn      | 9.13366e-26 | 1.000000 | 9.14834e-26 | 1.00000 |
| rad68anti     | 6.46540e-26 | 1.000000 | 6.47580e-26 | 1.00000 |
| rad61         | 3.19280e-26 | 1.000000 | 3.19793e-26 | 1.00000 |
| PAH8+H        | 1.72458e-27 | 1.000000 | 1.72735e-27 | 1.00000 |
| rad40syn      | 1.61447e-27 | 1.000000 | 1.61707e-27 | 1.00000 |
| rad40anti     | 4.19364e-28 | 1.000000 | 4.20038e-28 | 1.00000 |
| rad72         | 7.53721e-31 | 1.000000 | 7.54933e-31 | 1.00000 |
| rad8          | 1.31625e-35 | 1.000000 | 1.31837e-35 | 1.00000 |

1000.00000 Pa, 310.000000 K

=====

| Rate constant | True (fraction)     | Effective (fraction) |
|---------------|---------------------|----------------------|
| Total         | 2.44453e-22 (1.00 ) | 2.44087e-22 (1.00 )  |

| species     | PYtrue      | Cumul    | PYeffective | Cumul    |
|-------------|-------------|----------|-------------|----------|
| rad22       | 0.500799    | 0.500799 | 0.501551    | 0.501551 |
| Indene+H    | 0.356460    | 0.857259 | 0.356995    | 0.858546 |
| rad18       | 0.0530148   | 0.910274 | 0.0530945   | 0.911641 |
| rad23       | 0.0318280   | 0.942102 | 0.0318758   | 0.943516 |
| rad45       | 0.0306309   | 0.972733 | 0.0306769   | 0.974193 |
| rad20       | 0.0137221   | 0.986455 | 0.0137428   | 0.987936 |
| rad21       | 0.00866316  | 0.995118 | 0.00867618  | 0.996612 |
| rad36       | 0.00202702  | 0.997145 | 0.00203007  | 0.998642 |
| Benzyl+C2H2 | 0.00149995  | 0.998645 | 0.00000     | 0.998642 |
| rad11       | 0.00118008  | 0.999825 | 0.00118185  | 0.999824 |
| rad6        | 0.000174764 | 1.000000 | 0.000175026 | 0.999999 |
| rad30       | 4.68515e-08 | 1.000000 | 4.69219e-08 | 0.999999 |
| rad7        | 2.50143e-08 | 1.000000 | 2.50518e-08 | 0.999999 |
| rad15       | 7.23637e-09 | 1.000000 | 7.24724e-09 | 0.999999 |
| rad25       | 1.03318e-09 | 1.000000 | 1.03473e-09 | 0.999999 |
| PhCHCCH2+H  | 5.37422e-10 | 1.000000 | 5.38229e-10 | 0.999999 |
| rad24       | 4.19059e-10 | 1.000000 | 4.19689e-10 | 0.999999 |
| rad13       | 3.93757e-10 | 1.000000 | 3.94349e-10 | 0.999999 |
| rad8        | 1.57444e-10 | 1.000000 | 1.57680e-10 | 0.999999 |
| rad38       | 7.72661e-11 | 1.000000 | 7.73822e-11 | 0.999999 |
| PAH9+H      | 4.83783e-11 | 1.000000 | 4.84510e-11 | 0.999999 |
| rad9        | 4.51532e-11 | 1.000000 | 4.52211e-11 | 0.999999 |
| Ph+Allene   | 4.07046e-11 | 1.000000 | 4.07657e-11 | 0.999999 |
| rad3        | 3.53641e-11 | 1.000000 | 3.54173e-11 | 0.999999 |
| rad35       | 2.37370e-11 | 1.000000 | 2.37726e-11 | 0.999999 |
| rad4        | 1.89874e-11 | 1.000000 | 1.90159e-11 | 0.999999 |
| rad2        | 1.12132e-11 | 1.000000 | 1.12301e-11 | 0.999999 |
| rad28       | 3.62594e-12 | 1.000000 | 3.63139e-12 | 0.999999 |
| PhCH2CCH+H  | 1.60214e-12 | 1.000000 | 1.60455e-12 | 0.999999 |
| rad60syn    | 1.48975e-12 | 1.000000 | 1.49199e-12 | 0.999999 |
| PhCCH+CH3   | 9.40972e-13 | 1.000000 | 9.42386e-13 | 0.999999 |
| rad1        | 8.76179e-13 | 1.000000 | 8.77495e-13 | 0.999999 |
| rad46       | 8.27984e-13 | 1.000000 | 8.29228e-13 | 0.999999 |
| rad60anti   | 4.95135e-13 | 1.000000 | 4.95879e-13 | 0.999999 |

|               |             |          |             |          |
|---------------|-------------|----------|-------------|----------|
| rad33         | 4.87530e-13 | 1.000000 | 4.88262e-13 | 0.999999 |
| rad10         | 3.52825e-13 | 1.000000 | 3.53355e-13 | 0.999999 |
| PAH3+H        | 1.43564e-14 | 1.000000 | 1.43780e-14 | 0.999999 |
| PAH7+H        | 1.09661e-14 | 1.000000 | 1.09825e-14 | 0.999999 |
| PhCCCH3+H     | 9.33262e-15 | 1.000000 | 9.34664e-15 | 0.999999 |
| Ph+MeAc       | 7.90106e-15 | 1.000000 | 7.91293e-15 | 0.999999 |
| rad59         | 4.13278e-15 | 1.000000 | 4.13899e-15 | 0.999999 |
| rad14         | 3.33468e-15 | 1.000000 | 3.33969e-15 | 0.999999 |
| rad26         | 2.12399e-15 | 1.000000 | 2.12718e-15 | 0.999999 |
| rad50         | 7.12581e-17 | 1.000000 | 7.13652e-17 | 0.999999 |
| rad27         | 2.66156e-17 | 1.000000 | 2.66556e-17 | 0.999999 |
| rad39         | 1.22788e-17 | 1.000000 | 1.22972e-17 | 0.999999 |
| rad5          | 1.66205e-19 | 1.000000 | 1.66455e-19 | 0.999999 |
| rad12         | 1.50290e-19 | 1.000000 | 1.50516e-19 | 0.999999 |
| rad31         | 8.02134e-20 | 1.000000 | 8.03339e-20 | 0.999999 |
| rad52         | 7.72901e-20 | 1.000000 | 7.74062e-20 | 0.999999 |
| rad19syn      | 4.07888e-20 | 1.000000 | 4.08501e-20 | 0.999999 |
| rad37         | 2.39358e-20 | 1.000000 | 2.39717e-20 | 0.999999 |
| rad51         | 6.35101e-21 | 1.000000 | 6.36055e-21 | 0.999999 |
| rad54         | 2.24852e-21 | 1.000000 | 2.25190e-21 | 0.999999 |
| rad70         | 1.62766e-21 | 1.000000 | 1.63011e-21 | 0.999999 |
| rad58         | 1.52507e-21 | 1.000000 | 1.52736e-21 | 0.999999 |
| rad62         | 8.77429e-23 | 1.000000 | 8.78747e-23 | 0.999999 |
| rad65         | 5.10118e-23 | 1.000000 | 5.10884e-23 | 0.999999 |
| rad43         | 4.70403e-23 | 1.000000 | 4.71110e-23 | 0.999999 |
| PhcycC3H3_A+H | 2.53327e-23 | 1.000000 | 2.53708e-23 | 0.999999 |
| PAH10+CH3     | 7.31982e-24 | 1.000000 | 7.33082e-24 | 0.999999 |
| rad34         | 6.87786e-24 | 1.000000 | 6.88819e-24 | 0.999999 |
| rad55         | 6.50400e-24 | 1.000000 | 6.51377e-24 | 0.999999 |
| rad47         | 6.74432e-26 | 1.000000 | 6.75445e-26 | 0.999999 |
| PAH1+H        | 2.70795e-26 | 1.000000 | 2.71202e-26 | 0.999999 |
| rad42         | 1.22237e-27 | 1.000000 | 1.22420e-27 | 0.999999 |
| rad41         | 1.83040e-28 | 1.000000 | 1.83315e-28 | 0.999999 |

1000.00000 Pa, 400.000000 K

=====

| Rate constant | True (fraction)     | Effective (fraction) |
|---------------|---------------------|----------------------|
| Total         | 3.60269e-20 (1.00 ) | 3.57127e-20 (1.00 )  |

| species     | PYtrue      | Cumul    | PYeffective | Cumul    |
|-------------|-------------|----------|-------------|----------|
| Indene+H    | 0.539502    | 0.539502 | 0.544247    | 0.544247 |
| rad22       | 0.336128    | 0.875630 | 0.339084    | 0.883331 |
| rad23       | 0.0748343   | 0.950464 | 0.0754926   | 0.958824 |
| rad45       | 0.0202110   | 0.970675 | 0.0203888   | 0.979212 |
| rad18       | 0.0119418   | 0.982617 | 0.0120468   | 0.991259 |
| Benzyl+C2H2 | 0.00871911  | 0.991336 | 0.000000    | 0.991259 |
| rad20       | 0.00298121  | 0.994317 | 0.00300743  | 0.994267 |
| rad21       | 0.00197656  | 0.996294 | 0.00199395  | 0.996261 |
| rad11       | 0.00147506  | 0.997769 | 0.00148804  | 0.997749 |
| rad6        | 0.00145606  | 0.999225 | 0.00146886  | 0.999217 |
| rad36       | 0.000774424 | 1.000000 | 0.000781236 | 0.999999 |
| rad7        | 4.80139e-07 | 1.000000 | 4.84362e-07 | 0.999999 |
| rad30       | 3.91127e-07 | 1.000000 | 3.94567e-07 | 1.000000 |
| PAH9+H      | 1.28867e-07 | 1.000000 | 1.30000e-07 | 1.000000 |
| rad9        | 8.55277e-08 | 1.000000 | 8.62799e-08 | 1.000000 |
| rad38       | 5.09265e-08 | 1.000000 | 5.13744e-08 | 1.000000 |
| PhCHCCH2+H  | 3.82886e-08 | 1.000000 | 3.86253e-08 | 1.000000 |
| rad35       | 3.61727e-08 | 1.000000 | 3.64909e-08 | 1.000000 |
| rad25       | 5.91797e-09 | 1.000000 | 5.97003e-09 | 1.000000 |
| Ph+Allene   | 4.90427e-09 | 1.000000 | 4.94741e-09 | 1.000000 |
| rad2        | 4.05001e-09 | 1.000000 | 4.08564e-09 | 1.000000 |
| rad46       | 3.72868e-09 | 1.000000 | 3.76147e-09 | 1.000000 |
| rad13       | 3.10596e-09 | 1.000000 | 3.13328e-09 | 1.000000 |
| PhCCH+CH3   | 2.47567e-09 | 1.000000 | 2.49745e-09 | 1.000000 |
| rad3        | 1.81121e-09 | 1.000000 | 1.82714e-09 | 1.000000 |
| rad28       | 1.50580e-09 | 1.000000 | 1.51904e-09 | 1.000000 |
| rad4        | 9.54244e-10 | 1.000000 | 9.62637e-10 | 1.000000 |
| PhCH2CCH+H  | 9.13302e-10 | 1.000000 | 9.21335e-10 | 1.000000 |
| rad24       | 7.81218e-10 | 1.000000 | 7.88090e-10 | 1.000000 |
| rad1        | 3.77025e-10 | 1.000000 | 3.80341e-10 | 1.000000 |
| rad10       | 3.36030e-10 | 1.000000 | 3.38985e-10 | 1.000000 |
| PhCCCH3+H   | 2.65280e-10 | 1.000000 | 2.67613e-10 | 1.000000 |
| Ph+MeAc     | 2.41565e-10 | 1.000000 | 2.43690e-10 | 1.000000 |
| PAH7+H      | 1.51899e-10 | 1.000000 | 1.53235e-10 | 1.000000 |
| rad15       | 1.20617e-10 | 1.000000 | 1.21678e-10 | 1.000000 |
| rad60syn    | 9.61743e-11 | 1.000000 | 9.70203e-11 | 1.000000 |
| rad50       | 6.74277e-11 | 1.000000 | 6.80208e-11 | 1.000000 |
| rad19anti   | 4.46376e-11 | 1.000000 | 4.50303e-11 | 1.000000 |

|               |             |         |             |          |
|---------------|-------------|---------|-------------|----------|
| rad60anti     | 3.84723e-11 | 1.00000 | 3.88107e-11 | 1.000000 |
| rad26         | 3.71226e-11 | 1.00000 | 3.74491e-11 | 1.000000 |
| rad39         | 1.74724e-11 | 1.00000 | 1.76261e-11 | 1.000000 |
| PAH3+H        | 8.47429e-12 | 1.00000 | 8.54883e-12 | 1.000000 |
| rad33         | 4.93185e-12 | 1.00000 | 4.97523e-12 | 1.000000 |
| rad59         | 1.67607e-12 | 1.00000 | 1.69081e-12 | 1.000000 |
| rad52         | 1.27080e-12 | 1.00000 | 1.28198e-12 | 1.000000 |
| rad51         | 1.07688e-12 | 1.00000 | 1.08635e-12 | 1.000000 |
| rad14         | 3.31376e-13 | 1.00000 | 3.34290e-13 | 1.000000 |
| rad37         | 1.59092e-13 | 1.00000 | 1.60492e-13 | 1.000000 |
| rad19syn      | 6.43912e-14 | 1.00000 | 6.49575e-14 | 1.000000 |
| rad65         | 3.03858e-14 | 1.00000 | 3.06530e-14 | 1.000000 |
| rad54         | 1.51091e-14 | 1.00000 | 1.52420e-14 | 1.000000 |
| rad27         | 1.06521e-14 | 1.00000 | 1.07458e-14 | 1.000000 |
| PAH10+CH3     | 6.96803e-15 | 1.00000 | 7.02932e-15 | 1.000000 |
| PhcycC3H3_A+H | 5.45905e-15 | 1.00000 | 5.50707e-15 | 1.000000 |
| rad67         | 3.90955e-15 | 1.00000 | 3.94394e-15 | 1.000000 |
| PAH1+H        | 2.40106e-15 | 1.00000 | 2.42218e-15 | 1.000000 |
| rad70         | 2.07968e-15 | 1.00000 | 2.09797e-15 | 1.000000 |
| rad12         | 1.69200e-15 | 1.00000 | 1.70689e-15 | 1.000000 |
| rad5          | 1.09804e-15 | 1.00000 | 1.10770e-15 | 1.000000 |
| rad58         | 7.62782e-16 | 1.00000 | 7.69491e-16 | 1.000000 |
| rad55         | 5.08833e-16 | 1.00000 | 5.13309e-16 | 1.000000 |
| rad62         | 4.34598e-16 | 1.00000 | 4.38421e-16 | 1.000000 |
| rad43         | 2.37276e-16 | 1.00000 | 2.39363e-16 | 1.000000 |
| rad34         | 1.79262e-16 | 1.00000 | 1.80838e-16 | 1.000000 |
| rad31         | 1.13966e-16 | 1.00000 | 1.14969e-16 | 1.000000 |
| rad73         | 2.70366e-17 | 1.00000 | 2.72744e-17 | 1.000000 |
| rad64         | 8.68345e-18 | 1.00000 | 8.75983e-18 | 1.000000 |
| rad53         | 8.11440e-18 | 1.00000 | 8.18577e-18 | 1.000000 |
| rad71         | 6.92633e-18 | 1.00000 | 6.98725e-18 | 1.000000 |
| rad42         | 3.56910e-18 | 1.00000 | 3.60050e-18 | 1.000000 |
| rad56         | 1.73079e-18 | 1.00000 | 1.74602e-18 | 1.000000 |
| rad47         | 7.57241e-19 | 1.00000 | 7.63901e-19 | 1.000000 |
| rad41         | 6.98718e-19 | 1.00000 | 7.04864e-19 | 1.000000 |
| rad68syn      | 3.31511e-19 | 1.00000 | 3.34427e-19 | 1.000000 |
| rad68anti     | 2.26321e-19 | 1.00000 | 2.28312e-19 | 1.000000 |
| rad61         | 1.65172e-19 | 1.00000 | 1.66625e-19 | 1.000000 |
| PAH8+H        | 6.58836e-20 | 1.00000 | 6.64631e-20 | 1.000000 |
| rad40syn      | 2.38868e-20 | 1.00000 | 2.40969e-20 | 1.000000 |
| rad40anti     | 8.92769e-21 | 1.00000 | 9.00622e-21 | 1.000000 |
| rad72         | 4.03610e-21 | 1.00000 | 4.07160e-21 | 1.000000 |
| rad8          | 7.65086e-32 | 1.00000 | 7.71815e-32 | 1.000000 |

1000.00000 Pa, 500.000000 K

=====

| Rate constant | True (fraction)     | Effective (fraction) |
|---------------|---------------------|----------------------|
| Total         | 1.22595e-18 (1.00 ) | 1.18817e-18 (1.00 )  |

| species     | PYtrue      | Cumul    | PYeffective | Cumul    |
|-------------|-------------|----------|-------------|----------|
| Indene+H    | 0.695517    | 0.695517 | 0.717636    | 0.717636 |
| rad22       | 0.162937    | 0.858454 | 0.168118    | 0.885754 |
| rad23       | 0.0852218   | 0.943676 | 0.0879319   | 0.973686 |
| Benzyl+C2H2 | 0.0308209   | 0.974497 | 0.000000    | 0.973686 |
| rad45       | 0.0153425   | 0.989839 | 0.0158304   | 0.989516 |
| rad6        | 0.00466774  | 0.994507 | 0.00481618  | 0.994332 |
| rad18       | 0.00246930  | 0.996976 | 0.00254782  | 0.996880 |
| rad11       | 0.00118658  | 0.998163 | 0.00122431  | 0.998105 |
| rad36       | 0.000713478 | 0.998876 | 0.000736168 | 0.998841 |
| rad20       | 0.000657766 | 0.999534 | 0.000678684 | 0.999519 |
| rad21       | 0.000447430 | 0.999981 | 0.000461659 | 0.999981 |
| PAH9+H      | 6.66704e-06 | 0.999988 | 6.87905e-06 | 0.999988 |
| rad38       | 2.62459e-06 | 0.999991 | 2.70806e-06 | 0.999991 |
| rad30       | 2.18196e-06 | 0.999993 | 2.25135e-06 | 0.999993 |
| rad7        | 2.01676e-06 | 0.999995 | 2.08090e-06 | 0.999995 |
| rad35       | 1.50538e-06 | 0.999996 | 1.55325e-06 | 0.999997 |
| PhCHCCH2+H  | 9.85164e-07 | 0.999997 | 1.01649e-06 | 0.999998 |
| rad9        | 6.23775e-07 | 0.999998 | 6.43611e-07 | 0.999998 |
| Ph+Allene   | 6.13917e-07 | 0.999999 | 6.33441e-07 | 0.999999 |
| rad46       | 3.72437e-07 | 0.999999 | 3.84281e-07 | 0.999999 |
| PhCCH+CH3   | 3.27796e-07 | 0.999999 | 3.38221e-07 | 1.000000 |
| PhCH2CCH+H  | 2.30712e-07 | 1.000000 | 2.38049e-07 | 1.000000 |
| PAH7+H      | 8.50122e-08 | 1.000000 | 8.77156e-08 | 1.000000 |
| rad2        | 5.86304e-08 | 1.000000 | 6.04949e-08 | 1.000000 |
| rad28       | 5.73119e-08 | 1.000000 | 5.91345e-08 | 1.000000 |
| Ph+MeAc     | 4.84497e-08 | 1.000000 | 4.99904e-08 | 1.000000 |
| rad50       | 4.07483e-08 | 1.000000 | 4.20441e-08 | 1.000000 |
| PhCCCH3+H   | 3.23907e-08 | 1.000000 | 3.34207e-08 | 1.000000 |

|               |             |          |             |         |
|---------------|-------------|----------|-------------|---------|
| rad39         | 1.66688e-08 | 1.000000 | 1.71989e-08 | 1.00000 |
| rad3          | 1.41515e-08 | 1.000000 | 1.46016e-08 | 1.00000 |
| rad13         | 1.06112e-08 | 1.00000  | 1.09486e-08 | 1.00000 |
| rad25         | 9.68289e-09 | 1.00000  | 9.99081e-09 | 1.00000 |
| rad4          | 7.96906e-09 | 1.00000  | 8.22248e-09 | 1.00000 |
| rad1          | 7.00293e-09 | 1.00000  | 7.22563e-09 | 1.00000 |
| rad19anti     | 6.29128e-09 | 1.00000  | 6.49135e-09 | 1.00000 |
| rad10         | 5.39888e-09 | 1.00000  | 5.57057e-09 | 1.00000 |
| rad51         | 3.15185e-09 | 1.00000  | 3.25208e-09 | 1.00000 |
| rad60syn      | 2.51758e-09 | 1.00000  | 2.59764e-09 | 1.00000 |
| rad26         | 1.89578e-09 | 1.00000  | 1.95606e-09 | 1.00000 |
| PAH3+H        | 1.78380e-09 | 1.00000  | 1.84053e-09 | 1.00000 |
| rad52         | 1.76891e-09 | 1.00000  | 1.82517e-09 | 1.00000 |
| rad24         | 1.49332e-09 | 1.00000  | 1.54081e-09 | 1.00000 |
| rad60anti     | 1.17429e-09 | 1.00000  | 1.21164e-09 | 1.00000 |
| rad15         | 8.59901e-10 | 1.00000  | 8.87246e-10 | 1.00000 |
| rad59         | 2.62200e-10 | 1.00000  | 2.70539e-10 | 1.00000 |
| rad37         | 2.27896e-10 | 1.00000  | 2.35143e-10 | 1.00000 |
| rad19syn      | 1.82638e-10 | 1.00000  | 1.88446e-10 | 1.00000 |
| rad65         | 9.30661e-11 | 1.00000  | 9.60257e-11 | 1.00000 |
| PAH10+CH3     | 8.98689e-11 | 1.00000  | 9.27268e-11 | 1.00000 |
| rad54         | 5.72061e-11 | 1.00000  | 5.90253e-11 | 1.00000 |
| PhcycC3H3_A+H | 3.91337e-11 | 1.00000  | 4.03782e-11 | 1.00000 |
| PAH1+H        | 3.84668e-11 | 1.00000  | 3.96900e-11 | 1.00000 |
| rad33         | 2.06692e-11 | 1.00000  | 2.13265e-11 | 1.00000 |
| rad67         | 2.05401e-11 | 1.00000  | 2.11933e-11 | 1.00000 |
| rad70         | 1.05241e-11 | 1.00000  | 1.08587e-11 | 1.00000 |
| rad73         | 6.03528e-12 | 1.00000  | 6.22721e-12 | 1.00000 |
| rad71         | 4.76399e-12 | 1.00000  | 4.91548e-12 | 1.00000 |
| rad58         | 3.24404e-12 | 1.00000  | 3.34720e-12 | 1.00000 |
| rad55         | 2.81243e-12 | 1.00000  | 2.90187e-12 | 1.00000 |
| rad14         | 2.62841e-12 | 1.00000  | 2.71200e-12 | 1.00000 |
| rad34         | 1.65386e-12 | 1.00000  | 1.70645e-12 | 1.00000 |
| rad62         | 1.06346e-12 | 1.00000  | 1.09728e-12 | 1.00000 |
| rad64         | 4.07443e-13 | 1.00000  | 4.20400e-13 | 1.00000 |
| rad43         | 2.66043e-13 | 1.00000  | 2.74503e-13 | 1.00000 |
| rad53         | 1.87275e-13 | 1.00000  | 1.93230e-13 | 1.00000 |
| rad27         | 1.48217e-13 | 1.00000  | 1.52930e-13 | 1.00000 |
| rad56         | 9.90791e-14 | 1.00000  | 1.02230e-13 | 1.00000 |
| rad72         | 5.37819e-14 | 1.00000  | 5.54922e-14 | 1.00000 |
| PAH8+H        | 4.21608e-14 | 1.00000  | 4.35016e-14 | 1.00000 |
| rad61         | 3.99125e-14 | 1.00000  | 4.11818e-14 | 1.00000 |
| rad5          | 3.50628e-14 | 1.00000  | 3.61778e-14 | 1.00000 |
| rad12         | 3.11898e-14 | 1.00000  | 3.21817e-14 | 1.00000 |
| rad68syn      | 3.11035e-14 | 1.00000  | 3.20927e-14 | 1.00000 |
| rad42         | 2.65885e-14 | 1.00000  | 2.74340e-14 | 1.00000 |
| rad68anti     | 2.05748e-14 | 1.00000  | 2.12291e-14 | 1.00000 |
| rad31         | 1.52546e-14 | 1.00000  | 1.57397e-14 | 1.00000 |
| rad40syn      | 6.92806e-15 | 1.00000  | 7.14838e-15 | 1.00000 |
| rad41         | 4.00748e-15 | 1.00000  | 4.13493e-15 | 1.00000 |
| rad40anti     | 3.59026e-15 | 1.00000  | 3.70443e-15 | 1.00000 |
| rad47         | 1.71416e-15 | 1.00000  | 1.76867e-15 | 1.00000 |
| rad8          | 5.18629e-28 | 1.00000  | 5.35121e-28 | 1.00000 |

1000.00000 Pa, 600.000000 K

=====  
Rate constant | True (fraction) | Effective (fraction)

-----  
Total | 1.36947e-17 (1.00 ) | 1.26222e-17 (1.00 )

| species     | PYtrue      | Cumul    | PYeffective | Cumul    |
|-------------|-------------|----------|-------------|----------|
| Indene+H    | 0.785223    | 0.785223 | 0.851940    | 0.851940 |
| Benzyl+C2H2 | 0.0783119   | 0.863535 | 0.00000     | 0.851940 |
| rad22       | 0.0582586   | 0.921794 | 0.0632086   | 0.915149 |
| rad23       | 0.0572242   | 0.979018 | 0.0620863   | 0.977235 |
| rad45       | 0.00954019  | 0.988558 | 0.0103508   | 0.987586 |
| rad6        | 0.00909273  | 0.997651 | 0.00986530  | 0.997451 |
| rad11       | 0.000597969 | 0.998249 | 0.000648776 | 0.998100 |
| rad36       | 0.000557239 | 0.998806 | 0.000604585 | 0.998704 |
| rad18       | 0.000516316 | 0.999322 | 0.000560185 | 0.999265 |
| rad20       | 0.000210859 | 0.999533 | 0.000228775 | 0.999493 |
| rad21       | 0.000150760 | 0.999684 | 0.000163569 | 0.999657 |
| PAH9+H      | 0.000126215 | 0.999810 | 0.000136939 | 0.999794 |
| rad38       | 5.48601e-05 | 0.999865 | 5.95213e-05 | 0.999853 |
| Ph+Allene   | 2.50333e-05 | 0.999890 | 2.71602e-05 | 0.999881 |
| rad35       | 2.25370e-05 | 0.999912 | 2.44518e-05 | 0.999905 |
| PhCHCCH2+H  | 1.70644e-05 | 0.999929 | 1.85143e-05 | 0.999923 |
| PhCH2CCH+H  | 1.34513e-05 | 0.999943 | 1.45942e-05 | 0.999938 |
| rad46       | 1.33901e-05 | 0.999956 | 1.45278e-05 | 0.999953 |

|               |             |          |             |          |
|---------------|-------------|----------|-------------|----------|
| PAH7+H        | 8.27324e-06 | 0.999965 | 8.97618e-06 | 0.999962 |
| rad30         | 7.87414e-06 | 0.999972 | 8.54317e-06 | 0.999970 |
| PhCCH+CH3     | 6.70041e-06 | 0.999979 | 7.26972e-06 | 0.999977 |
| rad50         | 6.41460e-06 | 0.999986 | 6.95962e-06 | 0.999984 |
| rad7          | 4.40127e-06 | 0.999990 | 4.77522e-06 | 0.999989 |
| rad39         | 2.66175e-06 | 0.999993 | 2.88791e-06 | 0.999992 |
| rad9          | 1.97648e-06 | 0.999995 | 2.14441e-06 | 0.999994 |
| rad51         | 1.39971e-06 | 0.999996 | 1.51863e-06 | 0.999996 |
| Ph+MeAc       | 1.18281e-06 | 0.999997 | 1.28330e-06 | 0.999997 |
| rad28         | 6.50818e-07 | 0.999998 | 7.06116e-07 | 0.999998 |
| PhCCCH3+H     | 5.70400e-07 | 0.999998 | 6.18864e-07 | 0.999998 |
| rad52         | 4.76809e-07 | 0.999999 | 5.17322e-07 | 0.999999 |
| rad19anti     | 4.11454e-07 | 0.999999 | 4.46413e-07 | 0.999999 |
| rad2          | 2.96044e-07 | 1.000000 | 3.21197e-07 | 1.000000 |
| PAH3+H        | 2.17108e-07 | 1.000000 | 2.35555e-07 | 1.000000 |
| PAH10+CH3     | 8.59799e-08 | 1.000000 | 9.32852e-08 | 1.000000 |
| rad3          | 5.83255e-08 | 1.000000 | 6.32812e-08 | 1.000000 |
| rad37         | 5.43441e-08 | 1.000000 | 5.89615e-08 | 1.000000 |
| rad1          | 4.37990e-08 | 1.000000 | 4.75204e-08 | 1.000000 |
| rad60syn      | 4.12931e-08 | 1.000000 | 4.48016e-08 | 1.000000 |
| PAH1+H        | 4.03417e-08 | 1.000000 | 4.37694e-08 | 1.000000 |
| rad65         | 3.82897e-08 | 1.000000 | 4.15430e-08 | 1.000000 |
| rad4          | 3.55048e-08 | 1.000000 | 3.85215e-08 | 1.000000 |
| rad71         | 2.79530e-08 | 1.000000 | 3.03280e-08 | 1.000000 |
| rad13         | 2.49817e-08 | 1.000000 | 2.71043e-08 | 1.000000 |
| rad59         | 2.31060e-08 | 1.000000 | 2.50692e-08 | 1.000000 |
| rad60anti     | 2.27290e-08 | 1.000000 | 2.46602e-08 | 1.000000 |
| rad73         | 2.20200e-08 | 1.000000 | 2.38909e-08 | 1.000000 |
| rad19syn      | 2.09012e-08 | 1.000000 | 2.26771e-08 | 1.000000 |
| rad10         | 1.88869e-08 | 1.000000 | 2.04916e-08 | 1.000000 |
| rad26         | 1.44293e-08 | 1.000000 | 1.56553e-08 | 1.000000 |
| rad67         | 1.22781e-08 | 1.000000 | 1.33213e-08 | 1.000000 |
| PhcycC3H3_A+H | 9.52439e-09 | 1.000000 | 1.03336e-08 | 1.000000 |
| rad25         | 8.07284e-09 | 1.000000 | 8.75876e-09 | 1.000000 |
| rad54         | 7.92595e-09 | 1.000000 | 8.59938e-09 | 1.000000 |
| rad24         | 7.43180e-09 | 1.000000 | 8.06324e-09 | 1.000000 |
| rad70         | 5.47883e-09 | 1.000000 | 5.94434e-09 | 1.000000 |
| rad15         | 2.57984e-09 | 1.000000 | 2.79904e-09 | 1.000000 |
| rad58         | 1.68216e-09 | 1.000000 | 1.82508e-09 | 1.000000 |
| rad34         | 1.36533e-09 | 1.000000 | 1.48134e-09 | 1.000000 |
| rad72         | 7.93310e-10 | 1.000000 | 8.60714e-10 | 1.000000 |
| rad64         | 7.02188e-10 | 1.000000 | 7.61850e-10 | 1.000000 |
| rad55         | 5.19090e-10 | 1.000000 | 5.63194e-10 | 1.000000 |
| PAH8+H        | 3.08966e-10 | 1.000000 | 3.35218e-10 | 1.000000 |
| rad62         | 3.02934e-10 | 1.000000 | 3.28673e-10 | 1.000000 |
| rad61         | 1.42696e-10 | 1.000000 | 1.54820e-10 | 1.000000 |
| rad53         | 1.02823e-10 | 1.000000 | 1.11559e-10 | 1.000000 |
| rad68syn      | 9.94018e-11 | 1.000000 | 1.07848e-10 | 1.000000 |
| rad56         | 9.56382e-11 | 1.000000 | 1.03764e-10 | 1.000000 |
| rad33         | 7.00304e-11 | 1.000000 | 7.59806e-11 | 1.000000 |
| rad43         | 6.55991e-11 | 1.000000 | 7.11728e-11 | 1.000000 |
| rad68anti     | 6.47097e-11 | 1.000000 | 7.02078e-11 | 1.000000 |
| rad40syn      | 3.70403e-11 | 1.000000 | 4.01875e-11 | 1.000000 |
| rad42         | 2.42947e-11 | 1.000000 | 2.63590e-11 | 1.000000 |
| rad40anti     | 2.19733e-11 | 1.000000 | 2.38402e-11 | 1.000000 |
| rad14         | 8.88826e-12 | 1.000000 | 9.64346e-12 | 1.000000 |
| rad41         | 4.67709e-12 | 1.000000 | 5.07448e-12 | 1.000000 |
| rad47         | 1.20079e-12 | 1.000000 | 1.30282e-12 | 1.000000 |
| rad27         | 5.78523e-13 | 1.000000 | 6.27677e-13 | 1.000000 |
| rad12         | 5.28101e-13 | 1.000000 | 5.72972e-13 | 1.000000 |
| rad31         | 4.39982e-13 | 1.000000 | 4.77365e-13 | 1.000000 |
| rad5          | 1.81348e-13 | 1.000000 | 1.96756e-13 | 1.000000 |
| rad8          | 7.86257e-24 | 1.000000 | 8.53062e-24 | 1.000000 |

1000.00000 Pa, 700.000000 K

=====

| Rate constant | True (fraction)    | Effective (fraction) |
|---------------|--------------------|----------------------|
| Total         | 8.02260e-17 (1.00) | 6.78087e-17 (1.00)   |

| species     | PYtrue      | Cumul    | PYeffective | Cumul    |
|-------------|-------------|----------|-------------|----------|
| Indene+H    | 0.780614    | 0.780614 | 0.923562    | 0.923562 |
| Benzyl+C2H2 | 0.154779    | 0.935393 | 0.000000    | 0.923562 |
| rad23       | 0.0271334   | 0.962526 | 0.0321021   | 0.955664 |
| rad22       | 0.0170553   | 0.979582 | 0.0201786   | 0.975843 |
| rad6        | 0.0133117   | 0.992893 | 0.0157494   | 0.991592 |
| rad45       | 0.00403245  | 0.996926 | 0.00477088  | 0.996363 |
| PAH9+H      | 0.000803346 | 0.997729 | 0.000950456 | 0.997313 |
| rad38       | 0.000372934 | 0.998102 | 0.000441226 | 0.997755 |

|               |             |          |             |          |
|---------------|-------------|----------|-------------|----------|
| rad36         | 0.000273277 | 0.998375 | 0.000323320 | 0.998078 |
| rad11         | 0.000237182 | 0.998613 | 0.000280616 | 0.998359 |
| Ph+Allene     | 0.000184691 | 0.998797 | 0.000218512 | 0.998577 |
| rad18         | 0.000135084 | 0.998932 | 0.000159821 | 0.998737 |
| rad35         | 0.000124608 | 0.999057 | 0.000147427 | 0.998884 |
| PhCH2CCH+H    | 0.000121992 | 0.999179 | 0.000144331 | 0.999029 |
| rad20         | 0.000119490 | 0.999298 | 0.000141371 | 0.999170 |
| PhCHCCH2+H    | 0.000116289 | 0.999415 | 0.000137584 | 0.999308 |
| rad46         | 0.000116033 | 0.999531 | 0.000137281 | 0.999445 |
| PAH7+H        | 0.000103052 | 0.999634 | 0.000121923 | 0.999567 |
| rad50         | 9.39609e-05 | 0.999728 | 0.000111167 | 0.999678 |
| rad21         | 9.12162e-05 | 0.999819 | 0.000107920 | 0.999786 |
| rad39         | 4.15748e-05 | 0.999861 | 4.91881e-05 | 0.999835 |
| PhCCH+CH3     | 4.06798e-05 | 0.999901 | 4.81292e-05 | 0.999883 |
| rad51         | 2.65194e-05 | 0.999928 | 3.13757e-05 | 0.999915 |
| rad30         | 2.11471e-05 | 0.999949 | 2.50196e-05 | 0.999940 |
| Ph+MeAc       | 8.51389e-06 | 0.999957 | 1.00730e-05 | 0.999950 |
| rad52         | 7.99367e-06 | 0.999965 | 9.45749e-06 | 0.999959 |
| rad7          | 6.91741e-06 | 0.999972 | 8.18414e-06 | 0.999967 |
| rad19anti     | 4.50479e-06 | 0.999977 | 5.32971e-06 | 0.999973 |
| PhCCCH3+H     | 3.81893e-06 | 0.999981 | 4.51826e-06 | 0.999977 |
| rad9          | 3.79248e-06 | 0.999984 | 4.48697e-06 | 0.999982 |
| rad28         | 3.41809e-06 | 0.999988 | 4.04401e-06 | 0.999986 |
| PAH3+H        | 3.12278e-06 | 0.999991 | 3.69462e-06 | 0.999989 |
| PAH10+CH3     | 1.84126e-06 | 0.999993 | 2.17844e-06 | 0.999992 |
| PAH1+H        | 9.18706e-07 | 0.999994 | 1.08694e-06 | 0.999993 |
| rad71         | 8.42732e-07 | 0.999995 | 9.97055e-07 | 0.999994 |
| rad37         | 8.35080e-07 | 0.999995 | 9.88001e-07 | 0.999995 |
| rad2          | 8.03658e-07 | 0.999996 | 9.50825e-07 | 0.999996 |
| rad65         | 7.03423e-07 | 0.999997 | 8.32235e-07 | 0.999996 |
| rad73         | 6.15762e-07 | 0.999998 | 7.28522e-07 | 0.999997 |
| rad60syn      | 3.30730e-07 | 0.999998 | 3.91294e-07 | 0.999998 |
| rad59         | 3.03204e-07 | 0.999998 | 3.58728e-07 | 0.999998 |
| rad67         | 2.38512e-07 | 0.999998 | 2.82189e-07 | 0.999998 |
| rad19syn      | 2.22001e-07 | 0.999999 | 2.62654e-07 | 0.999998 |
| rad60anti     | 1.95529e-07 | 0.999999 | 2.31334e-07 | 0.999999 |
| rad1          | 1.39336e-07 | 0.999999 | 1.64851e-07 | 0.999999 |
| PhcycC3H3_A+H | 1.33927e-07 | 0.999999 | 1.58451e-07 | 0.999999 |
| rad3          | 1.23253e-07 | 0.999999 | 1.45823e-07 | 0.999999 |
| rad70         | 1.15601e-07 | 0.999999 | 1.36770e-07 | 0.999999 |
| rad54         | 8.86079e-08 | 0.999999 | 1.04834e-07 | 0.999999 |
| rad4          | 8.09530e-08 | 1.000000 | 9.57773e-08 | 1.000000 |
| rad13         | 5.51098e-08 | 1.000000 | 6.52017e-08 | 1.000000 |
| rad24         | 5.40925e-08 | 1.000000 | 6.39980e-08 | 1.000000 |
| rad26         | 4.89208e-08 | 1.000000 | 5.78793e-08 | 1.000000 |
| rad10         | 3.56070e-08 | 1.000000 | 4.21274e-08 | 1.000000 |
| rad58         | 3.26197e-08 | 1.000000 | 3.85931e-08 | 1.000000 |
| rad34         | 3.15143e-08 | 1.000000 | 3.72852e-08 | 1.000000 |
| rad72         | 2.72350e-08 | 1.000000 | 3.22223e-08 | 1.000000 |
| rad64         | 1.73081e-08 | 1.000000 | 2.04776e-08 | 1.000000 |
| PAH8+H        | 9.83756e-09 | 1.000000 | 1.16390e-08 | 1.000000 |
| rad62         | 6.64998e-09 | 1.000000 | 7.86774e-09 | 1.000000 |
| rad55         | 6.48147e-09 | 1.000000 | 7.66837e-09 | 1.000000 |
| rad25         | 5.53950e-09 | 1.000000 | 6.55391e-09 | 1.000000 |
| rad61         | 3.90070e-09 | 1.000000 | 4.61501e-09 | 1.000000 |
| rad15         | 3.40595e-09 | 1.000000 | 4.02966e-09 | 1.000000 |
| rad68syn      | 2.83022e-09 | 1.000000 | 3.34849e-09 | 1.000000 |
| rad56         | 1.96406e-09 | 1.000000 | 2.32373e-09 | 1.000000 |
| rad68anti     | 1.83828e-09 | 1.000000 | 2.17491e-09 | 1.000000 |
| rad53         | 1.83474e-09 | 1.000000 | 2.17073e-09 | 1.000000 |
| rad43         | 1.44705e-09 | 1.000000 | 1.71204e-09 | 1.000000 |
| rad40syn      | 1.13159e-09 | 1.000000 | 1.33881e-09 | 1.000000 |
| rad40anti     | 6.83379e-10 | 1.000000 | 8.08520e-10 | 1.000000 |
| rad42         | 6.42701e-10 | 1.000000 | 7.60394e-10 | 1.000000 |
| rad33         | 2.84547e-10 | 1.000000 | 3.36654e-10 | 1.000000 |
| rad41         | 1.26978e-10 | 1.000000 | 1.50231e-10 | 1.000000 |
| rad47         | 1.14463e-10 | 1.000000 | 1.35424e-10 | 1.000000 |
| rad14         | 2.10151e-11 | 1.000000 | 2.48635e-11 | 1.000000 |
| rad12         | 1.08435e-11 | 1.000000 | 1.28292e-11 | 1.000000 |
| rad31         | 2.95523e-12 | 1.000000 | 3.49640e-12 | 1.000000 |
| rad27         | 1.62506e-12 | 1.000000 | 1.92264e-12 | 1.000000 |
| rad5          | 4.49519e-13 | 1.000000 | 5.31836e-13 | 1.000000 |
| rad8          | 1.46372e-19 | 1.000000 | 1.73175e-19 | 1.000000 |

1000.00000 Pa, 800.000000 K

=====

| Rate constant | True (fraction)     | Effective (fraction) |
|---------------|---------------------|----------------------|
| Total         | 3.12228e-16 (1.00 ) | 2.33416e-16 (1.00 )  |

| species       | PYtrue      | Cumul    | PYeffective | Cumul    |
|---------------|-------------|----------|-------------|----------|
| Indene+H      | 0.707969    | 0.707969 | 0.947010    | 0.947010 |
| Benzyl+C2H2   | 0.252417    | 0.960386 | 0.00000     | 0.947010 |
| rad6          | 0.0159444   | 0.976330 | 0.0213280   | 0.968338 |
| rad23         | 0.0113403   | 0.987671 | 0.0151692   | 0.983507 |
| rad22         | 0.00484622  | 0.992517 | 0.00648253  | 0.989990 |
| rad45         | 0.00179318  | 0.994310 | 0.00239863  | 0.992388 |
| PAH9+H        | 0.00169008  | 0.996000 | 0.00226073  | 0.994649 |
| rad38         | 0.000803804 | 0.996804 | 0.00107520  | 0.995724 |
| Ph+Allene     | 0.000475375 | 0.997279 | 0.000635883 | 0.996360 |
| PhCHCCH2+H    | 0.000321950 | 0.997601 | 0.000430655 | 0.996791 |
| PhCH2CCH+H    | 0.000315099 | 0.997916 | 0.000421490 | 0.997212 |
| PAH7+H        | 0.000272957 | 0.998189 | 0.000365120 | 0.997577 |
| rad46         | 0.000270378 | 0.998460 | 0.000361670 | 0.997939 |
| rad50         | 0.000256139 | 0.998716 | 0.000342623 | 0.998282 |
| rad35         | 0.000249181 | 0.998965 | 0.000333316 | 0.998615 |
| PhCCH+CH3     | 0.000153022 | 0.999118 | 0.000204690 | 0.998820 |
| rad36         | 0.000136090 | 0.999254 | 0.000182040 | 0.999002 |
| rad20         | 0.000120920 | 0.999375 | 0.000161748 | 0.999164 |
| rad39         | 0.000117254 | 0.999492 | 0.000156844 | 0.999320 |
| rad11         | 9.97679e-05 | 0.999592 | 0.000133454 | 0.999454 |
| rad21         | 9.57235e-05 | 0.999688 | 0.000128044 | 0.999582 |
| rad51         | 7.75248e-05 | 0.999765 | 0.000103701 | 0.999686 |
| rad18         | 5.56369e-05 | 0.999821 | 7.44224e-05 | 0.999760 |
| rad30         | 4.20875e-05 | 0.999863 | 5.62981e-05 | 0.999816 |
| Ph+MeAc       | 2.96835e-05 | 0.999893 | 3.97060e-05 | 0.999856 |
| rad52         | 2.25792e-05 | 0.999915 | 3.02030e-05 | 0.999886 |
| PhCCCH3+H     | 1.31728e-05 | 0.999929 | 1.76205e-05 | 0.999904 |
| rad19anti     | 1.21964e-05 | 0.999941 | 1.63145e-05 | 0.999920 |
| rad7          | 9.33799e-06 | 0.999950 | 1.24909e-05 | 0.999933 |
| rad28         | 9.23289e-06 | 0.999959 | 1.23503e-05 | 0.999945 |
| PAH3+H        | 8.70864e-06 | 0.999968 | 1.16491e-05 | 0.999957 |
| rad9          | 7.41753e-06 | 0.999975 | 9.92202e-06 | 0.999967 |
| PAH10+CH3     | 5.55752e-06 | 0.999981 | 7.43399e-06 | 0.999974 |
| PAH1+H        | 2.83152e-06 | 0.999984 | 3.78757e-06 | 0.999978 |
| rad71         | 2.80485e-06 | 0.999987 | 3.75189e-06 | 0.999982 |
| rad37         | 2.29308e-06 | 0.999989 | 3.06732e-06 | 0.999985 |
| rad65         | 2.03613e-06 | 0.999991 | 2.72362e-06 | 0.999987 |
| rad73         | 2.00649e-06 | 0.999993 | 2.68396e-06 | 0.999990 |
| rad2          | 1.21836e-06 | 0.999994 | 1.62974e-06 | 0.999992 |
| rad60syn      | 8.99315e-07 | 0.999995 | 1.20296e-06 | 0.999993 |
| rad59         | 8.36946e-07 | 0.999996 | 1.11954e-06 | 0.999994 |
| rad67         | 7.04666e-07 | 0.999997 | 9.42593e-07 | 0.999995 |
| rad19syn      | 5.54051e-07 | 0.999997 | 7.41123e-07 | 0.999996 |
| rad60anti     | 5.34074e-07 | 0.999998 | 7.14401e-07 | 0.999996 |
| PhcycC3H3_A+H | 3.56820e-07 | 0.999998 | 4.77298e-07 | 0.999997 |
| rad70         | 3.51685e-07 | 0.999998 | 4.70430e-07 | 0.999997 |
| rad24         | 2.44138e-07 | 0.999999 | 3.26569e-07 | 0.999998 |
| rad1          | 2.26896e-07 | 0.999999 | 3.03506e-07 | 0.999998 |
| rad54         | 2.21145e-07 | 0.999999 | 2.95814e-07 | 0.999998 |
| rad3          | 1.66886e-07 | 0.999999 | 2.23235e-07 | 0.999998 |
| rad13         | 1.39972e-07 | 0.999999 | 1.87233e-07 | 0.999999 |
| rad4          | 1.15035e-07 | 1.000000 | 1.53876e-07 | 0.999999 |
| rad26         | 1.02834e-07 | 1.000000 | 1.37555e-07 | 0.999999 |
| rad34         | 9.80362e-08 | 1.000000 | 1.31138e-07 | 0.999999 |
| rad58         | 9.60484e-08 | 1.000000 | 1.28479e-07 | 0.999999 |
| rad72         | 9.40338e-08 | 1.000000 | 1.25784e-07 | 0.999999 |
| rad64         | 5.44709e-08 | 1.000000 | 7.28627e-08 | 0.999999 |
| rad10         | 4.83557e-08 | 1.000000 | 6.46828e-08 | 0.999999 |
| PAH8+H        | 3.33221e-08 | 1.000000 | 4.45732e-08 | 0.999999 |
| rad62         | 2.10713e-08 | 1.000000 | 2.81859e-08 | 1.000000 |
| rad55         | 1.66348e-08 | 1.000000 | 2.22515e-08 | 1.000000 |
| rad61         | 1.26210e-08 | 1.000000 | 1.68825e-08 | 1.000000 |
| rad68syn      | 9.29608e-09 | 1.000000 | 1.24348e-08 | 1.000000 |
| rad68anti     | 6.03433e-09 | 1.000000 | 8.07179e-09 | 1.000000 |
| rad56         | 5.84343e-09 | 1.000000 | 7.81643e-09 | 1.000000 |
| rad53         | 5.23702e-09 | 1.000000 | 7.00527e-09 | 1.000000 |
| rad43         | 4.93547e-09 | 1.000000 | 6.60190e-09 | 1.000000 |
| rad25         | 4.74281e-09 | 1.000000 | 6.34420e-09 | 1.000000 |
| rad40syn      | 3.79099e-09 | 1.000000 | 5.07100e-09 | 1.000000 |
| rad15         | 3.68293e-09 | 1.000000 | 4.92644e-09 | 1.000000 |
| rad40anti     | 2.30164e-09 | 1.000000 | 3.07878e-09 | 1.000000 |
| rad42         | 2.10576e-09 | 1.000000 | 2.81676e-09 | 1.000000 |
| rad33         | 1.75081e-09 | 1.000000 | 2.34196e-09 | 1.000000 |
| rad47         | 7.20600e-10 | 1.000000 | 9.63907e-10 | 1.000000 |
| rad41         | 4.40945e-10 | 1.000000 | 5.89827e-10 | 1.000000 |
| rad12         | 1.98237e-10 | 1.000000 | 2.65170e-10 | 1.000000 |
| rad14         | 5.03655e-11 | 1.000000 | 6.73711e-11 | 1.000000 |
| rad31         | 9.02926e-12 | 1.000000 | 1.20779e-11 | 1.000000 |

|       |             |         |             |          |
|-------|-------------|---------|-------------|----------|
| rad27 | 4.75075e-12 | 1.00000 | 6.35481e-12 | 1.000000 |
| rad5  | 7.82709e-13 | 1.00000 | 1.04699e-12 | 1.000000 |
| rad8  | 9.12346e-16 | 1.00000 | 1.22039e-15 | 1.000000 |

1000.00000 Pa, 900.000000 K

| =====         |                     |          |                      |          |
|---------------|---------------------|----------|----------------------|----------|
| Rate constant | True (fraction)     |          | Effective (fraction) |          |
| -----         |                     |          |                      |          |
| Total         | 9.21769e-16 (1.00 ) |          | 5.91902e-16 (1.00 )  |          |
| species       | PYtrue              | Cumul    | PYeffective          | Cumul    |
| -----         |                     |          |                      |          |
| Indene+H      | 0.611940            | 0.611940 | 0.952974             | 0.952974 |
| Benzyl+C2H2   | 0.357863            | 0.969803 | 0.00000              | 0.952974 |
| rad6          | 0.0157097           | 0.985513 | 0.0244648            | 0.977439 |
| rad23         | 0.00470200          | 0.990215 | 0.00732243           | 0.984761 |
| PAH9+H        | 0.00185182          | 0.992067 | 0.00288383           | 0.987645 |
| rad22         | 0.00136833          | 0.993435 | 0.00213090           | 0.989776 |
| rad45         | 0.00101021          | 0.994445 | 0.00157320           | 0.991349 |
| Ph+Allene     | 0.000904814         | 0.995350 | 0.00140907           | 0.992758 |
| rad38         | 0.000887602         | 0.996237 | 0.00138226           | 0.994140 |
| PhCHCCH2+H    | 0.000630859         | 0.996868 | 0.000982436          | 0.995123 |
| PhCH2CCH+H    | 0.000512432         | 0.997381 | 0.000798010          | 0.995921 |
| PhCCH+CH3     | 0.000432174         | 0.997813 | 0.000673024          | 0.996594 |
| PAH7+H        | 0.000344115         | 0.998157 | 0.000535890          | 0.997130 |
| rad50         | 0.000307750         | 0.998465 | 0.000479259          | 0.997609 |
| rad46         | 0.000306416         | 0.998771 | 0.000477182          | 0.998086 |
| rad35         | 0.000268919         | 0.999040 | 0.000418787          | 0.998505 |
| rad39         | 0.000147404         | 0.999188 | 0.000229552          | 0.998735 |
| rad20         | 0.000141379         | 0.999329 | 0.000220170          | 0.998955 |
| rad21         | 0.000107604         | 0.999437 | 0.000167572          | 0.999122 |
| rad51         | 9.58020e-05         | 0.999532 | 0.000149192          | 0.999272 |
| rad36         | 8.44021e-05         | 0.999617 | 0.000131439          | 0.999403 |
| Ph+MeAc       | 7.21861e-05         | 0.999689 | 0.000112415          | 0.999515 |
| rad30         | 6.72304e-05         | 0.999756 | 0.000104698          | 0.999620 |
| rad11         | 5.25728e-05         | 0.999809 | 8.18715e-05          | 0.999702 |
| rad18         | 3.19581e-05         | 0.999841 | 4.97683e-05          | 0.999752 |
| PhCCCH3+H     | 3.08928e-05         | 0.999872 | 4.81093e-05          | 0.999800 |
| rad52         | 2.75093e-05         | 0.999899 | 4.28403e-05          | 0.999843 |
| rad19anti     | 1.87385e-05         | 0.999918 | 2.91815e-05          | 0.999872 |
| rad28         | 1.49050e-05         | 0.999933 | 2.32115e-05          | 0.999895 |
| rad7          | 1.17598e-05         | 0.999944 | 1.83135e-05          | 0.999913 |
| rad9          | 1.17116e-05         | 0.999956 | 1.82385e-05          | 0.999932 |
| PAH3+H        | 1.15645e-05         | 0.999968 | 1.80093e-05          | 0.999950 |
| PAH10+CH3     | 6.97383e-06         | 0.999975 | 1.08603e-05          | 0.999961 |
| rad71         | 3.67032e-06         | 0.999978 | 5.71579e-06          | 0.999966 |
| PAH1+H        | 3.58180e-06         | 0.999982 | 5.57793e-06          | 0.999972 |
| rad37         | 2.79524e-06         | 0.999985 | 4.35303e-06          | 0.999976 |
| rad73         | 2.59977e-06         | 0.999987 | 4.04862e-06          | 0.999980 |
| rad65         | 2.50508e-06         | 0.999990 | 3.90115e-06          | 0.999984 |
| rad60syn      | 1.47220e-06         | 0.999991 | 2.29265e-06          | 0.999986 |
| rad2          | 1.38673e-06         | 0.999993 | 2.15956e-06          | 0.999989 |
| rad59         | 1.15293e-06         | 0.999994 | 1.79546e-06          | 0.999990 |
| rad67         | 9.27614e-07         | 0.999995 | 1.44457e-06          | 0.999992 |
| rad60anti     | 8.59876e-07         | 0.999996 | 1.33909e-06          | 0.999993 |
| rad19syn      | 7.37088e-07         | 0.999996 | 1.14787e-06          | 0.999994 |
| rad24         | 4.74605e-07         | 0.999997 | 7.39102e-07          | 0.999995 |
| rad70         | 4.45355e-07         | 0.999997 | 6.93552e-07          | 0.999996 |
| PhcycC3H3_A+H | 4.35932e-07         | 0.999998 | 6.78877e-07          | 0.999996 |
| rad13         | 4.29432e-07         | 0.999998 | 6.68755e-07          | 0.999997 |
| rad1          | 2.82753e-07         | 0.999998 | 4.40330e-07          | 0.999998 |
| rad54         | 2.81423e-07         | 0.999999 | 4.38260e-07          | 0.999998 |
| rad3          | 1.92903e-07         | 0.999999 | 3.00407e-07          | 0.999998 |
| rad26         | 1.54091e-07         | 0.999999 | 2.39966e-07          | 0.999998 |
| rad4          | 1.40609e-07         | 0.999999 | 2.18970e-07          | 0.999999 |
| rad72         | 1.25237e-07         | 0.999999 | 1.95032e-07          | 0.999999 |
| rad34         | 1.24860e-07         | 1.000000 | 1.94445e-07          | 0.999999 |
| rad58         | 1.20220e-07         | 1.000000 | 1.87219e-07          | 0.999999 |
| rad64         | 6.94790e-08         | 1.000000 | 1.08200e-07          | 0.999999 |
| rad10         | 6.34744e-08         | 1.000000 | 9.88487e-08          | 0.999999 |
| PAH8+H        | 4.40366e-08         | 1.000000 | 6.85782e-08          | 1.000000 |
| rad62         | 2.80698e-08         | 1.000000 | 4.37131e-08          | 1.000000 |
| rad55         | 2.04752e-08         | 1.000000 | 3.18860e-08          | 1.000000 |
| rad61         | 1.63204e-08         | 1.000000 | 2.54157e-08          | 1.000000 |
| rad33         | 1.23364e-08         | 1.000000 | 1.92115e-08          | 1.000000 |
| rad68syn      | 1.20969e-08         | 1.000000 | 1.88386e-08          | 1.000000 |
| rad43         | 7.89522e-09         | 1.000000 | 1.22952e-08          | 1.000000 |
| rad68anti     | 7.85031e-09         | 1.000000 | 1.22253e-08          | 1.000000 |
| rad56         | 7.27751e-09         | 1.000000 | 1.13333e-08          | 1.000000 |
| rad53         | 6.42817e-09         | 1.000000 | 1.00106e-08          | 1.000000 |



|           |             |          |             |          |
|-----------|-------------|----------|-------------|----------|
| rad25     | 5.87039e-09 | 1.000000 | 9.14195e-09 | 1.000000 |
| rad40syn  | 4.98911e-09 | 1.000000 | 7.76954e-09 | 1.000000 |
| rad15     | 4.21133e-09 | 1.000000 | 6.55830e-09 | 1.000000 |
| rad40anti | 3.04078e-09 | 1.000000 | 4.73541e-09 | 1.000000 |
| rad42     | 2.78855e-09 | 1.000000 | 4.34262e-09 | 1.000000 |
| rad12     | 1.40142e-09 | 1.000000 | 2.18242e-09 | 1.000000 |
| rad47     | 1.07958e-09 | 1.000000 | 1.68124e-09 | 1.000000 |
| rad41     | 6.84964e-10 | 1.000000 | 1.06669e-09 | 1.000000 |
| rad14     | 1.60966e-10 | 1.000000 | 2.50673e-10 | 1.000000 |
| rad27     | 2.23072e-11 | 1.000000 | 3.47390e-11 | 1.000000 |
| rad31     | 1.87458e-11 | 1.000000 | 2.91928e-11 | 1.000000 |
| rad5      | 1.10824e-12 | 1.000000 | 1.72586e-12 | 1.000000 |
| rad8      | 5.89045e-13 | 1.000000 | 9.17319e-13 | 1.000000 |

1000.00000 Pa, 1000.00000 K

| Rate constant | True (fraction)     | Effective (fraction) |
|---------------|---------------------|----------------------|
| Total         | 2.23691e-15 (1.00 ) | 1.20854e-15 (1.00 )  |

| species       | PYtrue      | Cumul    | PYeffective | Cumul    |
|---------------|-------------|----------|-------------|----------|
| Indene+H      | 0.515653    | 0.515653 | 0.954432    | 0.954432 |
| Benzyl+C2H2   | 0.459728    | 0.975381 | 0.00000     | 0.954432 |
| rad6          | 0.0125730   | 0.987954 | 0.0232716   | 0.977704 |
| rad23         | 0.00209236  | 0.990046 | 0.00387279  | 0.981576 |
| Ph+Allene     | 0.00172908  | 0.991775 | 0.00320039  | 0.984777 |
| PAH9+H        | 0.00151253  | 0.993288 | 0.00279958  | 0.987576 |
| PhCHCCH2+H    | 0.00112495  | 0.994413 | 0.00208220  | 0.989659 |
| PhCCH+CH3     | 0.000876164 | 0.995289 | 0.00162171  | 0.991280 |
| PhCH2CCH+H    | 0.000852460 | 0.996142 | 0.00157784  | 0.992858 |
| rad38         | 0.000724134 | 0.996866 | 0.00134031  | 0.994198 |
| rad45         | 0.000641757 | 0.997507 | 0.00118784  | 0.995386 |
| rad22         | 0.000435816 | 0.997943 | 0.000806661 | 0.996193 |
| PAH7+H        | 0.000337716 | 0.998281 | 0.000625086 | 0.996818 |
| rad50         | 0.000255328 | 0.998536 | 0.000472591 | 0.997291 |
| rad46         | 0.000250481 | 0.998787 | 0.000463620 | 0.997754 |
| rad35         | 0.000220488 | 0.999007 | 0.000408106 | 0.998162 |
| rad20         | 0.000140507 | 0.999148 | 0.000260067 | 0.998422 |
| rad39         | 0.000134699 | 0.999282 | 0.000249318 | 0.998672 |
| Ph+MeAc       | 0.000132489 | 0.999415 | 0.000245227 | 0.998917 |
| rad21         | 9.67647e-05 | 0.999512 | 0.000179104 | 0.999096 |
| rad30         | 9.54596e-05 | 0.999607 | 0.000176688 | 0.999273 |
| rad51         | 8.02558e-05 | 0.999687 | 0.000148547 | 0.999421 |
| rad36         | 5.60306e-05 | 0.999743 | 0.000103708 | 0.999525 |
| PhCCCH3+H     | 5.24985e-05 | 0.999796 | 9.71706e-05 | 0.999622 |
| rad11         | 4.18939e-05 | 0.999838 | 7.75423e-05 | 0.999700 |
| rad19anti     | 2.70533e-05 | 0.999865 | 5.00734e-05 | 0.999750 |
| rad18         | 2.35759e-05 | 0.999888 | 4.36372e-05 | 0.999793 |
| rad52         | 2.29293e-05 | 0.999911 | 4.24402e-05 | 0.999836 |
| rad28         | 1.59139e-05 | 0.999927 | 2.94554e-05 | 0.999865 |
| rad7          | 1.50076e-05 | 0.999942 | 2.77779e-05 | 0.999893 |
| rad9          | 1.31005e-05 | 0.999955 | 2.42480e-05 | 0.999917 |
| PAH3+H        | 1.29285e-05 | 0.999968 | 2.39297e-05 | 0.999941 |
| PAH10+CH3     | 5.92700e-06 | 0.999974 | 1.09704e-05 | 0.999952 |
| rad71         | 3.14196e-06 | 0.999977 | 5.81552e-06 | 0.999958 |
| PAH1+H        | 3.03807e-06 | 0.999980 | 5.62322e-06 | 0.999964 |
| rad37         | 2.41897e-06 | 0.999983 | 4.47733e-06 | 0.999968 |
| rad73         | 2.21693e-06 | 0.999985 | 4.10337e-06 | 0.999972 |
| rad60syn      | 2.21465e-06 | 0.999987 | 4.09913e-06 | 0.999976 |
| rad65         | 2.09512e-06 | 0.999989 | 3.87790e-06 | 0.999980 |
| rad59         | 1.40227e-06 | 0.999991 | 2.59550e-06 | 0.999983 |
| rad13         | 1.39806e-06 | 0.999992 | 2.58770e-06 | 0.999985 |
| rad2          | 1.33010e-06 | 0.999994 | 2.46190e-06 | 0.999988 |
| rad60anti     | 1.27572e-06 | 0.999995 | 2.36125e-06 | 0.999990 |
| rad67         | 1.01792e-06 | 0.999996 | 1.88410e-06 | 0.999992 |
| rad19syn      | 9.53984e-07 | 0.999997 | 1.76575e-06 | 0.999994 |
| rad24         | 5.02513e-07 | 0.999997 | 9.30112e-07 | 0.999995 |
| PhcycC3H3_A+H | 4.16102e-07 | 0.999998 | 7.70172e-07 | 0.999996 |
| rad70         | 3.87461e-07 | 0.999998 | 7.17159e-07 | 0.999996 |
| rad54         | 3.31774e-07 | 0.999998 | 6.14086e-07 | 0.999997 |
| rad1          | 2.97086e-07 | 0.999999 | 5.49882e-07 | 0.999997 |
| rad3          | 1.92273e-07 | 0.999999 | 3.55882e-07 | 0.999998 |
| rad26         | 1.68100e-07 | 0.999999 | 3.11140e-07 | 0.999998 |
| rad4          | 1.45356e-07 | 0.999999 | 2.69043e-07 | 0.999998 |
| rad72         | 1.07959e-07 | 0.999999 | 1.99824e-07 | 0.999999 |
| rad34         | 1.07223e-07 | 0.999999 | 1.98461e-07 | 0.999999 |
| rad58         | 1.06733e-07 | 1.000000 | 1.97555e-07 | 0.999999 |
| rad10         | 9.75560e-08 | 1.000000 | 1.80568e-07 | 0.999999 |
| rad64         | 5.89585e-08 | 1.000000 | 1.09127e-07 | 0.999999 |

|           |             |          |             |          |
|-----------|-------------|----------|-------------|----------|
| rad33     | 5.13639e-08 | 1.000000 | 9.50705e-08 | 0.999999 |
| PAH8+H    | 3.79545e-08 | 1.000000 | 7.02508e-08 | 0.999999 |
| rad62     | 2.64249e-08 | 1.000000 | 4.89103e-08 | 0.999999 |
| rad55     | 2.12691e-08 | 1.000000 | 3.93674e-08 | 1.000000 |
| rad61     | 1.39888e-08 | 1.000000 | 2.58921e-08 | 1.000000 |
| rad25     | 1.05628e-08 | 1.000000 | 1.95509e-08 | 1.000000 |
| rad68syn  | 1.03505e-08 | 1.000000 | 1.91579e-08 | 1.000000 |
| rad43     | 9.13331e-09 | 1.000000 | 1.69050e-08 | 1.000000 |
| rad68anti | 6.71646e-09 | 1.000000 | 1.24316e-08 | 1.000000 |
| rad56     | 6.19851e-09 | 1.000000 | 1.14729e-08 | 1.000000 |
| rad53     | 5.55395e-09 | 1.000000 | 1.02799e-08 | 1.000000 |
| rad15     | 5.15342e-09 | 1.000000 | 9.53858e-09 | 1.000000 |
| rad40syn  | 4.30087e-09 | 1.000000 | 7.96057e-09 | 1.000000 |
| rad12     | 4.16460e-09 | 1.000000 | 7.70835e-09 | 1.000000 |
| rad40anti | 2.63111e-09 | 1.000000 | 4.86997e-09 | 1.000000 |
| rad42     | 2.46844e-09 | 1.000000 | 4.56888e-09 | 1.000000 |
| rad47     | 9.20982e-10 | 1.000000 | 1.70466e-09 | 1.000000 |
| rad41     | 7.54886e-10 | 1.000000 | 1.39723e-09 | 1.000000 |
| rad14     | 5.22925e-10 | 1.000000 | 9.67892e-10 | 1.000000 |
| rad27     | 1.13434e-10 | 1.000000 | 2.09958e-10 | 1.000000 |
| rad8      | 3.51875e-11 | 1.000000 | 6.51293e-11 | 1.000000 |
| rad31     | 2.82847e-11 | 1.000000 | 5.23528e-11 | 1.000000 |
| rad5      | 1.40738e-12 | 1.000000 | 2.60495e-12 | 1.000000 |

1000.00000 Pa, 1100.00000 K

=====

| Rate constant | True (fraction)     | Effective (fraction) |
|---------------|---------------------|----------------------|
| Total         | 4.69847e-15 (1.00 ) | 2.11217e-15 (1.00 )  |

| species       | PYtrue      | Cumul    | PYeffective | Cumul    |
|---------------|-------------|----------|-------------|----------|
| Benzyl+C2H2   | 0.550456    | 0.550456 | 0.000000    | 0.000000 |
| Indene+H      | 0.428735    | 0.979191 | 0.953711    | 0.953711 |
| rad6          | 0.00819429  | 0.987385 | 0.0182280   | 0.971939 |
| Ph+Allene     | 0.00301382  | 0.990399 | 0.00670415  | 0.978643 |
| PhCHCCH2+H    | 0.00176607  | 0.992165 | 0.00392858  | 0.982572 |
| PhCH2CCH+H    | 0.00147247  | 0.993638 | 0.00327547  | 0.985847 |
| PhCCH+CH3     | 0.00131929  | 0.994957 | 0.00293472  | 0.988782 |
| PAH9+H        | 0.00110777  | 0.996065 | 0.00246420  | 0.991246 |
| rad23         | 0.00101789  | 0.997083 | 0.00226428  | 0.993510 |
| rad38         | 0.000525735 | 0.997608 | 0.00116948  | 0.994680 |
| rad45         | 0.000411489 | 0.998020 | 0.000915347 | 0.995595 |
| PAH7+H        | 0.000326842 | 0.998347 | 0.000727051 | 0.996322 |
| Ph+MeAc       | 0.000189135 | 0.998536 | 0.000420725 | 0.996743 |
| rad50         | 0.000180608 | 0.998716 | 0.000401758 | 0.997145 |
| rad46         | 0.000179204 | 0.998896 | 0.000398635 | 0.997543 |
| rad35         | 0.000164730 | 0.999060 | 0.000366438 | 0.997910 |
| rad22         | 0.000158031 | 0.999218 | 0.000351537 | 0.998261 |
| rad30         | 0.000125961 | 0.999344 | 0.000280196 | 0.998542 |
| rad39         | 0.000114222 | 0.999459 | 0.000254084 | 0.998796 |
| rad20         | 0.000102198 | 0.999561 | 0.000227338 | 0.999023 |
| PhCCCH3+H     | 6.72391e-05 | 0.999628 | 0.000149572 | 0.999173 |
| rad21         | 6.37214e-05 | 0.999692 | 0.000141747 | 0.999314 |
| rad51         | 5.68186e-05 | 0.999749 | 0.000126391 | 0.999441 |
| rad11         | 4.53084e-05 | 0.999794 | 0.000100787 | 0.999541 |
| rad19anti     | 4.02064e-05 | 0.999834 | 8.94382e-05 | 0.999631 |
| rad36         | 3.66528e-05 | 0.999871 | 8.15331e-05 | 0.999712 |
| rad7          | 1.95292e-05 | 0.999890 | 4.34422e-05 | 0.999756 |
| rad18         | 1.95038e-05 | 0.999910 | 4.33857e-05 | 0.999799 |
| PAH3+H        | 1.68743e-05 | 0.999927 | 3.75365e-05 | 0.999837 |
| rad52         | 1.62185e-05 | 0.999943 | 3.60776e-05 | 0.999873 |
| rad9          | 1.38848e-05 | 0.999957 | 3.08864e-05 | 0.999904 |
| rad28         | 1.24427e-05 | 0.999969 | 2.76784e-05 | 0.999931 |
| PAH10+CH3     | 4.29719e-06 | 0.999973 | 9.55899e-06 | 0.999941 |
| rad60syn      | 3.39873e-06 | 0.999977 | 7.56038e-06 | 0.999949 |
| rad13         | 3.24565e-06 | 0.999980 | 7.21986e-06 | 0.999956 |
| rad71         | 2.24005e-06 | 0.999982 | 4.98294e-06 | 0.999961 |
| PAH1+H        | 2.19004e-06 | 0.999985 | 4.87168e-06 | 0.999966 |
| rad59         | 1.97887e-06 | 0.999987 | 4.40195e-06 | 0.999970 |
| rad60anti     | 1.95779e-06 | 0.999988 | 4.35504e-06 | 0.999974 |
| rad37         | 1.86940e-06 | 0.999990 | 4.15844e-06 | 0.999979 |
| rad73         | 1.57830e-06 | 0.999992 | 3.51090e-06 | 0.999982 |
| rad19syn      | 1.48696e-06 | 0.999993 | 3.30771e-06 | 0.999985 |
| rad65         | 1.48278e-06 | 0.999995 | 3.29840e-06 | 0.999989 |
| rad67         | 1.16900e-06 | 0.999996 | 2.60041e-06 | 0.999991 |
| rad2          | 1.05869e-06 | 0.999997 | 2.35504e-06 | 0.999994 |
| rad54         | 4.86509e-07 | 0.999998 | 1.08223e-06 | 0.999995 |
| PhcycC3H3_A+H | 4.55857e-07 | 0.999998 | 1.01404e-06 | 0.999996 |
| rad24         | 4.08108e-07 | 0.999998 | 9.07826e-07 | 0.999997 |

|           |             |          |             |          |
|-----------|-------------|----------|-------------|----------|
| rad70     | 3.07569e-07 | 0.999999 | 6.84179e-07 | 0.999997 |
| rad1      | 2.47914e-07 | 0.999999 | 5.51478e-07 | 0.999998 |
| rad10     | 1.62539e-07 | 0.999999 | 3.61565e-07 | 0.999998 |
| rad3      | 1.56113e-07 | 0.999999 | 3.47270e-07 | 0.999999 |
| rad26     | 1.43433e-07 | 0.999999 | 3.19063e-07 | 0.999999 |
| rad4      | 1.20165e-07 | 1.000000 | 2.67305e-07 | 0.999999 |
| rad58     | 9.52630e-08 | 1.000000 | 2.11910e-07 | 0.999999 |
| rad33     | 9.49219e-08 | 1.000000 | 2.11151e-07 | 1.000000 |
| rad34     | 8.09333e-08 | 1.000000 | 1.80034e-07 | 1.000000 |
| rad72     | 7.71712e-08 | 1.000000 | 1.71665e-07 | 1.000000 |
| rad64     | 4.21430e-08 | 1.000000 | 9.37461e-08 | 1.000000 |
| PAH8+H    | 2.73221e-08 | 1.000000 | 6.07773e-08 | 1.000000 |
| rad55     | 2.71273e-08 | 1.000000 | 6.03440e-08 | 1.000000 |
| rad62     | 2.35571e-08 | 1.000000 | 5.24021e-08 | 1.000000 |
| rad25     | 1.84550e-08 | 1.000000 | 4.10527e-08 | 1.000000 |
| rad61     | 1.01031e-08 | 1.000000 | 2.24741e-08 | 1.000000 |
| rad43     | 8.63243e-09 | 1.000000 | 1.92026e-08 | 1.000000 |
| rad15     | 8.32329e-09 | 1.000000 | 1.85149e-08 | 1.000000 |
| rad12     | 7.88998e-09 | 1.000000 | 1.75511e-08 | 1.000000 |
| rad68syn  | 7.45485e-09 | 1.000000 | 1.65831e-08 | 1.000000 |
| rad68anti | 4.83819e-09 | 1.000000 | 1.07624e-08 | 1.000000 |
| rad56     | 4.81114e-09 | 1.000000 | 1.07023e-08 | 1.000000 |
| rad53     | 4.67389e-09 | 1.000000 | 1.03970e-08 | 1.000000 |
| rad40syn  | 3.10375e-09 | 1.000000 | 6.90422e-09 | 1.000000 |
| rad40anti | 1.90370e-09 | 1.000000 | 4.23474e-09 | 1.000000 |
| rad42     | 1.88645e-09 | 1.000000 | 4.19635e-09 | 1.000000 |
| rad14     | 1.12883e-09 | 1.000000 | 2.51105e-09 | 1.000000 |
| rad41     | 6.64193e-10 | 1.000000 | 1.47748e-09 | 1.000000 |
| rad47     | 6.28537e-10 | 1.000000 | 1.39816e-09 | 1.000000 |
| rad8      | 3.30779e-10 | 1.000000 | 7.35809e-10 | 1.000000 |
| rad27     | 2.85265e-10 | 1.000000 | 6.34564e-10 | 1.000000 |
| rad31     | 3.21311e-11 | 1.000000 | 7.14747e-11 | 1.000000 |
| rad5      | 1.68338e-12 | 1.000000 | 3.74464e-12 | 1.000000 |

1000.00000 Pa, 1200.00000 K

=====

| Rate constant | True (fraction)     | Effective (fraction) |
|---------------|---------------------|----------------------|
| Total         | 8.84330e-15 (1.00 ) | 3.30263e-15 (1.00 )  |

| species     | PYtrue      | Cumul    | PYeffective | Cumul    |
|-------------|-------------|----------|-------------|----------|
| Benzyl+C2H2 | 0.626539    | 0.626539 | 0.00000     | 0.00000  |
| Indene+H    | 0.354355    | 0.980894 | 0.948841    | 0.948841 |
| rad6        | 0.00456758  | 0.985462 | 0.0122304   | 0.961071 |
| Ph+Allene   | 0.00450308  | 0.989965 | 0.0120577   | 0.973129 |
| PhCHCCH2+H  | 0.00239496  | 0.992360 | 0.00641289  | 0.979542 |
| PhCH2CCH+H  | 0.00238299  | 0.994743 | 0.00638082  | 0.985923 |
| PhCCH+CH3   | 0.00157140  | 0.996314 | 0.00420767  | 0.990130 |
| PAH9+H      | 0.000804595 | 0.997119 | 0.00215443  | 0.992285 |
| rad23       | 0.000544470 | 0.997663 | 0.00145790  | 0.993743 |
| rad38       | 0.000375133 | 0.998038 | 0.00100448  | 0.994747 |
| PAH7+H      | 0.000325011 | 0.998363 | 0.000870269 | 0.995618 |
| rad45       | 0.000258653 | 0.998622 | 0.000692583 | 0.996310 |
| Ph+MeAc     | 0.000220066 | 0.998842 | 0.000589260 | 0.996899 |
| rad30       | 0.000157369 | 0.998999 | 0.000421380 | 0.997321 |
| rad35       | 0.000124282 | 0.999124 | 0.000332785 | 0.997654 |
| rad46       | 0.000123695 | 0.999247 | 0.000331213 | 0.997985 |
| rad50       | 0.000119407 | 0.999367 | 0.000319731 | 0.998305 |
| rad39       | 9.75700e-05 | 0.999464 | 0.000261259 | 0.998566 |
| PhCCCH3+H   | 6.83415e-05 | 0.999533 | 0.000182995 | 0.998749 |
| rad22       | 6.82472e-05 | 0.999601 | 0.000182743 | 0.998932 |
| rad20       | 6.04187e-05 | 0.999661 | 0.000161781 | 0.999093 |
| rad19anti   | 5.96031e-05 | 0.999721 | 0.000159597 | 0.999253 |
| rad11       | 4.98350e-05 | 0.999771 | 0.000133441 | 0.999386 |
| rad51       | 3.72596e-05 | 0.999808 | 9.97685e-05 | 0.999486 |
| rad21       | 3.57917e-05 | 0.999844 | 9.58380e-05 | 0.999582 |
| PAH3+H      | 2.61955e-05 | 0.999870 | 7.01425e-05 | 0.999652 |
| rad7        | 2.39786e-05 | 0.999894 | 6.42064e-05 | 0.999716 |
| rad36       | 2.33158e-05 | 0.999917 | 6.24316e-05 | 0.999779 |
| rad18       | 1.69803e-05 | 0.999934 | 4.54675e-05 | 0.999824 |
| rad9        | 1.46136e-05 | 0.999949 | 3.91302e-05 | 0.999863 |
| rad52       | 1.06666e-05 | 0.999960 | 2.85615e-05 | 0.999892 |
| rad28       | 7.93653e-06 | 0.999967 | 2.12513e-05 | 0.999913 |
| rad60syn    | 5.15179e-06 | 0.999973 | 1.37947e-05 | 0.999927 |
| rad13       | 4.09726e-06 | 0.999977 | 1.09711e-05 | 0.999938 |
| rad59       | 3.14369e-06 | 0.999980 | 8.41773e-06 | 0.999946 |
| rad60anti   | 2.99379e-06 | 0.999983 | 8.01633e-06 | 0.999954 |
| PAH10+CH3   | 2.93495e-06 | 0.999986 | 7.85878e-06 | 0.999962 |
| rad19syn    | 2.42124e-06 | 0.999988 | 6.48326e-06 | 0.999969 |

|               |             |          |             |          |
|---------------|-------------|----------|-------------|----------|
| PAH1+H        | 1.50434e-06 | 0.999990 | 4.02810e-06 | 0.999973 |
| rad71         | 1.46624e-06 | 0.999991 | 3.92610e-06 | 0.999977 |
| rad37         | 1.43376e-06 | 0.999993 | 3.83912e-06 | 0.999980 |
| rad67         | 1.36922e-06 | 0.999994 | 3.66630e-06 | 0.999984 |
| rad73         | 1.03272e-06 | 0.999995 | 2.76527e-06 | 0.999987 |
| rad65         | 9.73236e-07 | 0.999996 | 2.60599e-06 | 0.999989 |
| rad54         | 7.93553e-07 | 0.999997 | 2.12486e-06 | 0.999992 |
| rad2          | 6.74617e-07 | 0.999997 | 1.80639e-06 | 0.999993 |
| PhcycC3H3_A+H | 6.51662e-07 | 0.999998 | 1.74493e-06 | 0.999995 |
| rad24         | 3.10803e-07 | 0.999998 | 8.32225e-07 | 0.999996 |
| rad70         | 2.69358e-07 | 0.999999 | 7.21249e-07 | 0.999997 |
| rad10         | 2.30009e-07 | 0.999999 | 6.15886e-07 | 0.999997 |
| rad1          | 1.61636e-07 | 0.999999 | 4.32807e-07 | 0.999998 |
| rad58         | 1.12639e-07 | 0.999999 | 3.01609e-07 | 0.999998 |
| rad26         | 1.05282e-07 | 0.999999 | 2.81909e-07 | 0.999998 |
| rad3          | 1.02204e-07 | 0.999999 | 2.73668e-07 | 0.999999 |
| rad33         | 9.64915e-08 | 0.999999 | 2.58371e-07 | 0.999999 |
| rad4          | 7.94398e-08 | 1.000000 | 2.12713e-07 | 0.999999 |
| rad34         | 6.38005e-08 | 1.000000 | 1.70836e-07 | 0.999999 |
| rad72         | 5.05561e-08 | 1.000000 | 1.35372e-07 | 0.999999 |
| rad55         | 4.24149e-08 | 1.000000 | 1.13573e-07 | 1.000000 |
| rad64         | 2.82114e-08 | 1.000000 | 7.55404e-08 | 1.000000 |
| rad62         | 2.29525e-08 | 1.000000 | 6.14591e-08 | 1.000000 |
| rad25         | 2.21661e-08 | 1.000000 | 5.93531e-08 | 1.000000 |
| PAH8+H        | 1.82527e-08 | 1.000000 | 4.88744e-08 | 1.000000 |
| rad15         | 1.81553e-08 | 1.000000 | 4.86136e-08 | 1.000000 |
| rad12         | 1.17223e-08 | 1.000000 | 3.13884e-08 | 1.000000 |
| rad43         | 7.21107e-09 | 1.000000 | 1.93088e-08 | 1.000000 |
| rad61         | 6.76793e-09 | 1.000000 | 1.81222e-08 | 1.000000 |
| rad68syn      | 5.08423e-09 | 1.000000 | 1.36138e-08 | 1.000000 |
| rad53         | 4.98901e-09 | 1.000000 | 1.33589e-08 | 1.000000 |
| rad56         | 4.30890e-09 | 1.000000 | 1.15378e-08 | 1.000000 |
| rad68anti     | 3.30205e-09 | 1.000000 | 8.84175e-09 | 1.000000 |
| rad40syn      | 2.08676e-09 | 1.000000 | 5.58762e-09 | 1.000000 |
| rad42         | 1.44858e-09 | 1.000000 | 3.87881e-09 | 1.000000 |
| rad14         | 1.36028e-09 | 1.000000 | 3.64238e-09 | 1.000000 |
| rad40anti     | 1.27833e-09 | 1.000000 | 3.42294e-09 | 1.000000 |
| rad8          | 1.04933e-09 | 1.000000 | 2.80976e-09 | 1.000000 |
| rad41         | 4.96274e-10 | 1.000000 | 1.32885e-09 | 1.000000 |
| rad47         | 3.90816e-10 | 1.000000 | 1.04647e-09 | 1.000000 |
| rad27         | 3.27788e-10 | 1.000000 | 8.77704e-10 | 1.000000 |
| rad31         | 2.89483e-11 | 1.000000 | 7.75136e-11 | 1.000000 |
| rad5          | 1.98542e-12 | 1.000000 | 5.31629e-12 | 1.000000 |

1000.00000 Pa, 1300.00000 K

=====  
Rate constant | True (fraction) | Effective (fraction)  
-----  
Total | 1.52810e-14 (1.00) | 4.76984e-15 (1.00)

| species     | PYtrue      | Cumul    | PYeffective | Cumul    |
|-------------|-------------|----------|-------------|----------|
| Benzyl+C2H2 | 0.687858    | 0.687858 | 0.00000     | 0.00000  |
| Indene+H    | 0.292812    | 0.980670 | 0.938073    | 0.938073 |
| Ph+Allene   | 0.00588546  | 0.986555 | 0.0188551   | 0.956928 |
| PhCH2CCH+H  | 0.00354525  | 0.990101 | 0.0113578   | 0.968286 |
| PhCHCCH2+H  | 0.00290406  | 0.993005 | 0.00930365  | 0.977590 |
| rad6        | 0.00246074  | 0.995466 | 0.00788341  | 0.985473 |
| PhCCH+CH3   | 0.00158758  | 0.997053 | 0.00508608  | 0.990559 |
| PAH9+H      | 0.000624280 | 0.997677 | 0.00199999  | 0.992559 |
| rad23       | 0.000327796 | 0.998005 | 0.00105015  | 0.993609 |
| PAH7+H      | 0.000323286 | 0.998328 | 0.00103570  | 0.994645 |
| rad38       | 0.000283538 | 0.998612 | 0.000908364 | 0.995553 |
| Ph+MeAc     | 0.000222198 | 0.998834 | 0.000711848 | 0.996265 |
| rad30       | 0.000188503 | 0.999023 | 0.000603901 | 0.996869 |
| rad45       | 0.000159474 | 0.999182 | 0.000510901 | 0.997380 |
| rad35       | 0.000101711 | 0.999284 | 0.000325850 | 0.997706 |
| rad46       | 8.88396e-05 | 0.999373 | 0.000284613 | 0.997990 |
| rad19anti   | 8.67165e-05 | 0.999459 | 0.000277811 | 0.998268 |
| rad39       | 8.46110e-05 | 0.999544 | 0.000271066 | 0.998539 |
| rad50       | 7.82959e-05 | 0.999622 | 0.000250834 | 0.998790 |
| PhCCCH3+H   | 5.91371e-05 | 0.999681 | 0.000189456 | 0.998980 |
| rad11       | 4.38154e-05 | 0.999725 | 0.000140370 | 0.999120 |
| PAH3+H      | 4.29684e-05 | 0.999768 | 0.000137657 | 0.999258 |
| rad22       | 3.77251e-05 | 0.999806 | 0.000120859 | 0.999378 |
| rad20       | 3.47665e-05 | 0.999841 | 0.000111380 | 0.999490 |
| rad7        | 2.47941e-05 | 0.999866 | 7.94322e-05 | 0.999569 |
| rad51       | 2.38055e-05 | 0.999889 | 7.62649e-05 | 0.999645 |
| rad21       | 2.02750e-05 | 0.999910 | 6.49545e-05 | 0.999710 |
| rad36       | 1.45120e-05 | 0.999924 | 4.64918e-05 | 0.999757 |

|               |             |          |             |          |
|---------------|-------------|----------|-------------|----------|
| rad9          | 1.43407e-05 | 0.999938 | 4.59428e-05 | 0.999803 |
| rad18         | 1.35208e-05 | 0.999952 | 4.33163e-05 | 0.999846 |
| rad60syn      | 7.51150e-06 | 0.999960 | 2.40644e-05 | 0.999870 |
| rad52         | 6.88779e-06 | 0.999966 | 2.20662e-05 | 0.999892 |
| rad59         | 5.07357e-06 | 0.999971 | 1.62540e-05 | 0.999909 |
| rad28         | 4.73787e-06 | 0.999976 | 1.51786e-05 | 0.999924 |
| rad60anti     | 4.41556e-06 | 0.999981 | 1.41460e-05 | 0.999938 |
| rad19syn      | 3.69040e-06 | 0.999984 | 1.18228e-05 | 0.999950 |
| rad13         | 3.19121e-06 | 0.999988 | 1.02236e-05 | 0.999960 |
| PAH10+CH3     | 2.02068e-06 | 0.999990 | 6.47359e-06 | 0.999966 |
| rad67         | 1.70603e-06 | 0.999991 | 5.46555e-06 | 0.999972 |
| rad54         | 1.24103e-06 | 0.999992 | 3.97586e-06 | 0.999976 |
| rad37         | 1.16784e-06 | 0.999994 | 3.74137e-06 | 0.999980 |
| PAH1+H        | 1.07394e-06 | 0.999995 | 3.44053e-06 | 0.999983 |
| PhcycC3H3_A+H | 1.05285e-06 | 0.999996 | 3.37299e-06 | 0.999986 |
| rad71         | 9.20713e-07 | 0.999997 | 2.94966e-06 | 0.999989 |
| rad73         | 6.49050e-07 | 0.999997 | 2.07934e-06 | 0.999991 |
| rad65         | 6.24160e-07 | 0.999998 | 1.99960e-06 | 0.999993 |
| rad2          | 3.53299e-07 | 0.999998 | 1.13185e-06 | 0.999995 |
| rad70         | 2.89811e-07 | 0.999999 | 9.28458e-07 | 0.999996 |
| rad24         | 2.33447e-07 | 0.999999 | 7.47886e-07 | 0.999996 |
| rad10         | 2.28050e-07 | 0.999999 | 7.30596e-07 | 0.999997 |
| rad58         | 1.81920e-07 | 0.999999 | 5.82813e-07 | 0.999998 |
| rad1          | 8.57802e-08 | 0.999999 | 2.74811e-07 | 0.999998 |
| rad26         | 7.33798e-08 | 0.999999 | 2.35085e-07 | 0.999998 |
| rad33         | 7.32964e-08 | 0.999999 | 2.34817e-07 | 0.999998 |
| rad55         | 6.79738e-08 | 1.000000 | 2.17766e-07 | 0.999999 |
| rad34         | 6.09743e-08 | 1.000000 | 1.95342e-07 | 0.999999 |
| rad3          | 5.64123e-08 | 1.000000 | 1.80726e-07 | 0.999999 |
| rad15         | 4.63975e-08 | 1.000000 | 1.48642e-07 | 0.999999 |
| rad4          | 4.41401e-08 | 1.000000 | 1.41410e-07 | 0.999999 |
| rad72         | 3.17269e-08 | 1.000000 | 1.01643e-07 | 0.999999 |
| rad62         | 2.48478e-08 | 1.000000 | 7.96040e-08 | 0.999999 |
| rad25         | 1.92231e-08 | 1.000000 | 6.15844e-08 | 0.999999 |
| rad64         | 1.90464e-08 | 1.000000 | 6.10184e-08 | 1.000000 |
| rad12         | 1.49378e-08 | 1.000000 | 4.78558e-08 | 1.000000 |
| PAH8+H        | 1.21613e-08 | 1.000000 | 3.89606e-08 | 1.000000 |
| rad53         | 7.12951e-09 | 1.000000 | 2.28406e-08 | 1.000000 |
| rad43         | 5.91183e-09 | 1.000000 | 1.89395e-08 | 1.000000 |
| rad56         | 5.24244e-09 | 1.000000 | 1.67951e-08 | 1.000000 |
| rad61         | 4.41515e-09 | 1.000000 | 1.41447e-08 | 1.000000 |
| rad68syn      | 3.66318e-09 | 1.000000 | 1.17356e-08 | 1.000000 |
| rad68anti     | 2.38435e-09 | 1.000000 | 7.63866e-09 | 1.000000 |
| rad8          | 1.97315e-09 | 1.000000 | 6.32132e-09 | 1.000000 |
| rad40syn      | 1.42069e-09 | 1.000000 | 4.55143e-09 | 1.000000 |
| rad42         | 1.26249e-09 | 1.000000 | 4.04462e-09 | 1.000000 |
| rad14         | 1.04846e-09 | 1.000000 | 3.35892e-09 | 1.000000 |
| rad40anti     | 8.60983e-10 | 1.000000 | 2.75831e-09 | 1.000000 |
| rad41         | 3.50013e-10 | 1.000000 | 1.12133e-09 | 1.000000 |
| rad47         | 2.35354e-10 | 1.000000 | 7.53998e-10 | 1.000000 |
| rad27         | 2.29194e-10 | 1.000000 | 7.34261e-10 | 1.000000 |
| rad31         | 2.21576e-11 | 1.000000 | 7.09857e-11 | 1.000000 |
| rad5          | 2.40968e-12 | 1.000000 | 7.71982e-12 | 1.000000 |

1000.00000 Pa, 1400.00000 K

=====

| Rate constant | True (fraction)     | Effective (fraction) |
|---------------|---------------------|----------------------|
| Total         | 2.46691e-14 (1.00 ) | 6.50829e-15 (1.00 )  |

| species     | PYtrue      | Cumul    | PYeffective | Cumul    |
|-------------|-------------|----------|-------------|----------|
| Benzyl+C2H2 | 0.736177    | 0.736177 | 0.00000     | 0.00000  |
| Indene+H    | 0.243064    | 0.979241 | 0.921316    | 0.921316 |
| Ph+Allene   | 0.00701635  | 0.986257 | 0.0265949   | 0.947911 |
| PhCH2CCH+H  | 0.00494463  | 0.991202 | 0.0187423   | 0.966653 |
| PhCHCCH2+H  | 0.00329832  | 0.994500 | 0.0125020   | 0.979155 |
| PhCCH+CH3   | 0.00145434  | 0.995955 | 0.00551256  | 0.984668 |
| rad6        | 0.00145151  | 0.997406 | 0.00550184  | 0.990170 |
| PAH9+H      | 0.000543268 | 0.997949 | 0.00205922  | 0.992229 |
| PAH7+H      | 0.000318903 | 0.998268 | 0.00120878  | 0.993438 |
| rad38       | 0.000240028 | 0.998508 | 0.000909808 | 0.994347 |
| rad23       | 0.000227124 | 0.998735 | 0.000860897 | 0.995208 |
| rad30       | 0.000218560 | 0.998954 | 0.000828435 | 0.996037 |
| Ph+MeAc     | 0.000207643 | 0.999162 | 0.000787056 | 0.996824 |
| rad19anti   | 0.000122803 | 0.999284 | 0.000465476 | 0.997289 |
| rad45       | 9.72674e-05 | 0.999382 | 0.000368685 | 0.997658 |
| rad35       | 9.35456e-05 | 0.999475 | 0.000354578 | 0.998013 |
| rad39       | 7.45217e-05 | 0.999550 | 0.000282469 | 0.998295 |
| rad46       | 7.12868e-05 | 0.999621 | 0.000270207 | 0.998565 |

|               |             |          |             |          |
|---------------|-------------|----------|-------------|----------|
| PAH3+H        | 6.89608e-05 | 0.999690 | 0.000261391 | 0.998827 |
| rad50         | 5.45968e-05 | 0.999745 | 0.000206945 | 0.999034 |
| PhCCCH3+H     | 4.72242e-05 | 0.999792 | 0.000179000 | 0.999213 |
| rad11         | 2.99796e-05 | 0.999822 | 0.000113636 | 0.999326 |
| rad22         | 2.62919e-05 | 0.999848 | 9.96574e-05 | 0.999426 |
| rad20         | 2.08549e-05 | 0.999869 | 7.90491e-05 | 0.999505 |
| rad7          | 1.98905e-05 | 0.999889 | 7.53935e-05 | 0.999580 |
| rad51         | 1.56476e-05 | 0.999905 | 5.93110e-05 | 0.999640 |
| rad9          | 1.30773e-05 | 0.999918 | 4.95686e-05 | 0.999689 |
| rad21         | 1.20715e-05 | 0.999930 | 4.57560e-05 | 0.999735 |
| rad60syn      | 1.04662e-05 | 0.999940 | 3.96712e-05 | 0.999775 |
| rad18         | 9.00379e-06 | 0.999949 | 3.41282e-05 | 0.999809 |
| rad36         | 8.92942e-06 | 0.999958 | 3.38463e-05 | 0.999843 |
| rad59         | 7.89633e-06 | 0.999966 | 2.99305e-05 | 0.999872 |
| rad60anti     | 6.22340e-06 | 0.999972 | 2.35893e-05 | 0.999896 |
| rad19syn      | 5.18265e-06 | 0.999977 | 1.96444e-05 | 0.999916 |
| rad52         | 4.64864e-06 | 0.999982 | 1.76203e-05 | 0.999933 |
| rad28         | 3.00324e-06 | 0.999985 | 1.13836e-05 | 0.999945 |
| rad67         | 2.38626e-06 | 0.999987 | 9.04494e-06 | 0.999954 |
| rad13         | 2.00233e-06 | 0.999989 | 7.58967e-06 | 0.999961 |
| rad54         | 1.79677e-06 | 0.999991 | 6.81052e-06 | 0.999968 |
| PhcycC3H3_A+H | 1.69673e-06 | 0.999993 | 6.36309e-06 | 0.999975 |
| PAH10+CH3     | 1.53679e-06 | 0.999994 | 5.82510e-06 | 0.999980 |
| rad37         | 1.07144e-06 | 0.999996 | 4.06123e-06 | 0.999984 |
| PAH1+H        | 8.71630e-07 | 0.999996 | 3.30385e-06 | 0.999988 |
| rad71         | 5.71074e-07 | 0.999997 | 2.16461e-06 | 0.999990 |
| rad65         | 4.14857e-07 | 0.999997 | 1.57248e-06 | 0.999991 |
| rad73         | 4.04485e-07 | 0.999998 | 1.53317e-06 | 0.999993 |
| rad70         | 3.69637e-07 | 0.999998 | 1.40108e-06 | 0.999994 |
| rad58         | 3.30794e-07 | 0.999998 | 1.25385e-06 | 0.999996 |
| rad24         | 1.75014e-07 | 0.999999 | 6.63377e-07 | 0.999996 |
| rad2          | 1.63942e-07 | 0.999999 | 6.21410e-07 | 0.999997 |
| rad10         | 1.54678e-07 | 0.999999 | 5.86295e-07 | 0.999998 |
| rad55         | 1.03129e-07 | 0.999999 | 3.90902e-07 | 0.999998 |
| rad15         | 1.00859e-07 | 0.999999 | 3.82299e-07 | 0.999998 |
| rad34         | 7.34730e-08 | 0.999999 | 2.78494e-07 | 0.999999 |
| rad26         | 5.23960e-08 | 0.999999 | 1.98603e-07 | 0.999999 |
| rad33         | 4.94397e-08 | 0.999999 | 1.87398e-07 | 0.999999 |
| rad1          | 4.01925e-08 | 0.999999 | 1.52347e-07 | 0.999999 |
| rad62         | 2.84606e-08 | 0.999999 | 1.07878e-07 | 0.999999 |
| rad3          | 2.84472e-08 | 0.999999 | 1.07827e-07 | 0.999999 |
| rad4          | 2.23782e-08 | 0.999999 | 8.48231e-08 | 0.999999 |
| rad72         | 1.95790e-08 | 0.999999 | 7.42128e-08 | 0.999999 |
| rad12         | 1.72333e-08 | 1.000000 | 6.53216e-08 | 1.000000 |
| rad25         | 1.45790e-08 | 1.000000 | 5.52607e-08 | 1.000000 |
| rad64         | 1.42023e-08 | 1.000000 | 5.38326e-08 | 1.000000 |
| rad53         | 1.17381e-08 | 1.000000 | 4.44925e-08 | 1.000000 |
| PAH8+H        | 9.11201e-09 | 1.000000 | 3.45384e-08 | 1.000000 |
| rad56         | 8.31737e-09 | 1.000000 | 3.15264e-08 | 1.000000 |
| rad43         | 5.26272e-09 | 1.000000 | 1.99479e-08 | 1.000000 |
| rad68syn      | 3.27316e-09 | 1.000000 | 1.24067e-08 | 1.000000 |
| rad61         | 2.97171e-09 | 1.000000 | 1.12640e-08 | 1.000000 |
| rad8          | 2.87811e-09 | 1.000000 | 1.09092e-08 | 1.000000 |
| rad68anti     | 2.13881e-09 | 1.000000 | 8.10700e-09 | 1.000000 |
| rad42         | 1.31252e-09 | 1.000000 | 4.97502e-09 | 1.000000 |
| rad40syn      | 1.12640e-09 | 1.000000 | 4.26955e-09 | 1.000000 |
| rad14         | 6.67049e-10 | 1.000000 | 2.52840e-09 | 1.000000 |
| rad40anti     | 6.63576e-10 | 1.000000 | 2.51524e-09 | 1.000000 |
| rad41         | 2.71307e-10 | 1.000000 | 1.02837e-09 | 1.000000 |
| rad47         | 1.44840e-10 | 1.000000 | 5.49007e-10 | 1.000000 |
| rad27         | 1.30522e-10 | 1.000000 | 4.94733e-10 | 1.000000 |
| rad31         | 1.55433e-11 | 1.000000 | 5.89158e-11 | 1.000000 |
| rad5          | 3.07119e-12 | 1.000000 | 1.16411e-11 | 1.000000 |

1000.00000 Pa, 1500.00000 K

=====

| Rate constant | True (fraction)     | Effective (fraction) |
|---------------|---------------------|----------------------|
| Total         | 3.76908e-14 (1.00 ) | 8.52661e-15 (1.00 )  |

| species     | PYtrue      | Cumul    | PYeffective | Cumul    |
|-------------|-------------|----------|-------------|----------|
| Benzyl+C2H2 | 0.773775    | 0.773775 | 0.00000     | 0.00000  |
| Indene+H    | 0.203382    | 0.977157 | 0.899026    | 0.899026 |
| Ph+Allene   | 0.00788539  | 0.985042 | 0.0348563   | 0.933882 |
| PhCH2CCH+H  | 0.00659132  | 0.991634 | 0.0291361   | 0.963018 |
| PhCHCCH2+H  | 0.00363017  | 0.995264 | 0.0160467   | 0.979065 |
| PhCCH+CH3   | 0.00126525  | 0.996529 | 0.00559287  | 0.984658 |
| rad6        | 0.000967147 | 0.997496 | 0.00427515  | 0.988933 |
| PAH9+H      | 0.000531894 | 0.998028 | 0.00235117  | 0.991284 |

|               |             |          |             |          |
|---------------|-------------|----------|-------------|----------|
| PAH7+H        | 0.000314583 | 0.998343 | 0.00139057  | 0.992675 |
| rad30         | 0.000247043 | 0.998590 | 0.00109202  | 0.993767 |
| rad38         | 0.000230533 | 0.998820 | 0.00101904  | 0.994786 |
| Ph+MeAc       | 0.000188143 | 0.999008 | 0.000831661 | 0.995618 |
| rad23         | 0.000178636 | 0.999187 | 0.000789635 | 0.996407 |
| rad19anti     | 6.63965e-05 | 0.999355 | 0.000743002 | 0.997150 |
| PAH3+H        | 0.000105581 | 0.999461 | 0.000466707 | 0.997617 |
| rad35         | 9.55736e-05 | 0.999556 | 0.000422471 | 0.998039 |
| rad39         | 6.72931e-05 | 0.999624 | 0.000297461 | 0.998337 |
| rad46         | 6.23965e-05 | 0.999690 | 0.000293497 | 0.998630 |
| rad45         | 5.92353e-05 | 0.999749 | 0.000261842 | 0.998892 |
| rad50         | 4.42175e-05 | 0.999793 | 0.000195458 | 0.999088 |
| PhCCCH3+H     | 3.72783e-05 | 0.999831 | 0.000164784 | 0.999252 |
| rad22         | 2.12038e-05 | 0.999852 | 9.37286e-05 | 0.999346 |
| rad11         | 1.81809e-05 | 0.999870 | 8.03665e-05 | 0.999427 |
| rad60syn      | 1.39715e-05 | 0.999884 | 6.17594e-05 | 0.999488 |
| rad20         | 1.30417e-05 | 0.999897 | 5.76491e-05 | 0.999546 |
| rad7          | 1.28552e-05 | 0.999910 | 5.68247e-05 | 0.999603 |
| rad59         | 1.16912e-05 | 0.999922 | 5.16793e-05 | 0.999654 |
| rad51         | 1.15376e-05 | 0.999933 | 5.10005e-05 | 0.999705 |
| rad9          | 1.12829e-05 | 0.999945 | 4.98747e-05 | 0.999755 |
| rad60anti     | 8.39566e-06 | 0.999953 | 3.71119e-05 | 0.999792 |
| rad21         | 7.49330e-06 | 0.999960 | 3.31232e-05 | 0.999826 |
| rad19syn      | 6.76296e-06 | 0.999967 | 2.98948e-05 | 0.999855 |
| rad36         | 5.48538e-06 | 0.999973 | 2.42474e-05 | 0.999880 |
| rad18         | 5.43179e-06 | 0.999978 | 2.40105e-05 | 0.999904 |
| rad67         | 3.65478e-06 | 0.999982 | 1.61555e-05 | 0.999920 |
| rad52         | 3.58999e-06 | 0.999985 | 1.58691e-05 | 0.999936 |
| PhcycC3H3_A+H | 2.49399e-06 | 0.999988 | 1.10244e-05 | 0.999947 |
| rad54         | 2.42659e-06 | 0.999990 | 1.07264e-05 | 0.999957 |
| rad28         | 2.11185e-06 | 0.999992 | 9.33516e-06 | 0.999967 |
| PAH10+CH3     | 1.44581e-06 | 0.999994 | 6.39102e-06 | 0.999973 |
| rad13         | 1.17479e-06 | 0.999995 | 5.19302e-06 | 0.999978 |
| rad37         | 1.13763e-06 | 0.999996 | 5.02873e-06 | 0.999983 |
| PAH1+H        | 8.54418e-07 | 0.999997 | 3.77685e-06 | 0.999987 |
| rad58         | 5.91432e-07 | 0.999998 | 2.61435e-06 | 0.999990 |
| rad70         | 5.06429e-07 | 0.999998 | 2.23860e-06 | 0.999992 |
| rad71         | 3.64534e-07 | 0.999998 | 1.61138e-06 | 0.999994 |
| rad65         | 3.13389e-07 | 0.999999 | 1.38529e-06 | 0.999995 |
| rad73         | 2.62535e-07 | 0.999999 | 1.16050e-06 | 0.999996 |
| rad15         | 1.55775e-07 | 0.999999 | 6.88583e-07 | 0.999997 |
| rad55         | 1.46569e-07 | 0.999999 | 6.47888e-07 | 0.999998 |
| rad24         | 1.31806e-07 | 0.999999 | 5.82629e-07 | 0.999998 |
| rad34         | 1.01645e-07 | 1.000000 | 4.49310e-07 | 0.999999 |
| rad10         | 8.16238e-08 | 1.000000 | 3.60807e-07 | 0.999999 |
| rad2          | 7.24129e-08 | 1.000000 | 3.20092e-07 | 0.999999 |
| rad26         | 3.90357e-08 | 1.000000 | 1.72552e-07 | 0.999999 |
| rad62         | 3.31162e-08 | 1.000000 | 1.46386e-07 | 1.000000 |
| rad33         | 3.18949e-08 | 1.000000 | 1.40987e-07 | 1.000000 |
| rad53         | 1.94991e-08 | 1.000000 | 8.61931e-08 | 1.000000 |
| rad12         | 1.86144e-08 | 1.000000 | 8.22826e-08 | 1.000000 |
| rad1          | 1.79026e-08 | 1.000000 | 7.91363e-08 | 1.000000 |
| rad56         | 1.44670e-08 | 1.000000 | 6.39495e-08 | 1.000000 |
| rad3          | 1.39874e-08 | 1.000000 | 6.18297e-08 | 1.000000 |
| rad64         | 1.29378e-08 | 1.000000 | 5.71898e-08 | 1.000000 |
| rad72         | 1.22362e-08 | 1.000000 | 5.40887e-08 | 1.000000 |
| rad4          | 1.10535e-08 | 1.000000 | 4.88606e-08 | 1.000000 |
| rad25         | 1.06571e-08 | 1.000000 | 4.71085e-08 | 1.000000 |
| PAH8+H        | 9.17168e-09 | 1.000000 | 4.05422e-08 | 1.000000 |
| rad43         | 5.35167e-09 | 1.000000 | 2.36564e-08 | 1.000000 |
| rad68syn      | 4.00537e-09 | 1.000000 | 1.77052e-08 | 1.000000 |
| rad8          | 3.66398e-09 | 1.000000 | 1.61962e-08 | 1.000000 |
| rad68anti     | 2.62522e-09 | 1.000000 | 1.16045e-08 | 1.000000 |
| rad61         | 2.31388e-09 | 1.000000 | 1.02282e-08 | 1.000000 |
| rad42         | 1.56326e-09 | 1.000000 | 6.91021e-09 | 1.000000 |
| rad40syn      | 1.22487e-09 | 1.000000 | 5.41437e-09 | 1.000000 |
| rad40anti     | 6.95639e-10 | 1.000000 | 3.07498e-09 | 1.000000 |
| rad14         | 4.06009e-10 | 1.000000 | 1.79471e-09 | 1.000000 |
| rad41         | 2.63575e-10 | 1.000000 | 1.16510e-09 | 1.000000 |
| rad47         | 9.89961e-11 | 1.000000 | 4.37600e-10 | 1.000000 |
| rad27         | 7.04388e-11 | 1.000000 | 3.11365e-10 | 1.000000 |
| rad31         | 1.05630e-11 | 1.000000 | 4.66924e-11 | 1.000000 |
| rad5          | 4.05021e-12 | 1.000000 | 1.79034e-11 | 1.000000 |

1000.00000 Pa, 1750.00000 K

=====

| Rate constant | True (fraction)     | Effective (fraction) |
|---------------|---------------------|----------------------|
| Total         | 9.18604e-14 (1.00 ) | 1.49310e-14 (1.00 )  |

| species       | PYtrue      | Cumul    | PYeffective | Cumul    |
|---------------|-------------|----------|-------------|----------|
| Benzyl+C2H2   | 0.837460    | 0.837460 | 0.00000     | 0.00000  |
| Indene+H      | 0.131793    | 0.969253 | 0.810835    | 0.810835 |
| PhCH2CCH+H    | 0.0118546   | 0.981108 | 0.0729337   | 0.883769 |
| Ph+Allene     | 0.000975415 | 0.990862 | 0.0600109   | 0.943780 |
| PhCHCCH2+H    | 0.00449448  | 0.995356 | 0.0276516   | 0.971431 |
| PhCCH+CH3     | 0.000794006 | 0.996150 | 0.00488500  | 0.976316 |
| PAH9+H        | 0.000657693 | 0.996808 | 0.00404635  | 0.980363 |
| rad38         | 0.000370815 | 0.997179 | 0.00228138  | 0.982644 |
| PAH7+H        | 0.000355170 | 0.997534 | 0.00218513  | 0.984829 |
| rad30         | 0.000325452 | 0.997859 | 0.00200229  | 0.986831 |
| rad19anti     | 0.000319075 | 0.998178 | 0.00196306  | 0.988794 |
| rad6          | 0.000313576 | 0.998492 | 0.00192923  | 0.990723 |
| PAH3+H        | 0.000280276 | 0.998772 | 0.00172435  | 0.992448 |
| rad50         | 0.000164199 | 0.998936 | 0.00101021  | 0.993458 |
| Ph+MeAc       | 0.000163521 | 0.999100 | 0.00100603  | 0.994464 |
| rad39         | 0.000154122 | 0.999254 | 0.000948213 | 0.995412 |
| rad35         | 0.000121895 | 0.999376 | 0.000749938 | 0.996162 |
| rad46         | 0.000113216 | 0.999489 | 0.000696546 | 0.996859 |
| rad51         | 0.000105598 | 0.999595 | 0.000649677 | 0.997509 |
| rad71         | 8.10598e-05 | 0.999676 | 0.000498707 | 0.998007 |
| rad23         | 7.84332e-05 | 0.999754 | 0.000482548 | 0.998490 |
| PhCCCH3+H     | 2.88521e-05 | 0.999783 | 0.000177508 | 0.998667 |
| rad59         | 2.78739e-05 | 0.999811 | 0.000171490 | 0.998839 |
| rad60syn      | 2.66014e-05 | 0.999838 | 0.000163661 | 0.999013 |
| rad73         | 2.55382e-05 | 0.999863 | 0.000157120 | 0.999160 |
| rad52         | 2.00261e-05 | 0.999883 | 0.000123207 | 0.999283 |
| rad60anti     | 1.78587e-05 | 0.999901 | 0.000109873 | 0.999393 |
| rad72         | 1.54558e-05 | 0.999917 | 9.50893e-05 | 0.999488 |
| rad19syn      | 1.12018e-05 | 0.999928 | 6.89175e-05 | 0.999557 |
| rad67         | 1.10493e-05 | 0.999939 | 6.79792e-05 | 0.999625 |
| rad22         | 8.90102e-06 | 0.999948 | 5.47621e-05 | 0.999679 |
| PhcycC3H3_A+H | 8.87401e-06 | 0.999957 | 5.45960e-05 | 0.999734 |
| PAH1+H        | 7.26276e-06 | 0.999964 | 4.46830e-05 | 0.999779 |
| PAH10+CH3     | 6.79243e-06 | 0.999971 | 4.17894e-05 | 0.999821 |
| rad45         | 5.05987e-06 | 0.999976 | 3.11300e-05 | 0.999852 |
| rad54         | 4.13060e-06 | 0.999980 | 2.54129e-05 | 0.999877 |
| rad58         | 2.14828e-06 | 0.999982 | 1.32169e-05 | 0.999890 |
| rad37         | 2.08501e-06 | 0.999984 | 1.28277e-05 | 0.999903 |
| rad65         | 1.85954e-06 | 0.999986 | 1.14405e-05 | 0.999915 |
| rad11         | 1.82444e-06 | 0.999988 | 1.12246e-05 | 0.999926 |
| rad70         | 1.79236e-06 | 0.999990 | 1.10272e-05 | 0.999937 |
| rad7          | 1.39838e-06 | 0.999991 | 8.60332e-06 | 0.999945 |
| rad9          | 1.33925e-06 | 0.999992 | 8.23953e-06 | 0.999954 |
| rad20         | 1.28405e-06 | 0.999994 | 7.89993e-06 | 0.999962 |
| PAH8+H        | 1.15884e-06 | 0.999995 | 7.12959e-06 | 0.999969 |
| rad36         | 8.44022e-07 | 0.999996 | 5.19271e-06 | 0.999974 |
| rad28         | 8.37660e-07 | 0.999996 | 5.15357e-06 | 0.999979 |
| rad21         | 6.74093e-07 | 0.999997 | 4.14725e-06 | 0.999983 |
| rad18         | 6.24073e-07 | 0.999998 | 3.83951e-06 | 0.999987 |
| rad34         | 5.76164e-07 | 0.999998 | 3.54476e-06 | 0.999991 |
| rad55         | 3.31454e-07 | 0.999999 | 2.03922e-06 | 0.999993 |
| rad64         | 2.04224e-07 | 0.999999 | 1.25646e-06 | 0.999994 |
| rad56         | 1.31826e-07 | 0.999999 | 8.11041e-07 | 0.999995 |
| rad68syn      | 1.28450e-07 | 0.999999 | 7.90269e-07 | 0.999995 |
| rad62         | 1.12761e-07 | 0.999999 | 6.93747e-07 | 0.999996 |
| rad53         | 1.10737e-07 | 0.999999 | 6.81289e-07 | 0.999997 |
| rad40syn      | 8.45248e-08 | 0.999999 | 5.20026e-07 | 0.999997 |
| rad68anti     | 8.17928e-08 | 0.999999 | 5.03217e-07 | 0.999998 |
| rad13         | 8.07354e-08 | 1.000000 | 4.96712e-07 | 0.999998 |
| rad15         | 6.78001e-08 | 1.000000 | 4.17130e-07 | 0.999999 |
| rad40anti     | 6.52430e-08 | 1.000000 | 4.01397e-07 | 0.999999 |
| rad61         | 4.41943e-08 | 1.000000 | 2.71898e-07 | 0.999999 |
| rad42         | 1.86327e-08 | 1.000000 | 1.14635e-07 | 1.000000 |
| rad24         | 1.66920e-08 | 1.000000 | 1.02695e-07 | 1.000000 |
| rad43         | 1.60216e-08 | 1.000000 | 9.85705e-08 | 1.000000 |
| rad26         | 1.44028e-08 | 1.000000 | 8.86111e-08 | 1.000000 |
| rad10         | 6.03219e-09 | 1.000000 | 3.71121e-08 | 1.000000 |
| rad12         | 4.10040e-09 | 1.000000 | 2.52271e-08 | 1.000000 |
| rad41         | 2.44619e-09 | 1.000000 | 1.50498e-08 | 1.000000 |
| rad33         | 2.30627e-09 | 1.000000 | 1.41889e-08 | 1.000000 |
| rad2          | 1.95167e-09 | 1.000000 | 1.20073e-08 | 1.000000 |
| rad8          | 1.75470e-09 | 1.000000 | 1.07955e-08 | 1.000000 |
| rad25         | 1.12198e-09 | 1.000000 | 6.90278e-09 | 1.000000 |
| rad1          | 5.24983e-10 | 1.000000 | 3.22987e-09 | 1.000000 |
| rad3          | 3.81952e-10 | 1.000000 | 2.34990e-09 | 1.000000 |
| rad47         | 3.70171e-10 | 1.000000 | 2.27742e-09 | 1.000000 |
| rad4          | 2.43446e-10 | 1.000000 | 1.49777e-09 | 1.000000 |
| rad14         | 3.38340e-11 | 1.000000 | 2.08158e-10 | 1.000000 |



|       |             |          |             |          |
|-------|-------------|----------|-------------|----------|
| rad5  | 1.33260e-11 | 1.000000 | 8.19864e-11 | 1.000000 |
| rad27 | 4.36042e-12 | 1.000000 | 2.68268e-11 | 1.000000 |

1000.00000 Pa, 2000.00000 K

=====

| Rate constant | True (fraction)     | Effective (fraction) |
|---------------|---------------------|----------------------|
| Total         | 1.85359e-13 (1.00 ) | 2.47692e-14 (1.00 )  |

| species       | PYtrue      | Cumul    | PYeffective | Cumul    |
|---------------|-------------|----------|-------------|----------|
| Benzyl+C2H2   | 0.866372    | 0.866372 | 0.00000     | 0.00000  |
| Indene+H      | 0.0939614   | 0.960333 | 0.703156    | 0.703156 |
| PhCH2CCH+H    | 0.0189361   | 0.979270 | 0.141708    | 0.844864 |
| Ph+Allene     | 0.0102307   | 0.989500 | 0.0765612   | 0.921425 |
| PhCHCCH2+H    | 0.00579942  | 0.995300 | 0.0433997   | 0.964825 |
| PAH9+H        | 0.000805921 | 0.996106 | 0.00603107  | 0.970856 |
| PhCCH+CH3     | 0.000529809 | 0.996635 | 0.00396480  | 0.974821 |
| PAH3+H        | 0.000528523 | 0.997164 | 0.00395517  | 0.978776 |
| rad19anti     | 0.000484540 | 0.997648 | 0.00362603  | 0.982402 |
| rad38         | 0.000440581 | 0.998089 | 0.00329707  | 0.985699 |
| rad30         | 0.000378465 | 0.998467 | 0.00283223  | 0.988531 |
| PAH7+H        | 0.000374676 | 0.998842 | 0.00280387  | 0.991335 |
| Ph+MeAc       | 0.000164259 | 0.999006 | 0.00122923  | 0.992564 |
| rad35         | 0.000160184 | 0.999167 | 0.00119873  | 0.993763 |
| rad50         | 0.000139588 | 0.999306 | 0.00104460  | 0.994808 |
| rad46         | 0.000133534 | 0.999440 | 0.000999294 | 0.995807 |
| rad39         | 0.000113289 | 0.999553 | 0.000847795 | 0.996655 |
| rad51         | 6.39128e-05 | 0.999617 | 0.000478288 | 0.997133 |
| rad6          | 5.32374e-05 | 0.999670 | 0.000398399 | 0.997531 |
| rad59         | 4.93555e-05 | 0.999719 | 0.000369349 | 0.997901 |
| rad60syn      | 4.01764e-05 | 0.999760 | 0.000300658 | 0.998201 |
| PhCCCH3+H     | 3.55369e-05 | 0.999795 | 0.000265938 | 0.998467 |
| rad71         | 3.01173e-05 | 0.999825 | 0.000225382 | 0.998693 |
| rad60anti     | 2.75534e-05 | 0.999853 | 0.000206194 | 0.998899 |
| rad23         | 2.56847e-05 | 0.999879 | 0.000192210 | 0.999091 |
| rad67         | 2.48778e-05 | 0.999903 | 0.000186172 | 0.999277 |
| rad52         | 1.48343e-05 | 0.999918 | 0.000111012 | 0.999388 |
| rad19syn      | 1.36915e-05 | 0.999932 | 0.000102460 | 0.999491 |
| PhcycC3H3_A+H | 1.13330e-05 | 0.999943 | 8.48100e-05 | 0.999576 |
| rad73         | 9.88720e-06 | 0.999953 | 7.39904e-05 | 0.999650 |
| PAH10+CH3     | 9.32969e-06 | 0.999963 | 6.98183e-05 | 0.999719 |
| rad72         | 5.57029e-06 | 0.999968 | 4.16850e-05 | 0.999761 |
| PAH1+H        | 5.18381e-06 | 0.999973 | 3.87928e-05 | 0.999800 |
| rad58         | 5.09845e-06 | 0.999978 | 3.81540e-05 | 0.999838 |
| rad54         | 5.05632e-06 | 0.999983 | 3.78387e-05 | 0.999876 |
| rad37         | 3.56862e-06 | 0.999987 | 2.67056e-05 | 0.999903 |
| rad70         | 2.36900e-06 | 0.999989 | 1.77283e-05 | 0.999920 |
| rad22         | 1.87303e-06 | 0.999991 | 1.40167e-05 | 0.999934 |
| rad45         | 1.75775e-06 | 0.999993 | 1.31540e-05 | 0.999948 |
| rad65         | 1.48776e-06 | 0.999994 | 1.11336e-05 | 0.999959 |
| rad9          | 7.31279e-07 | 0.999995 | 5.47249e-06 | 0.999964 |
| rad34         | 6.76984e-07 | 0.999996 | 5.06617e-06 | 0.999969 |
| rad20         | 5.38457e-07 | 0.999996 | 4.02951e-06 | 0.999973 |
| PAH8+H        | 5.36838e-07 | 0.999997 | 4.01740e-06 | 0.999977 |
| rad11         | 4.72127e-07 | 0.999997 | 3.53314e-06 | 0.999981 |
| rad55         | 4.34223e-07 | 0.999998 | 3.24949e-06 | 0.999984 |
| rad36         | 3.00787e-07 | 0.999998 | 2.25093e-06 | 0.999986 |
| rad7          | 2.95303e-07 | 0.999998 | 2.20989e-06 | 0.999989 |
| rad21         | 2.76696e-07 | 0.999999 | 2.07064e-06 | 0.999991 |
| rad56         | 2.25861e-07 | 0.999999 | 1.69022e-06 | 0.999992 |
| rad28         | 2.07081e-07 | 0.999999 | 1.54968e-06 | 0.999994 |
| rad53         | 1.77920e-07 | 0.999999 | 1.33146e-06 | 0.999995 |
| rad18         | 1.72511e-07 | 1.000000 | 1.29098e-06 | 0.999996 |
| rad64         | 1.28047e-07 | 1.000000 | 9.58234e-07 | 0.999997 |
| rad62         | 1.04981e-07 | 1.000000 | 7.85622e-07 | 0.999998 |
| rad68syn      | 8.45704e-08 | 1.000000 | 6.32878e-07 | 0.999999 |
| rad68anti     | 5.41458e-08 | 1.000000 | 4.05197e-07 | 0.999999 |
| rad40syn      | 4.46660e-08 | 1.000000 | 3.34256e-07 | 1.000000 |
| rad15         | 3.75253e-08 | 1.000000 | 2.80818e-07 | 1.000000 |
| rad40anti     | 3.26742e-08 | 1.000000 | 2.44516e-07 | 1.000000 |
| rad61         | 3.10101e-08 | 1.000000 | 2.32063e-07 | 1.000000 |
| rad43         | 2.51935e-08 | 1.000000 | 1.88534e-07 | 1.000000 |
| rad13         | 2.34241e-08 | 1.000000 | 1.75293e-07 | 1.000000 |
| rad42         | 1.55353e-08 | 1.000000 | 1.16258e-07 | 1.000000 |
| rad24         | 9.41022e-09 | 1.000000 | 7.04209e-08 | 1.000000 |
| rad26         | 5.01843e-09 | 1.000000 | 3.75551e-08 | 1.000000 |
| rad12         | 3.67909e-09 | 1.000000 | 2.75323e-08 | 1.000000 |
| rad41         | 2.81481e-09 | 1.000000 | 2.10645e-08 | 1.000000 |
| rad8          | 2.01555e-09 | 1.000000 | 1.50833e-08 | 1.000000 |

|       |             |         |             |         |
|-------|-------------|---------|-------------|---------|
| rad10 | 1.41537e-09 | 1.00000 | 1.05918e-08 | 1.00000 |
| rad33 | 8.53307e-10 | 1.00000 | 6.38568e-09 | 1.00000 |
| rad25 | 5.26116e-10 | 1.00000 | 3.93716e-09 | 1.00000 |
| rad2  | 3.74927e-10 | 1.00000 | 2.80575e-09 | 1.00000 |
| rad47 | 1.81445e-10 | 1.00000 | 1.35783e-09 | 1.00000 |
| rad1  | 1.05304e-10 | 1.00000 | 7.88038e-10 | 1.00000 |
| rad3  | 9.51518e-11 | 1.00000 | 7.12064e-10 | 1.00000 |
| rad4  | 6.07007e-11 | 1.00000 | 4.54251e-10 | 1.00000 |
| rad5  | 2.09556e-11 | 1.00000 | 1.56820e-10 | 1.00000 |
| rad14 | 1.18133e-11 | 1.00000 | 8.84040e-11 | 1.00000 |
| rad27 | 1.85391e-12 | 1.00000 | 1.38736e-11 | 1.00000 |

1000.00000 Pa, 2250.00000 K

| Rate constant | True (fraction)     | Effective (fraction) |
|---------------|---------------------|----------------------|
| Total         | 3.29136e-13 (1.00 ) | 4.00927e-14 (1.00 )  |

| species       | PYtrue      | Cumul    | PYeffective | Cumul    |
|---------------|-------------|----------|-------------|----------|
| Benzyl+C2H2   | 0.878188    | 0.878188 | 0.00000     | 0.00000  |
| Indene+H      | 0.0701485   | 0.948336 | 0.575873    | 0.575873 |
| PhCH2CCH+H    | 0.0277445   | 0.976081 | 0.227764    | 0.803637 |
| Ph+Allene     | 0.0106300   | 0.986711 | 0.0872652   | 0.890902 |
| PhCHCCH2+H    | 0.00766353  | 0.994375 | 0.0629125   | 0.953815 |
| PAH9+H        | 0.000959424 | 0.995334 | 0.00787624  | 0.961691 |
| PAH3+H        | 0.000858244 | 0.996192 | 0.00704562  | 0.968737 |
| rad19anti     | 0.000627984 | 0.996820 | 0.00515534  | 0.973892 |
| rad38         | 0.000535966 | 0.997356 | 0.00439993  | 0.978292 |
| PAH7+H        | 0.000463945 | 0.997820 | 0.00380868  | 0.982101 |
| rad30         | 0.000417327 | 0.998237 | 0.00342598  | 0.985526 |
| PhCCH+CH3     | 0.000378972 | 0.998616 | 0.00311111  | 0.988638 |
| rad35         | 0.000202786 | 0.998819 | 0.00166474  | 0.990302 |
| Ph+MeAc       | 0.000198062 | 0.999017 | 0.00162596  | 0.991928 |
| rad50         | 0.000188573 | 0.999206 | 0.00154806  | 0.993476 |
| rad46         | 0.000171561 | 0.999377 | 0.00140840  | 0.994885 |
| rad39         | 0.000132977 | 0.999510 | 0.00109166  | 0.995976 |
| rad51         | 7.66276e-05 | 0.999587 | 0.000629062 | 0.996605 |
| rad59         | 7.58354e-05 | 0.999663 | 0.000622559 | 0.997228 |
| rad60syn      | 5.44780e-05 | 0.999717 | 0.000447229 | 0.997675 |
| PhCCCH3+H     | 5.15366e-05 | 0.999769 | 0.000423082 | 0.998098 |
| rad67         | 4.63915e-05 | 0.999815 | 0.000380844 | 0.998479 |
| rad60anti     | 3.80071e-05 | 0.999853 | 0.000312013 | 0.998791 |
| rad52         | 1.95426e-05 | 0.999873 | 0.000160432 | 0.998952 |
| PAH10+CH3     | 1.78547e-05 | 0.999891 | 0.000146575 | 0.999098 |
| rad19syn      | 1.70405e-05 | 0.999908 | 0.000139891 | 0.999238 |
| rad71         | 1.60952e-05 | 0.999924 | 0.000132131 | 0.999370 |
| PhcycC3H3_A+H | 1.24482e-05 | 0.999936 | 0.000102192 | 0.999472 |
| rad58         | 1.00944e-05 | 0.999946 | 8.28683e-05 | 0.999555 |
| rad6          | 9.25706e-06 | 0.999956 | 7.59944e-05 | 0.999631 |
| PAH1+H        | 6.98206e-06 | 0.999963 | 5.73181e-05 | 0.999689 |
| rad73         | 6.23188e-06 | 0.999969 | 5.11597e-05 | 0.999740 |
| rad23         | 6.07885e-06 | 0.999975 | 4.99034e-05 | 0.999790 |
| rad37         | 5.76970e-06 | 0.999981 | 4.73654e-05 | 0.999837 |
| rad54         | 5.61942e-06 | 0.999986 | 4.61318e-05 | 0.999883 |
| rad70         | 3.80606e-06 | 0.999990 | 3.12453e-05 | 0.999914 |
| rad72         | 2.51983e-06 | 0.999993 | 2.06861e-05 | 0.999935 |
| rad65         | 2.05165e-06 | 0.999995 | 1.68427e-05 | 0.999952 |
| rad34         | 1.13497e-06 | 0.999996 | 9.31735e-06 | 0.999961 |
| rad45         | 6.93448e-07 | 0.999996 | 5.69275e-06 | 0.999967 |
| PAH8+H        | 5.69740e-07 | 0.999997 | 4.67719e-06 | 0.999972 |
| rad55         | 5.00983e-07 | 0.999998 | 4.11274e-06 | 0.999976 |
| rad22         | 4.60593e-07 | 0.999998 | 3.78117e-06 | 0.999980 |
| rad9          | 3.90796e-07 | 0.999998 | 3.20818e-06 | 0.999983 |
| rad20         | 2.64898e-07 | 0.999999 | 2.17464e-06 | 0.999985 |
| rad56         | 2.41723e-07 | 0.999999 | 1.98439e-06 | 0.999987 |
| rad53         | 2.05047e-07 | 0.999999 | 1.68330e-06 | 0.999989 |
| rad64         | 1.63745e-07 | 0.999999 | 1.34424e-06 | 0.999990 |
| rad11         | 1.59160e-07 | 0.999999 | 1.30660e-06 | 0.999991 |
| rad21         | 1.32294e-07 | 1.000000 | 1.08605e-06 | 0.999992 |
| rad68syn      | 1.28433e-07 | 1.000000 | 1.05435e-06 | 0.999993 |
| rad36         | 1.21248e-07 | 1.000000 | 9.95367e-07 | 0.999994 |
| rad62         | 1.15005e-07 | 1.000000 | 9.44112e-07 | 0.999995 |
| rad68anti     | 8.24266e-08 | 1.000000 | 6.76669e-07 | 0.999996 |
| rad7          | 8.17587e-08 | 1.000000 | 6.71185e-07 | 0.999997 |
| rad18         | 6.57192e-08 | 1.000000 | 5.39511e-07 | 0.999997 |
| rad40syn      | 5.70449e-08 | 1.000000 | 4.68301e-07 | 0.999998 |
| rad61         | 5.29527e-08 | 1.000000 | 4.34707e-07 | 0.999998 |
| rad43         | 4.95794e-08 | 1.000000 | 4.07014e-07 | 0.999999 |
| rad28         | 4.20186e-08 | 1.000000 | 3.44945e-07 | 0.999999 |

|           |             |         |             |          |
|-----------|-------------|---------|-------------|----------|
| rad40anti | 3.91060e-08 | 1.00000 | 3.21035e-07 | 0.999999 |
| rad15     | 2.20933e-08 | 1.00000 | 1.81371e-07 | 0.999999 |
| rad42     | 1.49933e-08 | 1.00000 | 1.23085e-07 | 0.999999 |
| rad13     | 7.55862e-09 | 1.00000 | 6.20513e-08 | 1.000000 |
| rad41     | 5.71242e-09 | 1.00000 | 4.68952e-08 | 1.000000 |
| rad24     | 5.67780e-09 | 1.00000 | 4.66110e-08 | 1.000000 |
| rad12     | 3.04102e-09 | 1.00000 | 2.49648e-08 | 1.000000 |
| rad26     | 2.30407e-09 | 1.00000 | 1.89149e-08 | 1.000000 |
| rad8      | 2.18213e-09 | 1.00000 | 1.79139e-08 | 1.000000 |
| rad10     | 6.72210e-10 | 1.00000 | 5.51840e-09 | 1.000000 |
| rad33     | 3.37897e-10 | 1.00000 | 2.77391e-09 | 1.000000 |
| rad25     | 2.83105e-10 | 1.00000 | 2.32411e-09 | 1.000000 |
| rad47     | 1.84817e-10 | 1.00000 | 1.51722e-09 | 1.000000 |
| rad2      | 1.08720e-10 | 1.00000 | 8.92517e-10 | 1.000000 |
| rad1      | 3.27363e-11 | 1.00000 | 2.68744e-10 | 1.000000 |
| rad3      | 2.68111e-11 | 1.00000 | 2.20102e-10 | 1.000000 |
| rad5      | 2.23506e-11 | 1.00000 | 1.83484e-10 | 1.000000 |
| rad4      | 1.69867e-11 | 1.00000 | 1.39449e-10 | 1.000000 |
| rad14     | 5.03056e-12 | 1.00000 | 4.12976e-11 | 1.000000 |
| rad27     | 1.28062e-12 | 1.00000 | 1.05131e-11 | 1.000000 |

1000.00000 Pa, 2500.00000 K

| Rate constant | True (fraction)     | Effective (fraction) |
|---------------|---------------------|----------------------|
| Total         | 5.32896e-13 (1.00 ) | 6.40338e-14 (1.00 )  |

| species       | PYtrue      | Cumul    | PYeffective | Cumul    |
|---------------|-------------|----------|-------------|----------|
| Benzyl+C2H2   | 0.879838    | 0.879838 | 0.00000     | 0.00000  |
| Indene+H      | 0.0541073   | 0.933945 | 0.450285    | 0.450285 |
| PhCH2CCH+H    | 0.0379680   | 0.971913 | 0.315973    | 0.766258 |
| Ph+Allene     | 0.0112514   | 0.983165 | 0.0936347   | 0.859893 |
| PhCHCCH2+H    | 0.00999890  | 0.993164 | 0.0832117   | 0.943104 |
| PAH3+H        | 0.00124399  | 0.994408 | 0.0103526   | 0.953457 |
| PAH9+H        | 0.00107182  | 0.995479 | 0.00891973  | 0.962377 |
| rad19anti     | 0.000730364 | 0.996210 | 0.00607814  | 0.968455 |
| rad38         | 0.000618108 | 0.996828 | 0.00514395  | 0.973599 |
| PAH7+H        | 0.000590630 | 0.997419 | 0.00491527  | 0.978514 |
| rad30         | 0.000442224 | 0.997861 | 0.00368022  | 0.982194 |
| PhCCH+CH3     | 0.000308217 | 0.998169 | 0.00256501  | 0.984759 |
| rad50         | 0.000269061 | 0.998438 | 0.00223914  | 0.986998 |
| Ph+MeAc       | 0.000257124 | 0.998695 | 0.00213980  | 0.989138 |
| rad35         | 0.000242854 | 0.998938 | 0.00202105  | 0.991159 |
| rad46         | 0.000209775 | 0.999148 | 0.00174577  | 0.992905 |
| rad39         | 0.000181857 | 0.999330 | 0.00151343  | 0.994419 |
| rad51         | 0.000115857 | 0.999445 | 0.000964170 | 0.995383 |
| rad59         | 0.000104853 | 0.999550 | 0.000872595 | 0.996255 |
| rad67         | 7.35447e-05 | 0.999624 | 0.000612044 | 0.996867 |
| PhCCCH3+H     | 7.22921e-05 | 0.999696 | 0.000601620 | 0.997469 |
| rad60syn      | 6.81964e-05 | 0.999764 | 0.000567536 | 0.998036 |
| rad60anti     | 4.82460e-05 | 0.999813 | 0.000401507 | 0.998438 |
| PAH10+CH3     | 3.11803e-05 | 0.999844 | 0.000259485 | 0.998697 |
| rad52         | 2.88542e-05 | 0.999873 | 0.000240127 | 0.998938 |
| rad19syn      | 2.36574e-05 | 0.999896 | 0.000196879 | 0.999134 |
| rad58         | 1.71761e-05 | 0.999913 | 0.000142941 | 0.999277 |
| rad71         | 1.62622e-05 | 0.999930 | 0.000135336 | 0.999413 |
| PhcycC3H3_A+H | 1.53434e-05 | 0.999945 | 0.000127689 | 0.999540 |
| PAH1+H        | 1.17291e-05 | 0.999957 | 9.76101e-05 | 0.999638 |
| rad37         | 8.14408e-06 | 0.999965 | 6.77756e-05 | 0.999706 |
| rad73         | 7.64945e-06 | 0.999973 | 6.36593e-05 | 0.999769 |
| rad54         | 6.33681e-06 | 0.999979 | 5.27354e-05 | 0.999822 |
| rad70         | 6.01900e-06 | 0.999985 | 5.00906e-05 | 0.999872 |
| rad65         | 3.04154e-06 | 0.999988 | 2.53119e-05 | 0.999898 |
| rad6          | 2.07145e-06 | 0.999990 | 1.72388e-05 | 0.999915 |
| rad34         | 1.92842e-06 | 0.999992 | 1.60484e-05 | 0.999931 |
| rad23         | 1.84070e-06 | 0.999994 | 1.53184e-05 | 0.999946 |
| rad72         | 1.74643e-06 | 0.999996 | 1.45339e-05 | 0.999961 |
| PAH8+H        | 1.14399e-06 | 0.999997 | 9.52034e-06 | 0.999970 |
| rad55         | 5.94671e-07 | 0.999997 | 4.94890e-06 | 0.999975 |
| rad56         | 3.38142e-07 | 0.999998 | 2.81405e-06 | 0.999978 |
| rad45         | 3.04577e-07 | 0.999998 | 2.53472e-06 | 0.999981 |
| rad64         | 2.83672e-07 | 0.999998 | 2.36074e-06 | 0.999983 |
| rad53         | 2.79972e-07 | 0.999999 | 2.32995e-06 | 0.999985 |
| rad68syn      | 2.55498e-07 | 0.999999 | 2.12627e-06 | 0.999987 |
| rad9          | 2.10167e-07 | 0.999999 | 1.74903e-06 | 0.999989 |
| rad68anti     | 1.63763e-07 | 0.999999 | 1.36285e-06 | 0.999991 |
| rad62         | 1.62404e-07 | 0.999999 | 1.35154e-06 | 0.999992 |
| rad22         | 1.58745e-07 | 0.999999 | 1.32109e-06 | 0.999993 |
| rad20         | 1.46289e-07 | 1.000000 | 1.21743e-06 | 0.999994 |

|           |             |          |             |          |
|-----------|-------------|----------|-------------|----------|
| rad40syn  | 1.16352e-07 | 1.000000 | 9.68293e-07 | 0.999995 |
| rad61     | 1.08693e-07 | 1.000000 | 9.04549e-07 | 0.999996 |
| rad43     | 8.85121e-08 | 1.000000 | 7.36605e-07 | 0.999997 |
| rad40anti | 7.97337e-08 | 1.000000 | 6.63550e-07 | 0.999998 |
| rad21     | 7.07441e-08 | 1.000000 | 5.88738e-07 | 0.999998 |
| rad11     | 6.39390e-08 | 1.000000 | 5.32105e-07 | 0.999999 |
| rad36     | 5.42131e-08 | 1.000000 | 4.51166e-07 | 0.999999 |
| rad18     | 2.97215e-08 | 1.000000 | 2.47345e-07 | 0.999999 |
| rad7      | 2.56493e-08 | 1.000000 | 2.13456e-07 | 1.000000 |
| rad42     | 2.15223e-08 | 1.000000 | 1.79110e-07 | 1.000000 |
| rad15     | 1.31819e-08 | 1.000000 | 1.09701e-07 | 1.000000 |
| rad28     | 1.18969e-08 | 1.000000 | 9.90065e-08 | 1.000000 |
| rad41     | 1.15397e-08 | 1.000000 | 9.60340e-08 | 1.000000 |
| rad24     | 3.59857e-09 | 1.000000 | 2.99476e-08 | 1.000000 |
| rad13     | 2.64224e-09 | 1.000000 | 2.19889e-08 | 1.000000 |
| rad12     | 2.39858e-09 | 1.000000 | 1.99612e-08 | 1.000000 |
| rad8      | 2.26624e-09 | 1.000000 | 1.88598e-08 | 1.000000 |
| rad26     | 1.33750e-09 | 1.000000 | 1.11308e-08 | 1.000000 |
| rad10     | 4.19506e-10 | 1.000000 | 3.49116e-09 | 1.000000 |
| rad47     | 2.62094e-10 | 1.000000 | 2.18117e-09 | 1.000000 |
| rad25     | 1.72619e-10 | 1.000000 | 1.43655e-09 | 1.000000 |
| rad33     | 1.43497e-10 | 1.000000 | 1.19419e-09 | 1.000000 |
| rad2      | 4.70845e-11 | 1.000000 | 3.91841e-10 | 1.000000 |
| rad5      | 2.28738e-11 | 1.000000 | 1.90358e-10 | 1.000000 |
| rad1      | 1.56661e-11 | 1.000000 | 1.30375e-10 | 1.000000 |
| rad3      | 8.42095e-12 | 1.000000 | 7.00798e-11 | 1.000000 |
| rad4      | 5.25451e-12 | 1.000000 | 4.37284e-11 | 1.000000 |
| rad14     | 2.67588e-12 | 1.000000 | 2.22689e-11 | 1.000000 |
| rad27     | 1.08161e-12 | 1.000000 | 9.00123e-12 | 1.000000 |

1000.00000 Pa, 2750.00000 K

| Rate constant | True (fraction)     | Effective (fraction) |
|---------------|---------------------|----------------------|
| Total         | 8.05113e-13 (1.00 ) | 1.00489e-13 (1.00 )  |

| species       | PYtrue      | Cumul    | PYeffective | Cumul    |
|---------------|-------------|----------|-------------|----------|
| Benzyl+C2H2   | 0.875186    | 0.875186 | 0.00000     | 0.00000  |
| PhCH2CCH+H    | 0.0492372   | 0.924423 | 0.394485    | 0.394485 |
| Indene+H      | 0.0426951   | 0.967118 | 0.342070    | 0.736555 |
| PhCHCCH2+H    | 0.0126541   | 0.979772 | 0.101384    | 0.837939 |
| Ph+Allene     | 0.0121374   | 0.991910 | 0.0972437   | 0.935183 |
| PAH3+H        | 0.00165431  | 0.993564 | 0.0132542   | 0.948437 |
| PAH9+H        | 0.00113135  | 0.994695 | 0.00906434  | 0.957501 |
| rad19anti     | 0.000789709 | 0.995485 | 0.00632709  | 0.963828 |
| PAH7+H        | 0.000730906 | 0.996216 | 0.00585597  | 0.969684 |
| rad38         | 0.000671811 | 0.996888 | 0.00538250  | 0.975067 |
| rad30         | 0.000454288 | 0.997342 | 0.00363972  | 0.978707 |
| rad50         | 0.000360045 | 0.997702 | 0.00288465  | 0.981591 |
| Ph+MeAc       | 0.000331370 | 0.998034 | 0.00265491  | 0.984246 |
| PhCCH+CH3     | 0.000293197 | 0.998327 | 0.00234907  | 0.986595 |
| rad35         | 0.000277088 | 0.998604 | 0.00222001  | 0.988815 |
| rad39         | 0.000245427 | 0.998849 | 0.00196634  | 0.990781 |
| rad46         | 0.000240098 | 0.999089 | 0.00192365  | 0.992705 |
| rad51         | 0.000170369 | 0.999260 | 0.00136499  | 0.994070 |
| rad59         | 0.000133910 | 0.999394 | 0.00107288  | 0.995143 |
| rad67         | 0.000103339 | 0.999497 | 0.000827946 | 0.995971 |
| PhCCCH3+H     | 9.47670e-05 | 0.999592 | 0.000759266 | 0.996730 |
| rad60syn      | 8.03442e-05 | 0.999672 | 0.000643712 | 0.997374 |
| rad60anti     | 5.75013e-05 | 0.999730 | 0.000460696 | 0.997835 |
| PAH10+CH3     | 4.76764e-05 | 0.999777 | 0.000381980 | 0.998217 |
| rad52         | 4.02615e-05 | 0.999818 | 0.000322572 | 0.998539 |
| rad19syn      | 3.43987e-05 | 0.999852 | 0.000275600 | 0.998815 |
| rad71         | 2.64723e-05 | 0.999878 | 0.000212094 | 0.999027 |
| rad58         | 2.60330e-05 | 0.999904 | 0.000208575 | 0.999235 |
| PhcycC3H3_A+H | 1.92264e-05 | 0.999924 | 0.000154041 | 0.999390 |
| PAH1+H        | 1.91228e-05 | 0.999943 | 0.000153210 | 0.999543 |
| rad73         | 1.27946e-05 | 0.999956 | 0.000102509 | 0.999645 |
| rad37         | 1.02502e-05 | 0.999966 | 8.21242e-05 | 0.999727 |
| rad70         | 8.99643e-06 | 0.999975 | 7.20788e-05 | 0.999799 |
| rad54         | 7.06326e-06 | 0.999982 | 5.65903e-05 | 0.999856 |
| rad65         | 4.34586e-06 | 0.999986 | 3.48188e-05 | 0.999891 |
| rad34         | 3.07746e-06 | 0.999989 | 2.46564e-05 | 0.999915 |
| PAH8+H        | 2.46252e-06 | 0.999992 | 1.97295e-05 | 0.999935 |
| rad72         | 2.37184e-06 | 0.999994 | 1.90030e-05 | 0.999954 |
| rad55         | 6.96453e-07 | 0.999995 | 5.57993e-06 | 0.999960 |
| rad23         | 6.91524e-07 | 0.999996 | 5.54044e-06 | 0.999965 |
| rad6          | 5.50302e-07 | 0.999996 | 4.40898e-06 | 0.999970 |
| rad56         | 5.05147e-07 | 0.999997 | 4.04720e-06 | 0.999974 |

|           |             |          |             |          |
|-----------|-------------|----------|-------------|----------|
| rad68syn  | 4.87225e-07 | 0.999997 | 3.90362e-06 | 0.999978 |
| rad64     | 4.82705e-07 | 0.999998 | 3.86740e-06 | 0.999982 |
| rad53     | 3.90876e-07 | 0.999998 | 3.13167e-06 | 0.999985 |
| rad68anti | 3.11754e-07 | 0.999998 | 2.49775e-06 | 0.999987 |
| rad62     | 2.50484e-07 | 0.999999 | 2.00686e-06 | 0.999989 |
| rad40syn  | 2.38153e-07 | 0.999999 | 1.90806e-06 | 0.999991 |
| rad61     | 1.99837e-07 | 0.999999 | 1.60108e-06 | 0.999993 |
| rad40anti | 1.66546e-07 | 0.999999 | 1.33436e-06 | 0.999994 |
| rad45     | 1.45617e-07 | 0.999999 | 1.16667e-06 | 0.999995 |
| rad43     | 1.38553e-07 | 0.999999 | 1.11007e-06 | 0.999996 |
| rad9      | 1.15483e-07 | 1.000000 | 9.25238e-07 | 0.999997 |
| rad20     | 8.82621e-08 | 1.000000 | 7.07150e-07 | 0.999998 |
| rad22     | 6.70255e-08 | 1.000000 | 5.37004e-07 | 0.999998 |
| rad21     | 4.12341e-08 | 1.000000 | 3.30364e-07 | 0.999999 |
| rad42     | 3.66303e-08 | 1.000000 | 2.93479e-07 | 0.999999 |
| rad11     | 3.02556e-08 | 1.000000 | 2.42406e-07 | 0.999999 |
| rad36     | 2.63026e-08 | 1.000000 | 2.10735e-07 | 1.000000 |
| rad41     | 2.04016e-08 | 1.000000 | 1.63456e-07 | 1.000000 |
| rad18     | 1.50842e-08 | 1.000000 | 1.20854e-07 | 1.000000 |
| rad7      | 9.04339e-09 | 1.000000 | 7.24550e-08 | 1.000000 |
| rad15     | 7.95282e-09 | 1.000000 | 6.37175e-08 | 1.000000 |
| rad28     | 4.61475e-09 | 1.000000 | 3.69730e-08 | 1.000000 |
| rad24     | 2.36593e-09 | 1.000000 | 1.89557e-08 | 1.000000 |
| rad8      | 2.28378e-09 | 1.000000 | 1.82975e-08 | 1.000000 |
| rad12     | 1.84707e-09 | 1.000000 | 1.47986e-08 | 1.000000 |
| rad13     | 1.02810e-09 | 1.000000 | 8.23706e-09 | 1.000000 |
| rad26     | 8.34121e-10 | 1.000000 | 6.68292e-09 | 1.000000 |
| rad47     | 3.73480e-10 | 1.000000 | 2.99229e-09 | 1.000000 |
| rad10     | 2.81473e-10 | 1.000000 | 2.25514e-09 | 1.000000 |
| rad25     | 1.17608e-10 | 1.000000 | 9.42268e-10 | 1.000000 |
| rad33     | 6.69405e-11 | 1.000000 | 5.36322e-10 | 1.000000 |
| rad2      | 2.62506e-11 | 1.000000 | 2.10318e-10 | 1.000000 |
| rad5      | 2.26866e-11 | 1.000000 | 1.81764e-10 | 1.000000 |
| rad1      | 9.75335e-12 | 1.000000 | 7.81431e-11 | 1.000000 |
| rad3      | 3.03882e-12 | 1.000000 | 2.43468e-11 | 1.000000 |
| rad4      | 1.85285e-12 | 1.000000 | 1.48449e-11 | 1.000000 |
| rad14     | 1.80081e-12 | 1.000000 | 1.44279e-11 | 1.000000 |
| rad27     | 9.44161e-13 | 1.000000 | 7.56455e-12 | 1.000000 |

1000.00000 Pa, 3000.00000 K

=====

| Rate constant | True (fraction)     | Effective (fraction) |
|---------------|---------------------|----------------------|
| Total         | 1.15309e-12 (1.00 ) | 1.53864e-13 (1.00 )  |

| species       | PYtrue      | Cumul    | PYeffective | Cumul    |
|---------------|-------------|----------|-------------|----------|
| Benzyl+C2H2   | 0.866564    | 0.866564 | 0.00000     | 0.00000  |
| PhCH2CCH+H    | 0.0611726   | 0.927737 | 0.458443    | 0.458443 |
| Indene+H      | 0.0342584   | 0.961995 | 0.256741    | 0.715184 |
| PhCHCCH2+H    | 0.0154797   | 0.977475 | 0.116009    | 0.831193 |
| Ph+Allene     | 0.0132663   | 0.990741 | 0.0994207   | 0.930614 |
| PAH3+H        | 0.00205947  | 0.992800 | 0.0154342   | 0.946048 |
| PAH9+H        | 0.00113874  | 0.993939 | 0.00853400  | 0.954582 |
| PAH7+H        | 0.000866775 | 0.994806 | 0.00649583  | 0.961078 |
| rad19anti     | 0.000812836 | 0.995619 | 0.00609159  | 0.967169 |
| rad38         | 0.000693617 | 0.996312 | 0.00519814  | 0.972367 |
| rad30         | 0.000455427 | 0.996768 | 0.00341308  | 0.975781 |
| rad50         | 0.000446588 | 0.997214 | 0.00334684  | 0.979127 |
| Ph+MeAc       | 0.000411405 | 0.997626 | 0.00308317  | 0.982211 |
| PhCCH+CH3     | 0.000319071 | 0.997945 | 0.00239120  | 0.984602 |
| rad39         | 0.000312623 | 0.998258 | 0.00234287  | 0.986945 |
| rad35         | 0.000303869 | 0.998561 | 0.00227727  | 0.989222 |
| rad46         | 0.000259194 | 0.998821 | 0.00194246  | 0.991164 |
| rad51         | 0.000230988 | 0.999052 | 0.00173108  | 0.992895 |
| rad59         | 0.000160971 | 0.999213 | 0.00120636  | 0.994102 |
| rad67         | 0.000132872 | 0.999345 | 0.000995776 | 0.995098 |
| PhCCCH3+H     | 0.000117529 | 0.999463 | 0.000880789 | 0.995978 |
| rad60syn      | 9.03394e-05 | 0.999553 | 0.000677026 | 0.996655 |
| PAH10+CH3     | 6.54058e-05 | 0.999619 | 0.000490168 | 0.997146 |
| rad60anti     | 6.52892e-05 | 0.999684 | 0.000489294 | 0.997635 |
| rad52         | 5.18126e-05 | 0.999736 | 0.000388296 | 0.998023 |
| rad19syn      | 5.01222e-05 | 0.999786 | 0.000375628 | 0.998399 |
| rad71         | 4.58028e-05 | 0.999832 | 0.000343258 | 0.998742 |
| rad58         | 3.61248e-05 | 0.999868 | 0.000270729 | 0.999013 |
| PAH1+H        | 2.87175e-05 | 0.999897 | 0.000215216 | 0.999228 |
| PhcycC3H3_A+H | 2.34726e-05 | 0.999920 | 0.000175910 | 0.999404 |
| rad73         | 2.11058e-05 | 0.999941 | 0.000158172 | 0.999562 |
| rad70         | 1.26667e-05 | 0.999954 | 9.49277e-05 | 0.999657 |
| rad37         | 1.18411e-05 | 0.999966 | 8.87405e-05 | 0.999746 |

|           |             |          |             |          |
|-----------|-------------|----------|-------------|----------|
| rad54     | 7.74598e-06 | 0.999973 | 5.80503e-05 | 0.999804 |
| rad65     | 5.75116e-06 | 0.999979 | 4.31006e-05 | 0.999847 |
| PAH8+H    | 4.82052e-06 | 0.999984 | 3.61261e-05 | 0.999883 |
| rad34     | 4.57963e-06 | 0.999989 | 3.43209e-05 | 0.999917 |
| rad72     | 4.30841e-06 | 0.999993 | 3.22883e-05 | 0.999950 |
| rad68syn  | 8.46184e-07 | 0.999994 | 6.34152e-06 | 0.999956 |
| rad55     | 7.96960e-07 | 0.999995 | 5.97262e-06 | 0.999962 |
| rad64     | 7.51785e-07 | 0.999995 | 5.63407e-06 | 0.999968 |
| rad56     | 7.22066e-07 | 0.999996 | 5.41134e-06 | 0.999973 |
| rad68anti | 5.40659e-07 | 0.999997 | 4.05183e-06 | 0.999977 |
| rad53     | 5.24017e-07 | 0.999997 | 3.92711e-06 | 0.999981 |
| rad40syn  | 4.42049e-07 | 0.999998 | 3.31283e-06 | 0.999984 |
| rad62     | 3.73955e-07 | 0.999998 | 2.80251e-06 | 0.999987 |
| rad61     | 3.23178e-07 | 0.999998 | 2.42198e-06 | 0.999989 |
| rad40anti | 3.15411e-07 | 0.999999 | 2.36377e-06 | 0.999992 |
| rad23     | 2.95247e-07 | 0.999999 | 2.21265e-06 | 0.999994 |
| rad43     | 1.94991e-07 | 0.999999 | 1.46131e-06 | 0.999996 |
| rad6      | 1.69810e-07 | 0.999999 | 1.27260e-06 | 0.999997 |
| rad45     | 7.44386e-08 | 0.999999 | 5.57862e-07 | 0.999997 |
| rad9      | 6.53479e-08 | 0.999999 | 4.89733e-07 | 0.999998 |
| rad42     | 6.01126e-08 | 0.999999 | 4.50499e-07 | 0.999998 |
| rad20     | 5.70617e-08 | 0.999999 | 4.27634e-07 | 0.999999 |
| rad22     | 3.23378e-08 | 0.999999 | 2.42348e-07 | 0.999999 |
| rad41     | 3.19797e-08 | 0.999999 | 2.39664e-07 | 0.999999 |
| rad21     | 2.57104e-08 | 1.000000 | 1.92680e-07 | 0.999999 |
| rad11     | 1.65655e-08 | 1.000000 | 1.24146e-07 | 1.000000 |
| rad36     | 1.36077e-08 | 1.000000 | 1.01980e-07 | 1.000000 |
| rad18     | 8.34068e-09 | 1.000000 | 6.25072e-08 | 1.000000 |
| rad15     | 4.88179e-09 | 1.000000 | 3.65854e-08 | 1.000000 |
| rad7      | 3.62364e-09 | 1.000000 | 2.71565e-08 | 1.000000 |
| rad8      | 2.24811e-09 | 1.000000 | 1.68479e-08 | 1.000000 |
| rad28     | 2.22247e-09 | 1.000000 | 1.66558e-08 | 1.000000 |
| rad24     | 1.60042e-09 | 1.000000 | 1.19939e-08 | 1.000000 |
| rad12     | 1.40888e-09 | 1.000000 | 1.05585e-08 | 1.000000 |
| rad26     | 5.31171e-10 | 1.000000 | 3.98073e-09 | 1.000000 |
| rad47     | 4.93807e-10 | 1.000000 | 3.70071e-09 | 1.000000 |
| rad13     | 4.52492e-10 | 1.000000 | 3.39109e-09 | 1.000000 |
| rad10     | 1.91527e-10 | 1.000000 | 1.43535e-09 | 1.000000 |
| rad25     | 8.70350e-11 | 1.000000 | 6.52262e-10 | 1.000000 |
| rad33     | 3.45555e-11 | 1.000000 | 2.58967e-10 | 1.000000 |
| rad5      | 2.19922e-11 | 1.000000 | 1.64815e-10 | 1.000000 |
| rad2      | 1.63861e-11 | 1.000000 | 1.22801e-10 | 1.000000 |
| rad1      | 6.79182e-12 | 1.000000 | 5.08996e-11 | 1.000000 |
| rad14     | 1.42674e-12 | 1.000000 | 1.06923e-11 | 1.000000 |
| rad3      | 1.28233e-12 | 1.000000 | 9.61012e-12 | 1.000000 |
| rad27     | 8.12778e-13 | 1.000000 | 6.09116e-12 | 1.000000 |
| rad4      | 7.60846e-13 | 1.000000 | 5.70197e-12 | 1.000000 |

1000.00000 Pa, 3250.00000 K

=====

| Rate constant | True (fraction)     | Effective (fraction) |
|---------------|---------------------|----------------------|
| Total         | 1.58309e-12 (1.00 ) | 2.28796e-13 (1.00 )  |

| species     | PYtrue      | Cumul    | PYeffective | Cumul    |
|-------------|-------------|----------|-------------|----------|
| Benzyl+C2H2 | 0.855475    | 0.855475 | 0.00000     | 0.00000  |
| PhCH2CCH+H  | 0.0734301   | 0.928905 | 0.508080    | 0.508080 |
| Indene+H    | 0.0278609   | 0.956766 | 0.192776    | 0.700856 |
| PhCHCCH2+H  | 0.0183612   | 0.975127 | 0.127045    | 0.827901 |
| Ph+Allene   | 0.0145940   | 0.989721 | 0.100979    | 0.928880 |
| PAH3+H      | 0.00243649  | 0.992158 | 0.0168586   | 0.945739 |
| PAH9+H      | 0.00110350  | 0.993261 | 0.00763539  | 0.953374 |
| PAH7+H      | 0.000986814 | 0.994248 | 0.00682798  | 0.960202 |
| rad19anti   | 0.000808834 | 0.995057 | 0.00559651  | 0.965798 |
| rad38       | 0.000686753 | 0.995744 | 0.00475180  | 0.970550 |
| rad50       | 0.000518822 | 0.996262 | 0.00358985  | 0.974140 |
| Ph+MeAc     | 0.000489472 | 0.996752 | 0.00338677  | 0.977527 |
| rad30       | 0.000447971 | 0.997200 | 0.00309961  | 0.980627 |
| PhCCH+CH3   | 0.000378227 | 0.997578 | 0.00261704  | 0.983244 |
| rad39       | 0.000375031 | 0.997953 | 0.00259493  | 0.985858 |
| rad35       | 0.000323023 | 0.998276 | 0.00223507  | 0.988074 |
| rad51       | 0.000289881 | 0.998566 | 0.00200575  | 0.990079 |
| rad46       | 0.000266799 | 0.998833 | 0.00184604  | 0.991925 |
| rad59       | 0.000184697 | 0.999018 | 0.00127796  | 0.993203 |
| rad67       | 0.000159869 | 0.999177 | 0.00110617  | 0.994309 |
| PhCCCH3+H   | 0.000140366 | 0.999318 | 0.000971225 | 0.995281 |
| rad60syn    | 9.79797e-05 | 0.999416 | 0.000677943 | 0.995959 |
| PAH10+CH3   | 8.26370e-05 | 0.999498 | 0.000571784 | 0.996530 |
| rad71       | 7.34828e-05 | 0.999572 | 0.000508444 | 0.997039 |

|               |             |          |             |          |
|---------------|-------------|----------|-------------|----------|
| rad60anti     | 7.14065e-05 | 0.999643 | 0.000494077 | 0.997533 |
| rad19syn      | 7.13468e-05 | 0.999715 | 0.000493665 | 0.998027 |
| rad52         | 6.20513e-05 | 0.999777 | 0.000429347 | 0.998456 |
| rad58         | 4.68403e-05 | 0.999823 | 0.000324098 | 0.998780 |
| PAH1+H        | 3.99182e-05 | 0.999863 | 0.000276203 | 0.999056 |
| rad73         | 3.19410e-05 | 0.999895 | 0.000221007 | 0.999277 |
| PhcycC3H3_A+H | 2.78091e-05 | 0.999923 | 0.000192417 | 0.999470 |
| rad70         | 1.68875e-05 | 0.999940 | 0.000116848 | 0.999587 |
| rad37         | 1.28494e-05 | 0.999953 | 8.89080e-05 | 0.999675 |
| PAH8+H        | 8.51465e-06 | 0.999961 | 5.89148e-05 | 0.999734 |
| rad54         | 8.38363e-06 | 0.999970 | 5.80082e-05 | 0.999792 |
| rad72         | 7.65934e-06 | 0.999977 | 5.29967e-05 | 0.999845 |
| rad65         | 7.07556e-06 | 0.999985 | 4.89574e-05 | 0.999894 |
| rad34         | 6.39811e-06 | 0.999991 | 4.42700e-05 | 0.999939 |
| rad68syn      | 1.34704e-06 | 0.999992 | 9.32045e-06 | 0.999948 |
| rad64         | 1.07573e-06 | 0.999993 | 7.44324e-06 | 0.999955 |
| rad56         | 9.80305e-07 | 0.999994 | 6.78295e-06 | 0.999962 |
| rad55         | 8.94183e-07 | 0.999995 | 6.18705e-06 | 0.999968 |
| rad68anti     | 8.59678e-07 | 0.999996 | 5.94830e-06 | 0.999974 |
| rad40syn      | 7.45033e-07 | 0.999997 | 5.15505e-06 | 0.999979 |
| rad53         | 6.73589e-07 | 0.999998 | 4.66071e-06 | 0.999984 |
| rad40anti     | 5.40913e-07 | 0.999998 | 3.74270e-06 | 0.999988 |
| rad62         | 5.25746e-07 | 0.999999 | 3.63775e-06 | 0.999991 |
| rad61         | 4.70885e-07 | 0.999999 | 3.25816e-06 | 0.999995 |
| rad43         | 2.53753e-07 | 0.999999 | 1.75577e-06 | 0.999996 |
| rad23         | 1.37676e-07 | 0.999999 | 9.52610e-07 | 0.999997 |
| rad42         | 9.15845e-08 | 1.000000 | 6.33693e-07 | 0.999998 |
| rad6          | 6.09624e-08 | 1.000000 | 4.21813e-07 | 0.999998 |
| rad41         | 4.57596e-08 | 1.000000 | 3.16621e-07 | 0.999999 |
| rad45         | 4.01353e-08 | 1.000000 | 2.77705e-07 | 0.999999 |
| rad20         | 3.89704e-08 | 1.000000 | 2.69645e-07 | 0.999999 |
| rad9          | 3.82246e-08 | 1.000000 | 2.64484e-07 | 1.000000 |
| rad22         | 1.72527e-08 | 1.000000 | 1.19375e-07 | 1.000000 |
| rad21         | 1.69158e-08 | 1.000000 | 1.17044e-07 | 1.000000 |
| rad11         | 1.02020e-08 | 1.000000 | 7.05900e-08 | 1.000000 |
| rad36         | 7.40776e-09 | 1.000000 | 5.12559e-08 | 1.000000 |
| rad18         | 4.92851e-09 | 1.000000 | 3.41015e-08 | 1.000000 |
| rad15         | 3.06249e-09 | 1.000000 | 2.11901e-08 | 1.000000 |
| rad8          | 2.17025e-09 | 1.000000 | 1.50164e-08 | 1.000000 |
| rad7          | 1.64626e-09 | 1.000000 | 1.13908e-08 | 1.000000 |
| rad28         | 1.22722e-09 | 1.000000 | 8.49139e-09 | 1.000000 |
| rad24         | 1.10817e-09 | 1.000000 | 7.66769e-09 | 1.000000 |
| rad12         | 1.07373e-09 | 1.000000 | 7.42938e-09 | 1.000000 |
| rad47         | 6.05103e-10 | 1.000000 | 4.18684e-09 | 1.000000 |
| rad26         | 3.42298e-10 | 1.000000 | 2.36843e-09 | 1.000000 |
| rad13         | 2.24596e-10 | 1.000000 | 1.55403e-09 | 1.000000 |
| rad10         | 1.30880e-10 | 1.000000 | 9.05590e-10 | 1.000000 |
| rad25         | 6.80444e-11 | 1.000000 | 4.70815e-10 | 1.000000 |
| rad5          | 2.11006e-11 | 1.000000 | 1.46000e-10 | 1.000000 |
| rad33         | 1.95988e-11 | 1.000000 | 1.35609e-10 | 1.000000 |
| rad2          | 1.07873e-11 | 1.000000 | 7.46399e-11 | 1.000000 |
| rad1          | 4.95171e-12 | 1.000000 | 3.42620e-11 | 1.000000 |
| rad14         | 1.22335e-12 | 1.000000 | 8.46462e-12 | 1.000000 |
| rad27         | 6.88049e-13 | 1.000000 | 4.76076e-12 | 1.000000 |
| rad3          | 6.27476e-13 | 1.000000 | 4.34165e-12 | 1.000000 |
| rad4          | 3.62851e-13 | 1.000000 | 2.51065e-12 | 1.000000 |

1000.00000 Pa, 3500.00000 K

| Rate constant | True (fraction)     | Effective (fraction) |
|---------------|---------------------|----------------------|
| Total         | 2.10046e-12 (1.00 ) | 3.29926e-13 (1.00 )  |

  

| species     | PYtrue      | Cumul    | PYeffective | Cumul    |
|-------------|-------------|----------|-------------|----------|
| Benzyl+C2H2 | 0.842927    | 0.842927 | 0.00000     | 0.00000  |
| PhCH2CCH+H  | 0.0857240   | 0.928651 | 0.545761    | 0.545761 |
| Indene+H    | 0.0229275   | 0.951578 | 0.145968    | 0.691729 |
| PhCHCCH2+H  | 0.0212218   | 0.972800 | 0.135108    | 0.826837 |
| Ph+Allene   | 0.0160719   | 0.988872 | 0.102321    | 0.929158 |
| PAH3+H      | 0.00277082  | 0.991643 | 0.0176404   | 0.946798 |
| PAH7+H      | 0.00108555  | 0.992729 | 0.00691110  | 0.953709 |
| PAH9+H      | 0.00103820  | 0.993767 | 0.00660968  | 0.960319 |
| rad19anti   | 0.000785977 | 0.994553 | 0.00500391  | 0.965323 |
| rad38       | 0.000657552 | 0.995210 | 0.00418629  | 0.969509 |
| rad50       | 0.000571599 | 0.995782 | 0.00363908  | 0.973148 |
| Ph+MeAc     | 0.000559757 | 0.996342 | 0.00356368  | 0.976712 |
| PhCCH+CH3   | 0.000466765 | 0.996808 | 0.00297165  | 0.979684 |
| rad30       | 0.000434294 | 0.997243 | 0.00276493  | 0.982449 |
| rad39       | 0.000427063 | 0.997670 | 0.00271889  | 0.985168 |

|               |             |          |             |          |
|---------------|-------------|----------|-------------|----------|
| rad51         | 0.000341125 | 0.998011 | 0.00217176  | 0.987339 |
| rad35         | 0.000335209 | 0.998346 | 0.00213410  | 0.989473 |
| rad46         | 0.000264430 | 0.998611 | 0.00168349  | 0.991157 |
| rad59         | 0.000204436 | 0.998815 | 0.00130154  | 0.992459 |
| rad67         | 0.000182834 | 0.998998 | 0.00116401  | 0.993623 |
| PhCCCH3+H     | 0.000163684 | 0.999161 | 0.00104209  | 0.994665 |
| rad71         | 0.000107965 | 0.999269 | 0.000687356 | 0.995352 |
| rad60syn      | 0.000103349 | 0.999373 | 0.000657967 | 0.996010 |
| PAH10+CH3     | 9.81269e-05 | 0.999471 | 0.000624723 | 0.996635 |
| rad19syn      | 9.79750e-05 | 0.999569 | 0.000623756 | 0.997258 |
| rad60anti     | 7.58698e-05 | 0.999645 | 0.000483024 | 0.997741 |
| rad52         | 7.00658e-05 | 0.999715 | 0.000446073 | 0.998187 |
| rad58         | 5.76203e-05 | 0.999772 | 0.000366839 | 0.998554 |
| PAH1+H        | 5.20734e-05 | 0.999825 | 0.000331524 | 0.998886 |
| rad73         | 4.44195e-05 | 0.999869 | 0.000282796 | 0.999169 |
| PhcycC3H3_A+H | 3.20680e-05 | 0.999901 | 0.000204160 | 0.999373 |
| rad70         | 2.14732e-05 | 0.999923 | 0.000136709 | 0.999510 |
| PAH8+H        | 1.37780e-05 | 0.999936 | 8.77173e-05 | 0.999597 |
| rad37         | 1.33229e-05 | 0.999950 | 8.48198e-05 | 0.999682 |
| rad72         | 1.24656e-05 | 0.999962 | 7.93621e-05 | 0.999761 |
| rad54         | 8.98100e-06 | 0.999971 | 5.71774e-05 | 0.999819 |
| rad34         | 8.46836e-06 | 0.999980 | 5.39137e-05 | 0.999873 |
| rad65         | 8.19694e-06 | 0.999988 | 5.21857e-05 | 0.999925 |
| rad68syn      | 1.99283e-06 | 0.999990 | 1.26873e-05 | 0.999937 |
| rad64         | 1.43562e-06 | 0.999991 | 9.13987e-06 | 0.999947 |
| rad56         | 1.27439e-06 | 0.999992 | 8.11335e-06 | 0.999955 |
| rad68anti     | 1.27062e-06 | 0.999994 | 8.08941e-06 | 0.999963 |
| rad40syn      | 1.15754e-06 | 0.999995 | 7.36947e-06 | 0.999970 |
| rad55         | 9.87679e-07 | 0.999996 | 6.28804e-06 | 0.999976 |
| rad40anti     | 8.53041e-07 | 0.999997 | 5.43087e-06 | 0.999982 |
| rad53         | 8.36099e-07 | 0.999998 | 5.32301e-06 | 0.999987 |
| rad62         | 6.97598e-07 | 0.999998 | 4.44125e-06 | 0.999992 |
| rad61         | 6.32740e-07 | 0.999999 | 4.02833e-06 | 0.999996 |
| rad43         | 3.12024e-07 | 0.999999 | 1.98650e-06 | 0.999998 |
| rad42         | 1.30189e-07 | 0.999999 | 8.28846e-07 | 0.999998 |
| rad23         | 6.87633e-08 | 0.999999 | 4.37780e-07 | 0.999999 |
| rad41         | 6.11865e-08 | 0.999999 | 3.89543e-07 | 0.999999 |
| rad20         | 2.78198e-08 | 0.999999 | 1.77114e-07 | 0.999999 |
| rad6          | 2.53690e-08 | 0.999999 | 1.61511e-07 | 1.000000 |
| rad9          | 2.31372e-08 | 1.000000 | 1.47303e-07 | 1.000000 |
| rad45         | 2.25959e-08 | 1.000000 | 1.43857e-07 | 1.000000 |
| rad21         | 1.16260e-08 | 1.000000 | 7.40167e-08 | 1.000000 |
| rad22         | 9.97667e-09 | 1.000000 | 6.35163e-08 | 1.000000 |
| rad11         | 6.87011e-09 | 1.000000 | 4.37385e-08 | 1.000000 |
| rad36         | 4.20197e-09 | 1.000000 | 2.67518e-08 | 1.000000 |
| rad18         | 3.07071e-09 | 1.000000 | 1.95496e-08 | 1.000000 |
| rad8          | 2.05988e-09 | 1.000000 | 1.31142e-08 | 1.000000 |
| rad15         | 1.96710e-09 | 1.000000 | 1.25235e-08 | 1.000000 |
| rad7          | 8.36065e-10 | 1.000000 | 5.32279e-09 | 1.000000 |
| rad12         | 8.21551e-10 | 1.000000 | 5.23039e-09 | 1.000000 |
| rad24         | 7.83087e-10 | 1.000000 | 4.98551e-09 | 1.000000 |
| rad28         | 7.36699e-10 | 1.000000 | 4.69018e-09 | 1.000000 |
| rad47         | 6.95721e-10 | 1.000000 | 4.42930e-09 | 1.000000 |
| rad26         | 2.23409e-10 | 1.000000 | 1.42233e-09 | 1.000000 |
| rad13         | 1.23892e-10 | 1.000000 | 7.88758e-10 | 1.000000 |
| rad10         | 9.01273e-11 | 1.000000 | 5.73794e-10 | 1.000000 |
| rad25         | 5.50771e-11 | 1.000000 | 3.50647e-10 | 1.000000 |
| rad5          | 2.01905e-11 | 1.000000 | 1.28542e-10 | 1.000000 |
| rad33         | 1.20528e-11 | 1.000000 | 7.67338e-11 | 1.000000 |
| rad2          | 7.39272e-12 | 1.000000 | 4.70656e-11 | 1.000000 |
| rad1          | 3.69635e-12 | 1.000000 | 2.35327e-11 | 1.000000 |
| rad14         | 1.08018e-12 | 1.000000 | 6.87693e-12 | 1.000000 |
| rad27         | 5.76924e-13 | 1.000000 | 3.67298e-12 | 1.000000 |
| rad3          | 3.47756e-13 | 1.000000 | 2.21399e-12 | 1.000000 |
| rad4          | 1.97159e-13 | 1.000000 | 1.25521e-12 | 1.000000 |

1000.00000 Pa, 3750.00000 K

=====

| Rate constant | True (fraction)     | Effective (fraction) |
|---------------|---------------------|----------------------|
| Total         | 2.70978e-12 (1.00 ) | 4.61711e-13 (1.00 )  |

| species     | PYtrue     | Cumul    | PYeffective | Cumul    |
|-------------|------------|----------|-------------|----------|
| Benzyl+C2H2 | 0.829613   | 0.829613 | 0.00000     | 0.00000  |
| PhCH2CCH+H  | 0.0978315  | 0.927445 | 0.574174    | 0.574174 |
| PhCHCCH2+H  | 0.0240140  | 0.951458 | 0.140938    | 0.715112 |
| Indene+H    | 0.0190785  | 0.970537 | 0.111972    | 0.827084 |
| Ph+Allene   | 0.0176550  | 0.988192 | 0.103617    | 0.930701 |
| PAH3+H      | 0.00305566 | 0.991248 | 0.0179337   | 0.948635 |



|               |             |          |             |          |
|---------------|-------------|----------|-------------|----------|
| PAH7+H        | 0.00116197  | 0.992410 | 0.00681962  | 0.955454 |
| PAH9+H        | 0.000954967 | 0.993365 | 0.00560471  | 0.961059 |
| rad19anti     | 0.000750858 | 0.994115 | 0.00440679  | 0.965466 |
| Ph+MeAc       | 0.000618505 | 0.994734 | 0.00363001  | 0.969096 |
| rad38         | 0.000613144 | 0.995347 | 0.00359855  | 0.972694 |
| rad50         | 0.000603742 | 0.995951 | 0.00354336  | 0.976238 |
| PhCCH+CH3     | 0.000581842 | 0.996533 | 0.00341483  | 0.979653 |
| rad39         | 0.000465911 | 0.996999 | 0.00273444  | 0.982387 |
| rad30         | 0.000416538 | 0.997415 | 0.00244466  | 0.984832 |
| rad51         | 0.000381133 | 0.997796 | 0.00223687  | 0.987069 |
| rad35         | 0.000341495 | 0.998138 | 0.00200424  | 0.989073 |
| rad46         | 0.000254418 | 0.998392 | 0.00149318  | 0.990566 |
| rad59         | 0.000220084 | 0.998612 | 0.00129167  | 0.991858 |
| rad67         | 0.000201012 | 0.998813 | 0.00117974  | 0.993037 |
| PhCCCH3+H     | 0.000187988 | 0.999001 | 0.00110330  | 0.994141 |
| rad71         | 0.000146978 | 0.999148 | 0.000862615 | 0.995003 |
| rad19syn      | 0.000129262 | 0.999278 | 0.000758637 | 0.995762 |
| PAH10+CH3     | 0.000111174 | 0.999389 | 0.000652482 | 0.996414 |
| rad60syn      | 0.000106707 | 0.999495 | 0.000626262 | 0.997041 |
| rad60anti     | 7.88382e-05 | 0.999574 | 0.000462702 | 0.997503 |
| rad52         | 7.54706e-05 | 0.999650 | 0.000442937 | 0.997946 |
| rad58         | 6.80264e-05 | 0.999718 | 0.000399247 | 0.998346 |
| PAH1+H        | 6.45911e-05 | 0.999782 | 0.000379085 | 0.998725 |
| rad73         | 5.75453e-05 | 0.999840 | 0.000337734 | 0.999062 |
| PhcycC3H3_A+H | 3.61231e-05 | 0.999876 | 0.000212007 | 0.999274 |
| rad70         | 2.62319e-05 | 0.999902 | 0.000153955 | 0.999428 |
| PAH8+H        | 2.07450e-05 | 0.999923 | 0.000121752 | 0.999550 |
| rad72         | 1.86160e-05 | 0.999942 | 0.000109257 | 0.999659 |
| rad37         | 1.33630e-05 | 0.999955 | 7.84278e-05 | 0.999738 |
| rad34         | 1.07121e-05 | 0.999966 | 6.28696e-05 | 0.999801 |
| rad54         | 9.53983e-06 | 0.999975 | 5.59893e-05 | 0.999857 |
| rad65         | 9.05427e-06 | 0.999984 | 5.31395e-05 | 0.999910 |
| rad68syn      | 2.77546e-06 | 0.999987 | 1.62892e-05 | 0.999926 |
| rad64         | 1.81267e-06 | 0.999989 | 1.06386e-05 | 0.999937 |
| rad68anti     | 1.76824e-06 | 0.999991 | 1.03778e-05 | 0.999947 |
| rad40syn      | 1.68214e-06 | 0.999992 | 9.87247e-06 | 0.999957 |
| rad56         | 1.59886e-06 | 0.999994 | 9.38370e-06 | 0.999966 |
| rad40anti     | 1.25580e-06 | 0.999995 | 7.37028e-06 | 0.999974 |
| rad55         | 1.07706e-06 | 0.999996 | 6.32125e-06 | 0.999980 |
| rad53         | 1.00846e-06 | 0.999997 | 5.91868e-06 | 0.999986 |
| rad62         | 8.81888e-07 | 0.999998 | 5.17581e-06 | 0.999991 |
| rad61         | 7.98536e-07 | 0.999999 | 4.68661e-06 | 0.999996 |
| rad43         | 3.67980e-07 | 0.999999 | 2.15968e-06 | 0.999998 |
| rad42         | 1.74807e-07 | 0.999999 | 1.02594e-06 | 0.999999 |
| rad41         | 7.77099e-08 | 1.000000 | 4.56080e-07 | 0.999999 |
| rad23         | 3.63560e-08 | 1.000000 | 2.13373e-07 | 1.000000 |
| rad20         | 2.05942e-08 | 1.000000 | 1.20867e-07 | 1.000000 |
| rad9          | 1.44817e-08 | 1.000000 | 8.49931e-08 | 1.000000 |
| rad45         | 1.31874e-08 | 1.000000 | 7.73966e-08 | 1.000000 |
| rad6          | 1.20758e-08 | 1.000000 | 7.08727e-08 | 1.000000 |
| rad21         | 8.28460e-09 | 1.000000 | 4.86224e-08 | 1.000000 |
| rad22         | 6.16426e-09 | 1.000000 | 3.61781e-08 | 1.000000 |
| rad11         | 4.94406e-09 | 1.000000 | 2.90167e-08 | 1.000000 |
| rad36         | 2.46614e-09 | 1.000000 | 1.44738e-08 | 1.000000 |
| rad18         | 1.99826e-09 | 1.000000 | 1.17278e-08 | 1.000000 |
| rad8          | 1.92604e-09 | 1.000000 | 1.13039e-08 | 1.000000 |
| rad15         | 1.29375e-09 | 1.000000 | 7.59305e-09 | 1.000000 |
| rad47         | 7.60040e-10 | 1.000000 | 4.46068e-09 | 1.000000 |
| rad12         | 6.32611e-10 | 1.000000 | 3.71279e-09 | 1.000000 |
| rad24         | 5.63754e-10 | 1.000000 | 3.30867e-09 | 1.000000 |
| rad28         | 4.66626e-10 | 1.000000 | 2.73863e-09 | 1.000000 |
| rad7          | 4.65827e-10 | 1.000000 | 2.73394e-09 | 1.000000 |
| rad26         | 1.48000e-10 | 1.000000 | 8.68615e-10 | 1.000000 |
| rad13         | 7.45661e-11 | 1.000000 | 4.37629e-10 | 1.000000 |
| rad10         | 6.29198e-11 | 1.000000 | 3.69277e-10 | 1.000000 |
| rad25         | 4.55764e-11 | 1.000000 | 2.67488e-10 | 1.000000 |
| rad5          | 1.93208e-11 | 1.000000 | 1.13394e-10 | 1.000000 |
| rad33         | 7.92547e-12 | 1.000000 | 4.65146e-11 | 1.000000 |
| rad2          | 5.28872e-12 | 1.000000 | 3.10395e-11 | 1.000000 |
| rad1          | 2.80321e-12 | 1.000000 | 1.64520e-11 | 1.000000 |
| rad14         | 9.61840e-13 | 1.000000 | 5.64504e-12 | 1.000000 |
| rad27         | 4.82668e-13 | 1.000000 | 2.83278e-12 | 1.000000 |
| rad3          | 2.12749e-13 | 1.000000 | 1.24863e-12 | 1.000000 |
| rad4          | 1.19107e-13 | 1.000000 | 6.99038e-13 | 1.000000 |

1000.00000 Pa, 4000.00000 K

| Rate constant | True (fraction)     | Effective (fraction) |
|---------------|---------------------|----------------------|
| Total         | 3.41497e-12 (1.00 ) | 6.28300e-13 (1.00 )  |

| species       | PYtrue      | Cumul    | PYeffective | Cumul    |
|---------------|-------------|----------|-------------|----------|
| Benzyl+C2H2   | 0.816016    | 0.816016 | 0.00000     | 0.00000  |
| PhCH2CCH+H    | 0.109584    | 0.925600 | 0.595618    | 0.595618 |
| PhCHCCH2+H    | 0.0267097   | 0.952310 | 0.145174    | 0.740792 |
| Ph+Allene     | 0.0193045   | 0.971614 | 0.104925    | 0.845717 |
| Indene+H      | 0.0160486   | 0.987663 | 0.0872282   | 0.932945 |
| PAH3+H        | 0.00329013  | 0.990953 | 0.0178827   | 0.950828 |
| PAH7+H        | 0.00121789  | 0.992171 | 0.00661958  | 0.957447 |
| PAH9+H        | 0.000863943 | 0.993035 | 0.00469576  | 0.962143 |
| PhCCH+CH3     | 0.000720160 | 0.993755 | 0.00391426  | 0.966058 |
| rad19anti     | 0.000708488 | 0.994463 | 0.00385082  | 0.969908 |
| Ph+MeAc       | 0.000663929 | 0.995127 | 0.00360863  | 0.973517 |
| rad50         | 0.000616890 | 0.995744 | 0.00335296  | 0.976870 |
| rad38         | 0.000560096 | 0.996304 | 0.00304427  | 0.979914 |
| rad39         | 0.000491081 | 0.996795 | 0.00266916  | 0.982583 |
| rad51         | 0.000408555 | 0.997204 | 0.00222061  | 0.984804 |
| rad30         | 0.000396477 | 0.997600 | 0.00215496  | 0.986959 |
| rad35         | 0.000343086 | 0.997944 | 0.00186476  | 0.988824 |
| rad46         | 0.000239239 | 0.998183 | 0.00130033  | 0.990124 |
| rad59         | 0.000231903 | 0.998415 | 0.00126045  | 0.991384 |
| rad67         | 0.000214259 | 0.998629 | 0.00116455  | 0.992549 |
| PhCCCH3+H     | 0.000213579 | 0.998843 | 0.00116086  | 0.993710 |
| rad71         | 0.000187950 | 0.999030 | 0.00102156  | 0.994731 |
| rad19syn      | 0.000163942 | 0.999194 | 0.000891068 | 0.995622 |
| PAH10+CH3     | 0.000121536 | 0.999316 | 0.000660580 | 0.996283 |
| rad60syn      | 0.000108396 | 0.999424 | 0.000589160 | 0.996872 |
| rad60anti     | 8.05427e-05 | 0.999505 | 0.000437771 | 0.997310 |
| rad52         | 7.83024e-05 | 0.999583 | 0.000425595 | 0.997736 |
| rad58         | 7.77573e-05 | 0.999661 | 0.000422632 | 0.998158 |
| PAH1+H        | 7.70042e-05 | 0.999738 | 0.000418538 | 0.998577 |
| rad73         | 7.03849e-05 | 0.999808 | 0.000382561 | 0.998959 |
| PhcycC3H3_A+H | 3.98821e-05 | 0.999848 | 0.000216770 | 0.999176 |
| rad70         | 3.09912e-05 | 0.999879 | 0.000168445 | 0.999345 |
| PAH8+H        | 2.94371e-05 | 0.999909 | 0.000159999 | 0.999505 |
| rad72         | 2.58516e-05 | 0.999934 | 0.000140510 | 0.999645 |
| rad37         | 1.30843e-05 | 0.999948 | 7.11169e-05 | 0.999716 |
| rad34         | 1.30500e-05 | 0.999961 | 7.09300e-05 | 0.999787 |
| rad54         | 1.00585e-05 | 0.999971 | 5.46704e-05 | 0.999842 |
| rad65         | 9.63809e-06 | 0.999980 | 5.23856e-05 | 0.999894 |
| rad68syn      | 3.67791e-06 | 0.999984 | 1.99905e-05 | 0.999914 |
| rad68anti     | 2.34162e-06 | 0.999986 | 1.27273e-05 | 0.999927 |
| rad40syn      | 2.31369e-06 | 0.999989 | 1.25756e-05 | 0.999939 |
| rad64         | 2.19090e-06 | 0.999991 | 1.19081e-05 | 0.999951 |
| rad56         | 1.94746e-06 | 0.999993 | 1.05850e-05 | 0.999962 |
| rad40anti     | 1.74699e-06 | 0.999995 | 9.49537e-06 | 0.999971 |
| rad53         | 1.18747e-06 | 0.999996 | 6.45420e-06 | 0.999978 |
| rad55         | 1.16171e-06 | 0.999997 | 6.31422e-06 | 0.999984 |
| rad62         | 1.07274e-06 | 0.999998 | 5.83065e-06 | 0.999990 |
| rad61         | 9.59695e-07 | 0.999999 | 5.21620e-06 | 0.999995 |
| rad43         | 4.20275e-07 | 0.999999 | 2.28431e-06 | 0.999998 |
| rad42         | 2.24312e-07 | 1.000000 | 1.21919e-06 | 0.999999 |
| rad41         | 9.47636e-08 | 1.000000 | 5.15066e-07 | 0.999999 |
| rad23         | 2.01881e-08 | 1.000000 | 1.09728e-07 | 0.999999 |
| rad20         | 1.57138e-08 | 1.000000 | 8.54086e-08 | 0.999999 |
| rad9          | 9.35632e-09 | 1.000000 | 5.08541e-08 | 1.000000 |
| rad45         | 7.93722e-09 | 1.000000 | 4.31409e-08 | 1.000000 |
| rad6          | 6.45253e-09 | 1.000000 | 3.50712e-08 | 1.000000 |
| rad21         | 6.08655e-09 | 1.000000 | 3.30820e-08 | 1.000000 |
| rad22         | 4.02551e-09 | 1.000000 | 2.18797e-08 | 1.000000 |
| rad11         | 3.73879e-09 | 1.000000 | 2.03213e-08 | 1.000000 |
| rad8          | 1.77723e-09 | 1.000000 | 9.65973e-09 | 1.000000 |
| rad36         | 1.49004e-09 | 1.000000 | 8.09877e-09 | 1.000000 |
| rad18         | 1.34900e-09 | 1.000000 | 7.33217e-09 | 1.000000 |
| rad15         | 8.70441e-10 | 1.000000 | 4.73108e-09 | 1.000000 |
| rad47         | 7.97372e-10 | 1.000000 | 4.33393e-09 | 1.000000 |
| rad12         | 4.90765e-10 | 1.000000 | 2.66744e-09 | 1.000000 |
| rad24         | 4.13092e-10 | 1.000000 | 2.24527e-09 | 1.000000 |
| rad28         | 3.07092e-10 | 1.000000 | 1.66913e-09 | 1.000000 |
| rad7          | 2.79652e-10 | 1.000000 | 1.51998e-09 | 1.000000 |
| rad26         | 9.96817e-11 | 1.000000 | 5.41797e-10 | 1.000000 |
| rad13         | 4.81290e-11 | 1.000000 | 2.61594e-10 | 1.000000 |
| rad10         | 4.47832e-11 | 1.000000 | 2.43409e-10 | 1.000000 |
| rad25         | 3.82768e-11 | 1.000000 | 2.08044e-10 | 1.000000 |
| rad5          | 1.84903e-11 | 1.000000 | 1.00500e-10 | 1.000000 |
| rad33         | 5.50386e-12 | 1.000000 | 2.99150e-11 | 1.000000 |
| rad2          | 3.96720e-12 | 1.000000 | 2.15628e-11 | 1.000000 |
| rad1          | 2.15269e-12 | 1.000000 | 1.17004e-11 | 1.000000 |
| rad14         | 8.58182e-13 | 1.000000 | 4.66445e-12 | 1.000000 |

|       |             |          |             |          |
|-------|-------------|----------|-------------|----------|
| rad27 | 4.04942e-13 | 1.000000 | 2.20097e-12 | 1.000000 |
| rad3  | 1.40650e-13 | 1.000000 | 7.64471e-13 | 1.000000 |
| rad4  | 7.82155e-14 | 1.000000 | 4.25122e-13 | 1.000000 |

100.000000 Pa, 20.0000000 K

| Rate constant | True (fraction)      | Effective (fraction) |
|---------------|----------------------|----------------------|
| Total         | 1.34336e-156 (1.00 ) | 1.34336e-156 (1.00 ) |

| species       | PYtrue      | Cumul    | PYeffective | Cumul    |
|---------------|-------------|----------|-------------|----------|
| rad22         | 0.347846    | 0.347846 | 0.347846    | 0.347846 |
| rad20         | 0.262593    | 0.610439 | 0.262593    | 0.610439 |
| rad21         | 0.163579    | 0.774018 | 0.163580    | 0.774019 |
| rad18         | 0.162658    | 0.936676 | 0.162658    | 0.936677 |
| Indene+H      | 0.0481014   | 0.984777 | 0.0481014   | 0.984778 |
| rad45         | 0.0131518   | 0.997929 | 0.0131518   | 0.997930 |
| rad23         | 0.00119716  | 0.999126 | 0.00119716  | 0.999127 |
| rad36         | 0.000819493 | 0.999946 | 0.000819494 | 0.999947 |
| rad11         | 5.33906e-05 | 0.999999 | 5.33906e-05 | 1.00000  |
| Benzyl+C2H2   | 3.79658e-07 | 1.000000 | 0.00000     | 1.00000  |
| rad6          | 6.20880e-08 | 1.000000 | 6.20881e-08 | 1.00000  |
| rad24         | 2.88781e-10 | 1.000000 | 2.88781e-10 | 1.00000  |
| rad13         | 9.03487e-14 | 1.000000 | 9.03488e-14 | 1.00000  |
| rad7          | 4.53862e-14 | 1.000000 | 4.53862e-14 | 1.00000  |
| rad30         | 4.20364e-16 | 1.000000 | 4.20364e-16 | 1.00000  |
| rad33         | 1.01419e-16 | 1.000000 | 1.01419e-16 | 1.00000  |
| rad35         | 7.19600e-19 | 1.000000 | 7.19600e-19 | 1.00000  |
| rad38         | 5.28473e-19 | 1.000000 | 5.28473e-19 | 1.00000  |
| rad15         | 3.74112e-19 | 1.000000 | 3.74112e-19 | 1.00000  |
| rad3          | 2.75449e-19 | 1.000000 | 2.75449e-19 | 1.00000  |
| PAH9+H        | 2.40977e-19 | 1.000000 | 2.40977e-19 | 1.00000  |
| rad4          | 1.39364e-19 | 1.000000 | 1.39364e-19 | 1.00000  |
| rad25         | 2.81206e-20 | 1.000000 | 2.81206e-20 | 1.00000  |
| rad2          | 7.90393e-24 | 1.000000 | 7.90393e-24 | 1.00000  |
| rad28         | 2.30939e-24 | 1.000000 | 2.30939e-24 | 1.00000  |
| rad1          | 5.00542e-25 | 1.000000 | 5.00542e-25 | 1.00000  |
| PhCHCCH2+H    | 3.31222e-26 | 1.000000 | 3.31222e-26 | 1.00000  |
| rad46         | 3.12162e-27 | 1.000000 | 3.12162e-27 | 1.00000  |
| rad10         | 1.07799e-28 | 1.000000 | 1.07799e-28 | 1.00000  |
| rad31         | 7.25552e-29 | 1.000000 | 7.25552e-29 | 1.00000  |
| rad9          | 4.56051e-29 | 1.000000 | 4.56052e-29 | 1.00000  |
| rad14         | 6.42258e-31 | 1.000000 | 6.42258e-31 | 1.00000  |
| PhCCH+CH3     | 2.83097e-31 | 1.000000 | 2.83097e-31 | 1.00000  |
| rad8          | 9.77695e-33 | 1.000000 | 9.77695e-33 | 1.00000  |
| Ph+Allene     | 5.49376e-33 | 1.000000 | 5.49376e-33 | 1.00000  |
| rad27         | 1.88588e-33 | 1.000000 | 1.88588e-33 | 1.00000  |
| rad60syn      | 1.38837e-33 | 1.000000 | 1.38837e-33 | 1.00000  |
| rad60anti     | 2.77669e-35 | 1.000000 | 2.77669e-35 | 1.00000  |
| PhCCCH3+H     | 3.62637e-36 | 1.000000 | 3.62638e-36 | 1.00000  |
| rad26         | 1.02236e-36 | 1.000000 | 1.02236e-36 | 1.00000  |
| PhCH2CCH+H    | 1.66017e-38 | 1.000000 | 1.66017e-38 | 1.00000  |
| Ph+MeAc       | 4.90419e-39 | 1.000000 | 4.90419e-39 | 1.00000  |
| PAH7+H        | 1.38953e-39 | 1.000000 | 1.38953e-39 | 1.00000  |
| rad39         | 2.89607e-41 | 1.000000 | 2.89607e-41 | 1.00000  |
| PAH3+H        | 5.33803e-44 | 1.000000 | 5.33803e-44 | 1.00000  |
| rad50         | 3.09665e-44 | 1.000000 | 3.09665e-44 | 1.00000  |
| rad59         | 2.70134e-44 | 1.000000 | 2.70134e-44 | 1.00000  |
| rad12         | 3.52348e-48 | 1.000000 | 3.52348e-48 | 1.00000  |
| rad5          | 1.74532e-49 | 1.000000 | 1.74532e-49 | 1.00000  |
| rad37         | 7.19757e-52 | 1.000000 | 7.19757e-52 | 1.00000  |
| rad52         | 5.42678e-53 | 1.000000 | 5.42678e-53 | 1.00000  |
| rad19syn      | 1.78623e-54 | 1.000000 | 1.78623e-54 | 1.00000  |
| rad54         | 7.05813e-58 | 1.000000 | 7.05814e-58 | 1.00000  |
| rad51         | 6.03398e-58 | 1.000000 | 6.03398e-58 | 1.00000  |
| rad62         | 8.68292e-61 | 1.000000 | 8.68293e-61 | 1.00000  |
| rad43         | 8.16878e-61 | 1.000000 | 8.16878e-61 | 1.00000  |
| rad65         | 1.00142e-61 | 1.000000 | 1.00142e-61 | 1.00000  |
| PAH10+CH3     | 4.09277e-63 | 1.000000 | 4.09277e-63 | 1.00000  |
| rad70         | 1.96628e-63 | 1.000000 | 1.96628e-63 | 1.00000  |
| PhcycC3H3_A+H | 1.98217e-64 | 1.000000 | 1.98217e-64 | 1.00000  |
| rad55         | 9.75537e-65 | 1.000000 | 9.75537e-65 | 1.00000  |
| rad58         | 5.89441e-65 | 1.000000 | 5.89441e-65 | 1.00000  |
| rad47         | 1.87074e-66 | 1.000000 | 1.87074e-66 | 1.00000  |
| rad34         | 1.60864e-69 | 1.000000 | 1.60864e-69 | 1.00000  |
| PAH1+H        | 8.19878e-70 | 1.000000 | 8.19878e-70 | 1.00000  |
| rad42         | 5.79317e-73 | 1.000000 | 5.79317e-73 | 1.00000  |
| rad41         | 2.37851e-74 | 1.000000 | 2.37851e-74 | 1.00000  |

100.000000 Pa, 30.0000000 K

=====

| Rate constant | True (fraction)      | Effective (fraction) |
|---------------|----------------------|----------------------|
| Total         | 1.15918e-108 (1.00 ) | 1.15918e-108 (1.00 ) |

| species       | PYtrue      | Cumul    | PYeffective | Cumul    |
|---------------|-------------|----------|-------------|----------|
| rad22         | 0.490768    | 0.490768 | 0.490768    | 0.490768 |
| rad18         | 0.166999    | 0.657767 | 0.166999    | 0.657767 |
| rad20         | 0.123854    | 0.781621 | 0.123854    | 0.781621 |
| Indene+H      | 0.117076    | 0.898697 | 0.117076    | 0.898697 |
| rad21         | 0.0776893   | 0.976386 | 0.0776894   | 0.976386 |
| rad45         | 0.0186506   | 0.995037 | 0.0186506   | 0.995037 |
| rad23         | 0.00371050  | 0.998747 | 0.00371050  | 0.998747 |
| rad36         | 0.00116160  | 0.999909 | 0.00116160  | 0.999909 |
| rad11         | 9.00011e-05 | 0.999999 | 9.00011e-05 | 0.999999 |
| Benzyl+C2H2   | 6.31974e-07 | 1.000000 | 0.000000    | 0.999999 |
| rad6          | 2.20095e-07 | 1.000000 | 2.20095e-07 | 0.999999 |
| rad24         | 2.25259e-10 | 1.000000 | 2.25259e-10 | 0.999999 |
| rad13         | 3.57700e-13 | 1.000000 | 3.57700e-13 | 0.999999 |
| rad7          | 3.26743e-13 | 1.000000 | 3.26743e-13 | 0.999999 |
| rad30         | 5.94735e-16 | 1.000000 | 5.94735e-16 | 0.999999 |
| rad33         | 3.85384e-16 | 1.000000 | 3.85384e-16 | 0.999999 |
| rad35         | 4.87124e-18 | 1.000000 | 4.87124e-18 | 0.999999 |
| rad3          | 2.58428e-18 | 1.000000 | 2.58428e-18 | 0.999999 |
| PAH9+H        | 1.54471e-18 | 1.000000 | 1.54471e-18 | 0.999999 |
| rad38         | 1.40963e-18 | 1.000000 | 1.40963e-18 | 0.999999 |
| rad4          | 1.30720e-18 | 1.000000 | 1.30720e-18 | 0.999999 |
| rad15         | 3.58344e-19 | 1.000000 | 3.58344e-19 | 0.999999 |
| rad25         | 5.48735e-20 | 1.000000 | 5.48735e-20 | 0.999999 |
| rad2          | 1.29855e-22 | 1.000000 | 1.29855e-22 | 0.999999 |
| rad28         | 1.24756e-23 | 1.000000 | 1.24756e-23 | 0.999999 |
| rad1          | 8.22006e-24 | 1.000000 | 8.22007e-24 | 0.999999 |
| PhCHCCH2+H    | 5.27102e-26 | 1.000000 | 5.27103e-26 | 0.999999 |
| rad46         | 6.11859e-27 | 1.000000 | 6.11859e-27 | 0.999999 |
| rad10         | 3.05270e-27 | 1.000000 | 3.05270e-27 | 0.999999 |
| rad31         | 6.77722e-28 | 1.000000 | 6.77722e-28 | 0.999999 |
| rad9          | 6.85157e-29 | 1.000000 | 6.85158e-29 | 0.999999 |
| rad14         | 5.75458e-30 | 1.000000 | 5.75458e-30 | 0.999999 |
| PhCCH+CH3     | 2.26209e-30 | 1.000000 | 2.26209e-30 | 0.999999 |
| rad27         | 3.85359e-32 | 1.000000 | 3.85359e-32 | 0.999999 |
| Ph+Allene     | 7.13849e-33 | 1.000000 | 7.13849e-33 | 0.999999 |
| rad8          | 3.00833e-33 | 1.000000 | 3.00833e-33 | 0.999999 |
| rad60syn      | 2.30452e-34 | 1.000000 | 2.30452e-34 | 0.999999 |
| PhCCCH3+H     | 5.69547e-35 | 1.000000 | 5.69547e-35 | 0.999999 |
| rad26         | 3.73641e-35 | 1.000000 | 3.73641e-35 | 0.999999 |
| rad60anti     | 4.87417e-36 | 1.000000 | 4.87418e-36 | 0.999999 |
| Ph+MeAc       | 3.37370e-38 | 1.000000 | 3.37370e-38 | 0.999999 |
| PhCH2CCH+H    | 1.64028e-38 | 1.000000 | 1.64028e-38 | 0.999999 |
| PAH7+H        | 7.50873e-39 | 1.000000 | 7.50874e-39 | 0.999999 |
| rad39         | 1.89624e-40 | 1.000000 | 1.89624e-40 | 0.999999 |
| rad50         | 7.76664e-44 | 1.000000 | 7.76664e-44 | 0.999999 |
| PAH3+H        | 4.18103e-44 | 1.000000 | 4.18103e-44 | 0.999999 |
| rad59         | 2.12389e-44 | 1.000000 | 2.12389e-44 | 0.999999 |
| rad12         | 1.87067e-46 | 1.000000 | 1.87067e-46 | 0.999999 |
| rad5          | 1.80123e-48 | 1.000000 | 1.80123e-48 | 0.999999 |
| rad37         | 2.50774e-50 | 1.000000 | 2.50774e-50 | 0.999999 |
| rad52         | 1.54302e-52 | 1.000000 | 1.54302e-52 | 0.999999 |
| rad19syn      | 3.96489e-54 | 1.000000 | 3.96489e-54 | 0.999999 |
| rad51         | 1.60407e-57 | 1.000000 | 1.60407e-57 | 0.999999 |
| rad54         | 1.38876e-57 | 1.000000 | 1.38876e-57 | 0.999999 |
| rad43         | 4.99386e-60 | 1.000000 | 4.99386e-60 | 0.999999 |
| rad62         | 2.28903e-60 | 1.000000 | 2.28904e-60 | 0.999999 |
| rad65         | 2.38521e-61 | 1.000000 | 2.38521e-61 | 0.999999 |
| PAH10+CH3     | 7.41399e-62 | 1.000000 | 7.41399e-62 | 0.999999 |
| rad70         | 9.38693e-64 | 1.000000 | 9.38694e-64 | 0.999999 |
| PhcycC3H3_A+H | 3.96312e-64 | 1.000000 | 3.96312e-64 | 0.999999 |
| rad55         | 1.91888e-64 | 1.000000 | 1.91888e-64 | 0.999999 |
| rad58         | 4.59906e-65 | 1.000000 | 4.59907e-65 | 0.999999 |
| rad47         | 2.52765e-66 | 1.000000 | 2.52766e-66 | 0.999999 |
| PAH1+H        | 3.33882e-69 | 1.000000 | 3.33882e-69 | 0.999999 |
| rad34         | 2.60937e-69 | 1.000000 | 2.60937e-69 | 0.999999 |
| rad42         | 1.28144e-72 | 1.000000 | 1.28144e-72 | 0.999999 |
| rad41         | 9.85494e-74 | 1.000000 | 9.85495e-74 | 0.999999 |

100.000000 Pa, 40.0000000 K

=====

| Rate constant | True (fraction) | Effective (fraction) |
|---------------|-----------------|----------------------|
|---------------|-----------------|----------------------|

-----

Total | 1.02415e-84 (1.00 ) 1.02415e-84 (1.00 )

| species       | PYtrue      | Cumul    | PYeffective | Cumul    |
|---------------|-------------|----------|-------------|----------|
| rad22         | 0.544294    | 0.544294 | 0.544295    | 0.544295 |
| Indene+H      | 0.175024    | 0.719318 | 0.175024    | 0.719319 |
| rad18         | 0.143612    | 0.862930 | 0.143612    | 0.862931 |
| rad20         | 0.0669263   | 0.929856 | 0.0669264   | 0.929857 |
| rad21         | 0.0418124   | 0.971669 | 0.0418124   | 0.971670 |
| rad45         | 0.0204791   | 0.992148 | 0.0204791   | 0.992149 |
| rad23         | 0.00646157  | 0.998609 | 0.00646158  | 0.998610 |
| rad36         | 0.00127465  | 0.999884 | 0.00127465  | 0.999885 |
| rad11         | 0.000114301 | 0.999998 | 0.000114301 | 0.999999 |
| Benzyl+C2H2   | 1.00038e-06 | 0.999999 | 0.00000     | 0.999999 |
| rad6          | 4.35983e-07 | 1.000000 | 4.35984e-07 | 1.000000 |
| rad24         | 2.15087e-10 | 1.000000 | 2.15087e-10 | 1.000000 |
| rad7          | 9.89603e-13 | 1.000000 | 9.89604e-13 | 1.000000 |
| rad13         | 7.03523e-13 | 1.000000 | 7.03524e-13 | 1.000000 |
| rad30         | 7.90035e-16 | 1.000000 | 7.90035e-16 | 1.000000 |
| rad33         | 7.53237e-16 | 1.000000 | 7.53238e-16 | 1.000000 |
| rad35         | 1.59463e-17 | 1.000000 | 1.59463e-17 | 1.000000 |
| rad3          | 9.23392e-18 | 1.000000 | 9.23393e-18 | 1.000000 |
| PAH9+H        | 5.01249e-18 | 1.000000 | 5.01250e-18 | 1.000000 |
| rad4          | 4.67162e-18 | 1.000000 | 4.67162e-18 | 1.000000 |
| rad38         | 3.00329e-18 | 1.000000 | 3.00330e-18 | 1.000000 |
| rad15         | 3.81493e-19 | 1.000000 | 3.81493e-19 | 1.000000 |
| rad25         | 1.05752e-19 | 1.000000 | 1.05753e-19 | 1.000000 |
| rad2          | 6.88296e-22 | 1.000000 | 6.88297e-22 | 1.000000 |
| rad1          | 4.36101e-23 | 1.000000 | 4.36101e-23 | 1.000000 |
| rad28         | 3.94809e-23 | 1.000000 | 3.94809e-23 | 1.000000 |
| PhCHCCH2+H    | 9.91760e-26 | 1.000000 | 9.91761e-26 | 1.000000 |
| rad10         | 2.31312e-26 | 1.000000 | 2.31312e-26 | 1.000000 |
| rad46         | 1.33349e-26 | 1.000000 | 1.33349e-26 | 1.000000 |
| rad31         | 2.45274e-27 | 1.000000 | 2.45274e-27 | 1.000000 |
| rad9          | 1.26769e-28 | 1.000000 | 1.26769e-28 | 1.000000 |
| rad14         | 2.60482e-29 | 1.000000 | 2.60483e-29 | 1.000000 |
| PhCCH+CH3     | 1.00673e-29 | 1.000000 | 1.00673e-29 | 1.000000 |
| rad27         | 2.64834e-31 | 1.000000 | 2.64834e-31 | 1.000000 |
| Ph+Allene     | 1.21650e-32 | 1.000000 | 1.21650e-32 | 1.000000 |
| rad8          | 3.89931e-33 | 1.000000 | 3.89931e-33 | 1.000000 |
| PhCCCH3+H     | 3.77594e-34 | 1.000000 | 3.77594e-34 | 1.000000 |
| rad26         | 3.73554e-34 | 1.000000 | 3.73554e-34 | 1.000000 |
| rad60syn      | 1.63915e-34 | 1.000000 | 1.63915e-34 | 1.000000 |
| rad60anti     | 4.42552e-36 | 1.000000 | 4.42553e-36 | 1.000000 |
| Ph+MeAc       | 1.56287e-37 | 1.000000 | 1.56287e-37 | 1.000000 |
| PAH7+H        | 3.09454e-38 | 1.000000 | 3.09455e-38 | 1.000000 |
| PhCH2CCH+H    | 2.32033e-38 | 1.000000 | 2.32033e-38 | 1.000000 |
| rad39         | 8.05062e-40 | 1.000000 | 8.05062e-40 | 1.000000 |
| rad50         | 2.35151e-43 | 1.000000 | 2.35151e-43 | 1.000000 |
| PAH3+H        | 4.52116e-44 | 1.000000 | 4.52116e-44 | 1.000000 |
| rad59         | 2.31098e-44 | 1.000000 | 2.31099e-44 | 1.000000 |
| rad12         | 2.62120e-45 | 1.000000 | 2.62121e-45 | 1.000000 |
| rad5          | 1.06569e-47 | 1.000000 | 1.06569e-47 | 1.000000 |
| rad37         | 3.14343e-49 | 1.000000 | 3.14343e-49 | 1.000000 |
| rad52         | 4.70195e-52 | 1.000000 | 4.70195e-52 | 1.000000 |
| rad19syn      | 1.04274e-53 | 1.000000 | 1.04274e-53 | 1.000000 |
| rad51         | 4.84267e-57 | 1.000000 | 4.84268e-57 | 1.000000 |
| rad54         | 3.65476e-57 | 1.000000 | 3.65476e-57 | 1.000000 |
| rad43         | 2.44612e-59 | 1.000000 | 2.44612e-59 | 1.000000 |
| rad62         | 6.85353e-60 | 1.000000 | 6.85353e-60 | 1.000000 |
| rad65         | 6.94030e-61 | 1.000000 | 6.94031e-61 | 1.000000 |
| PAH10+CH3     | 6.66827e-61 | 1.000000 | 6.66828e-61 | 1.000000 |
| rad70         | 2.39474e-63 | 1.000000 | 2.39474e-63 | 1.000000 |
| PhcycC3H3_A+H | 1.11098e-63 | 1.000000 | 1.11098e-63 | 1.000000 |
| rad55         | 5.34564e-64 | 1.000000 | 5.34565e-64 | 1.000000 |
| rad58         | 1.26872e-64 | 1.000000 | 1.26872e-64 | 1.000000 |
| rad47         | 5.29666e-66 | 1.000000 | 5.29667e-66 | 1.000000 |
| PAH1+H        | 1.41704e-68 | 1.000000 | 1.41704e-68 | 1.000000 |
| rad34         | 7.57008e-69 | 1.000000 | 7.57009e-69 | 1.000000 |
| rad42         | 4.09557e-72 | 1.000000 | 4.09558e-72 | 1.000000 |
| rad41         | 4.53631e-73 | 1.000000 | 4.53632e-73 | 1.000000 |

100.000000 Pa, 50.000000 K

=====  
Rate constant | True (fraction) | Effective (fraction)  
-----  
Total | 2.31816e-70 (1.00 ) | 2.31816e-70 (1.00 )

| species | PYtrue | Cumul | PYeffective | Cumul |
|---------|--------|-------|-------------|-------|
|---------|--------|-------|-------------|-------|

|               |             |          |             |          |
|---------------|-------------|----------|-------------|----------|
| rad22         | 0.565450    | 0.565450 | 0.565451    | 0.565451 |
| Indene+H      | 0.221280    | 0.786730 | 0.221281    | 0.786732 |
| rad18         | 0.117826    | 0.904556 | 0.117826    | 0.904558 |
| rad20         | 0.0393506   | 0.943907 | 0.0393506   | 0.943909 |
| rad21         | 0.0244966   | 0.968403 | 0.0244966   | 0.968405 |
| rad45         | 0.0209246   | 0.989328 | 0.0209246   | 0.989330 |
| rad23         | 0.00923518  | 0.998563 | 0.00923520  | 0.998565 |
| rad36         | 0.00130133  | 0.999864 | 0.00130133  | 0.999866 |
| rad11         | 0.000133542 | 0.999998 | 0.000133543 | 1.000000 |
| Benzyl+C2H2   | 1.55582e-06 | 0.999999 | 0.00000     | 1.000000 |
| rad6          | 7.10176e-07 | 1.00000  | 7.10177e-07 | 1.00000  |
| rad24         | 2.06080e-10 | 1.00000  | 2.06081e-10 | 1.00000  |
| rad7          | 2.21935e-12 | 1.00000  | 2.21936e-12 | 1.00000  |
| rad13         | 1.11435e-12 | 1.00000  | 1.11435e-12 | 1.00000  |
| rad30         | 1.20772e-15 | 1.00000  | 1.20772e-15 | 1.00000  |
| rad33         | 1.19643e-15 | 1.00000  | 1.19644e-15 | 1.00000  |
| rad35         | 4.22656e-17 | 1.00000  | 4.22657e-17 | 1.00000  |
| rad3          | 2.40947e-17 | 1.00000  | 2.40947e-17 | 1.00000  |
| PAH9+H        | 1.35711e-17 | 1.00000  | 1.35711e-17 | 1.00000  |
| rad4          | 1.21946e-17 | 1.00000  | 1.21946e-17 | 1.00000  |
| rad38         | 6.60202e-18 | 1.00000  | 6.60203e-18 | 1.00000  |
| rad15         | 5.12017e-19 | 1.00000  | 5.12018e-19 | 1.00000  |
| rad25         | 2.31060e-19 | 1.00000  | 2.31061e-19 | 1.00000  |
| rad2          | 2.55402e-21 | 1.00000  | 2.55402e-21 | 1.00000  |
| rad1          | 1.62080e-22 | 1.00000  | 1.62080e-22 | 1.00000  |
| rad28         | 1.15901e-22 | 1.00000  | 1.15901e-22 | 1.00000  |
| PhCHCCH2+H    | 2.25485e-25 | 1.00000  | 2.25486e-25 | 1.00000  |
| rad10         | 1.16042e-25 | 1.00000  | 1.16042e-25 | 1.00000  |
| rad46         | 3.52279e-26 | 1.00000  | 3.52280e-26 | 1.00000  |
| rad31         | 6.54969e-27 | 1.00000  | 6.54970e-27 | 1.00000  |
| rad9          | 2.88984e-28 | 1.00000  | 2.88985e-28 | 1.00000  |
| rad14         | 1.03465e-28 | 1.00000  | 1.03465e-28 | 1.00000  |
| PhCCH+CH3     | 4.08293e-29 | 1.00000  | 4.08293e-29 | 1.00000  |
| rad27         | 1.35608e-30 | 1.00000  | 1.35608e-30 | 1.00000  |
| Ph+Alkene     | 2.65977e-32 | 1.00000  | 2.65978e-32 | 1.00000  |
| rad8          | 7.06926e-33 | 1.00000  | 7.06927e-33 | 1.00000  |
| rad26         | 2.57536e-33 | 1.00000  | 2.57537e-33 | 1.00000  |
| PhCCCH3+H     | 2.05240e-33 | 1.00000  | 2.05241e-33 | 1.00000  |
| rad60syn      | 2.35229e-34 | 1.00000  | 2.35230e-34 | 1.00000  |
| rad60anti     | 7.07530e-36 | 1.00000  | 7.07531e-36 | 1.00000  |
| Ph+MeAc       | 7.16907e-37 | 1.00000  | 7.16908e-37 | 1.00000  |
| PAH7+H        | 1.24846e-37 | 1.00000  | 1.24846e-37 | 1.00000  |
| PhCH2CCH+H    | 4.48608e-38 | 1.00000  | 4.48609e-38 | 1.00000  |
| rad39         | 3.30136e-39 | 1.00000  | 3.30136e-39 | 1.00000  |
| rad50         | 8.51133e-43 | 1.00000  | 8.51135e-43 | 1.00000  |
| PAH3+H        | 6.42890e-44 | 1.00000  | 6.42891e-44 | 1.00000  |
| rad59         | 3.29566e-44 | 1.00000  | 3.29566e-44 | 1.00000  |
| rad12         | 2.53243e-44 | 1.00000  | 2.53243e-44 | 1.00000  |
| rad5          | 6.09879e-47 | 1.00000  | 6.09880e-47 | 1.00000  |
| rad37         | 2.99509e-48 | 1.00000  | 2.99509e-48 | 1.00000  |
| rad52         | 1.80693e-51 | 1.00000  | 1.80694e-51 | 1.00000  |
| rad19syn      | 3.53916e-53 | 1.00000  | 3.53917e-53 | 1.00000  |
| rad51         | 1.93652e-56 | 1.00000  | 1.93653e-56 | 1.00000  |
| rad54         | 1.27765e-56 | 1.00000  | 1.27765e-56 | 1.00000  |
| rad43         | 1.38948e-58 | 1.00000  | 1.38948e-58 | 1.00000  |
| rad62         | 2.66344e-59 | 1.00000  | 2.66345e-59 | 1.00000  |
| PAH10+CH3     | 5.64961e-60 | 1.00000  | 5.64962e-60 | 1.00000  |
| rad65         | 2.75887e-60 | 1.00000  | 2.75887e-60 | 1.00000  |
| rad70         | 9.23874e-63 | 1.00000  | 9.23875e-63 | 1.00000  |
| PhcycC3H3_A+H | 4.24256e-63 | 1.00000  | 4.24257e-63 | 1.00000  |
| rad55         | 2.03114e-63 | 1.00000  | 2.03114e-63 | 1.00000  |
| rad58         | 5.12004e-64 | 1.00000  | 5.12005e-64 | 1.00000  |
| rad47         | 1.71692e-65 | 1.00000  | 1.71693e-65 | 1.00000  |
| PAH1+H        | 7.38355e-68 | 1.00000  | 7.38356e-68 | 1.00000  |
| rad34         | 3.08421e-68 | 1.00000  | 3.08421e-68 | 1.00000  |
| rad42         | 1.85174e-71 | 1.00000  | 1.85174e-71 | 1.00000  |
| rad41         | 2.77238e-72 | 1.00000  | 2.77239e-72 | 1.00000  |

100.000000 Pa, 60.0000000 K

=====

| Rate constant | True (fraction)     | Effective (fraction) |
|---------------|---------------------|----------------------|
| Total         | 8.44107e-61 (1.00 ) | 8.44105e-61 (1.00 )  |

| species  | PYtrue    | Cumul    | PYeffective | Cumul    |
|----------|-----------|----------|-------------|----------|
| rad22    | 0.572537  | 0.572537 | 0.572539    | 0.572539 |
| Indene+H | 0.258315  | 0.830852 | 0.258315    | 0.830854 |
| rad18    | 0.0951546 | 0.926007 | 0.0951548   | 0.926009 |
| rad20    | 0.0245605 | 0.950567 | 0.0245605   | 0.950569 |

|               |             |          |             |          |
|---------------|-------------|----------|-------------|----------|
| rad45         | 0.0207570   | 0.971324 | 0.0207571   | 0.971326 |
| rad21         | 0.0152469   | 0.986571 | 0.0152469   | 0.986573 |
| rad23         | 0.0119851   | 0.998556 | 0.0119852   | 0.998558 |
| rad36         | 0.00128982  | 0.999846 | 0.00128983  | 0.999848 |
| rad11         | 0.000150432 | 0.999996 | 0.000150433 | 0.999999 |
| Benzyl+C2H2   | 2.34453e-06 | 0.999999 | 2.00000     | 0.999999 |
| rad6          | 1.05303e-06 | 1.000000 | 1.05304e-06 | 1.000000 |
| rad24         | 1.96853e-10 | 1.000000 | 1.96854e-10 | 1.000000 |
| rad7          | 4.30153e-12 | 1.000000 | 4.30154e-12 | 1.000000 |
| rad13         | 1.60144e-12 | 1.000000 | 1.60144e-12 | 1.000000 |
| rad30         | 2.29047e-15 | 1.000000 | 2.29047e-15 | 1.000000 |
| rad33         | 1.72912e-15 | 1.000000 | 1.72913e-15 | 1.000000 |
| rad35         | 1.02015e-16 | 1.000000 | 1.02015e-16 | 1.000000 |
| rad3          | 5.45211e-17 | 1.000000 | 5.45212e-17 | 1.000000 |
| PAH9+H        | 3.48375e-17 | 1.000000 | 3.48375e-17 | 1.000000 |
| rad4          | 2.76079e-17 | 1.000000 | 2.76080e-17 | 1.000000 |
| rad38         | 1.58889e-17 | 1.000000 | 1.58889e-17 | 1.000000 |
| rad15         | 9.04334e-19 | 1.000000 | 9.04336e-19 | 1.000000 |
| rad25         | 5.99215e-19 | 1.000000 | 5.99216e-19 | 1.000000 |
| rad2          | 8.19377e-21 | 1.000000 | 8.19379e-21 | 1.000000 |
| rad1          | 5.21057e-22 | 1.000000 | 5.21059e-22 | 1.000000 |
| rad28         | 3.60037e-22 | 1.000000 | 3.60038e-22 | 1.000000 |
| PhCHCCH2+H    | 6.29988e-25 | 1.000000 | 6.29989e-25 | 1.000000 |
| rad10         | 4.98574e-25 | 1.000000 | 4.98575e-25 | 1.000000 |
| rad46         | 1.12239e-25 | 1.000000 | 1.12240e-25 | 1.000000 |
| rad31         | 1.52799e-26 | 1.000000 | 1.52799e-26 | 1.000000 |
| rad9          | 8.19867e-28 | 1.000000 | 8.19869e-28 | 1.000000 |
| rad14         | 4.24988e-28 | 1.000000 | 4.24989e-28 | 1.000000 |
| PhCCH+CH3     | 1.75260e-28 | 1.000000 | 1.75261e-28 | 1.000000 |
| rad27         | 6.53738e-30 | 1.000000 | 6.53739e-30 | 1.000000 |
| Ph+Allene     | 7.45031e-32 | 1.000000 | 7.45033e-32 | 1.000000 |
| rad26         | 1.61569e-32 | 1.000000 | 1.61570e-32 | 1.000000 |
| rad8          | 1.56464e-32 | 1.000000 | 1.56465e-32 | 1.000000 |
| PhCCCH3+H     | 1.11848e-32 | 1.000000 | 1.11848e-32 | 1.000000 |
| rad60syn      | 4.76315e-34 | 1.000000 | 4.76316e-34 | 1.000000 |
| rad60anti     | 1.47680e-35 | 1.000000 | 1.47680e-35 | 1.000000 |
| Ph+MeAc       | 3.66821e-36 | 1.000000 | 3.66822e-36 | 1.000000 |
| PAH7+H        | 5.51368e-37 | 1.000000 | 5.51369e-37 | 1.000000 |
| PhCH2CCH+H    | 1.16424e-37 | 1.000000 | 1.16424e-37 | 1.000000 |
| rad39         | 1.48136e-38 | 1.000000 | 1.48136e-38 | 1.000000 |
| rad50         | 3.84858e-42 | 1.000000 | 3.84859e-42 | 1.000000 |
| rad12         | 2.25628e-43 | 1.000000 | 2.25628e-43 | 1.000000 |
| PAH3+H        | 1.22654e-43 | 1.000000 | 1.22654e-43 | 1.000000 |
| rad59         | 6.28221e-44 | 1.000000 | 6.28223e-44 | 1.000000 |
| rad5          | 3.92076e-46 | 1.000000 | 3.92076e-46 | 1.000000 |
| rad37         | 2.80157e-47 | 1.000000 | 2.80158e-47 | 1.000000 |
| rad52         | 9.17177e-51 | 1.000000 | 9.17180e-51 | 1.000000 |
| rad19syn      | 1.55108e-52 | 1.000000 | 1.55108e-52 | 1.000000 |
| rad51         | 1.05935e-55 | 1.000000 | 1.05935e-55 | 1.000000 |
| rad54         | 5.84131e-56 | 1.000000 | 5.84133e-56 | 1.000000 |
| rad43         | 9.98416e-58 | 1.000000 | 9.98418e-58 | 1.000000 |
| rad62         | 1.36015e-58 | 1.000000 | 1.36015e-58 | 1.000000 |
| PAH10+CH3     | 5.41654e-59 | 1.000000 | 5.41655e-59 | 1.000000 |
| rad65         | 1.53251e-59 | 1.000000 | 1.53251e-59 | 1.000000 |
| rad70         | 4.88137e-62 | 1.000000 | 4.88138e-62 | 1.000000 |
| PhcycC3H3_A+H | 2.15569e-62 | 1.000000 | 2.15569e-62 | 1.000000 |
| rad55         | 1.02705e-62 | 1.000000 | 1.02706e-62 | 1.000000 |
| rad58         | 2.93898e-63 | 1.000000 | 2.93899e-63 | 1.000000 |
| rad47         | 8.41858e-65 | 1.000000 | 8.41860e-65 | 1.000000 |
| PAH1+H        | 4.88360e-67 | 1.000000 | 4.88361e-67 | 1.000000 |
| rad34         | 1.73470e-67 | 1.000000 | 1.73471e-67 | 1.000000 |
| rad42         | 1.16866e-70 | 1.000000 | 1.16866e-70 | 1.000000 |
| rad41         | 2.34758e-71 | 1.000000 | 2.34759e-71 | 1.000000 |

100.000000 Pa, 70.0000000 K

=====

| Rate constant | True (fraction)     | Effective (fraction) |
|---------------|---------------------|----------------------|
| Total         | 5.61998e-54 (1.00 ) | 5.61996e-54 (1.00 )  |

| species  | PYtrue     | Cumul    | PYeffective | Cumul    |
|----------|------------|----------|-------------|----------|
| rad22    | 0.572684   | 0.572684 | 0.572686    | 0.572686 |
| Indene+H | 0.288476   | 0.861160 | 0.288477    | 0.861163 |
| rad18    | 0.0764438  | 0.937604 | 0.0764441   | 0.937607 |
| rad45    | 0.0202913  | 0.957895 | 0.0202914   | 0.957898 |
| rad20    | 0.0160325  | 0.973928 | 0.0160326   | 0.973931 |
| rad23    | 0.0147096  | 0.988637 | 0.0147096   | 0.988641 |
| rad21    | 0.00993123 | 0.998568 | 0.00993126  | 0.998572 |
| rad36    | 0.00125988 | 0.999828 | 0.00125989  | 0.999832 |

|               |             |          |             |          |
|---------------|-------------|----------|-------------|----------|
| rad11         | 0.000166288 | 0.999995 | 0.000166288 | 0.999998 |
| Benzyl+C2H2   | 3.42695e-06 | 0.999998 | 0.00000     | 0.999998 |
| rad6          | 1.48219e-06 | 1.000000 | 1.48220e-06 | 1.000000 |
| rad24         | 1.87732e-10 | 1.000000 | 1.87732e-10 | 1.000000 |
| rad7          | 7.69598e-12 | 1.000000 | 7.69601e-12 | 1.000000 |
| rad13         | 2.18721e-12 | 1.000000 | 2.18721e-12 | 1.000000 |
| rad30         | 6.18745e-15 | 1.000000 | 6.18747e-15 | 1.000000 |
| rad33         | 2.37706e-15 | 1.000000 | 2.37707e-15 | 1.000000 |
| rad35         | 2.31884e-16 | 1.000000 | 2.31885e-16 | 1.000000 |
| rad3          | 1.15031e-16 | 1.000000 | 1.15031e-16 | 1.000000 |
| PAH9+H        | 8.82540e-17 | 1.000000 | 8.82543e-17 | 1.000000 |
| rad4          | 5.82841e-17 | 1.000000 | 5.82843e-17 | 1.000000 |
| rad38         | 4.31364e-17 | 1.000000 | 4.31366e-17 | 1.000000 |
| rad15         | 2.43011e-18 | 1.000000 | 2.43012e-18 | 1.000000 |
| rad25         | 2.01012e-18 | 1.000000 | 2.01012e-18 | 1.000000 |
| rad2          | 2.49830e-20 | 1.000000 | 2.49831e-20 | 1.000000 |
| rad1          | 1.59258e-21 | 1.000000 | 1.59258e-21 | 1.000000 |
| rad28         | 1.29641e-21 | 1.000000 | 1.29641e-21 | 1.000000 |
| PhCHCCH2+H    | 2.33951e-24 | 1.000000 | 2.33952e-24 | 1.000000 |
| rad10         | 2.07818e-24 | 1.000000 | 2.07818e-24 | 1.000000 |
| rad46         | 4.39035e-25 | 1.000000 | 4.39036e-25 | 1.000000 |
| rad31         | 3.34352e-26 | 1.000000 | 3.34353e-26 | 1.000000 |
| rad9          | 3.11963e-27 | 1.000000 | 3.11965e-27 | 1.000000 |
| rad14         | 2.04260e-27 | 1.000000 | 2.04260e-27 | 1.000000 |
| PhCCH+CH3     | 9.02554e-28 | 1.000000 | 9.02557e-28 | 1.000000 |
| rad27         | 3.40487e-29 | 1.000000 | 3.40488e-29 | 1.000000 |
| Ph+Allene     | 2.85982e-31 | 1.000000 | 2.85983e-31 | 1.000000 |
| rad26         | 1.09476e-31 | 1.000000 | 1.09476e-31 | 1.000000 |
| PhCCCH3+H     | 7.08813e-32 | 1.000000 | 7.08815e-32 | 1.000000 |
| rad8          | 4.43737e-32 | 1.000000 | 4.43739e-32 | 1.000000 |
| rad60syn      | 1.30756e-33 | 1.000000 | 1.30756e-33 | 1.000000 |
| rad60anti     | 4.02940e-35 | 1.000000 | 4.02941e-35 | 1.000000 |
| Ph+MeAc       | 2.35573e-35 | 1.000000 | 2.35574e-35 | 1.000000 |
| PAH7+H        | 2.99842e-36 | 1.000000 | 2.99843e-36 | 1.000000 |
| PhCH2CCH+H    | 4.28991e-37 | 1.000000 | 4.28993e-37 | 1.000000 |
| rad39         | 8.20782e-38 | 1.000000 | 8.20785e-38 | 1.000000 |
| rad50         | 2.31146e-41 | 1.000000 | 2.31147e-41 | 1.000000 |
| rad12         | 2.24504e-42 | 1.000000 | 2.24505e-42 | 1.000000 |
| PAH3+H        | 3.42193e-43 | 1.000000 | 3.42194e-43 | 1.000000 |
| rad59         | 1.74164e-43 | 1.000000 | 1.74165e-43 | 1.000000 |
| rad5          | 3.22104e-45 | 1.000000 | 3.22105e-45 | 1.000000 |
| rad37         | 3.07186e-46 | 1.000000 | 3.07187e-46 | 1.000000 |
| rad52         | 6.48630e-50 | 1.000000 | 6.48632e-50 | 1.000000 |
| rad19syn      | 9.32594e-52 | 1.000000 | 9.32597e-52 | 1.000000 |
| rad51         | 8.31073e-55 | 1.000000 | 8.31076e-55 | 1.000000 |
| rad54         | 3.69109e-55 | 1.000000 | 3.69110e-55 | 1.000000 |
| rad43         | 1.00761e-56 | 1.000000 | 1.00762e-56 | 1.000000 |
| rad62         | 9.80510e-58 | 1.000000 | 9.80514e-58 | 1.000000 |
| PAH10+CH3     | 6.79820e-58 | 1.000000 | 6.79822e-58 | 1.000000 |
| rad65         | 1.24218e-58 | 1.000000 | 1.24218e-58 | 1.000000 |
| rad70         | 3.69631e-61 | 1.000000 | 3.69632e-61 | 1.000000 |
| PhcycC3H3_A+H | 1.53273e-61 | 1.000000 | 1.53274e-61 | 1.000000 |
| rad55         | 7.26672e-62 | 1.000000 | 7.26674e-62 | 1.000000 |
| rad58         | 2.49358e-62 | 1.000000 | 2.49359e-62 | 1.000000 |
| rad47         | 6.37823e-64 | 1.000000 | 6.37825e-64 | 1.000000 |
| PAH1+H        | 4.41334e-66 | 1.000000 | 4.41335e-66 | 1.000000 |
| rad34         | 1.41460e-66 | 1.000000 | 1.41460e-66 | 1.000000 |
| rad42         | 1.11211e-69 | 1.000000 | 1.11211e-69 | 1.000000 |
| rad41         | 3.04733e-70 | 1.000000 | 3.04734e-70 | 1.000000 |

100.000000 Pa, 80.0000000 K

=====

| Rate constant | True (fraction)     | Effective (fraction) |
|---------------|---------------------|----------------------|
| Total         | 7.28864e-49 (1.00 ) | 7.28861e-49 (1.00 )  |

| species     | PYtrue      | Cumul    | PYeffective | Cumul    |
|-------------|-------------|----------|-------------|----------|
| rad22       | 0.569026    | 0.569026 | 0.569029    | 0.569029 |
| Indene+H    | 0.313595    | 0.882621 | 0.313596    | 0.882625 |
| rad18       | 0.0613365   | 0.943958 | 0.0613368   | 0.943962 |
| rad45       | 0.0196734   | 0.963631 | 0.0196735   | 0.963635 |
| rad23       | 0.0174214   | 0.981052 | 0.0174215   | 0.981057 |
| rad20       | 0.0108368   | 0.991889 | 0.0108368   | 0.991894 |
| rad21       | 0.00670118  | 0.998590 | 0.00670121  | 0.998595 |
| rad36       | 0.00122067  | 0.999811 | 0.00122068  | 0.999815 |
| rad11       | 0.000181893 | 0.999993 | 0.000181894 | 0.999997 |
| Benzyl+C2H2 | 4.88503e-06 | 0.999998 | 0.00000     | 0.999997 |
| rad6        | 2.02382e-06 | 1.000000 | 2.02383e-06 | 0.999999 |
| rad24       | 1.78923e-10 | 1.000000 | 1.78924e-10 | 0.999999 |



|               |             |          |             |          |
|---------------|-------------|----------|-------------|----------|
| rad7          | 1.31638e-11 | 1.000000 | 1.31639e-11 | 0.999999 |
| rad13         | 2.90453e-12 | 1.000000 | 2.90455e-12 | 0.999999 |
| rad30         | 2.58268e-14 | 1.000000 | 2.58269e-14 | 0.999999 |
| rad33         | 3.17797e-15 | 1.000000 | 3.17799e-15 | 0.999999 |
| rad35         | 5.02765e-16 | 1.000000 | 5.02768e-16 | 0.999999 |
| rad3          | 2.35132e-16 | 1.000000 | 2.35133e-16 | 0.999999 |
| PAH9+H        | 2.20320e-16 | 1.000000 | 2.20321e-16 | 0.999999 |
| rad38         | 1.28207e-16 | 1.000000 | 1.28207e-16 | 0.999999 |
| rad4          | 1.19220e-16 | 1.000000 | 1.19221e-16 | 0.999999 |
| rad15         | 1.36179e-17 | 1.000000 | 1.36180e-17 | 0.999999 |
| rad25         | 9.72053e-18 | 1.000000 | 9.72057e-18 | 0.999999 |
| rad2          | 7.63139e-20 | 1.000000 | 7.63143e-20 | 0.999999 |
| rad28         | 5.65204e-21 | 1.000000 | 5.65207e-21 | 0.999999 |
| rad1          | 4.87810e-21 | 1.000000 | 4.87812e-21 | 0.999999 |
| PhCHCCH2+H    | 1.37455e-23 | 1.000000 | 1.37456e-23 | 0.999999 |
| rad10         | 9.06265e-24 | 1.000000 | 9.06269e-24 | 0.999999 |
| rad46         | 2.22634e-24 | 1.000000 | 2.22635e-24 | 0.999999 |
| rad31         | 7.12336e-26 | 1.000000 | 7.12339e-26 | 0.999999 |
| rad9          | 1.89090e-26 | 1.000000 | 1.89091e-26 | 0.999999 |
| rad14         | 1.29240e-26 | 1.000000 | 1.29241e-26 | 0.999999 |
| PhCCH+CH3     | 6.47881e-27 | 1.000000 | 6.47884e-27 | 0.999999 |
| rad27         | 2.10001e-28 | 1.000000 | 2.10002e-28 | 0.999999 |
| Ph+Allene     | 1.77847e-30 | 1.000000 | 1.77848e-30 | 0.999999 |
| rad26         | 9.26687e-31 | 1.000000 | 9.26691e-31 | 0.999999 |
| PhCCCH3+H     | 6.16986e-31 | 1.000000 | 6.16989e-31 | 0.999999 |
| rad8          | 2.04467e-31 | 1.000000 | 2.04468e-31 | 0.999999 |
| rad60syn      | 6.11805e-33 | 1.000000 | 6.11808e-33 | 0.999999 |
| Ph+MeAc       | 2.26990e-34 | 1.000000 | 2.26992e-34 | 0.999999 |
| rad60anti     | 1.73151e-34 | 1.000000 | 1.73152e-34 | 0.999999 |
| PAH7+H        | 2.39520e-35 | 1.000000 | 2.39521e-35 | 0.999999 |
| PhCH2CCH+H    | 2.63288e-36 | 1.000000 | 2.63290e-36 | 0.999999 |
| rad39         | 6.74339e-37 | 1.000000 | 6.74342e-37 | 0.999999 |
| rad50         | 1.99710e-40 | 1.000000 | 1.99711e-40 | 0.999999 |
| rad12         | 3.08832e-41 | 1.000000 | 3.08833e-41 | 0.999999 |
| PAH3+H        | 1.65833e-42 | 1.000000 | 1.65834e-42 | 0.999999 |
| rad59         | 8.33642e-43 | 1.000000 | 8.33646e-43 | 0.999999 |
| rad5          | 4.08849e-44 | 1.000000 | 4.08851e-44 | 0.999999 |
| rad37         | 4.89192e-45 | 1.000000 | 4.89194e-45 | 0.999999 |
| rad52         | 6.89248e-49 | 1.000000 | 6.89251e-49 | 0.999999 |
| rad19syn      | 8.98103e-51 | 1.000000 | 8.98108e-51 | 0.999999 |
| rad51         | 1.00581e-53 | 1.000000 | 1.00582e-53 | 0.999999 |
| rad54         | 3.75307e-54 | 1.000000 | 3.75309e-54 | 0.999999 |
| rad43         | 1.72112e-55 | 1.000000 | 1.72112e-55 | 0.999999 |
| PAH10+CH3     | 1.37311e-56 | 1.000000 | 1.37311e-56 | 0.999999 |
| rad62         | 1.18775e-56 | 1.000000 | 1.18776e-56 | 0.999999 |
| rad65         | 1.57764e-57 | 1.000000 | 1.57765e-57 | 0.999999 |
| rad70         | 4.51674e-60 | 1.000000 | 4.51676e-60 | 0.999999 |
| PhcycC3H3_A+H | 1.76841e-60 | 1.000000 | 1.76842e-60 | 0.999999 |
| rad55         | 8.34175e-61 | 1.000000 | 8.34179e-61 | 0.999999 |
| rad58         | 3.35514e-61 | 1.000000 | 3.35516e-61 | 0.999999 |
| rad47         | 7.92227e-63 | 1.000000 | 7.92231e-63 | 0.999999 |
| PAH1+H        | 6.34891e-65 | 1.000000 | 6.34894e-65 | 0.999999 |
| rad34         | 1.89187e-65 | 1.000000 | 1.89188e-65 | 0.999999 |
| rad42         | 1.96068e-68 | 1.000000 | 1.96069e-68 | 0.999999 |
| rad41         | 7.43932e-69 | 1.000000 | 7.43935e-69 | 0.999999 |

100.000000 Pa, 90.0000000 K

=====

| Rate constant | True (fraction)     | Effective (fraction) |
|---------------|---------------------|----------------------|
| Total         | 6.85154e-45 (1.00 ) | 6.85149e-45 (1.00 )  |

| species     | PYtrue      | Cumul    | PYeffective | Cumul    |
|-------------|-------------|----------|-------------|----------|
| rad22       | 0.563056    | 0.563056 | 0.563060    | 0.563060 |
| Indene+H    | 0.335035    | 0.898091 | 0.335038    | 0.898098 |
| rad18       | 0.0492287   | 0.947320 | 0.0492290   | 0.947327 |
| rad23       | 0.0201382   | 0.967458 | 0.0201383   | 0.967465 |
| rad45       | 0.0189769   | 0.986435 | 0.0189770   | 0.986442 |
| rad20       | 0.00753056  | 0.993965 | 0.00753061  | 0.993973 |
| rad21       | 0.00465020  | 0.998616 | 0.00465023  | 0.998623 |
| rad36       | 0.00117680  | 0.999792 | 0.00117681  | 0.999800 |
| rad11       | 0.000197780 | 0.999990 | 0.000197782 | 0.999998 |
| Benzyl+C2H2 | 6.82706e-06 | 0.999997 | 0.000000    | 0.999998 |
| rad6        | 2.71499e-06 | 1.000000 | 2.71501e-06 | 1.000000 |
| rad24       | 1.70502e-10 | 1.000000 | 1.70503e-10 | 1.000000 |
| rad7        | 2.19837e-11 | 1.000000 | 2.19839e-11 | 1.000000 |
| rad13       | 3.79887e-12 | 1.000000 | 3.79889e-12 | 1.000000 |
| rad30       | 1.26719e-13 | 1.000000 | 1.26720e-13 | 1.000000 |
| rad33       | 4.18430e-15 | 1.000000 | 4.18433e-15 | 1.000000 |

|               |             |          |             |         |
|---------------|-------------|----------|-------------|---------|
| rad35         | 1.04975e-15 | 1.000000 | 1.04975e-15 | 1.00000 |
| PAH9+H        | 5.35070e-16 | 1.000000 | 5.35074e-16 | 1.00000 |
| rad3          | 4.76252e-16 | 1.000000 | 4.76255e-16 | 1.00000 |
| rad38         | 3.83328e-16 | 1.000000 | 3.83331e-16 | 1.00000 |
| rad4          | 2.41667e-16 | 1.000000 | 2.41669e-16 | 1.00000 |
| rad15         | 1.30716e-16 | 1.000000 | 1.30717e-16 | 1.00000 |
| rad25         | 6.28118e-17 | 1.000000 | 6.28122e-17 | 1.00000 |
| rad2          | 2.40620e-19 | 1.000000 | 2.40622e-19 | 1.00000 |
| rad28         | 2.79915e-20 | 1.000000 | 2.79917e-20 | 1.00000 |
| rad1          | 1.54276e-20 | 1.000000 | 1.54277e-20 | 1.00000 |
| PhCHCCH2+H    | 1.62107e-22 | 1.000000 | 1.62108e-22 | 1.00000 |
| rad10         | 4.30641e-23 | 1.000000 | 4.30644e-23 | 1.00000 |
| rad46         | 1.58637e-23 | 1.000000 | 1.58638e-23 | 1.00000 |
| rad9          | 2.49658e-25 | 1.000000 | 2.49659e-25 | 1.00000 |
| rad31         | 1.51007e-25 | 1.000000 | 1.51008e-25 | 1.00000 |
| rad14         | 1.09557e-25 | 1.000000 | 1.09558e-25 | 1.00000 |
| PhCCH+CH3     | 7.09863e-26 | 1.000000 | 7.09868e-26 | 1.00000 |
| rad27         | 1.54542e-27 | 1.000000 | 1.54543e-27 | 1.00000 |
| Ph+Allene     | 2.43516e-29 | 1.000000 | 2.43518e-29 | 1.00000 |
| rad26         | 1.05114e-29 | 1.000000 | 1.05115e-29 | 1.00000 |
| PhCCCH3+H     | 8.31232e-30 | 1.000000 | 8.31237e-30 | 1.00000 |
| rad8          | 5.29572e-30 | 1.000000 | 5.29575e-30 | 1.00000 |
| rad60syn      | 1.53096e-31 | 1.000000 | 1.53097e-31 | 1.00000 |
| Ph+MeAc       | 4.11933e-33 | 1.000000 | 4.11935e-33 | 1.00000 |
| rad60anti     | 2.96955e-33 | 1.000000 | 2.96957e-33 | 1.00000 |
| PAH7+H        | 3.53855e-34 | 1.000000 | 3.53857e-34 | 1.00000 |
| PhCH2CCH+H    | 3.63796e-35 | 1.000000 | 3.63798e-35 | 1.00000 |
| rad39         | 1.05458e-35 | 1.000000 | 1.05459e-35 | 1.00000 |
| rad50         | 2.76813e-39 | 1.000000 | 2.76815e-39 | 1.00000 |
| rad12         | 7.42240e-40 | 1.000000 | 7.42245e-40 | 1.00000 |
| PAH3+H        | 1.73024e-41 | 1.000000 | 1.73025e-41 | 1.00000 |
| rad59         | 8.59472e-42 | 1.000000 | 8.59478e-42 | 1.00000 |
| rad5          | 1.04099e-42 | 1.000000 | 1.04100e-42 | 1.00000 |
| rad37         | 1.48357e-43 | 1.000000 | 1.48358e-43 | 1.00000 |
| rad52         | 1.22514e-47 | 1.000000 | 1.22515e-47 | 1.00000 |
| rad19syn      | 1.79755e-49 | 1.000000 | 1.79756e-49 | 1.00000 |
| rad51         | 2.08900e-52 | 1.000000 | 2.08902e-52 | 1.00000 |
| rad54         | 7.94993e-53 | 1.000000 | 7.94998e-53 | 1.00000 |
| rad43         | 6.56170e-54 | 1.000000 | 6.56175e-54 | 1.00000 |
| PAH10+CH3     | 5.95219e-55 | 1.000000 | 5.95223e-55 | 1.00000 |
| rad62         | 3.24030e-55 | 1.000000 | 3.24032e-55 | 1.00000 |
| rad65         | 3.49050e-56 | 1.000000 | 3.49053e-56 | 1.00000 |
| rad70         | 1.06842e-58 | 1.000000 | 1.06842e-58 | 1.00000 |
| PhcycC3H3_A+H | 4.26367e-59 | 1.000000 | 4.26370e-59 | 1.00000 |
| rad55         | 2.00089e-59 | 1.000000 | 2.00091e-59 | 1.00000 |
| rad58         | 7.95923e-60 | 1.000000 | 7.95928e-60 | 1.00000 |
| rad47         | 1.78078e-61 | 1.000000 | 1.78079e-61 | 1.00000 |
| PAH1+H        | 1.85009e-63 | 1.000000 | 1.85011e-63 | 1.00000 |
| rad34         | 5.01678e-64 | 1.000000 | 5.01681e-64 | 1.00000 |
| rad42         | 9.03898e-67 | 1.000000 | 9.03904e-67 | 1.00000 |
| rad41         | 4.61734e-67 | 1.000000 | 4.61738e-67 | 1.00000 |

100.000000 Pa, 100.000000 K

=====

| Rate constant | True (fraction)     | Effective (fraction) |
|---------------|---------------------|----------------------|
| Total         | 1.02671e-41 (1.00 ) | 1.02670e-41 (1.00 )  |

| species     | PYtrue      | Cumul    | PYeffective | Cumul    |
|-------------|-------------|----------|-------------|----------|
| rad22       | 0.555519    | 0.555519 | 0.555524    | 0.555524 |
| Indene+H    | 0.353811    | 0.909330 | 0.353814    | 0.909338 |
| rad18       | 0.0395407   | 0.948871 | 0.0395411   | 0.948879 |
| rad23       | 0.0228785   | 0.971749 | 0.0228787   | 0.971758 |
| rad45       | 0.0182411   | 0.989990 | 0.0182413   | 0.989999 |
| rad20       | 0.00535155  | 0.995342 | 0.00535160  | 0.995351 |
| rad21       | 0.00330087  | 0.998643 | 0.00330090  | 0.998652 |
| rad36       | 0.00113072  | 0.999773 | 0.00113073  | 0.999782 |
| rad11       | 0.000214342 | 0.999988 | 0.000214344 | 0.999997 |
| Benzyl+C2H2 | 9.39467e-06 | 0.999997 | 0.00000     | 0.999997 |
| rad6        | 3.60732e-06 | 1.00000  | 3.60736e-06 | 1.00000  |
| rad24       | 1.62476e-10 | 1.00000  | 1.62478e-10 | 1.00000  |
| rad7        | 3.63255e-11 | 1.00000  | 3.63259e-11 | 1.00000  |
| rad13       | 4.93224e-12 | 1.00000  | 4.93229e-12 | 1.00000  |
| rad30       | 5.54533e-13 | 1.00000  | 5.54538e-13 | 1.00000  |
| rad33       | 5.46804e-15 | 1.00000  | 5.46809e-15 | 1.00000  |
| rad35       | 2.13015e-15 | 1.00000  | 2.13017e-15 | 1.00000  |
| PAH9+H      | 1.25503e-15 | 1.00000  | 1.25504e-15 | 1.00000  |
| rad15       | 1.15581e-15 | 1.00000  | 1.15582e-15 | 1.00000  |
| rad38       | 1.07920e-15 | 1.00000  | 1.07921e-15 | 1.00000  |

|               |             |         |             |         |
|---------------|-------------|---------|-------------|---------|
| rad3          | 9.68930e-16 | 1.00000 | 9.68939e-16 | 1.00000 |
| rad4          | 4.92098e-16 | 1.00000 | 4.92102e-16 | 1.00000 |
| rad25         | 4.13771e-16 | 1.00000 | 4.13774e-16 | 1.00000 |
| rad2          | 7.92948e-19 | 1.00000 | 7.92956e-19 | 1.00000 |
| rad28         | 1.40224e-19 | 1.00000 | 1.40226e-19 | 1.00000 |
| rad1          | 5.10105e-20 | 1.00000 | 5.10110e-20 | 1.00000 |
| PhCHCCH2+H    | 3.18217e-21 | 1.00000 | 3.18220e-21 | 1.00000 |
| rad10         | 2.24289e-22 | 1.00000 | 2.24291e-22 | 1.00000 |
| rad46         | 1.53184e-22 | 1.00000 | 1.53185e-22 | 1.00000 |
| rad9          | 7.23984e-24 | 1.00000 | 7.23991e-24 | 1.00000 |
| rad14         | 1.06870e-24 | 1.00000 | 1.06871e-24 | 1.00000 |
| PhCCH+CH3     | 1.02643e-24 | 1.00000 | 1.02644e-24 | 1.00000 |
| rad31         | 3.22634e-25 | 1.00000 | 3.22637e-25 | 1.00000 |
| rad27         | 1.25178e-26 | 1.00000 | 1.25180e-26 | 1.00000 |
| rad8          | 1.07164e-27 | 1.00000 | 1.07165e-27 | 1.00000 |
| Ph+Allene     | 9.35466e-28 | 1.00000 | 9.35474e-28 | 1.00000 |
| PhCCCH3+H     | 1.55410e-28 | 1.00000 | 1.55411e-28 | 1.00000 |
| rad26         | 1.48897e-28 | 1.00000 | 1.48899e-28 | 1.00000 |
| rad60syn      | 2.69493e-29 | 1.00000 | 2.69496e-29 | 1.00000 |
| rad60anti     | 4.43701e-31 | 1.00000 | 4.43705e-31 | 1.00000 |
| Ph+MeAc       | 1.46181e-31 | 1.00000 | 1.46183e-31 | 1.00000 |
| PAH7+H        | 9.95593e-33 | 1.00000 | 9.95602e-33 | 1.00000 |
| PhCH2CCH+H    | 1.43944e-33 | 1.00000 | 1.43946e-33 | 1.00000 |
| rad39         | 3.40143e-34 | 1.00000 | 3.40146e-34 | 1.00000 |
| rad50         | 6.98943e-38 | 1.00000 | 6.98950e-38 | 1.00000 |
| rad12         | 3.20692e-38 | 1.00000 | 3.20695e-38 | 1.00000 |
| PAH3+H        | 4.99513e-40 | 1.00000 | 4.99518e-40 | 1.00000 |
| rad59         | 2.49267e-40 | 1.00000 | 2.49270e-40 | 1.00000 |
| rad5          | 5.87663e-41 | 1.00000 | 5.87668e-41 | 1.00000 |
| rad37         | 9.47769e-42 | 1.00000 | 9.47778e-42 | 1.00000 |
| rad52         | 4.13307e-46 | 1.00000 | 4.13310e-46 | 1.00000 |
| rad19syn      | 8.74211e-48 | 1.00000 | 8.74219e-48 | 1.00000 |
| rad51         | 8.44799e-51 | 1.00000 | 8.44807e-51 | 1.00000 |
| rad54         | 4.09715e-51 | 1.00000 | 4.09719e-51 | 1.00000 |
| rad43         | 6.33116e-52 | 1.00000 | 6.33122e-52 | 1.00000 |
| PAH10+CH3     | 6.33689e-53 | 1.00000 | 6.33695e-53 | 1.00000 |
| rad62         | 2.39245e-53 | 1.00000 | 2.39247e-53 | 1.00000 |
| rad65         | 1.52649e-54 | 1.00000 | 1.52650e-54 | 1.00000 |
| rad70         | 5.65748e-57 | 1.00000 | 5.65754e-57 | 1.00000 |
| PhcycC3H3_A+H | 2.50230e-57 | 1.00000 | 2.50233e-57 | 1.00000 |
| rad55         | 1.16824e-57 | 1.00000 | 1.16825e-57 | 1.00000 |
| rad58         | 3.77734e-58 | 1.00000 | 3.77738e-58 | 1.00000 |
| rad47         | 8.18153e-60 | 1.00000 | 8.18161e-60 | 1.00000 |
| PAH1+H        | 1.28894e-61 | 1.00000 | 1.28895e-61 | 1.00000 |
| rad34         | 3.03557e-62 | 1.00000 | 3.03560e-62 | 1.00000 |
| rad42         | 1.32909e-64 | 1.00000 | 1.32910e-64 | 1.00000 |
| rad41         | 8.31663e-65 | 1.00000 | 8.31671e-65 | 1.00000 |

100.000000 Pa, 110.000000 K

=====

| Rate constant | True (fraction)     | Effective (fraction) |
|---------------|---------------------|----------------------|
| Total         | 4.04932e-39 (1.00 ) | 4.04927e-39 (1.00 )  |

| species     | PYtrue      | Cumul    | PYeffective | Cumul    |
|-------------|-------------|----------|-------------|----------|
| rad22       | 0.546791    | 0.546791 | 0.546798    | 0.546798 |
| Indene+H    | 0.370682    | 0.917473 | 0.370687    | 0.917485 |
| rad18       | 0.0317840   | 0.949257 | 0.0317844   | 0.949269 |
| rad23       | 0.0256606   | 0.974918 | 0.0256609   | 0.974930 |
| rad45       | 0.0174883   | 0.992406 | 0.0174885   | 0.992419 |
| rad20       | 0.00387351  | 0.996279 | 0.00387356  | 0.996292 |
| rad21       | 0.00238695  | 0.998666 | 0.00238698  | 0.998679 |
| rad36       | 0.00108380  | 0.999750 | 0.00108381  | 0.999763 |
| rad11       | 0.000231890 | 0.999982 | 0.000231893 | 0.999995 |
| Benzyl+C2H2 | 1.27718e-05 | 0.999995 | 0.00000     | 0.999995 |
| rad6        | 4.77221e-06 | 1.000000 | 4.77228e-06 | 1.000000 |
| rad24       | 1.54828e-10 | 1.000000 | 1.54829e-10 | 1.000000 |
| rad7        | 5.98867e-11 | 1.000000 | 5.98875e-11 | 1.000000 |
| rad13       | 6.38904e-12 | 1.000000 | 6.38913e-12 | 1.000000 |
| rad30       | 2.00899e-12 | 1.000000 | 2.00902e-12 | 1.000000 |
| rad15       | 7.69392e-15 | 1.000000 | 7.69402e-15 | 1.000000 |
| rad33       | 7.12761e-15 | 1.000000 | 7.12770e-15 | 1.000000 |
| rad35       | 4.23499e-15 | 1.000000 | 4.23504e-15 | 1.000000 |
| PAH9+H      | 2.84402e-15 | 1.000000 | 2.84406e-15 | 1.000000 |
| rad38       | 2.79624e-15 | 1.000000 | 2.79628e-15 | 1.000000 |
| rad25       | 2.34429e-15 | 1.000000 | 2.34432e-15 | 1.000000 |
| rad3        | 1.99490e-15 | 1.000000 | 1.99493e-15 | 1.000000 |
| rad4        | 1.01414e-15 | 1.000000 | 1.01415e-15 | 1.000000 |
| rad2        | 2.72604e-18 | 1.000000 | 2.72608e-18 | 1.000000 |

|               |             |          |             |          |
|---------------|-------------|----------|-------------|----------|
| rad28         | 6.59490e-19 | 1.000000 | 6.59499e-19 | 1.000000 |
| rad1          | 1.76008e-19 | 1.000000 | 1.76010e-19 | 1.000000 |
| PhCHCCH2+H    | 5.99643e-20 | 1.000000 | 5.99650e-20 | 1.000000 |
| rad46         | 1.56302e-21 | 1.000000 | 1.56304e-21 | 1.000000 |
| rad10         | 1.25239e-21 | 1.000000 | 1.25241e-21 | 1.000000 |
| rad9          | 2.26185e-22 | 1.000000 | 2.26188e-22 | 1.000000 |
| PhCCH+CH3     | 1.51117e-23 | 1.000000 | 1.51119e-23 | 1.000000 |
| rad14         | 1.00998e-23 | 1.000000 | 1.00999e-23 | 1.000000 |
| rad8          | 2.55106e-24 | 1.000000 | 2.55109e-24 | 1.000000 |
| rad31         | 6.99462e-25 | 1.000000 | 6.99471e-25 | 1.000000 |
| Ph+Allene     | 1.09262e-25 | 1.000000 | 1.09263e-25 | 1.000000 |
| rad27         | 1.00968e-25 | 1.000000 | 1.00969e-25 | 1.000000 |
| rad60syn      | 2.73231e-26 | 1.000000 | 2.73235e-26 | 1.000000 |
| PhCCCH3+H     | 3.12049e-27 | 1.000000 | 3.12053e-27 | 1.000000 |
| rad26         | 2.29354e-27 | 1.000000 | 2.29357e-27 | 1.000000 |
| rad60anti     | 1.05285e-27 | 1.000000 | 1.05286e-27 | 1.000000 |
| Ph+MeAc       | 7.61673e-30 | 1.000000 | 7.61683e-30 | 1.000000 |
| PAH7+H        | 3.60359e-31 | 1.000000 | 3.60363e-31 | 1.000000 |
| PhCH2CCH+H    | 1.73209e-31 | 1.000000 | 1.73211e-31 | 1.000000 |
| rad39         | 1.58030e-32 | 1.000000 | 1.58032e-32 | 1.000000 |
| rad50         | 3.50489e-36 | 1.000000 | 3.50494e-36 | 1.000000 |
| rad12         | 1.90881e-36 | 1.000000 | 1.90883e-36 | 1.000000 |
| PAH3+H        | 8.04132e-38 | 1.000000 | 8.04142e-38 | 1.000000 |
| rad59         | 4.16020e-38 | 1.000000 | 4.16025e-38 | 1.000000 |
| rad5          | 6.17851e-39 | 1.000000 | 6.17859e-39 | 1.000000 |
| rad37         | 1.06720e-39 | 1.000000 | 1.06721e-39 | 1.000000 |
| rad52         | 2.88330e-44 | 1.000000 | 2.88334e-44 | 1.000000 |
| rad19syn      | 9.81984e-46 | 1.000000 | 9.81996e-46 | 1.000000 |
| rad51         | 7.24902e-49 | 1.000000 | 7.24912e-49 | 1.000000 |
| rad54         | 4.88482e-49 | 1.000000 | 4.88488e-49 | 1.000000 |
| rad43         | 1.31975e-49 | 1.000000 | 1.31977e-49 | 1.000000 |
| PAH10+CH3     | 1.42797e-50 | 1.000000 | 1.42799e-50 | 1.000000 |
| rad62         | 4.34262e-51 | 1.000000 | 4.34268e-51 | 1.000000 |
| rad65         | 1.43834e-52 | 1.000000 | 1.43835e-52 | 1.000000 |
| rad70         | 6.87468e-55 | 1.000000 | 6.87477e-55 | 1.000000 |
| PhcycC3H3_A+H | 3.40614e-55 | 1.000000 | 3.40618e-55 | 1.000000 |
| rad55         | 1.58182e-55 | 1.000000 | 1.58184e-55 | 1.000000 |
| rad58         | 3.90822e-56 | 1.000000 | 3.90827e-56 | 1.000000 |
| rad47         | 8.34516e-58 | 1.000000 | 8.34527e-58 | 1.000000 |
| PAH1+H        | 2.14518e-59 | 1.000000 | 2.14520e-59 | 1.000000 |
| rad34         | 4.23982e-60 | 1.000000 | 4.23988e-60 | 1.000000 |
| rad42         | 5.18031e-62 | 1.000000 | 5.18037e-62 | 1.000000 |
| rad41         | 3.59434e-62 | 1.000000 | 3.59439e-62 | 1.000000 |

100.000000 Pa, 120.000000 K

=====

| Rate constant | True (fraction)     | Effective (fraction) |
|---------------|---------------------|----------------------|
| Total         | 5.87106e-37 (1.00 ) | 5.87096e-37 (1.00 )  |

| species     | PYtrue      | Cumul    | PYeffective | Cumul    |
|-------------|-------------|----------|-------------|----------|
| rad22       | 0.537061    | 0.537061 | 0.537070    | 0.537070 |
| Indene+H    | 0.386231    | 0.923292 | 0.386238    | 0.923308 |
| rad23       | 0.0285016   | 0.951794 | 0.0285021   | 0.951810 |
| rad18       | 0.0255643   | 0.977358 | 0.0255648   | 0.977375 |
| rad45       | 0.0167317   | 0.994090 | 0.0167320   | 0.994107 |
| rad20       | 0.00284669  | 0.996936 | 0.00284674  | 0.996954 |
| rad21       | 0.00175283  | 0.998689 | 0.00175286  | 0.998706 |
| rad36       | 0.00103686  | 0.999726 | 0.00103688  | 0.999743 |
| rad11       | 0.000250683 | 0.999977 | 0.000250687 | 0.999994 |
| Benzyl+C2H2 | 1.71954e-05 | 0.999994 | 0.00000     | 0.999994 |
| rad6        | 6.30782e-06 | 1.00000  | 6.30793e-06 | 1.00000  |
| rad24       | 1.47531e-10 | 1.00000  | 1.47533e-10 | 1.00000  |
| rad7        | 9.89568e-11 | 1.00000  | 9.89585e-11 | 1.00000  |
| rad13       | 8.28374e-12 | 1.00000  | 8.28388e-12 | 1.00000  |
| rad30       | 6.09572e-12 | 1.00000  | 6.09583e-12 | 1.00000  |
| rad15       | 3.89377e-14 | 1.00000  | 3.89384e-14 | 1.00000  |
| rad25       | 1.09866e-14 | 1.00000  | 1.09867e-14 | 1.00000  |
| rad33       | 9.29710e-15 | 1.00000  | 9.29725e-15 | 1.00000  |
| rad35       | 8.30010e-15 | 1.00000  | 8.30024e-15 | 1.00000  |
| rad38       | 6.68528e-15 | 1.00000  | 6.68540e-15 | 1.00000  |
| PAH9+H      | 6.25362e-15 | 1.00000  | 6.25373e-15 | 1.00000  |
| rad3        | 4.16774e-15 | 1.00000  | 4.16781e-15 | 1.00000  |
| rad4        | 2.12098e-15 | 1.00000  | 2.12102e-15 | 1.00000  |
| rad2        | 9.66274e-18 | 1.00000  | 9.66291e-18 | 1.00000  |
| rad28       | 2.83993e-18 | 1.00000  | 2.83998e-18 | 1.00000  |
| PhCHCCH2+H  | 8.47315e-19 | 1.00000  | 8.47329e-19 | 1.00000  |
| rad1        | 6.26362e-19 | 1.00000  | 6.26373e-19 | 1.00000  |
| rad46       | 1.36816e-20 | 1.00000  | 1.36819e-20 | 1.00000  |

|               |             |         |             |         |
|---------------|-------------|---------|-------------|---------|
| rad10         | 7.24004e-21 | 1.00000 | 7.24016e-21 | 1.00000 |
| rad9          | 5.06481e-21 | 1.00000 | 5.06490e-21 | 1.00000 |
| PhCCH+CH3     | 1.94766e-22 | 1.00000 | 1.94769e-22 | 1.00000 |
| rad8          | 1.51199e-22 | 1.00000 | 1.51201e-22 | 1.00000 |
| rad14         | 8.48022e-23 | 1.00000 | 8.48036e-23 | 1.00000 |
| Ph+Allene     | 6.87436e-24 | 1.00000 | 6.87448e-24 | 1.00000 |
| rad60syn      | 1.62855e-24 | 1.00000 | 1.62857e-24 | 1.00000 |
| rad31         | 1.54199e-24 | 1.00000 | 1.54202e-24 | 1.00000 |
| rad27         | 7.56418e-25 | 1.00000 | 7.56431e-25 | 1.00000 |
| rad60anti     | 9.81992e-26 | 1.00000 | 9.82008e-26 | 1.00000 |
| PhCCCH3+H     | 5.65064e-26 | 1.00000 | 5.65074e-26 | 1.00000 |
| rad26         | 3.44085e-26 | 1.00000 | 3.44090e-26 | 1.00000 |
| Ph+MeAc       | 3.48320e-28 | 1.00000 | 3.48326e-28 | 1.00000 |
| PhCH2CCH+H    | 3.09377e-29 | 1.00000 | 3.09382e-29 | 1.00000 |
| PAH7+H        | 1.99979e-29 | 1.00000 | 1.99982e-29 | 1.00000 |
| rad39         | 6.18616e-31 | 1.00000 | 6.18627e-31 | 1.00000 |
| rad50         | 2.65480e-34 | 1.00000 | 2.65484e-34 | 1.00000 |
| rad12         | 1.06386e-34 | 1.00000 | 1.06388e-34 | 1.00000 |
| PAH3+H        | 3.21618e-35 | 1.00000 | 3.21623e-35 | 1.00000 |
| rad59         | 1.68805e-35 | 1.00000 | 1.68808e-35 | 1.00000 |
| rad5          | 7.05581e-37 | 1.00000 | 7.05594e-37 | 1.00000 |
| rad37         | 1.25762e-37 | 1.00000 | 1.25764e-37 | 1.00000 |
| rad52         | 3.15893e-42 | 1.00000 | 3.15898e-42 | 1.00000 |
| rad19syn      | 1.45081e-43 | 1.00000 | 1.45084e-43 | 1.00000 |
| rad51         | 1.00209e-46 | 1.00000 | 1.00211e-46 | 1.00000 |
| rad54         | 7.67542e-47 | 1.00000 | 7.67555e-47 | 1.00000 |
| rad43         | 3.28296e-47 | 1.00000 | 3.28301e-47 | 1.00000 |
| PAH10+CH3     | 3.80332e-48 | 1.00000 | 3.80339e-48 | 1.00000 |
| rad62         | 1.04170e-48 | 1.00000 | 1.04171e-48 | 1.00000 |
| rad65         | 2.21746e-50 | 1.00000 | 2.21749e-50 | 1.00000 |
| rad70         | 1.19957e-52 | 1.00000 | 1.19959e-52 | 1.00000 |
| PhcycC3H3_A+H | 6.14605e-53 | 1.00000 | 6.14615e-53 | 1.00000 |
| rad55         | 2.83832e-53 | 1.00000 | 2.83837e-53 | 1.00000 |
| rad58         | 6.68442e-54 | 1.00000 | 6.68453e-54 | 1.00000 |
| rad47         | 1.43055e-55 | 1.00000 | 1.43057e-55 | 1.00000 |
| PAH1+H        | 5.14267e-57 | 1.00000 | 5.14276e-57 | 1.00000 |
| rad34         | 8.54593e-58 | 1.00000 | 8.54608e-58 | 1.00000 |
| rad42         | 2.67558e-59 | 1.00000 | 2.67562e-59 | 1.00000 |
| rad41         | 1.95895e-59 | 1.00000 | 1.95899e-59 | 1.00000 |

100.000000 Pa, 130.000000 K

=====  
Rate constant | True (fraction) | Effective (fraction)  
-----  
Total | 3.94360e-35 (1.00 ) | 3.94351e-35 (1.00 )

| species     | PYtrue      | Cumul    | PYeffective | Cumul    |
|-------------|-------------|----------|-------------|----------|
| rad22       | 0.526407    | 0.526407 | 0.526419    | 0.526419 |
| Indene+H    | 0.400911    | 0.927318 | 0.400920    | 0.927339 |
| rad23       | 0.0314172   | 0.958735 | 0.0314180   | 0.958757 |
| rad18       | 0.0205693   | 0.979305 | 0.0205697   | 0.979327 |
| rad45       | 0.0159802   | 0.995285 | 0.0159805   | 0.995307 |
| rad20       | 0.00211887  | 0.997404 | 0.00211892  | 0.997426 |
| rad21       | 0.00130384  | 0.998707 | 0.00130387  | 0.998730 |
| rad36       | 0.000990429 | 0.999698 | 0.000990452 | 0.999720 |
| rad11       | 0.000270934 | 0.999969 | 0.000270940 | 0.999991 |
| Benzyl+C2H2 | 2.29673e-05 | 0.999992 | 0.00000     | 0.999991 |
| rad6        | 8.34811e-06 | 1.00000  | 8.34830e-06 | 1.000000 |
| rad7        | 1.64141e-10 | 1.00000  | 1.64145e-10 | 1.000000 |
| rad24       | 1.40564e-10 | 1.00000  | 1.40567e-10 | 1.000000 |
| rad30       | 1.59517e-11 | 1.00000  | 1.59520e-11 | 1.000000 |
| rad13       | 1.07707e-11 | 1.00000  | 1.07709e-11 | 1.000000 |
| rad15       | 1.56878e-13 | 1.00000  | 1.56881e-13 | 1.000000 |
| rad25       | 4.30874e-14 | 1.00000  | 4.30884e-14 | 1.000000 |
| rad35       | 1.60999e-14 | 1.00000  | 1.61003e-14 | 1.000000 |
| rad38       | 1.49155e-14 | 1.00000  | 1.49158e-14 | 1.000000 |
| PAH9+H      | 1.34107e-14 | 1.00000  | 1.34110e-14 | 1.000000 |
| rad33       | 1.21581e-14 | 1.00000  | 1.21583e-14 | 1.000000 |
| rad3        | 8.82600e-15 | 1.00000  | 8.82620e-15 | 1.000000 |
| rad4        | 4.49681e-15 | 1.00000  | 4.49691e-15 | 1.000000 |
| rad2        | 3.47410e-17 | 1.00000  | 3.47418e-17 | 1.000000 |
| rad28       | 1.11906e-17 | 1.00000  | 1.11909e-17 | 1.000000 |
| PhCHCCH2+H  | 8.77395e-18 | 1.00000  | 8.77415e-18 | 1.000000 |
| rad1        | 2.26176e-18 | 1.00000  | 2.26181e-18 | 1.000000 |
| rad46       | 9.62859e-20 | 1.00000  | 9.62881e-20 | 1.000000 |
| rad9        | 7.75508e-20 | 1.00000  | 7.75526e-20 | 1.000000 |
| rad10       | 4.18502e-20 | 1.00000  | 4.18511e-20 | 1.000000 |
| rad8        | 4.69361e-21 | 1.00000  | 4.69372e-21 | 1.000000 |
| PhCCH+CH3   | 2.10100e-21 | 1.00000  | 2.10105e-21 | 1.000000 |

|               |             |         |             |          |
|---------------|-------------|---------|-------------|----------|
| rad14         | 6.16401e-22 | 1.00000 | 6.16415e-22 | 1.000000 |
| Ph+Allene     | 2.42970e-22 | 1.00000 | 2.42976e-22 | 1.000000 |
| rad60syn      | 5.09727e-23 | 1.00000 | 5.09738e-23 | 1.000000 |
| rad27         | 5.07923e-24 | 1.00000 | 5.07935e-24 | 1.000000 |
| rad60anti     | 3.91346e-24 | 1.00000 | 3.91355e-24 | 1.000000 |
| rad31         | 3.45177e-24 | 1.00000 | 3.45185e-24 | 1.000000 |
| PhCCCH3+H     | 8.66644e-25 | 1.00000 | 8.66664e-25 | 1.000000 |
| rad26         | 4.72493e-25 | 1.00000 | 4.72504e-25 | 1.000000 |
| Ph+MeAc       | 1.17906e-26 | 1.00000 | 1.17909e-26 | 1.000000 |
| PhCH2CCH+H    | 1.06075e-26 | 1.00000 | 1.06077e-26 | 1.000000 |
| PAH7+H        | 1.07643e-27 | 1.00000 | 1.07645e-27 | 1.000000 |
| rad39         | 1.79148e-29 | 1.00000 | 1.79152e-29 | 1.000000 |
| rad50         | 2.45685e-32 | 1.00000 | 2.45691e-32 | 1.000000 |
| PAH3+H        | 2.10225e-32 | 1.00000 | 2.10230e-32 | 1.000000 |
| rad59         | 1.10580e-32 | 1.00000 | 1.10583e-32 | 1.000000 |
| rad12         | 4.86977e-33 | 1.00000 | 4.86988e-33 | 1.000000 |
| rad5          | 7.46615e-35 | 1.00000 | 7.46632e-35 | 1.000000 |
| rad37         | 1.30892e-35 | 1.00000 | 1.30895e-35 | 1.000000 |
| rad52         | 4.39407e-40 | 1.00000 | 4.39417e-40 | 1.000000 |
| rad19syn      | 2.67437e-41 | 1.00000 | 2.67443e-41 | 1.000000 |
| rad51         | 1.80258e-44 | 1.00000 | 1.80262e-44 | 1.000000 |
| rad54         | 1.50664e-44 | 1.00000 | 1.50668e-44 | 1.000000 |
| rad43         | 8.47905e-45 | 1.00000 | 8.47925e-45 | 1.000000 |
| PAH10+CH3     | 1.04718e-45 | 1.00000 | 1.04720e-45 | 1.000000 |
| rad62         | 2.80903e-46 | 1.00000 | 2.80909e-46 | 1.000000 |
| rad65         | 4.51719e-48 | 1.00000 | 4.51729e-48 | 1.000000 |
| rad70         | 2.67174e-50 | 1.00000 | 2.67180e-50 | 1.000000 |
| PhcycC3H3_A+H | 1.38959e-50 | 1.00000 | 1.38963e-50 | 1.000000 |
| rad55         | 6.37990e-51 | 1.00000 | 6.38005e-51 | 1.000000 |
| rad58         | 1.52621e-51 | 1.00000 | 1.52624e-51 | 1.000000 |
| rad47         | 3.31760e-53 | 1.00000 | 3.31768e-53 | 1.000000 |
| PAH1+H        | 1.63546e-54 | 1.00000 | 1.63550e-54 | 1.000000 |
| rad34         | 2.22928e-55 | 1.00000 | 2.22934e-55 | 1.000000 |
| rad42         | 1.50544e-56 | 1.00000 | 1.50548e-56 | 1.000000 |
| rad41         | 1.14103e-56 | 1.00000 | 1.14105e-56 | 1.000000 |

100.000000 Pa, 140.000000 K

=====

| Rate constant | True (fraction)     | Effective (fraction) |
|---------------|---------------------|----------------------|
| Total         | 1.44756e-33 (1.00 ) | 1.44751e-33 (1.00 )  |

| species     | PYtrue      | Cumul    | PYeffective | Cumul    |
|-------------|-------------|----------|-------------|----------|
| rad22       | 0.514854    | 0.514854 | 0.514869    | 0.514869 |
| Indene+H    | 0.415079    | 0.929933 | 0.415092    | 0.929961 |
| rad23       | 0.0344214   | 0.964354 | 0.0344224   | 0.964383 |
| rad18       | 0.0165521   | 0.980907 | 0.0165526   | 0.980936 |
| rad45       | 0.0152398   | 0.996146 | 0.0152403   | 0.996176 |
| rad20       | 0.00159417  | 0.997740 | 0.00159422  | 0.997771 |
| rad21       | 0.000980439 | 0.998721 | 0.000980469 | 0.998751 |
| rad36       | 0.000944887 | 0.999666 | 0.000944916 | 0.999696 |
| rad11       | 0.000292811 | 0.999959 | 0.000292820 | 0.999989 |
| Benzyl+C2H2 | 3.04687e-05 | 0.999989 | 0.000000    | 0.999989 |
| rad6        | 1.10742e-05 | 1.00000  | 1.10745e-05 | 1.000000 |
| rad7        | 2.73050e-10 | 1.00000  | 2.73058e-10 | 1.000000 |
| rad24       | 1.33911e-10 | 1.00000  | 1.33915e-10 | 1.000000 |
| rad30       | 3.70315e-11 | 1.00000  | 3.70326e-11 | 1.000000 |
| rad13       | 1.40562e-11 | 1.00000  | 1.40566e-11 | 1.000000 |
| rad15       | 5.25656e-13 | 1.00000  | 5.25672e-13 | 1.000000 |
| rad25       | 1.44673e-13 | 1.00000  | 1.44678e-13 | 1.000000 |
| rad38       | 3.14347e-14 | 1.00000  | 3.14356e-14 | 1.000000 |
| rad35       | 3.09700e-14 | 1.00000  | 3.09709e-14 | 1.000000 |
| PAH9+H      | 2.81643e-14 | 1.00000  | 2.81652e-14 | 1.000000 |
| rad3        | 1.88726e-14 | 1.00000  | 1.88731e-14 | 1.000000 |
| rad33       | 1.59543e-14 | 1.00000  | 1.59548e-14 | 1.000000 |
| rad4        | 9.62775e-15 | 1.00000  | 9.62805e-15 | 1.000000 |
| rad2        | 1.24582e-16 | 1.00000  | 1.24586e-16 | 1.000000 |
| PhCHCCH2+H  | 6.89667e-17 | 1.00000  | 6.89688e-17 | 1.000000 |
| rad28       | 4.06433e-17 | 1.00000  | 4.06445e-17 | 1.000000 |
| rad1        | 8.14905e-18 | 1.00000  | 8.14929e-18 | 1.000000 |
| rad9        | 8.46063e-19 | 1.00000  | 8.46089e-19 | 1.000000 |
| rad46       | 5.48280e-19 | 1.00000  | 5.48296e-19 | 1.000000 |
| rad10       | 2.35048e-19 | 1.00000  | 2.35055e-19 | 1.000000 |
| rad8        | 8.89902e-20 | 1.00000  | 8.89929e-20 | 1.000000 |
| PhCCH+CH3   | 1.89607e-20 | 1.00000  | 1.89613e-20 | 1.000000 |
| Ph+Allene   | 5.35737e-21 | 1.00000  | 5.35753e-21 | 1.000000 |
| rad14       | 3.87138e-21 | 1.00000  | 3.87150e-21 | 1.000000 |
| rad60syn    | 9.71547e-22 | 1.00000  | 9.71576e-22 | 1.000000 |
| rad60anti   | 9.06241e-23 | 1.00000  | 9.06269e-23 | 1.000000 |

|               |             |         |             |          |
|---------------|-------------|---------|-------------|----------|
| rad27         | 3.01678e-23 | 1.00000 | 3.01687e-23 | 1.000000 |
| PhCCCH3+H     | 1.11145e-23 | 1.00000 | 1.11148e-23 | 1.000000 |
| rad31         | 7.81501e-24 | 1.00000 | 7.81525e-24 | 1.000000 |
| rad26         | 5.75035e-24 | 1.00000 | 5.75053e-24 | 1.000000 |
| PhCH2CCH+H    | 7.08596e-25 | 1.00000 | 7.08618e-25 | 1.000000 |
| Ph+MeAc       | 2.84015e-25 | 1.00000 | 2.84023e-25 | 1.000000 |
| PAH7+H        | 3.67270e-26 | 1.00000 | 3.67281e-26 | 1.000000 |
| rad39         | 3.78478e-28 | 1.00000 | 3.78490e-28 | 1.000000 |
| PAH3+H        | 1.16570e-28 | 1.00000 | 1.16573e-28 | 1.000000 |
| rad59         | 5.85486e-29 | 1.00000 | 5.85504e-29 | 1.000000 |
| rad50         | 2.32326e-30 | 1.00000 | 2.32333e-30 | 1.000000 |
| rad12         | 1.70645e-31 | 1.00000 | 1.70650e-31 | 1.000000 |
| rad5          | 5.52059e-33 | 1.00000 | 5.52076e-33 | 1.000000 |
| rad37         | 9.27005e-34 | 1.00000 | 9.27033e-34 | 1.000000 |
| rad52         | 5.64745e-38 | 1.00000 | 5.64762e-38 | 1.000000 |
| rad19syn      | 4.42832e-39 | 1.00000 | 4.42845e-39 | 1.000000 |
| rad51         | 3.06533e-42 | 1.00000 | 3.06543e-42 | 1.000000 |
| rad54         | 2.65993e-42 | 1.00000 | 2.66001e-42 | 1.000000 |
| rad43         | 1.70953e-42 | 1.00000 | 1.70958e-42 | 1.000000 |
| PAH10+CH3     | 2.25048e-43 | 1.00000 | 2.25055e-43 | 1.000000 |
| rad62         | 6.14759e-44 | 1.00000 | 6.14778e-44 | 1.000000 |
| rad65         | 8.82818e-46 | 1.00000 | 8.82844e-46 | 1.000000 |
| rad70         | 5.47899e-48 | 1.00000 | 5.47915e-48 | 1.000000 |
| PhcycC3H3_A+H | 2.83377e-48 | 1.00000 | 2.83385e-48 | 1.000000 |
| rad55         | 1.29306e-48 | 1.00000 | 1.29310e-48 | 1.000000 |
| rad58         | 3.37476e-49 | 1.00000 | 3.37486e-49 | 1.000000 |
| rad47         | 7.53159e-51 | 1.00000 | 7.53182e-51 | 1.000000 |
| PAH1+H        | 4.85368e-52 | 1.00000 | 4.85383e-52 | 1.000000 |
| rad34         | 5.46851e-53 | 1.00000 | 5.46868e-53 | 1.000000 |
| rad42         | 6.73593e-54 | 1.00000 | 6.73613e-54 | 1.000000 |
| rad41         | 5.25393e-54 | 1.00000 | 5.25409e-54 | 1.000000 |

100.000000 Pa, 150.000000 K

=====

| Rate constant | True (fraction)     | Effective (fraction) |
|---------------|---------------------|----------------------|
| Total         | 3.27736e-32 (1.00 ) | 3.27723e-32 (1.00 )  |

| species     | PYtrue      | Cumul    | PYeffective | Cumul    |
|-------------|-------------|----------|-------------|----------|
| rad22       | 0.502393    | 0.502393 | 0.502413    | 0.502413 |
| Indene+H    | 0.429021    | 0.931414 | 0.429039    | 0.931452 |
| rad23       | 0.0375255   | 0.968939 | 0.0375270   | 0.968979 |
| rad45       | 0.0145159   | 0.983455 | 0.0145165   | 0.983495 |
| rad18       | 0.0133178   | 0.996773 | 0.0133183   | 0.996814 |
| rad20       | 0.00121041  | 0.997984 | 0.00121045  | 0.998024 |
| rad36       | 0.000900543 | 0.998884 | 0.000900579 | 0.998925 |
| rad21       | 0.000744089 | 0.999628 | 0.000744119 | 0.999669 |
| rad11       | 0.000316431 | 0.999945 | 0.000316444 | 0.999985 |
| Benzyl+C2H2 | 4.01756e-05 | 0.999985 | 0.00000     | 0.999985 |
| rad6        | 1.47280e-05 | 1.000000 | 1.47286e-05 | 1.000000 |
| rad7        | 4.54286e-10 | 1.000000 | 4.54304e-10 | 1.000000 |
| rad24       | 1.27566e-10 | 1.000000 | 1.27571e-10 | 1.000000 |
| rad30       | 7.80647e-11 | 1.000000 | 7.80678e-11 | 1.000000 |
| rad13       | 1.84129e-11 | 1.000000 | 1.84137e-11 | 1.000000 |
| rad15       | 1.51783e-12 | 1.000000 | 1.51789e-12 | 1.000000 |
| rad25       | 4.25135e-13 | 1.000000 | 4.25152e-13 | 1.000000 |
| rad38       | 6.32403e-14 | 1.000000 | 6.32428e-14 | 1.000000 |
| rad35       | 5.91089e-14 | 1.000000 | 5.91113e-14 | 1.000000 |
| PAH9+H      | 5.80868e-14 | 1.000000 | 5.80892e-14 | 1.000000 |
| rad3        | 4.05179e-14 | 1.000000 | 4.05195e-14 | 1.000000 |
| rad33       | 2.10092e-14 | 1.000000 | 2.10101e-14 | 1.000000 |
| rad4        | 2.06989e-14 | 1.000000 | 2.06997e-14 | 1.000000 |
| rad2        | 4.39005e-16 | 1.000000 | 4.39023e-16 | 1.000000 |
| PhCHCCH2+H  | 4.29280e-16 | 1.000000 | 4.29297e-16 | 1.000000 |
| rad28       | 1.37186e-16 | 1.000000 | 1.37191e-16 | 1.000000 |
| rad1        | 2.88634e-17 | 1.000000 | 2.88645e-17 | 1.000000 |
| rad9        | 6.93260e-18 | 1.000000 | 6.93288e-18 | 1.000000 |
| rad46       | 2.59437e-18 | 1.000000 | 2.59447e-18 | 1.000000 |
| rad10       | 1.25556e-18 | 1.000000 | 1.25561e-18 | 1.000000 |
| rad8        | 1.14161e-18 | 1.000000 | 1.14166e-18 | 1.000000 |
| PhCCH+CH3   | 1.45042e-19 | 1.000000 | 1.45047e-19 | 1.000000 |
| Ph+Allene   | 8.05658e-20 | 1.000000 | 8.05691e-20 | 1.000000 |
| rad14       | 2.11280e-20 | 1.000000 | 2.11288e-20 | 1.000000 |
| rad60syn    | 1.24923e-20 | 1.000000 | 1.24928e-20 | 1.000000 |
| rad60anti   | 1.37634e-21 | 1.000000 | 1.37639e-21 | 1.000000 |
| rad27       | 1.58355e-22 | 1.000000 | 1.58362e-22 | 1.000000 |
| PhCCCH3+H   | 1.19967e-22 | 1.000000 | 1.19972e-22 | 1.000000 |
| rad26       | 6.11563e-23 | 1.000000 | 6.11587e-23 | 1.000000 |
| PhCH2CCH+H  | 2.25507e-23 | 1.000000 | 2.25516e-23 | 1.000000 |

|               |             |          |             |         |
|---------------|-------------|----------|-------------|---------|
| rad31         | 1.77981e-23 | 1.000000 | 1.77988e-23 | 1.00000 |
| Ph+MeAc       | 5.04058e-24 | 1.000000 | 5.04078e-24 | 1.00000 |
| PAH7+H        | 8.12193e-25 | 1.000000 | 8.12225e-25 | 1.00000 |
| PAH3+H        | 1.78507e-26 | 1.000000 | 1.78514e-26 | 1.00000 |
| rad59         | 8.04224e-27 | 1.000000 | 8.04256e-27 | 1.00000 |
| rad39         | 6.07014e-27 | 1.000000 | 6.07038e-27 | 1.00000 |
| rad50         | 1.20518e-28 | 1.000000 | 1.20523e-28 | 1.00000 |
| rad12         | 4.70855e-30 | 1.000000 | 4.70874e-30 | 1.00000 |
| rad5          | 2.86219e-31 | 1.000000 | 2.86230e-31 | 1.00000 |
| rad37         | 4.73613e-32 | 1.000000 | 4.73632e-32 | 1.00000 |
| rad52         | 8.98303e-36 | 1.000000 | 8.98339e-36 | 1.00000 |
| rad19syn      | 1.20316e-36 | 1.000000 | 1.20321e-36 | 1.00000 |
| rad54         | 7.72511e-40 | 1.000000 | 7.72542e-40 | 1.00000 |
| rad51         | 6.57905e-40 | 1.000000 | 6.57931e-40 | 1.00000 |
| rad43         | 3.71414e-40 | 1.000000 | 3.71429e-40 | 1.00000 |
| PAH10+CH3     | 5.20871e-41 | 1.000000 | 5.20892e-41 | 1.00000 |
| rad62         | 1.57319e-41 | 1.000000 | 1.57325e-41 | 1.00000 |
| rad65         | 2.20751e-43 | 1.000000 | 2.20760e-43 | 1.00000 |
| rad70         | 1.71538e-45 | 1.000000 | 1.71545e-45 | 1.00000 |
| PhcycC3H3_A+H | 9.47581e-46 | 1.000000 | 9.47619e-46 | 1.00000 |
| rad55         | 4.29817e-46 | 1.000000 | 4.29835e-46 | 1.00000 |
| rad58         | 9.64424e-47 | 1.000000 | 9.64463e-47 | 1.00000 |
| rad47         | 2.22413e-48 | 1.000000 | 2.22422e-48 | 1.00000 |
| PAH1+H        | 1.97420e-49 | 1.000000 | 1.97428e-49 | 1.00000 |
| rad34         | 2.01581e-50 | 1.000000 | 2.01589e-50 | 1.00000 |
| rad42         | 3.29052e-51 | 1.000000 | 3.29065e-51 | 1.00000 |
| rad41         | 2.63313e-51 | 1.000000 | 2.63324e-51 | 1.00000 |

100.000000 Pa, 160.000000 K

| Rate constant | True (fraction)     | Effective (fraction) |
|---------------|---------------------|----------------------|
| Total         | 5.01169e-31 (1.00 ) | 5.01142e-31 (1.00 )  |

| species     | PYtrue      | Cumul    | PYeffective | Cumul    |
|-------------|-------------|----------|-------------|----------|
| rad22       | 0.489005    | 0.489005 | 0.489030    | 0.489030 |
| Indene+H    | 0.442964    | 0.931969 | 0.442988    | 0.932018 |
| rad23       | 0.0407384   | 0.972707 | 0.0407405   | 0.972758 |
| rad45       | 0.0138132   | 0.986521 | 0.0138139   | 0.986572 |
| rad18       | 0.0107120   | 0.997233 | 0.0107126   | 0.997285 |
| rad20       | 0.000926236 | 0.998159 | 0.000926285 | 0.998211 |
| rad36       | 0.000857681 | 0.999017 | 0.000857726 | 0.999069 |
| rad21       | 0.000569195 | 0.999586 | 0.000569225 | 0.999638 |
| rad11       | 0.000341846 | 0.999928 | 0.000341864 | 0.999980 |
| Benzyl+C2H2 | 5.26776e-05 | 0.999980 | 0.00000     | 0.999980 |
| rad6        | 1.96279e-05 | 1.000000 | 1.96290e-05 | 1.000000 |
| rad7        | 7.53050e-10 | 1.000000 | 7.53090e-10 | 1.000000 |
| rad30       | 1.52225e-10 | 1.000000 | 1.52233e-10 | 1.000000 |
| rad24       | 1.21531e-10 | 1.000000 | 1.21538e-10 | 1.000000 |
| rad13       | 2.41959e-11 | 1.000000 | 2.41971e-11 | 1.000000 |
| rad15       | 3.88368e-12 | 1.000000 | 3.88388e-12 | 1.000000 |
| rad25       | 1.11374e-12 | 1.000000 | 1.11380e-12 | 1.000000 |
| rad38       | 1.22469e-13 | 1.000000 | 1.22476e-13 | 1.000000 |
| PAH9+H      | 1.17828e-13 | 1.000000 | 1.17834e-13 | 1.000000 |
| rad35       | 1.11883e-13 | 1.000000 | 1.11889e-13 | 1.000000 |
| rad3        | 8.67753e-14 | 1.000000 | 8.67799e-14 | 1.000000 |
| rad4        | 4.43977e-14 | 1.000000 | 4.44000e-14 | 1.000000 |
| rad33       | 2.77461e-14 | 1.000000 | 2.77476e-14 | 1.000000 |
| PhCHCCH2+H  | 2.19686e-15 | 1.000000 | 2.19697e-15 | 1.000000 |
| rad2        | 1.50191e-15 | 1.000000 | 1.50199e-15 | 1.000000 |
| rad28       | 4.33465e-16 | 1.000000 | 4.33488e-16 | 1.000000 |
| rad1        | 9.92983e-17 | 1.000000 | 9.93036e-17 | 1.000000 |
| rad9        | 4.47168e-17 | 1.000000 | 4.47192e-17 | 1.000000 |
| rad8        | 1.06679e-17 | 1.000000 | 1.06685e-17 | 1.000000 |
| rad46       | 1.04987e-17 | 1.000000 | 1.04992e-17 | 1.000000 |
| rad10       | 6.28530e-18 | 1.000000 | 6.28563e-18 | 1.000000 |
| PhCCH+CH3   | 9.55083e-19 | 1.000000 | 9.55133e-19 | 1.000000 |
| Ph+Allene   | 8.81892e-19 | 1.000000 | 8.81939e-19 | 1.000000 |
| rad60syn    | 1.16714e-19 | 1.000000 | 1.16720e-19 | 1.000000 |
| rad14       | 1.00970e-19 | 1.000000 | 1.00975e-19 | 1.000000 |
| rad60anti   | 1.48543e-20 | 1.000000 | 1.48551e-20 | 1.000000 |
| PhCCCH3+H   | 1.10199e-21 | 1.000000 | 1.10205e-21 | 1.000000 |
| rad27       | 7.38532e-22 | 1.000000 | 7.38571e-22 | 1.000000 |
| rad26       | 5.65637e-22 | 1.000000 | 5.65667e-22 | 1.000000 |
| PhCH2CCH+H  | 4.40644e-22 | 1.000000 | 4.40667e-22 | 1.000000 |
| Ph+MeAc     | 6.81839e-23 | 1.000000 | 6.81875e-23 | 1.000000 |
| rad31       | 4.05262e-23 | 1.000000 | 4.05283e-23 | 1.000000 |
| PAH7+H      | 1.24443e-23 | 1.000000 | 1.24449e-23 | 1.000000 |
| PAH3+H      | 5.34821e-25 | 1.000000 | 5.34849e-25 | 1.000000 |



|               |             |          |             |          |
|---------------|-------------|----------|-------------|----------|
| rad59         | 2.25766e-25 | 1.000000 | 2.25778e-25 | 1.000000 |
| rad39         | 7.65351e-26 | 1.000000 | 7.65391e-26 | 1.000000 |
| rad50         | 3.13567e-27 | 1.000000 | 3.13584e-27 | 1.000000 |
| rad12         | 1.00620e-28 | 1.000000 | 1.00625e-28 | 1.000000 |
| rad5          | 8.96232e-30 | 1.000000 | 8.96279e-30 | 1.000000 |
| rad37         | 1.58002e-30 | 1.000000 | 1.58011e-30 | 1.000000 |
| rad52         | 1.08837e-33 | 1.000000 | 1.08843e-33 | 1.000000 |
| rad19syn      | 2.54725e-34 | 1.000000 | 2.54738e-34 | 1.000000 |
| rad54         | 1.76124e-37 | 1.000000 | 1.76133e-37 | 1.000000 |
| rad51         | 1.08765e-37 | 1.000000 | 1.08771e-37 | 1.000000 |
| rad43         | 5.47234e-38 | 1.000000 | 5.47263e-38 | 1.000000 |
| PAH10+CH3     | 8.19616e-39 | 1.000000 | 8.19659e-39 | 1.000000 |
| rad62         | 2.85475e-39 | 1.000000 | 2.85490e-39 | 1.000000 |
| rad65         | 4.30318e-41 | 1.000000 | 4.30340e-41 | 1.000000 |
| rad70         | 4.26558e-43 | 1.000000 | 4.26581e-43 | 1.000000 |
| PhcycC3H3_A+H | 2.49094e-43 | 1.000000 | 2.49107e-43 | 1.000000 |
| rad55         | 1.12309e-43 | 1.000000 | 1.12315e-43 | 1.000000 |
| rad58         | 2.16835e-44 | 1.000000 | 2.16847e-44 | 1.000000 |
| rad47         | 5.18639e-46 | 1.000000 | 5.18666e-46 | 1.000000 |
| PAH1+H        | 5.85469e-47 | 1.000000 | 5.85500e-47 | 1.000000 |
| rad34         | 5.86572e-48 | 1.000000 | 5.86602e-48 | 1.000000 |
| rad42         | 1.09209e-48 | 1.000000 | 1.09214e-48 | 1.000000 |
| rad41         | 8.96159e-49 | 1.000000 | 8.96206e-49 | 1.000000 |

100.000000 Pa, 170.000000 K

| Rate constant | True (fraction)     | Effective (fraction) |
|---------------|---------------------|----------------------|
| Total         | 5.54821e-30 (1.00 ) | 5.54783e-30 (1.00 )  |

| species     | PYtrue      | Cumul    | PYeffective | Cumul    |
|-------------|-------------|----------|-------------|----------|
| rad22       | 0.474667    | 0.474667 | 0.474699    | 0.474699 |
| Indene+H    | 0.457087    | 0.931754 | 0.457119    | 0.931818 |
| rad23       | 0.0440655   | 0.975819 | 0.0440685   | 0.975886 |
| rad45       | 0.0131362   | 0.988956 | 0.0131371   | 0.989024 |
| rad18       | 0.00861181  | 0.997568 | 0.00861240  | 0.997636 |
| rad36       | 0.000816575 | 0.998384 | 0.000816631 | 0.998453 |
| rad20       | 0.000713580 | 0.999098 | 0.000713629 | 0.999166 |
| rad21       | 0.000438389 | 0.999536 | 0.000438419 | 0.999605 |
| rad11       | 0.000369027 | 0.999905 | 0.000369053 | 0.999974 |
| Benzyl+C2H2 | 6.86976e-05 | 0.999974 | 0.00000     | 0.999974 |
| rad6        | 2.61855e-05 | 1.000000 | 2.61873e-05 | 1.000000 |
| rad7        | 1.23848e-09 | 1.000000 | 1.23857e-09 | 1.000000 |
| rad30       | 2.78573e-10 | 1.000000 | 2.78593e-10 | 1.000000 |
| rad24       | 1.15818e-10 | 1.000000 | 1.15826e-10 | 1.000000 |
| rad13       | 3.18590e-11 | 1.000000 | 3.18612e-11 | 1.000000 |
| rad15       | 8.99990e-12 | 1.000000 | 9.00052e-12 | 1.000000 |
| rad25       | 2.64024e-12 | 1.000000 | 2.64042e-12 | 1.000000 |
| PAH9+H      | 2.35228e-13 | 1.000000 | 2.35244e-13 | 1.000000 |
| rad38       | 2.29795e-13 | 1.000000 | 2.29810e-13 | 1.000000 |
| rad35       | 2.09828e-13 | 1.000000 | 2.09842e-13 | 1.000000 |
| rad3        | 1.84180e-13 | 1.000000 | 1.84192e-13 | 1.000000 |
| rad4        | 9.43913e-14 | 1.000000 | 9.43978e-14 | 1.000000 |
| rad33       | 3.67094e-14 | 1.000000 | 3.67119e-14 | 1.000000 |
| PhCHCCH2+H  | 9.53449e-15 | 1.000000 | 9.53515e-15 | 1.000000 |
| rad2        | 4.94337e-15 | 1.000000 | 4.94371e-15 | 1.000000 |
| rad28       | 1.28964e-15 | 1.000000 | 1.28972e-15 | 1.000000 |
| rad1        | 3.28815e-16 | 1.000000 | 3.28838e-16 | 1.000000 |
| rad9        | 2.36050e-16 | 1.000000 | 2.36066e-16 | 1.000000 |
| rad8        | 7.68323e-17 | 1.000000 | 7.68376e-17 | 1.000000 |
| rad46       | 3.72779e-17 | 1.000000 | 3.72805e-17 | 1.000000 |
| rad10       | 2.92114e-17 | 1.000000 | 2.92134e-17 | 1.000000 |
| Ph+Allene   | 7.40729e-18 | 1.000000 | 7.40780e-18 | 1.000000 |
| PhCCH+CH3   | 5.49294e-18 | 1.000000 | 5.49332e-18 | 1.000000 |
| rad60syn    | 8.38769e-19 | 1.000000 | 8.38827e-19 | 1.000000 |
| rad14       | 4.26074e-19 | 1.000000 | 4.26103e-19 | 1.000000 |
| rad60anti   | 1.21088e-19 | 1.000000 | 1.21097e-19 | 1.000000 |
| PhCCCH3+H   | 8.72535e-21 | 1.000000 | 8.72595e-21 | 1.000000 |
| PhCH2CCH+H  | 6.09945e-21 | 1.000000 | 6.09987e-21 | 1.000000 |
| rad26       | 4.55712e-21 | 1.000000 | 4.55743e-21 | 1.000000 |
| rad27       | 3.08467e-21 | 1.000000 | 3.08488e-21 | 1.000000 |
| Ph+MeAc     | 7.30677e-22 | 1.000000 | 7.30727e-22 | 1.000000 |
| PAH7+H      | 1.41154e-22 | 1.000000 | 1.41163e-22 | 1.000000 |
| rad31       | 9.17096e-23 | 1.000000 | 9.17159e-23 | 1.000000 |
| PAH3+H      | 9.82082e-24 | 1.000000 | 9.82149e-24 | 1.000000 |
| rad59       | 3.99856e-24 | 1.000000 | 3.99883e-24 | 1.000000 |
| rad39       | 7.86720e-25 | 1.000000 | 7.86774e-25 | 1.000000 |
| rad50       | 5.49600e-26 | 1.000000 | 5.49638e-26 | 1.000000 |
| rad12       | 1.71121e-27 | 1.000000 | 1.71133e-27 | 1.000000 |

|               |             |          |             |          |
|---------------|-------------|----------|-------------|----------|
| rad5          | 1.94263e-28 | 1.000000 | 1.94276e-28 | 1.000000 |
| rad37         | 3.78594e-29 | 1.000000 | 3.78620e-29 | 1.000000 |
| rad52         | 1.18963e-31 | 1.000000 | 1.18972e-31 | 1.000000 |
| rad19syn      | 4.40340e-32 | 1.000000 | 4.40371e-32 | 1.000000 |
| rad54         | 3.08598e-35 | 1.000000 | 3.08619e-35 | 1.000000 |
| rad51         | 1.31943e-35 | 1.000000 | 1.31952e-35 | 1.000000 |
| rad43         | 5.50561e-36 | 1.000000 | 5.50599e-36 | 1.000000 |
| PAH10+CH3     | 8.83259e-37 | 1.000000 | 8.83320e-37 | 1.000000 |
| rad62         | 3.75050e-37 | 1.000000 | 3.75075e-37 | 1.000000 |
| rad65         | 6.21323e-39 | 1.000000 | 6.21366e-39 | 1.000000 |
| rad70         | 8.26555e-41 | 1.000000 | 8.26612e-41 | 1.000000 |
| PhcycC3H3_A+H | 5.04447e-41 | 1.000000 | 5.04481e-41 | 1.000000 |
| rad55         | 2.26063e-41 | 1.000000 | 2.26078e-41 | 1.000000 |
| rad58         | 3.65775e-42 | 1.000000 | 3.65800e-42 | 1.000000 |
| rad47         | 9.03786e-44 | 1.000000 | 9.03848e-44 | 1.000000 |
| PAH1+H        | 1.25389e-44 | 1.000000 | 1.25397e-44 | 1.000000 |
| rad34         | 1.30212e-45 | 1.000000 | 1.30221e-45 | 1.000000 |
| rad42         | 2.47405e-46 | 1.000000 | 2.47422e-46 | 1.000000 |
| rad41         | 2.08100e-46 | 1.000000 | 2.08115e-46 | 1.000000 |

100.000000 Pa, 180.000000 K

| Rate constant | True (fraction)     | Effective (fraction) |
|---------------|---------------------|----------------------|
| Total         | 4.69315e-29 (1.00 ) | 4.69273e-29 (1.00 )  |

| species     | PYtrue      | Cumul    | PYeffective | Cumul    |
|-------------|-------------|----------|-------------|----------|
| Indene+H    | 0.471526    | 0.471526 | 0.471568    | 0.471568 |
| rad22       | 0.459365    | 0.930891 | 0.459405    | 0.930973 |
| rad23       | 0.0475087   | 0.978400 | 0.0475129   | 0.978486 |
| rad45       | 0.0124895   | 0.990889 | 0.0124906   | 0.990977 |
| rad18       | 0.00691905  | 0.997808 | 0.00691967  | 0.997896 |
| rad36       | 0.000777498 | 0.998586 | 0.000777567 | 0.998674 |
| rad20       | 0.000552985 | 0.999139 | 0.000553034 | 0.999227 |
| rad11       | 0.000397851 | 0.999537 | 0.000397886 | 0.999625 |
| rad21       | 0.000339654 | 0.999876 | 0.000339685 | 0.999964 |
| Benzyl+C2H2 | 8.91151e-05 | 0.999965 | 0.000000    | 0.999964 |
| rad6        | 3.49220e-05 | 1.000000 | 3.49251e-05 | 0.999999 |
| rad7        | 2.01259e-09 | 1.000000 | 2.01277e-09 | 0.999999 |
| rad30       | 4.83853e-10 | 1.000000 | 4.83896e-10 | 0.999999 |
| rad24       | 1.10443e-10 | 1.000000 | 1.10453e-10 | 0.999999 |
| rad13       | 4.19714e-11 | 1.000000 | 4.19751e-11 | 0.999999 |
| rad15       | 1.92149e-11 | 1.000000 | 1.92166e-11 | 0.999999 |
| rad25       | 5.73244e-12 | 1.000000 | 5.73295e-12 | 0.999999 |
| PAH9+H      | 4.62203e-13 | 1.000000 | 4.62245e-13 | 0.999999 |
| rad38       | 4.19882e-13 | 1.000000 | 4.19919e-13 | 0.999999 |
| rad35       | 3.89452e-13 | 1.000000 | 3.89487e-13 | 0.999999 |
| rad3        | 3.85094e-13 | 1.000000 | 3.85128e-13 | 0.999999 |
| rad4        | 1.97721e-13 | 1.000000 | 1.97738e-13 | 0.999999 |
| rad33       | 4.85854e-14 | 1.000000 | 4.85897e-14 | 0.999999 |
| PhCHCCH2+H  | 3.59873e-14 | 1.000000 | 3.59905e-14 | 0.999999 |
| rad2        | 1.55533e-14 | 1.000000 | 1.55547e-14 | 0.999999 |
| rad28       | 3.63004e-15 | 1.000000 | 3.63036e-15 | 0.999999 |
| rad9        | 1.05241e-15 | 1.000000 | 1.05251e-15 | 0.999999 |
| rad1        | 1.04139e-15 | 1.000000 | 1.04148e-15 | 0.999999 |
| rad8        | 4.45632e-16 | 1.000000 | 4.45672e-16 | 0.999999 |
| rad10       | 1.25401e-16 | 1.000000 | 1.25412e-16 | 0.999999 |
| rad46       | 1.18669e-16 | 1.000000 | 1.18679e-16 | 0.999999 |
| Ph+Allene   | 4.97953e-17 | 1.000000 | 4.97997e-17 | 0.999999 |
| PhCCH+CH3   | 2.79503e-17 | 1.000000 | 2.79527e-17 | 0.999999 |
| rad60syn    | 4.84701e-18 | 1.000000 | 4.84744e-18 | 0.999999 |
| rad14       | 1.60124e-18 | 1.000000 | 1.60138e-18 | 0.999999 |
| rad60anti   | 7.81688e-19 | 1.000000 | 7.81758e-19 | 0.999999 |
| PhCH2CCH+H  | 6.37896e-20 | 1.000000 | 6.37953e-20 | 0.999999 |
| PhCCCH3+H   | 6.02985e-20 | 1.000000 | 6.03039e-20 | 0.999999 |
| rad26       | 3.21483e-20 | 1.000000 | 3.21512e-20 | 0.999999 |
| rad27       | 1.16397e-20 | 1.000000 | 1.16407e-20 | 0.999999 |
| Ph+MeAc     | 6.40979e-21 | 1.000000 | 6.41036e-21 | 0.999999 |
| PAH7+H      | 1.24452e-21 | 1.000000 | 1.24463e-21 | 0.999999 |
| rad31       | 2.05145e-22 | 1.000000 | 2.05163e-22 | 0.999999 |
| PAH3+H      | 1.29122e-22 | 1.000000 | 1.29134e-22 | 0.999999 |
| rad59       | 5.09695e-23 | 1.000000 | 5.09740e-23 | 0.999999 |
| rad39       | 6.79210e-24 | 1.000000 | 6.79271e-24 | 0.999999 |
| rad50       | 7.11757e-25 | 1.000000 | 7.11820e-25 | 0.999999 |
| rad12       | 2.36959e-26 | 1.000000 | 2.36980e-26 | 0.999999 |
| rad5        | 3.13596e-27 | 1.000000 | 3.13624e-27 | 0.999999 |
| rad37       | 6.88707e-28 | 1.000000 | 6.88768e-28 | 0.999999 |
| rad52       | 5.27417e-30 | 1.000000 | 5.27464e-30 | 0.999999 |
| rad19syn    | 3.42358e-30 | 1.000000 | 3.42389e-30 | 0.999999 |

|               |             |         |             |          |
|---------------|-------------|---------|-------------|----------|
| rad54         | 5.26020e-33 | 1.00000 | 5.26067e-33 | 0.999999 |
| rad51         | 1.27804e-33 | 1.00000 | 1.27816e-33 | 0.999999 |
| rad43         | 4.03152e-34 | 1.00000 | 4.03187e-34 | 0.999999 |
| PAH10+CH3     | 6.92781e-35 | 1.00000 | 6.92842e-35 | 0.999999 |
| rad62         | 4.20642e-35 | 1.00000 | 4.20680e-35 | 0.999999 |
| rad65         | 7.16937e-37 | 1.00000 | 7.17001e-37 | 0.999999 |
| rad70         | 1.62709e-38 | 1.00000 | 1.62724e-38 | 0.999999 |
| PhcycC3H3_A+H | 1.00228e-38 | 1.00000 | 1.00236e-38 | 0.999999 |
| rad55         | 4.46511e-39 | 1.00000 | 4.46551e-39 | 0.999999 |
| rad58         | 5.19101e-40 | 1.00000 | 5.19148e-40 | 0.999999 |
| rad47         | 1.26176e-41 | 1.00000 | 1.26187e-41 | 0.999999 |
| PAH1+H        | 2.29657e-42 | 1.00000 | 2.29678e-42 | 0.999999 |
| rad34         | 2.62973e-43 | 1.00000 | 2.62996e-43 | 0.999999 |
| rad42         | 4.12651e-44 | 1.00000 | 4.12688e-44 | 0.999999 |
| rad41         | 3.55139e-44 | 1.00000 | 3.55171e-44 | 0.999999 |

100.000000 Pa, 190.000000 K

| =====         |                     |          |                      |          |
|---------------|---------------------|----------|----------------------|----------|
| Rate constant | True (fraction)     |          | Effective (fraction) |          |
| -----         |                     |          |                      |          |
| Total         | 3.16530e-28 (1.00 ) |          | 3.16494e-28 (1.00 )  |          |
| species       | PYtrue              | Cumul    | PYeffective          | Cumul    |
| -----         |                     |          |                      |          |
| Indene+H      | 0.486377            | 0.486377 | 0.486432             | 0.486432 |
| rad22         | 0.443100            | 0.929477 | 0.443151             | 0.929583 |
| rad23         | 0.0510657           | 0.980543 | 0.0510716            | 0.980655 |
| rad45         | 0.0118774           | 0.992420 | 0.0118787            | 0.992533 |
| rad18         | 0.00555504          | 0.997975 | 0.00555568           | 0.998089 |
| rad36         | 0.000740713         | 0.998716 | 0.000740798          | 0.998830 |
| rad20         | 0.000430749         | 0.999147 | 0.000430799          | 0.999261 |
| rad11         | 0.000428081         | 0.999575 | 0.000428131          | 0.999689 |
| rad21         | 0.000264535         | 0.999839 | 0.000264565          | 0.999953 |
| Benzyl+C2H2   | 0.000114991         | 0.999954 | 0.000000             | 0.999953 |
| rad6          | 4.64827e-05         | 1.00000  | 4.64881e-05          | 1.000000 |
| rad7          | 3.22011e-09         | 1.00000  | 3.22048e-09          | 1.000000 |
| rad30         | 8.04697e-10         | 1.00000  | 8.04789e-10          | 1.000000 |
| rad24         | 1.05429e-10         | 1.00000  | 1.05441e-10          | 1.000000 |
| rad13         | 5.52298e-11         | 1.00000  | 5.52362e-11          | 1.000000 |
| rad15         | 3.83103e-11         | 1.00000  | 3.83147e-11          | 1.000000 |
| rad25         | 1.15120e-11         | 1.00000  | 1.15133e-11          | 1.000000 |
| PAH9+H        | 8.93734e-13         | 1.00000  | 8.93837e-13          | 1.000000 |
| rad3          | 7.89087e-13         | 1.00000  | 7.89178e-13          | 1.000000 |
| rad38         | 7.50089e-13         | 1.00000  | 7.50175e-13          | 1.000000 |
| rad35         | 7.14592e-13         | 1.00000  | 7.14674e-13          | 1.000000 |
| rad4          | 4.05955e-13         | 1.00000  | 4.06002e-13          | 1.000000 |
| PhCHCCH2+H    | 1.20557e-13         | 1.00000  | 1.20571e-13          | 1.000000 |
| rad33         | 6.42204e-14         | 1.00000  | 6.42278e-14          | 1.000000 |
| rad2          | 4.65874e-14         | 1.00000  | 4.65927e-14          | 1.000000 |
| rad28         | 9.70555e-15         | 1.00000  | 9.70667e-15          | 1.000000 |
| rad9          | 4.06540e-15         | 1.00000  | 4.06586e-15          | 1.000000 |
| rad1          | 3.14169e-15         | 1.00000  | 3.14205e-15          | 1.000000 |
| rad8          | 2.15497e-15         | 1.00000  | 2.15522e-15          | 1.000000 |
| rad10         | 4.96306e-16         | 1.00000  | 4.96363e-16          | 1.000000 |
| rad46         | 3.44726e-16         | 1.00000  | 3.44765e-16          | 1.000000 |
| Ph+Allene     | 2.77169e-16         | 1.00000  | 2.77201e-16          | 1.000000 |
| PhCCH+CH3     | 1.27271e-16         | 1.00000  | 1.27285e-16          | 1.000000 |
| rad60syn      | 2.33258e-17         | 1.00000  | 2.33285e-17          | 1.000000 |
| rad14         | 5.40535e-18         | 1.00000  | 5.40597e-18          | 1.000000 |
| rad60anti     | 4.14843e-18         | 1.00000  | 4.14891e-18          | 1.000000 |
| PhCH2CCH+H    | 5.27469e-19         | 1.00000  | 5.27530e-19          | 1.000000 |
| PhCCCH3+H     | 3.68097e-19         | 1.00000  | 3.68139e-19          | 1.000000 |
| rad26         | 2.00051e-19         | 1.00000  | 2.00074e-19          | 1.000000 |
| Ph+MeAc       | 4.73452e-20         | 1.00000  | 4.73507e-20          | 1.000000 |
| rad27         | 4.00222e-20         | 1.00000  | 4.00268e-20          | 1.000000 |
| PAH7+H        | 8.87103e-21         | 1.00000  | 8.87205e-21          | 1.000000 |
| PAH3+H        | 1.29678e-21         | 1.00000  | 1.29693e-21          | 1.000000 |
| rad59         | 4.96906e-22         | 1.00000  | 4.96963e-22          | 1.000000 |
| rad31         | 4.51547e-22         | 1.00000  | 4.51599e-22          | 1.000000 |
| rad39         | 5.05212e-23         | 1.00000  | 5.05270e-23          | 1.000000 |
| rad50         | 7.19269e-24         | 1.00000  | 7.19352e-24          | 1.000000 |
| rad12         | 2.75149e-25         | 1.00000  | 2.75181e-25          | 1.000000 |
| rad5          | 4.00815e-26         | 1.00000  | 4.00861e-26          | 1.000000 |
| rad37         | 1.01196e-26         | 1.00000  | 1.01208e-26          | 1.000000 |
| rad52         | 1.21254e-28         | 1.00000  | 1.21268e-28          | 1.000000 |
| rad19syn      | 1.09022e-28         | 1.00000  | 1.09035e-28          | 1.000000 |
| rad54         | 7.27886e-31         | 1.00000  | 7.27970e-31          | 1.000000 |
| rad51         | 1.72054e-31         | 1.00000  | 1.72074e-31          | 1.000000 |
| rad43         | 2.43769e-32         | 1.00000  | 2.43797e-32          | 1.000000 |
| rad62         | 6.28145e-33         | 1.00000  | 6.28217e-33          | 1.000000 |

|               |             |         |             |          |
|---------------|-------------|---------|-------------|----------|
| PAH10+CH3     | 4.62890e-33 | 1.00000 | 4.62943e-33 | 1.000000 |
| rad65         | 8.84434e-35 | 1.00000 | 8.84536e-35 | 1.000000 |
| rad70         | 6.08873e-36 | 1.00000 | 6.08943e-36 | 1.000000 |
| PhcycC3H3_A+H | 2.92825e-36 | 1.00000 | 2.92858e-36 | 1.000000 |
| rad55         | 1.29701e-36 | 1.00000 | 1.29716e-36 | 1.000000 |
| rad58         | 1.16958e-37 | 1.00000 | 1.16971e-37 | 1.000000 |
| rad47         | 1.83594e-39 | 1.00000 | 1.83615e-39 | 1.000000 |
| PAH1+H        | 5.49762e-40 | 1.00000 | 5.49825e-40 | 1.000000 |
| rad34         | 7.22063e-41 | 1.00000 | 7.22146e-41 | 1.000000 |
| rad42         | 6.50950e-42 | 1.00000 | 6.51024e-42 | 1.000000 |
| rad41         | 5.69356e-42 | 1.00000 | 5.69421e-42 | 1.000000 |

100.000000 Pa, 200.000000 K

| Rate constant | True (fraction)     | Effective (fraction) |
|---------------|---------------------|----------------------|
| Total         | 1.76115e-27 (1.00 ) | 1.76089e-27 (1.00 )  |

| species       | PYtrue      | Cumul    | PYeffective | Cumul    |
|---------------|-------------|----------|-------------|----------|
| Indene+H      | 0.501696    | 0.501696 | 0.501771    | 0.501771 |
| rad22         | 0.425894    | 0.927590 | 0.425957    | 0.927728 |
| rad23         | 0.0547299   | 0.982320 | 0.0547380   | 0.982466 |
| rad45         | 0.0113039   | 0.993624 | 0.0113056   | 0.993772 |
| rad18         | 0.00445645  | 0.998080 | 0.00445711  | 0.998229 |
| rad36         | 0.000706470 | 0.998787 | 0.000706574 | 0.998935 |
| rad11         | 0.000459364 | 0.999246 | 0.000459431 | 0.999395 |
| rad20         | 0.000337074 | 0.999583 | 0.000337124 | 0.999732 |
| rad21         | 0.000206987 | 0.999790 | 0.000207018 | 0.999939 |
| Benzyl+C2H2   | 0.000147596 | 0.999938 | 0.000000    | 0.999939 |
| rad6          | 6.16459e-05 | 0.999999 | 6.16550e-05 | 1.000000 |
| rad7          | 5.05821e-09 | 0.999999 | 5.05896e-09 | 1.000000 |
| rad30         | 1.29032e-09 | 0.999999 | 1.29051e-09 | 1.000000 |
| rad24         | 1.00798e-10 | 0.999999 | 1.00812e-10 | 1.000000 |
| rad13         | 7.24657e-11 | 0.999999 | 7.24764e-11 | 1.000000 |
| rad15         | 7.21013e-11 | 0.999999 | 7.21119e-11 | 1.000000 |
| rad25         | 2.15593e-11 | 0.999999 | 2.15625e-11 | 1.000000 |
| PAH9+H        | 1.70021e-12 | 0.999999 | 1.70046e-12 | 1.000000 |
| rad3          | 1.57800e-12 | 0.999999 | 1.57823e-12 | 1.000000 |
| rad38         | 1.31421e-12 | 0.999999 | 1.31441e-12 | 1.000000 |
| rad35         | 1.29496e-12 | 0.999999 | 1.29516e-12 | 1.000000 |
| rad4          | 8.13595e-13 | 0.999999 | 8.13715e-13 | 1.000000 |
| PhCHCCH2+H    | 3.64426e-13 | 0.999999 | 3.64480e-13 | 1.000000 |
| rad2          | 1.32558e-13 | 0.999999 | 1.32577e-13 | 1.000000 |
| rad33         | 8.46325e-14 | 0.999999 | 8.46450e-14 | 1.000000 |
| rad28         | 2.47356e-14 | 0.999999 | 2.47393e-14 | 1.000000 |
| rad9          | 1.38922e-14 | 0.999999 | 1.38942e-14 | 1.000000 |
| rad1          | 9.00893e-15 | 0.999999 | 9.01025e-15 | 1.000000 |
| rad8          | 8.93276e-15 | 0.999999 | 8.93408e-15 | 1.000000 |
| rad10         | 1.81176e-15 | 0.999999 | 1.81203e-15 | 1.000000 |
| Ph+Allene     | 1.31304e-15 | 0.999999 | 1.31324e-15 | 1.000000 |
| rad46         | 9.27078e-16 | 0.999999 | 9.27215e-16 | 1.000000 |
| PhCCH+CH3     | 5.23876e-16 | 0.999999 | 5.23953e-16 | 1.000000 |
| rad60syn      | 9.61399e-17 | 0.999999 | 9.61541e-17 | 1.000000 |
| rad60anti     | 1.86485e-17 | 0.999999 | 1.86513e-17 | 1.000000 |
| rad14         | 1.65283e-17 | 0.999999 | 1.65307e-17 | 1.000000 |
| PhCH2CCH+H    | 3.56967e-18 | 0.999999 | 3.57020e-18 | 1.000000 |
| PhCCCH3+H     | 2.00688e-18 | 0.999999 | 2.00717e-18 | 1.000000 |
| rad26         | 1.10716e-18 | 0.999999 | 1.10733e-18 | 1.000000 |
| Ph+MeAc       | 3.01274e-19 | 0.999999 | 3.01318e-19 | 1.000000 |
| rad27         | 1.26408e-19 | 0.999999 | 1.26427e-19 | 1.000000 |
| PAH7+H        | 5.27621e-20 | 0.999999 | 5.27699e-20 | 1.000000 |
| PAH3+H        | 1.03565e-20 | 0.999999 | 1.03581e-20 | 1.000000 |
| rad59         | 3.85754e-21 | 0.999999 | 3.85811e-21 | 1.000000 |
| rad31         | 9.74551e-22 | 0.999999 | 9.74695e-22 | 1.000000 |
| rad39         | 3.30005e-22 | 0.999999 | 3.30054e-22 | 1.000000 |
| rad50         | 5.87267e-23 | 0.999999 | 5.87354e-23 | 1.000000 |
| rad12         | 2.70850e-24 | 0.999999 | 2.70890e-24 | 1.000000 |
| rad5          | 4.14923e-25 | 0.999999 | 4.14984e-25 | 1.000000 |
| rad37         | 1.21204e-25 | 0.999999 | 1.21222e-25 | 1.000000 |
| rad19syn      | 1.94604e-27 | 0.999999 | 1.94633e-27 | 1.000000 |
| rad52         | 1.79923e-27 | 0.999999 | 1.79949e-27 | 1.000000 |
| rad54         | 2.23659e-29 | 0.999999 | 2.23692e-29 | 1.000000 |
| rad51         | 7.66388e-30 | 0.999999 | 7.66501e-30 | 1.000000 |
| rad43         | 7.70362e-31 | 0.999999 | 7.70476e-31 | 1.000000 |
| rad62         | 3.56759e-31 | 0.999999 | 3.56812e-31 | 1.000000 |
| PAH10+CH3     | 1.84726e-31 | 0.999999 | 1.84753e-31 | 1.000000 |
| rad65         | 1.16158e-32 | 0.999999 | 1.16175e-32 | 1.000000 |
| rad70         | 4.19518e-33 | 0.999999 | 4.19580e-33 | 1.000000 |
| PhcycC3H3_A+H | 8.30686e-34 | 0.999999 | 8.30809e-34 | 1.000000 |

|        |             |          |             |         |
|--------|-------------|----------|-------------|---------|
| rad55  | 3.65992e-34 | 0.999999 | 3.66046e-34 | 1.00000 |
| rad58  | 7.67750e-35 | 0.999999 | 7.67864e-35 | 1.00000 |
| rad47  | 2.05001e-37 | 0.999999 | 2.05032e-37 | 1.00000 |
| PAH1+H | 1.34509e-37 | 0.999999 | 1.34529e-37 | 1.00000 |
| rad34  | 2.06084e-38 | 0.999999 | 2.06114e-38 | 1.00000 |
| rad42  | 7.74168e-40 | 0.999999 | 7.74283e-40 | 1.00000 |
| rad41  | 6.74342e-40 | 0.999999 | 6.74442e-40 | 1.00000 |

100.000000 Pa, 210.000000 K

| Rate constant | True (fraction)     | Effective (fraction) |
|---------------|---------------------|----------------------|
| Total         | 8.30956e-27 (1.00 ) | 8.30799e-27 (1.00 )  |

| species       | PYtrue      | Cumul    | PYeffective | Cumul    |
|---------------|-------------|----------|-------------|----------|
| Indene+H      | 0.517508    | 0.517508 | 0.517605    | 0.517605 |
| rad22         | 0.407794    | 0.925302 | 0.407871    | 0.925476 |
| rad23         | 0.0584902   | 0.983792 | 0.0585012   | 0.983977 |
| rad45         | 0.0107726   | 0.994565 | 0.0107746   | 0.994752 |
| rad18         | 0.00357224  | 0.998137 | 0.00357292  | 0.998325 |
| rad36         | 0.000674987 | 0.998812 | 0.000675114 | 0.999000 |
| rad11         | 0.000491218 | 0.999303 | 0.000491310 | 0.999491 |
| rad20         | 0.000264859 | 0.999568 | 0.000264909 | 0.999756 |
| Benzyl+C2H2   | 0.000188436 | 0.999757 | 0.000000    | 0.999756 |
| rad21         | 0.000162636 | 0.999919 | 0.000162666 | 0.999919 |
| rad6          | 8.13252e-05 | 1.00000  | 8.13406e-05 | 1.00000  |
| rad7          | 7.78452e-09 | 1.00000  | 7.78599e-09 | 1.00000  |
| rad30         | 2.00573e-09 | 1.00000  | 2.00611e-09 | 1.00000  |
| rad15         | 1.29201e-10 | 1.00000  | 1.29226e-10 | 1.00000  |
| rad24         | 9.65734e-11 | 1.00000  | 9.65916e-11 | 1.00000  |
| rad13         | 9.46442e-11 | 1.00000  | 9.46621e-11 | 1.00000  |
| rad25         | 3.79155e-11 | 1.00000  | 3.79226e-11 | 1.00000  |
| PAH9+H        | 3.18139e-12 | 1.00000  | 3.18199e-12 | 1.00000  |
| rad3          | 3.07008e-12 | 1.00000  | 3.07065e-12 | 1.00000  |
| rad35         | 2.31588e-12 | 1.00000  | 2.31632e-12 | 1.00000  |
| rad38         | 2.26404e-12 | 1.00000  | 2.26447e-12 | 1.00000  |
| rad4          | 1.58666e-12 | 1.00000  | 1.58696e-12 | 1.00000  |
| PhCHCCH2+H    | 1.00760e-12 | 1.00000  | 1.00779e-12 | 1.00000  |
| rad2          | 3.58038e-13 | 1.00000  | 3.58106e-13 | 1.00000  |
| rad33         | 1.11015e-13 | 1.00000  | 1.11036e-13 | 1.00000  |
| rad28         | 6.02865e-14 | 1.00000  | 6.02979e-14 | 1.00000  |
| rad9          | 4.27140e-14 | 1.00000  | 4.27220e-14 | 1.00000  |
| rad8          | 3.24608e-14 | 1.00000  | 3.24669e-14 | 1.00000  |
| rad1          | 2.45389e-14 | 1.00000  | 2.45435e-14 | 1.00000  |
| rad10         | 6.11315e-15 | 1.00000  | 6.11430e-15 | 1.00000  |
| Ph+Allene     | 5.41453e-15 | 1.00000  | 5.41555e-15 | 1.00000  |
| rad46         | 2.33524e-15 | 1.00000  | 2.33568e-15 | 1.00000  |
| PhCCH+CH3     | 1.96716e-15 | 1.00000  | 1.96753e-15 | 1.00000  |
| rad60syn      | 3.47149e-16 | 1.00000  | 3.47214e-16 | 1.00000  |
| rad60anti     | 7.27490e-17 | 1.00000  | 7.27628e-17 | 1.00000  |
| rad14         | 4.61491e-17 | 1.00000  | 4.61578e-17 | 1.00000  |
| PhCH2CCH+H    | 2.03431e-17 | 1.00000  | 2.03470e-17 | 1.00000  |
| PhCCCH3+H     | 9.87259e-18 | 1.00000  | 9.87445e-18 | 1.00000  |
| rad26         | 5.49709e-18 | 1.00000  | 5.49813e-18 | 1.00000  |
| Ph+MeAc       | 1.68420e-18 | 1.00000  | 1.68452e-18 | 1.00000  |
| rad27         | 3.69445e-19 | 1.00000  | 3.69515e-19 | 1.00000  |
| PAH7+H        | 2.68737e-19 | 1.00000  | 2.68788e-19 | 1.00000  |
| PAH3+H        | 6.80408e-20 | 1.00000  | 6.80536e-20 | 1.00000  |
| rad59         | 2.46605e-20 | 1.00000  | 2.46651e-20 | 1.00000  |
| rad31         | 2.05717e-21 | 1.00000  | 2.05756e-21 | 1.00000  |
| rad39         | 1.92400e-21 | 1.00000  | 1.92436e-21 | 1.00000  |
| rad50         | 3.99521e-22 | 1.00000  | 3.99596e-22 | 1.00000  |
| rad12         | 2.29772e-23 | 1.00000  | 2.29815e-23 | 1.00000  |
| rad5          | 3.58452e-24 | 1.00000  | 3.58519e-24 | 1.00000  |
| rad37         | 1.21408e-24 | 1.00000  | 1.21431e-24 | 1.00000  |
| rad19syn      | 2.48201e-26 | 1.00000  | 2.48247e-26 | 1.00000  |
| rad52         | 2.01096e-26 | 1.00000  | 2.01134e-26 | 1.00000  |
| rad54         | 3.79681e-28 | 1.00000  | 3.79753e-28 | 1.00000  |
| rad51         | 1.48855e-28 | 1.00000  | 1.48883e-28 | 1.00000  |
| rad43         | 1.47793e-29 | 1.00000  | 1.47821e-29 | 1.00000  |
| rad62         | 8.17271e-30 | 1.00000  | 8.17425e-30 | 1.00000  |
| rad70         | 5.13748e-30 | 1.00000  | 5.13845e-30 | 1.00000  |
| PAH10+CH3     | 4.59317e-30 | 1.00000  | 4.59404e-30 | 1.00000  |
| rad58         | 1.85854e-30 | 1.00000  | 1.85889e-30 | 1.00000  |
| rad65         | 4.82208e-31 | 1.00000  | 4.82299e-31 | 1.00000  |
| PhcycC3H3_A+H | 1.51659e-31 | 1.00000  | 1.51687e-31 | 1.00000  |
| rad55         | 5.71662e-32 | 1.00000  | 5.71769e-32 | 1.00000  |
| PAH1+H        | 3.17729e-35 | 1.00000  | 3.17789e-35 | 1.00000  |
| rad47         | 1.87792e-35 | 1.00000  | 1.87827e-35 | 1.00000  |

|       |             |         |             |         |
|-------|-------------|---------|-------------|---------|
| rad34 | 7.30824e-36 | 1.00000 | 7.30962e-36 | 1.00000 |
| rad42 | 7.31691e-38 | 1.00000 | 7.31829e-38 | 1.00000 |
| rad41 | 5.89631e-38 | 1.00000 | 5.89742e-38 | 1.00000 |

100.000000 Pa, 220.000000 K

| =====         |                     |          |                      |          |
|---------------|---------------------|----------|----------------------|----------|
| Rate constant | True (fraction)     |          | Effective (fraction) |          |
| -----         |                     |          |                      |          |
| Total         | 3.40057e-26 (1.00 ) |          | 3.39976e-26 (1.00 )  |          |
| species       | PYtrue              | Cumul    | PYeffective          | Cumul    |
| -----         |                     |          |                      |          |
| Indene+H      | 0.533797            | 0.533797 | 0.533925             | 0.533925 |
| rad22         | 0.388873            | 0.922670 | 0.388966             | 0.922891 |
| rad23         | 0.0623306           | 0.985001 | 0.0623455            | 0.985236 |
| rad45         | 0.0102862           | 0.995287 | 0.0102887            | 0.995525 |
| rad18         | 0.00286116          | 0.998148 | 0.00286184           | 0.998387 |
| rad36         | 0.000646445         | 0.998794 | 0.000646600          | 0.999034 |
| rad11         | 0.000523044         | 0.999317 | 0.000523170          | 0.999557 |
| Benzyl+C2H2   | 0.000239286         | 0.999557 | 0.00000              | 0.999557 |
| rad20         | 0.000208897         | 0.999766 | 0.000208947          | 0.999766 |
| rad21         | 0.000128274         | 0.999894 | 0.000128305          | 0.999894 |
| rad6          | 0.000106562         | 1.00000  | 0.000106587          | 1.00000  |
| rad7          | 1.17217e-08         | 1.00000  | 1.17245e-08          | 1.00000  |
| rad30         | 3.03557e-09         | 1.00000  | 3.03629e-09          | 1.00000  |
| rad15         | 2.21980e-10         | 1.00000  | 2.22033e-10          | 1.00000  |
| rad13         | 1.22853e-10         | 1.00000  | 1.22882e-10          | 1.00000  |
| rad24         | 9.27766e-11         | 1.00000  | 9.27988e-11          | 1.00000  |
| rad25         | 6.29940e-11         | 1.00000  | 6.30090e-11          | 1.00000  |
| PAH9+H        | 5.85444e-12         | 1.00000  | 5.85585e-12          | 1.00000  |
| rad3          | 5.79833e-12         | 1.00000  | 5.79972e-12          | 1.00000  |
| rad35         | 4.08490e-12         | 1.00000  | 4.08588e-12          | 1.00000  |
| rad38         | 3.84280e-12         | 1.00000  | 3.84372e-12          | 1.00000  |
| rad4          | 3.00445e-12         | 1.00000  | 3.00517e-12          | 1.00000  |
| PhCHCCH2+H    | 2.57683e-12         | 1.00000  | 2.57745e-12          | 1.00000  |
| rad2          | 9.18395e-13         | 1.00000  | 9.18615e-13          | 1.00000  |
| rad33         | 1.44728e-13         | 1.00000  | 1.44762e-13          | 1.00000  |
| rad28         | 1.40938e-13         | 1.00000  | 1.40972e-13          | 1.00000  |
| rad9          | 1.19839e-13         | 1.00000  | 1.19867e-13          | 1.00000  |
| rad8          | 1.05324e-13         | 1.00000  | 1.05349e-13          | 1.00000  |
| rad1          | 6.35214e-14         | 1.00000  | 6.35366e-14          | 1.00000  |
| Ph+Allene     | 1.97989e-14         | 1.00000  | 1.98036e-14          | 1.00000  |
| rad10         | 1.91256e-14         | 1.00000  | 1.91302e-14          | 1.00000  |
| PhCCH+CH3     | 6.79433e-15         | 1.00000  | 6.79595e-15          | 1.00000  |
| rad46         | 5.56186e-15         | 1.00000  | 5.56319e-15          | 1.00000  |
| rad60syn      | 1.11870e-15         | 1.00000  | 1.11897e-15          | 1.00000  |
| rad60anti     | 2.51206e-16         | 1.00000  | 2.51266e-16          | 1.00000  |
| rad14         | 1.18557e-16         | 1.00000  | 1.18585e-16          | 1.00000  |
| PhCH2CCH+H    | 9.99261e-17         | 1.00000  | 9.99501e-17          | 1.00000  |
| PhCCCH3+H     | 4.42350e-17         | 1.00000  | 4.42456e-17          | 1.00000  |
| rad26         | 2.46962e-17         | 1.00000  | 2.47021e-17          | 1.00000  |
| Ph+MeAc       | 8.40858e-18         | 1.00000  | 8.41060e-18          | 1.00000  |
| PAH7+H        | 1.19756e-18         | 1.00000  | 1.19784e-18          | 1.00000  |
| rad27         | 1.00580e-18         | 1.00000  | 1.00604e-18          | 1.00000  |
| PAH3+H        | 3.77879e-19         | 1.00000  | 3.77970e-19          | 1.00000  |
| rad59         | 1.33387e-19         | 1.00000  | 1.33419e-19          | 1.00000  |
| rad39         | 1.01492e-20         | 1.00000  | 1.01516e-20          | 1.00000  |
| rad31         | 4.24045e-21         | 1.00000  | 4.24146e-21          | 1.00000  |
| rad50         | 2.32188e-21         | 1.00000  | 2.32244e-21          | 1.00000  |
| rad12         | 1.70666e-22         | 1.00000  | 1.70706e-22          | 1.00000  |
| rad5          | 2.64925e-23         | 1.00000  | 2.64988e-23          | 1.00000  |
| rad37         | 1.04188e-23         | 1.00000  | 1.04213e-23          | 1.00000  |
| rad19syn      | 2.51115e-25         | 1.00000  | 2.51175e-25          | 1.00000  |
| rad52         | 1.81328e-25         | 1.00000  | 1.81372e-25          | 1.00000  |
| rad54         | 4.69682e-27         | 1.00000  | 4.69795e-27          | 1.00000  |
| rad51         | 1.96350e-27         | 1.00000  | 1.96397e-27          | 1.00000  |
| rad43         | 2.04431e-28         | 1.00000  | 2.04480e-28          | 1.00000  |
| rad62         | 1.19880e-28         | 1.00000  | 1.19909e-28          | 1.00000  |
| rad70         | 1.13455e-28         | 1.00000  | 1.13482e-28          | 1.00000  |
| PAH10+CH3     | 7.80971e-29         | 1.00000  | 7.81157e-29          | 1.00000  |
| rad58         | 5.51668e-29         | 1.00000  | 5.51800e-29          | 1.00000  |
| rad65         | 8.63047e-30         | 1.00000  | 8.63254e-30          | 1.00000  |
| PhcycC3H3_A+H | 4.54507e-30         | 1.00000  | 4.54616e-30          | 1.00000  |
| rad55         | 1.50512e-30         | 1.00000  | 1.50548e-30          | 1.00000  |
| PAH1+H        | 2.63783e-33         | 1.00000  | 2.63846e-33          | 1.00000  |
| rad34         | 1.08857e-33         | 1.00000  | 1.08883e-33          | 1.00000  |
| rad47         | 9.42068e-34         | 1.00000  | 9.42294e-34          | 1.00000  |
| rad42         | 3.88874e-36         | 1.00000  | 3.88968e-36          | 1.00000  |
| rad41         | 2.75988e-36         | 1.00000  | 2.76054e-36          | 1.00000  |

100.000000 Pa, 230.000000 K

=====  
Rate constant | True (fraction)                      Effective (fraction)  
-----  
Total            | 1.22972e-25 (1.00    ) 1.22934e-25 (1.00    )

| species       | PYtrue      | Cumul    | PYeffective | Cumul    |
|---------------|-------------|----------|-------------|----------|
| Indene+H      | 0.550519    | 0.550519 | 0.550685    | 0.550685 |
| rad22         | 0.369231    | 0.919750 | 0.369343    | 0.920028 |
| rad23         | 0.0662304   | 0.985980 | 0.0662504   | 0.986278 |
| rad45         | 0.00984676  | 0.995827 | 0.00984974  | 0.996128 |
| rad18         | 0.00228983  | 0.998117 | 0.00229052  | 0.998419 |
| rad36         | 0.000620974 | 0.998738 | 0.000621162 | 0.999040 |
| rad11         | 0.000554144 | 0.999292 | 0.000554311 | 0.999594 |
| Benzyl+C2H2   | 0.000302224 | 0.999594 | 0.000000    | 0.999594 |
| rad20         | 0.000165330 | 0.999760 | 0.000165380 | 0.999760 |
| rad6          | 0.000138506 | 0.999898 | 0.000138548 | 0.999898 |
| rad21         | 0.000101528 | 1.000000 | 0.000101559 | 1.000000 |
| rad7          | 1.72571e-08 | 1.000000 | 1.72623e-08 | 1.000000 |
| rad30         | 4.48846e-09 | 1.000000 | 4.48982e-09 | 1.000000 |
| rad15         | 3.67740e-10 | 1.000000 | 3.67851e-10 | 1.000000 |
| rad13         | 1.58280e-10 | 1.000000 | 1.58327e-10 | 1.000000 |
| rad25         | 9.93931e-11 | 1.000000 | 9.94231e-11 | 1.000000 |
| rad24         | 8.94231e-11 | 1.000000 | 8.94501e-11 | 1.000000 |
| rad3          | 1.06167e-11 | 1.000000 | 1.06199e-11 | 1.000000 |
| PAH9+H        | 1.05946e-11 | 1.000000 | 1.05978e-11 | 1.000000 |
| rad35         | 7.10364e-12 | 1.000000 | 7.10579e-12 | 1.000000 |
| rad38         | 6.43659e-12 | 1.000000 | 6.43853e-12 | 1.000000 |
| PhCHCCH2+H    | 6.15273e-12 | 1.000000 | 6.15459e-12 | 1.000000 |
| rad4          | 5.51665e-12 | 1.000000 | 5.51832e-12 | 1.000000 |
| rad2          | 2.24004e-12 | 1.000000 | 2.24071e-12 | 1.000000 |
| rad28         | 3.16952e-13 | 1.000000 | 3.17048e-13 | 1.000000 |
| rad9          | 3.10397e-13 | 1.000000 | 3.10490e-13 | 1.000000 |
| rad8          | 3.09783e-13 | 1.000000 | 3.09877e-13 | 1.000000 |
| rad33         | 1.87275e-13 | 1.000000 | 1.87332e-13 | 1.000000 |
| rad1          | 1.56472e-13 | 1.000000 | 1.56519e-13 | 1.000000 |
| Ph+Allene     | 6.51937e-14 | 1.000000 | 6.52134e-14 | 1.000000 |
| rad10         | 5.56948e-14 | 1.000000 | 5.57116e-14 | 1.000000 |
| PhCCH+CH3     | 2.17483e-14 | 1.000000 | 2.17549e-14 | 1.000000 |
| rad46         | 1.26208e-14 | 1.000000 | 1.26246e-14 | 1.000000 |
| rad60syn      | 3.26682e-15 | 1.000000 | 3.26781e-15 | 1.000000 |
| rad60anti     | 7.80453e-16 | 1.000000 | 7.80689e-16 | 1.000000 |
| PhCH2CCH+H    | 4.31269e-16 | 1.000000 | 4.31399e-16 | 1.000000 |
| rad14         | 2.82222e-16 | 1.000000 | 2.82307e-16 | 1.000000 |
| PhCCCH3+H     | 1.82050e-16 | 1.000000 | 1.82105e-16 | 1.000000 |
| rad26         | 1.01215e-16 | 1.000000 | 1.01246e-16 | 1.000000 |
| Ph+MeAc       | 3.80085e-17 | 1.000000 | 3.80200e-17 | 1.000000 |
| PAH7+H        | 4.75321e-18 | 1.000000 | 4.75465e-18 | 1.000000 |
| rad27         | 2.56609e-18 | 1.000000 | 2.56687e-18 | 1.000000 |
| PAH3+H        | 1.81394e-18 | 1.000000 | 1.81449e-18 | 1.000000 |
| rad59         | 6.24149e-19 | 1.000000 | 6.24338e-19 | 1.000000 |
| rad39         | 4.89827e-20 | 1.000000 | 4.89975e-20 | 1.000000 |
| rad50         | 1.17639e-20 | 1.000000 | 1.17674e-20 | 1.000000 |
| rad31         | 8.52919e-21 | 1.000000 | 8.53176e-21 | 1.000000 |
| rad12         | 1.12402e-21 | 1.000000 | 1.12436e-21 | 1.000000 |
| rad5          | 1.70667e-22 | 1.000000 | 1.70719e-22 | 1.000000 |
| rad37         | 7.80242e-23 | 1.000000 | 7.80478e-23 | 1.000000 |
| rad19syn      | 2.11135e-24 | 1.000000 | 2.11199e-24 | 1.000000 |
| rad52         | 1.36244e-24 | 1.000000 | 1.36285e-24 | 1.000000 |
| rad54         | 4.73971e-26 | 1.000000 | 4.74114e-26 | 1.000000 |
| rad51         | 2.06344e-26 | 1.000000 | 2.06406e-26 | 1.000000 |
| rad43         | 2.30400e-27 | 1.000000 | 2.30470e-27 | 1.000000 |
| rad70         | 1.70083e-27 | 1.000000 | 1.70134e-27 | 1.000000 |
| rad62         | 1.40570e-27 | 1.000000 | 1.40613e-27 | 1.000000 |
| PAH10+CH3     | 1.11303e-27 | 1.000000 | 1.11337e-27 | 1.000000 |
| rad58         | 1.00955e-27 | 1.000000 | 1.00986e-27 | 1.000000 |
| rad65         | 1.16693e-28 | 1.000000 | 1.16728e-28 | 1.000000 |
| PhcycC3H3_A+H | 1.00117e-28 | 1.000000 | 1.00148e-28 | 1.000000 |
| rad55         | 2.92529e-29 | 1.000000 | 2.92617e-29 | 1.000000 |
| rad34         | 1.51422e-30 | 1.000000 | 1.51468e-30 | 1.000000 |
| PAH1+H        | 1.97912e-31 | 1.000000 | 1.97972e-31 | 1.000000 |
| rad47         | 1.32529e-32 | 1.000000 | 1.32570e-32 | 1.000000 |
| rad42         | 5.92199e-34 | 1.000000 | 5.92378e-34 | 1.000000 |
| rad41         | 1.89977e-34 | 1.000000 | 1.90034e-34 | 1.000000 |

100.000000 Pa, 240.000000 K

=====  
Rate constant | True (fraction)                      Effective (fraction)  
-----

Total | 3.99091e-25 (1.00 ) 3.98939e-25 (1.00 )

| species       | PYtrue      | Cumul    | PYeffective | Cumul    |
|---------------|-------------|----------|-------------|----------|
| Indene+H      | 0.567600    | 0.567600 | 0.567815    | 0.567815 |
| rad22         | 0.348997    | 0.916597 | 0.349130    | 0.916945 |
| rad23         | 0.0701647   | 0.986762 | 0.0701914   | 0.987136 |
| rad45         | 0.00945515  | 0.996217 | 0.00945874  | 0.996595 |
| rad18         | 0.00183123  | 0.998048 | 0.00183192  | 0.998427 |
| rad36         | 0.000598647 | 0.998647 | 0.000598874 | 0.999026 |
| rad11         | 0.000583740 | 0.999230 | 0.000583962 | 0.999610 |
| Benzyl+C2H2   | 0.000379655 | 0.999610 | 0.00000     | 0.999610 |
| rad6          | 0.000178389 | 0.999789 | 0.000178457 | 0.999788 |
| rad20         | 0.000131274 | 0.999920 | 0.000131324 | 0.999920 |
| rad21         | 8.06243e-05 | 1.00000  | 8.06549e-05 | 1.00000  |
| rad7          | 2.48364e-08 | 1.00000  | 2.48459e-08 | 1.00000  |
| rad30         | 6.50211e-09 | 1.00000  | 6.50458e-09 | 1.00000  |
| rad15         | 5.90146e-10 | 1.00000  | 5.90370e-10 | 1.00000  |
| rad13         | 2.02179e-10 | 1.00000  | 2.02256e-10 | 1.00000  |
| rad25         | 1.49622e-10 | 1.00000  | 1.49679e-10 | 1.00000  |
| rad24         | 8.65227e-11 | 1.00000  | 8.65555e-11 | 1.00000  |
| PAH9+H        | 1.88554e-11 | 1.00000  | 1.88626e-11 | 1.00000  |
| rad3          | 1.88336e-11 | 1.00000  | 1.88407e-11 | 1.00000  |
| PhCHCCH2+H    | 1.38245e-11 | 1.00000  | 1.38297e-11 | 1.00000  |
| rad35         | 1.21762e-11 | 1.00000  | 1.21808e-11 | 1.00000  |
| rad38         | 1.06525e-11 | 1.00000  | 1.06565e-11 | 1.00000  |
| rad4          | 9.81636e-12 | 1.00000  | 9.82009e-12 | 1.00000  |
| rad2          | 5.20483e-12 | 1.00000  | 5.20680e-12 | 1.00000  |
| rad8          | 8.36391e-13 | 1.00000  | 8.36708e-13 | 1.00000  |
| rad9          | 7.49507e-13 | 1.00000  | 7.49792e-13 | 1.00000  |
| rad28         | 6.87552e-13 | 1.00000  | 6.87813e-13 | 1.00000  |
| rad1          | 3.67473e-13 | 1.00000  | 3.67613e-13 | 1.00000  |
| rad33         | 2.40277e-13 | 1.00000  | 2.40368e-13 | 1.00000  |
| Ph+Allene     | 1.95817e-13 | 1.00000  | 1.95892e-13 | 1.00000  |
| rad10         | 1.51590e-13 | 1.00000  | 1.51647e-13 | 1.00000  |
| PhCCH+CH3     | 6.49639e-14 | 1.00000  | 6.49886e-14 | 1.00000  |
| rad46         | 2.74538e-14 | 1.00000  | 2.74642e-14 | 1.00000  |
| rad60syn      | 8.75502e-15 | 1.00000  | 8.75835e-15 | 1.00000  |
| rad60anti     | 2.21146e-15 | 1.00000  | 2.21230e-15 | 1.00000  |
| PhCH2CCH+H    | 1.66180e-15 | 1.00000  | 1.66243e-15 | 1.00000  |
| PhCCCH3+H     | 6.93371e-16 | 1.00000  | 6.93635e-16 | 1.00000  |
| rad14         | 6.26601e-16 | 1.00000  | 6.26839e-16 | 1.00000  |
| rad26         | 3.81312e-16 | 1.00000  | 3.81457e-16 | 1.00000  |
| Ph+MeAc       | 1.57322e-16 | 1.00000  | 1.57382e-16 | 1.00000  |
| PAH7+H        | 1.70594e-17 | 1.00000  | 1.70659e-17 | 1.00000  |
| PAH3+H        | 7.66687e-18 | 1.00000  | 7.66978e-18 | 1.00000  |
| rad27         | 6.16855e-18 | 1.00000  | 6.17090e-18 | 1.00000  |
| rad59         | 2.57368e-18 | 1.00000  | 2.57466e-18 | 1.00000  |
| rad39         | 2.18209e-19 | 1.00000  | 2.18292e-19 | 1.00000  |
| rad50         | 5.28451e-20 | 1.00000  | 5.28652e-20 | 1.00000  |
| rad31         | 1.67394e-20 | 1.00000  | 1.67457e-20 | 1.00000  |
| rad12         | 6.62251e-21 | 1.00000  | 6.62503e-21 | 1.00000  |
| rad5          | 9.72073e-22 | 1.00000  | 9.72443e-22 | 1.00000  |
| rad37         | 5.14596e-22 | 1.00000  | 5.14792e-22 | 1.00000  |
| rad19syn      | 1.49994e-23 | 1.00000  | 1.50051e-23 | 1.00000  |
| rad52         | 8.71618e-24 | 1.00000  | 8.71949e-24 | 1.00000  |
| rad54         | 3.91040e-25 | 1.00000  | 3.91188e-25 | 1.00000  |
| rad51         | 1.74089e-25 | 1.00000  | 1.74155e-25 | 1.00000  |
| rad43         | 2.09183e-26 | 1.00000  | 2.09263e-26 | 1.00000  |
| rad70         | 1.73713e-26 | 1.00000  | 1.73779e-26 | 1.00000  |
| rad62         | 1.29490e-26 | 1.00000  | 1.29539e-26 | 1.00000  |
| PAH10+CH3     | 1.21888e-26 | 1.00000  | 1.21935e-26 | 1.00000  |
| rad58         | 1.12363e-26 | 1.00000  | 1.12406e-26 | 1.00000  |
| PhcycC3H3_A+H | 1.32034e-27 | 1.00000  | 1.32085e-27 | 1.00000  |
| rad65         | 1.15585e-27 | 1.00000  | 1.15629e-27 | 1.00000  |
| rad55         | 3.59905e-28 | 1.00000  | 3.60042e-28 | 1.00000  |
| rad34         | 2.97599e-29 | 1.00000  | 2.97712e-29 | 1.00000  |
| PAH1+H        | 4.83487e-30 | 1.00000  | 4.83671e-30 | 1.00000  |
| rad47         | 1.26599e-31 | 1.00000  | 1.26647e-31 | 1.00000  |
| rad42         | 3.00689e-32 | 1.00000  | 3.00803e-32 | 1.00000  |
| rad41         | 7.42611e-33 | 1.00000  | 7.42893e-33 | 1.00000  |

100.000000 Pa, 250.000000 K

=====

| Rate constant | True (fraction)     | Effective (fraction) |
|---------------|---------------------|----------------------|
| Total         | 1.17763e-24 (1.00 ) | 1.17708e-24 (1.00 )  |

| species | PYtrue | Cumul | PYeffective | Cumul |
|---------|--------|-------|-------------|-------|
|---------|--------|-------|-------------|-------|



|               |             |          |             |          |
|---------------|-------------|----------|-------------|----------|
| Indene+H      | 0.584940    | 0.584940 | 0.585218    | 0.585218 |
| rad22         | 0.328319    | 0.913259 | 0.328475    | 0.913693 |
| rad23         | 0.0741044   | 0.987363 | 0.0741396   | 0.987833 |
| rad45         | 0.00911126  | 0.996475 | 0.00911558  | 0.996948 |
| rad18         | 0.00146348  | 0.997938 | 0.00146418  | 0.998412 |
| rad11         | 0.000611021 | 0.998549 | 0.000611311 | 0.999024 |
| rad36         | 0.000579475 | 0.999129 | 0.000579750 | 0.999603 |
| Benzyl+C2H2   | 0.000474351 | 0.999603 | 0.00000     | 0.999603 |
| rad6          | 0.000227482 | 0.999830 | 0.000227590 | 0.999831 |
| rad20         | 0.000104555 | 0.999935 | 0.000104605 | 0.999936 |
| rad21         | 6.42252e-05 | 0.999999 | 6.42557e-05 | 1.000000 |
| rad7          | 3.49510e-08 | 0.999999 | 3.49676e-08 | 1.000000 |
| rad30         | 9.24897e-09 | 0.999999 | 9.25336e-09 | 1.000000 |
| rad15         | 2.0927e-10  | 0.999999 | 9.21364e-10 | 1.000000 |
| rad13         | 2.55833e-10 | 0.999999 | 2.55954e-10 | 1.000000 |
| rad25         | 2.15775e-10 | 0.999999 | 2.15877e-10 | 1.000000 |
| rad24         | 8.40783e-11 | 0.999999 | 8.41182e-11 | 1.000000 |
| PAH9+H        | 3.30054e-11 | 0.999999 | 3.30210e-11 | 1.000000 |
| rad3          | 3.23679e-11 | 0.999999 | 3.23832e-11 | 1.000000 |
| PhCHCCH2+H    | 2.94260e-11 | 0.999999 | 2.94400e-11 | 1.000000 |
| rad35         | 2.05693e-11 | 0.999999 | 2.05790e-11 | 1.000000 |
| rad38         | 1.74358e-11 | 0.999999 | 1.74440e-11 | 1.000000 |
| rad4          | 1.69268e-11 | 0.999999 | 1.69348e-11 | 1.000000 |
| rad2          | 1.15465e-11 | 0.999999 | 1.15519e-11 | 1.000000 |
| rad8          | 2.09483e-12 | 0.999999 | 2.09582e-12 | 1.000000 |
| rad9          | 1.70120e-12 | 0.999999 | 1.70201e-12 | 1.000000 |
| rad28         | 1.44239e-12 | 0.999999 | 1.44308e-12 | 1.000000 |
| rad1          | 8.24658e-13 | 0.999999 | 8.25050e-13 | 1.000000 |
| Ph+Allene     | 5.42366e-13 | 0.999999 | 5.42623e-13 | 1.000000 |
| rad10         | 3.87296e-13 | 0.999999 | 3.87479e-13 | 1.000000 |
| rad33         | 3.05418e-13 | 0.999999 | 3.05563e-13 | 1.000000 |
| PhCCH+CH3     | 1.82235e-13 | 0.999999 | 1.82322e-13 | 1.000000 |
| rad46         | 5.75317e-14 | 0.999999 | 5.75590e-14 | 1.000000 |
| rad60syn      | 2.17632e-14 | 0.999999 | 2.17735e-14 | 1.000000 |
| PhCH2CCH+H    | 5.79444e-15 | 0.999999 | 5.79719e-15 | 1.000000 |
| rad60anti     | 5.78064e-15 | 0.999999 | 5.78339e-15 | 1.000000 |
| PhCCCH3+H     | 2.46023e-15 | 0.999999 | 2.46140e-15 | 1.000000 |
| rad26         | 1.32968e-15 | 0.999999 | 1.33031e-15 | 1.000000 |
| rad14         | 1.30535e-15 | 0.999999 | 1.30597e-15 | 1.000000 |
| Ph+MeAc       | 6.01911e-16 | 0.999999 | 6.02197e-16 | 1.000000 |
| PAH7+H        | 5.60880e-17 | 0.999999 | 5.61146e-17 | 1.000000 |
| PAH3+H        | 2.89791e-17 | 0.999999 | 2.89928e-17 | 1.000000 |
| rad27         | 1.40405e-17 | 0.999999 | 1.40472e-17 | 1.000000 |
| rad59         | 9.49816e-18 | 0.999999 | 9.50267e-18 | 1.000000 |
| rad39         | 9.03941e-19 | 0.999999 | 9.04370e-19 | 1.000000 |
| rad50         | 2.13491e-19 | 0.999999 | 2.13592e-19 | 1.000000 |
| rad12         | 3.52176e-20 | 0.999999 | 3.52343e-20 | 1.000000 |
| rad31         | 3.20732e-20 | 0.999999 | 3.20884e-20 | 1.000000 |
| rad5          | 4.95815e-21 | 0.999999 | 4.96051e-21 | 1.000000 |
| rad37         | 3.02315e-21 | 0.999999 | 3.02459e-21 | 1.000000 |
| rad19syn      | 9.20789e-23 | 0.999999 | 9.21226e-23 | 1.000000 |
| rad52         | 4.84602e-23 | 0.999999 | 4.84832e-23 | 1.000000 |
| rad54         | 2.72223e-24 | 0.999999 | 2.72352e-24 | 1.000000 |
| rad51         | 1.23083e-24 | 0.999999 | 1.23142e-24 | 1.000000 |
| rad43         | 1.58726e-25 | 0.999999 | 1.58801e-25 | 1.000000 |
| rad70         | 1.39184e-25 | 0.999999 | 1.39250e-25 | 1.000000 |
| PAH10+CH3     | 1.05794e-25 | 0.999999 | 1.05845e-25 | 1.000000 |
| rad62         | 9.83053e-26 | 0.999999 | 9.83520e-26 | 1.000000 |
| rad58         | 9.39569e-26 | 0.999999 | 9.40014e-26 | 1.000000 |
| PhcycC3H3_A+H | 1.19717e-26 | 0.999999 | 1.19773e-26 | 1.000000 |
| rad65         | 9.16785e-27 | 0.999999 | 9.17220e-27 | 1.000000 |
| rad55         | 3.18262e-27 | 0.999999 | 3.18413e-27 | 1.000000 |
| rad34         | 2.89924e-28 | 0.999999 | 2.90061e-28 | 1.000000 |
| PAH1+H        | 5.09315e-29 | 0.999999 | 5.09556e-29 | 1.000000 |
| rad47         | 9.94750e-31 | 0.999999 | 9.95222e-31 | 1.000000 |
| rad42         | 3.29225e-31 | 0.999999 | 3.29382e-31 | 1.000000 |
| rad41         | 8.34712e-32 | 0.999999 | 8.35108e-32 | 1.000000 |

100.000000 Pa, 260.000000 K

=====

| Rate constant | True (fraction)     | Effective (fraction) |
|---------------|---------------------|----------------------|
| Total         | 3.19452e-24 (1.00 ) | 3.19264e-24 (1.00 )  |

| species  | PYtrue     | Cumul    | PYeffective | Cumul    |
|----------|------------|----------|-------------|----------|
| Indene+H | 0.602423   | 0.602423 | 0.602779    | 0.602779 |
| rad22    | 0.307367   | 0.909790 | 0.307548    | 0.910327 |
| rad23    | 0.0780169  | 0.987807 | 0.0780629   | 0.988390 |
| rad45    | 0.00881391 | 0.996621 | 0.00881911  | 0.997209 |

|               |             |          |             |          |
|---------------|-------------|----------|-------------|----------|
| rad18         | 0.00116890  | 0.997790 | 0.00116958  | 0.998379 |
| rad11         | 0.000635180 | 0.998425 | 0.000635554 | 0.999014 |
| Benzyl+C2H2   | 0.000589480 | 0.999014 | 0.000000    | 0.999014 |
| rad36         | 0.000563409 | 0.999578 | 0.000563741 | 0.999578 |
| rad6          | 0.000287056 | 0.999865 | 0.000287225 | 0.999865 |
| rad20         | 8.35221e-05 | 0.999948 | 8.35713e-05 | 0.999949 |
| rad21         | 5.13166e-05 | 1.000000 | 5.13469e-05 | 1.000000 |
| rad7          | 4.81196e-08 | 1.000000 | 4.81480e-08 | 1.000000 |
| rad30         | 1.29425e-08 | 1.000000 | 1.29502e-08 | 1.000000 |
| rad15         | 1.40188e-09 | 1.000000 | 1.40271e-09 | 1.000000 |
| rad13         | 3.20501e-10 | 1.000000 | 3.20690e-10 | 1.000000 |
| rad25         | 2.99202e-10 | 1.000000 | 2.99379e-10 | 1.000000 |
| rad24         | 8.20855e-11 | 1.000000 | 8.21339e-11 | 1.000000 |
| PhCHCCH2+H    | 5.96758e-11 | 1.000000 | 5.97110e-11 | 1.000000 |
| PAH9+H        | 5.68341e-11 | 1.000000 | 5.68676e-11 | 1.000000 |
| rad3          | 5.39151e-11 | 1.000000 | 5.39469e-11 | 1.000000 |
| rad35         | 3.42453e-11 | 1.000000 | 3.42655e-11 | 1.000000 |
| rad4          | 2.82965e-11 | 1.000000 | 2.83132e-11 | 1.000000 |
| rad38         | 2.82431e-11 | 1.000000 | 2.82598e-11 | 1.000000 |
| rad2          | 2.45156e-11 | 1.000000 | 2.45300e-11 | 1.000000 |
| rad8          | 4.91051e-12 | 1.000000 | 4.91341e-12 | 1.000000 |
| rad9          | 3.65507e-12 | 1.000000 | 3.65723e-12 | 1.000000 |
| rad28         | 2.93343e-12 | 1.000000 | 2.93516e-12 | 1.000000 |
| rad1          | 1.77280e-12 | 1.000000 | 1.77385e-12 | 1.000000 |
| Ph+Allene     | 1.39807e-12 | 1.000000 | 1.39890e-12 | 1.000000 |
| rad10         | 9.32780e-13 | 1.000000 | 9.33331e-13 | 1.000000 |
| PhCCH+CH3     | 4.82858e-13 | 1.000000 | 4.83143e-13 | 1.000000 |
| rad33         | 3.84406e-13 | 1.000000 | 3.84632e-13 | 1.000000 |
| rad46         | 1.16607e-13 | 1.000000 | 1.16676e-13 | 1.000000 |
| rad60syn      | 5.06299e-14 | 1.000000 | 5.06598e-14 | 1.000000 |
| PhCH2CCH+H    | 1.84923e-14 | 1.000000 | 1.85032e-14 | 1.000000 |
| rad60anti     | 1.40738e-14 | 1.000000 | 1.40821e-14 | 1.000000 |
| PhCCCH3+H     | 8.17956e-15 | 1.000000 | 8.18438e-15 | 1.000000 |
| rad26         | 4.31869e-15 | 1.000000 | 4.32123e-15 | 1.000000 |
| rad14         | 2.56549e-15 | 1.000000 | 2.56700e-15 | 1.000000 |
| Ph+MeAc       | 2.14515e-15 | 1.000000 | 2.14642e-15 | 1.000000 |
| PAH7+H        | 1.70856e-16 | 1.000000 | 1.70957e-16 | 1.000000 |
| PAH3+H        | 9.92457e-17 | 1.000000 | 9.93042e-17 | 1.000000 |
| rad59         | 3.17849e-17 | 1.000000 | 3.18036e-17 | 1.000000 |
| rad27         | 3.03958e-17 | 1.000000 | 3.04137e-17 | 1.000000 |
| rad39         | 3.50359e-18 | 1.000000 | 3.50565e-18 | 1.000000 |
| rad50         | 7.85014e-19 | 1.000000 | 7.85477e-19 | 1.000000 |
| rad12         | 1.70337e-19 | 1.000000 | 1.70437e-19 | 1.000000 |
| rad31         | 6.00554e-20 | 1.000000 | 6.00908e-20 | 1.000000 |
| rad5          | 2.28888e-20 | 1.000000 | 2.29023e-20 | 1.000000 |
| rad37         | 1.59768e-20 | 1.000000 | 1.59862e-20 | 1.000000 |
| rad19syn      | 4.97722e-22 | 1.000000 | 4.98015e-22 | 1.000000 |
| rad52         | 2.38053e-22 | 1.000000 | 2.38193e-22 | 1.000000 |
| rad54         | 1.64616e-23 | 1.000000 | 1.64713e-23 | 1.000000 |
| rad51         | 7.51214e-24 | 1.000000 | 7.51657e-24 | 1.000000 |
| rad43         | 1.03969e-24 | 1.000000 | 1.04031e-24 | 1.000000 |
| rad70         | 9.41174e-25 | 1.000000 | 9.41729e-25 | 1.000000 |
| PAH10+CH3     | 7.81766e-25 | 1.000000 | 7.82227e-25 | 1.000000 |
| rad58         | 6.58115e-25 | 1.000000 | 6.58503e-25 | 1.000000 |
| rad62         | 6.41212e-25 | 1.000000 | 6.41590e-25 | 1.000000 |
| PhcycC3H3_A+H | 9.02495e-26 | 1.000000 | 9.03027e-26 | 1.000000 |
| rad65         | 6.17787e-26 | 1.000000 | 6.18152e-26 | 1.000000 |
| rad55         | 2.35174e-26 | 1.000000 | 2.35312e-26 | 1.000000 |
| rad34         | 2.28519e-27 | 1.000000 | 2.28654e-27 | 1.000000 |
| PAH1+H        | 4.32753e-28 | 1.000000 | 4.33008e-28 | 1.000000 |
| rad47         | 6.59236e-30 | 1.000000 | 6.59625e-30 | 1.000000 |
| rad42         | 2.86306e-30 | 1.000000 | 2.86474e-30 | 1.000000 |
| rad41         | 7.49805e-31 | 1.000000 | 7.50248e-31 | 1.000000 |

100.000000 Pa, 270.000000 K

=====

| Rate constant | True (fraction)     | Effective (fraction) |
|---------------|---------------------|----------------------|
| Total         | 8.04141e-24 (1.00 ) | 8.03555e-24 (1.00 )  |

| species     | PYtrue      | Cumul    | PYeffective | Cumul    |
|-------------|-------------|----------|-------------|----------|
| Indene+H    | 0.619918    | 0.619918 | 0.620370    | 0.620370 |
| rad22       | 0.286320    | 0.906238 | 0.286529    | 0.906899 |
| rad23       | 0.0818666   | 0.988105 | 0.0819263   | 0.988825 |
| rad45       | 0.00856096  | 0.996666 | 0.00856720  | 0.997392 |
| rad18       | 0.000933137 | 0.997599 | 0.000933818 | 0.998326 |
| Benzyl+C2H2 | 0.000728634 | 0.998327 | 0.000000    | 0.998326 |
| rad11       | 0.000655459 | 0.998983 | 0.000655937 | 0.998982 |
| rad36       | 0.000550341 | 0.999533 | 0.000550742 | 0.999533 |

|               |             |          |             |          |
|---------------|-------------|----------|-------------|----------|
| rad6          | 0.000358329 | 0.999891 | 0.000358590 | 0.999892 |
| rad20         | 6.69145e-05 | 0.999958 | 6.69633e-05 | 0.999959 |
| rad21         | 4.11240e-05 | 0.999999 | 4.11540e-05 | 1.000000 |
| rad7          | 6.48663e-08 | 1.000000 | 6.49136e-08 | 1.000000 |
| rad30         | 1.78443e-08 | 1.000000 | 1.78573e-08 | 1.000000 |
| rad15         | 2.08718e-09 | 1.000000 | 2.08870e-09 | 1.000000 |
| rad25         | 4.00239e-10 | 1.000000 | 4.00531e-10 | 1.000000 |
| rad13         | 3.97378e-10 | 1.000000 | 3.97667e-10 | 1.000000 |
| PhCHCCH2+H    | 1.15875e-10 | 1.000000 | 1.15960e-10 | 1.000000 |
| PAH9+H        | 9.62950e-11 | 1.000000 | 9.63653e-11 | 1.000000 |
| rad3          | 8.71065e-11 | 1.000000 | 8.71700e-11 | 1.000000 |
| rad24         | 8.05327e-11 | 1.000000 | 8.05914e-11 | 1.000000 |
| rad35         | 5.61929e-11 | 1.000000 | 5.62338e-11 | 1.000000 |
| rad2          | 4.99444e-11 | 1.000000 | 4.99808e-11 | 1.000000 |
| rad4          | 4.58942e-11 | 1.000000 | 4.59277e-11 | 1.000000 |
| rad38         | 4.52951e-11 | 1.000000 | 4.53281e-11 | 1.000000 |
| rad8          | 1.08544e-11 | 1.000000 | 1.08623e-11 | 1.000000 |
| rad9          | 7.47818e-12 | 1.000000 | 7.48364e-12 | 1.000000 |
| rad28         | 5.79633e-12 | 1.000000 | 5.80056e-12 | 1.000000 |
| rad1          | 3.66017e-12 | 1.000000 | 3.66284e-12 | 1.000000 |
| Ph+Allene     | 3.38050e-12 | 1.000000 | 3.38296e-12 | 1.000000 |
| rad10         | 2.12651e-12 | 1.000000 | 2.12806e-12 | 1.000000 |
| PhCCH+CH3     | 1.21486e-12 | 1.000000 | 1.21575e-12 | 1.000000 |
| rad33         | 4.78912e-13 | 1.000000 | 4.79261e-13 | 1.000000 |
| rad46         | 2.29319e-13 | 1.000000 | 2.29486e-13 | 1.000000 |
| rad60syn      | 1.11073e-13 | 1.000000 | 1.11154e-13 | 1.000000 |
| PhCH2CCH+H    | 5.45412e-14 | 1.000000 | 5.45810e-14 | 1.000000 |
| rad60anti     | 3.21760e-14 | 1.000000 | 3.21994e-14 | 1.000000 |
| PhCCCH3+H     | 2.56090e-14 | 1.000000 | 2.56276e-14 | 1.000000 |
| rad26         | 1.31373e-14 | 1.000000 | 1.31468e-14 | 1.000000 |
| Ph+MeAc       | 7.16642e-15 | 1.000000 | 7.17165e-15 | 1.000000 |
| rad14         | 4.78062e-15 | 1.000000 | 4.78411e-15 | 1.000000 |
| PAH7+H        | 4.87097e-16 | 1.000000 | 4.87452e-16 | 1.000000 |
| PAH3+H        | 3.11409e-16 | 1.000000 | 3.11636e-16 | 1.000000 |
| rad59         | 9.75254e-17 | 1.000000 | 9.75966e-17 | 1.000000 |
| rad27         | 6.28398e-17 | 1.000000 | 6.28856e-17 | 1.000000 |
| rad39         | 1.27691e-17 | 1.000000 | 1.27784e-17 | 1.000000 |
| rad50         | 2.65412e-18 | 1.000000 | 2.65605e-18 | 1.000000 |
| rad12         | 7.54256e-19 | 1.000000 | 7.54806e-19 | 1.000000 |
| rad31         | 1.10042e-19 | 1.000000 | 1.10122e-19 | 1.000000 |
| rad5          | 9.64880e-20 | 1.000000 | 9.65584e-20 | 1.000000 |
| rad37         | 7.65706e-20 | 1.000000 | 7.66264e-20 | 1.000000 |
| rad19syn      | 2.40264e-21 | 1.000000 | 2.40439e-21 | 1.000000 |
| rad52         | 1.04752e-21 | 1.000000 | 1.04828e-21 | 1.000000 |
| rad54         | 8.79324e-23 | 1.000000 | 8.79965e-23 | 1.000000 |
| rad51         | 4.02877e-23 | 1.000000 | 4.03170e-23 | 1.000000 |
| rad43         | 5.98033e-24 | 1.000000 | 5.98469e-24 | 1.000000 |
| rad70         | 5.50987e-24 | 1.000000 | 5.51388e-24 | 1.000000 |
| PAH10+CH3     | 5.02800e-24 | 1.000000 | 5.03167e-24 | 1.000000 |
| rad58         | 3.97768e-24 | 1.000000 | 3.98058e-24 | 1.000000 |
| rad62         | 3.66348e-24 | 1.000000 | 3.66615e-24 | 1.000000 |
| PhcycC3H3_A+H | 5.86341e-25 | 1.000000 | 5.86769e-25 | 1.000000 |
| rad65         | 3.61874e-25 | 1.000000 | 3.62138e-25 | 1.000000 |
| rad55         | 1.50017e-25 | 1.000000 | 1.50127e-25 | 1.000000 |
| rad34         | 1.54037e-26 | 1.000000 | 1.54150e-26 | 1.000000 |
| PAH1+H        | 3.14318e-27 | 1.000000 | 3.14547e-27 | 1.000000 |
| rad47         | 3.76190e-29 | 1.000000 | 3.76464e-29 | 1.000000 |
| rad42         | 2.12873e-29 | 1.000000 | 2.13028e-29 | 1.000000 |
| rad41         | 5.74771e-30 | 1.000000 | 5.75190e-30 | 1.000000 |

100.000000 Pa, 280.000000 K

=====

| Rate constant | True (fraction)     | Effective (fraction) |
|---------------|---------------------|----------------------|
| Total         | 1.89357e-23 (1.00 ) | 1.89188e-23 (1.00 )  |

| species     | PYtrue      | Cumul    | PYeffective | Cumul    |
|-------------|-------------|----------|-------------|----------|
| Indene+H    | 0.637289    | 0.637289 | 0.637860    | 0.637860 |
| rad22       | 0.265365    | 0.902654 | 0.265603    | 0.903463 |
| rad23       | 0.0856158   | 0.988270 | 0.0856926   | 0.989156 |
| rad45       | 0.00834940  | 0.996619 | 0.00835688  | 0.997512 |
| Benzyl+C2H2 | 0.000895861 | 0.997515 | 0.000000    | 0.997512 |
| rad18       | 0.000744635 | 0.998260 | 0.000745302 | 0.998258 |
| rad11       | 0.000671199 | 0.998931 | 0.000671801 | 0.998930 |
| rad36       | 0.000540111 | 0.999471 | 0.000540596 | 0.999470 |
| rad6        | 0.000442423 | 0.999913 | 0.000442820 | 0.999913 |
| rad20       | 5.37637e-05 | 0.999967 | 5.38119e-05 | 0.999967 |
| rad21       | 3.30527e-05 | 1.000000 | 3.30823e-05 | 1.000000 |
| rad7        | 8.56957e-08 | 1.000000 | 8.57725e-08 | 1.000000 |

|               |             |         |             |         |
|---------------|-------------|---------|-------------|---------|
| rad30         | 2.42713e-08 | 1.00000 | 2.42930e-08 | 1.00000 |
| rad15         | 3.04601e-09 | 1.00000 | 3.04874e-09 | 1.00000 |
| rad25         | 5.18027e-10 | 1.00000 | 5.18492e-10 | 1.00000 |
| rad13         | 4.87543e-10 | 1.00000 | 4.87980e-10 | 1.00000 |
| PhCHCCH2+H    | 2.16357e-10 | 1.00000 | 2.16551e-10 | 1.00000 |
| PAH9+H        | 1.60575e-10 | 1.00000 | 1.60719e-10 | 1.00000 |
| rad3          | 1.36641e-10 | 1.00000 | 1.36763e-10 | 1.00000 |
| rad2          | 9.78773e-11 | 1.00000 | 9.79651e-11 | 1.00000 |
| rad35         | 9.08885e-11 | 1.00000 | 9.09700e-11 | 1.00000 |
| rad24         | 7.94020e-11 | 1.00000 | 7.94732e-11 | 1.00000 |
| rad4          | 7.22937e-11 | 1.00000 | 7.23585e-11 | 1.00000 |
| rad38         | 7.19375e-11 | 1.00000 | 7.20020e-11 | 1.00000 |
| rad8          | 2.27700e-11 | 1.00000 | 2.27904e-11 | 1.00000 |
| rad9          | 1.46449e-11 | 1.00000 | 1.46580e-11 | 1.00000 |
| rad28         | 1.11509e-11 | 1.00000 | 1.11609e-11 | 1.00000 |
| Ph+Allene     | 7.71928e-12 | 1.00000 | 7.72620e-12 | 1.00000 |
| rad1          | 7.27639e-12 | 1.00000 | 7.28291e-12 | 1.00000 |
| rad10         | 4.60681e-12 | 1.00000 | 4.61094e-12 | 1.00000 |
| PhCCH+CH3     | 2.91632e-12 | 1.00000 | 2.91894e-12 | 1.00000 |
| rad33         | 5.90527e-13 | 1.00000 | 5.91057e-13 | 1.00000 |
| rad46         | 4.38702e-13 | 1.00000 | 4.39095e-13 | 1.00000 |
| rad60syn      | 2.31279e-13 | 1.00000 | 2.31486e-13 | 1.00000 |
| PhCH2CCH+H    | 1.49904e-13 | 1.00000 | 1.50038e-13 | 1.00000 |
| PhCCCH3+H     | 7.58258e-14 | 1.00000 | 7.58938e-14 | 1.00000 |
| rad60anti     | 6.95600e-14 | 1.00000 | 6.96224e-14 | 1.00000 |
| rad26         | 3.76117e-14 | 1.00000 | 3.76455e-14 | 1.00000 |
| Ph+MeAc       | 2.25569e-14 | 1.00000 | 2.25772e-14 | 1.00000 |
| rad14         | 8.48474e-15 | 1.00000 | 8.49235e-15 | 1.00000 |
| PAH7+H        | 1.31140e-15 | 1.00000 | 1.31257e-15 | 1.00000 |
| PAH3+H        | 9.03786e-16 | 1.00000 | 9.04597e-16 | 1.00000 |
| rad59         | 2.76977e-16 | 1.00000 | 2.77226e-16 | 1.00000 |
| rad27         | 1.24522e-16 | 1.00000 | 1.24634e-16 | 1.00000 |
| rad39         | 4.39294e-17 | 1.00000 | 4.39688e-17 | 1.00000 |
| rad50         | 8.32294e-18 | 1.00000 | 8.33040e-18 | 1.00000 |
| rad12         | 3.07477e-18 | 1.00000 | 3.07752e-18 | 1.00000 |
| rad5          | 3.74191e-19 | 1.00000 | 3.74526e-19 | 1.00000 |
| rad37         | 3.34991e-19 | 1.00000 | 3.35291e-19 | 1.00000 |
| rad31         | 1.97638e-19 | 1.00000 | 1.97815e-19 | 1.00000 |
| rad19syn      | 1.04686e-20 | 1.00000 | 1.04780e-20 | 1.00000 |
| rad52         | 4.17646e-21 | 1.00000 | 4.18020e-21 | 1.00000 |
| rad54         | 4.19420e-22 | 1.00000 | 4.19796e-22 | 1.00000 |
| rad51         | 1.92200e-22 | 1.00000 | 1.92372e-22 | 1.00000 |
| rad43         | 3.05460e-23 | 1.00000 | 3.05734e-23 | 1.00000 |
| PAH10+CH3     | 2.84344e-23 | 1.00000 | 2.84599e-23 | 1.00000 |
| rad70         | 2.82807e-23 | 1.00000 | 2.83060e-23 | 1.00000 |
| rad58         | 2.09961e-23 | 1.00000 | 2.10149e-23 | 1.00000 |
| rad62         | 1.85424e-23 | 1.00000 | 1.85590e-23 | 1.00000 |
| PhcycC3H3_A+H | 3.31441e-24 | 1.00000 | 3.31738e-24 | 1.00000 |
| rad65         | 1.86572e-24 | 1.00000 | 1.86739e-24 | 1.00000 |
| rad55         | 8.34564e-25 | 1.00000 | 8.35313e-25 | 1.00000 |
| rad34         | 8.94437e-26 | 1.00000 | 8.95239e-26 | 1.00000 |
| PAH1+H        | 1.96020e-26 | 1.00000 | 1.96196e-26 | 1.00000 |
| rad47         | 1.87875e-28 | 1.00000 | 1.88044e-28 | 1.00000 |
| rad42         | 1.35239e-28 | 1.00000 | 1.35360e-28 | 1.00000 |
| rad41         | 3.76828e-29 | 1.00000 | 3.77166e-29 | 1.00000 |

100.000000 Pa, 290.000000 K

=====

| Rate constant | True (fraction)     | Effective (fraction) |
|---------------|---------------------|----------------------|
| Total         | 4.20015e-23 (1.00 ) | 4.19555e-23 (1.00 )  |

| species     | PYtrue      | Cumul    | PYeffective | Cumul    |
|-------------|-------------|----------|-------------|----------|
| Indene+H    | 0.654398    | 0.654398 | 0.655115    | 0.655115 |
| rad22       | 0.244687    | 0.899085 | 0.244955    | 0.900070 |
| rad23       | 0.0892252   | 0.988310 | 0.0893231   | 0.989393 |
| rad45       | 0.00817548  | 0.996486 | 0.00818445  | 0.997578 |
| Benzyl+C2H2 | 0.00109569  | 0.997581 | 0.000000    | 0.997578 |
| rad11       | 0.000681875 | 0.998263 | 0.000682623 | 0.998260 |
| rad18       | 0.000594045 | 0.998857 | 0.000594697 | 0.998855 |
| rad6        | 0.000540325 | 0.999398 | 0.000540917 | 0.999396 |
| rad36       | 0.000532517 | 0.999930 | 0.000533101 | 0.999929 |
| rad20       | 4.33220e-05 | 0.999973 | 4.33696e-05 | 0.999972 |
| rad21       | 2.66436e-05 | 1.00000  | 2.66729e-05 | 0.999999 |
| rad7        | 1.11070e-07 | 1.00000  | 1.11192e-07 | 0.999999 |
| rad30       | 3.26037e-08 | 1.00000  | 3.26395e-08 | 0.999999 |
| rad15       | 4.36554e-09 | 1.00000  | 4.37033e-09 | 0.999999 |
| rad25       | 6.50470e-10 | 1.00000  | 6.51183e-10 | 0.999999 |
| rad13       | 5.91927e-10 | 1.00000  | 5.92576e-10 | 0.999999 |

|               |             |         |             |          |
|---------------|-------------|---------|-------------|----------|
| PhCHCCH2+H    | 3.89910e-10 | 1.00000 | 3.90338e-10 | 0.999999 |
| PAH9+H        | 2.63603e-10 | 1.00000 | 2.63892e-10 | 0.999999 |
| rad3          | 2.08365e-10 | 1.00000 | 2.08594e-10 | 0.999999 |
| rad2          | 1.84968e-10 | 1.00000 | 1.85171e-10 | 0.999999 |
| rad35         | 1.44927e-10 | 1.00000 | 1.45086e-10 | 0.999999 |
| rad38         | 1.13151e-10 | 1.00000 | 1.13275e-10 | 0.999999 |
| rad4          | 1.10737e-10 | 1.00000 | 1.10858e-10 | 0.999999 |
| rad24         | 7.86697e-11 | 1.00000 | 7.87560e-11 | 0.999999 |
| rad8          | 4.55809e-11 | 1.00000 | 4.56309e-11 | 0.999999 |
| rad9          | 2.75737e-11 | 1.00000 | 2.76039e-11 | 0.999999 |
| rad28         | 2.09241e-11 | 1.00000 | 2.09470e-11 | 0.999999 |
| Ph+Allene     | 1.67437e-11 | 1.00000 | 1.67621e-11 | 0.999999 |
| rad1          | 1.39632e-11 | 1.00000 | 1.39785e-11 | 0.999999 |
| rad10         | 9.51855e-12 | 1.00000 | 9.52899e-12 | 0.999999 |
| PhCCH+CH3     | 6.70847e-12 | 1.00000 | 6.71583e-12 | 0.999999 |
| rad46         | 8.18127e-13 | 1.00000 | 8.19025e-13 | 0.999999 |
| rad33         | 7.20719e-13 | 1.00000 | 7.21510e-13 | 0.999999 |
| rad60syn      | 4.59620e-13 | 1.00000 | 4.60125e-13 | 0.999999 |
| PhCH2CCH+H    | 3.86682e-13 | 1.00000 | 3.87106e-13 | 0.999999 |
| PhCCCH3+H     | 2.13101e-13 | 1.00000 | 2.13335e-13 | 0.999999 |
| rad60anti     | 1.43051e-13 | 1.00000 | 1.43208e-13 | 0.999999 |
| rad26         | 1.01779e-13 | 1.00000 | 1.01891e-13 | 0.999999 |
| Ph+MeAc       | 6.71729e-14 | 1.00000 | 6.72466e-14 | 0.999999 |
| rad14         | 1.44021e-14 | 1.00000 | 1.44179e-14 | 0.999999 |
| PAH7+H        | 3.36116e-15 | 1.00000 | 3.36485e-15 | 0.999999 |
| PAH3+H        | 2.44597e-15 | 1.00000 | 2.44866e-15 | 0.999999 |
| rad59         | 7.34053e-16 | 1.00000 | 7.34858e-16 | 0.999999 |
| rad27         | 2.37299e-16 | 1.00000 | 2.37559e-16 | 0.999999 |
| rad39         | 1.43087e-16 | 1.00000 | 1.43244e-16 | 0.999999 |
| rad50         | 2.43884e-17 | 1.00000 | 2.44152e-17 | 0.999999 |
| rad12         | 1.15976e-17 | 1.00000 | 1.16103e-17 | 0.999999 |
| rad37         | 1.34585e-18 | 1.00000 | 1.34733e-18 | 0.999999 |
| rad5          | 1.34354e-18 | 1.00000 | 1.34501e-18 | 0.999999 |
| rad31         | 3.48565e-19 | 1.00000 | 3.48947e-19 | 0.999999 |
| rad19syn      | 4.15493e-20 | 1.00000 | 4.15949e-20 | 0.999999 |
| rad52         | 1.52360e-20 | 1.00000 | 1.52527e-20 | 0.999999 |
| rad54         | 1.80414e-21 | 1.00000 | 1.80611e-21 | 0.999999 |
| rad51         | 8.24820e-22 | 1.00000 | 8.25725e-22 | 0.999999 |
| PAH10+CH3     | 1.42984e-22 | 1.00000 | 1.43140e-22 | 0.999999 |
| rad43         | 1.40007e-22 | 1.00000 | 1.40160e-22 | 0.999999 |
| rad70         | 1.28900e-22 | 1.00000 | 1.29041e-22 | 0.999999 |
| rad58         | 9.80725e-23 | 1.00000 | 9.81800e-23 | 0.999999 |
| rad62         | 8.40495e-23 | 1.00000 | 8.41416e-23 | 0.999999 |
| PhcycC3H3_A+H | 1.65179e-23 | 1.00000 | 1.65360e-23 | 0.999999 |
| rad65         | 8.57173e-24 | 1.00000 | 8.58113e-24 | 0.999999 |
| rad55         | 4.10142e-24 | 1.00000 | 4.10592e-24 | 0.999999 |
| rad34         | 4.54357e-25 | 1.00000 | 4.54856e-25 | 0.999999 |
| PAH1+H        | 1.06618e-25 | 1.00000 | 1.06735e-25 | 0.999999 |
| rad47         | 8.32978e-28 | 1.00000 | 8.33892e-28 | 0.999999 |
| rad42         | 7.46891e-28 | 1.00000 | 7.47710e-28 | 0.999999 |
| rad41         | 2.14957e-28 | 1.00000 | 2.15193e-28 | 0.999999 |

100.000000 Pa, 300.000000 K

=====

| Rate constant | True (fraction)     | Effective (fraction) |
|---------------|---------------------|----------------------|
| Total         | 1.17740e-22 (1.00 ) | 1.17545e-22 (1.00 )  |

| species     | PYtrue      | Cumul    | PYeffective | Cumul    |
|-------------|-------------|----------|-------------|----------|
| Indene+H    | 0.697895    | 0.697895 | 0.699050    | 0.699050 |
| rad22       | 0.198018    | 0.895913 | 0.198346    | 0.897396 |
| rad23       | 0.0916534   | 0.987566 | 0.0918051   | 0.989201 |
| rad45       | 0.00834304  | 0.995909 | 0.00835685  | 0.997558 |
| Benzyl+C2H2 | 0.00165274  | 0.997562 | 0.00000     | 0.997558 |
| rad18       | 0.000737695 | 0.998300 | 0.000738916 | 0.998297 |
| rad6        | 0.000716786 | 0.999017 | 0.000717972 | 0.999015 |
| rad11       | 0.000523537 | 0.999540 | 0.000524404 | 0.999539 |
| rad36       | 0.000284359 | 0.999825 | 0.000284829 | 0.999824 |
| rad20       | 0.000106895 | 0.999931 | 0.000107072 | 0.999931 |
| rad21       | 6.85251e-05 | 1.000000 | 6.86385e-05 | 1.000000 |
| rad7        | 1.64782e-07 | 1.00000  | 1.65055e-07 | 1.000000 |
| rad30       | 3.72560e-08 | 1.00000  | 3.73176e-08 | 1.000000 |
| rad9        | 4.48223e-09 | 1.00000  | 4.48965e-09 | 1.000000 |
| PAH9+H      | 2.00065e-09 | 1.00000  | 2.00396e-09 | 1.000000 |
| rad2        | 9.65203e-10 | 1.00000  | 9.66801e-10 | 1.000000 |
| rad35       | 8.32761e-10 | 1.00000  | 8.34139e-10 | 1.000000 |
| rad13       | 7.81513e-10 | 1.00000  | 7.82807e-10 | 1.000000 |
| rad25       | 6.89950e-10 | 1.00000  | 6.91092e-10 | 1.000000 |
| PhCHCCH2+H  | 6.57298e-10 | 1.00000  | 6.58386e-10 | 1.000000 |

|               |             |         |             |          |
|---------------|-------------|---------|-------------|----------|
| rad38         | 5.59593e-10 | 1.00000 | 5.60519e-10 | 1.000000 |
| rad3          | 4.69317e-10 | 1.00000 | 4.70094e-10 | 1.000000 |
| rad4          | 2.33404e-10 | 1.00000 | 2.33791e-10 | 1.000000 |
| rad28         | 1.13506e-10 | 1.00000 | 1.13694e-10 | 1.000000 |
| rad24         | 1.01127e-10 | 1.00000 | 1.01294e-10 | 1.000000 |
| PhCCH+CH3     | 8.85021e-11 | 1.00000 | 8.86486e-11 | 1.000000 |
| rad1          | 7.27345e-11 | 1.00000 | 7.28549e-11 | 1.000000 |
| rad10         | 6.39427e-11 | 1.00000 | 6.40485e-11 | 1.000000 |
| Ph+Allene     | 1.71625e-11 | 1.00000 | 1.71909e-11 | 1.000000 |
| PhCCCH3+H     | 9.58779e-12 | 1.00000 | 9.60367e-12 | 1.000000 |
| rad46         | 8.38688e-12 | 1.00000 | 8.40076e-12 | 1.000000 |
| rad15         | 4.49866e-12 | 1.00000 | 4.50611e-12 | 1.000000 |
| Ph+MeAc       | 3.82208e-12 | 1.00000 | 3.82841e-12 | 1.000000 |
| rad26         | 3.08397e-12 | 1.00000 | 3.08908e-12 | 1.000000 |
| rad19anti     | 1.20129e-12 | 1.00000 | 1.20327e-12 | 1.000000 |
| rad33         | 1.19597e-12 | 1.00000 | 1.19795e-12 | 1.000000 |
| PhCH2CCH+H    | 9.15106e-13 | 1.00000 | 9.16621e-13 | 1.000000 |
| rad60syn      | 7.09269e-13 | 1.00000 | 7.10443e-13 | 1.000000 |
| rad60anti     | 2.13635e-13 | 1.00000 | 2.13989e-13 | 1.000000 |
| PAH7+H        | 6.45433e-14 | 1.00000 | 6.46501e-14 | 1.000000 |
| rad14         | 4.17645e-14 | 1.00000 | 4.18337e-14 | 1.000000 |
| rad39         | 1.13898e-14 | 1.00000 | 1.14086e-14 | 1.000000 |
| PAH3+H        | 6.29056e-15 | 1.00000 | 6.30098e-15 | 1.000000 |
| rad50         | 2.37609e-15 | 1.00000 | 2.38002e-15 | 1.000000 |
| rad59         | 1.45489e-15 | 1.00000 | 1.45730e-15 | 1.000000 |
| rad27         | 1.35454e-15 | 1.00000 | 1.35679e-15 | 1.000000 |
| rad37         | 5.25144e-16 | 1.00000 | 5.26013e-16 | 1.000000 |
| rad12         | 4.77056e-17 | 1.00000 | 4.77846e-17 | 1.000000 |
| rad5          | 7.79167e-18 | 1.00000 | 7.80457e-18 | 1.000000 |
| rad52         | 5.86510e-18 | 1.00000 | 5.87481e-18 | 1.000000 |
| rad19syn      | 4.85737e-18 | 1.00000 | 4.86541e-18 | 1.000000 |
| rad31         | 2.48916e-18 | 1.00000 | 2.49328e-18 | 1.000000 |
| rad51         | 9.80734e-19 | 1.00000 | 9.82358e-19 | 1.000000 |
| rad67         | 5.56018e-19 | 1.00000 | 5.56939e-19 | 1.000000 |
| rad54         | 3.83045e-19 | 1.00000 | 3.83679e-19 | 1.000000 |
| PAH10+CH3     | 3.42293e-19 | 1.00000 | 3.42860e-19 | 1.000000 |
| rad43         | 8.28860e-20 | 1.00000 | 8.30232e-20 | 1.000000 |
| rad62         | 3.00488e-20 | 1.00000 | 3.00986e-20 | 1.000000 |
| PhcycC3H3_A+H | 1.89073e-20 | 1.00000 | 1.89386e-20 | 1.000000 |
| rad65         | 1.78740e-20 | 1.00000 | 1.79036e-20 | 1.000000 |
| rad70         | 6.43595e-21 | 1.00000 | 6.44661e-21 | 1.000000 |
| rad55         | 2.83086e-21 | 1.00000 | 2.83554e-21 | 1.000000 |
| PAH1+H        | 1.45712e-21 | 1.00000 | 1.45953e-21 | 1.000000 |
| rad58         | 5.69657e-22 | 1.00000 | 5.70600e-22 | 1.000000 |
| rad34         | 1.29235e-22 | 1.00000 | 1.29449e-22 | 1.000000 |
| rad42         | 6.65490e-24 | 1.00000 | 6.66592e-24 | 1.000000 |
| rad41         | 3.73025e-24 | 1.00000 | 3.73642e-24 | 1.000000 |
| rad53         | 6.05422e-25 | 1.00000 | 6.06424e-25 | 1.000000 |
| rad47         | 5.10498e-25 | 1.00000 | 5.11343e-25 | 1.000000 |
| rad64         | 2.17468e-25 | 1.00000 | 2.17828e-25 | 1.000000 |
| rad56         | 9.10245e-27 | 1.00000 | 9.11752e-27 | 1.000000 |
| rad73         | 3.14296e-27 | 1.00000 | 3.14817e-27 | 1.000000 |
| rad68syn      | 1.00403e-27 | 1.00000 | 1.00569e-27 | 1.000000 |
| rad61         | 9.00605e-28 | 1.00000 | 9.02096e-28 | 1.000000 |
| rad68anti     | 7.24683e-28 | 1.00000 | 7.25882e-28 | 1.000000 |
| rad71         | 1.21589e-28 | 1.00000 | 1.21790e-28 | 1.000000 |
| rad40syn      | 6.59988e-30 | 1.00000 | 6.61080e-30 | 1.000000 |
| PAH8+H        | 3.51739e-30 | 1.00000 | 3.52321e-30 | 1.000000 |
| rad40anti     | 1.77833e-30 | 1.00000 | 1.78128e-30 | 1.000000 |
| rad72         | 2.16529e-34 | 1.00000 | 2.16888e-34 | 1.000000 |
| rad8          | 6.29962e-38 | 1.00000 | 6.31005e-38 | 1.000000 |

100.000000 Pa, 310.000000 K

=====

Rate constant | True (fraction) | Effective (fraction)

-----  
Total | 2.44453e-22 (1.00) | 2.44059e-22 (1.00)

| species     | PYtrue      | Cumul    | PYeffective | Cumul    |
|-------------|-------------|----------|-------------|----------|
| Indene+H    | 0.687324    | 0.687324 | 0.688435    | 0.688435 |
| rad22       | 0.204858    | 0.892182 | 0.205189    | 0.893624 |
| rad23       | 0.0958650   | 0.988047 | 0.0960199   | 0.989644 |
| rad45       | 0.00792320  | 0.995970 | 0.00793601  | 0.997580 |
| Benzyl+C2H2 | 0.00161374  | 0.997584 | 0.000000    | 0.997580 |
| rad6        | 0.000780630 | 0.998365 | 0.000781892 | 0.998362 |
| rad11       | 0.000686763 | 0.999051 | 0.000687873 | 0.999050 |
| rad36       | 0.000524250 | 0.999576 | 0.000525097 | 0.999575 |
| rad18       | 0.000377942 | 0.999954 | 0.000378553 | 0.999953 |
| rad20       | 2.83769e-05 | 0.999982 | 2.84227e-05 | 0.999982 |

|               |             |          |             |          |
|---------------|-------------|----------|-------------|----------|
| rad21         | 1.74687e-05 | 0.999999 | 1.74969e-05 | 0.999999 |
| rad7          | 1.76964e-07 | 1.000000 | 1.77250e-07 | 0.999999 |
| rad30         | 5.68739e-08 | 1.000000 | 5.69659e-08 | 0.999999 |
| rad15         | 8.54522e-09 | 1.000000 | 8.55903e-09 | 0.999999 |
| PhCHCCH2+H    | 1.15332e-09 | 1.000000 | 1.15519e-09 | 0.999999 |
| rad25         | 9.45394e-10 | 1.000000 | 9.46922e-10 | 0.999999 |
| rad13         | 8.46187e-10 | 1.000000 | 8.47555e-10 | 0.999999 |
| PAH9+H        | 6.78557e-10 | 1.000000 | 6.79654e-10 | 0.999999 |
| rad2          | 5.97822e-10 | 1.000000 | 5.98788e-10 | 0.999999 |
| rad3          | 4.47555e-10 | 1.000000 | 4.48279e-10 | 0.999999 |
| rad35         | 3.53345e-10 | 1.000000 | 3.53916e-10 | 0.999999 |
| rad38         | 2.71875e-10 | 1.000000 | 2.72315e-10 | 0.999999 |
| rad4          | 2.40222e-10 | 1.000000 | 2.40610e-10 | 0.999999 |
| rad8          | 1.61636e-10 | 1.000000 | 1.61897e-10 | 0.999999 |
| rad9          | 8.81713e-11 | 1.000000 | 8.83138e-11 | 0.999999 |
| rad24         | 7.82849e-11 | 1.000000 | 7.84114e-11 | 0.999999 |
| Ph+Allene     | 6.88579e-11 | 1.000000 | 6.89692e-11 | 0.999999 |
| rad28         | 6.88149e-11 | 1.000000 | 6.89261e-11 | 0.999999 |
| rad1          | 4.66782e-11 | 1.000000 | 4.67536e-11 | 0.999999 |
| rad10         | 3.57257e-11 | 1.000000 | 3.57834e-11 | 0.999999 |
| PhCCH+CH3     | 3.17054e-11 | 1.000000 | 3.17567e-11 | 0.999999 |
| rad46         | 2.65312e-12 | 1.000000 | 2.65741e-12 | 0.999999 |
| PhCH2CCH+H    | 2.17844e-12 | 1.000000 | 2.18196e-12 | 0.999999 |
| rad60syn      | 1.60746e-12 | 1.000000 | 1.61006e-12 | 0.999999 |
| PhCCCH3+H     | 1.45665e-12 | 1.000000 | 1.45900e-12 | 0.999999 |
| rad33         | 1.04193e-12 | 1.000000 | 1.04361e-12 | 0.999999 |
| rad26         | 6.38442e-13 | 1.000000 | 6.39474e-13 | 0.999999 |
| rad60anti     | 5.31247e-13 | 1.000000 | 5.32106e-13 | 0.999999 |
| Ph+MeAc       | 5.11068e-13 | 1.000000 | 5.11894e-13 | 0.999999 |
| rad14         | 3.68386e-14 | 1.000000 | 3.68982e-14 | 0.999999 |
| PAH7+H        | 1.95809e-14 | 1.000000 | 1.96126e-14 | 0.999999 |
| PAH3+H        | 1.49255e-14 | 1.000000 | 1.49496e-14 | 0.999999 |
| rad59         | 4.30422e-15 | 1.000000 | 4.31117e-15 | 0.999999 |
| rad39         | 1.29939e-15 | 1.000000 | 1.30149e-15 | 0.999999 |
| rad27         | 7.75492e-16 | 1.000000 | 7.76746e-16 | 0.999999 |
| rad50         | 1.75169e-16 | 1.000000 | 1.75452e-16 | 0.999999 |
| rad12         | 1.33051e-16 | 1.000000 | 1.33266e-16 | 0.999999 |
| rad37         | 1.71831e-17 | 1.000000 | 1.72108e-17 | 0.999999 |
| rad5          | 1.40427e-17 | 1.000000 | 1.40654e-17 | 0.999999 |
| rad31         | 1.03480e-18 | 1.000000 | 1.03648e-18 | 0.999999 |
| rad19syn      | 5.09584e-19 | 1.000000 | 5.10408e-19 | 0.999999 |
| rad52         | 1.60465e-19 | 1.000000 | 1.60724e-19 | 0.999999 |
| rad54         | 2.52975e-20 | 1.000000 | 2.53384e-20 | 0.999999 |
| rad51         | 1.14812e-20 | 1.000000 | 1.14998e-20 | 0.999999 |
| PAH10+CH3     | 2.64256e-21 | 1.000000 | 2.64683e-21 | 0.999999 |
| rad43         | 2.20271e-21 | 1.000000 | 2.20627e-21 | 0.999999 |
| rad70         | 1.95625e-21 | 1.000000 | 1.95941e-21 | 0.999999 |
| rad58         | 1.54911e-21 | 1.000000 | 1.55161e-21 | 0.999999 |
| rad62         | 1.28659e-21 | 1.000000 | 1.28866e-21 | 0.999999 |
| PhcycC3H3_A+H | 2.93799e-22 | 1.000000 | 2.94274e-22 | 0.999999 |
| rad65         | 1.33489e-22 | 1.000000 | 1.33705e-22 | 0.999999 |
| rad55         | 7.12912e-23 | 1.000000 | 7.14064e-23 | 0.999999 |
| rad34         | 8.25098e-24 | 1.000000 | 8.26432e-24 | 0.999999 |
| PAH1+H        | 2.20056e-24 | 1.000000 | 2.20412e-24 | 0.999999 |
| rad42         | 1.57916e-26 | 1.000000 | 1.58171e-26 | 0.999999 |
| rad47         | 1.20235e-26 | 1.000000 | 1.20429e-26 | 0.999999 |
| rad41         | 4.86442e-27 | 1.000000 | 4.87228e-27 | 0.999999 |

100.000000 Pa, 400.000000 K

=====

| Rate constant | True (fraction)     | Effective (fraction) |
|---------------|---------------------|----------------------|
| Total         | 3.60269e-20 (1.00 ) | 3.57097e-20 (1.00 )  |

| species     | PYtrue      | Cumul    | PYeffective | Cumul    |
|-------------|-------------|----------|-------------|----------|
| Indene+H    | 0.817953    | 0.817953 | 0.825218    | 0.825218 |
| rad23       | 0.0966112   | 0.914564 | 0.0974694   | 0.922687 |
| rad22       | 0.0654079   | 0.979972 | 0.0659889   | 0.988676 |
| Benzyl+C2H2 | 0.00880491  | 0.988777 | 0.000000    | 0.988676 |
| rad45       | 0.00784459  | 0.996622 | 0.00791428  | 0.996591 |
| rad6        | 0.00258066  | 0.999202 | 0.00260359  | 0.999194 |
| rad11       | 0.000353092 | 0.999555 | 0.000356229 | 0.999550 |
| rad36       | 0.000300554 | 0.999856 | 0.000303224 | 0.999854 |
| rad18       | 0.000107537 | 0.999963 | 0.000108492 | 0.999962 |
| rad20       | 2.15246e-05 | 0.999985 | 2.17158e-05 | 0.999984 |
| rad21       | 1.40264e-05 | 0.999999 | 1.41510e-05 | 0.999998 |
| rad7        | 7.28890e-07 | 1.000000 | 7.35365e-07 | 0.999999 |
| rad30       | 3.99382e-07 | 1.000000 | 4.02929e-07 | 0.999999 |
| PAH9+H      | 8.70732e-08 | 1.000000 | 8.78467e-08 | 0.999999 |

|               |             |         |             |          |
|---------------|-------------|---------|-------------|----------|
| rad9          | 6.06216e-08 | 1.00000 | 6.11601e-08 | 0.999999 |
| PhCHCCH2+H    | 4.95113e-08 | 1.00000 | 4.99511e-08 | 0.999999 |
| rad2          | 4.29407e-08 | 1.00000 | 4.33221e-08 | 0.999999 |
| rad35         | 2.94709e-08 | 1.00000 | 2.97327e-08 | 0.999999 |
| rad38         | 2.67517e-08 | 1.00000 | 2.69894e-08 | 0.999999 |
| PhCCH+CH3     | 2.47503e-08 | 1.00000 | 2.49702e-08 | 0.999999 |
| rad28         | 1.10245e-08 | 1.00000 | 1.11224e-08 | 0.999999 |
| rad3          | 5.35442e-09 | 1.00000 | 5.40199e-09 | 0.999999 |
| Ph+Allene     | 5.26495e-09 | 1.00000 | 5.31172e-09 | 0.999999 |
| PhCCCH3+H     | 4.77326e-09 | 1.00000 | 4.81566e-09 | 0.999999 |
| rad1          | 3.99634e-09 | 1.00000 | 4.03184e-09 | 0.999999 |
| rad10         | 3.54572e-09 | 1.00000 | 3.57721e-09 | 0.999999 |
| rad13         | 2.89541e-09 | 1.00000 | 2.92113e-09 | 0.999999 |
| rad4          | 2.81994e-09 | 1.00000 | 2.84499e-09 | 0.999999 |
| Ph+MeAc       | 2.68147e-09 | 1.00000 | 2.70529e-09 | 0.999999 |
| rad25         | 1.56877e-09 | 1.00000 | 1.58271e-09 | 0.999999 |
| rad46         | 1.09849e-09 | 1.00000 | 1.10825e-09 | 0.999999 |
| rad26         | 8.18362e-10 | 1.00000 | 8.25632e-10 | 0.999999 |
| PhCH2CCH+H    | 7.78040e-10 | 1.00000 | 7.84951e-10 | 0.999999 |
| rad19anti     | 1.68799e-10 | 1.00000 | 1.70299e-10 | 0.999999 |
| rad24         | 1.34078e-10 | 1.00000 | 1.35269e-10 | 0.999999 |
| PAH7+H        | 9.90266e-11 | 1.00000 | 9.99062e-11 | 0.999999 |
| rad60syn      | 9.43564e-11 | 1.00000 | 9.51945e-11 | 0.999999 |
| rad15         | 5.96419e-11 | 1.00000 | 6.01717e-11 | 0.999999 |
| rad60anti     | 3.75284e-11 | 1.00000 | 3.78617e-11 | 0.999999 |
| rad39         | 2.07553e-11 | 1.00000 | 2.09396e-11 | 0.999999 |
| PAH3+H        | 6.61941e-12 | 1.00000 | 6.67821e-12 | 0.999999 |
| rad50         | 5.96480e-12 | 1.00000 | 6.01779e-12 | 0.999999 |
| rad33         | 5.05224e-12 | 1.00000 | 5.09712e-12 | 0.999999 |
| rad59         | 1.37786e-12 | 1.00000 | 1.39010e-12 | 0.999999 |
| rad37         | 9.09272e-13 | 1.00000 | 9.17349e-13 | 0.999999 |
| rad14         | 6.83197e-13 | 1.00000 | 6.89266e-13 | 0.999999 |
| rad52         | 7.62492e-14 | 1.00000 | 7.69265e-14 | 0.999999 |
| rad27         | 6.43200e-14 | 1.00000 | 6.48914e-14 | 0.999999 |
| rad51         | 5.07893e-14 | 1.00000 | 5.12404e-14 | 0.999999 |
| rad19syn      | 2.24070e-14 | 1.00000 | 2.26061e-14 | 0.999999 |
| rad54         | 3.25898e-15 | 1.00000 | 3.28793e-15 | 0.999999 |
| PAH10+CH3     | 2.17028e-15 | 1.00000 | 2.18956e-15 | 0.999999 |
| rad5          | 1.67948e-15 | 1.00000 | 1.69439e-15 | 0.999999 |
| rad65         | 1.39728e-15 | 1.00000 | 1.40969e-15 | 0.999999 |
| rad67         | 1.19892e-15 | 1.00000 | 1.20957e-15 | 0.999999 |
| rad12         | 1.04657e-15 | 1.00000 | 1.05587e-15 | 0.999999 |
| PhcycC3H3_A+H | 5.95713e-16 | 1.00000 | 6.01005e-16 | 0.999999 |
| rad31         | 3.62123e-16 | 1.00000 | 3.65340e-16 | 0.999999 |
| rad43         | 3.25847e-16 | 1.00000 | 3.28742e-16 | 0.999999 |
| rad70         | 1.88153e-16 | 1.00000 | 1.89825e-16 | 0.999999 |
| rad62         | 1.76458e-16 | 1.00000 | 1.78025e-16 | 0.999999 |
| PAH1+H        | 1.44167e-16 | 1.00000 | 1.45448e-16 | 0.999999 |
| rad55         | 6.55103e-17 | 1.00000 | 6.60922e-17 | 0.999999 |
| rad58         | 4.91279e-17 | 1.00000 | 4.95643e-17 | 0.999999 |
| rad34         | 1.13808e-17 | 1.00000 | 1.14819e-17 | 0.999999 |
| rad73         | 6.86389e-19 | 1.00000 | 6.92487e-19 | 0.999999 |
| rad53         | 4.40963e-19 | 1.00000 | 4.44880e-19 | 0.999999 |
| rad42         | 3.71378e-19 | 1.00000 | 3.74677e-19 | 0.999999 |
| rad64         | 3.46309e-19 | 1.00000 | 3.49385e-19 | 0.999999 |
| rad71         | 1.67106e-19 | 1.00000 | 1.68591e-19 | 0.999999 |
| rad41         | 1.29250e-19 | 1.00000 | 1.30398e-19 | 0.999999 |
| rad56         | 7.05804e-20 | 1.00000 | 7.12074e-20 | 0.999999 |
| rad68syn      | 1.13298e-20 | 1.00000 | 1.14305e-20 | 0.999999 |
| rad68anti     | 7.77247e-21 | 1.00000 | 7.84151e-21 | 0.999999 |
| rad47         | 7.19380e-21 | 1.00000 | 7.25770e-21 | 0.999999 |
| rad61         | 4.96538e-21 | 1.00000 | 5.00948e-21 | 0.999999 |
| PAH8+H        | 1.79592e-21 | 1.00000 | 1.81187e-21 | 0.999999 |
| rad40syn      | 7.04339e-22 | 1.00000 | 7.10596e-22 | 0.999999 |
| rad40anti     | 2.56212e-22 | 1.00000 | 2.58488e-22 | 0.999999 |
| rad72         | 8.93483e-23 | 1.00000 | 9.01419e-23 | 0.999999 |
| rad8          | 7.17378e-34 | 1.00000 | 7.23750e-34 | 0.999999 |

100.000000 Pa, 500.000000 K

=====

| Rate constant | True (fraction)     | Effective (fraction) |             |          |
|---------------|---------------------|----------------------|-------------|----------|
| Total         | 1.22595e-18 (1.00 ) | 1.18810e-18 (1.00 )  |             |          |
| species       | PYtrue              | Cumul                | PYeffective | Cumul    |
| Indene+H      | 0.877447            | 0.877447             | 0.905405    | 0.905405 |
| rad23         | 0.0634002           | 0.940847             | 0.0654203   | 0.970825 |
| Benzyl+C2H2   | 0.0308789           | 0.971726             | 0.00000     | 0.970825 |
| rad22         | 0.0154664           | 0.987193             | 0.0159592   | 0.986784 |



|               |             |          |             |          |
|---------------|-------------|----------|-------------|----------|
| rad45         | 0.00665628  | 0.993849 | 0.00686837  | 0.993653 |
| rad6          | 0.00566298  | 0.999512 | 0.00584342  | 0.999496 |
| rad36         | 0.000309574 | 0.999821 | 0.000319438 | 0.999816 |
| rad11         | 0.000137618 | 0.999959 | 0.000142003 | 0.999958 |
| rad18         | 1.81826e-05 | 0.999977 | 1.87620e-05 | 0.999976 |
| rad20         | 6.55638e-06 | 0.999984 | 6.76529e-06 | 0.999983 |
| rad21         | 4.43350e-06 | 0.999988 | 4.57476e-06 | 0.999988 |
| rad30         | 2.18409e-06 | 0.999990 | 2.25368e-06 | 0.999990 |
| PAH9+H        | 2.06603e-06 | 0.999992 | 2.13186e-06 | 0.999992 |
| rad7          | 1.69188e-06 | 0.999994 | 1.74578e-06 | 0.999994 |
| PhCCH+CH3     | 1.37044e-06 | 0.999995 | 1.41410e-06 | 0.999995 |
| PhCHCCH2+H    | 1.25919e-06 | 0.999997 | 1.29931e-06 | 0.999997 |
| rad38         | 7.39153e-07 | 0.999997 | 7.62704e-07 | 0.999997 |
| rad35         | 5.37900e-07 | 0.999998 | 5.55039e-07 | 0.999998 |
| Ph+Allene     | 3.74925e-07 | 0.999998 | 3.86871e-07 | 0.999998 |
| rad2          | 3.63767e-07 | 0.999999 | 3.75358e-07 | 0.999999 |
| rad28         | 2.80547e-07 | 0.999999 | 2.89487e-07 | 0.999999 |
| rad9          | 2.62019e-07 | 0.999999 | 2.70368e-07 | 0.999999 |
| PhCCCH3+H     | 2.60428e-07 | 1.000000 | 2.68726e-07 | 1.000000 |
| Ph+MeAc       | 2.03249e-07 | 1.000000 | 2.09725e-07 | 1.000000 |
| PhCH2CCH+H    | 9.83127e-08 | 1.000000 | 1.01445e-07 | 1.000000 |
| rad46         | 7.88691e-08 | 1.000000 | 8.13821e-08 | 1.000000 |
| rad1          | 4.34394e-08 | 1.000000 | 4.48235e-08 | 1.000000 |
| PAH7+H        | 2.98594e-08 | 1.000000 | 3.08108e-08 | 1.000000 |
| rad10         | 2.80992e-08 | 1.000000 | 2.89945e-08 | 1.000000 |
| rad3          | 2.73024e-08 | 1.000000 | 2.81723e-08 | 1.000000 |
| rad26         | 1.87382e-08 | 1.000000 | 1.93353e-08 | 1.000000 |
| rad4          | 1.53700e-08 | 1.000000 | 1.58597e-08 | 1.000000 |
| rad13         | 7.10278e-09 | 1.000000 | 7.32910e-09 | 1.000000 |
| rad39         | 6.51945e-09 | 1.000000 | 6.72718e-09 | 1.000000 |
| rad50         | 6.18010e-09 | 1.000000 | 6.37701e-09 | 1.000000 |
| rad19anti     | 6.09917e-09 | 1.000000 | 6.29350e-09 | 1.000000 |
| rad60syn      | 2.21942e-09 | 1.000000 | 2.29013e-09 | 1.000000 |
| rad25         | 1.24059e-09 | 1.000000 | 1.28012e-09 | 1.000000 |
| rad60anti     | 1.00506e-09 | 1.000000 | 1.03708e-09 | 1.000000 |
| PAH3+H        | 6.89710e-10 | 1.000000 | 7.11686e-10 | 1.000000 |
| rad51         | 4.45681e-10 | 1.000000 | 4.59881e-10 | 1.000000 |
| rad15         | 2.56830e-10 | 1.000000 | 2.65013e-10 | 1.000000 |
| rad52         | 2.55668e-10 | 1.000000 | 2.63814e-10 | 1.000000 |
| rad24         | 2.13191e-10 | 1.000000 | 2.19984e-10 | 1.000000 |
| rad37         | 1.48262e-10 | 1.000000 | 1.52986e-10 | 1.000000 |
| rad59         | 1.20507e-10 | 1.000000 | 1.24346e-10 | 1.000000 |
| rad19syn      | 3.83621e-11 | 1.000000 | 3.95844e-11 | 1.000000 |
| rad33         | 1.52421e-11 | 1.000000 | 1.57277e-11 | 1.000000 |
| PAH10+CH3     | 1.35302e-11 | 1.000000 | 1.39613e-11 | 1.000000 |
| rad65         | 1.31757e-11 | 1.000000 | 1.35955e-11 | 1.000000 |
| rad54         | 1.06729e-11 | 1.000000 | 1.10129e-11 | 1.000000 |
| PhcycC3H3_A+H | 6.35303e-12 | 1.000000 | 6.55545e-12 | 1.000000 |
| PAH1+H        | 5.52334e-12 | 1.000000 | 5.69933e-12 | 1.000000 |
| rad14         | 3.30024e-12 | 1.000000 | 3.40539e-12 | 1.000000 |
| rad67         | 3.13010e-12 | 1.000000 | 3.22984e-12 | 1.000000 |
| rad70         | 1.63044e-12 | 1.000000 | 1.68239e-12 | 1.000000 |
| rad73         | 8.33208e-13 | 1.000000 | 8.59756e-13 | 1.000000 |
| rad71         | 6.57034e-13 | 1.000000 | 6.77969e-13 | 1.000000 |
| rad27         | 5.42558e-13 | 1.000000 | 5.59845e-13 | 1.000000 |
| rad55         | 4.75814e-13 | 1.000000 | 4.90974e-13 | 1.000000 |
| rad58         | 4.67268e-13 | 1.000000 | 4.82156e-13 | 1.000000 |
| rad62         | 2.44526e-13 | 1.000000 | 2.52317e-13 | 1.000000 |
| rad34         | 2.44070e-13 | 1.000000 | 2.51846e-13 | 1.000000 |
| rad43         | 1.48181e-13 | 1.000000 | 1.52902e-13 | 1.000000 |
| rad64         | 5.71288e-14 | 1.000000 | 5.89491e-14 | 1.000000 |
| rad31         | 3.21395e-14 | 1.000000 | 3.31635e-14 | 1.000000 |
| rad53         | 2.75762e-14 | 1.000000 | 2.84548e-14 | 1.000000 |
| rad5          | 2.68661e-14 | 1.000000 | 2.77221e-14 | 1.000000 |
| rad56         | 1.41655e-14 | 1.000000 | 1.46169e-14 | 1.000000 |
| rad12         | 1.16652e-14 | 1.000000 | 1.20369e-14 | 1.000000 |
| rad72         | 7.39869e-15 | 1.000000 | 7.63443e-15 | 1.000000 |
| PAH8+H        | 5.82722e-15 | 1.000000 | 6.01289e-15 | 1.000000 |
| rad61         | 5.52424e-15 | 1.000000 | 5.70026e-15 | 1.000000 |
| rad68syn      | 4.33803e-15 | 1.000000 | 4.47625e-15 | 1.000000 |
| rad42         | 4.30622e-15 | 1.000000 | 4.44343e-15 | 1.000000 |
| rad68anti     | 2.87036e-15 | 1.000000 | 2.96181e-15 | 1.000000 |
| rad40syn      | 9.60053e-16 | 1.000000 | 9.90643e-16 | 1.000000 |
| rad41         | 7.78037e-16 | 1.000000 | 8.02828e-16 | 1.000000 |
| rad40anti     | 4.96981e-16 | 1.000000 | 5.12816e-16 | 1.000000 |
| rad47         | 2.67599e-17 | 1.000000 | 2.76125e-17 | 1.000000 |
| rad8          | 9.08106e-30 | 1.000000 | 9.37041e-30 | 1.000000 |

100.000000 Pa, 600.000000 K

=====

| Rate constant | True (fraction) |          | Effective (fraction) |          |
|---------------|-----------------|----------|----------------------|----------|
| -----         | -----           |          | -----                |          |
| Total         | 1.36947e-17     | (1.00 )  | 1.26256e-17          | (1.00 )  |
| species       | PYtrue          | Cumul    | PYeffective          | Cumul    |
| -----         | -----           | -----    | -----                | -----    |
| Indene+H      | 0.877637        | 0.877637 | 0.951949             | 0.951949 |
| Benzyl+C2H2   | 0.0780630       | 0.955700 | 0.00000              | 0.951949 |
| rad23         | 0.0276501       | 0.983350 | 0.0299914            | 0.981940 |
| rad6          | 0.00935336      | 0.992703 | 0.0101453            | 0.992086 |
| rad45         | 0.00383086      | 0.996534 | 0.00415523           | 0.996241 |
| rad22         | 0.00304575      | 0.999580 | 0.00330365           | 0.999545 |
| rad36         | 0.000223267     | 0.999803 | 0.000242172          | 0.999787 |
| rad11         | 4.10925e-05     | 0.999844 | 4.45719e-05          | 0.999831 |
| PAH9+H        | 3.65276e-05     | 0.999881 | 3.96205e-05          | 0.999871 |
| PhCCH+CH3     | 2.17293e-05     | 0.999903 | 2.35692e-05          | 0.999895 |
| PhCHCCH2+H    | 1.66273e-05     | 0.999919 | 1.80351e-05          | 0.999913 |
| rad38         | 1.54637e-05     | 0.999935 | 1.67731e-05          | 0.999929 |
| Ph+Allene     | 1.19523e-05     | 0.999947 | 1.29643e-05          | 0.999942 |
| rad30         | 7.62825e-06     | 0.999954 | 8.27416e-06          | 0.999951 |
| rad35         | 6.90765e-06     | 0.999961 | 7.49254e-06          | 0.999958 |
| PhCH2CCH+H    | 4.82760e-06     | 0.999966 | 5.23637e-06          | 0.999963 |
| rad18         | 4.22835e-06     | 0.999970 | 4.58638e-06          | 0.999968 |
| rad46         | 3.54227e-06     | 0.999974 | 3.84220e-06          | 0.999972 |
| rad20         | 3.52200e-06     | 0.999977 | 3.82021e-06          | 0.999976 |
| Ph+MeAc       | 3.49687e-06     | 0.999981 | 3.79296e-06          | 0.999979 |
| PhCCCH3+H     | 3.37843e-06     | 0.999984 | 3.66449e-06          | 0.999983 |
| rad7          | 2.87330e-06     | 0.999987 | 3.11659e-06          | 0.999986 |
| PAH7+H        | 2.60036e-06     | 0.999990 | 2.82054e-06          | 0.999989 |
| rad21         | 2.54908e-06     | 0.999992 | 2.76492e-06          | 0.999992 |
| rad28         | 2.14282e-06     | 0.999994 | 2.32426e-06          | 0.999994 |
| rad50         | 1.64164e-06     | 0.999996 | 1.78064e-06          | 0.999996 |
| rad2          | 1.36982e-06     | 0.999997 | 1.48580e-06          | 0.999997 |
| rad39         | 7.99526e-07     | 0.999998 | 8.67224e-07          | 0.999998 |
| rad9          | 5.34518e-07     | 0.999999 | 5.79777e-07          | 0.999999 |
| rad51         | 3.59610e-07     | 0.999999 | 3.90059e-07          | 0.999999 |
| rad1          | 2.02424e-07     | 0.999999 | 2.19563e-07          | 0.999999 |
| rad19anti     | 1.60131e-07     | 0.999999 | 1.73690e-07          | 1.000000 |
| rad52         | 1.22175e-07     | 1.000000 | 1.32520e-07          | 1.000000 |
| rad26         | 9.25710e-08     | 1.000000 | 1.00409e-07          | 1.000000 |
| rad3          | 9.00111e-08     | 1.000000 | 9.76326e-08          | 1.000000 |
| rad10         | 6.80985e-08     | 1.000000 | 7.38646e-08          | 1.000000 |
| PAH3+H        | 6.28825e-08     | 1.000000 | 6.82070e-08          | 1.000000 |
| rad4          | 5.47612e-08     | 1.000000 | 5.93980e-08          | 1.000000 |
| rad60syn      | 2.48443e-08     | 1.000000 | 2.69479e-08          | 1.000000 |
| PAH10+CH3     | 2.22479e-08     | 1.000000 | 2.41316e-08          | 1.000000 |
| rad37         | 1.63869e-08     | 1.000000 | 1.77744e-08          | 1.000000 |
| rad13         | 1.49740e-08     | 1.000000 | 1.62419e-08          | 1.000000 |
| rad60anti     | 1.27252e-08     | 1.000000 | 1.38027e-08          | 1.000000 |
| PAH1+H        | 1.04226e-08     | 1.000000 | 1.13052e-08          | 1.000000 |
| rad65         | 9.83078e-09     | 1.000000 | 1.06632e-08          | 1.000000 |
| rad71         | 7.26890e-09     | 1.000000 | 7.88438e-09          | 1.000000 |
| rad59         | 7.20714e-09     | 1.000000 | 7.81739e-09          | 1.000000 |
| rad19syn      | 5.72703e-09     | 1.000000 | 6.21195e-09          | 1.000000 |
| rad73         | 5.71663e-09     | 1.000000 | 6.20068e-09          | 1.000000 |
| rad67         | 3.16540e-09     | 1.000000 | 3.43342e-09          | 1.000000 |
| PhcycC3H3_A+H | 2.45951e-09     | 1.000000 | 2.66776e-09          | 1.000000 |
| rad54         | 2.10051e-09     | 1.000000 | 2.27836e-09          | 1.000000 |
| rad70         | 1.41617e-09     | 1.000000 | 1.53608e-09          | 1.000000 |
| rad24         | 7.36714e-10     | 1.000000 | 7.99094e-10          | 1.000000 |
| rad25         | 6.55569e-10     | 1.000000 | 7.11078e-10          | 1.000000 |
| rad15         | 4.95299e-10     | 1.000000 | 5.37237e-10          | 1.000000 |
| rad58         | 4.33244e-10     | 1.000000 | 4.69928e-10          | 1.000000 |
| rad34         | 3.52919e-10     | 1.000000 | 3.82802e-10          | 1.000000 |
| rad72         | 2.06783e-10     | 1.000000 | 2.24292e-10          | 1.000000 |
| rad64         | 1.81752e-10     | 1.000000 | 1.97141e-10          | 1.000000 |
| rad55         | 1.34781e-10     | 1.000000 | 1.46194e-10          | 1.000000 |
| rad62         | 8.18488e-11     | 1.000000 | 8.87792e-11          | 1.000000 |
| PAH8+H        | 8.04191e-11     | 1.000000 | 8.72284e-11          | 1.000000 |
| rad33         | 4.56117e-11     | 1.000000 | 4.94738e-11          | 1.000000 |
| rad61         | 3.70422e-11     | 1.000000 | 4.01787e-11          | 1.000000 |
| rad53         | 2.64654e-11     | 1.000000 | 2.87063e-11          | 1.000000 |
| rad68syn      | 2.58094e-11     | 1.000000 | 2.79948e-11          | 1.000000 |
| rad56         | 2.46784e-11     | 1.000000 | 2.67680e-11          | 1.000000 |
| rad43         | 2.35392e-11     | 1.000000 | 2.55323e-11          | 1.000000 |
| rad68anti     | 1.68008e-11     | 1.000000 | 1.82234e-11          | 1.000000 |
| rad40syn      | 9.63335e-12     | 1.000000 | 1.04490e-11          | 1.000000 |
| rad14         | 8.92184e-12     | 1.000000 | 9.67727e-12          | 1.000000 |
| rad42         | 6.32491e-12     | 1.000000 | 6.86046e-12          | 1.000000 |
| rad40anti     | 5.71718e-12     | 1.000000 | 6.20127e-12          | 1.000000 |

|       |             |         |             |         |
|-------|-------------|---------|-------------|---------|
| rad27 | 1.67066e-12 | 1.00000 | 1.81212e-12 | 1.00000 |
| rad41 | 1.27506e-12 | 1.00000 | 1.38302e-12 | 1.00000 |
| rad31 | 6.28697e-13 | 1.00000 | 6.81931e-13 | 1.00000 |
| rad12 | 1.31225e-13 | 1.00000 | 1.42336e-13 | 1.00000 |
| rad5  | 9.95409e-14 | 1.00000 | 1.07969e-13 | 1.00000 |
| rad47 | 3.01650e-14 | 1.00000 | 3.27192e-14 | 1.00000 |
| rad8  | 2.44791e-25 | 1.00000 | 2.65519e-25 | 1.00000 |

100.000000 Pa, 700.000000 K

| Rate constant | True (fraction)     | Effective (fraction) |
|---------------|---------------------|----------------------|
| Total         | 8.02260e-17 (1.00 ) | 6.78865e-17 (1.00 )  |

| species       | PYtrue      | Cumul    | PYeffective | Cumul    |
|---------------|-------------|----------|-------------|----------|
| Indene+H      | 0.821814    | 0.821814 | 0.971192    | 0.971192 |
| Benzyl+C2H2   | 0.153809    | 0.975623 | 0.00000     | 0.971192 |
| rad6          | 0.0121376   | 0.987761 | 0.0143438   | 0.985536 |
| rad23         | 0.00909000  | 0.996851 | 0.0107423   | 0.996278 |
| rad45         | 0.00145274  | 0.998303 | 0.00171680  | 0.997995 |
| rad22         | 0.000575629 | 0.998879 | 0.000680259 | 0.998675 |
| PAH9+H        | 0.000247705 | 0.999127 | 0.000292730 | 0.998968 |
| PhCCH+CH3     | 0.000139445 | 0.999266 | 0.000164792 | 0.999133 |
| rad38         | 0.000113818 | 0.999380 | 0.000134506 | 0.999267 |
| PhCHCCH2+H    | 0.000108059 | 0.999488 | 0.000127701 | 0.999395 |
| Ph+Allene     | 0.000104215 | 0.999592 | 0.000123158 | 0.999518 |
| rad36         | 9.66518e-05 | 0.999689 | 0.000114220 | 0.999632 |
| PhCH2CCH+H    | 4.93131e-05 | 0.999738 | 5.82765e-05 | 0.999691 |
| rad35         | 3.94058e-05 | 0.999778 | 4.65685e-05 | 0.999737 |
| PAH7+H        | 3.49561e-05 | 0.999813 | 4.13100e-05 | 0.999778 |
| rad46         | 3.46320e-05 | 0.999847 | 4.09269e-05 | 0.999819 |
| rad50         | 2.76549e-05 | 0.999875 | 3.26817e-05 | 0.999852 |
| Ph+MeAc       | 2.30579e-05 | 0.999898 | 2.72491e-05 | 0.999879 |
| rad30         | 1.95081e-05 | 0.999917 | 2.30540e-05 | 0.999902 |
| PhCCCH3+H     | 1.80697e-05 | 0.999935 | 2.13542e-05 | 0.999924 |
| rad39         | 1.33476e-05 | 0.999949 | 1.57737e-05 | 0.999939 |
| rad11         | 1.27840e-05 | 0.999962 | 1.51077e-05 | 0.999955 |
| rad51         | 7.79943e-06 | 0.999969 | 9.21711e-06 | 0.999964 |
| rad28         | 6.57831e-06 | 0.999976 | 7.77402e-06 | 0.999972 |
| rad7          | 3.95118e-06 | 0.999980 | 4.66937e-06 | 0.999976 |
| rad20         | 3.50806e-06 | 0.999983 | 4.14571e-06 | 0.999980 |
| rad21         | 2.76570e-06 | 0.999986 | 3.26842e-06 | 0.999984 |
| rad2          | 2.72276e-06 | 0.999989 | 3.21766e-06 | 0.999987 |
| rad52         | 2.35123e-06 | 0.999991 | 2.77861e-06 | 0.999990 |
| rad19anti     | 1.66156e-06 | 0.999993 | 1.96358e-06 | 0.999992 |
| rad18         | 1.60178e-06 | 0.999995 | 1.89293e-06 | 0.999993 |
| PAH3+H        | 9.80509e-07 | 0.999996 | 1.15873e-06 | 0.999995 |
| rad9          | 9.13971e-07 | 0.999996 | 1.08010e-06 | 0.999996 |
| PAH10+CH3     | 5.43373e-07 | 0.999997 | 6.42140e-07 | 0.999996 |
| rad1          | 4.65305e-07 | 0.999997 | 5.49882e-07 | 0.999997 |
| PAH1+H        | 2.70362e-07 | 0.999998 | 3.19505e-07 | 0.999997 |
| rad37         | 2.64016e-07 | 0.999998 | 3.12006e-07 | 0.999998 |
| rad71         | 2.48364e-07 | 0.999998 | 2.93509e-07 | 0.999998 |
| rad65         | 2.06866e-07 | 0.999998 | 2.44468e-07 | 0.999998 |
| rad26         | 2.01721e-07 | 0.999999 | 2.38387e-07 | 0.999998 |
| rad73         | 1.81368e-07 | 0.999999 | 2.14335e-07 | 0.999999 |
| rad60syn      | 1.64143e-07 | 0.999999 | 1.93979e-07 | 0.999999 |
| rad3          | 1.52073e-07 | 0.999999 | 1.79714e-07 | 0.999999 |
| rad59         | 9.94194e-08 | 0.999999 | 1.17491e-07 | 0.999999 |
| rad4          | 9.93691e-08 | 0.999999 | 1.17431e-07 | 0.999999 |
| rad10         | 9.25807e-08 | 0.999999 | 1.09409e-07 | 0.999999 |
| rad60anti     | 9.15508e-08 | 1.000000 | 1.08192e-07 | 0.999999 |
| rad19syn      | 7.04452e-08 | 1.000000 | 8.32498e-08 | 0.999999 |
| rad67         | 7.02196e-08 | 1.000000 | 8.29831e-08 | 1.000000 |
| PhcycC3H3_A+H | 3.96834e-08 | 1.000000 | 4.68965e-08 | 1.000000 |
| rad70         | 3.40807e-08 | 1.000000 | 4.02754e-08 | 1.000000 |
| rad13         | 3.08424e-08 | 1.000000 | 3.64486e-08 | 1.000000 |
| rad54         | 2.71210e-08 | 1.000000 | 3.20507e-08 | 1.000000 |
| rad58         | 9.60938e-09 | 1.000000 | 1.13560e-08 | 1.000000 |
| rad34         | 9.27966e-09 | 1.000000 | 1.09664e-08 | 1.000000 |
| rad72         | 8.03550e-09 | 1.000000 | 9.49609e-09 | 1.000000 |
| rad24         | 5.37466e-09 | 1.000000 | 6.35159e-09 | 1.000000 |
| rad64         | 5.09377e-09 | 1.000000 | 6.01964e-09 | 1.000000 |
| PAH8+H        | 2.90200e-09 | 1.000000 | 3.42949e-09 | 1.000000 |
| rad62         | 2.02356e-09 | 1.000000 | 2.39137e-09 | 1.000000 |
| rad55         | 1.93624e-09 | 1.000000 | 2.28818e-09 | 1.000000 |
| rad61         | 1.14962e-09 | 1.000000 | 1.35858e-09 | 1.000000 |
| rad68syn      | 8.33784e-10 | 1.000000 | 9.85338e-10 | 1.000000 |
| rad43         | 5.85300e-10 | 1.000000 | 6.91688e-10 | 1.000000 |

|           |             |          |             |          |
|-----------|-------------|----------|-------------|----------|
| rad15     | 5.79678e-10 | 1.000000 | 6.85044e-10 | 1.000000 |
| rad56     | 5.77771e-10 | 1.000000 | 6.82791e-10 | 1.000000 |
| rad68anti | 5.41552e-10 | 1.000000 | 6.39988e-10 | 1.000000 |
| rad53     | 5.39844e-10 | 1.000000 | 6.37970e-10 | 1.000000 |
| rad25     | 3.73805e-10 | 1.000000 | 4.41750e-10 | 1.000000 |
| rad40syn  | 3.33864e-10 | 1.000000 | 3.94550e-10 | 1.000000 |
| rad40anti | 2.01778e-10 | 1.000000 | 2.38455e-10 | 1.000000 |
| rad42     | 1.90998e-10 | 1.000000 | 2.25715e-10 | 1.000000 |
| rad33     | 1.72835e-10 | 1.000000 | 2.04251e-10 | 1.000000 |
| rad41     | 4.28776e-11 | 1.000000 | 5.06713e-11 | 1.000000 |
| rad14     | 1.75535e-11 | 1.000000 | 2.07441e-11 | 1.000000 |
| rad27     | 3.66739e-12 | 1.000000 | 4.33400e-12 | 1.000000 |
| rad47     | 3.35488e-12 | 1.000000 | 3.96468e-12 | 1.000000 |
| rad31     | 2.83698e-12 | 1.000000 | 3.35265e-12 | 1.000000 |
| rad12     | 2.49140e-12 | 1.000000 | 2.94426e-12 | 1.000000 |
| rad5      | 1.85471e-13 | 1.000000 | 2.19184e-13 | 1.000000 |
| rad8      | 7.31865e-21 | 1.000000 | 8.64894e-21 | 1.000000 |

100.000000 Pa, 800.000000 K

| Rate constant | True (fraction)     | Effective (fraction) |
|---------------|---------------------|----------------------|
| Total         | 3.12228e-16 (1.00 ) | 2.33829e-16 (1.00 )  |

| species       | PYtrue      | Cumul    | PYeffective | Cumul    |
|---------------|-------------|----------|-------------|----------|
| Indene+H      | 0.730423    | 0.730423 | 0.975320    | 0.975320 |
| Benzyl+C2H2   | 0.251094    | 0.981517 | 0.000000    | 0.975320 |
| rad6          | 0.0122749   | 0.993792 | 0.0163905   | 0.991710 |
| rad23         | 0.00280927  | 0.996601 | 0.00375117  | 0.995462 |
| rad45         | 0.000552165 | 0.997153 | 0.000737296 | 0.996199 |
| PAH9+H        | 0.000498492 | 0.997652 | 0.000665627 | 0.996865 |
| PhCCH+CH3     | 0.000462803 | 0.998115 | 0.000617973 | 0.997483 |
| Ph+Allene     | 0.000367827 | 0.998482 | 0.000491152 | 0.997974 |
| PhCHCCH2+H    | 0.000348878 | 0.998831 | 0.000465850 | 0.998440 |
| rad38         | 0.000234850 | 0.999066 | 0.000313591 | 0.998753 |
| PhCH2CCH+H    | 0.000157906 | 0.999224 | 0.000210849 | 0.998964 |
| rad22         | 0.000130408 | 0.999354 | 0.000174131 | 0.999138 |
| PAH7+H        | 9.74446e-05 | 0.999452 | 0.000130116 | 0.999268 |
| rad46         | 7.75014e-05 | 0.999529 | 0.000103486 | 0.999372 |
| rad35         | 7.52349e-05 | 0.999605 | 0.000100460 | 0.999472 |
| Ph+MeAc       | 7.42412e-05 | 0.999679 | 9.91329e-05 | 0.999571 |
| rad50         | 7.24390e-05 | 0.999751 | 9.67264e-05 | 0.999668 |
| PhCCCH3+H     | 4.98317e-05 | 0.999801 | 6.65393e-05 | 0.999735 |
| rad36         | 4.07959e-05 | 0.999842 | 5.44740e-05 | 0.999789 |
| rad30         | 3.85592e-05 | 0.999881 | 5.14874e-05 | 0.999841 |
| rad39         | 3.79675e-05 | 0.999919 | 5.06973e-05 | 0.999891 |
| rad51         | 2.18732e-05 | 0.999940 | 2.92069e-05 | 0.999920 |
| rad28         | 1.05314e-05 | 0.999951 | 1.40624e-05 | 0.999935 |
| rad52         | 6.37697e-06 | 0.999957 | 8.51505e-06 | 0.999943 |
| rad11         | 6.08942e-06 | 0.999963 | 8.13109e-06 | 0.999951 |
| rad20         | 5.67865e-06 | 0.999969 | 7.58260e-06 | 0.999959 |
| rad19anti     | 4.87568e-06 | 0.999974 | 6.51041e-06 | 0.999965 |
| rad21         | 4.66760e-06 | 0.999979 | 6.23256e-06 | 0.999971 |
| rad7          | 4.63511e-06 | 0.999983 | 6.18918e-06 | 0.999978 |
| rad2          | 2.84734e-06 | 0.999986 | 3.80201e-06 | 0.999981 |
| PAH3+H        | 2.78891e-06 | 0.999989 | 3.72398e-06 | 0.999985 |
| rad9          | 1.90389e-06 | 0.999991 | 2.54223e-06 | 0.999988 |
| PAH10+CH3     | 1.57989e-06 | 0.999992 | 2.10960e-06 | 0.999990 |
| rad18         | 1.10346e-06 | 0.999993 | 1.47344e-06 | 0.999991 |
| PAH1+H        | 7.98745e-07 | 0.999994 | 1.06655e-06 | 0.999992 |
| rad71         | 7.89319e-07 | 0.999995 | 1.05396e-06 | 0.999993 |
| rad37         | 7.11322e-07 | 0.999996 | 9.49815e-07 | 0.999994 |
| rad65         | 5.74632e-07 | 0.999996 | 7.67296e-07 | 0.999995 |
| rad73         | 5.64838e-07 | 0.999997 | 7.54218e-07 | 0.999996 |
| rad1          | 5.08425e-07 | 0.999997 | 6.78891e-07 | 0.999997 |
| rad60syn      | 4.79857e-07 | 0.999998 | 6.40744e-07 | 0.999997 |
| rad59         | 2.87332e-07 | 0.999998 | 3.83669e-07 | 0.999998 |
| rad60anti     | 2.70207e-07 | 0.999998 | 3.60803e-07 | 0.999998 |
| rad26         | 2.60462e-07 | 0.999999 | 3.47791e-07 | 0.999998 |
| rad67         | 1.99617e-07 | 0.999999 | 2.66545e-07 | 0.999999 |
| rad19syn      | 1.90433e-07 | 0.999999 | 2.54282e-07 | 0.999999 |
| rad3          | 1.52970e-07 | 0.999999 | 2.04258e-07 | 0.999999 |
| rad4          | 1.04038e-07 | 0.999999 | 1.38920e-07 | 0.999999 |
| PhcycC3H3_A+H | 1.03372e-07 | 0.999999 | 1.38031e-07 | 0.999999 |
| rad70         | 9.97032e-08 | 1.000000 | 1.33132e-07 | 0.999999 |
| rad10         | 8.56770e-08 | 1.000000 | 1.14403e-07 | 1.000000 |
| rad54         | 7.01164e-08 | 1.000000 | 9.36252e-08 | 1.000000 |
| rad13         | 6.90861e-08 | 1.000000 | 9.22494e-08 | 1.000000 |
| rad34         | 2.76709e-08 | 1.000000 | 3.69484e-08 | 1.000000 |

|           |             |          |             |          |
|-----------|-------------|----------|-------------|----------|
| rad58     | 2.72769e-08 | 1.000000 | 3.64223e-08 | 1.000000 |
| rad24     | 2.64911e-08 | 1.000000 | 3.53731e-08 | 1.000000 |
| rad72     | 2.64487e-08 | 1.000000 | 3.53165e-08 | 1.000000 |
| rad64     | 1.53448e-08 | 1.000000 | 2.04896e-08 | 1.000000 |
| PAH8+H    | 9.40113e-09 | 1.000000 | 1.25532e-08 | 1.000000 |
| rad62     | 6.38640e-09 | 1.000000 | 8.52764e-09 | 1.000000 |
| rad55     | 4.94384e-09 | 1.000000 | 6.60143e-09 | 1.000000 |
| rad61     | 3.56629e-09 | 1.000000 | 4.76200e-09 | 1.000000 |
| rad68syn  | 2.61666e-09 | 1.000000 | 3.49398e-09 | 1.000000 |
| rad43     | 2.49471e-09 | 1.000000 | 3.33114e-09 | 1.000000 |
| rad68anti | 1.69857e-09 | 1.000000 | 2.26806e-09 | 1.000000 |
| rad56     | 1.64977e-09 | 1.000000 | 2.20291e-09 | 1.000000 |
| rad53     | 1.48248e-09 | 1.000000 | 1.97952e-09 | 1.000000 |
| rad40syn  | 1.07225e-09 | 1.000000 | 1.43175e-09 | 1.000000 |
| rad33     | 9.66385e-10 | 1.000000 | 1.29040e-09 | 1.000000 |
| rad15     | 7.03169e-10 | 1.000000 | 9.38929e-10 | 1.000000 |
| rad40anti | 6.53028e-10 | 1.000000 | 8.71977e-10 | 1.000000 |
| rad42     | 6.10729e-10 | 1.000000 | 8.15496e-10 | 1.000000 |
| rad25     | 3.65120e-10 | 1.000000 | 4.87539e-10 | 1.000000 |
| rad41     | 1.84096e-10 | 1.000000 | 2.45820e-10 | 1.000000 |
| rad12     | 4.60402e-11 | 1.000000 | 6.14766e-11 | 1.000000 |
| rad14     | 3.38464e-11 | 1.000000 | 4.51945e-11 | 1.000000 |
| rad47     | 2.02932e-11 | 1.000000 | 2.70972e-11 | 1.000000 |
| rad27     | 8.03404e-12 | 1.000000 | 1.07277e-11 | 1.000000 |
| rad31     | 5.60352e-12 | 1.000000 | 7.48228e-12 | 1.000000 |
| rad5      | 2.47281e-13 | 1.000000 | 3.30189e-13 | 1.000000 |
| rad8      | 6.31321e-17 | 1.000000 | 8.42992e-17 | 1.000000 |

100.000000 Pa, 900.000000 K

| Rate constant | True (fraction)     | Effective (fraction) |
|---------------|---------------------|----------------------|
| Total         | 9.21769e-16 (1.00 ) | 5.92688e-16 (1.00 )  |

| species     | PYtrue      | Cumul    | PYeffective | Cumul    |
|-------------|-------------|----------|-------------|----------|
| Indene+H    | 0.627663    | 0.627663 | 0.976163    | 0.976163 |
| Benzyl+C2H2 | 0.357010    | 0.984673 | 0.000000    | 0.976163 |
| rad6        | 0.00955612  | 0.994229 | 0.0148620   | 0.991025 |
| PhCCH+CH3   | 0.000986615 | 0.995216 | 0.00153442  | 0.992559 |
| rad23       | 0.000964223 | 0.996180 | 0.00149959  | 0.994059 |
| Ph+Allene   | 0.000907569 | 0.997088 | 0.00141148  | 0.995470 |
| PhCHCCH2+H  | 0.000760102 | 0.997848 | 0.00118214  | 0.996653 |
| PAH9+H      | 0.000474702 | 0.998322 | 0.000738274 | 0.997391 |
| PhCH2CCH+H  | 0.000351190 | 0.998674 | 0.000546183 | 0.997937 |
| rad45       | 0.000247459 | 0.998921 | 0.000384857 | 0.998322 |
| rad38       | 0.00023692  | 0.999145 | 0.000347893 | 0.998670 |
| Ph+MeAc     | 0.000148696 | 0.999293 | 0.000231258 | 0.998901 |
| PAH7+H      | 0.000135540 | 0.999429 | 0.000210797 | 0.999112 |
| PhCCCH3+H   | 8.84916e-05 | 0.999517 | 0.000137625 | 0.999250 |
| rad46       | 7.46988e-05 | 0.999592 | 0.000116174 | 0.999366 |
| rad50       | 7.33933e-05 | 0.999665 | 0.000114144 | 0.999480 |
| rad35       | 7.17951e-05 | 0.999737 | 0.000111658 | 0.999591 |
| rad30       | 6.31922e-05 | 0.999800 | 9.82787e-05 | 0.999690 |
| rad39       | 4.77413e-05 | 0.999848 | 7.42489e-05 | 0.999764 |
| rad22       | 3.71296e-05 | 0.999885 | 5.77452e-05 | 0.999822 |
| rad51       | 2.27892e-05 | 0.999908 | 3.54425e-05 | 0.999857 |
| rad36       | 2.02672e-05 | 0.999928 | 3.15203e-05 | 0.999889 |
| rad28       | 1.05870e-05 | 0.999939 | 1.64652e-05 | 0.999905 |
| rad20       | 9.19097e-06 | 0.999948 | 1.42941e-05 | 0.999919 |
| rad19anti   | 8.99971e-06 | 0.999957 | 1.39967e-05 | 0.999933 |
| rad21       | 7.18170e-06 | 0.999964 | 1.11692e-05 | 0.999945 |
| rad52       | 6.55002e-06 | 0.999971 | 1.01868e-05 | 0.999955 |
| rad7        | 4.85044e-06 | 0.999976 | 7.54357e-06 | 0.999962 |
| rad11       | 4.64288e-06 | 0.999980 | 7.22076e-06 | 0.999970 |
| PAH3+H      | 4.01789e-06 | 0.999984 | 6.24876e-06 | 0.999976 |
| rad9        | 2.98721e-06 | 0.999987 | 4.64582e-06 | 0.999980 |
| rad2        | 2.10218e-06 | 0.999990 | 3.26938e-06 | 0.999984 |
| PAH10+CH3   | 1.68990e-06 | 0.999991 | 2.62818e-06 | 0.999986 |
| rad18       | 1.00364e-06 | 0.999992 | 1.56089e-06 | 0.999988 |
| rad60syn    | 9.56121e-07 | 0.999993 | 1.48699e-06 | 0.999989 |
| rad71       | 8.71242e-07 | 0.999994 | 1.35499e-06 | 0.999991 |
| PAH1+H      | 8.54754e-07 | 0.999995 | 1.32934e-06 | 0.999992 |
| rad37       | 7.95797e-07 | 0.999996 | 1.23765e-06 | 0.999993 |
| rad73       | 6.17295e-07 | 0.999996 | 9.60039e-07 | 0.999994 |
| rad65       | 5.96038e-07 | 0.999997 | 9.26979e-07 | 0.999995 |
| rad60anti   | 5.34251e-07 | 0.999997 | 8.30886e-07 | 0.999996 |
| rad59       | 4.58899e-07 | 0.999998 | 7.13695e-07 | 0.999997 |
| rad1        | 4.05143e-07 | 0.999998 | 6.30092e-07 | 0.999997 |
| rad19syn    | 3.11466e-07 | 0.999999 | 4.84402e-07 | 0.999998 |

|               |             |          |             |          |
|---------------|-------------|----------|-------------|----------|
| rad26         | 2.41857e-07 | 0.999999 | 3.76144e-07 | 0.999998 |
| rad67         | 2.26042e-07 | 0.999999 | 3.51548e-07 | 0.999999 |
| rad13         | 1.77777e-07 | 0.999999 | 2.76485e-07 | 0.999999 |
| rad3          | 1.21860e-07 | 0.999999 | 1.89522e-07 | 0.999999 |
| PhcycC3H3_A+H | 1.16968e-07 | 0.999999 | 1.81913e-07 | 0.999999 |
| rad70         | 1.08852e-07 | 1.000000 | 1.69290e-07 | 0.999999 |
| rad54         | 1.00331e-07 | 1.000000 | 1.56039e-07 | 1.000000 |
| rad4          | 8.74356e-08 | 1.000000 | 1.35983e-07 | 1.000000 |
| rad10         | 7.49809e-08 | 1.000000 | 1.16613e-07 | 1.000000 |
| rad24         | 5.38813e-08 | 1.000000 | 8.37981e-08 | 1.000000 |
| rad34         | 2.99668e-08 | 1.000000 | 4.66055e-08 | 1.000000 |
| rad58         | 2.98093e-08 | 1.000000 | 4.63604e-08 | 1.000000 |
| rad72         | 2.97145e-08 | 1.000000 | 4.62129e-08 | 1.000000 |
| rad64         | 1.65160e-08 | 1.000000 | 2.56863e-08 | 1.000000 |
| PAH8+H        | 1.05430e-08 | 1.000000 | 1.63968e-08 | 1.000000 |
| rad62         | 7.98753e-09 | 1.000000 | 1.24225e-08 | 1.000000 |
| rad55         | 6.06006e-09 | 1.000000 | 9.42481e-09 | 1.000000 |
| rad33         | 5.42165e-09 | 1.000000 | 8.43194e-09 | 1.000000 |
| rad43         | 4.62687e-09 | 1.000000 | 7.19587e-09 | 1.000000 |
| rad61         | 3.91495e-09 | 1.000000 | 6.08866e-09 | 1.000000 |
| rad68syn      | 2.87293e-09 | 1.000000 | 4.46808e-09 | 1.000000 |
| rad68anti     | 1.86443e-09 | 1.000000 | 2.89963e-09 | 1.000000 |
| rad56         | 1.73866e-09 | 1.000000 | 2.70402e-09 | 1.000000 |
| rad53         | 1.55471e-09 | 1.000000 | 2.41794e-09 | 1.000000 |
| rad40syn      | 1.20304e-09 | 1.000000 | 1.87102e-09 | 1.000000 |
| rad15         | 8.60739e-10 | 1.000000 | 1.33865e-09 | 1.000000 |
| rad40anti     | 7.40231e-10 | 1.000000 | 1.15123e-09 | 1.000000 |
| rad42         | 7.07062e-10 | 1.000000 | 1.09965e-09 | 1.000000 |
| rad25         | 6.57841e-10 | 1.000000 | 1.02310e-09 | 1.000000 |
| rad41         | 3.37286e-10 | 1.000000 | 5.24559e-10 | 1.000000 |
| rad12         | 2.88793e-10 | 1.000000 | 4.49142e-10 | 1.000000 |
| rad14         | 8.24716e-11 | 1.000000 | 1.28263e-10 | 1.000000 |
| rad27         | 2.74939e-11 | 1.000000 | 4.27594e-11 | 1.000000 |
| rad47         | 2.56400e-11 | 1.000000 | 3.98762e-11 | 1.000000 |
| rad31         | 7.51770e-12 | 1.000000 | 1.16918e-11 | 1.000000 |
| rad5          | 2.72175e-13 | 1.000000 | 4.23296e-13 | 1.000000 |
| rad8          | 4.91865e-14 | 1.000000 | 7.64966e-14 | 1.000000 |

100.000000 Pa, 1000.000000 K

=====

| Rate constant | True (fraction)     | Effective (fraction) |
|---------------|---------------------|----------------------|
| Total         | 2.23691e-15 (1.00 ) | 1.20913e-15 (1.00 )  |

| species     | PYtrue      | Cumul    | PYeffective | Cumul    |
|-------------|-------------|----------|-------------|----------|
| Indene+H    | 0.527330    | 0.527330 | 0.975574    | 0.975574 |
| Benzyl+C2H2 | 0.459467    | 0.986797 | 0.000000    | 0.975574 |
| rad6        | 0.00589422  | 0.992691 | 0.0109045   | 0.986479 |
| Ph+Allene   | 0.00181835  | 0.994510 | 0.00336400  | 0.989843 |
| PhCCH+CH3   | 0.00150868  | 0.996018 | 0.00279110  | 0.992634 |
| PhCHCCH2+H  | 0.00130410  | 0.997322 | 0.00241262  | 0.995046 |
| PhCH2CCH+H  | 0.000728430 | 0.998051 | 0.00134762  | 0.996394 |
| rad23       | 0.000392015 | 0.998443 | 0.000725238 | 0.997119 |
| PAH9+H      | 0.000353476 | 0.998796 | 0.000653940 | 0.997773 |
| Ph+MeAc     | 0.000215252 | 0.999012 | 0.000398223 | 0.998171 |
| PAH7+H      | 0.000166191 | 0.999178 | 0.000307459 | 0.998479 |
| rad38       | 0.000163017 | 0.999341 | 0.000301586 | 0.998780 |
| rad45       | 0.000126045 | 0.999467 | 0.000233187 | 0.999013 |
| PhCCCH3+H   | 0.000112970 | 0.999580 | 0.000208997 | 0.999222 |
| rad30       | 9.20681e-05 | 0.999672 | 0.000170328 | 0.999393 |
| rad35       | 5.59727e-05 | 0.999728 | 0.000103551 | 0.999496 |
| rad46       | 5.22662e-05 | 0.999780 | 9.66938e-05 | 0.999593 |
| rad50       | 5.01909e-05 | 0.999830 | 9.28545e-05 | 0.999686 |
| rad39       | 4.94678e-05 | 0.999880 | 9.15168e-05 | 0.999777 |
| rad19anti   | 1.65570e-05 | 0.999896 | 3.06309e-05 | 0.999808 |
| rad51       | 1.56748e-05 | 0.999912 | 2.89988e-05 | 0.999837 |
| rad22       | 1.46512e-05 | 0.999927 | 2.71052e-05 | 0.999864 |
| rad20       | 1.10767e-05 | 0.999938 | 2.04921e-05 | 0.999885 |
| rad36       | 1.08719e-05 | 0.999949 | 2.01132e-05 | 0.999905 |
| rad21       | 7.74521e-06 | 0.999956 | 1.43288e-05 | 0.999919 |
| rad28       | 7.63349e-06 | 0.999964 | 1.41222e-05 | 0.999933 |
| PAH3+H      | 6.28461e-06 | 0.999970 | 1.16267e-05 | 0.999945 |
| rad11       | 5.07982e-06 | 0.999975 | 9.39780e-06 | 0.999954 |
| rad7        | 4.97021e-06 | 0.999980 | 9.19502e-06 | 0.999963 |
| rad52       | 4.48776e-06 | 0.999985 | 8.30249e-06 | 0.999972 |
| rad9        | 3.00022e-06 | 0.999988 | 5.55050e-06 | 0.999977 |
| rad60syn    | 1.76485e-06 | 0.999990 | 3.26501e-06 | 0.999981 |
| rad2        | 1.32415e-06 | 0.999991 | 2.44972e-06 | 0.999983 |
| PAH10+CH3   | 1.19906e-06 | 0.999992 | 2.21830e-06 | 0.999985 |

|               |             |          |             |          |
|---------------|-------------|----------|-------------|----------|
| rad18         | 1.01708e-06 | 0.999993 | 1.88162e-06 | 0.999987 |
| rad60anti     | 9.91635e-07 | 0.999994 | 1.83455e-06 | 0.999989 |
| rad59         | 7.92828e-07 | 0.999995 | 1.46675e-06 | 0.999990 |
| rad37         | 6.69770e-07 | 0.999996 | 1.23909e-06 | 0.999992 |
| rad71         | 6.11953e-07 | 0.999996 | 1.13213e-06 | 0.999993 |
| PAH1+H        | 6.03288e-07 | 0.999997 | 1.11610e-06 | 0.999994 |
| rad19syn      | 5.75695e-07 | 0.999997 | 1.06505e-06 | 0.999995 |
| rad13         | 4.70486e-07 | 0.999998 | 8.70412e-07 | 0.999996 |
| rad73         | 4.31894e-07 | 0.999998 | 7.99015e-07 | 0.999997 |
| rad65         | 4.0373e-07  | 0.999999 | 7.57352e-07 | 0.999997 |
| rad1          | 2.80926e-07 | 0.999999 | 5.19720e-07 | 0.999998 |
| rad67         | 2.30262e-07 | 0.999999 | 4.25991e-07 | 0.999998 |
| rad26         | 1.77452e-07 | 0.999999 | 3.28291e-07 | 0.999999 |
| rad54         | 1.69093e-07 | 0.999999 | 3.12826e-07 | 0.999999 |
| PhcycC3H3_A+H | 1.30935e-07 | 1.000000 | 2.42234e-07 | 0.999999 |
| rad70         | 8.66363e-08 | 1.000000 | 1.60279e-07 | 0.999999 |
| rad3          | 8.48221e-08 | 1.000000 | 1.56923e-07 | 1.000000 |
| rad10         | 8.32614e-08 | 1.000000 | 1.54036e-07 | 1.000000 |
| rad4          | 6.32734e-08 | 1.000000 | 1.17058e-07 | 1.000000 |
| rad24         | 5.66742e-08 | 1.000000 | 1.04849e-07 | 1.000000 |
| rad58         | 2.64350e-08 | 1.000000 | 4.89054e-08 | 1.000000 |
| rad34         | 2.21825e-08 | 1.000000 | 4.10382e-08 | 1.000000 |
| rad72         | 2.10188e-08 | 1.000000 | 3.88854e-08 | 1.000000 |
| rad33         | 1.59923e-08 | 1.000000 | 2.95862e-08 | 1.000000 |
| rad64         | 1.15417e-08 | 1.000000 | 2.13524e-08 | 1.000000 |
| rad55         | 8.31965e-09 | 1.000000 | 1.53916e-08 | 1.000000 |
| rad62         | 7.94525e-09 | 1.000000 | 1.46989e-08 | 1.000000 |
| PAH8+H        | 7.51600e-09 | 1.000000 | 1.39048e-08 | 1.000000 |
| rad43         | 5.20759e-09 | 1.000000 | 9.63418e-09 | 1.000000 |
| rad61         | 2.77582e-09 | 1.000000 | 5.13534e-09 | 1.000000 |
| rad68syn      | 2.02276e-09 | 1.000000 | 3.74215e-09 | 1.000000 |
| rad25         | 1.55520e-09 | 1.000000 | 2.87716e-09 | 1.000000 |
| rad68anti     | 1.31275e-09 | 1.000000 | 2.42863e-09 | 1.000000 |
| rad56         | 1.25089e-09 | 1.000000 | 2.31418e-09 | 1.000000 |
| rad53         | 1.21002e-09 | 1.000000 | 2.23857e-09 | 1.000000 |
| rad15         | 9.93395e-10 | 1.000000 | 1.83781e-09 | 1.000000 |
| rad40syn      | 8.63110e-10 | 1.000000 | 1.59678e-09 | 1.000000 |
| rad12         | 7.17396e-10 | 1.000000 | 1.32720e-09 | 1.000000 |
| rad42         | 5.48542e-10 | 1.000000 | 1.01482e-09 | 1.000000 |
| rad40anti     | 5.37132e-10 | 1.000000 | 9.93709e-10 | 1.000000 |
| rad41         | 3.63608e-10 | 1.000000 | 6.72685e-10 | 1.000000 |
| rad14         | 1.95529e-10 | 1.000000 | 3.61734e-10 | 1.000000 |
| rad27         | 8.73101e-11 | 1.000000 | 1.61526e-10 | 1.000000 |
| rad47         | 1.79548e-11 | 1.000000 | 3.32168e-11 | 1.000000 |
| rad31         | 7.79552e-12 | 1.000000 | 1.44219e-11 | 1.000000 |
| rad8          | 3.19809e-12 | 1.000000 | 5.91655e-12 | 1.000000 |
| rad5          | 2.85692e-13 | 1.000000 | 5.28537e-13 | 1.000000 |

100.000000 Pa, 1100.00000 K

=====

| Rate constant | True (fraction)     | Effective (fraction) |
|---------------|---------------------|----------------------|
| Total         | 4.69847e-15 (1.00 ) | 2.11225e-15 (1.00 )  |

| species     | PYtrue      | Cumul    | PYeffective | Cumul    |
|-------------|-------------|----------|-------------|----------|
| Benzyl+C2H2 | 0.550438    | 0.550438 | 0.00000     | 0.00000  |
| Indene+H    | 0.436822    | 0.987260 | 0.971662    | 0.971662 |
| rad6        | 0.00302740  | 0.990287 | 0.00673412  | 0.978396 |
| Ph+Allene   | 0.00302391  | 0.993311 | 0.00672635  | 0.985122 |
| PhCHCCH2+H  | 0.00188449  | 0.995196 | 0.00419184  | 0.989314 |
| PhCCH+CH3   | 0.00183256  | 0.997028 | 0.00407632  | 0.993391 |
| PhCH2CCH+H  | 0.00135549  | 0.998384 | 0.00301515  | 0.996406 |
| PAH9+H      | 0.000275745 | 0.998660 | 0.000613363 | 0.997019 |
| Ph+MeAc     | 0.000252641 | 0.998912 | 0.000561972 | 0.997581 |
| PAH7+H      | 0.000202489 | 0.999115 | 0.000450415 | 0.998032 |
| rad23       | 0.000179251 | 0.999294 | 0.000398724 | 0.998430 |
| rad30       | 0.000123456 | 0.999417 | 0.000274614 | 0.998705 |
| rad38       | 0.000121986 | 0.999539 | 0.000271345 | 0.998976 |
| PhCCCH3+H   | 0.000114390 | 0.999654 | 0.000254447 | 0.999231 |
| rad45       | 6.69985e-05 | 0.999721 | 0.000149031 | 0.999380 |
| rad39       | 5.21500e-05 | 0.999773 | 0.000116002 | 0.999496 |
| rad35       | 4.71763e-05 | 0.999820 | 0.000104938 | 0.999601 |
| rad46       | 3.56022e-05 | 0.999856 | 7.91931e-05 | 0.999680 |
| rad50       | 3.04007e-05 | 0.999886 | 6.76230e-05 | 0.999747 |
| rad19anti   | 2.96971e-05 | 0.999916 | 6.60579e-05 | 0.999814 |
| PAH3+H      | 1.18821e-05 | 0.999928 | 2.64305e-05 | 0.999840 |
| rad51       | 9.33561e-06 | 0.999937 | 2.07660e-05 | 0.999861 |
| rad20       | 8.98256e-06 | 0.999946 | 1.99807e-05 | 0.999881 |
| rad22       | 6.67397e-06 | 0.999953 | 1.48455e-05 | 0.999896 |

|               |             |          |             |          |
|---------------|-------------|----------|-------------|----------|
| rad11         | 6.34299e-06 | 0.999959 | 1.41093e-05 | 0.999910 |
| rad36         | 5.92583e-06 | 0.999965 | 1.31813e-05 | 0.999923 |
| rad21         | 5.66081e-06 | 0.999971 | 1.25918e-05 | 0.999935 |
| rad7          | 5.18750e-06 | 0.999976 | 1.15390e-05 | 0.999947 |
| rad28         | 4.43309e-06 | 0.999980 | 9.86091e-06 | 0.999957 |
| rad60syn      | 3.60633e-06 | 0.999983 | 6.80737e-06 | 0.999964 |
| rad52         | 2.68680e-06 | 0.999986 | 5.97649e-06 | 0.999970 |
| rad9          | 2.65668e-06 | 0.999989 | 5.90949e-06 | 0.999976 |
| rad60anti     | 1.74405e-06 | 0.999990 | 3.87944e-06 | 0.999979 |
| rad59         | 1.52064e-06 | 0.999992 | 3.38249e-06 | 0.999983 |
| rad19syn      | 1.11324e-06 | 0.999993 | 2.47629e-06 | 0.999985 |
| rad18         | 1.06363e-06 | 0.999994 | 2.36592e-06 | 0.999988 |
| rad13         | 8.57437e-07 | 0.999995 | 1.90727e-06 | 0.999990 |
| PAH10+CH3     | 7.52878e-07 | 0.999996 | 1.67469e-06 | 0.999991 |
| rad2          | 7.37381e-07 | 0.999996 | 1.64022e-06 | 0.999993 |
| rad37         | 5.63610e-07 | 0.999997 | 1.25369e-06 | 0.999994 |
| PAH1+H        | 3.86340e-07 | 0.999997 | 8.59369e-07 | 0.999995 |
| rad71         | 3.64740e-07 | 0.999998 | 8.11322e-07 | 0.999996 |
| rad54         | 3.31946e-07 | 0.999998 | 7.38376e-07 | 0.999996 |
| rad67         | 2.96195e-07 | 0.999998 | 6.58853e-07 | 0.999997 |
| rad73         | 2.57083e-07 | 0.999999 | 5.71853e-07 | 0.999998 |
| rad65         | 2.44070e-07 | 0.999999 | 5.42906e-07 | 0.999998 |
| PhcycC3H3_A+H | 2.17447e-07 | 0.999999 | 4.83687e-07 | 0.999999 |
| rad1          | 1.65464e-07 | 0.999999 | 3.68056e-07 | 0.999999 |
| rad26         | 1.12322e-07 | 0.999999 | 2.49847e-07 | 0.999999 |
| rad10         | 1.08347e-07 | 0.999999 | 2.41007e-07 | 1.000000 |
| rad70         | 8.13638e-08 | 1.000000 | 1.80985e-07 | 1.000000 |
| rad3          | 5.09584e-08 | 1.000000 | 1.13351e-07 | 1.000000 |
| rad24         | 4.45617e-08 | 1.000000 | 9.91224e-08 | 1.000000 |
| rad4          | 3.88028e-08 | 1.000000 | 8.63125e-08 | 1.000000 |
| rad58         | 3.50306e-08 | 1.000000 | 7.79217e-08 | 1.000000 |
| rad33         | 2.15458e-08 | 1.000000 | 4.79262e-08 | 1.000000 |
| rad34         | 1.72933e-08 | 1.000000 | 3.84669e-08 | 1.000000 |
| rad55         | 1.56188e-08 | 1.000000 | 3.47422e-08 | 1.000000 |
| rad72         | 1.25601e-08 | 1.000000 | 2.79385e-08 | 1.000000 |
| rad62         | 9.10377e-09 | 1.000000 | 2.02503e-08 | 1.000000 |
| rad64         | 7.05243e-09 | 1.000000 | 1.56873e-08 | 1.000000 |
| PAH8+H        | 4.55500e-09 | 1.000000 | 1.01321e-08 | 1.000000 |
| rad43         | 4.45558e-09 | 1.000000 | 9.91093e-09 | 1.000000 |
| rad25         | 2.75153e-09 | 1.000000 | 6.12048e-09 | 1.000000 |
| rad61         | 1.68683e-09 | 1.000000 | 3.75217e-09 | 1.000000 |
| rad15         | 1.36648e-09 | 1.000000 | 3.03959e-09 | 1.000000 |
| rad53         | 1.24725e-09 | 1.000000 | 2.77437e-09 | 1.000000 |
| rad68syn      | 1.24720e-09 | 1.000000 | 2.77425e-09 | 1.000000 |
| rad12         | 1.14562e-09 | 1.000000 | 2.54830e-09 | 1.000000 |
| rad56         | 9.77391e-10 | 1.000000 | 2.17410e-09 | 1.000000 |
| rad68anti     | 8.10156e-10 | 1.000000 | 1.80210e-09 | 1.000000 |
| rad40syn      | 5.27968e-10 | 1.000000 | 1.17441e-09 | 1.000000 |
| rad42         | 4.17974e-10 | 1.000000 | 9.29736e-10 | 1.000000 |
| rad40anti     | 3.29866e-10 | 1.000000 | 7.33751e-10 | 1.000000 |
| rad14         | 3.07624e-10 | 1.000000 | 6.84274e-10 | 1.000000 |
| rad41         | 2.70879e-10 | 1.000000 | 6.02540e-10 | 1.000000 |
| rad27         | 1.38085e-10 | 1.000000 | 3.07154e-10 | 1.000000 |
| rad8          | 3.12143e-11 | 1.000000 | 6.94327e-11 | 1.000000 |
| rad47         | 1.02846e-11 | 1.000000 | 2.28769e-11 | 1.000000 |
| rad31         | 6.61730e-12 | 1.000000 | 1.47194e-11 | 1.000000 |
| rad5          | 3.04262e-13 | 1.000000 | 6.76796e-13 | 1.000000 |

100.000000 Pa, 1200.00000 K

=====

| Rate constant | True (fraction)     | Effective (fraction) |
|---------------|---------------------|----------------------|
| Total         | 8.84330e-15 (1.00 ) | 3.30221e-15 (1.00 )  |

| species     | PYtrue      | Cumul    | PYeffective | Cumul    |
|-------------|-------------|----------|-------------|----------|
| Benzyl+C2H2 | 0.626586    | 0.626586 | 0.00000     | 0.00000  |
| Indene+H    | 0.359555    | 0.986141 | 0.962885    | 0.962885 |
| Ph+Allene   | 0.00434340  | 0.990484 | 0.0116316   | 0.974517 |
| PhCHCCH2+H  | 0.00241836  | 0.992903 | 0.00647635  | 0.980993 |
| PhCH2CCH+H  | 0.00224761  | 0.995150 | 0.00601910  | 0.987012 |
| PhCCH+CH3   | 0.00190898  | 0.997059 | 0.00511224  | 0.992124 |
| rad6        | 0.00141648  | 0.998476 | 0.00379334  | 0.995918 |
| Ph+MeAc     | 0.000259402 | 0.998735 | 0.000694678 | 0.996612 |
| PAH9+H      | 0.000257028 | 0.998992 | 0.000688320 | 0.997301 |
| PAH7+H      | 0.000236799 | 0.999229 | 0.000634146 | 0.997935 |
| rad30       | 0.000155618 | 0.999385 | 0.000416744 | 0.998352 |
| rad38       | 0.000108902 | 0.999494 | 0.000291638 | 0.998643 |
| PhCCCH3+H   | 9.91129e-05 | 0.999593 | 0.000265424 | 0.998909 |
| rad23       | 8.99378e-05 | 0.999683 | 0.000240853 | 0.999149 |



|               |             |          |             |          |
|---------------|-------------|----------|-------------|----------|
| rad39         | 5.52122e-05 | 0.999738 | 0.000147858 | 0.999297 |
| rad19anti     | 5.00773e-05 | 0.999788 | 0.000134107 | 0.999431 |
| rad35         | 4.71863e-05 | 0.999835 | 0.000126365 | 0.999558 |
| rad45         | 3.61744e-05 | 0.999871 | 9.68750e-05 | 0.999655 |
| rad46         | 2.84422e-05 | 0.999900 | 7.61680e-05 | 0.999731 |
| PAH3+H        | 2.26878e-05 | 0.999922 | 6.07577e-05 | 0.999792 |
| rad50         | 1.90051e-05 | 0.999941 | 5.08956e-05 | 0.999842 |
| rad11         | 7.16532e-06 | 0.999949 | 1.91887e-05 | 0.999862 |
| rad20         | 5.62455e-06 | 0.999954 | 1.50625e-05 | 0.999877 |
| rad51         | 5.45286e-06 | 0.999960 | 1.46027e-05 | 0.999891 |
| rad7          | 5.36936e-06 | 0.999965 | 1.43791e-05 | 0.999906 |
| rad60syn      | 4.91281e-06 | 0.999970 | 1.31565e-05 | 0.999919 |
| rad22         | 3.38728e-06 | 0.999973 | 9.07111e-06 | 0.999928 |
| rad21         | 3.35785e-06 | 0.999977 | 8.99229e-06 | 0.999937 |
| rad36         | 3.24975e-06 | 0.999980 | 8.70281e-06 | 0.999946 |
| rad60anti     | 2.84286e-06 | 0.999983 | 7.61317e-06 | 0.999953 |
| rad59         | 2.82110e-06 | 0.999986 | 7.55490e-06 | 0.999961 |
| rad9          | 2.32936e-06 | 0.999988 | 6.23801e-06 | 0.999967 |
| rad28         | 2.32916e-06 | 0.999990 | 6.23748e-06 | 0.999973 |
| rad19syn      | 1.96111e-06 | 0.999992 | 5.25183e-06 | 0.999979 |
| rad52         | 1.61112e-06 | 0.999994 | 4.31456e-06 | 0.999983 |
| rad18         | 1.13781e-06 | 0.999995 | 3.04704e-06 | 0.999986 |
| rad13         | 8.79218e-07 | 0.999996 | 2.35454e-06 | 0.999988 |
| rad54         | 6.14774e-07 | 0.999996 | 1.64636e-06 | 0.999990 |
| rad37         | 5.25079e-07 | 0.999997 | 1.40616e-06 | 0.999991 |
| PAH10+CH3     | 4.92712e-07 | 0.999997 | 1.31948e-06 | 0.999993 |
| rad67         | 4.72148e-07 | 0.999998 | 1.26441e-06 | 0.999994 |
| PhcycC3H3_A+H | 4.24235e-07 | 0.999998 | 1.13610e-06 | 0.999995 |
| rad2          | 3.57094e-07 | 0.999999 | 9.56296e-07 | 0.999996 |
| PAH1+H        | 2.79323e-07 | 0.999999 | 7.48026e-07 | 0.999997 |
| rad71         | 2.05914e-07 | 0.999999 | 5.51436e-07 | 0.999997 |
| rad73         | 1.45267e-07 | 0.999999 | 3.89023e-07 | 0.999998 |
| rad65         | 1.43631e-07 | 1.000000 | 3.84644e-07 | 0.999998 |
| rad10         | 1.23935e-07 | 1.000000 | 3.31897e-07 | 0.999998 |
| rad70         | 1.09529e-07 | 1.000000 | 2.93318e-07 | 0.999999 |
| rad1          | 8.24767e-08 | 1.000000 | 2.20872e-07 | 0.999999 |
| rad58         | 7.05731e-08 | 1.000000 | 1.88994e-07 | 0.999999 |
| rad26         | 6.65742e-08 | 1.000000 | 1.78285e-07 | 0.999999 |
| rad24         | 3.29228e-08 | 1.000000 | 8.81671e-08 | 0.999999 |
| rad55         | 3.03363e-08 | 1.000000 | 8.12405e-08 | 0.999999 |
| rad3          | 2.66604e-08 | 1.000000 | 7.13964e-08 | 0.999999 |
| rad4          | 2.05383e-08 | 1.000000 | 5.50014e-08 | 1.000000 |
| rad34         | 1.95137e-08 | 1.000000 | 5.22576e-08 | 1.000000 |
| rad33         | 1.74838e-08 | 1.000000 | 4.68216e-08 | 1.000000 |
| rad62         | 1.21286e-08 | 1.000000 | 3.24804e-08 | 1.000000 |
| rad72         | 7.09018e-09 | 1.000000 | 1.89875e-08 | 1.000000 |
| rad64         | 4.49858e-09 | 1.000000 | 1.20472e-08 | 1.000000 |
| rad43         | 3.65005e-09 | 1.000000 | 9.77482e-09 | 1.000000 |
| rad25         | 3.03829e-09 | 1.000000 | 8.13652e-09 | 1.000000 |
| PAH8+H        | 2.71249e-09 | 1.000000 | 7.26402e-09 | 1.000000 |
| rad15         | 2.46621e-09 | 1.000000 | 6.60451e-09 | 1.000000 |
| rad53         | 2.15047e-09 | 1.000000 | 5.75894e-09 | 1.000000 |
| rad12         | 1.49797e-09 | 1.000000 | 4.01155e-09 | 1.000000 |
| rad56         | 1.29622e-09 | 1.000000 | 3.47126e-09 | 1.000000 |
| rad61         | 9.86398e-10 | 1.000000 | 2.64157e-09 | 1.000000 |
| rad68syn      | 8.44300e-10 | 1.000000 | 2.26103e-09 | 1.000000 |
| rad68anti     | 5.50579e-10 | 1.000000 | 1.47445e-09 | 1.000000 |
| rad42         | 4.11140e-10 | 1.000000 | 1.10103e-09 | 1.000000 |
| rad40syn      | 3.24231e-10 | 1.000000 | 8.68288e-10 | 1.000000 |
| rad14         | 2.89542e-10 | 1.000000 | 7.75391e-10 | 1.000000 |
| rad40anti     | 1.99165e-10 | 1.000000 | 5.33364e-10 | 1.000000 |
| rad41         | 1.71348e-10 | 1.000000 | 4.58870e-10 | 1.000000 |
| rad27         | 1.12379e-10 | 1.000000 | 3.00951e-10 | 1.000000 |
| rad8          | 1.00962e-10 | 1.000000 | 2.70375e-10 | 1.000000 |
| rad47         | 5.63787e-12 | 1.000000 | 1.50982e-11 | 1.000000 |
| rad31         | 4.87640e-12 | 1.000000 | 1.30590e-11 | 1.000000 |
| rad5          | 3.43911e-13 | 1.000000 | 9.20992e-13 | 1.000000 |

100.000000 Pa, 1300.00000 K

=====

| Rate constant | True (fraction)     | Effective (fraction) |
|---------------|---------------------|----------------------|
| Total         | 1.52810e-14 (1.00 ) | 4.76805e-15 (1.00 )  |

| species     | PYtrue     | Cumul    | PYeffective | Cumul    |
|-------------|------------|----------|-------------|----------|
| Benzyl+C2H2 | 0.687975   | 0.687975 | 0.00000     | 0.00000  |
| Indene+H    | 0.296074   | 0.984049 | 0.948879    | 0.948879 |
| Ph+Allene   | 0.00560889 | 0.989658 | 0.0179758   | 0.966855 |
| PhCH2CCH+H  | 0.00340254 | 0.993060 | 0.0109047   | 0.977760 |

|               |             |          |             |          |
|---------------|-------------|----------|-------------|----------|
| PhCHCCH2+H    | 0.00287629  | 0.995937 | 0.00921816  | 0.986978 |
| PhCCH+CH3     | 0.00180360  | 0.997740 | 0.00578032  | 0.992758 |
| rad6          | 0.000688563 | 0.998429 | 0.00220676  | 0.994965 |
| PAH9+H        | 0.000281939 | 0.998711 | 0.000903580 | 0.995868 |
| PAH7+H        | 0.000262682 | 0.998974 | 0.000841862 | 0.996710 |
| Ph+MeAc       | 0.000245930 | 0.999219 | 0.000788175 | 0.997498 |
| rad30         | 0.000187304 | 0.999407 | 0.000600286 | 0.998099 |
| rad38         | 0.000116759 | 0.999523 | 0.000374198 | 0.998473 |
| rad19anti     | 7.90998e-05 | 0.999603 | 0.000253505 | 0.998726 |
| PhCCCH3+H     | 7.82863e-05 | 0.999681 | 0.000250898 | 0.998977 |
| rad39         | 5.70402e-05 | 0.999738 | 0.000182807 | 0.999160 |
| rad35         | 5.36749e-05 | 0.999792 | 0.000172021 | 0.999332 |
| rad23         | 5.02799e-05 | 0.999842 | 0.000161141 | 0.999493 |
| PAH3+H        | 4.05320e-05 | 0.999882 | 0.000129900 | 0.999623 |
| rad46         | 2.87687e-05 | 0.999911 | 9.22002e-05 | 0.999715 |
| rad45         | 1.97866e-05 | 0.999931 | 6.34134e-05 | 0.999779 |
| rad50         | 1.44368e-05 | 0.999945 | 4.62683e-05 | 0.999825 |
| rad60syn      | 7.34480e-06 | 0.999953 | 2.35392e-05 | 0.999849 |
| rad11         | 6.20817e-06 | 0.999959 | 1.98964e-05 | 0.999868 |
| rad7          | 4.99862e-06 | 0.999964 | 1.60200e-05 | 0.999884 |
| rad59         | 4.84895e-06 | 0.999969 | 1.55403e-05 | 0.999900 |
| rad60anti     | 4.31028e-06 | 0.999973 | 1.38139e-05 | 0.999914 |
| rad51         | 3.53557e-06 | 0.999977 | 1.13310e-05 | 0.999925 |
| rad20         | 3.32146e-06 | 0.999980 | 1.06448e-05 | 0.999936 |
| rad19syn      | 3.08814e-06 | 0.999983 | 9.89711e-06 | 0.999946 |
| rad22         | 2.09424e-06 | 0.999985 | 6.71179e-06 | 0.999952 |
| rad9          | 1.96544e-06 | 0.999987 | 6.29900e-06 | 0.999959 |
| rad21         | 1.94722e-06 | 0.999989 | 6.24059e-06 | 0.999965 |
| rad36         | 1.79999e-06 | 0.999991 | 5.76875e-06 | 0.999971 |
| rad28         | 1.25039e-06 | 0.999992 | 4.00735e-06 | 0.999975 |
| rad52         | 1.12152e-06 | 0.999993 | 3.59432e-06 | 0.999978 |
| rad18         | 1.05124e-06 | 0.999994 | 3.36910e-06 | 0.999982 |
| rad54         | 1.01805e-06 | 0.999995 | 3.26271e-06 | 0.999985 |
| rad67         | 8.74807e-07 | 0.999996 | 2.80365e-06 | 0.999988 |
| PhcycC3H3_A+H | 7.85493e-07 | 0.999997 | 2.51740e-06 | 0.999990 |
| rad13         | 5.96805e-07 | 0.999998 | 1.91268e-06 | 0.999992 |
| rad37         | 5.57643e-07 | 0.999998 | 1.78718e-06 | 0.999994 |
| PAH10+CH3     | 4.05168e-07 | 0.999999 | 1.29851e-06 | 0.999995 |
| PAH1+H        | 2.70371e-07 | 0.999999 | 8.66506e-07 | 0.999996 |
| rad70         | 1.76928e-07 | 0.999999 | 5.67031e-07 | 0.999997 |
| rad2          | 1.54030e-07 | 0.999999 | 4.93648e-07 | 0.999997 |
| rad58         | 1.52976e-07 | 0.999999 | 4.90270e-07 | 0.999998 |
| rad71         | 1.16036e-07 | 0.999999 | 3.71881e-07 | 0.999998 |
| rad10         | 1.02112e-07 | 0.999999 | 3.27255e-07 | 0.999998 |
| rad65         | 9.55054e-08 | 1.000000 | 3.06083e-07 | 0.999999 |
| rad73         | 8.25770e-08 | 1.000000 | 2.64649e-07 | 0.999999 |
| rad55         | 5.35804e-08 | 1.000000 | 1.71719e-07 | 0.999999 |
| rad26         | 3.94489e-08 | 1.000000 | 1.26429e-07 | 0.999999 |
| rad1          | 3.61734e-08 | 1.000000 | 1.15931e-07 | 0.999999 |
| rad34         | 3.04810e-08 | 1.000000 | 9.76879e-08 | 0.999999 |
| rad24         | 2.42278e-08 | 1.000000 | 7.76469e-08 | 1.000000 |
| rad62         | 1.66122e-08 | 1.000000 | 5.32401e-08 | 1.000000 |
| rad3          | 1.27040e-08 | 1.000000 | 4.07147e-08 | 1.000000 |
| rad33         | 1.15946e-08 | 1.000000 | 3.71593e-08 | 1.000000 |
| rad4          | 9.86638e-09 | 1.000000 | 3.16205e-08 | 1.000000 |
| rad15         | 5.45173e-09 | 1.000000 | 1.74721e-08 | 1.000000 |
| rad53         | 4.40313e-09 | 1.000000 | 1.41115e-08 | 1.000000 |
| rad72         | 3.96408e-09 | 1.000000 | 1.27044e-08 | 1.000000 |
| rad64         | 3.65366e-09 | 1.000000 | 1.17095e-08 | 1.000000 |
| rad43         | 3.33942e-09 | 1.000000 | 1.07024e-08 | 1.000000 |
| rad56         | 2.59392e-09 | 1.000000 | 8.31319e-09 | 1.000000 |
| rad25         | 2.44836e-09 | 1.000000 | 7.84667e-09 | 1.000000 |
| PAH8+H        | 1.96854e-09 | 1.000000 | 6.30893e-09 | 1.000000 |
| rad12         | 1.75110e-09 | 1.000000 | 5.61207e-09 | 1.000000 |
| rad68syn      | 8.59054e-10 | 1.000000 | 2.75316e-09 | 1.000000 |
| rad61         | 6.16549e-10 | 1.000000 | 1.97596e-09 | 1.000000 |
| rad68anti     | 5.64158e-10 | 1.000000 | 1.80806e-09 | 1.000000 |
| rad42         | 5.35707e-10 | 1.000000 | 1.71687e-09 | 1.000000 |
| rad40syn      | 2.60609e-10 | 1.000000 | 8.35220e-10 | 1.000000 |
| rad8          | 1.92162e-10 | 1.000000 | 6.15855e-10 | 1.000000 |
| rad14         | 1.90004e-10 | 1.000000 | 6.08939e-10 | 1.000000 |
| rad40anti     | 1.50781e-10 | 1.000000 | 4.83235e-10 | 1.000000 |
| rad41         | 1.18563e-10 | 1.000000 | 3.79979e-10 | 1.000000 |
| rad27         | 6.21249e-11 | 1.000000 | 1.99102e-10 | 1.000000 |
| rad47         | 3.33941e-12 | 1.000000 | 1.07024e-11 | 1.000000 |
| rad31         | 3.30618e-12 | 1.000000 | 1.05959e-11 | 1.000000 |
| rad5          | 4.21434e-13 | 1.000000 | 1.35064e-12 | 1.000000 |

100.000000 Pa, 1400.000000 K

=====

| Rate constant | True (fraction)     |          | Effective (fraction) |          |
|---------------|---------------------|----------|----------------------|----------|
| Total         | 2.46691e-14 (1.00 ) |          | 6.50377e-15 (1.00 )  |          |
| species       | PYtrue              | Cumul    | PYeffective          | Cumul    |
| Benzyl+C2H2   | 0.736360            | 0.736360 | 0.00000              | 0.00000  |
| Indene+H      | 0.245141            | 0.981501 | 0.929832             | 0.929832 |
| Ph+Allene     | 0.00671439          | 0.988215 | 0.0254680            | 0.955300 |
| PhCH2CCH+H    | 0.00481831          | 0.993034 | 0.0182761            | 0.973576 |
| PhCHCCH2+H    | 0.00326759          | 0.996301 | 0.0123942            | 0.985970 |
| PhCCH+CH3     | 0.00160605          | 0.997907 | 0.00609184           | 0.992062 |
| rad6          | 0.000381892         | 0.998289 | 0.00144854           | 0.993511 |
| PAH9+H        | 0.000335636         | 0.998625 | 0.00127308           | 0.994784 |
| PAH7+H        | 0.000279717         | 0.998905 | 0.00106098           | 0.995845 |
| Ph+MeAc       | 0.000223575         | 0.999128 | 0.000848032          | 0.996693 |
| rad30         | 0.000217750         | 0.999346 | 0.000825938          | 0.997519 |
| rad38         | 0.000138682         | 0.999485 | 0.000526028          | 0.998045 |
| rad19anti     | 0.000117428         | 0.999602 | 0.000445412          | 0.998490 |
| PAH3+H        | 6.72170e-05         | 0.999669 | 0.000254958          | 0.998745 |
| rad35         | 6.45198e-05         | 0.999734 | 0.000244727          | 0.998990 |
| PhCCCH3+H     | 5.94033e-05         | 0.999793 | 0.000225320          | 0.999215 |
| rad39         | 5.74595e-05         | 0.999851 | 0.000217947          | 0.999433 |
| rad46         | 3.44813e-05         | 0.999885 | 0.000130790          | 0.999564 |
| rad23         | 3.18436e-05         | 0.999917 | 0.000120784          | 0.999685 |
| rad50         | 1.50263e-05         | 0.999932 | 5.69957e-05          | 0.999742 |
| rad45         | 1.10087e-05         | 0.999943 | 4.17566e-05          | 0.999783 |
| rad60syn      | 1.03482e-05         | 0.999953 | 3.92512e-05          | 0.999823 |
| rad59         | 7.73577e-06         | 0.999961 | 2.93422e-05          | 0.999852 |
| rad60anti     | 6.14878e-06         | 0.999967 | 2.33226e-05          | 0.999875 |
| rad19syn      | 4.42343e-06         | 0.999972 | 1.67783e-05          | 0.999892 |
| rad11         | 4.13977e-06         | 0.999976 | 1.57024e-05          | 0.999908 |
| rad7          | 3.74941e-06         | 0.999980 | 1.42217e-05          | 0.999922 |
| rad51         | 3.05333e-06         | 0.999983 | 1.15814e-05          | 0.999934 |
| rad20         | 2.01391e-06         | 0.999985 | 7.63887e-06          | 0.999941 |
| rad67         | 1.67715e-06         | 0.999986 | 6.36152e-06          | 0.999948 |
| rad22         | 1.60687e-06         | 0.999988 | 6.09495e-06          | 0.999954 |
| rad9          | 1.59399e-06         | 0.999989 | 6.04609e-06          | 0.999960 |
| rad54         | 1.52325e-06         | 0.999991 | 5.77775e-06          | 0.999966 |
| PhcycC3H3_A+H | 1.32100e-06         | 0.999992 | 5.01061e-06          | 0.999971 |
| rad21         | 1.17007e-06         | 0.999993 | 4.43815e-06          | 0.999975 |
| rad52         | 1.06979e-06         | 0.999995 | 4.05777e-06          | 0.999979 |
| rad36         | 1.01320e-06         | 0.999996 | 3.84313e-06          | 0.999983 |
| rad18         | 7.65280e-07         | 0.999996 | 2.90275e-06          | 0.999986 |
| rad28         | 7.46507e-07         | 0.999997 | 2.83154e-06          | 0.999989 |
| rad37         | 6.68623e-07         | 0.999998 | 2.53612e-06          | 0.999991 |
| PAH10+CH3     | 4.81482e-07         | 0.999998 | 1.82629e-06          | 0.999993 |
| rad13         | 3.43349e-07         | 0.999999 | 1.30234e-06          | 0.999994 |
| PAH1+H        | 3.43009e-07         | 0.999999 | 1.30105e-06          | 0.999996 |
| rad58         | 3.10080e-07         | 0.999999 | 1.17615e-06          | 0.999997 |
| rad70         | 2.87573e-07         | 1.000000 | 1.09078e-06          | 0.999998 |
| rad65         | 8.63871e-08         | 1.000000 | 3.27671e-07          | 0.999998 |
| rad55         | 8.52981e-08         | 1.000000 | 3.23540e-07          | 0.999999 |
| rad71         | 7.01259e-08         | 1.000000 | 2.65991e-07          | 0.999999 |
| rad2          | 6.22755e-08         | 1.000000 | 2.36214e-07          | 0.999999 |
| rad10         | 5.92807e-08         | 1.000000 | 2.24855e-07          | 0.999999 |
| rad34         | 5.18879e-08         | 1.000000 | 1.96813e-07          | 0.999999 |
| rad73         | 5.18867e-08         | 1.000000 | 1.96809e-07          | 1.000000 |
| rad26         | 2.40708e-08         | 1.00000  | 9.13018e-08          | 1.000000 |
| rad62         | 2.19350e-08         | 1.00000  | 8.32005e-08          | 1.000000 |
| rad24         | 1.79284e-08         | 1.00000  | 6.80035e-08          | 1.000000 |
| rad1          | 1.47972e-08         | 1.00000  | 5.61265e-08          | 1.000000 |
| rad15         | 1.08675e-08         | 1.00000  | 4.12211e-08          | 1.000000 |
| rad53         | 8.59010e-09         | 1.00000  | 3.25827e-08          | 1.00000  |
| rad33         | 7.25418e-09         | 1.00000  | 2.75155e-08          | 1.00000  |
| rad3          | 5.82874e-09         | 1.00000  | 2.21087e-08          | 1.00000  |
| rad56         | 5.48376e-09         | 1.00000  | 2.08002e-08          | 1.00000  |
| rad4          | 4.55691e-09         | 1.00000  | 1.72846e-08          | 1.00000  |
| rad64         | 4.24552e-09         | 1.00000  | 1.61035e-08          | 1.00000  |
| rad43         | 3.52637e-09         | 1.00000  | 1.33757e-08          | 1.00000  |
| PAH8+H        | 2.43171e-09         | 1.00000  | 9.22361e-09          | 1.00000  |
| rad72         | 2.29158e-09         | 1.00000  | 8.69208e-09          | 1.00000  |
| rad12         | 1.90814e-09         | 1.00000  | 7.23767e-09          | 1.00000  |
| rad25         | 1.76534e-09         | 1.00000  | 6.69602e-09          | 1.00000  |
| rad68syn      | 1.40153e-09         | 1.00000  | 5.31607e-09          | 1.00000  |
| rad68anti     | 9.23328e-10         | 1.00000  | 3.50223e-09          | 1.00000  |
| rad42         | 7.78473e-10         | 1.00000  | 2.95279e-09          | 1.00000  |
| rad61         | 5.17091e-10         | 1.00000  | 1.96135e-09          | 1.00000  |
| rad40syn      | 3.61647e-10         | 1.00000  | 1.37175e-09          | 1.00000  |
| rad8          | 2.82317e-10         | 1.00000  | 1.07084e-09          | 1.00000  |

|           |             |         |             |         |
|-----------|-------------|---------|-------------|---------|
| rad40anti | 1.96465e-10 | 1.00000 | 7.45200e-10 | 1.00000 |
| rad41     | 1.14666e-10 | 1.00000 | 4.34934e-10 | 1.00000 |
| rad14     | 1.08992e-10 | 1.00000 | 4.13411e-10 | 1.00000 |
| rad27     | 3.01378e-11 | 1.00000 | 1.14314e-10 | 1.00000 |
| rad47     | 2.56982e-12 | 1.00000 | 9.74745e-12 | 1.00000 |
| rad31     | 2.16205e-12 | 1.00000 | 8.20076e-12 | 1.00000 |
| rad5      | 5.47680e-13 | 1.00000 | 2.07738e-12 | 1.00000 |

100.000000 Pa, 1500.00000 K

| Rate constant | True (fraction)     | Effective (fraction) |
|---------------|---------------------|----------------------|
| Total         | 3.76908e-14 (1.00 ) | 8.51869e-15 (1.00 )  |

| species       | PYtrue      | Cumul    | PYeffective | Cumul    |
|---------------|-------------|----------|-------------|----------|
| Benzyl+C2H2   | 0.773985    | 0.773985 | 0.00000     | 0.00000  |
| Indene+H      | 0.204738    | 0.978723 | 0.905862    | 0.905862 |
| Ph+Allene     | 0.00761397  | 0.986337 | 0.0336879   | 0.939550 |
| PhCH2CCH+H    | 0.00649714  | 0.992834 | 0.0287465   | 0.968296 |
| PhCHCCH2+H    | 0.00361845  | 0.996453 | 0.0160098   | 0.984306 |
| PhCCH+CH3     | 0.00138053  | 0.997833 | 0.00610816  | 0.990414 |
| PAH9+H        | 0.000407972 | 0.998241 | 0.00180506  | 0.992219 |
| PAH7+H        | 0.000290880 | 0.998532 | 0.00128699  | 0.993506 |
| rad30         | 0.000246530 | 0.998778 | 0.00109077  | 0.994597 |
| rad6          | 0.000241257 | 0.999020 | 0.00106744  | 0.995665 |
| Ph+MeAc       | 0.000199929 | 0.999220 | 0.000884582 | 0.996549 |
| rad38         | 0.000169992 | 0.999390 | 0.000752129 | 0.997301 |
| rad19anti     | 0.000164770 | 0.999554 | 0.000729023 | 0.998030 |
| PAH3+H        | 0.000104362 | 0.999659 | 0.000461748 | 0.998492 |
| rad35         | 7.83290e-05 | 0.999737 | 0.000346565 | 0.998839 |
| rad39         | 5.72487e-05 | 0.999794 | 0.000253296 | 0.999092 |
| PhCCCH3+H     | 4.51988e-05 | 0.999840 | 0.000199981 | 0.999292 |
| rad46         | 4.41832e-05 | 0.999884 | 0.000195488 | 0.999487 |
| rad23         | 2.26483e-05 | 0.999906 | 0.000100207 | 0.999588 |
| rad50         | 1.99685e-05 | 0.999926 | 8.83503e-05 | 0.999676 |
| rad60syn      | 1.38912e-05 | 0.999940 | 6.14612e-05 | 0.999737 |
| rad59         | 1.15795e-05 | 0.999952 | 5.12334e-05 | 0.999789 |
| rad60anti     | 8.34468e-06 | 0.999960 | 3.69209e-05 | 0.999826 |
| rad45         | 6.25999e-06 | 0.999966 | 2.76972e-05 | 0.999853 |
| rad19syn      | 5.87717e-06 | 0.999972 | 2.60035e-05 | 0.999879 |
| rad51         | 3.78851e-06 | 0.999976 | 1.67622e-05 | 0.999896 |
| rad67         | 3.08705e-06 | 0.999979 | 1.36586e-05 | 0.999910 |
| rad11         | 2.42374e-06 | 0.999982 | 1.07238e-05 | 0.999920 |
| rad7          | 2.29080e-06 | 0.999984 | 1.01356e-05 | 0.999931 |
| rad54         | 2.09966e-06 | 0.999986 | 9.28991e-06 | 0.999940 |
| PhcycC3H3_A+H | 2.02741e-06 | 0.999988 | 8.97026e-06 | 0.999949 |
| rad22         | 1.43592e-06 | 0.999989 | 6.35322e-06 | 0.999955 |
| rad52         | 1.39165e-06 | 0.999991 | 6.15733e-06 | 0.999961 |
| rad20         | 1.26509e-06 | 0.999992 | 5.59738e-06 | 0.999967 |
| rad9          | 1.25762e-06 | 0.999993 | 5.56431e-06 | 0.999973 |
| rad37         | 8.73213e-07 | 0.999994 | 3.86352e-06 | 0.999976 |
| PAH10+CH3     | 7.51287e-07 | 0.999995 | 3.32406e-06 | 0.999980 |
| rad21         | 7.28871e-07 | 0.999996 | 3.22488e-06 | 0.999983 |
| rad36         | 5.82701e-07 | 0.999996 | 2.57815e-06 | 0.999986 |
| rad58         | 5.76770e-07 | 0.999997 | 2.55191e-06 | 0.999988 |
| rad28         | 4.99428e-07 | 0.999997 | 2.20971e-06 | 0.999990 |
| PAH1+H        | 4.92252e-07 | 0.999998 | 2.17796e-06 | 0.999992 |
| rad18         | 4.84760e-07 | 0.999998 | 2.14481e-06 | 0.999995 |
| rad70         | 4.45237e-07 | 0.999999 | 1.96995e-06 | 0.999997 |
| rad13         | 1.89960e-07 | 0.999999 | 8.40474e-07 | 0.999997 |
| rad55         | 1.24386e-07 | 0.999999 | 5.50346e-07 | 0.999998 |
| rad65         | 1.11190e-07 | 0.999999 | 4.91957e-07 | 0.999998 |
| rad34         | 8.58207e-08 | 0.999999 | 3.79713e-07 | 0.999999 |
| rad71         | 5.53824e-08 | 0.999999 | 2.45039e-07 | 0.999999 |
| rad73         | 4.49798e-08 | 0.999999 | 1.99013e-07 | 0.999999 |
| rad62         | 2.76264e-08 | 0.999999 | 1.22233e-07 | 0.999999 |
| rad10         | 2.71087e-08 | 0.999999 | 1.19942e-07 | 1.000000 |
| rad2          | 2.46375e-08 | 1.000000 | 1.09008e-07 | 1.000000 |
| rad15         | 1.59184e-08 | 1.000000 | 7.04309e-08 | 1.000000 |
| rad53         | 1.53006e-08 | 1.000000 | 6.76973e-08 | 1.000000 |
| rad26         | 1.48127e-08 | 1.000000 | 6.55384e-08 | 1.000000 |
| rad24         | 1.33880e-08 | 1.000000 | 5.92348e-08 | 1.000000 |
| rad56         | 1.07611e-08 | 1.000000 | 4.76122e-08 | 1.000000 |
| rad64         | 6.25635e-09 | 1.000000 | 2.76811e-08 | 1.000000 |
| rad1          | 5.91139e-09 | 1.000000 | 2.61549e-08 | 1.000000 |
| PAH8+H        | 4.72915e-09 | 1.000000 | 2.09241e-08 | 1.000000 |
| rad33         | 4.47375e-09 | 1.000000 | 1.97941e-08 | 1.000000 |
| rad43         | 4.18580e-09 | 1.000000 | 1.85200e-08 | 1.000000 |
| rad68syn      | 2.72098e-09 | 1.000000 | 1.20389e-08 | 1.000000 |

|           |             |          |             |         |
|-----------|-------------|----------|-------------|---------|
| rad3      | 2.67392e-09 | 1.000000 | 1.18307e-08 | 1.00000 |
| rad4      | 2.10265e-09 | 1.000000 | 9.30315e-09 | 1.00000 |
| rad12     | 1.98451e-09 | 1.000000 | 8.78043e-09 | 1.00000 |
| rad68anti | 1.79049e-09 | 1.000000 | 7.92199e-09 | 1.00000 |
| rad72     | 1.56523e-09 | 1.000000 | 6.92535e-09 | 1.00000 |
| rad25     | 1.24509e-09 | 1.000000 | 5.50889e-09 | 1.00000 |
| rad42     | 1.12906e-09 | 1.000000 | 4.99551e-09 | 1.00000 |
| rad61     | 7.21542e-10 | 1.000000 | 3.19245e-09 | 1.00000 |
| rad40syn  | 7.10926e-10 | 1.000000 | 3.14548e-09 | 1.00000 |
| rad40anti | 3.83109e-10 | 1.000000 | 1.69506e-09 | 1.00000 |
| rad8      | 3.60792e-10 | 1.000000 | 1.59632e-09 | 1.00000 |
| rad41     | 1.56023e-10 | 1.000000 | 6.90323e-10 | 1.00000 |
| rad14     | 6.17874e-11 | 1.000000 | 2.73377e-10 | 1.00000 |
| rad27     | 1.44542e-11 | 1.000000 | 6.39525e-11 | 1.00000 |
| rad47     | 2.91634e-12 | 1.000000 | 1.29033e-11 | 1.00000 |
| rad31     | 1.40418e-12 | 1.000000 | 6.21279e-12 | 1.00000 |
| rad5      | 7.07560e-13 | 1.000000 | 3.13059e-12 | 1.00000 |

100.000000 Pa, 1750.00000 K

| Rate constant | True (fraction)     | Effective (fraction) |
|---------------|---------------------|----------------------|
| Total         | 9.18604e-14 (1.00 ) | 1.49182e-14 (1.00 )  |

| species       | PYtrue      | Cumul    | PYeffective | Cumul    |
|---------------|-------------|----------|-------------|----------|
| Benzyl+C2H2   | 0.837599    | 0.837599 | 0.000000    | 0.000000 |
| Indene+H      | 0.132892    | 0.970491 | 0.818292    | 0.818292 |
| PhCH2CCH+H    | 0.0118171   | 0.982308 | 0.0727646   | 0.891057 |
| Ph+Allene     | 0.00955965  | 0.991868 | 0.0588643   | 0.949921 |
| PhCHCCH2+H    | 0.00446920  | 0.996337 | 0.0275195   | 0.977440 |
| PhCCH+CH3     | 0.000847314 | 0.997184 | 0.00521741  | 0.982658 |
| PAH9+H        | 0.000567284 | 0.997752 | 0.00349310  | 0.986151 |
| rad30         | 0.000325042 | 0.998077 | 0.00200147  | 0.988152 |
| rad19anti     | 0.000321273 | 0.998398 | 0.00197827  | 0.990131 |
| rad38         | 0.000295905 | 0.998694 | 0.00182206  | 0.991953 |
| PAH7+H        | 0.000293956 | 0.998988 | 0.00181006  | 0.993763 |
| PAH3+H        | 0.000275800 | 0.999264 | 0.00169826  | 0.995461 |
| Ph+MeAc       | 0.000166528 | 0.999430 | 0.00102541  | 0.996486 |
| rad35         | 0.000111312 | 0.999541 | 0.000685412 | 0.997172 |
| rad46         | 7.92727e-05 | 0.999621 | 0.000488129 | 0.997660 |
| rad39         | 6.82653e-05 | 0.999689 | 0.000420349 | 0.998080 |
| rad6          | 6.48550e-05 | 0.999754 | 0.000399350 | 0.998480 |
| rad50         | 5.62887e-05 | 0.999810 | 0.000346603 | 0.998826 |
| PhCCCH3+H     | 3.10360e-05 | 0.999841 | 0.000191107 | 0.999017 |
| rad59         | 2.75682e-05 | 0.999869 | 0.000169754 | 0.999187 |
| rad60syn      | 2.64652e-05 | 0.999895 | 0.000162962 | 0.999350 |
| rad51         | 2.05790e-05 | 0.999916 | 0.000126717 | 0.999477 |
| rad60anti     | 1.77567e-05 | 0.999933 | 0.000109338 | 0.999586 |
| rad67         | 1.01370e-05 | 0.999944 | 6.24195e-05 | 0.999649 |
| rad71         | 8.65949e-06 | 0.999952 | 5.33215e-05 | 0.999702 |
| rad19syn      | 8.65115e-06 | 0.999961 | 5.32702e-05 | 0.999755 |
| rad23         | 8.04881e-06 | 0.999969 | 4.95612e-05 | 0.999805 |
| rad52         | 5.34418e-06 | 0.999974 | 3.29072e-05 | 0.999838 |
| PhcycC3H3_A+H | 5.07655e-06 | 0.999979 | 3.12593e-05 | 0.999869 |
| rad54         | 3.28376e-06 | 0.999983 | 2.02201e-05 | 0.999889 |
| PAH10+CH3     | 3.04963e-06 | 0.999986 | 1.87783e-05 | 0.999908 |
| rad73         | 2.81446e-06 | 0.999989 | 1.73303e-05 | 0.999925 |
| rad58         | 2.03133e-06 | 0.999991 | 1.25081e-05 | 0.999938 |
| PAH1+H        | 1.76869e-06 | 0.999992 | 1.08909e-05 | 0.999949 |
| rad37         | 1.74930e-06 | 0.999994 | 1.07714e-05 | 0.999959 |
| rad72         | 1.62332e-06 | 0.999996 | 9.99572e-06 | 0.999969 |
| rad70         | 1.12923e-06 | 0.999997 | 6.95334e-06 | 0.999976 |
| rad22         | 7.93357e-07 | 0.999998 | 4.88516e-06 | 0.999981 |
| rad45         | 5.29479e-07 | 0.999998 | 3.26031e-06 | 0.999984 |
| rad65         | 4.70862e-07 | 0.999999 | 2.89937e-06 | 0.999987 |
| rad34         | 2.77798e-07 | 0.999999 | 1.71056e-06 | 0.999989 |
| rad55         | 2.46424e-07 | 0.999999 | 1.51738e-06 | 0.999991 |
| rad11         | 2.26118e-07 | 0.999999 | 1.39234e-06 | 0.999992 |
| rad7          | 2.22432e-07 | 1.000000 | 1.36964e-06 | 0.999993 |
| rad28         | 1.65577e-07 | 1.000000 | 1.01955e-06 | 0.999994 |
| PAH8+H        | 1.43732e-07 | 1.000000 | 8.85039e-07 | 0.999995 |
| rad9          | 1.42517e-07 | 1.000000 | 8.77557e-07 | 0.999996 |
| rad20         | 1.27364e-07 | 1.000000 | 7.84255e-07 | 0.999997 |
| rad36         | 8.85277e-08 | 1.000000 | 5.45117e-07 | 0.999997 |
| rad21         | 6.70165e-08 | 1.000000 | 4.12660e-07 | 0.999998 |
| rad18         | 6.05160e-08 | 1.000000 | 3.72632e-07 | 0.999998 |
| rad53         | 5.49151e-08 | 1.000000 | 3.38145e-07 | 0.999999 |
| rad56         | 5.05742e-08 | 1.000000 | 3.11415e-07 | 0.999999 |
| rad62         | 4.86346e-08 | 1.000000 | 2.99472e-07 | 0.999999 |

|           |             |         |             |          |
|-----------|-------------|---------|-------------|----------|
| rad64     | 3.90640e-08 | 1.00000 | 2.40540e-07 | 0.999999 |
| rad68syn  | 2.42970e-08 | 1.00000 | 1.49611e-07 | 1.000000 |
| rad68anti | 1.55986e-08 | 1.00000 | 9.60498e-08 | 1.000000 |
| rad40syn  | 1.20538e-08 | 1.00000 | 7.42222e-08 | 1.000000 |
| rad13     | 1.18182e-08 | 1.00000 | 7.27715e-08 | 1.000000 |
| rad43     | 9.43815e-09 | 1.00000 | 5.81162e-08 | 1.000000 |
| rad40anti | 8.74692e-09 | 1.00000 | 5.38599e-08 | 1.000000 |
| rad61     | 7.79072e-09 | 1.00000 | 4.79720e-08 | 1.000000 |
| rad15     | 7.04946e-09 | 1.00000 | 4.34076e-08 | 1.000000 |
| rad42     | 4.22517e-09 | 1.00000 | 2.60168e-08 | 1.000000 |
| rad26     | 2.75752e-09 | 1.00000 | 1.69796e-08 | 1.000000 |
| rad24     | 1.69715e-09 | 1.00000 | 1.04503e-08 | 1.000000 |
| rad10     | 1.36703e-09 | 1.00000 | 8.41761e-09 | 1.000000 |
| rad41     | 7.71117e-10 | 1.00000 | 4.74821e-09 | 1.000000 |
| rad2      | 5.26543e-10 | 1.00000 | 3.24223e-09 | 1.000000 |
| rad12     | 4.25021e-10 | 1.00000 | 2.61711e-09 | 1.000000 |
| rad33     | 3.00025e-10 | 1.00000 | 1.84743e-09 | 1.000000 |
| rad8      | 1.74553e-10 | 1.00000 | 1.07483e-09 | 1.000000 |
| rad1      | 1.36633e-10 | 1.00000 | 8.41332e-10 | 1.000000 |
| rad25     | 1.24426e-10 | 1.00000 | 7.66164e-10 | 1.000000 |
| rad3      | 6.43233e-11 | 1.00000 | 3.96076e-10 | 1.000000 |
| rad4      | 4.08735e-11 | 1.00000 | 2.51682e-10 | 1.000000 |
| rad47     | 6.06747e-12 | 1.00000 | 3.73609e-11 | 1.000000 |
| rad14     | 4.58132e-12 | 1.00000 | 2.82098e-11 | 1.000000 |
| rad5      | 1.47882e-12 | 1.00000 | 9.10595e-12 | 1.000000 |
| rad27     | 6.90342e-13 | 1.00000 | 4.25084e-12 | 1.000000 |

100.000000 Pa, 2000.00000 K

=====

| Rate constant | True (fraction)     | Effective (fraction) |
|---------------|---------------------|----------------------|
| Total         | 1.85359e-13 (1.00 ) | 2.47606e-14 (1.00 )  |

| species       | PYtrue      | Cumul    | PYeffective | Cumul    |
|---------------|-------------|----------|-------------|----------|
| Benzyl+C2H2   | 0.866418    | 0.866418 | 0.00000     | 0.00000  |
| Indene+H      | 0.0943393   | 0.960757 | 0.706228    | 0.706228 |
| PhCH2CCH+H    | 0.0189362   | 0.979693 | 0.141757    | 0.847985 |
| Ph+Allene     | 0.0101306   | 0.989824 | 0.0758377   | 0.923823 |
| PhCHCCH2+H    | 0.00579078  | 0.995615 | 0.0433500   | 0.967173 |
| PAH9+H        | 0.000769340 | 0.996384 | 0.00575931  | 0.972932 |
| PhCCH+CH3     | 0.000546804 | 0.996931 | 0.00409340  | 0.977025 |
| PAH3+H        | 0.000526472 | 0.997457 | 0.00394119  | 0.980967 |
| rad19anti     | 0.000486391 | 0.997944 | 0.00364114  | 0.984608 |
| rad38         | 0.000414455 | 0.998358 | 0.00310263  | 0.987710 |
| rad30         | 0.000378305 | 0.998737 | 0.00283201  | 0.990542 |
| PAH7+H        | 0.000352869 | 0.999090 | 0.00264159  | 0.993184 |
| Ph+MeAc       | 0.000164574 | 0.999254 | 0.00123201  | 0.994416 |
| rad35         | 0.000155983 | 0.999410 | 0.00116770  | 0.995584 |
| rad46         | 0.000121458 | 0.999532 | 0.000909241 | 0.996493 |
| rad50         | 0.000100224 | 0.999632 | 0.000750280 | 0.997243 |
| rad39         | 8.21550e-05 | 0.999714 | 0.000615016 | 0.997858 |
| rad59         | 4.92177e-05 | 0.999763 | 0.000368446 | 0.998227 |
| rad60syn      | 4.01174e-05 | 0.999803 | 0.000300321 | 0.998527 |
| PhCCH3+H      | 3.59659e-05 | 0.999839 | 0.000269242 | 0.998796 |
| rad51         | 3.27572e-05 | 0.999872 | 0.000245222 | 0.999041 |
| rad60anti     | 2.75089e-05 | 0.999899 | 0.000205933 | 0.999247 |
| rad67         | 2.44434e-05 | 0.999924 | 0.000182985 | 0.999430 |
| rad19syn      | 1.20051e-05 | 0.999936 | 8.98710e-05 | 0.999520 |
| rad52         | 9.44763e-06 | 0.999945 | 7.07254e-05 | 0.999591 |
| rad6          | 8.55327e-06 | 0.999954 | 6.40301e-05 | 0.999655 |
| PhcycC3H3_A+H | 8.01915e-06 | 0.999962 | 6.00317e-05 | 0.999715 |
| PAH10+CH3     | 7.89135e-06 | 0.999970 | 5.90749e-05 | 0.999774 |
| rad58         | 5.04299e-06 | 0.999975 | 3.77520e-05 | 0.999812 |
| rad54         | 4.45581e-06 | 0.999979 | 3.33564e-05 | 0.999845 |
| rad71         | 3.98639e-06 | 0.999983 | 2.98423e-05 | 0.999875 |
| rad37         | 3.45041e-06 | 0.999987 | 2.58299e-05 | 0.999901 |
| PAH1+H        | 3.00787e-06 | 0.999990 | 2.25170e-05 | 0.999923 |
| rad23         | 2.59483e-06 | 0.999992 | 1.94250e-05 | 0.999943 |
| rad70         | 2.12215e-06 | 0.999994 | 1.58865e-05 | 0.999959 |
| rad73         | 1.66208e-06 | 0.999996 | 1.24424e-05 | 0.999971 |
| rad65         | 8.86935e-07 | 0.999997 | 6.63963e-06 | 0.999978 |
| rad72         | 5.97942e-07 | 0.999998 | 4.47622e-06 | 0.999982 |
| rad34         | 5.65195e-07 | 0.999998 | 4.23107e-06 | 0.999986 |
| rad55         | 3.65584e-07 | 0.999999 | 2.73678e-06 | 0.999989 |
| rad22         | 1.78394e-07 | 0.999999 | 1.33546e-06 | 0.999991 |
| rad45         | 1.76177e-07 | 0.999999 | 1.31887e-06 | 0.999992 |
| PAH8+H        | 1.57627e-07 | 0.999999 | 1.18001e-06 | 0.999993 |
| rad56         | 1.11920e-07 | 0.999999 | 8.37838e-07 | 0.999994 |
| rad53         | 1.09231e-07 | 0.999999 | 8.17708e-07 | 0.999995 |

|           |             |          |             |          |
|-----------|-------------|----------|-------------|----------|
| rad9      | 7.33637e-08 | 0.999999 | 5.49204e-07 | 0.999995 |
| rad62     | 6.57483e-08 | 0.999999 | 4.92194e-07 | 0.999996 |
| rad64     | 6.34014e-08 | 1.000000 | 4.74626e-07 | 0.999996 |
| rad20     | 5.33984e-08 | 1.000000 | 3.99743e-07 | 0.999997 |
| rad11     | 5.23441e-08 | 1.000000 | 3.91850e-07 | 0.999997 |
| rad68syn  | 4.55630e-08 | 1.000000 | 3.41087e-07 | 0.999997 |
| rad7      | 3.87281e-08 | 1.000000 | 2.89920e-07 | 0.999998 |
| rad28     | 3.13110e-08 | 1.000000 | 2.34395e-07 | 0.999998 |
| rad36     | 3.02844e-08 | 1.000000 | 2.26710e-07 | 0.999998 |
| rad68anti | 2.93539e-08 | 1.000000 | 2.19744e-07 | 0.999998 |
| rad21     | 2.74562e-08 | 1.000000 | 2.05538e-07 | 0.999999 |
| rad43     | 2.23728e-08 | 1.000000 | 1.67483e-07 | 0.999999 |
| rad40syn  | 1.75004e-08 | 1.000000 | 1.31008e-07 | 0.999999 |
| rad61     | 1.69992e-08 | 1.000000 | 1.27256e-07 | 0.999999 |
| rad18     | 1.67914e-08 | 1.000000 | 1.25701e-07 | 0.999999 |
| rad40anti | 1.14949e-08 | 1.000000 | 8.60512e-08 | 0.999999 |
| rad42     | 6.27317e-09 | 1.000000 | 4.69612e-08 | 0.999999 |
| rad15     | 3.75453e-09 | 1.000000 | 2.81066e-08 | 0.999999 |
| rad13     | 2.92263e-09 | 1.000000 | 2.18790e-08 | 0.999999 |
| rad41     | 2.08318e-09 | 1.000000 | 1.55948e-08 | 0.999999 |
| rad24     | 9.48432e-10 | 1.000000 | 7.10001e-09 | 0.999999 |
| rad26     | 5.99792e-10 | 1.000000 | 4.49007e-09 | 0.999999 |
| rad12     | 3.72522e-10 | 1.000000 | 2.78872e-09 | 0.999999 |
| rad8      | 2.00667e-10 | 1.000000 | 1.50220e-09 | 0.999999 |
| rad10     | 1.98283e-10 | 1.000000 | 1.48436e-09 | 0.999999 |
| rad33     | 9.85030e-11 | 1.000000 | 7.37398e-10 | 0.999999 |
| rad2      | 6.96178e-11 | 1.000000 | 5.21162e-10 | 0.999999 |
| rad25     | 5.47342e-11 | 1.000000 | 4.09742e-10 | 0.999999 |
| rad1      | 1.88608e-11 | 1.000000 | 1.41193e-10 | 0.999999 |
| rad3      | 1.30052e-11 | 1.000000 | 9.73571e-11 | 0.999999 |
| rad4      | 8.29672e-12 | 1.000000 | 6.21096e-11 | 0.999999 |
| rad47     | 7.87355e-12 | 1.000000 | 5.89417e-11 | 0.999999 |
| rad5      | 2.06379e-12 | 1.000000 | 1.54496e-11 | 0.999999 |
| rad14     | 1.37608e-12 | 1.000000 | 1.03014e-11 | 0.999999 |
| rad27     | 2.18985e-13 | 1.000000 | 1.63933e-12 | 0.999999 |

100.000000 Pa, 2250.00000 K

=====

| Rate constant | True (fraction)     | Effective (fraction) |
|---------------|---------------------|----------------------|
| Total         | 3.29136e-13 (1.00 ) | 4.00885e-14 (1.00 )  |

| species       | PYtrue      | Cumul    | PYeffective | Cumul    |
|---------------|-------------|----------|-------------|----------|
| Benzyl+C2H2   | 0.878201    | 0.878201 | 0.000000    | 0.000000 |
| Indene+H      | 0.0702847   | 0.948486 | 0.577056    | 0.577056 |
| PhCH2CCH+H    | 0.0277457   | 0.976231 | 0.227800    | 0.804856 |
| Ph+Allene     | 0.0106021   | 0.986833 | 0.0870457   | 0.891902 |
| PhCHCCH2+H    | 0.00765701  | 0.994491 | 0.0628662   | 0.954768 |
| PAH9+H        | 0.000943579 | 0.995434 | 0.00774704  | 0.962515 |
| PAH3+H        | 0.000857335 | 0.996291 | 0.00703895  | 0.969554 |
| rad19anti     | 0.000629100 | 0.996921 | 0.00516508  | 0.974719 |
| rad38         | 0.000526544 | 0.997447 | 0.00432307  | 0.979042 |
| PAH7+H        | 0.000455429 | 0.997902 | 0.00373920  | 0.982781 |
| rad30         | 0.000417269 | 0.998320 | 0.00342589  | 0.986207 |
| PhCCH+CH3     | 0.000383017 | 0.998703 | 0.00314468  | 0.989352 |
| rad35         | 0.000201052 | 0.998904 | 0.00165069  | 0.991003 |
| Ph+MeAc       | 0.000197883 | 0.999102 | 0.00162467  | 0.992627 |
| rad50         | 0.000172675 | 0.999274 | 0.00141771  | 0.994045 |
| rad46         | 0.000167033 | 0.999441 | 0.00137138  | 0.995416 |
| rad39         | 0.000120195 | 0.999562 | 0.000986834 | 0.996403 |
| rad59         | 7.57756e-05 | 0.999637 | 0.000622138 | 0.997025 |
| rad51         | 6.36823e-05 | 0.999701 | 0.000522849 | 0.997548 |
| rad60syn      | 5.44536e-05 | 0.999756 | 0.000447079 | 0.997995 |
| PhCCCH3+H     | 5.15721e-05 | 0.999807 | 0.000423421 | 0.998419 |
| rad67         | 4.61989e-05 | 0.999853 | 0.000379306 | 0.998798 |
| rad60anti     | 3.79885e-05 | 0.999891 | 0.000311896 | 0.999110 |
| rad52         | 1.73264e-05 | 0.999909 | 0.000142254 | 0.999252 |
| PAH10+CH3     | 1.72588e-05 | 0.999926 | 0.000141699 | 0.999394 |
| rad19syn      | 1.64752e-05 | 0.999942 | 0.000135266 | 0.999529 |
| PhcycC3H3_A+H | 1.12064e-05 | 0.999954 | 9.20079e-05 | 0.999621 |
| rad58         | 1.00687e-05 | 0.999964 | 8.26671e-05 | 0.999704 |
| PAH1+H        | 6.07060e-06 | 0.999970 | 4.98413e-05 | 0.999754 |
| rad37         | 5.72808e-06 | 0.999975 | 4.70291e-05 | 0.999801 |
| rad54         | 5.42578e-06 | 0.999981 | 4.45471e-05 | 0.999845 |
| rad71         | 5.15176e-06 | 0.999986 | 4.22974e-05 | 0.999887 |
| rad70         | 3.70522e-06 | 0.999990 | 3.04209e-05 | 0.999918 |
| rad73         | 2.79037e-06 | 0.999992 | 2.29097e-05 | 0.999941 |
| rad65         | 1.72146e-06 | 0.999994 | 1.41337e-05 | 0.999955 |
| rad6          | 1.20411e-06 | 0.999995 | 9.88611e-06 | 0.999965 |

|           |             |          |             |          |
|-----------|-------------|----------|-------------|----------|
| rad34     | 1.08882e-06 | 0.999997 | 8.93952e-06 | 0.999974 |
| rad23     | 6.04392e-07 | 0.999997 | 4.96222e-06 | 0.999979 |
| rad55     | 4.77521e-07 | 0.999998 | 3.92058e-06 | 0.999983 |
| rad72     | 4.36743e-07 | 0.999998 | 3.58578e-06 | 0.999986 |
| PAH8+H    | 4.09639e-07 | 0.999998 | 3.36325e-06 | 0.999990 |
| rad56     | 1.93181e-07 | 0.999999 | 1.58607e-06 | 0.999991 |
| rad53     | 1.77214e-07 | 0.999999 | 1.45498e-06 | 0.999993 |
| rad64     | 1.36666e-07 | 0.999999 | 1.12206e-06 | 0.999994 |
| rad68syn  | 1.12073e-07 | 0.999999 | 9.20149e-07 | 0.999995 |
| rad62     | 9.71424e-08 | 0.999999 | 7.97566e-07 | 0.999995 |
| rad68anti | 7.20297e-08 | 0.999999 | 5.91383e-07 | 0.999996 |
| rad45     | 6.80669e-08 | 0.999999 | 5.58848e-07 | 0.999997 |
| rad43     | 4.83786e-08 | 0.999999 | 3.97202e-07 | 0.999997 |
| rad61     | 4.69152e-08 | 0.999999 | 3.85187e-07 | 0.999997 |
| rad40syn  | 4.55906e-08 | 0.999999 | 3.74311e-07 | 0.999998 |
| rad22     | 4.43372e-08 | 0.999999 | 3.64021e-07 | 0.999998 |
| rad9      | 3.82458e-08 | 1.000000 | 3.14009e-07 | 0.999998 |
| rad40anti | 3.01643e-08 | 1.000000 | 2.47657e-07 | 0.999999 |
| rad20     | 2.62687e-08 | 1.000000 | 2.15673e-07 | 0.999999 |
| rad11     | 1.64370e-08 | 1.000000 | 1.34953e-07 | 0.999999 |
| rad21     | 1.31136e-08 | 1.000000 | 1.07666e-07 | 0.999999 |
| rad36     | 1.19725e-08 | 1.000000 | 9.82979e-08 | 0.999999 |
| rad42     | 1.06068e-08 | 1.000000 | 8.70844e-08 | 0.999999 |
| rad7      | 9.29507e-09 | 1.000000 | 7.63151e-08 | 0.999999 |
| rad18     | 6.38371e-09 | 1.000000 | 5.24120e-08 | 0.999999 |
| rad41     | 5.38951e-09 | 1.000000 | 4.42493e-08 | 0.999999 |
| rad28     | 5.10497e-09 | 1.000000 | 4.19132e-08 | 0.999999 |
| rad15     | 2.17742e-09 | 1.000000 | 1.78772e-08 | 1.000000 |
| rad13     | 8.37962e-10 | 1.000000 | 6.87990e-09 | 1.000000 |
| rad24     | 5.69787e-10 | 1.000000 | 4.67811e-09 | 1.000000 |
| rad12     | 3.05293e-10 | 1.000000 | 2.50654e-09 | 1.000000 |
| rad26     | 2.35268e-10 | 1.000000 | 1.93161e-09 | 1.000000 |
| rad8      | 2.17309e-10 | 1.000000 | 1.78416e-09 | 1.000000 |
| rad10     | 7.22440e-11 | 1.000000 | 5.93143e-10 | 1.000000 |
| rad33     | 3.59117e-11 | 1.000000 | 2.94845e-10 | 1.000000 |
| rad25     | 2.85327e-11 | 1.000000 | 2.34262e-10 | 1.000000 |
| rad47     | 1.45650e-11 | 1.000000 | 1.19583e-10 | 1.000000 |
| rad2      | 1.42796e-11 | 1.000000 | 1.17239e-10 | 1.000000 |
| rad1      | 4.16292e-12 | 1.000000 | 3.41788e-11 | 1.000000 |
| rad3      | 3.11539e-12 | 1.000000 | 2.55782e-11 | 1.000000 |
| rad5      | 2.19958e-12 | 1.000000 | 1.80591e-11 | 1.000000 |
| rad4      | 1.97772e-12 | 1.000000 | 1.62376e-11 | 1.000000 |
| rad14     | 5.30491e-13 | 1.000000 | 4.35548e-12 | 1.000000 |
| rad27     | 1.31939e-13 | 1.000000 | 1.08325e-12 | 1.000000 |

100.00000 Pa, 2500.00000 K

=====

| Rate constant | True (fraction)     | Effective (fraction) |
|---------------|---------------------|----------------------|
| Total         | 5.32896e-13 (1.00 ) | 6.40311e-14 (1.00 )  |

| species     | PYtrue      | Cumul    | PYeffective | Cumul    |
|-------------|-------------|----------|-------------|----------|
| Benzyl+C2H2 | 0.879843    | 0.879843 | 0.00000     | 0.00000  |
| Indene+H    | 0.0541583   | 0.934001 | 0.450728    | 0.450728 |
| PhCH2CCH+H  | 0.0379681   | 0.971969 | 0.315987    | 0.766715 |
| Ph+Allene   | 0.0112452   | 0.983215 | 0.0935876   | 0.860303 |
| PhCHCCH2+H  | 0.00999519  | 0.993210 | 0.0831842   | 0.943487 |
| PAH3+H      | 0.00124360  | 0.994453 | 0.0103498   | 0.953837 |
| PAH9+H      | 0.00106606  | 0.995519 | 0.00887217  | 0.962709 |
| rad19anti   | 0.000730960 | 0.996250 | 0.00608336  | 0.968792 |
| rad38       | 0.000614748 | 0.996865 | 0.00511620  | 0.973908 |
| PAH7+H      | 0.000587185 | 0.997452 | 0.00488680  | 0.978795 |
| rad30       | 0.000442205 | 0.997895 | 0.00368022  | 0.982475 |
| PhCCH+CH3   | 0.000309016 | 0.998204 | 0.00257176  | 0.985047 |
| rad50       | 0.000262394 | 0.998466 | 0.00218376  | 0.987231 |
| Ph+MeAc     | 0.000256985 | 0.998723 | 0.00213874  | 0.989370 |
| rad35       | 0.000242255 | 0.998965 | 0.00201615  | 0.991386 |
| rad46       | 0.000208061 | 0.999173 | 0.00173157  | 0.993117 |
| rad39       | 0.000176363 | 0.999350 | 0.00146776  | 0.994585 |
| rad51       | 0.000110253 | 0.999460 | 0.000917573 | 0.995503 |
| rad59       | 0.000104828 | 0.999565 | 0.000872423 | 0.996375 |
| rad67       | 7.34632e-05 | 0.999638 | 0.000611392 | 0.996986 |
| PhCCCH3+H   | 7.22806e-05 | 0.999710 | 0.000601550 | 0.997588 |
| rad60syn    | 6.81867e-05 | 0.999779 | 0.000567479 | 0.998156 |
| rad60anti   | 4.82386e-05 | 0.999827 | 0.000401462 | 0.998557 |
| PAH10+CH3   | 3.09271e-05 | 0.999858 | 0.000257389 | 0.998814 |
| rad52       | 2.79095e-05 | 0.999886 | 0.000232275 | 0.999047 |
| rad19syn    | 2.35007e-05 | 0.999909 | 0.000195583 | 0.999242 |
| rad58       | 1.71647e-05 | 0.999926 | 0.000142852 | 0.999385 |



|               |             |          |             |          |
|---------------|-------------|----------|-------------|----------|
| PhcycC3H3_A+H | 1.49885e-05 | 0.999941 | 0.000124741 | 0.999510 |
| rad71         | 1.13889e-05 | 0.999953 | 9.47831e-05 | 0.999605 |
| PAH1+H        | 1.13438e-05 | 0.999964 | 9.44082e-05 | 0.999699 |
| rad37         | 8.13014e-06 | 0.999972 | 6.76625e-05 | 0.999767 |
| rad54         | 6.28647e-06 | 0.999979 | 5.23187e-05 | 0.999819 |
| rad73         | 6.12213e-06 | 0.999985 | 5.09509e-05 | 0.999870 |
| rad70         | 5.97568e-06 | 0.999991 | 4.97322e-05 | 0.999920 |
| rad65         | 2.89209e-06 | 0.999994 | 2.40692e-05 | 0.999944 |
| rad34         | 1.90841e-06 | 0.999995 | 1.58826e-05 | 0.999960 |
| PAH8+H        | 1.07294e-06 | 0.999996 | 8.92948e-06 | 0.999969 |
| rad72         | 8.15411e-07 | 0.999997 | 6.78620e-06 | 0.999975 |
| rad55         | 5.88356e-07 | 0.999998 | 4.89655e-06 | 0.999980 |
| rad56         | 3.23685e-07 | 0.999998 | 2.69384e-06 | 0.999983 |
| rad64         | 2.72116e-07 | 0.999998 | 2.26467e-06 | 0.999985 |
| rad53         | 2.71841e-07 | 0.999999 | 2.26238e-06 | 0.999987 |
| rad68syn      | 2.48286e-07 | 0.999999 | 2.06634e-06 | 0.999990 |
| rad6          | 2.34425e-07 | 0.999999 | 1.95098e-06 | 0.999991 |
| rad23         | 1.80044e-07 | 0.999999 | 1.49840e-06 | 0.999993 |
| rad68anti     | 1.59180e-07 | 1.000000 | 1.32477e-06 | 0.999994 |
| rad62         | 1.55905e-07 | 1.000000 | 1.29751e-06 | 0.999996 |
| rad40syn      | 1.11284e-07 | 1.000000 | 9.26151e-07 | 0.999997 |
| rad61         | 1.05974e-07 | 1.000000 | 8.81959e-07 | 0.999997 |
| rad43         | 8.80229e-08 | 1.000000 | 7.32564e-07 | 0.999998 |
| rad40anti     | 7.57732e-08 | 1.000000 | 6.30617e-07 | 0.999999 |
| rad45         | 2.95965e-08 | 1.000000 | 2.46315e-07 | 0.999999 |
| rad9          | 2.03622e-08 | 1.000000 | 1.69463e-07 | 0.999999 |
| rad42         | 1.99119e-08 | 1.000000 | 1.65715e-07 | 0.999999 |
| rad22         | 1.52156e-08 | 1.000000 | 1.26630e-07 | 0.999999 |
| rad20         | 1.45084e-08 | 1.000000 | 1.20745e-07 | 1.000000 |
| rad41         | 1.14027e-08 | 1.000000 | 9.48985e-08 | 1.000000 |
| rad21         | 7.01008e-09 | 1.000000 | 5.83408e-08 | 1.000000 |
| rad11         | 6.38934e-09 | 1.000000 | 5.31748e-08 | 1.000000 |
| rad36         | 5.30461e-09 | 1.000000 | 4.41472e-08 | 1.000000 |
| rad18         | 2.87807e-09 | 1.000000 | 2.39525e-08 | 1.000000 |
| rad7          | 2.68537e-09 | 1.000000 | 2.23488e-08 | 1.000000 |
| rad15         | 1.29229e-09 | 1.000000 | 1.07550e-08 | 1.000000 |
| rad28         | 1.26508e-09 | 1.000000 | 1.05285e-08 | 1.000000 |
| rad24         | 3.60372e-10 | 1.000000 | 2.99917e-09 | 1.000000 |
| rad13         | 2.74430e-10 | 1.000000 | 2.28392e-09 | 1.000000 |
| rad12         | 2.40067e-10 | 1.000000 | 1.99794e-09 | 1.000000 |
| rad8          | 2.25712e-10 | 1.000000 | 1.87847e-09 | 1.000000 |
| rad26         | 1.31877e-10 | 1.000000 | 1.09753e-09 | 1.000000 |
| rad10         | 4.18820e-11 | 1.000000 | 3.48560e-10 | 1.000000 |
| rad47         | 2.46273e-11 | 1.000000 | 2.04959e-10 | 1.000000 |
| rad25         | 1.72125e-11 | 1.000000 | 1.43250e-10 | 1.000000 |
| rad33         | 1.46443e-11 | 1.000000 | 1.21876e-10 | 1.000000 |
| rad2          | 5.06512e-12 | 1.000000 | 4.21541e-11 | 1.000000 |
| rad5          | 2.25461e-12 | 1.000000 | 1.87639e-11 | 1.000000 |
| rad1          | 1.65789e-12 | 1.000000 | 1.37976e-11 | 1.000000 |
| rad3          | 8.88342e-13 | 1.000000 | 7.39316e-12 | 1.000000 |
| rad4          | 5.55598e-13 | 1.000000 | 4.62392e-12 | 1.000000 |
| rad14         | 2.69968e-13 | 1.000000 | 2.24679e-12 | 1.000000 |
| rad27         | 1.08105e-13 | 1.000000 | 8.99693e-13 | 1.000000 |

100.000000 Pa, 2750.00000 K

| =====         |                     |          |                      |          |
|---------------|---------------------|----------|----------------------|----------|
| Rate constant | True (fraction)     |          | Effective (fraction) |          |
| -----         |                     |          |                      |          |
| Total         | 8.05113e-13 (1.00 ) |          | 1.00488e-13 (1.00 )  |          |
| species       | PYtrue              | Cumul    | PYeffective          | Cumul    |
| -----         |                     |          |                      |          |
| Benzyl+C2H2   | 0.875188            | 0.875188 | 0.00000              | 0.00000  |
| PhCH2CCH+H    | 0.0492371           | 0.924425 | 0.394491             | 0.394491 |
| Indene+H      | 0.0427150           | 0.967140 | 0.342236             | 0.736727 |
| PhCHCCH2+H    | 0.0126525           | 0.979793 | 0.101372             | 0.838099 |
| Ph+Allene     | 0.0121361           | 0.991929 | 0.0972356            | 0.935335 |
| PAH3+H        | 0.00165414          | 0.993583 | 0.0132531            | 0.948588 |
| PAH9+H        | 0.00112944          | 0.994712 | 0.00904916           | 0.957637 |
| rad19anti     | 0.000790010         | 0.995502 | 0.00632962           | 0.963966 |
| PAH7+H        | 0.000729483         | 0.996232 | 0.00584468           | 0.969811 |
| rad38         | 0.000670641         | 0.996902 | 0.00537323           | 0.975184 |
| rad30         | 0.000454283         | 0.997357 | 0.00363975           | 0.978824 |
| rad50         | 0.000357132         | 0.997714 | 0.00286137           | 0.981686 |
| Ph+MeAc       | 0.000331303         | 0.998045 | 0.00265443           | 0.984340 |
| PhCCH+CH3     | 0.000293322         | 0.998338 | 0.00235012           | 0.986690 |
| rad35         | 0.000276904         | 0.998615 | 0.00221858           | 0.988909 |
| rad39         | 0.000242954         | 0.998858 | 0.00194656           | 0.990855 |
| rad46         | 0.000239445         | 0.999098 | 0.00191845           | 0.992774 |
| rad51         | 0.000167825         | 0.999266 | 0.00134463           | 0.994118 |

|               |             |          |             |          |
|---------------|-------------|----------|-------------|----------|
| rad59         | 0.000133899 | 0.999399 | 0.00107281  | 0.995191 |
| rad67         | 0.000103306 | 0.999503 | 0.000827698 | 0.996019 |
| PhCCCH3+H     | 9.47602e-05 | 0.999598 | 0.000759226 | 0.996778 |
| rad60syn      | 8.03404e-05 | 0.999678 | 0.000643693 | 0.997422 |
| rad60anti     | 5.74983e-05 | 0.999735 | 0.000460681 | 0.997882 |
| PAH10+CH3     | 4.75658e-05 | 0.999783 | 0.000381101 | 0.998263 |
| rad52         | 3.98414e-05 | 0.999823 | 0.000319213 | 0.998583 |
| rad19syn      | 3.43533e-05 | 0.999857 | 0.000275242 | 0.998858 |
| rad58         | 2.60277e-05 | 0.999883 | 0.000208536 | 0.999066 |
| rad71         | 2.41602e-05 | 0.999907 | 0.000193574 | 0.999260 |
| PhcycC3H3_A+H | 1.91242e-05 | 0.999926 | 0.000153225 | 0.999413 |
| PAH1+H        | 1.89499e-05 | 0.999945 | 0.000151828 | 0.999565 |
| rad73         | 1.20737e-05 | 0.999957 | 9.67356e-05 | 0.999662 |
| rad37         | 1.02462e-05 | 0.999968 | 8.20932e-05 | 0.999744 |
| rad70         | 8.97668e-06 | 0.999977 | 7.19219e-05 | 0.999816 |
| rad54         | 7.05006e-06 | 0.999984 | 5.64856e-05 | 0.999872 |
| rad65         | 4.28055e-06 | 0.999988 | 3.42961e-05 | 0.999907 |
| rad34         | 3.6823e-06  | 0.999991 | 2.45829e-05 | 0.999931 |
| PAH8+H        | 2.42871e-06 | 0.999994 | 1.94590e-05 | 0.999951 |
| rad72         | 1.92789e-06 | 0.999995 | 1.54464e-05 | 0.999966 |
| rad55         | 6.94734e-07 | 0.999996 | 5.56626e-06 | 0.999972 |
| rad56         | 5.00806e-07 | 0.999997 | 4.01250e-06 | 0.999976 |
| rad68syn      | 4.83824e-07 | 0.999997 | 3.87643e-06 | 0.999980 |
| rad64         | 4.77463e-07 | 0.999998 | 3.82547e-06 | 0.999983 |
| rad53         | 3.88477e-07 | 0.999998 | 3.11251e-06 | 0.999987 |
| rad68anti     | 3.09593e-07 | 0.999998 | 2.48048e-06 | 0.999989 |
| rad62         | 2.47986e-07 | 0.999999 | 1.98688e-06 | 0.999991 |
| rad40syn      | 2.35749e-07 | 0.999999 | 1.88884e-06 | 0.999993 |
| rad61         | 1.98549e-07 | 0.999999 | 1.59079e-06 | 0.999994 |
| rad40anti     | 1.64666e-07 | 0.999999 | 1.31932e-06 | 0.999996 |
| rad43         | 1.38348e-07 | 0.999999 | 1.10846e-06 | 0.999997 |
| rad23         | 6.69167e-08 | 0.999999 | 5.36142e-07 | 0.999997 |
| rad6          | 5.73963e-08 | 0.999999 | 4.59864e-07 | 0.999998 |
| rad42         | 3.60063e-08 | 0.999999 | 2.88485e-07 | 0.999998 |
| rad41         | 2.03406e-08 | 0.999999 | 1.62970e-07 | 0.999998 |
| rad45         | 1.40848e-08 | 0.999999 | 1.12848e-07 | 0.999998 |
| rad9          | 1.11410e-08 | 1.000000 | 8.92629e-08 | 0.999999 |
| rad20         | 8.75495e-09 | 1.000000 | 7.01453e-08 | 0.999999 |
| rad22         | 6.37198e-09 | 1.000000 | 5.10528e-08 | 0.999999 |
| rad21         | 4.08564e-09 | 1.000000 | 3.27345e-08 | 0.999999 |
| rad11         | 2.98826e-09 | 1.000000 | 2.39422e-08 | 0.999999 |
| rad36         | 2.56344e-09 | 1.000000 | 2.05385e-08 | 0.999999 |
| rad18         | 1.45569e-09 | 1.000000 | 1.16631e-08 | 0.999999 |
| rad7          | 9.09747e-10 | 1.000000 | 7.28897e-09 | 0.999999 |
| rad15         | 7.78422e-10 | 1.000000 | 6.23678e-09 | 0.999999 |
| rad28         | 4.62489e-10 | 1.000000 | 3.70550e-09 | 0.999999 |
| rad24         | 2.36695e-10 | 1.000000 | 1.89642e-09 | 0.999999 |
| rad8          | 2.27477e-10 | 1.000000 | 1.82256e-09 | 0.999999 |
| rad12         | 1.84668e-10 | 1.000000 | 1.47957e-09 | 0.999999 |
| rad13         | 1.03664e-10 | 1.000000 | 8.30566e-10 | 0.999999 |
| rad26         | 8.16222e-11 | 1.000000 | 6.53963e-10 | 0.999999 |
| rad47         | 3.66692e-11 | 1.000000 | 2.93797e-10 | 0.999999 |
| rad10         | 2.76757e-11 | 1.000000 | 2.21740e-10 | 0.999999 |
| rad25         | 1.16952e-11 | 1.000000 | 9.37032e-11 | 0.999999 |
| rad33         | 6.72104e-12 | 1.000000 | 5.38495e-11 | 0.999999 |
| rad2          | 2.63669e-12 | 1.000000 | 2.11254e-11 | 0.999999 |
| rad5          | 2.23727e-12 | 1.000000 | 1.79252e-11 | 0.999999 |
| rad1          | 9.77166e-13 | 1.000000 | 7.82913e-12 | 0.999999 |
| rad3          | 3.05916e-13 | 1.000000 | 2.45103e-12 | 0.999999 |
| rad4          | 1.86793e-13 | 1.000000 | 1.49660e-12 | 0.999999 |
| rad14         | 1.79257e-13 | 1.000000 | 1.43622e-12 | 0.999999 |
| rad27         | 9.39046e-14 | 1.000000 | 7.52372e-13 | 0.999999 |

100.000000 Pa, 3000.00000 K

=====

| Rate constant | True (fraction)     | Effective (fraction) |
|---------------|---------------------|----------------------|
| Total         | 1.15309e-12 (1.00 ) | 1.53862e-13 (1.00 )  |

| species     | PYtrue      | Cumul    | PYeffective | Cumul    |
|-------------|-------------|----------|-------------|----------|
| Benzyl+C2H2 | 0.866566    | 0.866566 | 0.00000     | 0.00000  |
| PhCH2CCH+H  | 0.0611725   | 0.927738 | 0.458447    | 0.458447 |
| Indene+H    | 0.0342664   | 0.962005 | 0.256803    | 0.715250 |
| PhCHCCH2+H  | 0.0154791   | 0.977484 | 0.116005    | 0.831255 |
| Ph+Allene   | 0.0132661   | 0.990750 | 0.0994202   | 0.930675 |
| PAH3+H      | 0.00205939  | 0.992809 | 0.0154337   | 0.946109 |
| PAH9+H      | 0.00113818  | 0.993948 | 0.00852989  | 0.954639 |
| PAH7+H      | 0.000866196 | 0.994814 | 0.00649155  | 0.961130 |
| rad19anti   | 0.000812982 | 0.995627 | 0.00609275  | 0.967223 |

|               |             |          |             |          |
|---------------|-------------|----------|-------------|----------|
| rad38         | 0.000693250 | 0.996320 | 0.00519544  | 0.972419 |
| rad30         | 0.000455427 | 0.996776 | 0.00341311  | 0.975832 |
| rad50         | 0.000445284 | 0.997221 | 0.00333710  | 0.979169 |
| Ph+MeAc       | 0.000411380 | 0.997632 | 0.00308301  | 0.982252 |
| PhCCH+CH3     | 0.000319072 | 0.997951 | 0.00239123  | 0.984643 |
| rad39         | 0.000311473 | 0.998263 | 0.00233428  | 0.986977 |
| rad35         | 0.000303825 | 0.998567 | 0.00227696  | 0.989254 |
| rad46         | 0.000258953 | 0.998826 | 0.00194068  | 0.991195 |
| rad51         | 0.000229789 | 0.999055 | 0.00172211  | 0.992917 |
| rad59         | 0.000160967 | 0.999216 | 0.00120633  | 0.994123 |
| rad67         | 0.000132860 | 0.999349 | 0.000995694 | 0.995119 |
| PhCCCH3+H     | 0.000117527 | 0.999467 | 0.000880786 | 0.996000 |
| rad60syn      | 9.03380e-05 | 0.999557 | 0.000677022 | 0.996677 |
| PAH10+CH3     | 6.53573e-05 | 0.999622 | 0.000489808 | 0.997167 |
| rad60anti     | 6.52880e-05 | 0.999688 | 0.000489289 | 0.997656 |
| rad52         | 5.16202e-05 | 0.999739 | 0.000386858 | 0.998043 |
| rad19syn      | 5.01073e-05 | 0.999789 | 0.000375520 | 0.998418 |
| rad71         | 4.46402e-05 | 0.999834 | 0.000334548 | 0.998753 |
| rad58         | 3.61223e-05 | 0.999870 | 0.000270712 | 0.999024 |
| PAH1+H        | 2.86358e-05 | 0.999899 | 0.000214606 | 0.999238 |
| PhcycC3H3_A+H | 2.34405e-05 | 0.999922 | 0.000175670 | 0.999414 |
| rad73         | 2.07464e-05 | 0.999943 | 0.000155480 | 0.999569 |
| rad70         | 1.26574e-05 | 0.999956 | 9.48583e-05 | 0.999664 |
| rad37         | 1.18405e-05 | 0.999967 | 8.87364e-05 | 0.999753 |
| rad54         | 7.74224e-06 | 0.999975 | 5.80228e-05 | 0.999811 |
| rad65         | 5.72187e-06 | 0.999981 | 4.28815e-05 | 0.999854 |
| PAH8+H        | 4.80336e-06 | 0.999986 | 3.59980e-05 | 0.999890 |
| rad34         | 4.57517e-06 | 0.999990 | 3.42878e-05 | 0.999924 |
| rad72         | 4.08316e-06 | 0.999994 | 3.06005e-05 | 0.999955 |
| rad68syn      | 8.44484e-07 | 0.999995 | 6.32883e-06 | 0.999961 |
| rad55         | 7.96450e-07 | 0.999996 | 5.96885e-06 | 0.999967 |
| rad64         | 7.49282e-07 | 0.999997 | 5.61536e-06 | 0.999973 |
| rad56         | 7.20611e-07 | 0.999997 | 5.40049e-06 | 0.999978 |
| rad68anti     | 5.39579e-07 | 0.999998 | 4.04378e-06 | 0.999982 |
| rad53         | 5.23230e-07 | 0.999999 | 3.92125e-06 | 0.999986 |
| rad40syn      | 4.40837e-07 | 0.999999 | 3.30377e-06 | 0.999989 |
| rad62         | 3.72898e-07 | 0.999999 | 2.79461e-06 | 0.999992 |
| rad61         | 3.22545e-07 | 1.000000 | 2.41726e-06 | 0.999995 |
| rad40anti     | 3.14460e-07 | 1.000000 | 2.35667e-06 | 0.999997 |
| rad43         | 1.94905e-07 | 1.000000 | 1.46068e-06 | 0.999998 |
| rad42         | 5.98435e-08 | 1.000000 | 4.48487e-07 | 0.999999 |
| rad41         | 3.19514e-08 | 1.000000 | 2.39454e-07 | 0.999999 |
| rad23         | 2.83561e-08 | 1.000000 | 2.12510e-07 | 0.999999 |
| rad6          | 1.69453e-08 | 1.000000 | 1.26994e-07 | 0.999999 |
| rad45         | 7.18462e-09 | 1.000000 | 5.38438e-08 | 0.999999 |
| rad9          | 6.29141e-09 | 1.000000 | 4.71498e-08 | 0.999999 |
| rad20         | 5.66104e-09 | 1.000000 | 4.24256e-08 | 1.000000 |
| rad22         | 3.04394e-09 | 1.000000 | 2.28123e-08 | 1.000000 |
| rad21         | 2.54753e-09 | 1.000000 | 1.90920e-08 | 1.000000 |
| rad11         | 1.63081e-09 | 1.000000 | 1.22218e-08 | 1.000000 |
| rad36         | 1.32395e-09 | 1.000000 | 9.92213e-09 | 1.000000 |
| rad18         | 8.01987e-10 | 1.000000 | 6.01035e-09 | 1.000000 |
| rad15         | 4.77718e-10 | 1.000000 | 3.58017e-09 | 1.000000 |
| rad7          | 3.58481e-10 | 1.000000 | 2.68657e-09 | 1.000000 |
| rad8          | 2.23938e-10 | 1.000000 | 1.67826e-09 | 1.000000 |
| rad28         | 2.18337e-10 | 1.000000 | 1.63629e-09 | 1.000000 |
| rad24         | 1.60033e-10 | 1.000000 | 1.19933e-09 | 1.000000 |
| rad12         | 1.40806e-10 | 1.000000 | 1.05525e-09 | 1.000000 |
| rad26         | 5.18819e-11 | 1.000000 | 3.88820e-10 | 1.000000 |
| rad47         | 4.90753e-11 | 1.000000 | 3.67786e-10 | 1.000000 |
| rad13         | 4.51001e-11 | 1.000000 | 3.37994e-10 | 1.000000 |
| rad10         | 1.87739e-11 | 1.000000 | 1.40698e-10 | 1.000000 |
| rad25         | 8.65039e-12 | 1.000000 | 6.48288e-11 | 1.000000 |
| rad33         | 3.44956e-12 | 1.000000 | 2.58521e-11 | 1.000000 |
| rad5          | 2.16912e-12 | 1.000000 | 1.62561e-11 | 1.000000 |
| rad2          | 1.61546e-12 | 1.000000 | 1.21068e-11 | 1.000000 |
| rad1          | 6.72504e-13 | 1.000000 | 5.03996e-12 | 1.000000 |
| rad14         | 1.41618e-13 | 1.000000 | 1.06133e-12 | 1.000000 |
| rad3          | 1.26679e-13 | 1.000000 | 9.49376e-13 | 1.000000 |
| rad27         | 8.07771e-14 | 1.000000 | 6.05369e-13 | 1.000000 |
| rad4          | 7.51765e-14 | 1.000000 | 5.63397e-13 | 1.000000 |

100.000000 Pa, 3250.00000 K

=====

| Rate constant | True (fraction)     | Effective (fraction) |
|---------------|---------------------|----------------------|
| Total         | 1.58309e-12 (1.00 ) | 2.28795e-13 (1.00 )  |

| species | PYtrue | Cumul | PYeffective | Cumul |
|---------|--------|-------|-------------|-------|
| -----   |        |       |             |       |

|               |             |          |             |          |
|---------------|-------------|----------|-------------|----------|
| Benzy1+C2H2   | 0.855476    | 0.855476 | 0.00000     | 0.00000  |
| PhCH2CCH+H    | 0.0734301   | 0.928906 | 0.508082    | 0.508082 |
| Indene+H      | 0.0278640   | 0.956770 | 0.192798    | 0.700880 |
| PhCHCCH2+H    | 0.0183610   | 0.975131 | 0.127045    | 0.827925 |
| Ph+Allene     | 0.0145940   | 0.989725 | 0.100980    | 0.928905 |
| PAH3+H        | 0.00243646  | 0.992162 | 0.0168585   | 0.945763 |
| PAH9+H        | 0.00110340  | 0.993265 | 0.00763472  | 0.953398 |
| PAH7+H        | 0.000986593 | 0.994252 | 0.00682649  | 0.960225 |
| rad19anti     | 0.000808903 | 0.995060 | 0.00559701  | 0.965822 |
| rad38         | 0.000686676 | 0.995747 | 0.00475129  | 0.970573 |
| rad50         | 0.000518240 | 0.996265 | 0.00358583  | 0.974159 |
| Ph+MeAc       | 0.000489466 | 0.996755 | 0.00338674  | 0.977546 |
| rad30         | 0.000447972 | 0.997203 | 0.00309963  | 0.980645 |
| PhCCH+CH3     | 0.000378213 | 0.997581 | 0.00261695  | 0.983262 |
| rad39         | 0.000374491 | 0.997956 | 0.00259120  | 0.985853 |
| rad35         | 0.000323023 | 0.998279 | 0.00223508  | 0.988088 |
| rad51         | 0.000289306 | 0.998568 | 0.00200178  | 0.990090 |
| rad46         | 0.000266721 | 0.998835 | 0.00184551  | 0.991936 |
| rad59         | 0.000184695 | 0.999019 | 0.00127795  | 0.993214 |
| rad67         | 0.000159865 | 0.999179 | 0.00110615  | 0.994320 |
| PhCCCH3+H     | 0.000140367 | 0.999319 | 0.000971233 | 0.995291 |
| rad60syn      | 9.79791e-05 | 0.999417 | 0.000677943 | 0.995969 |
| PAH10+CH3     | 8.26164e-05 | 0.999500 | 0.000571644 | 0.996541 |
| rad71         | 7.28725e-05 | 0.999573 | 0.000504224 | 0.997045 |
| rad60anti     | 7.14060e-05 | 0.999644 | 0.000494077 | 0.997539 |
| rad19syn      | 7.13412e-05 | 0.999716 | 0.000493628 | 0.998033 |
| rad52         | 6.19626e-05 | 0.999778 | 0.000428735 | 0.998461 |
| rad58         | 4.68390e-05 | 0.999825 | 0.000324091 | 0.998785 |
| PAH1+H        | 3.98786e-05 | 0.999864 | 0.000275931 | 0.999061 |
| rad73         | 3.17548e-05 | 0.999896 | 0.000219720 | 0.999281 |
| PhcycC3H3_A+H | 2.77979e-05 | 0.999924 | 0.000192341 | 0.999473 |
| rad70         | 1.68829e-05 | 0.999941 | 0.000116817 | 0.999590 |
| rad37         | 1.28498e-05 | 0.999954 | 8.89111e-05 | 0.999679 |
| PAH8+H        | 8.50554e-06 | 0.999962 | 5.88521e-05 | 0.999738 |
| rad54         | 8.38247e-06 | 0.999971 | 5.80005e-05 | 0.999796 |
| rad72         | 7.53932e-06 | 0.999978 | 5.21665e-05 | 0.999848 |
| rad65         | 7.06215e-06 | 0.999985 | 4.88648e-05 | 0.999897 |
| rad34         | 6.39591e-06 | 0.999992 | 4.42550e-05 | 0.999941 |
| rad68syn      | 1.34615e-06 | 0.999993 | 9.31439e-06 | 0.999951 |
| rad64         | 1.07451e-06 | 0.999994 | 7.43479e-06 | 0.999958 |
| rad56         | 9.79749e-07 | 0.999995 | 6.77914e-06 | 0.999965 |
| rad55         | 8.94016e-07 | 0.999996 | 6.18593e-06 | 0.999971 |
| rad68anti     | 8.59118e-07 | 0.999997 | 5.94446e-06 | 0.999977 |
| rad40syn      | 7.44395e-07 | 0.999997 | 5.15066e-06 | 0.999982 |
| rad53         | 6.73296e-07 | 0.999998 | 4.65871e-06 | 0.999987 |
| rad40anti     | 5.40411e-07 | 0.999999 | 3.73924e-06 | 0.999990 |
| rad62         | 5.25271e-07 | 0.999999 | 3.63448e-06 | 0.999994 |
| rad61         | 4.70570e-07 | 1.000000 | 3.25599e-06 | 0.999997 |
| rad43         | 2.53719e-07 | 1.000000 | 1.75554e-06 | 0.999999 |
| rad42         | 9.14592e-08 | 1.000000 | 6.32830e-07 | 1.000000 |
| rad41         | 4.57464e-08 | 1.000000 | 3.16531e-07 | 1.000000 |
| rad23         | 1.31412e-08 | 1.000000 | 9.09271e-08 | 1.000000 |
| rad6          | 5.94564e-09 | 1.000000 | 4.11394e-08 | 1.000000 |
| rad45         | 3.86958e-09 | 1.000000 | 2.67746e-08 | 1.000000 |
| rad20         | 3.86683e-09 | 1.000000 | 2.67556e-08 | 1.000000 |
| rad9          | 3.67539e-09 | 1.000000 | 2.54310e-08 | 1.000000 |
| rad21         | 1.67615e-09 | 1.000000 | 1.15977e-08 | 1.000000 |
| rad22         | 1.60625e-09 | 1.000000 | 1.11140e-08 | 1.000000 |
| rad11         | 1.00372e-09 | 1.000000 | 6.94500e-09 | 1.000000 |
| rad36         | 7.20199e-10 | 1.000000 | 4.98324e-09 | 1.000000 |
| rad18         | 4.72060e-10 | 1.000000 | 3.26631e-09 | 1.000000 |
| rad15         | 2.99751e-10 | 1.000000 | 2.07405e-09 | 1.000000 |
| rad8          | 2.16194e-10 | 1.000000 | 1.49590e-09 | 1.000000 |
| rad7          | 1.61857e-10 | 1.000000 | 1.11993e-09 | 1.000000 |
| rad28         | 1.19922e-10 | 1.000000 | 8.29772e-10 | 1.000000 |
| rad24         | 1.10784e-10 | 1.000000 | 7.66540e-10 | 1.000000 |
| rad12         | 1.07299e-10 | 1.000000 | 7.42433e-10 | 1.000000 |
| rad47         | 6.03691e-11 | 1.000000 | 4.17709e-10 | 1.000000 |
| rad26         | 3.34176e-11 | 1.000000 | 2.31225e-10 | 1.000000 |
| rad13         | 2.22975e-11 | 1.000000 | 1.54282e-10 | 1.000000 |
| rad10         | 1.28213e-11 | 1.000000 | 8.87140e-11 | 1.000000 |
| rad25         | 6.76270e-12 | 1.000000 | 4.67929e-11 | 1.000000 |
| rad5          | 2.08136e-12 | 1.000000 | 1.44014e-11 | 1.000000 |
| rad33         | 1.95289e-12 | 1.000000 | 1.35125e-11 | 1.000000 |
| rad2          | 1.05741e-12 | 1.000000 | 7.31647e-12 | 1.000000 |
| rad1          | 4.89266e-13 | 1.000000 | 3.38536e-12 | 1.000000 |
| rad14         | 1.21383e-13 | 1.000000 | 8.39883e-13 | 1.000000 |
| rad27         | 6.83755e-14 | 1.000000 | 4.73108e-13 | 1.000000 |
| rad3          | 6.15801e-14 | 1.000000 | 4.26089e-13 | 1.000000 |
| rad4          | 3.55805e-14 | 1.000000 | 2.46191e-13 | 1.000000 |

100.000000 Pa, 3500.00000 K

=====

| Rate constant | True (fraction)     | Effective (fraction) |
|---------------|---------------------|----------------------|
| Total         | 2.10046e-12 (1.00 ) | 3.29923e-13 (1.00 )  |

| species       | PYtrue      | Cumul    | PYeffective | Cumul    |
|---------------|-------------|----------|-------------|----------|
| Benzyl+C2H2   | 0.842928    | 0.842928 | 0.00000     | 0.00000  |
| PhCH2CCH+H    | 0.0857241   | 0.928652 | 0.545762    | 0.545762 |
| Indene+H      | 0.0229286   | 0.951581 | 0.145975    | 0.691737 |
| PhCHCCH2+H    | 0.0212218   | 0.972802 | 0.135108    | 0.826845 |
| Ph+Allene     | 0.0160719   | 0.988874 | 0.102322    | 0.929167 |
| PAH3+H        | 0.00277081  | 0.991645 | 0.0176403   | 0.946807 |
| PAH7+H        | 0.00108548  | 0.992731 | 0.00691069  | 0.953718 |
| PAH9+H        | 0.00103824  | 0.993769 | 0.00660993  | 0.960328 |
| rad19anti     | 0.000786009 | 0.994555 | 0.00500412  | 0.965332 |
| rad38         | 0.000657571 | 0.995213 | 0.00418642  | 0.969518 |
| rad50         | 0.000571348 | 0.995784 | 0.00363749  | 0.973156 |
| Ph+MeAc       | 0.000559758 | 0.996344 | 0.00356370  | 0.976720 |
| PhCCH+CH3     | 0.000466754 | 0.996810 | 0.00297159  | 0.979691 |
| rad30         | 0.000434295 | 0.997245 | 0.00276494  | 0.982456 |
| rad39         | 0.000426813 | 0.997671 | 0.00271731  | 0.985173 |
| rad51         | 0.000340851 | 0.998012 | 0.00217003  | 0.987344 |
| rad35         | 0.000335220 | 0.998348 | 0.00213418  | 0.989478 |
| rad46         | 0.000264414 | 0.998612 | 0.00168339  | 0.991161 |
| rad59         | 0.000204436 | 0.998816 | 0.00130154  | 0.992463 |
| rad67         | 0.000182834 | 0.998999 | 0.00116401  | 0.993627 |
| PhCCCH3+H     | 0.000163685 | 0.999163 | 0.00104210  | 0.994669 |
| rad71         | 0.000107636 | 0.999271 | 0.000685264 | 0.995354 |
| rad60syn      | 0.000103349 | 0.999374 | 0.000657968 | 0.996012 |
| PAH10+CH3     | 9.81189e-05 | 0.999472 | 0.000624674 | 0.996637 |
| rad19syn      | 9.79727e-05 | 0.999570 | 0.000623743 | 0.997260 |
| rad60anti     | 7.58697e-05 | 0.999646 | 0.000483024 | 0.997743 |
| rad52         | 7.00258e-05 | 0.999716 | 0.000445819 | 0.998189 |
| rad58         | 5.76197e-05 | 0.999774 | 0.000366836 | 0.998556 |
| PAH1+H        | 5.20543e-05 | 0.999826 | 0.000331404 | 0.998887 |
| rad73         | 4.43211e-05 | 0.999870 | 0.000282170 | 0.999170 |
| PhcycC3H3_A+H | 3.20637e-05 | 0.999902 | 0.000204134 | 0.999374 |
| rad70         | 2.14711e-05 | 0.999923 | 0.000136695 | 0.999510 |
| PAH8+H        | 1.37730e-05 | 0.999937 | 8.76860e-05 | 0.999598 |
| rad37         | 1.33235e-05 | 0.999951 | 8.48238e-05 | 0.999683 |
| rad72         | 1.23994e-05 | 0.999963 | 7.89408e-05 | 0.999762 |
| rad54         | 8.98062e-06 | 0.999972 | 5.71751e-05 | 0.999819 |
| rad34         | 8.46729e-06 | 0.999980 | 5.39070e-05 | 0.999873 |
| rad65         | 8.19079e-06 | 0.999989 | 5.21466e-05 | 0.999925 |
| rad68syn      | 1.99237e-06 | 0.999991 | 1.26844e-05 | 0.999938 |
| rad64         | 1.43502e-06 | 0.999992 | 9.13608e-06 | 0.999947 |
| rad56         | 1.27415e-06 | 0.999993 | 8.11187e-06 | 0.999955 |
| rad68anti     | 1.27033e-06 | 0.999995 | 8.08756e-06 | 0.999963 |
| rad40syn      | 1.15720e-06 | 0.999996 | 7.36731e-06 | 0.999971 |
| rad55         | 9.87619e-07 | 0.999997 | 6.28768e-06 | 0.999977 |
| rad40anti     | 8.52770e-07 | 0.999998 | 5.42916e-06 | 0.999982 |
| rad53         | 8.35979e-07 | 0.999998 | 5.32226e-06 | 0.999988 |
| rad62         | 6.97383e-07 | 0.999999 | 4.43989e-06 | 0.999992 |
| rad61         | 6.32584e-07 | 1.000000 | 4.02735e-06 | 0.999996 |
| rad43         | 3.12013e-07 | 1.000000 | 1.98643e-06 | 0.999998 |
| rad42         | 1.30129e-07 | 1.000000 | 8.28465e-07 | 0.999999 |
| rad41         | 6.11807e-08 | 1.000000 | 3.89507e-07 | 0.999999 |
| rad23         | 6.52449e-09 | 1.000000 | 4.15382e-08 | 0.999999 |
| rad20         | 2.76082e-09 | 1.000000 | 1.75767e-08 | 0.999999 |
| rad6          | 2.44305e-09 | 1.000000 | 1.55536e-08 | 0.999999 |
| rad9          | 2.22228e-09 | 1.000000 | 1.41482e-08 | 0.999999 |
| rad45         | 2.17717e-09 | 1.000000 | 1.38610e-08 | 0.999999 |
| rad21         | 1.15201e-09 | 1.000000 | 7.33430e-09 | 0.999999 |
| rad22         | 9.18068e-10 | 1.000000 | 5.84488e-09 | 0.999999 |
| rad11         | 6.75944e-10 | 1.000000 | 4.30340e-09 | 0.999999 |
| rad36         | 4.08376e-10 | 1.000000 | 2.59993e-09 | 0.999999 |
| rad18         | 2.92897e-10 | 1.000000 | 1.86473e-09 | 0.999999 |
| rad8          | 2.05210e-10 | 1.000000 | 1.30647e-09 | 0.999999 |
| rad15         | 1.92595e-10 | 1.000000 | 1.22615e-09 | 0.999999 |
| rad12         | 8.20985e-11 | 1.000000 | 5.22680e-10 | 0.999999 |
| rad7          | 8.20262e-11 | 1.000000 | 5.22220e-10 | 0.999999 |
| rad24         | 7.82749e-11 | 1.000000 | 4.98337e-10 | 0.999999 |
| rad28         | 7.19073e-11 | 1.000000 | 4.57798e-10 | 0.999999 |
| rad47         | 6.95063e-11 | 1.000000 | 4.42512e-10 | 0.999999 |
| rad26         | 2.18086e-11 | 1.000000 | 1.38844e-10 | 0.999999 |
| rad13         | 1.22856e-11 | 1.000000 | 7.82161e-11 | 0.999999 |
| rad10         | 8.82862e-12 | 1.000000 | 5.62074e-11 | 0.999999 |

|       |             |         |             |          |
|-------|-------------|---------|-------------|----------|
| rad25 | 5.47425e-12 | 1.00000 | 3.48518e-11 | 0.999999 |
| rad5  | 1.99173e-12 | 1.00000 | 1.26803e-11 | 0.999999 |
| rad33 | 1.20035e-12 | 1.00000 | 7.64202e-12 | 0.999999 |
| rad2  | 7.22888e-13 | 1.00000 | 4.60226e-12 | 0.999999 |
| rad1  | 3.65175e-13 | 1.00000 | 2.32488e-12 | 0.999999 |
| rad14 | 1.07182e-13 | 1.00000 | 6.82375e-13 | 0.999999 |
| rad27 | 5.73348e-14 | 1.00000 | 3.65022e-13 | 0.999999 |
| rad3  | 3.40493e-14 | 1.00000 | 2.16775e-13 | 0.999999 |
| rad4  | 1.92754e-14 | 1.00000 | 1.22717e-13 | 0.999999 |

100.000000 Pa, 3750.00000 K

| Rate constant | True (fraction)     | Effective (fraction) |
|---------------|---------------------|----------------------|
| Total         | 2.70978e-12 (1.00 ) | 4.61708e-13 (1.00 )  |

| species       | PYtrue      | Cumul    | PYeffective | Cumul    |
|---------------|-------------|----------|-------------|----------|
| Benzyl+C2H2   | 0.829614    | 0.829614 | 0.00000     | 0.00000  |
| PhCH2CCH+H    | 0.0978315   | 0.927445 | 0.574175    | 0.574175 |
| PhCHCCH2+H    | 0.0240141   | 0.951460 | 0.140939    | 0.715114 |
| Indene+H      | 0.0190788   | 0.970538 | 0.111974    | 0.827088 |
| Ph+Allene     | 0.0176550   | 0.988193 | 0.103617    | 0.930705 |
| PAH3+H        | 0.00305565  | 0.991249 | 0.0179337   | 0.948639 |
| PAH7+H        | 0.00116197  | 0.992411 | 0.00681959  | 0.955458 |
| PAH9+H        | 0.000955033 | 0.993366 | 0.00560510  | 0.961063 |
| rad19anti     | 0.000750871 | 0.994117 | 0.00440687  | 0.965470 |
| Ph+MeAc       | 0.000618509 | 0.994735 | 0.00363003  | 0.969100 |
| rad38         | 0.000613187 | 0.995349 | 0.00359880  | 0.972699 |
| rad50         | 0.000603644 | 0.995952 | 0.00354280  | 0.976242 |
| PhCCH+CH3     | 0.000581835 | 0.996534 | 0.00341480  | 0.979657 |
| rad39         | 0.000465801 | 0.997000 | 0.00273379  | 0.982390 |
| rad30         | 0.000416539 | 0.997416 | 0.00244467  | 0.984835 |
| rad51         | 0.000381007 | 0.997797 | 0.00223614  | 0.987071 |
| rad35         | 0.000341506 | 0.998139 | 0.00200430  | 0.989076 |
| rad46         | 0.000254424 | 0.998393 | 0.00149322  | 0.990569 |
| rad59         | 0.000220084 | 0.998613 | 0.00129168  | 0.991860 |
| rad67         | 0.000201013 | 0.998814 | 0.00117975  | 0.993040 |
| PhCCCH3+H     | 0.000187989 | 0.999002 | 0.00110331  | 0.994144 |
| rad71         | 0.000146799 | 0.999149 | 0.000861566 | 0.995005 |
| rad19syn      | 0.000129261 | 0.999279 | 0.000758633 | 0.995764 |
| PAH10+CH3     | 0.000111172 | 0.999390 | 0.000652469 | 0.996416 |
| rad60syn      | 0.000106707 | 0.999496 | 0.000626263 | 0.997042 |
| rad60anti     | 7.88382e-05 | 0.999575 | 0.000462703 | 0.997505 |
| rad52         | 7.54537e-05 | 0.999651 | 0.000442839 | 0.997948 |
| rad58         | 6.80261e-05 | 0.999719 | 0.000399246 | 0.998347 |
| PAH1+H        | 6.45822e-05 | 0.999783 | 0.000379034 | 0.998726 |
| rad73         | 5.74933e-05 | 0.999841 | 0.000337429 | 0.999064 |
| PhcycC3H3_A+H | 3.61214e-05 | 0.999877 | 0.000211997 | 0.999276 |
| rad70         | 2.62310e-05 | 0.999903 | 0.000153950 | 0.999430 |
| PAH8+H        | 2.07423e-05 | 0.999924 | 0.000121737 | 0.999551 |
| rad72         | 1.85788e-05 | 0.999942 | 0.000109039 | 0.999660 |
| rad37         | 1.33636e-05 | 0.999956 | 7.84310e-05 | 0.999739 |
| rad34         | 1.07116e-05 | 0.999967 | 6.28668e-05 | 0.999802 |
| rad54         | 9.53970e-06 | 0.999976 | 5.59886e-05 | 0.999858 |
| rad65         | 9.05153e-06 | 0.999985 | 5.31235e-05 | 0.999911 |
| rad68syn      | 2.77522e-06 | 0.999988 | 1.62878e-05 | 0.999927 |
| rad64         | 1.81238e-06 | 0.999990 | 1.06369e-05 | 0.999938 |
| rad68anti     | 1.76808e-06 | 0.999991 | 1.03769e-05 | 0.999948 |
| rad40syn      | 1.68195e-06 | 0.999993 | 9.87141e-06 | 0.999958 |
| rad56         | 1.59875e-06 | 0.999995 | 9.38308e-06 | 0.999967 |
| rad40anti     | 1.25565e-06 | 0.999996 | 7.36944e-06 | 0.999975 |
| rad55         | 1.07703e-06 | 0.999997 | 6.32113e-06 | 0.999981 |
| rad53         | 1.00841e-06 | 0.999998 | 5.91837e-06 | 0.999987 |
| rad62         | 8.81796e-07 | 0.999999 | 5.17527e-06 | 0.999992 |
| rad61         | 7.98463e-07 | 1.000000 | 4.68619e-06 | 0.999997 |
| rad43         | 3.67979e-07 | 1.00000  | 2.15967e-06 | 0.999999 |
| rad42         | 1.74778e-07 | 1.00000  | 1.02578e-06 | 1.00000  |
| rad41         | 7.77076e-08 | 1.00000  | 4.56067e-07 | 1.00000  |
| rad23         | 3.42730e-09 | 1.00000  | 2.01149e-08 | 1.00000  |
| rad20         | 2.04403e-09 | 1.00000  | 1.19964e-08 | 1.00000  |
| rad9          | 1.38932e-09 | 1.00000  | 8.15395e-09 | 1.00000  |
| rad45         | 1.27001e-09 | 1.00000  | 7.45372e-09 | 1.00000  |
| rad6          | 1.15275e-09 | 1.00000  | 6.76552e-09 | 1.00000  |
| rad21         | 8.20925e-10 | 1.00000  | 4.81802e-09 | 1.00000  |
| rad22         | 5.60460e-10 | 1.00000  | 3.28935e-09 | 1.00000  |
| rad11         | 4.86535e-10 | 1.00000  | 2.85548e-09 | 1.00000  |
| rad36         | 2.39613e-10 | 1.00000  | 1.40629e-09 | 1.00000  |
| rad8          | 1.91884e-10 | 1.00000  | 1.12617e-09 | 1.00000  |
| rad18         | 1.89754e-10 | 1.00000  | 1.11367e-09 | 1.00000  |

|       |             |         |             |         |
|-------|-------------|---------|-------------|---------|
| rad15 | 1.26702e-10 | 1.00000 | 7.43617e-10 | 1.00000 |
| rad47 | 7.59738e-11 | 1.00000 | 4.45891e-10 | 1.00000 |
| rad12 | 6.32193e-11 | 1.00000 | 3.71035e-10 | 1.00000 |
| rad24 | 5.63475e-11 | 1.00000 | 3.30704e-10 | 1.00000 |
| rad7  | 4.56662e-11 | 1.00000 | 2.68015e-10 | 1.00000 |
| rad28 | 4.55399e-11 | 1.00000 | 2.67274e-10 | 1.00000 |
| rad26 | 1.44478e-11 | 1.00000 | 8.47942e-11 | 1.00000 |
| rad13 | 7.39222e-12 | 1.00000 | 4.33850e-11 | 1.00000 |
| rad10 | 6.16409e-12 | 1.00000 | 3.61771e-11 | 1.00000 |
| rad25 | 4.53027e-12 | 1.00000 | 2.65882e-11 | 1.00000 |
| rad5  | 1.90608e-12 | 1.00000 | 1.11868e-11 | 1.00000 |
| rad33 | 7.89218e-13 | 1.00000 | 4.63193e-12 | 1.00000 |
| rad2  | 5.16493e-13 | 1.00000 | 3.03130e-12 | 1.00000 |
| rad1  | 2.76991e-13 | 1.00000 | 1.62566e-12 | 1.00000 |
| rad14 | 9.54485e-14 | 1.00000 | 5.60188e-13 | 1.00000 |
| rad27 | 4.79708e-14 | 1.00000 | 2.81541e-13 | 1.00000 |
| rad3  | 2.08050e-14 | 1.00000 | 1.22105e-13 | 1.00000 |
| rad4  | 1.16255e-14 | 1.00000 | 6.82305e-14 | 1.00000 |

100.000000 Pa, 4000.00000 K

=====

| Rate constant | True (fraction)     | Effective (fraction) |
|---------------|---------------------|----------------------|
| Total         | 3.41497e-12 (1.00 ) | 6.28297e-13 (1.00 )  |

| species       | PYtrue      | Cumul    | PYeffective | Cumul    |
|---------------|-------------|----------|-------------|----------|
| Benzyl+C2H2   | 0.816017    | 0.816017 | 0.00000     | 0.00000  |
| PhCH2CCH+H    | 0.109584    | 0.925601 | 0.595618    | 0.595618 |
| PhCHCCH2+H    | 0.0267098   | 0.952311 | 0.145175    | 0.740793 |
| Ph+Allene     | 0.0193046   | 0.971615 | 0.104926    | 0.845719 |
| Indene+H      | 0.0160485   | 0.987664 | 0.0872278   | 0.932947 |
| PAH3+H        | 0.00329013  | 0.990954 | 0.0178828   | 0.950830 |
| PAH7+H        | 0.00121791  | 0.992172 | 0.00661967  | 0.957449 |
| PAH9+H        | 0.000864002 | 0.993036 | 0.00469609  | 0.962145 |
| PhCCH+CH3     | 0.000720156 | 0.993756 | 0.00391425  | 0.966060 |
| rad19anti     | 0.000708492 | 0.994465 | 0.00385085  | 0.969910 |
| Ph+MeAc       | 0.000663933 | 0.995129 | 0.00360866  | 0.973519 |
| rad50         | 0.000616862 | 0.995745 | 0.00335281  | 0.976872 |
| rad38         | 0.000560139 | 0.996306 | 0.00304451  | 0.979916 |
| rad39         | 0.000491039 | 0.996797 | 0.00266893  | 0.982585 |
| rad51         | 0.000408503 | 0.997205 | 0.00222033  | 0.984806 |
| rad30         | 0.000396478 | 0.997602 | 0.00215497  | 0.986961 |
| rad35         | 0.000343095 | 0.997945 | 0.00186481  | 0.988825 |
| rad46         | 0.000239251 | 0.998184 | 0.00130040  | 0.990126 |
| rad59         | 0.000231903 | 0.998416 | 0.00126046  | 0.991386 |
| rad67         | 0.000214260 | 0.998630 | 0.00116456  | 0.992551 |
| PhCCCH3+H     | 0.000213580 | 0.998844 | 0.00116087  | 0.993712 |
| rad71         | 0.000187854 | 0.999031 | 0.00102104  | 0.994733 |
| rad19syn      | 0.000163942 | 0.999195 | 0.000891067 | 0.995624 |
| PAH10+CH3     | 0.000121536 | 0.999317 | 0.000660582 | 0.996284 |
| rad60syn      | 0.000108396 | 0.999425 | 0.000589161 | 0.996874 |
| rad60anti     | 8.05427e-05 | 0.999506 | 0.000437772 | 0.997311 |
| rad52         | 7.82965e-05 | 0.999584 | 0.000425563 | 0.997737 |
| rad58         | 7.77572e-05 | 0.999662 | 0.000422632 | 0.998160 |
| PAH1+H        | 7.70004e-05 | 0.999739 | 0.000418519 | 0.998578 |
| rad73         | 7.03580e-05 | 0.999809 | 0.000382415 | 0.998961 |
| PhcycC3H3_A+H | 3.98814e-05 | 0.999849 | 0.000216766 | 0.999177 |
| rad70         | 3.09908e-05 | 0.999880 | 0.000168444 | 0.999346 |
| PAH8+H        | 2.94357e-05 | 0.999910 | 0.000159991 | 0.999506 |
| rad72         | 2.58306e-05 | 0.999935 | 0.000140396 | 0.999646 |
| rad37         | 1.30847e-05 | 0.999949 | 7.11192e-05 | 0.999717 |
| rad34         | 1.30498e-05 | 0.999962 | 7.09290e-05 | 0.999788 |
| rad54         | 1.00584e-05 | 0.999972 | 5.46703e-05 | 0.999843 |
| rad65         | 9.63697e-06 | 0.999981 | 5.23796e-05 | 0.999895 |
| rad68syn      | 3.67779e-06 | 0.999985 | 1.99898e-05 | 0.999915 |
| rad68anti     | 2.34155e-06 | 0.999987 | 1.27269e-05 | 0.999928 |
| rad40syn      | 2.31360e-06 | 0.999990 | 1.25750e-05 | 0.999941 |
| rad64         | 2.19078e-06 | 0.999992 | 1.19075e-05 | 0.999952 |
| rad56         | 1.94741e-06 | 0.999994 | 1.05847e-05 | 0.999963 |
| rad40anti     | 1.74691e-06 | 0.999996 | 9.49496e-06 | 0.999972 |
| rad53         | 1.18744e-06 | 0.999997 | 6.45407e-06 | 0.999979 |
| rad55         | 1.16170e-06 | 0.999998 | 6.31418e-06 | 0.999985 |
| rad62         | 1.07271e-06 | 0.999999 | 5.83047e-06 | 0.999991 |
| rad61         | 9.59664e-07 | 1.000000 | 5.21604e-06 | 0.999996 |
| rad43         | 4.20278e-07 | 1.00000  | 2.28433e-06 | 0.999999 |
| rad42         | 2.24299e-07 | 1.00000  | 1.21913e-06 | 1.000000 |
| rad41         | 9.47631e-08 | 1.00000  | 5.15063e-07 | 1.00000  |
| rad23         | 1.88867e-09 | 1.00000  | 1.02654e-08 | 1.00000  |
| rad20         | 1.55983e-09 | 1.00000  | 8.47809e-09 | 1.00000  |

|       |             |         |             |         |
|-------|-------------|---------|-------------|---------|
| rad9  | 8.96401e-10 | 1.00000 | 4.87218e-09 | 1.00000 |
| rad45 | 7.64007e-10 | 1.00000 | 4.15259e-09 | 1.00000 |
| rad6  | 6.11212e-10 | 1.00000 | 3.32210e-09 | 1.00000 |
| rad21 | 6.03120e-10 | 1.00000 | 3.27812e-09 | 1.00000 |
| rad11 | 3.68004e-10 | 1.00000 | 2.00020e-09 | 1.00000 |
| rad22 | 3.61590e-10 | 1.00000 | 1.96534e-09 | 1.00000 |
| rad8  | 1.77067e-10 | 1.00000 | 9.62406e-10 | 1.00000 |
| rad36 | 1.44728e-10 | 1.00000 | 7.86638e-10 | 1.00000 |
| rad18 | 1.27490e-10 | 1.00000 | 6.92946e-10 | 1.00000 |
| rad15 | 8.52599e-11 | 1.00000 | 4.63411e-10 | 1.00000 |
| rad47 | 7.97241e-11 | 1.00000 | 4.33322e-10 | 1.00000 |
| rad12 | 4.90460e-11 | 1.00000 | 2.66578e-10 | 1.00000 |
| rad24 | 4.12877e-11 | 1.00000 | 2.24410e-10 | 1.00000 |
| rad28 | 2.99717e-11 | 1.00000 | 1.62905e-10 | 1.00000 |
| rad7  | 2.74023e-11 | 1.00000 | 1.48939e-10 | 1.00000 |
| rad26 | 9.73164e-12 | 1.00000 | 5.28941e-11 | 1.00000 |
| rad13 | 4.77119e-12 | 1.00000 | 2.59327e-11 | 1.00000 |
| rad10 | 4.38797e-12 | 1.00000 | 2.38498e-11 | 1.00000 |
| rad25 | 3.80495e-12 | 1.00000 | 2.06810e-11 | 1.00000 |
| rad5  | 1.82429e-12 | 1.00000 | 9.91551e-12 | 1.00000 |
| rad33 | 5.48080e-13 | 1.00000 | 2.97897e-12 | 1.00000 |
| rad2  | 3.87223e-13 | 1.00000 | 2.10466e-12 | 1.00000 |
| rad1  | 2.12740e-13 | 1.00000 | 1.15630e-12 | 1.00000 |
| rad14 | 8.51689e-14 | 1.00000 | 4.62917e-13 | 1.00000 |
| rad27 | 4.02487e-14 | 1.00000 | 2.18762e-13 | 1.00000 |
| rad3  | 1.37388e-14 | 1.00000 | 7.46742e-14 | 1.00000 |
| rad4  | 7.62376e-15 | 1.00000 | 4.14372e-14 | 1.00000 |

10.0000000 Pa, 20.0000000 K

| Rate constant | True (fraction)      | Effective (fraction) |
|---------------|----------------------|----------------------|
| Total         | 1.34336e-156 (1.00 ) | 1.34336e-156 (1.00 ) |

| species     | PYtrue      | Cumul    | PYeffective | Cumul    |
|-------------|-------------|----------|-------------|----------|
| rad22       | 0.558296    | 0.558296 | 0.558297    | 0.558297 |
| Indene+H    | 0.358660    | 0.916956 | 0.358661    | 0.916958 |
| rad18       | 0.0355676   | 0.952524 | 0.0355676   | 0.952526 |
| rad23       | 0.0229571   | 0.975481 | 0.0229571   | 0.975483 |
| rad45       | 0.0161474   | 0.991628 | 0.0161474   | 0.991630 |
| rad20       | 0.00446394  | 0.996092 | 0.00446395  | 0.996094 |
| rad21       | 0.00274537  | 0.998837 | 0.00274537  | 0.998839 |
| rad36       | 0.00100589  | 0.999843 | 0.00100589  | 0.999845 |
| rad11       | 0.000153150 | 0.999996 | 0.000153150 | 0.999998 |
| rad6        | 1.96180e-06 | 0.999998 | 1.96181e-06 | 1.00000  |
| Benzyl+C2H2 | 7.51988e-07 | 0.999999 | 0.00000     | 1.00000  |
| rad24       | 1.37055e-10 | 0.999999 | 1.37056e-10 | 1.00000  |
| rad7        | 1.38215e-11 | 0.999999 | 1.38215e-11 | 1.00000  |
| rad13       | 2.47845e-12 | 0.999999 | 2.47845e-12 | 1.00000  |
| rad33       | 2.69083e-15 | 0.999999 | 2.69083e-15 | 1.00000  |
| rad3        | 1.36639e-16 | 0.999999 | 1.36639e-16 | 1.00000  |
| rad30       | 1.36447e-16 | 0.999999 | 1.36447e-16 | 1.00000  |
| rad35       | 1.34241e-16 | 0.999999 | 1.34241e-16 | 1.00000  |
| rad4        | 6.90837e-17 | 0.999999 | 6.90838e-17 | 1.00000  |
| PAH9+H      | 3.66670e-17 | 0.999999 | 3.66671e-17 | 1.00000  |
| rad38       | 3.60108e-18 | 0.999999 | 3.60108e-18 | 1.00000  |
| rad25       | 1.12336e-19 | 0.999999 | 1.12336e-19 | 1.00000  |
| rad15       | 2.75143e-20 | 0.999999 | 2.75144e-20 | 1.00000  |
| rad2        | 2.48551e-20 | 0.999999 | 2.48551e-20 | 1.00000  |
| rad1        | 1.57121e-21 | 0.999999 | 1.57122e-21 | 1.00000  |
| rad28       | 2.02147e-22 | 0.999999 | 2.02147e-22 | 1.00000  |
| rad10       | 2.14934e-24 | 0.999999 | 2.14934e-24 | 1.00000  |
| PhCHCCH2+H  | 6.35942e-26 | 0.999999 | 6.35942e-26 | 1.00000  |
| rad31       | 3.49276e-26 | 0.999999 | 3.49276e-26 | 1.00000  |
| rad46       | 9.06713e-27 | 0.999999 | 9.06714e-27 | 1.00000  |
| rad14       | 3.40385e-28 | 0.999999 | 3.40385e-28 | 1.00000  |
| PhCCH+CH3   | 1.07973e-28 | 0.999999 | 1.07973e-28 | 1.00000  |
| rad9        | 5.81736e-29 | 0.999999 | 5.81736e-29 | 1.00000  |
| rad27       | 1.35369e-29 | 0.999999 | 1.35369e-29 | 1.00000  |
| rad26       | 5.56726e-32 | 0.999999 | 5.56727e-32 | 1.00000  |
| PhCCCH3+H   | 1.25842e-32 | 0.999999 | 1.25842e-32 | 1.00000  |
| Ph+Allene   | 2.31133e-33 | 0.999999 | 2.31133e-33 | 1.00000  |
| rad8        | 7.48789e-34 | 0.999999 | 7.48790e-34 | 1.00000  |
| rad60syn    | 1.88415e-35 | 0.999999 | 1.88415e-35 | 1.00000  |
| Ph+MeAc     | 1.24744e-36 | 0.999999 | 1.24744e-36 | 1.00000  |
| rad60anti   | 5.03110e-37 | 0.999999 | 5.03110e-37 | 1.00000  |
| PAH7+H      | 2.14310e-37 | 0.999999 | 2.14311e-37 | 1.00000  |
| rad39       | 5.20573e-39 | 0.999999 | 5.20573e-39 | 1.00000  |
| PhCH2CCH+H  | 1.22660e-39 | 0.999999 | 1.22660e-39 | 1.00000  |



|               |             |          |             |         |
|---------------|-------------|----------|-------------|---------|
| rad12         | 5.22216e-43 | 0.999999 | 5.22217e-43 | 1.00000 |
| rad50         | 2.20138e-43 | 0.999999 | 2.20138e-43 | 1.00000 |
| PAH3+H        | 1.56653e-45 | 0.999999 | 1.56653e-45 | 1.00000 |
| rad59         | 7.96139e-46 | 0.999999 | 7.96139e-46 | 1.00000 |
| rad5          | 7.30048e-47 | 0.999999 | 7.30049e-47 | 1.00000 |
| rad37         | 2.24219e-47 | 0.999999 | 2.24220e-47 | 1.00000 |
| rad52         | 2.58661e-52 | 0.999999 | 2.58661e-52 | 1.00000 |
| rad19syn      | 7.78662e-54 | 0.999999 | 7.78663e-54 | 1.00000 |
| rad54         | 2.57136e-57 | 0.999999 | 2.57136e-57 | 1.00000 |
| rad51         | 1.61009e-57 | 0.999999 | 1.61010e-57 | 1.00000 |
| rad43         | 5.62893e-59 | 0.999999 | 5.62894e-59 | 1.00000 |
| PAH10+CH3     | 8.04662e-60 | 0.999999 | 8.04663e-60 | 1.00000 |
| rad62         | 5.30959e-60 | 0.999999 | 5.30959e-60 | 1.00000 |
| rad65         | 1.64013e-61 | 0.999999 | 1.64013e-61 | 1.00000 |
| rad70         | 1.19682e-63 | 0.999999 | 1.19682e-63 | 1.00000 |
| PhcycC3H3_A+H | 7.16041e-64 | 0.999999 | 7.16041e-64 | 1.00000 |
| rad55         | 3.43953e-64 | 0.999999 | 3.43954e-64 | 1.00000 |
| rad58         | 2.24568e-65 | 0.999999 | 2.24568e-65 | 1.00000 |
| rad47         | 2.31650e-67 | 0.999999 | 2.31651e-67 | 1.00000 |
| PAH1+H        | 2.57326e-68 | 0.999999 | 2.57326e-68 | 1.00000 |
| rad34         | 3.43136e-69 | 0.999999 | 3.43136e-69 | 1.00000 |
| rad42         | 2.62414e-72 | 0.999999 | 2.62414e-72 | 1.00000 |
| rad41         | 4.33266e-73 | 0.999999 | 4.33266e-73 | 1.00000 |

10.0000000 Pa, 30.0000000 K

=====

| Rate constant | True (fraction)      | Effective (fraction) |
|---------------|----------------------|----------------------|
| Total         | 1.15918e-108 (1.00 ) | 1.15918e-108 (1.00 ) |

| species     | PYtrue      | Cumul    | PYeffective | Cumul    |
|-------------|-------------|----------|-------------|----------|
| rad22       | 0.494154    | 0.494154 | 0.494154    | 0.494154 |
| Indene+H    | 0.447670    | 0.941824 | 0.447670    | 0.941824 |
| rad23       | 0.0390938   | 0.980918 | 0.0390938   | 0.980918 |
| rad45       | 0.00998037  | 0.990898 | 0.00998038  | 0.990898 |
| rad18       | 0.00741669  | 0.998315 | 0.00741670  | 0.998315 |
| rad36       | 0.000621518 | 0.998936 | 0.000621519 | 0.998936 |
| rad20       | 0.000553050 | 0.999489 | 0.000553051 | 0.999489 |
| rad21       | 0.000338530 | 0.999828 | 0.000338530 | 0.999828 |
| rad11       | 0.000166999 | 0.999995 | 0.000167000 | 0.999995 |
| rad6        | 4.48437e-06 | 0.999999 | 4.48437e-06 | 0.999999 |
| Benzyl+C2H2 | 9.86783e-07 | 1.00000  | 0.00000     | 0.999999 |
| rad24       | 8.01525e-11 | 1.00000  | 8.01526e-11 | 0.999999 |
| rad7        | 6.25280e-11 | 1.00000  | 6.25280e-11 | 0.999999 |
| rad13       | 4.71945e-12 | 1.00000  | 4.71945e-12 | 0.999999 |
| rad33       | 5.28161e-15 | 1.00000  | 5.28161e-15 | 0.999999 |
| rad3        | 6.89050e-16 | 1.00000  | 6.89050e-16 | 0.999999 |
| rad35       | 5.49150e-16 | 1.00000  | 5.49151e-16 | 0.999999 |
| rad4        | 3.48416e-16 | 1.00000  | 3.48416e-16 | 0.999999 |
| PAH9+H      | 1.43915e-16 | 1.00000  | 1.43915e-16 | 0.999999 |
| rad30       | 6.22636e-17 | 1.00000  | 6.22637e-17 | 0.999999 |
| rad38       | 5.82664e-18 | 1.00000  | 5.82665e-18 | 0.999999 |
| rad2        | 2.48953e-19 | 1.00000  | 2.48953e-19 | 0.999999 |
| rad25       | 2.08445e-19 | 1.00000  | 2.08446e-19 | 0.999999 |
| rad1        | 1.57452e-20 | 1.00000  | 1.57452e-20 | 0.999999 |
| rad15       | 9.21449e-21 | 1.00000  | 9.21450e-21 | 0.999999 |
| rad28       | 8.67800e-22 | 1.00000  | 8.67801e-22 | 0.999999 |
| rad10       | 4.15921e-23 | 1.00000  | 4.15922e-23 | 0.999999 |
| rad31       | 1.77261e-25 | 1.00000  | 1.77262e-25 | 0.999999 |
| PhCHCCH2+H  | 8.04205e-26 | 1.00000  | 8.04205e-26 | 0.999999 |
| rad46       | 2.25087e-26 | 1.00000  | 2.25087e-26 | 0.999999 |
| rad14       | 2.69674e-27 | 1.00000  | 2.69674e-27 | 0.999999 |
| PhCCH+CH3   | 7.84297e-28 | 1.00000  | 7.84298e-28 | 0.999999 |
| rad27       | 2.18514e-28 | 1.00000  | 2.18514e-28 | 0.999999 |
| rad9        | 5.50108e-29 | 1.00000  | 5.50109e-29 | 0.999999 |
| rad26       | 1.78885e-30 | 1.00000  | 1.78885e-30 | 0.999999 |
| PhCCCH3+H   | 1.78909e-31 | 1.00000  | 1.78910e-31 | 0.999999 |
| Ph+Allene   | 1.09729e-33 | 1.00000  | 1.09729e-33 | 0.999999 |
| rad8        | 4.25954e-34 | 1.00000  | 4.25954e-34 | 0.999999 |
| Ph+MeAc     | 9.77564e-36 | 1.00000  | 9.77565e-36 | 0.999999 |
| rad60syn    | 6.14986e-36 | 1.00000  | 6.14987e-36 | 0.999999 |
| PAH7+H      | 1.26999e-36 | 1.00000  | 1.26999e-36 | 0.999999 |
| rad60anti   | 1.44759e-37 | 1.00000  | 1.44759e-37 | 0.999999 |
| rad39       | 2.95490e-38 | 1.00000  | 2.95490e-38 | 0.999999 |
| PhCH2CCH+H  | 3.34368e-40 | 1.00000  | 3.34368e-40 | 0.999999 |
| rad12       | 2.03422e-41 | 1.00000  | 2.03422e-41 | 0.999999 |
| rad50       | 4.22312e-43 | 1.00000  | 4.22312e-43 | 0.999999 |
| PAH3+H      | 1.62128e-45 | 1.00000  | 1.62128e-45 | 0.999999 |
| rad59       | 8.07456e-46 | 1.00000  | 8.07456e-46 | 0.999999 |

|               |             |         |             |          |
|---------------|-------------|---------|-------------|----------|
| rad37         | 4.88980e-46 | 1.00000 | 4.88980e-46 | 0.999999 |
| rad5          | 4.86697e-46 | 1.00000 | 4.86697e-46 | 0.999999 |
| rad52         | 3.31055e-52 | 1.00000 | 3.31056e-52 | 0.999999 |
| rad19syn      | 1.99534e-53 | 1.00000 | 1.99534e-53 | 0.999999 |
| rad54         | 6.64664e-57 | 1.00000 | 6.64665e-57 | 0.999999 |
| rad51         | 1.34356e-57 | 1.00000 | 1.34356e-57 | 0.999999 |
| rad43         | 2.86816e-58 | 1.00000 | 2.86816e-58 | 0.999999 |
| PAH10+CH3     | 9.07881e-59 | 1.00000 | 9.07882e-59 | 0.999999 |
| rad62         | 1.57000e-59 | 1.00000 | 1.57000e-59 | 0.999999 |
| rad65         | 1.00556e-61 | 1.00000 | 1.00556e-61 | 0.999999 |
| rad70         | 2.84368e-63 | 1.00000 | 2.84369e-63 | 0.999999 |
| PhcycC3H3_A+H | 1.89390e-63 | 1.00000 | 1.89391e-63 | 0.999999 |
| rad55         | 9.08130e-64 | 1.00000 | 9.08131e-64 | 0.999999 |
| rad58         | 1.15880e-65 | 1.00000 | 1.15880e-65 | 0.999999 |
| PAH1+H        | 1.24924e-67 | 1.00000 | 1.24924e-67 | 0.999999 |
| rad47         | 4.55816e-68 | 1.00000 | 4.55816e-68 | 0.999999 |
| rad34         | 8.71384e-69 | 1.00000 | 8.71384e-69 | 0.999999 |
| rad42         | 7.44755e-72 | 1.00000 | 7.44756e-72 | 0.999999 |
| rad41         | 1.40389e-72 | 1.00000 | 1.40389e-72 | 0.999999 |

10.0000000 Pa, 40.0000000 K

| Rate constant | True (fraction)     | Effective (fraction) |
|---------------|---------------------|----------------------|
| Total         | 1.02415e-84 (1.00 ) | 1.02415e-84 (1.00 )  |

| species     | PYtrue      | Cumul    | PYeffective | Cumul    |
|-------------|-------------|----------|-------------|----------|
| Indene+H    | 0.502661    | 0.502661 | 0.502662    | 0.502662 |
| rad22       | 0.437267    | 0.939928 | 0.437267    | 0.939929 |
| rad23       | 0.0498423   | 0.989770 | 0.0498424   | 0.989771 |
| rad45       | 0.00695646  | 0.996727 | 0.00695647  | 0.996728 |
| rad18       | 0.00240863  | 0.999135 | 0.00240863  | 0.999136 |
| rad36       | 0.000432942 | 0.999568 | 0.000432943 | 0.999569 |
| rad11       | 0.000174348 | 0.999743 | 0.000174348 | 0.999744 |
| rad20       | 0.000154423 | 0.999897 | 0.000154424 | 0.999898 |
| rad21       | 9.44852e-05 | 0.999992 | 9.44854e-05 | 0.999993 |
| rad6        | 7.25353e-06 | 0.999999 | 7.25354e-06 | 1.000000 |
| Benzyl+C2H2 | 1.45221e-06 | 1.00000  | 0.00000     | 1.000000 |
| rad7        | 1.49699e-10 | 1.00000  | 1.49699e-10 | 1.000000 |
| rad24       | 5.48780e-11 | 1.00000  | 5.48781e-11 | 1.000000 |
| rad13       | 6.90437e-12 | 1.00000  | 6.90438e-12 | 1.000000 |
| rad33       | 7.89970e-15 | 1.00000  | 7.89971e-15 | 1.000000 |
| rad3        | 1.85982e-15 | 1.00000  | 1.85982e-15 | 1.000000 |
| rad35       | 1.40618e-15 | 1.00000  | 1.40618e-15 | 1.000000 |
| rad4        | 9.40692e-16 | 1.00000  | 9.40694e-16 | 1.000000 |
| PAH9+H      | 3.64017e-16 | 1.00000  | 3.64018e-16 | 1.000000 |
| rad30       | 5.72332e-17 | 1.00000  | 5.72333e-17 | 1.000000 |
| rad38       | 1.03534e-17 | 1.00000  | 1.03534e-17 | 1.000000 |
| rad2        | 1.07130e-18 | 1.00000  | 1.07130e-18 | 1.000000 |
| rad25       | 3.94529e-19 | 1.00000  | 3.94530e-19 | 1.000000 |
| rad1        | 6.78360e-20 | 1.00000  | 6.78361e-20 | 1.000000 |
| rad15       | 7.82216e-21 | 1.00000  | 7.82217e-21 | 1.000000 |
| rad28       | 2.61844e-21 | 1.00000  | 2.61844e-21 | 1.000000 |
| rad10       | 2.72213e-22 | 1.00000  | 2.72213e-22 | 1.000000 |
| rad31       | 4.87250e-25 | 1.00000  | 4.87251e-25 | 1.000000 |
| PhCHCCH2+H  | 1.17859e-25 | 1.00000  | 1.17859e-25 | 1.000000 |
| rad46       | 5.28741e-26 | 1.00000  | 5.28742e-26 | 1.000000 |
| rad14       | 1.17356e-26 | 1.00000  | 1.17356e-26 | 1.000000 |
| PhCCH+CH3   | 3.28953e-27 | 1.00000  | 3.28954e-27 | 1.000000 |
| rad27       | 1.37980e-27 | 1.00000  | 1.37980e-27 | 1.000000 |
| rad9        | 6.68988e-29 | 1.00000  | 6.68989e-29 | 1.000000 |
| rad26       | 1.70543e-29 | 1.00000  | 1.70543e-29 | 1.000000 |
| PhCCCH3+H   | 1.10746e-30 | 1.00000  | 1.10746e-30 | 1.000000 |
| rad8        | 1.16678e-33 | 1.00000  | 1.16678e-33 | 1.000000 |
| Ph+Allene   | 9.19951e-34 | 1.00000  | 9.19952e-34 | 1.000000 |
| Ph+MeAc     | 4.78523e-35 | 1.00000  | 4.78523e-35 | 1.000000 |
| PAH7+H      | 4.92756e-36 | 1.00000  | 4.92756e-36 | 1.000000 |
| rad60syn    | 4.33636e-36 | 1.00000  | 4.33637e-36 | 1.000000 |
| rad60anti   | 1.15351e-37 | 1.00000  | 1.15351e-37 | 1.000000 |
| rad39       | 1.13855e-37 | 1.00000  | 1.13855e-37 | 1.000000 |
| PhCH2CCH+H  | 3.82436e-40 | 1.00000  | 3.82437e-40 | 1.000000 |
| rad12       | 2.23801e-40 | 1.00000  | 2.23801e-40 | 1.000000 |
| rad50       | 8.47982e-43 | 1.00000  | 8.47983e-43 | 1.000000 |
| rad37       | 4.10127e-45 | 1.00000  | 4.10128e-45 | 1.000000 |
| PAH3+H      | 3.09960e-45 | 1.00000  | 3.09960e-45 | 1.000000 |
| rad5        | 2.26683e-45 | 1.00000  | 2.26683e-45 | 1.000000 |
| rad59       | 1.54602e-45 | 1.00000  | 1.54602e-45 | 1.000000 |
| rad52       | 5.09057e-52 | 1.00000  | 5.09058e-52 | 1.000000 |
| rad19syn    | 5.87442e-53 | 1.00000  | 5.87443e-53 | 1.000000 |

|               |             |         |             |          |
|---------------|-------------|---------|-------------|----------|
| rad54         | 2.00682e-56 | 1.00000 | 2.00682e-56 | 1.000000 |
| rad51         | 1.56048e-57 | 1.00000 | 1.56048e-57 | 1.000000 |
| rad43         | 1.29272e-57 | 1.00000 | 1.29272e-57 | 1.000000 |
| PAH10+CH3     | 6.17068e-58 | 1.00000 | 6.17069e-58 | 1.000000 |
| rad62         | 5.34162e-59 | 1.00000 | 5.34162e-59 | 1.000000 |
| rad65         | 9.59819e-62 | 1.00000 | 9.59820e-62 | 1.000000 |
| rad70         | 8.85778e-63 | 1.00000 | 8.85780e-63 | 1.000000 |
| PhcycC3H3_A+H | 6.04422e-63 | 1.00000 | 6.04423e-63 | 1.000000 |
| rad55         | 2.89224e-63 | 1.00000 | 2.89225e-63 | 1.000000 |
| rad58         | 1.17111e-65 | 1.00000 | 1.17111e-65 | 1.000000 |
| PAH1+H        | 5.60441e-67 | 1.00000 | 5.60442e-67 | 1.000000 |
| rad34         | 2.86736e-68 | 1.00000 | 2.86736e-68 | 1.000000 |
| rad47         | 2.24765e-68 | 1.00000 | 2.24765e-68 | 1.000000 |
| rad42         | 2.56502e-71 | 1.00000 | 2.56503e-71 | 1.000000 |
| rad41         | 5.08330e-72 | 1.00000 | 5.08330e-72 | 1.000000 |

10.000000 Pa, 50.000000 K

| Rate constant | True (fraction) |          | Effective (fraction) |          |
|---------------|-----------------|----------|----------------------|----------|
| -----         | -----           |          | -----                |          |
| Total         | 2.31816e-70     | (1.00 )  | 2.31816e-70          | (1.00 )  |
| species       | PYtrue          | Cumul    | PYeffective          | Cumul    |
| -----         | -----           | -----    | -----                | -----    |
| Indene+H      | 0.547210        | 0.547210 | 0.547212             | 0.547212 |
| rad22         | 0.387830        | 0.935040 | 0.387831             | 0.935043 |
| rad23         | 0.0579064       | 0.992946 | 0.0579065            | 0.992950 |
| rad45         | 0.00542472      | 0.998371 | 0.00542473           | 0.998374 |
| rad18         | 0.000998574     | 0.999370 | 0.000998576          | 0.999373 |
| rad36         | 0.000337348     | 0.999707 | 0.000337348          | 0.999710 |
| rad11         | 0.000180912     | 0.999888 | 0.000180912          | 0.999891 |
| rad20         | 6.16187e-05     | 0.999950 | 6.16189e-05          | 0.999953 |
| rad21         | 3.77305e-05     | 0.999987 | 3.77306e-05          | 0.999990 |
| rad6          | 1.04309e-05     | 0.999998 | 1.04309e-05          | 1.000000 |
| Benzyl+C2H2   | 2.15879e-06     | 1.000000 | 0.000000             | 1.000000 |
| rad7          | 2.85791e-10     | 1.000000 | 2.85791e-10          | 1.000000 |
| rad24         | 4.24787e-11     | 1.000000 | 4.24788e-11          | 1.000000 |
| rad13         | 9.28757e-12     | 1.000000 | 9.28759e-12          | 1.000000 |
| rad33         | 1.08203e-14     | 1.000000 | 1.08203e-14          | 1.000000 |
| rad3          | 4.08776e-15     | 1.000000 | 4.08777e-15          | 1.000000 |
| rad35         | 3.22382e-15     | 1.000000 | 3.22382e-15          | 1.000000 |
| rad4          | 2.06849e-15     | 1.000000 | 2.06849e-15          | 1.000000 |
| PAH9+H        | 8.42028e-16     | 1.000000 | 8.42030e-16          | 1.000000 |
| rad30         | 8.32743e-17     | 1.000000 | 8.32745e-17          | 1.000000 |
| rad38         | 2.11510e-17     | 1.000000 | 2.11511e-17          | 1.000000 |
| rad2          | 3.50956e-18     | 1.000000 | 3.50957e-18          | 1.000000 |
| rad25         | 8.40240e-19     | 1.000000 | 8.40242e-19          | 1.000000 |
| rad1          | 2.22616e-19     | 1.000000 | 2.22617e-19          | 1.000000 |
| rad15         | 1.11518e-20     | 1.000000 | 1.11518e-20          | 1.000000 |
| rad28         | 7.59178e-21     | 1.000000 | 7.59180e-21          | 1.000000 |
| rad10         | 1.25438e-21     | 1.000000 | 1.25438e-21          | 1.000000 |
| rad31         | 1.09958e-24     | 1.000000 | 1.09958e-24          | 1.000000 |
| PhCHCCH2+H    | 2.12669e-25     | 1.000000 | 2.12669e-25          | 1.000000 |
| rad46         | 1.28691e-25     | 1.000000 | 1.28692e-25          | 1.000000 |
| rad14         | 4.52464e-26     | 1.000000 | 4.52465e-26          | 1.000000 |
| PhCCH+CH3     | 1.26201e-26     | 1.000000 | 1.26201e-26          | 1.000000 |
| rad27         | 6.69047e-27     | 1.000000 | 6.69049e-27          | 1.000000 |
| rad26         | 1.13167e-28     | 1.000000 | 1.13167e-28          | 1.000000 |
| rad9          | 1.07089e-28     | 1.000000 | 1.07090e-28          | 1.000000 |
| PhCCCH3+H     | 5.65279e-30     | 1.000000 | 5.65280e-30          | 1.000000 |
| rad8          | 5.13825e-33     | 1.000000 | 5.13826e-33          | 1.000000 |
| Ph+Allene     | 1.22652e-33     | 1.000000 | 1.22652e-33          | 1.000000 |
| Ph+MeAc       | 2.23717e-34     | 1.000000 | 2.23717e-34          | 1.000000 |
| PAH7+H        | 1.85797e-35     | 1.000000 | 1.85797e-35          | 1.000000 |
| rad60syn      | 5.87819e-36     | 1.000000 | 5.87821e-36          | 1.000000 |
| rad39         | 4.33359e-37     | 1.000000 | 4.33360e-37          | 1.000000 |
| rad60anti     | 1.89945e-37     | 1.000000 | 1.89945e-37          | 1.000000 |
| rad12         | 1.76479e-39     | 1.000000 | 1.76480e-39          | 1.000000 |
| PhCH2CCH+H    | 9.06908e-40     | 1.000000 | 9.06910e-40          | 1.000000 |
| rad50         | 2.03134e-42     | 1.000000 | 2.03135e-42          | 1.000000 |
| rad37         | 2.87715e-44     | 1.000000 | 2.87716e-44          | 1.000000 |
| rad5          | 1.09866e-44     | 1.000000 | 1.09866e-44          | 1.000000 |
| PAH3+H        | 7.30223e-45     | 1.000000 | 7.30224e-45          | 1.000000 |
| rad59         | 3.64780e-45     | 1.000000 | 3.64781e-45          | 1.000000 |
| rad52         | 1.03719e-51     | 1.000000 | 1.03719e-51          | 1.000000 |
| rad19syn      | 2.12552e-52     | 1.000000 | 2.12552e-52          | 1.000000 |
| rad54         | 7.53703e-56     | 1.000000 | 7.53705e-56          | 1.000000 |
| rad43         | 6.72815e-57     | 1.000000 | 6.72817e-57          | 1.000000 |
| PAH10+CH3     | 4.21499e-57     | 1.000000 | 4.21499e-57          | 1.000000 |
| rad51         | 2.66938e-57     | 1.000000 | 2.66939e-57          | 1.000000 |

|               |             |          |             |         |
|---------------|-------------|----------|-------------|---------|
| rad62         | 2.27769e-58 | 1.000000 | 2.27770e-58 | 1.00000 |
| rad65         | 1.45374e-61 | 1.000000 | 1.45374e-61 | 1.00000 |
| rad70         | 3.56818e-62 | 1.000000 | 3.56819e-62 | 1.00000 |
| PhcycC3H3_A+H | 2.46126e-62 | 1.000000 | 2.46127e-62 | 1.00000 |
| rad55         | 1.17457e-62 | 1.000000 | 1.17457e-62 | 1.00000 |
| rad58         | 2.40796e-65 | 1.000000 | 2.40797e-65 | 1.00000 |
| PAH1+H        | 2.90878e-66 | 1.000000 | 2.90879e-66 | 1.00000 |
| rad34         | 1.23066e-67 | 1.000000 | 1.23066e-67 | 1.00000 |
| rad47         | 2.23235e-68 | 1.000000 | 2.23235e-68 | 1.00000 |
| rad42         | 1.15260e-70 | 1.000000 | 1.15260e-70 | 1.00000 |
| rad41         | 2.37594e-71 | 1.000000 | 2.37594e-71 | 1.00000 |

10.0000000 Pa, 60.0000000 K

| Rate constant | True (fraction)     | Effective (fraction) |
|---------------|---------------------|----------------------|
| Total         | 8.44107e-61 (1.00 ) | 8.44104e-61 (1.00 )  |

| species       | PYtrue      | Cumul    | PYeffective | Cumul    |
|---------------|-------------|----------|-------------|----------|
| Indene+H      | 0.585579    | 0.585579 | 0.585581    | 0.585581 |
| rad22         | 0.344385    | 0.929964 | 0.344386    | 0.929967 |
| rad23         | 0.0643949   | 0.994359 | 0.0643951   | 0.994362 |
| rad45         | 0.00461813  | 0.998977 | 0.00461815  | 0.998980 |
| rad18         | 0.000482758 | 0.999460 | 0.000482759 | 0.999463 |
| rad36         | 0.000286950 | 0.999747 | 0.000286951 | 0.999750 |
| rad11         | 0.000187399 | 0.999934 | 0.000187400 | 0.999937 |
| rad20         | 3.00511e-05 | 0.999964 | 3.00512e-05 | 0.999967 |
| rad21         | 1.84227e-05 | 0.999983 | 1.84228e-05 | 0.999986 |
| rad6          | 1.41517e-05 | 0.999997 | 1.41517e-05 | 1.000000 |
| Benzyl+C2H2   | 3.12530e-06 | 1.000000 | 0.00000     | 1.000000 |
| rad7          | 4.86658e-10 | 1.000000 | 4.86659e-10 | 1.000000 |
| rad24         | 3.60601e-11 | 1.000000 | 3.60602e-11 | 1.000000 |
| rad13         | 1.19988e-11 | 1.000000 | 1.19988e-11 | 1.000000 |
| rad33         | 1.41984e-14 | 1.000000 | 1.41984e-14 | 1.000000 |
| rad3          | 8.17759e-15 | 1.000000 | 8.17762e-15 | 1.000000 |
| rad35         | 7.05074e-15 | 1.000000 | 7.05076e-15 | 1.000000 |
| rad4          | 4.14028e-15 | 1.000000 | 4.14029e-15 | 1.000000 |
| PAH9+H        | 1.95630e-15 | 1.000000 | 1.95630e-15 | 1.000000 |
| rad30         | 2.13752e-16 | 1.000000 | 2.13753e-16 | 1.000000 |
| rad38         | 5.04501e-17 | 1.000000 | 5.04502e-17 | 1.000000 |
| rad2          | 1.02747e-17 | 1.000000 | 1.02748e-17 | 1.000000 |
| rad25         | 2.14175e-18 | 1.000000 | 2.14176e-18 | 1.000000 |
| rad1          | 6.53145e-19 | 1.000000 | 6.53147e-19 | 1.000000 |
| rad15         | 2.63766e-20 | 1.000000 | 2.63767e-20 | 1.000000 |
| rad28         | 2.37341e-20 | 1.000000 | 2.37342e-20 | 1.000000 |
| rad10         | 5.05413e-21 | 1.000000 | 5.05414e-21 | 1.000000 |
| rad31         | 2.27251e-24 | 1.000000 | 2.27252e-24 | 1.000000 |
| PhCHCCH2+H    | 4.89826e-25 | 1.000000 | 4.89827e-25 | 1.000000 |
| rad46         | 3.47373e-25 | 1.000000 | 3.47374e-25 | 1.000000 |
| rad14         | 1.82124e-25 | 1.000000 | 1.82125e-25 | 1.000000 |
| PhCCH+CH3     | 5.17997e-26 | 1.000000 | 5.17999e-26 | 1.000000 |
| rad27         | 3.09385e-26 | 1.000000 | 3.09386e-26 | 1.000000 |
| rad26         | 6.87943e-28 | 1.000000 | 6.87945e-28 | 1.000000 |
| rad9          | 2.28883e-28 | 1.000000 | 2.28884e-28 | 1.000000 |
| PhCCCH3+H     | 2.92969e-29 | 1.000000 | 2.92970e-29 | 1.000000 |
| rad8          | 2.60089e-32 | 1.000000 | 2.60090e-32 | 1.000000 |
| Ph+Allene     | 2.47362e-33 | 1.000000 | 2.47363e-33 | 1.000000 |
| Ph+MeAc       | 1.15411e-33 | 1.000000 | 1.15412e-33 | 1.000000 |
| PAH7+H        | 7.75187e-35 | 1.000000 | 7.75190e-35 | 1.000000 |
| rad60syn      | 1.28255e-35 | 1.000000 | 1.28255e-35 | 1.000000 |
| rad39         | 1.84098e-36 | 1.000000 | 1.84098e-36 | 1.000000 |
| rad60anti     | 4.75249e-37 | 1.000000 | 4.75250e-37 | 1.000000 |
| rad12         | 1.32700e-38 | 1.000000 | 1.32700e-38 | 1.000000 |
| PhCH2CCH+H    | 3.11947e-39 | 1.000000 | 3.11948e-39 | 1.000000 |
| rad50         | 5.98777e-42 | 1.000000 | 5.98778e-42 | 1.000000 |
| rad37         | 2.11869e-43 | 1.000000 | 2.11870e-43 | 1.000000 |
| rad5          | 6.24854e-44 | 1.000000 | 6.24855e-44 | 1.000000 |
| PAH3+H        | 2.13781e-44 | 1.000000 | 2.13782e-44 | 1.000000 |
| rad59         | 1.06859e-44 | 1.000000 | 1.06859e-44 | 1.000000 |
| rad52         | 2.82446e-51 | 1.000000 | 2.82447e-51 | 1.000000 |
| rad19syn      | 9.69267e-52 | 1.000000 | 9.69270e-52 | 1.000000 |
| rad54         | 3.59683e-55 | 1.000000 | 3.59684e-55 | 1.000000 |
| rad43         | 4.39838e-56 | 1.000000 | 4.39839e-56 | 1.000000 |
| PAH10+CH3     | 3.36510e-56 | 1.000000 | 3.36511e-56 | 1.000000 |
| rad51         | 6.61223e-57 | 1.000000 | 6.61225e-57 | 1.000000 |
| rad62         | 1.26000e-57 | 1.000000 | 1.26001e-57 | 1.000000 |
| rad65         | 3.36532e-61 | 1.000000 | 3.36533e-61 | 1.000000 |
| rad70         | 1.86228e-61 | 1.000000 | 1.86229e-61 | 1.000000 |
| PhcycC3H3_A+H | 1.29589e-61 | 1.000000 | 1.29590e-61 | 1.000000 |

|        |             |          |             |          |
|--------|-------------|----------|-------------|----------|
| rad55  | 6.16434e-62 | 1.000000 | 6.16436e-62 | 1.000000 |
| rad58  | 8.96505e-65 | 1.000000 | 8.96508e-65 | 1.000000 |
| PAH1+H | 1.85908e-65 | 1.000000 | 1.85909e-65 | 1.000000 |
| rad34  | 6.91662e-67 | 1.000000 | 6.91664e-67 | 1.000000 |
| rad47  | 3.94533e-68 | 1.000000 | 3.94534e-68 | 1.000000 |
| rad42  | 6.83082e-70 | 1.000000 | 6.83084e-70 | 1.000000 |
| rad41  | 1.46707e-70 | 1.000000 | 1.46707e-70 | 1.000000 |

10.0000000 Pa, 70.0000000 K

| Rate constant | True (fraction)     | Effective (fraction) |
|---------------|---------------------|----------------------|
| Total         | 5.61998e-54 (1.00 ) | 5.61996e-54 (1.00 )  |

| species       | PYtrue      | Cumul    | PYeffective | Cumul    |
|---------------|-------------|----------|-------------|----------|
| Indene+H      | 0.619354    | 0.619354 | 0.619357    | 0.619357 |
| rad22         | 0.305855    | 0.925209 | 0.305856    | 0.925213 |
| rad23         | 0.0698425   | 0.995051 | 0.0698428   | 0.995056 |
| rad45         | 0.00418527  | 0.999237 | 0.00418529  | 0.999241 |
| rad36         | 0.000259850 | 0.999497 | 0.000259852 | 0.999501 |
| rad18         | 0.000259332 | 0.999756 | 0.000259334 | 0.999760 |
| rad11         | 0.000193962 | 0.999950 | 0.000193963 | 0.999954 |
| rad6          | 1.85729e-05 | 0.999968 | 1.85730e-05 | 0.999973 |
| rad20         | 1.66626e-05 | 0.999985 | 1.66627e-05 | 0.999989 |
| rad21         | 1.02287e-05 | 0.999995 | 1.02288e-05 | 1.000000 |
| Benzyl+C2H2   | 4.40363e-06 | 1.000000 | 0.00000     | 1.000000 |
| rad7          | 7.75347e-10 | 1.000000 | 7.75351e-10 | 1.000000 |
| rad24         | 3.26693e-11 | 1.000000 | 3.26695e-11 | 1.000000 |
| rad13         | 1.51594e-11 | 1.000000 | 1.51594e-11 | 1.000000 |
| rad33         | 1.81886e-14 | 1.000000 | 1.81887e-14 | 1.000000 |
| rad3          | 1.56261e-14 | 1.000000 | 1.56262e-14 | 1.000000 |
| rad35         | 1.47372e-14 | 1.000000 | 1.47373e-14 | 1.000000 |
| rad4          | 7.91645e-15 | 1.000000 | 7.91648e-15 | 1.000000 |
| PAH9+H        | 4.64768e-15 | 1.000000 | 4.64770e-15 | 1.000000 |
| rad30         | 1.60442e-15 | 1.000000 | 1.60443e-15 | 1.000000 |
| rad38         | 1.46339e-16 | 1.000000 | 1.46340e-16 | 1.000000 |
| rad2          | 2.89321e-17 | 1.000000 | 2.89322e-17 | 1.000000 |
| rad25         | 7.37117e-18 | 1.000000 | 7.37120e-18 | 1.000000 |
| rad1          | 1.84373e-18 | 1.000000 | 1.84374e-18 | 1.000000 |
| rad15         | 2.09017e-19 | 1.000000 | 2.09018e-19 | 1.000000 |
| rad28         | 8.78139e-20 | 1.000000 | 8.78143e-20 | 1.000000 |
| rad10         | 1.97836e-20 | 1.000000 | 1.97837e-20 | 1.000000 |
| rad31         | 4.50900e-24 | 1.000000 | 4.50902e-24 | 1.000000 |
| PhCHCCH2+H    | 1.60030e-24 | 1.000000 | 1.60031e-24 | 1.000000 |
| rad46         | 1.12599e-24 | 1.000000 | 1.12600e-24 | 1.000000 |
| rad14         | 8.71653e-25 | 1.000000 | 8.71657e-25 | 1.000000 |
| PhCCH+CH3     | 2.60193e-25 | 1.000000 | 2.60195e-25 | 1.000000 |
| rad27         | 1.54761e-25 | 1.000000 | 1.54761e-25 | 1.000000 |
| rad26         | 4.55093e-27 | 1.000000 | 4.55095e-27 | 1.000000 |
| rad9          | 7.16154e-28 | 1.000000 | 7.16157e-28 | 1.000000 |
| PhCCCH3+H     | 1.80201e-28 | 1.000000 | 1.80202e-28 | 1.000000 |
| rad8          | 1.63085e-31 | 1.000000 | 1.63085e-31 | 1.000000 |
| Ph+Allene     | 7.89544e-33 | 1.000000 | 7.89548e-33 | 1.000000 |
| Ph+MeAc       | 7.51945e-33 | 1.000000 | 7.51948e-33 | 1.000000 |
| PAH7+H        | 4.06703e-34 | 1.000000 | 4.06705e-34 | 1.000000 |
| rad60syn      | 4.13027e-35 | 1.000000 | 4.13029e-35 | 1.000000 |
| rad39         | 9.88652e-36 | 1.000000 | 9.88656e-36 | 1.000000 |
| rad60anti     | 1.64393e-36 | 1.000000 | 1.64394e-36 | 1.000000 |
| rad12         | 1.15340e-37 | 1.000000 | 1.15341e-37 | 1.000000 |
| PhCH2CCH+H    | 1.51307e-38 | 1.000000 | 1.51307e-38 | 1.000000 |
| rad50         | 2.30034e-41 | 1.000000 | 2.30035e-41 | 1.000000 |
| rad37         | 1.93662e-42 | 1.000000 | 1.93663e-42 | 1.000000 |
| rad5          | 4.72341e-43 | 1.000000 | 4.72343e-43 | 1.000000 |
| PAH3+H        | 8.21472e-44 | 1.000000 | 8.21476e-44 | 1.000000 |
| rad59         | 4.10497e-44 | 1.000000 | 4.10499e-44 | 1.000000 |
| rad52         | 1.07445e-50 | 1.000000 | 1.07445e-50 | 1.000000 |
| rad19syn      | 6.03174e-51 | 1.000000 | 6.03177e-51 | 1.000000 |
| rad54         | 2.35539e-54 | 1.000000 | 2.35540e-54 | 1.000000 |
| rad43         | 4.05040e-55 | 1.000000 | 4.05042e-55 | 1.000000 |
| PAH10+CH3     | 3.61692e-55 | 1.000000 | 3.61693e-55 | 1.000000 |
| rad51         | 2.44353e-56 | 1.000000 | 2.44354e-56 | 1.000000 |
| rad62         | 9.93782e-57 | 1.000000 | 9.93787e-57 | 1.000000 |
| rad70         | 1.34966e-60 | 1.000000 | 1.34967e-60 | 1.000000 |
| rad65         | 1.21344e-60 | 1.000000 | 1.21345e-60 | 1.000000 |
| PhcycC3H3_A+H | 9.47493e-61 | 1.000000 | 9.47497e-61 | 1.000000 |
| rad55         | 4.49070e-61 | 1.000000 | 4.49072e-61 | 1.000000 |
| rad58         | 5.55815e-64 | 1.000000 | 5.55817e-64 | 1.000000 |
| PAH1+H        | 1.60385e-64 | 1.000000 | 1.60386e-64 | 1.000000 |
| rad34         | 5.44345e-66 | 1.000000 | 5.44348e-66 | 1.000000 |

|       |             |          |             |          |
|-------|-------------|----------|-------------|----------|
| rad47 | 1.21554e-67 | 1.000000 | 1.21555e-67 | 1.000000 |
| rad42 | 5.72755e-69 | 1.000000 | 5.72758e-69 | 1.000000 |
| rad41 | 1.29272e-69 | 1.000000 | 1.29272e-69 | 1.000000 |

10.0000000 Pa, 80.0000000 K

| =====         |                 |          |                      |          |
|---------------|-----------------|----------|----------------------|----------|
| Rate constant | True (fraction) |          | Effective (fraction) |          |
| -----         |                 |          |                      |          |
| Total         | 7.28864e-49     | (1.00 )  | 7.28860e-49          | (1.00 )  |
| species       | PYtrue          | Cumul    | PYeffective          | Cumul    |
| -----         |                 |          |                      |          |
| Indene+H      | 0.649418        | 0.649418 | 0.649422             | 0.649422 |
| rad22         | 0.271445        | 0.920863 | 0.271447             | 0.920869 |
| rad23         | 0.0745405       | 0.995403 | 0.0745409            | 0.995410 |
| rad45         | 0.00395410      | 0.999358 | 0.00395412           | 0.999364 |
| rad36         | 0.000245329     | 0.999603 | 0.000245331          | 0.999609 |
| rad11         | 0.000200637     | 0.999804 | 0.000200638          | 0.999810 |
| rad18         | 0.000150371     | 0.999954 | 0.000150372          | 0.999960 |
| rad6          | 2.38927e-05     | 0.999978 | 2.38928e-05          | 0.999984 |
| rad20         | 1.00954e-05     | 0.999988 | 1.00954e-05          | 0.999994 |
| rad21         | 6.20604e-06     | 0.999994 | 6.20608e-06          | 1.000000 |
| Benzyl+C2H2   | 6.07395e-06     | 1.000000 | 0.000000             | 1.000000 |
| rad7          | 1.18484e-09     | 1.000000 | 1.18485e-09          | 1.000000 |
| rad24         | 3.09038e-11     | 1.000000 | 3.09040e-11          | 1.000000 |
| rad13         | 1.89103e-11     | 1.000000 | 1.89105e-11          | 1.000000 |
| rad35         | 2.93735e-14     | 1.000000 | 2.93736e-14          | 1.000000 |
| rad3          | 2.92647e-14     | 1.000000 | 2.92648e-14          | 1.000000 |
| rad33         | 2.29767e-14     | 1.000000 | 2.29768e-14          | 1.000000 |
| rad30         | 1.67169e-14     | 1.000000 | 1.67170e-14          | 1.000000 |
| rad4          | 1.48366e-14     | 1.000000 | 1.48367e-14          | 1.000000 |
| PAH9+H        | 1.09945e-14     | 1.000000 | 1.09946e-14          | 1.000000 |
| rad38         | 4.81832e-16     | 1.000000 | 4.81835e-16          | 1.000000 |
| rad2          | 8.15583e-17     | 1.000000 | 8.15587e-17          | 1.000000 |
| rad25         | 3.99544e-17     | 1.000000 | 3.99546e-17          | 1.000000 |
| rad15         | 5.57896e-18     | 1.000000 | 5.57899e-18          | 1.000000 |
| rad1          | 5.21188e-18     | 1.000000 | 5.21191e-18          | 1.000000 |
| rad28         | 3.96982e-19     | 1.000000 | 3.96984e-19          | 1.000000 |
| rad10         | 7.98299e-20     | 1.000000 | 7.98304e-20          | 1.000000 |
| PhCHCCH2+H    | 1.00465e-23     | 1.000000 | 1.00466e-23          | 1.000000 |
| rad31         | 8.80629e-24     | 1.000000 | 8.80635e-24          | 1.000000 |
| rad14         | 5.56943e-24     | 1.000000 | 5.56946e-24          | 1.000000 |
| rad46         | 5.00216e-24     | 1.000000 | 5.00219e-24          | 1.000000 |
| PhCCH+CH3     | 1.87054e-24     | 1.000000 | 1.87055e-24          | 1.000000 |
| rad27         | 8.86369e-25     | 1.000000 | 8.86374e-25          | 1.000000 |
| rad26         | 3.72937e-26     | 1.000000 | 3.72939e-26          | 1.000000 |
| rad9          | 4.33853e-27     | 1.000000 | 4.33856e-27          | 1.000000 |
| PhCCCH3+H     | 1.55700e-27     | 1.000000 | 1.55701e-27          | 1.000000 |
| rad8          | 1.50155e-30     | 1.000000 | 1.50156e-30          | 1.000000 |
| Ph+MeAc       | 7.47850e-32     | 1.000000 | 7.47855e-32          | 1.000000 |
| Ph+Allene     | 4.93195e-32     | 1.000000 | 4.93198e-32          | 1.000000 |
| PAH7+H        | 3.25706e-33     | 1.000000 | 3.25708e-33          | 1.000000 |
| rad60syn      | 2.33759e-34     | 1.000000 | 2.33760e-34          | 1.000000 |
| rad39         | 8.14321e-35     | 1.000000 | 8.14326e-35          | 1.000000 |
| rad60anti     | 8.79428e-36     | 1.000000 | 8.79433e-36          | 1.000000 |
| rad12         | 1.43682e-36     | 1.000000 | 1.43683e-36          | 1.000000 |
| PhCH2CCH+H    | 1.19669e-37     | 1.000000 | 1.19670e-37          | 1.000000 |
| rad50         | 1.29890e-40     | 1.000000 | 1.29891e-40          | 1.000000 |
| rad37         | 2.72308e-41     | 1.000000 | 2.72310e-41          | 1.000000 |
| rad5          | 5.76774e-42     | 1.000000 | 5.76777e-42          | 1.000000 |
| PAH3+H        | 4.67392e-43     | 1.000000 | 4.67394e-43          | 1.000000 |
| rad59         | 2.33291e-43     | 1.000000 | 2.33292e-43          | 1.000000 |
| rad52         | 6.39648e-50     | 1.000000 | 6.39652e-50          | 1.000000 |
| rad19syn      | 6.07217e-50     | 1.000000 | 6.07221e-50          | 1.000000 |
| rad54         | 2.50487e-53     | 1.000000 | 2.50489e-53          | 1.000000 |
| PAH10+CH3     | 6.48402e-54     | 1.000000 | 6.48405e-54          | 1.000000 |
| rad43         | 6.43405e-54     | 1.000000 | 6.43409e-54          | 1.000000 |
| rad51         | 1.49876e-55     | 1.000000 | 1.49877e-55          | 1.000000 |
| rad62         | 1.36063e-55     | 1.000000 | 1.36064e-55          | 1.000000 |
| rad70         | 1.60131e-59     | 1.000000 | 1.60132e-59          | 1.000000 |
| PhcycC3H3_A+H | 1.13458e-59     | 1.000000 | 1.13458e-59          | 1.000000 |
| rad65         | 7.54412e-60     | 1.000000 | 7.54416e-60          | 1.000000 |
| rad55         | 5.35612e-60     | 1.000000 | 5.35615e-60          | 1.000000 |
| rad58         | 6.13513e-63     | 1.000000 | 6.13517e-63          | 1.000000 |
| PAH1+H        | 2.22603e-63     | 1.000000 | 2.22604e-63          | 1.000000 |
| rad34         | 7.05727e-65     | 1.000000 | 7.05731e-65          | 1.000000 |
| rad47         | 7.09452e-67     | 1.000000 | 7.09456e-67          | 1.000000 |
| rad42         | 8.05342e-68     | 1.000000 | 8.05347e-68          | 1.000000 |
| rad41         | 1.94751e-68     | 1.000000 | 1.94752e-68          | 1.000000 |

10.0000000 Pa, 90.0000000 K

=====  
Rate constant | True (fraction)                      Effective (fraction)  
-----

Total                      | 6.85154e-45 (1.00        ) 6.85148e-45 (1.00        )

| species       | PYtrue      | Cumul    | PYeffective | Cumul    |
|---------------|-------------|----------|-------------|----------|
| Indene+H      | 0.676360    | 0.676360 | 0.676366    | 0.676366 |
| rad22         | 0.240557    | 0.916917 | 0.240559    | 0.916925 |
| rad23         | 0.0786607   | 0.995578 | 0.0786613   | 0.995586 |
| rad45         | 0.00383528  | 0.999413 | 0.00383532  | 0.999422 |
| rad36         | 0.000237826 | 0.999651 | 0.000237828 | 0.999659 |
| rad11         | 0.000207392 | 0.999858 | 0.000207393 | 0.999867 |
| rad18         | 9.23568e-05 | 0.999951 | 9.23575e-05 | 0.999959 |
| rad6          | 3.03597e-05 | 0.999981 | 3.03600e-05 | 0.999990 |
| Benzyl+C2H2   | 8.24508e-06 | 0.999989 | 0.00000     | 0.999990 |
| rad20         | 6.52372e-06 | 0.999996 | 6.52377e-06 | 0.999996 |
| rad21         | 4.01613e-06 | 1.000000 | 4.01616e-06 | 1.000000 |
| rad7          | 1.76109e-09 | 1.000000 | 1.76111e-09 | 1.000000 |
| rad24         | 3.00470e-11 | 1.000000 | 3.00472e-11 | 1.000000 |
| rad13         | 2.34214e-11 | 1.000000 | 2.34216e-11 | 1.000000 |
| rad30         | 1.22829e-13 | 1.000000 | 1.22830e-13 | 1.000000 |
| rad35         | 5.60907e-14 | 1.000000 | 5.60912e-14 | 1.000000 |
| rad3          | 5.45036e-14 | 1.000000 | 5.45041e-14 | 1.000000 |
| rad33         | 2.87905e-14 | 1.000000 | 2.87907e-14 | 1.000000 |
| rad4          | 2.76543e-14 | 1.000000 | 2.76545e-14 | 1.000000 |
| PAH9+H        | 2.51446e-14 | 1.000000 | 2.51448e-14 | 1.000000 |
| rad38         | 1.55535e-15 | 1.000000 | 1.55536e-15 | 1.000000 |
| rad25         | 2.91746e-16 | 1.000000 | 2.91748e-16 | 1.000000 |
| rad2          | 2.34885e-16 | 1.000000 | 2.34887e-16 | 1.000000 |
| rad15         | 1.05545e-16 | 1.000000 | 1.05546e-16 | 1.000000 |
| rad1          | 1.50562e-17 | 1.000000 | 1.50563e-17 | 1.000000 |
| rad28         | 1.98993e-18 | 1.000000 | 1.98994e-18 | 1.000000 |
| rad10         | 3.40537e-19 | 1.000000 | 3.40540e-19 | 1.000000 |
| PhCHCCH2+H    | 2.01483e-22 | 1.000000 | 2.01485e-22 | 1.000000 |
| rad14         | 4.67333e-23 | 1.000000 | 4.67337e-23 | 1.000000 |
| rad46         | 3.69385e-23 | 1.000000 | 3.69388e-23 | 1.000000 |
| PhCCH+CH3     | 2.06960e-23 | 1.000000 | 2.06962e-23 | 1.000000 |
| rad31         | 1.71662e-23 | 1.000000 | 1.71664e-23 | 1.000000 |
| rad27         | 5.56936e-24 | 1.000000 | 5.56941e-24 | 1.000000 |
| rad26         | 3.87953e-25 | 1.000000 | 3.87956e-25 | 1.000000 |
| rad9          | 1.30346e-25 | 1.000000 | 1.30347e-25 | 1.000000 |
| PhCCCH3+H     | 2.07458e-26 | 1.000000 | 2.07460e-26 | 1.000000 |
| rad8          | 2.38456e-29 | 1.000000 | 2.38458e-29 | 1.000000 |
| Ph+MeAc       | 1.41262e-30 | 1.000000 | 1.41264e-30 | 1.000000 |
| Ph+Allene     | 1.14166e-30 | 1.000000 | 1.14167e-30 | 1.000000 |
| PAH7+H        | 5.19854e-32 | 1.000000 | 5.19858e-32 | 1.000000 |
| rad60syn      | 9.59403e-33 | 1.000000 | 9.59410e-33 | 1.000000 |
| rad39         | 1.35613e-33 | 1.000000 | 1.35614e-33 | 1.000000 |
| rad60anti     | 1.83040e-34 | 1.000000 | 1.83041e-34 | 1.000000 |
| rad12         | 3.19493e-35 | 1.000000 | 3.19495e-35 | 1.000000 |
| PhCH2CCH+H    | 2.06280e-36 | 1.000000 | 2.06282e-36 | 1.000000 |
| rad50         | 1.35256e-39 | 1.000000 | 1.35257e-39 | 1.000000 |
| rad37         | 7.71475e-40 | 1.000000 | 7.71481e-40 | 1.000000 |
| rad5          | 1.48260e-40 | 1.000000 | 1.48262e-40 | 1.000000 |
| PAH3+H        | 4.96327e-42 | 1.000000 | 4.96331e-42 | 1.000000 |
| rad59         | 2.47231e-42 | 1.000000 | 2.47233e-42 | 1.000000 |
| rad19syn      | 1.30123e-48 | 1.000000 | 1.30124e-48 | 1.000000 |
| rad52         | 7.46273e-49 | 1.000000 | 7.46279e-49 | 1.000000 |
| rad54         | 5.68657e-52 | 1.000000 | 5.68662e-52 | 1.000000 |
| PAH10+CH3     | 2.61182e-52 | 1.000000 | 2.61184e-52 | 1.000000 |
| rad43         | 2.36646e-52 | 1.000000 | 2.36648e-52 | 1.000000 |
| rad62         | 4.40072e-54 | 1.000000 | 4.40076e-54 | 1.000000 |
| rad51         | 1.90658e-54 | 1.000000 | 1.90659e-54 | 1.000000 |
| rad70         | 4.08004e-58 | 1.000000 | 4.08007e-58 | 1.000000 |
| PhcycC3H3_A+H | 2.91898e-58 | 1.000000 | 2.91900e-58 | 1.000000 |
| rad55         | 1.37215e-58 | 1.000000 | 1.37216e-58 | 1.000000 |
| rad65         | 1.00933e-58 | 1.000000 | 1.00933e-58 | 1.000000 |
| rad58         | 1.51362e-61 | 1.000000 | 1.51363e-61 | 1.000000 |
| PAH1+H        | 6.56491e-62 | 1.000000 | 6.56496e-62 | 1.000000 |
| rad34         | 1.97440e-63 | 1.000000 | 1.97442e-63 | 1.000000 |
| rad47         | 9.71108e-66 | 1.000000 | 9.71116e-66 | 1.000000 |
| rad42         | 2.53798e-66 | 1.000000 | 2.53800e-66 | 1.000000 |
| rad41         | 6.84164e-67 | 1.000000 | 6.84169e-67 | 1.000000 |

10.0000000 Pa, 100.000000 K

=====  
Rate constant | True (fraction)                      Effective (fraction)  
-----

Total | 1.02671e-41 (1.00 ) 1.02670e-41 (1.00 )

| species       | PYtrue      | Cumul    | PYeffective | Cumul    |
|---------------|-------------|----------|-------------|----------|
| Indene+H      | 0.700607    | 0.700607 | 0.700615    | 0.700615 |
| rad22         | 0.212738    | 0.913345 | 0.212740    | 0.913355 |
| rad23         | 0.0823106   | 0.995656 | 0.0823116   | 0.995667 |
| rad45         | 0.00378017  | 0.999436 | 0.00378021  | 0.999447 |
| rad36         | 0.000234314 | 0.999670 | 0.000234317 | 0.999681 |
| rad11         | 0.000214137 | 0.999884 | 0.000214139 | 0.999895 |
| rad18         | 5.93142e-05 | 0.999944 | 5.93148e-05 | 0.999955 |
| rad6          | 3.82804e-05 | 0.999982 | 3.82808e-05 | 0.999993 |
| Benzyl+C2H2   | 1.10602e-05 | 0.999993 | 0.00000     | 0.999993 |
| rad20         | 4.42572e-06 | 0.999997 | 4.42577e-06 | 0.999997 |
| rad21         | 2.72842e-06 | 1.00000  | 2.72845e-06 | 1.00000  |
| rad7          | 2.56621e-09 | 1.00000  | 2.56624e-09 | 1.00000  |
| rad24         | 2.97116e-11 | 1.00000  | 2.97120e-11 | 1.00000  |
| rad13         | 2.88969e-11 | 1.00000  | 2.88972e-11 | 1.00000  |
| rad30         | 6.25966e-13 | 1.00000  | 6.25973e-13 | 1.00000  |
| rad35         | 1.03489e-13 | 1.00000  | 1.03490e-13 | 1.00000  |
| rad3          | 1.01721e-13 | 1.00000  | 1.01722e-13 | 1.00000  |
| PAH9+H        | 5.48939e-14 | 1.00000  | 5.48945e-14 | 1.00000  |
| rad4          | 5.16572e-14 | 1.00000  | 5.16577e-14 | 1.00000  |
| rad33         | 3.59088e-14 | 1.00000  | 3.59092e-14 | 1.00000  |
| rad38         | 4.54778e-15 | 1.00000  | 4.54783e-15 | 1.00000  |
| rad25         | 1.99424e-15 | 1.00000  | 1.99426e-15 | 1.00000  |
| rad15         | 1.16490e-15 | 1.00000  | 1.16492e-15 | 1.00000  |
| rad2          | 6.94569e-16 | 1.00000  | 6.94576e-16 | 1.00000  |
| rad1          | 4.46719e-17 | 1.00000  | 4.46724e-17 | 1.00000  |
| rad28         | 9.69326e-18 | 1.00000  | 9.69337e-18 | 1.00000  |
| rad10         | 1.52666e-18 | 1.00000  | 1.52667e-18 | 1.00000  |
| PhCHCCH2+H    | 6.35500e-21 | 1.00000  | 6.35507e-21 | 1.00000  |
| rad46         | 4.27059e-22 | 1.00000  | 4.27064e-22 | 1.00000  |
| rad14         | 4.24404e-22 | 1.00000  | 4.24409e-22 | 1.00000  |
| PhCCH+CH3     | 2.89774e-22 | 1.00000  | 2.89777e-22 | 1.00000  |
| rad27         | 3.48218e-23 | 1.00000  | 3.48221e-23 | 1.00000  |
| rad31         | 3.36327e-23 | 1.00000  | 3.36331e-23 | 1.00000  |
| rad9          | 9.12836e-24 | 1.00000  | 9.12847e-24 | 1.00000  |
| rad26         | 4.59769e-24 | 1.00000  | 4.59774e-24 | 1.00000  |
| PhCCCH3+H     | 3.62419e-25 | 1.00000  | 3.62423e-25 | 1.00000  |
| rad8          | 6.57109e-28 | 1.00000  | 6.57117e-28 | 1.00000  |
| Ph+Allene     | 1.34541e-28 | 1.00000  | 1.34542e-28 | 1.00000  |
| Ph+MeAc       | 4.98765e-29 | 1.00000  | 4.98770e-29 | 1.00000  |
| rad60syn      | 2.66285e-30 | 1.00000  | 2.66288e-30 | 1.00000  |
| PAH7+H        | 1.67442e-30 | 1.00000  | 1.67443e-30 | 1.00000  |
| rad39         | 5.00078e-32 | 1.00000  | 5.00083e-32 | 1.00000  |
| rad60anti     | 3.86722e-32 | 1.00000  | 3.86727e-32 | 1.00000  |
| rad12         | 1.23336e-33 | 1.00000  | 1.23338e-33 | 1.00000  |
| PhCH2CCH+H    | 9.71885e-35 | 1.00000  | 9.71896e-35 | 1.00000  |
| rad37         | 4.70816e-38 | 1.00000  | 4.70821e-38 | 1.00000  |
| rad50         | 3.41921e-38 | 1.00000  | 3.41925e-38 | 1.00000  |
| rad5          | 8.59157e-39 | 1.00000  | 8.59166e-39 | 1.00000  |
| PAH3+H        | 1.32933e-40 | 1.00000  | 1.32935e-40 | 1.00000  |
| rad59         | 6.61245e-41 | 1.00000  | 6.61252e-41 | 1.00000  |
| rad19syn      | 6.85785e-47 | 1.00000  | 6.85792e-47 | 1.00000  |
| rad52         | 2.24882e-47 | 1.00000  | 2.24884e-47 | 1.00000  |
| rad54         | 3.18210e-50 | 1.00000  | 3.18213e-50 | 1.00000  |
| PAH10+CH3     | 2.62929e-50 | 1.00000  | 2.62932e-50 | 1.00000  |
| rad43         | 2.23841e-50 | 1.00000  | 2.23844e-50 | 1.00000  |
| rad62         | 3.85966e-52 | 1.00000  | 3.85970e-52 | 1.00000  |
| rad51         | 6.63072e-53 | 1.00000  | 6.63079e-53 | 1.00000  |
| rad70         | 2.57551e-56 | 1.00000  | 2.57554e-56 | 1.00000  |
| PhcycC3H3_A+H | 1.86138e-56 | 1.00000  | 1.86140e-56 | 1.00000  |
| rad55         | 8.71045e-57 | 1.00000  | 8.71055e-57 | 1.00000  |
| rad65         | 3.82920e-57 | 1.00000  | 3.82924e-57 | 1.00000  |
| rad58         | 9.50520e-60 | 1.00000  | 9.50531e-60 | 1.00000  |
| PAH1+H        | 4.77286e-60 | 1.00000  | 4.77292e-60 | 1.00000  |
| rad34         | 1.37424e-61 | 1.00000  | 1.37425e-61 | 1.00000  |
| rad47         | 4.04879e-64 | 1.00000  | 4.04884e-64 | 1.00000  |
| rad42         | 2.15326e-64 | 1.00000  | 2.15329e-64 | 1.00000  |
| rad41         | 6.87057e-65 | 1.00000  | 6.87065e-65 | 1.00000  |

10.000000 Pa, 110.000000 K

=====

| Rate constant | True (fraction)     | Effective (fraction) |
|---------------|---------------------|----------------------|
| Total         | 4.04932e-39 (1.00 ) | 4.04926e-39 (1.00 )  |

| species | PYtrue | Cumul | PYeffective | Cumul |
|---------|--------|-------|-------------|-------|
|---------|--------|-------|-------------|-------|



|               |             |          |             |          |
|---------------|-------------|----------|-------------|----------|
| Indene+H      | 0.722480    | 0.722480 | 0.722491    | 0.722491 |
| rad22         | 0.187638    | 0.910118 | 0.187640    | 0.910131 |
| rad23         | 0.0855599   | 0.995678 | 0.0855611   | 0.995692 |
| rad45         | 0.00376113  | 0.999439 | 0.00376118  | 0.999453 |
| rad36         | 0.000233080 | 0.999672 | 0.000233083 | 0.999686 |
| rad11         | 0.000220730 | 0.999893 | 0.000220733 | 0.999907 |
| rad6          | 4.80245e-05 | 0.999941 | 4.80252e-05 | 0.999955 |
| rad18         | 3.94660e-05 | 0.999980 | 3.94665e-05 | 0.999995 |
| Benzy1+C2H2   | 1.47053e-05 | 0.999995 | 0.00000     | 0.999995 |
| rad20         | 3.11777e-06 | 0.999998 | 3.11782e-06 | 0.999998 |
| rad21         | 1.92476e-06 | 1.00000  | 1.92479e-06 | 1.00000  |
| rad7          | 3.68116e-09 | 1.00000  | 3.68121e-09 | 1.00000  |
| rad13         | 3.55788e-11 | 1.00000  | 3.55793e-11 | 1.00000  |
| rad24         | 2.96788e-11 | 1.00000  | 2.96793e-11 | 1.00000  |
| rad30         | 2.39697e-12 | 1.00000  | 2.39700e-12 | 1.00000  |
| rad3          | 1.90732e-13 | 1.00000  | 1.90735e-13 | 1.00000  |
| rad35         | 1.86092e-13 | 1.00000  | 1.86094e-13 | 1.00000  |
| PAH9+H        | 1.14475e-13 | 1.00000  | 1.14476e-13 | 1.00000  |
| rad4          | 9.69540e-14 | 1.00000  | 9.69554e-14 | 1.00000  |
| rad33         | 4.46671e-14 | 1.00000  | 4.46677e-14 | 1.00000  |
| rad38         | 1.19210e-14 | 1.00000  | 1.19211e-14 | 1.00000  |
| rad25         | 1.08960e-14 | 1.00000  | 1.08962e-14 | 1.00000  |
| rad15         | 8.39248e-15 | 1.00000  | 8.39260e-15 | 1.00000  |
| rad2          | 2.09439e-15 | 1.00000  | 2.09442e-15 | 1.00000  |
| rad1          | 1.35197e-16 | 1.00000  | 1.35199e-16 | 1.00000  |
| rad28         | 4.28376e-17 | 1.00000  | 4.28382e-17 | 1.00000  |
| rad10         | 6.99956e-18 | 1.00000  | 6.99966e-18 | 1.00000  |
| PhCHCCH2+H    | 1.45054e-19 | 1.00000  | 1.45056e-19 | 1.00000  |
| rad46         | 5.09213e-21 | 1.00000  | 5.09221e-21 | 1.00000  |
| PhCCH+CH3     | 3.88414e-21 | 1.00000  | 3.88419e-21 | 1.00000  |
| rad14         | 3.48988e-21 | 1.00000  | 3.48994e-21 | 1.00000  |
| rad9          | 3.97441e-22 | 1.00000  | 3.97447e-22 | 1.00000  |
| rad27         | 2.00631e-22 | 1.00000  | 2.00634e-22 | 1.00000  |
| rad31         | 6.63651e-23 | 1.00000  | 6.63660e-23 | 1.00000  |
| rad26         | 5.41746e-23 | 1.00000  | 5.41754e-23 | 1.00000  |
| PhCCCH3+H     | 6.31741e-24 | 1.00000  | 6.31750e-24 | 1.00000  |
| rad8          | 2.54973e-24 | 1.00000  | 2.54977e-24 | 1.00000  |
| Ph+Allene     | 1.18122e-25 | 1.00000  | 1.18124e-25 | 1.00000  |
| rad60syn      | 2.70252e-26 | 1.00000  | 2.70256e-26 | 1.00000  |
| Ph+MeAc       | 2.29983e-27 | 1.00000  | 2.29987e-27 | 1.00000  |
| rad60anti     | 1.02767e-27 | 1.00000  | 1.02769e-27 | 1.00000  |
| PAH7+H        | 6.47142e-29 | 1.00000  | 6.47152e-29 | 1.00000  |
| rad39         | 2.58868e-30 | 1.00000  | 2.58871e-30 | 1.00000  |
| rad12         | 5.93501e-32 | 1.00000  | 5.93510e-32 | 1.00000  |
| PhCH2CCH+H    | 1.61326e-32 | 1.00000  | 1.61329e-32 | 1.00000  |
| rad37         | 5.05859e-36 | 1.00000  | 5.05867e-36 | 1.00000  |
| rad50         | 2.32358e-36 | 1.00000  | 2.32361e-36 | 1.00000  |
| rad5          | 9.19105e-37 | 1.00000  | 9.19119e-37 | 1.00000  |
| PAH3+H        | 1.28441e-38 | 1.00000  | 1.28443e-38 | 1.00000  |
| rad59         | 6.48169e-39 | 1.00000  | 6.48178e-39 | 1.00000  |
| rad19syn      | 8.28245e-45 | 1.00000  | 8.28257e-45 | 1.00000  |
| rad52         | 1.94257e-45 | 1.00000  | 1.94260e-45 | 1.00000  |
| PAH10+CH3     | 5.48722e-48 | 1.00000  | 5.48730e-48 | 1.00000  |
| rad43         | 4.48953e-48 | 1.00000  | 4.48960e-48 | 1.00000  |
| rad54         | 4.08769e-48 | 1.00000  | 4.08775e-48 | 1.00000  |
| rad62         | 7.70532e-50 | 1.00000  | 7.70543e-50 | 1.00000  |
| rad51         | 6.99512e-51 | 1.00000  | 6.99522e-51 | 1.00000  |
| rad70         | 3.74929e-54 | 1.00000  | 3.74935e-54 | 1.00000  |
| PhcycC3H3_A+H | 2.73865e-54 | 1.00000  | 2.73869e-54 | 1.00000  |
| rad55         | 1.27541e-54 | 1.00000  | 1.27542e-54 | 1.00000  |
| rad65         | 4.55862e-55 | 1.00000  | 4.55869e-55 | 1.00000  |
| rad58         | 1.40157e-57 | 1.00000  | 1.40160e-57 | 1.00000  |
| PAH1+H        | 7.99774e-58 | 1.00000  | 7.99786e-58 | 1.00000  |
| rad34         | 2.21502e-59 | 1.00000  | 2.21505e-59 | 1.00000  |
| rad47         | 5.52759e-62 | 1.00000  | 5.52767e-62 | 1.00000  |
| rad42         | 4.72694e-62 | 1.00000  | 4.72701e-62 | 1.00000  |
| rad41         | 1.84366e-62 | 1.00000  | 1.84368e-62 | 1.00000  |

10.000000 Pa, 120.000000 K

=====

| Rate constant | True (fraction)     | Effective (fraction) |
|---------------|---------------------|----------------------|
| Total         | 5.87106e-37 (1.00 ) | 5.87094e-37 (1.00 )  |

| species  | PYtrue     | Cumul    | PYeffective | Cumul    |
|----------|------------|----------|-------------|----------|
| Indene+H | 0.742230   | 0.742230 | 0.742245    | 0.742245 |
| rad22    | 0.164983   | 0.907213 | 0.164986    | 0.907231 |
| rad23    | 0.0884543  | 0.995667 | 0.0884560   | 0.995687 |
| rad45    | 0.00376191 | 0.999429 | 0.00376198  | 0.999449 |

|               |             |          |             |          |
|---------------|-------------|----------|-------------|----------|
| rad36         | 0.000233117 | 0.999662 | 0.000233122 | 0.999682 |
| rad11         | 0.000226979 | 0.999889 | 0.000226983 | 0.999909 |
| rad6          | 6.00267e-05 | 0.999949 | 6.00278e-05 | 0.999969 |
| rad18         | 2.70209e-05 | 0.999976 | 2.70214e-05 | 0.999996 |
| Benzyl+C2H2   | 1.94195e-05 | 0.999996 | 0.00000     | 0.999996 |
| rad20         | 2.26292e-06 | 0.999998 | 2.26296e-06 | 0.999998 |
| rad21         | 1.39891e-06 | 0.999999 | 1.39894e-06 | 1.000000 |
| rad7          | 5.20735e-09 | 0.999999 | 5.20745e-09 | 1.000000 |
| rad13         | 4.37478e-11 | 0.999999 | 4.37486e-11 | 1.000000 |
| rad24         | 2.98199e-11 | 0.999999 | 2.98205e-11 | 1.000000 |
| rad30         | 7.38928e-12 | 0.999999 | 7.38942e-12 | 1.000000 |
| rad3          | 3.58863e-13 | 0.999999 | 3.58870e-13 | 1.000000 |
| rad35         | 3.28448e-13 | 0.999999 | 3.28454e-13 | 1.000000 |
| PAH9+H        | 2.29500e-13 | 0.999999 | 2.29504e-13 | 1.000000 |
| rad4          | 1.82613e-13 | 0.999999 | 1.82617e-13 | 1.000000 |
| rad33         | 5.54595e-14 | 0.999999 | 5.54606e-14 | 1.000000 |
| rad25         | 4.70257e-14 | 0.999999 | 4.70266e-14 | 1.000000 |
| rad15         | 4.37196e-14 | 0.999999 | 4.37205e-14 | 1.000000 |
| rad38         | 2.84509e-14 | 0.999999 | 2.84515e-14 | 1.000000 |
| rad2          | 6.35091e-15 | 0.999999 | 6.35103e-15 | 1.000000 |
| rad1          | 4.11605e-16 | 0.999999 | 4.11613e-16 | 1.000000 |
| rad28         | 1.69095e-16 | 0.999999 | 1.69098e-16 | 1.000000 |
| rad10         | 3.17303e-17 | 0.999999 | 3.17310e-17 | 1.000000 |
| PhCHCCH2+H    | 2.16269e-18 | 0.999999 | 2.16273e-18 | 1.000000 |
| rad46         | 4.89372e-20 | 0.999999 | 4.89381e-20 | 1.000000 |
| PhCCH+CH3     | 4.34280e-20 | 0.999999 | 4.34289e-20 | 1.000000 |
| rad14         | 2.41065e-20 | 0.999999 | 2.41070e-20 | 1.000000 |
| rad9          | 9.92469e-21 | 0.999999 | 9.92489e-21 | 1.000000 |
| rad27         | 1.02762e-21 | 0.999999 | 1.02764e-21 | 1.000000 |
| rad26         | 5.81643e-22 | 0.999999 | 5.81654e-22 | 1.000000 |
| rad8          | 1.51945e-22 | 0.999999 | 1.51948e-22 | 1.000000 |
| rad31         | 1.31672e-22 | 0.999999 | 1.31675e-22 | 1.000000 |
| PhCCCH3+H     | 9.41138e-23 | 0.999999 | 9.41156e-23 | 1.000000 |
| Ph+Allene     | 9.30958e-24 | 0.999999 | 9.30976e-24 | 1.000000 |
| rad60syn      | 1.64956e-24 | 0.999999 | 1.64960e-24 | 1.000000 |
| rad60anti     | 9.91831e-26 | 0.999999 | 9.91850e-26 | 1.000000 |
| Ph+MeAc       | 8.76976e-26 | 0.999999 | 8.76993e-26 | 1.000000 |
| PAH7+H        | 1.96966e-27 | 0.999999 | 1.96970e-27 | 1.000000 |
| rad39         | 1.03462e-28 | 0.999999 | 1.03464e-28 | 1.000000 |
| PhCH2CCH+H    | 5.03532e-30 | 0.999999 | 5.03542e-30 | 1.000000 |
| rad12         | 2.46438e-30 | 0.999999 | 2.46443e-30 | 1.000000 |
| rad37         | 5.63896e-34 | 0.999999 | 5.63907e-34 | 1.000000 |
| rad50         | 2.50248e-34 | 0.999999 | 2.50253e-34 | 1.000000 |
| rad5          | 1.05237e-34 | 0.999999 | 1.05239e-34 | 1.000000 |
| PAH3+H        | 3.49704e-36 | 0.999999 | 3.49711e-36 | 1.000000 |
| rad59         | 1.81182e-36 | 0.999999 | 1.81185e-36 | 1.000000 |
| rad19syn      | 1.27381e-42 | 0.999999 | 1.27384e-42 | 1.000000 |
| rad52         | 2.83330e-43 | 0.999999 | 2.83336e-43 | 1.000000 |
| PAH10+CH3     | 1.31143e-45 | 0.999999 | 1.31145e-45 | 1.000000 |
| rad43         | 1.04292e-45 | 0.999999 | 1.04294e-45 | 1.000000 |
| rad54         | 6.69596e-46 | 0.999999 | 6.69609e-46 | 1.000000 |
| rad62         | 1.86186e-47 | 0.999999 | 1.86190e-47 | 1.000000 |
| rad51         | 1.31503e-48 | 0.999999 | 1.31506e-48 | 1.000000 |
| rad70         | 6.99003e-52 | 0.999999 | 6.99017e-52 | 1.000000 |
| PhcycC3H3_A+H | 5.16318e-52 | 0.999999 | 5.16328e-52 | 1.000000 |
| rad55         | 2.39218e-52 | 0.999999 | 2.39222e-52 | 1.000000 |
| rad65         | 9.96399e-53 | 0.999999 | 9.96418e-53 | 1.000000 |
| rad58         | 2.68911e-55 | 0.999999 | 2.68916e-55 | 1.000000 |
| PAH1+H        | 1.72312e-55 | 0.999999 | 1.72315e-55 | 1.000000 |
| rad34         | 4.59406e-57 | 0.999999 | 4.59415e-57 | 1.000000 |
| rad42         | 1.50391e-59 | 0.999999 | 1.50394e-59 | 1.000000 |
| rad47         | 1.42347e-59 | 0.999999 | 1.42349e-59 | 1.000000 |
| rad41         | 7.05523e-60 | 0.999999 | 7.05537e-60 | 1.000000 |

10.000000 Pa, 130.000000 K

=====

| Rate constant | True (fraction)     | Effective (fraction) |
|---------------|---------------------|----------------------|
| Total         | 3.94360e-35 (1.00 ) | 3.94350e-35 (1.00 )  |

| species     | PYtrue      | Cumul    | PYeffective | Cumul    |
|-------------|-------------|----------|-------------|----------|
| Indene+H    | 0.760060    | 0.760060 | 0.760080    | 0.760080 |
| rad22       | 0.144554    | 0.904614 | 0.144558    | 0.904638 |
| rad23       | 0.0910243   | 0.995638 | 0.0910266   | 0.995665 |
| rad45       | 0.00377266  | 0.999411 | 0.00377276  | 0.999437 |
| rad36       | 0.000233818 | 0.999645 | 0.000233824 | 0.999671 |
| rad11       | 0.000232649 | 0.999877 | 0.000232655 | 0.999904 |
| rad6        | 7.47818e-05 | 0.999952 | 7.47837e-05 | 0.999979 |
| Benzyl+C2H2 | 2.55072e-05 | 0.999978 | 0.00000     | 0.999979 |

|               |             |          |             |          |
|---------------|-------------|----------|-------------|----------|
| rad18         | 1.89384e-05 | 0.999997 | 1.89389e-05 | 0.999998 |
| rad20         | 1.68241e-06 | 0.999998 | 1.68245e-06 | 0.999999 |
| rad21         | 1.04141e-06 | 0.999999 | 1.04144e-06 | 1.00000  |
| rad7          | 7.26618e-09 | 0.999999 | 7.26637e-09 | 1.00000  |
| rad13         | 5.37192e-11 | 0.999999 | 5.37206e-11 | 1.00000  |
| rad24         | 3.00567e-11 | 0.999999 | 3.00575e-11 | 1.00000  |
| rad30         | 1.93043e-11 | 0.999999 | 1.93048e-11 | 1.00000  |
| rad3          | 6.74887e-13 | 0.999999 | 6.74904e-13 | 1.00000  |
| rad35         | 5.71853e-13 | 0.999999 | 5.71868e-13 | 1.00000  |
| PAH9+H        | 4.45588e-13 | 0.999999 | 4.45599e-13 | 1.00000  |
| rad4          | 3.43828e-13 | 0.999999 | 3.43837e-13 | 1.00000  |
| rad15         | 1.77588e-13 | 0.999999 | 1.77593e-13 | 1.00000  |
| rad25         | 1.64805e-13 | 0.999999 | 1.64809e-13 | 1.00000  |
| rad33         | 6.87366e-14 | 0.999999 | 6.87384e-14 | 1.00000  |
| rad38         | 6.30535e-14 | 0.999999 | 6.30551e-14 | 1.00000  |
| rad2          | 1.90625e-14 | 0.999999 | 1.90630e-14 | 1.00000  |
| rad1          | 1.24083e-15 | 0.999999 | 1.24086e-15 | 1.00000  |
| rad28         | 6.00094e-16 | 0.999999 | 6.00109e-16 | 1.00000  |
| rad10         | 1.38098e-16 | 0.999999 | 1.38102e-16 | 1.00000  |
| PhCHCCH2+H    | 2.22670e-17 | 0.999999 | 2.22675e-17 | 1.00000  |
| PhCCH+CH3     | 3.93264e-19 | 0.999999 | 3.93274e-19 | 1.00000  |
| rad46         | 3.63818e-19 | 0.999999 | 3.63827e-19 | 1.00000  |
| rad9          | 1.55952e-19 | 0.999999 | 1.55956e-19 | 1.00000  |
| rad14         | 1.38032e-19 | 0.999999 | 1.38035e-19 | 1.00000  |
| rad26         | 5.46850e-21 | 0.999999 | 5.46864e-21 | 1.00000  |
| rad8          | 4.72991e-21 | 0.999999 | 4.73003e-21 | 1.00000  |
| rad27         | 4.63862e-21 | 0.999999 | 4.63874e-21 | 1.00000  |
| PhCCCH3+H     | 1.14756e-21 | 0.999999 | 1.14759e-21 | 1.00000  |
| Ph+Allene     | 3.49255e-22 | 0.999999 | 3.49264e-22 | 1.00000  |
| rad31         | 2.61612e-22 | 0.999999 | 2.61618e-22 | 1.00000  |
| rad60syn      | 5.21382e-23 | 0.999999 | 5.21395e-23 | 1.00000  |
| rad60anti     | 3.98931e-24 | 0.999999 | 3.98942e-24 | 1.00000  |
| Ph+MeAc       | 2.45535e-24 | 0.999999 | 2.45541e-24 | 1.00000  |
| PAH7+H        | 4.41391e-26 | 0.999999 | 4.41402e-26 | 1.00000  |
| PhCH2CCH+H    | 1.19128e-26 | 0.999999 | 1.19131e-26 | 1.00000  |
| rad39         | 2.92904e-27 | 0.999999 | 2.92912e-27 | 1.00000  |
| rad12         | 7.95733e-29 | 0.999999 | 7.95753e-29 | 1.00000  |
| rad37         | 5.63882e-32 | 0.999999 | 5.63896e-32 | 1.00000  |
| rad50         | 3.57442e-32 | 0.999999 | 3.57451e-32 | 1.00000  |
| rad5          | 1.14060e-32 | 0.999999 | 1.14063e-32 | 1.00000  |
| PAH3+H        | 2.16647e-33 | 0.999999 | 2.16653e-33 | 1.00000  |
| rad59         | 1.13776e-33 | 0.999999 | 1.13779e-33 | 1.00000  |
| rad19syn      | 2.41561e-40 | 0.999999 | 2.41567e-40 | 1.00000  |
| rad52         | 5.72823e-41 | 0.999999 | 5.72838e-41 | 1.00000  |
| PAH10+CH3     | 3.22891e-43 | 0.999999 | 3.22900e-43 | 1.00000  |
| rad43         | 2.51198e-43 | 0.999999 | 2.51204e-43 | 1.00000  |
| rad54         | 1.35340e-43 | 0.999999 | 1.35344e-43 | 1.00000  |
| rad62         | 4.81528e-45 | 0.999999 | 4.81541e-45 | 1.00000  |
| rad51         | 3.59600e-46 | 0.999999 | 3.59609e-46 | 1.00000  |
| rad70         | 1.61195e-49 | 0.999999 | 1.61199e-49 | 1.00000  |
| PhcycC3H3_A+H | 1.20455e-49 | 0.999999 | 1.20458e-49 | 1.00000  |
| rad55         | 5.55053e-50 | 0.999999 | 5.55067e-50 | 1.00000  |
| rad65         | 3.25452e-50 | 0.999999 | 3.25461e-50 | 1.00000  |
| rad58         | 6.49515e-53 | 0.999999 | 6.49532e-53 | 1.00000  |
| PAH1+H        | 4.60050e-53 | 0.999999 | 4.60062e-53 | 1.00000  |
| rad34         | 1.18356e-54 | 0.999999 | 1.18359e-54 | 1.00000  |
| rad42         | 6.14370e-57 | 0.999999 | 6.14385e-57 | 1.00000  |
| rad47         | 5.67212e-57 | 0.999999 | 5.67227e-57 | 1.00000  |
| rad41         | 3.28001e-57 | 0.999999 | 3.28009e-57 | 1.00000  |

10.000000 Pa, 140.000000 K

=====

| Rate constant | True (fraction)     | Effective (fraction) |
|---------------|---------------------|----------------------|
| Total         | 1.44756e-33 (1.00 ) | 1.44751e-33 (1.00 )  |

| species     | PYtrue      | Cumul    | PYeffective | Cumul    |
|-------------|-------------|----------|-------------|----------|
| Indene+H    | 0.776140    | 0.776140 | 0.776166    | 0.776166 |
| rad22       | 0.126169    | 0.902309 | 0.126174    | 0.902340 |
| rad23       | 0.0932894   | 0.995598 | 0.0932925   | 0.995633 |
| rad45       | 0.00378722  | 0.999386 | 0.00378734  | 0.999420 |
| rad11       | 0.000237479 | 0.999623 | 0.000237487 | 0.999657 |
| rad36       | 0.000234806 | 0.999858 | 0.000234814 | 0.999892 |
| rad6        | 9.28342e-05 | 0.999951 | 9.28373e-05 | 0.999985 |
| Benzyl+C2H2 | 3.33516e-05 | 0.999984 | 0.00000     | 0.999985 |
| rad18       | 1.35336e-05 | 0.999998 | 1.35340e-05 | 0.999999 |
| rad20       | 1.27558e-06 | 0.999999 | 1.27562e-06 | 1.000000 |
| rad21       | 7.90580e-07 | 1.000000 | 7.90607e-07 | 1.00000  |
| rad7        | 9.99620e-09 | 1.000000 | 9.99654e-09 | 1.00000  |

|               |             |          |             |         |
|---------------|-------------|----------|-------------|---------|
| rad13         | 6.58354e-11 | 1.000000 | 6.58376e-11 | 1.00000 |
| rad30         | 4.43767e-11 | 1.000000 | 4.43782e-11 | 1.00000 |
| rad24         | 3.03402e-11 | 1.000000 | 3.03412e-11 | 1.00000 |
| rad3          | 1.26185e-12 | 1.000000 | 1.26189e-12 | 1.00000 |
| rad35         | 9.85156e-13 | 1.000000 | 9.85189e-13 | 1.00000 |
| PAH9+H        | 8.43071e-13 | 1.000000 | 8.43099e-13 | 1.00000 |
| rad4          | 6.43685e-13 | 1.000000 | 6.43707e-13 | 1.00000 |
| rad15         | 5.94231e-13 | 1.000000 | 5.94251e-13 | 1.00000 |
| rad25         | 4.84204e-13 | 1.000000 | 4.84221e-13 | 1.00000 |
| rad38         | 1.31989e-13 | 1.000000 | 1.31993e-13 | 1.00000 |
| rad33         | 8.49966e-14 | 1.000000 | 8.49995e-14 | 1.00000 |
| rad2          | 5.58411e-14 | 1.000000 | 5.58430e-14 | 1.00000 |
| rad1          | 3.65205e-15 | 1.000000 | 3.65217e-15 | 1.00000 |
| rad28         | 1.93885e-15 | 1.000000 | 1.93891e-15 | 1.00000 |
| rad10         | 5.65167e-16 | 1.000000 | 5.65186e-16 | 1.00000 |
| PhCHCCH2+H    | 1.69213e-16 | 1.000000 | 1.69218e-16 | 1.00000 |
| PhCCH+CH3     | 2.91666e-18 | 1.000000 | 2.91676e-18 | 1.00000 |
| rad46         | 2.14452e-18 | 1.000000 | 2.14459e-18 | 1.00000 |
| rad9          | 1.68405e-18 | 1.000000 | 1.68410e-18 | 1.00000 |
| rad14         | 6.61632e-19 | 1.000000 | 6.61655e-19 | 1.00000 |
| rad8          | 8.97926e-20 | 1.000000 | 8.97955e-20 | 1.00000 |
| rad26         | 4.44652e-20 | 1.000000 | 4.44666e-20 | 1.00000 |
| rad27         | 1.85358e-20 | 1.000000 | 1.85364e-20 | 1.00000 |
| PhCCCH3+H     | 1.14874e-20 | 1.000000 | 1.14877e-20 | 1.00000 |
| Ph+Allene     | 7.80468e-21 | 1.000000 | 7.80494e-21 | 1.00000 |
| rad60syn      | 9.97822e-22 | 1.000000 | 9.97855e-22 | 1.00000 |
| rad31         | 5.17784e-22 | 1.000000 | 5.17801e-22 | 1.00000 |
| rad60anti     | 9.27425e-23 | 1.000000 | 9.27456e-23 | 1.00000 |
| Ph+MeAc       | 4.97528e-23 | 1.000000 | 4.97545e-23 | 1.00000 |
| PhCH2CCH+H    | 8.67723e-25 | 1.000000 | 8.67752e-25 | 1.00000 |
| PAH7+H        | 7.43888e-25 | 1.000000 | 7.43913e-25 | 1.00000 |
| rad39         | 5.93448e-26 | 1.000000 | 5.93468e-26 | 1.00000 |
| rad12         | 1.94665e-27 | 1.000000 | 1.94671e-27 | 1.00000 |
| PAH3+H        | 1.15109e-28 | 1.000000 | 1.15112e-28 | 1.00000 |
| rad59         | 5.75838e-29 | 1.000000 | 5.75857e-29 | 1.00000 |
| rad50         | 6.15115e-30 | 1.000000 | 6.15136e-30 | 1.00000 |
| rad37         | 3.63078e-30 | 1.000000 | 3.63090e-30 | 1.00000 |
| rad5          | 8.66818e-31 | 1.000000 | 8.66846e-31 | 1.00000 |
| rad19syn      | 4.07123e-38 | 1.000000 | 4.07137e-38 | 1.00000 |
| rad52         | 1.07679e-38 | 1.000000 | 1.07683e-38 | 1.00000 |
| PAH10+CH3     | 6.23464e-41 | 1.000000 | 6.23485e-41 | 1.00000 |
| rad43         | 4.75525e-41 | 1.000000 | 4.75541e-41 | 1.00000 |
| rad54         | 2.43213e-41 | 1.000000 | 2.43221e-41 | 1.00000 |
| rad62         | 9.93739e-43 | 1.000000 | 9.93772e-43 | 1.00000 |
| rad51         | 9.50204e-44 | 1.000000 | 9.50235e-44 | 1.00000 |
| rad70         | 3.30922e-47 | 1.000000 | 3.30933e-47 | 1.00000 |
| PhcycC3H3_A+H | 2.50245e-47 | 1.000000 | 2.50254e-47 | 1.00000 |
| rad55         | 1.14653e-47 | 1.000000 | 1.14657e-47 | 1.00000 |
| rad65         | 1.05029e-47 | 1.000000 | 1.05032e-47 | 1.00000 |
| rad58         | 1.43934e-50 | 1.000000 | 1.43938e-50 | 1.00000 |
| PAH1+H        | 1.09522e-50 | 1.000000 | 1.09526e-50 | 1.00000 |
| rad34         | 2.72519e-52 | 1.000000 | 2.72528e-52 | 1.00000 |
| rad47         | 2.30289e-54 | 1.000000 | 2.30297e-54 | 1.00000 |
| rad42         | 2.23893e-54 | 1.000000 | 2.23901e-54 | 1.00000 |
| rad41         | 1.30858e-54 | 1.000000 | 1.30862e-54 | 1.00000 |

10.000000 Pa, 150.000000 K

=====

| Rate constant | True (fraction)     | Effective (fraction) |
|---------------|---------------------|----------------------|
| Total         | 3.27736e-32 (1.00 ) | 3.27722e-32 (1.00 )  |

| species     | PYtrue      | Cumul    | PYeffective | Cumul    |
|-------------|-------------|----------|-------------|----------|
| Indene+H    | 0.790617    | 0.790617 | 0.790652    | 0.790652 |
| rad22       | 0.109673    | 0.900290 | 0.109678    | 0.900330 |
| rad23       | 0.0952614   | 0.995551 | 0.0952656   | 0.995596 |
| rad45       | 0.00380163  | 0.999353 | 0.00380179  | 0.999397 |
| rad11       | 0.000241192 | 0.999594 | 0.000241203 | 0.999639 |
| rad36       | 0.000235841 | 0.999830 | 0.000235851 | 0.999874 |
| rad6        | 0.000114760 | 0.999945 | 0.000114765 | 0.999989 |
| Benzyl+C2H2 | 4.34308e-05 | 0.999988 | 0.00000     | 0.999989 |
| rad18       | 9.82959e-06 | 0.999998 | 9.83002e-06 | 0.999999 |
| rad20       | 9.82903e-07 | 0.999999 | 9.82945e-07 | 1.00000  |
| rad21       | 6.09920e-07 | 1.000000 | 6.09947e-07 | 1.00000  |
| rad7        | 1.35478e-08 | 1.000000 | 1.35484e-08 | 1.00000  |
| rad30       | 9.22932e-11 | 1.000000 | 9.22972e-11 | 1.00000  |
| rad13       | 8.04541e-11 | 1.000000 | 8.04576e-11 | 1.00000  |
| rad24       | 3.06386e-11 | 1.000000 | 3.06399e-11 | 1.00000  |
| rad3        | 2.33223e-12 | 1.000000 | 2.33233e-12 | 1.00000  |

|               |             |          |             |         |
|---------------|-------------|----------|-------------|---------|
| rad15         | 1.70563e-12 | 1.000000 | 1.70570e-12 | 1.00000 |
| rad35         | 1.68183e-12 | 1.000000 | 1.68191e-12 | 1.00000 |
| PAH9+H        | 1.56154e-12 | 1.000000 | 1.56161e-12 | 1.00000 |
| rad25         | 1.22654e-12 | 1.000000 | 1.22659e-12 | 1.00000 |
| rad4          | 1.19137e-12 | 1.000000 | 1.19142e-12 | 1.00000 |
| rad38         | 2.64376e-13 | 1.000000 | 2.64388e-13 | 1.00000 |
| rad2          | 1.57933e-13 | 1.000000 | 1.57940e-13 | 1.00000 |
| rad33         | 1.04772e-13 | 1.000000 | 1.04776e-13 | 1.00000 |
| rad1          | 1.03821e-14 | 1.000000 | 1.03826e-14 | 1.00000 |
| rad28         | 5.77616e-15 | 1.000000 | 5.77641e-15 | 1.00000 |
| rad10         | 2.14811e-15 | 1.000000 | 2.14820e-15 | 1.00000 |
| PhCHCCH2+H    | 1.00384e-15 | 1.000000 | 1.00389e-15 | 1.00000 |
| PhCCH+CH3     | 1.81093e-17 | 1.000000 | 1.81101e-17 | 1.00000 |
| rad9          | 1.34200e-17 | 1.000000 | 1.34206e-17 | 1.00000 |
| rad46         | 1.03882e-17 | 1.000000 | 1.03886e-17 | 1.00000 |
| rad14         | 2.69894e-18 | 1.000000 | 2.69906e-18 | 1.00000 |
| rad8          | 1.15242e-18 | 1.000000 | 1.15247e-18 | 1.00000 |
| rad26         | 3.13137e-19 | 1.000000 | 3.13150e-19 | 1.00000 |
| Ph+Allene     | 1.16638e-19 | 1.000000 | 1.16643e-19 | 1.00000 |
| PhCCCH3+H     | 9.61111e-20 | 1.000000 | 9.61153e-20 | 1.00000 |
| rad27         | 6.61981e-20 | 1.000000 | 6.62010e-20 | 1.00000 |
| rad60syn      | 1.28470e-20 | 1.000000 | 1.28476e-20 | 1.00000 |
| rad60anti     | 1.41043e-21 | 1.000000 | 1.41049e-21 | 1.00000 |
| rad31         | 1.01536e-21 | 1.000000 | 1.01540e-21 | 1.00000 |
| Ph+MeAc       | 7.55499e-22 | 1.000000 | 7.55531e-22 | 1.00000 |
| PhCH2CCH+H    | 2.77279e-23 | 1.000000 | 2.77291e-23 | 1.00000 |
| PAH7+H        | 9.84427e-24 | 1.000000 | 9.84470e-24 | 1.00000 |
| rad39         | 9.04934e-25 | 1.000000 | 9.04973e-25 | 1.00000 |
| rad12         | 3.71631e-26 | 1.000000 | 3.71647e-26 | 1.00000 |
| PAH3+H        | 1.80513e-26 | 1.000000 | 1.80521e-26 | 1.00000 |
| rad59         | 8.13650e-27 | 1.000000 | 8.13685e-27 | 1.00000 |
| rad50         | 3.72123e-28 | 1.000000 | 3.72139e-28 | 1.00000 |
| rad37         | 1.54085e-28 | 1.000000 | 1.54091e-28 | 1.00000 |
| rad5          | 4.29384e-29 | 1.000000 | 4.29403e-29 | 1.00000 |
| rad19syn      | 1.12964e-35 | 1.000000 | 1.12969e-35 | 1.00000 |
| rad52         | 3.12539e-36 | 1.000000 | 3.12552e-36 | 1.00000 |
| PAH10+CH3     | 1.34977e-38 | 1.000000 | 1.34983e-38 | 1.00000 |
| rad43         | 1.01333e-38 | 1.000000 | 1.01338e-38 | 1.00000 |
| rad54         | 7.19012e-39 | 1.000000 | 7.19044e-39 | 1.00000 |
| rad62         | 2.38924e-40 | 1.000000 | 2.38935e-40 | 1.00000 |
| rad51         | 3.92528e-41 | 1.000000 | 3.92545e-41 | 1.00000 |
| rad70         | 1.10984e-44 | 1.000000 | 1.10988e-44 | 1.00000 |
| PhcycC3H3_A+H | 8.48539e-45 | 1.000000 | 8.48576e-45 | 1.00000 |
| rad65         | 5.38615e-45 | 1.000000 | 5.38638e-45 | 1.00000 |
| rad55         | 3.86657e-45 | 1.000000 | 3.86674e-45 | 1.00000 |
| rad58         | 5.39606e-48 | 1.000000 | 5.39630e-48 | 1.00000 |
| PAH1+H        | 4.11318e-48 | 1.000000 | 4.11336e-48 | 1.00000 |
| rad34         | 1.01777e-49 | 1.000000 | 1.01781e-49 | 1.00000 |
| rad47         | 1.51910e-51 | 1.000000 | 1.51917e-51 | 1.00000 |
| rad42         | 1.03772e-51 | 1.000000 | 1.03776e-51 | 1.00000 |
| rad41         | 6.35384e-52 | 1.000000 | 6.35412e-52 | 1.00000 |

10.000000 Pa, 160.000000 K

=====

| Rate constant | True (fraction)     | Effective (fraction) |
|---------------|---------------------|----------------------|
| Total         | 5.01169e-31 (1.00 ) | 5.01141e-31 (1.00 )  |

| species     | PYtrue      | Cumul    | PYeffective | Cumul    |
|-------------|-------------|----------|-------------|----------|
| Indene+H    | 0.803628    | 0.803628 | 0.803673    | 0.803673 |
| rad23       | 0.0969467   | 0.900575 | 0.0969522   | 0.900625 |
| rad22       | 0.0949260   | 0.995501 | 0.0949313   | 0.995556 |
| rad45       | 0.00381327  | 0.999314 | 0.00381349  | 0.999370 |
| rad11       | 0.000243525 | 0.999557 | 0.000243539 | 0.999614 |
| rad36       | 0.000236766 | 0.999794 | 0.000236779 | 0.999850 |
| rad6        | 0.000141147 | 0.999935 | 0.000141155 | 0.999991 |
| Benzyl+C2H2 | 5.63360e-05 | 0.999992 | 0.00000     | 0.999991 |
| rad18       | 7.23795e-06 | 0.999999 | 7.23836e-06 | 0.999999 |
| rad20       | 7.67655e-07 | 1.000000 | 7.67699e-07 | 0.999999 |
| rad21       | 4.76903e-07 | 1.000000 | 4.76929e-07 | 1.000000 |
| rad7        | 1.80759e-08 | 1.000000 | 1.80770e-08 | 1.000000 |
| rad30       | 1.77304e-10 | 1.000000 | 1.77313e-10 | 1.000000 |
| rad13       | 9.79351e-11 | 1.000000 | 9.79406e-11 | 1.000000 |
| rad24       | 3.09308e-11 | 1.000000 | 3.09325e-11 | 1.000000 |
| rad15       | 4.32893e-12 | 1.000000 | 4.32917e-12 | 1.000000 |
| rad3        | 4.23857e-12 | 1.000000 | 4.23881e-12 | 1.000000 |
| rad35       | 2.84649e-12 | 1.000000 | 2.84665e-12 | 1.000000 |
| PAH9+H      | 2.83990e-12 | 1.000000 | 2.84006e-12 | 1.000000 |
| rad25       | 2.74126e-12 | 1.000000 | 2.74141e-12 | 1.000000 |

|               |             |         |             |          |
|---------------|-------------|---------|-------------|----------|
| rad4          | 2.16850e-12 | 1.00000 | 2.16862e-12 | 1.000000 |
| rad38         | 5.11464e-13 | 1.00000 | 5.11493e-13 | 1.000000 |
| rad2          | 4.28148e-13 | 1.00000 | 4.28172e-13 | 1.000000 |
| rad33         | 1.28612e-13 | 1.00000 | 1.28619e-13 | 1.000000 |
| rad1          | 2.83029e-14 | 1.00000 | 2.83045e-14 | 1.000000 |
| rad28         | 1.60469e-14 | 1.00000 | 1.60478e-14 | 1.000000 |
| rad10         | 7.53912e-15 | 1.00000 | 7.53954e-15 | 1.000000 |
| PhCHCCH2+H    | 4.86075e-15 | 1.00000 | 4.86103e-15 | 1.000000 |
| PhCCH+CH3     | 9.62899e-17 | 1.00000 | 9.62953e-17 | 1.000000 |
| rad9          | 8.34329e-17 | 1.00000 | 8.34376e-17 | 1.000000 |
| rad46         | 4.27417e-17 | 1.00000 | 4.27441e-17 | 1.000000 |
| rad8          | 1.07689e-17 | 1.00000 | 1.07695e-17 | 1.000000 |
| rad14         | 9.53253e-18 | 1.00000 | 9.53307e-18 | 1.000000 |
| rad26         | 1.92526e-18 | 1.00000 | 1.92537e-18 | 1.000000 |
| Ph+Allene     | 1.25682e-18 | 1.00000 | 1.25689e-18 | 1.000000 |
| PhCCCH3+H     | 6.86060e-19 | 1.00000 | 6.86099e-19 | 1.000000 |
| rad27         | 2.13602e-19 | 1.00000 | 2.13614e-19 | 1.000000 |
| rad60syn      | 1.20012e-19 | 1.00000 | 1.20019e-19 | 1.000000 |
| rad60anti     | 1.52226e-20 | 1.00000 | 1.52235e-20 | 1.000000 |
| Ph+MeAc       | 8.91592e-21 | 1.00000 | 8.91642e-21 | 1.000000 |
| rad31         | 1.96326e-21 | 1.00000 | 1.96337e-21 | 1.000000 |
| PhCH2CCH+H    | 5.38775e-22 | 1.00000 | 5.38805e-22 | 1.000000 |
| PAH7+H        | 1.05798e-22 | 1.00000 | 1.05804e-22 | 1.000000 |
| rad39         | 1.08309e-23 | 1.00000 | 1.08316e-23 | 1.000000 |
| rad12         | 5.63868e-25 | 1.00000 | 5.63899e-25 | 1.000000 |
| PAH3+H        | 5.41214e-25 | 1.00000 | 5.41245e-25 | 1.000000 |
| rad59         | 2.28527e-25 | 1.00000 | 2.28540e-25 | 1.000000 |
| rad50         | 9.78280e-27 | 1.00000 | 9.78335e-27 | 1.000000 |
| rad37         | 4.20007e-27 | 1.00000 | 4.20030e-27 | 1.000000 |
| rad5          | 1.23785e-27 | 1.00000 | 1.23792e-27 | 1.000000 |
| rad19syn      | 2.44353e-33 | 1.00000 | 2.44366e-33 | 1.000000 |
| rad52         | 6.84523e-34 | 1.00000 | 6.84562e-34 | 1.000000 |
| PAH10+CH3     | 2.04118e-36 | 1.00000 | 2.04129e-36 | 1.000000 |
| rad54         | 1.65829e-36 | 1.00000 | 1.65838e-36 | 1.000000 |
| rad43         | 1.50969e-36 | 1.00000 | 1.50978e-36 | 1.000000 |
| rad62         | 4.10229e-38 | 1.00000 | 4.10252e-38 | 1.000000 |
| rad51         | 1.16481e-38 | 1.00000 | 1.16487e-38 | 1.000000 |
| rad70         | 2.90181e-42 | 1.00000 | 2.90197e-42 | 1.000000 |
| PhcycC3H3_A+H | 2.24248e-42 | 1.00000 | 2.24261e-42 | 1.000000 |
| rad65         | 2.00280e-42 | 1.00000 | 2.00291e-42 | 1.000000 |
| rad55         | 1.01629e-42 | 1.00000 | 1.01634e-42 | 1.000000 |
| rad58         | 1.63431e-45 | 1.00000 | 1.63440e-45 | 1.000000 |
| PAH1+H        | 1.18909e-45 | 1.00000 | 1.18915e-45 | 1.000000 |
| rad34         | 2.95714e-47 | 1.00000 | 2.95730e-47 | 1.000000 |
| rad47         | 7.36321e-49 | 1.00000 | 7.36362e-49 | 1.000000 |
| rad42         | 3.49738e-49 | 1.00000 | 3.49757e-49 | 1.000000 |
| rad41         | 2.22545e-49 | 1.00000 | 2.22557e-49 | 1.000000 |

10.000000 Pa, 170.000000 K

=====

| Rate constant | True (fraction)     | Effective (fraction) |
|---------------|---------------------|----------------------|
| Total         | 5.54821e-30 (1.00 ) | 5.54780e-30 (1.00 )  |

| species     | PYtrue      | Cumul    | PYeffective | Cumul    |
|-------------|-------------|----------|-------------|----------|
| Indene+H    | 0.815298    | 0.815298 | 0.815358    | 0.815358 |
| rad23       | 0.0983470   | 0.913645 | 0.0983541   | 0.913712 |
| rad22       | 0.0818010   | 0.995446 | 0.0818069   | 0.995519 |
| rad45       | 0.00382036  | 0.999266 | 0.00382064  | 0.999340 |
| rad11       | 0.000244245 | 0.999511 | 0.000244263 | 0.999584 |
| rad36       | 0.000237476 | 0.999748 | 0.000237494 | 0.999821 |
| rad6        | 0.000172571 | 0.999921 | 0.000172583 | 0.999994 |
| Benzyl+C2H2 | 7.27913e-05 | 0.999993 | 0.00000     | 0.999994 |
| rad18       | 5.39222e-06 | 0.999999 | 5.39261e-06 | 0.999999 |
| rad20       | 6.06381e-07 | 0.999999 | 6.06425e-07 | 1.000000 |
| rad21       | 3.77125e-07 | 1.000000 | 3.77152e-07 | 1.000000 |
| rad7        | 2.37321e-08 | 1.000000 | 2.37339e-08 | 1.000000 |
| rad30       | 3.19604e-10 | 1.000000 | 3.19627e-10 | 1.000000 |
| rad13       | 1.18626e-10 | 1.000000 | 1.18634e-10 | 1.000000 |
| rad24       | 3.12019e-11 | 1.000000 | 3.12041e-11 | 1.000000 |
| rad15       | 9.94195e-12 | 1.000000 | 9.94267e-12 | 1.000000 |
| rad3        | 7.54087e-12 | 1.000000 | 7.54142e-12 | 1.000000 |
| rad25       | 5.50760e-12 | 1.000000 | 5.50800e-12 | 1.000000 |
| PAH9+H      | 5.08032e-12 | 1.000000 | 5.08069e-12 | 1.000000 |
| rad35       | 4.77520e-12 | 1.000000 | 4.77555e-12 | 1.000000 |
| rad4        | 3.86446e-12 | 1.000000 | 3.86475e-12 | 1.000000 |
| rad2        | 1.10795e-12 | 1.000000 | 1.10803e-12 | 1.000000 |
| rad38       | 9.61856e-13 | 1.000000 | 9.61926e-13 | 1.000000 |
| rad33       | 1.57065e-13 | 1.000000 | 1.57076e-13 | 1.000000 |

|               |             |          |             |         |
|---------------|-------------|----------|-------------|---------|
| rad1          | 7.36873e-14 | 1.000000 | 7.36927e-14 | 1.00000 |
| rad28         | 4.19671e-14 | 1.000000 | 4.19701e-14 | 1.00000 |
| rad10         | 2.44060e-14 | 1.000000 | 2.44078e-14 | 1.00000 |
| PhCHCCH2+H    | 1.98956e-14 | 1.000000 | 1.98971e-14 | 1.00000 |
| PhCCH+CH3     | 4.47557e-16 | 1.000000 | 4.47590e-16 | 1.00000 |
| rad9          | 4.22622e-16 | 1.000000 | 4.22652e-16 | 1.00000 |
| rad46         | 1.53533e-16 | 1.000000 | 1.53544e-16 | 1.00000 |
| rad8          | 7.75400e-17 | 1.000000 | 7.75456e-17 | 1.00000 |
| rad14         | 2.96274e-17 | 1.000000 | 2.96296e-17 | 1.00000 |
| rad26         | 1.04468e-17 | 1.000000 | 1.04475e-17 | 1.00000 |
| Ph+Allene     | 1.03435e-17 | 1.000000 | 1.03443e-17 | 1.00000 |
| PhCCCH3+H     | 4.26015e-18 | 1.000000 | 4.26046e-18 | 1.00000 |
| rad60syn      | 8.61675e-19 | 1.000000 | 8.61737e-19 | 1.00000 |
| rad27         | 6.29335e-19 | 1.000000 | 6.29381e-19 | 1.00000 |
| rad60anti     | 1.24003e-19 | 1.000000 | 1.24012e-19 | 1.00000 |
| Ph+MeAc       | 8.48137e-20 | 1.000000 | 8.48199e-20 | 1.00000 |
| PhCH2CCH+H    | 7.39132e-21 | 1.000000 | 7.39185e-21 | 1.00000 |
| rad31         | 3.72859e-21 | 1.000000 | 3.72886e-21 | 1.00000 |
| PAH7+H        | 9.48805e-22 | 1.000000 | 9.48874e-22 | 1.00000 |
| rad39         | 1.05825e-22 | 1.000000 | 1.05833e-22 | 1.00000 |
| PAH3+H        | 9.93630e-24 | 1.000000 | 9.93702e-24 | 1.00000 |
| rad12         | 6.99229e-24 | 1.000000 | 6.99280e-24 | 1.00000 |
| rad59         | 4.04677e-24 | 1.000000 | 4.04707e-24 | 1.00000 |
| rad50         | 1.69372e-25 | 1.000000 | 1.69385e-25 | 1.00000 |
| rad37         | 8.21182e-26 | 1.000000 | 8.21242e-26 | 1.00000 |
| rad5          | 2.45580e-26 | 1.000000 | 2.45598e-26 | 1.00000 |
| rad19syn      | 4.57484e-31 | 1.000000 | 4.57517e-31 | 1.00000 |
| rad52         | 2.16599e-31 | 1.000000 | 2.16615e-31 | 1.00000 |
| rad54         | 2.93630e-34 | 1.000000 | 2.93652e-34 | 1.00000 |
| PAH10+CH3     | 2.17607e-34 | 1.000000 | 2.17622e-34 | 1.00000 |
| rad43         | 1.58850e-34 | 1.000000 | 1.58862e-34 | 1.00000 |
| rad62         | 5.13537e-36 | 1.000000 | 5.13574e-36 | 1.00000 |
| rad51         | 2.34368e-36 | 1.000000 | 2.34385e-36 | 1.00000 |
| rad70         | 5.82846e-40 | 1.000000 | 5.82888e-40 | 1.00000 |
| rad65         | 5.04200e-40 | 1.000000 | 5.04237e-40 | 1.00000 |
| PhcycC3H3_A+H | 4.55189e-40 | 1.000000 | 4.55222e-40 | 1.00000 |
| rad55         | 2.05159e-40 | 1.000000 | 2.05174e-40 | 1.00000 |
| rad58         | 3.84086e-43 | 1.000000 | 3.84114e-43 | 1.00000 |
| PAH1+H        | 2.61529e-43 | 1.000000 | 2.61548e-43 | 1.00000 |
| rad34         | 6.59083e-45 | 1.000000 | 6.59131e-45 | 1.00000 |
| rad47         | 2.42964e-46 | 1.000000 | 2.42982e-46 | 1.00000 |
| rad42         | 8.54598e-47 | 1.000000 | 8.54660e-47 | 1.00000 |
| rad41         | 5.62207e-47 | 1.000000 | 5.62248e-47 | 1.00000 |

10.000000 Pa, 180.000000 K

=====

| Rate constant | True (fraction)     | Effective (fraction) |
|---------------|---------------------|----------------------|
| Total         | 4.69315e-29 (1.00 ) | 4.69271e-29 (1.00 )  |

| species     | PYtrue      | Cumul    | PYeffective | Cumul    |
|-------------|-------------|----------|-------------|----------|
| Indene+H    | 0.825752    | 0.825752 | 0.825830    | 0.825830 |
| rad23       | 0.0994607   | 0.925213 | 0.0994700   | 0.925300 |
| rad22       | 0.0701761   | 0.995389 | 0.0701826   | 0.995483 |
| rad45       | 0.00382161  | 0.999210 | 0.00382197  | 0.999305 |
| rad11       | 0.000243173 | 0.999454 | 0.000243196 | 0.999548 |
| rad36       | 0.000237899 | 0.999691 | 0.000237921 | 0.999786 |
| rad6        | 0.000209571 | 0.999901 | 0.000209591 | 0.999995 |
| Benzyl+C2H2 | 9.36769e-05 | 0.999995 | 0.00000     | 0.999995 |
| rad18       | 4.05761e-06 | 0.999999 | 4.05799e-06 | 0.999999 |
| rad20       | 4.83621e-07 | 0.999999 | 4.83666e-07 | 1.000000 |
| rad21       | 3.01090e-07 | 1.000000 | 3.01118e-07 | 1.00000  |
| rad7        | 3.06563e-08 | 1.000000 | 3.06592e-08 | 1.00000  |
| rad30       | 5.47074e-10 | 1.000000 | 5.47126e-10 | 1.00000  |
| rad13       | 1.42848e-10 | 1.000000 | 1.42862e-10 | 1.00000  |
| rad24       | 3.14412e-11 | 1.000000 | 3.14441e-11 | 1.00000  |
| rad15       | 2.10329e-11 | 1.000000 | 2.10349e-11 | 1.00000  |
| rad3        | 1.30891e-11 | 1.000000 | 1.30903e-11 | 1.00000  |
| rad25       | 1.01001e-11 | 1.000000 | 1.01010e-11 | 1.00000  |
| PAH9+H      | 8.94792e-12 | 1.000000 | 8.94876e-12 | 1.00000  |
| rad35       | 7.93556e-12 | 1.000000 | 7.93631e-12 | 1.00000  |
| rad4        | 6.72005e-12 | 1.000000 | 6.72068e-12 | 1.00000  |
| rad2        | 2.73227e-12 | 1.000000 | 2.73252e-12 | 1.00000  |
| rad38       | 1.76593e-12 | 1.000000 | 1.76609e-12 | 1.00000  |
| rad33       | 1.90660e-13 | 1.000000 | 1.90678e-13 | 1.00000  |
| rad1        | 1.82919e-13 | 1.000000 | 1.82936e-13 | 1.00000  |
| rad28       | 1.04138e-13 | 1.000000 | 1.04148e-13 | 1.00000  |
| rad10       | 7.30198e-14 | 1.000000 | 7.30266e-14 | 1.00000  |
| PhCHCCH2+H  | 7.07697e-14 | 1.000000 | 7.07763e-14 | 1.00000  |

|               |             |          |             |         |
|---------------|-------------|----------|-------------|---------|
| PhCCH+CH3     | 1.85133e-15 | 1.000000 | 1.85151e-15 | 1.00000 |
| rad9          | 1.80480e-15 | 1.000000 | 1.80497e-15 | 1.00000 |
| rad46         | 4.92272e-16 | 1.000000 | 4.92318e-16 | 1.00000 |
| rad8          | 4.49567e-16 | 1.000000 | 4.49609e-16 | 1.00000 |
| rad14         | 8.22204e-17 | 1.000000 | 8.22281e-17 | 1.00000 |
| Ph+Allene     | 6.79962e-17 | 1.000000 | 6.80026e-17 | 1.00000 |
| rad26         | 5.06074e-17 | 1.000000 | 5.06122e-17 | 1.00000 |
| PhCCCH3+H     | 2.34077e-17 | 1.000000 | 2.34099e-17 | 1.00000 |
| rad60syn      | 4.97267e-18 | 1.000000 | 4.97313e-18 | 1.00000 |
| rad27         | 1.70958e-18 | 1.000000 | 1.70974e-18 | 1.00000 |
| rad60anti     | 7.99620e-19 | 1.000000 | 7.99695e-19 | 1.00000 |
| Ph+MeAc       | 6.70735e-19 | 1.000000 | 6.70798e-19 | 1.00000 |
| PhCH2CCH+H    | 7.64832e-20 | 1.000000 | 7.64904e-20 | 1.00000 |
| PAH7+H        | 7.24793e-21 | 1.000000 | 7.24861e-21 | 1.00000 |
| rad31         | 6.93634e-21 | 1.000000 | 6.93699e-21 | 1.00000 |
| rad39         | 8.70939e-22 | 1.000000 | 8.71021e-22 | 1.00000 |
| PAH3+H        | 1.30587e-22 | 1.000000 | 1.30599e-22 | 1.00000 |
| rad12         | 7.24696e-23 | 1.000000 | 7.24764e-23 | 1.00000 |
| rad59         | 5.15633e-23 | 1.000000 | 5.15681e-23 | 1.00000 |
| rad50         | 2.14616e-24 | 1.000000 | 2.14636e-24 | 1.00000 |
| rad37         | 1.22104e-24 | 1.000000 | 1.22115e-24 | 1.00000 |
| rad5          | 3.62434e-25 | 1.000000 | 3.62468e-25 | 1.00000 |
| rad19syn      | 3.73199e-29 | 1.000000 | 3.73234e-29 | 1.00000 |
| rad52         | 1.15216e-29 | 1.000000 | 1.15227e-29 | 1.00000 |
| rad54         | 5.11022e-32 | 1.000000 | 5.11070e-32 | 1.00000 |
| PAH10+CH3     | 1.78974e-32 | 1.000000 | 1.78990e-32 | 1.00000 |
| rad43         | 1.30798e-32 | 1.000000 | 1.30810e-32 | 1.00000 |
| rad62         | 5.55081e-34 | 1.000000 | 5.55133e-34 | 1.00000 |
| rad51         | 3.96831e-34 | 1.000000 | 3.96868e-34 | 1.00000 |
| rad70         | 1.15126e-37 | 1.000000 | 1.15137e-37 | 1.00000 |
| rad65         | 1.01151e-37 | 1.000000 | 1.01160e-37 | 1.00000 |
| PhcycC3H3_A+H | 9.08090e-38 | 1.000000 | 9.08175e-38 | 1.00000 |
| rad55         | 4.07072e-38 | 1.000000 | 4.07110e-38 | 1.00000 |
| rad58         | 8.51225e-41 | 1.000000 | 8.51305e-41 | 1.00000 |
| PAH1+H        | 5.53254e-41 | 1.000000 | 5.53306e-41 | 1.00000 |
| rad34         | 1.43643e-42 | 1.000000 | 1.43656e-42 | 1.00000 |
| rad47         | 6.32278e-44 | 1.000000 | 6.32337e-44 | 1.00000 |
| rad42         | 1.71427e-44 | 1.000000 | 1.71443e-44 | 1.00000 |
| rad41         | 1.14606e-44 | 1.000000 | 1.14617e-44 | 1.00000 |

10.000000 Pa, 190.000000 K

=====

| Rate constant | True (fraction)     | Effective (fraction) |
|---------------|---------------------|----------------------|
| Total         | 3.16530e-28 (1.00 ) | 3.16492e-28 (1.00 )  |

| species     | PYtrue      | Cumul    | PYeffective | Cumul    |
|-------------|-------------|----------|-------------|----------|
| Indene+H    | 0.835112    | 0.835112 | 0.835212    | 0.835212 |
| rad23       | 0.100284    | 0.935396 | 0.100296    | 0.935508 |
| rad22       | 0.0599335   | 0.995329 | 0.0599407   | 0.995449 |
| rad45       | 0.00381609  | 0.999146 | 0.00381655  | 0.999265 |
| rad6        | 0.000252641 | 0.999398 | 0.000252671 | 0.999518 |
| rad11       | 0.000240203 | 0.999638 | 0.000240232 | 0.999758 |
| rad36       | 0.000237980 | 0.999876 | 0.000238008 | 0.999996 |
| Benzyl+C2H2 | 0.000120054 | 0.999996 | 0.00000     | 0.999996 |
| rad18       | 3.07989e-06 | 1.000000 | 3.08026e-06 | 0.999999 |
| rad20       | 3.88911e-07 | 1.000000 | 3.88957e-07 | 1.000000 |
| rad21       | 2.42365e-07 | 1.000000 | 2.42394e-07 | 1.000000 |
| rad7        | 3.89703e-08 | 1.000000 | 3.89750e-08 | 1.000000 |
| rad30       | 8.97448e-10 | 1.000000 | 8.97556e-10 | 1.000000 |
| rad13       | 1.70892e-10 | 1.000000 | 1.70912e-10 | 1.000000 |
| rad15       | 4.15631e-11 | 1.000000 | 4.15681e-11 | 1.000000 |
| rad24       | 3.16404e-11 | 1.000000 | 3.16442e-11 | 1.000000 |
| rad3        | 2.21143e-11 | 1.000000 | 2.21170e-11 | 1.000000 |
| rad25       | 1.71173e-11 | 1.000000 | 1.71194e-11 | 1.000000 |
| PAH9+H      | 1.55225e-11 | 1.000000 | 1.55244e-11 | 1.000000 |
| rad35       | 1.30541e-11 | 1.000000 | 1.30557e-11 | 1.000000 |
| rad4        | 1.13764e-11 | 1.000000 | 1.13778e-11 | 1.000000 |
| rad2        | 6.42177e-12 | 1.000000 | 6.42254e-12 | 1.000000 |
| rad38       | 3.17399e-12 | 1.000000 | 3.17437e-12 | 1.000000 |
| rad1        | 4.33011e-13 | 1.000000 | 4.33063e-13 | 1.000000 |
| rad28       | 2.46784e-13 | 1.000000 | 2.46814e-13 | 1.000000 |
| rad33       | 2.29898e-13 | 1.000000 | 2.29926e-13 | 1.000000 |
| PhCHCCH2+H  | 2.23638e-13 | 1.000000 | 2.23665e-13 | 1.000000 |
| rad10       | 2.02680e-13 | 1.000000 | 2.02705e-13 | 1.000000 |
| PhCCH+CH3   | 6.92137e-15 | 1.000000 | 6.92220e-15 | 1.000000 |
| rad9        | 6.67678e-15 | 1.000000 | 6.67758e-15 | 1.000000 |
| rad8        | 2.17305e-15 | 1.000000 | 2.17331e-15 | 1.000000 |
| rad46       | 1.43391e-15 | 1.000000 | 1.43408e-15 | 1.000000 |



|               |             |         |             |          |
|---------------|-------------|---------|-------------|----------|
| Ph+Allene     | 3.69942e-16 | 1.00000 | 3.69987e-16 | 1.000000 |
| rad26         | 2.21318e-16 | 1.00000 | 2.21345e-16 | 1.000000 |
| rad14         | 2.06381e-16 | 1.00000 | 2.06406e-16 | 1.000000 |
| PhCCCH3+H     | 1.15460e-16 | 1.00000 | 1.15474e-16 | 1.000000 |
| rad60syn      | 2.38932e-17 | 1.00000 | 2.38960e-17 | 1.000000 |
| Ph+MeAc       | 4.52483e-18 | 1.00000 | 4.52537e-18 | 1.000000 |
| rad27         | 4.31928e-18 | 1.00000 | 4.31979e-18 | 1.000000 |
| rad60anti     | 4.23805e-18 | 1.00000 | 4.23856e-18 | 1.000000 |
| PhCH2CCH+H    | 6.25381e-19 | 1.00000 | 6.25456e-19 | 1.000000 |
| PAH7+H        | 4.80193e-20 | 1.00000 | 4.80251e-20 | 1.000000 |
| rad31         | 1.26187e-20 | 1.00000 | 1.26202e-20 | 1.000000 |
| rad39         | 6.19485e-21 | 1.00000 | 6.19560e-21 | 1.000000 |
| PAH3+H        | 1.31077e-21 | 1.00000 | 1.31093e-21 | 1.000000 |
| rad12         | 6.40517e-22 | 1.00000 | 6.40594e-22 | 1.000000 |
| rad59         | 5.02422e-22 | 1.00000 | 5.02482e-22 | 1.000000 |
| rad50         | 2.10676e-23 | 1.00000 | 2.10701e-23 | 1.000000 |
| rad37         | 1.45063e-23 | 1.00000 | 1.45081e-23 | 1.000000 |
| rad5          | 4.20977e-24 | 1.00000 | 4.21027e-24 | 1.000000 |
| rad19syn      | 1.17749e-27 | 1.00000 | 1.17763e-27 | 1.000000 |
| rad52         | 2.62602e-28 | 1.00000 | 2.62634e-28 | 1.000000 |
| rad54         | 7.50024e-30 | 1.00000 | 7.50114e-30 | 1.000000 |
| PAH10+CH3     | 1.27238e-30 | 1.00000 | 1.27253e-30 | 1.000000 |
| rad43         | 9.41036e-31 | 1.00000 | 9.41149e-31 | 1.000000 |
| rad51         | 2.45826e-31 | 1.00000 | 2.45856e-31 | 1.000000 |
| rad62         | 8.70689e-32 | 1.00000 | 8.70793e-32 | 1.000000 |
| rad70         | 3.37481e-35 | 1.00000 | 3.37521e-35 | 1.000000 |
| PhcycC3H3_A+H | 2.67933e-35 | 1.00000 | 2.67965e-35 | 1.000000 |
| rad65         | 2.37142e-35 | 1.00000 | 2.37171e-35 | 1.000000 |
| rad55         | 1.19451e-35 | 1.00000 | 1.19465e-35 | 1.000000 |
| rad58         | 2.76805e-38 | 1.00000 | 2.76838e-38 | 1.000000 |
| PAH1+H        | 1.69453e-38 | 1.00000 | 1.69473e-38 | 1.000000 |
| rad34         | 4.61139e-40 | 1.00000 | 4.61194e-40 | 1.000000 |
| rad47         | 1.75105e-41 | 1.00000 | 1.75126e-41 | 1.000000 |
| rad42         | 3.95223e-42 | 1.00000 | 3.95271e-42 | 1.000000 |
| rad41         | 2.58013e-42 | 1.00000 | 2.58043e-42 | 1.000000 |

10.0000000 Pa, 200.000000 K

=====

| Rate constant | True (fraction)     | Effective (fraction) |
|---------------|---------------------|----------------------|
| Total         | 1.76115e-27 (1.00 ) | 1.76088e-27 (1.00 )  |

| species     | PYtrue      | Cumul    | PYeffective | Cumul    |
|-------------|-------------|----------|-------------|----------|
| Indene+H    | 0.843498    | 0.843498 | 0.843627    | 0.843627 |
| rad23       | 0.100809    | 0.944307 | 0.100825    | 0.944452 |
| rad22       | 0.0509580   | 0.995265 | 0.0509658   | 0.995418 |
| rad45       | 0.00380306  | 0.999068 | 0.00380365  | 0.999221 |
| rad6        | 0.000302210 | 0.999370 | 0.000302256 | 0.999524 |
| rad36       | 0.000237679 | 0.999608 | 0.000237715 | 0.999761 |
| rad11       | 0.000235308 | 0.999843 | 0.000235344 | 0.999997 |
| Benzyl+C2H2 | 0.000153192 | 0.999996 | 0.000000    | 0.999997 |
| rad18       | 2.35546e-06 | 0.999999 | 2.35583e-06 | 0.999999 |
| rad20       | 3.14996e-07 | 0.999999 | 3.15044e-07 | 0.999999 |
| rad21       | 1.96485e-07 | 0.999999 | 1.96515e-07 | 1.000000 |
| rad7        | 4.87734e-08 | 0.999999 | 4.87809e-08 | 1.000000 |
| rad30       | 1.42097e-09 | 0.999999 | 1.42119e-09 | 1.000000 |
| rad13       | 2.03005e-10 | 0.999999 | 2.03036e-10 | 1.000000 |
| rad15       | 7.75655e-11 | 0.999999 | 7.75774e-11 | 1.000000 |
| rad3        | 3.63182e-11 | 0.999999 | 3.63238e-11 | 1.000000 |
| rad24       | 3.17928e-11 | 0.999999 | 3.17977e-11 | 1.000000 |
| rad25       | 2.70865e-11 | 0.999999 | 2.70906e-11 | 1.000000 |
| PAH9+H      | 2.65235e-11 | 0.999999 | 2.65276e-11 | 1.000000 |
| rad35       | 2.12405e-11 | 0.999999 | 2.12438e-11 | 1.000000 |
| rad4        | 1.87243e-11 | 0.999999 | 1.87272e-11 | 1.000000 |
| rad2        | 1.44049e-11 | 0.999999 | 1.44071e-11 | 1.000000 |
| rad38       | 5.59445e-12 | 0.999999 | 5.59531e-12 | 1.000000 |
| rad1        | 9.78878e-13 | 0.999999 | 9.79028e-13 | 1.000000 |
| PhCHCCH2+H  | 6.39084e-13 | 0.999999 | 6.39182e-13 | 1.000000 |
| rad28       | 5.61530e-13 | 0.999999 | 5.61616e-13 | 1.000000 |
| rad10       | 5.24451e-13 | 0.999999 | 5.24531e-13 | 1.000000 |
| rad33       | 2.75239e-13 | 0.999999 | 2.75281e-13 | 1.000000 |
| PhCCH+CH3   | 2.36990e-14 | 0.999999 | 2.37027e-14 | 1.000000 |
| rad9        | 2.18699e-14 | 0.999999 | 2.18732e-14 | 1.000000 |
| rad8        | 9.00376e-15 | 0.999999 | 9.00514e-15 | 1.000000 |
| rad46       | 3.84812e-15 | 0.999999 | 3.84871e-15 | 1.000000 |
| Ph+Allene   | 1.71386e-15 | 0.999999 | 1.71413e-15 | 1.000000 |
| rad26       | 8.82638e-16 | 0.999999 | 8.82773e-16 | 1.000000 |
| PhCCCH3+H   | 5.17384e-16 | 0.999999 | 5.17464e-16 | 1.000000 |
| rad14       | 4.73904e-16 | 0.999999 | 4.73977e-16 | 1.000000 |

|               |             |          |             |          |
|---------------|-------------|----------|-------------|----------|
| rad60syn      | 9.83157e-17 | 0.999999 | 9.83307e-17 | 1.000000 |
| Ph+MeAc       | 2.65784e-17 | 0.999999 | 2.65825e-17 | 1.000000 |
| rad60anti     | 1.90247e-17 | 0.999999 | 1.90276e-17 | 1.000000 |
| rad27         | 1.02283e-17 | 0.999999 | 1.02299e-17 | 1.000000 |
| PhCH2CCH+H    | 4.18607e-18 | 0.999999 | 4.18671e-18 | 1.000000 |
| PAH7+H        | 2.80322e-19 | 0.999999 | 2.80364e-19 | 1.000000 |
| rad39         | 3.88169e-20 | 0.999999 | 3.88228e-20 | 1.000000 |
| rad31         | 2.24335e-20 | 0.999999 | 2.24369e-20 | 1.000000 |
| PAH3+H        | 1.04618e-20 | 0.999999 | 1.04634e-20 | 1.000000 |
| rad12         | 4.89091e-21 | 0.999999 | 4.89166e-21 | 1.000000 |
| rad59         | 3.89796e-21 | 0.999999 | 3.89856e-21 | 1.000000 |
| rad50         | 1.66217e-22 | 0.999999 | 1.66243e-22 | 1.000000 |
| rad37         | 1.40809e-22 | 0.999999 | 1.40831e-22 | 1.000000 |
| rad5          | 3.95514e-23 | 0.999999 | 3.95575e-23 | 1.000000 |
| rad19syn      | 2.07705e-26 | 0.999999 | 2.07737e-26 | 1.000000 |
| rad52         | 3.76628e-27 | 0.999999 | 3.76685e-27 | 1.000000 |
| rad54         | 2.28955e-28 | 0.999999 | 2.28990e-28 | 1.000000 |
| PAH10+CH3     | 4.37338e-29 | 0.999999 | 4.37405e-29 | 1.000000 |
| rad43         | 2.82699e-29 | 0.999999 | 2.82743e-29 | 1.000000 |
| rad51         | 1.30842e-29 | 0.999999 | 1.30862e-29 | 1.000000 |
| rad62         | 4.97289e-30 | 0.999999 | 4.97366e-30 | 1.000000 |
| rad65         | 1.62676e-32 | 0.999999 | 1.62701e-32 | 1.000000 |
| rad70         | 9.95387e-33 | 0.999999 | 9.95539e-33 | 1.000000 |
| PhcycC3H3_A+H | 7.76774e-33 | 0.999999 | 7.76893e-33 | 1.000000 |
| rad55         | 3.44305e-33 | 0.999999 | 3.44358e-33 | 1.000000 |
| rad58         | 1.29173e-35 | 0.999999 | 1.29193e-35 | 1.000000 |
| PAH1+H        | 5.03061e-36 | 0.999999 | 5.03138e-36 | 1.000000 |
| rad34         | 1.45961e-37 | 0.999999 | 1.45983e-37 | 1.000000 |
| rad47         | 3.54219e-39 | 0.999999 | 3.54273e-39 | 1.000000 |
| rad42         | 8.14177e-40 | 0.999999 | 8.14301e-40 | 1.000000 |
| rad41         | 4.88195e-40 | 0.999999 | 4.88270e-40 | 1.000000 |

10.0000000 Pa, 210.000000 K

=====

| Rate constant | True (fraction)     | Effective (fraction) |
|---------------|---------------------|----------------------|
| Total         | 8.30956e-27 (1.00 ) | 8.30794e-27 (1.00 )  |

| species     | PYtrue      | Cumul    | PYeffective | Cumul    |
|-------------|-------------|----------|-------------|----------|
| Indene+H    | 0.851030    | 0.851030 | 0.851196    | 0.851196 |
| rad23       | 0.101030    | 0.952060 | 0.101050    | 0.952246 |
| rad22       | 0.0431367   | 0.995197 | 0.0431451   | 0.995391 |
| rad45       | 0.00378193  | 0.998979 | 0.00378267  | 0.999174 |
| rad6        | 0.000358644 | 0.999337 | 0.000358714 | 0.999532 |
| rad36       | 0.000236964 | 0.999574 | 0.000237010 | 0.999769 |
| rad11       | 0.000228545 | 0.999803 | 0.000228589 | 0.999998 |
| Benzyl+C2H2 | 0.000194598 | 0.999997 | 0.000000    | 0.999998 |
| rad18       | 1.81341e-06 | 0.999999 | 1.81377e-06 | 1.000000 |
| rad20       | 2.56739e-07 | 0.999999 | 2.56789e-07 | 1.000000 |
| rad21       | 1.60288e-07 | 1.000000 | 1.60319e-07 | 1.000000 |
| rad7        | 6.01405e-08 | 1.000000 | 6.01522e-08 | 1.000000 |
| rad30       | 2.18360e-09 | 1.000000 | 2.18402e-09 | 1.000000 |
| rad13       | 2.39398e-10 | 1.000000 | 2.39445e-10 | 1.000000 |
| rad15       | 1.37905e-10 | 1.000000 | 1.37932e-10 | 1.000000 |
| rad3        | 5.79466e-11 | 1.000000 | 5.79579e-11 | 1.000000 |
| PAH9+H      | 4.46344e-11 | 1.000000 | 4.46431e-11 | 1.000000 |
| rad25       | 4.03630e-11 | 1.000000 | 4.03708e-11 | 1.000000 |
| rad35       | 3.41589e-11 | 1.000000 | 3.41656e-11 | 1.000000 |
| rad24       | 3.18926e-11 | 1.000000 | 3.18989e-11 | 1.000000 |
| rad2        | 3.09050e-11 | 1.000000 | 3.09110e-11 | 1.000000 |
| rad4        | 2.99464e-11 | 1.000000 | 2.99522e-11 | 1.000000 |
| rad38       | 9.67995e-12 | 1.000000 | 9.68184e-12 | 1.000000 |
| rad1        | 2.11792e-12 | 1.000000 | 2.11833e-12 | 1.000000 |
| PhCHCCH2+H  | 1.67552e-12 | 1.000000 | 1.67584e-12 | 1.000000 |
| rad10       | 1.27176e-12 | 1.000000 | 1.27201e-12 | 1.000000 |
| rad28       | 1.23229e-12 | 1.000000 | 1.23253e-12 | 1.000000 |
| rad33       | 3.27103e-13 | 1.000000 | 3.27167e-13 | 1.000000 |
| PhCCH+CH3   | 7.51717e-14 | 1.000000 | 7.51863e-14 | 1.000000 |
| rad9        | 6.45605e-14 | 1.000000 | 6.45731e-14 | 1.000000 |
| rad8        | 3.27052e-14 | 1.000000 | 3.27116e-14 | 1.000000 |
| rad46       | 9.62161e-15 | 1.000000 | 9.62349e-15 | 1.000000 |
| Ph+Allene   | 6.91902e-15 | 1.000000 | 6.92037e-15 | 1.000000 |
| rad26       | 3.23855e-15 | 1.000000 | 3.23918e-15 | 1.000000 |
| PhCCCH3+H   | 2.12676e-15 | 1.000000 | 2.12718e-15 | 1.000000 |
| rad14       | 1.00545e-15 | 1.000000 | 1.00565e-15 | 1.000000 |
| rad60syn    | 3.54415e-16 | 1.000000 | 3.54484e-16 | 1.000000 |
| Ph+MeAc     | 1.38225e-16 | 1.000000 | 1.38252e-16 | 1.000000 |
| rad60anti   | 7.41109e-17 | 1.000000 | 7.41253e-17 | 1.000000 |
| PhCH2CCH+H  | 2.36123e-17 | 1.000000 | 2.36168e-17 | 1.000000 |

|               |             |          |             |         |
|---------------|-------------|----------|-------------|---------|
| rad27         | 2.28584e-17 | 1.000000 | 2.28629e-17 | 1.00000 |
| PAH7+H        | 1.46354e-18 | 1.000000 | 1.46383e-18 | 1.00000 |
| rad39         | 2.17630e-19 | 1.000000 | 2.17673e-19 | 1.00000 |
| PAH3+H        | 6.86883e-20 | 1.000000 | 6.87016e-20 | 1.00000 |
| rad31         | 3.89806e-20 | 1.000000 | 3.89882e-20 | 1.00000 |
| rad12         | 3.26689e-20 | 1.000000 | 3.26753e-20 | 1.00000 |
| rad59         | 2.49028e-20 | 1.000000 | 2.49076e-20 | 1.00000 |
| rad37         | 1.14608e-21 | 1.000000 | 1.14631e-21 | 1.00000 |
| rad50         | 1.08788e-21 | 1.000000 | 1.08809e-21 | 1.00000 |
| rad5          | 3.09480e-22 | 1.000000 | 3.09540e-22 | 1.00000 |
| rad19syn      | 2.62226e-25 | 1.000000 | 2.62277e-25 | 1.00000 |
| rad52         | 4.05973e-26 | 1.000000 | 4.06052e-26 | 1.00000 |
| rad54         | 3.85352e-27 | 1.000000 | 3.85427e-27 | 1.00000 |
| PAH10+CH3     | 8.61867e-28 | 1.000000 | 8.62035e-28 | 1.00000 |
| rad43         | 4.86971e-28 | 1.000000 | 4.87066e-28 | 1.00000 |
| rad51         | 2.49188e-28 | 1.000000 | 2.49237e-28 | 1.00000 |
| rad62         | 1.10358e-28 | 1.000000 | 1.10380e-28 | 1.00000 |
| rad70         | 6.49152e-30 | 1.000000 | 6.49279e-30 | 1.00000 |
| rad58         | 1.86387e-30 | 1.000000 | 1.86423e-30 | 1.00000 |
| PhcycC3H3_A+H | 1.50944e-30 | 1.000000 | 1.50974e-30 | 1.00000 |
| rad65         | 8.07776e-31 | 1.000000 | 8.07933e-31 | 1.00000 |
| rad55         | 5.63809e-31 | 1.000000 | 5.63919e-31 | 1.00000 |
| PAH1+H        | 1.38047e-33 | 1.000000 | 1.38074e-33 | 1.00000 |
| rad34         | 4.52933e-35 | 1.000000 | 4.53022e-35 | 1.00000 |
| rad47         | 7.21639e-37 | 1.000000 | 7.21779e-37 | 1.00000 |
| rad42         | 1.60196e-37 | 1.000000 | 1.60227e-37 | 1.00000 |
| rad41         | 7.85498e-38 | 1.000000 | 7.85650e-38 | 1.00000 |

10.0000000 Pa, 220.000000 K

| Rate constant | True (fraction)     | Effective (fraction) |
|---------------|---------------------|----------------------|
| Total         | 3.40057e-26 (1.00 ) | 3.39974e-26 (1.00 )  |

| species     | PYtrue      | Cumul    | PYeffective | Cumul    |
|-------------|-------------|----------|-------------|----------|
| Indene+H    | 0.857826    | 0.857826 | 0.858037    | 0.858037 |
| rad23       | 0.100937    | 0.958763 | 0.100962    | 0.958999 |
| rad22       | 0.0363594   | 0.995122 | 0.0363684   | 0.995367 |
| rad45       | 0.00375221  | 0.998875 | 0.00375313  | 0.999121 |
| rad6        | 0.000422250 | 0.999297 | 0.000422354 | 0.999543 |
| Benzyl+C2H2 | 0.000246044 | 0.999543 | 0.00000     | 0.999543 |
| rad36       | 0.000235806 | 0.999779 | 0.000235864 | 0.999779 |
| rad11       | 0.000220047 | 0.999999 | 0.000220102 | 0.999999 |
| rad18       | 1.40433e-06 | 1.00000  | 1.40468e-06 | 1.00000  |
| rad20       | 2.10433e-07 | 1.00000  | 2.10484e-07 | 1.00000  |
| rad21       | 1.31489e-07 | 1.00000  | 1.31521e-07 | 1.00000  |
| rad7        | 7.31227e-08 | 1.00000  | 7.31407e-08 | 1.00000  |
| rad30       | 3.27079e-09 | 1.00000  | 3.27159e-09 | 1.00000  |
| rad13       | 2.80248e-10 | 1.00000  | 2.80317e-10 | 1.00000  |
| rad15       | 2.35229e-10 | 1.00000  | 2.35287e-10 | 1.00000  |
| rad3        | 8.98334e-11 | 1.00000  | 8.98555e-11 | 1.00000  |
| PAH9+H      | 7.39583e-11 | 1.00000  | 7.39765e-11 | 1.00000  |
| rad2        | 6.35847e-11 | 1.00000  | 6.36003e-11 | 1.00000  |
| rad25       | 5.70481e-11 | 1.00000  | 5.70622e-11 | 1.00000  |
| rad35       | 5.42591e-11 | 1.00000  | 5.42724e-11 | 1.00000  |
| rad4        | 4.65458e-11 | 1.00000  | 4.65573e-11 | 1.00000  |
| rad24       | 3.19348e-11 | 1.00000  | 3.19427e-11 | 1.00000  |
| rad38       | 1.64516e-11 | 1.00000  | 1.64556e-11 | 1.00000  |
| rad1        | 4.39743e-12 | 1.00000  | 4.39851e-12 | 1.00000  |
| PhCHCCH2+H  | 4.07819e-12 | 1.00000  | 4.07919e-12 | 1.00000  |
| rad10       | 2.90548e-12 | 1.00000  | 2.90620e-12 | 1.00000  |
| rad28       | 2.61787e-12 | 1.00000  | 2.61851e-12 | 1.00000  |
| rad33       | 3.85878e-13 | 1.00000  | 3.85973e-13 | 1.00000  |
| PhCCH+CH3   | 2.23055e-13 | 1.00000  | 2.23110e-13 | 1.00000  |
| rad9        | 1.74278e-13 | 1.00000  | 1.74321e-13 | 1.00000  |
| rad8        | 1.06078e-13 | 1.00000  | 1.06105e-13 | 1.00000  |
| Ph+Allene   | 2.48064e-14 | 1.00000  | 2.48125e-14 | 1.00000  |
| rad46       | 2.26163e-14 | 1.00000  | 2.26218e-14 | 1.00000  |
| rad26       | 1.10148e-14 | 1.00000  | 1.10175e-14 | 1.00000  |
| PhCCCH3+H   | 8.08240e-15 | 1.00000  | 8.08438e-15 | 1.00000  |
| rad14       | 1.98824e-15 | 1.00000  | 1.98873e-15 | 1.00000  |
| rad60syn    | 1.14025e-15 | 1.00000  | 1.14054e-15 | 1.00000  |
| Ph+MeAc     | 6.45082e-16 | 1.00000  | 6.45241e-16 | 1.00000  |
| rad60anti   | 2.55550e-16 | 1.00000  | 2.55613e-16 | 1.00000  |
| PhCH2CCH+H  | 1.14921e-16 | 1.00000  | 1.14949e-16 | 1.00000  |
| rad27       | 4.85030e-17 | 1.00000  | 4.85150e-17 | 1.00000  |
| PAH7+H      | 6.92659e-18 | 1.00000  | 6.92829e-18 | 1.00000  |
| rad39       | 1.10546e-18 | 1.00000  | 1.10573e-18 | 1.00000  |
| PAH3+H      | 3.81229e-19 | 1.00000  | 3.81323e-19 | 1.00000  |

|               |             |         |             |         |
|---------------|-------------|---------|-------------|---------|
| rad12         | 1.92942e-19 | 1.00000 | 1.92989e-19 | 1.00000 |
| rad59         | 1.34609e-19 | 1.00000 | 1.34643e-19 | 1.00000 |
| rad31         | 6.62576e-20 | 1.00000 | 6.62739e-20 | 1.00000 |
| rad37         | 7.98927e-21 | 1.00000 | 7.99124e-21 | 1.00000 |
| rad50         | 6.05947e-21 | 1.00000 | 6.06096e-21 | 1.00000 |
| rad5          | 2.06460e-21 | 1.00000 | 2.06511e-21 | 1.00000 |
| rad19syn      | 2.62835e-24 | 1.00000 | 2.62900e-24 | 1.00000 |
| rad52         | 3.52497e-25 | 1.00000 | 3.52583e-25 | 1.00000 |
| rad54         | 4.73135e-26 | 1.00000 | 4.73252e-26 | 1.00000 |
| PAH10+CH3     | 1.18966e-26 | 1.00000 | 1.18996e-26 | 1.00000 |
| rad43         | 6.09220e-27 | 1.00000 | 6.09370e-27 | 1.00000 |
| rad51         | 3.18366e-27 | 1.00000 | 3.18444e-27 | 1.00000 |
| rad62         | 1.57267e-27 | 1.00000 | 1.57305e-27 | 1.00000 |
| rad70         | 1.46239e-28 | 1.00000 | 1.46275e-28 | 1.00000 |
| rad58         | 5.53518e-29 | 1.00000 | 5.53654e-29 | 1.00000 |
| PhcycC3H3_A+H | 4.49817e-29 | 1.00000 | 4.49928e-29 | 1.00000 |
| rad55         | 1.47527e-29 | 1.00000 | 1.47564e-29 | 1.00000 |
| rad65         | 1.41812e-29 | 1.00000 | 1.41847e-29 | 1.00000 |
| PAH1+H        | 1.29102e-31 | 1.00000 | 1.29134e-31 | 1.00000 |
| rad34         | 4.75112e-33 | 1.00000 | 4.75229e-33 | 1.00000 |
| rad47         | 1.38465e-34 | 1.00000 | 1.38499e-34 | 1.00000 |
| rad42         | 1.36908e-35 | 1.00000 | 1.36941e-35 | 1.00000 |
| rad41         | 5.65120e-36 | 1.00000 | 5.65259e-36 | 1.00000 |

10.0000000 Pa, 230.000000 K

=====

| Rate constant | True (fraction)     | Effective (fraction) |
|---------------|---------------------|----------------------|
| Total         | 1.22972e-25 (1.00 ) | 1.22933e-25 (1.00 )  |

| species     | PYtrue      | Cumul    | PYeffective | Cumul    |
|-------------|-------------|----------|-------------|----------|
| Indene+H    | 0.863998    | 0.863998 | 0.864265    | 0.864265 |
| rad23       | 0.100521    | 0.964519 | 0.100552    | 0.964817 |
| rad22       | 0.0305196   | 0.995039 | 0.0305290   | 0.995346 |
| rad45       | 0.00371349  | 0.998752 | 0.00371464  | 0.999061 |
| rad6        | 0.000493282 | 0.999245 | 0.000493435 | 0.999554 |
| Benzyl+C2H2 | 0.000309606 | 0.999555 | 0.000000    | 0.999554 |
| rad36       | 0.000234183 | 0.999789 | 0.000234255 | 0.999788 |
| rad11       | 0.000210018 | 0.999999 | 0.000210083 | 0.999998 |
| rad18       | 1.09327e-06 | 1.00000  | 1.09360e-06 | 1.000000 |
| rad20       | 1.73355e-07 | 1.00000  | 1.73409e-07 | 1.000000 |
| rad21       | 1.08409e-07 | 1.00000  | 1.08442e-07 | 1.000000 |
| rad7        | 8.77505e-08 | 1.00000  | 8.77777e-08 | 1.000000 |
| rad30       | 4.79189e-09 | 1.00000  | 4.79338e-09 | 1.000000 |
| rad15       | 3.87139e-10 | 1.00000  | 3.87259e-10 | 1.000000 |
| rad13       | 3.25701e-10 | 1.00000  | 3.25802e-10 | 1.000000 |
| rad3        | 1.35405e-10 | 1.00000  | 1.35447e-10 | 1.000000 |
| rad2        | 1.25806e-10 | 1.00000  | 1.25845e-10 | 1.000000 |
| PAH9+H      | 1.20639e-10 | 1.00000  | 1.20676e-10 | 1.000000 |
| rad35       | 8.50778e-11 | 1.00000  | 8.51042e-11 | 1.000000 |
| rad25       | 7.69421e-11 | 1.00000  | 7.69659e-11 | 1.000000 |
| rad4        | 7.03564e-11 | 1.00000  | 7.03782e-11 | 1.000000 |
| rad24       | 3.19145e-11 | 1.00000  | 3.19244e-11 | 1.000000 |
| rad38       | 2.74728e-11 | 1.00000  | 2.74813e-11 | 1.000000 |
| PhCHCCH2+H  | 9.30673e-12 | 1.00000  | 9.30962e-12 | 1.000000 |
| rad1        | 8.78702e-12 | 1.00000  | 8.78974e-12 | 1.000000 |
| rad10       | 6.28604e-12 | 1.00000  | 6.28799e-12 | 1.000000 |
| rad28       | 5.40009e-12 | 1.00000  | 5.40176e-12 | 1.000000 |
| PhCCH+CH3   | 6.24350e-13 | 1.00000  | 6.24544e-13 | 1.000000 |
| rad33       | 4.51926e-13 | 1.00000  | 4.52066e-13 | 1.000000 |
| rad9        | 4.35407e-13 | 1.00000  | 4.35542e-13 | 1.000000 |
| rad8        | 3.11912e-13 | 1.00000  | 3.12008e-13 | 1.000000 |
| Ph+Allene   | 8.02313e-14 | 1.00000  | 8.02561e-14 | 1.000000 |
| rad46       | 5.03414e-14 | 1.00000  | 5.03570e-14 | 1.000000 |
| rad26       | 3.49428e-14 | 1.00000  | 3.49536e-14 | 1.000000 |
| PhCCCH3+H   | 2.85756e-14 | 1.00000  | 2.85845e-14 | 1.000000 |
| rad14       | 3.69268e-15 | 1.00000  | 3.69383e-15 | 1.000000 |
| rad60syn    | 3.32454e-15 | 1.00000  | 3.32557e-15 | 1.000000 |
| Ph+MeAc     | 2.73099e-15 | 1.00000  | 2.73184e-15 | 1.000000 |
| rad60anti   | 7.92872e-16 | 1.00000  | 7.93117e-16 | 1.000000 |
| PhCH2CCH+H  | 4.92079e-16 | 1.00000  | 4.92231e-16 | 1.000000 |
| rad27       | 9.82406e-17 | 1.00000  | 9.82711e-17 | 1.000000 |
| PAH7+H      | 3.00625e-17 | 1.00000  | 3.00718e-17 | 1.000000 |
| rad39       | 5.13713e-18 | 1.00000  | 5.13873e-18 | 1.000000 |
| PAH3+H      | 1.82887e-18 | 1.00000  | 1.82943e-18 | 1.000000 |
| rad12       | 1.01667e-18 | 1.00000  | 1.01698e-18 | 1.000000 |
| rad59       | 6.29467e-19 | 1.00000  | 6.29662e-19 | 1.000000 |
| rad31       | 1.10322e-19 | 1.00000  | 1.10357e-19 | 1.000000 |
| rad37       | 4.84651e-20 | 1.00000  | 4.84801e-20 | 1.000000 |

|               |             |         |             |          |
|---------------|-------------|---------|-------------|----------|
| rad50         | 2.93306e-20 | 1.00000 | 2.93397e-20 | 1.000000 |
| rad5          | 1.19592e-20 | 1.00000 | 1.19629e-20 | 1.000000 |
| rad19syn      | 2.18800e-23 | 1.00000 | 2.18868e-23 | 1.000000 |
| rad52         | 2.54497e-24 | 1.00000 | 2.54576e-24 | 1.000000 |
| rad54         | 4.73026e-25 | 1.00000 | 4.73172e-25 | 1.000000 |
| PAH10+CH3     | 1.32574e-25 | 1.00000 | 1.32616e-25 | 1.000000 |
| rad43         | 6.15023e-26 | 1.00000 | 6.15213e-26 | 1.000000 |
| rad51         | 3.22236e-26 | 1.00000 | 3.22336e-26 | 1.000000 |
| rad62         | 1.77932e-26 | 1.00000 | 1.77987e-26 | 1.000000 |
| rad70         | 2.27498e-27 | 1.00000 | 2.27568e-27 | 1.000000 |
| rad58         | 1.01287e-27 | 1.00000 | 1.01319e-27 | 1.000000 |
| PhcycC3H3_A+H | 9.72877e-28 | 1.00000 | 9.73178e-28 | 1.000000 |
| rad55         | 2.82205e-28 | 1.00000 | 2.82293e-28 | 1.000000 |
| rad65         | 1.84119e-28 | 1.00000 | 1.84176e-28 | 1.000000 |
| PAH1+H        | 9.12873e-30 | 1.00000 | 9.13155e-30 | 1.000000 |
| rad34         | 2.19051e-30 | 1.00000 | 2.19119e-30 | 1.000000 |
| rad42         | 5.06153e-33 | 1.00000 | 5.06310e-33 | 1.000000 |
| rad47         | 1.88543e-33 | 1.00000 | 1.88601e-33 | 1.000000 |
| rad41         | 1.25727e-33 | 1.00000 | 1.25766e-33 | 1.000000 |

10.0000000 Pa, 240.000000 K

| Rate constant | True (fraction)     | Effective (fraction) |
|---------------|---------------------|----------------------|
| Total         | 3.99091e-25 (1.00 ) | 3.98936e-25 (1.00 )  |

| species     | PYtrue      | Cumul    | PYeffective | Cumul    |
|-------------|-------------|----------|-------------|----------|
| Indene+H    | 0.869655    | 0.869655 | 0.869992    | 0.869992 |
| rad23       | 0.0997729   | 0.969428 | 0.0998116   | 0.969804 |
| rad22       | 0.0255152   | 0.994943 | 0.0255251   | 0.995329 |
| rad45       | 0.00366545  | 0.998609 | 0.00366687  | 0.998996 |
| rad6        | 0.000571959 | 0.999181 | 0.000572181 | 0.999568 |
| Benzyl+C2H2 | 0.000387687 | 0.999568 | 0.00000     | 0.999568 |
| rad36       | 0.000232072 | 0.999800 | 0.000232162 | 0.999800 |
| rad11       | 0.000198709 | 0.999999 | 0.000198786 | 0.999999 |
| rad18       | 8.55161e-07 | 1.000000 | 8.55492e-07 | 1.000000 |
| rad20       | 1.43480e-07 | 1.000000 | 1.43535e-07 | 1.000000 |
| rad7        | 1.04038e-07 | 1.000000 | 1.04078e-07 | 1.000000 |
| rad21       | 8.97956e-08 | 1.000000 | 8.98305e-08 | 1.000000 |
| rad30       | 6.88520e-09 | 1.000000 | 6.88787e-09 | 1.000000 |
| rad15       | 6.17606e-10 | 1.000000 | 6.17846e-10 | 1.000000 |
| rad13       | 3.75889e-10 | 1.000000 | 3.76035e-10 | 1.000000 |
| rad2        | 2.40049e-10 | 1.000000 | 2.40142e-10 | 1.000000 |
| rad3        | 1.98641e-10 | 1.000000 | 1.98718e-10 | 1.000000 |
| PAH9+H      | 1.93686e-10 | 1.000000 | 1.93761e-10 | 1.000000 |
| rad35       | 1.31623e-10 | 1.000000 | 1.31674e-10 | 1.000000 |
| rad4        | 1.03531e-10 | 1.000000 | 1.03571e-10 | 1.000000 |
| rad25       | 9.95403e-11 | 1.000000 | 9.95789e-11 | 1.000000 |
| rad38       | 4.50869e-11 | 1.000000 | 4.51044e-11 | 1.000000 |
| rad24       | 3.18277e-11 | 1.000000 | 3.18400e-11 | 1.000000 |
| PhCHCCH2+H  | 2.00791e-11 | 1.000000 | 2.00869e-11 | 1.000000 |
| rad1        | 1.69464e-11 | 1.000000 | 1.69530e-11 | 1.000000 |
| rad10       | 1.29411e-11 | 1.000000 | 1.29462e-11 | 1.000000 |
| rad28       | 1.08434e-11 | 1.000000 | 1.08476e-11 | 1.000000 |
| PhCCH+CH3   | 1.66016e-12 | 1.000000 | 1.66081e-12 | 1.000000 |
| rad9        | 1.01689e-12 | 1.000000 | 1.01728e-12 | 1.000000 |
| rad8        | 8.41973e-13 | 1.000000 | 8.42299e-13 | 1.000000 |
| rad33       | 5.25599e-13 | 1.000000 | 5.25803e-13 | 1.000000 |
| Ph+Allene   | 2.37174e-13 | 1.000000 | 2.37266e-13 | 1.000000 |
| rad46       | 1.06744e-13 | 1.000000 | 1.06786e-13 | 1.000000 |
| rad26       | 1.03921e-13 | 1.000000 | 1.03961e-13 | 1.000000 |
| PhCCCH3+H   | 9.44687e-14 | 1.000000 | 9.45053e-14 | 1.000000 |
| Ph+MeAc     | 1.05818e-14 | 1.000000 | 1.05859e-14 | 1.000000 |
| rad60syn    | 8.89648e-15 | 1.000000 | 8.89993e-15 | 1.000000 |
| rad14       | 6.48498e-15 | 1.000000 | 6.48750e-15 | 1.000000 |
| rad60anti   | 2.24375e-15 | 1.000000 | 2.24462e-15 | 1.000000 |
| PhCH2CCH+H  | 1.88396e-15 | 1.000000 | 1.88469e-15 | 1.000000 |
| rad27       | 1.90828e-16 | 1.000000 | 1.90902e-16 | 1.000000 |
| PAH7+H      | 1.20796e-16 | 1.000000 | 1.20843e-16 | 1.000000 |
| rad39       | 2.20068e-17 | 1.000000 | 2.20153e-17 | 1.000000 |
| PAH3+H      | 7.72527e-18 | 1.000000 | 7.72827e-18 | 1.000000 |
| rad12       | 4.81855e-18 | 1.000000 | 4.82042e-18 | 1.000000 |
| rad59       | 2.59400e-18 | 1.000000 | 2.59501e-18 | 1.000000 |
| rad37       | 2.59270e-19 | 1.000000 | 2.59371e-19 | 1.000000 |
| rad31       | 1.80271e-19 | 1.000000 | 1.80341e-19 | 1.000000 |
| rad50       | 1.25552e-19 | 1.000000 | 1.25600e-19 | 1.000000 |
| rad5        | 6.10704e-20 | 1.000000 | 6.10940e-20 | 1.000000 |
| rad19syn    | 1.53925e-22 | 1.000000 | 1.53985e-22 | 1.000000 |
| rad52       | 1.56303e-23 | 1.000000 | 1.56364e-23 | 1.000000 |

|               |             |         |             |          |
|---------------|-------------|---------|-------------|----------|
| rad54         | 3.86694e-24 | 1.00000 | 3.86844e-24 | 1.000000 |
| PAH10+CH3     | 1.17913e-24 | 1.00000 | 1.17958e-24 | 1.000000 |
| rad43         | 5.05979e-25 | 1.00000 | 5.06175e-25 | 1.000000 |
| rad51         | 2.62382e-25 | 1.00000 | 2.62484e-25 | 1.000000 |
| rad62         | 1.58785e-25 | 1.00000 | 1.58847e-25 | 1.000000 |
| rad70         | 2.39779e-26 | 1.00000 | 2.39872e-26 | 1.000000 |
| PhcycC3H3_A+H | 1.25927e-26 | 1.00000 | 1.25976e-26 | 1.000000 |
| rad58         | 1.12724e-26 | 1.00000 | 1.12767e-26 | 1.000000 |
| rad55         | 3.41686e-27 | 1.00000 | 3.41819e-27 | 1.000000 |
| rad65         | 1.75542e-27 | 1.00000 | 1.75610e-27 | 1.000000 |
| PAH1+H        | 1.93103e-28 | 1.00000 | 1.93178e-28 | 1.000000 |
| rad34         | 4.51235e-29 | 1.00000 | 4.51410e-29 | 1.000000 |
| rad42         | 2.90398e-31 | 1.00000 | 2.90510e-31 | 1.000000 |
| rad41         | 8.34627e-32 | 1.00000 | 8.34951e-32 | 1.000000 |
| rad47         | 1.75780e-32 | 1.00000 | 1.75848e-32 | 1.000000 |

10.000000 Pa, 250.000000 K

| Rate constant | True (fraction)     | Effective (fraction) |
|---------------|---------------------|----------------------|
| Total         | 1.17763e-24 (1.00 ) | 1.17707e-24 (1.00 )  |

| species     | PYtrue      | Cumul    | PYeffective | Cumul    |
|-------------|-------------|----------|-------------|----------|
| Indene+H    | 0.874897    | 0.874897 | 0.875320    | 0.875320 |
| rad23       | 0.0986866   | 0.973584 | 0.0987343   | 0.974054 |
| rad22       | 0.0212497   | 0.994833 | 0.0212599   | 0.995314 |
| rad45       | 0.00360786  | 0.998441 | 0.00360960  | 0.998924 |
| rad6        | 0.000658478 | 0.999100 | 0.000658797 | 0.999583 |
| Benzyl+C2H2 | 0.000483056 | 0.999583 | 0.000000    | 0.999583 |
| rad36       | 0.000229456 | 0.999812 | 0.000229567 | 0.999812 |
| rad11       | 0.000186406 | 0.999999 | 0.000186496 | 0.999999 |
| rad18       | 6.71829e-07 | 0.999999 | 6.72154e-07 | 0.999999 |
| rad7        | 1.21987e-07 | 0.999999 | 1.22046e-07 | 0.999999 |
| rad20       | 1.19274e-07 | 0.999999 | 1.19331e-07 | 1.000000 |
| rad21       | 7.47030e-08 | 1.000000 | 7.47391e-08 | 1.000000 |
| rad30       | 9.72359e-09 | 1.000000 | 9.72829e-09 | 1.000000 |
| rad15       | 9.58671e-10 | 1.000000 | 9.59135e-10 | 1.000000 |
| rad2        | 4.42897e-10 | 1.000000 | 4.43111e-10 | 1.000000 |
| rad13       | 4.30937e-10 | 1.000000 | 4.31145e-10 | 1.000000 |
| PAH9+H      | 3.06039e-10 | 1.000000 | 3.06187e-10 | 1.000000 |
| rad3        | 2.83999e-10 | 1.000000 | 2.84136e-10 | 1.000000 |
| rad35       | 2.00848e-10 | 1.000000 | 2.00945e-10 | 1.000000 |
| rad4        | 1.48512e-10 | 1.000000 | 1.48584e-10 | 1.000000 |
| rad25       | 1.24073e-10 | 1.000000 | 1.24133e-10 | 1.000000 |
| rad38       | 7.27313e-11 | 1.000000 | 7.27665e-11 | 1.000000 |
| PhCHCCH2+H  | 4.12461e-11 | 1.000000 | 4.12660e-11 | 1.000000 |
| rad24       | 3.16704e-11 | 1.000000 | 3.16857e-11 | 1.000000 |
| rad1        | 3.16293e-11 | 1.000000 | 3.16446e-11 | 1.000000 |
| rad10       | 2.54635e-11 | 1.000000 | 2.54758e-11 | 1.000000 |
| rad28       | 2.12386e-11 | 1.000000 | 2.12488e-11 | 1.000000 |
| PhCCH+CH3   | 4.21791e-12 | 1.000000 | 4.21995e-12 | 1.000000 |
| rad9        | 2.23888e-12 | 1.000000 | 2.23996e-12 | 1.000000 |
| rad8        | 2.10865e-12 | 1.000000 | 2.10967e-12 | 1.000000 |
| Ph+Allene   | 6.47925e-13 | 1.000000 | 6.48238e-13 | 1.000000 |
| rad33       | 6.07256e-13 | 1.000000 | 6.07549e-13 | 1.000000 |
| PhCCCH3+H   | 2.93251e-13 | 1.000000 | 2.93393e-13 | 1.000000 |
| rad26       | 2.90954e-13 | 1.000000 | 2.91095e-13 | 1.000000 |
| rad46       | 2.16681e-13 | 1.000000 | 2.16786e-13 | 1.000000 |
| Ph+MeAc     | 3.78049e-14 | 1.000000 | 3.78232e-14 | 1.000000 |
| rad60syn    | 2.20839e-14 | 1.000000 | 2.20946e-14 | 1.000000 |
| rad14       | 1.08333e-14 | 1.000000 | 1.08386e-14 | 1.000000 |
| PhCH2CCH+H  | 6.53753e-15 | 1.000000 | 6.54069e-15 | 1.000000 |
| rad60anti   | 5.85787e-15 | 1.000000 | 5.86070e-15 | 1.000000 |
| PAH7+H      | 4.52803e-16 | 1.000000 | 4.53022e-16 | 1.000000 |
| rad27       | 3.56932e-16 | 1.000000 | 3.57104e-16 | 1.000000 |
| rad39       | 8.74476e-17 | 1.000000 | 8.74899e-17 | 1.000000 |
| PAH3+H      | 2.91830e-17 | 1.000000 | 2.91971e-17 | 1.000000 |
| rad12       | 2.06969e-17 | 1.000000 | 2.07069e-17 | 1.000000 |
| rad59       | 9.56751e-18 | 1.000000 | 9.57214e-18 | 1.000000 |
| rad37       | 1.23751e-18 | 1.000000 | 1.23811e-18 | 1.000000 |
| rad50       | 4.82310e-19 | 1.000000 | 4.82543e-19 | 1.000000 |
| rad31       | 2.89709e-19 | 1.000000 | 2.89849e-19 | 1.000000 |
| rad5        | 2.78562e-19 | 1.000000 | 2.78697e-19 | 1.000000 |
| rad19syn    | 9.35993e-22 | 1.000000 | 9.36446e-22 | 1.000000 |
| rad52       | 8.33566e-23 | 1.000000 | 8.33969e-23 | 1.000000 |
| rad54       | 2.67029e-23 | 1.000000 | 2.67158e-23 | 1.000000 |
| PAH10+CH3   | 8.73363e-24 | 1.000000 | 8.73785e-24 | 1.000000 |
| rad43       | 3.51496e-24 | 1.000000 | 3.51665e-24 | 1.000000 |
| rad51       | 1.79364e-24 | 1.000000 | 1.79450e-24 | 1.000000 |

|               |             |          |             |          |
|---------------|-------------|----------|-------------|----------|
| rad62         | 1.17403e-24 | 1.000000 | 1.17460e-24 | 1.000000 |
| rad70         | 1.95862e-25 | 1.000000 | 1.95956e-25 | 1.000000 |
| PhcycC3H3_A+H | 1.13239e-25 | 1.000000 | 1.13294e-25 | 1.000000 |
| rad58         | 9.42513e-26 | 1.000000 | 9.42969e-26 | 1.000000 |
| rad55         | 2.99816e-26 | 1.000000 | 2.99960e-26 | 1.000000 |
| rad65         | 1.34782e-26 | 1.000000 | 1.34847e-26 | 1.000000 |
| PAH1+H        | 1.96195e-27 | 1.000000 | 1.96289e-27 | 1.000000 |
| rad34         | 4.45712e-28 | 1.000000 | 4.45927e-28 | 1.000000 |
| rad42         | 3.15010e-30 | 1.000000 | 3.15162e-30 | 1.000000 |
| rad41         | 9.13901e-31 | 1.000000 | 9.14343e-31 | 1.000000 |
| rad47         | 1.35093e-31 | 1.000000 | 1.35158e-31 | 1.000000 |

10.000000 Pa, 260.000000 K

| Rate constant | True (fraction)     | Effective (fraction) |
|---------------|---------------------|----------------------|
| Total         | 3.19452e-24 (1.00 ) | 3.19261e-24 (1.00 )  |

| species       | PYtrue      | Cumul    | PYeffective | Cumul    |
|---------------|-------------|----------|-------------|----------|
| Indene+H      | 0.879817    | 0.879817 | 0.880344    | 0.880344 |
| rad23         | 0.0972573   | 0.977074 | 0.0973156   | 0.977660 |
| rad22         | 0.0176328   | 0.994707 | 0.0176434   | 0.995303 |
| rad45         | 0.00354062  | 0.998248 | 0.00354274  | 0.998846 |
| rad6          | 0.000753030 | 0.999001 | 0.000753481 | 0.999599 |
| Benzyl+C2H2   | 0.000598878 | 0.999600 | 0.000000    | 0.999599 |
| rad36         | 0.000226322 | 0.999826 | 0.000226458 | 0.999826 |
| rad11         | 0.000173410 | 0.999999 | 0.000173514 | 0.999999 |
| rad18         | 5.29930e-07 | 1.000000 | 5.30247e-07 | 1.000000 |
| rad7          | 1.41597e-07 | 1.000000 | 1.41682e-07 | 1.000000 |
| rad20         | 9.95656e-08 | 1.000000 | 9.96253e-08 | 1.000000 |
| rad21         | 6.24064e-08 | 1.000000 | 6.24438e-08 | 1.000000 |
| rad30         | 1.35209e-08 | 1.000000 | 1.35290e-08 | 1.000000 |
| rad15         | 1.45243e-09 | 1.000000 | 1.45330e-09 | 1.000000 |
| rad2          | 7.92087e-10 | 1.000000 | 7.92562e-10 | 1.000000 |
| rad13         | 4.90973e-10 | 1.000000 | 4.91268e-10 | 1.000000 |
| PAH9+H        | 4.75909e-10 | 1.000000 | 4.76194e-10 | 1.000000 |
| rad3          | 3.96317e-10 | 1.000000 | 3.96554e-10 | 1.000000 |
| rad35         | 3.02220e-10 | 1.000000 | 3.02401e-10 | 1.000000 |
| rad4          | 2.07993e-10 | 1.000000 | 2.08118e-10 | 1.000000 |
| rad25         | 1.49579e-10 | 1.000000 | 1.49669e-10 | 1.000000 |
| rad38         | 1.15345e-10 | 1.000000 | 1.15414e-10 | 1.000000 |
| PhCHCCH2+H    | 8.11660e-11 | 1.000000 | 8.12146e-11 | 1.000000 |
| rad1          | 5.72735e-11 | 1.000000 | 5.73078e-11 | 1.000000 |
| rad10         | 4.80766e-11 | 1.000000 | 4.81054e-11 | 1.000000 |
| rad28         | 4.06441e-11 | 1.000000 | 4.06685e-11 | 1.000000 |
| rad24         | 3.14396e-11 | 1.000000 | 3.14585e-11 | 1.000000 |
| PhCCH+CH3     | 1.02872e-11 | 1.000000 | 1.02934e-11 | 1.000000 |
| rad8          | 4.94323e-12 | 1.000000 | 4.94619e-12 | 1.000000 |
| rad9          | 4.68009e-12 | 1.000000 | 4.68290e-12 | 1.000000 |
| Ph+Allene     | 1.65112e-12 | 1.000000 | 1.65211e-12 | 1.000000 |
| PhCCCH3+H     | 8.57850e-13 | 1.000000 | 8.58364e-13 | 1.000000 |
| rad26         | 7.69521e-13 | 1.000000 | 7.69982e-13 | 1.000000 |
| rad33         | 6.97278e-13 | 1.000000 | 6.97696e-13 | 1.000000 |
| rad46         | 4.22817e-13 | 1.000000 | 4.23070e-13 | 1.000000 |
| Ph+MeAc       | 1.25327e-13 | 1.000000 | 1.25402e-13 | 1.000000 |
| rad60syn      | 5.13090e-14 | 1.000000 | 5.13397e-14 | 1.000000 |
| PhCH2CCH+H    | 2.07994e-14 | 1.000000 | 2.08119e-14 | 1.000000 |
| rad14         | 1.73062e-14 | 1.000000 | 1.73166e-14 | 1.000000 |
| rad60anti     | 1.42455e-14 | 1.000000 | 1.42541e-14 | 1.000000 |
| PAH7+H        | 1.59272e-15 | 1.000000 | 1.59368e-15 | 1.000000 |
| rad27         | 6.45105e-16 | 1.000000 | 6.45492e-16 | 1.000000 |
| rad39         | 3.23959e-16 | 1.000000 | 3.24154e-16 | 1.000000 |
| PAH3+H        | 9.98897e-17 | 1.000000 | 9.99496e-17 | 1.000000 |
| rad12         | 8.11266e-17 | 1.000000 | 8.11752e-17 | 1.000000 |
| rad59         | 3.19991e-17 | 1.000000 | 3.20183e-17 | 1.000000 |
| rad37         | 5.32355e-18 | 1.000000 | 5.32674e-18 | 1.000000 |
| rad50         | 1.68357e-18 | 1.000000 | 1.68458e-18 | 1.000000 |
| rad5          | 1.14771e-18 | 1.000000 | 1.14840e-18 | 1.000000 |
| rad31         | 4.58997e-19 | 1.000000 | 4.59272e-19 | 1.000000 |
| rad19syn      | 5.01088e-21 | 1.000000 | 5.01388e-21 | 1.000000 |
| rad52         | 3.92512e-22 | 1.000000 | 3.92747e-22 | 1.000000 |
| rad54         | 1.60149e-22 | 1.000000 | 1.60245e-22 | 1.000000 |
| PAH10+CH3     | 5.56960e-23 | 1.000000 | 5.57293e-23 | 1.000000 |
| rad43         | 2.11396e-23 | 1.000000 | 2.11522e-23 | 1.000000 |
| rad51         | 1.05861e-23 | 1.000000 | 1.05924e-23 | 1.000000 |
| rad62         | 7.46061e-24 | 1.000000 | 7.46508e-24 | 1.000000 |
| rad70         | 1.34930e-24 | 1.000000 | 1.35011e-24 | 1.000000 |
| PhcycC3H3_A+H | 8.47186e-25 | 1.000000 | 8.47694e-25 | 1.000000 |
| rad58         | 6.60134e-25 | 1.000000 | 6.60530e-25 | 1.000000 |

|        |             |         |             |         |
|--------|-------------|---------|-------------|---------|
| rad55  | 2.19942e-25 | 1.00000 | 2.20074e-25 | 1.00000 |
| rad65  | 8.79801e-26 | 1.00000 | 8.80328e-26 | 1.00000 |
| PAH1+H | 1.61304e-26 | 1.00000 | 1.61400e-26 | 1.00000 |
| rad34  | 3.55933e-27 | 1.00000 | 3.56146e-27 | 1.00000 |
| rad42  | 2.70718e-29 | 1.00000 | 2.70880e-29 | 1.00000 |
| rad41  | 7.93271e-30 | 1.00000 | 7.93747e-30 | 1.00000 |
| rad47  | 8.75074e-31 | 1.00000 | 8.75599e-31 | 1.00000 |

10.000000 Pa, 270.000000 K

| Rate constant | True (fraction)     | Effective (fraction) |
|---------------|---------------------|----------------------|
| Total         | 8.04141e-24 (1.00 ) | 8.03547e-24 (1.00 )  |

| species       | PYtrue      | Cumul    | PYeffective | Cumul    |
|---------------|-------------|----------|-------------|----------|
| Indene+H      | 0.884493    | 0.884493 | 0.885147    | 0.885147 |
| rad23         | 0.0954840   | 0.979977 | 0.0955546   | 0.980702 |
| rad22         | 0.0145812   | 0.994558 | 0.0145920   | 0.995294 |
| rad45         | 0.00346374  | 0.998022 | 0.00346630  | 0.998760 |
| rad6          | 0.000855812 | 0.998878 | 0.000856444 | 0.999616 |
| Benzyl+C2H2   | 0.000738741 | 0.999616 | 0.00000     | 0.999616 |
| rad36         | 0.000222663 | 0.999839 | 0.000222827 | 0.999839 |
| rad11         | 0.000160019 | 0.999999 | 0.000160137 | 0.999999 |
| rad18         | 4.19581e-07 | 1.000000 | 4.19891e-07 | 1.000000 |
| rad7          | 1.62864e-07 | 1.000000 | 1.62984e-07 | 1.000000 |
| rad20         | 8.34510e-08 | 1.000000 | 8.35127e-08 | 1.000000 |
| rad21         | 5.23452e-08 | 1.000000 | 5.23839e-08 | 1.000000 |
| rad30         | 1.85387e-08 | 1.000000 | 1.85524e-08 | 1.000000 |
| rad15         | 2.15335e-09 | 1.000000 | 2.15494e-09 | 1.000000 |
| rad2          | 1.37608e-09 | 1.000000 | 1.37710e-09 | 1.000000 |
| PAH9+H        | 7.28418e-10 | 1.000000 | 7.28957e-10 | 1.000000 |
| rad13         | 5.56140e-10 | 1.000000 | 5.56552e-10 | 1.000000 |
| rad3          | 5.40715e-10 | 1.000000 | 5.41115e-10 | 1.000000 |
| rad35         | 4.48391e-10 | 1.000000 | 4.48723e-10 | 1.000000 |
| rad4          | 2.84879e-10 | 1.000000 | 2.85090e-10 | 1.000000 |
| rad38         | 1.79879e-10 | 1.000000 | 1.80012e-10 | 1.000000 |
| rad25         | 1.74997e-10 | 1.000000 | 1.75127e-10 | 1.000000 |
| PhCHCCH2+H    | 1.53833e-10 | 1.000000 | 1.53946e-10 | 1.000000 |
| rad1          | 1.00838e-10 | 1.000000 | 1.00913e-10 | 1.000000 |
| rad10         | 8.74056e-11 | 1.000000 | 8.74703e-11 | 1.000000 |
| rad28         | 7.60929e-11 | 1.000000 | 7.61492e-11 | 1.000000 |
| rad24         | 3.11331e-11 | 1.000000 | 3.11562e-11 | 1.000000 |
| PhCCH+CH3     | 2.41733e-11 | 1.000000 | 2.41911e-11 | 1.000000 |
| rad8          | 1.09292e-11 | 1.000000 | 1.09373e-11 | 1.000000 |
| rad9          | 9.34489e-12 | 1.000000 | 9.35180e-12 | 1.000000 |
| Ph+Allene     | 3.95650e-12 | 1.000000 | 3.95942e-12 | 1.000000 |
| PhCCCH3+H     | 2.37238e-12 | 1.000000 | 2.37413e-12 | 1.000000 |
| rad26         | 1.92828e-12 | 1.000000 | 1.92971e-12 | 1.000000 |
| rad33         | 7.96084e-13 | 1.000000 | 7.96673e-13 | 1.000000 |
| rad46         | 7.95921e-13 | 1.000000 | 7.96509e-13 | 1.000000 |
| Ph+MeAc       | 3.87656e-13 | 1.000000 | 3.87943e-13 | 1.000000 |
| rad60syn      | 1.12427e-13 | 1.000000 | 1.12510e-13 | 1.000000 |
| PhCH2CCH+H    | 6.12679e-14 | 1.000000 | 6.13132e-14 | 1.000000 |
| rad60anti     | 3.25338e-14 | 1.000000 | 3.25579e-14 | 1.000000 |
| rad14         | 2.65634e-14 | 1.000000 | 2.65830e-14 | 1.000000 |
| PAH7+H        | 5.28048e-15 | 1.000000 | 5.28439e-15 | 1.000000 |
| rad27         | 1.12995e-15 | 1.000000 | 1.13078e-15 | 1.000000 |
| rad39         | 1.12362e-15 | 1.000000 | 1.12445e-15 | 1.000000 |
| PAH3+H        | 3.13271e-16 | 1.000000 | 3.13503e-16 | 1.000000 |
| rad12         | 2.92081e-16 | 1.000000 | 2.92297e-16 | 1.000000 |
| rad59         | 9.81315e-17 | 1.000000 | 9.82041e-17 | 1.000000 |
| rad37         | 2.08242e-17 | 1.000000 | 2.08396e-17 | 1.000000 |
| rad50         | 5.39680e-18 | 1.000000 | 5.40079e-18 | 1.000000 |
| rad5          | 4.31273e-18 | 1.000000 | 4.31592e-18 | 1.000000 |
| rad31         | 7.18762e-19 | 1.000000 | 7.19294e-19 | 1.000000 |
| rad19syn      | 2.39510e-20 | 1.000000 | 2.39687e-20 | 1.000000 |
| rad52         | 1.65493e-21 | 1.000000 | 1.65616e-21 | 1.000000 |
| rad54         | 8.48142e-22 | 1.000000 | 8.48769e-22 | 1.000000 |
| PAH10+CH3     | 3.11274e-22 | 1.000000 | 3.11505e-22 | 1.000000 |
| rad43         | 1.11886e-22 | 1.000000 | 1.11969e-22 | 1.000000 |
| rad51         | 5.49052e-23 | 1.000000 | 5.49457e-23 | 1.000000 |
| rad62         | 4.15189e-23 | 1.000000 | 4.15496e-23 | 1.000000 |
| rad70         | 8.05081e-24 | 1.000000 | 8.05676e-24 | 1.000000 |
| PhcycC3H3_A+H | 5.46204e-24 | 1.000000 | 5.46608e-24 | 1.000000 |
| rad58         | 3.98966e-24 | 1.000000 | 3.99261e-24 | 1.000000 |
| rad55         | 1.39270e-24 | 1.000000 | 1.39373e-24 | 1.000000 |
| rad65         | 4.99392e-25 | 1.000000 | 4.99762e-25 | 1.000000 |
| PAH1+H        | 1.13365e-25 | 1.000000 | 1.13449e-25 | 1.000000 |
| rad34         | 2.43121e-26 | 1.000000 | 2.43301e-26 | 1.000000 |



|       |             |          |             |         |
|-------|-------------|----------|-------------|---------|
| rad42 | 1.98985e-28 | 1.000000 | 1.99132e-28 | 1.00000 |
| rad41 | 5.89130e-29 | 1.000000 | 5.89566e-29 | 1.00000 |
| rad47 | 4.87649e-30 | 1.000000 | 4.88010e-30 | 1.00000 |

10.0000000 Pa, 280.000000 K

| Rate constant | True (fraction)     | Effective (fraction) |
|---------------|---------------------|----------------------|
| Total         | 1.89357e-23 (1.00 ) | 1.89186e-23 (1.00 )  |

| species       | PYtrue      | Cumul    | PYeffective | Cumul    |
|---------------|-------------|----------|-------------|----------|
| Indene+H      | 0.888994    | 0.888994 | 0.889801    | 0.889801 |
| rad23         | 0.0933701   | 0.982364 | 0.0934549   | 0.983256 |
| rad22         | 0.0120187   | 0.994383 | 0.0120297   | 0.995286 |
| rad45         | 0.00337740  | 0.997760 | 0.00338047  | 0.998666 |
| rad6          | 0.000967039 | 0.998727 | 0.000967916 | 0.999634 |
| Benzyl+C2H2   | 0.000906689 | 0.999634 | 0.00000     | 0.999634 |
| rad36         | 0.000218476 | 0.999852 | 0.000218675 | 0.999853 |
| rad11         | 0.000146515 | 0.999999 | 0.000146648 | 0.999999 |
| rad18         | 3.33402e-07 | 0.999999 | 3.33704e-07 | 1.000000 |
| rad7          | 1.85787e-07 | 0.999999 | 1.85956e-07 | 1.000000 |
| rad20         | 7.02238e-08 | 1.000000 | 7.02875e-08 | 1.000000 |
| rad21         | 4.40819e-08 | 1.000000 | 4.41219e-08 | 1.000000 |
| rad30         | 2.50939e-08 | 1.000000 | 2.51167e-08 | 1.000000 |
| rad15         | 3.13088e-09 | 1.000000 | 3.13372e-09 | 1.000000 |
| rad2          | 2.32659e-09 | 1.000000 | 2.32870e-09 | 1.000000 |
| PAH9+H        | 1.09758e-09 | 1.000000 | 1.09857e-09 | 1.000000 |
| rad3          | 7.22524e-10 | 1.000000 | 7.23180e-10 | 1.000000 |
| rad35         | 6.55961e-10 | 1.000000 | 6.56556e-10 | 1.000000 |
| rad13         | 6.26600e-10 | 1.000000 | 6.27169e-10 | 1.000000 |
| rad4          | 3.82260e-10 | 1.000000 | 3.82607e-10 | 1.000000 |
| PhCHCCH2+H    | 2.82145e-10 | 1.000000 | 2.82401e-10 | 1.000000 |
| rad38         | 2.75934e-10 | 1.000000 | 2.76185e-10 | 1.000000 |
| rad25         | 1.99264e-10 | 1.000000 | 1.99445e-10 | 1.000000 |
| rad1          | 1.72950e-10 | 1.000000 | 1.73106e-10 | 1.000000 |
| rad10         | 1.53483e-10 | 1.000000 | 1.53622e-10 | 1.000000 |
| rad28         | 1.39507e-10 | 1.000000 | 1.39633e-10 | 1.000000 |
| PhCCH+CH3     | 5.48808e-11 | 1.000000 | 5.49306e-11 | 1.000000 |
| rad24         | 3.07498e-11 | 1.000000 | 3.07777e-11 | 1.000000 |
| rad8          | 2.29369e-11 | 1.000000 | 2.29577e-11 | 1.000000 |
| rad9          | 1.79159e-11 | 1.000000 | 1.79322e-11 | 1.000000 |
| Ph+Allene     | 8.97673e-12 | 1.000000 | 8.98488e-12 | 1.000000 |
| PhCCCH3+H     | 6.22054e-12 | 1.000000 | 6.22618e-12 | 1.000000 |
| rad26         | 4.58989e-12 | 1.000000 | 4.59406e-12 | 1.000000 |
| rad46         | 1.44977e-12 | 1.000000 | 1.45108e-12 | 1.000000 |
| Ph+MeAc       | 1.12433e-12 | 1.000000 | 1.12535e-12 | 1.000000 |
| rad33         | 9.04144e-13 | 1.000000 | 9.04965e-13 | 1.000000 |
| rad60syn      | 2.33836e-13 | 1.000000 | 2.34048e-13 | 1.000000 |
| PhCH2CCH+H    | 1.68499e-13 | 1.000000 | 1.68652e-13 | 1.000000 |
| rad60anti     | 7.02642e-14 | 1.000000 | 7.03280e-14 | 1.000000 |
| rad14         | 3.93409e-14 | 1.000000 | 3.93766e-14 | 1.000000 |
| PAH7+H        | 1.65561e-14 | 1.000000 | 1.65712e-14 | 1.000000 |
| rad39         | 3.66173e-15 | 1.000000 | 3.66505e-15 | 1.000000 |
| rad27         | 1.92279e-15 | 1.000000 | 1.92454e-15 | 1.000000 |
| rad12         | 9.71725e-16 | 1.000000 | 9.72607e-16 | 1.000000 |
| PAH3+H        | 9.08763e-16 | 1.000000 | 9.09588e-16 | 1.000000 |
| rad59         | 2.78563e-16 | 1.000000 | 2.78816e-16 | 1.000000 |
| rad37         | 7.46567e-17 | 1.000000 | 7.47245e-17 | 1.000000 |
| rad50         | 1.60313e-17 | 1.000000 | 1.60459e-17 | 1.000000 |
| rad5          | 1.49044e-17 | 1.000000 | 1.49179e-17 | 1.000000 |
| rad31         | 1.11543e-18 | 1.000000 | 1.11644e-18 | 1.000000 |
| rad19syn      | 1.03314e-19 | 1.000000 | 1.03408e-19 | 1.000000 |
| rad52         | 6.32102e-21 | 1.000000 | 6.32676e-21 | 1.000000 |
| rad54         | 4.01020e-21 | 1.000000 | 4.01384e-21 | 1.000000 |
| PAH10+CH3     | 1.54218e-21 | 1.000000 | 1.54358e-21 | 1.000000 |
| rad43         | 5.27365e-22 | 1.000000 | 5.27843e-22 | 1.000000 |
| rad51         | 2.53366e-22 | 1.000000 | 2.53596e-22 | 1.000000 |
| rad62         | 2.04736e-22 | 1.000000 | 2.04922e-22 | 1.000000 |
| rad70         | 4.21074e-23 | 1.000000 | 4.21456e-23 | 1.000000 |
| PhcycC3H3_A+H | 3.06469e-23 | 1.000000 | 3.06747e-23 | 1.000000 |
| rad58         | 2.10583e-23 | 1.000000 | 2.10774e-23 | 1.000000 |
| rad55         | 7.69208e-24 | 1.000000 | 7.69907e-24 | 1.000000 |
| rad65         | 2.49603e-24 | 1.000000 | 2.49830e-24 | 1.000000 |
| PAH1+H        | 6.85236e-25 | 1.000000 | 6.85858e-25 | 1.000000 |
| rad34         | 1.42989e-25 | 1.000000 | 1.43118e-25 | 1.000000 |
| rad42         | 1.24896e-27 | 1.000000 | 1.25010e-27 | 1.000000 |
| rad41         | 3.73363e-28 | 1.000000 | 3.73702e-28 | 1.000000 |
| rad47         | 2.37616e-29 | 1.000000 | 2.37832e-29 | 1.000000 |

10.000000 Pa, 290.000000 K

=====

| Rate constant | True (fraction)     | Effective (fraction) |
|---------------|---------------------|----------------------|
| Total         | 4.20015e-23 (1.00 ) | 4.19550e-23 (1.00 )  |

| species       | PYtrue      | Cumul    | PYeffective | Cumul    |
|---------------|-------------|----------|-------------|----------|
| Indene+H      | 0.893375    | 0.893375 | 0.894365    | 0.894365 |
| rad23         | 0.0909245   | 0.984299 | 0.0910253   | 0.985390 |
| rad22         | 0.00987677  | 0.994176 | 0.00988771  | 0.995278 |
| rad45         | 0.00328195  | 0.997458 | 0.00328559  | 0.998564 |
| Benzyl+C2H2   | 0.00110724  | 0.998565 | 0.000000    | 0.998564 |
| rad6          | 0.00108695  | 0.999652 | 0.00108816  | 0.999652 |
| rad36         | 0.000213770 | 0.999866 | 0.000214007 | 0.999866 |
| rad11         | 0.000133150 | 0.999999 | 0.000133298 | 0.999999 |
| rad18         | 2.65835e-07 | 1.000000 | 2.66130e-07 | 0.999999 |
| rad7          | 2.10375e-07 | 1.000000 | 2.10608e-07 | 1.000000 |
| rad20         | 5.93286e-08 | 1.000000 | 5.93943e-08 | 1.000000 |
| rad21         | 3.72719e-08 | 1.000000 | 3.73132e-08 | 1.000000 |
| rad30         | 3.35668e-08 | 1.000000 | 3.36040e-08 | 1.000000 |
| rad15         | 4.47243e-09 | 1.000000 | 4.47738e-09 | 1.000000 |
| rad2          | 3.83416e-09 | 1.000000 | 3.83841e-09 | 1.000000 |
| PAH9+H        | 1.62859e-09 | 1.000000 | 1.63040e-09 | 1.000000 |
| rad3          | 9.47262e-10 | 1.000000 | 9.48312e-10 | 1.000000 |
| rad35         | 9.46327e-10 | 1.000000 | 9.47376e-10 | 1.000000 |
| rad13         | 7.02541e-10 | 1.000000 | 7.03320e-10 | 1.000000 |
| rad4          | 5.03411e-10 | 1.000000 | 5.03969e-10 | 1.000000 |
| PhCHCCH2+H    | 5.02913e-10 | 1.000000 | 5.03470e-10 | 1.000000 |
| rad38         | 4.16518e-10 | 1.000000 | 4.16980e-10 | 1.000000 |
| rad1          | 2.89417e-10 | 1.000000 | 2.89737e-10 | 1.000000 |
| rad10         | 2.60995e-10 | 1.000000 | 2.61284e-10 | 1.000000 |
| rad28         | 2.50651e-10 | 1.000000 | 2.50929e-10 | 1.000000 |
| rad25         | 2.21403e-10 | 1.000000 | 2.21649e-10 | 1.000000 |
| PhCCH+CH3     | 1.20628e-10 | 1.000000 | 1.20762e-10 | 1.000000 |
| rad8          | 4.59451e-11 | 1.000000 | 4.59961e-11 | 1.000000 |
| rad9          | 3.31274e-11 | 1.000000 | 3.31641e-11 | 1.000000 |
| rad24         | 3.02897e-11 | 1.000000 | 3.03232e-11 | 1.000000 |
| Ph+Allene     | 1.94002e-11 | 1.000000 | 1.94217e-11 | 1.000000 |
| PhCCCH3+H     | 1.55073e-11 | 1.000000 | 1.55245e-11 | 1.000000 |
| rad26         | 1.04026e-11 | 1.000000 | 1.04141e-11 | 1.000000 |
| Ph+MeAc       | 3.07126e-12 | 1.000000 | 3.07466e-12 | 1.000000 |
| rad46         | 2.56209e-12 | 1.000000 | 2.56493e-12 | 1.000000 |
| rad33         | 1.02199e-12 | 1.000000 | 1.02312e-12 | 1.000000 |
| rad60syn      | 4.64225e-13 | 1.000000 | 4.64740e-13 | 1.000000 |
| PhCH2CCH+H    | 4.35787e-13 | 1.000000 | 4.36270e-13 | 1.000000 |
| rad60anti     | 1.44368e-13 | 1.000000 | 1.44528e-13 | 1.000000 |
| rad14         | 5.64342e-14 | 1.000000 | 5.64967e-14 | 1.000000 |
| PAH7+H        | 4.92181e-14 | 1.000000 | 4.92727e-14 | 1.000000 |
| rad39         | 1.12475e-14 | 1.000000 | 1.12600e-14 | 1.000000 |
| rad27         | 3.18515e-15 | 1.000000 | 3.18868e-15 | 1.000000 |
| rad12         | 3.00413e-15 | 1.000000 | 3.00746e-15 | 1.000000 |
| PAH3+H        | 2.45838e-15 | 1.000000 | 2.46110e-15 | 1.000000 |
| rad59         | 7.37924e-16 | 1.000000 | 7.38742e-16 | 1.000000 |
| rad37         | 2.47033e-16 | 1.000000 | 2.47306e-16 | 1.000000 |
| rad5          | 4.77192e-17 | 1.000000 | 4.77720e-17 | 1.000000 |
| rad50         | 4.44739e-17 | 1.000000 | 4.45232e-17 | 1.000000 |
| rad31         | 1.72005e-18 | 1.000000 | 1.72196e-18 | 1.000000 |
| rad19syn      | 4.05901e-19 | 1.000000 | 4.06351e-19 | 1.000000 |
| rad52         | 2.20902e-20 | 1.000000 | 2.21147e-20 | 1.000000 |
| rad54         | 1.70982e-20 | 1.000000 | 1.71172e-20 | 1.000000 |
| PAH10+CH3     | 6.84654e-21 | 1.000000 | 6.85413e-21 | 1.000000 |
| rad43         | 2.23725e-21 | 1.000000 | 2.23973e-21 | 1.000000 |
| rad51         | 1.05187e-21 | 1.000000 | 1.05304e-21 | 1.000000 |
| rad62         | 9.04472e-22 | 1.000000 | 9.05474e-22 | 1.000000 |
| rad70         | 1.95496e-22 | 1.000000 | 1.95713e-22 | 1.000000 |
| PhcycC3H3_A+H | 1.51640e-22 | 1.000000 | 1.51808e-22 | 1.000000 |
| rad58         | 9.83594e-23 | 1.000000 | 9.84684e-23 | 1.000000 |
| rad55         | 3.75371e-23 | 1.000000 | 3.75787e-23 | 1.000000 |
| rad65         | 1.11198e-23 | 1.000000 | 1.11321e-23 | 1.000000 |
| PAH1+H        | 3.61753e-24 | 1.000000 | 3.62154e-24 | 1.000000 |
| rad34         | 7.35387e-25 | 1.000000 | 7.36202e-25 | 1.000000 |
| rad42         | 6.81076e-27 | 1.000000 | 6.81831e-27 | 1.000000 |
| rad41         | 2.05484e-27 | 1.000000 | 2.05712e-27 | 1.000000 |
| rad47         | 1.02685e-28 | 1.000000 | 1.02799e-28 | 1.000000 |

10.000000 Pa, 300.000000 K

=====

| Rate constant | True (fraction) | Effective (fraction) |
|---------------|-----------------|----------------------|
|---------------|-----------------|----------------------|

Total | 1.17740e-22 (1.00 ) 1.17545e-22 (1.00 )

| species       | PYtrue      | Cumul    | PYeffective | Cumul    |
|---------------|-------------|----------|-------------|----------|
| Indene+H      | 0.907970    | 0.907970 | 0.909477    | 0.909477 |
| rad23         | 0.0760854   | 0.984055 | 0.0762118   | 0.985689 |
| rad22         | 0.00983256  | 0.993888 | 0.00984889  | 0.995538 |
| rad45         | 0.00310952  | 0.996997 | 0.00311469  | 0.998652 |
| Benzyl+C2H2   | 0.00165790  | 0.998655 | 0.000000    | 0.998652 |
| rad6          | 0.00114613  | 0.999802 | 0.00114803  | 0.999800 |
| rad36         | 0.000105982 | 0.999907 | 0.000106158 | 0.999907 |
| rad11         | 8.94695e-05 | 0.999997 | 8.96181e-05 | 0.999996 |
| rad18         | 1.86025e-06 | 0.999999 | 1.86334e-06 | 0.999998 |
| rad20         | 7.48594e-07 | 1.000000 | 7.49837e-07 | 0.999999 |
| rad21         | 4.76405e-07 | 1.000000 | 4.77196e-07 | 0.999999 |
| rad7          | 2.21619e-07 | 1.000000 | 2.21987e-07 | 0.999999 |
| rad30         | 3.73878e-08 | 1.000000 | 3.74499e-08 | 1.000000 |
| rad2          | 1.12966e-08 | 1.000000 | 1.13153e-08 | 1.000000 |
| PAH9+H        | 4.43424e-09 | 1.000000 | 4.44160e-09 | 1.000000 |
| rad9          | 2.61330e-09 | 1.000000 | 2.61764e-09 | 1.000000 |
| rad35         | 2.06304e-09 | 1.000000 | 2.06646e-09 | 1.000000 |
| rad3          | 1.34748e-09 | 1.000000 | 1.34972e-09 | 1.000000 |
| PhCCH+CH3     | 1.24899e-09 | 1.000000 | 1.25106e-09 | 1.000000 |
| rad28         | 1.07653e-09 | 1.000000 | 1.07831e-09 | 1.000000 |
| PhCHCCH2+H    | 1.06647e-09 | 1.000000 | 1.06824e-09 | 1.000000 |
| rad38         | 9.27100e-10 | 1.000000 | 9.28640e-10 | 1.000000 |
| rad1          | 8.51244e-10 | 1.000000 | 8.52658e-10 | 1.000000 |
| rad13         | 7.97282e-10 | 1.000000 | 7.98606e-10 | 1.000000 |
| rad10         | 7.84708e-10 | 1.000000 | 7.86011e-10 | 1.000000 |
| rad4          | 6.70109e-10 | 1.000000 | 6.71222e-10 | 1.000000 |
| PhCCCH3+H     | 2.76213e-10 | 1.000000 | 2.76672e-10 | 1.000000 |
| rad25         | 1.91003e-10 | 1.000000 | 1.91320e-10 | 1.000000 |
| rad26         | 1.03946e-10 | 1.000000 | 1.04118e-10 | 1.000000 |
| Ph+MeAc       | 7.35859e-11 | 1.000000 | 7.37081e-11 | 1.000000 |
| rad24         | 3.49146e-11 | 1.000000 | 3.49725e-11 | 1.000000 |
| Ph+Allene     | 2.68091e-11 | 1.000000 | 2.68537e-11 | 1.000000 |
| rad46         | 7.45233e-12 | 1.000000 | 7.46471e-12 | 1.000000 |
| rad19anti     | 5.14651e-12 | 1.000000 | 5.15506e-12 | 1.000000 |
| rad15         | 1.95581e-12 | 1.000000 | 1.95906e-12 | 1.000000 |
| PAH7+H        | 1.93970e-12 | 1.000000 | 1.94292e-12 | 1.000000 |
| PhCH2CCH+H    | 1.61186e-12 | 1.000000 | 1.61454e-12 | 1.000000 |
| rad33         | 1.49138e-12 | 1.000000 | 1.49386e-12 | 1.000000 |
| rad60syn      | 7.04905e-13 | 1.000000 | 7.06075e-13 | 1.000000 |
| rad39         | 4.30704e-13 | 1.000000 | 4.31419e-13 | 1.000000 |
| rad60anti     | 2.12265e-13 | 1.000000 | 2.12618e-13 | 1.000000 |
| rad14         | 1.01196e-13 | 1.000000 | 1.01364e-13 | 1.000000 |
| rad37         | 1.61243e-14 | 1.000000 | 1.61511e-14 | 1.000000 |
| rad27         | 1.11441e-14 | 1.000000 | 1.11626e-14 | 1.000000 |
| PAH3+H        | 6.22236e-15 | 1.000000 | 6.23269e-15 | 1.000000 |
| rad59         | 1.44000e-15 | 1.000000 | 1.44239e-15 | 1.000000 |
| rad50         | 2.99891e-16 | 1.000000 | 3.00389e-16 | 1.000000 |
| rad19syn      | 3.03404e-17 | 1.000000 | 3.03908e-17 | 1.000000 |
| rad12         | 2.71977e-17 | 1.000000 | 2.72428e-17 | 1.000000 |
| rad31         | 8.08965e-18 | 1.000000 | 8.10308e-18 | 1.000000 |
| rad5          | 6.16282e-18 | 1.000000 | 6.17306e-18 | 1.000000 |
| rad54         | 2.06877e-18 | 1.000000 | 2.07220e-18 | 1.000000 |
| PAH10+CH3     | 1.64402e-18 | 1.000000 | 1.64675e-18 | 1.000000 |
| rad67         | 8.11763e-19 | 1.000000 | 8.13111e-19 | 1.000000 |
| rad52         | 3.40969e-19 | 1.000000 | 3.41535e-19 | 1.000000 |
| rad43         | 2.96881e-19 | 1.000000 | 2.97374e-19 | 1.000000 |
| rad62         | 1.28165e-19 | 1.000000 | 1.28378e-19 | 1.000000 |
| PhcycC3H3_A+H | 6.55128e-20 | 1.000000 | 6.56216e-20 | 1.000000 |
| rad51         | 3.84010e-20 | 1.000000 | 3.84648e-20 | 1.000000 |
| rad70         | 2.21470e-20 | 1.000000 | 2.21838e-20 | 1.000000 |
| rad55         | 1.05916e-20 | 1.000000 | 1.06092e-20 | 1.000000 |
| PAH1+H        | 4.50088e-21 | 1.000000 | 4.50836e-21 | 1.000000 |
| rad65         | 6.27010e-22 | 1.000000 | 6.28051e-22 | 1.000000 |
| rad58         | 4.02509e-22 | 1.000000 | 4.03177e-22 | 1.000000 |
| rad34         | 2.98185e-22 | 1.000000 | 2.98680e-22 | 1.000000 |
| rad42         | 1.22637e-23 | 1.000000 | 1.22841e-23 | 1.000000 |
| rad41         | 4.48870e-24 | 1.000000 | 4.49615e-24 | 1.000000 |
| rad53         | 4.39541e-25 | 1.000000 | 4.40271e-25 | 1.000000 |
| rad64         | 1.19582e-25 | 1.000000 | 1.19780e-25 | 1.000000 |
| rad47         | 2.23986e-27 | 1.000000 | 2.24358e-27 | 1.000000 |
| rad56         | 1.41206e-27 | 1.000000 | 1.41441e-27 | 1.000000 |
| rad61         | 2.12258e-28 | 1.000000 | 2.12610e-28 | 1.000000 |
| rad68syn      | 1.35830e-28 | 1.000000 | 1.36056e-28 | 1.000000 |
| rad68anti     | 9.79379e-29 | 1.000000 | 9.81005e-29 | 1.000000 |
| rad73         | 7.41764e-29 | 1.000000 | 7.42996e-29 | 1.000000 |
| rad71         | 2.83247e-30 | 1.000000 | 2.83717e-30 | 1.000000 |

|           |             |         |             |          |
|-----------|-------------|---------|-------------|----------|
| rad40syn  | 2.26625e-31 | 1.00000 | 2.27002e-31 | 1.000000 |
| PAH8+H    | 7.35839e-32 | 1.00000 | 7.37061e-32 | 1.000000 |
| rad40anti | 7.21700e-32 | 1.00000 | 7.22899e-32 | 1.000000 |
| rad72     | 4.90235e-36 | 1.00000 | 4.91049e-36 | 1.000000 |
| rad8      | 1.57348e-39 | 1.00000 | 1.57609e-39 | 1.000000 |

10.000000 Pa, 310.000000 K

| Rate constant | True (fraction)     | Effective (fraction) |
|---------------|---------------------|----------------------|
| Total         | 2.44453e-22 (1.00 ) | 2.44056e-22 (1.00 )  |

| species       | PYtrue      | Cumul    | PYeffective | Cumul    |
|---------------|-------------|----------|-------------|----------|
| Indene+H      | 0.901924    | 0.901924 | 0.903394    | 0.903394 |
| rad23         | 0.0851019   | 0.987026 | 0.0852406   | 0.988635 |
| rad22         | 0.00661582  | 0.993642 | 0.00662660  | 0.995261 |
| rad45         | 0.00306605  | 0.996708 | 0.00307104  | 0.998332 |
| Benzyl+C2H2   | 0.00162676  | 0.998335 | 0.000000    | 0.998332 |
| rad6          | 0.00135392  | 0.999688 | 0.00135613  | 0.999688 |
| rad36         | 0.000202866 | 0.999891 | 0.000203197 | 0.999892 |
| rad11         | 0.000107678 | 0.999999 | 0.000107853 | 0.999999 |
| rad7          | 2.64614e-07 | 0.999999 | 2.65045e-07 | 1.000000 |
| rad18         | 1.70700e-07 | 0.999999 | 1.70978e-07 | 1.000000 |
| rad30         | 5.81526e-08 | 0.999999 | 5.82474e-08 | 1.000000 |
| rad20         | 4.28635e-08 | 1.000000 | 4.29334e-08 | 1.000000 |
| rad21         | 2.69739e-08 | 1.000000 | 2.70178e-08 | 1.000000 |
| rad2          | 9.68911e-09 | 1.000000 | 9.70490e-09 | 1.000000 |
| rad15         | 8.70682e-09 | 1.000000 | 8.72101e-09 | 1.000000 |
| PAH9+H        | 3.42937e-09 | 1.000000 | 3.43496e-09 | 1.000000 |
| rad35         | 1.89071e-09 | 1.000000 | 1.89379e-09 | 1.000000 |
| rad3          | 1.54884e-09 | 1.000000 | 1.55137e-09 | 1.000000 |
| PhCHCCH2+H    | 1.48839e-09 | 1.000000 | 1.49082e-09 | 1.000000 |
| rad38         | 9.05937e-10 | 1.000000 | 9.07413e-10 | 1.000000 |
| rad13         | 8.71755e-10 | 1.000000 | 8.73176e-10 | 1.000000 |
| rad4          | 8.31302e-10 | 1.000000 | 8.32656e-10 | 1.000000 |
| rad28         | 7.62980e-10 | 1.000000 | 7.64223e-10 | 1.000000 |
| rad1          | 7.56474e-10 | 1.000000 | 7.57706e-10 | 1.000000 |
| rad10         | 6.91304e-10 | 1.000000 | 6.92430e-10 | 1.000000 |
| PhCCH+CH3     | 5.31890e-10 | 1.000000 | 5.32757e-10 | 1.000000 |
| rad25         | 2.56218e-10 | 1.000000 | 2.56635e-10 | 1.000000 |
| rad8          | 1.63268e-10 | 1.000000 | 1.63534e-10 | 1.000000 |
| rad9          | 1.03141e-10 | 1.000000 | 1.03310e-10 | 1.000000 |
| PhCCCH3+H     | 8.36883e-11 | 1.000000 | 8.38246e-11 | 1.000000 |
| Ph+Allene     | 7.99181e-11 | 1.000000 | 8.00483e-11 | 1.000000 |
| rad26         | 4.65332e-11 | 1.000000 | 4.66091e-11 | 1.000000 |
| rad24         | 2.91465e-11 | 1.000000 | 2.91940e-11 | 1.000000 |
| Ph+MeAc       | 1.94523e-11 | 1.000000 | 1.94840e-11 | 1.000000 |
| rad46         | 7.37525e-12 | 1.000000 | 7.38726e-12 | 1.000000 |
| PhCH2CCH+H    | 2.48313e-12 | 1.000000 | 2.48718e-12 | 1.000000 |
| rad60syn      | 1.62065e-12 | 1.000000 | 1.62329e-12 | 1.000000 |
| rad33         | 1.28953e-12 | 1.000000 | 1.29163e-12 | 1.000000 |
| rad60anti     | 5.35278e-13 | 1.000000 | 5.36151e-13 | 1.000000 |
| PAH7+H        | 3.73814e-13 | 1.000000 | 3.74423e-13 | 1.000000 |
| rad14         | 1.06949e-13 | 1.000000 | 1.07123e-13 | 1.000000 |
| rad39         | 8.98462e-14 | 1.000000 | 8.99926e-14 | 1.000000 |
| rad12         | 2.35137e-14 | 1.000000 | 2.35520e-14 | 1.000000 |
| PAH3+H        | 1.49898e-14 | 1.000000 | 1.50143e-14 | 1.000000 |
| rad27         | 8.11319e-15 | 1.000000 | 8.12641e-15 | 1.000000 |
| rad59         | 4.32351e-15 | 1.000000 | 4.33055e-15 | 1.000000 |
| rad37         | 2.17938e-15 | 1.000000 | 2.18293e-15 | 1.000000 |
| rad5          | 3.98718e-16 | 1.000000 | 3.99368e-16 | 1.000000 |
| rad50         | 2.86096e-16 | 1.000000 | 2.86562e-16 | 1.000000 |
| rad19syn      | 4.87799e-18 | 1.000000 | 4.88594e-18 | 1.000000 |
| rad31         | 4.05491e-18 | 1.000000 | 4.06151e-18 | 1.000000 |
| rad54         | 2.35582e-19 | 1.000000 | 2.35966e-19 | 1.000000 |
| rad52         | 2.13523e-19 | 1.000000 | 2.13871e-19 | 1.000000 |
| PAH10+CH3     | 1.00686e-19 | 1.000000 | 1.00850e-19 | 1.000000 |
| rad43         | 3.04204e-20 | 1.000000 | 3.04700e-20 | 1.000000 |
| rad51         | 1.36968e-20 | 1.000000 | 1.37191e-20 | 1.000000 |
| rad62         | 1.31683e-20 | 1.000000 | 1.31897e-20 | 1.000000 |
| rad70         | 3.07373e-21 | 1.000000 | 3.07874e-21 | 1.000000 |
| PhcycC3H3_A+H | 2.66053e-21 | 1.000000 | 2.66486e-21 | 1.000000 |
| rad58         | 1.55355e-21 | 1.000000 | 1.55608e-21 | 1.000000 |
| rad55         | 6.43702e-22 | 1.000000 | 6.44751e-22 | 1.000000 |
| rad65         | 1.62751e-22 | 1.000000 | 1.63016e-22 | 1.000000 |
| PAH1+H        | 7.06031e-23 | 1.000000 | 7.07181e-23 | 1.000000 |
| rad34         | 1.36710e-23 | 1.000000 | 1.36932e-23 | 1.000000 |
| rad42         | 1.40101e-25 | 1.000000 | 1.40329e-25 | 1.000000 |
| rad41         | 4.30218e-26 | 1.000000 | 4.30919e-26 | 1.000000 |

rad47 | 1.40285e-27 1.000000 | 1.40513e-27 1.00000

10.000000 Pa, 400.000000 K

=====  
Rate constant | True (fraction) | Effective (fraction)  
-----  
Total | 3.60269e-20 (1.00 ) | 3.57093e-20 (1.00 )

| species       | PYtrue      | Cumul    | PYeffective | Cumul    |
|---------------|-------------|----------|-------------|----------|
| Indene+H      | 0.944296    | 0.944296 | 0.952693    | 0.952693 |
| rad23         | 0.0404463   | 0.984742 | 0.0408060   | 0.993499 |
| Benzyl+C2H2   | 0.00881426  | 0.993557 | 0.00000     | 0.993499 |
| rad6          | 0.00288911  | 0.996446 | 0.00291480  | 0.996414 |
| rad45         | 0.00195573  | 0.998401 | 0.00197312  | 0.998387 |
| rad22         | 0.00149497  | 0.999896 | 0.00150827  | 0.999895 |
| rad36         | 7.49307e-05 | 0.999971 | 7.55970e-05 | 0.999971 |
| rad11         | 2.64535e-05 | 0.999998 | 2.66887e-05 | 0.999997 |
| rad7          | 5.67207e-07 | 0.999998 | 5.72251e-07 | 0.999998 |
| rad30         | 4.00241e-07 | 0.999999 | 4.03801e-07 | 0.999998 |
| rad18         | 3.19963e-07 | 0.999999 | 3.22809e-07 | 0.999999 |
| PhCCH+CH3     | 2.56109e-07 | 0.999999 | 2.58386e-07 | 0.999999 |
| rad2          | 2.44051e-07 | 1.000000 | 2.46221e-07 | 0.999999 |
| rad20         | 2.35581e-07 | 1.000000 | 2.37676e-07 | 1.000000 |
| rad21         | 1.54250e-07 | 1.000000 | 1.55622e-07 | 1.000000 |
| PhCHCCH2+H    | 1.41132e-07 | 1.000000 | 1.42387e-07 | 1.000000 |
| PAH9+H        | 7.42638e-08 | 1.000000 | 7.49242e-08 | 1.000000 |
| rad28         | 6.98244e-08 | 1.000000 | 7.04453e-08 | 1.000000 |
| PhCCCH3+H     | 6.25174e-08 | 1.000000 | 6.30733e-08 | 1.000000 |
| rad35         | 2.85242e-08 | 1.000000 | 2.87779e-08 | 1.000000 |
| Ph+MeAc       | 2.54202e-08 | 1.000000 | 2.56463e-08 | 1.000000 |
| rad1          | 2.27123e-08 | 1.000000 | 2.29143e-08 | 1.000000 |
| rad38         | 1.90698e-08 | 1.000000 | 1.92394e-08 | 1.000000 |
| rad10         | 1.77884e-08 | 1.000000 | 1.79466e-08 | 1.000000 |
| rad9          | 1.73627e-08 | 1.000000 | 1.75171e-08 | 1.000000 |
| Ph+Allene     | 1.11328e-08 | 1.000000 | 1.12318e-08 | 1.000000 |
| rad26         | 9.33906e-09 | 1.000000 | 9.42211e-09 | 1.000000 |
| rad3          | 8.67313e-09 | 1.000000 | 8.75026e-09 | 1.000000 |
| rad4          | 4.56759e-09 | 1.000000 | 4.60821e-09 | 1.000000 |
| rad13         | 2.15571e-09 | 1.000000 | 2.17488e-09 | 1.000000 |
| PAH7+H        | 1.37868e-09 | 1.000000 | 1.39094e-09 | 1.000000 |
| PhCH2CCH+H    | 1.37105e-09 | 1.000000 | 1.38324e-09 | 1.000000 |
| rad46         | 4.59028e-10 | 1.000000 | 4.63110e-10 | 1.000000 |
| rad19anti     | 3.46312e-10 | 1.000000 | 3.49391e-10 | 1.000000 |
| rad39         | 3.22581e-10 | 1.000000 | 3.25450e-10 | 1.000000 |
| rad25         | 2.20848e-10 | 1.000000 | 2.22812e-10 | 1.000000 |
| rad60syn      | 9.41526e-11 | 1.000000 | 9.49899e-11 | 1.000000 |
| rad60anti     | 3.74259e-11 | 1.000000 | 3.77587e-11 | 1.000000 |
| rad24         | 3.07106e-11 | 1.000000 | 3.09837e-11 | 1.000000 |
| rad15         | 1.29418e-11 | 1.000000 | 1.30569e-11 | 1.000000 |
| rad37         | 9.96327e-12 | 1.000000 | 1.00519e-11 | 1.000000 |
| PAH3+H        | 6.48348e-12 | 1.000000 | 6.54114e-12 | 1.000000 |
| rad33         | 4.55483e-12 | 1.000000 | 4.59533e-12 | 1.000000 |
| rad59         | 1.35467e-12 | 1.000000 | 1.36672e-12 | 1.000000 |
| rad14         | 8.89199e-13 | 1.000000 | 8.97107e-13 | 1.000000 |
| rad50         | 8.42872e-13 | 1.000000 | 8.50367e-13 | 1.000000 |
| rad27         | 2.65924e-13 | 1.000000 | 2.68289e-13 | 1.000000 |
| rad19syn      | 6.81557e-14 | 1.000000 | 6.87618e-14 | 1.000000 |
| rad52         | 8.96345e-15 | 1.000000 | 9.04316e-15 | 1.000000 |
| rad54         | 6.49999e-15 | 1.000000 | 6.55779e-15 | 1.000000 |
| rad51         | 5.66597e-15 | 1.000000 | 5.71635e-15 | 1.000000 |
| PAH10+CH3     | 4.58581e-15 | 1.000000 | 4.62659e-15 | 1.000000 |
| rad67         | 1.21819e-15 | 1.000000 | 1.22902e-15 | 1.000000 |
| rad31         | 8.57829e-16 | 1.000000 | 8.65457e-16 | 1.000000 |
| rad43         | 7.42498e-16 | 1.000000 | 7.49101e-16 | 1.000000 |
| rad5          | 5.37446e-16 | 1.000000 | 5.42225e-16 | 1.000000 |
| PhcycC3H3_A+H | 4.18133e-16 | 1.000000 | 4.21852e-16 | 1.000000 |
| rad62         | 3.97595e-16 | 1.000000 | 4.01131e-16 | 1.000000 |
| rad12         | 2.94314e-16 | 1.000000 | 2.96932e-16 | 1.000000 |
| rad65         | 1.55144e-16 | 1.000000 | 1.56524e-16 | 1.000000 |
| rad70         | 1.40844e-16 | 1.000000 | 1.42096e-16 | 1.000000 |
| rad55         | 5.94159e-17 | 1.000000 | 5.99443e-17 | 1.000000 |
| PAH1+H        | 4.83501e-17 | 1.000000 | 4.87801e-17 | 1.000000 |
| rad58         | 2.14331e-17 | 1.000000 | 2.16237e-17 | 1.000000 |
| rad34         | 3.86137e-18 | 1.000000 | 3.89571e-18 | 1.000000 |
| rad42         | 1.59888e-19 | 1.000000 | 1.61310e-19 | 1.000000 |
| rad41         | 7.49346e-20 | 1.000000 | 7.56010e-20 | 1.000000 |
| rad73         | 7.40227e-20 | 1.000000 | 7.46810e-20 | 1.000000 |
| rad53         | 6.36900e-20 | 1.000000 | 6.42564e-20 | 1.000000 |
| rad64         | 4.37642e-20 | 1.000000 | 4.41534e-20 | 1.000000 |

|           |             |         |             |         |
|-----------|-------------|---------|-------------|---------|
| rad71     | 1.79849e-20 | 1.00000 | 1.81449e-20 | 1.00000 |
| rad56     | 8.44317e-21 | 1.00000 | 8.51825e-21 | 1.00000 |
| rad68syn  | 1.30962e-21 | 1.00000 | 1.32127e-21 | 1.00000 |
| rad68anti | 8.99619e-22 | 1.00000 | 9.07619e-22 | 1.00000 |
| rad61     | 6.00818e-22 | 1.00000 | 6.06161e-22 | 1.00000 |
| PAH8+H    | 1.99290e-22 | 1.00000 | 2.01062e-22 | 1.00000 |
| rad47     | 8.73247e-23 | 1.00000 | 8.81012e-23 | 1.00000 |
| rad40syn  | 7.91082e-23 | 1.00000 | 7.98117e-23 | 1.00000 |
| rad40anti | 2.88066e-23 | 1.00000 | 2.90628e-23 | 1.00000 |
| rad72     | 9.56619e-24 | 1.00000 | 9.65126e-24 | 1.00000 |
| rad8      | 2.51102e-35 | 1.00000 | 2.53335e-35 | 1.00000 |

10.0000000 Pa, 500.000000 K

| Rate constant | True (fraction)     | Effective (fraction) |
|---------------|---------------------|----------------------|
| Total         | 1.22595e-18 (1.00 ) | 1.18808e-18 (1.00 )  |

| species       | PYtrue      | Cumul    | PYeffective | Cumul    |
|---------------|-------------|----------|-------------|----------|
| Indene+H      | 0.946877    | 0.946877 | 0.977059    | 0.977059 |
| Benzyl+C2H2   | 0.0308915   | 0.977768 | 0.00000     | 0.977059 |
| rad23         | 0.0151579   | 0.992926 | 0.0156411   | 0.992700 |
| rad6          | 0.00560957  | 0.998536 | 0.00578838  | 0.998488 |
| rad45         | 0.00116795  | 0.999704 | 0.00120518  | 0.999694 |
| rad22         | 0.000210873 | 0.999915 | 0.000217595 | 0.999911 |
| rad36         | 5.43783e-05 | 0.999969 | 5.61116e-05 | 0.999967 |
| PhCCH+CH3     | 9.14919e-06 | 0.999978 | 9.44083e-06 | 0.999977 |
| rad11         | 6.12944e-06 | 0.999984 | 6.32483e-06 | 0.999983 |
| PhCHCCH2+H    | 4.28877e-06 | 0.999989 | 4.42548e-06 | 0.999988 |
| rad30         | 2.18383e-06 | 0.999991 | 2.25345e-06 | 0.999990 |
| PhCCCH3+H     | 1.99822e-06 | 0.999993 | 2.06191e-06 | 0.999992 |
| rad2          | 1.27659e-06 | 0.999994 | 1.31729e-06 | 0.999993 |
| Ph+MeAc       | 1.14937e-06 | 0.999995 | 1.18601e-06 | 0.999994 |
| rad7          | 1.10819e-06 | 0.999996 | 1.14351e-06 | 0.999996 |
| rad28         | 9.32791e-07 | 0.999997 | 9.62525e-07 | 0.999996 |
| Ph+Allene     | 7.60221e-07 | 0.999998 | 7.84454e-07 | 0.999997 |
| PAH9+H        | 7.50208e-07 | 0.999999 | 7.74121e-07 | 0.999998 |
| rad38         | 2.34196e-07 | 0.999999 | 2.41661e-07 | 0.999998 |
| rad35         | 2.30216e-07 | 0.999999 | 2.37555e-07 | 0.999999 |
| rad1          | 1.52440e-07 | 1.000000 | 1.57299e-07 | 0.999999 |
| PhCH2CCH+H    | 1.30869e-07 | 1.000000 | 1.35041e-07 | 0.999999 |
| rad20         | 1.19042e-07 | 1.000000 | 1.22836e-07 | 0.999999 |
| PAH7+H        | 1.12958e-07 | 1.000000 | 1.16559e-07 | 0.999999 |
| rad26         | 9.80656e-08 | 1.000000 | 1.01192e-07 | 0.999999 |
| rad21         | 8.27530e-08 | 1.00000  | 8.53909e-08 | 0.999999 |
| rad10         | 8.16063e-08 | 1.00000  | 8.42076e-08 | 0.999999 |
| rad18         | 7.58890e-08 | 1.00000  | 7.83081e-08 | 0.999999 |
| rad9          | 3.71003e-08 | 1.00000  | 3.82829e-08 | 0.999999 |
| rad3          | 3.62820e-08 | 1.00000  | 3.74385e-08 | 0.999999 |
| rad39         | 2.71331e-08 | 1.00000  | 2.79980e-08 | 1.000000 |
| rad4          | 2.04252e-08 | 1.00000  | 2.10762e-08 | 1.000000 |
| rad46         | 1.65072e-08 | 1.00000  | 1.70334e-08 | 1.000000 |
| rad19anti     | 8.05047e-09 | 1.00000  | 8.30708e-09 | 1.000000 |
| rad13         | 4.86410e-09 | 1.00000  | 5.01915e-09 | 1.000000 |
| rad60syn      | 2.17041e-09 | 1.00000  | 2.23959e-09 | 1.000000 |
| rad60anti     | 9.77415e-10 | 1.00000  | 1.00857e-09 | 1.000000 |
| rad50         | 9.31744e-10 | 1.00000  | 9.61445e-10 | 1.000000 |
| rad37         | 6.46922e-10 | 1.00000  | 6.67543e-10 | 1.000000 |
| PAH3+H        | 5.25382e-10 | 1.00000  | 5.42129e-10 | 1.000000 |
| rad25         | 1.14982e-10 | 1.00000  | 1.18647e-10 | 1.000000 |
| rad59         | 9.88637e-11 | 1.00000  | 1.02015e-10 | 1.000000 |
| rad51         | 6.66934e-11 | 1.00000  | 6.88194e-11 | 1.000000 |
| rad52         | 3.82212e-11 | 1.00000  | 3.94396e-11 | 1.000000 |
| rad24         | 3.17894e-11 | 1.00000  | 3.28028e-11 | 1.000000 |
| rad15         | 2.81015e-11 | 1.00000  | 2.89972e-11 | 1.000000 |
| rad19syn      | 2.02955e-11 | 1.00000  | 2.09425e-11 | 1.000000 |
| rad33         | 1.23909e-11 | 1.00000  | 1.27859e-11 | 1.000000 |
| rad54         | 3.42978e-12 | 1.00000  | 3.53911e-12 | 1.000000 |
| PAH10+CH3     | 3.39190e-12 | 1.00000  | 3.50003e-12 | 1.000000 |
| rad14         | 3.32484e-12 | 1.00000  | 3.43082e-12 | 1.000000 |
| rad65         | 1.97171e-12 | 1.00000  | 2.03456e-12 | 1.000000 |
| rad27         | 1.42904e-12 | 1.00000  | 1.47459e-12 | 1.000000 |
| PhcycC3H3_A+H | 1.15093e-12 | 1.00000  | 1.18762e-12 | 1.000000 |
| PAH1+H        | 8.55387e-13 | 1.00000  | 8.82654e-13 | 1.000000 |
| rad67         | 6.58391e-13 | 1.00000  | 6.79378e-13 | 1.000000 |
| rad70         | 3.03571e-13 | 1.00000  | 3.13247e-13 | 1.000000 |
| rad43         | 1.99078e-13 | 1.00000  | 2.05423e-13 | 1.000000 |
| rad62         | 1.42222e-13 | 1.00000  | 1.46755e-13 | 1.000000 |
| rad73         | 1.25441e-13 | 1.00000  | 1.29439e-13 | 1.000000 |

|           |             |         |             |          |
|-----------|-------------|---------|-------------|----------|
| rad71     | 9.89453e-14 | 1.00000 | 1.02099e-13 | 1.000000 |
| rad55     | 9.69276e-14 | 1.00000 | 1.00017e-13 | 1.000000 |
| rad58     | 8.06155e-14 | 1.00000 | 8.31852e-14 | 1.000000 |
| rad31     | 5.36403e-14 | 1.00000 | 5.53501e-14 | 1.000000 |
| rad34     | 3.88587e-14 | 1.00000 | 4.00974e-14 | 1.000000 |
| rad64     | 8.61714e-15 | 1.00000 | 8.89182e-15 | 1.000000 |
| rad5      | 5.11988e-15 | 1.00000 | 5.28308e-15 | 1.000000 |
| rad53     | 4.20397e-15 | 1.00000 | 4.33797e-15 | 1.000000 |
| rad56     | 2.14649e-15 | 1.00000 | 2.21492e-15 | 1.000000 |
| rad12     | 1.62742e-15 | 1.00000 | 1.67930e-15 | 1.000000 |
| rad72     | 1.11428e-15 | 1.00000 | 1.14980e-15 | 1.000000 |
| PAH8+H    | 8.78647e-16 | 1.00000 | 9.06655e-16 | 1.000000 |
| rad61     | 8.35015e-16 | 1.00000 | 8.61632e-16 | 1.000000 |
| rad42     | 7.81262e-16 | 1.00000 | 8.06165e-16 | 1.000000 |
| rad68syn  | 6.54151e-16 | 1.00000 | 6.75003e-16 | 1.000000 |
| rad68anti | 4.32841e-16 | 1.00000 | 4.46639e-16 | 1.000000 |
| rad41     | 2.85153e-16 | 1.00000 | 2.94243e-16 | 1.000000 |
| rad40syn  | 1.44836e-16 | 1.00000 | 1.49452e-16 | 1.000000 |
| rad40anti | 7.50181e-17 | 1.00000 | 7.74093e-17 | 1.000000 |
| rad47     | 3.96177e-19 | 1.00000 | 4.08805e-19 | 1.000000 |
| rad8      | 4.40225e-31 | 1.00000 | 4.54258e-31 | 1.000000 |

10.000000 Pa, 600.000000 K

| Rate constant | True (fraction)     | Effective (fraction) |
|---------------|---------------------|----------------------|
| Total         | 1.36947e-17 (1.00 ) | 1.26253e-17 (1.00 )  |

| species     | PYtrue      | Cumul    | PYeffective | Cumul    |
|-------------|-------------|----------|-------------|----------|
| Indene+H    | 0.908029    | 0.908029 | 0.984938    | 0.984938 |
| Benzyl+C2H2 | 0.0780845   | 0.986113 | 0.00000     | 0.984938 |
| rad6        | 0.00816129  | 0.994275 | 0.00885253  | 0.993791 |
| rad23       | 0.00486671  | 0.999142 | 0.00527891  | 0.999067 |
| rad45       | 0.000576330 | 0.999718 | 0.000625144 | 0.999695 |
| PhCCH+CH3   | 9.17162e-05 | 0.999810 | 9.94844e-05 | 0.999794 |
| PhCHCCH2+H  | 4.21842e-05 | 0.999852 | 4.57571e-05 | 0.999840 |
| rad36       | 3.39066e-05 | 0.999886 | 3.67784e-05 | 0.999877 |
| rad22       | 3.17866e-05 | 0.999917 | 3.44789e-05 | 0.999911 |
| PhCCCH3+H   | 1.70278e-05 | 0.999934 | 1.84700e-05 | 0.999930 |
| Ph+Allene   | 1.42665e-05 | 0.999949 | 1.54749e-05 | 0.999945 |
| Ph+MeAc     | 1.28330e-05 | 0.999962 | 1.39199e-05 | 0.999959 |
| rad30       | 7.56293e-06 | 0.999969 | 8.20349e-06 | 0.999967 |
| PAH9+H      | 7.36604e-06 | 0.999976 | 7.98994e-06 | 0.999975 |
| rad28       | 3.63534e-06 | 0.999980 | 3.94325e-06 | 0.999979 |
| rad2        | 3.33442e-06 | 0.999983 | 3.61684e-06 | 0.999983 |
| PhCH2CCH+H  | 3.18987e-06 | 0.999987 | 3.46005e-06 | 0.999986 |
| rad38       | 2.89127e-06 | 0.999990 | 3.13615e-06 | 0.999989 |
| PAH7+H      | 2.15677e-06 | 0.999992 | 2.33945e-06 | 0.999992 |
| rad11       | 1.76822e-06 | 0.999993 | 1.91799e-06 | 0.999994 |
| rad7        | 1.66533e-06 | 0.999995 | 1.80638e-06 | 0.999995 |
| rad35       | 1.61053e-06 | 0.999997 | 1.74694e-06 | 0.999997 |
| rad46       | 5.61850e-07 | 0.999997 | 6.09438e-07 | 0.999998 |
| rad39       | 5.50987e-07 | 0.999998 | 5.97655e-07 | 0.999998 |
| rad1        | 4.92019e-07 | 0.999998 | 5.33692e-07 | 0.999999 |
| rad26       | 2.73631e-07 | 0.999999 | 2.96808e-07 | 0.999999 |
| rad50       | 2.45101e-07 | 0.999999 | 2.65860e-07 | 0.999999 |
| rad10       | 1.35677e-07 | 0.999999 | 1.47168e-07 | 1.000000 |
| rad20       | 1.06390e-07 | 0.999999 | 1.15401e-07 | 1.000000 |
| rad19anti   | 1.02324e-07 | 0.999999 | 1.10990e-07 | 1.000000 |
| rad3        | 9.57400e-08 | 0.999999 | 1.03849e-07 | 1.000000 |
| rad21       | 8.14588e-08 | 0.999999 | 8.83582e-08 | 1.000000 |
| rad4        | 5.82510e-08 | 0.999999 | 6.31847e-08 | 1.000000 |
| rad51       | 5.37631e-08 | 0.999999 | 5.83168e-08 | 1.000000 |
| rad9        | 5.29373e-08 | 1.000000 | 5.74210e-08 | 1.000000 |
| rad18       | 2.82042e-08 | 1.000000 | 3.05930e-08 | 1.000000 |
| rad60syn    | 2.00497e-08 | 1.000000 | 2.17478e-08 | 1.000000 |
| rad52       | 1.82472e-08 | 1.000000 | 1.97928e-08 | 1.000000 |
| PAH3+H      | 1.77783e-08 | 1.000000 | 1.92841e-08 | 1.000000 |
| rad37       | 1.09197e-08 | 1.000000 | 1.18446e-08 | 1.000000 |
| rad60anti   | 9.80718e-09 | 1.000000 | 1.06378e-08 | 1.000000 |
| rad13       | 9.33571e-09 | 1.000000 | 1.01264e-08 | 1.000000 |
| PAH10+CH3   | 3.43549e-09 | 1.000000 | 3.72647e-09 | 1.000000 |
| rad59       | 2.56171e-09 | 1.000000 | 2.77868e-09 | 1.000000 |
| PAH1+H      | 1.56307e-09 | 1.000000 | 1.69546e-09 | 1.000000 |
| rad65       | 1.46942e-09 | 1.000000 | 1.59387e-09 | 1.000000 |
| rad19syn    | 1.39186e-09 | 1.000000 | 1.50975e-09 | 1.000000 |
| rad71       | 1.09017e-09 | 1.000000 | 1.18250e-09 | 1.000000 |
| rad73       | 8.57071e-10 | 1.000000 | 9.29664e-10 | 1.000000 |
| rad67       | 4.82409e-10 | 1.000000 | 5.23268e-10 | 1.000000 |

|               |             |          |             |         |
|---------------|-------------|----------|-------------|---------|
| rad54         | 3.96700e-10 | 1.000000 | 4.30299e-10 | 1.00000 |
| PhcycC3H3_A+H | 3.80806e-10 | 1.000000 | 4.13060e-10 | 1.00000 |
| rad70         | 2.15644e-10 | 1.000000 | 2.33909e-10 | 1.00000 |
| rad24         | 8.32742e-11 | 1.000000 | 9.03274e-11 | 1.00000 |
| rad58         | 6.56479e-11 | 1.000000 | 7.12082e-11 | 1.00000 |
| rad25         | 5.34023e-11 | 1.000000 | 5.79253e-11 | 1.00000 |
| rad34         | 5.30324e-11 | 1.000000 | 5.75241e-11 | 1.00000 |
| rad15         | 3.82867e-11 | 1.000000 | 4.15295e-11 | 1.00000 |
| rad33         | 3.29906e-11 | 1.000000 | 3.57848e-11 | 1.00000 |
| rad72         | 3.10270e-11 | 1.000000 | 3.36549e-11 | 1.00000 |
| rad64         | 2.72333e-11 | 1.000000 | 2.95399e-11 | 1.00000 |
| rad55         | 2.17025e-11 | 1.000000 | 2.35407e-11 | 1.00000 |
| rad62         | 1.70370e-11 | 1.000000 | 1.84800e-11 | 1.00000 |
| rad43         | 1.35932e-11 | 1.000000 | 1.47445e-11 | 1.00000 |
| PAH8+H        | 1.20679e-11 | 1.000000 | 1.30900e-11 | 1.00000 |
| rad14         | 7.18047e-12 | 1.000000 | 7.78865e-12 | 1.00000 |
| rad61         | 5.56225e-12 | 1.000000 | 6.03336e-12 | 1.00000 |
| rad53         | 3.96776e-12 | 1.000000 | 4.30382e-12 | 1.00000 |
| rad68syn      | 3.86986e-12 | 1.000000 | 4.19763e-12 | 1.00000 |
| rad56         | 3.70026e-12 | 1.000000 | 4.01367e-12 | 1.00000 |
| rad27         | 3.16698e-12 | 1.000000 | 3.43521e-12 | 1.00000 |
| rad68anti     | 2.51909e-12 | 1.000000 | 2.73245e-12 | 1.00000 |
| rad40syn      | 1.44605e-12 | 1.000000 | 1.56853e-12 | 1.00000 |
| rad42         | 9.73016e-13 | 1.000000 | 1.05543e-12 | 1.00000 |
| rad40anti     | 8.58702e-13 | 1.000000 | 9.31432e-13 | 1.00000 |
| rad31         | 6.19808e-13 | 1.000000 | 6.72305e-13 | 1.00000 |
| rad41         | 2.78880e-13 | 1.000000 | 3.02501e-13 | 1.00000 |
| rad5          | 1.42563e-14 | 1.000000 | 1.54637e-14 | 1.00000 |
| rad12         | 1.31248e-14 | 1.000000 | 1.42365e-14 | 1.00000 |
| rad47         | 4.47866e-16 | 1.000000 | 4.85799e-16 | 1.00000 |
| rad8          | 1.61683e-26 | 1.000000 | 1.75377e-26 | 1.00000 |

10.0000000 Pa, 700.000000 K

=====

| Rate constant | True (fraction)     | Effective (fraction) |
|---------------|---------------------|----------------------|
| Total         | 8.02260e-17 (1.00 ) | 6.78833e-17 (1.00 )  |

| species     | PYtrue      | Cumul    | PYeffective | Cumul    |
|-------------|-------------|----------|-------------|----------|
| Indene+H    | 0.835160    | 0.835160 | 0.987010    | 0.987010 |
| Benzyl+C2H2 | 0.153849    | 0.989009 | 0.000000    | 0.987010 |
| rad6        | 0.00846047  | 0.997469 | 0.00999877  | 0.997009 |
| rad23       | 0.00135456  | 0.998824 | 0.00160085  | 0.998610 |
| PhCCH+CH3   | 0.000384697 | 0.999209 | 0.000454643 | 0.999064 |
| rad45       | 0.000206419 | 0.999415 | 0.000243951 | 0.999308 |
| PhCHCCH2+H  | 0.000187544 | 0.999603 | 0.000221644 | 0.999530 |
| Ph+Allene   | 0.000101518 | 0.999704 | 0.000119976 | 0.999650 |
| PhCCCH3+H   | 6.01082e-05 | 0.999764 | 7.10372e-05 | 0.999721 |
| Ph+MeAc     | 5.64115e-05 | 0.999821 | 6.66684e-05 | 0.999788 |
| PAH9+H      | 4.13786e-05 | 0.999862 | 4.89021e-05 | 0.999836 |
| PhCH2CCH+H  | 2.71780e-05 | 0.999889 | 3.21196e-05 | 0.999869 |
| rad30       | 1.89599e-05 | 0.999908 | 2.24073e-05 | 0.999891 |
| rad38       | 1.81801e-05 | 0.999926 | 2.14857e-05 | 0.999912 |
| PAH7+H      | 1.54388e-05 | 0.999942 | 1.82459e-05 | 0.999931 |
| rad36       | 1.38559e-05 | 0.999956 | 1.63752e-05 | 0.999947 |
| rad35       | 7.29921e-06 | 0.999963 | 8.62636e-06 | 0.999956 |
| rad28       | 6.09097e-06 | 0.999969 | 7.19844e-06 | 0.999963 |
| rad22       | 5.82068e-06 | 0.999975 | 6.87901e-06 | 0.999970 |
| rad46       | 5.07563e-06 | 0.999980 | 5.99849e-06 | 0.999976 |
| rad39       | 4.45124e-06 | 0.999984 | 5.26057e-06 | 0.999981 |
| rad2        | 4.42211e-06 | 0.999989 | 5.22615e-06 | 0.999986 |
| rad50       | 3.91913e-06 | 0.999993 | 4.63171e-06 | 0.999991 |
| rad7        | 1.88137e-06 | 0.999995 | 2.22345e-06 | 0.999993 |
| rad51       | 1.10458e-06 | 0.999996 | 1.30542e-06 | 0.999994 |
| rad11       | 9.74867e-07 | 0.999997 | 1.15212e-06 | 0.999996 |
| rad1        | 7.43287e-07 | 0.999998 | 8.78433e-07 | 0.999996 |
| rad19anti   | 7.10169e-07 | 0.999998 | 8.39293e-07 | 0.999997 |
| rad26       | 3.54634e-07 | 0.999999 | 4.19114e-07 | 0.999998 |
| rad52       | 3.33001e-07 | 0.999999 | 3.93548e-07 | 0.999998 |
| PAH3+H      | 2.13774e-07 | 0.999999 | 2.52643e-07 | 0.999998 |
| rad20       | 1.64447e-07 | 0.999999 | 1.94347e-07 | 0.999999 |
| rad21       | 1.39047e-07 | 0.999999 | 1.64328e-07 | 0.999999 |
| rad10       | 1.25972e-07 | 1.000000 | 1.48877e-07 | 0.999999 |
| rad3        | 1.17706e-07 | 1.000000 | 1.39107e-07 | 0.999999 |
| rad60syn    | 1.04466e-07 | 1.000000 | 1.23460e-07 | 0.999999 |
| rad9        | 9.46158e-08 | 1.000000 | 1.11819e-07 | 0.999999 |
| PAH10+CH3   | 7.93663e-08 | 1.000000 | 9.37969e-08 | 0.999999 |
| rad37       | 7.93357e-08 | 1.000000 | 9.37607e-08 | 0.999999 |
| rad4        | 7.65186e-08 | 1.000000 | 9.04314e-08 | 1.000000 |



|               |             |         |             |          |
|---------------|-------------|---------|-------------|----------|
| rad60anti     | 5.42921e-08 | 1.00000 | 6.41636e-08 | 1.000000 |
| PAH1+H        | 3.83843e-08 | 1.00000 | 4.53634e-08 | 1.000000 |
| rad71         | 3.51961e-08 | 1.00000 | 4.15955e-08 | 1.000000 |
| rad65         | 2.92962e-08 | 1.00000 | 3.46229e-08 | 1.000000 |
| rad59         | 2.64424e-08 | 1.00000 | 3.12503e-08 | 1.000000 |
| rad73         | 2.56986e-08 | 1.00000 | 3.03712e-08 | 1.000000 |
| rad18         | 1.82987e-08 | 1.00000 | 2.16258e-08 | 1.000000 |
| rad19syn      | 1.65719e-08 | 1.00000 | 1.95851e-08 | 1.000000 |
| rad13         | 1.57270e-08 | 1.00000 | 1.85865e-08 | 1.000000 |
| rad67         | 1.01355e-08 | 1.00000 | 1.19783e-08 | 1.000000 |
| PhcycC3H3_A+H | 5.90564e-09 | 1.00000 | 6.97942e-09 | 1.000000 |
| rad54         | 5.06531e-09 | 1.00000 | 5.98630e-09 | 1.000000 |
| rad70         | 4.90047e-09 | 1.00000 | 5.79149e-09 | 1.000000 |
| rad58         | 1.38119e-09 | 1.00000 | 1.63233e-09 | 1.000000 |
| rad34         | 1.31951e-09 | 1.00000 | 1.55942e-09 | 1.000000 |
| rad72         | 1.13899e-09 | 1.00000 | 1.34609e-09 | 1.000000 |
| rad64         | 7.21729e-10 | 1.00000 | 8.52956e-10 | 1.000000 |
| rad24         | 5.77535e-10 | 1.00000 | 6.82544e-10 | 1.000000 |
| PAH8+H        | 4.13188e-10 | 1.00000 | 4.88315e-10 | 1.000000 |
| rad62         | 3.58590e-10 | 1.00000 | 4.23790e-10 | 1.000000 |
| rad55         | 3.04513e-10 | 1.00000 | 3.59880e-10 | 1.000000 |
| rad43         | 2.83435e-10 | 1.00000 | 3.34970e-10 | 1.000000 |
| rad61         | 1.64188e-10 | 1.00000 | 1.94041e-10 | 1.000000 |
| rad68syn      | 1.18156e-10 | 1.00000 | 1.39639e-10 | 1.000000 |
| rad33         | 1.01222e-10 | 1.00000 | 1.19627e-10 | 1.000000 |
| rad56         | 8.19781e-11 | 1.00000 | 9.68836e-11 | 1.000000 |
| rad53         | 7.67547e-11 | 1.00000 | 9.07104e-11 | 1.000000 |
| rad68anti     | 7.67434e-11 | 1.00000 | 9.06971e-11 | 1.000000 |
| rad40syn      | 4.77346e-11 | 1.00000 | 5.64138e-11 | 1.000000 |
| rad15         | 4.74152e-11 | 1.00000 | 5.60363e-11 | 1.000000 |
| rad25         | 3.85881e-11 | 1.00000 | 4.56042e-11 | 1.000000 |
| rad40anti     | 2.90087e-11 | 1.00000 | 3.42831e-11 | 1.000000 |
| rad42         | 2.84725e-11 | 1.00000 | 3.36494e-11 | 1.000000 |
| rad41         | 1.28526e-11 | 1.00000 | 1.51895e-11 | 1.000000 |
| rad14         | 1.08054e-11 | 1.00000 | 1.27700e-11 | 1.000000 |
| rad27         | 4.84036e-12 | 1.00000 | 5.72045e-12 | 1.000000 |
| rad31         | 1.62008e-12 | 1.00000 | 1.91465e-12 | 1.000000 |
| rad12         | 3.01374e-13 | 1.00000 | 3.56171e-13 | 1.000000 |
| rad47         | 4.74882e-14 | 1.00000 | 5.61226e-14 | 1.000000 |
| rad5          | 2.12540e-14 | 1.00000 | 2.51184e-14 | 1.000000 |
| rad8          | 6.25056e-22 | 1.00000 | 7.38706e-22 | 1.000000 |

10.000000 Pa, 800.000000 K

=====

| Rate constant | True (fraction)     | Effective (fraction) |
|---------------|---------------------|----------------------|
| Total         | 3.12228e-16 (1.00 ) | 2.33762e-16 (1.00 )  |

| species     | PYtrue      | Cumul    | PYeffective | Cumul    |
|-------------|-------------|----------|-------------|----------|
| Indene+H    | 0.739454    | 0.739454 | 0.987663    | 0.987663 |
| Benzyl+C2H2 | 0.251309    | 0.990763 | 0.000000    | 0.987663 |
| rad6        | 0.00639534  | 0.997158 | 0.00854202  | 0.996205 |
| PhCCH+CH3   | 0.000898399 | 0.998057 | 0.00119996  | 0.997405 |
| PhCHCCH2+H  | 0.000485847 | 0.998543 | 0.000648929 | 0.998054 |
| Ph+Allene   | 0.000375410 | 0.998918 | 0.000501422 | 0.998555 |
| rad23       | 0.000370879 | 0.999289 | 0.000495370 | 0.999051 |
| Ph+MeAc     | 0.000131540 | 0.999420 | 0.000175694 | 0.999226 |
| PhCCCH3+H   | 0.000116015 | 0.999536 | 0.000154957 | 0.999381 |
| PhCH2CCH+H  | 0.000110368 | 0.999647 | 0.000147414 | 0.999529 |
| PAH9+H      | 8.22477e-05 | 0.999729 | 0.000109855 | 0.999639 |
| rad45       | 7.36335e-05 | 0.999803 | 9.83497e-05 | 0.999737 |
| PAH7+H      | 4.58131e-05 | 0.999848 | 6.11910e-05 | 0.999798 |
| rad30       | 3.74319e-05 | 0.999886 | 4.99965e-05 | 0.999848 |
| rad38       | 3.67186e-05 | 0.999923 | 4.90437e-05 | 0.999897 |
| rad35       | 1.40260e-05 | 0.999937 | 1.87341e-05 | 0.999916 |
| rad39       | 1.30028e-05 | 0.999950 | 1.73674e-05 | 0.999933 |
| rad46       | 1.08918e-05 | 0.999961 | 1.45477e-05 | 0.999948 |
| rad50       | 9.65271e-06 | 0.999970 | 1.28928e-05 | 0.999961 |
| rad28       | 5.87768e-06 | 0.999976 | 7.85061e-06 | 0.999969 |
| rad36       | 5.45577e-06 | 0.999982 | 7.28708e-06 | 0.999976 |
| rad2        | 3.08345e-06 | 0.999985 | 4.11846e-06 | 0.999980 |
| rad51       | 2.90772e-06 | 0.999988 | 3.88373e-06 | 0.999984 |
| rad19anti   | 2.47943e-06 | 0.999990 | 3.31168e-06 | 0.999987 |
| rad7        | 1.71606e-06 | 0.999992 | 2.29208e-06 | 0.999989 |
| rad22       | 1.70061e-06 | 0.999993 | 2.27144e-06 | 0.999992 |
| rad52       | 8.48207e-07 | 0.999994 | 1.13292e-06 | 0.999993 |
| rad11       | 8.19038e-07 | 0.999995 | 1.09396e-06 | 0.999994 |
| PAH3+H      | 7.66044e-07 | 0.999996 | 1.02318e-06 | 0.999995 |
| rad1        | 5.27737e-07 | 0.999996 | 7.04879e-07 | 0.999996 |

|               |             |          |             |          |
|---------------|-------------|----------|-------------|----------|
| rad20         | 3.64627e-07 | 0.999997 | 4.87020e-07 | 0.999996 |
| rad60syn      | 3.36382e-07 | 0.999997 | 4.49294e-07 | 0.999997 |
| rad21         | 3.17032e-07 | 0.999997 | 4.23449e-07 | 0.999997 |
| rad26         | 2.88569e-07 | 0.999998 | 3.85432e-07 | 0.999997 |
| rad9          | 2.32014e-07 | 0.999998 | 3.09893e-07 | 0.999998 |
| PAH10+CH3     | 2.22238e-07 | 0.999998 | 2.96836e-07 | 0.999998 |
| rad37         | 1.98246e-07 | 0.999998 | 2.64790e-07 | 0.999998 |
| rad60anti     | 1.79922e-07 | 0.999999 | 2.40315e-07 | 0.999999 |
| PAH1+H        | 1.06964e-07 | 0.999999 | 1.42869e-07 | 0.999999 |
| rad71         | 1.04881e-07 | 0.999999 | 1.40085e-07 | 0.999999 |
| rad59         | 9.93468e-08 | 0.999999 | 1.32694e-07 | 0.999999 |
| rad3          | 8.19276e-08 | 0.999999 | 1.09428e-07 | 0.999999 |
| rad10         | 7.90676e-08 | 0.999999 | 1.05608e-07 | 0.999999 |
| rad65         | 7.63938e-08 | 0.999999 | 1.02036e-07 | 0.999999 |
| rad73         | 7.50550e-08 | 0.999999 | 1.00248e-07 | 0.999999 |
| rad19syn      | 6.52147e-08 | 0.999999 | 8.71050e-08 | 0.999999 |
| rad4          | 5.49769e-08 | 0.999999 | 7.34307e-08 | 1.000000 |
| rad67         | 2.81069e-08 | 0.999999 | 3.75415e-08 | 1.000000 |
| rad13         | 2.68684e-08 | 0.999999 | 3.58872e-08 | 1.000000 |
| rad18         | 2.07972e-08 | 0.999999 | 2.77780e-08 | 1.000000 |
| rad54         | 1.79058e-08 | 0.999999 | 2.39161e-08 | 1.000000 |
| PhcycC3H3_A+H | 1.64063e-08 | 0.999999 | 2.19133e-08 | 1.000000 |
| rad70         | 1.38953e-08 | 0.999999 | 1.85595e-08 | 1.000000 |
| rad58         | 3.84497e-09 | 0.999999 | 5.13559e-09 | 1.000000 |
| rad34         | 3.73151e-09 | 0.999999 | 4.98405e-09 | 1.000000 |
| rad72         | 3.51423e-09 | 0.999999 | 4.69383e-09 | 1.000000 |
| rad24         | 2.83748e-09 | 0.999999 | 3.78992e-09 | 1.000000 |
| rad64         | 2.04079e-09 | 0.999999 | 2.72582e-09 | 1.000000 |
| rad43         | 1.36864e-09 | 0.999999 | 1.82804e-09 | 1.000000 |
| PAH8+H        | 1.27325e-09 | 0.999999 | 1.70063e-09 | 1.000000 |
| rad62         | 1.25588e-09 | 0.999999 | 1.67743e-09 | 1.000000 |
| rad55         | 9.16553e-10 | 0.999999 | 1.22421e-09 | 1.000000 |
| rad61         | 4.85794e-10 | 0.999999 | 6.48858e-10 | 1.000000 |
| rad33         | 4.20851e-10 | 0.999999 | 5.62116e-10 | 1.000000 |
| rad68syn      | 3.47813e-10 | 0.999999 | 4.64562e-10 | 1.000000 |
| rad68anti     | 2.25781e-10 | 0.999999 | 3.01567e-10 | 1.000000 |
| rad56         | 2.20503e-10 | 0.999999 | 2.94518e-10 | 1.000000 |
| rad53         | 2.00730e-10 | 0.999999 | 2.68108e-10 | 1.000000 |
| rad40syn      | 1.47505e-10 | 0.999999 | 1.97018e-10 | 1.000000 |
| rad42         | 9.26717e-11 | 0.999999 | 1.23778e-10 | 1.000000 |
| rad40anti     | 9.17170e-11 | 0.999999 | 1.22503e-10 | 1.000000 |
| rad41         | 7.89052e-11 | 0.999999 | 1.05391e-10 | 1.000000 |
| rad15         | 7.11459e-11 | 0.999999 | 9.50271e-11 | 1.000000 |
| rad25         | 5.37600e-11 | 0.999999 | 7.18053e-11 | 1.000000 |
| rad14         | 1.58123e-11 | 0.999999 | 2.11199e-11 | 1.000000 |
| rad27         | 7.68807e-12 | 0.999999 | 1.02687e-11 | 1.000000 |
| rad12         | 6.45927e-12 | 0.999999 | 8.62742e-12 | 1.000000 |
| rad31         | 1.97023e-12 | 0.999999 | 2.63156e-12 | 1.000000 |
| rad47         | 2.69691e-13 | 0.999999 | 3.60217e-13 | 1.000000 |
| rad5          | 2.43194e-14 | 0.999999 | 3.24826e-14 | 1.000000 |
| rad8          | 6.08743e-18 | 0.999999 | 8.13076e-18 | 1.000000 |

10.000000 Pa, 900.000000 K

=====

| Rate constant | True (fraction)     | Effective (fraction) |
|---------------|---------------------|----------------------|
| Total         | 9.21769e-16 (1.00 ) | 5.92285e-16 (1.00 )  |

| species     | PYtrue      | Cumul    | PYeffective | Cumul    |
|-------------|-------------|----------|-------------|----------|
| Indene+H    | 0.634415    | 0.634415 | 0.987336    | 0.987336 |
| Benzyl+C2H2 | 0.357448    | 0.991863 | 0.000000    | 0.987336 |
| rad6        | 0.00363362  | 0.995497 | 0.00565499  | 0.992991 |
| PhCCH+CH3   | 0.00145929  | 0.996956 | 0.00227108  | 0.995262 |
| Ph+Allene   | 0.000944816 | 0.997901 | 0.00147041  | 0.996732 |
| PhCHCCH2+H  | 0.000914634 | 0.998815 | 0.00142344  | 0.998156 |
| PhCH2CCH+H  | 0.000310810 | 0.999126 | 0.000483711 | 0.998640 |
| Ph+MeAc     | 0.000206759 | 0.999333 | 0.000321778 | 0.998961 |
| PhCCCH3+H   | 0.000153945 | 0.999487 | 0.000239584 | 0.999201 |
| rad23       | 0.000118733 | 0.999606 | 0.000184784 | 0.999386 |
| PAH9+H      | 9.10037e-05 | 0.999697 | 0.000141629 | 0.999527 |
| PAH7+H      | 8.62799e-05 | 0.999783 | 0.000134277 | 0.999662 |
| rad30       | 6.21748e-05 | 0.999845 | 9.67623e-05 | 0.999758 |
| rad38       | 3.90692e-05 | 0.999884 | 6.08031e-05 | 0.999819 |
| rad45       | 2.98610e-05 | 0.999914 | 4.64725e-05 | 0.999866 |
| rad39       | 2.24120e-05 | 0.999936 | 3.48797e-05 | 0.999901 |
| rad35       | 1.66173e-05 | 0.999953 | 2.58615e-05 | 0.999926 |
| rad46       | 1.05942e-05 | 0.999964 | 1.64876e-05 | 0.999943 |
| rad50       | 8.97628e-06 | 0.999973 | 1.39697e-05 | 0.999957 |
| rad19anti   | 6.33256e-06 | 0.999979 | 9.85533e-06 | 0.999967 |

|               |             |          |             |          |
|---------------|-------------|----------|-------------|----------|
| rad28         | 3.84903e-06 | 0.999983 | 5.99022e-06 | 0.999973 |
| rad51         | 2.75867e-06 | 0.999986 | 4.29331e-06 | 0.999977 |
| rad36         | 2.45188e-06 | 0.999988 | 3.81584e-06 | 0.999981 |
| PAH3+H        | 1.94505e-06 | 0.999990 | 3.02707e-06 | 0.999984 |
| rad2          | 1.51208e-06 | 0.999991 | 2.35323e-06 | 0.999986 |
| rad7          | 1.36304e-06 | 0.999993 | 2.12128e-06 | 0.999988 |
| rad60syn      | 8.14656e-07 | 0.999994 | 1.26784e-06 | 0.999990 |
| rad22         | 8.14363e-07 | 0.999994 | 1.26739e-06 | 0.999991 |
| rad52         | 7.95057e-07 | 0.999995 | 1.23734e-06 | 0.999992 |
| rad11         | 7.60538e-07 | 0.999996 | 1.18362e-06 | 0.999993 |
| rad20         | 7.20411e-07 | 0.999997 | 1.12117e-06 | 0.999994 |
| rad21         | 5.81850e-07 | 0.999997 | 9.05530e-07 | 0.999995 |
| rad60anti     | 4.44932e-07 | 0.999998 | 6.92446e-07 | 0.999996 |
| rad9          | 3.80124e-07 | 0.999998 | 5.91585e-07 | 0.999997 |
| rad1          | 2.76252e-07 | 0.999998 | 4.29930e-07 | 0.999997 |
| rad59         | 2.68200e-07 | 0.999999 | 4.17398e-07 | 0.999997 |
| rad37         | 2.65682e-07 | 0.999999 | 4.13479e-07 | 0.999998 |
| PAH10+CH3     | 2.26937e-07 | 0.999999 | 3.53180e-07 | 0.999998 |
| rad19syn      | 1.90062e-07 | 0.999999 | 2.95792e-07 | 0.999999 |
| rad26         | 1.78524e-07 | 1.000000 | 2.77836e-07 | 0.999999 |
| PAH1+H        | 1.06733e-07 | 1.000000 | 1.66109e-07 | 0.999999 |
| rad71         | 1.05277e-07 | 1.000000 | 1.63842e-07 | 0.999999 |
| rad73         | 7.45938e-08 | 1.000000 | 1.16090e-07 | 0.999999 |
| rad65         | 7.21783e-08 | 1.000000 | 1.12331e-07 | 0.999999 |
| rad13         | 5.22974e-08 | 1.000000 | 8.13901e-08 | 0.999999 |
| rad54         | 4.91254e-08 | 1.000000 | 7.64536e-08 | 1.000000 |
| rad10         | 4.74673e-08 | 1.000000 | 7.38731e-08 | 1.000000 |
| rad3          | 4.46046e-08 | 1.000000 | 6.94179e-08 | 1.000000 |
| rad67         | 3.49661e-08 | 1.000000 | 5.44175e-08 | 1.000000 |
| rad4          | 3.15320e-08 | 1.000000 | 4.90730e-08 | 1.000000 |
| PhcycC3H3_A+H | 2.86615e-08 | 1.000000 | 4.46058e-08 | 1.000000 |
| rad18         | 2.79626e-08 | 1.000000 | 4.35180e-08 | 1.000000 |
| rad70         | 1.65288e-08 | 1.000000 | 2.57237e-08 | 1.000000 |
| rad24         | 5.68035e-09 | 1.000000 | 8.84029e-09 | 1.000000 |
| rad58         | 5.01181e-09 | 1.000000 | 7.79984e-09 | 1.000000 |
| rad34         | 3.96058e-09 | 1.000000 | 6.16383e-09 | 1.000000 |
| rad72         | 3.59039e-09 | 1.000000 | 5.58770e-09 | 1.000000 |
| rad43         | 2.46958e-09 | 1.000000 | 3.84339e-09 | 1.000000 |
| rad62         | 2.13849e-09 | 1.000000 | 3.32812e-09 | 1.000000 |
| rad55         | 2.03931e-09 | 1.000000 | 3.17376e-09 | 1.000000 |
| rad64         | 2.00754e-09 | 1.000000 | 3.12432e-09 | 1.000000 |
| rad33         | 1.58609e-09 | 1.000000 | 2.46843e-09 | 1.000000 |
| PAH8+H        | 1.33290e-09 | 1.000000 | 2.07439e-09 | 1.000000 |
| rad61         | 4.98459e-10 | 1.000000 | 7.75749e-10 | 1.000000 |
| rad68syn      | 3.48287e-10 | 1.000000 | 5.42036e-10 | 1.000000 |
| rad68anti     | 2.26058e-10 | 1.000000 | 3.51812e-10 | 1.000000 |
| rad56         | 2.17892e-10 | 1.000000 | 3.39103e-10 | 1.000000 |
| rad53         | 2.15038e-10 | 1.000000 | 3.34662e-10 | 1.000000 |
| rad40syn      | 1.57429e-10 | 1.000000 | 2.45006e-10 | 1.000000 |
| rad41         | 1.52497e-10 | 1.000000 | 2.37331e-10 | 1.000000 |
| rad25         | 1.11536e-10 | 1.000000 | 1.73583e-10 | 1.000000 |
| rad42         | 1.10509e-10 | 1.000000 | 1.71984e-10 | 1.000000 |
| rad40anti     | 1.01264e-10 | 1.000000 | 1.57597e-10 | 1.000000 |
| rad15         | 9.58547e-11 | 1.000000 | 1.49178e-10 | 1.000000 |
| rad12         | 3.74216e-11 | 1.000000 | 5.82389e-11 | 1.000000 |
| rad14         | 2.81148e-11 | 1.000000 | 4.37550e-11 | 1.000000 |
| rad27         | 1.80412e-11 | 1.000000 | 2.80774e-11 | 1.000000 |
| rad31         | 1.77296e-12 | 1.000000 | 2.75925e-12 | 1.000000 |
| rad47         | 3.10110e-13 | 1.000000 | 4.82623e-13 | 1.000000 |
| rad5          | 2.36442e-14 | 1.000000 | 3.67973e-14 | 1.000000 |
| rad8          | 4.80356e-15 | 1.000000 | 7.47575e-15 | 1.000000 |

10.000000 Pa, 1000.00000 K

=====

Rate constant | True (fraction) | Effective (fraction)

-----  
Total | 2.23691e-15 (1.00) | 1.20822e-15 (1.00)

| species     | PYtrue      | Cumul    | PYeffective | Cumul    |
|-------------|-------------|----------|-------------|----------|
| Indene+H    | 0.531676    | 0.531676 | 0.984355    | 0.984355 |
| Benzyl+C2H2 | 0.459874    | 0.991550 | 0.000000    | 0.984355 |
| PhCCH+CH3   | 0.00186320  | 0.993413 | 0.00344957  | 0.987805 |
| Ph+Allene   | 0.00184519  | 0.995258 | 0.00341622  | 0.991221 |
| rad6        | 0.00168080  | 0.996939 | 0.00311187  | 0.994333 |
| PhCHCCH2+H  | 0.00141601  | 0.998355 | 0.00262164  | 0.996954 |
| PhCH2CCH+H  | 0.000699679 | 0.999055 | 0.00129540  | 0.998250 |
| Ph+MeAc     | 0.000255778 | 0.999311 | 0.000473552 | 0.998723 |
| PhCCCH3+H   | 0.000159335 | 0.999470 | 0.000294996 | 0.999018 |
| PAH7+H      | 0.000133844 | 0.999604 | 0.000247802 | 0.999266 |

|               |             |          |             |          |
|---------------|-------------|----------|-------------|----------|
| PAH9+H        | 0.000100644 | 0.999704 | 0.000186334 | 0.999452 |
| rad30         | 9.14054e-05 | 0.999796 | 0.000169230 | 0.999622 |
| rad23         | 4.72562e-05 | 0.999843 | 8.74911e-05 | 0.999709 |
| rad38         | 4.08135e-05 | 0.999884 | 7.55630e-05 | 0.999785 |
| rad39         | 3.23066e-05 | 0.999916 | 5.98131e-05 | 0.999844 |
| rad35         | 1.99461e-05 | 0.999936 | 3.69287e-05 | 0.999881 |
| rad19anti     | 1.40451e-05 | 0.999950 | 2.60034e-05 | 0.999907 |
| rad45         | 1.39769e-05 | 0.999964 | 2.58770e-05 | 0.999933 |
| rad46         | 9.28411e-06 | 0.999974 | 1.71888e-05 | 0.999950 |
| rad50         | 5.94216e-06 | 0.999979 | 1.10014e-05 | 0.999961 |
| PAH3+H        | 4.85621e-06 | 0.999984 | 8.99088e-06 | 0.999970 |
| rad28         | 1.98294e-06 | 0.999986 | 3.67125e-06 | 0.999974 |
| rad51         | 1.76510e-06 | 0.999988 | 3.26793e-06 | 0.999977 |
| rad60syn      | 1.66853e-06 | 0.999990 | 3.08914e-06 | 0.999980 |
| rad36         | 1.21033e-06 | 0.999991 | 2.24083e-06 | 0.999983 |
| rad7          | 1.06940e-06 | 0.999992 | 1.97990e-06 | 0.999985 |
| rad20         | 9.70391e-07 | 0.999993 | 1.79660e-06 | 0.999987 |
| rad60anti     | 9.30752e-07 | 0.999994 | 1.72321e-06 | 0.999988 |
| rad11         | 7.84625e-07 | 0.999995 | 1.45267e-06 | 0.999990 |
| rad21         | 6.90854e-07 | 0.999995 | 1.27906e-06 | 0.999991 |
| rad59         | 6.61828e-07 | 0.999996 | 1.22532e-06 | 0.999992 |
| rad2          | 6.60319e-07 | 0.999997 | 1.22253e-06 | 0.999993 |
| rad52         | 5.13146e-07 | 0.999997 | 9.50048e-07 | 0.999994 |
| rad22         | 5.04268e-07 | 0.999998 | 9.33611e-07 | 0.999995 |
| rad19syn      | 4.85310e-07 | 0.999998 | 8.98513e-07 | 0.999996 |
| rad9          | 3.68143e-07 | 0.999999 | 6.81588e-07 | 0.999997 |
| rad37         | 2.99719e-07 | 0.999999 | 5.54905e-07 | 0.999997 |
| PAH10+CH3     | 1.60779e-07 | 0.999999 | 2.97669e-07 | 0.999998 |
| rad1          | 1.33602e-07 | 0.999999 | 2.47354e-07 | 0.999998 |
| rad54         | 1.31743e-07 | 0.999999 | 2.43911e-07 | 0.999998 |
| rad13         | 1.05294e-07 | 0.999999 | 1.94944e-07 | 0.999998 |
| rad26         | 9.52818e-08 | 1.000000 | 1.76407e-07 | 0.999999 |
| PAH1+H        | 7.83221e-08 | 1.000000 | 1.45007e-07 | 0.999999 |
| PhcycC3H3_A+H | 6.88342e-08 | 1.000000 | 1.27441e-07 | 0.999999 |
| rad71         | 6.80770e-08 | 1.000000 | 1.26039e-07 | 0.999999 |
| rad67         | 5.61496e-08 | 1.000000 | 1.03956e-07 | 0.999999 |
| rad73         | 4.80542e-08 | 1.000000 | 8.89685e-08 | 0.999999 |
| rad65         | 4.62225e-08 | 1.000000 | 8.55773e-08 | 0.999999 |
| rad18         | 3.90128e-08 | 1.000000 | 7.22290e-08 | 0.999999 |
| rad10         | 3.88869e-08 | 1.000000 | 7.19960e-08 | 0.999999 |
| rad3          | 2.24426e-08 | 1.000000 | 4.15507e-08 | 0.999999 |
| rad70         | 2.17954e-08 | 1.000000 | 4.03523e-08 | 1.000000 |
| rad4          | 1.65425e-08 | 1.000000 | 3.06271e-08 | 1.000000 |
| rad58         | 9.16821e-09 | 1.000000 | 1.69742e-08 | 1.000000 |
| rad24         | 5.86723e-09 | 1.000000 | 1.08627e-08 | 1.000000 |
| rad55         | 5.45546e-09 | 1.000000 | 1.01004e-08 | 1.000000 |
| rad34         | 3.88608e-09 | 1.000000 | 7.19477e-09 | 1.000000 |
| rad62         | 3.57234e-09 | 1.000000 | 6.61391e-09 | 1.000000 |
| rad33         | 3.19844e-09 | 1.000000 | 5.92165e-09 | 1.000000 |
| rad43         | 2.55243e-09 | 1.000000 | 4.72563e-09 | 1.000000 |
| rad72         | 2.33800e-09 | 1.000000 | 4.32862e-09 | 1.000000 |
| rad64         | 1.34077e-09 | 1.000000 | 2.48234e-09 | 1.000000 |
| PAH8+H        | 8.95485e-10 | 1.000000 | 1.65792e-09 | 1.000000 |
| rad61         | 3.32053e-10 | 1.000000 | 6.14770e-10 | 1.000000 |
| rad53         | 2.75062e-10 | 1.000000 | 5.09255e-10 | 1.000000 |
| rad25         | 2.36388e-10 | 1.000000 | 4.37654e-10 | 1.000000 |
| rad68syn      | 2.32850e-10 | 1.000000 | 4.31102e-10 | 1.000000 |
| rad56         | 1.85937e-10 | 1.000000 | 3.44247e-10 | 1.000000 |
| rad68anti     | 1.51308e-10 | 1.000000 | 2.80134e-10 | 1.000000 |
| rad41         | 1.41295e-10 | 1.000000 | 2.61597e-10 | 1.000000 |
| rad15         | 1.09245e-10 | 1.000000 | 2.02258e-10 | 1.000000 |
| rad40syn      | 1.08198e-10 | 1.000000 | 2.00321e-10 | 1.000000 |
| rad42         | 1.06448e-10 | 1.000000 | 1.97080e-10 | 1.000000 |
| rad12         | 8.41995e-11 | 1.000000 | 1.55889e-10 | 1.000000 |
| rad40anti     | 7.12480e-11 | 1.000000 | 1.31910e-10 | 1.000000 |
| rad14         | 4.74702e-11 | 1.000000 | 8.78873e-11 | 1.000000 |
| rad27         | 3.51125e-11 | 1.000000 | 6.50080e-11 | 1.000000 |
| rad31         | 1.36897e-12 | 1.000000 | 2.53453e-12 | 1.000000 |
| rad8          | 3.10565e-13 | 1.000000 | 5.74986e-13 | 1.000000 |
| rad47         | 2.01137e-13 | 1.000000 | 3.72390e-13 | 1.000000 |
| rad5          | 2.31685e-14 | 1.000000 | 4.28947e-14 | 1.000000 |

10.000000 Pa, 1100.00000 K

=====

| Rate constant | True (fraction)     | Effective (fraction) |
|---------------|---------------------|----------------------|
| Total         | 4.69847e-15 (1.00 ) | 2.11110e-15 (1.00 )  |

| species | PYtrue | Cumul | PYeffective | Cumul |
|---------|--------|-------|-------------|-------|
| -----   |        |       |             |       |

|               |             |          |             |          |
|---------------|-------------|----------|-------------|----------|
| Benzy1+C2H2   | 0.550684    | 0.550684 | 0.00000     | 0.00000  |
| Indene+H      | 0.439263    | 0.989947 | 0.977624    | 0.977624 |
| Ph+Allene     | 0.00300348  | 0.992950 | 0.00668455  | 0.984309 |
| PhCCH+CH3     | 0.00203773  | 0.994988 | 0.00453519  | 0.988844 |
| PhCHCCH2+H    | 0.00193446  | 0.996923 | 0.00430534  | 0.993149 |
| PhCH2CCH+H    | 0.00132696  | 0.998250 | 0.00295328  | 0.996102 |
| rad6          | 0.000685705 | 0.998935 | 0.00152611  | 0.997628 |
| Ph+MeAc       | 0.000274741 | 0.999210 | 0.000611465 | 0.998240 |
| PAH7+H        | 0.000181861 | 0.999392 | 0.000404750 | 0.998645 |
| PhCCCH3+H     | 0.000140995 | 0.999533 | 0.000313798 | 0.998958 |
| PAH9+H        | 0.000128880 | 0.999662 | 0.000286836 | 0.999245 |
| rad30         | 0.000123057 | 0.999785 | 0.000273876 | 0.999519 |
| rad38         | 5.08243e-05 | 0.999836 | 0.000113115 | 0.999632 |
| rad39         | 4.16629e-05 | 0.999877 | 9.27250e-05 | 0.999725 |
| rad19anti     | 2.74736e-05 | 0.999905 | 6.11454e-05 | 0.999786 |
| rad35         | 2.63481e-05 | 0.999931 | 5.86405e-05 | 0.999845 |
| rad23         | 2.13276e-05 | 0.999953 | 4.74668e-05 | 0.999892 |
| PAH3+H        | 1.10203e-05 | 0.999964 | 2.45268e-05 | 0.999917 |
| rad46         | 1.03966e-05 | 0.999974 | 2.31387e-05 | 0.999940 |
| rad45         | 6.98718e-06 | 0.999981 | 1.55507e-05 | 0.999956 |
| rad50         | 4.16954e-06 | 0.999985 | 9.27974e-06 | 0.999965 |
| rad60syn      | 3.00210e-06 | 0.999988 | 6.68147e-06 | 0.999971 |
| rad60anti     | 1.70724e-06 | 0.999990 | 3.79964e-06 | 0.999975 |
| rad59         | 1.44157e-06 | 0.999991 | 3.20836e-06 | 0.999978 |
| rad51         | 1.05453e-06 | 0.999992 | 2.34696e-06 | 0.999981 |
| rad19syn      | 1.03492e-06 | 0.999993 | 2.30333e-06 | 0.999983 |
| rad28         | 9.04605e-07 | 0.999994 | 2.01329e-06 | 0.999985 |
| rad7          | 8.91567e-07 | 0.999995 | 1.98427e-06 | 0.999987 |
| rad11         | 8.71646e-07 | 0.999996 | 1.93994e-06 | 0.999989 |
| rad20         | 8.36332e-07 | 0.999997 | 1.86134e-06 | 0.999991 |
| rad36         | 6.21348e-07 | 0.999997 | 1.38287e-06 | 0.999992 |
| rad21         | 5.32704e-07 | 0.999998 | 1.18559e-06 | 0.999993 |
| rad37         | 3.35543e-07 | 0.999998 | 7.46786e-07 | 0.999994 |
| rad52         | 3.25498e-07 | 0.999999 | 7.24429e-07 | 0.999995 |
| rad9          | 3.03036e-07 | 0.999999 | 6.74438e-07 | 0.999996 |
| rad54         | 3.01876e-07 | 0.999999 | 6.71855e-07 | 0.999996 |
| rad22         | 2.96635e-07 | 1.000000 | 6.60191e-07 | 0.999997 |
| rad2          | 2.73748e-07 | 1.000000 | 6.09254e-07 | 0.999998 |
| PhcycC3H3_A+H | 1.75511e-07 | 1.000000 | 3.90618e-07 | 0.999998 |
| rad13         | 1.49598e-07 | 1.000000 | 3.32945e-07 | 0.999998 |
| rad67         | 1.31698e-07 | 1.000000 | 2.93108e-07 | 0.999999 |
| PAH10+CH3     | 1.17918e-07 | 1.000000 | 2.62439e-07 | 0.999999 |
| PAH1+H        | 7.12470e-08 | 1.000000 | 1.58568e-07 | 0.999999 |
| rad1          | 5.90974e-08 | 1.000000 | 1.31527e-07 | 0.999999 |
| rad18         | 5.65060e-08 | 1.000000 | 1.25760e-07 | 0.999999 |
| rad26         | 4.77908e-08 | 1.000000 | 1.06363e-07 | 0.999999 |
| rad70         | 4.18761e-08 | 1.000000 | 9.31995e-08 | 0.999999 |
| rad10         | 3.99880e-08 | 1.000000 | 8.89974e-08 | 1.000000 |
| rad71         | 3.82098e-08 | 1.000000 | 8.50399e-08 | 1.000000 |
| rad65         | 2.80075e-08 | 1.000000 | 6.23336e-08 | 1.000000 |
| rad73         | 2.69785e-08 | 1.000000 | 6.00434e-08 | 1.000000 |
| rad58         | 2.46156e-08 | 1.000000 | 5.47845e-08 | 1.000000 |
| rad55         | 1.35305e-08 | 1.000000 | 3.01136e-08 | 1.000000 |
| rad3          | 1.05173e-08 | 1.000000 | 2.34074e-08 | 1.000000 |
| rad4          | 7.93535e-09 | 1.000000 | 1.76609e-08 | 1.000000 |
| rad62         | 6.26461e-09 | 1.000000 | 1.39425e-08 | 1.000000 |
| rad34         | 6.22770e-09 | 1.000000 | 1.38604e-08 | 1.000000 |
| rad24         | 4.54596e-09 | 1.000000 | 1.01175e-08 | 1.000000 |
| rad33         | 3.31023e-09 | 1.000000 | 7.36726e-09 | 1.000000 |
| rad43         | 2.29320e-09 | 1.000000 | 5.10376e-09 | 1.000000 |
| rad72         | 1.31438e-09 | 1.000000 | 2.92529e-09 | 1.000000 |
| rad64         | 9.41276e-10 | 1.000000 | 2.09491e-09 | 1.000000 |
| rad53         | 6.56687e-10 | 1.000000 | 1.46153e-09 | 1.000000 |
| PAH8+H        | 5.31338e-10 | 1.000000 | 1.18255e-09 | 1.000000 |
| rad25         | 3.55390e-10 | 1.000000 | 7.90956e-10 | 1.000000 |
| rad56         | 3.14667e-10 | 1.000000 | 7.00323e-10 | 1.000000 |
| rad61         | 1.92478e-10 | 1.000000 | 4.28380e-10 | 1.000000 |
| rad68syn      | 1.68684e-10 | 1.000000 | 3.75424e-10 | 1.000000 |
| rad42         | 1.41959e-10 | 1.000000 | 3.15943e-10 | 1.000000 |
| rad15         | 1.38512e-10 | 1.000000 | 3.08272e-10 | 1.000000 |
| rad12         | 1.25123e-10 | 1.000000 | 2.78474e-10 | 1.000000 |
| rad68anti     | 1.10333e-10 | 1.000000 | 2.45558e-10 | 1.000000 |
| rad41         | 9.04172e-11 | 1.000000 | 2.01233e-10 | 1.000000 |
| rad40syn      | 6.68789e-11 | 1.000000 | 1.48846e-10 | 1.000000 |
| rad14         | 5.56230e-11 | 1.000000 | 1.23795e-10 | 1.000000 |
| rad40anti     | 4.30668e-11 | 1.000000 | 9.58496e-11 | 1.000000 |
| rad27         | 3.70988e-11 | 1.000000 | 8.25672e-11 | 1.000000 |
| rad8          | 3.04872e-12 | 1.000000 | 6.78523e-12 | 1.000000 |
| rad31         | 9.50700e-13 | 1.000000 | 2.11588e-12 | 1.000000 |
| rad47         | 1.12962e-13 | 1.000000 | 2.51408e-13 | 1.000000 |

rad5 | 2.46457e-14 1.00000 | 5.48515e-14 1.000000

10.000000 Pa, 1200.00000 K

=====  
Rate constant | True (fraction) | Effective (fraction)  
-----  
Total | 8.84330e-15 (1.00 ) | 3.30106e-15 (1.00 )

| species       | PYtrue      | Cumul    | PYeffective | Cumul    |
|---------------|-------------|----------|-------------|----------|
| Benzyl+C2H2   | 0.626716    | 0.626716 | 0.00000     | 0.00000  |
| Indene+H      | 0.360861    | 0.987577 | 0.966720    | 0.966720 |
| Ph+Allene     | 0.00427802  | 0.991855 | 0.0114605   | 0.978181 |
| PhCHCCH2+H    | 0.00242633  | 0.994281 | 0.00649997  | 0.984680 |
| PhCH2CCH+H    | 0.00221483  | 0.996496 | 0.00593337  | 0.990614 |
| PhCCH+CH3     | 0.00201440  | 0.998511 | 0.00539643  | 0.996010 |
| rad6          | 0.000275129 | 0.998786 | 0.000737052 | 0.996747 |
| Ph+MeAc       | 0.000270436 | 0.999056 | 0.000724478 | 0.997472 |
| PAH7+H        | 0.000222850 | 0.999279 | 0.000596998 | 0.998069 |
| PAH9+H        | 0.000175563 | 0.999455 | 0.000470321 | 0.998539 |
| rad30         | 0.000155380 | 0.999610 | 0.000416251 | 0.998955 |
| PhCCCH3+H     | 0.000113313 | 0.999723 | 0.000303558 | 0.999259 |
| rad38         | 6.93487e-05 | 0.999793 | 0.000185780 | 0.999445 |
| rad39         | 4.88406e-05 | 0.999841 | 0.000130840 | 0.999576 |
| rad19anti     | 4.83131e-05 | 0.999890 | 0.000129427 | 0.999705 |
| rad35         | 3.56742e-05 | 0.999925 | 9.55686e-05 | 0.999801 |
| PAH3+H        | 2.21819e-05 | 0.999948 | 5.94237e-05 | 0.999860 |
| rad46         | 1.43480e-05 | 0.999962 | 3.84374e-05 | 0.999898 |
| rad23         | 1.04992e-05 | 0.999972 | 2.81265e-05 | 0.999927 |
| rad60syn      | 4.87830e-06 | 0.999977 | 1.30686e-05 | 0.999940 |
| rad50         | 4.22710e-06 | 0.999982 | 1.13241e-05 | 0.999951 |
| rad45         | 3.61561e-06 | 0.999985 | 9.68596e-06 | 0.999961 |
| rad60anti     | 2.82107e-06 | 0.999988 | 7.55744e-06 | 0.999968 |
| rad59         | 2.77458e-06 | 0.999991 | 7.43289e-06 | 0.999976 |
| rad19syn      | 1.87359e-06 | 0.999993 | 5.01921e-06 | 0.999981 |
| rad11         | 9.02865e-07 | 0.999994 | 2.41871e-06 | 0.999983 |
| rad7          | 7.97481e-07 | 0.999994 | 2.13639e-06 | 0.999985 |
| rad51         | 7.77533e-07 | 0.999995 | 2.08296e-06 | 0.999987 |
| rad54         | 5.83447e-07 | 0.999996 | 1.56301e-06 | 0.999989 |
| rad20         | 5.40709e-07 | 0.999996 | 1.44852e-06 | 0.999990 |
| rad28         | 4.08492e-07 | 0.999997 | 1.09432e-06 | 0.999991 |
| PhcycC3H3_A+H | 3.89671e-07 | 0.999997 | 1.04390e-06 | 0.999992 |
| rad37         | 3.89086e-07 | 0.999997 | 1.04233e-06 | 0.999993 |
| rad67         | 3.27227e-07 | 0.999998 | 8.76619e-07 | 0.999994 |
| rad36         | 3.27049e-07 | 0.999998 | 8.76141e-07 | 0.999995 |
| rad21         | 3.24878e-07 | 0.999998 | 8.70324e-07 | 0.999996 |
| rad52         | 2.79273e-07 | 0.999999 | 7.48152e-07 | 0.999997 |
| rad9          | 2.48143e-07 | 0.999999 | 6.64756e-07 | 0.999997 |
| rad22         | 1.72162e-07 | 0.999999 | 4.61210e-07 | 0.999998 |
| rad13         | 1.29594e-07 | 0.999999 | 3.47172e-07 | 0.999998 |
| PAH10+CH3     | 1.23230e-07 | 0.999999 | 3.30123e-07 | 0.999999 |
| rad2          | 1.06668e-07 | 0.999999 | 2.85755e-07 | 0.999999 |
| PAH1+H        | 9.87511e-08 | 1.000000 | 2.64547e-07 | 0.999999 |
| rad70         | 8.58458e-08 | 1.000000 | 2.29975e-07 | 0.999999 |
| rad18         | 7.92627e-08 | 1.000000 | 2.12339e-07 | 1.000000 |
| rad58         | 6.45002e-08 | 1.000000 | 1.72791e-07 | 1.000000 |
| rad10         | 3.75523e-08 | 1.000000 | 1.00600e-07 | 1.000000 |
| rad55         | 2.84012e-08 | 1.000000 | 7.60848e-08 | 1.000000 |
| rad26         | 2.40433e-08 | 1.000000 | 6.44104e-08 | 1.000000 |
| rad1          | 2.38393e-08 | 1.000000 | 6.38638e-08 | 1.000000 |
| rad65         | 2.16735e-08 | 1.000000 | 5.80619e-08 | 1.000000 |
| rad71         | 2.09350e-08 | 1.000000 | 5.60834e-08 | 1.000000 |
| rad73         | 1.49874e-08 | 1.000000 | 4.01503e-08 | 1.000000 |
| rad34         | 1.30214e-08 | 1.000000 | 3.48835e-08 | 1.000000 |
| rad62         | 1.02841e-08 | 1.000000 | 2.75504e-08 | 1.000000 |
| rad3          | 4.63441e-09 | 1.000000 | 1.24153e-08 | 1.000000 |
| rad4          | 3.54445e-09 | 1.000000 | 9.49532e-09 | 1.000000 |
| rad24         | 3.32861e-09 | 1.000000 | 8.91712e-09 | 1.000000 |
| rad43         | 2.31008e-09 | 1.000000 | 6.18853e-09 | 1.000000 |
| rad33         | 2.30356e-09 | 1.000000 | 6.17107e-09 | 1.000000 |
| rad53         | 1.73831e-09 | 1.000000 | 4.65679e-09 | 1.000000 |
| rad64         | 1.01861e-09 | 1.000000 | 2.72879e-09 | 1.000000 |
| rad56         | 8.57195e-10 | 1.000000 | 2.29636e-09 | 1.000000 |
| rad72         | 7.12883e-10 | 1.000000 | 1.90976e-09 | 1.000000 |
| PAH8+H        | 4.02585e-10 | 1.000000 | 1.07850e-09 | 1.000000 |
| rad25         | 3.53466e-10 | 1.000000 | 9.46911e-10 | 1.000000 |
| rad42         | 2.47051e-10 | 1.000000 | 6.61832e-10 | 1.000000 |
| rad68syn      | 2.25024e-10 | 1.000000 | 6.02824e-10 | 1.000000 |
| rad15         | 2.23646e-10 | 1.000000 | 5.99131e-10 | 1.000000 |
| rad12         | 1.56874e-10 | 1.000000 | 4.20253e-10 | 1.000000 |

|           |             |         |             |         |
|-----------|-------------|---------|-------------|---------|
| rad68anti | 1.48712e-10 | 1.00000 | 3.98389e-10 | 1.00000 |
| rad61     | 1.19974e-10 | 1.00000 | 3.21403e-10 | 1.00000 |
| rad41     | 6.02528e-11 | 1.00000 | 1.61413e-10 | 1.00000 |
| rad40syn  | 5.89436e-11 | 1.00000 | 1.57906e-10 | 1.00000 |
| rad14     | 4.30475e-11 | 1.00000 | 1.15321e-10 | 1.00000 |
| rad40anti | 3.38283e-11 | 1.00000 | 9.06236e-11 | 1.00000 |
| rad27     | 2.30791e-11 | 1.00000 | 6.18273e-11 | 1.00000 |
| rad8      | 9.94063e-12 | 1.00000 | 2.66302e-11 | 1.00000 |
| rad31     | 6.19426e-13 | 1.00000 | 1.65940e-12 | 1.00000 |
| rad47     | 7.28457e-14 | 1.00000 | 1.95148e-13 | 1.00000 |
| rad5      | 2.96577e-14 | 1.00000 | 7.94509e-14 | 1.00000 |

10.0000000 Pa, 1300.00000 K

| Rate constant | True (fraction)     | Effective (fraction) |
|---------------|---------------------|----------------------|
| Total         | 1.52810e-14 (1.00 ) | 4.76670e-15 (1.00 )  |

| species       | PYtrue      | Cumul    | PYeffective | Cumul    |
|---------------|-------------|----------|-------------|----------|
| Benzyl+C2H2   | 0.688063    | 0.688063 | 0.00000     | 0.00000  |
| Indene+H      | 0.296803    | 0.984866 | 0.951483    | 0.951483 |
| Ph+Allene     | 0.00552152  | 0.990388 | 0.0177007   | 0.969184 |
| PhCH2CCH+H    | 0.00336823  | 0.993756 | 0.0107978   | 0.979981 |
| PhCHCCH2+H    | 0.00286798  | 0.996624 | 0.00919410  | 0.989176 |
| PhCCH+CH3     | 0.00186179  | 0.998486 | 0.00596847  | 0.995144 |
| PAH7+H        | 0.000253227 | 0.998739 | 0.000811787 | 0.995956 |
| Ph+MeAc       | 0.000252125 | 0.998991 | 0.000808256 | 0.996764 |
| PAH9+H        | 0.000237378 | 0.999228 | 0.000760979 | 0.997525 |
| rad30         | 0.000187161 | 0.999415 | 0.000599995 | 0.998125 |
| rad6          | 0.000122641 | 0.999538 | 0.000393161 | 0.998518 |
| rad38         | 9.50775e-05 | 0.999633 | 0.000304797 | 0.998823 |
| PhCCCH3+H     | 8.62608e-05 | 0.999719 | 0.000276533 | 0.999100 |
| rad19anti     | 7.78392e-05 | 0.999797 | 0.000249535 | 0.999349 |
| rad39         | 5.32056e-05 | 0.999850 | 0.000170565 | 0.999520 |
| rad35         | 4.74014e-05 | 0.999898 | 0.000151958 | 0.999672 |
| PAH3+H        | 4.02265e-05 | 0.999938 | 0.000128957 | 0.999801 |
| rad46         | 2.09886e-05 | 0.999959 | 6.72846e-05 | 0.999868 |
| rad60syn      | 7.32374e-06 | 0.999966 | 2.34783e-05 | 0.999891 |
| rad50         | 6.21064e-06 | 0.999973 | 1.99099e-05 | 0.999911 |
| rad23         | 5.67156e-06 | 0.999978 | 1.81817e-05 | 0.999929 |
| rad59         | 4.82075e-06 | 0.999983 | 1.54542e-05 | 0.999945 |
| rad60anti     | 4.29699e-06 | 0.999987 | 1.37752e-05 | 0.999959 |
| rad19syn      | 2.97878e-06 | 0.999990 | 9.54929e-06 | 0.999968 |
| rad45         | 1.92210e-06 | 0.999992 | 6.16182e-06 | 0.999974 |
| rad54         | 9.80351e-07 | 0.999993 | 3.14279e-06 | 0.999978 |
| rad51         | 9.28183e-07 | 0.999994 | 2.97555e-06 | 0.999981 |
| rad67         | 7.57519e-07 | 0.999995 | 2.42844e-06 | 0.999983 |
| PhcycC3H3_A+H | 7.46638e-07 | 0.999996 | 2.39355e-06 | 0.999985 |
| rad11         | 7.46524e-07 | 0.999996 | 2.39319e-06 | 0.999988 |
| rad7          | 6.88331e-07 | 0.999997 | 2.20663e-06 | 0.999990 |
| rad37         | 4.76468e-07 | 0.999998 | 1.52745e-06 | 0.999991 |
| rad52         | 3.79330e-07 | 0.999998 | 1.21605e-06 | 0.999993 |
| rad20         | 3.23991e-07 | 0.999998 | 1.03864e-06 | 0.999994 |
| rad28         | 2.01655e-07 | 0.999999 | 6.46461e-07 | 0.999994 |
| rad9          | 1.99387e-07 | 0.999999 | 6.39188e-07 | 0.999995 |
| PAH10+CH3     | 1.91125e-07 | 0.999999 | 6.12702e-07 | 0.999996 |
| rad21         | 1.90676e-07 | 0.999999 | 6.11266e-07 | 0.999996 |
| rad36         | 1.76313e-07 | 0.999999 | 5.65221e-07 | 0.999997 |
| PAH1+H        | 1.66009e-07 | 0.999999 | 5.32188e-07 | 0.999997 |
| rad70         | 1.61803e-07 | 1.000000 | 5.18705e-07 | 0.999998 |
| rad58         | 1.49352e-07 | 1.000000 | 4.78790e-07 | 0.999998 |
| rad22         | 1.14984e-07 | 1.000000 | 3.68613e-07 | 0.999999 |
| rad18         | 8.53914e-08 | 1.000000 | 2.73746e-07 | 0.999999 |
| rad13         | 8.00183e-08 | 1.000000 | 2.56521e-07 | 0.999999 |
| rad55         | 5.13573e-08 | 1.000000 | 1.64640e-07 | 0.999999 |
| rad2          | 3.96070e-08 | 1.000000 | 1.26971e-07 | 1.000000 |
| rad65         | 2.74960e-08 | 1.000000 | 8.81459e-08 | 1.000000 |
| rad34         | 2.65060e-08 | 1.000000 | 8.49722e-08 | 1.000000 |
| rad10         | 2.63596e-08 | 1.000000 | 8.45028e-08 | 1.000000 |
| rad62         | 1.53063e-08 | 1.000000 | 4.90686e-08 | 1.000000 |
| rad71         | 1.26851e-08 | 1.000000 | 4.06654e-08 | 1.000000 |
| rad26         | 1.26275e-08 | 1.000000 | 4.04809e-08 | 1.000000 |
| rad73         | 9.80570e-09 | 1.000000 | 3.14349e-08 | 1.000000 |
| rad1          | 9.02998e-09 | 1.000000 | 2.89481e-08 | 1.000000 |
| rad53         | 4.04155e-09 | 1.000000 | 1.29563e-08 | 1.000000 |
| rad43         | 2.61317e-09 | 1.000000 | 8.37723e-09 | 1.000000 |
| rad24         | 2.43799e-09 | 1.000000 | 7.81565e-09 | 1.000000 |
| rad56         | 2.24538e-09 | 1.000000 | 7.19818e-09 | 1.000000 |
| rad3          | 1.98115e-09 | 1.000000 | 6.35112e-09 | 1.000000 |

|           |             |         |             |         |
|-----------|-------------|---------|-------------|---------|
| rad64     | 1.67217e-09 | 1.00000 | 5.36060e-09 | 1.00000 |
| rad4      | 1.52966e-09 | 1.00000 | 4.90375e-09 | 1.00000 |
| rad33     | 1.40938e-09 | 1.00000 | 4.51815e-09 | 1.00000 |
| PAH8+H    | 6.45835e-10 | 1.00000 | 2.07040e-09 | 1.00000 |
| rad68syn  | 5.00118e-10 | 1.00000 | 1.60326e-09 | 1.00000 |
| rad15     | 4.66581e-10 | 1.00000 | 1.49575e-09 | 1.00000 |
| rad42     | 4.34011e-10 | 1.00000 | 1.39134e-09 | 1.00000 |
| rad72     | 3.99455e-10 | 1.00000 | 1.28056e-09 | 1.00000 |
| rad68anti | 3.31165e-10 | 1.00000 | 1.06164e-09 | 1.00000 |
| rad25     | 2.70250e-10 | 1.00000 | 8.66360e-10 | 1.00000 |
| rad12     | 1.79383e-10 | 1.00000 | 5.75060e-10 | 1.00000 |
| rad61     | 1.19014e-10 | 1.00000 | 3.81533e-10 | 1.00000 |
| rad40syn  | 1.08519e-10 | 1.00000 | 3.47887e-10 | 1.00000 |
| rad41     | 5.91015e-11 | 1.00000 | 1.89466e-10 | 1.00000 |
| rad40anti | 5.63189e-11 | 1.00000 | 1.80546e-10 | 1.00000 |
| rad14     | 2.52552e-11 | 1.00000 | 8.09625e-11 | 1.00000 |
| rad8      | 1.90190e-11 | 1.00000 | 6.09707e-11 | 1.00000 |
| rad27     | 1.07658e-11 | 1.00000 | 3.45128e-11 | 1.00000 |
| rad31     | 3.92120e-13 | 1.00000 | 1.25705e-12 | 1.00000 |
| rad47     | 7.44840e-14 | 1.00000 | 2.38779e-13 | 1.00000 |
| rad5      | 4.01856e-14 | 1.00000 | 1.28826e-13 | 1.00000 |

10.000000 Pa, 1400.00000 K

| Rate constant | True (fraction)     | Effective (fraction) |
|---------------|---------------------|----------------------|
| Total         | 2.46691e-14 (1.00 ) | 6.50187e-15 (1.00 )  |

| species       | PYtrue      | Cumul    | PYeffective | Cumul    |
|---------------|-------------|----------|-------------|----------|
| Benzyl+C2H2   | 0.736437    | 0.736437 | 0.00000     | 0.00000  |
| Indene+H      | 0.245578    | 0.982015 | 0.931763    | 0.931763 |
| Ph+Allene     | 0.00662544  | 0.988640 | 0.0251380   | 0.956901 |
| PhCH2CCH+H    | 0.00478680  | 0.993427 | 0.0181619   | 0.975063 |
| PhCHCCH2+H    | 0.00325808  | 0.996685 | 0.0123617   | 0.987425 |
| PhCCH+CH3     | 0.00164445  | 0.998330 | 0.00623931  | 0.993664 |
| PAH9+H        | 0.000311240 | 0.998641 | 0.00118090  | 0.994845 |
| PAH7+H        | 0.000273588 | 0.998915 | 0.00103804  | 0.995883 |
| Ph+MeAc       | 0.000227786 | 0.999142 | 0.000864257 | 0.996747 |
| rad30         | 0.000217664 | 0.999360 | 0.000825853 | 0.997573 |
| rad38         | 0.000126787 | 0.999487 | 0.000481048 | 0.998054 |
| rad19anti     | 0.000116609 | 0.999603 | 0.000442432 | 0.998496 |
| PAH3+H        | 6.70197e-05 | 0.999670 | 0.000254283 | 0.998751 |
| rad6          | 6.45506e-05 | 0.999735 | 0.000244915 | 0.998996 |
| PhCCCH3+H     | 6.42458e-05 | 0.999799 | 0.000243759 | 0.999239 |
| rad35         | 6.11009e-05 | 0.999860 | 0.000231826 | 0.999471 |
| rad39         | 5.52282e-05 | 0.999916 | 0.000209544 | 0.999681 |
| rad46         | 3.01743e-05 | 0.999946 | 0.000114486 | 0.999795 |
| rad50         | 1.04197e-05 | 0.999956 | 3.95340e-05 | 0.999835 |
| rad60syn      | 1.03347e-05 | 0.999967 | 3.92114e-05 | 0.999874 |
| rad59         | 7.71754e-06 | 0.999974 | 2.92816e-05 | 0.999903 |
| rad60anti     | 6.14023e-06 | 0.999980 | 2.32970e-05 | 0.999927 |
| rad19syn      | 4.28566e-06 | 0.999985 | 1.62605e-05 | 0.999943 |
| rad23         | 3.39665e-06 | 0.999988 | 1.28874e-05 | 0.999956 |
| rad51         | 1.58941e-06 | 0.999990 | 6.03047e-06 | 0.999962 |
| rad67         | 1.58742e-06 | 0.999991 | 6.02291e-06 | 0.999968 |
| rad54         | 1.47640e-06 | 0.999993 | 5.60168e-06 | 0.999973 |
| PhcycC3H3_A+H | 1.26734e-06 | 0.999994 | 4.80849e-06 | 0.999978 |
| rad45         | 1.05002e-06 | 0.999995 | 3.98394e-06 | 0.999982 |
| rad52         | 6.53521e-07 | 0.999996 | 2.47956e-06 | 0.999985 |
| rad37         | 6.19054e-07 | 0.999996 | 2.34879e-06 | 0.999987 |
| rad7          | 4.95134e-07 | 0.999997 | 1.87862e-06 | 0.999989 |
| rad11         | 4.84846e-07 | 0.999997 | 1.83958e-06 | 0.999991 |
| PAH10+CH3     | 3.54263e-07 | 0.999998 | 1.34413e-06 | 0.999992 |
| rad58         | 3.07752e-07 | 0.999998 | 1.16766e-06 | 0.999993 |
| PAH1+H        | 2.79483e-07 | 0.999998 | 1.06040e-06 | 0.999994 |
| rad70         | 2.76849e-07 | 0.999998 | 1.05041e-06 | 0.999995 |
| rad20         | 1.97655e-07 | 0.999999 | 7.49936e-07 | 0.999996 |
| rad9          | 1.56500e-07 | 0.999999 | 5.93786e-07 | 0.999997 |
| rad21         | 1.15131e-07 | 0.999999 | 4.36824e-07 | 0.999997 |
| rad28         | 1.14587e-07 | 0.999999 | 4.34762e-07 | 0.999998 |
| rad36         | 9.75743e-08 | 0.999999 | 3.70212e-07 | 0.999998 |
| rad22         | 9.52148e-08 | 0.999999 | 3.61260e-07 | 0.999998 |
| rad55         | 8.24809e-08 | 0.999999 | 3.12945e-07 | 0.999999 |
| rad18         | 6.72789e-08 | 0.999999 | 2.55267e-07 | 0.999999 |
| rad34         | 4.92129e-08 | 0.999999 | 1.86722e-07 | 0.999999 |
| rad65         | 4.82028e-08 | 1.000000 | 1.82889e-07 | 0.999999 |
| rad13         | 4.35739e-08 | 1.000000 | 1.65326e-07 | 0.999999 |
| rad62         | 2.08993e-08 | 1.000000 | 7.92954e-08 | 0.999999 |
| rad2          | 1.44132e-08 | 1.000000 | 5.46861e-08 | 1.000000 |



|           |             |          |             |          |
|-----------|-------------|----------|-------------|----------|
| rad10     | 1.35265e-08 | 1.000000 | 5.13217e-08 | 1.000000 |
| rad71     | 1.19901e-08 | 1.000000 | 4.54922e-08 | 1.000000 |
| rad73     | 1.09588e-08 | 1.000000 | 4.15793e-08 | 1.000000 |
| rad53     | 8.17329e-09 | 1.000000 | 3.10107e-08 | 1.000000 |
| rad26     | 6.91036e-09 | 1.000000 | 2.62190e-08 | 1.000000 |
| rad56     | 5.11893e-09 | 1.000000 | 1.94220e-08 | 1.000000 |
| rad1      | 3.33106e-09 | 1.000000 | 1.26386e-08 | 1.000000 |
| rad43     | 3.13951e-09 | 1.000000 | 1.19118e-08 | 1.000000 |
| rad64     | 3.07369e-09 | 1.000000 | 1.16621e-08 | 1.000000 |
| rad24     | 1.79963e-09 | 1.000000 | 6.82808e-09 | 1.000000 |
| PAH8+H    | 1.64411e-09 | 1.000000 | 6.23801e-09 | 1.000000 |
| rad68syn  | 1.18194e-09 | 1.000000 | 4.48448e-09 | 1.000000 |
| rad15     | 9.47615e-10 | 1.000000 | 3.59540e-09 | 1.000000 |
| rad3      | 8.47348e-10 | 1.000000 | 3.21497e-09 | 1.000000 |
| rad33     | 8.45698e-10 | 1.000000 | 3.20871e-09 | 1.000000 |
| rad68anti | 7.80699e-10 | 1.000000 | 2.96209e-09 | 1.000000 |
| rad42     | 7.07541e-10 | 1.000000 | 2.68452e-09 | 1.000000 |
| rad4      | 6.59338e-10 | 1.000000 | 2.50163e-09 | 1.000000 |
| rad72     | 2.85988e-10 | 1.000000 | 1.08508e-09 | 1.000000 |
| rad40syn  | 2.70735e-10 | 1.000000 | 1.02721e-09 | 1.000000 |
| rad61     | 2.26490e-10 | 1.000000 | 8.59339e-10 | 1.000000 |
| rad12     | 1.93246e-10 | 1.000000 | 7.33204e-10 | 1.000000 |
| rad25     | 1.89540e-10 | 1.000000 | 7.19144e-10 | 1.000000 |
| rad40anti | 1.40392e-10 | 1.000000 | 5.32670e-10 | 1.000000 |
| rad41     | 8.33579e-11 | 1.000000 | 3.16273e-10 | 1.000000 |
| rad8      | 2.80156e-11 | 1.000000 | 1.06296e-10 | 1.000000 |
| rad14     | 1.35583e-11 | 1.000000 | 5.14425e-11 | 1.000000 |
| rad27     | 4.67905e-12 | 1.000000 | 1.77531e-11 | 1.000000 |
| rad31     | 2.46771e-13 | 1.000000 | 9.36290e-13 | 1.000000 |
| rad47     | 1.18667e-13 | 1.000000 | 4.50240e-13 | 1.000000 |
| rad5      | 5.76970e-14 | 1.000000 | 2.18912e-13 | 1.000000 |

10.0000000 Pa, 1500.00000 K

=====

| Rate constant | True (fraction)     | Effective (fraction) |
|---------------|---------------------|----------------------|
| Total         | 3.76908e-14 (1.00 ) | 8.51605e-15 (1.00 )  |

| species       | PYtrue      | Cumul    | PYeffective | Cumul    |
|---------------|-------------|----------|-------------|----------|
| Benzyl+C2H2   | 0.774055    | 0.774055 | 0.00000     | 0.00000  |
| Indene+H      | 0.205015    | 0.979070 | 0.907368    | 0.907368 |
| Ph+Allene     | 0.00753512  | 0.986605 | 0.0333494   | 0.940717 |
| PhCH2CCH+H    | 0.00647181  | 0.993077 | 0.0286433   | 0.969361 |
| PhCHCCH2+H    | 0.00361349  | 0.996690 | 0.0159928   | 0.985353 |
| PhCCH+CH3     | 0.00140923  | 0.998100 | 0.00623705  | 0.991591 |
| PAH9+H        | 0.000394498 | 0.998494 | 0.00174599  | 0.993337 |
| PAH7+H        | 0.000287161 | 0.998781 | 0.00127093  | 0.994607 |
| rad30         | 0.000246482 | 0.999028 | 0.00109089  | 0.995698 |
| Ph+MeAc       | 0.000203104 | 0.999231 | 0.000898908 | 0.996597 |
| rad19anti     | 0.000164292 | 0.999395 | 0.000727135 | 0.997324 |
| rad38         | 0.000163414 | 0.999559 | 0.000723248 | 0.998048 |
| PAH3+H        | 0.000104232 | 0.999663 | 0.000461318 | 0.998509 |
| rad35         | 7.64519e-05 | 0.999739 | 0.000338365 | 0.998847 |
| rad39         | 5.60238e-05 | 0.999795 | 0.000247954 | 0.999095 |
| PhCCCH3+H     | 4.82528e-05 | 0.999844 | 0.000213560 | 0.999309 |
| rad46         | 4.17734e-05 | 0.999885 | 0.000184883 | 0.999494 |
| rad6          | 3.90281e-05 | 0.999924 | 0.000172733 | 0.999666 |
| rad50         | 1.73493e-05 | 0.999942 | 7.67854e-05 | 0.999743 |
| rad60syn      | 1.38825e-05 | 0.999956 | 6.14420e-05 | 0.999805 |
| rad59         | 1.15676e-05 | 0.999967 | 5.11965e-05 | 0.999856 |
| rad60anti     | 8.33920e-06 | 0.999976 | 3.69081e-05 | 0.999893 |
| rad19syn      | 5.71324e-06 | 0.999981 | 2.52860e-05 | 0.999918 |
| rad67         | 3.02092e-06 | 0.999984 | 1.33702e-05 | 0.999931 |
| rad51         | 2.95283e-06 | 0.999987 | 1.30688e-05 | 0.999945 |
| rad23         | 2.25167e-06 | 0.999989 | 9.96556e-06 | 0.999954 |
| rad54         | 2.04182e-06 | 0.999991 | 9.03680e-06 | 0.999964 |
| PhcycC3H3_A+H | 1.95389e-06 | 0.999993 | 8.64763e-06 | 0.999972 |
| rad52         | 1.15441e-06 | 0.999995 | 5.10924e-06 | 0.999977 |
| rad37         | 8.41949e-07 | 0.999995 | 3.72635e-06 | 0.999981 |
| PAH10+CH3     | 6.72168e-07 | 0.999996 | 2.97492e-06 | 0.999984 |
| rad45         | 5.90560e-07 | 0.999997 | 2.61373e-06 | 0.999987 |
| rad58         | 5.75231e-07 | 0.999997 | 2.54589e-06 | 0.999989 |
| PAH1+H        | 4.49441e-07 | 0.999998 | 1.98916e-06 | 0.999991 |
| rad70         | 4.36903e-07 | 0.999998 | 1.93367e-06 | 0.999993 |
| rad7          | 2.92977e-07 | 0.999998 | 1.29667e-06 | 0.999994 |
| rad11         | 2.77320e-07 | 0.999999 | 1.22738e-06 | 0.999996 |
| rad20         | 1.24489e-07 | 0.999999 | 5.50971e-07 | 0.999996 |
| rad9          | 1.20793e-07 | 0.999999 | 5.34613e-07 | 0.999997 |
| rad55         | 1.20719e-07 | 0.999999 | 5.34284e-07 | 0.999997 |

|           |             |          |             |          |
|-----------|-------------|----------|-------------|----------|
| rad22     | 9.47559e-08 | 0.999999 | 4.19376e-07 | 0.999998 |
| rad65     | 8.93812e-08 | 0.999999 | 3.95588e-07 | 0.999998 |
| rad34     | 8.38228e-08 | 0.999999 | 3.70988e-07 | 0.999998 |
| rad28     | 7.37608e-08 | 0.999999 | 3.26455e-07 | 0.999999 |
| rad21     | 7.18541e-08 | 1.000000 | 3.18016e-07 | 0.999999 |
| rad36     | 5.55629e-08 | 1.000000 | 2.45914e-07 | 0.999999 |
| rad18     | 4.44234e-08 | 1.000000 | 1.96612e-07 | 0.999999 |
| rad62     | 2.67157e-08 | 1.000000 | 1.18240e-07 | 1.000000 |
| rad13     | 2.32460e-08 | 1.000000 | 1.02883e-07 | 1.000000 |
| rad71     | 2.20996e-08 | 1.000000 | 9.78096e-08 | 1.000000 |
| rad73     | 2.15533e-08 | 1.000000 | 9.53920e-08 | 1.000000 |
| rad53     | 1.47147e-08 | 1.000000 | 6.51252e-08 | 1.000000 |
| rad56     | 1.02661e-08 | 1.000000 | 4.54361e-08 | 1.000000 |
| rad10     | 5.58190e-09 | 1.000000 | 2.47047e-08 | 1.000000 |
| rad64     | 5.49830e-09 | 1.000000 | 2.43347e-08 | 1.000000 |
| rad2      | 5.25041e-09 | 1.000000 | 2.32376e-08 | 1.000000 |
| PAH8+H    | 4.23466e-09 | 1.000000 | 1.87420e-08 | 1.000000 |
| rad43     | 3.96948e-09 | 1.000000 | 1.75684e-08 | 1.000000 |
| rad26     | 3.76291e-09 | 1.000000 | 1.66541e-08 | 1.000000 |
| rad68syn  | 2.57600e-09 | 1.000000 | 1.14010e-08 | 1.000000 |
| rad68anti | 1.69621e-09 | 1.000000 | 7.50717e-09 | 1.000000 |
| rad15     | 1.43476e-09 | 1.000000 | 6.35004e-09 | 1.000000 |
| rad24     | 1.34196e-09 | 1.000000 | 5.93932e-09 | 1.000000 |
| rad1      | 1.22683e-09 | 1.000000 | 5.42979e-09 | 1.000000 |
| rad42     | 1.06993e-09 | 1.000000 | 4.73537e-09 | 1.000000 |
| rad40syn  | 6.53158e-10 | 1.000000 | 2.89079e-09 | 1.000000 |
| rad61     | 5.45824e-10 | 1.000000 | 2.41574e-09 | 1.000000 |
| rad33     | 5.08751e-10 | 1.000000 | 2.25166e-09 | 1.000000 |
| rad72     | 4.16778e-10 | 1.000000 | 1.84460e-09 | 1.000000 |
| rad3      | 3.69005e-10 | 1.000000 | 1.63316e-09 | 1.000000 |
| rad40anti | 3.47837e-10 | 1.000000 | 1.53948e-09 | 1.000000 |
| rad4      | 2.89104e-10 | 1.000000 | 1.27953e-09 | 1.000000 |
| rad12     | 1.99760e-10 | 1.000000 | 8.84108e-10 | 1.000000 |
| rad41     | 1.38374e-10 | 1.000000 | 6.12424e-10 | 1.000000 |
| rad25     | 1.31415e-10 | 1.000000 | 5.81624e-10 | 1.000000 |
| rad8      | 3.58486e-11 | 1.000000 | 1.58661e-10 | 1.000000 |
| rad14     | 7.35972e-12 | 1.000000 | 3.25731e-11 | 1.000000 |
| rad27     | 2.07790e-12 | 1.000000 | 9.19650e-12 | 1.000000 |
| rad47     | 2.16416e-13 | 1.000000 | 9.57828e-13 | 1.000000 |
| rad31     | 1.56393e-13 | 1.000000 | 6.92174e-13 | 1.000000 |
| rad5      | 7.95654e-14 | 1.000000 | 3.52145e-13 | 1.000000 |

10.000000 Pa, 1750.00000 K

=====

| Rate constant | True (fraction)     | Effective (fraction) |
|---------------|---------------------|----------------------|
| Total         | 9.18604e-14 (1.00 ) | 1.49150e-14 (1.00 )  |

| species       | PYtrue      | Cumul    | PYeffective | Cumul    |
|---------------|-------------|----------|-------------|----------|
| Benzyl+C2H2   | 0.837634    | 0.837634 | 0.00000     | 0.00000  |
| Indene+H      | 0.133043    | 0.970677 | 0.819399    | 0.819399 |
| PhCH2CCH+H    | 0.0118074   | 0.982484 | 0.0727211   | 0.892120 |
| Ph+Allene     | 0.00950978  | 0.991994 | 0.0585700   | 0.950690 |
| PhCHCCH2+H    | 0.00446820  | 0.996462 | 0.0275193   | 0.978209 |
| PhCCH+CH3     | 0.000859623 | 0.997322 | 0.00529435  | 0.983504 |
| PAH9+H        | 0.000557698 | 0.997880 | 0.00343482  | 0.986939 |
| rad30         | 0.000325004 | 0.998205 | 0.00200168  | 0.988940 |
| rad19anti     | 0.000321482 | 0.998526 | 0.00197998  | 0.990920 |
| rad38         | 0.000287975 | 0.998814 | 0.00177362  | 0.992694 |
| PAH7+H        | 0.000287151 | 0.999101 | 0.00176854  | 0.994462 |
| PAH3+H        | 0.000275346 | 0.999377 | 0.00169584  | 0.996158 |
| Ph+MeAc       | 0.000167522 | 0.999544 | 0.00103176  | 0.997190 |
| rad35         | 0.000110189 | 0.999654 | 0.000678646 | 0.997869 |
| rad46         | 7.56839e-05 | 0.999730 | 0.000466132 | 0.998335 |
| rad39         | 5.92340e-05 | 0.999789 | 0.000364818 | 0.998700 |
| rad50         | 4.49016e-05 | 0.999834 | 0.000276546 | 0.998976 |
| PhCCCH3+H     | 3.18685e-05 | 0.999866 | 0.000196276 | 0.999172 |
| rad59         | 2.75372e-05 | 0.999894 | 0.000169599 | 0.999342 |
| rad60syn      | 2.64514e-05 | 0.999920 | 0.000162912 | 0.999505 |
| rad60anti     | 1.77463e-05 | 0.999938 | 0.000109298 | 0.999614 |
| rad51         | 1.16100e-05 | 0.999949 | 7.15052e-05 | 0.999686 |
| rad67         | 1.00377e-05 | 0.999959 | 6.18214e-05 | 0.999748 |
| rad6          | 9.22760e-06 | 0.999969 | 5.68321e-05 | 0.999804 |
| rad19syn      | 8.19427e-06 | 0.999977 | 5.04679e-05 | 0.999855 |
| PhcycC3H3_A+H | 4.42203e-06 | 0.999981 | 2.72350e-05 | 0.999882 |
| rad52         | 3.79505e-06 | 0.999985 | 2.33734e-05 | 0.999905 |
| rad54         | 3.12764e-06 | 0.999988 | 1.92629e-05 | 0.999925 |
| PAH10+CH3     | 2.64766e-06 | 0.999991 | 1.63067e-05 | 0.999941 |
| rad58         | 2.01952e-06 | 0.999993 | 1.24381e-05 | 0.999953 |

|           |             |          |             |          |
|-----------|-------------|----------|-------------|----------|
| rad37     | 1.71200e-06 | 0.999995 | 1.05441e-05 | 0.999964 |
| PAH1+H    | 1.17285e-06 | 0.999996 | 7.22352e-06 | 0.999971 |
| rad70     | 1.05664e-06 | 0.999997 | 6.50775e-06 | 0.999978 |
| rad71     | 1.02440e-06 | 0.999998 | 6.30919e-06 | 0.999984 |
| rad23     | 7.02644e-07 | 0.999999 | 4.32753e-06 | 0.999988 |
| rad73     | 4.18039e-07 | 0.999999 | 2.57467e-06 | 0.999991 |
| rad65     | 3.24352e-07 | 0.999999 | 1.99766e-06 | 0.999993 |
| rad34     | 2.45587e-07 | 1.000000 | 1.51255e-06 | 0.999994 |
| rad55     | 2.31208e-07 | 1.000000 | 1.42399e-06 | 0.999996 |
| rad72     | 1.64626e-07 | 1.000000 | 1.01392e-06 | 0.999997 |
| rad22     | 7.13006e-08 | 1.000000 | 4.39135e-07 | 0.999997 |
| rad45     | 5.20416e-08 | 1.000000 | 3.20520e-07 | 0.999998 |
| rad53     | 4.57274e-08 | 1.000000 | 2.81632e-07 | 0.999998 |
| rad62     | 4.10018e-08 | 1.000000 | 2.52527e-07 | 0.999998 |
| rad56     | 3.75919e-08 | 1.000000 | 2.31526e-07 | 0.999998 |
| PAH8+H    | 3.61922e-08 | 1.000000 | 2.22905e-07 | 0.999999 |
| rad7      | 2.67171e-08 | 1.000000 | 1.64549e-07 | 0.999999 |
| rad11     | 2.48297e-08 | 1.000000 | 1.52924e-07 | 0.999999 |
| rad28     | 2.20723e-08 | 1.000000 | 1.35942e-07 | 0.999999 |
| rad64     | 2.12701e-08 | 1.000000 | 1.31001e-07 | 0.999999 |
| rad9      | 1.41200e-08 | 1.000000 | 8.69640e-08 | 0.999999 |
| rad68syn  | 1.32290e-08 | 1.000000 | 8.14765e-08 | 0.999999 |
| rad20     | 1.26834e-08 | 1.000000 | 7.81158e-08 | 0.999999 |
| rad36     | 8.74373e-09 | 1.000000 | 5.38520e-08 | 1.000000 |
| rad43     | 8.69462e-09 | 1.000000 | 5.35495e-08 | 1.000000 |
| rad68anti | 8.56392e-09 | 1.000000 | 5.27445e-08 | 1.000000 |
| rad21     | 6.67973e-09 | 1.000000 | 4.11399e-08 | 1.000000 |
| rad18     | 5.91637e-09 | 1.000000 | 3.64385e-08 | 1.000000 |
| rad40syn  | 4.36586e-09 | 1.000000 | 2.68890e-08 | 1.000000 |
| rad61     | 3.92785e-09 | 1.000000 | 2.41913e-08 | 1.000000 |
| rad40anti | 2.75568e-09 | 1.000000 | 1.69720e-08 | 1.000000 |
| rad42     | 2.58297e-09 | 1.000000 | 1.59083e-08 | 1.000000 |
| rad13     | 1.36104e-09 | 1.000000 | 8.38255e-09 | 1.000000 |
| rad15     | 6.95452e-10 | 1.000000 | 4.28324e-09 | 1.000000 |
| rad41     | 5.85707e-10 | 1.000000 | 3.60733e-09 | 1.000000 |
| rad26     | 4.47413e-10 | 1.000000 | 2.75558e-09 | 1.000000 |
| rad10     | 2.23050e-10 | 1.000000 | 1.37375e-09 | 1.000000 |
| rad24     | 1.70084e-10 | 1.000000 | 1.04754e-09 | 1.000000 |
| rad2      | 9.58872e-11 | 1.000000 | 5.90562e-10 | 1.000000 |
| rad12     | 4.26785e-11 | 1.000000 | 2.62854e-10 | 1.000000 |
| rad33     | 3.26497e-11 | 1.000000 | 2.01087e-10 | 1.000000 |
| rad1      | 2.41347e-11 | 1.000000 | 1.48644e-10 | 1.000000 |
| rad8      | 1.74187e-11 | 1.000000 | 1.07280e-10 | 1.000000 |
| rad25     | 1.28456e-11 | 1.000000 | 7.91153e-11 | 1.000000 |
| rad3      | 8.12083e-12 | 1.000000 | 5.00156e-11 | 1.000000 |
| rad4      | 5.14566e-12 | 1.000000 | 3.16917e-11 | 1.000000 |
| rad14     | 5.10281e-13 | 1.000000 | 3.14278e-12 | 1.000000 |
| rad47     | 2.80309e-13 | 1.000000 | 1.72640e-12 | 1.000000 |
| rad5      | 1.51097e-13 | 1.000000 | 9.30597e-13 | 1.000000 |
| rad27     | 8.54876e-14 | 1.000000 | 5.26512e-13 | 1.000000 |

10.000000 Pa, 2000.00000 K

=====

| Rate constant | True (fraction)     | Effective (fraction) |
|---------------|---------------------|----------------------|
| Total         | 1.85359e-13 (1.00 ) | 2.47590e-14 (1.00 )  |

| species     | PYtrue      | Cumul    | PYeffective | Cumul    |
|-------------|-------------|----------|-------------|----------|
| Benzyl+C2H2 | 0.866427    | 0.866427 | 0.00000     | 0.00000  |
| Indene+H    | 0.0943832   | 0.960810 | 0.706603    | 0.706603 |
| PhCH2CCH+H  | 0.0189359   | 0.979746 | 0.141764    | 0.848367 |
| Ph+Allene   | 0.0101116   | 0.989858 | 0.0757009   | 0.924068 |
| PhCHCCH2+H  | 0.00579093  | 0.995649 | 0.0433540   | 0.967422 |
| PAH9+H      | 0.000765649 | 0.996414 | 0.00573206  | 0.973154 |
| PhCCH+CH3   | 0.000549914 | 0.996964 | 0.00411695  | 0.977271 |
| PAH3+H      | 0.000526268 | 0.997490 | 0.00393993  | 0.981211 |
| rad19anti   | 0.000486585 | 0.997977 | 0.00364283  | 0.984854 |
| rad38       | 0.000411823 | 0.998389 | 0.00308313  | 0.987937 |
| rad30       | 0.000378290 | 0.998767 | 0.00283209  | 0.990769 |
| PAH7+H      | 0.000350637 | 0.999118 | 0.00262506  | 0.993394 |
| Ph+MeAc     | 0.000164723 | 0.999283 | 0.00123320  | 0.994627 |
| rad35       | 0.000155560 | 0.999438 | 0.00116461  | 0.995792 |
| rad46       | 0.000120241 | 0.999558 | 0.000900192 | 0.996692 |
| rad50       | 9.62583e-05 | 0.999655 | 0.000720642 | 0.997413 |
| rad39       | 7.90419e-05 | 0.999734 | 0.000591750 | 0.998004 |
| rad59       | 4.92041e-05 | 0.999783 | 0.000368368 | 0.998373 |
| rad60syn    | 4.01116e-05 | 0.999823 | 0.000300297 | 0.998673 |
| PhCCCH3+H   | 3.61053e-05 | 0.999859 | 0.000270304 | 0.998943 |
| rad51       | 2.96187e-05 | 0.999889 | 0.000221742 | 0.999165 |

|               |             |          |             |          |
|---------------|-------------|----------|-------------|----------|
| rad60anti     | 2.75045e-05 | 0.999916 | 0.000205913 | 0.999371 |
| rad67         | 2.43994e-05 | 0.999941 | 0.000182667 | 0.999554 |
| rad19syn      | 1.17432e-05 | 0.999952 | 8.79161e-05 | 0.999642 |
| rad52         | 8.90491e-06 | 0.999961 | 6.66670e-05 | 0.999708 |
| PAH10+CH3     | 7.74393e-06 | 0.999969 | 5.79752e-05 | 0.999766 |
| PhcycC3H3_A+H | 7.51232e-06 | 0.999976 | 5.62412e-05 | 0.999822 |
| rad58         | 5.03750e-06 | 0.999982 | 3.77135e-05 | 0.999860 |
| rad54         | 4.35998e-06 | 0.999986 | 3.26412e-05 | 0.999893 |
| rad37         | 3.43824e-06 | 0.999989 | 2.57405e-05 | 0.999919 |
| PAH1+H        | 2.77544e-06 | 0.999992 | 2.07784e-05 | 0.999939 |
| rad70         | 2.09640e-06 | 0.999994 | 1.56948e-05 | 0.999955 |
| rad71         | 1.35588e-06 | 0.999996 | 1.01508e-05 | 0.999965 |
| rad6          | 1.04065e-06 | 0.999997 | 7.79089e-06 | 0.999973 |
| rad73         | 8.34021e-07 | 0.999997 | 6.24393e-06 | 0.999979 |
| rad65         | 8.26279e-07 | 0.999998 | 6.18597e-06 | 0.999985 |
| rad34         | 5.53605e-07 | 0.999999 | 4.14459e-06 | 0.999990 |
| rad55         | 3.54770e-07 | 0.999999 | 2.65600e-06 | 0.999992 |
| rad23         | 2.43446e-07 | 0.999999 | 1.82256e-06 | 0.999994 |
| PAH8+H        | 1.18785e-07 | 1.000000 | 8.89289e-07 | 0.999995 |
| rad53         | 9.86481e-08 | 1.000000 | 7.38533e-07 | 0.999996 |
| rad72         | 9.74442e-08 | 1.000000 | 7.29519e-07 | 0.999996 |
| rad56         | 9.44380e-08 | 1.000000 | 7.07014e-07 | 0.999997 |
| rad62         | 6.06776e-08 | 1.000000 | 4.54265e-07 | 0.999998 |
| rad64         | 5.65618e-08 | 1.000000 | 4.23452e-07 | 0.999998 |
| rad68syn      | 4.15584e-08 | 1.000000 | 3.11129e-07 | 0.999998 |
| rad68anti     | 2.68085e-08 | 1.000000 | 2.00703e-07 | 0.999999 |
| rad43         | 2.20616e-08 | 1.000000 | 1.65165e-07 | 0.999999 |
| rad45         | 1.72650e-08 | 1.000000 | 1.29255e-07 | 0.999999 |
| rad22         | 1.69956e-08 | 1.000000 | 1.27238e-07 | 0.999999 |
| rad61         | 1.55737e-08 | 1.000000 | 1.16593e-07 | 0.999999 |
| rad40syn      | 1.47127e-08 | 1.000000 | 1.10147e-07 | 0.999999 |
| rad40anti     | 9.32167e-09 | 1.000000 | 6.97870e-08 | 0.999999 |
| rad9          | 7.18734e-09 | 1.000000 | 5.38083e-08 | 0.999999 |
| rad11         | 5.40954e-09 | 1.000000 | 4.04987e-08 | 0.999999 |
| rad20         | 5.31738e-09 | 1.000000 | 3.98087e-08 | 0.999999 |
| rad42         | 5.08228e-09 | 1.000000 | 3.80486e-08 | 0.999999 |
| rad7          | 4.21766e-09 | 1.000000 | 3.15757e-08 | 0.999999 |
| rad28         | 3.62543e-09 | 1.000000 | 2.71419e-08 | 0.999999 |
| rad36         | 2.98330e-09 | 1.000000 | 2.23346e-08 | 0.999999 |
| rad21         | 2.73447e-09 | 1.000000 | 2.04717e-08 | 0.999999 |
| rad41         | 2.00270e-09 | 1.000000 | 1.49933e-08 | 0.999999 |
| rad18         | 1.64692e-09 | 1.000000 | 1.23297e-08 | 0.999999 |
| rad15         | 3.70411e-10 | 1.000000 | 2.77309e-09 | 0.999999 |
| rad13         | 3.11984e-10 | 1.000000 | 2.33568e-09 | 0.999999 |
| rad24         | 9.49263e-11 | 1.000000 | 7.10669e-10 | 0.999999 |
| rad26         | 6.73296e-11 | 1.000000 | 5.04066e-10 | 0.999999 |
| rad12         | 3.72943e-11 | 1.000000 | 2.79205e-10 | 0.999999 |
| rad10         | 2.42222e-11 | 1.000000 | 1.81341e-10 | 0.999999 |
| rad8          | 2.00292e-11 | 1.000000 | 1.49949e-10 | 0.999999 |
| rad33         | 1.02101e-11 | 1.000000 | 7.64382e-11 | 0.999999 |
| rad2          | 1.00197e-11 | 1.000000 | 7.50132e-11 | 0.999999 |
| rad25         | 5.51691e-12 | 1.000000 | 4.13025e-11 | 0.999999 |
| rad1          | 2.63954e-12 | 1.000000 | 1.97610e-11 | 0.999999 |
| rad3          | 1.45671e-12 | 1.000000 | 1.09057e-11 | 0.999999 |
| rad4          | 9.28811e-13 | 1.000000 | 6.95358e-12 | 0.999999 |
| rad47         | 6.83921e-13 | 1.000000 | 5.12020e-12 | 0.999999 |
| rad5          | 2.01836e-13 | 1.000000 | 1.51105e-12 | 0.999999 |
| rad14         | 1.43426e-13 | 1.000000 | 1.07377e-12 | 0.999999 |
| rad27         | 2.34123e-14 | 1.000000 | 1.75277e-13 | 0.999999 |

10.000000 Pa, 2250.00000 K

=====

| Rate constant | True (fraction)     | Effective (fraction) |
|---------------|---------------------|----------------------|
| Total         | 3.29136e-13 (1.00 ) | 4.00878e-14 (1.00 )  |

| species     | PYtrue      | Cumul    | PYeffective | Cumul    |
|-------------|-------------|----------|-------------|----------|
| Benzyl+C2H2 | 0.878203    | 0.878203 | 0.00000     | 0.00000  |
| Indene+H    | 0.0702987   | 0.948502 | 0.577181    | 0.577181 |
| PhCH2CCH+H  | 0.0277459   | 0.976248 | 0.227805    | 0.804986 |
| Ph+Allene   | 0.0105979   | 0.986846 | 0.0870130   | 0.891999 |
| PhCHCCH2+H  | 0.00765660  | 0.994502 | 0.0628638   | 0.954863 |
| PAH9+H      | 0.000942023 | 0.995444 | 0.00773439  | 0.962597 |
| PAH3+H      | 0.000857246 | 0.996301 | 0.00703834  | 0.969636 |
| rad19anti   | 0.000629215 | 0.996931 | 0.00516611  | 0.974802 |
| rad38       | 0.000525622 | 0.997456 | 0.00431557  | 0.979117 |
| PAH7+H      | 0.000454593 | 0.997911 | 0.00373239  | 0.982850 |
| rad30       | 0.000417263 | 0.998328 | 0.00342590  | 0.986276 |
| PhCCH+CH3   | 0.000383620 | 0.998712 | 0.00314968  | 0.989425 |

|               |             |          |             |          |
|---------------|-------------|----------|-------------|----------|
| rad35         | 0.000200883 | 0.998913 | 0.00164933  | 0.991075 |
| Ph+MeAc       | 0.000197881 | 0.999110 | 0.00162469  | 0.992699 |
| rad50         | 0.000171110 | 0.999282 | 0.00140488  | 0.994104 |
| rad46         | 0.000166588 | 0.999448 | 0.00136776  | 0.995472 |
| rad39         | 0.000118942 | 0.999567 | 0.000976559 | 0.996448 |
| rad59         | 7.57697e-05 | 0.999643 | 0.000622100 | 0.997070 |
| rad51         | 6.24070e-05 | 0.999705 | 0.000512387 | 0.997583 |
| rad60syn      | 5.44512e-05 | 0.999760 | 0.000447067 | 0.998030 |
| PhCCCH3+H     | 5.15876e-05 | 0.999811 | 0.000423555 | 0.998454 |
| rad67         | 4.61802e-05 | 0.999857 | 0.000379158 | 0.998833 |
| rad60anti     | 3.79867e-05 | 0.999895 | 0.000311886 | 0.999145 |
| PAH10+CH3     | 1.71997e-05 | 0.999913 | 0.000141217 | 0.999286 |
| rad52         | 1.71081e-05 | 0.999930 | 0.000140464 | 0.999426 |
| rad19syn      | 1.64020e-05 | 0.999946 | 0.000134667 | 0.999561 |
| PhcycC3H3_A+H | 1.10468e-05 | 0.999957 | 9.06983e-05 | 0.999652 |
| rad58         | 1.00662e-05 | 0.999967 | 8.26478e-05 | 0.999734 |
| PAH1+H        | 5.97755e-06 | 0.999973 | 4.90781e-05 | 0.999783 |
| rad37         | 5.72400e-06 | 0.999979 | 4.69963e-05 | 0.999830 |
| rad54         | 5.40010e-06 | 0.999984 | 4.43371e-05 | 0.999875 |
| rad71         | 4.07400e-06 | 0.999988 | 3.34492e-05 | 0.999908 |
| rad70         | 3.69513e-06 | 0.999992 | 3.03386e-05 | 0.999938 |
| rad73         | 2.45141e-06 | 0.999995 | 2.01271e-05 | 0.999959 |
| rad65         | 1.68879e-06 | 0.999996 | 1.38656e-05 | 0.999972 |
| rad34         | 1.08421e-06 | 0.999997 | 8.90183e-06 | 0.999981 |
| rad55         | 4.74441e-07 | 0.999998 | 3.89535e-06 | 0.999985 |
| PAH8+H        | 3.93689e-07 | 0.999998 | 3.23235e-06 | 0.999988 |
| rad72         | 2.31604e-07 | 0.999998 | 1.90157e-06 | 0.999990 |
| rad56         | 1.86924e-07 | 0.999999 | 1.53472e-06 | 0.999992 |
| rad53         | 1.73618e-07 | 0.999999 | 1.42547e-06 | 0.999993 |
| rad64         | 1.33918e-07 | 0.999999 | 1.09952e-06 | 0.999994 |
| rad6          | 1.31124e-07 | 0.999999 | 1.07658e-06 | 0.999996 |
| rad68syn      | 1.10443e-07 | 0.999999 | 9.06782e-07 | 0.999996 |
| rad62         | 9.50674e-08 | 0.999999 | 7.80542e-07 | 0.999997 |
| rad68anti     | 7.09939e-08 | 0.999999 | 5.82888e-07 | 0.999998 |
| rad23         | 5.81496e-08 | 0.999999 | 4.77432e-07 | 0.999998 |
| rad43         | 4.82539e-08 | 0.999999 | 3.96184e-07 | 0.999999 |
| rad61         | 4.63175e-08 | 1.000000 | 3.80286e-07 | 0.999999 |
| rad40syn      | 4.44486e-08 | 1.000000 | 3.64941e-07 | 0.999999 |
| rad40anti     | 2.92726e-08 | 1.000000 | 2.40340e-07 | 1.000000 |
| rad42         | 1.00962e-08 | 1.000000 | 8.28937e-08 | 1.000000 |
| rad45         | 6.66299e-09 | 1.000000 | 5.47059e-08 | 1.000000 |
| rad41         | 5.35586e-09 | 1.000000 | 4.39738e-08 | 1.000000 |
| rad22         | 4.27119e-09 | 1.000000 | 3.50682e-08 | 1.000000 |
| rad9          | 3.73272e-09 | 1.000000 | 3.06471e-08 | 1.000000 |
| rad20         | 2.61593e-09 | 1.000000 | 2.14778e-08 | 1.000000 |
| rad11         | 1.64924e-09 | 1.000000 | 1.35409e-08 | 1.000000 |
| rad21         | 1.30567e-09 | 1.000000 | 1.07200e-08 | 1.000000 |
| rad36         | 1.17846e-09 | 1.000000 | 9.67567e-09 | 1.000000 |
| rad7          | 9.55478e-10 | 1.000000 | 7.84486e-09 | 1.000000 |
| rad18         | 6.25414e-10 | 1.000000 | 5.13490e-09 | 1.000000 |
| rad28         | 5.37152e-10 | 1.000000 | 4.41024e-09 | 1.000000 |
| rad15         | 2.14795e-10 | 1.000000 | 1.76355e-09 | 1.000000 |
| rad13         | 8.56802e-11 | 1.000000 | 7.03469e-10 | 1.000000 |
| rad24         | 5.69982e-11 | 1.000000 | 4.67978e-10 | 1.000000 |
| rad12         | 3.05359e-11 | 1.000000 | 2.50712e-10 | 1.000000 |
| rad26         | 2.35883e-11 | 1.000000 | 1.93670e-10 | 1.000000 |
| rad8          | 2.16927e-11 | 1.000000 | 1.78106e-10 | 1.000000 |
| rad10         | 7.47344e-12 | 1.000000 | 6.13600e-11 | 1.000000 |
| rad33         | 3.63161e-12 | 1.000000 | 2.98170e-11 | 1.000000 |
| rad25         | 2.85050e-12 | 1.000000 | 2.34038e-11 | 1.000000 |
| rad2          | 1.66647e-12 | 1.000000 | 1.36824e-11 | 1.000000 |
| rad47         | 1.41793e-12 | 1.000000 | 1.16418e-11 | 1.000000 |
| rad1          | 4.74779e-13 | 1.000000 | 3.89813e-12 | 1.000000 |
| rad3          | 3.23785e-13 | 1.000000 | 2.65841e-12 | 1.000000 |
| rad5          | 2.16828e-13 | 1.000000 | 1.78025e-12 | 1.000000 |
| rad4          | 2.05713e-13 | 1.000000 | 1.68899e-12 | 1.000000 |
| rad14         | 5.35257e-14 | 1.000000 | 4.39468e-13 | 1.000000 |
| rad27         | 1.32955e-14 | 1.000000 | 1.09162e-13 | 1.000000 |

10.000000 Pa, 2500.00000 K

| Rate constant | True (fraction)    | Effective (fraction) |             |          |
|---------------|--------------------|----------------------|-------------|----------|
| Total         | 5.32896e-13 (1.00) | 6.40311e-14 (1.00)   |             |          |
| species       | PYtrue             | Cumul                | PYeffective | Cumul    |
| Benzyl+C2H2   | 0.879843           | 0.879843             | 0.00000     | 0.00000  |
| Indene+H      | 0.0541633          | 0.934006             | 0.450772    | 0.450772 |
| PhCH2CCH+H    | 0.0379681          | 0.971974             | 0.315988    | 0.766760 |

|               |             |          |             |          |
|---------------|-------------|----------|-------------|----------|
| Ph+Allene     | 0.0112445   | 0.983219 | 0.0935817   | 0.860342 |
| PhCHCCH2+H    | 0.00999488  | 0.993214 | 0.0831820   | 0.943524 |
| PAH3+H        | 0.00124357  | 0.994457 | 0.0103495   | 0.953873 |
| PAH9+H        | 0.00106550  | 0.995523 | 0.00886763  | 0.962741 |
| rad19anti     | 0.000731021 | 0.996254 | 0.00608389  | 0.968825 |
| rad38         | 0.000614427 | 0.996868 | 0.00511355  | 0.973938 |
| PAH7+H        | 0.000586853 | 0.997455 | 0.00488406  | 0.978822 |
| rad30         | 0.000442204 | 0.997897 | 0.00368022  | 0.982503 |
| PhCCH+CH3     | 0.000309118 | 0.998206 | 0.00257263  | 0.985075 |
| rad50         | 0.000261747 | 0.998468 | 0.00217838  | 0.987254 |
| Ph+MeAc       | 0.000256974 | 0.998725 | 0.00213865  | 0.989392 |
| rad35         | 0.000242198 | 0.998967 | 0.00201569  | 0.991408 |
| rad46         | 0.000207896 | 0.999175 | 0.00173020  | 0.993138 |
| rad39         | 0.000175829 | 0.999351 | 0.00146333  | 0.994601 |
| rad51         | 0.000109708 | 0.999461 | 0.000913039 | 0.995514 |
| rad59         | 0.000104826 | 0.999566 | 0.000872407 | 0.996387 |
| rad67         | 7.34555e-05 | 0.999639 | 0.000611331 | 0.996998 |
| PhCCCH3+H     | 7.22809e-05 | 0.999711 | 0.000601556 | 0.997600 |
| rad60syn      | 6.81858e-05 | 0.999780 | 0.000567474 | 0.998167 |
| rad60anti     | 4.82378e-05 | 0.999828 | 0.000401458 | 0.998569 |
| PAH10+CH3     | 3.09025e-05 | 0.999859 | 0.000257185 | 0.998826 |
| rad52         | 2.78177e-05 | 0.999887 | 0.000231512 | 0.999057 |
| rad19syn      | 2.34830e-05 | 0.999910 | 0.000195437 | 0.999253 |
| rad58         | 1.71636e-05 | 0.999927 | 0.000142843 | 0.999396 |
| PhcycC3H3_A+H | 1.49485e-05 | 0.999942 | 0.000124408 | 0.999520 |
| PAH1+H        | 1.13058e-05 | 0.999953 | 9.40925e-05 | 0.999614 |
| rad71         | 1.09143e-05 | 0.999964 | 9.08340e-05 | 0.999705 |
| rad37         | 8.12882e-06 | 0.999972 | 6.76518e-05 | 0.999773 |
| rad54         | 6.28068e-06 | 0.999979 | 5.22707e-05 | 0.999825 |
| rad73         | 5.97340e-06 | 0.999985 | 4.97134e-05 | 0.999875 |
| rad70         | 5.97145e-06 | 0.999991 | 4.96971e-05 | 0.999924 |
| rad65         | 2.87752e-06 | 0.999994 | 2.39480e-05 | 0.999948 |
| rad34         | 1.90646e-06 | 0.999995 | 1.58664e-05 | 0.999964 |
| PAH8+H        | 1.06599e-06 | 0.999997 | 8.87168e-06 | 0.999973 |
| rad72         | 7.24745e-07 | 0.999997 | 6.03167e-06 | 0.999979 |
| rad55         | 5.87635e-07 | 0.999998 | 4.89057e-06 | 0.999984 |
| rad56         | 3.22057e-07 | 0.999998 | 2.68031e-06 | 0.999987 |
| rad64         | 2.70979e-07 | 0.999998 | 2.25522e-06 | 0.999989 |
| rad53         | 2.70924e-07 | 0.999999 | 2.25475e-06 | 0.999991 |
| rad68syn      | 2.47581e-07 | 0.999999 | 2.06048e-06 | 0.999993 |
| rad68anti     | 1.58732e-07 | 0.999999 | 1.32104e-06 | 0.999995 |
| rad62         | 1.55224e-07 | 0.999999 | 1.29185e-06 | 0.999996 |
| rad40syn      | 1.10788e-07 | 0.999999 | 9.22028e-07 | 0.999997 |
| rad61         | 1.05709e-07 | 1.000000 | 8.79757e-07 | 0.999998 |
| rad43         | 8.79745e-08 | 1.000000 | 7.32165e-07 | 0.999998 |
| rad40anti     | 7.53857e-08 | 1.000000 | 6.27395e-07 | 0.999999 |
| rad6          | 2.40082e-08 | 1.000000 | 1.99808e-07 | 0.999999 |
| rad42         | 1.97427e-08 | 1.000000 | 1.64308e-07 | 0.999999 |
| rad23         | 1.73736e-08 | 1.000000 | 1.44592e-07 | 0.999999 |
| rad41         | 1.13891e-08 | 1.000000 | 9.47858e-08 | 1.000000 |
| rad45         | 2.89546e-09 | 1.000000 | 2.40974e-08 | 1.000000 |
| rad9          | 1.98483e-09 | 1.000000 | 1.65186e-08 | 1.000000 |
| rad22         | 1.46084e-09 | 1.000000 | 1.21578e-08 | 1.000000 |
| rad20         | 1.44492e-09 | 1.000000 | 1.20253e-08 | 1.000000 |
| rad21         | 6.97931e-10 | 1.000000 | 5.80850e-09 | 1.000000 |
| rad11         | 6.34562e-10 | 1.000000 | 5.28112e-09 | 1.000000 |
| rad36         | 5.21986e-10 | 1.000000 | 4.34421e-09 | 1.000000 |
| rad18         | 2.81400e-10 | 1.000000 | 2.34194e-09 | 1.000000 |
| rad7          | 2.68930e-10 | 1.000000 | 2.23816e-09 | 1.000000 |
| rad15         | 1.27520e-10 | 1.000000 | 1.06128e-09 | 1.000000 |
| rad28         | 1.26837e-10 | 1.000000 | 1.05559e-09 | 1.000000 |
| rad24         | 3.60415e-11 | 1.000000 | 2.99954e-10 | 1.000000 |
| rad13         | 2.75521e-11 | 1.000000 | 2.29301e-10 | 1.000000 |
| rad12         | 2.40055e-11 | 1.000000 | 1.99785e-10 | 1.000000 |
| rad8          | 2.25333e-11 | 1.000000 | 1.87533e-10 | 1.000000 |
| rad26         | 1.30032e-11 | 1.000000 | 1.08219e-10 | 1.000000 |
| rad10         | 4.16144e-12 | 1.000000 | 3.46335e-11 | 1.000000 |
| rad47         | 2.44733e-12 | 1.000000 | 2.03678e-11 | 1.000000 |
| rad25         | 1.71572e-12 | 1.000000 | 1.42790e-11 | 1.000000 |
| rad33         | 1.46749e-12 | 1.000000 | 1.22131e-11 | 1.000000 |
| rad2          | 5.24085e-13 | 1.000000 | 4.36168e-12 | 1.000000 |
| rad5          | 2.22902e-13 | 1.000000 | 1.85509e-12 | 1.000000 |
| rad1          | 1.69796e-13 | 1.000000 | 1.41312e-12 | 1.000000 |
| rad3          | 8.91272e-14 | 1.000000 | 7.41758e-13 | 1.000000 |
| rad4          | 5.58020e-14 | 1.000000 | 4.64410e-13 | 1.000000 |
| rad14         | 2.69488e-14 | 1.000000 | 2.24280e-13 | 1.000000 |
| rad27         | 1.07856e-14 | 1.000000 | 8.97627e-14 | 1.000000 |

10.000000 Pa, 2750.00000 K

=====

| Rate constant | True (fraction) |          | Effective (fraction) |          |
|---------------|-----------------|----------|----------------------|----------|
| Total         | 8.05113e-13     | (1.00 )  | 1.00487e-13          | (1.00 )  |
| species       | PYtrue          | Cumul    | PYeffective          | Cumul    |
| Benzyl+C2H2   | 0.875189        | 0.875189 | 0.00000              | 0.00000  |
| PhCH2CCH+H    | 0.0492371       | 0.924426 | 0.394492             | 0.394492 |
| Indene+H      | 0.0427169       | 0.967143 | 0.342252             | 0.736744 |
| PhCHCCH2+H    | 0.0126523       | 0.979795 | 0.101371             | 0.838115 |
| Ph+Allene     | 0.0121360       | 0.991931 | 0.0972348            | 0.935350 |
| PAH3+H        | 0.00165412      | 0.993585 | 0.0132530            | 0.948603 |
| PAH9+H        | 0.00112926      | 0.994715 | 0.00904775           | 0.957651 |
| rad19anti     | 0.000790040     | 0.995505 | 0.00632988           | 0.963980 |
| PAH7+H        | 0.000729348     | 0.996234 | 0.00584360           | 0.969824 |
| rad38         | 0.000670533     | 0.996905 | 0.00537237           | 0.975196 |
| rad30         | 0.000454283     | 0.997359 | 0.00363976           | 0.978836 |
| rad50         | 0.000356852     | 0.997716 | 0.00285913           | 0.981695 |
| Ph+MeAc       | 0.000331298     | 0.998047 | 0.00265439           | 0.984350 |
| PhCCH+CH3     | 0.000293337     | 0.998340 | 0.00235024           | 0.986700 |
| rad35         | 0.000276888     | 0.998617 | 0.00221845           | 0.988918 |
| rad39         | 0.000242715     | 0.998860 | 0.00194466           | 0.990863 |
| rad46         | 0.000239383     | 0.999099 | 0.00191796           | 0.992781 |
| rad51         | 0.000167579     | 0.999267 | 0.00134266           | 0.994124 |
| rad59         | 0.000133898     | 0.999401 | 0.00107280           | 0.995196 |
| rad67         | 0.000103303     | 0.999504 | 0.000827676          | 0.996024 |
| PhCCCH3+H     | 9.47598e-05     | 0.999599 | 0.000759224          | 0.996783 |
| rad60syn      | 8.03400e-05     | 0.999679 | 0.000643692          | 0.997427 |
| rad60anti     | 5.74980e-05     | 0.999737 | 0.000460680          | 0.997888 |
| PAH10+CH3     | 4.75551e-05     | 0.999784 | 0.000381016          | 0.998269 |
| rad52         | 3.98009e-05     | 0.999824 | 0.000318889          | 0.998588 |
| rad19syn      | 3.43486e-05     | 0.999858 | 0.000275204          | 0.998863 |
| rad58         | 2.60272e-05     | 0.999884 | 0.000208532          | 0.999071 |
| rad71         | 2.39363e-05     | 0.999908 | 0.000191780          | 0.999263 |
| PhcycC3H3_A+H | 1.91136e-05     | 0.999928 | 0.000153140          | 0.999416 |
| PAH1+H        | 1.89331e-05     | 0.999946 | 0.000151694          | 0.999568 |
| rad73         | 1.20039e-05     | 0.999958 | 9.61765e-05          | 0.999664 |
| rad37         | 1.02458e-05     | 0.999969 | 8.20904e-05          | 0.999746 |
| rad70         | 8.97477e-06     | 0.999978 | 7.19067e-05          | 0.999818 |
| rad54         | 7.04867e-06     | 0.999985 | 5.64746e-05          | 0.999875 |
| rad65         | 4.27424e-06     | 0.999989 | 3.42456e-05          | 0.999909 |
| rad34         | 3.06734e-06     | 0.999992 | 2.45758e-05          | 0.999933 |
| PAH8+H        | 2.42543e-06     | 0.999994 | 1.94328e-05          | 0.999953 |
| rad72         | 1.88488e-06     | 0.999996 | 1.51019e-05          | 0.999968 |
| rad55         | 6.94554e-07     | 0.999997 | 5.56484e-06          | 0.999974 |
| rad56         | 5.00356e-07     | 0.999998 | 4.00890e-06          | 0.999978 |
| rad68syn      | 4.83494e-07     | 0.999998 | 3.87380e-06          | 0.999981 |
| rad64         | 4.76954e-07     | 0.999999 | 3.82140e-06          | 0.999985 |
| rad53         | 3.88227e-07     | 0.999999 | 3.11052e-06          | 0.999988 |
| rad68anti     | 3.09383e-07     | 0.999999 | 2.47881e-06          | 0.999991 |
| rad62         | 2.47738e-07     | 0.999999 | 1.98490e-06          | 0.999993 |
| rad40syn      | 2.35516e-07     | 1.000000 | 1.88698e-06          | 0.999995 |
| rad61         | 1.98425e-07     | 1.000000 | 1.58980e-06          | 0.999996 |
| rad40anti     | 1.64483e-07     | 1.000000 | 1.31786e-06          | 0.999998 |
| rad43         | 1.38328e-07     | 1.000000 | 1.10830e-06          | 0.999999 |
| rad42         | 3.59442e-08     | 1.000000 | 2.87988e-07          | 0.999999 |
| rad41         | 2.03347e-08     | 1.000000 | 1.62923e-07          | 0.999999 |
| rad23         | 6.44152e-09     | 1.000000 | 5.16101e-08          | 0.999999 |
| rad6          | 5.70432e-09     | 1.000000 | 4.57036e-08          | 0.999999 |
| rad45         | 1.37767e-09     | 1.000000 | 1.10380e-08          | 0.999999 |
| rad9          | 1.08542e-09     | 1.000000 | 8.69647e-09          | 0.999999 |
| rad20         | 8.72008e-10     | 1.000000 | 6.98661e-09          | 0.999999 |
| rad22         | 6.06717e-10     | 1.000000 | 4.86107e-09          | 0.999999 |
| rad21         | 4.06776e-10     | 1.000000 | 3.25913e-09          | 0.999999 |
| rad11         | 2.96012e-10     | 1.000000 | 2.37168e-09          | 0.999999 |
| rad36         | 2.52262e-10     | 1.000000 | 2.02114e-09          | 0.999999 |
| rad18         | 1.42005e-10     | 1.000000 | 1.13776e-09          | 0.999999 |
| rad7          | 9.02340e-11     | 1.000000 | 7.22963e-10          | 0.999999 |
| rad15         | 7.68459e-11     | 1.000000 | 6.15697e-10          | 0.999999 |
| rad28         | 4.56054e-11     | 1.000000 | 3.65395e-10          | 0.999999 |
| rad24         | 2.36700e-11     | 1.000000 | 1.89647e-10          | 0.999999 |
| rad8          | 2.27111e-11     | 1.000000 | 1.81963e-10          | 0.999999 |
| rad12         | 1.84646e-11     | 1.000000 | 1.47940e-10          | 0.999999 |
| rad13         | 1.03424e-11     | 1.000000 | 8.28639e-11          | 0.999999 |
| rad26         | 8.03145e-12     | 1.000000 | 6.43488e-11          | 0.999999 |
| rad47         | 3.66036e-12     | 1.000000 | 2.93272e-11          | 0.999999 |
| rad10         | 2.73303e-12     | 1.000000 | 2.18973e-11          | 0.999999 |
| rad25         | 1.16527e-12     | 1.000000 | 9.33628e-12          | 0.999999 |
| rad33         | 6.71643e-13     | 1.000000 | 5.38127e-12          | 0.999999 |
| rad2          | 2.62303e-13     | 1.000000 | 2.10160e-12          | 0.999999 |

|       |             |         |             |          |
|-------|-------------|---------|-------------|----------|
| rad5  | 2.21377e-13 | 1.00000 | 1.77369e-12 | 0.999999 |
| rad1  | 9.72359e-14 | 1.00000 | 7.79063e-13 | 0.999999 |
| rad3  | 3.02922e-14 | 1.00000 | 2.42704e-13 | 0.999999 |
| rad4  | 1.85087e-14 | 1.00000 | 1.48293e-13 | 0.999999 |
| rad14 | 1.78517e-14 | 1.00000 | 1.43030e-13 | 0.999999 |
| rad27 | 9.35917e-15 | 1.00000 | 7.49866e-14 | 0.999999 |

10.000000 Pa, 3000.00000 K

=====

| Rate constant | True (fraction)     | Effective (fraction) |
|---------------|---------------------|----------------------|
| Total         | 1.15309e-12 (1.00 ) | 1.53862e-13 (1.00 )  |

| species       | PYtrue      | Cumul    | PYeffective | Cumul    |
|---------------|-------------|----------|-------------|----------|
| Benzyl+C2H2   | 0.866566    | 0.866566 | 0.00000     | 0.00000  |
| PhCH2CCH+H    | 0.0611725   | 0.927738 | 0.458447    | 0.458447 |
| Indene+H      | 0.0342671   | 0.962006 | 0.256809    | 0.715256 |
| PhCHCCH2+H    | 0.0154790   | 0.977485 | 0.116005    | 0.831261 |
| Ph+Allene     | 0.0132660   | 0.990751 | 0.0994201   | 0.930681 |
| PAH3+H        | 0.00205938  | 0.992810 | 0.0154337   | 0.946115 |
| PAH9+H        | 0.00113813  | 0.993948 | 0.00852953  | 0.954644 |
| PAH7+H        | 0.000866141 | 0.994814 | 0.00649115  | 0.961135 |
| rad19anti     | 0.000812997 | 0.995627 | 0.00609286  | 0.967228 |
| rad38         | 0.000693218 | 0.996320 | 0.00519520  | 0.972424 |
| rad30         | 0.000455427 | 0.996776 | 0.00341312  | 0.975837 |
| rad50         | 0.000445160 | 0.997221 | 0.00333618  | 0.979173 |
| Ph+MeAc       | 0.000411378 | 0.997632 | 0.00308300  | 0.982256 |
| PhCCH+CH3     | 0.000319072 | 0.997952 | 0.00239123  | 0.984647 |
| rad39         | 0.000311363 | 0.998263 | 0.00233346  | 0.986981 |
| rad35         | 0.000303822 | 0.998567 | 0.00227694  | 0.989257 |
| rad46         | 0.000258931 | 0.998826 | 0.00194052  | 0.991198 |
| rad51         | 0.000229674 | 0.999055 | 0.00172125  | 0.992919 |
| rad59         | 0.000160966 | 0.999216 | 0.00120633  | 0.994126 |
| rad67         | 0.000132859 | 0.999349 | 0.000995687 | 0.995121 |
| PhCCCH3+H     | 0.000117527 | 0.999467 | 0.000880786 | 0.996002 |
| rad60syn      | 9.03378e-05 | 0.999557 | 0.000677021 | 0.996679 |
| PAH10+CH3     | 6.53527e-05 | 0.999622 | 0.000489774 | 0.997169 |
| rad60anti     | 6.52879e-05 | 0.999688 | 0.000489289 | 0.997658 |
| rad52         | 5.16018e-05 | 0.999739 | 0.000386721 | 0.998045 |
| rad19syn      | 5.01058e-05 | 0.999789 | 0.000375509 | 0.998420 |
| rad71         | 4.45280e-05 | 0.999834 | 0.000333707 | 0.998754 |
| rad58         | 3.61220e-05 | 0.999870 | 0.000270710 | 0.999025 |
| PAH1+H        | 2.86280e-05 | 0.999899 | 0.000214547 | 0.999239 |
| PhcycC3H3_A+H | 2.34373e-05 | 0.999922 | 0.000175647 | 0.999415 |
| rad73         | 2.07117e-05 | 0.999943 | 0.000155221 | 0.999570 |
| rad70         | 1.26565e-05 | 0.999955 | 9.48517e-05 | 0.999665 |
| rad37         | 1.18404e-05 | 0.999967 | 8.87361e-05 | 0.999754 |
| rad54         | 7.74187e-06 | 0.999975 | 5.80201e-05 | 0.999812 |
| rad65         | 5.71906e-06 | 0.999981 | 4.28605e-05 | 0.999855 |
| PAH8+H        | 4.80171e-06 | 0.999986 | 3.59856e-05 | 0.999891 |
| rad34         | 4.57474e-06 | 0.999990 | 3.42846e-05 | 0.999925 |
| rad72         | 4.06140e-06 | 0.999994 | 3.04375e-05 | 0.999955 |
| rad68syn      | 8.44320e-07 | 0.999995 | 6.32761e-06 | 0.999962 |
| rad55         | 7.96400e-07 | 0.999996 | 5.96848e-06 | 0.999968 |
| rad64         | 7.49041e-07 | 0.999997 | 5.61356e-06 | 0.999973 |
| rad56         | 7.20466e-07 | 0.999997 | 5.39941e-06 | 0.999979 |
| rad68anti     | 5.39474e-07 | 0.999998 | 4.04300e-06 | 0.999983 |
| rad53         | 5.23152e-07 | 0.999998 | 3.92067e-06 | 0.999987 |
| rad40syn      | 4.40720e-07 | 0.999999 | 3.30290e-06 | 0.999990 |
| rad62         | 3.72795e-07 | 0.999999 | 2.79385e-06 | 0.999993 |
| rad61         | 3.22484e-07 | 0.999999 | 2.41680e-06 | 0.999995 |
| rad40anti     | 3.14368e-07 | 1.000000 | 2.35598e-06 | 0.999998 |
| rad43         | 1.94897e-07 | 1.000000 | 1.46062e-06 | 0.999999 |
| rad42         | 5.98173e-08 | 1.000000 | 4.48291e-07 | 0.999999 |
| rad41         | 3.19487e-08 | 1.000000 | 2.39434e-07 | 1.000000 |
| rad23         | 2.71886e-09 | 1.000000 | 2.03760e-08 | 1.000000 |
| rad6          | 1.66033e-09 | 1.000000 | 1.24430e-08 | 1.000000 |
| rad45         | 7.02739e-10 | 1.000000 | 5.26656e-09 | 1.000000 |
| rad9          | 6.12716e-10 | 1.000000 | 4.59190e-09 | 1.000000 |
| rad20         | 5.63899e-10 | 1.000000 | 4.22604e-09 | 1.000000 |
| rad22         | 2.86706e-10 | 1.000000 | 2.14867e-09 | 1.000000 |
| rad21         | 2.53641e-10 | 1.000000 | 1.90087e-09 | 1.000000 |
| rad11         | 1.61480e-10 | 1.000000 | 1.21019e-09 | 1.000000 |
| rad36         | 1.30310e-10 | 1.000000 | 9.76588e-10 | 1.000000 |
| rad18         | 7.80463e-11 | 1.000000 | 5.84904e-10 | 1.000000 |
| rad15         | 4.71797e-11 | 1.000000 | 3.53580e-10 | 1.000000 |
| rad7          | 3.54513e-11 | 1.000000 | 2.65683e-10 | 1.000000 |
| rad8          | 2.23591e-11 | 1.000000 | 1.67567e-10 | 1.000000 |
| rad28         | 2.14485e-11 | 1.000000 | 1.60742e-10 | 1.000000 |



|       |             |         |             |          |
|-------|-------------|---------|-------------|----------|
| rad24 | 1.60029e-11 | 1.00000 | 1.19931e-10 | 1.000000 |
| rad12 | 1.40788e-11 | 1.00000 | 1.05511e-10 | 1.000000 |
| rad26 | 5.10414e-12 | 1.00000 | 3.82521e-11 | 1.000000 |
| rad47 | 4.90460e-12 | 1.00000 | 3.67567e-11 | 1.000000 |
| rad13 | 4.49143e-12 | 1.00000 | 3.36603e-11 | 1.000000 |
| rad10 | 1.85252e-12 | 1.00000 | 1.38834e-11 | 1.000000 |
| rad25 | 8.61863e-13 | 1.00000 | 6.45908e-12 | 1.000000 |
| rad33 | 3.44471e-13 | 1.00000 | 2.58158e-12 | 1.000000 |
| rad5  | 2.14696e-13 | 1.00000 | 1.60900e-12 | 1.000000 |
| rad2  | 1.59062e-13 | 1.00000 | 1.19206e-12 | 1.000000 |
| rad1  | 6.65753e-14 | 1.00000 | 4.98937e-13 | 1.000000 |
| rad14 | 1.40994e-14 | 1.00000 | 1.05666e-13 | 1.000000 |
| rad3  | 1.24932e-14 | 1.00000 | 9.36280e-14 | 1.000000 |
| rad27 | 8.05055e-15 | 1.00000 | 6.03335e-14 | 1.000000 |
| rad4  | 7.41471e-15 | 1.00000 | 5.55683e-14 | 1.000000 |

10.0000000 Pa, 3250.00000 K

| =====         |                     |          |                      |          |
|---------------|---------------------|----------|----------------------|----------|
| Rate constant | True (fraction)     |          | Effective (fraction) |          |
| -----         |                     |          |                      |          |
| Total         | 1.58309e-12 (1.00 ) |          | 2.28795e-13 (1.00 )  |          |
| species       | PYtrue              | Cumul    | PYeffective          | Cumul    |
| -----         |                     |          |                      |          |
| Benzyl+C2H2   | 0.855476            | 0.855476 | 0.00000              | 0.00000  |
| PhCH2CCH+H    | 0.0734301           | 0.928906 | 0.508082             | 0.508082 |
| Indene+H      | 0.0278643           | 0.956770 | 0.192800             | 0.700882 |
| PhCHCCH2+H    | 0.0183610           | 0.975131 | 0.127045             | 0.827927 |
| Ph+Allene     | 0.0145940           | 0.989725 | 0.100980             | 0.928907 |
| PAH3+H        | 0.00243645          | 0.992162 | 0.0168585            | 0.945765 |
| PAH9+H        | 0.00110340          | 0.993265 | 0.00763468           | 0.953400 |
| PAH7+H        | 0.000986573         | 0.994252 | 0.00682636           | 0.960227 |
| rad19anti     | 0.000808911         | 0.995061 | 0.00559706           | 0.965824 |
| rad38         | 0.000686670         | 0.995747 | 0.00475125           | 0.970575 |
| rad50         | 0.000518185         | 0.996266 | 0.00358546           | 0.974160 |
| Ph+MeAc       | 0.000489465         | 0.996755 | 0.00338674           | 0.977547 |
| rad30         | 0.000447972         | 0.997203 | 0.00309964           | 0.980647 |
| PhCCH+CH3     | 0.000378211         | 0.997581 | 0.00261694           | 0.983264 |
| rad39         | 0.000374440         | 0.997956 | 0.00259085           | 0.985854 |
| rad35         | 0.000323023         | 0.998279 | 0.00223508           | 0.988090 |
| rad51         | 0.000289251         | 0.998568 | 0.00200140           | 0.990091 |
| rad46         | 0.000266714         | 0.998835 | 0.00184547           | 0.991936 |
| rad59         | 0.000184695         | 0.999019 | 0.00127795           | 0.993214 |
| rad67         | 0.000159865         | 0.999179 | 0.00110615           | 0.994321 |
| PhCCCH3+H     | 0.000140367         | 0.999320 | 0.000971235          | 0.995292 |
| rad60syn      | 9.79791e-05         | 0.999418 | 0.000677943          | 0.995970 |
| PAH10+CH3     | 8.26144e-05         | 0.999500 | 0.000571631          | 0.996541 |
| rad71         | 7.28137e-05         | 0.999573 | 0.000503817          | 0.997045 |
| rad60anti     | 7.14060e-05         | 0.999644 | 0.000494077          | 0.997539 |
| rad19syn      | 7.13407e-05         | 0.999716 | 0.000493625          | 0.998033 |
| rad52         | 6.19542e-05         | 0.999778 | 0.000428677          | 0.998462 |
| rad58         | 4.68389e-05         | 0.999825 | 0.000324090          | 0.998786 |
| PAH1+H        | 3.98749e-05         | 0.999864 | 0.000275905          | 0.999062 |
| rad73         | 3.17369e-05         | 0.999896 | 0.000219596          | 0.999281 |
| PhcycC3H3_A+H | 2.77968e-05         | 0.999924 | 0.000192333          | 0.999473 |
| rad70         | 1.68825e-05         | 0.999941 | 0.000116815          | 0.999590 |
| rad37         | 1.28498e-05         | 0.999954 | 8.89115e-05          | 0.999679 |
| PAH8+H        | 8.50466e-06         | 0.999962 | 5.88460e-05          | 0.999738 |
| rad54         | 8.38236e-06         | 0.999971 | 5.79998e-05          | 0.999796 |
| rad72         | 7.52774e-06         | 0.999978 | 5.20864e-05          | 0.999848 |
| rad65         | 7.06087e-06         | 0.999985 | 4.88560e-05          | 0.999897 |
| rad34         | 6.39570e-06         | 0.999992 | 4.42535e-05          | 0.999941 |
| rad68syn      | 1.34607e-06         | 0.999993 | 9.31381e-06          | 0.999951 |
| rad64         | 1.07439e-06         | 0.999994 | 7.43398e-06          | 0.999958 |
| rad56         | 9.79696e-07         | 0.999995 | 6.77877e-06          | 0.999965 |
| rad55         | 8.94000e-07         | 0.999996 | 6.18582e-06          | 0.999971 |
| rad68anti     | 8.59064e-07         | 0.999997 | 5.94409e-06          | 0.999977 |
| rad40syn      | 7.44334e-07         | 0.999997 | 5.15024e-06          | 0.999982 |
| rad53         | 6.73268e-07         | 0.999998 | 4.65852e-06          | 0.999987 |
| rad40anti     | 5.40363e-07         | 0.999999 | 3.73891e-06          | 0.999990 |
| rad62         | 5.25225e-07         | 0.999999 | 3.63417e-06          | 0.999994 |
| rad61         | 4.70540e-07         | 1.000000 | 3.25579e-06          | 0.999997 |
| rad43         | 2.53715e-07         | 1.000000 | 1.75552e-06          | 0.999999 |
| rad42         | 9.14471e-08         | 1.00000  | 6.32746e-07          | 1.000000 |
| rad41         | 4.57452e-08         | 1.00000  | 3.16523e-07          | 1.00000  |
| rad23         | 1.25426e-09         | 1.00000  | 8.67856e-09          | 1.00000  |
| rad6          | 5.78137e-10         | 1.00000  | 4.00028e-09          | 1.00000  |
| rad20         | 3.85208e-10         | 1.00000  | 2.66536e-09          | 1.00000  |
| rad45         | 3.78508e-10         | 1.00000  | 2.61899e-09          | 1.00000  |
| rad9          | 3.57794e-10         | 1.00000  | 2.47567e-09          | 1.00000  |

|       |             |         |             |         |
|-------|-------------|---------|-------------|---------|
| rad21 | 1.66884e-10 | 1.00000 | 1.15471e-09 | 1.00000 |
| rad22 | 1.49413e-10 | 1.00000 | 1.03383e-09 | 1.00000 |
| rad11 | 9.93935e-11 | 1.00000 | 6.87730e-10 | 1.00000 |
| rad36 | 7.08994e-11 | 1.00000 | 4.90572e-10 | 1.00000 |
| rad18 | 4.58209e-11 | 1.00000 | 3.17047e-10 | 1.00000 |
| rad15 | 2.96137e-11 | 1.00000 | 2.04905e-10 | 1.00000 |
| rad8  | 2.15871e-11 | 1.00000 | 1.49367e-10 | 1.00000 |
| rad7  | 1.59951e-11 | 1.00000 | 1.10674e-10 | 1.00000 |
| rad28 | 1.17765e-11 | 1.00000 | 8.14848e-11 | 1.00000 |
| rad24 | 1.10779e-11 | 1.00000 | 7.66507e-11 | 1.00000 |
| rad12 | 1.07286e-11 | 1.00000 | 7.42343e-11 | 1.00000 |
| rad47 | 6.03556e-12 | 1.00000 | 4.17616e-11 | 1.00000 |
| rad26 | 3.28782e-12 | 1.00000 | 2.27493e-11 | 1.00000 |
| rad13 | 2.21971e-12 | 1.00000 | 1.53588e-11 | 1.00000 |
| rad10 | 1.26513e-12 | 1.00000 | 8.75375e-12 | 1.00000 |
| rad25 | 6.73806e-13 | 1.00000 | 4.66224e-12 | 1.00000 |
| rad5  | 2.06036e-13 | 1.00000 | 1.42562e-12 | 1.00000 |
| rad33 | 1.94988e-13 | 1.00000 | 1.34917e-12 | 1.00000 |
| rad2  | 1.03754e-13 | 1.00000 | 7.17904e-13 | 1.00000 |
| rad1  | 4.84074e-14 | 1.00000 | 3.34943e-13 | 1.00000 |
| rad14 | 1.20856e-14 | 1.00000 | 8.36231e-14 | 1.00000 |
| rad27 | 6.81496e-15 | 1.00000 | 4.71545e-14 | 1.00000 |
| rad3  | 6.06555e-15 | 1.00000 | 4.19691e-14 | 1.00000 |
| rad4  | 3.50329e-15 | 1.00000 | 2.42402e-14 | 1.00000 |

10.000000 Pa, 3500.00000 K

=====  
Rate constant | True (fraction) | Effective (fraction)  
-----

Total | 2.10046e-12 (1.00 ) | 3.29923e-13 (1.00 )

| species       | PYtrue      | Cumul    | PYeffective | Cumul    |
|---------------|-------------|----------|-------------|----------|
| Benzyl+C2H2   | 0.842928    | 0.842928 | 0.00000     | 0.00000  |
| PhCH2CCH+H    | 0.0857241   | 0.928652 | 0.545762    | 0.545762 |
| Indene+H      | 0.0229287   | 0.951581 | 0.145976    | 0.691738 |
| PhCHCCH2+H    | 0.0212218   | 0.972803 | 0.135108    | 0.826846 |
| Ph+Allene     | 0.0160719   | 0.988874 | 0.102322    | 0.929168 |
| PAH3+H        | 0.00277080  | 0.991645 | 0.0176403   | 0.946808 |
| PAH7+H        | 0.00108547  | 0.992731 | 0.00691065  | 0.953719 |
| PAH9+H        | 0.00103824  | 0.993769 | 0.00660997  | 0.960329 |
| rad19anti     | 0.000786012 | 0.994555 | 0.00500415  | 0.965333 |
| rad38         | 0.000657574 | 0.995213 | 0.00418645  | 0.969520 |
| rad50         | 0.000571325 | 0.995784 | 0.00363734  | 0.973157 |
| Ph+MeAc       | 0.000559758 | 0.996344 | 0.00356370  | 0.976721 |
| PhCCH+CH3     | 0.000466753 | 0.996810 | 0.00297158  | 0.979692 |
| rad30         | 0.000434295 | 0.997245 | 0.00276494  | 0.982457 |
| rad39         | 0.000426790 | 0.997672 | 0.00271716  | 0.985174 |
| rad51         | 0.000340825 | 0.998012 | 0.00216986  | 0.987344 |
| rad35         | 0.000335221 | 0.998348 | 0.00213418  | 0.989478 |
| rad46         | 0.000264413 | 0.998612 | 0.00168339  | 0.991162 |
| rad59         | 0.000204435 | 0.998816 | 0.00130154  | 0.992463 |
| rad67         | 0.000182834 | 0.998999 | 0.00116401  | 0.993627 |
| PhCCCH3+H     | 0.000163685 | 0.999163 | 0.00104210  | 0.994669 |
| rad71         | 0.000107604 | 0.999271 | 0.000685063 | 0.995354 |
| rad60syn      | 0.000103349 | 0.999374 | 0.000657969 | 0.996012 |
| PAH10+CH3     | 9.81182e-05 | 0.999472 | 0.000624670 | 0.996637 |
| rad19syn      | 9.79725e-05 | 0.999570 | 0.000623742 | 0.997261 |
| rad60anti     | 7.58697e-05 | 0.999646 | 0.000483025 | 0.997744 |
| rad52         | 7.00221e-05 | 0.999716 | 0.000445796 | 0.998190 |
| rad58         | 5.76196e-05 | 0.999773 | 0.000366835 | 0.998556 |
| PAH1+H        | 5.20525e-05 | 0.999826 | 0.000331392 | 0.998888 |
| rad73         | 4.43117e-05 | 0.999870 | 0.000282110 | 0.999170 |
| PhcycC3H3_A+H | 3.20633e-05 | 0.999902 | 0.000204131 | 0.999374 |
| rad70         | 2.14709e-05 | 0.999923 | 0.000136694 | 0.999511 |
| PAH8+H        | 1.37726e-05 | 0.999937 | 8.76830e-05 | 0.999598 |
| rad37         | 1.33235e-05 | 0.999950 | 8.48242e-05 | 0.999683 |
| rad72         | 1.23930e-05 | 0.999963 | 7.89002e-05 | 0.999762 |
| rad54         | 8.98058e-06 | 0.999972 | 5.71749e-05 | 0.999819 |
| rad34         | 8.46719e-06 | 0.999980 | 5.39064e-05 | 0.999873 |
| rad65         | 8.19021e-06 | 0.999989 | 5.21430e-05 | 0.999925 |
| rad68syn      | 1.99232e-06 | 0.999991 | 1.26841e-05 | 0.999938 |
| rad64         | 1.43497e-06 | 0.999992 | 9.13572e-06 | 0.999947 |
| rad56         | 1.27413e-06 | 0.999993 | 8.11173e-06 | 0.999955 |
| rad68anti     | 1.27030e-06 | 0.999994 | 8.08738e-06 | 0.999963 |
| rad40syn      | 1.15717e-06 | 0.999996 | 7.36710e-06 | 0.999971 |
| rad55         | 9.87614e-07 | 0.999997 | 6.28765e-06 | 0.999977 |
| rad40anti     | 8.52744e-07 | 0.999997 | 5.42900e-06 | 0.999982 |
| rad53         | 8.35967e-07 | 0.999998 | 5.32219e-06 | 0.999988 |
| rad62         | 6.97363e-07 | 0.999999 | 4.43976e-06 | 0.999992 |

|       |             |          |             |          |
|-------|-------------|----------|-------------|----------|
| rad61 | 6.32570e-07 | 1.000000 | 4.02726e-06 | 0.999996 |
| rad43 | 3.12012e-07 | 1.000000 | 1.98643e-06 | 0.999998 |
| rad42 | 1.30123e-07 | 1.000000 | 8.28428e-07 | 0.999999 |
| rad41 | 6.11801e-08 | 1.000000 | 3.89503e-07 | 0.999999 |
| rad23 | 6.19632e-10 | 1.000000 | 3.94489e-09 | 0.999999 |
| rad20 | 2.75049e-10 | 1.000000 | 1.75110e-09 | 0.999999 |
| rad6  | 2.36193e-10 | 1.000000 | 1.50372e-09 | 0.999999 |
| rad9  | 2.16215e-10 | 1.000000 | 1.37653e-09 | 0.999999 |
| rad45 | 2.12974e-10 | 1.000000 | 1.35590e-09 | 0.999999 |
| rad21 | 1.14699e-10 | 1.000000 | 7.30230e-10 | 0.999999 |
| rad22 | 8.42443e-11 | 1.000000 | 5.36341e-10 | 0.999999 |
| rad11 | 6.69444e-11 | 1.000000 | 4.26202e-10 | 0.999999 |
| rad36 | 4.02090e-11 | 1.000000 | 2.55991e-10 | 0.999999 |
| rad18 | 2.83524e-11 | 1.000000 | 1.80505e-10 | 0.999999 |
| rad8  | 2.04913e-11 | 1.000000 | 1.30458e-10 | 0.999999 |
| rad15 | 1.90323e-11 | 1.000000 | 1.21169e-10 | 0.999999 |
| rad12 | 8.20894e-12 | 1.000000 | 5.22622e-11 | 0.999999 |
| rad7  | 8.10505e-12 | 1.000000 | 5.16008e-11 | 0.999999 |
| rad24 | 7.82707e-12 | 1.000000 | 4.98311e-11 | 0.999999 |
| rad28 | 7.06306e-12 | 1.000000 | 4.49670e-11 | 0.999999 |
| rad47 | 6.95001e-12 | 1.000000 | 4.42472e-11 | 0.999999 |
| rad26 | 2.14585e-12 | 1.000000 | 1.36616e-11 | 0.999999 |
| rad13 | 1.22301e-12 | 1.000000 | 7.78628e-12 | 0.999999 |
| rad10 | 8.71233e-13 | 1.000000 | 5.54671e-12 | 0.999999 |
| rad25 | 5.45450e-13 | 1.000000 | 3.47261e-12 | 0.999999 |
| rad5  | 1.97180e-13 | 1.000000 | 1.25535e-12 | 0.999999 |
| rad33 | 1.19852e-13 | 1.000000 | 7.63036e-13 | 0.999999 |
| rad2  | 7.08107e-14 | 1.000000 | 4.50817e-13 | 0.999999 |
| rad1  | 3.61383e-14 | 1.000000 | 2.30074e-13 | 0.999999 |
| rad14 | 1.06725e-14 | 1.000000 | 6.79467e-14 | 0.999999 |
| rad27 | 5.71484e-15 | 1.000000 | 3.63835e-14 | 0.999999 |
| rad3  | 3.35156e-15 | 1.000000 | 2.13377e-14 | 0.999999 |
| rad4  | 1.89591e-15 | 1.000000 | 1.20703e-14 | 0.999999 |

10.000000 Pa, 3750.00000 K

| Rate constant | True (fraction)     | Effective (fraction) |
|---------------|---------------------|----------------------|
| Total         | 2.70978e-12 (1.00 ) | 4.61708e-13 (1.00 )  |

| species       | PYtrue      | Cumul    | PYeffective | Cumul    |
|---------------|-------------|----------|-------------|----------|
| Benzyl+C2H2   | 0.829614    | 0.829614 | 0.00000     | 0.00000  |
| PhCH2CCH+H    | 0.0978316   | 0.927446 | 0.574175    | 0.574175 |
| PhCHCCH2+H    | 0.0240141   | 0.951460 | 0.140939    | 0.715114 |
| Indene+H      | 0.0190788   | 0.970538 | 0.111974    | 0.827088 |
| Ph+Allene     | 0.0176550   | 0.988193 | 0.103617    | 0.930705 |
| PAH3+H        | 0.00305565  | 0.991249 | 0.0179337   | 0.948639 |
| PAH7+H        | 0.00116197  | 0.992411 | 0.00681959  | 0.955458 |
| PAH9+H        | 0.000955041 | 0.993366 | 0.00560515  | 0.961063 |
| rad19anti     | 0.000750872 | 0.994117 | 0.00440688  | 0.965470 |
| Ph+MeAc       | 0.000618509 | 0.994736 | 0.00363004  | 0.969100 |
| rad38         | 0.000613193 | 0.995349 | 0.00359884  | 0.972699 |
| rad50         | 0.000603635 | 0.995952 | 0.00354274  | 0.976242 |
| PhCCH+CH3     | 0.000581835 | 0.996534 | 0.00341480  | 0.979657 |
| rad39         | 0.000465791 | 0.997000 | 0.00273373  | 0.982390 |
| rad30         | 0.000416539 | 0.997417 | 0.00244467  | 0.984835 |
| rad51         | 0.000380996 | 0.997798 | 0.00223607  | 0.987071 |
| rad35         | 0.000341507 | 0.998139 | 0.00200431  | 0.989076 |
| rad46         | 0.000254425 | 0.998393 | 0.00149322  | 0.990569 |
| rad59         | 0.000220084 | 0.998614 | 0.00129168  | 0.991860 |
| rad67         | 0.000201013 | 0.998815 | 0.00117975  | 0.993040 |
| PhCCCH3+H     | 0.000187990 | 0.999003 | 0.00110331  | 0.994143 |
| rad71         | 0.000146782 | 0.999149 | 0.000861466 | 0.995005 |
| rad19syn      | 0.000129261 | 0.999279 | 0.000758633 | 0.995764 |
| PAH10+CH3     | 0.000111172 | 0.999390 | 0.000652468 | 0.996416 |
| rad60syn      | 0.000106707 | 0.999496 | 0.000626263 | 0.997042 |
| rad60anti     | 7.88382e-05 | 0.999575 | 0.000462703 | 0.997505 |
| rad52         | 7.54522e-05 | 0.999651 | 0.000442830 | 0.997948 |
| rad58         | 6.80261e-05 | 0.999719 | 0.000399246 | 0.998347 |
| PAH1+H        | 6.45814e-05 | 0.999783 | 0.000379029 | 0.998726 |
| rad73         | 5.74883e-05 | 0.999841 | 0.000337400 | 0.999064 |
| PhcycC3H3_A+H | 3.61213e-05 | 0.999877 | 0.000211996 | 0.999276 |
| rad70         | 2.62309e-05 | 0.999903 | 0.000153949 | 0.999429 |
| PAH8+H        | 2.07420e-05 | 0.999924 | 0.000121735 | 0.999551 |
| rad72         | 1.85752e-05 | 0.999943 | 0.000109018 | 0.999660 |
| rad37         | 1.33636e-05 | 0.999956 | 7.84313e-05 | 0.999739 |
| rad34         | 1.07116e-05 | 0.999967 | 6.28665e-05 | 0.999802 |
| rad54         | 9.53969e-06 | 0.999976 | 5.59886e-05 | 0.999858 |
| rad65         | 9.05128e-06 | 0.999985 | 5.31221e-05 | 0.999911 |

|           |             |          |             |          |
|-----------|-------------|----------|-------------|----------|
| rad68syn  | 2.77520e-06 | 0.999988 | 1.62877e-05 | 0.999927 |
| rad64     | 1.81236e-06 | 0.999990 | 1.06368e-05 | 0.999938 |
| rad68anti | 1.76807e-06 | 0.999992 | 1.03768e-05 | 0.999948 |
| rad40syn  | 1.68194e-06 | 0.999993 | 9.87131e-06 | 0.999958 |
| rad56     | 1.59874e-06 | 0.999995 | 9.38302e-06 | 0.999967 |
| rad40anti | 1.25564e-06 | 0.999996 | 7.36936e-06 | 0.999975 |
| rad55     | 1.07703e-06 | 0.999997 | 6.32112e-06 | 0.999981 |
| rad53     | 1.00841e-06 | 0.999998 | 5.91835e-06 | 0.999987 |
| rad62     | 8.81787e-07 | 0.999999 | 5.17522e-06 | 0.999992 |
| rad61     | 7.98456e-07 | 1.000000 | 4.68615e-06 | 0.999997 |
| rad43     | 3.67979e-07 | 1.000000 | 2.15967e-06 | 0.999999 |
| rad42     | 1.74776e-07 | 1.000000 | 1.02576e-06 | 1.000000 |
| rad41     | 7.77074e-08 | 1.000000 | 4.56066e-07 | 1.000000 |
| rad23     | 3.23733e-10 | 1.000000 | 1.89999e-09 | 1.000000 |
| rad20     | 2.03652e-10 | 1.000000 | 1.19524e-09 | 1.000000 |
| rad9      | 1.35073e-10 | 1.000000 | 7.92745e-10 | 1.000000 |
| rad45     | 1.24238e-10 | 1.000000 | 7.29155e-10 | 1.000000 |
| rad6      | 1.10794e-10 | 1.000000 | 6.50251e-10 | 1.000000 |
| rad21     | 8.17332e-11 | 1.000000 | 4.79693e-10 | 1.000000 |
| rad22     | 5.06967e-11 | 1.000000 | 2.97540e-10 | 1.000000 |
| rad11     | 4.81917e-11 | 1.000000 | 2.82838e-10 | 1.000000 |
| rad36     | 2.35954e-11 | 1.000000 | 1.38482e-10 | 1.000000 |
| rad8      | 1.91615e-11 | 1.000000 | 1.12459e-10 | 1.000000 |
| rad18     | 1.83144e-11 | 1.000000 | 1.07487e-10 | 1.000000 |
| rad15     | 1.25232e-11 | 1.000000 | 7.34988e-11 | 1.000000 |
| rad47     | 7.59710e-12 | 1.000000 | 4.45875e-11 | 1.000000 |
| rad12     | 6.32130e-12 | 1.000000 | 3.70998e-11 | 1.000000 |
| rad24     | 5.63443e-12 | 1.000000 | 3.30685e-11 | 1.000000 |
| rad7      | 4.51209e-12 | 1.000000 | 2.64815e-11 | 1.000000 |
| rad28     | 4.47413e-12 | 1.000000 | 2.62587e-11 | 1.000000 |
| rad26     | 1.42172e-12 | 1.000000 | 8.34410e-12 | 1.000000 |
| rad13     | 7.35919e-13 | 1.000000 | 4.31912e-12 | 1.000000 |
| rad10     | 6.08349e-13 | 1.000000 | 3.57041e-12 | 1.000000 |
| rad25     | 4.51407e-13 | 1.000000 | 2.64932e-12 | 1.000000 |
| rad5      | 1.88714e-13 | 1.000000 | 1.10756e-12 | 1.000000 |
| rad33     | 7.88050e-14 | 1.000000 | 4.62508e-13 | 1.000000 |
| rad2      | 5.05466e-14 | 1.000000 | 2.96659e-13 | 1.000000 |
| rad1      | 2.74198e-14 | 1.000000 | 1.60927e-13 | 1.000000 |
| rad14     | 9.50487e-15 | 1.000000 | 5.57842e-14 | 1.000000 |
| rad27     | 4.78170e-15 | 1.000000 | 2.80639e-14 | 1.000000 |
| rad3      | 2.04645e-15 | 1.000000 | 1.20106e-14 | 1.000000 |
| rad4      | 1.14238e-15 | 1.000000 | 6.70466e-15 | 1.000000 |

10.000000 Pa, 4000.00000 K

=====

| Rate constant | True (fraction)     | Effective (fraction) |
|---------------|---------------------|----------------------|
| Total         | 3.41497e-12 (1.00 ) | 6.28297e-13 (1.00 )  |

| species     | PYtrue      | Cumul    | PYeffective | Cumul    |
|-------------|-------------|----------|-------------|----------|
| Benzyl+C2H2 | 0.816017    | 0.816017 | 0.000000    | 0.000000 |
| PhCH2CCH+H  | 0.109584    | 0.925601 | 0.595618    | 0.595618 |
| PhCHCCH2+H  | 0.0267098   | 0.952311 | 0.145175    | 0.740793 |
| Ph+Allene   | 0.0193046   | 0.971615 | 0.104926    | 0.845719 |
| Indene+H    | 0.0160484   | 0.987664 | 0.0872277   | 0.932947 |
| PAH3+H      | 0.00329013  | 0.990954 | 0.0178828   | 0.950829 |
| PAH7+H      | 0.00121791  | 0.992172 | 0.00661968  | 0.957449 |
| PAH9+H      | 0.000864009 | 0.993036 | 0.00469612  | 0.962145 |
| PhCCH+CH3   | 0.000720156 | 0.993756 | 0.00391424  | 0.966060 |
| rad19anti   | 0.000708493 | 0.994464 | 0.00385085  | 0.969910 |
| Ph+MeAc     | 0.000663934 | 0.995128 | 0.00360866  | 0.973519 |
| rad50       | 0.000616860 | 0.995745 | 0.00335280  | 0.976872 |
| rad38       | 0.000560143 | 0.996305 | 0.00304453  | 0.979916 |
| rad39       | 0.000491035 | 0.996796 | 0.00266891  | 0.982585 |
| rad51       | 0.000408499 | 0.997205 | 0.00222030  | 0.984806 |
| rad30       | 0.000396478 | 0.997601 | 0.00215497  | 0.986961 |
| rad35       | 0.000343096 | 0.997945 | 0.00186482  | 0.988825 |
| rad46       | 0.000239253 | 0.998184 | 0.00130040  | 0.990126 |
| rad59       | 0.000231903 | 0.998416 | 0.00126046  | 0.991386 |
| rad67       | 0.000214260 | 0.998630 | 0.00116456  | 0.992551 |
| PhCCCH3+H   | 0.000213580 | 0.998844 | 0.00116087  | 0.993712 |
| rad71       | 0.000187845 | 0.999031 | 0.00102099  | 0.994733 |
| rad19syn    | 0.000163941 | 0.999195 | 0.000891067 | 0.995624 |
| PAH10+CH3   | 0.000121536 | 0.999317 | 0.000660582 | 0.996284 |
| rad60syn    | 0.000108396 | 0.999425 | 0.000589161 | 0.996873 |
| rad60anti   | 8.05427e-05 | 0.999506 | 0.000437772 | 0.997311 |
| rad52       | 7.82960e-05 | 0.999584 | 0.000425560 | 0.997737 |
| rad58       | 7.77572e-05 | 0.999662 | 0.000422632 | 0.998159 |
| PAH1+H      | 7.70001e-05 | 0.999739 | 0.000418517 | 0.998578 |

|               |             |          |             |          |
|---------------|-------------|----------|-------------|----------|
| rad73         | 7.03554e-05 | 0.999809 | 0.000382401 | 0.998960 |
| PhcycC3H3_A+H | 3.98814e-05 | 0.999849 | 0.000216766 | 0.999177 |
| rad70         | 3.09908e-05 | 0.999880 | 0.000168444 | 0.999346 |
| PAH8+H        | 2.94355e-05 | 0.999910 | 0.000159990 | 0.999506 |
| rad72         | 2.58286e-05 | 0.999935 | 0.000140385 | 0.999646 |
| rad37         | 1.30848e-05 | 0.999948 | 7.11194e-05 | 0.999717 |
| rad34         | 1.30497e-05 | 0.999961 | 7.09289e-05 | 0.999788 |
| rad54         | 1.00584e-05 | 0.999972 | 5.46703e-05 | 0.999843 |
| rad65         | 9.63687e-06 | 0.999981 | 5.23790e-05 | 0.999895 |
| rad68syn      | 3.67778e-06 | 0.999985 | 1.99898e-05 | 0.999915 |
| rad68anti     | 2.34154e-06 | 0.999987 | 1.27269e-05 | 0.999928 |
| rad40syn      | 2.31359e-06 | 0.999990 | 1.25750e-05 | 0.999940 |
| rad64         | 2.19077e-06 | 0.999992 | 1.19074e-05 | 0.999952 |
| rad56         | 1.94741e-06 | 0.999994 | 1.05847e-05 | 0.999963 |
| rad40anti     | 1.74691e-06 | 0.999995 | 9.49492e-06 | 0.999972 |
| rad53         | 1.18744e-06 | 0.999997 | 6.45406e-06 | 0.999979 |
| rad55         | 1.16170e-06 | 0.999998 | 6.31418e-06 | 0.999985 |
| rad62         | 1.07271e-06 | 0.999999 | 5.83046e-06 | 0.999991 |
| rad61         | 9.59661e-07 | 1.000000 | 5.21602e-06 | 0.999996 |
| rad43         | 4.20278e-07 | 1.000000 | 2.28433e-06 | 0.999998 |
| rad42         | 2.24298e-07 | 1.000000 | 1.21912e-06 | 1.000000 |
| rad41         | 9.47630e-08 | 1.000000 | 5.15063e-07 | 1.000000 |
| rad23         | 1.77339e-10 | 1.000000 | 9.63885e-10 | 1.000000 |
| rad20         | 1.55419e-10 | 1.000000 | 8.44747e-10 | 1.000000 |
| rad9          | 8.70678e-11 | 1.000000 | 4.73237e-10 | 1.000000 |
| rad45         | 7.47380e-11 | 1.000000 | 4.06221e-10 | 1.000000 |
| rad21         | 6.00468e-11 | 1.000000 | 3.26371e-10 | 1.000000 |
| rad6          | 5.83565e-11 | 1.000000 | 3.17183e-10 | 1.000000 |
| rad11         | 3.64552e-11 | 1.000000 | 1.98144e-10 | 1.000000 |
| rad22         | 3.22290e-11 | 1.000000 | 1.75173e-10 | 1.000000 |
| rad8          | 1.76826e-11 | 1.000000 | 9.61096e-11 | 1.000000 |
| rad36         | 1.42527e-11 | 1.000000 | 7.74675e-11 | 1.000000 |
| rad18         | 1.22665e-11 | 1.000000 | 6.66720e-11 | 1.000000 |
| rad15         | 8.42806e-12 | 1.000000 | 4.58088e-11 | 1.000000 |
| rad47         | 7.97229e-12 | 1.000000 | 4.33316e-11 | 1.000000 |
| rad12         | 4.90415e-12 | 1.000000 | 2.66554e-11 | 1.000000 |
| rad24         | 4.12852e-12 | 1.000000 | 2.24396e-11 | 1.000000 |
| rad28         | 2.94502e-12 | 1.000000 | 1.60070e-11 | 1.000000 |
| rad7          | 2.70724e-12 | 1.000000 | 1.47146e-11 | 1.000000 |
| rad26         | 9.57717e-13 | 1.000000 | 5.20546e-12 | 1.000000 |
| rad13         | 4.75006e-13 | 1.000000 | 2.58179e-12 | 1.000000 |
| rad10         | 4.33098e-13 | 1.000000 | 2.35400e-12 | 1.000000 |
| rad25         | 3.79147e-13 | 1.000000 | 2.06077e-12 | 1.000000 |
| rad5          | 1.80626e-13 | 1.000000 | 9.81751e-13 | 1.000000 |
| rad33         | 5.47295e-14 | 1.000000 | 2.97470e-13 | 1.000000 |
| rad2          | 3.78830e-14 | 1.000000 | 2.05904e-13 | 1.000000 |
| rad1          | 2.10635e-14 | 1.000000 | 1.14486e-13 | 1.000000 |
| rad14         | 8.48178e-15 | 1.000000 | 4.61008e-14 | 1.000000 |
| rad27         | 4.01212e-15 | 1.000000 | 2.18070e-14 | 1.000000 |
| rad3          | 1.35024e-15 | 1.000000 | 7.33895e-15 | 1.000000 |
| rad4          | 7.48385e-16 | 1.000000 | 4.06768e-15 | 1.000000 |

1.00000000 Pa, 20.0000000 K

=====

| Rate constant | True (fraction)      | Effective (fraction) |
|---------------|----------------------|----------------------|
| Total         | 1.34336e-156 (1.00 ) | 1.34336e-156 (1.00 ) |

| species     | PYtrue      | Cumul    | PYeffective | Cumul    |
|-------------|-------------|----------|-------------|----------|
| Indene+H    | 0.709561    | 0.709561 | 0.709562    | 0.709562 |
| rad22       | 0.205427    | 0.914988 | 0.205427    | 0.914989 |
| rad23       | 0.0811499   | 0.996138 | 0.0811500   | 0.996139 |
| rad45       | 0.00341719  | 0.999555 | 0.00341719  | 0.999556 |
| rad36       | 0.000212865 | 0.999768 | 0.000212865 | 0.999769 |
| rad11       | 0.000158733 | 0.999927 | 0.000158733 | 0.999928 |
| rad18       | 4.43185e-05 | 0.999971 | 4.43185e-05 | 0.999972 |
| rad6        | 2.18748e-05 | 0.999993 | 2.18748e-05 | 0.999994 |
| rad20       | 3.57626e-06 | 0.999996 | 3.57626e-06 | 0.999998 |
| rad21       | 2.20943e-06 | 0.999999 | 2.20943e-06 | 1.000000 |
| Benzyl+C2H2 | 8.07768e-07 | 0.999999 | 0.000000    | 1.000000 |
| rad7        | 1.16066e-09 | 0.999999 | 1.16066e-09 | 1.000000 |
| rad24       | 2.61468e-11 | 0.999999 | 2.61468e-11 | 1.000000 |
| rad13       | 1.56058e-11 | 0.999999 | 1.56058e-11 | 1.000000 |
| rad33       | 1.95368e-14 | 0.999999 | 1.95368e-14 | 1.000000 |
| rad3        | 1.63356e-14 | 0.999999 | 1.63356e-14 | 1.000000 |
| rad4        | 8.25856e-15 | 0.999999 | 8.25856e-15 | 1.000000 |
| rad35       | 5.47678e-15 | 0.999999 | 5.47678e-15 | 1.000000 |
| PAH9+H      | 1.25099e-15 | 0.999999 | 1.25099e-15 | 1.000000 |
| rad2        | 2.55569e-17 | 0.999999 | 2.55569e-17 | 1.000000 |

|               |             |          |             |          |
|---------------|-------------|----------|-------------|----------|
| rad38         | 1.52273e-17 | 0.999999 | 1.52273e-17 | 1.000000 |
| rad30         | 5.43377e-18 | 0.999999 | 5.43377e-18 | 1.000000 |
| rad1          | 1.61529e-18 | 0.999999 | 1.61529e-18 | 1.000000 |
| rad25         | 2.32292e-19 | 0.999999 | 2.32292e-19 | 1.000000 |
| rad10         | 1.82008e-20 | 0.999999 | 1.82008e-20 | 1.000000 |
| rad28         | 1.03588e-20 | 0.999999 | 1.03588e-20 | 1.000000 |
| rad15         | 6.04026e-22 | 0.999999 | 6.04027e-22 | 1.000000 |
| rad31         | 4.14529e-24 | 0.999999 | 4.14529e-24 | 1.000000 |
| rad14         | 1.01312e-25 | 0.999999 | 1.01313e-25 | 1.000000 |
| rad46         | 7.72564e-26 | 0.999999 | 7.72565e-26 | 1.000000 |
| rad27         | 4.72768e-26 | 0.999999 | 4.72768e-26 | 1.000000 |
| PhCCH+CH3     | 2.05923e-26 | 0.999999 | 2.05923e-26 | 1.000000 |
| PhCHCCH2+H    | 1.42281e-26 | 0.999999 | 1.42281e-26 | 1.000000 |
| rad26         | 1.72557e-27 | 0.999999 | 1.72557e-27 | 1.000000 |
| PhCCCH3+H     | 2.10896e-29 | 0.999999 | 2.10896e-29 | 1.000000 |
| rad9          | 3.60444e-30 | 0.999999 | 3.60444e-30 | 1.000000 |
| rad8          | 1.31116e-32 | 0.999999 | 1.31116e-32 | 1.000000 |
| Ph+MeAc       | 3.45778e-34 | 0.999999 | 3.45778e-34 | 1.000000 |
| Ph+Allene     | 6.01626e-35 | 0.999999 | 6.01626e-35 | 1.000000 |
| PAH7+H        | 2.52309e-35 | 0.999999 | 2.52309e-35 | 1.000000 |
| rad60syn      | 9.43294e-37 | 0.999999 | 9.43295e-37 | 1.000000 |
| rad39         | 5.55065e-37 | 0.999999 | 5.55066e-37 | 1.000000 |
| rad60anti     | 3.46901e-38 | 0.999999 | 3.46902e-38 | 1.000000 |
| rad12         | 1.45944e-38 | 0.999999 | 1.45944e-38 | 1.000000 |
| PhCH2CCH+H    | 2.80206e-40 | 0.999999 | 2.80206e-40 | 1.000000 |
| rad50         | 1.62829e-43 | 0.999999 | 1.62829e-43 | 1.000000 |
| rad37         | 8.16101e-44 | 0.999999 | 8.16101e-44 | 1.000000 |
| rad5          | 9.09635e-45 | 0.999999 | 9.09635e-45 | 1.000000 |
| PAH3+H        | 5.03954e-46 | 0.999999 | 5.03955e-46 | 1.000000 |
| rad59         | 2.57270e-46 | 0.999999 | 2.57271e-46 | 1.000000 |
| rad19syn      | 6.23843e-53 | 0.999999 | 6.23843e-53 | 1.000000 |
| rad52         | 1.33338e-53 | 0.999999 | 1.33338e-53 | 1.000000 |
| rad54         | 2.02793e-56 | 0.999999 | 2.02793e-56 | 1.000000 |
| PAH10+CH3     | 3.57750e-57 | 0.999999 | 3.57750e-57 | 1.000000 |
| rad43         | 2.39074e-57 | 0.999999 | 2.39074e-57 | 1.000000 |
| rad62         | 6.21453e-59 | 0.999999 | 6.21453e-59 | 1.000000 |
| rad51         | 8.46886e-60 | 0.999999 | 8.46887e-60 | 1.000000 |
| rad70         | 7.96350e-63 | 0.999999 | 7.96350e-63 | 1.000000 |
| PhcycC3H3_A+H | 5.41671e-63 | 0.999999 | 5.41672e-63 | 1.000000 |
| rad55         | 2.60207e-63 | 0.999999 | 2.60207e-63 | 1.000000 |
| rad65         | 2.15317e-64 | 0.999999 | 2.15317e-64 | 1.000000 |
| rad58         | 2.57607e-66 | 0.999999 | 2.57607e-66 | 1.000000 |
| PAH1+H        | 9.90485e-67 | 0.999999 | 9.90485e-67 | 1.000000 |
| rad34         | 2.30756e-68 | 0.999999 | 2.30756e-68 | 1.000000 |
| rad42         | 1.89147e-71 | 0.999999 | 1.89147e-71 | 1.000000 |
| rad47         | 8.88402e-72 | 0.999999 | 8.88403e-72 | 1.000000 |
| rad41         | 3.53782e-72 | 0.999999 | 3.53782e-72 | 1.000000 |

1.00000000 Pa, 30.0000000 K

=====

| Rate constant | True (fraction)      | Effective (fraction) |
|---------------|----------------------|----------------------|
| Total         | 1.15918e-108 (1.00 ) | 1.15918e-108 (1.00 ) |

| species     | PYtrue      | Cumul    | PYeffective | Cumul    |
|-------------|-------------|----------|-------------|----------|
| Indene+H    | 0.820190    | 0.820190 | 0.820191    | 0.820191 |
| rad23       | 0.0934389   | 0.913629 | 0.0934390   | 0.913630 |
| rad22       | 0.0827632   | 0.996392 | 0.0827633   | 0.996393 |
| rad45       | 0.00321734  | 0.999609 | 0.00321735  | 0.999611 |
| rad36       | 0.000200354 | 0.999810 | 0.000200355 | 0.999811 |
| rad11       | 0.000142867 | 0.999953 | 0.000142868 | 0.999954 |
| rad6        | 4.19043e-05 | 0.999995 | 4.19043e-05 | 0.999996 |
| rad18       | 3.54983e-06 | 0.999998 | 3.54984e-06 | 0.999999 |
| Benzy1+C2H2 | 1.03577e-06 | 0.999999 | 0.00000     | 0.999999 |
| rad20       | 4.76273e-07 | 1.000000 | 4.76274e-07 | 1.000000 |
| rad21       | 2.97519e-07 | 1.000000 | 2.97519e-07 | 1.000000 |
| rad7        | 3.48430e-09 | 1.000000 | 3.48430e-09 | 1.000000 |
| rad13       | 2.60038e-11 | 1.000000 | 2.60038e-11 | 1.000000 |
| rad24       | 2.46397e-11 | 1.000000 | 2.46398e-11 | 1.000000 |
| rad3        | 6.67390e-14 | 1.000000 | 6.67390e-14 | 1.000000 |
| rad33       | 3.49243e-14 | 1.000000 | 3.49244e-14 | 1.000000 |
| rad4        | 3.37451e-14 | 1.000000 | 3.37452e-14 | 1.000000 |
| rad35       | 1.49052e-14 | 1.000000 | 1.49052e-14 | 1.000000 |
| PAH9+H      | 3.22295e-15 | 1.000000 | 3.22295e-15 | 1.000000 |
| rad2        | 2.11554e-16 | 1.000000 | 2.11554e-16 | 1.000000 |
| rad38       | 3.58184e-17 | 1.000000 | 3.58184e-17 | 1.000000 |
| rad1        | 1.33786e-17 | 1.000000 | 1.33787e-17 | 1.000000 |
| rad30       | 3.07608e-18 | 1.000000 | 3.07608e-18 | 1.000000 |
| rad10       | 2.89525e-19 | 1.000000 | 2.89525e-19 | 1.000000 |

|               |             |          |             |         |
|---------------|-------------|----------|-------------|---------|
| rad25         | 2.00336e-19 | 1.000000 | 2.00337e-19 | 1.00000 |
| rad28         | 3.39327e-20 | 1.000000 | 3.39327e-20 | 1.00000 |
| rad15         | 3.06976e-22 | 1.000000 | 3.06977e-22 | 1.00000 |
| rad31         | 1.70670e-23 | 1.000000 | 1.70671e-23 | 1.00000 |
| rad27         | 5.25343e-25 | 1.000000 | 5.25344e-25 | 1.00000 |
| rad14         | 5.22527e-25 | 1.000000 | 5.22527e-25 | 1.00000 |
| rad46         | 1.37014e-25 | 1.000000 | 1.37014e-25 | 1.00000 |
| PhCCH+CH3     | 9.25812e-26 | 1.000000 | 9.25813e-26 | 1.00000 |
| rad26         | 3.67828e-26 | 1.000000 | 3.67828e-26 | 1.00000 |
| PhCHCCH2+H    | 6.49798e-27 | 1.000000 | 6.49798e-27 | 1.00000 |
| PhCCCH3+H     | 1.86225e-28 | 1.000000 | 1.86225e-28 | 1.00000 |
| rad9          | 1.38122e-30 | 1.000000 | 1.38122e-30 | 1.00000 |
| rad8          | 9.93098e-32 | 1.000000 | 9.93099e-32 | 1.00000 |
| Ph+MeAc       | 2.13697e-33 | 1.000000 | 2.13697e-33 | 1.00000 |
| PAH7+H        | 1.31233e-34 | 1.000000 | 1.31234e-34 | 1.00000 |
| Ph+Allene     | 1.24975e-34 | 1.000000 | 1.24975e-34 | 1.00000 |
| rad39         | 2.89911e-36 | 1.000000 | 2.89912e-36 | 1.00000 |
| rad60syn      | 8.95964e-37 | 1.000000 | 8.95965e-37 | 1.00000 |
| rad12         | 2.54938e-37 | 1.000000 | 2.54938e-37 | 1.00000 |
| rad60anti     | 2.90168e-38 | 1.000000 | 2.90168e-38 | 1.00000 |
| PhCH2CCH+H    | 7.19756e-40 | 1.000000 | 7.19757e-40 | 1.00000 |
| rad37         | 9.49584e-43 | 1.000000 | 9.49585e-43 | 1.00000 |
| rad50         | 5.47472e-44 | 1.000000 | 5.47473e-44 | 1.00000 |
| rad5          | 4.84671e-44 | 1.000000 | 4.84672e-44 | 1.00000 |
| PAH3+H        | 1.76515e-46 | 1.000000 | 1.76515e-46 | 1.00000 |
| rad59         | 9.05371e-47 | 1.000000 | 9.05372e-47 | 1.00000 |
| rad19syn      | 1.73242e-52 | 1.000000 | 1.73242e-52 | 1.00000 |
| rad52         | 1.20307e-54 | 1.000000 | 1.20307e-54 | 1.00000 |
| rad54         | 5.65415e-56 | 1.000000 | 5.65415e-56 | 1.00000 |
| PAH10+CH3     | 2.10684e-56 | 1.000000 | 2.10684e-56 | 1.00000 |
| rad43         | 8.36402e-57 | 1.000000 | 8.36402e-57 | 1.00000 |
| rad62         | 1.85261e-58 | 1.000000 | 1.85261e-58 | 1.00000 |
| rad51         | 5.15995e-61 | 1.000000 | 5.15995e-61 | 1.00000 |
| rad70         | 2.19818e-62 | 1.000000 | 2.19818e-62 | 1.00000 |
| PhcycC3H3_A+H | 1.49092e-62 | 1.000000 | 1.49092e-62 | 1.00000 |
| rad55         | 7.16996e-63 | 1.000000 | 7.16997e-63 | 1.00000 |
| rad65         | 3.79884e-65 | 1.000000 | 3.79885e-65 | 1.00000 |
| rad58         | 7.05404e-66 | 1.000000 | 7.05405e-66 | 1.00000 |
| PAH1+H        | 3.34627e-66 | 1.000000 | 3.34628e-66 | 1.00000 |
| rad34         | 6.09510e-68 | 1.000000 | 6.09511e-68 | 1.00000 |
| rad42         | 4.79845e-71 | 1.000000 | 4.79846e-71 | 1.00000 |
| rad41         | 8.87514e-72 | 1.000000 | 8.87515e-72 | 1.00000 |
| rad47         | 6.72016e-72 | 1.000000 | 6.72016e-72 | 1.00000 |

1.00000000 Pa, 40.0000000 K

=====

| Rate constant | True (fraction)     | Effective (fraction) |
|---------------|---------------------|----------------------|
| Total         | 1.02415e-84 (1.00 ) | 1.02415e-84 (1.00 )  |

| species     | PYtrue      | Cumul    | PYeffective | Cumul    |
|-------------|-------------|----------|-------------|----------|
| Indene+H    | 0.861451    | 0.861451 | 0.861452    | 0.861452 |
| rad23       | 0.0954996   | 0.956951 | 0.0954997   | 0.956952 |
| rad22       | 0.0396523   | 0.996603 | 0.0396524   | 0.996604 |
| rad45       | 0.00301625  | 0.999619 | 0.00301626  | 0.999620 |
| rad36       | 0.000187718 | 0.999807 | 0.000187718 | 0.999808 |
| rad11       | 0.000130022 | 0.999937 | 0.000130022 | 0.999938 |
| rad6        | 6.06014e-05 | 0.999997 | 6.06014e-05 | 0.999999 |
| Benzyl+C2H2 | 1.52093e-06 | 0.999999 | 0.00000     | 0.999999 |
| rad18       | 8.49768e-07 | 1.000000 | 8.49769e-07 | 1.000000 |
| rad20       | 1.63000e-07 | 1.00000  | 1.63001e-07 | 1.000000 |
| rad21       | 1.02397e-07 | 1.00000  | 1.02397e-07 | 1.000000 |
| rad7        | 6.15448e-09 | 1.00000  | 6.15449e-09 | 1.000000 |
| rad13       | 3.51108e-11 | 1.00000  | 3.51109e-11 | 1.000000 |
| rad24       | 2.32392e-11 | 1.00000  | 2.32392e-11 | 1.000000 |
| rad3        | 1.59207e-13 | 1.00000  | 1.59208e-13 | 1.000000 |
| rad4        | 8.05247e-14 | 1.00000  | 8.05248e-14 | 1.000000 |
| rad33       | 4.92219e-14 | 1.00000  | 4.92219e-14 | 1.000000 |
| rad35       | 3.11125e-14 | 1.00000  | 3.11125e-14 | 1.000000 |
| PAH9+H      | 6.50980e-15 | 1.00000  | 6.50981e-15 | 1.000000 |
| rad2        | 8.02376e-16 | 1.00000  | 8.02377e-16 | 1.000000 |
| rad38       | 7.07709e-17 | 1.00000  | 7.07710e-17 | 1.000000 |
| rad1        | 5.08043e-17 | 1.00000  | 5.08043e-17 | 1.000000 |
| rad30       | 3.41788e-18 | 1.00000  | 3.41789e-18 | 1.000000 |
| rad10       | 1.63588e-18 | 1.00000  | 1.63588e-18 | 1.000000 |
| rad25       | 2.18351e-19 | 1.00000  | 2.18352e-19 | 1.000000 |
| rad28       | 8.39561e-20 | 1.00000  | 8.39563e-20 | 1.000000 |
| rad15       | 3.33248e-22 | 1.00000  | 3.33249e-22 | 1.000000 |
| rad31       | 4.14663e-23 | 1.00000  | 4.14663e-23 | 1.000000 |

|               |             |         |             |          |
|---------------|-------------|---------|-------------|----------|
| rad27         | 2.54052e-24 | 1.00000 | 2.54052e-24 | 1.000000 |
| rad14         | 1.69649e-24 | 1.00000 | 1.69649e-24 | 1.000000 |
| PhCCH+CH3     | 2.86252e-25 | 1.00000 | 2.86252e-25 | 1.000000 |
| rad26         | 2.61234e-25 | 1.00000 | 2.61235e-25 | 1.000000 |
| rad46         | 2.29962e-25 | 1.00000 | 2.29963e-25 | 1.000000 |
| PhCHCCH2+H    | 1.15764e-26 | 1.00000 | 1.15764e-26 | 1.000000 |
| PhCCCH3+H     | 8.57158e-28 | 1.00000 | 8.57159e-28 | 1.000000 |
| rad9          | 2.00563e-30 | 1.00000 | 2.00563e-30 | 1.000000 |
| rad8          | 4.30890e-31 | 1.00000 | 4.30890e-31 | 1.000000 |
| Ph+MeAc       | 8.76038e-33 | 1.00000 | 8.76039e-33 | 1.000000 |
| PAH7+H        | 4.83353e-34 | 1.00000 | 4.83354e-34 | 1.000000 |
| Ph+Allene     | 3.14373e-34 | 1.00000 | 3.14374e-34 | 1.000000 |
| rad39         | 1.08209e-35 | 1.00000 | 1.08209e-35 | 1.000000 |
| rad12         | 1.74806e-36 | 1.00000 | 1.74806e-36 | 1.000000 |
| rad60syn      | 9.99998e-37 | 1.00000 | 9.99999e-37 | 1.000000 |
| rad60anti     | 2.97900e-38 | 1.00000 | 2.97901e-38 | 1.000000 |
| PhCH2CCH+H    | 1.93406e-39 | 1.00000 | 1.93406e-39 | 1.000000 |
| rad37         | 5.80764e-42 | 1.00000 | 5.80765e-42 | 1.000000 |
| rad5          | 1.96938e-43 | 1.00000 | 1.96938e-43 | 1.000000 |
| rad50         | 3.24468e-44 | 1.00000 | 3.24468e-44 | 1.000000 |
| PAH3+H        | 1.70342e-46 | 1.00000 | 1.70342e-46 | 1.000000 |
| rad59         | 8.58431e-47 | 1.00000 | 8.58432e-47 | 1.000000 |
| rad19syn      | 5.13170e-52 | 1.00000 | 5.13170e-52 | 1.000000 |
| rad52         | 4.04770e-55 | 1.00000 | 4.04771e-55 | 1.000000 |
| rad54         | 1.70752e-55 | 1.00000 | 1.70752e-55 | 1.000000 |
| PAH10+CH3     | 8.70853e-56 | 1.00000 | 8.70854e-56 | 1.000000 |
| rad43         | 2.76035e-56 | 1.00000 | 2.76036e-56 | 1.000000 |
| rad62         | 5.79146e-58 | 1.00000 | 5.79147e-58 | 1.000000 |
| rad51         | 6.52855e-61 | 1.00000 | 6.52856e-61 | 1.000000 |
| rad70         | 6.78310e-62 | 1.00000 | 6.78311e-62 | 1.000000 |
| PhcycC3H3_A+H | 4.60088e-62 | 1.00000 | 4.60089e-62 | 1.000000 |
| rad55         | 2.21271e-62 | 1.00000 | 2.21271e-62 | 1.000000 |
| rad65         | 1.02652e-64 | 1.00000 | 1.02652e-64 | 1.000000 |
| rad58         | 2.17696e-65 | 1.00000 | 2.17696e-65 | 1.000000 |
| PAH1+H        | 1.09754e-65 | 1.00000 | 1.09754e-65 | 1.000000 |
| rad34         | 1.85465e-67 | 1.00000 | 1.85466e-67 | 1.000000 |
| rad42         | 1.42793e-70 | 1.00000 | 1.42793e-70 | 1.000000 |
| rad41         | 2.62981e-71 | 1.00000 | 2.62982e-71 | 1.000000 |
| rad47         | 1.40411e-71 | 1.00000 | 1.40411e-71 | 1.000000 |

1.00000000 Pa, 50.0000000 K

=====

| Rate constant | True (fraction)     | Effective (fraction) |
|---------------|---------------------|----------------------|
| Total         | 2.31816e-70 (1.00 ) | 2.31816e-70 (1.00 )  |

| species     | PYtrue      | Cumul    | PYeffective | Cumul    |
|-------------|-------------|----------|-------------|----------|
| Indene+H    | 0.881177    | 0.881177 | 0.881179    | 0.881179 |
| rad23       | 0.0944541   | 0.975631 | 0.0944543   | 0.975633 |
| rad22       | 0.0211776   | 0.996809 | 0.0211777   | 0.996811 |
| rad45       | 0.00281497  | 0.999624 | 0.00281498  | 0.999626 |
| rad36       | 0.000175054 | 0.999799 | 0.000175054 | 0.999801 |
| rad11       | 0.000119006 | 0.999918 | 0.000119006 | 0.999920 |
| rad6        | 7.91238e-05 | 0.999997 | 7.91240e-05 | 0.999999 |
| Benzyl+C2H2 | 2.25066e-06 | 0.999999 | 0.00000     | 0.999999 |
| rad18       | 3.12680e-07 | 0.999999 | 3.12681e-07 | 0.999999 |
| rad20       | 7.82089e-08 | 0.999999 | 7.82091e-08 | 1.000000 |
| rad21       | 4.92745e-08 | 1.000000 | 4.92746e-08 | 1.000000 |
| rad7        | 9.01098e-09 | 1.000000 | 9.01100e-09 | 1.000000 |
| rad13       | 4.39069e-11 | 1.000000 | 4.39070e-11 | 1.000000 |
| rad24       | 2.18452e-11 | 1.000000 | 2.18452e-11 | 1.000000 |
| rad3        | 3.15339e-13 | 1.000000 | 3.15340e-13 | 1.000000 |
| rad4        | 1.59565e-13 | 1.000000 | 1.59565e-13 | 1.000000 |
| rad35       | 6.42341e-14 | 1.000000 | 6.42343e-14 | 1.000000 |
| rad33       | 6.34582e-14 | 1.000000 | 6.34583e-14 | 1.000000 |
| PAH9+H      | 1.31895e-14 | 1.000000 | 1.31895e-14 | 1.000000 |
| rad2        | 2.34955e-15 | 1.000000 | 2.34955e-15 | 1.000000 |
| rad1        | 1.49028e-16 | 1.000000 | 1.49028e-16 | 1.000000 |
| rad38       | 1.42701e-16 | 1.000000 | 1.42702e-16 | 1.000000 |
| rad10       | 6.58354e-18 | 1.000000 | 6.58356e-18 | 1.000000 |
| rad30       | 6.03713e-18 | 1.000000 | 6.03715e-18 | 1.000000 |
| rad25       | 3.14688e-19 | 1.000000 | 3.14689e-19 | 1.000000 |
| rad28       | 2.10062e-19 | 1.000000 | 2.10062e-19 | 1.000000 |
| rad15       | 5.83543e-22 | 1.000000 | 5.83545e-22 | 1.000000 |
| rad31       | 8.43100e-23 | 1.000000 | 8.43102e-23 | 1.000000 |
| rad27       | 1.00030e-23 | 1.000000 | 1.00030e-23 | 1.000000 |
| rad14       | 5.25103e-24 | 1.000000 | 5.25105e-24 | 1.000000 |
| rad26       | 1.37552e-24 | 1.000000 | 1.37552e-24 | 1.000000 |
| PhCCH+CH3   | 8.76362e-25 | 1.000000 | 8.76364e-25 | 1.000000 |



|               |             |          |             |          |
|---------------|-------------|----------|-------------|----------|
| rad46         | 4.24849e-25 | 1.000000 | 4.24850e-25 | 1.000000 |
| PhCHCCH2+H    | 3.73051e-26 | 1.000000 | 3.73052e-26 | 1.000000 |
| PhCCCH3+H     | 3.52919e-27 | 1.000000 | 3.52920e-27 | 1.000000 |
| rad9          | 4.72861e-30 | 1.000000 | 4.72862e-30 | 1.000000 |
| rad8          | 1.74516e-30 | 1.000000 | 1.74517e-30 | 1.000000 |
| Ph+MeAc       | 3.55810e-32 | 1.000000 | 3.55811e-32 | 1.000000 |
| PAH7+H        | 1.75863e-33 | 1.000000 | 1.75863e-33 | 1.000000 |
| Ph+Allene     | 9.11353e-34 | 1.000000 | 9.11355e-34 | 1.000000 |
| rad39         | 4.01343e-35 | 1.000000 | 4.01344e-35 | 1.000000 |
| rad12         | 9.85648e-36 | 1.000000 | 9.85650e-36 | 1.000000 |
| rad60syn      | 1.42222e-36 | 1.000000 | 1.42222e-36 | 1.000000 |
| rad60anti     | 4.05212e-38 | 1.000000 | 4.05213e-38 | 1.000000 |
| PhCH2CCH+H    | 6.02008e-39 | 1.000000 | 6.02010e-39 | 1.000000 |
| rad37         | 3.27235e-41 | 1.000000 | 3.27235e-41 | 1.000000 |
| rad5          | 8.47459e-43 | 1.000000 | 8.47461e-43 | 1.000000 |
| rad50         | 3.12881e-44 | 1.000000 | 3.12882e-44 | 1.000000 |
| PAH3+H        | 3.69908e-46 | 1.000000 | 3.69908e-46 | 1.000000 |
| rad59         | 1.83028e-46 | 1.000000 | 1.83029e-46 | 1.000000 |
| rad19syn      | 1.82767e-51 | 1.000000 | 1.82767e-51 | 1.000000 |
| rad54         | 6.27359e-55 | 1.000000 | 6.27360e-55 | 1.000000 |
| PAH10+CH3     | 3.85487e-55 | 1.000000 | 3.85488e-55 | 1.000000 |
| rad52         | 3.81234e-55 | 1.000000 | 3.81235e-55 | 1.000000 |
| rad43         | 1.07769e-55 | 1.000000 | 1.07769e-55 | 1.000000 |
| rad62         | 2.20275e-57 | 1.000000 | 2.20276e-57 | 1.000000 |
| rad51         | 2.21974e-60 | 1.000000 | 2.21974e-60 | 1.000000 |
| rad70         | 2.61036e-61 | 1.000000 | 2.61037e-61 | 1.000000 |
| PhcycC3H3_A+H | 1.77456e-61 | 1.000000 | 1.77456e-61 | 1.000000 |
| rad55         | 8.52746e-62 | 1.000000 | 8.52748e-62 | 1.000000 |
| rad65         | 3.90257e-64 | 1.000000 | 3.90257e-64 | 1.000000 |
| rad58         | 8.40769e-65 | 1.000000 | 8.40771e-65 | 1.000000 |
| PAH1+H        | 4.39382e-65 | 1.000000 | 4.39383e-65 | 1.000000 |
| rad34         | 7.20567e-67 | 1.000000 | 7.20568e-67 | 1.000000 |
| rad42         | 5.49916e-70 | 1.000000 | 5.49917e-70 | 1.000000 |
| rad41         | 1.01204e-70 | 1.000000 | 1.01204e-70 | 1.000000 |
| rad47         | 4.18294e-71 | 1.000000 | 4.18295e-71 | 1.000000 |

1.00000000 Pa, 60.0000000 K

=====

| Rate constant | True (fraction)     | Effective (fraction) |
|---------------|---------------------|----------------------|
| Total         | 8.44107e-61 (1.00 ) | 8.44104e-61 (1.00 )  |

| species     | PYtrue      | Cumul    | PYeffective | Cumul    |
|-------------|-------------|----------|-------------|----------|
| Indene+H    | 0.892568    | 0.892568 | 0.892571    | 0.892571 |
| rad23       | 0.0922220   | 0.984790 | 0.0922223   | 0.984793 |
| rad22       | 0.0122045   | 0.996995 | 0.0122045   | 0.996998 |
| rad45       | 0.00263150  | 0.999626 | 0.00263150  | 0.999629 |
| rad36       | 0.000163508 | 0.999790 | 0.000163509 | 0.999793 |
| rad11       | 0.000109009 | 0.999899 | 0.000109010 | 0.999902 |
| rad6        | 9.78951e-05 | 0.999996 | 9.78954e-05 | 1.000000 |
| Benzyl+C2H2 | 3.24005e-06 | 1.000000 | 0.000000    | 1.000000 |
| rad18       | 1.44620e-07 | 1.000000 | 1.44621e-07 | 1.000000 |
| rad20       | 4.46328e-08 | 1.000000 | 4.46330e-08 | 1.000000 |
| rad21       | 2.81645e-08 | 1.000000 | 2.81646e-08 | 1.000000 |
| rad7        | 1.19967e-08 | 1.000000 | 1.19967e-08 | 1.000000 |
| rad13       | 5.27039e-11 | 1.000000 | 5.27041e-11 | 1.000000 |
| rad24       | 2.05783e-11 | 1.000000 | 2.05784e-11 | 1.000000 |
| rad3        | 5.70186e-13 | 1.000000 | 5.70188e-13 | 1.000000 |
| rad4        | 2.88678e-13 | 1.000000 | 2.88679e-13 | 1.000000 |
| rad35       | 1.32354e-13 | 1.000000 | 1.32354e-13 | 1.000000 |
| rad33       | 7.79828e-14 | 1.000000 | 7.79830e-14 | 1.000000 |
| PAH9+H      | 2.87887e-14 | 1.000000 | 2.87888e-14 | 1.000000 |
| rad2        | 6.13839e-15 | 1.000000 | 6.13841e-15 | 1.000000 |
| rad1        | 3.90190e-16 | 1.000000 | 3.90191e-16 | 1.000000 |
| rad38       | 3.19144e-16 | 1.000000 | 3.19145e-16 | 1.000000 |
| rad30       | 4.35593e-17 | 1.000000 | 4.35594e-17 | 1.000000 |
| rad10       | 2.30283e-17 | 1.000000 | 2.30284e-17 | 1.000000 |
| rad25       | 6.39862e-19 | 1.000000 | 6.39864e-19 | 1.000000 |
| rad28       | 5.91791e-19 | 1.000000 | 5.91793e-19 | 1.000000 |
| rad15       | 2.17432e-21 | 1.000000 | 2.17433e-21 | 1.000000 |
| rad31       | 1.57421e-22 | 1.000000 | 1.57422e-22 | 1.000000 |
| rad27       | 3.89692e-23 | 1.000000 | 3.89693e-23 | 1.000000 |
| rad14       | 1.78061e-23 | 1.000000 | 1.78061e-23 | 1.000000 |
| rad26       | 6.91071e-24 | 1.000000 | 6.91073e-24 | 1.000000 |
| PhCCH+CH3   | 3.00866e-24 | 1.000000 | 3.00867e-24 | 1.000000 |
| rad46       | 9.12448e-25 | 1.000000 | 9.12451e-25 | 1.000000 |
| PhCHCCH2+H  | 1.50900e-25 | 1.000000 | 1.50901e-25 | 1.000000 |
| PhCCCH3+H   | 1.54933e-26 | 1.000000 | 1.54933e-26 | 1.000000 |
| rad9        | 1.46325e-29 | 1.000000 | 1.46325e-29 | 1.000000 |

|               |             |          |             |          |
|---------------|-------------|----------|-------------|----------|
| rad8          | 7.73626e-30 | 1.000000 | 7.73628e-30 | 1.000000 |
| Ph+MeAc       | 1.63634e-31 | 1.000000 | 1.63634e-31 | 1.000000 |
| PAH7+H        | 7.13643e-33 | 1.000000 | 7.13645e-33 | 1.000000 |
| Ph+Allene     | 3.18917e-33 | 1.000000 | 3.18918e-33 | 1.000000 |
| rad39         | 1.66688e-34 | 1.000000 | 1.66689e-34 | 1.000000 |
| rad12         | 5.72772e-35 | 1.000000 | 5.72774e-35 | 1.000000 |
| rad60syn      | 2.63860e-36 | 1.000000 | 2.63861e-36 | 1.000000 |
| rad60anti     | 7.43961e-38 | 1.000000 | 7.43963e-38 | 1.000000 |
| PhCH2CCH+H    | 2.28270e-38 | 1.000000 | 2.28271e-38 | 1.000000 |
| rad37         | 2.02527e-40 | 1.000000 | 2.02527e-40 | 1.000000 |
| rad5          | 4.31144e-42 | 1.000000 | 4.31145e-42 | 1.000000 |
| rad50         | 4.61077e-44 | 1.000000 | 4.61079e-44 | 1.000000 |
| PAH3+H        | 1.28877e-45 | 1.000000 | 1.28878e-45 | 1.000000 |
| rad59         | 6.31179e-46 | 1.000000 | 6.31181e-46 | 1.000000 |
| rad19syn      | 8.15562e-51 | 1.000000 | 8.15565e-51 | 1.000000 |
| rad54         | 2.91169e-54 | 1.000000 | 2.91170e-54 | 1.000000 |
| PAH10+CH3     | 2.05062e-54 | 1.000000 | 2.05062e-54 | 1.000000 |
| rad52         | 8.76486e-55 | 1.000000 | 8.76488e-55 | 1.000000 |
| rad43         | 5.28471e-55 | 1.000000 | 5.28473e-55 | 1.000000 |
| rad62         | 1.06279e-56 | 1.000000 | 1.06279e-56 | 1.000000 |
| rad51         | 1.03979e-59 | 1.000000 | 1.03979e-59 | 1.000000 |
| rad70         | 1.29119e-60 | 1.000000 | 1.29119e-60 | 1.000000 |
| PhcycC3H3_A+H | 8.81109e-61 | 1.000000 | 8.81112e-61 | 1.000000 |
| rad55         | 4.22796e-61 | 1.000000 | 4.22798e-61 | 1.000000 |
| rad65         | 1.91104e-63 | 1.000000 | 1.91104e-63 | 1.000000 |
| rad58         | 4.18390e-64 | 1.000000 | 4.18391e-64 | 1.000000 |
| PAH1+H        | 2.25923e-64 | 1.000000 | 2.25923e-64 | 1.000000 |
| rad34         | 3.65948e-66 | 1.000000 | 3.65949e-66 | 1.000000 |
| rad42         | 2.79543e-69 | 1.000000 | 2.79544e-69 | 1.000000 |
| rad41         | 5.15285e-70 | 1.000000 | 5.15286e-70 | 1.000000 |
| rad47         | 1.72067e-70 | 1.000000 | 1.72067e-70 | 1.000000 |

1.00000000 Pa, 70.0000000 K

=====

| Rate constant | True (fraction)     | Effective (fraction) |
|---------------|---------------------|----------------------|
| Total         | 5.61998e-54 (1.00 ) | 5.61996e-54 (1.00 )  |

| species     | PYtrue      | Cumul    | PYeffective | Cumul    |
|-------------|-------------|----------|-------------|----------|
| Indene+H    | 0.900248    | 0.900248 | 0.900252    | 0.900252 |
| rad23       | 0.00894666  | 0.989715 | 0.00894670  | 0.989719 |
| rad22       | 0.00744448  | 0.997159 | 0.00744452  | 0.997164 |
| rad45       | 0.00246644  | 0.999626 | 0.00246646  | 0.999630 |
| rad36       | 0.000153133 | 0.999779 | 0.000153134 | 0.999783 |
| rad6        | 0.000117175 | 0.999896 | 0.000117175 | 0.999900 |
| rad11       | 9.96750e-05 | 0.999996 | 9.96755e-05 | 1.000000 |
| Benzyl+C2H2 | 4.54101e-06 | 1.00000  | 0.00000     | 1.000000 |
| rad18       | 7.70644e-08 | 1.00000  | 7.70648e-08 | 1.00000  |
| rad20       | 2.83220e-08 | 1.00000  | 2.83221e-08 | 1.00000  |
| rad21       | 1.78875e-08 | 1.00000  | 1.78876e-08 | 1.00000  |
| rad7        | 1.50935e-08 | 1.00000  | 1.50936e-08 | 1.00000  |
| rad13       | 6.16724e-11 | 1.00000  | 6.16727e-11 | 1.00000  |
| rad24       | 1.94403e-11 | 1.00000  | 1.94404e-11 | 1.00000  |
| rad3        | 9.80032e-13 | 1.00000  | 9.80036e-13 | 1.00000  |
| rad4        | 4.96494e-13 | 1.00000  | 4.96496e-13 | 1.00000  |
| rad35       | 2.62295e-13 | 1.00000  | 2.62296e-13 | 1.00000  |
| rad33       | 9.30078e-14 | 1.00000  | 9.30082e-14 | 1.00000  |
| PAH9+H      | 6.69089e-14 | 1.00000  | 6.69092e-14 | 1.00000  |
| rad2        | 1.52389e-14 | 1.00000  | 1.52389e-14 | 1.00000  |
| rad30       | 1.08800e-15 | 1.00000  | 1.08801e-15 | 1.00000  |
| rad1        | 9.71083e-16 | 1.00000  | 9.71087e-16 | 1.00000  |
| rad38       | 8.54272e-16 | 1.00000  | 8.54276e-16 | 1.00000  |
| rad10       | 7.64635e-17 | 1.00000  | 7.64639e-17 | 1.00000  |
| rad25       | 2.52035e-18 | 1.00000  | 2.52036e-18 | 1.00000  |
| rad28       | 2.07777e-18 | 1.00000  | 2.07778e-18 | 1.00000  |
| rad15       | 1.03766e-19 | 1.00000  | 1.03766e-19 | 1.00000  |
| rad31       | 2.80744e-22 | 1.00000  | 2.80746e-22 | 1.00000  |
| rad27       | 1.66331e-22 | 1.00000  | 1.66331e-22 | 1.00000  |
| rad14       | 7.49429e-23 | 1.00000  | 7.49433e-23 | 1.00000  |
| rad26       | 3.87857e-23 | 1.00000  | 3.87859e-23 | 1.00000  |
| PhCCH+CH3   | 1.31614e-23 | 1.00000  | 1.31614e-23 | 1.00000  |
| rad46       | 2.47973e-24 | 1.00000  | 2.47975e-24 | 1.00000  |
| PhCHCCH2+H  | 7.83658e-25 | 1.00000  | 7.83662e-25 | 1.00000  |
| PhCCCH3+H   | 8.40224e-26 | 1.00000  | 8.40228e-26 | 1.00000  |
| rad9        | 6.24977e-29 | 1.00000  | 6.24980e-29 | 1.00000  |
| rad8        | 4.33158e-29 | 1.00000  | 4.33160e-29 | 1.00000  |
| Ph+MeAc     | 9.75151e-31 | 1.00000  | 9.75156e-31 | 1.00000  |
| PAH7+H      | 3.68400e-32 | 1.00000  | 3.68401e-32 | 1.00000  |
| Ph+Allene   | 1.49000e-32 | 1.00000  | 1.49000e-32 | 1.00000  |

|               |             |         |             |         |
|---------------|-------------|---------|-------------|---------|
| rad39         | 8.83119e-34 | 1.00000 | 8.83123e-34 | 1.00000 |
| rad12         | 4.07308e-34 | 1.00000 | 4.07310e-34 | 1.00000 |
| rad60syn      | 6.89152e-36 | 1.00000 | 6.89156e-36 | 1.00000 |
| rad60anti     | 1.98714e-37 | 1.00000 | 1.98715e-37 | 1.00000 |
| PhCH2CCH+H    | 1.16412e-37 | 1.00000 | 1.16412e-37 | 1.00000 |
| rad37         | 1.60557e-39 | 1.00000 | 1.60558e-39 | 1.00000 |
| rad5          | 2.94274e-41 | 1.00000 | 2.94275e-41 | 1.00000 |
| rad50         | 1.06450e-43 | 1.00000 | 1.06450e-43 | 1.00000 |
| PAH3+H        | 6.61987e-45 | 1.00000 | 6.61990e-45 | 1.00000 |
| rad59         | 3.22302e-45 | 1.00000 | 3.22303e-45 | 1.00000 |
| rad19syn      | 4.99214e-50 | 1.00000 | 4.99216e-50 | 1.00000 |
| rad54         | 1.86422e-53 | 1.00000 | 1.86423e-53 | 1.00000 |
| PAH10+CH3     | 1.47866e-53 | 1.00000 | 1.47867e-53 | 1.00000 |
| rad52         | 4.06670e-54 | 1.00000 | 4.06671e-54 | 1.00000 |
| rad43         | 3.58960e-54 | 1.00000 | 3.58962e-54 | 1.00000 |
| rad62         | 7.11285e-56 | 1.00000 | 7.11289e-56 | 1.00000 |
| rad51         | 6.81602e-59 | 1.00000 | 6.81605e-59 | 1.00000 |
| rad70         | 8.91798e-60 | 1.00000 | 8.91802e-60 | 1.00000 |
| PhcycC3H3_A+H | 6.11563e-60 | 1.00000 | 6.11566e-60 | 1.00000 |
| rad55         | 2.92896e-60 | 1.00000 | 2.92897e-60 | 1.00000 |
| rad65         | 1.30357e-62 | 1.00000 | 1.30358e-62 | 1.00000 |
| rad58         | 2.91227e-63 | 1.00000 | 2.91229e-63 | 1.00000 |
| PAH1+H        | 1.62782e-63 | 1.00000 | 1.62783e-63 | 1.00000 |
| rad34         | 2.62673e-65 | 1.00000 | 2.62674e-65 | 1.00000 |
| rad42         | 2.02300e-68 | 1.00000 | 2.02301e-68 | 1.00000 |
| rad41         | 3.74194e-69 | 1.00000 | 3.74195e-69 | 1.00000 |
| rad47         | 1.03397e-69 | 1.00000 | 1.03398e-69 | 1.00000 |

1.00000000 Pa, 80.0000000 K

| Rate constant | True (fraction)     | Effective (fraction) |
|---------------|---------------------|----------------------|
| Total         | 7.28864e-49 (1.00 ) | 7.28860e-49 (1.00 )  |

| species     | PYtrue      | Cumul    | PYeffective | Cumul    |
|-------------|-------------|----------|-------------|----------|
| Indene+H    | 0.906110    | 0.906110 | 0.906115    | 0.906115 |
| rad23       | 0.0864493   | 0.992559 | 0.0864498   | 0.992565 |
| rad22       | 0.00474609  | 0.997305 | 0.00474612  | 0.997311 |
| rad45       | 0.00231679  | 0.999622 | 0.00231680  | 0.999628 |
| rad36       | 0.000143743 | 0.999766 | 0.000143744 | 0.999771 |
| rad6        | 0.000137181 | 0.999903 | 0.000137182 | 0.999909 |
| rad11       | 9.08422e-05 | 0.999994 | 9.08428e-05 | 0.999999 |
| Benzyl+C2H2 | 6.23426e-06 | 1.00000  | 0.00000     | 0.999999 |
| rad18       | 4.51940e-08 | 1.00000  | 4.51943e-08 | 1.000000 |
| rad20       | 1.93046e-08 | 1.00000  | 1.93047e-08 | 1.000000 |
| rad7        | 1.83029e-08 | 1.00000  | 1.83030e-08 | 1.000000 |
| rad21       | 1.21984e-08 | 1.00000  | 1.21985e-08 | 1.000000 |
| rad13       | 7.09420e-11 | 1.00000  | 7.09425e-11 | 1.000000 |
| rad24       | 1.84078e-11 | 1.00000  | 1.84079e-11 | 1.000000 |
| rad3        | 1.63466e-12 | 1.00000  | 1.63467e-12 | 1.000000 |
| rad4        | 8.28731e-13 | 1.00000  | 8.28736e-13 | 1.000000 |
| rad35       | 4.91674e-13 | 1.00000  | 4.91678e-13 | 1.000000 |
| PAH9+H      | 1.55227e-13 | 1.00000  | 1.55228e-13 | 1.000000 |
| rad33       | 1.08714e-13 | 1.00000  | 1.08715e-13 | 1.000000 |
| rad2        | 3.70982e-14 | 1.00000  | 3.70985e-14 | 1.000000 |
| rad30       | 1.53176e-14 | 1.00000  | 1.53177e-14 | 1.000000 |
| rad38       | 2.64861e-15 | 1.00000  | 2.64863e-15 | 1.000000 |
| rad1        | 2.37065e-15 | 1.00000  | 2.37066e-15 | 1.000000 |
| rad10       | 2.51213e-16 | 1.00000  | 2.51215e-16 | 1.000000 |
| rad25       | 2.46026e-17 | 1.00000  | 2.46028e-17 | 1.000000 |
| rad28       | 9.32745e-18 | 1.00000  | 9.32751e-18 | 1.000000 |
| rad15       | 4.91636e-18 | 1.00000  | 4.91639e-18 | 1.000000 |
| rad27       | 7.85109e-22 | 1.00000  | 7.85114e-22 | 1.000000 |
| rad31       | 4.87820e-22 | 1.00000  | 4.87823e-22 | 1.000000 |
| rad14       | 4.39639e-22 | 1.00000  | 4.39642e-22 | 1.000000 |
| rad26       | 2.68054e-22 | 1.00000  | 2.68055e-22 | 1.000000 |
| PhCCH+CH3   | 8.70693e-23 | 1.00000  | 8.70698e-23 | 1.000000 |
| rad46       | 1.02770e-23 | 1.00000  | 1.02770e-23 | 1.000000 |
| PhCHCCH2+H  | 6.71693e-24 | 1.00000  | 6.71697e-24 | 1.000000 |
| PhCCCH3+H   | 6.67524e-25 | 1.00000  | 6.67528e-25 | 1.000000 |
| rad9        | 4.82896e-28 | 1.00000  | 4.82899e-28 | 1.000000 |
| rad8        | 3.69978e-28 | 1.00000  | 3.69980e-28 | 1.000000 |
| Ph+MeAc     | 9.18210e-30 | 1.00000  | 9.18215e-30 | 1.000000 |
| PAH7+H      | 2.97284e-31 | 1.00000  | 2.97286e-31 | 1.000000 |
| Ph+Allene   | 1.12561e-31 | 1.00000  | 1.12562e-31 | 1.000000 |
| rad39       | 7.33021e-33 | 1.00000  | 7.33025e-33 | 1.000000 |
| rad12       | 4.38608e-33 | 1.00000  | 4.38611e-33 | 1.000000 |
| rad60syn    | 3.29179e-35 | 1.00000  | 3.29181e-35 | 1.000000 |
| PhCH2CCH+H  | 9.64432e-37 | 1.00000  | 9.64438e-37 | 1.000000 |

|               |             |         |             |          |
|---------------|-------------|---------|-------------|----------|
| rad60anti     | 9.63943e-37 | 1.00000 | 9.63949e-37 | 1.000000 |
| rad37         | 2.02570e-38 | 1.00000 | 2.02571e-38 | 1.000000 |
| rad5          | 3.30747e-40 | 1.00000 | 3.30749e-40 | 1.000000 |
| rad50         | 4.51814e-43 | 1.00000 | 4.51817e-43 | 1.000000 |
| PAH3+H        | 5.70934e-44 | 1.00000 | 5.70938e-44 | 1.000000 |
| rad59         | 2.76796e-44 | 1.00000 | 2.76798e-44 | 1.000000 |
| rad19syn      | 5.03437e-49 | 1.00000 | 5.03440e-49 | 1.000000 |
| rad54         | 1.97434e-52 | 1.00000 | 1.97435e-52 | 1.000000 |
| PAH10+CH3     | 1.76891e-52 | 1.00000 | 1.76892e-52 | 1.000000 |
| rad43         | 4.08659e-53 | 1.00000 | 4.08662e-53 | 1.000000 |
| rad52         | 3.66859e-53 | 1.00000 | 3.66861e-53 | 1.000000 |
| rad62         | 7.93398e-55 | 1.00000 | 7.93403e-55 | 1.000000 |
| rad51         | 7.42497e-58 | 1.00000 | 7.42502e-58 | 1.000000 |
| rad70         | 1.02777e-58 | 1.00000 | 1.02778e-58 | 1.000000 |
| PhcycC3H3_A+H | 7.08859e-59 | 1.00000 | 7.08864e-59 | 1.000000 |
| rad55         | 3.38725e-59 | 1.00000 | 3.38727e-59 | 1.000000 |
| rad65         | 1.48069e-61 | 1.00000 | 1.48070e-61 | 1.000000 |
| rad58         | 3.38681e-62 | 1.00000 | 3.38684e-62 | 1.000000 |
| PAH1+H        | 1.96515e-62 | 1.00000 | 1.96516e-62 | 1.000000 |
| rad34         | 3.17436e-64 | 1.00000 | 3.17438e-64 | 1.000000 |
| rad42         | 2.47880e-67 | 1.00000 | 2.47881e-67 | 1.000000 |
| rad41         | 4.60880e-68 | 1.00000 | 4.60883e-68 | 1.000000 |
| rad47         | 1.06937e-68 | 1.00000 | 1.06938e-68 | 1.000000 |

1.00000000 Pa, 90.0000000 K

| Rate constant | True (fraction)     | Effective (fraction) |
|---------------|---------------------|----------------------|
| Total         | 6.85154e-45 (1.00 ) | 6.85148e-45 (1.00 )  |

| species     | PYtrue      | Cumul    | PYeffective | Cumul    |
|-------------|-------------|----------|-------------|----------|
| Indene+H    | 0.911021    | 0.911021 | 0.911029    | 0.911029 |
| rad23       | 0.0832802   | 0.994301 | 0.0832809   | 0.994310 |
| rad22       | 0.00313489  | 0.997436 | 0.00313491  | 0.997445 |
| rad45       | 0.00217927  | 0.999615 | 0.00217929  | 0.999624 |
| rad6        | 0.000158113 | 0.999773 | 0.000158114 | 0.999782 |
| rad36       | 0.000135136 | 0.999909 | 0.000135137 | 0.999917 |
| rad11       | 8.24416e-05 | 0.999991 | 8.24423e-05 | 1.000000 |
| Benzyl+C2H2 | 8.42918e-06 | 0.999999 | 0.000000    | 1.000000 |
| rad18       | 2.83881e-08 | 1.000000 | 2.83883e-08 | 1.000000 |
| rad7        | 2.16354e-08 | 1.000000 | 2.16356e-08 | 1.000000 |
| rad20       | 1.38505e-08 | 1.000000 | 1.38507e-08 | 1.000000 |
| rad21       | 8.75473e-09 | 1.000000 | 8.75480e-09 | 1.000000 |
| rad13       | 8.06225e-11 | 1.000000 | 8.06232e-11 | 1.000000 |
| rad24       | 1.74566e-11 | 1.000000 | 1.74568e-11 | 1.000000 |
| rad3        | 2.67543e-12 | 1.000000 | 2.67545e-12 | 1.000000 |
| rad4        | 1.35746e-12 | 1.000000 | 1.35747e-12 | 1.000000 |
| rad35       | 8.74323e-13 | 1.000000 | 8.74331e-13 | 1.000000 |
| PAH9+H      | 3.42649e-13 | 1.000000 | 3.42652e-13 | 1.000000 |
| rad33       | 1.25268e-13 | 1.000000 | 1.25269e-13 | 1.000000 |
| rad30       | 1.21099e-13 | 1.000000 | 1.21100e-13 | 1.000000 |
| rad2        | 8.98581e-14 | 1.000000 | 8.98589e-14 | 1.000000 |
| rad38       | 8.29431e-15 | 1.000000 | 8.29438e-15 | 1.000000 |
| rad1        | 5.75978e-15 | 1.000000 | 5.75983e-15 | 1.000000 |
| rad10       | 8.26496e-16 | 1.000000 | 8.26503e-16 | 1.000000 |
| rad25       | 2.61602e-16 | 1.000000 | 2.61604e-16 | 1.000000 |
| rad15       | 1.02625e-16 | 1.000000 | 1.02626e-16 | 1.000000 |
| rad28       | 4.63352e-17 | 1.000000 | 4.63356e-17 | 1.000000 |
| rad27       | 3.77283e-21 | 1.000000 | 3.77287e-21 | 1.000000 |
| rad14       | 3.39921e-21 | 1.000000 | 3.39924e-21 | 1.000000 |
| rad26       | 2.20801e-21 | 1.000000 | 2.20803e-21 | 1.000000 |
| PhCCH+CH3   | 9.41763e-22 | 1.000000 | 9.41771e-22 | 1.000000 |
| rad31       | 8.34586e-22 | 1.000000 | 8.34593e-22 | 1.000000 |
| PhCHCCH2+H  | 1.79360e-22 | 1.000000 | 1.79361e-22 | 1.000000 |
| rad46       | 8.86101e-23 | 1.000000 | 8.86108e-23 | 1.000000 |
| PhCCCH3+H   | 8.38798e-24 | 1.000000 | 8.38805e-24 | 1.000000 |
| rad9        | 7.04141e-26 | 1.000000 | 7.04147e-26 | 1.000000 |
| rad8        | 5.63377e-27 | 1.000000 | 5.63382e-27 | 1.000000 |
| Ph+MeAc     | 1.71296e-28 | 1.000000 | 1.71298e-28 | 1.000000 |
| PAH7+H      | 4.98289e-30 | 1.000000 | 4.98293e-30 | 1.000000 |
| Ph+Allene   | 1.85704e-30 | 1.000000 | 1.85705e-30 | 1.000000 |
| rad39       | 1.27302e-31 | 1.000000 | 1.27303e-31 | 1.000000 |
| rad12       | 8.90916e-32 | 1.000000 | 8.90924e-32 | 1.000000 |
| rad60syn    | 1.06982e-33 | 1.000000 | 1.06982e-33 | 1.000000 |
| rad60anti   | 2.09947e-35 | 1.000000 | 2.09949e-35 | 1.000000 |
| PhCH2CCH+H  | 1.72781e-35 | 1.000000 | 1.72782e-35 | 1.000000 |
| rad37       | 5.35460e-37 | 1.000000 | 5.35465e-37 | 1.000000 |
| rad5        | 8.05539e-39 | 1.000000 | 8.05546e-39 | 1.000000 |
| rad50       | 5.57944e-42 | 1.000000 | 5.57948e-42 | 1.000000 |

|               |             |          |             |          |
|---------------|-------------|----------|-------------|----------|
| PAH3+H        | 1.08207e-42 | 1.000000 | 1.08208e-42 | 1.000000 |
| rad59         | 5.22798e-43 | 1.000000 | 5.22803e-43 | 1.000000 |
| rad19syn      | 1.10926e-47 | 1.000000 | 1.10927e-47 | 1.000000 |
| PAH10+CH3     | 4.72167e-51 | 1.000000 | 4.72171e-51 | 1.000000 |
| rad54         | 4.58219e-51 | 1.000000 | 4.58223e-51 | 1.000000 |
| rad43         | 1.04414e-51 | 1.000000 | 1.04415e-51 | 1.000000 |
| rad52         | 7.85702e-52 | 1.000000 | 7.85709e-52 | 1.000000 |
| rad62         | 1.96160e-53 | 1.000000 | 1.96162e-53 | 1.000000 |
| rad51         | 1.77753e-56 | 1.000000 | 1.77755e-56 | 1.000000 |
| rad70         | 2.61254e-57 | 1.000000 | 2.61257e-57 | 1.000000 |
| PhcycC3H3_A+H | 1.81339e-57 | 1.000000 | 1.81340e-57 | 1.000000 |
| rad55         | 8.64306e-58 | 1.000000 | 8.64313e-58 | 1.000000 |
| rad65         | 3.70420e-60 | 1.000000 | 3.70423e-60 | 1.000000 |
| rad58         | 8.69585e-61 | 1.000000 | 8.69593e-61 | 1.000000 |
| PAH1+H        | 5.25262e-61 | 1.000000 | 5.25267e-61 | 1.000000 |
| rad34         | 8.51952e-63 | 1.000000 | 8.51959e-63 | 1.000000 |
| rad42         | 6.77699e-66 | 1.000000 | 6.77704e-66 | 1.000000 |
| rad41         | 1.26897e-66 | 1.000000 | 1.26898e-66 | 1.000000 |
| rad47         | 2.49509e-67 | 1.000000 | 2.49511e-67 | 1.000000 |

1.00000000 Pa, 100.000000 K

| Rate constant | True (fraction)     | Effective (fraction) |
|---------------|---------------------|----------------------|
| Total         | 1.02671e-41 (1.00 ) | 1.02670e-41 (1.00 )  |

| species     | PYtrue      | Cumul    | PYeffective | Cumul    |
|-------------|-------------|----------|-------------|----------|
| Indene+H    | 0.915417    | 0.915417 | 0.915428    | 0.915428 |
| rad23       | 0.0800066   | 0.995424 | 0.0800075   | 0.995436 |
| rad22       | 0.00213191  | 0.997556 | 0.00213194  | 0.997567 |
| rad45       | 0.00205116  | 0.999607 | 0.00205118  | 0.999619 |
| rad6        | 0.000180158 | 0.999787 | 0.000180160 | 0.999799 |
| rad36       | 0.000127141 | 0.999914 | 0.000127143 | 0.999926 |
| rad11       | 7.44517e-05 | 0.999988 | 7.44526e-05 | 1.00000  |
| Benzyl+C2H2 | 1.12694e-05 | 1.000000 | 0.00000     | 1.00000  |
| rad7        | 2.51063e-08 | 1.000000 | 2.51066e-08 | 1.00000  |
| rad18       | 1.87704e-08 | 1.000000 | 1.87706e-08 | 1.00000  |
| rad20       | 1.03257e-08 | 1.000000 | 1.03258e-08 | 1.00000  |
| rad21       | 6.52810e-09 | 1.000000 | 6.52818e-09 | 1.00000  |
| rad13       | 9.08140e-11 | 1.000000 | 9.08150e-11 | 1.00000  |
| rad24       | 1.65663e-11 | 1.000000 | 1.65665e-11 | 1.00000  |
| rad3        | 4.32110e-12 | 1.000000 | 4.32115e-12 | 1.00000  |
| rad4        | 2.19437e-12 | 1.000000 | 2.19440e-12 | 1.00000  |
| rad35       | 1.48985e-12 | 1.000000 | 1.48986e-12 | 1.00000  |
| PAH9+H      | 7.09386e-13 | 1.000000 | 7.09394e-13 | 1.00000  |
| rad30       | 6.31689e-13 | 1.000000 | 6.31696e-13 | 1.00000  |
| rad2        | 2.17311e-13 | 1.000000 | 2.17313e-13 | 1.00000  |
| rad33       | 1.42833e-13 | 1.000000 | 1.42834e-13 | 1.00000  |
| rad38       | 2.39278e-14 | 1.000000 | 2.39281e-14 | 1.00000  |
| rad1        | 1.39763e-14 | 1.000000 | 1.39764e-14 | 1.00000  |
| rad10       | 2.70099e-15 | 1.000000 | 2.70102e-15 | 1.00000  |
| rad25       | 1.95794e-15 | 1.000000 | 1.95796e-15 | 1.00000  |
| rad15       | 1.16337e-15 | 1.000000 | 1.16338e-15 | 1.00000  |
| rad28       | 2.17224e-16 | 1.000000 | 2.17226e-16 | 1.00000  |
| rad14       | 2.69764e-20 | 1.000000 | 2.69767e-20 | 1.00000  |
| rad26       | 1.89761e-20 | 1.000000 | 1.89763e-20 | 1.00000  |
| rad27       | 1.68852e-20 | 1.000000 | 1.68854e-20 | 1.00000  |
| PhCCH+CH3   | 1.28532e-20 | 1.000000 | 1.28533e-20 | 1.00000  |
| PhCHCCH2+H  | 6.85533e-21 | 1.000000 | 6.85541e-21 | 1.00000  |
| rad31       | 1.41327e-21 | 1.000000 | 1.41329e-21 | 1.00000  |
| rad46       | 1.28861e-21 | 1.000000 | 1.28863e-21 | 1.00000  |
| PhCCCH3+H   | 1.34931e-22 | 1.000000 | 1.34933e-22 | 1.00000  |
| rad9        | 8.39480e-24 | 1.000000 | 8.39490e-24 | 1.00000  |
| rad8        | 1.28581e-25 | 1.000000 | 1.28583e-25 | 1.00000  |
| Ph+MeAc     | 6.12902e-27 | 1.000000 | 6.12909e-27 | 1.00000  |
| PAH7+H      | 1.72275e-28 | 1.000000 | 1.72277e-28 | 1.00000  |
| Ph+Allene   | 8.34916e-29 | 1.000000 | 8.34926e-29 | 1.00000  |
| rad39       | 5.00430e-30 | 1.000000 | 5.00435e-30 | 1.00000  |
| rad12       | 3.22037e-30 | 1.000000 | 3.22041e-30 | 1.00000  |
| rad60syn    | 2.77216e-31 | 1.000000 | 2.77219e-31 | 1.00000  |
| rad60anti   | 4.11650e-33 | 1.000000 | 4.11655e-33 | 1.00000  |
| PhCH2CCH+H  | 7.58236e-34 | 1.000000 | 7.58245e-34 | 1.00000  |
| rad37       | 3.11332e-35 | 1.000000 | 3.11336e-35 | 1.00000  |
| rad5        | 4.49255e-37 | 1.000000 | 4.49260e-37 | 1.00000  |
| rad50       | 3.30272e-40 | 1.000000 | 3.30276e-40 | 1.00000  |
| PAH3+H      | 5.10780e-41 | 1.000000 | 5.10786e-41 | 1.00000  |
| rad59       | 2.46212e-41 | 1.000000 | 2.46215e-41 | 1.00000  |
| rad19syn    | 6.02992e-46 | 1.000000 | 6.02999e-46 | 1.00000  |
| PAH10+CH3   | 3.16751e-49 | 1.000000 | 3.16755e-49 | 1.00000  |

|               |             |          |             |         |
|---------------|-------------|----------|-------------|---------|
| rad54         | 2.62981e-49 | 1.000000 | 2.62984e-49 | 1.00000 |
| rad43         | 6.78227e-50 | 1.000000 | 6.78235e-50 | 1.00000 |
| rad52         | 4.62609e-50 | 1.000000 | 4.62614e-50 | 1.00000 |
| rad62         | 1.21783e-51 | 1.000000 | 1.21784e-51 | 1.00000 |
| rad51         | 1.05688e-54 | 1.000000 | 1.05690e-54 | 1.00000 |
| rad70         | 1.65048e-55 | 1.000000 | 1.65050e-55 | 1.00000 |
| PhcycC3H3_A+H | 1.15350e-55 | 1.000000 | 1.15352e-55 | 1.00000 |
| rad55         | 5.48253e-56 | 1.000000 | 5.48259e-56 | 1.00000 |
| rad65         | 2.30139e-58 | 1.000000 | 2.30141e-58 | 1.00000 |
| rad58         | 5.55326e-59 | 1.000000 | 5.55332e-59 | 1.00000 |
| PAH1+H        | 3.50097e-59 | 1.000000 | 3.50101e-59 | 1.00000 |
| rad34         | 5.71360e-61 | 1.000000 | 5.71367e-61 | 1.00000 |
| rad42         | 4.64956e-64 | 1.000000 | 4.64961e-64 | 1.00000 |
| rad41         | 8.78989e-65 | 1.000000 | 8.78999e-65 | 1.00000 |
| rad47         | 1.47197e-65 | 1.000000 | 1.47199e-65 | 1.00000 |

1.00000000 Pa, 110.000000 K

| Rate constant | True (fraction)     | Effective (fraction) |
|---------------|---------------------|----------------------|
| Total         | 4.04932e-39 (1.00 ) | 4.04926e-39 (1.00 )  |

| species     | PYtrue      | Cumul    | PYeffective | Cumul    |
|-------------|-------------|----------|-------------|----------|
| Indene+H    | 0.919530    | 0.919530 | 0.919544    | 0.919544 |
| rad23       | 0.0766483   | 0.996178 | 0.0766495   | 0.996194 |
| rad45       | 0.00193028  | 0.998109 | 0.00193031  | 0.998124 |
| rad22       | 0.00148588  | 0.999594 | 0.00148590  | 0.999610 |
| rad6        | 0.000203510 | 0.999798 | 0.000203513 | 0.999813 |
| rad36       | 0.000119621 | 0.999918 | 0.000119623 | 0.999933 |
| rad11       | 6.68775e-05 | 0.999984 | 6.68785e-05 | 1.000000 |
| Benzyl+C2H2 | 1.49413e-05 | 0.999999 | 0.000000    | 1.000000 |
| rad7        | 2.87349e-08 | 0.999999 | 2.87353e-08 | 1.000000 |
| rad18       | 1.29115e-08 | 0.999999 | 1.29117e-08 | 1.000000 |
| rad20       | 7.92874e-09 | 0.999999 | 7.92886e-09 | 1.000000 |
| rad21       | 5.01357e-09 | 0.999999 | 5.01364e-09 | 1.000000 |
| rad13       | 1.01616e-10 | 0.999999 | 1.01617e-10 | 1.000000 |
| rad24       | 1.57208e-11 | 0.999999 | 1.57210e-11 | 1.000000 |
| rad3        | 6.90228e-12 | 0.999999 | 6.90239e-12 | 1.000000 |
| rad4        | 3.50858e-12 | 0.999999 | 3.50863e-12 | 1.000000 |
| rad35       | 2.45827e-12 | 0.999999 | 2.45831e-12 | 1.000000 |
| rad30       | 2.43905e-12 | 0.999999 | 2.43908e-12 | 1.000000 |
| PAH9+H      | 1.38310e-12 | 0.999999 | 1.38313e-12 | 1.000000 |
| rad2        | 5.22721e-13 | 0.999999 | 5.22729e-13 | 1.000000 |
| rad33       | 1.61575e-13 | 0.999999 | 1.61578e-13 | 1.000000 |
| rad38       | 6.21987e-14 | 0.999999 | 6.21996e-14 | 1.000000 |
| rad1        | 3.37421e-14 | 0.999999 | 3.37427e-14 | 1.000000 |
| rad25       | 1.02819e-14 | 0.999999 | 1.02820e-14 | 1.000000 |
| rad10       | 8.61128e-15 | 0.999999 | 8.61141e-15 | 1.000000 |
| rad15       | 8.46143e-15 | 0.999999 | 8.46155e-15 | 1.000000 |
| rad28       | 9.01640e-16 | 0.999999 | 9.01653e-16 | 1.000000 |
| rad14       | 1.82743e-19 | 0.999999 | 1.82746e-19 | 1.000000 |
| PhCHCCH2+H  | 1.69136e-19 | 0.999999 | 1.69139e-19 | 1.000000 |
| PhCCH+CH3   | 1.60540e-19 | 0.999999 | 1.60542e-19 | 1.000000 |
| rad26       | 1.52266e-19 | 0.999999 | 1.52268e-19 | 1.000000 |
| rad27       | 6.73605e-20 | 0.999999 | 6.73615e-20 | 1.000000 |
| rad46       | 1.72918e-20 | 0.999999 | 1.72920e-20 | 1.000000 |
| rad31       | 2.37343e-21 | 0.999999 | 2.37346e-21 | 1.000000 |
| PhCCCH3+H   | 2.07700e-21 | 0.999999 | 2.07703e-21 | 1.000000 |
| rad9        | 4.15661e-22 | 0.999999 | 4.15667e-22 | 1.000000 |
| rad8        | 5.49647e-24 | 0.999999 | 5.49656e-24 | 1.000000 |
| Ph+MeAc     | 2.78640e-25 | 0.999999 | 2.78644e-25 | 1.000000 |
| Ph+Allene   | 1.21891e-25 | 0.999999 | 1.21893e-25 | 1.000000 |
| rad60syn    | 2.69949e-26 | 0.999999 | 2.69953e-26 | 1.000000 |
| PAH7+H      | 6.92498e-27 | 0.999999 | 6.92508e-27 | 1.000000 |
| rad60anti   | 1.02509e-27 | 0.999999 | 1.02511e-27 | 1.000000 |
| rad39       | 2.70453e-28 | 0.999999 | 2.70457e-28 | 1.000000 |
| rad12       | 1.40079e-28 | 0.999999 | 1.40081e-28 | 1.000000 |
| PhCH2CCH+H  | 7.52065e-32 | 0.999999 | 7.52076e-32 | 1.000000 |
| rad37       | 3.24257e-33 | 0.999999 | 3.24262e-33 | 1.000000 |
| rad5        | 4.70332e-35 | 0.999999 | 4.70339e-35 | 1.000000 |
| rad50       | 7.65994e-38 | 0.999999 | 7.66006e-38 | 1.000000 |
| PAH3+H      | 5.79407e-39 | 0.999999 | 5.79416e-39 | 1.000000 |
| rad59       | 2.80329e-39 | 0.999999 | 2.80333e-39 | 1.000000 |
| rad19syn    | 7.39834e-44 | 0.999999 | 7.39845e-44 | 1.000000 |
| PAH10+CH3   | 4.71573e-47 | 0.999999 | 4.71580e-47 | 1.000000 |
| rad54       | 3.41264e-47 | 0.999999 | 3.41269e-47 | 1.000000 |
| rad43       | 1.00154e-47 | 0.999999 | 1.00156e-47 | 1.000000 |
| rad52       | 8.09915e-48 | 0.999999 | 8.09927e-48 | 1.000000 |
| rad62       | 1.72967e-49 | 0.999999 | 1.72969e-49 | 1.000000 |

|               |             |          |             |          |
|---------------|-------------|----------|-------------|----------|
| rad51         | 1.44587e-52 | 0.999999 | 1.44589e-52 | 1.000000 |
| rad70         | 2.36710e-53 | 0.999999 | 2.36714e-53 | 1.000000 |
| PhcycC3H3_A+H | 1.66644e-53 | 0.999999 | 1.66646e-53 | 1.000000 |
| rad55         | 7.89666e-54 | 0.999999 | 7.89678e-54 | 1.000000 |
| rad65         | 3.25234e-56 | 0.999999 | 3.25239e-56 | 1.000000 |
| rad58         | 8.05600e-57 | 0.999999 | 8.05612e-57 | 1.000000 |
| PAH1+H        | 5.31282e-57 | 0.999999 | 5.31290e-57 | 1.000000 |
| rad34         | 8.73753e-59 | 0.999999 | 8.73766e-59 | 1.000000 |
| rad42         | 7.30614e-62 | 0.999999 | 7.30625e-62 | 1.000000 |
| rad41         | 1.40003e-62 | 0.999999 | 1.40005e-62 | 1.000000 |
| rad47         | 1.99901e-63 | 0.999999 | 1.99904e-63 | 1.000000 |

1.00000000 Pa, 120.000000 K

| Rate constant | True (fraction)     | Effective (fraction) |
|---------------|---------------------|----------------------|
| Total         | 5.87106e-37 (1.00 ) | 5.87094e-37 (1.00 )  |

| species       | PYtrue      | Cumul    | PYeffective | Cumul    |
|---------------|-------------|----------|-------------|----------|
| Indene+H      | 0.923494    | 0.923494 | 0.923512    | 0.923512 |
| rad23         | 0.0732134   | 0.996707 | 0.0732149   | 0.996727 |
| rad45         | 0.00181498  | 0.998522 | 0.00181501  | 0.998542 |
| rad22         | 0.00105774  | 0.999580 | 0.00105776  | 0.999600 |
| rad6          | 0.000228375 | 0.999808 | 0.000228379 | 0.999828 |
| rad36         | 0.000112470 | 0.999921 | 0.000112472 | 0.999941 |
| rad11         | 5.97369e-05 | 0.999981 | 5.97381e-05 | 1.000000 |
| Benzyl+C2H2   | 1.96844e-05 | 1.000000 | 0.000000    | 1.000000 |
| rad7          | 3.25445e-08 | 1.000000 | 3.25452e-08 | 1.000000 |
| rad18         | 9.16263e-09 | 1.000000 | 9.16281e-09 | 1.000000 |
| rad20         | 6.23179e-09 | 1.000000 | 6.23191e-09 | 1.000000 |
| rad21         | 3.94122e-09 | 1.000000 | 3.94130e-09 | 1.000000 |
| rad13         | 1.13132e-10 | 1.000000 | 1.13135e-10 | 1.000000 |
| rad24         | 1.49075e-11 | 1.000000 | 1.49078e-11 | 1.000000 |
| rad3          | 1.09029e-11 | 1.000000 | 1.09031e-11 | 1.000000 |
| rad30         | 7.53892e-12 | 1.000000 | 7.53907e-12 | 1.000000 |
| rad4          | 5.54808e-12 | 1.000000 | 5.54818e-12 | 1.000000 |
| rad35         | 3.96116e-12 | 1.000000 | 3.96124e-12 | 1.000000 |
| PAH9+H        | 2.56490e-12 | 1.000000 | 2.56495e-12 | 1.000000 |
| rad2          | 1.24108e-12 | 1.000000 | 1.24110e-12 | 1.000000 |
| rad33         | 1.81680e-13 | 1.000000 | 1.81684e-13 | 1.000000 |
| rad38         | 1.46977e-13 | 1.000000 | 1.46979e-13 | 1.000000 |
| rad1          | 8.04334e-14 | 1.000000 | 8.04349e-14 | 1.000000 |
| rad15         | 4.42369e-14 | 1.000000 | 4.42378e-14 | 1.000000 |
| rad25         | 4.03846e-14 | 1.000000 | 4.03854e-14 | 1.000000 |
| rad10         | 2.62984e-14 | 1.000000 | 2.62990e-14 | 1.000000 |
| rad28         | 3.29932e-15 | 1.000000 | 3.29938e-15 | 1.000000 |
| PhCHCCH2+H    | 2.59270e-18 | 1.000000 | 2.59275e-18 | 1.000000 |
| PhCCH+CH3     | 1.61539e-18 | 1.000000 | 1.61542e-18 | 1.000000 |
| rad26         | 1.08476e-18 | 1.000000 | 1.08478e-18 | 1.000000 |
| rad14         | 9.99464e-19 | 1.000000 | 9.99484e-19 | 1.000000 |
| rad27         | 2.37524e-19 | 1.000000 | 2.37529e-19 | 1.000000 |
| rad46         | 1.72910e-19 | 1.000000 | 1.72914e-19 | 1.000000 |
| PhCCCH3+H     | 2.66302e-20 | 1.000000 | 2.66308e-20 | 1.000000 |
| rad9          | 1.08477e-20 | 1.000000 | 1.08479e-20 | 1.000000 |
| rad31         | 3.95227e-21 | 1.000000 | 3.95235e-21 | 1.000000 |
| rad8          | 2.06627e-22 | 1.000000 | 2.06631e-22 | 1.000000 |
| Ph+MeAc       | 1.00712e-23 | 1.000000 | 1.00714e-23 | 1.000000 |
| Ph+Allene     | 9.90936e-24 | 1.000000 | 9.90955e-24 | 1.000000 |
| rad60syn      | 1.65173e-24 | 1.000000 | 1.65176e-24 | 1.000000 |
| PAH7+H        | 2.11804e-25 | 1.000000 | 2.11808e-25 | 1.000000 |
| rad60anti     | 9.92856e-26 | 1.000000 | 9.92876e-26 | 1.000000 |
| rad39         | 1.09296e-26 | 1.000000 | 1.09299e-26 | 1.000000 |
| rad12         | 5.04736e-27 | 1.000000 | 5.04746e-27 | 1.000000 |
| PhCH2CCH+H    | 9.59782e-30 | 1.000000 | 9.59801e-30 | 1.000000 |
| rad37         | 3.54606e-31 | 1.000000 | 3.54613e-31 | 1.000000 |
| rad5          | 5.34630e-33 | 1.000000 | 5.34641e-33 | 1.000000 |
| rad50         | 2.11693e-35 | 1.000000 | 2.11697e-35 | 1.000000 |
| PAH3+H        | 9.88073e-37 | 1.000000 | 9.88093e-37 | 1.000000 |
| rad59         | 4.86538e-37 | 1.000000 | 4.86547e-37 | 1.000000 |
| rad19syn      | 1.14032e-41 | 1.000000 | 1.14034e-41 | 1.000000 |
| PAH10+CH3     | 8.64248e-45 | 1.000000 | 8.64265e-45 | 1.000000 |
| rad54         | 5.57104e-45 | 1.000000 | 5.57115e-45 | 1.000000 |
| rad52         | 2.41950e-45 | 1.000000 | 2.41955e-45 | 1.000000 |
| rad43         | 1.85406e-45 | 1.000000 | 1.85409e-45 | 1.000000 |
| rad62         | 3.12229e-47 | 1.000000 | 3.12235e-47 | 1.000000 |
| rad51         | 2.65408e-50 | 1.000000 | 2.65413e-50 | 1.000000 |
| rad70         | 4.28509e-51 | 1.000000 | 4.28517e-51 | 1.000000 |
| PhcycC3H3_A+H | 3.03986e-51 | 1.000000 | 3.03992e-51 | 1.000000 |
| rad55         | 1.43587e-51 | 1.000000 | 1.43590e-51 | 1.000000 |

|        |             |         |             |         |
|--------|-------------|---------|-------------|---------|
| rad65  | 5.88160e-54 | 1.00000 | 5.88172e-54 | 1.00000 |
| rad58  | 1.47594e-54 | 1.00000 | 1.47597e-54 | 1.00000 |
| PAH1+H | 1.02030e-54 | 1.00000 | 1.02032e-54 | 1.00000 |
| rad34  | 1.69292e-56 | 1.00000 | 1.69295e-56 | 1.00000 |
| rad42  | 1.46286e-59 | 1.00000 | 1.46289e-59 | 1.00000 |
| rad41  | 2.86253e-60 | 1.00000 | 2.86259e-60 | 1.00000 |
| rad47  | 3.47333e-61 | 1.00000 | 3.47340e-61 | 1.00000 |

1.00000000 Pa, 130.000000 K

| Rate constant | True (fraction)     | Effective (fraction) |
|---------------|---------------------|----------------------|
| Total         | 3.94360e-35 (1.00 ) | 3.94350e-35 (1.00 )  |

| species       | PYtrue      | Cumul    | PYeffective | Cumul    |
|---------------|-------------|----------|-------------|----------|
| Indene+H      | 0.927383    | 0.927383 | 0.927407    | 0.927407 |
| rad23         | 0.0697062   | 0.997089 | 0.0697080   | 0.997115 |
| rad45         | 0.00170400  | 0.998793 | 0.00170405  | 0.998819 |
| rad22         | 0.000767063 | 0.999560 | 0.000767082 | 0.999586 |
| rad6          | 0.000254982 | 0.999815 | 0.000254989 | 0.999841 |
| rad36         | 0.000105609 | 0.999921 | 0.000105611 | 0.999947 |
| rad11         | 5.30522e-05 | 0.999974 | 5.30535e-05 | 1.000000 |
| Benzyl+C2H2   | 2.58034e-05 | 1.000000 | 0.000000    | 1.000000 |
| rad7          | 3.65632e-08 | 1.000000 | 3.65641e-08 | 1.000000 |
| rad18         | 6.66720e-09 | 1.000000 | 6.66738e-09 | 1.000000 |
| rad20         | 4.99068e-09 | 1.000000 | 4.99081e-09 | 1.000000 |
| rad21         | 3.15692e-09 | 1.000000 | 3.15700e-09 | 1.000000 |
| rad13         | 1.25479e-10 | 1.000000 | 1.25482e-10 | 1.000000 |
| rad30         | 1.96994e-11 | 1.000000 | 1.96999e-11 | 1.000000 |
| rad3          | 1.70038e-11 | 1.000000 | 1.70043e-11 | 1.000000 |
| rad24         | 1.41172e-11 | 1.000000 | 1.41175e-11 | 1.000000 |
| rad4          | 8.66274e-12 | 1.000000 | 8.66296e-12 | 1.000000 |
| rad35         | 6.27097e-12 | 1.000000 | 6.27113e-12 | 1.000000 |
| PAH9+H        | 4.56928e-12 | 1.000000 | 4.56940e-12 | 1.000000 |
| rad2          | 2.88427e-12 | 1.000000 | 2.88434e-12 | 1.000000 |
| rad38         | 3.20819e-13 | 1.000000 | 3.20828e-13 | 1.000000 |
| rad33         | 2.03353e-13 | 1.000000 | 2.03359e-13 | 1.000000 |
| rad1          | 1.87741e-13 | 1.000000 | 1.87746e-13 | 1.000000 |
| rad15         | 1.79890e-13 | 1.000000 | 1.79894e-13 | 1.000000 |
| rad25         | 1.25807e-13 | 1.000000 | 1.25810e-13 | 1.000000 |
| rad10         | 7.59309e-14 | 1.000000 | 7.59328e-14 | 1.000000 |
| rad28         | 1.08058e-14 | 1.000000 | 1.08060e-14 | 1.000000 |
| PhCHCCH2+H    | 2.68811e-17 | 1.000000 | 2.68818e-17 | 1.000000 |
| PhCCH+CH3     | 1.29485e-17 | 1.000000 | 1.29489e-17 | 1.000000 |
| rad26         | 6.78279e-18 | 1.000000 | 6.78296e-18 | 1.000000 |
| rad14         | 4.43557e-18 | 1.000000 | 4.43568e-18 | 1.000000 |
| rad46         | 1.28734e-18 | 1.000000 | 1.28737e-18 | 1.000000 |
| rad27         | 7.45987e-19 | 1.000000 | 7.46006e-19 | 1.000000 |
| PhCCCH3+H     | 2.76955e-19 | 1.000000 | 2.76962e-19 | 1.000000 |
| rad9          | 1.73193e-19 | 1.000000 | 1.73198e-19 | 1.000000 |
| rad31         | 6.51627e-21 | 1.000000 | 6.51643e-21 | 1.000000 |
| rad8          | 5.50913e-21 | 1.000000 | 5.50927e-21 | 1.000000 |
| Ph+Allene     | 3.76001e-22 | 1.000000 | 3.76011e-22 | 1.000000 |
| Ph+MeAc       | 2.62381e-22 | 1.000000 | 2.62388e-22 | 1.000000 |
| rad60syn      | 5.22598e-23 | 1.000000 | 5.22611e-23 | 1.000000 |
| PAH7+H        | 4.65080e-24 | 1.000000 | 4.65092e-24 | 1.000000 |
| rad60anti     | 3.99725e-24 | 1.000000 | 3.99735e-24 | 1.000000 |
| rad39         | 3.08601e-25 | 1.000000 | 3.08609e-25 | 1.000000 |
| rad12         | 1.37646e-25 | 1.000000 | 1.37649e-25 | 1.000000 |
| PhCH2CCH+H    | 1.32843e-26 | 1.000000 | 1.32846e-26 | 1.000000 |
| rad37         | 3.60410e-29 | 1.000000 | 3.60419e-29 | 1.000000 |
| rad5          | 5.99681e-31 | 1.000000 | 5.99697e-31 | 1.000000 |
| rad50         | 7.66781e-33 | 1.000000 | 7.66801e-33 | 1.000000 |
| PAH3+H        | 3.32483e-34 | 1.000000 | 3.32492e-34 | 1.000000 |
| rad59         | 1.69473e-34 | 1.000000 | 1.69478e-34 | 1.000000 |
| rad19syn      | 2.15897e-39 | 1.000000 | 2.15903e-39 | 1.000000 |
| PAH10+CH3     | 1.84367e-42 | 1.000000 | 1.84371e-42 | 1.000000 |
| rad54         | 1.11814e-42 | 1.000000 | 1.11817e-42 | 1.000000 |
| rad52         | 1.08810e-42 | 1.000000 | 1.08813e-42 | 1.000000 |
| rad43         | 4.06201e-43 | 1.000000 | 4.06211e-43 | 1.000000 |
| rad62         | 6.89375e-45 | 1.000000 | 6.89393e-45 | 1.000000 |
| rad51         | 7.32454e-48 | 1.000000 | 7.32473e-48 | 1.000000 |
| rad70         | 9.56348e-49 | 1.000000 | 9.56373e-49 | 1.000000 |
| PhcycC3H3_A+H | 6.83872e-49 | 1.000000 | 6.83890e-49 | 1.000000 |
| rad55         | 3.21932e-49 | 1.000000 | 3.21941e-49 | 1.000000 |
| rad65         | 1.40127e-51 | 1.000000 | 1.40131e-51 | 1.000000 |
| rad58         | 3.33547e-52 | 1.000000 | 3.33556e-52 | 1.000000 |
| PAH1+H        | 2.42152e-52 | 1.000000 | 2.42158e-52 | 1.000000 |
| rad34         | 4.05732e-54 | 1.000000 | 4.05743e-54 | 1.000000 |



|       |             |          |             |          |
|-------|-------------|----------|-------------|----------|
| rad42 | 3.65554e-57 | 1.000000 | 3.65563e-57 | 1.000000 |
| rad41 | 7.41217e-58 | 1.000000 | 7.41236e-58 | 1.000000 |
| rad47 | 7.63191e-59 | 1.000000 | 7.63211e-59 | 1.000000 |

1.00000000 Pa, 140.000000 K

| =====         |                     |          |                      |          |
|---------------|---------------------|----------|----------------------|----------|
| Rate constant | True (fraction)     |          | Effective (fraction) |          |
| -----         |                     |          |                      |          |
| Total         | 1.44756e-33 (1.00 ) |          | 1.44751e-33 (1.00 )  |          |
| species       | PYtrue              | Cumul    | PYeffective          | Cumul    |
| -----         |                     |          |                      |          |
| Indene+H      | 0.931244            | 0.931244 | 0.931275             | 0.931275 |
| rad23         | 0.0661311           | 0.997375 | 0.0661333            | 0.997408 |
| rad45         | 0.00159646          | 0.998972 | 0.00159652           | 0.999005 |
| rad22         | 0.000565566         | 0.999537 | 0.000565585          | 0.999570 |
| rad6          | 0.000283590         | 0.999821 | 0.000283599          | 0.999854 |
| rad36         | 9.89799e-05         | 0.999920 | 9.89832e-05          | 0.999953 |
| rad11         | 4.68431e-05         | 0.999967 | 4.68447e-05          | 1.000000 |
| Benzyl+C2H2   | 3.36818e-05         | 1.00000  | 0.00000              | 1.000000 |
| rad7          | 4.08237e-08         | 1.00000  | 4.08251e-08          | 1.000000 |
| rad18         | 4.95160e-09         | 1.00000  | 4.95177e-09          | 1.000000 |
| rad20         | 4.05838e-09         | 1.00000  | 4.05851e-09          | 1.000000 |
| rad21         | 2.56779e-09         | 1.00000  | 2.56788e-09          | 1.000000 |
| rad13         | 1.38784e-10         | 1.00000  | 1.38788e-10          | 1.000000 |
| rad30         | 4.52439e-11         | 1.00000  | 4.52454e-11          | 1.000000 |
| rad3          | 2.61211e-11         | 1.00000  | 2.61220e-11          | 1.000000 |
| rad24         | 1.33429e-11         | 1.00000  | 1.33434e-11          | 1.000000 |
| rad4          | 1.33246e-11         | 1.00000  | 1.33251e-11          | 1.000000 |
| rad35         | 9.79085e-12         | 1.00000  | 9.79118e-12          | 1.000000 |
| PAH9+H        | 7.88302e-12         | 1.00000  | 7.88329e-12          | 1.000000 |
| rad2          | 6.51594e-12         | 1.00000  | 6.51616e-12          | 1.000000 |
| rad38         | 6.56608e-13         | 1.00000  | 6.56630e-13          | 1.000000 |
| rad15         | 6.01913e-13         | 1.00000  | 6.01933e-13          | 1.000000 |
| rad1          | 4.26141e-13         | 1.00000  | 4.26155e-13          | 1.000000 |
| rad25         | 3.25458e-13         | 1.00000  | 3.25469e-13          | 1.000000 |
| rad33         | 2.26827e-13         | 1.00000  | 2.26835e-13          | 1.000000 |
| rad10         | 2.05879e-13         | 1.00000  | 2.05886e-13          | 1.000000 |
| rad28         | 3.22563e-14         | 1.00000  | 3.22574e-14          | 1.000000 |
| PhCHCCH2+H    | 2.03950e-16         | 1.00000  | 2.03957e-16          | 1.000000 |
| PhCCH+CH3     | 8.47351e-17         | 1.00000  | 8.47380e-17          | 1.000000 |
| rad26         | 3.74314e-17         | 1.00000  | 3.74327e-17          | 1.000000 |
| rad14         | 1.63447e-17         | 1.00000  | 1.63453e-17          | 1.000000 |
| rad46         | 7.44384e-18         | 1.00000  | 7.44409e-18          | 1.000000 |
| PhCCCH3+H     | 2.36898e-18         | 1.00000  | 2.36906e-18          | 1.000000 |
| rad27         | 2.11364e-18         | 1.00000  | 2.11371e-18          | 1.000000 |
| rad9          | 1.87813e-18         | 1.00000  | 1.87819e-18          | 1.000000 |
| rad8          | 9.84496e-20         | 1.00000  | 9.84529e-20          | 1.000000 |
| rad31         | 1.06159e-20         | 1.00000  | 1.06162e-20          | 1.000000 |
| Ph+Allene     | 8.45040e-21         | 1.00000  | 8.45068e-21          | 1.000000 |
| Ph+MeAc       | 4.91869e-21         | 1.00000  | 4.91886e-21          | 1.000000 |
| rad60syn      | 1.00058e-21         | 1.00000  | 1.00061e-21          | 1.000000 |
| rad60anti     | 9.29651e-23         | 1.00000  | 9.29683e-23          | 1.000000 |
| PAH7+H        | 7.52368e-23         | 1.00000  | 7.52394e-23          | 1.000000 |
| rad39         | 6.19470e-24         | 1.00000  | 6.19491e-24          | 1.000000 |
| rad12         | 2.81338e-24         | 1.00000  | 2.81347e-24          | 1.000000 |
| PhCH2CCH+H    | 9.68506e-25         | 1.00000  | 9.68539e-25          | 1.000000 |
| rad37         | 2.22855e-27         | 1.00000  | 2.22863e-27          | 1.000000 |
| PAH3+H        | 1.14969e-28         | 1.00000  | 1.14972e-28          | 1.000000 |
| rad59         | 5.74870e-29         | 1.00000  | 5.74889e-29          | 1.000000 |
| rad5          | 4.79064e-29         | 1.00000  | 4.79080e-29          | 1.000000 |
| rad50         | 7.46695e-30         | 1.00000  | 7.46720e-30          | 1.000000 |
| rad19syn      | 3.62909e-37         | 1.00000  | 3.62921e-37          | 1.000000 |
| rad52         | 3.94315e-40         | 1.00000  | 3.94329e-40          | 1.000000 |
| PAH10+CH3     | 3.37051e-40         | 1.00000  | 3.37063e-40          | 1.000000 |
| rad54         | 1.99373e-40         | 1.00000  | 1.99380e-40          | 1.000000 |
| rad43         | 7.66210e-41         | 1.00000  | 7.66235e-41          | 1.000000 |
| rad62         | 1.34363e-42         | 1.00000  | 1.34367e-42          | 1.000000 |
| rad51         | 2.36907e-45         | 1.00000  | 2.36915e-45          | 1.000000 |
| rad70         | 1.90078e-46         | 1.00000  | 1.90084e-46          | 1.000000 |
| PhcycC3H3_A+H | 1.37055e-46         | 1.00000  | 1.37059e-46          | 1.000000 |
| rad55         | 6.42881e-47         | 1.00000  | 6.42902e-47          | 1.000000 |
| rad65         | 3.57522e-49         | 1.00000  | 3.57534e-49          | 1.000000 |
| rad58         | 6.71695e-50         | 1.00000  | 6.71718e-50          | 1.000000 |
| PAH1+H        | 5.13039e-50         | 1.00000  | 5.13056e-50          | 1.000000 |
| rad34         | 8.68721e-52         | 1.00000  | 8.68750e-52          | 1.000000 |
| rad42         | 8.29735e-55         | 1.00000  | 8.29763e-55          | 1.000000 |
| rad41         | 1.79485e-55         | 1.00000  | 1.79491e-55          | 1.000000 |
| rad47         | 1.62099e-56         | 1.00000  | 1.62105e-56          | 1.000000 |

1.00000000 Pa, 150.000000 K

=====

| Rate constant | True (fraction)     | Effective (fraction) |
|---------------|---------------------|----------------------|
| Total         | 3.27736e-32 (1.00 ) | 3.27722e-32 (1.00 )  |

| species       | PYtrue      | Cumul    | PYeffective | Cumul    |
|---------------|-------------|----------|-------------|----------|
| Indene+H      | 0.935097    | 0.935097 | 0.935138    | 0.935138 |
| rad23         | 0.0624954   | 0.997592 | 0.0624982   | 0.997636 |
| rad45         | 0.00149177  | 0.999084 | 0.00149184  | 0.999128 |
| rad22         | 0.000423314 | 0.999507 | 0.000423333 | 0.999551 |
| rad6          | 0.000314484 | 0.999822 | 0.000314498 | 0.999866 |
| rad36         | 9.25444e-05 | 0.999915 | 9.25485e-05 | 0.999958 |
| Benzyl+C2H2   | 4.37980e-05 | 0.999958 | 0.00000     | 0.999958 |
| rad11         | 4.11235e-05 | 0.999999 | 4.11253e-05 | 1.000000 |
| rad7          | 4.53639e-08 | 0.999999 | 4.53659e-08 | 1.000000 |
| rad18         | 3.74013e-09 | 0.999999 | 3.74029e-09 | 1.000000 |
| rad20         | 3.34230e-09 | 0.999999 | 3.34244e-09 | 1.000000 |
| rad21         | 2.11533e-09 | 0.999999 | 2.11542e-09 | 1.000000 |
| rad13         | 1.53189e-10 | 0.999999 | 1.53195e-10 | 1.000000 |
| rad30         | 9.39638e-11 | 0.999999 | 9.39679e-11 | 1.000000 |
| rad3          | 3.94284e-11 | 0.999999 | 3.94301e-11 | 1.000000 |
| rad4          | 2.01410e-11 | 0.999999 | 2.01419e-11 | 1.000000 |
| rad35         | 1.51073e-11 | 0.999999 | 1.51079e-11 | 1.000000 |
| rad2          | 1.42450e-11 | 0.999999 | 1.42457e-11 | 1.000000 |
| PAH9+H        | 1.32486e-11 | 0.999999 | 1.32492e-11 | 1.000000 |
| rad24         | 1.25802e-11 | 0.999999 | 1.25807e-11 | 1.000000 |
| rad15         | 1.72667e-12 | 0.999999 | 1.72675e-12 | 1.000000 |
| rad38         | 1.27514e-12 | 0.999999 | 1.27520e-12 | 1.000000 |
| rad1          | 9.36419e-13 | 0.999999 | 9.36460e-13 | 1.000000 |
| rad25         | 7.24173e-13 | 0.999999 | 7.24204e-13 | 1.000000 |
| rad10         | 5.23438e-13 | 0.999999 | 5.23461e-13 | 1.000000 |
| rad33         | 2.52365e-13 | 0.999999 | 2.52376e-13 | 1.000000 |
| rad28         | 8.91943e-14 | 0.999999 | 8.91982e-14 | 1.000000 |
| PhCHCCH2+H    | 1.20470e-15 | 0.999999 | 1.20476e-15 | 1.000000 |
| PhCCH+CH3     | 4.66853e-16 | 0.999999 | 4.66874e-16 | 1.000000 |
| rad26         | 1.84379e-16 | 0.999999 | 1.84387e-16 | 1.000000 |
| rad14         | 5.12981e-17 | 0.999999 | 5.13003e-17 | 1.000000 |
| rad46         | 3.49142e-17 | 0.999999 | 3.49158e-17 | 1.000000 |
| PhCCCH3+H     | 1.70613e-17 | 0.999999 | 1.70621e-17 | 1.000000 |
| rad9          | 1.49512e-17 | 0.999999 | 1.49518e-17 | 1.000000 |
| rad27         | 5.47526e-18 | 0.999999 | 5.47550e-18 | 1.000000 |
| rad8          | 1.22973e-18 | 0.999999 | 1.22978e-18 | 1.000000 |
| Ph+Allene     | 1.26754e-19 | 0.999999 | 1.26760e-19 | 1.000000 |
| Ph+MeAc       | 6.89040e-20 | 0.999999 | 6.89071e-20 | 1.000000 |
| rad31         | 1.70559e-20 | 0.999999 | 1.70566e-20 | 1.000000 |
| rad60syn      | 1.28844e-20 | 0.999999 | 1.28849e-20 | 1.000000 |
| rad60anti     | 1.41402e-21 | 0.999999 | 1.41408e-21 | 1.000000 |
| PAH7+H        | 9.40563e-22 | 0.999999 | 9.40604e-22 | 1.000000 |
| rad39         | 9.31622e-23 | 0.999999 | 9.31663e-23 | 1.000000 |
| rad12         | 4.43523e-23 | 0.999999 | 4.43543e-23 | 1.000000 |
| PhCH2CCH+H    | 3.11921e-23 | 0.999999 | 3.11934e-23 | 1.000000 |
| rad37         | 8.28282e-26 | 0.999999 | 8.28319e-26 | 1.000000 |
| PAH3+H        | 1.80741e-26 | 0.999999 | 1.80749e-26 | 1.000000 |
| rad59         | 8.14714e-27 | 0.999999 | 8.14749e-27 | 1.000000 |
| rad5          | 2.27437e-27 | 0.999999 | 2.27447e-27 | 1.000000 |
| rad50         | 5.20398e-28 | 0.999999 | 5.20421e-28 | 1.000000 |
| rad19syn      | 1.00887e-34 | 0.999999 | 1.00891e-34 | 1.000000 |
| rad52         | 2.27734e-37 | 0.999999 | 2.27744e-37 | 1.000000 |
| PAH10+CH3     | 8.84028e-38 | 0.999999 | 8.84067e-38 | 1.000000 |
| rad54         | 5.87697e-38 | 0.999999 | 5.87723e-38 | 1.000000 |
| rad43         | 2.09680e-38 | 0.999999 | 2.09690e-38 | 1.000000 |
| rad62         | 4.06445e-40 | 0.999999 | 4.06462e-40 | 1.000000 |
| rad51         | 1.57183e-42 | 0.999999 | 1.57190e-42 | 1.000000 |
| rad70         | 6.25174e-44 | 0.999999 | 6.25202e-44 | 1.000000 |
| PhcycC3H3_A+H | 4.54651e-44 | 0.999999 | 4.54671e-44 | 1.000000 |
| rad55         | 2.12465e-44 | 0.999999 | 2.12475e-44 | 1.000000 |
| rad65         | 2.08538e-46 | 0.999999 | 2.08547e-46 | 1.000000 |
| rad58         | 2.24056e-47 | 0.999999 | 2.24065e-47 | 1.000000 |
| PAH1+H        | 1.80256e-47 | 0.999999 | 1.80264e-47 | 1.000000 |
| rad34         | 3.08689e-49 | 0.999999 | 3.08703e-49 | 1.000000 |
| rad42         | 3.19738e-52 | 0.999999 | 3.19752e-52 | 1.000000 |
| rad41         | 7.64583e-53 | 0.999999 | 7.64616e-53 | 1.000000 |
| rad47         | 7.38194e-54 | 0.999999 | 7.38226e-54 | 1.000000 |

1.00000000 Pa, 160.000000 K

=====

| Rate constant | True (fraction) | Effective (fraction) |
|---------------|-----------------|----------------------|
|---------------|-----------------|----------------------|

Total | 5.01169e-31 (1.00 ) 5.01140e-31 (1.00 )

| species       | PYtrue      | Cumul    | PYeffective | Cumul    |
|---------------|-------------|----------|-------------|----------|
| Indene+H      | 0.938952    | 0.938952 | 0.939005    | 0.939005 |
| rad23         | 0.0588104   | 0.997762 | 0.0588137   | 0.997819 |
| rad45         | 0.00138958  | 0.999152 | 0.00138966  | 0.999208 |
| rad6          | 0.000347984 | 0.999500 | 0.000348004 | 0.999556 |
| rad22         | 0.000321239 | 0.999821 | 0.000321258 | 0.999878 |
| rad36         | 8.62788e-05 | 0.999907 | 8.62837e-05 | 0.999964 |
| Benzyl+C2H2   | 5.67432e-05 | 0.999964 | 0.00000     | 0.999964 |
| rad11         | 3.58992e-05 | 1.00000  | 3.59012e-05 | 1.00000  |
| rad7          | 5.02267e-08 | 1.00000  | 5.02295e-08 | 1.00000  |
| rad18         | 2.86524e-09 | 1.00000  | 2.86540e-09 | 1.00000  |
| rad20         | 2.78193e-09 | 1.00000  | 2.78209e-09 | 1.00000  |
| rad21         | 1.76129e-09 | 1.00000  | 1.76139e-09 | 1.00000  |
| rad30         | 1.80223e-10 | 1.00000  | 1.80233e-10 | 1.00000  |
| rad13         | 1.68853e-10 | 1.00000  | 1.68862e-10 | 1.00000  |
| rad3          | 5.83573e-11 | 1.00000  | 5.83606e-11 | 1.00000  |
| rad2          | 3.00730e-11 | 1.00000  | 3.00747e-11 | 1.00000  |
| rad4          | 2.98561e-11 | 1.00000  | 2.98578e-11 | 1.00000  |
| rad35         | 2.30583e-11 | 1.00000  | 2.30596e-11 | 1.00000  |
| PAH9+H        | 2.17792e-11 | 1.00000  | 2.17804e-11 | 1.00000  |
| rad24         | 1.18263e-11 | 1.00000  | 1.18270e-11 | 1.00000  |
| rad15         | 4.37864e-12 | 1.00000  | 4.37889e-12 | 1.00000  |
| rad38         | 2.37090e-12 | 1.00000  | 2.37103e-12 | 1.00000  |
| rad1          | 1.98796e-12 | 1.00000  | 1.98807e-12 | 1.00000  |
| rad25         | 1.42382e-12 | 1.00000  | 1.42390e-12 | 1.00000  |
| rad10         | 1.25042e-12 | 1.00000  | 1.25049e-12 | 1.00000  |
| rad33         | 2.80263e-13 | 1.00000  | 2.80279e-13 | 1.00000  |
| rad28         | 2.31504e-13 | 1.00000  | 2.31518e-13 | 1.00000  |
| PhCHCCH2+H    | 5.81177e-15 | 1.00000  | 5.81210e-15 | 1.00000  |
| PhCCH+CH3     | 2.22814e-15 | 1.00000  | 2.22827e-15 | 1.00000  |
| rad26         | 8.20394e-16 | 1.00000  | 8.20441e-16 | 1.00000  |
| rad14         | 1.40348e-16 | 1.00000  | 1.40356e-16 | 1.00000  |
| rad46         | 1.37813e-16 | 1.00000  | 1.37821e-16 | 1.00000  |
| PhCCCH3+H     | 1.05820e-16 | 1.00000  | 1.05826e-16 | 1.00000  |
| rad9          | 9.26476e-17 | 1.00000  | 9.26528e-17 | 1.00000  |
| rad27         | 1.31279e-17 | 1.00000  | 1.31286e-17 | 1.00000  |
| rad8          | 1.13408e-17 | 1.00000  | 1.13414e-17 | 1.00000  |
| Ph+Allene     | 1.37025e-18 | 1.00000  | 1.37032e-18 | 1.00000  |
| Ph+MeAc       | 7.49427e-19 | 1.00000  | 7.49470e-19 | 1.00000  |
| rad60syn      | 1.20359e-19 | 1.00000  | 1.20366e-19 | 1.00000  |
| rad31         | 2.69865e-20 | 1.00000  | 2.69881e-20 | 1.00000  |
| rad60anti     | 1.52615e-20 | 1.00000  | 1.52623e-20 | 1.00000  |
| PAH7+H        | 9.47028e-21 | 1.00000  | 9.47081e-21 | 1.00000  |
| rad39         | 1.09568e-21 | 1.00000  | 1.09574e-21 | 1.00000  |
| PhCH2CCH+H    | 6.11323e-22 | 1.00000  | 6.11358e-22 | 1.00000  |
| rad12         | 5.53097e-22 | 1.00000  | 5.53128e-22 | 1.00000  |
| rad37         | 1.93169e-24 | 1.00000  | 1.93180e-24 | 1.00000  |
| PAH3+H        | 5.41947e-25 | 1.00000  | 5.41978e-25 | 1.00000  |
| rad59         | 2.28841e-25 | 1.00000  | 2.28854e-25 | 1.00000  |
| rad5          | 6.02455e-26 | 1.00000  | 6.02490e-26 | 1.00000  |
| rad50         | 1.37046e-26 | 1.00000  | 1.37054e-26 | 1.00000  |
| rad19syn      | 2.20056e-32 | 1.00000  | 2.20069e-32 | 1.00000  |
| rad52         | 8.83528e-35 | 1.00000  | 8.83578e-35 | 1.00000  |
| PAH10+CH3     | 1.74942e-35 | 1.00000  | 1.74952e-35 | 1.00000  |
| rad54         | 1.35953e-35 | 1.00000  | 1.35960e-35 | 1.00000  |
| rad43         | 4.30345e-36 | 1.00000  | 4.30369e-36 | 1.00000  |
| rad62         | 9.40960e-38 | 1.00000  | 9.41014e-38 | 1.00000  |
| rad51         | 7.00635e-40 | 1.00000  | 7.00675e-40 | 1.00000  |
| rad70         | 1.61538e-41 | 1.00000  | 1.61547e-41 | 1.00000  |
| PhcycC3H3_A+H | 1.18515e-41 | 1.00000  | 1.18522e-41 | 1.00000  |
| rad55         | 5.51678e-42 | 1.00000  | 5.51709e-42 | 1.00000  |
| rad65         | 1.02455e-43 | 1.00000  | 1.02461e-43 | 1.00000  |
| rad58         | 5.88073e-45 | 1.00000  | 5.88107e-45 | 1.00000  |
| PAH1+H        | 4.98653e-45 | 1.00000  | 4.98681e-45 | 1.00000  |
| rad34         | 8.64309e-47 | 1.00000  | 8.64358e-47 | 1.00000  |
| rad42         | 1.00557e-49 | 1.00000  | 1.00563e-49 | 1.00000  |
| rad41         | 2.77307e-50 | 1.00000  | 2.77323e-50 | 1.00000  |
| rad47         | 3.52060e-51 | 1.00000  | 3.52080e-51 | 1.00000  |

1.00000000 Pa, 170.000000 K

=====

| Rate constant | True (fraction)     | Effective (fraction) |
|---------------|---------------------|----------------------|
| Total         | 5.54821e-30 (1.00 ) | 5.54780e-30 (1.00 )  |

| species | PYtrue | Cumul | PYeffective | Cumul |
|---------|--------|-------|-------------|-------|
|---------|--------|-------|-------------|-------|

-----

|               |             |          |             |          |
|---------------|-------------|----------|-------------|----------|
| Indene+H      | 0.942803    | 0.942803 | 0.942872    | 0.942872 |
| rad23         | 0.0550916   | 0.997895 | 0.0550956   | 0.997968 |
| rad45         | 0.00128977  | 0.999184 | 0.00128986  | 0.999257 |
| rad6          | 0.000384441 | 0.999569 | 0.000384469 | 0.999642 |
| rad22         | 0.000246901 | 0.999816 | 0.000246919 | 0.999889 |
| rad36         | 8.01728e-05 | 0.999896 | 8.01787e-05 | 0.999969 |
| Benzyl+C2H2   | 7.32419e-05 | 0.999969 | 0.00000     | 0.999969 |
| rad11         | 3.11670e-05 | 1.00000  | 3.11693e-05 | 1.00000  |
| rad7          | 5.54593e-08 | 1.00000  | 5.54634e-08 | 1.00000  |
| rad20         | 2.33646e-09 | 1.00000  | 2.33663e-09 | 1.00000  |
| rad18         | 2.22133e-09 | 1.00000  | 2.22149e-09 | 1.00000  |
| rad21         | 1.47986e-09 | 1.00000  | 1.47997e-09 | 1.00000  |
| rad30         | 3.24331e-10 | 1.00000  | 3.24355e-10 | 1.00000  |
| rad13         | 1.85949e-10 | 1.00000  | 1.85963e-10 | 1.00000  |
| rad3          | 8.45707e-11 | 1.00000  | 8.45769e-11 | 1.00000  |
| rad2          | 6.12959e-11 | 1.00000  | 6.13004e-11 | 1.00000  |
| rad4          | 4.33396e-11 | 1.00000  | 4.33428e-11 | 1.00000  |
| PAH9+H        | 3.51133e-11 | 1.00000  | 3.51159e-11 | 1.00000  |
| rad35         | 3.48205e-11 | 1.00000  | 3.48230e-11 | 1.00000  |
| rad24         | 1.10804e-11 | 1.00000  | 1.10812e-11 | 1.00000  |
| rad15         | 1.00466e-11 | 1.00000  | 1.00473e-11 | 1.00000  |
| rad38         | 4.24874e-12 | 1.00000  | 4.24906e-12 | 1.00000  |
| rad1          | 4.07660e-12 | 1.00000  | 4.07690e-12 | 1.00000  |
| rad10         | 2.81796e-12 | 1.00000  | 2.81816e-12 | 1.00000  |
| rad25         | 2.52592e-12 | 1.00000  | 2.52610e-12 | 1.00000  |
| rad28         | 5.69886e-13 | 1.00000  | 5.69928e-13 | 1.00000  |
| rad33         | 3.10851e-13 | 1.00000  | 3.10873e-13 | 1.00000  |
| PhCHCCH2+H    | 2.37702e-14 | 1.00000  | 2.37719e-14 | 1.00000  |
| PhCCH+CH3     | 9.43748e-15 | 1.00000  | 9.43817e-15 | 1.00000  |
| rad26         | 3.33229e-15 | 1.00000  | 3.33253e-15 | 1.00000  |
| PhCCCH3+H     | 5.76037e-16 | 1.00000  | 5.76079e-16 | 1.00000  |
| rad46         | 4.71596e-16 | 1.00000  | 4.71631e-16 | 1.00000  |
| rad9          | 4.67453e-16 | 1.00000  | 4.67488e-16 | 1.00000  |
| rad14         | 3.41485e-16 | 1.00000  | 3.41510e-16 | 1.00000  |
| rad8          | 8.11346e-17 | 1.00000  | 8.11406e-17 | 1.00000  |
| rad27         | 2.94498e-17 | 1.00000  | 2.94520e-17 | 1.00000  |
| Ph+Allene     | 1.13196e-17 | 1.00000  | 1.13204e-17 | 1.00000  |
| Ph+MeAc       | 6.55725e-18 | 1.00000  | 6.55773e-18 | 1.00000  |
| rad60syn      | 8.64090e-19 | 1.00000  | 8.64153e-19 | 1.00000  |
| rad60anti     | 1.24311e-19 | 1.00000  | 1.24320e-19 | 1.00000  |
| PAH7+H        | 7.95083e-20 | 1.00000  | 7.95141e-20 | 1.00000  |
| rad31         | 4.20254e-20 | 1.00000  | 4.20284e-20 | 1.00000  |
| rad39         | 1.04750e-20 | 1.00000  | 1.04758e-20 | 1.00000  |
| PhCH2CCH+H    | 8.47033e-21 | 1.00000  | 8.47095e-21 | 1.00000  |
| rad12         | 5.60336e-21 | 1.00000  | 5.60377e-21 | 1.00000  |
| rad37         | 3.19362e-23 | 1.00000  | 3.19386e-23 | 1.00000  |
| PAH3+H        | 9.94972e-24 | 1.00000  | 9.95045e-24 | 1.00000  |
| rad59         | 4.05232e-24 | 1.00000  | 4.05262e-24 | 1.00000  |
| rad5          | 1.08943e-24 | 1.00000  | 1.08951e-24 | 1.00000  |
| rad50         | 2.34680e-25 | 1.00000  | 2.34697e-25 | 1.00000  |
| rad19syn      | 4.25646e-30 | 1.00000  | 4.25677e-30 | 1.00000  |
| rad52         | 2.26656e-31 | 1.00000  | 2.26673e-31 | 1.00000  |
| PAH10+CH3     | 2.57119e-33 | 1.00000  | 2.57138e-33 | 1.00000  |
| rad54         | 2.43367e-33 | 1.00000  | 2.43385e-33 | 1.00000  |
| rad43         | 6.52930e-34 | 1.00000  | 6.52978e-34 | 1.00000  |
| rad62         | 1.64157e-35 | 1.00000  | 1.64169e-35 | 1.00000  |
| rad51         | 1.91318e-37 | 1.00000  | 1.91332e-37 | 1.00000  |
| rad70         | 3.23162e-39 | 1.00000  | 3.23186e-39 | 1.00000  |
| PhcycC3H3_A+H | 2.39234e-39 | 1.00000  | 2.39251e-39 | 1.00000  |
| rad55         | 1.10910e-39 | 1.00000  | 1.10918e-39 | 1.00000  |
| rad65         | 3.37269e-41 | 1.00000  | 3.37294e-41 | 1.00000  |
| rad58         | 1.19728e-42 | 1.00000  | 1.19737e-42 | 1.00000  |
| PAH1+H        | 1.06998e-42 | 1.00000  | 1.07006e-42 | 1.00000  |
| rad34         | 1.87862e-44 | 1.00000  | 1.87875e-44 | 1.00000  |
| rad42         | 2.55157e-47 | 1.00000  | 2.55176e-47 | 1.00000  |
| rad41         | 8.31344e-48 | 1.00000  | 8.31405e-48 | 1.00000  |
| rad47         | 1.37000e-48 | 1.00000  | 1.37010e-48 | 1.00000  |

1.0000000 Pa, 180.00000 K

=====

| Rate constant | True (fraction)     | Effective (fraction) |
|---------------|---------------------|----------------------|
| Total         | 4.69315e-29 (1.00 ) | 4.69271e-29 (1.00 )  |

| species  | PYtrue      | Cumul    | PYeffective | Cumul    |
|----------|-------------|----------|-------------|----------|
| Indene+H | 0.946637    | 0.946637 | 0.946726    | 0.946726 |
| rad23    | 0.0513591   | 0.997996 | 0.0513639   | 0.998090 |
| rad45    | 0.00119240  | 0.999188 | 0.00119251  | 0.999282 |
| rad6     | 0.000424233 | 0.999613 | 0.000424273 | 0.999707 |

|               |             |          |             |          |
|---------------|-------------|----------|-------------|----------|
| rad22         | 0.000192014 | 0.999805 | 0.000192032 | 0.999899 |
| Benzyl+C2H2   | 9.41743e-05 | 0.999899 | 0.00000     | 0.999899 |
| rad36         | 7.42276e-05 | 0.999973 | 7.42346e-05 | 0.999973 |
| rad11         | 2.69158e-05 | 1.00000  | 2.69183e-05 | 1.000000 |
| rad7          | 6.11136e-08 | 1.00000  | 6.11193e-08 | 1.000000 |
| rad20         | 1.97754e-09 | 1.00000  | 1.97773e-09 | 1.000000 |
| rad18         | 1.73972e-09 | 1.00000  | 1.73989e-09 | 1.000000 |
| rad21         | 1.25314e-09 | 1.00000  | 1.25326e-09 | 1.000000 |
| rad30         | 5.54281e-10 | 1.00000  | 5.54333e-10 | 1.000000 |
| rad13         | 2.04669e-10 | 1.00000  | 2.04688e-10 | 1.000000 |
| rad2          | 1.20755e-10 | 1.00000  | 1.20767e-10 | 1.000000 |
| rad3          | 1.19915e-10 | 1.00000  | 1.19926e-10 | 1.000000 |
| rad4          | 6.15649e-11 | 1.00000  | 6.15707e-11 | 1.000000 |
| PAH9+H        | 5.56186e-11 | 1.00000  | 5.56239e-11 | 1.000000 |
| rad35         | 5.20175e-11 | 1.00000  | 5.20224e-11 | 1.000000 |
| rad15         | 2.12336e-11 | 1.00000  | 2.12356e-11 | 1.000000 |
| rad24         | 1.03431e-11 | 1.00000  | 1.03441e-11 | 1.000000 |
| rad1          | 8.08420e-12 | 1.00000  | 8.08496e-12 | 1.000000 |
| rad38         | 7.37483e-12 | 1.00000  | 7.37552e-12 | 1.000000 |
| rad10         | 6.02060e-12 | 1.00000  | 6.02116e-12 | 1.000000 |
| rad25         | 4.11031e-12 | 1.00000  | 4.11069e-12 | 1.000000 |
| rad28         | 1.34123e-12 | 1.00000  | 1.34135e-12 | 1.000000 |
| rad33         | 3.44491e-13 | 1.00000  | 3.44523e-13 | 1.000000 |
| PhCHCCH2+H    | 8.49038e-14 | 1.00000  | 8.49118e-14 | 1.000000 |
| PhCCH+CH3     | 3.61833e-14 | 1.00000  | 3.61867e-14 | 1.000000 |
| rad26         | 1.24606e-14 | 1.00000  | 1.24618e-14 | 1.000000 |
| PhCCCH3+H     | 2.79397e-15 | 1.00000  | 2.79423e-15 | 1.000000 |
| rad9          | 1.98897e-15 | 1.00000  | 1.98916e-15 | 1.000000 |
| rad46         | 1.43271e-15 | 1.00000  | 1.43285e-15 | 1.000000 |
| rad14         | 7.51475e-16 | 1.00000  | 7.51545e-16 | 1.000000 |
| rad8          | 4.69179e-16 | 1.00000  | 4.69223e-16 | 1.000000 |
| Ph+Allene     | 7.47821e-17 | 1.00000  | 7.47891e-17 | 1.000000 |
| rad27         | 6.23841e-17 | 1.00000  | 6.23900e-17 | 1.000000 |
| Ph+MeAc       | 4.75413e-17 | 1.00000  | 4.75458e-17 | 1.000000 |
| rad60syn      | 4.98593e-18 | 1.00000  | 4.98640e-18 | 1.000000 |
| rad60anti     | 8.01517e-19 | 1.00000  | 8.01593e-19 | 1.000000 |
| PAH7+H        | 5.71614e-19 | 1.00000  | 5.71667e-19 | 1.000000 |
| PhCH2CCH+H    | 8.86837e-20 | 1.00000  | 8.86921e-20 | 1.000000 |
| rad39         | 8.39068e-20 | 1.00000  | 8.39147e-20 | 1.000000 |
| rad31         | 6.44291e-20 | 1.00000  | 6.44352e-20 | 1.000000 |
| rad12         | 4.71484e-20 | 1.00000  | 4.71528e-20 | 1.000000 |
| rad37         | 3.98055e-22 | 1.00000  | 3.98093e-22 | 1.000000 |
| PAH3+H        | 1.30760e-22 | 1.00000  | 1.30772e-22 | 1.000000 |
| rad59         | 5.16327e-23 | 1.00000  | 5.16375e-23 | 1.000000 |
| rad5          | 1.46156e-23 | 1.00000  | 1.46170e-23 | 1.000000 |
| rad50         | 2.92782e-24 | 1.00000  | 2.92810e-24 | 1.000000 |
| rad19syn      | 3.50925e-28 | 1.00000  | 3.50958e-28 | 1.000000 |
| rad52         | 1.33455e-29 | 1.00000  | 1.33468e-29 | 1.000000 |
| rad54         | 4.37017e-31 | 1.00000  | 4.37058e-31 | 1.000000 |
| PAH10+CH3     | 3.37169e-31 | 1.00000  | 3.37201e-31 | 1.000000 |
| rad43         | 8.94639e-32 | 1.00000  | 8.94724e-32 | 1.000000 |
| rad62         | 2.72116e-33 | 1.00000  | 2.72142e-33 | 1.000000 |
| rad51         | 4.38351e-35 | 1.00000  | 4.38392e-35 | 1.000000 |
| rad70         | 6.48029e-37 | 1.00000  | 6.48090e-37 | 1.000000 |
| PhcycC3H3_A+H | 4.84056e-37 | 1.00000  | 4.84101e-37 | 1.000000 |
| rad55         | 2.23489e-37 | 1.00000  | 2.23510e-37 | 1.000000 |
| rad65         | 8.72538e-39 | 1.00000  | 8.72620e-39 | 1.000000 |
| rad58         | 2.44566e-40 | 1.00000  | 2.44589e-40 | 1.000000 |
| PAH1+H        | 2.29993e-40 | 1.00000  | 2.30015e-40 | 1.000000 |
| rad34         | 4.09251e-42 | 1.00000  | 4.09290e-42 | 1.000000 |
| rad42         | 6.42804e-45 | 1.00000  | 6.42865e-45 | 1.000000 |
| rad41         | 2.38492e-45 | 1.00000  | 2.38514e-45 | 1.000000 |
| rad47         | 4.46550e-46 | 1.00000  | 4.46592e-46 | 1.000000 |

1.00000000 Pa, 190.000000 K

=====

| Rate constant | True (fraction)     | Effective (fraction) |
|---------------|---------------------|----------------------|
| Total         | 3.16530e-28 (1.00 ) | 3.16492e-28 (1.00 )  |

| species     | PYtrue      | Cumul    | PYeffective | Cumul    |
|-------------|-------------|----------|-------------|----------|
| Indene+H    | 0.950435    | 0.950435 | 0.950549    | 0.950549 |
| rad23       | 0.0476367   | 0.998072 | 0.0476425   | 0.998192 |
| rad45       | 0.00109767  | 0.999169 | 0.00109780  | 0.999289 |
| rad6        | 0.000467769 | 0.999637 | 0.000467825 | 0.999757 |
| rad22       | 0.000150963 | 0.999788 | 0.000150981 | 0.999908 |
| Benzyl+C2H2 | 0.000120602 | 0.999909 | 0.00000     | 0.999908 |
| rad36       | 6.84526e-05 | 0.999977 | 6.84609e-05 | 0.999977 |
| rad11       | 2.31268e-05 | 1.00000  | 2.31296e-05 | 1.000000 |

|               |             |         |             |          |
|---------------|-------------|---------|-------------|----------|
| rad7          | 6.72448e-08 | 1.00000 | 6.72529e-08 | 1.000000 |
| rad20         | 1.68505e-09 | 1.00000 | 1.68525e-09 | 1.000000 |
| rad18         | 1.37450e-09 | 1.00000 | 1.37466e-09 | 1.000000 |
| rad21         | 1.06840e-09 | 1.00000 | 1.06853e-09 | 1.000000 |
| rad30         | 9.07910e-10 | 1.00000 | 9.08019e-10 | 1.000000 |
| rad2          | 2.30353e-10 | 1.00000 | 2.30381e-10 | 1.000000 |
| rad13         | 2.25216e-10 | 1.00000 | 2.25244e-10 | 1.000000 |
| rad3          | 1.66358e-10 | 1.00000 | 1.66378e-10 | 1.000000 |
| PAH9+H        | 8.66567e-11 | 1.00000 | 8.66671e-11 | 1.000000 |
| rad4          | 8.55803e-11 | 1.00000 | 8.55907e-11 | 1.000000 |
| rad35         | 7.68537e-11 | 1.00000 | 7.68630e-11 | 1.000000 |
| rad15         | 4.19199e-11 | 1.00000 | 4.19249e-11 | 1.000000 |
| rad1          | 1.55322e-11 | 1.00000 | 1.55341e-11 | 1.000000 |
| rad38         | 1.24457e-11 | 1.00000 | 1.24472e-11 | 1.000000 |
| rad10         | 1.22575e-11 | 1.00000 | 1.22589e-11 | 1.000000 |
| rad24         | 9.61616e-12 | 1.00000 | 9.61732e-12 | 1.000000 |
| rad25         | 6.21590e-12 | 1.00000 | 6.21665e-12 | 1.000000 |
| rad28         | 3.03638e-12 | 1.00000 | 3.03674e-12 | 1.000000 |
| rad33         | 3.81581e-13 | 1.00000 | 3.81628e-13 | 1.000000 |
| PhCHCCH2+H    | 2.71270e-13 | 1.00000 | 2.71302e-13 | 1.000000 |
| PhCCH+CH3     | 1.27566e-13 | 1.00000 | 1.27581e-13 | 1.000000 |
| rad26         | 4.31702e-14 | 1.00000 | 4.31754e-14 | 1.000000 |
| PhCCCH3+H     | 1.22189e-14 | 1.00000 | 1.22204e-14 | 1.000000 |
| rad9          | 7.33793e-15 | 1.00000 | 7.33881e-15 | 1.000000 |
| rad46         | 3.93820e-15 | 1.00000 | 3.93868e-15 | 1.000000 |
| rad8          | 2.26754e-15 | 1.00000 | 2.26781e-15 | 1.000000 |
| rad14         | 1.51699e-15 | 1.00000 | 1.51717e-15 | 1.000000 |
| Ph+Allene     | 4.09585e-16 | 1.00000 | 4.09635e-16 | 1.000000 |
| Ph+MeAc       | 2.92672e-16 | 1.00000 | 2.92708e-16 | 1.000000 |
| rad27         | 1.25761e-16 | 1.00000 | 1.25776e-16 | 1.000000 |
| rad60syn      | 2.39531e-17 | 1.00000 | 2.39560e-17 | 1.000000 |
| rad60anti     | 4.24754e-18 | 1.00000 | 4.24806e-18 | 1.000000 |
| PAH7+H        | 3.59164e-18 | 1.00000 | 3.59207e-18 | 1.000000 |
| PhCH2CCH+H    | 7.35392e-19 | 1.00000 | 7.35481e-19 | 1.000000 |
| rad39         | 5.76768e-19 | 1.00000 | 5.76838e-19 | 1.000000 |
| rad12         | 3.35773e-19 | 1.00000 | 3.35814e-19 | 1.000000 |
| rad31         | 9.73511e-20 | 1.00000 | 9.73628e-20 | 1.000000 |
| rad37         | 3.90960e-21 | 1.00000 | 3.91007e-21 | 1.000000 |
| PAH3+H        | 1.31246e-21 | 1.00000 | 1.31262e-21 | 1.000000 |
| rad59         | 5.03080e-22 | 1.00000 | 5.03140e-22 | 1.000000 |
| rad5          | 1.53413e-22 | 1.00000 | 1.53431e-22 | 1.000000 |
| rad50         | 2.82155e-23 | 1.00000 | 2.82189e-23 | 1.000000 |
| rad19syn      | 1.08789e-26 | 1.00000 | 1.08802e-26 | 1.000000 |
| rad52         | 3.03325e-28 | 1.00000 | 3.03362e-28 | 1.000000 |
| rad54         | 6.68921e-29 | 1.00000 | 6.69001e-29 | 1.000000 |
| PAH10+CH3     | 3.67021e-29 | 1.00000 | 3.67065e-29 | 1.000000 |
| rad43         | 1.08475e-29 | 1.00000 | 1.08488e-29 | 1.000000 |
| rad62         | 7.42939e-31 | 1.00000 | 7.43028e-31 | 1.000000 |
| rad51         | 2.52102e-31 | 1.00000 | 2.52132e-31 | 1.000000 |
| rad70         | 1.99868e-34 | 1.00000 | 1.99892e-34 | 1.000000 |
| PhcycC3H3_A+H | 1.50611e-34 | 1.00000 | 1.50630e-34 | 1.000000 |
| rad55         | 6.92539e-35 | 1.00000 | 6.92622e-35 | 1.000000 |
| rad65         | 2.67695e-36 | 1.00000 | 2.67727e-36 | 1.000000 |
| rad58         | 7.68714e-38 | 1.00000 | 7.68807e-38 | 1.000000 |
| PAH1+H        | 7.57425e-38 | 1.00000 | 7.57516e-38 | 1.000000 |
| rad34         | 1.36637e-39 | 1.00000 | 1.36654e-39 | 1.000000 |
| rad42         | 2.24475e-42 | 1.00000 | 2.24502e-42 | 1.000000 |
| rad41         | 8.59430e-43 | 1.00000 | 8.59534e-43 | 1.000000 |
| rad47         | 1.55969e-43 | 1.00000 | 1.55988e-43 | 1.000000 |

1.00000000 Pa, 200.000000 K

=====

| Rate constant | True (fraction)     | Effective (fraction) |
|---------------|---------------------|----------------------|
| Total         | 1.76115e-27 (1.00 ) | 1.76088e-27 (1.00 )  |

| species     | PYtrue      | Cumul    | PYeffective | Cumul    |
|-------------|-------------|----------|-------------|----------|
| Indene+H    | 0.954171    | 0.954171 | 0.954318    | 0.954318 |
| rad23       | 0.0439510   | 0.998122 | 0.0439578   | 0.998276 |
| rad45       | 0.00100588  | 0.999128 | 0.00100603  | 0.999282 |
| rad6        | 0.000515481 | 0.999643 | 0.000515561 | 0.999797 |
| Benzyl+C2H2 | 0.000153793 | 0.999797 | 0.00000     | 0.999797 |
| rad22       | 0.000119879 | 0.999917 | 0.000119897 | 0.999917 |
| rad36       | 6.28639e-05 | 0.999980 | 6.28735e-05 | 0.999980 |
| rad11       | 1.97753e-05 | 1.000000 | 1.97783e-05 | 1.000000 |
| rad7        | 7.39119e-08 | 1.000000 | 7.39233e-08 | 1.000000 |
| rad20       | 1.44435e-09 | 1.000000 | 1.44457e-09 | 1.000000 |
| rad30       | 1.43556e-09 | 1.000000 | 1.43578e-09 | 1.000000 |
| rad18       | 1.09423e-09 | 1.000000 | 1.09440e-09 | 1.000000 |

|               |             |          |             |         |
|---------------|-------------|----------|-------------|---------|
| rad21         | 9.16379e-10 | 1.000000 | 9.16520e-10 | 1.00000 |
| rad2          | 4.26379e-10 | 1.000000 | 4.26444e-10 | 1.00000 |
| rad13         | 2.47811e-10 | 1.000000 | 2.47849e-10 | 1.00000 |
| rad3          | 2.25939e-10 | 1.000000 | 2.25973e-10 | 1.00000 |
| PAH9+H        | 1.32920e-10 | 1.000000 | 1.32941e-10 | 1.00000 |
| rad4          | 1.16485e-10 | 1.000000 | 1.16503e-10 | 1.00000 |
| rad35         | 1.12277e-10 | 1.000000 | 1.12295e-10 | 1.00000 |
| rad15         | 7.81611e-11 | 1.000000 | 7.81732e-11 | 1.00000 |
| rad1          | 2.89741e-11 | 1.000000 | 2.89786e-11 | 1.00000 |
| rad10         | 2.38967e-11 | 1.000000 | 2.39003e-11 | 1.00000 |
| rad38         | 2.04802e-11 | 1.000000 | 2.04833e-11 | 1.00000 |
| rad24         | 8.90237e-12 | 1.000000 | 8.90374e-12 | 1.00000 |
| rad25         | 8.82857e-12 | 1.000000 | 8.82992e-12 | 1.00000 |
| rad28         | 6.64288e-12 | 1.000000 | 6.64390e-12 | 1.00000 |
| PhCHCCH2+H    | 7.90691e-13 | 1.000000 | 7.90813e-13 | 1.00000 |
| rad33         | 4.22555e-13 | 1.000000 | 4.22620e-13 | 1.00000 |
| PhCCH+CH3     | 4.18622e-13 | 1.000000 | 4.18687e-13 | 1.00000 |
| rad26         | 1.39227e-13 | 1.000000 | 1.39248e-13 | 1.00000 |
| PhCCCH3+H     | 4.86378e-14 | 1.000000 | 4.86453e-14 | 1.00000 |
| rad9          | 2.40029e-14 | 1.000000 | 2.40066e-14 | 1.00000 |
| rad46         | 9.94494e-15 | 1.000000 | 9.94647e-15 | 1.00000 |
| rad8          | 9.41123e-15 | 1.000000 | 9.41268e-15 | 1.00000 |
| rad14         | 2.84284e-15 | 1.000000 | 2.84328e-15 | 1.00000 |
| Ph+Allene     | 1.91440e-15 | 1.000000 | 1.91470e-15 | 1.00000 |
| Ph+MeAc       | 1.56078e-15 | 1.000000 | 1.56102e-15 | 1.00000 |
| rad27         | 2.42827e-16 | 1.000000 | 2.42864e-16 | 1.00000 |
| rad60syn      | 9.85458e-17 | 1.000000 | 9.85610e-17 | 1.00000 |
| PAH7+H        | 2.00230e-17 | 1.000000 | 2.00261e-17 | 1.00000 |
| rad60anti     | 1.90646e-17 | 1.000000 | 1.90676e-17 | 1.00000 |
| PhCH2CCH+H    | 5.00387e-18 | 1.000000 | 5.00464e-18 | 1.00000 |
| rad39         | 3.46405e-18 | 1.000000 | 3.46458e-18 | 1.00000 |
| rad12         | 2.05639e-18 | 1.000000 | 2.05670e-18 | 1.00000 |
| rad31         | 1.45239e-19 | 1.000000 | 1.45262e-19 | 1.00000 |
| rad37         | 3.12201e-20 | 1.000000 | 3.12249e-20 | 1.00000 |
| PAH3+H        | 1.04749e-20 | 1.000000 | 1.04765e-20 | 1.00000 |
| rad59         | 3.90291e-21 | 1.000000 | 3.90351e-21 | 1.00000 |
| rad5          | 1.30086e-21 | 1.000000 | 1.30106e-21 | 1.00000 |
| rad50         | 2.18251e-22 | 1.000000 | 2.18285e-22 | 1.00000 |
| rad19syn      | 1.87820e-25 | 1.000000 | 1.87849e-25 | 1.00000 |
| rad52         | 4.30781e-27 | 1.000000 | 4.30848e-27 | 1.00000 |
| rad54         | 1.98570e-27 | 1.000000 | 1.98601e-27 | 1.00000 |
| PAH10+CH3     | 1.12897e-27 | 1.000000 | 1.12914e-27 | 1.00000 |
| rad43         | 3.24465e-28 | 1.000000 | 3.24514e-28 | 1.00000 |
| rad62         | 4.55947e-29 | 1.000000 | 4.56017e-29 | 1.00000 |
| rad51         | 1.42117e-29 | 1.000000 | 1.42139e-29 | 1.00000 |
| rad70         | 6.43221e-32 | 1.000000 | 6.43320e-32 | 1.00000 |
| PhcycC3H3_A+H | 4.88844e-32 | 1.000000 | 4.88919e-32 | 1.00000 |
| rad55         | 2.23849e-32 | 1.000000 | 2.23884e-32 | 1.00000 |
| rad65         | 1.65288e-32 | 1.000000 | 1.65313e-32 | 1.00000 |
| PAH1+H        | 2.59223e-35 | 1.000000 | 2.59263e-35 | 1.00000 |
| rad58         | 2.55656e-35 | 1.000000 | 2.55695e-35 | 1.00000 |
| rad34         | 4.75285e-37 | 1.000000 | 4.75358e-37 | 1.00000 |
| rad42         | 7.29052e-40 | 1.000000 | 7.29164e-40 | 1.00000 |
| rad41         | 2.56817e-40 | 1.000000 | 2.56857e-40 | 1.00000 |
| rad47         | 3.91242e-41 | 1.000000 | 3.91302e-41 | 1.00000 |

1.00000000 Pa, 210.000000 K

=====

| Rate constant | True (fraction)     | Effective (fraction) |
|---------------|---------------------|----------------------|
| Total         | 8.30956e-27 (1.00 ) | 8.30794e-27 (1.00 )  |

| species     | PYtrue      | Cumul    | PYeffective | Cumul    |
|-------------|-------------|----------|-------------|----------|
| Indene+H    | 0.957819    | 0.957819 | 0.958006    | 0.958006 |
| rad23       | 0.0403303   | 0.998149 | 0.0403382   | 0.998344 |
| rad45       | 0.000917400 | 0.999067 | 0.000917579 | 0.999262 |
| rad6        | 0.000567825 | 0.999635 | 0.000567936 | 0.999830 |
| Benzyl+C2H2 | 0.000195256 | 0.999830 | 0.00000     | 0.999830 |
| rad22       | 9.60612e-05 | 0.999926 | 9.60800e-05 | 0.999926 |
| rad36       | 5.74812e-05 | 0.999983 | 5.74925e-05 | 0.999983 |
| rad11       | 1.68322e-05 | 1.00000  | 1.68355e-05 | 1.00000  |
| rad7        | 8.11764e-08 | 1.00000  | 8.11922e-08 | 1.00000  |
| rad30       | 2.20327e-09 | 1.00000  | 2.20370e-09 | 1.00000  |
| rad20       | 1.24460e-09 | 1.00000  | 1.24485e-09 | 1.00000  |
| rad18       | 8.76929e-10 | 1.00000  | 8.77100e-10 | 1.00000  |
| rad21       | 7.90235e-10 | 1.00000  | 7.90389e-10 | 1.00000  |
| rad2        | 7.67346e-10 | 1.00000  | 7.67496e-10 | 1.00000  |
| rad3        | 3.00730e-10 | 1.00000  | 3.00789e-10 | 1.00000  |
| rad13       | 2.72685e-10 | 1.00000  | 2.72738e-10 | 1.00000  |

|               |             |         |             |         |
|---------------|-------------|---------|-------------|---------|
| PAH9+H        | 2.00859e-10 | 1.00000 | 2.00898e-10 | 1.00000 |
| rad35         | 1.62176e-10 | 1.00000 | 1.62208e-10 | 1.00000 |
| rad4          | 1.55414e-10 | 1.00000 | 1.55445e-10 | 1.00000 |
| rad15         | 1.38848e-10 | 1.00000 | 1.38875e-10 | 1.00000 |
| rad1          | 5.25856e-11 | 1.00000 | 5.25958e-11 | 1.00000 |
| rad10         | 4.48076e-11 | 1.00000 | 4.48163e-11 | 1.00000 |
| rad38         | 3.29398e-11 | 1.00000 | 3.29462e-11 | 1.00000 |
| rad28         | 1.40928e-11 | 1.00000 | 1.40956e-11 | 1.00000 |
| rad25         | 1.18786e-11 | 1.00000 | 1.18809e-11 | 1.00000 |
| rad24         | 8.20513e-12 | 1.00000 | 8.20674e-12 | 1.00000 |
| PhCHCCH2+H    | 2.13721e-12 | 1.00000 | 2.13763e-12 | 1.00000 |
| PhCCH+CH3     | 1.29039e-12 | 1.00000 | 1.29064e-12 | 1.00000 |
| rad33         | 4.67876e-13 | 1.00000 | 4.67967e-13 | 1.00000 |
| rad26         | 4.19461e-13 | 1.00000 | 4.19543e-13 | 1.00000 |
| PhCCCH3+H     | 1.77578e-13 | 1.00000 | 1.77613e-13 | 1.00000 |
| rad9          | 7.08897e-14 | 1.00000 | 7.09036e-14 | 1.00000 |
| rad8          | 3.42962e-14 | 1.00000 | 3.43029e-14 | 1.00000 |
| rad46         | 2.33569e-14 | 1.00000 | 2.33615e-14 | 1.00000 |
| Ph+Allene     | 7.81806e-15 | 1.00000 | 7.81959e-15 | 1.00000 |
| Ph+MeAc       | 7.33117e-15 | 1.00000 | 7.33260e-15 | 1.00000 |
| rad14         | 4.99580e-15 | 1.00000 | 4.99678e-15 | 1.00000 |
| rad27         | 4.51445e-16 | 1.00000 | 4.51533e-16 | 1.00000 |
| rad60syn      | 3.55185e-16 | 1.00000 | 3.55255e-16 | 1.00000 |
| PAH7+H        | 1.00207e-16 | 1.00000 | 1.00227e-16 | 1.00000 |
| rad60anti     | 7.42561e-17 | 1.00000 | 7.42706e-17 | 1.00000 |
| PhCH2CCH+H    | 2.87664e-17 | 1.00000 | 2.87720e-17 | 1.00000 |
| rad39         | 1.84420e-17 | 1.00000 | 1.84456e-17 | 1.00000 |
| rad12         | 1.09852e-17 | 1.00000 | 1.09874e-17 | 1.00000 |
| rad31         | 2.14469e-19 | 1.00000 | 2.14511e-19 | 1.00000 |
| rad37         | 2.08301e-19 | 1.00000 | 2.08341e-19 | 1.00000 |
| PAH3+H        | 6.87722e-20 | 1.00000 | 6.87856e-20 | 1.00000 |
| rad59         | 2.49334e-20 | 1.00000 | 2.49383e-20 | 1.00000 |
| rad5          | 9.17694e-21 | 1.00000 | 9.17873e-21 | 1.00000 |
| rad50         | 1.39965e-21 | 1.00000 | 1.39993e-21 | 1.00000 |
| rad19syn      | 2.32063e-24 | 1.00000 | 2.32108e-24 | 1.00000 |
| rad52         | 4.59910e-26 | 1.00000 | 4.60000e-26 | 1.00000 |
| rad54         | 3.23387e-26 | 1.00000 | 3.23450e-26 | 1.00000 |
| PAH10+CH3     | 1.88687e-26 | 1.00000 | 1.88724e-26 | 1.00000 |
| rad43         | 5.24670e-27 | 1.00000 | 5.24772e-27 | 1.00000 |
| rad62         | 9.66851e-28 | 1.00000 | 9.67040e-28 | 1.00000 |
| rad51         | 2.69612e-28 | 1.00000 | 2.69664e-28 | 1.00000 |
| rad70         | 1.53191e-29 | 1.00000 | 1.53221e-29 | 1.00000 |
| PhcycC3H3_A+H | 1.10396e-29 | 1.00000 | 1.10417e-29 | 1.00000 |
| rad55         | 4.18271e-30 | 1.00000 | 4.18353e-30 | 1.00000 |
| rad58         | 1.86986e-30 | 1.00000 | 1.87023e-30 | 1.00000 |
| rad65         | 8.66833e-31 | 1.00000 | 8.67002e-31 | 1.00000 |
| PAH1+H        | 9.41304e-33 | 1.00000 | 9.41488e-33 | 1.00000 |
| rad34         | 1.77182e-34 | 1.00000 | 1.77216e-34 | 1.00000 |
| rad42         | 2.38616e-37 | 1.00000 | 2.38663e-37 | 1.00000 |
| rad41         | 6.82502e-38 | 1.00000 | 6.82635e-38 | 1.00000 |
| rad47         | 1.07007e-38 | 1.00000 | 1.07028e-38 | 1.00000 |

1.00000000 Pa, 220.000000 K

=====

| Rate constant | True (fraction)     | Effective (fraction) |
|---------------|---------------------|----------------------|
| Total         | 3.40057e-26 (1.00 ) | 3.39973e-26 (1.00 )  |

| species     | PYtrue      | Cumul    | PYeffective | Cumul    |
|-------------|-------------|----------|-------------|----------|
| Indene+H    | 0.961348    | 0.961348 | 0.961585    | 0.961585 |
| rad23       | 0.0368028   | 0.998151 | 0.0368119   | 0.998397 |
| rad45       | 0.000832631 | 0.998983 | 0.000832836 | 0.999230 |
| rad6        | 0.000625274 | 0.999609 | 0.000625428 | 0.999855 |
| Benzyl+C2H2 | 0.000246762 | 0.999855 | 0.00000     | 0.999855 |
| rad22       | 7.76017e-05 | 0.999933 | 7.76209e-05 | 0.999933 |
| rad36       | 5.23263e-05 | 0.999985 | 5.23392e-05 | 0.999985 |
| rad11       | 1.42655e-05 | 1.000000 | 1.42690e-05 | 0.999999 |
| rad7        | 8.91020e-08 | 1.000000 | 8.91239e-08 | 0.999999 |
| rad30       | 3.29658e-09 | 1.000000 | 3.29739e-09 | 0.999999 |
| rad2        | 1.34507e-09 | 1.000000 | 1.34540e-09 | 0.999999 |
| rad20       | 1.07765e-09 | 1.000000 | 1.07792e-09 | 0.999999 |
| rad18       | 7.06946e-10 | 1.000000 | 7.07120e-10 | 0.999999 |
| rad21       | 6.84807e-10 | 1.000000 | 6.84976e-10 | 0.999999 |
| rad3        | 3.92851e-10 | 1.000000 | 3.92948e-10 | 0.999999 |
| rad13       | 3.00085e-10 | 1.000000 | 3.00159e-10 | 0.999999 |
| PAH9+H      | 2.99208e-10 | 1.000000 | 2.99281e-10 | 0.999999 |
| rad15       | 2.36657e-10 | 1.000000 | 2.36715e-10 | 0.999999 |
| rad35       | 2.31609e-10 | 1.000000 | 2.31666e-10 | 0.999999 |
| rad4        | 2.03549e-10 | 1.000000 | 2.03599e-10 | 0.999999 |



|               |             |          |             |          |
|---------------|-------------|----------|-------------|----------|
| rad1          | 9.30220e-11 | 1.000000 | 9.30450e-11 | 0.999999 |
| rad10         | 8.11094e-11 | 1.000000 | 8.11294e-11 | 0.999999 |
| rad38         | 5.18834e-11 | 1.000000 | 5.18962e-11 | 0.999999 |
| rad28         | 2.90649e-11 | 1.000000 | 2.90721e-11 | 0.999999 |
| rad25         | 1.52477e-11 | 1.000000 | 1.52515e-11 | 0.999999 |
| rad24         | 7.52824e-12 | 1.000000 | 7.53010e-12 | 0.999999 |
| PhCHCCH2+H    | 5.43016e-12 | 1.000000 | 5.43150e-12 | 0.999999 |
| PhCCH+CH3     | 3.76092e-12 | 1.000000 | 3.76185e-12 | 0.999999 |
| rad26         | 1.18393e-12 | 1.000000 | 1.18422e-12 | 0.999999 |
| PhCCCH3+H     | 5.98574e-13 | 1.000000 | 5.98721e-13 | 0.999999 |
| rad33         | 5.18045e-13 | 1.000000 | 5.18172e-13 | 0.999999 |
| rad9          | 1.91875e-13 | 1.000000 | 1.91922e-13 | 0.999999 |
| rad8          | 1.11756e-13 | 1.000000 | 1.11783e-13 | 0.999999 |
| rad46         | 5.15330e-14 | 1.000000 | 5.15457e-14 | 0.999999 |
| Ph+MeAc       | 3.07566e-14 | 1.000000 | 3.07641e-14 | 0.999999 |
| Ph+Allene     | 2.84427e-14 | 1.000000 | 2.84497e-14 | 0.999999 |
| rad14         | 8.30383e-15 | 1.000000 | 8.30588e-15 | 0.999999 |
| rad60syn      | 1.14255e-15 | 1.000000 | 1.14283e-15 | 0.999999 |
| rad27         | 8.11480e-16 | 1.000000 | 8.11680e-16 | 0.999999 |
| PAH7+H        | 4.54376e-16 | 1.000000 | 4.54488e-16 | 0.999999 |
| rad60anti     | 2.56015e-16 | 1.000000 | 2.56079e-16 | 0.999999 |
| PhCH2CCH+H    | 1.43087e-16 | 1.000000 | 1.43122e-16 | 0.999999 |
| rad39         | 8.80434e-17 | 1.000000 | 8.80652e-17 | 0.999999 |
| rad12         | 5.18378e-17 | 1.000000 | 5.18506e-17 | 0.999999 |
| rad37         | 1.18749e-18 | 1.000000 | 1.18778e-18 | 0.999999 |
| PAH3+H        | 3.81685e-19 | 1.000000 | 3.81779e-19 | 0.999999 |
| rad31         | 3.14350e-19 | 1.000000 | 3.14428e-19 | 0.999999 |
| rad59         | 1.34771e-19 | 1.000000 | 1.34804e-19 | 0.999999 |
| rad5          | 5.51567e-20 | 1.000000 | 5.51704e-20 | 0.999999 |
| rad50         | 7.63865e-21 | 1.000000 | 7.64054e-21 | 0.999999 |
| rad19syn      | 2.27537e-23 | 1.000000 | 2.27593e-23 | 0.999999 |
| rad52         | 3.95524e-25 | 1.000000 | 3.95622e-25 | 0.999999 |
| rad54         | 3.85307e-25 | 1.000000 | 3.85402e-25 | 0.999999 |
| PAH10+CH3     | 2.28249e-25 | 1.000000 | 2.28305e-25 | 0.999999 |
| rad43         | 6.19601e-26 | 1.000000 | 6.19754e-26 | 0.999999 |
| rad62         | 1.31902e-26 | 1.000000 | 1.31935e-26 | 0.999999 |
| rad51         | 3.42463e-27 | 1.000000 | 3.42548e-27 | 0.999999 |
| rad70         | 3.53615e-28 | 1.000000 | 3.53703e-28 | 0.999999 |
| PhcycC3H3_A+H | 3.17907e-28 | 1.000000 | 3.17985e-28 | 0.999999 |
| rad55         | 1.05474e-28 | 1.000000 | 1.05500e-28 | 0.999999 |
| rad58         | 5.55438e-29 | 1.000000 | 5.55575e-29 | 0.999999 |
| rad65         | 1.51926e-29 | 1.000000 | 1.51963e-29 | 0.999999 |
| PAH1+H        | 1.35482e-30 | 1.000000 | 1.35516e-30 | 0.999999 |
| rad34         | 2.18650e-32 | 1.000000 | 2.18704e-32 | 0.999999 |
| rad42         | 2.81817e-35 | 1.000000 | 2.81887e-35 | 0.999999 |
| rad47         | 1.46521e-35 | 1.000000 | 1.46558e-35 | 0.999999 |
| rad41         | 7.04372e-36 | 1.000000 | 7.04546e-36 | 0.999999 |

1.00000000 Pa, 230.000000 K

=====

| Rate constant | True (fraction)     | Effective (fraction) |
|---------------|---------------------|----------------------|
| Total         | 1.22972e-25 (1.00 ) | 1.22933e-25 (1.00 )  |

| species     | PYtrue      | Cumul    | PYeffective | Cumul    |
|-------------|-------------|----------|-------------|----------|
| Indene+H    | 0.964731    | 0.964731 | 0.965030    | 0.965030 |
| rad23       | 0.0333960   | 0.998127 | 0.0334064   | 0.998436 |
| rad45       | 0.000751957 | 0.998879 | 0.000752191 | 0.999189 |
| rad6        | 0.000688318 | 0.999567 | 0.000688531 | 0.999877 |
| Benzyl+C2H2 | 0.000310387 | 0.999878 | 0.00000     | 0.999877 |
| rad22       | 6.31374e-05 | 0.999941 | 6.31570e-05 | 0.999940 |
| rad36       | 4.74204e-05 | 0.999988 | 4.74351e-05 | 0.999988 |
| rad11       | 1.20416e-05 | 1.00000  | 1.20453e-05 | 1.000000 |
| rad7        | 9.77541e-08 | 1.00000  | 9.77845e-08 | 1.000000 |
| rad30       | 4.82490e-09 | 1.00000  | 4.82640e-09 | 1.000000 |
| rad2        | 2.29965e-09 | 1.00000  | 2.30037e-09 | 1.000000 |
| rad20       | 9.37244e-10 | 1.00000  | 9.37535e-10 | 1.000000 |
| rad21       | 5.96147e-10 | 1.00000  | 5.96332e-10 | 1.000000 |
| rad18       | 5.72936e-10 | 1.00000  | 5.73114e-10 | 1.000000 |
| rad3        | 5.04525e-10 | 1.00000  | 5.04682e-10 | 1.000000 |
| PAH9+H      | 4.39641e-10 | 1.00000  | 4.39778e-10 | 1.000000 |
| rad15       | 3.89218e-10 | 1.00000  | 3.89339e-10 | 1.000000 |
| rad13       | 3.30269e-10 | 1.00000  | 3.30371e-10 | 1.000000 |
| rad35       | 3.27083e-10 | 1.00000  | 3.27184e-10 | 1.000000 |
| rad4        | 2.62150e-10 | 1.00000  | 2.62232e-10 | 1.000000 |
| rad1        | 1.60619e-10 | 1.00000  | 1.60669e-10 | 1.000000 |
| rad10       | 1.42179e-10 | 1.00000  | 1.42223e-10 | 1.000000 |
| rad38       | 8.01639e-11 | 1.00000  | 8.01888e-11 | 1.000000 |
| rad28       | 5.83754e-11 | 1.00000  | 5.83935e-11 | 1.000000 |

|               |             |         |             |          |
|---------------|-------------|---------|-------------|----------|
| rad25         | 1.87832e-11 | 1.00000 | 1.87890e-11 | 1.000000 |
| PhCHCCH2+H    | 1.31133e-11 | 1.00000 | 1.31173e-11 | 1.000000 |
| PhCCH+CH3     | 1.04128e-11 | 1.00000 | 1.04160e-11 | 1.000000 |
| rad24         | 6.87554e-12 | 1.00000 | 6.87767e-12 | 1.000000 |
| rad26         | 3.13855e-12 | 1.00000 | 3.13952e-12 | 1.000000 |
| PhCCCH3+H     | 1.87352e-12 | 1.00000 | 1.87411e-12 | 1.000000 |
| rad33         | 5.73593e-13 | 1.00000 | 5.73771e-13 | 1.000000 |
| rad9          | 4.81911e-13 | 1.00000 | 4.82061e-13 | 1.000000 |
| rad8          | 3.30571e-13 | 1.00000 | 3.30674e-13 | 1.000000 |
| Ph+MeAc       | 1.16617e-13 | 1.00000 | 1.16653e-13 | 1.000000 |
| rad46         | 1.07689e-13 | 1.00000 | 1.07723e-13 | 1.000000 |
| Ph+Allene     | 9.36829e-14 | 1.00000 | 9.37120e-14 | 1.000000 |
| rad14         | 1.31517e-14 | 1.00000 | 1.31557e-14 | 1.000000 |
| rad60syn      | 3.33072e-15 | 1.00000 | 3.33175e-15 | 1.000000 |
| PAH7+H        | 1.88078e-15 | 1.00000 | 1.88136e-15 | 1.000000 |
| rad27         | 1.41486e-15 | 1.00000 | 1.41530e-15 | 1.000000 |
| rad60anti     | 7.94213e-16 | 1.00000 | 7.94459e-16 | 1.000000 |
| PhCH2CCH+H    | 6.27957e-16 | 1.00000 | 6.28152e-16 | 1.000000 |
| rad39         | 3.80490e-16 | 1.00000 | 3.80609e-16 | 1.000000 |
| rad12         | 2.18536e-16 | 1.00000 | 2.18603e-16 | 1.000000 |
| rad37         | 5.89269e-18 | 1.00000 | 5.89452e-18 | 1.000000 |
| PAH3+H        | 1.83102e-18 | 1.00000 | 1.83159e-18 | 1.000000 |
| rad59         | 6.30207e-19 | 1.00000 | 6.30403e-19 | 1.000000 |
| rad31         | 4.58729e-19 | 1.00000 | 4.58871e-19 | 1.000000 |
| rad5          | 2.87960e-19 | 1.00000 | 2.88050e-19 | 1.000000 |
| rad50         | 3.62411e-20 | 1.00000 | 3.62524e-20 | 1.000000 |
| rad19syn      | 1.84451e-22 | 1.00000 | 1.84508e-22 | 1.000000 |
| rad54         | 3.70627e-24 | 1.00000 | 3.70742e-24 | 1.000000 |
| rad52         | 2.82845e-24 | 1.00000 | 2.82933e-24 | 1.000000 |
| PAH10+CH3     | 2.21481e-24 | 1.00000 | 2.21550e-24 | 1.000000 |
| rad43         | 5.86939e-25 | 1.00000 | 5.87121e-25 | 1.000000 |
| rad62         | 1.41195e-25 | 1.00000 | 1.41239e-25 | 1.000000 |
| rad51         | 3.44411e-26 | 1.00000 | 3.44518e-26 | 1.000000 |
| PhcycC3H3_A+H | 6.33230e-27 | 1.00000 | 6.33427e-27 | 1.000000 |
| rad70         | 5.68384e-27 | 1.00000 | 5.68561e-27 | 1.000000 |
| rad55         | 1.86625e-27 | 1.00000 | 1.86683e-27 | 1.000000 |
| rad58         | 1.01692e-27 | 1.00000 | 1.01724e-27 | 1.000000 |
| rad65         | 1.96171e-28 | 1.00000 | 1.96232e-28 | 1.000000 |
| PAH1+H        | 9.13682e-29 | 1.00000 | 9.13966e-29 | 1.000000 |
| rad34         | 5.71620e-30 | 1.00000 | 5.71798e-30 | 1.000000 |
| rad42         | 2.49885e-32 | 1.00000 | 2.49963e-32 | 1.000000 |
| rad41         | 5.16079e-33 | 1.00000 | 5.16239e-33 | 1.000000 |
| rad47         | 1.98325e-34 | 1.00000 | 1.98387e-34 | 1.000000 |

1.00000000 Pa, 240.000000 K

=====

| Rate constant | True (fraction)     | Effective (fraction) |
|---------------|---------------------|----------------------|
| Total         | 3.99091e-25 (1.00 ) | 3.98936e-25 (1.00 )  |

| species     | PYtrue      | Cumul    | PYeffective | Cumul    |
|-------------|-------------|----------|-------------|----------|
| Indene+H    | 0.967939    | 0.967939 | 0.968315    | 0.968315 |
| rad23       | 0.0301346   | 0.998074 | 0.0301463   | 0.998461 |
| rad6        | 0.000757456 | 0.998831 | 0.000757751 | 0.999219 |
| rad45       | 0.000675730 | 0.999507 | 0.000675993 | 0.999895 |
| Benzyl+C2H2 | 0.000388534 | 0.999895 | 0.00000     | 0.999895 |
| rad22       | 5.16849e-05 | 0.999947 | 5.17050e-05 | 0.999947 |
| rad36       | 4.27827e-05 | 0.999990 | 4.27993e-05 | 0.999990 |
| rad11       | 1.01264e-05 | 1.000000 | 1.01304e-05 | 1.000000 |
| rad7        | 1.07199e-07 | 1.00000  | 1.07241e-07 | 1.000000 |
| rad30       | 6.92658e-09 | 1.00000  | 6.92927e-09 | 1.000000 |
| rad2        | 3.83877e-09 | 1.00000  | 3.84026e-09 | 1.000000 |
| rad20       | 8.18529e-10 | 1.00000  | 8.18847e-10 | 1.000000 |
| rad3        | 6.38199e-10 | 1.00000  | 6.38447e-10 | 1.000000 |
| PAH9+H      | 6.37567e-10 | 1.00000  | 6.37815e-10 | 1.000000 |
| rad15       | 6.20537e-10 | 1.00000  | 6.20778e-10 | 1.000000 |
| rad21       | 5.21188e-10 | 1.00000  | 5.21390e-10 | 1.000000 |
| rad18       | 4.66562e-10 | 1.00000  | 4.66743e-10 | 1.000000 |
| rad35       | 4.56873e-10 | 1.00000  | 4.57051e-10 | 1.000000 |
| rad13       | 3.63504e-10 | 1.00000  | 3.63645e-10 | 1.000000 |
| rad4        | 3.32626e-10 | 1.00000  | 3.32755e-10 | 1.000000 |
| rad1        | 2.70999e-10 | 1.00000  | 2.71104e-10 | 1.000000 |
| rad10       | 2.41942e-10 | 1.00000  | 2.42036e-10 | 1.000000 |
| rad38       | 1.21675e-10 | 1.00000  | 1.21722e-10 | 1.000000 |
| rad28       | 1.14309e-10 | 1.00000  | 1.14353e-10 | 1.000000 |
| PhCHCCH2+H  | 3.03616e-11 | 1.00000  | 3.03734e-11 | 1.000000 |
| PhCCH+CH3   | 2.74773e-11 | 1.00000  | 2.74880e-11 | 1.000000 |
| rad25       | 2.23155e-11 | 1.00000  | 2.23241e-11 | 1.000000 |
| rad26       | 7.83371e-12 | 1.00000  | 7.83675e-12 | 1.000000 |

|               |             |         |             |          |
|---------------|-------------|---------|-------------|----------|
| rad24         | 6.25070e-12 | 1.00000 | 6.25313e-12 | 1.000000 |
| PhCCCH3+H     | 5.47365e-12 | 1.00000 | 5.47578e-12 | 1.000000 |
| rad9          | 1.13492e-12 | 1.00000 | 1.13536e-12 | 1.000000 |
| rad8          | 8.98851e-13 | 1.00000 | 8.99200e-13 | 1.000000 |
| rad33         | 6.35086e-13 | 1.00000 | 6.35333e-13 | 1.000000 |
| Ph+MeAc       | 4.03679e-13 | 1.00000 | 4.03836e-13 | 1.000000 |
| Ph+Allene     | 2.83175e-13 | 1.00000 | 2.83285e-13 | 1.000000 |
| rad46         | 2.14594e-13 | 1.00000 | 2.14677e-13 | 1.000000 |
| rad14         | 1.99750e-14 | 1.00000 | 1.99827e-14 | 1.000000 |
| rad60syn      | 8.91172e-15 | 1.00000 | 8.91518e-15 | 1.000000 |
| PAH7+H        | 7.15231e-15 | 1.00000 | 7.15509e-15 | 1.000000 |
| PhCH2CCH+H    | 2.47124e-15 | 1.00000 | 2.47220e-15 | 1.000000 |
| rad27         | 2.39865e-15 | 1.00000 | 2.39958e-15 | 1.000000 |
| rad60anti     | 2.24727e-15 | 1.00000 | 2.24814e-15 | 1.000000 |
| rad39         | 1.50043e-15 | 1.00000 | 1.50101e-15 | 1.000000 |
| rad12         | 8.31475e-16 | 1.00000 | 8.31799e-16 | 1.000000 |
| rad37         | 2.58553e-17 | 1.00000 | 2.58654e-17 | 1.000000 |
| PAH3+H        | 7.73434e-18 | 1.00000 | 7.73735e-18 | 1.000000 |
| rad59         | 2.59702e-18 | 1.00000 | 2.59803e-18 | 1.000000 |
| rad5          | 1.32728e-18 | 1.00000 | 1.32779e-18 | 1.000000 |
| rad31         | 6.68519e-19 | 1.00000 | 6.68778e-19 | 1.000000 |
| rad50         | 1.52151e-19 | 1.00000 | 1.52211e-19 | 1.000000 |
| rad19syn      | 1.26168e-21 | 1.00000 | 1.26217e-21 | 1.000000 |
| rad54         | 2.91841e-23 | 1.00000 | 2.91954e-23 | 1.000000 |
| PAH10+CH3     | 1.75400e-23 | 1.00000 | 1.75468e-23 | 1.000000 |
| rad52         | 1.72103e-23 | 1.00000 | 1.72170e-23 | 1.000000 |
| rad43         | 4.55697e-24 | 1.00000 | 4.55874e-24 | 1.000000 |
| rad62         | 1.19987e-24 | 1.00000 | 1.20034e-24 | 1.000000 |
| rad51         | 2.78812e-25 | 1.00000 | 2.78920e-25 | 1.000000 |
| PhcycC3H3_A+H | 7.59172e-26 | 1.00000 | 7.59467e-26 | 1.000000 |
| rad70         | 6.07923e-26 | 1.00000 | 6.08159e-26 | 1.000000 |
| rad55         | 2.10643e-26 | 1.00000 | 2.10725e-26 | 1.000000 |
| rad58         | 1.13217e-26 | 1.00000 | 1.13261e-26 | 1.000000 |
| rad65         | 1.86067e-27 | 1.00000 | 1.86140e-27 | 1.000000 |
| PAH1+H        | 1.61486e-27 | 1.00000 | 1.61549e-27 | 1.000000 |
| rad34         | 1.17584e-28 | 1.00000 | 1.17630e-28 | 1.000000 |
| rad42         | 1.46486e-30 | 1.00000 | 1.46543e-30 | 1.000000 |
| rad41         | 4.24175e-31 | 1.00000 | 4.24340e-31 | 1.000000 |
| rad47         | 1.84275e-33 | 1.00000 | 1.84347e-33 | 1.000000 |

1.00000000 Pa, 250.000000 K

=====

| Rate constant | True (fraction)     | Effective (fraction) |
|---------------|---------------------|----------------------|
| Total         | 1.17763e-24 (1.00 ) | 1.17706e-24 (1.00 )  |

| species     | PYtrue      | Cumul    | PYeffective | Cumul    |
|-------------|-------------|----------|-------------|----------|
| Indene+H    | 0.970949    | 0.970949 | 0.971419    | 0.971419 |
| rad23       | 0.0270403   | 0.997989 | 0.0270534   | 0.998472 |
| rad6        | 0.000833198 | 0.998822 | 0.000833602 | 0.999306 |
| rad45       | 0.000604241 | 0.999427 | 0.000604534 | 0.999911 |
| Benzyl+C2H2 | 0.000483972 | 0.999911 | 0.00000     | 0.999911 |
| rad22       | 4.25285e-05 | 0.999953 | 4.25491e-05 | 0.999953 |
| rad36       | 3.84290e-05 | 0.999992 | 3.84476e-05 | 0.999992 |
| rad11       | 8.48673e-06 | 1.00000  | 8.49084e-06 | 1.00000  |
| rad7        | 1.17505e-07 | 1.00000  | 1.17562e-07 | 1.00000  |
| rad30       | 9.77454e-09 | 1.00000  | 9.77927e-09 | 1.00000  |
| rad2        | 6.26090e-09 | 1.00000  | 6.26394e-09 | 1.00000  |
| rad15       | 9.62683e-10 | 1.00000  | 9.63149e-10 | 1.00000  |
| PAH9+H      | 9.13087e-10 | 1.00000  | 9.13529e-10 | 1.00000  |
| rad3        | 7.96718e-10 | 1.00000  | 7.97104e-10 | 1.00000  |
| rad20       | 7.17691e-10 | 1.00000  | 7.18039e-10 | 1.00000  |
| rad35       | 6.31399e-10 | 1.00000  | 6.31705e-10 | 1.00000  |
| rad21       | 4.57521e-10 | 1.00000  | 4.57742e-10 | 1.00000  |
| rad1        | 4.47115e-10 | 1.00000  | 4.47332e-10 | 1.00000  |
| rad4        | 4.16627e-10 | 1.00000  | 4.16829e-10 | 1.00000  |
| rad10       | 4.00424e-10 | 1.00000  | 4.00618e-10 | 1.00000  |
| rad13       | 4.00069e-10 | 1.00000  | 4.00263e-10 | 1.00000  |
| rad18       | 3.81614e-10 | 1.00000  | 3.81798e-10 | 1.00000  |
| rad28       | 2.18378e-10 | 1.00000  | 2.18484e-10 | 1.00000  |
| rad38       | 1.81656e-10 | 1.00000  | 1.81744e-10 | 1.00000  |
| PhCCH+CH3   | 6.92767e-11 | 1.00000  | 6.93103e-11 | 1.00000  |
| PhCHCCH2+H  | 6.78377e-11 | 1.00000  | 6.78705e-11 | 1.00000  |
| rad25       | 2.56764e-11 | 1.00000  | 2.56888e-11 | 1.00000  |
| rad26       | 1.84558e-11 | 1.00000  | 1.84648e-11 | 1.00000  |
| PhCCCH3+H   | 1.49988e-11 | 1.00000  | 1.50061e-11 | 1.00000  |
| rad24       | 5.65703e-12 | 1.00000  | 5.65977e-12 | 1.00000  |
| rad9        | 2.52841e-12 | 1.00000  | 2.52963e-12 | 1.00000  |
| rad8        | 2.27041e-12 | 1.00000  | 2.27151e-12 | 1.00000  |

|               |             |         |             |         |
|---------------|-------------|---------|-------------|---------|
| Ph+MeAc       | 1.28692e-12 | 1.00000 | 1.28755e-12 | 1.00000 |
| Ph+Allene     | 7.94556e-13 | 1.00000 | 7.94940e-13 | 1.00000 |
| rad33         | 7.03122e-13 | 1.00000 | 7.03463e-13 | 1.00000 |
| rad46         | 4.10071e-13 | 1.00000 | 4.10269e-13 | 1.00000 |
| rad14         | 2.92554e-14 | 1.00000 | 2.92695e-14 | 1.00000 |
| PAH7+H        | 2.51303e-14 | 1.00000 | 2.51425e-14 | 1.00000 |
| rad60syn      | 2.21188e-14 | 1.00000 | 2.21295e-14 | 1.00000 |
| PhCH2CCH+H    | 8.83943e-15 | 1.00000 | 8.84371e-15 | 1.00000 |
| rad60anti     | 5.86643e-15 | 1.00000 | 5.86927e-15 | 1.00000 |
| rad39         | 5.43660e-15 | 1.00000 | 5.43923e-15 | 1.00000 |
| rad27         | 3.96099e-15 | 1.00000 | 3.96290e-15 | 1.00000 |
| rad12         | 2.88135e-15 | 1.00000 | 2.88274e-15 | 1.00000 |
| rad37         | 1.01655e-16 | 1.00000 | 1.01704e-16 | 1.00000 |
| PAH3+H        | 2.92175e-17 | 1.00000 | 2.92317e-17 | 1.00000 |
| rad59         | 9.57865e-18 | 1.00000 | 9.58329e-18 | 1.00000 |
| rad5          | 5.47601e-18 | 1.00000 | 5.47866e-18 | 1.00000 |
| rad31         | 9.75675e-19 | 1.00000 | 9.76147e-19 | 1.00000 |
| rad50         | 5.73722e-19 | 1.00000 | 5.74000e-19 | 1.00000 |
| rad19syn      | 7.44940e-21 | 1.00000 | 7.45301e-21 | 1.00000 |
| rad54         | 1.94714e-22 | 1.00000 | 1.94808e-22 | 1.00000 |
| PAH10+CH3     | 1.17553e-22 | 1.00000 | 1.17610e-22 | 1.00000 |
| rad52         | 9.09591e-23 | 1.00000 | 9.10031e-23 | 1.00000 |
| rad43         | 3.00016e-23 | 1.00000 | 3.00161e-23 | 1.00000 |
| rad62         | 8.51506e-24 | 1.00000 | 8.51918e-24 | 1.00000 |
| rad51         | 1.89570e-24 | 1.00000 | 1.89662e-24 | 1.00000 |
| PhcycC3H3_A+H | 6.59594e-25 | 1.00000 | 6.59913e-25 | 1.00000 |
| rad70         | 5.01203e-25 | 1.00000 | 5.01446e-25 | 1.00000 |
| rad55         | 1.78498e-25 | 1.00000 | 1.78584e-25 | 1.00000 |
| rad58         | 9.46814e-26 | 1.00000 | 9.47272e-26 | 1.00000 |
| PAH1+H        | 1.56414e-26 | 1.00000 | 1.56489e-26 | 1.00000 |
| rad65         | 1.42225e-26 | 1.00000 | 1.42294e-26 | 1.00000 |
| rad34         | 1.16129e-27 | 1.00000 | 1.16185e-27 | 1.00000 |
| rad42         | 1.56318e-29 | 1.00000 | 1.56393e-29 | 1.00000 |
| rad41         | 4.56175e-30 | 1.00000 | 4.56396e-30 | 1.00000 |
| rad47         | 1.41189e-32 | 1.00000 | 1.41258e-32 | 1.00000 |

1.00000000 Pa, 260.000000 K

=====

| Rate constant | True (fraction)     | Effective (fraction) |
|---------------|---------------------|----------------------|
| Total         | 3.19452e-24 (1.00 ) | 3.19260e-24 (1.00 )  |

| species     | PYtrue      | Cumul    | PYeffective | Cumul    |
|-------------|-------------|----------|-------------|----------|
| Indene+H    | 0.973739    | 0.973739 | 0.974324    | 0.974324 |
| rad23       | 0.0241304   | 0.997869 | 0.0241449   | 0.998469 |
| rad6        | 0.000916053 | 0.998785 | 0.000916603 | 0.999386 |
| Benzyl+C2H2 | 0.000599865 | 0.999385 | 0.00000     | 0.999386 |
| rad45       | 0.000537703 | 0.999923 | 0.000538026 | 0.999924 |
| rad22       | 3.51422e-05 | 0.999958 | 3.51633e-05 | 0.999959 |
| rad36       | 3.43708e-05 | 0.999993 | 3.43915e-05 | 0.999993 |
| rad11       | 7.09048e-06 | 1.000000 | 7.09473e-06 | 1.000000 |
| rad7        | 1.28737e-07 | 1.000000 | 1.28815e-07 | 1.000000 |
| rad30       | 1.35826e-08 | 1.000000 | 1.35908e-08 | 1.000000 |
| rad2        | 9.98147e-09 | 1.000000 | 9.98746e-09 | 1.000000 |
| rad15       | 1.45779e-09 | 1.000000 | 1.45866e-09 | 1.000000 |
| PAH9+H      | 1.29215e-09 | 1.000000 | 1.29292e-09 | 1.000000 |
| rad3        | 9.83540e-10 | 1.000000 | 9.84131e-10 | 1.000000 |
| rad35       | 8.63654e-10 | 1.000000 | 8.64172e-10 | 1.000000 |
| rad1        | 7.21724e-10 | 1.000000 | 7.22157e-10 | 1.000000 |
| rad10       | 6.45497e-10 | 1.000000 | 6.45885e-10 | 1.000000 |
| rad20       | 6.31696e-10 | 1.000000 | 6.32075e-10 | 1.000000 |
| rad4        | 5.16176e-10 | 1.000000 | 5.16485e-10 | 1.000000 |
| rad13       | 4.40250e-10 | 1.000000 | 4.40515e-10 | 1.000000 |
| rad28       | 4.07156e-10 | 1.000000 | 4.07400e-10 | 1.000000 |
| rad21       | 4.03229e-10 | 1.000000 | 4.03471e-10 | 1.000000 |
| rad18       | 3.13411e-10 | 1.000000 | 3.13599e-10 | 1.000000 |
| rad38       | 2.67068e-10 | 1.000000 | 2.67228e-10 | 1.000000 |
| PhCCH+CH3   | 1.67212e-10 | 1.000000 | 1.67312e-10 | 1.000000 |
| PhCHCCH2+H  | 1.46921e-10 | 1.000000 | 1.47009e-10 | 1.000000 |
| rad26       | 4.11488e-11 | 1.000000 | 4.11735e-11 | 1.000000 |
| PhCCCH3+H   | 3.87201e-11 | 1.000000 | 3.87433e-11 | 1.000000 |
| rad25       | 2.87150e-11 | 1.000000 | 2.87322e-11 | 1.000000 |
| rad8        | 5.37480e-12 | 1.000000 | 5.37802e-12 | 1.000000 |
| rad9        | 5.36887e-12 | 1.000000 | 5.37209e-12 | 1.000000 |
| rad24       | 5.09725e-12 | 1.000000 | 5.10031e-12 | 1.000000 |
| Ph+MeAc     | 3.80723e-12 | 1.000000 | 3.80952e-12 | 1.000000 |
| Ph+Allene   | 2.08966e-12 | 1.000000 | 2.09092e-12 | 1.000000 |
| rad33       | 7.78331e-13 | 1.000000 | 7.78798e-13 | 1.000000 |
| rad46       | 7.54992e-13 | 1.000000 | 7.55445e-13 | 1.000000 |

|               |             |          |             |         |
|---------------|-------------|----------|-------------|---------|
| PAH7+H        | 8.20021e-14 | 1.000000 | 8.20513e-14 | 1.00000 |
| rad60syn      | 5.13841e-14 | 1.000000 | 5.14150e-14 | 1.00000 |
| rad14         | 4.15182e-14 | 1.000000 | 4.15431e-14 | 1.00000 |
| PhCH2CCH+H    | 2.90650e-14 | 1.000000 | 2.90824e-14 | 1.00000 |
| rad39         | 1.82124e-14 | 1.000000 | 1.82233e-14 | 1.00000 |
| rad60anti     | 1.42649e-14 | 1.000000 | 1.42735e-14 | 1.00000 |
| rad12         | 9.16907e-15 | 1.000000 | 9.17458e-15 | 1.00000 |
| rad27         | 6.37943e-15 | 1.000000 | 6.38326e-15 | 1.00000 |
| rad37         | 3.62236e-16 | 1.000000 | 3.62453e-16 | 1.00000 |
| PAH3+H        | 1.00011e-16 | 1.000000 | 1.00071e-16 | 1.00000 |
| rad59         | 3.20369e-17 | 1.000000 | 3.20562e-17 | 1.00000 |
| rad5          | 2.04600e-17 | 1.000000 | 2.04723e-17 | 1.00000 |
| rad50         | 1.96755e-18 | 1.000000 | 1.96873e-18 | 1.00000 |
| rad31         | 1.42939e-18 | 1.000000 | 1.43025e-18 | 1.00000 |
| rad19syn      | 3.86261e-20 | 1.000000 | 3.86493e-20 | 1.00000 |
| rad54         | 1.12686e-21 | 1.000000 | 1.12754e-21 | 1.00000 |
| PAH10+CH3     | 6.81892e-22 | 1.000000 | 6.82302e-22 | 1.00000 |
| rad52         | 4.24613e-22 | 1.000000 | 4.24868e-22 | 1.00000 |
| rad43         | 1.71077e-22 | 1.000000 | 1.71179e-22 | 1.00000 |
| rad62         | 5.19476e-23 | 1.000000 | 5.19788e-23 | 1.00000 |
| rad51         | 1.11308e-23 | 1.000000 | 1.11375e-23 | 1.00000 |
| PhcycC3H3_A+H | 4.78189e-24 | 1.000000 | 4.78476e-24 | 1.00000 |
| rad70         | 3.47755e-24 | 1.000000 | 3.47964e-24 | 1.00000 |
| rad55         | 1.26787e-24 | 1.000000 | 1.26863e-24 | 1.00000 |
| rad58         | 6.63256e-25 | 1.000000 | 6.63654e-25 | 1.00000 |
| PAH1+H        | 1.23245e-25 | 1.000000 | 1.23319e-25 | 1.00000 |
| rad65         | 9.24403e-26 | 1.000000 | 9.24958e-26 | 1.00000 |
| rad34         | 9.26766e-27 | 1.000000 | 9.27322e-27 | 1.00000 |
| rad42         | 1.31869e-28 | 1.000000 | 1.31949e-28 | 1.00000 |
| rad41         | 3.87683e-29 | 1.000000 | 3.87915e-29 | 1.00000 |
| rad47         | 9.11713e-32 | 1.000000 | 9.12261e-32 | 1.00000 |

1.00000000 Pa, 270.000000 K

=====

| Rate constant | True (fraction)     | Effective (fraction) |
|---------------|---------------------|----------------------|
| Total         | 8.04141e-24 (1.00 ) | 8.03546e-24 (1.00 )  |

| species     | PYtrue      | Cumul    | PYeffective | Cumul    |
|-------------|-------------|----------|-------------|----------|
| Indene+H    | 0.976294    | 0.976294 | 0.977016    | 0.977016 |
| rad23       | 0.0214180   | 0.997712 | 0.0214338   | 0.998450 |
| rad6        | 0.00100653  | 0.998719 | 0.00100727  | 0.999457 |
| Benzyl+C2H2 | 0.000739801 | 0.999458 | 0.000000    | 0.999457 |
| rad45       | 0.000476246 | 0.999935 | 0.000476599 | 0.999934 |
| rad36       | 3.06149e-05 | 0.999965 | 3.06376e-05 | 0.999964 |
| rad22       | 2.91361e-05 | 0.999994 | 2.91577e-05 | 0.999993 |
| rad11       | 5.90761e-06 | 1.00000  | 5.91198e-06 | 0.999999 |
| rad7        | 1.40963e-07 | 1.00000  | 1.41067e-07 | 1.000000 |
| rad30       | 1.86125e-08 | 1.00000  | 1.86263e-08 | 1.000000 |
| rad2        | 1.55594e-08 | 1.00000  | 1.55710e-08 | 1.000000 |
| rad15       | 2.16035e-09 | 1.00000  | 2.16194e-09 | 1.000000 |
| PAH9+H      | 1.80789e-09 | 1.00000  | 1.80923e-09 | 1.000000 |
| rad3        | 1.20298e-09 | 1.00000  | 1.20387e-09 | 1.000000 |
| rad35       | 1.16970e-09 | 1.00000  | 1.17056e-09 | 1.000000 |
| rad1        | 1.14017e-09 | 1.00000  | 1.14101e-09 | 1.000000 |
| rad10       | 1.01465e-09 | 1.00000  | 1.01541e-09 | 1.000000 |
| rad28       | 7.40910e-10 | 1.00000  | 7.41459e-10 | 1.000000 |
| rad4        | 6.33793e-10 | 1.00000  | 6.34263e-10 | 1.000000 |
| rad20       | 5.58105e-10 | 1.00000  | 5.58518e-10 | 1.000000 |
| rad13       | 4.84341e-10 | 1.00000  | 4.84700e-10 | 1.000000 |
| PhCCH+CH3   | 3.87059e-10 | 1.00000  | 3.87345e-10 | 1.000000 |
| rad38       | 3.87046e-10 | 1.00000  | 3.87333e-10 | 1.000000 |
| rad21       | 3.56773e-10 | 1.00000  | 3.57038e-10 | 1.000000 |
| PhCHCCH2+H  | 3.09291e-10 | 1.00000  | 3.09520e-10 | 1.000000 |
| rad18       | 2.58391e-10 | 1.00000  | 2.58582e-10 | 1.000000 |
| PhCCCH3+H   | 9.45624e-11 | 1.00000  | 9.46324e-11 | 1.000000 |
| rad26       | 8.70566e-11 | 1.00000  | 8.71211e-11 | 1.000000 |
| rad25       | 3.13089e-11 | 1.00000  | 3.13320e-11 | 1.000000 |
| rad8        | 1.20145e-11 | 1.00000  | 1.20234e-11 | 1.000000 |
| rad9        | 1.09359e-11 | 1.00000  | 1.09440e-11 | 1.000000 |
| Ph+MeAc     | 1.05218e-11 | 1.00000  | 1.05295e-11 | 1.000000 |
| Ph+Allene   | 5.19366e-12 | 1.00000  | 5.19750e-12 | 1.000000 |
| rad24       | 4.57346e-12 | 1.00000  | 4.57685e-12 | 1.000000 |
| rad46       | 1.34458e-12 | 1.00000  | 1.34558e-12 | 1.000000 |
| rad33       | 8.61373e-13 | 1.00000  | 8.62011e-13 | 1.000000 |
| PAH7+H      | 2.49686e-13 | 1.00000  | 2.49871e-13 | 1.000000 |
| rad60syn    | 1.12580e-13 | 1.00000  | 1.12663e-13 | 1.000000 |
| PhCH2CCH+H  | 8.86883e-14 | 1.00000  | 8.87540e-14 | 1.000000 |
| rad14       | 5.73339e-14 | 1.00000  | 5.73764e-14 | 1.000000 |

|               |             |         |             |          |
|---------------|-------------|---------|-------------|----------|
| rad39         | 5.67228e-14 | 1.00000 | 5.67648e-14 | 1.000000 |
| rad60anti     | 3.25754e-14 | 1.00000 | 3.25995e-14 | 1.000000 |
| rad12         | 2.69924e-14 | 1.00000 | 2.70124e-14 | 1.000000 |
| rad27         | 1.00302e-14 | 1.00000 | 1.00376e-14 | 1.000000 |
| rad37         | 1.18140e-15 | 1.00000 | 1.18228e-15 | 1.000000 |
| PAH3+H        | 3.13665e-16 | 1.00000 | 3.13897e-16 | 1.000000 |
| rad59         | 9.82508e-17 | 1.00000 | 9.83235e-17 | 1.000000 |
| rad5          | 6.99215e-17 | 1.00000 | 6.99733e-17 | 1.000000 |
| rad50         | 6.20263e-18 | 1.00000 | 6.20723e-18 | 1.000000 |
| rad31         | 2.10573e-18 | 1.00000 | 2.10729e-18 | 1.000000 |
| rad19syn      | 1.78348e-19 | 1.00000 | 1.78480e-19 | 1.000000 |
| rad54         | 5.74850e-21 | 1.00000 | 5.75276e-21 | 1.000000 |
| PAH10+CH3     | 3.47895e-21 | 1.00000 | 3.48153e-21 | 1.000000 |
| rad52         | 1.77550e-21 | 1.00000 | 1.77681e-21 | 1.000000 |
| rad43         | 8.58428e-22 | 1.00000 | 8.59064e-22 | 1.000000 |
| rad62         | 2.77336e-22 | 1.00000 | 2.77542e-22 | 1.000000 |
| rad51         | 5.74445e-23 | 1.00000 | 5.74870e-23 | 1.000000 |
| PhcycC3H3_A+H | 2.98739e-23 | 1.00000 | 2.98960e-23 | 1.000000 |
| rad70         | 2.08589e-23 | 1.00000 | 2.08744e-23 | 1.000000 |
| rad55         | 7.77202e-24 | 1.00000 | 7.77778e-24 | 1.000000 |
| rad58         | 4.00918e-24 | 1.00000 | 4.01215e-24 | 1.000000 |
| PAH1+H        | 8.30554e-25 | 1.00000 | 8.31169e-25 | 1.000000 |
| rad65         | 5.22534e-25 | 1.00000 | 5.22920e-25 | 1.000000 |
| rad34         | 6.32142e-26 | 1.00000 | 6.32610e-26 | 1.000000 |
| rad42         | 9.51647e-28 | 1.00000 | 9.52351e-28 | 1.000000 |
| rad41         | 2.82144e-28 | 1.00000 | 2.82353e-28 | 1.000000 |
| rad47         | 5.06445e-31 | 1.00000 | 5.06820e-31 | 1.000000 |

1.00000000 Pa, 280.000000 K

| Rate constant | True (fraction)     | Effective (fraction) |
|---------------|---------------------|----------------------|
| Total         | 1.89357e-23 (1.00 ) | 1.89185e-23 (1.00 )  |

| species     | PYtrue      | Cumul    | PYeffective | Cumul    |
|-------------|-------------|----------|-------------|----------|
| Indene+H    | 0.978600    | 0.978600 | 0.979489    | 0.979489 |
| rad23       | 0.00189111  | 0.997511 | 0.00189283  | 0.998417 |
| rad6        | 0.00110512  | 0.998616 | 0.00110613  | 0.999523 |
| Benzyl+C2H2 | 0.000907824 | 0.999524 | 0.000000    | 0.999523 |
| rad45       | 0.000419911 | 0.999944 | 0.000420292 | 0.999944 |
| rad36       | 2.71630e-05 | 0.999971 | 2.71877e-05 | 0.999971 |
| rad22       | 2.42181e-05 | 0.999995 | 2.42401e-05 | 0.999995 |
| rad11       | 4.91035e-06 | 1.00000  | 4.91481e-06 | 1.00000  |
| rad7        | 1.54246e-07 | 1.00000  | 1.54386e-07 | 1.00000  |
| rad30       | 2.51811e-08 | 1.00000  | 2.52040e-08 | 1.00000  |
| rad2        | 2.37210e-08 | 1.00000  | 2.37426e-08 | 1.00000  |
| rad15       | 3.13984e-09 | 1.00000  | 3.14270e-09 | 1.00000  |
| PAH9+H      | 2.50230e-09 | 1.00000  | 2.50457e-09 | 1.00000  |
| rad1        | 1.76331e-09 | 1.00000  | 1.76491e-09 | 1.00000  |
| rad35       | 1.56921e-09 | 1.00000  | 1.57064e-09 | 1.00000  |
| rad10       | 1.55659e-09 | 1.00000  | 1.55801e-09 | 1.00000  |
| rad3        | 1.46041e-09 | 1.00000  | 1.46174e-09 | 1.00000  |
| rad28       | 1.31582e-09 | 1.00000  | 1.31702e-09 | 1.00000  |
| PhCCH+CH3   | 8.60688e-10 | 1.00000  | 8.61470e-10 | 1.00000  |
| rad4        | 7.72644e-10 | 1.00000  | 7.73346e-10 | 1.00000  |
| PhCHCCH2+H  | 6.33829e-10 | 1.00000  | 6.34405e-10 | 1.00000  |
| rad38       | 5.53446e-10 | 1.00000  | 5.53949e-10 | 1.00000  |
| rad13       | 5.32639e-10 | 1.00000  | 5.33123e-10 | 1.00000  |
| rad20       | 4.94940e-10 | 1.00000  | 4.95389e-10 | 1.00000  |
| rad21       | 3.16905e-10 | 1.00000  | 3.17193e-10 | 1.00000  |
| PhCCCH3+H   | 2.19321e-10 | 1.00000  | 2.19520e-10 | 1.00000  |
| rad18       | 2.13812e-10 | 1.00000  | 2.14006e-10 | 1.00000  |
| rad26       | 1.75247e-10 | 1.00000  | 1.75406e-10 | 1.00000  |
| rad25       | 3.33710e-11 | 1.00000  | 3.34013e-11 | 1.00000  |
| Ph+MeAc     | 2.73223e-11 | 1.00000  | 2.73471e-11 | 1.00000  |
| rad8        | 2.55209e-11 | 1.00000  | 2.55441e-11 | 1.00000  |
| rad9        | 2.14849e-11 | 1.00000  | 2.15044e-11 | 1.00000  |
| Ph+Allene   | 1.22833e-11 | 1.00000  | 1.22945e-11 | 1.00000  |
| rad24       | 4.08702e-12 | 1.00000  | 4.09074e-12 | 1.00000  |
| rad46       | 2.32410e-12 | 1.00000  | 2.32621e-12 | 1.00000  |
| rad33       | 9.52940e-13 | 1.00000  | 9.53806e-13 | 1.00000  |
| PAH7+H      | 7.12583e-13 | 1.00000  | 7.13231e-13 | 1.00000  |
| PhCH2CCH+H  | 2.53140e-13 | 1.00000  | 2.53370e-13 | 1.00000  |
| rad60syn    | 2.34134e-13 | 1.00000  | 2.34347e-13 | 1.00000  |
| rad39       | 1.65089e-13 | 1.00000  | 1.65239e-13 | 1.00000  |
| rad14       | 7.73230e-14 | 1.00000  | 7.73932e-14 | 1.00000  |
| rad12       | 7.39978e-14 | 1.00000  | 7.40650e-14 | 1.00000  |
| rad60anti   | 7.03492e-14 | 1.00000  | 7.04131e-14 | 1.00000  |
| rad27       | 1.54064e-14 | 1.00000  | 1.54204e-14 | 1.00000  |

|               |             |         |             |         |
|---------------|-------------|---------|-------------|---------|
| rad37         | 3.55652e-15 | 1.00000 | 3.55975e-15 | 1.00000 |
| PAH3+H        | 9.09966e-16 | 1.00000 | 9.10792e-16 | 1.00000 |
| rad59         | 2.78917e-16 | 1.00000 | 2.79170e-16 | 1.00000 |
| rad5          | 2.20438e-16 | 1.00000 | 2.20639e-16 | 1.00000 |
| rad50         | 1.81381e-17 | 1.00000 | 1.81545e-17 | 1.00000 |
| rad31         | 3.12255e-18 | 1.00000 | 3.12539e-18 | 1.00000 |
| rad19syn      | 7.41602e-19 | 1.00000 | 7.42276e-19 | 1.00000 |
| rad54         | 2.61575e-20 | 1.00000 | 2.61812e-20 | 1.00000 |
| PAH10+CH3     | 1.58035e-20 | 1.00000 | 1.58178e-20 | 1.00000 |
| rad52         | 6.72823e-21 | 1.00000 | 6.73435e-21 | 1.00000 |
| rad43         | 3.83777e-21 | 1.00000 | 3.84126e-21 | 1.00000 |
| rad62         | 1.31211e-21 | 1.00000 | 1.31330e-21 | 1.00000 |
| rad51         | 2.63825e-22 | 1.00000 | 2.64065e-22 | 1.00000 |
| PhcycC3H3_A+H | 1.62619e-22 | 1.00000 | 1.62767e-22 | 1.00000 |
| rad70         | 1.09483e-22 | 1.00000 | 1.09583e-22 | 1.00000 |
| rad55         | 4.15995e-23 | 1.00000 | 4.16373e-23 | 1.00000 |
| rad58         | 2.11646e-23 | 1.00000 | 2.11838e-23 | 1.00000 |
| PAH1+H        | 4.82650e-24 | 1.00000 | 4.83088e-24 | 1.00000 |
| rad65         | 2.60123e-24 | 1.00000 | 2.60359e-24 | 1.00000 |
| rad34         | 3.71069e-25 | 1.00000 | 3.71407e-25 | 1.00000 |
| rad42         | 5.86673e-27 | 1.00000 | 5.87206e-27 | 1.00000 |
| rad41         | 1.75225e-27 | 1.00000 | 1.75384e-27 | 1.00000 |
| rad47         | 2.45968e-30 | 1.00000 | 2.46192e-30 | 1.00000 |

1.00000000 Pa, 290.000000 K

| Rate constant | True (fraction)     | Effective (fraction) |
|---------------|---------------------|----------------------|
| Total         | 4.20015e-23 (1.00 ) | 4.19550e-23 (1.00 )  |

| species     | PYtrue      | Cumul    | PYeffective | Cumul    |
|-------------|-------------|----------|-------------|----------|
| Indene+H    | 0.980648    | 0.980648 | 0.981737    | 0.981737 |
| rad23       | 0.0166136   | 0.997262 | 0.0166320   | 0.998369 |
| rad6        | 0.00121231  | 0.998474 | 0.00121366  | 0.999583 |
| Benzyl+C2H2 | 0.00110846  | 0.999582 | 0.000000    | 0.999583 |
| rad45       | 0.000368652 | 0.999951 | 0.000369061 | 0.999952 |
| rad36       | 2.40121e-05 | 0.999975 | 2.40388e-05 | 0.999976 |
| rad22       | 2.01673e-05 | 0.999995 | 2.01897e-05 | 0.999996 |
| rad11       | 4.07339e-06 | 0.999999 | 4.07791e-06 | 1.000000 |
| rad7        | 1.68649e-07 | 0.999999 | 1.68836e-07 | 1.000000 |
| rad2        | 3.53762e-08 | 0.999999 | 3.54155e-08 | 1.000000 |
| rad30       | 3.36686e-08 | 1.000000 | 3.37060e-08 | 1.000000 |
| rad15       | 4.48372e-09 | 1.000000 | 4.48869e-09 | 1.000000 |
| PAH9+H      | 3.42799e-09 | 1.000000 | 3.43179e-09 | 1.000000 |
| rad1        | 2.67031e-09 | 1.000000 | 2.67327e-09 | 1.000000 |
| rad10       | 2.33234e-09 | 1.000000 | 2.33493e-09 | 1.000000 |
| rad28       | 2.28037e-09 | 1.000000 | 2.28290e-09 | 1.000000 |
| rad35       | 2.08614e-09 | 1.000000 | 2.08845e-09 | 1.000000 |
| PhCCH+CH3   | 1.84160e-09 | 1.000000 | 1.84364e-09 | 1.000000 |
| rad3        | 1.76249e-09 | 1.000000 | 1.76444e-09 | 1.000000 |
| PhCHCCH2+H  | 1.26530e-09 | 1.000000 | 1.26671e-09 | 1.000000 |
| rad4        | 9.36649e-10 | 1.000000 | 9.37689e-10 | 1.000000 |
| rad38       | 7.81493e-10 | 1.000000 | 7.82360e-10 | 1.000000 |
| rad13       | 5.85445e-10 | 1.000000 | 5.86095e-10 | 1.000000 |
| PhCCCH3+H   | 4.84807e-10 | 1.000000 | 4.85345e-10 | 1.000000 |
| rad20       | 4.40583e-10 | 1.000000 | 4.41071e-10 | 1.000000 |
| rad26       | 3.36575e-10 | 1.000000 | 3.36948e-10 | 1.000000 |
| rad21       | 2.82604e-10 | 1.000000 | 2.82918e-10 | 1.000000 |
| rad18       | 1.77551e-10 | 1.000000 | 1.77748e-10 | 1.000000 |
| Ph+MeAc     | 6.70076e-11 | 1.000000 | 6.70820e-11 | 1.000000 |
| rad8        | 5.17933e-11 | 1.000000 | 5.18508e-11 | 1.000000 |
| rad9        | 4.08993e-11 | 1.000000 | 4.09447e-11 | 1.000000 |
| rad25       | 3.48519e-11 | 1.000000 | 3.48906e-11 | 1.000000 |
| Ph+Allene   | 2.78039e-11 | 1.000000 | 2.78347e-11 | 1.000000 |
| rad46       | 3.91011e-12 | 1.000000 | 3.91445e-12 | 1.000000 |
| rad24       | 3.63860e-12 | 1.000000 | 3.64264e-12 | 1.000000 |
| PAH7+H      | 1.91406e-12 | 1.000000 | 1.91618e-12 | 1.000000 |
| rad33       | 1.05375e-12 | 1.000000 | 1.05492e-12 | 1.000000 |
| PhCH2CCH+H  | 6.80362e-13 | 1.000000 | 6.81117e-13 | 1.000000 |
| rad60syn    | 4.64783e-13 | 1.000000 | 4.65299e-13 | 1.000000 |
| rad39       | 4.51109e-13 | 1.000000 | 4.51610e-13 | 1.000000 |
| rad12       | 1.90035e-13 | 1.000000 | 1.90246e-13 | 1.000000 |
| rad60anti   | 1.44534e-13 | 1.000000 | 1.44695e-13 | 1.000000 |
| rad14       | 1.02161e-13 | 1.000000 | 1.02275e-13 | 1.000000 |
| rad27       | 2.31322e-14 | 1.000000 | 2.31579e-14 | 1.000000 |
| rad37       | 9.95569e-15 | 1.000000 | 9.96674e-15 | 1.000000 |
| PAH3+H      | 2.46184e-15 | 1.000000 | 2.46458e-15 | 1.000000 |
| rad59       | 7.38914e-16 | 1.000000 | 7.39734e-16 | 1.000000 |
| rad5        | 6.45849e-16 | 1.000000 | 6.46566e-16 | 1.000000 |

|               |             |          |             |         |
|---------------|-------------|----------|-------------|---------|
| rad50         | 4.95844e-17 | 1.000000 | 4.96394e-17 | 1.00000 |
| rad31         | 4.66270e-18 | 1.000000 | 4.66787e-18 | 1.00000 |
| rad19syn      | 2.80416e-18 | 1.000000 | 2.80727e-18 | 1.00000 |
| rad54         | 1.07291e-19 | 1.000000 | 1.07410e-19 | 1.00000 |
| PAH10+CH3     | 6.46156e-20 | 1.000000 | 6.46873e-20 | 1.00000 |
| rad52         | 2.33377e-20 | 1.000000 | 2.33636e-20 | 1.00000 |
| rad43         | 1.54545e-20 | 1.000000 | 1.54717e-20 | 1.00000 |
| rad62         | 5.56394e-21 | 1.000000 | 5.57012e-21 | 1.00000 |
| rad51         | 1.09029e-21 | 1.000000 | 1.09150e-21 | 1.00000 |
| PhcycC3H3_A+H | 7.81590e-22 | 1.000000 | 7.82457e-22 | 1.00000 |
| rad70         | 5.09312e-22 | 1.000000 | 5.09877e-22 | 1.00000 |
| rad55         | 1.96955e-22 | 1.000000 | 1.97173e-22 | 1.00000 |
| rad58         | 9.88697e-23 | 1.000000 | 9.89794e-23 | 1.00000 |
| PAH1+H        | 2.45528e-23 | 1.000000 | 2.45801e-23 | 1.00000 |
| rad65         | 1.15432e-23 | 1.000000 | 1.15560e-23 | 1.00000 |
| rad34         | 1.90383e-24 | 1.000000 | 1.90594e-24 | 1.00000 |
| rad42         | 3.14330e-26 | 1.000000 | 3.14679e-26 | 1.00000 |
| rad41         | 9.45088e-27 | 1.000000 | 9.46137e-27 | 1.00000 |
| rad47         | 1.05937e-29 | 1.000000 | 1.06055e-29 | 1.00000 |

1.00000000 Pa, 300.000000 K

| Rate constant | True (fraction)     | Effective (fraction) |
|---------------|---------------------|----------------------|
| Total         | 1.17740e-22 (1.00 ) | 1.17545e-22 (1.00 )  |

| species     | PYtrue      | Cumul    | PYeffective | Cumul    |
|-------------|-------------|----------|-------------|----------|
| Indene+H    | 0.984468    | 0.984468 | 0.986104    | 0.986104 |
| rad23       | 0.0122764   | 0.996744 | 0.0122968   | 0.998401 |
| Benzyl+C2H2 | 0.00165847  | 0.998403 | 0.00000     | 0.998401 |
| rad6        | 0.00122779  | 0.999631 | 0.00122983  | 0.999631 |
| rad45       | 0.000311685 | 0.999942 | 0.000312203 | 0.999943 |
| rad22       | 4.26565e-05 | 0.999985 | 4.27274e-05 | 0.999986 |
| rad36       | 1.06231e-05 | 0.999996 | 1.06408e-05 | 0.999996 |
| rad11       | 3.74022e-06 | 0.999999 | 3.74643e-06 | 1.000000 |
| rad7        | 1.71510e-07 | 1.000000 | 1.71795e-07 | 1.00000  |
| rad2        | 7.09793e-08 | 1.000000 | 7.10972e-08 | 1.00000  |
| rad30       | 3.74022e-08 | 1.000000 | 3.74644e-08 | 1.00000  |
| rad20       | 1.69967e-08 | 1.000000 | 1.70249e-08 | 1.00000  |
| PhCCH+CH3   | 1.41170e-08 | 1.000000 | 1.41405e-08 | 1.00000  |
| rad21       | 1.08229e-08 | 1.000000 | 1.08409e-08 | 1.00000  |
| rad28       | 7.72341e-09 | 1.000000 | 7.73624e-09 | 1.00000  |
| rad18       | 7.20680e-09 | 1.000000 | 7.21877e-09 | 1.00000  |
| PhCHCCH2+H  | 6.73183e-09 | 1.000000 | 6.74301e-09 | 1.00000  |
| PAH9+H      | 5.40559e-09 | 1.000000 | 5.41457e-09 | 1.00000  |
| rad1        | 5.34857e-09 | 1.000000 | 5.35745e-09 | 1.00000  |
| rad10       | 4.51068e-09 | 1.000000 | 4.51818e-09 | 1.00000  |
| PhCCCH3+H   | 4.11476e-09 | 1.000000 | 4.12159e-09 | 1.00000  |
| rad35       | 2.66287e-09 | 1.000000 | 2.66730e-09 | 1.00000  |
| rad3        | 2.17730e-09 | 1.000000 | 2.18092e-09 | 1.00000  |
| rad26       | 1.46806e-09 | 1.000000 | 1.47050e-09 | 1.00000  |
| rad4        | 1.08278e-09 | 1.000000 | 1.08458e-09 | 1.00000  |
| rad38       | 1.01994e-09 | 1.000000 | 1.02163e-09 | 1.00000  |
| Ph+MeAc     | 7.33274e-10 | 1.000000 | 7.34492e-10 | 1.00000  |
| rad13       | 6.80229e-10 | 1.000000 | 6.81359e-10 | 1.00000  |
| rad9        | 3.63829e-10 | 1.000000 | 3.64433e-10 | 1.00000  |
| Ph+Allene   | 8.98573e-11 | 1.000000 | 9.00066e-11 | 1.00000  |
| PAH7+H      | 3.39555e-11 | 1.000000 | 3.40119e-11 | 1.00000  |
| rad25       | 2.89372e-11 | 1.000000 | 2.89852e-11 | 1.00000  |
| rad19anti   | 9.64140e-12 | 1.000000 | 9.65742e-12 | 1.00000  |
| rad39       | 7.06098e-12 | 1.000000 | 7.07271e-12 | 1.00000  |
| rad46       | 5.95478e-12 | 1.000000 | 5.96467e-12 | 1.00000  |
| PhCH2CCH+H  | 5.19187e-12 | 1.000000 | 5.20050e-12 | 1.00000  |
| rad24       | 3.74465e-12 | 1.000000 | 3.75087e-12 | 1.00000  |
| rad33       | 1.51740e-12 | 1.000000 | 1.51992e-12 | 1.00000  |
| rad60syn    | 7.05139e-13 | 1.000000 | 7.06311e-13 | 1.00000  |
| rad15       | 2.22981e-13 | 1.000000 | 2.23351e-13 | 1.00000  |
| rad60anti   | 2.12403e-13 | 1.000000 | 2.12755e-13 | 1.00000  |
| rad37       | 1.79898e-13 | 1.000000 | 1.80197e-13 | 1.00000  |
| rad14       | 1.66496e-13 | 1.000000 | 1.66773e-13 | 1.00000  |
| rad27       | 6.06501e-14 | 1.000000 | 6.07508e-14 | 1.00000  |
| PAH3+H      | 6.25733e-15 | 1.000000 | 6.26773e-15 | 1.00000  |
| rad59       | 1.44753e-15 | 1.000000 | 1.44994e-15 | 1.00000  |
| rad50       | 1.20627e-16 | 1.000000 | 1.20828e-16 | 1.00000  |
| rad19syn    | 7.48791e-17 | 1.000000 | 7.50034e-17 | 1.00000  |
| rad31       | 2.04861e-17 | 1.000000 | 2.05202e-17 | 1.00000  |
| rad12       | 3.77765e-18 | 1.000000 | 3.78393e-18 | 1.00000  |
| rad54       | 3.45043e-18 | 1.000000 | 3.45616e-18 | 1.00000  |
| PAH10+CH3   | 2.57488e-18 | 1.000000 | 2.57916e-18 | 1.00000  |



|               |             |          |             |         |
|---------------|-------------|----------|-------------|---------|
| rad67         | 1.29498e-18 | 1.000000 | 1.29713e-18 | 1.00000 |
| rad43         | 4.98864e-19 | 1.000000 | 4.99693e-19 | 1.00000 |
| rad5          | 4.93428e-19 | 1.000000 | 4.94248e-19 | 1.00000 |
| rad62         | 1.86582e-19 | 1.000000 | 1.86892e-19 | 1.00000 |
| rad52         | 8.82353e-20 | 1.000000 | 8.83819e-20 | 1.00000 |
| PhcycC3H3_A+H | 4.19456e-20 | 1.000000 | 4.20153e-20 | 1.00000 |
| rad70         | 1.67419e-20 | 1.000000 | 1.67697e-20 | 1.00000 |
| rad55         | 7.55169e-21 | 1.000000 | 7.56424e-21 | 1.00000 |
| rad51         | 6.57367e-21 | 1.000000 | 6.58459e-21 | 1.00000 |
| PAH1+H        | 1.65789e-21 | 1.000000 | 1.66065e-21 | 1.00000 |
| rad58         | 3.78946e-22 | 1.000000 | 3.79576e-22 | 1.00000 |
| rad65         | 9.33373e-23 | 1.000000 | 9.34923e-23 | 1.00000 |
| rad34         | 9.24224e-23 | 1.000000 | 9.25759e-23 | 1.00000 |
| rad42         | 2.64519e-24 | 1.000000 | 2.64958e-24 | 1.00000 |
| rad41         | 9.26131e-25 | 1.000000 | 9.27669e-25 | 1.00000 |
| rad53         | 1.99855e-26 | 1.000000 | 2.00187e-26 | 1.00000 |
| rad64         | 3.81772e-27 | 1.000000 | 3.82406e-27 | 1.00000 |
| rad47         | 4.24963e-29 | 1.000000 | 4.25669e-29 | 1.00000 |
| rad56         | 2.30370e-29 | 1.000000 | 2.30753e-29 | 1.00000 |
| rad61         | 7.96370e-30 | 1.000000 | 7.97693e-30 | 1.00000 |
| rad73         | 6.09322e-30 | 1.000000 | 6.10334e-30 | 1.00000 |
| rad68syn      | 2.48108e-30 | 1.000000 | 2.48520e-30 | 1.00000 |
| rad68anti     | 1.76340e-30 | 1.000000 | 1.76633e-30 | 1.00000 |
| rad71         | 2.32598e-31 | 1.000000 | 2.32985e-31 | 1.00000 |
| rad40syn      | 1.24021e-32 | 1.000000 | 1.24227e-32 | 1.00000 |
| PAH8+H        | 8.04064e-33 | 1.000000 | 8.05400e-33 | 1.00000 |
| rad40anti     | 4.85411e-33 | 1.000000 | 4.86217e-33 | 1.00000 |
| rad72         | 4.02128e-37 | 1.000000 | 4.02796e-37 | 1.00000 |
| rad8          | 1.53766e-40 | 1.000000 | 1.54022e-40 | 1.00000 |

1.00000000 Pa, 310.000000 K

| Rate constant | True (fraction)     | Effective (fraction) |
|---------------|---------------------|----------------------|
| Total         | 2.44453e-22 (1.00 ) | 2.44055e-22 (1.00 )  |

| species     | PYtrue      | Cumul    | PYeffective | Cumul    |
|-------------|-------------|----------|-------------|----------|
| Indene+H    | 0.983960    | 0.983960 | 0.985565    | 0.985565 |
| rad23       | 0.0126405   | 0.996601 | 0.0126611   | 0.998226 |
| Benzyl+C2H2 | 0.00162814  | 0.998229 | 0.00000     | 0.998226 |
| rad6        | 0.00145428  | 0.999683 | 0.00145665  | 0.999683 |
| rad45       | 0.000280815 | 0.999964 | 0.000281273 | 0.999964 |
| rad36       | 1.85803e-05 | 0.999982 | 1.86106e-05 | 0.999983 |
| rad22       | 1.40296e-05 | 0.999996 | 1.40525e-05 | 0.999997 |
| rad11       | 2.79199e-06 | 0.999999 | 2.79654e-06 | 0.999999 |
| rad7        | 2.01039e-07 | 0.999999 | 2.01367e-07 | 1.000000 |
| rad2        | 7.37385e-08 | 0.999999 | 7.38588e-08 | 1.000000 |
| rad30       | 5.82878e-08 | 0.999999 | 5.83829e-08 | 1.000000 |
| rad15       | 8.72402e-09 | 0.999999 | 8.73825e-09 | 1.000000 |
| PhCCH+CH3   | 7.56160e-09 | 0.999999 | 7.57393e-09 | 1.000000 |
| rad28       | 6.36266e-09 | 0.999999 | 6.37304e-09 | 1.000000 |
| PAH9+H      | 6.25049e-09 | 0.999999 | 6.26068e-09 | 1.000000 |
| rad1        | 5.75706e-09 | 1.000000 | 5.76645e-09 | 1.000000 |
| rad10       | 4.89189e-09 | 1.000000 | 4.89986e-09 | 1.000000 |
| PhCHCCH2+H  | 4.66486e-09 | 1.000000 | 4.67247e-09 | 1.000000 |
| rad35       | 3.59358e-09 | 1.000000 | 3.59944e-09 | 1.000000 |
| rad3        | 2.53393e-09 | 1.000000 | 2.53806e-09 | 1.000000 |
| PhCCCH3+H   | 2.07746e-09 | 1.000000 | 2.08085e-09 | 1.000000 |
| rad38       | 1.50498e-09 | 1.000000 | 1.50743e-09 | 1.000000 |
| rad4        | 1.36002e-09 | 1.000000 | 1.36223e-09 | 1.000000 |
| rad26       | 1.08972e-09 | 1.000000 | 1.09149e-09 | 1.000000 |
| rad13       | 7.05779e-10 | 1.000000 | 7.06930e-10 | 1.000000 |
| rad20       | 3.53191e-10 | 1.000000 | 3.53767e-10 | 1.000000 |
| Ph+MeAc     | 3.45547e-10 | 1.000000 | 3.46110e-10 | 1.000000 |
| rad21       | 2.27486e-10 | 1.000000 | 2.27857e-10 | 1.000000 |
| rad8        | 1.89361e-10 | 1.000000 | 1.89670e-10 | 1.000000 |
| rad9        | 1.36817e-10 | 1.000000 | 1.37040e-10 | 1.000000 |
| Ph+Allene   | 1.27161e-10 | 1.000000 | 1.27369e-10 | 1.000000 |
| rad18       | 1.23705e-10 | 1.000000 | 1.23907e-10 | 1.000000 |
| rad25       | 3.60477e-11 | 1.000000 | 3.61064e-11 | 1.000000 |
| PAH7+H      | 1.16921e-11 | 1.000000 | 1.17111e-11 | 1.000000 |
| rad46       | 1.03036e-11 | 1.000000 | 1.03204e-11 | 1.000000 |
| PhCH2CCH+H  | 4.19201e-12 | 1.000000 | 4.19885e-12 | 1.000000 |
| rad24       | 2.85509e-12 | 1.000000 | 2.85975e-12 | 1.000000 |
| rad39       | 2.83506e-12 | 1.000000 | 2.83969e-12 | 1.000000 |
| rad60syn    | 1.62246e-12 | 1.000000 | 1.62511e-12 | 1.000000 |
| rad33       | 1.28611e-12 | 1.000000 | 1.28821e-12 | 1.000000 |
| rad12       | 1.05192e-12 | 1.000000 | 1.05364e-12 | 1.000000 |
| rad60anti   | 5.35868e-13 | 1.000000 | 5.36742e-13 | 1.000000 |

|               |             |          |             |          |
|---------------|-------------|----------|-------------|----------|
| rad14         | 1.69392e-13 | 1.000000 | 1.69669e-13 | 1.000000 |
| rad37         | 6.43044e-14 | 1.000000 | 6.44093e-14 | 1.000000 |
| rad27         | 4.88201e-14 | 1.000000 | 4.88998e-14 | 1.000000 |
| PAH3+H        | 1.50146e-14 | 1.000000 | 1.50390e-14 | 1.000000 |
| rad5          | 4.56077e-15 | 1.000000 | 4.56820e-15 | 1.000000 |
| rad59         | 4.33021e-15 | 1.000000 | 4.33728e-15 | 1.000000 |
| rad50         | 3.10627e-16 | 1.000000 | 3.11133e-16 | 1.000000 |
| rad19syn      | 3.11327e-17 | 1.000000 | 3.11834e-17 | 1.000000 |
| rad31         | 1.06051e-17 | 1.000000 | 1.06224e-17 | 1.000000 |
| rad54         | 1.36922e-18 | 1.000000 | 1.37145e-18 | 1.000000 |
| PAH10+CH3     | 8.16792e-19 | 1.000000 | 8.18124e-19 | 1.000000 |
| rad52         | 2.22463e-19 | 1.000000 | 2.22826e-19 | 1.000000 |
| rad43         | 1.89960e-19 | 1.000000 | 1.90269e-19 | 1.000000 |
| rad62         | 7.48260e-20 | 1.000000 | 7.49480e-20 | 1.000000 |
| rad51         | 1.40719e-20 | 1.000000 | 1.40948e-20 | 1.000000 |
| PhcycC3H3_A+H | 1.29878e-20 | 1.000000 | 1.30090e-20 | 1.000000 |
| rad70         | 8.00780e-21 | 1.000000 | 8.02086e-21 | 1.000000 |
| rad55         | 3.19083e-21 | 1.000000 | 3.19603e-21 | 1.000000 |
| rad58         | 1.56200e-21 | 1.000000 | 1.56455e-21 | 1.000000 |
| PAH1+H        | 4.47691e-22 | 1.000000 | 4.48421e-22 | 1.000000 |
| rad65         | 1.67650e-22 | 1.000000 | 1.67923e-22 | 1.000000 |
| rad34         | 3.51823e-23 | 1.000000 | 3.52397e-23 | 1.000000 |
| rad42         | 6.24801e-25 | 1.000000 | 6.25820e-25 | 1.000000 |
| rad41         | 1.90041e-25 | 1.000000 | 1.90351e-25 | 1.000000 |
| rad47         | 1.43701e-28 | 1.000000 | 1.43935e-28 | 1.000000 |

1.00000000 Pa, 400.000000 K

| Rate constant | True (fraction)     | Effective (fraction) |
|---------------|---------------------|----------------------|
| Total         | 3.60269e-20 (1.00 ) | 3.57092e-20 (1.00 )  |

| species     | PYtrue      | Cumul    | PYeffective | Cumul    |
|-------------|-------------|----------|-------------|----------|
| Indene+H    | 0.985188    | 0.985188 | 0.993953    | 0.993953 |
| Benzyl+C2H2 | 0.00881797  | 0.994006 | 0.000000    | 0.993953 |
| rad23       | 0.00304170  | 0.997048 | 0.00306877  | 0.997022 |
| rad6        | 0.00283845  | 0.999886 | 0.00286370  | 0.999885 |
| rad45       | 9.76274e-05 | 0.999984 | 9.84960e-05 | 0.999984 |
| rad22       | 6.09775e-06 | 0.999990 | 6.15200e-06 | 0.999990 |
| rad36       | 3.74051e-06 | 0.999994 | 3.77378e-06 | 0.999994 |
| PhCCH+CH3   | 1.73243e-06 | 0.999995 | 1.74784e-06 | 0.999996 |
| rad11       | 7.65368e-07 | 0.999996 | 7.72177e-07 | 0.999996 |
| PhCHCCH2+H  | 7.57206e-07 | 0.999997 | 7.63942e-07 | 0.999997 |
| rad2        | 7.40670e-07 | 0.999998 | 7.47260e-07 | 0.999998 |
| PhCCCH3+H   | 4.71508e-07 | 0.999998 | 4.75703e-07 | 0.999998 |
| rad30       | 4.00543e-07 | 0.999998 | 4.04106e-07 | 0.999999 |
| rad7        | 3.94797e-07 | 0.999999 | 3.98310e-07 | 0.999999 |
| rad28       | 2.53363e-07 | 0.999999 | 2.55617e-07 | 0.999999 |
| Ph+MeAc     | 1.40487e-07 | 0.999999 | 1.41737e-07 | 1.000000 |
| rad1        | 6.89295e-08 | 0.999999 | 6.95427e-08 | 1.000000 |
| PAH9+H      | 6.85939e-08 | 0.999999 | 6.92041e-08 | 1.000000 |
| rad10       | 4.73532e-08 | 0.999999 | 4.77744e-08 | 1.000000 |
| rad26       | 4.59928e-08 | 0.999999 | 4.64019e-08 | 1.000000 |
| Ph+Allene   | 3.20302e-08 | 1.000000 | 3.23152e-08 | 1.000000 |
| rad35       | 2.74137e-08 | 1.000000 | 2.76576e-08 | 1.000000 |
| rad38       | 1.65994e-08 | 1.000000 | 1.67471e-08 | 1.000000 |
| rad3        | 1.12224e-08 | 1.000000 | 1.13223e-08 | 1.000000 |
| PAH7+H      | 9.89072e-09 | 1.000000 | 9.97872e-09 | 1.000000 |
| rad20       | 7.34264e-09 | 1.000000 | 7.40796e-09 | 1.000000 |
| rad4        | 5.91013e-09 | 1.000000 | 5.96271e-09 | 1.000000 |
| rad21       | 4.94363e-09 | 1.000000 | 4.98761e-09 | 1.000000 |
| PhCH2CCH+H  | 3.09107e-09 | 1.000000 | 3.11857e-09 | 1.000000 |
| rad39       | 2.21673e-09 | 1.000000 | 2.23645e-09 | 1.000000 |
| rad13       | 1.73349e-09 | 1.000000 | 1.74892e-09 | 1.000000 |
| rad18       | 1.70865e-09 | 1.000000 | 1.72386e-09 | 1.000000 |
| rad9        | 9.81139e-10 | 1.000000 | 9.89868e-10 | 1.000000 |
| rad19anti   | 5.04770e-10 | 1.000000 | 5.09261e-10 | 1.000000 |
| rad46       | 3.22640e-10 | 1.000000 | 3.25510e-10 | 1.000000 |
| rad60syn    | 9.43383e-11 | 1.000000 | 9.51776e-11 | 1.000000 |
| rad37       | 5.30733e-11 | 1.000000 | 5.35455e-11 | 1.000000 |
| rad60anti   | 3.75057e-11 | 1.000000 | 3.78393e-11 | 1.000000 |
| rad25       | 2.55217e-11 | 1.000000 | 2.57487e-11 | 1.000000 |
| PAH3+H      | 6.49484e-12 | 1.000000 | 6.55263e-12 | 1.000000 |
| rad33       | 4.28637e-12 | 1.000000 | 4.32450e-12 | 1.000000 |
| rad24       | 1.60749e-12 | 1.000000 | 1.62179e-12 | 1.000000 |
| rad59       | 1.35756e-12 | 1.000000 | 1.36964e-12 | 1.000000 |
| rad14       | 1.09731e-12 | 1.000000 | 1.10708e-12 | 1.000000 |
| rad27       | 7.15360e-13 | 1.000000 | 7.21724e-13 | 1.000000 |
| rad15       | 6.14334e-13 | 1.000000 | 6.19800e-13 | 1.000000 |

|               |             |          |             |          |
|---------------|-------------|----------|-------------|----------|
| rad50         | 2.13854e-13 | 1.000000 | 2.15756e-13 | 1.000000 |
| rad19syn      | 1.29007e-13 | 1.000000 | 1.30155e-13 | 1.000000 |
| rad54         | 9.63333e-15 | 1.000000 | 9.71903e-15 | 1.000000 |
| PAH10+CH3     | 6.23165e-15 | 1.000000 | 6.28709e-15 | 1.000000 |
| rad31         | 1.66402e-15 | 1.000000 | 1.67882e-15 | 1.000000 |
| rad67         | 1.56977e-15 | 1.000000 | 1.58374e-15 | 1.000000 |
| rad52         | 1.34826e-15 | 1.000000 | 1.36026e-15 | 1.000000 |
| rad43         | 1.08287e-15 | 1.000000 | 1.09250e-15 | 1.000000 |
| rad51         | 6.93854e-16 | 1.000000 | 7.00027e-16 | 1.000000 |
| rad62         | 5.62418e-16 | 1.000000 | 5.67421e-16 | 1.000000 |
| PhcycC3H3_A+H | 3.69393e-16 | 1.000000 | 3.72680e-16 | 1.000000 |
| rad70         | 1.35236e-16 | 1.000000 | 1.36440e-16 | 1.000000 |
| rad55         | 5.75495e-17 | 1.000000 | 5.80614e-17 | 1.000000 |
| PAH1+H        | 2.93725e-17 | 1.000000 | 2.96338e-17 | 1.000000 |
| rad5          | 2.83447e-17 | 1.000000 | 2.85968e-17 | 1.000000 |
| rad65         | 1.85143e-17 | 1.000000 | 1.86790e-17 | 1.000000 |
| rad58         | 1.83759e-17 | 1.000000 | 1.85394e-17 | 1.000000 |
| rad12         | 1.66017e-17 | 1.000000 | 1.67494e-17 | 1.000000 |
| rad34         | 2.37254e-18 | 1.000000 | 2.39364e-18 | 1.000000 |
| rad42         | 9.39150e-20 | 1.000000 | 9.47505e-20 | 1.000000 |
| rad41         | 4.39249e-20 | 1.000000 | 4.43157e-20 | 1.000000 |
| rad53         | 1.25296e-20 | 1.000000 | 1.26410e-20 | 1.000000 |
| rad73         | 8.19782e-21 | 1.000000 | 8.27075e-21 | 1.000000 |
| rad64         | 6.64396e-21 | 1.000000 | 6.70307e-21 | 1.000000 |
| rad71         | 1.99148e-21 | 1.000000 | 2.00920e-21 | 1.000000 |
| rad56         | 1.06809e-21 | 1.000000 | 1.07759e-21 | 1.000000 |
| rad68syn      | 1.60126e-22 | 1.000000 | 1.61551e-22 | 1.000000 |
| rad68anti     | 1.10244e-22 | 1.000000 | 1.11225e-22 | 1.000000 |
| rad61         | 9.21399e-23 | 1.000000 | 9.29596e-23 | 1.000000 |
| PAH8+H        | 2.37066e-23 | 1.000000 | 2.39175e-23 | 1.000000 |
| rad40syn      | 9.45577e-24 | 1.000000 | 9.53990e-24 | 1.000000 |
| rad40anti     | 3.51609e-24 | 1.000000 | 3.54737e-24 | 1.000000 |
| rad47         | 1.43536e-24 | 1.000000 | 1.44813e-24 | 1.000000 |
| rad72         | 1.05881e-24 | 1.000000 | 1.06823e-24 | 1.000000 |
| rad8          | 2.78583e-36 | 1.000000 | 2.81062e-36 | 1.000000 |

1.00000000 Pa, 500.000000 K

=====

| Rate constant | True (fraction)     | Effective (fraction) |
|---------------|---------------------|----------------------|
| Total         | 1.22595e-18 (1.00 ) | 1.18802e-18 (1.00 )  |

| species     | PYtrue      | Cumul    | PYeffective | Cumul    |
|-------------|-------------|----------|-------------|----------|
| Indene+H    | 0.963266    | 0.963266 | 0.994021    | 0.994021 |
| Benzyl+C2H2 | 0.0309393   | 0.994205 | 0.000000    | 0.994021 |
| rad6        | 0.00482610  | 0.999031 | 0.00498018  | 0.999001 |
| rad23       | 0.000836473 | 0.999868 | 0.000863179 | 0.999864 |
| rad45       | 5.49897e-05 | 0.999923 | 5.67453e-05 | 0.999921 |
| PhCCH+CH3   | 3.54814e-05 | 0.999958 | 3.66142e-05 | 0.999958 |
| PhCHCCH2+H  | 1.47625e-05 | 0.999973 | 1.52339e-05 | 0.999973 |
| PhCCCH3+H   | 8.54918e-06 | 0.999982 | 8.82213e-06 | 0.999982 |
| Ph+MeAc     | 3.70105e-06 | 0.999985 | 3.81921e-06 | 0.999986 |
| rad36       | 2.57517e-06 | 0.999988 | 2.65739e-06 | 0.999988 |
| rad2        | 2.29440e-06 | 0.999990 | 2.36765e-06 | 0.999991 |
| rad30       | 2.18806e-06 | 0.999992 | 2.25792e-06 | 0.999993 |
| rad28       | 1.54381e-06 | 0.999994 | 1.59309e-06 | 0.999994 |
| Ph+Allene   | 1.52834e-06 | 0.999995 | 1.57714e-06 | 0.999996 |
| rad22       | 1.04637e-06 | 0.999997 | 1.07977e-06 | 0.999997 |
| rad7        | 6.85231e-07 | 0.999997 | 7.07108e-07 | 0.999998 |
| PAH9+H      | 5.10417e-07 | 0.999998 | 5.26714e-07 | 0.999998 |
| PAH7+H      | 3.61439e-07 | 0.999998 | 3.72979e-07 | 0.999999 |
| rad11       | 3.13104e-07 | 0.999998 | 3.23100e-07 | 0.999999 |
| rad1        | 2.73972e-07 | 0.999999 | 2.82719e-07 | 0.999999 |
| rad26       | 2.22081e-07 | 0.999999 | 2.29172e-07 | 1.000000 |
| PhCH2CCH+H  | 2.08263e-07 | 0.999999 | 2.14912e-07 | 1.000000 |
| rad35       | 1.71774e-07 | 0.999999 | 1.77258e-07 | 1.000000 |
| rad38       | 1.44577e-07 | 0.999999 | 1.49193e-07 | 1.000000 |
| rad10       | 1.26863e-07 | 1.000000 | 1.30913e-07 | 1.000000 |
| rad39       | 8.49813e-08 | 1.000000 | 8.76945e-08 | 1.000000 |
| rad3        | 3.66915e-08 | 1.000000 | 3.78629e-08 | 1.000000 |
| rad4        | 2.06573e-08 | 1.000000 | 2.13168e-08 | 1.000000 |
| rad19anti   | 1.10766e-08 | 1.000000 | 1.14303e-08 | 1.000000 |
| rad46       | 6.27380e-09 | 1.000000 | 6.47410e-09 | 1.000000 |
| rad20       | 4.99442e-09 | 1.000000 | 5.15387e-09 | 1.000000 |
| rad21       | 3.69391e-09 | 1.000000 | 3.81184e-09 | 1.000000 |
| rad13       | 3.48911e-09 | 1.000000 | 3.60051e-09 | 1.000000 |
| rad60syn    | 2.17006e-09 | 1.000000 | 2.23935e-09 | 1.000000 |
| rad37       | 1.84167e-09 | 1.000000 | 1.90047e-09 | 1.000000 |
| rad9        | 1.28610e-09 | 1.000000 | 1.32716e-09 | 1.000000 |

|               |             |          |             |         |
|---------------|-------------|----------|-------------|---------|
| rad60anti     | 9.76449e-10 | 1.000000 | 1.00762e-09 | 1.00000 |
| rad18         | 5.58003e-10 | 1.000000 | 5.75819e-10 | 1.00000 |
| PAH3+H        | 5.01285e-10 | 1.000000 | 5.17290e-10 | 1.00000 |
| rad50         | 1.11694e-10 | 1.000000 | 1.15260e-10 | 1.00000 |
| rad59         | 9.57982e-11 | 1.000000 | 9.88567e-11 | 1.00000 |
| rad19syn      | 2.19073e-11 | 1.000000 | 2.26068e-11 | 1.00000 |
| rad25         | 1.31935e-11 | 1.000000 | 1.36148e-11 | 1.00000 |
| rad33         | 1.02523e-11 | 1.000000 | 1.05796e-11 | 1.00000 |
| rad51         | 7.15144e-12 | 1.000000 | 7.37977e-12 | 1.00000 |
| rad52         | 4.16666e-12 | 1.000000 | 4.29969e-12 | 1.00000 |
| rad14         | 3.06611e-12 | 1.000000 | 3.16401e-12 | 1.00000 |
| rad54         | 2.54588e-12 | 1.000000 | 2.62716e-12 | 1.00000 |
| rad27         | 2.30984e-12 | 1.000000 | 2.38359e-12 | 1.00000 |
| PAH10+CH3     | 1.74432e-12 | 1.000000 | 1.80001e-12 | 1.00000 |
| rad24         | 1.52982e-12 | 1.000000 | 1.57866e-12 | 1.00000 |
| rad15         | 8.41519e-13 | 1.000000 | 8.68387e-13 | 1.00000 |
| PhcycC3H3_A+H | 3.09455e-13 | 1.000000 | 3.19335e-13 | 1.00000 |
| rad67         | 2.87471e-13 | 1.000000 | 2.96649e-13 | 1.00000 |
| rad43         | 2.14488e-13 | 1.000000 | 2.21336e-13 | 1.00000 |
| rad65         | 2.11287e-13 | 1.000000 | 2.18033e-13 | 1.00000 |
| rad62         | 1.37856e-13 | 1.000000 | 1.42258e-13 | 1.00000 |
| PAH1+H        | 1.12910e-13 | 1.000000 | 1.16515e-13 | 1.00000 |
| rad70         | 9.22752e-14 | 1.000000 | 9.52213e-14 | 1.00000 |
| rad31         | 5.52012e-14 | 1.000000 | 5.69636e-14 | 1.00000 |
| rad55         | 3.57456e-14 | 1.000000 | 3.68869e-14 | 1.00000 |
| rad58         | 1.97677e-14 | 1.000000 | 2.03989e-14 | 1.00000 |
| rad73         | 1.33969e-14 | 1.000000 | 1.38246e-14 | 1.00000 |
| rad71         | 1.05676e-14 | 1.000000 | 1.09050e-14 | 1.00000 |
| rad34         | 6.09119e-15 | 1.000000 | 6.28566e-15 | 1.00000 |
| rad64         | 9.29631e-16 | 1.000000 | 9.59311e-16 | 1.00000 |
| rad53         | 4.74440e-16 | 1.000000 | 4.89588e-16 | 1.00000 |
| rad56         | 2.34182e-16 | 1.000000 | 2.41659e-16 | 1.00000 |
| rad5          | 2.17738e-16 | 1.000000 | 2.24689e-16 | 1.00000 |
| rad42         | 1.89923e-16 | 1.000000 | 1.95987e-16 | 1.00000 |
| rad41         | 1.56768e-16 | 1.000000 | 1.61773e-16 | 1.00000 |
| rad72         | 1.19009e-16 | 1.000000 | 1.22808e-16 | 1.00000 |
| PAH8+H        | 9.43712e-17 | 1.000000 | 9.73842e-17 | 1.00000 |
| rad61         | 9.14699e-17 | 1.000000 | 9.43903e-17 | 1.00000 |
| rad68syn      | 7.02721e-17 | 1.000000 | 7.25157e-17 | 1.00000 |
| rad12         | 5.66277e-17 | 1.000000 | 5.84357e-17 | 1.00000 |
| rad68anti     | 4.65028e-17 | 1.000000 | 4.79875e-17 | 1.00000 |
| rad40syn      | 1.56109e-17 | 1.000000 | 1.61093e-17 | 1.00000 |
| rad40anti     | 8.11730e-18 | 1.000000 | 8.37646e-18 | 1.00000 |
| rad47         | 4.48221e-21 | 1.000000 | 4.62531e-21 | 1.00000 |
| rad8          | 6.02010e-32 | 1.000000 | 6.21231e-32 | 1.00000 |

1.00000000 Pa, 600.000000 K

=====

| Rate constant | True (fraction)     | Effective (fraction) |
|---------------|---------------------|----------------------|
| Total         | 1.36947e-17 (1.00 ) | 1.26224e-17 (1.00 )  |

| species     | PYtrue      | Cumul    | PYeffective | Cumul    |
|-------------|-------------|----------|-------------|----------|
| Indene+H    | 0.915583    | 0.915583 | 0.993364    | 0.993364 |
| Benzyl+C2H2 | 0.0783007   | 0.993884 | 0.00000     | 0.993364 |
| rad6        | 0.00532706  | 0.999211 | 0.00577961  | 0.999144 |
| rad23       | 0.000323270 | 0.999534 | 0.000350732 | 0.999494 |
| PhCCH+CH3   | 0.000216262 | 0.999750 | 0.000234634 | 0.999729 |
| PhCHCCH2+H  | 9.00907e-05 | 0.999840 | 9.77441e-05 | 0.999827 |
| PhCCCH3+H   | 4.49995e-05 | 0.999885 | 4.88224e-05 | 0.999876 |
| rad45       | 3.72553e-05 | 0.999923 | 4.04202e-05 | 0.999916 |
| Ph+MeAc     | 2.61717e-05 | 0.999949 | 2.83951e-05 | 0.999944 |
| Ph+Allene   | 1.96495e-05 | 0.999968 | 2.13188e-05 | 0.999966 |
| rad30       | 7.57484e-06 | 0.999976 | 8.21835e-06 | 0.999974 |
| rad2        | 3.85144e-06 | 0.999980 | 4.17863e-06 | 0.999978 |
| PhCH2CCH+H  | 3.51326e-06 | 0.999983 | 3.81172e-06 | 0.999982 |
| PAH7+H      | 3.50509e-06 | 0.999987 | 3.80285e-06 | 0.999986 |
| rad28       | 3.00586e-06 | 0.999990 | 3.26122e-06 | 0.999989 |
| PAH9+H      | 2.71393e-06 | 0.999993 | 2.94448e-06 | 0.999992 |
| rad36       | 2.28983e-06 | 0.999995 | 2.48436e-06 | 0.999994 |
| rad38       | 8.91462e-07 | 0.999996 | 9.67194e-07 | 0.999995 |
| rad39       | 8.48356e-07 | 0.999997 | 9.20426e-07 | 0.999996 |
| rad7        | 8.01187e-07 | 0.999997 | 8.69250e-07 | 0.999997 |
| rad35       | 7.59605e-07 | 0.999998 | 8.24136e-07 | 0.999998 |
| rad1        | 5.67173e-07 | 0.999999 | 6.15356e-07 | 0.999999 |
| rad26       | 3.42759e-07 | 0.999999 | 3.71878e-07 | 0.999999 |
| rad11       | 2.66135e-07 | 0.999999 | 2.88744e-07 | 0.999999 |
| rad22       | 2.59033e-07 | 1.000000 | 2.81039e-07 | 1.000000 |
| rad10       | 1.37774e-07 | 1.000000 | 1.49478e-07 | 1.000000 |

|               |             |          |             |          |
|---------------|-------------|----------|-------------|----------|
| rad19anti     | 1.09238e-07 | 1.000000 | 1.18518e-07 | 1.000000 |
| rad46         | 9.09920e-08 | 1.000000 | 9.87220e-08 | 1.000000 |
| rad3          | 6.68652e-08 | 1.000000 | 7.25455e-08 | 1.000000 |
| rad4          | 4.06789e-08 | 1.000000 | 4.41347e-08 | 1.000000 |
| rad50         | 2.40135e-08 | 1.000000 | 2.60535e-08 | 1.000000 |
| rad60syn      | 1.93447e-08 | 1.000000 | 2.09881e-08 | 1.000000 |
| rad37         | 1.60510e-08 | 1.000000 | 1.74146e-08 | 1.000000 |
| PAH3+H        | 1.06520e-08 | 1.000000 | 1.15569e-08 | 1.000000 |
| rad60anti     | 9.37090e-09 | 1.000000 | 1.01670e-08 | 1.000000 |
| rad20         | 5.84163e-09 | 1.000000 | 6.33789e-09 | 1.000000 |
| rad51         | 5.19183e-09 | 1.000000 | 5.63289e-09 | 1.000000 |
| rad13         | 5.12702e-09 | 1.000000 | 5.56258e-09 | 1.000000 |
| rad21         | 4.86872e-09 | 1.000000 | 5.28233e-09 | 1.000000 |
| rad9          | 1.88789e-09 | 1.000000 | 2.04827e-09 | 1.000000 |
| rad59         | 1.82979e-09 | 1.000000 | 1.98523e-09 | 1.000000 |
| rad52         | 1.76632e-09 | 1.000000 | 1.91637e-09 | 1.000000 |
| rad19syn      | 7.54955e-10 | 1.000000 | 8.19090e-10 | 1.000000 |
| PAH10+CH3     | 4.15768e-10 | 1.000000 | 4.51089e-10 | 1.000000 |
| rad18         | 2.79348e-10 | 1.000000 | 3.03080e-10 | 1.000000 |
| PAH1+H        | 1.53110e-10 | 1.000000 | 1.66117e-10 | 1.000000 |
| rad65         | 1.41915e-10 | 1.000000 | 1.53971e-10 | 1.000000 |
| rad54         | 1.29993e-10 | 1.000000 | 1.41037e-10 | 1.000000 |
| rad71         | 1.05119e-10 | 1.000000 | 1.14049e-10 | 1.000000 |
| rad73         | 8.26494e-11 | 1.000000 | 8.96707e-11 | 1.000000 |
| rad67         | 5.57659e-11 | 1.000000 | 6.05033e-11 | 1.000000 |
| PhcycC3H3_A+H | 5.07003e-11 | 1.000000 | 5.50075e-11 | 1.000000 |
| rad70         | 2.47680e-11 | 1.000000 | 2.68721e-11 | 1.000000 |
| rad33         | 2.07239e-11 | 1.000000 | 2.24844e-11 | 1.000000 |
| rad43         | 9.79780e-12 | 1.000000 | 1.06302e-11 | 1.000000 |
| rad25         | 8.67620e-12 | 1.000000 | 9.41327e-12 | 1.000000 |
| rad58         | 7.24966e-12 | 1.000000 | 7.86553e-12 | 1.000000 |
| rad24         | 6.50235e-12 | 1.000000 | 7.05474e-12 | 1.000000 |
| rad62         | 6.43407e-12 | 1.000000 | 6.98066e-12 | 1.000000 |
| rad34         | 5.31423e-12 | 1.000000 | 5.76569e-12 | 1.000000 |
| rad14         | 4.55394e-12 | 1.000000 | 4.94081e-12 | 1.000000 |
| rad55         | 3.75855e-12 | 1.000000 | 4.07785e-12 | 1.000000 |
| rad27         | 3.35482e-12 | 1.000000 | 3.63982e-12 | 1.000000 |
| rad72         | 2.99143e-12 | 1.000000 | 3.24556e-12 | 1.000000 |
| rad64         | 2.62914e-12 | 1.000000 | 2.85249e-12 | 1.000000 |
| rad15         | 1.19969e-12 | 1.000000 | 1.30161e-12 | 1.000000 |
| PAH8+H        | 1.16676e-12 | 1.000000 | 1.26587e-12 | 1.000000 |
| rad61         | 5.42834e-13 | 1.000000 | 5.88949e-13 | 1.000000 |
| rad53         | 3.89590e-13 | 1.000000 | 4.22686e-13 | 1.000000 |
| rad68syn      | 3.73362e-13 | 1.000000 | 4.05080e-13 | 1.000000 |
| rad56         | 3.59574e-13 | 1.000000 | 3.90121e-13 | 1.000000 |
| rad31         | 3.28401e-13 | 1.000000 | 3.56300e-13 | 1.000000 |
| rad68anti     | 2.43043e-13 | 1.000000 | 2.63690e-13 | 1.000000 |
| rad40syn      | 1.40315e-13 | 1.000000 | 1.52235e-13 | 1.000000 |
| rad42         | 1.12375e-13 | 1.000000 | 1.21921e-13 | 1.000000 |
| rad41         | 9.03945e-14 | 1.000000 | 9.80738e-14 | 1.000000 |
| rad40anti     | 8.36383e-14 | 1.000000 | 9.07436e-14 | 1.000000 |
| rad12         | 5.55636e-16 | 1.000000 | 6.02839e-16 | 1.000000 |
| rad5          | 5.42825e-16 | 1.000000 | 5.88940e-16 | 1.000000 |
| rad47         | 4.35423e-18 | 1.000000 | 4.72414e-18 | 1.000000 |
| rad8          | 2.49495e-27 | 1.000000 | 2.70690e-27 | 1.000000 |

1.00000000 Pa, 700.000000 K

=====

| Rate constant | True (fraction)     | Effective (fraction) |
|---------------|---------------------|----------------------|
| Total         | 8.02260e-17 (1.00 ) | 6.78515e-17 (1.00 )  |

| species     | PYtrue      | Cumul    | PYeffective | Cumul    |
|-------------|-------------|----------|-------------|----------|
| Indene+H    | 0.840480    | 0.840480 | 0.993763    | 0.993763 |
| Benzyl+C2H2 | 0.154245    | 0.994725 | 0.000000    | 0.993763 |
| rad6        | 0.00384706  | 0.998572 | 0.00454868  | 0.998312 |
| PhCCH+CH3   | 0.000625760 | 0.999198 | 0.000739883 | 0.999052 |
| PhCHCCH2+H  | 0.000276151 | 0.999474 | 0.000326514 | 0.999378 |
| rad23       | 0.000113353 | 0.999587 | 0.000134026 | 0.999512 |
| Ph+Allene   | 0.000112881 | 0.999700 | 0.000133468 | 0.999646 |
| PhCCCH3+H   | 0.000109079 | 0.999809 | 0.000128972 | 0.999775 |
| Ph+MeAc     | 8.21543e-05 | 0.999891 | 9.71373e-05 | 0.999872 |
| PhCH2CCH+H  | 2.53083e-05 | 0.999917 | 2.99239e-05 | 0.999902 |
| rad30       | 1.89217e-05 | 0.999936 | 2.23726e-05 | 0.999924 |
| rad45       | 1.69557e-05 | 0.999953 | 2.00480e-05 | 0.999944 |
| PAH7+H      | 1.55681e-05 | 0.999968 | 1.84073e-05 | 0.999962 |
| PAH9+H      | 1.04992e-05 | 0.999979 | 1.24140e-05 | 0.999975 |
| rad38       | 3.87503e-06 | 0.999983 | 4.58174e-06 | 0.999979 |
| rad39       | 3.85563e-06 | 0.999986 | 4.55880e-06 | 0.999984 |

|               |             |          |             |          |
|---------------|-------------|----------|-------------|----------|
| rad2          | 3.29867e-06 | 0.999990 | 3.90027e-06 | 0.999988 |
| rad28         | 2.83477e-06 | 0.999993 | 3.35177e-06 | 0.999991 |
| rad35         | 2.48668e-06 | 0.999995 | 2.94019e-06 | 0.999994 |
| rad36         | 1.19360e-06 | 0.999996 | 1.41128e-06 | 0.999996 |
| rad46         | 6.62101e-07 | 0.999997 | 7.82852e-07 | 0.999996 |
| rad7          | 6.51105e-07 | 0.999998 | 7.69850e-07 | 0.999997 |
| rad19anti     | 6.00134e-07 | 0.999998 | 7.09583e-07 | 0.999998 |
| rad1          | 5.44504e-07 | 0.999999 | 6.43809e-07 | 0.999998 |
| rad50         | 3.77403e-07 | 0.999999 | 4.46232e-07 | 0.999999 |
| rad26         | 2.70222e-07 | 0.999999 | 3.19504e-07 | 0.999999 |
| rad11         | 2.21357e-07 | 1.000000 | 2.61727e-07 | 1.000000 |
| rad51         | 1.05300e-07 | 1.000000 | 1.24504e-07 | 1.000000 |
| PAH3+H        | 9.94017e-08 | 1.000000 | 1.17530e-07 | 1.000000 |
| rad60syn      | 9.56818e-08 | 1.000000 | 1.13132e-07 | 1.000000 |
| rad10         | 8.56133e-08 | 1.000000 | 1.01227e-07 | 1.000000 |
| rad22         | 8.14464e-08 | 1.000000 | 9.63002e-08 | 1.000000 |
| rad37         | 6.10318e-08 | 1.000000 | 7.21625e-08 | 1.000000 |
| rad3          | 5.43319e-08 | 1.000000 | 6.42407e-08 | 1.000000 |
| rad60anti     | 4.87902e-08 | 1.000000 | 5.76883e-08 | 1.000000 |
| rad4          | 3.50919e-08 | 1.000000 | 4.14918e-08 | 1.000000 |
| rad52         | 3.18095e-08 | 1.000000 | 3.76108e-08 | 1.000000 |
| rad59         | 1.55610e-08 | 1.000000 | 1.83989e-08 | 1.000000 |
| rad20         | 1.12783e-08 | 1.000000 | 1.33352e-08 | 1.000000 |
| rad21         | 1.03284e-08 | 1.000000 | 1.22120e-08 | 1.000000 |
| PAH10+CH3     | 9.02329e-09 | 1.000000 | 1.06689e-08 | 1.000000 |
| rad19syn      | 8.61608e-09 | 1.000000 | 1.01874e-08 | 1.000000 |
| rad13         | 6.02696e-09 | 1.000000 | 7.12613e-09 | 1.000000 |
| rad9          | 4.99467e-09 | 1.000000 | 5.90557e-09 | 1.000000 |
| PAH1+H        | 3.72570e-09 | 1.000000 | 4.40517e-09 | 1.000000 |
| rad71         | 3.34912e-09 | 1.000000 | 3.95992e-09 | 1.000000 |
| rad65         | 2.79331e-09 | 1.000000 | 3.30275e-09 | 1.000000 |
| rad73         | 2.44586e-09 | 1.000000 | 2.89192e-09 | 1.000000 |
| rad54         | 1.76777e-09 | 1.000000 | 2.09017e-09 | 1.000000 |
| rad67         | 1.13540e-09 | 1.000000 | 1.34247e-09 | 1.000000 |
| PhcycC3H3_A+H | 8.54217e-10 | 1.000000 | 1.01001e-09 | 1.000000 |
| rad70         | 5.42798e-10 | 1.000000 | 6.41791e-10 | 1.000000 |
| rad18         | 2.36936e-10 | 1.000000 | 2.80148e-10 | 1.000000 |
| rad58         | 1.53012e-10 | 1.000000 | 1.80918e-10 | 1.000000 |
| rad43         | 1.52646e-10 | 1.000000 | 1.80485e-10 | 1.000000 |
| rad34         | 1.30750e-10 | 1.000000 | 1.54595e-10 | 1.000000 |
| rad72         | 1.08347e-10 | 1.000000 | 1.28107e-10 | 1.000000 |
| rad62         | 9.38906e-11 | 1.000000 | 1.11014e-10 | 1.000000 |
| rad64         | 6.88210e-11 | 1.000000 | 8.13723e-11 | 1.000000 |
| rad55         | 6.02968e-11 | 1.000000 | 7.12935e-11 | 1.000000 |
| rad24         | 5.63891e-11 | 1.000000 | 6.66730e-11 | 1.000000 |
| rad33         | 4.39445e-11 | 1.000000 | 5.19589e-11 | 1.000000 |
| PAH8+H        | 4.03830e-11 | 1.000000 | 4.77479e-11 | 1.000000 |
| rad61         | 1.63626e-11 | 1.000000 | 1.93467e-11 | 1.000000 |
| rad68syn      | 1.12505e-11 | 1.000000 | 1.33024e-11 | 1.000000 |
| rad25         | 8.37941e-12 | 1.000000 | 9.90761e-12 | 1.000000 |
| rad56         | 7.87275e-12 | 1.000000 | 9.30854e-12 | 1.000000 |
| rad53         | 7.54602e-12 | 1.000000 | 8.92222e-12 | 1.000000 |
| rad68anti     | 7.30754e-12 | 1.000000 | 8.64026e-12 | 1.000000 |
| rad41         | 5.04381e-12 | 1.000000 | 5.96368e-12 | 1.000000 |
| rad14         | 4.78481e-12 | 1.000000 | 5.65744e-12 | 1.000000 |
| rad40syn      | 4.77959e-12 | 1.000000 | 5.65128e-12 | 1.000000 |
| rad27         | 3.43689e-12 | 1.000000 | 4.06369e-12 | 1.000000 |
| rad42         | 3.42671e-12 | 1.000000 | 4.05166e-12 | 1.000000 |
| rad40anti     | 2.99319e-12 | 1.000000 | 3.53907e-12 | 1.000000 |
| rad15         | 2.23370e-12 | 1.000000 | 2.64107e-12 | 1.000000 |
| rad31         | 4.92579e-13 | 1.000000 | 5.82414e-13 | 1.000000 |
| rad12         | 2.82017e-14 | 1.000000 | 3.33450e-14 | 1.000000 |
| rad5          | 7.55599e-16 | 1.000000 | 8.93402e-16 | 1.000000 |
| rad47         | 4.53028e-16 | 1.000000 | 5.35650e-16 | 1.000000 |
| rad8          | 8.99282e-23 | 1.000000 | 1.06329e-22 | 1.000000 |

1.00000000 Pa, 800.000000 K

=====  
Rate constant | True (fraction) | Effective (fraction)  
-----  
Total | 3.12228e-16 (1.00 ) | 2.33633e-16 (1.00 )

| species     | PYtrue      | Cumul    | PYeffective | Cumul    |
|-------------|-------------|----------|-------------|----------|
| Indene+H    | 0.743512    | 0.743512 | 0.993632    | 0.993632 |
| Benzyl+C2H2 | 0.251723    | 0.995235 | 0.000000    | 0.993632 |
| rad6        | 0.00203288  | 0.997268 | 0.00271675  | 0.996349 |
| PhCCH+CH3   | 0.00115853  | 0.998426 | 0.00154826  | 0.997897 |
| PhCHCCH2+H  | 0.000576444 | 0.999003 | 0.000770362 | 0.998667 |
| Ph+Allene   | 0.000389037 | 0.999392 | 0.000519910 | 0.999187 |

|               |             |          |             |          |
|---------------|-------------|----------|-------------|----------|
| PhCCCH3+H     | 0.000163774 | 0.999556 | 0.000218868 | 0.999406 |
| Ph+MeAc       | 0.000156547 | 0.999712 | 0.000209211 | 0.999615 |
| PhCH2CCH+H    | 0.000105236 | 0.999817 | 0.000140637 | 0.999756 |
| PAH7+H        | 4.19134e-05 | 0.999859 | 5.60132e-05 | 0.999812 |
| rad30         | 3.73206e-05 | 0.999897 | 4.98754e-05 | 0.999862 |
| rad23         | 3.52051e-05 | 0.999932 | 4.70482e-05 | 0.999909 |
| PAH9+H        | 2.45154e-05 | 0.999956 | 3.27625e-05 | 0.999942 |
| rad39         | 1.03368e-05 | 0.999967 | 1.38142e-05 | 0.999956 |
| rad38         | 9.24452e-06 | 0.999976 | 1.23544e-05 | 0.999968 |
| rad45         | 6.80489e-06 | 0.999983 | 9.09408e-06 | 0.999977 |
| rad35         | 5.53122e-06 | 0.999988 | 7.39195e-06 | 0.999984 |
| rad19anti     | 2.17142e-06 | 0.999990 | 2.90189e-06 | 0.999987 |
| rad28         | 1.73454e-06 | 0.999992 | 2.31805e-06 | 0.999990 |
| rad46         | 1.66327e-06 | 0.999994 | 2.22280e-06 | 0.999992 |
| rad2          | 1.56772e-06 | 0.999995 | 2.09511e-06 | 0.999994 |
| rad50         | 9.62578e-07 | 0.999996 | 1.28639e-06 | 0.999995 |
| rad36         | 5.18227e-07 | 0.999997 | 6.92561e-07 | 0.999996 |
| PAH3+H        | 4.86082e-07 | 0.999997 | 6.49602e-07 | 0.999997 |
| rad7          | 4.28140e-07 | 0.999998 | 5.72167e-07 | 0.999997 |
| rad60syn      | 3.16648e-07 | 0.999998 | 4.23169e-07 | 0.999998 |
| rad51         | 2.83349e-07 | 0.999998 | 3.78669e-07 | 0.999998 |
| rad1          | 2.57788e-07 | 0.999999 | 3.44508e-07 | 0.999998 |
| rad60anti     | 1.67483e-07 | 0.999999 | 2.23825e-07 | 0.999998 |
| rad11         | 1.66450e-07 | 0.999999 | 2.22445e-07 | 0.999999 |
| rad26         | 1.46902e-07 | 0.999999 | 1.96320e-07 | 0.999999 |
| rad37         | 1.30184e-07 | 0.999999 | 1.73979e-07 | 0.999999 |
| rad52         | 8.30820e-08 | 0.999999 | 1.11031e-07 | 0.999999 |
| rad59         | 7.33312e-08 | 0.999999 | 9.80000e-08 | 0.999999 |
| rad19syn      | 4.76983e-08 | 1.000000 | 6.37442e-08 | 0.999999 |
| rad10         | 3.76715e-08 | 1.000000 | 5.03443e-08 | 0.999999 |
| rad22         | 3.49439e-08 | 1.000000 | 4.66992e-08 | 0.999999 |
| rad20         | 2.92630e-08 | 1.000000 | 3.91072e-08 | 0.999999 |
| PAH10+CH3     | 2.73689e-08 | 1.000000 | 3.65759e-08 | 0.999999 |
| rad21         | 2.68701e-08 | 1.000000 | 3.59093e-08 | 1.000000 |
| rad3          | 2.58015e-08 | 1.000000 | 3.44812e-08 | 1.000000 |
| rad4          | 1.70838e-08 | 1.000000 | 2.28308e-08 | 1.000000 |
| rad9          | 1.70596e-08 | 1.000000 | 2.27985e-08 | 1.000000 |
| PAH1+H        | 1.10202e-08 | 1.000000 | 1.47275e-08 | 1.000000 |
| rad54         | 1.06004e-08 | 1.000000 | 1.41664e-08 | 1.000000 |
| rad71         | 1.01959e-08 | 1.000000 | 1.36258e-08 | 1.000000 |
| rad65         | 7.44789e-09 | 1.000000 | 9.95338e-09 | 1.000000 |
| rad73         | 7.29649e-09 | 1.000000 | 9.75105e-09 | 1.000000 |
| rad13         | 7.22341e-09 | 1.000000 | 9.65339e-09 | 1.000000 |
| PhcycC3H3_A+H | 4.31325e-09 | 1.000000 | 5.76424e-09 | 1.000000 |
| rad67         | 4.09431e-09 | 1.000000 | 5.47165e-09 | 1.000000 |
| rad70         | 2.01762e-09 | 1.000000 | 2.69636e-09 | 1.000000 |
| rad43         | 6.26410e-10 | 1.000000 | 8.37137e-10 | 1.000000 |
| rad58         | 6.02531e-10 | 1.000000 | 8.05225e-10 | 1.000000 |
| rad62         | 4.41008e-10 | 1.000000 | 5.89365e-10 | 1.000000 |
| rad34         | 4.18742e-10 | 1.000000 | 5.59608e-10 | 1.000000 |
| rad55         | 3.55326e-10 | 1.000000 | 4.74858e-10 | 1.000000 |
| rad18         | 3.53209e-10 | 1.000000 | 4.72029e-10 | 1.000000 |
| rad72         | 3.41629e-10 | 1.000000 | 4.56555e-10 | 1.000000 |
| rad24         | 2.86408e-10 | 1.000000 | 3.82756e-10 | 1.000000 |
| rad64         | 1.99896e-10 | 1.000000 | 2.67141e-10 | 1.000000 |
| PAH8+H        | 1.33453e-10 | 1.000000 | 1.78347e-10 | 1.000000 |
| rad33         | 1.20700e-10 | 1.000000 | 1.61304e-10 | 1.000000 |
| rad61         | 5.20029e-11 | 1.000000 | 6.94969e-11 | 1.000000 |
| rad68syn      | 3.39131e-11 | 1.000000 | 4.53215e-11 | 1.000000 |
| rad41         | 2.96532e-11 | 1.000000 | 3.96287e-11 | 1.000000 |
| rad53         | 2.28461e-11 | 1.000000 | 3.05316e-11 | 1.000000 |
| rad56         | 2.22115e-11 | 1.000000 | 2.96836e-11 | 1.000000 |
| rad68anti     | 2.20177e-11 | 1.000000 | 2.94245e-11 | 1.000000 |
| rad40syn      | 1.63619e-11 | 1.000000 | 2.18662e-11 | 1.000000 |
| rad42         | 1.36873e-11 | 1.000000 | 1.82917e-11 | 1.000000 |
| rad25         | 1.09209e-11 | 1.000000 | 1.45947e-11 | 1.000000 |
| rad40anti     | 1.09025e-11 | 1.000000 | 1.45702e-11 | 1.000000 |
| rad14         | 5.12786e-12 | 1.000000 | 6.85289e-12 | 1.000000 |
| rad15         | 4.82739e-12 | 1.000000 | 6.45134e-12 | 1.000000 |
| rad27         | 3.97954e-12 | 1.000000 | 5.31827e-12 | 1.000000 |
| rad12         | 7.05216e-13 | 1.000000 | 9.42453e-13 | 1.000000 |
| rad31         | 3.97867e-13 | 1.000000 | 5.31711e-13 | 1.000000 |
| rad47         | 2.62607e-15 | 1.000000 | 3.50950e-15 | 1.000000 |
| rad5          | 8.54125e-16 | 1.000000 | 1.14146e-15 | 1.000000 |
| rad8          | 7.16110e-19 | 1.000000 | 9.57013e-19 | 1.000000 |

1.00000000 Pa, 900.000000 K

=====

Rate constant | True (fraction) | Effective (fraction)

-----

Total | 9.21769e-16 (1.00 ) 5.92014e-16 (1.00 )

| species       | PYtrue      | Cumul    | PYeffective | Cumul    |
|---------------|-------------|----------|-------------|----------|
| Indene+H      | 0.636873    | 0.636873 | 0.991617    | 0.991617 |
| Benzyl+C2H2   | 0.357742    | 0.994615 | 0.00000     | 0.991617 |
| PhCCH+CH3     | 0.00164360  | 0.996259 | 0.00255910  | 0.994176 |
| PhCHCCH2+H    | 0.000975673 | 0.997234 | 0.00151913  | 0.995695 |
| Ph+Allene     | 0.000955542 | 0.998190 | 0.00148779  | 0.997183 |
| rad6          | 0.000832443 | 0.999022 | 0.00129612  | 0.998479 |
| PhCH2CCH+H    | 0.000306186 | 0.999328 | 0.000476733 | 0.998956 |
| Ph+MeAc       | 0.000221698 | 0.999550 | 0.000345185 | 0.999301 |
| PhCCCH3+H     | 0.000185095 | 0.999735 | 0.000288194 | 0.999589 |
| PAH7+H        | 8.21474e-05 | 0.999817 | 0.000127904 | 0.999717 |
| rad30         | 6.20767e-05 | 0.999879 | 9.66539e-05 | 0.999814 |
| PAH9+H        | 4.33181e-05 | 0.999923 | 6.74466e-05 | 0.999881 |
| rad39         | 1.97542e-05 | 0.999943 | 3.07574e-05 | 0.999912 |
| rad38         | 1.61263e-05 | 0.999959 | 2.51088e-05 | 0.999937 |
| rad23         | 1.20832e-05 | 0.999971 | 1.88137e-05 | 0.999956 |
| rad35         | 9.75765e-06 | 0.999981 | 1.51927e-05 | 0.999971 |
| rad19anti     | 5.99727e-06 | 0.999986 | 9.33780e-06 | 0.999980 |
| rad45         | 2.85229e-06 | 0.999989 | 4.44104e-06 | 0.999985 |
| rad46         | 2.63245e-06 | 0.999992 | 4.09874e-06 | 0.999989 |
| PAH3+H        | 1.68775e-06 | 0.999994 | 2.62784e-06 | 0.999992 |
| rad50         | 9.81147e-07 | 0.999995 | 1.52765e-06 | 0.999993 |
| rad60syn      | 7.97164e-07 | 0.999995 | 1.24119e-06 | 0.999994 |
| rad28         | 7.86545e-07 | 0.999996 | 1.22466e-06 | 0.999996 |
| rad2          | 5.40202e-07 | 0.999997 | 8.41098e-07 | 0.999996 |
| rad60anti     | 4.33876e-07 | 0.999997 | 6.75548e-07 | 0.999997 |
| rad51         | 2.73018e-07 | 0.999997 | 4.25092e-07 | 0.999998 |
| rad7          | 2.50334e-07 | 0.999998 | 3.89771e-07 | 0.999998 |
| rad59         | 2.44528e-07 | 0.999998 | 3.80732e-07 | 0.999998 |
| rad36         | 2.37805e-07 | 0.999998 | 3.70264e-07 | 0.999999 |
| rad37         | 1.95864e-07 | 0.999998 | 3.04962e-07 | 0.999999 |
| rad19syn      | 1.74313e-07 | 0.999999 | 2.71407e-07 | 0.999999 |
| rad11         | 1.21324e-07 | 0.999999 | 1.88902e-07 | 0.999999 |
| rad1          | 9.41669e-08 | 0.999999 | 1.46618e-07 | 1.000000 |
| rad52         | 8.08480e-08 | 0.999999 | 1.25881e-07 | 1.000000 |
| rad26         | 6.49413e-08 | 0.999999 | 1.01114e-07 | 1.000000 |
| rad20         | 6.38577e-08 | 0.999999 | 9.94270e-08 | 1.000000 |
| rad21         | 5.31305e-08 | 0.999999 | 8.27246e-08 | 1.000000 |
| rad54         | 4.25959e-08 | 0.999999 | 6.63222e-08 | 1.000000 |
| rad9          | 3.26947e-08 | 0.999999 | 5.09059e-08 | 1.000000 |
| PAH10+CH3     | 3.20733e-08 | 0.999999 | 4.99383e-08 | 1.000000 |
| rad22         | 2.30533e-08 | 0.999999 | 3.58942e-08 | 1.000000 |
| PhcycC3H3_A+H | 1.76095e-08 | 0.999999 | 2.74181e-08 | 1.000000 |
| rad10         | 1.64471e-08 | 0.999999 | 2.56082e-08 | 1.000000 |
| PAH1+H        | 1.33863e-08 | 0.999999 | 2.08426e-08 | 1.000000 |
| rad67         | 1.05771e-08 | 0.999999 | 1.64687e-08 | 1.000000 |
| rad13         | 1.02680e-08 | 0.999999 | 1.59873e-08 | 1.000000 |
| rad71         | 1.02462e-08 | 0.999999 | 1.59534e-08 | 1.000000 |
| rad3          | 9.99940e-09 | 0.999999 | 1.55691e-08 | 1.000000 |
| rad73         | 7.26059e-09 | 0.999999 | 1.13048e-08 | 1.000000 |
| rad65         | 7.16925e-09 | 0.999999 | 1.11626e-08 | 1.000000 |
| rad4          | 6.97665e-09 | 0.999999 | 1.08627e-08 | 1.000000 |
| rad70         | 5.06351e-09 | 0.999999 | 7.88392e-09 | 1.000000 |
| rad58         | 1.93444e-09 | 0.999999 | 3.01193e-09 | 1.000000 |
| rad55         | 1.53365e-09 | 0.999999 | 2.38791e-09 | 1.000000 |
| rad62         | 1.24649e-09 | 0.999999 | 1.94080e-09 | 1.000000 |
| rad43         | 1.03801e-09 | 0.999999 | 1.61619e-09 | 1.000000 |
| rad34         | 7.32768e-10 | 0.999999 | 1.14092e-09 | 1.000000 |
| rad18         | 6.71459e-10 | 0.999999 | 1.04547e-09 | 1.000000 |
| rad24         | 5.73500e-10 | 0.999999 | 8.92943e-10 | 1.000000 |
| rad72         | 3.49429e-10 | 0.999999 | 5.44063e-10 | 1.000000 |
| rad33         | 2.97190e-10 | 0.999999 | 4.62728e-10 | 1.000000 |
| rad64         | 2.06818e-10 | 0.999999 | 3.22018e-10 | 1.000000 |
| PAH8+H        | 1.46614e-10 | 0.999999 | 2.28280e-10 | 1.000000 |
| rad61         | 5.57565e-11 | 0.999999 | 8.68133e-11 | 1.000000 |
| rad53         | 4.79872e-11 | 0.999999 | 7.47165e-11 | 1.000000 |
| rad41         | 4.74758e-11 | 0.999999 | 7.39202e-11 | 1.000000 |
| rad68syn      | 3.50211e-11 | 0.999999 | 5.45281e-11 | 1.000000 |
| rad56         | 2.83283e-11 | 0.999999 | 4.41073e-11 | 1.000000 |
| rad42         | 2.35538e-11 | 0.999999 | 3.66735e-11 | 1.000000 |
| rad68anti     | 2.27629e-11 | 0.999999 | 3.54420e-11 | 1.000000 |
| rad40syn      | 1.88024e-11 | 0.999999 | 2.92755e-11 | 1.000000 |
| rad25         | 1.77261e-11 | 0.999999 | 2.75997e-11 | 1.000000 |
| rad40anti     | 1.32238e-11 | 0.999999 | 2.05895e-11 | 1.000000 |
| rad15         | 7.79976e-12 | 0.999999 | 1.21443e-11 | 1.000000 |
| rad14         | 6.47536e-12 | 0.999999 | 1.00822e-11 | 1.000000 |
| rad27         | 6.18025e-12 | 0.999999 | 9.62270e-12 | 1.000000 |



|       |             |          |             |         |
|-------|-------------|----------|-------------|---------|
| rad12 | 3.93317e-12 | 0.999999 | 6.12398e-12 | 1.00000 |
| rad31 | 2.68579e-13 | 0.999999 | 4.18180e-13 | 1.00000 |
| rad47 | 3.04713e-15 | 0.999999 | 4.74440e-15 | 1.00000 |
| rad5  | 8.43087e-16 | 0.999999 | 1.31269e-15 | 1.00000 |
| rad8  | 4.95724e-16 | 0.999999 | 7.71846e-16 | 1.00000 |

1.00000000 Pa, 1000.00000 K

| Rate constant | True (fraction)     | Effective (fraction) |
|---------------|---------------------|----------------------|
| Total         | 2.23691e-15 (1.00 ) | 1.20787e-15 (1.00 )  |

| species       | PYtrue      | Cumul    | PYeffective | Cumul    |
|---------------|-------------|----------|-------------|----------|
| Indene+H      | 0.532886    | 0.532886 | 0.986879    | 0.986879 |
| Benzyl+C2H2   | 0.460029    | 0.992915 | 0.00000     | 0.986879 |
| PhCCH+CH3     | 0.00196118  | 0.994876 | 0.00363201  | 0.990511 |
| Ph+Allene     | 0.00184734  | 0.996724 | 0.00342119  | 0.993932 |
| PhCHCCH2+H    | 0.00144559  | 0.998169 | 0.00267716  | 0.996609 |
| PhCH2CCH+H    | 0.000695668 | 0.998865 | 0.00128834  | 0.997898 |
| rad6          | 0.000294333 | 0.999159 | 0.000545090 | 0.998443 |
| Ph+MeAc       | 0.000262558 | 0.999422 | 0.000486244 | 0.998925 |
| PhCCCH3+H     | 0.000175110 | 0.999597 | 0.000324296 | 0.999253 |
| PAH7+H        | 0.000130859 | 0.999728 | 0.000242345 | 0.999496 |
| rad30         | 9.13425e-05 | 0.999819 | 0.000169162 | 0.999665 |
| PAH9+H        | 7.20199e-05 | 0.999891 | 0.000133377 | 0.999798 |
| rad39         | 3.05348e-05 | 0.999922 | 5.65489e-05 | 0.999855 |
| rad38         | 2.69791e-05 | 0.999949 | 4.99639e-05 | 0.999905 |
| rad35         | 1.58663e-05 | 0.999964 | 2.93835e-05 | 0.999934 |
| rad19anti     | 1.37331e-05 | 0.999978 | 2.54331e-05 | 0.999960 |
| rad23         | 4.99244e-06 | 0.999983 | 9.24575e-06 | 0.999969 |
| PAH3+H        | 4.69462e-06 | 0.999988 | 8.69419e-06 | 0.999977 |
| rad46         | 4.42063e-06 | 0.999992 | 8.18679e-06 | 0.999986 |
| rad60syn      | 1.65763e-06 | 0.999994 | 3.06986e-06 | 0.999989 |
| rad45         | 1.34073e-06 | 0.999995 | 2.48297e-06 | 0.999991 |
| rad50         | 9.38313e-07 | 0.999996 | 1.73771e-06 | 0.999993 |
| rad60anti     | 9.23864e-07 | 0.999997 | 1.71095e-06 | 0.999995 |
| rad59         | 6.47003e-07 | 0.999998 | 1.19822e-06 | 0.999996 |
| rad19syn      | 4.73955e-07 | 0.999998 | 8.77741e-07 | 0.999997 |
| rad28         | 3.07850e-07 | 0.999999 | 5.70123e-07 | 0.999997 |
| rad37         | 2.53059e-07 | 0.999999 | 4.68653e-07 | 0.999998 |
| rad51         | 1.92342e-07 | 0.999999 | 3.56208e-07 | 0.999998 |
| rad2          | 1.75141e-07 | 0.999999 | 3.24353e-07 | 0.999998 |
| rad7          | 1.50829e-07 | 0.999999 | 2.79328e-07 | 0.999999 |
| rad54         | 1.27264e-07 | 0.999999 | 2.35686e-07 | 0.999999 |
| rad36         | 1.17353e-07 | 1.00000  | 2.17331e-07 | 0.999999 |
| rad11         | 9.92829e-08 | 1.00000  | 1.83867e-07 | 0.999999 |
| rad20         | 9.08574e-08 | 1.00000  | 1.68263e-07 | 1.00000  |
| rad21         | 6.56309e-08 | 1.00000  | 1.21545e-07 | 1.00000  |
| rad52         | 6.37130e-08 | 1.00000  | 1.17993e-07 | 1.00000  |
| PhcycC3H3_A+H | 6.17172e-08 | 1.00000  | 1.14297e-07 | 1.00000  |
| rad67         | 3.53312e-08 | 1.00000  | 6.54316e-08 | 1.00000  |
| rad9          | 3.40575e-08 | 1.00000  | 6.30728e-08 | 1.00000  |
| rad1          | 3.40557e-08 | 1.00000  | 6.30695e-08 | 1.00000  |
| PAH10+CH3     | 3.19333e-08 | 1.00000  | 5.91388e-08 | 1.00000  |
| rad26         | 2.68144e-08 | 1.00000  | 4.96590e-08 | 1.00000  |
| PAH1+H        | 1.84674e-08 | 1.00000  | 3.42007e-08 | 1.00000  |
| rad22         | 1.76277e-08 | 1.00000  | 3.26456e-08 | 1.00000  |
| rad13         | 1.58013e-08 | 1.00000  | 2.92631e-08 | 1.00000  |
| rad70         | 1.44514e-08 | 1.00000  | 2.67632e-08 | 1.00000  |
| rad10         | 1.03703e-08 | 1.00000  | 1.92053e-08 | 1.00000  |
| rad58         | 7.21581e-09 | 1.00000  | 1.33633e-08 | 1.00000  |
| rad71         | 6.59240e-09 | 1.00000  | 1.22088e-08 | 1.00000  |
| rad65         | 5.16081e-09 | 1.00000  | 9.55755e-09 | 1.00000  |
| rad55         | 5.12344e-09 | 1.00000  | 9.48835e-09 | 1.00000  |
| rad73         | 4.66047e-09 | 1.00000  | 8.63096e-09 | 1.00000  |
| rad3          | 3.87183e-09 | 1.00000  | 7.17044e-09 | 1.00000  |
| rad62         | 2.95125e-09 | 1.00000  | 5.46557e-09 | 1.00000  |
| rad4          | 2.82688e-09 | 1.00000  | 5.23524e-09 | 1.00000  |
| rad34         | 1.81649e-09 | 1.00000  | 3.36405e-09 | 1.00000  |
| rad18         | 1.48465e-09 | 1.00000  | 2.74950e-09 | 1.00000  |
| rad43         | 1.22878e-09 | 1.00000  | 2.27563e-09 | 1.00000  |
| rad24         | 5.90179e-10 | 1.00000  | 1.09298e-09 | 1.00000  |
| rad33         | 4.41701e-10 | 1.00000  | 8.18008e-10 | 1.00000  |
| rad72         | 2.26243e-10 | 1.00000  | 4.18991e-10 | 1.00000  |
| rad64         | 1.87019e-10 | 1.00000  | 3.46350e-10 | 1.00000  |
| rad53         | 1.68718e-10 | 1.00000  | 3.12457e-10 | 1.00000  |
| PAH8+H        | 1.01663e-10 | 1.00000  | 1.88274e-10 | 1.00000  |
| rad56         | 6.48464e-11 | 1.00000  | 1.20092e-10 | 1.00000  |
| rad42         | 4.64607e-11 | 1.00000  | 8.60429e-11 | 1.00000  |

|           |             |         |             |         |
|-----------|-------------|---------|-------------|---------|
| rad41     | 3.80315e-11 | 1.00000 | 7.04324e-11 | 1.00000 |
| rad61     | 3.74562e-11 | 1.00000 | 6.93669e-11 | 1.00000 |
| rad68syn  | 3.04709e-11 | 1.00000 | 5.64307e-11 | 1.00000 |
| rad25     | 2.96492e-11 | 1.00000 | 5.49089e-11 | 1.00000 |
| rad68anti | 1.99871e-11 | 1.00000 | 3.70151e-11 | 1.00000 |
| rad40syn  | 1.37092e-11 | 1.00000 | 2.53888e-11 | 1.00000 |
| rad40anti | 9.56779e-12 | 1.00000 | 1.77191e-11 | 1.00000 |
| rad15     | 9.51528e-12 | 1.00000 | 1.76218e-11 | 1.00000 |
| rad12     | 8.61617e-12 | 1.00000 | 1.59567e-11 | 1.00000 |
| rad14     | 7.86174e-12 | 1.00000 | 1.45595e-11 | 1.00000 |
| rad27     | 7.78187e-12 | 1.00000 | 1.44116e-11 | 1.00000 |
| rad31     | 1.73009e-13 | 1.00000 | 3.20403e-13 | 1.00000 |
| rad8      | 3.09417e-14 | 1.00000 | 5.73025e-14 | 1.00000 |
| rad47     | 2.08975e-15 | 1.00000 | 3.87012e-15 | 1.00000 |
| rad5      | 8.87462e-16 | 1.00000 | 1.64353e-15 | 1.00000 |

1.00000000 Pa, 1100.00000 K

| Rate constant | True (fraction)     | Effective (fraction) |
|---------------|---------------------|----------------------|
| Total         | 4.69847e-15 (1.00 ) | 2.11079e-15 (1.00 )  |

| species       | PYtrue      | Cumul    | PYeffective | Cumul    |
|---------------|-------------|----------|-------------|----------|
| Benzyl+C2H2   | 0.550749    | 0.550749 | 0.00000     | 0.00000  |
| Indene+H      | 0.439799    | 0.990548 | 0.978961    | 0.978961 |
| Ph+Allene     | 0.00299647  | 0.993544 | 0.00666992  | 0.985631 |
| PhCCH+CH3     | 0.00208113  | 0.995626 | 0.00463245  | 0.990263 |
| PhCHCCH2+H    | 0.00194423  | 0.997570 | 0.00432771  | 0.994591 |
| PhCH2CCH+H    | 0.00132250  | 0.998892 | 0.00294378  | 0.997535 |
| Ph+MeAc       | 0.000277452 | 0.999170 | 0.000617589 | 0.998152 |
| PAH7+H        | 0.000179641 | 0.999349 | 0.000399869 | 0.998552 |
| PhCCCH3+H     | 0.000148057 | 0.999497 | 0.000329564 | 0.998882 |
| rad30         | 0.000123019 | 0.999620 | 0.000273830 | 0.999156 |
| PAH9+H        | 0.000113348 | 0.999734 | 0.000252304 | 0.999408 |
| rad6          | 9.85325e-05 | 0.999832 | 0.000219326 | 0.999627 |
| rad38         | 4.32985e-05 | 0.999876 | 9.63794e-05 | 0.999724 |
| rad39         | 4.05511e-05 | 0.999916 | 9.02638e-05 | 0.999814 |
| rad19anti     | 2.72076e-05 | 0.999943 | 6.05622e-05 | 0.999875 |
| rad35         | 2.41447e-05 | 0.999968 | 5.37442e-05 | 0.999928 |
| PAH3+H        | 1.09292e-05 | 0.999979 | 2.43275e-05 | 0.999953 |
| rad46         | 7.73213e-06 | 0.999986 | 1.72112e-05 | 0.999970 |
| rad60syn      | 2.99591e-06 | 0.999989 | 6.66867e-06 | 0.999976 |
| rad23         | 2.28630e-06 | 0.999992 | 5.08913e-06 | 0.999982 |
| rad60anti     | 1.70333e-06 | 0.999993 | 3.79149e-06 | 0.999985 |
| rad59         | 1.43320e-06 | 0.999995 | 3.19020e-06 | 0.999989 |
| rad50         | 1.39818e-06 | 0.999996 | 3.11224e-06 | 0.999992 |
| rad19syn      | 1.02510e-06 | 0.999997 | 2.28179e-06 | 0.999994 |
| rad45         | 6.68641e-07 | 0.999998 | 1.48835e-06 | 0.999995 |
| rad37         | 3.08392e-07 | 0.999998 | 6.86457e-07 | 0.999996 |
| rad54         | 2.98339e-07 | 0.999998 | 6.64080e-07 | 0.999997 |
| rad51         | 1.79729e-07 | 0.999999 | 4.00064e-07 | 0.999997 |
| PhcycC3H3_A+H | 1.70963e-07 | 0.999999 | 3.80551e-07 | 0.999998 |
| rad28         | 1.16247e-07 | 0.999999 | 2.58757e-07 | 0.999998 |
| rad67         | 1.13076e-07 | 0.999999 | 2.51699e-07 | 0.999998 |
| rad7          | 1.03592e-07 | 0.999999 | 2.30588e-07 | 0.999998 |
| rad11         | 9.45803e-08 | 0.999999 | 2.10529e-07 | 0.999999 |
| rad20         | 8.06846e-08 | 0.999999 | 1.79598e-07 | 0.999999 |
| rad52         | 7.60403e-08 | 0.999999 | 1.69260e-07 | 0.999999 |
| rad36         | 6.00186e-08 | 0.999999 | 1.33597e-07 | 0.999999 |
| rad2          | 5.77324e-08 | 0.999999 | 1.28508e-07 | 0.999999 |
| rad21         | 5.17562e-08 | 0.999999 | 1.15205e-07 | 0.999999 |
| PAH10+CH3     | 4.45942e-08 | 1.000000 | 9.92634e-08 | 0.999999 |
| rad70         | 3.76859e-08 | 1.000000 | 8.38860e-08 | 0.999999 |
| PAH1+H        | 3.76702e-08 | 1.000000 | 8.38512e-08 | 1.000000 |
| rad9          | 2.87187e-08 | 1.000000 | 6.39258e-08 | 1.000000 |
| rad58         | 2.35156e-08 | 1.000000 | 5.23440e-08 | 1.000000 |
| rad13         | 1.85808e-08 | 1.000000 | 4.13594e-08 | 1.000000 |
| rad55         | 1.32982e-08 | 1.000000 | 2.96008e-08 | 1.000000 |
| rad1          | 1.20821e-08 | 1.000000 | 2.68938e-08 | 1.000000 |
| rad22         | 1.19503e-08 | 1.000000 | 2.66006e-08 | 1.000000 |
| rad26         | 1.11587e-08 | 1.000000 | 2.48384e-08 | 1.000000 |
| rad10         | 8.58716e-09 | 1.000000 | 1.91144e-08 | 1.000000 |
| rad62         | 5.89462e-09 | 1.000000 | 1.31210e-08 | 1.000000 |
| rad65         | 5.18280e-09 | 1.000000 | 1.15365e-08 | 1.000000 |
| rad34         | 5.05740e-09 | 1.000000 | 1.12574e-08 | 1.000000 |
| rad71         | 3.72129e-09 | 1.000000 | 8.28331e-09 | 1.000000 |
| rad18         | 3.38961e-09 | 1.000000 | 7.54503e-09 | 1.000000 |
| rad73         | 2.67393e-09 | 1.000000 | 5.95198e-09 | 1.000000 |
| rad3          | 1.50979e-09 | 1.000000 | 3.36067e-09 | 1.000000 |

|           |             |          |             |          |
|-----------|-------------|----------|-------------|----------|
| rad43     | 1.50783e-09 | 1.000000 | 3.35632e-09 | 1.000000 |
| rad4      | 1.13173e-09 | 1.000000 | 2.51916e-09 | 1.000000 |
| rad53     | 5.93603e-10 | 1.000000 | 1.32132e-09 | 1.000000 |
| rad24     | 4.55981e-10 | 1.000000 | 1.01498e-09 | 1.000000 |
| rad33     | 3.88338e-10 | 1.000000 | 8.64412e-10 | 1.000000 |
| rad64     | 2.95463e-10 | 1.000000 | 6.57678e-10 | 1.000000 |
| rad56     | 2.43941e-10 | 1.000000 | 5.42995e-10 | 1.000000 |
| rad72     | 1.26633e-10 | 1.000000 | 2.81875e-10 | 1.000000 |
| rad42     | 1.07652e-10 | 1.000000 | 2.39626e-10 | 1.000000 |
| PAH8+H    | 8.00211e-11 | 1.000000 | 1.78121e-10 | 1.000000 |
| rad68syn  | 5.47518e-11 | 1.000000 | 1.21873e-10 | 1.000000 |
| rad25     | 3.89879e-11 | 1.000000 | 8.67841e-11 | 1.000000 |
| rad68anti | 3.64052e-11 | 1.000000 | 8.10353e-11 | 1.000000 |
| rad41     | 2.76283e-11 | 1.000000 | 6.14985e-11 | 1.000000 |
| rad61     | 2.41388e-11 | 1.000000 | 5.37312e-11 | 1.000000 |
| rad40syn  | 1.28971e-11 | 1.000000 | 2.87079e-11 | 1.000000 |
| rad12     | 1.26361e-11 | 1.000000 | 2.81271e-11 | 1.000000 |
| rad15     | 1.18554e-11 | 1.000000 | 2.63894e-11 | 1.000000 |
| rad40anti | 7.57067e-12 | 1.000000 | 1.68518e-11 | 1.000000 |
| rad14     | 7.28964e-12 | 1.000000 | 1.62262e-11 | 1.000000 |
| rad27     | 6.06716e-12 | 1.000000 | 1.35051e-11 | 1.000000 |
| rad8      | 3.02944e-13 | 1.000000 | 6.74332e-13 | 1.000000 |
| rad31     | 1.08208e-13 | 1.000000 | 2.40864e-13 | 1.000000 |
| rad47     | 1.62651e-15 | 1.000000 | 3.62048e-15 | 1.000000 |
| rad5      | 1.08165e-15 | 1.000000 | 2.40768e-15 | 1.000000 |

1.00000000 Pa, 1200.00000 K

| Rate constant | True (fraction)     | Effective (fraction) |
|---------------|---------------------|----------------------|
| Total         | 8.84330e-15 (1.00 ) | 3.30082e-15 (1.00 )  |

| species       | PYtrue      | Cumul    | PYeffective | Cumul    |
|---------------|-------------|----------|-------------|----------|
| Benzyl+C2H2   | 0.626743    | 0.626743 | 0.00000     | 0.00000  |
| Indene+H      | 0.361104    | 0.987847 | 0.967442    | 0.967442 |
| Ph+Allene     | 0.00426510  | 0.992112 | 0.0114267   | 0.978869 |
| PhCHCCH2+H    | 0.00242723  | 0.994539 | 0.00650284  | 0.985372 |
| PhCH2CCH+H    | 0.00220976  | 0.996749 | 0.00592022  | 0.991292 |
| PhCCH+CH3     | 0.00203281  | 0.998782 | 0.00544613  | 0.996738 |
| Ph+MeAc       | 0.000271635 | 0.999054 | 0.000727744 | 0.997466 |
| PAH7+H        | 0.000221162 | 0.999275 | 0.000592519 | 0.998058 |
| PAH9+H        | 0.000167346 | 0.999442 | 0.000448340 | 0.998506 |
| rad30         | 0.000155356 | 0.999597 | 0.000416217 | 0.998923 |
| PhCCCH3+H     | 0.000116555 | 0.999714 | 0.000312264 | 0.999235 |
| rad38         | 6.53590e-05 | 0.999779 | 0.000175105 | 0.999410 |
| rad39         | 4.81375e-05 | 0.999827 | 0.000128966 | 0.999539 |
| rad19anti     | 4.81125e-05 | 0.999876 | 0.000128899 | 0.999668 |
| rad6          | 3.49735e-05 | 0.999911 | 9.36982e-05 | 0.999762 |
| rad35         | 3.45127e-05 | 0.999945 | 9.24638e-05 | 0.999854 |
| PAH3+H        | 2.21308e-05 | 0.999967 | 5.92910e-05 | 0.999913 |
| rad46         | 1.29267e-05 | 0.999980 | 3.46323e-05 | 0.999948 |
| rad60syn      | 4.87477e-06 | 0.999985 | 1.30601e-05 | 0.999961 |
| rad60anti     | 2.81884e-06 | 0.999988 | 7.55201e-06 | 0.999969 |
| rad59         | 2.76987e-06 | 0.999991 | 7.42080e-06 | 0.999976 |
| rad50         | 2.73752e-06 | 0.999993 | 7.33414e-06 | 0.999983 |
| rad19syn      | 1.86264e-06 | 0.999995 | 4.99023e-06 | 0.999988 |
| rad23         | 1.12454e-06 | 0.999996 | 3.01279e-06 | 0.999991 |
| rad54         | 5.79744e-07 | 0.999997 | 1.55320e-06 | 0.999993 |
| PhcycC3H3_A+H | 3.85951e-07 | 0.999997 | 1.03401e-06 | 0.999994 |
| rad37         | 3.73824e-07 | 0.999998 | 1.00152e-06 | 0.999995 |
| rad45         | 3.45049e-07 | 0.999998 | 9.24427e-07 | 0.999996 |
| rad67         | 3.11725e-07 | 0.999998 | 8.35150e-07 | 0.999997 |
| rad51         | 3.06325e-07 | 0.999999 | 8.20683e-07 | 0.999998 |
| rad52         | 1.45035e-07 | 0.999999 | 3.88565e-07 | 0.999998 |
| rad11         | 9.20588e-08 | 0.999999 | 2.46637e-07 | 0.999998 |
| rad7          | 8.41406e-08 | 0.999999 | 2.25423e-07 | 0.999998 |
| rad70         | 8.34246e-08 | 0.999999 | 2.23505e-07 | 0.999999 |
| PAH10+CH3     | 8.32575e-08 | 0.999999 | 2.23057e-07 | 0.999999 |
| PAH1+H        | 8.03898e-08 | 0.999999 | 2.15374e-07 | 0.999999 |
| rad58         | 6.38880e-08 | 0.999999 | 1.71164e-07 | 0.999999 |
| rad20         | 5.30018e-08 | 0.999999 | 1.41998e-07 | 0.999999 |
| rad28         | 4.67675e-08 | 0.999999 | 1.25296e-07 | 1.000000 |
| rad21         | 3.19575e-08 | 0.999999 | 8.56181e-08 | 1.000000 |
| rad36         | 3.14984e-08 | 0.999999 | 8.43879e-08 | 1.000000 |
| rad55         | 2.81856e-08 | 0.999999 | 7.55125e-08 | 1.000000 |
| rad9          | 2.36037e-08 | 0.999999 | 6.32372e-08 | 1.000000 |
| rad2          | 1.91222e-08 | 0.999999 | 5.12308e-08 | 1.000000 |
| rad13         | 1.46226e-08 | 0.999999 | 3.91758e-08 | 1.000000 |
| rad34         | 1.23636e-08 | 0.999999 | 3.31236e-08 | 1.000000 |

|           |             |          |             |          |
|-----------|-------------|----------|-------------|----------|
| rad62     | 1.00595e-08 | 1.000000 | 2.69507e-08 | 1.000000 |
| rad65     | 9.38172e-09 | 1.000000 | 2.51347e-08 | 1.000000 |
| rad22     | 7.66443e-09 | 1.000000 | 2.05339e-08 | 1.000000 |
| rad10     | 6.76002e-09 | 1.000000 | 1.81109e-08 | 1.000000 |
| rad18     | 6.18416e-09 | 1.000000 | 1.65681e-08 | 1.000000 |
| rad26     | 4.92269e-09 | 1.000000 | 1.31885e-08 | 1.000000 |
| rad1      | 4.16654e-09 | 1.000000 | 1.11627e-08 | 1.000000 |
| rad71     | 2.29449e-09 | 1.000000 | 6.14720e-09 | 1.000000 |
| rad43     | 1.93772e-09 | 1.000000 | 5.19139e-09 | 1.000000 |
| rad73     | 1.85877e-09 | 1.000000 | 4.97988e-09 | 1.000000 |
| rad53     | 1.69525e-09 | 1.000000 | 4.54178e-09 | 1.000000 |
| rad56     | 8.11488e-10 | 1.000000 | 2.17407e-09 | 1.000000 |
| rad64     | 6.67489e-10 | 1.000000 | 1.78828e-09 | 1.000000 |
| rad3      | 5.91351e-10 | 1.000000 | 1.58430e-09 | 1.000000 |
| rad4      | 4.50260e-10 | 1.000000 | 1.20630e-09 | 1.000000 |
| rad24     | 3.33375e-10 | 1.000000 | 8.93153e-10 | 1.000000 |
| rad33     | 2.50828e-10 | 1.000000 | 6.71998e-10 | 1.000000 |
| rad42     | 2.28225e-10 | 1.000000 | 6.11441e-10 | 1.000000 |
| rad68syn  | 1.62561e-10 | 1.000000 | 4.35520e-10 | 1.000000 |
| PAH8+H    | 1.58287e-10 | 1.000000 | 4.24070e-10 | 1.000000 |
| rad68anti | 1.08177e-10 | 1.000000 | 2.89820e-10 | 1.000000 |
| rad72     | 7.02570e-11 | 1.000000 | 1.88227e-10 | 1.000000 |
| rad25     | 3.67725e-11 | 1.000000 | 9.85180e-11 | 1.000000 |
| rad41     | 3.03747e-11 | 1.000000 | 8.13775e-11 | 1.000000 |
| rad40syn  | 2.99119e-11 | 1.000000 | 8.01375e-11 | 1.000000 |
| rad61     | 2.80451e-11 | 1.000000 | 7.51363e-11 | 1.000000 |
| rad15     | 1.78682e-11 | 1.000000 | 4.78710e-11 | 1.000000 |
| rad12     | 1.57493e-11 | 1.000000 | 4.21944e-11 | 1.000000 |
| rad40anti | 1.49085e-11 | 1.000000 | 3.99418e-11 | 1.000000 |
| rad14     | 4.97738e-12 | 1.000000 | 1.33350e-11 | 1.000000 |
| rad27     | 3.15776e-12 | 1.000000 | 8.46003e-12 | 1.000000 |
| rad8      | 9.89865e-13 | 1.000000 | 2.65197e-12 | 1.000000 |
| rad31     | 6.67383e-14 | 1.000000 | 1.78800e-13 | 1.000000 |
| rad47     | 2.33727e-15 | 1.000000 | 6.26183e-15 | 1.000000 |
| rad5      | 1.56614e-15 | 1.000000 | 4.19588e-15 | 1.000000 |

1.00000000 Pa, 1300.00000 K

=====

| Rate constant | True (fraction)     | Effective (fraction) |
|---------------|---------------------|----------------------|
| Total         | 1.52810e-14 (1.00 ) | 4.76647e-15 (1.00 )  |

| species       | PYtrue      | Cumul    | PYeffective | Cumul    |
|---------------|-------------|----------|-------------|----------|
| Benzyl+C2H2   | 0.688078    | 0.688078 | 0.000000    | 0.000000 |
| Indene+H      | 0.296927    | 0.985005 | 0.951927    | 0.951927 |
| Ph+Allene     | 0.00550632  | 0.990511 | 0.0176529   | 0.969580 |
| PhCH2CCH+H    | 0.00336297  | 0.993874 | 0.0107814   | 0.980361 |
| PhCHCCH2+H    | 0.00286612  | 0.996740 | 0.00918858  | 0.989550 |
| PhCCH+CH3     | 0.00187081  | 0.998611 | 0.00599768  | 0.995548 |
| Ph+MeAc       | 0.000252859 | 0.998864 | 0.000810649 | 0.996358 |
| PAH7+H        | 0.000251991 | 0.999116 | 0.000807865 | 0.997166 |
| PAH9+H        | 0.000233025 | 0.999349 | 0.000747060 | 0.997913 |
| rad30         | 0.000187146 | 0.999536 | 0.000599978 | 0.998513 |
| rad38         | 9.29594e-05 | 0.999629 | 0.000298021 | 0.998811 |
| PhCCCH3+H     | 8.79560e-05 | 0.999717 | 0.000281981 | 0.999093 |
| rad19anti     | 7.77011e-05 | 0.999795 | 0.000249104 | 0.999342 |
| rad39         | 5.27651e-05 | 0.999848 | 0.000169161 | 0.999511 |
| rad35         | 4.67886e-05 | 0.999894 | 0.000150001 | 0.999661 |
| PAH3+H        | 4.01963e-05 | 0.999935 | 0.000128867 | 0.999790 |
| rad46         | 2.02284e-05 | 0.999955 | 6.48509e-05 | 0.999855 |
| rad6          | 1.46058e-05 | 0.999969 | 4.68251e-05 | 0.999902 |
| rad60syn      | 7.32163e-06 | 0.999977 | 2.34726e-05 | 0.999925 |
| rad50         | 5.40708e-06 | 0.999982 | 1.73347e-05 | 0.999943 |
| rad59         | 4.81796e-06 | 0.999987 | 1.54460e-05 | 0.999958 |
| rad60anti     | 4.29565e-06 | 0.999991 | 1.37716e-05 | 0.999972 |
| rad19syn      | 2.96505e-06 | 0.999994 | 9.50574e-06 | 0.999981 |
| rad54         | 9.75831e-07 | 0.999995 | 3.12844e-06 | 0.999985 |
| rad67         | 7.45531e-07 | 0.999996 | 2.39012e-06 | 0.999987 |
| PhcycC3H3_A+H | 7.42328e-07 | 0.999997 | 2.37985e-06 | 0.999989 |
| rad51         | 6.73504e-07 | 0.999997 | 2.15921e-06 | 0.999992 |
| rad23         | 5.96612e-07 | 0.999998 | 1.91269e-06 | 0.999993 |
| rad37         | 4.67752e-07 | 0.999998 | 1.49958e-06 | 0.999995 |
| rad52         | 3.06833e-07 | 0.999999 | 9.83684e-07 | 0.999996 |
| rad45         | 1.83151e-07 | 0.999999 | 5.87168e-07 | 0.999996 |
| PAH10+CH3     | 1.69057e-07 | 0.999999 | 5.41983e-07 | 0.999997 |
| rad70         | 1.60263e-07 | 0.999999 | 5.13793e-07 | 0.999998 |
| PAH1+H        | 1.55677e-07 | 0.999999 | 4.99090e-07 | 0.999998 |
| rad58         | 1.48997e-07 | 1.000000 | 4.77674e-07 | 0.999999 |
| rad11         | 7.52768e-08 | 1.000000 | 2.41332e-07 | 0.999999 |

|           |             |          |             |          |
|-----------|-------------|----------|-------------|----------|
| rad7      | 7.08881e-08 | 1.000000 | 2.27262e-07 | 0.999999 |
| rad55     | 5.11038e-08 | 1.000000 | 1.63835e-07 | 0.999999 |
| rad20     | 3.19930e-08 | 1.000000 | 1.02567e-07 | 0.999999 |
| rad34     | 2.61095e-08 | 1.000000 | 8.37052e-08 | 0.999999 |
| rad28     | 2.16689e-08 | 1.000000 | 6.94691e-08 | 0.999999 |
| rad65     | 2.08530e-08 | 1.000000 | 6.68532e-08 | 0.999999 |
| rad9      | 1.89469e-08 | 1.000000 | 6.07424e-08 | 1.000000 |
| rad21     | 1.88631e-08 | 1.000000 | 6.04737e-08 | 1.000000 |
| rad36     | 1.69583e-08 | 1.000000 | 5.43672e-08 | 1.000000 |
| rad62     | 1.51509e-08 | 1.000000 | 4.85727e-08 | 1.000000 |
| rad13     | 8.66108e-09 | 1.000000 | 2.77668e-08 | 1.000000 |
| rad18     | 7.46964e-09 | 1.000000 | 2.39471e-08 | 1.000000 |
| rad2      | 6.36338e-09 | 1.000000 | 2.04005e-08 | 1.000000 |
| rad22     | 5.56708e-09 | 1.000000 | 1.78477e-08 | 1.000000 |
| rad10     | 4.16832e-09 | 1.000000 | 1.33633e-08 | 1.000000 |
| rad53     | 4.00330e-09 | 1.000000 | 1.28343e-08 | 1.000000 |
| rad73     | 2.69848e-09 | 1.000000 | 8.65113e-09 | 1.000000 |
| rad71     | 2.59148e-09 | 1.000000 | 8.30810e-09 | 1.000000 |
| rad43     | 2.45069e-09 | 1.000000 | 7.85673e-09 | 1.000000 |
| rad26     | 2.35187e-09 | 1.000000 | 7.53992e-09 | 1.000000 |
| rad56     | 2.20875e-09 | 1.000000 | 7.08111e-09 | 1.000000 |
| rad64     | 1.47782e-09 | 1.000000 | 4.73777e-09 | 1.000000 |
| rad1      | 1.41918e-09 | 1.000000 | 4.54980e-09 | 1.000000 |
| PAH8+H    | 5.11834e-10 | 1.000000 | 1.64090e-09 | 1.000000 |
| rad68syn  | 4.64862e-10 | 1.000000 | 1.49031e-09 | 1.000000 |
| rad42     | 4.22920e-10 | 1.000000 | 1.35585e-09 | 1.000000 |
| rad68anti | 3.08279e-10 | 1.000000 | 9.88319e-10 | 1.000000 |
| rad24     | 2.44007e-10 | 1.000000 | 7.82269e-10 | 1.000000 |
| rad3      | 2.35448e-10 | 1.000000 | 7.54829e-10 | 1.000000 |
| rad4      | 1.81244e-10 | 1.000000 | 5.81054e-10 | 1.000000 |
| rad33     | 1.48603e-10 | 1.000000 | 4.76411e-10 | 1.000000 |
| rad40syn  | 9.27377e-11 | 1.000000 | 2.97310e-10 | 1.000000 |
| rad61     | 6.85763e-11 | 1.000000 | 2.19851e-10 | 1.000000 |
| rad72     | 5.13336e-11 | 1.000000 | 1.64572e-10 | 1.000000 |
| rad41     | 4.62293e-11 | 1.000000 | 1.48208e-10 | 1.000000 |
| rad40anti | 4.62055e-11 | 1.000000 | 1.48131e-10 | 1.000000 |
| rad15     | 3.74022e-11 | 1.000000 | 1.19909e-10 | 1.000000 |
| rad25     | 2.75954e-11 | 1.000000 | 8.84689e-11 | 1.000000 |
| rad12     | 1.79648e-11 | 1.000000 | 5.75937e-11 | 1.000000 |
| rad14     | 2.75386e-12 | 1.000000 | 8.82869e-12 | 1.000000 |
| rad8      | 1.89670e-12 | 1.000000 | 6.08068e-12 | 1.000000 |
| rad27     | 1.33132e-12 | 1.000000 | 4.26811e-12 | 1.000000 |
| rad31     | 4.11181e-14 | 1.000000 | 1.31822e-13 | 1.000000 |
| rad47     | 4.91446e-15 | 1.000000 | 1.57554e-14 | 1.000000 |
| rad5      | 2.58451e-15 | 1.000000 | 8.28577e-15 | 1.000000 |

1.00000000 Pa, 1400.00000 K

=====

| Rate constant | True (fraction)     | Effective (fraction) |
|---------------|---------------------|----------------------|
| Total         | 2.46691e-14 (1.00 ) | 6.50158e-15 (1.00 )  |

| species     | PYtrue      | Cumul    | PYeffective | Cumul    |
|-------------|-------------|----------|-------------|----------|
| Benzyl+C2H2 | 0.736449    | 0.736449 | 0.00000     | 0.00000  |
| Indene+H    | 0.245650    | 0.982099 | 0.932077    | 0.932077 |
| Ph+Allene   | 0.00661053  | 0.988710 | 0.0250825   | 0.957160 |
| PhCH2CCH+H  | 0.00478190  | 0.993491 | 0.0181441   | 0.975304 |
| PhCHCCH2+H  | 0.00325606  | 0.996747 | 0.0123546   | 0.987658 |
| PhCCH+CH3   | 0.00165012  | 0.998398 | 0.00626111  | 0.993919 |
| PAH9+H      | 0.000308907 | 0.998707 | 0.00117210  | 0.995091 |
| PAH7+H      | 0.000272736 | 0.998979 | 0.00103485  | 0.996126 |
| Ph+MeAc     | 0.000228357 | 0.999208 | 0.000866460 | 0.996993 |
| rad30       | 0.000217656 | 0.999425 | 0.000825858 | 0.997819 |
| rad38       | 0.000125649 | 0.999551 | 0.000476753 | 0.998295 |
| rad19anti   | 0.000116520 | 0.999667 | 0.000442117 | 0.998737 |
| PAH3+H      | 6.70004e-05 | 0.999734 | 0.000254222 | 0.998992 |
| PhCCCH3+H   | 6.52424e-05 | 0.999800 | 0.000247551 | 0.999239 |
| rad35       | 6.07741e-05 | 0.999860 | 0.000230597 | 0.999470 |
| rad39       | 5.49620e-05 | 0.999915 | 0.000208544 | 0.999678 |
| rad46       | 2.97620e-05 | 0.999945 | 0.000112927 | 0.999791 |
| rad60syn    | 1.03333e-05 | 0.999956 | 3.92080e-05 | 0.999830 |
| rad50       | 9.97868e-06 | 0.999965 | 3.78624e-05 | 0.999868 |
| rad59       | 7.71576e-06 | 0.999973 | 2.92761e-05 | 0.999898 |
| rad6        | 7.42636e-06 | 0.999981 | 2.81781e-05 | 0.999926 |
| rad60anti   | 6.13938e-06 | 0.999987 | 2.32948e-05 | 0.999949 |
| rad19syn    | 4.26815e-06 | 0.999991 | 1.61948e-05 | 0.999965 |
| rad67       | 1.57853e-06 | 0.999993 | 5.98946e-06 | 0.999971 |
| rad54       | 1.47065e-06 | 0.999994 | 5.58014e-06 | 0.999977 |
| rad51       | 1.44926e-06 | 0.999996 | 5.49895e-06 | 0.999982 |

|               |             |          |             |          |
|---------------|-------------|----------|-------------|----------|
| PhcycC3H3_A+H | 1.26114e-06 | 0.999997 | 4.78519e-06 | 0.999987 |
| rad37         | 6.13835e-07 | 0.999997 | 2.32909e-06 | 0.999989 |
| rad52         | 6.13668e-07 | 0.999998 | 2.32846e-06 | 0.999992 |
| rad23         | 3.43916e-07 | 0.999998 | 1.30493e-06 | 0.999993 |
| PAH10+CH3     | 3.41472e-07 | 0.999999 | 1.29566e-06 | 0.999994 |
| rad58         | 3.07527e-07 | 0.999999 | 1.16686e-06 | 0.999996 |
| rad70         | 2.75723e-07 | 0.999999 | 1.04618e-06 | 0.999997 |
| PAH1+H        | 2.73216e-07 | 1.000000 | 1.03667e-06 | 0.999998 |
| rad45         | 1.00025e-07 | 1.000000 | 3.79529e-07 | 0.999998 |
| rad55         | 8.21495e-08 | 1.000000 | 3.11702e-07 | 0.999998 |
| rad7          | 5.10263e-08 | 1.000000 | 1.93611e-07 | 0.999999 |
| rad11         | 4.90365e-08 | 1.000000 | 1.86061e-07 | 0.999999 |
| rad34         | 4.89417e-08 | 1.000000 | 1.85701e-07 | 0.999999 |
| rad65         | 4.45470e-08 | 1.000000 | 1.69026e-07 | 0.999999 |
| rad62         | 2.07738e-08 | 1.000000 | 7.88226e-08 | 0.999999 |
| rad20         | 1.95794e-08 | 1.000000 | 7.42908e-08 | 0.999999 |
| rad9          | 1.48466e-08 | 1.000000 | 5.63330e-08 | 0.999999 |
| rad28         | 1.19167e-08 | 1.000000 | 4.52159e-08 | 0.999999 |
| rad21         | 1.14167e-08 | 1.000000 | 4.33188e-08 | 0.999999 |
| rad36         | 9.38507e-09 | 1.000000 | 3.56101e-08 | 0.999999 |
| rad53         | 8.12778e-09 | 1.000000 | 3.08395e-08 | 0.999999 |
| rad73         | 7.04058e-09 | 1.000000 | 2.67143e-08 | 0.999999 |
| rad71         | 6.42459e-09 | 1.000000 | 2.43770e-08 | 1.000000 |
| rad18         | 6.20897e-09 | 1.000000 | 2.35589e-08 | 1.000000 |
| rad22         | 5.19342e-09 | 1.000000 | 1.97055e-08 | 1.000000 |
| rad56         | 5.07945e-09 | 1.000000 | 1.92731e-08 | 1.000000 |
| rad13         | 4.62241e-09 | 1.000000 | 1.75389e-08 | 1.000000 |
| rad43         | 3.06711e-09 | 1.000000 | 1.16376e-08 | 1.000000 |
| rad64         | 2.95996e-09 | 1.000000 | 1.12311e-08 | 1.000000 |
| rad2          | 2.14784e-09 | 1.000000 | 8.14961e-09 | 1.000000 |
| rad10         | 1.95779e-09 | 1.000000 | 7.42851e-09 | 1.000000 |
| PAH8+H        | 1.56608e-09 | 1.000000 | 5.94223e-09 | 1.000000 |
| rad26         | 1.19075e-09 | 1.000000 | 4.51809e-09 | 1.000000 |
| rad68syn      | 1.16050e-09 | 1.000000 | 4.40334e-09 | 1.000000 |
| rad68anti     | 7.66771e-10 | 1.000000 | 2.90938e-09 | 1.000000 |
| rad42         | 6.99876e-10 | 1.000000 | 2.65556e-09 | 1.000000 |
| rad1          | 4.86563e-10 | 1.000000 | 1.84618e-09 | 1.000000 |
| rad40syn      | 2.61585e-10 | 1.000000 | 9.92540e-10 | 1.000000 |
| rad61         | 1.97841e-10 | 1.000000 | 7.50672e-10 | 1.000000 |
| rad24         | 1.80057e-10 | 1.000000 | 6.83195e-10 | 1.000000 |
| rad40anti     | 1.34639e-10 | 1.000000 | 5.10864e-10 | 1.000000 |
| rad3          | 9.63463e-11 | 1.000000 | 3.65569e-10 | 1.000000 |
| rad72         | 9.39939e-11 | 1.000000 | 3.56644e-10 | 1.000000 |
| rad33         | 8.78622e-11 | 1.000000 | 3.33378e-10 | 1.000000 |
| rad15         | 8.16339e-11 | 1.000000 | 3.09746e-10 | 1.000000 |
| rad41         | 7.77671e-11 | 1.000000 | 2.95074e-10 | 1.000000 |
| rad4          | 7.48242e-11 | 1.000000 | 2.83908e-10 | 1.000000 |
| rad12         | 1.93333e-11 | 1.000000 | 7.33569e-11 | 1.000000 |
| rad25         | 1.92056e-11 | 1.000000 | 7.28726e-11 | 1.000000 |
| rad8          | 2.79592e-12 | 1.000000 | 1.06086e-11 | 1.000000 |
| rad14         | 1.43606e-12 | 1.000000 | 5.44887e-12 | 1.000000 |
| rad27         | 5.45313e-13 | 1.000000 | 2.06910e-12 | 1.000000 |
| rad31         | 2.55187e-14 | 1.000000 | 9.68266e-14 | 1.000000 |
| rad47         | 1.05426e-14 | 1.000000 | 4.00020e-14 | 1.000000 |
| rad5          | 4.40113e-15 | 1.000000 | 1.66994e-14 | 1.000000 |

1.00000000 Pa, 1500.00000 K

=====

| Rate constant | True (fraction)     | Effective (fraction) |
|---------------|---------------------|----------------------|
| Total         | 3.76908e-14 (1.00 ) | 8.51564e-15 (1.00 )  |

| species     | PYtrue      | Cumul    | PYeffective | Cumul    |
|-------------|-------------|----------|-------------|----------|
| Benzyl+C2H2 | 0.774066    | 0.774066 | 0.00000     | 0.00000  |
| Indene+H    | 0.205059    | 0.979125 | 0.907606    | 0.907606 |
| Ph+Allene   | 0.00752203  | 0.986647 | 0.0332930   | 0.940899 |
| PhCH2CCH+H  | 0.00646774  | 0.993115 | 0.0286267   | 0.969526 |
| PhCHCCH2+H  | 0.00361223  | 0.996727 | 0.0159880   | 0.985514 |
| PhCCH+CH3   | 0.00141344  | 0.998140 | 0.00625599  | 0.991770 |
| PAH9+H      | 0.000393227 | 0.998534 | 0.00174045  | 0.993510 |
| PAH7+H      | 0.000286615 | 0.998820 | 0.00126858  | 0.994779 |
| rad30       | 0.000246477 | 0.999067 | 0.00109093  | 0.995870 |
| Ph+MeAc     | 0.000203569 | 0.999270 | 0.000901008 | 0.996771 |
| rad19anti   | 0.000164241 | 0.999435 | 0.000726942 | 0.997498 |
| rad38       | 0.000162794 | 0.999597 | 0.000720536 | 0.998218 |
| PAH3+H      | 0.000104220 | 0.999702 | 0.000461284 | 0.998679 |
| rad35       | 7.62751e-05 | 0.999778 | 0.000337599 | 0.999017 |
| rad39       | 5.58736e-05 | 0.999834 | 0.000247300 | 0.999264 |
| PhCCCH3+H   | 4.88665e-05 | 0.999883 | 0.000216286 | 0.999481 |

|               |             |          |             |          |
|---------------|-------------|----------|-------------|----------|
| rad46         | 4.15457e-05 | 0.999924 | 0.000183884 | 0.999664 |
| rad50         | 1.71015e-05 | 0.999941 | 7.56925e-05 | 0.999740 |
| rad60syn      | 1.38816e-05 | 0.999955 | 6.14411e-05 | 0.999802 |
| rad59         | 1.15664e-05 | 0.999967 | 5.11937e-05 | 0.999853 |
| rad60anti     | 8.33865e-06 | 0.999975 | 3.69074e-05 | 0.999890 |
| rad19syn      | 5.69206e-06 | 0.999981 | 2.51935e-05 | 0.999915 |
| rad6          | 4.39699e-06 | 0.999985 | 1.94614e-05 | 0.999934 |
| rad67         | 3.01451e-06 | 0.999988 | 1.33424e-05 | 0.999948 |
| rad51         | 2.87378e-06 | 0.999991 | 1.27195e-05 | 0.999960 |
| rad54         | 2.03455e-06 | 0.999993 | 9.00506e-06 | 0.999969 |
| PhcycC3H3_A+H | 1.94512e-06 | 0.999995 | 8.60923e-06 | 0.999978 |
| rad52         | 1.13196e-06 | 0.999996 | 5.01015e-06 | 0.999983 |
| rad37         | 8.38651e-07 | 0.999997 | 3.71193e-06 | 0.999987 |
| PAH10+CH3     | 6.64243e-07 | 0.999998 | 2.93998e-06 | 0.999990 |
| rad58         | 5.75083e-07 | 0.999998 | 2.54535e-06 | 0.999992 |
| PAH1+H        | 4.45102e-07 | 0.999999 | 1.97005e-06 | 0.999994 |
| rad70         | 4.35977e-07 | 0.999999 | 1.92966e-06 | 0.999996 |
| rad23         | 2.15955e-07 | 0.999999 | 9.55830e-07 | 0.999997 |
| rad55         | 1.20273e-07 | 0.999999 | 5.32338e-07 | 0.999998 |
| rad65         | 8.73180e-08 | 1.000000 | 3.86475e-07 | 0.999998 |
| rad34         | 8.36110e-08 | 1.000000 | 3.70068e-07 | 0.999998 |
| rad45         | 5.62869e-08 | 1.000000 | 2.49129e-07 | 0.999999 |
| rad7          | 3.02759e-08 | 1.000000 | 1.34003e-07 | 0.999999 |
| rad11         | 2.80914e-08 | 1.000000 | 1.24335e-07 | 0.999999 |
| rad62         | 2.66014e-08 | 1.000000 | 1.17740e-07 | 0.999999 |
| rad73         | 1.93372e-08 | 1.000000 | 8.55877e-08 | 0.999999 |
| rad71         | 1.89511e-08 | 1.000000 | 8.38787e-08 | 0.999999 |
| rad53         | 1.46484e-08 | 1.000000 | 6.48350e-08 | 0.999999 |
| rad20         | 1.23489e-08 | 1.000000 | 5.46572e-08 | 0.999999 |
| rad9          | 1.14418e-08 | 1.000000 | 5.06422e-08 | 0.999999 |
| rad56         | 1.02108e-08 | 1.000000 | 4.51939e-08 | 0.999999 |
| rad28         | 7.56294e-09 | 1.000000 | 3.34741e-08 | 0.999999 |
| rad21         | 7.13245e-09 | 1.000000 | 3.15687e-08 | 0.999999 |
| rad22         | 6.09836e-09 | 1.000000 | 2.69917e-08 | 1.000000 |
| rad64         | 5.42363e-09 | 1.000000 | 2.40054e-08 | 1.000000 |
| rad36         | 5.34853e-09 | 1.000000 | 2.36730e-08 | 1.000000 |
| rad18         | 4.21445e-09 | 1.000000 | 1.86534e-08 | 1.000000 |
| PAH8+H        | 4.18591e-09 | 1.000000 | 1.85271e-08 | 1.000000 |
| rad43         | 3.93443e-09 | 1.000000 | 1.74141e-08 | 1.000000 |
| rad68syn      | 2.56166e-09 | 1.000000 | 1.13381e-08 | 1.000000 |
| rad13         | 2.43621e-09 | 1.000000 | 1.07828e-08 | 1.000000 |
| rad68anti     | 1.68688e-09 | 1.000000 | 7.46624e-09 | 1.000000 |
| rad42         | 1.06334e-09 | 1.000000 | 4.70642e-09 | 1.000000 |
| rad10         | 7.57652e-10 | 1.000000 | 3.35342e-09 | 1.000000 |
| rad2          | 7.40269e-10 | 1.000000 | 3.27648e-09 | 1.000000 |
| rad40syn      | 6.47395e-10 | 1.000000 | 2.86541e-09 | 1.000000 |
| rad26         | 6.01566e-10 | 1.000000 | 2.66257e-09 | 1.000000 |
| rad61         | 5.28708e-10 | 1.000000 | 2.34010e-09 | 1.000000 |
| rad40anti     | 3.44284e-10 | 1.000000 | 1.52382e-09 | 1.000000 |
| rad72         | 3.08137e-10 | 1.000000 | 1.36384e-09 | 1.000000 |
| rad1          | 1.69770e-10 | 1.000000 | 7.51412e-10 | 1.000000 |
| rad41         | 1.35716e-10 | 1.000000 | 6.00688e-10 | 1.000000 |
| rad24         | 1.34241e-10 | 1.000000 | 5.94160e-10 | 1.000000 |
| rad15         | 1.30579e-10 | 1.000000 | 5.77953e-10 | 1.000000 |
| rad33         | 5.24268e-11 | 1.000000 | 2.32045e-10 | 1.000000 |
| rad3          | 4.07068e-11 | 1.000000 | 1.80171e-10 | 1.000000 |
| rad4          | 3.18590e-11 | 1.000000 | 1.41010e-10 | 1.000000 |
| rad12         | 1.99764e-11 | 1.000000 | 8.84171e-11 | 1.000000 |
| rad25         | 1.32600e-11 | 1.000000 | 5.86898e-11 | 1.000000 |
| rad8          | 3.57887e-12 | 1.000000 | 1.58403e-11 | 1.000000 |
| rad14         | 7.66714e-13 | 1.000000 | 3.39353e-12 | 1.000000 |
| rad27         | 2.33283e-13 | 1.000000 | 1.03252e-12 | 1.000000 |
| rad47         | 2.09301e-14 | 1.000000 | 9.26382e-14 | 1.000000 |
| rad31         | 1.60402e-14 | 1.000000 | 7.09949e-14 | 1.000000 |
| rad5          | 6.85625e-15 | 1.000000 | 3.03462e-14 | 1.000000 |

1.00000000 Pa, 1750.00000 K

=====  
Rate constant | True (fraction) | Effective (fraction)  
-----  
Total | 9.18604e-14 (1.00) | 1.49146e-14 (1.00)

| species     | PYtrue      | Cumul    | PYeffective | Cumul    |
|-------------|-------------|----------|-------------|----------|
| Benzyl+C2H2 | 0.837639    | 0.837639 | 0.00000     | 0.00000  |
| Indene+H    | 0.133061    | 0.970700 | 0.819542    | 0.819542 |
| PhCH2CCH+H  | 0.0118058   | 0.982506 | 0.0727137   | 0.892256 |
| Ph+Allene   | 0.00950191  | 0.992008 | 0.0585234   | 0.950779 |
| PhCHCCH2+H  | 0.00446805  | 0.996476 | 0.0275193   | 0.978298 |
| PhCCH+CH3   | 0.000861381 | 0.997337 | 0.00530535  | 0.983604 |

|               |             |          |             |          |
|---------------|-------------|----------|-------------|----------|
| PAH9+H        | 0.000556755 | 0.997894 | 0.00342912  | 0.987033 |
| rad30         | 0.000325001 | 0.998219 | 0.00200172  | 0.989035 |
| rad19anti     | 0.000321501 | 0.998540 | 0.00198016  | 0.991015 |
| rad38         | 0.000287195 | 0.998828 | 0.00176887  | 0.992784 |
| PAH7+H        | 0.000286426 | 0.999114 | 0.00176413  | 0.994548 |
| PAH3+H        | 0.000275301 | 0.999389 | 0.00169561  | 0.996243 |
| Ph+MeAc       | 0.000167676 | 0.999557 | 0.00103274  | 0.997276 |
| rad35         | 0.000110078 | 0.999667 | 0.000677987 | 0.997954 |
| rad46         | 7.53306e-05 | 0.999742 | 0.000463971 | 0.998418 |
| rad39         | 5.83405e-05 | 0.999801 | 0.000359326 | 0.998777 |
| rad50         | 4.37807e-05 | 0.999845 | 0.000269650 | 0.999047 |
| PhCCCH3+H     | 3.20258e-05 | 0.999877 | 0.000197251 | 0.999244 |
| rad59         | 2.75341e-05 | 0.999904 | 0.000169586 | 0.999414 |
| rad60syn      | 2.64500e-05 | 0.999931 | 0.000162909 | 0.999577 |
| rad60anti     | 1.77453e-05 | 0.999948 | 0.000109295 | 0.999686 |
| rad51         | 1.07270e-05 | 0.999959 | 6.60688e-05 | 0.999752 |
| rad67         | 1.00277e-05 | 0.999969 | 6.17619e-05 | 0.999814 |
| rad19syn      | 8.13520e-06 | 0.999977 | 5.01057e-05 | 0.999864 |
| PhcycC3H3_A+H | 4.33940e-06 | 0.999982 | 2.67269e-05 | 0.999891 |
| rad52         | 3.64252e-06 | 0.999985 | 2.24348e-05 | 0.999913 |
| rad54         | 3.10713e-06 | 0.999988 | 1.91372e-05 | 0.999932 |
| PAH10+CH3     | 2.60748e-06 | 0.999991 | 1.60598e-05 | 0.999948 |
| rad58         | 2.01835e-06 | 0.999993 | 1.24313e-05 | 0.999961 |
| rad37         | 1.70815e-06 | 0.999995 | 1.05207e-05 | 0.999971 |
| PAH1+H        | 1.11295e-06 | 0.999996 | 6.85482e-06 | 0.999978 |
| rad70         | 1.04928e-06 | 0.999997 | 6.46264e-06 | 0.999985 |
| rad6          | 1.01983e-06 | 0.999998 | 6.28125e-06 | 0.999991 |
| rad65         | 3.09926e-07 | 0.999998 | 1.90887e-06 | 0.999993 |
| rad71         | 2.72909e-07 | 0.999998 | 1.68088e-06 | 0.999995 |
| rad34         | 2.42357e-07 | 0.999999 | 1.49271e-06 | 0.999996 |
| rad55         | 2.29235e-07 | 0.999999 | 1.41189e-06 | 0.999997 |
| rad73         | 1.82167e-07 | 0.999999 | 1.12199e-06 | 0.999999 |
| rad23         | 6.09193e-08 | 0.999999 | 3.75209e-07 | 0.999999 |
| rad53         | 4.45753e-08 | 0.999999 | 2.74545e-07 | 0.999999 |
| rad62         | 4.01834e-08 | 0.999999 | 2.47494e-07 | 0.999999 |
| rad56         | 3.59838e-08 | 0.999999 | 2.21629e-07 | 1.000000 |
| PAH8+H        | 2.55604e-08 | 0.999999 | 1.57430e-07 | 1.000000 |
| rad72         | 2.10548e-08 | 0.999999 | 1.29679e-07 | 1.000000 |
| rad64         | 1.94901e-08 | 0.999999 | 1.20042e-07 | 1.000000 |
| rad68syn      | 1.21325e-08 | 0.999999 | 7.47256e-08 | 1.000000 |
| rad43         | 8.61606e-09 | 0.999999 | 5.30674e-08 | 1.000000 |
| rad68anti     | 7.86695e-09 | 0.999999 | 4.84535e-08 | 1.000000 |
| rad22         | 6.55315e-09 | 0.999999 | 4.03616e-08 | 1.000000 |
| rad45         | 5.12211e-09 | 0.999999 | 3.15477e-08 | 1.000000 |
| rad40syn      | 3.60496e-09 | 0.999999 | 2.22034e-08 | 1.000000 |
| rad61         | 3.54535e-09 | 0.999999 | 2.18363e-08 | 1.000000 |
| rad7          | 2.77813e-09 | 0.999999 | 1.71109e-08 | 1.000000 |
| rad11         | 2.52866e-09 | 0.999999 | 1.55743e-08 | 1.000000 |
| rad42         | 2.41222e-09 | 0.999999 | 1.48572e-08 | 1.000000 |
| rad28         | 2.29526e-09 | 0.999999 | 1.41368e-08 | 1.000000 |
| rad40anti     | 2.16280e-09 | 0.999999 | 1.33209e-08 | 1.000000 |
| rad9          | 1.38906e-09 | 0.999999 | 8.55540e-09 | 1.000000 |
| rad20         | 1.26465e-09 | 0.999999 | 7.78915e-09 | 1.000000 |
| rad36         | 8.64190e-10 | 0.999999 | 5.32265e-09 | 1.000000 |
| rad21         | 6.66137e-10 | 0.999999 | 4.10282e-09 | 1.000000 |
| rad18         | 5.84594e-10 | 0.999999 | 3.60059e-09 | 1.000000 |
| rad41         | 5.66491e-10 | 0.999999 | 3.48909e-09 | 1.000000 |
| rad13         | 1.40450e-10 | 0.999999 | 8.65048e-10 | 1.000000 |
| rad15         | 6.85507e-11 | 0.999999 | 4.22212e-10 | 1.000000 |
| rad26         | 5.72083e-11 | 0.999999 | 3.52353e-10 | 1.000000 |
| rad10         | 2.72843e-11 | 0.999999 | 1.68047e-10 | 1.000000 |
| rad24         | 1.70129e-11 | 0.999999 | 1.04785e-10 | 1.000000 |
| rad2          | 1.25579e-11 | 0.999999 | 7.73455e-11 | 1.000000 |
| rad12         | 4.26939e-12 | 0.999999 | 2.62957e-11 | 1.000000 |
| rad33         | 3.32288e-12 | 0.999999 | 2.04660e-11 | 1.000000 |
| rad1          | 3.09461e-12 | 0.999999 | 1.90601e-11 | 1.000000 |
| rad8          | 1.74125e-12 | 0.999999 | 1.07246e-11 | 1.000000 |
| rad25         | 1.29073e-12 | 0.999999 | 7.94977e-12 | 1.000000 |
| rad3          | 8.68650e-13 | 0.999999 | 5.35012e-12 | 1.000000 |
| rad4          | 5.49800e-13 | 0.999999 | 3.38629e-12 | 1.000000 |
| rad14         | 5.22408e-14 | 0.999999 | 3.21758e-13 | 1.000000 |
| rad47         | 2.48176e-14 | 0.999999 | 1.52855e-13 | 1.000000 |
| rad5          | 1.45838e-14 | 0.999999 | 8.98237e-14 | 1.000000 |
| rad27         | 9.08862e-15 | 0.999999 | 5.59779e-14 | 1.000000 |

1.00000000 Pa, 2000.00000 K

| Rate constant | True (fraction)     | Effective (fraction) |
|---------------|---------------------|----------------------|
| Total         | 1.85359e-13 (1.00 ) | 2.47588e-14 (1.00 )  |



| species       | PYtrue      | Cumul    | PYeffective | Cumul    |
|---------------|-------------|----------|-------------|----------|
| Benzyl+C2H2   | 0.866428    | 0.866428 | 0.00000     | 0.00000  |
| Indene+H      | 0.0943880   | 0.960816 | 0.706645    | 0.706645 |
| PhCH2CCH+H    | 0.0189358   | 0.979752 | 0.141765    | 0.848410 |
| Ph+Allene     | 0.0101091   | 0.989861 | 0.0756829   | 0.924093 |
| PhCHCCH2+H    | 0.00579099  | 0.995652 | 0.0433548   | 0.967448 |
| PAH9+H        | 0.000765290 | 0.996417 | 0.00572942  | 0.973177 |
| PhCCH+CH3     | 0.000550307 | 0.996967 | 0.00411993  | 0.977297 |
| PAH3+H        | 0.000526248 | 0.997494 | 0.00393981  | 0.981237 |
| rad19anti     | 0.000486604 | 0.997980 | 0.00364301  | 0.984880 |
| rad38         | 0.000411566 | 0.998392 | 0.00308123  | 0.987961 |
| rad30         | 0.000378289 | 0.998770 | 0.00283210  | 0.990793 |
| PAH7+H        | 0.000350413 | 0.999121 | 0.00262340  | 0.993417 |
| Ph+MeAc       | 0.000164745 | 0.999285 | 0.00123338  | 0.994650 |
| rad35         | 0.000155519 | 0.999441 | 0.00116431  | 0.995814 |
| rad46         | 0.000120122 | 0.999561 | 0.000899308 | 0.996714 |
| rad50         | 9.58696e-05 | 0.999657 | 0.000717737 | 0.997431 |
| rad39         | 7.87372e-05 | 0.999736 | 0.000589474 | 0.998021 |
| rad59         | 4.92027e-05 | 0.999785 | 0.000368361 | 0.998389 |
| rad60syn      | 4.01110e-05 | 0.999825 | 0.000300295 | 0.998689 |
| PhCCCH3+H     | 3.61278e-05 | 0.999861 | 0.000270474 | 0.998960 |
| rad51         | 2.93109e-05 | 0.999890 | 0.000219439 | 0.999179 |
| rad60anti     | 2.75041e-05 | 0.999918 | 0.000205912 | 0.999385 |
| rad67         | 2.43951e-05 | 0.999942 | 0.000182636 | 0.999568 |
| rad19syn      | 1.17121e-05 | 0.999954 | 8.76835e-05 | 0.999656 |
| rad52         | 8.85168e-06 | 0.999963 | 6.62690e-05 | 0.999722 |
| PAH10+CH3     | 7.72931e-06 | 0.999971 | 5.78663e-05 | 0.999780 |
| PhcycC3H3_A+H | 7.45246e-06 | 0.999978 | 5.57936e-05 | 0.999836 |
| rad58         | 5.03696e-06 | 0.999983 | 3.77097e-05 | 0.999873 |
| rad54         | 4.34844e-06 | 0.999987 | 3.25550e-05 | 0.999906 |
| rad37         | 3.43703e-06 | 0.999991 | 2.57317e-05 | 0.999932 |
| PAH1+H        | 2.75185e-06 | 0.999994 | 2.06020e-05 | 0.999952 |
| rad70         | 2.09382e-06 | 0.999996 | 1.56756e-05 | 0.999968 |
| rad71         | 1.09785e-06 | 0.999997 | 8.21914e-06 | 0.999976 |
| rad65         | 8.20337e-07 | 0.999998 | 6.14154e-06 | 0.999982 |
| rad73         | 7.52797e-07 | 0.999998 | 5.63589e-06 | 0.999988 |
| rad34         | 5.52448e-07 | 0.999999 | 4.13596e-06 | 0.999992 |
| rad55         | 3.53474e-07 | 0.999999 | 2.64632e-06 | 0.999995 |
| PAH8+H        | 1.14933e-07 | 0.999999 | 8.60459e-07 | 0.999995 |
| rad6          | 1.08790e-07 | 0.999999 | 8.14467e-07 | 0.999996 |
| rad53         | 9.73893e-08 | 1.000000 | 7.29115e-07 | 0.999997 |
| rad56         | 9.23615e-08 | 1.000000 | 6.91473e-07 | 0.999998 |
| rad62         | 6.01127e-08 | 1.000000 | 4.50040e-07 | 0.999998 |
| rad64         | 5.58714e-08 | 1.000000 | 4.18287e-07 | 0.999999 |
| rad72         | 4.83489e-08 | 1.000000 | 3.61969e-07 | 0.999999 |
| rad68syn      | 4.11608e-08 | 1.000000 | 3.08155e-07 | 0.999999 |
| rad68anti     | 2.65558e-08 | 1.000000 | 1.98813e-07 | 0.999999 |
| rad23         | 2.27837e-08 | 1.000000 | 1.70573e-07 | 1.000000 |
| rad43         | 2.20294e-08 | 1.000000 | 1.64925e-07 | 1.000000 |
| rad61         | 1.54329e-08 | 1.000000 | 1.15540e-07 | 1.000000 |
| rad40syn      | 1.44360e-08 | 1.000000 | 1.08076e-07 | 1.000000 |
| rad40anti     | 9.10594e-09 | 1.000000 | 6.81725e-08 | 1.000000 |
| rad42         | 4.94995e-09 | 1.000000 | 3.70583e-08 | 1.000000 |
| rad41         | 1.99437e-09 | 1.000000 | 1.49311e-08 | 1.000000 |
| rad45         | 1.70099e-09 | 1.000000 | 1.27347e-08 | 1.000000 |
| rad22         | 1.63560e-09 | 1.000000 | 1.22451e-08 | 1.000000 |
| rad9          | 7.06076e-10 | 1.000000 | 5.28611e-09 | 1.000000 |
| rad11         | 5.42080e-10 | 1.000000 | 4.05834e-09 | 1.000000 |
| rad20         | 5.30236e-10 | 1.000000 | 3.96967e-09 | 1.000000 |
| rad7          | 4.27010e-10 | 1.000000 | 3.19685e-09 | 1.000000 |
| rad28         | 3.66843e-10 | 1.000000 | 2.74641e-09 | 1.000000 |
| rad36         | 2.95164e-10 | 1.000000 | 2.20978e-09 | 1.000000 |
| rad21         | 2.72655e-10 | 1.000000 | 2.04126e-09 | 1.000000 |
| rad18         | 1.63172e-10 | 1.000000 | 1.22160e-09 | 1.000000 |
| rad15         | 3.66847e-11 | 1.000000 | 2.74643e-10 | 1.000000 |
| rad13         | 3.15291e-11 | 1.000000 | 2.36046e-10 | 1.000000 |
| rad24         | 9.49350e-12 | 1.000000 | 7.10741e-11 | 1.000000 |
| rad26         | 7.07587e-12 | 1.000000 | 5.29742e-11 | 1.000000 |
| rad12         | 3.72966e-12 | 1.000000 | 2.79225e-11 | 1.000000 |
| rad10         | 2.60383e-12 | 1.000000 | 1.94939e-11 | 1.000000 |
| rad8          | 2.00230e-12 | 1.000000 | 1.49904e-11 | 1.000000 |
| rad2          | 1.16494e-12 | 1.000000 | 8.72147e-12 | 1.000000 |
| rad33         | 1.02722e-12 | 1.000000 | 7.69037e-12 | 1.000000 |
| rad25         | 5.51648e-13 | 1.000000 | 4.12997e-12 | 1.000000 |
| rad1          | 3.01594e-13 | 1.000000 | 2.25791e-12 | 1.000000 |
| rad3          | 1.49065e-13 | 1.000000 | 1.11599e-12 | 1.000000 |
| rad4          | 9.50607e-14 | 1.000000 | 7.11682e-13 | 1.000000 |
| rad47         | 6.73777e-14 | 1.000000 | 5.04430e-13 | 1.000000 |

|       |             |          |             |         |
|-------|-------------|----------|-------------|---------|
| rad5  | 1.97602e-14 | 1.000000 | 1.47937e-13 | 1.00000 |
| rad14 | 1.44294e-14 | 1.000000 | 1.08028e-13 | 1.00000 |
| rad27 | 2.37501e-15 | 1.000000 | 1.77807e-14 | 1.00000 |

1.00000000 Pa, 2250.00000 K

| Rate constant | True (fraction)     | Effective (fraction) |
|---------------|---------------------|----------------------|
| Total         | 3.29136e-13 (1.00 ) | 4.00875e-14 (1.00 )  |

| species       | PYtrue      | Cumul    | PYeffective | Cumul    |
|---------------|-------------|----------|-------------|----------|
| Benzyl+C2H2   | 0.878204    | 0.878204 | 0.00000     | 0.00000  |
| Indene+H      | 0.0703001   | 0.948504 | 0.577194    | 0.577194 |
| PhCH2CCH+H    | 0.0277459   | 0.976250 | 0.227806    | 0.805000 |
| Ph+Allene     | 0.0105974   | 0.986847 | 0.0870092   | 0.892009 |
| PhCHCCH2+H    | 0.00765657  | 0.994504 | 0.0628636   | 0.954873 |
| PAH9+H        | 0.000941872 | 0.995446 | 0.00773317  | 0.962606 |
| PAH3+H        | 0.000857237 | 0.996303 | 0.00703828  | 0.969644 |
| rad19anti     | 0.000629227 | 0.996932 | 0.00516622  | 0.974810 |
| rad38         | 0.000525532 | 0.997458 | 0.00431484  | 0.979125 |
| PAH7+H        | 0.000454511 | 0.997912 | 0.00373172  | 0.982857 |
| rad30         | 0.000417263 | 0.998330 | 0.00342590  | 0.986283 |
| PhCCH+CH3     | 0.000383689 | 0.998713 | 0.00315025  | 0.989433 |
| rad35         | 0.000200866 | 0.998914 | 0.00164920  | 0.991082 |
| Ph+MeAc       | 0.000197882 | 0.999112 | 0.00162469  | 0.992707 |
| rad50         | 0.000170957 | 0.999283 | 0.00140363  | 0.994111 |
| rad46         | 0.000166545 | 0.999450 | 0.00136741  | 0.995478 |
| rad39         | 0.000118819 | 0.999568 | 0.000975555 | 0.996454 |
| rad59         | 7.57692e-05 | 0.999644 | 0.000622097 | 0.997076 |
| rad51         | 6.22822e-05 | 0.999706 | 0.000511363 | 0.997587 |
| rad60syn      | 5.44510e-05 | 0.999761 | 0.000447066 | 0.998034 |
| PhCCCH3+H     | 5.15898e-05 | 0.999812 | 0.000423574 | 0.998458 |
| rad67         | 4.61783e-05 | 0.999859 | 0.000379144 | 0.998837 |
| rad60anti     | 3.79865e-05 | 0.999897 | 0.000311885 | 0.999149 |
| PAH10+CH3     | 1.71939e-05 | 0.999914 | 0.000141169 | 0.999290 |
| rad52         | 1.70867e-05 | 0.999931 | 0.000140289 | 0.999430 |
| rad19syn      | 1.63940e-05 | 0.999947 | 0.000134602 | 0.999565 |
| PhcycC3H3_A+H | 1.10295e-05 | 0.999958 | 9.05565e-05 | 0.999655 |
| rad58         | 1.00660e-05 | 0.999968 | 8.26460e-05 | 0.999738 |
| PAH1+H        | 5.96829e-06 | 0.999974 | 4.90022e-05 | 0.999787 |
| rad37         | 5.72360e-06 | 0.999980 | 4.69932e-05 | 0.999834 |
| rad54         | 5.39729e-06 | 0.999985 | 4.43141e-05 | 0.999878 |
| rad71         | 3.96846e-06 | 0.999989 | 3.25827e-05 | 0.999911 |
| rad70         | 3.69414e-06 | 0.999993 | 3.03305e-05 | 0.999941 |
| rad73         | 2.41822e-06 | 0.999996 | 1.98546e-05 | 0.999961 |
| rad65         | 1.68560e-06 | 0.999997 | 1.38395e-05 | 0.999975 |
| rad34         | 1.08376e-06 | 0.999998 | 8.89812e-06 | 0.999984 |
| rad55         | 4.74104e-07 | 0.999999 | 3.89260e-06 | 0.999988 |
| PAH8+H        | 3.92118e-07 | 0.999999 | 3.21946e-06 | 0.999991 |
| rad72         | 2.11516e-07 | 0.999999 | 1.73663e-06 | 0.999993 |
| rad56         | 1.86245e-07 | 1.000000 | 1.52915e-06 | 0.999994 |
| rad53         | 1.73227e-07 | 1.000000 | 1.42227e-06 | 0.999996 |
| rad64         | 1.33646e-07 | 1.000000 | 1.09729e-06 | 0.999997 |
| rad68syn      | 1.10283e-07 | 1.000000 | 9.05466e-07 | 0.999998 |
| rad62         | 9.48500e-08 | 1.000000 | 7.78759e-07 | 0.999998 |
| rad68anti     | 7.08919e-08 | 1.000000 | 5.82052e-07 | 0.999999 |
| rad43         | 4.82414e-08 | 1.000000 | 3.96082e-07 | 0.999999 |
| rad61         | 4.62589e-08 | 1.000000 | 3.79805e-07 | 1.000000 |
| rad40syn      | 4.43361e-08 | 1.000000 | 3.64018e-07 | 1.000000 |
| rad40anti     | 2.91847e-08 | 1.000000 | 2.39619e-07 | 1.000000 |
| rad6          | 1.32261e-08 | 1.000000 | 1.08592e-07 | 1.000000 |
| rad42         | 1.00426e-08 | 1.000000 | 8.24543e-08 | 1.000000 |
| rad23         | 5.59550e-09 | 1.000000 | 4.59414e-08 | 1.000000 |
| rad41         | 5.35248e-09 | 1.000000 | 4.39461e-08 | 1.000000 |
| rad45         | 6.56856e-10 | 1.000000 | 5.39307e-09 | 1.000000 |
| rad22         | 4.14969e-10 | 1.000000 | 3.40707e-09 | 1.000000 |
| rad9          | 3.66559e-10 | 1.000000 | 3.00961e-09 | 1.000000 |
| rad20         | 2.60869e-10 | 1.000000 | 2.14184e-09 | 1.000000 |
| rad11         | 1.64190e-10 | 1.000000 | 1.34807e-09 | 1.000000 |
| rad21         | 1.30179e-10 | 1.000000 | 1.06883e-09 | 1.000000 |
| rad36         | 1.16678e-10 | 1.000000 | 9.57978e-10 | 1.000000 |
| rad7          | 9.54199e-11 | 1.000000 | 7.83438e-10 | 1.000000 |
| rad18         | 6.19713e-11 | 1.000000 | 5.08811e-10 | 1.000000 |
| rad28         | 5.34439e-11 | 1.000000 | 4.38797e-10 | 1.000000 |
| rad15         | 2.12993e-11 | 1.000000 | 1.74877e-10 | 1.000000 |
| rad13         | 8.57662e-12 | 1.000000 | 7.04177e-11 | 1.000000 |
| rad24         | 5.70000e-12 | 1.000000 | 4.67994e-11 | 1.000000 |
| rad12         | 3.05355e-12 | 1.000000 | 2.50709e-11 | 1.000000 |
| rad26         | 2.34446e-12 | 1.000000 | 1.92490e-11 | 1.000000 |

|       |             |         |             |         |
|-------|-------------|---------|-------------|---------|
| rad8  | 2.16865e-12 | 1.00000 | 1.78056e-11 | 1.00000 |
| rad10 | 7.50580e-13 | 1.00000 | 6.16257e-12 | 1.00000 |
| rad33 | 3.63694e-13 | 1.00000 | 2.98608e-12 | 1.00000 |
| rad25 | 2.84627e-13 | 1.00000 | 2.33690e-12 | 1.00000 |
| rad2  | 1.75429e-13 | 1.00000 | 1.44034e-12 | 1.00000 |
| rad47 | 1.41415e-13 | 1.00000 | 1.16108e-12 | 1.00000 |
| rad1  | 4.94168e-14 | 1.00000 | 4.05733e-13 | 1.00000 |
| rad3  | 3.23962e-14 | 1.00000 | 2.65986e-13 | 1.00000 |
| rad5  | 2.14406e-14 | 1.00000 | 1.76037e-13 | 1.00000 |
| rad4  | 2.05981e-14 | 1.00000 | 1.69119e-13 | 1.00000 |
| rad14 | 5.34939e-15 | 1.00000 | 4.39207e-14 | 1.00000 |
| rad27 | 1.32832e-15 | 1.00000 | 1.09061e-14 | 1.00000 |

1.0000000 Pa, 2500.00000 K

=====  
Rate constant | True (fraction) | Effective (fraction)  
-----

Total | 5.32896e-13 (1.00 ) | 6.40311e-14 (1.00 )

| species       | PYtrue      | Cumul    | PYeffective | Cumul    |
|---------------|-------------|----------|-------------|----------|
| Benzyl+C2H2   | 0.879843    | 0.879843 | 0.00000     | 0.00000  |
| Indene+H      | 0.0541637   | 0.934007 | 0.450776    | 0.450776 |
| PhCH2CCH+H    | 0.0379681   | 0.971975 | 0.315989    | 0.766765 |
| Ph+Allene     | 0.0112444   | 0.983219 | 0.0935811   | 0.860346 |
| PhCHCCH2+H    | 0.00999485  | 0.993214 | 0.0831818   | 0.943528 |
| PAH3+H        | 0.00124356  | 0.994458 | 0.0103495   | 0.953877 |
| PAH9+H        | 0.00106545  | 0.995523 | 0.00886719  | 0.962745 |
| rad19anti     | 0.000731027 | 0.996254 | 0.00608395  | 0.968829 |
| rad38         | 0.000614396 | 0.996868 | 0.00511329  | 0.973942 |
| PAH7+H        | 0.000586820 | 0.997455 | 0.00488379  | 0.978826 |
| rad30         | 0.000442203 | 0.997898 | 0.00368022  | 0.982506 |
| PhCCH+CH3     | 0.000309129 | 0.998207 | 0.00257272  | 0.985079 |
| rad50         | 0.000261684 | 0.998468 | 0.00217786  | 0.987256 |
| Ph+MeAc       | 0.000256973 | 0.998725 | 0.00213865  | 0.989395 |
| rad35         | 0.000242193 | 0.998967 | 0.00201564  | 0.991411 |
| rad46         | 0.000207880 | 0.999175 | 0.00173007  | 0.993141 |
| rad39         | 0.000175777 | 0.999351 | 0.00146290  | 0.994604 |
| rad51         | 0.000109654 | 0.999461 | 0.000912596 | 0.995516 |
| rad59         | 0.000104825 | 0.999566 | 0.000872406 | 0.996389 |
| rad67         | 7.34548e-05 | 0.999639 | 0.000611325 | 0.997000 |
| PhCCCH3+H     | 7.22810e-05 | 0.999711 | 0.000601556 | 0.997602 |
| rad60syn      | 6.81857e-05 | 0.999780 | 0.000567474 | 0.998169 |
| rad60anti     | 4.82378e-05 | 0.999828 | 0.000401457 | 0.998570 |
| PAH10+CH3     | 3.09001e-05 | 0.999859 | 0.000257165 | 0.998828 |
| rad52         | 2.78087e-05 | 0.999886 | 0.000231437 | 0.999059 |
| rad19syn      | 2.34812e-05 | 0.999910 | 0.000195422 | 0.999255 |
| rad58         | 1.71635e-05 | 0.999927 | 0.000142842 | 0.999397 |
| PhcycC3H3_A+H | 1.49444e-05 | 0.999942 | 0.000124374 | 0.999522 |
| PAH1+H        | 1.13021e-05 | 0.999953 | 9.40615e-05 | 0.999616 |
| rad71         | 1.08679e-05 | 0.999964 | 9.04476e-05 | 0.999706 |
| rad37         | 8.12869e-06 | 0.999972 | 6.76508e-05 | 0.999774 |
| rad54         | 6.28008e-06 | 0.999979 | 5.22658e-05 | 0.999826 |
| rad70         | 5.97103e-06 | 0.999985 | 4.96937e-05 | 0.999876 |
| rad73         | 5.95885e-06 | 0.999991 | 4.95924e-05 | 0.999925 |
| rad65         | 2.87610e-06 | 0.999993 | 2.39363e-05 | 0.999949 |
| rad34         | 1.90627e-06 | 0.999995 | 1.58648e-05 | 0.999965 |
| PAH8+H        | 1.06531e-06 | 0.999996 | 8.86602e-06 | 0.999974 |
| rad72         | 7.15874e-07 | 0.999997 | 5.95784e-06 | 0.999980 |
| rad55         | 5.87561e-07 | 0.999998 | 4.88996e-06 | 0.999985 |
| rad56         | 3.21891e-07 | 0.999998 | 2.67892e-06 | 0.999988 |
| rad64         | 2.70868e-07 | 0.999998 | 2.25429e-06 | 0.999990 |
| rad53         | 2.70830e-07 | 0.999999 | 2.25397e-06 | 0.999992 |
| rad68syn      | 2.47512e-07 | 0.999999 | 2.05991e-06 | 0.999994 |
| rad68anti     | 1.58688e-07 | 0.999999 | 1.32068e-06 | 0.999996 |
| rad62         | 1.55156e-07 | 0.999999 | 1.29128e-06 | 0.999997 |
| rad40syn      | 1.10739e-07 | 0.999999 | 9.21624e-07 | 0.999998 |
| rad61         | 1.05683e-07 | 0.999999 | 8.79542e-07 | 0.999999 |
| rad43         | 8.79698e-08 | 0.999999 | 7.32126e-07 | 0.999999 |
| rad40anti     | 7.53477e-08 | 1.000000 | 6.27079e-07 | 1.000000 |
| rad42         | 1.97258e-08 | 1.000000 | 1.64167e-07 | 1.000000 |
| rad41         | 1.13878e-08 | 1.000000 | 9.47747e-08 | 1.000000 |
| rad6          | 2.37965e-09 | 1.000000 | 1.98045e-08 | 1.000000 |
| rad23         | 1.68032e-09 | 1.000000 | 1.39844e-08 | 1.000000 |
| rad45         | 2.85508e-10 | 1.000000 | 2.37613e-09 | 1.000000 |
| rad9          | 1.94891e-10 | 1.000000 | 1.62198e-09 | 1.000000 |
| rad20         | 1.44101e-10 | 1.000000 | 1.19928e-09 | 1.000000 |
| rad22         | 1.41600e-10 | 1.000000 | 1.17846e-09 | 1.000000 |
| rad21         | 6.95839e-11 | 1.000000 | 5.79110e-10 | 1.000000 |
| rad11         | 6.30676e-11 | 1.000000 | 5.24878e-10 | 1.000000 |

|       |             |          |             |         |
|-------|-------------|----------|-------------|---------|
| rad36 | 5.16998e-11 | 1.000000 | 4.30270e-10 | 1.00000 |
| rad18 | 2.78732e-11 | 1.000000 | 2.31974e-10 | 1.00000 |
| rad7  | 2.67252e-11 | 1.000000 | 2.22420e-10 | 1.00000 |
| rad15 | 1.26522e-11 | 1.000000 | 1.05297e-10 | 1.00000 |
| rad28 | 1.25225e-11 | 1.000000 | 1.04218e-10 | 1.00000 |
| rad24 | 3.60418e-12 | 1.000000 | 2.99957e-11 | 1.00000 |
| rad13 | 2.74926e-12 | 1.000000 | 2.28806e-11 | 1.00000 |
| rad12 | 2.40049e-12 | 1.000000 | 1.99780e-11 | 1.00000 |
| rad8  | 2.25274e-12 | 1.000000 | 1.87484e-11 | 1.00000 |
| rad26 | 1.28536e-12 | 1.000000 | 1.06974e-11 | 1.00000 |
| rad10 | 4.12602e-13 | 1.000000 | 3.43387e-12 | 1.00000 |
| rad47 | 2.44583e-13 | 1.000000 | 2.03553e-12 | 1.00000 |
| rad25 | 1.71276e-13 | 1.000000 | 1.42544e-12 | 1.00000 |
| rad33 | 1.46766e-13 | 1.000000 | 1.22145e-12 | 1.00000 |
| rad2  | 5.23630e-14 | 1.000000 | 4.35789e-13 | 1.00000 |
| rad5  | 2.20981e-14 | 1.000000 | 1.83910e-13 | 1.00000 |
| rad1  | 1.69319e-14 | 1.000000 | 1.40915e-13 | 1.00000 |
| rad3  | 8.84365e-15 | 1.000000 | 7.36010e-14 | 1.00000 |
| rad4  | 5.54134e-15 | 1.000000 | 4.61177e-14 | 1.00000 |
| rad14 | 2.68879e-15 | 1.000000 | 2.23774e-14 | 1.00000 |
| rad27 | 1.07563e-15 | 1.000000 | 8.95190e-15 | 1.00000 |

1.00000000 Pa, 2750.00000 K

| Rate constant | True (fraction)     | Effective (fraction) |
|---------------|---------------------|----------------------|
| Total         | 8.05113e-13 (1.00 ) | 1.00487e-13 (1.00 )  |

| species       | PYtrue      | Cumul    | PYeffective | Cumul    |
|---------------|-------------|----------|-------------|----------|
| Benzyl+C2H2   | 0.875189    | 0.875189 | 0.00000     | 0.00000  |
| PhCH2CCH+H    | 0.0492371   | 0.924426 | 0.394492    | 0.394492 |
| Indene+H      | 0.0427171   | 0.967143 | 0.342254    | 0.736746 |
| PhCHCCH2+H    | 0.0126523   | 0.979795 | 0.101371    | 0.838117 |
| Ph+Allene     | 0.0121360   | 0.991931 | 0.0972347   | 0.935352 |
| PAH3+H        | 0.00165412  | 0.993586 | 0.0132530   | 0.948605 |
| PAH9+H        | 0.00112925  | 0.994715 | 0.00904762  | 0.957652 |
| rad19anti     | 0.000790044 | 0.995505 | 0.00632991  | 0.963982 |
| PAH7+H        | 0.000729335 | 0.996234 | 0.00584350  | 0.969826 |
| rad38         | 0.000670523 | 0.996905 | 0.00537229  | 0.975198 |
| rad30         | 0.000454283 | 0.997359 | 0.00363976  | 0.978838 |
| rad50         | 0.000356825 | 0.997716 | 0.00285892  | 0.981697 |
| Ph+MeAc       | 0.000331297 | 0.998047 | 0.00265439  | 0.984351 |
| PhCCH+CH3     | 0.000293338 | 0.998341 | 0.00235025  | 0.986701 |
| rad35         | 0.000276886 | 0.998617 | 0.00221844  | 0.988920 |
| rad39         | 0.000242692 | 0.998860 | 0.00194447  | 0.990864 |
| rad46         | 0.000239377 | 0.999099 | 0.00191791  | 0.992782 |
| rad51         | 0.000167555 | 0.999267 | 0.00134247  | 0.994125 |
| rad59         | 0.000133898 | 0.999401 | 0.00107280  | 0.995197 |
| rad67         | 0.000103303 | 0.999504 | 0.000827674 | 0.996025 |
| PhCCCH3+H     | 9.47597e-05 | 0.999599 | 0.000759224 | 0.996784 |
| rad60syn      | 8.03400e-05 | 0.999679 | 0.000643692 | 0.997428 |
| rad60anti     | 5.74980e-05 | 0.999737 | 0.000460680 | 0.997889 |
| PAH10+CH3     | 4.75541e-05 | 0.999784 | 0.000381008 | 0.998270 |
| rad52         | 3.97970e-05 | 0.999824 | 0.000318857 | 0.998589 |
| rad19syn      | 3.43481e-05 | 0.999859 | 0.000275201 | 0.998864 |
| rad58         | 2.60271e-05 | 0.999885 | 0.000208532 | 0.999072 |
| rad71         | 2.39144e-05 | 0.999908 | 0.000191605 | 0.999264 |
| PhcycC3H3_A+H | 1.91125e-05 | 0.999928 | 0.000153131 | 0.999417 |
| PAH1+H        | 1.89315e-05 | 0.999947 | 0.000151681 | 0.999569 |
| rad73         | 1.19971e-05 | 0.999959 | 9.61219e-05 | 0.999665 |
| rad37         | 1.02458e-05 | 0.999969 | 8.20902e-05 | 0.999747 |
| rad70         | 8.97458e-06 | 0.999978 | 7.19052e-05 | 0.999819 |
| rad54         | 7.04853e-06 | 0.999985 | 5.64735e-05 | 0.999875 |
| rad65         | 4.27363e-06 | 0.999989 | 3.42407e-05 | 0.999910 |
| rad34         | 3.06725e-06 | 0.999992 | 2.45751e-05 | 0.999934 |
| PAH8+H        | 2.42511e-06 | 0.999995 | 1.94302e-05 | 0.999954 |
| rad72         | 1.88068e-06 | 0.999996 | 1.50682e-05 | 0.999969 |
| rad55         | 6.94537e-07 | 0.999997 | 5.56469e-06 | 0.999974 |
| rad56         | 5.00311e-07 | 0.999998 | 4.00854e-06 | 0.999978 |
| rad68syn      | 4.83461e-07 | 0.999998 | 3.87354e-06 | 0.999982 |
| rad64         | 4.76904e-07 | 0.999999 | 3.82100e-06 | 0.999986 |
| rad53         | 3.88203e-07 | 0.999999 | 3.11032e-06 | 0.999989 |
| rad68anti     | 3.09363e-07 | 0.999999 | 2.47864e-06 | 0.999991 |
| rad62         | 2.47713e-07 | 1.000000 | 1.98470e-06 | 0.999993 |
| rad40syn      | 2.35493e-07 | 1.000000 | 1.88680e-06 | 0.999995 |
| rad61         | 1.98412e-07 | 1.000000 | 1.58970e-06 | 0.999997 |
| rad40anti     | 1.64465e-07 | 1.000000 | 1.31771e-06 | 0.999998 |
| rad43         | 1.38326e-07 | 1.000000 | 1.10828e-06 | 0.999999 |
| rad42         | 3.59380e-08 | 1.000000 | 2.87939e-07 | 1.000000 |

|       |             |         |             |          |
|-------|-------------|---------|-------------|----------|
| rad41 | 2.03341e-08 | 1.00000 | 1.62919e-07 | 1.000000 |
| rad23 | 6.22108e-10 | 1.00000 | 4.98439e-09 | 1.000000 |
| rad6  | 5.61107e-10 | 1.00000 | 4.49564e-09 | 1.000000 |
| rad45 | 1.35864e-10 | 1.00000 | 1.08856e-09 | 1.000000 |
| rad9  | 1.06567e-10 | 1.00000 | 8.53826e-10 | 1.000000 |
| rad20 | 8.69696e-11 | 1.00000 | 6.96809e-10 | 1.000000 |
| rad22 | 5.84238e-11 | 1.00000 | 4.68097e-10 | 1.000000 |
| rad21 | 4.05545e-11 | 1.00000 | 3.24926e-10 | 1.000000 |
| rad11 | 2.94140e-11 | 1.00000 | 2.35668e-10 | 1.000000 |
| rad36 | 2.49915e-11 | 1.00000 | 2.00235e-10 | 1.000000 |
| rad18 | 1.40591e-11 | 1.00000 | 1.12643e-10 | 1.000000 |
| rad7  | 8.95592e-12 | 1.00000 | 7.17557e-11 | 1.000000 |
| rad15 | 7.62718e-12 | 1.00000 | 6.11097e-11 | 1.000000 |
| rad28 | 4.49603e-12 | 1.00000 | 3.60226e-11 | 1.000000 |
| rad24 | 2.36701e-12 | 1.00000 | 1.89647e-11 | 1.000000 |
| rad8  | 2.27055e-12 | 1.00000 | 1.81919e-11 | 1.000000 |
| rad12 | 1.84641e-12 | 1.00000 | 1.47936e-11 | 1.000000 |
| rad13 | 1.03121e-12 | 1.00000 | 8.26217e-12 | 1.000000 |
| rad26 | 7.93802e-13 | 1.00000 | 6.36002e-12 | 1.000000 |
| rad47 | 3.65972e-13 | 1.00000 | 2.93221e-12 | 1.000000 |
| rad10 | 2.70718e-13 | 1.00000 | 2.16902e-12 | 1.000000 |
| rad25 | 1.16328e-13 | 1.00000 | 9.32033e-13 | 1.000000 |
| rad33 | 6.71508e-14 | 1.00000 | 5.38019e-13 | 1.000000 |
| rad2  | 2.58150e-14 | 1.00000 | 2.06833e-13 | 1.000000 |
| rad5  | 2.19625e-14 | 1.00000 | 1.75965e-13 | 1.000000 |
| rad1  | 9.61492e-15 | 1.00000 | 7.70357e-14 | 1.000000 |
| rad3  | 2.99895e-15 | 1.00000 | 2.40279e-14 | 1.000000 |
| rad4  | 1.83339e-15 | 1.00000 | 1.46893e-14 | 1.000000 |
| rad14 | 1.78070e-15 | 1.00000 | 1.42672e-14 | 1.000000 |
| rad27 | 9.33336e-16 | 1.00000 | 7.47798e-15 | 1.000000 |

1.0000000 Pa, 3000.00000 K

=====

| Rate constant | True (fraction)     | Effective (fraction) |
|---------------|---------------------|----------------------|
| Total         | 1.15309e-12 (1.00 ) | 1.53862e-13 (1.00 )  |

| species       | PYtrue      | Cumul    | PYeffective | Cumul    |
|---------------|-------------|----------|-------------|----------|
| Benzyl+C2H2   | 0.866566    | 0.866566 | 0.00000     | 0.00000  |
| PhCH2CCH+H    | 0.0611725   | 0.927738 | 0.458447    | 0.458447 |
| Indene+H      | 0.0342672   | 0.962006 | 0.256810    | 0.715257 |
| PhCHCCH2+H    | 0.0154790   | 0.977485 | 0.116005    | 0.831262 |
| Ph+Allene     | 0.0132660   | 0.990751 | 0.0994201   | 0.930682 |
| PAH3+H        | 0.00205938  | 0.992810 | 0.0154337   | 0.946116 |
| PAH9+H        | 0.00113813  | 0.993948 | 0.00852950  | 0.954645 |
| PAH7+H        | 0.000866136 | 0.994814 | 0.00649111  | 0.961136 |
| rad19anti     | 0.000812998 | 0.995627 | 0.00609288  | 0.967229 |
| rad38         | 0.000693215 | 0.996321 | 0.00519518  | 0.972424 |
| rad30         | 0.000455427 | 0.996776 | 0.00341312  | 0.975838 |
| rad50         | 0.000445148 | 0.997221 | 0.00333609  | 0.979174 |
| Ph+MeAc       | 0.000411378 | 0.997633 | 0.00308300  | 0.982257 |
| PhCCH+CH3     | 0.000319072 | 0.997952 | 0.00239123  | 0.984648 |
| rad39         | 0.000311352 | 0.998263 | 0.00233338  | 0.986981 |
| rad35         | 0.000303822 | 0.998567 | 0.00227694  | 0.989258 |
| rad46         | 0.000258929 | 0.998826 | 0.00194050  | 0.991199 |
| rad51         | 0.000229662 | 0.999055 | 0.00172117  | 0.992920 |
| rad59         | 0.000160966 | 0.999216 | 0.00120633  | 0.994126 |
| rad67         | 0.000132859 | 0.999349 | 0.000995687 | 0.995122 |
| PhCCCH3+H     | 0.000117527 | 0.999467 | 0.000880786 | 0.996003 |
| rad60syn      | 9.03378e-05 | 0.999557 | 0.000677021 | 0.996680 |
| PAH10+CH3     | 6.53522e-05 | 0.999622 | 0.000489771 | 0.997169 |
| rad60anti     | 6.52879e-05 | 0.999688 | 0.000489289 | 0.997659 |
| rad52         | 5.16000e-05 | 0.999739 | 0.000386707 | 0.998045 |
| rad19syn      | 5.01057e-05 | 0.999789 | 0.000375508 | 0.998421 |
| rad71         | 4.45170e-05 | 0.999834 | 0.000333625 | 0.998755 |
| rad58         | 3.61220e-05 | 0.999870 | 0.000270710 | 0.999025 |
| PAH1+H        | 2.86272e-05 | 0.999899 | 0.000214542 | 0.999240 |
| PhcycC3H3_A+H | 2.34370e-05 | 0.999922 | 0.000175644 | 0.999416 |
| rad73         | 2.07083e-05 | 0.999943 | 0.000155195 | 0.999571 |
| rad70         | 1.26564e-05 | 0.999955 | 9.48510e-05 | 0.999666 |
| rad37         | 1.18404e-05 | 0.999967 | 8.87361e-05 | 0.999754 |
| rad54         | 7.74184e-06 | 0.999975 | 5.80199e-05 | 0.999812 |
| rad65         | 5.71879e-06 | 0.999981 | 4.28585e-05 | 0.999855 |
| PAH8+H        | 4.80154e-06 | 0.999986 | 3.59843e-05 | 0.999891 |
| rad34         | 4.57470e-06 | 0.999990 | 3.42843e-05 | 0.999925 |
| rad72         | 4.05928e-06 | 0.999994 | 3.04216e-05 | 0.999956 |
| rad68syn      | 8.44303e-07 | 0.999995 | 6.32749e-06 | 0.999962 |
| rad55         | 7.96395e-07 | 0.999996 | 5.96845e-06 | 0.999968 |
| rad64         | 7.49017e-07 | 0.999997 | 5.61338e-06 | 0.999974 |

|           |             |          |             |          |
|-----------|-------------|----------|-------------|----------|
| rad56     | 7.20452e-07 | 0.999997 | 5.39931e-06 | 0.999979 |
| rad68anti | 5.39464e-07 | 0.999998 | 4.04292e-06 | 0.999983 |
| rad53     | 5.23144e-07 | 0.999998 | 3.92061e-06 | 0.999987 |
| rad40syn  | 4.40708e-07 | 0.999999 | 3.30281e-06 | 0.999990 |
| rad62     | 3.72785e-07 | 0.999999 | 2.79377e-06 | 0.999993 |
| rad61     | 3.22479e-07 | 0.999999 | 2.41676e-06 | 0.999996 |
| rad40anti | 3.14360e-07 | 1.000000 | 2.35591e-06 | 0.999998 |
| rad43     | 1.94896e-07 | 1.000000 | 1.46062e-06 | 0.999999 |
| rad42     | 5.98148e-08 | 1.000000 | 4.48272e-07 | 1.000000 |
| rad41     | 3.19484e-08 | 1.000000 | 2.39432e-07 | 1.000000 |
| rad23     | 2.61670e-10 | 1.000000 | 1.96104e-09 | 1.000000 |
| rad6      | 1.62690e-10 | 1.000000 | 1.21925e-09 | 1.000000 |
| rad45     | 6.93110e-11 | 1.000000 | 5.19440e-10 | 1.000000 |
| rad9      | 6.01467e-11 | 1.000000 | 4.50759e-10 | 1.000000 |
| rad20     | 5.62435e-11 | 1.000000 | 4.21508e-10 | 1.000000 |
| rad22     | 2.73635e-11 | 1.000000 | 2.05071e-10 | 1.000000 |
| rad21     | 2.52865e-11 | 1.000000 | 1.89505e-10 | 1.000000 |
| rad11     | 1.60474e-11 | 1.000000 | 1.20264e-10 | 1.000000 |
| rad36     | 1.29125e-11 | 1.000000 | 9.67705e-11 | 1.000000 |
| rad18     | 7.72292e-12 | 1.000000 | 5.78781e-11 | 1.000000 |
| rad15     | 4.68396e-12 | 1.000000 | 3.51031e-11 | 1.000000 |
| rad7      | 3.51817e-12 | 1.000000 | 2.63663e-11 | 1.000000 |
| rad8      | 2.23539e-12 | 1.000000 | 1.67528e-11 | 1.000000 |
| rad28     | 2.11533e-12 | 1.000000 | 1.58529e-11 | 1.000000 |
| rad24     | 1.60029e-12 | 1.000000 | 1.19931e-11 | 1.000000 |
| rad12     | 1.40785e-12 | 1.000000 | 1.05509e-11 | 1.000000 |
| rad26     | 5.04557e-13 | 1.000000 | 3.78132e-12 | 1.000000 |
| rad47     | 4.90431e-13 | 1.000000 | 3.67545e-12 | 1.000000 |
| rad13     | 4.47793e-13 | 1.000000 | 3.35591e-12 | 1.000000 |
| rad10     | 1.83532e-13 | 1.000000 | 1.37545e-12 | 1.000000 |
| rad25     | 8.60437e-14 | 1.000000 | 6.44840e-13 | 1.000000 |
| rad33     | 3.44384e-14 | 1.000000 | 2.58093e-13 | 1.000000 |
| rad5      | 2.13047e-14 | 1.000000 | 1.59664e-13 | 1.000000 |
| rad2      | 1.55960e-14 | 1.000000 | 1.16881e-13 | 1.000000 |
| rad1      | 6.58107e-15 | 1.000000 | 4.93207e-14 | 1.000000 |
| rad14     | 1.40642e-15 | 1.000000 | 1.05402e-14 | 1.000000 |
| rad3      | 1.23620e-15 | 1.000000 | 9.26446e-15 | 1.000000 |
| rad27     | 8.02873e-16 | 1.000000 | 6.01699e-15 | 1.000000 |
| rad4      | 7.33862e-16 | 1.000000 | 5.49980e-15 | 1.000000 |

1.00000000 Pa, 3250.00000 K

=====  
Rate constant | True (fraction) | Effective (fraction)  
-----  
Total | 1.58309e-12 (1.00) | 2.28795e-13 (1.00)

| species       | PYtrue      | Cumul    | PYeffective | Cumul    |
|---------------|-------------|----------|-------------|----------|
| Benzyl+C2H2   | 0.855476    | 0.855476 | 0.00000     | 0.00000  |
| PhCH2CCH+H    | 0.0734301   | 0.928906 | 0.508082    | 0.508082 |
| Indene+H      | 0.0278643   | 0.956770 | 0.192800    | 0.700882 |
| PhCHCCH2+H    | 0.0183610   | 0.975131 | 0.127045    | 0.827927 |
| Ph+Allene     | 0.0145940   | 0.989725 | 0.100980    | 0.928907 |
| PAH3+H        | 0.00243645  | 0.992162 | 0.0168585   | 0.945765 |
| PAH9+H        | 0.00110339  | 0.993265 | 0.00763468  | 0.953400 |
| PAH7+H        | 0.000986571 | 0.994252 | 0.00682634  | 0.960227 |
| rad19anti     | 0.000808911 | 0.995061 | 0.00559707  | 0.965824 |
| rad38         | 0.000686670 | 0.995747 | 0.00475125  | 0.970575 |
| rad50         | 0.000518180 | 0.996266 | 0.00358542  | 0.974160 |
| Ph+MeAc       | 0.000489465 | 0.996755 | 0.00338674  | 0.977547 |
| rad30         | 0.000447972 | 0.997203 | 0.00309964  | 0.980647 |
| PhCCH+CH3     | 0.000378211 | 0.997581 | 0.00261694  | 0.983264 |
| rad39         | 0.000374435 | 0.997956 | 0.00259081  | 0.985854 |
| rad35         | 0.000323023 | 0.998279 | 0.00223508  | 0.988089 |
| rad51         | 0.000289246 | 0.998568 | 0.00200137  | 0.990091 |
| rad46         | 0.000266714 | 0.998835 | 0.00184546  | 0.991936 |
| rad59         | 0.000184695 | 0.999019 | 0.00127795  | 0.993214 |
| rad67         | 0.000159865 | 0.999179 | 0.00110614  | 0.994320 |
| PhCCCH3+H     | 0.000140367 | 0.999320 | 0.000971235 | 0.995292 |
| rad60syn      | 9.79791e-05 | 0.999418 | 0.000677943 | 0.995970 |
| PAH10+CH3     | 8.26143e-05 | 0.999500 | 0.000571630 | 0.996541 |
| rad71         | 7.28080e-05 | 0.999573 | 0.000503778 | 0.997045 |
| rad60anti     | 7.14060e-05 | 0.999644 | 0.000494077 | 0.997539 |
| rad19syn      | 7.13406e-05 | 0.999716 | 0.000493624 | 0.998033 |
| rad52         | 6.19534e-05 | 0.999778 | 0.000428672 | 0.998461 |
| rad58         | 4.68388e-05 | 0.999825 | 0.000324090 | 0.998785 |
| PAH1+H        | 3.98745e-05 | 0.999864 | 0.000275902 | 0.999061 |
| rad73         | 3.17352e-05 | 0.999896 | 0.000219584 | 0.999281 |
| PhcycC3H3_A+H | 2.77967e-05 | 0.999924 | 0.000192333 | 0.999473 |
| rad70         | 1.68825e-05 | 0.999941 | 0.000116814 | 0.999590 |

|           |             |          |             |          |
|-----------|-------------|----------|-------------|----------|
| rad37     | 1.28499e-05 | 0.999954 | 8.89115e-05 | 0.999679 |
| PAH8+H    | 8.50458e-06 | 0.999962 | 5.88454e-05 | 0.999738 |
| rad54     | 8.38235e-06 | 0.999971 | 5.79997e-05 | 0.999796 |
| rad72     | 7.52661e-06 | 0.999978 | 5.20786e-05 | 0.999848 |
| rad65     | 7.06075e-06 | 0.999985 | 4.88552e-05 | 0.999897 |
| rad34     | 6.39568e-06 | 0.999992 | 4.42534e-05 | 0.999941 |
| rad68syn  | 1.34606e-06 | 0.999993 | 9.31375e-06 | 0.999950 |
| rad64     | 1.07438e-06 | 0.999994 | 7.43390e-06 | 0.999958 |
| rad56     | 9.79690e-07 | 0.999995 | 6.77873e-06 | 0.999965 |
| rad55     | 8.93999e-07 | 0.999996 | 6.18581e-06 | 0.999971 |
| rad68anti | 8.59058e-07 | 0.999997 | 5.94405e-06 | 0.999977 |
| rad40syn  | 7.44328e-07 | 0.999997 | 5.15020e-06 | 0.999982 |
| rad53     | 6.73265e-07 | 0.999998 | 4.65850e-06 | 0.999986 |
| rad40anti | 5.40358e-07 | 0.999999 | 3.73888e-06 | 0.999990 |
| rad62     | 5.25221e-07 | 0.999999 | 3.63414e-06 | 0.999994 |
| rad61     | 4.70537e-07 | 1.000000 | 3.25577e-06 | 0.999997 |
| rad43     | 2.53715e-07 | 1.000000 | 1.75552e-06 | 0.999999 |
| rad42     | 9.14459e-08 | 1.000000 | 6.32738e-07 | 0.999999 |
| rad41     | 4.57451e-08 | 1.000000 | 3.16522e-07 | 1.000000 |
| rad23     | 1.20200e-10 | 1.000000 | 8.31692e-10 | 1.000000 |
| rad6      | 5.64764e-11 | 1.000000 | 3.90775e-10 | 1.000000 |
| rad20     | 3.84229e-11 | 1.000000 | 2.65858e-10 | 1.000000 |
| rad45     | 3.73356e-11 | 1.000000 | 2.58335e-10 | 1.000000 |
| rad9      | 3.51128e-11 | 1.000000 | 2.42955e-10 | 1.000000 |
| rad21     | 1.66367e-11 | 1.000000 | 1.15114e-10 | 1.000000 |
| rad22     | 1.41102e-11 | 1.000000 | 9.76324e-11 | 1.000000 |
| rad11     | 9.87846e-12 | 1.000000 | 6.83516e-11 | 1.000000 |
| rad36     | 7.02663e-12 | 1.000000 | 4.86191e-11 | 1.000000 |
| rad18     | 4.53166e-12 | 1.000000 | 3.13557e-11 | 1.000000 |
| rad15     | 2.94061e-12 | 1.000000 | 2.03469e-11 | 1.000000 |
| rad8      | 2.15823e-12 | 1.000000 | 1.49334e-11 | 1.000000 |
| rad7      | 1.58752e-12 | 1.000000 | 1.09844e-11 | 1.000000 |
| rad28     | 1.16203e-12 | 1.000000 | 8.04040e-12 | 1.000000 |
| rad24     | 1.10778e-12 | 1.000000 | 7.66503e-12 | 1.000000 |
| rad12     | 1.07284e-12 | 1.000000 | 7.42327e-12 | 1.000000 |
| rad47     | 6.03543e-13 | 1.000000 | 4.17607e-12 | 1.000000 |
| rad26     | 3.25047e-13 | 1.000000 | 2.24909e-12 | 1.000000 |
| rad13     | 2.21318e-13 | 1.000000 | 1.53136e-12 | 1.000000 |
| rad10     | 1.25360e-13 | 1.000000 | 8.67401e-13 | 1.000000 |
| rad25     | 6.72728e-14 | 1.000000 | 4.65478e-13 | 1.000000 |
| rad5      | 2.04475e-14 | 1.000000 | 1.41482e-13 | 1.000000 |
| rad33     | 1.94939e-14 | 1.000000 | 1.34884e-13 | 1.000000 |
| rad2      | 1.01582e-14 | 1.000000 | 7.02874e-14 | 1.000000 |
| rad1      | 4.78850e-15 | 1.000000 | 3.31329e-14 | 1.000000 |
| rad14     | 1.20556e-15 | 1.000000 | 8.34156e-15 | 1.000000 |
| rad27     | 6.79671e-16 | 1.000000 | 4.70282e-15 | 1.000000 |
| rad3      | 6.00026e-16 | 1.000000 | 4.15174e-15 | 1.000000 |
| rad4      | 3.46542e-16 | 1.000000 | 2.39782e-15 | 1.000000 |

1.00000000 Pa, 3500.00000 K

=====

| Rate constant | True (fraction)     | Effective (fraction) |
|---------------|---------------------|----------------------|
| Total         | 2.10046e-12 (1.00 ) | 3.29923e-13 (1.00 )  |

| species     | PYtrue      | Cumul    | PYeffective | Cumul    |
|-------------|-------------|----------|-------------|----------|
| Benzyl+C2H2 | 0.842928    | 0.842928 | 0.000000    | 0.000000 |
| PhCH2CCH+H  | 0.0857241   | 0.928652 | 0.545762    | 0.545762 |
| Indene+H    | 0.0229287   | 0.951581 | 0.145976    | 0.691738 |
| PhCHCCH2+H  | 0.0212218   | 0.972803 | 0.135108    | 0.826846 |
| Ph+Allene   | 0.0160719   | 0.988874 | 0.102322    | 0.929168 |
| PAH3+H      | 0.00277080  | 0.991645 | 0.0176403   | 0.946808 |
| PAH7+H      | 0.00108547  | 0.992731 | 0.00691065  | 0.953719 |
| PAH9+H      | 0.00103824  | 0.993769 | 0.00660998  | 0.960329 |
| rad19anti   | 0.000786012 | 0.994555 | 0.00500415  | 0.965333 |
| rad38       | 0.000657575 | 0.995213 | 0.00418645  | 0.969520 |
| rad50       | 0.000571323 | 0.995784 | 0.00363733  | 0.973157 |
| Ph+MeAc     | 0.000559758 | 0.996344 | 0.00356370  | 0.976721 |
| PhCCH+CH3   | 0.000466753 | 0.996810 | 0.00297158  | 0.979692 |
| rad30       | 0.000434295 | 0.997245 | 0.00276494  | 0.982457 |
| rad39       | 0.000426787 | 0.997672 | 0.00271714  | 0.985174 |
| rad51       | 0.000340823 | 0.998012 | 0.00216985  | 0.987344 |
| rad35       | 0.000335221 | 0.998348 | 0.00213419  | 0.989478 |
| rad46       | 0.000264413 | 0.998612 | 0.00168339  | 0.991162 |
| rad59       | 0.000204435 | 0.998816 | 0.00130154  | 0.992463 |
| rad67       | 0.000182834 | 0.998999 | 0.00116401  | 0.993627 |
| PhCCCH3+H   | 0.000163685 | 0.999163 | 0.00104210  | 0.994669 |
| rad71       | 0.000107601 | 0.999271 | 0.000685044 | 0.995354 |
| rad60syn    | 0.000103349 | 0.999374 | 0.000657969 | 0.996012 |

|               |             |          |             |          |
|---------------|-------------|----------|-------------|----------|
| PAH10+CH3     | 9.81181e-05 | 0.999472 | 0.000624669 | 0.996637 |
| rad19syn      | 9.79725e-05 | 0.999570 | 0.000623742 | 0.997261 |
| rad60anti     | 7.58697e-05 | 0.999646 | 0.000483025 | 0.997744 |
| rad52         | 7.00217e-05 | 0.999716 | 0.000445793 | 0.998190 |
| rad58         | 5.76196e-05 | 0.999773 | 0.000366835 | 0.998556 |
| PAH1+H        | 5.20523e-05 | 0.999826 | 0.000331391 | 0.998888 |
| rad73         | 4.43108e-05 | 0.999870 | 0.000282105 | 0.999170 |
| PhcycC3H3_A+H | 3.20633e-05 | 0.999902 | 0.000204131 | 0.999374 |
| rad70         | 2.14708e-05 | 0.999923 | 0.000136694 | 0.999511 |
| PAH8+H        | 1.37725e-05 | 0.999937 | 8.76827e-05 | 0.999598 |
| rad37         | 1.33235e-05 | 0.999950 | 8.48243e-05 | 0.999683 |
| rad72         | 1.23924e-05 | 0.999963 | 7.88963e-05 | 0.999762 |
| rad54         | 8.98058e-06 | 0.999972 | 5.71749e-05 | 0.999819 |
| rad34         | 8.46718e-06 | 0.999980 | 5.39063e-05 | 0.999873 |
| rad65         | 8.19016e-06 | 0.999988 | 5.21426e-05 | 0.999925 |
| rad68syn      | 1.99232e-06 | 0.999990 | 1.26841e-05 | 0.999938 |
| rad64         | 1.43496e-06 | 0.999992 | 9.13568e-06 | 0.999947 |
| rad56         | 1.27412e-06 | 0.999993 | 8.11171e-06 | 0.999955 |
| rad68anti     | 1.27030e-06 | 0.999994 | 8.08736e-06 | 0.999963 |
| rad40syn      | 1.15716e-06 | 0.999996 | 7.36708e-06 | 0.999971 |
| rad55         | 9.87613e-07 | 0.999997 | 6.28764e-06 | 0.999977 |
| rad40anti     | 8.52742e-07 | 0.999997 | 5.42898e-06 | 0.999982 |
| rad53         | 8.35966e-07 | 0.999998 | 5.32218e-06 | 0.999988 |
| rad62         | 6.97361e-07 | 0.999999 | 4.43975e-06 | 0.999992 |
| rad61         | 6.32568e-07 | 1.000000 | 4.02725e-06 | 0.999996 |
| rad43         | 3.12012e-07 | 1.000000 | 1.98643e-06 | 0.999998 |
| rad42         | 1.30122e-07 | 1.000000 | 8.28425e-07 | 0.999999 |
| rad41         | 6.11801e-08 | 1.000000 | 3.89503e-07 | 0.999999 |
| rad23         | 5.91057e-11 | 1.000000 | 3.76297e-10 | 0.999999 |
| rad20         | 2.74364e-11 | 1.000000 | 1.74674e-10 | 0.999999 |
| rad6          | 2.29907e-11 | 1.000000 | 1.46370e-10 | 0.999999 |
| rad9          | 2.12100e-11 | 1.000000 | 1.35034e-10 | 0.999999 |
| rad45         | 2.10092e-11 | 1.000000 | 1.33755e-10 | 0.999999 |
| rad21         | 1.14338e-11 | 1.000000 | 7.27936e-11 | 0.999999 |
| rad22         | 7.86191e-12 | 1.000000 | 5.00529e-11 | 0.999999 |
| rad11         | 6.65402e-12 | 1.000000 | 4.23629e-11 | 0.999999 |
| rad36         | 3.98553e-12 | 1.000000 | 2.53739e-11 | 0.999999 |
| rad18         | 2.80241e-12 | 1.000000 | 1.78416e-11 | 0.999999 |
| rad8          | 2.04870e-12 | 1.000000 | 1.30430e-11 | 0.999999 |
| rad15         | 1.89018e-12 | 1.000000 | 1.20338e-11 | 0.999999 |
| rad12         | 8.20879e-13 | 1.000000 | 5.22613e-12 | 0.999999 |
| rad7          | 8.04507e-13 | 1.000000 | 5.12189e-12 | 0.999999 |
| rad24         | 7.82702e-13 | 1.000000 | 4.98308e-12 | 0.999999 |
| rad28         | 6.97171e-13 | 1.000000 | 4.43854e-12 | 0.999999 |
| rad47         | 6.94995e-13 | 1.000000 | 4.42469e-12 | 0.999999 |
| rad26         | 2.12166e-13 | 1.000000 | 1.35075e-12 | 0.999999 |
| rad13         | 1.21950e-13 | 1.000000 | 7.76393e-13 | 0.999999 |
| rad10         | 8.63394e-14 | 1.000000 | 5.49680e-13 | 0.999999 |
| rad25         | 5.44605e-14 | 1.000000 | 3.46723e-13 | 0.999999 |
| rad5          | 1.95699e-14 | 1.000000 | 1.24592e-13 | 0.999999 |
| rad33         | 1.19823e-14 | 1.000000 | 7.62857e-14 | 0.999999 |
| rad2          | 6.92692e-15 | 1.000000 | 4.41002e-14 | 0.999999 |
| rad1          | 3.57727e-15 | 1.000000 | 2.27747e-14 | 0.999999 |
| rad14         | 1.06462e-15 | 1.000000 | 6.77788e-15 | 0.999999 |
| rad27         | 5.69967e-16 | 1.000000 | 3.62870e-15 | 0.999999 |
| rad3          | 3.31433e-16 | 1.000000 | 2.11007e-15 | 0.999999 |
| rad4          | 1.87432e-16 | 1.000000 | 1.19329e-15 | 0.999999 |

1.00000000 Pa, 3750.00000 K

=====

| Rate constant | True (fraction)     | Effective (fraction) |
|---------------|---------------------|----------------------|
| Total         | 2.70978e-12 (1.00 ) | 4.61708e-13 (1.00 )  |

| species     | PYtrue      | Cumul    | PYeffective | Cumul    |
|-------------|-------------|----------|-------------|----------|
| Benzyl+C2H2 | 0.829614    | 0.829614 | 0.00000     | 0.00000  |
| PhCH2CCH+H  | 0.0978316   | 0.927446 | 0.574175    | 0.574175 |
| PhCHCCH2+H  | 0.0240141   | 0.951460 | 0.140939    | 0.715114 |
| Indene+H    | 0.0190788   | 0.970538 | 0.111974    | 0.827088 |
| Ph+Allene   | 0.0176550   | 0.988193 | 0.103617    | 0.930705 |
| PAH3+H      | 0.00305565  | 0.991249 | 0.0179337   | 0.948639 |
| PAH7+H      | 0.00116197  | 0.992411 | 0.00681959  | 0.955458 |
| PAH9+H      | 0.000955041 | 0.993366 | 0.00560515  | 0.961063 |
| rad19anti   | 0.000750872 | 0.994117 | 0.00440688  | 0.965470 |
| Ph+MeAc     | 0.000618509 | 0.994736 | 0.00363004  | 0.969100 |
| rad38       | 0.000613193 | 0.995349 | 0.00359884  | 0.972699 |
| rad50       | 0.000603635 | 0.995952 | 0.00354274  | 0.976242 |
| PhCCH+CH3   | 0.000581835 | 0.996534 | 0.00341480  | 0.979657 |
| rad39       | 0.000465790 | 0.997000 | 0.00273373  | 0.982390 |



|               |             |          |             |          |
|---------------|-------------|----------|-------------|----------|
| rad30         | 0.000416539 | 0.997417 | 0.00244467  | 0.984835 |
| rad51         | 0.000380994 | 0.997798 | 0.00223606  | 0.987071 |
| rad35         | 0.000341508 | 0.998139 | 0.00200431  | 0.989076 |
| rad46         | 0.000254425 | 0.998393 | 0.00149322  | 0.990569 |
| rad59         | 0.000220084 | 0.998614 | 0.00129168  | 0.991860 |
| rad67         | 0.000201013 | 0.998815 | 0.00117975  | 0.993040 |
| PhCCCH3+H     | 0.000187990 | 0.999003 | 0.00110331  | 0.994143 |
| rad71         | 0.000146780 | 0.999149 | 0.000861456 | 0.995005 |
| rad19syn      | 0.000129261 | 0.999279 | 0.000758633 | 0.995764 |
| PAH10+CH3     | 0.000111172 | 0.999390 | 0.000652468 | 0.996416 |
| rad60syn      | 0.000106707 | 0.999496 | 0.000626263 | 0.997042 |
| rad60anti     | 7.88382e-05 | 0.999575 | 0.000462703 | 0.997505 |
| rad52         | 7.54521e-05 | 0.999651 | 0.000442829 | 0.997948 |
| rad58         | 6.80261e-05 | 0.999719 | 0.000399246 | 0.998347 |
| PAH1+H        | 6.45813e-05 | 0.999783 | 0.000379028 | 0.998726 |
| rad73         | 5.74878e-05 | 0.999841 | 0.000337397 | 0.999063 |
| PhcycC3H3_A+H | 3.61213e-05 | 0.999877 | 0.000211996 | 0.999275 |
| rad70         | 2.62309e-05 | 0.999903 | 0.000153949 | 0.999429 |
| PAH8+H        | 2.07420e-05 | 0.999924 | 0.000121735 | 0.999551 |
| rad72         | 1.85748e-05 | 0.999943 | 0.000109016 | 0.999660 |
| rad37         | 1.33636e-05 | 0.999956 | 7.84314e-05 | 0.999739 |
| rad34         | 1.07116e-05 | 0.999967 | 6.28665e-05 | 0.999801 |
| rad54         | 9.53969e-06 | 0.999976 | 5.59886e-05 | 0.999857 |
| rad65         | 9.05126e-06 | 0.999985 | 5.31219e-05 | 0.999911 |
| rad68syn      | 2.77520e-06 | 0.999988 | 1.62877e-05 | 0.999927 |
| rad64         | 1.81236e-06 | 0.999990 | 1.06367e-05 | 0.999938 |
| rad68anti     | 1.76807e-06 | 0.999992 | 1.03768e-05 | 0.999948 |
| rad40syn      | 1.68193e-06 | 0.999993 | 9.87130e-06 | 0.999958 |
| rad56         | 1.59874e-06 | 0.999995 | 9.38301e-06 | 0.999967 |
| rad40anti     | 1.25564e-06 | 0.999996 | 7.36935e-06 | 0.999975 |
| rad55         | 1.07703e-06 | 0.999997 | 6.32112e-06 | 0.999981 |
| rad53         | 1.00840e-06 | 0.999998 | 5.91834e-06 | 0.999987 |
| rad62         | 8.81786e-07 | 0.999999 | 5.17522e-06 | 0.999992 |
| rad61         | 7.98455e-07 | 1.000000 | 4.68615e-06 | 0.999997 |
| rad43         | 3.67979e-07 | 1.000000 | 2.15967e-06 | 0.999999 |
| rad42         | 1.74775e-07 | 1.000000 | 1.02576e-06 | 1.000000 |
| rad41         | 7.77074e-08 | 1.000000 | 4.56066e-07 | 1.000000 |
| rad23         | 3.07291e-11 | 1.000000 | 1.80350e-10 | 1.000000 |
| rad20         | 2.03155e-11 | 1.000000 | 1.19232e-10 | 1.000000 |
| rad9          | 1.32429e-11 | 1.000000 | 7.77227e-11 | 1.000000 |
| rad45         | 1.22565e-11 | 1.000000 | 7.19334e-11 | 1.000000 |
| rad6          | 1.07358e-11 | 1.000000 | 6.30087e-11 | 1.000000 |
| rad21         | 8.14726e-12 | 1.000000 | 4.78164e-11 | 1.000000 |
| rad11         | 4.79042e-12 | 1.000000 | 2.81151e-11 | 1.000000 |
| rad22         | 4.67041e-12 | 1.000000 | 2.74107e-11 | 1.000000 |
| rad36         | 2.33903e-12 | 1.000000 | 1.37278e-11 | 1.000000 |
| rad8          | 1.91577e-12 | 1.000000 | 1.12437e-11 | 1.000000 |
| rad18         | 1.80913e-12 | 1.000000 | 1.06178e-11 | 1.000000 |
| rad15         | 1.24386e-12 | 1.000000 | 7.30024e-12 | 1.000000 |
| rad47         | 7.59707e-13 | 1.000000 | 4.45873e-12 | 1.000000 |
| rad12         | 6.32120e-13 | 1.000000 | 3.70992e-12 | 1.000000 |
| rad24         | 5.63439e-13 | 1.000000 | 3.30683e-12 | 1.000000 |
| rad7          | 4.47886e-13 | 1.000000 | 2.62865e-12 | 1.000000 |
| rad28         | 4.41713e-13 | 1.000000 | 2.59242e-12 | 1.000000 |
| rad26         | 1.40579e-13 | 1.000000 | 8.25058e-13 | 1.000000 |
| rad13         | 7.33848e-14 | 1.000000 | 4.30697e-13 | 1.000000 |
| rad10         | 6.02920e-14 | 1.000000 | 3.53855e-13 | 1.000000 |
| rad25         | 4.50729e-14 | 1.000000 | 2.64533e-13 | 1.000000 |
| rad5          | 1.87305e-14 | 1.000000 | 1.09930e-13 | 1.000000 |
| rad33         | 7.87875e-15 | 1.000000 | 4.62405e-14 | 1.000000 |
| rad2          | 4.94252e-15 | 1.000000 | 2.90077e-14 | 1.000000 |
| rad1          | 2.71564e-15 | 1.000000 | 1.59381e-14 | 1.000000 |
| rad14         | 9.48144e-16 | 1.000000 | 5.56467e-15 | 1.000000 |
| rad27         | 4.76910e-16 | 1.000000 | 2.79899e-15 | 1.000000 |
| rad3          | 2.02281e-16 | 1.000000 | 1.18719e-15 | 1.000000 |
| rad4          | 1.12867e-16 | 1.000000 | 6.62421e-16 | 1.000000 |

1.00000000 Pa, 4000.00000 K

=====  
Rate constant | True (fraction) | Effective (fraction)  
-----  
Total | 3.41497e-12 (1.00) | 6.28297e-13 (1.00)

-----  
species | PYtrue | Cumul | PYeffective | Cumul  
-----  
Benzyl+C2H2 | 0.816017 | 0.816017 | 0.000000 | 0.000000  
PhCH2CCH+H | 0.109584 | 0.925601 | 0.595618 | 0.595618  
PhCHCCH2+H | 0.0267098 | 0.952311 | 0.145175 | 0.740793  
Ph+Allene | 0.0193046 | 0.971615 | 0.104926 | 0.845719  
Indene+H | 0.0160484 | 0.987664 | 0.0872277 | 0.932947

|               |             |          |             |          |
|---------------|-------------|----------|-------------|----------|
| PAH3+H        | 0.00329013  | 0.990954 | 0.0178828   | 0.950829 |
| PAH7+H        | 0.00121791  | 0.992172 | 0.00661968  | 0.957449 |
| PAH9+H        | 0.000864009 | 0.993036 | 0.00469613  | 0.962145 |
| PhCCH+CH3     | 0.000720156 | 0.993756 | 0.00391424  | 0.966060 |
| rad19anti     | 0.000708493 | 0.994464 | 0.00385085  | 0.969910 |
| Ph+MeAc       | 0.000663934 | 0.995128 | 0.00360866  | 0.973519 |
| rad50         | 0.000616859 | 0.995745 | 0.00335280  | 0.976872 |
| rad38         | 0.000560144 | 0.996305 | 0.00304454  | 0.979916 |
| rad39         | 0.000491035 | 0.996796 | 0.00266891  | 0.982585 |
| rad51         | 0.000408498 | 0.997205 | 0.00222030  | 0.984806 |
| rad30         | 0.000396478 | 0.997601 | 0.00215497  | 0.986961 |
| rad35         | 0.000343096 | 0.997945 | 0.00186482  | 0.988825 |
| rad46         | 0.000239253 | 0.998184 | 0.00130040  | 0.990126 |
| rad59         | 0.000231903 | 0.998416 | 0.00126046  | 0.991386 |
| rad67         | 0.000214260 | 0.998630 | 0.00116456  | 0.992551 |
| PhCCCH3+H     | 0.000213580 | 0.998844 | 0.00116087  | 0.993712 |
| rad71         | 0.000187844 | 0.999031 | 0.00102098  | 0.994733 |
| rad19syn      | 0.000163941 | 0.999195 | 0.000891067 | 0.995624 |
| PAH10+CH3     | 0.000121536 | 0.999317 | 0.000660582 | 0.996284 |
| rad60syn      | 0.000108396 | 0.999425 | 0.000589161 | 0.996873 |
| rad60anti     | 8.05427e-05 | 0.999506 | 0.000437772 | 0.997311 |
| rad52         | 7.82960e-05 | 0.999584 | 0.000425560 | 0.997737 |
| rad58         | 7.77572e-05 | 0.999662 | 0.000422632 | 0.998159 |
| PAH1+H        | 7.70001e-05 | 0.999739 | 0.000418517 | 0.998578 |
| rad73         | 7.03552e-05 | 0.999809 | 0.000382400 | 0.998960 |
| PhcycC3H3_A+H | 3.98813e-05 | 0.999849 | 0.000216766 | 0.999177 |
| rad70         | 3.09908e-05 | 0.999880 | 0.000168444 | 0.999346 |
| PAH8+H        | 2.94355e-05 | 0.999910 | 0.000159990 | 0.999506 |
| rad72         | 2.58284e-05 | 0.999935 | 0.000140384 | 0.999646 |
| rad37         | 1.30848e-05 | 0.999948 | 7.11194e-05 | 0.999717 |
| rad34         | 1.30497e-05 | 0.999961 | 7.09289e-05 | 0.999788 |
| rad54         | 1.00584e-05 | 0.999972 | 5.46703e-05 | 0.999843 |
| rad65         | 9.63686e-06 | 0.999981 | 5.23790e-05 | 0.999895 |
| rad68syn      | 3.67778e-06 | 0.999985 | 1.99898e-05 | 0.999915 |
| rad68anti     | 2.34154e-06 | 0.999987 | 1.27269e-05 | 0.999928 |
| rad40syn      | 2.31359e-06 | 0.999990 | 1.25750e-05 | 0.999940 |
| rad64         | 2.19077e-06 | 0.999992 | 1.19074e-05 | 0.999952 |
| rad56         | 1.94741e-06 | 0.999994 | 1.05847e-05 | 0.999963 |
| rad40anti     | 1.74691e-06 | 0.999995 | 9.49492e-06 | 0.999972 |
| rad53         | 1.18744e-06 | 0.999997 | 6.45406e-06 | 0.999979 |
| rad55         | 1.16170e-06 | 0.999998 | 6.31418e-06 | 0.999985 |
| rad62         | 1.07271e-06 | 0.999999 | 5.83046e-06 | 0.999991 |
| rad61         | 9.59661e-07 | 1.000000 | 5.21602e-06 | 0.999996 |
| rad43         | 4.20278e-07 | 1.000000 | 2.28433e-06 | 0.999998 |
| rad42         | 2.24298e-07 | 1.000000 | 1.21912e-06 | 1.000000 |
| rad41         | 9.47630e-08 | 1.000000 | 5.15063e-07 | 1.000000 |
| rad23         | 1.67467e-11 | 1.000000 | 9.10230e-11 | 1.000000 |
| rad20         | 1.55048e-11 | 1.000000 | 8.42727e-11 | 1.000000 |
| rad9          | 8.53027e-12 | 1.000000 | 4.63644e-11 | 1.000000 |
| rad45         | 7.37351e-12 | 1.000000 | 4.00770e-11 | 1.000000 |
| rad21         | 5.98524e-12 | 1.000000 | 3.25314e-11 | 1.000000 |
| rad6          | 5.62357e-12 | 1.000000 | 3.05656e-11 | 1.000000 |
| rad11         | 3.62399e-12 | 1.000000 | 1.96974e-11 | 1.000000 |
| rad22         | 2.92855e-12 | 1.000000 | 1.59175e-11 | 1.000000 |
| rad8          | 1.76791e-12 | 1.000000 | 9.60910e-12 | 1.000000 |
| rad36         | 1.41299e-12 | 1.000000 | 7.68000e-12 | 1.000000 |
| rad18         | 1.21093e-12 | 1.000000 | 6.58174e-12 | 1.000000 |
| rad15         | 8.37176e-13 | 1.000000 | 4.55028e-12 | 1.000000 |
| rad47         | 7.97227e-13 | 1.000000 | 4.33315e-12 | 1.000000 |
| rad12         | 4.90408e-13 | 1.000000 | 2.66550e-12 | 1.000000 |
| rad24         | 4.12850e-13 | 1.000000 | 2.24395e-12 | 1.000000 |
| rad28         | 2.90782e-13 | 1.000000 | 1.58048e-12 | 1.000000 |
| rad7          | 2.68725e-13 | 1.000000 | 1.46059e-12 | 1.000000 |
| rad26         | 9.47037e-14 | 1.000000 | 5.14740e-13 | 1.000000 |
| rad13         | 4.73689e-14 | 1.000000 | 2.57463e-13 | 1.000000 |
| rad10         | 4.29254e-14 | 1.000000 | 2.33311e-13 | 1.000000 |
| rad25         | 3.78593e-14 | 1.000000 | 2.05776e-13 | 1.000000 |
| rad5          | 1.79285e-14 | 1.000000 | 9.74464e-14 | 1.000000 |
| rad33         | 5.47180e-15 | 1.000000 | 2.97407e-14 | 1.000000 |
| rad2          | 3.70442e-15 | 1.000000 | 2.01345e-14 | 1.000000 |
| rad1          | 2.08681e-15 | 1.000000 | 1.13424e-14 | 1.000000 |
| rad14         | 8.46088e-16 | 1.000000 | 4.59872e-15 | 1.000000 |
| rad27         | 4.00162e-16 | 1.000000 | 2.17499e-15 | 1.000000 |
| rad3          | 1.33395e-16 | 1.000000 | 7.25038e-16 | 1.000000 |
| rad4          | 7.38941e-17 | 1.000000 | 4.01635e-16 | 1.000000 |

0.10000000 Pa, 20.000000 K

=====

Rate constant | True (fraction) | Effective (fraction)

-----

Total | 1.34336e-156 (1.00 ) 1.34336e-156 (1.00 )

| species       | PYtrue      | Cumul    | PYeffective | Cumul    |
|---------------|-------------|----------|-------------|----------|
| Indene+H      | 0.918714    | 0.918714 | 0.918715    | 0.918715 |
| rad23         | 0.0773912   | 0.996105 | 0.0773913   | 0.996106 |
| rad45         | 0.00188210  | 0.997987 | 0.00188210  | 0.997988 |
| rad22         | 0.00171192  | 0.999699 | 0.00171192  | 0.999700 |
| rad6          | 0.000119066 | 0.999818 | 0.000119066 | 0.999819 |
| rad36         | 0.000117240 | 0.999936 | 0.000117240 | 0.999937 |
| rad11         | 6.35072e-05 | 0.999999 | 6.35073e-05 | 1.00000  |
| Benzyl+C2H2   | 8.11542e-07 | 1.000000 | 0.00000     | 1.00000  |
| rad7          | 1.55700e-08 | 1.000000 | 1.55700e-08 | 1.00000  |
| rad18         | 1.43244e-08 | 1.000000 | 1.43244e-08 | 1.00000  |
| rad20         | 9.42459e-09 | 1.000000 | 9.42460e-09 | 1.00000  |
| rad21         | 5.95672e-09 | 1.000000 | 5.95673e-09 | 1.00000  |
| rad13         | 5.78883e-11 | 1.000000 | 5.78883e-11 | 1.00000  |
| rad24         | 1.49632e-11 | 1.000000 | 1.49632e-11 | 1.00000  |
| rad3          | 9.34581e-13 | 1.000000 | 9.34582e-13 | 1.00000  |
| rad4          | 4.72480e-13 | 1.000000 | 4.72480e-13 | 1.00000  |
| rad33         | 9.20865e-14 | 1.000000 | 9.20866e-14 | 1.00000  |
| rad35         | 5.77153e-14 | 1.000000 | 5.77153e-14 | 1.00000  |
| rad2          | 1.23335e-14 | 1.000000 | 1.23335e-14 | 1.00000  |
| PAH9+H        | 1.06157e-14 | 1.000000 | 1.06158e-14 | 1.00000  |
| rad1          | 7.79508e-16 | 1.000000 | 7.79508e-16 | 1.00000  |
| rad38         | 9.30926e-17 | 1.000000 | 9.30927e-17 | 1.00000  |
| rad10         | 6.37423e-17 | 1.000000 | 6.37423e-17 | 1.00000  |
| rad30         | 4.14752e-19 | 1.000000 | 4.14752e-19 | 1.00000  |
| rad28         | 1.70943e-19 | 1.000000 | 1.70943e-19 | 1.00000  |
| rad25         | 1.56833e-20 | 1.000000 | 1.56834e-20 | 1.00000  |
| rad31         | 2.35601e-22 | 1.000000 | 2.35601e-22 | 1.00000  |
| rad15         | 3.89413e-23 | 1.000000 | 3.89413e-23 | 1.00000  |
| rad27         | 3.36035e-23 | 1.000000 | 3.36035e-23 | 1.00000  |
| rad26         | 9.27787e-24 | 1.000000 | 9.27787e-24 | 1.00000  |
| rad14         | 5.42970e-24 | 1.000000 | 5.42970e-24 | 1.00000  |
| PhCCH+CH3     | 7.35686e-25 | 1.000000 | 7.35687e-25 | 1.00000  |
| PhCHCCH2+H    | 7.47061e-26 | 1.000000 | 7.47061e-26 | 1.00000  |
| rad46         | 7.31454e-26 | 1.000000 | 7.31454e-26 | 1.00000  |
| PhCCCH3+H     | 6.93569e-27 | 1.000000 | 6.93569e-27 | 1.00000  |
| rad8          | 2.69149e-30 | 1.000000 | 2.69149e-30 | 1.00000  |
| rad9          | 2.35157e-30 | 1.000000 | 2.35157e-30 | 1.00000  |
| Ph+MeAc       | 4.21062e-32 | 1.000000 | 4.21063e-32 | 1.00000  |
| PAH7+H        | 2.48860e-33 | 1.000000 | 2.48860e-33 | 1.00000  |
| Ph+Allene     | 4.49263e-34 | 1.000000 | 4.49263e-34 | 1.00000  |
| rad39         | 5.44561e-35 | 1.000000 | 5.44561e-35 | 1.00000  |
| rad12         | 3.56157e-35 | 1.000000 | 3.56157e-35 | 1.00000  |
| rad60syn      | 5.09512e-38 | 1.000000 | 5.09513e-38 | 1.00000  |
| PhCH2CCH+H    | 2.59580e-39 | 1.000000 | 2.59580e-39 | 1.00000  |
| rad60anti     | 1.60587e-39 | 1.000000 | 1.60587e-39 | 1.00000  |
| rad37         | 5.71996e-41 | 1.000000 | 5.71997e-41 | 1.00000  |
| rad5          | 5.49598e-43 | 1.000000 | 5.49599e-43 | 1.00000  |
| PAH3+H        | 1.16808e-46 | 1.000000 | 1.16808e-46 | 1.00000  |
| rad50         | 9.12299e-47 | 1.000000 | 9.12300e-47 | 1.00000  |
| rad59         | 5.72442e-47 | 1.000000 | 5.72443e-47 | 1.00000  |
| rad19syn      | 5.49863e-52 | 1.000000 | 5.49864e-52 | 1.00000  |
| rad54         | 1.65358e-55 | 1.000000 | 1.65358e-55 | 1.00000  |
| PAH10+CH3     | 1.12020e-55 | 1.000000 | 1.12020e-55 | 1.00000  |
| rad52         | 3.67661e-56 | 1.000000 | 3.67662e-56 | 1.00000  |
| rad43         | 2.62867e-56 | 1.000000 | 2.62867e-56 | 1.00000  |
| rad62         | 5.11071e-58 | 1.000000 | 5.11071e-58 | 1.00000  |
| rad51         | 5.25758e-61 | 1.000000 | 5.25758e-61 | 1.00000  |
| rad70         | 4.76147e-62 | 1.000000 | 4.76147e-62 | 1.00000  |
| PhcycC3H3_A+H | 3.11357e-62 | 1.000000 | 3.11357e-62 | 1.00000  |
| rad55         | 1.52005e-62 | 1.000000 | 1.52005e-62 | 1.00000  |
| rad65         | 7.84461e-65 | 1.000000 | 7.84461e-65 | 1.00000  |
| rad58         | 1.44091e-65 | 1.000000 | 1.44091e-65 | 1.00000  |
| PAH1+H        | 5.69353e-66 | 1.000000 | 5.69353e-66 | 1.00000  |
| rad34         | 8.14589e-68 | 1.000000 | 8.14590e-68 | 1.00000  |
| rad42         | 4.59071e-71 | 1.000000 | 4.59071e-71 | 1.00000  |
| rad41         | 7.94968e-72 | 1.000000 | 7.94969e-72 | 1.00000  |
| rad47         | 2.39326e-72 | 1.000000 | 2.39327e-72 | 1.00000  |

0.100000000 Pa, 30.0000000 K

=====  
 Rate constant | True (fraction) | Effective (fraction)  
 -----  
 Total | 1.15918e-108 (1.00 ) | 1.15918e-108 (1.00 )

| species | PYtrue | Cumul | PYeffective | Cumul |
|---------|--------|-------|-------------|-------|
|---------|--------|-------|-------------|-------|

|               |             |          |             |          |
|---------------|-------------|----------|-------------|----------|
| Indene+H      | 0.944365    | 0.944365 | 0.944366    | 0.944366 |
| rad23         | 0.0540477   | 0.998413 | 0.0540478   | 0.998414 |
| rad45         | 0.00114274  | 0.999555 | 0.00114274  | 0.999557 |
| rad22         | 0.000186772 | 0.999742 | 0.000186772 | 0.999743 |
| rad6          | 0.000155175 | 0.999897 | 0.000155176 | 0.999898 |
| rad36         | 7.11618e-05 | 0.999969 | 7.11618e-05 | 0.999970 |
| rad11         | 2.99382e-05 | 0.999998 | 2.99382e-05 | 1.000000 |
| Benzyl+C2H2   | 1.04051e-06 | 1.000000 | 0.000000    | 1.000000 |
| rad7          | 2.02839e-08 | 1.000000 | 2.02840e-08 | 1.000000 |
| rad20         | 2.26081e-09 | 1.000000 | 2.26081e-09 | 1.000000 |
| rad18         | 1.54978e-09 | 1.000000 | 1.54978e-09 | 1.000000 |
| rad21         | 1.42749e-09 | 1.000000 | 1.42750e-09 | 1.000000 |
| rad13         | 7.03331e-11 | 1.000000 | 7.03331e-11 | 1.000000 |
| rad24         | 9.43329e-12 | 1.000000 | 9.43330e-12 | 1.000000 |
| rad3          | 2.70668e-12 | 1.000000 | 2.70668e-12 | 1.000000 |
| rad4          | 1.36857e-12 | 1.000000 | 1.36857e-12 | 1.000000 |
| rad33         | 1.18785e-13 | 1.000000 | 1.18785e-13 | 1.000000 |
| rad35         | 1.03478e-13 | 1.000000 | 1.03478e-13 | 1.000000 |
| rad2          | 7.15616e-14 | 1.000000 | 7.15617e-14 | 1.000000 |
| PAH9+H        | 1.72512e-14 | 1.000000 | 1.72512e-14 | 1.000000 |
| rad1          | 4.52550e-15 | 1.000000 | 4.52551e-15 | 1.000000 |
| rad10         | 6.57206e-16 | 1.000000 | 6.57206e-16 | 1.000000 |
| rad38         | 1.28507e-16 | 1.000000 | 1.28507e-16 | 1.000000 |
| rad28         | 4.25464e-19 | 1.000000 | 4.25464e-19 | 1.000000 |
| rad30         | 2.66146e-19 | 1.000000 | 2.66146e-19 | 1.000000 |
| rad25         | 5.61096e-21 | 1.000000 | 5.61096e-21 | 1.000000 |
| rad31         | 6.88631e-22 | 1.000000 | 6.88632e-22 | 1.000000 |
| rad27         | 2.05612e-22 | 1.000000 | 2.05612e-22 | 1.000000 |
| rad26         | 9.93008e-23 | 1.000000 | 9.93009e-23 | 1.000000 |
| rad15         | 2.55405e-23 | 1.000000 | 2.55405e-23 | 1.000000 |
| rad14         | 1.54234e-23 | 1.000000 | 1.54234e-23 | 1.000000 |
| PhCCH+CH3     | 2.11063e-24 | 1.000000 | 2.11063e-24 | 1.000000 |
| PhCHCCH2+H    | 4.52280e-25 | 1.000000 | 4.52280e-25 | 1.000000 |
| PhCCCH3+H     | 3.98439e-26 | 1.000000 | 3.98439e-26 | 1.000000 |
| rad46         | 3.25898e-26 | 1.000000 | 3.25898e-26 | 1.000000 |
| rad8          | 1.44835e-29 | 1.000000 | 1.44835e-29 | 1.000000 |
| rad9          | 6.06435e-30 | 1.000000 | 6.06436e-30 | 1.000000 |
| Ph+MeAc       | 2.11620e-31 | 1.000000 | 2.11620e-31 | 1.000000 |
| PAH7+H        | 1.28985e-32 | 1.000000 | 1.28985e-32 | 1.000000 |
| Ph+Allene     | 1.17984e-33 | 1.000000 | 1.17984e-33 | 1.000000 |
| rad12         | 3.78083e-34 | 1.000000 | 3.78084e-34 | 1.000000 |
| rad39         | 2.83310e-34 | 1.000000 | 2.83311e-34 | 1.000000 |
| rad60syn      | 5.93271e-38 | 1.000000 | 5.93272e-38 | 1.000000 |
| PhCH2CCH+H    | 6.90939e-39 | 1.000000 | 6.90940e-39 | 1.000000 |
| rad60anti     | 2.75992e-39 | 1.000000 | 2.75992e-39 | 1.000000 |
| rad37         | 3.99964e-40 | 1.000000 | 3.99964e-40 | 1.000000 |
| rad5          | 2.00505e-42 | 1.000000 | 2.00505e-42 | 1.000000 |
| PAH3+H        | 3.10957e-46 | 1.000000 | 3.10957e-46 | 1.000000 |
| rad59         | 1.52407e-46 | 1.000000 | 1.52407e-46 | 1.000000 |
| rad50         | 2.85742e-47 | 1.000000 | 2.85743e-47 | 1.000000 |
| rad19syn      | 1.38307e-51 | 1.000000 | 1.38307e-51 | 1.000000 |
| rad54         | 3.88771e-55 | 1.000000 | 3.88772e-55 | 1.000000 |
| PAH10+CH3     | 2.68973e-55 | 1.000000 | 2.68973e-55 | 1.000000 |
| rad52         | 9.33877e-56 | 1.000000 | 9.33878e-56 | 1.000000 |
| rad43         | 6.16986e-56 | 1.000000 | 6.16987e-56 | 1.000000 |
| rad62         | 1.12938e-57 | 1.000000 | 1.12938e-57 | 1.000000 |
| rad51         | 1.16872e-60 | 1.000000 | 1.16872e-60 | 1.000000 |
| rad70         | 8.47751e-62 | 1.000000 | 8.47752e-62 | 1.000000 |
| PhcycC3H3_A+H | 5.36298e-62 | 1.000000 | 5.36299e-62 | 1.000000 |
| rad55         | 2.65206e-62 | 1.000000 | 2.65207e-62 | 1.000000 |
| rad65         | 1.51628e-64 | 1.000000 | 1.51629e-64 | 1.000000 |
| rad58         | 2.43083e-65 | 1.000000 | 2.43084e-65 | 1.000000 |
| PAH1+H        | 7.19625e-66 | 1.000000 | 7.19626e-66 | 1.000000 |
| rad34         | 9.35444e-68 | 1.000000 | 9.35445e-68 | 1.000000 |
| rad42         | 3.99385e-71 | 1.000000 | 3.99385e-71 | 1.000000 |
| rad41         | 6.59253e-72 | 1.000000 | 6.59254e-72 | 1.000000 |
| rad47         | 1.74821e-72 | 1.000000 | 1.74821e-72 | 1.000000 |

0.100000000 Pa, 40.0000000 K

=====

| Rate constant | True (fraction)     | Effective (fraction) |
|---------------|---------------------|----------------------|
| Total         | 1.02415e-84 (1.00 ) | 1.02415e-84 (1.00 )  |

| species  | PYtrue      | Cumul    | PYeffective | Cumul    |
|----------|-------------|----------|-------------|----------|
| Indene+H | 0.960010    | 0.960010 | 0.960012    | 0.960012 |
| rad23    | 0.0389253   | 0.998935 | 0.0389254   | 0.998937 |
| rad45    | 0.000764065 | 0.999699 | 0.000764066 | 0.999701 |
| rad6     | 0.000173567 | 0.999873 | 0.000173567 | 0.999875 |

|               |             |          |             |          |
|---------------|-------------|----------|-------------|----------|
| rad22         | 6.09447e-05 | 0.999934 | 6.09448e-05 | 0.999936 |
| rad36         | 4.75518e-05 | 0.999981 | 4.75519e-05 | 0.999984 |
| rad11         | 1.68745e-05 | 0.999998 | 1.68745e-05 | 1.00000  |
| Benzyl+C2H2   | 1.52819e-06 | 1.000000 | 0.00000     | 1.00000  |
| rad7          | 2.20499e-08 | 1.000000 | 2.20499e-08 | 1.00000  |
| rad20         | 1.08568e-09 | 1.000000 | 1.08569e-09 | 1.00000  |
| rad21         | 6.84911e-10 | 1.000000 | 6.84912e-10 | 1.00000  |
| rad18         | 4.66931e-10 | 1.000000 | 4.66932e-10 | 1.00000  |
| rad13         | 7.63913e-11 | 1.000000 | 7.63914e-11 | 1.00000  |
| rad24         | 6.49115e-12 | 1.000000 | 6.49116e-12 | 1.00000  |
| rad3          | 5.08781e-12 | 1.000000 | 5.08782e-12 | 1.00000  |
| rad4          | 2.57334e-12 | 1.000000 | 2.57334e-12 | 1.00000  |
| rad2          | 2.14147e-13 | 1.000000 | 2.14147e-13 | 1.00000  |
| rad35         | 1.76160e-13 | 1.000000 | 1.76160e-13 | 1.00000  |
| rad33         | 1.32586e-13 | 1.000000 | 1.32586e-13 | 1.00000  |
| PAH9+H        | 2.65478e-14 | 1.000000 | 2.65478e-14 | 1.00000  |
| rad1          | 1.35591e-14 | 1.000000 | 1.35591e-14 | 1.00000  |
| rad10         | 2.76234e-15 | 1.000000 | 2.76235e-15 | 1.00000  |
| rad38         | 1.77008e-16 | 1.000000 | 1.77009e-16 | 1.00000  |
| rad28         | 9.50735e-19 | 1.000000 | 9.50737e-19 | 1.00000  |
| rad30         | 3.13562e-19 | 1.000000 | 3.13563e-19 | 1.00000  |
| rad25         | 5.23492e-21 | 1.000000 | 5.23493e-21 | 1.00000  |
| rad31         | 1.32068e-21 | 1.000000 | 1.32068e-21 | 1.00000  |
| rad27         | 7.09655e-22 | 1.000000 | 7.09656e-22 | 1.00000  |
| rad26         | 4.68722e-22 | 1.000000 | 4.68722e-22 | 1.00000  |
| rad14         | 3.54542e-23 | 1.000000 | 3.54543e-23 | 1.00000  |
| rad15         | 3.01303e-23 | 1.000000 | 3.01303e-23 | 1.00000  |
| PhCCH+CH3     | 5.24525e-24 | 1.000000 | 5.24526e-24 | 1.00000  |
| PhCHCCH2+H    | 1.69627e-24 | 1.000000 | 1.69628e-24 | 1.00000  |
| PhCCCH3+H     | 1.47800e-25 | 1.000000 | 1.47800e-25 | 1.00000  |
| rad46         | 2.31583e-26 | 1.000000 | 2.31583e-26 | 1.00000  |
| rad8          | 5.33307e-29 | 1.000000 | 5.33307e-29 | 1.00000  |
| rad9          | 1.49543e-29 | 1.000000 | 1.49543e-29 | 1.00000  |
| Ph+MeAc       | 7.66989e-31 | 1.000000 | 7.66991e-31 | 1.00000  |
| PAH7+H        | 4.70314e-32 | 1.000000 | 4.70315e-32 | 1.00000  |
| Ph+Allene     | 3.02123e-33 | 1.000000 | 3.02124e-33 | 1.00000  |
| rad12         | 2.04857e-33 | 1.000000 | 2.04857e-33 | 1.00000  |
| rad39         | 1.04464e-33 | 1.000000 | 1.04465e-33 | 1.00000  |
| rad60syn      | 1.43787e-37 | 1.000000 | 1.43787e-37 | 1.00000  |
| PhCH2CCH+H    | 1.83839e-38 | 1.000000 | 1.83840e-38 | 1.00000  |
| rad60anti     | 6.98221e-39 | 1.000000 | 6.98223e-39 | 1.00000  |
| rad37         | 1.68690e-39 | 1.000000 | 1.68690e-39 | 1.00000  |
| rad5          | 6.14140e-42 | 1.000000 | 6.14141e-42 | 1.00000  |
| PAH3+H        | 8.42354e-46 | 1.000000 | 8.42355e-46 | 1.00000  |
| rad59         | 4.12631e-46 | 1.000000 | 4.12632e-46 | 1.00000  |
| rad50         | 6.87449e-47 | 1.000000 | 6.87450e-47 | 1.00000  |
| rad19syn      | 3.70026e-51 | 1.000000 | 3.70026e-51 | 1.00000  |
| rad54         | 9.95453e-55 | 1.000000 | 9.95455e-55 | 1.00000  |
| PAH10+CH3     | 6.89710e-55 | 1.000000 | 6.89711e-55 | 1.00000  |
| rad52         | 2.51469e-55 | 1.000000 | 2.51469e-55 | 1.00000  |
| rad43         | 1.58088e-55 | 1.000000 | 1.58089e-55 | 1.00000  |
| rad62         | 2.77162e-57 | 1.000000 | 2.77163e-57 | 1.00000  |
| rad51         | 2.87457e-60 | 1.000000 | 2.87457e-60 | 1.00000  |
| rad70         | 1.77813e-61 | 1.000000 | 1.77814e-61 | 1.00000  |
| PhcycC3H3_A+H | 1.09905e-61 | 1.000000 | 1.09905e-61 | 1.00000  |
| rad55         | 5.48118e-62 | 1.000000 | 5.48119e-62 | 1.00000  |
| rad65         | 3.37244e-64 | 1.000000 | 3.37245e-64 | 1.00000  |
| rad58         | 4.90766e-65 | 1.000000 | 4.90766e-65 | 1.00000  |
| PAH1+H        | 1.18331e-65 | 1.000000 | 1.18331e-65 | 1.00000  |
| rad34         | 1.44595e-67 | 1.000000 | 1.44595e-67 | 1.00000  |
| rad42         | 5.15797e-71 | 1.000000 | 5.15798e-71 | 1.00000  |
| rad41         | 8.26585e-72 | 1.000000 | 8.26586e-72 | 1.00000  |
| rad47         | 2.16057e-72 | 1.000000 | 2.16057e-72 | 1.00000  |

0.100000000 Pa, 50.0000000 K

=====

| Rate constant | True (fraction)     | Effective (fraction) |
|---------------|---------------------|----------------------|
| Total         | 2.31816e-70 (1.00 ) | 2.31816e-70 (1.00 )  |

| species     | PYtrue      | Cumul    | PYeffective | Cumul    |
|-------------|-------------|----------|-------------|----------|
| Indene+H    | 0.970519    | 0.970519 | 0.970521    | 0.970521 |
| rad23       | 0.0286811   | 0.999200 | 0.0286812   | 0.999202 |
| rad45       | 0.000535816 | 0.999736 | 0.000535817 | 0.999738 |
| rad6        | 0.000187190 | 0.999923 | 0.000187191 | 0.999925 |
| rad36       | 3.33206e-05 | 0.999956 | 3.33207e-05 | 0.999959 |
| rad22       | 3.10711e-05 | 0.999987 | 3.10712e-05 | 0.999990 |
| rad11       | 1.05040e-05 | 0.999998 | 1.05040e-05 | 1.000000 |
| Benzyl+C2H2 | 2.26046e-06 | 1.00000  | 0.00000     | 1.00000  |

|               |             |         |             |         |
|---------------|-------------|---------|-------------|---------|
| rad7          | 2.31633e-08 | 1.00000 | 2.31633e-08 | 1.00000 |
| rad20         | 6.62620e-10 | 1.00000 | 6.62621e-10 | 1.00000 |
| rad21         | 4.17763e-10 | 1.00000 | 4.17764e-10 | 1.00000 |
| rad18         | 2.05647e-10 | 1.00000 | 2.05647e-10 | 1.00000 |
| rad13         | 8.10761e-11 | 1.00000 | 8.10763e-11 | 1.00000 |
| rad3          | 8.31273e-12 | 1.00000 | 8.31275e-12 | 1.00000 |
| rad24         | 4.66204e-12 | 1.00000 | 4.66205e-12 | 1.00000 |
| rad4          | 4.20632e-12 | 1.00000 | 4.20633e-12 | 1.00000 |
| rad2          | 5.17587e-13 | 1.00000 | 5.17588e-13 | 1.00000 |
| rad35         | 3.41626e-13 | 1.00000 | 3.41627e-13 | 1.00000 |
| rad33         | 1.43036e-13 | 1.00000 | 1.43036e-13 | 1.00000 |
| PAH9+H        | 4.66412e-14 | 1.00000 | 4.66413e-14 | 1.00000 |
| rad1          | 3.28296e-14 | 1.00000 | 3.28296e-14 | 1.00000 |
| rad10         | 8.62930e-15 | 1.00000 | 8.62932e-15 | 1.00000 |
| rad38         | 2.81506e-16 | 1.00000 | 2.81507e-16 | 1.00000 |
| rad28         | 2.26283e-18 | 1.00000 | 2.26283e-18 | 1.00000 |
| rad30         | 7.30400e-19 | 1.00000 | 7.30401e-19 | 1.00000 |
| rad25         | 8.21679e-21 | 1.00000 | 8.21680e-21 | 1.00000 |
| rad31         | 2.21830e-21 | 1.00000 | 2.21831e-21 | 1.00000 |
| rad27         | 2.20993e-21 | 1.00000 | 2.20993e-21 | 1.00000 |
| rad26         | 1.84083e-21 | 1.00000 | 1.84084e-21 | 1.00000 |
| rad14         | 8.56573e-23 | 1.00000 | 8.56575e-23 | 1.00000 |
| rad15         | 5.47557e-23 | 1.00000 | 5.47559e-23 | 1.00000 |
| PhCCH+CH3     | 1.39961e-23 | 1.00000 | 1.39961e-23 | 1.00000 |
| PhCHCCH2+H    | 6.01849e-24 | 1.00000 | 6.01850e-24 | 1.00000 |
| PhCCCH3+H     | 5.28424e-25 | 1.00000 | 5.28425e-25 | 1.00000 |
| rad46         | 2.46311e-26 | 1.00000 | 2.46311e-26 | 1.00000 |
| rad8          | 1.93829e-28 | 1.00000 | 1.93830e-28 | 1.00000 |
| rad9          | 4.09131e-29 | 1.00000 | 4.09132e-29 | 1.00000 |
| Ph+MeAc       | 2.81872e-30 | 1.00000 | 2.81872e-30 | 1.00000 |
| PAH7+H        | 1.69213e-31 | 1.00000 | 1.69213e-31 | 1.00000 |
| rad12         | 9.85759e-33 | 1.00000 | 9.85761e-33 | 1.00000 |
| Ph+Allene     | 8.73608e-33 | 1.00000 | 8.73610e-33 | 1.00000 |
| rad39         | 3.82276e-33 | 1.00000 | 3.82277e-33 | 1.00000 |
| rad60syn      | 4.09561e-37 | 1.00000 | 4.09562e-37 | 1.00000 |
| PhCH2CCH+H    | 5.63152e-38 | 1.00000 | 5.63154e-38 | 1.00000 |
| rad60anti     | 2.02925e-38 | 1.00000 | 2.02926e-38 | 1.00000 |
| rad37         | 6.93608e-39 | 1.00000 | 6.93610e-39 | 1.00000 |
| rad5          | 2.07829e-41 | 1.00000 | 2.07830e-41 | 1.00000 |
| PAH3+H        | 2.66111e-45 | 1.00000 | 2.66112e-45 | 1.00000 |
| rad59         | 1.30207e-45 | 1.00000 | 1.30207e-45 | 1.00000 |
| rad50         | 2.13608e-46 | 1.00000 | 2.13608e-46 | 1.00000 |
| rad19syn      | 1.19630e-50 | 1.00000 | 1.19631e-50 | 1.00000 |
| rad54         | 3.13758e-54 | 1.00000 | 3.13758e-54 | 1.00000 |
| PAH10+CH3     | 2.17828e-54 | 1.00000 | 2.17829e-54 | 1.00000 |
| rad52         | 8.15350e-55 | 1.00000 | 8.15352e-55 | 1.00000 |
| rad43         | 4.99493e-55 | 1.00000 | 4.99494e-55 | 1.00000 |
| rad62         | 8.49620e-57 | 1.00000 | 8.49622e-57 | 1.00000 |
| rad51         | 8.81782e-60 | 1.00000 | 8.81784e-60 | 1.00000 |
| rad70         | 4.87039e-61 | 1.00000 | 4.87041e-61 | 1.00000 |
| PhcycC3H3_A+H | 2.96137e-61 | 1.00000 | 2.96138e-61 | 1.00000 |
| rad55         | 1.48538e-61 | 1.00000 | 1.48538e-61 | 1.00000 |
| rad65         | 9.63368e-64 | 1.00000 | 9.63370e-64 | 1.00000 |
| rad58         | 1.30824e-64 | 1.00000 | 1.30824e-64 | 1.00000 |
| PAH1+H        | 2.72753e-65 | 1.00000 | 2.72754e-65 | 1.00000 |
| rad34         | 3.19568e-67 | 1.00000 | 3.19569e-67 | 1.00000 |
| rad42         | 1.01138e-70 | 1.00000 | 1.01138e-70 | 1.00000 |
| rad41         | 1.59085e-71 | 1.00000 | 1.59086e-71 | 1.00000 |
| rad47         | 4.09204e-72 | 1.00000 | 4.09205e-72 | 1.00000 |

0.100000000 Pa, 60.0000000 K

=====

| Rate constant | True (fraction)     | Effective (fraction) |
|---------------|---------------------|----------------------|
| Total         | 8.44107e-61 (1.00 ) | 8.44104e-61 (1.00 )  |

| species     | PYtrue      | Cumul    | PYeffective | Cumul    |
|-------------|-------------|----------|-------------|----------|
| Indene+H    | 0.977867    | 0.977867 | 0.977870    | 0.977870 |
| rad23       | 0.0214933   | 0.999360 | 0.0214933   | 0.999363 |
| rad45       | 0.000387142 | 0.999747 | 0.000387144 | 0.999750 |
| rad6        | 0.000199358 | 0.999947 | 0.000199359 | 0.999950 |
| rad36       | 2.40552e-05 | 0.999971 | 2.40552e-05 | 0.999974 |
| rad22       | 1.92539e-05 | 0.999990 | 1.92540e-05 | 0.999993 |
| rad11       | 6.96886e-06 | 0.999997 | 6.96888e-06 | 1.00000  |
| Benzyl+C2H2 | 3.25224e-06 | 1.00000  | 0.00000     | 1.00000  |
| rad7        | 2.41278e-08 | 1.00000  | 2.41279e-08 | 1.00000  |
| rad20       | 4.55944e-10 | 1.00000  | 4.55946e-10 | 1.00000  |
| rad21       | 2.87347e-10 | 1.00000  | 2.87348e-10 | 1.00000  |
| rad18       | 1.10279e-10 | 1.00000  | 1.10279e-10 | 1.00000  |

|               |             |         |             |         |
|---------------|-------------|---------|-------------|---------|
| rad13         | 8.55052e-11 | 1.00000 | 8.55054e-11 | 1.00000 |
| rad3          | 1.26882e-11 | 1.00000 | 1.26882e-11 | 1.00000 |
| rad4          | 6.42387e-12 | 1.00000 | 6.42389e-12 | 1.00000 |
| rad24         | 3.43926e-12 | 1.00000 | 3.43927e-12 | 1.00000 |
| rad2          | 1.13465e-12 | 1.00000 | 1.13466e-12 | 1.00000 |
| rad35         | 6.96631e-13 | 1.00000 | 6.96633e-13 | 1.00000 |
| rad33         | 1.52551e-13 | 1.00000 | 1.52552e-13 | 1.00000 |
| PAH9+H        | 1.01438e-13 | 1.00000 | 1.01439e-13 | 1.00000 |
| rad1          | 7.21245e-14 | 1.00000 | 7.21248e-14 | 1.00000 |
| rad10         | 2.34654e-14 | 1.00000 | 2.34654e-14 | 1.00000 |
| rad38         | 5.75819e-16 | 1.00000 | 5.75821e-16 | 1.00000 |
| rad30         | 2.95501e-17 | 1.00000 | 2.95502e-17 | 1.00000 |
| rad28         | 6.23434e-18 | 1.00000 | 6.23436e-18 | 1.00000 |
| rad25         | 2.20795e-20 | 1.00000 | 2.20796e-20 | 1.00000 |
| rad26         | 7.36419e-21 | 1.00000 | 7.36422e-21 | 1.00000 |
| rad27         | 7.19556e-21 | 1.00000 | 7.19558e-21 | 1.00000 |
| rad31         | 3.50027e-21 | 1.00000 | 3.50028e-21 | 1.00000 |
| rad15         | 6.38935e-22 | 1.00000 | 6.38937e-22 | 1.00000 |
| rad14         | 2.39656e-22 | 1.00000 | 2.39657e-22 | 1.00000 |
| PhCCH+CH3     | 4.36909e-23 | 1.00000 | 4.36910e-23 | 1.00000 |
| PhCHCCH2+H    | 2.34041e-23 | 1.00000 | 2.34042e-23 | 1.00000 |
| PhCCCH3+H     | 2.09438e-24 | 1.00000 | 2.09439e-24 | 1.00000 |
| rad46         | 3.89071e-26 | 1.00000 | 3.89072e-26 | 1.00000 |
| rad8          | 7.92421e-28 | 1.00000 | 7.92424e-28 | 1.00000 |
| rad9          | 1.33154e-28 | 1.00000 | 1.33155e-28 | 1.00000 |
| Ph+MeAc       | 1.18616e-29 | 1.00000 | 1.18616e-29 | 1.00000 |
| PAH7+H        | 6.80599e-31 | 1.00000 | 6.80601e-31 | 1.00000 |
| rad12         | 5.06149e-32 | 1.00000 | 5.06151e-32 | 1.00000 |
| Ph+Allene     | 3.04115e-32 | 1.00000 | 3.04116e-32 | 1.00000 |
| rad39         | 1.57014e-32 | 1.00000 | 1.57014e-32 | 1.00000 |
| rad60syn      | 1.40898e-36 | 1.00000 | 1.40898e-36 | 1.00000 |
| PhCH2CCH+H    | 2.10486e-37 | 1.00000 | 2.10486e-37 | 1.00000 |
| rad60anti     | 7.12223e-38 | 1.00000 | 7.12225e-38 | 1.00000 |
| rad37         | 3.22905e-38 | 1.00000 | 3.22906e-38 | 1.00000 |
| rad5          | 8.47842e-41 | 1.00000 | 8.47845e-41 | 1.00000 |
| PAH3+H        | 1.03494e-44 | 1.00000 | 1.03495e-44 | 1.00000 |
| rad59         | 5.05597e-45 | 1.00000 | 5.05598e-45 | 1.00000 |
| rad50         | 8.22191e-46 | 1.00000 | 8.22193e-46 | 1.00000 |
| rad19syn      | 4.88363e-50 | 1.00000 | 4.88365e-50 | 1.00000 |
| rad54         | 1.26580e-53 | 1.00000 | 1.26580e-53 | 1.00000 |
| PAH10+CH3     | 8.81701e-54 | 1.00000 | 8.81704e-54 | 1.00000 |
| rad52         | 3.33010e-54 | 1.00000 | 3.33011e-54 | 1.00000 |
| rad43         | 2.02252e-54 | 1.00000 | 2.02252e-54 | 1.00000 |
| rad62         | 3.36979e-56 | 1.00000 | 3.36980e-56 | 1.00000 |
| rad51         | 3.49629e-59 | 1.00000 | 3.49630e-59 | 1.00000 |
| rad70         | 1.78346e-60 | 1.00000 | 1.78346e-60 | 1.00000 |
| PhcycC3H3_A+H | 1.07191e-60 | 1.00000 | 1.07191e-60 | 1.00000 |
| rad55         | 5.39764e-61 | 1.00000 | 5.39766e-61 | 1.00000 |
| rad65         | 3.63504e-63 | 1.00000 | 3.63505e-63 | 1.00000 |
| rad58         | 4.69907e-64 | 1.00000 | 4.69909e-64 | 1.00000 |
| PAH1+H        | 8.83951e-65 | 1.00000 | 8.83954e-65 | 1.00000 |
| rad34         | 1.00620e-66 | 1.00000 | 1.00620e-66 | 1.00000 |
| rad42         | 2.93930e-70 | 1.00000 | 2.93931e-70 | 1.00000 |
| rad41         | 4.57154e-71 | 1.00000 | 4.57155e-71 | 1.00000 |
| rad47         | 1.13706e-71 | 1.00000 | 1.13706e-71 | 1.00000 |

0.100000000 Pa, 70.0000000 K

=====

| Rate constant | True (fraction)     | Effective (fraction) |
|---------------|---------------------|----------------------|
| Total         | 5.61998e-54 (1.00 ) | 5.61996e-54 (1.00 )  |

| species     | PYtrue      | Cumul    | PYeffective | Cumul    |
|-------------|-------------|----------|-------------|----------|
| Indene+H    | 0.983146    | 0.983146 | 0.983151    | 0.983151 |
| rad23       | 0.0163167   | 0.999463 | 0.0163168   | 0.999468 |
| rad45       | 0.000285615 | 0.999748 | 0.000285616 | 0.999753 |
| rad6        | 0.000211352 | 0.999960 | 0.000211353 | 0.999965 |
| rad36       | 1.77328e-05 | 0.999977 | 1.77329e-05 | 0.999983 |
| rad22       | 1.30976e-05 | 0.999990 | 1.30976e-05 | 0.999996 |
| rad11       | 4.83471e-06 | 0.999995 | 4.83473e-06 | 1.00000  |
| Benzyl+C2H2 | 4.55551e-06 | 1.000000 | 0.00000     | 1.00000  |
| rad7        | 2.51066e-08 | 1.000000 | 2.51067e-08 | 1.00000  |
| rad20       | 3.37013e-10 | 1.000000 | 3.37015e-10 | 1.00000  |
| rad21       | 2.12348e-10 | 1.000000 | 2.12349e-10 | 1.00000  |
| rad13       | 9.00816e-11 | 1.000000 | 9.00820e-11 | 1.00000  |
| rad18       | 6.66653e-11 | 1.000000 | 6.66656e-11 | 1.00000  |
| rad3        | 1.86095e-11 | 1.000000 | 1.86096e-11 | 1.00000  |
| rad4        | 9.42775e-12 | 1.000000 | 9.42779e-12 | 1.00000  |
| rad24       | 2.58515e-12 | 1.000000 | 2.58516e-12 | 1.00000  |

|               |             |          |             |         |
|---------------|-------------|----------|-------------|---------|
| rad2          | 2.36445e-12 | 1.000000 | 2.36446e-12 | 1.00000 |
| rad35         | 1.34864e-12 | 1.000000 | 1.34865e-12 | 1.00000 |
| PAH9+H        | 2.50120e-13 | 1.000000 | 2.50121e-13 | 1.00000 |
| rad33         | 1.62069e-13 | 1.000000 | 1.62070e-13 | 1.00000 |
| rad1          | 1.50672e-13 | 1.000000 | 1.50672e-13 | 1.00000 |
| rad10         | 5.90933e-14 | 1.000000 | 5.90936e-14 | 1.00000 |
| rad38         | 1.71480e-15 | 1.000000 | 1.71481e-15 | 1.00000 |
| rad30         | 1.03898e-15 | 1.000000 | 1.03898e-15 | 1.00000 |
| rad28         | 2.20731e-17 | 1.000000 | 2.20732e-17 | 1.00000 |
| rad25         | 2.74726e-19 | 1.000000 | 2.74728e-19 | 1.00000 |
| rad15         | 9.51151e-20 | 1.000000 | 9.51156e-20 | 1.00000 |
| rad26         | 3.42340e-20 | 1.000000 | 3.42341e-20 | 1.00000 |
| rad27         | 2.62214e-20 | 1.000000 | 2.62215e-20 | 1.00000 |
| rad31         | 5.33119e-21 | 1.000000 | 5.33121e-21 | 1.00000 |
| rad14         | 8.72366e-22 | 1.000000 | 8.72370e-22 | 1.00000 |
| PhCCH+CH3     | 1.79438e-22 | 1.000000 | 1.79439e-22 | 1.00000 |
| PhCHCCH2+H    | 1.14228e-22 | 1.000000 | 1.14229e-22 | 1.00000 |
| PhCCCH3+H     | 1.05428e-23 | 1.000000 | 1.05428e-23 | 1.00000 |
| rad46         | 1.08555e-25 | 1.000000 | 1.08555e-25 | 1.00000 |
| rad8          | 4.17060e-27 | 1.000000 | 4.17062e-27 | 1.00000 |
| rad9          | 5.76108e-28 | 1.000000 | 5.76111e-28 | 1.00000 |
| Ph+MeAc       | 6.52329e-29 | 1.000000 | 6.52332e-29 | 1.00000 |
| PAH7+H        | 3.50090e-30 | 1.000000 | 3.50092e-30 | 1.00000 |
| rad12         | 3.24853e-31 | 1.000000 | 3.24855e-31 | 1.00000 |
| Ph+Allene     | 1.41833e-31 | 1.000000 | 1.41834e-31 | 1.00000 |
| rad39         | 8.27039e-32 | 1.000000 | 8.27042e-32 | 1.00000 |
| rad60syn      | 6.49472e-36 | 1.000000 | 6.49475e-36 | 1.00000 |
| PhCH2CCH+H    | 1.06376e-36 | 1.000000 | 1.06376e-36 | 1.00000 |
| rad60anti     | 3.35364e-37 | 1.000000 | 3.35366e-37 | 1.00000 |
| rad37         | 1.95865e-37 | 1.000000 | 1.95865e-37 | 1.00000 |
| rad5          | 4.67064e-40 | 1.000000 | 4.67066e-40 | 1.00000 |
| PAH3+H        | 5.47612e-44 | 1.000000 | 5.47615e-44 | 1.00000 |
| rad59         | 2.67017e-44 | 1.000000 | 2.67018e-44 | 1.00000 |
| rad50         | 4.30483e-45 | 1.000000 | 4.30485e-45 | 1.00000 |
| rad19syn      | 2.76195e-49 | 1.000000 | 2.76196e-49 | 1.00000 |
| rad54         | 7.14664e-53 | 1.000000 | 7.14667e-53 | 1.00000 |
| PAH10+CH3     | 5.00120e-53 | 1.000000 | 5.00122e-53 | 1.00000 |
| rad52         | 1.88109e-53 | 1.000000 | 1.88110e-53 | 1.00000 |
| rad43         | 1.14747e-53 | 1.000000 | 1.14747e-53 | 1.00000 |
| rad62         | 1.88598e-55 | 1.000000 | 1.88599e-55 | 1.00000 |
| rad51         | 1.95459e-58 | 1.000000 | 1.95460e-58 | 1.00000 |
| rad70         | 9.44416e-60 | 1.000000 | 9.44420e-60 | 1.00000 |
| PhcycC3H3_A+H | 5.63059e-60 | 1.000000 | 5.63062e-60 | 1.00000 |
| rad55         | 2.84287e-60 | 1.000000 | 2.84288e-60 | 1.00000 |
| rad65         | 1.96574e-62 | 1.000000 | 1.96575e-62 | 1.00000 |
| rad58         | 2.45504e-63 | 1.000000 | 2.45505e-63 | 1.00000 |
| PAH1+H        | 4.29879e-64 | 1.000000 | 4.29881e-64 | 1.00000 |
| rad34         | 4.79843e-66 | 1.000000 | 4.79845e-66 | 1.00000 |
| rad42         | 1.33008e-69 | 1.000000 | 1.33009e-69 | 1.00000 |
| rad41         | 2.05695e-70 | 1.000000 | 2.05696e-70 | 1.00000 |
| rad47         | 4.85756e-71 | 1.000000 | 4.85758e-71 | 1.00000 |

0.100000000 Pa, 80.0000000 K

=====

| Rate constant | True (fraction)     | Effective (fraction) |
|---------------|---------------------|----------------------|
| Total         | 7.28864e-49 (1.00 ) | 7.28860e-49 (1.00 )  |

| species     | PYtrue      | Cumul    | PYeffective | Cumul    |
|-------------|-------------|----------|-------------|----------|
| Indene+H    | 0.987018    | 0.987018 | 0.987024    | 0.987024 |
| rad23       | 0.0125120   | 0.999530 | 0.0125121   | 0.999536 |
| rad6        | 0.000223842 | 0.999754 | 0.000223843 | 0.999760 |
| rad45       | 0.000213973 | 0.999968 | 0.000213975 | 0.999974 |
| rad36       | 1.32758e-05 | 0.999981 | 1.32759e-05 | 0.999987 |
| rad22       | 9.36499e-06 | 0.999990 | 9.36505e-06 | 0.999997 |
| Benzyl+C2H2 | 6.25108e-06 | 0.999997 | 0.00000     | 0.999997 |
| rad11       | 3.46655e-06 | 1.00000  | 3.46657e-06 | 1.00000  |
| rad7        | 2.61717e-08 | 1.00000  | 2.61718e-08 | 1.00000  |
| rad20       | 2.61125e-10 | 1.00000  | 2.61127e-10 | 1.00000  |
| rad21       | 1.64522e-10 | 1.00000  | 1.64523e-10 | 1.00000  |
| rad13       | 9.50163e-11 | 1.00000  | 9.50169e-11 | 1.00000  |
| rad18       | 4.36530e-11 | 1.00000  | 4.36533e-11 | 1.00000  |
| rad3        | 2.65700e-11 | 1.00000  | 2.65701e-11 | 1.00000  |
| rad4        | 1.34703e-11 | 1.00000  | 1.34704e-11 | 1.00000  |
| rad2        | 4.78495e-12 | 1.00000  | 4.78498e-12 | 1.00000  |
| rad35       | 2.40854e-12 | 1.00000  | 2.40855e-12 | 1.00000  |
| rad24       | 1.97017e-12 | 1.00000  | 1.97018e-12 | 1.00000  |
| PAH9+H      | 6.00465e-13 | 1.00000  | 6.00468e-13 | 1.00000  |
| rad1        | 3.05767e-13 | 1.00000  | 3.05768e-13 | 1.00000  |



|               |             |         |             |         |
|---------------|-------------|---------|-------------|---------|
| rad33         | 1.72088e-13 | 1.00000 | 1.72089e-13 | 1.00000 |
| rad10         | 1.41396e-13 | 1.00000 | 1.41397e-13 | 1.00000 |
| rad30         | 1.51744e-14 | 1.00000 | 1.51745e-14 | 1.00000 |
| rad38         | 6.28802e-15 | 1.00000 | 6.28806e-15 | 1.00000 |
| rad28         | 1.02425e-16 | 1.00000 | 1.02426e-16 | 1.00000 |
| rad25         | 6.02023e-18 | 1.00000 | 6.02027e-18 | 1.00000 |
| rad15         | 4.85320e-18 | 1.00000 | 4.85323e-18 | 1.00000 |
| rad26         | 1.96531e-19 | 1.00000 | 1.96532e-19 | 1.00000 |
| rad27         | 1.03217e-19 | 1.00000 | 1.03218e-19 | 1.00000 |
| rad31         | 7.93604e-21 | 1.00000 | 7.93609e-21 | 1.00000 |
| rad14         | 4.69052e-21 | 1.00000 | 4.69055e-21 | 1.00000 |
| PhCCH+CH3     | 1.16484e-21 | 1.00000 | 1.16485e-21 | 1.00000 |
| PhCHCCH2+H    | 8.12551e-22 | 1.00000 | 8.12556e-22 | 1.00000 |
| PhCCCH3+H     | 7.98975e-23 | 1.00000 | 7.98980e-23 | 1.00000 |
| rad46         | 1.19014e-24 | 1.00000 | 1.19015e-24 | 1.00000 |
| rad8          | 3.41355e-26 | 1.00000 | 3.41357e-26 | 1.00000 |
| rad9          | 4.03624e-27 | 1.00000 | 4.03627e-27 | 1.00000 |
| Ph+MeAc       | 5.72389e-28 | 1.00000 | 5.72392e-28 | 1.00000 |
| PAH7+H        | 2.83620e-29 | 1.00000 | 2.83622e-29 | 1.00000 |
| rad12         | 3.21312e-30 | 1.00000 | 3.21314e-30 | 1.00000 |
| Ph+Allene     | 1.07570e-30 | 1.00000 | 1.07571e-30 | 1.00000 |
| rad39         | 6.87551e-31 | 1.00000 | 6.87555e-31 | 1.00000 |
| rad60syn      | 4.88943e-35 | 1.00000 | 4.88946e-35 | 1.00000 |
| PhCH2CCH+H    | 8.79945e-36 | 1.00000 | 8.79950e-36 | 1.00000 |
| rad60anti     | 2.57295e-36 | 1.00000 | 2.57296e-36 | 1.00000 |
| rad37         | 1.90945e-36 | 1.00000 | 1.90947e-36 | 1.00000 |
| rad5          | 4.23060e-39 | 1.00000 | 4.23063e-39 | 1.00000 |
| PAH3+H        | 4.76351e-43 | 1.00000 | 4.76354e-43 | 1.00000 |
| rad59         | 2.31775e-43 | 1.00000 | 2.31776e-43 | 1.00000 |
| rad50         | 3.70749e-44 | 1.00000 | 3.70751e-44 | 1.00000 |
| rad19syn      | 2.60245e-48 | 1.00000 | 2.60246e-48 | 1.00000 |
| rad54         | 6.77505e-52 | 1.00000 | 6.77509e-52 | 1.00000 |
| PAH10+CH3     | 4.77056e-52 | 1.00000 | 4.77059e-52 | 1.00000 |
| rad52         | 1.76815e-52 | 1.00000 | 1.76816e-52 | 1.00000 |
| rad43         | 1.09466e-52 | 1.00000 | 1.09467e-52 | 1.00000 |
| rad62         | 1.78412e-54 | 1.00000 | 1.78413e-54 | 1.00000 |
| rad51         | 1.84542e-57 | 1.00000 | 1.84543e-57 | 1.00000 |
| rad70         | 8.61339e-59 | 1.00000 | 8.61344e-59 | 1.00000 |
| PhcycC3H3_A+H | 5.10761e-59 | 1.00000 | 5.10764e-59 | 1.00000 |
| rad55         | 2.58337e-59 | 1.00000 | 2.58338e-59 | 1.00000 |
| rad65         | 1.81824e-61 | 1.00000 | 1.81825e-61 | 1.00000 |
| rad58         | 2.21891e-62 | 1.00000 | 2.21892e-62 | 1.00000 |
| PAH1+H        | 3.70292e-63 | 1.00000 | 3.70295e-63 | 1.00000 |
| rad34         | 4.08104e-65 | 1.00000 | 4.08106e-65 | 1.00000 |
| rad42         | 1.09557e-68 | 1.00000 | 1.09558e-68 | 1.00000 |
| rad41         | 1.69307e-69 | 1.00000 | 1.69308e-69 | 1.00000 |
| rad47         | 3.73290e-70 | 1.00000 | 3.73293e-70 | 1.00000 |

0.100000000 Pa, 90.0000000 K

=====

| Rate constant | True (fraction)     | Effective (fraction) |
|---------------|---------------------|----------------------|
| Total         | 6.85154e-45 (1.00 ) | 6.85148e-45 (1.00 )  |

| species     | PYtrue      | Cumul    | PYeffective | Cumul    |
|-------------|-------------|----------|-------------|----------|
| Indene+H    | 0.989902    | 0.989902 | 0.989911    | 0.989911 |
| rad23       | 0.00967014  | 0.999572 | 0.00967022  | 0.999581 |
| rad6        | 0.000237262 | 0.999809 | 0.000237264 | 0.999818 |
| rad45       | 0.000162179 | 0.999972 | 0.000162181 | 0.999981 |
| rad36       | 1.00567e-05 | 0.999982 | 1.00568e-05 | 0.999991 |
| Benzyl+C2H2 | 8.44840e-06 | 0.999990 | 0.00000     | 0.999991 |
| rad22       | 6.89656e-06 | 0.999997 | 6.89661e-06 | 0.999998 |
| rad11       | 2.54890e-06 | 1.000000 | 2.54892e-06 | 1.000000 |
| rad7        | 2.73637e-08 | 1.000000 | 2.73639e-08 | 1.000000 |
| rad20       | 2.09117e-10 | 1.000000 | 2.09119e-10 | 1.000000 |
| rad21       | 1.31765e-10 | 1.000000 | 1.31766e-10 | 1.000000 |
| rad13       | 1.00451e-10 | 1.000000 | 1.00452e-10 | 1.000000 |
| rad3        | 3.71515e-11 | 1.000000 | 3.71518e-11 | 1.000000 |
| rad18       | 3.02480e-11 | 1.000000 | 3.02483e-11 | 1.000000 |
| rad4        | 1.88499e-11 | 1.000000 | 1.88501e-11 | 1.000000 |
| rad2        | 9.48894e-12 | 1.000000 | 9.48902e-12 | 1.000000 |
| rad35       | 4.00148e-12 | 1.000000 | 4.00151e-12 | 1.000000 |
| rad24       | 1.51731e-12 | 1.000000 | 1.51732e-12 | 1.000000 |
| PAH9+H      | 1.31337e-12 | 1.000000 | 1.31338e-12 | 1.000000 |
| rad1        | 6.08226e-13 | 1.000000 | 6.08232e-13 | 1.000000 |
| rad10       | 3.24365e-13 | 1.000000 | 3.24368e-13 | 1.000000 |
| rad33       | 1.82938e-13 | 1.000000 | 1.82939e-13 | 1.000000 |
| rad30       | 1.20908e-13 | 1.000000 | 1.20909e-13 | 1.000000 |
| rad38       | 2.16940e-14 | 1.000000 | 2.16942e-14 | 1.000000 |

|               |             |          |             |         |
|---------------|-------------|----------|-------------|---------|
| rad28         | 5.21690e-16 | 1.000000 | 5.21694e-16 | 1.00000 |
| rad15         | 1.02330e-16 | 1.000000 | 1.02331e-16 | 1.00000 |
| rad25         | 7.47198e-17 | 1.000000 | 7.47205e-17 | 1.00000 |
| rad26         | 1.29306e-18 | 1.000000 | 1.29307e-18 | 1.00000 |
| rad27         | 3.95542e-19 | 1.000000 | 3.95546e-19 | 1.00000 |
| rad14         | 3.40306e-20 | 1.000000 | 3.40309e-20 | 1.00000 |
| PhCCH+CH3     | 1.31412e-20 | 1.000000 | 1.31413e-20 | 1.00000 |
| rad31         | 1.16136e-20 | 1.000000 | 1.16137e-20 | 1.00000 |
| PhCHCCH2+H    | 8.63671e-21 | 1.000000 | 8.63678e-21 | 1.00000 |
| PhCCCH3+H     | 9.80787e-22 | 1.000000 | 9.80795e-22 | 1.00000 |
| rad46         | 4.53976e-23 | 1.000000 | 4.53980e-23 | 1.00000 |
| rad8          | 5.10357e-25 | 1.000000 | 5.10362e-25 | 1.00000 |
| rad9          | 1.21136e-25 | 1.000000 | 1.21137e-25 | 1.00000 |
| Ph+MeAc       | 1.01267e-26 | 1.000000 | 1.01267e-26 | 1.00000 |
| PAH7+H        | 4.80213e-28 | 1.000000 | 4.80217e-28 | 1.00000 |
| rad12         | 6.11657e-29 | 1.000000 | 6.11663e-29 | 1.00000 |
| Ph+Allene     | 1.76459e-29 | 1.000000 | 1.76461e-29 | 1.00000 |
| rad39         | 1.20234e-29 | 1.000000 | 1.20235e-29 | 1.00000 |
| rad60syn      | 8.62245e-34 | 1.000000 | 8.62252e-34 | 1.00000 |
| PhCH2CCH+H    | 1.58159e-34 | 1.000000 | 1.58160e-34 | 1.00000 |
| rad60anti     | 4.36001e-35 | 1.000000 | 4.36004e-35 | 1.00000 |
| rad37         | 3.96820e-35 | 1.000000 | 3.96824e-35 | 1.00000 |
| rad5          | 8.35556e-38 | 1.000000 | 8.35563e-38 | 1.00000 |
| PAH3+H        | 9.03234e-42 | 1.000000 | 9.03242e-42 | 1.00000 |
| rad59         | 4.38457e-42 | 1.000000 | 4.38461e-42 | 1.00000 |
| rad50         | 7.07062e-43 | 1.000000 | 7.07068e-43 | 1.00000 |
| rad19syn      | 5.39993e-47 | 1.000000 | 5.39997e-47 | 1.00000 |
| rad54         | 1.42312e-50 | 1.000000 | 1.42313e-50 | 1.00000 |
| PAH10+CH3     | 1.01034e-50 | 1.000000 | 1.01035e-50 | 1.00000 |
| rad52         | 3.65652e-51 | 1.000000 | 3.65655e-51 | 1.00000 |
| rad43         | 2.31835e-51 | 1.000000 | 2.31837e-51 | 1.00000 |
| rad62         | 3.76092e-53 | 1.000000 | 3.76095e-53 | 1.00000 |
| rad51         | 3.87865e-56 | 1.000000 | 3.87869e-56 | 1.00000 |
| rad70         | 1.77627e-57 | 1.000000 | 1.77629e-57 | 1.00000 |
| PhcycC3H3_A+H | 1.04981e-57 | 1.000000 | 1.04982e-57 | 1.00000 |
| rad55         | 5.31556e-58 | 1.000000 | 5.31560e-58 | 1.00000 |
| rad65         | 3.78213e-60 | 1.000000 | 3.78216e-60 | 1.00000 |
| rad58         | 4.55046e-61 | 1.000000 | 4.55050e-61 | 1.00000 |
| PAH1+H        | 7.37160e-62 | 1.000000 | 7.37166e-62 | 1.00000 |
| rad34         | 8.06352e-64 | 1.000000 | 8.06359e-64 | 1.00000 |
| rad42         | 2.13056e-67 | 1.000000 | 2.13057e-67 | 1.00000 |
| rad41         | 3.30895e-68 | 1.000000 | 3.30898e-68 | 1.00000 |
| rad47         | 6.70073e-69 | 1.000000 | 6.70079e-69 | 1.00000 |

0.100000000 Pa, 100.000000 K

=====

| Rate constant | True (fraction)     | Effective (fraction) |
|---------------|---------------------|----------------------|
| Total         | 1.02671e-41 (1.00 ) | 1.02670e-41 (1.00 )  |

| species     | PYtrue      | Cumul    | PYeffective | Cumul    |
|-------------|-------------|----------|-------------|----------|
| Indene+H    | 0.992078    | 0.992078 | 0.992089    | 0.992089 |
| rad23       | 0.00751967  | 0.999598 | 0.00751976  | 0.999609 |
| rad6        | 0.000251942 | 0.999850 | 0.000251945 | 0.999861 |
| rad45       | 0.000124031 | 0.999974 | 0.000124032 | 0.999985 |
| Benzyl+C2H2 | 1.12911e-05 | 0.999985 | 0.00000     | 0.999985 |
| rad36       | 7.68805e-06 | 0.999993 | 7.68813e-06 | 0.999992 |
| rad22       | 5.17572e-06 | 0.999998 | 5.17577e-06 | 0.999998 |
| rad11       | 1.91143e-06 | 1.000000 | 1.91145e-06 | 1.000000 |
| rad7        | 2.87117e-08 | 1.000000 | 2.87120e-08 | 1.000000 |
| rad20       | 1.71562e-10 | 1.000000 | 1.71564e-10 | 1.000000 |
| rad21       | 1.08125e-10 | 1.000000 | 1.08126e-10 | 1.000000 |
| rad13       | 1.06504e-10 | 1.000000 | 1.06505e-10 | 1.000000 |
| rad3        | 5.10009e-11 | 1.000000 | 5.10015e-11 | 1.000000 |
| rad4        | 2.58996e-11 | 1.000000 | 2.58999e-11 | 1.000000 |
| rad18       | 2.18534e-11 | 1.000000 | 2.18536e-11 | 1.000000 |
| rad2        | 1.84895e-11 | 1.000000 | 1.84897e-11 | 1.000000 |
| rad35       | 6.28691e-12 | 1.000000 | 6.28698e-12 | 1.000000 |
| PAH9+H      | 2.60753e-12 | 1.000000 | 2.60756e-12 | 1.000000 |
| rad1        | 1.18914e-12 | 1.000000 | 1.18916e-12 | 1.000000 |
| rad24       | 1.17804e-12 | 1.000000 | 1.17805e-12 | 1.000000 |
| rad10       | 7.14900e-13 | 1.000000 | 7.14908e-13 | 1.000000 |
| rad30       | 6.32240e-13 | 1.000000 | 6.32247e-13 | 1.000000 |
| rad33       | 1.94880e-13 | 1.000000 | 1.94883e-13 | 1.000000 |
| rad38       | 6.42510e-14 | 1.000000 | 6.42517e-14 | 1.000000 |
| rad28       | 2.45862e-15 | 1.000000 | 2.45864e-15 | 1.000000 |
| rad15       | 1.16319e-15 | 1.000000 | 1.16320e-15 | 1.000000 |
| rad25       | 5.48150e-16 | 1.000000 | 5.48156e-16 | 1.000000 |
| rad26       | 8.53442e-18 | 1.000000 | 8.53452e-18 | 1.000000 |

|               |             |          |             |          |
|---------------|-------------|----------|-------------|----------|
| rad27         | 1.37018e-18 | 1.000000 | 1.37020e-18 | 1.000000 |
| rad14         | 2.44186e-19 | 1.000000 | 2.44189e-19 | 1.000000 |
| PhCCH+CH3     | 1.89178e-19 | 1.000000 | 1.89180e-19 | 1.000000 |
| PhCHCCH2+H    | 1.10689e-19 | 1.000000 | 1.10690e-19 | 1.000000 |
| rad31         | 1.67510e-20 | 1.000000 | 1.67512e-20 | 1.000000 |
| PhCCCH3+H     | 1.53770e-20 | 1.000000 | 1.53771e-20 | 1.000000 |
| rad46         | 1.30171e-21 | 1.000000 | 1.30172e-21 | 1.000000 |
| rad8          | 1.15513e-23 | 1.000000 | 1.15514e-23 | 1.000000 |
| rad9          | 9.99266e-24 | 1.000000 | 9.99278e-24 | 1.000000 |
| Ph+MeAc       | 3.55309e-25 | 1.000000 | 3.55313e-25 | 1.000000 |
| PAH7+H        | 1.67503e-26 | 1.000000 | 1.67505e-26 | 1.000000 |
| rad12         | 2.10749e-27 | 1.000000 | 2.10752e-27 | 1.000000 |
| Ph+Allene     | 7.05411e-28 | 1.000000 | 7.05419e-28 | 1.000000 |
| rad39         | 4.75718e-28 | 1.000000 | 4.75723e-28 | 1.000000 |
| rad60syn      | 5.81798e-32 | 1.000000 | 5.81805e-32 | 1.000000 |
| PhCH2CCH+H    | 6.94141e-33 | 1.000000 | 6.94149e-33 | 1.000000 |
| rad60anti     | 2.09658e-33 | 1.000000 | 2.09660e-33 | 1.000000 |
| rad37         | 1.91715e-33 | 1.000000 | 1.91717e-33 | 1.000000 |
| rad5          | 3.97694e-36 | 1.000000 | 3.97699e-36 | 1.000000 |
| PAH3+H        | 4.19223e-40 | 1.000000 | 4.19228e-40 | 1.000000 |
| rad59         | 2.02998e-40 | 1.000000 | 2.03000e-40 | 1.000000 |
| rad50         | 3.67070e-41 | 1.000000 | 3.67074e-41 | 1.000000 |
| rad19syn      | 2.76448e-45 | 1.000000 | 2.76451e-45 | 1.000000 |
| rad54         | 7.41272e-49 | 1.000000 | 7.41280e-49 | 1.000000 |
| PAH10+CH3     | 5.32157e-49 | 1.000000 | 5.32163e-49 | 1.000000 |
| rad52         | 1.86507e-49 | 1.000000 | 1.86510e-49 | 1.000000 |
| rad43         | 1.22104e-49 | 1.000000 | 1.22105e-49 | 1.000000 |
| rad62         | 1.97631e-51 | 1.000000 | 1.97633e-51 | 1.000000 |
| rad51         | 2.02939e-54 | 1.000000 | 2.02941e-54 | 1.000000 |
| rad70         | 9.23544e-56 | 1.000000 | 9.23554e-56 | 1.000000 |
| PhcycC3H3_A+H | 5.44940e-56 | 1.000000 | 5.44946e-56 | 1.000000 |
| rad55         | 2.76071e-56 | 1.000000 | 2.76074e-56 | 1.000000 |
| rad65         | 1.97484e-58 | 1.000000 | 1.97486e-58 | 1.000000 |
| rad58         | 2.35942e-59 | 1.000000 | 2.35945e-59 | 1.000000 |
| PAH1+H        | 3.76523e-60 | 1.000000 | 3.76527e-60 | 1.000000 |
| rad34         | 4.10457e-62 | 1.000000 | 4.10462e-62 | 1.000000 |
| rad42         | 1.08275e-65 | 1.000000 | 1.08277e-65 | 1.000000 |
| rad41         | 1.70512e-66 | 1.000000 | 1.70514e-66 | 1.000000 |
| rad47         | 3.11028e-67 | 1.000000 | 3.11031e-67 | 1.000000 |

0.100000000 Pa, 110.000000 K

=====

| Rate constant | True (fraction)     | Effective (fraction) |
|---------------|---------------------|----------------------|
| Total         | 4.04932e-39 (1.00 ) | 4.04926e-39 (1.00 )  |

| species     | PYtrue      | Cumul    | PYeffective | Cumul    |
|-------------|-------------|----------|-------------|----------|
| Indene+H    | 0.993735    | 0.993735 | 0.993749    | 0.993749 |
| rad23       | 0.00587538  | 0.999610 | 0.00587547  | 0.999624 |
| rad6        | 0.000268174 | 0.999879 | 0.000268178 | 0.999893 |
| rad45       | 9.55217e-05 | 0.999974 | 9.55231e-05 | 0.999988 |
| Benzyl+C2H2 | 1.49657e-05 | 0.999989 | 0.00000     | 0.999988 |
| rad36       | 5.91953e-06 | 0.999995 | 5.91962e-06 | 0.999994 |
| rad22       | 3.93455e-06 | 0.999999 | 3.93461e-06 | 0.999998 |
| rad11       | 1.45609e-06 | 1.00000  | 1.45611e-06 | 0.999999 |
| rad7        | 3.02410e-08 | 1.00000  | 3.02415e-08 | 1.000000 |
| rad20       | 1.43345e-10 | 1.00000  | 1.43347e-10 | 1.000000 |
| rad13       | 1.13284e-10 | 1.00000  | 1.13286e-10 | 1.000000 |
| rad21       | 9.03716e-11 | 1.00000  | 9.03730e-11 | 1.000000 |
| rad3        | 6.87951e-11 | 1.00000  | 6.87961e-11 | 1.000000 |
| rad2        | 3.53970e-11 | 1.00000  | 3.53976e-11 | 1.000000 |
| rad4        | 3.49700e-11 | 1.00000  | 3.49705e-11 | 1.000000 |
| rad18       | 1.62989e-11 | 1.00000  | 1.62991e-11 | 1.000000 |
| rad35       | 9.48337e-12 | 1.00000  | 9.48351e-12 | 1.000000 |
| PAH9+H      | 4.77424e-12 | 1.00000  | 4.77431e-12 | 1.000000 |
| rad30       | 2.44331e-12 | 1.00000  | 2.44334e-12 | 1.000000 |
| rad1        | 2.28491e-12 | 1.00000  | 2.28494e-12 | 1.000000 |
| rad10       | 1.51439e-12 | 1.00000  | 1.51441e-12 | 1.000000 |
| rad24       | 9.20417e-13 | 1.00000  | 9.20431e-13 | 1.000000 |
| rad33       | 2.08155e-13 | 1.00000  | 2.08158e-13 | 1.000000 |
| rad38       | 1.64276e-13 | 1.00000  | 1.64279e-13 | 1.000000 |
| rad28       | 1.01282e-14 | 1.00000  | 1.01283e-14 | 1.000000 |
| rad15       | 8.46836e-15 | 1.00000  | 8.46849e-15 | 1.000000 |
| rad25       | 2.70243e-15 | 1.00000  | 2.70247e-15 | 1.000000 |
| rad26       | 5.20337e-17 | 1.00000  | 5.20345e-17 | 1.000000 |
| rad27       | 4.19759e-18 | 1.00000  | 4.19765e-18 | 1.000000 |
| PhCCH+CH3   | 2.43259e-18 | 1.00000  | 2.43263e-18 | 1.000000 |
| rad14       | 1.43942e-18 | 1.00000  | 1.43944e-18 | 1.000000 |
| PhCHCCH2+H  | 1.35077e-18 | 1.00000  | 1.35079e-18 | 1.000000 |

|               |             |         |             |          |
|---------------|-------------|---------|-------------|----------|
| PhCCCH3+H     | 2.26090e-19 | 1.00000 | 2.26093e-19 | 1.000000 |
| rad31         | 2.38432e-20 | 1.00000 | 2.38435e-20 | 1.000000 |
| rad46         | 2.19826e-20 | 1.00000 | 2.19829e-20 | 1.000000 |
| rad9          | 4.71523e-22 | 1.00000 | 4.71530e-22 | 1.000000 |
| rad8          | 2.62120e-22 | 1.00000 | 2.62124e-22 | 1.000000 |
| Ph+MeAc       | 1.58964e-23 | 1.00000 | 1.58966e-23 | 1.000000 |
| PAH7+H        | 6.72617e-25 | 1.00000 | 6.72627e-25 | 1.000000 |
| Ph+Allene     | 1.78202e-25 | 1.00000 | 1.78205e-25 | 1.000000 |
| rad12         | 8.50372e-26 | 1.00000 | 8.50385e-26 | 1.000000 |
| rad60syn      | 2.69939e-26 | 1.00000 | 2.69943e-26 | 1.000000 |
| rad39         | 2.56295e-26 | 1.00000 | 2.56299e-26 | 1.000000 |
| rad60anti     | 1.02497e-27 | 1.00000 | 1.02498e-27 | 1.000000 |
| PhCH2CCH+H    | 6.83153e-31 | 1.00000 | 6.83163e-31 | 1.000000 |
| rad37         | 1.87895e-31 | 1.00000 | 1.87898e-31 | 1.000000 |
| rad5          | 4.05230e-34 | 1.00000 | 4.05237e-34 | 1.000000 |
| PAH3+H        | 4.37319e-38 | 1.00000 | 4.37325e-38 | 1.000000 |
| rad59         | 2.11220e-38 | 1.00000 | 2.11223e-38 | 1.000000 |
| rad50         | 6.44415e-39 | 1.00000 | 6.44425e-39 | 1.000000 |
| rad19syn      | 3.19897e-43 | 1.00000 | 3.19902e-43 | 1.000000 |
| rad54         | 8.76439e-47 | 1.00000 | 8.76452e-47 | 1.000000 |
| PAH10+CH3     | 6.38942e-47 | 1.00000 | 6.38951e-47 | 1.000000 |
| rad52         | 2.15762e-47 | 1.00000 | 2.15765e-47 | 1.000000 |
| rad43         | 1.46605e-47 | 1.00000 | 1.46607e-47 | 1.000000 |
| rad62         | 2.37018e-49 | 1.00000 | 2.37021e-49 | 1.000000 |
| rad51         | 2.41907e-52 | 1.00000 | 2.41910e-52 | 1.000000 |
| rad70         | 1.10523e-53 | 1.00000 | 1.10524e-53 | 1.000000 |
| PhcycC3H3_A+H | 6.51978e-54 | 1.00000 | 6.51988e-54 | 1.000000 |
| rad55         | 3.30332e-54 | 1.00000 | 3.30337e-54 | 1.000000 |
| rad65         | 2.36521e-56 | 1.00000 | 2.36525e-56 | 1.000000 |
| rad58         | 2.82235e-57 | 1.00000 | 2.82240e-57 | 1.000000 |
| PAH1+H        | 4.49065e-58 | 1.00000 | 4.49072e-58 | 1.000000 |
| rad34         | 4.89477e-60 | 1.00000 | 4.89484e-60 | 1.000000 |
| rad42         | 1.30985e-63 | 1.00000 | 1.30987e-63 | 1.000000 |
| rad41         | 2.13061e-64 | 1.00000 | 2.13064e-64 | 1.000000 |
| rad47         | 3.39155e-65 | 1.00000 | 3.39160e-65 | 1.000000 |

0.100000000 Pa, 120.000000 K

=====

| Rate constant | True (fraction)     | Effective (fraction) |
|---------------|---------------------|----------------------|
| Total         | 5.87106e-37 (1.00 ) | 5.87094e-37 (1.00 )  |

| species     | PYtrue      | Cumul    | PYeffective | Cumul    |
|-------------|-------------|----------|-------------|----------|
| Indene+H    | 0.995004    | 0.995004 | 0.995023    | 0.995023 |
| rad23       | 0.00460759  | 0.999612 | 0.00460768  | 0.999631 |
| rad6        | 0.000286239 | 0.999898 | 0.000286244 | 0.999917 |
| rad45       | 7.39690e-05 | 0.999972 | 7.39705e-05 | 0.999991 |
| Benzyl+C2H2 | 1.97118e-05 | 0.999992 | 0.00000     | 0.999991 |
| rad36       | 4.58368e-06 | 0.999996 | 4.58377e-06 | 0.999995 |
| rad22       | 3.01840e-06 | 0.999999 | 3.01846e-06 | 0.999998 |
| rad11       | 1.12346e-06 | 1.00000  | 1.12348e-06 | 1.000000 |
| rad7        | 3.19765e-08 | 1.00000  | 3.19771e-08 | 1.000000 |
| rad20       | 1.21476e-10 | 1.00000  | 1.21479e-10 | 1.000000 |
| rad13       | 1.20904e-10 | 1.00000  | 1.20907e-10 | 1.000000 |
| rad3        | 9.12041e-11 | 1.00000  | 9.12059e-11 | 1.000000 |
| rad21       | 7.66192e-11 | 1.00000  | 7.66207e-11 | 1.000000 |
| rad2        | 6.65274e-11 | 1.00000  | 6.65287e-11 | 1.000000 |
| rad4        | 4.64103e-11 | 1.00000  | 4.64113e-11 | 1.000000 |
| rad35       | 1.38974e-11 | 1.00000  | 1.38977e-11 | 1.000000 |
| rad18       | 1.24618e-11 | 1.00000  | 1.24620e-11 | 1.000000 |
| PAH9+H      | 8.20772e-12 | 1.00000  | 8.20788e-12 | 1.000000 |
| rad30       | 7.55422e-12 | 1.00000  | 7.55437e-12 | 1.000000 |
| rad1        | 4.31159e-12 | 1.00000  | 4.31167e-12 | 1.000000 |
| rad10       | 3.08631e-12 | 1.00000  | 3.08637e-12 | 1.000000 |
| rad24       | 7.22696e-13 | 1.00000  | 7.22710e-13 | 1.000000 |
| rad38       | 3.72628e-13 | 1.00000  | 3.72635e-13 | 1.000000 |
| rad33       | 2.22998e-13 | 1.00000  | 2.23003e-13 | 1.000000 |
| rad15       | 4.42896e-14 | 1.00000  | 4.42904e-14 | 1.000000 |
| rad28       | 3.65710e-14 | 1.00000  | 3.65717e-14 | 1.000000 |
| rad25       | 9.86247e-15 | 1.00000  | 9.86266e-15 | 1.000000 |
| rad26       | 2.85154e-16 | 1.00000  | 2.85160e-16 | 1.000000 |
| PhCCH+CH3   | 2.48013e-17 | 1.00000  | 2.48017e-17 | 1.000000 |
| PhCHCCH2+H  | 1.39366e-17 | 1.00000  | 1.39368e-17 | 1.000000 |
| rad27       | 1.14449e-17 | 1.00000  | 1.14451e-17 | 1.000000 |
| rad14       | 6.72806e-18 | 1.00000  | 6.72819e-18 | 1.000000 |
| PhCCCH3+H   | 2.71833e-18 | 1.00000  | 2.71838e-18 | 1.000000 |
| rad46       | 2.37926e-19 | 1.00000  | 2.37931e-19 | 1.000000 |
| rad31       | 3.35233e-20 | 1.00000  | 3.35240e-20 | 1.000000 |
| rad9        | 1.22198e-20 | 1.00000  | 1.22201e-20 | 1.000000 |

|               |             |         |             |          |
|---------------|-------------|---------|-------------|----------|
| rad8          | 4.74614e-21 | 1.00000 | 4.74623e-21 | 1.000000 |
| Ph+MeAc       | 5.48020e-22 | 1.00000 | 5.48031e-22 | 1.000000 |
| PAH7+H        | 2.03782e-23 | 1.00000 | 2.03786e-23 | 1.000000 |
| Ph+Allene     | 1.33623e-23 | 1.00000 | 1.33625e-23 | 1.000000 |
| rad12         | 2.72432e-24 | 1.00000 | 2.72437e-24 | 1.000000 |
| rad60syn      | 1.65206e-24 | 1.00000 | 1.65209e-24 | 1.000000 |
| rad39         | 1.02113e-24 | 1.00000 | 1.02115e-24 | 1.000000 |
| rad60anti     | 9.93059e-26 | 1.00000 | 9.93079e-26 | 1.000000 |
| PhCH2CCH+H    | 8.44201e-29 | 1.00000 | 8.44218e-29 | 1.000000 |
| rad37         | 2.13422e-29 | 1.00000 | 2.13426e-29 | 1.000000 |
| rad5          | 4.96321e-32 | 1.00000 | 4.96331e-32 | 1.000000 |
| PAH3+H        | 5.74975e-36 | 1.00000 | 5.74987e-36 | 1.000000 |
| rad59         | 2.77043e-36 | 1.00000 | 2.77049e-36 | 1.000000 |
| rad50         | 1.87660e-36 | 1.00000 | 1.87663e-36 | 1.000000 |
| rad19syn      | 4.67649e-41 | 1.00000 | 4.67658e-41 | 1.000000 |
| rad54         | 1.31390e-44 | 1.00000 | 1.31392e-44 | 1.000000 |
| PAH10+CH3     | 9.78954e-45 | 1.00000 | 9.78973e-45 | 1.000000 |
| rad52         | 3.20661e-45 | 1.00000 | 3.20668e-45 | 1.000000 |
| rad43         | 2.24652e-45 | 1.00000 | 2.24656e-45 | 1.000000 |
| rad62         | 3.62723e-47 | 1.00000 | 3.62730e-47 | 1.000000 |
| rad51         | 3.67635e-50 | 1.00000 | 3.67643e-50 | 1.000000 |
| rad70         | 1.69721e-51 | 1.00000 | 1.69725e-51 | 1.000000 |
| PhcycC3H3_A+H | 1.00213e-51 | 1.00000 | 1.00215e-51 | 1.000000 |
| rad55         | 5.07605e-52 | 1.00000 | 5.07615e-52 | 1.000000 |
| rad65         | 3.62869e-54 | 1.00000 | 3.62876e-54 | 1.000000 |
| rad58         | 4.34081e-55 | 1.00000 | 4.34090e-55 | 1.000000 |
| PAH1+H        | 6.95727e-56 | 1.00000 | 6.95741e-56 | 1.000000 |
| rad34         | 7.60353e-58 | 1.00000 | 7.60368e-58 | 1.000000 |
| rad42         | 2.11992e-61 | 1.00000 | 2.11997e-61 | 1.000000 |
| rad41         | 3.72943e-62 | 1.00000 | 3.72950e-62 | 1.000000 |
| rad47         | 4.83145e-63 | 1.00000 | 4.83154e-63 | 1.000000 |

0.100000000 Pa, 130.000000 K

| Rate constant | True (fraction)     | Effective (fraction) |
|---------------|---------------------|----------------------|
| Total         | 3.94360e-35 (1.00 ) | 3.94350e-35 (1.00 )  |

| species     | PYtrue      | Cumul    | PYeffective | Cumul    |
|-------------|-------------|----------|-------------|----------|
| Indene+H    | 0.995980    | 0.995980 | 0.996006    | 0.996006 |
| rad23       | 0.00362354  | 0.999604 | 0.00362363  | 0.999630 |
| rad6        | 0.000306424 | 0.999910 | 0.000306432 | 0.999936 |
| rad45       | 5.75253e-05 | 0.999967 | 5.75268e-05 | 0.999994 |
| Benzyl+C2H2 | 2.58339e-05 | 0.999993 | 0.00000     | 0.999994 |
| rad36       | 3.56523e-06 | 0.999997 | 3.56533e-06 | 0.999997 |
| rad22       | 2.33098e-06 | 0.999999 | 2.33104e-06 | 0.999999 |
| rad11       | 8.76000e-07 | 1.00000  | 8.76023e-07 | 1.00000  |
| rad7        | 3.39440e-08 | 1.00000  | 3.39449e-08 | 1.00000  |
| rad13       | 1.29486e-10 | 1.00000  | 1.29489e-10 | 1.00000  |
| rad2        | 1.22696e-10 | 1.00000  | 1.22699e-10 | 1.00000  |
| rad3        | 1.18862e-10 | 1.00000  | 1.18865e-10 | 1.00000  |
| rad20       | 1.04102e-10 | 1.00000  | 1.04105e-10 | 1.00000  |
| rad21       | 6.56983e-11 | 1.00000  | 6.57000e-11 | 1.00000  |
| rad4        | 6.05549e-11 | 1.00000  | 6.05564e-11 | 1.00000  |
| rad35       | 1.99576e-11 | 1.00000  | 1.99581e-11 | 1.00000  |
| rad30       | 1.97399e-11 | 1.00000  | 1.97404e-11 | 1.00000  |
| PAH9+H      | 1.34534e-11 | 1.00000  | 1.34537e-11 | 1.00000  |
| rad18       | 9.71799e-12 | 1.00000  | 9.71824e-12 | 1.00000  |
| rad1        | 7.98646e-12 | 1.00000  | 7.98667e-12 | 1.00000  |
| rad10       | 6.06440e-12 | 1.00000  | 6.06456e-12 | 1.00000  |
| rad38       | 7.69934e-13 | 1.00000  | 7.69954e-13 | 1.00000  |
| rad24       | 5.69655e-13 | 1.00000  | 5.69669e-13 | 1.00000  |
| rad33       | 2.39659e-13 | 1.00000  | 2.39665e-13 | 1.00000  |
| rad15       | 1.80124e-13 | 1.00000  | 1.80129e-13 | 1.00000  |
| rad28       | 1.17984e-13 | 1.00000  | 1.17987e-13 | 1.00000  |
| rad25       | 2.85412e-14 | 1.00000  | 2.85420e-14 | 1.00000  |
| rad26       | 1.40251e-15 | 1.00000  | 1.40255e-15 | 1.00000  |
| PhCCH+CH3   | 2.00622e-16 | 1.00000  | 2.00628e-16 | 1.00000  |
| PhCHCCH2+H  | 1.17431e-16 | 1.00000  | 1.17434e-16 | 1.00000  |
| rad27       | 2.82100e-17 | 1.00000  | 2.82107e-17 | 1.00000  |
| PhCCCH3+H   | 2.61374e-17 | 1.00000  | 2.61381e-17 | 1.00000  |
| rad14       | 2.54331e-17 | 1.00000  | 2.54337e-17 | 1.00000  |
| rad46       | 1.81212e-18 | 1.00000  | 1.81217e-18 | 1.00000  |
| rad9        | 1.95905e-19 | 1.00000  | 1.95910e-19 | 1.00000  |
| rad8        | 6.58889e-20 | 1.00000  | 6.58906e-20 | 1.00000  |
| rad31       | 4.66162e-20 | 1.00000  | 4.66174e-20 | 1.00000  |
| Ph+MeAc     | 1.32941e-20 | 1.00000  | 1.32945e-20 | 1.00000  |
| Ph+Allene   | 5.03128e-22 | 1.00000  | 5.03141e-22 | 1.00000  |
| PAH7+H      | 4.39595e-22 | 1.00000  | 4.39606e-22 | 1.00000  |

|               |             |         |             |         |
|---------------|-------------|---------|-------------|---------|
| rad12         | 6.34358e-23 | 1.00000 | 6.34374e-23 | 1.00000 |
| rad60syn      | 5.22756e-23 | 1.00000 | 5.22769e-23 | 1.00000 |
| rad39         | 2.81364e-23 | 1.00000 | 2.81371e-23 | 1.00000 |
| rad60anti     | 3.99845e-24 | 1.00000 | 3.99855e-24 | 1.00000 |
| PhCH2CCH+H    | 2.52726e-26 | 1.00000 | 2.52733e-26 | 1.00000 |
| rad37         | 2.65552e-27 | 1.00000 | 2.65559e-27 | 1.00000 |
| rad5          | 6.92531e-30 | 1.00000 | 6.92549e-30 | 1.00000 |
| PAH3+H        | 9.51959e-34 | 1.00000 | 9.51984e-34 | 1.00000 |
| rad50         | 8.61032e-34 | 1.00000 | 8.61055e-34 | 1.00000 |
| rad59         | 4.58199e-34 | 1.00000 | 4.58211e-34 | 1.00000 |
| rad19syn      | 8.51932e-39 | 1.00000 | 8.51954e-39 | 1.00000 |
| rad54         | 2.46249e-42 | 1.00000 | 2.46255e-42 | 1.00000 |
| PAH10+CH3     | 1.89031e-42 | 1.00000 | 1.89035e-42 | 1.00000 |
| rad52         | 6.28609e-43 | 1.00000 | 6.28625e-43 | 1.00000 |
| rad43         | 4.34041e-43 | 1.00000 | 4.34052e-43 | 1.00000 |
| rad62         | 6.99552e-45 | 1.00000 | 6.99570e-45 | 1.00000 |
| rad51         | 7.10516e-48 | 1.00000 | 7.10534e-48 | 1.00000 |
| rad70         | 3.29330e-49 | 1.00000 | 3.29339e-49 | 1.00000 |
| PhcycC3H3_A+H | 1.94843e-49 | 1.00000 | 1.94848e-49 | 1.00000 |
| rad55         | 9.86339e-50 | 1.00000 | 9.86364e-50 | 1.00000 |
| rad65         | 7.08026e-52 | 1.00000 | 7.08044e-52 | 1.00000 |
| rad58         | 8.45123e-53 | 1.00000 | 8.45144e-53 | 1.00000 |
| PAH1+H        | 1.37753e-53 | 1.00000 | 1.37757e-53 | 1.00000 |
| rad34         | 1.51352e-55 | 1.00000 | 1.51356e-55 | 1.00000 |
| rad42         | 4.69197e-59 | 1.00000 | 4.69209e-59 | 1.00000 |
| rad41         | 9.97112e-60 | 1.00000 | 9.97138e-60 | 1.00000 |
| rad47         | 8.90917e-61 | 1.00000 | 8.90940e-61 | 1.00000 |

0.100000000 Pa, 140.000000 K

| Rate constant | True (fraction)     | Effective (fraction) |
|---------------|---------------------|----------------------|
| Total         | 1.44756e-33 (1.00 ) | 1.44751e-33 (1.00 )  |

| species     | PYtrue      | Cumul    | PYeffective | Cumul    |
|-------------|-------------|----------|-------------|----------|
| Indene+H    | 0.996731    | 0.996731 | 0.996765    | 0.996765 |
| rad23       | 0.00285566  | 0.999587 | 0.00285576  | 0.999621 |
| rad6        | 0.000329028 | 0.999916 | 0.000329039 | 0.999950 |
| rad45       | 4.48873e-05 | 0.999961 | 4.48888e-05 | 0.999995 |
| Benzyl+C2H2 | 3.37157e-05 | 0.999994 | 0.00000     | 0.999995 |
| rad36       | 2.78298e-06 | 0.999997 | 2.78308e-06 | 0.999997 |
| rad22       | 1.80897e-06 | 0.999999 | 1.80903e-06 | 0.999999 |
| rad11       | 6.89159e-07 | 1.000000 | 6.89182e-07 | 1.000000 |
| rad7        | 3.61712e-08 | 1.000000 | 3.61724e-08 | 1.000000 |
| rad2        | 2.22083e-10 | 1.000000 | 2.22091e-10 | 1.000000 |
| rad3        | 1.52353e-10 | 1.000000 | 1.52359e-10 | 1.000000 |
| rad13       | 1.39157e-10 | 1.000000 | 1.39162e-10 | 1.000000 |
| rad20       | 9.00194e-11 | 1.000000 | 9.00224e-11 | 1.000000 |
| rad4        | 7.77170e-11 | 1.000000 | 7.77196e-11 | 1.000000 |
| rad21       | 5.68501e-11 | 1.000000 | 5.68520e-11 | 1.000000 |
| rad30       | 4.53328e-11 | 1.000000 | 4.53344e-11 | 1.000000 |
| rad35       | 2.82555e-11 | 1.000000 | 2.82564e-11 | 1.000000 |
| PAH9+H      | 2.12758e-11 | 1.000000 | 2.12765e-11 | 1.000000 |
| rad1        | 1.45241e-11 | 1.000000 | 1.45246e-11 | 1.000000 |
| rad10       | 1.15237e-11 | 1.000000 | 1.15240e-11 | 1.000000 |
| rad18       | 7.70010e-12 | 1.000000 | 7.70036e-12 | 1.000000 |
| rad38       | 1.48006e-12 | 1.000000 | 1.48011e-12 | 1.000000 |
| rad15       | 6.02698e-13 | 1.000000 | 6.02718e-13 | 1.000000 |
| rad24       | 4.50391e-13 | 1.000000 | 4.50406e-13 | 1.000000 |
| rad28       | 3.46987e-13 | 1.000000 | 3.46999e-13 | 1.000000 |
| rad33       | 2.58403e-13 | 1.000000 | 2.58411e-13 | 1.000000 |
| rad25       | 6.88229e-14 | 1.000000 | 6.88252e-14 | 1.000000 |
| rad26       | 6.23035e-15 | 1.000000 | 6.23056e-15 | 1.000000 |
| PhCCH+CH3   | 1.32774e-15 | 1.000000 | 1.32778e-15 | 1.000000 |
| PhCHCCH2+H  | 8.12237e-16 | 1.000000 | 8.12265e-16 | 1.000000 |
| PhCCH3+H    | 2.04238e-16 | 1.000000 | 2.04245e-16 | 1.000000 |
| rad14       | 8.02131e-17 | 1.000000 | 8.02158e-17 | 1.000000 |
| rad27       | 6.39095e-17 | 1.000000 | 6.39116e-17 | 1.000000 |
| rad46       | 1.04568e-17 | 1.000000 | 1.04571e-17 | 1.000000 |
| rad9        | 2.14533e-18 | 1.000000 | 2.14541e-18 | 1.000000 |
| rad8        | 7.13672e-19 | 1.000000 | 7.13696e-19 | 1.000000 |
| Ph+MeAc     | 2.28358e-19 | 1.000000 | 2.28366e-19 | 1.000000 |
| rad31       | 6.42325e-20 | 1.000000 | 6.42346e-20 | 1.000000 |
| Ph+Allene   | 1.14366e-20 | 1.000000 | 1.14369e-20 | 1.000000 |
| PAH7+H      | 6.92288e-21 | 1.000000 | 6.92311e-21 | 1.000000 |
| rad12       | 1.07478e-21 | 1.000000 | 1.07482e-21 | 1.000000 |
| rad60syn    | 1.00093e-21 | 1.000000 | 1.00096e-21 | 1.000000 |
| rad39       | 5.45660e-22 | 1.000000 | 5.45678e-22 | 1.000000 |
| rad60anti   | 9.29974e-23 | 1.000000 | 9.30006e-23 | 1.000000 |

|               |             |          |             |         |
|---------------|-------------|----------|-------------|---------|
| PhCH2CCH+H    | 1.73880e-24 | 1.000000 | 1.73886e-24 | 1.00000 |
| rad37         | 1.68858e-25 | 1.000000 | 1.68864e-25 | 1.00000 |
| rad5          | 7.17121e-28 | 1.000000 | 7.17146e-28 | 1.00000 |
| PAH3+H        | 1.15088e-28 | 1.000000 | 1.15092e-28 | 1.00000 |
| rad59         | 5.75416e-29 | 1.000000 | 5.75436e-29 | 1.00000 |
| rad50         | 7.53112e-30 | 1.000000 | 7.53138e-30 | 1.00000 |
| rad19syn      | 1.40237e-36 | 1.000000 | 1.40241e-36 | 1.00000 |
| rad54         | 4.18214e-40 | 1.000000 | 4.18228e-40 | 1.00000 |
| PAH10+CH3     | 3.33419e-40 | 1.000000 | 3.33430e-40 | 1.00000 |
| rad52         | 1.21659e-40 | 1.000000 | 1.21663e-40 | 1.00000 |
| rad43         | 7.66571e-41 | 1.000000 | 7.66597e-41 | 1.00000 |
| rad62         | 1.23458e-42 | 1.000000 | 1.23462e-42 | 1.00000 |
| rad51         | 1.30723e-45 | 1.000000 | 1.30727e-45 | 1.00000 |
| rad70         | 5.84936e-47 | 1.000000 | 5.84956e-47 | 1.00000 |
| PhcycC3H3_A+H | 3.47133e-47 | 1.000000 | 3.47144e-47 | 1.00000 |
| rad55         | 1.75558e-47 | 1.000000 | 1.75564e-47 | 1.00000 |
| rad65         | 1.31311e-49 | 1.000000 | 1.31315e-49 | 1.00000 |
| rad58         | 1.50888e-50 | 1.000000 | 1.50893e-50 | 1.00000 |
| PAH1+H        | 2.52924e-51 | 1.000000 | 2.52933e-51 | 1.00000 |
| rad34         | 2.80464e-53 | 1.000000 | 2.80473e-53 | 1.00000 |
| rad42         | 1.14692e-56 | 1.000000 | 1.14696e-56 | 1.00000 |
| rad41         | 3.46744e-57 | 1.000000 | 3.46755e-57 | 1.00000 |
| rad47         | 1.61627e-58 | 1.000000 | 1.61632e-58 | 1.00000 |

0.100000000 Pa, 150.000000 K

=====

| Rate constant | True (fraction)     | Effective (fraction) |
|---------------|---------------------|----------------------|
| Total         | 3.27736e-32 (1.00 ) | 3.27722e-32 (1.00 )  |

| species     | PYtrue      | Cumul    | PYeffective | Cumul    |
|-------------|-------------|----------|-------------|----------|
| Indene+H    | 0.997309    | 0.997309 | 0.997352    | 0.997352 |
| rad23       | 0.00225399  | 0.999563 | 0.00225408  | 0.999606 |
| rad6        | 0.000354367 | 0.999917 | 0.000354383 | 0.999960 |
| Benzyl+C2H2 | 4.38357e-05 | 0.999961 | 0.000000    | 0.999960 |
| rad45       | 3.51174e-05 | 0.999996 | 3.51189e-05 | 0.999996 |
| rad36       | 2.17856e-06 | 0.999998 | 2.17866e-06 | 0.999998 |
| rad22       | 1.40901e-06 | 1.000000 | 1.40907e-06 | 0.999999 |
| rad11       | 5.46370e-07 | 1.000000 | 5.46394e-07 | 1.000000 |
| rad7        | 3.86877e-08 | 1.000000 | 3.86894e-08 | 1.000000 |
| rad2        | 3.94719e-10 | 1.000000 | 3.94737e-10 | 1.000000 |
| rad3        | 1.92234e-10 | 1.000000 | 1.92242e-10 | 1.000000 |
| rad13       | 1.50059e-10 | 1.000000 | 1.50065e-10 | 1.000000 |
| rad4        | 9.81978e-11 | 1.000000 | 9.82021e-11 | 1.000000 |
| rad30       | 9.41352e-11 | 1.000000 | 9.41393e-11 | 1.000000 |
| rad20       | 7.84162e-11 | 1.000000 | 7.84197e-11 | 1.000000 |
| rad21       | 4.95625e-11 | 1.000000 | 4.95646e-11 | 1.000000 |
| rad35       | 3.95955e-11 | 1.000000 | 3.95972e-11 | 1.000000 |
| PAH9+H      | 3.27489e-11 | 1.000000 | 3.27504e-11 | 1.000000 |
| rad1        | 2.59474e-11 | 1.000000 | 2.59486e-11 | 1.000000 |
| rad10       | 2.12463e-11 | 1.000000 | 2.12472e-11 | 1.000000 |
| rad18       | 6.18130e-12 | 1.000000 | 6.18157e-12 | 1.000000 |
| rad38       | 2.68952e-12 | 1.000000 | 2.68964e-12 | 1.000000 |
| rad15       | 1.72882e-12 | 1.000000 | 1.72890e-12 | 1.000000 |
| rad28       | 9.46188e-13 | 1.000000 | 9.46230e-13 | 1.000000 |
| rad24       | 3.56948e-13 | 1.000000 | 3.56964e-13 | 1.000000 |
| rad33       | 2.79513e-13 | 1.000000 | 2.79525e-13 | 1.000000 |
| rad25       | 1.43409e-13 | 1.000000 | 1.43415e-13 | 1.000000 |
| rad26       | 2.51728e-14 | 1.000000 | 2.51740e-14 | 1.000000 |
| PhCCH+CH3   | 7.42611e-15 | 1.000000 | 7.42644e-15 | 1.000000 |
| PhCHCCH2+H  | 4.70593e-15 | 1.000000 | 4.70614e-15 | 1.000000 |
| PhCCCH3+H   | 1.32872e-15 | 1.000000 | 1.32878e-15 | 1.000000 |
| rad14       | 2.17434e-16 | 1.000000 | 2.17444e-16 | 1.000000 |
| rad27       | 1.35038e-16 | 1.000000 | 1.35044e-16 | 1.000000 |
| rad46       | 4.83581e-17 | 1.000000 | 4.83602e-17 | 1.000000 |
| rad9        | 1.73250e-17 | 1.000000 | 1.73258e-17 | 1.000000 |
| rad8        | 6.19595e-18 | 1.000000 | 6.19622e-18 | 1.000000 |
| Ph+MeAc     | 2.89512e-18 | 1.000000 | 2.89525e-18 | 1.000000 |
| Ph+Allene   | 1.75367e-19 | 1.000000 | 1.75374e-19 | 1.000000 |
| rad31       | 8.79307e-20 | 1.000000 | 8.79346e-20 | 1.000000 |
| PAH7+H      | 8.32611e-20 | 1.000000 | 8.32648e-20 | 1.000000 |
| rad12       | 1.36960e-20 | 1.000000 | 1.36966e-20 | 1.000000 |
| rad60syn    | 1.28892e-20 | 1.000000 | 1.28898e-20 | 1.000000 |
| rad39       | 7.82502e-21 | 1.000000 | 7.82537e-21 | 1.000000 |
| rad60anti   | 1.41455e-21 | 1.000000 | 1.41461e-21 | 1.000000 |
| PhCH2CCH+H  | 5.74511e-23 | 1.000000 | 5.74536e-23 | 1.000000 |
| rad37       | 5.49036e-24 | 1.000000 | 5.49060e-24 | 1.000000 |
| rad5        | 3.43704e-26 | 1.000000 | 3.43719e-26 | 1.000000 |
| PAH3+H      | 1.80908e-26 | 1.000000 | 1.80916e-26 | 1.000000 |

|               |             |         |             |          |
|---------------|-------------|---------|-------------|----------|
| rad59         | 8.15438e-27 | 1.00000 | 8.15474e-27 | 1.000000 |
| rad50         | 5.41962e-28 | 1.00000 | 5.41986e-28 | 1.000000 |
| rad19syn      | 4.04972e-34 | 1.00000 | 4.04990e-34 | 1.000000 |
| rad54         | 1.24866e-37 | 1.00000 | 1.24871e-37 | 1.000000 |
| PAH10+CH3     | 1.02026e-37 | 1.00000 | 1.02030e-37 | 1.000000 |
| rad52         | 4.64723e-38 | 1.00000 | 4.64743e-38 | 1.000000 |
| rad43         | 2.35183e-38 | 1.00000 | 2.35193e-38 | 1.000000 |
| rad62         | 3.83541e-40 | 1.00000 | 3.83557e-40 | 1.000000 |
| rad51         | 4.73253e-43 | 1.00000 | 4.73274e-43 | 1.000000 |
| rad70         | 1.84297e-44 | 1.00000 | 1.84305e-44 | 1.000000 |
| PhcycC3H3_A+H | 1.09831e-44 | 1.00000 | 1.09836e-44 | 1.000000 |
| rad55         | 5.54706e-45 | 1.00000 | 5.54730e-45 | 1.000000 |
| rad65         | 4.90355e-47 | 1.00000 | 4.90376e-47 | 1.000000 |
| rad58         | 4.78904e-48 | 1.00000 | 4.78925e-48 | 1.000000 |
| PAH1+H        | 8.38627e-49 | 1.00000 | 8.38664e-49 | 1.000000 |
| rad34         | 9.46231e-51 | 1.00000 | 9.46273e-51 | 1.000000 |
| rad42         | 6.64588e-54 | 1.00000 | 6.64617e-54 | 1.000000 |
| rad41         | 2.86250e-54 | 1.00000 | 2.86263e-54 | 1.000000 |
| rad47         | 6.72742e-56 | 1.00000 | 6.72771e-56 | 1.000000 |

0.100000000 Pa, 160.000000 K

| Rate constant | True (fraction)     | Effective (fraction) |
|---------------|---------------------|----------------------|
| Total         | 5.01169e-31 (1.00 ) | 5.01140e-31 (1.00 )  |

| species     | PYtrue      | Cumul    | PYeffective | Cumul    |
|-------------|-------------|----------|-------------|----------|
| Indene+H    | 0.997749    | 0.997749 | 0.997805    | 0.997805 |
| rad23       | 0.00178103  | 0.999530 | 0.00178113  | 0.999586 |
| rad6        | 0.000382776 | 0.999913 | 0.000382798 | 0.999969 |
| Benzyl+C2H2 | 5.67850e-05 | 0.999970 | 0.000000    | 0.999969 |
| rad45       | 2.75298e-05 | 0.999997 | 2.75313e-05 | 0.999996 |
| rad36       | 1.70932e-06 | 0.999999 | 1.70942e-06 | 0.999998 |
| rad22       | 1.10049e-06 | 1.000000 | 1.10055e-06 | 0.999999 |
| rad11       | 4.36180e-07 | 1.000000 | 4.36204e-07 | 1.000000 |
| rad7        | 4.15251e-08 | 1.000000 | 4.15274e-08 | 1.000000 |
| rad2        | 6.89311e-10 | 1.000000 | 6.89350e-10 | 1.000000 |
| rad3        | 2.39070e-10 | 1.000000 | 2.39084e-10 | 1.000000 |
| rad30       | 1.80522e-10 | 1.000000 | 1.80532e-10 | 1.000000 |
| rad13       | 1.62341e-10 | 1.000000 | 1.62350e-10 | 1.000000 |
| rad4        | 1.22310e-10 | 1.000000 | 1.22317e-10 | 1.000000 |
| rad20       | 6.87263e-11 | 1.000000 | 6.87302e-11 | 1.000000 |
| rad35       | 5.50579e-11 | 1.000000 | 5.50610e-11 | 1.000000 |
| PAH9+H      | 4.93743e-11 | 1.000000 | 4.93771e-11 | 1.000000 |
| rad1        | 4.55665e-11 | 1.000000 | 4.55691e-11 | 1.000000 |
| rad21       | 4.34785e-11 | 1.000000 | 4.34810e-11 | 1.000000 |
| rad10       | 3.81241e-11 | 1.000000 | 3.81263e-11 | 1.000000 |
| rad18       | 5.01589e-12 | 1.000000 | 5.01617e-12 | 1.000000 |
| rad38       | 4.67477e-12 | 1.000000 | 4.67504e-12 | 1.000000 |
| rad15       | 4.38373e-12 | 1.000000 | 4.38397e-12 | 1.000000 |
| rad28       | 2.42428e-12 | 1.000000 | 2.42442e-12 | 1.000000 |
| rad33       | 3.03299e-13 | 1.000000 | 3.03316e-13 | 1.000000 |
| rad24       | 2.83424e-13 | 1.000000 | 2.83440e-13 | 1.000000 |
| rad25       | 2.65374e-13 | 1.000000 | 2.65389e-13 | 1.000000 |
| rad26       | 9.30271e-14 | 1.000000 | 9.30324e-14 | 1.000000 |
| PhCCH+CH3   | 3.60699e-14 | 1.000000 | 3.60720e-14 | 1.000000 |
| PhCHCCH2+H  | 2.33802e-14 | 1.000000 | 2.33816e-14 | 1.000000 |
| PhCCCH3+H   | 7.36535e-15 | 1.000000 | 7.36576e-15 | 1.000000 |
| rad14       | 5.19574e-16 | 1.000000 | 5.19604e-16 | 1.000000 |
| rad27       | 2.69329e-16 | 1.000000 | 2.69344e-16 | 1.000000 |
| rad46       | 1.87059e-16 | 1.000000 | 1.87070e-16 | 1.000000 |
| rad9        | 1.09403e-16 | 1.000000 | 1.09409e-16 | 1.000000 |
| rad8        | 4.41612e-17 | 1.000000 | 4.41637e-17 | 1.000000 |
| Ph+MeAc     | 2.82621e-17 | 1.000000 | 2.82638e-17 | 1.000000 |
| Ph+Allene   | 1.95282e-18 | 1.000000 | 1.95294e-18 | 1.000000 |
| PAH7+H      | 7.95792e-19 | 1.000000 | 7.95837e-19 | 1.000000 |
| rad12       | 1.35957e-19 | 1.000000 | 1.35964e-19 | 1.000000 |
| rad60syn    | 1.20405e-19 | 1.000000 | 1.20412e-19 | 1.000000 |
| rad31       | 1.19986e-19 | 1.000000 | 1.19992e-19 | 1.000000 |
| rad39       | 8.65995e-20 | 1.000000 | 8.66044e-20 | 1.000000 |
| rad60anti   | 1.52674e-20 | 1.000000 | 1.52683e-20 | 1.000000 |
| PhCH2CCH+H  | 1.16245e-21 | 1.000000 | 1.16252e-21 | 1.000000 |
| rad37       | 1.11676e-22 | 1.000000 | 1.11682e-22 | 1.000000 |
| rad5        | 8.61310e-25 | 1.000000 | 8.61359e-25 | 1.000000 |
| PAH3+H      | 5.42506e-25 | 1.000000 | 5.42536e-25 | 1.000000 |
| rad59       | 2.29066e-25 | 1.000000 | 2.29079e-25 | 1.000000 |
| rad50       | 1.42932e-26 | 1.000000 | 1.42940e-26 | 1.000000 |
| rad19syn    | 9.70721e-32 | 1.000000 | 9.70776e-32 | 1.000000 |
| rad54       | 3.09887e-35 | 1.000000 | 3.09905e-35 | 1.000000 |



|               |             |         |             |          |
|---------------|-------------|---------|-------------|----------|
| PAH10+CH3     | 2.52007e-35 | 1.00000 | 2.52022e-35 | 1.000000 |
| rad52         | 1.50731e-35 | 1.00000 | 1.50739e-35 | 1.000000 |
| rad43         | 5.82704e-36 | 1.00000 | 5.82737e-36 | 1.000000 |
| rad62         | 9.80140e-38 | 1.00000 | 9.80196e-38 | 1.000000 |
| rad51         | 1.49763e-40 | 1.00000 | 1.49771e-40 | 1.000000 |
| rad70         | 4.86002e-42 | 1.00000 | 4.86029e-42 | 1.000000 |
| PhcycC3H3_A+H | 2.91142e-42 | 1.00000 | 2.91158e-42 | 1.000000 |
| rad55         | 1.46785e-42 | 1.00000 | 1.46793e-42 | 1.000000 |
| rad65         | 1.73181e-44 | 1.00000 | 1.73191e-44 | 1.000000 |
| rad58         | 1.27502e-45 | 1.00000 | 1.27510e-45 | 1.000000 |
| PAH1+H        | 2.37823e-46 | 1.00000 | 2.37837e-46 | 1.000000 |
| rad34         | 2.76818e-48 | 1.00000 | 2.76834e-48 | 1.000000 |
| rad42         | 3.86116e-51 | 1.00000 | 3.86137e-51 | 1.000000 |
| rad41         | 2.04422e-51 | 1.00000 | 2.04434e-51 | 1.000000 |
| rad47         | 3.19817e-53 | 1.00000 | 3.19836e-53 | 1.000000 |

0.100000000 Pa, 170.000000 K

| Rate constant | True (fraction) |          | Effective (fraction) |          |
|---------------|-----------------|----------|----------------------|----------|
| -----         | -----           |          | -----                |          |
| Total         | 5.54821e-30     | (1.00 )  | 5.54780e-30          | (1.00 )  |
| species       | PYtrue          | Cumul    | PYeffective          | Cumul    |
| -----         | -----           | -----    | -----                | -----    |
| Indene+H      | 0.998080        | 0.998080 | 0.998153             | 0.998153 |
| rad23         | 0.00140836      | 0.999488 | 0.00140846           | 0.999561 |
| rad6          | 0.000414605     | 0.999903 | 0.000414636          | 0.999976 |
| Benzyl+C2H2   | 7.32881e-05     | 0.999976 | 0.000000             | 0.999976 |
| rad45         | 2.16157e-05     | 0.999998 | 2.16173e-05          | 0.999998 |
| rad36         | 1.34364e-06     | 0.999999 | 1.34374e-06          | 0.999999 |
| rad22         | 8.61295e-07     | 1.00000  | 8.61358e-07          | 1.000000 |
| rad11         | 3.50490e-07     | 1.00000  | 3.50515e-07          | 1.00000  |
| rad7          | 4.47171e-08     | 1.00000  | 4.47204e-08          | 1.00000  |
| rad2          | 1.18319e-09     | 1.00000  | 1.18328e-09          | 1.00000  |
| rad30         | 3.24815e-10     | 1.00000  | 3.24839e-10          | 1.00000  |
| rad3          | 2.93520e-10     | 1.00000  | 2.93542e-10          | 1.00000  |
| rad13         | 1.76167e-10     | 1.00000  | 1.76180e-10          | 1.00000  |
| rad4          | 1.50419e-10     | 1.00000  | 1.50430e-10          | 1.00000  |
| rad1          | 7.86905e-11     | 1.00000  | 7.86963e-11          | 1.00000  |
| rad35         | 7.60771e-11     | 1.00000  | 7.60827e-11          | 1.00000  |
| PAH9+H        | 7.32333e-11     | 1.00000  | 7.32387e-11          | 1.00000  |
| rad10         | 6.67445e-11     | 1.00000  | 6.67494e-11          | 1.00000  |
| rad20         | 6.05435e-11     | 1.00000  | 6.05479e-11          | 1.00000  |
| rad21         | 3.83423e-11     | 1.00000  | 3.83451e-11          | 1.00000  |
| rad15         | 1.00573e-11     | 1.00000  | 1.00580e-11          | 1.00000  |
| rad38         | 7.83983e-12     | 1.00000  | 7.84041e-12          | 1.00000  |
| rad28         | 5.89476e-12     | 1.00000  | 5.89520e-12          | 1.00000  |
| rad18         | 4.10706e-12     | 1.00000  | 4.10736e-12          | 1.00000  |
| rad25         | 4.45284e-13     | 1.00000  | 4.45317e-13          | 1.00000  |
| rad33         | 3.30092e-13     | 1.00000  | 3.30117e-13          | 1.00000  |
| rad26         | 3.15791e-13     | 1.00000  | 3.15815e-13          | 1.00000  |
| rad24         | 2.25379e-13     | 1.00000  | 2.25395e-13          | 1.00000  |
| PhCCH+CH3     | 1.55412e-13     | 1.00000  | 1.55423e-13          | 1.00000  |
| PhCHCCH2+H    | 1.01790e-13     | 1.00000  | 1.01798e-13          | 1.00000  |
| PhCCCH3+H     | 3.54879e-14     | 1.00000  | 3.54905e-14          | 1.00000  |
| rad14         | 1.11758e-15     | 1.00000  | 1.11767e-15          | 1.00000  |
| rad46         | 6.25481e-16     | 1.00000  | 6.25527e-16          | 1.00000  |
| rad9          | 5.65275e-16     | 1.00000  | 5.65316e-16          | 1.00000  |
| rad27         | 5.11812e-16     | 1.00000  | 5.11849e-16          | 1.00000  |
| rad8          | 2.63823e-16     | 1.00000  | 2.63843e-16          | 1.00000  |
| Ph+MeAc       | 2.20682e-16     | 1.00000  | 2.20698e-16          | 1.00000  |
| Ph+Allene     | 1.67291e-17     | 1.00000  | 1.67303e-17          | 1.00000  |
| PAH7+H        | 6.24666e-18     | 1.00000  | 6.24712e-18          | 1.00000  |
| rad12         | 1.08588e-18     | 1.00000  | 1.08596e-18          | 1.00000  |
| rad60syn      | 8.64426e-19     | 1.00000  | 8.64490e-19          | 1.00000  |
| rad39         | 7.67749e-19     | 1.00000  | 7.67805e-19          | 1.00000  |
| rad31         | 1.63818e-19     | 1.00000  | 1.63830e-19          | 1.00000  |
| rad60anti     | 1.24361e-19     | 1.00000  | 1.24370e-19          | 1.00000  |
| PhCH2CCH+H    | 1.66868e-20     | 1.00000  | 1.66881e-20          | 1.00000  |
| rad37         | 1.61008e-21     | 1.00000  | 1.61019e-21          | 1.00000  |
| rad5          | 1.46395e-23     | 1.00000  | 1.46406e-23          | 1.00000  |
| PAH3+H        | 9.96101e-24     | 1.00000  | 9.96174e-24          | 1.00000  |
| rad59         | 4.05667e-24     | 1.00000  | 4.05697e-24          | 1.00000  |
| rad50         | 2.44540e-25     | 1.00000  | 2.44558e-25          | 1.00000  |
| rad19syn      | 2.39471e-29     | 1.00000  | 2.39488e-29          | 1.00000  |
| rad52         | 2.27938e-31     | 1.00000  | 2.27954e-31          | 1.00000  |
| rad54         | 6.33077e-33     | 1.00000  | 6.33124e-33          | 1.00000  |
| PAH10+CH3     | 4.94257e-33     | 1.00000  | 4.94293e-33          | 1.00000  |
| rad43         | 1.14621e-33     | 1.00000  | 1.14630e-33          | 1.00000  |
| rad62         | 2.02070e-35     | 1.00000  | 2.02084e-35          | 1.00000  |

|               |             |         |             |         |
|---------------|-------------|---------|-------------|---------|
| rad51         | 3.62627e-38 | 1.00000 | 3.62654e-38 | 1.00000 |
| rad70         | 1.05870e-39 | 1.00000 | 1.05878e-39 | 1.00000 |
| PhcycC3H3_A+H | 6.37810e-40 | 1.00000 | 6.37857e-40 | 1.00000 |
| rad55         | 3.20942e-40 | 1.00000 | 3.20965e-40 | 1.00000 |
| rad65         | 4.93012e-42 | 1.00000 | 4.93048e-42 | 1.00000 |
| rad58         | 2.80780e-43 | 1.00000 | 2.80801e-43 | 1.00000 |
| PAH1+H        | 5.63849e-44 | 1.00000 | 5.63890e-44 | 1.00000 |
| rad34         | 6.83493e-46 | 1.00000 | 6.83543e-46 | 1.00000 |
| rad42         | 1.75006e-48 | 1.00000 | 1.75019e-48 | 1.00000 |
| rad41         | 1.02733e-48 | 1.00000 | 1.02740e-48 | 1.00000 |
| rad47         | 1.28871e-50 | 1.00000 | 1.28881e-50 | 1.00000 |

0.100000000 Pa, 180.000000 K

| Rate constant | True (fraction)     | Effective (fraction) |
|---------------|---------------------|----------------------|
| Total         | 4.69315e-29 (1.00 ) | 4.69271e-29 (1.00 )  |

| species       | PYtrue      | Cumul    | PYeffective | Cumul    |
|---------------|-------------|----------|-------------|----------|
| Indene+H      | 0.998322    | 0.998322 | 0.998416    | 0.998416 |
| rad23         | 0.00111420  | 0.999436 | 0.00111431  | 0.999530 |
| rad6          | 0.000450227 | 0.999886 | 0.000450270 | 0.999981 |
| Benzyl+C2H2   | 9.42253e-05 | 0.999981 | 0.00000     | 0.999981 |
| rad45         | 1.69931e-05 | 0.999998 | 1.69947e-05 | 0.999998 |
| rad36         | 1.05783e-06 | 0.999999 | 1.05793e-06 | 0.999999 |
| rad22         | 6.75133e-07 | 0.999999 | 6.75197e-07 | 0.999999 |
| rad11         | 2.83460e-07 | 1.000000 | 2.83487e-07 | 1.000000 |
| rad7          | 4.82993e-08 | 1.000000 | 4.83038e-08 | 1.000000 |
| rad2          | 1.99613e-09 | 1.000000 | 1.99632e-09 | 1.000000 |
| rad30         | 5.55018e-10 | 1.000000 | 5.55071e-10 | 1.000000 |
| rad3          | 3.56438e-10 | 1.000000 | 3.56471e-10 | 1.000000 |
| rad13         | 1.91710e-10 | 1.000000 | 1.91728e-10 | 1.000000 |
| rad4          | 1.82997e-10 | 1.000000 | 1.83015e-10 | 1.000000 |
| rad1          | 1.33635e-10 | 1.000000 | 1.33647e-10 | 1.000000 |
| rad10         | 1.14200e-10 | 1.000000 | 1.14211e-10 | 1.000000 |
| PAH9+H        | 1.07184e-10 | 1.000000 | 1.07194e-10 | 1.000000 |
| rad35         | 1.04540e-10 | 1.000000 | 1.04550e-10 | 1.000000 |
| rad20         | 5.35696e-11 | 1.000000 | 5.35746e-11 | 1.000000 |
| rad21         | 3.39661e-11 | 1.000000 | 3.39693e-11 | 1.000000 |
| rad15         | 2.12541e-11 | 1.000000 | 2.12561e-11 | 1.000000 |
| rad28         | 1.37019e-11 | 1.000000 | 1.37032e-11 | 1.000000 |
| rad38         | 1.27672e-11 | 1.000000 | 1.27684e-11 | 1.000000 |
| rad18         | 3.38857e-12 | 1.000000 | 3.38889e-12 | 1.000000 |
| rad26         | 9.88157e-13 | 1.000000 | 9.88250e-13 | 1.000000 |
| rad25         | 6.88581e-13 | 1.000000 | 6.88646e-13 | 1.000000 |
| PhCCH+CH3     | 6.03667e-13 | 1.000000 | 6.03724e-13 | 1.000000 |
| PhCHCCH2+H    | 3.95523e-13 | 1.000000 | 3.95561e-13 | 1.000000 |
| rad33         | 3.60250e-13 | 1.000000 | 3.60284e-13 | 1.000000 |
| rad24         | 1.79436e-13 | 1.000000 | 1.79453e-13 | 1.000000 |
| PhCCCH3+H     | 1.51138e-13 | 1.000000 | 1.51152e-13 | 1.000000 |
| rad9          | 2.47644e-15 | 1.000000 | 2.47667e-15 | 1.000000 |
| rad14         | 2.20115e-15 | 1.000000 | 2.20136e-15 | 1.000000 |
| rad46         | 1.85472e-15 | 1.000000 | 1.85490e-15 | 1.000000 |
| Ph+MeAc       | 1.42314e-15 | 1.000000 | 1.42327e-15 | 1.000000 |
| rad8          | 1.34608e-15 | 1.000000 | 1.34621e-15 | 1.000000 |
| rad27         | 9.33248e-16 | 1.000000 | 9.33336e-16 | 1.000000 |
| Ph+Allene     | 1.15309e-16 | 1.000000 | 1.15319e-16 | 1.000000 |
| PAH7+H        | 4.13244e-17 | 1.000000 | 4.13283e-17 | 1.000000 |
| rad12         | 7.17432e-18 | 1.000000 | 7.17500e-18 | 1.000000 |
| rad39         | 5.61803e-18 | 1.000000 | 5.61856e-18 | 1.000000 |
| rad60syn      | 4.98789e-18 | 1.000000 | 4.98836e-18 | 1.000000 |
| rad60anti     | 8.01849e-19 | 1.000000 | 8.01924e-19 | 1.000000 |
| rad31         | 2.24667e-19 | 1.000000 | 2.24688e-19 | 1.000000 |
| PhCH2CCH+H    | 1.81501e-19 | 1.000000 | 1.81518e-19 | 1.000000 |
| rad37         | 1.74548e-20 | 1.000000 | 1.74564e-20 | 1.000000 |
| rad5          | 1.84186e-22 | 1.000000 | 1.84203e-22 | 1.000000 |
| PAH3+H        | 1.30922e-22 | 1.000000 | 1.30934e-22 | 1.000000 |
| rad59         | 5.16930e-23 | 1.000000 | 5.16979e-23 | 1.000000 |
| rad50         | 3.04556e-24 | 1.000000 | 3.04585e-24 | 1.000000 |
| rad19syn      | 2.09753e-27 | 1.000000 | 2.09773e-27 | 1.000000 |
| rad52         | 1.36316e-29 | 1.000000 | 1.36328e-29 | 1.000000 |
| rad54         | 1.49799e-30 | 1.000000 | 1.49813e-30 | 1.000000 |
| PAH10+CH3     | 1.07280e-30 | 1.000000 | 1.07290e-30 | 1.000000 |
| rad43         | 2.49932e-31 | 1.000000 | 2.49955e-31 | 1.000000 |
| rad62         | 4.68145e-33 | 1.000000 | 4.68189e-33 | 1.000000 |
| rad51         | 8.76300e-36 | 1.000000 | 8.76383e-36 | 1.000000 |
| rad70         | 2.66690e-37 | 1.000000 | 2.66715e-37 | 1.000000 |
| PhcycC3H3_A+H | 1.61424e-37 | 1.000000 | 1.61439e-37 | 1.000000 |
| rad55         | 8.11034e-38 | 1.000000 | 8.11110e-38 | 1.000000 |

|        |             |          |             |          |
|--------|-------------|----------|-------------|----------|
| rad65  | 1.30498e-39 | 1.000000 | 1.30510e-39 | 1.000000 |
| rad58  | 7.13609e-41 | 1.000000 | 7.13677e-41 | 1.000000 |
| PAH1+H | 1.49658e-41 | 1.000000 | 1.49672e-41 | 1.000000 |
| rad34  | 1.84564e-43 | 1.000000 | 1.84581e-43 | 1.000000 |
| rad42  | 6.32646e-46 | 1.000000 | 6.32705e-46 | 1.000000 |
| rad41  | 3.93828e-46 | 1.000000 | 3.93865e-46 | 1.000000 |
| rad47  | 4.41824e-48 | 1.000000 | 4.41866e-48 | 1.000000 |

0.100000000 Pa, 190.000000 K

| Rate constant | True (fraction)     | Effective (fraction) |
|---------------|---------------------|----------------------|
| Total         | 3.16530e-28 (1.00 ) | 3.16492e-28 (1.00 )  |

| species       | PYtrue      | Cumul    | PYeffective | Cumul    |
|---------------|-------------|----------|-------------|----------|
| Indene+H      | 0.998493    | 0.998493 | 0.998613    | 0.998613 |
| rad23         | 0.000881735 | 0.999375 | 0.000881841 | 0.999495 |
| rad6          | 0.000490029 | 0.999865 | 0.000490088 | 0.999985 |
| Benzyl+C2H2   | 0.000120658 | 0.999985 | 0.00000     | 0.999985 |
| rad45         | 1.33723e-05 | 0.999999 | 1.33739e-05 | 0.999998 |
| rad36         | 8.33921e-07 | 1.000000 | 8.34022e-07 | 0.999999 |
| rad22         | 5.29829e-07 | 1.000000 | 5.29893e-07 | 1.000000 |
| rad11         | 2.30809e-07 | 1.000000 | 2.30836e-07 | 1.000000 |
| rad7          | 5.23090e-08 | 1.000000 | 5.23153e-08 | 1.000000 |
| rad2          | 3.30824e-09 | 1.000000 | 3.30864e-09 | 1.000000 |
| rad30         | 9.08980e-10 | 1.000000 | 9.09090e-10 | 1.000000 |
| rad3          | 4.29009e-10 | 1.000000 | 4.29061e-10 | 1.000000 |
| rad1          | 2.23068e-10 | 1.000000 | 2.23094e-10 | 1.000000 |
| rad4          | 2.20697e-10 | 1.000000 | 2.20724e-10 | 1.000000 |
| rad13         | 2.09156e-10 | 1.000000 | 2.09181e-10 | 1.000000 |
| rad10         | 1.91141e-10 | 1.000000 | 1.91164e-10 | 1.000000 |
| PAH9+H        | 1.55114e-10 | 1.000000 | 1.55133e-10 | 1.000000 |
| rad35         | 1.42907e-10 | 1.000000 | 1.42924e-10 | 1.000000 |
| rad20         | 4.75806e-11 | 1.000000 | 4.75863e-11 | 1.000000 |
| rad15         | 4.19565e-11 | 1.000000 | 4.19615e-11 | 1.000000 |
| rad28         | 3.06006e-11 | 1.000000 | 3.06043e-11 | 1.000000 |
| rad21         | 3.02087e-11 | 1.000000 | 3.02123e-11 | 1.000000 |
| rad38         | 2.02859e-11 | 1.000000 | 2.02883e-11 | 1.000000 |
| rad26         | 2.85964e-12 | 1.000000 | 2.85998e-12 | 1.000000 |
| rad18         | 2.81397e-12 | 1.000000 | 2.81431e-12 | 1.000000 |
| PhCCH+CH3     | 2.14016e-12 | 1.000000 | 2.14042e-12 | 1.000000 |
| PhCHCCH2+H    | 1.39223e-12 | 1.000000 | 1.39240e-12 | 1.000000 |
| rad25         | 9.93953e-13 | 1.000000 | 9.94073e-13 | 1.000000 |
| PhCCCH3+H     | 5.77016e-13 | 1.000000 | 5.77085e-13 | 1.000000 |
| rad33         | 3.94156e-13 | 1.000000 | 3.94203e-13 | 1.000000 |
| rad24         | 1.43001e-13 | 1.000000 | 1.43018e-13 | 1.000000 |
| rad9          | 9.46286e-15 | 1.000000 | 9.46400e-15 | 1.000000 |
| Ph+MeAc       | 7.78289e-15 | 1.000000 | 7.78383e-15 | 1.000000 |
| rad8          | 5.96811e-15 | 1.000000 | 5.96883e-15 | 1.000000 |
| rad46         | 4.97620e-15 | 1.000000 | 4.97680e-15 | 1.000000 |
| rad14         | 4.02557e-15 | 1.000000 | 4.02605e-15 | 1.000000 |
| rad27         | 1.64120e-15 | 1.000000 | 1.64140e-15 | 1.000000 |
| Ph+Allene     | 6.62612e-16 | 1.000000 | 6.62692e-16 | 1.000000 |
| PAH7+H        | 2.35158e-16 | 1.000000 | 2.35187e-16 | 1.000000 |
| rad12         | 4.01431e-17 | 1.000000 | 4.01480e-17 | 1.000000 |
| rad39         | 3.47628e-17 | 1.000000 | 3.47670e-17 | 1.000000 |
| rad60syn      | 2.39627e-17 | 1.000000 | 2.39656e-17 | 1.000000 |
| rad60anti     | 4.24937e-18 | 1.000000 | 4.24989e-18 | 1.000000 |
| PhCH2CCH+H    | 1.56622e-18 | 1.000000 | 1.56641e-18 | 1.000000 |
| rad31         | 3.10600e-19 | 1.000000 | 3.10638e-19 | 1.000000 |
| rad37         | 1.48583e-19 | 1.000000 | 1.48601e-19 | 1.000000 |
| rad5          | 1.80604e-21 | 1.000000 | 1.80626e-21 | 1.000000 |
| PAH3+H        | 1.31425e-21 | 1.000000 | 1.31441e-21 | 1.000000 |
| rad59         | 5.03723e-22 | 1.000000 | 5.03784e-22 | 1.000000 |
| rad50         | 2.92858e-23 | 1.000000 | 2.92894e-23 | 1.000000 |
| rad19syn      | 6.00539e-26 | 1.000000 | 6.00611e-26 | 1.000000 |
| rad54         | 3.18567e-28 | 1.000000 | 3.18606e-28 | 1.000000 |
| rad52         | 3.09964e-28 | 1.000000 | 3.10001e-28 | 1.000000 |
| PAH10+CH3     | 2.10643e-28 | 1.000000 | 2.10668e-28 | 1.000000 |
| rad43         | 5.24358e-29 | 1.000000 | 5.24421e-29 | 1.000000 |
| rad62         | 2.90903e-30 | 1.000000 | 2.90938e-30 | 1.000000 |
| rad51         | 2.54706e-31 | 1.000000 | 2.54737e-31 | 1.000000 |
| rad70         | 1.31715e-34 | 1.000000 | 1.31731e-34 | 1.000000 |
| PhcycC3H3_A+H | 8.00234e-35 | 1.000000 | 8.00331e-35 | 1.000000 |
| rad55         | 4.01639e-35 | 1.000000 | 4.01687e-35 | 1.000000 |
| rad65         | 5.04904e-37 | 1.000000 | 5.04964e-37 | 1.000000 |
| rad58         | 3.54543e-38 | 1.000000 | 3.54586e-38 | 1.000000 |
| PAH1+H        | 7.41440e-39 | 1.000000 | 7.41529e-39 | 1.000000 |
| rad34         | 8.94971e-41 | 1.000000 | 8.95079e-41 | 1.000000 |

|       |             |         |             |          |
|-------|-------------|---------|-------------|----------|
| rad42 | 2.37574e-43 | 1.00000 | 2.37603e-43 | 1.000000 |
| rad41 | 1.50669e-43 | 1.00000 | 1.50687e-43 | 1.000000 |
| rad47 | 1.68323e-45 | 1.00000 | 1.68344e-45 | 1.000000 |

0.100000000 Pa, 200.000000 K

| =====         |                     |          |                      |          |
|---------------|---------------------|----------|----------------------|----------|
| Rate constant | True (fraction)     |          | Effective (fraction) |          |
| -----         |                     |          |                      |          |
| Total         | 1.76115e-27 (1.00 ) |          | 1.76088e-27 (1.00 )  |          |
| species       | PYtrue              | Cumul    | PYeffective          | Cumul    |
| -----         |                     |          |                      |          |
| Indene+H      | 0.998602            | 0.998602 | 0.998756             | 0.998756 |
| rad23         | 0.000697884         | 0.999300 | 0.000697991          | 0.999454 |
| rad6          | 0.000534415         | 0.999834 | 0.000534497          | 0.999988 |
| Benzyl+C2H2   | 0.000153855         | 0.999988 | 0.00000              | 0.999988 |
| rad45         | 1.05316e-05         | 0.999999 | 1.05332e-05          | 0.999999 |
| rad36         | 6.58188e-07         | 0.999999 | 6.58289e-07          | 1.000000 |
| rad22         | 4.16173e-07         | 1.000000 | 4.16237e-07          | 1.000000 |
| rad11         | 1.89349e-07         | 1.000000 | 1.89378e-07          | 1.000000 |
| rad7          | 5.67853e-08         | 1.000000 | 5.67940e-08          | 1.000000 |
| rad2          | 5.38154e-09         | 1.000000 | 5.38237e-09          | 1.000000 |
| rad30         | 1.43705e-09         | 1.000000 | 1.43727e-09          | 1.000000 |
| rad3          | 5.12903e-10         | 1.000000 | 5.12982e-10          | 1.000000 |
| rad1          | 3.65697e-10         | 1.000000 | 3.65753e-10          | 1.000000 |
| rad10         | 3.13033e-10         | 1.000000 | 3.13081e-10          | 1.000000 |
| rad4          | 2.64432e-10         | 1.000000 | 2.64473e-10          | 1.000000 |
| rad13         | 2.28700e-10         | 1.000000 | 2.28735e-10          | 1.000000 |
| PAH9+H        | 2.22261e-10         | 1.000000 | 2.22295e-10          | 1.000000 |
| rad35         | 1.94364e-10         | 1.000000 | 1.94394e-10          | 1.000000 |
| rad15         | 7.82224e-11         | 1.000000 | 7.82344e-11          | 1.000000 |
| rad28         | 6.58812e-11         | 1.000000 | 6.58913e-11          | 1.000000 |
| rad20         | 4.24051e-11         | 1.000000 | 4.24116e-11          | 1.000000 |
| rad38         | 3.15610e-11         | 1.000000 | 3.15659e-11          | 1.000000 |
| rad21         | 2.69623e-11         | 1.000000 | 2.69664e-11          | 1.000000 |
| rad26         | 7.67939e-12         | 1.000000 | 7.68057e-12          | 1.000000 |
| PhCCH+CH3     | 6.99208e-12         | 1.000000 | 6.99316e-12          | 1.000000 |
| PhCHCCH2+H    | 4.49257e-12         | 1.000000 | 4.49326e-12          | 1.000000 |
| rad18         | 2.34989e-12         | 1.000000 | 2.35025e-12          | 1.000000 |
| PhCCCH3+H     | 1.99841e-12         | 1.000000 | 1.99871e-12          | 1.000000 |
| rad25         | 1.35306e-12         | 1.000000 | 1.35327e-12          | 1.000000 |
| rad33         | 4.32219e-13         | 1.000000 | 4.32286e-13          | 1.000000 |
| rad24         | 1.14064e-13         | 1.000000 | 1.14081e-13          | 1.000000 |
| Ph+MeAc       | 3.68896e-14         | 1.000000 | 3.68953e-14          | 1.000000 |
| rad9          | 3.22630e-14         | 1.000000 | 3.22680e-14          | 1.000000 |
| rad8          | 2.33613e-14         | 1.000000 | 2.33649e-14          | 1.000000 |
| rad46         | 1.22742e-14         | 1.000000 | 1.22761e-14          | 1.000000 |
| rad14         | 6.91508e-15         | 1.000000 | 6.91614e-15          | 1.000000 |
| Ph+Allene     | 3.26543e-15         | 1.000000 | 3.26594e-15          | 1.000000 |
| rad27         | 2.79354e-15         | 1.000000 | 2.79397e-15          | 1.000000 |
| PAH7+H        | 1.17022e-15         | 1.000000 | 1.17040e-15          | 1.000000 |
| rad12         | 1.94051e-16         | 1.000000 | 1.94081e-16          | 1.000000 |
| rad39         | 1.85512e-16         | 1.000000 | 1.85541e-16          | 1.000000 |
| rad60syn      | 9.85868e-17         | 1.000000 | 9.86020e-17          | 1.000000 |
| rad60anti     | 1.90733e-17         | 1.000000 | 1.90762e-17          | 1.000000 |
| PhCH2CCH+H    | 1.10903e-17         | 1.000000 | 1.10920e-17          | 1.000000 |
| rad37         | 1.02771e-18         | 1.000000 | 1.02787e-18          | 1.000000 |
| rad31         | 4.34013e-19         | 1.000000 | 4.34080e-19          | 1.000000 |
| rad5          | 1.42839e-20         | 1.000000 | 1.42861e-20          | 1.000000 |
| PAH3+H        | 1.04907e-20         | 1.000000 | 1.04923e-20          | 1.000000 |
| rad59         | 3.90839e-21         | 1.000000 | 3.90899e-21          | 1.000000 |
| rad50         | 2.25992e-22         | 1.000000 | 2.26027e-22          | 1.000000 |
| rad19syn      | 9.57648e-25         | 1.000000 | 9.57796e-25          | 1.000000 |
| rad54         | 8.57825e-27         | 1.000000 | 8.57957e-27          | 1.000000 |
| PAH10+CH3     | 5.77870e-27         | 1.000000 | 5.77959e-27          | 1.000000 |
| rad52         | 4.39922e-27         | 1.000000 | 4.39990e-27          | 1.000000 |
| rad43         | 1.44124e-27         | 1.000000 | 1.44146e-27          | 1.000000 |
| rad62         | 1.80873e-28         | 1.000000 | 1.80901e-28          | 1.000000 |
| rad51         | 1.44641e-29         | 1.000000 | 1.44663e-29          | 1.000000 |
| rad70         | 8.77757e-32         | 1.000000 | 8.77892e-32          | 1.000000 |
| PhcycC3H3_A+H | 5.35813e-32         | 1.000000 | 5.35895e-32          | 1.000000 |
| rad55         | 2.68544e-32         | 1.000000 | 2.68586e-32          | 1.000000 |
| rad65         | 1.67016e-32         | 1.000000 | 1.67042e-32          | 1.000000 |
| rad58         | 2.38177e-35         | 1.000000 | 2.38213e-35          | 1.000000 |
| PAH1+H        | 5.02653e-36         | 1.000000 | 5.02730e-36          | 1.000000 |
| rad34         | 5.98962e-38         | 1.000000 | 5.99054e-38          | 1.000000 |
| rad42         | 7.15706e-41         | 1.000000 | 7.15816e-41          | 1.000000 |
| rad41         | 4.06319e-41         | 1.000000 | 4.06381e-41          | 1.000000 |
| rad47         | 5.36873e-43         | 1.000000 | 5.36956e-43          | 1.000000 |

0.100000000 Pa, 210.000000 K

=====  
Rate constant | True (fraction)                      Effective (fraction)  
-----  
Total            | 8.30956e-27 (1.00     ) 8.30794e-27 (1.00     )

| species       | PYtrue      | Cumul    | PYeffective | Cumul    |
|---------------|-------------|----------|-------------|----------|
| Indene+H      | 0.998659    | 0.998659 | 0.998854    | 0.998854 |
| rad6          | 0.000583802 | 0.999243 | 0.000583916 | 0.999438 |
| rad23         | 0.000552422 | 0.999795 | 0.000552530 | 0.999990 |
| Benzyl+C2H2   | 0.000195323 | 0.999991 | 0.000000    | 0.999990 |
| rad45         | 8.30037e-06 | 0.999999 | 8.30199e-06 | 0.999999 |
| rad36         | 5.20073e-07 | 0.999999 | 5.20175e-07 | 0.999999 |
| rad22         | 3.27135e-07 | 1.000000 | 3.27199e-07 | 1.000000 |
| rad11         | 1.56678e-07 | 1.000000 | 1.56708e-07 | 1.000000 |
| rad7          | 6.17684e-08 | 1.000000 | 6.17804e-08 | 1.000000 |
| rad2          | 8.58354e-09 | 1.000000 | 8.58522e-09 | 1.000000 |
| rad30         | 2.20529e-09 | 1.000000 | 2.20572e-09 | 1.000000 |
| rad3          | 6.10433e-10 | 1.000000 | 6.10552e-10 | 1.000000 |
| rad1          | 5.88222e-10 | 1.000000 | 5.88337e-10 | 1.000000 |
| rad10         | 5.01543e-10 | 1.000000 | 5.01641e-10 | 1.000000 |
| PAH9+H        | 3.15621e-10 | 1.000000 | 3.15682e-10 | 1.000000 |
| rad4          | 3.15465e-10 | 1.000000 | 3.15527e-10 | 1.000000 |
| rad35         | 2.63006e-10 | 1.000000 | 2.63057e-10 | 1.000000 |
| rad13         | 2.50550e-10 | 1.000000 | 2.50599e-10 | 1.000000 |
| rad15         | 1.38946e-10 | 1.000000 | 1.38973e-10 | 1.000000 |
| rad28         | 1.37012e-10 | 1.000000 | 1.37039e-10 | 1.000000 |
| rad38         | 4.82109e-11 | 1.000000 | 4.82203e-11 | 1.000000 |
| rad20         | 3.79094e-11 | 1.000000 | 3.79168e-11 | 1.000000 |
| rad21         | 2.41428e-11 | 1.000000 | 2.41475e-11 | 1.000000 |
| PhCCH+CH3     | 2.12146e-11 | 1.000000 | 2.12187e-11 | 1.000000 |
| rad26         | 1.92062e-11 | 1.000000 | 1.92100e-11 | 1.000000 |
| PhCHCCH2+H    | 1.34178e-11 | 1.000000 | 1.34204e-11 | 1.000000 |
| PhCCCH3+H     | 6.34248e-12 | 1.000000 | 6.34371e-12 | 1.000000 |
| rad18         | 1.97192e-12 | 1.000000 | 1.97230e-12 | 1.000000 |
| rad25         | 1.75153e-12 | 1.000000 | 1.75187e-12 | 1.000000 |
| rad33         | 4.74876e-13 | 1.000000 | 4.74969e-13 | 1.000000 |
| Ph+MeAc       | 1.54288e-13 | 1.000000 | 1.54318e-13 | 1.000000 |
| rad9          | 9.99598e-14 | 1.000000 | 9.99793e-14 | 1.000000 |
| rad24         | 9.10559e-14 | 1.000000 | 9.10737e-14 | 1.000000 |
| rad8          | 8.18947e-14 | 1.000000 | 8.19107e-14 | 1.000000 |
| rad46         | 2.81907e-14 | 1.000000 | 2.81962e-14 | 1.000000 |
| Ph+Allene     | 1.41174e-14 | 1.000000 | 1.41202e-14 | 1.000000 |
| rad14         | 1.12632e-14 | 1.000000 | 1.12654e-14 | 1.000000 |
| PAH7+H        | 5.16277e-15 | 1.000000 | 5.16378e-15 | 1.000000 |
| rad27         | 4.61360e-15 | 1.000000 | 4.61450e-15 | 1.000000 |
| rad39         | 8.67947e-16 | 1.000000 | 8.68117e-16 | 1.000000 |
| rad12         | 8.24201e-16 | 1.000000 | 8.24362e-16 | 1.000000 |
| rad60syn      | 3.55340e-16 | 1.000000 | 3.55410e-16 | 1.000000 |
| rad60anti     | 7.42923e-17 | 1.000000 | 7.43069e-17 | 1.000000 |
| PhCH2CCH+H    | 6.62619e-17 | 1.000000 | 6.62749e-17 | 1.000000 |
| rad37         | 5.94228e-18 | 1.000000 | 5.94344e-18 | 1.000000 |
| rad31         | 6.13779e-19 | 1.000000 | 6.13898e-19 | 1.000000 |
| rad5          | 9.38431e-20 | 1.000000 | 9.38615e-20 | 1.000000 |
| PAH3+H        | 6.88861e-20 | 1.000000 | 6.88996e-20 | 1.000000 |
| rad59         | 2.49720e-20 | 1.000000 | 2.49768e-20 | 1.000000 |
| rad50         | 1.44580e-21 | 1.000000 | 1.44608e-21 | 1.000000 |
| rad19syn      | 1.10707e-23 | 1.000000 | 1.10729e-23 | 1.000000 |
| rad54         | 1.27673e-25 | 1.000000 | 1.27698e-25 | 1.000000 |
| PAH10+CH3     | 8.62548e-26 | 1.000000 | 8.62717e-26 | 1.000000 |
| rad52         | 4.69321e-26 | 1.000000 | 4.69413e-26 | 1.000000 |
| rad43         | 2.13088e-26 | 1.000000 | 2.13129e-26 | 1.000000 |
| rad62         | 3.45819e-27 | 1.000000 | 3.45887e-27 | 1.000000 |
| rad51         | 2.74384e-28 | 1.000000 | 2.74437e-28 | 1.000000 |
| rad70         | 3.41090e-29 | 1.000000 | 3.41156e-29 | 1.000000 |
| PhcycC3H3_A+H | 2.99035e-29 | 1.000000 | 2.99093e-29 | 1.000000 |
| rad55         | 1.16815e-29 | 1.000000 | 1.16838e-29 | 1.000000 |
| rad58         | 1.88040e-30 | 1.000000 | 1.88076e-30 | 1.000000 |
| rad65         | 8.81817e-31 | 1.000000 | 8.81990e-31 | 1.000000 |
| PAH1+H        | 4.74863e-33 | 1.000000 | 4.74956e-33 | 1.000000 |
| rad34         | 5.69216e-35 | 1.000000 | 5.69327e-35 | 1.000000 |
| rad42         | 2.83165e-38 | 1.000000 | 2.83221e-38 | 1.000000 |
| rad41         | 9.63527e-39 | 1.000000 | 9.63715e-39 | 1.000000 |
| rad47         | 2.63100e-40 | 1.000000 | 2.63151e-40 | 1.000000 |

0.100000000 Pa, 220.000000 K

=====  
Rate constant | True (fraction)                      Effective (fraction)  
-----

Total | 3.40057e-26 (1.00 ) 3.39973e-26 (1.00 )

| species       | PYtrue      | Cumul    | PYeffective | Cumul    |
|---------------|-------------|----------|-------------|----------|
| Indene+H      | 0.998670    | 0.998670 | 0.998916    | 0.998916 |
| rad6          | 0.000638617 | 0.999309 | 0.000638774 | 0.999555 |
| rad23         | 0.000437319 | 0.999746 | 0.000437427 | 0.999992 |
| Benzyl+C2H2   | 0.000246837 | 0.999993 | 0.00000     | 0.999992 |
| rad45         | 6.54642e-06 | 0.999999 | 6.54804e-06 | 0.999999 |
| rad36         | 4.11407e-07 | 1.000000 | 4.11509e-07 | 0.999999 |
| rad22         | 2.57307e-07 | 1.000000 | 2.57371e-07 | 0.999999 |
| rad11         | 1.30964e-07 | 1.000000 | 1.30996e-07 | 1.000000 |
| rad7          | 6.72995e-08 | 1.000000 | 6.73161e-08 | 1.000000 |
| rad2          | 1.34099e-08 | 1.000000 | 1.34132e-08 | 1.000000 |
| rad30         | 3.29923e-09 | 1.000000 | 3.30004e-09 | 1.000000 |
| rad1          | 9.27400e-10 | 1.000000 | 9.27629e-10 | 1.000000 |
| rad10         | 7.85857e-10 | 1.000000 | 7.86051e-10 | 1.000000 |
| rad3          | 7.24700e-10 | 1.000000 | 7.24879e-10 | 1.000000 |
| PAH9+H        | 4.44455e-10 | 1.000000 | 4.44565e-10 | 1.000000 |
| rad4          | 3.75491e-10 | 1.000000 | 3.75584e-10 | 1.000000 |
| rad35         | 3.54057e-10 | 1.000000 | 3.54144e-10 | 1.000000 |
| rad28         | 2.75549e-10 | 1.000000 | 2.75617e-10 | 1.000000 |
| rad13         | 2.74922e-10 | 1.000000 | 2.74990e-10 | 1.000000 |
| rad15         | 2.36805e-10 | 1.000000 | 2.36864e-10 | 1.000000 |
| rad38         | 7.24572e-11 | 1.000000 | 7.24751e-11 | 1.000000 |
| PhCCH+CH3     | 6.01593e-11 | 1.000000 | 6.01741e-11 | 1.000000 |
| rad26         | 4.49073e-11 | 1.000000 | 4.49184e-11 | 1.000000 |
| PhCHCCH2+H    | 3.73801e-11 | 1.000000 | 3.73893e-11 | 1.000000 |
| rad20         | 3.39877e-11 | 1.000000 | 3.39961e-11 | 1.000000 |
| rad21         | 2.16837e-11 | 1.000000 | 2.16890e-11 | 1.000000 |
| PhCCCH3+H     | 1.86069e-11 | 1.000000 | 1.86115e-11 | 1.000000 |
| rad25         | 2.17084e-12 | 1.000000 | 2.17137e-12 | 1.000000 |
| rad18         | 1.66185e-12 | 1.000000 | 1.66226e-12 | 1.000000 |
| Ph+MeAc       | 5.77926e-13 | 1.000000 | 5.78069e-13 | 1.000000 |
| rad33         | 5.22589e-13 | 1.000000 | 5.22718e-13 | 1.000000 |
| rad9          | 2.85618e-13 | 1.000000 | 2.85688e-13 | 1.000000 |
| rad8          | 2.60376e-13 | 1.000000 | 2.60440e-13 | 1.000000 |
| rad24         | 7.27490e-14 | 1.000000 | 7.27670e-14 | 1.000000 |
| rad46         | 6.09114e-14 | 1.000000 | 6.09265e-14 | 1.000000 |
| Ph+Allene     | 5.45276e-14 | 1.000000 | 5.45411e-14 | 1.000000 |
| PAH7+H        | 2.04297e-14 | 1.000000 | 2.04347e-14 | 1.000000 |
| rad14         | 1.75306e-14 | 1.000000 | 1.75349e-14 | 1.000000 |
| rad27         | 7.40528e-15 | 1.000000 | 7.40711e-15 | 1.000000 |
| rad39         | 3.60997e-15 | 1.000000 | 3.61086e-15 | 1.000000 |
| rad12         | 3.12047e-15 | 1.000000 | 3.12124e-15 | 1.000000 |
| rad60syn      | 1.14308e-15 | 1.000000 | 1.14337e-15 | 1.000000 |
| PhCH2CCH+H    | 3.41658e-16 | 1.000000 | 3.41742e-16 | 1.000000 |
| rad60anti     | 2.56152e-16 | 1.000000 | 2.56215e-16 | 1.000000 |
| rad37         | 2.94033e-17 | 1.000000 | 2.94105e-17 | 1.000000 |
| rad31         | 8.78289e-19 | 1.000000 | 8.78506e-19 | 1.000000 |
| rad5          | 5.24503e-19 | 1.000000 | 5.24632e-19 | 1.000000 |
| PAH3+H        | 3.82382e-19 | 1.000000 | 3.82476e-19 | 1.000000 |
| rad59         | 1.35000e-19 | 1.000000 | 1.35034e-19 | 1.000000 |
| rad50         | 7.87186e-21 | 1.000000 | 7.87381e-21 | 1.000000 |
| rad19syn      | 1.01976e-22 | 1.000000 | 1.02001e-22 | 1.000000 |
| rad54         | 1.41656e-24 | 1.000000 | 1.41691e-24 | 1.000000 |
| PAH10+CH3     | 9.56773e-25 | 1.000000 | 9.57009e-25 | 1.000000 |
| rad52         | 4.03307e-25 | 1.000000 | 4.03406e-25 | 1.000000 |
| rad43         | 2.34622e-25 | 1.000000 | 2.34680e-25 | 1.000000 |
| rad62         | 4.37510e-26 | 1.000000 | 4.37618e-26 | 1.000000 |
| rad51         | 3.48350e-27 | 1.000000 | 3.48436e-27 | 1.000000 |
| PhcycC3H3_A+H | 8.14850e-28 | 1.000000 | 8.15051e-28 | 1.000000 |
| rad70         | 7.52172e-28 | 1.000000 | 7.52357e-28 | 1.000000 |
| rad55         | 2.76802e-28 | 1.000000 | 2.76870e-28 | 1.000000 |
| rad58         | 5.58572e-29 | 1.000000 | 5.58710e-29 | 1.000000 |
| rad65         | 1.54530e-29 | 1.000000 | 1.54568e-29 | 1.000000 |
| PAH1+H        | 2.81665e-30 | 1.000000 | 2.81734e-30 | 1.000000 |
| rad34         | 1.37130e-32 | 1.000000 | 1.37164e-32 | 1.000000 |
| rad42         | 5.47123e-36 | 1.000000 | 5.47259e-36 | 1.000000 |
| rad47         | 1.48885e-36 | 1.000000 | 1.48921e-36 | 1.000000 |
| rad41         | 1.23128e-36 | 1.000000 | 1.23159e-36 | 1.000000 |

0.100000000 Pa, 230.000000 K

| Rate constant | True (fraction)     | Effective (fraction) |
|---------------|---------------------|----------------------|
| Total         | 1.22972e-25 (1.00 ) | 1.22933e-25 (1.00 )  |

| species | PYtrue | Cumul | PYeffective | Cumul |
|---------|--------|-------|-------------|-------|
|---------|--------|-------|-------------|-------|

|               |             |          |             |          |
|---------------|-------------|----------|-------------|----------|
| Indene+H      | 0.998638    | 0.998638 | 0.998948    | 0.998948 |
| rad6          | 0.000699289 | 0.999337 | 0.000699507 | 0.999648 |
| rad23         | 0.000346246 | 0.999684 | 0.000346353 | 0.999994 |
| Benzyl+C2H2   | 0.000310468 | 0.999994 | 0.00000     | 0.999994 |
| rad45         | 5.16690e-06 | 0.999999 | 5.16850e-06 | 0.999999 |
| rad36         | 3.25838e-07 | 0.999999 | 3.25939e-07 | 0.999999 |
| rad22         | 2.02505e-07 | 1.000000 | 2.02568e-07 | 1.000000 |
| rad11         | 1.10797e-07 | 1.000000 | 1.10831e-07 | 1.000000 |
| rad7          | 7.34203e-08 | 1.000000 | 7.34431e-08 | 1.000000 |
| rad2          | 2.05022e-08 | 1.000000 | 2.05085e-08 | 1.000000 |
| rad30         | 4.82831e-09 | 1.000000 | 4.82981e-09 | 1.000000 |
| rad1          | 1.43197e-09 | 1.000000 | 1.43242e-09 | 1.000000 |
| rad10         | 1.20373e-09 | 1.000000 | 1.20410e-09 | 1.000000 |
| rad3          | 8.59713e-10 | 1.000000 | 8.59980e-10 | 1.000000 |
| PAH9+H        | 6.20925e-10 | 1.000000 | 6.21117e-10 | 1.000000 |
| rad28         | 5.36158e-10 | 1.000000 | 5.36324e-10 | 1.000000 |
| rad35         | 4.74138e-10 | 1.000000 | 4.74285e-10 | 1.000000 |
| rad4          | 4.46705e-10 | 1.000000 | 4.46844e-10 | 1.000000 |
| rad15         | 3.89437e-10 | 1.000000 | 3.89558e-10 | 1.000000 |
| rad13         | 3.02041e-10 | 1.000000 | 3.02135e-10 | 1.000000 |
| PhCCH+CH3     | 1.60312e-10 | 1.000000 | 1.60362e-10 | 1.000000 |
| rad38         | 1.07317e-10 | 1.000000 | 1.07350e-10 | 1.000000 |
| rad26         | 9.85521e-11 | 1.000000 | 9.85827e-11 | 1.000000 |
| PhCHCCH2+H    | 9.77595e-11 | 1.000000 | 9.77899e-11 | 1.000000 |
| PhCCCH3+H     | 5.08346e-11 | 1.000000 | 5.08504e-11 | 1.000000 |
| rad20         | 3.05550e-11 | 1.000000 | 3.05645e-11 | 1.000000 |
| rad21         | 1.95315e-11 | 1.000000 | 1.95376e-11 | 1.000000 |
| rad25         | 2.59062e-12 | 1.000000 | 2.59142e-12 | 1.000000 |
| Ph+MeAc       | 1.96282e-12 | 1.000000 | 1.96343e-12 | 1.000000 |
| rad18         | 1.40591e-12 | 1.000000 | 1.40635e-12 | 1.000000 |
| rad9          | 7.61571e-13 | 1.000000 | 7.61808e-13 | 1.000000 |
| rad8          | 7.59138e-13 | 1.000000 | 7.59374e-13 | 1.000000 |
| rad33         | 5.75842e-13 | 1.000000 | 5.76021e-13 | 1.000000 |
| Ph+Allene     | 1.90940e-13 | 1.000000 | 1.91000e-13 | 1.000000 |
| rad46         | 1.24854e-13 | 1.000000 | 1.24893e-13 | 1.000000 |
| PAH7+H        | 7.32473e-14 | 1.000000 | 7.32701e-14 | 1.000000 |
| rad24         | 5.81747e-14 | 1.000000 | 5.81928e-14 | 1.000000 |
| rad14         | 2.62417e-14 | 1.000000 | 2.62498e-14 | 1.000000 |
| rad39         | 1.35069e-14 | 1.000000 | 1.35111e-14 | 1.000000 |
| rad27         | 1.15659e-14 | 1.000000 | 1.15695e-14 | 1.000000 |
| rad12         | 1.06618e-14 | 1.000000 | 1.06651e-14 | 1.000000 |
| rad60syn      | 3.33242e-15 | 1.000000 | 3.33346e-15 | 1.000000 |
| PhCH2CCH+H    | 1.54842e-15 | 1.000000 | 1.54890e-15 | 1.000000 |
| rad60anti     | 7.94680e-16 | 1.000000 | 7.94927e-16 | 1.000000 |
| rad37         | 1.26956e-16 | 1.000000 | 1.26995e-16 | 1.000000 |
| rad5          | 2.54335e-18 | 1.000000 | 2.54414e-18 | 1.000000 |
| PAH3+H        | 1.83471e-18 | 1.000000 | 1.83528e-18 | 1.000000 |
| rad31         | 1.26970e-18 | 1.000000 | 1.27009e-18 | 1.000000 |
| rad59         | 6.31390e-19 | 1.000000 | 6.31586e-19 | 1.000000 |
| rad50         | 3.72637e-20 | 1.000000 | 3.72753e-20 | 1.000000 |
| rad19syn      | 7.74910e-22 | 1.000000 | 7.75150e-22 | 1.000000 |
| rad54         | 1.26581e-23 | 1.000000 | 1.26620e-23 | 1.000000 |
| PAH10+CH3     | 8.52194e-24 | 1.000000 | 8.52459e-24 | 1.000000 |
| rad52         | 2.88183e-24 | 1.000000 | 2.88273e-24 | 1.000000 |
| rad43         | 2.07283e-24 | 1.000000 | 2.07347e-24 | 1.000000 |
| rad62         | 4.33249e-25 | 1.000000 | 4.33384e-25 | 1.000000 |
| rad51         | 3.50090e-26 | 1.000000 | 3.50199e-26 | 1.000000 |
| PhcycC3H3_A+H | 1.44542e-26 | 1.000000 | 1.44587e-26 | 1.000000 |
| rad70         | 1.12357e-26 | 1.000000 | 1.12392e-26 | 1.000000 |
| rad55         | 4.38173e-27 | 1.000000 | 4.38309e-27 | 1.000000 |
| rad58         | 1.02249e-27 | 1.000000 | 1.02281e-27 | 1.000000 |
| rad65         | 1.99378e-28 | 1.000000 | 1.99440e-28 | 1.000000 |
| PAH1+H        | 1.96970e-28 | 1.000000 | 1.97031e-28 | 1.000000 |
| rad34         | 9.71596e-30 | 1.000000 | 9.71898e-30 | 1.000000 |
| rad42         | 4.12576e-32 | 1.000000 | 4.12705e-32 | 1.000000 |
| rad41         | 7.48680e-33 | 1.000000 | 7.48912e-33 | 1.000000 |
| rad47         | 2.01314e-35 | 1.000000 | 2.01377e-35 | 1.000000 |

0.100000000 Pa, 240.000000 K

=====

| Rate constant | True (fraction)     | Effective (fraction) |
|---------------|---------------------|----------------------|
| Total         | 3.99091e-25 (1.00 ) | 3.98936e-25 (1.00 )  |

| species     | PYtrue      | Cumul    | PYeffective | Cumul    |
|-------------|-------------|----------|-------------|----------|
| Indene+H    | 0.998566    | 0.998566 | 0.998954    | 0.998954 |
| rad6        | 0.000766248 | 0.999332 | 0.000766546 | 0.999721 |
| Benzyl+C2H2 | 0.000388623 | 0.999721 | 0.00000     | 0.999721 |
| rad23       | 0.000274202 | 0.999995 | 0.000274309 | 0.999995 |

|               |             |          |             |          |
|---------------|-------------|----------|-------------|----------|
| rad45         | 4.08147e-06 | 0.999999 | 4.08306e-06 | 0.999999 |
| rad36         | 2.58411e-07 | 0.999999 | 2.58512e-07 | 0.999999 |
| rad22         | 1.59474e-07 | 1.000000 | 1.59536e-07 | 0.999999 |
| rad11         | 9.50834e-08 | 1.000000 | 9.51204e-08 | 0.999999 |
| rad7          | 8.01720e-08 | 1.000000 | 8.02032e-08 | 1.000000 |
| rad2          | 3.06561e-08 | 1.000000 | 3.06680e-08 | 1.000000 |
| rad30         | 6.93089e-09 | 1.000000 | 6.93359e-09 | 1.000000 |
| rad1          | 2.16417e-09 | 1.000000 | 2.16501e-09 | 1.000000 |
| rad10         | 1.80194e-09 | 1.000000 | 1.80265e-09 | 1.000000 |
| rad3          | 1.02043e-09 | 1.000000 | 1.02083e-09 | 1.000000 |
| rad28         | 1.00952e-09 | 1.000000 | 1.00992e-09 | 1.000000 |
| PAH9+H        | 8.60863e-10 | 1.000000 | 8.61197e-10 | 1.000000 |
| rad35         | 6.31583e-10 | 1.000000 | 6.31829e-10 | 1.000000 |
| rad15         | 6.20852e-10 | 1.000000 | 6.21093e-10 | 1.000000 |
| rad4          | 5.31842e-10 | 1.000000 | 5.32049e-10 | 1.000000 |
| PhCCH+CH3     | 4.03327e-10 | 1.000000 | 4.03484e-10 | 1.000000 |
| rad13         | 3.32135e-10 | 1.000000 | 3.32264e-10 | 1.000000 |
| PhCHCCH2+H    | 2.41306e-10 | 1.000000 | 2.41399e-10 | 1.000000 |
| rad26         | 2.03804e-10 | 1.000000 | 2.03884e-10 | 1.000000 |
| rad38         | 1.56841e-10 | 1.000000 | 1.56902e-10 | 1.000000 |
| PhCCCH3+H     | 1.30167e-10 | 1.000000 | 1.30217e-10 | 1.000000 |
| rad20         | 2.75419e-11 | 1.000000 | 2.75526e-11 | 1.000000 |
| rad21         | 1.76427e-11 | 1.000000 | 1.76496e-11 | 1.000000 |
| Ph+MeAc       | 6.10719e-12 | 1.000000 | 6.10957e-12 | 1.000000 |
| rad25         | 2.99097e-12 | 1.000000 | 2.99214e-12 | 1.000000 |
| rad8          | 2.04904e-12 | 1.000000 | 2.04984e-12 | 1.000000 |
| rad9          | 1.91276e-12 | 1.000000 | 1.91350e-12 | 1.000000 |
| rad18         | 1.19352e-12 | 1.000000 | 1.19399e-12 | 1.000000 |
| rad33         | 6.35141e-13 | 1.000000 | 6.35388e-13 | 1.000000 |
| Ph+Allene     | 6.13394e-13 | 1.000000 | 6.13632e-13 | 1.000000 |
| rad46         | 2.44446e-13 | 1.000000 | 2.44541e-13 | 1.000000 |
| PAH7+H        | 2.40064e-13 | 1.000000 | 2.40157e-13 | 1.000000 |
| rad24         | 4.65676e-14 | 1.000000 | 4.65857e-14 | 1.000000 |
| rad39         | 4.59310e-14 | 1.000000 | 4.59488e-14 | 1.000000 |
| rad14         | 3.79778e-14 | 1.000000 | 3.79926e-14 | 1.000000 |
| rad12         | 3.32245e-14 | 1.000000 | 3.32374e-14 | 1.000000 |
| rad27         | 1.75939e-14 | 1.000000 | 1.76007e-14 | 1.000000 |
| rad60syn      | 8.91679e-15 | 1.000000 | 8.92025e-15 | 1.000000 |
| PhCH2CCH+H    | 6.26236e-15 | 1.000000 | 6.26480e-15 | 1.000000 |
| rad60anti     | 2.24875e-15 | 1.000000 | 2.24963e-15 | 1.000000 |
| rad37         | 4.86185e-16 | 1.000000 | 4.86374e-16 | 1.000000 |
| rad5          | 1.08775e-17 | 1.000000 | 1.08817e-17 | 1.000000 |
| PAH3+H        | 7.75145e-18 | 1.000000 | 7.75446e-18 | 1.000000 |
| rad59         | 2.60238e-18 | 1.000000 | 2.60339e-18 | 1.000000 |
| rad31         | 1.84983e-18 | 1.000000 | 1.85055e-18 | 1.000000 |
| rad50         | 1.56116e-19 | 1.000000 | 1.56177e-19 | 1.000000 |
| rad19syn      | 4.97402e-21 | 1.000000 | 4.97595e-21 | 1.000000 |
| rad54         | 9.33971e-23 | 1.000000 | 9.34334e-23 | 1.000000 |
| PAH10+CH3     | 6.26583e-23 | 1.000000 | 6.26826e-23 | 1.000000 |
| rad52         | 1.75214e-23 | 1.000000 | 1.75282e-23 | 1.000000 |
| rad43         | 1.51287e-23 | 1.000000 | 1.51346e-23 | 1.000000 |
| rad62         | 3.45942e-24 | 1.000000 | 3.46077e-24 | 1.000000 |
| rad51         | 2.83212e-25 | 1.000000 | 2.83323e-25 | 1.000000 |
| PhcycC3H3_A+H | 1.59707e-25 | 1.000000 | 1.59770e-25 | 1.000000 |
| rad70         | 1.14135e-25 | 1.000000 | 1.14179e-25 | 1.000000 |
| rad55         | 4.58199e-26 | 1.000000 | 4.58377e-26 | 1.000000 |
| rad58         | 1.13812e-26 | 1.000000 | 1.13856e-26 | 1.000000 |
| PAH1+H        | 3.13901e-27 | 1.000000 | 3.14023e-27 | 1.000000 |
| rad65         | 1.88955e-27 | 1.000000 | 1.89028e-27 | 1.000000 |
| rad34         | 1.86916e-28 | 1.000000 | 1.86989e-28 | 1.000000 |
| rad42         | 2.43577e-30 | 1.000000 | 2.43672e-30 | 1.000000 |
| rad41         | 7.01884e-31 | 1.000000 | 7.02157e-31 | 1.000000 |
| rad47         | 1.86946e-34 | 1.000000 | 1.87019e-34 | 1.000000 |

0.100000000 Pa, 250.000000 K

=====

| Rate constant | True (fraction)     | Effective (fraction) |
|---------------|---------------------|----------------------|
| Total         | 1.17763e-24 (1.00 ) | 1.17706e-24 (1.00 )  |

| species     | PYtrue      | Cumul    | PYeffective | Cumul    |
|-------------|-------------|----------|-------------|----------|
| Indene+H    | 0.998455    | 0.998455 | 0.998939    | 0.998939 |
| rad6        | 0.000839909 | 0.999295 | 0.000840316 | 0.999779 |
| Benzyl+C2H2 | 0.000484070 | 0.999779 | 0.000000    | 0.999779 |
| rad23       | 0.000217232 | 0.999996 | 0.000217337 | 0.999997 |
| rad45       | 3.22726e-06 | 0.999999 | 3.22882e-06 | 1.000000 |
| rad36       | 2.05250e-07 | 1.000000 | 2.05349e-07 | 1.000000 |
| rad22       | 1.25678e-07 | 1.000000 | 1.25739e-07 | 1.000000 |
| rad7        | 8.75948e-08 | 1.000000 | 8.76372e-08 | 1.000000 |



|               |             |          |             |         |
|---------------|-------------|----------|-------------|---------|
| rad11         | 8.29674e-08 | 1.000000 | 8.30076e-08 | 1.00000 |
| rad2          | 4.48159e-08 | 1.000000 | 4.48376e-08 | 1.00000 |
| rad30         | 9.77994e-09 | 1.000000 | 9.78467e-09 | 1.00000 |
| rad1          | 3.20047e-09 | 1.000000 | 3.20202e-09 | 1.00000 |
| rad10         | 2.63604e-09 | 1.000000 | 2.63732e-09 | 1.00000 |
| rad28         | 1.83952e-09 | 1.000000 | 1.84041e-09 | 1.00000 |
| rad3          | 1.21274e-09 | 1.000000 | 1.21332e-09 | 1.00000 |
| PAH9+H        | 1.18472e-09 | 1.000000 | 1.18529e-09 | 1.00000 |
| rad15         | 9.63129e-10 | 1.000000 | 9.63596e-10 | 1.00000 |
| PhCCH+CH3     | 9.61949e-10 | 1.000000 | 9.62415e-10 | 1.00000 |
| rad35         | 8.36805e-10 | 1.000000 | 8.37211e-10 | 1.00000 |
| rad4          | 6.34176e-10 | 1.000000 | 6.34484e-10 | 1.00000 |
| PhCHCCH2+H    | 5.64738e-10 | 1.000000 | 5.65012e-10 | 1.00000 |
| rad26         | 3.98711e-10 | 1.000000 | 3.98905e-10 | 1.00000 |
| rad13         | 3.65437e-10 | 1.000000 | 3.65614e-10 | 1.00000 |
| PhCCCH3+H     | 3.14121e-10 | 1.000000 | 3.14273e-10 | 1.00000 |
| rad38         | 2.26419e-10 | 1.000000 | 2.26528e-10 | 1.00000 |
| rad20         | 2.48911e-11 | 1.000000 | 2.49032e-11 | 1.00000 |
| Ph+MeAc       | 1.75604e-11 | 1.000000 | 1.75689e-11 | 1.00000 |
| rad21         | 1.59815e-11 | 1.000000 | 1.59893e-11 | 1.00000 |
| rad8          | 5.16228e-12 | 1.000000 | 5.16478e-12 | 1.00000 |
| rad9          | 4.55827e-12 | 1.000000 | 4.56047e-12 | 1.00000 |
| rad25         | 3.35435e-12 | 1.000000 | 3.35598e-12 | 1.00000 |
| Ph+Allene     | 1.82518e-12 | 1.000000 | 1.82606e-12 | 1.00000 |
| rad18         | 1.01646e-12 | 1.000000 | 1.01695e-12 | 1.00000 |
| PAH7+H        | 7.24909e-13 | 1.000000 | 7.25260e-13 | 1.00000 |
| rad33         | 7.01007e-13 | 1.000000 | 7.01346e-13 | 1.00000 |
| rad46         | 4.59710e-13 | 1.000000 | 4.59933e-13 | 1.00000 |
| rad39         | 1.43234e-13 | 1.000000 | 1.43303e-13 | 1.00000 |
| rad12         | 9.52962e-14 | 1.000000 | 9.53424e-14 | 1.00000 |
| rad14         | 5.33685e-14 | 1.000000 | 5.33943e-14 | 1.00000 |
| rad24         | 3.73215e-14 | 1.000000 | 3.73396e-14 | 1.00000 |
| rad27         | 2.60889e-14 | 1.000000 | 2.61015e-14 | 1.00000 |
| PhCH2CCH+H    | 2.28898e-14 | 1.000000 | 2.29009e-14 | 1.00000 |
| rad60syn      | 2.21330e-14 | 1.000000 | 2.21437e-14 | 1.00000 |
| rad60anti     | 5.87081e-15 | 1.000000 | 5.87366e-15 | 1.00000 |
| rad37         | 1.67417e-15 | 1.000000 | 1.67498e-15 | 1.00000 |
| rad5          | 4.16053e-17 | 1.000000 | 4.16255e-17 | 1.00000 |
| PAH3+H        | 2.92883e-17 | 1.000000 | 2.93025e-17 | 1.00000 |
| rad59         | 9.60035e-18 | 1.000000 | 9.60500e-18 | 1.00000 |
| rad31         | 2.70834e-18 | 1.000000 | 2.70966e-18 | 1.00000 |
| rad50         | 5.87531e-19 | 1.000000 | 5.87816e-19 | 1.00000 |
| rad19syn      | 2.75525e-20 | 1.000000 | 2.75658e-20 | 1.00000 |
| rad54         | 5.86378e-22 | 1.000000 | 5.86662e-22 | 1.00000 |
| PAH10+CH3     | 3.91806e-22 | 1.000000 | 3.91996e-22 | 1.00000 |
| rad43         | 9.38952e-23 | 1.000000 | 9.39407e-23 | 1.00000 |
| rad52         | 9.25315e-23 | 1.000000 | 9.25763e-23 | 1.00000 |
| rad62         | 2.32356e-23 | 1.000000 | 2.32468e-23 | 1.00000 |
| rad51         | 1.92436e-24 | 1.000000 | 1.92529e-24 | 1.00000 |
| PhcycC3H3_A+H | 1.33260e-24 | 1.000000 | 1.33324e-24 | 1.00000 |
| rad70         | 9.12658e-25 | 1.000000 | 9.13100e-25 | 1.00000 |
| rad55         | 3.72230e-25 | 1.000000 | 3.72410e-25 | 1.00000 |
| rad58         | 9.51676e-26 | 1.000000 | 9.52137e-26 | 1.00000 |
| PAH1+H        | 2.95096e-26 | 1.000000 | 2.95239e-26 | 1.00000 |
| rad65         | 1.44335e-26 | 1.000000 | 1.44405e-26 | 1.00000 |
| rad34         | 1.81501e-27 | 1.000000 | 1.81589e-27 | 1.00000 |
| rad42         | 2.57011e-29 | 1.000000 | 2.57135e-29 | 1.00000 |
| rad41         | 7.46475e-30 | 1.000000 | 7.46836e-30 | 1.00000 |
| rad47         | 1.43164e-33 | 1.000000 | 1.43234e-33 | 1.00000 |

0.100000000 Pa, 260.000000 K

=====

| Rate constant | True (fraction)     | Effective (fraction) |
|---------------|---------------------|----------------------|
| Total         | 3.19452e-24 (1.00 ) | 3.19260e-24 (1.00 )  |

| species     | PYtrue      | Cumul    | PYeffective | Cumul    |
|-------------|-------------|----------|-------------|----------|
| Indene+H    | 0.998304    | 0.998304 | 0.998903    | 0.998903 |
| rad6        | 0.000920664 | 0.999225 | 0.000921216 | 0.999824 |
| Benzyl+C2H2 | 0.000599974 | 0.999825 | 0.00000     | 0.999824 |
| rad23       | 0.000172199 | 0.999997 | 0.000172302 | 0.999997 |
| rad45       | 2.55492e-06 | 0.999999 | 2.55646e-06 | 0.999999 |
| rad36       | 1.63315e-07 | 1.000000 | 1.63413e-07 | 0.999999 |
| rad22       | 9.91301e-08 | 1.000000 | 9.91896e-08 | 0.999999 |
| rad7        | 9.57262e-08 | 1.000000 | 9.57836e-08 | 0.999999 |
| rad11       | 7.37764e-08 | 1.000000 | 7.38207e-08 | 1.000000 |
| rad2        | 6.40519e-08 | 1.000000 | 6.40904e-08 | 1.000000 |
| rad30       | 1.35893e-08 | 1.000000 | 1.35975e-08 | 1.000000 |
| rad1        | 4.63136e-09 | 1.000000 | 4.63414e-09 | 1.000000 |

|               |             |          |             |          |
|---------------|-------------|----------|-------------|----------|
| rad10         | 3.76898e-09 | 1.000000 | 3.77125e-09 | 1.000000 |
| rad28         | 3.24425e-09 | 1.000000 | 3.24620e-09 | 1.000000 |
| PhCCH+CH3     | 2.18281e-09 | 1.000000 | 2.18412e-09 | 1.000000 |
| PAH9+H        | 1.61869e-09 | 1.000000 | 1.61966e-09 | 1.000000 |
| rad15         | 1.45841e-09 | 1.000000 | 1.45929e-09 | 1.000000 |
| rad3          | 1.44331e-09 | 1.000000 | 1.44417e-09 | 1.000000 |
| PhCHCCH2+H    | 1.25807e-09 | 1.000000 | 1.25882e-09 | 1.000000 |
| rad35         | 1.10273e-09 | 1.000000 | 1.10339e-09 | 1.000000 |
| rad4          | 7.57467e-10 | 1.000000 | 7.57921e-10 | 1.000000 |
| rad26         | 7.40700e-10 | 1.000000 | 7.41145e-10 | 1.000000 |
| PhCCCH3+H     | 7.17849e-10 | 1.000000 | 7.18280e-10 | 1.000000 |
| rad13         | 4.02175e-10 | 1.000000 | 4.02417e-10 | 1.000000 |
| rad38         | 3.23140e-10 | 1.000000 | 3.23334e-10 | 1.000000 |
| Ph+MeAc       | 4.70085e-11 | 1.000000 | 4.70367e-11 | 1.000000 |
| rad20         | 2.25551e-11 | 1.000000 | 2.25687e-11 | 1.000000 |
| rad21         | 1.45180e-11 | 1.000000 | 1.45267e-11 | 1.000000 |
| rad8          | 1.22244e-11 | 1.000000 | 1.22318e-11 | 1.000000 |
| rad9          | 1.03650e-11 | 1.000000 | 1.03712e-11 | 1.000000 |
| Ph+Allene     | 5.06980e-12 | 1.000000 | 5.07285e-12 | 1.000000 |
| rad25         | 3.66689e-12 | 1.000000 | 3.66909e-12 | 1.000000 |
| PAH7+H        | 2.03101e-12 | 1.000000 | 2.03223e-12 | 1.000000 |
| rad18         | 8.68246e-13 | 1.000000 | 8.68767e-13 | 1.000000 |
| rad46         | 8.34317e-13 | 1.000000 | 8.34818e-13 | 1.000000 |
| rad33         | 7.73967e-13 | 1.000000 | 7.74432e-13 | 1.000000 |
| rad39         | 4.12848e-13 | 1.000000 | 4.13096e-13 | 1.000000 |
| rad12         | 2.53583e-13 | 1.000000 | 2.53735e-13 | 1.000000 |
| PhCH2CCH+H    | 7.64245e-14 | 1.000000 | 7.64704e-14 | 1.000000 |
| rad14         | 7.30770e-14 | 1.000000 | 7.31209e-14 | 1.000000 |
| rad60syn      | 5.14217e-14 | 1.000000 | 5.14526e-14 | 1.000000 |
| rad27         | 3.77420e-14 | 1.000000 | 3.77646e-14 | 1.000000 |
| rad24         | 2.99548e-14 | 1.000000 | 2.99728e-14 | 1.000000 |
| rad60anti     | 1.42771e-14 | 1.000000 | 1.42857e-14 | 1.000000 |
| rad37         | 5.24444e-15 | 1.000000 | 5.24759e-15 | 1.000000 |
| rad5          | 1.44015e-16 | 1.000000 | 1.44101e-16 | 1.000000 |
| PAH3+H        | 1.00275e-16 | 1.000000 | 1.00335e-16 | 1.000000 |
| rad59         | 3.21162e-17 | 1.000000 | 3.21354e-17 | 1.000000 |
| rad31         | 3.97426e-18 | 1.000000 | 3.97665e-18 | 1.000000 |
| rad50         | 2.01134e-18 | 1.000000 | 2.01255e-18 | 1.000000 |
| rad19syn      | 1.33962e-19 | 1.000000 | 1.34043e-19 | 1.000000 |
| rad54         | 3.19720e-21 | 1.000000 | 3.19911e-21 | 1.000000 |
| PAH10+CH3     | 2.12514e-21 | 1.000000 | 2.12642e-21 | 1.000000 |
| rad43         | 5.05256e-22 | 1.000000 | 5.05559e-22 | 1.000000 |
| rad52         | 4.31622e-22 | 1.000000 | 4.31881e-22 | 1.000000 |
| rad62         | 1.34425e-22 | 1.000000 | 1.34505e-22 | 1.000000 |
| rad51         | 1.12915e-23 | 1.000000 | 1.12983e-23 | 1.000000 |
| PhcycC3H3_A+H | 9.32179e-24 | 1.000000 | 9.32739e-24 | 1.000000 |
| rad70         | 6.15730e-24 | 1.000000 | 6.16099e-24 | 1.000000 |
| rad55         | 2.54579e-24 | 1.000000 | 2.54732e-24 | 1.000000 |
| rad58         | 6.66583e-25 | 1.000000 | 6.66984e-25 | 1.000000 |
| PAH1+H        | 2.26528e-25 | 1.000000 | 2.26664e-25 | 1.000000 |
| rad65         | 9.37491e-26 | 1.000000 | 9.38054e-26 | 1.000000 |
| rad34         | 1.42662e-26 | 1.000000 | 1.42748e-26 | 1.000000 |
| rad42         | 2.13879e-28 | 1.000000 | 2.14007e-28 | 1.000000 |
| rad41         | 6.26012e-29 | 1.000000 | 6.26388e-29 | 1.000000 |
| rad47         | 9.23996e-33 | 1.000000 | 9.24550e-33 | 1.000000 |

0.100000000 Pa, 270.000000 K

=====

| Rate constant | True (fraction)     | Effective (fraction) |
|---------------|---------------------|----------------------|
| Total         | 8.04141e-24 (1.00 ) | 8.03546e-24 (1.00 )  |

| species     | PYtrue      | Cumul    | PYeffective | Cumul    |
|-------------|-------------|----------|-------------|----------|
| Indene+H    | 0.998112    | 0.998112 | 0.998851    | 0.998851 |
| rad6        | 0.00100886  | 0.999121 | 0.00100961  | 0.999861 |
| Benzyl+C2H2 | 0.000739925 | 0.999861 | 0.000000    | 0.999861 |
| rad23       | 0.000136618 | 0.999997 | 0.000136719 | 0.999997 |
| rad45       | 2.02570e-06 | 0.999999 | 2.02720e-06 | 0.999999 |
| rad36       | 1.30220e-07 | 1.000000 | 1.30316e-07 | 0.999999 |
| rad7        | 1.04600e-07 | 1.000000 | 1.04677e-07 | 1.000000 |
| rad2        | 8.95201e-08 | 1.000000 | 8.95864e-08 | 1.000000 |
| rad22       | 7.82752e-08 | 1.000000 | 7.83332e-08 | 1.000000 |
| rad11       | 6.69781e-08 | 1.000000 | 6.70277e-08 | 1.000000 |
| rad30       | 1.86209e-08 | 1.000000 | 1.86347e-08 | 1.000000 |
| rad1        | 6.55988e-09 | 1.000000 | 6.56474e-09 | 1.000000 |
| rad28       | 5.53956e-09 | 1.000000 | 5.54366e-09 | 1.000000 |
| rad10       | 5.26882e-09 | 1.000000 | 5.27272e-09 | 1.000000 |
| PhCCH+CH3   | 4.72765e-09 | 1.000000 | 4.73116e-09 | 1.000000 |
| PhCHCCH2+H  | 2.67682e-09 | 1.000000 | 2.67880e-09 | 1.000000 |

|               |             |          |             |          |
|---------------|-------------|----------|-------------|----------|
| PAH9+H        | 2.19607e-09 | 1.000000 | 2.19770e-09 | 1.000000 |
| rad15         | 2.16123e-09 | 1.000000 | 2.16283e-09 | 1.000000 |
| rad3          | 1.71935e-09 | 1.000000 | 1.72063e-09 | 1.000000 |
| PhCCCH3+H     | 1.55998e-09 | 1.000000 | 1.56114e-09 | 1.000000 |
| rad35         | 1.44528e-09 | 1.000000 | 1.44635e-09 | 1.000000 |
| rad26         | 1.31138e-09 | 1.000000 | 1.31235e-09 | 1.000000 |
| rad4          | 9.05850e-10 | 1.000000 | 9.06521e-10 | 1.000000 |
| rad38         | 4.56248e-10 | 1.000000 | 4.56586e-10 | 1.000000 |
| rad13         | 4.42570e-10 | 1.000000 | 4.42897e-10 | 1.000000 |
| Ph+MeAc       | 1.17903e-10 | 1.000000 | 1.17990e-10 | 1.000000 |
| rad8          | 2.73721e-11 | 1.000000 | 2.73924e-11 | 1.000000 |
| rad9          | 2.25856e-11 | 1.000000 | 2.26023e-11 | 1.000000 |
| rad20         | 2.04937e-11 | 1.000000 | 2.05089e-11 | 1.000000 |
| Ph+Allene     | 1.32311e-11 | 1.000000 | 1.32409e-11 | 1.000000 |
| rad21         | 1.32270e-11 | 1.000000 | 1.32368e-11 | 1.000000 |
| PAH7+H        | 5.31305e-12 | 1.000000 | 5.31699e-12 | 1.000000 |
| rad25         | 3.91911e-12 | 1.000000 | 3.92201e-12 | 1.000000 |
| rad46         | 1.46694e-12 | 1.000000 | 1.46803e-12 | 1.000000 |
| rad39         | 1.10754e-12 | 1.000000 | 1.10836e-12 | 1.000000 |
| rad33         | 8.54546e-13 | 1.000000 | 8.55179e-13 | 1.000000 |
| rad18         | 7.43739e-13 | 1.000000 | 7.44290e-13 | 1.000000 |
| rad12         | 6.30353e-13 | 1.000000 | 6.30820e-13 | 1.000000 |
| PhCH2CCH+H    | 2.35207e-13 | 1.000000 | 2.35381e-13 | 1.000000 |
| rad60syn      | 1.12674e-13 | 1.000000 | 1.12758e-13 | 1.000000 |
| rad14         | 9.77812e-14 | 1.000000 | 9.78536e-14 | 1.000000 |
| rad27         | 5.33149e-14 | 1.000000 | 5.33544e-14 | 1.000000 |
| rad60anti     | 3.26072e-14 | 1.000000 | 3.26314e-14 | 1.000000 |
| rad24         | 2.40850e-14 | 1.000000 | 2.41028e-14 | 1.000000 |
| rad37         | 1.50940e-14 | 1.000000 | 1.51052e-14 | 1.000000 |
| rad5          | 4.55727e-16 | 1.000000 | 4.56064e-16 | 1.000000 |
| PAH3+H        | 3.14561e-16 | 1.000000 | 3.14794e-16 | 1.000000 |
| rad59         | 9.85148e-17 | 1.000000 | 9.85878e-17 | 1.000000 |
| rad50         | 6.33041e-18 | 1.000000 | 6.33510e-18 | 1.000000 |
| rad31         | 5.83218e-18 | 1.000000 | 5.83650e-18 | 1.000000 |
| rad19syn      | 5.79924e-19 | 1.000000 | 5.80353e-19 | 1.000000 |
| rad54         | 1.53820e-20 | 1.000000 | 1.53934e-20 | 1.000000 |
| PAH10+CH3     | 1.01575e-20 | 1.000000 | 1.01650e-20 | 1.000000 |
| rad43         | 2.39474e-21 | 1.000000 | 2.39651e-21 | 1.000000 |
| rad52         | 1.80343e-21 | 1.000000 | 1.80476e-21 | 1.000000 |
| rad62         | 6.81457e-22 | 1.000000 | 6.81962e-22 | 1.000000 |
| rad51         | 5.82341e-23 | 1.000000 | 5.82772e-23 | 1.000000 |
| PhcycC3H3_A+H | 5.62802e-23 | 1.000000 | 5.63218e-23 | 1.000000 |
| rad70         | 3.59364e-23 | 1.000000 | 3.59630e-23 | 1.000000 |
| rad55         | 1.50498e-23 | 1.000000 | 1.50610e-23 | 1.000000 |
| rad58         | 4.02880e-24 | 1.000000 | 4.03178e-24 | 1.000000 |
| PAH1+H        | 1.48836e-24 | 1.000000 | 1.48946e-24 | 1.000000 |
| rad65         | 5.29578e-25 | 1.000000 | 5.29970e-25 | 1.000000 |
| rad34         | 9.58585e-26 | 1.000000 | 9.59295e-26 | 1.000000 |
| rad42         | 1.52310e-27 | 1.000000 | 1.52423e-27 | 1.000000 |
| rad41         | 4.49841e-28 | 1.000000 | 4.50174e-28 | 1.000000 |
| rad47         | 5.12997e-32 | 1.000000 | 5.13377e-32 | 1.000000 |

0.100000000 Pa, 280.000000 K

=====

| Rate constant | True (fraction)     | Effective (fraction) |
|---------------|---------------------|----------------------|
| Total         | 1.89357e-23 (1.00 ) | 1.89185e-23 (1.00 )  |

| species     | PYtrue      | Cumul    | PYeffective | Cumul    |
|-------------|-------------|----------|-------------|----------|
| Indene+H    | 0.997877    | 0.997877 | 0.998783    | 0.998783 |
| rad6        | 0.00110480  | 0.998982 | 0.00110580  | 0.999889 |
| Benzyl+C2H2 | 0.000907969 | 0.999890 | 0.000000    | 0.999889 |
| rad23       | 0.000108517 | 0.999998 | 0.000108615 | 0.999997 |
| rad45       | 1.60911e-06 | 1.000000 | 1.61057e-06 | 0.999999 |
| rad2        | 1.22404e-07 | 1.000000 | 1.22515e-07 | 0.999999 |
| rad7        | 1.14243e-07 | 1.000000 | 1.14347e-07 | 0.999999 |
| rad36       | 1.04089e-07 | 1.000000 | 1.04184e-07 | 0.999999 |
| rad11       | 6.21494e-08 | 1.000000 | 6.22059e-08 | 0.999999 |
| rad22       | 6.18925e-08 | 1.000000 | 6.19488e-08 | 0.999999 |
| rad30       | 2.51916e-08 | 1.000000 | 2.52145e-08 | 1.000000 |
| PhCCH+CH3   | 9.80146e-09 | 1.000000 | 9.81037e-09 | 1.000000 |
| rad28       | 9.16202e-09 | 1.000000 | 9.17035e-09 | 1.000000 |
| rad1        | 9.09894e-09 | 1.000000 | 9.10721e-09 | 1.000000 |
| rad10       | 7.20537e-09 | 1.000000 | 7.21192e-09 | 1.000000 |
| PhCHCCH2+H  | 5.45632e-09 | 1.000000 | 5.46128e-09 | 1.000000 |
| PhCCCH3+H   | 3.23554e-09 | 1.000000 | 3.23848e-09 | 1.000000 |
| rad15       | 3.14109e-09 | 1.000000 | 3.14395e-09 | 1.000000 |
| PAH9+H      | 2.95887e-09 | 1.000000 | 2.96156e-09 | 1.000000 |
| rad26       | 2.22021e-09 | 1.000000 | 2.22223e-09 | 1.000000 |

|               |             |         |             |          |
|---------------|-------------|---------|-------------|----------|
| rad3          | 2.04831e-09 | 1.00000 | 2.05018e-09 | 1.000000 |
| rad35         | 1.88395e-09 | 1.00000 | 1.88566e-09 | 1.000000 |
| rad4          | 1.08368e-09 | 1.00000 | 1.08467e-09 | 1.000000 |
| rad38         | 6.37682e-10 | 1.00000 | 6.38261e-10 | 1.000000 |
| rad13         | 4.86822e-10 | 1.00000 | 4.87264e-10 | 1.000000 |
| Ph+MeAc       | 2.78594e-10 | 1.00000 | 2.78848e-10 | 1.000000 |
| rad8          | 5.82511e-11 | 1.00000 | 5.83040e-11 | 1.000000 |
| rad9          | 4.73162e-11 | 1.00000 | 4.73592e-11 | 1.000000 |
| Ph+Allene     | 3.26180e-11 | 1.00000 | 3.26476e-11 | 1.000000 |
| rad20         | 1.86728e-11 | 1.00000 | 1.86897e-11 | 1.000000 |
| PAH7+H        | 1.30507e-11 | 1.00000 | 1.30625e-11 | 1.000000 |
| rad21         | 1.20873e-11 | 1.00000 | 1.20983e-11 | 1.000000 |
| rad25         | 4.10608e-12 | 1.00000 | 4.10981e-12 | 1.000000 |
| rad39         | 2.78249e-12 | 1.00000 | 2.78502e-12 | 1.000000 |
| rad46         | 2.50696e-12 | 1.00000 | 2.50924e-12 | 1.000000 |
| rad12         | 1.47260e-12 | 1.00000 | 1.47394e-12 | 1.000000 |
| rad33         | 9.43250e-13 | 1.00000 | 9.44107e-13 | 1.000000 |
| PhCH2CCH+H    | 6.72480e-13 | 1.00000 | 6.73091e-13 | 1.000000 |
| rad18         | 6.38818e-13 | 1.00000 | 6.39399e-13 | 1.000000 |
| rad60syn      | 2.34361e-13 | 1.00000 | 2.34573e-13 | 1.000000 |
| rad14         | 1.28148e-13 | 1.00000 | 1.28264e-13 | 1.000000 |
| rad27         | 7.36089e-14 | 1.00000 | 7.36758e-14 | 1.000000 |
| rad60anti     | 7.04279e-14 | 1.00000 | 7.04919e-14 | 1.000000 |
| rad37         | 4.02542e-14 | 1.00000 | 4.02908e-14 | 1.000000 |
| rad24         | 1.94074e-14 | 1.00000 | 1.94251e-14 | 1.000000 |
| rad5          | 1.32998e-15 | 1.00000 | 1.33119e-15 | 1.000000 |
| PAH3+H        | 9.12765e-16 | 1.00000 | 9.13594e-16 | 1.000000 |
| rad59         | 2.79726e-16 | 1.00000 | 2.79980e-16 | 1.000000 |
| rad50         | 1.84845e-17 | 1.00000 | 1.85013e-17 | 1.000000 |
| rad31         | 8.54550e-18 | 1.00000 | 8.55327e-18 | 1.000000 |
| rad19syn      | 2.26222e-18 | 1.00000 | 2.26428e-18 | 1.000000 |
| rad54         | 6.61312e-20 | 1.00000 | 6.61913e-20 | 1.000000 |
| PAH10+CH3     | 4.33360e-20 | 1.00000 | 4.33753e-20 | 1.000000 |
| rad43         | 1.01279e-20 | 1.00000 | 1.01371e-20 | 1.000000 |
| rad52         | 6.82887e-21 | 1.00000 | 6.83507e-21 | 1.000000 |
| rad62         | 3.06749e-21 | 1.00000 | 3.07028e-21 | 1.000000 |
| PhcycC3H3_A+H | 2.96829e-22 | 1.00000 | 2.97098e-22 | 1.000000 |
| rad51         | 2.67268e-22 | 1.00000 | 2.67511e-22 | 1.000000 |
| rad70         | 1.83800e-22 | 1.00000 | 1.83967e-22 | 1.000000 |
| rad55         | 7.78790e-23 | 1.00000 | 7.79497e-23 | 1.000000 |
| rad58         | 2.12655e-23 | 1.00000 | 2.12849e-23 | 1.000000 |
| PAH1+H        | 8.44880e-24 | 1.00000 | 8.45648e-24 | 1.000000 |
| rad65         | 2.63455e-24 | 1.00000 | 2.63694e-24 | 1.000000 |
| rad34         | 5.54854e-25 | 1.00000 | 5.55358e-25 | 1.000000 |
| rad42         | 9.27196e-27 | 1.00000 | 9.28038e-27 | 1.000000 |
| rad41         | 2.75991e-27 | 1.00000 | 2.76242e-27 | 1.000000 |
| rad47         | 2.49014e-31 | 1.00000 | 2.49241e-31 | 1.000000 |

0.100000000 Pa, 290.000000 K

=====

| Rate constant | True (fraction)     | Effective (fraction) |
|---------------|---------------------|----------------------|
| Total         | 4.20015e-23 (1.00 ) | 4.19550e-23 (1.00 )  |

| species     | PYtrue      | Cumul    | PYeffective | Cumul    |
|-------------|-------------|----------|-------------|----------|
| Indene+H    | 0.997594    | 0.997594 | 0.998702    | 0.998702 |
| rad6        | 0.00120867  | 0.998803 | 0.00121001  | 0.999912 |
| Benzyl+C2H2 | 0.00110863  | 0.999911 | 0.000000    | 0.999912 |
| rad23       | 8.63331e-05 | 0.999998 | 8.64289e-05 | 0.999998 |
| rad45       | 1.28116e-06 | 0.999999 | 1.28258e-06 | 1.000000 |
| rad2        | 1.63844e-07 | 0.999999 | 1.64026e-07 | 1.000000 |
| rad7        | 1.24675e-07 | 0.999999 | 1.24813e-07 | 1.000000 |
| rad36       | 8.34482e-08 | 0.999999 | 8.35409e-08 | 1.000000 |
| rad11       | 5.89516e-08 | 0.999999 | 5.90170e-08 | 1.000000 |
| rad22       | 4.90233e-08 | 0.999999 | 4.90777e-08 | 1.000000 |
| rad30       | 3.36821e-08 | 0.999999 | 3.37195e-08 | 1.000000 |
| PhCCH+CH3   | 1.95023e-08 | 0.999999 | 1.95239e-08 | 1.000000 |
| rad28       | 1.46877e-08 | 0.999999 | 1.47040e-08 | 1.000000 |
| rad1        | 1.23675e-08 | 0.999999 | 1.23812e-08 | 1.000000 |
| PhCHCCH2+H  | 1.06834e-08 | 0.999999 | 1.06952e-08 | 1.000000 |
| rad10       | 9.64611e-09 | 0.999999 | 9.65681e-09 | 1.000000 |
| PhCCCH3+H   | 6.42560e-09 | 1.000000 | 6.43273e-09 | 1.000000 |
| rad15       | 4.48553e-09 | 1.000000 | 4.49050e-09 | 1.000000 |
| PAH9+H      | 3.95963e-09 | 1.000000 | 3.96402e-09 | 1.000000 |
| rad26       | 3.60592e-09 | 1.000000 | 3.60993e-09 | 1.000000 |
| rad35       | 2.44243e-09 | 1.000000 | 2.44514e-09 | 1.000000 |
| rad3        | 2.43740e-09 | 1.000000 | 2.44010e-09 | 1.000000 |
| rad4        | 1.29532e-09 | 1.000000 | 1.29676e-09 | 1.000000 |
| rad38       | 8.82716e-10 | 1.000000 | 8.83696e-10 | 1.000000 |

|               |             |          |             |         |
|---------------|-------------|----------|-------------|---------|
| Ph+MeAc       | 6.23179e-10 | 1.000000 | 6.23871e-10 | 1.00000 |
| rad13         | 5.35105e-10 | 1.000000 | 5.35699e-10 | 1.00000 |
| rad8          | 1.18339e-10 | 1.000000 | 1.18470e-10 | 1.00000 |
| rad9          | 9.55464e-11 | 1.000000 | 9.56524e-11 | 1.00000 |
| Ph+Allene     | 7.63077e-11 | 1.000000 | 7.63924e-11 | 1.00000 |
| PAH7+H        | 3.02544e-11 | 1.000000 | 3.02880e-11 | 1.00000 |
| rad20         | 1.70633e-11 | 1.000000 | 1.70822e-11 | 1.00000 |
| rad21         | 1.10807e-11 | 1.000000 | 1.10930e-11 | 1.00000 |
| rad39         | 6.58266e-12 | 1.000000 | 6.58997e-12 | 1.00000 |
| rad25         | 4.22706e-12 | 1.000000 | 4.23175e-12 | 1.00000 |
| rad46         | 4.17576e-12 | 1.000000 | 4.18040e-12 | 1.00000 |
| rad12         | 3.25031e-12 | 1.000000 | 3.25392e-12 | 1.00000 |
| PhCH2CCH+H    | 1.79825e-12 | 1.000000 | 1.80025e-12 | 1.00000 |
| rad33         | 1.04055e-12 | 1.000000 | 1.04170e-12 | 1.00000 |
| rad18         | 5.50153e-13 | 1.000000 | 5.50764e-13 | 1.00000 |
| rad60syn      | 4.65302e-13 | 1.000000 | 4.65818e-13 | 1.00000 |
| rad14         | 1.64800e-13 | 1.000000 | 1.64983e-13 | 1.00000 |
| rad60anti     | 1.44719e-13 | 1.000000 | 1.44880e-13 | 1.00000 |
| rad37         | 1.00210e-13 | 1.000000 | 1.00321e-13 | 1.00000 |
| rad27         | 9.94239e-14 | 1.000000 | 9.95343e-14 | 1.00000 |
| rad24         | 1.56798e-14 | 1.000000 | 1.56972e-14 | 1.00000 |
| rad5          | 3.60687e-15 | 1.000000 | 3.61087e-15 | 1.00000 |
| PAH3+H        | 2.46994e-15 | 1.000000 | 2.47268e-15 | 1.00000 |
| rad59         | 7.41215e-16 | 1.000000 | 7.42038e-16 | 1.00000 |
| rad50         | 5.04636e-17 | 1.000000 | 5.05196e-17 | 1.00000 |
| rad31         | 1.24900e-17 | 1.000000 | 1.25038e-17 | 1.00000 |
| rad19syn      | 8.03458e-18 | 1.000000 | 8.04349e-18 | 1.00000 |
| rad54         | 2.56876e-19 | 1.000000 | 2.57161e-19 | 1.00000 |
| PAH10+CH3     | 1.66884e-19 | 1.000000 | 1.67069e-19 | 1.00000 |
| rad43         | 3.86537e-20 | 1.000000 | 3.86966e-20 | 1.00000 |
| rad52         | 2.36687e-20 | 1.000000 | 2.36950e-20 | 1.00000 |
| rad62         | 1.24042e-20 | 1.000000 | 1.24179e-20 | 1.00000 |
| PhcycC3H3_A+H | 1.38561e-21 | 1.000000 | 1.38715e-21 | 1.00000 |
| rad51         | 1.10375e-21 | 1.000000 | 1.10498e-21 | 1.00000 |
| rad70         | 8.34448e-22 | 1.000000 | 8.35374e-22 | 1.00000 |
| rad55         | 3.57351e-22 | 1.000000 | 3.57748e-22 | 1.00000 |
| rad58         | 9.93293e-23 | 1.000000 | 9.94395e-23 | 1.00000 |
| PAH1+H        | 4.20575e-23 | 1.000000 | 4.21042e-23 | 1.00000 |
| rad65         | 1.16834e-23 | 1.000000 | 1.16963e-23 | 1.00000 |
| rad34         | 2.80962e-24 | 1.000000 | 2.81274e-24 | 1.00000 |
| rad42         | 4.90863e-26 | 1.000000 | 4.91408e-26 | 1.00000 |
| rad41         | 1.47133e-26 | 1.000000 | 1.47296e-26 | 1.00000 |
| rad47         | 1.07189e-30 | 1.000000 | 1.07308e-30 | 1.00000 |

0.100000000 Pa, 300.000000 K

=====

| Rate constant | True (fraction)     | Effective (fraction) |
|---------------|---------------------|----------------------|
| Total         | 1.17740e-22 (1.00 ) | 1.17545e-22 (1.00 )  |

| species     | PYtrue      | Cumul    | PYeffective | Cumul    |
|-------------|-------------|----------|-------------|----------|
| Indene+H    | 0.996987    | 0.996987 | 0.998644    | 0.998644 |
| Benzyl+C2H2 | 0.00165874  | 0.998646 | 0.00000     | 0.998644 |
| rad6        | 0.00121284  | 0.999859 | 0.00121485  | 0.999859 |
| rad23       | 0.000137787 | 0.999996 | 0.000138016 | 0.999997 |
| rad45       | 2.35080e-06 | 0.999999 | 2.35470e-06 | 0.999999 |
| rad2        | 2.32957e-07 | 0.999999 | 2.33345e-07 | 0.999999 |
| rad22       | 1.37358e-07 | 0.999999 | 1.37586e-07 | 1.000000 |
| rad7        | 1.30309e-07 | 0.999999 | 1.30525e-07 | 1.000000 |
| rad11       | 9.48408e-08 | 0.999999 | 9.49984e-08 | 1.000000 |
| PhCCH+CH3   | 9.23107e-08 | 0.999999 | 9.24641e-08 | 1.000000 |
| rad36       | 8.01218e-08 | 0.999999 | 8.02550e-08 | 1.000000 |
| PhCHCCH2+H  | 4.51548e-08 | 1.000000 | 4.52298e-08 | 1.00000  |
| rad30       | 3.74147e-08 | 1.000000 | 3.74769e-08 | 1.00000  |
| rad28       | 3.47601e-08 | 1.000000 | 3.48179e-08 | 1.00000  |
| PhCCCH3+H   | 2.98750e-08 | 1.000000 | 2.99247e-08 | 1.00000  |
| rad1        | 1.75543e-08 | 1.000000 | 1.75834e-08 | 1.00000  |
| rad10       | 1.35260e-08 | 1.000000 | 1.35484e-08 | 1.00000  |
| rad26       | 8.36796e-09 | 1.000000 | 8.38186e-09 | 1.00000  |
| PAH9+H      | 5.51788e-09 | 1.000000 | 5.52705e-09 | 1.00000  |
| Ph+MeAc     | 3.40383e-09 | 1.000000 | 3.40948e-09 | 1.00000  |
| rad3        | 2.92984e-09 | 1.000000 | 2.93470e-09 | 1.00000  |
| rad35       | 2.75008e-09 | 1.000000 | 2.75465e-09 | 1.00000  |
| rad4        | 1.45702e-09 | 1.000000 | 1.45944e-09 | 1.00000  |
| rad38       | 1.02108e-09 | 1.000000 | 1.02278e-09 | 1.00000  |
| rad20       | 9.09848e-10 | 1.000000 | 9.11360e-10 | 1.00000  |
| rad13       | 6.27465e-10 | 1.000000 | 6.28507e-10 | 1.00000  |
| rad21       | 5.80972e-10 | 1.000000 | 5.81937e-10 | 1.00000  |
| Ph+Allene   | 2.40346e-10 | 1.000000 | 2.40745e-10 | 1.00000  |

|               |             |          |             |         |
|---------------|-------------|----------|-------------|---------|
| PAH7+H        | 2.26799e-10 | 1.000000 | 2.27176e-10 | 1.00000 |
| rad18         | 8.47033e-11 | 1.000000 | 8.48440e-11 | 1.00000 |
| rad39         | 4.16615e-11 | 1.000000 | 4.17307e-11 | 1.00000 |
| rad19anti     | 1.27247e-11 | 1.000000 | 1.27458e-11 | 1.00000 |
| PhCH2CCH+H    | 9.95244e-12 | 1.000000 | 9.96898e-12 | 1.00000 |
| rad46         | 5.68005e-12 | 1.000000 | 5.68949e-12 | 1.00000 |
| rad9          | 4.10142e-12 | 1.000000 | 4.10824e-12 | 1.00000 |
| rad25         | 3.47768e-12 | 1.000000 | 3.48346e-12 | 1.00000 |
| rad33         | 1.49010e-12 | 1.000000 | 1.49257e-12 | 1.00000 |
| rad60syn      | 7.07111e-13 | 1.000000 | 7.08286e-13 | 1.00000 |
| rad37         | 6.57661e-13 | 1.000000 | 6.58754e-13 | 1.00000 |
| rad14         | 2.61520e-13 | 1.000000 | 2.61955e-13 | 1.00000 |
| rad60anti     | 2.13119e-13 | 1.000000 | 2.13473e-13 | 1.00000 |
| rad27         | 1.92013e-13 | 1.000000 | 1.92332e-13 | 1.00000 |
| rad24         | 3.69255e-14 | 1.000000 | 3.69869e-14 | 1.00000 |
| PAH3+H        | 6.27884e-15 | 1.000000 | 6.28928e-15 | 1.00000 |
| rad15         | 2.33257e-15 | 1.000000 | 2.33644e-15 | 1.00000 |
| rad59         | 1.45304e-15 | 1.000000 | 1.45546e-15 | 1.00000 |
| rad50         | 1.05670e-16 | 1.000000 | 1.05845e-16 | 1.00000 |
| rad31         | 4.60999e-17 | 1.000000 | 4.61765e-17 | 1.00000 |
| rad19syn      | 4.56593e-17 | 1.000000 | 4.57352e-17 | 1.00000 |
| rad67         | 1.56303e-18 | 1.000000 | 1.56563e-18 | 1.00000 |
| rad54         | 1.36211e-18 | 1.000000 | 1.36437e-18 | 1.00000 |
| PAH10+CH3     | 9.94764e-19 | 1.000000 | 9.96416e-19 | 1.00000 |
| rad43         | 2.07223e-19 | 1.000000 | 2.07567e-19 | 1.00000 |
| rad52         | 6.58890e-20 | 1.000000 | 6.59985e-20 | 1.00000 |
| rad62         | 6.29432e-20 | 1.000000 | 6.30478e-20 | 1.00000 |
| rad12         | 4.25793e-20 | 1.000000 | 4.26501e-20 | 1.00000 |
| rad5          | 9.36033e-21 | 1.000000 | 9.37588e-21 | 1.00000 |
| PhcycC3H3_A+H | 9.26287e-21 | 1.000000 | 9.27826e-21 | 1.00000 |
| rad70         | 4.17344e-21 | 1.000000 | 4.18037e-21 | 1.00000 |
| rad51         | 3.76741e-21 | 1.000000 | 3.77367e-21 | 1.00000 |
| rad55         | 1.69344e-21 | 1.000000 | 1.69626e-21 | 1.00000 |
| rad58         | 3.60811e-22 | 1.000000 | 3.61411e-22 | 1.00000 |
| PAH1+H        | 3.22627e-22 | 1.000000 | 3.23163e-22 | 1.00000 |
| rad65         | 4.69329e-23 | 1.000000 | 4.70108e-23 | 1.00000 |
| rad34         | 2.06593e-23 | 1.000000 | 2.06936e-23 | 1.00000 |
| rad42         | 5.40553e-25 | 1.000000 | 5.41451e-25 | 1.00000 |
| rad41         | 1.81691e-25 | 1.000000 | 1.81993e-25 | 1.00000 |
| rad53         | 6.75528e-27 | 1.000000 | 6.76650e-27 | 1.00000 |
| rad64         | 1.44820e-27 | 1.000000 | 1.45060e-27 | 1.00000 |
| rad56         | 1.09498e-29 | 1.000000 | 1.09680e-29 | 1.00000 |
| rad47         | 2.57565e-30 | 1.000000 | 2.57993e-30 | 1.00000 |
| rad61         | 2.22667e-30 | 1.000000 | 2.23037e-30 | 1.00000 |
| rad68syn      | 1.21267e-30 | 1.000000 | 1.21468e-30 | 1.00000 |
| rad68anti     | 8.65789e-31 | 1.000000 | 8.67227e-31 | 1.00000 |
| rad73         | 6.00947e-31 | 1.000000 | 6.01946e-31 | 1.00000 |
| rad71         | 2.28693e-32 | 1.000000 | 2.29073e-32 | 1.00000 |
| rad40syn      | 2.59247e-33 | 1.000000 | 2.59678e-33 | 1.00000 |
| PAH8+H        | 1.76300e-33 | 1.000000 | 1.76593e-33 | 1.00000 |
| rad40anti     | 9.47051e-34 | 1.000000 | 9.48624e-34 | 1.00000 |
| rad72         | 3.96437e-38 | 1.000000 | 3.97095e-38 | 1.00000 |
| rad8          | 1.12752e-40 | 1.000000 | 1.12939e-40 | 1.00000 |

0.100000000 Pa, 310.000000 K

=====  
Rate constant | True (fraction) | Effective (fraction)

-----  
Total | 2.44453e-22 (1.00 ) | 2.44055e-22 (1.00 )

| species     | PYtrue      | Cumul    | PYeffective | Cumul    |
|-------------|-------------|----------|-------------|----------|
| Indene+H    | 0.996874    | 0.996874 | 0.998500    | 0.998500 |
| Benzyl+C2H2 | 0.00162843  | 0.998502 | 0.000000    | 0.998500 |
| rad6        | 0.00144043  | 0.999943 | 0.00144278  | 0.999943 |
| rad23       | 5.50199e-05 | 0.999998 | 5.51096e-05 | 0.999998 |
| rad45       | 8.19760e-07 | 0.999999 | 8.21097e-07 | 0.999999 |
| rad2        | 2.76264e-07 | 0.999999 | 2.76715e-07 | 0.999999 |
| rad7        | 1.47919e-07 | 0.999999 | 1.48160e-07 | 0.999999 |
| PhCCH+CH3   | 6.88945e-08 | 0.999999 | 6.90069e-08 | 0.999999 |
| rad30       | 5.83118e-08 | 0.999999 | 5.84069e-08 | 0.999999 |
| rad11       | 5.64056e-08 | 0.999999 | 5.64976e-08 | 0.999999 |
| rad36       | 5.42398e-08 | 0.999999 | 5.43282e-08 | 0.999999 |
| PhCHCCH2+H  | 3.66446e-08 | 0.999999 | 3.67043e-08 | 0.999999 |
| rad28       | 3.44936e-08 | 0.999999 | 3.45498e-08 | 0.999999 |
| rad22       | 3.09735e-08 | 0.999999 | 3.10240e-08 | 0.999999 |
| PhCCCH3+H   | 2.24979e-08 | 0.999999 | 2.25346e-08 | 0.999999 |
| rad1        | 2.15691e-08 | 1.000000 | 2.16043e-08 | 1.000000 |
| rad10       | 1.62706e-08 | 1.000000 | 1.62971e-08 | 1.000000 |
| rad15       | 8.72806e-09 | 1.000000 | 8.74230e-09 | 1.000000 |

|               |             |          |             |          |
|---------------|-------------|----------|-------------|----------|
| rad26         | 8.49498e-09 | 1.000000 | 8.50884e-09 | 1.000000 |
| PAH9+H        | 6.95142e-09 | 1.000000 | 6.96276e-09 | 1.000000 |
| rad35         | 4.03896e-09 | 1.000000 | 4.04554e-09 | 1.000000 |
| rad3          | 3.42093e-09 | 1.000000 | 3.42651e-09 | 1.000000 |
| Ph+MeAc       | 2.68947e-09 | 1.000000 | 2.69386e-09 | 1.000000 |
| rad4          | 1.83609e-09 | 1.000000 | 1.83908e-09 | 1.000000 |
| rad38         | 1.64609e-09 | 1.000000 | 1.64877e-09 | 1.000000 |
| rad13         | 6.44241e-10 | 1.000000 | 6.45292e-10 | 1.000000 |
| rad8          | 4.31197e-10 | 1.000000 | 4.31900e-10 | 1.000000 |
| Ph+Allene     | 3.62425e-10 | 1.000000 | 3.63016e-10 | 1.000000 |
| rad9          | 3.51665e-10 | 1.000000 | 3.52238e-10 | 1.000000 |
| PAH7+H        | 1.39153e-10 | 1.000000 | 1.39380e-10 | 1.000000 |
| rad39         | 3.13588e-11 | 1.000000 | 3.14100e-11 | 1.000000 |
| rad20         | 1.43821e-11 | 1.000000 | 1.44056e-11 | 1.000000 |
| rad12         | 1.35996e-11 | 1.000000 | 1.36218e-11 | 1.000000 |
| rad46         | 1.08244e-11 | 1.000000 | 1.08420e-11 | 1.000000 |
| PhCH2CCH+H    | 1.07632e-11 | 1.000000 | 1.07808e-11 | 1.000000 |
| rad21         | 9.40659e-12 | 1.000000 | 9.42193e-12 | 1.000000 |
| rad25         | 4.28521e-12 | 1.000000 | 4.29220e-12 | 1.000000 |
| rad60syn      | 1.62483e-12 | 1.000000 | 1.62748e-12 | 1.000000 |
| rad33         | 1.26246e-12 | 1.000000 | 1.26452e-12 | 1.000000 |
| rad60anti     | 5.36752e-13 | 1.000000 | 5.37628e-13 | 1.000000 |
| rad37         | 5.17776e-13 | 1.000000 | 5.18620e-13 | 1.000000 |
| rad18         | 4.11245e-13 | 1.000000 | 4.11915e-13 | 1.000000 |
| rad14         | 2.59035e-13 | 1.000000 | 2.59458e-13 | 1.000000 |
| rad27         | 1.70530e-13 | 1.000000 | 1.70808e-13 | 1.000000 |
| rad5          | 2.18450e-14 | 1.000000 | 2.18807e-14 | 1.000000 |
| PAH3+H        | 1.50697e-14 | 1.000000 | 1.50943e-14 | 1.000000 |
| rad24         | 1.03418e-14 | 1.000000 | 1.03587e-14 | 1.000000 |
| rad59         | 4.34541e-15 | 1.000000 | 4.35250e-15 | 1.000000 |
| rad50         | 3.15384e-16 | 1.000000 | 3.15899e-16 | 1.000000 |
| rad19syn      | 7.91642e-17 | 1.000000 | 7.92933e-17 | 1.000000 |
| rad31         | 2.64513e-17 | 1.000000 | 2.64944e-17 | 1.000000 |
| rad54         | 2.96452e-18 | 1.000000 | 2.96935e-18 | 1.000000 |
| PAH10+CH3     | 1.88894e-18 | 1.000000 | 1.89202e-18 | 1.000000 |
| rad43         | 4.29630e-19 | 1.000000 | 4.30330e-19 | 1.000000 |
| rad52         | 2.25271e-19 | 1.000000 | 2.25638e-19 | 1.000000 |
| rad62         | 1.52859e-19 | 1.000000 | 1.53109e-19 | 1.000000 |
| PhcycC3H3_A+H | 2.18682e-20 | 1.000000 | 2.19039e-20 | 1.000000 |
| rad51         | 1.42259e-20 | 1.000000 | 1.42491e-20 | 1.000000 |
| rad70         | 1.25542e-20 | 1.000000 | 1.25747e-20 | 1.000000 |
| rad55         | 5.47618e-21 | 1.000000 | 5.48511e-21 | 1.000000 |
| rad58         | 1.56889e-21 | 1.000000 | 1.57145e-21 | 1.000000 |
| PAH1+H        | 7.37759e-22 | 1.000000 | 7.38962e-22 | 1.000000 |
| rad65         | 1.69465e-22 | 1.000000 | 1.69741e-22 | 1.000000 |
| rad34         | 5.06997e-23 | 1.000000 | 5.07824e-23 | 1.000000 |
| rad42         | 9.54277e-25 | 1.000000 | 9.55833e-25 | 1.000000 |
| rad41         | 2.89455e-25 | 1.000000 | 2.89927e-25 | 1.000000 |
| rad47         | 1.45227e-29 | 1.000000 | 1.45464e-29 | 1.000000 |

0.100000000 Pa, 400.000000 K

=====

| Rate constant | True (fraction)     | Effective (fraction) |
|---------------|---------------------|----------------------|
| Total         | 3.60269e-20 (1.00 ) | 3.57089e-20 (1.00 )  |

| species     | PYtrue      | Cumul    | PYeffective | Cumul    |
|-------------|-------------|----------|-------------|----------|
| Indene+H    | 0.988639    | 0.988639 | 0.997444    | 0.997444 |
| Benzyl+C2H2 | 0.00882710  | 0.997466 | 0.000000    | 0.997444 |
| rad6        | 0.00248786  | 0.999954 | 0.00251002  | 0.999954 |
| rad23       | 3.11752e-05 | 0.999985 | 3.14528e-05 | 0.999985 |
| PhCCH+CH3   | 5.99822e-06 | 0.999991 | 6.05163e-06 | 0.999992 |
| PhCHCCH2+H  | 2.65966e-06 | 0.999994 | 2.68335e-06 | 0.999994 |
| PhCCCH3+H   | 1.76487e-06 | 0.999996 | 1.78059e-06 | 0.999996 |
| rad2        | 1.11196e-06 | 0.999997 | 1.12186e-06 | 0.999997 |
| rad45       | 8.17634e-07 | 0.999997 | 8.24916e-07 | 0.999998 |
| rad28       | 4.69389e-07 | 0.999998 | 4.73570e-07 | 0.999998 |
| rad30       | 4.01151e-07 | 0.999998 | 4.04724e-07 | 0.999999 |
| Ph+MeAc     | 3.74873e-07 | 0.999999 | 3.78212e-07 | 0.999999 |
| rad7        | 2.71555e-07 | 0.999999 | 2.73974e-07 | 0.999999 |
| rad1        | 1.03483e-07 | 0.999999 | 1.04404e-07 | 1.000000 |
| rad26       | 9.39192e-08 | 0.999999 | 9.47556e-08 | 1.000000 |
| rad11       | 8.21823e-08 | 0.999999 | 8.29142e-08 | 1.000000 |
| PAH9+H      | 6.79070e-08 | 0.999999 | 6.85117e-08 | 1.000000 |
| rad10       | 6.53385e-08 | 0.999999 | 6.59204e-08 | 1.000000 |
| Ph+Allene   | 5.65027e-08 | 0.999999 | 5.70059e-08 | 1.000000 |
| rad36       | 3.13315e-08 | 1.000000 | 3.16105e-08 | 1.000000 |
| PAH7+H      | 2.86670e-08 | 1.000000 | 2.89223e-08 | 1.000000 |
| rad35       | 2.72847e-08 | 1.000000 | 2.75277e-08 | 1.000000 |

|               |             |          |             |         |
|---------------|-------------|----------|-------------|---------|
| rad22         | 2.43395e-08 | 1.000000 | 2.45563e-08 | 1.00000 |
| rad38         | 1.62978e-08 | 1.000000 | 1.64430e-08 | 1.00000 |
| rad3          | 1.10898e-08 | 1.000000 | 1.11885e-08 | 1.00000 |
| rad39         | 5.99667e-09 | 1.000000 | 6.05007e-09 | 1.00000 |
| rad4          | 5.84026e-09 | 1.000000 | 5.89227e-09 | 1.00000 |
| PhCH2CCH+H    | 4.41528e-09 | 1.000000 | 4.45460e-09 | 1.00000 |
| rad13         | 1.43384e-09 | 1.000000 | 1.44661e-09 | 1.00000 |
| rad19anti     | 7.03433e-10 | 1.000000 | 7.09698e-10 | 1.00000 |
| rad20         | 4.56423e-10 | 1.000000 | 4.60488e-10 | 1.00000 |
| rad21         | 3.16302e-10 | 1.000000 | 3.19119e-10 | 1.00000 |
| rad46         | 3.07047e-10 | 1.000000 | 3.09781e-10 | 1.00000 |
| rad37         | 1.18760e-10 | 1.000000 | 1.19818e-10 | 1.00000 |
| rad60syn      | 9.46170e-11 | 1.000000 | 9.54596e-11 | 1.00000 |
| rad60anti     | 3.76182e-11 | 1.000000 | 3.79532e-11 | 1.00000 |
| rad18         | 2.62018e-11 | 1.000000 | 2.64351e-11 | 1.00000 |
| rad9          | 7.83004e-12 | 1.000000 | 7.89977e-12 | 1.00000 |
| PAH3+H        | 6.50579e-12 | 1.000000 | 6.56373e-12 | 1.00000 |
| rad33         | 3.73812e-12 | 1.000000 | 3.77141e-12 | 1.00000 |
| rad25         | 3.64079e-12 | 1.000000 | 3.67321e-12 | 1.00000 |
| rad59         | 1.36012e-12 | 1.000000 | 1.37223e-12 | 1.00000 |
| rad14         | 1.18246e-12 | 1.000000 | 1.19299e-12 | 1.00000 |
| rad27         | 1.04752e-12 | 1.000000 | 1.05685e-12 | 1.00000 |
| rad50         | 1.43947e-13 | 1.000000 | 1.45229e-13 | 1.00000 |
| rad19syn      | 1.32293e-13 | 1.000000 | 1.33471e-13 | 1.00000 |
| rad24         | 1.89038e-14 | 1.000000 | 1.90722e-14 | 1.00000 |
| rad54         | 9.13377e-15 | 1.000000 | 9.21512e-15 | 1.00000 |
| PAH10+CH3     | 5.34624e-15 | 1.000000 | 5.39385e-15 | 1.00000 |
| rad15         | 4.67479e-15 | 1.000000 | 4.71642e-15 | 1.00000 |
| rad31         | 1.89540e-15 | 1.000000 | 1.91228e-15 | 1.00000 |
| rad67         | 1.69306e-15 | 1.000000 | 1.70814e-15 | 1.00000 |
| rad43         | 9.54925e-16 | 1.000000 | 9.63429e-16 | 1.00000 |
| rad62         | 5.08848e-16 | 1.000000 | 5.13380e-16 | 1.00000 |
| rad52         | 4.99152e-16 | 1.000000 | 5.03597e-16 | 1.00000 |
| PhcycC3H3_A+H | 3.27618e-16 | 1.000000 | 3.30535e-16 | 1.00000 |
| rad51         | 1.38733e-16 | 1.000000 | 1.39968e-16 | 1.00000 |
| rad70         | 1.22281e-16 | 1.000000 | 1.23370e-16 | 1.00000 |
| rad55         | 5.13207e-17 | 1.000000 | 5.17777e-17 | 1.00000 |
| PAH1+H        | 2.49502e-17 | 1.000000 | 2.51724e-17 | 1.00000 |
| rad58         | 1.80124e-17 | 1.000000 | 1.81728e-17 | 1.00000 |
| rad65         | 3.25247e-18 | 1.000000 | 3.28144e-18 | 1.00000 |
| rad34         | 2.06744e-18 | 1.000000 | 2.08586e-18 | 1.00000 |
| rad5          | 5.27328e-19 | 1.000000 | 5.32024e-19 | 1.00000 |
| rad12         | 1.32703e-19 | 1.000000 | 1.33885e-19 | 1.00000 |
| rad42         | 7.68096e-20 | 1.000000 | 7.74937e-20 | 1.00000 |
| rad41         | 2.89935e-20 | 1.000000 | 2.92517e-20 | 1.00000 |
| rad53         | 6.47739e-21 | 1.000000 | 6.53507e-21 | 1.00000 |
| rad64         | 2.35839e-21 | 1.000000 | 2.37940e-21 | 1.00000 |
| rad73         | 8.30499e-22 | 1.000000 | 8.37895e-22 | 1.00000 |
| rad71         | 2.01715e-22 | 1.000000 | 2.03511e-22 | 1.00000 |
| rad56         | 1.92177e-22 | 1.000000 | 1.93888e-22 | 1.00000 |
| rad68syn      | 2.63645e-23 | 1.000000 | 2.65993e-23 | 1.00000 |
| rad61         | 2.02429e-23 | 1.000000 | 2.04232e-23 | 1.00000 |
| rad68anti     | 1.83966e-23 | 1.000000 | 1.85604e-23 | 1.00000 |
| PAH8+H        | 2.99869e-24 | 1.000000 | 3.02539e-24 | 1.00000 |
| rad40syn      | 1.22587e-24 | 1.000000 | 1.23679e-24 | 1.00000 |
| rad40anti     | 4.74237e-25 | 1.000000 | 4.78460e-25 | 1.00000 |
| rad72         | 1.07256e-25 | 1.000000 | 1.08211e-25 | 1.00000 |
| rad47         | 6.23868e-26 | 1.000000 | 6.29424e-26 | 1.00000 |
| rad8          | 1.24249e-36 | 1.000000 | 1.25356e-36 | 1.00000 |

0.100000000 Pa, 500.000000 K

=====

| Rate constant | True (fraction)     | Effective (fraction) |
|---------------|---------------------|----------------------|
| Total         | 1.22595e-18 (1.00 ) | 1.18794e-18 (1.00 )  |

| species     | PYtrue      | Cumul    | PYeffective | Cumul    |
|-------------|-------------|----------|-------------|----------|
| Indene+H    | 0.965744    | 0.965744 | 0.996648    | 0.996648 |
| Benzyl+C2H2 | 0.0310083   | 0.996752 | 0.000000    | 0.996648 |
| rad6        | 0.00308787  | 0.999840 | 0.00318668  | 0.999835 |
| PhCCH+CH3   | 7.11480e-05 | 0.999911 | 7.34248e-05 | 0.999908 |
| PhCHCCH2+H  | 2.96821e-05 | 0.999941 | 3.06319e-05 | 0.999939 |
| rad23       | 2.24918e-05 | 0.999963 | 2.32116e-05 | 0.999962 |
| PhCCCH3+H   | 1.84915e-05 | 0.999982 | 1.90833e-05 | 0.999981 |
| Ph+MeAc     | 6.20388e-06 | 0.999988 | 6.40240e-06 | 0.999987 |
| rad30       | 2.19343e-06 | 0.999990 | 2.26362e-06 | 0.999990 |
| Ph+Allene   | 1.96146e-06 | 0.999992 | 2.02423e-06 | 0.999992 |
| rad2        | 1.93437e-06 | 0.999994 | 1.99627e-06 | 0.999994 |
| rad45       | 1.73140e-06 | 0.999996 | 1.78681e-06 | 0.999996 |



|               |             |          |             |          |
|---------------|-------------|----------|-------------|----------|
| rad28         | 1.27051e-06 | 0.999997 | 1.31117e-06 | 0.999997 |
| PAH7+H        | 5.90246e-07 | 0.999998 | 6.09134e-07 | 0.999997 |
| PAH9+H        | 4.85914e-07 | 0.999998 | 5.01464e-07 | 0.999998 |
| rad7          | 3.52165e-07 | 0.999999 | 3.63434e-07 | 0.999998 |
| PhCH2CCH+H    | 2.40486e-07 | 0.999999 | 2.48182e-07 | 0.999999 |
| rad1          | 2.30975e-07 | 0.999999 | 2.38366e-07 | 0.999999 |
| rad26         | 2.12329e-07 | 0.999999 | 2.19123e-07 | 0.999999 |
| rad35         | 1.65958e-07 | 1.000000 | 1.71269e-07 | 0.999999 |
| rad38         | 1.35269e-07 | 1.000000 | 1.39598e-07 | 0.999999 |
| rad39         | 1.34468e-07 | 1.000000 | 1.38771e-07 | 0.999999 |
| rad10         | 9.88057e-08 | 1.000000 | 1.01968e-07 | 1.000000 |
| rad11         | 9.76969e-08 | 1.000000 | 1.00823e-07 | 1.000000 |
| rad36         | 8.27634e-08 | 1.000000 | 8.54119e-08 | 1.000000 |
| rad3          | 2.30506e-08 | 1.000000 | 2.37883e-08 | 1.000000 |
| rad19anti     | 1.33904e-08 | 1.000000 | 1.38189e-08 | 1.000000 |
| rad4          | 1.29788e-08 | 1.000000 | 1.33941e-08 | 1.000000 |
| rad22         | 9.82411e-09 | 1.000000 | 1.01385e-08 | 1.000000 |
| rad46         | 5.18278e-09 | 1.000000 | 5.34863e-09 | 1.000000 |
| rad37         | 2.71414e-09 | 1.000000 | 2.80099e-09 | 1.000000 |
| rad60syn      | 2.17387e-09 | 1.000000 | 2.24343e-09 | 1.000000 |
| rad13         | 2.11765e-09 | 1.000000 | 2.18541e-09 | 1.000000 |
| rad60anti     | 9.77979e-10 | 1.000000 | 1.00927e-09 | 1.000000 |
| PAH3+H        | 4.98980e-10 | 1.000000 | 5.14948e-10 | 1.000000 |
| rad20         | 3.52860e-10 | 1.000000 | 3.64152e-10 | 1.000000 |
| rad21         | 2.74288e-10 | 1.000000 | 2.83066e-10 | 1.000000 |
| rad59         | 9.55316e-11 | 1.000000 | 9.85887e-11 | 1.000000 |
| rad50         | 2.35078e-11 | 1.000000 | 2.42600e-11 | 1.000000 |
| rad19syn      | 2.21690e-11 | 1.000000 | 2.28784e-11 | 1.000000 |
| rad9          | 1.31392e-11 | 1.000000 | 1.35597e-11 | 1.000000 |
| rad18         | 1.09250e-11 | 1.000000 | 1.12746e-11 | 1.000000 |
| rad33         | 6.52787e-12 | 1.000000 | 6.73676e-12 | 1.000000 |
| rad25         | 2.92506e-12 | 1.000000 | 3.01866e-12 | 1.000000 |
| rad54         | 2.42178e-12 | 1.000000 | 2.49927e-12 | 1.000000 |
| rad14         | 2.07645e-12 | 1.000000 | 2.14290e-12 | 1.000000 |
| rad27         | 1.91484e-12 | 1.000000 | 1.97612e-12 | 1.000000 |
| PAH10+CH3     | 1.22692e-12 | 1.000000 | 1.26618e-12 | 1.000000 |
| rad51         | 7.41957e-13 | 1.000000 | 7.65700e-13 | 1.000000 |
| rad52         | 5.02437e-13 | 1.000000 | 5.18515e-13 | 1.000000 |
| rad67         | 2.45319e-13 | 1.000000 | 2.53169e-13 | 1.000000 |
| PhcycC3H3_A+H | 2.14374e-13 | 1.000000 | 2.21234e-13 | 1.000000 |
| rad43         | 1.76387e-13 | 1.000000 | 1.82032e-13 | 1.000000 |
| rad62         | 1.28505e-13 | 1.000000 | 1.32617e-13 | 1.000000 |
| rad70         | 6.84499e-14 | 1.000000 | 7.06403e-14 | 1.000000 |
| rad24         | 6.00022e-14 | 1.000000 | 6.19224e-14 | 1.000000 |
| PAH1+H        | 3.20782e-14 | 1.000000 | 3.31048e-14 | 1.000000 |
| rad55         | 2.85967e-14 | 1.000000 | 2.95118e-14 | 1.000000 |
| rad31         | 2.84240e-14 | 1.000000 | 2.93336e-14 | 1.000000 |
| rad65         | 2.17814e-14 | 1.000000 | 2.24784e-14 | 1.000000 |
| rad58         | 1.32136e-14 | 1.000000 | 1.36364e-14 | 1.000000 |
| rad15         | 8.40007e-15 | 1.000000 | 8.66888e-15 | 1.000000 |
| rad34         | 2.51993e-15 | 1.000000 | 2.60057e-15 | 1.000000 |
| rad73         | 1.32488e-15 | 1.000000 | 1.36728e-15 | 1.000000 |
| rad71         | 1.04507e-15 | 1.000000 | 1.07851e-15 | 1.000000 |
| rad42         | 1.04078e-16 | 1.000000 | 1.07409e-16 | 1.000000 |
| rad64         | 9.96486e-17 | 1.000000 | 1.02837e-16 | 1.000000 |
| rad41         | 7.46717e-17 | 1.000000 | 7.70612e-17 | 1.000000 |
| rad53         | 6.70369e-17 | 1.000000 | 6.91821e-17 | 1.000000 |
| rad56         | 2.49291e-17 | 1.000000 | 2.57268e-17 | 1.000000 |
| rad72         | 1.17692e-17 | 1.000000 | 1.21459e-17 | 1.000000 |
| rad61         | 9.89473e-18 | 1.000000 | 1.02114e-17 | 1.000000 |
| PAH8+H        | 9.48583e-18 | 1.000000 | 9.78938e-18 | 1.000000 |
| rad68syn      | 7.12287e-18 | 1.000000 | 7.35081e-18 | 1.000000 |
| rad68anti     | 4.71812e-18 | 1.000000 | 4.86910e-18 | 1.000000 |
| rad5          | 3.85864e-18 | 1.000000 | 3.98212e-18 | 1.000000 |
| rad40syn      | 1.58968e-18 | 1.000000 | 1.64055e-18 | 1.000000 |
| rad40anti     | 8.37876e-19 | 1.000000 | 8.64688e-19 | 1.000000 |
| rad12         | 6.19732e-19 | 1.000000 | 6.39564e-19 | 1.000000 |
| rad47         | 7.09868e-23 | 1.000000 | 7.32584e-23 | 1.000000 |
| rad8          | 1.95611e-32 | 1.000000 | 2.01870e-32 | 1.000000 |

0.100000000 Pa, 600.000000 K

| Rate constant | True (fraction)     | Effective (fraction) |             |          |
|---------------|---------------------|----------------------|-------------|----------|
| Total         | 1.36947e-17 (1.00 ) | 1.26201e-17 (1.00 )  |             |          |
| species       | PYtrue              | Cumul                | PYeffective | Cumul    |
| Indene+H      | 0.918710            | 0.918710             | 0.996934    | 0.996934 |
| Benzy1+C2H2   | 0.0784644           | 0.997174             | 0.000000    | 0.996934 |

|               |             |          |             |          |
|---------------|-------------|----------|-------------|----------|
| rad6          | 0.00222975  | 0.999404 | 0.00241961  | 0.999354 |
| PhCCH+CH3     | 0.000303621 | 0.999708 | 0.000329473 | 0.999683 |
| PhCHCCH2+H    | 0.000124718 | 0.999832 | 0.000135337 | 0.999818 |
| PhCCCH3+H     | 6.72512e-05 | 0.999900 | 7.29773e-05 | 0.999891 |
| Ph+MeAc       | 3.27663e-05 | 0.999933 | 3.55562e-05 | 0.999927 |
| Ph+Allene     | 2.14394e-05 | 0.999954 | 2.32648e-05 | 0.999950 |
| rad23         | 1.92941e-05 | 0.999973 | 2.09369e-05 | 0.999971 |
| rad30         | 7.58817e-06 | 0.999981 | 8.23427e-06 | 0.999979 |
| PAH7+H        | 4.22376e-06 | 0.999985 | 4.58340e-06 | 0.999984 |
| PhCH2CCH+H    | 3.64603e-06 | 0.999989 | 3.95647e-06 | 0.999988 |
| rad45         | 2.28965e-06 | 0.999991 | 2.48461e-06 | 0.999990 |
| PAH9+H        | 2.26408e-06 | 0.999993 | 2.45686e-06 | 0.999993 |
| rad2          | 2.02300e-06 | 0.999995 | 2.19525e-06 | 0.999995 |
| rad28         | 1.28815e-06 | 0.999997 | 1.39783e-06 | 0.999996 |
| rad39         | 1.00822e-06 | 0.999998 | 1.09407e-06 | 0.999998 |
| rad38         | 6.97492e-07 | 0.999998 | 7.56880e-07 | 0.999998 |
| rad35         | 6.77941e-07 | 0.999999 | 7.35664e-07 | 0.999999 |
| rad1          | 2.97193e-07 | 0.999999 | 3.22497e-07 | 0.999999 |
| rad7          | 2.76279e-07 | 1.000000 | 2.99803e-07 | 1.000000 |
| rad26         | 1.86280e-07 | 1.000000 | 2.02141e-07 | 1.000000 |
| rad36         | 1.51461e-07 | 1.000000 | 1.64357e-07 | 1.000000 |
| rad19anti     | 1.15204e-07 | 1.000000 | 1.25013e-07 | 1.000000 |
| rad11         | 7.97094e-08 | 1.000000 | 8.64963e-08 | 1.000000 |
| rad10         | 6.86735e-08 | 1.000000 | 7.45207e-08 | 1.000000 |
| rad46         | 4.52151e-08 | 1.000000 | 4.90650e-08 | 1.000000 |
| rad3          | 2.63582e-08 | 1.000000 | 2.86025e-08 | 1.000000 |
| rad60syn      | 1.92898e-08 | 1.000000 | 2.09322e-08 | 1.000000 |
| rad37         | 1.81056e-08 | 1.000000 | 1.96472e-08 | 1.000000 |
| rad4          | 1.60256e-08 | 1.000000 | 1.73902e-08 | 1.000000 |
| PAH3+H        | 9.96352e-09 | 1.000000 | 1.08119e-08 | 1.000000 |
| rad60anti     | 9.33450e-09 | 1.000000 | 1.01293e-08 | 1.000000 |
| rad22         | 6.28091e-09 | 1.000000 | 6.81570e-09 | 1.000000 |
| rad50         | 2.61023e-09 | 1.000000 | 2.83248e-09 | 1.000000 |
| rad13         | 2.03707e-09 | 1.000000 | 2.21051e-09 | 1.000000 |
| rad59         | 1.75920e-09 | 1.000000 | 1.90899e-09 | 1.000000 |
| rad19syn      | 6.92929e-10 | 1.000000 | 7.51929e-10 | 1.000000 |
| rad51         | 4.95910e-10 | 1.000000 | 5.38135e-10 | 1.000000 |
| rad20         | 4.60934e-10 | 1.000000 | 5.00180e-10 | 1.000000 |
| rad21         | 4.06180e-10 | 1.000000 | 4.40765e-10 | 1.000000 |
| rad52         | 1.72102e-10 | 1.000000 | 1.86756e-10 | 1.000000 |
| rad54         | 1.03617e-10 | 1.000000 | 1.12439e-10 | 1.000000 |
| PAH10+CH3     | 8.38167e-11 | 1.000000 | 9.09533e-11 | 1.000000 |
| rad9          | 3.85774e-11 | 1.000000 | 4.18621e-11 | 1.000000 |
| PhcycC3H3_A+H | 1.84680e-11 | 1.000000 | 2.00405e-11 | 1.000000 |
| PAH1+H        | 1.65954e-11 | 1.000000 | 1.80084e-11 | 1.000000 |
| rad67         | 1.38062e-11 | 1.000000 | 1.49817e-11 | 1.000000 |
| rad65         | 1.35598e-11 | 1.000000 | 1.47144e-11 | 1.000000 |
| rad71         | 9.98058e-12 | 1.000000 | 1.08304e-11 | 1.000000 |
| rad33         | 8.61354e-12 | 1.000000 | 9.34694e-12 | 1.000000 |
| rad73         | 7.84783e-12 | 1.000000 | 8.51604e-12 | 1.000000 |
| rad18         | 6.76848e-12 | 1.000000 | 7.34479e-12 | 1.000000 |
| rad70         | 6.28382e-12 | 1.000000 | 6.81886e-12 | 1.000000 |
| rad43         | 5.92960e-12 | 1.000000 | 6.43448e-12 | 1.000000 |
| rad62         | 4.85693e-12 | 1.000000 | 5.27047e-12 | 1.000000 |
| rad25         | 2.37353e-12 | 1.000000 | 2.57563e-12 | 1.000000 |
| rad55         | 1.99989e-12 | 1.000000 | 2.17017e-12 | 1.000000 |
| rad14         | 1.96399e-12 | 1.000000 | 2.13122e-12 | 1.000000 |
| rad27         | 1.77755e-12 | 1.000000 | 1.92890e-12 | 1.000000 |
| rad58         | 1.60415e-12 | 1.000000 | 1.74073e-12 | 1.000000 |
| rad34         | 6.99134e-13 | 1.000000 | 7.58662e-13 | 1.000000 |
| rad24         | 5.47559e-13 | 1.000000 | 5.94181e-13 | 1.000000 |
| rad72         | 2.83996e-13 | 1.000000 | 3.08177e-13 | 1.000000 |
| rad64         | 2.51593e-13 | 1.000000 | 2.73015e-13 | 1.000000 |
| PAH8+H        | 1.11728e-13 | 1.000000 | 1.21241e-13 | 1.000000 |
| rad31         | 8.82543e-14 | 1.000000 | 9.57687e-14 | 1.000000 |
| rad61         | 5.35836e-14 | 1.000000 | 5.81460e-14 | 1.000000 |
| rad53         | 4.15942e-14 | 1.000000 | 4.51358e-14 | 1.000000 |
| rad68syn      | 3.55197e-14 | 1.000000 | 3.85440e-14 | 1.000000 |
| rad56         | 3.48546e-14 | 1.000000 | 3.78223e-14 | 1.000000 |
| rad41         | 2.97850e-14 | 1.000000 | 3.23210e-14 | 1.000000 |
| rad15         | 2.42162e-14 | 1.000000 | 2.62781e-14 | 1.000000 |
| rad68anti     | 2.31242e-14 | 1.000000 | 2.50931e-14 | 1.000000 |
| rad42         | 2.11491e-14 | 1.000000 | 2.29499e-14 | 1.000000 |
| rad40syn      | 1.35955e-14 | 1.000000 | 1.47531e-14 | 1.000000 |
| rad40anti     | 8.20338e-15 | 1.000000 | 8.90186e-15 | 1.000000 |
| rad12         | 2.57072e-17 | 1.000000 | 2.78960e-17 | 1.000000 |
| rad5          | 9.49425e-18 | 1.000000 | 1.03026e-17 | 1.000000 |
| rad47         | 4.35015e-20 | 1.000000 | 4.72054e-20 | 1.000000 |
| rad8          | 5.54978e-28 | 1.000000 | 6.02232e-28 | 1.000000 |

0.100000000 Pa, 700.000000 K

| =====         |                     |          |                      |          |
|---------------|---------------------|----------|----------------------|----------|
| Rate constant | True (fraction)     |          | Effective (fraction) |          |
| -----         |                     |          |                      |          |
| Total         | 8.02260e-17 (1.00 ) |          | 6.78370e-17 (1.00 )  |          |
| species       | PYtrue              | Cumul    | PYeffective          | Cumul    |
| -----         |                     |          |                      |          |
| Indene+H      | 0.843050            | 0.843050 | 0.997015             | 0.997015 |
| Benzyl+C2H2   | 0.154426            | 0.997476 | 0.000000             | 0.997015 |
| rad6          | 0.00105994          | 0.998536 | 0.00125352           | 0.998269 |
| PhCCH+CH3     | 0.000724858         | 0.999261 | 0.000857238          | 0.999126 |
| PhCHCCH2+H    | 0.000312748         | 0.999574 | 0.000369865          | 0.999496 |
| PhCCCH3+H     | 0.000131681         | 0.999705 | 0.000155729          | 0.999651 |
| Ph+Allene     | 0.000115622         | 0.999821 | 0.000136738          | 0.999788 |
| Ph+MeAc       | 8.85007e-05         | 0.999909 | 0.000104663          | 0.999893 |
| PhCH2CCH+H    | 2.52660e-05         | 0.999935 | 2.98803e-05          | 0.999923 |
| rad30         | 1.89311e-05         | 0.999954 | 2.23885e-05          | 0.999945 |
| PAH7+H        | 1.62723e-05         | 0.999970 | 1.92441e-05          | 0.999964 |
| rad23         | 9.39376e-06         | 0.999979 | 1.11093e-05          | 0.999975 |
| PAH9+H        | 7.54817e-06         | 0.999987 | 8.92668e-06          | 0.999984 |
| rad39         | 3.95666e-06         | 0.999991 | 4.67926e-06          | 0.999989 |
| rad38         | 2.50704e-06         | 0.999993 | 2.96490e-06          | 0.999992 |
| rad35         | 2.02758e-06         | 0.999995 | 2.39787e-06          | 0.999994 |
| rad45         | 1.37127e-06         | 0.999997 | 1.62171e-06          | 0.999996 |
| rad2          | 1.15521e-06         | 0.999998 | 1.36619e-06          | 0.999997 |
| rad28         | 7.28286e-07         | 0.999999 | 8.61292e-07          | 0.999998 |
| rad19anti     | 5.93054e-07         | 0.999999 | 7.01363e-07          | 0.999999 |
| rad46         | 2.40008e-07         | 0.999999 | 2.83840e-07          | 0.999999 |
| rad1          | 1.87418e-07         | 1.000000 | 2.21646e-07          | 0.999999 |
| rad7          | 1.51441e-07         | 1.000000 | 1.79099e-07          | 1.000000 |
| rad36         | 1.02278e-07         | 1.000000 | 1.20957e-07          | 1.000000 |
| rad60syn      | 9.48598e-08         | 1.000000 | 1.12184e-07          | 1.000000 |
| rad26         | 9.48026e-08         | 1.000000 | 1.12116e-07          | 1.000000 |
| PAH3+H        | 8.84844e-08         | 1.000000 | 1.04644e-07          | 1.000000 |
| rad37         | 5.82730e-08         | 1.000000 | 6.89153e-08          | 1.000000 |
| rad60anti     | 4.82722e-08         | 1.000000 | 5.70880e-08          | 1.000000 |
| rad11         | 4.77520e-08         | 1.000000 | 5.64728e-08          | 1.000000 |
| rad50         | 3.93045e-08         | 1.000000 | 4.64826e-08          | 1.000000 |
| rad10         | 2.94722e-08         | 1.000000 | 3.48547e-08          | 1.000000 |
| rad59         | 1.45222e-08         | 1.000000 | 1.71744e-08          | 1.000000 |
| rad3          | 1.42340e-08         | 1.000000 | 1.68336e-08          | 1.000000 |
| rad51         | 9.98692e-09         | 1.000000 | 1.18108e-08          | 1.000000 |
| rad4          | 9.13180e-09         | 1.000000 | 1.07995e-08          | 1.000000 |
| rad19syn      | 7.84090e-09         | 1.000000 | 9.27287e-09          | 1.000000 |
| rad52         | 3.07059e-09         | 1.000000 | 3.63137e-09          | 1.000000 |
| rad22         | 2.96843e-09         | 1.000000 | 3.51055e-09          | 1.000000 |
| rad13         | 1.57305e-09         | 1.000000 | 1.86033e-09          | 1.000000 |
| rad54         | 1.44780e-09         | 1.000000 | 1.71220e-09          | 1.000000 |
| PAH10+CH3     | 1.39964e-09         | 1.000000 | 1.65525e-09          | 1.000000 |
| rad20         | 9.73590e-10         | 1.000000 | 1.15139e-09          | 1.000000 |
| rad21         | 9.32882e-10         | 1.000000 | 1.10325e-09          | 1.000000 |
| PAH1+H        | 4.03758e-10         | 1.000000 | 4.77496e-10          | 1.000000 |
| PhcycC3H3_A+H | 3.68074e-10         | 1.000000 | 4.35294e-10          | 1.000000 |
| rad71         | 3.15425e-10         | 1.000000 | 3.73031e-10          | 1.000000 |
| rad65         | 2.65188e-10         | 1.000000 | 3.13618e-10          | 1.000000 |
| rad67         | 2.48349e-10         | 1.000000 | 2.93705e-10          | 1.000000 |
| rad73         | 2.30392e-10         | 1.000000 | 2.72468e-10          | 1.000000 |
| rad9          | 2.04442e-10         | 1.000000 | 2.41779e-10          | 1.000000 |
| rad70         | 1.26998e-10         | 1.000000 | 1.50191e-10          | 1.000000 |
| rad43         | 6.65515e-11         | 1.000000 | 7.87057e-11          | 1.000000 |
| rad62         | 5.88625e-11         | 1.000000 | 6.96125e-11          | 1.000000 |
| rad55         | 3.67310e-11         | 1.000000 | 4.34392e-11          | 1.000000 |
| rad58         | 3.58675e-11         | 1.000000 | 4.24179e-11          | 1.000000 |
| rad34         | 1.73844e-11         | 1.000000 | 2.05593e-11          | 1.000000 |
| rad33         | 1.18210e-11         | 1.000000 | 1.39799e-11          | 1.000000 |
| rad72         | 1.02016e-11         | 1.000000 | 1.20646e-11          | 1.000000 |
| rad18         | 6.83632e-12         | 1.000000 | 8.08482e-12          | 1.000000 |
| rad64         | 6.57223e-12         | 1.000000 | 7.77250e-12          | 1.000000 |
| rad24         | 5.55444e-12         | 1.000000 | 6.56884e-12          | 1.000000 |
| PAH8+H        | 4.05804e-12         | 1.000000 | 4.79915e-12          | 1.000000 |
| rad25         | 1.89921e-12         | 1.000000 | 2.24606e-12          | 1.000000 |
| rad61         | 1.71647e-12         | 1.000000 | 2.02995e-12          | 1.000000 |
| rad14         | 1.41341e-12         | 1.000000 | 1.67154e-12          | 1.000000 |
| rad41         | 1.40952e-12         | 1.000000 | 1.66694e-12          | 1.000000 |
| rad27         | 1.28136e-12         | 1.000000 | 1.51537e-12          | 1.000000 |
| rad68syn      | 1.06364e-12         | 1.000000 | 1.25789e-12          | 1.000000 |
| rad53         | 9.07567e-13         | 1.000000 | 1.07331e-12          | 1.000000 |
| rad56         | 7.72437e-13         | 1.000000 | 9.13506e-13          | 1.000000 |
| rad68anti     | 6.91015e-13         | 1.000000 | 8.17214e-13          | 1.000000 |

|           |             |         |             |         |
|-----------|-------------|---------|-------------|---------|
| rad42     | 6.06572e-13 | 1.00000 | 7.17349e-13 | 1.00000 |
| rad40syn  | 5.06811e-13 | 1.00000 | 5.99369e-13 | 1.00000 |
| rad40anti | 3.37436e-13 | 1.00000 | 3.99061e-13 | 1.00000 |
| rad15     | 9.07518e-14 | 1.00000 | 1.07326e-13 | 1.00000 |
| rad31     | 8.54380e-14 | 1.00000 | 1.01041e-13 | 1.00000 |
| rad12     | 2.80072e-15 | 1.00000 | 3.31221e-15 | 1.00000 |
| rad5      | 1.36917e-17 | 1.00000 | 1.61921e-17 | 1.00000 |
| rad47     | 4.31287e-18 | 1.00000 | 5.10052e-18 | 1.00000 |
| rad8      | 1.32647e-23 | 1.00000 | 1.56873e-23 | 1.00000 |

0.100000000 Pa, 800.000000 K

| Rate constant | True (fraction)     | Effective (fraction) |
|---------------|---------------------|----------------------|
| Total         | 3.12228e-16 (1.00 ) | 2.33594e-16 (1.00 )  |

| species       | PYtrue      | Cumul    | PYeffective | Cumul    |
|---------------|-------------|----------|-------------|----------|
| Indene+H      | 0.744967    | 0.744967 | 0.995743    | 0.995743 |
| Benzyl+C2H2   | 0.251848    | 0.996815 | 0.00000     | 0.995743 |
| PhCCH+CH3     | 0.00122982  | 0.998045 | 0.00164382  | 0.997387 |
| PhCHCCH2+H    | 0.000600352 | 0.998645 | 0.000802447 | 0.998189 |
| rad6          | 0.000392678 | 0.999038 | 0.000524864 | 0.998714 |
| Ph+Allene     | 0.000391353 | 0.999429 | 0.000523093 | 0.999237 |
| PhCCCH3+H     | 0.000178130 | 0.999607 | 0.000238093 | 0.999475 |
| Ph+MeAc       | 0.000159197 | 0.999767 | 0.000212787 | 0.999688 |
| PhCH2CCH+H    | 0.000104796 | 0.999871 | 0.000140074 | 0.999828 |
| PAH7+H        | 4.19745e-05 | 0.999913 | 5.61043e-05 | 0.999884 |
| rad30         | 3.73178e-05 | 0.999951 | 4.98800e-05 | 0.999934 |
| PAH9+H        | 1.88975e-05 | 0.999970 | 2.52590e-05 | 0.999959 |
| rad39         | 1.01790e-05 | 0.999980 | 1.36056e-05 | 0.999973 |
| rad38         | 6.56976e-06 | 0.999986 | 8.78133e-06 | 0.999982 |
| rad35         | 4.70532e-06 | 0.999991 | 6.28925e-06 | 0.999988 |
| rad23         | 3.32041e-06 | 0.999994 | 4.43815e-06 | 0.999993 |
| rad19anti     | 2.13868e-06 | 0.999996 | 2.85861e-06 | 0.999995 |
| rad46         | 7.64625e-07 | 0.999997 | 1.02202e-06 | 0.999996 |
| rad45         | 6.20147e-07 | 0.999998 | 8.28905e-07 | 0.999997 |
| PAH3+H        | 4.58816e-07 | 0.999998 | 6.13265e-07 | 0.999998 |
| rad2          | 3.99891e-07 | 0.999999 | 5.34505e-07 | 0.999998 |
| rad60syn      | 3.14736e-07 | 0.999999 | 4.20685e-07 | 0.999999 |
| rad28         | 3.02224e-07 | 0.999999 | 4.03961e-07 | 0.999999 |
| rad60anti     | 1.66276e-07 | 0.999999 | 2.22250e-07 | 0.999999 |
| rad37         | 1.19149e-07 | 1.000000 | 1.59258e-07 | 1.000000 |
| rad50         | 1.16381e-07 | 1.000000 | 1.55558e-07 | 1.000000 |
| rad7          | 7.09235e-08 | 1.000000 | 9.47982e-08 | 1.000000 |
| rad59         | 7.07974e-08 | 1.000000 | 9.46297e-08 | 1.000000 |
| rad1          | 6.36210e-08 | 1.000000 | 8.50376e-08 | 1.000000 |
| rad36         | 4.86117e-08 | 1.000000 | 6.49757e-08 | 1.000000 |
| rad19syn      | 4.59403e-08 | 1.000000 | 6.14050e-08 | 1.000000 |
| rad26         | 3.69966e-08 | 1.000000 | 4.94507e-08 | 1.000000 |
| rad51         | 2.78115e-08 | 1.000000 | 3.71736e-08 | 1.000000 |
| rad11         | 2.59117e-08 | 1.000000 | 3.46343e-08 | 1.000000 |
| rad54         | 9.87518e-09 | 1.000000 | 1.31994e-08 | 1.000000 |
| rad10         | 9.69287e-09 | 1.000000 | 1.29558e-08 | 1.000000 |
| rad52         | 8.57982e-09 | 1.000000 | 1.14680e-08 | 1.000000 |
| rad3          | 4.91272e-09 | 1.000000 | 6.56648e-09 | 1.000000 |
| PAH10+CH3     | 4.77460e-09 | 1.000000 | 6.38186e-09 | 1.000000 |
| rad4          | 3.21734e-09 | 1.000000 | 4.30038e-09 | 1.000000 |
| PhcycC3H3_A+H | 3.12251e-09 | 1.000000 | 4.17364e-09 | 1.000000 |
| rad20         | 2.68772e-09 | 1.000000 | 3.59247e-09 | 1.000000 |
| rad21         | 2.53964e-09 | 1.000000 | 3.39456e-09 | 1.000000 |
| rad67         | 1.60793e-09 | 1.000000 | 2.14920e-09 | 1.000000 |
| PAH1+H        | 1.56522e-09 | 1.000000 | 2.09212e-09 | 1.000000 |
| rad13         | 1.31898e-09 | 1.000000 | 1.76299e-09 | 1.000000 |
| rad22         | 1.19820e-09 | 1.000000 | 1.60155e-09 | 1.000000 |
| rad9          | 1.06218e-09 | 1.000000 | 1.41974e-09 | 1.000000 |
| rad71         | 9.76722e-10 | 1.000000 | 1.30551e-09 | 1.000000 |
| rad70         | 8.60300e-10 | 1.000000 | 1.14990e-09 | 1.000000 |
| rad65         | 7.34514e-10 | 1.000000 | 9.81772e-10 | 1.000000 |
| rad73         | 6.99008e-10 | 1.000000 | 9.34313e-10 | 1.000000 |
| rad62         | 3.24049e-10 | 1.000000 | 4.33133e-10 | 1.000000 |
| rad55         | 2.99941e-10 | 1.000000 | 4.00910e-10 | 1.000000 |
| rad58         | 2.86768e-10 | 1.000000 | 3.83302e-10 | 1.000000 |
| rad43         | 2.50862e-10 | 1.000000 | 3.35309e-10 | 1.000000 |
| rad34         | 9.60401e-11 | 1.000000 | 1.28370e-10 | 1.000000 |
| rad72         | 3.27261e-11 | 1.000000 | 4.37426e-11 | 1.000000 |
| rad24         | 2.86894e-11 | 1.000000 | 3.83471e-11 | 1.000000 |
| rad33         | 2.15567e-11 | 1.000000 | 2.88132e-11 | 1.000000 |
| rad64         | 2.05370e-11 | 1.000000 | 2.74503e-11 | 1.000000 |
| PAH8+H        | 1.44548e-11 | 1.000000 | 1.93207e-11 | 1.000000 |

|           |             |         |             |         |
|-----------|-------------|---------|-------------|---------|
| rad18     | 1.20484e-11 | 1.00000 | 1.61042e-11 | 1.00000 |
| rad41     | 6.85780e-12 | 1.00000 | 9.16632e-12 | 1.00000 |
| rad61     | 5.80657e-12 | 1.00000 | 7.76122e-12 | 1.00000 |
| rad53     | 5.37478e-12 | 1.00000 | 7.18408e-12 | 1.00000 |
| rad42     | 3.44935e-12 | 1.00000 | 4.61050e-12 | 1.00000 |
| rad68syn  | 3.34231e-12 | 1.00000 | 4.46742e-12 | 1.00000 |
| rad56     | 2.75094e-12 | 1.00000 | 3.67698e-12 | 1.00000 |
| rad68anti | 2.17313e-12 | 1.00000 | 2.90467e-12 | 1.00000 |
| rad40syn  | 1.91889e-12 | 1.00000 | 2.56484e-12 | 1.00000 |
| rad25     | 1.80999e-12 | 1.00000 | 2.41928e-12 | 1.00000 |
| rad40anti | 1.38647e-12 | 1.00000 | 1.85319e-12 | 1.00000 |
| rad27     | 1.11164e-12 | 1.00000 | 1.48584e-12 | 1.00000 |
| rad14     | 1.09796e-12 | 1.00000 | 1.46756e-12 | 1.00000 |
| rad15     | 3.01276e-13 | 1.00000 | 4.02693e-13 | 1.00000 |
| rad12     | 7.15731e-14 | 1.00000 | 9.56666e-14 | 1.00000 |
| rad31     | 5.30891e-14 | 1.00000 | 7.09603e-14 | 1.00000 |
| rad47     | 2.55823e-17 | 1.00000 | 3.41940e-17 | 1.00000 |
| rad5      | 1.70251e-17 | 1.00000 | 2.27562e-17 | 1.00000 |
| rad8      | 8.00836e-20 | 1.00000 | 1.07042e-19 | 1.00000 |

0.100000000 Pa, 900.000000 K

| Rate constant | True (fraction)     | Effective (fraction) |
|---------------|---------------------|----------------------|
| Total         | 9.21769e-16 (1.00 ) | 5.91956e-16 (1.00 )  |

| species       | PYtrue      | Cumul    | PYeffective | Cumul    |
|---------------|-------------|----------|-------------|----------|
| Indene+H      | 0.637494    | 0.637494 | 0.992679    | 0.992679 |
| Benzyl+C2H2   | 0.357804    | 0.995298 | 0.00000     | 0.992679 |
| PhCCH+CH3     | 0.00168025  | 0.996978 | 0.00261642  | 0.995295 |
| PhCHCCH2+H    | 0.000986763 | 0.997965 | 0.00153654  | 0.996832 |
| Ph+Allene     | 0.000956713 | 0.998922 | 0.00148975  | 0.998322 |
| PhCH2CCH+H    | 0.000305698 | 0.999227 | 0.000476019 | 0.998798 |
| Ph+MeAc       | 0.000222072 | 0.999449 | 0.000345801 | 0.999144 |
| PhCCCH3+H     | 0.000191730 | 0.999641 | 0.000298554 | 0.999442 |
| rad6          | 0.000119485 | 0.999761 | 0.000186057 | 0.999628 |
| PAH7+H        | 8.19026e-05 | 0.999843 | 0.000127535 | 0.999756 |
| rad30         | 6.20703e-05 | 0.999905 | 9.66532e-05 | 0.999852 |
| PAH9+H        | 3.86754e-05 | 0.999943 | 6.02237e-05 | 0.999913 |
| rad39         | 1.95316e-05 | 0.999963 | 3.04138e-05 | 0.999943 |
| rad38         | 1.38917e-05 | 0.999977 | 2.16316e-05 | 0.999965 |
| rad35         | 9.09007e-06 | 0.999986 | 1.41547e-05 | 0.999979 |
| rad19anti     | 5.95996e-06 | 0.999992 | 9.28059e-06 | 0.999988 |
| rad46         | 1.85698e-06 | 0.999994 | 2.89161e-06 | 0.999991 |
| PAH3+H        | 1.66268e-06 | 0.999995 | 2.58905e-06 | 0.999994 |
| rad23         | 1.19901e-06 | 0.999997 | 1.86705e-06 | 0.999995 |
| rad60syn      | 7.95462e-07 | 0.999997 | 1.23866e-06 | 0.999997 |
| rad60anti     | 4.32799e-07 | 0.999998 | 6.73936e-07 | 0.999997 |
| rad45         | 2.70701e-07 | 0.999998 | 4.21524e-07 | 0.999998 |
| rad59         | 2.42221e-07 | 0.999998 | 3.77176e-07 | 0.999998 |
| rad50         | 2.02404e-07 | 0.999998 | 3.15176e-07 | 0.999998 |
| rad37         | 1.85095e-07 | 0.999999 | 2.88222e-07 | 0.999999 |
| rad19syn      | 1.72707e-07 | 0.999999 | 2.68933e-07 | 0.999999 |
| rad2          | 1.05144e-07 | 0.999999 | 1.63726e-07 | 0.999999 |
| rad28         | 1.01546e-07 | 0.999999 | 1.58123e-07 | 0.999999 |
| rad54         | 4.19438e-08 | 0.999999 | 6.53132e-08 | 0.999999 |
| rad7          | 3.09354e-08 | 0.999999 | 4.81713e-08 | 0.999999 |
| rad51         | 3.09090e-08 | 0.999999 | 4.81302e-08 | 0.999999 |
| rad36         | 2.29074e-08 | 0.999999 | 3.56704e-08 | 0.999999 |
| rad1          | 1.76987e-08 | 0.999999 | 2.75597e-08 | 1.000000 |
| PhcycC3H3_A+H | 1.65189e-08 | 0.999999 | 2.57225e-08 | 1.000000 |
| rad11         | 1.41729e-08 | 0.999999 | 2.20694e-08 | 1.000000 |
| rad26         | 1.25040e-08 | 0.999999 | 1.94707e-08 | 1.000000 |
| rad52         | 1.12821e-08 | 0.999999 | 1.75680e-08 | 1.000000 |
| PAH10+CH3     | 8.65632e-09 | 0.999999 | 1.34792e-08 | 1.000000 |
| rad67         | 7.99552e-09 | 0.999999 | 1.24503e-08 | 1.000000 |
| rad20         | 6.09788e-09 | 0.999999 | 9.49536e-09 | 1.000000 |
| rad21         | 5.14698e-09 | 0.999999 | 8.01465e-09 | 1.000000 |
| PAH1+H        | 4.12424e-09 | 0.999999 | 6.42210e-09 | 1.000000 |
| rad70         | 3.94590e-09 | 0.999999 | 6.14438e-09 | 1.000000 |
| rad10         | 3.30440e-09 | 0.999999 | 5.14547e-09 | 1.000000 |
| rad9          | 2.55012e-09 | 0.999999 | 3.97094e-09 | 1.000000 |
| rad58         | 1.63462e-09 | 0.999999 | 2.54536e-09 | 1.000000 |
| rad55         | 1.48361e-09 | 0.999999 | 2.31022e-09 | 1.000000 |
| rad3          | 1.47876e-09 | 0.999999 | 2.30266e-09 | 1.000000 |
| rad13         | 1.39742e-09 | 0.999999 | 2.17600e-09 | 1.000000 |
| rad62         | 1.12043e-09 | 0.999999 | 1.74469e-09 | 1.000000 |
| rad4          | 1.02250e-09 | 0.999999 | 1.59219e-09 | 1.000000 |
| rad71         | 9.89940e-10 | 0.999999 | 1.54149e-09 | 1.000000 |

|           |             |          |             |          |
|-----------|-------------|----------|-------------|----------|
| rad65     | 8.37202e-10 | 0.999999 | 1.30366e-09 | 1.000000 |
| rad73     | 7.02164e-10 | 0.999999 | 1.09338e-09 | 1.000000 |
| rad22     | 6.07780e-10 | 0.999999 | 9.46410e-10 | 1.000000 |
| rad43     | 5.10746e-10 | 0.999999 | 7.95312e-10 | 1.000000 |
| rad34     | 4.18222e-10 | 0.999999 | 6.51237e-10 | 1.000000 |
| rad24     | 5.74565e-11 | 0.999999 | 8.94689e-11 | 1.000000 |
| rad33     | 3.83421e-11 | 0.999999 | 5.97047e-11 | 1.000000 |
| rad72     | 3.37486e-11 | 0.999999 | 5.25519e-11 | 1.000000 |
| rad53     | 3.15451e-11 | 0.999999 | 4.91208e-11 | 1.000000 |
| rad64     | 3.12664e-11 | 0.999999 | 4.86868e-11 | 1.000000 |
| rad18     | 3.02450e-11 | 0.999999 | 4.70962e-11 | 1.000000 |
| PAH8+H    | 1.65322e-11 | 0.999999 | 2.57432e-11 | 1.000000 |
| rad42     | 1.20504e-11 | 0.999999 | 1.87643e-11 | 1.000000 |
| rad41     | 9.89377e-12 | 0.999999 | 1.54062e-11 | 1.000000 |
| rad56     | 9.68291e-12 | 0.999999 | 1.50778e-11 | 1.000000 |
| rad61     | 6.36844e-12 | 0.999999 | 9.91666e-12 | 1.000000 |
| rad68syn  | 4.49949e-12 | 0.999999 | 7.00641e-12 | 1.000000 |
| rad68anti | 2.95580e-12 | 0.999999 | 4.60264e-12 | 1.000000 |
| rad40syn  | 2.33470e-12 | 0.999999 | 3.63550e-12 | 1.000000 |
| rad25     | 2.21863e-12 | 0.999999 | 3.45476e-12 | 1.000000 |
| rad40anti | 1.72793e-12 | 0.999999 | 2.69065e-12 | 1.000000 |
| rad27     | 1.18287e-12 | 0.999999 | 1.84191e-12 | 1.000000 |
| rad14     | 1.00227e-12 | 0.999999 | 1.56070e-12 | 1.000000 |
| rad15     | 6.07785e-13 | 0.999999 | 9.46417e-13 | 1.000000 |
| rad12     | 3.94559e-13 | 0.999999 | 6.14391e-13 | 1.000000 |
| rad31     | 3.08501e-14 | 0.999999 | 4.80385e-14 | 1.000000 |
| rad8      | 5.03993e-17 | 0.999999 | 7.84796e-17 | 1.000000 |
| rad47     | 3.23428e-17 | 0.999999 | 5.03628e-17 | 1.000000 |
| rad5      | 1.95061e-17 | 0.999999 | 3.03740e-17 | 1.000000 |

0.100000000 Pa, 1000.00000 K

| Rate constant | True (fraction)     | Effective (fraction) |
|---------------|---------------------|----------------------|
| Total         | 2.23691e-15 (1.00 ) | 1.20782e-15 (1.00 )  |

| species       | PYtrue      | Cumul    | PYeffective | Cumul    |
|---------------|-------------|----------|-------------|----------|
| Indene+H      | 0.533114    | 0.533114 | 0.987345    | 0.987345 |
| Benzyl+C2H2   | 0.460053    | 0.993167 | 0.000000    | 0.987345 |
| PhCCH+CH3     | 0.00197652  | 0.995144 | 0.00366058  | 0.991006 |
| Ph+Allene     | 0.00184726  | 0.996991 | 0.00342119  | 0.994427 |
| PhCHCCH2+H    | 0.00144967  | 0.998440 | 0.00268484  | 0.997112 |
| PhCH2CCH+H    | 0.000695195 | 0.999136 | 0.00128753  | 0.998399 |
| Ph+MeAc       | 0.000262497 | 0.999398 | 0.000486154 | 0.998885 |
| PhCCCH3+H     | 0.000177721 | 0.999576 | 0.000329146 | 0.999214 |
| PAH7+H        | 0.000130592 | 0.999706 | 0.000241861 | 0.999456 |
| rad30         | 9.13373e-05 | 0.999798 | 0.000169160 | 0.999625 |
| PAH9+H        | 6.92513e-05 | 0.999867 | 0.000128256 | 0.999754 |
| rad6          | 3.36510e-05 | 0.999901 | 6.23229e-05 | 0.999816 |
| rad39         | 3.03679e-05 | 0.999931 | 5.62424e-05 | 0.999872 |
| rad38         | 2.56405e-05 | 0.999957 | 4.74871e-05 | 0.999920 |
| rad35         | 1.54717e-05 | 0.999972 | 2.86542e-05 | 0.999948 |
| rad19anti     | 1.37001e-05 | 0.999986 | 2.53730e-05 | 0.999974 |
| PAH3+H        | 4.67897e-06 | 0.999991 | 8.66561e-06 | 0.999982 |
| rad46         | 3.95007e-06 | 0.999995 | 7.31568e-06 | 0.999990 |
| rad60syn      | 1.65658e-06 | 0.999996 | 3.06804e-06 | 0.999993 |
| rad60anti     | 9.23196e-07 | 0.999997 | 1.70979e-06 | 0.999995 |
| rad59         | 6.45568e-07 | 0.999998 | 1.19561e-06 | 0.999996 |
| rad23         | 5.04421e-07 | 0.999998 | 9.34206e-07 | 0.999997 |
| rad19syn      | 4.72784e-07 | 0.999999 | 8.75612e-07 | 0.999998 |
| rad50         | 4.54157e-07 | 0.999999 | 8.41114e-07 | 0.999998 |
| rad37         | 2.46563e-07 | 0.999999 | 4.56644e-07 | 0.999999 |
| rad45         | 1.28794e-07 | 1.000000 | 2.38531e-07 | 0.999999 |
| rad54         | 1.26815e-07 | 1.000000 | 2.34866e-07 | 0.999999 |
| PhcycC3H3_A+H | 6.10193e-08 | 1.000000 | 1.13010e-07 | 0.999999 |
| rad51         | 4.01665e-08 | 1.000000 | 7.43898e-08 | 1.000000 |
| rad67         | 3.31789e-08 | 1.000000 | 6.14485e-08 | 1.000000 |
| rad28         | 3.20619e-08 | 1.000000 | 5.93797e-08 | 1.000000 |
| rad2          | 2.75034e-08 | 1.000000 | 5.09373e-08 | 1.000000 |
| rad52         | 2.02270e-08 | 1.000000 | 3.74611e-08 | 1.000000 |
| PAH10+CH3     | 1.68530e-08 | 1.000000 | 3.12123e-08 | 1.000000 |
| rad7          | 1.47803e-08 | 1.000000 | 2.73737e-08 | 1.000000 |
| rad70         | 1.37400e-08 | 1.000000 | 2.54469e-08 | 1.000000 |
| PAH1+H        | 1.25651e-08 | 1.000000 | 2.32709e-08 | 1.000000 |
| rad36         | 1.13861e-08 | 1.000000 | 2.10875e-08 | 1.000000 |
| rad11         | 9.42696e-09 | 1.000000 | 1.74591e-08 | 1.000000 |
| rad20         | 8.85995e-09 | 1.000000 | 1.64089e-08 | 1.000000 |
| rad58         | 7.02684e-09 | 1.000000 | 1.30139e-08 | 1.000000 |
| rad21         | 6.44036e-09 | 1.000000 | 1.19278e-08 | 1.000000 |

|           |             |          |             |          |
|-----------|-------------|----------|-------------|----------|
| rad1      | 5.20722e-09 | 1.000000 | 9.64396e-09 | 1.000000 |
| rad55     | 5.09072e-09 | 1.000000 | 9.42819e-09 | 1.000000 |
| rad26     | 4.20933e-09 | 1.000000 | 7.79583e-09 | 1.000000 |
| rad9      | 2.99555e-09 | 1.000000 | 5.54786e-09 | 1.000000 |
| rad62     | 2.87052e-09 | 1.000000 | 5.31630e-09 | 1.000000 |
| rad13     | 1.76048e-09 | 1.000000 | 3.26046e-09 | 1.000000 |
| rad10     | 1.67792e-09 | 1.000000 | 3.10756e-09 | 1.000000 |
| rad34     | 1.61613e-09 | 1.000000 | 2.99313e-09 | 1.000000 |
| rad65     | 1.18778e-09 | 1.000000 | 2.19981e-09 | 1.000000 |
| rad43     | 8.65747e-10 | 1.000000 | 1.60339e-09 | 1.000000 |
| rad71     | 6.43383e-10 | 1.000000 | 1.19157e-09 | 1.000000 |
| rad3      | 4.80873e-10 | 1.000000 | 8.90594e-10 | 1.000000 |
| rad73     | 4.61855e-10 | 1.000000 | 8.55371e-10 | 1.000000 |
| rad22     | 4.11535e-10 | 1.000000 | 7.62178e-10 | 1.000000 |
| rad4      | 3.49284e-10 | 1.000000 | 6.46887e-10 | 1.000000 |
| rad53     | 1.58329e-10 | 1.000000 | 2.93230e-10 | 1.000000 |
| rad18     | 9.35507e-11 | 1.000000 | 1.73259e-10 | 1.000000 |
| rad64     | 7.52860e-11 | 1.000000 | 1.39432e-10 | 1.000000 |
| rad24     | 5.90713e-11 | 1.000000 | 1.09402e-10 | 1.000000 |
| rad56     | 5.30242e-11 | 1.000000 | 9.82027e-11 | 1.000000 |
| rad33     | 4.82848e-11 | 1.000000 | 8.94252e-11 | 1.000000 |
| rad42     | 3.89850e-11 | 1.000000 | 7.22016e-11 | 1.000000 |
| rad72     | 2.19172e-11 | 1.000000 | 4.05914e-11 | 1.000000 |
| PAH8+H    | 1.44210e-11 | 1.000000 | 2.67082e-11 | 1.000000 |
| rad68syn  | 1.08840e-11 | 1.000000 | 2.01575e-11 | 1.000000 |
| rad41     | 1.00777e-11 | 1.000000 | 1.86643e-11 | 1.000000 |
| rad68anti | 7.27735e-12 | 1.000000 | 1.34779e-11 | 1.000000 |
| rad61     | 4.76340e-12 | 1.000000 | 8.82197e-12 | 1.000000 |
| rad25     | 3.17923e-12 | 1.000000 | 5.88804e-12 | 1.000000 |
| rad40syn  | 2.46375e-12 | 1.000000 | 4.56296e-12 | 1.000000 |
| rad40anti | 1.52752e-12 | 1.000000 | 2.82901e-12 | 1.000000 |
| rad27     | 1.08852e-12 | 1.000000 | 2.01597e-12 | 1.000000 |
| rad14     | 9.49716e-13 | 1.000000 | 1.75891e-12 | 1.000000 |
| rad12     | 8.62235e-13 | 1.000000 | 1.59689e-12 | 1.000000 |
| rad15     | 8.10080e-13 | 1.000000 | 1.50030e-12 | 1.000000 |
| rad31     | 1.84230e-14 | 1.000000 | 3.41200e-14 | 1.000000 |
| rad8      | 3.09610e-15 | 1.000000 | 5.73409e-15 | 1.000000 |
| rad47     | 3.45839e-17 | 1.000000 | 6.40506e-17 | 1.000000 |
| rad5      | 2.52673e-17 | 1.000000 | 4.67960e-17 | 1.000000 |

0.100000000 Pa, 1100.00000 K

=====

| Rate constant | True (fraction)     | Effective (fraction) |
|---------------|---------------------|----------------------|
| Total         | 4.69847e-15 (1.00 ) | 2.11075e-15 (1.00 )  |

| species       | PYtrue      | Cumul    | PYeffective | Cumul    |
|---------------|-------------|----------|-------------|----------|
| Benzyl+C2H2   | 0.550758    | 0.550758 | 0.000000    | 0.000000 |
| Indene+H      | 0.439880    | 0.990638 | 0.979160    | 0.979160 |
| Ph+Allene     | 0.00299541  | 0.993633 | 0.00666769  | 0.985828 |
| PhCCH+CH3     | 0.00208689  | 0.995720 | 0.00464536  | 0.990473 |
| PhCHCCH2+H    | 0.00194533  | 0.997666 | 0.00433024  | 0.994803 |
| PhCH2CCH+H    | 0.00132197  | 0.998988 | 0.00294267  | 0.997746 |
| Ph+MeAc       | 0.000277422 | 0.999265 | 0.000617533 | 0.998363 |
| PAH7+H        | 0.000179410 | 0.999444 | 0.000399362 | 0.998763 |
| PhCCCH3+H     | 0.000149051 | 0.999593 | 0.000331783 | 0.999095 |
| rad30         | 0.000123015 | 0.999716 | 0.000273827 | 0.999368 |
| PAH9+H        | 0.000111856 | 0.999828 | 0.000248988 | 0.999617 |
| rad38         | 4.25754e-05 | 0.999871 | 9.47715e-05 | 0.999712 |
| rad39         | 4.04398e-05 | 0.999911 | 9.00178e-05 | 0.999802 |
| rad19anti     | 2.71808e-05 | 0.999939 | 6.05037e-05 | 0.999863 |
| rad35         | 2.39330e-05 | 0.999962 | 5.32742e-05 | 0.999916 |
| PAH3+H        | 1.09204e-05 | 0.999973 | 2.43085e-05 | 0.999940 |
| rad6          | 9.64781e-06 | 0.999983 | 2.14757e-05 | 0.999962 |
| rad46         | 7.47607e-06 | 0.999991 | 1.66415e-05 | 0.999978 |
| rad60syn      | 2.99531e-06 | 0.999994 | 6.66746e-06 | 0.999985 |
| rad60anti     | 1.70295e-06 | 0.999995 | 3.79072e-06 | 0.999989 |
| rad59         | 1.43239e-06 | 0.999997 | 3.18846e-06 | 0.999992 |
| rad50         | 1.13182e-06 | 0.999998 | 2.51939e-06 | 0.999995 |
| rad19syn      | 1.02408e-06 | 0.999999 | 2.27956e-06 | 0.999997 |
| rad37         | 3.05032e-07 | 0.999999 | 6.78991e-07 | 0.999998 |
| rad54         | 2.97981e-07 | 0.999999 | 6.63296e-07 | 0.999998 |
| rad23         | 2.32394e-07 | 1.000000 | 5.17301e-07 | 0.999999 |
| PhcycC3H3_A+H | 1.70517e-07 | 1.000000 | 3.79567e-07 | 0.999999 |
| rad67         | 1.11222e-07 | 1.000000 | 2.47577e-07 | 0.999999 |
| rad51         | 9.56499e-08 | 1.000000 | 2.12914e-07 | 1.000000 |
| rad45         | 6.44897e-08 | 1.000000 | 1.43552e-07 | 1.000000 |
| rad52         | 5.20642e-08 | 1.000000 | 1.15893e-07 | 1.000000 |
| rad70         | 3.72821e-08 | 1.000000 | 8.29888e-08 | 1.000000 |

|           |             |         |             |         |
|-----------|-------------|---------|-------------|---------|
| PAH10+CH3 | 3.65178e-08 | 1.00000 | 8.12876e-08 | 1.00000 |
| PAH1+H    | 3.43967e-08 | 1.00000 | 7.65661e-08 | 1.00000 |
| rad58     | 2.34098e-08 | 1.00000 | 5.21095e-08 | 1.00000 |
| rad55     | 1.32752e-08 | 1.00000 | 2.95502e-08 | 1.00000 |
| rad28     | 1.05084e-08 | 1.00000 | 2.33914e-08 | 1.00000 |
| rad7      | 8.84319e-09 | 1.00000 | 1.96847e-08 | 1.00000 |
| rad11     | 8.29017e-09 | 1.00000 | 1.84537e-08 | 1.00000 |
| rad20     | 7.95900e-09 | 1.00000 | 1.77165e-08 | 1.00000 |
| rad2      | 7.76029e-09 | 1.00000 | 1.72742e-08 | 1.00000 |
| rad62     | 5.85104e-09 | 1.00000 | 1.30242e-08 | 1.00000 |
| rad36     | 5.83718e-09 | 1.00000 | 1.29934e-08 | 1.00000 |
| rad21     | 5.11902e-09 | 1.00000 | 1.13948e-08 | 1.00000 |
| rad34     | 4.94479e-09 | 1.00000 | 1.10070e-08 | 1.00000 |
| rad65     | 2.98904e-09 | 1.00000 | 6.65352e-09 | 1.00000 |
| rad9      | 2.66457e-09 | 1.00000 | 5.93125e-09 | 1.00000 |
| rad13     | 1.89614e-09 | 1.00000 | 4.22076e-09 | 1.00000 |
| rad1      | 1.59439e-09 | 1.00000 | 3.54907e-09 | 1.00000 |
| rad26     | 1.51141e-09 | 1.00000 | 3.36435e-09 | 1.00000 |
| rad43     | 1.33880e-09 | 1.00000 | 2.98014e-09 | 1.00000 |
| rad10     | 1.15103e-09 | 1.00000 | 2.56215e-09 | 1.00000 |
| rad53     | 5.87467e-10 | 1.00000 | 1.30768e-09 | 1.00000 |
| rad71     | 4.06546e-10 | 1.00000 | 9.04960e-10 | 1.00000 |
| rad73     | 3.37983e-10 | 1.00000 | 7.52341e-10 | 1.00000 |
| rad22     | 2.89745e-10 | 1.00000 | 6.44964e-10 | 1.00000 |
| rad18     | 2.70452e-10 | 1.00000 | 6.02018e-10 | 1.00000 |
| rad56     | 2.37072e-10 | 1.00000 | 5.27714e-10 | 1.00000 |
| rad64     | 2.33345e-10 | 1.00000 | 5.19419e-10 | 1.00000 |
| rad3      | 1.68246e-10 | 1.00000 | 3.74512e-10 | 1.00000 |
| rad4      | 1.25820e-10 | 1.00000 | 2.80072e-10 | 1.00000 |
| rad42     | 1.03716e-10 | 1.00000 | 2.30868e-10 | 1.00000 |
| rad24     | 4.56156e-11 | 1.00000 | 1.01539e-10 | 1.00000 |
| rad68syn  | 4.37974e-11 | 1.00000 | 9.74916e-11 | 1.00000 |
| rad33     | 3.99735e-11 | 1.00000 | 8.89798e-11 | 1.00000 |
| PAH8+H    | 3.21973e-11 | 1.00000 | 7.16702e-11 | 1.00000 |
| rad68anti | 2.92971e-11 | 1.00000 | 6.52145e-11 | 1.00000 |
| rad41     | 1.42195e-11 | 1.00000 | 3.16522e-11 | 1.00000 |
| rad72     | 1.24769e-11 | 1.00000 | 2.77733e-11 | 1.00000 |
| rad40syn  | 6.81734e-12 | 1.00000 | 1.51752e-11 | 1.00000 |
| rad61     | 6.22612e-12 | 1.00000 | 1.38592e-11 | 1.00000 |
| rad25     | 3.96679e-12 | 1.00000 | 8.82995e-12 | 1.00000 |
| rad40anti | 3.28076e-12 | 1.00000 | 7.30288e-12 | 1.00000 |
| rad12     | 1.26378e-12 | 1.00000 | 2.81313e-12 | 1.00000 |
| rad15     | 9.94298e-13 | 1.00000 | 2.21328e-12 | 1.00000 |
| rad14     | 7.75156e-13 | 1.00000 | 1.72547e-12 | 1.00000 |
| rad27     | 7.11384e-13 | 1.00000 | 1.58352e-12 | 1.00000 |
| rad8      | 3.02719e-14 | 1.00000 | 6.73843e-14 | 1.00000 |
| rad31     | 1.11272e-14 | 1.00000 | 2.47689e-14 | 1.00000 |
| rad47     | 6.97143e-17 | 1.00000 | 1.55182e-16 | 1.00000 |
| rad5      | 3.95620e-17 | 1.00000 | 8.80638e-17 | 1.00000 |

0.100000000 Pa, 1200.00000 K

=====

| Rate constant | True (fraction)     | Effective (fraction) |
|---------------|---------------------|----------------------|
| Total         | 8.84330e-15 (1.00 ) | 3.30080e-15 (1.00 )  |

| species     | PYtrue      | Cumul    | PYeffective | Cumul    |
|-------------|-------------|----------|-------------|----------|
| Benzyl+C2H2 | 0.626746    | 0.626746 | 0.00000     | 0.00000  |
| Indene+H    | 0.361136    | 0.987882 | 0.967535    | 0.967535 |
| Ph+Allene   | 0.00426349  | 0.992145 | 0.0114225   | 0.978958 |
| PhCHCCH2+H  | 0.00242727  | 0.994573 | 0.00650299  | 0.985460 |
| PhCH2CCH+H  | 0.00220918  | 0.996782 | 0.00591872  | 0.991379 |
| PhCCH+CH3   | 0.00203502  | 0.998817 | 0.00545210  | 0.996831 |
| Ph+MeAc     | 0.000271660 | 0.999089 | 0.000727815 | 0.997559 |
| PAH7+H      | 0.000220978 | 0.999310 | 0.000592031 | 0.998151 |
| PAH9+H      | 0.000166561 | 0.999476 | 0.000446240 | 0.998597 |
| rad30       | 0.000155354 | 0.999632 | 0.000416215 | 0.999014 |
| PhCCCH3+H   | 0.000116978 | 0.999748 | 0.000313400 | 0.999327 |
| rad38       | 6.49776e-05 | 0.999813 | 0.000174084 | 0.999501 |
| rad19anti   | 4.80929e-05 | 0.999862 | 0.000128848 | 0.999630 |
| rad39       | 4.80649e-05 | 0.999910 | 0.000128773 | 0.999759 |
| rad35       | 3.44018e-05 | 0.999944 | 9.21672e-05 | 0.999851 |
| PAH3+H      | 2.21259e-05 | 0.999966 | 5.92783e-05 | 0.999910 |
| rad46       | 1.27908e-05 | 0.999979 | 3.42684e-05 | 0.999944 |
| rad60syn    | 4.87442e-06 | 0.999984 | 1.30593e-05 | 0.999957 |
| rad6        | 3.14201e-06 | 0.999987 | 8.41790e-06 | 0.999966 |
| rad60anti   | 2.81863e-06 | 0.999990 | 7.55150e-06 | 0.999973 |
| rad59       | 2.76941e-06 | 0.999993 | 7.41965e-06 | 0.999981 |
| rad50       | 2.59501e-06 | 0.999995 | 6.95241e-06 | 0.999988 |



|               |             |          |             |          |
|---------------|-------------|----------|-------------|----------|
| rad19syn      | 1.86149e-06 | 0.999997 | 4.98719e-06 | 0.999993 |
| rad54         | 5.79364e-07 | 0.999998 | 1.55220e-06 | 0.999994 |
| PhcycC3H3_A+H | 3.85582e-07 | 0.999998 | 1.03303e-06 | 0.999995 |
| rad37         | 3.72107e-07 | 0.999998 | 9.96927e-07 | 0.999996 |
| rad67         | 3.10218e-07 | 0.999999 | 8.31118e-07 | 0.999997 |
| rad51         | 2.61245e-07 | 0.999999 | 6.99912e-07 | 0.999998 |
| rad52         | 1.32192e-07 | 0.999999 | 3.54162e-07 | 0.999998 |
| rad23         | 1.14194e-07 | 0.999999 | 3.05943e-07 | 0.999999 |
| rad70         | 8.31912e-08 | 0.999999 | 2.22881e-07 | 0.999999 |
| PAH10+CH3     | 7.90915e-08 | 0.999999 | 2.11897e-07 | 0.999999 |
| PAH1+H        | 7.86155e-08 | 0.999999 | 2.10622e-07 | 0.999999 |
| rad58         | 6.38293e-08 | 0.999999 | 1.71008e-07 | 0.999999 |
| rad45         | 3.33424e-08 | 0.999999 | 8.93291e-08 | 0.999999 |
| rad55         | 2.81639e-08 | 1.000000 | 7.54550e-08 | 1.000000 |
| rad34         | 1.23004e-08 | 1.000000 | 3.29547e-08 | 1.000000 |
| rad62         | 1.00350e-08 | 1.000000 | 2.68851e-08 | 1.000000 |
| rad11         | 8.22519e-09 | 1.000000 | 2.20365e-08 | 1.000000 |
| rad65         | 8.20575e-09 | 1.000000 | 2.19844e-08 | 1.000000 |
| rad7          | 7.06648e-09 | 1.000000 | 1.89321e-08 | 1.000000 |
| rad20         | 5.26048e-09 | 1.000000 | 1.40936e-08 | 1.000000 |
| rad28         | 3.89577e-09 | 1.000000 | 1.04373e-08 | 1.000000 |
| rad21         | 3.17552e-09 | 1.000000 | 8.50767e-09 | 1.000000 |
| rad36         | 3.06761e-09 | 1.000000 | 8.21858e-09 | 1.000000 |
| rad2          | 2.31560e-09 | 1.000000 | 6.20382e-09 | 1.000000 |
| rad9          | 2.23486e-09 | 1.000000 | 5.98752e-09 | 1.000000 |
| rad43         | 1.87108e-09 | 1.000000 | 5.01290e-09 | 1.000000 |
| rad53         | 1.69103e-09 | 1.000000 | 4.53050e-09 | 1.000000 |
| rad13         | 1.45958e-09 | 1.000000 | 3.91043e-09 | 1.000000 |
| rad56         | 8.07016e-10 | 1.000000 | 2.16211e-09 | 1.000000 |
| rad10         | 7.91607e-10 | 1.000000 | 2.12083e-09 | 1.000000 |
| rad64         | 6.33860e-10 | 1.000000 | 1.69820e-09 | 1.000000 |
| rad26         | 6.03534e-10 | 1.000000 | 1.61696e-09 | 1.000000 |
| rad73         | 6.02761e-10 | 1.000000 | 1.61488e-09 | 1.000000 |
| rad18         | 5.50992e-10 | 1.000000 | 1.47619e-09 | 1.000000 |
| rad71         | 5.11163e-10 | 1.000000 | 1.36948e-09 | 1.000000 |
| rad1          | 4.98011e-10 | 1.000000 | 1.33424e-09 | 1.000000 |
| rad42         | 2.26206e-10 | 1.000000 | 6.06039e-10 | 1.000000 |
| rad22         | 2.08535e-10 | 1.000000 | 5.58695e-10 | 1.000000 |
| rad68syn      | 1.56578e-10 | 1.000000 | 4.19495e-10 | 1.000000 |
| PAH8+H        | 1.33394e-10 | 1.000000 | 3.57381e-10 | 1.000000 |
| rad68anti     | 1.04295e-10 | 1.000000 | 2.79421e-10 | 1.000000 |
| rad3          | 6.19989e-11 | 1.000000 | 1.66104e-10 | 1.000000 |
| rad4          | 4.71791e-11 | 1.000000 | 1.26399e-10 | 1.000000 |
| rad24         | 3.33433e-11 | 1.000000 | 8.93314e-11 | 1.000000 |
| rad40syn      | 2.68310e-11 | 1.000000 | 7.18841e-11 | 1.000000 |
| rad33         | 2.53520e-11 | 1.000000 | 6.79216e-11 | 1.000000 |
| rad41         | 2.50507e-11 | 1.000000 | 6.71145e-11 | 1.000000 |
| rad61         | 1.86674e-11 | 1.000000 | 5.00127e-11 | 1.000000 |
| rad40anti     | 1.28002e-11 | 1.000000 | 3.42936e-11 | 1.000000 |
| rad72         | 8.77784e-12 | 1.000000 | 2.35171e-11 | 1.000000 |
| rad25         | 3.69365e-12 | 1.000000 | 9.89580e-12 | 1.000000 |
| rad12         | 1.57479e-12 | 1.000000 | 4.21908e-12 | 1.000000 |
| rad15         | 1.41269e-12 | 1.000000 | 3.78480e-12 | 1.000000 |
| rad14         | 5.05264e-13 | 1.000000 | 1.35367e-12 | 1.000000 |
| rad27         | 3.40326e-13 | 1.000000 | 9.11781e-13 | 1.000000 |
| rad8          | 9.89328e-14 | 1.000000 | 2.65055e-13 | 1.000000 |
| rad31         | 6.76175e-15 | 1.000000 | 1.81157e-14 | 1.000000 |
| rad47         | 1.86397e-16 | 1.000000 | 4.99384e-16 | 1.000000 |
| rad5          | 7.43995e-17 | 1.000000 | 1.99327e-16 | 1.000000 |

0.100000000 Pa, 1300.00000 K

=====

| Rate constant | True (fraction)     | Effective (fraction) |
|---------------|---------------------|----------------------|
| Total         | 1.52810e-14 (1.00 ) | 4.76644e-15 (1.00 )  |

| species     | PYtrue      | Cumul    | PYeffective | Cumul    |
|-------------|-------------|----------|-------------|----------|
| Benzyl+C2H2 | 0.688080    | 0.688080 | 0.00000     | 0.00000  |
| Indene+H    | 0.296942    | 0.985022 | 0.951980    | 0.951980 |
| Ph+Allene   | 0.00550453  | 0.990527 | 0.0176472   | 0.969627 |
| PhCH2CCH+H  | 0.00336238  | 0.993889 | 0.0107796   | 0.980407 |
| PhCHCCH2+H  | 0.00286587  | 0.996755 | 0.00918782  | 0.989595 |
| PhCCH+CH3   | 0.00187184  | 0.998627 | 0.00600102  | 0.995596 |
| Ph+MeAc     | 0.000252910 | 0.998880 | 0.000810815 | 0.996406 |
| PAH7+H      | 0.000251854 | 0.999131 | 0.000807430 | 0.997214 |
| PAH9+H      | 0.000232610 | 0.999364 | 0.000745734 | 0.997960 |
| rad30       | 0.000187145 | 0.999551 | 0.000599977 | 0.998560 |
| rad38       | 9.27575e-05 | 0.999644 | 0.000297375 | 0.998857 |
| PhCCCH3+H   | 8.81714e-05 | 0.999732 | 0.000282673 | 0.999140 |

|               |             |          |             |          |
|---------------|-------------|----------|-------------|----------|
| rad19anti     | 7.76879e-05 | 0.999810 | 0.000249063 | 0.999389 |
| rad39         | 5.27188e-05 | 0.999862 | 0.000169014 | 0.999558 |
| rad35         | 4.67302e-05 | 0.999909 | 0.000149815 | 0.999708 |
| PAH3+H        | 4.01934e-05 | 0.999949 | 0.000128858 | 0.999836 |
| rad46         | 2.01559e-05 | 0.999970 | 6.46188e-05 | 0.999901 |
| rad60syn      | 7.32142e-06 | 0.999977 | 2.34721e-05 | 0.999924 |
| rad50         | 5.33039e-06 | 0.999982 | 1.70889e-05 | 0.999942 |
| rad59         | 4.81769e-06 | 0.999987 | 1.54453e-05 | 0.999957 |
| rad60anti     | 4.29552e-06 | 0.999991 | 1.37712e-05 | 0.999971 |
| rad19syn      | 2.96361e-06 | 0.999994 | 9.50116e-06 | 0.999980 |
| rad6          | 1.26670e-06 | 0.999996 | 4.06096e-06 | 0.999984 |
| rad54         | 9.75361e-07 | 0.999997 | 3.12696e-06 | 0.999987 |
| rad67         | 7.44380e-07 | 0.999997 | 2.38644e-06 | 0.999990 |
| PhcycC3H3_A+H | 7.41891e-07 | 0.999998 | 2.37846e-06 | 0.999992 |
| rad51         | 6.49196e-07 | 0.999999 | 2.08129e-06 | 0.999994 |
| rad37         | 4.66828e-07 | 0.999999 | 1.49662e-06 | 0.999996 |
| rad52         | 2.99914e-07 | 0.999999 | 9.61507e-07 | 0.999997 |
| PAH10+CH3     | 1.66838e-07 | 1.000000 | 5.34872e-07 | 0.999997 |
| rad70         | 1.60114e-07 | 1.000000 | 5.13315e-07 | 0.999998 |
| PAH1+H        | 1.54682e-07 | 1.000000 | 4.95901e-07 | 0.999998 |
| rad58         | 1.48963e-07 | 1.000000 | 4.77568e-07 | 0.999999 |
| rad23         | 5.99143e-08 | 1.000000 | 1.92082e-07 | 0.999999 |
| rad55         | 5.10779e-08 | 1.000000 | 1.63753e-07 | 0.999999 |
| rad34         | 2.60712e-08 | 1.000000 | 8.35830e-08 | 0.999999 |
| rad65         | 2.02189e-08 | 1.000000 | 6.48208e-08 | 0.999999 |
| rad45         | 1.77235e-08 | 1.000000 | 5.68206e-08 | 0.999999 |
| rad62         | 1.51345e-08 | 1.000000 | 4.85204e-08 | 0.999999 |
| rad11         | 6.99019e-09 | 1.000000 | 2.24102e-08 | 0.999999 |
| rad7          | 6.25060e-09 | 1.000000 | 2.00391e-08 | 0.999999 |
| rad53         | 3.99948e-09 | 1.000000 | 1.28221e-08 | 0.999999 |
| rad20         | 3.18437e-09 | 1.000000 | 1.02089e-08 | 0.999999 |
| rad43         | 2.42540e-09 | 1.000000 | 7.77569e-09 | 0.999999 |
| rad56         | 2.20511e-09 | 1.000000 | 7.06947e-09 | 0.999999 |
| rad73         | 2.02013e-09 | 1.000000 | 6.47642e-09 | 1.000000 |
| rad21         | 1.87851e-09 | 1.000000 | 6.02240e-09 | 1.000000 |
| rad9          | 1.80812e-09 | 1.000000 | 5.79675e-09 | 1.000000 |
| rad28         | 1.73932e-09 | 1.000000 | 5.57617e-09 | 1.000000 |
| rad36         | 1.65371e-09 | 1.000000 | 5.30171e-09 | 1.000000 |
| rad71         | 1.62810e-09 | 1.000000 | 5.21959e-09 | 1.000000 |
| rad64         | 1.45922e-09 | 1.000000 | 4.67817e-09 | 1.000000 |
| rad13         | 8.62801e-10 | 1.000000 | 2.76609e-09 | 1.000000 |
| rad2          | 7.19897e-10 | 1.000000 | 2.30795e-09 | 1.000000 |
| rad18         | 6.99372e-10 | 1.000000 | 2.24215e-09 | 1.000000 |
| PAH8+H        | 4.98537e-10 | 1.000000 | 1.59828e-09 | 1.000000 |
| rad68syn      | 4.61484e-10 | 1.000000 | 1.47949e-09 | 1.000000 |
| rad10         | 4.50984e-10 | 1.000000 | 1.44583e-09 | 1.000000 |
| rad42         | 4.21779e-10 | 1.000000 | 1.35220e-09 | 1.000000 |
| rad68anti     | 3.06086e-10 | 1.000000 | 9.81294e-10 | 1.000000 |
| rad26         | 2.70567e-10 | 1.000000 | 8.67424e-10 | 1.000000 |
| rad22         | 1.85348e-10 | 1.000000 | 5.94216e-10 | 1.000000 |
| rad1          | 1.59008e-10 | 1.000000 | 5.09770e-10 | 1.000000 |
| rad40syn      | 9.11326e-11 | 1.000000 | 2.92166e-10 | 1.000000 |
| rad61         | 6.35768e-11 | 1.000000 | 2.03824e-10 | 1.000000 |
| rad40anti     | 4.51445e-11 | 1.000000 | 1.44731e-10 | 1.000000 |
| rad41         | 4.42291e-11 | 1.000000 | 1.41796e-10 | 1.000000 |
| rad24         | 2.44029e-11 | 1.000000 | 7.82343e-11 | 1.000000 |
| rad3          | 2.38978e-11 | 1.000000 | 7.66151e-11 | 1.000000 |
| rad4          | 1.84063e-11 | 1.000000 | 5.90096e-11 | 1.000000 |
| rad72         | 1.81073e-11 | 1.000000 | 5.80510e-11 | 1.000000 |
| rad33         | 1.49396e-11 | 1.000000 | 4.78955e-11 | 1.000000 |
| rad15         | 3.08399e-12 | 1.000000 | 9.88710e-12 | 1.000000 |
| rad25         | 2.76409e-12 | 1.000000 | 8.86152e-12 | 1.000000 |
| rad12         | 1.79619e-12 | 1.000000 | 5.75849e-12 | 1.000000 |
| rad14         | 2.75910e-13 | 1.000000 | 8.84553e-13 | 1.000000 |
| rad8          | 1.89603e-13 | 1.000000 | 6.07858e-13 | 1.000000 |
| rad27         | 1.37992e-13 | 1.000000 | 4.42396e-13 | 1.000000 |
| rad31         | 4.14046e-15 | 1.000000 | 1.32741e-14 | 1.000000 |
| rad47         | 4.67261e-16 | 1.000000 | 1.49801e-15 | 1.000000 |
| rad5          | 1.55301e-16 | 1.000000 | 4.97886e-16 | 1.000000 |

0.100000000 Pa, 1400.00000 K

=====

| Rate constant | True (fraction)     | Effective (fraction) |             |          |
|---------------|---------------------|----------------------|-------------|----------|
| Total         | 2.46691e-14 (1.00 ) | 6.50155e-15 (1.00 )  |             |          |
| species       | PYtrue              | Cumul                | PYeffective | Cumul    |
| Benzyl+C2H2   | 0.736450            | 0.736450             | 0.00000     | 0.00000  |
| Indene+H      | 0.245658            | 0.982108             | 0.932114    | 0.932114 |

|               |             |          |             |          |
|---------------|-------------|----------|-------------|----------|
| Ph+Allene     | 0.00660880  | 0.988717 | 0.0250761   | 0.957190 |
| PhCH2CCH+H    | 0.00478135  | 0.993498 | 0.0181421   | 0.975332 |
| PhCHCCH2+H    | 0.00325581  | 0.996754 | 0.0123537   | 0.987686 |
| PhCCH+CH3     | 0.00165076  | 0.998405 | 0.00626356  | 0.993949 |
| PAH9+H        | 0.000308685 | 0.998713 | 0.00117126  | 0.995121 |
| PAH7+H        | 0.000272640 | 0.998986 | 0.00103449  | 0.996155 |
| Ph+MeAc       | 0.000228412 | 0.999214 | 0.000866677 | 0.997022 |
| rad30         | 0.000217655 | 0.999432 | 0.000825859 | 0.997848 |
| rad38         | 0.000125540 | 0.999558 | 0.000476344 | 0.998324 |
| rad19anti     | 0.000116512 | 0.999674 | 0.000442087 | 0.998766 |
| PAH3+H        | 6.69986e-05 | 0.999741 | 0.000254216 | 0.999020 |
| PhCCCH3+H     | 6.53671e-05 | 0.999807 | 0.000248025 | 0.999268 |
| rad35         | 6.07430e-05 | 0.999867 | 0.000230480 | 0.999499 |
| rad39         | 5.49335e-05 | 0.999922 | 0.000208437 | 0.999707 |
| rad46         | 2.97227e-05 | 0.999952 | 0.000112778 | 0.999820 |
| rad60syn      | 1.03332e-05 | 0.999962 | 3.92077e-05 | 0.999859 |
| rad50         | 9.93663e-06 | 0.999972 | 3.77030e-05 | 0.999897 |
| rad59         | 7.71558e-06 | 0.999980 | 2.92756e-05 | 0.999926 |
| rad60anti     | 6.13930e-06 | 0.999986 | 2.32946e-05 | 0.999950 |
| rad19syn      | 4.26629e-06 | 0.999990 | 1.61878e-05 | 0.999966 |
| rad67         | 1.57768e-06 | 0.999992 | 5.98628e-06 | 0.999972 |
| rad54         | 1.47005e-06 | 0.999993 | 5.57788e-06 | 0.999977 |
| rad51         | 1.43589e-06 | 0.999995 | 5.44826e-06 | 0.999983 |
| PhcycC3H3_A+H | 1.26050e-06 | 0.999996 | 4.78278e-06 | 0.999988 |
| rad6          | 6.42027e-07 | 0.999997 | 2.43608e-06 | 0.999990 |
| rad37         | 6.13298e-07 | 0.999997 | 2.32707e-06 | 0.999992 |
| rad52         | 6.09866e-07 | 0.999998 | 2.31405e-06 | 0.999995 |
| PAH10+CH3     | 3.40207e-07 | 0.999998 | 1.29087e-06 | 0.999996 |
| rad58         | 3.07505e-07 | 0.999999 | 1.16678e-06 | 0.999997 |
| rad70         | 2.75611e-07 | 0.999999 | 1.04576e-06 | 0.999998 |
| PAH1+H        | 2.72609e-07 | 0.999999 | 1.03437e-06 | 0.999999 |
| rad55         | 8.21152e-08 | 0.999999 | 3.11574e-07 | 1.000000 |
| rad34         | 4.89152e-08 | 0.999999 | 1.85601e-07 | 1.000000 |
| rad65         | 4.41983e-08 | 0.999999 | 1.67704e-07 | 1.000000 |
| rad23         | 3.36883e-08 | 0.999999 | 1.27825e-07 | 1.000000 |
| rad62         | 2.07606e-08 | 0.999999 | 7.87729e-08 | 1.000000 |
| rad45         | 9.69217e-09 | 0.999999 | 3.67755e-08 | 1.000000 |
| rad53         | 8.12316e-09 | 0.999999 | 3.08221e-08 | 1.000000 |
| rad73         | 6.66683e-09 | 0.999999 | 2.52963e-08 | 1.000000 |
| rad71         | 5.89370e-09 | 0.999999 | 2.23628e-08 | 1.000000 |
| rad56         | 5.07546e-09 | 0.999999 | 1.92581e-08 | 1.000000 |
| rad7          | 4.71218e-09 | 0.999999 | 1.78797e-08 | 1.000000 |
| rad11         | 4.68413e-09 | 0.999999 | 1.77732e-08 | 1.000000 |
| rad43         | 3.05704e-09 | 0.999999 | 1.15995e-08 | 1.000000 |
| rad64         | 2.94903e-09 | 0.999999 | 1.11897e-08 | 1.000000 |
| rad20         | 1.95122e-09 | 0.999999 | 7.40360e-09 | 1.000000 |
| PAH8+H        | 1.55843e-09 | 0.999999 | 5.91324e-09 | 1.000000 |
| rad9          | 1.42146e-09 | 0.999999 | 5.39351e-09 | 1.000000 |
| rad68syn      | 1.15844e-09 | 0.999999 | 4.39552e-09 | 1.000000 |
| rad21         | 1.13805e-09 | 0.999999 | 4.31816e-09 | 1.000000 |
| rad28         | 9.54417e-10 | 0.999999 | 3.62139e-09 | 1.000000 |
| rad36         | 9.16387e-10 | 0.999999 | 3.47709e-09 | 1.000000 |
| rad68anti     | 7.65429e-10 | 0.999999 | 2.90430e-09 | 1.000000 |
| rad42         | 6.99098e-10 | 0.999999 | 2.65262e-09 | 1.000000 |
| rad18         | 5.96604e-10 | 0.999999 | 2.26372e-09 | 1.000000 |
| rad13         | 4.61065e-10 | 0.999999 | 1.74944e-09 | 1.000000 |
| rad40syn      | 2.60676e-10 | 0.999999 | 9.89095e-10 | 1.000000 |
| rad22         | 2.39437e-10 | 0.999999 | 9.08509e-10 | 1.000000 |
| rad2          | 2.32299e-10 | 0.999999 | 8.81423e-10 | 1.000000 |
| rad10         | 2.03192e-10 | 0.999999 | 7.70982e-10 | 1.000000 |
| rad61         | 1.95042e-10 | 0.999999 | 7.40056e-10 | 1.000000 |
| rad40anti     | 1.34057e-10 | 0.999999 | 5.08659e-10 | 1.000000 |
| rad26         | 1.31582e-10 | 0.999999 | 4.99267e-10 | 1.000000 |
| rad41         | 7.69913e-11 | 0.999999 | 2.92132e-10 | 1.000000 |
| rad72         | 7.56797e-11 | 0.999999 | 2.87155e-10 | 1.000000 |
| rad1          | 5.22285e-11 | 0.999999 | 1.98173e-10 | 1.000000 |
| rad24         | 1.80066e-11 | 0.999999 | 6.83235e-11 | 1.000000 |
| rad3          | 9.61212e-12 | 0.999999 | 3.64717e-11 | 1.000000 |
| rad33         | 8.81712e-12 | 0.999999 | 3.34552e-11 | 1.000000 |
| rad4          | 7.47468e-12 | 0.999999 | 2.83615e-11 | 1.000000 |
| rad15         | 7.31736e-12 | 0.999999 | 2.77646e-11 | 1.000000 |
| rad12         | 1.93302e-12 | 0.999999 | 7.33455e-12 | 1.000000 |
| rad25         | 1.92228e-12 | 0.999999 | 7.29382e-12 | 1.000000 |
| rad8          | 2.79520e-13 | 0.999999 | 1.06060e-12 | 1.000000 |
| rad14         | 1.43410e-13 | 0.999999 | 5.44149e-13 | 1.000000 |
| rad27         | 5.54810e-14 | 0.999999 | 2.10514e-13 | 1.000000 |
| rad31         | 2.56273e-15 | 0.999999 | 9.72388e-15 | 1.000000 |
| rad47         | 1.04163e-15 | 0.999999 | 3.95230e-15 | 1.000000 |
| rad5          | 3.17799e-16 | 0.999999 | 1.20584e-15 | 1.000000 |

0.100000000 Pa, 1500.00000 K

| =====         |                     |          |                      |          |
|---------------|---------------------|----------|----------------------|----------|
| Rate constant | True (fraction)     |          | Effective (fraction) |          |
| -----         |                     |          |                      |          |
| Total         | 3.76908e-14 (1.00 ) |          | 8.51560e-15 (1.00 )  |          |
| species       | PYtrue              | Cumul    | PYeffective          | Cumul    |
| -----         |                     |          |                      |          |
| Benzyl+C2H2   | 0.774067            | 0.774067 | 0.00000              | 0.00000  |
| Indene+H      | 0.205064            | 0.979131 | 0.907633             | 0.907633 |
| Ph+Allene     | 0.00752053          | 0.986652 | 0.0332865            | 0.940920 |
| PhCH2CCH+H    | 0.00646728          | 0.993119 | 0.0286248            | 0.969544 |
| PhCHCCH2+H    | 0.00361207          | 0.996731 | 0.0159873            | 0.985532 |
| PhCCH+CH3     | 0.00141391          | 0.998145 | 0.00625811           | 0.991790 |
| PAH9+H        | 0.000393106         | 0.998538 | 0.00173992           | 0.993530 |
| PAH7+H        | 0.000286553         | 0.998824 | 0.00126831           | 0.994798 |
| rad30         | 0.000246477         | 0.999071 | 0.00109093           | 0.995889 |
| Ph+MeAc       | 0.000203619         | 0.999275 | 0.000901237          | 0.996790 |
| rad19anti     | 0.000164236         | 0.999439 | 0.000726925          | 0.997517 |
| rad38         | 0.000162735         | 0.999602 | 0.000720278          | 0.998237 |
| PAH3+H        | 0.000104219         | 0.999706 | 0.000461281          | 0.998699 |
| rad35         | 7.62583e-05         | 0.999782 | 0.000337526          | 0.999036 |
| rad39         | 5.58574e-05         | 0.999838 | 0.000247230          | 0.999283 |
| PhCCCH3+H     | 4.89419e-05         | 0.999887 | 0.000216621          | 0.999500 |
| rad46         | 4.15240e-05         | 0.999928 | 0.000183789          | 0.999684 |
| rad50         | 1.70779e-05         | 0.999945 | 7.55883e-05          | 0.999759 |
| rad60syn      | 1.38816e-05         | 0.999959 | 6.14410e-05          | 0.999821 |
| rad59         | 1.15663e-05         | 0.999971 | 5.11935e-05          | 0.999872 |
| rad60anti     | 8.33860e-06         | 0.999979 | 3.69074e-05          | 0.999909 |
| rad19syn      | 5.68981e-06         | 0.999985 | 2.51836e-05          | 0.999934 |
| rad67         | 3.01390e-06         | 0.999988 | 1.33398e-05          | 0.999947 |
| rad51         | 2.86623e-06         | 0.999991 | 1.26862e-05          | 0.999960 |
| rad54         | 2.03378e-06         | 0.999993 | 9.00171e-06          | 0.999969 |
| PhcycC3H3_A+H | 1.94421e-06         | 0.999995 | 8.60524e-06          | 0.999978 |
| rad52         | 1.12982e-06         | 0.999996 | 5.00070e-06          | 0.999983 |
| rad37         | 8.38315e-07         | 0.999997 | 3.71046e-06          | 0.999986 |
| PAH10+CH3     | 6.63461e-07         | 0.999997 | 2.93654e-06          | 0.999989 |
| rad58         | 5.75068e-07         | 0.999998 | 2.54530e-06          | 0.999992 |
| PAH1+H        | 4.44675e-07         | 0.999998 | 1.96817e-06          | 0.999994 |
| rad70         | 4.35883e-07         | 0.999999 | 1.92926e-06          | 0.999996 |
| rad6          | 3.86917e-07         | 0.999999 | 1.71253e-06          | 0.999998 |
| rad55         | 1.20227e-07         | 0.999999 | 5.32135e-07          | 0.999998 |
| rad65         | 8.71211e-08         | 0.999999 | 3.85606e-07          | 0.999998 |
| rad34         | 8.35899e-08         | 0.999999 | 3.69976e-07          | 0.999999 |
| rad62         | 2.65893e-08         | 1.000000 | 1.17687e-07          | 0.999999 |
| rad23         | 2.03600e-08         | 1.000000 | 9.01153e-08          | 0.999999 |
| rad73         | 1.91257e-08         | 1.000000 | 8.46521e-08          | 0.999999 |
| rad71         | 1.86506e-08         | 1.000000 | 8.25492e-08          | 0.999999 |
| rad53         | 1.46416e-08         | 1.000000 | 6.48052e-08          | 0.999999 |
| rad56         | 1.02052e-08         | 1.000000 | 4.51692e-08          | 0.999999 |
| rad45         | 5.46018e-09         | 1.000000 | 2.41673e-08          | 0.999999 |
| rad64         | 5.41638e-09         | 1.000000 | 2.39734e-08          | 0.999999 |
| PAH8+H        | 4.18114e-09         | 1.000000 | 1.85061e-08          | 0.999999 |
| rad43         | 3.92998e-09         | 1.000000 | 1.73944e-08          | 0.999999 |
| rad7          | 2.88168e-09         | 1.000000 | 1.27546e-08          | 0.999999 |
| rad11         | 2.72898e-09         | 1.000000 | 1.20787e-08          | 0.999999 |
| rad68syn      | 2.56027e-09         | 1.000000 | 1.13320e-08          | 0.999999 |
| rad68anti     | 1.68597e-09         | 1.000000 | 7.46226e-09          | 0.999999 |
| rad20         | 1.23135e-09         | 1.000000 | 5.45007e-09          | 0.999999 |
| rad9          | 1.09705e-09         | 1.000000 | 4.85564e-09          | 0.999999 |
| rad42         | 1.06267e-09         | 1.000000 | 4.70347e-09          | 0.999999 |
| rad21         | 7.11298e-10         | 1.000000 | 3.14827e-09          | 0.999999 |
| rad40syn      | 6.46827e-10         | 1.000000 | 2.86292e-09          | 0.999999 |
| rad28         | 6.22104e-10         | 1.000000 | 2.75349e-09          | 0.999999 |
| rad61         | 5.27043e-10         | 1.000000 | 2.33274e-09          | 0.999999 |
| rad36         | 5.22859e-10         | 1.000000 | 2.31422e-09          | 0.999999 |
| rad18         | 4.10774e-10         | 1.000000 | 1.81812e-09          | 0.999999 |
| rad22         | 3.85720e-10         | 1.000000 | 1.70723e-09          | 0.999999 |
| rad40anti     | 3.43931e-10         | 1.000000 | 1.52227e-09          | 0.999999 |
| rad72         | 2.97769e-10         | 1.000000 | 1.31795e-09          | 0.999999 |
| rad13         | 2.43269e-10         | 1.000000 | 1.07673e-09          | 0.999999 |
| rad41         | 1.35382e-10         | 1.000000 | 5.99214e-10          | 0.999999 |
| rad2          | 7.77007e-11         | 1.000000 | 3.43910e-10          | 0.999999 |
| rad10         | 7.68961e-11         | 1.000000 | 3.40349e-10          | 0.999999 |
| rad26         | 6.47069e-11         | 1.000000 | 2.86399e-10          | 0.999999 |
| rad1          | 1.77089e-11         | 1.000000 | 7.83814e-11          | 0.999999 |
| rad24         | 1.34246e-11         | 1.000000 | 5.94184e-11          | 0.999999 |
| rad15         | 1.22668e-11         | 1.000000 | 5.42941e-11          | 0.999999 |
| rad33         | 5.25695e-12         | 1.000000 | 2.32677e-11          | 0.999999 |
| rad3          | 4.02468e-12         | 1.000000 | 1.78136e-11          | 0.999999 |

|       |             |          |             |          |
|-------|-------------|----------|-------------|----------|
| rad4  | 3.15557e-12 | 1.000000 | 1.39669e-11 | 0.999999 |
| rad12 | 1.99736e-12 | 1.000000 | 8.84050e-12 | 0.999999 |
| rad25 | 1.32673e-12 | 1.000000 | 5.87225e-12 | 0.999999 |
| rad8  | 3.57812e-13 | 1.000000 | 1.58371e-12 | 0.999999 |
| rad14 | 7.65028e-14 | 1.000000 | 3.38608e-13 | 0.999999 |
| rad27 | 2.35162e-14 | 1.000000 | 1.04085e-13 | 0.999999 |
| rad47 | 2.08623e-15 | 1.000000 | 9.23382e-15 | 0.999999 |
| rad31 | 1.60869e-15 | 1.000000 | 7.12019e-15 | 0.999999 |
| rad5  | 5.62003e-16 | 1.000000 | 2.48748e-15 | 0.999999 |

0.100000000 Pa, 1750.00000 K

| Rate constant | True (fraction)     | Effective (fraction) |
|---------------|---------------------|----------------------|
| Total         | 9.18604e-14 (1.00 ) | 1.49145e-14 (1.00 )  |

| species       | PYtrue      | Cumul    | PYeffective | Cumul    |
|---------------|-------------|----------|-------------|----------|
| Benzyl+C2H2   | 0.837640    | 0.837640 | 0.000000    | 0.000000 |
| Indene+H      | 0.133063    | 0.970703 | 0.819557    | 0.819557 |
| PhCH2CCH+H    | 0.0118057   | 0.982509 | 0.0727128   | 0.892270 |
| Ph+Allene     | 0.00950101  | 0.992010 | 0.0585181   | 0.950788 |
| PhCHCCH2+H    | 0.00446803  | 0.996478 | 0.0275192   | 0.978307 |
| PhCCH+CH3     | 0.000861575 | 0.997339 | 0.00530657  | 0.983614 |
| PAH9+H        | 0.000556662 | 0.997896 | 0.00342856  | 0.987042 |
| rad30         | 0.000325000 | 0.998221 | 0.00200172  | 0.989044 |
| rad19anti     | 0.000321502 | 0.998542 | 0.00198018  | 0.991024 |
| rad38         | 0.000287118 | 0.998830 | 0.00176840  | 0.992793 |
| PAH7+H        | 0.000286352 | 0.999116 | 0.00176368  | 0.994556 |
| PAH3+H        | 0.000275297 | 0.999391 | 0.00169559  | 0.996252 |
| Ph+MeAc       | 0.000167693 | 0.999559 | 0.00103285  | 0.997285 |
| rad35         | 0.000110068 | 0.999669 | 0.000677922 | 0.997963 |
| rad46         | 7.52958e-05 | 0.999744 | 0.000463758 | 0.998426 |
| rad39         | 5.82522e-05 | 0.999803 | 0.000358784 | 0.998785 |
| rad50         | 4.36703e-05 | 0.999846 | 0.000268971 | 0.999054 |
| PhCCCH3+H     | 3.20449e-05 | 0.999878 | 0.000197369 | 0.999251 |
| rad59         | 2.75338e-05 | 0.999906 | 0.000169585 | 0.999421 |
| rad60syn      | 2.64499e-05 | 0.999932 | 0.000162908 | 0.999584 |
| rad60anti     | 1.77452e-05 | 0.999950 | 0.000109295 | 0.999693 |
| rad51         | 1.06400e-05 | 0.999961 | 6.55333e-05 | 0.999759 |
| rad67         | 1.00267e-05 | 0.999971 | 6.17561e-05 | 0.999821 |
| rad19syn      | 8.12887e-06 | 0.999979 | 5.00669e-05 | 0.999871 |
| PhcycC3H3_A+H | 4.33061e-06 | 0.999983 | 2.66729e-05 | 0.999897 |
| rad52         | 3.62750e-06 | 0.999987 | 2.23423e-05 | 0.999920 |
| rad54         | 3.10492e-06 | 0.999990 | 1.91237e-05 | 0.999939 |
| PAH10+CH3     | 2.60350e-06 | 0.999992 | 1.60353e-05 | 0.999955 |
| rad58         | 2.01824e-06 | 0.999994 | 1.24306e-05 | 0.999967 |
| rad37         | 1.70777e-06 | 0.999996 | 1.05184e-05 | 0.999978 |
| PAH1+H        | 1.10701e-06 | 0.999997 | 6.81822e-06 | 0.999985 |
| rad70         | 1.04855e-06 | 0.999998 | 6.45815e-06 | 0.999991 |
| rad65         | 3.08505e-07 | 0.999999 | 1.90013e-06 | 0.999993 |
| rad34         | 2.42037e-07 | 0.999999 | 1.49074e-06 | 0.999994 |
| rad55         | 2.29023e-07 | 0.999999 | 1.41059e-06 | 0.999996 |
| rad71         | 1.98892e-07 | 0.999999 | 1.22501e-06 | 0.999997 |
| rad73         | 1.58935e-07 | 0.999999 | 9.78902e-07 | 0.999998 |
| rad6          | 9.93780e-08 | 1.000000 | 6.12084e-07 | 0.999999 |
| rad53         | 4.44526e-08 | 1.000000 | 2.73790e-07 | 0.999999 |
| rad62         | 4.01002e-08 | 1.000000 | 2.46983e-07 | 0.999999 |
| rad56         | 3.58132e-08 | 1.000000 | 2.20579e-07 | 0.999999 |
| PAH8+H        | 2.45113e-08 | 1.000000 | 1.50969e-07 | 1.000000 |
| rad64         | 1.93137e-08 | 1.000000 | 1.18956e-07 | 1.000000 |
| rad68syn      | 1.20242e-08 | 1.000000 | 7.40590e-08 | 1.000000 |
| rad43         | 8.60802e-09 | 1.000000 | 5.30180e-08 | 1.000000 |
| rad68anti     | 7.79813e-09 | 1.000000 | 4.80298e-08 | 1.000000 |
| rad72         | 6.91422e-09 | 1.000000 | 4.25857e-08 | 1.000000 |
| rad23         | 5.37862e-09 | 1.000000 | 3.31277e-08 | 1.000000 |
| rad40syn      | 3.52984e-09 | 1.000000 | 2.17408e-08 | 1.000000 |
| rad61         | 3.50758e-09 | 1.000000 | 2.16037e-08 | 1.000000 |
| rad42         | 2.39507e-09 | 1.000000 | 1.47516e-08 | 1.000000 |
| rad40anti     | 2.10427e-09 | 1.000000 | 1.29605e-08 | 1.000000 |
| rad22         | 6.12329e-10 | 1.000000 | 3.77142e-09 | 1.000000 |
| rad41         | 5.64541e-10 | 1.000000 | 3.47709e-09 | 1.000000 |
| rad45         | 5.06990e-10 | 1.000000 | 3.12263e-09 | 1.000000 |
| rad7          | 2.75953e-10 | 1.000000 | 1.69964e-09 | 1.000000 |
| rad11         | 2.51769e-10 | 1.000000 | 1.55068e-09 | 1.000000 |
| rad28         | 2.15046e-10 | 1.000000 | 1.32450e-09 | 1.000000 |
| rad9          | 1.37082e-10 | 1.000000 | 8.44306e-10 | 1.000000 |
| rad20         | 1.26308e-10 | 1.000000 | 7.77950e-10 | 1.000000 |
| rad36         | 8.58049e-11 | 1.000000 | 5.28485e-10 | 1.000000 |
| rad21         | 6.65311e-11 | 1.000000 | 4.09775e-10 | 1.000000 |

|       |             |          |             |          |
|-------|-------------|----------|-------------|----------|
| rad18 | 5.81689e-11 | 1.000000 | 3.58271e-10 | 1.000000 |
| rad13 | 1.40740e-11 | 1.000000 | 8.66838e-11 | 1.000000 |
| rad15 | 6.79054e-12 | 1.000000 | 4.18239e-11 | 1.000000 |
| rad26 | 5.93087e-12 | 1.000000 | 3.65291e-11 | 1.000000 |
| rad10 | 2.77349e-12 | 1.000000 | 1.70824e-11 | 1.000000 |
| rad24 | 1.70134e-12 | 1.000000 | 1.04788e-11 | 1.000000 |
| rad2  | 1.31116e-12 | 1.000000 | 8.07560e-12 | 1.000000 |
| rad12 | 4.26946e-13 | 1.000000 | 2.62963e-12 | 1.000000 |
| rad33 | 3.32963e-13 | 1.000000 | 2.05077e-12 | 1.000000 |
| rad1  | 3.20559e-13 | 1.000000 | 1.97437e-12 | 1.000000 |
| rad8  | 1.74118e-13 | 1.000000 | 1.07242e-12 | 1.000000 |
| rad25 | 1.29130e-13 | 1.000000 | 7.95328e-13 | 1.000000 |
| rad3  | 8.68831e-14 | 1.000000 | 5.35125e-13 | 1.000000 |
| rad4  | 5.50225e-14 | 1.000000 | 3.38892e-13 | 1.000000 |
| rad14 | 5.22479e-15 | 1.000000 | 3.21803e-14 | 1.000000 |
| rad47 | 2.45011e-15 | 1.000000 | 1.50906e-14 | 1.000000 |
| rad5  | 1.39474e-15 | 1.000000 | 8.59042e-15 | 1.000000 |
| rad27 | 9.13034e-16 | 1.000000 | 5.62351e-15 | 1.000000 |

0.10000000 Pa, 2000.00000 K

=====

| Rate constant | True (fraction)     | Effective (fraction) |
|---------------|---------------------|----------------------|
| Total         | 1.85359e-13 (1.00 ) | 2.47588e-14 (1.00 )  |

| species       | PYtrue      | Cumul    | PYeffective | Cumul    |
|---------------|-------------|----------|-------------|----------|
| Benzyl+C2H2   | 0.866428    | 0.866428 | 0.00000     | 0.00000  |
| Indene+H      | 0.0943885   | 0.960816 | 0.706650    | 0.706650 |
| PhCH2CCH+H    | 0.0189358   | 0.979752 | 0.141765    | 0.848415 |
| Ph+Allene     | 0.0101088   | 0.989861 | 0.0756810   | 0.924096 |
| PhCHCCH2+H    | 0.00579099  | 0.995652 | 0.0433549   | 0.967451 |
| PAH9+H        | 0.000765254 | 0.996417 | 0.00572916  | 0.973180 |
| PhCCH+CH3     | 0.000550349 | 0.996968 | 0.00412025  | 0.977300 |
| PAH3+H        | 0.000526246 | 0.997494 | 0.00393980  | 0.981240 |
| rad19anti     | 0.000486606 | 0.997981 | 0.00364303  | 0.984883 |
| rad38         | 0.000411541 | 0.998392 | 0.00308105  | 0.987964 |
| rad30         | 0.000378289 | 0.998770 | 0.00283210  | 0.990796 |
| PAH7+H        | 0.000350390 | 0.999121 | 0.00262323  | 0.993420 |
| Ph+MeAc       | 0.000164747 | 0.999286 | 0.00123340  | 0.994653 |
| rad35         | 0.000155515 | 0.999441 | 0.00116428  | 0.995817 |
| rad46         | 0.000120111 | 0.999561 | 0.000899222 | 0.996716 |
| rad50         | 9.58313e-05 | 0.999657 | 0.000717451 | 0.997434 |
| rad39         | 7.87072e-05 | 0.999736 | 0.000589250 | 0.998023 |
| rad59         | 4.92026e-05 | 0.999785 | 0.000368361 | 0.998391 |
| rad60syn      | 4.01110e-05 | 0.999825 | 0.000300295 | 0.998692 |
| PhCCCH3+H     | 3.61303e-05 | 0.999861 | 0.000270493 | 0.998962 |
| rad51         | 2.92805e-05 | 0.999890 | 0.000219212 | 0.999181 |
| rad60anti     | 2.75040e-05 | 0.999918 | 0.000205912 | 0.999387 |
| rad67         | 2.43946e-05 | 0.999942 | 0.000182633 | 0.999570 |
| rad19syn      | 1.17088e-05 | 0.999954 | 8.76593e-05 | 0.999658 |
| rad52         | 8.84644e-06 | 0.999963 | 6.62298e-05 | 0.999724 |
| PAH10+CH3     | 7.72787e-06 | 0.999971 | 5.78555e-05 | 0.999782 |
| PhcycC3H3_A+H | 7.44624e-06 | 0.999978 | 5.57471e-05 | 0.999838 |
| rad58         | 5.03691e-06 | 0.999983 | 3.77094e-05 | 0.999875 |
| rad54         | 4.34723e-06 | 0.999987 | 3.25460e-05 | 0.999908 |
| rad37         | 3.43691e-06 | 0.999991 | 2.57308e-05 | 0.999934 |
| PAH1+H        | 2.74950e-06 | 0.999994 | 2.05844e-05 | 0.999954 |
| rad70         | 2.09357e-06 | 0.999996 | 1.56737e-05 | 0.999970 |
| rad71         | 1.07241e-06 | 0.999997 | 8.02872e-06 | 0.999978 |
| rad65         | 8.19753e-07 | 0.999998 | 6.13717e-06 | 0.999984 |
| rad73         | 7.44791e-07 | 0.999998 | 5.57596e-06 | 0.999990 |
| rad34         | 5.52333e-07 | 0.999999 | 4.13510e-06 | 0.999994 |
| rad55         | 3.53338e-07 | 0.999999 | 2.64531e-06 | 0.999996 |
| PAH8+H        | 1.14552e-07 | 0.999999 | 8.57608e-07 | 0.999997 |
| rad53         | 9.72583e-08 | 0.999999 | 7.28135e-07 | 0.999998 |
| rad56         | 9.21454e-08 | 1.000000 | 6.89856e-07 | 0.999999 |
| rad62         | 6.00549e-08 | 1.000000 | 4.49607e-07 | 0.999999 |
| rad64         | 5.58028e-08 | 1.000000 | 4.17773e-07 | 0.999999 |
| rad72         | 4.35090e-08 | 1.000000 | 3.25735e-07 | 1.000000 |
| rad68syn      | 4.11215e-08 | 1.000000 | 3.07861e-07 | 1.000000 |
| rad68anti     | 2.65308e-08 | 1.000000 | 1.98626e-07 | 1.000000 |
| rad43         | 2.20261e-08 | 1.000000 | 1.64901e-07 | 1.000000 |
| rad61         | 1.54190e-08 | 1.000000 | 1.15436e-07 | 1.000000 |
| rad40syn      | 1.44086e-08 | 1.000000 | 1.07871e-07 | 1.000000 |
| rad6          | 1.07356e-08 | 1.000000 | 8.03729e-08 | 1.000000 |
| rad40anti     | 9.08459e-09 | 1.000000 | 6.80127e-08 | 1.000000 |
| rad42         | 4.93642e-09 | 1.000000 | 3.69570e-08 | 1.000000 |
| rad23         | 2.14822e-09 | 1.000000 | 1.60829e-08 | 1.000000 |
| rad41         | 1.99354e-09 | 1.000000 | 1.49248e-08 | 1.000000 |

|       |             |          |             |         |
|-------|-------------|----------|-------------|---------|
| rad45 | 1.68468e-10 | 1.000000 | 1.26126e-09 | 1.00000 |
| rad22 | 1.58466e-10 | 1.000000 | 1.18637e-09 | 1.00000 |
| rad9  | 6.96842e-11 | 1.000000 | 5.21698e-10 | 1.00000 |
| rad11 | 5.39918e-11 | 1.000000 | 4.04215e-10 | 1.00000 |
| rad20 | 5.29643e-11 | 1.000000 | 3.96523e-10 | 1.00000 |
| rad7  | 4.25064e-11 | 1.000000 | 3.18229e-10 | 1.00000 |
| rad28 | 3.56372e-11 | 1.000000 | 2.66802e-10 | 1.00000 |
| rad36 | 2.93258e-11 | 1.000000 | 2.19551e-10 | 1.00000 |
| rad21 | 2.72336e-11 | 1.000000 | 2.03887e-10 | 1.00000 |
| rad18 | 1.62619e-11 | 1.000000 | 1.21746e-10 | 1.00000 |
| rad15 | 3.64691e-12 | 1.000000 | 2.73030e-11 | 1.00000 |
| rad13 | 3.15321e-12 | 1.000000 | 2.36068e-11 | 1.00000 |
| rad24 | 9.49358e-13 | 1.000000 | 7.10747e-12 | 1.00000 |
| rad26 | 7.03906e-13 | 1.000000 | 5.26987e-12 | 1.00000 |
| rad12 | 3.72965e-13 | 1.000000 | 2.79224e-12 | 1.00000 |
| rad10 | 2.59117e-13 | 1.000000 | 1.93991e-12 | 1.00000 |
| rad8  | 2.00224e-13 | 1.000000 | 1.49900e-12 | 1.00000 |
| rad2  | 1.17527e-13 | 1.000000 | 8.79882e-13 | 1.00000 |
| rad33 | 1.02786e-13 | 1.000000 | 7.69521e-13 | 1.00000 |
| rad25 | 5.51574e-14 | 1.000000 | 4.12942e-13 | 1.00000 |
| rad1  | 3.02965e-14 | 1.000000 | 2.26818e-13 | 1.00000 |
| rad3  | 1.48384e-14 | 1.000000 | 1.11089e-13 | 1.00000 |
| rad4  | 9.46976e-15 | 1.000000 | 7.08964e-14 | 1.00000 |
| rad47 | 6.72777e-15 | 1.000000 | 5.03682e-14 | 1.00000 |
| rad5  | 1.94240e-15 | 1.000000 | 1.45420e-14 | 1.00000 |
| rad14 | 1.44057e-15 | 1.000000 | 1.07850e-14 | 1.00000 |
| rad27 | 2.37395e-16 | 1.000000 | 1.77729e-15 | 1.00000 |

0.100000000 Pa, 2250.00000 K

| Rate constant | True (fraction)     | Effective (fraction) |
|---------------|---------------------|----------------------|
| Total         | 3.29136e-13 (1.00 ) | 4.00875e-14 (1.00 )  |

| species       | PYtrue      | Cumul    | PYeffective | Cumul    |
|---------------|-------------|----------|-------------|----------|
| Benzyl+C2H2   | 0.878204    | 0.878204 | 0.00000     | 0.00000  |
| Indene+H      | 0.0703002   | 0.948504 | 0.577195    | 0.577195 |
| PhCH2CCH+H    | 0.0277459   | 0.976250 | 0.227806    | 0.805001 |
| Ph+Allene     | 0.0105974   | 0.986847 | 0.0870089   | 0.892010 |
| PhCHCCH2+H    | 0.00765656  | 0.994504 | 0.0628636   | 0.954874 |
| PAH9+H        | 0.000941858 | 0.995446 | 0.00773305  | 0.962607 |
| PAH3+H        | 0.000857236 | 0.996303 | 0.00703827  | 0.969645 |
| rad19anti     | 0.000629228 | 0.996932 | 0.00516623  | 0.974811 |
| rad38         | 0.000525524 | 0.997458 | 0.00431477  | 0.979126 |
| PAH7+H        | 0.000454503 | 0.997912 | 0.00373166  | 0.982857 |
| rad30         | 0.000417263 | 0.998330 | 0.00342591  | 0.986283 |
| PhCCH+CH3     | 0.000383696 | 0.998713 | 0.00315031  | 0.989434 |
| rad35         | 0.000200865 | 0.998914 | 0.00164918  | 0.991083 |
| Ph+MeAc       | 0.000197882 | 0.999112 | 0.00162470  | 0.992708 |
| rad50         | 0.000170942 | 0.999283 | 0.00140351  | 0.994111 |
| rad46         | 0.000166541 | 0.999450 | 0.00136737  | 0.995478 |
| rad39         | 0.000118807 | 0.999568 | 0.000975456 | 0.996454 |
| rad59         | 7.57691e-05 | 0.999644 | 0.000622097 | 0.997076 |
| rad51         | 6.22699e-05 | 0.999706 | 0.000511262 | 0.997587 |
| rad60syn      | 5.44510e-05 | 0.999761 | 0.000447066 | 0.998034 |
| PhCCCH3+H     | 5.15901e-05 | 0.999812 | 0.000423576 | 0.998458 |
| rad67         | 4.61782e-05 | 0.999859 | 0.000379142 | 0.998837 |
| rad60anti     | 3.79865e-05 | 0.999897 | 0.000311885 | 0.999149 |
| PAH10+CH3     | 1.71933e-05 | 0.999914 | 0.000141165 | 0.999290 |
| rad52         | 1.70846e-05 | 0.999931 | 0.000140272 | 0.999430 |
| rad19syn      | 1.63932e-05 | 0.999947 | 0.000134595 | 0.999565 |
| PhcycC3H3_A+H | 1.10277e-05 | 0.999958 | 9.05422e-05 | 0.999656 |
| rad58         | 1.00660e-05 | 0.999968 | 8.26458e-05 | 0.999738 |
| PAH1+H        | 5.96738e-06 | 0.999974 | 4.89947e-05 | 0.999787 |
| rad37         | 5.72356e-06 | 0.999980 | 4.69929e-05 | 0.999834 |
| rad54         | 5.39701e-06 | 0.999986 | 4.43117e-05 | 0.999878 |
| rad71         | 3.95806e-06 | 0.999989 | 3.24973e-05 | 0.999911 |
| rad70         | 3.69404e-06 | 0.999993 | 3.03297e-05 | 0.999941 |
| rad73         | 2.41495e-06 | 0.999996 | 1.98278e-05 | 0.999961 |
| rad65         | 1.68529e-06 | 0.999997 | 1.38369e-05 | 0.999975 |
| rad34         | 1.08371e-06 | 0.999998 | 8.89775e-06 | 0.999984 |
| rad55         | 4.74070e-07 | 0.999999 | 3.89232e-06 | 0.999988 |
| PAH8+H        | 3.91963e-07 | 0.999999 | 3.21818e-06 | 0.999991 |
| rad72         | 2.09535e-07 | 0.999999 | 1.72038e-06 | 0.999993 |
| rad56         | 1.86176e-07 | 1.000000 | 1.52858e-06 | 0.999994 |
| rad53         | 1.73187e-07 | 1.000000 | 1.42194e-06 | 0.999996 |
| rad64         | 1.33619e-07 | 1.000000 | 1.09707e-06 | 0.999997 |
| rad68syn      | 1.10267e-07 | 1.000000 | 9.05336e-07 | 0.999998 |
| rad62         | 9.48283e-08 | 1.000000 | 7.78580e-07 | 0.999998 |

|           |             |         |             |          |
|-----------|-------------|---------|-------------|----------|
| rad68anti | 7.08818e-08 | 1.00000 | 5.81970e-07 | 0.999999 |
| rad43     | 4.82402e-08 | 1.00000 | 3.96072e-07 | 0.999999 |
| rad61     | 4.62531e-08 | 1.00000 | 3.79757e-07 | 1.000000 |
| rad40syn  | 4.43250e-08 | 1.00000 | 3.63927e-07 | 1.000000 |
| rad40anti | 2.91761e-08 | 1.00000 | 2.39548e-07 | 1.000000 |
| rad42     | 1.00373e-08 | 1.00000 | 8.24103e-08 | 1.000000 |
| rad41     | 5.35215e-09 | 1.00000 | 4.39434e-08 | 1.000000 |
| rad6      | 1.30595e-09 | 1.00000 | 1.07224e-08 | 1.000000 |
| rad23     | 5.40661e-10 | 1.00000 | 4.43906e-09 | 1.000000 |
| rad45     | 6.50814e-11 | 1.00000 | 5.34346e-10 | 1.000000 |
| rad22     | 4.05038e-11 | 1.00000 | 3.32554e-10 | 1.000000 |
| rad9      | 3.61776e-11 | 1.00000 | 2.97034e-10 | 1.000000 |
| rad20     | 2.60597e-11 | 1.00000 | 2.13962e-10 | 1.000000 |
| rad11     | 1.63497e-11 | 1.00000 | 1.34238e-10 | 1.000000 |
| rad21     | 1.30033e-11 | 1.00000 | 1.06763e-10 | 1.000000 |
| rad36     | 1.15977e-11 | 1.00000 | 9.52217e-11 | 1.000000 |
| rad7      | 9.49393e-12 | 1.00000 | 7.79492e-11 | 1.000000 |
| rad18     | 6.17804e-12 | 1.00000 | 5.07243e-11 | 1.000000 |
| rad28     | 5.25979e-12 | 1.00000 | 4.31851e-11 | 1.000000 |
| rad15     | 2.11926e-12 | 1.00000 | 1.74001e-11 | 1.000000 |
| rad13     | 8.56951e-13 | 1.00000 | 7.03593e-12 | 1.000000 |
| rad24     | 5.70002e-13 | 1.00000 | 4.67996e-12 | 1.000000 |
| rad12     | 3.05352e-13 | 1.00000 | 2.50707e-12 | 1.000000 |
| rad26     | 2.31843e-13 | 1.00000 | 1.90353e-12 | 1.000000 |
| rad8      | 2.16859e-13 | 1.00000 | 1.78050e-12 | 1.000000 |
| rad10     | 7.42386e-14 | 1.00000 | 6.09531e-13 | 1.000000 |
| rad33     | 3.63734e-14 | 1.00000 | 2.98641e-13 | 1.000000 |
| rad25     | 2.84548e-14 | 1.00000 | 2.33626e-13 | 1.000000 |
| rad2      | 1.72128e-14 | 1.00000 | 1.41324e-13 | 1.000000 |
| rad47     | 1.41378e-14 | 1.00000 | 1.16077e-13 | 1.000000 |
| rad1      | 4.85456e-15 | 1.00000 | 3.98580e-14 | 1.000000 |
| rad3      | 3.21730e-15 | 1.00000 | 2.64154e-14 | 1.000000 |
| rad5      | 2.12575e-15 | 1.00000 | 1.74533e-14 | 1.000000 |
| rad4      | 2.04723e-15 | 1.00000 | 1.68086e-14 | 1.000000 |
| rad14     | 5.33726e-16 | 1.00000 | 4.38212e-15 | 1.000000 |
| rad27     | 1.32635e-16 | 1.00000 | 1.08899e-15 | 1.000000 |

0.100000000 Pa, 2500.00000 K

=====

| Rate constant | True (fraction)     | Effective (fraction) |
|---------------|---------------------|----------------------|
| Total         | 5.32896e-13 (1.00 ) | 6.40311e-14 (1.00 )  |

| species       | PYtrue      | Cumul    | PYeffective | Cumul    |
|---------------|-------------|----------|-------------|----------|
| Benzyl+C2H2   | 0.879843    | 0.879843 | 0.00000     | 0.00000  |
| Indene+H      | 0.0541638   | 0.934007 | 0.450777    | 0.450777 |
| PhCH2CCH+H    | 0.0379681   | 0.971975 | 0.315989    | 0.766766 |
| Ph+Allene     | 0.0112444   | 0.983219 | 0.0935810   | 0.860347 |
| PhCHCCH2+H    | 0.00999485  | 0.993214 | 0.0831818   | 0.943529 |
| PAH3+H        | 0.00124356  | 0.994458 | 0.0103495   | 0.953878 |
| PAH9+H        | 0.00106545  | 0.995523 | 0.00886715  | 0.962745 |
| rad19anti     | 0.000731028 | 0.996254 | 0.00608395  | 0.968829 |
| rad38         | 0.000614393 | 0.996869 | 0.00511327  | 0.973943 |
| PAH7+H        | 0.000586817 | 0.997455 | 0.00488377  | 0.978826 |
| rad30         | 0.000442203 | 0.997898 | 0.00368022  | 0.982507 |
| PhCCH+CH3     | 0.000309130 | 0.998207 | 0.00257273  | 0.985079 |
| rad50         | 0.000261678 | 0.998468 | 0.00217781  | 0.987257 |
| Ph+MeAc       | 0.000256973 | 0.998725 | 0.00213865  | 0.989396 |
| rad35         | 0.000242192 | 0.998968 | 0.00201564  | 0.991411 |
| rad46         | 0.000207878 | 0.999175 | 0.00173006  | 0.993142 |
| rad39         | 0.000175772 | 0.999351 | 0.00146286  | 0.994604 |
| rad51         | 0.000109649 | 0.999461 | 0.000912552 | 0.995517 |
| rad59         | 0.000104825 | 0.999566 | 0.000872406 | 0.996389 |
| rad67         | 7.34547e-05 | 0.999639 | 0.000611325 | 0.997001 |
| PhCCCH3+H     | 7.22810e-05 | 0.999711 | 0.000601557 | 0.997602 |
| rad60syn      | 6.81857e-05 | 0.999780 | 0.000567474 | 0.998170 |
| rad60anti     | 4.82378e-05 | 0.999828 | 0.000401457 | 0.998571 |
| PAH10+CH3     | 3.08999e-05 | 0.999859 | 0.000257163 | 0.998828 |
| rad52         | 2.78078e-05 | 0.999887 | 0.000231430 | 0.999060 |
| rad19syn      | 2.34810e-05 | 0.999910 | 0.000195420 | 0.999255 |
| rad58         | 1.71635e-05 | 0.999927 | 0.000142842 | 0.999398 |
| PhcycC3H3_A+H | 1.49440e-05 | 0.999942 | 0.000124371 | 0.999522 |
| PAH1+H        | 1.13017e-05 | 0.999953 | 9.40584e-05 | 0.999616 |
| rad71         | 1.08633e-05 | 0.999964 | 9.04095e-05 | 0.999707 |
| rad37         | 8.12868e-06 | 0.999972 | 6.76507e-05 | 0.999775 |
| rad54         | 6.28002e-06 | 0.999979 | 5.22653e-05 | 0.999827 |
| rad70         | 5.97099e-06 | 0.999985 | 4.96934e-05 | 0.999876 |
| rad73         | 5.95742e-06 | 0.999991 | 4.95805e-05 | 0.999926 |
| rad65         | 2.87596e-06 | 0.999994 | 2.39351e-05 | 0.999950 |



|           |             |          |             |          |
|-----------|-------------|----------|-------------|----------|
| rad34     | 1.90625e-06 | 0.999995 | 1.58647e-05 | 0.999966 |
| PAH8+H    | 1.06524e-06 | 0.999997 | 8.86546e-06 | 0.999975 |
| rad72     | 7.14999e-07 | 0.999997 | 5.95056e-06 | 0.999981 |
| rad55     | 5.87554e-07 | 0.999998 | 4.88990e-06 | 0.999986 |
| rad56     | 3.21874e-07 | 0.999998 | 2.67879e-06 | 0.999988 |
| rad64     | 2.70857e-07 | 0.999998 | 2.25420e-06 | 0.999991 |
| rad53     | 2.70821e-07 | 0.999999 | 2.25390e-06 | 0.999993 |
| rad68syn  | 2.47505e-07 | 0.999999 | 2.05985e-06 | 0.999995 |
| rad68anti | 1.58684e-07 | 0.999999 | 1.32064e-06 | 0.999996 |
| rad62     | 1.55149e-07 | 0.999999 | 1.29122e-06 | 0.999997 |
| rad40syn  | 1.10734e-07 | 0.999999 | 9.21584e-07 | 0.999998 |
| rad61     | 1.05680e-07 | 0.999999 | 8.79521e-07 | 0.999999 |
| rad43     | 8.79693e-08 | 1.000000 | 7.32122e-07 | 1.000000 |
| rad40anti | 7.53439e-08 | 1.000000 | 6.27048e-07 | 1.000000 |
| rad42     | 1.97241e-08 | 1.000000 | 1.64153e-07 | 1.000000 |
| rad41     | 1.13877e-08 | 1.000000 | 9.47736e-08 | 1.000000 |
| rad6      | 2.34637e-10 | 1.000000 | 1.95276e-09 | 1.000000 |
| rad23     | 1.63132e-10 | 1.000000 | 1.35766e-09 | 1.000000 |
| rad45     | 2.82929e-11 | 1.000000 | 2.35467e-10 | 1.000000 |
| rad9      | 1.92348e-11 | 1.000000 | 1.60081e-10 | 1.000000 |
| rad20     | 1.43961e-11 | 1.000000 | 1.19811e-10 | 1.000000 |
| rad22     | 1.37889e-11 | 1.000000 | 1.14758e-10 | 1.000000 |
| rad21     | 6.95082e-12 | 1.000000 | 5.78480e-11 | 1.000000 |
| rad11     | 6.28039e-12 | 1.000000 | 5.22683e-11 | 1.000000 |
| rad36     | 5.14014e-12 | 1.000000 | 4.27786e-11 | 1.000000 |
| rad18     | 2.77896e-12 | 1.000000 | 2.31278e-11 | 1.000000 |
| rad7      | 2.65874e-12 | 1.000000 | 2.21273e-11 | 1.000000 |
| rad15     | 1.25930e-12 | 1.000000 | 1.04805e-11 | 1.000000 |
| rad28     | 1.23676e-12 | 1.000000 | 1.02929e-11 | 1.000000 |
| rad24     | 3.60418e-13 | 1.000000 | 2.99957e-12 | 1.000000 |
| rad13     | 2.74642e-13 | 1.000000 | 2.28570e-12 | 1.000000 |
| rad12     | 2.40047e-13 | 1.000000 | 1.99778e-12 | 1.000000 |
| rad8      | 2.25268e-13 | 1.000000 | 1.87478e-12 | 1.000000 |
| rad26     | 1.27310e-13 | 1.000000 | 1.05953e-12 | 1.000000 |
| rad10     | 4.08973e-14 | 1.000000 | 3.40367e-13 | 1.000000 |
| rad47     | 2.44568e-14 | 1.000000 | 2.03541e-13 | 1.000000 |
| rad25     | 1.71227e-14 | 1.000000 | 1.42503e-13 | 1.000000 |
| rad33     | 1.46763e-14 | 1.000000 | 1.22143e-13 | 1.000000 |
| rad2      | 5.09270e-15 | 1.000000 | 4.23838e-14 | 1.000000 |
| rad5      | 2.19537e-15 | 1.000000 | 1.82709e-14 | 1.000000 |
| rad1      | 1.65834e-15 | 1.000000 | 1.38015e-14 | 1.000000 |
| rad3      | 8.77774e-16 | 1.000000 | 7.30524e-15 | 1.000000 |
| rad4      | 5.50379e-16 | 1.000000 | 4.58051e-15 | 1.000000 |
| rad14     | 2.68250e-16 | 1.000000 | 2.23250e-15 | 1.000000 |
| rad27     | 1.07421e-16 | 1.000000 | 8.94005e-16 | 1.000000 |

0.100000000 Pa, 2750.00000 K

=====

| Rate constant | True (fraction)     | Effective (fraction) |
|---------------|---------------------|----------------------|
| Total         | 8.05113e-13 (1.00 ) | 1.00487e-13 (1.00 )  |

| species     | PYtrue      | Cumul    | PYeffective | Cumul    |
|-------------|-------------|----------|-------------|----------|
| Benzyl+C2H2 | 0.875189    | 0.875189 | 0.00000     | 0.00000  |
| PhCH2CCH+H  | 0.0492371   | 0.924426 | 0.394492    | 0.394492 |
| Indene+H    | 0.0427171   | 0.967143 | 0.342254    | 0.736746 |
| PhCHCCH2+H  | 0.0126523   | 0.979795 | 0.101371    | 0.838117 |
| Ph+Allene   | 0.0121360   | 0.991931 | 0.0972347   | 0.935352 |
| PAH3+H      | 0.00165412  | 0.993586 | 0.0132530   | 0.948605 |
| PAH9+H      | 0.00112924  | 0.994715 | 0.00904761  | 0.957652 |
| rad19anti   | 0.000790044 | 0.995505 | 0.00632991  | 0.963982 |
| PAH7+H      | 0.000729333 | 0.996234 | 0.00584349  | 0.969826 |
| rad38       | 0.000670522 | 0.996905 | 0.00537228  | 0.975198 |
| rad30       | 0.000454283 | 0.997359 | 0.00363976  | 0.978838 |
| rad50       | 0.000356822 | 0.997716 | 0.00285889  | 0.981697 |
| Ph+MeAc     | 0.000331297 | 0.998047 | 0.00265438  | 0.984351 |
| PhCCH+CH3   | 0.000293338 | 0.998340 | 0.00235025  | 0.986701 |
| rad35       | 0.000276886 | 0.998617 | 0.00221844  | 0.988920 |
| rad39       | 0.000242690 | 0.998860 | 0.00194445  | 0.990864 |
| rad46       | 0.000239377 | 0.999099 | 0.00191791  | 0.992782 |
| rad51       | 0.000167553 | 0.999267 | 0.00134245  | 0.994125 |
| rad59       | 0.000133898 | 0.999401 | 0.00107280  | 0.995197 |
| rad67       | 0.000103303 | 0.999504 | 0.000827674 | 0.996025 |
| PhCCCH3+H   | 9.47597e-05 | 0.999599 | 0.000759224 | 0.996784 |
| rad60syn    | 8.03400e-05 | 0.999679 | 0.000643692 | 0.997428 |
| rad60anti   | 5.74980e-05 | 0.999737 | 0.000460680 | 0.997889 |
| PAH10+CH3   | 4.75540e-05 | 0.999784 | 0.000381007 | 0.998270 |
| rad52       | 3.97966e-05 | 0.999824 | 0.000318854 | 0.998588 |
| rad19syn    | 3.43481e-05 | 0.999859 | 0.000275200 | 0.998864 |

|               |             |          |             |          |
|---------------|-------------|----------|-------------|----------|
| rad58         | 2.60271e-05 | 0.999885 | 0.000208532 | 0.999072 |
| rad71         | 2.39123e-05 | 0.999908 | 0.000191587 | 0.999264 |
| PhcycC3H3_A+H | 1.91124e-05 | 0.999928 | 0.000153131 | 0.999417 |
| PAH1+H        | 1.89313e-05 | 0.999946 | 0.000151679 | 0.999569 |
| rad73         | 1.19964e-05 | 0.999958 | 9.61165e-05 | 0.999665 |
| rad37         | 1.02458e-05 | 0.999969 | 8.20902e-05 | 0.999747 |
| rad70         | 8.97457e-06 | 0.999978 | 7.19051e-05 | 0.999819 |
| rad54         | 7.04852e-06 | 0.999985 | 5.64734e-05 | 0.999875 |
| rad65         | 4.27357e-06 | 0.999989 | 3.42402e-05 | 0.999909 |
| rad34         | 3.06724e-06 | 0.999992 | 2.45750e-05 | 0.999934 |
| PAH8+H        | 2.42508e-06 | 0.999995 | 1.94300e-05 | 0.999953 |
| rad72         | 1.88026e-06 | 0.999996 | 1.50649e-05 | 0.999968 |
| rad55         | 6.94535e-07 | 0.999997 | 5.56468e-06 | 0.999974 |
| rad56         | 5.00307e-07 | 0.999998 | 4.00851e-06 | 0.999978 |
| rad68syn      | 4.83458e-07 | 0.999998 | 3.87351e-06 | 0.999982 |
| rad64         | 4.76900e-07 | 0.999999 | 3.82097e-06 | 0.999986 |
| rad53         | 3.88200e-07 | 0.999999 | 3.11030e-06 | 0.999989 |
| rad68anti     | 3.09361e-07 | 0.999999 | 2.47863e-06 | 0.999991 |
| rad62         | 2.47711e-07 | 0.999999 | 1.98468e-06 | 0.999993 |
| rad40syn      | 2.35491e-07 | 1.000000 | 1.88678e-06 | 0.999995 |
| rad61         | 1.98411e-07 | 1.000000 | 1.58969e-06 | 0.999997 |
| rad40anti     | 1.64464e-07 | 1.000000 | 1.31770e-06 | 0.999998 |
| rad43         | 1.38326e-07 | 1.000000 | 1.10828e-06 | 0.999999 |
| rad42         | 3.59374e-08 | 1.000000 | 2.87934e-07 | 1.000000 |
| rad41         | 2.03340e-08 | 1.000000 | 1.62918e-07 | 1.000000 |
| rad23         | 6.03162e-11 | 1.000000 | 4.83260e-10 | 1.000000 |
| rad6          | 5.52654e-11 | 1.000000 | 4.42792e-10 | 1.000000 |
| rad45         | 1.34650e-11 | 1.000000 | 1.07883e-10 | 1.000000 |
| rad9          | 1.05171e-11 | 1.000000 | 8.42638e-11 | 1.000000 |
| rad20         | 8.68898e-12 | 1.000000 | 6.96170e-11 | 1.000000 |
| rad22         | 5.65500e-12 | 1.000000 | 4.53084e-11 | 1.000000 |
| rad21         | 4.05115e-12 | 1.000000 | 3.24582e-11 | 1.000000 |
| rad11         | 2.92941e-12 | 1.000000 | 2.34708e-11 | 1.000000 |
| rad36         | 2.48514e-12 | 1.000000 | 1.99112e-11 | 1.000000 |
| rad18         | 1.40174e-12 | 1.000000 | 1.12308e-11 | 1.000000 |
| rad7          | 8.91102e-13 | 1.000000 | 7.13960e-12 | 1.000000 |
| rad15         | 7.59296e-13 | 1.000000 | 6.08356e-12 | 1.000000 |
| rad28         | 4.44719e-13 | 1.000000 | 3.56313e-12 | 1.000000 |
| rad24         | 2.36701e-13 | 1.000000 | 1.89647e-12 | 1.000000 |
| rad8          | 2.27049e-13 | 1.000000 | 1.81914e-12 | 1.000000 |
| rad12         | 1.84640e-13 | 1.000000 | 1.47935e-12 | 1.000000 |
| rad13         | 1.03019e-13 | 1.000000 | 8.25395e-13 | 1.000000 |
| rad26         | 7.86890e-14 | 1.000000 | 6.30464e-13 | 1.000000 |
| rad47         | 3.65966e-14 | 1.000000 | 2.93216e-13 | 1.000000 |
| rad10         | 2.68747e-14 | 1.000000 | 2.15323e-13 | 1.000000 |
| rad25         | 1.16296e-14 | 1.000000 | 9.31778e-14 | 1.000000 |
| rad33         | 6.71481e-15 | 1.000000 | 5.37997e-14 | 1.000000 |
| rad2          | 2.51595e-15 | 1.000000 | 2.01581e-14 | 1.000000 |
| rad5          | 2.18309e-15 | 1.000000 | 1.74911e-14 | 1.000000 |
| rad1          | 9.46246e-16 | 1.000000 | 7.58142e-15 | 1.000000 |
| rad3          | 2.97688e-16 | 1.000000 | 2.38510e-15 | 1.000000 |
| rad4          | 1.82081e-16 | 1.000000 | 1.45885e-15 | 1.000000 |
| rad14         | 1.77662e-16 | 1.000000 | 1.42345e-15 | 1.000000 |
| rad27         | 9.32227e-17 | 1.000000 | 7.46909e-16 | 1.000000 |

0.100000000 Pa, 3000.00000 K

=====

| Rate constant | True (fraction)     | Effective (fraction) |
|---------------|---------------------|----------------------|
| Total         | 1.15309e-12 (1.00 ) | 1.53862e-13 (1.00 )  |

| species     | PYtrue      | Cumul    | PYeffective | Cumul    |
|-------------|-------------|----------|-------------|----------|
| Benzyl+C2H2 | 0.866566    | 0.866566 | 0.00000     | 0.00000  |
| PhCH2CCH+H  | 0.0611725   | 0.927738 | 0.458447    | 0.458447 |
| Indene+H    | 0.0342672   | 0.962006 | 0.256810    | 0.715257 |
| PhCHCCH2+H  | 0.0154790   | 0.977485 | 0.116005    | 0.831262 |
| Ph+Allene   | 0.0132660   | 0.990751 | 0.0994201   | 0.930682 |
| PAH3+H      | 0.00205938  | 0.992810 | 0.0154337   | 0.946116 |
| PAH9+H      | 0.00113813  | 0.993948 | 0.00852950  | 0.954645 |
| PAH7+H      | 0.000866136 | 0.994814 | 0.00649110  | 0.961136 |
| rad19anti   | 0.000812998 | 0.995627 | 0.00609288  | 0.967229 |
| rad38       | 0.000693215 | 0.996321 | 0.00519518  | 0.972424 |
| rad30       | 0.000455427 | 0.996776 | 0.00341312  | 0.975838 |
| rad50       | 0.000445147 | 0.997221 | 0.00333608  | 0.979174 |
| Ph+MeAc     | 0.000411378 | 0.997633 | 0.00308300  | 0.982257 |
| PhCCH+CH3   | 0.000319072 | 0.997952 | 0.00239123  | 0.984648 |
| rad39       | 0.000311351 | 0.998263 | 0.00233337  | 0.986981 |
| rad35       | 0.000303822 | 0.998567 | 0.00227694  | 0.989258 |
| rad46       | 0.000258929 | 0.998826 | 0.00194050  | 0.991199 |

|               |             |          |             |          |
|---------------|-------------|----------|-------------|----------|
| rad51         | 0.000229661 | 0.999055 | 0.00172116  | 0.992920 |
| rad59         | 0.000160966 | 0.999216 | 0.00120633  | 0.994126 |
| rad67         | 0.000132859 | 0.999349 | 0.000995686 | 0.995122 |
| PhCCCH3+H     | 0.000117527 | 0.999467 | 0.000880786 | 0.996003 |
| rad60syn      | 9.03378e-05 | 0.999557 | 0.000677021 | 0.996680 |
| PAH10+CH3     | 6.53522e-05 | 0.999622 | 0.000489771 | 0.997169 |
| rad60anti     | 6.52879e-05 | 0.999688 | 0.000489289 | 0.997659 |
| rad52         | 5.15998e-05 | 0.999739 | 0.000386706 | 0.998045 |
| rad19syn      | 5.01057e-05 | 0.999789 | 0.000375508 | 0.998421 |
| rad71         | 4.45159e-05 | 0.999834 | 0.000333617 | 0.998755 |
| rad58         | 3.61220e-05 | 0.999870 | 0.000270710 | 0.999025 |
| PAH1+H        | 2.86271e-05 | 0.999899 | 0.000214541 | 0.999240 |
| PhcycC3H3_A+H | 2.34369e-05 | 0.999922 | 0.000175644 | 0.999415 |
| rad73         | 2.07080e-05 | 0.999943 | 0.000155193 | 0.999571 |
| rad70         | 1.26564e-05 | 0.999955 | 9.48509e-05 | 0.999666 |
| rad37         | 1.18404e-05 | 0.999967 | 8.87361e-05 | 0.999754 |
| rad54         | 7.74183e-06 | 0.999975 | 5.80198e-05 | 0.999812 |
| rad65         | 5.71877e-06 | 0.999981 | 4.28583e-05 | 0.999855 |
| PAH8+H        | 4.80153e-06 | 0.999986 | 3.59842e-05 | 0.999891 |
| rad34         | 4.57469e-06 | 0.999990 | 3.42843e-05 | 0.999925 |
| rad72         | 4.05907e-06 | 0.999994 | 3.04200e-05 | 0.999956 |
| rad68syn      | 8.44302e-07 | 0.999995 | 6.32748e-06 | 0.999962 |
| rad55         | 7.96394e-07 | 0.999996 | 5.96844e-06 | 0.999968 |
| rad64         | 7.49015e-07 | 0.999997 | 5.61336e-06 | 0.999974 |
| rad56         | 7.20451e-07 | 0.999997 | 5.39930e-06 | 0.999979 |
| rad68anti     | 5.39463e-07 | 0.999998 | 4.04291e-06 | 0.999983 |
| rad53         | 5.23143e-07 | 0.999998 | 3.92061e-06 | 0.999987 |
| rad40syn      | 4.40707e-07 | 0.999999 | 3.30281e-06 | 0.999990 |
| rad62         | 3.72784e-07 | 0.999999 | 2.79377e-06 | 0.999993 |
| rad61         | 3.22478e-07 | 0.999999 | 2.41676e-06 | 0.999996 |
| rad40anti     | 3.14359e-07 | 1.000000 | 2.35591e-06 | 0.999998 |
| rad43         | 1.94896e-07 | 1.000000 | 1.46061e-06 | 0.999999 |
| rad42         | 5.98145e-08 | 1.000000 | 4.48270e-07 | 1.000000 |
| rad41         | 3.19484e-08 | 1.000000 | 2.39432e-07 | 1.000000 |
| rad23         | 2.52858e-11 | 1.000000 | 1.89500e-10 | 1.000000 |
| rad6          | 1.60044e-11 | 1.000000 | 1.19943e-10 | 1.000000 |
| rad45         | 6.86971e-12 | 1.000000 | 5.14839e-11 | 1.000000 |
| rad9          | 5.93512e-12 | 1.000000 | 4.44798e-11 | 1.000000 |
| rad20         | 5.61948e-12 | 1.000000 | 4.21142e-11 | 1.000000 |
| rad22         | 2.62703e-12 | 1.000000 | 1.96878e-11 | 1.000000 |
| rad21         | 2.52602e-12 | 1.000000 | 1.89309e-11 | 1.000000 |
| rad11         | 1.59833e-12 | 1.000000 | 1.19784e-11 | 1.000000 |
| rad36         | 1.28417e-12 | 1.000000 | 9.62403e-12 | 1.000000 |
| rad18         | 7.70005e-13 | 1.000000 | 5.77067e-12 | 1.000000 |
| rad15         | 4.66355e-13 | 1.000000 | 3.49502e-12 | 1.000000 |
| rad7          | 3.50113e-13 | 1.000000 | 2.62386e-12 | 1.000000 |
| rad8          | 2.23534e-13 | 1.000000 | 1.67524e-12 | 1.000000 |
| rad28         | 2.09407e-13 | 1.000000 | 1.56936e-12 | 1.000000 |
| rad24         | 1.60028e-13 | 1.000000 | 1.19931e-12 | 1.000000 |
| rad12         | 1.40784e-13 | 1.000000 | 1.05508e-12 | 1.000000 |
| rad26         | 5.00330e-14 | 1.000000 | 3.74964e-13 | 1.000000 |
| rad47         | 4.90428e-14 | 1.000000 | 3.67543e-13 | 1.000000 |
| rad13         | 4.47382e-14 | 1.000000 | 3.35283e-13 | 1.000000 |
| rad10         | 1.82313e-14 | 1.000000 | 1.36631e-13 | 1.000000 |
| rad25         | 8.60215e-15 | 1.000000 | 6.44673e-14 | 1.000000 |
| rad33         | 3.44371e-15 | 1.000000 | 2.58083e-14 | 1.000000 |
| rad5          | 2.11809e-15 | 1.000000 | 1.58737e-14 | 1.000000 |
| rad2          | 1.52305e-15 | 1.000000 | 1.14143e-14 | 1.000000 |
| rad1          | 6.49840e-16 | 1.000000 | 4.87012e-15 | 1.000000 |
| rad14         | 1.40327e-16 | 1.000000 | 1.05166e-15 | 1.000000 |
| rad3          | 1.22719e-16 | 1.000000 | 9.19697e-16 | 1.000000 |
| rad27         | 8.01980e-17 | 1.000000 | 6.01030e-16 | 1.000000 |
| rad4          | 7.28738e-17 | 1.000000 | 5.46140e-16 | 1.000000 |

0.100000000 Pa, 3250.00000 K

=====

| Rate constant | True (fraction)     | Effective (fraction) |
|---------------|---------------------|----------------------|
| Total         | 1.58309e-12 (1.00 ) | 2.28795e-13 (1.00 )  |

| species     | PYtrue      | Cumul    | PYeffective | Cumul    |
|-------------|-------------|----------|-------------|----------|
| Benzyl+C2H2 | 0.855476    | 0.855476 | 0.00000     | 0.00000  |
| PhCH2CCH+H  | 0.0734301   | 0.928906 | 0.508082    | 0.508082 |
| Indene+H    | 0.0278643   | 0.956770 | 0.192800    | 0.700882 |
| PhCHCCH2+H  | 0.0183610   | 0.975131 | 0.127045    | 0.827927 |
| Ph+Allene   | 0.0145940   | 0.989725 | 0.100980    | 0.928907 |
| PAH3+H      | 0.00243645  | 0.992162 | 0.0168585   | 0.945765 |
| PAH9+H      | 0.00110339  | 0.993265 | 0.00763468  | 0.953400 |
| PAH7+H      | 0.000986571 | 0.994252 | 0.00682634  | 0.960227 |

|               |             |          |             |          |
|---------------|-------------|----------|-------------|----------|
| rad19anti     | 0.000808911 | 0.995061 | 0.00559707  | 0.965824 |
| rad38         | 0.000686670 | 0.995747 | 0.00475125  | 0.970575 |
| rad50         | 0.000518179 | 0.996266 | 0.00358542  | 0.974160 |
| Ph+MeAc       | 0.000489465 | 0.996755 | 0.00338674  | 0.977547 |
| rad30         | 0.000447972 | 0.997203 | 0.00309964  | 0.980647 |
| PhCCH+CH3     | 0.000378211 | 0.997581 | 0.00261694  | 0.983264 |
| rad39         | 0.000374434 | 0.997956 | 0.00259081  | 0.985854 |
| rad35         | 0.000323023 | 0.998279 | 0.00223508  | 0.988089 |
| rad51         | 0.000289245 | 0.998568 | 0.00200136  | 0.990091 |
| rad46         | 0.000266714 | 0.998835 | 0.00184546  | 0.991936 |
| rad59         | 0.000184695 | 0.999019 | 0.00127795  | 0.993214 |
| rad67         | 0.000159865 | 0.999179 | 0.00110614  | 0.994320 |
| PhCCCH3+H     | 0.000140367 | 0.999320 | 0.000971235 | 0.995292 |
| rad60syn      | 9.79791e-05 | 0.999418 | 0.000677943 | 0.995970 |
| PAH10+CH3     | 8.26142e-05 | 0.999500 | 0.000571630 | 0.996541 |
| rad71         | 7.28074e-05 | 0.999573 | 0.000503774 | 0.997045 |
| rad60anti     | 7.14060e-05 | 0.999644 | 0.000494077 | 0.997539 |
| rad19syn      | 7.13406e-05 | 0.999716 | 0.000493624 | 0.998033 |
| rad52         | 6.19533e-05 | 0.999778 | 0.000428671 | 0.998461 |
| rad58         | 4.68388e-05 | 0.999825 | 0.000324090 | 0.998785 |
| PAH1+H        | 3.98745e-05 | 0.999864 | 0.000275902 | 0.999061 |
| rad73         | 3.17350e-05 | 0.999896 | 0.000219583 | 0.999281 |
| PhcycC3H3_A+H | 2.77967e-05 | 0.999924 | 0.000192333 | 0.999473 |
| rad70         | 1.68825e-05 | 0.999941 | 0.000116814 | 0.999590 |
| rad37         | 1.28499e-05 | 0.999954 | 8.89115e-05 | 0.999679 |
| PAH8+H        | 8.50457e-06 | 0.999962 | 5.88454e-05 | 0.999738 |
| rad54         | 8.38235e-06 | 0.999971 | 5.79997e-05 | 0.999796 |
| rad72         | 7.52650e-06 | 0.999978 | 5.20778e-05 | 0.999848 |
| rad65         | 7.06074e-06 | 0.999985 | 4.88551e-05 | 0.999897 |
| rad34         | 6.39568e-06 | 0.999992 | 4.42534e-05 | 0.999941 |
| rad68syn      | 1.34606e-06 | 0.999993 | 9.31375e-06 | 0.999950 |
| rad64         | 1.07438e-06 | 0.999994 | 7.43389e-06 | 0.999958 |
| rad56         | 9.79690e-07 | 0.999995 | 6.77873e-06 | 0.999965 |
| rad55         | 8.93999e-07 | 0.999996 | 6.18581e-06 | 0.999971 |
| rad68anti     | 8.59058e-07 | 0.999997 | 5.94405e-06 | 0.999977 |
| rad40syn      | 7.44327e-07 | 0.999997 | 5.15020e-06 | 0.999982 |
| rad53         | 6.73265e-07 | 0.999998 | 4.65850e-06 | 0.999986 |
| rad40anti     | 5.40357e-07 | 0.999999 | 3.73888e-06 | 0.999990 |
| rad62         | 5.25220e-07 | 0.999999 | 3.63414e-06 | 0.999994 |
| rad61         | 4.70536e-07 | 1.000000 | 3.25576e-06 | 0.999997 |
| rad43         | 2.53715e-07 | 1.000000 | 1.75552e-06 | 0.999999 |
| rad42         | 9.14458e-08 | 1.000000 | 6.32737e-07 | 0.999999 |
| rad41         | 4.57450e-08 | 1.000000 | 3.16522e-07 | 1.000000 |
| rad23         | 1.15676e-11 | 1.000000 | 8.00396e-11 | 1.000000 |
| rad6          | 5.54593e-12 | 1.000000 | 3.83737e-11 | 1.000000 |
| rad20         | 3.83914e-12 | 1.000000 | 2.65640e-11 | 1.000000 |
| rad45         | 3.70074e-12 | 1.000000 | 2.56064e-11 | 1.000000 |
| rad9          | 3.46412e-12 | 1.000000 | 2.39692e-11 | 1.000000 |
| rad21         | 1.66197e-12 | 1.000000 | 1.14996e-11 | 1.000000 |
| rad22         | 1.34153e-12 | 1.000000 | 9.28238e-12 | 1.000000 |
| rad11         | 9.83965e-13 | 1.000000 | 6.80832e-12 | 1.000000 |
| rad36         | 6.98886e-13 | 1.000000 | 4.83578e-12 | 1.000000 |
| rad18         | 4.51823e-13 | 1.000000 | 3.12628e-12 | 1.000000 |
| rad15         | 2.92808e-13 | 1.000000 | 2.02601e-12 | 1.000000 |
| rad8          | 2.15818e-13 | 1.000000 | 1.49330e-12 | 1.000000 |
| rad7          | 1.58002e-13 | 1.000000 | 1.09326e-12 | 1.000000 |
| rad28         | 1.15086e-13 | 1.000000 | 7.96310e-13 | 1.000000 |
| rad24         | 1.10778e-13 | 1.000000 | 7.66503e-13 | 1.000000 |
| rad12         | 1.07284e-13 | 1.000000 | 7.42325e-13 | 1.000000 |
| rad47         | 6.03542e-14 | 1.000000 | 4.17606e-13 | 1.000000 |
| rad26         | 3.22372e-14 | 1.000000 | 2.23058e-13 | 1.000000 |
| rad13         | 2.21129e-14 | 1.000000 | 1.53005e-13 | 1.000000 |
| rad10         | 1.24562e-14 | 1.000000 | 8.61877e-14 | 1.000000 |
| rad25         | 6.72563e-15 | 1.000000 | 4.65364e-14 | 1.000000 |
| rad5          | 2.03303e-15 | 1.000000 | 1.40671e-14 | 1.000000 |
| rad33         | 1.94933e-15 | 1.000000 | 1.34879e-14 | 1.000000 |
| rad2          | 9.92765e-16 | 1.000000 | 6.86920e-15 | 1.000000 |
| rad1          | 4.73720e-16 | 1.000000 | 3.27779e-15 | 1.000000 |
| rad14         | 1.20291e-16 | 1.000000 | 8.32324e-16 | 1.000000 |
| rad27         | 6.78951e-17 | 1.000000 | 4.69784e-16 | 1.000000 |
| rad3          | 5.95606e-17 | 1.000000 | 4.12115e-16 | 1.000000 |
| rad4          | 3.44029e-17 | 1.000000 | 2.38043e-16 | 1.000000 |

0.100000000 Pa, 3500.00000 K

| Rate constant | True (fraction)     | Effective (fraction) |
|---------------|---------------------|----------------------|
| Total         | 2.10046e-12 (1.00 ) | 3.29923e-13 (1.00 )  |
| species       | PYtrue Cumul        | PYeffective Cumul    |

|               |             |          |             |          |
|---------------|-------------|----------|-------------|----------|
| Benzyl+C2H2   | 0.842928    | 0.842928 | 0.00000     | 0.00000  |
| PhCH2CCH+H    | 0.0857241   | 0.928652 | 0.545762    | 0.545762 |
| Indene+H      | 0.0229287   | 0.951581 | 0.145976    | 0.691738 |
| PhCHCCH2+H    | 0.0212218   | 0.972803 | 0.135108    | 0.826846 |
| Ph+Allene     | 0.0160719   | 0.988874 | 0.102322    | 0.929168 |
| PAH3+H        | 0.00277080  | 0.991645 | 0.0176403   | 0.946808 |
| PAH7+H        | 0.00108547  | 0.992731 | 0.00691065  | 0.953719 |
| PAH9+H        | 0.00103824  | 0.993769 | 0.00660998  | 0.960329 |
| rad19anti     | 0.000786012 | 0.994555 | 0.00500415  | 0.965333 |
| rad38         | 0.000657575 | 0.995213 | 0.00418645  | 0.969520 |
| rad50         | 0.000571322 | 0.995784 | 0.00363732  | 0.973157 |
| Ph+MeAc       | 0.000559758 | 0.996344 | 0.00356370  | 0.976721 |
| PhCCH+CH3     | 0.000466753 | 0.996810 | 0.00297158  | 0.979692 |
| rad30         | 0.000434295 | 0.997245 | 0.00276494  | 0.982457 |
| rad39         | 0.000426787 | 0.997672 | 0.00271714  | 0.985174 |
| rad51         | 0.000340822 | 0.998012 | 0.00216985  | 0.987344 |
| rad35         | 0.000335221 | 0.998348 | 0.00213419  | 0.989478 |
| rad46         | 0.000264413 | 0.998612 | 0.00168339  | 0.991162 |
| rad59         | 0.000204435 | 0.998816 | 0.00130154  | 0.992463 |
| rad67         | 0.000182834 | 0.998999 | 0.00116401  | 0.993627 |
| PhCCCH3+H     | 0.000163685 | 0.999163 | 0.00104210  | 0.994669 |
| rad71         | 0.000107601 | 0.999271 | 0.000685042 | 0.995354 |
| rad60syn      | 0.000103349 | 0.999374 | 0.000657969 | 0.996012 |
| PAH10+CH3     | 9.81181e-05 | 0.999472 | 0.000624669 | 0.996637 |
| rad19syn      | 9.79725e-05 | 0.999570 | 0.000623742 | 0.997261 |
| rad60anti     | 7.58697e-05 | 0.999646 | 0.000483025 | 0.997744 |
| rad52         | 7.00217e-05 | 0.999716 | 0.000445793 | 0.998190 |
| rad58         | 5.76196e-05 | 0.999773 | 0.000366835 | 0.998556 |
| PAH1+H        | 5.20523e-05 | 0.999826 | 0.000331391 | 0.998888 |
| rad73         | 4.43107e-05 | 0.999870 | 0.000282104 | 0.999170 |
| PhcycC3H3_A+H | 3.20633e-05 | 0.999902 | 0.000204131 | 0.999374 |
| rad70         | 2.14708e-05 | 0.999923 | 0.000136694 | 0.999511 |
| PAH8+H        | 1.37725e-05 | 0.999937 | 8.76827e-05 | 0.999598 |
| rad37         | 1.33235e-05 | 0.999950 | 8.48243e-05 | 0.999683 |
| rad72         | 1.23923e-05 | 0.999963 | 7.88959e-05 | 0.999762 |
| rad54         | 8.98058e-06 | 0.999972 | 5.71749e-05 | 0.999819 |
| rad34         | 8.46717e-06 | 0.999980 | 5.39063e-05 | 0.999873 |
| rad65         | 8.19015e-06 | 0.999988 | 5.21426e-05 | 0.999925 |
| rad68syn      | 1.99232e-06 | 0.999990 | 1.26841e-05 | 0.999938 |
| rad64         | 1.43496e-06 | 0.999992 | 9.13568e-06 | 0.999947 |
| rad56         | 1.27412e-06 | 0.999993 | 8.11171e-06 | 0.999955 |
| rad68anti     | 1.27030e-06 | 0.999994 | 8.08736e-06 | 0.999963 |
| rad40syn      | 1.15716e-06 | 0.999996 | 7.36708e-06 | 0.999971 |
| rad55         | 9.87613e-07 | 0.999997 | 6.28764e-06 | 0.999977 |
| rad40anti     | 8.52741e-07 | 0.999997 | 5.42898e-06 | 0.999982 |
| rad53         | 8.35966e-07 | 0.999998 | 5.32218e-06 | 0.999988 |
| rad62         | 6.97360e-07 | 0.999999 | 4.43975e-06 | 0.999992 |
| rad61         | 6.32568e-07 | 1.000000 | 4.02725e-06 | 0.999996 |
| rad43         | 3.12012e-07 | 1.000000 | 1.98643e-06 | 0.999998 |
| rad42         | 1.30122e-07 | 1.000000 | 8.28424e-07 | 0.999999 |
| rad41         | 6.11800e-08 | 1.000000 | 3.89503e-07 | 0.999999 |
| rad23         | 5.66285e-12 | 1.000000 | 3.60525e-11 | 0.999999 |
| rad20         | 2.74150e-12 | 1.000000 | 1.74538e-11 | 0.999999 |
| rad6          | 2.25181e-12 | 1.000000 | 1.43361e-11 | 0.999999 |
| rad9          | 2.09187e-12 | 1.000000 | 1.33179e-11 | 0.999999 |
| rad45         | 2.08257e-12 | 1.000000 | 1.32587e-11 | 0.999999 |
| rad21         | 1.14224e-12 | 1.000000 | 7.27204e-12 | 0.999999 |
| rad22         | 7.39283e-13 | 1.000000 | 4.70665e-12 | 0.999999 |
| rad11         | 6.62819e-13 | 1.000000 | 4.21984e-12 | 0.999999 |
| rad36         | 3.96445e-13 | 1.000000 | 2.52397e-12 | 0.999999 |
| rad18         | 2.79409e-13 | 1.000000 | 1.77886e-12 | 0.999999 |
| rad8          | 2.04865e-13 | 1.000000 | 1.30428e-12 | 0.999999 |
| rad15         | 1.88225e-13 | 1.000000 | 1.19834e-12 | 0.999999 |
| rad12         | 8.20877e-14 | 1.000000 | 5.22612e-13 | 0.999999 |
| rad7          | 8.00765e-14 | 1.000000 | 5.09808e-13 | 0.999999 |
| rad24         | 7.82702e-14 | 1.000000 | 4.98307e-13 | 0.999999 |
| rad47         | 6.94994e-14 | 1.000000 | 4.42468e-13 | 0.999999 |
| rad28         | 6.90632e-14 | 1.000000 | 4.39691e-13 | 0.999999 |
| rad26         | 2.10438e-14 | 1.000000 | 1.33975e-13 | 0.999999 |
| rad13         | 1.21852e-14 | 1.000000 | 7.75769e-14 | 0.999999 |
| rad10         | 8.58015e-15 | 1.000000 | 5.46255e-14 | 0.999999 |
| rad25         | 5.44478e-15 | 1.000000 | 3.46642e-14 | 0.999999 |
| rad5          | 1.94586e-15 | 1.000000 | 1.23883e-14 | 0.999999 |
| rad33         | 1.19820e-15 | 1.000000 | 7.62833e-15 | 0.999999 |
| rad2          | 6.77109e-16 | 1.000000 | 4.31082e-15 | 0.999999 |
| rad1          | 3.54295e-16 | 1.000000 | 2.25562e-15 | 0.999999 |
| rad14         | 1.06232e-16 | 1.000000 | 6.76324e-16 | 0.999999 |
| rad27         | 5.69388e-17 | 1.000000 | 3.62501e-16 | 0.999999 |
| rad3          | 3.28926e-17 | 1.000000 | 2.09411e-16 | 0.999999 |

rad4 | 1.86007e-17 1.00000 | 1.18421e-16 0.999999

0.100000000 Pa, 3750.00000 K

=====  
Rate constant | True (fraction) Effective (fraction)  
-----  
Total | 2.70978e-12 (1.00 ) 4.61708e-13 (1.00 )

| species       | PYtrue      | Cumul    | PYeffective | Cumul    |
|---------------|-------------|----------|-------------|----------|
| Benzyl+C2H2   | 0.829614    | 0.829614 | 0.000000    | 0.000000 |
| PhCH2CCH+H    | 0.0978316   | 0.927446 | 0.574175    | 0.574175 |
| PhCHCCH2+H    | 0.0240141   | 0.951460 | 0.140939    | 0.715114 |
| Indene+H      | 0.0190788   | 0.970538 | 0.111974    | 0.827088 |
| Ph+Allene     | 0.0176550   | 0.988193 | 0.103617    | 0.930705 |
| PAH3+H        | 0.00305565  | 0.991249 | 0.0179337   | 0.948639 |
| PAH7+H        | 0.00116197  | 0.992411 | 0.00681959  | 0.955458 |
| PAH9+H        | 0.000955042 | 0.993366 | 0.00560515  | 0.961063 |
| rad19anti     | 0.000750872 | 0.994117 | 0.00440688  | 0.965470 |
| Ph+MeAc       | 0.000618509 | 0.994736 | 0.00363004  | 0.969100 |
| rad38         | 0.000613193 | 0.995349 | 0.00359884  | 0.972699 |
| rad50         | 0.000603635 | 0.995952 | 0.00354274  | 0.976242 |
| PhCCH+CH3     | 0.000581835 | 0.996534 | 0.00341479  | 0.979657 |
| rad39         | 0.000465790 | 0.997000 | 0.00273373  | 0.982390 |
| rad30         | 0.000416539 | 0.997417 | 0.00244467  | 0.984835 |
| rad51         | 0.000380994 | 0.997798 | 0.00223606  | 0.987071 |
| rad35         | 0.000341508 | 0.998139 | 0.00200431  | 0.989075 |
| rad46         | 0.000254425 | 0.998393 | 0.00149322  | 0.990569 |
| rad59         | 0.000220084 | 0.998614 | 0.00129168  | 0.991860 |
| rad67         | 0.000201013 | 0.998815 | 0.00117975  | 0.993040 |
| PhCCCH3+H     | 0.000187990 | 0.999003 | 0.00110331  | 0.994143 |
| rad71         | 0.000146780 | 0.999149 | 0.000861455 | 0.995005 |
| rad19syn      | 0.000129261 | 0.999279 | 0.000758633 | 0.995764 |
| PAH10+CH3     | 0.000111172 | 0.999390 | 0.000652468 | 0.996416 |
| rad60syn      | 0.000106707 | 0.999496 | 0.000626263 | 0.997042 |
| rad60anti     | 7.88382e-05 | 0.999575 | 0.000462703 | 0.997505 |
| rad52         | 7.54521e-05 | 0.999651 | 0.000442829 | 0.997948 |
| rad58         | 6.80261e-05 | 0.999719 | 0.000399246 | 0.998347 |
| PAH1+H        | 6.45813e-05 | 0.999783 | 0.000379028 | 0.998726 |
| rad73         | 5.74878e-05 | 0.999841 | 0.000337397 | 0.999063 |
| PhcycC3H3_A+H | 3.61213e-05 | 0.999877 | 0.000211996 | 0.999275 |
| rad70         | 2.62309e-05 | 0.999903 | 0.000153949 | 0.999429 |
| PAH8+H        | 2.07420e-05 | 0.999924 | 0.000121735 | 0.999551 |
| rad72         | 1.85748e-05 | 0.999943 | 0.000109016 | 0.999660 |
| rad37         | 1.33636e-05 | 0.999956 | 7.84314e-05 | 0.999739 |
| rad34         | 1.07116e-05 | 0.999967 | 6.28665e-05 | 0.999801 |
| rad54         | 9.53969e-06 | 0.999976 | 5.59886e-05 | 0.999857 |
| rad65         | 9.05125e-06 | 0.999985 | 5.31219e-05 | 0.999911 |
| rad68syn      | 2.77520e-06 | 0.999988 | 1.62877e-05 | 0.999927 |
| rad64         | 1.81236e-06 | 0.999990 | 1.06367e-05 | 0.999938 |
| rad68anti     | 1.76807e-06 | 0.999992 | 1.03768e-05 | 0.999948 |
| rad40syn      | 1.68193e-06 | 0.999993 | 9.87130e-06 | 0.999958 |
| rad56         | 1.59874e-06 | 0.999995 | 9.38301e-06 | 0.999967 |
| rad40anti     | 1.25564e-06 | 0.999996 | 7.36935e-06 | 0.999975 |
| rad55         | 1.07703e-06 | 0.999997 | 6.32112e-06 | 0.999981 |
| rad53         | 1.00840e-06 | 0.999998 | 5.91834e-06 | 0.999987 |
| rad62         | 8.81786e-07 | 0.999999 | 5.17522e-06 | 0.999992 |
| rad61         | 7.98455e-07 | 1.000000 | 4.68615e-06 | 0.999997 |
| rad43         | 3.67979e-07 | 1.000000 | 2.15967e-06 | 0.999999 |
| rad42         | 1.74775e-07 | 1.000000 | 1.02576e-06 | 1.000000 |
| rad41         | 7.77074e-08 | 1.000000 | 4.56066e-07 | 1.000000 |
| rad23         | 2.93041e-12 | 1.000000 | 1.71986e-11 | 1.000000 |
| rad20         | 2.03004e-12 | 1.000000 | 1.19143e-11 | 1.000000 |
| rad9          | 1.30556e-12 | 1.000000 | 7.66233e-12 | 1.000000 |
| rad45         | 1.21501e-12 | 1.000000 | 7.13089e-12 | 1.000000 |
| rad6          | 1.04783e-12 | 1.000000 | 6.14971e-12 | 1.000000 |
| rad21         | 8.13916e-13 | 1.000000 | 4.77689e-12 | 1.000000 |
| rad11         | 4.77200e-13 | 1.000000 | 2.80069e-12 | 1.000000 |
| rad22         | 4.33898e-13 | 1.000000 | 2.54655e-12 | 1.000000 |
| rad36         | 2.32681e-13 | 1.000000 | 1.36561e-12 | 1.000000 |
| rad8          | 1.91573e-13 | 1.000000 | 1.12434e-12 | 1.000000 |
| rad18         | 1.80372e-13 | 1.000000 | 1.05861e-12 | 1.000000 |
| rad15         | 1.23871e-13 | 1.000000 | 7.26998e-13 | 1.000000 |
| rad47         | 7.59707e-14 | 1.000000 | 4.45873e-13 | 1.000000 |
| rad12         | 6.32119e-14 | 1.000000 | 3.70991e-13 | 1.000000 |
| rad24         | 5.63439e-14 | 1.000000 | 3.30683e-13 | 1.000000 |
| rad7          | 4.45818e-14 | 1.000000 | 2.61651e-13 | 1.000000 |
| rad28         | 4.37628e-14 | 1.000000 | 2.56844e-13 | 1.000000 |
| rad26         | 1.39441e-14 | 1.000000 | 8.18384e-14 | 1.000000 |
| rad13         | 7.33285e-15 | 1.000000 | 4.30366e-14 | 1.000000 |

|       |             |         |             |         |
|-------|-------------|---------|-------------|---------|
| rad10 | 5.99208e-15 | 1.00000 | 3.51676e-14 | 1.00000 |
| rad25 | 4.50628e-15 | 1.00000 | 2.64474e-14 | 1.00000 |
| rad5  | 1.86247e-15 | 1.00000 | 1.09309e-14 | 1.00000 |
| rad33 | 7.87853e-16 | 1.00000 | 4.62392e-15 | 1.00000 |
| rad2  | 4.83228e-16 | 1.00000 | 2.83607e-15 | 1.00000 |
| rad1  | 2.69153e-16 | 1.00000 | 1.57967e-15 | 1.00000 |
| rad14 | 9.46128e-17 | 1.00000 | 5.55284e-16 | 1.00000 |
| rad27 | 4.76443e-17 | 1.00000 | 2.79625e-16 | 1.00000 |
| rad3  | 2.00698e-17 | 1.00000 | 1.17790e-16 | 1.00000 |
| rad4  | 1.11968e-17 | 1.00000 | 6.57141e-17 | 1.00000 |

0.100000000 Pa, 4000.00000 K

=====

| Rate constant | True (fraction)     | Effective (fraction) |
|---------------|---------------------|----------------------|
| Total         | 3.41497e-12 (1.00 ) | 6.28297e-13 (1.00 )  |

| species       | PYtrue      | Cumul    | PYeffective | Cumul    |
|---------------|-------------|----------|-------------|----------|
| Benzyl+C2H2   | 0.816017    | 0.816017 | 0.00000     | 0.00000  |
| PhCH2CCH+H    | 0.109584    | 0.925601 | 0.595618    | 0.595618 |
| PhCHCCH2+H    | 0.0267098   | 0.952311 | 0.145175    | 0.740793 |
| Ph+Allene     | 0.0193046   | 0.971615 | 0.104926    | 0.845719 |
| Indene+H      | 0.0160484   | 0.987664 | 0.0872277   | 0.932947 |
| PAH3+H        | 0.00329013  | 0.990954 | 0.0178828   | 0.950829 |
| PAH7+H        | 0.00121791  | 0.992172 | 0.00661968  | 0.957449 |
| PAH9+H        | 0.000864009 | 0.993036 | 0.00469613  | 0.962145 |
| PhCCH+CH3     | 0.000720156 | 0.993756 | 0.00391424  | 0.966060 |
| rad19anti     | 0.000708493 | 0.994464 | 0.00385085  | 0.969910 |
| Ph+MeAc       | 0.000663934 | 0.995128 | 0.00360866  | 0.973519 |
| rad50         | 0.000616859 | 0.995745 | 0.00335280  | 0.976872 |
| rad38         | 0.000560144 | 0.996305 | 0.00304454  | 0.979916 |
| rad39         | 0.000491035 | 0.996796 | 0.00266891  | 0.982585 |
| rad51         | 0.000408498 | 0.997205 | 0.00222030  | 0.984806 |
| rad30         | 0.000396478 | 0.997601 | 0.00215497  | 0.986961 |
| rad35         | 0.000343096 | 0.997945 | 0.00186482  | 0.988825 |
| rad46         | 0.000239253 | 0.998184 | 0.00130041  | 0.990126 |
| rad59         | 0.000231903 | 0.998416 | 0.00126046  | 0.991386 |
| rad67         | 0.000214260 | 0.998630 | 0.00116456  | 0.992551 |
| PhCCCH3+H     | 0.000213580 | 0.998844 | 0.00116087  | 0.993712 |
| rad71         | 0.000187844 | 0.999031 | 0.00102098  | 0.994733 |
| rad19syn      | 0.000163941 | 0.999195 | 0.000891067 | 0.995624 |
| PAH10+CH3     | 0.000121536 | 0.999317 | 0.000660582 | 0.996284 |
| rad60syn      | 0.000108396 | 0.999425 | 0.000589161 | 0.996873 |
| rad60anti     | 8.05427e-05 | 0.999506 | 0.000437772 | 0.997311 |
| rad52         | 7.82960e-05 | 0.999584 | 0.000425560 | 0.997737 |
| rad58         | 7.77572e-05 | 0.999662 | 0.000422632 | 0.998159 |
| PAH1+H        | 7.70001e-05 | 0.999739 | 0.000418517 | 0.998578 |
| rad73         | 7.03552e-05 | 0.999809 | 0.000382400 | 0.998960 |
| PhcycC3H3_A+H | 3.98813e-05 | 0.999849 | 0.000216766 | 0.999177 |
| rad70         | 3.09908e-05 | 0.999880 | 0.000168444 | 0.999346 |
| PAH8+H        | 2.94355e-05 | 0.999910 | 0.000159990 | 0.999506 |
| rad72         | 2.58284e-05 | 0.999935 | 0.000140384 | 0.999646 |
| rad37         | 1.30848e-05 | 0.999948 | 7.11194e-05 | 0.999717 |
| rad34         | 1.30497e-05 | 0.999961 | 7.09289e-05 | 0.999788 |
| rad54         | 1.00584e-05 | 0.999972 | 5.46703e-05 | 0.999843 |
| rad65         | 9.63686e-06 | 0.999981 | 5.23790e-05 | 0.999895 |
| rad68syn      | 3.67778e-06 | 0.999985 | 1.99898e-05 | 0.999915 |
| rad68anti     | 2.34154e-06 | 0.999987 | 1.27269e-05 | 0.999928 |
| rad40syn      | 2.31359e-06 | 0.999990 | 1.25750e-05 | 0.999940 |
| rad64         | 2.19077e-06 | 0.999992 | 1.19074e-05 | 0.999952 |
| rad56         | 1.94741e-06 | 0.999994 | 1.05847e-05 | 0.999963 |
| rad40anti     | 1.74691e-06 | 0.999995 | 9.49492e-06 | 0.999972 |
| rad53         | 1.18744e-06 | 0.999997 | 6.45406e-06 | 0.999979 |
| rad55         | 1.16170e-06 | 0.999998 | 6.31418e-06 | 0.999985 |
| rad62         | 1.07271e-06 | 0.999999 | 5.83046e-06 | 0.999991 |
| rad61         | 9.59661e-07 | 1.000000 | 5.21602e-06 | 0.999996 |
| rad43         | 4.20278e-07 | 1.000000 | 2.28433e-06 | 0.999998 |
| rad42         | 2.24298e-07 | 1.000000 | 1.21912e-06 | 1.000000 |
| rad41         | 9.47630e-08 | 1.000000 | 5.15063e-07 | 1.000000 |
| rad23         | 1.58931e-12 | 1.000000 | 8.63836e-12 | 1.000000 |
| rad20         | 1.54937e-12 | 1.000000 | 8.42128e-12 | 1.000000 |
| rad9          | 8.40512e-13 | 1.000000 | 4.56841e-12 | 1.000000 |
| rad45         | 7.30983e-13 | 1.000000 | 3.97309e-12 | 1.000000 |
| rad21         | 5.97934e-13 | 1.000000 | 3.24994e-12 | 1.000000 |
| rad6          | 5.46463e-13 | 1.000000 | 2.97018e-12 | 1.000000 |
| rad11         | 3.61017e-13 | 1.000000 | 1.96223e-12 | 1.000000 |
| rad22         | 2.68564e-13 | 1.000000 | 1.45972e-12 | 1.000000 |
| rad8          | 1.76788e-13 | 1.000000 | 9.60891e-13 | 1.000000 |
| rad36         | 1.40569e-13 | 1.000000 | 7.64032e-13 | 1.000000 |

|       |             |         |             |         |
|-------|-------------|---------|-------------|---------|
| rad18 | 1.20728e-13 | 1.00000 | 6.56191e-13 | 1.00000 |
| rad15 | 8.33731e-14 | 1.00000 | 4.53156e-13 | 1.00000 |
| rad47 | 7.97227e-14 | 1.00000 | 4.33315e-13 | 1.00000 |
| rad12 | 4.90407e-14 | 1.00000 | 2.66550e-13 | 1.00000 |
| rad24 | 4.12849e-14 | 1.00000 | 2.24395e-13 | 1.00000 |
| rad28 | 2.88114e-14 | 1.00000 | 1.56598e-13 | 1.00000 |
| rad7  | 2.67484e-14 | 1.00000 | 1.45385e-13 | 1.00000 |
| rad26 | 9.39414e-15 | 1.00000 | 5.10597e-14 | 1.00000 |
| rad13 | 4.73338e-15 | 1.00000 | 2.57272e-14 | 1.00000 |
| rad10 | 4.26629e-15 | 1.00000 | 2.31884e-14 | 1.00000 |
| rad25 | 3.78512e-15 | 1.00000 | 2.05732e-14 | 1.00000 |
| rad5  | 1.78278e-15 | 1.00000 | 9.68990e-15 | 1.00000 |
| rad33 | 5.47165e-16 | 1.00000 | 2.97399e-15 | 1.00000 |
| rad2  | 3.62346e-16 | 1.00000 | 1.96945e-15 | 1.00000 |
| rad1  | 2.06921e-16 | 1.00000 | 1.12467e-15 | 1.00000 |
| rad14 | 8.44316e-17 | 1.00000 | 4.58909e-16 | 1.00000 |
| rad27 | 3.99783e-17 | 1.00000 | 2.17293e-16 | 1.00000 |
| rad3  | 1.32313e-17 | 1.00000 | 7.19157e-17 | 1.00000 |
| rad4  | 7.32793e-18 | 1.00000 | 3.98293e-17 | 1.00000 |

0.100000000E-01 Pa, 20.0000000 K

| Rate constant | True (fraction)      | Effective (fraction) |
|---------------|----------------------|----------------------|
| Total         | 1.34336e-156 (1.00 ) | 1.34336e-156 (1.00 ) |

| species     | PYtrue      | Cumul    | PYeffective | Cumul    |
|-------------|-------------|----------|-------------|----------|
| Indene+H    | 0.993231    | 0.993231 | 0.993232    | 0.993232 |
| rad23       | 0.00647300  | 0.999704 | 0.00647300  | 0.999705 |
| rad6        | 0.000180263 | 0.999884 | 0.000180263 | 0.999885 |
| rad45       | 0.000102123 | 0.999986 | 0.000102123 | 0.999987 |
| rad36       | 6.36146e-06 | 0.999993 | 6.36146e-06 | 0.999994 |
| rad22       | 4.26368e-06 | 0.999997 | 4.26368e-06 | 0.999998 |
| rad11       | 1.82173e-06 | 0.999999 | 1.82173e-06 | 1.000000 |
| Benzyl+C2H2 | 8.11881e-07 | 1.000000 | 0.000000    | 1.000000 |
| rad7        | 1.99084e-08 | 1.000000 | 1.99084e-08 | 1.000000 |
| rad20       | 1.80056e-10 | 1.000000 | 1.80056e-10 | 1.000000 |
| rad21       | 1.13056e-10 | 1.000000 | 1.13057e-10 | 1.000000 |
| rad13       | 7.47426e-11 | 1.000000 | 7.47426e-11 | 1.000000 |
| rad18       | 1.86628e-11 | 1.000000 | 1.86628e-11 | 1.000000 |
| rad3        | 1.60608e-11 | 1.000000 | 1.60609e-11 | 1.000000 |
| rad4        | 8.11959e-12 | 1.000000 | 8.11960e-12 | 1.000000 |
| rad2        | 1.81353e-12 | 1.000000 | 1.81353e-12 | 1.000000 |
| rad24       | 9.70087e-13 | 1.000000 | 9.70088e-13 | 1.000000 |
| rad33       | 1.36726e-13 | 1.000000 | 1.36726e-13 | 1.000000 |
| rad1        | 1.14619e-13 | 1.000000 | 1.14620e-13 | 1.000000 |
| rad35       | 1.04723e-13 | 1.000000 | 1.04723e-13 | 1.000000 |
| rad10       | 4.70760e-14 | 1.000000 | 4.70761e-14 | 1.000000 |
| PAH9+H      | 1.19582e-14 | 1.000000 | 1.19582e-14 | 1.000000 |
| rad38       | 4.72937e-17 | 1.000000 | 4.72937e-17 | 1.000000 |
| rad28       | 1.73279e-18 | 1.000000 | 1.73279e-18 | 1.000000 |
| rad30       | 4.02301e-20 | 1.000000 | 4.02301e-20 | 1.000000 |
| rad26       | 5.06193e-21 | 1.000000 | 5.06194e-21 | 1.000000 |
| rad31       | 4.06911e-21 | 1.000000 | 4.06911e-21 | 1.000000 |
| rad27       | 3.36247e-21 | 1.000000 | 3.36247e-21 | 1.000000 |
| rad25       | 1.33302e-21 | 1.000000 | 1.33303e-21 | 1.000000 |
| rad14       | 4.55366e-23 | 1.000000 | 4.55366e-23 | 1.000000 |
| PhCCH+CH3   | 1.03044e-23 | 1.000000 | 1.03044e-23 | 1.000000 |
| PhCHCCH2+H  | 9.81150e-24 | 1.000000 | 9.81151e-24 | 1.000000 |
| rad15       | 3.46098e-24 | 1.000000 | 3.46098e-24 | 1.000000 |
| PhCCCH3+H   | 7.77911e-25 | 1.000000 | 7.77912e-25 | 1.000000 |
| rad46       | 5.50609e-28 | 1.000000 | 5.50610e-28 | 1.000000 |
| rad8        | 2.39154e-28 | 1.000000 | 2.39154e-28 | 1.000000 |
| rad9        | 2.38212e-29 | 1.000000 | 2.38212e-29 | 1.000000 |
| Ph+MeAc     | 2.48618e-30 | 1.000000 | 2.48619e-30 | 1.000000 |
| PAH7+H      | 2.40561e-31 | 1.000000 | 2.40562e-31 | 1.000000 |
| rad12       | 2.37041e-32 | 1.000000 | 2.37041e-32 | 1.000000 |
| rad39       | 5.13644e-33 | 1.000000 | 5.13644e-33 | 1.000000 |
| Ph+Allene   | 4.36347e-33 | 1.000000 | 4.36348e-33 | 1.000000 |
| rad60syn    | 2.08584e-37 | 1.000000 | 2.08585e-37 | 1.000000 |
| PhCH2CCH+H  | 2.33945e-38 | 1.000000 | 2.33945e-38 | 1.000000 |
| rad60anti   | 9.93804e-39 | 1.000000 | 9.93805e-39 | 1.000000 |
| rad37       | 4.41266e-39 | 1.000000 | 4.41266e-39 | 1.000000 |
| rad5        | 8.00003e-42 | 1.000000 | 8.00003e-42 | 1.000000 |
| PAH3+H      | 9.42128e-46 | 1.000000 | 9.42128e-46 | 1.000000 |
| rad59       | 4.64896e-46 | 1.000000 | 4.64896e-46 | 1.000000 |
| rad50       | 7.91129e-47 | 1.000000 | 7.91130e-47 | 1.000000 |
| rad19syn    | 2.13894e-51 | 1.000000 | 2.13895e-51 | 1.000000 |
| rad54       | 3.60559e-55 | 1.000000 | 3.60559e-55 | 1.000000 |



|               |             |          |             |          |
|---------------|-------------|----------|-------------|----------|
| PAH10+CH3     | 2.44284e-55 | 1.000000 | 2.44284e-55 | 1.000000 |
| rad52         | 1.56152e-55 | 1.000000 | 1.56153e-55 | 1.000000 |
| rad43         | 5.61394e-56 | 1.000000 | 5.61394e-56 | 1.000000 |
| rad62         | 6.99599e-58 | 1.000000 | 6.99599e-58 | 1.000000 |
| rad51         | 7.40512e-61 | 1.000000 | 7.40513e-61 | 1.000000 |
| rad70         | 1.59840e-62 | 1.000000 | 1.59840e-62 | 1.000000 |
| PhcycC3H3_A+H | 8.70412e-63 | 1.000000 | 8.70413e-63 | 1.000000 |
| rad55         | 4.50712e-63 | 1.000000 | 4.50712e-63 | 1.000000 |
| rad65         | 4.31633e-65 | 1.000000 | 4.31633e-65 | 1.000000 |
| rad58         | 3.56374e-66 | 1.000000 | 3.56375e-66 | 1.000000 |
| PAH1+H        | 3.00698e-67 | 1.000000 | 3.00698e-67 | 1.000000 |
| rad34         | 2.79553e-69 | 1.000000 | 2.79553e-69 | 1.000000 |
| rad42         | 4.75919e-73 | 1.000000 | 4.75920e-73 | 1.000000 |
| rad41         | 6.76928e-74 | 1.000000 | 6.76928e-74 | 1.000000 |
| rad47         | 2.63829e-74 | 1.000000 | 2.63829e-74 | 1.000000 |

0.100000000E-01 Pa, 30.000000 K

| Rate constant | True (fraction)      | Effective (fraction) |
|---------------|----------------------|----------------------|
| Total         | 1.15918e-108 (1.00 ) | 1.15918e-108 (1.00 ) |

| species     | PYtrue      | Cumul    | PYeffective | Cumul    |
|-------------|-------------|----------|-------------|----------|
| Indene+H    | 0.998688    | 0.998688 | 0.998689    | 0.998689 |
| rad23       | 0.00110928  | 0.999797 | 0.00110928  | 0.999798 |
| rad6        | 0.000184375 | 0.999982 | 0.000184375 | 0.999983 |
| rad45       | 1.56178e-05 | 0.999997 | 1.56179e-05 | 0.999998 |
| Benzyl+C2H2 | 1.04098e-06 | 0.999998 | 0.00000     | 0.999998 |
| rad36       | 9.72573e-07 | 0.999999 | 9.72574e-07 | 0.999999 |
| rad22       | 6.31953e-07 | 1.000000 | 6.31954e-07 | 1.000000 |
| rad11       | 3.94132e-07 | 1.000000 | 3.94133e-07 | 1.000000 |
| rad7        | 1.87828e-08 | 1.000000 | 1.87829e-08 | 1.000000 |
| rad13       | 7.52754e-11 | 1.000000 | 7.52755e-11 | 1.000000 |
| rad20       | 7.21685e-11 | 1.000000 | 7.21685e-11 | 1.000000 |
| rad21       | 4.52004e-11 | 1.000000 | 4.52004e-11 | 1.000000 |
| rad3        | 3.23919e-11 | 1.000000 | 3.23920e-11 | 1.000000 |
| rad4        | 1.63782e-11 | 1.000000 | 1.63782e-11 | 1.000000 |
| rad2        | 7.41256e-12 | 1.000000 | 7.41257e-12 | 1.000000 |
| rad18       | 3.51875e-12 | 1.000000 | 3.51876e-12 | 1.000000 |
| rad1        | 4.68764e-13 | 1.000000 | 4.68765e-13 | 1.000000 |
| rad10       | 2.68263e-13 | 1.000000 | 2.68263e-13 | 1.000000 |
| rad24       | 1.61109e-13 | 1.000000 | 1.61110e-13 | 1.000000 |
| rad33       | 1.39792e-13 | 1.000000 | 1.39792e-13 | 1.000000 |
| rad35       | 9.58771e-14 | 1.000000 | 9.58772e-14 | 1.000000 |
| PAH9+H      | 9.02906e-15 | 1.000000 | 9.02907e-15 | 1.000000 |
| rad38       | 2.73601e-17 | 1.000000 | 2.73601e-17 | 1.000000 |
| rad28       | 4.26119e-18 | 1.000000 | 4.26119e-18 | 1.000000 |
| rad26       | 2.93785e-20 | 1.000000 | 2.93785e-20 | 1.000000 |
| rad30       | 2.60272e-20 | 1.000000 | 2.60272e-20 | 1.000000 |
| rad27       | 1.13290e-20 | 1.000000 | 1.13290e-20 | 1.000000 |
| rad31       | 8.34221e-21 | 1.000000 | 8.34222e-21 | 1.000000 |
| rad25       | 1.69619e-21 | 1.000000 | 1.69619e-21 | 1.000000 |
| rad14       | 8.36462e-23 | 1.000000 | 8.36463e-23 | 1.000000 |
| PhCHCCH2+H  | 4.81292e-23 | 1.000000 | 4.81293e-23 | 1.000000 |
| PhCCH+CH3   | 3.02803e-23 | 1.000000 | 3.02804e-23 | 1.000000 |
| PhCCCH3+H   | 3.66844e-24 | 1.000000 | 3.66845e-24 | 1.000000 |
| rad15       | 2.36213e-24 | 1.000000 | 2.36213e-24 | 1.000000 |
| rad8        | 1.02593e-27 | 1.000000 | 1.02593e-27 | 1.000000 |
| rad46       | 1.29826e-28 | 1.000000 | 1.29826e-28 | 1.000000 |
| rad9        | 6.16140e-29 | 1.000000 | 6.16141e-29 | 1.000000 |
| Ph+MeAc     | 8.63684e-30 | 1.000000 | 8.63685e-30 | 1.000000 |
| PAH7+H      | 1.20430e-30 | 1.000000 | 1.20430e-30 | 1.000000 |
| rad12       | 1.64950e-31 | 1.000000 | 1.64950e-31 | 1.000000 |
| rad39       | 2.52360e-32 | 1.000000 | 2.52360e-32 | 1.000000 |
| Ph+Allene   | 1.11068e-32 | 1.000000 | 1.11069e-32 | 1.000000 |
| rad60syn    | 5.32389e-37 | 1.000000 | 5.32389e-37 | 1.000000 |
| PhCH2CCH+H  | 5.62411e-38 | 1.000000 | 5.62412e-38 | 1.000000 |
| rad60anti   | 2.52330e-38 | 1.000000 | 2.52330e-38 | 1.000000 |
| rad37       | 1.23802e-38 | 1.000000 | 1.23803e-38 | 1.000000 |
| rad5        | 1.88154e-41 | 1.000000 | 1.88154e-41 | 1.000000 |
| PAH3+H      | 2.05418e-45 | 1.000000 | 2.05418e-45 | 1.000000 |
| rad59       | 1.01973e-45 | 1.000000 | 1.01973e-45 | 1.000000 |
| rad50       | 1.78241e-46 | 1.000000 | 1.78241e-46 | 1.000000 |
| rad19syn    | 2.54529e-51 | 1.000000 | 2.54529e-51 | 1.000000 |
| rad54       | 2.85605e-55 | 1.000000 | 2.85606e-55 | 1.000000 |
| rad52       | 1.98049e-55 | 1.000000 | 1.98049e-55 | 1.000000 |
| PAH10+CH3   | 1.92128e-55 | 1.000000 | 1.92128e-55 | 1.000000 |
| rad43       | 4.41307e-56 | 1.000000 | 4.41307e-56 | 1.000000 |
| rad62       | 4.16212e-58 | 1.000000 | 4.16213e-58 | 1.000000 |

|               |             |         |             |         |
|---------------|-------------|---------|-------------|---------|
| rad51         | 4.46125e-61 | 1.00000 | 4.46125e-61 | 1.00000 |
| rad70         | 4.59527e-63 | 1.00000 | 4.59528e-63 | 1.00000 |
| PhcycC3H3_A+H | 2.32171e-63 | 1.00000 | 2.32171e-63 | 1.00000 |
| rad55         | 1.22171e-63 | 1.00000 | 1.22171e-63 | 1.00000 |
| rad65         | 1.56351e-65 | 1.00000 | 1.56351e-65 | 1.00000 |
| rad58         | 8.99011e-67 | 1.00000 | 8.99012e-67 | 1.00000 |
| PAH1+H        | 4.23332e-68 | 1.00000 | 4.23332e-68 | 1.00000 |
| rad34         | 3.45065e-70 | 1.00000 | 3.45065e-70 | 1.00000 |
| rad42         | 4.24587e-74 | 1.00000 | 4.24587e-74 | 1.00000 |
| rad41         | 5.75374e-75 | 1.00000 | 5.75375e-75 | 1.00000 |
| rad47         | 2.35975e-75 | 1.00000 | 2.35975e-75 | 1.00000 |

0.100000000E-01 Pa, 40.0000000 K

| Rate constant | True (fraction)     | Effective (fraction) |
|---------------|---------------------|----------------------|
| Total         | 1.02415e-84 (1.00 ) | 1.02415e-84 (1.00 )  |

| species       | PYtrue      | Cumul    | PYeffective | Cumul    |
|---------------|-------------|----------|-------------|----------|
| Indene+H      | 0.999481    | 0.999481 | 0.999482    | 0.999482 |
| rad23         | 0.000322592 | 0.999804 | 0.000322593 | 0.999805 |
| rad6          | 0.000190025 | 0.999994 | 0.000190025 | 0.999995 |
| rad45         | 4.27837e-06 | 0.999998 | 4.27838e-06 | 0.999999 |
| Benzyl+C2H2   | 1.52893e-06 | 0.999999 | 0.00000     | 0.999999 |
| rad36         | 2.66266e-07 | 1.000000 | 2.66266e-07 | 0.999999 |
| rad22         | 1.72568e-07 | 1.000000 | 1.72568e-07 | 0.999999 |
| rad11         | 1.61305e-07 | 1.000000 | 1.61305e-07 | 0.999999 |
| rad7          | 1.85623e-08 | 1.000000 | 1.85623e-08 | 1.000000 |
| rad13         | 7.72320e-11 | 1.000000 | 7.72321e-11 | 1.000000 |
| rad3          | 4.90379e-11 | 1.000000 | 4.90379e-11 | 1.000000 |
| rad20         | 4.38914e-11 | 1.000000 | 4.38915e-11 | 1.000000 |
| rad21         | 2.74664e-11 | 1.000000 | 2.74665e-11 | 1.000000 |
| rad4          | 2.48026e-11 | 1.000000 | 2.48026e-11 | 1.000000 |
| rad2          | 1.78722e-11 | 1.000000 | 1.78722e-11 | 1.000000 |
| rad18         | 1.45314e-12 | 1.000000 | 1.45315e-12 | 1.000000 |
| rad1          | 1.13161e-12 | 1.000000 | 1.13161e-12 | 1.000000 |
| rad10         | 7.48982e-13 | 1.000000 | 7.48983e-13 | 1.000000 |
| rad35         | 1.50254e-13 | 1.000000 | 1.50255e-13 | 1.000000 |
| rad33         | 1.44226e-13 | 1.000000 | 1.44226e-13 | 1.000000 |
| rad24         | 4.64098e-14 | 1.000000 | 4.64099e-14 | 1.000000 |
| PAH9+H        | 1.04039e-14 | 1.000000 | 1.04040e-14 | 1.000000 |
| rad38         | 2.75587e-17 | 1.000000 | 2.75588e-17 | 1.000000 |
| rad28         | 9.48923e-18 | 1.000000 | 9.48924e-18 | 1.000000 |
| rad26         | 1.03325e-19 | 1.000000 | 1.03326e-19 | 1.000000 |
| rad30         | 3.09503e-20 | 1.000000 | 3.09504e-20 | 1.000000 |
| rad27         | 2.83203e-20 | 1.000000 | 2.83204e-20 | 1.000000 |
| rad31         | 1.29710e-20 | 1.000000 | 1.29711e-20 | 1.000000 |
| rad25         | 2.66603e-21 | 1.000000 | 2.66603e-21 | 1.000000 |
| PhCHCCH2+H    | 1.61587e-22 | 1.000000 | 1.61587e-22 | 1.000000 |
| rad14         | 1.56929e-22 | 1.000000 | 1.56929e-22 | 1.000000 |
| PhCCH+CH3     | 7.97040e-23 | 1.000000 | 7.97041e-23 | 1.000000 |
| PhCCCH3+H     | 1.20859e-23 | 1.000000 | 1.20860e-23 | 1.000000 |
| rad15         | 3.11322e-24 | 1.000000 | 3.11322e-24 | 1.000000 |
| rad8          | 3.20039e-27 | 1.000000 | 3.20040e-27 | 1.000000 |
| rad9          | 1.51105e-28 | 1.000000 | 1.51106e-28 | 1.000000 |
| rad46         | 1.00011e-28 | 1.000000 | 1.00011e-28 | 1.000000 |
| Ph+MeAc       | 2.41288e-29 | 1.000000 | 2.41288e-29 | 1.000000 |
| PAH7+H        | 4.25038e-30 | 1.000000 | 4.25039e-30 | 1.000000 |
| rad12         | 6.61588e-31 | 1.000000 | 6.61589e-31 | 1.000000 |
| rad39         | 8.82908e-32 | 1.000000 | 8.82909e-32 | 1.000000 |
| Ph+Allene     | 2.76150e-32 | 1.000000 | 2.76151e-32 | 1.000000 |
| rad60syn      | 1.32237e-36 | 1.000000 | 1.32237e-36 | 1.000000 |
| PhCH2CCH+H    | 1.36314e-37 | 1.000000 | 1.36314e-37 | 1.000000 |
| rad60anti     | 6.27840e-38 | 1.000000 | 6.27841e-38 | 1.000000 |
| rad37         | 3.11020e-38 | 1.000000 | 3.11020e-38 | 1.000000 |
| rad5          | 4.47431e-41 | 1.000000 | 4.47432e-41 | 1.000000 |
| PAH3+H        | 4.65394e-45 | 1.000000 | 4.65395e-45 | 1.000000 |
| rad59         | 2.31991e-45 | 1.000000 | 2.31991e-45 | 1.000000 |
| rad50         | 4.13209e-46 | 1.000000 | 4.13210e-46 | 1.000000 |
| rad19syn      | 3.78147e-51 | 1.000000 | 3.78147e-51 | 1.000000 |
| rad54         | 3.28798e-55 | 1.000000 | 3.28798e-55 | 1.000000 |
| rad52         | 3.06789e-55 | 1.000000 | 3.06789e-55 | 1.000000 |
| PAH10+CH3     | 2.20609e-55 | 1.000000 | 2.20609e-55 | 1.000000 |
| rad43         | 5.06515e-56 | 1.000000 | 5.06516e-56 | 1.000000 |
| rad62         | 4.06410e-58 | 1.000000 | 4.06411e-58 | 1.000000 |
| rad51         | 4.38368e-61 | 1.000000 | 4.38369e-61 | 1.000000 |
| rad70         | 3.08084e-63 | 1.000000 | 3.08084e-63 | 1.000000 |
| PhcycC3H3_A+H | 1.50397e-63 | 1.000000 | 1.50397e-63 | 1.000000 |
| rad55         | 7.96127e-64 | 1.000000 | 7.96128e-64 | 1.000000 |

|        |             |         |             |          |
|--------|-------------|---------|-------------|----------|
| rad65  | 1.17288e-65 | 1.00000 | 1.17289e-65 | 1.000000 |
| rad58  | 5.67101e-67 | 1.00000 | 5.67102e-67 | 1.000000 |
| PAH1+H | 2.07848e-68 | 1.00000 | 2.07849e-68 | 1.000000 |
| rad34  | 1.61031e-70 | 1.00000 | 1.61032e-70 | 1.000000 |
| rad42  | 1.76161e-74 | 1.00000 | 1.76161e-74 | 1.000000 |
| rad41  | 2.35137e-75 | 1.00000 | 2.35137e-75 | 1.000000 |
| rad47  | 8.66579e-76 | 1.00000 | 8.66581e-76 | 1.000000 |

0.100000000E-01 Pa, 50.0000000 K

| Rate constant | True (fraction)     | Effective (fraction) |
|---------------|---------------------|----------------------|
| Total         | 2.31816e-70 (1.00 ) | 2.31816e-70 (1.00 )  |

| species       | PYtrue      | Cumul    | PYeffective | Cumul    |
|---------------|-------------|----------|-------------|----------|
| Indene+H      | 0.999675    | 0.999675 | 0.999677    | 0.999677 |
| rad6          | 0.000197407 | 0.999872 | 0.000197407 | 0.999874 |
| rad23         | 0.000123728 | 0.999996 | 0.000123728 | 0.999998 |
| Benzyl+C2H2   | 2.26146e-06 | 0.999998 | 0.00000     | 0.999998 |
| rad45         | 1.57744e-06 | 1.000000 | 1.57745e-06 | 1.000000 |
| rad36         | 9.80958e-08 | 1.00000  | 9.80961e-08 | 1.000000 |
| rad11         | 8.61500e-08 | 1.00000  | 8.61502e-08 | 1.000000 |
| rad22         | 6.35988e-08 | 1.00000  | 6.35989e-08 | 1.000000 |
| rad7          | 1.87629e-08 | 1.00000  | 1.87629e-08 | 1.000000 |
| rad13         | 8.01185e-11 | 1.00000  | 8.01187e-11 | 1.000000 |
| rad3          | 6.70629e-11 | 1.00000  | 6.70631e-11 | 1.000000 |
| rad2          | 3.59526e-11 | 1.00000  | 3.59527e-11 | 1.000000 |
| rad4          | 3.39344e-11 | 1.00000  | 3.39345e-11 | 1.000000 |
| rad20         | 3.08985e-11 | 1.00000  | 3.08986e-11 | 1.000000 |
| rad21         | 1.93318e-11 | 1.00000  | 1.93318e-11 | 1.000000 |
| rad1          | 2.28041e-12 | 1.00000  | 2.28041e-12 | 1.000000 |
| rad10         | 1.63932e-12 | 1.00000  | 1.63932e-12 | 1.000000 |
| rad18         | 7.96955e-13 | 1.00000  | 7.96957e-13 | 1.000000 |
| rad35         | 3.88035e-13 | 1.00000  | 3.88036e-13 | 1.000000 |
| rad33         | 1.50099e-13 | 1.00000  | 1.50099e-13 | 1.000000 |
| PAH9+H        | 2.20146e-14 | 1.00000  | 2.20147e-14 | 1.000000 |
| rad24         | 1.77505e-14 | 1.00000  | 1.77505e-14 | 1.000000 |
| rad38         | 4.34429e-17 | 1.00000  | 4.34430e-17 | 1.000000 |
| rad28         | 2.25427e-17 | 1.00000  | 2.25427e-17 | 1.000000 |
| rad26         | 3.38278e-19 | 1.00000  | 3.38279e-19 | 1.000000 |
| rad30         | 2.27585e-19 | 1.00000  | 2.27585e-19 | 1.000000 |
| rad27         | 7.13031e-20 | 1.00000  | 7.13033e-20 | 1.000000 |
| rad31         | 1.83775e-20 | 1.00000  | 1.83776e-20 | 1.000000 |
| rad25         | 5.02504e-21 | 1.00000  | 5.02505e-21 | 1.000000 |
| PhCHCCH2+H    | 5.28458e-22 | 1.00000  | 5.28459e-22 | 1.000000 |
| rad14         | 3.35472e-22 | 1.00000  | 3.35473e-22 | 1.000000 |
| PhCCH+CH3     | 2.24416e-22 | 1.00000  | 2.24416e-22 | 1.000000 |
| PhCCCH3+H     | 3.92645e-23 | 1.00000  | 3.92646e-23 | 1.000000 |
| rad15         | 6.38629e-24 | 1.00000  | 6.38630e-24 | 1.000000 |
| rad8          | 1.00926e-26 | 1.00000  | 1.00927e-26 | 1.000000 |
| rad9          | 4.10596e-28 | 1.00000  | 4.10597e-28 | 1.000000 |
| rad46         | 1.45335e-28 | 1.00000  | 1.45336e-28 | 1.000000 |
| Ph+MeAc       | 7.18664e-29 | 1.00000  | 7.18666e-29 | 1.000000 |
| PAH7+H        | 1.48344e-29 | 1.00000  | 1.48344e-29 | 1.000000 |
| rad12         | 2.48282e-30 | 1.00000  | 2.48282e-30 | 1.000000 |
| rad39         | 3.07806e-31 | 1.00000  | 3.07807e-31 | 1.000000 |
| Ph+Allene     | 7.76866e-32 | 1.00000  | 7.76867e-32 | 1.000000 |
| rad60syn      | 3.70553e-36 | 1.00000  | 3.70554e-36 | 1.000000 |
| PhCH2CCH+H    | 3.83180e-37 | 1.00000  | 3.83181e-37 | 1.000000 |
| rad60anti     | 1.77206e-37 | 1.00000  | 1.77206e-37 | 1.000000 |
| rad37         | 8.88432e-38 | 1.00000  | 8.88434e-38 | 1.000000 |
| rad5          | 1.24501e-40 | 1.00000  | 1.24501e-40 | 1.000000 |
| PAH3+H        | 1.25167e-44 | 1.00000  | 1.25168e-44 | 1.000000 |
| rad59         | 6.25727e-45 | 1.00000  | 6.25729e-45 | 1.000000 |
| rad50         | 1.12910e-45 | 1.00000  | 1.12910e-45 | 1.000000 |
| rad19syn      | 7.55452e-51 | 1.00000  | 7.55454e-51 | 1.000000 |
| rad52         | 6.30485e-55 | 1.00000  | 6.30487e-55 | 1.000000 |
| rad54         | 5.56096e-55 | 1.00000  | 5.56097e-55 | 1.000000 |
| PAH10+CH3     | 3.73072e-55 | 1.00000  | 3.73073e-55 | 1.000000 |
| rad43         | 8.56336e-56 | 1.00000  | 8.56338e-56 | 1.000000 |
| rad62         | 6.21899e-58 | 1.00000  | 6.21900e-58 | 1.000000 |
| rad51         | 6.72813e-61 | 1.00000  | 6.72815e-61 | 1.000000 |
| rad70         | 3.81821e-63 | 1.00000  | 3.81822e-63 | 1.000000 |
| PhcycC3H3_A+H | 1.83164e-63 | 1.00000  | 1.83164e-63 | 1.000000 |
| rad55         | 9.72162e-64 | 1.00000  | 9.72165e-64 | 1.000000 |
| rad65         | 1.54290e-65 | 1.00000  | 1.54290e-65 | 1.000000 |
| rad58         | 6.81286e-67 | 1.00000  | 6.81288e-67 | 1.000000 |
| PAH1+H        | 2.21911e-68 | 1.00000  | 2.21912e-68 | 1.000000 |
| rad34         | 1.68370e-70 | 1.00000  | 1.68371e-70 | 1.000000 |

|       |             |         |             |          |
|-------|-------------|---------|-------------|----------|
| rad42 | 1.76376e-74 | 1.00000 | 1.76377e-74 | 1.000000 |
| rad41 | 2.35060e-75 | 1.00000 | 2.35061e-75 | 1.000000 |
| rad47 | 7.39275e-76 | 1.00000 | 7.39276e-76 | 1.000000 |

0.100000000E-01 Pa, 60.0000000 K

| Rate constant | True (fraction)     | Effective (fraction) |
|---------------|---------------------|----------------------|
| Total         | 8.44107e-61 (1.00 ) | 8.44104e-61 (1.00 )  |

| species       | PYtrue      | Cumul    | PYeffective | Cumul    |
|---------------|-------------|----------|-------------|----------|
| Indene+H      | 0.999733    | 0.999733 | 0.999737    | 0.999737 |
| rad6          | 0.000206106 | 0.999939 | 0.000206107 | 0.999943 |
| rad23         | 5.63026e-05 | 0.999995 | 5.63028e-05 | 0.999999 |
| Benzyl+C2H2   | 3.25348e-06 | 0.999999 | 0.00000     | 0.999999 |
| rad45         | 6.97354e-07 | 0.999999 | 6.97357e-07 | 1.00000  |
| rad11         | 5.34537e-08 | 0.999999 | 5.34538e-08 | 1.00000  |
| rad36         | 4.33302e-08 | 0.999999 | 4.33304e-08 | 1.00000  |
| rad22         | 2.81243e-08 | 0.999999 | 2.81244e-08 | 1.00000  |
| rad7          | 1.92053e-08 | 1.000000 | 1.92054e-08 | 1.00000  |
| rad3          | 8.66148e-11 | 1.000000 | 8.66150e-11 | 1.00000  |
| rad13         | 8.36483e-11 | 1.000000 | 8.36486e-11 | 1.00000  |
| rad2          | 6.58882e-11 | 1.000000 | 6.58884e-11 | 1.00000  |
| rad4          | 4.38519e-11 | 1.000000 | 4.38521e-11 | 1.00000  |
| rad20         | 2.34546e-11 | 1.000000 | 2.34547e-11 | 1.00000  |
| rad21         | 1.46765e-11 | 1.000000 | 1.46766e-11 | 1.00000  |
| rad1          | 4.18821e-12 | 1.000000 | 4.18822e-12 | 1.00000  |
| rad10         | 3.17090e-12 | 1.000000 | 3.17091e-12 | 1.00000  |
| rad35         | 9.70167e-13 | 1.000000 | 9.70170e-13 | 1.00000  |
| rad18         | 5.05648e-13 | 1.000000 | 5.05650e-13 | 1.00000  |
| rad33         | 1.57076e-13 | 1.000000 | 1.57076e-13 | 1.00000  |
| PAH9+H        | 7.92353e-14 | 1.000000 | 7.92356e-14 | 1.00000  |
| rad24         | 8.08033e-15 | 1.000000 | 8.08036e-15 | 1.00000  |
| rad38         | 1.57746e-16 | 1.000000 | 1.57746e-16 | 1.00000  |
| rad28         | 6.20834e-17 | 1.000000 | 6.20836e-17 | 1.00000  |
| rad30         | 2.81808e-17 | 1.000000 | 2.81809e-17 | 1.00000  |
| rad26         | 1.19291e-18 | 1.000000 | 1.19291e-18 | 1.00000  |
| rad27         | 1.99466e-19 | 1.000000 | 1.99467e-19 | 1.00000  |
| rad31         | 2.47727e-20 | 1.000000 | 2.47728e-20 | 1.00000  |
| rad25         | 1.20174e-20 | 1.000000 | 1.20174e-20 | 1.00000  |
| PhCHCCH2+H    | 1.91898e-21 | 1.000000 | 1.91899e-21 | 1.00000  |
| rad14         | 8.65348e-22 | 1.000000 | 8.65351e-22 | 1.00000  |
| PhCCH+CH3     | 7.35117e-22 | 1.000000 | 7.35119e-22 | 1.00000  |
| rad15         | 4.94780e-22 | 1.000000 | 4.94782e-22 | 1.00000  |
| PhCCCH3+H     | 1.42891e-22 | 1.000000 | 1.42892e-22 | 1.00000  |
| rad8          | 3.62585e-26 | 1.000000 | 3.62586e-26 | 1.00000  |
| rad9          | 1.32709e-27 | 1.000000 | 1.32710e-27 | 1.00000  |
| rad46         | 3.80503e-28 | 1.000000 | 3.80504e-28 | 1.00000  |
| Ph+MeAc       | 2.51566e-28 | 1.000000 | 2.51566e-28 | 1.00000  |
| PAH7+H        | 5.79999e-29 | 1.000000 | 5.80001e-29 | 1.00000  |
| rad12         | 1.02273e-29 | 1.000000 | 1.02273e-29 | 1.00000  |
| rad39         | 1.20869e-30 | 1.000000 | 1.20870e-30 | 1.00000  |
| Ph+Allene     | 2.63635e-31 | 1.000000 | 2.63636e-31 | 1.00000  |
| rad60syn      | 1.24997e-35 | 1.000000 | 1.24997e-35 | 1.00000  |
| PhCH2CCH+H    | 1.32257e-36 | 1.000000 | 1.32258e-36 | 1.00000  |
| rad60anti     | 6.04417e-37 | 1.000000 | 6.04419e-37 | 1.00000  |
| rad37         | 3.10261e-37 | 1.000000 | 3.10262e-37 | 1.00000  |
| rad5          | 4.28533e-40 | 1.000000 | 4.28535e-40 | 1.00000  |
| PAH3+H        | 4.20508e-44 | 1.000000 | 4.20510e-44 | 1.00000  |
| rad59         | 2.10629e-44 | 1.000000 | 2.10629e-44 | 1.00000  |
| rad50         | 3.83394e-45 | 1.000000 | 3.83395e-45 | 1.00000  |
| rad19syn      | 2.05754e-50 | 1.000000 | 2.05755e-50 | 1.00000  |
| rad52         | 1.75079e-54 | 1.000000 | 1.75080e-54 | 1.00000  |
| rad54         | 1.35678e-54 | 1.000000 | 1.35678e-54 | 1.00000  |
| PAH10+CH3     | 9.11979e-55 | 1.000000 | 9.11982e-55 | 1.00000  |
| rad43         | 2.09291e-55 | 1.000000 | 2.09292e-55 | 1.00000  |
| rad62         | 1.42761e-57 | 1.000000 | 1.42761e-57 | 1.00000  |
| rad51         | 1.54566e-60 | 1.000000 | 1.54567e-60 | 1.00000  |
| rad70         | 7.78319e-63 | 1.000000 | 7.78322e-63 | 1.00000  |
| PhcycC3H3_A+H | 3.70158e-63 | 1.000000 | 3.70159e-63 | 1.00000  |
| rad55         | 1.96697e-63 | 1.000000 | 1.96698e-63 | 1.00000  |
| rad65         | 3.24465e-65 | 1.000000 | 3.24466e-65 | 1.00000  |
| rad58         | 1.36760e-66 | 1.000000 | 1.36760e-66 | 1.00000  |
| PAH1+H        | 4.23607e-68 | 1.000000 | 4.23608e-68 | 1.00000  |
| rad34         | 3.19427e-70 | 1.000000 | 3.19428e-70 | 1.00000  |
| rad42         | 3.32760e-74 | 1.000000 | 3.32761e-74 | 1.00000  |
| rad41         | 4.47691e-75 | 1.000000 | 4.47693e-75 | 1.00000  |
| rad47         | 1.17034e-75 | 1.000000 | 1.17034e-75 | 1.00000  |

0.100000000E-01 Pa, 70.0000000 K

=====

| Rate constant | True (fraction)     | Effective (fraction) |
|---------------|---------------------|----------------------|
| Total         | 5.61998e-54 (1.00 ) | 5.61996e-54 (1.00 )  |

| species       | PYtrue      | Cumul    | PYeffective | Cumul    |
|---------------|-------------|----------|-------------|----------|
| Indene+H      | 0.999750    | 0.999750 | 0.999755    | 0.999755 |
| rad6          | 0.000216006 | 0.999966 | 0.000216007 | 0.999971 |
| rad23         | 2.87735e-05 | 0.999995 | 2.87736e-05 | 1.000000 |
| Benzyl+C2H2   | 4.55698e-06 | 0.999999 | 0.000000    | 1.000000 |
| rad45         | 3.48449e-07 | 1.000000 | 3.48450e-07 | 1.000000 |
| rad11         | 3.66337e-08 | 1.000000 | 3.66339e-08 | 1.000000 |
| rad36         | 2.16340e-08 | 1.000000 | 2.16341e-08 | 1.000000 |
| rad7          | 1.98226e-08 | 1.000000 | 1.98227e-08 | 1.000000 |
| rad22         | 1.40625e-08 | 1.000000 | 1.40626e-08 | 1.000000 |
| rad2          | 1.14159e-10 | 1.000000 | 1.14160e-10 | 1.000000 |
| rad3          | 1.07626e-10 | 1.000000 | 1.07627e-10 | 1.000000 |
| rad13         | 8.77343e-11 | 1.000000 | 8.77347e-11 | 1.000000 |
| rad4          | 5.45246e-11 | 1.000000 | 5.45248e-11 | 1.000000 |
| rad20         | 1.86467e-11 | 1.000000 | 1.86468e-11 | 1.000000 |
| rad21         | 1.16722e-11 | 1.000000 | 1.16723e-11 | 1.000000 |
| rad1          | 7.27466e-12 | 1.000000 | 7.27470e-12 | 1.000000 |
| rad10         | 5.69732e-12 | 1.000000 | 5.69734e-12 | 1.000000 |
| rad35         | 2.02428e-12 | 1.000000 | 2.02429e-12 | 1.000000 |
| rad18         | 3.50401e-13 | 1.000000 | 3.50402e-13 | 1.000000 |
| PAH9+H        | 2.72346e-13 | 1.000000 | 2.72348e-13 | 1.000000 |
| rad33         | 1.65062e-13 | 1.000000 | 1.65063e-13 | 1.000000 |
| rad24         | 4.13857e-15 | 1.000000 | 4.13859e-15 | 1.000000 |
| rad38         | 1.06954e-15 | 1.000000 | 1.06954e-15 | 1.000000 |
| rad30         | 1.03409e-15 | 1.000000 | 1.03409e-15 | 1.000000 |
| rad28         | 2.20488e-16 | 1.000000 | 2.20489e-16 | 1.000000 |
| rad26         | 5.06358e-18 | 1.000000 | 5.06361e-18 | 1.000000 |
| rad27         | 6.47998e-19 | 1.000000 | 6.48001e-19 | 1.000000 |
| rad15         | 9.42730e-20 | 1.000000 | 9.42735e-20 | 1.000000 |
| rad25         | 6.53016e-20 | 1.000000 | 6.53019e-20 | 1.000000 |
| rad31         | 3.23602e-20 | 1.000000 | 3.23604e-20 | 1.000000 |
| PhCHCCH2+H    | 8.81837e-21 | 1.000000 | 8.81841e-21 | 1.000000 |
| PhCCH+CH3     | 3.14957e-21 | 1.000000 | 3.14959e-21 | 1.000000 |
| rad14         | 2.98035e-21 | 1.000000 | 2.98036e-21 | 1.000000 |
| PhCCCH3+H     | 6.64882e-22 | 1.000000 | 6.64885e-22 | 1.000000 |
| rad8          | 1.69055e-25 | 1.000000 | 1.69056e-25 | 1.000000 |
| rad9          | 5.70366e-27 | 1.000000 | 5.70369e-27 | 1.000000 |
| rad46         | 3.94490e-27 | 1.000000 | 3.94491e-27 | 1.000000 |
| Ph+MeAc       | 1.16679e-27 | 1.000000 | 1.16680e-27 | 1.000000 |
| PAH7+H        | 2.90600e-28 | 1.000000 | 2.90601e-28 | 1.000000 |
| rad12         | 5.35463e-29 | 1.000000 | 5.35466e-29 | 1.000000 |
| rad39         | 6.10598e-30 | 1.000000 | 6.10601e-30 | 1.000000 |
| Ph+Allene     | 1.20102e-30 | 1.000000 | 1.20102e-30 | 1.000000 |
| rad60syn      | 5.65184e-35 | 1.000000 | 5.65186e-35 | 1.000000 |
| PhCH2CCH+H    | 6.20703e-36 | 1.000000 | 6.20706e-36 | 1.000000 |
| rad60anti     | 2.77088e-36 | 1.000000 | 2.77089e-36 | 1.000000 |
| rad37         | 1.47276e-36 | 1.000000 | 1.47277e-36 | 1.000000 |
| rad5          | 2.01765e-39 | 1.000000 | 2.01766e-39 | 1.000000 |
| PAH3+H        | 1.94581e-43 | 1.000000 | 1.94581e-43 | 1.000000 |
| rad59         | 9.75901e-44 | 1.000000 | 9.75905e-44 | 1.000000 |
| rad50         | 1.78608e-44 | 1.000000 | 1.78609e-44 | 1.000000 |
| rad19syn      | 8.22695e-50 | 1.000000 | 8.22699e-50 | 1.000000 |
| rad52         | 7.09324e-54 | 1.000000 | 7.09327e-54 | 1.000000 |
| rad54         | 5.05027e-54 | 1.000000 | 5.05029e-54 | 1.000000 |
| PAH10+CH3     | 3.40886e-54 | 1.000000 | 3.40888e-54 | 1.000000 |
| rad43         | 7.82189e-55 | 1.000000 | 7.82193e-55 | 1.000000 |
| rad62         | 5.13183e-57 | 1.000000 | 5.13185e-57 | 1.000000 |
| rad51         | 5.54930e-60 | 1.000000 | 5.54933e-60 | 1.000000 |
| rad70         | 2.62855e-62 | 1.000000 | 2.62856e-62 | 1.000000 |
| PhcycC3H3_A+H | 1.24588e-62 | 1.000000 | 1.24589e-62 | 1.000000 |
| rad55         | 6.62290e-63 | 1.000000 | 6.62293e-63 | 1.000000 |
| rad65         | 1.11124e-64 | 1.000000 | 1.11125e-64 | 1.000000 |
| rad58         | 4.59136e-66 | 1.000000 | 4.59139e-66 | 1.000000 |
| PAH1+H        | 1.40694e-67 | 1.000000 | 1.40695e-67 | 1.000000 |
| rad34         | 1.06334e-69 | 1.000000 | 1.06335e-69 | 1.000000 |
| rad42         | 1.13099e-73 | 1.000000 | 1.13099e-73 | 1.000000 |
| rad41         | 1.56471e-74 | 1.000000 | 1.56472e-74 | 1.000000 |
| rad47         | 3.30304e-75 | 1.000000 | 3.30306e-75 | 1.000000 |

0.100000000E-01 Pa, 80.0000000 K

=====

| Rate constant | True (fraction) | Effective (fraction) |
|---------------|-----------------|----------------------|
|---------------|-----------------|----------------------|

Total | 7.28864e-49 (1.00 ) 7.28860e-49 (1.00 )

| species       | PYtrue      | Cumul    | PYeffective | Cumul    |
|---------------|-------------|----------|-------------|----------|
| Indene+H      | 0.999750    | 0.999750 | 0.999757    | 0.999757 |
| rad6          | 0.000227153 | 0.999977 | 0.000227155 | 0.999984 |
| rad23         | 1.59864e-05 | 0.999993 | 1.59865e-05 | 1.00000  |
| Benzyl+C2H2   | 6.25278e-06 | 0.999999 | 0.00000     | 1.00000  |
| rad45         | 1.90101e-07 | 1.000000 | 1.90102e-07 | 1.00000  |
| rad11         | 2.70151e-08 | 1.000000 | 2.70153e-08 | 1.00000  |
| rad7          | 2.05915e-08 | 1.000000 | 2.05916e-08 | 1.00000  |
| rad36         | 1.17946e-08 | 1.000000 | 1.17947e-08 | 1.00000  |
| rad22         | 7.67930e-09 | 1.000000 | 7.67935e-09 | 1.00000  |
| rad2          | 1.90787e-10 | 1.000000 | 1.90788e-10 | 1.00000  |
| rad3          | 1.30016e-10 | 1.000000 | 1.30017e-10 | 1.00000  |
| rad13         | 9.23812e-11 | 1.000000 | 9.23818e-11 | 1.00000  |
| rad4          | 6.59149e-11 | 1.000000 | 6.59153e-11 | 1.00000  |
| rad20         | 1.52926e-11 | 1.000000 | 1.52927e-11 | 1.00000  |
| rad1          | 1.21916e-11 | 1.000000 | 1.21917e-11 | 1.00000  |
| rad10         | 9.76306e-12 | 1.000000 | 9.76312e-12 | 1.00000  |
| rad21         | 9.57755e-12 | 1.000000 | 9.57761e-12 | 1.00000  |
| rad35         | 3.64459e-12 | 1.000000 | 3.64462e-12 | 1.00000  |
| PAH9+H        | 7.52945e-13 | 1.000000 | 7.52949e-13 | 1.00000  |
| rad18         | 2.57444e-13 | 1.000000 | 2.57445e-13 | 1.00000  |
| rad33         | 1.74098e-13 | 1.000000 | 1.74099e-13 | 1.00000  |
| rad30         | 1.51600e-14 | 1.000000 | 1.51600e-14 | 1.00000  |
| rad38         | 5.97678e-15 | 1.000000 | 5.97682e-15 | 1.00000  |
| rad24         | 2.30730e-15 | 1.000000 | 2.30731e-15 | 1.00000  |
| rad28         | 1.02964e-15 | 1.000000 | 1.02965e-15 | 1.00000  |
| rad26         | 2.70132e-17 | 1.000000 | 2.70134e-17 | 1.00000  |
| rad15         | 4.84693e-18 | 1.000000 | 4.84696e-18 | 1.00000  |
| rad27         | 2.30074e-18 | 1.000000 | 2.30075e-18 | 1.00000  |
| rad25         | 9.49956e-19 | 1.000000 | 9.49962e-19 | 1.00000  |
| PhCHCCH2+H    | 5.95735e-20 | 1.000000 | 5.95738e-20 | 1.00000  |
| rad31         | 4.14190e-20 | 1.000000 | 4.14193e-20 | 1.00000  |
| PhCCH+CH3     | 2.10372e-20 | 1.000000 | 2.10373e-20 | 1.00000  |
| rad14         | 1.54027e-20 | 1.000000 | 1.54028e-20 | 1.00000  |
| PhCCCH3+H     | 4.70533e-21 | 1.000000 | 4.70536e-21 | 1.00000  |
| rad8          | 1.24153e-24 | 1.000000 | 1.24154e-24 | 1.00000  |
| rad46         | 5.01301e-25 | 1.000000 | 5.01305e-25 | 1.00000  |
| rad9          | 3.96738e-26 | 1.000000 | 3.96740e-26 | 1.00000  |
| Ph+MeAc       | 8.74157e-27 | 1.000000 | 8.74162e-27 | 1.00000  |
| PAH7+H        | 2.29781e-27 | 1.000000 | 2.29782e-27 | 1.00000  |
| rad12         | 4.38712e-28 | 1.000000 | 4.38715e-28 | 1.00000  |
| rad39         | 4.88284e-29 | 1.000000 | 4.88287e-29 | 1.00000  |
| Ph+Allene     | 8.91556e-30 | 1.000000 | 8.91562e-30 | 1.00000  |
| rad60syn      | 4.15987e-34 | 1.000000 | 4.15989e-34 | 1.00000  |
| PhCH2CCH+H    | 4.79228e-35 | 1.000000 | 4.79231e-35 | 1.00000  |
| rad60anti     | 2.07173e-35 | 1.000000 | 2.07174e-35 | 1.00000  |
| rad37         | 1.15137e-35 | 1.000000 | 1.15138e-35 | 1.00000  |
| rad5          | 1.57083e-38 | 1.000000 | 1.57084e-38 | 1.00000  |
| PAH3+H        | 1.49604e-42 | 1.000000 | 1.49605e-42 | 1.00000  |
| rad59         | 7.50926e-43 | 1.000000 | 7.50930e-43 | 1.00000  |
| rad50         | 1.37837e-43 | 1.000000 | 1.37837e-43 | 1.00000  |
| rad19syn      | 5.73604e-49 | 1.000000 | 5.73608e-49 | 1.00000  |
| rad52         | 4.98853e-53 | 1.000000 | 4.98856e-53 | 1.00000  |
| rad54         | 3.36924e-53 | 1.000000 | 3.36926e-53 | 1.00000  |
| PAH10+CH3     | 2.29112e-53 | 1.000000 | 2.29114e-53 | 1.00000  |
| rad43         | 5.25670e-54 | 1.000000 | 5.25673e-54 | 1.00000  |
| rad62         | 3.37026e-56 | 1.000000 | 3.37028e-56 | 1.00000  |
| rad51         | 3.63092e-59 | 1.000000 | 3.63095e-59 | 1.00000  |
| rad70         | 1.68190e-61 | 1.000000 | 1.68191e-61 | 1.00000  |
| PhcycC3H3_A+H | 7.97207e-62 | 1.000000 | 7.97212e-62 | 1.00000  |
| rad55         | 4.23726e-62 | 1.000000 | 4.23728e-62 | 1.00000  |
| rad65         | 7.13080e-64 | 1.000000 | 7.13084e-64 | 1.00000  |
| rad58         | 2.93841e-65 | 1.000000 | 2.93843e-65 | 1.00000  |
| PAH1+H        | 9.13720e-67 | 1.000000 | 9.13726e-67 | 1.00000  |
| rad34         | 6.95883e-69 | 1.000000 | 6.95888e-69 | 1.00000  |
| rad42         | 7.80609e-73 | 1.000000 | 7.80614e-73 | 1.00000  |
| rad41         | 1.16633e-73 | 1.000000 | 1.16633e-73 | 1.00000  |
| rad47         | 1.85479e-74 | 1.000000 | 1.85480e-74 | 1.00000  |

0.100000000E-01 Pa, 90.000000 K

=====  
Rate constant | True (fraction) | Effective (fraction)  
-----  
Total | 6.85154e-45 (1.00 ) | 6.85148e-45 (1.00 )

| species | PYtrue | Cumul | PYeffective | Cumul |
|---------|--------|-------|-------------|-------|
|---------|--------|-------|-------------|-------|

|               |             |          |             |          |
|---------------|-------------|----------|-------------|----------|
| Indene+H      | 0.999742    | 0.999742 | 0.999751    | 0.999751 |
| rad6          | 0.000239671 | 0.999982 | 0.000239673 | 0.999991 |
| rad23         | 9.45680e-06 | 0.999991 | 9.45688e-06 | 1.00000  |
| Benzyl+C2H2   | 8.45034e-06 | 1.000000 | 0.00000     | 1.00000  |
| rad45         | 1.10763e-07 | 1.000000 | 1.10763e-07 | 1.00000  |
| rad7          | 2.15071e-08 | 1.000000 | 2.15073e-08 | 1.00000  |
| rad11         | 2.11157e-08 | 1.000000 | 2.11159e-08 | 1.00000  |
| rad36         | 6.86836e-09 | 1.000000 | 6.86841e-09 | 1.00000  |
| rad22         | 4.47963e-09 | 1.000000 | 4.47967e-09 | 1.00000  |
| rad2          | 3.11421e-10 | 1.000000 | 3.11424e-10 | 1.00000  |
| rad3          | 1.53763e-10 | 1.000000 | 1.53765e-10 | 1.00000  |
| rad13         | 9.76335e-11 | 1.000000 | 9.76343e-11 | 1.00000  |
| rad4          | 7.80164e-11 | 1.000000 | 7.80170e-11 | 1.00000  |
| rad1          | 1.99616e-11 | 1.000000 | 1.99618e-11 | 1.00000  |
| rad10         | 1.62155e-11 | 1.000000 | 1.62156e-11 | 1.00000  |
| rad20         | 1.28221e-11 | 1.000000 | 1.28222e-11 | 1.00000  |
| rad21         | 8.03547e-12 | 1.000000 | 8.03554e-12 | 1.00000  |
| rad35         | 5.92712e-12 | 1.000000 | 5.92717e-12 | 1.00000  |
| PAH9+H        | 1.72446e-12 | 1.000000 | 1.72448e-12 | 1.00000  |
| rad18         | 1.97087e-13 | 1.000000 | 1.97089e-13 | 1.00000  |
| rad33         | 1.84285e-13 | 1.000000 | 1.84287e-13 | 1.00000  |
| rad30         | 1.20889e-13 | 1.000000 | 1.20890e-13 | 1.00000  |
| rad38         | 2.41674e-14 | 1.000000 | 2.41676e-14 | 1.00000  |
| rad28         | 5.26811e-15 | 1.000000 | 5.26815e-15 | 1.00000  |
| rad24         | 1.37086e-15 | 1.000000 | 1.37087e-15 | 1.00000  |
| rad26         | 1.63694e-16 | 1.000000 | 1.63696e-16 | 1.00000  |
| rad15         | 1.02301e-16 | 1.000000 | 1.02302e-16 | 1.00000  |
| rad25         | 1.06843e-17 | 1.000000 | 1.06844e-17 | 1.00000  |
| rad27         | 7.92049e-18 | 1.000000 | 7.92055e-18 | 1.00000  |
| PhCHCCH2+H    | 5.97735e-19 | 1.000000 | 5.97740e-19 | 1.00000  |
| PhCCH+CH3     | 2.37728e-19 | 1.000000 | 2.37730e-19 | 1.00000  |
| rad14         | 1.06849e-19 | 1.000000 | 1.06850e-19 | 1.00000  |
| PhCCCH3+H     | 5.48501e-20 | 1.000000 | 5.48505e-20 | 1.00000  |
| rad31         | 5.23736e-20 | 1.000000 | 5.23741e-20 | 1.00000  |
| rad46         | 3.81627e-23 | 1.000000 | 3.81630e-23 | 1.00000  |
| rad8          | 1.73940e-23 | 1.000000 | 1.73941e-23 | 1.00000  |
| rad9          | 6.57993e-25 | 1.000000 | 6.57998e-25 | 1.00000  |
| Ph+MeAc       | 1.38884e-25 | 1.000000 | 1.38885e-25 | 1.00000  |
| PAH7+H        | 3.81089e-26 | 1.000000 | 3.81092e-26 | 1.00000  |
| rad12         | 7.24972e-27 | 1.000000 | 7.24978e-27 | 1.00000  |
| rad39         | 8.24806e-28 | 1.000000 | 8.24813e-28 | 1.00000  |
| Ph+Allene     | 1.43623e-28 | 1.000000 | 1.43625e-28 | 1.00000  |
| rad60syn      | 6.64525e-33 | 1.000000 | 6.64531e-33 | 1.00000  |
| PhCH2CCH+H    | 8.08836e-34 | 1.000000 | 8.08843e-34 | 1.00000  |
| rad60anti     | 3.36440e-34 | 1.000000 | 3.36443e-34 | 1.00000  |
| rad37         | 1.97082e-34 | 1.000000 | 1.97084e-34 | 1.00000  |
| rad5          | 2.68598e-37 | 1.000000 | 2.68600e-37 | 1.00000  |
| PAH3+H        | 2.53455e-41 | 1.000000 | 2.53457e-41 | 1.00000  |
| rad59         | 1.27271e-41 | 1.000000 | 1.27272e-41 | 1.00000  |
| rad50         | 2.33903e-42 | 1.000000 | 2.33905e-42 | 1.00000  |
| rad19syn      | 9.15105e-48 | 1.000000 | 9.15113e-48 | 1.00000  |
| rad52         | 8.00039e-52 | 1.000000 | 8.00046e-52 | 1.00000  |
| rad54         | 5.24940e-52 | 1.000000 | 5.24945e-52 | 1.00000  |
| PAH10+CH3     | 3.61604e-52 | 1.000000 | 3.61607e-52 | 1.00000  |
| rad43         | 8.29673e-53 | 1.000000 | 8.29680e-53 | 1.00000  |
| rad62         | 5.25384e-55 | 1.000000 | 5.25388e-55 | 1.00000  |
| rad51         | 5.61624e-58 | 1.000000 | 5.61629e-58 | 1.00000  |
| rad70         | 2.61489e-60 | 1.000000 | 2.61491e-60 | 1.00000  |
| PhcycC3H3_A+H | 1.24244e-60 | 1.000000 | 1.24245e-60 | 1.00000  |
| rad55         | 6.60050e-61 | 1.000000 | 6.60055e-61 | 1.00000  |
| rad65         | 1.10337e-62 | 1.000000 | 1.10338e-62 | 1.00000  |
| rad58         | 4.58908e-64 | 1.000000 | 4.58912e-64 | 1.00000  |
| PAH1+H        | 1.47469e-65 | 1.000000 | 1.47470e-65 | 1.00000  |
| rad34         | 1.13621e-67 | 1.000000 | 1.13622e-67 | 1.00000  |
| rad42         | 1.45576e-71 | 1.000000 | 1.45577e-71 | 1.00000  |
| rad41         | 2.69307e-72 | 1.000000 | 2.69309e-72 | 1.00000  |
| rad47         | 2.62260e-73 | 1.000000 | 2.62263e-73 | 1.00000  |

0.100000000E-01 Pa, 100.000000 K

=====

| Rate constant | True (fraction)     | Effective (fraction) |
|---------------|---------------------|----------------------|
| Total         | 1.02671e-41 (1.00 ) | 1.02670e-41 (1.00 )  |

| species     | PYtrue      | Cumul    | PYeffective | Cumul    |
|-------------|-------------|----------|-------------|----------|
| Indene+H    | 0.999729    | 0.999729 | 0.999740    | 0.999740 |
| rad6        | 0.000253723 | 0.999983 | 0.000253726 | 0.999994 |
| Benzyl+C2H2 | 1.12933e-05 | 0.999994 | 0.00000     | 0.999994 |
| rad23       | 5.87229e-06 | 1.000000 | 5.87236e-06 | 1.000000 |

|               |             |          |             |          |
|---------------|-------------|----------|-------------|----------|
| rad45         | 6.79008e-08 | 1.000000 | 6.79016e-08 | 1.000000 |
| rad7          | 2.25742e-08 | 1.000000 | 2.25745e-08 | 1.000000 |
| rad11         | 1.73291e-08 | 1.000000 | 1.73293e-08 | 1.000000 |
| rad36         | 4.20883e-09 | 1.000000 | 4.20887e-09 | 1.000000 |
| rad22         | 2.74991e-09 | 1.000000 | 2.74994e-09 | 1.000000 |
| rad2          | 5.00700e-10 | 1.000000 | 5.00705e-10 | 1.000000 |
| rad3          | 1.78956e-10 | 1.000000 | 1.78958e-10 | 1.000000 |
| rad13         | 1.03558e-10 | 1.000000 | 1.03559e-10 | 1.000000 |
| rad4          | 9.08789e-11 | 1.000000 | 9.08800e-11 | 1.000000 |
| rad1          | 3.22022e-11 | 1.000000 | 3.22026e-11 | 1.000000 |
| rad10         | 2.63854e-11 | 1.000000 | 2.63857e-11 | 1.000000 |
| rad20         | 1.09277e-11 | 1.000000 | 1.09278e-11 | 1.000000 |
| rad35         | 9.00559e-12 | 1.000000 | 9.00569e-12 | 1.000000 |
| rad21         | 6.85346e-12 | 1.000000 | 6.85353e-12 | 1.000000 |
| PAH9+H        | 3.43761e-12 | 1.000000 | 3.43765e-12 | 1.000000 |
| rad30         | 6.32295e-13 | 1.000000 | 6.32302e-13 | 1.000000 |
| rad33         | 1.95763e-13 | 1.000000 | 1.95765e-13 | 1.000000 |
| rad18         | 1.55493e-13 | 1.000000 | 1.55494e-13 | 1.000000 |
| rad38         | 7.55819e-14 | 1.000000 | 7.55827e-14 | 1.000000 |
| rad28         | 2.48538e-14 | 1.000000 | 2.48541e-14 | 1.000000 |
| rad15         | 1.16318e-15 | 1.000000 | 1.16319e-15 | 1.000000 |
| rad26         | 9.74528e-16 | 1.000000 | 9.74539e-16 | 1.000000 |
| rad24         | 8.55617e-16 | 1.000000 | 8.55627e-16 | 1.000000 |
| rad25         | 7.48657e-17 | 1.000000 | 7.48666e-17 | 1.000000 |
| rad27         | 2.45575e-17 | 1.000000 | 2.45578e-17 | 1.000000 |
| PhCHCCH2+H    | 6.90471e-18 | 1.000000 | 6.90479e-18 | 1.000000 |
| PhCCH+CH3     | 3.39040e-18 | 1.000000 | 3.39044e-18 | 1.000000 |
| PhCCCH3+H     | 8.15319e-19 | 1.000000 | 8.15328e-19 | 1.000000 |
| rad14         | 7.23273e-19 | 1.000000 | 7.23281e-19 | 1.000000 |
| rad31         | 6.58920e-20 | 1.000000 | 6.58927e-20 | 1.000000 |
| rad46         | 1.26522e-21 | 1.000000 | 1.26523e-21 | 1.000000 |
| rad8          | 3.85007e-22 | 1.000000 | 3.85011e-22 | 1.000000 |
| rad9          | 2.66124e-23 | 1.000000 | 2.66127e-23 | 1.000000 |
| Ph+MeAc       | 5.04885e-24 | 1.000000 | 5.04890e-24 | 1.000000 |
| PAH7+H        | 1.30349e-24 | 1.000000 | 1.30350e-24 | 1.000000 |
| rad12         | 2.36512e-25 | 1.000000 | 2.36514e-25 | 1.000000 |
| rad39         | 3.18687e-26 | 1.000000 | 3.18690e-26 | 1.000000 |
| Ph+Allene     | 5.69135e-27 | 1.000000 | 5.69141e-27 | 1.000000 |
| rad60syn      | 2.63107e-31 | 1.000000 | 2.63110e-31 | 1.000000 |
| PhCH2CCH+H    | 3.37739e-32 | 1.000000 | 3.37743e-32 | 1.000000 |
| rad60anti     | 1.34754e-32 | 1.000000 | 1.34755e-32 | 1.000000 |
| rad37         | 8.35353e-33 | 1.000000 | 8.35362e-33 | 1.000000 |
| rad5          | 1.14102e-35 | 1.000000 | 1.14103e-35 | 1.000000 |
| PAH3+H        | 1.06927e-39 | 1.000000 | 1.06928e-39 | 1.000000 |
| rad59         | 5.36976e-40 | 1.000000 | 5.36982e-40 | 1.000000 |
| rad50         | 9.89627e-41 | 1.000000 | 9.89638e-41 | 1.000000 |
| rad19syn      | 3.74734e-46 | 1.000000 | 3.74738e-46 | 1.000000 |
| rad52         | 3.28536e-50 | 1.000000 | 3.28540e-50 | 1.000000 |
| rad54         | 2.13277e-50 | 1.000000 | 2.13279e-50 | 1.000000 |
| PAH10+CH3     | 1.50409e-50 | 1.000000 | 1.50410e-50 | 1.000000 |
| rad43         | 3.45194e-51 | 1.000000 | 3.45198e-51 | 1.000000 |
| rad62         | 2.17398e-53 | 1.000000 | 2.17401e-53 | 1.000000 |
| rad51         | 2.28720e-56 | 1.000000 | 2.28722e-56 | 1.000000 |
| rad70         | 1.09289e-58 | 1.000000 | 1.09291e-58 | 1.000000 |
| PhcycC3H3_A+H | 5.21547e-59 | 1.000000 | 5.21553e-59 | 1.000000 |
| rad55         | 2.76851e-59 | 1.000000 | 2.76855e-59 | 1.000000 |
| rad65         | 4.56499e-61 | 1.000000 | 4.56504e-61 | 1.000000 |
| rad58         | 1.93342e-62 | 1.000000 | 1.93345e-62 | 1.000000 |
| PAH1+H        | 6.53146e-64 | 1.000000 | 6.53154e-64 | 1.000000 |
| rad34         | 5.11340e-66 | 1.000000 | 5.11346e-66 | 1.000000 |
| rad42         | 9.61299e-70 | 1.000000 | 9.61310e-70 | 1.000000 |
| rad41         | 2.75932e-70 | 1.000000 | 2.75935e-70 | 1.000000 |
| rad47         | 1.02789e-71 | 1.000000 | 1.02790e-71 | 1.000000 |

0.100000000E-01 Pa, 110.000000 K

=====

| Rate constant | True (fraction)    | Effective (fraction) |
|---------------|--------------------|----------------------|
| Total         | 4.04932e-39 (1.00) | 4.04926e-39 (1.00)   |

| species     | PYtrue      | Cumul    | PYeffective | Cumul    |
|-------------|-------------|----------|-------------|----------|
| Indene+H    | 0.999712    | 0.999712 | 0.999727    | 0.999727 |
| rad6        | 0.000269502 | 0.999982 | 0.000269506 | 0.999997 |
| Benzyl+C2H2 | 1.49682e-05 | 0.999996 | 0.00000     | 0.999997 |
| rad23       | 3.78944e-06 | 1.00000  | 3.78949e-06 | 1.00000  |
| rad45       | 4.33353e-08 | 1.00000  | 4.33359e-08 | 1.00000  |
| rad7        | 2.38030e-08 | 1.00000  | 2.38034e-08 | 1.00000  |
| rad11       | 1.48361e-08 | 1.00000  | 1.48363e-08 | 1.00000  |
| rad36       | 2.68551e-09 | 1.00000  | 2.68555e-09 | 1.00000  |



|               |             |         |             |         |
|---------------|-------------|---------|-------------|---------|
| rad22         | 1.75773e-09 | 1.00000 | 1.75775e-09 | 1.00000 |
| rad2          | 7.97472e-10 | 1.00000 | 7.97483e-10 | 1.00000 |
| rad3          | 2.05837e-10 | 1.00000 | 2.05840e-10 | 1.00000 |
| rad13         | 1.10236e-10 | 1.00000 | 1.10237e-10 | 1.00000 |
| rad4          | 1.04631e-10 | 1.00000 | 1.04633e-10 | 1.00000 |
| rad1          | 5.14774e-11 | 1.00000 | 5.14782e-11 | 1.00000 |
| rad10         | 4.23669e-11 | 1.00000 | 4.23676e-11 | 1.00000 |
| rad35         | 1.30828e-11 | 1.00000 | 1.30830e-11 | 1.00000 |
| rad20         | 9.42958e-12 | 1.00000 | 9.42972e-12 | 1.00000 |
| PAH9+H        | 6.20395e-12 | 1.00000 | 6.20404e-12 | 1.00000 |
| rad21         | 5.91898e-12 | 1.00000 | 5.91907e-12 | 1.00000 |
| rad30         | 2.44374e-12 | 1.00000 | 2.44377e-12 | 1.00000 |
| rad33         | 2.08699e-13 | 1.00000 | 2.08702e-13 | 1.00000 |
| rad38         | 1.95807e-13 | 1.00000 | 1.95810e-13 | 1.00000 |
| rad18         | 1.25496e-13 | 1.00000 | 1.25498e-13 | 1.00000 |
| rad28         | 1.02250e-13 | 1.00000 | 1.02252e-13 | 1.00000 |
| rad15         | 8.46909e-15 | 1.00000 | 8.46922e-15 | 1.00000 |
| rad26         | 5.26195e-15 | 1.00000 | 5.26203e-15 | 1.00000 |
| rad24         | 5.55339e-16 | 1.00000 | 5.55347e-16 | 1.00000 |
| rad25         | 3.57880e-16 | 1.00000 | 3.57886e-16 | 1.00000 |
| PhCHCCH2+H    | 7.19518e-17 | 1.00000 | 7.19529e-17 | 1.00000 |
| rad27         | 6.73887e-17 | 1.00000 | 6.73897e-17 | 1.00000 |
| PhCCH+CH3     | 4.33393e-17 | 1.00000 | 4.33400e-17 | 1.00000 |
| PhCCCH3+H     | 1.11136e-17 | 1.00000 | 1.11138e-17 | 1.00000 |
| rad14         | 4.00636e-18 | 1.00000 | 4.00642e-18 | 1.00000 |
| rad31         | 8.30324e-20 | 1.00000 | 8.30337e-20 | 1.00000 |
| rad46         | 2.23539e-20 | 1.00000 | 2.23543e-20 | 1.00000 |
| rad8          | 8.36475e-21 | 1.00000 | 8.36487e-21 | 1.00000 |
| rad9          | 1.01290e-21 | 1.00000 | 1.01291e-21 | 1.00000 |
| Ph+MeAc       | 2.44644e-22 | 1.00000 | 2.44648e-22 | 1.00000 |
| PAH7+H        | 5.02020e-23 | 1.00000 | 5.02028e-23 | 1.00000 |
| rad12         | 8.87641e-24 | 1.00000 | 8.87654e-24 | 1.00000 |
| rad39         | 1.63732e-24 | 1.00000 | 1.63734e-24 | 1.00000 |
| Ph+Allene     | 6.40787e-25 | 1.00000 | 6.40797e-25 | 1.00000 |
| rad60syn      | 2.70125e-26 | 1.00000 | 2.70129e-26 | 1.00000 |
| rad60anti     | 1.02613e-27 | 1.00000 | 1.02614e-27 | 1.00000 |
| PhCH2CCH+H    | 3.28789e-30 | 1.00000 | 3.28794e-30 | 1.00000 |
| rad37         | 8.22196e-31 | 1.00000 | 8.22208e-31 | 1.00000 |
| rad5          | 1.13190e-33 | 1.00000 | 1.13192e-33 | 1.00000 |
| PAH3+H        | 1.05744e-37 | 1.00000 | 1.05746e-37 | 1.00000 |
| rad59         | 5.30940e-38 | 1.00000 | 5.30948e-38 | 1.00000 |
| rad50         | 1.00081e-38 | 1.00000 | 1.00082e-38 | 1.00000 |
| rad19syn      | 3.68826e-44 | 1.00000 | 3.68832e-44 | 1.00000 |
| rad52         | 3.24384e-48 | 1.00000 | 3.24389e-48 | 1.00000 |
| rad54         | 2.10959e-48 | 1.00000 | 2.10962e-48 | 1.00000 |
| PAH10+CH3     | 1.55683e-48 | 1.00000 | 1.55685e-48 | 1.00000 |
| rad43         | 3.57602e-49 | 1.00000 | 3.57607e-49 | 1.00000 |
| rad62         | 2.25045e-51 | 1.00000 | 2.25048e-51 | 1.00000 |
| rad51         | 2.29403e-54 | 1.00000 | 2.29406e-54 | 1.00000 |
| rad70         | 1.14310e-56 | 1.00000 | 1.14311e-56 | 1.00000 |
| PhcycC3H3_A+H | 5.49153e-57 | 1.00000 | 5.49161e-57 | 1.00000 |
| rad55         | 2.91142e-57 | 1.00000 | 2.91147e-57 | 1.00000 |
| rad65         | 4.72983e-59 | 1.00000 | 4.72990e-59 | 1.00000 |
| rad58         | 2.04707e-60 | 1.00000 | 2.04710e-60 | 1.00000 |
| PAH1+H        | 7.50656e-62 | 1.00000 | 7.50667e-62 | 1.00000 |
| rad34         | 6.04309e-64 | 1.00000 | 6.04318e-64 | 1.00000 |
| rad42         | 2.85151e-67 | 1.00000 | 2.85155e-67 | 1.00000 |
| rad41         | 1.26156e-67 | 1.00000 | 1.26158e-67 | 1.00000 |
| rad47         | 1.06480e-69 | 1.00000 | 1.06482e-69 | 1.00000 |

0.100000000E-01 Pa, 120.000000 K

=====

| Rate constant | True (fraction)     | Effective (fraction) |
|---------------|---------------------|----------------------|
| Total         | 5.87106e-37 (1.00 ) | 5.87094e-37 (1.00 )  |

| species     | PYtrue      | Cumul    | PYeffective | Cumul    |
|-------------|-------------|----------|-------------|----------|
| Indene+H    | 0.999690    | 0.999690 | 0.999710    | 0.999710 |
| rad6        | 0.000287229 | 0.999977 | 0.000287235 | 0.999977 |
| Benzyl+C2H2 | 1.97145e-05 | 0.999997 | 0.00000     | 0.999997 |
| rad23       | 2.52259e-06 | 0.999999 | 2.52264e-06 | 1.000000 |
| rad45       | 2.85721e-08 | 0.999999 | 2.85726e-08 | 1.000000 |
| rad7        | 2.52079e-08 | 1.000000 | 2.52084e-08 | 1.000000 |
| rad11       | 1.31860e-08 | 1.000000 | 1.31863e-08 | 1.000000 |
| rad36       | 1.77054e-09 | 1.000000 | 1.77058e-09 | 1.000000 |
| rad2        | 1.26253e-09 | 1.000000 | 1.26255e-09 | 1.000000 |
| rad22       | 1.16086e-09 | 1.000000 | 1.16088e-09 | 1.000000 |
| rad3        | 2.34839e-10 | 1.000000 | 2.34844e-10 | 1.000000 |
| rad4        | 1.19501e-10 | 1.000000 | 1.19503e-10 | 1.000000 |

|               |             |          |             |          |
|---------------|-------------|----------|-------------|----------|
| rad13         | 1.17765e-10 | 1.000000 | 1.17767e-10 | 1.000000 |
| rad1          | 8.18234e-11 | 1.000000 | 8.18250e-11 | 1.000000 |
| rad10         | 6.74328e-11 | 1.000000 | 6.74341e-11 | 1.000000 |
| rad35         | 1.84608e-11 | 1.000000 | 1.84612e-11 | 1.000000 |
| PAH9+H        | 1.04302e-11 | 1.000000 | 1.04304e-11 | 1.000000 |
| rad20         | 8.21580e-12 | 1.000000 | 8.21596e-12 | 1.000000 |
| rad30         | 7.55577e-12 | 1.000000 | 7.55592e-12 | 1.000000 |
| rad21         | 5.16204e-12 | 1.000000 | 5.16215e-12 | 1.000000 |
| rad38         | 4.42196e-13 | 1.000000 | 4.42205e-13 | 1.000000 |
| rad28         | 3.68152e-13 | 1.000000 | 3.68159e-13 | 1.000000 |
| rad33         | 2.23286e-13 | 1.000000 | 2.23290e-13 | 1.000000 |
| rad18         | 1.03077e-13 | 1.000000 | 1.03079e-13 | 1.000000 |
| rad15         | 4.42951e-14 | 1.000000 | 4.42959e-14 | 1.000000 |
| rad26         | 2.51470e-14 | 1.000000 | 2.51475e-14 | 1.000000 |
| rad25         | 1.27626e-15 | 1.000000 | 1.27629e-15 | 1.000000 |
| PhCHCCH2+H    | 6.17461e-16 | 1.000000 | 6.17473e-16 | 1.000000 |
| PhCCH+CH3     | 4.39395e-16 | 1.000000 | 4.39404e-16 | 1.000000 |
| rad24         | 3.72056e-16 | 1.000000 | 3.72064e-16 | 1.000000 |
| rad27         | 1.65119e-16 | 1.000000 | 1.65123e-16 | 1.000000 |
| PhCCCH3+H     | 1.21020e-16 | 1.000000 | 1.21023e-16 | 1.000000 |
| rad14         | 1.76563e-17 | 1.000000 | 1.76567e-17 | 1.000000 |
| rad46         | 2.46046e-19 | 1.000000 | 2.46051e-19 | 1.000000 |
| rad8          | 1.39254e-19 | 1.000000 | 1.39257e-19 | 1.000000 |
| rad31         | 1.05467e-19 | 1.000000 | 1.05469e-19 | 1.000000 |
| rad9          | 2.49459e-20 | 1.000000 | 2.49464e-20 | 1.000000 |
| Ph+MeAc       | 8.50393e-21 | 1.000000 | 8.50410e-21 | 1.000000 |
| PAH7+H        | 1.42968e-21 | 1.000000 | 1.42970e-21 | 1.000000 |
| rad12         | 2.50980e-22 | 1.000000 | 2.50985e-22 | 1.000000 |
| rad39         | 6.04152e-23 | 1.000000 | 6.04164e-23 | 1.000000 |
| Ph+Allene     | 4.14077e-23 | 1.000000 | 4.14085e-23 | 1.000000 |
| rad60syn      | 1.65302e-24 | 1.000000 | 1.65305e-24 | 1.000000 |
| rad60anti     | 9.93884e-26 | 1.000000 | 9.93904e-26 | 1.000000 |
| PhCH2CCH+H    | 4.22825e-28 | 1.000000 | 4.22833e-28 | 1.000000 |
| rad37         | 1.05627e-28 | 1.000000 | 1.05629e-28 | 1.000000 |
| rad5          | 1.47700e-31 | 1.000000 | 1.47703e-31 | 1.000000 |
| PAH3+H        | 1.38780e-35 | 1.000000 | 1.38782e-35 | 1.000000 |
| rad59         | 6.96530e-36 | 1.000000 | 6.96544e-36 | 1.000000 |
| rad50         | 1.40938e-36 | 1.000000 | 1.40940e-36 | 1.000000 |
| rad19syn      | 4.92028e-42 | 1.000000 | 4.92037e-42 | 1.000000 |
| rad52         | 4.38778e-46 | 1.000000 | 4.38786e-46 | 1.000000 |
| rad54         | 2.86042e-46 | 1.000000 | 2.86047e-46 | 1.000000 |
| PAH10+CH3     | 2.30643e-46 | 1.000000 | 2.30648e-46 | 1.000000 |
| rad43         | 5.30899e-47 | 1.000000 | 5.30910e-47 | 1.000000 |
| rad62         | 3.36307e-49 | 1.000000 | 3.36314e-49 | 1.000000 |
| rad51         | 3.27153e-52 | 1.000000 | 3.27159e-52 | 1.000000 |
| rad70         | 1.70014e-54 | 1.000000 | 1.70017e-54 | 1.000000 |
| PhcycC3H3_A+H | 8.26508e-55 | 1.000000 | 8.26524e-55 | 1.000000 |
| rad55         | 4.37099e-55 | 1.000000 | 4.37107e-55 | 1.000000 |
| rad65         | 7.32467e-57 | 1.000000 | 7.32482e-57 | 1.000000 |
| rad58         | 3.11211e-58 | 1.000000 | 3.11217e-58 | 1.000000 |
| PAH1+H        | 1.38624e-59 | 1.000000 | 1.38627e-59 | 1.000000 |
| rad34         | 1.21070e-61 | 1.000000 | 1.21072e-61 | 1.000000 |
| rad42         | 2.09354e-64 | 1.000000 | 2.09358e-64 | 1.000000 |
| rad41         | 1.11797e-64 | 1.000000 | 1.11799e-64 | 1.000000 |
| rad47         | 2.07462e-67 | 1.000000 | 2.07466e-67 | 1.000000 |

0.100000000E-01 Pa, 130.000000 K

=====

| Rate constant | True (fraction)     | Effective (fraction) |
|---------------|---------------------|----------------------|
| Total         | 3.94360e-35 (1.00 ) | 3.94350e-35 (1.00 )  |

| species     | PYtrue      | Cumul    | PYeffective | Cumul    |
|-------------|-------------|----------|-------------|----------|
| Indene+H    | 0.999665    | 0.999665 | 0.999691    | 0.999691 |
| rad6        | 0.000307153 | 0.999972 | 0.000307161 | 0.999998 |
| Benzyl+C2H2 | 2.58370e-05 | 0.999998 | 0.00000     | 0.999998 |
| rad23       | 1.72274e-06 | 1.000000 | 1.72279e-06 | 1.000000 |
| rad7        | 2.68066e-08 | 1.000000 | 2.68073e-08 | 1.000000 |
| rad45       | 1.93493e-08 | 1.000000 | 1.93498e-08 | 1.000000 |
| rad11       | 1.21164e-08 | 1.000000 | 1.21167e-08 | 1.000000 |
| rad2        | 1.98937e-09 | 1.000000 | 1.98942e-09 | 1.000000 |
| rad36       | 1.19921e-09 | 1.000000 | 1.19924e-09 | 1.000000 |
| rad22       | 7.87544e-10 | 1.000000 | 7.87565e-10 | 1.000000 |
| rad3        | 2.66640e-10 | 1.000000 | 2.66647e-10 | 1.000000 |
| rad4        | 1.35842e-10 | 1.000000 | 1.35845e-10 | 1.000000 |
| rad1        | 1.29491e-10 | 1.000000 | 1.29494e-10 | 1.000000 |
| rad13       | 1.26253e-10 | 1.000000 | 1.26256e-10 | 1.000000 |
| rad10       | 1.06610e-10 | 1.000000 | 1.06613e-10 | 1.000000 |
| rad35       | 2.55729e-11 | 1.000000 | 2.55736e-11 | 1.000000 |

|               |             |          |             |          |
|---------------|-------------|----------|-------------|----------|
| rad30         | 1.97440e-11 | 1.000000 | 1.97445e-11 | 1.000000 |
| PAH9+H        | 1.66719e-11 | 1.000000 | 1.66723e-11 | 1.000000 |
| rad20         | 7.21318e-12 | 1.000000 | 7.21336e-12 | 1.000000 |
| rad21         | 4.53690e-12 | 1.000000 | 4.53701e-12 | 1.000000 |
| rad28         | 1.18262e-12 | 1.000000 | 1.18265e-12 | 1.000000 |
| rad38         | 9.02685e-13 | 1.000000 | 9.02708e-13 | 1.000000 |
| rad33         | 2.39743e-13 | 1.000000 | 2.39750e-13 | 1.000000 |
| rad15         | 1.80149e-13 | 1.000000 | 1.80154e-13 | 1.000000 |
| rad26         | 1.06247e-13 | 1.000000 | 1.06249e-13 | 1.000000 |
| rad18         | 8.58379e-14 | 1.000000 | 8.58401e-14 | 1.000000 |
| PhCHCCH2+H    | 4.32779e-15 | 1.000000 | 4.32790e-15 | 1.000000 |
| rad25         | 3.62873e-15 | 1.000000 | 3.62882e-15 | 1.000000 |
| PhCCH+CH3     | 3.51540e-15 | 1.000000 | 3.51549e-15 | 1.000000 |
| PhCCCH3+H     | 1.03525e-15 | 1.000000 | 1.03528e-15 | 1.000000 |
| rad27         | 3.67059e-16 | 1.000000 | 3.67069e-16 | 1.000000 |
| rad24         | 2.55872e-16 | 1.000000 | 2.55879e-16 | 1.000000 |
| rad14         | 6.33176e-17 | 1.000000 | 6.33192e-17 | 1.000000 |
| rad46         | 1.88516e-18 | 1.000000 | 1.88521e-18 | 1.000000 |
| rad8          | 1.70725e-18 | 1.000000 | 1.70729e-18 | 1.000000 |
| rad9          | 4.02618e-19 | 1.000000 | 4.02628e-19 | 1.000000 |
| Ph+MeAc       | 1.99551e-19 | 1.000000 | 1.99556e-19 | 1.000000 |
| rad31         | 1.35814e-19 | 1.000000 | 1.35818e-19 | 1.000000 |
| PAH7+H        | 2.83579e-20 | 1.000000 | 2.83586e-20 | 1.000000 |
| rad12         | 4.95269e-21 | 1.000000 | 4.95281e-21 | 1.000000 |
| Ph+Allene     | 1.51229e-21 | 1.000000 | 1.51233e-21 | 1.000000 |
| rad39         | 1.50506e-21 | 1.000000 | 1.50510e-21 | 1.000000 |
| rad60syn      | 5.23055e-23 | 1.000000 | 5.23068e-23 | 1.000000 |
| rad60anti     | 4.00166e-24 | 1.000000 | 4.00176e-24 | 1.000000 |
| PhCH2CCH+H    | 9.24573e-26 | 1.000000 | 9.24597e-26 | 1.000000 |
| rad37         | 2.15419e-26 | 1.000000 | 2.15424e-26 | 1.000000 |
| rad5          | 2.59942e-29 | 1.000000 | 2.59949e-29 | 1.000000 |
| PAH3+H        | 2.51932e-33 | 1.000000 | 2.51938e-33 | 1.000000 |
| rad59         | 1.26373e-33 | 1.000000 | 1.26376e-33 | 1.000000 |
| rad50         | 3.08918e-34 | 1.000000 | 3.08926e-34 | 1.000000 |
| rad19syn      | 9.23632e-40 | 1.000000 | 9.23656e-40 | 1.000000 |
| rad52         | 8.67093e-44 | 1.000000 | 8.67115e-44 | 1.000000 |
| rad54         | 5.51591e-44 | 1.000000 | 5.51605e-44 | 1.000000 |
| PAH10+CH3     | 5.14252e-44 | 1.000000 | 5.14265e-44 | 1.000000 |
| rad43         | 1.18830e-44 | 1.000000 | 1.18833e-44 | 1.000000 |
| rad62         | 7.74318e-47 | 1.000000 | 7.74338e-47 | 1.000000 |
| rad51         | 7.65499e-50 | 1.000000 | 7.65519e-50 | 1.000000 |
| rad70         | 3.85230e-52 | 1.000000 | 3.85240e-52 | 1.000000 |
| PhcycC3H3_A+H | 1.92289e-52 | 1.000000 | 1.92294e-52 | 1.000000 |
| rad55         | 1.01030e-52 | 1.000000 | 1.01033e-52 | 1.000000 |
| rad65         | 2.26192e-54 | 1.000000 | 2.26198e-54 | 1.000000 |
| rad58         | 7.41086e-56 | 1.000000 | 7.41105e-56 | 1.000000 |
| PAH1+H        | 5.51185e-57 | 1.000000 | 5.51200e-57 | 1.000000 |
| rad34         | 5.98084e-59 | 1.000000 | 5.98099e-59 | 1.000000 |
| rad42         | 2.63371e-61 | 1.000000 | 2.63378e-61 | 1.000000 |
| rad41         | 1.48390e-61 | 1.000000 | 1.48394e-61 | 1.000000 |
| rad47         | 1.37301e-64 | 1.000000 | 1.37305e-64 | 1.000000 |

0.100000000E-01 Pa, 140.000000 K

=====

| Rate constant | True (fraction)     | Effective (fraction) |
|---------------|---------------------|----------------------|
| Total         | 1.44756e-33 (1.00 ) | 1.44751e-33 (1.00 )  |

| species     | PYtrue      | Cumul    | PYeffective | Cumul    |
|-------------|-------------|----------|-------------|----------|
| Indene+H    | 0.999635    | 0.999635 | 0.999669    | 0.999669 |
| rad6        | 0.000329544 | 0.999965 | 0.000329555 | 0.999999 |
| Benzyl+C2H2 | 3.37192e-05 | 0.999998 | 0.00000     | 0.999999 |
| rad23       | 1.20188e-06 | 0.999999 | 1.20192e-06 | 1.000000 |
| rad7        | 2.86196e-08 | 0.999999 | 2.86206e-08 | 1.000000 |
| rad45       | 1.33998e-08 | 1.000000 | 1.34002e-08 | 1.000000 |
| rad11       | 1.14675e-08 | 1.000000 | 1.14679e-08 | 1.000000 |
| rad2        | 3.11803e-09 | 1.000000 | 3.11813e-09 | 1.000000 |
| rad36       | 8.30778e-10 | 1.000000 | 8.30806e-10 | 1.000000 |
| rad22       | 5.46402e-10 | 1.000000 | 5.46421e-10 | 1.000000 |
| rad3        | 3.02215e-10 | 1.000000 | 3.02225e-10 | 1.000000 |
| rad1        | 2.03918e-10 | 1.000000 | 2.03925e-10 | 1.000000 |
| rad10       | 1.67419e-10 | 1.000000 | 1.67424e-10 | 1.000000 |
| rad4        | 1.54163e-10 | 1.000000 | 1.54168e-10 | 1.000000 |
| rad13       | 1.35822e-10 | 1.000000 | 1.35827e-10 | 1.000000 |
| rad30       | 4.53419e-11 | 1.000000 | 4.53434e-11 | 1.000000 |
| rad35       | 3.50225e-11 | 1.000000 | 3.50237e-11 | 1.000000 |
| PAH9+H      | 2.57054e-11 | 1.000000 | 2.57063e-11 | 1.000000 |
| rad20       | 6.37193e-12 | 1.000000 | 6.37215e-12 | 1.000000 |
| rad21       | 4.01244e-12 | 1.000000 | 4.01257e-12 | 1.000000 |

|               |             |          |             |          |
|---------------|-------------|----------|-------------|----------|
| rad28         | 3.45639e-12 | 1.000000 | 3.45651e-12 | 1.000000 |
| rad38         | 1.70902e-12 | 1.000000 | 1.70908e-12 | 1.000000 |
| rad15         | 6.02781e-13 | 1.000000 | 6.02802e-13 | 1.000000 |
| rad26         | 3.99280e-13 | 1.000000 | 3.99293e-13 | 1.000000 |
| rad33         | 2.58315e-13 | 1.000000 | 2.58324e-13 | 1.000000 |
| rad18         | 7.22699e-14 | 1.000000 | 7.22724e-14 | 1.000000 |
| PhCHCCH2+H    | 2.52243e-14 | 1.000000 | 2.52251e-14 | 1.000000 |
| PhCCH+CH3     | 2.27948e-14 | 1.000000 | 2.27956e-14 | 1.000000 |
| rad25         | 8.63408e-15 | 1.000000 | 8.63437e-15 | 1.000000 |
| PhCCCH3+H     | 7.11022e-15 | 1.000000 | 7.11046e-15 | 1.000000 |
| rad27         | 7.51872e-16 | 1.000000 | 7.51897e-16 | 1.000000 |
| rad14         | 1.90706e-16 | 1.000000 | 1.90712e-16 | 1.000000 |
| rad24         | 1.79875e-16 | 1.000000 | 1.79881e-16 | 1.000000 |
| rad8          | 1.58310e-17 | 1.000000 | 1.58315e-17 | 1.000000 |
| rad46         | 1.08901e-17 | 1.000000 | 1.08905e-17 | 1.000000 |
| rad9          | 4.55740e-18 | 1.000000 | 4.55755e-18 | 1.000000 |
| Ph+MeAc       | 3.24063e-18 | 1.000000 | 3.24074e-18 | 1.000000 |
| PAH7+H        | 4.02211e-19 | 1.000000 | 4.02225e-19 | 1.000000 |
| rad31         | 1.78114e-19 | 1.000000 | 1.78120e-19 | 1.000000 |
| rad12         | 6.94972e-20 | 1.000000 | 6.94995e-20 | 1.000000 |
| Ph+Allene     | 3.44770e-20 | 1.000000 | 3.44782e-20 | 1.000000 |
| rad39         | 2.59191e-20 | 1.000000 | 2.59199e-20 | 1.000000 |
| rad60syn      | 1.00153e-21 | 1.000000 | 1.00156e-21 | 1.000000 |
| rad60anti     | 9.30741e-23 | 1.000000 | 9.30773e-23 | 1.000000 |
| PhCH2CCH+H    | 6.03080e-24 | 1.000000 | 6.03100e-24 | 1.000000 |
| rad37         | 1.55840e-24 | 1.000000 | 1.55845e-24 | 1.000000 |
| rad5          | 3.93774e-27 | 1.000000 | 3.93787e-27 | 1.000000 |
| PAH3+H        | 1.15539e-28 | 1.000000 | 1.15543e-28 | 1.000000 |
| rad59         | 5.77702e-29 | 1.000000 | 5.77721e-29 | 1.000000 |
| rad50         | 7.57351e-30 | 1.000000 | 7.57377e-30 | 1.000000 |
| rad19syn      | 1.76794e-37 | 1.000000 | 1.76800e-37 | 1.000000 |
| rad52         | 1.82202e-41 | 1.000000 | 1.82208e-41 | 1.000000 |
| PAH10+CH3     | 1.20333e-41 | 1.000000 | 1.20337e-41 | 1.000000 |
| rad54         | 1.09409e-41 | 1.000000 | 1.09412e-41 | 1.000000 |
| rad43         | 2.79362e-42 | 1.000000 | 2.79371e-42 | 1.000000 |
| rad62         | 1.94154e-44 | 1.000000 | 1.94161e-44 | 1.000000 |
| rad51         | 2.32453e-47 | 1.000000 | 2.32461e-47 | 1.000000 |
| rad70         | 9.98120e-50 | 1.000000 | 9.98154e-50 | 1.000000 |
| PhcycC3H3_A+H | 5.25124e-50 | 1.000000 | 5.25142e-50 | 1.000000 |
| rad55         | 2.71805e-50 | 1.000000 | 2.71815e-50 | 1.000000 |
| rad65         | 1.11058e-51 | 1.000000 | 1.11062e-51 | 1.000000 |
| rad58         | 2.12043e-53 | 1.000000 | 2.12050e-53 | 1.000000 |
| PAH1+H        | 3.55440e-54 | 1.000000 | 3.55452e-54 | 1.000000 |
| rad34         | 5.00384e-56 | 1.000000 | 5.00401e-56 | 1.000000 |
| rad42         | 3.05916e-58 | 1.000000 | 3.05927e-58 | 1.000000 |
| rad41         | 1.74070e-58 | 1.000000 | 1.74076e-58 | 1.000000 |
| rad47         | 1.34919e-61 | 1.000000 | 1.34924e-61 | 1.000000 |

0.100000000E-01 Pa, 150.000000 K

=====

| Rate constant | True (fraction)     | Effective (fraction) |
|---------------|---------------------|----------------------|
| Total         | 3.27736e-32 (1.00 ) | 3.27722e-32 (1.00 )  |

| species     | PYtrue      | Cumul    | PYeffective | Cumul    |
|-------------|-------------|----------|-------------|----------|
| Indene+H    | 0.999601    | 0.999601 | 0.999644    | 0.999644 |
| rad6        | 0.000354694 | 0.999956 | 0.000354710 | 0.999999 |
| Benzyl+C2H2 | 4.38395e-05 | 1.000000 | 0.000000    | 0.999999 |
| rad23       | 8.53789e-07 | 1.000000 | 8.53827e-07 | 1.000000 |
| rad7        | 3.06696e-08 | 1.000000 | 3.06709e-08 | 1.000000 |
| rad11       | 1.11390e-08 | 1.000000 | 1.11395e-08 | 1.000000 |
| rad45       | 9.45708e-09 | 1.000000 | 9.45750e-09 | 1.000000 |
| rad2        | 4.85112e-09 | 1.000000 | 4.85133e-09 | 1.000000 |
| rad36       | 5.86685e-10 | 1.000000 | 5.86711e-10 | 1.000000 |
| rad22       | 3.86361e-10 | 1.000000 | 3.86378e-10 | 1.000000 |
| rad3        | 3.42907e-10 | 1.000000 | 3.42922e-10 | 1.000000 |
| rad1        | 3.18895e-10 | 1.000000 | 3.18909e-10 | 1.000000 |
| rad10       | 2.60731e-10 | 1.000000 | 2.60742e-10 | 1.000000 |
| rad4        | 1.75165e-10 | 1.000000 | 1.75173e-10 | 1.000000 |
| rad13       | 1.46606e-10 | 1.000000 | 1.46612e-10 | 1.000000 |
| rad30       | 9.41527e-11 | 1.000000 | 9.41569e-11 | 1.000000 |
| rad35       | 4.76303e-11 | 1.000000 | 4.76324e-11 | 1.000000 |
| PAH9+H      | 3.86213e-11 | 1.000000 | 3.86230e-11 | 1.000000 |
| rad28       | 9.33844e-12 | 1.000000 | 9.33885e-12 | 1.000000 |
| rad20       | 5.65708e-12 | 1.000000 | 5.65732e-12 | 1.000000 |
| rad21       | 3.56681e-12 | 1.000000 | 3.56696e-12 | 1.000000 |
| rad38       | 3.05614e-12 | 1.000000 | 3.05627e-12 | 1.000000 |
| rad15       | 1.72906e-12 | 1.000000 | 1.72913e-12 | 1.000000 |
| rad26       | 1.34504e-12 | 1.000000 | 1.34510e-12 | 1.000000 |

|               |             |         |             |          |
|---------------|-------------|---------|-------------|----------|
| rad33         | 2.79268e-13 | 1.00000 | 2.79280e-13 | 1.000000 |
| PhCHCCH2+H    | 1.25105e-13 | 1.00000 | 1.25111e-13 | 1.000000 |
| PhCCH+CH3     | 1.23488e-13 | 1.00000 | 1.23494e-13 | 1.000000 |
| rad18         | 6.13865e-14 | 1.00000 | 6.13892e-14 | 1.000000 |
| PhCCCH3+H     | 4.03671e-14 | 1.00000 | 4.03689e-14 | 1.000000 |
| rad25         | 1.78180e-14 | 1.00000 | 1.78188e-14 | 1.000000 |
| rad27         | 1.43762e-15 | 1.00000 | 1.43768e-15 | 1.000000 |
| rad14         | 4.96693e-16 | 1.00000 | 4.96715e-16 | 1.000000 |
| rad24         | 1.28837e-16 | 1.00000 | 1.28843e-16 | 1.000000 |
| rad8          | 1.15495e-16 | 1.00000 | 1.15500e-16 | 1.000000 |
| rad46         | 5.02986e-17 | 1.00000 | 5.03008e-17 | 1.000000 |
| rad9          | 3.85973e-17 | 1.00000 | 3.85990e-17 | 1.000000 |
| Ph+MeAc       | 3.83255e-17 | 1.00000 | 3.83272e-17 | 1.000000 |
| PAH7+H        | 4.26845e-18 | 1.00000 | 4.26863e-18 | 1.000000 |
| rad12         | 7.24343e-19 | 1.00000 | 7.24374e-19 | 1.000000 |
| Ph+Allene     | 5.37419e-19 | 1.00000 | 5.37442e-19 | 1.000000 |
| rad39         | 3.24411e-19 | 1.00000 | 3.24425e-19 | 1.000000 |
| rad31         | 2.38476e-19 | 1.00000 | 2.38486e-19 | 1.000000 |
| rad60syn      | 1.28975e-20 | 1.00000 | 1.28981e-20 | 1.000000 |
| rad60anti     | 1.41579e-21 | 1.00000 | 1.41585e-21 | 1.000000 |
| PhCH2CCH+H    | 1.94136e-22 | 1.00000 | 1.94144e-22 | 1.000000 |
| rad37         | 4.77034e-23 | 1.00000 | 4.77055e-23 | 1.000000 |
| rad5          | 1.84873e-25 | 1.00000 | 1.84881e-25 | 1.000000 |
| PAH3+H        | 1.81469e-26 | 1.00000 | 1.81477e-26 | 1.000000 |
| rad59         | 8.17921e-27 | 1.00000 | 8.17956e-27 | 1.000000 |
| rad50         | 5.46863e-28 | 1.00000 | 5.46887e-28 | 1.000000 |
| rad19syn      | 8.43157e-35 | 1.00000 | 8.43194e-35 | 1.000000 |
| rad52         | 9.27159e-39 | 1.00000 | 9.27199e-39 | 1.000000 |
| PAH10+CH3     | 5.82404e-39 | 1.00000 | 5.82429e-39 | 1.000000 |
| rad54         | 5.39064e-39 | 1.00000 | 5.39088e-39 | 1.000000 |
| rad43         | 1.35361e-39 | 1.00000 | 1.35367e-39 | 1.000000 |
| rad62         | 1.01422e-41 | 1.00000 | 1.01426e-41 | 1.000000 |
| rad51         | 1.72187e-44 | 1.00000 | 1.72194e-44 | 1.000000 |
| rad70         | 6.04833e-47 | 1.00000 | 6.04860e-47 | 1.000000 |
| PhcycC3H3_A+H | 3.32205e-47 | 1.00000 | 3.32220e-47 | 1.000000 |
| rad55         | 1.69582e-47 | 1.00000 | 1.69589e-47 | 1.000000 |
| rad65         | 1.22584e-48 | 1.00000 | 1.22590e-48 | 1.000000 |
| rad58         | 1.39762e-50 | 1.00000 | 1.39768e-50 | 1.000000 |
| PAH1+H        | 4.01635e-51 | 1.00000 | 4.01653e-51 | 1.000000 |
| rad34         | 6.56843e-53 | 1.00000 | 6.56871e-53 | 1.000000 |
| rad42         | 4.84589e-55 | 1.00000 | 4.84610e-55 | 1.000000 |
| rad41         | 2.79380e-55 | 1.00000 | 2.79393e-55 | 1.000000 |
| rad47         | 2.25648e-58 | 1.00000 | 2.25658e-58 | 1.000000 |

0.100000000E-01 Pa, 160.000000 K

=====

| Rate constant | True (fraction)     | Effective (fraction) |
|---------------|---------------------|----------------------|
| Total         | 5.01169e-31 (1.00 ) | 5.01140e-31 (1.00 )  |

| species     | PYtrue      | Cumul    | PYeffective | Cumul    |
|-------------|-------------|----------|-------------|----------|
| Indene+H    | 0.999560    | 0.999560 | 0.999616    | 0.999616 |
| rad6        | 0.000382916 | 0.999943 | 0.000382938 | 0.999999 |
| Benzyl+C2H2 | 5.67893e-05 | 1.000000 | 0.000000    | 0.999999 |
| rad23       | 6.16002e-07 | 1.000000 | 6.16037e-07 | 1.000000 |
| rad7        | 3.29811e-08 | 1.000000 | 3.29830e-08 | 1.000000 |
| rad11       | 1.10663e-08 | 1.000000 | 1.10670e-08 | 1.000000 |
| rad2        | 7.47004e-09 | 1.000000 | 7.47047e-09 | 1.000000 |
| rad45       | 6.78416e-09 | 1.000000 | 6.78454e-09 | 1.000000 |
| rad1        | 4.93803e-10 | 1.000000 | 4.93831e-10 | 1.000000 |
| rad36       | 4.21227e-10 | 1.000000 | 4.21251e-10 | 1.000000 |
| rad10       | 4.01633e-10 | 1.000000 | 4.01656e-10 | 1.000000 |
| rad3        | 3.90498e-10 | 1.000000 | 3.90521e-10 | 1.000000 |
| rad22       | 2.77683e-10 | 1.000000 | 2.77699e-10 | 1.000000 |
| rad4        | 1.99782e-10 | 1.000000 | 1.99793e-10 | 1.000000 |
| rad30       | 1.80553e-10 | 1.000000 | 1.80563e-10 | 1.000000 |
| rad13       | 1.58747e-10 | 1.000000 | 1.58756e-10 | 1.000000 |
| rad35       | 6.44950e-11 | 1.000000 | 6.44987e-11 | 1.000000 |
| PAH9+H      | 5.69431e-11 | 1.000000 | 5.69464e-11 | 1.000000 |
| rad28       | 2.35998e-11 | 1.000000 | 2.36011e-11 | 1.000000 |
| rad38       | 5.22950e-12 | 1.000000 | 5.22979e-12 | 1.000000 |
| rad20       | 5.04329e-12 | 1.000000 | 5.04358e-12 | 1.000000 |
| rad15       | 4.38430e-12 | 1.000000 | 4.38455e-12 | 1.000000 |
| rad26       | 4.09338e-12 | 1.000000 | 4.09361e-12 | 1.000000 |
| rad21       | 3.18419e-12 | 1.000000 | 3.18438e-12 | 1.000000 |
| PhCCH+CH3   | 5.74081e-13 | 1.000000 | 5.74114e-13 | 1.000000 |
| PhCHCCH2+H  | 5.39549e-13 | 1.000000 | 5.39579e-13 | 1.000000 |
| rad33       | 3.02893e-13 | 1.000000 | 3.02911e-13 | 1.000000 |
| PhCCCH3+H   | 1.94676e-13 | 1.000000 | 1.94687e-13 | 1.000000 |

|               |             |         |             |          |
|---------------|-------------|---------|-------------|----------|
| rad18         | 5.25180e-14 | 1.00000 | 5.25210e-14 | 1.000000 |
| rad25         | 3.27617e-14 | 1.00000 | 3.27636e-14 | 1.000000 |
| rad27         | 2.59204e-15 | 1.00000 | 2.59219e-15 | 1.000000 |
| rad14         | 1.14623e-15 | 1.00000 | 1.14629e-15 | 1.000000 |
| rad8          | 6.87791e-16 | 1.00000 | 6.87830e-16 | 1.000000 |
| Ph+MeAc       | 3.46283e-16 | 1.00000 | 3.46303e-16 | 1.000000 |
| rad9          | 2.57761e-16 | 1.00000 | 2.57775e-16 | 1.000000 |
| rad46         | 1.94097e-16 | 1.00000 | 1.94108e-16 | 1.000000 |
| rad24         | 9.37888e-17 | 1.00000 | 9.37941e-17 | 1.000000 |
| PAH7+H        | 3.53611e-17 | 1.00000 | 3.53631e-17 | 1.000000 |
| Ph+Allene     | 6.11240e-18 | 1.00000 | 6.11275e-18 | 1.000000 |
| rad12         | 5.85514e-18 | 1.00000 | 5.85547e-18 | 1.000000 |
| rad39         | 3.09200e-18 | 1.00000 | 3.09217e-18 | 1.000000 |
| rad31         | 3.25925e-19 | 1.00000 | 3.25943e-19 | 1.000000 |
| rad60syn      | 1.20491e-19 | 1.00000 | 1.20497e-19 | 1.000000 |
| rad60anti     | 1.52818e-20 | 1.00000 | 1.52827e-20 | 1.000000 |
| PhCH2CCH+H    | 3.83939e-21 | 1.00000 | 3.83961e-21 | 1.000000 |
| rad37         | 9.12371e-22 | 1.00000 | 9.12423e-22 | 1.000000 |
| rad5          | 4.35738e-24 | 1.00000 | 4.35762e-24 | 1.000000 |
| PAH3+H        | 5.44242e-25 | 1.00000 | 5.44273e-25 | 1.000000 |
| rad59         | 2.29783e-25 | 1.00000 | 2.29796e-25 | 1.000000 |
| rad50         | 1.44276e-26 | 1.00000 | 1.44285e-26 | 1.000000 |
| rad19syn      | 3.90135e-32 | 1.00000 | 3.90157e-32 | 1.000000 |
| rad52         | 4.23473e-36 | 1.00000 | 4.23497e-36 | 1.000000 |
| rad54         | 2.57140e-36 | 1.00000 | 2.57155e-36 | 1.000000 |
| PAH10+CH3     | 2.36505e-36 | 1.00000 | 2.36518e-36 | 1.000000 |
| rad43         | 5.48274e-37 | 1.00000 | 5.48305e-37 | 1.000000 |
| rad62         | 4.30301e-39 | 1.00000 | 4.30325e-39 | 1.000000 |
| rad51         | 8.88368e-42 | 1.00000 | 8.88419e-42 | 1.000000 |
| rad70         | 3.06560e-44 | 1.00000 | 3.06578e-44 | 1.000000 |
| PhcycC3H3_A+H | 1.70427e-44 | 1.00000 | 1.70436e-44 | 1.000000 |
| rad55         | 8.65497e-45 | 1.00000 | 8.65546e-45 | 1.000000 |
| rad65         | 8.17194e-46 | 1.00000 | 8.17240e-46 | 1.000000 |
| rad58         | 7.30007e-48 | 1.00000 | 7.30048e-48 | 1.000000 |
| PAH1+H        | 2.72118e-48 | 1.00000 | 2.72133e-48 | 1.000000 |
| rad34         | 4.89348e-50 | 1.00000 | 4.89376e-50 | 1.000000 |
| rad42         | 4.46701e-52 | 1.00000 | 4.46726e-52 | 1.000000 |
| rad41         | 2.63751e-52 | 1.00000 | 2.63766e-52 | 1.000000 |
| rad47         | 2.06678e-55 | 1.00000 | 2.06690e-55 | 1.000000 |

0.100000000E-01 Pa, 170.000000 K

=====

| Rate constant | True (fraction)     | Effective (fraction) |
|---------------|---------------------|----------------------|
| Total         | 5.54821e-30 (1.00 ) | 5.54780e-30 (1.00 )  |

| species     | PYtrue      | Cumul    | PYeffective | Cumul    |
|-------------|-------------|----------|-------------|----------|
| Indene+H    | 0.999512    | 0.999512 | 0.999585    | 0.999585 |
| rad6        | 0.000414537 | 0.999927 | 0.000414568 | 1.000000 |
| Benzyl+C2H2 | 7.32929e-05 | 1.000000 | 0.00000     | 1.000000 |
| rad23       | 4.50505e-07 | 1.00000  | 4.50538e-07 | 1.00000  |
| rad7        | 3.55805e-08 | 1.00000  | 3.55831e-08 | 1.00000  |
| rad2        | 1.13481e-08 | 1.00000  | 1.13489e-08 | 1.00000  |
| rad11       | 1.12076e-08 | 1.00000  | 1.12084e-08 | 1.00000  |
| rad45       | 4.93656e-09 | 1.00000  | 4.93692e-09 | 1.00000  |
| rad1        | 7.54727e-10 | 1.00000  | 7.54783e-10 | 1.00000  |
| rad10       | 6.10127e-10 | 1.00000  | 6.10172e-10 | 1.00000  |
| rad3        | 4.47267e-10 | 1.00000  | 4.47300e-10 | 1.00000  |
| rad30       | 3.24866e-10 | 1.00000  | 3.24890e-10 | 1.00000  |
| rad36       | 3.06859e-10 | 1.00000  | 3.06882e-10 | 1.00000  |
| rad4        | 2.29209e-10 | 1.00000  | 2.29226e-10 | 1.00000  |
| rad22       | 2.02426e-10 | 1.00000  | 2.02441e-10 | 1.00000  |
| rad13       | 1.72399e-10 | 1.00000  | 1.72412e-10 | 1.00000  |
| rad35       | 8.70698e-11 | 1.00000  | 8.70762e-11 | 1.00000  |
| PAH9+H      | 8.27795e-11 | 1.00000  | 8.27856e-11 | 1.00000  |
| rad28       | 5.62411e-11 | 1.00000  | 5.62452e-11 | 1.00000  |
| rad26       | 1.13388e-11 | 1.00000  | 1.13397e-11 | 1.00000  |
| rad15       | 1.00585e-11 | 1.00000  | 1.00593e-11 | 1.00000  |
| rad38       | 8.64276e-12 | 1.00000  | 8.64339e-12 | 1.00000  |
| rad20       | 4.51183e-12 | 1.00000  | 4.51216e-12 | 1.00000  |
| rad21       | 2.85290e-12 | 1.00000  | 2.85311e-12 | 1.00000  |
| PhCCH+CH3   | 2.34115e-12 | 1.00000  | 2.34132e-12 | 1.00000  |
| PhCHCCH2+H  | 2.06141e-12 | 1.00000  | 2.06156e-12 | 1.00000  |
| PhCCCH3+H   | 8.16188e-13 | 1.00000  | 8.16248e-13 | 1.00000  |
| rad33       | 3.29504e-13 | 1.00000  | 3.29528e-13 | 1.00000  |
| rad25       | 5.47883e-14 | 1.00000  | 5.47923e-14 | 1.00000  |
| rad18       | 4.51966e-14 | 1.00000  | 4.51999e-14 | 1.00000  |
| rad27       | 4.44142e-15 | 1.00000  | 4.44175e-15 | 1.00000  |
| rad8        | 3.44852e-15 | 1.00000  | 3.44877e-15 | 1.00000  |

|               |             |         |             |         |
|---------------|-------------|---------|-------------|---------|
| Ph+MeAc       | 2.49006e-15 | 1.00000 | 2.49024e-15 | 1.00000 |
| rad14         | 2.39043e-15 | 1.00000 | 2.39061e-15 | 1.00000 |
| rad9          | 1.41454e-15 | 1.00000 | 1.41465e-15 | 1.00000 |
| rad46         | 6.47110e-16 | 1.00000 | 6.47157e-16 | 1.00000 |
| PAH7+H        | 2.37045e-16 | 1.00000 | 2.37062e-16 | 1.00000 |
| rad24         | 6.92585e-17 | 1.00000 | 6.92636e-17 | 1.00000 |
| Ph+Allene     | 5.34662e-17 | 1.00000 | 5.34701e-17 | 1.00000 |
| rad12         | 3.81111e-17 | 1.00000 | 3.81139e-17 | 1.00000 |
| rad39         | 2.33590e-17 | 1.00000 | 2.33607e-17 | 1.00000 |
| rad60syn      | 8.65105e-19 | 1.00000 | 8.65168e-19 | 1.00000 |
| rad31         | 4.53436e-19 | 1.00000 | 4.53469e-19 | 1.00000 |
| rad60anti     | 1.24489e-19 | 1.00000 | 1.24498e-19 | 1.00000 |
| PhCH2CCH+H    | 5.38044e-20 | 1.00000 | 5.38083e-20 | 1.00000 |
| rad37         | 1.22963e-20 | 1.00000 | 1.22972e-20 | 1.00000 |
| rad5          | 6.95978e-23 | 1.00000 | 6.96029e-23 | 1.00000 |
| PAH3+H        | 9.99360e-24 | 1.00000 | 9.99433e-24 | 1.00000 |
| rad59         | 4.06963e-24 | 1.00000 | 4.06993e-24 | 1.00000 |
| rad50         | 2.46856e-25 | 1.00000 | 2.46874e-25 | 1.00000 |
| rad19syn      | 3.76060e-29 | 1.00000 | 3.76088e-29 | 1.00000 |
| rad52         | 2.29398e-31 | 1.00000 | 2.29415e-31 | 1.00000 |
| rad54         | 1.05867e-33 | 1.00000 | 1.05875e-33 | 1.00000 |
| PAH10+CH3     | 8.20843e-34 | 1.00000 | 8.20903e-34 | 1.00000 |
| rad43         | 1.89586e-34 | 1.00000 | 1.89600e-34 | 1.00000 |
| rad62         | 1.50457e-36 | 1.00000 | 1.50468e-36 | 1.00000 |
| rad51         | 3.02716e-39 | 1.00000 | 3.02738e-39 | 1.00000 |
| rad70         | 1.23338e-41 | 1.00000 | 1.23347e-41 | 1.00000 |
| PhcycC3H3_A+H | 6.74174e-42 | 1.00000 | 6.74223e-42 | 1.00000 |
| rad55         | 3.44040e-42 | 1.00000 | 3.44065e-42 | 1.00000 |
| rad65         | 3.15933e-43 | 1.00000 | 3.15956e-43 | 1.00000 |
| rad58         | 2.86529e-45 | 1.00000 | 2.86550e-45 | 1.00000 |
| PAH1+H        | 1.07302e-45 | 1.00000 | 1.07310e-45 | 1.00000 |
| rad34         | 2.03475e-47 | 1.00000 | 2.03490e-47 | 1.00000 |
| rad42         | 2.37774e-49 | 1.00000 | 2.37791e-49 | 1.00000 |
| rad41         | 1.45533e-49 | 1.00000 | 1.45544e-49 | 1.00000 |
| rad47         | 1.05427e-52 | 1.00000 | 1.05435e-52 | 1.00000 |

0.100000000E-01 Pa, 180.000000 K

=====

| Rate constant | True (fraction)     | Effective (fraction) |
|---------------|---------------------|----------------------|
| Total         | 4.69315e-29 (1.00 ) | 4.69271e-29 (1.00 )  |

| species     | PYtrue      | Cumul    | PYeffective | Cumul    |
|-------------|-------------|----------|-------------|----------|
| Indene+H    | 0.999455    | 0.999455 | 0.999550    | 0.999550 |
| rad6        | 0.000449896 | 0.999905 | 0.000449939 | 1.000000 |
| Benzyl+C2H2 | 9.42307e-05 | 0.999999 | 0.000000    | 1.000000 |
| rad23       | 3.33467e-07 | 0.999999 | 3.33499e-07 | 1.000000 |
| rad7        | 3.84950e-08 | 0.999999 | 3.84987e-08 | 1.000000 |
| rad2        | 1.69567e-08 | 1.000000 | 1.69583e-08 | 1.000000 |
| rad11       | 1.15355e-08 | 1.000000 | 1.15365e-08 | 1.000000 |
| rad45       | 3.63802e-09 | 1.000000 | 3.63837e-09 | 1.000000 |
| rad1        | 1.13520e-09 | 1.000000 | 1.13531e-09 | 1.000000 |
| rad10       | 9.11461e-10 | 1.000000 | 9.11547e-10 | 1.000000 |
| rad30       | 5.55098e-10 | 1.000000 | 5.55151e-10 | 1.000000 |
| rad3        | 5.16006e-10 | 1.000000 | 5.16055e-10 | 1.000000 |
| rad4        | 2.64921e-10 | 1.000000 | 2.64945e-10 | 1.000000 |
| rad36       | 2.26469e-10 | 1.000000 | 2.26491e-10 | 1.000000 |
| rad13       | 1.87723e-10 | 1.000000 | 1.87740e-10 | 1.000000 |
| rad22       | 1.49430e-10 | 1.000000 | 1.49445e-10 | 1.000000 |
| rad28       | 1.27063e-10 | 1.000000 | 1.27075e-10 | 1.000000 |
| PAH9+H      | 1.19020e-10 | 1.000000 | 1.19032e-10 | 1.000000 |
| rad35       | 1.17259e-10 | 1.000000 | 1.17270e-10 | 1.000000 |
| rad26       | 2.87934e-11 | 1.000000 | 2.87961e-11 | 1.000000 |
| rad15       | 2.12567e-11 | 1.000000 | 2.12588e-11 | 1.000000 |
| rad38       | 1.38888e-11 | 1.000000 | 1.38901e-11 | 1.000000 |
| PhCCH+CH3   | 8.52428e-12 | 1.000000 | 8.52508e-12 | 1.000000 |
| PhCHCCH2+H  | 7.08590e-12 | 1.000000 | 7.08656e-12 | 1.000000 |
| rad20       | 4.04849e-12 | 1.000000 | 4.04887e-12 | 1.000000 |
| PhCCCH3+H   | 3.03194e-12 | 1.000000 | 3.03223e-12 | 1.000000 |
| rad21       | 2.56405e-12 | 1.000000 | 2.56429e-12 | 1.000000 |
| rad33       | 3.59430e-13 | 1.000000 | 3.59464e-13 | 1.000000 |
| rad25       | 8.46838e-14 | 1.000000 | 8.46918e-14 | 1.000000 |
| rad18       | 3.90864e-14 | 1.000000 | 3.90901e-14 | 1.000000 |
| rad8        | 1.49272e-14 | 1.000000 | 1.49286e-14 | 1.000000 |
| Ph+MeAc     | 1.47367e-14 | 1.000000 | 1.47381e-14 | 1.000000 |
| rad27       | 7.27559e-15 | 1.000000 | 7.27627e-15 | 1.000000 |
| rad9        | 6.58789e-15 | 1.000000 | 6.58851e-15 | 1.000000 |
| rad14       | 4.57713e-15 | 1.000000 | 4.57756e-15 | 1.000000 |
| rad46       | 1.91289e-15 | 1.000000 | 1.91307e-15 | 1.000000 |

|               |             |          |             |         |
|---------------|-------------|----------|-------------|---------|
| PAH7+H        | 1.32444e-15 | 1.000000 | 1.32457e-15 | 1.00000 |
| Ph+Allene     | 3.74926e-16 | 1.000000 | 3.74961e-16 | 1.00000 |
| rad12         | 2.06090e-16 | 1.000000 | 2.06109e-16 | 1.00000 |
| rad39         | 1.44589e-16 | 1.000000 | 1.44603e-16 | 1.00000 |
| rad24         | 5.18074e-17 | 1.000000 | 5.18123e-17 | 1.00000 |
| rad60syn      | 4.99227e-18 | 1.000000 | 4.99274e-18 | 1.00000 |
| rad60anti     | 8.02760e-19 | 1.000000 | 8.02835e-19 | 1.00000 |
| rad31         | 6.39161e-19 | 1.000000 | 6.39222e-19 | 1.00000 |
| PhCH2CCH+H    | 5.69277e-19 | 1.000000 | 5.69331e-19 | 1.00000 |
| rad37         | 1.23885e-19 | 1.000000 | 1.23896e-19 | 1.00000 |
| rad5          | 8.20997e-22 | 1.000000 | 8.21074e-22 | 1.00000 |
| PAH3+H        | 1.31358e-22 | 1.000000 | 1.31371e-22 | 1.00000 |
| rad59         | 5.18614e-23 | 1.000000 | 5.18663e-23 | 1.00000 |
| rad50         | 3.07429e-24 | 1.000000 | 3.07458e-24 | 1.00000 |
| rad19syn      | 4.16532e-27 | 1.000000 | 4.16571e-27 | 1.00000 |
| rad52         | 1.37472e-29 | 1.000000 | 1.37485e-29 | 1.00000 |
| rad54         | 6.17908e-31 | 1.000000 | 6.17966e-31 | 1.00000 |
| PAH10+CH3     | 4.23215e-31 | 1.000000 | 4.23255e-31 | 1.00000 |
| rad43         | 9.75757e-32 | 1.000000 | 9.75849e-32 | 1.00000 |
| rad62         | 7.68404e-34 | 1.000000 | 7.68477e-34 | 1.00000 |
| rad51         | 1.20097e-36 | 1.000000 | 1.20108e-36 | 1.00000 |
| rad70         | 6.86834e-39 | 1.000000 | 6.86899e-39 | 1.00000 |
| PhcycC3H3_A+H | 3.59682e-39 | 1.000000 | 3.59715e-39 | 1.00000 |
| rad55         | 1.86474e-39 | 1.000000 | 1.86491e-39 | 1.00000 |
| rad65         | 1.00136e-40 | 1.000000 | 1.00145e-40 | 1.00000 |
| rad58         | 1.46516e-42 | 1.000000 | 1.46530e-42 | 1.00000 |
| PAH1+H        | 3.18365e-43 | 1.000000 | 3.18395e-43 | 1.00000 |
| rad34         | 5.70502e-45 | 1.000000 | 5.70555e-45 | 1.00000 |
| rad42         | 8.55225e-47 | 1.000000 | 8.55306e-47 | 1.00000 |
| rad41         | 5.51394e-47 | 1.000000 | 5.51446e-47 | 1.00000 |
| rad47         | 3.87984e-50 | 1.000000 | 3.88020e-50 | 1.00000 |

0.100000000E-01 Pa, 190.000000 K

=====

| Rate constant | True (fraction)     | Effective (fraction) |
|---------------|---------------------|----------------------|
| Total         | 3.16530e-28 (1.00 ) | 3.16492e-28 (1.00 )  |

| species     | PYtrue      | Cumul    | PYeffective | Cumul    |
|-------------|-------------|----------|-------------|----------|
| Indene+H    | 0.999390    | 0.999390 | 0.999510    | 0.999510 |
| rad6        | 0.000489336 | 0.999879 | 0.000489395 | 0.999999 |
| Benzyl+C2H2 | 0.000120664 | 1.00000  | 0.00000     | 0.999999 |
| rad23       | 2.49553e-07 | 1.00000  | 2.49583e-07 | 1.00000  |
| rad7        | 4.17525e-08 | 1.00000  | 4.17576e-08 | 1.00000  |
| rad2        | 2.48611e-08 | 1.00000  | 2.48641e-08 | 1.00000  |
| rad11       | 1.20323e-08 | 1.00000  | 1.20338e-08 | 1.00000  |
| rad45       | 2.71220e-09 | 1.00000  | 2.71252e-09 | 1.00000  |
| rad1        | 1.67633e-09 | 1.00000  | 1.67653e-09 | 1.00000  |
| rad10       | 1.33591e-09 | 1.00000  | 1.33607e-09 | 1.00000  |
| rad30       | 9.09102e-10 | 1.00000  | 9.09212e-10 | 1.00000  |
| rad3        | 5.99991e-10 | 1.00000  | 6.00064e-10 | 1.00000  |
| rad4        | 3.08656e-10 | 1.00000  | 3.08694e-10 | 1.00000  |
| rad28       | 2.73058e-10 | 1.00000  | 2.73091e-10 | 1.00000  |
| rad13       | 2.04885e-10 | 1.00000  | 2.04910e-10 | 1.00000  |
| PAH9+H      | 1.69587e-10 | 1.00000  | 1.69608e-10 | 1.00000  |
| rad36       | 1.69138e-10 | 1.00000  | 1.69158e-10 | 1.00000  |
| rad35       | 1.57540e-10 | 1.00000  | 1.57559e-10 | 1.00000  |
| rad22       | 1.11566e-10 | 1.00000  | 1.11580e-10 | 1.00000  |
| rad26       | 6.74815e-11 | 1.00000  | 6.74896e-11 | 1.00000  |
| rad15       | 4.19617e-11 | 1.00000  | 4.19668e-11 | 1.00000  |
| PhCCH+CH3   | 2.81047e-11 | 1.00000  | 2.81081e-11 | 1.00000  |
| PhCHCCH2+H  | 2.21935e-11 | 1.00000  | 2.21962e-11 | 1.00000  |
| rad38       | 2.18076e-11 | 1.00000  | 2.18102e-11 | 1.00000  |
| PhCCCH3+H   | 1.01346e-11 | 1.00000  | 1.01358e-11 | 1.00000  |
| rad20       | 3.64230e-12 | 1.00000  | 3.64274e-12 | 1.00000  |
| rad21       | 2.31082e-12 | 1.00000  | 2.31109e-12 | 1.00000  |
| rad33       | 3.93018e-13 | 1.00000  | 3.93066e-13 | 1.00000  |
| rad25       | 1.22528e-13 | 1.00000  | 1.22543e-13 | 1.00000  |
| Ph+MeAc     | 7.37724e-14 | 1.00000  | 7.37813e-14 | 1.00000  |
| rad8        | 5.69154e-14 | 1.00000  | 5.69222e-14 | 1.00000  |
| rad18       | 3.39408e-14 | 1.00000  | 3.39449e-14 | 1.00000  |
| rad9        | 2.67022e-14 | 1.00000  | 2.67054e-14 | 1.00000  |
| rad27       | 1.14471e-14 | 1.00000  | 1.14485e-14 | 1.00000  |
| rad14       | 8.15016e-15 | 1.00000  | 8.15114e-15 | 1.00000  |
| PAH7+H      | 6.31952e-15 | 1.00000  | 6.32028e-15 | 1.00000  |
| rad46       | 5.11645e-15 | 1.00000  | 5.11707e-15 | 1.00000  |
| Ph+Allene   | 2.17877e-15 | 1.00000  | 2.17903e-15 | 1.00000  |
| rad12       | 9.49985e-16 | 1.00000  | 9.50099e-16 | 1.00000  |
| rad39       | 7.53594e-16 | 1.00000  | 7.53685e-16 | 1.00000  |



|               |             |         |             |          |
|---------------|-------------|---------|-------------|----------|
| rad24         | 3.92171e-17 | 1.00000 | 3.92218e-17 | 1.000000 |
| rad60syn      | 2.39863e-17 | 1.00000 | 2.39892e-17 | 1.000000 |
| PhCH2CCH+H    | 4.75414e-18 | 1.00000 | 4.75471e-18 | 1.000000 |
| rad60anti     | 4.25469e-18 | 1.00000 | 4.25521e-18 | 1.000000 |
| rad37         | 9.75669e-19 | 1.00000 | 9.75787e-19 | 1.000000 |
| rad31         | 9.07849e-19 | 1.00000 | 9.07959e-19 | 1.000000 |
| rad5          | 7.51783e-21 | 1.00000 | 7.51874e-21 | 1.000000 |
| PAH3+H        | 1.31871e-21 | 1.00000 | 1.31887e-21 | 1.000000 |
| rad59         | 5.05394e-22 | 1.00000 | 5.05455e-22 | 1.000000 |
| rad50         | 2.95591e-23 | 1.00000 | 2.95627e-23 | 1.000000 |
| rad19syn      | 1.10933e-25 | 1.00000 | 1.10946e-25 | 1.000000 |
| rad54         | 5.09948e-28 | 1.00000 | 5.10009e-28 | 1.000000 |
| PAH10+CH3     | 3.42837e-28 | 1.00000 | 3.42878e-28 | 1.000000 |
| rad52         | 3.12520e-28 | 1.00000 | 3.12557e-28 | 1.000000 |
| rad43         | 8.36002e-29 | 1.00000 | 8.36103e-29 | 1.000000 |
| rad62         | 3.99977e-30 | 1.00000 | 4.00025e-30 | 1.000000 |
| rad51         | 2.55989e-31 | 1.00000 | 2.56020e-31 | 1.000000 |
| rad70         | 9.52311e-36 | 1.00000 | 9.52426e-36 | 1.000000 |
| PhcycC3H3_A+H | 4.89297e-36 | 1.00000 | 4.89356e-36 | 1.000000 |
| rad55         | 2.55872e-36 | 1.00000 | 2.55903e-36 | 1.000000 |
| rad65         | 5.67350e-38 | 1.00000 | 5.67418e-38 | 1.000000 |
| rad58         | 1.93629e-39 | 1.00000 | 1.93653e-39 | 1.000000 |
| PAH1+H        | 1.75103e-40 | 1.00000 | 1.75124e-40 | 1.000000 |
| rad34         | 2.23169e-42 | 1.00000 | 2.23196e-42 | 1.000000 |
| rad42         | 2.85715e-44 | 1.00000 | 2.85750e-44 | 1.000000 |
| rad41         | 1.94973e-44 | 1.00000 | 1.94997e-44 | 1.000000 |
| rad47         | 1.47642e-47 | 1.00000 | 1.47660e-47 | 1.000000 |

0.100000000E-01 Pa, 200.000000 K

| Rate constant | True (fraction)     | Effective (fraction) |
|---------------|---------------------|----------------------|
| Total         | 1.76115e-27 (1.00 ) | 1.76088e-27 (1.00 )  |

| species     | PYtrue      | Cumul    | PYeffective | Cumul    |
|-------------|-------------|----------|-------------|----------|
| Indene+H    | 0.999313    | 0.999313 | 0.999466    | 0.999466 |
| rad6        | 0.000533194 | 0.999846 | 0.000533276 | 0.999999 |
| Benzyl+C2H2 | 0.000153862 | 1.00000  | 0.00000     | 0.999999 |
| rad23       | 1.88670e-07 | 1.00000  | 1.88699e-07 | 0.999999 |
| rad7        | 4.53805e-08 | 1.00000  | 4.53875e-08 | 1.000000 |
| rad2        | 3.57028e-08 | 1.00000  | 3.57083e-08 | 1.000000 |
| rad11       | 1.26872e-08 | 1.00000  | 1.26891e-08 | 1.000000 |
| rad1        | 2.42614e-09 | 1.00000  | 2.42651e-09 | 1.000000 |
| rad45       | 2.04387e-09 | 1.00000  | 2.04419e-09 | 1.000000 |
| rad10       | 1.91784e-09 | 1.00000  | 1.91814e-09 | 1.000000 |
| rad30       | 1.43724e-09 | 1.00000  | 1.43746e-09 | 1.000000 |
| rad3        | 7.02888e-10 | 1.00000  | 7.02997e-10 | 1.000000 |
| rad28       | 5.59351e-10 | 1.00000  | 5.59437e-10 | 1.000000 |
| rad4        | 3.62381e-10 | 1.00000  | 3.62437e-10 | 1.000000 |
| PAH9+H      | 2.39756e-10 | 1.00000  | 2.39793e-10 | 1.000000 |
| rad13       | 2.24055e-10 | 1.00000  | 2.24089e-10 | 1.000000 |
| rad35       | 2.11113e-10 | 1.00000  | 2.11146e-10 | 1.000000 |
| rad26       | 1.46895e-10 | 1.00000  | 1.46917e-10 | 1.000000 |
| rad36       | 1.27735e-10 | 1.00000  | 1.27755e-10 | 1.000000 |
| PhCCH+CH3   | 8.48587e-11 | 1.00000  | 8.48717e-11 | 1.000000 |
| rad22       | 8.41718e-11 | 1.00000  | 8.41848e-11 | 1.000000 |
| rad15       | 7.82326e-11 | 1.00000  | 7.82446e-11 | 1.000000 |
| PhCHCCH2+H  | 6.39953e-11 | 1.00000  | 6.40051e-11 | 1.000000 |
| rad38       | 3.35760e-11 | 1.00000  | 3.35812e-11 | 1.000000 |
| PhCCCH3+H   | 3.08661e-11 | 1.00000  | 3.08709e-11 | 1.000000 |
| rad20       | 3.28462e-12 | 1.00000  | 3.28512e-12 | 1.000000 |
| rad21       | 2.08781e-12 | 1.00000  | 2.08813e-12 | 1.000000 |
| rad33       | 4.30624e-13 | 1.00000  | 4.30690e-13 | 1.000000 |
| Ph+MeAc     | 3.19444e-13 | 1.00000  | 3.19493e-13 | 1.000000 |
| rad8        | 1.94273e-13 | 1.00000  | 1.94303e-13 | 1.000000 |
| rad25       | 1.67666e-13 | 1.00000  | 1.67692e-13 | 1.000000 |
| rad9        | 9.60771e-14 | 1.00000  | 9.60919e-14 | 1.000000 |
| rad18       | 2.95748e-14 | 1.00000  | 2.95794e-14 | 1.000000 |
| PAH7+H      | 2.62721e-14 | 1.00000  | 2.62761e-14 | 1.000000 |
| rad27       | 1.73627e-14 | 1.00000  | 1.73654e-14 | 1.000000 |
| rad14       | 1.36358e-14 | 1.00000  | 1.36379e-14 | 1.000000 |
| rad46       | 1.25831e-14 | 1.00000  | 1.25850e-14 | 1.000000 |
| Ph+Allene   | 1.07761e-14 | 1.00000  | 1.07778e-14 | 1.000000 |
| rad12       | 3.81248e-15 | 1.00000  | 3.81307e-15 | 1.000000 |
| rad39       | 3.38258e-15 | 1.00000  | 3.38310e-15 | 1.000000 |
| rad60syn    | 9.86955e-17 | 1.00000  | 9.87107e-17 | 1.000000 |
| PhCH2CCH+H  | 3.24210e-17 | 1.00000  | 3.24260e-17 | 1.000000 |
| rad24       | 3.00232e-17 | 1.00000  | 3.00278e-17 | 1.000000 |
| rad60anti   | 1.90996e-17 | 1.00000  | 1.91025e-17 | 1.000000 |

|               |             |         |             |          |
|---------------|-------------|---------|-------------|----------|
| rad37         | 6.22594e-18 | 1.00000 | 6.22690e-18 | 1.000000 |
| rad31         | 1.29248e-18 | 1.00000 | 1.29268e-18 | 1.000000 |
| rad5          | 5.54088e-20 | 1.00000 | 5.54174e-20 | 1.000000 |
| PAH3+H        | 1.05267e-20 | 1.00000 | 1.05283e-20 | 1.000000 |
| rad59         | 3.92156e-21 | 1.00000 | 3.92217e-21 | 1.000000 |
| rad50         | 2.28068e-22 | 1.00000 | 2.28103e-22 | 1.000000 |
| rad19syn      | 1.67127e-24 | 1.00000 | 1.67153e-24 | 1.000000 |
| rad54         | 1.29427e-26 | 1.00000 | 1.29447e-26 | 1.000000 |
| PAH10+CH3     | 8.85823e-27 | 1.00000 | 8.85959e-27 | 1.000000 |
| rad52         | 4.43378e-27 | 1.00000 | 4.43447e-27 | 1.000000 |
| rad43         | 2.17384e-27 | 1.00000 | 2.17418e-27 | 1.000000 |
| rad62         | 2.56399e-28 | 1.00000 | 2.56438e-28 | 1.000000 |
| rad51         | 1.45502e-29 | 1.00000 | 1.45524e-29 | 1.000000 |
| rad70         | 1.73818e-32 | 1.00000 | 1.73845e-32 | 1.000000 |
| rad65         | 1.67631e-32 | 1.00000 | 1.67657e-32 | 1.000000 |
| PhcycC3H3_A+H | 8.97376e-33 | 1.00000 | 8.97514e-33 | 1.000000 |
| rad55         | 4.69196e-33 | 1.00000 | 4.69268e-33 | 1.000000 |
| rad58         | 3.54792e-36 | 1.00000 | 3.54846e-36 | 1.000000 |
| PAH1+H        | 2.49233e-37 | 1.00000 | 2.49271e-37 | 1.000000 |
| rad34         | 2.44198e-39 | 1.00000 | 2.44235e-39 | 1.000000 |
| rad42         | 6.90563e-42 | 1.00000 | 6.90669e-42 | 1.000000 |
| rad41         | 4.70078e-42 | 1.00000 | 4.70150e-42 | 1.000000 |
| rad47         | 4.93212e-45 | 1.00000 | 4.93287e-45 | 1.000000 |

0.1000000000E-01 Pa, 210.000000 K

| Rate constant | True (fraction)     | Effective (fraction) |
|---------------|---------------------|----------------------|
| Total         | 8.30956e-27 (1.00 ) | 8.30794e-27 (1.00 )  |

| species     | PYtrue      | Cumul    | PYeffective | Cumul    |
|-------------|-------------|----------|-------------|----------|
| Indene+H    | 0.999223    | 0.999223 | 0.999418    | 0.999418 |
| rad6        | 0.000581788 | 0.999805 | 0.000581902 | 1.000000 |
| Benzyl+C2H2 | 0.000195333 | 1.00000  | 0.00000     | 1.000000 |
| rad23       | 1.44043e-07 | 1.00000  | 1.44071e-07 | 1.00000  |
| rad2        | 5.01690e-08 | 1.00000  | 5.01788e-08 | 1.00000  |
| rad7        | 4.94051e-08 | 1.00000  | 4.94147e-08 | 1.00000  |
| rad11       | 1.34931e-08 | 1.00000  | 1.34957e-08 | 1.00000  |
| rad1        | 3.43804e-09 | 1.00000  | 3.43871e-09 | 1.00000  |
| rad10       | 2.69413e-09 | 1.00000  | 2.69466e-09 | 1.00000  |
| rad30       | 2.20557e-09 | 1.00000  | 2.20600e-09 | 1.00000  |
| rad45       | 1.55623e-09 | 1.00000  | 1.55653e-09 | 1.00000  |
| rad28       | 1.09387e-09 | 1.00000  | 1.09408e-09 | 1.00000  |
| rad3        | 8.28581e-10 | 1.00000  | 8.28743e-10 | 1.00000  |
| rad4        | 4.28202e-10 | 1.00000  | 4.28286e-10 | 1.00000  |
| PAH9+H      | 3.36559e-10 | 1.00000  | 3.36624e-10 | 1.00000  |
| rad26       | 2.98774e-10 | 1.00000  | 2.98833e-10 | 1.00000  |
| rad35       | 2.82083e-10 | 1.00000  | 2.82138e-10 | 1.00000  |
| rad13       | 2.45396e-10 | 1.00000  | 2.45444e-10 | 1.00000  |
| PhCCH+CH3   | 2.36797e-10 | 1.00000  | 2.36844e-10 | 1.00000  |
| PhCHCCH2+H  | 1.71330e-10 | 1.00000  | 1.71363e-10 | 1.00000  |
| rad15       | 1.38965e-10 | 1.00000  | 1.38993e-10 | 1.00000  |
| rad36       | 9.75081e-11 | 1.00000  | 9.75271e-11 | 1.00000  |
| PhCCCH3+H   | 8.65311e-11 | 1.00000  | 8.65481e-11 | 1.00000  |
| rad22       | 6.41350e-11 | 1.00000  | 6.41476e-11 | 1.00000  |
| rad38       | 5.08248e-11 | 1.00000  | 5.08347e-11 | 1.00000  |
| rad20       | 2.96855e-12 | 1.00000  | 2.96913e-12 | 1.00000  |
| rad21       | 1.89073e-12 | 1.00000  | 1.89110e-12 | 1.00000  |
| Ph+MeAc     | 1.21867e-12 | 1.00000  | 1.21891e-12 | 1.00000  |
| rad8        | 6.01488e-13 | 1.00000  | 6.01605e-13 | 1.00000  |
| rad33       | 4.72599e-13 | 1.00000  | 4.72692e-13 | 1.00000  |
| rad9        | 3.11736e-13 | 1.00000  | 3.11797e-13 | 1.00000  |
| rad25       | 2.18809e-13 | 1.00000  | 2.18852e-13 | 1.00000  |
| PAH7+H      | 9.67663e-14 | 1.00000  | 9.67852e-14 | 1.00000  |
| Ph+Allene   | 4.63584e-14 | 1.00000  | 4.63674e-14 | 1.00000  |
| rad46       | 2.88212e-14 | 1.00000  | 2.88268e-14 | 1.00000  |
| rad18       | 2.58472e-14 | 1.00000  | 2.58522e-14 | 1.00000  |
| rad27       | 2.54668e-14 | 1.00000  | 2.54717e-14 | 1.00000  |
| rad14       | 2.16172e-14 | 1.00000  | 2.16214e-14 | 1.00000  |
| rad12       | 1.35553e-14 | 1.00000  | 1.35580e-14 | 1.00000  |
| rad39       | 1.33232e-14 | 1.00000  | 1.33258e-14 | 1.00000  |
| rad60syn    | 3.55779e-16 | 1.00000  | 3.55849e-16 | 1.00000  |
| PhCH2CCH+H  | 1.85694e-16 | 1.00000  | 1.85730e-16 | 1.00000  |
| rad60anti   | 7.44049e-17 | 1.00000  | 7.44195e-17 | 1.00000  |
| rad37       | 3.31513e-17 | 1.00000  | 3.31578e-17 | 1.00000  |
| rad24       | 2.32394e-17 | 1.00000  | 2.32440e-17 | 1.00000  |
| rad31       | 1.83620e-18 | 1.00000  | 1.83656e-18 | 1.00000  |
| rad5        | 3.38751e-19 | 1.00000  | 3.38817e-19 | 1.00000  |
| PAH3+H      | 6.91251e-20 | 1.00000  | 6.91386e-20 | 1.00000  |

|               |             |         |             |         |
|---------------|-------------|---------|-------------|---------|
| rad59         | 2.50571e-20 | 1.00000 | 2.50620e-20 | 1.00000 |
| rad50         | 1.45882e-21 | 1.00000 | 1.45910e-21 | 1.00000 |
| rad19syn      | 1.85262e-23 | 1.00000 | 1.85298e-23 | 1.00000 |
| rad54         | 1.84564e-25 | 1.00000 | 1.84600e-25 | 1.00000 |
| PAH10+CH3     | 1.26478e-25 | 1.00000 | 1.26503e-25 | 1.00000 |
| rad52         | 4.72835e-26 | 1.00000 | 4.72927e-26 | 1.00000 |
| rad43         | 3.08428e-26 | 1.00000 | 3.08489e-26 | 1.00000 |
| rad62         | 4.68423e-27 | 1.00000 | 4.68515e-27 | 1.00000 |
| rad51         | 2.75875e-28 | 1.00000 | 2.75929e-28 | 1.00000 |
| rad70         | 4.06041e-29 | 1.00000 | 4.06121e-29 | 1.00000 |
| PhcycC3H3_A+H | 3.59608e-29 | 1.00000 | 3.59678e-29 | 1.00000 |
| rad55         | 1.41789e-29 | 1.00000 | 1.41817e-29 | 1.00000 |
| rad58         | 1.88361e-30 | 1.00000 | 1.88398e-30 | 1.00000 |
| rad65         | 8.85873e-31 | 1.00000 | 8.86046e-31 | 1.00000 |
| PAH1+H        | 5.47162e-34 | 1.00000 | 5.47269e-34 | 1.00000 |
| rad34         | 5.24501e-36 | 1.00000 | 5.24603e-36 | 1.00000 |
| rad42         | 2.09559e-39 | 1.00000 | 2.09600e-39 | 1.00000 |
| rad41         | 9.15963e-40 | 1.00000 | 9.16142e-40 | 1.00000 |
| rad47         | 3.95723e-42 | 1.00000 | 3.95800e-42 | 1.00000 |

0.1000000000E-01 Pa, 220.000000 K

| Rate constant | True (fraction)     | Effective (fraction) |
|---------------|---------------------|----------------------|
| Total         | 3.40057e-26 (1.00 ) | 3.39973e-26 (1.00 )  |

| species     | PYtrue      | Cumul    | PYeffective | Cumul    |
|-------------|-------------|----------|-------------|----------|
| Indene+H    | 0.999117    | 0.999117 | 0.999364    | 0.999364 |
| rad6        | 0.000635403 | 0.999752 | 0.000635559 | 1.000000 |
| Benzyl+C2H2 | 0.000246849 | 0.999999 | 0.000000    | 1.000000 |
| rad23       | 1.11044e-07 | 0.999999 | 1.11071e-07 | 1.000000 |
| rad2        | 6.89501e-08 | 0.999999 | 6.89672e-08 | 1.000000 |
| rad7        | 5.38495e-08 | 0.999999 | 5.38628e-08 | 1.000000 |
| rad11       | 1.44457e-08 | 1.000000 | 1.44493e-08 | 1.000000 |
| rad1        | 4.76844e-09 | 1.000000 | 4.76962e-09 | 1.000000 |
| rad10       | 3.70188e-09 | 1.000000 | 3.70280e-09 | 1.000000 |
| rad30       | 3.29967e-09 | 1.000000 | 3.30048e-09 | 1.000000 |
| rad28       | 2.04485e-09 | 1.000000 | 2.04536e-09 | 1.000000 |
| rad45       | 1.19712e-09 | 1.000000 | 1.19741e-09 | 1.000000 |
| rad3        | 9.80947e-10 | 1.000000 | 9.81190e-10 | 1.000000 |
| PhCCH+CH3   | 6.15296e-10 | 1.000000 | 6.15448e-10 | 1.000000 |
| rad26       | 5.70946e-10 | 1.000000 | 5.71087e-10 | 1.000000 |
| rad4        | 5.08261e-10 | 1.000000 | 5.08387e-10 | 1.000000 |
| PAH9+H      | 4.69297e-10 | 1.000000 | 4.69413e-10 | 1.000000 |
| PhCHCCH2+H  | 4.28856e-10 | 1.000000 | 4.28962e-10 | 1.000000 |
| rad35       | 3.75685e-10 | 1.000000 | 3.75778e-10 | 1.000000 |
| rad13       | 2.69063e-10 | 1.000000 | 2.69129e-10 | 1.000000 |
| rad15       | 2.36844e-10 | 1.000000 | 2.36903e-10 | 1.000000 |
| PhCCCH3+H   | 2.25176e-10 | 1.000000 | 2.25232e-10 | 1.000000 |
| rad38       | 7.57887e-11 | 1.000000 | 7.58074e-11 | 1.000000 |
| rad36       | 7.52324e-11 | 1.000000 | 7.52510e-11 | 1.000000 |
| rad22       | 4.93409e-11 | 1.000000 | 4.93531e-11 | 1.000000 |
| Ph+MeAc     | 4.15895e-12 | 1.000000 | 4.15998e-12 | 1.000000 |
| rad20       | 2.68849e-12 | 1.000000 | 2.68915e-12 | 1.000000 |
| rad21       | 1.71609e-12 | 1.000000 | 1.71651e-12 | 1.000000 |
| rad8        | 1.70752e-12 | 1.000000 | 1.70794e-12 | 1.000000 |
| rad9        | 9.23673e-13 | 1.000000 | 9.23901e-13 | 1.000000 |
| rad33       | 5.19285e-13 | 1.000000 | 5.19413e-13 | 1.000000 |
| PAH7+H      | 3.20244e-13 | 1.000000 | 3.20323e-13 | 1.000000 |
| rad25       | 2.74224e-13 | 1.000000 | 2.74292e-13 | 1.000000 |
| Ph+Allene   | 1.76584e-13 | 1.000000 | 1.76627e-13 | 1.000000 |
| rad46       | 6.21195e-14 | 1.000000 | 6.21348e-14 | 1.000000 |
| rad39       | 4.67773e-14 | 1.000000 | 4.67889e-14 | 1.000000 |
| rad12       | 4.33240e-14 | 1.000000 | 4.33347e-14 | 1.000000 |
| rad27       | 3.62170e-14 | 1.000000 | 3.62259e-14 | 1.000000 |
| rad14       | 3.26980e-14 | 1.000000 | 3.27061e-14 | 1.000000 |
| rad18       | 2.26479e-14 | 1.000000 | 2.26535e-14 | 1.000000 |
| rad60syn    | 1.14466e-15 | 1.000000 | 1.14494e-15 | 1.000000 |
| PhCH2CCH+H  | 9.14128e-16 | 1.000000 | 9.14354e-16 | 1.000000 |
| rad60anti   | 2.56577e-16 | 1.000000 | 2.56640e-16 | 1.000000 |
| rad37       | 1.50911e-16 | 1.000000 | 1.50949e-16 | 1.000000 |
| rad24       | 1.81898e-17 | 1.000000 | 1.81943e-17 | 1.000000 |
| rad31       | 2.59470e-18 | 1.000000 | 2.59534e-18 | 1.000000 |
| rad5        | 1.76078e-18 | 1.000000 | 1.76121e-18 | 1.000000 |
| PAH3+H      | 3.83716e-19 | 1.000000 | 3.83810e-19 | 1.000000 |
| rad59       | 1.35465e-19 | 1.000000 | 1.35498e-19 | 1.000000 |
| rad50       | 7.94111e-21 | 1.000000 | 7.94307e-21 | 1.000000 |
| rad19syn    | 1.64252e-22 | 1.000000 | 1.64292e-22 | 1.000000 |
| rad54       | 1.98437e-24 | 1.000000 | 1.98486e-24 | 1.000000 |

|               |             |          |             |          |
|---------------|-------------|----------|-------------|----------|
| PAH10+CH3     | 1.35848e-24 | 1.000000 | 1.35882e-24 | 1.000000 |
| rad52         | 4.06176e-25 | 1.000000 | 4.06276e-25 | 1.000000 |
| rad43         | 3.29608e-25 | 1.000000 | 3.29689e-25 | 1.000000 |
| rad62         | 5.76072e-26 | 1.000000 | 5.76214e-26 | 1.000000 |
| rad51         | 3.50097e-27 | 1.000000 | 3.50184e-27 | 1.000000 |
| PhcycC3H3_A+H | 9.66691e-28 | 1.000000 | 9.66930e-28 | 1.000000 |
| rad70         | 8.80033e-28 | 1.000000 | 8.80250e-28 | 1.000000 |
| rad55         | 3.30840e-28 | 1.000000 | 3.30922e-28 | 1.000000 |
| rad58         | 5.59505e-29 | 1.000000 | 5.59643e-29 | 1.000000 |
| rad65         | 1.55187e-29 | 1.000000 | 1.55225e-29 | 1.000000 |
| PAH1+H        | 3.07936e-30 | 1.000000 | 3.08012e-30 | 1.000000 |
| rad34         | 1.95212e-33 | 1.000000 | 1.95260e-33 | 1.000000 |
| rad42         | 4.85935e-37 | 1.000000 | 4.86055e-37 | 1.000000 |
| rad47         | 1.49433e-37 | 1.000000 | 1.49470e-37 | 1.000000 |
| rad41         | 1.13378e-37 | 1.000000 | 1.13406e-37 | 1.000000 |

0.100000000E-01 Pa, 230.000000 K

| Rate constant | True (fraction)     | Effective (fraction) |
|---------------|---------------------|----------------------|
| Total         | 1.22972e-25 (1.00 ) | 1.22933e-25 (1.00 )  |

| species     | PYtrue      | Cumul    | PYeffective | Cumul    |
|-------------|-------------|----------|-------------|----------|
| Indene+H    | 0.998995    | 0.998995 | 0.999305    | 0.999305 |
| rad6        | 0.000694259 | 0.999689 | 0.000694475 | 0.999999 |
| Benzyl+C2H2 | 0.000310486 | 1.000000 | 0.000000    | 0.999999 |
| rad2        | 9.26887e-08 | 1.000000 | 9.27175e-08 | 1.000000 |
| rad23       | 8.64594e-08 | 1.000000 | 8.64863e-08 | 1.000000 |
| rad7        | 5.87323e-08 | 1.000000 | 5.87506e-08 | 1.000000 |
| rad11       | 1.55421e-08 | 1.000000 | 1.55469e-08 | 1.000000 |
| rad1        | 6.47383e-09 | 1.000000 | 6.47584e-09 | 1.000000 |
| rad10       | 4.97576e-09 | 1.000000 | 4.97730e-09 | 1.000000 |
| rad30       | 4.82902e-09 | 1.000000 | 4.83052e-09 | 1.000000 |
| rad28       | 3.65899e-09 | 1.000000 | 3.66013e-09 | 1.000000 |
| PhCCH+CH3   | 1.49814e-09 | 1.000000 | 1.49860e-09 | 1.000000 |
| rad3        | 1.16358e-09 | 1.000000 | 1.16394e-09 | 1.000000 |
| rad26       | 1.03034e-09 | 1.000000 | 1.03066e-09 | 1.000000 |
| PhCHCCH2+H  | 1.00953e-09 | 1.000000 | 1.00984e-09 | 1.000000 |
| rad45       | 9.30578e-10 | 1.000000 | 9.30867e-10 | 1.000000 |
| PAH9+H      | 6.50172e-10 | 1.000000 | 6.50374e-10 | 1.000000 |
| rad4        | 6.04595e-10 | 1.000000 | 6.04783e-10 | 1.000000 |
| PhCCCH3+H   | 5.47742e-10 | 1.000000 | 5.47912e-10 | 1.000000 |
| rad35       | 4.98550e-10 | 1.000000 | 4.98705e-10 | 1.000000 |
| rad15       | 3.89514e-10 | 1.000000 | 3.89635e-10 | 1.000000 |
| rad13       | 2.95190e-10 | 1.000000 | 2.95282e-10 | 1.000000 |
| rad38       | 1.11499e-10 | 1.000000 | 1.11533e-10 | 1.000000 |
| rad36       | 5.86847e-11 | 1.000000 | 5.87029e-11 | 1.000000 |
| rad22       | 3.83288e-11 | 1.000000 | 3.83407e-11 | 1.000000 |
| Ph+MeAc     | 1.28597e-11 | 1.000000 | 1.28637e-11 | 1.000000 |
| rad8        | 4.48488e-12 | 1.000000 | 4.48627e-12 | 1.000000 |
| rad9        | 2.52503e-12 | 1.000000 | 2.52582e-12 | 1.000000 |
| rad20       | 2.43980e-12 | 1.000000 | 2.44056e-12 | 1.000000 |
| rad21       | 1.56100e-12 | 1.000000 | 1.56148e-12 | 1.000000 |
| PAH7+H      | 9.63722e-13 | 1.000000 | 9.64021e-13 | 1.000000 |
| Ph+Allene   | 6.04445e-13 | 1.000000 | 6.04633e-13 | 1.000000 |
| rad33       | 5.70988e-13 | 1.000000 | 5.71166e-13 | 1.000000 |
| rad25       | 3.31964e-13 | 1.000000 | 3.32068e-13 | 1.000000 |
| rad39       | 1.48352e-13 | 1.000000 | 1.48399e-13 | 1.000000 |
| rad46       | 1.27049e-13 | 1.000000 | 1.27088e-13 | 1.000000 |
| rad12       | 1.25995e-13 | 1.000000 | 1.26034e-13 | 1.000000 |
| rad27       | 5.00545e-14 | 1.000000 | 5.00701e-14 | 1.000000 |
| rad14       | 4.74606e-14 | 1.000000 | 4.74753e-14 | 1.000000 |
| rad18       | 1.98904e-14 | 1.000000 | 1.98966e-14 | 1.000000 |
| PhCH2CCH+H  | 3.94240e-15 | 1.000000 | 3.94362e-15 | 1.000000 |
| rad60syn    | 3.33751e-15 | 1.000000 | 3.33855e-15 | 1.000000 |
| rad60anti   | 7.96117e-16 | 1.000000 | 7.96364e-16 | 1.000000 |
| rad37       | 5.99272e-16 | 1.000000 | 5.99458e-16 | 1.000000 |
| rad24       | 1.44037e-17 | 1.000000 | 1.44082e-17 | 1.000000 |
| rad5        | 7.94199e-18 | 1.000000 | 7.94445e-18 | 1.000000 |
| rad31       | 3.63924e-18 | 1.000000 | 3.64037e-18 | 1.000000 |
| PAH3+H      | 1.84110e-18 | 1.000000 | 1.84167e-18 | 1.000000 |
| rad59       | 6.33568e-19 | 1.000000 | 6.33765e-19 | 1.000000 |
| rad50       | 3.75826e-20 | 1.000000 | 3.75942e-20 | 1.000000 |
| rad19syn    | 1.20338e-21 | 1.000000 | 1.20375e-21 | 1.000000 |
| rad54       | 1.72230e-23 | 1.000000 | 1.72284e-23 | 1.000000 |
| PAH10+CH3   | 1.17499e-23 | 1.000000 | 1.17536e-23 | 1.000000 |
| rad52       | 2.90121e-24 | 1.000000 | 2.90211e-24 | 1.000000 |
| rad43       | 2.83408e-24 | 1.000000 | 2.83496e-24 | 1.000000 |
| rad62       | 5.56131e-25 | 1.000000 | 5.56304e-25 | 1.000000 |

|               |             |         |             |          |
|---------------|-------------|---------|-------------|----------|
| rad51         | 3.51694e-26 | 1.00000 | 3.51803e-26 | 1.000000 |
| PhcycC3H3_A+H | 1.66517e-26 | 1.00000 | 1.66569e-26 | 1.000000 |
| rad70         | 1.28353e-26 | 1.00000 | 1.28393e-26 | 1.000000 |
| rad55         | 5.09020e-27 | 1.00000 | 5.09178e-27 | 1.000000 |
| rad58         | 1.02396e-27 | 1.00000 | 1.02427e-27 | 1.000000 |
| PAH1+H        | 2.20703e-28 | 1.00000 | 2.20772e-28 | 1.000000 |
| rad65         | 2.00131e-28 | 1.00000 | 2.00193e-28 | 1.000000 |
| rad34         | 1.05689e-29 | 1.00000 | 1.05722e-29 | 1.000000 |
| rad42         | 4.40743e-32 | 1.00000 | 4.40880e-32 | 1.000000 |
| rad41         | 7.72170e-33 | 1.00000 | 7.72410e-33 | 1.000000 |
| rad47         | 2.01962e-36 | 1.00000 | 2.02024e-36 | 1.000000 |

0.1000000000E-01 Pa, 240.000000 K

| Rate constant | True (fraction)     | Effective (fraction) |
|---------------|---------------------|----------------------|
| Total         | 3.99091e-25 (1.00 ) | 3.98936e-25 (1.00 )  |

| species       | PYtrue      | Cumul    | PYeffective | Cumul    |
|---------------|-------------|----------|-------------|----------|
| Indene+H      | 0.998853    | 0.998853 | 0.999241    | 0.999241 |
| rad6          | 0.000758493 | 0.999611 | 0.000758788 | 1.000000 |
| Benzyl+C2H2   | 0.000388650 | 1.00000  | 0.00000     | 1.000000 |
| rad2          | 1.21925e-07 | 1.00000  | 1.21972e-07 | 1.000000 |
| rad23         | 6.80319e-08 | 1.00000  | 6.80583e-08 | 1.000000 |
| rad7          | 6.40648e-08 | 1.00000  | 6.40897e-08 | 1.000000 |
| rad11         | 1.67789e-08 | 1.00000  | 1.67854e-08 | 1.000000 |
| rad1          | 8.60730e-09 | 1.00000  | 8.61065e-09 | 1.000000 |
| rad30         | 6.93207e-09 | 1.00000  | 6.93476e-09 | 1.000000 |
| rad10         | 6.54509e-09 | 1.00000  | 6.54763e-09 | 1.000000 |
| rad28         | 6.27635e-09 | 1.00000  | 6.27879e-09 | 1.000000 |
| PhCCH+CH3     | 3.43651e-09 | 1.00000  | 3.43785e-09 | 1.000000 |
| PhCHCCH2+H    | 2.24602e-09 | 1.00000  | 2.24690e-09 | 1.000000 |
| rad26         | 1.76412e-09 | 1.00000  | 1.76481e-09 | 1.000000 |
| rad3          | 1.37950e-09 | 1.00000  | 1.38004e-09 | 1.000000 |
| PhCCCH3+H     | 1.25290e-09 | 1.00000  | 1.25338e-09 | 1.000000 |
| PAH9+H        | 8.95063e-10 | 1.00000  | 8.95411e-10 | 1.000000 |
| rad45         | 7.31453e-10 | 1.00000  | 7.31737e-10 | 1.000000 |
| rad4          | 7.18989e-10 | 1.00000  | 7.19268e-10 | 1.000000 |
| rad35         | 6.59020e-10 | 1.00000  | 6.59276e-10 | 1.000000 |
| rad15         | 6.21001e-10 | 1.00000  | 6.21242e-10 | 1.000000 |
| rad13         | 3.23879e-10 | 1.00000  | 3.24005e-10 | 1.000000 |
| rad38         | 1.62022e-10 | 1.00000  | 1.62085e-10 | 1.000000 |
| rad36         | 4.63106e-11 | 1.00000  | 4.63286e-11 | 1.000000 |
| Ph+MeAc       | 3.64173e-11 | 1.00000  | 3.64314e-11 | 1.000000 |
| rad22         | 3.00754e-11 | 1.00000  | 3.00871e-11 | 1.000000 |
| rad8          | 1.09825e-11 | 1.00000  | 1.09868e-11 | 1.000000 |
| rad9          | 6.42263e-12 | 1.00000  | 6.42512e-12 | 1.000000 |
| PAH7+H        | 2.66426e-12 | 1.00000  | 2.66530e-12 | 1.000000 |
| rad20         | 2.21862e-12 | 1.00000  | 2.21948e-12 | 1.000000 |
| Ph+Allene     | 1.88249e-12 | 1.00000  | 1.88322e-12 | 1.000000 |
| rad21         | 1.42307e-12 | 1.00000  | 1.42362e-12 | 1.000000 |
| rad33         | 6.27960e-13 | 1.00000  | 6.28204e-13 | 1.000000 |
| rad39         | 4.29825e-13 | 1.00000  | 4.29992e-13 | 1.000000 |
| rad25         | 3.90089e-13 | 1.00000  | 3.90241e-13 | 1.000000 |
| rad12         | 3.36863e-13 | 1.00000  | 3.36994e-13 | 1.000000 |
| rad46         | 2.48261e-13 | 1.00000  | 2.48357e-13 | 1.000000 |
| rad27         | 6.73710e-14 | 1.00000  | 6.73972e-14 | 1.000000 |
| rad14         | 6.64205e-14 | 1.00000  | 6.64463e-14 | 1.000000 |
| rad18         | 1.75050e-14 | 1.00000  | 1.75118e-14 | 1.000000 |
| PhCH2CCH+H    | 1.51363e-14 | 1.00000  | 1.51422e-14 | 1.000000 |
| rad60syn      | 8.93179e-15 | 1.00000  | 8.93526e-15 | 1.000000 |
| rad60anti     | 2.25315e-15 | 1.00000  | 2.25403e-15 | 1.000000 |
| rad37         | 2.11124e-15 | 1.00000  | 2.11206e-15 | 1.000000 |
| rad5          | 3.16227e-17 | 1.00000  | 3.16350e-17 | 1.000000 |
| rad24         | 1.15488e-17 | 1.00000  | 1.15533e-17 | 1.000000 |
| PAH3+H        | 7.77831e-18 | 1.00000  | 7.78134e-18 | 1.000000 |
| rad31         | 5.06075e-18 | 1.00000  | 5.06272e-18 | 1.000000 |
| rad59         | 2.61134e-18 | 1.00000  | 2.61235e-18 | 1.000000 |
| rad50         | 1.57410e-19 | 1.00000  | 1.57471e-19 | 1.000000 |
| rad19syn      | 7.46254e-21 | 1.00000  | 7.46544e-21 | 1.000000 |
| rad54         | 1.23887e-22 | 1.00000  | 1.23935e-22 | 1.000000 |
| PAH10+CH3     | 8.41994e-23 | 1.00000  | 8.42321e-23 | 1.000000 |
| rad43         | 2.01947e-23 | 1.00000  | 2.02026e-23 | 1.000000 |
| rad52         | 1.76323e-23 | 1.00000  | 1.76391e-23 | 1.000000 |
| rad62         | 4.35158e-24 | 1.00000  | 4.35327e-24 | 1.000000 |
| rad51         | 2.84407e-25 | 1.00000  | 2.84518e-25 | 1.000000 |
| PhcycC3H3_A+H | 1.80778e-25 | 1.00000  | 1.80848e-25 | 1.000000 |
| rad70         | 1.28544e-25 | 1.00000  | 1.28594e-25 | 1.000000 |
| rad55         | 5.23369e-26 | 1.00000  | 5.23572e-26 | 1.000000 |

|        |             |         |             |         |
|--------|-------------|---------|-------------|---------|
| rad58  | 1.13957e-26 | 1.00000 | 1.14001e-26 | 1.00000 |
| PAH1+H | 3.45174e-27 | 1.00000 | 3.45308e-27 | 1.00000 |
| rad65  | 1.89604e-27 | 1.00000 | 1.89677e-27 | 1.00000 |
| rad34  | 2.00418e-28 | 1.00000 | 2.00496e-28 | 1.00000 |
| rad42  | 2.60636e-30 | 1.00000 | 2.60737e-30 | 1.00000 |
| rad41  | 7.50332e-31 | 1.00000 | 7.50623e-31 | 1.00000 |
| rad47  | 1.87515e-35 | 1.00000 | 1.87588e-35 | 1.00000 |

0.100000000E-01 Pa, 250.000000 K

| Rate constant | True (fraction)     | Effective (fraction) |
|---------------|---------------------|----------------------|
| Total         | 1.17763e-24 (1.00 ) | 1.17706e-24 (1.00 )  |

| species       | PYtrue      | Cumul    | PYeffective | Cumul    |
|---------------|-------------|----------|-------------|----------|
| Indene+H      | 0.998687    | 0.998687 | 0.999171    | 0.999171 |
| rad6          | 0.000828117 | 0.999515 | 0.000828518 | 1.000000 |
| Benzyl+C2H2   | 0.000484113 | 0.999999 | 0.000000    | 1.000000 |
| rad2          | 1.57044e-07 | 0.999999 | 1.57120e-07 | 1.000000 |
| rad7          | 6.98483e-08 | 0.999999 | 6.98821e-08 | 1.000000 |
| rad23         | 5.41536e-08 | 1.000000 | 5.41799e-08 | 1.000000 |
| rad11         | 1.81521e-08 | 1.000000 | 1.81609e-08 | 1.000000 |
| rad1          | 1.12151e-08 | 1.000000 | 1.12205e-08 | 1.000000 |
| rad28         | 1.03375e-08 | 1.000000 | 1.03425e-08 | 1.000000 |
| rad30         | 9.78194e-09 | 1.000000 | 9.78668e-09 | 1.000000 |
| rad10         | 8.43110e-09 | 1.000000 | 8.43518e-09 | 1.000000 |
| PhCCH+CH3     | 7.46143e-09 | 1.000000 | 7.46504e-09 | 1.000000 |
| PhCHCCH2+H    | 4.74328e-09 | 1.000000 | 4.74558e-09 | 1.000000 |
| rad26         | 2.87808e-09 | 1.000000 | 2.87948e-09 | 1.000000 |
| PhCCCH3+H     | 2.70876e-09 | 1.000000 | 2.71007e-09 | 1.000000 |
| rad3          | 1.63086e-09 | 1.000000 | 1.63165e-09 | 1.000000 |
| PAH9+H        | 1.22447e-09 | 1.000000 | 1.22507e-09 | 1.000000 |
| rad15         | 9.63416e-10 | 1.000000 | 9.63883e-10 | 1.000000 |
| rad35         | 8.67520e-10 | 1.000000 | 8.67941e-10 | 1.000000 |
| rad4          | 8.52823e-10 | 1.000000 | 8.53236e-10 | 1.000000 |
| rad45         | 5.81942e-10 | 1.000000 | 5.82224e-10 | 1.000000 |
| rad13         | 3.55182e-10 | 1.000000 | 3.55354e-10 | 1.000000 |
| rad38         | 2.32767e-10 | 1.000000 | 2.32879e-10 | 1.000000 |
| Ph+MeAc       | 9.53253e-11 | 1.000000 | 9.53715e-11 | 1.000000 |
| rad36         | 3.70108e-11 | 1.000000 | 3.70287e-11 | 1.000000 |
| rad8          | 2.52397e-11 | 1.000000 | 2.52519e-11 | 1.000000 |
| rad22         | 2.38551e-11 | 1.000000 | 2.38667e-11 | 1.000000 |
| rad9          | 1.53091e-11 | 1.000000 | 1.53166e-11 | 1.000000 |
| PAH7+H        | 6.82638e-12 | 1.000000 | 6.82969e-12 | 1.000000 |
| Ph+Allene     | 5.39057e-12 | 1.000000 | 5.39318e-12 | 1.000000 |
| rad20         | 2.02169e-12 | 1.000000 | 2.02267e-12 | 1.000000 |
| rad21         | 1.30027e-12 | 1.000000 | 1.30090e-12 | 1.000000 |
| rad39         | 1.14878e-12 | 1.000000 | 1.14933e-12 | 1.000000 |
| rad12         | 8.35315e-13 | 1.000000 | 8.35719e-13 | 1.000000 |
| rad33         | 6.90368e-13 | 1.000000 | 6.90703e-13 | 1.000000 |
| rad46         | 4.66101e-13 | 1.000000 | 4.66327e-13 | 1.000000 |
| rad25         | 4.46847e-13 | 1.000000 | 4.47063e-13 | 1.000000 |
| rad14         | 8.99836e-14 | 1.000000 | 9.00272e-14 | 1.000000 |
| rad27         | 8.84753e-14 | 1.000000 | 8.85182e-14 | 1.000000 |
| PhCH2CCH+H    | 5.24400e-14 | 1.000000 | 5.24654e-14 | 1.000000 |
| rad60syn      | 2.21737e-14 | 1.000000 | 2.21845e-14 | 1.000000 |
| rad18         | 1.54354e-14 | 1.000000 | 1.54429e-14 | 1.000000 |
| rad37         | 6.69343e-15 | 1.000000 | 6.69667e-15 | 1.000000 |
| rad60anti     | 5.88317e-15 | 1.000000 | 5.88601e-15 | 1.000000 |
| rad5          | 1.12771e-16 | 1.000000 | 1.12826e-16 | 1.000000 |
| PAH3+H        | 2.93886e-17 | 1.000000 | 2.94028e-17 | 1.000000 |
| rad59         | 9.63313e-18 | 1.000000 | 9.63779e-18 | 1.000000 |
| rad24         | 9.38810e-18 | 1.000000 | 9.39265e-18 | 1.000000 |
| rad31         | 6.97538e-18 | 1.000000 | 6.97876e-18 | 1.000000 |
| rad50         | 5.92224e-19 | 1.000000 | 5.92511e-19 | 1.000000 |
| rad19syn      | 4.00037e-20 | 1.000000 | 4.00231e-20 | 1.000000 |
| rad54         | 7.59770e-22 | 1.000000 | 7.60138e-22 | 1.000000 |
| PAH10+CH3     | 5.14099e-22 | 1.000000 | 5.14348e-22 | 1.000000 |
| rad43         | 1.22561e-22 | 1.000000 | 1.22621e-22 | 1.000000 |
| rad52         | 9.30803e-23 | 1.000000 | 9.31254e-23 | 1.000000 |
| rad62         | 2.87031e-23 | 1.000000 | 2.87170e-23 | 1.000000 |
| rad51         | 1.93186e-24 | 1.000000 | 1.93280e-24 | 1.000000 |
| PhcycC3H3_A+H | 1.49420e-24 | 1.000000 | 1.49492e-24 | 1.000000 |
| rad70         | 1.01865e-24 | 1.000000 | 1.01914e-24 | 1.000000 |
| rad55         | 4.20879e-25 | 1.000000 | 4.21083e-25 | 1.000000 |
| rad58         | 9.52807e-26 | 1.000000 | 9.53269e-26 | 1.000000 |
| PAH1+H        | 3.22692e-26 | 1.000000 | 3.22848e-26 | 1.000000 |
| rad65         | 1.44795e-26 | 1.000000 | 1.44865e-26 | 1.000000 |
| rad34         | 1.93903e-27 | 1.000000 | 1.93997e-27 | 1.000000 |

|       |             |          |             |          |
|-------|-------------|----------|-------------|----------|
| rad42 | 2.74552e-29 | 1.000000 | 2.74685e-29 | 1.000000 |
| rad41 | 7.96620e-30 | 1.000000 | 7.97006e-30 | 1.000000 |
| rad47 | 1.43579e-34 | 1.000000 | 1.43648e-34 | 1.000000 |

0.100000000E-01 Pa, 260.000000 K

| Rate constant | True (fraction)     | Effective (fraction) |
|---------------|---------------------|----------------------|
| Total         | 3.19452e-24 (1.00 ) | 3.19260e-24 (1.00 )  |

| species       | PYtrue      | Cumul    | PYeffective | Cumul    |
|---------------|-------------|----------|-------------|----------|
| Indene+H      | 0.998497    | 0.998497 | 0.999096    | 0.999096 |
| rad6          | 0.000902987 | 0.999400 | 0.000903529 | 1.000000 |
| Benzyl+C2H2   | 0.000600044 | 1.000000 | 0.000000    | 1.000000 |
| rad2          | 1.98228e-07 | 1.000000 | 1.98347e-07 | 1.000000 |
| rad7          | 7.60714e-08 | 1.000000 | 7.61170e-08 | 1.000000 |
| rad23         | 4.36695e-08 | 1.000000 | 4.36957e-08 | 1.000000 |
| rad11         | 1.96550e-08 | 1.000000 | 1.96668e-08 | 1.000000 |
| rad28         | 1.63782e-08 | 1.000000 | 1.63881e-08 | 1.000000 |
| PhCCH+CH3     | 1.53984e-08 | 1.000000 | 1.54077e-08 | 1.000000 |
| rad1          | 1.43331e-08 | 1.000000 | 1.43417e-08 | 1.000000 |
| rad30         | 1.35928e-08 | 1.000000 | 1.36009e-08 | 1.000000 |
| rad10         | 1.06444e-08 | 1.000000 | 1.06508e-08 | 1.000000 |
| PhCHCCH2+H    | 9.54500e-09 | 1.000000 | 9.55073e-09 | 1.000000 |
| PhCCCH3+H     | 5.56026e-09 | 1.000000 | 5.56360e-09 | 1.000000 |
| rad26         | 4.49155e-09 | 1.000000 | 4.49425e-09 | 1.000000 |
| rad3          | 1.91865e-09 | 1.000000 | 1.91980e-09 | 1.000000 |
| PAH9+H        | 1.66467e-09 | 1.000000 | 1.66567e-09 | 1.000000 |
| rad15         | 1.45896e-09 | 1.000000 | 1.45983e-09 | 1.000000 |
| rad35         | 1.13700e-09 | 1.000000 | 1.13768e-09 | 1.000000 |
| rad4          | 1.00693e-09 | 1.000000 | 1.00754e-09 | 1.000000 |
| rad45         | 4.69317e-10 | 1.000000 | 4.69599e-10 | 1.000000 |
| rad13         | 3.89091e-10 | 1.000000 | 3.89325e-10 | 1.000000 |
| rad38         | 3.30846e-10 | 1.000000 | 3.31045e-10 | 1.000000 |
| Ph+MeAc       | 2.32471e-10 | 1.000000 | 2.32610e-10 | 1.000000 |
| rad8          | 5.47505e-11 | 1.000000 | 5.47834e-11 | 1.000000 |
| rad9          | 3.44054e-11 | 1.000000 | 3.44261e-11 | 1.000000 |
| rad36         | 2.99995e-11 | 1.000000 | 3.00175e-11 | 1.000000 |
| rad22         | 1.91478e-11 | 1.000000 | 1.91593e-11 | 1.000000 |
| PAH7+H        | 1.63351e-11 | 1.000000 | 1.63449e-11 | 1.000000 |
| Ph+Allene     | 1.43205e-11 | 1.000000 | 1.43291e-11 | 1.000000 |
| rad39         | 2.85602e-12 | 1.000000 | 2.85774e-12 | 1.000000 |
| rad12         | 1.93564e-12 | 1.000000 | 1.93680e-12 | 1.000000 |
| rad20         | 1.84621e-12 | 1.000000 | 1.84732e-12 | 1.000000 |
| rad21         | 1.19087e-12 | 1.000000 | 1.19159e-12 | 1.000000 |
| rad46         | 8.44707e-13 | 1.000000 | 8.45214e-13 | 1.000000 |
| rad33         | 7.58264e-13 | 1.000000 | 7.58719e-13 | 1.000000 |
| rad25         | 5.00796e-13 | 1.000000 | 5.01097e-13 | 1.000000 |
| PhCH2CCH+H    | 1.65839e-13 | 1.000000 | 1.65939e-13 | 1.000000 |
| rad14         | 1.18407e-13 | 1.000000 | 1.18478e-13 | 1.000000 |
| rad27         | 1.13563e-13 | 1.000000 | 1.13631e-13 | 1.000000 |
| rad60syn      | 5.15242e-14 | 1.000000 | 5.15551e-14 | 1.000000 |
| rad37         | 1.93289e-14 | 1.000000 | 1.93405e-14 | 1.000000 |
| rad60anti     | 1.43091e-14 | 1.000000 | 1.43177e-14 | 1.000000 |
| rad18         | 1.36354e-14 | 1.000000 | 1.36436e-14 | 1.000000 |
| rad5          | 3.64645e-16 | 1.000000 | 3.64864e-16 | 1.000000 |
| PAH3+H        | 1.00612e-16 | 1.000000 | 1.00672e-16 | 1.000000 |
| rad59         | 3.22243e-17 | 1.000000 | 3.22437e-17 | 1.000000 |
| rad31         | 9.53215e-18 | 1.000000 | 9.53787e-18 | 1.000000 |
| rad24         | 7.75068e-18 | 1.000000 | 7.75533e-18 | 1.000000 |
| rad50         | 2.02675e-18 | 1.000000 | 2.02797e-18 | 1.000000 |
| rad19syn      | 1.88549e-19 | 1.000000 | 1.88663e-19 | 1.000000 |
| rad54         | 4.05254e-21 | 1.000000 | 4.05497e-21 | 1.000000 |
| PAH10+CH3     | 2.72685e-21 | 1.000000 | 2.72848e-21 | 1.000000 |
| rad43         | 6.45760e-22 | 1.000000 | 6.46148e-22 | 1.000000 |
| rad52         | 4.34009e-22 | 1.000000 | 4.34270e-22 | 1.000000 |
| rad62         | 1.63277e-22 | 1.000000 | 1.63375e-22 | 1.000000 |
| rad51         | 1.13321e-23 | 1.000000 | 1.13389e-23 | 1.000000 |
| PhcycC3H3_A+H | 1.03666e-23 | 1.000000 | 1.03728e-23 | 1.000000 |
| rad70         | 6.81740e-24 | 1.000000 | 6.82150e-24 | 1.000000 |
| rad55         | 2.85284e-24 | 1.000000 | 2.85455e-24 | 1.000000 |
| rad58         | 6.67327e-25 | 1.000000 | 6.67727e-25 | 1.000000 |
| PAH1+H        | 2.46524e-25 | 1.000000 | 2.46672e-25 | 1.000000 |
| rad65         | 9.40258e-26 | 1.000000 | 9.40823e-26 | 1.000000 |
| rad34         | 1.51926e-26 | 1.000000 | 1.52017e-26 | 1.000000 |
| rad42         | 2.27956e-28 | 1.000000 | 2.28093e-28 | 1.000000 |
| rad41         | 6.66604e-29 | 1.000000 | 6.67004e-29 | 1.000000 |
| rad47         | 9.26533e-34 | 1.000000 | 9.27089e-34 | 1.000000 |

0.100000000E-01 Pa, 270.000000 K

=====

| Rate constant | True (fraction)     | Effective (fraction) |
|---------------|---------------------|----------------------|
| Total         | 8.04141e-24 (1.00 ) | 8.03546e-24 (1.00 )  |

| species       | PYtrue      | Cumul    | PYeffective | Cumul    |
|---------------|-------------|----------|-------------|----------|
| Indene+H      | 0.998277    | 0.998277 | 0.999016    | 0.999016 |
| rad6          | 0.000982766 | 0.999260 | 0.000983494 | 0.999999 |
| Benzyl+C2H2   | 0.000740040 | 1.000000 | 0.000000    | 0.999999 |
| rad2          | 2.45422e-07 | 1.000000 | 2.45604e-07 | 1.000000 |
| rad7          | 8.27068e-08 | 1.000000 | 8.27680e-08 | 1.000000 |
| rad23         | 3.57424e-08 | 1.000000 | 3.57689e-08 | 1.000000 |
| PhCCH+CH3     | 3.03189e-08 | 1.000000 | 3.03414e-08 | 1.000000 |
| rad28         | 2.50080e-08 | 1.000000 | 2.50265e-08 | 1.000000 |
| rad11         | 2.12780e-08 | 1.000000 | 2.12938e-08 | 1.000000 |
| rad30         | 1.86268e-08 | 1.000000 | 1.86406e-08 | 1.000000 |
| PhCHCCH2+H    | 1.83655e-08 | 1.000000 | 1.83791e-08 | 1.000000 |
| rad1          | 1.79841e-08 | 1.000000 | 1.79974e-08 | 1.000000 |
| rad10         | 1.31831e-08 | 1.000000 | 1.31929e-08 | 1.000000 |
| PhCCCH3+H     | 1.08801e-08 | 1.000000 | 1.08881e-08 | 1.000000 |
| rad26         | 6.72896e-09 | 1.000000 | 6.73394e-09 | 1.000000 |
| PAH9+H        | 2.24905e-09 | 1.000000 | 2.25072e-09 | 1.000000 |
| rad3          | 2.24255e-09 | 1.000000 | 2.24421e-09 | 1.000000 |
| rad15         | 2.16222e-09 | 1.000000 | 2.16382e-09 | 1.000000 |
| rad35         | 1.48340e-09 | 1.000000 | 1.48450e-09 | 1.000000 |
| rad4          | 1.18150e-09 | 1.000000 | 1.18237e-09 | 1.000000 |
| Ph+MeAc       | 5.31823e-10 | 1.000000 | 5.32217e-10 | 1.000000 |
| rad38         | 4.65537e-10 | 1.000000 | 4.65881e-10 | 1.000000 |
| rad13         | 4.25515e-10 | 1.000000 | 4.25830e-10 | 1.000000 |
| rad45         | 3.84400e-10 | 1.000000 | 3.84685e-10 | 1.000000 |
| rad8          | 1.12671e-10 | 1.000000 | 1.12754e-10 | 1.000000 |
| rad9          | 7.32888e-11 | 1.000000 | 7.33431e-11 | 1.000000 |
| PAH7+H        | 3.67520e-11 | 1.000000 | 3.67792e-11 | 1.000000 |
| Ph+Allene     | 3.55671e-11 | 1.000000 | 3.55934e-11 | 1.000000 |
| rad36         | 2.47107e-11 | 1.000000 | 2.47290e-11 | 1.000000 |
| rad22         | 1.55771e-11 | 1.000000 | 1.55886e-11 | 1.000000 |
| rad39         | 6.65319e-12 | 1.000000 | 6.65812e-12 | 1.000000 |
| rad12         | 4.21911e-12 | 1.000000 | 4.22223e-12 | 1.000000 |
| rad20         | 1.68979e-12 | 1.000000 | 1.69104e-12 | 1.000000 |
| rad46         | 1.48342e-12 | 1.000000 | 1.48452e-12 | 1.000000 |
| rad21         | 1.09339e-12 | 1.000000 | 1.09420e-12 | 1.000000 |
| rad33         | 8.31550e-13 | 1.000000 | 8.32166e-13 | 1.000000 |
| rad25         | 5.50866e-13 | 1.000000 | 5.51274e-13 | 1.000000 |
| PhCH2CCH+H    | 4.83471e-13 | 1.000000 | 4.83829e-13 | 1.000000 |
| rad14         | 1.51770e-13 | 1.000000 | 1.51882e-13 | 1.000000 |
| rad27         | 1.42691e-13 | 1.000000 | 1.42797e-13 | 1.000000 |
| rad60syn      | 1.12915e-13 | 1.000000 | 1.12999e-13 | 1.000000 |
| rad37         | 5.13685e-14 | 1.000000 | 5.14066e-14 | 1.000000 |
| rad60anti     | 3.26846e-14 | 1.000000 | 3.27088e-14 | 1.000000 |
| rad18         | 1.20665e-14 | 1.000000 | 1.20755e-14 | 1.000000 |
| rad5          | 1.08040e-15 | 1.000000 | 1.08120e-15 | 1.000000 |
| PAH3+H        | 3.15593e-16 | 1.000000 | 3.15827e-16 | 1.000000 |
| rad59         | 9.88399e-17 | 1.000000 | 9.89131e-17 | 1.000000 |
| rad31         | 1.29236e-17 | 1.000000 | 1.29332e-17 | 1.000000 |
| rad24         | 6.51254e-18 | 1.000000 | 6.51737e-18 | 1.000000 |
| rad50         | 6.37669e-18 | 1.000000 | 6.38142e-18 | 1.000000 |
| rad19syn      | 7.92669e-19 | 1.000000 | 7.93256e-19 | 1.000000 |
| rad54         | 1.91003e-20 | 1.000000 | 1.91144e-20 | 1.000000 |
| PAH10+CH3     | 1.27639e-20 | 1.000000 | 1.27733e-20 | 1.000000 |
| rad43         | 3.00072e-21 | 1.000000 | 3.00294e-21 | 1.000000 |
| rad52         | 1.81269e-21 | 1.000000 | 1.81403e-21 | 1.000000 |
| rad62         | 8.14768e-22 | 1.000000 | 8.15371e-22 | 1.000000 |
| PhcycC3H3_A+H | 6.21114e-23 | 1.000000 | 6.21574e-23 | 1.000000 |
| rad51         | 5.84269e-23 | 1.000000 | 5.84702e-23 | 1.000000 |
| rad70         | 3.94917e-23 | 1.000000 | 3.95210e-23 | 1.000000 |
| rad55         | 1.67249e-23 | 1.000000 | 1.67373e-23 | 1.000000 |
| rad58         | 4.03301e-24 | 1.000000 | 4.03600e-24 | 1.000000 |
| PAH1+H        | 1.61230e-24 | 1.000000 | 1.61349e-24 | 1.000000 |
| rad65         | 5.31025e-25 | 1.000000 | 5.31418e-25 | 1.000000 |
| rad34         | 1.01769e-25 | 1.000000 | 1.01844e-25 | 1.000000 |
| rad42         | 1.61976e-27 | 1.000000 | 1.62096e-27 | 1.000000 |
| rad41         | 4.78017e-28 | 1.000000 | 4.78371e-28 | 1.000000 |
| rad47         | 5.14331e-33 | 1.000000 | 5.14711e-33 | 1.000000 |

0.100000000E-01 Pa, 280.000000 K

=====

| Rate constant | True (fraction) | Effective (fraction) |
|---------------|-----------------|----------------------|
|---------------|-----------------|----------------------|



Total | 1.89357e-23 (1.00 ) 1.89185e-23 (1.00 )

| species       | PYtrue      | Cumul    | PYeffective | Cumul    |
|---------------|-------------|----------|-------------|----------|
| Indene+H      | 0.998024    | 0.998024 | 0.998931    | 0.998931 |
| rad6          | 0.00106689  | 0.999091 | 0.00106786  | 0.999999 |
| Benzyl+C2H2   | 0.000908155 | 0.999999 | 0.000000    | 0.999999 |
| rad2          | 2.98310e-07 | 0.999999 | 2.98581e-07 | 0.999999 |
| rad7          | 8.97087e-08 | 0.999999 | 8.97902e-08 | 0.999999 |
| PhCCH+CH3     | 5.71503e-08 | 0.999999 | 5.72023e-08 | 0.999999 |
| rad28         | 3.68716e-08 | 1.000000 | 3.69051e-08 | 0.999999 |
| PhCHCCH2+H    | 3.38942e-08 | 1.000000 | 3.39250e-08 | 0.999999 |
| rad23         | 2.97621e-08 | 1.000000 | 2.97891e-08 | 0.999999 |
| rad30         | 2.52016e-08 | 1.000000 | 2.52245e-08 | 0.999999 |
| rad11         | 2.30073e-08 | 1.000000 | 2.30283e-08 | 0.999999 |
| rad1          | 2.21750e-08 | 1.000000 | 2.21951e-08 | 0.999999 |
| PhCCCH3+H     | 2.03677e-08 | 1.000000 | 2.03862e-08 | 0.999999 |
| rad10         | 1.60315e-08 | 1.000000 | 1.60461e-08 | 1.000000 |
| rad26         | 9.70855e-09 | 1.000000 | 9.71737e-09 | 1.000000 |
| rad15         | 3.14287e-09 | 1.000000 | 3.14573e-09 | 1.000000 |
| PAH9+H        | 3.01974e-09 | 1.000000 | 3.02249e-09 | 1.000000 |
| rad3          | 2.60072e-09 | 1.000000 | 2.60308e-09 | 1.000000 |
| rad35         | 1.92628e-09 | 1.000000 | 1.92803e-09 | 1.000000 |
| rad4          | 1.37594e-09 | 1.000000 | 1.37719e-09 | 1.000000 |
| Ph+MeAc       | 1.14817e-09 | 1.000000 | 1.14922e-09 | 1.000000 |
| rad38         | 6.48819e-10 | 1.000000 | 6.49409e-10 | 1.000000 |
| rad13         | 4.64267e-10 | 1.000000 | 4.64689e-10 | 1.000000 |
| rad45         | 3.20535e-10 | 1.000000 | 3.20827e-10 | 1.000000 |
| rad8          | 2.20958e-10 | 1.000000 | 2.21159e-10 | 1.000000 |
| rad9          | 1.48662e-10 | 1.000000 | 1.48798e-10 | 1.000000 |
| Ph+Allene     | 8.31403e-11 | 1.000000 | 8.32159e-11 | 1.000000 |
| PAH7+H        | 7.82038e-11 | 1.000000 | 7.82748e-11 | 1.000000 |
| rad36         | 2.07347e-11 | 1.000000 | 2.07535e-11 | 1.000000 |
| rad39         | 1.46151e-11 | 1.000000 | 1.46284e-11 | 1.000000 |
| rad22         | 1.28688e-11 | 1.000000 | 1.28805e-11 | 1.000000 |
| rad12         | 8.70010e-12 | 1.000000 | 8.70800e-12 | 1.000000 |
| rad46         | 2.53258e-12 | 1.000000 | 2.53488e-12 | 1.000000 |
| rad20         | 1.55034e-12 | 1.000000 | 1.55175e-12 | 1.000000 |
| PhCH2CCH+H    | 1.31037e-12 | 1.000000 | 1.31156e-12 | 1.000000 |
| rad21         | 1.00652e-12 | 1.000000 | 1.00744e-12 | 1.000000 |
| rad33         | 9.09945e-13 | 1.000000 | 9.10772e-13 | 1.000000 |
| rad25         | 5.96362e-13 | 1.000000 | 5.96904e-13 | 1.000000 |
| rad60syn      | 2.34894e-13 | 1.000000 | 2.35107e-13 | 1.000000 |
| rad14         | 1.89949e-13 | 1.000000 | 1.90122e-13 | 1.000000 |
| rad27         | 1.75761e-13 | 1.000000 | 1.75920e-13 | 1.000000 |
| rad37         | 1.26758e-13 | 1.000000 | 1.26873e-13 | 1.000000 |
| rad60anti     | 7.06031e-14 | 1.000000 | 7.06673e-14 | 1.000000 |
| rad18         | 1.06968e-14 | 1.000000 | 1.07065e-14 | 1.000000 |
| rad5          | 2.95987e-15 | 1.000000 | 2.96256e-15 | 1.000000 |
| PAH3+H        | 9.15669e-16 | 1.000000 | 9.16501e-16 | 1.000000 |
| rad59         | 2.80625e-16 | 1.000000 | 2.80880e-16 | 1.000000 |
| rad50         | 1.86127e-17 | 1.000000 | 1.86297e-17 | 1.000000 |
| rad31         | 1.74006e-17 | 1.000000 | 1.74164e-17 | 1.000000 |
| rad24         | 5.58340e-18 | 1.000000 | 5.58847e-18 | 1.000000 |
| rad19syn      | 3.00849e-18 | 1.000000 | 3.01123e-18 | 1.000000 |
| rad54         | 8.05665e-20 | 1.000000 | 8.06398e-20 | 1.000000 |
| PAH10+CH3     | 5.34089e-20 | 1.000000 | 5.34574e-20 | 1.000000 |
| rad43         | 1.24588e-20 | 1.000000 | 1.24701e-20 | 1.000000 |
| rad52         | 6.86128e-21 | 1.000000 | 6.86751e-21 | 1.000000 |
| rad62         | 3.61436e-21 | 1.000000 | 3.61765e-21 | 1.000000 |
| PhcycC3H3_A+H | 3.25328e-22 | 1.000000 | 3.25624e-22 | 1.000000 |
| rad51         | 2.68081e-22 | 1.000000 | 2.68325e-22 | 1.000000 |
| rad70         | 2.00606e-22 | 1.000000 | 2.00788e-22 | 1.000000 |
| rad55         | 8.58929e-23 | 1.000000 | 8.59710e-23 | 1.000000 |
| rad58         | 2.12864e-23 | 1.000000 | 2.13058e-23 | 1.000000 |
| PAH1+H        | 9.11410e-24 | 1.000000 | 9.12238e-24 | 1.000000 |
| rad65         | 2.64120e-24 | 1.000000 | 2.64361e-24 | 1.000000 |
| rad34         | 5.87403e-25 | 1.000000 | 5.87937e-25 | 1.000000 |
| rad42         | 9.83989e-27 | 1.000000 | 9.84884e-27 | 1.000000 |
| rad41         | 2.92702e-27 | 1.000000 | 2.92968e-27 | 1.000000 |
| rad47         | 2.49626e-32 | 1.000000 | 2.49853e-32 | 1.000000 |

0.100000000E-01 Pa, 290.000000 K

| Rate constant | True (fraction)     | Effective (fraction) |
|---------------|---------------------|----------------------|
| Total         | 4.20015e-23 (1.00 ) | 4.19549e-23 (1.00 )  |

| species | PYtrue | Cumul | PYeffective | Cumul |
|---------|--------|-------|-------------|-------|
|---------|--------|-------|-------------|-------|

|               |             |          |             |          |
|---------------|-------------|----------|-------------|----------|
| Indene+H      | 0.997736    | 0.997736 | 0.998843    | 0.998843 |
| rad6          | 0.00115455  | 0.998891 | 0.00115583  | 0.999999 |
| Benzyl+C2H2   | 0.00110893  | 0.999999 | 0.000000    | 0.999999 |
| rad2          | 3.56308e-07 | 1.000000 | 3.56703e-07 | 0.999999 |
| PhCCH+CH3     | 1.03456e-07 | 1.000000 | 1.03571e-07 | 0.999999 |
| rad7          | 9.70108e-08 | 1.000000 | 9.71185e-08 | 0.999999 |
| PhCHCCH2+H    | 6.01730e-08 | 1.000000 | 6.02398e-08 | 0.999999 |
| rad28         | 5.25955e-08 | 1.000000 | 5.26538e-08 | 1.000000 |
| PhCCCH3+H     | 3.65971e-08 | 1.000000 | 3.66377e-08 | 1.000000 |
| rad30         | 3.36986e-08 | 1.000000 | 3.37360e-08 | 1.000000 |
| rad1          | 2.68952e-08 | 1.000000 | 2.69251e-08 | 1.000000 |
| rad23         | 2.52821e-08 | 1.000000 | 2.53102e-08 | 1.000000 |
| rad11         | 2.48246e-08 | 1.000000 | 2.48521e-08 | 1.000000 |
| rad10         | 1.91597e-08 | 1.000000 | 1.91810e-08 | 1.000000 |
| rad26         | 1.35296e-08 | 1.000000 | 1.35446e-08 | 1.000000 |
| rad15         | 4.48861e-09 | 1.000000 | 4.49359e-09 | 1.000000 |
| PAH9+H        | 4.02950e-09 | 1.000000 | 4.03398e-09 | 1.000000 |
| rad3          | 2.98978e-09 | 1.000000 | 2.99310e-09 | 1.000000 |
| rad35         | 2.48940e-09 | 1.000000 | 2.49216e-09 | 1.000000 |
| Ph+MeAc       | 2.35165e-09 | 1.000000 | 2.35426e-09 | 1.000000 |
| rad4          | 1.58887e-09 | 1.000000 | 1.59064e-09 | 1.000000 |
| rad38         | 8.96029e-10 | 1.000000 | 8.97023e-10 | 1.000000 |
| rad13         | 5.05052e-10 | 1.000000 | 5.05613e-10 | 1.000000 |
| rad8          | 4.14601e-10 | 1.000000 | 4.15061e-10 | 1.000000 |
| rad9          | 2.88344e-10 | 1.000000 | 2.88664e-10 | 1.000000 |
| rad45         | 2.72885e-10 | 1.000000 | 2.73188e-10 | 1.000000 |
| Ph+Allene     | 1.83984e-10 | 1.000000 | 1.84188e-10 | 1.000000 |
| PAH7+H        | 1.58205e-10 | 1.000000 | 1.58381e-10 | 1.000000 |
| rad39         | 3.04439e-11 | 1.000000 | 3.04777e-11 | 1.000000 |
| rad36         | 1.77743e-11 | 1.000000 | 1.77940e-11 | 1.000000 |
| rad12         | 1.70576e-11 | 1.000000 | 1.70765e-11 | 1.000000 |
| rad22         | 1.08221e-11 | 1.000000 | 1.08341e-11 | 1.000000 |
| rad46         | 4.21493e-12 | 1.000000 | 4.21961e-12 | 1.000000 |
| PhCH2CCH+H    | 3.32613e-12 | 1.000000 | 3.32982e-12 | 1.000000 |
| rad20         | 1.42603e-12 | 1.000000 | 1.42762e-12 | 1.000000 |
| rad33         | 9.92961e-13 | 1.000000 | 9.94063e-13 | 1.000000 |
| rad21         | 9.29160e-13 | 1.000000 | 9.30192e-13 | 1.000000 |
| rad25         | 6.36925e-13 | 1.000000 | 6.37632e-13 | 1.000000 |
| rad60syn      | 4.66416e-13 | 1.000000 | 4.66934e-13 | 1.000000 |
| rad37         | 2.92665e-13 | 1.000000 | 2.92990e-13 | 1.000000 |
| rad14         | 2.32616e-13 | 1.000000 | 2.32875e-13 | 1.000000 |
| rad27         | 2.12507e-13 | 1.000000 | 2.12743e-13 | 1.000000 |
| rad60anti     | 1.45093e-13 | 1.000000 | 1.45255e-13 | 1.000000 |
| rad18         | 9.49906e-15 | 1.000000 | 9.50961e-15 | 1.000000 |
| rad5          | 7.55685e-15 | 1.000000 | 7.56524e-15 | 1.000000 |
| PAH3+H        | 2.47751e-15 | 1.000000 | 2.48026e-15 | 1.000000 |
| rad59         | 7.43523e-16 | 1.000000 | 7.44348e-16 | 1.000000 |
| rad50         | 5.07939e-17 | 1.000000 | 5.08503e-17 | 1.000000 |
| rad31         | 2.32923e-17 | 1.000000 | 2.33182e-17 | 1.000000 |
| rad19syn      | 1.04161e-17 | 1.000000 | 1.04276e-17 | 1.000000 |
| rad24         | 4.89757e-18 | 1.000000 | 4.90300e-18 | 1.000000 |
| rad54         | 3.07507e-19 | 1.000000 | 3.07848e-19 | 1.000000 |
| PAH10+CH3     | 2.02022e-19 | 1.000000 | 2.02246e-19 | 1.000000 |
| rad43         | 4.67425e-20 | 1.000000 | 4.67944e-20 | 1.000000 |
| rad52         | 2.37721e-20 | 1.000000 | 2.37985e-20 | 1.000000 |
| rad62         | 1.44202e-20 | 1.000000 | 1.44362e-20 | 1.000000 |
| PhcycC3H3_A+H | 1.50923e-21 | 1.000000 | 1.51090e-21 | 1.000000 |
| rad51         | 1.10683e-21 | 1.000000 | 1.10806e-21 | 1.000000 |
| rad70         | 9.05093e-22 | 1.000000 | 9.06098e-22 | 1.000000 |
| rad55         | 3.91426e-22 | 1.000000 | 3.91860e-22 | 1.000000 |
| rad58         | 9.94210e-23 | 1.000000 | 9.95314e-23 | 1.000000 |
| PAH1+H        | 4.51961e-23 | 1.000000 | 4.52462e-23 | 1.000000 |
| rad65         | 1.17107e-23 | 1.000000 | 1.17237e-23 | 1.000000 |
| rad34         | 2.96675e-24 | 1.000000 | 2.97004e-24 | 1.000000 |
| rad42         | 5.19914e-26 | 1.000000 | 5.20491e-26 | 1.000000 |
| rad41         | 1.55751e-26 | 1.000000 | 1.55924e-26 | 1.000000 |
| rad47         | 1.07437e-31 | 1.000000 | 1.07556e-31 | 1.000000 |

0.100000000E-01 Pa, 300.000000 K

=====

| Rate constant | True (fraction)     | Effective (fraction) |
|---------------|---------------------|----------------------|
| Total         | 1.17740e-22 (1.00 ) | 1.17545e-22 (1.00 )  |

| species     | PYtrue      | Cumul    | PYeffective | Cumul    |
|-------------|-------------|----------|-------------|----------|
| Indene+H    | 0.997228    | 0.997228 | 0.998886    | 0.998886 |
| Benzyl+C2H2 | 0.00165951  | 0.998888 | 0.000000    | 0.998886 |
| rad6        | 0.00111065  | 0.999998 | 0.00111249  | 0.999998 |
| rad2        | 3.81785e-07 | 0.999999 | 3.82420e-07 | 0.999999 |

|               |             |          |             |          |
|---------------|-------------|----------|-------------|----------|
| rad23         | 3.03894e-07 | 0.999999 | 3.04400e-07 | 0.999999 |
| PhCCH+CH3     | 2.83772e-07 | 0.999999 | 2.84244e-07 | 0.999999 |
| PhCHCCH2+H    | 1.51606e-07 | 0.999999 | 1.51858e-07 | 1.000000 |
| rad7          | 1.02699e-07 | 0.999999 | 1.02870e-07 | 1.000000 |
| PhCCCH3+H     | 9.75640e-08 | 0.999999 | 9.77261e-08 | 1.000000 |
| rad28         | 8.37934e-08 | 1.000000 | 8.39327e-08 | 1.000000 |
| rad30         | 3.74458e-08 | 1.000000 | 3.75081e-08 | 1.000000 |
| rad1          | 2.87690e-08 | 1.000000 | 2.88168e-08 | 1.000000 |
| rad11         | 2.69246e-08 | 1.000000 | 2.69694e-08 | 1.000000 |
| rad10         | 2.14121e-08 | 1.000000 | 2.14477e-08 | 1.000000 |
| rad26         | 2.00263e-08 | 1.000000 | 2.00595e-08 | 1.000000 |
| Ph+MeAc       | 6.39237e-09 | 1.000000 | 6.40299e-09 | 1.000000 |
| PAH9+H        | 5.53607e-09 | 1.000000 | 5.54527e-09 | 1.000000 |
| rad45         | 3.83789e-09 | 1.000000 | 3.84427e-09 | 1.000000 |
| rad3          | 3.20036e-09 | 1.000000 | 3.20568e-09 | 1.000000 |
| rad35         | 2.76240e-09 | 1.000000 | 2.76699e-09 | 1.000000 |
| rad4          | 1.59155e-09 | 1.000000 | 1.59420e-09 | 1.000000 |
| rad38         | 1.02242e-09 | 1.000000 | 1.02412e-09 | 1.000000 |
| rad13         | 5.68882e-10 | 1.000000 | 5.69828e-10 | 1.000000 |
| PAH7+H        | 5.62273e-10 | 1.000000 | 5.63208e-10 | 1.000000 |
| rad22         | 3.44556e-10 | 1.000000 | 3.45129e-10 | 1.000000 |
| Ph+Allene     | 2.91344e-10 | 1.000000 | 2.91828e-10 | 1.000000 |
| rad36         | 1.30806e-10 | 1.000000 | 1.31024e-10 | 1.000000 |
| rad39         | 8.65353e-11 | 1.000000 | 8.66792e-11 | 1.000000 |
| rad20         | 7.94908e-11 | 1.000000 | 7.96230e-11 | 1.000000 |
| rad21         | 5.08068e-11 | 1.000000 | 5.08912e-11 | 1.000000 |
| rad19anti     | 1.57889e-11 | 1.000000 | 1.58151e-11 | 1.000000 |
| PhCH2CCH+H    | 8.72333e-12 | 1.000000 | 8.73783e-12 | 1.000000 |
| rad46         | 5.66631e-12 | 1.000000 | 5.67573e-12 | 1.000000 |
| rad18         | 2.70087e-12 | 1.000000 | 2.70536e-12 | 1.000000 |
| rad33         | 1.36361e-12 | 1.000000 | 1.36588e-12 | 1.000000 |
| rad37         | 7.53287e-13 | 1.000000 | 7.54539e-13 | 1.000000 |
| rad60syn      | 7.08370e-13 | 1.000000 | 7.09547e-13 | 1.000000 |
| rad25         | 6.39896e-13 | 1.000000 | 6.40959e-13 | 1.000000 |
| rad14         | 3.22108e-13 | 1.000000 | 3.22643e-13 | 1.000000 |
| rad27         | 3.11763e-13 | 1.000000 | 3.12281e-13 | 1.000000 |
| rad60anti     | 2.13431e-13 | 1.000000 | 2.13786e-13 | 1.000000 |
| rad9          | 7.82050e-15 | 1.000000 | 7.83350e-15 | 1.000000 |
| PAH3+H        | 6.25573e-15 | 1.000000 | 6.26613e-15 | 1.000000 |
| rad59         | 1.44805e-15 | 1.000000 | 1.45046e-15 | 1.000000 |
| rad24         | 2.54708e-16 | 1.000000 | 2.55131e-16 | 1.000000 |
| rad50         | 1.03387e-16 | 1.000000 | 1.03559e-16 | 1.000000 |
| rad31         | 6.41838e-17 | 1.000000 | 6.42905e-17 | 1.000000 |
| rad19syn      | 2.83897e-17 | 1.000000 | 2.84369e-17 | 1.000000 |
| rad15         | 4.55577e-18 | 1.000000 | 4.56334e-18 | 1.000000 |
| rad67         | 1.30999e-18 | 1.000000 | 1.31217e-18 | 1.000000 |
| rad54         | 8.93146e-19 | 1.000000 | 8.94630e-19 | 1.000000 |
| PAH10+CH3     | 6.02109e-19 | 1.000000 | 6.03110e-19 | 1.000000 |
| rad43         | 1.25356e-19 | 1.000000 | 1.25564e-19 | 1.000000 |
| rad52         | 6.31559e-20 | 1.000000 | 6.32609e-20 | 1.000000 |
| rad62         | 4.19336e-20 | 1.000000 | 4.20033e-20 | 1.000000 |
| PhcycC3H3_A+H | 7.50566e-21 | 1.000000 | 7.51814e-21 | 1.000000 |
| rad51         | 3.49035e-21 | 1.000000 | 3.49615e-21 | 1.000000 |
| rad70         | 3.40399e-21 | 1.000000 | 3.40965e-21 | 1.000000 |
| rad55         | 1.35734e-21 | 1.000000 | 1.35960e-21 | 1.000000 |
| rad58         | 3.59930e-22 | 1.000000 | 3.60529e-22 | 1.000000 |
| PAH1+H        | 2.79623e-22 | 1.000000 | 2.80088e-22 | 1.000000 |
| rad5          | 8.68696e-23 | 1.000000 | 8.70140e-23 | 1.000000 |
| rad12         | 8.13280e-23 | 1.000000 | 8.14632e-23 | 1.000000 |
| rad65         | 4.25196e-23 | 1.000000 | 4.25903e-23 | 1.000000 |
| rad34         | 1.86970e-23 | 1.000000 | 1.87281e-23 | 1.000000 |
| rad42         | 4.81157e-25 | 1.000000 | 4.81957e-25 | 1.000000 |
| rad41         | 1.48742e-25 | 1.000000 | 1.48990e-25 | 1.000000 |
| rad53         | 6.45041e-27 | 1.000000 | 6.46113e-27 | 1.000000 |
| rad64         | 1.37992e-27 | 1.000000 | 1.38221e-27 | 1.000000 |
| rad56         | 9.52507e-30 | 1.000000 | 9.54090e-30 | 1.000000 |
| rad61         | 1.51043e-30 | 1.000000 | 1.51294e-30 | 1.000000 |
| rad68syn      | 1.05390e-30 | 1.000000 | 1.05565e-30 | 1.000000 |
| rad68anti     | 7.52308e-31 | 1.000000 | 7.53558e-31 | 1.000000 |
| rad47         | 2.41679e-31 | 1.000000 | 2.42081e-31 | 1.000000 |
| rad73         | 6.20738e-32 | 1.000000 | 6.21770e-32 | 1.000000 |
| rad71         | 2.28804e-33 | 1.000000 | 2.29185e-33 | 1.000000 |
| rad40syn      | 6.77543e-34 | 1.000000 | 6.78669e-34 | 1.000000 |
| PAH8+H        | 3.58167e-34 | 1.000000 | 3.58763e-34 | 1.000000 |
| rad40anti     | 2.24979e-34 | 1.000000 | 2.25353e-34 | 1.000000 |
| rad72         | 3.98782e-39 | 1.000000 | 3.99445e-39 | 1.000000 |
| rad8          | 7.95245e-41 | 1.000000 | 7.96567e-41 | 1.000000 |

0.100000000E-01 Pa, 310.000000 K

=====

| Rate constant | True (fraction)     |          | Effective (fraction) |          |
|---------------|---------------------|----------|----------------------|----------|
| Total         | 2.44453e-22 (1.00 ) |          | 2.44055e-22 (1.00 )  |          |
| species       | PYtrue              | Cumul    | PYeffective          | Cumul    |
| Indene+H      | 0.997033            | 0.997033 | 0.998660             | 0.998660 |
| Benzyl+C2H2   | 0.00162914          | 0.998662 | 0.000000             | 0.998660 |
| rad6          | 0.00133591          | 0.999998 | 0.00133809           | 0.999998 |
| rad2          | 4.84031e-07         | 0.999999 | 4.84820e-07          | 0.999999 |
| PhCCH+CH3     | 3.03705e-07         | 0.999999 | 3.04201e-07          | 0.999999 |
| PhCHCCH2+H    | 1.70602e-07         | 0.999999 | 1.70880e-07          | 0.999999 |
| rad7          | 1.12144e-07         | 0.999999 | 1.12327e-07          | 0.999999 |
| PhCCCH3+H     | 1.05710e-07         | 0.999999 | 1.05883e-07          | 0.999999 |
| rad28         | 9.76529e-08         | 0.999999 | 9.78122e-08          | 0.999999 |
| rad30         | 5.83541e-08         | 0.999999 | 5.84493e-08          | 0.999999 |
| rad1          | 3.77902e-08         | 0.999999 | 3.78519e-08          | 0.999999 |
| rad11         | 2.86239e-08         | 0.999999 | 2.86706e-08          | 0.999999 |
| rad10         | 2.60684e-08         | 0.999999 | 2.61109e-08          | 1.000000 |
| rad26         | 2.39229e-08         | 0.999999 | 2.39619e-08          | 1.000000 |
| rad23         | 1.96078e-08         | 1.000000 | 1.96398e-08          | 1.000000 |
| rad15         | 8.73649e-09         | 1.000000 | 8.75074e-09          | 1.000000 |
| Ph+MeAc       | 8.57692e-09         | 1.000000 | 8.59091e-09          | 1.000000 |
| PAH9+H        | 7.04374e-09         | 1.000000 | 7.05524e-09          | 1.000000 |
| rad35         | 4.09696e-09         | 1.000000 | 4.10364e-09          | 1.000000 |
| rad3          | 3.83953e-09         | 1.000000 | 3.84579e-09          | 1.000000 |
| rad4          | 2.06076e-09         | 1.000000 | 2.06413e-09          | 1.000000 |
| rad38         | 1.66509e-09         | 1.000000 | 1.66781e-09          | 1.000000 |
| rad8          | 1.29688e-09         | 1.000000 | 1.29900e-09          | 1.000000 |
| rad9          | 9.62129e-10         | 1.000000 | 9.63699e-10          | 1.000000 |
| Ph+Allene     | 7.79735e-10         | 1.000000 | 7.81007e-10          | 1.000000 |
| rad13         | 5.90954e-10         | 1.000000 | 5.91918e-10          | 1.000000 |
| PAH7+H        | 5.66425e-10         | 1.000000 | 5.67350e-10          | 1.000000 |
| rad45         | 2.13192e-10         | 1.000000 | 2.13540e-10          | 1.000000 |
| rad39         | 1.14816e-10         | 1.000000 | 1.15003e-10          | 1.000000 |
| rad12         | 5.73409e-11         | 1.000000 | 5.74345e-11          | 1.000000 |
| PhCH2CCH+H    | 1.80433e-11         | 1.000000 | 1.80727e-11          | 1.000000 |
| rad36         | 1.41059e-11         | 1.000000 | 1.41289e-11          | 1.000000 |
| rad46         | 1.09122e-11         | 1.000000 | 1.09300e-11          | 1.000000 |
| rad22         | 8.16269e-12         | 1.000000 | 8.17601e-12          | 1.000000 |
| rad60syn      | 1.62902e-12         | 1.000000 | 1.63168e-12          | 1.000000 |
| rad37         | 1.31130e-12         | 1.000000 | 1.31344e-12          | 1.000000 |
| rad20         | 1.21669e-12         | 1.000000 | 1.21868e-12          | 1.000000 |
| rad33         | 1.16975e-12         | 1.000000 | 1.17166e-12          | 1.000000 |
| rad21         | 7.99122e-13         | 1.000000 | 8.00426e-13          | 1.000000 |
| rad25         | 7.03112e-13         | 1.000000 | 7.04260e-13          | 1.000000 |
| rad60anti     | 5.38210e-13         | 1.000000 | 5.39088e-13          | 1.000000 |
| rad14         | 3.29075e-13         | 1.000000 | 3.29612e-13          | 1.000000 |
| rad27         | 2.95155e-13         | 1.000000 | 2.95637e-13          | 1.000000 |
| rad5          | 4.09335e-14         | 1.000000 | 4.10003e-14          | 1.000000 |
| PAH3+H        | 1.51118e-14         | 1.000000 | 1.51365e-14          | 1.000000 |
| rad18         | 7.53139e-15         | 1.000000 | 7.54368e-15          | 1.000000 |
| rad59         | 4.35786e-15         | 1.000000 | 4.36498e-15          | 1.000000 |
| rad50         | 3.17191e-16         | 1.000000 | 3.17709e-16          | 1.000000 |
| rad19syn      | 9.80928e-17         | 1.000000 | 9.82529e-17          | 1.000000 |
| rad31         | 4.12070e-17         | 1.000000 | 4.12743e-17          | 1.000000 |
| rad24         | 4.08050e-18         | 1.000000 | 4.08716e-18          | 1.000000 |
| rad54         | 3.44192e-18         | 1.000000 | 3.44753e-18          | 1.000000 |
| PAH10+CH3     | 2.21572e-18         | 1.000000 | 2.21934e-18          | 1.000000 |
| rad43         | 5.04005e-19         | 1.000000 | 5.04827e-19          | 1.000000 |
| rad52         | 2.26095e-19         | 1.000000 | 2.26464e-19          | 1.000000 |
| rad62         | 1.73565e-19         | 1.000000 | 1.73848e-19          | 1.000000 |
| PhcycC3H3_A+H | 2.35674e-20         | 1.000000 | 2.36059e-20          | 1.000000 |
| rad51         | 1.42591e-20         | 1.000000 | 1.42824e-20          | 1.000000 |
| rad70         | 1.34719e-20         | 1.000000 | 1.34938e-20          | 1.000000 |
| rad55         | 5.92812e-21         | 1.000000 | 5.93779e-21          | 1.000000 |
| rad58         | 1.57018e-21         | 1.000000 | 1.57275e-21          | 1.000000 |
| PAH1+H        | 7.87543e-22         | 1.000000 | 7.88828e-22          | 1.000000 |
| rad65         | 1.69803e-22         | 1.000000 | 1.70080e-22          | 1.000000 |
| rad34         | 5.32921e-23         | 1.000000 | 5.33790e-23          | 1.000000 |
| rad42         | 1.00716e-24         | 1.000000 | 1.00881e-24          | 1.000000 |
| rad41         | 3.05355e-25         | 1.000000 | 3.05854e-25          | 1.000000 |
| rad47         | 1.45523e-30         | 1.000000 | 1.45760e-30          | 1.000000 |

0.100000000E-01 Pa, 400.000000 K

| Rate constant | True (fraction)     |  | Effective (fraction) |  |
|---------------|---------------------|--|----------------------|--|
| Total         | 3.60269e-20 (1.00 ) |  | 3.57084e-20 (1.00 )  |  |

| species       | PYtrue      | Cumul    | PYeffective | Cumul    |
|---------------|-------------|----------|-------------|----------|
| Indene+H      | 0.989492    | 0.989492 | 0.998316    | 0.998316 |
| Benzyl+C2H2   | 0.00883935  | 0.998331 | 0.00000     | 0.998316 |
| rad6          | 0.00164700  | 0.999978 | 0.00166169  | 0.999978 |
| PhCCH+CH3     | 1.05119e-05 | 0.999989 | 1.06057e-05 | 0.999988 |
| PhCHCCH2+H    | 4.88404e-06 | 0.999994 | 4.92760e-06 | 0.999993 |
| PhCCCH3+H     | 3.25506e-06 | 0.999997 | 3.28409e-06 | 0.999997 |
| rad2          | 8.20973e-07 | 0.999998 | 8.28295e-07 | 0.999997 |
| Ph+MeAc       | 5.15221e-07 | 0.999998 | 5.19815e-07 | 0.999998 |
| rad28         | 4.33731e-07 | 0.999999 | 4.37599e-07 | 0.999998 |
| rad30         | 4.01792e-07 | 0.999999 | 4.05376e-07 | 0.999999 |
| rad23         | 3.71229e-07 | 1.000000 | 3.74539e-07 | 0.999999 |
| rad7          | 1.58092e-07 | 1.000000 | 1.59502e-07 | 0.999999 |
| rad26         | 8.49479e-08 | 1.000000 | 8.57055e-08 | 0.999999 |
| rad1          | 7.64027e-08 | 1.000000 | 7.70841e-08 | 0.999999 |
| PAH9+H        | 6.80043e-08 | 1.000000 | 6.86108e-08 | 0.999999 |
| Ph+Allene     | 6.36606e-08 | 1.000000 | 6.42284e-08 | 1.000000 |
| rad10         | 4.73982e-08 | 1.000000 | 4.78209e-08 | 1.000000 |
| PAH7+H        | 4.18733e-08 | 1.000000 | 4.22468e-08 | 1.000000 |
| rad11         | 4.04994e-08 | 1.000000 | 4.08606e-08 | 1.000000 |
| rad35         | 2.73391e-08 | 1.000000 | 2.75829e-08 | 1.000000 |
| rad38         | 1.63069e-08 | 1.000000 | 1.64524e-08 | 1.000000 |
| rad45         | 1.17681e-08 | 1.000000 | 1.18730e-08 | 1.000000 |
| rad39         | 8.21822e-09 | 1.000000 | 8.29152e-09 | 1.000000 |
| rad3          | 6.77518e-09 | 1.000000 | 6.83560e-09 | 1.000000 |
| PhCH2CCH+H    | 4.57645e-09 | 1.000000 | 4.61726e-09 | 1.000000 |
| rad4          | 3.56805e-09 | 1.000000 | 3.59987e-09 | 1.000000 |
| rad13         | 9.41520e-10 | 1.000000 | 9.49917e-10 | 1.000000 |
| rad19anti     | 8.20862e-10 | 1.000000 | 8.28183e-10 | 1.000000 |
| rad36         | 4.51311e-10 | 1.000000 | 4.55335e-10 | 1.000000 |
| rad46         | 3.06052e-10 | 1.000000 | 3.08782e-10 | 1.000000 |
| rad22         | 1.52780e-10 | 1.000000 | 1.54142e-10 | 1.000000 |
| rad37         | 1.38988e-10 | 1.000000 | 1.40228e-10 | 1.000000 |
| rad60syn      | 9.47183e-11 | 1.000000 | 9.55630e-11 | 1.000000 |
| rad20         | 4.15121e-11 | 1.000000 | 4.18823e-11 | 1.000000 |
| rad60anti     | 3.76535e-11 | 1.000000 | 3.79893e-11 | 1.000000 |
| rad21         | 2.89932e-11 | 1.000000 | 2.92518e-11 | 1.000000 |
| PAH3+H        | 6.50549e-12 | 1.000000 | 6.56351e-12 | 1.000000 |
| rad33         | 2.47272e-12 | 1.000000 | 2.49477e-12 | 1.000000 |
| rad59         | 1.36011e-12 | 1.000000 | 1.37224e-12 | 1.000000 |
| rad18         | 1.01588e-12 | 1.000000 | 1.02494e-12 | 1.000000 |
| rad25         | 9.99855e-13 | 1.000000 | 1.00877e-12 | 1.000000 |
| rad14         | 8.20227e-13 | 1.000000 | 8.27542e-13 | 1.000000 |
| rad27         | 7.76539e-13 | 1.000000 | 7.83464e-13 | 1.000000 |
| rad50         | 1.36799e-13 | 1.000000 | 1.38019e-13 | 1.000000 |
| rad19syn      | 1.29170e-13 | 1.000000 | 1.30322e-13 | 1.000000 |
| rad9          | 2.64650e-14 | 1.000000 | 2.67010e-14 | 1.000000 |
| rad54         | 8.93897e-15 | 1.000000 | 9.01869e-15 | 1.000000 |
| PAH10+CH3     | 4.93626e-15 | 1.000000 | 4.98029e-15 | 1.000000 |
| rad67         | 1.67998e-15 | 1.000000 | 1.69496e-15 | 1.000000 |
| rad31         | 1.09555e-15 | 1.000000 | 1.10533e-15 | 1.000000 |
| rad43         | 8.84947e-16 | 1.000000 | 8.92839e-16 | 1.000000 |
| rad24         | 6.76748e-16 | 1.000000 | 6.82783e-16 | 1.000000 |
| rad62         | 4.90015e-16 | 1.000000 | 4.94385e-16 | 1.000000 |
| rad52         | 4.12939e-16 | 1.000000 | 4.16622e-16 | 1.000000 |
| PhcycC3H3_A+H | 3.22499e-16 | 1.000000 | 3.25375e-16 | 1.000000 |
| rad70         | 1.20583e-16 | 1.000000 | 1.21659e-16 | 1.000000 |
| rad51         | 8.24535e-17 | 1.000000 | 8.31889e-17 | 1.000000 |
| rad55         | 5.05211e-17 | 1.000000 | 5.09717e-17 | 1.000000 |
| PAH1+H        | 2.44642e-17 | 1.000000 | 2.46823e-17 | 1.000000 |
| rad58         | 1.79752e-17 | 1.000000 | 1.81355e-17 | 1.000000 |
| rad15         | 1.63740e-17 | 1.000000 | 1.65200e-17 | 1.000000 |
| rad34         | 2.03526e-18 | 1.000000 | 2.05341e-18 | 1.000000 |
| rad65         | 1.70529e-18 | 1.000000 | 1.72050e-18 | 1.000000 |
| rad42         | 7.33402e-20 | 1.000000 | 7.39942e-20 | 1.000000 |
| rad41         | 2.38346e-20 | 1.000000 | 2.40472e-20 | 1.000000 |
| rad5          | 6.16892e-21 | 1.000000 | 6.22393e-21 | 1.000000 |
| rad53         | 5.76192e-21 | 1.000000 | 5.81331e-21 | 1.000000 |
| rad64         | 1.88063e-21 | 1.000000 | 1.89740e-21 | 1.000000 |
| rad12         | 4.64627e-22 | 1.000000 | 4.68771e-22 | 1.000000 |
| rad56         | 8.35067e-23 | 1.000000 | 8.42514e-23 | 1.000000 |
| rad73         | 8.34684e-23 | 1.000000 | 8.42128e-23 | 1.000000 |
| rad71         | 2.02342e-23 | 1.000000 | 2.04146e-23 | 1.000000 |
| rad68syn      | 1.08024e-23 | 1.000000 | 1.08987e-23 | 1.000000 |
| rad68anti     | 7.71827e-24 | 1.000000 | 7.78711e-24 | 1.000000 |
| rad61         | 7.24462e-24 | 1.000000 | 7.30923e-24 | 1.000000 |
| PAH8+H        | 4.34284e-25 | 1.000000 | 4.38157e-25 | 1.000000 |
| rad40syn      | 2.09095e-25 | 1.000000 | 2.10960e-25 | 1.000000 |
| rad40anti     | 7.78984e-26 | 1.000000 | 7.85931e-26 | 1.000000 |

|       |             |         |             |          |
|-------|-------------|---------|-------------|----------|
| rad72 | 1.07594e-26 | 1.00000 | 1.08554e-26 | 1.000000 |
| rad47 | 5.41590e-27 | 1.00000 | 5.46420e-27 | 1.000000 |
| rad8  | 4.89672e-37 | 1.00000 | 4.94039e-37 | 1.000000 |

0.100000000E-01 Pa, 500.000000 K

| Rate constant | True (fraction)     | Effective (fraction) |
|---------------|---------------------|----------------------|
| Total         | 1.22595e-18 (1.00 ) | 1.18789e-18 (1.00 )  |

| species       | PYtrue      | Cumul    | PYeffective | Cumul    |
|---------------|-------------|----------|-------------|----------|
| Indene+H      | 0.967530    | 0.967530 | 0.998535    | 0.998535 |
| Benzyl+C2H2   | 0.0310498   | 0.998580 | 0.00000     | 0.998535 |
| rad6          | 0.00125239  | 0.999832 | 0.00129252  | 0.999828 |
| PhCCH+CH3     | 8.93598e-05 | 0.999922 | 9.22233e-05 | 0.999920 |
| PhCHCCH2+H    | 3.79356e-05 | 0.999959 | 3.91513e-05 | 0.999959 |
| PhCCCH3+H     | 2.40685e-05 | 0.999984 | 2.48398e-05 | 0.999984 |
| Ph+MeAc       | 6.98772e-06 | 0.999991 | 7.21164e-06 | 0.999991 |
| rad30         | 2.19602e-06 | 0.999993 | 2.26639e-06 | 0.999993 |
| Ph+Allene     | 2.04285e-06 | 0.999995 | 2.10831e-06 | 0.999995 |
| rad23         | 1.00329e-06 | 0.999996 | 1.03545e-06 | 0.999996 |
| rad2          | 7.83914e-07 | 0.999997 | 8.09034e-07 | 0.999997 |
| PAH7+H        | 6.67869e-07 | 0.999997 | 6.89271e-07 | 0.999998 |
| rad28         | 5.46878e-07 | 0.999998 | 5.64402e-07 | 0.999998 |
| PAH9+H        | 4.84144e-07 | 0.999998 | 4.99658e-07 | 0.999999 |
| PhCH2CCH+H    | 2.44495e-07 | 0.999999 | 2.52330e-07 | 0.999999 |
| rad35         | 1.65633e-07 | 0.999999 | 1.70940e-07 | 0.999999 |
| rad39         | 1.49378e-07 | 0.999999 | 1.54165e-07 | 0.999999 |
| rad38         | 1.34511e-07 | 0.999999 | 1.38822e-07 | 1.000000 |
| rad7          | 1.28103e-07 | 0.999999 | 1.32208e-07 | 1.000000 |
| rad26         | 9.41446e-08 | 0.999999 | 9.71615e-08 | 1.000000 |
| rad1          | 9.36009e-08 | 0.999999 | 9.66003e-08 | 1.000000 |
| rad45         | 9.11159e-08 | 0.999999 | 9.40357e-08 | 1.000000 |
| rad10         | 3.98032e-08 | 0.999999 | 4.10787e-08 | 1.000000 |
| rad11         | 3.38317e-08 | 0.999999 | 3.49159e-08 | 1.000000 |
| rad19anti     | 1.40655e-08 | 0.999999 | 1.45162e-08 | 1.000000 |
| rad3          | 8.01582e-09 | 0.999999 | 8.27269e-09 | 1.000000 |
| rad46         | 5.07788e-09 | 0.999999 | 5.24060e-09 | 1.000000 |
| rad4          | 4.51378e-09 | 0.999999 | 4.65843e-09 | 1.000000 |
| rad36         | 4.48947e-09 | 0.999999 | 4.63333e-09 | 1.000000 |
| rad37         | 2.87097e-09 | 0.999999 | 2.96297e-09 | 1.000000 |
| rad60syn      | 2.17475e-09 | 0.999999 | 2.24444e-09 | 1.000000 |
| rad60anti     | 9.78314e-10 | 0.999999 | 1.00966e-09 | 1.000000 |
| rad13         | 8.52613e-10 | 0.999999 | 8.79935e-10 | 1.000000 |
| PAH3+H        | 4.98741e-10 | 0.999999 | 5.14723e-10 | 1.000000 |
| rad22         | 2.14388e-10 | 0.999999 | 2.21258e-10 | 1.000000 |
| rad59         | 9.55036e-11 | 0.999999 | 9.85640e-11 | 1.000000 |
| rad20         | 3.30500e-11 | 0.999999 | 3.41091e-11 | 1.000000 |
| rad21         | 2.59931e-11 | 0.999999 | 2.68260e-11 | 1.000000 |
| rad19syn      | 2.21225e-11 | 0.999999 | 2.28314e-11 | 1.000000 |
| rad50         | 1.47904e-11 | 0.999999 | 1.52644e-11 | 1.000000 |
| rad33         | 2.64379e-12 | 0.999999 | 2.72851e-12 | 1.000000 |
| rad54         | 2.40347e-12 | 0.999999 | 2.48049e-12 | 1.000000 |
| PAH10+CH3     | 1.02585e-12 | 0.999999 | 1.05872e-12 | 1.000000 |
| rad25         | 8.60738e-13 | 0.999999 | 8.88320e-13 | 1.000000 |
| rad14         | 8.30691e-13 | 0.999999 | 8.57311e-13 | 1.000000 |
| rad27         | 7.85355e-13 | 0.999999 | 8.10522e-13 | 1.000000 |
| rad18         | 5.03473e-13 | 0.999999 | 5.19606e-13 | 1.000000 |
| rad67         | 2.38741e-13 | 0.999999 | 2.46391e-13 | 1.000000 |
| PhcycC3H3_A+H | 2.04358e-13 | 0.999999 | 2.10906e-13 | 1.000000 |
| rad43         | 1.54736e-13 | 0.999999 | 1.59695e-13 | 1.000000 |
| rad52         | 1.40375e-13 | 0.999999 | 1.44874e-13 | 1.000000 |
| rad62         | 1.24224e-13 | 0.999999 | 1.28205e-13 | 1.000000 |
| rad9          | 1.09820e-13 | 0.999999 | 1.13339e-13 | 1.000000 |
| rad51         | 1.08733e-13 | 0.999999 | 1.12218e-13 | 1.000000 |
| rad70         | 6.59772e-14 | 0.999999 | 6.80915e-14 | 1.000000 |
| rad55         | 2.78262e-14 | 0.999999 | 2.87179e-14 | 1.000000 |
| PAH1+H        | 2.38582e-14 | 0.999999 | 2.46228e-14 | 1.000000 |
| rad58         | 1.25657e-14 | 0.999999 | 1.29684e-14 | 1.000000 |
| rad31         | 7.36070e-15 | 0.999999 | 7.59657e-15 | 1.000000 |
| rad24         | 4.49428e-15 | 0.999999 | 4.63829e-15 | 1.000000 |
| rad65         | 3.05921e-15 | 0.999999 | 3.15724e-15 | 1.000000 |
| rad34         | 2.15927e-15 | 0.999999 | 2.22846e-15 | 1.000000 |
| rad73         | 1.32407e-16 | 0.999999 | 1.36650e-16 | 1.000000 |
| rad71         | 1.04439e-16 | 0.999999 | 1.07785e-16 | 1.000000 |
| rad42         | 8.64825e-17 | 0.999999 | 8.92538e-17 | 1.000000 |
| rad15         | 7.33367e-17 | 0.999999 | 7.56867e-17 | 1.000000 |
| rad41         | 3.51376e-17 | 0.999999 | 3.62635e-17 | 1.000000 |
| rad53         | 2.51305e-17 | 0.999999 | 2.59358e-17 | 1.000000 |

|           |             |          |             |         |
|-----------|-------------|----------|-------------|---------|
| rad64     | 1.71357e-17 | 0.999999 | 1.76848e-17 | 1.00000 |
| rad56     | 3.29281e-18 | 0.999999 | 3.39833e-18 | 1.00000 |
| rad72     | 1.17616e-18 | 0.999999 | 1.21385e-18 | 1.00000 |
| rad61     | 1.15675e-18 | 0.999999 | 1.19382e-18 | 1.00000 |
| PAH8+H    | 9.71284e-19 | 0.999999 | 1.00241e-18 | 1.00000 |
| rad68syn  | 8.12565e-19 | 0.999999 | 8.38603e-19 | 1.00000 |
| rad68anti | 5.42596e-19 | 0.999999 | 5.59984e-19 | 1.00000 |
| rad40syn  | 1.67191e-19 | 0.999999 | 1.72548e-19 | 1.00000 |
| rad40anti | 8.97250e-20 | 0.999999 | 9.26002e-20 | 1.00000 |
| rad5      | 4.95922e-20 | 0.999999 | 5.11814e-20 | 1.00000 |
| rad12     | 9.78605e-21 | 0.999999 | 1.00996e-20 | 1.00000 |
| rad47     | 3.36916e-24 | 0.999999 | 3.47713e-24 | 1.00000 |
| rad8      | 4.54964e-33 | 0.999999 | 4.69543e-33 | 1.00000 |

0.100000000E-01 Pa, 600.000000 K

| Rate constant | True (fraction)     | Effective (fraction) |
|---------------|---------------------|----------------------|
| Total         | 1.36947e-17 (1.00 ) | 1.26194e-17 (1.00 )  |

| species       | PYtrue      | Cumul    | PYeffective | Cumul    |
|---------------|-------------|----------|-------------|----------|
| Indene+H      | 0.920305    | 0.920305 | 0.998723    | 0.998723 |
| Benzyl+C2H2   | 0.0785177   | 0.998823 | 0.00000     | 0.998723 |
| rad6          | 0.000559956 | 0.999383 | 0.000607669 | 0.999331 |
| PhCCH+CH3     | 0.000328980 | 0.999712 | 0.000357012 | 0.999688 |
| PhCHCCH2+H    | 0.000135261 | 0.999847 | 0.000146786 | 0.999834 |
| PhCCCH3+H     | 7.42568e-05 | 0.999921 | 8.05841e-05 | 0.999915 |
| Ph+MeAc       | 3.38277e-05 | 0.999955 | 3.67101e-05 | 0.999952 |
| Ph+Allene     | 2.16825e-05 | 0.999977 | 2.35300e-05 | 0.999975 |
| rad30         | 7.59193e-06 | 0.999984 | 8.23882e-06 | 0.999984 |
| PAH7+H        | 4.37195e-06 | 0.999989 | 4.74448e-06 | 0.999988 |
| PhCH2CCH+H    | 3.66039e-06 | 0.999992 | 3.97228e-06 | 0.999992 |
| PAH9+H        | 2.22203e-06 | 0.999995 | 2.41136e-06 | 0.999995 |
| rad23         | 1.36264e-06 | 0.999996 | 1.47875e-06 | 0.999996 |
| rad39         | 1.03895e-06 | 0.999997 | 1.12748e-06 | 0.999997 |
| rad38         | 6.79216e-07 | 0.999998 | 7.37090e-07 | 0.999998 |
| rad35         | 6.70459e-07 | 0.999998 | 7.27587e-07 | 0.999999 |
| rad2          | 5.20794e-07 | 0.999999 | 5.65170e-07 | 0.999999 |
| rad28         | 3.11928e-07 | 0.999999 | 3.38507e-07 | 1.000000 |
| rad45         | 1.68717e-07 | 0.999999 | 1.83093e-07 | 1.000000 |
| rad19anti     | 1.16156e-07 | 0.999999 | 1.26053e-07 | 1.000000 |
| rad1          | 7.63272e-08 | 0.999999 | 8.28309e-08 | 1.00000  |
| rad7          | 6.32757e-08 | 1.000000 | 6.86673e-08 | 1.00000  |
| rad26         | 4.95009e-08 | 1.000000 | 5.37188e-08 | 1.00000  |
| rad46         | 4.08653e-08 | 1.000000 | 4.43473e-08 | 1.00000  |
| rad60syn      | 1.92855e-08 | 1.000000 | 2.09288e-08 | 1.00000  |
| rad37         | 1.80987e-08 | 1.000000 | 1.96408e-08 | 1.00000  |
| rad10         | 1.80102e-08 | 1.000000 | 1.95448e-08 | 1.00000  |
| rad11         | 1.76903e-08 | 1.000000 | 1.91977e-08 | 1.00000  |
| rad36         | 1.20200e-08 | 1.000000 | 1.30442e-08 | 1.00000  |
| PAH3+H        | 9.89822e-09 | 1.000000 | 1.07416e-08 | 1.00000  |
| rad60anti     | 9.33138e-09 | 1.000000 | 1.01265e-08 | 1.00000  |
| rad3          | 5.76054e-09 | 1.000000 | 6.25139e-09 | 1.00000  |
| rad4          | 3.49941e-09 | 1.000000 | 3.79759e-09 | 1.00000  |
| rad59         | 1.75250e-09 | 1.000000 | 1.90183e-09 | 1.00000  |
| rad19syn      | 6.86386e-10 | 1.000000 | 7.44872e-10 | 1.00000  |
| rad50         | 5.81842e-10 | 1.000000 | 6.31420e-10 | 1.00000  |
| rad13         | 5.07860e-10 | 1.000000 | 5.51134e-10 | 1.00000  |
| rad22         | 2.38775e-10 | 1.000000 | 2.59120e-10 | 1.00000  |
| rad54         | 1.00990e-10 | 1.000000 | 1.09595e-10 | 1.00000  |
| rad51         | 5.13635e-11 | 1.000000 | 5.57401e-11 | 1.00000  |
| rad20         | 4.41727e-11 | 1.000000 | 4.79365e-11 | 1.00000  |
| rad21         | 3.93939e-11 | 1.000000 | 4.27506e-11 | 1.00000  |
| PAH10+CH3     | 3.69852e-11 | 1.000000 | 4.01367e-11 | 1.00000  |
| rad52         | 2.11178e-11 | 1.000000 | 2.29172e-11 | 1.00000  |
| PhcycC3H3_A+H | 1.53530e-11 | 1.000000 | 1.66612e-11 | 1.00000  |
| rad67         | 9.55473e-12 | 1.000000 | 1.03689e-11 | 1.00000  |
| rad70         | 4.52744e-12 | 1.000000 | 4.91321e-12 | 1.00000  |
| rad62         | 4.51774e-12 | 1.000000 | 4.90269e-12 | 1.00000  |
| rad43         | 4.22297e-12 | 1.000000 | 4.58280e-12 | 1.00000  |
| PAH1+H        | 3.57969e-12 | 1.000000 | 3.88471e-12 | 1.00000  |
| rad33         | 2.15263e-12 | 1.000000 | 2.33605e-12 | 1.00000  |
| rad55         | 1.82876e-12 | 1.000000 | 1.98459e-12 | 1.00000  |
| rad65         | 1.40805e-12 | 1.000000 | 1.52803e-12 | 1.00000  |
| rad58         | 1.06972e-12 | 1.000000 | 1.16087e-12 | 1.00000  |
| rad71         | 9.82490e-13 | 1.000000 | 1.06621e-12 | 1.00000  |
| rad9          | 8.24510e-13 | 1.000000 | 8.94765e-13 | 1.00000  |
| rad73         | 7.72569e-13 | 1.000000 | 8.38398e-13 | 1.00000  |
| rad25         | 5.28155e-13 | 1.000000 | 5.73158e-13 | 1.00000  |

|           |             |          |             |         |
|-----------|-------------|----------|-------------|---------|
| rad14     | 5.05400e-13 | 1.000000 | 5.48464e-13 | 1.00000 |
| rad27     | 4.78343e-13 | 1.000000 | 5.19102e-13 | 1.00000 |
| rad18     | 3.63866e-13 | 1.000000 | 3.94871e-13 | 1.00000 |
| rad34     | 2.61565e-13 | 1.000000 | 2.83853e-13 | 1.00000 |
| rad24     | 5.23286e-14 | 1.000000 | 5.67874e-14 | 1.00000 |
| rad72     | 2.79556e-14 | 1.000000 | 3.03377e-14 | 1.00000 |
| rad64     | 2.65338e-14 | 1.000000 | 2.87946e-14 | 1.00000 |
| rad31     | 1.37496e-14 | 1.000000 | 1.49211e-14 | 1.00000 |
| PAH8+H    | 1.11288e-14 | 1.000000 | 1.20771e-14 | 1.00000 |
| rad42     | 9.75566e-15 | 1.000000 | 1.05869e-14 | 1.00000 |
| rad53     | 8.24363e-15 | 1.000000 | 8.94605e-15 | 1.00000 |
| rad41     | 7.41430e-15 | 1.000000 | 8.04605e-15 | 1.00000 |
| rad61     | 5.56352e-15 | 1.000000 | 6.03758e-15 | 1.00000 |
| rad56     | 3.77548e-15 | 1.000000 | 4.09718e-15 | 1.00000 |
| rad68syn  | 3.54304e-15 | 1.000000 | 3.84494e-15 | 1.00000 |
| rad68anti | 2.30878e-15 | 1.000000 | 2.50551e-15 | 1.00000 |
| rad40syn  | 1.37683e-15 | 1.000000 | 1.49414e-15 | 1.00000 |
| rad40anti | 8.43903e-16 | 1.000000 | 9.15811e-16 | 1.00000 |
| rad15     | 5.39813e-16 | 1.000000 | 5.85809e-16 | 1.00000 |
| rad12     | 2.17047e-18 | 1.000000 | 2.35541e-18 | 1.00000 |
| rad5      | 1.36729e-19 | 1.000000 | 1.48380e-19 | 1.00000 |
| rad47     | 6.31448e-22 | 1.000000 | 6.85253e-22 | 1.00000 |
| rad8      | 8.43343e-29 | 1.000000 | 9.15203e-29 | 1.00000 |

0.1000000000E-01 Pa, 700.000000 K

| Rate constant | True (fraction)     | Effective (fraction) |
|---------------|---------------------|----------------------|
| Total         | 8.02260e-17 (1.00 ) | 6.78340e-17 (1.00 )  |

| species       | PYtrue      | Cumul    | PYeffective | Cumul    |
|---------------|-------------|----------|-------------|----------|
| Indene+H      | 0.843875    | 0.843875 | 0.998036    | 0.998036 |
| Benzyl+C2H2   | 0.154464    | 0.998339 | 0.00000     | 0.998036 |
| PhCCH+CH3     | 0.000743951 | 0.999083 | 0.000879857 | 0.998916 |
| PhCHCCH2+H    | 0.000319714 | 0.999403 | 0.000378120 | 0.999294 |
| rad6          | 0.000177819 | 0.999580 | 0.000210304 | 0.999504 |
| PhCCCH3+H     | 0.000136183 | 0.999717 | 0.000161061 | 0.999665 |
| Ph+Allene     | 0.000115931 | 0.999833 | 0.000137109 | 0.999802 |
| Ph+MeAc       | 8.87459e-05 | 0.999921 | 0.000104958 | 0.999907 |
| PhCH2CCH+H    | 2.52619e-05 | 0.999947 | 2.98768e-05 | 0.999937 |
| rad30         | 1.89335e-05 | 0.999966 | 2.23923e-05 | 0.999960 |
| PAH7+H        | 1.63919e-05 | 0.999982 | 1.93864e-05 | 0.999979 |
| PAH9+H        | 7.27055e-06 | 0.999989 | 8.59875e-06 | 0.999988 |
| rad39         | 3.97694e-06 | 0.999993 | 4.70345e-06 | 0.999992 |
| rad38         | 2.37821e-06 | 0.999996 | 2.81267e-06 | 0.999995 |
| rad35         | 1.98449e-06 | 0.999998 | 2.34702e-06 | 0.999998 |
| rad23         | 7.92614e-07 | 0.999998 | 9.37410e-07 | 0.999998 |
| rad19anti     | 5.91800e-07 | 0.999999 | 6.99911e-07 | 0.999999 |
| rad2          | 2.13269e-07 | 0.999999 | 2.52229e-07 | 0.999999 |
| rad46         | 2.00256e-07 | 0.999999 | 2.36839e-07 | 1.000000 |
| rad45         | 1.18835e-07 | 0.999999 | 1.40543e-07 | 1.000000 |
| rad28         | 1.14665e-07 | 1.000000 | 1.35612e-07 | 1.000000 |
| rad60syn      | 9.47830e-08 | 1.000000 | 1.12098e-07 | 1.000000 |
| PAH3+H        | 8.74574e-08 | 1.000000 | 1.03434e-07 | 1.000000 |
| rad37         | 5.70090e-08 | 1.000000 | 6.74235e-08 | 1.000000 |
| rad60anti     | 4.82236e-08 | 1.000000 | 5.70332e-08 | 1.000000 |
| rad1          | 3.41581e-08 | 1.000000 | 4.03981e-08 | 1.000000 |
| rad7          | 2.34224e-08 | 1.000000 | 2.77013e-08 | 1.000000 |
| rad26         | 1.73798e-08 | 1.000000 | 2.05548e-08 | 1.000000 |
| rad59         | 1.44245e-08 | 1.000000 | 1.70596e-08 | 1.000000 |
| rad36         | 9.32574e-09 | 1.000000 | 1.10294e-08 | 1.000000 |
| rad19syn      | 7.76473e-09 | 1.000000 | 9.18320e-09 | 1.000000 |
| rad50         | 7.50838e-09 | 1.000000 | 8.88002e-09 | 1.000000 |
| rad11         | 7.18536e-09 | 1.000000 | 8.49799e-09 | 1.000000 |
| rad10         | 5.67620e-09 | 1.000000 | 6.71313e-09 | 1.000000 |
| rad3          | 2.23586e-09 | 1.000000 | 2.64431e-09 | 1.000000 |
| rad4          | 1.42794e-09 | 1.000000 | 1.68880e-09 | 1.000000 |
| rad54         | 1.41683e-09 | 1.000000 | 1.67566e-09 | 1.000000 |
| rad51         | 1.02945e-09 | 1.000000 | 1.21751e-09 | 1.000000 |
| PAH10+CH3     | 4.31641e-10 | 1.000000 | 5.10494e-10 | 1.000000 |
| rad52         | 3.68871e-10 | 1.000000 | 4.36257e-10 | 1.000000 |
| PhcycC3H3_A+H | 3.21634e-10 | 1.000000 | 3.80391e-10 | 1.000000 |
| rad13         | 2.61885e-10 | 1.000000 | 3.09727e-10 | 1.000000 |
| rad67         | 1.57095e-10 | 1.000000 | 1.85793e-10 | 1.000000 |
| rad22         | 1.37616e-10 | 1.000000 | 1.62756e-10 | 1.000000 |
| rad20         | 9.49324e-11 | 1.000000 | 1.12275e-10 | 1.000000 |
| rad21         | 9.18054e-11 | 1.000000 | 1.08577e-10 | 1.000000 |
| rad70         | 8.78767e-11 | 1.000000 | 1.03930e-10 | 1.000000 |
| PAH1+H        | 8.68358e-11 | 1.000000 | 1.02699e-10 | 1.000000 |



|           |             |          |             |         |
|-----------|-------------|----------|-------------|---------|
| rad62     | 5.32869e-11 | 1.000000 | 6.30215e-11 | 1.00000 |
| rad43     | 3.82476e-11 | 1.000000 | 4.52348e-11 | 1.00000 |
| rad55     | 3.44698e-11 | 1.000000 | 4.07668e-11 | 1.00000 |
| rad71     | 3.06231e-11 | 1.000000 | 3.62174e-11 | 1.00000 |
| rad65     | 2.75748e-11 | 1.000000 | 3.26122e-11 | 1.00000 |
| rad58     | 2.48573e-11 | 1.000000 | 2.93982e-11 | 1.00000 |
| rad73     | 2.23704e-11 | 1.000000 | 2.64571e-11 | 1.00000 |
| rad9      | 8.64212e-12 | 1.000000 | 1.02209e-11 | 1.00000 |
| rad34     | 6.72646e-12 | 1.000000 | 7.95526e-12 | 1.00000 |
| rad33     | 1.94977e-12 | 1.000000 | 2.30596e-12 | 1.00000 |
| rad72     | 9.90272e-13 | 1.000000 | 1.17118e-12 | 1.00000 |
| rad64     | 7.21036e-13 | 1.000000 | 8.52756e-13 | 1.00000 |
| rad24     | 5.53928e-13 | 1.000000 | 6.55121e-13 | 1.00000 |
| rad18     | 4.20039e-13 | 1.000000 | 4.96772e-13 | 1.00000 |
| PAH8+H    | 4.19928e-13 | 1.000000 | 4.96641e-13 | 1.00000 |
| rad25     | 2.99021e-13 | 1.000000 | 3.53647e-13 | 1.00000 |
| rad53     | 2.77277e-13 | 1.000000 | 3.27930e-13 | 1.00000 |
| rad41     | 2.64078e-13 | 1.000000 | 3.12321e-13 | 1.00000 |
| rad14     | 2.59204e-13 | 1.000000 | 3.06556e-13 | 1.00000 |
| rad27     | 2.57600e-13 | 1.000000 | 3.04659e-13 | 1.00000 |
| rad42     | 2.42534e-13 | 1.000000 | 2.86840e-13 | 1.00000 |
| rad61     | 1.84684e-13 | 1.000000 | 2.18422e-13 | 1.00000 |
| rad68syn  | 1.06874e-13 | 1.000000 | 1.26398e-13 | 1.00000 |
| rad56     | 9.96536e-14 | 1.000000 | 1.17858e-13 | 1.00000 |
| rad68anti | 6.95797e-14 | 1.000000 | 8.22906e-14 | 1.00000 |
| rad40syn  | 5.50565e-14 | 1.000000 | 6.51143e-14 | 1.00000 |
| rad40anti | 3.83986e-14 | 1.000000 | 4.54133e-14 | 1.00000 |
| rad31     | 1.03063e-14 | 1.000000 | 1.21891e-14 | 1.00000 |
| rad15     | 3.97460e-15 | 1.000000 | 4.70069e-15 | 1.00000 |
| rad12     | 2.80397e-16 | 1.000000 | 3.31621e-16 | 1.00000 |
| rad5      | 2.30292e-19 | 1.000000 | 2.72362e-19 | 1.00000 |
| rad47     | 4.59271e-20 | 1.000000 | 5.43172e-20 | 1.00000 |
| rad8      | 1.52786e-24 | 1.000000 | 1.80698e-24 | 1.00000 |

0.100000000E-01 Pa, 800.000000 K

=====

| Rate constant | True (fraction)     | Effective (fraction) |
|---------------|---------------------|----------------------|
| Total         | 3.12228e-16 (1.00 ) | 2.33588e-16 (1.00 )  |

| species       | PYtrue      | Cumul    | PYeffective | Cumul    |
|---------------|-------------|----------|-------------|----------|
| Indene+H      | 0.745282    | 0.745282 | 0.996190    | 0.996190 |
| Benzyl+C2H2   | 0.251868    | 0.997150 | 0.000000    | 0.996190 |
| PhCCH+CH3     | 0.00124036  | 0.998390 | 0.00165795  | 0.997848 |
| PhCHCCH2+H    | 0.000603575 | 0.998994 | 0.000806776 | 0.998655 |
| Ph+Allene     | 0.000391583 | 0.999386 | 0.000523414 | 0.999178 |
| PhCCCH3+H     | 0.000180188 | 0.999566 | 0.000240851 | 0.999419 |
| Ph+MeAc       | 0.000158817 | 0.999725 | 0.000212284 | 0.999631 |
| PhCH2CCH+H    | 0.000104752 | 0.999829 | 0.000140018 | 0.999771 |
| rad6          | 4.80924e-05 | 0.999877 | 6.42833e-05 | 0.999836 |
| PAH7+H        | 4.20010e-05 | 0.999919 | 5.61411e-05 | 0.999892 |
| rad30         | 3.73181e-05 | 0.999957 | 4.98817e-05 | 0.999942 |
| PAH9+H        | 1.83606e-05 | 0.999975 | 2.45420e-05 | 0.999966 |
| rad39         | 1.01681e-05 | 0.999985 | 1.35913e-05 | 0.999980 |
| rad38         | 6.31398e-06 | 0.999992 | 8.43966e-06 | 0.999988 |
| rad35         | 4.62643e-06 | 0.999996 | 6.18397e-06 | 0.999994 |
| rad19anti     | 2.13433e-06 | 0.999998 | 2.85287e-06 | 0.999997 |
| rad46         | 6.78695e-07 | 0.999999 | 9.07186e-07 | 0.999998 |
| PAH3+H        | 4.56207e-07 | 0.999999 | 6.09795e-07 | 0.999999 |
| rad60syn      | 3.14554e-07 | 1.000000 | 4.20452e-07 | 0.999999 |
| rad23         | 3.02750e-07 | 1.000000 | 4.04675e-07 | 1.000000 |
| rad60anti     | 1.66161e-07 | 1.000000 | 2.22101e-07 | 1.000000 |
| rad37         | 1.16890e-07 | 1.000000 | 1.56242e-07 | 1.000000 |
| rad59         | 7.05550e-08 | 1.000000 | 9.43082e-08 | 1.000000 |
| rad2          | 5.90216e-08 | 1.000000 | 7.88919e-08 | 1.000000 |
| rad45         | 5.81341e-08 | 1.000000 | 7.77056e-08 | 1.000000 |
| rad19syn      | 4.57661e-08 | 1.000000 | 6.11738e-08 | 1.000000 |
| rad50         | 3.54634e-08 | 1.000000 | 4.74026e-08 | 1.000000 |
| rad28         | 3.47720e-08 | 1.000000 | 4.64784e-08 | 1.000000 |
| rad54         | 9.80420e-09 | 1.000000 | 1.31049e-08 | 1.000000 |
| rad1          | 9.20474e-09 | 1.000000 | 1.23036e-08 | 1.000000 |
| rad7          | 8.00878e-09 | 1.000000 | 1.07050e-08 | 1.000000 |
| rad26         | 5.19815e-09 | 1.000000 | 6.94816e-09 | 1.000000 |
| rad36         | 4.66704e-09 | 1.000000 | 6.23826e-09 | 1.000000 |
| rad51         | 3.37574e-09 | 1.000000 | 4.51223e-09 | 1.000000 |
| PhcycC3H3_A+H | 3.00679e-09 | 1.000000 | 4.01906e-09 | 1.000000 |
| rad11         | 2.84864e-09 | 1.000000 | 3.80767e-09 | 1.000000 |
| PAH10+CH3     | 1.92679e-09 | 1.000000 | 2.57546e-09 | 1.000000 |
| rad10         | 1.51025e-09 | 1.000000 | 2.01870e-09 | 1.000000 |

|           |             |         |             |         |
|-----------|-------------|---------|-------------|---------|
| rad52     | 1.45555e-09 | 1.00000 | 1.94558e-09 | 1.00000 |
| rad67     | 1.34216e-09 | 1.00000 | 1.79401e-09 | 1.00000 |
| rad70     | 7.49527e-10 | 1.00000 | 1.00186e-09 | 1.00000 |
| PAH1+H    | 6.39978e-10 | 1.00000 | 8.55434e-10 | 1.00000 |
| rad3      | 6.24909e-10 | 1.00000 | 8.35292e-10 | 1.00000 |
| rad4      | 4.07082e-10 | 1.00000 | 5.44131e-10 | 1.00000 |
| rad62     | 3.06981e-10 | 1.00000 | 4.10330e-10 | 1.00000 |
| rad55     | 2.94545e-10 | 1.00000 | 3.93707e-10 | 1.00000 |
| rad20     | 2.64942e-10 | 1.00000 | 3.54138e-10 | 1.00000 |
| rad58     | 2.56565e-10 | 1.00000 | 3.42941e-10 | 1.00000 |
| rad21     | 2.51751e-10 | 1.00000 | 3.36505e-10 | 1.00000 |
| rad13     | 1.60667e-10 | 1.00000 | 2.14757e-10 | 1.00000 |
| rad43     | 1.57335e-10 | 1.00000 | 2.10303e-10 | 1.00000 |
| rad71     | 9.51435e-11 | 1.00000 | 1.27175e-10 | 1.00000 |
| rad65     | 9.25495e-11 | 1.00000 | 1.23707e-10 | 1.00000 |
| rad73     | 6.81275e-11 | 1.00000 | 9.10635e-11 | 1.00000 |
| rad9      | 6.80138e-11 | 1.00000 | 9.09115e-11 | 1.00000 |
| rad34     | 6.51610e-11 | 1.00000 | 8.70982e-11 | 1.00000 |
| rad22     | 5.60814e-11 | 1.00000 | 7.49618e-11 | 1.00000 |
| rad53     | 3.68270e-12 | 1.00000 | 4.92252e-12 | 1.00000 |
| rad64     | 3.36635e-12 | 1.00000 | 4.49968e-12 | 1.00000 |
| rad72     | 3.18745e-12 | 1.00000 | 4.26054e-12 | 1.00000 |
| rad24     | 2.87045e-12 | 1.00000 | 3.83683e-12 | 1.00000 |
| rad33     | 2.60671e-12 | 1.00000 | 3.48428e-12 | 1.00000 |
| rad42     | 2.07918e-12 | 1.00000 | 2.77916e-12 | 1.00000 |
| PAH8+H    | 1.54333e-12 | 1.00000 | 2.06291e-12 | 1.00000 |
| rad41     | 1.24675e-12 | 1.00000 | 1.66648e-12 | 1.00000 |
| rad56     | 8.68571e-13 | 1.00000 | 1.16099e-12 | 1.00000 |
| rad18     | 8.26811e-13 | 1.00000 | 1.10517e-12 | 1.00000 |
| rad61     | 6.33751e-13 | 1.00000 | 8.47111e-13 | 1.00000 |
| rad68syn  | 4.17933e-13 | 1.00000 | 5.58635e-13 | 1.00000 |
| rad68anti | 2.74817e-13 | 1.00000 | 3.67337e-13 | 1.00000 |
| rad40syn  | 2.17993e-13 | 1.00000 | 2.91383e-13 | 1.00000 |
| rad25     | 2.17066e-13 | 1.00000 | 2.90144e-13 | 1.00000 |
| rad27     | 1.74730e-13 | 1.00000 | 2.33555e-13 | 1.00000 |
| rad40anti | 1.61739e-13 | 1.00000 | 2.16190e-13 | 1.00000 |
| rad14     | 1.53511e-13 | 1.00000 | 2.05192e-13 | 1.00000 |
| rad15     | 1.98568e-14 | 1.00000 | 2.65418e-14 | 1.00000 |
| rad12     | 7.14916e-15 | 1.00000 | 9.55601e-15 | 1.00000 |
| rad31     | 5.72127e-15 | 1.00000 | 7.64741e-15 | 1.00000 |
| rad5      | 3.47346e-19 | 1.00000 | 4.64284e-19 | 1.00000 |
| rad47     | 2.91690e-19 | 1.00000 | 3.89891e-19 | 1.00000 |
| rad8      | 8.23394e-21 | 1.00000 | 1.10060e-20 | 1.00000 |

0.100000000E-01 Pa, 900.000000 K

=====  
Rate constant | True (fraction) | Effective (fraction)  
-----

Total | 9.21769e-16 (1.00) | 5.91949e-16 (1.00)

| species       | PYtrue      | Cumul    | PYeffective | Cumul    |
|---------------|-------------|----------|-------------|----------|
| Indene+H      | 0.637591    | 0.637591 | 0.992842    | 0.992842 |
| Benzyl+C2H2   | 0.357812    | 0.995403 | 0.000000    | 0.992842 |
| PhCCH+CH3     | 0.00168481  | 0.997088 | 0.00262355  | 0.995466 |
| PhCHCCH2+H    | 0.000987948 | 0.998076 | 0.00153841  | 0.997004 |
| Ph+Allene     | 0.000956815 | 0.999033 | 0.00148993  | 0.998494 |
| PhCH2CCH+H    | 0.000305647 | 0.999338 | 0.000475947 | 0.998970 |
| Ph+MeAc       | 0.000221757 | 0.999560 | 0.000345315 | 0.999315 |
| PhCCCH3+H     | 0.000192499 | 0.999752 | 0.000299756 | 0.999615 |
| PAH7+H        | 8.18833e-05 | 0.999834 | 0.000127507 | 0.999742 |
| rad30         | 6.20698e-05 | 0.999896 | 9.66537e-05 | 0.999839 |
| PAH9+H        | 3.82278e-05 | 0.999935 | 5.95274e-05 | 0.999899 |
| rad39         | 1.95110e-05 | 0.999954 | 3.03820e-05 | 0.999929 |
| rad38         | 1.36762e-05 | 0.999968 | 2.12962e-05 | 0.999950 |
| rad6          | 1.14185e-05 | 0.999979 | 1.77807e-05 | 0.999968 |
| rad35         | 9.02572e-06 | 0.999988 | 1.40546e-05 | 0.999982 |
| rad19anti     | 5.95559e-06 | 0.999994 | 9.27391e-06 | 0.999991 |
| rad46         | 1.78219e-06 | 0.999996 | 2.77518e-06 | 0.999994 |
| PAH3+H        | 1.66026e-06 | 0.999998 | 2.58532e-06 | 0.999997 |
| rad60syn      | 7.95297e-07 | 0.999998 | 1.23842e-06 | 0.999998 |
| rad60anti     | 4.32695e-07 | 0.999999 | 6.73783e-07 | 0.999999 |
| rad59         | 2.41998e-07 | 0.999999 | 3.76834e-07 | 0.999999 |
| rad37         | 1.83411e-07 | 0.999999 | 2.85604e-07 | 0.999999 |
| rad19syn      | 1.72548e-07 | 1.000000 | 2.68687e-07 | 1.000000 |
| rad50         | 1.27292e-07 | 1.000000 | 1.98216e-07 | 1.000000 |
| rad23         | 1.12841e-07 | 1.000000 | 1.75713e-07 | 1.000000 |
| rad54         | 4.18798e-08 | 1.000000 | 6.52142e-08 | 1.000000 |
| rad45         | 2.60982e-08 | 1.000000 | 4.06394e-08 | 1.000000 |
| PhcycC3H3_A+H | 1.64122e-08 | 1.000000 | 2.55568e-08 | 1.000000 |

|           |             |          |             |         |
|-----------|-------------|----------|-------------|---------|
| rad2      | 1.31147e-08 | 1.000000 | 2.04218e-08 | 1.00000 |
| rad28     | 9.26201e-09 | 1.000000 | 1.44226e-08 | 1.00000 |
| rad67     | 7.71990e-09 | 1.000000 | 1.20212e-08 | 1.00000 |
| rad51     | 7.55610e-09 | 1.000000 | 1.17662e-08 | 1.00000 |
| PAH10+CH3 | 5.80709e-09 | 1.000000 | 9.04266e-09 | 1.00000 |
| rad52     | 4.57211e-09 | 1.000000 | 7.11958e-09 | 1.00000 |
| rad70     | 3.83802e-09 | 1.000000 | 5.97648e-09 | 1.00000 |
| PAH1+H    | 3.20859e-09 | 1.000000 | 4.99634e-09 | 1.00000 |
| rad7      | 2.70248e-09 | 1.000000 | 4.20824e-09 | 1.00000 |
| rad36     | 2.23513e-09 | 1.000000 | 3.48049e-09 | 1.00000 |
| rad1      | 2.17066e-09 | 1.000000 | 3.38011e-09 | 1.00000 |
| rad58     | 1.60569e-09 | 1.000000 | 2.50035e-09 | 1.00000 |
| rad55     | 1.47872e-09 | 1.000000 | 2.30262e-09 | 1.00000 |
| rad26     | 1.42557e-09 | 1.000000 | 2.21987e-09 | 1.00000 |
| rad11     | 1.21901e-09 | 1.000000 | 1.89822e-09 | 1.00000 |
| rad62     | 1.10398e-09 | 1.000000 | 1.71910e-09 | 1.00000 |
| rad20     | 6.05072e-10 | 1.000000 | 9.42205e-10 | 1.00000 |
| rad21     | 5.12035e-10 | 1.000000 | 7.97328e-10 | 1.00000 |
| rad10     | 4.31724e-10 | 1.000000 | 6.72270e-10 | 1.00000 |
| rad43     | 4.08266e-10 | 1.000000 | 6.35743e-10 | 1.00000 |
| rad34     | 3.87866e-10 | 1.000000 | 6.03976e-10 | 1.00000 |
| rad65     | 2.26439e-10 | 1.000000 | 3.52606e-10 | 1.00000 |
| rad9      | 2.04419e-10 | 1.000000 | 3.18316e-10 | 1.00000 |
| rad3      | 1.63703e-10 | 1.000000 | 2.54914e-10 | 1.00000 |
| rad13     | 1.37783e-10 | 1.000000 | 2.14552e-10 | 1.00000 |
| rad4      | 1.12904e-10 | 1.000000 | 1.75811e-10 | 1.00000 |
| rad71     | 9.70991e-11 | 1.000000 | 1.51200e-10 | 1.00000 |
| rad73     | 6.95538e-11 | 1.000000 | 1.08308e-10 | 1.00000 |
| rad53     | 2.99414e-11 | 1.000000 | 4.66241e-11 | 1.00000 |
| rad22     | 2.33903e-11 | 1.000000 | 3.64228e-11 | 1.00000 |
| rad64     | 1.43137e-11 | 1.000000 | 2.22889e-11 | 1.00000 |
| rad42     | 1.06121e-11 | 1.000000 | 1.65250e-11 | 1.00000 |
| rad56     | 7.86571e-12 | 1.000000 | 1.22483e-11 | 1.00000 |
| rad24     | 5.74725e-12 | 1.000000 | 8.94949e-12 | 1.00000 |
| rad33     | 3.97065e-12 | 1.000000 | 6.18300e-12 | 1.00000 |
| rad72     | 3.29840e-12 | 1.000000 | 5.13619e-12 | 1.00000 |
| rad41     | 2.62706e-12 | 1.000000 | 4.09080e-12 | 1.00000 |
| rad18     | 2.34018e-12 | 1.000000 | 3.64407e-12 | 1.00000 |
| PAH8+H    | 2.05035e-12 | 1.000000 | 3.19276e-12 | 1.00000 |
| rad68syn  | 1.55447e-12 | 1.000000 | 2.42059e-12 | 1.00000 |
| rad68anti | 1.04461e-12 | 1.000000 | 1.62664e-12 | 1.00000 |
| rad61     | 7.70242e-13 | 1.000000 | 1.19940e-12 | 1.00000 |
| rad40syn  | 3.51606e-13 | 1.000000 | 5.47513e-13 | 1.00000 |
| rad40anti | 2.30299e-13 | 1.000000 | 3.58617e-13 | 1.00000 |
| rad25     | 2.30093e-13 | 1.000000 | 3.58295e-13 | 1.00000 |
| rad27     | 1.45216e-13 | 1.000000 | 2.26126e-13 | 1.00000 |
| rad14     | 1.12931e-13 | 1.000000 | 1.75854e-13 | 1.00000 |
| rad15     | 4.91569e-14 | 1.000000 | 7.65459e-14 | 1.00000 |
| rad12     | 3.94061e-14 | 1.000000 | 6.13623e-14 | 1.00000 |
| rad31     | 3.16974e-15 | 1.000000 | 4.93585e-15 | 1.00000 |
| rad8      | 5.05500e-18 | 1.000000 | 7.87153e-18 | 1.00000 |
| rad47     | 6.07114e-19 | 1.000000 | 9.45384e-19 | 1.00000 |
| rad5      | 5.02660e-19 | 1.000000 | 7.82730e-19 | 1.00000 |

0.100000000E-01 Pa, 1000.00000 K

=====

| Rate constant | True (fraction)     | Effective (fraction) |
|---------------|---------------------|----------------------|
| Total         | 2.23691e-15 (1.00 ) | 1.20781e-15 (1.00 )  |

| species     | PYtrue      | Cumul    | PYeffective | Cumul    |
|-------------|-------------|----------|-------------|----------|
| Indene+H    | 0.533141    | 0.533141 | 0.987401    | 0.987401 |
| Benzyl+C2H2 | 0.460056    | 0.993197 | 0.00000     | 0.987401 |
| PhCCH+CH3   | 0.00197825  | 0.995175 | 0.00366380  | 0.991065 |
| Ph+Allene   | 0.00184724  | 0.997022 | 0.00342117  | 0.994486 |
| PhCHCCH2+H  | 0.00145006  | 0.998473 | 0.00268558  | 0.997172 |
| PhCH2CCH+H  | 0.000695147 | 0.999168 | 0.00128744  | 0.998459 |
| Ph+MeAc     | 0.000262377 | 0.999430 | 0.000485934 | 0.998945 |
| PhCCCH3+H   | 0.000177996 | 0.999608 | 0.000329656 | 0.999275 |
| PAH7+H      | 0.000130566 | 0.999739 | 0.000241814 | 0.999516 |
| rad30       | 9.13368e-05 | 0.999830 | 0.000169160 | 0.999686 |
| PAH9+H      | 6.89837e-05 | 0.999899 | 0.000127761 | 0.999813 |
| rad39       | 3.03517e-05 | 0.999929 | 5.62127e-05 | 0.999870 |
| rad38       | 2.55111e-05 | 0.999955 | 4.72476e-05 | 0.999917 |
| rad35       | 1.54336e-05 | 0.999970 | 2.85837e-05 | 0.999945 |
| rad19anti   | 1.36967e-05 | 0.999984 | 2.53668e-05 | 0.999971 |
| PAH3+H      | 4.67746e-06 | 0.999989 | 8.66286e-06 | 0.999979 |
| rad46       | 3.90458e-06 | 0.999993 | 7.23145e-06 | 0.999987 |
| rad6        | 2.69363e-06 | 0.999995 | 4.98871e-06 | 0.999992 |

|               |             |          |             |          |
|---------------|-------------|----------|-------------|----------|
| rad60syn      | 1.65648e-06 | 0.999997 | 3.06787e-06 | 0.999995 |
| rad60anti     | 9.23131e-07 | 0.999998 | 1.70968e-06 | 0.999996 |
| rad59         | 6.45429e-07 | 0.999998 | 1.19536e-06 | 0.999998 |
| rad19syn      | 4.72667e-07 | 0.999999 | 8.75401e-07 | 0.999998 |
| rad50         | 4.07342e-07 | 0.999999 | 7.54415e-07 | 0.999999 |
| rad37         | 2.45721e-07 | 1.000000 | 4.55086e-07 | 1.000000 |
| rad54         | 1.26771e-07 | 1.000000 | 2.34786e-07 | 1.000000 |
| PhcycC3H3_A+H | 6.09512e-08 | 1.000000 | 1.12884e-07 | 1.000000 |
| rad23         | 4.80803e-08 | 1.000000 | 8.90469e-08 | 1.000000 |
| rad67         | 3.29595e-08 | 1.000000 | 6.10424e-08 | 1.000000 |
| rad51         | 2.54518e-08 | 1.000000 | 4.71378e-08 | 1.000000 |
| rad52         | 1.60221e-08 | 1.000000 | 2.96736e-08 | 1.000000 |
| PAH10+CH3     | 1.51447e-08 | 1.000000 | 2.80487e-08 | 1.000000 |
| rad70         | 1.36712e-08 | 1.000000 | 2.53196e-08 | 1.000000 |
| rad45         | 1.25309e-08 | 1.000000 | 2.32078e-08 | 1.000000 |
| PAH1+H        | 1.19838e-08 | 1.000000 | 2.21946e-08 | 1.000000 |
| rad58         | 7.00856e-09 | 1.000000 | 1.29802e-08 | 1.000000 |
| rad55         | 5.08752e-09 | 1.000000 | 9.42232e-09 | 1.000000 |
| rad2          | 3.04557e-09 | 1.000000 | 5.64053e-09 | 1.000000 |
| rad62         | 2.86109e-09 | 1.000000 | 5.29886e-09 | 1.000000 |
| rad28         | 2.49539e-09 | 1.000000 | 4.62158e-09 | 1.000000 |
| rad34         | 1.59675e-09 | 1.000000 | 2.95726e-09 | 1.000000 |
| rad36         | 1.11661e-09 | 1.000000 | 2.06800e-09 | 1.000000 |
| rad7          | 1.07920e-09 | 1.000000 | 1.99873e-09 | 1.000000 |
| rad20         | 8.82251e-10 | 1.000000 | 1.63397e-09 | 1.000000 |
| rad43         | 8.08139e-10 | 1.000000 | 1.49671e-09 | 1.000000 |
| rad65         | 8.03606e-10 | 1.000000 | 1.48831e-09 | 1.000000 |
| rad11         | 7.18674e-10 | 1.000000 | 1.33102e-09 | 1.000000 |
| rad21         | 6.41973e-10 | 1.000000 | 1.18896e-09 | 1.000000 |
| rad1          | 5.71452e-10 | 1.000000 | 1.05835e-09 | 1.000000 |
| rad26         | 4.10785e-10 | 1.000000 | 7.60792e-10 | 1.000000 |
| rad9          | 2.68686e-10 | 1.000000 | 4.97618e-10 | 1.000000 |
| rad10         | 1.84422e-10 | 1.000000 | 3.41557e-10 | 1.000000 |
| rad13         | 1.63651e-10 | 1.000000 | 3.03089e-10 | 1.000000 |
| rad53         | 1.57317e-10 | 1.000000 | 2.91357e-10 | 1.000000 |
| rad71         | 6.81348e-11 | 1.000000 | 1.26189e-10 | 1.000000 |
| rad64         | 6.44729e-11 | 1.000000 | 1.19407e-10 | 1.000000 |
| rad73         | 5.58646e-11 | 1.000000 | 1.03464e-10 | 1.000000 |
| rad56         | 5.18731e-11 | 1.000000 | 9.60713e-11 | 1.000000 |
| rad3          | 4.92287e-11 | 1.000000 | 9.11737e-11 | 1.000000 |
| rad42         | 3.81305e-11 | 1.000000 | 7.06193e-11 | 1.000000 |
| rad4          | 3.57615e-11 | 1.000000 | 6.62318e-11 | 1.000000 |
| rad22         | 1.20582e-11 | 1.000000 | 2.23323e-11 | 1.000000 |
| rad68syn      | 8.98954e-12 | 1.000000 | 1.66490e-11 | 1.000000 |
| rad18         | 8.05339e-12 | 1.000000 | 1.49152e-11 | 1.000000 |
| rad68anti     | 6.04808e-12 | 1.000000 | 1.12013e-11 | 1.000000 |
| rad24         | 5.90768e-12 | 1.000000 | 1.09413e-11 | 1.000000 |
| rad41         | 5.65299e-12 | 1.000000 | 1.04696e-11 | 1.000000 |
| PAH8+H        | 4.98494e-12 | 1.000000 | 9.23232e-12 | 1.000000 |
| rad33         | 4.81554e-12 | 1.000000 | 8.91860e-12 | 1.000000 |
| rad72         | 2.15955e-12 | 1.000000 | 3.99958e-12 | 1.000000 |
| rad61         | 1.20104e-12 | 1.000000 | 2.22437e-12 | 1.000000 |
| rad40syn      | 1.17478e-12 | 1.000000 | 2.17574e-12 | 1.000000 |
| rad40anti     | 5.51403e-13 | 1.000000 | 1.02122e-12 | 1.000000 |
| rad25         | 3.17936e-13 | 1.000000 | 5.88832e-13 | 1.000000 |
| rad27         | 1.15934e-13 | 1.000000 | 2.14715e-13 | 1.000000 |
| rad14         | 9.62409e-14 | 1.000000 | 1.78242e-13 | 1.000000 |
| rad12         | 8.61788e-14 | 1.000000 | 1.59607e-13 | 1.000000 |
| rad15         | 6.99434e-14 | 1.000000 | 1.29538e-13 | 1.000000 |
| rad31         | 1.85913e-15 | 1.000000 | 3.44319e-15 | 1.000000 |
| rad8          | 3.09653e-16 | 1.000000 | 5.73491e-16 | 1.000000 |
| rad47         | 1.77211e-18 | 1.000000 | 3.28202e-18 | 1.000000 |
| rad5          | 8.43068e-19 | 1.000000 | 1.56140e-18 | 1.000000 |

0.100000000E-01 Pa, 1100.00000 K

=====

| Rate constant | True (fraction)    | Effective (fraction) |
|---------------|--------------------|----------------------|
| Total         | 4.69847e-15 (1.00) | 2.11075e-15 (1.00)   |

| species     | PYtrue      | Cumul    | PYeffective | Cumul    |
|-------------|-------------|----------|-------------|----------|
| Benzyl+C2H2 | 0.550759    | 0.550759 | 0.00000     | 0.00000  |
| Indene+H    | 0.439888    | 0.990647 | 0.979180    | 0.979180 |
| Ph+Allene   | 0.00299529  | 0.993642 | 0.00666745  | 0.985847 |
| PhCCH+CH3   | 0.00208752  | 0.995730 | 0.00464677  | 0.990494 |
| PhCHCCH2+H  | 0.00194543  | 0.997675 | 0.00433048  | 0.994825 |
| PhCH2CCH+H  | 0.00132192  | 0.998997 | 0.00294255  | 0.997767 |
| Ph+MeAc     | 0.000277392 | 0.999275 | 0.000617468 | 0.998385 |
| PAH7+H      | 0.000179387 | 0.999454 | 0.000399312 | 0.998784 |

|               |             |          |             |          |
|---------------|-------------|----------|-------------|----------|
| PhCCCH3+H     | 0.000149155 | 0.999603 | 0.000332014 | 0.999116 |
| rad30         | 0.000123015 | 0.999726 | 0.000273827 | 0.999390 |
| PAH9+H        | 0.000111712 | 0.999838 | 0.000248667 | 0.999639 |
| rad38         | 4.25054e-05 | 0.999880 | 9.46160e-05 | 0.999733 |
| rad39         | 4.04289e-05 | 0.999921 | 8.99938e-05 | 0.999823 |
| rad19anti     | 2.71782e-05 | 0.999948 | 6.04981e-05 | 0.999884 |
| rad35         | 2.39126e-05 | 0.999972 | 5.32288e-05 | 0.999937 |
| PAH3+H        | 1.09196e-05 | 0.999983 | 2.43066e-05 | 0.999961 |
| rad46         | 7.45130e-06 | 0.999990 | 1.65864e-05 | 0.999978 |
| rad60syn      | 2.99525e-06 | 0.999993 | 6.66735e-06 | 0.999984 |
| rad60anti     | 1.70292e-06 | 0.999995 | 3.79065e-06 | 0.999988 |
| rad59         | 1.43232e-06 | 0.999996 | 3.18830e-06 | 0.999991 |
| rad50         | 1.10605e-06 | 0.999997 | 2.46203e-06 | 0.999994 |
| rad19syn      | 1.02397e-06 | 0.999998 | 2.27934e-06 | 0.999996 |
| rad6          | 6.94179e-07 | 0.999999 | 1.54523e-06 | 0.999998 |
| rad37         | 3.04651e-07 | 0.999999 | 6.78145e-07 | 0.999998 |
| rad54         | 2.97946e-07 | 1.000000 | 6.63219e-07 | 0.999999 |
| PhcycC3H3_A+H | 1.70474e-07 | 1.000000 | 3.79471e-07 | 0.999999 |
| rad67         | 1.11040e-07 | 1.000000 | 2.47172e-07 | 1.000000 |
| rad51         | 8.75148e-08 | 1.000000 | 1.94806e-07 | 1.000000 |
| rad52         | 4.97444e-08 | 1.000000 | 1.10730e-07 | 1.000000 |
| rad70         | 3.72430e-08 | 1.000000 | 8.29019e-08 | 1.000000 |
| PAH10+CH3     | 3.56640e-08 | 1.000000 | 7.93872e-08 | 1.000000 |
| PAH1+H        | 3.40768e-08 | 1.000000 | 7.58540e-08 | 1.000000 |
| rad58         | 2.33996e-08 | 1.000000 | 5.20868e-08 | 1.000000 |
| rad23         | 2.22948e-08 | 1.000000 | 4.96277e-08 | 1.000000 |
| rad55         | 1.32730e-08 | 1.000000 | 2.95453e-08 | 1.000000 |
| rad45         | 6.29660e-09 | 1.000000 | 1.40161e-08 | 1.000000 |
| rad62         | 5.84637e-09 | 1.000000 | 1.30139e-08 | 1.000000 |
| rad34         | 4.93389e-09 | 1.000000 | 1.09827e-08 | 1.000000 |
| rad65         | 2.77678e-09 | 1.000000 | 6.18105e-09 | 1.000000 |
| rad43         | 1.31584e-09 | 1.000000 | 2.92903e-09 | 1.000000 |
| rad2          | 7.95777e-10 | 1.000000 | 1.77138e-09 | 1.000000 |
| rad20         | 7.94094e-10 | 1.000000 | 1.76763e-09 | 1.000000 |
| rad28         | 7.42449e-10 | 1.000000 | 1.65267e-09 | 1.000000 |
| rad11         | 6.61485e-10 | 1.000000 | 1.47245e-09 | 1.000000 |
| rad7          | 6.15812e-10 | 1.000000 | 1.37078e-09 | 1.000000 |
| rad53         | 5.86870e-10 | 1.000000 | 1.30636e-09 | 1.000000 |
| rad36         | 5.73639e-10 | 1.000000 | 1.27691e-09 | 1.000000 |
| rad21         | 5.10944e-10 | 1.000000 | 1.13735e-09 | 1.000000 |
| rad9          | 2.50850e-10 | 1.000000 | 5.58386e-10 | 1.000000 |
| rad56         | 2.36403e-10 | 1.000000 | 5.26228e-10 | 1.000000 |
| rad64         | 2.27332e-10 | 1.000000 | 5.06035e-10 | 1.000000 |
| rad13         | 1.80095e-10 | 1.000000 | 4.00887e-10 | 1.000000 |
| rad1          | 1.63027e-10 | 1.000000 | 3.62894e-10 | 1.000000 |
| rad26         | 1.32791e-10 | 1.000000 | 2.95590e-10 | 1.000000 |
| rad73         | 1.11969e-10 | 1.000000 | 2.49240e-10 | 1.000000 |
| rad10         | 1.10023e-10 | 1.000000 | 2.44909e-10 | 1.000000 |
| rad42         | 1.03298e-10 | 1.000000 | 2.29938e-10 | 1.000000 |
| rad71         | 8.58289e-11 | 1.000000 | 1.91053e-10 | 1.000000 |
| rad68syn      | 4.27372e-11 | 1.000000 | 9.51320e-11 | 1.000000 |
| rad68anti     | 2.86092e-11 | 1.000000 | 6.36834e-11 | 1.000000 |
| PAH8+H        | 2.72553e-11 | 1.000000 | 6.06697e-11 | 1.000000 |
| rad18         | 2.49185e-11 | 1.000000 | 5.54680e-11 | 1.000000 |
| rad3          | 1.65837e-11 | 1.000000 | 3.69149e-11 | 1.000000 |
| rad4          | 1.24215e-11 | 1.000000 | 2.76499e-11 | 1.000000 |
| rad41         | 1.24002e-11 | 1.000000 | 2.76026e-11 | 1.000000 |
| rad22         | 7.33229e-12 | 1.000000 | 1.63215e-11 | 1.000000 |
| rad40syn      | 6.16599e-12 | 1.000000 | 1.37253e-11 | 1.000000 |
| rad24         | 4.56170e-12 | 1.000000 | 1.01542e-11 | 1.000000 |
| rad61         | 4.37083e-12 | 1.000000 | 9.72936e-12 | 1.000000 |
| rad33         | 3.97552e-12 | 1.000000 | 8.84941e-12 | 1.000000 |
| rad40anti     | 2.80352e-12 | 1.000000 | 6.24056e-12 | 1.000000 |
| rad72         | 1.43183e-12 | 1.000000 | 3.18721e-12 | 1.000000 |
| rad25         | 3.95676e-13 | 1.000000 | 8.80766e-13 | 1.000000 |
| rad12         | 1.26351e-13 | 1.000000 | 2.81254e-13 | 1.000000 |
| rad15         | 8.31505e-14 | 1.000000 | 1.85091e-13 | 1.000000 |
| rad14         | 7.64498e-14 | 1.000000 | 1.70175e-13 | 1.000000 |
| rad27         | 7.17960e-14 | 1.000000 | 1.59816e-13 | 1.000000 |
| rad8          | 3.02697e-15 | 1.000000 | 6.73796e-15 | 1.000000 |
| rad31         | 1.11586e-15 | 1.000000 | 2.48388e-15 | 1.000000 |
| rad47         | 6.07223e-18 | 1.000000 | 1.35166e-17 | 1.000000 |
| rad5          | 1.71540e-18 | 1.000000 | 3.81844e-18 | 1.000000 |

0.100000000E-01 Pa, 1200.00000 K

=====

Rate constant | True (fraction)                      Effective (fraction)

-----  
Total | 8.84330e-15 (1.00 ) 3.30079e-15 (1.00 )

| species       | PYtrue      | Cumul    | PYeffective | Cumul    |
|---------------|-------------|----------|-------------|----------|
| Benzyl+C2H2   | 0.626747    | 0.626747 | 0.00000     | 0.00000  |
| Indene+H      | 0.361139    | 0.987886 | 0.967544    | 0.967544 |
| Ph+Allene     | 0.00426332  | 0.992149 | 0.0114221   | 0.978966 |
| PhCHCCH2+H    | 0.00242727  | 0.994577 | 0.00650301  | 0.985469 |
| PhCH2CCH+H    | 0.00220912  | 0.996786 | 0.00591856  | 0.991388 |
| PhCCH+CH3     | 0.00203526  | 0.998821 | 0.00545276  | 0.996840 |
| Ph+MeAc       | 0.000271658 | 0.999093 | 0.000727812 | 0.997568 |
| PAH7+H        | 0.000220960 | 0.999314 | 0.000591983 | 0.998160 |
| PAH9+H        | 0.000166485 | 0.999480 | 0.000446037 | 0.998606 |
| rad30         | 0.000155353 | 0.999635 | 0.000416215 | 0.999022 |
| PhCCCH3+H     | 0.000117023 | 0.999752 | 0.000313521 | 0.999336 |
| rad38         | 6.49407e-05 | 0.999817 | 0.000173986 | 0.999510 |
| rad19anti     | 4.80911e-05 | 0.999865 | 0.000128843 | 0.999639 |
| rad39         | 4.80578e-05 | 0.999914 | 0.000128754 | 0.999768 |
| rad35         | 3.43910e-05 | 0.999948 | 9.21386e-05 | 0.999860 |
| PAH3+H        | 2.21254e-05 | 0.999970 | 5.92771e-05 | 0.999919 |
| rad46         | 1.27777e-05 | 0.999983 | 3.42332e-05 | 0.999953 |
| rad60syn      | 4.87439e-06 | 0.999988 | 1.30592e-05 | 0.999966 |
| rad60anti     | 2.81860e-06 | 0.999991 | 7.55145e-06 | 0.999974 |
| rad59         | 2.76937e-06 | 0.999993 | 7.41954e-06 | 0.999981 |
| rad50         | 2.58122e-06 | 0.999996 | 6.91546e-06 | 0.999988 |
| rad19syn      | 1.86137e-06 | 0.999998 | 4.98689e-06 | 0.999993 |
| rad54         | 5.79326e-07 | 0.999998 | 1.55210e-06 | 0.999995 |
| PhcycC3H3_A+H | 3.85546e-07 | 0.999999 | 1.03293e-06 | 0.999996 |
| rad37         | 3.71928e-07 | 0.999999 | 9.96450e-07 | 0.999997 |
| rad67         | 3.10072e-07 | 0.999999 | 8.30728e-07 | 0.999998 |
| rad51         | 2.56880e-07 | 1.000000 | 6.88220e-07 | 0.999998 |
| rad6          | 2.16721e-07 | 1.000000 | 5.80627e-07 | 0.999999 |
| rad52         | 1.30949e-07 | 1.000000 | 3.50831e-07 | 0.999999 |
| rad70         | 8.31685e-08 | 1.000000 | 2.22821e-07 | 0.999999 |
| PAH10+CH3     | 7.86700e-08 | 1.000000 | 2.10768e-07 | 1.000000 |
| PAH1+H        | 7.84428e-08 | 1.000000 | 2.10160e-07 | 1.000000 |
| rad58         | 6.38236e-08 | 1.000000 | 1.70993e-07 | 1.000000 |
| rad55         | 2.81617e-08 | 1.000000 | 7.54494e-08 | 1.000000 |
| rad34         | 1.22943e-08 | 1.000000 | 3.29383e-08 | 1.000000 |
| rad23         | 1.09773e-08 | 1.000000 | 2.94099e-08 | 1.000000 |
| rad62         | 1.00324e-08 | 1.000000 | 2.68784e-08 | 1.000000 |
| rad65         | 8.09190e-09 | 1.000000 | 2.16794e-08 | 1.000000 |
| rad45         | 3.26142e-09 | 1.000000 | 8.73783e-09 | 1.000000 |
| rad43         | 1.86297e-09 | 1.000000 | 4.99117e-09 | 1.000000 |
| rad53         | 1.69061e-09 | 1.000000 | 4.52939e-09 | 1.000000 |
| rad56         | 8.06579e-10 | 1.000000 | 2.16094e-09 | 1.000000 |
| rad11         | 7.21858e-10 | 1.000000 | 1.93396e-09 | 1.000000 |
| rad64         | 6.30603e-10 | 1.000000 | 1.68948e-09 | 1.000000 |
| rad7          | 5.42630e-10 | 1.000000 | 1.45379e-09 | 1.000000 |
| rad20         | 5.25401e-10 | 1.000000 | 1.40763e-09 | 1.000000 |
| rad73         | 4.81166e-10 | 1.000000 | 1.28911e-09 | 1.000000 |
| rad71         | 3.38518e-10 | 1.000000 | 9.06940e-10 | 1.000000 |
| rad21         | 3.17213e-10 | 1.000000 | 8.49859e-10 | 1.000000 |
| rad36         | 3.01858e-10 | 1.000000 | 8.08721e-10 | 1.000000 |
| rad28         | 2.63235e-10 | 1.000000 | 7.05246e-10 | 1.000000 |
| rad2          | 2.26531e-10 | 1.000000 | 6.06910e-10 | 1.000000 |
| rad42         | 2.26001e-10 | 1.000000 | 6.05491e-10 | 1.000000 |
| rad9          | 2.14283e-10 | 1.000000 | 5.74096e-10 | 1.000000 |
| rad68syn      | 1.55999e-10 | 1.000000 | 4.17943e-10 | 1.000000 |
| rad13         | 1.41868e-10 | 1.000000 | 3.80085e-10 | 1.000000 |
| PAH8+H        | 1.30902e-10 | 1.000000 | 3.50705e-10 | 1.000000 |
| rad68anti     | 1.03919e-10 | 1.000000 | 2.78414e-10 | 1.000000 |
| rad10         | 7.08638e-11 | 1.000000 | 1.89854e-10 | 1.000000 |
| rad18         | 5.25950e-11 | 1.000000 | 1.40910e-10 | 1.000000 |
| rad26         | 5.00575e-11 | 1.000000 | 1.34111e-10 | 1.000000 |
| rad1          | 4.87650e-11 | 1.000000 | 1.30649e-10 | 1.000000 |
| rad40syn      | 2.65164e-11 | 1.000000 | 7.10413e-11 | 1.000000 |
| rad41         | 2.44028e-11 | 1.000000 | 6.53786e-11 | 1.000000 |
| rad61         | 1.77286e-11 | 1.000000 | 4.74976e-11 | 1.000000 |
| rad40anti     | 1.25801e-11 | 1.000000 | 3.37038e-11 | 1.000000 |
| rad3          | 6.01679e-12 | 1.000000 | 1.61199e-11 | 1.000000 |
| rad22         | 5.56736e-12 | 1.000000 | 1.49158e-11 | 1.000000 |
| rad4          | 4.58917e-12 | 1.000000 | 1.22951e-11 | 1.000000 |
| rad24         | 3.33437e-12 | 1.000000 | 8.93325e-12 | 1.000000 |
| rad72         | 2.82603e-12 | 1.000000 | 7.57134e-12 | 1.000000 |
| rad33         | 2.52655e-12 | 1.000000 | 6.76899e-12 | 1.000000 |
| rad25         | 3.68856e-13 | 1.000000 | 9.88220e-13 | 1.000000 |
| rad12         | 1.57460e-13 | 1.000000 | 4.21859e-13 | 1.000000 |
| rad15         | 1.12872e-13 | 1.000000 | 3.02401e-13 | 1.000000 |
| rad14         | 4.98181e-14 | 1.000000 | 1.33470e-13 | 1.000000 |
| rad27         | 3.37900e-14 | 1.000000 | 9.05283e-14 | 1.000000 |
| rad8          | 9.89274e-15 | 1.000000 | 2.65041e-14 | 1.000000 |

|       |             |         |             |         |
|-------|-------------|---------|-------------|---------|
| rad31 | 6.76700e-16 | 1.00000 | 1.81298e-15 | 1.00000 |
| rad47 | 1.81815e-17 | 1.00000 | 4.87108e-17 | 1.00000 |
| rad5  | 4.10045e-18 | 1.00000 | 1.09857e-17 | 1.00000 |

0.100000000E-01 Pa, 1300.00000 K

| Rate constant | True (fraction)     | Effective (fraction) |
|---------------|---------------------|----------------------|
| Total         | 1.52810e-14 (1.00 ) | 4.76644e-15 (1.00 )  |

| species       | PYtrue      | Cumul    | PYeffective | Cumul    |
|---------------|-------------|----------|-------------|----------|
| Benzyl+C2H2   | 0.688080    | 0.688080 | 0.000000    | 0.000000 |
| Indene+H      | 0.296943    | 0.985023 | 0.951985    | 0.951985 |
| Ph+Allene     | 0.00550435  | 0.990527 | 0.0176466   | 0.969632 |
| PhCH2CCH+H    | 0.00336232  | 0.993890 | 0.0107794   | 0.980411 |
| PhCHCCH2+H    | 0.00286585  | 0.996756 | 0.00918776  | 0.989599 |
| PhCCH+CH3     | 0.00187196  | 0.998627 | 0.00600140  | 0.995600 |
| Ph+MeAc       | 0.000252916 | 0.998880 | 0.000810834 | 0.996411 |
| PAH7+H        | 0.000251840 | 0.999132 | 0.000807387 | 0.997218 |
| PAH9+H        | 0.000232570 | 0.999365 | 0.000745606 | 0.997964 |
| rad30         | 0.00187145  | 0.999552 | 0.000599977 | 0.998564 |
| rad38         | 9.27379e-05 | 0.999645 | 0.000297313 | 0.998861 |
| PhCCCH3+H     | 8.81946e-05 | 0.999733 | 0.000282747 | 0.999144 |
| rad19anti     | 7.76867e-05 | 0.999811 | 0.000249059 | 0.999393 |
| rad39         | 5.27143e-05 | 0.999863 | 0.000168999 | 0.999562 |
| rad35         | 4.67246e-05 | 0.999910 | 0.000149797 | 0.999712 |
| PAH3+H        | 4.01932e-05 | 0.999950 | 0.000128857 | 0.999841 |
| rad46         | 2.01489e-05 | 0.999970 | 6.45963e-05 | 0.999905 |
| rad60syn      | 7.32140e-06 | 0.999978 | 2.34720e-05 | 0.999929 |
| rad50         | 5.32296e-06 | 0.999983 | 1.70651e-05 | 0.999946 |
| rad59         | 4.81766e-06 | 0.999988 | 1.54452e-05 | 0.999961 |
| rad60anti     | 4.29551e-06 | 0.999992 | 1.37712e-05 | 0.999975 |
| rad19syn      | 2.96346e-06 | 0.999995 | 9.50070e-06 | 0.999985 |
| rad54         | 9.75315e-07 | 0.999996 | 3.12681e-06 | 0.999988 |
| rad67         | 7.44269e-07 | 0.999997 | 2.38609e-06 | 0.999990 |
| PhcycC3H3_A+H | 7.41848e-07 | 0.999998 | 2.37832e-06 | 0.999992 |
| rad51         | 6.46841e-07 | 0.999998 | 2.07374e-06 | 0.999995 |
| rad37         | 4.66736e-07 | 0.999999 | 1.49633e-06 | 0.999996 |
| rad52         | 2.99243e-07 | 0.999999 | 9.59358e-07 | 0.999997 |
| PAH10+CH3     | 1.66618e-07 | 0.999999 | 5.34169e-07 | 0.999998 |
| rad70         | 1.60099e-07 | 0.999999 | 5.13269e-07 | 0.999998 |
| PAH1+H        | 1.54585e-07 | 0.999999 | 4.95591e-07 | 0.999999 |
| rad58         | 1.48960e-07 | 1.000000 | 4.77557e-07 | 0.999999 |
| rad6          | 8.80054e-08 | 1.000000 | 2.82141e-07 | 0.999999 |
| rad55         | 5.10753e-08 | 1.000000 | 1.63745e-07 | 0.999999 |
| rad34         | 2.60675e-08 | 1.000000 | 8.35711e-08 | 1.000000 |
| rad65         | 2.01575e-08 | 1.000000 | 6.46239e-08 | 1.000000 |
| rad62         | 1.51329e-08 | 1.000000 | 4.85151e-08 | 1.000000 |
| rad23         | 5.72708e-09 | 1.000000 | 1.83607e-08 | 1.000000 |
| rad53         | 3.99910e-09 | 1.000000 | 1.28209e-08 | 1.000000 |
| rad43         | 2.42254e-09 | 1.000000 | 7.76654e-09 | 1.000000 |
| rad56         | 2.20475e-09 | 1.000000 | 7.06832e-09 | 1.000000 |
| rad73         | 1.95439e-09 | 1.000000 | 6.26569e-09 | 1.000000 |
| rad45         | 1.73583e-09 | 1.000000 | 5.56499e-09 | 1.000000 |
| rad71         | 1.53474e-09 | 1.000000 | 4.92030e-09 | 1.000000 |
| rad64         | 1.45741e-09 | 1.000000 | 4.67239e-09 | 1.000000 |
| rad11         | 6.50664e-10 | 1.000000 | 2.08600e-09 | 1.000000 |
| rad7          | 5.37129e-10 | 1.000000 | 1.72201e-09 | 1.000000 |
| PAH8+H        | 4.97228e-10 | 1.000000 | 1.59409e-09 | 1.000000 |
| rad68syn      | 4.61156e-10 | 1.000000 | 1.47844e-09 | 1.000000 |
| rad42         | 4.21665e-10 | 1.000000 | 1.35184e-09 | 1.000000 |
| rad20         | 3.18198e-10 | 1.000000 | 1.02013e-09 | 1.000000 |
| rad68anti     | 3.05873e-10 | 1.000000 | 9.80612e-10 | 1.000000 |
| rad21         | 1.87723e-10 | 1.000000 | 6.01829e-10 | 1.000000 |
| rad9          | 1.74608e-10 | 1.000000 | 5.59784e-10 | 1.000000 |
| rad36         | 1.62899e-10 | 1.000000 | 5.22246e-10 | 1.000000 |
| rad28         | 1.17610e-10 | 1.000000 | 3.77051e-10 | 1.000000 |
| rad40syn      | 9.09729e-11 | 1.000000 | 2.91654e-10 | 1.000000 |
| rad13         | 8.49301e-11 | 1.000000 | 2.72281e-10 | 1.000000 |
| rad2          | 6.83544e-11 | 1.000000 | 2.19141e-10 | 1.000000 |
| rad18         | 6.80229e-11 | 1.000000 | 2.18078e-10 | 1.000000 |
| rad61         | 6.30849e-11 | 1.000000 | 2.02247e-10 | 1.000000 |
| rad40anti     | 4.50377e-11 | 1.000000 | 1.44388e-10 | 1.000000 |
| rad41         | 4.40031e-11 | 1.000000 | 1.41072e-10 | 1.000000 |
| rad10         | 3.98448e-11 | 1.000000 | 1.27740e-10 | 1.000000 |
| rad26         | 2.20402e-11 | 1.000000 | 7.06597e-11 | 1.000000 |
| rad1          | 1.51497e-11 | 1.000000 | 4.85693e-11 | 1.000000 |
| rad72         | 1.48876e-11 | 1.000000 | 4.77289e-11 | 1.000000 |
| rad22         | 6.85813e-12 | 1.000000 | 2.19868e-11 | 1.000000 |

|       |             |          |             |          |
|-------|-------------|----------|-------------|----------|
| rad24 | 2.44030e-12 | 1.000000 | 7.82347e-12 | 1.000000 |
| rad3  | 2.30696e-12 | 1.000000 | 7.39598e-12 | 1.000000 |
| rad4  | 1.78161e-12 | 1.000000 | 5.71176e-12 | 1.000000 |
| rad33 | 1.49109e-12 | 1.000000 | 4.78036e-12 | 1.000000 |
| rad25 | 2.76232e-13 | 1.000000 | 8.85586e-13 | 1.000000 |
| rad15 | 2.66523e-13 | 1.000000 | 8.54459e-13 | 1.000000 |
| rad12 | 1.79605e-13 | 1.000000 | 5.75804e-13 | 1.000000 |
| rad14 | 2.73156e-14 | 1.000000 | 8.75725e-14 | 1.000000 |
| rad8  | 1.89596e-14 | 1.000000 | 6.07836e-14 | 1.000000 |
| rad27 | 1.36453e-14 | 1.000000 | 4.37462e-14 | 1.000000 |
| rad31 | 4.14102e-16 | 1.000000 | 1.32759e-15 | 1.000000 |
| rad47 | 4.64917e-17 | 1.000000 | 1.49050e-16 | 1.000000 |
| rad5  | 1.04221e-17 | 1.000000 | 3.34128e-17 | 1.000000 |

0.100000000E-01 Pa, 1400.00000 K

| Rate constant | True (fraction)     | Effective (fraction) |
|---------------|---------------------|----------------------|
| Total         | 2.46691e-14 (1.00 ) | 6.50155e-15 (1.00 )  |

| species       | PYtrue      | Cumul    | PYeffective | Cumul    |
|---------------|-------------|----------|-------------|----------|
| Benzyl+C2H2   | 0.736450    | 0.736450 | 0.000000    | 0.000000 |
| Indene+H      | 0.245659    | 0.982109 | 0.932117    | 0.932117 |
| Ph+Allene     | 0.00660863  | 0.988718 | 0.0250755   | 0.957193 |
| PhCH2CCH+H    | 0.00478129  | 0.993499 | 0.0181419   | 0.975334 |
| PhCHCCH2+H    | 0.00325579  | 0.996755 | 0.0123536   | 0.987688 |
| PhCCH+CH3     | 0.00165083  | 0.998406 | 0.00626384  | 0.993952 |
| PAH9+H        | 0.000308664 | 0.998714 | 0.00117118  | 0.995123 |
| PAH7+H        | 0.000272631 | 0.998987 | 0.00103446  | 0.996157 |
| Ph+MeAc       | 0.000228419 | 0.999215 | 0.000866703 | 0.997024 |
| rad30         | 0.000217655 | 0.999433 | 0.000825859 | 0.997850 |
| rad38         | 0.000125530 | 0.999558 | 0.000476305 | 0.998326 |
| rad19anti     | 0.000116511 | 0.999675 | 0.000442085 | 0.998768 |
| PAH3+H        | 6.69984e-05 | 0.999742 | 0.000254215 | 0.999023 |
| PhCCCH3+H     | 6.53802e-05 | 0.999807 | 0.000248076 | 0.999271 |
| rad35         | 6.07400e-05 | 0.999868 | 0.000230469 | 0.999501 |
| rad39         | 5.49308e-05 | 0.999923 | 0.000208427 | 0.999710 |
| rad46         | 2.97189e-05 | 0.999953 | 0.000112764 | 0.999822 |
| rad60syn      | 1.03332e-05 | 0.999963 | 3.92077e-05 | 0.999862 |
| rad50         | 9.93255e-06 | 0.999973 | 3.76876e-05 | 0.999899 |
| rad59         | 7.71557e-06 | 0.999981 | 2.92756e-05 | 0.999929 |
| rad60anti     | 6.13929e-06 | 0.999987 | 2.32946e-05 | 0.999952 |
| rad19syn      | 4.26611e-06 | 0.999991 | 1.61871e-05 | 0.999968 |
| rad67         | 1.57760e-06 | 0.999993 | 5.98597e-06 | 0.999974 |
| rad54         | 1.46999e-06 | 0.999994 | 5.57766e-06 | 0.999980 |
| rad51         | 1.43459e-06 | 0.999996 | 5.44334e-06 | 0.999985 |
| PhcycC3H3_A+H | 1.26044e-06 | 0.999997 | 4.78255e-06 | 0.999990 |
| rad37         | 6.13246e-07 | 0.999997 | 2.32687e-06 | 0.999992 |
| rad52         | 6.09498e-07 | 0.999998 | 2.31265e-06 | 0.999994 |
| PAH10+CH3     | 3.40083e-07 | 0.999998 | 1.29040e-06 | 0.999996 |
| rad58         | 3.07503e-07 | 0.999999 | 1.16678e-06 | 0.999997 |
| rad70         | 2.75600e-07 | 0.999999 | 1.04572e-06 | 0.999998 |
| PAH1+H        | 2.72550e-07 | 0.999999 | 1.03415e-06 | 0.999999 |
| rad55         | 8.21117e-08 | 0.999999 | 3.11561e-07 | 0.999999 |
| rad34         | 4.89126e-08 | 0.999999 | 1.85592e-07 | 0.999999 |
| rad6          | 4.65731e-08 | 0.999999 | 1.76715e-07 | 1.000000 |
| rad65         | 4.41644e-08 | 0.999999 | 1.67575e-07 | 1.000000 |
| rad62         | 2.07593e-08 | 1.000000 | 7.87679e-08 | 1.000000 |
| rad53         | 8.12270e-09 | 1.000000 | 3.08204e-08 | 1.000000 |
| rad73         | 6.63057e-09 | 1.000000 | 2.51587e-08 | 1.000000 |
| rad71         | 5.84220e-09 | 1.000000 | 2.21674e-08 | 1.000000 |
| rad56         | 5.07506e-09 | 1.000000 | 1.92566e-08 | 1.000000 |
| rad23         | 3.16905e-09 | 1.000000 | 1.20245e-08 | 1.000000 |
| rad43         | 3.05596e-09 | 1.000000 | 1.15954e-08 | 1.000000 |
| rad64         | 2.94797e-09 | 1.000000 | 1.11856e-08 | 1.000000 |
| PAH8+H        | 1.55769e-09 | 1.000000 | 5.91041e-09 | 1.000000 |
| rad68syn      | 1.15824e-09 | 1.000000 | 4.39476e-09 | 1.000000 |
| rad45         | 9.50167e-10 | 1.000000 | 3.60527e-09 | 1.000000 |
| rad68anti     | 7.65298e-10 | 1.000000 | 2.90381e-09 | 1.000000 |
| rad42         | 6.99021e-10 | 1.000000 | 2.65233e-09 | 1.000000 |
| rad11         | 4.49444e-10 | 1.000000 | 1.70535e-09 | 1.000000 |
| rad7          | 4.32235e-10 | 1.000000 | 1.64005e-09 | 1.000000 |
| rad40syn      | 2.60586e-10 | 1.000000 | 9.88756e-10 | 1.000000 |
| rad20         | 1.95016e-10 | 1.000000 | 7.39960e-10 | 1.000000 |
| rad61         | 1.94768e-10 | 1.000000 | 7.39019e-10 | 1.000000 |
| rad9          | 1.37680e-10 | 1.000000 | 5.22408e-10 | 1.000000 |
| rad40anti     | 1.33999e-10 | 1.000000 | 5.08440e-10 | 1.000000 |
| rad21         | 1.13747e-10 | 1.000000 | 4.31596e-10 | 1.000000 |
| rad36         | 9.03493e-11 | 1.000000 | 3.42817e-10 | 1.000000 |



|       |             |          |             |         |
|-------|-------------|----------|-------------|---------|
| rad41 | 7.69081e-11 | 1.000000 | 2.91816e-10 | 1.00000 |
| rad72 | 7.39030e-11 | 1.000000 | 2.80414e-10 | 1.00000 |
| rad28 | 6.73667e-11 | 1.000000 | 2.55613e-10 | 1.00000 |
| rad18 | 5.86614e-11 | 1.000000 | 2.22582e-10 | 1.00000 |
| rad13 | 4.56737e-11 | 1.000000 | 1.73302e-10 | 1.00000 |
| rad2  | 2.16118e-11 | 1.000000 | 8.20028e-11 | 1.00000 |
| rad10 | 1.80532e-11 | 1.000000 | 6.85003e-11 | 1.00000 |
| rad22 | 1.37728e-11 | 1.000000 | 5.22589e-11 | 1.00000 |
| rad26 | 1.08183e-11 | 1.000000 | 4.10486e-11 | 1.00000 |
| rad1  | 4.88449e-12 | 1.000000 | 1.85335e-11 | 1.00000 |
| rad24 | 1.80067e-12 | 1.000000 | 6.83237e-12 | 1.00000 |
| rad3  | 9.27021e-13 | 1.000000 | 3.51744e-12 | 1.00000 |
| rad33 | 8.80709e-13 | 1.000000 | 3.34172e-12 | 1.00000 |
| rad4  | 7.22958e-13 | 1.000000 | 2.74316e-12 | 1.00000 |
| rad15 | 6.83799e-13 | 1.000000 | 2.59457e-12 | 1.00000 |
| rad12 | 1.93291e-13 | 1.000000 | 7.33414e-13 | 1.00000 |
| rad25 | 1.92168e-13 | 1.000000 | 7.29155e-13 | 1.00000 |
| rad8  | 2.79513e-14 | 1.000000 | 1.06057e-13 | 1.00000 |
| rad14 | 1.42436e-14 | 1.000000 | 5.40452e-14 | 1.00000 |
| rad27 | 5.48378e-15 | 1.000000 | 2.08074e-14 | 1.00000 |
| rad31 | 2.56260e-16 | 1.000000 | 9.72339e-16 | 1.00000 |
| rad47 | 1.04040e-16 | 1.000000 | 3.94765e-16 | 1.00000 |
| rad5  | 2.46660e-17 | 1.000000 | 9.35916e-17 | 1.00000 |

0.1000000000E-01 Pa, 1500.00000 K

| Rate constant | True (fraction)     | Effective (fraction) |
|---------------|---------------------|----------------------|
| Total         | 3.76908e-14 (1.00 ) | 8.51560e-15 (1.00 )  |

| species       | PYtrue      | Cumul    | PYeffective | Cumul    |
|---------------|-------------|----------|-------------|----------|
| Benzyl+C2H2   | 0.774067    | 0.774067 | 0.00000     | 0.00000  |
| Indene+H      | 0.205065    | 0.979132 | 0.907636    | 0.907636 |
| Ph+Allene     | 0.00752038  | 0.986652 | 0.0332859   | 0.940922 |
| PhCH2CCH+H    | 0.00646724  | 0.993120 | 0.0286246   | 0.969546 |
| PhCHCCH2+H    | 0.00361205  | 0.996732 | 0.0159873   | 0.985534 |
| PhCCH+CH3     | 0.00141397  | 0.998146 | 0.00625834  | 0.991792 |
| PAH9+H        | 0.000393095 | 0.998539 | 0.00173987  | 0.993532 |
| PAH7+H        | 0.000286547 | 0.998825 | 0.00126828  | 0.994800 |
| rad30         | 0.000246477 | 0.999072 | 0.00109093  | 0.995891 |
| Ph+MeAc       | 0.000203625 | 0.999275 | 0.000901264 | 0.996792 |
| rad19anti     | 0.000164236 | 0.999440 | 0.000726924 | 0.997519 |
| rad38         | 0.000162729 | 0.999602 | 0.000720253 | 0.998240 |
| PAH3+H        | 0.000104219 | 0.999707 | 0.000461281 | 0.998701 |
| rad35         | 7.62567e-05 | 0.999783 | 0.000337519 | 0.999038 |
| rad39         | 5.58559e-05 | 0.999839 | 0.000247223 | 0.999286 |
| PhCCCH3+H     | 4.89496e-05 | 0.999888 | 0.000216656 | 0.999502 |
| rad46         | 4.15219e-05 | 0.999929 | 0.000183780 | 0.999686 |
| rad50         | 1.70756e-05 | 0.999946 | 7.55782e-05 | 0.999762 |
| rad60syn      | 1.12961e-05 | 0.999960 | 6.14410e-05 | 0.999823 |
| rad59         | 1.15663e-05 | 0.999972 | 5.11935e-05 | 0.999874 |
| rad60anti     | 8.33859e-06 | 0.999980 | 3.69074e-05 | 0.999911 |
| rad19syn      | 5.68958e-06 | 0.999986 | 2.51826e-05 | 0.999936 |
| rad67         | 3.01384e-06 | 0.999989 | 1.33395e-05 | 0.999950 |
| rad51         | 2.86550e-06 | 0.999992 | 1.26830e-05 | 0.999962 |
| rad54         | 2.03371e-06 | 0.999994 | 9.00138e-06 | 0.999971 |
| PhcycC3H3_A+H | 1.94412e-06 | 0.999996 | 8.60484e-06 | 0.999980 |
| rad52         | 1.12962e-06 | 0.999997 | 4.99978e-06 | 0.999985 |
| rad37         | 8.38283e-07 | 0.999998 | 3.71032e-06 | 0.999989 |
| PAH10+CH3     | 6.63385e-07 | 0.999998 | 2.93620e-06 | 0.999992 |
| rad58         | 5.75067e-07 | 0.999999 | 2.54530e-06 | 0.999994 |
| PAH1+H        | 4.44633e-07 | 0.999999 | 1.96799e-06 | 0.999996 |
| rad70         | 4.35874e-07 | 1.000000 | 1.92922e-06 | 0.999998 |
| rad55         | 1.20222e-07 | 1.000000 | 5.32115e-07 | 0.999999 |
| rad65         | 8.71020e-08 | 1.000000 | 3.85522e-07 | 0.999999 |
| rad34         | 8.35878e-08 | 1.000000 | 3.69967e-07 | 0.999999 |
| rad6          | 2.99850e-08 | 1.000000 | 1.32717e-07 | 1.000000 |
| rad62         | 2.65881e-08 | 1.000000 | 1.17681e-07 | 1.000000 |
| rad73         | 1.91052e-08 | 1.000000 | 8.45612e-08 | 1.000000 |
| rad71         | 1.86214e-08 | 1.000000 | 8.24201e-08 | 1.000000 |
| rad53         | 1.46410e-08 | 1.000000 | 6.48022e-08 | 1.000000 |
| rad56         | 1.02046e-08 | 1.000000 | 4.51667e-08 | 1.000000 |
| rad64         | 5.41567e-09 | 1.000000 | 2.39703e-08 | 1.000000 |
| PAH8+H        | 4.18068e-09 | 1.000000 | 1.85041e-08 | 1.000000 |
| rad43         | 3.92952e-09 | 1.000000 | 1.73924e-08 | 1.000000 |
| rad68syn      | 2.56013e-09 | 1.000000 | 1.13314e-08 | 1.000000 |
| rad23         | 1.86568e-09 | 1.000000 | 8.25769e-09 | 1.000000 |
| rad68anti     | 1.68588e-09 | 1.000000 | 7.46187e-09 | 1.000000 |
| rad42         | 1.06260e-09 | 1.000000 | 4.70318e-09 | 1.000000 |

|           |             |         |             |         |
|-----------|-------------|---------|-------------|---------|
| rad40syn  | 6.46771e-10 | 1.00000 | 2.86267e-09 | 1.00000 |
| rad45     | 5.35669e-10 | 1.00000 | 2.37092e-09 | 1.00000 |
| rad61     | 5.26881e-10 | 1.00000 | 2.33202e-09 | 1.00000 |
| rad40anti | 3.43896e-10 | 1.00000 | 1.52212e-09 | 1.00000 |
| rad72     | 2.96762e-10 | 1.00000 | 1.31350e-09 | 1.00000 |
| rad7      | 2.73614e-10 | 1.00000 | 1.21104e-09 | 1.00000 |
| rad11     | 2.66057e-10 | 1.00000 | 1.17759e-09 | 1.00000 |
| rad41     | 1.35348e-10 | 1.00000 | 5.99062e-10 | 1.00000 |
| rad20     | 1.23081e-10 | 1.00000 | 5.44766e-10 | 1.00000 |
| rad9      | 1.06403e-10 | 1.00000 | 4.70950e-10 | 1.00000 |
| rad21     | 7.10993e-11 | 1.00000 | 3.14692e-10 | 1.00000 |
| rad36     | 5.15867e-11 | 1.00000 | 2.28328e-10 | 1.00000 |
| rad28     | 4.72865e-11 | 1.00000 | 2.09295e-10 | 1.00000 |
| rad18     | 4.06413e-11 | 1.00000 | 1.79882e-10 | 1.00000 |
| rad22     | 2.91960e-11 | 1.00000 | 1.29224e-10 | 1.00000 |
| rad13     | 2.41785e-11 | 1.00000 | 1.07016e-10 | 1.00000 |
| rad2      | 7.12999e-12 | 1.00000 | 3.15580e-11 | 1.00000 |
| rad10     | 6.89812e-12 | 1.00000 | 3.05317e-11 | 1.00000 |
| rad26     | 5.44244e-12 | 1.00000 | 2.40887e-11 | 1.00000 |
| rad1      | 1.63557e-12 | 1.00000 | 7.23918e-12 | 1.00000 |
| rad24     | 1.34246e-12 | 1.00000 | 5.94185e-12 | 1.00000 |
| rad15     | 1.18461e-12 | 1.00000 | 5.24318e-12 | 1.00000 |
| rad33     | 5.25324e-13 | 1.00000 | 2.32513e-12 | 1.00000 |
| rad3      | 3.88655e-13 | 1.00000 | 1.72022e-12 | 1.00000 |
| rad4      | 3.05626e-13 | 1.00000 | 1.35273e-12 | 1.00000 |
| rad12     | 1.99727e-13 | 1.00000 | 8.84012e-13 | 1.00000 |
| rad25     | 1.32651e-13 | 1.00000 | 5.87125e-13 | 1.00000 |
| rad8      | 3.57804e-14 | 1.00000 | 1.58367e-13 | 1.00000 |
| rad14     | 7.61348e-15 | 1.00000 | 3.36980e-14 | 1.00000 |
| rad27     | 2.32595e-15 | 1.00000 | 1.02949e-14 | 1.00000 |
| rad47     | 2.08557e-16 | 1.00000 | 9.23091e-16 | 1.00000 |
| rad31     | 1.60855e-16 | 1.00000 | 7.11960e-16 | 1.00000 |
| rad5      | 4.80771e-17 | 1.00000 | 2.12794e-16 | 1.00000 |

0.100000000E-01 Pa, 1750.00000 K

| Rate constant | True (fraction)     | Effective (fraction) |
|---------------|---------------------|----------------------|
| Total         | 9.18604e-14 (1.00 ) | 1.49145e-14 (1.00 )  |

| species       | PYtrue      | Cumul    | PYeffective | Cumul    |
|---------------|-------------|----------|-------------|----------|
| Benzyl+C2H2   | 0.837640    | 0.837640 | 0.00000     | 0.00000  |
| Indene+H      | 0.133064    | 0.970704 | 0.819559    | 0.819559 |
| PhCH2CCH+H    | 0.0118056   | 0.982510 | 0.0727127   | 0.892272 |
| Ph+Allene     | 0.00950092  | 0.992011 | 0.0585176   | 0.950789 |
| PhCHCCH2+H    | 0.00446803  | 0.996479 | 0.0275192   | 0.978309 |
| PhCCH+CH3     | 0.000861595 | 0.997340 | 0.00530669  | 0.983615 |
| PAH9+H        | 0.000556653 | 0.997897 | 0.00342851  | 0.987044 |
| rad30         | 0.000325000 | 0.998222 | 0.00200172  | 0.989045 |
| rad19anti     | 0.000321503 | 0.998543 | 0.00198018  | 0.991026 |
| rad38         | 0.000287110 | 0.998830 | 0.00176835  | 0.992794 |
| PAH7+H        | 0.000286344 | 0.999117 | 0.00176364  | 0.994558 |
| PAH3+H        | 0.000275296 | 0.999392 | 0.00169559  | 0.996253 |
| Ph+MeAc       | 0.000167695 | 0.999560 | 0.00103286  | 0.997286 |
| rad35         | 0.000110067 | 0.999670 | 0.000677916 | 0.997964 |
| rad46         | 7.52924e-05 | 0.999745 | 0.000463737 | 0.998428 |
| rad39         | 5.82435e-05 | 0.999803 | 0.000358730 | 0.998786 |
| rad50         | 4.36593e-05 | 0.999847 | 0.000268904 | 0.999055 |
| PhCCCH3+H     | 3.20468e-05 | 0.999879 | 0.000197381 | 0.999253 |
| rad59         | 2.75338e-05 | 0.999907 | 0.000169584 | 0.999422 |
| rad60syn      | 2.64498e-05 | 0.999933 | 0.000162908 | 0.999585 |
| rad60anti     | 1.77452e-05 | 0.999951 | 0.000109295 | 0.999694 |
| rad51         | 1.06314e-05 | 0.999961 | 6.54802e-05 | 0.999760 |
| rad67         | 1.00266e-05 | 0.999971 | 6.17555e-05 | 0.999822 |
| rad19syn      | 8.12823e-06 | 0.999980 | 5.00630e-05 | 0.999872 |
| PhcycC3H3_A+H | 4.32974e-06 | 0.999984 | 2.66675e-05 | 0.999898 |
| rad52         | 3.62601e-06 | 0.999988 | 2.23331e-05 | 0.999921 |
| rad54         | 3.10470e-06 | 0.999991 | 1.91223e-05 | 0.999940 |
| PAH10+CH3     | 2.60310e-06 | 0.999993 | 1.60329e-05 | 0.999956 |
| rad58         | 2.01823e-06 | 0.999995 | 1.24306e-05 | 0.999968 |
| rad37         | 1.70773e-06 | 0.999997 | 1.05181e-05 | 0.999979 |
| PAH1+H        | 1.10642e-06 | 0.999998 | 6.81459e-06 | 0.999986 |
| rad70         | 1.04847e-06 | 0.999999 | 6.45770e-06 | 0.999992 |
| rad65         | 3.08364e-07 | 0.999999 | 1.89926e-06 | 0.999994 |
| rad34         | 2.42005e-07 | 1.000000 | 1.49055e-06 | 0.999996 |
| rad55         | 2.29002e-07 | 1.000000 | 1.41046e-06 | 0.999997 |
| rad71         | 1.91562e-07 | 1.00000  | 1.17986e-06 | 0.999998 |
| rad73         | 1.56634e-07 | 1.00000  | 9.64732e-07 | 0.999999 |
| rad53         | 4.44404e-08 | 1.00000  | 2.73715e-07 | 0.999999 |

|           |             |         |             |          |
|-----------|-------------|---------|-------------|----------|
| rad62     | 4.00920e-08 | 1.00000 | 2.46932e-07 | 1.000000 |
| rad56     | 3.57962e-08 | 1.00000 | 2.20474e-07 | 1.000000 |
| PAH8+H    | 2.44074e-08 | 1.00000 | 1.50329e-07 | 1.000000 |
| rad64     | 1.92962e-08 | 1.00000 | 1.18848e-07 | 1.000000 |
| rad68syn  | 1.20135e-08 | 1.00000 | 7.39930e-08 | 1.000000 |
| rad6      | 9.31886e-09 | 1.00000 | 5.73962e-08 | 1.000000 |
| rad43     | 8.60722e-09 | 1.00000 | 5.30131e-08 | 1.000000 |
| rad68anti | 7.79132e-09 | 1.00000 | 4.79879e-08 | 1.000000 |
| rad72     | 5.51379e-09 | 1.00000 | 3.39602e-08 | 1.000000 |
| rad40syn  | 3.52239e-09 | 1.00000 | 2.16950e-08 | 1.000000 |
| rad61     | 3.50383e-09 | 1.00000 | 2.15806e-08 | 1.000000 |
| rad42     | 2.39336e-09 | 1.00000 | 1.47411e-08 | 1.000000 |
| rad40anti | 2.09847e-09 | 1.00000 | 1.29248e-08 | 1.000000 |
| rad41     | 5.64347e-10 | 1.00000 | 3.47589e-09 | 1.000000 |
| rad23     | 4.82186e-10 | 1.00000 | 2.96986e-09 | 1.000000 |
| rad22     | 5.86366e-11 | 1.00000 | 3.61152e-10 | 1.000000 |
| rad45     | 5.03712e-11 | 1.00000 | 3.10244e-10 | 1.000000 |
| rad7      | 2.72780e-11 | 1.00000 | 1.68009e-10 | 1.000000 |
| rad11     | 2.50247e-11 | 1.00000 | 1.54131e-10 | 1.000000 |
| rad28     | 1.98416e-11 | 1.00000 | 1.22208e-10 | 1.000000 |
| rad9      | 1.35741e-11 | 1.00000 | 8.36047e-11 | 1.000000 |
| rad20     | 1.26286e-11 | 1.00000 | 7.77813e-11 | 1.000000 |
| rad36     | 8.54405e-12 | 1.00000 | 5.26240e-11 | 1.000000 |
| rad21     | 6.65192e-12 | 1.00000 | 4.09702e-11 | 1.000000 |
| rad18     | 5.81110e-12 | 1.00000 | 3.57914e-11 | 1.000000 |
| rad13     | 1.40546e-12 | 1.00000 | 8.65641e-12 | 1.000000 |
| rad15     | 6.75051e-13 | 1.00000 | 4.15774e-12 | 1.000000 |
| rad26     | 5.48930e-13 | 1.00000 | 3.38094e-12 | 1.000000 |
| rad10     | 2.62616e-13 | 1.00000 | 1.61749e-12 | 1.000000 |
| rad24     | 1.70134e-13 | 1.00000 | 1.04788e-12 | 1.000000 |
| rad2      | 1.23142e-13 | 1.00000 | 7.58447e-13 | 1.000000 |
| rad12     | 4.26946e-14 | 1.00000 | 2.62962e-13 | 1.000000 |
| rad33     | 3.32958e-14 | 1.00000 | 2.05073e-13 | 1.000000 |
| rad1      | 3.02530e-14 | 1.00000 | 1.86333e-13 | 1.000000 |
| rad8      | 1.74118e-14 | 1.00000 | 1.07242e-13 | 1.000000 |
| rad25     | 1.29131e-14 | 1.00000 | 7.95335e-14 | 1.000000 |
| rad3      | 8.57173e-15 | 1.00000 | 5.27945e-14 | 1.000000 |
| rad4      | 5.43473e-15 | 1.00000 | 3.34733e-14 | 1.000000 |
| rad14     | 5.21817e-16 | 1.00000 | 3.21395e-15 | 1.000000 |
| rad47     | 2.44698e-16 | 1.00000 | 1.50713e-15 | 1.000000 |
| rad5      | 1.34531e-16 | 1.00000 | 8.28593e-16 | 1.000000 |
| rad27     | 9.09535e-17 | 1.00000 | 5.60196e-16 | 1.000000 |

0.100000000E-01 Pa, 2000.00000 K

=====

| Rate constant | True (fraction)     | Effective (fraction) |
|---------------|---------------------|----------------------|
| Total         | 1.85359e-13 (1.00 ) | 2.47588e-14 (1.00 )  |

| species       | PYtrue      | Cumul    | PYeffective | Cumul    |
|---------------|-------------|----------|-------------|----------|
| Benzyl+C2H2   | 0.866428    | 0.866428 | 0.00000     | 0.00000  |
| Indene+H      | 0.0943885   | 0.960816 | 0.706650    | 0.706650 |
| PhCH2CCH+H    | 0.0189358   | 0.979752 | 0.141765    | 0.848415 |
| Ph+Allene     | 0.0101088   | 0.989861 | 0.0756808   | 0.924096 |
| PhCHCCH2+H    | 0.00579099  | 0.995652 | 0.0433549   | 0.967451 |
| PAH9+H        | 0.000765251 | 0.996417 | 0.00572914  | 0.973180 |
| PhCCH+CH3     | 0.000550353 | 0.996968 | 0.00412028  | 0.977300 |
| PAH3+H        | 0.000526246 | 0.997494 | 0.00393980  | 0.981240 |
| rad19anti     | 0.000486607 | 0.997981 | 0.00364303  | 0.984883 |
| rad38         | 0.000411538 | 0.998392 | 0.00308103  | 0.987964 |
| rad30         | 0.000378289 | 0.998770 | 0.00283210  | 0.990796 |
| PAH7+H        | 0.000350388 | 0.999121 | 0.00262322  | 0.993419 |
| Ph+MeAc       | 0.000164748 | 0.999286 | 0.00123340  | 0.994653 |
| rad35         | 0.000155515 | 0.999441 | 0.00116428  | 0.995817 |
| rad46         | 0.000120110 | 0.999561 | 0.000899213 | 0.996716 |
| rad50         | 9.58275e-05 | 0.999657 | 0.000717423 | 0.997434 |
| rad39         | 7.87042e-05 | 0.999736 | 0.000589228 | 0.998023 |
| rad59         | 4.92026e-05 | 0.999785 | 0.000368361 | 0.998391 |
| rad60syn      | 4.01110e-05 | 0.999825 | 0.000300295 | 0.998692 |
| PhCCCH3+H     | 3.61305e-05 | 0.999861 | 0.000270495 | 0.998962 |
| rad51         | 2.92775e-05 | 0.999890 | 0.000219190 | 0.999181 |
| rad60anti     | 2.75040e-05 | 0.999918 | 0.000205912 | 0.999387 |
| rad67         | 2.43946e-05 | 0.999942 | 0.000182633 | 0.999570 |
| rad19syn      | 1.17085e-05 | 0.999954 | 8.76569e-05 | 0.999657 |
| rad52         | 8.84592e-06 | 0.999963 | 6.62259e-05 | 0.999724 |
| PAH10+CH3     | 7.72772e-06 | 0.999971 | 5.78544e-05 | 0.999781 |
| PhcycC3H3_A+H | 7.44563e-06 | 0.999978 | 5.57425e-05 | 0.999837 |
| rad58         | 5.03691e-06 | 0.999983 | 3.77093e-05 | 0.999875 |
| rad54         | 4.34711e-06 | 0.999987 | 3.25451e-05 | 0.999907 |

|           |             |          |             |          |
|-----------|-------------|----------|-------------|----------|
| rad37     | 3.43690e-06 | 0.999991 | 2.57307e-05 | 0.999933 |
| PAH1+H    | 2.74926e-06 | 0.999994 | 2.05827e-05 | 0.999954 |
| rad70     | 2.09354e-06 | 0.999996 | 1.56735e-05 | 0.999969 |
| rad71     | 1.06989e-06 | 0.999997 | 8.00985e-06 | 0.999977 |
| rad65     | 8.19695e-07 | 0.999998 | 6.13673e-06 | 0.999984 |
| rad73     | 7.43997e-07 | 0.999998 | 5.57002e-06 | 0.999989 |
| rad34     | 5.52322e-07 | 0.999999 | 4.13502e-06 | 0.999993 |
| rad55     | 3.53325e-07 | 0.999999 | 2.64521e-06 | 0.999996 |
| PAH8+H    | 1.14514e-07 | 0.999999 | 8.57325e-07 | 0.999997 |
| rad53     | 9.72453e-08 | 0.999999 | 7.28037e-07 | 0.999998 |
| rad56     | 9.21239e-08 | 1.000000 | 6.89696e-07 | 0.999998 |
| rad62     | 6.00491e-08 | 1.000000 | 4.49564e-07 | 0.999999 |
| rad64     | 5.57960e-08 | 1.000000 | 4.17723e-07 | 0.999999 |
| rad72     | 4.30295e-08 | 1.000000 | 3.22145e-07 | 0.999999 |
| rad68syn  | 4.11176e-08 | 1.000000 | 3.07831e-07 | 1.000000 |
| rad68anti | 2.65283e-08 | 1.000000 | 1.98607e-07 | 1.000000 |
| rad43     | 2.20258e-08 | 1.000000 | 1.64898e-07 | 1.000000 |
| rad61     | 1.54176e-08 | 1.000000 | 1.15426e-07 | 1.000000 |
| rad40syn  | 1.44059e-08 | 1.000000 | 1.07851e-07 | 1.000000 |
| rad40anti | 9.08247e-09 | 1.000000 | 6.79969e-08 | 1.000000 |
| rad42     | 4.93507e-09 | 1.000000 | 3.69470e-08 | 1.000000 |
| rad41     | 1.99345e-09 | 1.000000 | 1.49242e-08 | 1.000000 |
| rad6      | 1.04689e-09 | 1.000000 | 7.83768e-09 | 1.000000 |
| rad23     | 2.04025e-10 | 1.000000 | 1.52746e-09 | 1.000000 |
| rad45     | 1.67423e-11 | 1.000000 | 1.25343e-10 | 1.000000 |
| rad22     | 1.55655e-11 | 1.000000 | 1.16533e-10 | 1.000000 |
| rad9      | 6.90137e-12 | 1.000000 | 5.16678e-11 | 1.000000 |
| rad11     | 5.38042e-12 | 1.000000 | 4.02811e-11 | 1.000000 |
| rad20     | 5.29561e-12 | 1.000000 | 3.96462e-11 | 1.000000 |
| rad7      | 4.22912e-12 | 1.000000 | 3.16618e-11 | 1.000000 |
| rad28     | 3.45708e-12 | 1.000000 | 2.58818e-11 | 1.000000 |
| rad36     | 2.92102e-12 | 1.000000 | 2.18685e-11 | 1.000000 |
| rad21     | 2.72292e-12 | 1.000000 | 2.03854e-11 | 1.000000 |
| rad18     | 1.62515e-12 | 1.000000 | 1.21669e-11 | 1.000000 |
| rad15     | 3.63400e-13 | 1.000000 | 2.72063e-12 | 1.000000 |
| rad13     | 3.15165e-13 | 1.000000 | 2.35952e-12 | 1.000000 |
| rad24     | 9.49359e-14 | 1.000000 | 7.10748e-13 | 1.000000 |
| rad26     | 6.82743e-14 | 1.000000 | 5.11143e-13 | 1.000000 |
| rad12     | 3.72964e-14 | 1.000000 | 2.79223e-13 | 1.000000 |
| rad10     | 2.51584e-14 | 1.000000 | 1.88351e-13 | 1.000000 |
| rad8      | 2.00223e-14 | 1.000000 | 1.49899e-13 | 1.000000 |
| rad2      | 1.11274e-14 | 1.000000 | 8.33066e-14 | 1.000000 |
| rad33     | 1.02787e-14 | 1.000000 | 7.69527e-14 | 1.000000 |
| rad25     | 5.51562e-15 | 1.000000 | 4.12933e-14 | 1.000000 |
| rad1      | 2.88805e-15 | 1.000000 | 2.16217e-14 | 1.000000 |
| rad3      | 1.47245e-15 | 1.000000 | 1.10237e-14 | 1.000000 |
| rad4      | 9.40456e-16 | 1.000000 | 7.04083e-15 | 1.000000 |
| rad47     | 6.72678e-16 | 1.000000 | 5.03608e-15 | 1.000000 |
| rad5      | 1.91709e-16 | 1.000000 | 1.43525e-15 | 1.000000 |
| rad14     | 1.43939e-16 | 1.000000 | 1.07761e-15 | 1.000000 |
| rad27     | 2.37090e-17 | 1.000000 | 1.77500e-16 | 1.000000 |

0.100000000E-01 Pa, 2250.00000 K

=====

| Rate constant | True (fraction)     | Effective (fraction) |
|---------------|---------------------|----------------------|
| Total         | 3.29136e-13 (1.00 ) | 4.00875e-14 (1.00 )  |

| species     | PYtrue      | Cumul    | PYeffective | Cumul    |
|-------------|-------------|----------|-------------|----------|
| Benzyl+C2H2 | 0.878204    | 0.878204 | 0.00000     | 0.00000  |
| Indene+H    | 0.0703003   | 0.948504 | 0.577195    | 0.577195 |
| PhCH2CCH+H  | 0.0277459   | 0.976250 | 0.227806    | 0.805001 |
| Ph+Allene   | 0.0105974   | 0.986848 | 0.0870088   | 0.892010 |
| PhCHCCH2+H  | 0.00765656  | 0.994504 | 0.0628636   | 0.954873 |
| PAH9+H      | 0.000941856 | 0.995446 | 0.00773304  | 0.962606 |
| PAH3+H      | 0.000857236 | 0.996303 | 0.00703827  | 0.969645 |
| rad19anti   | 0.000629228 | 0.996932 | 0.00516623  | 0.974811 |
| rad38       | 0.000525523 | 0.997458 | 0.00431476  | 0.979126 |
| PAH7+H      | 0.000454502 | 0.997913 | 0.00373165  | 0.982857 |
| rad30       | 0.000417263 | 0.998330 | 0.00342591  | 0.986283 |
| PhCCH+CH3   | 0.000383697 | 0.998713 | 0.00315031  | 0.989434 |
| rad35       | 0.000200865 | 0.998914 | 0.00164918  | 0.991083 |
| Ph+MeAc     | 0.000197882 | 0.999112 | 0.00162470  | 0.992707 |
| rad50       | 0.000170940 | 0.999283 | 0.00140349  | 0.994111 |
| rad46       | 0.000166540 | 0.999450 | 0.00136737  | 0.995478 |
| rad39       | 0.000118806 | 0.999568 | 0.000975446 | 0.996454 |
| rad59       | 7.57691e-05 | 0.999644 | 0.000622096 | 0.997076 |
| rad51       | 6.22687e-05 | 0.999707 | 0.000511252 | 0.997587 |
| rad60syn    | 5.44510e-05 | 0.999761 | 0.000447066 | 0.998034 |

|               |             |          |             |          |
|---------------|-------------|----------|-------------|----------|
| PhCCCH3+H     | 5.15901e-05 | 0.999813 | 0.000423577 | 0.998458 |
| rad67         | 4.61782e-05 | 0.999859 | 0.000379142 | 0.998837 |
| rad60anti     | 3.79865e-05 | 0.999897 | 0.000311885 | 0.999149 |
| PAH10+CH3     | 1.71933e-05 | 0.999914 | 0.000141164 | 0.999290 |
| rad52         | 1.70844e-05 | 0.999931 | 0.000140270 | 0.999430 |
| rad19syn      | 1.63932e-05 | 0.999947 | 0.000134595 | 0.999565 |
| PhcycC3H3_A+H | 1.10275e-05 | 0.999958 | 9.05408e-05 | 0.999655 |
| rad58         | 1.00660e-05 | 0.999969 | 8.26458e-05 | 0.999738 |
| PAH1+H        | 5.96729e-06 | 0.999974 | 4.89940e-05 | 0.999787 |
| rad37         | 5.72356e-06 | 0.999980 | 4.69928e-05 | 0.999834 |
| rad54         | 5.39698e-06 | 0.999986 | 4.43115e-05 | 0.999878 |
| rad71         | 3.95703e-06 | 0.999990 | 3.24889e-05 | 0.999911 |
| rad70         | 3.69403e-06 | 0.999993 | 3.03296e-05 | 0.999941 |
| rad73         | 2.41463e-06 | 0.999996 | 1.98251e-05 | 0.999961 |
| rad65         | 1.68526e-06 | 0.999997 | 1.38367e-05 | 0.999975 |
| rad34         | 1.08371e-06 | 0.999998 | 8.89771e-06 | 0.999984 |
| rad55         | 4.74067e-07 | 0.999999 | 3.89229e-06 | 0.999988 |
| PAH8+H        | 3.91948e-07 | 0.999999 | 3.21806e-06 | 0.999991 |
| rad72         | 2.09339e-07 | 1.000000 | 1.71876e-06 | 0.999992 |
| rad56         | 1.86169e-07 | 1.000000 | 1.52853e-06 | 0.999994 |
| rad53         | 1.73183e-07 | 1.000000 | 1.42191e-06 | 0.999995 |
| rad64         | 1.33616e-07 | 1.000000 | 1.09704e-06 | 0.999997 |
| rad68syn      | 1.10265e-07 | 1.000000 | 9.05324e-07 | 0.999997 |
| rad62         | 9.48261e-08 | 1.000000 | 7.78563e-07 | 0.999998 |
| rad68anti     | 7.08808e-08 | 1.000000 | 5.81961e-07 | 0.999999 |
| rad43         | 4.82400e-08 | 1.000000 | 3.96071e-07 | 0.999999 |
| rad61         | 4.62525e-08 | 1.000000 | 3.79753e-07 | 1.000000 |
| rad40syn      | 4.43239e-08 | 1.000000 | 3.63918e-07 | 1.000000 |
| rad40anti     | 2.91752e-08 | 1.000000 | 2.39541e-07 | 1.000000 |
| rad42         | 1.00367e-08 | 1.000000 | 8.24060e-08 | 1.000000 |
| rad41         | 5.35211e-09 | 1.000000 | 4.39431e-08 | 1.000000 |
| rad6          | 1.28722e-10 | 1.000000 | 1.05686e-09 | 1.000000 |
| rad23         | 5.24514e-11 | 1.000000 | 4.30648e-10 | 1.000000 |
| rad45         | 6.46902e-12 | 1.000000 | 5.31134e-11 | 1.000000 |
| rad22         | 4.00327e-12 | 1.000000 | 3.28685e-11 | 1.000000 |
| rad9          | 3.58313e-12 | 1.000000 | 2.94190e-11 | 1.000000 |
| rad20         | 2.60561e-12 | 1.000000 | 2.13932e-11 | 1.000000 |
| rad11         | 1.63019e-12 | 1.000000 | 1.33845e-11 | 1.000000 |
| rad21         | 1.30014e-12 | 1.000000 | 1.06747e-11 | 1.000000 |
| rad36         | 1.15546e-12 | 1.000000 | 9.48686e-12 | 1.000000 |
| rad7          | 9.45877e-13 | 1.000000 | 7.76605e-12 | 1.000000 |
| rad18         | 6.17465e-13 | 1.000000 | 5.06965e-12 | 1.000000 |
| rad28         | 5.18792e-13 | 1.000000 | 4.25950e-12 | 1.000000 |
| rad15         | 2.11299e-13 | 1.000000 | 1.73485e-12 | 1.000000 |
| rad13         | 8.56690e-14 | 1.000000 | 7.03379e-13 | 1.000000 |
| rad24         | 5.70002e-14 | 1.000000 | 4.67996e-13 | 1.000000 |
| rad12         | 3.05352e-14 | 1.000000 | 2.50707e-13 | 1.000000 |
| rad26         | 2.29083e-14 | 1.000000 | 1.88087e-13 | 1.000000 |
| rad8          | 2.16858e-14 | 1.000000 | 1.78050e-13 | 1.000000 |
| rad10         | 7.32331e-15 | 1.000000 | 6.01275e-14 | 1.000000 |
| rad33         | 3.63731e-15 | 1.000000 | 2.98638e-14 | 1.000000 |
| rad25         | 2.84539e-15 | 1.000000 | 2.33618e-14 | 1.000000 |
| rad2          | 1.63857e-15 | 1.000000 | 1.34533e-14 | 1.000000 |
| rad47         | 1.41374e-15 | 1.000000 | 1.16074e-14 | 1.000000 |
| rad1          | 4.66873e-16 | 1.000000 | 3.83322e-15 | 1.000000 |
| rad3          | 3.19900e-16 | 1.000000 | 2.62651e-15 | 1.000000 |
| rad5          | 2.11201e-16 | 1.000000 | 1.73405e-15 | 1.000000 |
| rad4          | 2.03685e-16 | 1.000000 | 1.67234e-15 | 1.000000 |
| rad14         | 5.33346e-17 | 1.000000 | 4.37900e-16 | 1.000000 |
| rad27         | 1.32575e-17 | 1.000000 | 1.08850e-16 | 1.000000 |

0.100000000E-01 Pa, 2500.00000 K

| Rate constant | True (fraction)    | Effective (fraction) |
|---------------|--------------------|----------------------|
| Total         | 5.32896e-13 (1.00) | 6.40311e-14 (1.00)   |

| species     | PYtrue      | Cumul    | PYeffective | Cumul    |
|-------------|-------------|----------|-------------|----------|
| Benzyl+C2H2 | 0.879843    | 0.879843 | 0.00000     | 0.00000  |
| Indene+H    | 0.0541638   | 0.934007 | 0.450777    | 0.450777 |
| PhCH2CCH+H  | 0.0379681   | 0.971975 | 0.315989    | 0.766766 |
| Ph+Allene   | 0.0112444   | 0.983219 | 0.0935810   | 0.860347 |
| PhCHCCH2+H  | 0.00999485  | 0.993214 | 0.0831818   | 0.943529 |
| PAH3+H      | 0.00124356  | 0.994458 | 0.0103495   | 0.953878 |
| PAH9+H      | 0.00106545  | 0.995523 | 0.00886715  | 0.962745 |
| rad19anti   | 0.000731028 | 0.996254 | 0.00608396  | 0.968829 |
| rad38       | 0.000614393 | 0.996869 | 0.00511327  | 0.973943 |
| PAH7+H      | 0.000586817 | 0.997455 | 0.00488376  | 0.978826 |
| rad30       | 0.000442203 | 0.997898 | 0.00368022  | 0.982507 |

|               |             |          |             |          |
|---------------|-------------|----------|-------------|----------|
| PhCCH+CH3     | 0.000309130 | 0.998207 | 0.00257273  | 0.985079 |
| rad50         | 0.000261677 | 0.998468 | 0.00217780  | 0.987257 |
| Ph+MeAc       | 0.000256973 | 0.998725 | 0.00213865  | 0.989396 |
| rad35         | 0.000242192 | 0.998968 | 0.00201564  | 0.991411 |
| rad46         | 0.000207878 | 0.999175 | 0.00173006  | 0.993142 |
| rad39         | 0.000175772 | 0.999351 | 0.00146285  | 0.994604 |
| rad51         | 0.000109649 | 0.999461 | 0.000912548 | 0.995517 |
| rad59         | 0.000104825 | 0.999566 | 0.000872406 | 0.996389 |
| rad67         | 7.34547e-05 | 0.999639 | 0.000611325 | 0.997001 |
| PhCCCH3+H     | 7.22810e-05 | 0.999711 | 0.000601557 | 0.997602 |
| rad60syn      | 6.81857e-05 | 0.999780 | 0.000567474 | 0.998170 |
| rad60anti     | 4.82378e-05 | 0.999828 | 0.000401457 | 0.998571 |
| PAH10+CH3     | 3.08998e-05 | 0.999859 | 0.000257163 | 0.998828 |
| rad52         | 2.78077e-05 | 0.999887 | 0.000231429 | 0.999060 |
| rad19syn      | 2.34810e-05 | 0.999910 | 0.000195420 | 0.999255 |
| rad58         | 1.71635e-05 | 0.999927 | 0.000142842 | 0.999398 |
| PhcycC3H3_A+H | 1.49440e-05 | 0.999942 | 0.000124371 | 0.999522 |
| PAH1+H        | 1.13017e-05 | 0.999953 | 9.40581e-05 | 0.999616 |
| rad71         | 1.08629e-05 | 0.999964 | 9.04058e-05 | 0.999707 |
| rad37         | 8.12868e-06 | 0.999972 | 6.76507e-05 | 0.999774 |
| rad54         | 6.28002e-06 | 0.999979 | 5.22652e-05 | 0.999827 |
| rad70         | 5.97099e-06 | 0.999985 | 4.96933e-05 | 0.999876 |
| rad73         | 5.95728e-06 | 0.999991 | 4.95793e-05 | 0.999926 |
| rad65         | 2.87595e-06 | 0.999994 | 2.39350e-05 | 0.999950 |
| rad34         | 1.90624e-06 | 0.999995 | 1.58647e-05 | 0.999966 |
| PAH8+H        | 1.06524e-06 | 0.999997 | 8.86540e-06 | 0.999975 |
| rad72         | 7.14913e-07 | 0.999997 | 5.94984e-06 | 0.999981 |
| rad55         | 5.87553e-07 | 0.999998 | 4.88989e-06 | 0.999986 |
| rad56         | 3.21872e-07 | 0.999998 | 2.67877e-06 | 0.999988 |
| rad64         | 2.70856e-07 | 0.999998 | 2.25419e-06 | 0.999990 |
| rad53         | 2.70820e-07 | 0.999999 | 2.25389e-06 | 0.999993 |
| rad68syn      | 2.47504e-07 | 0.999999 | 2.05985e-06 | 0.999995 |
| rad68anti     | 1.58683e-07 | 0.999999 | 1.32064e-06 | 0.999996 |
| rad62         | 1.55148e-07 | 0.999999 | 1.29122e-06 | 0.999997 |
| rad40syn      | 1.10734e-07 | 0.999999 | 9.21580e-07 | 0.999998 |
| rad61         | 1.05680e-07 | 0.999999 | 8.79519e-07 | 0.999999 |
| rad43         | 8.79692e-08 | 1.000000 | 7.32121e-07 | 1.000000 |
| rad40anti     | 7.53436e-08 | 1.000000 | 6.27045e-07 | 1.000000 |
| rad42         | 1.97239e-08 | 1.000000 | 1.64152e-07 | 1.000000 |
| rad41         | 1.13877e-08 | 1.000000 | 9.47735e-08 | 1.000000 |
| rad6          | 2.31776e-11 | 1.000000 | 1.92895e-10 | 1.000000 |
| rad23         | 1.58922e-11 | 1.000000 | 1.32263e-10 | 1.000000 |
| rad45         | 2.81255e-12 | 1.000000 | 2.34073e-11 | 1.000000 |
| rad9          | 1.90507e-12 | 1.000000 | 1.58549e-11 | 1.000000 |
| rad20         | 1.43942e-12 | 1.000000 | 1.19795e-11 | 1.000000 |
| rad22         | 1.36326e-12 | 1.000000 | 1.13457e-11 | 1.000000 |
| rad21         | 6.94982e-13 | 1.000000 | 5.78397e-12 | 1.000000 |
| rad11         | 6.26319e-13 | 1.000000 | 5.21252e-12 | 1.000000 |
| rad36         | 5.12178e-13 | 1.000000 | 4.26259e-12 | 1.000000 |
| rad18         | 2.77753e-13 | 1.000000 | 2.31159e-12 | 1.000000 |
| rad7          | 2.65000e-13 | 1.000000 | 2.20545e-12 | 1.000000 |
| rad15         | 1.25587e-13 | 1.000000 | 1.04519e-12 | 1.000000 |
| rad28         | 1.22527e-13 | 1.000000 | 1.01973e-12 | 1.000000 |
| rad24         | 3.60418e-14 | 1.000000 | 2.99957e-13 | 1.000000 |
| rad13         | 2.74577e-14 | 1.000000 | 2.28516e-13 | 1.000000 |
| rad12         | 2.40047e-14 | 1.000000 | 1.99778e-13 | 1.000000 |
| rad8          | 2.25267e-14 | 1.000000 | 1.87478e-13 | 1.000000 |
| rad26         | 1.26336e-14 | 1.000000 | 1.05143e-13 | 1.000000 |
| rad10         | 4.05981e-15 | 1.000000 | 3.37877e-14 | 1.000000 |
| rad47         | 2.44566e-15 | 1.000000 | 2.03540e-14 | 1.000000 |
| rad25         | 1.71222e-15 | 1.000000 | 1.42499e-14 | 1.000000 |
| rad33         | 1.46761e-15 | 1.000000 | 1.22142e-14 | 1.000000 |
| rad2          | 4.90080e-16 | 1.000000 | 4.07868e-15 | 1.000000 |
| rad5          | 2.18454e-16 | 1.000000 | 1.81808e-15 | 1.000000 |
| rad1          | 1.61590e-16 | 1.000000 | 1.34483e-15 | 1.000000 |
| rad3          | 8.73433e-17 | 1.000000 | 7.26912e-16 | 1.000000 |
| rad4          | 5.47929e-17 | 1.000000 | 4.56012e-16 | 1.000000 |
| rad14         | 2.68076e-17 | 1.000000 | 2.23105e-16 | 1.000000 |
| rad27         | 1.07395e-17 | 1.000000 | 8.93791e-17 | 1.000000 |

0.100000000E-01 Pa, 2750.00000 K

=====

| Rate constant | True (fraction)     | Effective (fraction) |             |          |
|---------------|---------------------|----------------------|-------------|----------|
| Total         | 8.05113e-13 (1.00 ) | 1.00487e-13 (1.00 )  |             |          |
| species       | PYtrue              | Cumul                | PYeffective | Cumul    |
| Benzyl+C2H2   | 0.875189            | 0.875189             | 0.00000     | 0.00000  |
| PhCH2CCH+H    | 0.0492371           | 0.924426             | 0.394492    | 0.394492 |

|               |             |          |             |          |
|---------------|-------------|----------|-------------|----------|
| Indene+H      | 0.0427171   | 0.967143 | 0.342254    | 0.736746 |
| PhCHCCH2+H    | 0.0126523   | 0.979795 | 0.101371    | 0.838117 |
| Ph+Allene     | 0.0121360   | 0.991931 | 0.0972347   | 0.935352 |
| PAH3+H        | 0.00165412  | 0.993586 | 0.0132530   | 0.948605 |
| PAH9+H        | 0.00112924  | 0.994715 | 0.00904761  | 0.957652 |
| rad19anti     | 0.000790044 | 0.995505 | 0.00632991  | 0.963982 |
| PAH7+H        | 0.000729333 | 0.996234 | 0.00584349  | 0.969826 |
| rad38         | 0.000670521 | 0.996905 | 0.00537228  | 0.975198 |
| rad30         | 0.000454283 | 0.997359 | 0.00363976  | 0.978838 |
| rad50         | 0.000356822 | 0.997716 | 0.00285889  | 0.981697 |
| Ph+MeAc       | 0.000331297 | 0.998047 | 0.00265438  | 0.984351 |
| PhCCH+CH3     | 0.000293338 | 0.998340 | 0.00235025  | 0.986701 |
| rad35         | 0.000276886 | 0.998617 | 0.00221844  | 0.988920 |
| rad39         | 0.000242690 | 0.998860 | 0.00194445  | 0.990864 |
| rad46         | 0.000239377 | 0.999099 | 0.00191791  | 0.992782 |
| rad51         | 0.000167553 | 0.999267 | 0.00134245  | 0.994125 |
| rad59         | 0.000133898 | 0.999401 | 0.00107280  | 0.995197 |
| rad67         | 0.000103303 | 0.999504 | 0.000827674 | 0.996025 |
| PhCCCH3+H     | 9.47597e-05 | 0.999599 | 0.000759224 | 0.996784 |
| rad60syn      | 8.03400e-05 | 0.999679 | 0.000643692 | 0.997428 |
| rad60anti     | 5.74980e-05 | 0.999737 | 0.000460680 | 0.997889 |
| PAH10+CH3     | 4.75540e-05 | 0.999784 | 0.000381007 | 0.998270 |
| rad52         | 3.97965e-05 | 0.999824 | 0.000318854 | 0.998588 |
| rad19syn      | 3.43481e-05 | 0.999859 | 0.000275200 | 0.998864 |
| rad58         | 2.60271e-05 | 0.999885 | 0.000208532 | 0.999072 |
| rad71         | 2.39121e-05 | 0.999908 | 0.000191586 | 0.999264 |
| PhcycC3H3_A+H | 1.91124e-05 | 0.999928 | 0.000153131 | 0.999417 |
| PAH1+H        | 1.89313e-05 | 0.999946 | 0.000151679 | 0.999569 |
| rad73         | 1.19964e-05 | 0.999958 | 9.61160e-05 | 0.999665 |
| rad37         | 1.02458e-05 | 0.999969 | 8.20902e-05 | 0.999747 |
| rad70         | 8.97456e-06 | 0.999978 | 7.19051e-05 | 0.999819 |
| rad54         | 7.04852e-06 | 0.999985 | 5.64734e-05 | 0.999875 |
| rad65         | 4.27356e-06 | 0.999989 | 3.42402e-05 | 0.999909 |
| rad34         | 3.06724e-06 | 0.999992 | 2.45750e-05 | 0.999934 |
| PAH8+H        | 2.42508e-06 | 0.999995 | 1.94299e-05 | 0.999953 |
| rad72         | 1.88022e-06 | 0.999996 | 1.50645e-05 | 0.999968 |
| rad55         | 6.94535e-07 | 0.999997 | 5.56468e-06 | 0.999974 |
| rad56         | 5.00306e-07 | 0.999998 | 4.00850e-06 | 0.999978 |
| rad68syn      | 4.83458e-07 | 0.999998 | 3.87351e-06 | 0.999982 |
| rad64         | 4.76899e-07 | 0.999999 | 3.82096e-06 | 0.999986 |
| rad53         | 3.88200e-07 | 0.999999 | 3.11030e-06 | 0.999989 |
| rad68anti     | 3.09361e-07 | 0.999999 | 2.47863e-06 | 0.999991 |
| rad62         | 2.47711e-07 | 0.999999 | 1.98468e-06 | 0.999993 |
| rad40syn      | 2.35491e-07 | 1.000000 | 1.88678e-06 | 0.999995 |
| rad61         | 1.98411e-07 | 1.000000 | 1.58969e-06 | 0.999997 |
| rad40anti     | 1.64464e-07 | 1.000000 | 1.31770e-06 | 0.999998 |
| rad43         | 1.38326e-07 | 1.000000 | 1.10828e-06 | 0.999999 |
| rad42         | 3.59374e-08 | 1.000000 | 2.87934e-07 | 1.000000 |
| rad41         | 2.03340e-08 | 1.000000 | 1.62918e-07 | 1.000000 |
| rad23         | 5.86817e-12 | 1.000000 | 4.70163e-11 | 1.000000 |
| rad6          | 5.46012e-12 | 1.000000 | 4.37470e-11 | 1.000000 |
| rad45         | 1.33862e-12 | 1.000000 | 1.07252e-11 | 1.000000 |
| rad9          | 1.04159e-12 | 1.000000 | 8.34535e-12 | 1.000000 |
| rad20         | 8.68795e-13 | 1.000000 | 6.96087e-12 | 1.000000 |
| rad22         | 5.58311e-13 | 1.000000 | 4.47324e-12 | 1.000000 |
| rad21         | 4.05059e-13 | 1.000000 | 3.24538e-12 | 1.000000 |
| rad11         | 2.92171e-13 | 1.000000 | 2.34091e-12 | 1.000000 |
| rad36         | 2.47651e-13 | 1.000000 | 1.98420e-12 | 1.000000 |
| rad18         | 1.40105e-13 | 1.000000 | 1.12253e-12 | 1.000000 |
| rad7          | 8.88371e-14 | 1.000000 | 7.11772e-13 | 1.000000 |
| rad15         | 7.57336e-14 | 1.000000 | 6.06785e-13 | 1.000000 |
| rad28         | 4.41229e-14 | 1.000000 | 3.53517e-13 | 1.000000 |
| rad24         | 2.36701e-14 | 1.000000 | 1.89647e-13 | 1.000000 |
| rad8          | 2.27048e-14 | 1.000000 | 1.81913e-13 | 1.000000 |
| rad12         | 1.84640e-14 | 1.000000 | 1.47935e-13 | 1.000000 |
| rad13         | 1.02999e-14 | 1.000000 | 8.25238e-14 | 1.000000 |
| rad26         | 7.81775e-15 | 1.000000 | 6.26366e-14 | 1.000000 |
| rad47         | 3.65965e-15 | 1.000000 | 2.93215e-14 | 1.000000 |
| rad10         | 2.67317e-15 | 1.000000 | 2.14177e-14 | 1.000000 |
| rad25         | 1.16293e-15 | 1.000000 | 9.31751e-15 | 1.000000 |
| rad33         | 6.71475e-16 | 1.000000 | 5.37992e-15 | 1.000000 |
| rad2          | 2.44667e-16 | 1.000000 | 1.96030e-15 | 1.000000 |
| rad5          | 2.17323e-16 | 1.000000 | 1.74121e-15 | 1.000000 |
| rad1          | 9.31273e-17 | 1.000000 | 7.46145e-16 | 1.000000 |
| rad3          | 2.96330e-17 | 1.000000 | 2.37423e-16 | 1.000000 |
| rad4          | 1.81318e-17 | 1.000000 | 1.45273e-16 | 1.000000 |
| rad14         | 1.77556e-17 | 1.000000 | 1.42259e-16 | 1.000000 |
| rad27         | 9.32059e-18 | 1.000000 | 7.46775e-17 | 1.000000 |

0.100000000E-01 Pa, 3000.00000 K

=====

| Rate constant | True (fraction)     | Effective (fraction) |
|---------------|---------------------|----------------------|
| Total         | 1.15309e-12 (1.00 ) | 1.53862e-13 (1.00 )  |

| species       | PYtrue      | Cumul    | PYeffective | Cumul    |
|---------------|-------------|----------|-------------|----------|
| Benzyl+C2H2   | 0.866566    | 0.866566 | 0.00000     | 0.00000  |
| PhCH2CCH+H    | 0.0611725   | 0.927738 | 0.458447    | 0.458447 |
| Indene+H      | 0.0342672   | 0.962006 | 0.256810    | 0.715257 |
| PhCHCCH2+H    | 0.0154790   | 0.977485 | 0.116005    | 0.831262 |
| Ph+Allene     | 0.0132660   | 0.990751 | 0.0994201   | 0.930682 |
| PAH3+H        | 0.00205938  | 0.992810 | 0.0154337   | 0.946116 |
| PAH9+H        | 0.00113813  | 0.993948 | 0.00852950  | 0.954645 |
| PAH7+H        | 0.000866135 | 0.994814 | 0.00649110  | 0.961136 |
| rad19anti     | 0.000812999 | 0.995627 | 0.00609288  | 0.967229 |
| rad38         | 0.000693215 | 0.996321 | 0.00519518  | 0.972424 |
| rad30         | 0.000455427 | 0.996776 | 0.00341312  | 0.975838 |
| rad50         | 0.000445147 | 0.997221 | 0.00333608  | 0.979174 |
| Ph+MeAc       | 0.000411378 | 0.997633 | 0.00308300  | 0.982257 |
| PhCCH+CH3     | 0.000319072 | 0.997952 | 0.00239123  | 0.984648 |
| rad39         | 0.000311351 | 0.998263 | 0.00233337  | 0.986991 |
| rad35         | 0.000303822 | 0.998567 | 0.00227694  | 0.989258 |
| rad46         | 0.000258929 | 0.998826 | 0.00194050  | 0.991199 |
| rad51         | 0.000229661 | 0.999055 | 0.00172116  | 0.992920 |
| rad59         | 0.000160966 | 0.999216 | 0.00120633  | 0.994126 |
| rad67         | 0.000132859 | 0.999349 | 0.000995686 | 0.995122 |
| PhCCCH3+H     | 0.000117527 | 0.999467 | 0.000880786 | 0.996003 |
| rad60syn      | 9.03378e-05 | 0.999557 | 0.000677021 | 0.996680 |
| PAH10+CH3     | 6.53522e-05 | 0.999622 | 0.000489771 | 0.997169 |
| rad60anti     | 6.52879e-05 | 0.999688 | 0.000489289 | 0.997659 |
| rad52         | 5.15998e-05 | 0.999739 | 0.000386706 | 0.998045 |
| rad19syn      | 5.01057e-05 | 0.999789 | 0.000375508 | 0.998421 |
| rad71         | 4.45158e-05 | 0.999834 | 0.000333616 | 0.998755 |
| rad58         | 3.61220e-05 | 0.999870 | 0.000270710 | 0.999025 |
| PAH1+H        | 2.86271e-05 | 0.999899 | 0.000214541 | 0.999240 |
| PhcycC3H3_A+H | 2.34369e-05 | 0.999922 | 0.000175644 | 0.999415 |
| rad73         | 2.07080e-05 | 0.999943 | 0.000155192 | 0.999571 |
| rad70         | 1.26564e-05 | 0.999955 | 9.48509e-05 | 0.999666 |
| rad37         | 1.18404e-05 | 0.999967 | 8.87361e-05 | 0.999754 |
| rad54         | 7.74183e-06 | 0.999975 | 5.80198e-05 | 0.999812 |
| rad65         | 5.71876e-06 | 0.999981 | 4.28583e-05 | 0.999855 |
| PAH8+H        | 4.80153e-06 | 0.999986 | 3.59842e-05 | 0.999891 |
| rad34         | 4.57469e-06 | 0.999990 | 3.42843e-05 | 0.999925 |
| rad72         | 4.05905e-06 | 0.999994 | 3.04198e-05 | 0.999956 |
| rad68syn      | 8.44302e-07 | 0.999995 | 6.32748e-06 | 0.999962 |
| rad55         | 7.96394e-07 | 0.999996 | 5.96844e-06 | 0.999968 |
| rad64         | 7.49015e-07 | 0.999997 | 5.61336e-06 | 0.999974 |
| rad56         | 7.20451e-07 | 0.999997 | 5.39929e-06 | 0.999979 |
| rad68anti     | 5.39463e-07 | 0.999998 | 4.04291e-06 | 0.999983 |
| rad53         | 5.23143e-07 | 0.999998 | 3.92061e-06 | 0.999987 |
| rad40syn      | 4.40707e-07 | 0.999999 | 3.30280e-06 | 0.999990 |
| rad62         | 3.72784e-07 | 0.999999 | 2.79376e-06 | 0.999993 |
| rad61         | 3.22478e-07 | 0.999999 | 2.41676e-06 | 0.999996 |
| rad40anti     | 3.14359e-07 | 1.000000 | 2.35591e-06 | 0.999998 |
| rad43         | 1.94896e-07 | 1.00000  | 1.46061e-06 | 0.999999 |
| rad42         | 5.98145e-08 | 1.00000  | 4.48269e-07 | 1.000000 |
| rad41         | 3.19484e-08 | 1.00000  | 2.39432e-07 | 1.00000  |
| rad23         | 2.45221e-12 | 1.00000  | 1.83777e-11 | 1.00000  |
| rad6          | 1.58021e-12 | 1.00000  | 1.18426e-11 | 1.00000  |
| rad45         | 6.82983e-13 | 1.00000  | 5.11850e-12 | 1.00000  |
| rad9          | 5.87748e-13 | 1.00000  | 4.40478e-12 | 1.00000  |
| rad20         | 5.61886e-13 | 1.00000  | 4.21096e-12 | 1.00000  |
| rad22         | 2.58820e-13 | 1.00000  | 1.93969e-12 | 1.00000  |
| rad21         | 2.52569e-13 | 1.00000  | 1.89283e-12 | 1.00000  |
| rad11         | 1.59425e-13 | 1.00000  | 1.19479e-12 | 1.00000  |
| rad36         | 1.27982e-13 | 1.00000  | 9.59136e-13 | 1.00000  |
| rad18         | 7.69640e-14 | 1.00000  | 5.76794e-13 | 1.00000  |
| rad15         | 4.65202e-14 | 1.00000  | 3.48637e-13 | 1.00000  |
| rad7          | 3.49091e-14 | 1.00000  | 2.61620e-13 | 1.00000  |
| rad8          | 2.23533e-14 | 1.00000  | 1.67523e-13 | 1.00000  |
| rad28         | 2.07890e-14 | 1.00000  | 1.55800e-13 | 1.00000  |
| rad24         | 1.60028e-14 | 1.00000  | 1.19931e-13 | 1.00000  |
| rad12         | 1.40784e-14 | 1.00000  | 1.05508e-13 | 1.00000  |
| rad26         | 4.97268e-15 | 1.00000  | 3.72669e-14 | 1.00000  |
| rad47         | 4.90428e-15 | 1.00000  | 3.67543e-14 | 1.00000  |
| rad13         | 4.47311e-15 | 1.00000  | 3.35229e-14 | 1.00000  |
| rad10         | 1.81466e-15 | 1.00000  | 1.35996e-14 | 1.00000  |
| rad25         | 8.60191e-16 | 1.00000  | 6.44656e-15 | 1.00000  |
| rad33         | 3.44368e-16 | 1.00000  | 2.58081e-15 | 1.00000  |



|       |             |         |             |         |
|-------|-------------|---------|-------------|---------|
| rad5  | 2.10881e-16 | 1.00000 | 1.58041e-15 | 1.00000 |
| rad2  | 1.48870e-16 | 1.00000 | 1.11568e-15 | 1.00000 |
| rad1  | 6.42565e-17 | 1.00000 | 4.81559e-16 | 1.00000 |
| rad14 | 1.40248e-17 | 1.00000 | 1.05106e-16 | 1.00000 |
| rad3  | 1.22179e-17 | 1.00000 | 9.15647e-17 | 1.00000 |
| rad27 | 8.01853e-18 | 1.00000 | 6.00935e-17 | 1.00000 |
| rad4  | 7.25707e-18 | 1.00000 | 5.43869e-17 | 1.00000 |

0.1000000000E-01 Pa, 3250.00000 K

| Rate constant | True (fraction)     | Effective (fraction) |
|---------------|---------------------|----------------------|
| Total         | 1.58309e-12 (1.00 ) | 2.28795e-13 (1.00 )  |

| species       | PYtrue      | Cumul    | PYeffective | Cumul    |
|---------------|-------------|----------|-------------|----------|
| Benzyl+C2H2   | 0.855476    | 0.855476 | 0.00000     | 0.00000  |
| PhCH2CCH+H    | 0.0734301   | 0.928906 | 0.508082    | 0.508082 |
| Indene+H      | 0.0278643   | 0.956770 | 0.192800    | 0.700882 |
| PhCHCCH2+H    | 0.0183610   | 0.975131 | 0.127045    | 0.827927 |
| Ph+Allene     | 0.0145940   | 0.989725 | 0.100980    | 0.928907 |
| PAH3+H        | 0.00243645  | 0.992162 | 0.0168585   | 0.945765 |
| PAH9+H        | 0.00110339  | 0.993265 | 0.00763468  | 0.953400 |
| PAH7+H        | 0.000986571 | 0.994252 | 0.00682634  | 0.960227 |
| rad19anti     | 0.000808911 | 0.995061 | 0.00559707  | 0.965824 |
| rad38         | 0.000686670 | 0.995747 | 0.00475125  | 0.970575 |
| rad50         | 0.000518179 | 0.996266 | 0.00358542  | 0.974160 |
| Ph+MeAc       | 0.000489465 | 0.996755 | 0.00338674  | 0.977547 |
| rad30         | 0.000447972 | 0.997203 | 0.00309964  | 0.980647 |
| PhCCH+CH3     | 0.000378211 | 0.997581 | 0.00261694  | 0.983264 |
| rad39         | 0.000374434 | 0.997956 | 0.00259081  | 0.985854 |
| rad35         | 0.000323023 | 0.998279 | 0.00223508  | 0.988089 |
| rad51         | 0.000289245 | 0.998568 | 0.00200136  | 0.990091 |
| rad46         | 0.000266714 | 0.998835 | 0.00184546  | 0.991936 |
| rad59         | 0.000184695 | 0.999019 | 0.00127795  | 0.993214 |
| rad67         | 0.000159865 | 0.999179 | 0.00110614  | 0.994320 |
| PhCCCH3+H     | 0.000140367 | 0.999320 | 0.000971235 | 0.995292 |
| rad60syn      | 9.79791e-05 | 0.999418 | 0.000677943 | 0.995970 |
| PAH10+CH3     | 8.26142e-05 | 0.999500 | 0.000571630 | 0.996541 |
| rad71         | 7.28074e-05 | 0.999573 | 0.000503773 | 0.997045 |
| rad60anti     | 7.14060e-05 | 0.999644 | 0.000494077 | 0.997539 |
| rad19syn      | 7.13406e-05 | 0.999716 | 0.000493624 | 0.998033 |
| rad52         | 6.19533e-05 | 0.999778 | 0.000428671 | 0.998461 |
| rad58         | 4.68388e-05 | 0.999825 | 0.000324090 | 0.998785 |
| PAH1+H        | 3.98745e-05 | 0.999864 | 0.000275902 | 0.999061 |
| rad73         | 3.17350e-05 | 0.999896 | 0.000219583 | 0.999281 |
| PhcycC3H3_A+H | 2.77967e-05 | 0.999924 | 0.000192333 | 0.999473 |
| rad70         | 1.68825e-05 | 0.999941 | 0.000116814 | 0.999590 |
| rad37         | 1.28499e-05 | 0.999954 | 8.89115e-05 | 0.999679 |
| PAH8+H        | 8.50457e-06 | 0.999962 | 5.88453e-05 | 0.999738 |
| rad54         | 8.38235e-06 | 0.999971 | 5.79997e-05 | 0.999796 |
| rad72         | 7.52649e-06 | 0.999978 | 5.20777e-05 | 0.999848 |
| rad65         | 7.06074e-06 | 0.999985 | 4.88551e-05 | 0.999897 |
| rad34         | 6.39568e-06 | 0.999992 | 4.42534e-05 | 0.999941 |
| rad68syn      | 1.34606e-06 | 0.999993 | 9.31375e-06 | 0.999950 |
| rad64         | 1.07438e-06 | 0.999994 | 7.43389e-06 | 0.999958 |
| rad56         | 9.79690e-07 | 0.999995 | 6.77873e-06 | 0.999965 |
| rad55         | 8.93999e-07 | 0.999996 | 6.18581e-06 | 0.999971 |
| rad68anti     | 8.59058e-07 | 0.999997 | 5.94405e-06 | 0.999977 |
| rad40syn      | 7.44327e-07 | 0.999997 | 5.15020e-06 | 0.999982 |
| rad53         | 6.73265e-07 | 0.999998 | 4.65850e-06 | 0.999986 |
| rad40anti     | 5.40357e-07 | 0.999999 | 3.73887e-06 | 0.999990 |
| rad62         | 5.25220e-07 | 0.999999 | 3.63414e-06 | 0.999994 |
| rad61         | 4.70536e-07 | 1.000000 | 3.25576e-06 | 0.999997 |
| rad43         | 2.53715e-07 | 1.000000 | 1.75552e-06 | 0.999999 |
| rad42         | 9.14458e-08 | 1.000000 | 6.32737e-07 | 0.999999 |
| rad41         | 4.57450e-08 | 1.000000 | 3.16522e-07 | 1.000000 |
| rad23         | 1.11741e-12 | 1.000000 | 7.73165e-12 | 1.000000 |
| rad6          | 5.46864e-13 | 1.000000 | 3.78390e-12 | 1.000000 |
| rad20         | 3.83874e-13 | 1.000000 | 2.65612e-12 | 1.000000 |
| rad45         | 3.67941e-13 | 1.000000 | 2.54588e-12 | 1.000000 |
| rad9          | 3.42993e-13 | 1.000000 | 2.37326e-12 | 1.000000 |
| rad21         | 1.66176e-13 | 1.000000 | 1.14981e-12 | 1.000000 |
| rad22         | 1.31840e-13 | 1.000000 | 9.12235e-13 | 1.000000 |
| rad11         | 9.81513e-14 | 1.000000 | 6.79135e-13 | 1.000000 |
| rad36         | 6.96559e-14 | 1.000000 | 4.81967e-13 | 1.000000 |
| rad18         | 4.51615e-14 | 1.000000 | 3.12484e-13 | 1.000000 |
| rad15         | 2.92109e-14 | 1.000000 | 2.02118e-13 | 1.000000 |
| rad8          | 2.15818e-14 | 1.000000 | 1.49330e-13 | 1.000000 |
| rad7          | 1.57556e-14 | 1.000000 | 1.09017e-13 | 1.000000 |

|       |             |         |             |          |
|-------|-------------|---------|-------------|----------|
| rad28 | 1.14285e-14 | 1.00000 | 7.90771e-14 | 1.000000 |
| rad24 | 1.10778e-14 | 1.00000 | 7.66503e-14 | 1.000000 |
| rad12 | 1.07284e-14 | 1.00000 | 7.42324e-14 | 1.000000 |
| rad47 | 6.03541e-15 | 1.00000 | 4.17606e-14 | 1.000000 |
| rad26 | 3.20451e-15 | 1.00000 | 2.21728e-14 | 1.000000 |
| rad13 | 2.21098e-15 | 1.00000 | 1.52984e-14 | 1.000000 |
| rad10 | 1.24017e-15 | 1.00000 | 8.58109e-15 | 1.000000 |
| rad25 | 6.72546e-16 | 1.00000 | 4.65352e-15 | 1.000000 |
| rad5  | 2.02425e-16 | 1.00000 | 1.40063e-15 | 1.000000 |
| rad33 | 1.94932e-16 | 1.00000 | 1.34878e-15 | 1.000000 |
| rad2  | 9.72341e-17 | 1.00000 | 6.72789e-16 | 1.000000 |
| rad1  | 4.69454e-17 | 1.00000 | 3.24827e-16 | 1.000000 |
| rad14 | 1.20226e-17 | 1.00000 | 8.31878e-17 | 1.000000 |
| rad27 | 6.78852e-18 | 1.00000 | 4.69715e-17 | 1.000000 |
| rad3  | 5.92985e-18 | 1.00000 | 4.10302e-17 | 1.000000 |
| rad4  | 3.42561e-18 | 1.00000 | 2.37027e-17 | 1.000000 |

0.100000000E-01 Pa, 3500.00000 K

| =====         |                     |          |                      |          |
|---------------|---------------------|----------|----------------------|----------|
| Rate constant | True (fraction)     |          | Effective (fraction) |          |
| -----         |                     |          |                      |          |
| Total         | 2.10046e-12 (1.00 ) |          | 3.29923e-13 (1.00 )  |          |
| species       | PYtrue              | Cumul    | PYeffective          | Cumul    |
| -----         |                     |          |                      |          |
| Benzyl+C2H2   | 0.842928            | 0.842928 | 0.00000              | 0.00000  |
| PhCH2CCH+H    | 0.0857241           | 0.928652 | 0.545762             | 0.545762 |
| Indene+H      | 0.0229287           | 0.951581 | 0.145976             | 0.691738 |
| PhCHCCH2+H    | 0.0212218           | 0.972803 | 0.135108             | 0.826846 |
| Ph+Allene     | 0.0160719           | 0.988874 | 0.102322             | 0.929168 |
| PAH3+H        | 0.00277080          | 0.991645 | 0.0176403            | 0.946808 |
| PAH7+H        | 0.00108547          | 0.992731 | 0.00691065           | 0.953719 |
| PAH9+H        | 0.00103824          | 0.993769 | 0.00660998           | 0.960329 |
| rad19anti     | 0.000786012         | 0.994555 | 0.00500415           | 0.965333 |
| rad38         | 0.000657575         | 0.995213 | 0.00418645           | 0.969520 |
| rad50         | 0.000571322         | 0.995784 | 0.00363732           | 0.973157 |
| Ph+MeAc       | 0.000559758         | 0.996344 | 0.00356370           | 0.976721 |
| PhCCH+CH3     | 0.000466753         | 0.996810 | 0.00297158           | 0.979692 |
| rad30         | 0.000434295         | 0.997245 | 0.00276494           | 0.982457 |
| rad39         | 0.000426787         | 0.997672 | 0.00271714           | 0.985174 |
| rad51         | 0.000340822         | 0.998012 | 0.00216985           | 0.987344 |
| rad35         | 0.000335221         | 0.998348 | 0.00213419           | 0.989478 |
| rad46         | 0.000264413         | 0.998612 | 0.00168339           | 0.991162 |
| rad59         | 0.000204435         | 0.998816 | 0.00130154           | 0.992463 |
| rad67         | 0.000182834         | 0.998999 | 0.00116401           | 0.993627 |
| PhCCCH3+H     | 0.000163685         | 0.999163 | 0.00104210           | 0.994669 |
| rad71         | 0.000107601         | 0.999271 | 0.000685042          | 0.995354 |
| rad60syn      | 0.000103349         | 0.999374 | 0.000657969          | 0.996012 |
| PAH10+CH3     | 9.81181e-05         | 0.999472 | 0.000624669          | 0.996637 |
| rad19syn      | 9.79725e-05         | 0.999570 | 0.000623742          | 0.997261 |
| rad60anti     | 7.58697e-05         | 0.999646 | 0.000483025          | 0.997744 |
| rad52         | 7.00217e-05         | 0.999716 | 0.000445793          | 0.998190 |
| rad58         | 5.76196e-05         | 0.999773 | 0.000366835          | 0.998556 |
| PAH1+H        | 5.20523e-05         | 0.999826 | 0.000331391          | 0.998888 |
| rad73         | 4.43107e-05         | 0.999870 | 0.000282104          | 0.999170 |
| PhcycC3H3_A+H | 3.20633e-05         | 0.999902 | 0.000204131          | 0.999374 |
| rad70         | 2.14708e-05         | 0.999923 | 0.000136694          | 0.999511 |
| PAH8+H        | 1.37725e-05         | 0.999937 | 8.76827e-05          | 0.999598 |
| rad37         | 1.33235e-05         | 0.999950 | 8.48243e-05          | 0.999683 |
| rad72         | 1.23923e-05         | 0.999963 | 7.88958e-05          | 0.999762 |
| rad54         | 8.98058e-06         | 0.999972 | 5.71749e-05          | 0.999819 |
| rad34         | 8.46717e-06         | 0.999980 | 5.39063e-05          | 0.999873 |
| rad65         | 8.19015e-06         | 0.999988 | 5.21426e-05          | 0.999925 |
| rad68syn      | 1.99232e-06         | 0.999990 | 1.26841e-05          | 0.999938 |
| rad64         | 1.43496e-06         | 0.999992 | 9.13568e-06          | 0.999947 |
| rad56         | 1.27412e-06         | 0.999993 | 8.11171e-06          | 0.999955 |
| rad68anti     | 1.27030e-06         | 0.999994 | 8.08736e-06          | 0.999963 |
| rad40syn      | 1.15716e-06         | 0.999996 | 7.36708e-06          | 0.999971 |
| rad55         | 9.87613e-07         | 0.999997 | 6.28764e-06          | 0.999977 |
| rad40anti     | 8.52741e-07         | 0.999997 | 5.42898e-06          | 0.999982 |
| rad53         | 8.35966e-07         | 0.999998 | 5.32218e-06          | 0.999988 |
| rad62         | 6.97360e-07         | 0.999999 | 4.43975e-06          | 0.999992 |
| rad61         | 6.32568e-07         | 1.000000 | 4.02725e-06          | 0.999996 |
| rad43         | 3.12012e-07         | 1.000000 | 1.98643e-06          | 0.999998 |
| rad42         | 1.30122e-07         | 1.000000 | 8.28424e-07          | 0.999999 |
| rad41         | 6.11800e-08         | 1.000000 | 3.89503e-07          | 0.999999 |
| rad23         | 5.44673e-13         | 1.000000 | 3.46766e-12          | 0.999999 |
| rad20         | 2.74123e-13         | 1.000000 | 1.74521e-12          | 0.999999 |
| rad6          | 2.21591e-13         | 1.000000 | 1.41076e-12          | 0.999999 |
| rad9          | 2.07074e-13         | 1.000000 | 1.31834e-12          | 0.999999 |

|       |             |         |             |          |
|-------|-------------|---------|-------------|----------|
| rad45 | 2.07065e-13 | 1.00000 | 1.31828e-12 | 0.999999 |
| rad21 | 1.14209e-13 | 1.00000 | 7.27113e-13 | 0.999999 |
| rad22 | 7.24513e-14 | 1.00000 | 4.61261e-13 | 0.999999 |
| rad11 | 6.61201e-14 | 1.00000 | 4.20954e-13 | 0.999999 |
| rad36 | 3.95146e-14 | 1.00000 | 2.51570e-13 | 0.999999 |
| rad18 | 2.79283e-14 | 1.00000 | 1.77806e-13 | 0.999999 |
| rad8  | 2.04865e-14 | 1.00000 | 1.30427e-13 | 0.999999 |
| rad15 | 1.87789e-14 | 1.00000 | 1.19556e-13 | 0.999999 |
| rad12 | 8.20877e-15 | 1.00000 | 5.22611e-14 | 0.999999 |
| rad7  | 7.98563e-15 | 1.00000 | 5.08405e-14 | 0.999999 |
| rad24 | 7.82702e-15 | 1.00000 | 4.98307e-14 | 0.999999 |
| rad47 | 6.94994e-15 | 1.00000 | 4.42468e-14 | 0.999999 |
| rad28 | 6.85931e-15 | 1.00000 | 4.36698e-14 | 0.999999 |
| rad26 | 2.09201e-15 | 1.00000 | 1.33188e-14 | 0.999999 |
| rad13 | 1.21836e-15 | 1.00000 | 7.75670e-15 | 0.999999 |
| rad10 | 8.54374e-16 | 1.00000 | 5.43937e-15 | 0.999999 |
| rad25 | 5.44464e-16 | 1.00000 | 3.46633e-15 | 0.999999 |
| rad5  | 1.93752e-16 | 1.00000 | 1.23353e-15 | 0.999999 |
| rad33 | 1.19819e-16 | 1.00000 | 7.62830e-16 | 0.999999 |
| rad2  | 6.63729e-17 | 1.00000 | 4.22563e-16 | 0.999999 |
| rad1  | 3.51525e-17 | 1.00000 | 2.23798e-16 | 0.999999 |
| rad14 | 1.06177e-17 | 1.00000 | 6.75978e-17 | 0.999999 |
| rad27 | 5.69309e-18 | 1.00000 | 3.62451e-17 | 0.999999 |
| rad3  | 3.27453e-18 | 1.00000 | 2.08473e-17 | 0.999999 |
| rad4  | 1.85182e-18 | 1.00000 | 1.17896e-17 | 0.999999 |

0.100000000E-01 Pa, 3750.00000 K

=====  
Rate constant | True (fraction) | Effective (fraction)  
-----

Total | 2.70978e-12 (1.00 ) | 4.61708e-13 (1.00 )

| species       | PYtrue      | Cumul    | PYeffective | Cumul    |
|---------------|-------------|----------|-------------|----------|
| Benzyl+C2H2   | 0.829614    | 0.829614 | 0.00000     | 0.00000  |
| PhCH2CCH+H    | 0.0978316   | 0.927446 | 0.574175    | 0.574175 |
| PhCHCCH2+H    | 0.0240141   | 0.951460 | 0.140939    | 0.715114 |
| Indene+H      | 0.0190788   | 0.970538 | 0.111974    | 0.827088 |
| Ph+Allene     | 0.0176550   | 0.988193 | 0.103617    | 0.930705 |
| PAH3+H        | 0.00305565  | 0.991249 | 0.0179337   | 0.948639 |
| PAH7+H        | 0.00116197  | 0.992411 | 0.00681959  | 0.955458 |
| PAH9+H        | 0.000955042 | 0.993366 | 0.00560515  | 0.961063 |
| rad19anti     | 0.000750872 | 0.994117 | 0.00440688  | 0.965470 |
| Ph+MeAc       | 0.000618509 | 0.994736 | 0.00363004  | 0.969100 |
| rad38         | 0.000613193 | 0.995349 | 0.00359884  | 0.972699 |
| rad50         | 0.000603635 | 0.995952 | 0.00354274  | 0.976242 |
| PhCCH+CH3     | 0.000581835 | 0.996534 | 0.00341479  | 0.979657 |
| rad39         | 0.000465790 | 0.997000 | 0.00273373  | 0.982390 |
| rad30         | 0.000416539 | 0.997417 | 0.00244467  | 0.984835 |
| rad51         | 0.000380994 | 0.997798 | 0.00223606  | 0.987071 |
| rad35         | 0.000341508 | 0.998139 | 0.00200431  | 0.989075 |
| rad46         | 0.000254425 | 0.998393 | 0.00149322  | 0.990569 |
| rad59         | 0.000220084 | 0.998614 | 0.00129168  | 0.991860 |
| rad67         | 0.000201013 | 0.998815 | 0.00117975  | 0.993040 |
| PhCCCH3+H     | 0.000187990 | 0.999003 | 0.00110331  | 0.994143 |
| rad71         | 0.000146780 | 0.999149 | 0.000861455 | 0.995005 |
| rad19syn      | 0.000129261 | 0.999279 | 0.000758633 | 0.995764 |
| PAH10+CH3     | 0.000111172 | 0.999390 | 0.000652468 | 0.996416 |
| rad60syn      | 0.000106707 | 0.999496 | 0.000626263 | 0.997042 |
| rad60anti     | 7.88382e-05 | 0.999575 | 0.000462703 | 0.997505 |
| rad52         | 7.54521e-05 | 0.999651 | 0.000442829 | 0.997948 |
| rad58         | 6.80261e-05 | 0.999719 | 0.000399246 | 0.998347 |
| PAH1+H        | 6.45813e-05 | 0.999783 | 0.000379028 | 0.998726 |
| rad73         | 5.74878e-05 | 0.999841 | 0.000337397 | 0.999063 |
| PhcycC3H3_A+H | 3.61213e-05 | 0.999877 | 0.000211996 | 0.999275 |
| rad70         | 2.62309e-05 | 0.999903 | 0.000153949 | 0.999429 |
| PAH8+H        | 2.07420e-05 | 0.999924 | 0.000121735 | 0.999551 |
| rad72         | 1.85748e-05 | 0.999943 | 0.000109016 | 0.999660 |
| rad37         | 1.33636e-05 | 0.999956 | 7.84314e-05 | 0.999739 |
| rad34         | 1.07116e-05 | 0.999967 | 6.28665e-05 | 0.999801 |
| rad54         | 9.53969e-06 | 0.999976 | 5.59886e-05 | 0.999857 |
| rad65         | 9.05125e-06 | 0.999985 | 5.31219e-05 | 0.999911 |
| rad68syn      | 2.77520e-06 | 0.999988 | 1.62877e-05 | 0.999927 |
| rad64         | 1.81236e-06 | 0.999990 | 1.06367e-05 | 0.999938 |
| rad68anti     | 1.76807e-06 | 0.999992 | 1.03768e-05 | 0.999948 |
| rad40syn      | 1.68193e-06 | 0.999993 | 9.87130e-06 | 0.999958 |
| rad56         | 1.59874e-06 | 0.999995 | 9.38301e-06 | 0.999967 |
| rad40anti     | 1.25564e-06 | 0.999996 | 7.36935e-06 | 0.999975 |
| rad55         | 1.07703e-06 | 0.999997 | 6.32112e-06 | 0.999981 |
| rad53         | 1.00840e-06 | 0.999998 | 5.91834e-06 | 0.999987 |

|       |             |          |             |          |
|-------|-------------|----------|-------------|----------|
| rad62 | 8.81786e-07 | 0.999999 | 5.17522e-06 | 0.999992 |
| rad61 | 7.98455e-07 | 1.000000 | 4.68615e-06 | 0.999997 |
| rad43 | 3.67979e-07 | 1.000000 | 2.15967e-06 | 0.999999 |
| rad42 | 1.74775e-07 | 1.000000 | 1.02576e-06 | 1.000000 |
| rad41 | 7.77074e-08 | 1.000000 | 4.56066e-07 | 1.000000 |
| rad23 | 2.80593e-13 | 1.000000 | 1.64680e-12 | 1.000000 |
| rad20 | 2.02985e-13 | 1.000000 | 1.19132e-12 | 1.000000 |
| rad9  | 1.29196e-13 | 1.000000 | 7.58253e-13 | 1.000000 |
| rad45 | 1.20810e-13 | 1.000000 | 7.09034e-13 | 1.000000 |
| rad6  | 1.02824e-13 | 1.000000 | 6.03474e-13 | 1.000000 |
| rad21 | 8.13816e-14 | 1.000000 | 4.77630e-13 | 1.000000 |
| rad11 | 4.76057e-14 | 1.000000 | 2.79398e-13 | 1.000000 |
| rad22 | 4.23948e-14 | 1.000000 | 2.48816e-13 | 1.000000 |
| rad36 | 2.31929e-14 | 1.000000 | 1.36119e-13 | 1.000000 |
| rad8  | 1.91572e-14 | 1.000000 | 1.12434e-13 | 1.000000 |
| rad18 | 1.80293e-14 | 1.000000 | 1.05814e-13 | 1.000000 |
| rad15 | 1.23591e-14 | 1.000000 | 7.25356e-14 | 1.000000 |
| rad47 | 7.59707e-15 | 1.000000 | 4.45873e-14 | 1.000000 |
| rad12 | 6.32118e-15 | 1.000000 | 3.70991e-14 | 1.000000 |
| rad24 | 5.63439e-15 | 1.000000 | 3.30683e-14 | 1.000000 |
| rad7  | 4.44612e-15 | 1.000000 | 2.60943e-14 | 1.000000 |
| rad28 | 4.34687e-15 | 1.000000 | 2.55118e-14 | 1.000000 |
| rad26 | 1.38629e-15 | 1.000000 | 8.13615e-15 | 1.000000 |
| rad13 | 7.33197e-16 | 1.000000 | 4.30314e-15 | 1.000000 |
| rad10 | 5.96706e-16 | 1.000000 | 3.50208e-15 | 1.000000 |
| rad25 | 4.50618e-16 | 1.000000 | 2.64468e-15 | 1.000000 |
| rad5  | 1.85454e-16 | 1.000000 | 1.08843e-15 | 1.000000 |
| rad33 | 7.87850e-17 | 1.000000 | 4.62390e-16 | 1.000000 |
| rad2  | 4.73925e-17 | 1.000000 | 2.78147e-16 | 1.000000 |
| rad1  | 2.67240e-17 | 1.000000 | 1.56843e-16 | 1.000000 |
| rad14 | 9.45664e-18 | 1.000000 | 5.55011e-17 | 1.000000 |
| rad27 | 4.76381e-18 | 1.000000 | 2.79589e-17 | 1.000000 |
| rad3  | 1.99777e-18 | 1.000000 | 1.17249e-17 | 1.000000 |
| rad4  | 1.11452e-18 | 1.000000 | 6.54115e-18 | 1.000000 |

0.100000000E-01 Pa, 4000.00000 K

=====

| Rate constant | True (fraction)     | Effective (fraction) |
|---------------|---------------------|----------------------|
| Total         | 3.41497e-12 (1.00 ) | 6.28297e-13 (1.00 )  |

| species       | PYtrue      | Cumul    | PYeffective | Cumul    |
|---------------|-------------|----------|-------------|----------|
| Benzyl+C2H2   | 0.816017    | 0.816017 | 0.000000    | 0.000000 |
| PhCH2CCH+H    | 0.109584    | 0.925601 | 0.595618    | 0.595618 |
| PhCHCCH2+H    | 0.0267098   | 0.952311 | 0.145175    | 0.740793 |
| Ph+Allene     | 0.0193046   | 0.971615 | 0.104926    | 0.845719 |
| Indene+H      | 0.0160484   | 0.987664 | 0.0872277   | 0.932947 |
| PAH3+H        | 0.00329013  | 0.990954 | 0.0178828   | 0.950829 |
| PAH7+H        | 0.00121791  | 0.992172 | 0.00661968  | 0.957449 |
| PAH9+H        | 0.000864009 | 0.993036 | 0.00469613  | 0.962145 |
| PhCCH+CH3     | 0.000720156 | 0.993756 | 0.00391424  | 0.966060 |
| rad19anti     | 0.000708493 | 0.994464 | 0.00385085  | 0.969910 |
| Ph+MeAc       | 0.000663934 | 0.995128 | 0.00360866  | 0.973519 |
| rad50         | 0.000616859 | 0.995745 | 0.00335280  | 0.976872 |
| rad38         | 0.000560144 | 0.996305 | 0.00304454  | 0.979916 |
| rad39         | 0.000491035 | 0.996796 | 0.00266891  | 0.982585 |
| rad51         | 0.000408498 | 0.997205 | 0.00222030  | 0.984806 |
| rad30         | 0.000396478 | 0.997601 | 0.00215497  | 0.986961 |
| rad35         | 0.000343096 | 0.997945 | 0.00186482  | 0.988825 |
| rad46         | 0.000239253 | 0.998184 | 0.00130041  | 0.990126 |
| rad59         | 0.000231903 | 0.998416 | 0.00126046  | 0.991386 |
| rad67         | 0.000214260 | 0.998630 | 0.00116456  | 0.992551 |
| PhCCCH3+H     | 0.000213580 | 0.998844 | 0.00116087  | 0.993712 |
| rad71         | 0.000187844 | 0.999031 | 0.00102098  | 0.994733 |
| rad19syn      | 0.000163941 | 0.999195 | 0.000891067 | 0.995624 |
| PAH10+CH3     | 0.000121536 | 0.999317 | 0.000660582 | 0.996284 |
| rad60syn      | 0.000108396 | 0.999425 | 0.000589161 | 0.996873 |
| rad60anti     | 8.05427e-05 | 0.999506 | 0.000437772 | 0.997311 |
| rad52         | 7.82960e-05 | 0.999584 | 0.000425560 | 0.997737 |
| rad58         | 7.77572e-05 | 0.999662 | 0.000422632 | 0.998159 |
| PAH1+H        | 7.70001e-05 | 0.999739 | 0.000418517 | 0.998578 |
| rad73         | 7.03552e-05 | 0.999809 | 0.000382400 | 0.998960 |
| PhcycC3H3_A+H | 3.98813e-05 | 0.999849 | 0.000216766 | 0.999177 |
| rad70         | 3.09908e-05 | 0.999880 | 0.000168444 | 0.999346 |
| PAH8+H        | 2.94355e-05 | 0.999910 | 0.000159990 | 0.999506 |
| rad72         | 2.58284e-05 | 0.999935 | 0.000140384 | 0.999646 |
| rad37         | 1.30848e-05 | 0.999948 | 7.11194e-05 | 0.999717 |
| rad34         | 1.30497e-05 | 0.999961 | 7.09289e-05 | 0.999788 |
| rad54         | 1.00584e-05 | 0.999972 | 5.46703e-05 | 0.999843 |

|           |             |          |             |          |
|-----------|-------------|----------|-------------|----------|
| rad65     | 9.63686e-06 | 0.999981 | 5.23790e-05 | 0.999895 |
| rad68syn  | 3.67778e-06 | 0.999985 | 1.99898e-05 | 0.999915 |
| rad68anti | 2.34154e-06 | 0.999987 | 1.27269e-05 | 0.999928 |
| rad40syn  | 2.31359e-06 | 0.999990 | 1.25750e-05 | 0.999940 |
| rad64     | 2.19077e-06 | 0.999992 | 1.19074e-05 | 0.999952 |
| rad56     | 1.94741e-06 | 0.999994 | 1.05847e-05 | 0.999963 |
| rad40anti | 1.74691e-06 | 0.999995 | 9.49492e-06 | 0.999972 |
| rad53     | 1.18744e-06 | 0.999997 | 6.45406e-06 | 0.999979 |
| rad55     | 1.16170e-06 | 0.999998 | 6.31418e-06 | 0.999985 |
| rad62     | 1.07271e-06 | 0.999999 | 5.83046e-06 | 0.999991 |
| rad61     | 9.59661e-07 | 1.000000 | 5.21602e-06 | 0.999996 |
| rad43     | 4.20278e-07 | 1.000000 | 2.28433e-06 | 0.999998 |
| rad42     | 2.24298e-07 | 1.000000 | 1.21912e-06 | 1.000000 |
| rad41     | 9.47630e-08 | 1.000000 | 5.15063e-07 | 1.000000 |
| rad20     | 1.54924e-13 | 1.000000 | 8.42054e-13 | 1.000000 |
| rad23     | 1.51474e-13 | 1.000000 | 8.23303e-13 | 1.000000 |
| rad9      | 8.31425e-14 | 1.000000 | 4.51902e-13 | 1.000000 |
| rad45     | 7.26852e-14 | 1.000000 | 3.95064e-13 | 1.000000 |
| rad21     | 5.97861e-14 | 1.000000 | 3.24954e-13 | 1.000000 |
| rad6      | 5.34343e-14 | 1.000000 | 2.90430e-13 | 1.000000 |
| rad11     | 3.60167e-14 | 1.000000 | 1.95761e-13 | 1.000000 |
| rad22     | 2.61569e-14 | 1.000000 | 1.42170e-13 | 1.000000 |
| rad8      | 1.76788e-14 | 1.000000 | 9.60889e-14 | 1.000000 |
| rad36     | 1.40120e-14 | 1.000000 | 7.61589e-14 | 1.000000 |
| rad18     | 1.20676e-14 | 1.000000 | 6.55905e-14 | 1.000000 |
| rad15     | 8.31886e-15 | 1.000000 | 4.52153e-14 | 1.000000 |
| rad47     | 7.97227e-15 | 1.000000 | 4.33315e-14 | 1.000000 |
| rad12     | 4.90407e-15 | 1.000000 | 2.66550e-14 | 1.000000 |
| rad24     | 4.12849e-15 | 1.000000 | 2.24395e-14 | 1.000000 |
| rad28     | 2.86193e-15 | 1.000000 | 1.55554e-14 | 1.000000 |
| rad7      | 2.66769e-15 | 1.000000 | 1.44996e-14 | 1.000000 |
| rad26     | 9.33972e-16 | 1.000000 | 5.07639e-15 | 1.000000 |
| rad13     | 4.73283e-16 | 1.000000 | 2.57243e-15 | 1.000000 |
| rad10     | 4.24863e-16 | 1.000000 | 2.30925e-15 | 1.000000 |
| rad25     | 3.78503e-16 | 1.000000 | 2.05727e-15 | 1.000000 |
| rad5      | 1.77524e-16 | 1.000000 | 9.64890e-16 | 1.000000 |
| rad33     | 5.47163e-17 | 1.000000 | 2.97398e-16 | 1.000000 |
| rad2      | 3.55586e-17 | 1.000000 | 1.93271e-16 | 1.000000 |
| rad1      | 2.05537e-17 | 1.000000 | 1.11715e-16 | 1.000000 |
| rad14     | 8.43918e-18 | 1.000000 | 4.58692e-17 | 1.000000 |
| rad27     | 3.99734e-18 | 1.000000 | 2.17266e-17 | 1.000000 |
| rad3      | 1.31690e-18 | 1.000000 | 7.15771e-18 | 1.000000 |
| rad4      | 7.29304e-19 | 1.000000 | 3.96396e-18 | 1.000000 |

0.100000000E-02 Pa, 20.0000000 K

=====  
Rate constant | True (fraction) | Effective (fraction)  
-----

Total | 1.34336e-156 (1.00) | 1.34336e-156 (1.00)

| species     | PYtrue      | Cumul    | PYeffective | Cumul    |
|-------------|-------------|----------|-------------|----------|
| Indene+H    | 0.999813    | 0.999813 | 0.999814    | 0.999814 |
| rad6        | 0.000181993 | 0.999995 | 0.000181993 | 0.999996 |
| rad23       | 4.12140e-06 | 0.999999 | 4.12141e-06 | 1.000000 |
| Benzyl+C2H2 | 8.11914e-07 | 1.000000 | 0.000000    | 1.000000 |
| rad45       | 4.59593e-08 | 1.000000 | 4.59594e-08 | 1.000000 |
| rad7        | 1.58326e-08 | 1.000000 | 1.58326e-08 | 1.000000 |
| rad11       | 1.58209e-08 | 1.000000 | 1.58210e-08 | 1.000000 |
| rad36       | 2.86291e-09 | 1.000000 | 2.86291e-09 | 1.000000 |
| rad22       | 1.87447e-09 | 1.000000 | 1.87447e-09 | 1.000000 |
| rad2        | 9.28115e-11 | 1.000000 | 9.28116e-11 | 1.000000 |
| rad3        | 9.16692e-11 | 1.000000 | 9.16693e-11 | 1.000000 |
| rad13       | 7.32363e-11 | 1.000000 | 7.32364e-11 | 1.000000 |
| rad4        | 4.63436e-11 | 1.000000 | 4.63436e-11 | 1.000000 |
| rad20       | 1.22196e-11 | 1.000000 | 1.22196e-11 | 1.000000 |
| rad21       | 7.62850e-12 | 1.000000 | 7.62851e-12 | 1.000000 |
| rad1        | 5.86591e-12 | 1.000000 | 5.86592e-12 | 1.000000 |
| rad10       | 4.63656e-12 | 1.000000 | 4.63656e-12 | 1.000000 |
| rad18       | 1.51675e-13 | 1.000000 | 1.51675e-13 | 1.000000 |
| rad33       | 1.37778e-13 | 1.000000 | 1.37778e-13 | 1.000000 |
| rad35       | 2.22422e-14 | 1.000000 | 2.22422e-14 | 1.000000 |
| PAH9+H      | 1.63476e-15 | 1.000000 | 1.63476e-15 | 1.000000 |
| rad24       | 5.81968e-16 | 1.000000 | 5.81969e-16 | 1.000000 |
| rad28       | 1.73016e-17 | 1.000000 | 1.73016e-17 | 1.000000 |
| rad38       | 3.38141e-18 | 1.000000 | 3.38142e-18 | 1.000000 |
| rad26       | 6.02576e-19 | 1.000000 | 6.02576e-19 | 1.000000 |
| rad27       | 5.98345e-20 | 1.000000 | 5.98345e-20 | 1.000000 |
| rad31       | 2.45768e-20 | 1.000000 | 2.45768e-20 | 1.000000 |
| rad30       | 4.28360e-21 | 1.000000 | 4.28360e-21 | 1.000000 |

|               |             |         |             |         |
|---------------|-------------|---------|-------------|---------|
| rad25         | 1.47755e-21 | 1.00000 | 1.47755e-21 | 1.00000 |
| PhCHCCH2+H    | 6.57221e-22 | 1.00000 | 6.57221e-22 | 1.00000 |
| PhCCH+CH3     | 1.88579e-22 | 1.00000 | 1.88580e-22 | 1.00000 |
| rad14         | 1.36996e-22 | 1.00000 | 1.36996e-22 | 1.00000 |
| PhCCCH3+H     | 4.07088e-23 | 1.00000 | 4.07089e-23 | 1.00000 |
| rad15         | 1.17471e-24 | 1.00000 | 1.17471e-24 | 1.00000 |
| rad8          | 7.56809e-27 | 1.00000 | 7.56809e-27 | 1.00000 |
| rad9          | 2.27307e-28 | 1.00000 | 2.27307e-28 | 1.00000 |
| Ph+MeAc       | 3.68287e-29 | 1.00000 | 3.68287e-29 | 1.00000 |
| PAH7+H        | 1.78530e-29 | 1.00000 | 1.78530e-29 | 1.00000 |
| rad46         | 8.31414e-30 | 1.00000 | 8.31414e-30 | 1.00000 |
| rad12         | 2.59520e-30 | 1.00000 | 2.59520e-30 | 1.00000 |
| rad39         | 3.18157e-31 | 1.00000 | 3.18158e-31 | 1.00000 |
| Ph+Allene     | 3.30143e-32 | 1.00000 | 3.30143e-32 | 1.00000 |
| rad60syn      | 1.65393e-36 | 1.00000 | 1.65394e-36 | 1.00000 |
| PhCH2CCH+H    | 9.65819e-38 | 1.00000 | 9.65820e-38 | 1.00000 |
| rad60anti     | 7.20129e-38 | 1.00000 | 7.20130e-38 | 1.00000 |
| rad37         | 2.03061e-38 | 1.00000 | 2.03061e-38 | 1.00000 |
| rad5          | 2.43993e-41 | 1.00000 | 2.43993e-41 | 1.00000 |
| PAH3+H        | 1.81643e-45 | 1.00000 | 1.81643e-45 | 1.00000 |
| rad59         | 9.29125e-46 | 1.00000 | 9.29126e-46 | 1.00000 |
| rad50         | 1.92775e-46 | 1.00000 | 1.92775e-46 | 1.00000 |
| rad19syn      | 1.56362e-52 | 1.00000 | 1.56362e-52 | 1.00000 |
| rad52         | 1.51182e-56 | 1.00000 | 1.51182e-56 | 1.00000 |
| rad54         | 5.12715e-57 | 1.00000 | 5.12716e-57 | 1.00000 |
| PAH10+CH3     | 3.39333e-57 | 1.00000 | 3.39334e-57 | 1.00000 |
| rad43         | 7.78591e-58 | 1.00000 | 7.78592e-58 | 1.00000 |
| rad62         | 3.65667e-60 | 1.00000 | 3.65668e-60 | 1.00000 |
| rad51         | 4.02810e-63 | 1.00000 | 4.02810e-63 | 1.00000 |
| rad70         | 9.27734e-66 | 1.00000 | 9.27735e-66 | 1.00000 |
| PhcycC3H3_A+H | 4.13832e-66 | 1.00000 | 4.13833e-66 | 1.00000 |
| rad55         | 2.21741e-66 | 1.00000 | 2.21741e-66 | 1.00000 |
| rad65         | 4.80500e-68 | 1.00000 | 4.80501e-68 | 1.00000 |
| rad58         | 1.45137e-69 | 1.00000 | 1.45137e-69 | 1.00000 |
| PAH1+H        | 2.80043e-71 | 1.00000 | 2.80043e-71 | 1.00000 |
| rad34         | 1.91491e-73 | 1.00000 | 1.91491e-73 | 1.00000 |
| rad42         | 1.55839e-77 | 1.00000 | 1.55839e-77 | 1.00000 |
| rad41         | 1.98928e-78 | 1.00000 | 1.98928e-78 | 1.00000 |
| rad47         | 4.42632e-79 | 1.00000 | 4.42632e-79 | 1.00000 |

0.100000000E-02 Pa, 30.0000000 K

=====  
Rate constant | True (fraction) | Effective (fraction)  
-----  
Total | 1.15918e-108 (1.00) | 1.15918e-108 (1.00)

| species     | PYtrue      | Cumul    | PYeffective | Cumul    |
|-------------|-------------|----------|-------------|----------|
| Indene+H    | 0.999814    | 0.999814 | 0.999815    | 0.999815 |
| rad6        | 0.000184715 | 0.999999 | 0.000184715 | 1.000000 |
| Benzyl+C2H2 | 1.04103e-06 | 1.000000 | 0.000000    | 1.000000 |
| rad23       | 2.59341e-07 | 1.000000 | 2.59341e-07 | 1.000000 |
| rad7        | 1.52270e-08 | 1.000000 | 1.52270e-08 | 1.000000 |
| rad11       | 6.65321e-09 | 1.000000 | 6.65321e-09 | 1.000000 |
| rad45       | 2.64742e-09 | 1.000000 | 2.64742e-09 | 1.000000 |
| rad2        | 2.62547e-10 | 1.000000 | 2.62547e-10 | 1.000000 |
| rad36       | 1.64863e-10 | 1.000000 | 1.64863e-10 | 1.000000 |
| rad3        | 1.22955e-10 | 1.000000 | 1.22955e-10 | 1.000000 |
| rad22       | 1.11747e-10 | 1.000000 | 1.11747e-10 | 1.000000 |
| rad13       | 7.42268e-11 | 1.000000 | 7.42268e-11 | 1.000000 |
| rad4        | 6.21694e-11 | 1.000000 | 6.21695e-11 | 1.000000 |
| rad1        | 1.66033e-11 | 1.000000 | 1.66033e-11 | 1.000000 |
| rad10       | 1.34855e-11 | 1.000000 | 1.34855e-11 | 1.000000 |
| rad20       | 5.81549e-12 | 1.000000 | 5.81550e-12 | 1.000000 |
| rad21       | 3.62930e-12 | 1.000000 | 3.62931e-12 | 1.000000 |
| rad33       | 1.39914e-13 | 1.000000 | 1.39914e-13 | 1.000000 |
| rad18       | 4.92027e-14 | 1.000000 | 4.92028e-14 | 1.000000 |
| rad35       | 1.76111e-14 | 1.000000 | 1.76111e-14 | 1.000000 |
| PAH9+H      | 1.03268e-15 | 1.000000 | 1.03269e-15 | 1.000000 |
| rad28       | 4.24571e-17 | 1.000000 | 4.24571e-17 | 1.000000 |
| rad24       | 3.68440e-17 | 1.000000 | 3.68441e-17 | 1.000000 |
| rad26       | 2.72997e-18 | 1.000000 | 2.72997e-18 | 1.000000 |
| rad38       | 2.01622e-18 | 1.000000 | 2.01622e-18 | 1.000000 |
| rad27       | 1.46837e-19 | 1.000000 | 1.46837e-19 | 1.000000 |
| rad31       | 3.55470e-20 | 1.000000 | 3.55470e-20 | 1.000000 |
| rad30       | 3.41420e-21 | 1.000000 | 3.41420e-21 | 1.000000 |
| PhCHCCH2+H  | 2.37963e-21 | 1.000000 | 2.37963e-21 | 1.000000 |
| rad25       | 1.83879e-21 | 1.000000 | 1.83879e-21 | 1.000000 |
| PhCCH+CH3   | 5.54466e-22 | 1.000000 | 5.54467e-22 | 1.000000 |
| rad14       | 2.23575e-22 | 1.000000 | 2.23575e-22 | 1.000000 |

|               |             |         |             |          |
|---------------|-------------|---------|-------------|----------|
| PhCCCH3+H     | 1.30911e-22 | 1.00000 | 1.30911e-22 | 1.000000 |
| rad15         | 2.33925e-24 | 1.00000 | 2.33925e-24 | 1.000000 |
| rad8          | 2.04944e-26 | 1.00000 | 2.04944e-26 | 1.000000 |
| rad9          | 5.40727e-28 | 1.00000 | 5.40728e-28 | 1.000000 |
| Ph+MeAc       | 8.42780e-29 | 1.00000 | 8.42781e-29 | 1.000000 |
| PAH7+H        | 7.01027e-29 | 1.00000 | 7.01028e-29 | 1.000000 |
| rad46         | 1.01494e-29 | 1.00000 | 1.01494e-29 | 1.000000 |
| rad12         | 8.43834e-30 | 1.00000 | 8.43835e-30 | 1.000000 |
| rad39         | 1.09461e-30 | 1.00000 | 1.09461e-30 | 1.000000 |
| Ph+Allene     | 6.55079e-32 | 1.00000 | 6.55080e-32 | 1.000000 |
| rad60syn      | 3.41530e-36 | 1.00000 | 3.41531e-36 | 1.000000 |
| rad60anti     | 1.37350e-37 | 1.00000 | 1.37351e-37 | 1.000000 |
| PhCH2CCH+H    | 1.18674e-37 | 1.00000 | 1.18674e-37 | 1.000000 |
| rad37         | 2.25629e-38 | 1.00000 | 2.25630e-38 | 1.000000 |
| rad5          | 2.40027e-41 | 1.00000 | 2.40028e-41 | 1.000000 |
| PAH3+H        | 1.35824e-45 | 1.00000 | 1.35824e-45 | 1.000000 |
| rad59         | 7.05409e-46 | 1.00000 | 7.05409e-46 | 1.000000 |
| rad50         | 1.66100e-46 | 1.00000 | 1.66101e-46 | 1.000000 |
| rad19syn      | 3.05790e-53 | 1.00000 | 3.05790e-53 | 1.000000 |
| rad52         | 3.20403e-57 | 1.00000 | 3.20403e-57 | 1.000000 |
| rad54         | 6.71540e-58 | 1.00000 | 6.71541e-58 | 1.000000 |
| PAH10+CH3     | 4.43362e-58 | 1.00000 | 4.43363e-58 | 1.000000 |
| rad43         | 1.01710e-58 | 1.00000 | 1.01710e-58 | 1.000000 |
| rad62         | 3.96397e-61 | 1.00000 | 3.96398e-61 | 1.000000 |
| rad51         | 4.39036e-64 | 1.00000 | 4.39036e-64 | 1.000000 |
| rad70         | 7.32076e-67 | 1.00000 | 7.32077e-67 | 1.000000 |
| PhcycC3H3_A+H | 3.19379e-67 | 1.00000 | 3.19379e-67 | 1.000000 |
| rad55         | 1.71512e-67 | 1.00000 | 1.71512e-67 | 1.000000 |
| rad65         | 4.10995e-69 | 1.00000 | 4.10995e-69 | 1.000000 |
| rad58         | 1.09984e-70 | 1.00000 | 1.09984e-70 | 1.000000 |
| PAH1+H        | 1.83632e-72 | 1.00000 | 1.83632e-72 | 1.000000 |
| rad34         | 1.22834e-74 | 1.00000 | 1.22834e-74 | 1.000000 |
| rad42         | 9.49448e-79 | 1.00000 | 9.49449e-79 | 1.000000 |
| rad41         | 1.20666e-79 | 1.00000 | 1.20667e-79 | 1.000000 |
| rad47         | 1.52328e-80 | 1.00000 | 1.52328e-80 | 1.000000 |

0.100000000E-02 Pa, 40.0000000 K

=====

| Rate constant | True (fraction)     | Effective (fraction) |
|---------------|---------------------|----------------------|
| Total         | 1.02415e-84 (1.00 ) | 1.02415e-84 (1.00 )  |

| species     | PYtrue      | Cumul    | PYeffective | Cumul    |
|-------------|-------------|----------|-------------|----------|
| Indene+H    | 0.999808    | 0.999808 | 0.999810    | 0.999810 |
| rad6        | 0.000190134 | 0.999998 | 0.000190134 | 1.00000  |
| Benzyl+C2H2 | 1.52900e-06 | 1.000000 | 0.00000     | 1.00000  |
| rad23       | 5.36096e-08 | 1.000000 | 5.36097e-08 | 1.00000  |
| rad7        | 1.52762e-08 | 1.000000 | 1.52762e-08 | 1.00000  |
| rad11       | 5.11304e-09 | 1.000000 | 5.11305e-09 | 1.00000  |
| rad45       | 5.22785e-10 | 1.000000 | 5.22786e-10 | 1.00000  |
| rad2        | 4.92831e-10 | 1.000000 | 4.92832e-10 | 1.00000  |
| rad3        | 1.41227e-10 | 1.000000 | 1.41228e-10 | 1.00000  |
| rad13       | 7.64331e-11 | 1.000000 | 7.64332e-11 | 1.00000  |
| rad4        | 7.14306e-11 | 1.000000 | 7.14307e-11 | 1.00000  |
| rad36       | 3.25357e-11 | 1.000000 | 3.25357e-11 | 1.00000  |
| rad1        | 3.12045e-11 | 1.000000 | 3.12046e-11 | 1.00000  |
| rad10       | 2.53766e-11 | 1.000000 | 2.53767e-11 | 1.00000  |
| rad22       | 2.30576e-11 | 1.000000 | 2.30576e-11 | 1.00000  |
| rad20       | 3.77035e-12 | 1.000000 | 3.77036e-12 | 1.00000  |
| rad21       | 2.35336e-12 | 1.000000 | 2.35336e-12 | 1.00000  |
| rad33       | 1.44212e-13 | 1.000000 | 1.44212e-13 | 1.00000  |
| rad35       | 7.21109e-14 | 1.000000 | 7.21110e-14 | 1.00000  |
| rad18       | 2.72823e-14 | 1.000000 | 2.72823e-14 | 1.00000  |
| PAH9+H      | 1.57417e-15 | 1.000000 | 1.57418e-15 | 1.00000  |
| rad28       | 9.43658e-17 | 1.000000 | 9.43660e-17 | 1.00000  |
| rad26       | 8.38046e-18 | 1.000000 | 8.38047e-18 | 1.00000  |
| rad24       | 7.72995e-18 | 1.000000 | 7.72996e-18 | 1.00000  |
| rad38       | 2.25314e-18 | 1.000000 | 2.25315e-18 | 1.00000  |
| rad27       | 3.18862e-19 | 1.000000 | 3.18862e-19 | 1.00000  |
| rad31       | 4.46249e-20 | 1.000000 | 4.46249e-20 | 1.00000  |
| PhCHCCH2+H  | 6.44118e-21 | 1.000000 | 6.44119e-21 | 1.00000  |
| rad30       | 5.01687e-21 | 1.000000 | 5.01688e-21 | 1.00000  |
| rad25       | 2.81857e-21 | 1.000000 | 2.81857e-21 | 1.00000  |
| PhCCH+CH3   | 1.37713e-21 | 1.000000 | 1.37713e-21 | 1.00000  |
| rad14       | 3.99531e-22 | 1.000000 | 3.99532e-22 | 1.00000  |
| PhCCCH3+H   | 3.34521e-22 | 1.000000 | 3.34522e-22 | 1.00000  |
| rad15       | 5.10353e-24 | 1.000000 | 5.10354e-24 | 1.00000  |
| rad8        | 4.89863e-26 | 1.000000 | 4.89864e-26 | 1.00000  |
| rad9        | 1.23237e-27 | 1.000000 | 1.23237e-27 | 1.00000  |

|               |             |          |             |         |
|---------------|-------------|----------|-------------|---------|
| PAH7+H        | 2.02564e-28 | 1.000000 | 2.02564e-28 | 1.00000 |
| Ph+MeAc       | 1.86013e-28 | 1.000000 | 1.86014e-28 | 1.00000 |
| rad12         | 2.14113e-29 | 1.000000 | 2.14114e-29 | 1.00000 |
| rad46         | 2.02230e-29 | 1.000000 | 2.02230e-29 | 1.00000 |
| rad39         | 2.89598e-30 | 1.000000 | 2.89598e-30 | 1.00000 |
| Ph+Allene     | 1.31510e-31 | 1.000000 | 1.31510e-31 | 1.00000 |
| rad60syn      | 7.05169e-36 | 1.000000 | 7.05170e-36 | 1.00000 |
| rad60anti     | 2.67728e-37 | 1.000000 | 2.67728e-37 | 1.00000 |
| PhCH2CCH+H    | 1.71721e-37 | 1.000000 | 1.71722e-37 | 1.00000 |
| rad37         | 3.04756e-38 | 1.000000 | 3.04757e-38 | 1.00000 |
| rad5          | 3.02334e-41 | 1.000000 | 3.02335e-41 | 1.00000 |
| PAH3+H        | 1.45660e-45 | 1.000000 | 1.45660e-45 | 1.00000 |
| rad59         | 7.61769e-46 | 1.000000 | 7.61771e-46 | 1.00000 |
| rad50         | 1.93229e-46 | 1.000000 | 1.93229e-46 | 1.00000 |
| rad19syn      | 1.75727e-53 | 1.000000 | 1.75728e-53 | 1.00000 |
| rad52         | 1.89791e-57 | 1.000000 | 1.89791e-57 | 1.00000 |
| rad54         | 3.35806e-58 | 1.000000 | 3.35807e-58 | 1.00000 |
| PAH10+CH3     | 2.22159e-58 | 1.000000 | 2.22159e-58 | 1.00000 |
| rad43         | 5.09561e-59 | 1.000000 | 5.09561e-59 | 1.00000 |
| rad62         | 1.87549e-61 | 1.000000 | 1.87549e-61 | 1.00000 |
| rad51         | 2.07720e-64 | 1.000000 | 2.07720e-64 | 1.00000 |
| rad70         | 3.20142e-67 | 1.000000 | 3.20142e-67 | 1.00000 |
| PhcycC3H3_A+H | 1.39099e-67 | 1.000000 | 1.39099e-67 | 1.00000 |
| rad55         | 7.47218e-68 | 1.000000 | 7.47219e-68 | 1.00000 |
| rad65         | 1.82743e-69 | 1.000000 | 1.82743e-69 | 1.00000 |
| rad58         | 4.77461e-71 | 1.000000 | 4.77461e-71 | 1.00000 |
| PAH1+H        | 7.82466e-73 | 1.000000 | 7.82468e-73 | 1.00000 |
| rad34         | 5.24187e-75 | 1.000000 | 5.24187e-75 | 1.00000 |
| rad42         | 4.07793e-79 | 1.000000 | 4.07793e-79 | 1.00000 |
| rad41         | 5.22957e-80 | 1.000000 | 5.22958e-80 | 1.00000 |
| rad47         | 4.42261e-81 | 1.000000 | 4.42262e-81 | 1.00000 |

0.100000000E-02 Pa, 50.0000000 K

=====

| Rate constant | True (fraction)     | Effective (fraction) |
|---------------|---------------------|----------------------|
| Total         | 2.31816e-70 (1.00 ) | 2.31816e-70 (1.00 )  |

| species     | PYtrue      | Cumul    | PYeffective | Cumul    |
|-------------|-------------|----------|-------------|----------|
| Indene+H    | 0.999800    | 0.999800 | 0.999803    | 0.999803 |
| rad6        | 0.000197433 | 0.999997 | 0.000197433 | 1.00000  |
| Benzyl+C2H2 | 2.26156e-06 | 1.000000 | 0.00000     | 1.00000  |
| rad23       | 1.77617e-08 | 1.000000 | 1.77617e-08 | 1.00000  |
| rad7        | 1.56159e-08 | 1.000000 | 1.56159e-08 | 1.00000  |
| rad11       | 4.64318e-09 | 1.000000 | 4.64319e-09 | 1.00000  |
| rad2        | 8.10368e-10 | 1.000000 | 8.10370e-10 | 1.00000  |
| rad45       | 1.68100e-10 | 1.000000 | 1.68101e-10 | 1.00000  |
| rad3        | 1.55828e-10 | 1.000000 | 1.55828e-10 | 1.00000  |
| rad13       | 7.94546e-11 | 1.000000 | 7.94548e-11 | 1.00000  |
| rad4        | 7.88502e-11 | 1.000000 | 7.88503e-11 | 1.00000  |
| rad1        | 5.14001e-11 | 1.000000 | 5.14002e-11 | 1.00000  |
| rad10       | 4.16867e-11 | 1.000000 | 4.16868e-11 | 1.00000  |
| rad36       | 1.04536e-11 | 1.000000 | 1.04536e-11 | 1.00000  |
| rad22       | 7.77630e-12 | 1.000000 | 7.77632e-12 | 1.00000  |
| rad20       | 2.74500e-12 | 1.000000 | 2.74500e-12 | 1.00000  |
| rad21       | 1.71401e-12 | 1.000000 | 1.71401e-12 | 1.00000  |
| rad35       | 3.29661e-13 | 1.000000 | 3.29662e-13 | 1.00000  |
| rad33       | 1.50040e-13 | 1.000000 | 1.50040e-13 | 1.00000  |
| rad18       | 1.82226e-14 | 1.000000 | 1.82226e-14 | 1.00000  |
| PAH9+H      | 1.03351e-14 | 1.000000 | 1.03351e-14 | 1.00000  |
| rad28       | 2.23778e-16 | 1.000000 | 2.23779e-16 | 1.00000  |
| rad26       | 2.47441e-17 | 1.000000 | 2.47441e-17 | 1.00000  |
| rad38       | 6.03684e-18 | 1.000000 | 6.03685e-18 | 1.00000  |
| rad24       | 2.61948e-18 | 1.000000 | 2.61949e-18 | 1.00000  |
| rad27       | 7.34338e-19 | 1.000000 | 7.34340e-19 | 1.00000  |
| rad30       | 1.82097e-19 | 1.000000 | 1.82098e-19 | 1.00000  |
| rad31       | 5.46121e-20 | 1.000000 | 5.46122e-20 | 1.00000  |
| PhCHCCH2+H  | 1.77150e-20 | 1.000000 | 1.77151e-20 | 1.00000  |
| rad25       | 5.22056e-21 | 1.000000 | 5.22057e-21 | 1.00000  |
| PhCCH+CH3   | 3.62066e-21 | 1.000000 | 3.62067e-21 | 1.00000  |
| PhCCCH3+H   | 8.94275e-22 | 1.000000 | 8.94277e-22 | 1.00000  |
| rad14       | 8.25803e-22 | 1.000000 | 8.25804e-22 | 1.00000  |
| rad15       | 1.25834e-23 | 1.000000 | 1.25834e-23 | 1.00000  |
| rad8        | 1.27599e-25 | 1.000000 | 1.27599e-25 | 1.00000  |
| rad9        | 3.13300e-27 | 1.000000 | 3.13301e-27 | 1.00000  |
| PAH7+H      | 5.95113e-28 | 1.000000 | 5.95114e-28 | 1.00000  |
| Ph+MeAc     | 4.63716e-28 | 1.000000 | 4.63717e-28 | 1.00000  |
| rad12       | 5.75070e-29 | 1.000000 | 5.75071e-29 | 1.00000  |
| rad46       | 4.92067e-29 | 1.000000 | 4.92068e-29 | 1.00000  |



|               |             |          |             |         |
|---------------|-------------|----------|-------------|---------|
| rad39         | 7.99959e-30 | 1.000000 | 7.99961e-30 | 1.00000 |
| Ph+Allene     | 3.06490e-31 | 1.000000 | 3.06490e-31 | 1.00000 |
| rad60syn      | 1.67652e-35 | 1.000000 | 1.67652e-35 | 1.00000 |
| rad60anti     | 6.10499e-37 | 1.000000 | 6.10500e-37 | 1.00000 |
| PhCH2CCH+H    | 3.18175e-37 | 1.000000 | 3.18176e-37 | 1.00000 |
| rad37         | 5.39049e-38 | 1.000000 | 5.39051e-38 | 1.00000 |
| rad5          | 5.12013e-41 | 1.000000 | 5.12014e-41 | 1.00000 |
| PAH3+H        | 2.22994e-45 | 1.000000 | 2.22994e-45 | 1.00000 |
| rad59         | 1.17050e-45 | 1.000000 | 1.17050e-45 | 1.00000 |
| rad50         | 3.10907e-46 | 1.000000 | 3.10907e-46 | 1.00000 |
| rad19syn      | 1.95234e-53 | 1.000000 | 1.95235e-53 | 1.00000 |
| rad52         | 2.13472e-57 | 1.000000 | 2.13473e-57 | 1.00000 |
| rad54         | 3.55434e-58 | 1.000000 | 3.55435e-58 | 1.00000 |
| PAH10+CH3     | 2.36623e-58 | 1.000000 | 2.36624e-58 | 1.00000 |
| rad43         | 5.42657e-59 | 1.000000 | 5.42658e-59 | 1.00000 |
| rad62         | 1.96629e-61 | 1.000000 | 1.96629e-61 | 1.00000 |
| rad51         | 2.17033e-64 | 1.000000 | 2.17033e-64 | 1.00000 |
| rad70         | 3.34689e-67 | 1.000000 | 3.34689e-67 | 1.00000 |
| PhcycC3H3_A+H | 1.45692e-67 | 1.000000 | 1.45693e-67 | 1.00000 |
| rad55         | 7.82420e-68 | 1.000000 | 7.82422e-68 | 1.00000 |
| rad65         | 1.90257e-69 | 1.000000 | 1.90257e-69 | 1.00000 |
| rad58         | 5.00960e-71 | 1.000000 | 5.00961e-71 | 1.00000 |
| PAH1+H        | 8.41167e-73 | 1.000000 | 8.41169e-73 | 1.00000 |
| rad34         | 5.69064e-75 | 1.000000 | 5.69065e-75 | 1.00000 |
| rad42         | 4.58008e-79 | 1.000000 | 4.58009e-79 | 1.00000 |
| rad41         | 6.04577e-80 | 1.000000 | 6.04578e-80 | 1.00000 |
| rad47         | 3.59582e-81 | 1.000000 | 3.59583e-81 | 1.00000 |

0.100000000E-02 Pa, 60.0000000 K

| Rate constant | True (fraction)     | Effective (fraction) |
|---------------|---------------------|----------------------|
| Total         | 8.44107e-61 (1.00 ) | 8.44104e-61 (1.00 )  |

| species     | PYtrue      | Cumul    | PYeffective | Cumul    |
|-------------|-------------|----------|-------------|----------|
| Indene+H    | 0.999791    | 0.999791 | 0.999794    | 0.999794 |
| rad6        | 0.000206085 | 0.999997 | 0.000206086 | 1.00000  |
| Benzyl+C2H2 | 3.25360e-06 | 1.00000  | 0.00000     | 1.00000  |
| rad7        | 1.61271e-08 | 1.00000  | 1.61272e-08 | 1.00000  |
| rad23       | 7.57486e-09 | 1.00000  | 7.57489e-09 | 1.00000  |
| rad11       | 4.50446e-09 | 1.00000  | 4.50448e-09 | 1.00000  |
| rad2        | 1.25202e-09 | 1.00000  | 1.25202e-09 | 1.00000  |
| rad3        | 1.69410e-10 | 1.00000  | 1.69410e-10 | 1.00000  |
| rad4        | 8.57698e-11 | 1.00000  | 8.57701e-11 | 1.00000  |
| rad13       | 8.30640e-11 | 1.00000  | 8.30643e-11 | 1.00000  |
| rad1        | 7.95849e-11 | 1.00000  | 7.95852e-11 | 1.00000  |
| rad45       | 7.01469e-11 | 1.00000  | 7.01472e-11 | 1.00000  |
| rad10       | 6.43083e-11 | 1.00000  | 6.43085e-11 | 1.00000  |
| rad36       | 4.35859e-12 | 1.00000  | 4.35860e-12 | 1.00000  |
| rad22       | 3.40753e-12 | 1.00000  | 3.40754e-12 | 1.00000  |
| rad20       | 2.12761e-12 | 1.00000  | 2.12761e-12 | 1.00000  |
| rad21       | 1.32920e-12 | 1.00000  | 1.32920e-12 | 1.00000  |
| rad35       | 9.65445e-13 | 1.00000  | 9.65449e-13 | 1.00000  |
| rad33       | 1.56991e-13 | 1.00000  | 1.56992e-13 | 1.00000  |
| PAH9+H      | 6.55597e-14 | 1.00000  | 6.55599e-14 | 1.00000  |
| rad18       | 1.33683e-14 | 1.00000  | 1.33683e-14 | 1.00000  |
| rad28       | 6.15342e-16 | 1.00000  | 6.15344e-16 | 1.00000  |
| rad38       | 8.50057e-17 | 1.00000  | 8.50060e-17 | 1.00000  |
| rad26       | 7.99638e-17 | 1.00000  | 7.99641e-17 | 1.00000  |
| rad30       | 2.80559e-17 | 1.00000  | 2.80560e-17 | 1.00000  |
| rad27       | 1.92635e-18 | 1.00000  | 1.92635e-18 | 1.00000  |
| rad24       | 1.15255e-18 | 1.00000  | 1.15256e-18 | 1.00000  |
| rad31       | 6.68369e-20 | 1.00000  | 6.68371e-20 | 1.00000  |
| PhCHCCH2+H  | 5.54532e-20 | 1.00000  | 5.54534e-20 | 1.00000  |
| rad25       | 1.20159e-20 | 1.00000  | 1.20159e-20 | 1.00000  |
| PhCCH+CH3   | 1.10549e-20 | 1.00000  | 1.10549e-20 | 1.00000  |
| PhCCCH3+H   | 2.76686e-21 | 1.00000  | 2.76687e-21 | 1.00000  |
| rad14       | 2.06828e-21 | 1.00000  | 2.06829e-21 | 1.00000  |
| rad15       | 5.11329e-22 | 1.00000  | 5.11331e-22 | 1.00000  |
| rad8        | 3.92767e-25 | 1.00000  | 3.92768e-25 | 1.00000  |
| rad9        | 9.51934e-27 | 1.00000  | 9.51937e-27 | 1.00000  |
| PAH7+H      | 1.99796e-27 | 1.00000  | 1.99796e-27 | 1.00000  |
| Ph+MeAc     | 1.39569e-27 | 1.00000  | 1.39570e-27 | 1.00000  |
| rad12       | 1.81076e-28 | 1.00000  | 1.81077e-28 | 1.00000  |
| rad46       | 1.49582e-28 | 1.00000  | 1.49583e-28 | 1.00000  |
| rad39       | 2.56980e-29 | 1.00000  | 2.56981e-29 | 1.00000  |
| Ph+Allene   | 8.78807e-31 | 1.00000  | 8.78810e-31 | 1.00000  |
| rad60syn    | 4.87589e-35 | 1.00000  | 4.87591e-35 | 1.00000  |
| rad60anti   | 1.72272e-36 | 1.00000  | 1.72272e-36 | 1.00000  |

|               |             |         |             |         |
|---------------|-------------|---------|-------------|---------|
| PhCH2CCH+H    | 7.75648e-37 | 1.00000 | 7.75651e-37 | 1.00000 |
| rad37         | 1.27455e-37 | 1.00000 | 1.27455e-37 | 1.00000 |
| rad5          | 1.17745e-40 | 1.00000 | 1.17746e-40 | 1.00000 |
| PAH3+H        | 4.80445e-45 | 1.00000 | 4.80446e-45 | 1.00000 |
| rad59         | 2.52698e-45 | 1.00000 | 2.52699e-45 | 1.00000 |
| rad50         | 6.90847e-46 | 1.00000 | 6.90850e-46 | 1.00000 |
| rad19syn      | 3.58543e-53 | 1.00000 | 3.58545e-53 | 1.00000 |
| rad52         | 3.93438e-57 | 1.00000 | 3.93439e-57 | 1.00000 |
| rad54         | 6.49631e-58 | 1.00000 | 6.49634e-58 | 1.00000 |
| PAH10+CH3     | 4.38439e-58 | 1.00000 | 4.38441e-58 | 1.00000 |
| rad43         | 1.00548e-58 | 1.00000 | 1.00549e-58 | 1.00000 |
| rad62         | 3.65206e-61 | 1.00000 | 3.65208e-61 | 1.00000 |
| rad51         | 3.99619e-64 | 1.00000 | 3.99621e-64 | 1.00000 |
| rad70         | 6.40750e-67 | 1.00000 | 6.40752e-67 | 1.00000 |
| PhcycC3H3_A+H | 2.80277e-67 | 1.00000 | 2.80278e-67 | 1.00000 |
| rad55         | 1.50431e-67 | 1.00000 | 1.50431e-67 | 1.00000 |
| rad65         | 3.59095e-69 | 1.00000 | 3.59096e-69 | 1.00000 |
| rad58         | 9.67802e-71 | 1.00000 | 9.67805e-71 | 1.00000 |
| PAH1+H        | 1.70235e-72 | 1.00000 | 1.70236e-72 | 1.00000 |
| rad34         | 1.16819e-74 | 1.00000 | 1.16819e-74 | 1.00000 |
| rad42         | 1.01077e-78 | 1.00000 | 1.01077e-78 | 1.00000 |
| rad41         | 1.46438e-79 | 1.00000 | 1.46439e-79 | 1.00000 |
| rad47         | 5.82063e-81 | 1.00000 | 5.82065e-81 | 1.00000 |

0.1000000000E-02 Pa, 70.0000000 K

| Rate constant | True (fraction)     | Effective (fraction) |
|---------------|---------------------|----------------------|
| Total         | 5.61998e-54 (1.00 ) | 5.61996e-54 (1.00 )  |

| species     | PYtrue      | Cumul    | PYeffective | Cumul    |
|-------------|-------------|----------|-------------|----------|
| Indene+H    | 0.999779    | 0.999779 | 0.999784    | 0.999784 |
| rad6        | 0.000215946 | 0.999995 | 0.000215947 | 1.000000 |
| Benzyl+C2H2 | 4.55713e-06 | 1.000000 | 0.000000    | 1.000000 |
| rad7        | 1.67687e-08 | 1.000000 | 1.67687e-08 | 1.000000 |
| rad11       | 4.51413e-09 | 1.000000 | 4.51415e-09 | 1.000000 |
| rad23       | 3.77883e-09 | 1.000000 | 3.77885e-09 | 1.000000 |
| rad2        | 1.87164e-09 | 1.000000 | 1.87165e-09 | 1.000000 |
| rad3        | 1.83313e-10 | 1.000000 | 1.83314e-10 | 1.000000 |
| rad1        | 1.19268e-10 | 1.000000 | 1.19269e-10 | 1.000000 |
| rad10       | 9.59962e-11 | 1.000000 | 9.59966e-11 | 1.000000 |
| rad4        | 9.28680e-11 | 1.000000 | 9.28685e-11 | 1.000000 |
| rad13       | 8.71980e-11 | 1.000000 | 8.71984e-11 | 1.000000 |
| rad45       | 3.44100e-11 | 1.000000 | 3.44102e-11 | 1.000000 |
| rad36       | 2.13640e-12 | 1.000000 | 2.13641e-12 | 1.000000 |
| rad35       | 2.10298e-12 | 1.000000 | 2.10299e-12 | 1.000000 |
| rad22       | 1.75501e-12 | 1.000000 | 1.75502e-12 | 1.000000 |
| rad20       | 1.71580e-12 | 1.000000 | 1.71581e-12 | 1.000000 |
| rad21       | 1.07261e-12 | 1.000000 | 1.07261e-12 | 1.000000 |
| PAH9+H      | 2.63563e-13 | 1.000000 | 2.63564e-13 | 1.000000 |
| rad33       | 1.64954e-13 | 1.000000 | 1.64955e-13 | 1.000000 |
| rad18       | 1.03742e-14 | 1.000000 | 1.03742e-14 | 1.000000 |
| rad28       | 2.18335e-15 | 1.000000 | 2.18336e-15 | 1.000000 |
| rad30       | 1.03364e-15 | 1.000000 | 1.03364e-15 | 1.000000 |
| rad38       | 9.33117e-16 | 1.000000 | 9.33121e-16 | 1.000000 |
| rad26       | 3.14821e-16 | 1.000000 | 3.14823e-16 | 1.000000 |
| rad27       | 5.96610e-18 | 1.000000 | 5.96612e-18 | 1.000000 |
| rad24       | 5.99109e-19 | 1.000000 | 5.99112e-19 | 1.000000 |
| PhCHCCH2+H  | 2.24070e-19 | 1.000000 | 2.24071e-19 | 1.000000 |
| rad15       | 9.43037e-20 | 1.000000 | 9.43041e-20 | 1.000000 |
| rad31       | 8.26688e-20 | 1.000000 | 8.26691e-20 | 1.000000 |
| PhCCH+CH3   | 4.42136e-20 | 1.000000 | 4.42138e-20 | 1.000000 |
| rad25       | 4.03705e-20 | 1.000000 | 4.03707e-20 | 1.000000 |
| PhCCCH3+H   | 1.11993e-20 | 1.000000 | 1.11994e-20 | 1.000000 |
| rad14       | 6.91011e-21 | 1.000000 | 6.91015e-21 | 1.000000 |
| rad8        | 1.60305e-24 | 1.000000 | 1.60306e-24 | 1.000000 |
| rad9        | 3.86112e-26 | 1.000000 | 3.86114e-26 | 1.000000 |
| PAH7+H      | 8.72899e-27 | 1.000000 | 8.72903e-27 | 1.000000 |
| Ph+MeAc     | 5.65263e-27 | 1.000000 | 5.65265e-27 | 1.000000 |
| rad46       | 2.18006e-27 | 1.000000 | 2.18007e-27 | 1.000000 |
| rad12       | 7.54879e-28 | 1.000000 | 7.54883e-28 | 1.000000 |
| rad39       | 1.08759e-28 | 1.000000 | 1.08760e-28 | 1.000000 |
| Ph+Allene   | 3.43726e-30 | 1.000000 | 3.43728e-30 | 1.000000 |
| rad60syn    | 1.92629e-34 | 1.000000 | 1.92630e-34 | 1.000000 |
| rad60anti   | 6.66062e-36 | 1.000000 | 6.66065e-36 | 1.000000 |
| PhCH2CCH+H  | 2.70659e-36 | 1.000000 | 2.70660e-36 | 1.000000 |
| rad37       | 4.36515e-37 | 1.000000 | 4.36517e-37 | 1.000000 |
| rad5        | 3.96264e-40 | 1.000000 | 3.96266e-40 | 1.000000 |
| PAH3+H      | 1.54969e-44 | 1.000000 | 1.54969e-44 | 1.000000 |

|               |             |          |             |          |
|---------------|-------------|----------|-------------|----------|
| rad59         | 8.15982e-45 | 1.000000 | 8.15985e-45 | 1.000000 |
| rad50         | 2.27021e-45 | 1.000000 | 2.27022e-45 | 1.000000 |
| rad19syn      | 1.08582e-52 | 1.000000 | 1.08582e-52 | 1.000000 |
| rad52         | 1.18983e-56 | 1.000000 | 1.18983e-56 | 1.000000 |
| rad54         | 2.00744e-57 | 1.000000 | 2.00745e-57 | 1.000000 |
| PAH10+CH3     | 1.39689e-57 | 1.000000 | 1.39689e-57 | 1.000000 |
| rad43         | 3.20492e-58 | 1.000000 | 3.20493e-58 | 1.000000 |
| rad62         | 1.17521e-60 | 1.000000 | 1.17521e-60 | 1.000000 |
| rad51         | 1.25890e-63 | 1.000000 | 1.25891e-63 | 1.000000 |
| rad70         | 2.14701e-66 | 1.000000 | 2.14702e-66 | 1.000000 |
| PhcycC3H3_A+H | 9.45469e-67 | 1.000000 | 9.45474e-67 | 1.000000 |
| rad55         | 5.07043e-67 | 1.000000 | 5.07046e-67 | 1.000000 |
| rad65         | 1.17931e-68 | 1.000000 | 1.17931e-68 | 1.000000 |
| rad58         | 3.28363e-70 | 1.000000 | 3.28364e-70 | 1.000000 |
| PAH1+H        | 6.14218e-72 | 1.000000 | 6.14221e-72 | 1.000000 |
| rad34         | 4.28868e-74 | 1.000000 | 4.28870e-74 | 1.000000 |
| rad42         | 4.55033e-78 | 1.000000 | 4.55035e-78 | 1.000000 |
| rad41         | 8.91135e-79 | 1.000000 | 8.91139e-79 | 1.000000 |
| rad47         | 1.73907e-80 | 1.000000 | 1.73907e-80 | 1.000000 |

0.100000000E-02 Pa, 80.0000000 K

| Rate constant | True (fraction)     | Effective (fraction) |
|---------------|---------------------|----------------------|
| Total         | 7.28864e-49 (1.00 ) | 7.28860e-49 (1.00 )  |

| species     | PYtrue      | Cumul    | PYeffective | Cumul    |
|-------------|-------------|----------|-------------|----------|
| Indene+H    | 0.999767    | 0.999767 | 0.999773    | 0.999773 |
| rad6        | 0.000227052 | 0.999994 | 0.000227054 | 1.000000 |
| Benzyl+C2H2 | 6.25295e-06 | 1.000000 | 0.000000    | 1.000000 |
| rad7        | 1.75290e-08 | 1.000000 | 1.75291e-08 | 1.000000 |
| rad11       | 4.60959e-09 | 1.000000 | 4.60962e-09 | 1.000000 |
| rad2        | 2.74803e-09 | 1.000000 | 2.74805e-09 | 1.000000 |
| rad23       | 2.09657e-09 | 1.000000 | 2.09658e-09 | 1.000000 |
| rad3        | 1.98540e-10 | 1.000000 | 1.98542e-10 | 1.000000 |
| rad1        | 1.75604e-10 | 1.000000 | 1.75605e-10 | 1.000000 |
| rad10       | 1.40774e-10 | 1.000000 | 1.40774e-10 | 1.000000 |
| rad4        | 1.00655e-10 | 1.000000 | 1.00655e-10 | 1.000000 |
| rad13       | 9.18715e-11 | 1.000000 | 9.18721e-11 | 1.000000 |
| rad45       | 1.88348e-11 | 1.000000 | 1.88349e-11 | 1.000000 |
| rad35       | 3.82551e-12 | 1.000000 | 3.82553e-12 | 1.000000 |
| rad20       | 1.42191e-12 | 1.000000 | 1.42192e-12 | 1.000000 |
| rad36       | 1.16859e-12 | 1.000000 | 1.16860e-12 | 1.000000 |
| rad22       | 1.00769e-12 | 1.000000 | 1.00770e-12 | 1.000000 |
| rad21       | 8.89533e-13 | 1.000000 | 8.89538e-13 | 1.000000 |
| PAH9+H      | 7.62888e-13 | 1.000000 | 7.62893e-13 | 1.000000 |
| rad33       | 1.73963e-13 | 1.000000 | 1.73964e-13 | 1.000000 |
| rad30       | 1.51587e-14 | 1.000000 | 1.51588e-14 | 1.000000 |
| rad28       | 1.01906e-14 | 1.000000 | 1.01906e-14 | 1.000000 |
| rad18       | 8.35415e-15 | 1.000000 | 8.35420e-15 | 1.000000 |
| rad38       | 5.82372e-15 | 1.000000 | 5.82376e-15 | 1.000000 |
| rad26       | 1.56383e-15 | 1.000000 | 1.56384e-15 | 1.000000 |
| rad27       | 2.02981e-17 | 1.000000 | 2.02982e-17 | 1.000000 |
| rad15       | 4.84696e-18 | 1.000000 | 4.84699e-18 | 1.000000 |
| PhCHCCH2+H  | 1.37748e-18 | 1.000000 | 1.37748e-18 | 1.000000 |
| rad24       | 3.50269e-19 | 1.000000 | 3.50271e-19 | 1.000000 |
| PhCCH+CH3   | 2.79377e-19 | 1.000000 | 2.79379e-19 | 1.000000 |
| rad25       | 2.55726e-19 | 1.000000 | 2.55727e-19 | 1.000000 |
| rad31       | 1.03939e-19 | 1.000000 | 1.03940e-19 | 1.000000 |
| PhCCCH3+H   | 7.16337e-20 | 1.000000 | 7.16341e-20 | 1.000000 |
| rad14       | 3.43761e-20 | 1.000000 | 3.43763e-20 | 1.000000 |
| rad8        | 1.05976e-23 | 1.000000 | 1.05977e-23 | 1.000000 |
| rad46       | 4.64973e-25 | 1.000000 | 4.64976e-25 | 1.000000 |
| rad9        | 2.54988e-25 | 1.000000 | 2.54989e-25 | 1.000000 |
| PAH7+H      | 6.10848e-26 | 1.000000 | 6.10852e-26 | 1.000000 |
| Ph+MeAc     | 3.75137e-26 | 1.000000 | 3.75139e-26 | 1.000000 |
| rad12       | 5.10140e-27 | 1.000000 | 5.10143e-27 | 1.000000 |
| rad39       | 7.44130e-28 | 1.000000 | 7.44135e-28 | 1.000000 |
| Ph+Allene   | 2.22562e-29 | 1.000000 | 2.22564e-29 | 1.000000 |
| rad60syn    | 1.25583e-33 | 1.000000 | 1.25584e-33 | 1.000000 |
| rad60anti   | 4.27817e-35 | 1.000000 | 4.27820e-35 | 1.000000 |
| PhCH2CCH+H  | 1.62085e-35 | 1.000000 | 1.62086e-35 | 1.000000 |
| rad37       | 2.59040e-36 | 1.000000 | 2.59042e-36 | 1.000000 |
| rad5        | 2.32764e-39 | 1.000000 | 2.32765e-39 | 1.000000 |
| PAH3+H      | 8.85374e-44 | 1.000000 | 8.85380e-44 | 1.000000 |
| rad59       | 4.66429e-44 | 1.000000 | 4.66432e-44 | 1.000000 |
| rad50       | 1.31032e-44 | 1.000000 | 1.31033e-44 | 1.000000 |
| rad19syn    | 6.20598e-52 | 1.000000 | 6.20602e-52 | 1.000000 |
| rad52       | 6.76982e-56 | 1.000000 | 6.76986e-56 | 1.000000 |

|               |             |         |             |         |
|---------------|-------------|---------|-------------|---------|
| rad54         | 1.19011e-56 | 1.00000 | 1.19011e-56 | 1.00000 |
| PAH10+CH3     | 8.91981e-57 | 1.00000 | 8.91987e-57 | 1.00000 |
| rad43         | 2.04999e-57 | 1.00000 | 2.05000e-57 | 1.00000 |
| rad62         | 7.58906e-60 | 1.00000 | 7.58911e-60 | 1.00000 |
| rad51         | 7.67497e-63 | 1.00000 | 7.67502e-63 | 1.00000 |
| rad70         | 1.41802e-65 | 1.00000 | 1.41803e-65 | 1.00000 |
| PhcycC3H3_A+H | 6.29859e-66 | 1.00000 | 6.29863e-66 | 1.00000 |
| rad55         | 3.37420e-66 | 1.00000 | 3.37422e-66 | 1.00000 |
| rad65         | 7.59857e-68 | 1.00000 | 7.59862e-68 | 1.00000 |
| rad58         | 2.20373e-69 | 1.00000 | 2.20375e-69 | 1.00000 |
| PAH1+H        | 4.47785e-71 | 1.00000 | 4.47787e-71 | 1.00000 |
| rad34         | 3.19828e-73 | 1.00000 | 3.19830e-73 | 1.00000 |
| rad42         | 6.69407e-77 | 1.00000 | 6.69411e-77 | 1.00000 |
| rad41         | 2.26588e-77 | 1.00000 | 2.26590e-77 | 1.00000 |
| rad47         | 1.07131e-79 | 1.00000 | 1.07132e-79 | 1.00000 |

0.100000000E-02 Pa, 90.0000000 K

| =====         |                     |          |                      |          |
|---------------|---------------------|----------|----------------------|----------|
| Rate constant | True (fraction)     |          | Effective (fraction) |          |
| -----         |                     |          |                      |          |
| Total         | 6.85154e-45 (1.00 ) |          | 6.85148e-45 (1.00 )  |          |
| species       | PYtrue              | Cumul    | PYeffective          | Cumul    |
| -----         |                     |          |                      |          |
| Indene+H      | 0.999752            | 0.999752 | 0.999760             | 0.999760 |
| rad6          | 0.000239519         | 0.999992 | 0.000239522          | 1.000000 |
| Benzyl+C2H2   | 8.45054e-06         | 1.000000 | 0.000000             | 1.000000 |
| rad7          | 1.84092e-08         | 1.000000 | 1.84094e-08          | 1.000000 |
| rad11         | 4.76568e-09         | 1.000000 | 4.76572e-09          | 1.000000 |
| rad2          | 3.99360e-09         | 1.000000 | 3.99364e-09          | 1.000000 |
| rad23         | 1.25564e-09         | 1.000000 | 1.25565e-09          | 1.000000 |
| rad1          | 2.55984e-10         | 1.000000 | 2.55986e-10          | 1.000000 |
| rad3          | 2.16050e-10         | 1.000000 | 2.16052e-10          | 1.000000 |
| rad10         | 2.04380e-10         | 1.000000 | 2.04382e-10          | 1.000000 |
| rad4          | 1.09619e-10         | 1.000000 | 1.09620e-10          | 1.000000 |
| rad13         | 9.71332e-11         | 1.000000 | 9.71340e-11          | 1.000000 |
| rad45         | 1.11548e-11         | 1.000000 | 1.11549e-11          | 1.000000 |
| rad35         | 6.21942e-12         | 1.000000 | 6.21947e-12          | 1.000000 |
| PAH9+H        | 1.77210e-12         | 1.000000 | 1.77211e-12          | 1.000000 |
| rad20         | 1.20176e-12         | 1.000000 | 1.20177e-12          | 1.000000 |
| rad21         | 7.52414e-13         | 1.000000 | 7.52420e-13          | 1.000000 |
| rad36         | 6.91706e-13         | 1.000000 | 6.91712e-13          | 1.000000 |
| rad22         | 6.25174e-13         | 1.000000 | 6.25179e-13          | 1.000000 |
| rad33         | 1.84113e-13         | 1.000000 | 1.84115e-13          | 1.000000 |
| rad30         | 1.20888e-13         | 1.000000 | 1.20889e-13          | 1.000000 |
| rad28         | 5.20486e-14         | 1.000000 | 5.20491e-14          | 1.000000 |
| rad38         | 2.42995e-14         | 1.000000 | 2.42997e-14          | 1.000000 |
| rad26         | 8.65414e-15         | 1.000000 | 8.65422e-15          | 1.000000 |
| rad18         | 6.90322e-15         | 1.000000 | 6.90328e-15          | 1.000000 |
| rad15         | 1.02303e-16         | 1.000000 | 1.02304e-16          | 1.000000 |
| rad27         | 6.65151e-17         | 1.000000 | 6.65156e-17          | 1.000000 |
| PhCHCCH2+H    | 1.31536e-17         | 1.000000 | 1.31537e-17          | 1.000000 |
| PhCCH+CH3     | 3.08833e-18         | 1.000000 | 3.08835e-18          | 1.000000 |
| rad25         | 2.03328e-18         | 1.000000 | 2.03329e-18          | 1.000000 |
| PhCCCH3+H     | 8.14375e-19         | 1.000000 | 8.14382e-19          | 1.000000 |
| rad14         | 2.28188e-19         | 1.000000 | 2.28190e-19          | 1.000000 |
| rad24         | 2.23826e-19         | 1.000000 | 2.23828e-19          | 1.000000 |
| rad31         | 1.33233e-19         | 1.000000 | 1.33234e-19          | 1.000000 |
| rad8          | 1.47016e-22         | 1.000000 | 1.47017e-22          | 1.000000 |
| rad46         | 3.75566e-23         | 1.000000 | 3.75569e-23          | 1.000000 |
| rad9          | 3.84099e-24         | 1.000000 | 3.84102e-24          | 1.000000 |
| PAH7+H        | 9.32104e-25         | 1.000000 | 9.32112e-25          | 1.000000 |
| Ph+MeAc       | 5.55804e-25         | 1.000000 | 5.55809e-25          | 1.000000 |
| rad12         | 7.61701e-26         | 1.000000 | 7.61708e-26          | 1.000000 |
| rad39         | 1.12095e-26         | 1.000000 | 1.12096e-26          | 1.000000 |
| Ph+Allene     | 3.24659e-28         | 1.000000 | 3.24662e-28          | 1.000000 |
| rad60syn      | 1.83997e-32         | 1.000000 | 1.83999e-32          | 1.000000 |
| rad60anti     | 6.20827e-34         | 1.000000 | 6.20832e-34          | 1.000000 |
| PhCH2CCH+H    | 2.24854e-34         | 1.000000 | 2.24856e-34          | 1.000000 |
| rad37         | 3.59164e-35         | 1.000000 | 3.59167e-35          | 1.000000 |
| rad5          | 3.21263e-38         | 1.000000 | 3.21266e-38          | 1.000000 |
| PAH3+H        | 1.19936e-42         | 1.000000 | 1.19937e-42          | 1.000000 |
| rad59         | 6.31907e-43         | 1.000000 | 6.31912e-43          | 1.000000 |
| rad50         | 1.78308e-43         | 1.000000 | 1.78310e-43          | 1.000000 |
| rad19syn      | 8.80209e-51         | 1.000000 | 8.80216e-51          | 1.000000 |
| rad52         | 9.54509e-55         | 1.000000 | 9.54517e-55          | 1.000000 |
| rad54         | 1.77559e-55         | 1.000000 | 1.77560e-55          | 1.000000 |
| PAH10+CH3     | 1.60889e-55         | 1.000000 | 1.60890e-55          | 1.000000 |
| rad43         | 3.71545e-56         | 1.000000 | 3.71548e-56          | 1.000000 |
| rad62         | 1.39011e-58         | 1.000000 | 1.39012e-58          | 1.000000 |

|               |             |          |             |          |
|---------------|-------------|----------|-------------|----------|
| rad51         | 1.19291e-61 | 1.000000 | 1.19292e-61 | 1.000000 |
| rad70         | 2.46317e-64 | 1.000000 | 2.46319e-64 | 1.000000 |
| PhcycC3H3_A+H | 1.10952e-64 | 1.000000 | 1.10953e-64 | 1.000000 |
| rad55         | 5.93191e-65 | 1.000000 | 5.93196e-65 | 1.000000 |
| rad65         | 1.28069e-66 | 1.000000 | 1.28070e-66 | 1.000000 |
| rad58         | 3.92920e-68 | 1.000000 | 3.92924e-68 | 1.000000 |
| PAH1+H        | 9.46140e-70 | 1.000000 | 9.46148e-70 | 1.000000 |
| rad34         | 7.09912e-72 | 1.000000 | 7.09918e-72 | 1.000000 |
| rad42         | 5.99815e-75 | 1.000000 | 5.99820e-75 | 1.000000 |
| rad41         | 2.82992e-75 | 1.000000 | 2.82994e-75 | 1.000000 |
| rad47         | 1.90756e-78 | 1.000000 | 1.90758e-78 | 1.000000 |

0.100000000E-02 Pa, 100.000000 K

| Rate constant | True (fraction)     | Effective (fraction) |
|---------------|---------------------|----------------------|
| Total         | 1.02671e-41 (1.00 ) | 1.02670e-41 (1.00 )  |

| species       | PYtrue      | Cumul    | PYeffective | Cumul    |
|---------------|-------------|----------|-------------|----------|
| Indene+H      | 0.999735    | 0.999735 | 0.999746    | 0.999746 |
| rad6          | 0.000253502 | 0.999989 | 0.000253505 | 1.000000 |
| Benzyl+C2H2   | 1.12936e-05 | 1.000000 | 0.000000    | 1.000000 |
| rad7          | 1.94163e-08 | 1.000000 | 1.94166e-08 | 1.000000 |
| rad2          | 5.76367e-09 | 1.000000 | 5.76373e-09 | 1.000000 |
| rad11         | 4.97181e-09 | 1.000000 | 4.97187e-09 | 1.000000 |
| rad23         | 7.96442e-10 | 1.000000 | 7.96451e-10 | 1.000000 |
| rad1          | 3.70687e-10 | 1.000000 | 3.70691e-10 | 1.000000 |
| rad10         | 2.94742e-10 | 1.000000 | 2.94746e-10 | 1.000000 |
| rad3          | 2.36902e-10 | 1.000000 | 2.36905e-10 | 1.000000 |
| rad4          | 1.20305e-10 | 1.000000 | 1.20307e-10 | 1.000000 |
| rad13         | 1.03050e-10 | 1.000000 | 1.03051e-10 | 1.000000 |
| rad35         | 9.41252e-12 | 1.000000 | 9.41262e-12 | 1.000000 |
| rad45         | 7.00912e-12 | 1.000000 | 7.00920e-12 | 1.000000 |
| PAH9+H        | 3.54430e-12 | 1.000000 | 3.54434e-12 | 1.000000 |
| rad20         | 1.03070e-12 | 1.000000 | 1.03071e-12 | 1.000000 |
| rad21         | 6.45894e-13 | 1.000000 | 6.45901e-13 | 1.000000 |
| rad30         | 6.32306e-13 | 1.000000 | 6.32313e-13 | 1.000000 |
| rad36         | 4.34460e-13 | 1.000000 | 4.34465e-13 | 1.000000 |
| rad22         | 4.10804e-13 | 1.000000 | 4.10809e-13 | 1.000000 |
| rad28         | 2.44511e-13 | 1.000000 | 2.44514e-13 | 1.000000 |
| rad33         | 1.95540e-13 | 1.000000 | 1.95542e-13 | 1.000000 |
| rad38         | 7.67731e-14 | 1.000000 | 7.67740e-14 | 1.000000 |
| rad26         | 4.54945e-14 | 1.000000 | 4.54950e-14 | 1.000000 |
| rad18         | 5.81197e-15 | 1.000000 | 5.81203e-15 | 1.000000 |
| rad15         | 1.16322e-15 | 1.000000 | 1.16324e-15 | 1.000000 |
| rad27         | 1.94206e-16 | 1.000000 | 1.94208e-16 | 1.000000 |
| PhCHCCH2+H    | 1.44633e-16 | 1.000000 | 1.44635e-16 | 1.000000 |
| PhCCH+CH3     | 4.35081e-17 | 1.000000 | 4.35086e-17 | 1.000000 |
| rad25         | 1.28060e-17 | 1.000000 | 1.28062e-17 | 1.000000 |
| PhCCH3+H      | 1.21485e-17 | 1.000000 | 1.21487e-17 | 1.000000 |
| rad14         | 1.48336e-18 | 1.000000 | 1.48338e-18 | 1.000000 |
| rad31         | 1.74207e-19 | 1.000000 | 1.74209e-19 | 1.000000 |
| rad24         | 1.53526e-19 | 1.000000 | 1.53528e-19 | 1.000000 |
| rad8          | 3.50354e-21 | 1.000000 | 3.50358e-21 | 1.000000 |
| rad46         | 1.26187e-21 | 1.000000 | 1.26188e-21 | 1.000000 |
| rad9          | 1.29475e-22 | 1.000000 | 1.29476e-22 | 1.000000 |
| PAH7+H        | 3.11951e-23 | 1.000000 | 3.11955e-23 | 1.000000 |
| Ph+MeAc       | 2.29452e-23 | 1.000000 | 2.29455e-23 | 1.000000 |
| rad12         | 2.70190e-24 | 1.000000 | 2.70193e-24 | 1.000000 |
| rad39         | 4.42112e-25 | 1.000000 | 4.42117e-25 | 1.000000 |
| Ph+Allene     | 1.30917e-26 | 1.000000 | 1.30919e-26 | 1.000000 |
| rad60syn      | 7.43950e-31 | 1.000000 | 7.43958e-31 | 1.000000 |
| rad60anti     | 2.49648e-32 | 1.000000 | 2.49651e-32 | 1.000000 |
| PhCH2CCH+H    | 8.81552e-33 | 1.000000 | 8.81562e-33 | 1.000000 |
| rad37         | 1.41836e-33 | 1.000000 | 1.41838e-33 | 1.000000 |
| rad5          | 1.26935e-36 | 1.000000 | 1.26936e-36 | 1.000000 |
| PAH3+H        | 4.67418e-41 | 1.000000 | 4.67423e-41 | 1.000000 |
| rad59         | 2.46220e-41 | 1.000000 | 2.46223e-41 | 1.000000 |
| rad50         | 6.98025e-42 | 1.000000 | 6.98032e-42 | 1.000000 |
| rad19syn      | 3.73113e-49 | 1.000000 | 3.73118e-49 | 1.000000 |
| rad52         | 4.07714e-53 | 1.000000 | 4.07719e-53 | 1.000000 |
| PAH10+CH3     | 1.13384e-53 | 1.000000 | 1.13385e-53 | 1.000000 |
| rad54         | 8.08566e-54 | 1.000000 | 8.08575e-54 | 1.000000 |
| rad43         | 2.64288e-54 | 1.000000 | 2.64291e-54 | 1.000000 |
| rad62         | 1.03346e-56 | 1.000000 | 1.03347e-56 | 1.000000 |
| rad51         | 6.19960e-60 | 1.000000 | 6.19967e-60 | 1.000000 |
| rad70         | 1.51745e-62 | 1.000000 | 1.51746e-62 | 1.000000 |
| PhcycC3H3_A+H | 7.09369e-63 | 1.000000 | 7.09377e-63 | 1.000000 |
| rad55         | 3.76839e-63 | 1.000000 | 3.76843e-63 | 1.000000 |

|        |             |          |             |          |
|--------|-------------|----------|-------------|----------|
| rad65  | 8.37376e-65 | 1.000000 | 8.37385e-65 | 1.000000 |
| rad58  | 2.59461e-66 | 1.000000 | 2.59464e-66 | 1.000000 |
| PAH1+H | 1.03971e-67 | 1.000000 | 1.03972e-67 | 1.000000 |
| rad34  | 8.97860e-70 | 1.000000 | 8.97870e-70 | 1.000000 |
| rad42  | 2.71841e-72 | 1.000000 | 2.71844e-72 | 1.000000 |
| rad41  | 1.41446e-72 | 1.000000 | 1.41448e-72 | 1.000000 |
| rad47  | 2.10713e-76 | 1.000000 | 2.10716e-76 | 1.000000 |

0.100000000E-02 Pa, 110.000000 K

| Rate constant | True (fraction)     | Effective (fraction) |
|---------------|---------------------|----------------------|
| Total         | 4.04932e-39 (1.00 ) | 4.04926e-39 (1.00 )  |

| species       | PYtrue      | Cumul    | PYeffective | Cumul    |
|---------------|-------------|----------|-------------|----------|
| Indene+H      | 0.999716    | 0.999716 | 0.999731    | 0.999731 |
| rad6          | 0.000269183 | 0.999985 | 0.000269187 | 1.000000 |
| Benzyl+C2H2   | 1.49685e-05 | 1.000000 | 0.000000    | 1.000000 |
| rad7          | 2.05615e-08 | 1.000000 | 2.05618e-08 | 1.000000 |
| rad2          | 8.26364e-09 | 1.000000 | 8.26376e-09 | 1.000000 |
| rad11         | 5.22408e-09 | 1.000000 | 5.22415e-09 | 1.000000 |
| rad1          | 5.33425e-10 | 1.000000 | 5.33433e-10 | 1.000000 |
| rad23         | 5.28230e-10 | 1.000000 | 5.28238e-10 | 1.000000 |
| rad10         | 4.22353e-10 | 1.000000 | 4.22359e-10 | 1.000000 |
| rad3          | 2.62341e-10 | 1.000000 | 2.62344e-10 | 1.000000 |
| rad4          | 1.33353e-10 | 1.000000 | 1.33355e-10 | 1.000000 |
| rad13         | 1.09703e-10 | 1.000000 | 1.09704e-10 | 1.000000 |
| rad35         | 1.36051e-11 | 1.000000 | 1.36053e-11 | 1.000000 |
| PAH9+H        | 6.39133e-12 | 1.000000 | 6.39142e-12 | 1.000000 |
| rad45         | 4.61152e-12 | 1.000000 | 4.61159e-12 | 1.000000 |
| rad30         | 2.44380e-12 | 1.000000 | 2.44384e-12 | 1.000000 |
| rad28         | 9.98048e-13 | 1.000000 | 9.98063e-13 | 1.000000 |
| rad20         | 8.93986e-13 | 1.000000 | 8.94000e-13 | 1.000000 |
| rad21         | 5.60770e-13 | 1.000000 | 5.60778e-13 | 1.000000 |
| rad36         | 2.85778e-13 | 1.000000 | 2.85783e-13 | 1.000000 |
| rad22         | 2.82088e-13 | 1.000000 | 2.82093e-13 | 1.000000 |
| rad26         | 2.10172e-13 | 1.000000 | 2.10175e-13 | 1.000000 |
| rad33         | 2.08400e-13 | 1.000000 | 2.08403e-13 | 1.000000 |
| rad38         | 1.99474e-13 | 1.000000 | 1.99477e-13 | 1.000000 |
| rad15         | 8.46950e-15 | 1.000000 | 8.46963e-15 | 1.000000 |
| rad18         | 4.96192e-15 | 1.000000 | 4.96199e-15 | 1.000000 |
| PhCHCCH2+H    | 1.39561e-15 | 1.000000 | 1.39563e-15 | 1.000000 |
| PhCCH+CH3     | 5.39980e-16 | 1.000000 | 5.39988e-16 | 1.000000 |
| rad27         | 4.96406e-16 | 1.000000 | 4.96414e-16 | 1.000000 |
| PhCCCH3+H     | 1.61127e-16 | 1.000000 | 1.61129e-16 | 1.000000 |
| rad25         | 5.94746e-17 | 1.000000 | 5.94754e-17 | 1.000000 |
| rad14         | 7.92667e-18 | 1.000000 | 7.92679e-18 | 1.000000 |
| rad31         | 2.31913e-19 | 1.000000 | 2.31916e-19 | 1.000000 |
| rad24         | 1.11665e-19 | 1.000000 | 1.11666e-19 | 1.000000 |
| rad8          | 7.92884e-20 | 1.000000 | 7.92896e-20 | 1.000000 |
| rad46         | 2.23967e-20 | 1.000000 | 2.23971e-20 | 1.000000 |
| rad9          | 4.42542e-21 | 1.000000 | 4.42549e-21 | 1.000000 |
| Ph+MeAc       | 1.27549e-21 | 1.000000 | 1.27551e-21 | 1.000000 |
| PAH7+H        | 1.12982e-21 | 1.000000 | 1.12983e-21 | 1.000000 |
| rad12         | 1.06435e-22 | 1.000000 | 1.06437e-22 | 1.000000 |
| rad39         | 2.26938e-23 | 1.000000 | 2.26942e-23 | 1.000000 |
| Ph+Allene     | 1.88702e-24 | 1.000000 | 1.88704e-24 | 1.000000 |
| rad60syn      | 2.70749e-26 | 1.000000 | 2.70753e-26 | 1.000000 |
| rad60anti     | 1.02884e-27 | 1.000000 | 1.02886e-27 | 1.000000 |
| PhCH2CCH+H    | 1.10943e-30 | 1.000000 | 1.10944e-30 | 1.000000 |
| rad37         | 1.79727e-31 | 1.000000 | 1.79730e-31 | 1.000000 |
| rad5          | 1.61691e-34 | 1.000000 | 1.61694e-34 | 1.000000 |
| PAH3+H        | 5.92827e-39 | 1.000000 | 5.92836e-39 | 1.000000 |
| rad59         | 3.12147e-39 | 1.000000 | 3.12151e-39 | 1.000000 |
| rad50         | 9.04844e-40 | 1.000000 | 9.04858e-40 | 1.000000 |
| rad19syn      | 5.34114e-47 | 1.000000 | 5.34122e-47 | 1.000000 |
| rad52         | 6.59192e-51 | 1.000000 | 6.59202e-51 | 1.000000 |
| PAH10+CH3     | 3.48557e-51 | 1.000000 | 3.48562e-51 | 1.000000 |
| rad54         | 1.29750e-51 | 1.000000 | 1.29752e-51 | 1.000000 |
| rad43         | 8.19971e-52 | 1.000000 | 8.19983e-52 | 1.000000 |
| rad62         | 3.60503e-54 | 1.000000 | 3.60508e-54 | 1.000000 |
| rad51         | 1.91938e-57 | 1.000000 | 1.91941e-57 | 1.000000 |
| rad70         | 4.76217e-60 | 1.000000 | 4.76224e-60 | 1.000000 |
| PhcycC3H3_A+H | 2.41548e-60 | 1.000000 | 2.41551e-60 | 1.000000 |
| rad55         | 1.26268e-60 | 1.000000 | 1.26270e-60 | 1.000000 |
| rad65         | 4.84714e-62 | 1.000000 | 4.84722e-62 | 1.000000 |
| rad58         | 9.45793e-64 | 1.000000 | 9.45807e-64 | 1.000000 |
| PAH1+H        | 8.39045e-65 | 1.000000 | 8.39058e-65 | 1.000000 |
| rad34         | 8.64321e-67 | 1.000000 | 8.64334e-67 | 1.000000 |

|       |             |         |             |         |
|-------|-------------|---------|-------------|---------|
| rad42 | 4.24072e-69 | 1.00000 | 4.24078e-69 | 1.00000 |
| rad41 | 2.29320e-69 | 1.00000 | 2.29323e-69 | 1.00000 |
| rad47 | 2.83231e-73 | 1.00000 | 2.83235e-73 | 1.00000 |

0.100000000E-02 Pa, 120.000000 K

| Rate constant | True (fraction)     | Effective (fraction) |
|---------------|---------------------|----------------------|
| Total         | 5.87106e-37 (1.00 ) | 5.87094e-37 (1.00 )  |

| species       | PYtrue      | Cumul    | PYeffective | Cumul    |
|---------------|-------------|----------|-------------|----------|
| Indene+H      | 0.999693    | 0.999693 | 0.999713    | 0.999713 |
| rad6          | 0.000286767 | 0.999980 | 0.000286772 | 1.000000 |
| Benzyl+C2H2   | 1.97148e-05 | 0.999999 | 0.000000    | 1.000000 |
| rad7          | 2.18583e-08 | 1.000000 | 2.18587e-08 | 1.000000 |
| rad2          | 1.17514e-08 | 1.000000 | 1.17516e-08 | 1.000000 |
| rad11         | 5.52204e-09 | 1.000000 | 5.52215e-09 | 1.000000 |
| rad1          | 7.61596e-10 | 1.000000 | 7.61611e-10 | 1.000000 |
| rad10         | 6.00395e-10 | 1.000000 | 6.00407e-10 | 1.000000 |
| rad23         | 3.63077e-10 | 1.000000 | 3.63084e-10 | 1.000000 |
| rad3          | 2.93834e-10 | 1.000000 | 2.93839e-10 | 1.000000 |
| rad4          | 1.49521e-10 | 1.000000 | 1.49524e-10 | 1.000000 |
| rad13         | 1.17181e-10 | 1.000000 | 1.17184e-10 | 1.000000 |
| rad35         | 1.90992e-11 | 1.000000 | 1.90996e-11 | 1.000000 |
| PAH9+H        | 1.07192e-11 | 1.000000 | 1.07194e-11 | 1.000000 |
| rad30         | 7.55601e-12 | 1.000000 | 7.55616e-12 | 1.000000 |
| rad28         | 3.54657e-12 | 1.000000 | 3.54664e-12 | 1.000000 |
| rad45         | 3.14786e-12 | 1.000000 | 3.14792e-12 | 1.000000 |
| rad26         | 8.38706e-13 | 1.000000 | 8.38723e-13 | 1.000000 |
| rad20         | 7.82253e-13 | 1.000000 | 7.82269e-13 | 1.000000 |
| rad21         | 4.91205e-13 | 1.000000 | 4.91214e-13 | 1.000000 |
| rad38         | 4.50491e-13 | 1.000000 | 4.50500e-13 | 1.000000 |
| rad33         | 2.22875e-13 | 1.000000 | 2.22879e-13 | 1.000000 |
| rad22         | 2.00516e-13 | 1.000000 | 2.00520e-13 | 1.000000 |
| rad36         | 1.95065e-13 | 1.000000 | 1.95069e-13 | 1.000000 |
| rad15         | 4.42976e-14 | 1.000000 | 4.42985e-14 | 1.000000 |
| PhCHCCH2+H    | 1.08436e-14 | 1.000000 | 1.08438e-14 | 1.000000 |
| PhCCH+CH3     | 5.21974e-15 | 1.000000 | 5.21984e-15 | 1.000000 |
| rad18         | 4.28136e-15 | 1.000000 | 4.28145e-15 | 1.000000 |
| PhCCCH3+H     | 1.65409e-15 | 1.000000 | 1.65413e-15 | 1.000000 |
| rad27         | 1.12126e-15 | 1.000000 | 1.12129e-15 | 1.000000 |
| rad25         | 2.12418e-16 | 1.000000 | 2.12422e-16 | 1.000000 |
| rad14         | 3.37679e-17 | 1.000000 | 3.37686e-17 | 1.000000 |
| rad8          | 1.30755e-18 | 1.000000 | 1.30758e-18 | 1.000000 |
| rad31         | 3.13107e-19 | 1.000000 | 3.13114e-19 | 1.000000 |
| rad46         | 2.46962e-19 | 1.000000 | 2.46967e-19 | 1.000000 |
| rad9          | 1.03885e-19 | 1.000000 | 1.03887e-19 | 1.000000 |
| rad24         | 8.53678e-20 | 1.000000 | 8.53695e-20 | 1.000000 |
| Ph+MeAc       | 4.54478e-20 | 1.000000 | 4.54487e-20 | 1.000000 |
| PAH7+H        | 2.90385e-20 | 1.000000 | 2.90391e-20 | 1.000000 |
| rad12         | 2.91867e-21 | 1.000000 | 2.91873e-21 | 1.000000 |
| rad39         | 7.76089e-22 | 1.000000 | 7.76104e-22 | 1.000000 |
| Ph+Allene     | 1.25164e-22 | 1.000000 | 1.25166e-22 | 1.000000 |
| rad60syn      | 1.65629e-24 | 1.000000 | 1.65632e-24 | 1.000000 |
| rad60anti     | 9.96114e-26 | 1.000000 | 9.96134e-26 | 1.000000 |
| PhCH2CCH+H    | 2.32399e-28 | 1.000000 | 2.32404e-28 | 1.000000 |
| rad37         | 3.74398e-29 | 1.000000 | 3.74405e-29 | 1.000000 |
| rad5          | 3.39130e-32 | 1.000000 | 3.39137e-32 | 1.000000 |
| PAH3+H        | 1.26392e-36 | 1.000000 | 1.26394e-36 | 1.000000 |
| rad59         | 6.65107e-37 | 1.000000 | 6.65121e-37 | 1.000000 |
| rad50         | 1.99435e-37 | 1.000000 | 1.99439e-37 | 1.000000 |
| rad19syn      | 1.31956e-44 | 1.000000 | 1.31959e-44 | 1.000000 |
| rad52         | 2.15493e-48 | 1.000000 | 2.15497e-48 | 1.000000 |
| PAH10+CH3     | 1.75690e-48 | 1.000000 | 1.75693e-48 | 1.000000 |
| rad43         | 4.15472e-49 | 1.000000 | 4.15480e-49 | 1.000000 |
| rad54         | 3.77503e-49 | 1.000000 | 3.77510e-49 | 1.000000 |
| rad62         | 2.13347e-51 | 1.000000 | 2.13352e-51 | 1.000000 |
| rad51         | 1.50855e-54 | 1.000000 | 1.50858e-54 | 1.000000 |
| rad70         | 3.46303e-57 | 1.000000 | 3.46309e-57 | 1.000000 |
| PhcycC3H3_A+H | 1.91196e-57 | 1.000000 | 1.91199e-57 | 1.000000 |
| rad55         | 9.80074e-58 | 1.000000 | 9.80093e-58 | 1.000000 |
| rad65         | 6.07985e-59 | 1.000000 | 6.07997e-59 | 1.000000 |
| rad58         | 7.99564e-61 | 1.000000 | 7.99580e-61 | 1.000000 |
| PAH1+H        | 1.32904e-61 | 1.000000 | 1.32906e-61 | 1.000000 |
| rad34         | 1.60069e-63 | 1.000000 | 1.60072e-63 | 1.000000 |
| rad42         | 8.70609e-66 | 1.000000 | 8.70626e-66 | 1.000000 |
| rad41         | 4.80234e-66 | 1.000000 | 4.80243e-66 | 1.000000 |
| rad47         | 5.29325e-70 | 1.000000 | 5.29336e-70 | 1.000000 |

0.100000000E-02 Pa, 130.000000 K

=====

| Rate constant | True (fraction)     | Effective (fraction) |
|---------------|---------------------|----------------------|
| Total         | 3.94360e-35 (1.00 ) | 3.94350e-35 (1.00 )  |

| species       | PYtrue      | Cumul    | PYeffective | Cumul    |
|---------------|-------------|----------|-------------|----------|
| Indene+H      | 0.999668    | 0.999668 | 0.999693    | 0.999693 |
| rad6          | 0.000306475 | 0.999974 | 0.000306483 | 0.999999 |
| Benzyl+C2H2   | 2.58373e-05 | 1.00000  | 0.00000     | 0.999999 |
| rad7          | 2.33225e-08 | 1.00000  | 2.33231e-08 | 1.000000 |
| rad2          | 1.65318e-08 | 1.00000  | 1.65322e-08 | 1.000000 |
| rad11         | 5.86728e-09 | 1.00000  | 5.86743e-09 | 1.000000 |
| rad1          | 1.07608e-09 | 1.00000  | 1.07611e-09 | 1.000000 |
| rad10         | 8.44482e-10 | 1.00000  | 8.44504e-10 | 1.000000 |
| rad3          | 3.33057e-10 | 1.00000  | 3.33066e-10 | 1.000000 |
| rad23         | 2.56992e-10 | 1.00000  | 2.56998e-10 | 1.000000 |
| rad4          | 1.69678e-10 | 1.00000  | 1.69683e-10 | 1.000000 |
| rad13         | 1.25586e-10 | 1.00000  | 1.25589e-10 | 1.000000 |
| rad35         | 2.63299e-11 | 1.00000  | 2.63306e-11 | 1.000000 |
| rad30         | 1.97447e-11 | 1.00000  | 1.97453e-11 | 1.000000 |
| PAH9+H        | 1.70827e-11 | 1.00000  | 1.70832e-11 | 1.000000 |
| rad28         | 1.11586e-11 | 1.00000  | 1.11589e-11 | 1.000000 |
| rad26         | 2.90887e-12 | 1.00000  | 2.90895e-12 | 1.000000 |
| rad45         | 2.21479e-12 | 1.00000  | 2.21484e-12 | 1.000000 |
| rad38         | 9.18527e-13 | 1.00000  | 9.18551e-13 | 1.000000 |
| rad20         | 6.89284e-13 | 1.00000  | 6.89302e-13 | 1.000000 |
| rad21         | 4.33324e-13 | 1.00000  | 4.33335e-13 | 1.000000 |
| rad33         | 2.39163e-13 | 1.00000  | 2.39169e-13 | 1.000000 |
| rad15         | 1.80161e-13 | 1.00000  | 1.80166e-13 | 1.000000 |
| rad22         | 1.46539e-13 | 1.00000  | 1.46543e-13 | 1.000000 |
| rad36         | 1.37265e-13 | 1.00000  | 1.37269e-13 | 1.000000 |
| PhCHCCH2+H    | 6.79420e-14 | 1.00000  | 6.79437e-14 | 1.000000 |
| PhCCH+CH3     | 3.92684e-14 | 1.00000  | 3.92694e-14 | 1.000000 |
| PhCCCH3+H     | 1.30776e-14 | 1.00000  | 1.30779e-14 | 1.000000 |
| rad18         | 3.72451e-15 | 1.00000  | 3.72460e-15 | 1.000000 |
| rad27         | 2.27539e-15 | 1.00000  | 2.27545e-15 | 1.000000 |
| rad25         | 6.13983e-16 | 1.00000  | 6.13999e-16 | 1.000000 |
| rad14         | 1.17061e-16 | 1.00000  | 1.17064e-16 | 1.000000 |
| rad8          | 1.53616e-17 | 1.00000  | 1.53620e-17 | 1.000000 |
| rad46         | 1.89350e-18 | 1.00000  | 1.89355e-18 | 1.000000 |
| rad9          | 1.63508e-18 | 1.00000  | 1.63512e-18 | 1.000000 |
| Ph+MeAc       | 1.03966e-18 | 1.00000  | 1.03968e-18 | 1.000000 |
| PAH7+H        | 5.03944e-19 | 1.00000  | 5.03957e-19 | 1.000000 |
| rad31         | 4.26482e-19 | 1.00000  | 4.26493e-19 | 1.000000 |
| rad24         | 6.81371e-20 | 1.00000  | 6.81388e-20 | 1.000000 |
| rad12         | 5.31599e-20 | 1.00000  | 5.31612e-20 | 1.000000 |
| rad39         | 1.72448e-20 | 1.00000  | 1.72452e-20 | 1.000000 |
| Ph+Allene     | 4.48214e-21 | 1.00000  | 4.48226e-21 | 1.000000 |
| rad60syn      | 5.24044e-23 | 1.00000  | 5.24058e-23 | 1.000000 |
| rad60anti     | 4.01027e-24 | 1.00000  | 4.01037e-24 | 1.000000 |
| PhCH2CCH+H    | 1.57415e-25 | 1.00000  | 1.57419e-25 | 1.000000 |
| rad37         | 3.44643e-26 | 1.00000  | 3.44652e-26 | 1.000000 |
| rad5          | 1.27065e-29 | 1.00000  | 1.27069e-29 | 1.000000 |
| PAH3+H        | 4.93818e-34 | 1.00000  | 4.93831e-34 | 1.000000 |
| rad59         | 2.59685e-34 | 1.00000  | 2.59692e-34 | 1.000000 |
| rad50         | 7.98947e-35 | 1.00000  | 7.98968e-35 | 1.000000 |
| rad19syn      | 5.88200e-42 | 1.00000  | 5.88215e-42 | 1.000000 |
| rad52         | 1.20759e-45 | 1.00000  | 1.20762e-45 | 1.000000 |
| PAH10+CH3     | 1.07554e-45 | 1.00000  | 1.07557e-45 | 1.000000 |
| rad43         | 2.54922e-46 | 1.00000  | 2.54928e-46 | 1.000000 |
| rad54         | 1.91305e-46 | 1.00000  | 1.91310e-46 | 1.000000 |
| rad62         | 1.52697e-48 | 1.00000  | 1.52701e-48 | 1.000000 |
| rad51         | 1.60208e-51 | 1.00000  | 1.60212e-51 | 1.000000 |
| rad70         | 3.55808e-54 | 1.00000  | 3.55817e-54 | 1.000000 |
| PhcycC3H3_A+H | 2.09351e-54 | 1.00000  | 2.09357e-54 | 1.000000 |
| rad55         | 1.05367e-54 | 1.00000  | 1.05369e-54 | 1.000000 |
| rad65         | 8.78315e-56 | 1.00000  | 8.78337e-56 | 1.000000 |
| rad58         | 9.18571e-58 | 1.00000  | 9.18595e-58 | 1.000000 |
| PAH1+H        | 2.50827e-58 | 1.00000  | 2.50833e-58 | 1.000000 |
| rad34         | 3.51166e-60 | 1.00000  | 3.51175e-60 | 1.000000 |
| rad42         | 1.95310e-62 | 1.00000  | 1.95315e-62 | 1.000000 |
| rad41         | 1.08420e-62 | 1.00000  | 1.08423e-62 | 1.000000 |
| rad47         | 1.02497e-66 | 1.00000  | 1.02499e-66 | 1.000000 |

0.100000000E-02 Pa, 140.000000 K

=====

| Rate constant | True (fraction) | Effective (fraction) |
|---------------|-----------------|----------------------|
|---------------|-----------------|----------------------|



Total | 1.44756e-33 (1.00 ) 1.44751e-33 (1.00 )

| species       | PYtrue      | Cumul    | PYeffective | Cumul    |
|---------------|-------------|----------|-------------|----------|
| Indene+H      | 0.999638    | 0.999638 | 0.999671    | 0.999671 |
| rad6          | 0.000328540 | 0.999967 | 0.000328551 | 1.000000 |
| Benzyl+C2H2   | 3.37196e-05 | 1.00000  | 0.00000     | 1.000000 |
| rad7          | 2.49710e-08 | 1.00000  | 2.49718e-08 | 1.000000 |
| rad2          | 2.29423e-08 | 1.00000  | 2.29430e-08 | 1.000000 |
| rad11         | 6.26248e-09 | 1.00000  | 6.26269e-09 | 1.000000 |
| rad1          | 1.50042e-09 | 1.00000  | 1.50047e-09 | 1.000000 |
| rad10         | 1.17193e-09 | 1.00000  | 1.17196e-09 | 1.000000 |
| rad3          | 3.81840e-10 | 1.00000  | 3.81853e-10 | 1.000000 |
| rad4          | 1.94780e-10 | 1.00000  | 1.94787e-10 | 1.000000 |
| rad23         | 1.86465e-10 | 1.00000  | 1.86471e-10 | 1.000000 |
| rad13         | 1.35022e-10 | 1.00000  | 1.35027e-10 | 1.000000 |
| rad30         | 4.53437e-11 | 1.00000  | 4.53452e-11 | 1.000000 |
| rad35         | 3.59029e-11 | 1.00000  | 3.59041e-11 | 1.000000 |
| rad28         | 3.16124e-11 | 1.00000  | 3.16135e-11 | 1.000000 |
| PAH9+H        | 2.62585e-11 | 1.00000  | 2.62594e-11 | 1.000000 |
| rad26         | 8.87737e-12 | 1.00000  | 8.87767e-12 | 1.000000 |
| rad38         | 1.73612e-12 | 1.00000  | 1.73617e-12 | 1.000000 |
| rad45         | 1.59863e-12 | 1.00000  | 1.59869e-12 | 1.000000 |
| rad20         | 6.10795e-13 | 1.00000  | 6.10815e-13 | 1.000000 |
| rad15         | 6.02830e-13 | 1.00000  | 6.02850e-13 | 1.000000 |
| rad21         | 3.84459e-13 | 1.00000  | 3.84472e-13 | 1.000000 |
| PhCHCCH2+H    | 3.51830e-13 | 1.00000  | 3.51842e-13 | 1.000000 |
| rad33         | 2.57476e-13 | 1.00000  | 2.57484e-13 | 1.000000 |
| PhCCH+CH3     | 2.36868e-13 | 1.00000  | 2.36876e-13 | 1.000000 |
| rad22         | 1.09546e-13 | 1.00000  | 1.09550e-13 | 1.000000 |
| rad36         | 9.91144e-14 | 1.00000  | 9.91178e-14 | 1.000000 |
| PhCCCH3+H     | 8.20397e-14 | 1.00000  | 8.20425e-14 | 1.000000 |
| rad27         | 4.21693e-15 | 1.00000  | 4.21707e-15 | 1.000000 |
| rad18         | 3.26083e-15 | 1.00000  | 3.26094e-15 | 1.000000 |
| rad25         | 1.49840e-15 | 1.00000  | 1.49845e-15 | 1.000000 |
| rad14         | 3.40464e-16 | 1.00000  | 3.40475e-16 | 1.000000 |
| rad8          | 1.33668e-16 | 1.00000  | 1.33672e-16 | 1.000000 |
| rad9          | 1.81519e-17 | 1.00000  | 1.81525e-17 | 1.000000 |
| Ph+MeAc       | 1.60295e-17 | 1.00000  | 1.60300e-17 | 1.000000 |
| rad46         | 1.09405e-17 | 1.00000  | 1.09408e-17 | 1.000000 |
| PAH7+H        | 6.13561e-18 | 1.00000  | 6.13581e-18 | 1.000000 |
| rad12         | 6.70709e-19 | 1.00000  | 6.70731e-19 | 1.000000 |
| rad31         | 5.82795e-19 | 1.00000  | 5.82814e-19 | 1.000000 |
| rad39         | 2.59707e-19 | 1.00000  | 2.59715e-19 | 1.000000 |
| Ph+Allene     | 9.88294e-20 | 1.00000  | 9.88327e-20 | 1.000000 |
| rad24         | 5.64678e-20 | 1.00000  | 5.64697e-20 | 1.000000 |
| rad60syn      | 1.00341e-21 | 1.00000  | 1.00344e-21 | 1.000000 |
| rad60anti     | 9.32718e-23 | 1.00000  | 9.32749e-23 | 1.000000 |
| PhCH2CCH+H    | 1.08711e-23 | 1.00000  | 1.08714e-23 | 1.000000 |
| rad37         | 3.08748e-24 | 1.00000  | 3.08758e-24 | 1.000000 |
| rad5          | 6.55302e-27 | 1.00000  | 6.55324e-27 | 1.000000 |
| PAH3+H        | 1.15623e-28 | 1.00000  | 1.15627e-28 | 1.000000 |
| rad59         | 5.78166e-29 | 1.00000  | 5.78186e-29 | 1.000000 |
| rad50         | 7.59677e-30 | 1.00000  | 7.59703e-30 | 1.000000 |
| rad19syn      | 2.61311e-39 | 1.00000  | 2.61319e-39 | 1.000000 |
| rad52         | 5.50725e-43 | 1.00000  | 5.50744e-43 | 1.000000 |
| PAH10+CH3     | 4.69052e-43 | 1.00000  | 4.69068e-43 | 1.000000 |
| rad43         | 1.11276e-43 | 1.00000  | 1.11280e-43 | 1.000000 |
| rad54         | 8.96506e-44 | 1.00000  | 8.96537e-44 | 1.000000 |
| rad62         | 7.69691e-46 | 1.00000  | 7.69717e-46 | 1.000000 |
| rad51         | 1.13985e-48 | 1.00000  | 1.13989e-48 | 1.000000 |
| rad70         | 2.64199e-51 | 1.00000  | 2.64208e-51 | 1.000000 |
| PhcycC3H3_A+H | 1.64350e-51 | 1.00000  | 1.64355e-51 | 1.000000 |
| rad55         | 8.11475e-52 | 1.00000  | 8.11502e-52 | 1.000000 |
| rad65         | 8.20831e-53 | 1.00000  | 8.20859e-53 | 1.000000 |
| rad58         | 7.51600e-55 | 1.00000  | 7.51625e-55 | 1.000000 |
| PAH1+H        | 3.24647e-55 | 1.00000  | 3.24658e-55 | 1.000000 |
| rad34         | 5.25337e-57 | 1.00000  | 5.25354e-57 | 1.000000 |
| rad42         | 3.00383e-59 | 1.00000  | 3.00393e-59 | 1.000000 |
| rad41         | 1.65891e-59 | 1.00000  | 1.65897e-59 | 1.000000 |
| rad47         | 1.27425e-63 | 1.00000  | 1.27429e-63 | 1.000000 |

0.100000000E-02 Pa, 150.00000 K

=====  
Rate constant | True (fraction) | Effective (fraction)  
-----  
Total | 3.27736e-32 (1.00 ) | 3.27722e-32 (1.00 )

| species | PYtrue | Cumul | PYeffective | Cumul |
|---------|--------|-------|-------------|-------|
|---------|--------|-------|-------------|-------|

|               |             |          |             |          |
|---------------|-------------|----------|-------------|----------|
| Indene+H      | 0.999603    | 0.999603 | 0.999647    | 0.999647 |
| rad6          | 0.000353192 | 0.999956 | 0.000353208 | 1.00000  |
| Benzyl+C2H2   | 4.38401e-05 | 1.00000  | 0.00000     | 1.00000  |
| rad2          | 3.13297e-08 | 1.00000  | 3.13311e-08 | 1.00000  |
| rad7          | 2.68211e-08 | 1.00000  | 2.68222e-08 | 1.00000  |
| rad11         | 6.71099e-09 | 1.00000  | 6.71129e-09 | 1.00000  |
| rad1          | 2.05950e-09 | 1.00000  | 2.05959e-09 | 1.00000  |
| rad10         | 1.60060e-09 | 1.00000  | 1.60067e-09 | 1.00000  |
| rad3          | 4.42037e-10 | 1.00000  | 4.42056e-10 | 1.00000  |
| rad4          | 2.25803e-10 | 1.00000  | 2.25813e-10 | 1.00000  |
| rad13         | 1.45597e-10 | 1.00000  | 1.45604e-10 | 1.00000  |
| rad23         | 1.38236e-10 | 1.00000  | 1.38242e-10 | 1.00000  |
| rad30         | 9.41572e-11 | 1.00000  | 9.41613e-11 | 1.00000  |
| rad28         | 8.17163e-11 | 1.00000  | 8.17199e-11 | 1.00000  |
| rad35         | 4.86419e-11 | 1.00000  | 4.86440e-11 | 1.00000  |
| PAH9+H        | 3.93380e-11 | 1.00000  | 3.93397e-11 | 1.00000  |
| rad26         | 2.41489e-11 | 1.00000  | 2.41500e-11 | 1.00000  |
| rad38         | 3.09900e-12 | 1.00000  | 3.09913e-12 | 1.00000  |
| rad15         | 1.72923e-12 | 1.00000  | 1.72930e-12 | 1.00000  |
| PhCHCCH2+H    | 1.54640e-12 | 1.00000  | 1.54647e-12 | 1.00000  |
| PhCCH+CH3     | 1.18320e-12 | 1.00000  | 1.18326e-12 | 1.00000  |
| rad45         | 1.17981e-12 | 1.00000  | 1.17986e-12 | 1.00000  |
| rad20         | 5.43742e-13 | 1.00000  | 5.43766e-13 | 1.00000  |
| PhCCCH3+H     | 4.22288e-13 | 1.00000  | 4.22306e-13 | 1.00000  |
| rad21         | 3.42713e-13 | 1.00000  | 3.42728e-13 | 1.00000  |
| rad33         | 2.78032e-13 | 1.00000  | 2.78044e-13 | 1.00000  |
| rad22         | 8.34510e-14 | 1.00000  | 8.34546e-14 | 1.00000  |
| rad36         | 7.31912e-14 | 1.00000  | 7.31944e-14 | 1.00000  |
| rad27         | 7.23889e-15 | 1.00000  | 7.23921e-15 | 1.00000  |
| rad25         | 3.19091e-15 | 1.00000  | 3.19105e-15 | 1.00000  |
| rad18         | 2.86923e-15 | 1.00000  | 2.86935e-15 | 1.00000  |
| rad8          | 9.01978e-16 | 1.00000  | 9.02018e-16 | 1.00000  |
| rad14         | 8.54842e-16 | 1.00000  | 8.54880e-16 | 1.00000  |
| Ph+MeAc       | 1.77214e-16 | 1.00000  | 1.77222e-16 | 1.00000  |
| rad9          | 1.50425e-16 | 1.00000  | 1.50432e-16 | 1.00000  |
| PAH7+H        | 5.52528e-17 | 1.00000  | 5.52552e-17 | 1.00000  |
| rad46         | 5.05296e-17 | 1.00000  | 5.05318e-17 | 1.00000  |
| rad12         | 6.19989e-18 | 1.00000  | 6.20016e-18 | 1.00000  |
| rad39         | 2.81254e-18 | 1.00000  | 2.81266e-18 | 1.00000  |
| Ph+Allene     | 1.47671e-18 | 1.00000  | 1.47677e-18 | 1.00000  |
| rad31         | 7.94895e-19 | 1.00000  | 7.94930e-19 | 1.00000  |
| rad24         | 4.83644e-20 | 1.00000  | 4.83665e-20 | 1.00000  |
| rad60syn      | 1.29219e-20 | 1.00000  | 1.29224e-20 | 1.00000  |
| rad60anti     | 1.41879e-21 | 1.00000  | 1.41885e-21 | 1.00000  |
| PhCH2CCH+H    | 3.39471e-22 | 1.00000  | 3.39485e-22 | 1.00000  |
| rad37         | 9.31402e-23 | 1.00000  | 9.31442e-23 | 1.00000  |
| rad5          | 3.08693e-25 | 1.00000  | 3.08707e-25 | 1.00000  |
| PAH3+H        | 1.81818e-26 | 1.00000  | 1.81826e-26 | 1.00000  |
| rad59         | 8.19531e-27 | 1.00000  | 8.19567e-27 | 1.00000  |
| rad50         | 5.49018e-28 | 1.00000  | 5.49042e-28 | 1.00000  |
| rad19syn      | 3.69717e-36 | 1.00000  | 3.69733e-36 | 1.00000  |
| rad52         | 5.73516e-40 | 1.00000  | 5.73541e-40 | 1.00000  |
| PAH10+CH3     | 2.98475e-40 | 1.00000  | 2.98488e-40 | 1.00000  |
| rad54         | 1.17643e-40 | 1.00000  | 1.17648e-40 | 1.00000  |
| rad43         | 7.04963e-41 | 1.00000  | 7.04994e-41 | 1.00000  |
| rad62         | 5.26285e-43 | 1.00000  | 5.26308e-43 | 1.00000  |
| rad51         | 1.18954e-45 | 1.00000  | 1.18959e-45 | 1.00000  |
| rad70         | 2.45263e-48 | 1.00000  | 2.45274e-48 | 1.00000  |
| PhcycC3H3_A+H | 1.56129e-48 | 1.00000  | 1.56136e-48 | 1.00000  |
| rad55         | 7.62295e-49 | 1.00000  | 7.62329e-49 | 1.00000  |
| rad65         | 1.08494e-49 | 1.00000  | 1.08499e-49 | 1.00000  |
| rad58         | 7.32914e-52 | 1.00000  | 7.32946e-52 | 1.00000  |
| PAH1+H        | 4.25828e-52 | 1.00000  | 4.25847e-52 | 1.00000  |
| rad34         | 7.58366e-54 | 1.00000  | 7.58399e-54 | 1.00000  |
| rad42         | 5.23789e-56 | 1.00000  | 5.23812e-56 | 1.00000  |
| rad41         | 2.94851e-56 | 1.00000  | 2.94864e-56 | 1.00000  |
| rad47         | 2.22250e-60 | 1.00000  | 2.22260e-60 | 1.00000  |

0.100000000E-02 Pa, 160.000000 K

=====

| Rate constant | True (fraction)     | Effective (fraction) |
|---------------|---------------------|----------------------|
| Total         | 5.01169e-31 (1.00 ) | 5.01140e-31 (1.00 )  |

| species     | PYtrue      | Cumul    | PYeffective | Cumul    |
|-------------|-------------|----------|-------------|----------|
| Indene+H    | 0.999562    | 0.999562 | 0.999619    | 0.999619 |
| rad6        | 0.000380650 | 0.999943 | 0.000380672 | 1.000000 |
| Benzyl+C2H2 | 5.67902e-05 | 0.999999 | 0.00000     | 1.000000 |
| rad2        | 4.20225e-08 | 0.999999 | 4.20249e-08 | 1.000000 |

|               |             |          |             |          |
|---------------|-------------|----------|-------------|----------|
| rad7          | 2.88893e-08 | 1.000000 | 2.88909e-08 | 1.000000 |
| rad11         | 7.21629e-09 | 1.000000 | 7.21670e-09 | 1.000000 |
| rad1          | 2.77787e-09 | 1.000000 | 2.77803e-09 | 1.000000 |
| rad10         | 2.14752e-09 | 1.000000 | 2.14764e-09 | 1.000000 |
| rad3          | 5.15410e-10 | 1.000000 | 5.15439e-10 | 1.000000 |
| rad4          | 2.63688e-10 | 1.000000 | 2.63703e-10 | 1.000000 |
| rad28         | 1.94628e-10 | 1.000000 | 1.94639e-10 | 1.000000 |
| rad30         | 1.80563e-10 | 1.000000 | 1.80573e-10 | 1.000000 |
| rad13         | 1.57416e-10 | 1.000000 | 1.57425e-10 | 1.000000 |
| rad23         | 1.04478e-10 | 1.000000 | 1.04484e-10 | 1.000000 |
| rad35         | 6.56486e-11 | 1.000000 | 6.56524e-11 | 1.000000 |
| rad26         | 5.92574e-11 | 1.000000 | 5.92608e-11 | 1.000000 |
| PAH9+H        | 5.78469e-11 | 1.000000 | 5.78502e-11 | 1.000000 |
| PhCHCCH2+H    | 5.90514e-12 | 1.000000 | 5.90547e-12 | 1.000000 |
| rad38         | 5.29353e-12 | 1.000000 | 5.29383e-12 | 1.000000 |
| PhCCH+CH3     | 5.03376e-12 | 1.000000 | 5.03405e-12 | 1.000000 |
| rad15         | 4.38483e-12 | 1.000000 | 4.38508e-12 | 1.000000 |
| PhCCCH3+H     | 1.83703e-12 | 1.000000 | 1.83714e-12 | 1.000000 |
| rad45         | 8.88223e-13 | 1.000000 | 8.88274e-13 | 1.000000 |
| rad20         | 4.85904e-13 | 1.000000 | 4.85931e-13 | 1.000000 |
| rad21         | 3.06702e-13 | 1.000000 | 3.06719e-13 | 1.000000 |
| rad33         | 3.01046e-13 | 1.000000 | 3.01064e-13 | 1.000000 |
| rad22         | 6.45968e-14 | 1.000000 | 6.46004e-14 | 1.000000 |
| rad36         | 5.51496e-14 | 1.000000 | 5.51528e-14 | 1.000000 |
| rad27         | 1.16454e-14 | 1.000000 | 1.16461e-14 | 1.000000 |
| rad25         | 6.08201e-15 | 1.000000 | 6.08236e-15 | 1.000000 |
| rad8          | 4.91600e-15 | 1.000000 | 4.91628e-15 | 1.000000 |
| rad18         | 2.53469e-15 | 1.000000 | 2.53484e-15 | 1.000000 |
| rad14         | 1.89802e-15 | 1.000000 | 1.89813e-15 | 1.000000 |
| Ph+MeAc       | 1.48286e-15 | 1.000000 | 1.48295e-15 | 1.000000 |
| rad9          | 9.76988e-16 | 1.000000 | 9.77043e-16 | 1.000000 |
| PAH7+H        | 3.86156e-16 | 1.000000 | 3.86178e-16 | 1.000000 |
| rad46         | 1.94962e-16 | 1.000000 | 1.94973e-16 | 1.000000 |
| rad12         | 4.41571e-17 | 1.000000 | 4.41597e-17 | 1.000000 |
| rad39         | 2.30963e-17 | 1.000000 | 2.30976e-17 | 1.000000 |
| Ph+Allene     | 1.60023e-17 | 1.000000 | 1.60032e-17 | 1.000000 |
| rad31         | 1.07769e-18 | 1.000000 | 1.07775e-18 | 1.000000 |
| rad60syn      | 1.20722e-19 | 1.000000 | 1.20728e-19 | 1.000000 |
| rad24         | 4.26386e-20 | 1.000000 | 4.26410e-20 | 1.000000 |
| rad60anti     | 1.53143e-20 | 1.000000 | 1.53152e-20 | 1.000000 |
| PhCH2CCH+H    | 6.50162e-21 | 1.000000 | 6.50199e-21 | 1.000000 |
| rad37         | 1.74736e-21 | 1.000000 | 1.74746e-21 | 1.000000 |
| rad5          | 7.07649e-24 | 1.000000 | 7.07689e-24 | 1.000000 |
| PAH3+H        | 5.45267e-25 | 1.000000 | 5.45298e-25 | 1.000000 |
| rad59         | 2.30225e-25 | 1.000000 | 2.30238e-25 | 1.000000 |
| rad50         | 1.44834e-26 | 1.000000 | 1.44842e-26 | 1.000000 |
| rad19syn      | 3.77198e-33 | 1.000000 | 3.77219e-33 | 1.000000 |
| rad52         | 4.67822e-37 | 1.000000 | 4.67849e-37 | 1.000000 |
| PAH10+CH3     | 1.47808e-37 | 1.000000 | 1.47817e-37 | 1.000000 |
| rad54         | 1.20706e-37 | 1.000000 | 1.20713e-37 | 1.000000 |
| rad43         | 3.45422e-38 | 1.000000 | 3.45442e-38 | 1.000000 |
| rad62         | 2.49140e-40 | 1.000000 | 2.49154e-40 | 1.000000 |
| rad51         | 6.86075e-43 | 1.000000 | 6.86114e-43 | 1.000000 |
| rad70         | 1.42221e-45 | 1.000000 | 1.42229e-45 | 1.000000 |
| PhcycC3H3_A+H | 8.92339e-46 | 1.000000 | 8.92390e-46 | 1.000000 |
| rad55         | 4.35337e-46 | 1.000000 | 4.35362e-46 | 1.000000 |
| rad65         | 7.56016e-47 | 1.000000 | 7.56059e-47 | 1.000000 |
| rad58         | 4.21547e-49 | 1.000000 | 4.21571e-49 | 1.000000 |
| PAH1+H        | 2.91802e-49 | 1.000000 | 2.91819e-49 | 1.000000 |
| rad34         | 5.60547e-51 | 1.000000 | 5.60579e-51 | 1.000000 |
| rad42         | 4.91009e-53 | 1.000000 | 4.91037e-53 | 1.000000 |
| rad41         | 2.84927e-53 | 1.000000 | 2.84943e-53 | 1.000000 |
| rad47         | 2.05215e-57 | 1.000000 | 2.05227e-57 | 1.000000 |

0.100000000E-02 Pa, 170.000000 K

=====

| Rate constant | True (fraction)     | Effective (fraction) |
|---------------|---------------------|----------------------|
| Total         | 5.54821e-30 (1.00 ) | 5.54780e-30 (1.00 )  |

| species     | PYtrue      | Cumul    | PYeffective | Cumul    |
|-------------|-------------|----------|-------------|----------|
| Indene+H    | 0.999516    | 0.999516 | 0.999589    | 0.999589 |
| rad6        | 0.000411101 | 0.999927 | 0.000411131 | 1.000000 |
| Benzyl+C2H2 | 7.32944e-05 | 1.000000 | 0.000000    | 1.000000 |
| rad2        | 5.52992e-08 | 1.000000 | 5.53033e-08 | 1.000000 |
| rad7        | 3.11902e-08 | 1.000000 | 3.11925e-08 | 1.000000 |
| rad11       | 7.78155e-09 | 1.000000 | 7.78212e-09 | 1.000000 |
| rad1        | 3.67778e-09 | 1.000000 | 3.67805e-09 | 1.000000 |
| rad10       | 2.82725e-09 | 1.000000 | 2.82745e-09 | 1.000000 |

|               |             |         |             |         |
|---------------|-------------|---------|-------------|---------|
| rad3          | 6.03449e-10 | 1.00000 | 6.03494e-10 | 1.00000 |
| rad28         | 4.30228e-10 | 1.00000 | 4.30260e-10 | 1.00000 |
| rad30         | 3.24889e-10 | 1.00000 | 3.24913e-10 | 1.00000 |
| rad4          | 3.09247e-10 | 1.00000 | 3.09270e-10 | 1.00000 |
| rad13         | 1.70572e-10 | 1.00000 | 1.70584e-10 | 1.00000 |
| rad26         | 1.32569e-10 | 1.00000 | 1.32578e-10 | 1.00000 |
| rad35         | 8.83795e-11 | 1.00000 | 8.83859e-11 | 1.00000 |
| PAH9+H        | 8.38974e-11 | 1.00000 | 8.39035e-11 | 1.00000 |
| rad23         | 8.03956e-11 | 1.00000 | 8.04015e-11 | 1.00000 |
| PhCHCCH2+H    | 1.99713e-11 | 1.00000 | 1.99727e-11 | 1.00000 |
| PhCCH+CH3     | 1.86644e-11 | 1.00000 | 1.86658e-11 | 1.00000 |
| rad15         | 1.00601e-11 | 1.00000 | 1.00608e-11 | 1.00000 |
| rad38         | 8.73439e-12 | 1.00000 | 8.73503e-12 | 1.00000 |
| PhCCCH3+H     | 6.92113e-12 | 1.00000 | 6.92164e-12 | 1.00000 |
| rad45         | 6.81207e-13 | 1.00000 | 6.81257e-13 | 1.00000 |
| rad20         | 4.35621e-13 | 1.00000 | 4.35653e-13 | 1.00000 |
| rad33         | 3.26716e-13 | 1.00000 | 3.26740e-13 | 1.00000 |
| rad21         | 2.75391e-13 | 1.00000 | 2.75411e-13 | 1.00000 |
| rad22         | 5.07004e-14 | 1.00000 | 5.07041e-14 | 1.00000 |
| rad36         | 4.23442e-14 | 1.00000 | 4.23473e-14 | 1.00000 |
| rad8          | 2.23804e-14 | 1.00000 | 2.23820e-14 | 1.00000 |
| rad27         | 1.77245e-14 | 1.00000 | 1.77258e-14 | 1.00000 |
| rad25         | 1.05821e-14 | 1.00000 | 1.05828e-14 | 1.00000 |
| Ph+MeAc       | 9.81943e-15 | 1.00000 | 9.82015e-15 | 1.00000 |
| rad9          | 5.17408e-15 | 1.00000 | 5.17446e-15 | 1.00000 |
| rad14         | 3.80036e-15 | 1.00000 | 3.80064e-15 | 1.00000 |
| rad18         | 2.24624e-15 | 1.00000 | 2.24640e-15 | 1.00000 |
| PAH7+H        | 2.18052e-15 | 1.00000 | 2.18067e-15 | 1.00000 |
| rad46         | 6.49885e-16 | 1.00000 | 6.49933e-16 | 1.00000 |
| rad12         | 2.52661e-16 | 1.00000 | 2.52679e-16 | 1.00000 |
| rad39         | 1.50316e-16 | 1.00000 | 1.50327e-16 | 1.00000 |
| Ph+Allene     | 1.32755e-16 | 1.00000 | 1.32764e-16 | 1.00000 |
| rad31         | 1.44807e-18 | 1.00000 | 1.44817e-18 | 1.00000 |
| rad60syn      | 8.66790e-19 | 1.00000 | 8.66853e-19 | 1.00000 |
| rad60anti     | 1.24755e-19 | 1.00000 | 1.24764e-19 | 1.00000 |
| PhCH2CCH+H    | 8.80541e-20 | 1.00000 | 8.80606e-20 | 1.00000 |
| rad24         | 3.85563e-20 | 1.00000 | 3.85591e-20 | 1.00000 |
| rad37         | 2.29398e-20 | 1.00000 | 2.29414e-20 | 1.00000 |
| rad5          | 1.09829e-22 | 1.00000 | 1.09837e-22 | 1.00000 |
| PAH3+H        | 1.00117e-23 | 1.00000 | 1.00124e-23 | 1.00000 |
| rad59         | 4.07720e-24 | 1.00000 | 4.07750e-24 | 1.00000 |
| rad50         | 2.47774e-25 | 1.00000 | 2.47792e-25 | 1.00000 |
| rad19syn      | 3.69961e-29 | 1.00000 | 3.69989e-29 | 1.00000 |
| rad52         | 2.29650e-31 | 1.00000 | 2.29667e-31 | 1.00000 |
| rad54         | 8.48571e-35 | 1.00000 | 8.48633e-35 | 1.00000 |
| PAH10+CH3     | 6.85768e-35 | 1.00000 | 6.85818e-35 | 1.00000 |
| rad43         | 1.58619e-35 | 1.00000 | 1.58631e-35 | 1.00000 |
| rad62         | 1.02449e-37 | 1.00000 | 1.02456e-37 | 1.00000 |
| rad51         | 2.49779e-40 | 1.00000 | 2.49797e-40 | 1.00000 |
| rad70         | 6.21412e-43 | 1.00000 | 6.21458e-43 | 1.00000 |
| PhcycC3H3_A+H | 3.64702e-43 | 1.00000 | 3.64728e-43 | 1.00000 |
| rad55         | 1.80940e-43 | 1.00000 | 1.80954e-43 | 1.00000 |
| rad65         | 2.95082e-44 | 1.00000 | 2.95103e-44 | 1.00000 |
| rad58         | 1.66744e-46 | 1.00000 | 1.66756e-46 | 1.00000 |
| PAH1+H        | 1.11511e-46 | 1.00000 | 1.11519e-46 | 1.00000 |
| rad34         | 2.25289e-48 | 1.00000 | 2.25305e-48 | 1.00000 |
| rad42         | 2.59156e-50 | 1.00000 | 2.59175e-50 | 1.00000 |
| rad41         | 1.56743e-50 | 1.00000 | 1.56755e-50 | 1.00000 |
| rad47         | 1.04881e-54 | 1.00000 | 1.04889e-54 | 1.00000 |

0.100000000E-02 Pa, 180.000000 K

=====

| Rate constant | True (fraction)     | Effective (fraction) |
|---------------|---------------------|----------------------|
| Total         | 4.69315e-29 (1.00 ) | 4.69271e-29 (1.00 )  |

| species     | PYtrue      | Cumul    | PYeffective | Cumul    |
|-------------|-------------|----------|-------------|----------|
| Indene+H    | 0.999461    | 0.999461 | 0.999555    | 0.999555 |
| rad6        | 0.000444675 | 0.999906 | 0.000444717 | 1.000000 |
| Benzyl+C2H2 | 9.42335e-05 | 1.000000 | 0.000000    | 1.000000 |
| rad2        | 7.13588e-08 | 1.000000 | 7.13655e-08 | 1.000000 |
| rad7        | 3.37345e-08 | 1.000000 | 3.37376e-08 | 1.000000 |
| rad11       | 8.40914e-09 | 1.000000 | 8.40993e-09 | 1.000000 |
| rad1        | 4.77724e-09 | 1.000000 | 4.77769e-09 | 1.000000 |
| rad10       | 3.65044e-09 | 1.000000 | 3.65078e-09 | 1.000000 |
| rad28       | 8.87711e-10 | 1.000000 | 8.87795e-10 | 1.000000 |
| rad3        | 7.07252e-10 | 1.000000 | 7.07318e-10 | 1.000000 |
| rad30       | 5.55151e-10 | 1.000000 | 5.55203e-10 | 1.000000 |
| rad4        | 3.63107e-10 | 1.000000 | 3.63141e-10 | 1.000000 |

|               |             |         |             |          |
|---------------|-------------|---------|-------------|----------|
| rad26         | 2.72953e-10 | 1.00000 | 2.72979e-10 | 1.000000 |
| rad13         | 1.85138e-10 | 1.00000 | 1.85156e-10 | 1.000000 |
| PAH9+H        | 1.20384e-10 | 1.00000 | 1.20395e-10 | 1.000000 |
| rad35         | 1.18742e-10 | 1.00000 | 1.18754e-10 | 1.000000 |
| rad23         | 6.29505e-11 | 1.00000 | 6.29564e-11 | 1.000000 |
| PhCCH+CH3     | 6.14532e-11 | 1.00000 | 6.14590e-11 | 1.000000 |
| PhCHCCH2+H    | 6.07641e-11 | 1.00000 | 6.07698e-11 | 1.000000 |
| PhCCCH3+H     | 2.30382e-11 | 1.00000 | 2.30404e-11 | 1.000000 |
| rad15         | 2.12609e-11 | 1.00000 | 2.12629e-11 | 1.000000 |
| rad38         | 1.40157e-11 | 1.00000 | 1.40170e-11 | 1.000000 |
| rad45         | 5.31893e-13 | 1.00000 | 5.31943e-13 | 1.000000 |
| rad20         | 3.91626e-13 | 1.00000 | 3.91663e-13 | 1.000000 |
| rad33         | 3.55201e-13 | 1.00000 | 3.55234e-13 | 1.000000 |
| rad21         | 2.47993e-13 | 1.00000 | 2.48017e-13 | 1.000000 |
| rad8          | 8.74586e-14 | 1.00000 | 8.74669e-14 | 1.000000 |
| Ph+MeAc       | 5.33517e-14 | 1.00000 | 5.33567e-14 | 1.000000 |
| rad22         | 4.02874e-14 | 1.00000 | 4.02912e-14 | 1.000000 |
| rad36         | 3.31107e-14 | 1.00000 | 3.31138e-14 | 1.000000 |
| rad27         | 2.57200e-14 | 1.00000 | 2.57224e-14 | 1.000000 |
| rad9          | 2.30670e-14 | 1.00000 | 2.30691e-14 | 1.000000 |
| rad25         | 1.70675e-14 | 1.00000 | 1.70691e-14 | 1.000000 |
| PAH7+H        | 1.02808e-14 | 1.00000 | 1.02817e-14 | 1.000000 |
| rad14         | 6.97162e-15 | 1.00000 | 6.97228e-15 | 1.000000 |
| rad18         | 1.99564e-15 | 1.00000 | 1.99583e-15 | 1.000000 |
| rad46         | 1.92078e-15 | 1.00000 | 1.92096e-15 | 1.000000 |
| rad12         | 1.20157e-15 | 1.00000 | 1.20169e-15 | 1.000000 |
| Ph+Allene     | 8.80136e-16 | 1.00000 | 8.80219e-16 | 1.000000 |
| rad39         | 8.03749e-16 | 1.00000 | 8.03825e-16 | 1.000000 |
| rad60syn      | 5.00213e-18 | 1.00000 | 5.00260e-18 | 1.000000 |
| rad31         | 1.92491e-18 | 1.00000 | 1.92509e-18 | 1.000000 |
| PhCH2CCH+H    | 8.98862e-19 | 1.00000 | 8.98946e-19 | 1.000000 |
| rad60anti     | 8.04472e-19 | 1.00000 | 8.04548e-19 | 1.000000 |
| rad37         | 2.24128e-19 | 1.00000 | 2.24149e-19 | 1.000000 |
| rad24         | 3.56505e-20 | 1.00000 | 3.56539e-20 | 1.000000 |
| rad5          | 1.25666e-21 | 1.00000 | 1.25678e-21 | 1.000000 |
| PAH3+H        | 1.31586e-22 | 1.00000 | 1.31598e-22 | 1.000000 |
| rad59         | 5.19539e-23 | 1.00000 | 5.19588e-23 | 1.000000 |
| rad50         | 3.08519e-24 | 1.00000 | 3.08549e-24 | 1.000000 |
| rad19syn      | 4.60705e-27 | 1.00000 | 4.60748e-27 | 1.000000 |
| rad52         | 1.37703e-29 | 1.00000 | 1.37716e-29 | 1.000000 |
| rad54         | 7.83749e-32 | 1.00000 | 7.83823e-32 | 1.000000 |
| PAH10+CH3     | 5.31534e-32 | 1.00000 | 5.31584e-32 | 1.000000 |
| rad43         | 1.22459e-32 | 1.00000 | 1.22470e-32 | 1.000000 |
| rad62         | 7.27661e-35 | 1.00000 | 7.27730e-35 | 1.000000 |
| rad51         | 1.16151e-37 | 1.00000 | 1.16162e-37 | 1.000000 |
| rad70         | 4.24447e-40 | 1.00000 | 4.24487e-40 | 1.000000 |
| PhcycC3H3_A+H | 2.21126e-40 | 1.00000 | 2.21147e-40 | 1.000000 |
| rad55         | 1.14138e-40 | 1.00000 | 1.14148e-40 | 1.000000 |
| rad65         | 9.25758e-42 | 1.00000 | 9.25845e-42 | 1.000000 |
| rad58         | 9.11091e-44 | 1.00000 | 9.11177e-44 | 1.000000 |
| PAH1+H        | 2.99195e-44 | 1.00000 | 2.99224e-44 | 1.000000 |
| rad34         | 5.86360e-46 | 1.00000 | 5.86415e-46 | 1.000000 |
| rad42         | 9.13769e-48 | 1.00000 | 9.13855e-48 | 1.000000 |
| rad41         | 5.85189e-48 | 1.00000 | 5.85244e-48 | 1.000000 |
| rad47         | 3.85366e-52 | 1.00000 | 3.85402e-52 | 1.000000 |

0.100000000E-02 Pa, 190.000000 K

=====

| Rate constant | True (fraction)     | Effective (fraction) |
|---------------|---------------------|----------------------|
| Total         | 3.16530e-28 (1.00 ) | 3.16492e-28 (1.00 )  |

| species     | PYtrue      | Cumul    | PYeffective | Cumul    |
|-------------|-------------|----------|-------------|----------|
| Indene+H    | 0.999398    | 0.999398 | 0.999518    | 0.999518 |
| rad6        | 0.000481422 | 0.999879 | 0.000481480 | 0.999999 |
| Benzyl+C2H2 | 0.000120669 | 1.00000  | 0.00000     | 0.999999 |
| rad2        | 9.02969e-08 | 1.00000  | 9.03078e-08 | 1.000000 |
| rad7        | 3.65265e-08 | 1.00000  | 3.65309e-08 | 1.000000 |
| rad11       | 9.10002e-09 | 1.00000  | 9.10112e-09 | 1.000000 |
| rad1        | 6.08853e-09 | 1.00000  | 6.08926e-09 | 1.000000 |
| rad10       | 4.62255e-09 | 1.00000  | 4.62311e-09 | 1.000000 |
| rad28       | 1.71801e-09 | 1.00000  | 1.71821e-09 | 1.000000 |
| rad30       | 9.09216e-10 | 1.00000  | 9.09325e-10 | 1.000000 |
| rad3        | 8.27337e-10 | 1.00000  | 8.27437e-10 | 1.000000 |
| rad26       | 5.21564e-10 | 1.00000  | 5.21626e-10 | 1.000000 |
| rad4        | 4.25611e-10 | 1.00000  | 4.25662e-10 | 1.000000 |
| rad13       | 2.01156e-10 | 1.00000  | 2.01180e-10 | 1.000000 |
| PhCCH+CH3   | 1.82431e-10 | 1.00000  | 1.82453e-10 | 1.000000 |
| PAH9+H      | 1.71235e-10 | 1.00000  | 1.71256e-10 | 1.000000 |

|               |             |         |             |          |
|---------------|-------------|---------|-------------|----------|
| PhCHCCH2+H    | 1.68468e-10 | 1.00000 | 1.68488e-10 | 1.000000 |
| rad35         | 1.59218e-10 | 1.00000 | 1.59238e-10 | 1.000000 |
| PhCCCH3+H     | 6.88653e-11 | 1.00000 | 6.88736e-11 | 1.000000 |
| rad23         | 5.01662e-11 | 1.00000 | 5.01722e-11 | 1.000000 |
| rad15         | 4.19721e-11 | 1.00000 | 4.19772e-11 | 1.000000 |
| rad38         | 2.19792e-11 | 1.00000 | 2.19819e-11 | 1.000000 |
| rad45         | 4.22891e-13 | 1.00000 | 4.22942e-13 | 1.000000 |
| rad33         | 3.86602e-13 | 1.00000 | 3.86648e-13 | 1.000000 |
| rad20         | 3.52936e-13 | 1.00000 | 3.52979e-13 | 1.000000 |
| rad8          | 2.99924e-13 | 1.00000 | 2.99960e-13 | 1.000000 |
| Ph+MeAc       | 2.44909e-13 | 1.00000 | 2.44938e-13 | 1.000000 |
| rad21         | 2.23896e-13 | 1.00000 | 2.23923e-13 | 1.000000 |
| rad9          | 8.88203e-14 | 1.00000 | 8.88310e-14 | 1.000000 |
| PAH7+H        | 4.15712e-14 | 1.00000 | 4.15762e-14 | 1.000000 |
| rad27         | 3.58075e-14 | 1.00000 | 3.58118e-14 | 1.000000 |
| rad22         | 3.23779e-14 | 1.00000 | 3.23818e-14 | 1.000000 |
| rad36         | 2.63723e-14 | 1.00000 | 2.63755e-14 | 1.000000 |
| rad25         | 2.58304e-14 | 1.00000 | 2.58335e-14 | 1.000000 |
| rad14         | 1.18682e-14 | 1.00000 | 1.18697e-14 | 1.000000 |
| rad46         | 5.13678e-15 | 1.00000 | 5.13740e-15 | 1.000000 |
| rad12         | 4.88205e-15 | 1.00000 | 4.88264e-15 | 1.000000 |
| Ph+Allene     | 4.82656e-15 | 1.00000 | 4.82714e-15 | 1.000000 |
| rad39         | 3.63578e-15 | 1.00000 | 3.63622e-15 | 1.000000 |
| rad18         | 1.77663e-15 | 1.00000 | 1.77685e-15 | 1.000000 |
| rad60syn      | 2.40342e-17 | 1.00000 | 2.40371e-17 | 1.000000 |
| PhCH2CCH+H    | 7.23745e-18 | 1.00000 | 7.23832e-18 | 1.000000 |
| rad60anti     | 4.26374e-18 | 1.00000 | 4.26426e-18 | 1.000000 |
| rad31         | 2.52916e-18 | 1.00000 | 2.52947e-18 | 1.000000 |
| rad37         | 1.70761e-18 | 1.00000 | 1.70782e-18 | 1.000000 |
| rad24         | 3.36173e-20 | 1.00000 | 3.36214e-20 | 1.000000 |
| rad5          | 1.11497e-20 | 1.00000 | 1.11511e-20 | 1.000000 |
| PAH3+H        | 1.32088e-21 | 1.00000 | 1.32104e-21 | 1.000000 |
| rad59         | 5.06252e-22 | 1.00000 | 5.06313e-22 | 1.000000 |
| rad50         | 2.96583e-23 | 1.00000 | 2.96619e-23 | 1.000000 |
| rad19syn      | 1.21162e-25 | 1.00000 | 1.21177e-25 | 1.000000 |
| rad54         | 5.41903e-28 | 1.00000 | 5.41968e-28 | 1.000000 |
| PAH10+CH3     | 3.64793e-28 | 1.00000 | 3.64837e-28 | 1.000000 |
| rad52         | 3.13002e-28 | 1.00000 | 3.13040e-28 | 1.000000 |
| rad43         | 8.87530e-29 | 1.00000 | 8.87637e-29 | 1.000000 |
| rad62         | 4.14027e-30 | 1.00000 | 4.14077e-30 | 1.000000 |
| rad51         | 2.56172e-31 | 1.00000 | 2.56203e-31 | 1.000000 |
| rad70         | 8.13610e-37 | 1.00000 | 8.13708e-37 | 1.000000 |
| PhcycC3H3_A+H | 4.05353e-37 | 1.00000 | 4.05402e-37 | 1.000000 |
| rad55         | 2.13037e-37 | 1.00000 | 2.13062e-37 | 1.000000 |
| rad65         | 5.53454e-39 | 1.00000 | 5.53521e-39 | 1.000000 |
| rad58         | 1.57074e-40 | 1.00000 | 1.57093e-40 | 1.000000 |
| PAH1+H        | 1.37628e-41 | 1.00000 | 1.37645e-41 | 1.000000 |
| rad34         | 1.90669e-43 | 1.00000 | 1.90692e-43 | 1.000000 |
| rad42         | 2.97591e-45 | 1.00000 | 2.97627e-45 | 1.000000 |
| rad41         | 2.02959e-45 | 1.00000 | 2.02983e-45 | 1.000000 |
| rad47         | 1.45439e-49 | 1.00000 | 1.45457e-49 | 1.000000 |

0.100000000E-02 Pa, 200.000000 K

=====

| Rate constant | True (fraction)     | Effective (fraction) |
|---------------|---------------------|----------------------|
| Total         | 1.76115e-27 (1.00 ) | 1.76088e-27 (1.00 )  |

| species     | PYtrue      | Cumul    | PYeffective | Cumul    |
|-------------|-------------|----------|-------------|----------|
| Indene+H    | 0.999325    | 0.999325 | 0.999478    | 0.999478 |
| rad6        | 0.000521273 | 0.999846 | 0.000521354 | 0.999999 |
| Benzyl+C2H2 | 0.000153872 | 1.00000  | 0.00000     | 0.999999 |
| rad2        | 1.12083e-07 | 1.00000  | 1.12101e-07 | 0.999999 |
| rad7        | 3.95624e-08 | 1.00000  | 3.95685e-08 | 1.000000 |
| rad11       | 9.85312e-09 | 1.00000  | 9.85464e-09 | 1.000000 |
| rad1        | 7.61650e-09 | 1.00000  | 7.61767e-09 | 1.000000 |
| rad10       | 5.74274e-09 | 1.00000  | 5.74362e-09 | 1.000000 |
| rad28       | 3.13227e-09 | 1.00000  | 3.13275e-09 | 1.000000 |
| rad30       | 1.43747e-09 | 1.00000  | 1.43769e-09 | 1.000000 |
| rad3        | 9.63566e-10 | 1.00000  | 9.63714e-10 | 1.000000 |
| rad26       | 9.31773e-10 | 1.00000  | 9.31916e-10 | 1.000000 |
| rad4        | 4.96776e-10 | 1.00000  | 4.96853e-10 | 1.000000 |
| PhCCH+CH3   | 4.94458e-10 | 1.00000  | 4.94534e-10 | 1.000000 |
| PhCHCCH2+H  | 4.30152e-10 | 1.00000  | 4.30218e-10 | 1.000000 |
| PAH9+H      | 2.41735e-10 | 1.00000  | 2.41772e-10 | 1.000000 |
| rad13       | 2.18618e-10 | 1.00000  | 2.18652e-10 | 1.000000 |
| rad35       | 2.13012e-10 | 1.00000  | 2.13045e-10 | 1.000000 |
| PhCCCH3+H   | 1.87348e-10 | 1.00000  | 1.87377e-10 | 1.000000 |
| rad15       | 7.82570e-11 | 1.00000  | 7.82691e-11 | 1.000000 |

|               |             |         |             |          |
|---------------|-------------|---------|-------------|----------|
| rad23         | 4.07263e-11 | 1.00000 | 4.07326e-11 | 1.000000 |
| rad38         | 3.38042e-11 | 1.00000 | 3.38094e-11 | 1.000000 |
| Ph+MeAc       | 9.72781e-13 | 1.00000 | 9.72930e-13 | 1.000000 |
| rad8          | 9.18983e-13 | 1.00000 | 9.19124e-13 | 1.000000 |
| rad33         | 4.20933e-13 | 1.00000 | 4.20998e-13 | 1.000000 |
| rad45         | 3.42687e-13 | 1.00000 | 3.42740e-13 | 1.000000 |
| rad20         | 3.18772e-13 | 1.00000 | 3.18821e-13 | 1.000000 |
| rad9          | 3.01614e-13 | 1.00000 | 3.01660e-13 | 1.000000 |
| rad21         | 2.02614e-13 | 1.00000 | 2.02645e-13 | 1.000000 |
| PAH7+H        | 1.47354e-13 | 1.00000 | 1.47377e-13 | 1.000000 |
| rad27         | 4.80731e-14 | 1.00000 | 4.80805e-14 | 1.000000 |
| rad25         | 3.70397e-14 | 1.00000 | 3.70454e-14 | 1.000000 |
| rad22         | 2.63044e-14 | 1.00000 | 2.63084e-14 | 1.000000 |
| Ph+Allene     | 2.25113e-14 | 1.00000 | 2.25147e-14 | 1.000000 |
| rad36         | 2.14168e-14 | 1.00000 | 2.14201e-14 | 1.000000 |
| rad14         | 1.89450e-14 | 1.00000 | 1.89479e-14 | 1.000000 |
| rad12         | 1.73315e-14 | 1.00000 | 1.73342e-14 | 1.000000 |
| rad39         | 1.42499e-14 | 1.00000 | 1.42520e-14 | 1.000000 |
| rad46         | 1.26316e-14 | 1.00000 | 1.26335e-14 | 1.000000 |
| rad18         | 1.58430e-15 | 1.00000 | 1.58454e-15 | 1.000000 |
| rad60syn      | 9.88937e-17 | 1.00000 | 9.89089e-17 | 1.000000 |
| PhCH2CCH+H    | 4.76094e-17 | 1.00000 | 4.76167e-17 | 1.000000 |
| rad60anti     | 1.91399e-17 | 1.00000 | 1.91429e-17 | 1.000000 |
| rad37         | 1.05306e-17 | 1.00000 | 1.05322e-17 | 1.000000 |
| rad31         | 3.28405e-18 | 1.00000 | 3.28455e-18 | 1.000000 |
| rad5          | 7.96425e-20 | 1.00000 | 7.96547e-20 | 1.000000 |
| rad24         | 3.22564e-20 | 1.00000 | 3.22614e-20 | 1.000000 |
| PAH3+H        | 1.05430e-20 | 1.00000 | 1.05447e-20 | 1.000000 |
| rad59         | 3.92786e-21 | 1.00000 | 3.92847e-21 | 1.000000 |
| rad50         | 2.28787e-22 | 1.00000 | 2.28822e-22 | 1.000000 |
| rad19syn      | 1.80869e-24 | 1.00000 | 1.80897e-24 | 1.000000 |
| rad54         | 1.36347e-26 | 1.00000 | 1.36368e-26 | 1.000000 |
| PAH10+CH3     | 9.34437e-27 | 1.00000 | 9.34581e-27 | 1.000000 |
| rad52         | 4.44005e-27 | 1.00000 | 4.44073e-27 | 1.000000 |
| rad43         | 2.28928e-27 | 1.00000 | 2.28963e-27 | 1.000000 |
| rad62         | 2.67451e-28 | 1.00000 | 2.67493e-28 | 1.000000 |
| rad51         | 1.45622e-29 | 1.00000 | 1.45645e-29 | 1.000000 |
| rad65         | 1.67706e-32 | 1.00000 | 1.67732e-32 | 1.000000 |
| rad70         | 1.89863e-33 | 1.00000 | 1.89892e-33 | 1.000000 |
| PhcycC3H3_A+H | 9.50147e-34 | 1.00000 | 9.50294e-34 | 1.000000 |
| rad55         | 4.99556e-34 | 1.00000 | 4.99633e-34 | 1.000000 |
| rad58         | 3.67054e-37 | 1.00000 | 3.67111e-37 | 1.000000 |
| PAH1+H        | 2.14465e-38 | 1.00000 | 2.14498e-38 | 1.000000 |
| rad34         | 2.05567e-40 | 1.00000 | 2.05599e-40 | 1.000000 |
| rad42         | 6.98688e-43 | 1.00000 | 6.98796e-43 | 1.000000 |
| rad41         | 4.81191e-43 | 1.00000 | 4.81266e-43 | 1.000000 |
| rad47         | 4.81375e-47 | 1.00000 | 4.81449e-47 | 1.000000 |

0.100000000E-02 Pa, 210.000000 K

=====

| Rate constant | True (fraction)     | Effective (fraction) |
|---------------|---------------------|----------------------|
| Total         | 8.30956e-27 (1.00 ) | 8.30794e-27 (1.00 )  |

| species     | PYtrue      | Cumul    | PYeffective | Cumul    |
|-------------|-------------|----------|-------------|----------|
| Indene+H    | 0.999240    | 0.999240 | 0.999436    | 0.999436 |
| rad6        | 0.000564011 | 0.999804 | 0.000564122 | 1.000000 |
| Benzyl+C2H2 | 0.000195350 | 0.999999 | 0.000000    | 1.000000 |
| rad2        | 1.36551e-07 | 0.999999 | 1.36578e-07 | 1.000000 |
| rad7        | 4.28270e-08 | 1.000000 | 4.28354e-08 | 1.000000 |
| rad11       | 1.06646e-08 | 1.000000 | 1.06667e-08 | 1.000000 |
| rad1        | 9.35771e-09 | 1.000000 | 9.35954e-09 | 1.000000 |
| rad10       | 7.00324e-09 | 1.000000 | 7.00461e-09 | 1.000000 |
| rad28       | 5.40204e-09 | 1.000000 | 5.40309e-09 | 1.000000 |
| rad30       | 2.20605e-09 | 1.000000 | 2.20648e-09 | 1.000000 |
| rad26       | 1.56654e-09 | 1.000000 | 1.56684e-09 | 1.000000 |
| PhCCH+CH3   | 1.23648e-09 | 1.000000 | 1.23672e-09 | 1.000000 |
| rad3        | 1.11503e-09 | 1.000000 | 1.11525e-09 | 1.000000 |
| PhCHCCH2+H  | 1.02056e-09 | 1.000000 | 1.02076e-09 | 1.000000 |
| rad4        | 5.76235e-10 | 1.000000 | 5.76348e-10 | 1.000000 |
| PhCCCH3+H   | 4.69067e-10 | 1.000000 | 4.69158e-10 | 1.000000 |
| PAH9+H      | 3.38932e-10 | 1.000000 | 3.38998e-10 | 1.000000 |
| rad35       | 2.84238e-10 | 1.000000 | 2.84293e-10 | 1.000000 |
| rad13       | 2.37458e-10 | 1.000000 | 2.37505e-10 | 1.000000 |
| rad15       | 1.39019e-10 | 1.000000 | 1.39047e-10 | 1.000000 |
| rad38       | 5.11249e-11 | 1.000000 | 5.11349e-11 | 1.000000 |
| rad23       | 3.37385e-11 | 1.000000 | 3.37451e-11 | 1.000000 |
| Ph+MeAc     | 3.40944e-12 | 1.000000 | 3.41011e-12 | 1.000000 |
| rad8        | 2.55336e-12 | 1.000000 | 2.55386e-12 | 1.000000 |

|               |             |          |             |         |
|---------------|-------------|----------|-------------|---------|
| rad9          | 9.18795e-13 | 1.000000 | 9.18974e-13 | 1.00000 |
| PAH7+H        | 4.66180e-13 | 1.000000 | 4.66272e-13 | 1.00000 |
| rad33         | 4.58092e-13 | 1.000000 | 4.58182e-13 | 1.00000 |
| rad20         | 2.88506e-13 | 1.000000 | 2.88562e-13 | 1.00000 |
| rad45         | 2.83510e-13 | 1.000000 | 2.83565e-13 | 1.00000 |
| rad21         | 1.83759e-13 | 1.000000 | 1.83795e-13 | 1.00000 |
| Ph+Allene     | 9.13482e-14 | 1.000000 | 9.13660e-14 | 1.00000 |
| rad27         | 6.25002e-14 | 1.000000 | 6.25124e-14 | 1.00000 |
| rad12         | 5.47569e-14 | 1.000000 | 5.47676e-14 | 1.00000 |
| rad25         | 5.07187e-14 | 1.000000 | 5.07286e-14 | 1.00000 |
| rad39         | 4.93493e-14 | 1.000000 | 4.93590e-14 | 1.00000 |
| rad46         | 2.89298e-14 | 1.000000 | 2.89354e-14 | 1.00000 |
| rad14         | 2.85989e-14 | 1.000000 | 2.86045e-14 | 1.00000 |
| rad22         | 2.16025e-14 | 1.000000 | 2.16067e-14 | 1.00000 |
| rad36         | 1.77638e-14 | 1.000000 | 1.77672e-14 | 1.00000 |
| rad18         | 1.41476e-15 | 1.000000 | 1.41504e-15 | 1.00000 |
| rad60syn      | 3.56493e-16 | 1.000000 | 3.56563e-16 | 1.00000 |
| PhCH2CCH+H    | 2.63335e-16 | 1.000000 | 2.63387e-16 | 1.00000 |
| rad60anti     | 7.45599e-17 | 1.000000 | 7.45745e-17 | 1.00000 |
| rad37         | 5.41800e-17 | 1.000000 | 5.41906e-17 | 1.00000 |
| rad31         | 4.21551e-18 | 1.000000 | 4.21633e-18 | 1.00000 |
| rad5          | 4.72306e-19 | 1.000000 | 4.72398e-19 | 1.00000 |
| PAH3+H        | 6.92256e-20 | 1.000000 | 6.92392e-20 | 1.00000 |
| rad24         | 3.14358e-20 | 1.000000 | 3.14420e-20 | 1.00000 |
| rad59         | 2.50950e-20 | 1.000000 | 2.50999e-20 | 1.00000 |
| rad50         | 1.46311e-21 | 1.000000 | 1.46339e-21 | 1.00000 |
| rad19syn      | 1.99141e-23 | 1.000000 | 1.99179e-23 | 1.00000 |
| rad54         | 1.93299e-25 | 1.000000 | 1.93337e-25 | 1.00000 |
| PAH10+CH3     | 1.32629e-25 | 1.000000 | 1.32655e-25 | 1.00000 |
| rad52         | 4.73452e-26 | 1.000000 | 4.73544e-26 | 1.00000 |
| rad43         | 3.22995e-26 | 1.000000 | 3.23058e-26 | 1.00000 |
| rad62         | 4.85679e-27 | 1.000000 | 4.85774e-27 | 1.00000 |
| rad51         | 2.76075e-28 | 1.000000 | 2.76129e-28 | 1.00000 |
| rad70         | 4.14100e-29 | 1.000000 | 4.14181e-29 | 1.00000 |
| PhcycC3H3_A+H | 3.66944e-29 | 1.000000 | 3.67016e-29 | 1.00000 |
| rad55         | 1.44832e-29 | 1.000000 | 1.44861e-29 | 1.00000 |
| rad58         | 1.88400e-30 | 1.000000 | 1.88436e-30 | 1.00000 |
| rad65         | 8.86376e-31 | 1.000000 | 8.86549e-31 | 1.00000 |
| PAH1+H        | 5.49598e-35 | 1.000000 | 5.49706e-35 | 1.00000 |
| rad34         | 5.09734e-37 | 1.000000 | 5.09833e-37 | 1.00000 |
| rad42         | 2.01221e-40 | 1.000000 | 2.01260e-40 | 1.00000 |
| rad41         | 9.12804e-41 | 1.000000 | 9.12982e-41 | 1.00000 |
| rad47         | 4.18061e-44 | 1.000000 | 4.18143e-44 | 1.00000 |

0.100000000E-02 Pa, 220.000000 K

=====  
Rate constant | True (fraction) | Effective (fraction)  
-----  
Total | 3.40057e-26 (1.00) | 3.39973e-26 (1.00)

| species     | PYtrue      | Cumul    | PYeffective | Cumul    |
|-------------|-------------|----------|-------------|----------|
| Indene+H    | 0.999144    | 0.999144 | 0.999390    | 0.999390 |
| rad6        | 0.000609240 | 0.999753 | 0.000609390 | 0.999999 |
| Benzyl+C2H2 | 0.000246879 | 1.00000  | 0.00000     | 0.999999 |
| rad2        | 1.63390e-07 | 1.00000  | 1.63430e-07 | 1.000000 |
| rad7        | 4.62917e-08 | 1.00000  | 4.63031e-08 | 1.000000 |
| rad11       | 1.15275e-08 | 1.00000  | 1.15303e-08 | 1.000000 |
| rad1        | 1.12997e-08 | 1.00000  | 1.13025e-08 | 1.000000 |
| rad28       | 8.84747e-09 | 1.00000  | 8.84966e-09 | 1.000000 |
| rad10       | 8.38907e-09 | 1.00000  | 8.39115e-09 | 1.000000 |
| rad30       | 3.30059e-09 | 1.00000  | 3.30141e-09 | 1.000000 |
| PhCCH+CH3   | 2.87820e-09 | 1.00000  | 2.87891e-09 | 1.000000 |
| rad26       | 2.49301e-09 | 1.00000  | 2.49363e-09 | 1.000000 |
| PhCHCCH2+H  | 2.26710e-09 | 1.00000  | 2.26766e-09 | 1.000000 |
| rad3        | 1.28001e-09 | 1.00000  | 1.28033e-09 | 1.000000 |
| PhCCCH3+H   | 1.09102e-09 | 1.00000  | 1.09129e-09 | 1.000000 |
| rad4        | 6.63218e-10 | 1.00000  | 6.63382e-10 | 1.000000 |
| PAH9+H      | 4.72148e-10 | 1.00000  | 4.72264e-10 | 1.000000 |
| rad35       | 3.78140e-10 | 1.00000  | 3.78233e-10 | 1.000000 |
| rad13       | 2.57533e-10 | 1.00000  | 2.57596e-10 | 1.000000 |
| rad15       | 2.36957e-10 | 1.00000  | 2.37015e-10 | 1.000000 |
| rad38       | 7.61813e-11 | 1.00000  | 7.62001e-11 | 1.000000 |
| rad23       | 2.85899e-11 | 1.00000  | 2.85969e-11 | 1.000000 |
| Ph+MeAc     | 1.07162e-11 | 1.00000  | 1.07188e-11 | 1.000000 |
| rad8        | 6.51249e-12 | 1.00000  | 6.51410e-12 | 1.000000 |
| rad9        | 2.54648e-12 | 1.00000  | 2.54711e-12 | 1.000000 |
| PAH7+H      | 1.33612e-12 | 1.00000  | 1.33645e-12 | 1.000000 |
| rad33       | 4.97834e-13 | 1.00000  | 4.97957e-13 | 1.000000 |
| Ph+Allene   | 3.28589e-13 | 1.00000  | 3.28670e-13 | 1.000000 |



|               |             |         |             |          |
|---------------|-------------|---------|-------------|----------|
| rad20         | 2.61628e-13 | 1.00000 | 2.61692e-13 | 1.000000 |
| rad45         | 2.40041e-13 | 1.00000 | 2.40101e-13 | 1.000000 |
| rad21         | 1.67011e-13 | 1.00000 | 1.67052e-13 | 1.000000 |
| rad12         | 1.56317e-13 | 1.00000 | 1.56356e-13 | 1.000000 |
| rad39         | 1.53486e-13 | 1.00000 | 1.53524e-13 | 1.000000 |
| rad27         | 7.89614e-14 | 1.00000 | 7.89809e-14 | 1.000000 |
| rad25         | 6.67388e-14 | 1.00000 | 6.67553e-14 | 1.000000 |
| rad46         | 6.23497e-14 | 1.00000 | 6.23650e-14 | 1.000000 |
| rad14         | 4.11137e-14 | 1.00000 | 4.11238e-14 | 1.000000 |
| rad22         | 1.79433e-14 | 1.00000 | 1.79478e-14 | 1.000000 |
| rad36         | 1.50853e-14 | 1.00000 | 1.50890e-14 | 1.000000 |
| rad18         | 1.26488e-15 | 1.00000 | 1.26519e-15 | 1.000000 |
| PhCH2CCH+H    | 1.25387e-15 | 1.00000 | 1.25418e-15 | 1.000000 |
| rad60syn      | 1.14694e-15 | 1.00000 | 1.14722e-15 | 1.000000 |
| rad60anti     | 2.57101e-16 | 1.00000 | 2.57164e-16 | 1.000000 |
| rad37         | 2.38416e-16 | 1.00000 | 2.38475e-16 | 1.000000 |
| rad31         | 5.35285e-18 | 1.00000 | 5.35417e-18 | 1.000000 |
| rad5          | 2.38451e-18 | 1.00000 | 2.38510e-18 | 1.000000 |
| PAH3+H        | 3.84236e-19 | 1.00000 | 3.84331e-19 | 1.000000 |
| rad59         | 1.35656e-19 | 1.00000 | 1.35690e-19 | 1.000000 |
| rad24         | 3.10703e-20 | 1.00000 | 3.10779e-20 | 1.000000 |
| rad50         | 7.96273e-21 | 1.00000 | 7.96470e-21 | 1.000000 |
| rad19syn      | 1.75462e-22 | 1.00000 | 1.75505e-22 | 1.000000 |
| rad54         | 2.06934e-24 | 1.00000 | 2.06985e-24 | 1.000000 |
| PAH10+CH3     | 1.41839e-24 | 1.00000 | 1.41874e-24 | 1.000000 |
| rad52         | 4.06664e-25 | 1.00000 | 4.06764e-25 | 1.000000 |
| rad43         | 3.43773e-25 | 1.00000 | 3.43858e-25 | 1.000000 |
| rad62         | 5.95135e-26 | 1.00000 | 5.95282e-26 | 1.000000 |
| rad51         | 3.50327e-27 | 1.00000 | 3.50413e-27 | 1.000000 |
| PhcycC3H3_A+H | 9.85008e-28 | 1.00000 | 9.85251e-28 | 1.000000 |
| rad70         | 8.95654e-28 | 1.00000 | 8.95875e-28 | 1.000000 |
| rad55         | 3.37413e-28 | 1.00000 | 3.37496e-28 | 1.000000 |
| rad58         | 5.59617e-29 | 1.00000 | 5.59755e-29 | 1.000000 |
| rad65         | 1.55267e-29 | 1.00000 | 1.55305e-29 | 1.000000 |
| PAH1+H        | 3.10630e-30 | 1.00000 | 3.10707e-30 | 1.000000 |
| rad34         | 2.03217e-34 | 1.00000 | 2.03267e-34 | 1.000000 |
| rad42         | 4.74813e-38 | 1.00000 | 4.74930e-38 | 1.000000 |
| rad47         | 1.49497e-38 | 1.00000 | 1.49534e-38 | 1.000000 |
| rad41         | 1.11716e-38 | 1.00000 | 1.11743e-38 | 1.000000 |

0.100000000E-02 Pa, 230.000000 K

=====  
Rate constant | True (fraction) | Effective (fraction)  
-----  
Total | 1.22972e-25 (1.00) | 1.22933e-25 (1.00)

| species     | PYtrue      | Cumul    | PYeffective | Cumul    |
|-------------|-------------|----------|-------------|----------|
| Indene+H    | 0.999033    | 0.999033 | 0.999343    | 0.999343 |
| rad6        | 0.000656363 | 0.999689 | 0.000656567 | 1.000000 |
| Benzyl+C2H2 | 0.000310538 | 1.000000 | 0.00000     | 1.000000 |
| rad2        | 1.92153e-07 | 1.00000  | 1.92212e-07 | 1.000000 |
| rad7        | 4.99129e-08 | 1.00000  | 4.99284e-08 | 1.000000 |
| rad28       | 1.38122e-08 | 1.00000  | 1.38165e-08 | 1.000000 |
| rad1        | 1.34209e-08 | 1.00000  | 1.34251e-08 | 1.000000 |
| rad11       | 1.24309e-08 | 1.00000  | 1.24347e-08 | 1.000000 |
| rad10       | 9.87814e-09 | 1.00000  | 9.88121e-09 | 1.000000 |
| PhCCH+CH3   | 6.28384e-09 | 1.00000  | 6.28579e-09 | 1.000000 |
| rad30       | 4.83074e-09 | 1.00000  | 4.83224e-09 | 1.000000 |
| PhCHCCH2+H  | 4.74655e-09 | 1.00000  | 4.74803e-09 | 1.000000 |
| rad26       | 3.77483e-09 | 1.00000  | 3.77601e-09 | 1.000000 |
| PhCCCH3+H   | 2.37632e-09 | 1.00000  | 2.37706e-09 | 1.000000 |
| rad3        | 1.45599e-09 | 1.00000  | 1.45645e-09 | 1.000000 |
| rad4        | 7.56532e-10 | 1.00000  | 7.56767e-10 | 1.000000 |
| PAH9+H      | 6.53615e-10 | 1.00000  | 6.53818e-10 | 1.000000 |
| rad35       | 5.01365e-10 | 1.00000  | 5.01521e-10 | 1.000000 |
| rad15       | 3.89736e-10 | 1.00000  | 3.89857e-10 | 1.000000 |
| rad13       | 2.78614e-10 | 1.00000  | 2.78700e-10 | 1.000000 |
| rad38       | 1.12012e-10 | 1.00000  | 1.12047e-10 | 1.000000 |
| Ph+MeAc     | 3.06158e-11 | 1.00000  | 3.06253e-11 | 1.000000 |
| rad23       | 2.48579e-11 | 1.00000  | 2.48657e-11 | 1.000000 |
| rad8        | 1.54051e-11 | 1.00000  | 1.54099e-11 | 1.000000 |
| rad9        | 6.49714e-12 | 1.00000  | 6.49916e-12 | 1.000000 |
| PAH7+H      | 3.51272e-12 | 1.00000  | 3.51381e-12 | 1.000000 |
| Ph+Allene   | 1.06412e-12 | 1.00000  | 1.06445e-12 | 1.000000 |
| rad33       | 5.39749e-13 | 1.00000  | 5.39916e-13 | 1.000000 |
| rad39       | 4.34573e-13 | 1.00000  | 4.34708e-13 | 1.000000 |
| rad12       | 4.08350e-13 | 1.00000  | 4.08477e-13 | 1.000000 |
| rad20       | 2.37712e-13 | 1.00000  | 2.37786e-13 | 1.000000 |
| rad45       | 2.08642e-13 | 1.00000  | 2.08707e-13 | 1.000000 |

|               |             |         |             |          |
|---------------|-------------|---------|-------------|----------|
| rad21         | 1.52109e-13 | 1.00000 | 1.52156e-13 | 1.000000 |
| rad46         | 1.27514e-13 | 1.00000 | 1.27553e-13 | 1.000000 |
| rad27         | 9.72183e-14 | 1.00000 | 9.72485e-14 | 1.000000 |
| rad25         | 8.48270e-14 | 1.00000 | 8.48534e-14 | 1.000000 |
| rad14         | 5.66137e-14 | 1.00000 | 5.66313e-14 | 1.000000 |
| rad22         | 1.50911e-14 | 1.00000 | 1.50957e-14 | 1.000000 |
| rad36         | 1.31575e-14 | 1.00000 | 1.31616e-14 | 1.000000 |
| PhCH2CCH+H    | 5.24043e-15 | 1.00000 | 5.24206e-15 | 1.000000 |
| rad60syn      | 3.34408e-15 | 1.00000 | 3.34512e-15 | 1.000000 |
| rad18         | 1.13207e-15 | 1.00000 | 1.13242e-15 | 1.000000 |
| rad37         | 9.15950e-16 | 1.00000 | 9.16235e-16 | 1.000000 |
| rad60anti     | 7.97703e-16 | 1.00000 | 7.97951e-16 | 1.000000 |
| rad5          | 1.04634e-17 | 1.00000 | 1.04666e-17 | 1.000000 |
| rad31         | 6.72968e-18 | 1.00000 | 6.73177e-18 | 1.000000 |
| PAH3+H        | 1.84342e-18 | 1.00000 | 1.84399e-18 | 1.000000 |
| rad59         | 6.34403e-19 | 1.00000 | 6.34600e-19 | 1.000000 |
| rad50         | 3.76769e-20 | 1.00000 | 3.76886e-20 | 1.000000 |
| rad24         | 3.11082e-20 | 1.00000 | 3.11179e-20 | 1.000000 |
| rad19syn      | 1.27797e-21 | 1.00000 | 1.27837e-21 | 1.000000 |
| rad54         | 1.78898e-23 | 1.00000 | 1.78954e-23 | 1.000000 |
| PAH10+CH3     | 1.22201e-23 | 1.00000 | 1.22239e-23 | 1.000000 |
| rad43         | 2.94505e-24 | 1.00000 | 2.94597e-24 | 1.000000 |
| rad52         | 2.90440e-24 | 1.00000 | 2.90530e-24 | 1.000000 |
| rad62         | 5.72704e-25 | 1.00000 | 5.72882e-25 | 1.000000 |
| rad51         | 3.51900e-26 | 1.00000 | 3.52009e-26 | 1.000000 |
| PhcycC3H3_A+H | 1.69100e-26 | 1.00000 | 1.69153e-26 | 1.000000 |
| rad70         | 1.30264e-26 | 1.00000 | 1.30304e-26 | 1.000000 |
| rad55         | 5.17432e-27 | 1.00000 | 5.17593e-27 | 1.000000 |
| rad58         | 1.02413e-27 | 1.00000 | 1.02444e-27 | 1.000000 |
| PAH1+H        | 2.23371e-28 | 1.00000 | 2.23440e-28 | 1.000000 |
| rad65         | 2.00221e-28 | 1.00000 | 2.00283e-28 | 1.000000 |
| rad34         | 1.06637e-29 | 1.00000 | 1.06670e-29 | 1.000000 |
| rad42         | 4.43790e-32 | 1.00000 | 4.43927e-32 | 1.000000 |
| rad41         | 7.74211e-33 | 1.00000 | 7.74451e-33 | 1.000000 |
| rad47         | 2.02036e-37 | 1.00000 | 2.02098e-37 | 1.000000 |

0.100000000E-02 Pa, 240.000000 K

=====

| Rate constant | True (fraction)     | Effective (fraction) |
|---------------|---------------------|----------------------|
| Total         | 3.99091e-25 (1.00 ) | 3.98936e-25 (1.00 )  |

| species     | PYtrue      | Cumul    | PYeffective | Cumul    |
|-------------|-------------|----------|-------------|----------|
| Indene+H    | 0.998906    | 0.998906 | 0.999295    | 0.999295 |
| rad6        | 0.000704582 | 0.999611 | 0.000704856 | 1.000000 |
| Benzyl+C2H2 | 0.000388738 | 0.999999 | 0.000000    | 1.000000 |
| rad2        | 2.22263e-07 | 1.000000 | 2.22349e-07 | 1.000000 |
| rad7        | 5.36313e-08 | 1.000000 | 5.36522e-08 | 1.000000 |
| rad28       | 2.06266e-08 | 1.000000 | 2.06346e-08 | 1.000000 |
| rad1        | 1.56907e-08 | 1.000000 | 1.56968e-08 | 1.000000 |
| rad11       | 1.33601e-08 | 1.000000 | 1.33653e-08 | 1.000000 |
| PhCCH+CH3   | 1.29521e-08 | 1.000000 | 1.29572e-08 | 1.000000 |
| rad10       | 1.14418e-08 | 1.000000 | 1.14462e-08 | 1.000000 |
| PhCHCCH2+H  | 9.42010e-09 | 1.000000 | 9.42376e-09 | 1.000000 |
| rad30       | 6.93514e-09 | 1.000000 | 6.93784e-09 | 1.000000 |
| rad26       | 5.46326e-09 | 1.000000 | 5.46539e-09 | 1.000000 |
| PhCCCH3+H   | 4.88012e-09 | 1.000000 | 4.88202e-09 | 1.000000 |
| rad3        | 1.63970e-09 | 1.000000 | 1.64034e-09 | 1.000000 |
| PAH9+H      | 8.99256e-10 | 1.000000 | 8.99606e-10 | 1.000000 |
| rad4        | 8.54602e-10 | 1.000000 | 8.54934e-10 | 1.000000 |
| rad35       | 6.62279e-10 | 1.000000 | 6.62537e-10 | 1.000000 |
| rad15       | 6.21420e-10 | 1.000000 | 6.21662e-10 | 1.000000 |
| rad13       | 3.00383e-10 | 1.000000 | 3.00500e-10 | 1.000000 |
| rad38       | 1.62697e-10 | 1.000000 | 1.62760e-10 | 1.000000 |
| Ph+MeAc     | 8.04118e-11 | 1.000000 | 8.04431e-11 | 1.000000 |
| rad8        | 3.40900e-11 | 1.000000 | 3.41033e-11 | 1.000000 |
| rad23       | 2.22544e-11 | 1.000000 | 2.22631e-11 | 1.000000 |
| rad9        | 1.54119e-11 | 1.000000 | 1.54179e-11 | 1.000000 |
| PAH7+H      | 8.56050e-12 | 1.000000 | 8.56383e-12 | 1.000000 |
| Ph+Allene   | 3.14300e-12 | 1.000000 | 3.14422e-12 | 1.000000 |
| rad39       | 1.13295e-12 | 1.000000 | 1.13339e-12 | 1.000000 |
| rad12       | 9.86562e-13 | 1.000000 | 9.86946e-13 | 1.000000 |
| rad33       | 5.83251e-13 | 1.000000 | 5.83478e-13 | 1.000000 |
| rad46       | 2.49161e-13 | 1.000000 | 2.49258e-13 | 1.000000 |
| rad20       | 2.16403e-13 | 1.000000 | 2.16488e-13 | 1.000000 |
| rad45       | 1.86841e-13 | 1.000000 | 1.86914e-13 | 1.000000 |
| rad21       | 1.38830e-13 | 1.000000 | 1.38884e-13 | 1.000000 |
| rad27       | 1.16928e-13 | 1.000000 | 1.16974e-13 | 1.000000 |
| rad25       | 1.04585e-13 | 1.000000 | 1.04625e-13 | 1.000000 |

|               |             |          |             |         |
|---------------|-------------|----------|-------------|---------|
| rad14         | 7.50342e-14 | 1.000000 | 7.50633e-14 | 1.00000 |
| PhCH2CCH+H    | 1.95383e-14 | 1.000000 | 1.95459e-14 | 1.00000 |
| rad22         | 1.28751e-14 | 1.000000 | 1.28801e-14 | 1.00000 |
| rad36         | 1.18295e-14 | 1.000000 | 1.18341e-14 | 1.00000 |
| rad60syn      | 8.94901e-15 | 1.000000 | 8.95249e-15 | 1.00000 |
| rad37         | 3.12535e-15 | 1.000000 | 3.12657e-15 | 1.00000 |
| rad60anti     | 2.25750e-15 | 1.000000 | 2.25838e-15 | 1.00000 |
| rad18         | 1.01418e-15 | 1.000000 | 1.01458e-15 | 1.00000 |
| rad5          | 4.06021e-17 | 1.000000 | 4.06179e-17 | 1.00000 |
| rad31         | 8.38521e-18 | 1.000000 | 8.38847e-18 | 1.00000 |
| PAH3+H        | 7.78735e-18 | 1.000000 | 7.79037e-18 | 1.00000 |
| rad59         | 2.61453e-18 | 1.000000 | 2.61554e-18 | 1.00000 |
| rad50         | 1.57772e-19 | 1.000000 | 1.57833e-19 | 1.00000 |
| rad24         | 3.15242e-20 | 1.000000 | 3.15365e-20 | 1.00000 |
| rad19syn      | 7.88182e-21 | 1.000000 | 7.88489e-21 | 1.00000 |
| rad54         | 1.28239e-22 | 1.000000 | 1.28289e-22 | 1.00000 |
| PAH10+CH3     | 8.72675e-23 | 1.000000 | 8.73014e-23 | 1.00000 |
| rad43         | 2.09172e-23 | 1.000000 | 2.09253e-23 | 1.00000 |
| rad52         | 1.76500e-23 | 1.000000 | 1.76569e-23 | 1.00000 |
| rad62         | 4.46977e-24 | 1.000000 | 4.47151e-24 | 1.00000 |
| rad51         | 2.84558e-25 | 1.000000 | 2.84669e-25 | 1.00000 |
| PhcycC3H3_A+H | 1.83221e-25 | 1.000000 | 1.83292e-25 | 1.00000 |
| rad70         | 1.30244e-25 | 1.000000 | 1.30294e-25 | 1.00000 |
| rad55         | 5.31008e-26 | 1.000000 | 5.31214e-26 | 1.00000 |
| rad58         | 1.13974e-26 | 1.000000 | 1.14018e-26 | 1.00000 |
| PAH1+H        | 3.48634e-27 | 1.000000 | 3.48770e-27 | 1.00000 |
| rad65         | 1.89680e-27 | 1.000000 | 1.89754e-27 | 1.00000 |
| rad34         | 2.01897e-28 | 1.000000 | 2.01976e-28 | 1.00000 |
| rad42         | 2.62469e-30 | 1.000000 | 2.62571e-30 | 1.00000 |
| rad41         | 7.55533e-31 | 1.000000 | 7.55827e-31 | 1.00000 |
| rad47         | 1.87580e-36 | 1.000000 | 1.87653e-36 | 1.00000 |

0.100000000E-02 Pa, 250.000000 K

=====

| Rate constant | True (fraction)     | Effective (fraction) |
|---------------|---------------------|----------------------|
| Total         | 1.17763e-24 (1.00 ) | 1.17706e-24 (1.00 )  |

| species     | PYtrue      | Cumul    | PYeffective | Cumul    |
|-------------|-------------|----------|-------------|----------|
| Indene+H    | 0.998762    | 0.998762 | 0.999246    | 0.999246 |
| rad6        | 0.000752901 | 0.999515 | 0.000753266 | 0.999999 |
| Benzyl+C2H2 | 0.000484256 | 0.999999 | 0.00000     | 0.999999 |
| rad2        | 2.53035e-07 | 0.999999 | 2.53158e-07 | 1.000000 |
| rad7        | 5.73729e-08 | 0.999999 | 5.74007e-08 | 1.000000 |
| rad28       | 2.95636e-08 | 0.999999 | 2.95779e-08 | 1.000000 |
| PhCCH+CH3   | 2.53482e-08 | 1.000000 | 2.53605e-08 | 1.000000 |
| rad1        | 1.80702e-08 | 1.000000 | 1.80790e-08 | 1.000000 |
| PhCHCCH2+H  | 1.78113e-08 | 1.000000 | 1.78200e-08 | 1.000000 |
| rad11       | 1.42968e-08 | 1.000000 | 1.43037e-08 | 1.000000 |
| rad10       | 1.30457e-08 | 1.000000 | 1.30520e-08 | 1.000000 |
| rad30       | 9.78721e-09 | 1.000000 | 9.79195e-09 | 1.000000 |
| PhCCCH3+H   | 9.50564e-09 | 1.000000 | 9.51024e-09 | 1.000000 |
| rad26       | 7.58850e-09 | 1.000000 | 7.59217e-09 | 1.000000 |
| rad3        | 1.82716e-09 | 1.000000 | 1.82805e-09 | 1.000000 |
| PAH9+H      | 1.22964e-09 | 1.000000 | 1.23023e-09 | 1.000000 |
| rad15       | 9.64169e-10 | 1.000000 | 9.64636e-10 | 1.000000 |
| rad4        | 9.55477e-10 | 1.000000 | 9.55940e-10 | 1.000000 |
| rad35       | 8.71339e-10 | 1.000000 | 8.71762e-10 | 1.000000 |
| rad13       | 3.22436e-10 | 1.000000 | 3.22593e-10 | 1.000000 |
| rad38       | 2.33659e-10 | 1.000000 | 2.33772e-10 | 1.000000 |
| Ph+MeAc     | 1.96030e-10 | 1.000000 | 1.96125e-10 | 1.000000 |
| rad8        | 7.10941e-11 | 1.000000 | 7.11285e-11 | 1.000000 |
| rad9        | 3.42749e-11 | 1.000000 | 3.42915e-11 | 1.000000 |
| rad23       | 2.05899e-11 | 1.000000 | 2.05999e-11 | 1.000000 |
| PAH7+H      | 1.95104e-11 | 1.000000 | 1.95198e-11 | 1.000000 |
| Ph+Allene   | 8.55956e-12 | 1.000000 | 8.56371e-12 | 1.000000 |
| rad39       | 2.74601e-12 | 1.000000 | 2.74734e-12 | 1.000000 |
| rad12       | 2.22421e-12 | 1.000000 | 2.22528e-12 | 1.000000 |
| rad33       | 6.27585e-13 | 1.000000 | 6.27889e-13 | 1.000000 |
| rad46       | 4.67775e-13 | 1.000000 | 4.68001e-13 | 1.000000 |
| rad20       | 1.97399e-13 | 1.000000 | 1.97495e-13 | 1.000000 |
| rad45       | 1.73025e-13 | 1.000000 | 1.73109e-13 | 1.000000 |
| rad27       | 1.37657e-13 | 1.000000 | 1.37724e-13 | 1.000000 |
| rad21       | 1.26989e-13 | 1.000000 | 1.27050e-13 | 1.000000 |
| rad25       | 1.25513e-13 | 1.000000 | 1.25574e-13 | 1.000000 |
| rad14       | 9.61098e-14 | 1.000000 | 9.61563e-14 | 1.000000 |
| PhCH2CCH+H  | 6.58768e-14 | 1.000000 | 6.59087e-14 | 1.000000 |
| rad60syn    | 2.22153e-14 | 1.000000 | 2.22261e-14 | 1.000000 |
| rad22       | 1.11723e-14 | 1.000000 | 1.11777e-14 | 1.000000 |

|               |             |          |             |          |
|---------------|-------------|----------|-------------|----------|
| rad36         | 1.10042e-14 | 1.000000 | 1.10095e-14 | 1.000000 |
| rad37         | 9.60917e-15 | 1.000000 | 9.61382e-15 | 1.000000 |
| rad60anti     | 5.89410e-15 | 1.000000 | 5.89695e-15 | 1.000000 |
| rad18         | 9.09421e-16 | 1.000000 | 9.09862e-16 | 1.000000 |
| rad5          | 1.41364e-16 | 1.000000 | 1.41433e-16 | 1.000000 |
| PAH3+H        | 2.94200e-17 | 1.000000 | 2.94342e-17 | 1.000000 |
| rad31         | 1.03660e-17 | 1.000000 | 1.03710e-17 | 1.000000 |
| rad59         | 9.64397e-18 | 1.000000 | 9.64864e-18 | 1.000000 |
| rad50         | 5.93466e-19 | 1.000000 | 5.93754e-19 | 1.000000 |
| rad19syn      | 4.20355e-20 | 1.000000 | 4.20559e-20 | 1.000000 |
| rad24         | 3.23141e-20 | 1.000000 | 3.23298e-20 | 1.000000 |
| rad54         | 7.83968e-22 | 1.000000 | 7.84348e-22 | 1.000000 |
| PAH10+CH3     | 5.31140e-22 | 1.000000 | 5.31397e-22 | 1.000000 |
| rad43         | 1.26563e-22 | 1.000000 | 1.26624e-22 | 1.000000 |
| rad52         | 9.31655e-23 | 1.000000 | 9.32106e-23 | 1.000000 |
| rad62         | 2.94150e-23 | 1.000000 | 2.94293e-23 | 1.000000 |
| rad51         | 1.93279e-24 | 1.000000 | 1.93373e-24 | 1.000000 |
| PhcycC3H3_A+H | 1.51276e-24 | 1.000000 | 1.51349e-24 | 1.000000 |
| rad70         | 1.03103e-24 | 1.000000 | 1.03153e-24 | 1.000000 |
| rad55         | 4.26525e-25 | 1.000000 | 4.26732e-25 | 1.000000 |
| rad58         | 9.52936e-26 | 1.000000 | 9.53398e-26 | 1.000000 |
| PAH1+H        | 3.25729e-26 | 1.000000 | 3.25887e-26 | 1.000000 |
| rad65         | 1.44848e-26 | 1.000000 | 1.44918e-26 | 1.000000 |
| rad34         | 1.95256e-27 | 1.000000 | 1.95350e-27 | 1.000000 |
| rad42         | 2.76435e-29 | 1.000000 | 2.76569e-29 | 1.000000 |
| rad41         | 8.01996e-30 | 1.000000 | 8.02384e-30 | 1.000000 |
| rad47         | 1.43625e-35 | 1.000000 | 1.43695e-35 | 1.000000 |

0.100000000E-02 Pa, 260.000000 K

| Rate constant | True (fraction)     | Effective (fraction) |
|---------------|---------------------|----------------------|
| Total         | 3.19452e-24 (1.00 ) | 3.19260e-24 (1.00 )  |

| species     | PYtrue      | Cumul    | PYeffective | Cumul    |
|-------------|-------------|----------|-------------|----------|
| Indene+H    | 0.998599    | 0.998599 | 0.999199    | 0.999199 |
| rad6        | 0.000800168 | 0.999399 | 0.000800648 | 1.000000 |
| Benzyl+C2H2 | 0.000600268 | 0.999999 | 0.000000    | 1.000000 |
| rad2        | 2.83719e-07 | 1.000000 | 2.83889e-07 | 1.000000 |
| rad7        | 6.10510e-08 | 1.000000 | 6.10876e-08 | 1.000000 |
| PhCCH+CH3   | 4.73377e-08 | 1.000000 | 4.73662e-08 | 1.000000 |
| rad28       | 4.07948e-08 | 1.000000 | 4.08193e-08 | 1.000000 |
| PhCHCCH2+H  | 3.22287e-08 | 1.000000 | 3.22481e-08 | 1.000000 |
| rad1        | 2.05147e-08 | 1.000000 | 2.05270e-08 | 1.000000 |
| PhCCCH3+H   | 1.76522e-08 | 1.000000 | 1.76628e-08 | 1.000000 |
| rad11       | 1.52195e-08 | 1.000000 | 1.52286e-08 | 1.000000 |
| rad10       | 1.46517e-08 | 1.000000 | 1.46605e-08 | 1.000000 |
| rad30       | 1.36015e-08 | 1.000000 | 1.36097e-08 | 1.000000 |
| rad26       | 1.01528e-08 | 1.000000 | 1.01589e-08 | 1.000000 |
| rad3        | 2.01397e-09 | 1.000000 | 2.01518e-09 | 1.000000 |
| PAH9+H      | 1.67111e-09 | 1.000000 | 1.67211e-09 | 1.000000 |
| rad15       | 1.46025e-09 | 1.000000 | 1.46113e-09 | 1.000000 |
| rad35       | 1.14153e-09 | 1.000000 | 1.14222e-09 | 1.000000 |
| rad4        | 1.05696e-09 | 1.000000 | 1.05759e-09 | 1.000000 |
| Ph+MeAc     | 4.47192e-10 | 1.000000 | 4.47461e-10 | 1.000000 |
| rad13       | 3.44293e-10 | 1.000000 | 3.44499e-10 | 1.000000 |
| rad38       | 3.32034e-10 | 1.000000 | 3.32234e-10 | 1.000000 |
| rad8        | 1.40614e-10 | 1.000000 | 1.40698e-10 | 1.000000 |
| rad9        | 7.19751e-11 | 1.000000 | 7.20184e-11 | 1.000000 |
| PAH7+H      | 4.19013e-11 | 1.000000 | 4.19264e-11 | 1.000000 |
| Ph+Allene   | 2.16935e-11 | 1.000000 | 2.17065e-11 | 1.000000 |
| rad23       | 1.97526e-11 | 1.000000 | 1.97645e-11 | 1.000000 |
| rad39       | 6.23881e-12 | 1.000000 | 6.24256e-12 | 1.000000 |
| rad12       | 4.71514e-12 | 1.000000 | 4.71798e-12 | 1.000000 |
| rad46       | 8.47702e-13 | 1.000000 | 8.48211e-13 | 1.000000 |
| rad33       | 6.71841e-13 | 1.000000 | 6.72245e-13 | 1.000000 |
| PhCH2CCH+H  | 2.03193e-13 | 1.000000 | 2.03315e-13 | 1.000000 |
| rad20       | 1.80441e-13 | 1.000000 | 1.80549e-13 | 1.000000 |
| rad45       | 1.66271e-13 | 1.000000 | 1.66371e-13 | 1.000000 |
| rad27       | 1.58900e-13 | 1.000000 | 1.58996e-13 | 1.000000 |
| rad25       | 1.47044e-13 | 1.000000 | 1.47132e-13 | 1.000000 |
| rad14       | 1.19385e-13 | 1.000000 | 1.19456e-13 | 1.000000 |
| rad21       | 1.16423e-13 | 1.000000 | 1.16493e-13 | 1.000000 |
| rad60syn    | 5.16174e-14 | 1.000000 | 5.16484e-14 | 1.000000 |
| rad37       | 2.69489e-14 | 1.000000 | 2.69651e-14 | 1.000000 |
| rad60anti   | 1.43346e-14 | 1.000000 | 1.43432e-14 | 1.000000 |
| rad36       | 1.06283e-14 | 1.000000 | 1.06347e-14 | 1.000000 |
| rad22       | 9.89474e-15 | 1.000000 | 9.90069e-15 | 1.000000 |
| rad18       | 8.16233e-16 | 1.000000 | 8.16723e-16 | 1.000000 |

|               |             |         |             |         |
|---------------|-------------|---------|-------------|---------|
| rad5          | 4.47086e-16 | 1.00000 | 4.47355e-16 | 1.00000 |
| PAH3+H        | 1.00710e-16 | 1.00000 | 1.00771e-16 | 1.00000 |
| rad59         | 3.22576e-17 | 1.00000 | 3.22770e-17 | 1.00000 |
| rad31         | 1.27282e-17 | 1.00000 | 1.27359e-17 | 1.00000 |
| rad50         | 2.03061e-18 | 1.00000 | 2.03183e-18 | 1.00000 |
| rad19syn      | 1.97186e-19 | 1.00000 | 1.97304e-19 | 1.00000 |
| rad24         | 3.34935e-20 | 1.00000 | 3.35136e-20 | 1.00000 |
| rad54         | 4.16935e-21 | 1.00000 | 4.17185e-21 | 1.00000 |
| PAH10+CH3     | 2.80893e-21 | 1.00000 | 2.81062e-21 | 1.00000 |
| rad43         | 6.64973e-22 | 1.00000 | 6.65372e-22 | 1.00000 |
| rad52         | 4.34369e-22 | 1.00000 | 4.34630e-22 | 1.00000 |
| rad62         | 1.66972e-22 | 1.00000 | 1.67073e-22 | 1.00000 |
| rad51         | 1.13371e-23 | 1.00000 | 1.13439e-23 | 1.00000 |
| PhcycC3H3_A+H | 1.04855e-23 | 1.00000 | 1.04918e-23 | 1.00000 |
| rad70         | 6.89375e-24 | 1.00000 | 6.89789e-24 | 1.00000 |
| rad55         | 2.88815e-24 | 1.00000 | 2.88988e-24 | 1.00000 |
| rad58         | 6.67411e-25 | 1.00000 | 6.67812e-25 | 1.00000 |
| PAH1+H        | 2.48714e-25 | 1.00000 | 2.48863e-25 | 1.00000 |
| rad65         | 9.40577e-26 | 1.00000 | 9.41142e-26 | 1.00000 |
| rad34         | 1.52932e-26 | 1.00000 | 1.53024e-26 | 1.00000 |
| rad42         | 2.29464e-28 | 1.00000 | 2.29602e-28 | 1.00000 |
| rad41         | 6.70946e-29 | 1.00000 | 6.71349e-29 | 1.00000 |
| rad47         | 9.26818e-35 | 1.00000 | 9.27375e-35 | 1.00000 |

0.1000000000E-02 Pa, 270.000000 K

| Rate constant | True (fraction)     | Effective (fraction) |
|---------------|---------------------|----------------------|
| Total         | 8.04141e-24 (1.00 ) | 8.03546e-24 (1.00 )  |

| species     | PYtrue      | Cumul    | PYeffective | Cumul    |
|-------------|-------------|----------|-------------|----------|
| Indene+H    | 0.998414    | 0.998414 | 0.999154    | 0.999154 |
| rad6        | 0.000845116 | 0.999259 | 0.000845742 | 1.000000 |
| Benzyl+C2H2 | 0.000740380 | 0.999999 | 0.000000    | 1.000000 |
| rad2        | 3.13508e-07 | 1.000000 | 3.13740e-07 | 1.000000 |
| PhCCH+CH3   | 8.47288e-08 | 1.000000 | 8.47915e-08 | 1.000000 |
| rad7        | 6.45699e-08 | 1.000000 | 6.46178e-08 | 1.000000 |
| PhCHCCH2+H  | 5.60301e-08 | 1.000000 | 5.60716e-08 | 1.000000 |
| rad28       | 5.43533e-08 | 1.000000 | 5.43936e-08 | 1.000000 |
| PhCCCH3+H   | 3.13942e-08 | 1.000000 | 3.14174e-08 | 1.000000 |
| rad1        | 2.29733e-08 | 1.000000 | 2.29903e-08 | 1.000000 |
| rad30       | 1.86406e-08 | 1.000000 | 1.86544e-08 | 1.000000 |
| rad10       | 1.62189e-08 | 1.000000 | 1.62309e-08 | 1.000000 |
| rad11       | 1.61043e-08 | 1.000000 | 1.61162e-08 | 1.000000 |
| rad26       | 1.31265e-08 | 1.000000 | 1.31363e-08 | 1.000000 |
| PAH9+H      | 2.25717e-09 | 1.000000 | 2.25884e-09 | 1.000000 |
| rad3        | 2.19534e-09 | 1.000000 | 2.19697e-09 | 1.000000 |
| rad15       | 2.16436e-09 | 1.000000 | 2.16596e-09 | 1.000000 |
| rad35       | 1.48886e-09 | 1.000000 | 1.48996e-09 | 1.000000 |
| rad4        | 1.15663e-09 | 1.000000 | 1.15748e-09 | 1.000000 |
| Ph+MeAc     | 9.61312e-10 | 1.000000 | 9.62024e-10 | 1.000000 |
| rad38       | 4.67128e-10 | 1.000000 | 4.67474e-10 | 1.000000 |
| rad13       | 3.65415e-10 | 1.000000 | 3.65686e-10 | 1.000000 |
| rad8        | 2.65206e-10 | 1.000000 | 2.65402e-10 | 1.000000 |
| rad9        | 1.43594e-10 | 1.000000 | 1.43700e-10 | 1.000000 |
| PAH7+H      | 8.53486e-11 | 1.000000 | 8.54119e-11 | 1.000000 |
| Ph+Allene   | 5.15706e-11 | 1.000000 | 5.16088e-11 | 1.000000 |
| rad23       | 1.96975e-11 | 1.000000 | 1.97121e-11 | 1.000000 |
| rad39       | 1.33803e-11 | 1.000000 | 1.33902e-11 | 1.000000 |
| rad12       | 9.46056e-12 | 1.000000 | 9.46757e-12 | 1.000000 |
| rad46       | 1.48859e-12 | 1.000000 | 1.48970e-12 | 1.000000 |
| rad33       | 7.14994e-13 | 1.000000 | 7.15524e-13 | 1.000000 |
| PhCH2CCH+H  | 5.79005e-13 | 1.000000 | 5.79434e-13 | 1.000000 |
| rad27       | 1.80107e-13 | 1.000000 | 1.80240e-13 | 1.000000 |
| rad25       | 1.68571e-13 | 1.000000 | 1.68696e-13 | 1.000000 |
| rad45       | 1.66248e-13 | 1.000000 | 1.66371e-13 | 1.000000 |
| rad20       | 1.65303e-13 | 1.000000 | 1.65426e-13 | 1.000000 |
| rad14       | 1.44240e-13 | 1.000000 | 1.44347e-13 | 1.000000 |
| rad60syn    | 1.13111e-13 | 1.000000 | 1.13195e-13 | 1.000000 |
| rad21       | 1.06996e-13 | 1.000000 | 1.07075e-13 | 1.000000 |
| rad37       | 6.96607e-14 | 1.000000 | 6.97123e-14 | 1.000000 |
| rad60anti   | 3.27398e-14 | 1.000000 | 3.27640e-14 | 1.000000 |
| rad36       | 1.06870e-14 | 1.000000 | 1.06950e-14 | 1.000000 |
| rad22       | 8.98272e-15 | 1.000000 | 8.98937e-15 | 1.000000 |
| rad5        | 1.29795e-15 | 1.000000 | 1.29891e-15 | 1.000000 |
| rad18       | 7.33287e-16 | 1.000000 | 7.33830e-16 | 1.000000 |
| PAH3+H      | 3.15874e-16 | 1.000000 | 3.16108e-16 | 1.000000 |
| rad59       | 9.89334e-17 | 1.000000 | 9.90067e-17 | 1.000000 |
| rad31       | 1.55409e-17 | 1.000000 | 1.55524e-17 | 1.000000 |

|               |             |         |             |         |
|---------------|-------------|---------|-------------|---------|
| rad50         | 6.38766e-18 | 1.00000 | 6.39239e-18 | 1.00000 |
| rad19syn      | 8.25341e-19 | 1.00000 | 8.25953e-19 | 1.00000 |
| rad24         | 3.50974e-20 | 1.00000 | 3.51234e-20 | 1.00000 |
| rad54         | 1.95976e-20 | 1.00000 | 1.96121e-20 | 1.00000 |
| PAH10+CH3     | 1.31123e-20 | 1.00000 | 1.31220e-20 | 1.00000 |
| rad43         | 3.08195e-21 | 1.00000 | 3.08424e-21 | 1.00000 |
| rad52         | 1.81405e-21 | 1.00000 | 1.81539e-21 | 1.00000 |
| rad62         | 8.31570e-22 | 1.00000 | 8.32186e-22 | 1.00000 |
| PhcycC3H3_A+H | 6.27699e-23 | 1.00000 | 6.28164e-23 | 1.00000 |
| rad51         | 5.84502e-23 | 1.00000 | 5.84935e-23 | 1.00000 |
| rad70         | 3.98992e-23 | 1.00000 | 3.99288e-23 | 1.00000 |
| rad55         | 1.69158e-23 | 1.00000 | 1.69283e-23 | 1.00000 |
| rad58         | 4.03348e-24 | 1.00000 | 4.03647e-24 | 1.00000 |
| PAH1+H        | 1.62581e-24 | 1.00000 | 1.62702e-24 | 1.00000 |
| rad65         | 5.31189e-25 | 1.00000 | 5.31583e-25 | 1.00000 |
| rad34         | 1.02408e-25 | 1.00000 | 1.02484e-25 | 1.00000 |
| rad42         | 1.63009e-27 | 1.00000 | 1.63130e-27 | 1.00000 |
| rad41         | 4.81025e-28 | 1.00000 | 4.81382e-28 | 1.00000 |
| rad47         | 5.14480e-34 | 1.00000 | 5.14861e-34 | 1.00000 |

0.100000000E-02 Pa, 280.000000 K

| Rate constant | True (fraction)     | Effective (fraction) |
|---------------|---------------------|----------------------|
| Total         | 1.89357e-23 (1.00 ) | 1.89185e-23 (1.00 )  |

| species     | PYtrue      | Cumul    | PYeffective | Cumul    |
|-------------|-------------|----------|-------------|----------|
| Indene+H    | 0.998204    | 0.998204 | 0.999112    | 0.999112 |
| Benzyl+C2H2 | 0.000908656 | 0.999113 | 0.00000     | 0.999112 |
| rad6        | 0.000886437 | 0.999999 | 0.000887243 | 0.999999 |
| rad2        | 3.41597e-07 | 0.999999 | 3.41908e-07 | 1.000000 |
| PhCCH+CH3   | 1.45916e-07 | 1.000000 | 1.46048e-07 | 1.000000 |
| PhCHCCH2+H  | 9.39227e-08 | 1.000000 | 9.40081e-08 | 1.000000 |
| rad28       | 7.01105e-08 | 1.000000 | 7.01743e-08 | 1.000000 |
| rad7        | 6.78303e-08 | 1.000000 | 6.78920e-08 | 1.000000 |
| PhCCCH3+H   | 5.36855e-08 | 1.000000 | 5.37343e-08 | 1.000000 |
| rad1        | 2.53927e-08 | 1.000000 | 2.54158e-08 | 1.000000 |
| rad30       | 2.52229e-08 | 1.000000 | 2.52459e-08 | 1.000000 |
| rad10       | 1.77061e-08 | 1.000000 | 1.77222e-08 | 1.000000 |
| rad11       | 1.69264e-08 | 1.000000 | 1.69418e-08 | 1.000000 |
| rad26       | 1.64478e-08 | 1.000000 | 1.64627e-08 | 1.000000 |
| rad15       | 3.14628e-09 | 1.000000 | 3.14914e-09 | 1.000000 |
| PAH9+H      | 3.03009e-09 | 1.000000 | 3.03284e-09 | 1.000000 |
| rad3        | 2.36653e-09 | 1.000000 | 2.36868e-09 | 1.000000 |
| Ph+MeAc     | 1.95904e-09 | 1.000000 | 1.96082e-09 | 1.000000 |
| rad35       | 1.93293e-09 | 1.000000 | 1.93469e-09 | 1.000000 |
| rad4        | 1.25203e-09 | 1.000000 | 1.25317e-09 | 1.000000 |
| rad38       | 6.50956e-10 | 1.000000 | 6.51548e-10 | 1.000000 |
| rad8        | 4.79245e-10 | 1.000000 | 4.79681e-10 | 1.000000 |
| rad13       | 3.85238e-10 | 1.000000 | 3.85588e-10 | 1.000000 |
| rad9        | 2.73609e-10 | 1.000000 | 2.73858e-10 | 1.000000 |
| PAH7+H      | 1.65805e-10 | 1.000000 | 1.65956e-10 | 1.000000 |
| Ph+Allene   | 1.15773e-10 | 1.000000 | 1.15878e-10 | 1.000000 |
| rad39       | 2.72535e-11 | 1.000000 | 2.72783e-11 | 1.000000 |
| rad23       | 2.04430e-11 | 1.000000 | 2.04616e-11 | 1.000000 |
| rad12       | 1.80667e-11 | 1.000000 | 1.80831e-11 | 1.000000 |
| rad46       | 2.54122e-12 | 1.000000 | 2.54353e-12 | 1.000000 |
| PhCH2CCH+H  | 1.53711e-12 | 1.000000 | 1.53850e-12 | 1.000000 |
| rad33       | 7.55950e-13 | 1.000000 | 7.56638e-13 | 1.000000 |
| rad60syn    | 2.35281e-13 | 1.000000 | 2.35495e-13 | 1.000000 |
| rad27       | 2.00707e-13 | 1.000000 | 2.00889e-13 | 1.000000 |
| rad25       | 1.89485e-13 | 1.000000 | 1.89657e-13 | 1.000000 |
| rad45       | 1.73205e-13 | 1.000000 | 1.73362e-13 | 1.000000 |
| rad14       | 1.69937e-13 | 1.000000 | 1.70092e-13 | 1.000000 |
| rad37       | 1.67458e-13 | 1.000000 | 1.67610e-13 | 1.000000 |
| rad20       | 1.51792e-13 | 1.000000 | 1.51930e-13 | 1.000000 |
| rad21       | 9.85850e-14 | 1.000000 | 9.86747e-14 | 1.000000 |
| rad60anti   | 7.07156e-14 | 1.000000 | 7.07799e-14 | 1.000000 |
| rad36       | 1.12042e-14 | 1.000000 | 1.12144e-14 | 1.000000 |
| rad22       | 8.39961e-15 | 1.000000 | 8.40725e-15 | 1.000000 |
| rad5        | 3.49016e-15 | 1.000000 | 3.49333e-15 | 1.000000 |
| PAH3+H      | 9.16409e-16 | 1.000000 | 9.17242e-16 | 1.000000 |
| rad18       | 6.59427e-16 | 1.000000 | 6.60027e-16 | 1.000000 |
| rad59       | 2.80867e-16 | 1.000000 | 2.81123e-16 | 1.000000 |
| rad31       | 1.88893e-17 | 1.000000 | 1.89064e-17 | 1.000000 |
| rad50       | 1.86415e-17 | 1.000000 | 1.86585e-17 | 1.000000 |
| rad19syn    | 3.11989e-18 | 1.000000 | 3.12273e-18 | 1.000000 |
| rad54       | 8.24591e-20 | 1.000000 | 8.25341e-20 | 1.000000 |
| PAH10+CH3   | 5.47295e-20 | 1.000000 | 5.47793e-20 | 1.000000 |

|               |             |          |             |         |
|---------------|-------------|----------|-------------|---------|
| rad24         | 3.71826e-20 | 1.000000 | 3.72164e-20 | 1.00000 |
| rad43         | 1.27654e-20 | 1.000000 | 1.27770e-20 | 1.00000 |
| rad52         | 6.86590e-21 | 1.000000 | 6.87215e-21 | 1.00000 |
| rad62         | 3.68225e-21 | 1.000000 | 3.68560e-21 | 1.00000 |
| PhcycC3H3_A+H | 3.28522e-22 | 1.000000 | 3.28820e-22 | 1.00000 |
| rad51         | 2.68178e-22 | 1.000000 | 2.68422e-22 | 1.00000 |
| rad70         | 2.02515e-22 | 1.000000 | 2.02700e-22 | 1.00000 |
| rad55         | 8.67988e-23 | 1.000000 | 8.68777e-23 | 1.00000 |
| rad58         | 2.12887e-23 | 1.000000 | 2.13081e-23 | 1.00000 |
| PAH1+H        | 9.18631e-24 | 1.000000 | 9.19466e-24 | 1.00000 |
| rad65         | 2.64196e-24 | 1.000000 | 2.64436e-24 | 1.00000 |
| rad34         | 5.90913e-25 | 1.000000 | 5.91450e-25 | 1.00000 |
| rad42         | 9.90046e-27 | 1.000000 | 9.90947e-27 | 1.00000 |
| rad41         | 2.94482e-27 | 1.000000 | 2.94750e-27 | 1.00000 |
| rad47         | 2.49694e-33 | 1.000000 | 2.49921e-33 | 1.00000 |

0.100000000E-02 Pa, 290.000000 K

| Rate constant | True (fraction)     | Effective (fraction) |
|---------------|---------------------|----------------------|
| Total         | 4.20015e-23 (1.00 ) | 4.19549e-23 (1.00 )  |

| species     | PYtrue      | Cumul    | PYeffective | Cumul    |
|-------------|-------------|----------|-------------|----------|
| Indene+H    | 0.997966    | 0.997966 | 0.999075    | 0.999075 |
| Benzyl+C2H2 | 0.00110964  | 0.999076 | 0.00000     | 0.999075 |
| rad6        | 0.000922853 | 0.999998 | 0.000923878 | 0.999999 |
| rad2        | 3.67230e-07 | 0.999999 | 3.67638e-07 | 0.999999 |
| PhCCH+CH3   | 2.42613e-07 | 0.999999 | 2.42883e-07 | 0.999999 |
| PhCHCCH2+H  | 1.52288e-07 | 0.999999 | 1.52457e-07 | 1.000000 |
| PhCCH3+H    | 8.85826e-08 | 0.999999 | 8.86810e-08 | 1.000000 |
| rad28       | 8.77702e-08 | 0.999999 | 8.78677e-08 | 1.000000 |
| rad7        | 7.07340e-08 | 1.000000 | 7.08126e-08 | 1.000000 |
| rad30       | 3.37304e-08 | 1.000000 | 3.37679e-08 | 1.000000 |
| rad1        | 2.77197e-08 | 1.000000 | 2.77505e-08 | 1.000000 |
| rad26       | 2.00256e-08 | 1.000000 | 2.00478e-08 | 1.000000 |
| rad10       | 1.90740e-08 | 1.000000 | 1.90952e-08 | 1.000000 |
| rad11       | 1.76613e-08 | 1.000000 | 1.76809e-08 | 1.00000  |
| rad15       | 4.49383e-09 | 1.000000 | 4.49883e-09 | 1.00000  |
| PAH9+H      | 4.04276e-09 | 1.000000 | 4.04725e-09 | 1.00000  |
| Ph+MeAc     | 3.80443e-09 | 1.000000 | 3.80866e-09 | 1.00000  |
| rad3        | 2.52292e-09 | 1.000000 | 2.52572e-09 | 1.00000  |
| rad35       | 2.49759e-09 | 1.000000 | 2.50036e-09 | 1.00000  |
| rad4        | 1.34077e-09 | 1.000000 | 1.34226e-09 | 1.00000  |
| rad38       | 8.98896e-10 | 1.000000 | 8.99895e-10 | 1.00000  |
| rad8        | 8.33204e-10 | 1.000000 | 8.34130e-10 | 1.00000  |
| rad9        | 5.00220e-10 | 1.000000 | 5.00776e-10 | 1.00000  |
| rad13       | 4.03196e-10 | 1.000000 | 4.03644e-10 | 1.00000  |
| PAH7+H      | 3.08697e-10 | 1.000000 | 3.09040e-10 | 1.00000  |
| Ph+Allene   | 2.46876e-10 | 1.000000 | 2.47150e-10 | 1.00000  |
| rad39       | 5.29966e-11 | 1.000000 | 5.30555e-11 | 1.00000  |
| rad12       | 3.29982e-11 | 1.000000 | 3.30349e-11 | 1.00000  |
| rad23       | 2.20752e-11 | 1.000000 | 2.20998e-11 | 1.00000  |
| rad46       | 4.22888e-12 | 1.000000 | 4.23357e-12 | 1.00000  |
| PhCH2CCH+H  | 3.82928e-12 | 1.000000 | 3.83353e-12 | 1.00000  |
| rad33       | 7.93605e-13 | 1.000000 | 7.94487e-13 | 1.00000  |
| rad60syn    | 4.67144e-13 | 1.000000 | 4.67663e-13 | 1.00000  |
| rad37       | 3.77252e-13 | 1.000000 | 3.77671e-13 | 1.00000  |
| rad27       | 2.20141e-13 | 1.000000 | 2.20386e-13 | 1.00000  |
| rad25       | 2.09200e-13 | 1.000000 | 2.09433e-13 | 1.00000  |
| rad14       | 1.95666e-13 | 1.000000 | 1.95883e-13 | 1.00000  |
| rad45       | 1.88050e-13 | 1.000000 | 1.88258e-13 | 1.00000  |
| rad60anti   | 1.45310e-13 | 1.000000 | 1.45472e-13 | 1.00000  |
| rad20       | 1.39735e-13 | 1.000000 | 1.39890e-13 | 1.00000  |
| rad21       | 9.10863e-14 | 1.000000 | 9.11875e-14 | 1.00000  |
| rad36       | 1.22486e-14 | 1.000000 | 1.22622e-14 | 1.00000  |
| rad5        | 8.76038e-15 | 1.000000 | 8.77011e-15 | 1.00000  |
| rad22       | 8.12990e-15 | 1.000000 | 8.13893e-15 | 1.00000  |
| PAH3+H      | 2.47932e-15 | 1.000000 | 2.48208e-15 | 1.00000  |
| rad59       | 7.44104e-16 | 1.000000 | 7.44931e-16 | 1.00000  |
| rad18       | 5.93640e-16 | 1.000000 | 5.94299e-16 | 1.00000  |
| rad50       | 5.08643e-17 | 1.000000 | 5.09208e-17 | 1.00000  |
| rad31       | 2.28801e-17 | 1.000000 | 2.29055e-17 | 1.00000  |
| rad19syn    | 1.07621e-17 | 1.000000 | 1.07740e-17 | 1.00000  |
| rad54       | 3.14021e-19 | 1.000000 | 3.14370e-19 | 1.00000  |
| PAH10+CH3   | 2.06544e-19 | 1.000000 | 2.06774e-19 | 1.00000  |
| rad43       | 4.77874e-20 | 1.000000 | 4.78405e-20 | 1.00000  |
| rad24       | 3.98311e-20 | 1.000000 | 3.98753e-20 | 1.00000  |
| rad52       | 2.37865e-20 | 1.000000 | 2.38129e-20 | 1.00000  |
| rad62       | 1.46669e-20 | 1.000000 | 1.46832e-20 | 1.00000  |

|               |             |          |             |         |
|---------------|-------------|----------|-------------|---------|
| PhcycC3H3_A+H | 1.52298e-21 | 1.000000 | 1.52467e-21 | 1.00000 |
| rad51         | 1.10719e-21 | 1.000000 | 1.10842e-21 | 1.00000 |
| rad70         | 9.13055e-22 | 1.000000 | 9.14070e-22 | 1.00000 |
| rad55         | 3.95247e-22 | 1.000000 | 3.95686e-22 | 1.00000 |
| rad58         | 9.94311e-23 | 1.000000 | 9.95416e-23 | 1.00000 |
| PAH1+H        | 4.55353e-23 | 1.000000 | 4.55859e-23 | 1.00000 |
| rad65         | 1.17137e-23 | 1.000000 | 1.17268e-23 | 1.00000 |
| rad34         | 2.98363e-24 | 1.000000 | 2.98695e-24 | 1.00000 |
| rad42         | 5.23006e-26 | 1.000000 | 5.23587e-26 | 1.00000 |
| rad41         | 1.56667e-26 | 1.000000 | 1.56841e-26 | 1.00000 |
| rad47         | 1.07465e-32 | 1.000000 | 1.07584e-32 | 1.00000 |

0.1000000000E-02 Pa, 300.000000 K

| Rate constant | True (fraction)     | Effective (fraction) |
|---------------|---------------------|----------------------|
| Total         | 1.17740e-22 (1.00 ) | 1.17544e-22 (1.00 )  |

| species       | PYtrue      | Cumul    | PYeffective | Cumul    |
|---------------|-------------|----------|-------------|----------|
| Indene+H      | 0.997535    | 0.997535 | 0.999194    | 0.999194 |
| Benzyl+C2H2   | 0.00166067  | 0.999196 | 0.00000     | 0.999194 |
| rad6          | 0.000802888 | 0.999999 | 0.000804223 | 0.999998 |
| PhCCH+CH3     | 4.22024e-07 | 0.999999 | 4.22726e-07 | 0.999999 |
| rad2          | 3.18896e-07 | 0.999999 | 3.19426e-07 | 0.999999 |
| PhCHCCH2+H    | 2.46518e-07 | 1.000000 | 2.46929e-07 | 0.999999 |
| PhCCCH3+H     | 1.49791e-07 | 1.000000 | 1.50040e-07 | 0.999999 |
| rad28         | 9.91125e-08 | 1.000000 | 9.92773e-08 | 0.999999 |
| rad7          | 7.09811e-08 | 1.000000 | 7.10991e-08 | 1.000000 |
| rad30         | 3.74792e-08 | 1.000000 | 3.75416e-08 | 1.000000 |
| rad1          | 2.40300e-08 | 1.000000 | 2.40700e-08 | 1.000000 |
| rad26         | 2.19279e-08 | 1.000000 | 2.19644e-08 | 1.000000 |
| rad10         | 1.83372e-08 | 1.000000 | 1.83677e-08 | 1.000000 |
| rad11         | 1.74118e-08 | 1.000000 | 1.74408e-08 | 1.000000 |
| Ph+MeAc       | 6.40143e-09 | 1.000000 | 6.41208e-09 | 1.000000 |
| PAH9+H        | 5.54509e-09 | 1.000000 | 5.55431e-09 | 1.000000 |
| rad35         | 2.76716e-09 | 1.000000 | 2.77176e-09 | 1.000000 |
| rad3          | 2.30260e-09 | 1.000000 | 2.30643e-09 | 1.000000 |
| rad23         | 1.58655e-09 | 1.000000 | 1.58919e-09 | 1.000000 |
| rad4          | 1.14509e-09 | 1.000000 | 1.14699e-09 | 1.000000 |
| rad38         | 1.02391e-09 | 1.000000 | 1.02561e-09 | 1.000000 |
| PAH7+H        | 6.67980e-10 | 1.000000 | 6.69092e-10 | 1.000000 |
| rad13         | 4.10811e-10 | 1.000000 | 4.11494e-10 | 1.000000 |
| Ph+Allene     | 2.59814e-10 | 1.000000 | 2.60246e-10 | 1.000000 |
| rad39         | 9.04531e-11 | 1.000000 | 9.06035e-11 | 1.000000 |
| rad45         | 1.80260e-11 | 1.000000 | 1.80560e-11 | 1.000000 |
| rad19anti     | 1.65399e-11 | 1.000000 | 1.65674e-11 | 1.000000 |
| rad20         | 7.82564e-12 | 1.000000 | 7.83866e-12 | 1.000000 |
| PhCH2CCH+H    | 7.64884e-12 | 1.000000 | 7.66157e-12 | 1.000000 |
| rad46         | 5.66849e-12 | 1.000000 | 5.67792e-12 | 1.000000 |
| rad21         | 5.00248e-12 | 1.000000 | 5.01080e-12 | 1.000000 |
| rad22         | 2.48206e-12 | 1.000000 | 2.48619e-12 | 1.000000 |
| rad33         | 9.85404e-13 | 1.000000 | 9.87043e-13 | 1.000000 |
| rad60syn      | 7.08112e-13 | 1.000000 | 7.09290e-13 | 1.000000 |
| rad37         | 6.25077e-13 | 1.000000 | 6.26116e-13 | 1.000000 |
| rad36         | 6.14379e-13 | 1.000000 | 6.15401e-13 | 1.000000 |
| rad27         | 2.61721e-13 | 1.000000 | 2.62156e-13 | 1.000000 |
| rad25         | 2.36552e-13 | 1.000000 | 2.36945e-13 | 1.000000 |
| rad14         | 2.30043e-13 | 1.000000 | 2.30425e-13 | 1.000000 |
| rad60anti     | 2.13286e-13 | 1.000000 | 2.13641e-13 | 1.000000 |
| rad18         | 1.97144e-13 | 1.000000 | 1.97472e-13 | 1.000000 |
| PAH3+H        | 6.24966e-15 | 1.000000 | 6.26005e-15 | 1.000000 |
| rad59         | 1.44660e-15 | 1.000000 | 1.44901e-15 | 1.000000 |
| rad50         | 1.03059e-16 | 1.000000 | 1.03230e-16 | 1.000000 |
| rad31         | 4.77643e-17 | 1.000000 | 4.78437e-17 | 1.000000 |
| rad19syn      | 2.70832e-17 | 1.000000 | 2.71282e-17 | 1.000000 |
| rad9          | 1.97359e-17 | 1.000000 | 1.97687e-17 | 1.000000 |
| rad24         | 1.77728e-17 | 1.000000 | 1.78024e-17 | 1.000000 |
| rad67         | 1.21364e-18 | 1.000000 | 1.21566e-18 | 1.000000 |
| rad54         | 8.65249e-19 | 1.000000 | 8.66688e-19 | 1.000000 |
| PAH10+CH3     | 5.74889e-19 | 1.000000 | 5.75845e-19 | 1.000000 |
| rad43         | 1.19660e-19 | 1.000000 | 1.19859e-19 | 1.000000 |
| rad52         | 6.29021e-20 | 1.000000 | 6.30067e-20 | 1.000000 |
| rad62         | 4.06414e-20 | 1.000000 | 4.07090e-20 | 1.000000 |
| rad15         | 1.17159e-20 | 1.000000 | 1.17354e-20 | 1.000000 |
| PhcycC3H3_A+H | 7.40062e-21 | 1.000000 | 7.41293e-21 | 1.000000 |
| rad51         | 3.46386e-21 | 1.000000 | 3.46962e-21 | 1.000000 |
| rad70         | 3.35899e-21 | 1.000000 | 3.36458e-21 | 1.000000 |
| rad55         | 1.33748e-21 | 1.000000 | 1.33971e-21 | 1.000000 |
| rad58         | 3.59875e-22 | 1.000000 | 3.60473e-22 | 1.000000 |



|           |             |         |             |          |
|-----------|-------------|---------|-------------|----------|
| PAH1+H    | 2.76724e-22 | 1.00000 | 2.77184e-22 | 1.000000 |
| rad65     | 4.20893e-23 | 1.00000 | 4.21593e-23 | 1.000000 |
| rad34     | 1.85578e-23 | 1.00000 | 1.85886e-23 | 1.000000 |
| rad5      | 7.96789e-25 | 1.00000 | 7.98114e-25 | 1.000000 |
| rad42     | 4.75845e-25 | 1.00000 | 4.76636e-25 | 1.000000 |
| rad12     | 2.14309e-25 | 1.00000 | 2.14666e-25 | 1.000000 |
| rad41     | 1.45062e-25 | 1.00000 | 1.45303e-25 | 1.000000 |
| rad53     | 6.41758e-27 | 1.00000 | 6.42826e-27 | 1.000000 |
| rad64     | 1.37169e-27 | 1.00000 | 1.37397e-27 | 1.000000 |
| rad56     | 9.25735e-30 | 1.00000 | 9.27275e-30 | 1.000000 |
| rad61     | 1.40890e-30 | 1.00000 | 1.41124e-30 | 1.000000 |
| rad68syn  | 1.02468e-30 | 1.00000 | 1.02639e-30 | 1.000000 |
| rad68anti | 7.31430e-31 | 1.00000 | 7.32647e-31 | 1.000000 |
| rad47     | 2.40164e-32 | 1.00000 | 2.40563e-32 | 1.000000 |
| rad73     | 8.19118e-33 | 1.00000 | 8.20481e-33 | 1.000000 |
| rad40syn  | 2.98882e-34 | 1.00000 | 2.99379e-34 | 1.000000 |
| rad71     | 2.29197e-34 | 1.00000 | 2.29578e-34 | 1.000000 |
| rad40anti | 9.26992e-35 | 1.00000 | 9.28534e-35 | 1.000000 |
| PAH8+H    | 5.66355e-35 | 1.00000 | 5.67297e-35 | 1.000000 |
| rad72     | 4.01951e-40 | 1.00000 | 4.02619e-40 | 1.000000 |
| rad8      | 2.21446e-41 | 1.00000 | 2.21814e-41 | 1.000000 |

0.100000000E-02 Pa, 310.000000 K

| Rate constant | True (fraction)     | Effective (fraction) |
|---------------|---------------------|----------------------|
| Total         | 2.44453e-22 (1.00 ) | 2.44055e-22 (1.00 )  |

| species     | PYtrue      | Cumul    | PYeffective | Cumul    |
|-------------|-------------|----------|-------------|----------|
| Indene+H    | 0.997391    | 0.997391 | 0.999020    | 0.999020 |
| Benzyl+C2H2 | 0.00163049  | 0.999021 | 0.00000     | 0.999020 |
| rad6        | 0.000976460 | 0.999998 | 0.000978054 | 0.999998 |
| PhCCH+CH3   | 6.10838e-07 | 0.999999 | 6.11835e-07 | 0.999999 |
| rad2        | 4.08501e-07 | 0.999999 | 4.09168e-07 | 0.999999 |
| PhCHCCH2+H  | 3.66340e-07 | 0.999999 | 3.66939e-07 | 0.999999 |
| PhCCCH3+H   | 2.19299e-07 | 1.000000 | 2.19657e-07 | 1.000000 |
| rad28       | 1.26868e-07 | 1.000000 | 1.27075e-07 | 1.000000 |
| rad7        | 7.51215e-08 | 1.000000 | 7.52441e-08 | 1.000000 |
| rad30       | 5.84186e-08 | 1.000000 | 5.85140e-08 | 1.000000 |
| rad1        | 3.18933e-08 | 1.000000 | 3.19454e-08 | 1.000000 |
| rad26       | 2.74829e-08 | 1.000000 | 2.75278e-08 | 1.000000 |
| rad10       | 2.13142e-08 | 1.000000 | 2.13490e-08 | 1.000000 |
| rad11       | 1.87817e-08 | 1.000000 | 1.88124e-08 | 1.000000 |
| Ph+MeAc     | 1.26357e-08 | 1.000000 | 1.26564e-08 | 1.000000 |
| rad15       | 8.74767e-09 | 1.000000 | 8.76196e-09 | 1.000000 |
| PAH9+H      | 7.06556e-09 | 1.000000 | 7.07710e-09 | 1.000000 |
| rad35       | 4.10954e-09 | 1.000000 | 4.11625e-09 | 1.000000 |
| rad3        | 2.77531e-09 | 1.000000 | 2.77984e-09 | 1.000000 |
| rad8        | 2.27473e-09 | 1.000000 | 2.27845e-09 | 1.000000 |
| rad38       | 1.67017e-09 | 1.000000 | 1.67290e-09 | 1.000000 |
| rad9        | 1.49987e-09 | 1.000000 | 1.50232e-09 | 1.000000 |
| rad4        | 1.48957e-09 | 1.000000 | 1.49200e-09 | 1.000000 |
| Ph+Allene   | 9.81055e-10 | 1.000000 | 9.82657e-10 | 1.000000 |
| PAH7+H      | 9.57324e-10 | 1.000000 | 9.58888e-10 | 1.000000 |
| rad13       | 4.31456e-10 | 1.000000 | 4.32160e-10 | 1.000000 |
| rad39       | 1.77485e-10 | 1.000000 | 1.77775e-10 | 1.000000 |
| rad12       | 9.78961e-11 | 1.000000 | 9.80560e-11 | 1.000000 |
| rad23       | 2.87669e-11 | 1.000000 | 2.88139e-11 | 1.000000 |
| PhCH2CCH+H  | 2.01204e-11 | 1.000000 | 2.01532e-11 | 1.000000 |
| rad46       | 1.09454e-11 | 1.000000 | 1.09633e-11 | 1.000000 |
| rad60syn    | 1.63124e-12 | 1.000000 | 1.63391e-12 | 1.000000 |
| rad37       | 1.61698e-12 | 1.000000 | 1.61962e-12 | 1.000000 |
| rad33       | 8.54919e-13 | 1.000000 | 8.56315e-13 | 1.000000 |
| rad60anti   | 5.38905e-13 | 1.000000 | 5.39785e-13 | 1.000000 |
| rad27       | 2.53503e-13 | 1.000000 | 2.53917e-13 | 1.000000 |
| rad45       | 2.49431e-13 | 1.000000 | 2.49838e-13 | 1.000000 |
| rad14       | 2.43954e-13 | 1.000000 | 2.44352e-13 | 1.000000 |
| rad25       | 2.42986e-13 | 1.000000 | 2.43383e-13 | 1.000000 |
| rad20       | 1.19401e-13 | 1.000000 | 1.19596e-13 | 1.000000 |
| rad21       | 7.84648e-14 | 1.000000 | 7.85930e-14 | 1.000000 |
| rad5        | 4.60734e-14 | 1.000000 | 4.61486e-14 | 1.000000 |
| rad36       | 1.65037e-14 | 1.000000 | 1.65306e-14 | 1.000000 |
| PAH3+H      | 1.51208e-14 | 1.000000 | 1.51455e-14 | 1.000000 |
| rad22       | 8.57391e-15 | 1.000000 | 8.58791e-15 | 1.000000 |
| rad59       | 4.36065e-15 | 1.000000 | 4.36777e-15 | 1.000000 |
| rad18       | 4.82823e-16 | 1.000000 | 4.83612e-16 | 1.000000 |
| rad50       | 3.17540e-16 | 1.000000 | 3.18059e-16 | 1.000000 |
| rad19syn    | 1.00709e-16 | 1.000000 | 1.00873e-16 | 1.000000 |
| rad31       | 3.33576e-17 | 1.000000 | 3.34121e-17 | 1.000000 |

|               |             |          |             |         |
|---------------|-------------|----------|-------------|---------|
| rad54         | 3.50125e-18 | 1.000000 | 3.50697e-18 | 1.00000 |
| PAH10+CH3     | 2.25638e-18 | 1.000000 | 2.26006e-18 | 1.00000 |
| rad43         | 5.13297e-19 | 1.000000 | 5.14136e-19 | 1.00000 |
| rad52         | 2.26204e-19 | 1.000000 | 2.26574e-19 | 1.00000 |
| rad62         | 1.76032e-19 | 1.000000 | 1.76319e-19 | 1.00000 |
| rad24         | 4.73106e-20 | 1.000000 | 4.73879e-20 | 1.00000 |
| PhcycC3H3_A+H | 2.37540e-20 | 1.000000 | 2.37928e-20 | 1.00000 |
| rad51         | 1.42629e-20 | 1.000000 | 1.42862e-20 | 1.00000 |
| rad70         | 1.35738e-20 | 1.000000 | 1.35959e-20 | 1.00000 |
| rad55         | 5.97809e-21 | 1.000000 | 5.98786e-21 | 1.00000 |
| rad58         | 1.57032e-21 | 1.000000 | 1.57289e-21 | 1.00000 |
| PAH1+H        | 7.92885e-22 | 1.000000 | 7.94180e-22 | 1.00000 |
| rad65         | 1.69841e-22 | 1.000000 | 1.70118e-22 | 1.00000 |
| rad34         | 5.35689e-23 | 1.000000 | 5.36564e-23 | 1.00000 |
| rad42         | 1.01277e-24 | 1.000000 | 1.01443e-24 | 1.00000 |
| rad41         | 3.07040e-25 | 1.000000 | 3.07541e-25 | 1.00000 |
| rad47         | 1.45555e-31 | 1.000000 | 1.45793e-31 | 1.00000 |

0.100000000E-02 Pa, 400.000000 K

| Rate constant | True (fraction)     | Effective (fraction) |
|---------------|---------------------|----------------------|
| Total         | 3.60269e-20 (1.00 ) | 3.57082e-20 (1.00 )  |

| species       | PYtrue      | Cumul    | PYeffective | Cumul    |
|---------------|-------------|----------|-------------|----------|
| Indene+H      | 0.990445    | 0.990445 | 0.999285    | 0.999285 |
| Benzyl+C2H2   | 0.00884634  | 0.999291 | 0.00000     | 0.999285 |
| rad6          | 0.000685500 | 0.999977 | 0.000691618 | 0.999977 |
| PhCCH+CH3     | 1.21167e-05 | 0.999989 | 1.22248e-05 | 0.999989 |
| PhCHCCH2+H    | 5.79350e-06 | 0.999995 | 5.84520e-06 | 0.999995 |
| PhCCCH3+H     | 3.82232e-06 | 0.999999 | 3.85643e-06 | 0.999999 |
| Ph+MeAc       | 5.34234e-07 | 0.999999 | 5.39003e-07 | 0.999999 |
| rad30         | 4.02067e-07 | 1.000000 | 4.05655e-07 | 0.999999 |
| rad2          | 3.14370e-07 | 1.000000 | 3.17176e-07 | 1.000000 |
| rad28         | 2.05183e-07 | 1.000000 | 2.07014e-07 | 1.000000 |
| PAH9+H        | 6.80666e-08 | 1.000000 | 6.86741e-08 | 1.000000 |
| Ph+Allene     | 6.39922e-08 | 1.000000 | 6.45633e-08 | 1.000000 |
| rad7          | 6.37769e-08 | 1.000000 | 6.43461e-08 | 1.000000 |
| PAH7+H        | 4.47676e-08 | 1.000000 | 4.51672e-08 | 1.000000 |
| rad26         | 3.84300e-08 | 1.000000 | 3.87730e-08 | 1.000000 |
| rad1          | 2.92564e-08 | 1.000000 | 2.95176e-08 | 1.000000 |
| rad35         | 2.73683e-08 | 1.000000 | 2.76126e-08 | 1.000000 |
| rad10         | 1.88505e-08 | 1.000000 | 1.90187e-08 | 1.000000 |
| rad38         | 1.63188e-08 | 1.000000 | 1.64645e-08 | 1.000000 |
| rad11         | 1.59517e-08 | 1.000000 | 1.60941e-08 | 1.000000 |
| rad23         | 1.07166e-08 | 1.000000 | 1.08122e-08 | 1.000000 |
| rad39         | 8.57617e-09 | 1.000000 | 8.65272e-09 | 1.000000 |
| PhCH2CCH+H    | 4.56492e-09 | 1.000000 | 4.60567e-09 | 1.000000 |
| rad3          | 2.40536e-09 | 1.000000 | 2.42683e-09 | 1.000000 |
| rad4          | 1.26675e-09 | 1.000000 | 1.27806e-09 | 1.000000 |
| rad19anti     | 8.42822e-10 | 1.000000 | 8.50345e-10 | 1.000000 |
| rad45         | 4.53258e-10 | 1.000000 | 4.57303e-10 | 1.000000 |
| rad13         | 3.91535e-10 | 1.000000 | 3.95030e-10 | 1.000000 |
| rad46         | 3.06016e-10 | 1.000000 | 3.08747e-10 | 1.000000 |
| rad37         | 1.38530e-10 | 1.000000 | 1.39766e-10 | 1.000000 |
| rad60syn      | 9.47273e-11 | 1.000000 | 9.55727e-11 | 1.000000 |
| rad60anti     | 3.76555e-11 | 1.000000 | 3.79916e-11 | 1.000000 |
| rad36         | 1.74110e-11 | 1.000000 | 1.75663e-11 | 1.000000 |
| PAH3+H        | 6.50523e-12 | 1.000000 | 6.56329e-12 | 1.000000 |
| rad20         | 4.10755e-12 | 1.000000 | 4.14421e-12 | 1.000000 |
| rad21         | 2.87177e-12 | 1.000000 | 2.89740e-12 | 1.000000 |
| rad22         | 2.21678e-12 | 1.000000 | 2.23657e-12 | 1.000000 |
| rad59         | 1.36006e-12 | 1.000000 | 1.37220e-12 | 1.000000 |
| rad33         | 1.02847e-12 | 1.000000 | 1.03765e-12 | 1.000000 |
| rad14         | 3.21901e-13 | 1.000000 | 3.24774e-13 | 1.000000 |
| rad25         | 3.10450e-13 | 1.000000 | 3.13221e-13 | 1.000000 |
| rad27         | 3.08766e-13 | 1.000000 | 3.11522e-13 | 1.000000 |
| rad50         | 1.36075e-13 | 1.000000 | 1.37289e-13 | 1.000000 |
| rad19syn      | 1.28787e-13 | 1.000000 | 1.29936e-13 | 1.000000 |
| rad18         | 8.01822e-14 | 1.000000 | 8.08979e-14 | 1.000000 |
| rad54         | 8.91830e-15 | 1.000000 | 8.99790e-15 | 1.000000 |
| PAH10+CH3     | 4.85824e-15 | 1.000000 | 4.90160e-15 | 1.000000 |
| rad67         | 1.67409e-15 | 1.000000 | 1.68903e-15 | 1.000000 |
| rad43         | 8.71769e-16 | 1.000000 | 8.79549e-16 | 1.000000 |
| rad62         | 4.87076e-16 | 1.000000 | 4.91423e-16 | 1.000000 |
| rad52         | 4.04291e-16 | 1.000000 | 4.07900e-16 | 1.000000 |
| rad31         | 3.25559e-16 | 1.000000 | 3.28465e-16 | 1.000000 |
| PhcycC3H3_A+H | 3.21951e-16 | 1.000000 | 3.24825e-16 | 1.000000 |
| rad9          | 1.44582e-16 | 1.000000 | 1.45872e-16 | 1.000000 |

|           |             |         |             |         |
|-----------|-------------|---------|-------------|---------|
| rad70     | 1.20406e-16 | 1.00000 | 1.21480e-16 | 1.00000 |
| rad51     | 7.68098e-17 | 1.00000 | 7.74954e-17 | 1.00000 |
| rad24     | 5.73001e-17 | 1.00000 | 5.78116e-17 | 1.00000 |
| rad55     | 5.04370e-17 | 1.00000 | 5.08872e-17 | 1.00000 |
| PAH1+H    | 2.44075e-17 | 1.00000 | 2.46253e-17 | 1.00000 |
| rad58     | 1.79714e-17 | 1.00000 | 1.81318e-17 | 1.00000 |
| rad34     | 2.03160e-18 | 1.00000 | 2.04973e-18 | 1.00000 |
| rad65     | 1.55014e-18 | 1.00000 | 1.56398e-18 | 1.00000 |
| rad15     | 9.11205e-20 | 1.00000 | 9.19337e-20 | 1.00000 |
| rad42     | 7.26769e-20 | 1.00000 | 7.33256e-20 | 1.00000 |
| rad41     | 2.26627e-20 | 1.00000 | 2.28650e-20 | 1.00000 |
| rad53     | 5.66800e-21 | 1.00000 | 5.71859e-21 | 1.00000 |
| rad64     | 1.82341e-21 | 1.00000 | 1.83968e-21 | 1.00000 |
| rad5      | 8.34426e-23 | 1.00000 | 8.41873e-23 | 1.00000 |
| rad56     | 6.83338e-23 | 1.00000 | 6.89437e-23 | 1.00000 |
| rad68syn  | 8.81142e-24 | 1.00000 | 8.89007e-24 | 1.00000 |
| rad73     | 8.54730e-24 | 1.00000 | 8.62358e-24 | 1.00000 |
| rad68anti | 6.35356e-24 | 1.00000 | 6.41026e-24 | 1.00000 |
| rad61     | 4.90149e-24 | 1.00000 | 4.94523e-24 | 1.00000 |
| rad12     | 4.01364e-24 | 1.00000 | 4.04947e-24 | 1.00000 |
| rad71     | 2.03212e-24 | 1.00000 | 2.05026e-24 | 1.00000 |
| PAH8+H    | 7.74482e-26 | 1.00000 | 7.81394e-26 | 1.00000 |
| rad40syn  | 6.88776e-26 | 1.00000 | 6.94923e-26 | 1.00000 |
| rad40anti | 2.02031e-26 | 1.00000 | 2.03835e-26 | 1.00000 |
| rad72     | 1.07795e-27 | 1.00000 | 1.08757e-27 | 1.00000 |
| rad47     | 5.33340e-28 | 1.00000 | 5.38100e-28 | 1.00000 |
| rad8      | 8.99284e-38 | 1.00000 | 9.07310e-38 | 1.00000 |

0.100000000E-02 Pa, 500.000000 K

| Rate constant | True (fraction)     | Effective (fraction) |
|---------------|---------------------|----------------------|
| Total         | 1.22595e-18 (1.00 ) | 1.18787e-18 (1.00 )  |

| species     | PYtrue      | Cumul    | PYeffective | Cumul    |
|-------------|-------------|----------|-------------|----------|
| Indene+H    | 0.968468    | 0.968468 | 0.999515    | 0.999515 |
| Benzyl+C2H2 | 0.0310615   | 0.999529 | 0.00000     | 0.999515 |
| rad6        | 0.000298236 | 0.999828 | 0.000307797 | 0.999823 |
| PhCCH+CH3   | 9.31228e-05 | 0.999921 | 9.61081e-05 | 0.999919 |
| PhCHCCH2+H  | 3.98062e-05 | 0.999961 | 4.10823e-05 | 0.999960 |
| PhCCCH3+H   | 2.52892e-05 | 0.999986 | 2.60999e-05 | 0.999986 |
| Ph+MeAc     | 7.06894e-06 | 0.999993 | 7.29555e-06 | 0.999993 |
| rad30       | 2.19660e-06 | 0.999995 | 2.26702e-06 | 0.999996 |
| Ph+Allene   | 2.05021e-06 | 0.999997 | 2.11594e-06 | 0.999998 |
| PAH7+H      | 6.79474e-07 | 0.999998 | 7.01256e-07 | 0.999998 |
| PAH9+H      | 4.84050e-07 | 0.999998 | 4.99568e-07 | 0.999999 |
| PhCH2CCH+H  | 2.44775e-07 | 0.999999 | 2.52621e-07 | 0.999999 |
| rad2        | 1.69372e-07 | 0.999999 | 1.74801e-07 | 0.999999 |
| rad35       | 1.65636e-07 | 0.999999 | 1.70946e-07 | 1.000000 |
| rad39       | 1.51319e-07 | 0.999999 | 1.56170e-07 | 1.000000 |
| rad38       | 1.34454e-07 | 0.999999 | 1.38764e-07 | 1.000000 |
| rad28       | 1.33275e-07 | 0.999999 | 1.37547e-07 | 1.000000 |
| rad23       | 5.74961e-08 | 0.999999 | 5.93393e-08 | 1.000000 |
| rad7        | 2.98438e-08 | 1.000000 | 3.08005e-08 | 1.000000 |
| rad26       | 2.27590e-08 | 1.000000 | 2.34886e-08 | 1.000000 |
| rad1        | 2.02229e-08 | 1.000000 | 2.08712e-08 | 1.000000 |
| rad19anti   | 1.41490e-08 | 1.000000 | 1.46025e-08 | 1.000000 |
| rad10       | 8.99311e-09 | 1.000000 | 9.28141e-09 | 1.000000 |
| rad11       | 7.73807e-09 | 1.000000 | 7.98613e-09 | 1.000000 |
| rad45       | 6.23507e-09 | 1.000000 | 6.43495e-09 | 1.000000 |
| rad46       | 5.06753e-09 | 1.000000 | 5.22999e-09 | 1.000000 |
| rad37       | 2.87139e-09 | 1.000000 | 2.96344e-09 | 1.000000 |
| rad60syn    | 2.17484e-09 | 1.000000 | 2.24456e-09 | 1.000000 |
| rad3        | 1.60799e-09 | 1.000000 | 1.65954e-09 | 1.000000 |
| rad60anti   | 9.78345e-10 | 1.000000 | 1.00971e-09 | 1.000000 |
| rad4        | 9.05520e-10 | 1.000000 | 9.34548e-10 | 1.000000 |
| PAH3+H      | 4.98716e-10 | 1.000000 | 5.14703e-10 | 1.000000 |
| rad36       | 3.17383e-10 | 1.000000 | 3.27557e-10 | 1.000000 |
| rad13       | 2.02878e-10 | 1.000000 | 2.09382e-10 | 1.000000 |
| rad59       | 9.55004e-11 | 1.000000 | 9.85619e-11 | 1.000000 |
| rad19syn    | 2.21140e-11 | 1.000000 | 2.28229e-11 | 1.000000 |
| rad50       | 1.39192e-11 | 1.000000 | 1.43654e-11 | 1.000000 |
| rad22       | 6.12026e-12 | 1.000000 | 6.31646e-12 | 1.000000 |
| rad20       | 3.28214e-12 | 1.000000 | 3.38735e-12 | 1.000000 |
| rad21       | 2.58538e-12 | 1.000000 | 2.66826e-12 | 1.000000 |
| rad54       | 2.40122e-12 | 1.000000 | 2.47820e-12 | 1.000000 |
| PAH10+CH3   | 9.78448e-13 | 1.000000 | 1.00981e-12 | 1.000000 |
| rad33       | 6.28703e-13 | 1.000000 | 6.48857e-13 | 1.000000 |
| rad67       | 2.37655e-13 | 1.000000 | 2.45273e-13 | 1.000000 |

|               |             |          |             |         |
|---------------|-------------|----------|-------------|---------|
| PhcycC3H3_A+H | 2.03269e-13 | 1.000000 | 2.09785e-13 | 1.00000 |
| rad14         | 1.92058e-13 | 1.000000 | 1.98215e-13 | 1.00000 |
| rad25         | 1.82925e-13 | 1.000000 | 1.88789e-13 | 1.00000 |
| rad27         | 1.76905e-13 | 1.000000 | 1.82576e-13 | 1.00000 |
| rad43         | 1.49365e-13 | 1.000000 | 1.54153e-13 | 1.00000 |
| rad62         | 1.23232e-13 | 1.000000 | 1.27183e-13 | 1.00000 |
| rad52         | 1.04196e-13 | 1.000000 | 1.07536e-13 | 1.00000 |
| rad70         | 6.57149e-14 | 1.000000 | 6.78216e-14 | 1.00000 |
| rad51         | 4.54601e-14 | 1.000000 | 4.69174e-14 | 1.00000 |
| rad18         | 4.20995e-14 | 1.000000 | 4.34491e-14 | 1.00000 |
| rad55         | 2.77408e-14 | 1.000000 | 2.86301e-14 | 1.00000 |
| PAH1+H        | 2.29959e-14 | 1.000000 | 2.37331e-14 | 1.00000 |
| rad58         | 1.25009e-14 | 1.000000 | 1.29017e-14 | 1.00000 |
| rad34         | 2.12202e-15 | 1.000000 | 2.19005e-15 | 1.00000 |
| rad9          | 1.41062e-15 | 1.000000 | 1.45584e-15 | 1.00000 |
| rad65         | 1.18844e-15 | 1.000000 | 1.22654e-15 | 1.00000 |
| rad31         | 1.12470e-15 | 1.000000 | 1.16076e-15 | 1.00000 |
| rad24         | 4.19512e-16 | 1.000000 | 4.32961e-16 | 1.00000 |
| rad42         | 8.30699e-17 | 1.000000 | 8.57329e-17 | 1.00000 |
| rad41         | 2.52354e-17 | 1.000000 | 2.60444e-17 | 1.00000 |
| rad53         | 2.07030e-17 | 1.000000 | 2.13666e-17 | 1.00000 |
| rad73         | 1.32556e-17 | 1.000000 | 1.36805e-17 | 1.00000 |
| rad71         | 1.04514e-17 | 1.000000 | 1.07864e-17 | 1.00000 |
| rad64         | 8.81365e-18 | 1.000000 | 9.09619e-18 | 1.00000 |
| rad56         | 9.93465e-19 | 1.000000 | 1.02531e-18 | 1.00000 |
| rad15         | 9.58882e-19 | 1.000000 | 9.89621e-19 | 1.00000 |
| rad68syn      | 1.71725e-19 | 1.000000 | 1.77230e-19 | 1.00000 |
| rad61         | 1.54554e-19 | 1.000000 | 1.59509e-19 | 1.00000 |
| rad68anti     | 1.18535e-19 | 1.000000 | 1.22335e-19 | 1.00000 |
| rad72         | 1.17696e-19 | 1.000000 | 1.21469e-19 | 1.00000 |
| PAH8+H        | 1.00177e-19 | 1.000000 | 1.03388e-19 | 1.00000 |
| rad40syn      | 1.86473e-20 | 1.000000 | 1.92451e-20 | 1.00000 |
| rad40anti     | 9.80082e-21 | 1.000000 | 1.01150e-20 | 1.00000 |
| rad5          | 8.11118e-22 | 1.000000 | 8.37120e-22 | 1.00000 |
| rad12         | 5.89675e-22 | 1.000000 | 6.08578e-22 | 1.00000 |
| rad47         | 2.99644e-25 | 1.000000 | 3.09249e-25 | 1.00000 |
| rad8          | 6.08379e-34 | 1.000000 | 6.27882e-34 | 1.00000 |

0.100000000E-02 Pa, 600.000000 K

=====

Rate constant | True (fraction) | Effective (fraction)

-----  
Total | 1.36947e-17 (1.00 ) | 1.26193e-17 (1.00 )

| species     | PYtrue      | Cumul    | PYeffective | Cumul    |
|-------------|-------------|----------|-------------|----------|
| Indene+H    | 0.920767    | 0.920767 | 0.999234    | 0.999234 |
| Benzyl+C2H2 | 0.0785271   | 0.999294 | 0.00000     | 0.999234 |
| PhCCH+CH3   | 0.000332628 | 0.999627 | 0.000360975 | 0.999595 |
| PhCHCCH2+H  | 0.000136838 | 0.999764 | 0.000148499 | 0.999743 |
| rad6        | 8.45049e-05 | 0.999848 | 9.17063e-05 | 0.999835 |
| PhCCCH3+H   | 7.52879e-05 | 0.999923 | 8.17039e-05 | 0.999917 |
| Ph+MeAc     | 3.38761e-05 | 0.999957 | 3.67630e-05 | 0.999954 |
| Ph+Allene   | 2.17053e-05 | 0.999979 | 2.35550e-05 | 0.999977 |
| rad30       | 7.59249e-06 | 0.999987 | 8.23952e-06 | 0.999985 |
| PAH7+H      | 4.38958e-06 | 0.999991 | 4.76365e-06 | 0.999990 |
| PhCH2CCH+H  | 3.66156e-06 | 0.999995 | 3.97360e-06 | 0.999994 |
| PAH9+H      | 2.21793e-06 | 0.999997 | 2.40694e-06 | 0.999997 |
| rad39       | 1.04238e-06 | 0.999998 | 1.13121e-06 | 0.999998 |
| rad38       | 6.77425e-07 | 0.999999 | 7.35154e-07 | 0.999998 |
| rad35       | 6.69743e-07 | 0.999999 | 7.26818e-07 | 0.999999 |
| rad19anti   | 1.16217e-07 | 0.999999 | 1.26121e-07 | 0.999999 |
| rad23       | 1.01580e-07 | 0.999999 | 1.10236e-07 | 0.999999 |
| rad2        | 7.67385e-08 | 0.999999 | 8.32781e-08 | 0.999999 |
| rad28       | 4.73643e-08 | 1.000000 | 5.14006e-08 | 1.000000 |
| rad46       | 4.04368e-08 | 1.000000 | 4.38828e-08 | 1.000000 |
| rad60syn    | 1.92851e-08 | 1.000000 | 2.09285e-08 | 1.000000 |
| rad37       | 1.80304e-08 | 1.000000 | 1.95670e-08 | 1.000000 |
| rad45       | 1.38076e-08 | 1.000000 | 1.49842e-08 | 1.000000 |
| rad1        | 1.12327e-08 | 1.000000 | 1.21900e-08 | 1.000000 |
| PAH3+H      | 9.89178e-09 | 1.000000 | 1.07347e-08 | 1.000000 |
| rad7        | 9.38094e-09 | 1.000000 | 1.01804e-08 | 1.000000 |
| rad60anti   | 9.33107e-09 | 1.000000 | 1.01263e-08 | 1.000000 |
| rad26       | 7.72746e-09 | 1.000000 | 8.38598e-09 | 1.000000 |
| rad10       | 2.80385e-09 | 1.000000 | 3.04279e-09 | 1.000000 |
| rad11       | 2.57905e-09 | 1.000000 | 2.79883e-09 | 1.000000 |
| rad59       | 1.75184e-09 | 1.000000 | 1.90113e-09 | 1.000000 |
| rad36       | 1.04936e-09 | 1.000000 | 1.13879e-09 | 1.000000 |
| rad3        | 7.83271e-10 | 1.000000 | 8.50020e-10 | 1.000000 |
| rad19syn    | 6.85678e-10 | 1.000000 | 7.44110e-10 | 1.000000 |

|               |             |          |             |          |
|---------------|-------------|----------|-------------|----------|
| rad4          | 4.75712e-10 | 1.000000 | 5.16252e-10 | 1.000000 |
| rad50         | 3.82246e-10 | 1.000000 | 4.14821e-10 | 1.000000 |
| rad54         | 1.00717e-10 | 1.000000 | 1.09300e-10 | 1.000000 |
| rad13         | 7.65887e-11 | 1.000000 | 8.31155e-11 | 1.000000 |
| PAH10+CH3     | 3.00906e-11 | 1.000000 | 3.26549e-11 | 1.000000 |
| PhcycC3H3_A+H | 1.50395e-11 | 1.000000 | 1.63211e-11 | 1.000000 |
| rad67         | 9.09505e-12 | 1.000000 | 9.87013e-12 | 1.000000 |
| rad22         | 9.05900e-12 | 1.000000 | 9.83100e-12 | 1.000000 |
| rad51         | 7.63588e-12 | 1.000000 | 8.28660e-12 | 1.000000 |
| rad52         | 6.26403e-12 | 1.000000 | 6.79785e-12 | 1.000000 |
| rad62         | 4.45785e-12 | 1.000000 | 4.83774e-12 | 1.000000 |
| rad20         | 4.39828e-12 | 1.000000 | 4.77310e-12 | 1.000000 |
| rad70         | 4.35385e-12 | 1.000000 | 4.72488e-12 | 1.000000 |
| rad21         | 3.92878e-12 | 1.000000 | 4.26359e-12 | 1.000000 |
| rad43         | 3.85705e-12 | 1.000000 | 4.18574e-12 | 1.000000 |
| PAH1+H        | 2.28520e-12 | 1.000000 | 2.47995e-12 | 1.000000 |
| rad55         | 1.81139e-12 | 1.000000 | 1.96576e-12 | 1.000000 |
| rad58         | 1.01715e-12 | 1.000000 | 1.10383e-12 | 1.000000 |
| rad33         | 3.24484e-13 | 1.000000 | 3.52136e-13 | 1.000000 |
| rad34         | 2.18431e-13 | 1.000000 | 2.37045e-13 | 1.000000 |
| rad65         | 2.12717e-13 | 1.000000 | 2.30844e-13 | 1.000000 |
| rad71         | 9.76790e-14 | 1.000000 | 1.06003e-13 | 1.000000 |
| rad14         | 7.87484e-14 | 1.000000 | 8.54593e-14 | 1.000000 |
| rad25         | 7.73786e-14 | 1.000000 | 8.39727e-14 | 1.000000 |
| rad73         | 7.68152e-14 | 1.000000 | 8.33613e-14 | 1.000000 |
| rad27         | 7.37864e-14 | 1.000000 | 8.00744e-14 | 1.000000 |
| rad18         | 3.18273e-14 | 1.000000 | 3.45396e-14 | 1.000000 |
| rad9          | 2.27492e-14 | 1.000000 | 2.46879e-14 | 1.000000 |
| rad42         | 8.24869e-15 | 1.000000 | 8.95164e-15 | 1.000000 |
| rad24         | 5.17947e-15 | 1.000000 | 5.62086e-15 | 1.000000 |
| rad53         | 4.92373e-15 | 1.000000 | 5.34333e-15 | 1.000000 |
| rad64         | 4.38559e-15 | 1.000000 | 4.75933e-15 | 1.000000 |
| rad72         | 2.77928e-15 | 1.000000 | 3.01613e-15 | 1.000000 |
| rad41         | 2.71431e-15 | 1.000000 | 2.94562e-15 | 1.000000 |
| rad31         | 1.57139e-15 | 1.000000 | 1.70530e-15 | 1.000000 |
| PAH8+H        | 1.11617e-15 | 1.000000 | 1.21129e-15 | 1.000000 |
| rad56         | 6.87120e-16 | 1.000000 | 7.45676e-16 | 1.000000 |
| rad61         | 5.78734e-16 | 1.000000 | 6.28053e-16 | 1.000000 |
| rad68syn      | 3.96658e-16 | 1.000000 | 4.30461e-16 | 1.000000 |
| rad68anti     | 2.60602e-16 | 1.000000 | 2.82810e-16 | 1.000000 |
| rad40syn      | 1.40457e-16 | 1.000000 | 1.52426e-16 | 1.000000 |
| rad40anti     | 8.64912e-17 | 1.000000 | 9.38620e-17 | 1.000000 |
| rad15         | 1.51140e-17 | 1.000000 | 1.64021e-17 | 1.000000 |
| rad12         | 2.11990e-19 | 1.000000 | 2.30056e-19 | 1.000000 |
| rad5          | 2.66810e-21 | 1.000000 | 2.89547e-21 | 1.000000 |
| rad47         | 2.65373e-23 | 1.000000 | 2.87988e-23 | 1.000000 |
| rad8          | 9.36121e-30 | 1.000000 | 1.01590e-29 | 1.000000 |

0.100000000E-02 Pa, 700.000000 K

=====

| Rate constant | True (fraction)     | Effective (fraction) |
|---------------|---------------------|----------------------|
| Total         | 8.02260e-17 (1.00 ) | 6.78336e-17 (1.00 )  |

| species      | PYtrue      | Cumul    | PYeffective | Cumul    |
|--------------|-------------|----------|-------------|----------|
| Indene+H     | 0.844027    | 0.844027 | 0.998221    | 0.998221 |
| Benzyl+CH2H2 | 0.154469    | 0.998496 | 0.000000    | 0.998221 |
| PhCCH+CH3    | 0.000746184 | 0.999242 | 0.000882503 | 0.999104 |
| PhCHCCH2+H   | 0.000320499 | 0.999563 | 0.000379051 | 0.999483 |
| PhCCCH3+H    | 0.000136687 | 0.999699 | 0.000161659 | 0.999644 |
| Ph+Allene    | 0.000115960 | 0.999815 | 0.000137144 | 0.999781 |
| Ph+MeAc      | 8.86734e-05 | 0.999904 | 0.000104873 | 0.999886 |
| PhCH2CCH+H   | 2.52613e-05 | 0.999929 | 2.98762e-05 | 0.999916 |
| rad30        | 1.89338e-05 | 0.999948 | 2.23928e-05 | 0.999938 |
| rad6         | 1.88844e-05 | 0.999967 | 2.23344e-05 | 0.999961 |
| PAH7+H       | 1.64049e-05 | 0.999983 | 1.94018e-05 | 0.999980 |
| PAH9+H       | 7.24360e-06 | 0.999991 | 8.56693e-06 | 0.999989 |
| rad39        | 3.97911e-06 | 0.999995 | 4.70604e-06 | 0.999994 |
| rad38        | 2.36570e-06 | 0.999997 | 2.79789e-06 | 0.999996 |
| rad35        | 1.98031e-06 | 0.999999 | 2.34209e-06 | 0.999999 |
| rad19anti    | 5.91572e-07 | 1.000000 | 6.99646e-07 | 0.999999 |
| rad46        | 1.96396e-07 | 1.000000 | 2.32275e-07 | 1.000000 |
| rad60syn     | 9.47755e-08 | 1.000000 | 1.12090e-07 | 1.000000 |
| PAH3+H       | 8.73577e-08 | 1.000000 | 1.03317e-07 | 1.000000 |
| rad23        | 6.61430e-08 | 1.000000 | 7.82266e-08 | 1.000000 |
| rad37        | 5.67605e-08 | 1.000000 | 6.71300e-08 | 1.000000 |
| rad60anti    | 4.82189e-08 | 1.000000 | 5.70280e-08 | 1.000000 |
| rad2         | 2.51138e-08 | 1.000000 | 2.97018e-08 | 1.000000 |
| rad59        | 1.44150e-08 | 1.000000 | 1.70484e-08 | 1.000000 |

|               |             |         |             |         |
|---------------|-------------|---------|-------------|---------|
| rad28         | 1.24011e-08 | 1.00000 | 1.46666e-08 | 1.00000 |
| rad45         | 1.07899e-08 | 1.00000 | 1.27611e-08 | 1.00000 |
| rad19syn      | 7.75706e-09 | 1.00000 | 9.17418e-09 | 1.00000 |
| rad50         | 4.42330e-09 | 1.00000 | 5.23139e-09 | 1.00000 |
| rad1          | 4.00814e-09 | 1.00000 | 4.74039e-09 | 1.00000 |
| rad7          | 2.43735e-09 | 1.00000 | 2.88263e-09 | 1.00000 |
| rad26         | 1.99774e-09 | 1.00000 | 2.36270e-09 | 1.00000 |
| rad54         | 1.41375e-09 | 1.00000 | 1.67202e-09 | 1.00000 |
| rad36         | 8.81733e-10 | 1.00000 | 1.04282e-09 | 1.00000 |
| rad11         | 7.36126e-10 | 1.00000 | 8.70608e-10 | 1.00000 |
| rad10         | 7.09110e-10 | 1.00000 | 8.38656e-10 | 1.00000 |
| PhcycC3H3_A+H | 3.17064e-10 | 1.00000 | 3.74988e-10 | 1.00000 |
| PAH10+CH3     | 3.10941e-10 | 1.00000 | 3.67747e-10 | 1.00000 |
| rad3          | 2.47634e-10 | 1.00000 | 2.92874e-10 | 1.00000 |
| rad51         | 1.60645e-10 | 1.00000 | 1.89993e-10 | 1.00000 |
| rad4          | 1.58151e-10 | 1.00000 | 1.87043e-10 | 1.00000 |
| rad67         | 1.47400e-10 | 1.00000 | 1.74328e-10 | 1.00000 |
| rad52         | 1.06783e-10 | 1.00000 | 1.26291e-10 | 1.00000 |
| rad70         | 8.40776e-11 | 1.00000 | 9.94377e-11 | 1.00000 |
| PAH1+H        | 5.55871e-11 | 1.00000 | 6.57422e-11 | 1.00000 |
| rad62         | 5.25242e-11 | 1.00000 | 6.21198e-11 | 1.00000 |
| rad55         | 3.42463e-11 | 1.00000 | 4.05027e-11 | 1.00000 |
| rad43         | 3.33498e-11 | 1.00000 | 3.94424e-11 | 1.00000 |
| rad13         | 2.78373e-11 | 1.00000 | 3.29229e-11 | 1.00000 |
| rad58         | 2.37892e-11 | 1.00000 | 2.81353e-11 | 1.00000 |
| rad20         | 9.46856e-12 | 1.00000 | 1.11984e-11 | 1.00000 |
| rad21         | 9.16717e-12 | 1.00000 | 1.08419e-11 | 1.00000 |
| rad22         | 5.92346e-12 | 1.00000 | 7.00561e-12 | 1.00000 |
| rad34         | 5.69216e-12 | 1.00000 | 6.73205e-12 | 1.00000 |
| rad65         | 4.52728e-12 | 1.00000 | 5.35437e-12 | 1.00000 |
| rad71         | 3.01525e-12 | 1.00000 | 3.56610e-12 | 1.00000 |
| rad73         | 2.20361e-12 | 1.00000 | 2.60619e-12 | 1.00000 |
| rad9          | 4.25572e-13 | 1.00000 | 5.03319e-13 | 1.00000 |
| rad53         | 2.15602e-13 | 1.00000 | 2.54990e-13 | 1.00000 |
| rad33         | 2.12185e-13 | 1.00000 | 2.50949e-13 | 1.00000 |
| rad42         | 1.97715e-13 | 1.00000 | 2.33835e-13 | 1.00000 |
| rad64         | 1.53239e-13 | 1.00000 | 1.81234e-13 | 1.00000 |
| rad72         | 9.74910e-14 | 1.00000 | 1.15301e-13 | 1.00000 |
| rad41         | 6.66441e-14 | 1.00000 | 7.88192e-14 | 1.00000 |
| rad24         | 5.53663e-14 | 1.00000 | 6.54811e-14 | 1.00000 |
| PAH8+H        | 4.26730e-14 | 1.00000 | 5.04688e-14 | 1.00000 |
| rad18         | 3.80659e-14 | 1.00000 | 4.50201e-14 | 1.00000 |
| rad56         | 3.39420e-14 | 1.00000 | 4.01428e-14 | 1.00000 |
| rad25         | 3.34177e-14 | 1.00000 | 3.95227e-14 | 1.00000 |
| rad27         | 3.13610e-14 | 1.00000 | 3.70903e-14 | 1.00000 |
| rad14         | 3.08595e-14 | 1.00000 | 3.64972e-14 | 1.00000 |
| rad61         | 1.93347e-14 | 1.00000 | 2.28670e-14 | 1.00000 |
| rad68syn      | 1.40965e-14 | 1.00000 | 1.66718e-14 | 1.00000 |
| rad68anti     | 9.31868e-15 | 1.00000 | 1.10211e-14 | 1.00000 |
| rad40syn      | 5.80746e-15 | 1.00000 | 6.86842e-15 | 1.00000 |
| rad40anti     | 4.05042e-15 | 1.00000 | 4.79039e-15 | 1.00000 |
| rad31         | 1.07087e-15 | 1.00000 | 1.26650e-15 | 1.00000 |
| rad15         | 1.97499e-16 | 1.00000 | 2.33580e-16 | 1.00000 |
| rad12         | 2.79654e-17 | 1.00000 | 3.30744e-17 | 1.00000 |
| rad5          | 5.41633e-21 | 1.00000 | 6.40583e-21 | 1.00000 |
| rad47         | 8.54325e-22 | 1.00000 | 1.01040e-21 | 1.00000 |
| rad8          | 1.56642e-25 | 1.00000 | 1.85259e-25 | 1.00000 |

0.100000000E-02 Pa, 800.000000 K

=====

| Rate constant | True (fraction)     | Effective (fraction) |
|---------------|---------------------|----------------------|
| Total         | 3.12228e-16 (1.00 ) | 2.33587e-16 (1.00 )  |

| species     | PYtrue      | Cumul    | PYeffective | Cumul    |
|-------------|-------------|----------|-------------|----------|
| Indene+H    | 0.745322    | 0.745322 | 0.996247    | 0.996247 |
| Benzyl+C2H2 | 0.251870    | 0.997192 | 0.000000    | 0.996247 |
| PhCCH+CH3   | 0.00124149  | 0.998433 | 0.00165946  | 0.997906 |
| PhCHCCH2+H  | 0.000603886 | 0.999037 | 0.000807194 | 0.998714 |
| Ph+Allene   | 0.000391605 | 0.999429 | 0.000523445 | 0.999237 |
| PhCCCH3+H   | 0.000180390 | 0.999609 | 0.000241121 | 0.999478 |
| Ph+MeAc     | 0.000158715 | 0.999768 | 0.000212148 | 0.999690 |
| PhCH2CCH+H  | 0.000104747 | 0.999873 | 0.000140012 | 0.999830 |
| PAH7+H      | 4.20040e-05 | 0.999915 | 5.61453e-05 | 0.999887 |
| rad30       | 3.73181e-05 | 0.999952 | 4.98819e-05 | 0.999936 |
| PAH9+H      | 1.83084e-05 | 0.999970 | 2.44722e-05 | 0.999961 |
| rad39       | 1.01671e-05 | 0.999981 | 1.35901e-05 | 0.999974 |
| rad38       | 6.28910e-06 | 0.999987 | 8.40643e-06 | 0.999983 |
| rad35       | 4.61876e-06 | 0.999992 | 6.17374e-06 | 0.999989 |

|               |             |          |             |          |
|---------------|-------------|----------|-------------|----------|
| rad6          | 3.94593e-06 | 0.999995 | 5.27439e-06 | 0.999994 |
| rad19anti     | 2.13380e-06 | 0.999998 | 2.85218e-06 | 0.999997 |
| rad46         | 6.70336e-07 | 0.999998 | 8.96015e-07 | 0.999998 |
| PAH3+H        | 4.55954e-07 | 0.999999 | 6.09458e-07 | 0.999999 |
| rad60syn      | 3.14536e-07 | 0.999999 | 4.20430e-07 | 0.999999 |
| rad60anti     | 1.66150e-07 | 0.999999 | 2.22087e-07 | 0.999999 |
| rad37         | 1.16573e-07 | 0.999999 | 1.55819e-07 | 0.999999 |
| rad59         | 7.05314e-08 | 0.999999 | 9.42769e-08 | 1.000000 |
| rad19syn      | 4.57488e-08 | 0.999999 | 6.11508e-08 | 1.000000 |
| rad50         | 2.75914e-08 | 0.999999 | 3.68805e-08 | 1.000000 |
| rad23         | 2.66541e-08 | 1.000000 | 3.56277e-08 | 1.000000 |
| rad54         | 9.79719e-09 | 1.000000 | 1.30956e-08 | 1.000000 |
| rad2          | 6.21872e-09 | 1.000000 | 8.31235e-09 | 1.000000 |
| rad45         | 5.56634e-09 | 1.000000 | 7.44034e-09 | 1.000000 |
| PhcycC3H3_A+H | 2.99541e-09 | 1.000000 | 4.00386e-09 | 1.000000 |
| rad28         | 2.96405e-09 | 1.000000 | 3.96194e-09 | 1.000000 |
| PAH10+CH3     | 1.59794e-09 | 1.000000 | 2.13591e-09 | 1.000000 |
| rad67         | 1.31419e-09 | 1.000000 | 1.75663e-09 | 1.000000 |
| rad51         | 9.98533e-10 | 1.000000 | 1.33470e-09 | 1.000000 |
| rad1          | 9.67933e-10 | 1.000000 | 1.29380e-09 | 1.000000 |
| rad52         | 7.62477e-10 | 1.000000 | 1.01918e-09 | 1.000000 |
| rad70         | 7.38743e-10 | 1.000000 | 9.87453e-10 | 1.000000 |
| rad7          | 6.37012e-10 | 1.000000 | 8.51473e-10 | 1.000000 |
| PAH1+H        | 5.48386e-10 | 1.000000 | 7.33009e-10 | 1.000000 |
| rad26         | 4.83848e-10 | 1.000000 | 6.46743e-10 | 1.000000 |
| rad36         | 4.55063e-10 | 1.000000 | 6.08268e-10 | 1.000000 |
| rad62         | 3.04927e-10 | 1.000000 | 4.07585e-10 | 1.000000 |
| rad55         | 2.94014e-10 | 1.000000 | 3.92998e-10 | 1.000000 |
| rad58         | 2.53626e-10 | 1.000000 | 3.39014e-10 | 1.000000 |
| rad11         | 2.24416e-10 | 1.000000 | 2.99969e-10 | 1.000000 |
| rad10         | 1.66901e-10 | 1.000000 | 2.23091e-10 | 1.000000 |
| rad43         | 1.43892e-10 | 1.000000 | 1.92335e-10 | 1.000000 |
| rad3          | 6.34068e-11 | 1.000000 | 8.47537e-11 | 1.000000 |
| rad34         | 6.21555e-11 | 1.000000 | 8.30812e-11 | 1.000000 |
| rad4          | 4.13621e-11 | 1.000000 | 5.52873e-11 | 1.000000 |
| rad65         | 3.00964e-11 | 1.000000 | 4.02289e-11 | 1.000000 |
| rad20         | 2.64511e-11 | 1.000000 | 3.53563e-11 | 1.000000 |
| rad21         | 2.51492e-11 | 1.000000 | 3.36160e-11 | 1.000000 |
| rad13         | 1.35090e-11 | 1.000000 | 1.80570e-11 | 1.000000 |
| rad71         | 9.37883e-12 | 1.000000 | 1.25364e-11 | 1.000000 |
| rad73         | 6.75223e-12 | 1.000000 | 9.02548e-12 | 1.000000 |
| rad9          | 4.77310e-12 | 1.000000 | 6.38004e-12 | 1.000000 |
| rad53         | 3.51671e-12 | 1.000000 | 4.70067e-12 | 1.000000 |
| rad22         | 2.56071e-12 | 1.000000 | 3.42281e-12 | 1.000000 |
| rad42         | 1.92009e-12 | 1.000000 | 2.56652e-12 | 1.000000 |
| rad64         | 1.69450e-12 | 1.000000 | 2.26499e-12 | 1.000000 |
| rad56         | 6.84079e-13 | 1.000000 | 9.14385e-13 | 1.000000 |
| rad41         | 4.41609e-13 | 1.000000 | 5.90283e-13 | 1.000000 |
| rad72         | 3.13757e-13 | 1.000000 | 4.19388e-13 | 1.000000 |
| rad24         | 2.87058e-13 | 1.000000 | 3.83701e-13 | 1.000000 |
| rad33         | 2.49094e-13 | 1.000000 | 3.32956e-13 | 1.000000 |
| PAH8+H        | 1.71279e-13 | 1.000000 | 2.28942e-13 | 1.000000 |
| rad68syn      | 1.33363e-13 | 1.000000 | 1.78261e-13 | 1.000000 |
| rad68anti     | 9.00920e-14 | 1.000000 | 1.20423e-13 | 1.000000 |
| rad18         | 7.68994e-14 | 1.000000 | 1.02789e-13 | 1.000000 |
| rad61         | 7.34130e-14 | 1.000000 | 9.81286e-14 | 1.000000 |
| rad40syn      | 2.83236e-14 | 1.000000 | 3.78591e-14 | 1.000000 |
| rad25         | 2.14216e-14 | 1.000000 | 2.86335e-14 | 1.000000 |
| rad40anti     | 1.87729e-14 | 1.000000 | 2.50931e-14 | 1.000000 |
| rad27         | 1.85417e-14 | 1.000000 | 2.47841e-14 | 1.000000 |
| rad14         | 1.57268e-14 | 1.000000 | 2.10215e-14 | 1.000000 |
| rad15         | 1.39303e-15 | 1.000000 | 1.86201e-15 | 1.000000 |
| rad12         | 7.13969e-16 | 1.000000 | 9.54339e-16 | 1.000000 |
| rad31         | 5.78315e-16 | 1.000000 | 7.73014e-16 | 1.000000 |
| rad5          | 9.92977e-21 | 1.000000 | 1.32728e-20 | 1.000000 |
| rad47         | 7.11916e-21 | 1.000000 | 9.51594e-21 | 1.000000 |
| rad8          | 8.26467e-22 | 1.000000 | 1.10471e-21 | 1.000000 |

0.100000000E-02 Pa, 900.000000 K

=====

| Rate constant | True (fraction)     | Effective (fraction) |             |          |
|---------------|---------------------|----------------------|-------------|----------|
| Total         | 9.21769e-16 (1.00 ) | 5.91948e-16 (1.00 )  |             |          |
| species       | PYtrue              | Cumul                | PYeffective | Cumul    |
| Indene+H      | 0.637600            | 0.637600             | 0.992858    | 0.992858 |
| Benzyl+C2H2   | 0.357813            | 0.995413             | 0.000000    | 0.992858 |
| PhCCH+CH3     | 0.00168529          | 0.997098             | 0.00262429  | 0.995482 |
| PhCHCCH2+H    | 0.000988059         | 0.998086             | 0.00153858  | 0.997021 |

|               |             |          |             |          |
|---------------|-------------|----------|-------------|----------|
| Ph+Allene     | 0.000956825 | 0.999043 | 0.00148995  | 0.998511 |
| PhCH2CCH+H    | 0.000305642 | 0.999349 | 0.000475940 | 0.998987 |
| Ph+MeAc       | 0.000221706 | 0.999571 | 0.000345235 | 0.999332 |
| PhCCCH3+H     | 0.000192574 | 0.999763 | 0.000299872 | 0.999632 |
| PAH7+H        | 8.18815e-05 | 0.999845 | 0.000127504 | 0.999759 |
| rad30         | 6.20698e-05 | 0.999907 | 9.66537e-05 | 0.999856 |
| PAH9+H        | 3.81841e-05 | 0.999945 | 5.94594e-05 | 0.999915 |
| rad39         | 1.95090e-05 | 0.999965 | 3.03790e-05 | 0.999946 |
| rad38         | 1.36551e-05 | 0.999978 | 2.12635e-05 | 0.999967 |
| rad35         | 9.01944e-06 | 0.999987 | 1.40449e-05 | 0.999981 |
| rad19anti     | 5.95513e-06 | 0.999993 | 9.27319e-06 | 0.999990 |
| rad46         | 1.77489e-06 | 0.999995 | 2.76382e-06 | 0.999993 |
| PAH3+H        | 1.66002e-06 | 0.999997 | 2.58495e-06 | 0.999996 |
| rad60syn      | 7.95281e-07 | 0.999998 | 1.23839e-06 | 0.999997 |
| rad6          | 7.73880e-07 | 0.999998 | 1.20507e-06 | 0.999998 |
| rad60anti     | 4.32685e-07 | 0.999999 | 6.73768e-07 | 0.999999 |
| rad59         | 2.41976e-07 | 0.999999 | 3.76801e-07 | 0.999999 |
| rad37         | 1.83212e-07 | 0.999999 | 2.85294e-07 | 1.000000 |
| rad19syn      | 1.72532e-07 | 0.999999 | 2.68663e-07 | 1.000000 |
| rad50         | 1.19959e-07 | 1.000000 | 1.86798e-07 | 1.000000 |
| rad54         | 4.18735e-08 | 1.000000 | 6.52045e-08 | 1.000000 |
| PhcycC3H3_A+H | 1.64018e-08 | 1.000000 | 2.55405e-08 | 1.000000 |
| rad23         | 1.01834e-08 | 1.000000 | 1.58574e-08 | 1.000000 |
| rad67         | 7.69159e-09 | 1.000000 | 1.19772e-08 | 1.000000 |
| PAH10+CH3     | 5.49799e-09 | 1.000000 | 8.56135e-09 | 1.000000 |
| rad51         | 5.27630e-09 | 1.000000 | 8.21615e-09 | 1.000000 |
| rad52         | 3.91706e-09 | 1.000000 | 6.09956e-09 | 1.000000 |
| rad70         | 3.82749e-09 | 1.000000 | 5.96008e-09 | 1.000000 |
| PAH1+H        | 3.11804e-09 | 1.000000 | 4.85535e-09 | 1.000000 |
| rad45         | 2.54752e-09 | 1.000000 | 3.96695e-09 | 1.000000 |
| rad58         | 1.60287e-09 | 1.000000 | 2.49595e-09 | 1.000000 |
| rad55         | 1.47823e-09 | 1.000000 | 2.30187e-09 | 1.000000 |
| rad2          | 1.29934e-09 | 1.000000 | 2.02330e-09 | 1.000000 |
| rad62         | 1.10218e-09 | 1.000000 | 1.71629e-09 | 1.000000 |
| rad28         | 6.67385e-10 | 1.000000 | 1.03924e-09 | 1.000000 |
| rad43         | 3.95557e-10 | 1.000000 | 6.15953e-10 | 1.000000 |
| rad34         | 3.84902e-10 | 1.000000 | 5.99361e-10 | 1.000000 |
| rad36         | 2.20130e-10 | 1.000000 | 3.42783e-10 | 1.000000 |
| rad1          | 2.15541e-10 | 1.000000 | 3.35636e-10 | 1.000000 |
| rad7          | 1.75497e-10 | 1.000000 | 2.73280e-10 | 1.000000 |
| rad65         | 1.66814e-10 | 1.000000 | 2.59760e-10 | 1.000000 |
| rad26         | 1.13613e-10 | 1.000000 | 1.76916e-10 | 1.000000 |
| rad11         | 8.15140e-11 | 1.000000 | 1.26932e-10 | 1.000000 |
| rad20         | 6.04507e-11 | 1.000000 | 9.41326e-11 | 1.000000 |
| rad21         | 5.11680e-11 | 1.000000 | 7.96778e-11 | 1.000000 |
| rad10         | 4.27856e-11 | 1.000000 | 6.66248e-11 | 1.000000 |
| rad53         | 2.97840e-11 | 1.000000 | 4.63791e-11 | 1.000000 |
| rad9          | 1.72282e-11 | 1.000000 | 2.68273e-11 | 1.000000 |
| rad3          | 1.60153e-11 | 1.000000 | 2.49387e-11 | 1.000000 |
| rad64         | 1.26577e-11 | 1.000000 | 1.97102e-11 | 1.000000 |
| rad4          | 1.10741e-11 | 1.000000 | 1.72443e-11 | 1.000000 |
| rad13         | 1.09909e-11 | 1.000000 | 1.71148e-11 | 1.000000 |
| rad42         | 1.04568e-11 | 1.000000 | 1.62831e-11 | 1.000000 |
| rad71         | 9.93495e-12 | 1.000000 | 1.54705e-11 | 1.000000 |
| rad73         | 7.79503e-12 | 1.000000 | 1.21383e-11 | 1.000000 |
| rad56         | 7.68746e-12 | 1.000000 | 1.19708e-11 | 1.000000 |
| rad41         | 1.72684e-12 | 1.000000 | 2.68900e-12 | 1.000000 |
| rad68syn      | 1.26692e-12 | 1.000000 | 1.97282e-12 | 1.000000 |
| rad22         | 1.07064e-12 | 1.000000 | 1.66718e-12 | 1.000000 |
| rad68anti     | 8.58001e-13 | 1.000000 | 1.33606e-12 | 1.000000 |
| rad24         | 5.74734e-13 | 1.000000 | 8.94963e-13 | 1.000000 |
| PAH8+H        | 5.35234e-13 | 1.000000 | 8.33454e-13 | 1.000000 |
| rad33         | 3.82726e-13 | 1.000000 | 5.95972e-13 | 1.000000 |
| rad72         | 3.25660e-13 | 1.000000 | 5.07110e-13 | 1.000000 |
| rad18         | 2.23125e-13 | 1.000000 | 3.47445e-13 | 1.000000 |
| rad61         | 1.80005e-13 | 1.000000 | 2.80300e-13 | 1.000000 |
| rad40syn      | 1.37331e-13 | 1.000000 | 2.13849e-13 | 1.000000 |
| rad40anti     | 6.37271e-14 | 1.000000 | 9.92345e-14 | 1.000000 |
| rad25         | 2.24779e-14 | 1.000000 | 3.50022e-14 | 1.000000 |
| rad27         | 1.44242e-14 | 1.000000 | 2.24610e-14 | 1.000000 |
| rad14         | 1.09740e-14 | 1.000000 | 1.70884e-14 | 1.000000 |
| rad15         | 4.04169e-15 | 1.000000 | 6.29363e-15 | 1.000000 |
| rad12         | 3.93840e-15 | 1.000000 | 6.13279e-15 | 1.000000 |
| rad31         | 3.17830e-16 | 1.000000 | 4.94918e-16 | 1.000000 |
| rad8          | 5.05674e-19 | 1.000000 | 7.87426e-19 | 1.000000 |
| rad47         | 3.50641e-20 | 1.000000 | 5.46011e-20 | 1.000000 |
| rad5          | 1.78116e-20 | 1.000000 | 2.77358e-20 | 1.000000 |

0.100000000E-02 Pa, 1000.00000 K

=====



| Rate constant | True (fraction) |          | Effective (fraction) |          |
|---------------|-----------------|----------|----------------------|----------|
| -----         | -----           |          | -----                |          |
| Total         | 2.23691e-15     | (1.00 )  | 1.20781e-15          | (1.00 )  |
| species       | PYtrue          | Cumul    | PYeffective          | Cumul    |
| -----         | -----           | -----    | -----                | -----    |
| Indene+H      | 0.533143        | 0.533143 | 0.987405             | 0.987405 |
| Benzyl+C2H2   | 0.460056        | 0.993199 | 0.00000              | 0.987405 |
| PhCCH+CH3     | 0.00197843      | 0.995177 | 0.00366414           | 0.991069 |
| Ph+Allene     | 0.00184724      | 0.997025 | 0.00342117           | 0.994490 |
| PhCHCCH2+H    | 0.00145010      | 0.998475 | 0.00268566           | 0.997176 |
| PhCH2CCH+H    | 0.000695142     | 0.999170 | 0.00128743           | 0.998463 |
| Ph+MeAc       | 0.000262362     | 0.999432 | 0.000485906          | 0.998949 |
| PhCCCH3+H     | 0.000178024     | 0.999610 | 0.000329709          | 0.999279 |
| PAH7+H        | 0.000130564     | 0.999741 | 0.000241810          | 0.999521 |
| rad30         | 9.13367e-05     | 0.999832 | 0.000169160          | 0.999690 |
| PAH9+H        | 6.89575e-05     | 0.999901 | 0.000127712          | 0.999818 |
| rad39         | 3.03502e-05     | 0.999932 | 5.62099e-05          | 0.999874 |
| rad38         | 2.54984e-05     | 0.999957 | 4.72242e-05          | 0.999921 |
| rad35         | 1.54299e-05     | 0.999972 | 2.85768e-05          | 0.999950 |
| rad19anti     | 1.36963e-05     | 0.999986 | 2.53662e-05          | 0.999975 |
| PAH3+H        | 4.67731e-06     | 0.999991 | 8.66259e-06          | 0.999984 |
| rad46         | 3.90013e-06     | 0.999995 | 7.22322e-06          | 0.999991 |
| rad60syn      | 1.65647e-06     | 0.999996 | 3.06785e-06          | 0.999994 |
| rad60anti     | 9.23125e-07     | 0.999997 | 1.70967e-06          | 0.999996 |
| rad59         | 6.45415e-07     | 0.999998 | 1.19534e-06          | 0.999997 |
| rad19syn      | 4.72656e-07     | 0.999998 | 8.75380e-07          | 0.999998 |
| rad50         | 4.02764e-07     | 0.999999 | 7.45937e-07          | 0.999999 |
| rad37         | 2.45631e-07     | 0.999999 | 4.54920e-07          | 0.999999 |
| rad6          | 1.61701e-07     | 0.999999 | 2.99478e-07          | 0.999999 |
| rad54         | 1.26767e-07     | 0.999999 | 2.34778e-07          | 1.000000 |
| PhcycC3H3_A+H | 6.09445e-08     | 0.999999 | 1.12872e-07          | 1.000000 |
| rad67         | 3.29377e-08     | 0.999999 | 6.10021e-08          | 1.000000 |
| rad51         | 2.40129e-08     | 0.999999 | 4.44729e-08          | 1.000000 |
| rad52         | 1.56109e-08     | 0.999999 | 2.89121e-08          | 1.000000 |
| PAH10+CH3     | 1.49691e-08     | 0.999999 | 2.77234e-08          | 1.000000 |
| rad70         | 1.36644e-08     | 1.000000 | 2.53071e-08          | 1.000000 |
| PAH1+H        | 1.19266e-08     | 1.000000 | 2.20887e-08          | 1.000000 |
| rad58         | 7.00677e-09     | 1.000000 | 1.29769e-08          | 1.000000 |
| rad55         | 5.08721e-09     | 1.000000 | 9.42174e-09          | 1.000000 |
| rad23         | 4.39352e-09     | 1.000000 | 8.13699e-09          | 1.000000 |
| rad62         | 2.86012e-09     | 1.000000 | 5.29707e-09          | 1.000000 |
| rad34         | 1.59486e-09     | 1.000000 | 2.95375e-09          | 1.000000 |
| rad45         | 1.23103e-09     | 1.000000 | 2.27993e-09          | 1.000000 |
| rad43         | 8.01735e-10     | 1.000000 | 1.48485e-09          | 1.000000 |
| rad65         | 7.66038e-10     | 1.000000 | 1.41874e-09          | 1.000000 |
| rad2          | 2.91904e-10     | 1.000000 | 5.40620e-10          | 1.000000 |
| rad28         | 1.61630e-10     | 1.000000 | 2.99346e-10          | 1.000000 |
| rad53         | 1.57217e-10     | 1.000000 | 2.91174e-10          | 1.000000 |
| rad36         | 1.10333e-10     | 1.000000 | 2.04341e-10          | 1.000000 |
| rad20         | 8.81805e-11     | 1.000000 | 1.63314e-10          | 1.000000 |
| rad21         | 6.41705e-11     | 1.000000 | 1.18847e-10          | 1.000000 |
| rad7          | 6.35707e-11     | 1.000000 | 1.17736e-10          | 1.000000 |
| rad64         | 6.34152e-11     | 1.000000 | 1.17448e-10          | 1.000000 |
| rad1          | 5.50798e-11     | 1.000000 | 1.02010e-10          | 1.000000 |
| rad56         | 5.17603e-11     | 1.000000 | 9.58625e-11          | 1.000000 |
| rad11         | 4.95231e-11     | 1.000000 | 9.17191e-11          | 1.000000 |
| rad42         | 3.80431e-11     | 1.000000 | 7.04575e-11          | 1.000000 |
| rad26         | 2.94935e-11     | 1.000000 | 5.46233e-11          | 1.000000 |
| rad9          | 2.47348e-11     | 1.000000 | 4.58100e-11          | 1.000000 |
| rad10         | 1.62253e-11     | 1.000000 | 3.00501e-11          | 1.000000 |
| rad73         | 1.61634e-11     | 1.000000 | 2.99354e-11          | 1.000000 |
| rad13         | 1.45016e-11     | 1.000000 | 2.68576e-11          | 1.000000 |
| rad71         | 1.18819e-11     | 1.000000 | 2.20059e-11          | 1.000000 |
| rad68syn      | 8.80427e-12     | 1.000000 | 1.63059e-11          | 1.000000 |
| rad68anti     | 5.92786e-12     | 1.000000 | 1.09787e-11          | 1.000000 |
| rad41         | 5.16137e-12     | 1.000000 | 9.55910e-12          | 1.000000 |
| rad3          | 4.76434e-12     | 1.000000 | 8.82378e-12          | 1.000000 |
| PAH8+H        | 4.02797e-12     | 1.000000 | 7.45998e-12          | 1.000000 |
| rad4          | 3.47075e-12     | 1.000000 | 6.42799e-12          | 1.000000 |
| rad40syn      | 1.04183e-12     | 1.000000 | 1.92951e-12          | 1.000000 |
| rad61         | 8.38956e-13     | 1.000000 | 1.55378e-12          | 1.000000 |
| rad18         | 7.83096e-13     | 1.000000 | 1.45033e-12          | 1.000000 |
| rad24         | 5.90769e-13     | 1.000000 | 1.09413e-12          | 1.000000 |
| rad22         | 5.25964e-13     | 1.000000 | 9.74110e-13          | 1.000000 |
| rad33         | 4.74449e-13     | 1.000000 | 8.78701e-13          | 1.000000 |
| rad40anti     | 4.49150e-13     | 1.000000 | 8.31847e-13          | 1.000000 |
| rad72         | 2.27468e-13     | 1.000000 | 4.21282e-13          | 1.000000 |
| rad25         | 3.15221e-14     | 1.000000 | 5.83803e-14          | 1.000000 |
| rad27         | 1.13805e-14     | 1.000000 | 2.10772e-14          | 1.000000 |

|       |             |          |             |          |
|-------|-------------|----------|-------------|----------|
| rad14 | 9.38286e-15 | 1.000000 | 1.73775e-14 | 1.000000 |
| rad12 | 8.61622e-15 | 1.000000 | 1.59576e-14 | 1.000000 |
| rad15 | 5.95826e-15 | 1.000000 | 1.10350e-14 | 1.000000 |
| rad31 | 1.86010e-16 | 1.000000 | 3.44498e-16 | 1.000000 |
| rad8  | 3.09658e-17 | 1.000000 | 5.73501e-17 | 1.000000 |
| rad47 | 1.60721e-19 | 1.000000 | 2.97662e-19 | 1.000000 |
| rad5  | 3.71654e-20 | 1.000000 | 6.88320e-20 | 1.000000 |

0.1000000000E-02 Pa, 1100.00000 K

| Rate constant | True (fraction)     | Effective (fraction) |
|---------------|---------------------|----------------------|
| Total         | 4.69847e-15 (1.00 ) | 2.11075e-15 (1.00 )  |

| species       | PYtrue      | Cumul    | PYeffective | Cumul    |
|---------------|-------------|----------|-------------|----------|
| Benzyl+C2H2   | 0.550759    | 0.550759 | 0.000000    | 0.000000 |
| Indene+H      | 0.439889    | 0.990648 | 0.979181    | 0.979181 |
| Ph+Allene     | 0.00299528  | 0.993643 | 0.00666743  | 0.985848 |
| PhCCH+CH3     | 0.00208759  | 0.995731 | 0.00464692  | 0.990495 |
| PhCHCCH2+H    | 0.00194544  | 0.997676 | 0.00433050  | 0.994826 |
| PhCH2CCH+H    | 0.00132191  | 0.998998 | 0.00294254  | 0.997768 |
| Ph+MeAc       | 0.000277389 | 0.999276 | 0.000617462 | 0.998386 |
| PAH7+H        | 0.000179385 | 0.999455 | 0.000399307 | 0.998785 |
| PhCCCH3+H     | 0.000149166 | 0.999604 | 0.000332040 | 0.999117 |
| rad30         | 0.000123015 | 0.999727 | 0.000273827 | 0.999391 |
| PAH9+H        | 0.000111698 | 0.999839 | 0.000248636 | 0.999640 |
| rad38         | 4.24986e-05 | 0.999881 | 9.46007e-05 | 0.999734 |
| rad39         | 4.04279e-05 | 0.999922 | 8.99915e-05 | 0.999824 |
| rad19anti     | 2.71780e-05 | 0.999949 | 6.04975e-05 | 0.999885 |
| rad35         | 2.39106e-05 | 0.999973 | 5.32243e-05 | 0.999938 |
| PAH3+H        | 1.09195e-05 | 0.999984 | 2.43065e-05 | 0.999962 |
| rad46         | 7.44887e-06 | 0.999991 | 1.65810e-05 | 0.999979 |
| rad60syn      | 2.99524e-06 | 0.999994 | 6.66734e-06 | 0.999986 |
| rad60anti     | 1.70291e-06 | 0.999996 | 3.79064e-06 | 0.999989 |
| rad59         | 1.43231e-06 | 0.999997 | 3.18828e-06 | 0.999993 |
| rad50         | 1.10352e-06 | 0.999998 | 2.45642e-06 | 0.999995 |
| rad19syn      | 1.02396e-06 | 1.000000 | 2.27932e-06 | 0.999997 |
| rad37         | 3.04613e-07 | 1.000000 | 6.78061e-07 | 0.999998 |
| rad54         | 2.97942e-07 | 1.000000 | 6.63211e-07 | 0.999999 |
| PhcycC3H3_A+H | 1.70470e-07 | 1.000000 | 3.79461e-07 | 0.999999 |
| rad67         | 1.11022e-07 | 1.000000 | 2.47133e-07 | 0.999999 |
| rad51         | 8.67185e-08 | 1.000000 | 1.93033e-07 | 0.999999 |
| rad52         | 4.95173e-08 | 1.000000 | 1.10224e-07 | 1.000000 |
| rad6          | 3.95560e-08 | 1.000000 | 8.80506e-08 | 1.000000 |
| rad70         | 3.72392e-08 | 1.000000 | 8.28934e-08 | 1.000000 |
| PAH10+CH3     | 3.55791e-08 | 1.000000 | 7.91982e-08 | 1.000000 |
| PAH1+H        | 3.40454e-08 | 1.000000 | 7.57842e-08 | 1.000000 |
| rad58         | 2.33986e-08 | 1.000000 | 5.20846e-08 | 1.000000 |
| rad55         | 1.32727e-08 | 1.000000 | 2.95448e-08 | 1.000000 |
| rad62         | 5.84590e-09 | 1.000000 | 1.30128e-08 | 1.000000 |
| rad34         | 4.93282e-09 | 1.000000 | 1.09803e-08 | 1.000000 |
| rad65         | 2.75601e-09 | 1.000000 | 6.13480e-09 | 1.000000 |
| rad23         | 2.05343e-09 | 1.000000 | 4.57089e-09 | 1.000000 |
| rad43         | 1.31347e-09 | 1.000000 | 2.92376e-09 | 1.000000 |
| rad45         | 6.20131e-10 | 1.000000 | 1.38039e-09 | 1.000000 |
| rad53         | 5.86811e-10 | 1.000000 | 1.30623e-09 | 1.000000 |
| rad56         | 2.36338e-10 | 1.000000 | 5.26082e-10 | 1.000000 |
| rad64         | 2.26743e-10 | 1.000000 | 5.04725e-10 | 1.000000 |
| rad42         | 1.03256e-10 | 1.000000 | 2.29846e-10 | 1.000000 |
| rad73         | 8.98468e-11 | 1.000000 | 1.99997e-10 | 1.000000 |
| rad20         | 7.93883e-11 | 1.000000 | 1.76716e-10 | 1.000000 |
| rad2          | 7.50041e-11 | 1.000000 | 1.66957e-10 | 1.000000 |
| rad36         | 5.67618e-11 | 1.000000 | 1.26350e-10 | 1.000000 |
| rad71         | 5.44373e-11 | 1.000000 | 1.21176e-10 | 1.000000 |
| rad11         | 5.41600e-11 | 1.000000 | 1.20559e-10 | 1.000000 |
| rad21         | 5.10824e-11 | 1.000000 | 1.13708e-10 | 1.000000 |
| rad28         | 4.56062e-11 | 1.000000 | 1.01518e-10 | 1.000000 |
| rad68syn      | 4.26335e-11 | 1.000000 | 9.49010e-11 | 1.000000 |
| rad7          | 3.99244e-11 | 1.000000 | 8.88706e-11 | 1.000000 |
| rad68anti     | 2.85419e-11 | 1.000000 | 6.35335e-11 | 1.000000 |
| PAH8+H        | 2.67659e-11 | 1.000000 | 5.95803e-11 | 1.000000 |
| rad9          | 2.39765e-11 | 1.000000 | 5.33712e-11 | 1.000000 |
| rad13         | 1.71876e-11 | 1.000000 | 3.82592e-11 | 1.000000 |
| rad1          | 1.54785e-11 | 1.000000 | 3.44548e-11 | 1.000000 |
| rad41         | 1.22127e-11 | 1.000000 | 2.71852e-11 | 1.000000 |
| rad10         | 9.07595e-12 | 1.000000 | 2.02028e-11 | 1.000000 |
| rad26         | 9.04252e-12 | 1.000000 | 2.01284e-11 | 1.000000 |
| rad40syn      | 6.10110e-12 | 1.000000 | 1.35809e-11 | 1.000000 |
| rad61         | 4.18705e-12 | 1.000000 | 9.32027e-12 | 1.000000 |

|           |             |         |             |          |
|-----------|-------------|---------|-------------|----------|
| rad40anti | 2.75568e-12 | 1.00000 | 6.13407e-12 | 1.000000 |
| rad18     | 2.45322e-12 | 1.00000 | 5.46081e-12 | 1.000000 |
| rad3      | 1.60450e-12 | 1.00000 | 3.57157e-12 | 1.000000 |
| rad4      | 1.20501e-12 | 1.00000 | 2.68233e-12 | 1.000000 |
| rad24     | 4.56170e-13 | 1.00000 | 1.01542e-12 | 1.000000 |
| rad33     | 3.95326e-13 | 1.00000 | 8.79986e-13 | 1.000000 |
| rad72     | 3.50737e-13 | 1.00000 | 7.80733e-13 | 1.000000 |
| rad22     | 3.03114e-13 | 1.00000 | 6.74724e-13 | 1.000000 |
| rad25     | 3.94698e-14 | 1.00000 | 8.78588e-14 | 1.000000 |
| rad12     | 1.26342e-14 | 1.00000 | 2.81234e-14 | 1.000000 |
| rad14     | 7.53833e-15 | 1.00000 | 1.67801e-14 | 1.000000 |
| rad27     | 7.07292e-15 | 1.00000 | 1.57442e-14 | 1.000000 |
| rad15     | 6.78931e-15 | 1.00000 | 1.51128e-14 | 1.000000 |
| rad8      | 3.02695e-16 | 1.00000 | 6.73791e-16 | 1.000000 |
| rad31     | 1.11584e-16 | 1.00000 | 2.48384e-16 | 1.000000 |
| rad47     | 5.98422e-19 | 1.00000 | 1.33207e-18 | 1.000000 |
| rad5      | 9.30939e-20 | 1.00000 | 2.07225e-19 | 1.000000 |

0.100000000E-02 Pa, 1200.00000 K

| Rate constant | True (fraction)     | Effective (fraction) |
|---------------|---------------------|----------------------|
| Total         | 8.84330e-15 (1.00 ) | 3.30079e-15 (1.00 )  |

| species       | PYtrue      | Cumul    | PYeffective | Cumul    |
|---------------|-------------|----------|-------------|----------|
| Benzyl+C2H2   | 0.626747    | 0.626747 | 0.00000     | 0.00000  |
| Indene+H      | 0.361139    | 0.987886 | 0.967544    | 0.967544 |
| Ph+Allene     | 0.00426331  | 0.992149 | 0.0114220   | 0.978966 |
| PhCHCCH2+H    | 0.00242727  | 0.994577 | 0.00650302  | 0.985469 |
| PhCH2CCH+H    | 0.00220912  | 0.996786 | 0.00591855  | 0.991388 |
| PhCCH+CH3     | 0.00203529  | 0.998821 | 0.00545284  | 0.996840 |
| Ph+MeAc       | 0.000271659 | 0.999093 | 0.000727813 | 0.997568 |
| PAH7+H        | 0.000220958 | 0.999314 | 0.000591978 | 0.998160 |
| PAH9+H        | 0.000166477 | 0.999480 | 0.000446017 | 0.998606 |
| rad30         | 0.000155353 | 0.999635 | 0.000416215 | 0.999022 |
| PhCCCH3+H     | 0.000117028 | 0.999752 | 0.000313536 | 0.999336 |
| rad38         | 6.49371e-05 | 0.999817 | 0.000173976 | 0.999510 |
| rad19anti     | 4.80909e-05 | 0.999865 | 0.000128843 | 0.999639 |
| rad39         | 4.80572e-05 | 0.999914 | 0.000128752 | 0.999768 |
| rad35         | 3.43900e-05 | 0.999948 | 9.21358e-05 | 0.999860 |
| PAH3+H        | 2.21253e-05 | 0.999970 | 5.92770e-05 | 0.999919 |
| rad46         | 1.27764e-05 | 0.999983 | 3.42298e-05 | 0.999953 |
| rad60syn      | 4.87439e-06 | 0.999988 | 1.30592e-05 | 0.999966 |
| rad60anti     | 2.81860e-06 | 0.999991 | 7.55145e-06 | 0.999974 |
| rad59         | 2.76936e-06 | 0.999993 | 7.41953e-06 | 0.999981 |
| rad50         | 2.57987e-06 | 0.999996 | 6.91184e-06 | 0.999988 |
| rad19syn      | 1.86136e-06 | 0.999998 | 4.98686e-06 | 0.999993 |
| rad54         | 5.79323e-07 | 0.999998 | 1.55209e-06 | 0.999995 |
| PhcycC3H3_A+H | 3.85542e-07 | 0.999999 | 1.03292e-06 | 0.999996 |
| rad37         | 3.71911e-07 | 0.999999 | 9.96403e-07 | 0.999997 |
| rad67         | 3.10058e-07 | 0.999999 | 8.30690e-07 | 0.999998 |
| rad51         | 2.56453e-07 | 1.000000 | 6.87075e-07 | 0.999998 |
| rad52         | 1.30827e-07 | 1.000000 | 3.50505e-07 | 0.999999 |
| rad70         | 8.31663e-08 | 1.000000 | 2.22815e-07 | 0.999999 |
| PAH10+CH3     | 7.86287e-08 | 1.000000 | 2.10658e-07 | 0.999999 |
| PAH1+H        | 7.84259e-08 | 1.000000 | 2.10114e-07 | 0.999999 |
| rad58         | 6.38231e-08 | 1.000000 | 1.70991e-07 | 0.999999 |
| rad55         | 2.81615e-08 | 1.000000 | 7.54488e-08 | 0.999999 |
| rad6          | 1.24891e-08 | 1.000000 | 3.34601e-08 | 0.999999 |
| rad34         | 1.22937e-08 | 1.000000 | 3.29367e-08 | 1.000000 |
| rad62         | 1.00322e-08 | 1.000000 | 2.68777e-08 | 1.000000 |
| rad65         | 8.08075e-09 | 1.000000 | 2.16495e-08 | 1.000000 |
| rad43         | 1.86217e-09 | 1.000000 | 4.98903e-09 | 1.000000 |
| rad53         | 1.69057e-09 | 1.000000 | 4.52928e-09 | 1.000000 |
| rad23         | 1.01457e-09 | 1.000000 | 2.71818e-09 | 1.000000 |
| rad56         | 8.06536e-10 | 1.000000 | 2.16083e-09 | 1.000000 |
| rad64         | 6.30284e-10 | 1.000000 | 1.68862e-09 | 1.000000 |
| rad73         | 4.69254e-10 | 1.000000 | 1.25720e-09 | 1.000000 |
| rad45         | 3.21614e-10 | 1.000000 | 8.61650e-10 | 1.000000 |
| rad71         | 3.21606e-10 | 1.000000 | 8.61629e-10 | 1.000000 |
| rad42         | 2.25981e-10 | 1.000000 | 6.05437e-10 | 1.000000 |
| rad68syn      | 1.55942e-10 | 1.000000 | 4.17791e-10 | 1.000000 |
| PAH8+H        | 1.30658e-10 | 1.000000 | 3.50051e-10 | 1.000000 |
| rad68anti     | 1.03882e-10 | 1.000000 | 2.78315e-10 | 1.000000 |
| rad11         | 6.61065e-11 | 1.000000 | 1.77109e-10 | 1.000000 |
| rad20         | 5.25327e-11 | 1.000000 | 1.40743e-10 | 1.000000 |
| rad7          | 4.31409e-11 | 1.000000 | 1.15581e-10 | 1.000000 |
| rad21         | 3.17172e-11 | 1.000000 | 8.49749e-11 | 1.000000 |
| rad36         | 2.98942e-11 | 1.000000 | 8.00910e-11 | 1.000000 |

|           |             |         |             |          |
|-----------|-------------|---------|-------------|----------|
| rad40syn  | 2.64856e-11 | 1.00000 | 7.09587e-11 | 1.000000 |
| rad41     | 2.43391e-11 | 1.00000 | 6.52080e-11 | 1.000000 |
| rad2      | 2.11559e-11 | 1.00000 | 5.66797e-11 | 1.000000 |
| rad9      | 2.07727e-11 | 1.00000 | 5.56532e-11 | 1.000000 |
| rad61     | 1.76366e-11 | 1.00000 | 4.72511e-11 | 1.000000 |
| rad28     | 1.61229e-11 | 1.00000 | 4.31956e-11 | 1.000000 |
| rad13     | 1.39191e-11 | 1.00000 | 3.72912e-11 | 1.000000 |
| rad40anti | 1.25585e-11 | 1.00000 | 3.36460e-11 | 1.000000 |
| rad10     | 5.91527e-12 | 1.00000 | 1.58479e-11 | 1.000000 |
| rad18     | 5.21276e-12 | 1.00000 | 1.39657e-11 | 1.000000 |
| rad1      | 4.59229e-12 | 1.00000 | 1.23034e-11 | 1.000000 |
| rad26     | 3.40138e-12 | 1.00000 | 9.11279e-12 | 1.000000 |
| rad72     | 2.24297e-12 | 1.00000 | 6.00924e-12 | 1.000000 |
| rad3      | 5.83741e-13 | 1.00000 | 1.56393e-12 | 1.000000 |
| rad4      | 4.46351e-13 | 1.00000 | 1.19584e-12 | 1.000000 |
| rad24     | 3.33437e-13 | 1.00000 | 8.93325e-13 | 1.000000 |
| rad33     | 2.52074e-13 | 1.00000 | 6.75343e-13 | 1.000000 |
| rad22     | 2.47810e-13 | 1.00000 | 6.63920e-13 | 1.000000 |
| rad25     | 3.68564e-14 | 1.00000 | 9.87436e-14 | 1.000000 |
| rad12     | 1.57454e-14 | 1.00000 | 4.21844e-14 | 1.000000 |
| rad15     | 9.05709e-15 | 1.00000 | 2.42653e-14 | 1.000000 |
| rad14     | 4.94527e-15 | 1.00000 | 1.32491e-14 | 1.000000 |
| rad27     | 3.34253e-15 | 1.00000 | 8.95512e-15 | 1.000000 |
| rad8      | 9.89268e-16 | 1.00000 | 2.65039e-15 | 1.000000 |
| rad31     | 6.76618e-17 | 1.00000 | 1.81276e-16 | 1.000000 |
| rad47     | 1.81366e-18 | 1.00000 | 4.85906e-18 | 1.000000 |
| rad5      | 2.66841e-19 | 1.00000 | 7.14907e-19 | 1.000000 |

0.100000000E-02 Pa, 1300.00000 K

| Rate constant | True (fraction)     | Effective (fraction) |
|---------------|---------------------|----------------------|
| Total         | 1.52810e-14 (1.00 ) | 4.76644e-15 (1.00 )  |

| species       | PYtrue      | Cumul    | PYeffective | Cumul    |
|---------------|-------------|----------|-------------|----------|
| Benzyl+C2H2   | 0.688080    | 0.688080 | 0.00000     | 0.00000  |
| Indene+H      | 0.296944    | 0.985024 | 0.951986    | 0.951986 |
| Ph+Allene     | 0.00550433  | 0.990528 | 0.0176466   | 0.969633 |
| PhCH2CCH+H    | 0.00336231  | 0.993891 | 0.0107794   | 0.980412 |
| PhCHCCH2+H    | 0.00286585  | 0.996756 | 0.00918775  | 0.989600 |
| PhCCH+CH3     | 0.00187197  | 0.998628 | 0.00600145  | 0.995601 |
| Ph+MeAc       | 0.000252917 | 0.998881 | 0.000810838 | 0.996412 |
| PAH7+H        | 0.000251839 | 0.999133 | 0.000807383 | 0.997219 |
| PAH9+H        | 0.000232566 | 0.999366 | 0.000745593 | 0.997965 |
| rad30         | 0.000187145 | 0.999553 | 0.000599977 | 0.998565 |
| rad38         | 9.27360e-05 | 0.999646 | 0.000297307 | 0.998862 |
| PhCCCH3+H     | 8.81974e-05 | 0.999734 | 0.000282756 | 0.999145 |
| rad19anti     | 7.76866e-05 | 0.999812 | 0.000249059 | 0.999394 |
| rad39         | 5.27139e-05 | 0.999864 | 0.000168998 | 0.999563 |
| rad35         | 4.67240e-05 | 0.999911 | 0.000149795 | 0.999713 |
| PAH3+H        | 4.01931e-05 | 0.999951 | 0.000128857 | 0.999842 |
| rad46         | 2.01482e-05 | 0.999971 | 6.45941e-05 | 0.999906 |
| rad60syn      | 7.32140e-06 | 0.999979 | 2.34720e-05 | 0.999930 |
| rad50         | 5.32223e-06 | 0.999984 | 1.70628e-05 | 0.999947 |
| rad59         | 4.81766e-06 | 0.999989 | 1.54452e-05 | 0.999962 |
| rad60anti     | 4.29551e-06 | 0.999993 | 1.37712e-05 | 0.999976 |
| rad19syn      | 2.96345e-06 | 0.999996 | 9.50065e-06 | 0.999986 |
| rad54         | 9.75310e-07 | 0.999997 | 3.12679e-06 | 0.999989 |
| rad67         | 7.44259e-07 | 0.999998 | 2.38605e-06 | 0.999991 |
| PhcycC3H3_A+H | 7.41843e-07 | 0.999999 | 2.37831e-06 | 0.999994 |
| rad51         | 6.46610e-07 | 0.999999 | 2.07300e-06 | 0.999996 |
| rad37         | 4.66728e-07 | 1.000000 | 1.49630e-06 | 0.999997 |
| rad52         | 2.99178e-07 | 1.000000 | 9.59147e-07 | 0.999998 |
| PAH10+CH3     | 1.66597e-07 | 1.000000 | 5.34100e-07 | 0.999999 |
| rad70         | 1.60097e-07 | 1.000000 | 5.13264e-07 | 0.999999 |
| PAH1+H        | 1.54575e-07 | 1.000000 | 4.95560e-07 | 1.000000 |
| rad58         | 1.48960e-07 | 1.000000 | 4.77556e-07 | 1.000000 |
| rad55         | 5.10750e-08 | 1.000000 | 1.63744e-07 | 1.000000 |
| rad34         | 2.60671e-08 | 1.000000 | 8.35699e-08 | 1.000000 |
| rad65         | 2.01515e-08 | 1.000000 | 6.46046e-08 | 1.000000 |
| rad62         | 1.51327e-08 | 1.000000 | 4.85146e-08 | 1.000000 |
| rad6          | 5.39515e-09 | 1.000000 | 1.72966e-08 | 1.000000 |
| rad53         | 3.99906e-09 | 1.000000 | 1.28208e-08 | 1.000000 |
| rad43         | 2.42227e-09 | 1.000000 | 7.76566e-09 | 1.000000 |
| rad56         | 2.20472e-09 | 1.000000 | 7.06821e-09 | 1.000000 |
| rad73         | 1.94795e-09 | 1.000000 | 6.24502e-09 | 1.000000 |
| rad71         | 1.52559e-09 | 1.000000 | 4.89096e-09 | 1.000000 |
| rad64         | 1.45724e-09 | 1.000000 | 4.67182e-09 | 1.000000 |
| rad23         | 5.27429e-10 | 1.000000 | 1.69091e-09 | 1.000000 |

|           |             |         |             |         |
|-----------|-------------|---------|-------------|---------|
| PAH8+H    | 4.97100e-10 | 1.00000 | 1.59368e-09 | 1.00000 |
| rad68syn  | 4.61124e-10 | 1.00000 | 1.47834e-09 | 1.00000 |
| rad42     | 4.21654e-10 | 1.00000 | 1.35180e-09 | 1.00000 |
| rad68anti | 3.05852e-10 | 1.00000 | 9.80545e-10 | 1.00000 |
| rad45     | 1.71310e-10 | 1.00000 | 5.49211e-10 | 1.00000 |
| rad40syn  | 9.09573e-11 | 1.00000 | 2.91604e-10 | 1.00000 |
| rad61     | 6.30369e-11 | 1.00000 | 2.02093e-10 | 1.00000 |
| rad11     | 6.23337e-11 | 1.00000 | 1.99839e-10 | 1.00000 |
| rad7      | 4.82414e-11 | 1.00000 | 1.54659e-10 | 1.00000 |
| rad40anti | 4.50273e-11 | 1.00000 | 1.44355e-10 | 1.00000 |
| rad41     | 4.39816e-11 | 1.00000 | 1.41003e-10 | 1.00000 |
| rad20     | 3.18171e-11 | 1.00000 | 1.02004e-10 | 1.00000 |
| rad21     | 1.87708e-11 | 1.00000 | 6.01781e-11 | 1.00000 |
| rad9      | 1.70196e-11 | 1.00000 | 5.45641e-11 | 1.00000 |
| rad36     | 1.61427e-11 | 1.00000 | 5.17528e-11 | 1.00000 |
| rad72     | 1.45719e-11 | 1.00000 | 4.67168e-11 | 1.00000 |
| rad13     | 8.41631e-12 | 1.00000 | 2.69823e-11 | 1.00000 |
| rad28     | 7.54434e-12 | 1.00000 | 2.41868e-11 | 1.00000 |
| rad18     | 6.76645e-12 | 1.00000 | 2.16929e-11 | 1.00000 |
| rad2      | 6.33785e-12 | 1.00000 | 2.03188e-11 | 1.00000 |
| rad10     | 3.44437e-12 | 1.00000 | 1.10425e-11 | 1.00000 |
| rad26     | 1.55556e-12 | 1.00000 | 4.98704e-12 | 1.00000 |
| rad1      | 1.41783e-12 | 1.00000 | 4.54550e-12 | 1.00000 |
| rad22     | 4.11847e-13 | 1.00000 | 1.32036e-12 | 1.00000 |
| rad24     | 2.44030e-13 | 1.00000 | 7.82347e-13 | 1.00000 |
| rad3      | 2.24452e-13 | 1.00000 | 7.19583e-13 | 1.00000 |
| rad4      | 1.73754e-13 | 1.00000 | 5.57045e-13 | 1.00000 |
| rad33     | 1.48946e-13 | 1.00000 | 4.77512e-13 | 1.00000 |
| rad25     | 2.76149e-14 | 1.00000 | 8.85318e-14 | 1.00000 |
| rad15     | 2.40188e-14 | 1.00000 | 7.70031e-14 | 1.00000 |
| rad12     | 1.79601e-14 | 1.00000 | 5.75791e-14 | 1.00000 |
| rad14     | 2.72045e-15 | 1.00000 | 8.72161e-15 | 1.00000 |
| rad8      | 1.89596e-15 | 1.00000 | 6.07834e-15 | 1.00000 |
| rad27     | 1.35348e-15 | 1.00000 | 4.33917e-15 | 1.00000 |
| rad31     | 4.14051e-17 | 1.00000 | 1.32742e-16 | 1.00000 |
| rad47     | 4.64687e-18 | 1.00000 | 1.48976e-17 | 1.00000 |
| rad5      | 7.83464e-19 | 1.00000 | 2.51174e-18 | 1.00000 |

0.100000000E-02 Pa, 1400.00000 K

| Rate constant | True (fraction)     | Effective (fraction) |
|---------------|---------------------|----------------------|
| Total         | 2.46691e-14 (1.00 ) | 6.50155e-15 (1.00 )  |

| species       | PYtrue      | Cumul    | PYeffective | Cumul    |
|---------------|-------------|----------|-------------|----------|
| Benzyl+C2H2   | 0.736450    | 0.736450 | 0.00000     | 0.00000  |
| Indene+H      | 0.245659    | 0.982109 | 0.932117    | 0.932117 |
| Ph+Allene     | 0.00660861  | 0.988718 | 0.0250754   | 0.957192 |
| PhCH2CCH+H    | 0.00478128  | 0.993499 | 0.0181419   | 0.975334 |
| PhCHCCH2+H    | 0.00325578  | 0.996755 | 0.0123536   | 0.987688 |
| PhCCH+CH3     | 0.00165084  | 0.998406 | 0.00626387  | 0.993952 |
| PAH9+H        | 0.000308662 | 0.998714 | 0.00117117  | 0.995123 |
| PAH7+H        | 0.000272630 | 0.998987 | 0.00103445  | 0.996157 |
| Ph+MeAc       | 0.000228420 | 0.999215 | 0.000866707 | 0.997024 |
| rad30         | 0.000217655 | 0.999433 | 0.000825859 | 0.997850 |
| rad38         | 0.000125529 | 0.999558 | 0.000476301 | 0.998326 |
| rad19anti     | 0.000116511 | 0.999675 | 0.000442085 | 0.998768 |
| PAH3+H        | 6.69984e-05 | 0.999742 | 0.000254215 | 0.999023 |
| PhCCCH3+H     | 6.53818e-05 | 0.999807 | 0.000248081 | 0.999271 |
| rad35         | 6.07397e-05 | 0.999868 | 0.000230468 | 0.999501 |
| rad39         | 5.49305e-05 | 0.999923 | 0.000208426 | 0.999710 |
| rad46         | 2.97185e-05 | 0.999953 | 0.000112763 | 0.999822 |
| rad60syn      | 1.03332e-05 | 0.999963 | 3.92077e-05 | 0.999862 |
| rad50         | 9.93215e-06 | 0.999973 | 3.76861e-05 | 0.999899 |
| rad59         | 7.71556e-06 | 0.999981 | 2.92756e-05 | 0.999928 |
| rad60anti     | 6.13929e-06 | 0.999987 | 2.32946e-05 | 0.999952 |
| rad19syn      | 4.26609e-06 | 0.999991 | 1.61870e-05 | 0.999968 |
| rad67         | 1.57759e-06 | 0.999993 | 5.98594e-06 | 0.999974 |
| rad54         | 1.46998e-06 | 0.999994 | 5.57763e-06 | 0.999980 |
| rad51         | 1.43446e-06 | 0.999996 | 5.44286e-06 | 0.999985 |
| PhcycC3H3_A+H | 1.26043e-06 | 0.999997 | 4.78252e-06 | 0.999990 |
| rad37         | 6.13241e-07 | 0.999997 | 2.32685e-06 | 0.999992 |
| rad52         | 6.09462e-07 | 0.999998 | 2.31251e-06 | 0.999994 |
| PAH10+CH3     | 3.40071e-07 | 0.999998 | 1.29035e-06 | 0.999996 |
| rad58         | 3.07503e-07 | 0.999999 | 1.16677e-06 | 0.999997 |
| rad70         | 2.75599e-07 | 0.999999 | 1.04572e-06 | 0.999998 |
| PAH1+H        | 2.72544e-07 | 0.999999 | 1.03413e-06 | 0.999999 |
| rad55         | 8.21114e-08 | 0.999999 | 3.11560e-07 | 0.999999 |
| rad34         | 4.89123e-08 | 0.999999 | 1.85591e-07 | 0.999999 |

|           |             |          |             |          |
|-----------|-------------|----------|-------------|----------|
| rad65     | 4.41611e-08 | 0.999999 | 1.67563e-07 | 1.000000 |
| rad62     | 2.07591e-08 | 0.999999 | 7.87674e-08 | 1.000000 |
| rad53     | 8.12265e-09 | 0.999999 | 3.08202e-08 | 1.000000 |
| rad73     | 6.62701e-09 | 0.999999 | 2.51452e-08 | 1.000000 |
| rad71     | 5.83714e-09 | 0.999999 | 2.21482e-08 | 1.000000 |
| rad56     | 1.55702e-09 | 0.999999 | 1.92564e-08 | 1.000000 |
| rad6      | 3.14308e-09 | 0.999999 | 1.19259e-08 | 1.000000 |
| rad43     | 3.05586e-09 | 0.999999 | 1.15950e-08 | 1.000000 |
| rad64     | 2.94786e-09 | 0.999999 | 1.11852e-08 | 1.000000 |
| PAH8+H    | 1.55761e-09 | 0.999999 | 5.91013e-09 | 1.000000 |
| rad68syn  | 1.15822e-09 | 0.999999 | 4.39468e-09 | 1.000000 |
| rad68anti | 7.65285e-10 | 0.999999 | 2.90376e-09 | 1.000000 |
| rad42     | 6.99014e-10 | 0.999999 | 2.65230e-09 | 1.000000 |
| rad23     | 2.88362e-10 | 0.999999 | 1.09415e-09 | 1.000000 |
| rad40syn  | 2.60578e-10 | 0.999999 | 9.88723e-10 | 1.000000 |
| rad61     | 1.94742e-10 | 0.999999 | 7.38918e-10 | 1.000000 |
| rad40anti | 1.33994e-10 | 0.999999 | 5.08419e-10 | 1.000000 |
| rad45     | 9.38249e-11 | 0.999999 | 3.56005e-10 | 1.000000 |
| rad41     | 7.69002e-11 | 0.999999 | 2.91787e-10 | 1.000000 |
| rad72     | 7.37286e-11 | 0.999999 | 2.79752e-10 | 1.000000 |
| rad11     | 4.38922e-11 | 0.999999 | 1.66543e-10 | 1.000000 |
| rad7      | 4.08716e-11 | 0.999999 | 1.55081e-10 | 1.000000 |
| rad20     | 1.95004e-11 | 0.999999 | 7.39915e-11 | 1.000000 |
| rad9      | 1.34510e-11 | 0.999999 | 5.10379e-11 | 1.000000 |
| rad21     | 1.13740e-11 | 0.999999 | 4.31570e-11 | 1.000000 |
| rad36     | 8.95774e-12 | 0.999999 | 3.39888e-11 | 1.000000 |
| rad18     | 5.84760e-12 | 0.999999 | 2.21878e-11 | 1.000000 |
| rad28     | 4.71778e-12 | 0.999999 | 1.79009e-11 | 1.000000 |
| rad13     | 4.54443e-12 | 0.999999 | 1.72432e-11 | 1.000000 |
| rad2      | 1.98886e-12 | 0.999999 | 7.54643e-12 | 1.000000 |
| rad10     | 1.60407e-12 | 0.999999 | 6.08642e-12 | 1.000000 |
| rad22     | 1.06899e-12 | 0.999999 | 4.05614e-12 | 1.000000 |
| rad26     | 8.08670e-13 | 0.999999 | 3.06838e-12 | 1.000000 |
| rad1      | 4.54223e-13 | 0.999999 | 1.72348e-12 | 1.000000 |
| rad24     | 1.80067e-13 | 0.999999 | 6.83237e-13 | 1.000000 |
| rad3      | 9.03996e-14 | 0.999999 | 3.43008e-13 | 1.000000 |
| rad33     | 8.80166e-14 | 0.999999 | 3.33966e-13 | 1.000000 |
| rad4      | 7.06635e-14 | 0.999999 | 2.68122e-13 | 1.000000 |
| rad15     | 6.59112e-14 | 0.999999 | 2.50090e-13 | 1.000000 |
| rad12     | 1.93288e-14 | 0.999999 | 7.33403e-14 | 1.000000 |
| rad25     | 1.92142e-14 | 0.999999 | 7.29055e-14 | 1.000000 |
| rad8      | 2.79512e-15 | 0.999999 | 1.06057e-14 | 1.000000 |
| rad14     | 1.42086e-15 | 0.999999 | 5.39126e-15 | 1.000000 |
| rad27     | 5.44817e-16 | 0.999999 | 2.06723e-15 | 1.000000 |
| rad31     | 2.56232e-17 | 0.999999 | 9.72234e-17 | 1.000000 |
| rad47     | 1.04028e-17 | 0.999999 | 3.94720e-17 | 1.000000 |
| rad5      | 2.05783e-18 | 0.999999 | 7.80814e-18 | 1.000000 |

0.100000000E-02 Pa, 1500.00000 K

=====

| Rate constant | True (fraction)     | Effective (fraction) |
|---------------|---------------------|----------------------|
| Total         | 3.76908e-14 (1.00 ) | 8.51560e-15 (1.00 )  |

| species     | PYtrue      | Cumul    | PYeffective | Cumul    |
|-------------|-------------|----------|-------------|----------|
| Benzyl+C2H2 | 0.774067    | 0.774067 | 0.00000     | 0.00000  |
| Indene+H    | 0.205065    | 0.979132 | 0.907636    | 0.907636 |
| Ph+Allene   | 0.00752036  | 0.986652 | 0.0332858   | 0.940922 |
| PhCH2CCH+H  | 0.00646723  | 0.993120 | 0.0286246   | 0.969546 |
| PhCHCCH2+H  | 0.00361205  | 0.996732 | 0.0159873   | 0.985534 |
| PhCCH+CH3   | 0.00141397  | 0.998146 | 0.00625837  | 0.991792 |
| PAH9+H      | 0.000393094 | 0.998539 | 0.00173987  | 0.993532 |
| PAH7+H      | 0.000286546 | 0.998825 | 0.00126828  | 0.994800 |
| rad30       | 0.000246477 | 0.999072 | 0.00109093  | 0.995891 |
| Ph+MeAc     | 0.000203626 | 0.999275 | 0.000901267 | 0.996792 |
| rad19anti   | 0.000164236 | 0.999440 | 0.000726923 | 0.997519 |
| rad38       | 0.000162728 | 0.999602 | 0.000720251 | 0.998240 |
| PAH3+H      | 0.000104219 | 0.999707 | 0.000461281 | 0.998701 |
| rad35       | 7.62565e-05 | 0.999783 | 0.000337518 | 0.999038 |
| rad39       | 5.58557e-05 | 0.999839 | 0.000247223 | 0.999286 |
| PhCCCH3+H   | 4.89504e-05 | 0.999888 | 0.000216659 | 0.999502 |
| rad46       | 4.15217e-05 | 0.999929 | 0.000183779 | 0.999686 |
| rad50       | 1.70754e-05 | 0.999946 | 7.55772e-05 | 0.999762 |
| rad60syn    | 1.38815e-05 | 0.999960 | 6.14410e-05 | 0.999823 |
| rad59       | 1.15663e-05 | 0.999972 | 5.11935e-05 | 0.999874 |
| rad60anti   | 8.33859e-06 | 0.999980 | 3.69074e-05 | 0.999911 |
| rad19syn    | 5.68956e-06 | 0.999986 | 2.51825e-05 | 0.999936 |
| rad67       | 3.01383e-06 | 0.999989 | 1.33395e-05 | 0.999950 |
| rad51       | 2.86543e-06 | 0.999992 | 1.26827e-05 | 0.999962 |

|               |             |          |             |          |
|---------------|-------------|----------|-------------|----------|
| rad54         | 2.03370e-06 | 0.999994 | 9.00134e-06 | 0.999971 |
| PhcycC3H3_A+H | 1.94411e-06 | 0.999996 | 8.60480e-06 | 0.999980 |
| rad52         | 1.12959e-06 | 0.999997 | 4.99969e-06 | 0.999985 |
| rad37         | 8.38280e-07 | 0.999997 | 3.71031e-06 | 0.999989 |
| PAH10+CH3     | 6.63377e-07 | 0.999998 | 2.93617e-06 | 0.999992 |
| rad58         | 5.75067e-07 | 0.999999 | 2.54530e-06 | 0.999994 |
| PAH1+H        | 4.44629e-07 | 0.999999 | 1.96797e-06 | 0.999996 |
| rad70         | 4.35873e-07 | 1.000000 | 1.92921e-06 | 0.999998 |
| rad55         | 1.20222e-07 | 1.000000 | 5.32113e-07 | 0.999999 |
| rad65         | 8.71001e-08 | 1.000000 | 3.85513e-07 | 0.999999 |
| rad34         | 8.35876e-08 | 1.000000 | 3.69967e-07 | 0.999999 |
| rad62         | 2.65880e-08 | 1.000000 | 1.17681e-07 | 0.999999 |
| rad73         | 1.91031e-08 | 1.000000 | 8.45523e-08 | 1.000000 |
| rad71         | 1.86185e-08 | 1.000000 | 8.24074e-08 | 1.000000 |
| rad53         | 1.46409e-08 | 1.000000 | 6.48019e-08 | 1.000000 |
| rad56         | 1.02046e-08 | 1.000000 | 4.51665e-08 | 1.000000 |
| rad64         | 5.41560e-09 | 1.000000 | 2.39700e-08 | 1.000000 |
| PAH8+H        | 4.18063e-09 | 1.000000 | 1.85039e-08 | 1.000000 |
| rad43         | 3.92948e-09 | 1.000000 | 1.73922e-08 | 1.000000 |
| rad68syn      | 2.56012e-09 | 1.000000 | 1.13313e-08 | 1.000000 |
| rad6          | 2.25388e-09 | 1.000000 | 9.97587e-09 | 1.000000 |
| rad68anti     | 1.68587e-09 | 1.000000 | 7.46183e-09 | 1.000000 |
| rad42         | 1.06260e-09 | 1.000000 | 4.70315e-09 | 1.000000 |
| rad40syn      | 6.46766e-10 | 1.000000 | 2.86265e-09 | 1.000000 |
| rad61         | 5.26865e-10 | 1.000000 | 2.33195e-09 | 1.000000 |
| rad40anti     | 3.43893e-10 | 1.000000 | 1.52210e-09 | 1.000000 |
| rad72         | 2.96663e-10 | 1.000000 | 1.31306e-09 | 1.000000 |
| rad23         | 1.66511e-10 | 1.000000 | 7.36993e-10 | 1.000000 |
| rad41         | 1.35345e-10 | 1.000000 | 5.99048e-10 | 1.000000 |
| rad45         | 5.29154e-11 | 1.000000 | 2.34208e-10 | 1.000000 |
| rad7          | 2.64879e-11 | 1.000000 | 1.17238e-10 | 1.000000 |
| rad11         | 2.62271e-11 | 1.000000 | 1.16083e-10 | 1.000000 |
| rad20         | 1.23075e-11 | 1.000000 | 5.44740e-11 | 1.000000 |
| rad9          | 1.04060e-11 | 1.000000 | 4.60580e-11 | 1.000000 |
| rad21         | 7.10958e-12 | 1.000000 | 3.14677e-11 | 1.000000 |
| rad36         | 5.11653e-12 | 1.000000 | 2.26462e-11 | 1.000000 |
| rad18         | 4.05615e-12 | 1.000000 | 1.79529e-11 | 1.000000 |
| rad28         | 3.67239e-12 | 1.000000 | 1.62543e-11 | 1.000000 |
| rad22         | 2.55477e-12 | 1.000000 | 1.13076e-11 | 1.000000 |
| rad13         | 2.41019e-12 | 1.000000 | 1.06677e-11 | 1.000000 |
| rad2          | 6.51103e-13 | 1.000000 | 2.88184e-12 | 1.000000 |
| rad10         | 6.24112e-13 | 1.000000 | 2.76238e-12 | 1.000000 |
| rad26         | 4.30645e-13 | 1.000000 | 1.90608e-12 | 1.000000 |
| rad1          | 1.51112e-13 | 1.000000 | 6.68836e-13 | 1.000000 |
| rad24         | 1.34246e-13 | 1.000000 | 5.94185e-13 | 1.000000 |
| rad15         | 1.16572e-13 | 1.000000 | 5.15957e-13 | 1.000000 |
| rad33         | 5.25122e-14 | 1.000000 | 2.32424e-13 | 1.000000 |
| rad3          | 3.79766e-14 | 1.000000 | 1.68088e-13 | 1.000000 |
| rad4          | 2.99310e-14 | 1.000000 | 1.32478e-13 | 1.000000 |
| rad12         | 1.99725e-14 | 1.000000 | 8.84003e-14 | 1.000000 |
| rad25         | 1.32641e-14 | 1.000000 | 5.87083e-14 | 1.000000 |
| rad8          | 3.57803e-15 | 1.000000 | 1.58367e-14 | 1.000000 |
| rad14         | 7.60121e-16 | 1.000000 | 3.36437e-15 | 1.000000 |
| rad27         | 2.31324e-16 | 1.000000 | 1.02386e-15 | 1.000000 |
| rad47         | 2.08550e-17 | 1.000000 | 9.23062e-17 | 1.000000 |
| rad31         | 1.60842e-17 | 1.000000 | 7.11900e-17 | 1.000000 |
| rad5          | 4.29663e-18 | 1.000000 | 1.90173e-17 | 1.000000 |

0.100000000E-02 Pa, 1750.00000 K

=====

| Rate constant | True (fraction)     | Effective (fraction) |
|---------------|---------------------|----------------------|
| Total         | 9.18604e-14 (1.00 ) | 1.49145e-14 (1.00 )  |

| species     | PYtrue      | Cumul    | PYeffective | Cumul    |
|-------------|-------------|----------|-------------|----------|
| Benzyl+C2H2 | 0.837640    | 0.837640 | 0.00000     | 0.00000  |
| Indene+H    | 0.133064    | 0.970704 | 0.819559    | 0.819559 |
| PhCH2CCH+H  | 0.0118056   | 0.982510 | 0.0727127   | 0.892272 |
| Ph+Allene   | 0.00950091  | 0.992011 | 0.0585175   | 0.950789 |
| PhCHCCH2+H  | 0.00446803  | 0.996479 | 0.0275192   | 0.978308 |
| PhCCH+CH3   | 0.000861597 | 0.997340 | 0.00530670  | 0.983615 |
| PAH9+H      | 0.000556652 | 0.997897 | 0.00342850  | 0.987044 |
| rad30       | 0.000325000 | 0.998222 | 0.00200173  | 0.989045 |
| rad19anti   | 0.000321503 | 0.998543 | 0.00198018  | 0.991026 |
| rad38       | 0.000287109 | 0.998830 | 0.00176835  | 0.992794 |
| PAH7+H      | 0.000286344 | 0.999117 | 0.00176363  | 0.994557 |
| PAH3+H      | 0.000275296 | 0.999392 | 0.00169559  | 0.996253 |
| Ph+MeAc     | 0.000167695 | 0.999560 | 0.00103286  | 0.997286 |
| rad35       | 0.000110066 | 0.999670 | 0.000677915 | 0.997964 |

|               |             |          |             |          |
|---------------|-------------|----------|-------------|----------|
| rad46         | 7.52920e-05 | 0.999745 | 0.000463735 | 0.998428 |
| rad39         | 5.82426e-05 | 0.999803 | 0.000358725 | 0.998786 |
| rad50         | 4.36582e-05 | 0.999847 | 0.000268898 | 0.999055 |
| PhCCCH3+H     | 3.20470e-05 | 0.999879 | 0.000197382 | 0.999253 |
| rad59         | 2.75338e-05 | 0.999907 | 0.000169584 | 0.999422 |
| rad60syn      | 2.64498e-05 | 0.999933 | 0.000162908 | 0.999585 |
| rad60anti     | 1.77452e-05 | 0.999951 | 0.000109295 | 0.999694 |
| rad51         | 1.06305e-05 | 0.999961 | 6.54750e-05 | 0.999760 |
| rad67         | 1.00266e-05 | 0.999971 | 6.17554e-05 | 0.999822 |
| rad19syn      | 8.12817e-06 | 0.999980 | 5.00626e-05 | 0.999872 |
| PhcycC3H3_A+H | 4.32965e-06 | 0.999984 | 2.66670e-05 | 0.999898 |
| rad52         | 3.62586e-06 | 0.999988 | 2.23322e-05 | 0.999921 |
| rad54         | 3.10468e-06 | 0.999991 | 1.91222e-05 | 0.999940 |
| PAH10+CH3     | 2.60306e-06 | 0.999993 | 1.60326e-05 | 0.999956 |
| rad58         | 2.01823e-06 | 0.999995 | 1.24306e-05 | 0.999968 |
| rad37         | 1.70772e-06 | 0.999997 | 1.05181e-05 | 0.999979 |
| PAH1+H        | 1.10636e-06 | 0.999998 | 6.81423e-06 | 0.999986 |
| rad70         | 1.04847e-06 | 0.999999 | 6.45766e-06 | 0.999992 |
| rad65         | 3.08350e-07 | 0.999999 | 1.89917e-06 | 0.999994 |
| rad34         | 2.42002e-07 | 1.000000 | 1.49053e-06 | 0.999995 |
| rad55         | 2.29000e-07 | 1.000000 | 1.41045e-06 | 0.999997 |
| rad71         | 1.90833e-07 | 1.000000 | 1.17537e-06 | 0.999998 |
| rad73         | 1.56405e-07 | 1.000000 | 9.63323e-07 | 0.999999 |
| rad53         | 4.44392e-08 | 1.000000 | 2.73707e-07 | 0.999999 |
| rad62         | 4.00912e-08 | 1.000000 | 2.46927e-07 | 1.000000 |
| rad56         | 3.57945e-08 | 1.000000 | 2.20464e-07 | 1.000000 |
| PAH8+H        | 2.43971e-08 | 1.000000 | 1.50265e-07 | 1.000000 |
| rad64         | 1.92945e-08 | 1.000000 | 1.18838e-07 | 1.000000 |
| rad68syn      | 1.20124e-08 | 1.000000 | 7.39864e-08 | 1.000000 |
| rad43         | 8.60714e-09 | 1.000000 | 5.30126e-08 | 1.000000 |
| rad68anti     | 7.79064e-09 | 1.000000 | 4.79837e-08 | 1.000000 |
| rad72         | 5.37459e-09 | 1.000000 | 3.31029e-08 | 1.000000 |
| rad40syn      | 3.52166e-09 | 1.000000 | 2.16904e-08 | 1.000000 |
| rad61         | 3.50346e-09 | 1.000000 | 2.15783e-08 | 1.000000 |
| rad42         | 2.39319e-09 | 1.000000 | 1.47400e-08 | 1.000000 |
| rad40anti     | 2.09789e-09 | 1.000000 | 1.29212e-08 | 1.000000 |
| rad6          | 8.74393e-10 | 1.000000 | 5.38552e-09 | 1.000000 |
| rad41         | 5.64327e-10 | 1.000000 | 3.47578e-09 | 1.000000 |
| rad23         | 4.37168e-11 | 1.000000 | 2.69258e-10 | 1.000000 |
| rad22         | 5.70751e-12 | 1.000000 | 3.51534e-11 | 1.000000 |
| rad45         | 5.01683e-12 | 1.000000 | 3.08994e-11 | 1.000000 |
| rad7          | 2.71227e-12 | 1.000000 | 1.67053e-11 | 1.000000 |
| rad11         | 2.49649e-12 | 1.000000 | 1.53762e-11 | 1.000000 |
| rad28         | 1.86027e-12 | 1.000000 | 1.14577e-11 | 1.000000 |
| rad9          | 1.34755e-12 | 1.000000 | 8.29975e-12 | 1.000000 |
| rad20         | 1.26284e-12 | 1.000000 | 7.77799e-12 | 1.000000 |
| rad36         | 8.52245e-13 | 1.000000 | 5.24910e-12 | 1.000000 |
| rad21         | 6.65179e-13 | 1.000000 | 4.09694e-12 | 1.000000 |
| rad18         | 5.81044e-13 | 1.000000 | 3.57874e-12 | 1.000000 |
| rad13         | 1.40423e-13 | 1.000000 | 8.64884e-13 | 1.000000 |
| rad15         | 6.73769e-14 | 1.000000 | 4.14984e-13 | 1.000000 |
| rad26         | 5.00457e-14 | 1.000000 | 3.08239e-13 | 1.000000 |
| rad10         | 2.49843e-14 | 1.000000 | 1.53882e-13 | 1.000000 |
| rad24         | 1.70134e-14 | 1.000000 | 1.04788e-13 | 1.000000 |
| rad2          | 1.14381e-14 | 1.000000 | 7.04490e-14 | 1.000000 |
| rad12         | 4.26945e-15 | 1.000000 | 2.62962e-14 | 1.000000 |
| rad33         | 3.32931e-15 | 1.000000 | 2.05057e-14 | 1.000000 |
| rad1          | 2.84038e-15 | 1.000000 | 1.74943e-14 | 1.000000 |
| rad8          | 1.74118e-15 | 1.000000 | 1.07242e-14 | 1.000000 |
| rad25         | 1.29130e-15 | 1.000000 | 7.95329e-15 | 1.000000 |
| rad3          | 8.49748e-16 | 1.000000 | 5.23372e-15 | 1.000000 |
| rad4          | 5.39184e-16 | 1.000000 | 3.32091e-15 | 1.000000 |
| rad14         | 5.21617e-17 | 1.000000 | 3.21272e-16 | 1.000000 |
| rad47         | 2.44667e-17 | 1.000000 | 1.50694e-16 | 1.000000 |
| rad5          | 1.30912e-17 | 1.000000 | 8.06304e-17 | 1.000000 |
| rad27         | 9.07725e-18 | 1.000000 | 5.59081e-17 | 1.000000 |

0.100000000E-02 Pa, 2000.00000 K

| Rate constant | True (fraction)    | Effective (fraction) |
|---------------|--------------------|----------------------|
| Total         | 1.85359e-13 (1.00) | 2.47588e-14 (1.00)   |

| species     | PYtrue     | Cumul    | PYeffective | Cumul    |
|-------------|------------|----------|-------------|----------|
| Benzyl+C2H2 | 0.866428   | 0.866428 | 0.00000     | 0.00000  |
| Indene+H    | 0.0943885  | 0.960816 | 0.706650    | 0.706650 |
| PhCH2CCH+H  | 0.0189358  | 0.979752 | 0.141765    | 0.848415 |
| Ph+Allene   | 0.0101088  | 0.989861 | 0.0756807   | 0.924096 |
| PhCHCCH2+H  | 0.00579099 | 0.995652 | 0.0433549   | 0.967451 |



|               |             |          |             |          |
|---------------|-------------|----------|-------------|----------|
| PAH9+H        | 0.000765251 | 0.996417 | 0.00572913  | 0.973180 |
| PhCCH+CH3     | 0.000550354 | 0.996968 | 0.00412028  | 0.977300 |
| PAH3+H        | 0.000526246 | 0.997494 | 0.00393980  | 0.981240 |
| rad19anti     | 0.000486607 | 0.997981 | 0.00364303  | 0.984883 |
| rad38         | 0.000411538 | 0.998392 | 0.00308103  | 0.987964 |
| rad30         | 0.000378289 | 0.998770 | 0.00283210  | 0.990796 |
| PAH7+H        | 0.000350388 | 0.999121 | 0.00262322  | 0.993419 |
| Ph+MeAc       | 0.000164748 | 0.999286 | 0.00123340  | 0.994653 |
| rad35         | 0.000155515 | 0.999441 | 0.00116428  | 0.995817 |
| rad46         | 0.000120109 | 0.999561 | 0.000899212 | 0.996716 |
| rad50         | 9.58271e-05 | 0.999657 | 0.000717420 | 0.997434 |
| rad39         | 7.87039e-05 | 0.999736 | 0.000589226 | 0.998023 |
| rad59         | 4.92026e-05 | 0.999785 | 0.000368361 | 0.998391 |
| rad60syn      | 4.01110e-05 | 0.999825 | 0.000300295 | 0.998691 |
| PhCCCH3+H     | 3.61306e-05 | 0.999861 | 0.000270495 | 0.998962 |
| rad51         | 2.92772e-05 | 0.999890 | 0.000219187 | 0.999181 |
| rad60anti     | 2.75040e-05 | 0.999918 | 0.000205912 | 0.999387 |
| rad67         | 2.43946e-05 | 0.999942 | 0.000182633 | 0.999570 |
| rad19syn      | 1.17085e-05 | 0.999954 | 8.76566e-05 | 0.999657 |
| rad52         | 8.84587e-06 | 0.999963 | 6.62255e-05 | 0.999723 |
| PAH10+CH3     | 7.72771e-06 | 0.999971 | 5.78543e-05 | 0.999781 |
| PhcycC3H3_A+H | 7.44557e-06 | 0.999978 | 5.57420e-05 | 0.999837 |
| rad58         | 5.03691e-06 | 0.999983 | 3.77093e-05 | 0.999875 |
| rad54         | 4.34710e-06 | 0.999987 | 3.25450e-05 | 0.999907 |
| rad37         | 3.43690e-06 | 0.999991 | 2.57307e-05 | 0.999933 |
| PAH1+H        | 2.74924e-06 | 0.999994 | 2.05825e-05 | 0.999954 |
| rad70         | 2.09354e-06 | 0.999996 | 1.56735e-05 | 0.999969 |
| rad71         | 1.06964e-06 | 0.999997 | 8.00797e-06 | 0.999977 |
| rad65         | 8.19689e-07 | 0.999998 | 6.13669e-06 | 0.999983 |
| rad73         | 7.43918e-07 | 0.999998 | 5.56943e-06 | 0.999989 |
| rad34         | 5.52321e-07 | 0.999999 | 4.13501e-06 | 0.999993 |
| rad55         | 3.53324e-07 | 0.999999 | 2.64520e-06 | 0.999996 |
| PAH8+H        | 1.14511e-07 | 0.999999 | 8.57297e-07 | 0.999997 |
| rad53         | 9.72440e-08 | 0.999999 | 7.28028e-07 | 0.999997 |
| rad56         | 9.21218e-08 | 1.000000 | 6.89680e-07 | 0.999998 |
| rad62         | 6.00486e-08 | 1.000000 | 4.49560e-07 | 0.999999 |
| rad64         | 5.57953e-08 | 1.000000 | 4.17718e-07 | 0.999999 |
| rad72         | 4.29818e-08 | 1.000000 | 3.21788e-07 | 0.999999 |
| rad68syn      | 4.11172e-08 | 1.000000 | 3.07828e-07 | 1.000000 |
| rad68anti     | 2.65281e-08 | 1.000000 | 1.98605e-07 | 1.000000 |
| rad43         | 2.20258e-08 | 1.000000 | 1.64898e-07 | 1.000000 |
| rad61         | 1.54175e-08 | 1.000000 | 1.15425e-07 | 1.000000 |
| rad40syn      | 1.44056e-08 | 1.000000 | 1.07849e-07 | 1.000000 |
| rad40anti     | 9.08226e-09 | 1.000000 | 6.79953e-08 | 1.000000 |
| rad42         | 4.93494e-09 | 1.000000 | 3.69460e-08 | 1.000000 |
| rad41         | 1.99345e-09 | 1.000000 | 1.49242e-08 | 1.000000 |
| rad6          | 1.02308e-10 | 1.000000 | 7.65938e-10 | 1.000000 |
| rad23         | 1.94993e-11 | 1.000000 | 1.45984e-10 | 1.000000 |
| rad45         | 1.66773e-12 | 1.000000 | 1.24856e-11 | 1.000000 |
| rad22         | 1.54102e-12 | 1.000000 | 1.15370e-11 | 1.000000 |
| rad9          | 6.85214e-13 | 1.000000 | 5.12993e-12 | 1.000000 |
| rad11         | 5.37438e-13 | 1.000000 | 4.02359e-12 | 1.000000 |
| rad20         | 5.29553e-13 | 1.000000 | 3.96455e-12 | 1.000000 |
| rad7          | 4.22035e-13 | 1.000000 | 3.15961e-12 | 1.000000 |
| rad28         | 3.37792e-13 | 1.000000 | 2.52892e-12 | 1.000000 |
| rad36         | 2.91412e-13 | 1.000000 | 2.18169e-12 | 1.000000 |
| rad21         | 2.72288e-13 | 1.000000 | 2.03851e-12 | 1.000000 |
| rad18         | 1.62504e-13 | 1.000000 | 1.21660e-12 | 1.000000 |
| rad15         | 3.62994e-14 | 1.000000 | 2.71760e-13 | 1.000000 |
| rad13         | 3.15082e-14 | 1.000000 | 2.35890e-13 | 1.000000 |
| rad24         | 9.49359e-15 | 1.000000 | 7.10748e-14 | 1.000000 |
| rad26         | 6.63097e-15 | 1.000000 | 4.96435e-14 | 1.000000 |
| rad12         | 3.72964e-15 | 1.000000 | 2.79223e-14 | 1.000000 |
| rad10         | 2.45696e-15 | 1.000000 | 1.83943e-14 | 1.000000 |
| rad8          | 2.00223e-15 | 1.000000 | 1.49899e-14 | 1.000000 |
| rad2          | 1.04962e-15 | 1.000000 | 7.85810e-15 | 1.000000 |
| rad33         | 1.02785e-15 | 1.000000 | 7.69514e-15 | 1.000000 |
| rad25         | 5.51560e-16 | 1.000000 | 4.12931e-15 | 1.000000 |
| rad1          | 2.75452e-16 | 1.000000 | 2.06220e-15 | 1.000000 |
| rad3          | 1.46653e-16 | 1.000000 | 1.09793e-15 | 1.000000 |
| rad4          | 9.37052e-17 | 1.000000 | 7.01535e-16 | 1.000000 |
| rad47         | 6.72668e-17 | 1.000000 | 5.03600e-16 | 1.000000 |
| rad5          | 1.89818e-17 | 1.000000 | 1.42110e-16 | 1.000000 |
| rad14         | 1.43917e-17 | 1.000000 | 1.07745e-16 | 1.000000 |
| rad27         | 2.36962e-18 | 1.000000 | 1.77404e-17 | 1.000000 |

0.100000000E-02 Pa, 2250.00000 K

=====

Rate constant | True (fraction) | Effective (fraction)

-----

Total | 3.29136e-13 (1.00 ) 4.00875e-14 (1.00 )

| species       | PYtrue      | Cumul    | PYeffective | Cumul    |
|---------------|-------------|----------|-------------|----------|
| Benzyl+C2H2   | 0.878204    | 0.878204 | 0.00000     | 0.00000  |
| Indene+H      | 0.0703003   | 0.948504 | 0.577195    | 0.577195 |
| PhCH2CCH+H    | 0.0277459   | 0.976250 | 0.227806    | 0.805001 |
| Ph+Allene     | 0.0105974   | 0.986848 | 0.0870088   | 0.892010 |
| PhCHCCH2+H    | 0.00765656  | 0.994504 | 0.0628636   | 0.954873 |
| PAH9+H        | 0.000941856 | 0.995446 | 0.00773304  | 0.962606 |
| PAH3+H        | 0.000857236 | 0.996303 | 0.00703827  | 0.969645 |
| rad19anti     | 0.000629228 | 0.996932 | 0.00516623  | 0.974811 |
| rad38         | 0.000525523 | 0.997458 | 0.00431476  | 0.979126 |
| PAH7+H        | 0.000454502 | 0.997913 | 0.00373165  | 0.982857 |
| rad30         | 0.000417263 | 0.998330 | 0.00342591  | 0.986283 |
| PhCCH+CH3     | 0.000383697 | 0.998713 | 0.00315031  | 0.989434 |
| rad35         | 0.000200865 | 0.998914 | 0.00164918  | 0.991083 |
| Ph+MeAc       | 0.000197882 | 0.999112 | 0.00162470  | 0.992707 |
| rad50         | 0.000170940 | 0.999283 | 0.00140349  | 0.994111 |
| rad46         | 0.000166540 | 0.999450 | 0.00136737  | 0.995478 |
| rad39         | 0.000118806 | 0.999568 | 0.000975445 | 0.996454 |
| rad59         | 7.57691e-05 | 0.999644 | 0.000622096 | 0.997076 |
| rad51         | 6.22686e-05 | 0.999707 | 0.000511251 | 0.997587 |
| rad60syn      | 5.44510e-05 | 0.999761 | 0.000447066 | 0.998034 |
| PhCCCH3+H     | 5.15901e-05 | 0.999813 | 0.000423577 | 0.998458 |
| rad67         | 4.61782e-05 | 0.999859 | 0.000379142 | 0.998837 |
| rad60anti     | 3.79865e-05 | 0.999897 | 0.000311885 | 0.999149 |
| PAH10+CH3     | 1.71933e-05 | 0.999914 | 0.000141164 | 0.999290 |
| rad52         | 1.70844e-05 | 0.999931 | 0.000140270 | 0.999430 |
| rad19syn      | 1.63932e-05 | 0.999947 | 0.000134595 | 0.999565 |
| PhcycC3H3_A+H | 1.10275e-05 | 0.999958 | 9.05407e-05 | 0.999655 |
| rad58         | 1.00660e-05 | 0.999969 | 8.26458e-05 | 0.999738 |
| PAH1+H        | 5.96728e-06 | 0.999974 | 4.89939e-05 | 0.999787 |
| rad37         | 5.72356e-06 | 0.999980 | 4.69928e-05 | 0.999834 |
| rad54         | 5.39698e-06 | 0.999986 | 4.43115e-05 | 0.999878 |
| rad71         | 3.95692e-06 | 0.999990 | 3.24880e-05 | 0.999911 |
| rad70         | 3.69403e-06 | 0.999993 | 3.03296e-05 | 0.999941 |
| rad73         | 2.41459e-06 | 0.999996 | 1.98248e-05 | 0.999961 |
| rad65         | 1.68525e-06 | 0.999997 | 1.38367e-05 | 0.999975 |
| rad34         | 1.08371e-06 | 0.999998 | 8.89771e-06 | 0.999984 |
| rad55         | 4.74067e-07 | 0.999999 | 3.89229e-06 | 0.999988 |
| PAH8+H        | 3.91946e-07 | 0.999999 | 3.21804e-06 | 0.999991 |
| rad72         | 2.09320e-07 | 1.000000 | 1.71860e-06 | 0.999992 |
| rad56         | 1.86169e-07 | 1.000000 | 1.52852e-06 | 0.999994 |
| rad53         | 1.73183e-07 | 1.000000 | 1.42191e-06 | 0.999995 |
| rad64         | 1.33616e-07 | 1.000000 | 1.09704e-06 | 0.999997 |
| rad68syn      | 1.10265e-07 | 1.000000 | 9.05322e-07 | 0.999997 |
| rad62         | 9.48259e-08 | 1.000000 | 7.78561e-07 | 0.999998 |
| rad68anti     | 7.08807e-08 | 1.000000 | 5.81961e-07 | 0.999999 |
| rad43         | 4.82400e-08 | 1.000000 | 3.96071e-07 | 0.999999 |
| rad61         | 4.62524e-08 | 1.000000 | 3.79752e-07 | 1.000000 |
| rad40syn      | 4.43238e-08 | 1.000000 | 3.63917e-07 | 1.000000 |
| rad40anti     | 2.91751e-08 | 1.000000 | 2.39540e-07 | 1.000000 |
| rad42         | 1.00367e-08 | 1.000000 | 8.24055e-08 | 1.000000 |
| rad41         | 5.35211e-09 | 1.000000 | 4.39431e-08 | 1.000000 |
| rad6          | 1.27174e-11 | 1.000000 | 1.04415e-10 | 1.000000 |
| rad23         | 5.10627e-12 | 1.000000 | 4.19246e-11 | 1.000000 |
| rad45         | 6.44478e-13 | 1.000000 | 5.29144e-12 | 1.000000 |
| rad22         | 3.98128e-13 | 1.000000 | 3.26880e-12 | 1.000000 |
| rad9          | 3.55770e-13 | 1.000000 | 2.92102e-12 | 1.000000 |
| rad20         | 2.60557e-13 | 1.000000 | 2.13929e-12 | 1.000000 |
| rad11         | 1.62884e-13 | 1.000000 | 1.33734e-12 | 1.000000 |
| rad21         | 1.30012e-13 | 1.000000 | 1.06745e-12 | 1.000000 |
| rad36         | 1.15290e-13 | 1.000000 | 9.46579e-13 | 1.000000 |
| rad7          | 9.44698e-14 | 1.000000 | 7.75637e-13 | 1.000000 |
| rad18         | 6.17427e-14 | 1.000000 | 5.06934e-13 | 1.000000 |
| rad28         | 5.13617e-14 | 1.000000 | 4.21701e-13 | 1.000000 |
| rad15         | 2.11109e-14 | 1.000000 | 1.73329e-13 | 1.000000 |
| rad13         | 8.56593e-15 | 1.000000 | 7.03299e-14 | 1.000000 |
| rad24         | 5.70002e-15 | 1.000000 | 4.67996e-14 | 1.000000 |
| rad12         | 3.05352e-15 | 1.000000 | 2.50707e-14 | 1.000000 |
| rad26         | 2.26954e-15 | 1.000000 | 1.86339e-14 | 1.000000 |
| rad8          | 2.16858e-15 | 1.000000 | 1.78050e-14 | 1.000000 |
| rad10         | 7.25700e-16 | 1.000000 | 5.95831e-15 | 1.000000 |
| rad33         | 3.63729e-16 | 1.000000 | 2.98637e-15 | 1.000000 |
| rad25         | 2.84538e-16 | 1.000000 | 2.33618e-15 | 1.000000 |
| rad2          | 1.56378e-16 | 1.000000 | 1.28393e-15 | 1.000000 |
| rad47         | 1.41374e-16 | 1.000000 | 1.16074e-15 | 1.000000 |
| rad1          | 4.51176e-17 | 1.000000 | 3.70435e-16 | 1.000000 |
| rad3          | 3.19134e-17 | 1.000000 | 2.62022e-16 | 1.000000 |

|       |             |         |             |         |
|-------|-------------|---------|-------------|---------|
| rad5  | 2.10172e-17 | 1.00000 | 1.72560e-16 | 1.00000 |
| rad4  | 2.03248e-17 | 1.00000 | 1.66875e-16 | 1.00000 |
| rad14 | 5.33293e-18 | 1.00000 | 4.37856e-17 | 1.00000 |
| rad27 | 1.32558e-18 | 1.00000 | 1.08836e-17 | 1.00000 |

0.100000000E-02 Pa, 2500.00000 K

=====

| Rate constant | True (fraction)     | Effective (fraction) |
|---------------|---------------------|----------------------|
| Total         | 5.32896e-13 (1.00 ) | 6.40311e-14 (1.00 )  |

| species       | PYtrue      | Cumul    | PYeffective | Cumul    |
|---------------|-------------|----------|-------------|----------|
| Benzyl+C2H2   | 0.879843    | 0.879843 | 0.00000     | 0.00000  |
| Indene+H      | 0.0541638   | 0.934007 | 0.450777    | 0.450777 |
| PhCH2CCH+H    | 0.0379681   | 0.971975 | 0.315989    | 0.766766 |
| Ph+Allene     | 0.0112444   | 0.983219 | 0.0935810   | 0.860347 |
| PhCHCCH2+H    | 0.00999485  | 0.993214 | 0.0831818   | 0.943529 |
| PAH3+H        | 0.00124356  | 0.994458 | 0.0103495   | 0.953878 |
| PAH9+H        | 0.00106545  | 0.995523 | 0.00886715  | 0.962745 |
| rad19anti     | 0.000731028 | 0.996254 | 0.00608396  | 0.968829 |
| rad38         | 0.000614393 | 0.996869 | 0.00511327  | 0.973943 |
| PAH7+H        | 0.000586817 | 0.997455 | 0.00488376  | 0.978826 |
| rad30         | 0.000442203 | 0.997898 | 0.00368022  | 0.982507 |
| PhCCH+CH3     | 0.000309130 | 0.998207 | 0.00257273  | 0.985079 |
| rad50         | 0.000261677 | 0.998468 | 0.00217780  | 0.987257 |
| Ph+MeAc       | 0.000256973 | 0.998725 | 0.00213865  | 0.989396 |
| rad35         | 0.000242192 | 0.998968 | 0.00201564  | 0.991411 |
| rad46         | 0.000207878 | 0.999175 | 0.00173006  | 0.993142 |
| rad39         | 0.000175772 | 0.999351 | 0.00146285  | 0.994604 |
| rad51         | 0.000109649 | 0.999461 | 0.000912547 | 0.995517 |
| rad59         | 0.000104825 | 0.999566 | 0.000872406 | 0.996389 |
| rad67         | 7.34547e-05 | 0.999639 | 0.000611325 | 0.997001 |
| PhCCCH3+H     | 7.22810e-05 | 0.999711 | 0.000601557 | 0.997602 |
| rad60syn      | 6.81857e-05 | 0.999780 | 0.000567474 | 0.998170 |
| rad60anti     | 4.82378e-05 | 0.999828 | 0.000401457 | 0.998571 |
| PAH10+CH3     | 3.08998e-05 | 0.999859 | 0.000257163 | 0.998828 |
| rad52         | 2.78077e-05 | 0.999887 | 0.000231429 | 0.999060 |
| rad19syn      | 2.34810e-05 | 0.999910 | 0.000195420 | 0.999255 |
| rad58         | 1.71635e-05 | 0.999927 | 0.000142842 | 0.999398 |
| PhcycC3H3_A+H | 1.49440e-05 | 0.999942 | 0.000124371 | 0.999522 |
| PAH1+H        | 1.13017e-05 | 0.999953 | 9.40581e-05 | 0.999616 |
| rad71         | 1.08628e-05 | 0.999964 | 9.04054e-05 | 0.999707 |
| rad37         | 8.12868e-06 | 0.999972 | 6.76507e-05 | 0.999774 |
| rad54         | 6.28002e-06 | 0.999979 | 5.22652e-05 | 0.999827 |
| rad70         | 5.97099e-06 | 0.999985 | 4.96933e-05 | 0.999876 |
| rad73         | 5.95726e-06 | 0.999991 | 4.95792e-05 | 0.999926 |
| rad65         | 2.87595e-06 | 0.999994 | 2.39350e-05 | 0.999950 |
| rad34         | 1.90624e-06 | 0.999995 | 1.58647e-05 | 0.999966 |
| PAH8+H        | 1.06524e-06 | 0.999997 | 8.86540e-06 | 0.999975 |
| rad72         | 7.14904e-07 | 0.999997 | 5.94977e-06 | 0.999981 |
| rad55         | 5.87553e-07 | 0.999998 | 4.88989e-06 | 0.999986 |
| rad56         | 3.21872e-07 | 0.999998 | 2.67877e-06 | 0.999988 |
| rad64         | 2.70855e-07 | 0.999998 | 2.25419e-06 | 0.999990 |
| rad53         | 2.70820e-07 | 0.999999 | 2.25389e-06 | 0.999993 |
| rad68syn      | 2.47504e-07 | 0.999999 | 2.05985e-06 | 0.999995 |
| rad68anti     | 1.58683e-07 | 0.999999 | 1.32064e-06 | 0.999996 |
| rad62         | 1.55148e-07 | 0.999999 | 1.29122e-06 | 0.999997 |
| rad40syn      | 1.10734e-07 | 0.999999 | 9.21579e-07 | 0.999998 |
| rad61         | 1.05680e-07 | 0.999999 | 8.79519e-07 | 0.999999 |
| rad43         | 8.79692e-08 | 1.000000 | 7.32121e-07 | 1.000000 |
| rad40anti     | 7.53435e-08 | 1.000000 | 6.27044e-07 | 1.000000 |
| rad42         | 1.97239e-08 | 1.000000 | 1.64152e-07 | 1.000000 |
| rad41         | 1.13877e-08 | 1.000000 | 9.47734e-08 | 1.000000 |
| rad6          | 2.29520e-12 | 1.000000 | 1.91017e-11 | 1.000000 |
| rad23         | 1.55264e-12 | 1.000000 | 1.29218e-11 | 1.000000 |
| rad45         | 2.80225e-13 | 1.000000 | 2.33217e-12 | 1.000000 |
| rad9          | 1.89154e-13 | 1.000000 | 1.57423e-12 | 1.000000 |
| rad20         | 1.43940e-13 | 1.000000 | 1.19794e-12 | 1.000000 |
| rad22         | 1.35699e-13 | 1.000000 | 1.12935e-12 | 1.000000 |
| rad21         | 6.94972e-14 | 1.000000 | 5.78388e-13 | 1.000000 |
| rad11         | 6.25867e-14 | 1.000000 | 5.20876e-13 | 1.000000 |
| rad36         | 5.11091e-14 | 1.000000 | 4.25354e-13 | 1.000000 |
| rad18         | 2.77737e-14 | 1.000000 | 2.31146e-13 | 1.000000 |
| rad7          | 2.64737e-14 | 1.000000 | 2.20327e-13 | 1.000000 |
| rad15         | 1.25487e-14 | 1.000000 | 1.04436e-13 | 1.000000 |
| rad28         | 1.21717e-14 | 1.000000 | 1.01298e-13 | 1.000000 |
| rad24         | 3.60418e-15 | 1.000000 | 2.99957e-14 | 1.000000 |
| rad13         | 2.74558e-15 | 1.000000 | 2.28500e-14 | 1.000000 |
| rad12         | 2.40046e-15 | 1.000000 | 1.99778e-14 | 1.000000 |

|       |             |          |             |         |
|-------|-------------|----------|-------------|---------|
| rad8  | 2.25267e-15 | 1.000000 | 1.87478e-14 | 1.00000 |
| rad26 | 1.25639e-15 | 1.000000 | 1.04562e-14 | 1.00000 |
| rad10 | 4.04301e-16 | 1.000000 | 3.36478e-15 | 1.00000 |
| rad47 | 2.44566e-16 | 1.000000 | 2.03539e-15 | 1.00000 |
| rad25 | 1.71221e-16 | 1.000000 | 1.42498e-15 | 1.00000 |
| rad33 | 1.46761e-16 | 1.000000 | 1.22141e-15 | 1.00000 |
| rad2  | 4.73757e-17 | 1.000000 | 3.94283e-16 | 1.00000 |
| rad5  | 2.17645e-17 | 1.000000 | 1.81134e-16 | 1.00000 |
| rad1  | 1.58223e-17 | 1.000000 | 1.31681e-16 | 1.00000 |
| rad3  | 8.71812e-18 | 1.000000 | 7.25563e-17 | 1.00000 |
| rad4  | 5.47010e-18 | 1.000000 | 4.55248e-17 | 1.00000 |
| rad14 | 2.68054e-18 | 1.000000 | 2.23087e-17 | 1.00000 |
| rad27 | 1.07390e-18 | 1.000000 | 8.93753e-18 | 1.00000 |

0.100000000E-02 Pa, 2750.00000 K

| Rate constant | True (fraction)     | Effective (fraction) |
|---------------|---------------------|----------------------|
| Total         | 8.05113e-13 (1.00 ) | 1.00487e-13 (1.00 )  |

| species       | PYtrue      | Cumul    | PYeffective | Cumul    |
|---------------|-------------|----------|-------------|----------|
| Benzyl+C2H2   | 0.875189    | 0.875189 | 0.00000     | 0.00000  |
| PhCH2CCH+H    | 0.0492371   | 0.924426 | 0.394492    | 0.394492 |
| Indene+H      | 0.0427171   | 0.967143 | 0.342254    | 0.736746 |
| PhCHCCH2+H    | 0.0126523   | 0.979795 | 0.101371    | 0.838117 |
| Ph+Allene     | 0.0121360   | 0.991931 | 0.0972347   | 0.935352 |
| PAH3+H        | 0.00165412  | 0.993586 | 0.0132530   | 0.948605 |
| PAH9+H        | 0.00112924  | 0.994715 | 0.00904761  | 0.957652 |
| rad19anti     | 0.000790044 | 0.995505 | 0.00632991  | 0.963982 |
| PAH7+H        | 0.000729333 | 0.996234 | 0.00584349  | 0.969826 |
| rad38         | 0.000670521 | 0.996905 | 0.00537228  | 0.975198 |
| rad30         | 0.000454283 | 0.997359 | 0.00363976  | 0.978838 |
| rad50         | 0.000356822 | 0.997716 | 0.00285889  | 0.981697 |
| Ph+MeAc       | 0.000331297 | 0.998047 | 0.00265438  | 0.984351 |
| PhCCH+CH3     | 0.000293338 | 0.998340 | 0.00235025  | 0.986701 |
| rad35         | 0.000276886 | 0.998617 | 0.00221844  | 0.988920 |
| rad39         | 0.000242689 | 0.998860 | 0.00194445  | 0.990864 |
| rad46         | 0.000239377 | 0.999099 | 0.00191791  | 0.992782 |
| rad51         | 0.000167552 | 0.999267 | 0.00134245  | 0.994125 |
| rad59         | 0.000133898 | 0.999401 | 0.00107280  | 0.995197 |
| rad67         | 0.000103303 | 0.999504 | 0.000827674 | 0.996025 |
| PhCCCH3+H     | 9.47597e-05 | 0.999599 | 0.000759224 | 0.996784 |
| rad60syn      | 8.03400e-05 | 0.999679 | 0.000643692 | 0.997428 |
| rad60anti     | 5.74980e-05 | 0.999737 | 0.000460680 | 0.997889 |
| PAH10+CH3     | 4.75540e-05 | 0.999784 | 0.000381007 | 0.998270 |
| rad52         | 3.97965e-05 | 0.999824 | 0.000318854 | 0.998588 |
| rad19syn      | 3.43481e-05 | 0.999858 | 0.000275200 | 0.998864 |
| rad58         | 2.60271e-05 | 0.999885 | 0.000208532 | 0.999072 |
| rad71         | 2.39120e-05 | 0.999908 | 0.000191586 | 0.999264 |
| PhcycC3H3_A+H | 1.91124e-05 | 0.999928 | 0.000153131 | 0.999417 |
| PAH1+H        | 1.89313e-05 | 0.999946 | 0.000151679 | 0.999569 |
| rad73         | 1.19963e-05 | 0.999958 | 9.61159e-05 | 0.999665 |
| rad37         | 1.02458e-05 | 0.999969 | 8.20902e-05 | 0.999747 |
| rad70         | 8.97456e-06 | 0.999978 | 7.19051e-05 | 0.999819 |
| rad54         | 7.04852e-06 | 0.999985 | 5.64734e-05 | 0.999875 |
| rad65         | 4.27356e-06 | 0.999989 | 3.42402e-05 | 0.999909 |
| rad34         | 3.06724e-06 | 0.999992 | 2.45750e-05 | 0.999934 |
| PAH8+H        | 2.42508e-06 | 0.999995 | 1.94299e-05 | 0.999953 |
| rad72         | 1.88022e-06 | 0.999996 | 1.50645e-05 | 0.999968 |
| rad55         | 6.94535e-07 | 0.999997 | 5.56468e-06 | 0.999974 |
| rad56         | 5.00306e-07 | 0.999998 | 4.00850e-06 | 0.999978 |
| rad68syn      | 4.83458e-07 | 0.999998 | 3.87351e-06 | 0.999982 |
| rad64         | 4.76899e-07 | 0.999999 | 3.82096e-06 | 0.999986 |
| rad53         | 3.88200e-07 | 0.999999 | 3.11030e-06 | 0.999989 |
| rad68anti     | 3.09361e-07 | 0.999999 | 2.47863e-06 | 0.999991 |
| rad62         | 2.47711e-07 | 0.999999 | 1.98468e-06 | 0.999993 |
| rad40syn      | 2.35491e-07 | 1.000000 | 1.88678e-06 | 0.999995 |
| rad61         | 1.98411e-07 | 1.000000 | 1.58969e-06 | 0.999997 |
| rad40anti     | 1.64464e-07 | 1.000000 | 1.31770e-06 | 0.999998 |
| rad43         | 1.38326e-07 | 1.000000 | 1.10828e-06 | 0.999999 |
| rad42         | 3.59374e-08 | 1.000000 | 2.87934e-07 | 1.000000 |
| rad41         | 2.03340e-08 | 1.000000 | 1.62918e-07 | 1.000000 |
| rad23         | 5.72482e-13 | 1.000000 | 4.58678e-12 | 1.000000 |
| rad6          | 5.40835e-13 | 1.000000 | 4.33322e-12 | 1.000000 |
| rad45         | 1.33381e-13 | 1.000000 | 1.06866e-12 | 1.000000 |
| rad9          | 1.03416e-13 | 1.000000 | 8.28581e-13 | 1.000000 |
| rad20         | 8.68784e-14 | 1.000000 | 6.96078e-13 | 1.000000 |
| rad22         | 5.55777e-14 | 1.000000 | 4.45294e-13 | 1.000000 |
| rad21         | 4.05054e-14 | 1.000000 | 3.24533e-13 | 1.000000 |

|       |             |         |             |          |
|-------|-------------|---------|-------------|----------|
| rad11 | 2.91978e-14 | 1.00000 | 2.33936e-13 | 1.000000 |
| rad36 | 2.47144e-14 | 1.00000 | 1.98014e-13 | 1.000000 |
| rad18 | 1.40097e-14 | 1.00000 | 1.12247e-13 | 1.000000 |
| rad7  | 8.87603e-15 | 1.00000 | 7.11156e-14 | 1.000000 |
| rad15 | 7.56782e-15 | 1.00000 | 6.06341e-14 | 1.000000 |
| rad28 | 4.38767e-15 | 1.00000 | 3.51544e-14 | 1.000000 |
| rad24 | 2.36701e-15 | 1.00000 | 1.89647e-14 | 1.000000 |
| rad8  | 2.27048e-15 | 1.00000 | 1.81913e-14 | 1.000000 |
| rad12 | 1.84640e-15 | 1.00000 | 1.47935e-14 | 1.000000 |
| rad13 | 1.02994e-15 | 1.00000 | 8.25198e-15 | 1.000000 |
| rad26 | 7.78181e-16 | 1.00000 | 6.23486e-15 | 1.000000 |
| rad47 | 3.65965e-16 | 1.00000 | 2.93215e-15 | 1.000000 |
| rad10 | 2.66600e-16 | 1.00000 | 2.13602e-15 | 1.000000 |
| rad25 | 1.16293e-16 | 1.00000 | 9.31748e-16 | 1.000000 |
| rad33 | 6.71474e-17 | 1.00000 | 5.37991e-16 | 1.000000 |
| rad2  | 2.38910e-17 | 1.00000 | 1.91417e-16 | 1.000000 |
| rad5  | 2.16587e-17 | 1.00000 | 1.73532e-16 | 1.000000 |
| rad1  | 9.19684e-18 | 1.00000 | 7.36860e-17 | 1.000000 |
| rad3  | 2.95843e-18 | 1.00000 | 2.37032e-17 | 1.000000 |
| rad4  | 1.81043e-18 | 1.00000 | 1.45053e-17 | 1.000000 |
| rad14 | 1.77543e-18 | 1.00000 | 1.42249e-17 | 1.000000 |
| rad27 | 9.32037e-19 | 1.00000 | 7.46757e-18 | 1.000000 |

0.100000000E-02 Pa, 3000.00000 K

=====

| Rate constant | True (fraction)     | Effective (fraction) |
|---------------|---------------------|----------------------|
| Total         | 1.15309e-12 (1.00 ) | 1.53862e-13 (1.00 )  |

| species       | PYtrue      | Cumul    | PYeffective | Cumul    |
|---------------|-------------|----------|-------------|----------|
| Benzyl+C2H2   | 0.866566    | 0.866566 | 0.00000     | 0.00000  |
| PhCH2CCH+H    | 0.0611725   | 0.927738 | 0.458447    | 0.458447 |
| Indene+H      | 0.0342672   | 0.962006 | 0.256810    | 0.715257 |
| PhCHCCH2+H    | 0.0154790   | 0.977485 | 0.116005    | 0.831262 |
| Ph+Allene     | 0.0132660   | 0.990751 | 0.0994201   | 0.930682 |
| PAH3+H        | 0.00205938  | 0.992810 | 0.0154337   | 0.946116 |
| PAH9+H        | 0.00113813  | 0.993948 | 0.00852950  | 0.954645 |
| PAH7+H        | 0.000866135 | 0.994814 | 0.00649110  | 0.961136 |
| rad19anti     | 0.000812999 | 0.995627 | 0.00609288  | 0.967229 |
| rad38         | 0.000693215 | 0.996321 | 0.00519518  | 0.972424 |
| rad30         | 0.000455427 | 0.996776 | 0.00341312  | 0.975838 |
| rad50         | 0.000445147 | 0.997221 | 0.00333608  | 0.979174 |
| Ph+MeAc       | 0.000411378 | 0.997633 | 0.00308300  | 0.982257 |
| PhCCH+CH3     | 0.000319072 | 0.997952 | 0.00239123  | 0.984648 |
| rad39         | 0.000311351 | 0.998263 | 0.00233337  | 0.986981 |
| rad35         | 0.000303822 | 0.998567 | 0.00227694  | 0.989258 |
| rad46         | 0.000258929 | 0.998826 | 0.00194050  | 0.991199 |
| rad51         | 0.000229661 | 0.999055 | 0.00172116  | 0.992920 |
| rad59         | 0.000160966 | 0.999216 | 0.00120633  | 0.994126 |
| rad67         | 0.000132859 | 0.999349 | 0.000995686 | 0.995122 |
| PhCCCH3+H     | 0.000117527 | 0.999467 | 0.000880786 | 0.996003 |
| rad60syn      | 9.03378e-05 | 0.999557 | 0.000677021 | 0.996680 |
| PAH10+CH3     | 6.53522e-05 | 0.999622 | 0.000489771 | 0.997169 |
| rad60anti     | 6.52879e-05 | 0.999688 | 0.000489289 | 0.997659 |
| rad52         | 5.15998e-05 | 0.999739 | 0.000386706 | 0.998045 |
| rad19syn      | 5.01057e-05 | 0.999789 | 0.000375508 | 0.998421 |
| rad71         | 4.45158e-05 | 0.999834 | 0.000333616 | 0.998755 |
| rad58         | 3.61220e-05 | 0.999870 | 0.000270710 | 0.999025 |
| PAH1+H        | 2.86271e-05 | 0.999899 | 0.000214541 | 0.999240 |
| PhcycC3H3_A+H | 2.34369e-05 | 0.999922 | 0.000175644 | 0.999415 |
| rad73         | 2.07080e-05 | 0.999943 | 0.000155192 | 0.999571 |
| rad70         | 1.26564e-05 | 0.999955 | 9.48509e-05 | 0.999666 |
| rad37         | 1.18404e-05 | 0.999967 | 8.87361e-05 | 0.999754 |
| rad54         | 7.74183e-06 | 0.999975 | 5.80198e-05 | 0.999812 |
| rad65         | 5.71876e-06 | 0.999981 | 4.28583e-05 | 0.999855 |
| PAH8+H        | 4.80152e-06 | 0.999986 | 3.59842e-05 | 0.999891 |
| rad34         | 4.57469e-06 | 0.999990 | 3.42843e-05 | 0.999925 |
| rad72         | 4.05904e-06 | 0.999994 | 3.04198e-05 | 0.999956 |
| rad68syn      | 8.44302e-07 | 0.999995 | 6.32747e-06 | 0.999962 |
| rad55         | 7.96394e-07 | 0.999996 | 5.96844e-06 | 0.999968 |
| rad64         | 7.49015e-07 | 0.999997 | 5.61336e-06 | 0.999974 |
| rad56         | 7.20451e-07 | 0.999997 | 5.39929e-06 | 0.999979 |
| rad68anti     | 5.39463e-07 | 0.999998 | 4.04291e-06 | 0.999983 |
| rad53         | 5.23143e-07 | 0.999998 | 3.92061e-06 | 0.999987 |
| rad40syn      | 4.40707e-07 | 0.999999 | 3.30280e-06 | 0.999990 |
| rad62         | 3.72784e-07 | 0.999999 | 2.79376e-06 | 0.999993 |
| rad61         | 3.22478e-07 | 0.999999 | 2.41676e-06 | 0.999996 |
| rad40anti     | 3.14359e-07 | 1.000000 | 2.35591e-06 | 0.999998 |
| rad43         | 1.94896e-07 | 1.00000  | 1.46061e-06 | 0.999999 |

|       |             |         |             |          |
|-------|-------------|---------|-------------|----------|
| rad42 | 5.98145e-08 | 1.00000 | 4.48269e-07 | 1.000000 |
| rad41 | 3.19484e-08 | 1.00000 | 2.39432e-07 | 1.00000  |
| rad23 | 2.38467e-13 | 1.00000 | 1.78715e-12 | 1.00000  |
| rad6  | 1.56436e-13 | 1.00000 | 1.17238e-12 | 1.00000  |
| rad45 | 6.80574e-14 | 1.00000 | 5.10044e-13 | 1.00000  |
| rad9  | 5.83510e-14 | 1.00000 | 4.37302e-13 | 1.00000  |
| rad20 | 5.61879e-14 | 1.00000 | 4.21091e-13 | 1.00000  |
| rad22 | 2.57601e-14 | 1.00000 | 1.93055e-13 | 1.00000  |
| rad21 | 2.52565e-14 | 1.00000 | 1.89281e-13 | 1.00000  |
| rad11 | 1.59326e-14 | 1.00000 | 1.19404e-13 | 1.00000  |
| rad36 | 1.27727e-14 | 1.00000 | 9.57232e-14 | 1.00000  |
| rad18 | 7.69601e-15 | 1.00000 | 5.76764e-14 | 1.00000  |
| rad15 | 4.64884e-15 | 1.00000 | 3.48400e-14 | 1.00000  |
| rad7  | 3.48817e-15 | 1.00000 | 2.61415e-14 | 1.00000  |
| rad8  | 2.23533e-15 | 1.00000 | 1.67523e-14 | 1.00000  |
| rad28 | 2.06813e-15 | 1.00000 | 1.54992e-14 | 1.00000  |
| rad24 | 1.60028e-15 | 1.00000 | 1.19931e-14 | 1.00000  |
| rad12 | 1.40784e-15 | 1.00000 | 1.05508e-14 | 1.00000  |
| rad26 | 4.95132e-16 | 1.00000 | 3.71068e-15 | 1.00000  |
| rad47 | 4.90428e-16 | 1.00000 | 3.67543e-15 | 1.00000  |
| rad13 | 4.47294e-16 | 1.00000 | 3.35217e-15 | 1.00000  |
| rad10 | 1.81069e-16 | 1.00000 | 1.35699e-15 | 1.00000  |
| rad25 | 8.60189e-17 | 1.00000 | 6.44654e-16 | 1.00000  |
| rad33 | 3.44368e-17 | 1.00000 | 2.58081e-16 | 1.00000  |
| rad5  | 2.10191e-17 | 1.00000 | 1.57524e-16 | 1.00000  |
| rad2  | 1.46039e-17 | 1.00000 | 1.09447e-16 | 1.00000  |
| rad1  | 6.36987e-18 | 1.00000 | 4.77379e-17 | 1.00000  |
| rad14 | 1.40238e-18 | 1.00000 | 1.05099e-17 | 1.00000  |
| rad3  | 1.21984e-18 | 1.00000 | 9.14190e-18 | 1.00000  |
| rad27 | 8.01839e-19 | 1.00000 | 6.00924e-18 | 1.00000  |
| rad4  | 7.24616e-19 | 1.00000 | 5.43051e-18 | 1.00000  |

0.100000000E-02 Pa, 3250.00000 K

=====

| Rate constant | True (fraction)     | Effective (fraction) |
|---------------|---------------------|----------------------|
| Total         | 1.58309e-12 (1.00 ) | 2.28795e-13 (1.00 )  |

| species       | PYtrue      | Cumul    | PYeffective | Cumul    |
|---------------|-------------|----------|-------------|----------|
| Benzyl+C2H2   | 0.855476    | 0.855476 | 0.00000     | 0.00000  |
| PhCH2CCH+H    | 0.0734301   | 0.928906 | 0.508082    | 0.508082 |
| Indene+H      | 0.0278643   | 0.956770 | 0.192800    | 0.700882 |
| PhCHCCH2+H    | 0.0183610   | 0.975131 | 0.127045    | 0.827927 |
| Ph+Allene     | 0.0145940   | 0.989725 | 0.100980    | 0.928907 |
| PAH3+H        | 0.00243645  | 0.992162 | 0.0168585   | 0.945765 |
| PAH9+H        | 0.00110339  | 0.993265 | 0.00763468  | 0.953400 |
| PAH7+H        | 0.000986571 | 0.994252 | 0.00682634  | 0.960227 |
| rad19anti     | 0.000808911 | 0.995061 | 0.00559707  | 0.965824 |
| rad38         | 0.000686670 | 0.995747 | 0.00475125  | 0.970575 |
| rad50         | 0.000518179 | 0.996266 | 0.00358542  | 0.974160 |
| Ph+MeAc       | 0.000489465 | 0.996755 | 0.00338674  | 0.977547 |
| rad30         | 0.000447972 | 0.997203 | 0.00309964  | 0.980647 |
| PhCCH+CH3     | 0.000378211 | 0.997581 | 0.00261694  | 0.983264 |
| rad39         | 0.000374434 | 0.997956 | 0.00259081  | 0.985854 |
| rad35         | 0.000323023 | 0.998279 | 0.00223508  | 0.988089 |
| rad51         | 0.000289245 | 0.998568 | 0.00200136  | 0.990091 |
| rad46         | 0.000266714 | 0.998835 | 0.00184546  | 0.991936 |
| rad59         | 0.000184695 | 0.999019 | 0.00127795  | 0.993214 |
| rad67         | 0.000159865 | 0.999179 | 0.00110614  | 0.994320 |
| PhCCCH3+H     | 0.000140367 | 0.999320 | 0.000971235 | 0.995292 |
| rad60syn      | 9.79791e-05 | 0.999418 | 0.000677943 | 0.995970 |
| PAH10+CH3     | 8.26142e-05 | 0.999500 | 0.000571630 | 0.996541 |
| rad71         | 7.28074e-05 | 0.999573 | 0.000503773 | 0.997045 |
| rad60anti     | 7.14060e-05 | 0.999644 | 0.000494077 | 0.997539 |
| rad19syn      | 7.13406e-05 | 0.999716 | 0.000493624 | 0.998033 |
| rad52         | 6.19533e-05 | 0.999778 | 0.000428671 | 0.998461 |
| rad58         | 4.68388e-05 | 0.999825 | 0.000324090 | 0.998785 |
| PAH1+H        | 3.98744e-05 | 0.999864 | 0.000275902 | 0.999061 |
| rad73         | 3.17350e-05 | 0.999896 | 0.000219583 | 0.999281 |
| PhcycC3H3_A+H | 2.77967e-05 | 0.999924 | 0.000192333 | 0.999473 |
| rad70         | 1.68825e-05 | 0.999941 | 0.000116814 | 0.999590 |
| rad37         | 1.28499e-05 | 0.999954 | 8.89115e-05 | 0.999679 |
| PAH8+H        | 8.50457e-06 | 0.999962 | 5.88453e-05 | 0.999738 |
| rad54         | 8.38235e-06 | 0.999971 | 5.79997e-05 | 0.999796 |
| rad72         | 7.52648e-06 | 0.999978 | 5.20777e-05 | 0.999848 |
| rad65         | 7.06074e-06 | 0.999985 | 4.88551e-05 | 0.999897 |
| rad34         | 6.39568e-06 | 0.999992 | 4.42534e-05 | 0.999941 |
| rad68syn      | 1.34606e-06 | 0.999993 | 9.31375e-06 | 0.999950 |
| rad64         | 1.07438e-06 | 0.999994 | 7.43389e-06 | 0.999958 |

|           |             |          |             |          |
|-----------|-------------|----------|-------------|----------|
| rad56     | 9.79690e-07 | 0.999995 | 6.77873e-06 | 0.999965 |
| rad55     | 8.93999e-07 | 0.999996 | 6.18581e-06 | 0.999971 |
| rad68anti | 8.59058e-07 | 0.999997 | 5.94405e-06 | 0.999977 |
| rad40syn  | 7.44327e-07 | 0.999997 | 5.15020e-06 | 0.999982 |
| rad53     | 6.73265e-07 | 0.999998 | 4.65850e-06 | 0.999986 |
| rad40anti | 5.40357e-07 | 0.999999 | 3.73887e-06 | 0.999990 |
| rad62     | 5.25220e-07 | 0.999999 | 3.63414e-06 | 0.999994 |
| rad61     | 4.70536e-07 | 1.000000 | 3.25576e-06 | 0.999997 |
| rad43     | 2.53715e-07 | 1.000000 | 1.75552e-06 | 0.999999 |
| rad42     | 9.14458e-08 | 1.000000 | 6.32737e-07 | 0.999999 |
| rad41     | 4.57450e-08 | 1.000000 | 3.16522e-07 | 1.000000 |
| rad23     | 1.08237e-13 | 1.000000 | 7.48921e-13 | 1.000000 |
| rad6      | 5.40747e-14 | 1.000000 | 3.74157e-13 | 1.000000 |
| rad20     | 3.83870e-14 | 1.000000 | 2.65610e-13 | 1.000000 |
| rad45     | 3.66665e-14 | 1.000000 | 2.53705e-13 | 1.000000 |
| rad9      | 3.40478e-14 | 1.000000 | 2.35586e-13 | 1.000000 |
| rad21     | 1.66174e-14 | 1.000000 | 1.14980e-13 | 1.000000 |
| rad22     | 1.31185e-14 | 1.000000 | 9.07702e-14 | 1.000000 |
| rad11     | 9.80936e-15 | 1.000000 | 6.78736e-14 | 1.000000 |
| rad36     | 6.95213e-15 | 1.000000 | 4.81036e-14 | 1.000000 |
| rad18     | 4.51593e-15 | 1.000000 | 3.12469e-14 | 1.000000 |
| rad15     | 2.91921e-15 | 1.000000 | 2.01988e-14 | 1.000000 |
| rad8      | 2.15817e-15 | 1.000000 | 1.49330e-14 | 1.000000 |
| rad7      | 1.57441e-15 | 1.000000 | 1.08938e-14 | 1.000000 |
| rad28     | 1.13714e-15 | 1.000000 | 7.86817e-15 | 1.000000 |
| rad24     | 1.10778e-15 | 1.000000 | 7.66503e-15 | 1.000000 |
| rad12     | 1.07284e-15 | 1.000000 | 7.42324e-15 | 1.000000 |
| rad47     | 6.03541e-16 | 1.000000 | 4.17606e-15 | 1.000000 |
| rad26     | 3.19114e-16 | 1.000000 | 2.20803e-15 | 1.000000 |
| rad13     | 2.21091e-16 | 1.000000 | 1.52979e-15 | 1.000000 |
| rad10     | 1.23772e-16 | 1.000000 | 8.56410e-16 | 1.000000 |
| rad25     | 6.72544e-17 | 1.000000 | 4.65351e-16 | 1.000000 |
| rad5      | 2.01773e-17 | 1.000000 | 1.39612e-16 | 1.000000 |
| rad33     | 1.94932e-17 | 1.000000 | 1.34878e-16 | 1.000000 |
| rad2      | 9.55584e-18 | 1.000000 | 6.61194e-17 | 1.000000 |
| rad1      | 4.66197e-18 | 1.000000 | 3.22574e-17 | 1.000000 |
| rad14     | 1.20219e-18 | 1.000000 | 8.31826e-18 | 1.000000 |
| rad27     | 6.78841e-19 | 1.000000 | 4.69708e-18 | 1.000000 |
| rad3      | 5.92021e-19 | 1.000000 | 4.09635e-18 | 1.000000 |
| rad4      | 3.42021e-19 | 1.000000 | 2.36654e-18 | 1.000000 |

0.100000000E-02 Pa, 3500.00000 K

| =====         |                 |          |                      |          |
|---------------|-----------------|----------|----------------------|----------|
| Rate constant | True (fraction) |          | Effective (fraction) |          |
| -----         |                 |          |                      |          |
| Total         | 2.10046e-12     | (1.00 )  | 3.29923e-13          | (1.00 )  |
| species       | PYtrue          | Cumul    | PYeffective          | Cumul    |
| -----         |                 |          |                      |          |
| Benzyl+C2H2   | 0.842928        | 0.842928 | 0.00000              | 0.00000  |
| PhCH2CCH+H    | 0.0857241       | 0.928652 | 0.545762             | 0.545762 |
| Indene+H      | 0.0229287       | 0.951581 | 0.145976             | 0.691738 |
| PhCHCCH2+H    | 0.0212218       | 0.972803 | 0.135108             | 0.826846 |
| Ph+Allene     | 0.0160719       | 0.988874 | 0.102322             | 0.929168 |
| PAH3+H        | 0.00277080      | 0.991645 | 0.0176403            | 0.946808 |
| PAH7+H        | 0.00108547      | 0.992731 | 0.00691065           | 0.953719 |
| PAH9+H        | 0.00103824      | 0.993769 | 0.00660998           | 0.960329 |
| rad19anti     | 0.000786012     | 0.994555 | 0.00500415           | 0.965333 |
| rad38         | 0.000657575     | 0.995213 | 0.00418645           | 0.969520 |
| rad50         | 0.000571322     | 0.995784 | 0.00363732           | 0.973157 |
| Ph+MeAc       | 0.000559758     | 0.996344 | 0.00356370           | 0.976721 |
| PhCCH+CH3     | 0.000466753     | 0.996810 | 0.00297158           | 0.979692 |
| rad30         | 0.000434295     | 0.997245 | 0.00276494           | 0.982457 |
| rad39         | 0.000426787     | 0.997672 | 0.00271714           | 0.985174 |
| rad51         | 0.000340822     | 0.998012 | 0.00216985           | 0.987344 |
| rad35         | 0.000335221     | 0.998348 | 0.00213419           | 0.989478 |
| rad46         | 0.000264413     | 0.998612 | 0.00168339           | 0.991162 |
| rad59         | 0.000204435     | 0.998816 | 0.00130154           | 0.992463 |
| rad67         | 0.000182834     | 0.998999 | 0.00116401           | 0.993627 |
| PhCCCH3+H     | 0.000163685     | 0.999163 | 0.00104210           | 0.994669 |
| rad71         | 0.000107601     | 0.999271 | 0.000685042          | 0.995354 |
| rad60syn      | 0.000103349     | 0.999374 | 0.000657969          | 0.996012 |
| PAH10+CH3     | 9.81181e-05     | 0.999472 | 0.000624669          | 0.996637 |
| rad19syn      | 9.79725e-05     | 0.999570 | 0.000623742          | 0.997261 |
| rad60anti     | 7.58697e-05     | 0.999646 | 0.000483025          | 0.997744 |
| rad52         | 7.00217e-05     | 0.999716 | 0.000445793          | 0.998190 |
| rad58         | 5.76196e-05     | 0.999773 | 0.000366835          | 0.998556 |
| PAH1+H        | 5.20523e-05     | 0.999826 | 0.000331391          | 0.998888 |
| rad73         | 4.43107e-05     | 0.999870 | 0.000282104          | 0.999170 |
| PhcycC3H3_A+H | 3.20633e-05     | 0.999902 | 0.000204131          | 0.999374 |

|           |             |          |             |          |
|-----------|-------------|----------|-------------|----------|
| rad70     | 2.14708e-05 | 0.999923 | 0.000136694 | 0.999511 |
| PAH8+H    | 1.37725e-05 | 0.999937 | 8.76827e-05 | 0.999598 |
| rad37     | 1.33235e-05 | 0.999950 | 8.48243e-05 | 0.999683 |
| rad72     | 1.23923e-05 | 0.999963 | 7.88958e-05 | 0.999762 |
| rad54     | 8.98058e-06 | 0.999972 | 5.71749e-05 | 0.999819 |
| rad34     | 8.46717e-06 | 0.999980 | 5.39063e-05 | 0.999873 |
| rad65     | 8.19015e-06 | 0.999988 | 5.21426e-05 | 0.999925 |
| rad68syn  | 1.99232e-06 | 0.999990 | 1.26841e-05 | 0.999938 |
| rad64     | 1.43496e-06 | 0.999992 | 9.13568e-06 | 0.999947 |
| rad56     | 1.27412e-06 | 0.999993 | 8.11171e-06 | 0.999955 |
| rad68anti | 1.27030e-06 | 0.999994 | 8.08736e-06 | 0.999963 |
| rad40syn  | 1.15716e-06 | 0.999996 | 7.36708e-06 | 0.999971 |
| rad55     | 9.87613e-07 | 0.999997 | 6.28764e-06 | 0.999977 |
| rad40anti | 8.52741e-07 | 0.999997 | 5.42898e-06 | 0.999982 |
| rad53     | 8.35966e-07 | 0.999998 | 5.32218e-06 | 0.999988 |
| rad62     | 6.97360e-07 | 0.999999 | 4.43975e-06 | 0.999992 |
| rad61     | 6.32568e-07 | 1.000000 | 4.02725e-06 | 0.999996 |
| rad43     | 3.12012e-07 | 1.000000 | 1.98643e-06 | 0.999998 |
| rad42     | 1.30122e-07 | 1.000000 | 8.28424e-07 | 0.999999 |
| rad41     | 6.11800e-08 | 1.000000 | 3.89503e-07 | 0.999999 |
| rad23     | 5.25342e-14 | 1.000000 | 3.34459e-13 | 0.999999 |
| rad20     | 2.74120e-14 | 1.000000 | 1.74519e-13 | 0.999999 |
| rad6      | 2.18712e-14 | 1.000000 | 1.39243e-13 | 0.999999 |
| rad45     | 2.06358e-14 | 1.000000 | 1.31378e-13 | 0.999999 |
| rad9      | 2.05520e-14 | 1.000000 | 1.30844e-13 | 0.999999 |
| rad21     | 1.14208e-14 | 1.000000 | 7.27103e-14 | 0.999999 |
| rad22     | 7.20694e-15 | 1.000000 | 4.58830e-14 | 0.999999 |
| rad11     | 6.60831e-15 | 1.000000 | 4.20718e-14 | 0.999999 |
| rad36     | 3.94401e-15 | 1.000000 | 2.51095e-14 | 0.999999 |
| rad18     | 2.79270e-15 | 1.000000 | 1.77797e-14 | 0.999999 |
| rad8      | 2.04865e-15 | 1.000000 | 1.30427e-14 | 0.999999 |
| rad15     | 1.87673e-15 | 1.000000 | 1.19482e-14 | 0.999999 |
| rad12     | 8.20876e-16 | 1.000000 | 5.22611e-15 | 0.999999 |
| rad7      | 7.98007e-16 | 1.000000 | 5.08051e-15 | 0.999999 |
| rad24     | 7.82702e-16 | 1.000000 | 4.98307e-15 | 0.999999 |
| rad47     | 6.94994e-16 | 1.000000 | 4.42468e-15 | 0.999999 |
| rad28     | 6.82567e-16 | 1.000000 | 4.34557e-15 | 0.999999 |
| rad26     | 2.08342e-16 | 1.000000 | 1.32641e-15 | 0.999999 |
| rad13     | 1.21833e-16 | 1.000000 | 7.75650e-16 | 0.999999 |
| rad10     | 8.52772e-17 | 1.000000 | 5.42917e-16 | 0.999999 |
| rad25     | 5.44463e-17 | 1.000000 | 3.46632e-16 | 0.999999 |
| rad5      | 1.93135e-17 | 1.000000 | 1.22960e-16 | 0.999999 |
| rad33     | 1.19819e-17 | 1.000000 | 7.62829e-17 | 0.999999 |
| rad2      | 6.52787e-18 | 1.000000 | 4.15597e-17 | 0.999999 |
| rad1      | 3.49416e-18 | 1.000000 | 2.22456e-17 | 0.999999 |
| rad14     | 1.06171e-18 | 1.000000 | 6.75938e-18 | 0.999999 |
| rad27     | 5.69301e-19 | 1.000000 | 3.62446e-18 | 0.999999 |
| rad3      | 3.26897e-19 | 1.000000 | 2.08119e-18 | 0.999999 |
| rad4      | 1.84871e-19 | 1.000000 | 1.17698e-18 | 0.999999 |

0.100000000E-02 Pa, 3750.00000 K

| Rate constant | True (fraction)     | Effective (fraction) |
|---------------|---------------------|----------------------|
| Total         | 2.70978e-12 (1.00 ) | 4.61708e-13 (1.00 )  |

| species     | PYtrue      | Cumul    | PYeffective | Cumul    |
|-------------|-------------|----------|-------------|----------|
| Benzyl+C2H2 | 0.829614    | 0.829614 | 0.00000     | 0.00000  |
| PhCH2CCH+H  | 0.0978316   | 0.927446 | 0.574175    | 0.574175 |
| PhCHCCH2+H  | 0.0240141   | 0.951460 | 0.140939    | 0.715114 |
| Indene+H    | 0.0190788   | 0.970538 | 0.111974    | 0.827088 |
| Ph+Allene   | 0.0176550   | 0.988193 | 0.103617    | 0.930705 |
| PAH3+H      | 0.00305565  | 0.991249 | 0.0179337   | 0.948639 |
| PAH7+H      | 0.00116197  | 0.992411 | 0.00681959  | 0.955458 |
| PAH9+H      | 0.000955042 | 0.993366 | 0.00560515  | 0.961063 |
| rad19anti   | 0.000750872 | 0.994117 | 0.00440688  | 0.965470 |
| Ph+MeAc     | 0.000618509 | 0.994736 | 0.00363004  | 0.969100 |
| rad38       | 0.000613193 | 0.995349 | 0.00359884  | 0.972699 |
| rad50       | 0.000603635 | 0.995952 | 0.00354274  | 0.976242 |
| PhCCH+CH3   | 0.000581835 | 0.996534 | 0.00341479  | 0.979657 |
| rad39       | 0.000465790 | 0.997000 | 0.00273373  | 0.982390 |
| rad30       | 0.000416539 | 0.997417 | 0.00244467  | 0.984835 |
| rad51       | 0.000380994 | 0.997798 | 0.00223606  | 0.987071 |
| rad35       | 0.000341508 | 0.998139 | 0.00200431  | 0.989075 |
| rad46       | 0.000254425 | 0.998393 | 0.00149322  | 0.990569 |
| rad59       | 0.000220084 | 0.998614 | 0.00129168  | 0.991860 |
| rad67       | 0.000201013 | 0.998815 | 0.00117975  | 0.993040 |
| PhCCCH3+H   | 0.000187990 | 0.999003 | 0.00110331  | 0.994143 |
| rad71       | 0.000146780 | 0.999149 | 0.000861455 | 0.995005 |



|               |             |          |             |          |
|---------------|-------------|----------|-------------|----------|
| rad19syn      | 0.000129261 | 0.999279 | 0.000758633 | 0.995764 |
| PAH10+CH3     | 0.000111172 | 0.999390 | 0.000652468 | 0.996416 |
| rad60syn      | 0.000106707 | 0.999496 | 0.000626263 | 0.997042 |
| rad60anti     | 7.88382e-05 | 0.999575 | 0.000462703 | 0.997505 |
| rad52         | 7.54521e-05 | 0.999651 | 0.000442829 | 0.997948 |
| rad58         | 6.80261e-05 | 0.999719 | 0.000399246 | 0.998347 |
| PAH1+H        | 6.45813e-05 | 0.999783 | 0.000379028 | 0.998726 |
| rad73         | 5.74878e-05 | 0.999841 | 0.000337397 | 0.999063 |
| PhcycC3H3_A+H | 3.61213e-05 | 0.999877 | 0.000211996 | 0.999275 |
| rad70         | 2.62309e-05 | 0.999903 | 0.000153949 | 0.999429 |
| PAH8+H        | 2.07420e-05 | 0.999924 | 0.000121735 | 0.999551 |
| rad72         | 1.85748e-05 | 0.999943 | 0.000109016 | 0.999660 |
| rad37         | 1.33636e-05 | 0.999956 | 7.84314e-05 | 0.999739 |
| rad34         | 1.07116e-05 | 0.999967 | 6.28665e-05 | 0.999801 |
| rad54         | 9.53969e-06 | 0.999976 | 5.59886e-05 | 0.999857 |
| rad65         | 9.05125e-06 | 0.999985 | 5.31219e-05 | 0.999911 |
| rad68syn      | 2.77520e-06 | 0.999988 | 1.62877e-05 | 0.999927 |
| rad64         | 1.81236e-06 | 0.999990 | 1.06367e-05 | 0.999938 |
| rad68anti     | 1.76807e-06 | 0.999992 | 1.03768e-05 | 0.999948 |
| rad40syn      | 1.68193e-06 | 0.999993 | 9.87130e-06 | 0.999958 |
| rad56         | 1.59874e-06 | 0.999995 | 9.38301e-06 | 0.999967 |
| rad40anti     | 1.25564e-06 | 0.999996 | 7.36935e-06 | 0.999975 |
| rad55         | 1.07703e-06 | 0.999997 | 6.32112e-06 | 0.999981 |
| rad53         | 1.00840e-06 | 0.999998 | 5.91834e-06 | 0.999987 |
| rad62         | 8.81786e-07 | 0.999999 | 5.17522e-06 | 0.999992 |
| rad61         | 7.98455e-07 | 1.000000 | 4.68615e-06 | 0.999997 |
| rad43         | 3.67979e-07 | 1.000000 | 2.15967e-06 | 0.999999 |
| rad42         | 1.74775e-07 | 1.000000 | 1.02576e-06 | 1.000000 |
| rad41         | 7.77074e-08 | 1.000000 | 4.56066e-07 | 1.000000 |
| rad23         | 2.69432e-14 | 1.000000 | 1.58130e-13 | 1.000000 |
| rad20         | 2.02983e-14 | 1.000000 | 1.19131e-13 | 1.000000 |
| rad9          | 1.28196e-14 | 1.000000 | 7.52383e-14 | 1.000000 |
| rad45         | 1.20404e-14 | 1.000000 | 7.06652e-14 | 1.000000 |
| rad6          | 1.01231e-14 | 1.000000 | 5.94123e-14 | 1.000000 |
| rad21         | 8.13806e-15 | 1.000000 | 4.77624e-14 | 1.000000 |
| rad11         | 4.75801e-15 | 1.000000 | 2.79249e-14 | 1.000000 |
| rad22         | 4.21574e-15 | 1.000000 | 2.47422e-14 | 1.000000 |
| rad36         | 2.31501e-15 | 1.000000 | 1.35868e-14 | 1.000000 |
| rad8          | 1.91572e-15 | 1.000000 | 1.12434e-14 | 1.000000 |
| rad18         | 1.80284e-15 | 1.000000 | 1.05809e-14 | 1.000000 |
| rad15         | 1.23517e-15 | 1.000000 | 7.24925e-15 | 1.000000 |
| rad47         | 7.59707e-16 | 1.000000 | 4.45873e-15 | 1.000000 |
| rad12         | 6.32118e-16 | 1.000000 | 3.70991e-15 | 1.000000 |
| rad24         | 5.63439e-16 | 1.000000 | 3.30683e-15 | 1.000000 |
| rad7          | 4.44313e-16 | 1.000000 | 2.60768e-15 | 1.000000 |
| rad28         | 4.32580e-16 | 1.000000 | 2.53882e-15 | 1.000000 |
| rad26         | 1.38065e-16 | 1.000000 | 8.10306e-16 | 1.000000 |
| rad13         | 7.33179e-17 | 1.000000 | 4.30304e-16 | 1.000000 |
| rad10         | 5.95623e-17 | 1.000000 | 3.49572e-16 | 1.000000 |
| rad25         | 4.50617e-17 | 1.000000 | 2.64468e-16 | 1.000000 |
| rad5          | 1.84869e-17 | 1.000000 | 1.08500e-16 | 1.000000 |
| rad33         | 7.87849e-18 | 1.000000 | 4.62390e-17 | 1.000000 |
| rad2          | 4.66345e-18 | 1.000000 | 2.73699e-17 | 1.000000 |
| rad1          | 2.65787e-18 | 1.000000 | 1.55991e-17 | 1.000000 |
| rad14         | 9.45611e-19 | 1.000000 | 5.54980e-18 | 1.000000 |
| rad27         | 4.76374e-19 | 1.000000 | 2.79585e-18 | 1.000000 |
| rad3          | 1.99423e-19 | 1.000000 | 1.17041e-18 | 1.000000 |
| rad4          | 1.11254e-19 | 1.000000 | 6.52953e-19 | 1.000000 |

0.100000000E-02 Pa, 4000.00000 K

=====

| Rate constant | True (fraction)     | Effective (fraction) |
|---------------|---------------------|----------------------|
| Total         | 3.41497e-12 (1.00 ) | 6.28297e-13 (1.00 )  |

| species     | PYtrue      | Cumul    | PYeffective | Cumul    |
|-------------|-------------|----------|-------------|----------|
| Benzyl+C2H2 | 0.816017    | 0.816017 | 0.000000    | 0.000000 |
| PhCH2CCH+H  | 0.109584    | 0.925601 | 0.595618    | 0.595618 |
| PhCHCCH2+H  | 0.0267098   | 0.952311 | 0.145175    | 0.740793 |
| Ph+Allene   | 0.0193046   | 0.971615 | 0.104926    | 0.845719 |
| Indene+H    | 0.0160484   | 0.987664 | 0.0872277   | 0.932947 |
| PAH3+H      | 0.00329013  | 0.990954 | 0.0178828   | 0.950829 |
| PAH7+H      | 0.00121791  | 0.992172 | 0.00661968  | 0.957449 |
| PAH9+H      | 0.000864009 | 0.993036 | 0.00469613  | 0.962145 |
| PhCCH+CH3   | 0.000720156 | 0.993756 | 0.00391424  | 0.966060 |
| rad19anti   | 0.000708493 | 0.994464 | 0.00385085  | 0.969910 |
| Ph+MeAc     | 0.000663934 | 0.995128 | 0.00360866  | 0.973519 |
| rad50       | 0.000616859 | 0.995745 | 0.00335280  | 0.976872 |
| rad38       | 0.000560144 | 0.996305 | 0.00304454  | 0.979916 |

|               |             |          |             |          |
|---------------|-------------|----------|-------------|----------|
| rad39         | 0.000491035 | 0.996796 | 0.00266891  | 0.982585 |
| rad51         | 0.000408498 | 0.997205 | 0.00222030  | 0.984806 |
| rad30         | 0.000396478 | 0.997601 | 0.00215497  | 0.986961 |
| rad35         | 0.000343096 | 0.997945 | 0.00186482  | 0.988825 |
| rad46         | 0.000239253 | 0.998184 | 0.00130041  | 0.990126 |
| rad59         | 0.000231903 | 0.998416 | 0.00126046  | 0.991386 |
| rad67         | 0.000214260 | 0.998630 | 0.00116456  | 0.992551 |
| PhCCCH3+H     | 0.000213580 | 0.998844 | 0.00116087  | 0.993712 |
| rad71         | 0.000187844 | 0.999031 | 0.00102098  | 0.994733 |
| rad19syn      | 0.000163941 | 0.999195 | 0.000891067 | 0.995624 |
| PAH10+CH3     | 0.000121536 | 0.999317 | 0.000660582 | 0.996284 |
| rad60syn      | 0.000108396 | 0.999425 | 0.000589161 | 0.996873 |
| rad60anti     | 8.05427e-05 | 0.999506 | 0.000437772 | 0.997311 |
| rad52         | 7.82960e-05 | 0.999584 | 0.000425560 | 0.997737 |
| rad58         | 7.77572e-05 | 0.999662 | 0.000422632 | 0.998159 |
| PAH1+H        | 7.70001e-05 | 0.999739 | 0.000418517 | 0.998578 |
| rad73         | 7.03552e-05 | 0.999809 | 0.000382400 | 0.998960 |
| PhcycC3H3_A+H | 3.98813e-05 | 0.999849 | 0.000216766 | 0.999177 |
| rad70         | 3.09908e-05 | 0.999880 | 0.000168444 | 0.999346 |
| PAH8+H        | 2.94355e-05 | 0.999910 | 0.000159990 | 0.999506 |
| rad72         | 2.58284e-05 | 0.999935 | 0.000140384 | 0.999646 |
| rad37         | 1.30848e-05 | 0.999948 | 7.11194e-05 | 0.999717 |
| rad34         | 1.30497e-05 | 0.999961 | 7.09289e-05 | 0.999788 |
| rad54         | 1.00584e-05 | 0.999972 | 5.46703e-05 | 0.999843 |
| rad65         | 9.63686e-06 | 0.999981 | 5.23790e-05 | 0.999895 |
| rad68syn      | 3.67778e-06 | 0.999985 | 1.99898e-05 | 0.999915 |
| rad68anti     | 2.34154e-06 | 0.999987 | 1.27269e-05 | 0.999928 |
| rad40syn      | 2.31359e-06 | 0.999990 | 1.25750e-05 | 0.999940 |
| rad64         | 2.19077e-06 | 0.999992 | 1.19074e-05 | 0.999952 |
| rad56         | 1.94741e-06 | 0.999994 | 1.05847e-05 | 0.999963 |
| rad40anti     | 1.74691e-06 | 0.999995 | 9.49492e-06 | 0.999972 |
| rad53         | 1.18744e-06 | 0.999997 | 6.45406e-06 | 0.999979 |
| rad55         | 1.16170e-06 | 0.999998 | 6.31418e-06 | 0.999985 |
| rad62         | 1.07271e-06 | 0.999999 | 5.83046e-06 | 0.999991 |
| rad61         | 9.59661e-07 | 1.000000 | 5.21602e-06 | 0.999996 |
| rad43         | 4.20278e-07 | 1.000000 | 2.28433e-06 | 0.999998 |
| rad42         | 2.24298e-07 | 1.000000 | 1.21912e-06 | 1.000000 |
| rad41         | 9.47630e-08 | 1.000000 | 5.15063e-07 | 1.000000 |
| rad20         | 1.54923e-14 | 1.000000 | 8.42047e-14 | 1.000000 |
| rad23         | 1.44789e-14 | 1.000000 | 7.86969e-14 | 1.000000 |
| rad9          | 8.24739e-15 | 1.000000 | 4.48268e-14 | 1.000000 |
| rad45         | 7.24447e-15 | 1.000000 | 3.93757e-14 | 1.000000 |
| rad21         | 5.97854e-15 | 1.000000 | 3.24950e-14 | 1.000000 |
| rad6          | 5.24365e-15 | 1.000000 | 2.85007e-14 | 1.000000 |
| rad11         | 3.59981e-15 | 1.000000 | 1.95660e-14 | 1.000000 |
| rad22         | 2.60012e-15 | 1.000000 | 1.41324e-14 | 1.000000 |
| rad8          | 1.76788e-15 | 1.000000 | 9.60889e-15 | 1.000000 |
| rad36         | 1.39866e-15 | 1.000000 | 7.60212e-15 | 1.000000 |
| rad18         | 1.20670e-15 | 1.000000 | 6.55875e-15 | 1.000000 |
| rad15         | 8.31405e-16 | 1.000000 | 4.51892e-15 | 1.000000 |
| rad47         | 7.97227e-16 | 1.000000 | 4.33315e-15 | 1.000000 |
| rad12         | 4.90407e-16 | 1.000000 | 2.66550e-15 | 1.000000 |
| rad24         | 4.12849e-16 | 1.000000 | 2.24395e-15 | 1.000000 |
| rad28         | 2.84817e-16 | 1.000000 | 1.54806e-15 | 1.000000 |
| rad7          | 2.66593e-16 | 1.000000 | 1.44901e-15 | 1.000000 |
| rad26         | 9.30201e-17 | 1.000000 | 5.05590e-16 | 1.000000 |
| rad13         | 4.73272e-17 | 1.000000 | 2.57236e-16 | 1.000000 |
| rad10         | 4.24108e-17 | 1.000000 | 2.30514e-16 | 1.000000 |
| rad25         | 3.78502e-17 | 1.000000 | 2.05726e-16 | 1.000000 |
| rad5          | 1.76968e-17 | 1.000000 | 9.61868e-17 | 1.000000 |
| rad33         | 5.47163e-18 | 1.000000 | 2.97398e-17 | 1.000000 |
| rad2          | 3.50102e-18 | 1.000000 | 1.90290e-17 | 1.000000 |
| rad1          | 2.04490e-18 | 1.000000 | 1.11146e-17 | 1.000000 |
| rad14         | 8.43873e-19 | 1.000000 | 4.58668e-18 | 1.000000 |
| rad27         | 3.99728e-19 | 1.000000 | 2.17263e-18 | 1.000000 |
| rad3          | 1.31447e-19 | 1.000000 | 7.14451e-19 | 1.000000 |
| rad4          | 7.27949e-20 | 1.000000 | 3.95660e-19 | 1.000000 |

0.100000000E-03 Pa, 20.0000000 K

=====

| Rate constant | True (fraction)      | Effective (fraction) |             |          |
|---------------|----------------------|----------------------|-------------|----------|
| Total         | 1.34336e-156 (1.00 ) | 1.34336e-156 (1.00 ) |             |          |
| species       | PYtrue               | Cumul                | PYeffective | Cumul    |
| Indene+H      | 0.999817             | 0.999817             | 0.999818    | 0.999818 |
| rad6          | 0.000181921          | 0.999999             | 0.000181921 | 1.000000 |
| Benzyl+C2H2   | 8.11917e-07          | 1.000000             | 0.000000    | 1.000000 |
| rad7          | 1.37424e-08          | 1.000000             | 1.37424e-08 | 1.000000 |

|               |             |          |             |          |
|---------------|-------------|----------|-------------|----------|
| rad11         | 3.57138e-09 | 1.000000 | 3.57139e-09 | 1.000000 |
| rad2          | 1.56381e-09 | 1.000000 | 1.56381e-09 | 1.000000 |
| rad23         | 5.60391e-10 | 1.000000 | 5.60392e-10 | 1.000000 |
| rad3          | 1.49272e-10 | 1.000000 | 1.49272e-10 | 1.000000 |
| rad1          | 9.88368e-11 | 1.000000 | 9.88369e-11 | 1.000000 |
| rad10         | 7.92938e-11 | 1.000000 | 7.92939e-11 | 1.000000 |
| rad4          | 7.54648e-11 | 1.000000 | 7.54649e-11 | 1.000000 |
| rad13         | 7.29601e-11 | 1.000000 | 7.29602e-11 | 1.000000 |
| rad45         | 4.79350e-12 | 1.000000 | 4.79351e-12 | 1.000000 |
| rad20         | 1.16456e-12 | 1.000000 | 1.16456e-12 | 1.000000 |
| rad21         | 7.26375e-13 | 1.000000 | 7.26376e-13 | 1.000000 |
| rad22         | 3.08682e-13 | 1.000000 | 3.08682e-13 | 1.000000 |
| rad36         | 2.98598e-13 | 1.000000 | 2.98598e-13 | 1.000000 |
| rad33         | 1.37695e-13 | 1.000000 | 1.37695e-13 | 1.000000 |
| rad18         | 6.34253e-15 | 1.000000 | 6.34254e-15 | 1.000000 |
| rad35         | 2.42860e-15 | 1.000000 | 2.42860e-15 | 1.000000 |
| rad28         | 1.70044e-16 | 1.000000 | 1.70044e-16 | 1.000000 |
| PAH9+H        | 1.62760e-16 | 1.000000 | 1.62760e-16 | 1.000000 |
| rad26         | 3.00628e-17 | 1.000000 | 3.00628e-17 | 1.000000 |
| rad27         | 4.60533e-19 | 1.000000 | 4.60533e-19 | 1.000000 |
| rad38         | 2.99009e-19 | 1.000000 | 2.99010e-19 | 1.000000 |
| rad24         | 1.07445e-19 | 1.000000 | 1.07445e-19 | 1.000000 |
| rad31         | 6.20852e-20 | 1.000000 | 6.20852e-20 | 1.000000 |
| PhCHCCH2+H    | 1.28056e-20 | 1.000000 | 1.28057e-20 | 1.000000 |
| rad30         | 3.78748e-21 | 1.000000 | 3.78748e-21 | 1.000000 |
| PhCCH+CH3     | 2.25630e-21 | 1.000000 | 2.25630e-21 | 1.000000 |
| rad25         | 1.47124e-21 | 1.000000 | 1.47124e-21 | 1.000000 |
| PhCCCH3+H     | 5.44863e-22 | 1.000000 | 5.44863e-22 | 1.000000 |
| rad14         | 2.71062e-22 | 1.000000 | 2.71062e-22 | 1.000000 |
| rad15         | 8.21367e-24 | 1.000000 | 8.21368e-24 | 1.000000 |
| rad8          | 5.99533e-26 | 1.000000 | 5.99533e-26 | 1.000000 |
| rad9          | 1.19581e-27 | 1.000000 | 1.19581e-27 | 1.000000 |
| PAH7+H        | 3.05615e-28 | 1.000000 | 3.05615e-28 | 1.000000 |
| Ph+MeAc       | 1.25263e-28 | 1.000000 | 1.25263e-28 | 1.000000 |
| rad46         | 2.47726e-29 | 1.000000 | 2.47726e-29 | 1.000000 |
| rad12         | 2.05912e-29 | 1.000000 | 2.05912e-29 | 1.000000 |
| rad39         | 2.80094e-30 | 1.000000 | 2.80094e-30 | 1.000000 |
| Ph+Allene     | 4.87413e-32 | 1.000000 | 4.87414e-32 | 1.000000 |
| rad60syn      | 3.07140e-36 | 1.000000 | 3.07140e-36 | 1.000000 |
| rad60anti     | 8.18124e-38 | 1.000000 | 8.18125e-38 | 1.000000 |
| PhCH2CCH+H    | 1.30461e-38 | 1.000000 | 1.30461e-38 | 1.000000 |
| rad37         | 1.70947e-39 | 1.000000 | 1.70948e-39 | 1.000000 |
| rad5          | 1.34407e-42 | 1.000000 | 1.34408e-42 | 1.000000 |
| PAH3+H        | 3.79316e-47 | 1.000000 | 3.79316e-47 | 1.000000 |
| rad59         | 2.01589e-47 | 1.000000 | 2.01589e-47 | 1.000000 |
| rad50         | 6.56707e-48 | 1.000000 | 6.56708e-48 | 1.000000 |
| rad19syn      | 8.39169e-56 | 1.000000 | 8.39169e-56 | 1.000000 |
| rad52         | 9.76214e-60 | 1.000000 | 9.76214e-60 | 1.000000 |
| rad54         | 1.12822e-60 | 1.000000 | 1.12823e-60 | 1.000000 |
| PAH10+CH3     | 7.41630e-61 | 1.000000 | 7.41630e-61 | 1.000000 |
| rad43         | 1.70137e-61 | 1.000000 | 1.70137e-61 | 1.000000 |
| rad62         | 5.37739e-64 | 1.000000 | 5.37739e-64 | 1.000000 |
| rad51         | 5.99288e-67 | 1.000000 | 5.99288e-67 | 1.000000 |
| rad70         | 7.04926e-70 | 1.000000 | 7.04926e-70 | 1.000000 |
| PhcycC3H3_A+H | 3.00296e-70 | 1.000000 | 3.00297e-70 | 1.000000 |
| rad55         | 1.61616e-70 | 1.000000 | 1.61616e-70 | 1.000000 |
| rad65         | 4.31217e-72 | 1.000000 | 4.31217e-72 | 1.000000 |
| rad58         | 1.01379e-73 | 1.000000 | 1.01379e-73 | 1.000000 |
| PAH1+H        | 1.43486e-75 | 1.000000 | 1.43486e-75 | 1.000000 |
| rad34         | 9.39517e-78 | 1.000000 | 9.39518e-78 | 1.000000 |
| rad42         | 6.79938e-82 | 1.000000 | 6.79938e-82 | 1.000000 |
| rad41         | 8.55710e-83 | 1.000000 | 8.55711e-83 | 1.000000 |
| rad47         | 2.54853e-84 | 1.000000 | 2.54853e-84 | 1.000000 |

0.100000000E-03 Pa, 30.000000 K

=====

| Rate constant | True (fraction) |          | Effective (fraction) |          |
|---------------|-----------------|----------|----------------------|----------|
| Total         | 1.15918e-108    | (1.00 )  | 1.15918e-108         | (1.00 )  |
| species       | PYtrue          | Cumul    | PYeffective          | Cumul    |
| Indene+H      | 0.999814        | 0.999814 | 0.999815             | 0.999815 |
| rad6          | 0.000184548     | 0.999999 | 0.000184548          | 1.000000 |
| Benzyl+C2H2   | 1.04104e-06     | 1.000000 | 0.00000              | 1.000000 |
| rad7          | 1.36484e-08     | 1.000000 | 1.36484e-08          | 1.000000 |
| rad11         | 3.42444e-09     | 1.000000 | 3.42444e-09          | 1.000000 |
| rad2          | 3.37156e-09     | 1.000000 | 3.37156e-09          | 1.000000 |
| rad1          | 2.13214e-10     | 1.000000 | 2.13215e-10          | 1.000000 |
| rad10         | 1.69801e-10     | 1.000000 | 1.69802e-10          | 1.000000 |

|               |             |          |             |          |
|---------------|-------------|----------|-------------|----------|
| rad3          | 1.57776e-10 | 1.000000 | 1.57776e-10 | 1.000000 |
| rad4          | 7.97758e-11 | 1.000000 | 7.97759e-11 | 1.000000 |
| rad13         | 7.40342e-11 | 1.000000 | 7.40343e-11 | 1.000000 |
| rad23         | 4.49035e-11 | 1.000000 | 4.49035e-11 | 1.000000 |
| rad20         | 5.67584e-13 | 1.000000 | 5.67584e-13 | 1.000000 |
| rad45         | 3.59556e-13 | 1.000000 | 3.59557e-13 | 1.000000 |
| rad21         | 3.54056e-13 | 1.000000 | 3.54056e-13 | 1.000000 |
| rad33         | 1.39773e-13 | 1.000000 | 1.39773e-13 | 1.000000 |
| rad22         | 3.61644e-14 | 1.000000 | 3.61644e-14 | 1.000000 |
| rad36         | 2.23907e-14 | 1.000000 | 2.23907e-14 | 1.000000 |
| rad35         | 4.75044e-15 | 1.000000 | 4.75044e-15 | 1.000000 |
| rad18         | 2.88033e-15 | 1.000000 | 2.88033e-15 | 1.000000 |
| rad28         | 4.10260e-16 | 1.000000 | 4.10260e-16 | 1.000000 |
| PAH9+H        | 1.06192e-16 | 1.000000 | 1.06192e-16 | 1.000000 |
| rad26         | 9.28110e-17 | 1.000000 | 9.28111e-17 | 1.000000 |
| rad27         | 8.55871e-19 | 1.000000 | 8.55872e-19 | 1.000000 |
| rad38         | 1.91015e-19 | 1.000000 | 1.91015e-19 | 1.000000 |
| rad31         | 9.15737e-20 | 1.000000 | 9.15738e-20 | 1.000000 |
| PhCHCCH2+H    | 3.05096e-20 | 1.000000 | 3.05096e-20 | 1.000000 |
| rad24         | 1.88903e-20 | 1.000000 | 1.88903e-20 | 1.000000 |
| rad30         | 8.45785e-21 | 1.000000 | 8.45786e-21 | 1.000000 |
| PhCCH+CH3     | 4.99352e-21 | 1.000000 | 4.99352e-21 | 1.000000 |
| rad25         | 1.76231e-21 | 1.000000 | 1.76231e-21 | 1.000000 |
| PhCCCH3+H     | 1.18741e-21 | 1.000000 | 1.18742e-21 | 1.000000 |
| rad14         | 3.46838e-22 | 1.000000 | 3.46838e-22 | 1.000000 |
| rad15         | 1.93123e-23 | 1.000000 | 1.93124e-23 | 1.000000 |
| rad8          | 1.06223e-25 | 1.000000 | 1.06223e-25 | 1.000000 |
| rad9          | 1.73000e-27 | 1.000000 | 1.73000e-27 | 1.000000 |
| PAH7+H        | 4.74018e-28 | 1.000000 | 4.74018e-28 | 1.000000 |
| Ph+MeAc       | 1.33584e-28 | 1.000000 | 1.33584e-28 | 1.000000 |
| rad46         | 5.12575e-29 | 1.000000 | 5.12575e-29 | 1.000000 |
| rad12         | 2.63003e-29 | 1.000000 | 2.63003e-29 | 1.000000 |
| rad39         | 3.23575e-30 | 1.000000 | 3.23575e-30 | 1.000000 |
| Ph+Allene     | 3.31417e-32 | 1.000000 | 3.31417e-32 | 1.000000 |
| rad60syn      | 2.30935e-36 | 1.000000 | 2.30936e-36 | 1.000000 |
| rad60anti     | 4.82403e-38 | 1.000000 | 4.82404e-38 | 1.000000 |
| PhCH2CCH+H    | 3.67821e-39 | 1.000000 | 3.67821e-39 | 1.000000 |
| rad37         | 4.19974e-40 | 1.000000 | 4.19975e-40 | 1.000000 |
| rad5          | 3.03697e-43 | 1.000000 | 3.03697e-43 | 1.000000 |
| PAH3+H        | 7.07621e-48 | 1.000000 | 7.07622e-48 | 1.000000 |
| rad59         | 3.77417e-48 | 1.000000 | 3.77417e-48 | 1.000000 |
| rad50         | 1.34209e-48 | 1.000000 | 1.34209e-48 | 1.000000 |
| rad19syn      | 1.01021e-56 | 1.000000 | 1.01022e-56 | 1.000000 |
| rad52         | 1.19159e-60 | 1.000000 | 1.19159e-60 | 1.000000 |
| rad54         | 1.28126e-61 | 1.000000 | 1.28126e-61 | 1.000000 |
| PAH10+CH3     | 8.43284e-62 | 1.000000 | 8.43285e-62 | 1.000000 |
| rad43         | 1.93561e-62 | 1.000000 | 1.93561e-62 | 1.000000 |
| rad62         | 5.99057e-65 | 1.000000 | 5.99057e-65 | 1.000000 |
| rad51         | 6.67048e-68 | 1.000000 | 6.67048e-68 | 1.000000 |
| rad70         | 7.66939e-71 | 1.000000 | 7.66940e-71 | 1.000000 |
| PhcycC3H3_A+H | 3.26450e-71 | 1.000000 | 3.26450e-71 | 1.000000 |
| rad55         | 1.75698e-71 | 1.000000 | 1.75698e-71 | 1.000000 |
| rad65         | 4.70894e-73 | 1.000000 | 4.70895e-73 | 1.000000 |
| rad58         | 1.10140e-74 | 1.000000 | 1.10140e-74 | 1.000000 |
| PAH1+H        | 1.55288e-76 | 1.000000 | 1.55288e-76 | 1.000000 |
| rad34         | 1.02179e-78 | 1.000000 | 1.02179e-78 | 1.000000 |
| rad42         | 7.44393e-83 | 1.000000 | 7.44394e-83 | 1.000000 |
| rad41         | 9.42004e-84 | 1.000000 | 9.42005e-84 | 1.000000 |
| rad47         | 1.37627e-85 | 1.000000 | 1.37627e-85 | 1.000000 |

0.100000000E-03 Pa, 40.0000000 K

=====

| Rate constant | True (fraction)     | Effective (fraction) |
|---------------|---------------------|----------------------|
| Total         | 1.02415e-84 (1.00 ) | 1.02415e-84 (1.00 )  |

| species     | PYtrue      | Cumul    | PYeffective | Cumul    |
|-------------|-------------|----------|-------------|----------|
| Indene+H    | 0.999809    | 0.999809 | 0.999810    | 0.999810 |
| rad6        | 0.000189861 | 0.999999 | 0.000189861 | 1.000000 |
| Benzyl+C2H2 | 1.52901e-06 | 1.000000 | 0.000000    | 1.000000 |
| rad7        | 1.39353e-08 | 1.000000 | 1.39354e-08 | 1.000000 |
| rad2        | 5.49974e-09 | 1.000000 | 5.49975e-09 | 1.000000 |
| rad11       | 3.46423e-09 | 1.000000 | 3.46423e-09 | 1.000000 |
| rad1        | 3.48226e-10 | 1.000000 | 3.48227e-10 | 1.000000 |
| rad10       | 2.76488e-10 | 1.000000 | 2.76488e-10 | 1.000000 |
| rad3        | 1.69361e-10 | 1.000000 | 1.69361e-10 | 1.000000 |
| rad4        | 8.56599e-11 | 1.000000 | 8.56601e-11 | 1.000000 |
| rad13       | 7.62358e-11 | 1.000000 | 7.62359e-11 | 1.000000 |
| rad23       | 1.12627e-11 | 1.000000 | 1.12627e-11 | 1.000000 |

|               |             |         |             |          |
|---------------|-------------|---------|-------------|----------|
| rad20         | 3.70853e-13 | 1.00000 | 3.70853e-13 | 1.000000 |
| rad21         | 2.31407e-13 | 1.00000 | 2.31407e-13 | 1.000000 |
| rad33         | 1.43994e-13 | 1.00000 | 1.43994e-13 | 1.000000 |
| rad45         | 8.71540e-14 | 1.00000 | 8.71541e-14 | 1.000000 |
| rad35         | 6.04543e-14 | 1.00000 | 6.04544e-14 | 1.000000 |
| rad22         | 1.20020e-14 | 1.00000 | 1.20021e-14 | 1.000000 |
| rad36         | 5.42405e-15 | 1.00000 | 5.42406e-15 | 1.000000 |
| rad18         | 1.83920e-15 | 1.00000 | 1.83920e-15 | 1.000000 |
| rad28         | 8.97533e-16 | 1.00000 | 8.97534e-16 | 1.000000 |
| PAH9+H        | 5.62954e-16 | 1.00000 | 5.62955e-16 | 1.000000 |
| rad26         | 2.22541e-16 | 1.00000 | 2.22541e-16 | 1.000000 |
| rad27         | 1.53101e-18 | 1.00000 | 1.53102e-18 | 1.000000 |
| rad38         | 2.31332e-19 | 1.00000 | 2.31332e-19 | 1.000000 |
| rad31         | 1.27322e-19 | 1.00000 | 1.27323e-19 | 1.000000 |
| PhCHCCH2+H    | 6.58636e-20 | 1.00000 | 6.58637e-20 | 1.000000 |
| rad30         | 1.83762e-20 | 1.00000 | 1.83762e-20 | 1.000000 |
| PhCCH+CH3     | 1.03538e-20 | 1.00000 | 1.03538e-20 | 1.000000 |
| rad24         | 9.79703e-21 | 1.00000 | 9.79705e-21 | 1.000000 |
| rad25         | 2.62486e-21 | 1.00000 | 2.62486e-21 | 1.000000 |
| PhCCCH3+H     | 2.43303e-21 | 1.00000 | 2.43304e-21 | 1.000000 |
| rad14         | 5.26844e-22 | 1.00000 | 5.26845e-22 | 1.000000 |
| rad15         | 4.19745e-23 | 1.00000 | 4.19746e-23 | 1.000000 |
| rad8          | 1.88514e-25 | 1.00000 | 1.88514e-25 | 1.000000 |
| rad9          | 2.68017e-27 | 1.00000 | 2.68017e-27 | 1.000000 |
| PAH7+H        | 7.29323e-28 | 1.00000 | 7.29325e-28 | 1.000000 |
| Ph+MeAc       | 1.71547e-28 | 1.00000 | 1.71547e-28 | 1.000000 |
| rad46         | 1.02321e-28 | 1.00000 | 1.02321e-28 | 1.000000 |
| rad12         | 3.71920e-29 | 1.00000 | 3.71921e-29 | 1.000000 |
| rad39         | 4.23197e-30 | 1.00000 | 4.23198e-30 | 1.000000 |
| Ph+Allene     | 3.31132e-32 | 1.00000 | 3.31132e-32 | 1.000000 |
| rad60syn      | 2.42237e-36 | 1.00000 | 2.42238e-36 | 1.000000 |
| rad60anti     | 4.47126e-38 | 1.00000 | 4.47126e-38 | 1.000000 |
| PhCH2CCH+H    | 2.49158e-39 | 1.00000 | 2.49158e-39 | 1.000000 |
| rad37         | 2.70850e-40 | 1.00000 | 2.70850e-40 | 1.000000 |
| rad5          | 1.90674e-43 | 1.00000 | 1.90675e-43 | 1.000000 |
| PAH3+H        | 4.17965e-48 | 1.00000 | 4.17965e-48 | 1.000000 |
| rad59         | 2.23116e-48 | 1.00000 | 2.23116e-48 | 1.000000 |
| rad50         | 8.14620e-49 | 1.00000 | 8.14621e-49 | 1.000000 |
| rad19syn      | 5.47953e-57 | 1.00000 | 5.47954e-57 | 1.000000 |
| rad52         | 6.46251e-61 | 1.00000 | 6.46252e-61 | 1.000000 |
| rad54         | 7.00826e-62 | 1.00000 | 7.00827e-62 | 1.000000 |
| PAH10+CH3     | 4.64551e-62 | 1.00000 | 4.64552e-62 | 1.000000 |
| rad43         | 1.06686e-62 | 1.00000 | 1.06686e-62 | 1.000000 |
| rad62         | 3.32303e-65 | 1.00000 | 3.32303e-65 | 1.000000 |
| rad51         | 3.68316e-68 | 1.00000 | 3.68316e-68 | 1.000000 |
| rad70         | 4.37381e-71 | 1.00000 | 4.37382e-71 | 1.000000 |
| PhcycC3H3_A+H | 1.86820e-71 | 1.00000 | 1.86820e-71 | 1.000000 |
| rad55         | 1.00511e-71 | 1.00000 | 1.00511e-71 | 1.000000 |
| rad65         | 2.65634e-73 | 1.00000 | 2.65635e-73 | 1.000000 |
| rad58         | 6.32222e-75 | 1.00000 | 6.32223e-75 | 1.000000 |
| PAH1+H        | 9.18626e-77 | 1.00000 | 9.18628e-77 | 1.000000 |
| rad34         | 6.10818e-79 | 1.00000 | 6.10818e-79 | 1.000000 |
| rad42         | 4.58459e-83 | 1.00000 | 4.58459e-83 | 1.000000 |
| rad41         | 5.93022e-84 | 1.00000 | 5.93023e-84 | 1.000000 |
| rad47         | 5.45244e-86 | 1.00000 | 5.45245e-86 | 1.000000 |

0.100000000E-03 Pa, 50.0000000 K

=====

| Rate constant | True (fraction)     | Effective (fraction) |
|---------------|---------------------|----------------------|
| Total         | 2.31816e-70 (1.00 ) | 2.31816e-70 (1.00 )  |

| species     | PYtrue      | Cumul    | PYeffective | Cumul    |
|-------------|-------------|----------|-------------|----------|
| Indene+H    | 0.999801    | 0.999801 | 0.999803    | 0.999803 |
| rad6        | 0.000197025 | 0.999998 | 0.000197025 | 1.00000  |
| Benzyl+C2H2 | 2.26157e-06 | 1.00000  | 0.00000     | 1.00000  |
| rad7        | 1.44113e-08 | 1.00000  | 1.44113e-08 | 1.00000  |
| rad2        | 8.15918e-09 | 1.00000  | 8.15919e-09 | 1.00000  |
| rad11       | 3.56742e-09 | 1.00000  | 3.56743e-09 | 1.00000  |
| rad1        | 5.17521e-10 | 1.00000  | 5.17522e-10 | 1.00000  |
| rad10       | 4.10130e-10 | 1.00000  | 4.10131e-10 | 1.00000  |
| rad3        | 1.85108e-10 | 1.00000  | 1.85108e-10 | 1.00000  |
| rad4        | 9.36663e-11 | 1.00000  | 9.36665e-11 | 1.00000  |
| rad13       | 7.92212e-11 | 1.00000  | 7.92214e-11 | 1.00000  |
| rad23       | 4.33762e-12 | 1.00000  | 4.33763e-12 | 1.00000  |
| rad35       | 3.20858e-13 | 1.00000  | 3.20858e-13 | 1.00000  |
| rad20       | 2.71049e-13 | 1.00000  | 2.71050e-13 | 1.00000  |
| rad21       | 1.69208e-13 | 1.00000  | 1.69209e-13 | 1.00000  |
| rad33       | 1.49721e-13 | 1.00000  | 1.49722e-13 | 1.00000  |

|               |             |         |             |         |
|---------------|-------------|---------|-------------|---------|
| rad45         | 3.28246e-14 | 1.00000 | 3.28246e-14 | 1.00000 |
| PAH9+H        | 8.96913e-15 | 1.00000 | 8.96915e-15 | 1.00000 |
| rad22         | 5.72658e-15 | 1.00000 | 5.72659e-15 | 1.00000 |
| rad28         | 2.09684e-15 | 1.00000 | 2.09685e-15 | 1.00000 |
| rad36         | 2.04125e-15 | 1.00000 | 2.04125e-15 | 1.00000 |
| rad18         | 1.32952e-15 | 1.00000 | 1.32952e-15 | 1.00000 |
| rad26         | 5.46529e-16 | 1.00000 | 5.46531e-16 | 1.00000 |
| rad27         | 3.02895e-18 | 1.00000 | 3.02896e-18 | 1.00000 |
| rad38         | 2.69416e-18 | 1.00000 | 2.69416e-18 | 1.00000 |
| rad30         | 2.14869e-19 | 1.00000 | 2.14870e-19 | 1.00000 |
| rad31         | 1.73435e-19 | 1.00000 | 1.73436e-19 | 1.00000 |
| PhCHCCH2+H    | 1.54374e-19 | 1.00000 | 1.54374e-19 | 1.00000 |
| PhCCH+CH3     | 2.36333e-20 | 1.00000 | 2.36334e-20 | 1.00000 |
| rad24         | 6.80010e-21 | 1.00000 | 6.80011e-21 | 1.00000 |
| PhCCCH3+H     | 5.50760e-21 | 1.00000 | 5.50762e-21 | 1.00000 |
| rad25         | 4.74068e-21 | 1.00000 | 4.74069e-21 | 1.00000 |
| rad14         | 9.63899e-22 | 1.00000 | 9.63901e-22 | 1.00000 |
| rad15         | 9.89562e-23 | 1.00000 | 9.89564e-23 | 1.00000 |
| rad8          | 3.84740e-25 | 1.00000 | 3.84741e-25 | 1.00000 |
| rad9          | 4.97176e-27 | 1.00000 | 4.97177e-27 | 1.00000 |
| PAH7+H        | 1.33147e-27 | 1.00000 | 1.33147e-27 | 1.00000 |
| Ph+MeAc       | 2.81690e-28 | 1.00000 | 2.81691e-28 | 1.00000 |
| rad46         | 2.27517e-28 | 1.00000 | 2.27518e-28 | 1.00000 |
| rad12         | 6.47874e-29 | 1.00000 | 6.47876e-29 | 1.00000 |
| rad39         | 6.98086e-30 | 1.00000 | 6.98087e-30 | 1.00000 |
| Ph+Allene     | 4.67078e-32 | 1.00000 | 4.67079e-32 | 1.00000 |
| rad60syn      | 3.50865e-36 | 1.00000 | 3.50866e-36 | 1.00000 |
| rad60anti     | 6.04522e-38 | 1.00000 | 6.04523e-38 | 1.00000 |
| PhCH2CCH+H    | 2.90467e-39 | 1.00000 | 2.90468e-39 | 1.00000 |
| rad37         | 3.10813e-40 | 1.00000 | 3.10814e-40 | 1.00000 |
| rad5          | 2.17052e-43 | 1.00000 | 2.17053e-43 | 1.00000 |
| PAH3+H        | 4.66582e-48 | 1.00000 | 4.66583e-48 | 1.00000 |
| rad59         | 2.49090e-48 | 1.00000 | 2.49091e-48 | 1.00000 |
| rad50         | 9.15107e-49 | 1.00000 | 9.15109e-49 | 1.00000 |
| rad19syn      | 6.31386e-57 | 1.00000 | 6.31388e-57 | 1.00000 |
| rad52         | 7.40825e-61 | 1.00000 | 7.40827e-61 | 1.00000 |
| rad54         | 8.35537e-62 | 1.00000 | 8.35539e-62 | 1.00000 |
| PAH10+CH3     | 5.65494e-62 | 1.00000 | 5.65495e-62 | 1.00000 |
| rad43         | 1.29961e-62 | 1.00000 | 1.29962e-62 | 1.00000 |
| rad62         | 4.10375e-65 | 1.00000 | 4.10376e-65 | 1.00000 |
| rad51         | 4.48901e-68 | 1.00000 | 4.48902e-68 | 1.00000 |
| rad70         | 5.65427e-71 | 1.00000 | 5.65428e-71 | 1.00000 |
| PhcycC3H3_A+H | 2.42908e-71 | 1.00000 | 2.42909e-71 | 1.00000 |
| rad55         | 1.30609e-71 | 1.00000 | 1.30609e-71 | 1.00000 |
| rad65         | 3.37140e-73 | 1.00000 | 3.37141e-73 | 1.00000 |
| rad58         | 8.26148e-75 | 1.00000 | 8.26150e-75 | 1.00000 |
| PAH1+H        | 1.26115e-76 | 1.00000 | 1.26115e-76 | 1.00000 |
| rad34         | 8.50648e-79 | 1.00000 | 8.50650e-79 | 1.00000 |
| rad42         | 6.82291e-83 | 1.00000 | 6.82293e-83 | 1.00000 |
| rad41         | 9.58622e-84 | 1.00000 | 9.58624e-84 | 1.00000 |
| rad47         | 5.61149e-86 | 1.00000 | 5.61150e-86 | 1.00000 |

0.100000000E-03 Pa, 60.0000000 K

=====

| Rate constant | True (fraction)     | Effective (fraction) |
|---------------|---------------------|----------------------|
| Total         | 8.44107e-61 (1.00 ) | 8.44104e-61 (1.00 )  |

| species     | PYtrue      | Cumul    | PYeffective | Cumul    |
|-------------|-------------|----------|-------------|----------|
| Indene+H    | 0.999791    | 0.999791 | 0.999794    | 0.999794 |
| rad6        | 0.000205501 | 0.999997 | 0.000205502 | 1.000000 |
| Benzyl+C2H2 | 3.25362e-06 | 1.000000 | 0.000000    | 1.000000 |
| rad7        | 1.50070e-08 | 1.000000 | 1.50071e-08 | 1.000000 |
| rad2        | 1.15019e-08 | 1.000000 | 1.15020e-08 | 1.000000 |
| rad11       | 3.70611e-09 | 1.000000 | 3.70613e-09 | 1.000000 |
| rad1        | 7.31125e-10 | 1.000000 | 7.31127e-10 | 1.000000 |
| rad10       | 5.78513e-10 | 1.000000 | 5.78515e-10 | 1.000000 |
| rad3        | 2.05236e-10 | 1.000000 | 2.05236e-10 | 1.000000 |
| rad4        | 1.03908e-10 | 1.000000 | 1.03909e-10 | 1.000000 |
| rad13       | 8.27700e-11 | 1.000000 | 8.27703e-11 | 1.000000 |
| rad23       | 2.09188e-12 | 1.000000 | 2.09189e-12 | 1.000000 |
| rad35       | 9.63170e-13 | 1.000000 | 9.63173e-13 | 1.000000 |
| rad20       | 2.10579e-13 | 1.000000 | 2.10580e-13 | 1.000000 |
| rad33       | 1.56539e-13 | 1.000000 | 1.56540e-13 | 1.000000 |
| rad21       | 1.31534e-13 | 1.000000 | 1.31534e-13 | 1.000000 |
| PAH9+H      | 6.39167e-14 | 1.000000 | 6.39169e-14 | 1.000000 |
| rad45       | 1.55762e-14 | 1.000000 | 1.55763e-14 | 1.000000 |
| rad28       | 5.68703e-15 | 1.000000 | 5.68705e-15 | 1.000000 |
| rad22       | 3.27785e-15 | 1.000000 | 3.27786e-15 | 1.000000 |

|               |             |          |             |          |
|---------------|-------------|----------|-------------|----------|
| rad26         | 1.52801e-15 | 1.000000 | 1.52802e-15 | 1.000000 |
| rad18         | 1.02640e-15 | 1.000000 | 1.02640e-15 | 1.000000 |
| rad36         | 9.67832e-16 | 1.000000 | 9.67835e-16 | 1.000000 |
| rad38         | 7.78401e-17 | 1.000000 | 7.78404e-17 | 1.000000 |
| rad30         | 2.81448e-17 | 1.000000 | 2.81449e-17 | 1.000000 |
| rad27         | 7.05407e-18 | 1.000000 | 7.05409e-18 | 1.000000 |
| PhCHCCH2+H    | 4.25425e-19 | 1.000000 | 4.25426e-19 | 1.000000 |
| rad31         | 2.33022e-19 | 1.000000 | 2.33023e-19 | 1.000000 |
| PhCCH+CH3     | 6.39781e-20 | 1.000000 | 6.39784e-20 | 1.000000 |
| PhCCCH3+H     | 1.48268e-20 | 1.000000 | 1.48268e-20 | 1.000000 |
| rad25         | 1.06407e-20 | 1.000000 | 1.06408e-20 | 1.000000 |
| rad24         | 5.33172e-21 | 1.000000 | 5.33174e-21 | 1.000000 |
| rad14         | 2.18875e-21 | 1.000000 | 2.18876e-21 | 1.000000 |
| rad15         | 7.47746e-22 | 1.000000 | 7.47748e-22 | 1.000000 |
| rad8          | 9.60542e-25 | 1.000000 | 9.60545e-25 | 1.000000 |
| rad9          | 1.15888e-26 | 1.000000 | 1.15888e-26 | 1.000000 |
| PAH7+H        | 3.05872e-27 | 1.000000 | 3.05873e-27 | 1.000000 |
| Ph+MeAc       | 6.05798e-28 | 1.000000 | 6.05800e-28 | 1.000000 |
| rad46         | 6.04804e-28 | 1.000000 | 6.04806e-28 | 1.000000 |
| rad12         | 1.44689e-28 | 1.000000 | 1.44689e-28 | 1.000000 |
| rad39         | 1.50089e-29 | 1.000000 | 1.50089e-29 | 1.000000 |
| Ph+Allene     | 9.13970e-32 | 1.000000 | 9.13973e-32 | 1.000000 |
| rad60syn      | 6.96799e-36 | 1.000000 | 6.96801e-36 | 1.000000 |
| rad60anti     | 1.15505e-37 | 1.000000 | 1.15505e-37 | 1.000000 |
| PhCH2CCH+H    | 5.20381e-39 | 1.000000 | 5.20383e-39 | 1.000000 |
| rad37         | 5.58377e-40 | 1.000000 | 5.58379e-40 | 1.000000 |
| rad5          | 3.90407e-43 | 1.000000 | 3.90409e-43 | 1.000000 |
| PAH3+H        | 8.37208e-48 | 1.000000 | 8.37211e-48 | 1.000000 |
| rad59         | 4.46834e-48 | 1.000000 | 4.46835e-48 | 1.000000 |
| rad50         | 1.63594e-48 | 1.000000 | 1.63595e-48 | 1.000000 |
| rad19syn      | 1.23978e-56 | 1.000000 | 1.23979e-56 | 1.000000 |
| rad52         | 1.44332e-60 | 1.000000 | 1.44332e-60 | 1.000000 |
| rad54         | 1.72259e-61 | 1.000000 | 1.72260e-61 | 1.000000 |
| PAH10+CH3     | 1.24046e-61 | 1.000000 | 1.24047e-61 | 1.000000 |
| rad43         | 2.85592e-62 | 1.000000 | 2.85593e-62 | 1.000000 |
| rad62         | 9.08702e-65 | 1.000000 | 9.08705e-65 | 1.000000 |
| rad51         | 9.53555e-68 | 1.000000 | 9.53558e-68 | 1.000000 |
| rad70         | 1.29617e-70 | 1.000000 | 1.29618e-70 | 1.000000 |
| PhcycC3H3_A+H | 5.60957e-71 | 1.000000 | 5.60959e-71 | 1.000000 |
| rad55         | 3.01381e-71 | 1.000000 | 3.01382e-71 | 1.000000 |
| rad65         | 7.55095e-73 | 1.000000 | 7.55097e-73 | 1.000000 |
| rad58         | 1.92001e-74 | 1.000000 | 1.92001e-74 | 1.000000 |
| PAH1+H        | 3.12351e-76 | 1.000000 | 3.12352e-76 | 1.000000 |
| rad34         | 2.14330e-78 | 1.000000 | 2.14330e-78 | 1.000000 |
| rad42         | 2.14414e-82 | 1.000000 | 2.14415e-82 | 1.000000 |
| rad41         | 4.18471e-83 | 1.000000 | 4.18472e-83 | 1.000000 |
| rad47         | 1.10490e-85 | 1.000000 | 1.10490e-85 | 1.000000 |

0.100000000E-03 Pa, 70.0000000 K

=====

| Rate constant | True (fraction)     | Effective (fraction) |
|---------------|---------------------|----------------------|
| Total         | 5.61998e-54 (1.00 ) | 5.61996e-54 (1.00 )  |

| species     | PYtrue      | Cumul    | PYeffective | Cumul    |
|-------------|-------------|----------|-------------|----------|
| Indene+H    | 0.999780    | 0.999780 | 0.999785    | 0.999785 |
| rad6        | 0.000215127 | 0.999995 | 0.000215128 | 1.00000  |
| Benzyl+C2H2 | 4.55715e-06 | 1.000000 | 0.00000     | 1.00000  |
| rad7        | 1.57003e-08 | 1.000000 | 1.57004e-08 | 1.00000  |
| rad2        | 1.56705e-08 | 1.000000 | 1.56705e-08 | 1.00000  |
| rad11       | 3.87167e-09 | 1.000000 | 3.87169e-09 | 1.00000  |
| rad1        | 9.98583e-10 | 1.000000 | 9.98588e-10 | 1.00000  |
| rad10       | 7.88977e-10 | 1.000000 | 7.88981e-10 | 1.00000  |
| rad3        | 2.30215e-10 | 1.000000 | 2.30216e-10 | 1.00000  |
| rad4        | 1.16629e-10 | 1.000000 | 1.16629e-10 | 1.00000  |
| rad13       | 8.68155e-11 | 1.000000 | 8.68159e-11 | 1.00000  |
| rad35       | 2.11029e-12 | 1.000000 | 2.11030e-12 | 1.00000  |
| rad23       | 1.15855e-12 | 1.000000 | 1.15855e-12 | 1.00000  |
| PAH9+H      | 2.62392e-13 | 1.000000 | 2.62394e-13 | 1.00000  |
| rad20       | 1.70089e-13 | 1.000000 | 1.70089e-13 | 1.00000  |
| rad33       | 1.64322e-13 | 1.000000 | 1.64323e-13 | 1.00000  |
| rad21       | 1.06313e-13 | 1.000000 | 1.06313e-13 | 1.00000  |
| rad28       | 1.99599e-14 | 1.000000 | 1.99600e-14 | 1.00000  |
| rad45       | 8.52011e-15 | 1.000000 | 8.52015e-15 | 1.00000  |
| rad26       | 5.42341e-15 | 1.000000 | 5.42344e-15 | 1.00000  |
| rad22       | 2.09129e-15 | 1.000000 | 2.09130e-15 | 1.00000  |
| rad30       | 1.03395e-15 | 1.000000 | 1.03396e-15 | 1.00000  |
| rad38       | 9.18857e-16 | 1.000000 | 9.18861e-16 | 1.00000  |
| rad18       | 8.25601e-16 | 1.000000 | 8.25604e-16 | 1.00000  |

|               |             |          |             |         |
|---------------|-------------|----------|-------------|---------|
| rad36         | 5.28984e-16 | 1.000000 | 5.28986e-16 | 1.00000 |
| rad27         | 2.01255e-17 | 1.000000 | 2.01256e-17 | 1.00000 |
| PhCHCCH2+H    | 1.55253e-18 | 1.000000 | 1.55254e-18 | 1.00000 |
| rad31         | 3.09421e-19 | 1.000000 | 3.09422e-19 | 1.00000 |
| PhCCH+CH3     | 2.30867e-19 | 1.000000 | 2.30868e-19 | 1.00000 |
| rad15         | 9.51554e-20 | 1.000000 | 9.51558e-20 | 1.00000 |
| PhCCCH3+H     | 5.33176e-20 | 1.000000 | 5.33179e-20 | 1.00000 |
| rad25         | 3.29171e-20 | 1.000000 | 3.29172e-20 | 1.00000 |
| rad14         | 6.79100e-21 | 1.000000 | 6.79103e-21 | 1.00000 |
| rad24         | 4.46669e-21 | 1.000000 | 4.46671e-21 | 1.00000 |
| rad8          | 3.27050e-24 | 1.000000 | 3.27052e-24 | 1.00000 |
| rad9          | 3.75399e-26 | 1.000000 | 3.75401e-26 | 1.00000 |
| PAH7+H        | 9.79778e-27 | 1.000000 | 9.79783e-27 | 1.00000 |
| rad46         | 3.64912e-27 | 1.000000 | 3.64914e-27 | 1.00000 |
| Ph+MeAc       | 1.86257e-27 | 1.000000 | 1.86258e-27 | 1.00000 |
| rad12         | 4.55682e-28 | 1.000000 | 4.55685e-28 | 1.00000 |
| rad39         | 4.60235e-29 | 1.000000 | 4.60237e-29 | 1.00000 |
| Ph+Allene     | 2.65162e-31 | 1.000000 | 2.65163e-31 | 1.00000 |
| rad60syn      | 2.03735e-35 | 1.000000 | 2.03736e-35 | 1.00000 |
| rad60anti     | 3.31010e-37 | 1.000000 | 3.31012e-37 | 1.00000 |
| PhCH2CCH+H    | 1.46839e-38 | 1.000000 | 1.46839e-38 | 1.00000 |
| rad37         | 1.60358e-39 | 1.000000 | 1.60359e-39 | 1.00000 |
| rad5          | 1.12958e-42 | 1.000000 | 1.12958e-42 | 1.00000 |
| PAH3+H        | 2.42769e-47 | 1.000000 | 2.42770e-47 | 1.00000 |
| rad59         | 1.29508e-47 | 1.000000 | 1.29508e-47 | 1.00000 |
| rad50         | 4.69945e-48 | 1.000000 | 4.69947e-48 | 1.00000 |
| rad19syn      | 4.08077e-56 | 1.000000 | 4.08078e-56 | 1.00000 |
| rad52         | 4.70563e-60 | 1.000000 | 4.70565e-60 | 1.00000 |
| rad54         | 6.02278e-61 | 1.000000 | 6.02281e-61 | 1.00000 |
| PAH10+CH3     | 5.28812e-61 | 1.000000 | 5.28815e-61 | 1.00000 |
| rad43         | 1.22394e-61 | 1.000000 | 1.22394e-61 | 1.00000 |
| rad62         | 3.83245e-64 | 1.000000 | 3.83246e-64 | 1.00000 |
| rad51         | 3.46272e-67 | 1.000000 | 3.46273e-67 | 1.00000 |
| rad70         | 5.18161e-70 | 1.000000 | 5.18163e-70 | 1.00000 |
| PhcycC3H3_A+H | 2.26447e-70 | 1.000000 | 2.26448e-70 | 1.00000 |
| rad55         | 1.21525e-70 | 1.000000 | 1.21526e-70 | 1.00000 |
| rad65         | 2.93324e-72 | 1.000000 | 2.93325e-72 | 1.00000 |
| rad58         | 7.81612e-74 | 1.000000 | 7.81616e-74 | 1.00000 |
| PAH1+H        | 1.39403e-75 | 1.000000 | 1.39404e-75 | 1.00000 |
| rad34         | 9.78712e-78 | 1.000000 | 9.78716e-78 | 1.00000 |
| rad42         | 2.36961e-81 | 1.000000 | 2.36962e-81 | 1.00000 |
| rad41         | 8.52910e-82 | 1.000000 | 8.52914e-82 | 1.00000 |
| rad47         | 4.03661e-85 | 1.000000 | 4.03663e-85 | 1.00000 |

0.100000000E-03 Pa, 80.0000000 K

=====  
Rate constant | True (fraction) | Effective (fraction)  
-----  
Total | 7.28864e-49 (1.00) | 7.28860e-49 (1.00)

| species     | PYtrue      | Cumul    | PYeffective | Cumul    |
|-------------|-------------|----------|-------------|----------|
| Indene+H    | 0.999768    | 0.999768 | 0.999774    | 0.999774 |
| rad6        | 0.000225914 | 0.999994 | 0.000225915 | 1.000000 |
| Benzyl+C2H2 | 6.25298e-06 | 1.00000  | 0.00000     | 1.000000 |
| rad2        | 2.07964e-08 | 1.00000  | 2.07965e-08 | 1.000000 |
| rad7        | 1.64875e-08 | 1.00000  | 1.64876e-08 | 1.000000 |
| rad11       | 4.06195e-09 | 1.00000  | 4.06198e-09 | 1.000000 |
| rad1        | 1.32893e-09 | 1.00000  | 1.32894e-09 | 1.000000 |
| rad10       | 1.04836e-09 | 1.00000  | 1.04836e-09 | 1.000000 |
| rad3        | 2.60613e-10 | 1.00000  | 2.60614e-10 | 1.000000 |
| rad4        | 1.32124e-10 | 1.00000  | 1.32125e-10 | 1.000000 |
| rad13       | 9.13632e-11 | 1.00000  | 9.13638e-11 | 1.000000 |
| rad35       | 3.84415e-12 | 1.00000  | 3.84418e-12 | 1.000000 |
| PAH9+H      | 7.63680e-13 | 1.00000  | 7.63685e-13 | 1.000000 |
| rad23       | 7.04504e-13 | 1.00000  | 7.04508e-13 | 1.000000 |
| rad33       | 1.73084e-13 | 1.00000  | 1.73085e-13 | 1.000000 |
| rad20       | 1.41116e-13 | 1.00000  | 1.41117e-13 | 1.000000 |
| rad28       | 9.22862e-14 | 1.00000  | 9.22867e-14 | 1.000000 |
| rad21       | 8.82697e-14 | 1.00000  | 8.82703e-14 | 1.000000 |
| rad26       | 2.52617e-14 | 1.00000  | 2.52619e-14 | 1.000000 |
| rad30       | 1.51603e-14 | 1.00000  | 1.51604e-14 | 1.000000 |
| rad38       | 5.80688e-15 | 1.00000  | 5.80692e-15 | 1.000000 |
| rad45       | 5.12989e-15 | 1.00000  | 5.12993e-15 | 1.000000 |
| rad22       | 1.43295e-15 | 1.00000  | 1.43296e-15 | 1.000000 |
| rad18       | 6.82835e-16 | 1.00000  | 6.82839e-16 | 1.000000 |
| rad36       | 3.18279e-16 | 1.00000  | 3.18281e-16 | 1.000000 |
| rad27       | 6.45306e-17 | 1.00000  | 6.45310e-17 | 1.000000 |
| PhCHCCH2+H  | 9.10539e-18 | 1.00000  | 9.10545e-18 | 1.000000 |
| rad15       | 4.85176e-18 | 1.00000  | 4.85179e-18 | 1.000000 |



|               |             |         |             |          |
|---------------|-------------|---------|-------------|----------|
| PhCCH+CH3     | 1.37643e-18 | 1.00000 | 1.37644e-18 | 1.000000 |
| rad31         | 4.06218e-19 | 1.00000 | 4.06220e-19 | 1.000000 |
| PhCCCH3+H     | 3.18574e-19 | 1.00000 | 3.18576e-19 | 1.000000 |
| rad25         | 1.59679e-19 | 1.00000 | 1.59680e-19 | 1.000000 |
| rad14         | 3.29427e-20 | 1.00000 | 3.29429e-20 | 1.000000 |
| rad24         | 3.90172e-21 | 1.00000 | 3.90175e-21 | 1.000000 |
| rad8          | 1.90552e-23 | 1.00000 | 1.90553e-23 | 1.000000 |
| rad46         | 4.70906e-25 | 1.00000 | 4.70909e-25 | 1.000000 |
| rad9          | 2.10011e-25 | 1.00000 | 2.10012e-25 | 1.000000 |
| PAH7+H        | 5.43531e-26 | 1.00000 | 5.43535e-26 | 1.000000 |
| Ph+MeAc       | 1.00966e-26 | 1.00000 | 1.00967e-26 | 1.000000 |
| rad12         | 2.50595e-27 | 1.00000 | 2.50597e-27 | 1.000000 |
| rad39         | 2.48309e-28 | 1.00000 | 2.48311e-28 | 1.000000 |
| Ph+Allene     | 1.38968e-30 | 1.00000 | 1.38969e-30 | 1.000000 |
| rad60syn      | 1.07118e-34 | 1.00000 | 1.07119e-34 | 1.000000 |
| rad60anti     | 1.72686e-36 | 1.00000 | 1.72687e-36 | 1.000000 |
| PhCH2CCH+H    | 7.78408e-38 | 1.00000 | 7.78413e-38 | 1.000000 |
| rad37         | 8.80974e-39 | 1.00000 | 8.80979e-39 | 1.000000 |
| rad5          | 6.29250e-42 | 1.00000 | 6.29254e-42 | 1.000000 |
| PAH3+H        | 1.34510e-46 | 1.00000 | 1.34511e-46 | 1.000000 |
| rad59         | 7.17091e-47 | 1.00000 | 7.17096e-47 | 1.000000 |
| rad50         | 2.57187e-47 | 1.00000 | 2.57189e-47 | 1.000000 |
| rad19syn      | 2.65543e-55 | 1.00000 | 2.65545e-55 | 1.000000 |
| rad52         | 3.03900e-59 | 1.00000 | 3.03901e-59 | 1.000000 |
| PAH10+CH3     | 6.56320e-60 | 1.00000 | 6.56324e-60 | 1.000000 |
| rad54         | 4.25389e-60 | 1.00000 | 4.25391e-60 | 1.000000 |
| rad43         | 1.53581e-60 | 1.00000 | 1.53582e-60 | 1.000000 |
| rad62         | 4.70669e-63 | 1.00000 | 4.70672e-63 | 1.000000 |
| rad51         | 2.62813e-66 | 1.00000 | 2.62815e-66 | 1.000000 |
| rad70         | 4.63141e-69 | 1.00000 | 4.63144e-69 | 1.000000 |
| PhcycC3H3_A+H | 2.06876e-69 | 1.00000 | 2.06878e-69 | 1.000000 |
| rad55         | 1.10695e-69 | 1.00000 | 1.10695e-69 | 1.000000 |
| rad65         | 2.53414e-71 | 1.00000 | 2.53416e-71 | 1.000000 |
| rad58         | 7.27797e-73 | 1.00000 | 7.27802e-73 | 1.000000 |
| PAH1+H        | 1.68770e-74 | 1.00000 | 1.68771e-74 | 1.000000 |
| rad34         | 1.26028e-76 | 1.00000 | 1.26028e-76 | 1.000000 |
| rad42         | 1.58836e-79 | 1.00000 | 1.58837e-79 | 1.000000 |
| rad41         | 7.53725e-80 | 1.00000 | 7.53729e-80 | 1.000000 |
| rad47         | 3.99677e-84 | 1.00000 | 3.99680e-84 | 1.000000 |

0.100000000E-03 Pa, 90.0000000 K

=====  
Rate constant | True (fraction) | Effective (fraction)  
-----  
Total | 6.85154e-45 (1.00) | 6.85148e-45 (1.00)

| species     | PYtrue      | Cumul    | PYeffective | Cumul    |
|-------------|-------------|----------|-------------|----------|
| Indene+H    | 0.999754    | 0.999754 | 0.999762    | 0.999762 |
| rad6        | 0.000237935 | 0.999992 | 0.000237937 | 1.000000 |
| Benzyl+C2H2 | 8.45058e-06 | 1.00000  | 0.00000     | 1.000000 |
| rad2        | 2.69842e-08 | 1.00000  | 2.69845e-08 | 1.000000 |
| rad7        | 1.73719e-08 | 1.00000  | 1.73721e-08 | 1.000000 |
| rad11       | 4.27721e-09 | 1.00000  | 4.27725e-09 | 1.000000 |
| rad1        | 1.72965e-09 | 1.00000  | 1.72966e-09 | 1.000000 |
| rad10       | 1.36227e-09 | 1.00000  | 1.36228e-09 | 1.000000 |
| rad3        | 2.96945e-10 | 1.00000  | 2.96947e-10 | 1.000000 |
| rad4        | 1.50664e-10 | 1.00000  | 1.50665e-10 | 1.000000 |
| rad13       | 9.64463e-11 | 1.00000  | 9.64471e-11 | 1.000000 |
| rad35       | 6.25008e-12 | 1.00000  | 6.25014e-12 | 1.000000 |
| PAH9+H      | 1.77686e-12 | 1.00000  | 1.77688e-12 | 1.000000 |
| rad28       | 4.63526e-13 | 1.00000  | 4.63530e-13 | 1.000000 |
| rad23       | 4.58220e-13 | 1.00000  | 4.58224e-13 | 1.000000 |
| rad33       | 1.82889e-13 | 1.00000  | 1.82891e-13 | 1.000000 |
| rad26       | 1.30247e-13 | 1.00000  | 1.30248e-13 | 1.000000 |
| rad30       | 1.20897e-13 | 1.00000  | 1.20898e-13 | 1.000000 |
| rad20       | 1.19369e-13 | 1.00000  | 1.19370e-13 | 1.000000 |
| rad21       | 7.47291e-14 | 1.00000  | 7.47297e-14 | 1.000000 |
| rad38       | 2.43114e-14 | 1.00000  | 2.43116e-14 | 1.000000 |
| rad45       | 3.30961e-15 | 1.00000  | 3.30964e-15 | 1.000000 |
| rad22       | 1.03215e-15 | 1.00000  | 1.03216e-15 | 1.000000 |
| rad18       | 5.76062e-16 | 1.00000  | 5.76067e-16 | 1.000000 |
| rad36       | 2.05228e-16 | 1.00000  | 2.05230e-16 | 1.000000 |
| rad27       | 1.98756e-16 | 1.00000  | 1.98757e-16 | 1.000000 |
| rad15       | 1.02343e-16 | 1.00000  | 1.02344e-16 | 1.000000 |
| PhCHCCH2+H  | 8.92955e-17 | 1.00000  | 8.92963e-17 | 1.000000 |
| PhCCH+CH3   | 1.57331e-17 | 1.00000  | 1.57333e-17 | 1.000000 |
| PhCCCH3+H   | 3.79316e-18 | 1.00000  | 3.79320e-18 | 1.000000 |
| rad25       | 9.95448e-19 | 1.00000  | 9.95457e-19 | 1.000000 |
| rad31       | 5.27040e-19 | 1.00000  | 5.27045e-19 | 1.000000 |

|               |             |         |             |          |
|---------------|-------------|---------|-------------|----------|
| rad14         | 2.22357e-19 | 1.00000 | 2.22359e-19 | 1.000000 |
| rad24         | 3.50828e-21 | 1.00000 | 3.50831e-21 | 1.000000 |
| rad8          | 2.97834e-22 | 1.00000 | 2.97836e-22 | 1.000000 |
| rad46         | 3.76162e-23 | 1.00000 | 3.76165e-23 | 1.000000 |
| rad9          | 3.87492e-24 | 1.00000 | 3.87496e-24 | 1.000000 |
| PAH7+H        | 9.55238e-25 | 1.00000 | 9.55246e-25 | 1.000000 |
| Ph+MeAc       | 1.64783e-25 | 1.00000 | 1.64784e-25 | 1.000000 |
| rad12         | 4.44410e-26 | 1.00000 | 4.44413e-26 | 1.000000 |
| rad39         | 3.98226e-27 | 1.00000 | 3.98229e-27 | 1.000000 |
| Ph+Allene     | 2.22275e-29 | 1.00000 | 2.22277e-29 | 1.000000 |
| rad60syn      | 1.71344e-33 | 1.00000 | 1.71345e-33 | 1.000000 |
| rad60anti     | 2.76440e-35 | 1.00000 | 2.76443e-35 | 1.000000 |
| PhCH2CCH+H    | 1.29425e-36 | 1.00000 | 1.29426e-36 | 1.000000 |
| rad37         | 1.55495e-37 | 1.00000 | 1.55496e-37 | 1.000000 |
| rad5          | 1.13674e-40 | 1.00000 | 1.13675e-40 | 1.000000 |
| PAH3+H        | 2.36907e-45 | 1.00000 | 2.36909e-45 | 1.000000 |
| rad59         | 1.26193e-45 | 1.00000 | 1.26194e-45 | 1.000000 |
| rad50         | 4.53564e-46 | 1.00000 | 4.53568e-46 | 1.000000 |
| rad19syn      | 5.84653e-54 | 1.00000 | 5.84658e-54 | 1.000000 |
| rad52         | 7.37438e-58 | 1.00000 | 7.37444e-58 | 1.000000 |
| PAH10+CH3     | 4.47993e-58 | 1.00000 | 4.47997e-58 | 1.000000 |
| rad54         | 1.09844e-58 | 1.00000 | 1.09845e-58 | 1.000000 |
| rad43         | 1.05840e-58 | 1.00000 | 1.05841e-58 | 1.000000 |
| rad62         | 3.48491e-61 | 1.00000 | 3.48494e-61 | 1.000000 |
| rad51         | 1.10583e-64 | 1.00000 | 1.10584e-64 | 1.000000 |
| rad70         | 2.28355e-67 | 1.00000 | 2.28357e-67 | 1.000000 |
| PhcycC3H3_A+H | 1.08842e-67 | 1.00000 | 1.08842e-67 | 1.000000 |
| rad55         | 5.76466e-68 | 1.00000 | 5.76471e-68 | 1.000000 |
| rad65         | 1.73325e-69 | 1.00000 | 1.73326e-69 | 1.000000 |
| rad58         | 4.04699e-71 | 1.00000 | 4.04703e-71 | 1.000000 |
| PAH1+H        | 1.83507e-72 | 1.00000 | 1.83508e-72 | 1.000000 |
| rad34         | 1.56906e-74 | 1.00000 | 1.56908e-74 | 1.000000 |
| rad42         | 5.30636e-77 | 1.00000 | 5.30641e-77 | 1.000000 |
| rad41         | 2.69333e-77 | 1.00000 | 2.69335e-77 | 1.000000 |
| rad47         | 5.79770e-82 | 1.00000 | 5.79775e-82 | 1.000000 |

0.100000000E-03 Pa, 100.000000 K

=====

| Rate constant | True (fraction)     | Effective (fraction) |
|---------------|---------------------|----------------------|
| Total         | 1.02671e-41 (1.00 ) | 1.02670e-41 (1.00 )  |

| species     | PYtrue      | Cumul    | PYeffective | Cumul    |
|-------------|-------------|----------|-------------|----------|
| Indene+H    | 0.999737    | 0.999737 | 0.999749    | 0.999749 |
| rad6        | 0.000251285 | 0.999988 | 0.000251288 | 1.000000 |
| Benzyl+C2H2 | 1.12936e-05 | 1.000000 | 0.000000    | 1.000000 |
| rad2        | 3.43035e-08 | 1.000000 | 3.43039e-08 | 1.000000 |
| rad7        | 1.83596e-08 | 1.000000 | 1.83598e-08 | 1.000000 |
| rad11       | 4.51862e-09 | 1.000000 | 4.51867e-09 | 1.000000 |
| rad1        | 2.20621e-09 | 1.000000 | 2.20623e-09 | 1.000000 |
| rad10       | 1.73444e-09 | 1.000000 | 1.73446e-09 | 1.000000 |
| rad3        | 3.39625e-10 | 1.000000 | 3.39629e-10 | 1.000000 |
| rad4        | 1.72471e-10 | 1.000000 | 1.72473e-10 | 1.000000 |
| rad13       | 1.02107e-10 | 1.000000 | 1.02108e-10 | 1.000000 |
| rad35       | 9.45529e-12 | 1.000000 | 9.45540e-12 | 1.000000 |
| PAH9+H      | 3.55527e-12 | 1.000000 | 3.55531e-12 | 1.000000 |
| rad28       | 2.11185e-12 | 1.000000 | 2.11187e-12 | 1.000000 |
| rad30       | 6.32352e-13 | 1.000000 | 6.32359e-13 | 1.000000 |
| rad26       | 6.14395e-13 | 1.000000 | 6.14402e-13 | 1.000000 |
| rad23       | 3.13580e-13 | 1.000000 | 3.13583e-13 | 1.000000 |
| rad33       | 1.93824e-13 | 1.000000 | 1.93827e-13 | 1.000000 |
| rad20       | 1.02448e-13 | 1.000000 | 1.02449e-13 | 1.000000 |
| rad38       | 7.68951e-14 | 1.000000 | 7.68960e-14 | 1.000000 |
| rad21       | 6.41941e-14 | 1.000000 | 6.41949e-14 | 1.000000 |
| rad45       | 2.24980e-15 | 1.000000 | 2.24983e-15 | 1.000000 |
| rad15       | 1.16356e-15 | 1.000000 | 1.16357e-15 | 1.000000 |
| PhCHCCH2+H  | 9.98347e-16 | 1.000000 | 9.98358e-16 | 1.000000 |
| rad22       | 7.71106e-16 | 1.000000 | 7.71115e-16 | 1.000000 |
| rad27       | 5.39302e-16 | 1.000000 | 5.39308e-16 | 1.000000 |
| rad18       | 4.93122e-16 | 1.000000 | 4.93128e-16 | 1.000000 |
| PhCCH+CH3   | 2.30712e-16 | 1.000000 | 2.30715e-16 | 1.000000 |
| rad36       | 1.39454e-16 | 1.000000 | 1.39455e-16 | 1.000000 |
| PhCCCH3+H   | 6.03865e-17 | 1.000000 | 6.03871e-17 | 1.000000 |
| rad25       | 5.60567e-18 | 1.000000 | 5.60573e-18 | 1.000000 |
| rad14       | 1.45909e-18 | 1.000000 | 1.45910e-18 | 1.000000 |
| rad31       | 6.75360e-19 | 1.000000 | 6.75368e-19 | 1.000000 |
| rad8        | 9.08474e-21 | 1.000000 | 9.08484e-21 | 1.000000 |
| rad24       | 3.22257e-21 | 1.000000 | 3.22260e-21 | 1.000000 |
| rad46       | 1.26370e-21 | 1.000000 | 1.26371e-21 | 1.000000 |

|               |             |          |             |         |
|---------------|-------------|----------|-------------|---------|
| rad9          | 2.06875e-22 | 1.000000 | 2.06877e-22 | 1.00000 |
| PAH7+H        | 5.77076e-23 | 1.000000 | 5.77082e-23 | 1.00000 |
| Ph+MeAc       | 2.02812e-23 | 1.000000 | 2.02815e-23 | 1.00000 |
| rad12         | 3.50141e-24 | 1.000000 | 3.50145e-24 | 1.00000 |
| rad39         | 4.57245e-25 | 1.000000 | 4.57250e-25 | 1.00000 |
| Ph+Allene     | 1.89179e-27 | 1.000000 | 1.89181e-27 | 1.00000 |
| rad60syn      | 1.45536e-31 | 1.000000 | 1.45538e-31 | 1.00000 |
| rad60anti     | 2.36374e-33 | 1.000000 | 2.36376e-33 | 1.00000 |
| PhCH2CCH+H    | 1.16582e-34 | 1.000000 | 1.16584e-34 | 1.00000 |
| rad37         | 1.47050e-35 | 1.000000 | 1.47052e-35 | 1.00000 |
| rad5          | 1.10357e-38 | 1.000000 | 1.10358e-38 | 1.00000 |
| PAH3+H        | 2.27994e-43 | 1.000000 | 2.27997e-43 | 1.00000 |
| rad59         | 1.21324e-43 | 1.000000 | 1.21325e-43 | 1.00000 |
| rad50         | 4.58407e-44 | 1.000000 | 4.58412e-44 | 1.00000 |
| rad19syn      | 7.64744e-52 | 1.000000 | 7.64752e-52 | 1.00000 |
| PAH10+CH3     | 1.62865e-55 | 1.000000 | 1.62866e-55 | 1.00000 |
| rad52         | 1.53646e-55 | 1.000000 | 1.53648e-55 | 1.00000 |
| rad43         | 3.86147e-56 | 1.000000 | 3.86151e-56 | 1.00000 |
| rad54         | 1.92006e-56 | 1.000000 | 1.92008e-56 | 1.00000 |
| rad62         | 1.47134e-58 | 1.000000 | 1.47135e-58 | 1.00000 |
| rad51         | 6.06966e-62 | 1.000000 | 6.06973e-62 | 1.00000 |
| rad70         | 1.06158e-64 | 1.000000 | 1.06159e-64 | 1.00000 |
| PhcycC3H3_A+H | 5.44507e-65 | 1.000000 | 5.44513e-65 | 1.00000 |
| rad55         | 2.84560e-65 | 1.000000 | 2.84563e-65 | 1.00000 |
| rad65         | 1.54718e-66 | 1.000000 | 1.54719e-66 | 1.00000 |
| rad58         | 2.14892e-68 | 1.000000 | 2.14894e-68 | 1.00000 |
| PAH1+H        | 1.71860e-69 | 1.000000 | 1.71862e-69 | 1.00000 |
| rad34         | 1.65264e-71 | 1.000000 | 1.65266e-71 | 1.00000 |
| rad42         | 7.37310e-74 | 1.000000 | 7.37318e-74 | 1.00000 |
| rad41         | 3.87611e-74 | 1.000000 | 3.87615e-74 | 1.00000 |
| rad47         | 8.14104e-79 | 1.000000 | 8.14113e-79 | 1.00000 |

0.100000000E-03 Pa, 110.000000 K

=====

| Rate constant | True (fraction)     | Effective (fraction) |
|---------------|---------------------|----------------------|
| Total         | 4.04932e-39 (1.00 ) | 4.04926e-39 (1.00 )  |

| species     | PYtrue      | Cumul    | PYeffective | Cumul    |
|-------------|-------------|----------|-------------|----------|
| Indene+H    | 0.999719    | 0.999719 | 0.999734    | 0.999734 |
| rad6        | 0.000266058 | 0.999985 | 0.000266062 | 1.00000  |
| Benzyl+C2H2 | 1.49686e-05 | 1.00000  | 0.00000     | 1.00000  |
| rad2        | 4.27753e-08 | 1.00000  | 4.27759e-08 | 1.00000  |
| rad7        | 1.94570e-08 | 1.00000  | 1.94573e-08 | 1.00000  |
| rad11       | 4.78760e-09 | 1.00000  | 4.78767e-09 | 1.00000  |
| rad1        | 2.76118e-09 | 1.00000  | 2.76122e-09 | 1.00000  |
| rad10       | 2.16637e-09 | 1.00000  | 2.16641e-09 | 1.00000  |
| rad3        | 3.88774e-10 | 1.00000  | 3.88780e-10 | 1.00000  |
| rad4        | 1.97622e-10 | 1.00000  | 1.97625e-10 | 1.00000  |
| rad13       | 1.08389e-10 | 1.00000  | 1.08390e-10 | 1.00000  |
| rad35       | 1.36599e-11 | 1.00000  | 1.36601e-11 | 1.00000  |
| rad28       | 8.21824e-12 | 1.00000  | 8.21836e-12 | 1.00000  |
| PAH9+H      | 6.41075e-12 | 1.00000  | 6.41085e-12 | 1.00000  |
| rad26       | 2.45905e-12 | 1.00000  | 2.45908e-12 | 1.00000  |
| rad30       | 2.44400e-12 | 1.00000  | 2.44404e-12 | 1.00000  |
| rad23       | 2.23367e-13 | 1.00000  | 2.23370e-13 | 1.00000  |
| rad33       | 2.05975e-13 | 1.00000  | 2.05978e-13 | 1.00000  |
| rad38       | 1.99857e-13 | 1.00000  | 1.99860e-13 | 1.00000  |
| rad20       | 8.89081e-14 | 1.00000  | 8.89094e-14 | 1.00000  |
| rad21       | 5.57652e-14 | 1.00000  | 5.57660e-14 | 1.00000  |
| PhCHCCH2+H  | 9.33843e-15 | 1.00000  | 9.33857e-15 | 1.00000  |
| rad15       | 8.47184e-15 | 1.00000  | 8.47197e-15 | 1.00000  |
| PhCCH+CH3   | 2.82703e-15 | 1.00000  | 2.82708e-15 | 1.00000  |
| rad45       | 1.59354e-15 | 1.00000  | 1.59357e-15 | 1.00000  |
| rad27       | 1.26917e-15 | 1.00000  | 1.26919e-15 | 1.00000  |
| PhCCCH3+H   | 8.03469e-16 | 1.00000  | 8.03481e-16 | 1.00000  |
| rad22       | 5.92183e-16 | 1.00000  | 5.92192e-16 | 1.00000  |
| rad18       | 4.26781e-16 | 1.00000  | 4.26787e-16 | 1.00000  |
| rad36       | 9.87528e-17 | 1.00000  | 9.87543e-17 | 1.00000  |
| rad25       | 2.50296e-17 | 1.00000  | 2.50300e-17 | 1.00000  |
| rad14       | 7.71678e-18 | 1.00000  | 7.71689e-18 | 1.00000  |
| rad31       | 8.54406e-19 | 1.00000  | 8.54419e-19 | 1.00000  |
| rad8        | 2.30404e-19 | 1.00000  | 2.30407e-19 | 1.00000  |
| rad46       | 2.24330e-20 | 1.00000  | 2.24334e-20 | 1.00000  |
| rad9        | 8.52980e-21 | 1.00000  | 8.52993e-21 | 1.00000  |
| rad24       | 3.00942e-21 | 1.00000  | 3.00947e-21 | 1.00000  |
| PAH7+H      | 2.72042e-21 | 1.00000  | 2.72046e-21 | 1.00000  |
| Ph+MeAc     | 1.79022e-21 | 1.00000  | 1.79024e-21 | 1.00000  |
| rad12       | 1.91848e-22 | 1.00000  | 1.91850e-22 | 1.00000  |

|               |             |         |             |         |
|---------------|-------------|---------|-------------|---------|
| rad39         | 3.73472e-23 | 1.00000 | 3.73477e-23 | 1.00000 |
| Ph+Allene     | 1.95538e-24 | 1.00000 | 1.95541e-24 | 1.00000 |
| rad60syn      | 2.70860e-26 | 1.00000 | 2.70864e-26 | 1.00000 |
| rad60anti     | 1.02869e-27 | 1.00000 | 1.02870e-27 | 1.00000 |
| PhCH2CCH+H    | 5.26613e-32 | 1.00000 | 5.26621e-32 | 1.00000 |
| rad37         | 6.49782e-33 | 1.00000 | 6.49792e-33 | 1.00000 |
| rad5          | 4.91356e-36 | 1.00000 | 4.91363e-36 | 1.00000 |
| PAH3+H        | 1.09744e-40 | 1.00000 | 1.09745e-40 | 1.00000 |
| rad59         | 5.83464e-41 | 1.00000 | 5.83473e-41 | 1.00000 |
| rad50         | 2.26743e-41 | 1.00000 | 2.26746e-41 | 1.00000 |
| rad19syn      | 4.69185e-49 | 1.00000 | 4.69192e-49 | 1.00000 |
| PAH10+CH3     | 1.58686e-52 | 1.00000 | 1.58688e-52 | 1.00000 |
| rad52         | 1.42153e-52 | 1.00000 | 1.42155e-52 | 1.00000 |
| rad43         | 3.76705e-53 | 1.00000 | 3.76711e-53 | 1.00000 |
| rad54         | 1.49770e-53 | 1.00000 | 1.49773e-53 | 1.00000 |
| rad62         | 1.67989e-55 | 1.00000 | 1.67992e-55 | 1.00000 |
| rad51         | 1.03900e-58 | 1.00000 | 1.03901e-58 | 1.00000 |
| rad70         | 1.72164e-61 | 1.00000 | 1.72167e-61 | 1.00000 |
| PhcycC3H3_A+H | 9.31138e-62 | 1.00000 | 9.31152e-62 | 1.00000 |
| rad55         | 4.80787e-62 | 1.00000 | 4.80794e-62 | 1.00000 |
| rad65         | 3.52553e-63 | 1.00000 | 3.52558e-63 | 1.00000 |
| rad58         | 3.83213e-65 | 1.00000 | 3.83218e-65 | 1.00000 |
| PAH1+H        | 4.69711e-66 | 1.00000 | 4.69718e-66 | 1.00000 |
| rad34         | 5.07380e-68 | 1.00000 | 5.07388e-68 | 1.00000 |
| rad42         | 2.53487e-70 | 1.00000 | 2.53491e-70 | 1.00000 |
| rad41         | 1.36830e-70 | 1.00000 | 1.36832e-70 | 1.00000 |
| rad47         | 2.43600e-75 | 1.00000 | 2.43604e-75 | 1.00000 |

0.100000000E-03 Pa, 120.000000 K

| Rate constant | True (fraction)     | Effective (fraction) |
|---------------|---------------------|----------------------|
| Total         | 5.87106e-37 (1.00 ) | 5.87094e-37 (1.00 )  |

| species     | PYtrue      | Cumul    | PYeffective | Cumul    |
|-------------|-------------|----------|-------------|----------|
| Indene+H    | 0.999698    | 0.999698 | 0.999718    | 0.999718 |
| rad6        | 0.000282321 | 0.999980 | 0.000282327 | 1.00000  |
| Benzyl+C2H2 | 1.97151e-05 | 1.00000  | 0.00000     | 1.00000  |
| rad2        | 5.23753e-08 | 1.00000  | 5.23763e-08 | 1.00000  |
| rad7        | 2.06694e-08 | 1.00000  | 2.06698e-08 | 1.00000  |
| rad11       | 5.08533e-09 | 1.00000  | 5.08543e-09 | 1.00000  |
| rad1        | 3.39440e-09 | 1.00000  | 3.39446e-09 | 1.00000  |
| rad10       | 2.65718e-09 | 1.00000  | 2.65723e-09 | 1.00000  |
| rad3        | 4.44366e-10 | 1.00000  | 4.44375e-10 | 1.00000  |
| rad4        | 2.26121e-10 | 1.00000  | 2.26126e-10 | 1.00000  |
| rad13       | 1.15326e-10 | 1.00000  | 1.15328e-10 | 1.00000  |
| rad28       | 2.73074e-11 | 1.00000  | 2.73080e-11 | 1.00000  |
| rad35       | 1.91661e-11 | 1.00000  | 1.91665e-11 | 1.00000  |
| PAH9+H      | 1.07493e-11 | 1.00000  | 1.07495e-11 | 1.00000  |
| rad26       | 8.29588e-12 | 1.00000  | 8.29604e-12 | 1.00000  |
| rad30       | 7.55672e-12 | 1.00000  | 7.55687e-12 | 1.00000  |
| rad38       | 4.51369e-13 | 1.00000  | 4.51378e-13 | 1.00000  |
| rad33       | 2.19415e-13 | 1.00000  | 2.19419e-13 | 1.00000  |
| rad23       | 1.64415e-13 | 1.00000  | 1.64418e-13 | 1.00000  |
| rad20       | 7.78315e-14 | 1.00000  | 7.78331e-14 | 1.00000  |
| PhCHCCH2+H  | 6.78731e-14 | 1.00000  | 6.78744e-14 | 1.00000  |
| rad21       | 4.88702e-14 | 1.00000  | 4.88712e-14 | 1.00000  |
| rad15       | 4.43105e-14 | 1.00000  | 4.43114e-14 | 1.00000  |
| PhCCH+CH3   | 2.59188e-14 | 1.00000  | 2.59193e-14 | 1.00000  |
| PhCCCH3+H   | 7.89116e-15 | 1.00000  | 7.89132e-15 | 1.00000  |
| rad27       | 2.62402e-15 | 1.00000  | 2.62407e-15 | 1.00000  |
| rad45       | 1.16739e-15 | 1.00000  | 1.16741e-15 | 1.00000  |
| rad22       | 4.64575e-16 | 1.00000  | 4.64584e-16 | 1.00000  |
| rad18       | 3.72477e-16 | 1.00000  | 3.72485e-16 | 1.00000  |
| rad25       | 8.87247e-17 | 1.00000  | 8.87264e-17 | 1.00000  |
| rad36       | 7.23402e-17 | 1.00000  | 7.23416e-17 | 1.00000  |
| rad14       | 3.20844e-17 | 1.00000  | 3.20850e-17 | 1.00000  |
| rad8        | 3.86693e-18 | 1.00000  | 3.86700e-18 | 1.00000  |
| rad31       | 1.06711e-18 | 1.00000  | 1.06713e-18 | 1.00000  |
| rad46       | 2.47392e-19 | 1.00000  | 2.47397e-19 | 1.00000  |
| rad9        | 2.10358e-19 | 1.00000  | 2.10363e-19 | 1.00000  |
| PAH7+H      | 7.50332e-20 | 1.00000  | 7.50346e-20 | 1.00000  |
| Ph+MeAc     | 7.13603e-20 | 1.00000  | 7.13617e-20 | 1.00000  |
| rad12       | 5.83531e-21 | 1.00000  | 5.83543e-21 | 1.00000  |
| rad24       | 2.84795e-21 | 1.00000  | 2.84800e-21 | 1.00000  |
| rad39       | 1.43856e-21 | 1.00000  | 1.43859e-21 | 1.00000  |
| Ph+Allene   | 1.53172e-22 | 1.00000  | 1.53175e-22 | 1.00000  |
| rad60syn    | 1.65766e-24 | 1.00000  | 1.65770e-24 | 1.00000  |
| rad60anti   | 9.96746e-26 | 1.00000  | 9.96766e-26 | 1.00000  |

|               |             |         |             |         |
|---------------|-------------|---------|-------------|---------|
| PhCH2CCH+H    | 2.57531e-29 | 1.00000 | 2.57536e-29 | 1.00000 |
| rad37         | 3.09993e-30 | 1.00000 | 3.09999e-30 | 1.00000 |
| rad5          | 2.34808e-33 | 1.00000 | 2.34813e-33 | 1.00000 |
| PAH3+H        | 5.72789e-38 | 1.00000 | 5.72801e-38 | 1.00000 |
| rad59         | 3.04263e-38 | 1.00000 | 3.04269e-38 | 1.00000 |
| rad50         | 1.15678e-38 | 1.00000 | 1.15681e-38 | 1.00000 |
| rad19syn      | 2.93868e-46 | 1.00000 | 2.93874e-46 | 1.00000 |
| PAH10+CH3     | 1.28628e-49 | 1.00000 | 1.28631e-49 | 1.00000 |
| rad52         | 1.08157e-49 | 1.00000 | 1.08160e-49 | 1.00000 |
| rad43         | 3.05646e-50 | 1.00000 | 3.05652e-50 | 1.00000 |
| rad54         | 1.12532e-50 | 1.00000 | 1.12534e-50 | 1.00000 |
| rad62         | 1.59625e-52 | 1.00000 | 1.59628e-52 | 1.00000 |
| rad51         | 1.28781e-55 | 1.00000 | 1.28783e-55 | 1.00000 |
| rad70         | 2.44816e-58 | 1.00000 | 2.44821e-58 | 1.00000 |
| PhcycC3H3_A+H | 1.39420e-58 | 1.00000 | 1.39423e-58 | 1.00000 |
| rad55         | 7.09860e-59 | 1.00000 | 7.09874e-59 | 1.00000 |
| rad65         | 5.67195e-60 | 1.00000 | 5.67206e-60 | 1.00000 |
| rad58         | 5.96442e-62 | 1.00000 | 5.96454e-62 | 1.00000 |
| PAH1+H        | 1.13221e-62 | 1.00000 | 1.13223e-62 | 1.00000 |
| rad34         | 1.40212e-64 | 1.00000 | 1.40215e-64 | 1.00000 |
| rad42         | 7.26833e-67 | 1.00000 | 7.26847e-67 | 1.00000 |
| rad41         | 3.98525e-67 | 1.00000 | 3.98533e-67 | 1.00000 |
| rad47         | 5.11600e-72 | 1.00000 | 5.11610e-72 | 1.00000 |

0.1000000000E-03 Pa, 130.000000 K

| Rate constant | True (fraction)     | Effective (fraction) |
|---------------|---------------------|----------------------|
| Total         | 3.94360e-35 (1.00 ) | 3.94350e-35 (1.00 )  |

| species     | PYtrue      | Cumul    | PYeffective | Cumul    |
|-------------|-------------|----------|-------------|----------|
| Indene+H    | 0.999674    | 0.999674 | 0.999700    | 0.999700 |
| rad6        | 0.000300102 | 0.999974 | 0.000300110 | 1.00000  |
| Benzyl+C2H2 | 2.58378e-05 | 1.000000 | 0.00000     | 1.00000  |
| rad2        | 6.30334e-08 | 1.00000  | 6.30350e-08 | 1.00000  |
| rad7        | 2.19989e-08 | 1.00000  | 2.19994e-08 | 1.00000  |
| rad11       | 5.41233e-09 | 1.00000  | 5.41247e-09 | 1.00000  |
| rad1        | 4.10293e-09 | 1.00000  | 4.10303e-09 | 1.00000  |
| rad10       | 3.20359e-09 | 1.00000  | 3.20368e-09 | 1.00000  |
| rad3        | 5.06086e-10 | 1.00000  | 5.06099e-10 | 1.00000  |
| rad4        | 2.57829e-10 | 1.00000  | 2.57836e-10 | 1.00000  |
| rad13       | 1.22936e-10 | 1.00000  | 1.22939e-10 | 1.00000  |
| rad28       | 7.87039e-11 | 1.00000  | 7.87059e-11 | 1.00000  |
| rad35       | 2.64092e-11 | 1.00000  | 2.64098e-11 | 1.00000  |
| rad26       | 2.39516e-11 | 1.00000  | 2.39522e-11 | 1.00000  |
| rad30       | 1.97470e-11 | 1.00000  | 1.97475e-11 | 1.00000  |
| PAH9+H      | 1.71258e-11 | 1.00000  | 1.71263e-11 | 1.00000  |
| rad38       | 9.20236e-13 | 1.00000  | 9.20260e-13 | 1.00000  |
| PhCHCCH2+H  | 3.89068e-13 | 1.00000  | 3.89078e-13 | 1.00000  |
| rad33       | 2.34184e-13 | 1.00000  | 2.34190e-13 | 1.00000  |
| PhCCH+CH3   | 1.80527e-13 | 1.00000  | 1.80531e-13 | 1.00000  |
| rad15       | 1.80219e-13 | 1.00000  | 1.80224e-13 | 1.00000  |
| rad23       | 1.24457e-13 | 1.00000  | 1.24460e-13 | 1.00000  |
| rad20       | 6.86078e-14 | 1.00000  | 6.86096e-14 | 1.00000  |
| PhCCCH3+H   | 5.80809e-14 | 1.00000  | 5.80824e-14 | 1.00000  |
| rad21       | 4.31287e-14 | 1.00000  | 4.31298e-14 | 1.00000  |
| rad27       | 4.85878e-15 | 1.00000  | 4.85890e-15 | 1.00000  |
| rad45       | 8.80162e-16 | 1.00000  | 8.80185e-16 | 1.00000  |
| rad22       | 3.70640e-16 | 1.00000  | 3.70649e-16 | 1.00000  |
| rad18       | 3.27200e-16 | 1.00000  | 3.27208e-16 | 1.00000  |
| rad25       | 2.58001e-16 | 1.00000  | 2.58007e-16 | 1.00000  |
| rad14       | 1.07611e-16 | 1.00000  | 1.07613e-16 | 1.00000  |
| rad36       | 5.45496e-17 | 1.00000  | 5.45510e-17 | 1.00000  |
| rad8        | 4.41319e-17 | 1.00000  | 4.41331e-17 | 1.00000  |
| rad9        | 3.29567e-18 | 1.00000  | 3.29575e-18 | 1.00000  |
| rad46       | 1.89694e-18 | 1.00000  | 1.89699e-18 | 1.00000  |
| Ph+MeAc     | 1.67275e-18 | 1.00000  | 1.67279e-18 | 1.00000  |
| rad31       | 1.31611e-18 | 1.00000  | 1.31614e-18 | 1.00000  |
| PAH7+H      | 1.28904e-18 | 1.00000  | 1.28907e-18 | 1.00000  |
| rad12       | 1.08134e-19 | 1.00000  | 1.08137e-19 | 1.00000  |
| rad39       | 3.26121e-20 | 1.00000  | 3.26130e-20 | 1.00000  |
| Ph+Allene   | 5.70816e-21 | 1.00000  | 5.70831e-21 | 1.00000  |
| rad24       | 2.72502e-21 | 1.00000  | 2.72509e-21 | 1.00000  |
| rad60syn    | 5.24539e-23 | 1.00000  | 5.24553e-23 | 1.00000  |
| rad60anti   | 4.01344e-24 | 1.00000  | 4.01354e-24 | 1.00000  |
| PhCH2CCH+H  | 1.64038e-25 | 1.00000  | 1.64043e-25 | 1.00000  |
| rad37       | 3.41897e-26 | 1.00000  | 3.41906e-26 | 1.00000  |
| rad5        | 1.65443e-30 | 1.00000  | 1.65448e-30 | 1.00000  |
| PAH3+H      | 4.38357e-35 | 1.00000  | 4.38368e-35 | 1.00000  |

|               |             |         |             |         |
|---------------|-------------|---------|-------------|---------|
| rad59         | 2.32648e-35 | 1.00000 | 2.32654e-35 | 1.00000 |
| rad50         | 8.45893e-36 | 1.00000 | 8.45915e-36 | 1.00000 |
| rad19syn      | 2.43995e-43 | 1.00000 | 2.44001e-43 | 1.00000 |
| PAH10+CH3     | 9.44796e-47 | 1.00000 | 9.44820e-47 | 1.00000 |
| rad52         | 8.54661e-47 | 1.00000 | 8.54683e-47 | 1.00000 |
| rad43         | 2.24635e-47 | 1.00000 | 2.24641e-47 | 1.00000 |
| rad54         | 9.38233e-48 | 1.00000 | 9.38257e-48 | 1.00000 |
| rad62         | 1.36560e-49 | 1.00000 | 1.36564e-49 | 1.00000 |
| rad51         | 1.51684e-52 | 1.00000 | 1.51688e-52 | 1.00000 |
| rad70         | 3.15692e-55 | 1.00000 | 3.15700e-55 | 1.00000 |
| PhcycC3H3_A+H | 1.89025e-55 | 1.00000 | 1.89030e-55 | 1.00000 |
| rad55         | 9.47205e-56 | 1.00000 | 9.47230e-56 | 1.00000 |
| rad65         | 8.61265e-57 | 1.00000 | 8.61288e-57 | 1.00000 |
| rad58         | 8.39401e-59 | 1.00000 | 8.39423e-59 | 1.00000 |
| PAH1+H        | 2.46495e-59 | 1.00000 | 2.46501e-59 | 1.00000 |
| rad34         | 3.51383e-61 | 1.00000 | 3.51392e-61 | 1.00000 |
| rad42         | 1.86815e-63 | 1.00000 | 1.86819e-63 | 1.00000 |
| rad41         | 1.02959e-63 | 1.00000 | 1.02962e-63 | 1.00000 |
| rad47         | 1.01771e-68 | 1.00000 | 1.01774e-68 | 1.00000 |

0.1000000000E-03 Pa, 140.000000 K

| Rate constant | True (fraction)     | Effective (fraction) |
|---------------|---------------------|----------------------|
| Total         | 1.44756e-33 (1.00 ) | 1.44751e-33 (1.00 )  |

| species     | PYtrue      | Cumul    | PYeffective | Cumul    |
|-------------|-------------|----------|-------------|----------|
| Indene+H    | 0.999647    | 0.999647 | 0.999681    | 0.999681 |
| rad6        | 0.000319354 | 0.999966 | 0.000319364 | 1.00000  |
| Benzyl+C2H2 | 3.37205e-05 | 1.00000  | 0.00000     | 1.00000  |
| rad2        | 7.46247e-08 | 1.00000  | 7.46272e-08 | 1.00000  |
| rad7        | 2.34427e-08 | 1.00000  | 2.34434e-08 | 1.00000  |
| rad11       | 5.76789e-09 | 1.00000  | 5.76808e-09 | 1.00000  |
| rad1        | 4.88043e-09 | 1.00000  | 4.88059e-09 | 1.00000  |
| rad10       | 3.79986e-09 | 1.00000  | 3.79999e-09 | 1.00000  |
| rad3        | 5.73357e-10 | 1.00000  | 5.73376e-10 | 1.00000  |
| rad4        | 2.92475e-10 | 1.00000  | 2.92485e-10 | 1.00000  |
| rad28       | 2.00181e-10 | 1.00000  | 2.00187e-10 | 1.00000  |
| rad13       | 1.31209e-10 | 1.00000  | 1.31213e-10 | 1.00000  |
| rad26       | 6.03260e-11 | 1.00000  | 6.03280e-11 | 1.00000  |
| rad30       | 4.53502e-11 | 1.00000  | 4.53517e-11 | 1.00000  |
| rad35       | 3.59955e-11 | 1.00000  | 3.59967e-11 | 1.00000  |
| PAH9+H      | 2.63172e-11 | 1.00000  | 2.63181e-11 | 1.00000  |
| PhCHCCH2+H  | 1.81791e-12 | 1.00000  | 1.81797e-12 | 1.00000  |
| rad38       | 1.73912e-12 | 1.00000  | 1.73918e-12 | 1.00000  |
| PhCCH+CH3   | 9.93699e-13 | 1.00000  | 9.93732e-13 | 1.00000  |
| rad15       | 6.03047e-13 | 1.00000  | 6.03067e-13 | 1.00000  |
| PhCCCH3+H   | 3.33982e-13 | 1.00000  | 3.33993e-13 | 1.00000  |
| rad33       | 2.50271e-13 | 1.00000  | 2.50279e-13 | 1.00000  |
| rad23       | 9.65894e-14 | 1.00000  | 9.65927e-14 | 1.00000  |
| rad20       | 6.08155e-14 | 1.00000  | 6.08175e-14 | 1.00000  |
| rad21       | 3.82782e-14 | 1.00000  | 3.82795e-14 | 1.00000  |
| rad27       | 8.20495e-15 | 1.00000  | 8.20522e-15 | 1.00000  |
| rad45       | 6.80816e-16 | 1.00000  | 6.80839e-16 | 1.00000  |
| rad25       | 6.36662e-16 | 1.00000  | 6.36683e-16 | 1.00000  |
| rad8        | 3.64546e-16 | 1.00000  | 3.64558e-16 | 1.00000  |
| rad14       | 3.01074e-16 | 1.00000  | 3.01084e-16 | 1.00000  |
| rad22       | 2.99702e-16 | 1.00000  | 2.99713e-16 | 1.00000  |
| rad18       | 2.88882e-16 | 1.00000  | 2.88892e-16 | 1.00000  |
| rad36       | 4.22102e-17 | 1.00000  | 4.22116e-17 | 1.00000  |
| rad9        | 3.55612e-17 | 1.00000  | 3.55624e-17 | 1.00000  |
| Ph+MeAc     | 2.55213e-17 | 1.00000  | 2.55221e-17 | 1.00000  |
| PAH7+H      | 1.49946e-17 | 1.00000  | 1.49951e-17 | 1.00000  |
| rad46       | 1.09610e-17 | 1.00000  | 1.09614e-17 | 1.00000  |
| rad31       | 1.60375e-18 | 1.00000  | 1.60380e-18 | 1.00000  |
| rad12       | 1.33708e-18 | 1.00000  | 1.33713e-18 | 1.00000  |
| rad39       | 4.81164e-19 | 1.00000  | 4.81180e-19 | 1.00000  |
| Ph+Allene   | 1.26593e-19 | 1.00000  | 1.26597e-19 | 1.00000  |
| rad24       | 2.63210e-21 | 1.00000  | 2.63219e-21 | 1.00000  |
| rad60syn    | 1.00438e-21 | 1.00000  | 1.00442e-21 | 1.00000  |
| rad60anti   | 9.33499e-23 | 1.00000  | 9.33530e-23 | 1.00000  |
| PhCH2CCH+H  | 1.17651e-23 | 1.00000  | 1.17655e-23 | 1.00000  |
| rad37       | 3.35700e-24 | 1.00000  | 3.35711e-24 | 1.00000  |
| rad5        | 6.92949e-27 | 1.00000  | 6.92972e-27 | 1.00000  |
| PAH3+H      | 1.15606e-28 | 1.00000  | 1.15610e-28 | 1.00000  |
| rad59       | 5.78040e-29 | 1.00000  | 5.78059e-29 | 1.00000  |
| rad50       | 7.59902e-30 | 1.00000  | 7.59928e-30 | 1.00000  |
| rad19syn    | 1.56613e-40 | 1.00000  | 1.56618e-40 | 1.00000  |
| rad52       | 4.46714e-44 | 1.00000  | 4.46729e-44 | 1.00000  |

|               |             |         |             |         |
|---------------|-------------|---------|-------------|---------|
| PAH10+CH3     | 4.38915e-44 | 1.00000 | 4.38930e-44 | 1.00000 |
| rad43         | 1.04381e-44 | 1.00000 | 1.04385e-44 | 1.00000 |
| rad54         | 5.61874e-45 | 1.00000 | 5.61893e-45 | 1.00000 |
| rad62         | 7.32406e-47 | 1.00000 | 7.32431e-47 | 1.00000 |
| rad51         | 1.10960e-49 | 1.00000 | 1.10964e-49 | 1.00000 |
| rad70         | 2.52930e-52 | 1.00000 | 2.52938e-52 | 1.00000 |
| PhcycC3H3_A+H | 1.59294e-52 | 1.00000 | 1.59299e-52 | 1.00000 |
| rad55         | 7.83783e-53 | 1.00000 | 7.83809e-53 | 1.00000 |
| rad65         | 8.14855e-54 | 1.00000 | 8.14883e-54 | 1.00000 |
| rad58         | 7.34162e-56 | 1.00000 | 7.34187e-56 | 1.00000 |
| PAH1+H        | 3.32898e-56 | 1.00000 | 3.32909e-56 | 1.00000 |
| rad34         | 5.45134e-58 | 1.00000 | 5.45152e-58 | 1.00000 |
| rad42         | 3.01265e-60 | 1.00000 | 3.01275e-60 | 1.00000 |
| rad41         | 1.65156e-60 | 1.00000 | 1.65162e-60 | 1.00000 |
| rad47         | 1.27342e-65 | 1.00000 | 1.27346e-65 | 1.00000 |

0.100000000E-03 Pa, 150.000000 K

| Rate constant | True (fraction)     | Effective (fraction) |
|---------------|---------------------|----------------------|
| Total         | 3.27736e-32 (1.00 ) | 3.27722e-32 (1.00 )  |

| species     | PYtrue      | Cumul    | PYeffective | Cumul    |
|-------------|-------------|----------|-------------|----------|
| Indene+H    | 0.999616    | 0.999616 | 0.999660    | 0.999660 |
| rad6        | 0.000339933 | 0.999956 | 0.000339948 | 1.000000 |
| Benzyl+C2H2 | 4.38420e-05 | 1.000000 | 0.000000    | 1.000000 |
| rad2        | 8.69787e-08 | 1.000000 | 8.69825e-08 | 1.000000 |
| rad7        | 2.49909e-08 | 1.000000 | 2.49920e-08 | 1.000000 |
| rad11       | 6.14958e-09 | 1.000000 | 6.14985e-09 | 1.000000 |
| rad1        | 5.71766e-09 | 1.000000 | 5.71792e-09 | 1.000000 |
| rad10       | 4.43762e-09 | 1.000000 | 4.43781e-09 | 1.000000 |
| rad3        | 6.45245e-10 | 1.000000 | 6.45274e-10 | 1.000000 |
| rad28       | 4.56269e-10 | 1.000000 | 4.56289e-10 | 1.000000 |
| rad4        | 3.29607e-10 | 1.000000 | 3.29621e-10 | 1.000000 |
| rad13       | 1.40094e-10 | 1.000000 | 1.40100e-10 | 1.000000 |
| rad26       | 1.34951e-10 | 1.000000 | 1.34957e-10 | 1.000000 |
| rad30       | 9.41738e-11 | 1.000000 | 9.41779e-11 | 1.000000 |
| rad35       | 4.87497e-11 | 1.000000 | 4.87519e-11 | 1.000000 |
| PAH9+H      | 3.94158e-11 | 1.000000 | 3.94175e-11 | 1.000000 |
| PhCHCCH2+H  | 7.14935e-12 | 1.000000 | 7.14966e-12 | 1.000000 |
| PhCCH+CH3   | 4.49156e-12 | 1.000000 | 4.49175e-12 | 1.000000 |
| rad38       | 3.10397e-12 | 1.000000 | 3.10411e-12 | 1.000000 |
| rad15       | 1.72993e-12 | 1.000000 | 1.73001e-12 | 1.000000 |
| PhCCCH3+H   | 1.56231e-12 | 1.000000 | 1.56238e-12 | 1.000000 |
| rad33       | 2.67589e-13 | 1.000000 | 2.67601e-13 | 1.000000 |
| rad23       | 7.67300e-14 | 1.000000 | 7.67333e-14 | 1.000000 |
| rad20       | 5.41548e-14 | 1.000000 | 5.41572e-14 | 1.000000 |
| rad21       | 3.41319e-14 | 1.000000 | 3.41334e-14 | 1.000000 |
| rad27       | 1.28302e-14 | 1.000000 | 1.28307e-14 | 1.000000 |
| rad8        | 2.30783e-15 | 1.000000 | 2.30793e-15 | 1.000000 |
| rad25       | 1.37200e-15 | 1.000000 | 1.37206e-15 | 1.000000 |
| rad14       | 7.24200e-16 | 1.000000 | 7.24231e-16 | 1.000000 |
| rad45       | 5.39340e-16 | 1.000000 | 5.39364e-16 | 1.000000 |
| rad9        | 2.83140e-16 | 1.000000 | 2.83152e-16 | 1.000000 |
| Ph+MeAc     | 2.74933e-16 | 1.000000 | 2.74945e-16 | 1.000000 |
| rad18       | 2.56062e-16 | 1.000000 | 2.56073e-16 | 1.000000 |
| rad22       | 2.45003e-16 | 1.000000 | 2.45014e-16 | 1.000000 |
| PAH7+H      | 1.26951e-16 | 1.000000 | 1.26956e-16 | 1.000000 |
| rad46       | 5.06264e-17 | 1.000000 | 5.06286e-17 | 1.000000 |
| rad36       | 3.34589e-17 | 1.000000 | 3.34603e-17 | 1.000000 |
| rad12       | 1.19031e-17 | 1.000000 | 1.19036e-17 | 1.000000 |
| rad39       | 5.01418e-18 | 1.000000 | 5.01440e-18 | 1.000000 |
| rad31       | 1.93199e-18 | 1.000000 | 1.93207e-18 | 1.000000 |
| Ph+Allene   | 1.87559e-18 | 1.000000 | 1.87567e-18 | 1.000000 |
| rad60syn    | 1.29343e-20 | 1.000000 | 1.29349e-20 | 1.000000 |
| rad24       | 2.56347e-21 | 1.000000 | 2.56358e-21 | 1.000000 |
| rad60anti   | 1.41998e-21 | 1.000000 | 1.42004e-21 | 1.000000 |
| PhCH2CCH+H  | 3.67380e-22 | 1.000000 | 3.67396e-22 | 1.000000 |
| rad37       | 1.01538e-22 | 1.000000 | 1.01543e-22 | 1.000000 |
| rad5        | 3.28936e-25 | 1.000000 | 3.28950e-25 | 1.000000 |
| PAH3+H      | 1.81868e-26 | 1.000000 | 1.81876e-26 | 1.000000 |
| rad59       | 8.19765e-27 | 1.000000 | 8.19801e-27 | 1.000000 |
| rad50       | 5.49334e-28 | 1.000000 | 5.49358e-28 | 1.000000 |
| rad19syn    | 3.04644e-37 | 1.000000 | 3.04657e-37 | 1.000000 |
| rad52       | 5.15098e-41 | 1.000000 | 5.15121e-41 | 1.000000 |
| PAH10+CH3   | 2.79405e-41 | 1.000000 | 2.79417e-41 | 1.000000 |
| rad54       | 8.94067e-42 | 1.000000 | 8.94106e-42 | 1.000000 |
| rad43       | 6.61551e-42 | 1.000000 | 6.61580e-42 | 1.000000 |
| rad62       | 5.02271e-44 | 1.000000 | 5.02293e-44 | 1.000000 |

|               |             |          |             |         |
|---------------|-------------|----------|-------------|---------|
| rad51         | 1.16250e-46 | 1.000000 | 1.16256e-46 | 1.00000 |
| rad70         | 2.35284e-49 | 1.000000 | 2.35294e-49 | 1.00000 |
| PhcycC3H3_A+H | 1.51845e-49 | 1.000000 | 1.51852e-49 | 1.00000 |
| rad55         | 7.38491e-50 | 1.000000 | 7.38524e-50 | 1.00000 |
| rad65         | 1.07970e-50 | 1.000000 | 1.07974e-50 | 1.00000 |
| rad58         | 7.18839e-53 | 1.000000 | 7.18870e-53 | 1.00000 |
| PAH1+H        | 4.36130e-53 | 1.000000 | 4.36149e-53 | 1.00000 |
| rad34         | 7.82690e-55 | 1.000000 | 7.82724e-55 | 1.00000 |
| rad42         | 5.30656e-57 | 1.000000 | 5.30679e-57 | 1.00000 |
| rad41         | 2.97335e-57 | 1.000000 | 2.97348e-57 | 1.00000 |
| rad47         | 2.22228e-62 | 1.000000 | 2.22238e-62 | 1.00000 |

0.100000000E-03 Pa, 160.000000 K

| Rate constant | True (fraction)     | Effective (fraction) |
|---------------|---------------------|----------------------|
| Total         | 5.01169e-31 (1.00 ) | 5.01140e-31 (1.00 )  |

| species       | PYtrue      | Cumul    | PYeffective | Cumul    |
|---------------|-------------|----------|-------------|----------|
| Indene+H      | 0.999581    | 0.999581 | 0.999638    | 0.999638 |
| rad6          | 0.000361574 | 0.999943 | 0.000361595 | 1.000000 |
| Benzyl+C2H2   | 5.67937e-05 | 0.999999 | 0.000000    | 1.000000 |
| rad2          | 9.98824e-08 | 0.999999 | 9.98881e-08 | 1.000000 |
| rad7          | 2.66246e-08 | 0.999999 | 2.66261e-08 | 1.000000 |
| rad1          | 6.60267e-09 | 1.000000 | 6.60305e-09 | 1.000000 |
| rad11         | 6.55278e-09 | 1.000000 | 6.55315e-09 | 1.000000 |
| rad10         | 5.10638e-09 | 1.000000 | 5.10667e-09 | 1.000000 |
| rad28         | 9.44220e-10 | 1.000000 | 9.44274e-10 | 1.000000 |
| rad3          | 7.20699e-10 | 1.000000 | 7.20740e-10 | 1.000000 |
| rad4          | 3.68715e-10 | 1.000000 | 3.68736e-10 | 1.000000 |
| rad26         | 2.72367e-10 | 1.000000 | 2.72382e-10 | 1.000000 |
| rad30         | 1.80603e-10 | 1.000000 | 1.80613e-10 | 1.000000 |
| rad13         | 1.49489e-10 | 1.000000 | 1.49498e-10 | 1.000000 |
| rad35         | 6.57748e-11 | 1.000000 | 6.57785e-11 | 1.000000 |
| PAH9+H        | 5.79488e-11 | 1.000000 | 5.79521e-11 | 1.000000 |
| PhCHCCH2+H    | 2.43191e-11 | 1.000000 | 2.43204e-11 | 1.000000 |
| PhCCH+CH3     | 1.72184e-11 | 1.000000 | 1.72194e-11 | 1.000000 |
| PhCCH3+H      | 6.15102e-12 | 1.000000 | 6.15137e-12 | 1.000000 |
| rad38         | 5.30146e-12 | 1.000000 | 5.30176e-12 | 1.000000 |
| rad15         | 4.38685e-12 | 1.000000 | 4.38710e-12 | 1.000000 |
| rad33         | 2.85954e-13 | 1.000000 | 2.85970e-13 | 1.000000 |
| rad23         | 6.23665e-14 | 1.000000 | 6.23701e-14 | 1.000000 |
| rad20         | 4.84066e-14 | 1.000000 | 4.84094e-14 | 1.000000 |
| rad21         | 3.05534e-14 | 1.000000 | 3.05551e-14 | 1.000000 |
| rad27         | 1.88080e-14 | 1.000000 | 1.88090e-14 | 1.000000 |
| rad8          | 1.17324e-14 | 1.000000 | 1.17331e-14 | 1.000000 |
| rad25         | 2.64209e-15 | 1.000000 | 2.64224e-15 | 1.000000 |
| Ph+MeAc       | 2.22668e-15 | 1.000000 | 2.22681e-15 | 1.000000 |
| rad9          | 1.75694e-15 | 1.000000 | 1.75704e-15 | 1.000000 |
| rad14         | 1.53549e-15 | 1.000000 | 1.53557e-15 | 1.000000 |
| PAH7+H        | 8.28616e-16 | 1.000000 | 8.28664e-16 | 1.000000 |
| rad45         | 4.37426e-16 | 1.000000 | 4.37450e-16 | 1.000000 |
| rad18         | 2.27676e-16 | 1.000000 | 2.27689e-16 | 1.000000 |
| rad22         | 2.02096e-16 | 1.000000 | 2.02108e-16 | 1.000000 |
| rad46         | 1.95341e-16 | 1.000000 | 1.95352e-16 | 1.000000 |
| rad12         | 8.09851e-17 | 1.000000 | 8.09897e-17 | 1.000000 |
| rad39         | 3.93222e-17 | 1.000000 | 3.93244e-17 | 1.000000 |
| rad36         | 2.71597e-17 | 1.000000 | 2.71612e-17 | 1.000000 |
| Ph+Allene     | 2.00221e-17 | 1.000000 | 2.00232e-17 | 1.000000 |
| rad31         | 2.30248e-18 | 1.000000 | 2.30261e-18 | 1.000000 |
| rad60syn      | 1.20834e-19 | 1.000000 | 1.20841e-19 | 1.000000 |
| rad60anti     | 1.53268e-20 | 1.000000 | 1.53277e-20 | 1.000000 |
| PhCH2CCH+H    | 7.01358e-21 | 1.000000 | 7.01398e-21 | 1.000000 |
| rad24         | 2.51530e-21 | 1.000000 | 2.51544e-21 | 1.000000 |
| rad37         | 1.90490e-21 | 1.000000 | 1.90500e-21 | 1.000000 |
| rad5          | 7.52586e-24 | 1.000000 | 7.52628e-24 | 1.000000 |
| PAH3+H        | 5.45416e-25 | 1.000000 | 5.45447e-25 | 1.000000 |
| rad59         | 2.30290e-25 | 1.000000 | 2.30303e-25 | 1.000000 |
| rad50         | 1.44916e-26 | 1.000000 | 1.44924e-26 | 1.000000 |
| rad19syn      | 3.67389e-34 | 1.000000 | 3.67410e-34 | 1.000000 |
| rad52         | 4.67041e-38 | 1.000000 | 4.67068e-38 | 1.000000 |
| PAH10+CH3     | 1.38458e-38 | 1.000000 | 1.38466e-38 | 1.000000 |
| rad54         | 1.06249e-38 | 1.000000 | 1.06255e-38 | 1.000000 |
| rad43         | 3.24065e-39 | 1.000000 | 3.24083e-39 | 1.000000 |
| rad62         | 2.34971e-41 | 1.000000 | 2.34984e-41 | 1.000000 |
| rad51         | 6.69812e-44 | 1.000000 | 6.69850e-44 | 1.000000 |
| rad70         | 1.34233e-46 | 1.000000 | 1.34241e-46 | 1.000000 |
| PhcycC3H3_A+H | 8.55733e-47 | 1.000000 | 8.55782e-47 | 1.000000 |
| rad55         | 4.15479e-47 | 1.000000 | 4.15502e-47 | 1.000000 |



|        |             |          |             |          |
|--------|-------------|----------|-------------|----------|
| rad65  | 7.52459e-48 | 1.000000 | 7.52502e-48 | 1.000000 |
| rad58  | 4.08595e-50 | 1.000000 | 4.08618e-50 | 1.000000 |
| PAH1+H | 2.97024e-50 | 1.000000 | 2.97041e-50 | 1.000000 |
| rad34  | 5.73978e-52 | 1.000000 | 5.74011e-52 | 1.000000 |
| rad42  | 4.97397e-54 | 1.000000 | 4.97425e-54 | 1.000000 |
| rad41  | 2.87771e-54 | 1.000000 | 2.87787e-54 | 1.000000 |
| rad47  | 2.05179e-59 | 1.000000 | 2.05191e-59 | 1.000000 |

0.100000000E-03 Pa, 170.000000 K

| Rate constant | True (fraction)     | Effective (fraction) |
|---------------|---------------------|----------------------|
| Total         | 5.54821e-30 (1.00 ) | 5.54780e-30 (1.00 )  |

| species       | PYtrue      | Cumul    | PYeffective | Cumul    |
|---------------|-------------|----------|-------------|----------|
| Indene+H      | 0.999543    | 0.999543 | 0.999616    | 0.999616 |
| rad6          | 0.000383872 | 0.999927 | 0.000383901 | 1.000000 |
| Benzyl+C2H2   | 7.33010e-05 | 1.000000 | 0.000000    | 1.000000 |
| rad2          | 1.13069e-07 | 1.000000 | 1.13078e-07 | 1.000000 |
| rad7          | 2.83148e-08 | 1.000000 | 2.83168e-08 | 1.000000 |
| rad1          | 7.51988e-09 | 1.000000 | 7.52043e-09 | 1.000000 |
| rad11         | 6.97035e-09 | 1.000000 | 6.97086e-09 | 1.000000 |
| rad10         | 5.79267e-09 | 1.000000 | 5.79310e-09 | 1.000000 |
| rad28         | 1.79398e-09 | 1.000000 | 1.79411e-09 | 1.000000 |
| rad3          | 7.98036e-10 | 1.000000 | 7.98094e-10 | 1.000000 |
| rad26         | 5.02600e-10 | 1.000000 | 5.02637e-10 | 1.000000 |
| rad4          | 4.08966e-10 | 1.000000 | 4.08996e-10 | 1.000000 |
| rad30         | 3.24977e-10 | 1.000000 | 3.25001e-10 | 1.000000 |
| rad13         | 1.59237e-10 | 1.000000 | 1.59248e-10 | 1.000000 |
| rad35         | 8.85290e-11 | 1.000000 | 8.85355e-11 | 1.000000 |
| PAH9+H        | 8.40310e-11 | 1.000000 | 8.40371e-11 | 1.000000 |
| PhCHCCH2+H    | 7.31677e-11 | 1.000000 | 7.31731e-11 | 1.000000 |
| PhCCH+CH3     | 5.74707e-11 | 1.000000 | 5.74749e-11 | 1.000000 |
| PhCCCH3+H     | 2.09541e-11 | 1.000000 | 2.09556e-11 | 1.000000 |
| rad15         | 1.00653e-11 | 1.000000 | 1.00660e-11 | 1.000000 |
| rad38         | 8.74681e-12 | 1.000000 | 8.74746e-12 | 1.000000 |
| rad33         | 3.05071e-13 | 1.000000 | 3.05093e-13 | 1.000000 |
| rad23         | 5.19043e-14 | 1.000000 | 5.19081e-14 | 1.000000 |
| rad8          | 4.97134e-14 | 1.000000 | 4.97171e-14 | 1.000000 |
| rad20         | 4.34071e-14 | 1.000000 | 4.34103e-14 | 1.000000 |
| rad21         | 2.74407e-14 | 1.000000 | 2.74427e-14 | 1.000000 |
| rad27         | 2.61012e-14 | 1.000000 | 2.61031e-14 | 1.000000 |
| Ph+MeAc       | 1.42373e-14 | 1.000000 | 1.42384e-14 | 1.000000 |
| rad9          | 8.86947e-15 | 1.000000 | 8.87012e-15 | 1.000000 |
| rad25         | 4.63048e-15 | 1.000000 | 4.63082e-15 | 1.000000 |
| PAH7+H        | 4.36268e-15 | 1.000000 | 4.36300e-15 | 1.000000 |
| rad14         | 2.92808e-15 | 1.000000 | 2.92829e-15 | 1.000000 |
| rad46         | 6.51156e-16 | 1.000000 | 6.51204e-16 | 1.000000 |
| rad12         | 4.41245e-16 | 1.000000 | 4.41277e-16 | 1.000000 |
| rad45         | 3.63429e-16 | 1.000000 | 3.63456e-16 | 1.000000 |
| rad39         | 2.43819e-16 | 1.000000 | 2.43836e-16 | 1.000000 |
| rad18         | 2.02932e-16 | 1.000000 | 2.02947e-16 | 1.000000 |
| rad22         | 1.67961e-16 | 1.000000 | 1.67973e-16 | 1.000000 |
| Ph+Allene     | 1.63159e-16 | 1.000000 | 1.63171e-16 | 1.000000 |
| rad36         | 2.25910e-17 | 1.000000 | 2.25926e-17 | 1.000000 |
| rad31         | 2.71624e-18 | 1.000000 | 2.71644e-18 | 1.000000 |
| rad60syn      | 8.67564e-19 | 1.000000 | 8.67627e-19 | 1.000000 |
| rad60anti     | 1.24852e-19 | 1.000000 | 1.24861e-19 | 1.000000 |
| PhCH2CCH+H    | 9.45319e-20 | 1.000000 | 9.45388e-20 | 1.000000 |
| rad37         | 2.49465e-20 | 1.000000 | 2.49483e-20 | 1.000000 |
| rad24         | 2.48502e-21 | 1.000000 | 2.48520e-21 | 1.000000 |
| rad5          | 1.16439e-22 | 1.000000 | 1.16448e-22 | 1.000000 |
| PAH3+H        | 1.00143e-23 | 1.000000 | 1.00151e-23 | 1.000000 |
| rad59         | 4.07831e-24 | 1.000000 | 4.07861e-24 | 1.000000 |
| rad50         | 2.47909e-25 | 1.000000 | 2.47927e-25 | 1.000000 |
| rad19syn      | 3.67922e-29 | 1.000000 | 3.67949e-29 | 1.000000 |
| rad52         | 2.29675e-31 | 1.000000 | 2.29692e-31 | 1.000000 |
| rad54         | 8.15997e-36 | 1.000000 | 8.16056e-36 | 1.000000 |
| PAH10+CH3     | 6.64666e-36 | 1.000000 | 6.64714e-36 | 1.000000 |
| rad43         | 1.53786e-36 | 1.000000 | 1.53798e-36 | 1.000000 |
| rad62         | 9.73117e-39 | 1.000000 | 9.73188e-39 | 1.000000 |
| rad51         | 2.44052e-41 | 1.000000 | 2.44070e-41 | 1.000000 |
| rad70         | 5.78940e-44 | 1.000000 | 5.78983e-44 | 1.000000 |
| PhcycC3H3_A+H | 3.44110e-44 | 1.000000 | 3.44135e-44 | 1.000000 |
| rad55         | 1.69970e-44 | 1.000000 | 1.69983e-44 | 1.000000 |
| rad65         | 2.93451e-45 | 1.000000 | 2.93472e-45 | 1.000000 |
| rad58         | 1.59050e-47 | 1.000000 | 1.59062e-47 | 1.000000 |
| PAH1+H        | 1.12758e-47 | 1.000000 | 1.12766e-47 | 1.000000 |
| rad34         | 2.29097e-49 | 1.000000 | 2.29114e-49 | 1.000000 |

|       |             |         |             |         |
|-------|-------------|---------|-------------|---------|
| rad42 | 2.61952e-51 | 1.00000 | 2.61971e-51 | 1.00000 |
| rad41 | 1.58127e-51 | 1.00000 | 1.58139e-51 | 1.00000 |
| rad47 | 1.04853e-56 | 1.00000 | 1.04861e-56 | 1.00000 |

0.100000000E-03 Pa, 180.000000 K

| Rate constant | True (fraction)     | Effective (fraction) |
|---------------|---------------------|----------------------|
| Total         | 4.69315e-29 (1.00 ) | 4.69271e-29 (1.00 )  |

| species       | PYtrue      | Cumul    | PYeffective | Cumul    |
|---------------|-------------|----------|-------------|----------|
| Indene+H      | 0.999499    | 0.999499 | 0.999593    | 0.999593 |
| rad6          | 0.000406283 | 0.999905 | 0.000406321 | 0.999999 |
| Benzyl+C2H2   | 9.42452e-05 | 1.000000 | 0.000000    | 0.999999 |
| rad2          | 1.26232e-07 | 1.000000 | 1.26244e-07 | 0.999999 |
| rad7          | 3.00216e-08 | 1.000000 | 3.00245e-08 | 0.999999 |
| rad1          | 8.45084e-09 | 1.000000 | 8.45163e-09 | 0.999999 |
| rad11         | 7.39254e-09 | 1.000000 | 7.39324e-09 | 0.999999 |
| rad10         | 6.48100e-09 | 1.000000 | 6.48161e-09 | 0.999999 |
| rad28         | 3.15942e-09 | 1.000000 | 3.15971e-09 | 1.000000 |
| rad3          | 8.75572e-10 | 1.000000 | 8.75654e-10 | 1.000000 |
| rad26         | 8.57610e-10 | 1.000000 | 8.57691e-10 | 1.000000 |
| rad30         | 5.55331e-10 | 1.000000 | 5.55384e-10 | 1.000000 |
| rad4          | 4.49524e-10 | 1.000000 | 4.49566e-10 | 1.000000 |
| PhCHCCH2+H    | 1.98284e-10 | 1.000000 | 1.98303e-10 | 1.000000 |
| PhCCH+CH3     | 1.70593e-10 | 1.000000 | 1.70609e-10 | 1.000000 |
| rad13         | 1.69116e-10 | 1.000000 | 1.69132e-10 | 1.000000 |
| PAH9+H        | 1.20561e-10 | 1.000000 | 1.20572e-10 | 1.000000 |
| rad35         | 1.18923e-10 | 1.000000 | 1.18935e-10 | 1.000000 |
| PhCCCH3+H     | 6.31568e-11 | 1.000000 | 6.31628e-11 | 1.000000 |
| rad15         | 2.12731e-11 | 1.000000 | 2.12751e-11 | 1.000000 |
| rad38         | 1.40350e-11 | 1.000000 | 1.40363e-11 | 1.000000 |
| rad33         | 3.24527e-13 | 1.000000 | 3.24557e-13 | 1.000000 |
| rad8          | 1.80854e-13 | 1.000000 | 1.80871e-13 | 1.000000 |
| Ph+MeAc       | 7.46855e-14 | 1.000000 | 7.46926e-14 | 1.000000 |
| rad23         | 4.43091e-14 | 1.000000 | 4.43132e-14 | 1.000000 |
| rad20         | 3.90313e-14 | 1.000000 | 3.90350e-14 | 1.000000 |
| rad9          | 3.76828e-14 | 1.000000 | 3.76864e-14 | 1.000000 |
| rad27         | 3.45610e-14 | 1.000000 | 3.45642e-14 | 1.000000 |
| rad21         | 2.47160e-14 | 1.000000 | 2.47183e-14 | 1.000000 |
| PAH7+H        | 1.92028e-14 | 1.000000 | 1.92046e-14 | 1.000000 |
| rad25         | 7.49374e-15 | 1.000000 | 7.49445e-15 | 1.000000 |
| rad14         | 5.10391e-15 | 1.000000 | 5.10439e-15 | 1.000000 |
| rad12         | 1.99728e-15 | 1.000000 | 1.99747e-15 | 1.000000 |
| rad46         | 1.92453e-15 | 1.000000 | 1.92471e-15 | 1.000000 |
| rad39         | 1.24263e-15 | 1.000000 | 1.24275e-15 | 1.000000 |
| Ph+Allene     | 1.06155e-15 | 1.000000 | 1.06165e-15 | 1.000000 |
| rad45         | 3.09908e-16 | 1.000000 | 3.09937e-16 | 1.000000 |
| rad18         | 1.81228e-16 | 1.000000 | 1.81245e-16 | 1.000000 |
| rad22         | 1.40489e-16 | 1.000000 | 1.40502e-16 | 1.000000 |
| rad36         | 1.92920e-17 | 1.000000 | 1.92938e-17 | 1.000000 |
| rad60syn      | 5.00636e-18 | 1.000000 | 5.00683e-18 | 1.000000 |
| rad31         | 3.17386e-18 | 1.000000 | 3.17416e-18 | 1.000000 |
| PhCH2CCH+H    | 9.59561e-19 | 1.000000 | 9.59651e-19 | 1.000000 |
| rad60anti     | 8.05066e-19 | 1.000000 | 8.05142e-19 | 1.000000 |
| rad37         | 2.42796e-19 | 1.000000 | 2.42819e-19 | 1.000000 |
| rad24         | 2.47104e-21 | 1.000000 | 2.47128e-21 | 1.000000 |
| rad5          | 1.32711e-21 | 1.000000 | 1.32724e-21 | 1.000000 |
| PAH3+H        | 1.31619e-22 | 1.000000 | 1.31631e-22 | 1.000000 |
| rad59         | 5.19674e-23 | 1.000000 | 5.19723e-23 | 1.000000 |
| rad50         | 3.08677e-24 | 1.000000 | 3.08706e-24 | 1.000000 |
| rad19syn      | 4.65590e-27 | 1.000000 | 4.65634e-27 | 1.000000 |
| rad52         | 1.37729e-29 | 1.000000 | 1.37742e-29 | 1.000000 |
| rad54         | 8.04503e-33 | 1.000000 | 8.04579e-33 | 1.000000 |
| PAH10+CH3     | 5.44971e-33 | 1.000000 | 5.45023e-33 | 1.000000 |
| rad43         | 1.25550e-33 | 1.000000 | 1.25562e-33 | 1.000000 |
| rad62         | 7.20277e-36 | 1.000000 | 7.20345e-36 | 1.000000 |
| rad51         | 1.15401e-38 | 1.000000 | 1.15412e-38 | 1.000000 |
| rad70         | 4.00748e-41 | 1.000000 | 4.00786e-41 | 1.000000 |
| PhcycC3H3_A+H | 2.08970e-41 | 1.000000 | 2.08990e-41 | 1.000000 |
| rad55         | 1.07753e-41 | 1.000000 | 1.07763e-41 | 1.000000 |
| rad65         | 9.18208e-43 | 1.000000 | 9.18295e-43 | 1.000000 |
| rad58         | 8.63520e-45 | 1.000000 | 8.63601e-45 | 1.000000 |
| PAH1+H        | 2.99025e-45 | 1.000000 | 2.99053e-45 | 1.000000 |
| rad34         | 5.90961e-47 | 1.000000 | 5.91017e-47 | 1.000000 |
| rad42         | 9.20927e-49 | 1.000000 | 9.21014e-49 | 1.000000 |
| rad41         | 5.89120e-49 | 1.000000 | 5.89175e-49 | 1.000000 |
| rad47         | 3.85169e-54 | 1.000000 | 3.85205e-54 | 1.000000 |

0.100000000E-03 Pa, 190.000000 K

=====

| Rate constant | True (fraction)     | Effective (fraction) |
|---------------|---------------------|----------------------|
| Total         | 3.16530e-28 (1.00 ) | 3.16492e-28 (1.00 )  |

| species       | PYtrue      | Cumul    | PYeffective | Cumul    |
|---------------|-------------|----------|-------------|----------|
| Indene+H      | 0.999451    | 0.999451 | 0.999572    | 0.999572 |
| rad6          | 0.000428135 | 0.999879 | 0.000428186 | 1.000000 |
| Benzyl+C2H2   | 0.000120689 | 1.000000 | 0.000000    | 1.000000 |
| rad2          | 1.39025e-07 | 1.000000 | 1.39042e-07 | 1.000000 |
| rad7          | 3.16960e-08 | 1.000000 | 3.16998e-08 | 1.000000 |
| rad1          | 9.37415e-09 | 1.000000 | 9.37529e-09 | 1.000000 |
| rad11         | 7.80728e-09 | 1.000000 | 7.80822e-09 | 1.000000 |
| rad10         | 7.15403e-09 | 1.000000 | 7.15490e-09 | 1.000000 |
| rad28         | 5.20045e-09 | 1.000000 | 5.20108e-09 | 1.000000 |
| rad26         | 1.36620e-09 | 1.000000 | 1.36636e-09 | 1.000000 |
| rad3          | 9.51241e-10 | 1.000000 | 9.51356e-10 | 1.000000 |
| rad30         | 9.09567e-10 | 1.000000 | 9.09677e-10 | 1.000000 |
| PhCHCCH2+H    | 4.91248e-10 | 1.000000 | 4.91307e-10 | 1.000000 |
| rad4          | 4.89351e-10 | 1.000000 | 4.89411e-10 | 1.000000 |
| PhCCH+CH3     | 4.58127e-10 | 1.000000 | 4.58182e-10 | 1.000000 |
| rad13         | 1.78853e-10 | 1.000000 | 1.78875e-10 | 1.000000 |
| PhCCCH3+H     | 1.71490e-10 | 1.000000 | 1.71510e-10 | 1.000000 |
| PAH9+H        | 1.71474e-10 | 1.000000 | 1.71495e-10 | 1.000000 |
| rad35         | 1.59443e-10 | 1.000000 | 1.59462e-10 | 1.000000 |
| rad15         | 4.19986e-11 | 1.000000 | 4.20037e-11 | 1.000000 |
| rad38         | 2.20092e-11 | 1.000000 | 2.20118e-11 | 1.000000 |
| rad8          | 5.78432e-13 | 1.000000 | 5.78502e-13 | 1.000000 |
| rad33         | 3.43803e-13 | 1.000000 | 3.43844e-13 | 1.000000 |
| Ph+MeAc       | 3.31404e-13 | 1.000000 | 3.31444e-13 | 1.000000 |
| rad9          | 1.38427e-13 | 1.000000 | 1.38444e-13 | 1.000000 |
| PAH7+H        | 7.27022e-14 | 1.000000 | 7.27110e-14 | 1.000000 |
| rad27         | 4.39374e-14 | 1.000000 | 4.39427e-14 | 1.000000 |
| rad23         | 3.89049e-14 | 1.000000 | 3.89096e-14 | 1.000000 |
| rad20         | 3.51818e-14 | 1.000000 | 3.51861e-14 | 1.000000 |
| rad21         | 2.23187e-14 | 1.000000 | 2.23214e-14 | 1.000000 |
| rad25         | 1.13299e-14 | 1.000000 | 1.13312e-14 | 1.000000 |
| rad14         | 8.23922e-15 | 1.000000 | 8.24022e-15 | 1.000000 |
| rad12         | 7.73322e-15 | 1.000000 | 7.73416e-15 | 1.000000 |
| Ph+Allene     | 5.71367e-15 | 1.000000 | 5.71436e-15 | 1.000000 |
| rad39         | 5.36838e-15 | 1.000000 | 5.36902e-15 | 1.000000 |
| rad46         | 5.14672e-15 | 1.000000 | 5.14734e-15 | 1.000000 |
| rad45         | 2.71947e-16 | 1.000000 | 2.71980e-16 | 1.000000 |
| rad18         | 1.62094e-16 | 1.000000 | 1.62114e-16 | 1.000000 |
| rad22         | 1.18173e-16 | 1.000000 | 1.18187e-16 | 1.000000 |
| rad60syn      | 2.40533e-17 | 1.000000 | 2.40562e-17 | 1.000000 |
| rad36         | 1.69591e-17 | 1.000000 | 1.69612e-17 | 1.000000 |
| PhCH2CCH+H    | 7.68049e-18 | 1.000000 | 7.68141e-18 | 1.000000 |
| rad60anti     | 4.26669e-18 | 1.000000 | 4.26721e-18 | 1.000000 |
| rad31         | 3.67532e-18 | 1.000000 | 3.67576e-18 | 1.000000 |
| rad37         | 1.84137e-18 | 1.000000 | 1.84159e-18 | 1.000000 |
| rad5          | 1.17246e-20 | 1.000000 | 1.17260e-20 | 1.000000 |
| rad24         | 2.47247e-21 | 1.000000 | 2.47277e-21 | 1.000000 |
| PAH3+H        | 1.32118e-21 | 1.000000 | 1.32134e-21 | 1.000000 |
| rad59         | 5.06376e-22 | 1.000000 | 5.06437e-22 | 1.000000 |
| rad50         | 2.96723e-23 | 1.000000 | 2.96759e-23 | 1.000000 |
| rad19syn      | 1.22285e-25 | 1.000000 | 1.22300e-25 | 1.000000 |
| rad54         | 5.45302e-28 | 1.000000 | 5.45368e-28 | 1.000000 |
| PAH10+CH3     | 3.67126e-28 | 1.000000 | 3.67171e-28 | 1.000000 |
| rad52         | 3.13055e-28 | 1.000000 | 3.13092e-28 | 1.000000 |
| rad43         | 8.93001e-29 | 1.000000 | 8.93109e-29 | 1.000000 |
| rad62         | 4.15462e-30 | 1.000000 | 4.15512e-30 | 1.000000 |
| rad51         | 2.56191e-31 | 1.000000 | 2.56222e-31 | 1.000000 |
| rad70         | 7.98261e-38 | 1.000000 | 7.98357e-38 | 1.000000 |
| PhcycC3H3_A+H | 3.96380e-38 | 1.000000 | 3.96428e-38 | 1.000000 |
| rad55         | 2.08424e-38 | 1.000000 | 2.08449e-38 | 1.000000 |
| rad65         | 5.51486e-40 | 1.000000 | 5.51553e-40 | 1.000000 |
| rad58         | 1.53251e-41 | 1.000000 | 1.53270e-41 | 1.000000 |
| PAH1+H        | 1.34385e-42 | 1.000000 | 1.34401e-42 | 1.000000 |
| rad34         | 1.88135e-44 | 1.000000 | 1.88158e-44 | 1.000000 |
| rad42         | 2.98966e-46 | 1.000000 | 2.99002e-46 | 1.000000 |
| rad41         | 2.03840e-46 | 1.000000 | 2.03865e-46 | 1.000000 |
| rad47         | 1.45232e-51 | 1.000000 | 1.45250e-51 | 1.000000 |

0.100000000E-03 Pa, 200.000000 K

=====

| Rate constant | True (fraction) | Effective (fraction) |
|---------------|-----------------|----------------------|
|---------------|-----------------|----------------------|

Total | 1.76115e-27 (1.00 ) 1.76088e-27 (1.00 )

| species       | PYtrue      | Cumul    | PYeffective | Cumul    |
|---------------|-------------|----------|-------------|----------|
| Indene+H      | 0.999397    | 0.999397 | 0.999551    | 0.999551 |
| rad6          | 0.000448666 | 0.999846 | 0.000448735 | 1.000000 |
| Benzyl+C2H2   | 0.000153906 | 1.000000 | 0.000000    | 1.000000 |
| rad2          | 1.51082e-07 | 1.000000 | 1.51106e-07 | 1.000000 |
| rad7          | 3.32815e-08 | 1.000000 | 3.32866e-08 | 1.000000 |
| rad1          | 1.02666e-08 | 1.000000 | 1.02682e-08 | 1.000000 |
| rad11         | 8.20068e-09 | 1.000000 | 8.20194e-09 | 1.000000 |
| rad28         | 8.05847e-09 | 1.000000 | 8.05971e-09 | 1.000000 |
| rad10         | 7.79275e-09 | 1.000000 | 7.79395e-09 | 1.000000 |
| rad26         | 2.04845e-09 | 1.000000 | 2.04877e-09 | 1.000000 |
| rad30         | 1.43812e-09 | 1.000000 | 1.43834e-09 | 1.000000 |
| PhCCH+CH3     | 1.12873e-09 | 1.000000 | 1.12891e-09 | 1.000000 |
| PhCHCCH2+H    | 1.12630e-09 | 1.000000 | 1.12647e-09 | 1.000000 |
| rad3          | 1.02277e-09 | 1.000000 | 1.02292e-09 | 1.000000 |
| rad4          | 5.27298e-10 | 1.000000 | 5.27379e-10 | 1.000000 |
| PhCCCH3+H     | 4.25698e-10 | 1.000000 | 4.25763e-10 | 1.000000 |
| PAH9+H        | 2.42064e-10 | 1.000000 | 2.42101e-10 | 1.000000 |
| rad35         | 2.13299e-10 | 1.000000 | 2.13331e-10 | 1.000000 |
| rad13         | 1.88130e-10 | 1.000000 | 1.88159e-10 | 1.000000 |
| rad15         | 7.83105e-11 | 1.000000 | 7.83225e-11 | 1.000000 |
| rad38         | 3.38505e-11 | 1.000000 | 3.38557e-11 | 1.000000 |
| rad8          | 1.65789e-12 | 1.000000 | 1.65815e-12 | 1.000000 |
| Ph+MeAc       | 1.27486e-12 | 1.000000 | 1.27505e-12 | 1.000000 |
| rad9          | 4.49329e-13 | 1.000000 | 4.49399e-13 | 1.000000 |
| rad33         | 3.62295e-13 | 1.000000 | 3.62351e-13 | 1.000000 |
| PAH7+H        | 2.42236e-13 | 1.000000 | 2.42273e-13 | 1.000000 |
| rad27         | 5.39011e-14 | 1.000000 | 5.39094e-14 | 1.000000 |
| rad23         | 3.52578e-14 | 1.000000 | 3.52632e-14 | 1.000000 |
| rad20         | 3.17817e-14 | 1.000000 | 3.17866e-14 | 1.000000 |
| rad12         | 2.62187e-14 | 1.000000 | 2.62227e-14 | 1.000000 |
| Ph+Allene     | 2.61753e-14 | 1.000000 | 2.61793e-14 | 1.000000 |
| rad21         | 2.02009e-14 | 1.000000 | 2.02040e-14 | 1.000000 |
| rad39         | 2.01516e-14 | 1.000000 | 2.01547e-14 | 1.000000 |
| rad25         | 1.61545e-14 | 1.000000 | 1.61570e-14 | 1.000000 |
| rad46         | 1.26556e-14 | 1.000000 | 1.26575e-14 | 1.000000 |
| rad14         | 1.24495e-14 | 1.000000 | 1.24515e-14 | 1.000000 |
| rad45         | 2.46472e-16 | 1.000000 | 2.46510e-16 | 1.000000 |
| rad18         | 1.45162e-16 | 1.000000 | 1.45184e-16 | 1.000000 |
| rad22         | 9.99109e-17 | 1.000000 | 9.99263e-17 | 1.000000 |
| rad60syn      | 9.89668e-17 | 1.000000 | 9.89821e-17 | 1.000000 |
| PhCH2CCH+H    | 5.02280e-17 | 1.000000 | 5.02357e-17 | 1.000000 |
| rad60anti     | 1.91522e-17 | 1.000000 | 1.91552e-17 | 1.000000 |
| rad36         | 1.54036e-17 | 1.000000 | 1.54060e-17 | 1.000000 |
| rad37         | 1.12995e-17 | 1.000000 | 1.13013e-17 | 1.000000 |
| rad31         | 4.22006e-18 | 1.000000 | 4.22071e-18 | 1.000000 |
| rad5          | 8.33866e-20 | 1.000000 | 8.33995e-20 | 1.000000 |
| PAH3+H        | 1.05453e-20 | 1.000000 | 1.05469e-20 | 1.000000 |
| rad59         | 3.92875e-21 | 1.000000 | 3.92936e-21 | 1.000000 |
| rad24         | 2.48902e-21 | 1.000000 | 2.48940e-21 | 1.000000 |
| rad50         | 2.28886e-22 | 1.000000 | 2.28922e-22 | 1.000000 |
| rad19syn      | 1.82369e-24 | 1.000000 | 1.82397e-24 | 1.000000 |
| rad54         | 1.37079e-26 | 1.000000 | 1.37100e-26 | 1.000000 |
| PAH10+CH3     | 9.39573e-27 | 1.000000 | 9.39717e-27 | 1.000000 |
| rad52         | 4.44073e-27 | 1.000000 | 4.44142e-27 | 1.000000 |
| rad43         | 2.30147e-27 | 1.000000 | 2.30182e-27 | 1.000000 |
| rad62         | 2.68607e-28 | 1.000000 | 2.68648e-28 | 1.000000 |
| rad51         | 1.45635e-29 | 1.000000 | 1.45657e-29 | 1.000000 |
| rad65         | 1.67714e-32 | 1.000000 | 1.67739e-32 | 1.000000 |
| rad70         | 1.91607e-34 | 1.000000 | 1.91637e-34 | 1.000000 |
| PhcycC3H3_A+H | 9.55620e-35 | 1.000000 | 9.55767e-35 | 1.000000 |
| rad55         | 5.02718e-35 | 1.000000 | 5.02796e-35 | 1.000000 |
| rad58         | 3.68226e-38 | 1.000000 | 3.68283e-38 | 1.000000 |
| PAH1+H        | 2.10958e-39 | 1.000000 | 2.10990e-39 | 1.000000 |
| rad34         | 2.01788e-41 | 1.000000 | 2.01819e-41 | 1.000000 |
| rad42         | 6.99729e-44 | 1.000000 | 6.99837e-44 | 1.000000 |
| rad41         | 4.82394e-44 | 1.000000 | 4.82468e-44 | 1.000000 |
| rad47         | 4.80090e-49 | 1.000000 | 4.80164e-49 | 1.000000 |

0.100000000E-03 Pa, 210.00000 K

=====  
Rate constant | True (fraction) | Effective (fraction)  
-----  
Total | 8.30956e-27 (1.00 ) | 8.30794e-27 (1.00 )

| species | PYtrue | Cumul | PYeffective | Cumul |
|---------|--------|-------|-------------|-------|
|---------|--------|-------|-------------|-------|

|               |             |          |             |          |
|---------------|-------------|----------|-------------|----------|
| Indene+H      | 0.999337    | 0.999337 | 0.999533    | 0.999533 |
| rad6          | 0.000467072 | 0.999804 | 0.000467163 | 1.00000  |
| Benzyl+C2H2   | 0.000195403 | 0.999999 | 0.00000     | 1.00000  |
| rad2          | 1.62040e-07 | 1.000000 | 1.62072e-07 | 1.00000  |
| rad7          | 3.47181e-08 | 1.000000 | 3.47249e-08 | 1.00000  |
| rad28         | 1.18299e-08 | 1.000000 | 1.18322e-08 | 1.00000  |
| rad1          | 1.11045e-08 | 1.000000 | 1.11067e-08 | 1.00000  |
| rad11         | 8.55795e-09 | 1.000000 | 8.55963e-09 | 1.00000  |
| rad10         | 8.37838e-09 | 1.000000 | 8.38002e-09 | 1.00000  |
| rad26         | 2.91102e-09 | 1.000000 | 2.91159e-09 | 1.00000  |
| PhCCH+CH3     | 2.58081e-09 | 1.000000 | 2.58131e-09 | 1.00000  |
| PhCHCCH2+H    | 2.41395e-09 | 1.000000 | 2.41442e-09 | 1.00000  |
| rad30         | 2.20717e-09 | 1.000000 | 2.20761e-09 | 1.00000  |
| rad3          | 1.08784e-09 | 1.000000 | 1.08805e-09 | 1.00000  |
| PhCCCH3+H     | 9.77786e-10 | 1.000000 | 9.77977e-10 | 1.00000  |
| rad4          | 5.62184e-10 | 1.000000 | 5.62294e-10 | 1.00000  |
| PAH9+H        | 3.39390e-10 | 1.000000 | 3.39457e-10 | 1.00000  |
| rad35         | 2.84611e-10 | 1.000000 | 2.84667e-10 | 1.00000  |
| rad13         | 1.96609e-10 | 1.000000 | 1.96647e-10 | 1.00000  |
| rad15         | 1.39121e-10 | 1.000000 | 1.39148e-10 | 1.00000  |
| rad38         | 5.11959e-11 | 1.000000 | 5.12059e-11 | 1.00000  |
| Ph+MeAc       | 4.33719e-12 | 1.000000 | 4.33804e-12 | 1.00000  |
| rad8          | 4.32510e-12 | 1.000000 | 4.32595e-12 | 1.00000  |
| rad9          | 1.31170e-12 | 1.000000 | 1.31196e-12 | 1.00000  |
| PAH7+H        | 7.23591e-13 | 1.000000 | 7.23733e-13 | 1.00000  |
| rad33         | 3.79350e-13 | 1.000000 | 3.79425e-13 | 1.00000  |
| Ph+Allene     | 1.04443e-13 | 1.000000 | 1.04464e-13 | 1.00000  |
| rad12         | 7.93281e-14 | 1.000000 | 7.93436e-14 | 1.00000  |
| rad39         | 6.70575e-14 | 1.000000 | 6.70706e-14 | 1.00000  |
| rad27         | 6.40720e-14 | 1.000000 | 6.40845e-14 | 1.00000  |
| rad23         | 3.31090e-14 | 1.000000 | 3.31155e-14 | 1.00000  |
| rad46         | 2.89831e-14 | 1.000000 | 2.89887e-14 | 1.00000  |
| rad20         | 2.87688e-14 | 1.000000 | 2.87744e-14 | 1.00000  |
| rad25         | 2.18903e-14 | 1.000000 | 2.18946e-14 | 1.00000  |
| rad21         | 1.83240e-14 | 1.000000 | 1.83276e-14 | 1.00000  |
| rad14         | 1.77621e-14 | 1.000000 | 1.77656e-14 | 1.00000  |
| rad60syn      | 3.56738e-16 | 1.000000 | 3.56807e-16 | 1.00000  |
| PhCH2CCH+H    | 2.76262e-16 | 1.000000 | 2.76316e-16 | 1.00000  |
| rad45         | 2.31620e-16 | 1.000000 | 2.31666e-16 | 1.00000  |
| rad18         | 1.30132e-16 | 1.000000 | 1.30157e-16 | 1.00000  |
| rad22         | 8.48864e-17 | 1.000000 | 8.49030e-17 | 1.00000  |
| rad60anti     | 7.46043e-17 | 1.000000 | 7.46189e-17 | 1.00000  |
| rad37         | 5.78445e-17 | 1.000000 | 5.78558e-17 | 1.00000  |
| rad36         | 1.45126e-17 | 1.000000 | 1.45154e-17 | 1.00000  |
| rad31         | 4.80736e-18 | 1.000000 | 4.80830e-18 | 1.00000  |
| rad5          | 4.92424e-19 | 1.000000 | 4.92520e-19 | 1.00000  |
| PAH3+H        | 6.92393e-20 | 1.000000 | 6.92528e-20 | 1.00000  |
| rad59         | 2.51003e-20 | 1.000000 | 2.51052e-20 | 1.00000  |
| rad24         | 2.52092e-21 | 1.000000 | 2.52141e-21 | 1.00000  |
| rad50         | 1.46369e-21 | 1.000000 | 1.46397e-21 | 1.00000  |
| rad19syn      | 2.00649e-23 | 1.000000 | 2.00688e-23 | 1.00000  |
| rad54         | 1.94219e-25 | 1.000000 | 1.94257e-25 | 1.00000  |
| PAH10+CH3     | 1.33276e-25 | 1.000000 | 1.33302e-25 | 1.00000  |
| rad52         | 4.73519e-26 | 1.000000 | 4.73611e-26 | 1.00000  |
| rad43         | 3.24528e-26 | 1.000000 | 3.24591e-26 | 1.00000  |
| rad62         | 4.87475e-27 | 1.000000 | 4.87570e-27 | 1.00000  |
| rad51         | 2.76096e-28 | 1.000000 | 2.76150e-28 | 1.00000  |
| rad70         | 4.14925e-29 | 1.000000 | 4.15006e-29 | 1.00000  |
| PhcycC3H3_A+H | 3.67693e-29 | 1.000000 | 3.67765e-29 | 1.00000  |
| rad55         | 1.45143e-29 | 1.000000 | 1.45171e-29 | 1.00000  |
| rad58         | 1.88403e-30 | 1.000000 | 1.88440e-30 | 1.00000  |
| rad65         | 8.86428e-31 | 1.000000 | 8.86601e-31 | 1.00000  |
| PAH1+H        | 5.49743e-36 | 1.000000 | 5.49850e-36 | 1.00000  |
| rad34         | 5.08106e-38 | 1.000000 | 5.08205e-38 | 1.00000  |
| rad42         | 2.00393e-41 | 1.000000 | 2.00432e-41 | 1.00000  |
| rad41         | 9.12545e-42 | 1.000000 | 9.12723e-42 | 1.00000  |
| rad47         | 4.20446e-46 | 1.000000 | 4.20528e-46 | 1.00000  |

0.100000000E-03 Pa, 220.000000 K

=====

| Rate constant | True (fraction) |          | Effective (fraction) |          |
|---------------|-----------------|----------|----------------------|----------|
| Total         | 3.40057e-26     | (1.00 )  | 3.39973e-26          | (1.00 )  |
| species       | PYtrue          | Cumul    | PYeffective          | Cumul    |
| Indene+H      | 0.999270        | 0.999270 | 0.999517             | 0.999517 |
| rad6          | 0.000482564     | 0.999753 | 0.000482683          | 1.000000 |
| Benzyl+C2H2   | 0.000246962     | 1.000000 | 0.00000              | 1.000000 |
| rad2          | 1.71557e-07     | 1.000000 | 1.71599e-07          | 1.000000 |

|               |             |          |             |          |
|---------------|-------------|----------|-------------|----------|
| rad7          | 3.59465e-08 | 1.000000 | 3.59554e-08 | 1.000000 |
| rad28         | 1.65434e-08 | 1.000000 | 1.65475e-08 | 1.000000 |
| rad1          | 1.18645e-08 | 1.000000 | 1.18674e-08 | 1.000000 |
| rad10         | 8.89308e-09 | 1.000000 | 8.89528e-09 | 1.000000 |
| rad11         | 8.86444e-09 | 1.000000 | 8.86663e-09 | 1.000000 |
| PhCCH+CH3     | 5.52839e-09 | 1.000000 | 5.52976e-09 | 1.000000 |
| PhCHCCH2+H    | 4.87715e-09 | 1.000000 | 4.87835e-09 | 1.000000 |
| rad26         | 3.94416e-09 | 1.000000 | 3.94514e-09 | 1.000000 |
| rad30         | 3.30247e-09 | 1.000000 | 3.30329e-09 | 1.000000 |
| PhCCCH3+H     | 2.09888e-09 | 1.000000 | 2.09940e-09 | 1.000000 |
| rad3          | 1.14436e-09 | 1.000000 | 1.14464e-09 | 1.000000 |
| rad4          | 5.92932e-10 | 1.000000 | 5.93078e-10 | 1.000000 |
| PAH9+H        | 4.72791e-10 | 1.000000 | 4.72908e-10 | 1.000000 |
| rad35         | 3.78635e-10 | 1.000000 | 3.78729e-10 | 1.000000 |
| rad15         | 2.37138e-10 | 1.000000 | 2.37196e-10 | 1.000000 |
| rad13         | 2.03949e-10 | 1.000000 | 2.04000e-10 | 1.000000 |
| rad38         | 7.62892e-11 | 1.000000 | 7.63080e-11 | 1.000000 |
| Ph+MeAc       | 1.32648e-11 | 1.000000 | 1.32681e-11 | 1.000000 |
| rad8          | 1.04019e-11 | 1.000000 | 1.04045e-11 | 1.000000 |
| rad9          | 3.49391e-12 | 1.000000 | 3.49477e-12 | 1.000000 |
| PAH7+H        | 1.96743e-12 | 1.000000 | 1.96792e-12 | 1.000000 |
| rad33         | 3.94314e-13 | 1.000000 | 3.94412e-13 | 1.000000 |
| Ph+Allene     | 3.69888e-13 | 1.000000 | 3.69979e-13 | 1.000000 |
| rad12         | 2.17544e-13 | 1.000000 | 2.17597e-13 | 1.000000 |
| rad39         | 2.01088e-13 | 1.000000 | 2.01138e-13 | 1.000000 |
| rad27         | 7.40497e-14 | 1.000000 | 7.40680e-14 | 1.000000 |
| rad46         | 6.24600e-14 | 1.000000 | 6.24754e-14 | 1.000000 |
| rad23         | 3.23405e-14 | 1.000000 | 3.23484e-14 | 1.000000 |
| rad25         | 2.83699e-14 | 1.000000 | 2.83769e-14 | 1.000000 |
| rad20         | 2.60925e-14 | 1.000000 | 2.60989e-14 | 1.000000 |
| rad14         | 2.41019e-14 | 1.000000 | 2.41079e-14 | 1.000000 |
| rad21         | 1.66567e-14 | 1.000000 | 1.66608e-14 | 1.000000 |
| PhCH2CCH+H    | 1.30851e-15 | 1.000000 | 1.30884e-15 | 1.000000 |
| rad60syn      | 1.14766e-15 | 1.000000 | 1.14795e-15 | 1.000000 |
| rad60anti     | 2.57242e-16 | 1.000000 | 2.57305e-16 | 1.000000 |
| rad37         | 2.53277e-16 | 1.000000 | 2.53339e-16 | 1.000000 |
| rad45         | 2.26619e-16 | 1.000000 | 2.26675e-16 | 1.000000 |
| rad18         | 1.16761e-16 | 1.000000 | 1.16790e-16 | 1.000000 |
| rad22         | 7.24848e-17 | 1.000000 | 7.25027e-17 | 1.000000 |
| rad36         | 1.42418e-17 | 1.000000 | 1.42453e-17 | 1.000000 |
| rad31         | 5.43660e-18 | 1.000000 | 5.43794e-18 | 1.000000 |
| rad5          | 2.47610e-18 | 1.000000 | 2.47671e-18 | 1.000000 |
| PAH3+H        | 3.84305e-19 | 1.000000 | 3.84400e-19 | 1.000000 |
| rad59         | 1.35682e-19 | 1.000000 | 1.35716e-19 | 1.000000 |
| rad50         | 7.96561e-21 | 1.000000 | 7.96757e-21 | 1.000000 |
| rad24         | 2.56888e-21 | 1.000000 | 2.56952e-21 | 1.000000 |
| rad19syn      | 1.76674e-22 | 1.000000 | 1.76717e-22 | 1.000000 |
| rad54         | 2.07826e-24 | 1.000000 | 2.07877e-24 | 1.000000 |
| PAH10+CH3     | 1.42468e-24 | 1.000000 | 1.42503e-24 | 1.000000 |
| rad52         | 4.06716e-25 | 1.000000 | 4.06817e-25 | 1.000000 |
| rad43         | 3.45259e-25 | 1.000000 | 3.45344e-25 | 1.000000 |
| rad62         | 5.97113e-26 | 1.000000 | 5.97260e-26 | 1.000000 |
| rad51         | 3.50350e-27 | 1.000000 | 3.50437e-27 | 1.000000 |
| PhcycC3H3_A+H | 9.86877e-28 | 1.000000 | 9.87121e-28 | 1.000000 |
| rad70         | 8.97251e-28 | 1.000000 | 8.97472e-28 | 1.000000 |
| rad55         | 3.38084e-28 | 1.000000 | 3.38168e-28 | 1.000000 |
| rad58         | 5.59628e-29 | 1.000000 | 5.59766e-29 | 1.000000 |
| rad65         | 1.55275e-29 | 1.000000 | 1.55313e-29 | 1.000000 |
| PAH1+H        | 3.10900e-30 | 1.000000 | 3.10977e-30 | 1.000000 |
| rad34         | 2.04048e-35 | 1.000000 | 2.04098e-35 | 1.000000 |
| rad42         | 4.73640e-39 | 1.000000 | 4.73757e-39 | 1.000000 |
| rad47         | 1.49503e-39 | 1.000000 | 1.49540e-39 | 1.000000 |
| rad41         | 1.11542e-39 | 1.000000 | 1.11570e-39 | 1.000000 |

0.100000000E-03 Pa, 230.000000 K

=====

| Rate constant | True (fraction)     | Effective (fraction) |
|---------------|---------------------|----------------------|
| Total         | 1.22972e-25 (1.00 ) | 1.22933e-25 (1.00 )  |

| species     | PYtrue      | Cumul    | PYeffective | Cumul    |
|-------------|-------------|----------|-------------|----------|
| Indene+H    | 0.999195    | 0.999195 | 0.999505    | 0.999505 |
| rad6        | 0.000494428 | 0.999689 | 0.000494582 | 1.000000 |
| Benzyl+C2H2 | 0.000310661 | 1.000000 | 0.000000    | 1.000000 |
| rad2        | 1.79343e-07 | 1.000000 | 1.79398e-07 | 1.000000 |
| rad7        | 3.69123e-08 | 1.000000 | 3.69238e-08 | 1.000000 |
| rad28       | 2.21460e-08 | 1.000000 | 2.21529e-08 | 1.000000 |
| rad1        | 1.25262e-08 | 1.000000 | 1.25301e-08 | 1.000000 |
| PhCCH+CH3   | 1.11827e-08 | 1.000000 | 1.11862e-08 | 1.000000 |

|               |             |         |             |          |
|---------------|-------------|---------|-------------|----------|
| PhCHCCH2+H    | 9.35455e-09 | 1.00000 | 9.35746e-09 | 1.000000 |
| rad10         | 9.32096e-09 | 1.00000 | 9.32386e-09 | 1.000000 |
| rad11         | 9.10671e-09 | 1.00000 | 9.10954e-09 | 1.000000 |
| rad26         | 5.12131e-09 | 1.00000 | 5.12290e-09 | 1.000000 |
| rad30         | 4.83374e-09 | 1.00000 | 4.83524e-09 | 1.000000 |
| PhCCCH3+H     | 4.24552e-09 | 1.00000 | 4.24684e-09 | 1.000000 |
| rad3          | 1.19044e-09 | 1.00000 | 1.19081e-09 | 1.000000 |
| PAH9+H        | 6.54518e-10 | 1.00000 | 6.54721e-10 | 1.000000 |
| rad4          | 6.18549e-10 | 1.00000 | 6.18741e-10 | 1.000000 |
| rad35         | 5.02028e-10 | 1.00000 | 5.02184e-10 | 1.000000 |
| rad15         | 3.90043e-10 | 1.00000 | 3.90165e-10 | 1.000000 |
| rad13         | 2.09840e-10 | 1.00000 | 2.09905e-10 | 1.000000 |
| rad38         | 1.12174e-10 | 1.00000 | 1.12208e-10 | 1.000000 |
| Ph+MeAc       | 3.69669e-11 | 1.00000 | 3.69784e-11 | 1.000000 |
| rad8          | 2.33067e-11 | 1.00000 | 2.33140e-11 | 1.000000 |
| rad9          | 8.59375e-12 | 1.00000 | 8.59642e-12 | 1.000000 |
| PAH7+H        | 4.93048e-12 | 1.00000 | 4.93202e-12 | 1.000000 |
| Ph+Allene     | 1.18094e-12 | 1.00000 | 1.18130e-12 | 1.000000 |
| rad39         | 5.50829e-13 | 1.00000 | 5.51001e-13 | 1.000000 |
| rad12         | 5.47672e-13 | 1.00000 | 5.47842e-13 | 1.000000 |
| rad33         | 4.06576e-13 | 1.00000 | 4.06702e-13 | 1.000000 |
| rad46         | 1.27728e-13 | 1.00000 | 1.27768e-13 | 1.000000 |
| rad27         | 8.34445e-14 | 1.00000 | 8.34705e-14 | 1.000000 |
| rad25         | 3.53517e-14 | 1.00000 | 3.53627e-14 | 1.000000 |
| rad23         | 3.29634e-14 | 1.00000 | 3.29736e-14 | 1.000000 |
| rad14         | 3.12927e-14 | 1.00000 | 3.13024e-14 | 1.000000 |
| rad20         | 2.37107e-14 | 1.00000 | 2.37181e-14 | 1.000000 |
| rad21         | 1.51727e-14 | 1.00000 | 1.51774e-14 | 1.000000 |
| PhCH2CCH+H    | 5.44225e-15 | 1.00000 | 5.44394e-15 | 1.000000 |
| rad60syn      | 3.34601e-15 | 1.00000 | 3.34705e-15 | 1.000000 |
| rad37         | 9.68340e-16 | 1.00000 | 9.68641e-16 | 1.000000 |
| rad60anti     | 7.98104e-16 | 1.00000 | 7.98352e-16 | 1.000000 |
| rad45         | 2.31604e-16 | 1.00000 | 2.31676e-16 | 1.000000 |
| rad18         | 1.04846e-16 | 1.00000 | 1.04878e-16 | 1.000000 |
| rad22         | 6.22403e-17 | 1.00000 | 6.22596e-17 | 1.000000 |
| rad36         | 1.46056e-17 | 1.00000 | 1.46101e-17 | 1.000000 |
| rad5          | 1.08244e-17 | 1.00000 | 1.08278e-17 | 1.000000 |
| rad31         | 6.10755e-18 | 1.00000 | 6.10945e-18 | 1.000000 |
| PAH3+H        | 1.84372e-18 | 1.00000 | 1.84429e-18 | 1.000000 |
| rad59         | 6.34514e-19 | 1.00000 | 6.34711e-19 | 1.000000 |
| rad50         | 3.76891e-20 | 1.00000 | 3.77008e-20 | 1.000000 |
| rad24         | 2.63414e-21 | 1.00000 | 2.63496e-21 | 1.000000 |
| rad19syn      | 1.28600e-21 | 1.00000 | 1.28640e-21 | 1.000000 |
| rad54         | 1.79596e-23 | 1.00000 | 1.79652e-23 | 1.000000 |
| PAH10+CH3     | 1.22693e-23 | 1.00000 | 1.22731e-23 | 1.000000 |
| rad43         | 2.95666e-24 | 1.00000 | 2.95758e-24 | 1.000000 |
| rad52         | 2.90474e-24 | 1.00000 | 2.90565e-24 | 1.000000 |
| rad62         | 5.74419e-25 | 1.00000 | 5.74598e-25 | 1.000000 |
| rad51         | 3.51921e-26 | 1.00000 | 3.52031e-26 | 1.000000 |
| PhcycC3H3_A+H | 1.69363e-26 | 1.00000 | 1.69416e-26 | 1.000000 |
| rad70         | 1.30459e-26 | 1.00000 | 1.30499e-26 | 1.000000 |
| rad55         | 5.18289e-27 | 1.00000 | 5.18450e-27 | 1.000000 |
| rad58         | 1.02414e-27 | 1.00000 | 1.02446e-27 | 1.000000 |
| PAH1+H        | 2.23641e-28 | 1.00000 | 2.23710e-28 | 1.000000 |
| rad65         | 2.00230e-28 | 1.00000 | 2.00292e-28 | 1.000000 |
| rad34         | 1.06733e-29 | 1.00000 | 1.06766e-29 | 1.000000 |
| rad42         | 4.44097e-32 | 1.00000 | 4.44235e-32 | 1.000000 |
| rad41         | 7.74411e-33 | 1.00000 | 7.74651e-33 | 1.000000 |
| rad47         | 2.02043e-38 | 1.00000 | 2.02106e-38 | 1.000000 |

0.100000000E-03 Pa, 240.000000 K

=====

| Rate constant | True (fraction)     | Effective (fraction) |
|---------------|---------------------|----------------------|
| Total         | 3.99091e-25 (1.00 ) | 3.98936e-25 (1.00 )  |

| species     | PYtrue      | Cumul    | PYeffective | Cumul    |
|-------------|-------------|----------|-------------|----------|
| Indene+H    | 0.999109    | 0.999109 | 0.999497    | 0.999497 |
| rad6        | 0.000502083 | 0.999611 | 0.000502279 | 0.999999 |
| Benzyl+C2H2 | 0.000388915 | 1.000000 | 0.000000    | 0.999999 |
| rad2        | 1.85147e-07 | 1.000000 | 1.85219e-07 | 0.999999 |
| rad7        | 3.75706e-08 | 1.000000 | 3.75852e-08 | 1.000000 |
| rad28       | 2.85003e-08 | 1.000000 | 2.85114e-08 | 1.000000 |
| PhCCH+CH3   | 2.15019e-08 | 1.000000 | 2.15103e-08 | 1.000000 |
| PhCHCCH2+H  | 1.71345e-08 | 1.000000 | 1.71412e-08 | 1.000000 |
| rad1        | 1.30705e-08 | 1.000000 | 1.30756e-08 | 1.000000 |
| rad10       | 9.64897e-09 | 1.000000 | 9.65273e-09 | 1.000000 |
| rad11       | 9.27358e-09 | 1.000000 | 9.27719e-09 | 1.000000 |
| PhCCCH3+H   | 8.14863e-09 | 1.000000 | 8.15180e-09 | 1.000000 |

|               |             |         |             |          |
|---------------|-------------|---------|-------------|----------|
| rad30         | 6.93974e-09 | 1.00000 | 6.94244e-09 | 1.000000 |
| rad26         | 6.40103e-09 | 1.00000 | 6.40352e-09 | 1.000000 |
| rad3          | 1.22457e-09 | 1.00000 | 1.22505e-09 | 1.000000 |
| PAH9+H        | 9.00515e-10 | 1.00000 | 9.00866e-10 | 1.000000 |
| rad35         | 6.63167e-10 | 1.00000 | 6.63425e-10 | 1.000000 |
| rad4          | 6.38239e-10 | 1.00000 | 6.38488e-10 | 1.000000 |
| rad15         | 6.21917e-10 | 1.00000 | 6.22159e-10 | 1.000000 |
| rad13         | 2.14018e-10 | 1.00000 | 2.14102e-10 | 1.000000 |
| rad38         | 1.62934e-10 | 1.00000 | 1.62998e-10 | 1.000000 |
| Ph+MeAc       | 9.49377e-11 | 1.00000 | 9.49746e-11 | 1.000000 |
| rad8          | 4.90803e-11 | 1.00000 | 4.90994e-11 | 1.000000 |
| rad9          | 1.97138e-11 | 1.00000 | 1.97215e-11 | 1.000000 |
| PAH7+H        | 1.15074e-11 | 1.00000 | 1.15119e-11 | 1.000000 |
| Ph+Allene     | 3.44335e-12 | 1.00000 | 3.44469e-12 | 1.000000 |
| rad39         | 1.39394e-12 | 1.00000 | 1.39448e-12 | 1.000000 |
| rad12         | 1.27928e-12 | 1.00000 | 1.27977e-12 | 1.000000 |
| rad33         | 4.15615e-13 | 1.00000 | 4.15777e-13 | 1.000000 |
| rad46         | 2.49555e-13 | 1.00000 | 2.49652e-13 | 1.000000 |
| rad27         | 9.19050e-14 | 1.00000 | 9.19408e-14 | 1.000000 |
| rad25         | 4.25449e-14 | 1.00000 | 4.25615e-14 | 1.000000 |
| rad14         | 3.90730e-14 | 1.00000 | 3.90883e-14 | 1.000000 |
| rad23         | 3.51275e-14 | 1.00000 | 3.51412e-14 | 1.000000 |
| rad20         | 2.15882e-14 | 1.00000 | 2.15966e-14 | 1.000000 |
| PhCH2CCH+H    | 2.02009e-14 | 1.00000 | 2.02087e-14 | 1.000000 |
| rad21         | 1.38502e-14 | 1.00000 | 1.38556e-14 | 1.000000 |
| rad60syn      | 8.95372e-15 | 1.00000 | 8.95721e-15 | 1.000000 |
| rad37         | 3.28881e-15 | 1.00000 | 3.29009e-15 | 1.000000 |
| rad60anti     | 2.25854e-15 | 1.00000 | 2.25941e-15 | 1.000000 |
| rad45         | 2.47785e-16 | 1.00000 | 2.47882e-16 | 1.000000 |
| rad18         | 9.42154e-17 | 1.00000 | 9.42521e-17 | 1.000000 |
| rad22         | 5.38002e-17 | 1.00000 | 5.38212e-17 | 1.000000 |
| rad5          | 4.18569e-17 | 1.00000 | 4.18732e-17 | 1.000000 |
| rad36         | 1.56881e-17 | 1.00000 | 1.56942e-17 | 1.000000 |
| PAH3+H        | 7.78850e-18 | 1.00000 | 7.79153e-18 | 1.000000 |
| rad31         | 6.82092e-18 | 1.00000 | 6.82357e-18 | 1.000000 |
| rad59         | 2.61494e-18 | 1.00000 | 2.61596e-18 | 1.000000 |
| rad50         | 1.57818e-19 | 1.00000 | 1.57879e-19 | 1.000000 |
| rad19syn      | 7.92673e-21 | 1.00000 | 7.92981e-21 | 1.000000 |
| rad24         | 2.71846e-21 | 1.00000 | 2.71951e-21 | 1.000000 |
| rad54         | 1.28693e-22 | 1.00000 | 1.28743e-22 | 1.000000 |
| PAH10+CH3     | 8.75875e-23 | 1.00000 | 8.76216e-23 | 1.000000 |
| rad43         | 2.09925e-23 | 1.00000 | 2.10007e-23 | 1.000000 |
| rad52         | 1.76519e-23 | 1.00000 | 1.76588e-23 | 1.000000 |
| rad62         | 4.48198e-24 | 1.00000 | 4.48372e-24 | 1.000000 |
| rad51         | 2.84574e-25 | 1.00000 | 2.84684e-25 | 1.000000 |
| PhcycC3H3_A+H | 1.83469e-25 | 1.00000 | 1.83541e-25 | 1.000000 |
| rad70         | 1.30417e-25 | 1.00000 | 1.30468e-25 | 1.000000 |
| rad55         | 5.31785e-26 | 1.00000 | 5.31992e-26 | 1.000000 |
| rad58         | 1.13975e-26 | 1.00000 | 1.14020e-26 | 1.000000 |
| PAH1+H        | 3.48984e-27 | 1.00000 | 3.49120e-27 | 1.000000 |
| rad65         | 1.89687e-27 | 1.00000 | 1.89761e-27 | 1.000000 |
| rad34         | 2.02047e-28 | 1.00000 | 2.02125e-28 | 1.000000 |
| rad42         | 2.62653e-30 | 1.00000 | 2.62755e-30 | 1.000000 |
| rad41         | 7.56057e-31 | 1.00000 | 7.56351e-31 | 1.000000 |
| rad47         | 1.87587e-37 | 1.00000 | 1.87660e-37 | 1.000000 |

0.100000000E-03 Pa, 250.000000 K

=====

| Rate constant | True (fraction)     | Effective (fraction) |
|---------------|---------------------|----------------------|
| Total         | 1.17763e-24 (1.00 ) | 1.17706e-24 (1.00 )  |

| species     | PYtrue      | Cumul    | PYeffective | Cumul    |
|-------------|-------------|----------|-------------|----------|
| Indene+H    | 0.999010    | 0.999010 | 0.999494    | 0.999494 |
| rad6        | 0.000505123 | 0.999515 | 0.000505368 | 0.999999 |
| Benzyl+C2H2 | 0.000484502 | 1.000000 | 0.000000    | 0.999999 |
| rad2        | 1.88829e-07 | 1.000000 | 1.88921e-07 | 1.000000 |
| PhCCH+CH3   | 3.95194e-08 | 1.000000 | 3.95386e-08 | 1.000000 |
| rad7        | 3.78888e-08 | 1.000000 | 3.79071e-08 | 1.000000 |
| rad28       | 3.53939e-08 | 1.000000 | 3.54110e-08 | 1.000000 |
| PhCHCCH2+H  | 3.01224e-08 | 1.000000 | 3.01370e-08 | 1.000000 |
| PhCCCH3+H   | 1.49275e-08 | 1.000000 | 1.49348e-08 | 1.000000 |
| rad1        | 1.34850e-08 | 1.000000 | 1.34915e-08 | 1.000000 |
| rad10       | 9.86860e-09 | 1.000000 | 9.87338e-09 | 1.000000 |
| rad30       | 9.79401e-09 | 1.000000 | 9.79875e-09 | 1.000000 |
| rad11       | 9.35693e-09 | 1.000000 | 9.36147e-09 | 1.000000 |
| rad26       | 7.73096e-09 | 1.000000 | 7.73471e-09 | 1.000000 |
| rad3        | 1.24566e-09 | 1.000000 | 1.24626e-09 | 1.000000 |
| PAH9+H      | 1.23137e-09 | 1.000000 | 1.23197e-09 | 1.000000 |



|               |             |         |             |          |
|---------------|-------------|---------|-------------|----------|
| rad15         | 9.64941e-10 | 1.00000 | 9.65409e-10 | 1.000000 |
| rad35         | 8.72521e-10 | 1.00000 | 8.72944e-10 | 1.000000 |
| rad4          | 6.51392e-10 | 1.00000 | 6.51708e-10 | 1.000000 |
| rad38         | 2.33999e-10 | 1.00000 | 2.34113e-10 | 1.000000 |
| Ph+MeAc       | 2.26825e-10 | 1.00000 | 2.26935e-10 | 1.000000 |
| rad13         | 2.16291e-10 | 1.00000 | 2.16395e-10 | 1.000000 |
| rad8          | 9.78541e-11 | 1.00000 | 9.79016e-11 | 1.000000 |
| rad9          | 4.25305e-11 | 1.00000 | 4.25511e-11 | 1.000000 |
| PAH7+H        | 2.52309e-11 | 1.00000 | 2.52431e-11 | 1.000000 |
| Ph+Allene     | 9.26952e-12 | 1.00000 | 9.27401e-12 | 1.000000 |
| rad39         | 3.28989e-12 | 1.00000 | 3.29149e-12 | 1.000000 |
| rad12         | 2.79731e-12 | 1.00000 | 2.79866e-12 | 1.000000 |
| rad46         | 4.68464e-13 | 1.00000 | 4.68691e-13 | 1.000000 |
| rad33         | 4.21040e-13 | 1.00000 | 4.21244e-13 | 1.000000 |
| rad27         | 9.91393e-14 | 1.00000 | 9.91874e-14 | 1.000000 |
| PhCH2CCH+H    | 6.78375e-14 | 1.00000 | 6.78704e-14 | 1.000000 |
| rad25         | 4.96376e-14 | 1.00000 | 4.96617e-14 | 1.000000 |
| rad14         | 4.71228e-14 | 1.00000 | 4.71456e-14 | 1.000000 |
| rad23         | 3.91526e-14 | 1.00000 | 3.91716e-14 | 1.000000 |
| rad60syn      | 2.22259e-14 | 1.00000 | 2.22367e-14 | 1.000000 |
| rad20         | 1.96950e-14 | 1.00000 | 1.97045e-14 | 1.000000 |
| rad21         | 1.26706e-14 | 1.00000 | 1.26767e-14 | 1.000000 |
| rad37         | 1.00672e-14 | 1.00000 | 1.00721e-14 | 1.000000 |
| rad60anti     | 5.89654e-15 | 1.00000 | 5.89940e-15 | 1.000000 |
| rad45         | 2.77739e-16 | 1.00000 | 2.77874e-16 | 1.000000 |
| rad5          | 1.45268e-16 | 1.00000 | 1.45338e-16 | 1.000000 |
| rad18         | 8.47236e-17 | 1.00000 | 8.47647e-17 | 1.000000 |
| rad22         | 4.69018e-17 | 1.00000 | 4.69245e-17 | 1.000000 |
| PAH3+H        | 2.94239e-17 | 1.00000 | 2.94382e-17 | 1.000000 |
| rad36         | 1.76639e-17 | 1.00000 | 1.76724e-17 | 1.000000 |
| rad59         | 9.64535e-18 | 1.00000 | 9.65003e-18 | 1.000000 |
| rad31         | 7.57901e-18 | 1.00000 | 7.58268e-18 | 1.000000 |
| rad50         | 5.93621e-19 | 1.00000 | 5.93909e-19 | 1.000000 |
| rad19syn      | 4.22521e-20 | 1.00000 | 4.22726e-20 | 1.000000 |
| rad24         | 2.82419e-21 | 1.00000 | 2.82556e-21 | 1.000000 |
| rad54         | 7.86486e-22 | 1.00000 | 7.86867e-22 | 1.000000 |
| PAH10+CH3     | 5.32912e-22 | 1.00000 | 5.33171e-22 | 1.000000 |
| rad43         | 1.26979e-22 | 1.00000 | 1.27041e-22 | 1.000000 |
| rad52         | 9.31745e-23 | 1.00000 | 9.32197e-23 | 1.000000 |
| rad62         | 2.94884e-23 | 1.00000 | 2.95027e-23 | 1.000000 |
| rad51         | 1.93289e-24 | 1.00000 | 1.93383e-24 | 1.000000 |
| PhcycC3H3_A+H | 1.51464e-24 | 1.00000 | 1.51538e-24 | 1.000000 |
| rad70         | 1.03228e-24 | 1.00000 | 1.03278e-24 | 1.000000 |
| rad55         | 4.27099e-25 | 1.00000 | 4.27306e-25 | 1.000000 |
| rad58         | 9.52950e-26 | 1.00000 | 9.53411e-26 | 1.000000 |
| PAH1+H        | 3.26036e-26 | 1.00000 | 3.26194e-26 | 1.000000 |
| rad65         | 1.44853e-26 | 1.00000 | 1.44924e-26 | 1.000000 |
| rad34         | 1.95392e-27 | 1.00000 | 1.95487e-27 | 1.000000 |
| rad42         | 2.76625e-29 | 1.00000 | 2.76759e-29 | 1.000000 |
| rad41         | 8.02537e-30 | 1.00000 | 8.02926e-30 | 1.000000 |
| rad47         | 1.43630e-36 | 1.00000 | 1.43700e-36 | 1.000000 |

0.100000000E-03 Pa, 260.000000 K

=====

| Rate constant | True (fraction)     | Effective (fraction) |
|---------------|---------------------|----------------------|
| Total         | 3.19452e-24 (1.00 ) | 3.19260e-24 (1.00 )  |

| species     | PYtrue      | Cumul    | PYeffective | Cumul    |
|-------------|-------------|----------|-------------|----------|
| Indene+H    | 0.998896    | 0.998896 | 0.999496    | 0.999496 |
| Benzyl+C2H2 | 0.000600601 | 0.999497 | 0.00000     | 0.999496 |
| rad6        | 0.000503340 | 1.000000 | 0.000503643 | 1.000000 |
| rad2        | 1.90313e-07 | 1.00000  | 1.90428e-07 | 1.000000 |
| PhCCH+CH3   | 6.97597e-08 | 1.00000  | 6.98016e-08 | 1.000000 |
| PhCHCCH2+H  | 5.10427e-08 | 1.00000  | 5.10734e-08 | 1.000000 |
| rad28       | 4.25579e-08 | 1.00000  | 4.25835e-08 | 1.000000 |
| rad7        | 3.78490e-08 | 1.00000  | 3.78718e-08 | 1.00000  |
| PhCCCH3+H   | 2.62295e-08 | 1.00000  | 2.62453e-08 | 1.00000  |
| rad1        | 1.37608e-08 | 1.00000  | 1.37691e-08 | 1.00000  |
| rad30       | 1.36112e-08 | 1.00000  | 1.36194e-08 | 1.00000  |
| rad10       | 9.97520e-09 | 1.00000  | 9.98119e-09 | 1.00000  |
| rad11       | 9.35223e-09 | 1.00000  | 9.35785e-09 | 1.00000  |
| rad26       | 9.05302e-09 | 1.00000  | 9.05846e-09 | 1.00000  |
| PAH9+H      | 1.67346e-09 | 1.00000  | 1.67447e-09 | 1.00000  |
| rad15       | 1.46140e-09 | 1.00000  | 1.46228e-09 | 1.00000  |
| rad3        | 1.25303e-09 | 1.00000  | 1.25378e-09 | 1.00000  |
| rad35       | 1.14309e-09 | 1.00000  | 1.14377e-09 | 1.00000  |
| rad4        | 6.57607e-10 | 1.00000  | 6.58003e-10 | 1.00000  |
| Ph+MeAc     | 5.08217e-10 | 1.00000  | 5.08523e-10 | 1.00000  |

|               |             |         |             |         |
|---------------|-------------|---------|-------------|---------|
| rad38         | 3.32513e-10 | 1.00000 | 3.32713e-10 | 1.00000 |
| rad13         | 2.16544e-10 | 1.00000 | 2.16674e-10 | 1.00000 |
| rad8          | 1.85860e-10 | 1.00000 | 1.85971e-10 | 1.00000 |
| rad9          | 8.69023e-11 | 1.00000 | 8.69546e-11 | 1.00000 |
| PAH7+H        | 5.23522e-11 | 1.00000 | 5.23836e-11 | 1.00000 |
| Ph+Allene     | 2.32511e-11 | 1.00000 | 2.32651e-11 | 1.00000 |
| rad39         | 7.29978e-12 | 1.00000 | 7.30417e-12 | 1.00000 |
| rad12         | 5.76902e-12 | 1.00000 | 5.77249e-12 | 1.00000 |
| rad46         | 8.48853e-13 | 1.00000 | 8.49363e-13 | 1.00000 |
| rad33         | 4.22609e-13 | 1.00000 | 4.22863e-13 | 1.00000 |
| PhCH2CCH+H    | 2.08487e-13 | 1.00000 | 2.08612e-13 | 1.00000 |
| rad27         | 1.04930e-13 | 1.00000 | 1.04993e-13 | 1.00000 |
| rad25         | 5.63259e-14 | 1.00000 | 5.63598e-14 | 1.00000 |
| rad14         | 5.50946e-14 | 1.00000 | 5.51277e-14 | 1.00000 |
| rad60syn      | 5.16397e-14 | 1.00000 | 5.16707e-14 | 1.00000 |
| rad23         | 4.55897e-14 | 1.00000 | 4.56171e-14 | 1.00000 |
| rad37         | 2.81164e-14 | 1.00000 | 2.81333e-14 | 1.00000 |
| rad20         | 1.80053e-14 | 1.00000 | 1.80161e-14 | 1.00000 |
| rad60anti     | 1.43399e-14 | 1.00000 | 1.43486e-14 | 1.00000 |
| rad21         | 1.16180e-14 | 1.00000 | 1.16250e-14 | 1.00000 |
| rad5          | 4.58093e-16 | 1.00000 | 4.58368e-16 | 1.00000 |
| rad45         | 3.25926e-16 | 1.00000 | 3.26121e-16 | 1.00000 |
| PAH3+H        | 1.00722e-16 | 1.00000 | 1.00783e-16 | 1.00000 |
| rad18         | 7.62441e-17 | 1.00000 | 7.62899e-17 | 1.00000 |
| rad22         | 4.13578e-17 | 1.00000 | 4.13826e-17 | 1.00000 |
| rad59         | 3.22618e-17 | 1.00000 | 3.22812e-17 | 1.00000 |
| rad36         | 2.08337e-17 | 1.00000 | 2.08462e-17 | 1.00000 |
| rad31         | 8.38593e-18 | 1.00000 | 8.39097e-18 | 1.00000 |
| rad50         | 2.03108e-18 | 1.00000 | 2.03230e-18 | 1.00000 |
| rad19syn      | 1.98102e-19 | 1.00000 | 1.98221e-19 | 1.00000 |
| rad54         | 4.18147e-21 | 1.00000 | 4.18398e-21 | 1.00000 |
| rad24         | 2.95443e-21 | 1.00000 | 2.95621e-21 | 1.00000 |
| PAH10+CH3     | 2.81745e-21 | 1.00000 | 2.81914e-21 | 1.00000 |
| rad43         | 6.66966e-22 | 1.00000 | 6.67367e-22 | 1.00000 |
| rad52         | 4.34407e-22 | 1.00000 | 4.34668e-22 | 1.00000 |
| rad62         | 1.67353e-22 | 1.00000 | 1.67453e-22 | 1.00000 |
| rad51         | 1.13376e-23 | 1.00000 | 1.13444e-23 | 1.00000 |
| PhcycC3H3_A+H | 1.04976e-23 | 1.00000 | 1.05039e-23 | 1.00000 |
| rad70         | 6.90151e-24 | 1.00000 | 6.90566e-24 | 1.00000 |
| rad55         | 2.89173e-24 | 1.00000 | 2.89347e-24 | 1.00000 |
| rad58         | 6.67419e-25 | 1.00000 | 6.67820e-25 | 1.00000 |
| PAH1+H        | 2.48935e-25 | 1.00000 | 2.49084e-25 | 1.00000 |
| rad65         | 9.40609e-26 | 1.00000 | 9.41174e-26 | 1.00000 |
| rad34         | 1.53034e-26 | 1.00000 | 1.53126e-26 | 1.00000 |
| rad42         | 2.29616e-28 | 1.00000 | 2.29754e-28 | 1.00000 |
| rad41         | 6.71383e-29 | 1.00000 | 6.71786e-29 | 1.00000 |
| rad47         | 9.26847e-36 | 1.00000 | 9.27404e-36 | 1.00000 |

0.100000000E-03 Pa, 270.000000 K

=====

| Rate constant | True (fraction)    | Effective (fraction) |
|---------------|--------------------|----------------------|
| Total         | 8.04141e-24 (1.00) | 8.03545e-24 (1.00)   |

| species     | PYtrue      | Cumul    | PYeffective | Cumul    |
|-------------|-------------|----------|-------------|----------|
| Indene+H    | 0.998762    | 0.998762 | 0.999502    | 0.999502 |
| Benzyl+C2H2 | 0.000740818 | 0.999503 | 0.00000     | 0.999502 |
| rad6        | 0.000496735 | 1.00000  | 0.000497104 | 0.999999 |
| rad2        | 1.89601e-07 | 1.00000  | 1.89741e-07 | 0.999999 |
| PhCCH+CH3   | 1.18744e-07 | 1.00000  | 1.18832e-07 | 0.999999 |
| PhCHCCH2+H  | 8.36735e-08 | 1.00000  | 8.37355e-08 | 0.999999 |
| rad28       | 4.96926e-08 | 1.00000  | 4.97294e-08 | 1.00000  |
| PhCCCH3+H   | 4.43943e-08 | 1.00000  | 4.44272e-08 | 1.00000  |
| rad7        | 3.74488e-08 | 1.00000  | 3.74765e-08 | 1.00000  |
| rad30       | 1.86540e-08 | 1.00000  | 1.86679e-08 | 1.00000  |
| rad1        | 1.38936e-08 | 1.00000  | 1.39039e-08 | 1.00000  |
| rad26       | 1.03088e-08 | 1.00000  | 1.03165e-08 | 1.00000  |
| rad10       | 9.96884e-09 | 1.00000  | 9.97623e-09 | 1.00000  |
| rad11       | 9.25870e-09 | 1.00000  | 9.26556e-09 | 1.00000  |
| PAH9+H      | 2.26031e-09 | 1.00000  | 2.26199e-09 | 1.00000  |
| rad15       | 2.16603e-09 | 1.00000  | 2.16763e-09 | 1.00000  |
| rad35       | 1.49088e-09 | 1.00000  | 1.49199e-09 | 1.00000  |
| rad3        | 1.24709e-09 | 1.00000  | 1.24802e-09 | 1.00000  |
| Ph+MeAc     | 1.07516e-09 | 1.00000  | 1.07596e-09 | 1.00000  |
| rad4        | 6.57036e-10 | 1.00000  | 6.57524e-10 | 1.00000  |
| rad38       | 4.67785e-10 | 1.00000  | 4.68132e-10 | 1.00000  |
| rad8        | 3.38070e-10 | 1.00000  | 3.38320e-10 | 1.00000  |
| rad13       | 2.14751e-10 | 1.00000  | 2.14911e-10 | 1.00000  |
| rad9        | 1.69185e-10 | 1.00000  | 1.69311e-10 | 1.00000  |

|               |             |         |             |          |
|---------------|-------------|---------|-------------|----------|
| PAH7+H        | 1.03436e-10 | 1.00000 | 1.03512e-10 | 1.000000 |
| Ph+Allene     | 5.47687e-11 | 1.00000 | 5.48093e-11 | 1.000000 |
| rad39         | 1.53315e-11 | 1.00000 | 1.53429e-11 | 1.000000 |
| rad12         | 1.12930e-11 | 1.00000 | 1.13014e-11 | 1.000000 |
| rad46         | 1.49044e-12 | 1.00000 | 1.49154e-12 | 1.000000 |
| PhCH2CCH+H    | 5.92175e-13 | 1.00000 | 5.92614e-13 | 1.000000 |
| rad33         | 4.20246e-13 | 1.00000 | 4.20557e-13 | 1.000000 |
| rad60syn      | 1.13155e-13 | 1.00000 | 1.13239e-13 | 1.000000 |
| rad27         | 1.09140e-13 | 1.00000 | 1.09221e-13 | 1.000000 |
| rad37         | 7.23962e-14 | 1.00000 | 7.24498e-14 | 1.000000 |
| rad14         | 6.26462e-14 | 1.00000 | 6.26926e-14 | 1.000000 |
| rad25         | 6.23380e-14 | 1.00000 | 6.23842e-14 | 1.000000 |
| rad23         | 5.53239e-14 | 1.00000 | 5.53650e-14 | 1.000000 |
| rad60anti     | 3.27508e-14 | 1.00000 | 3.27751e-14 | 1.000000 |
| rad20         | 1.64968e-14 | 1.00000 | 1.65090e-14 | 1.000000 |
| rad21         | 1.06787e-14 | 1.00000 | 1.06866e-14 | 1.000000 |
| rad5          | 1.32639e-15 | 1.00000 | 1.32737e-15 | 1.000000 |
| rad45         | 3.99712e-16 | 1.00000 | 4.00009e-16 | 1.000000 |
| PAH3+H        | 3.15908e-16 | 1.00000 | 3.16142e-16 | 1.000000 |
| rad59         | 9.89449e-17 | 1.00000 | 9.90183e-17 | 1.000000 |
| rad18         | 6.86668e-17 | 1.00000 | 6.87177e-17 | 1.000000 |
| rad22         | 3.70503e-17 | 1.00000 | 3.70777e-17 | 1.000000 |
| rad36         | 2.56950e-17 | 1.00000 | 2.57141e-17 | 1.000000 |
| rad31         | 9.24817e-18 | 1.00000 | 9.25503e-18 | 1.000000 |
| rad50         | 6.38897e-18 | 1.00000 | 6.39371e-18 | 1.000000 |
| rad19syn      | 8.28793e-19 | 1.00000 | 8.29408e-19 | 1.000000 |
| rad54         | 1.96490e-20 | 1.00000 | 1.96636e-20 | 1.000000 |
| PAH10+CH3     | 1.31483e-20 | 1.00000 | 1.31581e-20 | 1.000000 |
| rad24         | 3.11314e-21 | 1.00000 | 3.11544e-21 | 1.000000 |
| rad43         | 3.09036e-21 | 1.00000 | 3.09265e-21 | 1.000000 |
| rad52         | 1.81419e-21 | 1.00000 | 1.81554e-21 | 1.000000 |
| rad62         | 8.33295e-22 | 1.00000 | 8.33913e-22 | 1.000000 |
| PhcycC3H3_A+H | 6.28366e-23 | 1.00000 | 6.28832e-23 | 1.000000 |
| rad51         | 5.84526e-23 | 1.00000 | 5.84959e-23 | 1.000000 |
| rad70         | 3.99406e-23 | 1.00000 | 3.99702e-23 | 1.000000 |
| rad55         | 1.69352e-23 | 1.00000 | 1.69477e-23 | 1.000000 |
| rad58         | 4.03353e-24 | 1.00000 | 4.03652e-24 | 1.000000 |
| PAH1+H        | 1.62718e-24 | 1.00000 | 1.62838e-24 | 1.000000 |
| rad65         | 5.31206e-25 | 1.00000 | 5.31600e-25 | 1.000000 |
| rad34         | 1.02473e-25 | 1.00000 | 1.02549e-25 | 1.000000 |
| rad42         | 1.63113e-27 | 1.00000 | 1.63234e-27 | 1.000000 |
| rad41         | 4.81328e-28 | 1.00000 | 4.81685e-28 | 1.000000 |
| rad47         | 5.14495e-35 | 1.00000 | 5.14877e-35 | 1.000000 |

0.100000000E-03 Pa, 280.000000 K

=====  
Rate constant | True (fraction) | Effective (fraction)  
-----

Total | 1.89357e-23 (1.00) | 1.89185e-23 (1.00)

| species     | PYtrue      | Cumul    | PYeffective | Cumul    |
|-------------|-------------|----------|-------------|----------|
| Indene+H    | 0.998605    | 0.998605 | 0.999513    | 0.999513 |
| Benzyl+C2H2 | 0.000909217 | 0.999514 | 0.00000     | 0.999513 |
| rad6        | 0.000485509 | 1.000000 | 0.000485950 | 0.999999 |
| PhCCH+CH3   | 1.95588e-07 | 1.000000 | 1.95766e-07 | 0.999999 |
| rad2        | 1.86828e-07 | 1.000000 | 1.86998e-07 | 0.999999 |
| PhCHCCH2+H  | 1.33111e-07 | 1.000000 | 1.33232e-07 | 0.999999 |
| PhCCCH3+H   | 7.26385e-08 | 1.000000 | 7.27046e-08 | 1.000000 |
| rad28       | 5.64944e-08 | 1.000000 | 5.65459e-08 | 1.000000 |
| rad7        | 3.67002e-08 | 1.000000 | 3.67336e-08 | 1.000000 |
| rad30       | 2.52409e-08 | 1.000000 | 2.52639e-08 | 1.000000 |
| rad1        | 1.38879e-08 | 1.000000 | 1.39005e-08 | 1.000000 |
| rad26       | 1.14449e-08 | 1.000000 | 1.14553e-08 | 1.000000 |
| rad10       | 9.85377e-09 | 1.000000 | 9.86273e-09 | 1.000000 |
| rad11       | 9.07921e-09 | 1.000000 | 9.08747e-09 | 1.000000 |
| rad15       | 3.14860e-09 | 1.000000 | 3.15147e-09 | 1.000000 |
| PAH9+H      | 3.03419e-09 | 1.000000 | 3.03695e-09 | 1.000000 |
| Ph+MeAc     | 2.16026e-09 | 1.000000 | 2.16222e-09 | 1.000000 |
| rad35       | 1.93552e-09 | 1.000000 | 1.93728e-09 | 1.000000 |
| rad3        | 1.22818e-09 | 1.000000 | 1.22930e-09 | 1.000000 |
| rad38       | 6.51838e-10 | 1.000000 | 6.52431e-10 | 1.000000 |
| rad4        | 6.49781e-10 | 1.000000 | 6.50372e-10 | 1.000000 |
| rad8        | 5.91547e-10 | 1.000000 | 5.92086e-10 | 1.000000 |
| rad9        | 3.15437e-10 | 1.000000 | 3.15724e-10 | 1.000000 |
| rad13       | 2.10970e-10 | 1.000000 | 2.11162e-10 | 1.000000 |
| PAH7+H      | 1.95627e-10 | 1.000000 | 1.95805e-10 | 1.000000 |
| Ph+Allene   | 1.21961e-10 | 1.000000 | 1.22072e-10 | 1.000000 |
| rad39       | 3.06576e-11 | 1.000000 | 3.06855e-11 | 1.000000 |
| rad12       | 2.10969e-11 | 1.000000 | 2.11161e-11 | 1.000000 |

|               |             |         |             |          |
|---------------|-------------|---------|-------------|----------|
| rad46         | 2.54407e-12 | 1.00000 | 2.54638e-12 | 1.000000 |
| PhCH2CCH+H    | 1.56756e-12 | 1.00000 | 1.56899e-12 | 1.000000 |
| rad33         | 4.14033e-13 | 1.00000 | 4.14409e-13 | 1.000000 |
| rad60syn      | 2.35363e-13 | 1.00000 | 2.35577e-13 | 1.000000 |
| rad37         | 1.73403e-13 | 1.00000 | 1.73561e-13 | 1.000000 |
| rad27         | 1.11714e-13 | 1.00000 | 1.11816e-13 | 1.000000 |
| rad60anti     | 7.07369e-14 | 1.00000 | 7.08013e-14 | 1.000000 |
| rad23         | 6.97428e-14 | 1.00000 | 6.98062e-14 | 1.000000 |
| rad14         | 6.94684e-14 | 1.00000 | 6.95316e-14 | 1.000000 |
| rad25         | 6.74529e-14 | 1.00000 | 6.75142e-14 | 1.000000 |
| rad20         | 1.51502e-14 | 1.00000 | 1.51640e-14 | 1.000000 |
| rad21         | 9.84055e-15 | 1.00000 | 9.84951e-15 | 1.000000 |
| rad5          | 3.55812e-15 | 1.00000 | 3.56136e-15 | 1.000000 |
| PAH3+H        | 9.16497e-16 | 1.00000 | 9.17331e-16 | 1.000000 |
| rad45         | 5.11075e-16 | 1.00000 | 5.11540e-16 | 1.000000 |
| rad59         | 2.80896e-16 | 1.00000 | 2.81152e-16 | 1.000000 |
| rad18         | 6.18949e-17 | 1.00000 | 6.19513e-17 | 1.000000 |
| rad22         | 3.39314e-17 | 1.00000 | 3.39623e-17 | 1.000000 |
| rad36         | 3.30602e-17 | 1.00000 | 3.30903e-17 | 1.000000 |
| rad50         | 1.86449e-17 | 1.00000 | 1.86619e-17 | 1.000000 |
| rad31         | 1.01749e-17 | 1.00000 | 1.01842e-17 | 1.000000 |
| rad19syn      | 3.13161e-18 | 1.00000 | 3.13446e-18 | 1.000000 |
| rad54         | 8.26545e-20 | 1.00000 | 8.27297e-20 | 1.000000 |
| PAH10+CH3     | 5.48658e-20 | 1.00000 | 5.49157e-20 | 1.000000 |
| rad43         | 1.27970e-20 | 1.00000 | 1.28087e-20 | 1.000000 |
| rad52         | 6.86639e-21 | 1.00000 | 6.87264e-21 | 1.000000 |
| rad62         | 3.68920e-21 | 1.00000 | 3.69256e-21 | 1.000000 |
| rad24         | 3.30535e-21 | 1.00000 | 3.30836e-21 | 1.000000 |
| PhcycC3H3_A+H | 3.28845e-22 | 1.00000 | 3.29144e-22 | 1.000000 |
| rad51         | 2.68188e-22 | 1.00000 | 2.68432e-22 | 1.000000 |
| rad70         | 2.02709e-22 | 1.00000 | 2.02893e-22 | 1.000000 |
| rad55         | 8.68905e-23 | 1.00000 | 8.69696e-23 | 1.000000 |
| rad58         | 2.12890e-23 | 1.00000 | 2.13083e-23 | 1.000000 |
| PAH1+H        | 9.19359e-24 | 1.00000 | 9.20196e-24 | 1.000000 |
| rad65         | 2.64203e-24 | 1.00000 | 2.64444e-24 | 1.000000 |
| rad34         | 5.91266e-25 | 1.00000 | 5.91804e-25 | 1.000000 |
| rad42         | 9.90656e-27 | 1.00000 | 9.91558e-27 | 1.000000 |
| rad41         | 2.94661e-27 | 1.00000 | 2.94929e-27 | 1.000000 |
| rad47         | 2.49701e-34 | 1.00000 | 2.49928e-34 | 1.000000 |

0.100000000E-03 Pa, 290.000000 K

=====  
Rate constant | True (fraction) | Effective (fraction)  
-----

Total | 4.20015e-23 (1.00) | 4.19549e-23 (1.00)

| species     | PYtrue      | Cumul    | PYeffective | Cumul    |
|-------------|-------------|----------|-------------|----------|
| Indene+H    | 0.998419    | 0.998419 | 0.999528    | 0.999528 |
| Benzyl+C2H2 | 0.00111035  | 0.999529 | 0.00000     | 0.999528 |
| rad6        | 0.000470033 | 0.999999 | 0.000470556 | 0.999999 |
| PhCCH+CH3   | 3.12674e-07 | 1.000000 | 3.13021e-07 | 0.999999 |
| PhCHCCH2+H  | 2.06057e-07 | 1.000000 | 2.06286e-07 | 0.999999 |
| rad2        | 1.82124e-07 | 1.00000  | 1.82326e-07 | 0.999999 |
| PhCCCH3+H   | 1.15256e-07 | 1.00000  | 1.15384e-07 | 0.999999 |
| rad28       | 6.26818e-08 | 1.00000  | 6.27514e-08 | 0.999999 |
| rad7        | 3.56288e-08 | 1.00000  | 3.56684e-08 | 0.999999 |
| rad30       | 3.37540e-08 | 1.00000  | 3.37915e-08 | 1.000000 |
| rad1        | 1.37473e-08 | 1.00000  | 1.37626e-08 | 1.000000 |
| rad26       | 1.24163e-08 | 1.00000  | 1.24301e-08 | 1.000000 |
| rad10       | 9.63795e-09 | 1.00000  | 9.64866e-09 | 1.000000 |
| rad11       | 8.81987e-09 | 1.00000  | 8.82968e-09 | 1.000000 |
| rad15       | 4.49699e-09 | 1.00000  | 4.50199e-09 | 1.000000 |
| Ph+MeAc     | 4.14311e-09 | 1.00000  | 4.14771e-09 | 1.000000 |
| PAH9+H      | 4.04803e-09 | 1.00000  | 4.05253e-09 | 1.000000 |
| rad35       | 2.50084e-09 | 1.00000  | 2.50362e-09 | 1.000000 |
| rad3        | 1.19733e-09 | 1.00000  | 1.19866e-09 | 1.000000 |
| rad8        | 9.99559e-10 | 1.00000  | 1.00067e-09 | 1.000000 |
| rad38       | 9.00055e-10 | 1.00000  | 9.01055e-10 | 1.000000 |
| rad4        | 6.36306e-10 | 1.00000  | 6.37013e-10 | 1.000000 |
| rad9        | 5.65706e-10 | 1.00000  | 5.66335e-10 | 1.000000 |
| PAH7+H      | 3.55770e-10 | 1.00000  | 3.56165e-10 | 1.000000 |
| Ph+Allene   | 2.58226e-10 | 1.00000  | 2.58513e-10 | 1.000000 |
| rad13       | 2.05333e-10 | 1.00000  | 2.05561e-10 | 1.000000 |
| rad39       | 5.86600e-11 | 1.00000  | 5.87252e-11 | 1.000000 |
| rad12       | 3.77873e-11 | 1.00000  | 3.78293e-11 | 1.000000 |
| rad46       | 4.23314e-12 | 1.00000  | 4.23784e-12 | 1.000000 |
| PhCH2CCH+H  | 3.89526e-12 | 1.00000  | 3.89959e-12 | 1.000000 |
| rad60syn    | 4.67288e-13 | 1.00000  | 4.67808e-13 | 1.000000 |
| rad33       | 4.04197e-13 | 1.00000  | 4.04647e-13 | 1.000000 |

|               |             |         |             |          |
|---------------|-------------|---------|-------------|----------|
| rad37         | 3.89333e-13 | 1.00000 | 3.89765e-13 | 1.000000 |
| rad60anti     | 1.45349e-13 | 1.00000 | 1.45511e-13 | 1.000000 |
| rad27         | 1.12672e-13 | 1.00000 | 1.12797e-13 | 1.000000 |
| rad23         | 9.10033e-14 | 1.00000 | 9.11044e-14 | 1.000000 |
| rad14         | 7.53072e-14 | 1.00000 | 7.53909e-14 | 1.000000 |
| rad25         | 7.15111e-14 | 1.00000 | 7.15906e-14 | 1.000000 |
| rad20         | 1.39484e-14 | 1.00000 | 1.39639e-14 | 1.000000 |
| rad21         | 9.09322e-15 | 1.00000 | 9.10333e-15 | 1.000000 |
| rad5          | 8.91176e-15 | 1.00000 | 8.92167e-15 | 1.000000 |
| PAH3+H        | 2.47954e-15 | 1.00000 | 2.48229e-15 | 1.000000 |
| rad59         | 7.44174e-16 | 1.00000 | 7.45001e-16 | 1.000000 |
| rad45         | 6.79644e-16 | 1.00000 | 6.80399e-16 | 1.000000 |
| rad18         | 5.58431e-17 | 1.00000 | 5.59051e-17 | 1.000000 |
| rad50         | 5.08725e-17 | 1.00000 | 5.09290e-17 | 1.000000 |
| rad36         | 4.42685e-17 | 1.00000 | 4.43177e-17 | 1.000000 |
| rad22         | 3.20317e-17 | 1.00000 | 3.20673e-17 | 1.000000 |
| rad31         | 1.11785e-17 | 1.00000 | 1.11909e-17 | 1.000000 |
| rad19syn      | 1.07983e-17 | 1.00000 | 1.08103e-17 | 1.000000 |
| rad54         | 3.14692e-19 | 1.00000 | 3.15041e-19 | 1.000000 |
| PAH10+CH3     | 2.07010e-19 | 1.00000 | 2.07240e-19 | 1.000000 |
| rad43         | 4.78950e-20 | 1.00000 | 4.79483e-20 | 1.000000 |
| rad52         | 2.37880e-20 | 1.00000 | 2.38145e-20 | 1.000000 |
| rad62         | 1.46921e-20 | 1.00000 | 1.47084e-20 | 1.000000 |
| rad24         | 3.53750e-21 | 1.00000 | 3.54143e-21 | 1.000000 |
| PhcycC3H3_A+H | 1.52437e-21 | 1.00000 | 1.52606e-21 | 1.000000 |
| rad51         | 1.10723e-21 | 1.00000 | 1.10846e-21 | 1.000000 |
| rad70         | 9.13862e-22 | 1.00000 | 9.14878e-22 | 1.000000 |
| rad55         | 3.95634e-22 | 1.00000 | 3.96074e-22 | 1.000000 |
| rad58         | 9.94322e-23 | 1.00000 | 9.95427e-23 | 1.000000 |
| PAH1+H        | 4.55695e-23 | 1.00000 | 4.56202e-23 | 1.000000 |
| rad65         | 1.17141e-23 | 1.00000 | 1.17271e-23 | 1.000000 |
| rad34         | 2.98534e-24 | 1.00000 | 2.98865e-24 | 1.000000 |
| rad42         | 5.23317e-26 | 1.00000 | 5.23899e-26 | 1.000000 |
| rad41         | 1.56759e-26 | 1.00000 | 1.56934e-26 | 1.000000 |
| rad47         | 1.07468e-33 | 1.00000 | 1.07587e-33 | 1.000000 |

0.100000000E-03 Pa, 300.000000 K

=====

| Rate constant | True (fraction)     | Effective (fraction) |
|---------------|---------------------|----------------------|
| Total         | 1.17740e-22 (1.00 ) | 1.17544e-22 (1.00 )  |

| species     | PYtrue      | Cumul    | PYeffective | Cumul    |
|-------------|-------------|----------|-------------|----------|
| Indene+H    | 0.997974    | 0.997974 | 0.999634    | 0.999634 |
| Benzyl+C2H2 | 0.00166137  | 0.999635 | 0.000000    | 0.999634 |
| rad6        | 0.000363884 | 0.999999 | 0.000364490 | 0.999998 |
| PhCCH+CH3   | 4.39168e-07 | 1.000000 | 4.39898e-07 | 0.999999 |
| PhCHCCH2+H  | 2.66554e-07 | 1.000000 | 2.66998e-07 | 0.999999 |
| PhCCCH3+H   | 1.56650e-07 | 1.000000 | 1.56910e-07 | 0.999999 |
| rad2        | 1.37366e-07 | 1.000000 | 1.37595e-07 | 0.999999 |
| rad28       | 5.59070e-08 | 1.000000 | 5.60000e-08 | 1.000000 |
| rad30       | 3.74921e-08 | 1.000000 | 3.75545e-08 | 1.000000 |
| rad7        | 3.22819e-08 | 1.000000 | 3.23356e-08 | 1.000000 |
| rad26       | 1.15256e-08 | 1.000000 | 1.15448e-08 | 1.000000 |
| rad1        | 1.03511e-08 | 1.000000 | 1.03683e-08 | 1.000000 |
| rad10       | 8.45938e-09 | 1.000000 | 8.47346e-09 | 1.000000 |
| rad11       | 7.75697e-09 | 1.000000 | 7.76988e-09 | 1.000000 |
| Ph+MeAc     | 6.13898e-09 | 1.000000 | 6.14920e-09 | 1.000000 |
| PAH9+H      | 5.54826e-09 | 1.000000 | 5.55749e-09 | 1.000000 |
| rad35       | 2.76894e-09 | 1.000000 | 2.77355e-09 | 1.000000 |
| rad38       | 1.02438e-09 | 1.000000 | 1.02609e-09 | 1.000000 |
| rad3        | 9.56345e-10 | 1.000000 | 9.57937e-10 | 1.000000 |
| PAH7+H      | 6.50646e-10 | 1.000000 | 6.51729e-10 | 1.000000 |
| rad4        | 4.75593e-10 | 1.000000 | 4.76385e-10 | 1.000000 |
| Ph+Allene   | 2.52791e-10 | 1.000000 | 2.53212e-10 | 1.000000 |
| rad13       | 1.86167e-10 | 1.000000 | 1.86477e-10 | 1.000000 |
| rad39       | 8.70041e-11 | 1.000000 | 8.71489e-11 | 1.000000 |
| rad23       | 2.30541e-11 | 1.000000 | 2.30925e-11 | 1.000000 |
| rad19anti   | 1.63822e-11 | 1.000000 | 1.64095e-11 | 1.000000 |
| PhCH2CCH+H  | 7.52934e-12 | 1.000000 | 7.54187e-12 | 1.000000 |
| rad46       | 5.66776e-12 | 1.000000 | 5.67719e-12 | 1.000000 |
| rad20       | 7.81408e-13 | 1.000000 | 7.82709e-13 | 1.000000 |
| rad60syn    | 7.07982e-13 | 1.000000 | 7.09160e-13 | 1.000000 |
| rad37       | 6.07444e-13 | 1.000000 | 6.08455e-13 | 1.000000 |
| rad21       | 4.99552e-13 | 1.000000 | 5.00383e-13 | 1.000000 |
| rad33       | 4.46336e-13 | 1.000000 | 4.47079e-13 | 1.000000 |
| rad45       | 3.18688e-13 | 1.000000 | 3.19218e-13 | 1.000000 |
| rad60anti   | 2.13248e-13 | 1.000000 | 2.13603e-13 | 1.000000 |
| rad27       | 1.13171e-13 | 1.000000 | 1.13359e-13 | 1.000000 |

|               |             |         |             |          |
|---------------|-------------|---------|-------------|----------|
| rad14         | 7.51930e-14 | 1.00000 | 7.53182e-14 | 1.000000 |
| rad25         | 6.81129e-14 | 1.00000 | 6.82263e-14 | 1.000000 |
| rad22         | 4.58197e-14 | 1.00000 | 4.58960e-14 | 1.000000 |
| rad18         | 1.89331e-14 | 1.00000 | 1.89646e-14 | 1.000000 |
| rad36         | 1.08619e-14 | 1.00000 | 1.08799e-14 | 1.000000 |
| PAH3+H        | 6.24911e-15 | 1.00000 | 6.25951e-15 | 1.000000 |
| rad59         | 1.44647e-15 | 1.00000 | 1.44888e-15 | 1.000000 |
| rad50         | 1.03028e-16 | 1.00000 | 1.03199e-16 | 1.000000 |
| rad19syn      | 2.69399e-17 | 1.00000 | 2.69848e-17 | 1.000000 |
| rad31         | 1.83404e-17 | 1.00000 | 1.83710e-17 | 1.000000 |
| rad24         | 1.73851e-18 | 1.00000 | 1.74140e-18 | 1.000000 |
| rad67         | 1.20289e-18 | 1.00000 | 1.20489e-18 | 1.000000 |
| rad54         | 8.62744e-19 | 1.00000 | 8.64180e-19 | 1.000000 |
| PAH10+CH3     | 5.72267e-19 | 1.00000 | 5.73219e-19 | 1.000000 |
| rad43         | 1.19112e-19 | 1.00000 | 1.19310e-19 | 1.000000 |
| rad9          | 1.14817e-19 | 1.00000 | 1.15008e-19 | 1.000000 |
| rad52         | 6.28774e-20 | 1.00000 | 6.29821e-20 | 1.000000 |
| rad62         | 4.05189e-20 | 1.00000 | 4.05864e-20 | 1.000000 |
| PhcycC3H3_A+H | 7.39055e-21 | 1.00000 | 7.40285e-21 | 1.000000 |
| rad51         | 3.46122e-21 | 1.00000 | 3.46698e-21 | 1.000000 |
| rad70         | 3.35470e-21 | 1.00000 | 3.36028e-21 | 1.000000 |
| rad55         | 1.33559e-21 | 1.00000 | 1.33781e-21 | 1.000000 |
| rad58         | 3.59869e-22 | 1.00000 | 3.60468e-22 | 1.000000 |
| PAH1+H        | 2.76441e-22 | 1.00000 | 2.76901e-22 | 1.000000 |
| rad15         | 6.83362e-23 | 1.00000 | 6.84499e-23 | 1.000000 |
| rad65         | 4.20463e-23 | 1.00000 | 4.21163e-23 | 1.000000 |
| rad34         | 1.85440e-23 | 1.00000 | 1.85749e-23 | 1.000000 |
| rad42         | 4.75282e-25 | 1.00000 | 4.76073e-25 | 1.000000 |
| rad41         | 1.44644e-25 | 1.00000 | 1.44885e-25 | 1.000000 |
| rad5          | 1.52921e-26 | 1.00000 | 1.53176e-26 | 1.000000 |
| rad53         | 6.41372e-27 | 1.00000 | 6.42440e-27 | 1.000000 |
| rad12         | 2.07048e-27 | 1.00000 | 2.07393e-27 | 1.000000 |
| rad64         | 1.37065e-27 | 1.00000 | 1.37294e-27 | 1.000000 |
| rad56         | 9.21530e-30 | 1.00000 | 9.23064e-30 | 1.000000 |
| rad61         | 1.39633e-30 | 1.00000 | 1.39865e-30 | 1.000000 |
| rad68syn      | 1.02013e-30 | 1.00000 | 1.02183e-30 | 1.000000 |
| rad68anti     | 7.28182e-31 | 1.00000 | 7.29394e-31 | 1.000000 |
| rad73         | 2.79611e-33 | 1.00000 | 2.80077e-33 | 1.000000 |
| rad47         | 2.40012e-33 | 1.00000 | 2.40412e-33 | 1.000000 |
| rad40syn      | 2.38973e-34 | 1.00000 | 2.39371e-34 | 1.000000 |
| rad40anti     | 7.27883e-35 | 1.00000 | 7.29095e-35 | 1.000000 |
| rad71         | 2.29432e-35 | 1.00000 | 2.29814e-35 | 1.000000 |
| PAH8+H        | 7.08168e-36 | 1.00000 | 7.09346e-36 | 1.000000 |
| rad72         | 4.04059e-41 | 1.00000 | 4.04731e-41 | 1.000000 |
| rad8          | 2.67126e-42 | 1.00000 | 2.67570e-42 | 1.000000 |

0.100000000E-03 Pa, 310.000000 K

=====

| Rate constant | True (fraction)     | Effective (fraction) |
|---------------|---------------------|----------------------|
| Total         | 2.44453e-22 (1.00 ) | 2.44054e-22 (1.00 )  |

| species     | PYtrue      | Cumul    | PYeffective | Cumul    |
|-------------|-------------|----------|-------------|----------|
| Indene+H    | 0.997938    | 0.997938 | 0.999569    | 0.999569 |
| Benzyl+C2H2 | 0.00163152  | 0.999570 | 0.00000     | 0.999569 |
| rad6        | 0.000428490 | 0.999998 | 0.000429190 | 0.999998 |
| PhCCH+CH3   | 7.37914e-07 | 0.999999 | 7.39119e-07 | 0.999999 |
| PhCHCCH2+H  | 4.59111e-07 | 0.999999 | 4.59861e-07 | 0.999999 |
| PhCCCH3+H   | 2.67395e-07 | 0.999999 | 2.67832e-07 | 1.000000 |
| rad2        | 1.67971e-07 | 1.000000 | 1.68246e-07 | 1.000000 |
| rad28       | 7.23141e-08 | 1.000000 | 7.24323e-08 | 1.000000 |
| rad30       | 5.84561e-08 | 1.000000 | 5.85516e-08 | 1.000000 |
| rad7        | 3.26697e-08 | 1.000000 | 3.27231e-08 | 1.000000 |
| rad26       | 1.37450e-08 | 1.000000 | 1.37675e-08 | 1.000000 |
| Ph+MeAc     | 1.34796e-08 | 1.000000 | 1.35016e-08 | 1.000000 |
| rad1        | 1.31142e-08 | 1.000000 | 1.31356e-08 | 1.000000 |
| rad10       | 8.95066e-09 | 1.000000 | 8.96529e-09 | 1.000000 |
| rad15       | 8.75303e-09 | 1.000000 | 8.76734e-09 | 1.000000 |
| rad11       | 8.09873e-09 | 1.000000 | 8.11197e-09 | 1.000000 |
| PAH9+H      | 7.07377e-09 | 1.000000 | 7.08533e-09 | 1.000000 |
| rad35       | 4.11443e-09 | 1.000000 | 4.12115e-09 | 1.000000 |
| rad8        | 2.60346e-09 | 1.000000 | 2.60772e-09 | 1.000000 |
| rad38       | 1.67205e-09 | 1.000000 | 1.67478e-09 | 1.000000 |
| rad9        | 1.64322e-09 | 1.000000 | 1.64590e-09 | 1.000000 |
| rad3        | 1.10572e-09 | 1.000000 | 1.10753e-09 | 1.000000 |
| PAH7+H      | 1.06195e-09 | 1.000000 | 1.06368e-09 | 1.000000 |
| Ph+Allene   | 1.01427e-09 | 1.000000 | 1.01593e-09 | 1.000000 |
| rad4        | 5.93466e-10 | 1.000000 | 5.94436e-10 | 1.000000 |
| rad39       | 1.91326e-10 | 1.000000 | 1.91639e-10 | 1.000000 |

|               |             |          |             |         |
|---------------|-------------|----------|-------------|---------|
| rad13         | 1.89310e-10 | 1.000000 | 1.89619e-10 | 1.00000 |
| rad12         | 1.08518e-10 | 1.000000 | 1.08695e-10 | 1.00000 |
| PhCH2CCH+H    | 2.03812e-11 | 1.000000 | 2.04145e-11 | 1.00000 |
| rad46         | 1.09541e-11 | 1.000000 | 1.09720e-11 | 1.00000 |
| rad37         | 1.65882e-12 | 1.000000 | 1.66153e-12 | 1.00000 |
| rad60syn      | 1.63164e-12 | 1.000000 | 1.63431e-12 | 1.00000 |
| rad60anti     | 5.39020e-13 | 1.000000 | 5.39900e-13 | 1.00000 |
| rad33         | 3.75151e-13 | 1.000000 | 3.75764e-13 | 1.00000 |
| rad23         | 1.69323e-13 | 1.000000 | 1.69600e-13 | 1.00000 |
| rad27         | 1.10130e-13 | 1.000000 | 1.10310e-13 | 1.00000 |
| rad14         | 8.33640e-14 | 1.000000 | 8.35002e-14 | 1.00000 |
| rad25         | 7.61481e-14 | 1.000000 | 7.62726e-14 | 1.00000 |
| rad5          | 4.66984e-14 | 1.000000 | 4.67747e-14 | 1.00000 |
| PAH3+H        | 1.51218e-14 | 1.000000 | 1.51465e-14 | 1.00000 |
| rad20         | 1.19214e-14 | 1.000000 | 1.19409e-14 | 1.00000 |
| rad21         | 7.83518e-15 | 1.000000 | 7.84799e-15 | 1.00000 |
| rad59         | 4.36097e-15 | 1.000000 | 4.36810e-15 | 1.00000 |
| rad45         | 1.33995e-15 | 1.000000 | 1.34214e-15 | 1.00000 |
| rad50         | 3.17580e-16 | 1.000000 | 3.18098e-16 | 1.00000 |
| rad19syn      | 1.00981e-16 | 1.000000 | 1.01146e-16 | 1.00000 |
| rad36         | 8.86585e-17 | 1.000000 | 8.88034e-17 | 1.00000 |
| rad18         | 4.56034e-17 | 1.000000 | 4.56779e-17 | 1.00000 |
| rad22         | 3.25223e-17 | 1.000000 | 3.25755e-17 | 1.00000 |
| rad31         | 1.34828e-17 | 1.000000 | 1.35049e-17 | 1.00000 |
| rad54         | 3.50733e-18 | 1.000000 | 3.51306e-18 | 1.00000 |
| PAH10+CH3     | 2.26054e-18 | 1.000000 | 2.26424e-18 | 1.00000 |
| rad43         | 5.14250e-19 | 1.000000 | 5.15091e-19 | 1.00000 |
| rad52         | 2.26216e-19 | 1.000000 | 2.26585e-19 | 1.00000 |
| rad62         | 1.76283e-19 | 1.000000 | 1.76571e-19 | 1.00000 |
| PhcycC3H3_A+H | 2.37728e-20 | 1.000000 | 2.38117e-20 | 1.00000 |
| rad51         | 1.42633e-20 | 1.000000 | 1.42866e-20 | 1.00000 |
| rad70         | 1.35841e-20 | 1.000000 | 1.36063e-20 | 1.00000 |
| rad55         | 5.98314e-21 | 1.000000 | 5.99292e-21 | 1.00000 |
| rad24         | 4.15656e-21 | 1.000000 | 4.16336e-21 | 1.00000 |
| rad58         | 1.57034e-21 | 1.000000 | 1.57290e-21 | 1.00000 |
| PAH1+H        | 7.93423e-22 | 1.000000 | 7.94720e-22 | 1.00000 |
| rad65         | 1.69845e-22 | 1.000000 | 1.70122e-22 | 1.00000 |
| rad34         | 5.35968e-23 | 1.000000 | 5.36844e-23 | 1.00000 |
| rad42         | 1.01334e-24 | 1.000000 | 1.01499e-24 | 1.00000 |
| rad41         | 3.07209e-25 | 1.000000 | 3.07711e-25 | 1.00000 |
| rad47         | 1.45559e-32 | 1.000000 | 1.45797e-32 | 1.00000 |

0.100000000E-03 Pa, 400.000000 K

=====

| Rate constant | True (fraction)     | Effective (fraction) |
|---------------|---------------------|----------------------|
| Total         | 3.60269e-20 (1.00 ) | 3.57081e-20 (1.00 )  |

| species     | PYtrue      | Cumul    | PYeffective | Cumul    |
|-------------|-------------|----------|-------------|----------|
| Indene+H    | 0.990968    | 0.990968 | 0.999815    | 0.999815 |
| Benzyl+C2H2 | 0.00884818  | 0.999816 | 0.00000     | 0.999815 |
| rad6        | 0.000160159 | 0.999976 | 0.000161589 | 0.999977 |
| PhCCH+CH3   | 1.23306e-05 | 0.999989 | 1.24407e-05 | 0.999989 |
| PhCHCCH2+H  | 5.93600e-06 | 0.999995 | 5.98900e-06 | 0.999995 |
| PhCCCH3+H   | 3.90031e-06 | 0.999999 | 3.93513e-06 | 0.999999 |
| Ph+MeAc     | 5.34657e-07 | 0.999999 | 5.39430e-07 | 0.999999 |
| rad30       | 4.02120e-07 | 0.999999 | 4.05709e-07 | 1.000000 |
| PAH9+H      | 6.80787e-08 | 1.000000 | 6.86864e-08 | 1.000000 |
| rad2        | 6.52840e-08 | 1.000000 | 6.58668e-08 | 1.00000  |
| Ph+Allene   | 6.39801e-08 | 1.000000 | 6.45513e-08 | 1.00000  |
| rad28       | 5.34718e-08 | 1.000000 | 5.39491e-08 | 1.00000  |
| PAH7+H      | 4.50080e-08 | 1.000000 | 4.54098e-08 | 1.00000  |
| rad35       | 2.73743e-08 | 1.000000 | 2.76187e-08 | 1.00000  |
| rad38       | 1.63210e-08 | 1.000000 | 1.64667e-08 | 1.00000  |
| rad7        | 1.49910e-08 | 1.000000 | 1.51248e-08 | 1.00000  |
| rad26       | 9.75634e-09 | 1.000000 | 9.84343e-09 | 1.00000  |
| rad39       | 8.59710e-09 | 1.000000 | 8.67385e-09 | 1.00000  |
| rad1        | 6.07557e-09 | 1.000000 | 6.12981e-09 | 1.00000  |
| PhCH2CCH+H  | 4.56293e-09 | 1.000000 | 4.60366e-09 | 1.00000  |
| rad10       | 4.21058e-09 | 1.000000 | 4.24816e-09 | 1.00000  |
| rad11       | 3.69021e-09 | 1.000000 | 3.72315e-09 | 1.00000  |
| rad19anti   | 8.44326e-10 | 1.000000 | 8.51863e-10 | 1.00000  |
| rad3        | 4.89847e-10 | 1.000000 | 4.94220e-10 | 1.00000  |
| rad23       | 4.44251e-10 | 1.000000 | 4.48217e-10 | 1.00000  |
| rad46       | 3.06010e-10 | 1.000000 | 3.08742e-10 | 1.00000  |
| rad4        | 2.57972e-10 | 1.000000 | 2.60275e-10 | 1.00000  |
| rad37       | 1.38286e-10 | 1.000000 | 1.39520e-10 | 1.00000  |
| rad60syn    | 9.47275e-11 | 1.000000 | 9.55731e-11 | 1.00000  |
| rad13       | 9.14697e-11 | 1.000000 | 9.22863e-11 | 1.00000  |

|               |             |          |             |         |
|---------------|-------------|----------|-------------|---------|
| rad60anti     | 3.76555e-11 | 1.000000 | 3.79916e-11 | 1.00000 |
| rad45         | 2.62620e-11 | 1.000000 | 2.64965e-11 | 1.00000 |
| PAH3+H        | 6.50520e-12 | 1.000000 | 6.56327e-12 | 1.00000 |
| rad59         | 1.36005e-12 | 1.000000 | 1.37219e-12 | 1.00000 |
| rad36         | 1.01088e-12 | 1.000000 | 1.01991e-12 | 1.00000 |
| rad20         | 4.10415e-13 | 1.000000 | 4.14079e-13 | 1.00000 |
| rad21         | 2.87014e-13 | 1.000000 | 2.89577e-13 | 1.00000 |
| rad33         | 2.40162e-13 | 1.000000 | 2.42306e-13 | 1.00000 |
| rad50         | 1.36002e-13 | 1.000000 | 1.37216e-13 | 1.00000 |
| rad19syn      | 1.28747e-13 | 1.000000 | 1.29897e-13 | 1.00000 |
| rad27         | 6.97948e-14 | 1.000000 | 7.04179e-14 | 1.00000 |
| rad14         | 6.57816e-14 | 1.000000 | 6.63689e-14 | 1.00000 |
| rad25         | 5.98050e-14 | 1.000000 | 6.03389e-14 | 1.00000 |
| rad22         | 4.08068e-14 | 1.000000 | 4.11711e-14 | 1.00000 |
| rad54         | 8.91617e-15 | 1.000000 | 8.99577e-15 | 1.00000 |
| rad18         | 7.78999e-15 | 1.000000 | 7.85953e-15 | 1.00000 |
| PAH10+CH3     | 4.84720e-15 | 1.000000 | 4.89048e-15 | 1.00000 |
| rad67         | 1.67328e-15 | 1.000000 | 1.68822e-15 | 1.00000 |
| rad43         | 8.69917e-16 | 1.000000 | 8.77683e-16 | 1.00000 |
| rad62         | 4.86689e-16 | 1.000000 | 4.91034e-16 | 1.00000 |
| rad52         | 4.03425e-16 | 1.000000 | 4.07027e-16 | 1.00000 |
| PhcycC3H3_A+H | 3.21892e-16 | 1.000000 | 3.24765e-16 | 1.00000 |
| rad70         | 1.20387e-16 | 1.000000 | 1.21461e-16 | 1.00000 |
| rad51         | 7.62446e-17 | 1.000000 | 7.69253e-17 | 1.00000 |
| rad31         | 5.51195e-17 | 1.000000 | 5.56116e-17 | 1.00000 |
| rad55         | 5.04280e-17 | 1.000000 | 5.08782e-17 | 1.00000 |
| PAH1+H        | 2.44010e-17 | 1.000000 | 2.46188e-17 | 1.00000 |
| rad58         | 1.79710e-17 | 1.000000 | 1.81314e-17 | 1.00000 |
| rad24         | 5.56698e-18 | 1.000000 | 5.61668e-18 | 1.00000 |
| rad34         | 2.03118e-18 | 1.000000 | 2.04931e-18 | 1.00000 |
| rad9          | 1.54963e-18 | 1.000000 | 1.56346e-18 | 1.00000 |
| rad65         | 1.53460e-18 | 1.000000 | 1.54830e-18 | 1.00000 |
| rad42         | 7.25819e-20 | 1.000000 | 7.32299e-20 | 1.00000 |
| rad41         | 2.24858e-20 | 1.000000 | 2.26866e-20 | 1.00000 |
| rad53         | 5.65621e-21 | 1.000000 | 5.70670e-21 | 1.00000 |
| rad64         | 1.81667e-21 | 1.000000 | 1.83289e-21 | 1.00000 |
| rad15         | 9.78220e-22 | 1.000000 | 9.86953e-22 | 1.00000 |
| rad56         | 6.63505e-23 | 1.000000 | 6.69428e-23 | 1.00000 |
| rad68syn      | 8.56534e-24 | 1.000000 | 8.64181e-24 | 1.00000 |
| rad68anti     | 6.18500e-24 | 1.000000 | 6.24022e-24 | 1.00000 |
| rad61         | 4.57094e-24 | 1.000000 | 4.61175e-24 | 1.00000 |
| rad5          | 1.90917e-24 | 1.000000 | 1.92621e-24 | 1.00000 |
| rad73         | 1.04343e-24 | 1.000000 | 1.05274e-24 | 1.00000 |
| rad71         | 2.08948e-25 | 1.000000 | 2.10813e-25 | 1.00000 |
| rad12         | 1.82149e-25 | 1.000000 | 1.83775e-25 | 1.00000 |
| rad40syn      | 5.07802e-26 | 1.000000 | 5.12336e-26 | 1.00000 |
| PAH8+H        | 3.09567e-26 | 1.000000 | 3.12330e-26 | 1.00000 |
| rad40anti     | 1.25681e-26 | 1.000000 | 1.26803e-26 | 1.00000 |
| rad72         | 1.07877e-28 | 1.000000 | 1.08840e-28 | 1.00000 |
| rad47         | 5.32514e-29 | 1.000000 | 5.37268e-29 | 1.00000 |
| rad8          | 1.00861e-38 | 1.000000 | 1.01761e-38 | 1.00000 |

0.100000000E-03 Pa, 500.000000 K

=====

| Rate constant | True (fraction)     | Effective (fraction) |
|---------------|---------------------|----------------------|
| Total         | 1.22595e-18 (1.00 ) | 1.18787e-18 (1.00 )  |

| species     | PYtrue      | Cumul    | PYeffective | Cumul    |
|-------------|-------------|----------|-------------|----------|
| Indene+H    | 0.968723    | 0.968723 | 0.999780    | 0.999780 |
| Benzyl+C2H2 | 0.0310633   | 0.999786 | 0.00000     | 0.999780 |
| PhCCH+CH3   | 9.35475e-05 | 0.999880 | 9.65465e-05 | 0.999877 |
| rad6        | 4.10880e-05 | 0.999921 | 4.24053e-05 | 0.999919 |
| PhCHCCH2+H  | 4.00316e-05 | 0.999961 | 4.13150e-05 | 0.999960 |
| PhCCCH3+H   | 2.54284e-05 | 0.999986 | 2.62436e-05 | 0.999987 |
| Ph+MeAc     | 7.07351e-06 | 0.999993 | 7.30028e-06 | 0.999994 |
| rad30       | 2.19668e-06 | 0.999996 | 2.26710e-06 | 0.999996 |
| Ph+Allene   | 2.05085e-06 | 0.999998 | 2.11660e-06 | 0.999998 |
| PAH7+H      | 6.80622e-07 | 0.999998 | 7.02442e-07 | 0.999999 |
| PAH9+H      | 4.84045e-07 | 0.999999 | 4.99563e-07 | 0.999999 |
| PhCH2CCH+H  | 2.44798e-07 | 0.999999 | 2.52646e-07 | 1.000000 |
| rad35       | 1.65639e-07 | 0.999999 | 1.70949e-07 | 1.000000 |
| rad39       | 1.51500e-07 | 0.999999 | 1.56357e-07 | 1.000000 |
| rad38       | 1.34449e-07 | 1.000000 | 1.38760e-07 | 1.000000 |
| rad2        | 2.17484e-08 | 1.000000 | 2.24456e-08 | 1.000000 |
| rad28       | 2.06771e-08 | 1.000000 | 2.13399e-08 | 1.000000 |
| rad19anti   | 1.41557e-08 | 1.000000 | 1.46096e-08 | 1.000000 |
| rad46       | 5.06650e-09 | 1.000000 | 5.22892e-09 | 1.000000 |
| rad7        | 4.13900e-09 | 1.000000 | 4.27170e-09 | 1.000000 |



|               |             |          |             |         |
|---------------|-------------|----------|-------------|---------|
| rad23         | 3.73752e-09 | 1.000000 | 3.85734e-09 | 1.00000 |
| rad26         | 3.53363e-09 | 1.000000 | 3.64691e-09 | 1.00000 |
| rad37         | 2.87004e-09 | 1.000000 | 2.96205e-09 | 1.00000 |
| rad1          | 2.59686e-09 | 1.000000 | 2.68012e-09 | 1.00000 |
| rad60syn      | 2.17485e-09 | 1.000000 | 2.24457e-09 | 1.00000 |
| rad10         | 1.23748e-09 | 1.000000 | 1.27715e-09 | 1.00000 |
| rad11         | 1.05895e-09 | 1.000000 | 1.09289e-09 | 1.00000 |
| rad60anti     | 9.78347e-10 | 1.000000 | 1.00971e-09 | 1.00000 |
| PAH3+H        | 4.98713e-10 | 1.000000 | 5.14701e-10 | 1.00000 |
| rad45         | 4.92630e-10 | 1.000000 | 5.08424e-10 | 1.00000 |
| rad3          | 2.02057e-10 | 1.000000 | 2.08535e-10 | 1.00000 |
| rad4          | 1.13798e-10 | 1.000000 | 1.17447e-10 | 1.00000 |
| rad59         | 9.55001e-11 | 1.000000 | 9.85618e-11 | 1.00000 |
| rad13         | 2.79501e-11 | 1.000000 | 2.88462e-11 | 1.00000 |
| rad36         | 2.58030e-11 | 1.000000 | 2.66302e-11 | 1.00000 |
| rad19syn      | 2.21129e-11 | 1.000000 | 2.28218e-11 | 1.00000 |
| rad50         | 1.38320e-11 | 1.000000 | 1.42754e-11 | 1.00000 |
| rad54         | 2.40097e-12 | 1.000000 | 2.47794e-12 | 1.00000 |
| PAH10+CH3     | 9.71321e-13 | 1.000000 | 1.00246e-12 | 1.00000 |
| rad20         | 3.28052e-13 | 1.000000 | 3.38569e-13 | 1.00000 |
| rad21         | 2.58487e-13 | 1.000000 | 2.66774e-13 | 1.00000 |
| rad67         | 2.37510e-13 | 1.000000 | 2.45124e-13 | 1.00000 |
| PhcycC3H3_A+H | 2.03153e-13 | 1.000000 | 2.09666e-13 | 1.00000 |
| rad43         | 1.48549e-13 | 1.000000 | 1.53311e-13 | 1.00000 |
| rad22         | 1.39527e-13 | 1.000000 | 1.44000e-13 | 1.00000 |
| rad62         | 1.23085e-13 | 1.000000 | 1.27031e-13 | 1.00000 |
| rad52         | 1.00575e-13 | 1.000000 | 1.03800e-13 | 1.00000 |
| rad33         | 8.67927e-14 | 1.000000 | 8.95752e-14 | 1.00000 |
| rad70         | 6.56874e-14 | 1.000000 | 6.77933e-14 | 1.00000 |
| rad51         | 3.91281e-14 | 1.000000 | 4.03825e-14 | 1.00000 |
| rad55         | 2.77315e-14 | 1.000000 | 2.86206e-14 | 1.00000 |
| rad14         | 2.71143e-14 | 1.000000 | 2.79836e-14 | 1.00000 |
| rad25         | 2.50856e-14 | 1.000000 | 2.58899e-14 | 1.00000 |
| rad27         | 2.48750e-14 | 1.000000 | 2.56725e-14 | 1.00000 |
| PAH1+H        | 2.29061e-14 | 1.000000 | 2.36405e-14 | 1.00000 |
| rad58         | 1.24944e-14 | 1.000000 | 1.28950e-14 | 1.00000 |
| rad18         | 4.12182e-15 | 1.000000 | 4.25397e-15 | 1.00000 |
| rad34         | 2.11820e-15 | 1.000000 | 2.18611e-15 | 1.00000 |
| rad65         | 1.00123e-15 | 1.000000 | 1.03333e-15 | 1.00000 |
| rad31         | 1.27465e-16 | 1.000000 | 1.31552e-16 | 1.00000 |
| rad42         | 8.25859e-17 | 1.000000 | 8.52335e-17 | 1.00000 |
| rad24         | 4.13117e-17 | 1.000000 | 4.26361e-17 | 1.00000 |
| rad9          | 2.87687e-17 | 1.000000 | 2.96910e-17 | 1.00000 |
| rad41         | 2.37184e-17 | 1.000000 | 2.44788e-17 | 1.00000 |
| rad53         | 2.02423e-17 | 1.000000 | 2.08913e-17 | 1.00000 |
| rad64         | 7.97509e-18 | 1.000000 | 8.23077e-18 | 1.00000 |
| rad73         | 1.33177e-18 | 1.000000 | 1.37446e-18 | 1.00000 |
| rad71         | 1.04580e-18 | 1.000000 | 1.07933e-18 | 1.00000 |
| rad56         | 7.53461e-19 | 1.000000 | 7.77617e-19 | 1.00000 |
| rad68syn      | 1.06850e-19 | 1.000000 | 1.10275e-19 | 1.00000 |
| rad68anti     | 7.56045e-20 | 1.000000 | 7.80283e-20 | 1.00000 |
| rad61         | 4.28409e-20 | 1.000000 | 4.42144e-20 | 1.00000 |
| rad15         | 1.95550e-20 | 1.000000 | 2.01819e-20 | 1.00000 |
| rad72         | 1.17722e-20 | 1.000000 | 1.21496e-20 | 1.00000 |
| PAH8+H        | 1.14135e-20 | 1.000000 | 1.17794e-20 | 1.00000 |
| rad40syn      | 3.24999e-21 | 1.000000 | 3.35418e-21 | 1.00000 |
| rad40anti     | 1.36273e-21 | 1.000000 | 1.40642e-21 | 1.00000 |
| rad12         | 5.47262e-23 | 1.000000 | 5.64807e-23 | 1.00000 |
| rad5          | 2.14149e-23 | 1.000000 | 2.21015e-23 | 1.00000 |
| rad47         | 2.95914e-26 | 1.000000 | 3.05400e-26 | 1.00000 |
| rad8          | 6.37694e-35 | 1.000000 | 6.58138e-35 | 1.00000 |

0.100000000E-03 Pa, 600.000000 K

=====

| Rate constant | True (fraction)     | Effective (fraction) |
|---------------|---------------------|----------------------|
| Total         | 1.36947e-17 (1.00 ) | 1.26193e-17 (1.00 )  |

| species     | PYtrue      | Cumul    | PYeffective | Cumul    |
|-------------|-------------|----------|-------------|----------|
| Indene+H    | 0.920842    | 0.920842 | 0.999317    | 0.999317 |
| Benzyl+C2H2 | 0.0785282   | 0.999370 | 0.000000    | 0.999317 |
| PhCCH+CH3   | 0.000333004 | 0.999703 | 0.000361382 | 0.999678 |
| PhCHCCH2+H  | 0.000137002 | 0.999840 | 0.000148677 | 0.999827 |
| PhCCCH3+H   | 7.53921e-05 | 0.999916 | 8.18170e-05 | 0.999909 |
| Ph+MeAc     | 3.38752e-05 | 0.999949 | 3.67620e-05 | 0.999946 |
| Ph+Allene   | 2.17075e-05 | 0.999971 | 2.35574e-05 | 0.999969 |
| rad6        | 7.89397e-06 | 0.999979 | 8.56670e-06 | 0.999978 |
| rad30       | 7.59255e-06 | 0.999987 | 8.23960e-06 | 0.999986 |
| PAH7+H      | 4.39133e-06 | 0.999991 | 4.76556e-06 | 0.999991 |

|               |             |          |             |          |
|---------------|-------------|----------|-------------|----------|
| PhCH2CCH+H    | 3.66167e-06 | 0.999995 | 3.97372e-06 | 0.999995 |
| PAH9+H        | 2.21753e-06 | 0.999997 | 2.40650e-06 | 0.999997 |
| rad39         | 1.04271e-06 | 0.999998 | 1.13157e-06 | 0.999998 |
| rad38         | 6.77247e-07 | 0.999999 | 7.34962e-07 | 0.999999 |
| rad35         | 6.69672e-07 | 0.999999 | 7.26742e-07 | 1.000000 |
| rad19anti     | 1.16219e-07 | 0.999999 | 1.26123e-07 | 1.000000 |
| rad46         | 4.03942e-08 | 0.999999 | 4.38366e-08 | 1.000000 |
| rad60syn      | 1.92850e-08 | 1.000000 | 2.09285e-08 | 1.000000 |
| rad37         | 1.80193e-08 | 1.000000 | 1.95549e-08 | 1.000000 |
| PAH3+H        | 9.89114e-09 | 1.000000 | 1.07341e-08 | 1.000000 |
| rad60anti     | 9.33104e-09 | 1.000000 | 1.01262e-08 | 1.000000 |
| rad23         | 7.83249e-09 | 1.000000 | 8.49998e-09 | 1.000000 |
| rad2          | 7.69247e-09 | 1.000000 | 8.34803e-09 | 1.000000 |
| rad28         | 5.16492e-09 | 1.000000 | 5.60508e-09 | 1.000000 |
| rad59         | 1.75178e-09 | 1.000000 | 1.90106e-09 | 1.000000 |
| rad45         | 1.21333e-09 | 1.000000 | 1.31673e-09 | 1.000000 |
| rad1          | 1.12824e-09 | 1.000000 | 1.22439e-09 | 1.000000 |
| rad7          | 8.80642e-10 | 1.000000 | 9.55691e-10 | 1.000000 |
| rad26         | 8.58502e-10 | 1.000000 | 9.31664e-10 | 1.000000 |
| rad19syn      | 6.85603e-10 | 1.000000 | 7.44031e-10 | 1.000000 |
| rad50         | 3.62404e-10 | 1.000000 | 3.93288e-10 | 1.000000 |
| rad10         | 2.98278e-10 | 1.000000 | 3.23697e-10 | 1.000000 |
| rad11         | 2.39455e-10 | 1.000000 | 2.59861e-10 | 1.000000 |
| rad54         | 1.00689e-10 | 1.000000 | 1.09270e-10 | 1.000000 |
| rad36         | 9.68454e-11 | 1.000000 | 1.05099e-10 | 1.000000 |
| rad3          | 7.81787e-11 | 1.000000 | 8.48411e-11 | 1.000000 |
| rad4          | 4.75672e-11 | 1.000000 | 5.16209e-11 | 1.000000 |
| PAH10+CH3     | 2.92596e-11 | 1.000000 | 3.17531e-11 | 1.000000 |
| PhcycC3H3_A+H | 1.50079e-11 | 1.000000 | 1.62869e-11 | 1.000000 |
| rad67         | 9.04672e-12 | 1.000000 | 9.81769e-12 | 1.000000 |
| rad13         | 7.15999e-12 | 1.000000 | 7.77017e-12 | 1.000000 |
| rad52         | 4.78753e-12 | 1.000000 | 5.19553e-12 | 1.000000 |
| rad62         | 4.45026e-12 | 1.000000 | 4.82951e-12 | 1.000000 |
| rad70         | 4.33655e-12 | 1.000000 | 4.70611e-12 | 1.000000 |
| rad43         | 3.80809e-12 | 1.000000 | 4.13262e-12 | 1.000000 |
| rad51         | 3.28949e-12 | 1.000000 | 3.56982e-12 | 1.000000 |
| PAH1+H        | 2.15563e-12 | 1.000000 | 2.33934e-12 | 1.000000 |
| rad55         | 1.80964e-12 | 1.000000 | 1.96385e-12 | 1.000000 |
| rad58         | 1.01192e-12 | 1.000000 | 1.09816e-12 | 1.000000 |
| rad20         | 4.39634e-13 | 1.000000 | 4.77100e-13 | 1.000000 |
| rad21         | 3.92775e-13 | 1.000000 | 4.26247e-13 | 1.000000 |
| rad22         | 2.33455e-13 | 1.000000 | 2.53350e-13 | 1.000000 |
| rad34         | 2.14138e-13 | 1.000000 | 2.32387e-13 | 1.000000 |
| rad65         | 9.39032e-14 | 1.000000 | 1.01906e-13 | 1.000000 |
| rad33         | 3.10906e-14 | 1.000000 | 3.37401e-14 | 1.000000 |
| rad71         | 9.74234e-15 | 1.000000 | 1.05726e-14 | 1.000000 |
| rad14         | 8.65915e-15 | 1.000000 | 9.39709e-15 | 1.000000 |
| rad25         | 8.39249e-15 | 1.000000 | 9.10770e-15 | 1.000000 |
| rad42         | 8.07518e-15 | 1.000000 | 8.76335e-15 | 1.000000 |
| rad27         | 7.71820e-15 | 1.000000 | 8.37595e-15 | 1.000000 |
| rad73         | 7.66719e-15 | 1.000000 | 8.32059e-15 | 1.000000 |
| rad53         | 4.59180e-15 | 1.000000 | 4.98311e-15 | 1.000000 |
| rad18         | 3.13310e-15 | 1.000000 | 3.40010e-15 | 1.000000 |
| rad64         | 2.18347e-15 | 1.000000 | 2.36955e-15 | 1.000000 |
| rad41         | 2.08696e-15 | 1.000000 | 2.26482e-15 | 1.000000 |
| rad9          | 8.38553e-16 | 1.000000 | 9.10015e-16 | 1.000000 |
| rad24         | 5.16816e-16 | 1.000000 | 5.60859e-16 | 1.000000 |
| rad56         | 3.78686e-16 | 1.000000 | 4.10958e-16 | 1.000000 |
| rad72         | 2.77174e-16 | 1.000000 | 3.00795e-16 | 1.000000 |
| rad31         | 1.60818e-16 | 1.000000 | 1.74523e-16 | 1.000000 |
| PAH8+H        | 1.13411e-16 | 1.000000 | 1.23076e-16 | 1.000000 |
| rad68syn      | 8.38610e-17 | 1.000000 | 9.10077e-17 | 1.000000 |
| rad61         | 6.64547e-17 | 1.000000 | 7.21180e-17 | 1.000000 |
| rad68anti     | 5.69818e-17 | 1.000000 | 6.18378e-17 | 1.000000 |
| rad40syn      | 1.53513e-17 | 1.000000 | 1.66595e-17 | 1.000000 |
| rad40anti     | 9.05502e-18 | 1.000000 | 9.82670e-18 | 1.000000 |
| rad15         | 5.55022e-19 | 1.000000 | 6.02322e-19 | 1.000000 |
| rad12         | 2.10712e-20 | 1.000000 | 2.28669e-20 | 1.000000 |
| rad5          | 8.12613e-23 | 1.000000 | 8.81864e-23 | 1.000000 |
| rad47         | 2.28976e-24 | 1.000000 | 2.48489e-24 | 1.000000 |
| rad8          | 9.49358e-31 | 1.000000 | 1.03026e-30 | 1.000000 |

0.100000000E-03 Pa, 700.000000 K

=====

| Rate constant | True (fraction)     | Effective (fraction) |
|---------------|---------------------|----------------------|
| Total         | 8.02260e-17 (1.00 ) | 6.78335e-17 (1.00 )  |

| species | PYtrue | Cumul | PYeffective | Cumul |
|---------|--------|-------|-------------|-------|
| -----   |        |       |             |       |

|               |             |          |             |          |
|---------------|-------------|----------|-------------|----------|
| Indene+H      | 0.844044    | 0.844044 | 0.998241    | 0.998241 |
| Benzyl+C2H2   | 0.154470    | 0.998514 | 0.00000     | 0.998241 |
| PhCCH+CH3     | 0.000746409 | 0.999260 | 0.000882770 | 0.999124 |
| PhCHCCH2+H    | 0.000320576 | 0.999581 | 0.000379142 | 0.999503 |
| PhCCCH3+H     | 0.000136737 | 0.999718 | 0.000161717 | 0.999665 |
| Ph+Allene     | 0.000115963 | 0.999834 | 0.000137148 | 0.999802 |
| Ph+MeAc       | 8.86619e-05 | 0.999922 | 0.000104860 | 0.999907 |
| PhCH2CCH+H    | 2.52612e-05 | 0.999948 | 2.98762e-05 | 0.999937 |
| rad30         | 1.89338e-05 | 0.999967 | 2.23928e-05 | 0.999959 |
| PAH7+H        | 1.64061e-05 | 0.999983 | 1.94034e-05 | 0.999978 |
| PAH9+H        | 7.24095e-06 | 0.999990 | 8.56379e-06 | 0.999987 |
| rad39         | 3.97932e-06 | 0.999994 | 4.70630e-06 | 0.999992 |
| rad38         | 2.36447e-06 | 0.999997 | 2.79643e-06 | 0.999994 |
| rad35         | 1.97990e-06 | 0.999999 | 2.34160e-06 | 0.999997 |
| rad6          | 1.33322e-06 | 1.000000 | 1.57678e-06 | 0.999998 |
| rad19anti     | 5.91545e-07 | 1.000000 | 6.99614e-07 | 0.999999 |
| rad46         | 1.96016e-07 | 1.000000 | 2.31826e-07 | 0.999999 |
| rad60syn      | 9.47748e-08 | 1.000000 | 1.12089e-07 | 0.999999 |
| PAH3+H        | 8.73479e-08 | 1.000000 | 1.03305e-07 | 0.999999 |
| rad37         | 5.67310e-08 | 1.000000 | 6.70951e-08 | 1.000000 |
| rad60anti     | 4.82184e-08 | 1.000000 | 5.70274e-08 | 1.000000 |
| rad59         | 1.44141e-08 | 1.000000 | 1.70474e-08 | 1.000000 |
| rad19syn      | 7.75629e-09 | 1.000000 | 9.17329e-09 | 1.000000 |
| rad23         | 5.48180e-09 | 1.000000 | 6.48327e-09 | 1.000000 |
| rad50         | 4.11964e-09 | 1.000000 | 4.87226e-09 | 1.000000 |
| rad2          | 2.32247e-09 | 1.000000 | 2.74676e-09 | 1.000000 |
| rad54         | 1.41344e-09 | 1.000000 | 1.67166e-09 | 1.000000 |
| rad28         | 1.06081e-09 | 1.000000 | 1.25461e-09 | 1.000000 |
| rad45         | 1.01411e-09 | 1.000000 | 1.19938e-09 | 1.000000 |
| rad1          | 3.74200e-10 | 1.000000 | 4.42563e-10 | 1.000000 |
| PhcycC3H3_A+H | 3.16612e-10 | 1.000000 | 3.74454e-10 | 1.000000 |
| PAH10+CH3     | 2.97990e-10 | 1.000000 | 3.52429e-10 | 1.000000 |
| rad26         | 1.76402e-10 | 1.000000 | 2.08628e-10 | 1.000000 |
| rad7          | 1.72148e-10 | 1.000000 | 2.03598e-10 | 1.000000 |
| rad67         | 1.46412e-10 | 1.000000 | 1.73160e-10 | 1.000000 |
| rad36         | 8.52869e-11 | 1.000000 | 1.00868e-10 | 1.000000 |
| rad70         | 8.37036e-11 | 1.000000 | 9.89954e-11 | 1.000000 |
| rad52         | 8.09889e-11 | 1.000000 | 9.57848e-11 | 1.000000 |
| rad51         | 7.51472e-11 | 1.000000 | 8.88758e-11 | 1.000000 |
| rad10         | 6.83040e-11 | 1.000000 | 8.07824e-11 | 1.000000 |
| PAH1+H        | 5.24916e-11 | 1.000000 | 6.20813e-11 | 1.000000 |
| rad62         | 5.24408e-11 | 1.000000 | 6.20211e-11 | 1.000000 |
| rad11         | 5.16663e-11 | 1.000000 | 6.11051e-11 | 1.000000 |
| rad55         | 3.42242e-11 | 1.000000 | 4.04766e-11 | 1.000000 |
| rad43         | 3.27816e-11 | 1.000000 | 3.87705e-11 | 1.000000 |
| rad58         | 2.36841e-11 | 1.000000 | 2.80110e-11 | 1.000000 |
| rad3          | 2.34250e-11 | 1.000000 | 2.77045e-11 | 1.000000 |
| rad4          | 1.50301e-11 | 1.000000 | 1.77759e-11 | 1.000000 |
| rad34         | 5.59036e-12 | 1.000000 | 6.61165e-12 | 1.000000 |
| rad65         | 2.25914e-12 | 1.000000 | 2.67186e-12 | 1.000000 |
| rad13         | 1.98665e-12 | 1.000000 | 2.34959e-12 | 1.000000 |
| rad20         | 9.46466e-13 | 1.000000 | 1.11938e-12 | 1.000000 |
| rad21         | 9.16388e-13 | 1.000000 | 1.08380e-12 | 1.000000 |
| rad71         | 2.99218e-13 | 1.000000 | 3.53882e-13 | 1.000000 |
| rad73         | 2.19531e-13 | 1.000000 | 2.59637e-13 | 1.000000 |
| rad53         | 2.09513e-13 | 1.000000 | 2.47789e-13 | 1.000000 |
| rad42         | 1.92949e-13 | 1.000000 | 2.28199e-13 | 1.000000 |
| rad22         | 1.62660e-13 | 1.000000 | 1.92376e-13 | 1.000000 |
| rad64         | 9.73544e-14 | 1.000000 | 1.15140e-13 | 1.000000 |
| rad41         | 4.37457e-14 | 1.000000 | 5.17376e-14 | 1.000000 |
| rad56         | 2.74591e-14 | 1.000000 | 3.24756e-14 | 1.000000 |
| rad9          | 2.47901e-14 | 1.000000 | 2.93190e-14 | 1.000000 |
| rad33         | 1.75181e-14 | 1.000000 | 2.07185e-14 | 1.000000 |
| rad72         | 9.66732e-15 | 1.000000 | 1.14334e-14 | 1.000000 |
| rad24         | 5.53583e-15 | 1.000000 | 6.54717e-15 | 1.000000 |
| rad68syn      | 4.96790e-15 | 1.000000 | 5.87548e-15 | 1.000000 |
| PAH8+H        | 4.56888e-15 | 1.000000 | 5.40356e-15 | 1.000000 |
| rad18         | 3.76233e-15 | 1.000000 | 4.44967e-15 | 1.000000 |
| rad68anti     | 3.38944e-15 | 1.000000 | 4.00866e-15 | 1.000000 |
| rad25         | 3.23286e-15 | 1.000000 | 3.82347e-15 | 1.000000 |
| rad14         | 2.98046e-15 | 1.000000 | 3.52496e-15 | 1.000000 |
| rad27         | 2.88934e-15 | 1.000000 | 3.41719e-15 | 1.000000 |
| rad61         | 2.38887e-15 | 1.000000 | 2.82529e-15 | 1.000000 |
| rad40syn      | 7.42590e-16 | 1.000000 | 8.78253e-16 | 1.000000 |
| rad40anti     | 4.55377e-16 | 1.000000 | 5.38569e-16 | 1.000000 |
| rad31         | 1.07528e-16 | 1.000000 | 1.27172e-16 | 1.000000 |
| rad15         | 1.13673e-17 | 1.000000 | 1.34440e-17 | 1.000000 |
| rad12         | 2.79308e-18 | 1.000000 | 3.30334e-18 | 1.000000 |
| rad5          | 1.91360e-22 | 1.000000 | 2.26320e-22 | 1.000000 |
| rad47         | 4.86396e-23 | 1.000000 | 5.75255e-23 | 1.000000 |

rad8 | 1.57095e-26 1.00000 | 1.85795e-26 1.00000

0.100000000E-03 Pa, 800.000000 K

=====  
Rate constant | True (fraction) | Effective (fraction)  
-----  
Total | 3.12228e-16 (1.00 ) | 2.33587e-16 (1.00 )

| species       | PYtrue      | Cumul    | PYeffective | Cumul    |
|---------------|-------------|----------|-------------|----------|
| Indene+H      | 0.745326    | 0.745326 | 0.996252    | 0.996252 |
| Benzyl+C2H2   | 0.251870    | 0.997196 | 0.00000     | 0.996252 |
| PhCCH+CH3     | 0.00124161  | 0.998438 | 0.00165962  | 0.997912 |
| PhCHCCH2+H    | 0.000603917 | 0.999042 | 0.000807235 | 0.998719 |
| Ph+Allene     | 0.000391607 | 0.999433 | 0.000523448 | 0.999242 |
| PhCCCH3+H     | 0.000180410 | 0.999614 | 0.000241148 | 0.999483 |
| Ph+MeAc       | 0.000158703 | 0.999772 | 0.000212133 | 0.999696 |
| PhCH2CCH+H    | 0.000104747 | 0.999877 | 0.000140012 | 0.999836 |
| PAH7+H        | 4.20043e-05 | 0.999919 | 5.61457e-05 | 0.999892 |
| rad30         | 3.73181e-05 | 0.999956 | 4.98819e-05 | 0.999942 |
| PAH9+H        | 1.83033e-05 | 0.999975 | 2.44654e-05 | 0.999966 |
| rad39         | 1.01670e-05 | 0.999985 | 1.35899e-05 | 0.999980 |
| rad38         | 6.28665e-06 | 0.999991 | 8.40316e-06 | 0.999988 |
| rad35         | 4.61800e-06 | 0.999996 | 6.17273e-06 | 0.999994 |
| rad19anti     | 2.13374e-06 | 0.999998 | 2.85210e-06 | 0.999997 |
| rad46         | 6.69514e-07 | 0.999998 | 8.94916e-07 | 0.999998 |
| PAH3+H        | 4.55929e-07 | 0.999999 | 6.09424e-07 | 0.999999 |
| rad60syn      | 3.14534e-07 | 0.999999 | 4.20427e-07 | 0.999999 |
| rad6          | 2.30155e-07 | 0.999999 | 3.07641e-07 | 0.999999 |
| rad60anti     | 1.66149e-07 | 1.000000 | 2.22085e-07 | 1.000000 |
| rad37         | 1.16540e-07 | 1.000000 | 1.55775e-07 | 1.000000 |
| rad59         | 7.05291e-08 | 1.000000 | 9.42739e-08 | 1.000000 |
| rad19syn      | 4.57471e-08 | 1.000000 | 6.11486e-08 | 1.000000 |
| rad50         | 2.68172e-08 | 1.000000 | 3.58456e-08 | 1.000000 |
| rad54         | 9.79649e-09 | 1.000000 | 1.30946e-08 | 1.000000 |
| PhcycC3H3_A+H | 2.99429e-09 | 1.000000 | 4.00236e-09 | 1.000000 |
| rad23         | 2.28866e-09 | 1.000000 | 3.05918e-09 | 1.000000 |
| PAH10+CH3     | 1.56441e-09 | 1.000000 | 2.09110e-09 | 1.000000 |
| rad67         | 1.31139e-09 | 1.000000 | 1.75289e-09 | 1.000000 |
| rad51         | 7.64714e-10 | 1.000000 | 1.02217e-09 | 1.000000 |
| rad70         | 7.37683e-10 | 1.000000 | 9.86036e-10 | 1.000000 |
| rad52         | 6.94307e-10 | 1.000000 | 9.28057e-10 | 1.000000 |
| rad2          | 5.74188e-10 | 1.000000 | 7.67498e-10 | 1.000000 |
| rad45         | 5.41570e-10 | 1.000000 | 7.23899e-10 | 1.000000 |
| PAH1+H        | 5.39342e-10 | 1.000000 | 7.20920e-10 | 1.000000 |
| rad62         | 3.04717e-10 | 1.000000 | 4.07304e-10 | 1.000000 |
| rad55         | 2.93961e-10 | 1.000000 | 3.92928e-10 | 1.000000 |
| rad58         | 2.53337e-10 | 1.000000 | 3.38627e-10 | 1.000000 |
| rad28         | 2.15107e-10 | 1.000000 | 2.87527e-10 | 1.000000 |
| rad43         | 1.42471e-10 | 1.000000 | 1.90436e-10 | 1.000000 |
| rad1          | 9.05664e-11 | 1.000000 | 1.21057e-10 | 1.000000 |
| rad34         | 6.18599e-11 | 1.000000 | 8.26860e-11 | 1.000000 |
| rad36         | 4.48289e-11 | 1.000000 | 5.99214e-11 | 1.000000 |
| rad7          | 3.69486e-11 | 1.000000 | 4.93879e-11 | 1.000000 |
| rad26         | 3.66389e-11 | 1.000000 | 4.89740e-11 | 1.000000 |
| rad65         | 2.39537e-11 | 1.000000 | 3.20180e-11 | 1.000000 |
| rad10         | 1.53992e-11 | 1.000000 | 2.05836e-11 | 1.000000 |
| rad11         | 1.32233e-11 | 1.000000 | 1.76751e-11 | 1.000000 |
| rad3          | 6.03979e-12 | 1.000000 | 8.07318e-12 | 1.000000 |
| rad4          | 3.95913e-12 | 1.000000 | 5.29204e-12 | 1.000000 |
| rad53         | 3.50036e-12 | 1.000000 | 4.67881e-12 | 1.000000 |
| rad20         | 2.64437e-12 | 1.000000 | 3.53464e-12 | 1.000000 |
| rad21         | 2.51426e-12 | 1.000000 | 3.36072e-12 | 1.000000 |
| rad42         | 1.90392e-12 | 1.000000 | 2.54491e-12 | 1.000000 |
| rad64         | 1.53003e-12 | 1.000000 | 2.04514e-12 | 1.000000 |
| rad71         | 9.43029e-13 | 1.000000 | 1.26052e-12 | 1.000000 |
| rad13         | 8.71461e-13 | 1.000000 | 1.16485e-12 | 1.000000 |
| rad73         | 7.15380e-13 | 1.000000 | 9.56224e-13 | 1.000000 |
| rad56         | 6.65905e-13 | 1.000000 | 8.90093e-13 | 1.000000 |
| rad9          | 3.65473e-13 | 1.000000 | 4.88515e-13 | 1.000000 |
| rad41         | 3.56518e-13 | 1.000000 | 4.76546e-13 | 1.000000 |
| rad68syn      | 1.05371e-13 | 1.000000 | 1.40846e-13 | 1.000000 |
| rad22         | 7.41312e-14 | 1.000000 | 9.90887e-14 | 1.000000 |
| rad68anti     | 7.19215e-14 | 1.000000 | 9.61351e-14 | 1.000000 |
| PAH8+H        | 3.36864e-14 | 1.000000 | 4.50275e-14 | 1.000000 |
| rad72         | 3.10992e-14 | 1.000000 | 4.15692e-14 | 1.000000 |
| rad24         | 2.87055e-14 | 1.000000 | 3.83696e-14 | 1.000000 |
| rad33         | 2.23252e-14 | 1.000000 | 2.98414e-14 | 1.000000 |
| rad61         | 1.69996e-14 | 1.000000 | 2.27229e-14 | 1.000000 |
| rad40syn      | 9.11735e-15 | 1.000000 | 1.21869e-14 | 1.000000 |

|           |             |          |             |          |
|-----------|-------------|----------|-------------|----------|
| rad18     | 7.62308e-15 | 1.000000 | 1.01895e-14 | 1.000000 |
| rad40anti | 4.16909e-15 | 1.000000 | 5.57268e-15 | 1.000000 |
| rad25     | 2.05596e-15 | 1.000000 | 2.74814e-15 | 1.000000 |
| rad27     | 1.71993e-15 | 1.000000 | 2.29897e-15 | 1.000000 |
| rad14     | 1.48429e-15 | 1.000000 | 1.98400e-15 | 1.000000 |
| rad15     | 1.03661e-16 | 1.000000 | 1.38560e-16 | 1.000000 |
| rad12     | 7.13648e-17 | 1.000000 | 9.53910e-17 | 1.000000 |
| rad31     | 5.78742e-17 | 1.000000 | 7.73585e-17 | 1.000000 |
| rad47     | 4.95037e-22 | 1.000000 | 6.61699e-22 | 1.000000 |
| rad5      | 4.07506e-22 | 1.000000 | 5.44700e-22 | 1.000000 |
| rad8      | 8.26800e-23 | 1.000000 | 1.10516e-22 | 1.000000 |

0.100000000E-03 Pa, 900.000000 K

| Rate constant | True (fraction)     | Effective (fraction) |
|---------------|---------------------|----------------------|
| Total         | 9.21769e-16 (1.00 ) | 5.91948e-16 (1.00 )  |

| species       | PYtrue      | Cumul    | PYeffective | Cumul    |
|---------------|-------------|----------|-------------|----------|
| Indene+H      | 0.637601    | 0.637601 | 0.992859    | 0.992859 |
| Benzyl+C2H2   | 0.357813    | 0.995414 | 0.000000    | 0.992859 |
| PhCCH+CH3     | 0.00168533  | 0.997099 | 0.00262437  | 0.995483 |
| PhCHCCH2+H    | 0.000988071 | 0.998087 | 0.00153860  | 0.997022 |
| Ph+Allene     | 0.000956826 | 0.999044 | 0.00148995  | 0.998512 |
| PhCH2CCH+H    | 0.000305642 | 0.999350 | 0.000475939 | 0.998988 |
| Ph+MeAc       | 0.000221701 | 0.999572 | 0.000345227 | 0.999333 |
| PhCCCH3+H     | 0.000192582 | 0.999764 | 0.000299884 | 0.999633 |
| PAH7+H        | 8.18814e-05 | 0.999846 | 0.000127504 | 0.999760 |
| rad30         | 6.20698e-05 | 0.999908 | 9.66537e-05 | 0.999857 |
| PAH9+H        | 3.81798e-05 | 0.999946 | 5.94527e-05 | 0.999917 |
| rad39         | 1.95088e-05 | 0.999966 | 3.03787e-05 | 0.999947 |
| rad38         | 1.36531e-05 | 0.999979 | 2.12603e-05 | 0.999968 |
| rad35         | 9.01882e-06 | 0.999988 | 1.40439e-05 | 0.999982 |
| rad19anti     | 5.95508e-06 | 0.999994 | 9.27312e-06 | 0.999992 |
| rad46         | 1.77417e-06 | 0.999996 | 2.76270e-06 | 0.999994 |
| PAH3+H        | 1.66000e-06 | 0.999998 | 2.58492e-06 | 0.999997 |
| rad60syn      | 7.95279e-07 | 0.999999 | 1.23839e-06 | 0.999998 |
| rad60anti     | 4.32684e-07 | 0.999999 | 6.73766e-07 | 0.999999 |
| rad59         | 2.41974e-07 | 0.999999 | 3.76797e-07 | 0.999999 |
| rad37         | 1.83192e-07 | 1.000000 | 2.85263e-07 | 0.999999 |
| rad19syn      | 1.72530e-07 | 1.000000 | 2.68661e-07 | 1.000000 |
| rad50         | 1.19237e-07 | 1.000000 | 1.85673e-07 | 1.000000 |
| rad54         | 4.18728e-08 | 1.000000 | 6.52035e-08 | 1.000000 |
| rad6          | 3.97964e-08 | 1.000000 | 6.19701e-08 | 1.000000 |
| PhcycC3H3_A+H | 1.64007e-08 | 1.000000 | 2.55389e-08 | 1.000000 |
| rad67         | 7.68880e-09 | 1.000000 | 1.19728e-08 | 1.000000 |
| PAH10+CH3     | 5.46735e-09 | 1.000000 | 8.51364e-09 | 1.000000 |
| rad51         | 5.05175e-09 | 1.000000 | 7.86648e-09 | 1.000000 |
| rad52         | 3.85254e-09 | 1.000000 | 5.99909e-09 | 1.000000 |
| rad70         | 3.82645e-09 | 1.000000 | 5.95847e-09 | 1.000000 |
| PAH1+H        | 3.10912e-09 | 1.000000 | 4.84145e-09 | 1.000000 |
| rad58         | 1.60259e-09 | 1.000000 | 2.49552e-09 | 1.000000 |
| rad55         | 1.47819e-09 | 1.000000 | 2.30180e-09 | 1.000000 |
| rad62         | 1.10200e-09 | 1.000000 | 1.71602e-09 | 1.000000 |
| rad23         | 8.88873e-10 | 1.000000 | 1.38413e-09 | 1.000000 |
| rad43         | 3.94288e-10 | 1.000000 | 6.13977e-10 | 1.000000 |
| rad34         | 3.84610e-10 | 1.000000 | 5.98906e-10 | 1.000000 |
| rad45         | 2.50982e-10 | 1.000000 | 3.90825e-10 | 1.000000 |
| rad65         | 1.60941e-10 | 1.000000 | 2.50615e-10 | 1.000000 |
| rad2          | 1.21649e-10 | 1.000000 | 1.89429e-10 | 1.000000 |
| rad28         | 4.34594e-11 | 1.000000 | 6.76740e-11 | 1.000000 |
| rad53         | 2.97685e-11 | 1.000000 | 4.63549e-11 | 1.000000 |
| rad36         | 2.18166e-11 | 1.000000 | 3.39724e-11 | 1.000000 |
| rad1          | 2.04281e-11 | 1.000000 | 3.18101e-11 | 1.000000 |
| rad64         | 1.24945e-11 | 1.000000 | 1.94562e-11 | 1.000000 |
| rad42         | 1.04415e-11 | 1.000000 | 1.62592e-11 | 1.000000 |
| rad7          | 9.05055e-12 | 1.000000 | 1.40933e-11 | 1.000000 |
| rad26         | 7.78690e-12 | 1.000000 | 1.21256e-11 | 1.000000 |
| rad56         | 7.66990e-12 | 1.000000 | 1.19434e-11 | 1.000000 |
| rad20         | 6.04424e-12 | 1.000000 | 9.41196e-12 | 1.000000 |
| rad21         | 5.11614e-12 | 1.000000 | 7.96674e-12 | 1.000000 |
| rad11         | 4.73382e-12 | 1.000000 | 7.37140e-12 | 1.000000 |
| rad10         | 3.70212e-12 | 1.000000 | 5.76487e-12 | 1.000000 |
| rad73         | 1.71183e-12 | 1.000000 | 2.66563e-12 | 1.000000 |
| rad41         | 1.63696e-12 | 1.000000 | 2.54903e-12 | 1.000000 |
| rad3          | 1.54681e-12 | 1.000000 | 2.40867e-12 | 1.000000 |
| rad9          | 1.51549e-12 | 1.000000 | 2.35989e-12 | 1.000000 |
| rad71         | 1.34930e-12 | 1.000000 | 2.10111e-12 | 1.000000 |
| rad68syn      | 1.23859e-12 | 1.000000 | 1.92871e-12 | 1.000000 |

|           |             |          |             |         |
|-----------|-------------|----------|-------------|---------|
| rad4      | 1.07339e-12 | 1.000000 | 1.67146e-12 | 1.00000 |
| rad13     | 8.42999e-13 | 1.000000 | 1.31270e-12 | 1.00000 |
| rad68anti | 8.39620e-13 | 1.000000 | 1.30744e-12 | 1.00000 |
| PAH8+H    | 3.85349e-13 | 1.000000 | 6.00057e-13 | 1.00000 |
| rad61     | 1.21589e-13 | 1.000000 | 1.89335e-13 | 1.00000 |
| rad40syn  | 1.16093e-13 | 1.000000 | 1.80778e-13 | 1.00000 |
| rad24     | 5.74732e-14 | 1.000000 | 8.94961e-14 | 1.00000 |
| rad40anti | 4.71900e-14 | 1.000000 | 7.34833e-14 | 1.00000 |
| rad33     | 3.71301e-14 | 1.000000 | 5.78182e-14 | 1.00000 |
| rad72     | 3.28436e-14 | 1.000000 | 5.11433e-14 | 1.00000 |
| rad22     | 3.19298e-14 | 1.000000 | 4.97204e-14 | 1.00000 |
| rad18     | 2.21852e-14 | 1.000000 | 3.45464e-14 | 1.00000 |
| rad25     | 2.21446e-15 | 1.000000 | 3.44832e-15 | 1.00000 |
| rad27     | 1.39159e-15 | 1.000000 | 2.16696e-15 | 1.00000 |
| rad14     | 1.06230e-15 | 1.000000 | 1.65419e-15 | 1.00000 |
| rad12     | 3.93775e-16 | 1.000000 | 6.13178e-16 | 1.00000 |
| rad15     | 3.33722e-16 | 1.000000 | 5.19664e-16 | 1.00000 |
| rad31     | 3.17855e-17 | 1.000000 | 4.94958e-17 | 1.00000 |
| rad8      | 5.05693e-20 | 1.000000 | 7.87455e-20 | 1.00000 |
| rad47     | 3.25379e-21 | 1.000000 | 5.06673e-21 | 1.00000 |
| rad5      | 8.58588e-22 | 1.000000 | 1.33698e-21 | 1.00000 |

0.100000000E-03 Pa, 1000.00000 K

| Rate constant | True (fraction)     | Effective (fraction) |
|---------------|---------------------|----------------------|
| Total         | 2.23691e-15 (1.00 ) | 1.20781e-15 (1.00 )  |

| species       | PYtrue      | Cumul    | PYeffective | Cumul    |
|---------------|-------------|----------|-------------|----------|
| Indene+H      | 0.533143    | 0.533143 | 0.987405    | 0.987405 |
| Benzyl+C2H2   | 0.460056    | 0.993199 | 0.00000     | 0.987405 |
| PhCCH+CH3     | 0.00197845  | 0.995177 | 0.00366418  | 0.991069 |
| Ph+Allene     | 0.00184724  | 0.997025 | 0.00342117  | 0.994490 |
| PhCHCCH2+H    | 0.00145011  | 0.998475 | 0.00268567  | 0.997176 |
| PhCH2CCH+H    | 0.000695141 | 0.999170 | 0.00128743  | 0.998463 |
| Ph+MeAc       | 0.000262360 | 0.999432 | 0.000485903 | 0.998949 |
| PhCCCH3+H     | 0.000178027 | 0.999610 | 0.000329714 | 0.999279 |
| PAH7+H        | 0.000130563 | 0.999741 | 0.000241809 | 0.999521 |
| rad30         | 9.13367e-05 | 0.999832 | 0.000169160 | 0.999690 |
| PAH9+H        | 6.89549e-05 | 0.999901 | 0.000127708 | 0.999818 |
| rad39         | 3.03500e-05 | 0.999932 | 5.62096e-05 | 0.999874 |
| rad38         | 2.54972e-05 | 0.999957 | 4.72219e-05 | 0.999921 |
| rad35         | 1.54295e-05 | 0.999972 | 2.85761e-05 | 0.999950 |
| rad19anti     | 1.36963e-05 | 0.999986 | 2.53662e-05 | 0.999975 |
| PAH3+H        | 4.67729e-06 | 0.999991 | 8.66256e-06 | 0.999984 |
| rad46         | 3.89969e-06 | 0.999995 | 7.22240e-06 | 0.999991 |
| rad60syn      | 1.65646e-06 | 0.999996 | 3.06785e-06 | 0.999994 |
| rad60anti     | 9.23124e-07 | 0.999997 | 1.70967e-06 | 0.999996 |
| rad59         | 6.45414e-07 | 0.999998 | 1.19534e-06 | 0.999997 |
| rad19syn      | 4.72655e-07 | 0.999998 | 8.75378e-07 | 0.999998 |
| rad50         | 4.02312e-07 | 0.999999 | 7.45101e-07 | 0.999999 |
| rad37         | 2.45622e-07 | 0.999999 | 4.54904e-07 | 0.999999 |
| rad54         | 1.26767e-07 | 0.999999 | 2.34777e-07 | 0.999999 |
| PhcycC3H3_A+H | 6.09439e-08 | 0.999999 | 1.12871e-07 | 0.999999 |
| rad67         | 3.29355e-08 | 0.999999 | 6.09981e-08 | 0.999999 |
| rad51         | 2.38710e-08 | 0.999999 | 4.42101e-08 | 1.000000 |
| rad52         | 1.55703e-08 | 0.999999 | 2.88370e-08 | 1.000000 |
| PAH10+CH3     | 1.49519e-08 | 0.999999 | 2.76916e-08 | 1.000000 |
| rad70         | 1.36638e-08 | 0.999999 | 2.53059e-08 | 1.000000 |
| PAH1+H        | 1.19210e-08 | 0.999999 | 2.20783e-08 | 1.000000 |
| rad6          | 7.85471e-09 | 0.999999 | 1.45473e-08 | 1.000000 |
| rad58         | 7.00660e-09 | 0.999999 | 1.29765e-08 | 1.000000 |
| rad55         | 5.08718e-09 | 0.999999 | 9.42168e-09 | 1.000000 |
| rad62         | 2.86002e-09 | 0.999999 | 5.29690e-09 | 1.000000 |
| rad34         | 1.59467e-09 | 0.999999 | 2.95340e-09 | 1.000000 |
| rad43         | 8.01117e-10 | 0.999999 | 1.48371e-09 | 1.000000 |
| rad65         | 7.62334e-10 | 0.999999 | 1.41188e-09 | 1.000000 |
| rad23         | 3.86592e-10 | 0.999999 | 7.15986e-10 | 1.000000 |
| rad53         | 1.57208e-10 | 0.999999 | 2.91156e-10 | 1.000000 |
| rad45         | 1.21787e-10 | 0.999999 | 2.25556e-10 | 1.000000 |
| rad64         | 6.33109e-11 | 0.999999 | 1.17255e-10 | 1.000000 |
| rad56         | 5.17492e-11 | 0.999999 | 9.58419e-11 | 1.000000 |
| rad42         | 3.80345e-11 | 0.999999 | 7.04417e-11 | 1.000000 |
| rad2          | 2.76376e-11 | 0.999999 | 5.11861e-11 | 1.000000 |
| rad73         | 1.22490e-11 | 0.999999 | 2.26857e-11 | 1.000000 |
| rad36         | 1.09569e-11 | 0.999999 | 2.02926e-11 | 1.000000 |
| rad28         | 9.91821e-12 | 0.999999 | 1.83690e-11 | 1.000000 |
| rad20         | 8.81748e-12 | 0.999999 | 1.63304e-11 | 1.000000 |
| rad68syn      | 8.78600e-12 | 0.999999 | 1.62721e-11 | 1.000000 |

|           |             |          |             |          |
|-----------|-------------|----------|-------------|----------|
| rad21     | 6.41666e-12 | 0.999999 | 1.18839e-11 | 1.000000 |
| rad71     | 6.33559e-12 | 0.999999 | 1.17338e-11 | 1.000000 |
| rad68anti | 5.91601e-12 | 0.999999 | 1.09567e-11 | 1.000000 |
| rad1      | 5.26643e-12 | 0.999999 | 9.75367e-12 | 1.000000 |
| rad41     | 5.11393e-12 | 0.999999 | 9.47123e-12 | 1.000000 |
| PAH8+H    | 3.93421e-12 | 0.999999 | 7.28633e-12 | 1.000000 |
| rad11     | 3.59590e-12 | 0.999999 | 6.65978e-12 | 1.000000 |
| rad7      | 3.42805e-12 | 0.999999 | 6.34890e-12 | 1.000000 |
| rad9      | 2.32534e-12 | 0.999999 | 4.30664e-12 | 1.000000 |
| rad26     | 1.92327e-12 | 0.999999 | 3.56199e-12 | 1.000000 |
| rad13     | 1.33610e-12 | 0.999999 | 2.47452e-12 | 1.000000 |
| rad10     | 1.31822e-12 | 0.999999 | 2.44140e-12 | 1.000000 |
| rad40syn  | 1.02884e-12 | 0.999999 | 1.90546e-12 | 1.000000 |
| rad61     | 8.03496e-13 | 0.999999 | 1.48811e-12 | 1.000000 |
| rad3      | 4.64762e-13 | 0.999999 | 8.60760e-13 | 1.000000 |
| rad40anti | 4.39187e-13 | 0.999999 | 8.13395e-13 | 1.000000 |
| rad4      | 3.39393e-13 | 0.999999 | 6.28571e-13 | 1.000000 |
| rad18     | 7.80513e-14 | 0.999999 | 1.44555e-13 | 1.000000 |
| rad24     | 5.90769e-14 | 0.999999 | 1.09413e-13 | 1.000000 |
| rad33     | 4.70958e-14 | 0.999999 | 8.72236e-14 | 1.000000 |
| rad72     | 3.69708e-14 | 0.999999 | 6.84715e-14 | 1.000000 |
| rad22     | 1.63061e-14 | 0.999999 | 3.01996e-14 | 1.000000 |
| rad25     | 3.14175e-15 | 0.999999 | 5.81866e-15 | 1.000000 |
| rad27     | 1.12152e-15 | 0.999999 | 2.07711e-15 | 1.000000 |
| rad14     | 9.26595e-16 | 0.999999 | 1.71610e-15 | 1.000000 |
| rad12     | 8.61576e-16 | 0.999999 | 1.59568e-15 | 1.000000 |
| rad15     | 4.94667e-16 | 0.999999 | 9.16146e-16 | 1.000000 |
| rad31     | 1.86003e-17 | 0.999999 | 3.44486e-17 | 1.000000 |
| rad8      | 3.09659e-18 | 0.999999 | 5.73503e-18 | 1.000000 |
| rad47     | 1.59095e-20 | 0.999999 | 2.94651e-20 | 1.000000 |
| rad5      | 2.10041e-21 | 0.999999 | 3.89006e-21 | 1.000000 |

0.100000000E-03 Pa, 1100.00000 K

=====

| Rate constant | True (fraction)     | Effective (fraction) |
|---------------|---------------------|----------------------|
| Total         | 4.69847e-15 (1.00 ) | 2.11075e-15 (1.00 )  |

| species       | PYtrue      | Cumul    | PYeffective | Cumul    |
|---------------|-------------|----------|-------------|----------|
| Benzyl+C2H2   | 0.550759    | 0.550759 | 0.000000    | 0.000000 |
| Indene+H      | 0.439889    | 0.990648 | 0.979181    | 0.979181 |
| Ph+Allene     | 0.00299528  | 0.993643 | 0.00666742  | 0.985848 |
| PhCCH+CH3     | 0.00208760  | 0.995731 | 0.00464694  | 0.990495 |
| PhCHCCH2+H    | 0.00194544  | 0.997676 | 0.00433051  | 0.994826 |
| PhCH2CCH+H    | 0.00132191  | 0.998998 | 0.00294254  | 0.997768 |
| Ph+MeAc       | 0.000277389 | 0.999276 | 0.000617461 | 0.998386 |
| PAH7+H        | 0.000179385 | 0.999455 | 0.000399306 | 0.998785 |
| PhCCCH3+H     | 0.000149167 | 0.999604 | 0.000332043 | 0.999117 |
| rad30         | 0.000123015 | 0.999727 | 0.000273827 | 0.999391 |
| PAH9+H        | 0.000111696 | 0.999839 | 0.000248633 | 0.999640 |
| rad38         | 4.24979e-05 | 0.999881 | 9.45992e-05 | 0.999734 |
| rad39         | 4.04278e-05 | 0.999922 | 8.99912e-05 | 0.999824 |
| rad19anti     | 2.71780e-05 | 0.999949 | 6.04975e-05 | 0.999885 |
| rad35         | 2.39104e-05 | 0.999973 | 5.32239e-05 | 0.999938 |
| PAH3+H        | 1.09195e-05 | 0.999984 | 2.43064e-05 | 0.999962 |
| rad46         | 7.44863e-06 | 0.999991 | 1.65805e-05 | 0.999979 |
| rad60syn      | 2.99524e-06 | 0.999994 | 6.66734e-06 | 0.999986 |
| rad60anti     | 1.70291e-06 | 0.999996 | 3.79064e-06 | 0.999989 |
| rad59         | 1.43231e-06 | 0.999997 | 3.18828e-06 | 0.999993 |
| rad50         | 1.10328e-06 | 0.999998 | 2.45586e-06 | 0.999995 |
| rad19syn      | 1.02396e-06 | 1.000000 | 2.27932e-06 | 0.999997 |
| rad37         | 3.04609e-07 | 1.000000 | 6.78053e-07 | 0.999998 |
| rad54         | 2.97942e-07 | 1.000000 | 6.63211e-07 | 0.999999 |
| PhcycC3H3_A+H | 1.70469e-07 | 1.000000 | 3.79460e-07 | 0.999999 |
| rad67         | 1.11021e-07 | 1.000000 | 2.47129e-07 | 0.999999 |
| rad51         | 8.66400e-08 | 1.000000 | 1.92858e-07 | 0.999999 |
| rad52         | 4.94949e-08 | 1.000000 | 1.10174e-07 | 1.000000 |
| rad70         | 3.72388e-08 | 1.000000 | 8.28926e-08 | 1.000000 |
| PAH10+CH3     | 3.55709e-08 | 1.000000 | 7.91798e-08 | 1.000000 |
| PAH1+H        | 3.40423e-08 | 1.000000 | 7.57773e-08 | 1.000000 |
| rad58         | 2.33985e-08 | 1.000000 | 5.20844e-08 | 1.000000 |
| rad55         | 1.32727e-08 | 1.000000 | 2.95447e-08 | 1.000000 |
| rad62         | 5.84586e-09 | 1.000000 | 1.30127e-08 | 1.000000 |
| rad34         | 4.93272e-09 | 1.000000 | 1.09801e-08 | 1.000000 |
| rad65         | 2.75396e-09 | 1.000000 | 6.13024e-09 | 1.000000 |
| rad6          | 1.94441e-09 | 1.000000 | 4.32821e-09 | 1.000000 |
| rad43         | 1.31325e-09 | 1.000000 | 2.92326e-09 | 1.000000 |
| rad53         | 5.86805e-10 | 1.000000 | 1.30621e-09 | 1.000000 |
| rad56         | 2.36331e-10 | 1.000000 | 5.26068e-10 | 1.000000 |

|           |             |         |             |          |
|-----------|-------------|---------|-------------|----------|
| rad64     | 2.26685e-10 | 1.00000 | 5.04595e-10 | 1.000000 |
| rad23     | 1.81426e-10 | 1.00000 | 4.03850e-10 | 1.000000 |
| rad42     | 1.03252e-10 | 1.00000 | 2.29837e-10 | 1.000000 |
| rad73     | 8.76642e-11 | 1.00000 | 1.95138e-10 | 1.000000 |
| rad45     | 6.14510e-11 | 1.00000 | 1.36788e-10 | 1.000000 |
| rad71     | 5.13402e-11 | 1.00000 | 1.14282e-10 | 1.000000 |
| rad68syn  | 4.26232e-11 | 1.00000 | 9.48782e-11 | 1.000000 |
| rad68anti | 2.85352e-11 | 1.00000 | 6.35187e-11 | 1.000000 |
| PAH8+H    | 2.67181e-11 | 1.00000 | 5.94738e-11 | 1.000000 |
| rad41     | 1.21950e-11 | 1.00000 | 2.71457e-11 | 1.000000 |
| rad20     | 7.93858e-12 | 1.00000 | 1.76711e-11 | 1.000000 |
| rad2      | 7.14814e-12 | 1.00000 | 1.59116e-11 | 1.000000 |
| rad40syn  | 6.09478e-12 | 1.00000 | 1.35668e-11 | 1.000000 |
| rad36     | 5.64184e-12 | 1.00000 | 1.25586e-11 | 1.000000 |
| rad21     | 5.10809e-12 | 1.00000 | 1.13705e-11 | 1.000000 |
| rad11     | 4.83051e-12 | 1.00000 | 1.07526e-11 | 1.000000 |
| rad61     | 4.16909e-12 | 1.00000 | 9.28030e-12 | 1.000000 |
| rad7      | 2.81521e-12 | 1.00000 | 6.26658e-12 | 1.000000 |
| rad28     | 2.76219e-12 | 1.00000 | 6.14856e-12 | 1.000000 |
| rad40anti | 2.75105e-12 | 1.00000 | 6.12376e-12 | 1.000000 |
| rad9      | 2.31868e-12 | 1.00000 | 5.16131e-12 | 1.000000 |
| rad13     | 1.67987e-12 | 1.00000 | 3.73935e-12 | 1.000000 |
| rad1      | 1.48731e-12 | 1.00000 | 3.31071e-12 | 1.000000 |
| rad10     | 7.45652e-13 | 1.00000 | 1.65980e-12 | 1.000000 |
| rad26     | 5.90511e-13 | 1.00000 | 1.31446e-12 | 1.000000 |
| rad18     | 2.44879e-13 | 1.00000 | 5.45095e-13 | 1.000000 |
| rad72     | 2.44076e-13 | 1.00000 | 5.43308e-13 | 1.000000 |
| rad3      | 1.57487e-13 | 1.00000 | 3.50562e-13 | 1.000000 |
| rad4      | 1.18489e-13 | 1.00000 | 2.63755e-13 | 1.000000 |
| rad24     | 4.56170e-14 | 1.00000 | 1.01542e-13 | 1.000000 |
| rad33     | 3.94493e-14 | 1.00000 | 8.78133e-14 | 1.000000 |
| rad22     | 1.05411e-14 | 1.00000 | 2.34643e-14 | 1.000000 |
| rad25     | 3.94409e-15 | 1.00000 | 8.77944e-15 | 1.000000 |
| rad12     | 1.26340e-15 | 1.00000 | 2.81229e-15 | 1.000000 |
| rad14     | 7.50329e-16 | 1.00000 | 1.67021e-15 | 1.000000 |
| rad27     | 7.02600e-16 | 1.00000 | 1.56397e-15 | 1.000000 |
| rad15     | 5.37902e-16 | 1.00000 | 1.19736e-15 | 1.000000 |
| rad8      | 3.02695e-17 | 1.00000 | 6.73791e-17 | 1.000000 |
| rad31     | 1.11580e-17 | 1.00000 | 2.48374e-17 | 1.000000 |
| rad47     | 5.97553e-20 | 1.00000 | 1.33014e-19 | 1.000000 |
| rad5      | 6.09928e-21 | 1.00000 | 1.35768e-20 | 1.000000 |

0.100000000E-03 Pa, 1200.00000 K

=====

| Rate constant | True (fraction)     | Effective (fraction) |
|---------------|---------------------|----------------------|
| Total         | 8.84330e-15 (1.00 ) | 3.30079e-15 (1.00 )  |

| species       | PYtrue      | Cumul    | PYeffective | Cumul    |
|---------------|-------------|----------|-------------|----------|
| Benzyl+C2H2   | 0.626747    | 0.626747 | 0.00000     | 0.00000  |
| Indene+H      | 0.361139    | 0.987886 | 0.967544    | 0.967544 |
| Ph+Allene     | 0.00426331  | 0.992149 | 0.0114220   | 0.978966 |
| PhCHCCH2+H    | 0.00242727  | 0.994577 | 0.00650302  | 0.985469 |
| PhCH2CCH+H    | 0.00220912  | 0.996786 | 0.00591855  | 0.991388 |
| PhCCH+CH3     | 0.00203529  | 0.998821 | 0.00545285  | 0.996840 |
| Ph+MeAc       | 0.000271659 | 0.999093 | 0.000727813 | 0.997568 |
| PAH7+H        | 0.000220958 | 0.999314 | 0.000591978 | 0.998160 |
| PAH9+H        | 0.000166477 | 0.999480 | 0.000446015 | 0.998606 |
| rad30         | 0.000155353 | 0.999635 | 0.000416215 | 0.999022 |
| PhCCCH3+H     | 0.000117029 | 0.999752 | 0.000313537 | 0.999336 |
| rad38         | 6.49367e-05 | 0.999817 | 0.000173975 | 0.999510 |
| rad19anti     | 4.80909e-05 | 0.999865 | 0.000128843 | 0.999639 |
| rad39         | 4.80571e-05 | 0.999914 | 0.000128752 | 0.999768 |
| rad35         | 3.43899e-05 | 0.999948 | 9.21355e-05 | 0.999860 |
| PAH3+H        | 2.21253e-05 | 0.999970 | 5.92770e-05 | 0.999919 |
| rad46         | 1.27762e-05 | 0.999983 | 3.42294e-05 | 0.999953 |
| rad60syn      | 4.87439e-06 | 0.999988 | 1.30592e-05 | 0.999966 |
| rad60anti     | 2.81860e-06 | 0.999991 | 7.55145e-06 | 0.999974 |
| rad59         | 2.76936e-06 | 0.999993 | 7.41953e-06 | 0.999981 |
| rad50         | 2.57973e-06 | 0.999996 | 6.91148e-06 | 0.999988 |
| rad19syn      | 1.86136e-06 | 0.999998 | 4.98686e-06 | 0.999993 |
| rad54         | 5.79322e-07 | 0.999998 | 1.55209e-06 | 0.999995 |
| PhcycC3H3_A+H | 3.85542e-07 | 0.999999 | 1.03292e-06 | 0.999996 |
| rad37         | 3.71909e-07 | 0.999999 | 9.96399e-07 | 0.999997 |
| rad67         | 3.10056e-07 | 0.999999 | 8.30686e-07 | 0.999998 |
| rad51         | 2.56411e-07 | 1.000000 | 6.86962e-07 | 0.999998 |
| rad52         | 1.30815e-07 | 1.000000 | 3.50473e-07 | 0.999999 |
| rad70         | 8.31661e-08 | 1.000000 | 2.22814e-07 | 0.999999 |
| PAH10+CH3     | 7.86247e-08 | 1.000000 | 2.10647e-07 | 0.999999 |



|           |             |         |             |          |
|-----------|-------------|---------|-------------|----------|
| PAH1+H    | 7.84242e-08 | 1.00000 | 2.10110e-07 | 0.999999 |
| rad58     | 6.38230e-08 | 1.00000 | 1.70991e-07 | 0.999999 |
| rad55     | 2.81615e-08 | 1.00000 | 7.54487e-08 | 0.999999 |
| rad34     | 1.22937e-08 | 1.00000 | 3.29365e-08 | 0.999999 |
| rad62     | 1.00322e-08 | 1.00000 | 2.68777e-08 | 1.000000 |
| rad65     | 8.07965e-09 | 1.00000 | 2.16466e-08 | 1.000000 |
| rad43     | 1.86210e-09 | 1.00000 | 4.98883e-09 | 1.000000 |
| rad53     | 1.69057e-09 | 1.00000 | 4.52927e-09 | 1.000000 |
| rad56     | 8.06532e-10 | 1.00000 | 2.16082e-09 | 1.000000 |
| rad6      | 6.61097e-10 | 1.00000 | 1.77118e-09 | 1.000000 |
| rad64     | 6.30252e-10 | 1.00000 | 1.68854e-09 | 1.000000 |
| rad73     | 4.68079e-10 | 1.00000 | 1.25405e-09 | 1.000000 |
| rad71     | 3.19936e-10 | 1.00000 | 8.57156e-10 | 1.000000 |
| rad42     | 2.25979e-10 | 1.00000 | 6.05432e-10 | 1.000000 |
| rad68syn  | 1.55936e-10 | 1.00000 | 4.17776e-10 | 1.000000 |
| PAH8+H    | 1.30634e-10 | 1.00000 | 3.49987e-10 | 1.000000 |
| rad68anti | 1.03878e-10 | 1.00000 | 2.78305e-10 | 1.000000 |
| rad23     | 8.96274e-11 | 1.00000 | 2.40125e-10 | 1.000000 |
| rad45     | 3.18962e-11 | 1.00000 | 8.54546e-11 | 1.000000 |
| rad40syn  | 2.64826e-11 | 1.00000 | 7.09506e-11 | 1.000000 |
| rad41     | 2.43331e-11 | 1.00000 | 6.51920e-11 | 1.000000 |
| rad61     | 1.76276e-11 | 1.00000 | 4.72270e-11 | 1.000000 |
| rad40anti | 1.25564e-11 | 1.00000 | 3.36404e-11 | 1.000000 |
| rad11     | 6.34637e-12 | 1.00000 | 1.70028e-11 | 1.000000 |
| rad20     | 5.25318e-12 | 1.00000 | 1.40740e-11 | 1.000000 |
| rad7      | 3.78327e-12 | 1.00000 | 1.01359e-11 | 1.000000 |
| rad21     | 3.17167e-12 | 1.00000 | 8.49736e-12 | 1.000000 |
| rad36     | 2.97289e-12 | 1.00000 | 7.96479e-12 | 1.000000 |
| rad72     | 2.18541e-12 | 1.00000 | 5.85504e-12 | 1.000000 |
| rad9      | 2.03030e-12 | 1.00000 | 5.43946e-12 | 1.000000 |
| rad2      | 2.02173e-12 | 1.00000 | 5.41651e-12 | 1.000000 |
| rad13     | 1.38097e-12 | 1.00000 | 3.69983e-12 | 1.000000 |
| rad28     | 1.01089e-12 | 1.00000 | 2.70833e-12 | 1.000000 |
| rad18     | 5.20746e-13 | 1.00000 | 1.39516e-12 | 1.000000 |
| rad10     | 5.14486e-13 | 1.00000 | 1.37838e-12 | 1.000000 |
| rad1      | 4.42203e-13 | 1.00000 | 1.18473e-12 | 1.000000 |
| rad26     | 2.32992e-13 | 1.00000 | 6.24218e-13 | 1.000000 |
| rad3      | 5.75061e-14 | 1.00000 | 1.54067e-13 | 1.000000 |
| rad4      | 4.40372e-14 | 1.00000 | 1.17982e-13 | 1.000000 |
| rad24     | 3.33436e-14 | 1.00000 | 8.93325e-14 | 1.000000 |
| rad33     | 2.51887e-14 | 1.00000 | 6.74842e-14 | 1.000000 |
| rad22     | 1.22348e-14 | 1.00000 | 3.27788e-14 | 1.000000 |
| rad25     | 3.68489e-15 | 1.00000 | 9.87235e-15 | 1.000000 |
| rad12     | 1.57453e-15 | 1.00000 | 4.21840e-15 | 1.000000 |
| rad15     | 7.29653e-16 | 1.00000 | 1.95485e-15 | 1.000000 |
| rad14     | 4.93548e-16 | 1.00000 | 1.32229e-15 | 1.000000 |
| rad27     | 3.33034e-16 | 1.00000 | 8.92246e-16 | 1.000000 |
| rad8      | 9.89268e-17 | 1.00000 | 2.65039e-16 | 1.000000 |
| rad31     | 6.76596e-18 | 1.00000 | 1.81270e-17 | 1.000000 |
| rad47     | 1.81322e-19 | 1.00000 | 4.85787e-19 | 1.000000 |
| rad5      | 1.98442e-20 | 1.00000 | 5.31655e-20 | 1.000000 |

0.100000000E-03 Pa, 1300.00000 K

=====

| Rate constant | True (fraction)     | Effective (fraction) |
|---------------|---------------------|----------------------|
| Total         | 1.52810e-14 (1.00 ) | 4.76644e-15 (1.00 )  |

| species     | PYtrue      | Cumul    | PYeffective | Cumul    |
|-------------|-------------|----------|-------------|----------|
| Benzyl+C2H2 | 0.688080    | 0.688080 | 0.00000     | 0.00000  |
| Indene+H    | 0.296944    | 0.985024 | 0.951986    | 0.951986 |
| Ph+Allene   | 0.00550433  | 0.990528 | 0.0176466   | 0.969633 |
| PhCH2CCH+H  | 0.00336231  | 0.993891 | 0.0107794   | 0.980412 |
| PhCHCCH2+H  | 0.00286585  | 0.996756 | 0.00918775  | 0.989600 |
| PhCCH+CH3   | 0.00187197  | 0.998628 | 0.00600145  | 0.995601 |
| Ph+MeAc     | 0.000252917 | 0.998881 | 0.000810838 | 0.996412 |
| PAH7+H      | 0.000251839 | 0.999133 | 0.000807383 | 0.997219 |
| PAH9+H      | 0.000232565 | 0.999366 | 0.000745592 | 0.997965 |
| rad30       | 0.000187145 | 0.999553 | 0.000599977 | 0.998565 |
| rad38       | 9.27358e-05 | 0.999646 | 0.000297306 | 0.998862 |
| PhCCCH3+H   | 8.81977e-05 | 0.999734 | 0.000282757 | 0.999145 |
| rad19anti   | 7.76866e-05 | 0.999812 | 0.000249059 | 0.999394 |
| rad39       | 5.27138e-05 | 0.999864 | 0.000168998 | 0.999563 |
| rad35       | 4.67240e-05 | 0.999911 | 0.000149795 | 0.999713 |
| PAH3+H      | 4.01931e-05 | 0.999951 | 0.000128857 | 0.999842 |
| rad46       | 2.01481e-05 | 0.999971 | 6.45939e-05 | 0.999906 |
| rad60syn    | 7.32140e-06 | 0.999979 | 2.34720e-05 | 0.999930 |
| rad50       | 5.32216e-06 | 0.999984 | 1.70626e-05 | 0.999947 |
| rad59       | 4.81766e-06 | 0.999989 | 1.54452e-05 | 0.999962 |

|               |             |          |             |          |
|---------------|-------------|----------|-------------|----------|
| rad60anti     | 4.29551e-06 | 0.999993 | 1.37712e-05 | 0.999976 |
| rad19syn      | 2.96345e-06 | 0.999996 | 9.50065e-06 | 0.999986 |
| rad54         | 9.75309e-07 | 0.999997 | 3.12679e-06 | 0.999989 |
| rad67         | 7.44257e-07 | 0.999998 | 2.38605e-06 | 0.999991 |
| PhcycC3H3_A+H | 7.41843e-07 | 0.999999 | 2.37831e-06 | 0.999993 |
| rad51         | 6.46587e-07 | 0.999999 | 2.07293e-06 | 0.999996 |
| rad37         | 4.66727e-07 | 1.000000 | 1.49630e-06 | 0.999997 |
| rad52         | 2.99171e-07 | 1.000000 | 9.59127e-07 | 0.999998 |
| PAH10+CH3     | 1.66595e-07 | 1.000000 | 5.34094e-07 | 0.999999 |
| rad70         | 1.60097e-07 | 1.000000 | 5.13264e-07 | 0.999999 |
| PAH1+H        | 1.54574e-07 | 1.000000 | 4.95557e-07 | 1.000000 |
| rad58         | 1.48959e-07 | 1.000000 | 4.77556e-07 | 1.000000 |
| rad55         | 5.10750e-08 | 1.000000 | 1.63744e-07 | 1.000000 |
| rad34         | 2.60671e-08 | 1.000000 | 8.35698e-08 | 1.000000 |
| rad65         | 2.01509e-08 | 1.000000 | 6.46027e-08 | 1.000000 |
| rad62         | 1.51327e-08 | 1.000000 | 4.85146e-08 | 1.000000 |
| rad53         | 3.99906e-09 | 1.000000 | 1.28208e-08 | 1.000000 |
| rad43         | 2.42224e-09 | 1.000000 | 7.76558e-09 | 1.000000 |
| rad56         | 2.20471e-09 | 1.000000 | 7.06820e-09 | 1.000000 |
| rad73         | 1.94731e-09 | 1.000000 | 6.24298e-09 | 1.000000 |
| rad71         | 1.52469e-09 | 1.000000 | 4.88806e-09 | 1.000000 |
| rad64         | 1.45722e-09 | 1.000000 | 4.67176e-09 | 1.000000 |
| PAH8+H        | 4.97087e-10 | 1.000000 | 1.59363e-09 | 1.000000 |
| rad68syn      | 4.61121e-10 | 1.000000 | 1.47833e-09 | 1.000000 |
| rad42         | 4.21653e-10 | 1.000000 | 1.35180e-09 | 1.000000 |
| rad6          | 3.21478e-10 | 1.000000 | 1.03064e-09 | 1.000000 |
| rad68anti     | 3.05850e-10 | 1.000000 | 9.80538e-10 | 1.000000 |
| rad40syn      | 9.09558e-11 | 1.000000 | 2.91600e-10 | 1.000000 |
| rad61         | 6.30321e-11 | 1.000000 | 2.02078e-10 | 1.000000 |
| rad23         | 4.63238e-11 | 1.000000 | 1.48512e-10 | 1.000000 |
| rad40anti     | 4.50262e-11 | 1.000000 | 1.44352e-10 | 1.000000 |
| rad41         | 4.39795e-11 | 1.000000 | 1.40996e-10 | 1.000000 |
| rad45         | 1.69984e-11 | 1.000000 | 5.44961e-11 | 1.000000 |
| rad72         | 1.45407e-11 | 1.000000 | 4.66168e-11 | 1.000000 |
| rad11         | 6.11971e-12 | 1.000000 | 1.96195e-11 | 1.000000 |
| rad7          | 4.58141e-12 | 1.000000 | 1.46878e-11 | 1.000000 |
| rad20         | 3.18168e-12 | 1.000000 | 1.02003e-11 | 1.000000 |
| rad21         | 1.87706e-12 | 1.000000 | 6.01775e-12 | 1.000000 |
| rad9          | 1.67033e-12 | 1.000000 | 5.35500e-12 | 1.000000 |
| rad36         | 1.60595e-12 | 1.000000 | 5.14859e-12 | 1.000000 |
| rad13         | 8.38721e-13 | 1.000000 | 2.68890e-12 | 1.000000 |
| rad18         | 6.76242e-13 | 1.000000 | 2.16800e-12 | 1.000000 |
| rad2          | 6.05385e-13 | 1.000000 | 1.94083e-12 | 1.000000 |
| rad28         | 5.12076e-13 | 1.000000 | 1.64169e-12 | 1.000000 |
| rad10         | 3.13254e-13 | 1.000000 | 1.00428e-12 | 1.000000 |
| rad1          | 1.36482e-13 | 1.000000 | 4.37554e-13 | 1.000000 |
| rad26         | 1.14711e-13 | 1.000000 | 3.67758e-13 | 1.000000 |
| rad22         | 3.02579e-14 | 1.000000 | 9.70053e-14 | 1.000000 |
| rad24         | 2.44030e-14 | 1.000000 | 7.82347e-14 | 1.000000 |
| rad3          | 2.21577e-14 | 1.000000 | 7.10365e-14 | 1.000000 |
| rad4          | 1.71761e-14 | 1.000000 | 5.50655e-14 | 1.000000 |
| rad33         | 1.48897e-14 | 1.000000 | 4.77355e-14 | 1.000000 |
| rad25         | 2.76129e-15 | 1.000000 | 8.85255e-15 | 1.000000 |
| rad15         | 2.22472e-15 | 1.000000 | 7.13235e-15 | 1.000000 |
| rad12         | 1.79600e-15 | 1.000000 | 5.75788e-15 | 1.000000 |
| rad14         | 2.71775e-16 | 1.000000 | 8.71297e-16 | 1.000000 |
| rad8          | 1.89596e-16 | 1.000000 | 6.07834e-16 | 1.000000 |
| rad27         | 1.35026e-16 | 1.000000 | 4.32885e-16 | 1.000000 |
| rad31         | 4.14040e-18 | 1.000000 | 1.32739e-17 | 1.000000 |
| rad47         | 4.64665e-19 | 1.000000 | 1.48969e-18 | 1.000000 |
| rad5          | 6.43444e-20 | 1.000000 | 2.06285e-19 | 1.000000 |

0.100000000E-03 Pa, 1400.00000 K

=====

Rate constant | True (fraction) | Effective (fraction)

-----  
Total | 2.46691e-14 (1.00) | 6.50155e-15 (1.00)

| species     | PYtrue      | Cumul    | PYeffective | Cumul    |
|-------------|-------------|----------|-------------|----------|
| Benzyl+C2H2 | 0.736450    | 0.736450 | 0.00000     | 0.00000  |
| Indene+H    | 0.245659    | 0.982109 | 0.932117    | 0.932117 |
| Ph+Allene   | 0.00660861  | 0.988718 | 0.0250754   | 0.957192 |
| PhCH2CCH+H  | 0.00478128  | 0.993499 | 0.0181419   | 0.975334 |
| PhCHCCH2+H  | 0.00325578  | 0.996755 | 0.0123536   | 0.987688 |
| PhCCH+CH3   | 0.00165084  | 0.998406 | 0.00626388  | 0.993952 |
| PAH9+H      | 0.000308661 | 0.998714 | 0.00117117  | 0.995123 |
| PAH7+H      | 0.000272630 | 0.998987 | 0.00103445  | 0.996157 |
| Ph+MeAc     | 0.000228420 | 0.999215 | 0.000866707 | 0.997024 |
| rad30       | 0.000217655 | 0.999433 | 0.000825859 | 0.997850 |

|               |             |          |             |          |
|---------------|-------------|----------|-------------|----------|
| rad38         | 0.000125529 | 0.999558 | 0.000476301 | 0.998326 |
| rad19anti     | 0.000116511 | 0.999675 | 0.000442085 | 0.998768 |
| PAH3+H        | 6.69984e-05 | 0.999742 | 0.000254215 | 0.999023 |
| PhCCCH3+H     | 6.53819e-05 | 0.999807 | 0.000248082 | 0.999271 |
| rad35         | 6.07397e-05 | 0.999868 | 0.000230468 | 0.999501 |
| rad39         | 5.49305e-05 | 0.999923 | 0.000208426 | 0.999710 |
| rad46         | 2.97185e-05 | 0.999953 | 0.000112762 | 0.999822 |
| rad60syn      | 1.03332e-05 | 0.999963 | 3.92077e-05 | 0.999862 |
| rad50         | 9.93211e-06 | 0.999973 | 3.76859e-05 | 0.999899 |
| rad59         | 7.71556e-06 | 0.999981 | 2.92756e-05 | 0.999928 |
| rad60anti     | 6.13929e-06 | 0.999987 | 2.32946e-05 | 0.999952 |
| rad19syn      | 4.26609e-06 | 0.999991 | 1.61870e-05 | 0.999968 |
| rad67         | 1.57759e-06 | 0.999993 | 5.98594e-06 | 0.999974 |
| rad54         | 1.46998e-06 | 0.999994 | 5.57763e-06 | 0.999980 |
| rad51         | 1.43445e-06 | 0.999996 | 5.44281e-06 | 0.999985 |
| PhcycC3H3_A+H | 1.26043e-06 | 0.999997 | 4.78252e-06 | 0.999990 |
| rad37         | 6.13241e-07 | 0.999997 | 2.32685e-06 | 0.999992 |
| rad52         | 6.09458e-07 | 0.999998 | 2.31250e-06 | 0.999994 |
| PAH10+CH3     | 3.40070e-07 | 0.999998 | 1.29034e-06 | 0.999996 |
| rad58         | 3.07503e-07 | 0.999999 | 1.16677e-06 | 0.999997 |
| rad70         | 2.75599e-07 | 0.999999 | 1.04572e-06 | 0.999998 |
| PAH1+H        | 2.72543e-07 | 0.999999 | 1.03413e-06 | 0.999999 |
| rad55         | 8.21114e-08 | 0.999999 | 3.11559e-07 | 0.999999 |
| rad34         | 4.89123e-08 | 0.999999 | 1.85590e-07 | 0.999999 |
| rad65         | 4.41608e-08 | 0.999999 | 1.67562e-07 | 1.000000 |
| rad62         | 2.07591e-08 | 0.999999 | 7.87674e-08 | 1.000000 |
| rad53         | 8.12265e-09 | 0.999999 | 3.08202e-08 | 1.000000 |
| rad73         | 6.62666e-09 | 0.999999 | 2.51439e-08 | 1.000000 |
| rad71         | 5.83665e-09 | 0.999999 | 2.21463e-08 | 1.000000 |
| rad56         | 5.07502e-09 | 0.999999 | 1.92564e-08 | 1.000000 |
| rad43         | 3.05585e-09 | 0.999999 | 1.15950e-08 | 1.000000 |
| rad64         | 2.94785e-09 | 0.999999 | 1.11852e-08 | 1.000000 |
| PAH8+H        | 1.55760e-09 | 0.999999 | 5.91010e-09 | 1.000000 |
| rad68syn      | 1.15822e-09 | 0.999999 | 4.39468e-09 | 1.000000 |
| rad68anti     | 7.65284e-10 | 0.999999 | 2.90376e-09 | 1.000000 |
| rad42         | 6.99013e-10 | 0.999999 | 2.65230e-09 | 1.000000 |
| rad40syn      | 2.60577e-10 | 0.999999 | 9.88719e-10 | 1.000000 |
| rad6          | 2.14605e-10 | 0.999999 | 8.14286e-10 | 1.000000 |
| rad61         | 1.94739e-10 | 0.999999 | 7.38908e-10 | 1.000000 |
| rad40anti     | 1.33993e-10 | 0.999999 | 5.08417e-10 | 1.000000 |
| rad41         | 7.68995e-11 | 0.999999 | 2.91784e-10 | 1.000000 |
| rad72         | 7.37114e-11 | 0.999999 | 2.79687e-10 | 1.000000 |
| rad23         | 2.50367e-11 | 0.999999 | 9.49982e-11 | 1.000000 |
| rad45         | 9.31318e-12 | 0.999999 | 3.53375e-11 | 1.000000 |
| rad11         | 4.34608e-12 | 0.999999 | 1.64906e-11 | 1.000000 |
| rad7          | 3.98566e-12 | 0.999999 | 1.51230e-11 | 1.000000 |
| rad20         | 1.95003e-12 | 0.999999 | 7.39910e-12 | 1.000000 |
| rad9          | 1.32237e-12 | 0.999999 | 5.01754e-12 | 1.000000 |
| rad21         | 1.13739e-12 | 0.999999 | 4.31567e-12 | 1.000000 |
| rad36         | 8.91415e-13 | 0.999999 | 3.38234e-12 | 1.000000 |
| rad18         | 5.84552e-13 | 0.999999 | 2.21800e-12 | 1.000000 |
| rad13         | 4.53593e-13 | 0.999999 | 1.72109e-12 | 1.000000 |
| rad28         | 3.55433e-13 | 0.999999 | 1.34864e-12 | 1.000000 |
| rad2          | 1.89367e-13 | 0.999999 | 7.18525e-13 | 1.000000 |
| rad10         | 1.49537e-13 | 0.999999 | 5.67395e-13 | 1.000000 |
| rad22         | 9.31155e-14 | 0.999999 | 3.53313e-13 | 1.000000 |
| rad26         | 6.41679e-14 | 0.999999 | 2.43476e-13 | 1.000000 |
| rad1          | 4.36144e-14 | 0.999999 | 1.65488e-13 | 1.000000 |
| rad24         | 1.80067e-14 | 0.999999 | 6.83237e-14 | 1.000000 |
| rad3          | 8.93470e-15 | 0.999999 | 3.39014e-14 | 1.000000 |
| rad33         | 8.80008e-15 | 0.999999 | 3.33906e-14 | 1.000000 |
| rad4          | 6.99314e-15 | 0.999999 | 2.65344e-14 | 1.000000 |
| rad15         | 6.44752e-15 | 0.999999 | 2.44642e-14 | 1.000000 |
| rad12         | 1.93287e-15 | 0.999999 | 7.33400e-15 | 1.000000 |
| rad25         | 1.92136e-15 | 0.999999 | 7.29031e-15 | 1.000000 |
| rad8          | 2.79512e-16 | 0.999999 | 1.06057e-15 | 1.000000 |
| rad14         | 1.42005e-16 | 0.999999 | 5.38817e-16 | 1.000000 |
| rad27         | 5.43839e-17 | 0.999999 | 2.06352e-16 | 1.000000 |
| rad31         | 2.56227e-18 | 0.999999 | 9.72214e-18 | 1.000000 |
| rad47         | 1.04027e-18 | 0.999999 | 3.94715e-18 | 1.000000 |
| rad5          | 1.81471e-19 | 0.999999 | 6.88566e-19 | 1.000000 |

0.100000000E-03 Pa, 1500.00000 K

=====

| Rate constant | True (fraction)     | Effective (fraction) |
|---------------|---------------------|----------------------|
| Total         | 3.76908e-14 (1.00 ) | 8.51560e-15 (1.00 )  |

| species | PYtrue | Cumul | PYeffective | Cumul |
|---------|--------|-------|-------------|-------|
| -----   |        |       |             |       |

|               |             |          |             |          |
|---------------|-------------|----------|-------------|----------|
| Benzyl+C2H2   | 0.774067    | 0.774067 | 0.00000     | 0.00000  |
| Indene+H      | 0.205065    | 0.979132 | 0.907636    | 0.907636 |
| Ph+Allene     | 0.00752036  | 0.986652 | 0.0332858   | 0.940922 |
| PhCH2CCH+H    | 0.00646723  | 0.993120 | 0.0286246   | 0.969546 |
| PhCHCCH2+H    | 0.00361205  | 0.996732 | 0.0159873   | 0.985534 |
| PhCCH+CH3     | 0.00141397  | 0.998146 | 0.00625837  | 0.991792 |
| PAH9+H        | 0.000393094 | 0.998539 | 0.00173987  | 0.993532 |
| PAH7+H        | 0.000286546 | 0.998825 | 0.00126828  | 0.994800 |
| rad30         | 0.000246477 | 0.999072 | 0.00109093  | 0.995891 |
| Ph+MeAc       | 0.000203626 | 0.999275 | 0.000901268 | 0.996792 |
| rad19anti     | 0.000164236 | 0.999440 | 0.000726923 | 0.997519 |
| rad38         | 0.000162728 | 0.999602 | 0.000720251 | 0.998240 |
| PAH3+H        | 0.000104218 | 0.999707 | 0.000461281 | 0.998701 |
| rad35         | 7.62565e-05 | 0.999783 | 0.000337518 | 0.999038 |
| rad39         | 5.58557e-05 | 0.999839 | 0.000247223 | 0.999286 |
| PhCCCH3+H     | 4.89505e-05 | 0.999888 | 0.000216660 | 0.999502 |
| rad46         | 4.15217e-05 | 0.999929 | 0.000183779 | 0.999686 |
| rad50         | 1.70754e-05 | 0.999946 | 7.55771e-05 | 0.999762 |
| rad60syn      | 1.38815e-05 | 0.999960 | 6.14410e-05 | 0.999823 |
| rad59         | 1.15663e-05 | 0.999972 | 5.11935e-05 | 0.999874 |
| rad60anti     | 8.33859e-06 | 0.999980 | 3.69074e-05 | 0.999911 |
| rad19syn      | 5.68956e-06 | 0.999986 | 2.51825e-05 | 0.999936 |
| rad67         | 3.01383e-06 | 0.999989 | 1.33395e-05 | 0.999950 |
| rad51         | 2.86542e-06 | 0.999992 | 1.26826e-05 | 0.999962 |
| rad54         | 2.03370e-06 | 0.999994 | 9.00134e-06 | 0.999971 |
| PhcycC3H3_A+H | 1.94411e-06 | 0.999996 | 8.60479e-06 | 0.999980 |
| rad52         | 1.12959e-06 | 0.999997 | 4.99968e-06 | 0.999985 |
| rad37         | 8.38280e-07 | 0.999997 | 3.71030e-06 | 0.999989 |
| PAH10+CH3     | 6.63376e-07 | 0.999998 | 2.93617e-06 | 0.999992 |
| rad58         | 5.75067e-07 | 0.999999 | 2.54530e-06 | 0.999994 |
| PAH1+H        | 4.44629e-07 | 0.999999 | 1.96797e-06 | 0.999996 |
| rad70         | 4.35873e-07 | 1.000000 | 1.92921e-06 | 0.999998 |
| rad55         | 1.20222e-07 | 1.000000 | 5.32112e-07 | 0.999999 |
| rad65         | 8.70999e-08 | 1.000000 | 3.85512e-07 | 0.999999 |
| rad34         | 8.35876e-08 | 1.000000 | 3.69966e-07 | 0.999999 |
| rad62         | 2.65880e-08 | 1.000000 | 1.17681e-07 | 0.999999 |
| rad73         | 1.91029e-08 | 1.000000 | 8.45514e-08 | 1.000000 |
| rad71         | 1.86182e-08 | 1.000000 | 8.24061e-08 | 1.000000 |
| rad53         | 1.46409e-08 | 1.000000 | 6.48019e-08 | 1.000000 |
| rad56         | 1.02046e-08 | 1.000000 | 4.51664e-08 | 1.000000 |
| rad64         | 5.41559e-09 | 1.000000 | 2.39699e-08 | 1.000000 |
| PAH8+H        | 4.18063e-09 | 1.000000 | 1.85038e-08 | 1.000000 |
| rad43         | 3.92947e-09 | 1.000000 | 1.73922e-08 | 1.000000 |
| rad68syn      | 2.56012e-09 | 1.000000 | 1.13313e-08 | 1.000000 |
| rad68anti     | 1.68587e-09 | 1.000000 | 7.46183e-09 | 1.000000 |
| rad42         | 1.06259e-09 | 1.000000 | 4.70314e-09 | 1.000000 |
| rad40syn      | 6.46765e-10 | 1.000000 | 2.86264e-09 | 1.000000 |
| rad61         | 5.26864e-10 | 1.000000 | 2.33195e-09 | 1.000000 |
| rad40anti     | 3.43892e-10 | 1.000000 | 1.52210e-09 | 1.000000 |
| rad72         | 2.96654e-10 | 1.000000 | 1.31302e-09 | 1.000000 |
| rad6          | 1.74376e-10 | 1.000000 | 7.71805e-10 | 1.000000 |
| rad41         | 1.35344e-10 | 1.000000 | 5.99047e-10 | 1.000000 |
| rad23         | 1.42408e-11 | 1.000000 | 6.30312e-11 | 1.000000 |
| rad45         | 5.25378e-12 | 1.000000 | 2.32537e-11 | 1.000000 |
| rad7          | 2.61118e-12 | 1.000000 | 1.15573e-11 | 1.000000 |
| rad11         | 2.60726e-12 | 1.000000 | 1.15400e-11 | 1.000000 |
| rad20         | 1.23074e-12 | 1.000000 | 5.44737e-12 | 1.000000 |
| rad9          | 1.02380e-12 | 1.000000 | 4.53144e-12 | 1.000000 |
| rad21         | 7.10954e-13 | 1.000000 | 3.14675e-12 | 1.000000 |
| rad36         | 5.09278e-13 | 1.000000 | 2.25411e-12 | 1.000000 |
| rad18         | 4.05526e-13 | 1.000000 | 1.79489e-12 | 1.000000 |
| rad28         | 3.04914e-13 | 1.000000 | 1.34958e-12 | 1.000000 |
| rad13         | 2.40732e-13 | 1.000000 | 1.06550e-12 | 1.000000 |
| rad22         | 2.36917e-13 | 1.000000 | 1.04862e-12 | 1.000000 |
| rad2          | 6.16662e-14 | 1.000000 | 2.72940e-13 | 1.000000 |
| rad10         | 5.89564e-14 | 1.000000 | 2.60946e-13 | 1.000000 |
| rad26         | 3.61874e-14 | 1.000000 | 1.60169e-13 | 1.000000 |
| rad1          | 1.44492e-14 | 1.000000 | 6.39533e-14 | 1.000000 |
| rad24         | 1.34246e-14 | 1.000000 | 5.94185e-14 | 1.000000 |
| rad15         | 1.15591e-14 | 1.000000 | 5.11616e-14 | 1.000000 |
| rad33         | 5.25062e-15 | 1.000000 | 2.32397e-14 | 1.000000 |
| rad3          | 3.75628e-15 | 1.000000 | 1.66257e-14 | 1.000000 |
| rad4          | 2.96427e-15 | 1.000000 | 1.31202e-14 | 1.000000 |
| rad12         | 1.99725e-15 | 1.000000 | 8.84000e-15 | 1.000000 |
| rad25         | 1.32639e-15 | 1.000000 | 5.87073e-15 | 1.000000 |
| rad8          | 3.57803e-16 | 1.000000 | 1.58367e-15 | 1.000000 |
| rad14         | 7.59838e-17 | 1.000000 | 3.36311e-16 | 1.000000 |
| rad27         | 2.30978e-17 | 1.000000 | 1.02233e-16 | 1.000000 |
| rad47         | 2.08549e-18 | 1.000000 | 9.23060e-18 | 1.000000 |
| rad31         | 1.60839e-18 | 1.000000 | 7.11889e-18 | 1.000000 |

rad5 | 3.97111e-19 1.00000 | 1.75765e-18 1.000000

0.100000000E-03 Pa, 1750.00000 K

=====  
Rate constant | True (fraction) | Effective (fraction)  
-----  
Total | 9.18604e-14 (1.00 ) | 1.49145e-14 (1.00 )

| species       | PYtrue      | Cumul    | PYeffective | Cumul    |
|---------------|-------------|----------|-------------|----------|
| Benzyl+C2H2   | 0.837640    | 0.837640 | 0.000000    | 0.000000 |
| Indene+H      | 0.133064    | 0.970704 | 0.819559    | 0.819559 |
| PhCH2CCH+H    | 0.0118056   | 0.982510 | 0.0727127   | 0.892272 |
| Ph+Allene     | 0.00950091  | 0.992011 | 0.0585175   | 0.950789 |
| PhCHCCH2+H    | 0.00446803  | 0.996479 | 0.0275192   | 0.978308 |
| PhCCH+CH3     | 0.000861597 | 0.997340 | 0.00530671  | 0.983615 |
| PAH9+H        | 0.000556652 | 0.997897 | 0.00342850  | 0.987044 |
| rad30         | 0.000325000 | 0.998222 | 0.00200173  | 0.989045 |
| rad19anti     | 0.000321503 | 0.998543 | 0.00198018  | 0.991026 |
| rad38         | 0.000287109 | 0.998830 | 0.00176835  | 0.992794 |
| PAH7+H        | 0.000286344 | 0.999117 | 0.00176363  | 0.994557 |
| PAH3+H        | 0.000275296 | 0.999392 | 0.00169559  | 0.996253 |
| Ph+MeAc       | 0.000167695 | 0.999560 | 0.00103286  | 0.997286 |
| rad35         | 0.000110066 | 0.999670 | 0.000677915 | 0.997964 |
| rad46         | 7.52920e-05 | 0.999745 | 0.000463735 | 0.998428 |
| rad39         | 5.82425e-05 | 0.999803 | 0.000358724 | 0.998786 |
| rad50         | 4.36581e-05 | 0.999847 | 0.000268897 | 0.999055 |
| PhCCCH3+H     | 3.20470e-05 | 0.999879 | 0.000197382 | 0.999253 |
| rad59         | 2.75338e-05 | 0.999907 | 0.000169584 | 0.999422 |
| rad60syn      | 2.64498e-05 | 0.999933 | 0.000162908 | 0.999585 |
| rad60anti     | 1.77452e-05 | 0.999951 | 0.000109295 | 0.999694 |
| rad51         | 1.06304e-05 | 0.999961 | 6.54744e-05 | 0.999760 |
| rad67         | 1.00266e-05 | 0.999971 | 6.17554e-05 | 0.999822 |
| rad19syn      | 8.12817e-06 | 0.999980 | 5.00626e-05 | 0.999872 |
| PhcycC3H3_A+H | 4.32964e-06 | 0.999984 | 2.66669e-05 | 0.999898 |
| rad52         | 3.62585e-06 | 0.999988 | 2.23321e-05 | 0.999921 |
| rad54         | 3.10468e-06 | 0.999991 | 1.91222e-05 | 0.999940 |
| PAH10+CH3     | 2.60306e-06 | 0.999993 | 1.60326e-05 | 0.999956 |
| rad58         | 2.01823e-06 | 0.999995 | 1.24306e-05 | 0.999968 |
| rad37         | 1.70772e-06 | 0.999997 | 1.05181e-05 | 0.999979 |
| PAH1+H        | 1.10635e-06 | 0.999998 | 6.81420e-06 | 0.999986 |
| rad70         | 1.04847e-06 | 0.999999 | 6.45765e-06 | 0.999992 |
| rad65         | 3.08349e-07 | 0.999999 | 1.89916e-06 | 0.999994 |
| rad34         | 2.42002e-07 | 1.000000 | 1.49052e-06 | 0.999995 |
| rad55         | 2.29000e-07 | 1.000000 | 1.41044e-06 | 0.999997 |
| rad71         | 1.90761e-07 | 1.000000 | 1.17492e-06 | 0.999998 |
| rad73         | 1.56382e-07 | 1.000000 | 9.63183e-07 | 0.999999 |
| rad53         | 4.44391e-08 | 1.000000 | 2.73707e-07 | 0.999999 |
| rad62         | 4.00911e-08 | 1.000000 | 2.46927e-07 | 1.000000 |
| rad56         | 3.57943e-08 | 1.000000 | 2.20463e-07 | 1.000000 |
| PAH8+H        | 2.43961e-08 | 1.000000 | 1.50259e-07 | 1.000000 |
| rad64         | 1.92943e-08 | 1.000000 | 1.18837e-07 | 1.000000 |
| rad68syn      | 1.20123e-08 | 1.000000 | 7.39858e-08 | 1.000000 |
| rad43         | 8.60713e-09 | 1.000000 | 5.30126e-08 | 1.000000 |
| rad68anti     | 7.79057e-09 | 1.000000 | 4.79833e-08 | 1.000000 |
| rad72         | 5.36073e-09 | 1.000000 | 3.30175e-08 | 1.000000 |
| rad40syn      | 3.52158e-09 | 1.000000 | 2.16899e-08 | 1.000000 |
| rad61         | 3.50342e-09 | 1.000000 | 2.15781e-08 | 1.000000 |
| rad42         | 2.39318e-09 | 1.000000 | 1.47399e-08 | 1.000000 |
| rad40anti     | 2.09784e-09 | 1.000000 | 1.29209e-08 | 1.000000 |
| rad41         | 5.64326e-10 | 1.000000 | 3.47576e-09 | 1.000000 |
| rad6          | 8.29980e-11 | 1.000000 | 5.11197e-10 | 1.000000 |
| rad23         | 3.92907e-12 | 1.000000 | 2.41997e-11 | 1.000000 |
| rad22         | 5.59845e-13 | 1.000000 | 3.44817e-12 | 1.000000 |
| rad45         | 5.01033e-13 | 1.000000 | 3.08594e-12 | 1.000000 |
| rad7          | 2.70592e-13 | 1.000000 | 1.66662e-12 | 1.000000 |
| rad11         | 2.49483e-13 | 1.000000 | 1.53660e-12 | 1.000000 |
| rad28         | 1.77867e-13 | 1.000000 | 1.09551e-12 | 1.000000 |
| rad9          | 1.34030e-13 | 1.000000 | 8.25510e-13 | 1.000000 |
| rad20         | 1.26283e-13 | 1.000000 | 7.77797e-13 | 1.000000 |
| rad36         | 8.51558e-14 | 1.000000 | 5.24487e-13 | 1.000000 |
| rad21         | 6.65178e-14 | 1.000000 | 4.09693e-13 | 1.000000 |
| rad18         | 5.81037e-14 | 1.000000 | 3.57869e-13 | 1.000000 |
| rad13         | 1.40369e-14 | 1.000000 | 8.64556e-14 | 1.000000 |
| rad15         | 6.73321e-15 | 1.000000 | 4.14708e-14 | 1.000000 |
| rad26         | 4.70055e-15 | 1.000000 | 2.89514e-14 | 1.000000 |
| rad10         | 2.43135e-15 | 1.000000 | 1.49750e-14 | 1.000000 |
| rad24         | 1.70134e-15 | 1.000000 | 1.04788e-14 | 1.000000 |
| rad2          | 1.08849e-15 | 1.000000 | 6.70419e-15 | 1.000000 |
| rad12         | 4.26945e-16 | 1.000000 | 2.62962e-15 | 1.000000 |

|       |             |         |             |         |
|-------|-------------|---------|-------------|---------|
| rad33 | 3.32922e-16 | 1.00000 | 2.05052e-15 | 1.00000 |
| rad1  | 2.72955e-16 | 1.00000 | 1.68117e-15 | 1.00000 |
| rad8  | 1.74118e-16 | 1.00000 | 1.07242e-15 | 1.00000 |
| rad25 | 1.29129e-16 | 1.00000 | 7.95327e-16 | 1.00000 |
| rad3  | 8.46426e-17 | 1.00000 | 5.21326e-16 | 1.00000 |
| rad4  | 5.37290e-17 | 1.00000 | 3.30925e-16 | 1.00000 |
| rad14 | 5.21570e-18 | 1.00000 | 3.21243e-17 | 1.00000 |
| rad47 | 2.44664e-18 | 1.00000 | 1.50692e-17 | 1.00000 |
| rad5  | 1.28474e-18 | 1.00000 | 7.91288e-18 | 1.00000 |
| rad27 | 9.07196e-19 | 1.00000 | 5.58755e-18 | 1.00000 |

0.100000000E-03 Pa, 2000.00000 K

=====

| Rate constant | True (fraction)     | Effective (fraction) |
|---------------|---------------------|----------------------|
| Total         | 1.85359e-13 (1.00 ) | 2.47588e-14 (1.00 )  |

| species       | PYtrue      | Cumul    | PYeffective | Cumul    |
|---------------|-------------|----------|-------------|----------|
| Benzyl+C2H2   | 0.866428    | 0.866428 | 0.00000     | 0.00000  |
| Indene+H      | 0.0943885   | 0.960816 | 0.706650    | 0.706650 |
| PhCH2CCH+H    | 0.0189358   | 0.979752 | 0.141765    | 0.848415 |
| Ph+Allene     | 0.0101088   | 0.989861 | 0.0756807   | 0.924096 |
| PhCHCCH2+H    | 0.00579099  | 0.995652 | 0.0433549   | 0.967451 |
| PAH9+H        | 0.000765251 | 0.996417 | 0.00572913  | 0.973180 |
| PhCCH+CH3     | 0.000550354 | 0.996968 | 0.00412028  | 0.977300 |
| PAH3+H        | 0.000526246 | 0.997494 | 0.00393980  | 0.981240 |
| rad19anti     | 0.000486607 | 0.997981 | 0.00364303  | 0.984883 |
| rad38         | 0.000411538 | 0.998392 | 0.00308103  | 0.987964 |
| rad30         | 0.000378289 | 0.998770 | 0.00283210  | 0.990796 |
| PAH7+H        | 0.000350388 | 0.999121 | 0.00262322  | 0.993419 |
| Ph+MeAc       | 0.000164748 | 0.999286 | 0.00123340  | 0.994653 |
| rad35         | 0.000155515 | 0.999441 | 0.00116428  | 0.995817 |
| rad46         | 0.000120109 | 0.999561 | 0.000899212 | 0.996716 |
| rad50         | 9.58270e-05 | 0.999657 | 0.000717420 | 0.997434 |
| rad39         | 7.87039e-05 | 0.999736 | 0.000589225 | 0.998023 |
| rad59         | 4.92026e-05 | 0.999785 | 0.000368361 | 0.998391 |
| rad60syn      | 4.01110e-05 | 0.999825 | 0.000300295 | 0.998691 |
| PhCCCH3+H     | 3.61306e-05 | 0.999861 | 0.000270495 | 0.998962 |
| rad51         | 2.92772e-05 | 0.999890 | 0.000219187 | 0.999181 |
| rad60anti     | 2.75040e-05 | 0.999918 | 0.000205912 | 0.999387 |
| rad67         | 2.43946e-05 | 0.999942 | 0.000182633 | 0.999570 |
| rad19syn      | 1.17085e-05 | 0.999954 | 8.76566e-05 | 0.999657 |
| rad52         | 8.84586e-06 | 0.999963 | 6.62255e-05 | 0.999723 |
| PAH10+CH3     | 7.72771e-06 | 0.999971 | 5.78543e-05 | 0.999781 |
| PhcycC3H3_A+H | 7.44556e-06 | 0.999978 | 5.57420e-05 | 0.999837 |
| rad58         | 5.03691e-06 | 0.999983 | 3.77093e-05 | 0.999875 |
| rad54         | 4.34710e-06 | 0.999987 | 3.25450e-05 | 0.999907 |
| rad37         | 3.43690e-06 | 0.999991 | 2.57307e-05 | 0.999933 |
| PAH1+H        | 2.74924e-06 | 0.999994 | 2.05825e-05 | 0.999954 |
| rad70         | 2.09354e-06 | 0.999996 | 1.56735e-05 | 0.999969 |
| rad71         | 1.06961e-06 | 0.999997 | 8.00779e-06 | 0.999977 |
| rad65         | 8.19688e-07 | 0.999998 | 6.13669e-06 | 0.999983 |
| rad73         | 7.43911e-07 | 0.999998 | 5.56937e-06 | 0.999989 |
| rad34         | 5.52321e-07 | 0.999999 | 4.13501e-06 | 0.999993 |
| rad55         | 3.53324e-07 | 0.999999 | 2.64520e-06 | 0.999996 |
| PAH8+H        | 1.14510e-07 | 0.999999 | 8.57294e-07 | 0.999997 |
| rad53         | 9.72439e-08 | 0.999999 | 7.28027e-07 | 0.999997 |
| rad56         | 9.21216e-08 | 1.000000 | 6.89678e-07 | 0.999998 |
| rad62         | 6.00485e-08 | 1.000000 | 4.49560e-07 | 0.999999 |
| rad64         | 5.57952e-08 | 1.000000 | 4.17717e-07 | 0.999999 |
| rad72         | 4.29770e-08 | 1.000000 | 3.21752e-07 | 0.999999 |
| rad68syn      | 4.11172e-08 | 1.000000 | 3.07828e-07 | 1.000000 |
| rad68anti     | 2.65281e-08 | 1.000000 | 1.98605e-07 | 1.000000 |
| rad43         | 2.20258e-08 | 1.000000 | 1.64898e-07 | 1.000000 |
| rad61         | 1.54174e-08 | 1.000000 | 1.15424e-07 | 1.000000 |
| rad40syn      | 1.44056e-08 | 1.000000 | 1.07849e-07 | 1.000000 |
| rad40anti     | 9.08224e-09 | 1.000000 | 6.79952e-08 | 1.000000 |
| rad42         | 4.93493e-09 | 1.000000 | 3.69459e-08 | 1.000000 |
| rad41         | 1.99345e-09 | 1.000000 | 1.49241e-08 | 1.000000 |
| rad6          | 1.00444e-11 | 1.000000 | 7.51986e-11 | 1.000000 |
| rad23         | 1.86169e-12 | 1.000000 | 1.39377e-11 | 1.000000 |
| rad45         | 1.66573e-13 | 1.000000 | 1.24707e-12 | 1.000000 |
| rad22         | 1.53033e-13 | 1.000000 | 1.14570e-12 | 1.000000 |
| rad9          | 6.81594e-14 | 1.000000 | 5.10282e-13 | 1.000000 |
| rad11         | 5.37316e-14 | 1.000000 | 4.02267e-13 | 1.000000 |
| rad20         | 5.29552e-14 | 1.000000 | 3.96455e-13 | 1.000000 |
| rad7          | 4.21724e-14 | 1.000000 | 3.15729e-13 | 1.000000 |
| rad28         | 3.32366e-14 | 1.000000 | 2.48829e-13 | 1.000000 |
| rad36         | 2.91201e-14 | 1.000000 | 2.18011e-13 | 1.000000 |

|       |             |          |             |         |
|-------|-------------|----------|-------------|---------|
| rad21 | 2.72287e-14 | 1.000000 | 2.03851e-13 | 1.00000 |
| rad18 | 1.62503e-14 | 1.000000 | 1.21660e-13 | 1.00000 |
| rad15 | 3.62850e-15 | 1.000000 | 2.71652e-14 | 1.00000 |
| rad13 | 3.15047e-15 | 1.000000 | 2.35863e-14 | 1.00000 |
| rad24 | 9.49359e-16 | 1.000000 | 7.10748e-15 | 1.00000 |
| rad26 | 6.50769e-16 | 1.000000 | 4.87205e-15 | 1.00000 |
| rad12 | 3.72964e-16 | 1.000000 | 2.79223e-15 | 1.00000 |
| rad10 | 2.42603e-16 | 1.000000 | 1.81627e-15 | 1.00000 |
| rad8  | 2.00223e-16 | 1.000000 | 1.49899e-15 | 1.00000 |
| rad33 | 1.02785e-16 | 1.000000 | 7.69509e-16 | 1.00000 |
| rad2  | 1.00844e-16 | 1.000000 | 7.54976e-16 | 1.00000 |
| rad25 | 5.51560e-17 | 1.000000 | 4.12931e-16 | 1.00000 |
| rad1  | 2.67202e-17 | 1.000000 | 2.00043e-16 | 1.00000 |
| rad3  | 1.46402e-17 | 1.000000 | 1.09605e-16 | 1.00000 |
| rad4  | 9.35625e-18 | 1.000000 | 7.00466e-17 | 1.00000 |
| rad47 | 6.72667e-18 | 1.000000 | 5.03600e-17 | 1.00000 |
| rad5  | 1.88503e-18 | 1.000000 | 1.41125e-17 | 1.00000 |
| rad14 | 1.43913e-18 | 1.000000 | 1.07742e-17 | 1.00000 |
| rad27 | 2.36925e-19 | 1.000000 | 1.77376e-18 | 1.00000 |

0.1000000000E-03 Pa, 2250.00000 K

| Rate constant | True (fraction)     | Effective (fraction) |
|---------------|---------------------|----------------------|
| Total         | 3.29136e-13 (1.00 ) | 4.00875e-14 (1.00 )  |

| species       | PYtrue      | Cumul    | PYeffective | Cumul    |
|---------------|-------------|----------|-------------|----------|
| Benzyl+C2H2   | 0.878204    | 0.878204 | 0.00000     | 0.00000  |
| Indene+H      | 0.0703003   | 0.948504 | 0.577195    | 0.577195 |
| PhCH2CCH+H    | 0.0277459   | 0.976250 | 0.227806    | 0.805001 |
| Ph+Allene     | 0.0105974   | 0.986848 | 0.0870088   | 0.892010 |
| PhCHCCH2+H    | 0.00765656  | 0.994504 | 0.0628636   | 0.954873 |
| PAH9+H        | 0.000941856 | 0.995446 | 0.00773304  | 0.962606 |
| PAH3+H        | 0.000857236 | 0.996303 | 0.00703827  | 0.969645 |
| rad19anti     | 0.000629228 | 0.996932 | 0.00516623  | 0.974811 |
| rad38         | 0.000525523 | 0.997458 | 0.00431476  | 0.979126 |
| PAH7+H        | 0.000454502 | 0.997913 | 0.00373165  | 0.982857 |
| rad30         | 0.000417263 | 0.998330 | 0.00342591  | 0.986283 |
| PhCCH+CH3     | 0.000383697 | 0.998713 | 0.00315031  | 0.989434 |
| rad35         | 0.000200865 | 0.998914 | 0.00164918  | 0.991083 |
| Ph+MeAc       | 0.000197882 | 0.999112 | 0.00162470  | 0.992707 |
| rad50         | 0.000170940 | 0.999283 | 0.00140349  | 0.994111 |
| rad46         | 0.000166540 | 0.999450 | 0.00136737  | 0.995478 |
| rad39         | 0.000118806 | 0.999568 | 0.000975445 | 0.996454 |
| rad59         | 7.57691e-05 | 0.999644 | 0.000622096 | 0.997076 |
| rad51         | 6.22686e-05 | 0.999707 | 0.000511251 | 0.997587 |
| rad60syn      | 5.44510e-05 | 0.999761 | 0.000447066 | 0.998034 |
| PhCCCH3+H     | 5.15901e-05 | 0.999813 | 0.000423577 | 0.998458 |
| rad67         | 4.61782e-05 | 0.999859 | 0.000379142 | 0.998837 |
| rad60anti     | 3.79865e-05 | 0.999897 | 0.000311885 | 0.999149 |
| PAH10+CH3     | 1.71933e-05 | 0.999914 | 0.000141164 | 0.999290 |
| rad52         | 1.70844e-05 | 0.999931 | 0.000140270 | 0.999430 |
| rad19syn      | 1.63932e-05 | 0.999947 | 0.000134595 | 0.999565 |
| PhcycC3H3_A+H | 1.10275e-05 | 0.999958 | 9.05407e-05 | 0.999655 |
| rad58         | 1.00660e-05 | 0.999969 | 8.26458e-05 | 0.999738 |
| PAH1+H        | 5.96728e-06 | 0.999974 | 4.89939e-05 | 0.999787 |
| rad37         | 5.72356e-06 | 0.999980 | 4.69928e-05 | 0.999834 |
| rad54         | 5.39698e-06 | 0.999986 | 4.43115e-05 | 0.999878 |
| rad71         | 3.95691e-06 | 0.999990 | 3.24879e-05 | 0.999911 |
| rad70         | 3.69403e-06 | 0.999993 | 3.03296e-05 | 0.999941 |
| rad73         | 2.41459e-06 | 0.999996 | 1.98248e-05 | 0.999961 |
| rad65         | 1.68525e-06 | 0.999997 | 1.38367e-05 | 0.999975 |
| rad34         | 1.08371e-06 | 0.999998 | 8.89771e-06 | 0.999984 |
| rad55         | 4.74067e-07 | 0.999999 | 3.89229e-06 | 0.999988 |
| PAH8+H        | 3.91946e-07 | 0.999999 | 3.21804e-06 | 0.999991 |
| rad72         | 2.09318e-07 | 1.000000 | 1.71859e-06 | 0.999992 |
| rad56         | 1.86168e-07 | 1.000000 | 1.52852e-06 | 0.999994 |
| rad53         | 1.73183e-07 | 1.000000 | 1.42191e-06 | 0.999995 |
| rad64         | 1.33616e-07 | 1.000000 | 1.09704e-06 | 0.999997 |
| rad68syn      | 1.10265e-07 | 1.000000 | 9.05322e-07 | 0.999997 |
| rad62         | 9.48259e-08 | 1.000000 | 7.78561e-07 | 0.999998 |
| rad68anti     | 7.08807e-08 | 1.000000 | 5.81961e-07 | 0.999999 |
| rad43         | 4.82400e-08 | 1.000000 | 3.96071e-07 | 0.999999 |
| rad61         | 4.62524e-08 | 1.000000 | 3.79752e-07 | 1.000000 |
| rad40syn      | 4.43238e-08 | 1.000000 | 3.63917e-07 | 1.000000 |
| rad40anti     | 2.91751e-08 | 1.000000 | 2.39540e-07 | 1.000000 |
| rad42         | 1.00367e-08 | 1.000000 | 8.24055e-08 | 1.000000 |
| rad41         | 5.35211e-09 | 1.000000 | 4.39431e-08 | 1.000000 |
| rad6          | 1.25977e-12 | 1.000000 | 1.03432e-11 | 1.000000 |

|       |             |         |             |         |
|-------|-------------|---------|-------------|---------|
| rad23 | 4.96464e-13 | 1.00000 | 4.07618e-12 | 1.00000 |
| rad45 | 6.43767e-14 | 1.00000 | 5.28560e-13 | 1.00000 |
| rad22 | 3.96693e-14 | 1.00000 | 3.25702e-13 | 1.00000 |
| rad9  | 3.53900e-14 | 1.00000 | 2.90567e-13 | 1.00000 |
| rad20 | 2.60557e-14 | 1.00000 | 2.13928e-13 | 1.00000 |
| rad11 | 1.62863e-14 | 1.00000 | 1.33717e-13 | 1.00000 |
| rad21 | 1.30011e-14 | 1.00000 | 1.06745e-13 | 1.00000 |
| rad36 | 1.15215e-14 | 1.00000 | 9.45963e-14 | 1.00000 |
| rad7  | 9.44364e-15 | 1.00000 | 7.75363e-14 | 1.00000 |
| rad18 | 6.17424e-15 | 1.00000 | 5.06931e-14 | 1.00000 |
| rad28 | 5.10049e-15 | 1.00000 | 4.18772e-14 | 1.00000 |
| rad15 | 2.11042e-15 | 1.00000 | 1.73275e-14 | 1.00000 |
| rad13 | 8.56555e-16 | 1.00000 | 7.03268e-15 | 1.00000 |
| rad24 | 5.70002e-16 | 1.00000 | 4.67996e-15 | 1.00000 |
| rad12 | 3.05352e-16 | 1.00000 | 2.50707e-15 | 1.00000 |
| rad26 | 2.25572e-16 | 1.00000 | 1.85204e-15 | 1.00000 |
| rad8  | 2.16858e-16 | 1.00000 | 1.78050e-15 | 1.00000 |
| rad10 | 7.22468e-17 | 1.00000 | 5.93177e-16 | 1.00000 |
| rad33 | 3.63728e-17 | 1.00000 | 2.98636e-16 | 1.00000 |
| rad25 | 2.84538e-17 | 1.00000 | 2.33618e-16 | 1.00000 |
| rad2  | 1.51446e-17 | 1.00000 | 1.24344e-16 | 1.00000 |
| rad47 | 1.41374e-17 | 1.00000 | 1.16074e-16 | 1.00000 |
| rad1  | 4.41397e-18 | 1.00000 | 3.62406e-17 | 1.00000 |
| rad3  | 3.18842e-18 | 1.00000 | 2.61783e-17 | 1.00000 |
| rad5  | 2.09445e-18 | 1.00000 | 1.71963e-17 | 1.00000 |
| rad4  | 2.03082e-18 | 1.00000 | 1.66739e-17 | 1.00000 |
| rad14 | 5.33285e-19 | 1.00000 | 4.37850e-18 | 1.00000 |
| rad27 | 1.32554e-19 | 1.00000 | 1.08833e-18 | 1.00000 |

0.100000000E-03 Pa, 2500.00000 K

=====

| Rate constant | True (fraction)     | Effective (fraction) |
|---------------|---------------------|----------------------|
| Total         | 5.32896e-13 (1.00 ) | 6.40311e-14 (1.00 )  |

| species       | PYtrue      | Cumul    | PYeffective | Cumul    |
|---------------|-------------|----------|-------------|----------|
| Benzyl+C2H2   | 0.879843    | 0.879843 | 0.00000     | 0.00000  |
| Indene+H      | 0.0541638   | 0.934007 | 0.450777    | 0.450777 |
| PhCH2CCH+H    | 0.0379681   | 0.971975 | 0.315989    | 0.766766 |
| Ph+Allene     | 0.0112444   | 0.983219 | 0.0935810   | 0.860347 |
| PhCHCCH2+H    | 0.00999485  | 0.993214 | 0.0831818   | 0.943529 |
| PAH3+H        | 0.00124356  | 0.994458 | 0.0103495   | 0.953878 |
| PAH9+H        | 0.00106545  | 0.995523 | 0.00886715  | 0.962745 |
| rad19anti     | 0.000731028 | 0.996254 | 0.00608396  | 0.968829 |
| rad38         | 0.000614393 | 0.996869 | 0.00511327  | 0.973943 |
| PAH7+H        | 0.000586817 | 0.997455 | 0.00488376  | 0.978826 |
| rad30         | 0.000442203 | 0.997898 | 0.00368022  | 0.982507 |
| PhCCH+CH3     | 0.000309130 | 0.998207 | 0.00257273  | 0.985079 |
| rad50         | 0.000261677 | 0.998468 | 0.00217780  | 0.987257 |
| Ph+MeAc       | 0.000256973 | 0.998725 | 0.00213865  | 0.989396 |
| rad35         | 0.000242192 | 0.998968 | 0.00201564  | 0.991411 |
| rad46         | 0.000207878 | 0.999175 | 0.00173006  | 0.993142 |
| rad39         | 0.000175772 | 0.999351 | 0.00146285  | 0.994604 |
| rad51         | 0.000109649 | 0.999461 | 0.000912547 | 0.995517 |
| rad59         | 0.000104825 | 0.999566 | 0.000872406 | 0.996389 |
| rad67         | 7.34547e-05 | 0.999639 | 0.000611325 | 0.997001 |
| PhCCCH3+H     | 7.22810e-05 | 0.999711 | 0.000601557 | 0.997602 |
| rad60syn      | 6.81857e-05 | 0.999780 | 0.000567474 | 0.998170 |
| rad60anti     | 4.82378e-05 | 0.999828 | 0.000401457 | 0.998571 |
| PAH10+CH3     | 3.08998e-05 | 0.999859 | 0.000257163 | 0.998828 |
| rad52         | 2.78077e-05 | 0.999887 | 0.000231429 | 0.999060 |
| rad19syn      | 2.34810e-05 | 0.999910 | 0.000195420 | 0.999255 |
| rad58         | 1.71635e-05 | 0.999927 | 0.000142842 | 0.999398 |
| PhcycC3H3_A+H | 1.49440e-05 | 0.999942 | 0.000124371 | 0.999522 |
| PAH1+H        | 1.13017e-05 | 0.999953 | 9.40581e-05 | 0.999616 |
| rad71         | 1.08628e-05 | 0.999964 | 9.04053e-05 | 0.999707 |
| rad37         | 8.12868e-06 | 0.999972 | 6.76507e-05 | 0.999774 |
| rad54         | 6.28002e-06 | 0.999979 | 5.22652e-05 | 0.999827 |
| rad70         | 5.97099e-06 | 0.999985 | 4.96933e-05 | 0.999876 |
| rad73         | 5.95726e-06 | 0.999991 | 4.95791e-05 | 0.999926 |
| rad65         | 2.87595e-06 | 0.999994 | 2.39350e-05 | 0.999950 |
| rad34         | 1.90624e-06 | 0.999995 | 1.58647e-05 | 0.999966 |
| PAH8+H        | 1.06524e-06 | 0.999997 | 8.86540e-06 | 0.999975 |
| rad72         | 7.14903e-07 | 0.999997 | 5.94976e-06 | 0.999981 |
| rad55         | 5.87553e-07 | 0.999998 | 4.88989e-06 | 0.999986 |
| rad56         | 3.21872e-07 | 0.999998 | 2.67877e-06 | 0.999988 |
| rad64         | 2.70855e-07 | 0.999998 | 2.25419e-06 | 0.999990 |
| rad53         | 2.70820e-07 | 0.999999 | 2.25389e-06 | 0.999993 |
| rad68syn      | 2.47504e-07 | 0.999999 | 2.05985e-06 | 0.999995 |



|           |             |          |             |          |
|-----------|-------------|----------|-------------|----------|
| rad68anti | 1.58683e-07 | 0.999999 | 1.32064e-06 | 0.999996 |
| rad62     | 1.55148e-07 | 0.999999 | 1.29122e-06 | 0.999997 |
| rad40syn  | 1.10734e-07 | 0.999999 | 9.21579e-07 | 0.999998 |
| rad61     | 1.05680e-07 | 0.999999 | 8.79519e-07 | 0.999999 |
| rad43     | 8.79692e-08 | 1.000000 | 7.32121e-07 | 1.000000 |
| rad40anti | 7.53435e-08 | 1.000000 | 6.27044e-07 | 1.000000 |
| rad42     | 1.97239e-08 | 1.000000 | 1.64152e-07 | 1.000000 |
| rad41     | 1.13877e-08 | 1.000000 | 9.47734e-08 | 1.000000 |
| rad6      | 2.27791e-13 | 1.000000 | 1.89578e-12 | 1.000000 |
| rad23     | 1.51450e-13 | 1.000000 | 1.26044e-12 | 1.000000 |
| rad45     | 2.79935e-14 | 1.000000 | 2.32975e-13 | 1.000000 |
| rad9      | 1.88160e-14 | 1.000000 | 1.56596e-13 | 1.000000 |
| rad20     | 1.43940e-14 | 1.000000 | 1.19794e-13 | 1.000000 |
| rad22     | 1.35313e-14 | 1.000000 | 1.12614e-13 | 1.000000 |
| rad21     | 6.94971e-15 | 1.000000 | 5.78387e-14 | 1.000000 |
| rad11     | 6.25805e-15 | 1.000000 | 5.20824e-14 | 1.000000 |
| rad36     | 5.10784e-15 | 1.000000 | 4.25099e-14 | 1.000000 |
| rad18     | 2.77736e-15 | 1.000000 | 2.31145e-14 | 1.000000 |
| rad7      | 2.64673e-15 | 1.000000 | 2.20273e-14 | 1.000000 |
| rad15     | 1.25452e-15 | 1.000000 | 1.04407e-14 | 1.000000 |
| rad28     | 1.21156e-15 | 1.000000 | 1.00832e-14 | 1.000000 |
| rad24     | 3.60418e-16 | 1.000000 | 2.99957e-15 | 1.000000 |
| rad13     | 2.74551e-16 | 1.000000 | 2.28494e-15 | 1.000000 |
| rad12     | 2.40046e-16 | 1.000000 | 1.99778e-15 | 1.000000 |
| rad8      | 2.25267e-16 | 1.000000 | 1.87478e-15 | 1.000000 |
| rad26     | 1.25167e-16 | 1.000000 | 1.04170e-15 | 1.000000 |
| rad10     | 4.03591e-17 | 1.000000 | 3.35887e-16 | 1.000000 |
| rad47     | 2.44566e-17 | 1.000000 | 2.03539e-16 | 1.000000 |
| rad25     | 1.71221e-17 | 1.000000 | 1.42498e-16 | 1.000000 |
| rad33     | 1.46761e-17 | 1.000000 | 1.22141e-16 | 1.000000 |
| rad2      | 4.62692e-18 | 1.000000 | 3.85074e-17 | 1.000000 |
| rad5      | 2.17067e-18 | 1.000000 | 1.80653e-17 | 1.000000 |
| rad1      | 1.56073e-18 | 1.000000 | 1.29891e-17 | 1.000000 |
| rad3      | 8.71228e-19 | 1.000000 | 7.25076e-18 | 1.000000 |
| rad4      | 5.46680e-19 | 1.000000 | 4.54973e-18 | 1.000000 |
| rad14     | 2.68051e-19 | 1.000000 | 2.23085e-18 | 1.000000 |
| rad27     | 1.07390e-19 | 1.000000 | 8.93746e-19 | 1.000000 |

0.100000000E-03 Pa, 2750.00000 K

| Rate constant | True (fraction)     | Effective (fraction) |
|---------------|---------------------|----------------------|
| Total         | 8.05113e-13 (1.00 ) | 1.00487e-13 (1.00 )  |

| species       | PYtrue      | Cumul    | PYeffective | Cumul    |
|---------------|-------------|----------|-------------|----------|
| Benzyl+C2H2   | 0.875189    | 0.875189 | 0.00000     | 0.00000  |
| PhCH2CCH+H    | 0.0492371   | 0.924426 | 0.394492    | 0.394492 |
| Indene+H      | 0.0427171   | 0.967143 | 0.342254    | 0.736746 |
| PhCHCCH2+H    | 0.0126523   | 0.979795 | 0.101371    | 0.838117 |
| Ph+Allene     | 0.0121360   | 0.991931 | 0.0972347   | 0.935352 |
| PAH3+H        | 0.00165412  | 0.993586 | 0.0132530   | 0.948605 |
| PAH9+H        | 0.00112924  | 0.994715 | 0.00904761  | 0.957652 |
| rad19anti     | 0.000790044 | 0.995505 | 0.00632991  | 0.963982 |
| PAH7+H        | 0.000729333 | 0.996234 | 0.00584349  | 0.969826 |
| rad38         | 0.000670521 | 0.996905 | 0.00537228  | 0.975198 |
| rad30         | 0.000454283 | 0.997359 | 0.00363976  | 0.978838 |
| rad50         | 0.000356822 | 0.997716 | 0.00285889  | 0.981697 |
| Ph+MeAc       | 0.000331297 | 0.998047 | 0.00265438  | 0.984351 |
| PhCCH+CH3     | 0.000293338 | 0.998340 | 0.00235025  | 0.986701 |
| rad35         | 0.000276886 | 0.998617 | 0.00221844  | 0.988920 |
| rad39         | 0.000242689 | 0.998860 | 0.00194445  | 0.990864 |
| rad46         | 0.000239377 | 0.999099 | 0.00191791  | 0.992782 |
| rad51         | 0.000167552 | 0.999267 | 0.00134245  | 0.994125 |
| rad59         | 0.000133898 | 0.999401 | 0.00107280  | 0.995197 |
| rad67         | 0.000103303 | 0.999504 | 0.000827674 | 0.996025 |
| PhCCCH3+H     | 9.47597e-05 | 0.999599 | 0.000759224 | 0.996784 |
| rad60syn      | 8.03400e-05 | 0.999679 | 0.000643692 | 0.997428 |
| rad60anti     | 5.74980e-05 | 0.999737 | 0.000460680 | 0.997889 |
| PAH10+CH3     | 4.75540e-05 | 0.999784 | 0.000381007 | 0.998270 |
| rad52         | 3.97965e-05 | 0.999824 | 0.000318854 | 0.998588 |
| rad19syn      | 3.43481e-05 | 0.999858 | 0.000275200 | 0.998864 |
| rad58         | 2.60271e-05 | 0.999885 | 0.000208532 | 0.999072 |
| rad71         | 2.39120e-05 | 0.999908 | 0.000191585 | 0.999264 |
| PhcycC3H3_A+H | 1.91124e-05 | 0.999928 | 0.000153131 | 0.999417 |
| PAH1+H        | 1.89313e-05 | 0.999946 | 0.000151679 | 0.999569 |
| rad73         | 1.19963e-05 | 0.999958 | 9.61159e-05 | 0.999665 |
| rad37         | 1.02458e-05 | 0.999969 | 8.20902e-05 | 0.999747 |
| rad70         | 8.97456e-06 | 0.999978 | 7.19051e-05 | 0.999819 |
| rad54         | 7.04852e-06 | 0.999985 | 5.64734e-05 | 0.999875 |

|           |             |          |             |          |
|-----------|-------------|----------|-------------|----------|
| rad65     | 4.27356e-06 | 0.999989 | 3.42402e-05 | 0.999909 |
| rad34     | 3.06724e-06 | 0.999992 | 2.45750e-05 | 0.999934 |
| PAH8+H    | 2.42508e-06 | 0.999995 | 1.94299e-05 | 0.999953 |
| rad72     | 1.88022e-06 | 0.999996 | 1.50645e-05 | 0.999968 |
| rad55     | 6.94535e-07 | 0.999997 | 5.56468e-06 | 0.999974 |
| rad56     | 5.00306e-07 | 0.999998 | 4.00850e-06 | 0.999978 |
| rad68syn  | 4.83458e-07 | 0.999998 | 3.87351e-06 | 0.999982 |
| rad64     | 4.76899e-07 | 0.999999 | 3.82096e-06 | 0.999986 |
| rad53     | 3.88200e-07 | 0.999999 | 3.11030e-06 | 0.999989 |
| rad68anti | 3.09361e-07 | 0.999999 | 2.47863e-06 | 0.999991 |
| rad62     | 2.47711e-07 | 0.999999 | 1.98468e-06 | 0.999993 |
| rad40syn  | 2.35491e-07 | 1.000000 | 1.88678e-06 | 0.999995 |
| rad61     | 1.98411e-07 | 1.000000 | 1.58969e-06 | 0.999997 |
| rad40anti | 1.64464e-07 | 1.000000 | 1.31770e-06 | 0.999998 |
| rad43     | 1.38326e-07 | 1.000000 | 1.10828e-06 | 0.999999 |
| rad42     | 3.59374e-08 | 1.000000 | 2.87934e-07 | 1.000000 |
| rad41     | 2.03340e-08 | 1.000000 | 1.62918e-07 | 1.000000 |
| rad23     | 5.57362e-14 | 1.000000 | 4.46564e-13 | 1.000000 |
| rad6      | 5.36871e-14 | 1.000000 | 4.30146e-13 | 1.000000 |
| rad45     | 1.33250e-14 | 1.000000 | 1.06761e-13 | 1.000000 |
| rad9      | 1.02870e-14 | 1.000000 | 8.24204e-14 | 1.000000 |
| rad20     | 8.68783e-15 | 1.000000 | 6.96078e-14 | 1.000000 |
| rad22     | 5.54310e-15 | 1.000000 | 4.44119e-14 | 1.000000 |
| rad21     | 4.05053e-15 | 1.000000 | 3.24532e-14 | 1.000000 |
| rad11     | 2.91953e-15 | 1.000000 | 2.33916e-14 | 1.000000 |
| rad36     | 2.47005e-15 | 1.000000 | 1.97903e-14 | 1.000000 |
| rad18     | 1.40097e-15 | 1.000000 | 1.12247e-14 | 1.000000 |
| rad7      | 8.87434e-16 | 1.000000 | 7.11021e-15 | 1.000000 |
| rad15     | 7.56595e-16 | 1.000000 | 6.06191e-15 | 1.000000 |
| rad28     | 4.37046e-16 | 1.000000 | 3.50165e-15 | 1.000000 |
| rad24     | 2.36701e-16 | 1.000000 | 1.89647e-15 | 1.000000 |
| rad8      | 2.27048e-16 | 1.000000 | 1.81913e-15 | 1.000000 |
| rad12     | 1.84640e-16 | 1.000000 | 1.47935e-15 | 1.000000 |
| rad13     | 1.02992e-16 | 1.000000 | 8.25185e-16 | 1.000000 |
| rad26     | 7.75713e-17 | 1.000000 | 6.21508e-16 | 1.000000 |
| rad47     | 3.65965e-17 | 1.000000 | 2.93215e-16 | 1.000000 |
| rad10     | 2.66337e-17 | 1.000000 | 2.13392e-16 | 1.000000 |
| rad25     | 1.16293e-17 | 1.000000 | 9.31748e-17 | 1.000000 |
| rad33     | 6.71473e-18 | 1.000000 | 5.37991e-17 | 1.000000 |
| rad2      | 2.34833e-18 | 1.000000 | 1.88151e-17 | 1.000000 |
| rad5      | 2.16056e-18 | 1.000000 | 1.73106e-17 | 1.000000 |
| rad1      | 9.11960e-19 | 1.000000 | 7.30672e-18 | 1.000000 |
| rad3      | 2.95667e-19 | 1.000000 | 2.36891e-18 | 1.000000 |
| rad4      | 1.80944e-19 | 1.000000 | 1.44974e-18 | 1.000000 |
| rad14     | 1.77542e-19 | 1.000000 | 1.42248e-18 | 1.000000 |
| rad27     | 9.32033e-20 | 1.000000 | 7.46754e-19 | 1.000000 |

0.100000000E-03 Pa, 3000.00000 K

| =====         |                 |          |                      |          |
|---------------|-----------------|----------|----------------------|----------|
| Rate constant | True (fraction) |          | Effective (fraction) |          |
| -----         |                 |          |                      |          |
| Total         | 1.15309e-12     | (1.00 )  | 1.53862e-13          | (1.00 )  |
| -----         |                 |          |                      |          |
| species       | PYtrue          | Cumul    | PYeffective          | Cumul    |
| -----         |                 |          |                      |          |
| Benzyl+C2H2   | 0.866566        | 0.866566 | 0.00000              | 0.00000  |
| PhCH2CCH+H    | 0.0611725       | 0.927738 | 0.458447             | 0.458447 |
| Indene+H      | 0.0342672       | 0.962006 | 0.256810             | 0.715257 |
| PhCHCCH2+H    | 0.0154790       | 0.977485 | 0.116005             | 0.831262 |
| Ph+Allene     | 0.0132660       | 0.990751 | 0.0994201            | 0.930682 |
| PAH3+H        | 0.00205938      | 0.992810 | 0.0154337            | 0.946116 |
| PAH9+H        | 0.00113813      | 0.993948 | 0.00852950           | 0.954645 |
| PAH7+H        | 0.000866135     | 0.994814 | 0.00649110           | 0.961136 |
| rad19anti     | 0.000812999     | 0.995627 | 0.00609288           | 0.967229 |
| rad38         | 0.000693215     | 0.996321 | 0.00519518           | 0.972424 |
| rad30         | 0.000455427     | 0.996776 | 0.00341312           | 0.975838 |
| rad50         | 0.000445147     | 0.997221 | 0.00333608           | 0.979174 |
| Ph+MeAc       | 0.000411378     | 0.997633 | 0.00308300           | 0.982257 |
| PhCCH+CH3     | 0.000319072     | 0.997952 | 0.00239123           | 0.984648 |
| rad39         | 0.000311351     | 0.998263 | 0.00233337           | 0.986981 |
| rad35         | 0.000303822     | 0.998567 | 0.00227694           | 0.989258 |
| rad46         | 0.000258929     | 0.998826 | 0.00194050           | 0.991199 |
| rad51         | 0.000229661     | 0.999055 | 0.00172116           | 0.992920 |
| rad59         | 0.000160966     | 0.999216 | 0.00120633           | 0.994126 |
| rad67         | 0.000132859     | 0.999349 | 0.000995686          | 0.995122 |
| PhCCCH3+H     | 0.000117527     | 0.999467 | 0.000880786          | 0.996003 |
| rad60syn      | 9.03378e-05     | 0.999557 | 0.000677021          | 0.996680 |
| PAH10+CH3     | 6.53522e-05     | 0.999622 | 0.000489771          | 0.997169 |
| rad60anti     | 6.52879e-05     | 0.999688 | 0.000489289          | 0.997659 |
| rad52         | 5.15998e-05     | 0.999739 | 0.000386706          | 0.998045 |

|               |             |          |             |          |
|---------------|-------------|----------|-------------|----------|
| rad19syn      | 5.01057e-05 | 0.999789 | 0.000375508 | 0.998421 |
| rad71         | 4.45158e-05 | 0.999834 | 0.000333616 | 0.998755 |
| rad58         | 3.61220e-05 | 0.999870 | 0.000270710 | 0.999025 |
| PAH1+H        | 2.86271e-05 | 0.999899 | 0.000214541 | 0.999240 |
| PhcycC3H3_A+H | 2.34369e-05 | 0.999922 | 0.000175644 | 0.999415 |
| rad73         | 2.07080e-05 | 0.999943 | 0.000155192 | 0.999571 |
| rad70         | 1.26564e-05 | 0.999955 | 9.48509e-05 | 0.999666 |
| rad37         | 1.18404e-05 | 0.999967 | 8.87361e-05 | 0.999754 |
| rad54         | 7.74183e-06 | 0.999975 | 5.80198e-05 | 0.999812 |
| rad65         | 5.71876e-06 | 0.999981 | 4.28583e-05 | 0.999855 |
| PAH8+H        | 4.80152e-06 | 0.999986 | 3.59842e-05 | 0.999891 |
| rad34         | 4.57469e-06 | 0.999990 | 3.42843e-05 | 0.999925 |
| rad72         | 4.05904e-06 | 0.999994 | 3.04198e-05 | 0.999956 |
| rad68syn      | 8.44302e-07 | 0.999995 | 6.32747e-06 | 0.999962 |
| rad55         | 7.96394e-07 | 0.999996 | 5.96844e-06 | 0.999968 |
| rad64         | 7.49015e-07 | 0.999997 | 5.61336e-06 | 0.999974 |
| rad56         | 7.20451e-07 | 0.999997 | 5.39929e-06 | 0.999979 |
| rad68anti     | 5.39463e-07 | 0.999998 | 4.04291e-06 | 0.999983 |
| rad53         | 5.23143e-07 | 0.999998 | 3.92061e-06 | 0.999987 |
| rad40syn      | 4.40707e-07 | 0.999999 | 3.30280e-06 | 0.999990 |
| rad62         | 3.72784e-07 | 0.999999 | 2.79376e-06 | 0.999993 |
| rad61         | 3.22478e-07 | 0.999999 | 2.41676e-06 | 0.999996 |
| rad40anti     | 3.14359e-07 | 1.000000 | 2.35591e-06 | 0.999998 |
| rad43         | 1.94896e-07 | 1.000000 | 1.46061e-06 | 0.999999 |
| rad42         | 5.98145e-08 | 1.000000 | 4.48269e-07 | 1.000000 |
| rad41         | 3.19484e-08 | 1.000000 | 2.39432e-07 | 1.000000 |
| rad23         | 2.31289e-14 | 1.000000 | 1.73336e-13 | 1.000000 |
| rad6          | 1.55221e-14 | 1.000000 | 1.16328e-13 | 1.000000 |
| rad45         | 6.79932e-15 | 1.000000 | 5.09564e-14 | 1.000000 |
| rad9          | 5.80396e-15 | 1.000000 | 4.34968e-14 | 1.000000 |
| rad20         | 5.61879e-15 | 1.000000 | 4.21090e-14 | 1.000000 |
| rad22         | 2.56938e-15 | 1.000000 | 1.92558e-14 | 1.000000 |
| rad21         | 2.52565e-15 | 1.000000 | 1.89281e-14 | 1.000000 |
| rad11         | 1.59314e-15 | 1.000000 | 1.19395e-14 | 1.000000 |
| rad36         | 1.27660e-15 | 1.000000 | 9.56726e-15 | 1.000000 |
| rad18         | 7.69597e-16 | 1.000000 | 5.76761e-15 | 1.000000 |
| rad15         | 4.64778e-16 | 1.000000 | 3.48320e-15 | 1.000000 |
| rad7          | 3.48761e-16 | 1.000000 | 2.61373e-15 | 1.000000 |
| rad8          | 2.23533e-16 | 1.000000 | 1.67523e-15 | 1.000000 |
| rad28         | 2.06054e-16 | 1.000000 | 1.54423e-15 | 1.000000 |
| rad24         | 1.60028e-16 | 1.000000 | 1.19931e-15 | 1.000000 |
| rad12         | 1.40784e-16 | 1.000000 | 1.05508e-15 | 1.000000 |
| rad26         | 4.93659e-17 | 1.000000 | 3.69964e-16 | 1.000000 |
| rad47         | 4.90428e-17 | 1.000000 | 3.67543e-16 | 1.000000 |
| rad13         | 4.47289e-17 | 1.000000 | 3.35213e-16 | 1.000000 |
| rad10         | 1.80935e-17 | 1.000000 | 1.35599e-16 | 1.000000 |
| rad25         | 8.60189e-18 | 1.000000 | 6.44654e-17 | 1.000000 |
| rad33         | 3.44368e-18 | 1.000000 | 2.58081e-17 | 1.000000 |
| rad5          | 2.09687e-18 | 1.000000 | 1.57146e-17 | 1.000000 |
| rad2          | 1.43964e-18 | 1.000000 | 1.07891e-17 | 1.000000 |
| rad1          | 6.33132e-19 | 1.000000 | 4.74490e-18 | 1.000000 |
| rad14         | 1.40237e-19 | 1.000000 | 1.05099e-18 | 1.000000 |
| rad3          | 1.21910e-19 | 1.000000 | 9.13637e-19 | 1.000000 |
| rad27         | 8.01837e-20 | 1.000000 | 6.00923e-19 | 1.000000 |
| rad4          | 7.24205e-20 | 1.000000 | 5.42743e-19 | 1.000000 |

0.100000000E-03 Pa, 3250.00000 K

=====

| Rate constant | True (fraction)     | Effective (fraction) |
|---------------|---------------------|----------------------|
| Total         | 1.58309e-12 (1.00 ) | 2.28795e-13 (1.00 )  |

| species     | PYtrue      | Cumul    | PYeffective | Cumul    |
|-------------|-------------|----------|-------------|----------|
| Benzyl+C2H2 | 0.855476    | 0.855476 | 0.00000     | 0.00000  |
| PhCH2CCH+H  | 0.0734301   | 0.928906 | 0.508082    | 0.508082 |
| Indene+H    | 0.0278643   | 0.956770 | 0.192800    | 0.700882 |
| PhCHCCH2+H  | 0.0183610   | 0.975131 | 0.127045    | 0.827927 |
| Ph+Allene   | 0.0145940   | 0.989725 | 0.100980    | 0.928907 |
| PAH3+H      | 0.00243645  | 0.992162 | 0.0168585   | 0.945765 |
| PAH9+H      | 0.00110339  | 0.993265 | 0.00763468  | 0.953400 |
| PAH7+H      | 0.000986571 | 0.994252 | 0.00682634  | 0.960227 |
| rad19anti   | 0.000808911 | 0.995061 | 0.00559707  | 0.965824 |
| rad38       | 0.000686670 | 0.995747 | 0.00475125  | 0.970575 |
| rad50       | 0.000518179 | 0.996266 | 0.00358542  | 0.974160 |
| Ph+MeAc     | 0.000489465 | 0.996755 | 0.00338674  | 0.977547 |
| rad30       | 0.000447972 | 0.997203 | 0.00309964  | 0.980647 |
| PhCCH+CH3   | 0.000378211 | 0.997581 | 0.00261694  | 0.983264 |
| rad39       | 0.000374434 | 0.997956 | 0.00259081  | 0.985854 |
| rad35       | 0.000323023 | 0.998279 | 0.00223508  | 0.988089 |

|               |             |          |             |          |
|---------------|-------------|----------|-------------|----------|
| rad51         | 0.000289245 | 0.998568 | 0.00200136  | 0.990091 |
| rad46         | 0.000266714 | 0.998835 | 0.00184546  | 0.991936 |
| rad59         | 0.000184695 | 0.999019 | 0.00127795  | 0.993214 |
| rad67         | 0.000159865 | 0.999179 | 0.00110614  | 0.994320 |
| PhCCCH3+H     | 0.000140367 | 0.999320 | 0.000971235 | 0.995292 |
| rad60syn      | 9.79791e-05 | 0.999418 | 0.000677943 | 0.995970 |
| PAH10+CH3     | 8.26142e-05 | 0.999500 | 0.000571630 | 0.996541 |
| rad71         | 7.28074e-05 | 0.999573 | 0.000503773 | 0.997045 |
| rad60anti     | 7.14060e-05 | 0.999644 | 0.000494077 | 0.997539 |
| rad19syn      | 7.13406e-05 | 0.999716 | 0.000493624 | 0.998033 |
| rad52         | 6.19533e-05 | 0.999778 | 0.000428671 | 0.998461 |
| rad58         | 4.68388e-05 | 0.999825 | 0.000324090 | 0.998785 |
| PAH1+H        | 3.98744e-05 | 0.999864 | 0.000275902 | 0.999061 |
| rad73         | 3.17350e-05 | 0.999896 | 0.000219583 | 0.999281 |
| PhcycC3H3_A+H | 2.77967e-05 | 0.999924 | 0.000192333 | 0.999473 |
| rad70         | 1.68825e-05 | 0.999941 | 0.000116814 | 0.999590 |
| rad37         | 1.28499e-05 | 0.999954 | 8.89115e-05 | 0.999679 |
| PAH8+H        | 8.50457e-06 | 0.999962 | 5.88453e-05 | 0.999738 |
| rad54         | 8.38235e-06 | 0.999971 | 5.79997e-05 | 0.999796 |
| rad72         | 7.52648e-06 | 0.999978 | 5.20777e-05 | 0.999848 |
| rad65         | 7.06074e-06 | 0.999985 | 4.88551e-05 | 0.999897 |
| rad34         | 6.39568e-06 | 0.999992 | 4.42534e-05 | 0.999941 |
| rad68syn      | 1.34606e-06 | 0.999993 | 9.31375e-06 | 0.999950 |
| rad64         | 1.07438e-06 | 0.999994 | 7.43389e-06 | 0.999958 |
| rad56         | 9.79690e-07 | 0.999995 | 6.77873e-06 | 0.999965 |
| rad55         | 8.93999e-07 | 0.999996 | 6.18581e-06 | 0.999971 |
| rad68anti     | 8.59058e-07 | 0.999997 | 5.94405e-06 | 0.999977 |
| rad40syn      | 7.44327e-07 | 0.999997 | 5.15020e-06 | 0.999982 |
| rad53         | 6.73265e-07 | 0.999998 | 4.65850e-06 | 0.999986 |
| rad40anti     | 5.40357e-07 | 0.999999 | 3.73887e-06 | 0.999990 |
| rad62         | 5.25220e-07 | 0.999999 | 3.63414e-06 | 0.999994 |
| rad61         | 4.70536e-07 | 1.000000 | 3.25576e-06 | 0.999997 |
| rad43         | 2.53715e-07 | 1.000000 | 1.75552e-06 | 0.999999 |
| rad42         | 9.14458e-08 | 1.000000 | 6.32737e-07 | 0.999999 |
| rad41         | 4.57450e-08 | 1.000000 | 3.16522e-07 | 1.000000 |
| rad23         | 1.04499e-14 | 1.000000 | 7.23055e-14 | 1.000000 |
| rad6          | 5.36039e-15 | 1.000000 | 3.70900e-14 | 1.000000 |
| rad20         | 3.83869e-15 | 1.000000 | 2.65609e-14 | 1.000000 |
| rad45         | 3.66334e-15 | 1.000000 | 2.53476e-14 | 1.000000 |
| rad9          | 3.38631e-15 | 1.000000 | 2.34307e-14 | 1.000000 |
| rad21         | 1.66173e-15 | 1.000000 | 1.14980e-14 | 1.000000 |
| rad22         | 1.30850e-15 | 1.000000 | 9.05386e-15 | 1.000000 |
| rad11         | 9.80868e-16 | 1.000000 | 6.78688e-15 | 1.000000 |
| rad36         | 6.94864e-16 | 1.000000 | 4.80795e-15 | 1.000000 |
| rad18         | 4.51591e-16 | 1.000000 | 3.12468e-15 | 1.000000 |
| rad15         | 2.91858e-16 | 1.000000 | 2.01944e-15 | 1.000000 |
| rad8          | 2.15817e-16 | 1.000000 | 1.49330e-15 | 1.000000 |
| rad7          | 1.57418e-16 | 1.000000 | 1.08922e-15 | 1.000000 |
| rad28         | 1.13309e-16 | 1.000000 | 7.84015e-16 | 1.000000 |
| rad24         | 1.10778e-16 | 1.000000 | 7.66503e-16 | 1.000000 |
| rad12         | 1.07284e-16 | 1.000000 | 7.42324e-16 | 1.000000 |
| rad47         | 6.03541e-17 | 1.000000 | 4.17606e-16 | 1.000000 |
| rad26         | 3.18194e-17 | 1.000000 | 2.20167e-16 | 1.000000 |
| rad13         | 2.21089e-17 | 1.000000 | 1.52978e-16 | 1.000000 |
| rad10         | 1.23692e-17 | 1.000000 | 8.55860e-17 | 1.000000 |
| rad25         | 6.72544e-18 | 1.000000 | 4.65351e-17 | 1.000000 |
| rad5          | 2.01292e-18 | 1.000000 | 1.39279e-17 | 1.000000 |
| rad33         | 1.94932e-18 | 1.000000 | 1.34878e-17 | 1.000000 |
| rad2          | 9.43062e-19 | 1.000000 | 6.52529e-18 | 1.000000 |
| rad1          | 4.63897e-19 | 1.000000 | 3.20983e-18 | 1.000000 |
| rad14         | 1.20218e-19 | 1.000000 | 8.31821e-19 | 1.000000 |
| rad27         | 6.78840e-20 | 1.000000 | 4.69707e-19 | 1.000000 |
| rad3          | 5.91634e-20 | 1.000000 | 4.09367e-19 | 1.000000 |
| rad4          | 3.41807e-20 | 1.000000 | 2.36505e-19 | 1.000000 |

0.100000000E-03 Pa, 3500.00000 K

=====  
Rate constant | True (fraction) | Effective (fraction)  
-----  
Total | 2.10046e-12 (1.00) | 3.29923e-13 (1.00)

-----  
species | PYtrue | Cumul | PYeffective | Cumul  
-----  
Benzyl+C2H2 | 0.842928 | 0.842928 | 0.00000 | 0.00000  
PhCH2CCH+H | 0.0857241 | 0.928652 | 0.545762 | 0.545762  
Indene+H | 0.0229287 | 0.951581 | 0.145976 | 0.691738  
PhCHCCH2+H | 0.0212218 | 0.972803 | 0.135108 | 0.826846  
Ph+Allene | 0.0160719 | 0.988874 | 0.102322 | 0.929168  
PAH3+H | 0.00277080 | 0.991645 | 0.0176403 | 0.946808  
PAH7+H | 0.00108547 | 0.992731 | 0.00691065 | 0.953719

|               |             |          |             |          |
|---------------|-------------|----------|-------------|----------|
| PAH9+H        | 0.00103824  | 0.993769 | 0.00660998  | 0.960329 |
| rad19anti     | 0.000786012 | 0.994555 | 0.00500415  | 0.965333 |
| rad38         | 0.000657575 | 0.995213 | 0.00418645  | 0.969520 |
| rad50         | 0.000571322 | 0.995784 | 0.00363732  | 0.973157 |
| Ph+MeAc       | 0.000559758 | 0.996344 | 0.00356370  | 0.976721 |
| PhCCH+CH3     | 0.000466753 | 0.996810 | 0.00297158  | 0.979692 |
| rad30         | 0.000434295 | 0.997245 | 0.00276494  | 0.982457 |
| rad39         | 0.000426787 | 0.997672 | 0.00271714  | 0.985174 |
| rad51         | 0.000340822 | 0.998012 | 0.00216985  | 0.987344 |
| rad35         | 0.000335221 | 0.998348 | 0.00213419  | 0.989478 |
| rad46         | 0.000264413 | 0.998612 | 0.00168339  | 0.991162 |
| rad59         | 0.000204435 | 0.998816 | 0.00130154  | 0.992463 |
| rad67         | 0.000182834 | 0.998999 | 0.00116401  | 0.993627 |
| PhCCCH3+H     | 0.000163685 | 0.999163 | 0.00104210  | 0.994669 |
| rad71         | 0.000107601 | 0.999271 | 0.000685042 | 0.995354 |
| rad60syn      | 0.000103349 | 0.999374 | 0.000657969 | 0.996012 |
| PAH10+CH3     | 9.81181e-05 | 0.999472 | 0.000624669 | 0.996637 |
| rad19syn      | 9.79725e-05 | 0.999570 | 0.000623742 | 0.997261 |
| rad60anti     | 7.58697e-05 | 0.999646 | 0.000483025 | 0.997744 |
| rad52         | 7.00217e-05 | 0.999716 | 0.000445793 | 0.998190 |
| rad58         | 5.76196e-05 | 0.999773 | 0.000366835 | 0.998556 |
| PAH1+H        | 5.20523e-05 | 0.999826 | 0.000331391 | 0.998888 |
| rad73         | 4.43107e-05 | 0.999870 | 0.000282104 | 0.999170 |
| PhcycC3H3_A+H | 3.20633e-05 | 0.999902 | 0.000204131 | 0.999374 |
| rad70         | 2.14708e-05 | 0.999923 | 0.000136694 | 0.999511 |
| PAH8+H        | 1.37725e-05 | 0.999937 | 8.76827e-05 | 0.999598 |
| rad37         | 1.33235e-05 | 0.999950 | 8.48243e-05 | 0.999683 |
| rad72         | 1.23923e-05 | 0.999963 | 7.88958e-05 | 0.999762 |
| rad54         | 8.98058e-06 | 0.999972 | 5.71749e-05 | 0.999819 |
| rad34         | 8.46717e-06 | 0.999980 | 5.39063e-05 | 0.999873 |
| rad65         | 8.19015e-06 | 0.999988 | 5.21426e-05 | 0.999925 |
| rad68syn      | 1.99232e-06 | 0.999990 | 1.26841e-05 | 0.999938 |
| rad64         | 1.43496e-06 | 0.999992 | 9.13568e-06 | 0.999947 |
| rad56         | 1.27412e-06 | 0.999993 | 8.11171e-06 | 0.999955 |
| rad68anti     | 1.27030e-06 | 0.999994 | 8.08736e-06 | 0.999963 |
| rad40syn      | 1.15716e-06 | 0.999996 | 7.36708e-06 | 0.999971 |
| rad55         | 9.87613e-07 | 0.999997 | 6.28764e-06 | 0.999977 |
| rad40anti     | 8.52741e-07 | 0.999997 | 5.42898e-06 | 0.999982 |
| rad53         | 8.35966e-07 | 0.999998 | 5.32218e-06 | 0.999988 |
| rad62         | 6.97360e-07 | 0.999999 | 4.43975e-06 | 0.999992 |
| rad61         | 6.32568e-07 | 1.000000 | 4.02725e-06 | 0.999996 |
| rad43         | 3.12012e-07 | 1.000000 | 1.98643e-06 | 0.999998 |
| rad42         | 1.30122e-07 | 1.000000 | 8.28424e-07 | 0.999999 |
| rad41         | 6.11800e-08 | 1.000000 | 3.89503e-07 | 0.999999 |
| rad23         | 5.04703e-15 | 1.000000 | 3.21319e-14 | 0.999999 |
| rad20         | 2.74120e-15 | 1.000000 | 1.74519e-14 | 0.999999 |
| rad6          | 2.16489e-15 | 1.000000 | 1.37828e-14 | 0.999999 |
| rad45         | 2.06179e-15 | 1.000000 | 1.31264e-14 | 0.999999 |
| rad9          | 2.04378e-15 | 1.000000 | 1.30117e-14 | 0.999999 |
| rad21         | 1.14208e-15 | 1.000000 | 7.27102e-15 | 0.999999 |
| rad22         | 7.18863e-16 | 1.000000 | 4.57664e-15 | 0.999999 |
| rad11         | 6.60787e-16 | 1.000000 | 4.20690e-15 | 0.999999 |
| rad36         | 3.94212e-16 | 1.000000 | 2.50975e-15 | 0.999999 |
| rad18         | 2.79268e-16 | 1.000000 | 1.77796e-15 | 0.999999 |
| rad8          | 2.04865e-16 | 1.000000 | 1.30427e-15 | 0.999999 |
| rad15         | 1.87635e-16 | 1.000000 | 1.19458e-15 | 0.999999 |
| rad12         | 8.20876e-17 | 1.000000 | 5.22611e-16 | 0.999999 |
| rad7          | 7.97899e-17 | 1.000000 | 5.07982e-16 | 0.999999 |
| rad24         | 7.82702e-17 | 1.000000 | 4.98307e-16 | 0.999999 |
| rad47         | 6.94994e-17 | 1.000000 | 4.42468e-16 | 0.999999 |
| rad28         | 6.80175e-17 | 1.000000 | 4.33034e-16 | 0.999999 |
| rad26         | 2.07753e-17 | 1.000000 | 1.32266e-16 | 0.999999 |
| rad13         | 1.21832e-17 | 1.000000 | 7.75643e-17 | 0.999999 |
| rad10         | 8.52258e-18 | 1.000000 | 5.42590e-17 | 0.999999 |
| rad25         | 5.44463e-18 | 1.000000 | 3.46632e-17 | 0.999999 |
| rad5          | 1.92675e-18 | 1.000000 | 1.22667e-17 | 0.999999 |
| rad33         | 1.19819e-18 | 1.000000 | 7.62829e-18 | 0.999999 |
| rad2          | 6.44548e-19 | 1.000000 | 4.10352e-18 | 0.999999 |
| rad1          | 3.47913e-19 | 1.000000 | 2.21499e-18 | 0.999999 |
| rad14         | 1.06170e-19 | 1.000000 | 6.75934e-19 | 0.999999 |
| rad27         | 5.69300e-20 | 1.000000 | 3.62445e-19 | 0.999999 |
| rad3          | 3.26663e-20 | 1.000000 | 2.07970e-19 | 0.999999 |
| rad4          | 1.84742e-20 | 1.000000 | 1.17616e-19 | 0.999999 |

0.100000000E-03 Pa, 3750.00000 K

| Rate constant | True (fraction)     | Effective (fraction) |
|---------------|---------------------|----------------------|
| Total         | 2.70978e-12 (1.00 ) | 4.61708e-13 (1.00 )  |

| species       | PYtrue      | Cumul    | PYeffective | Cumul    |
|---------------|-------------|----------|-------------|----------|
| Benzyl+C2H2   | 0.829614    | 0.829614 | 0.00000     | 0.00000  |
| PhCH2CCH+H    | 0.0978316   | 0.927446 | 0.574175    | 0.574175 |
| PhCHCCH2+H    | 0.0240141   | 0.951460 | 0.140939    | 0.715114 |
| Indene+H      | 0.0190788   | 0.970538 | 0.111974    | 0.827088 |
| Ph+Allene     | 0.0176550   | 0.988193 | 0.103617    | 0.930705 |
| PAH3+H        | 0.00305565  | 0.991249 | 0.0179337   | 0.948639 |
| PAH7+H        | 0.00116197  | 0.992411 | 0.00681959  | 0.955458 |
| PAH9+H        | 0.000955042 | 0.993366 | 0.00560515  | 0.961063 |
| rad19anti     | 0.000750872 | 0.994117 | 0.00440688  | 0.965470 |
| Ph+MeAc       | 0.000618509 | 0.994736 | 0.00363004  | 0.969100 |
| rad38         | 0.000613193 | 0.995349 | 0.00359884  | 0.972699 |
| rad50         | 0.000603635 | 0.995952 | 0.00354274  | 0.976242 |
| PhCCH+CH3     | 0.000581835 | 0.996534 | 0.00341479  | 0.979657 |
| rad39         | 0.000465790 | 0.997000 | 0.00273373  | 0.982390 |
| rad30         | 0.000416539 | 0.997417 | 0.00244467  | 0.984835 |
| rad51         | 0.000380994 | 0.997798 | 0.00223606  | 0.987071 |
| rad35         | 0.000341508 | 0.998139 | 0.00200431  | 0.989075 |
| rad46         | 0.000254425 | 0.998393 | 0.00149322  | 0.990569 |
| rad59         | 0.000220084 | 0.998614 | 0.00129168  | 0.991860 |
| rad67         | 0.000201013 | 0.998815 | 0.00117975  | 0.993040 |
| PhCCCH3+H     | 0.000187990 | 0.999003 | 0.00110331  | 0.994143 |
| rad71         | 0.000146780 | 0.999149 | 0.000861455 | 0.995005 |
| rad19syn      | 0.000129261 | 0.999279 | 0.000758633 | 0.995764 |
| PAH10+CH3     | 0.000111172 | 0.999390 | 0.000652468 | 0.996416 |
| rad60syn      | 0.000106707 | 0.999496 | 0.000626263 | 0.997042 |
| rad60anti     | 7.88382e-05 | 0.999575 | 0.000462703 | 0.997505 |
| rad52         | 7.54521e-05 | 0.999651 | 0.000442829 | 0.997948 |
| rad58         | 6.80261e-05 | 0.999719 | 0.000399246 | 0.998347 |
| PAH1+H        | 6.45813e-05 | 0.999783 | 0.000379028 | 0.998726 |
| rad73         | 5.74878e-05 | 0.999841 | 0.000337397 | 0.999063 |
| PhcycC3H3_A+H | 3.61213e-05 | 0.999877 | 0.000211996 | 0.999275 |
| rad70         | 2.62309e-05 | 0.999903 | 0.000153949 | 0.999429 |
| PAH8+H        | 2.07420e-05 | 0.999924 | 0.000121735 | 0.999551 |
| rad72         | 1.85748e-05 | 0.999943 | 0.000109016 | 0.999660 |
| rad37         | 1.33636e-05 | 0.999956 | 7.84314e-05 | 0.999739 |
| rad34         | 1.07116e-05 | 0.999967 | 6.28665e-05 | 0.999801 |
| rad54         | 9.53969e-06 | 0.999976 | 5.59886e-05 | 0.999857 |
| rad65         | 9.05125e-06 | 0.999985 | 5.31219e-05 | 0.999911 |
| rad68syn      | 2.77520e-06 | 0.999988 | 1.62877e-05 | 0.999927 |
| rad64         | 1.81236e-06 | 0.999990 | 1.06367e-05 | 0.999938 |
| rad68anti     | 1.76807e-06 | 0.999992 | 1.03768e-05 | 0.999948 |
| rad40syn      | 1.68193e-06 | 0.999993 | 9.87130e-06 | 0.999958 |
| rad56         | 1.59874e-06 | 0.999995 | 9.38301e-06 | 0.999967 |
| rad40anti     | 1.25564e-06 | 0.999996 | 7.36935e-06 | 0.999975 |
| rad55         | 1.07703e-06 | 0.999997 | 6.32112e-06 | 0.999981 |
| rad53         | 1.00840e-06 | 0.999998 | 5.91834e-06 | 0.999987 |
| rad62         | 8.81786e-07 | 0.999999 | 5.17522e-06 | 0.999992 |
| rad61         | 7.98455e-07 | 1.000000 | 4.68615e-06 | 0.999997 |
| rad43         | 3.67979e-07 | 1.000000 | 2.15967e-06 | 0.999999 |
| rad42         | 1.74775e-07 | 1.000000 | 1.02576e-06 | 1.000000 |
| rad41         | 7.77074e-08 | 1.000000 | 4.56066e-07 | 1.000000 |
| rad23         | 2.57540e-15 | 1.000000 | 1.51150e-14 | 1.000000 |
| rad20         | 2.02983e-15 | 1.000000 | 1.19131e-14 | 1.000000 |
| rad9          | 1.27461e-15 | 1.000000 | 7.48072e-15 | 1.000000 |
| rad45         | 1.20303e-15 | 1.000000 | 7.06059e-15 | 1.000000 |
| rad6          | 9.99972e-16 | 1.000000 | 5.86885e-15 | 1.000000 |
| rad21         | 8.13805e-16 | 1.000000 | 4.77623e-15 | 1.000000 |
| rad11         | 4.75772e-16 | 1.000000 | 2.79231e-15 | 1.000000 |
| rad22         | 4.20504e-16 | 1.000000 | 2.46795e-15 | 1.000000 |
| rad36         | 2.31395e-16 | 1.000000 | 1.35806e-15 | 1.000000 |
| rad8          | 1.91572e-16 | 1.000000 | 1.12434e-15 | 1.000000 |
| rad18         | 1.80283e-16 | 1.000000 | 1.05809e-15 | 1.000000 |
| rad15         | 1.23493e-16 | 1.000000 | 7.24781e-16 | 1.000000 |
| rad47         | 7.59707e-17 | 1.000000 | 4.45873e-16 | 1.000000 |
| rad12         | 6.32118e-17 | 1.000000 | 3.70991e-16 | 1.000000 |
| rad24         | 5.63439e-17 | 1.000000 | 3.30683e-16 | 1.000000 |
| rad7          | 4.44254e-17 | 1.000000 | 2.60733e-16 | 1.000000 |
| rad28         | 4.31080e-17 | 1.000000 | 2.53001e-16 | 1.000000 |
| rad26         | 1.37681e-17 | 1.000000 | 8.08051e-17 | 1.000000 |
| rad13         | 7.33173e-18 | 1.000000 | 4.30300e-17 | 1.000000 |
| rad10         | 5.95274e-18 | 1.000000 | 3.49367e-17 | 1.000000 |
| rad25         | 4.50617e-18 | 1.000000 | 2.64468e-17 | 1.000000 |
| rad5          | 1.84428e-18 | 1.000000 | 1.08241e-17 | 1.000000 |
| rad33         | 7.87849e-19 | 1.000000 | 4.62390e-18 | 1.000000 |
| rad2          | 4.60631e-19 | 1.000000 | 2.70345e-18 | 1.000000 |
| rad1          | 2.64748e-19 | 1.000000 | 1.55381e-18 | 1.000000 |
| rad14         | 9.45606e-20 | 1.000000 | 5.54977e-19 | 1.000000 |
| rad27         | 4.76374e-20 | 1.000000 | 2.79584e-19 | 1.000000 |

|      |             |         |             |         |
|------|-------------|---------|-------------|---------|
| rad3 | 1.99268e-20 | 1.00000 | 1.16951e-19 | 1.00000 |
| rad4 | 1.11169e-20 | 1.00000 | 6.52453e-20 | 1.00000 |

0.100000000E-03 Pa, 4000.00000 K

=====

| Rate constant | True (fraction)     | Effective (fraction) |
|---------------|---------------------|----------------------|
| Total         | 3.41497e-12 (1.00 ) | 6.28297e-13 (1.00 )  |

| species       | PYtrue      | Cumul    | PYeffective | Cumul    |
|---------------|-------------|----------|-------------|----------|
| Benzyl+C2H2   | 0.816017    | 0.816017 | 0.00000     | 0.00000  |
| PhCH2CCH+H    | 0.109584    | 0.925601 | 0.595618    | 0.595618 |
| PhCHCCH2+H    | 0.0267098   | 0.952311 | 0.145175    | 0.740793 |
| Ph+Allene     | 0.0193046   | 0.971615 | 0.104926    | 0.845719 |
| Indene+H      | 0.0160484   | 0.987664 | 0.0872277   | 0.932947 |
| PAH3+H        | 0.00329013  | 0.990954 | 0.0178828   | 0.950829 |
| PAH7+H        | 0.00121791  | 0.992172 | 0.00661968  | 0.957449 |
| PAH9+H        | 0.000864009 | 0.993036 | 0.00469613  | 0.962145 |
| PhCCH+CH3     | 0.000720156 | 0.993756 | 0.00391424  | 0.966060 |
| rad19anti     | 0.000708493 | 0.994464 | 0.00385085  | 0.969910 |
| Ph+MeAc       | 0.000663934 | 0.995128 | 0.00360866  | 0.973519 |
| rad50         | 0.000616859 | 0.995745 | 0.00335280  | 0.976872 |
| rad38         | 0.000560144 | 0.996305 | 0.00304454  | 0.979916 |
| rad39         | 0.000491035 | 0.996796 | 0.00266891  | 0.982585 |
| rad51         | 0.000408498 | 0.997205 | 0.00222030  | 0.984806 |
| rad30         | 0.000396478 | 0.997601 | 0.00215497  | 0.986961 |
| rad35         | 0.000343096 | 0.997945 | 0.00186482  | 0.988825 |
| rad46         | 0.000239253 | 0.998184 | 0.00130041  | 0.990126 |
| rad59         | 0.000231903 | 0.998416 | 0.00126046  | 0.991386 |
| rad67         | 0.000214260 | 0.998630 | 0.00116456  | 0.992551 |
| PhCCCH3+H     | 0.000213580 | 0.998844 | 0.00116087  | 0.993712 |
| rad71         | 0.000187844 | 0.999031 | 0.00102098  | 0.994733 |
| rad19syn      | 0.000163941 | 0.999195 | 0.000891067 | 0.995624 |
| PAH10+CH3     | 0.000121536 | 0.999317 | 0.000660582 | 0.996284 |
| rad60syn      | 0.000108396 | 0.999425 | 0.000589161 | 0.996873 |
| rad60anti     | 8.05427e-05 | 0.999506 | 0.000437772 | 0.997311 |
| rad52         | 7.82960e-05 | 0.999584 | 0.000425560 | 0.997737 |
| rad58         | 7.77572e-05 | 0.999662 | 0.000422632 | 0.998159 |
| PAH1+H        | 7.70001e-05 | 0.999739 | 0.000418517 | 0.998578 |
| rad73         | 7.03552e-05 | 0.999809 | 0.000382400 | 0.998960 |
| PhcycC3H3_A+H | 3.98813e-05 | 0.999849 | 0.000216766 | 0.999177 |
| rad70         | 3.09908e-05 | 0.999880 | 0.000168444 | 0.999346 |
| PAH8+H        | 2.94355e-05 | 0.999910 | 0.000159990 | 0.999506 |
| rad72         | 2.58284e-05 | 0.999935 | 0.000140384 | 0.999646 |
| rad37         | 1.30848e-05 | 0.999948 | 7.11194e-05 | 0.999717 |
| rad34         | 1.30497e-05 | 0.999961 | 7.09289e-05 | 0.999788 |
| rad54         | 1.00584e-05 | 0.999972 | 5.46703e-05 | 0.999843 |
| rad65         | 9.63686e-06 | 0.999981 | 5.23790e-05 | 0.999895 |
| rad68syn      | 3.67778e-06 | 0.999985 | 1.99898e-05 | 0.999915 |
| rad68anti     | 2.34154e-06 | 0.999987 | 1.27269e-05 | 0.999928 |
| rad40syn      | 2.31359e-06 | 0.999990 | 1.25750e-05 | 0.999940 |
| rad64         | 2.19077e-06 | 0.999992 | 1.19074e-05 | 0.999952 |
| rad56         | 1.94741e-06 | 0.999994 | 1.05847e-05 | 0.999963 |
| rad40anti     | 1.74691e-06 | 0.999995 | 9.49492e-06 | 0.999972 |
| rad53         | 1.18744e-06 | 0.999997 | 6.45406e-06 | 0.999979 |
| rad55         | 1.16170e-06 | 0.999998 | 6.31418e-06 | 0.999985 |
| rad62         | 1.07271e-06 | 0.999999 | 5.83046e-06 | 0.999991 |
| rad61         | 9.59661e-07 | 1.000000 | 5.21602e-06 | 0.999996 |
| rad43         | 4.20278e-07 | 1.00000  | 2.28433e-06 | 0.999998 |
| rad42         | 2.24298e-07 | 1.00000  | 1.21912e-06 | 1.000000 |
| rad41         | 9.47630e-08 | 1.00000  | 5.15063e-07 | 1.00000  |
| rad20         | 1.54922e-15 | 1.00000  | 8.42046e-15 | 1.00000  |
| rad23         | 1.37698e-15 | 1.00000  | 7.48425e-15 | 1.00000  |
| rad9          | 8.19831e-16 | 1.00000  | 4.45600e-15 | 1.00000  |
| rad45         | 7.23859e-16 | 1.00000  | 3.93437e-15 | 1.00000  |
| rad21         | 5.97853e-16 | 1.00000  | 3.24950e-15 | 1.00000  |
| rad6          | 5.16625e-16 | 1.00000  | 2.80800e-15 | 1.00000  |
| rad11         | 3.59960e-16 | 1.00000  | 1.95648e-15 | 1.00000  |
| rad22         | 2.59353e-16 | 1.00000  | 1.40965e-15 | 1.00000  |
| rad8          | 1.76788e-16 | 1.00000  | 9.60889e-16 | 1.00000  |
| rad36         | 1.39804e-16 | 1.00000  | 7.59876e-16 | 1.00000  |
| rad18         | 1.20670e-16 | 1.00000  | 6.55872e-16 | 1.00000  |
| rad15         | 8.31242e-17 | 1.00000  | 4.51803e-16 | 1.00000  |
| rad47         | 7.97227e-17 | 1.00000  | 4.33315e-16 | 1.00000  |
| rad12         | 4.90407e-17 | 1.00000  | 2.66550e-16 | 1.00000  |
| rad24         | 4.12849e-17 | 1.00000  | 2.24395e-16 | 1.00000  |
| rad28         | 2.83837e-17 | 1.00000  | 1.54273e-16 | 1.00000  |
| rad7          | 2.66558e-17 | 1.00000  | 1.44882e-16 | 1.00000  |
| rad26         | 9.27644e-18 | 1.00000  | 5.04200e-17 | 1.00000  |

|       |             |         |             |         |
|-------|-------------|---------|-------------|---------|
| rad13 | 4.73269e-18 | 1.00000 | 2.57235e-17 | 1.00000 |
| rad10 | 4.23861e-18 | 1.00000 | 2.30380e-17 | 1.00000 |
| rad25 | 3.78502e-18 | 1.00000 | 2.05726e-17 | 1.00000 |
| rad5  | 1.76545e-18 | 1.00000 | 9.59571e-18 | 1.00000 |
| rad33 | 5.47163e-19 | 1.00000 | 2.97398e-18 | 1.00000 |
| rad2  | 3.45976e-19 | 1.00000 | 1.88047e-18 | 1.00000 |
| rad1  | 2.03741e-19 | 1.00000 | 1.10739e-18 | 1.00000 |
| rad14 | 8.43868e-20 | 1.00000 | 4.58665e-19 | 1.00000 |
| rad27 | 3.99728e-20 | 1.00000 | 2.17263e-19 | 1.00000 |
| rad3  | 1.31339e-20 | 1.00000 | 7.13863e-20 | 1.00000 |
| rad4  | 7.27353e-21 | 1.00000 | 3.95336e-20 | 1.00000 |

0.100000000E-04 Pa, 20.0000000 K

| Rate constant | True (fraction)      | Effective (fraction) |
|---------------|----------------------|----------------------|
| Total         | 1.34336e-156 (1.00 ) | 1.34336e-156 (1.00 ) |

| species       | PYtrue      | Cumul    | PYeffective | Cumul    |
|---------------|-------------|----------|-------------|----------|
| Indene+H      | 0.999818    | 0.999818 | 0.999819    | 0.999819 |
| rad6          | 0.000181132 | 0.999999 | 0.000181132 | 1.00000  |
| Benzyl+C2H2   | 8.11918e-07 | 1.000000 | 0.00000     | 1.00000  |
| rad2          | 1.34027e-08 | 1.000000 | 1.34027e-08 | 1.00000  |
| rad7          | 1.31185e-08 | 1.000000 | 1.31185e-08 | 1.00000  |
| rad11         | 3.22400e-09 | 1.000000 | 3.22401e-09 | 1.00000  |
| rad1          | 8.47083e-10 | 1.000000 | 8.47084e-10 | 1.00000  |
| rad10         | 6.74317e-10 | 1.000000 | 6.74317e-10 | 1.00000  |
| rad3          | 1.88355e-10 | 1.000000 | 1.88356e-10 | 1.00000  |
| rad4          | 9.52235e-11 | 1.000000 | 9.52236e-11 | 1.00000  |
| rad13         | 7.26187e-11 | 1.000000 | 7.26188e-11 | 1.00000  |
| rad23         | 2.32530e-13 | 1.000000 | 2.32530e-13 | 1.00000  |
| rad33         | 1.37095e-13 | 1.000000 | 1.37095e-13 | 1.00000  |
| rad20         | 1.15882e-13 | 1.000000 | 1.15882e-13 | 1.00000  |
| rad21         | 7.22725e-14 | 1.000000 | 7.22725e-14 | 1.00000  |
| rad45         | 1.63379e-15 | 1.000000 | 1.63379e-15 | 1.00000  |
| rad28         | 1.45378e-15 | 1.000000 | 1.45378e-15 | 1.00000  |
| rad22         | 7.02086e-16 | 1.000000 | 7.02087e-16 | 1.00000  |
| rad18         | 5.53655e-16 | 1.000000 | 5.53655e-16 | 1.00000  |
| rad26         | 3.80663e-16 | 1.000000 | 3.80664e-16 | 1.00000  |
| rad35         | 2.53479e-16 | 1.000000 | 2.53480e-16 | 1.00000  |
| rad36         | 1.01772e-16 | 1.000000 | 1.01772e-16 | 1.00000  |
| PAH9+H        | 1.65579e-17 | 1.000000 | 1.65579e-17 | 1.00000  |
| rad27         | 1.08081e-18 | 1.000000 | 1.08081e-18 | 1.00000  |
| rad31         | 2.44024e-19 | 1.000000 | 2.44024e-19 | 1.00000  |
| PhCHCCH2+H    | 6.79922e-20 | 1.000000 | 6.79922e-20 | 1.00000  |
| rad38         | 3.52836e-20 | 1.000000 | 3.52836e-20 | 1.00000  |
| rad30         | 2.90207e-20 | 1.000000 | 2.90207e-20 | 1.00000  |
| PhCCH+CH3     | 8.23159e-21 | 1.000000 | 8.23160e-21 | 1.00000  |
| rad24         | 2.38693e-21 | 1.000000 | 2.38693e-21 | 1.00000  |
| PhCCH3+H      | 1.75885e-21 | 1.000000 | 1.75885e-21 | 1.00000  |
| rad25         | 1.14506e-21 | 1.000000 | 1.14506e-21 | 1.00000  |
| rad14         | 2.13237e-22 | 1.000000 | 2.13237e-22 | 1.00000  |
| rad15         | 5.30521e-23 | 1.000000 | 5.30522e-23 | 1.00000  |
| rad8          | 6.01180e-26 | 1.000000 | 6.01180e-26 | 1.00000  |
| rad9          | 4.67099e-28 | 1.000000 | 4.67100e-28 | 1.00000  |
| PAH7+H        | 1.05890e-28 | 1.000000 | 1.05890e-28 | 1.00000  |
| rad46         | 6.49249e-29 | 1.000000 | 6.49250e-29 | 1.00000  |
| Ph+MeAc       | 1.47782e-29 | 1.000000 | 1.47782e-29 | 1.00000  |
| rad12         | 4.34544e-30 | 1.000000 | 4.34545e-30 | 1.00000  |
| rad39         | 3.62477e-31 | 1.000000 | 3.62478e-31 | 1.00000  |
| Ph+Allene     | 1.29369e-33 | 1.000000 | 1.29369e-33 | 1.00000  |
| rad60syn      | 1.07592e-37 | 1.000000 | 1.07592e-37 | 1.00000  |
| rad60anti     | 1.40236e-39 | 1.000000 | 1.40236e-39 | 1.00000  |
| PhCH2CCH+H    | 3.54547e-41 | 1.000000 | 3.54548e-41 | 1.00000  |
| rad37         | 3.37384e-42 | 1.000000 | 3.37385e-42 | 1.00000  |
| rad5          | 2.22388e-45 | 1.000000 | 2.22388e-45 | 1.00000  |
| PAH3+H        | 4.17909e-50 | 1.000000 | 4.17910e-50 | 1.00000  |
| rad59         | 2.23615e-50 | 1.000000 | 2.23615e-50 | 1.00000  |
| rad50         | 8.77638e-51 | 1.000000 | 8.77639e-51 | 1.00000  |
| rad19syn      | 3.69811e-59 | 1.000000 | 3.69811e-59 | 1.00000  |
| rad52         | 4.43411e-63 | 1.000000 | 4.43412e-63 | 1.00000  |
| rad54         | 4.34208e-64 | 1.000000 | 4.34208e-64 | 1.00000  |
| PAH10+CH3     | 2.83444e-64 | 1.000000 | 2.83444e-64 | 1.00000  |
| rad43         | 6.53020e-65 | 1.000000 | 6.53021e-65 | 1.00000  |
| rad62         | 1.95898e-67 | 1.000000 | 1.95899e-67 | 1.00000  |
| rad51         | 2.18690e-70 | 1.000000 | 2.18690e-70 | 1.00000  |
| rad70         | 2.37094e-73 | 1.000000 | 2.37094e-73 | 1.00000  |
| PhcycC3H3_A+H | 1.00473e-73 | 1.000000 | 1.00473e-73 | 1.00000  |
| rad55         | 5.40973e-74 | 1.000000 | 5.40973e-74 | 1.00000  |



|        |             |          |             |         |
|--------|-------------|----------|-------------|---------|
| rad65  | 1.47774e-75 | 1.000000 | 1.47774e-75 | 1.00000 |
| rad58  | 3.37699e-77 | 1.000000 | 3.37699e-77 | 1.00000 |
| PAH1+H | 4.57423e-79 | 1.000000 | 4.57423e-79 | 1.00000 |
| rad34  | 3.00992e-81 | 1.000000 | 3.00992e-81 | 1.00000 |
| rad42  | 2.15021e-85 | 1.000000 | 2.15021e-85 | 1.00000 |
| rad41  | 2.69892e-86 | 1.000000 | 2.69892e-86 | 1.00000 |
| rad47  | 8.30127e-89 | 1.000000 | 8.30128e-89 | 1.00000 |

0.100000000E-04 Pa, 30.0000000 K

| Rate constant | True (fraction)      | Effective (fraction) |
|---------------|----------------------|----------------------|
| Total         | 1.15918e-108 (1.00 ) | 1.15918e-108 (1.00 ) |

| species       | PYtrue      | Cumul    | PYeffective | Cumul    |
|---------------|-------------|----------|-------------|----------|
| Indene+H      | 0.999816    | 0.999816 | 0.999817    | 0.999817 |
| rad6          | 0.000182895 | 0.999999 | 0.000182895 | 1.000000 |
| Benzyl+C2H2   | 1.04104e-06 | 1.000000 | 0.00000     | 1.000000 |
| rad2          | 2.32677e-08 | 1.000000 | 2.32677e-08 | 1.000000 |
| rad7          | 1.32179e-08 | 1.000000 | 1.32179e-08 | 1.000000 |
| rad11         | 3.23927e-09 | 1.000000 | 3.23927e-09 | 1.000000 |
| rad1          | 1.47143e-09 | 1.000000 | 1.47143e-09 | 1.000000 |
| rad10         | 1.17603e-09 | 1.000000 | 1.17603e-09 | 1.000000 |
| rad3          | 2.29528e-10 | 1.000000 | 2.29528e-10 | 1.000000 |
| rad4          | 1.16055e-10 | 1.000000 | 1.16056e-10 | 1.000000 |
| rad13         | 7.33586e-11 | 1.000000 | 7.33587e-11 | 1.000000 |
| rad33         | 1.38520e-13 | 1.000000 | 1.38520e-13 | 1.000000 |
| rad20         | 5.66188e-14 | 1.000000 | 5.66189e-14 | 1.000000 |
| rad21         | 3.53170e-14 | 1.000000 | 3.53170e-14 | 1.000000 |
| rad23         | 2.80552e-14 | 1.000000 | 2.80552e-14 | 1.000000 |
| rad35         | 3.39739e-15 | 1.000000 | 3.39739e-15 | 1.000000 |
| rad28         | 3.06041e-15 | 1.000000 | 3.06042e-15 | 1.000000 |
| rad26         | 7.78496e-16 | 1.000000 | 7.78497e-16 | 1.000000 |
| rad18         | 2.68517e-16 | 1.000000 | 2.68518e-16 | 1.000000 |
| rad45         | 1.88673e-16 | 1.000000 | 1.88673e-16 | 1.000000 |
| rad22         | 1.61965e-16 | 1.000000 | 1.61966e-16 | 1.000000 |
| PAH9+H        | 1.41017e-17 | 1.000000 | 1.41017e-17 | 1.000000 |
| rad36         | 1.17493e-17 | 1.000000 | 1.17493e-17 | 1.000000 |
| rad27         | 1.30441e-18 | 1.000000 | 1.30441e-18 | 1.000000 |
| rad31         | 3.98501e-19 | 1.000000 | 3.98502e-19 | 1.000000 |
| PhCHCCH2+H    | 9.57164e-20 | 1.000000 | 9.57165e-20 | 1.000000 |
| rad30         | 6.09246e-20 | 1.000000 | 6.09246e-20 | 1.000000 |
| rad38         | 3.20976e-20 | 1.000000 | 3.20977e-20 | 1.000000 |
| PhCCH+CH3     | 9.36270e-21 | 1.000000 | 9.36271e-21 | 1.000000 |
| PhCCCH3+H     | 1.85525e-21 | 1.000000 | 1.85525e-21 | 1.000000 |
| rad24         | 1.16467e-21 | 1.000000 | 1.16467e-21 | 1.000000 |
| rad25         | 1.09671e-21 | 1.000000 | 1.09671e-21 | 1.000000 |
| rad14         | 1.87767e-22 | 1.000000 | 1.87768e-22 | 1.000000 |
| rad15         | 8.90850e-23 | 1.000000 | 8.90851e-23 | 1.000000 |
| rad8          | 3.64503e-26 | 1.000000 | 3.64504e-26 | 1.000000 |
| rad9          | 2.06185e-28 | 1.000000 | 2.06186e-28 | 1.000000 |
| rad46         | 6.17989e-29 | 1.000000 | 6.17990e-29 | 1.000000 |
| PAH7+H        | 4.16854e-29 | 1.000000 | 4.16855e-29 | 1.000000 |
| Ph+MeAc       | 4.86748e-30 | 1.000000 | 4.86749e-30 | 1.000000 |
| rad12         | 1.59345e-30 | 1.000000 | 1.59345e-30 | 1.000000 |
| rad39         | 1.16800e-31 | 1.000000 | 1.16800e-31 | 1.000000 |
| Ph+Allene     | 3.26087e-34 | 1.000000 | 3.26087e-34 | 1.000000 |
| rad60syn      | 2.80669e-38 | 1.000000 | 2.80669e-38 | 1.000000 |
| rad60anti     | 3.31641e-40 | 1.000000 | 3.31641e-40 | 1.000000 |
| PhCH2CCH+H    | 7.02412e-42 | 1.000000 | 7.02413e-42 | 1.000000 |
| rad37         | 6.52363e-43 | 1.000000 | 6.52363e-43 | 1.000000 |
| rad5          | 4.26517e-46 | 1.000000 | 4.26517e-46 | 1.000000 |
| PAH3+H        | 7.83887e-51 | 1.000000 | 7.83887e-51 | 1.000000 |
| rad59         | 4.19534e-51 | 1.000000 | 4.19535e-51 | 1.000000 |
| rad50         | 1.66212e-51 | 1.000000 | 1.66212e-51 | 1.000000 |
| rad19syn      | 6.80420e-60 | 1.000000 | 6.80421e-60 | 1.000000 |
| rad52         | 8.15053e-64 | 1.000000 | 8.15054e-64 | 1.000000 |
| rad54         | 8.05148e-65 | 1.000000 | 8.05149e-65 | 1.000000 |
| PAH10+CH3     | 5.25691e-65 | 1.000000 | 5.25692e-65 | 1.000000 |
| rad43         | 1.21393e-65 | 1.000000 | 1.21393e-65 | 1.000000 |
| rad62         | 3.66008e-68 | 1.000000 | 3.66008e-68 | 1.000000 |
| rad51         | 4.07922e-71 | 1.000000 | 4.07922e-71 | 1.000000 |
| rad70         | 4.50233e-74 | 1.000000 | 4.50234e-74 | 1.000000 |
| PhcycC3H3_A+H | 1.91140e-74 | 1.000000 | 1.91140e-74 | 1.000000 |
| rad55         | 1.02896e-74 | 1.000000 | 1.02897e-74 | 1.000000 |
| rad65         | 2.78976e-76 | 1.000000 | 2.78976e-76 | 1.000000 |
| rad58         | 6.43456e-78 | 1.000000 | 6.43457e-78 | 1.000000 |
| PAH1+H        | 8.83355e-80 | 1.000000 | 8.83356e-80 | 1.000000 |
| rad34         | 5.85411e-82 | 1.000000 | 5.85412e-82 | 1.000000 |

|       |             |          |             |          |
|-------|-------------|----------|-------------|----------|
| rad42 | 4.23655e-86 | 1.000000 | 4.23656e-86 | 1.000000 |
| rad41 | 5.35244e-87 | 1.000000 | 5.35244e-87 | 1.000000 |
| rad47 | 7.94862e-90 | 1.000000 | 7.94863e-90 | 1.000000 |

0.100000000E-04 Pa, 40.0000000 K

| Rate constant | True (fraction)     | Effective (fraction) |
|---------------|---------------------|----------------------|
| Total         | 1.02415e-84 (1.00 ) | 1.02415e-84 (1.00 )  |

| species       | PYtrue      | Cumul    | PYeffective | Cumul    |
|---------------|-------------|----------|-------------|----------|
| Indene+H      | 0.999811    | 0.999811 | 0.999813    | 0.999813 |
| rad6          | 0.000187190 | 0.999998 | 0.000187191 | 1.000000 |
| Benzyl+C2H2   | 1.52902e-06 | 1.000000 | 0.000000    | 1.000000 |
| rad2          | 3.16516e-08 | 1.000000 | 3.16516e-08 | 1.000000 |
| rad7          | 1.35272e-08 | 1.000000 | 1.35272e-08 | 1.000000 |
| rad11         | 3.31210e-09 | 1.000000 | 3.31211e-09 | 1.000000 |
| rad1          | 2.00408e-09 | 1.000000 | 2.00408e-09 | 1.000000 |
| rad10         | 1.60472e-09 | 1.000000 | 1.60472e-09 | 1.000000 |
| rad3          | 2.69128e-10 | 1.000000 | 2.69128e-10 | 1.000000 |
| rad4          | 1.36121e-10 | 1.000000 | 1.36121e-10 | 1.000000 |
| rad13         | 7.51548e-11 | 1.000000 | 7.51550e-11 | 1.000000 |
| rad33         | 1.41968e-13 | 1.000000 | 1.41968e-13 | 1.000000 |
| rad35         | 5.92426e-14 | 1.000000 | 5.92426e-14 | 1.000000 |
| rad20         | 3.70237e-14 | 1.000000 | 3.70237e-14 | 1.000000 |
| rad21         | 2.31016e-14 | 1.000000 | 2.31016e-14 | 1.000000 |
| rad23         | 8.83630e-15 | 1.000000 | 8.83631e-15 | 1.000000 |
| rad28         | 5.95870e-15 | 1.000000 | 5.95871e-15 | 1.000000 |
| rad26         | 1.47261e-15 | 1.000000 | 1.47261e-15 | 1.000000 |
| PAH9+H        | 4.62284e-16 | 1.000000 | 4.62284e-16 | 1.000000 |
| rad18         | 1.75287e-16 | 1.000000 | 1.75288e-16 | 1.000000 |
| rad22         | 7.36237e-17 | 1.000000 | 7.36238e-17 | 1.000000 |
| rad45         | 5.82749e-17 | 1.000000 | 5.82750e-17 | 1.000000 |
| rad36         | 3.62675e-18 | 1.000000 | 3.62676e-18 | 1.000000 |
| rad27         | 1.85786e-18 | 1.000000 | 1.85786e-18 | 1.000000 |
| rad31         | 5.35310e-19 | 1.000000 | 5.35311e-19 | 1.000000 |
| PhCHCCH2+H    | 1.42078e-19 | 1.000000 | 1.42078e-19 | 1.000000 |
| rad30         | 1.18653e-19 | 1.000000 | 1.18653e-19 | 1.000000 |
| rad38         | 6.02494e-20 | 1.000000 | 6.02495e-20 | 1.000000 |
| PhCCH+CH3     | 1.22052e-20 | 1.000000 | 1.22052e-20 | 1.000000 |
| PhCCCH3+H     | 2.31453e-21 | 1.000000 | 2.31453e-21 | 1.000000 |
| rad25         | 1.35344e-21 | 1.000000 | 1.35344e-21 | 1.000000 |
| rad24         | 7.83936e-22 | 1.000000 | 7.83937e-22 | 1.000000 |
| rad14         | 2.17987e-22 | 1.000000 | 2.17987e-22 | 1.000000 |
| rad15         | 1.48029e-22 | 1.000000 | 1.48029e-22 | 1.000000 |
| rad8          | 3.42383e-26 | 1.000000 | 3.42383e-26 | 1.000000 |
| rad9          | 1.69315e-28 | 1.000000 | 1.69315e-28 | 1.000000 |
| rad46         | 7.26269e-29 | 1.000000 | 7.26270e-29 | 1.000000 |
| PAH7+H        | 3.25918e-29 | 1.000000 | 3.25918e-29 | 1.000000 |
| Ph+MeAc       | 3.60256e-30 | 1.000000 | 3.60257e-30 | 1.000000 |
| rad12         | 1.22016e-30 | 1.000000 | 1.22016e-30 | 1.000000 |
| rad39         | 8.53128e-32 | 1.000000 | 8.53129e-32 | 1.000000 |
| Ph+Allene     | 2.22722e-34 | 1.000000 | 2.22723e-34 | 1.000000 |
| rad60syn      | 1.93312e-38 | 1.000000 | 1.93312e-38 | 1.000000 |
| rad60anti     | 2.23084e-40 | 1.000000 | 2.23084e-40 | 1.000000 |
| PhCH2CCH+H    | 4.61891e-42 | 1.000000 | 4.61891e-42 | 1.000000 |
| rad37         | 4.30563e-43 | 1.000000 | 4.30563e-43 | 1.000000 |
| rad5          | 2.82622e-46 | 1.000000 | 2.82623e-46 | 1.000000 |
| PAH3+H        | 5.21984e-51 | 1.000000 | 5.21984e-51 | 1.000000 |
| rad59         | 2.79305e-51 | 1.000000 | 2.79305e-51 | 1.000000 |
| rad50         | 1.10150e-51 | 1.000000 | 1.10151e-51 | 1.000000 |
| rad19syn      | 4.83742e-60 | 1.000000 | 4.83742e-60 | 1.000000 |
| rad52         | 5.76527e-64 | 1.000000 | 5.76528e-64 | 1.000000 |
| rad54         | 5.90068e-65 | 1.000000 | 5.90069e-65 | 1.000000 |
| PAH10+CH3     | 3.89442e-65 | 1.000000 | 3.89443e-65 | 1.000000 |
| rad43         | 9.00607e-66 | 1.000000 | 9.00608e-66 | 1.000000 |
| rad62         | 2.75046e-68 | 1.000000 | 2.75046e-68 | 1.000000 |
| rad51         | 3.04376e-71 | 1.000000 | 3.04377e-71 | 1.000000 |
| rad70         | 3.51594e-74 | 1.000000 | 3.51595e-74 | 1.000000 |
| PhcycC3H3_A+H | 1.49910e-74 | 1.000000 | 1.49910e-74 | 1.000000 |
| rad55         | 8.06662e-75 | 1.000000 | 8.06663e-75 | 1.000000 |
| rad65         | 2.14832e-76 | 1.000000 | 2.14832e-76 | 1.000000 |
| rad58         | 5.06551e-78 | 1.000000 | 5.06552e-78 | 1.000000 |
| PAH1+H        | 7.20672e-80 | 1.000000 | 7.20673e-80 | 1.000000 |
| rad34         | 4.82963e-82 | 1.000000 | 4.82964e-82 | 1.000000 |
| rad42         | 3.61900e-86 | 1.000000 | 3.61901e-86 | 1.000000 |
| rad41         | 4.70964e-87 | 1.000000 | 4.70965e-87 | 1.000000 |
| rad47         | 4.33404e-90 | 1.000000 | 4.33405e-90 | 1.000000 |

0.100000000E-04 Pa, 50.0000000 K

=====

Rate constant | True (fraction)                      Effective (fraction)

-----  
Total            | 2.31816e-70 (1.00     ) 2.31816e-70 (1.00     )

| species       | PYtrue      | Cumul    | PYeffective | Cumul    |
|---------------|-------------|----------|-------------|----------|
| Indene+H      | 0.999805    | 0.999805 | 0.999807    | 0.999807 |
| rad6          | 0.000193078 | 0.999998 | 0.000193078 | 1.000000 |
| Benzyl+C2H2   | 2.26158e-06 | 1.000000 | 0.000000    | 1.000000 |
| rad2          | 3.93489e-08 | 1.000000 | 3.93490e-08 | 1.000000 |
| rad7          | 1.39604e-08 | 1.000000 | 1.39604e-08 | 1.000000 |
| rad11         | 3.41695e-09 | 1.000000 | 3.41696e-09 | 1.000000 |
| rad1          | 2.49583e-09 | 1.000000 | 2.49583e-09 | 1.000000 |
| rad10         | 2.00008e-09 | 1.000000 | 2.00009e-09 | 1.000000 |
| rad3          | 3.07984e-10 | 1.000000 | 3.07984e-10 | 1.000000 |
| rad4          | 1.55843e-10 | 1.000000 | 1.55843e-10 | 1.000000 |
| rad13         | 7.76272e-11 | 1.000000 | 7.76274e-11 | 1.000000 |
| rad35         | 3.19950e-13 | 1.000000 | 3.19950e-13 | 1.000000 |
| rad33         | 1.46722e-13 | 1.000000 | 1.46722e-13 | 1.000000 |
| rad20         | 2.70707e-14 | 1.000000 | 2.70708e-14 | 1.000000 |
| rad21         | 1.68991e-14 | 1.000000 | 1.68991e-14 | 1.000000 |
| rad28         | 1.25712e-14 | 1.000000 | 1.25713e-14 | 1.000000 |
| PAH9+H        | 8.83356e-15 | 1.000000 | 8.83358e-15 | 1.000000 |
| rad23         | 3.98538e-15 | 1.000000 | 3.98539e-15 | 1.000000 |
| rad26         | 3.03365e-15 | 1.000000 | 3.03366e-15 | 1.000000 |
| rad18         | 1.28132e-16 | 1.000000 | 1.28132e-16 | 1.000000 |
| rad22         | 4.27919e-17 | 1.000000 | 4.27920e-17 | 1.000000 |
| rad45         | 2.59911e-17 | 1.000000 | 2.59912e-17 | 1.000000 |
| rad27         | 3.16140e-18 | 1.000000 | 3.16141e-18 | 1.000000 |
| rad38         | 2.41697e-18 | 1.000000 | 2.41698e-18 | 1.000000 |
| rad36         | 1.61630e-18 | 1.000000 | 1.61630e-18 | 1.000000 |
| rad31         | 6.67381e-19 | 1.000000 | 6.67382e-19 | 1.000000 |
| rad30         | 4.22622e-19 | 1.000000 | 4.22623e-19 | 1.000000 |
| PhCHCCH2+H    | 2.48092e-19 | 1.000000 | 2.48092e-19 | 1.000000 |
| PhCCH+CH3     | 1.95796e-20 | 1.000000 | 1.95796e-20 | 1.000000 |
| PhCCCH3+H     | 3.61287e-21 | 1.000000 | 3.61287e-21 | 1.000000 |
| rad25         | 2.07989e-21 | 1.000000 | 2.07989e-21 | 1.000000 |
| rad24         | 5.99110e-22 | 1.000000 | 5.99112e-22 | 1.000000 |
| rad14         | 3.20467e-22 | 1.000000 | 3.20468e-22 | 1.000000 |
| rad15         | 2.79075e-22 | 1.000000 | 2.79076e-22 | 1.000000 |
| rad8          | 4.55338e-26 | 1.000000 | 4.55339e-26 | 1.000000 |
| rad9          | 2.11115e-28 | 1.000000 | 2.11116e-28 | 1.000000 |
| rad46         | 1.09182e-28 | 1.000000 | 1.09182e-28 | 1.000000 |
| PAH7+H        | 3.96926e-29 | 1.000000 | 3.96927e-29 | 1.000000 |
| Ph+MeAc       | 4.32682e-30 | 1.000000 | 4.32683e-30 | 1.000000 |
| rad12         | 1.48046e-30 | 1.000000 | 1.48046e-30 | 1.000000 |
| rad39         | 1.01441e-31 | 1.000000 | 1.01442e-31 | 1.000000 |
| Ph+Allene     | 2.62241e-34 | 1.000000 | 2.62241e-34 | 1.000000 |
| rad60syn      | 2.27667e-38 | 1.000000 | 2.27668e-38 | 1.000000 |
| rad60anti     | 2.62803e-40 | 1.000000 | 2.62803e-40 | 1.000000 |
| PhCH2CCH+H    | 5.60378e-42 | 1.000000 | 5.60380e-42 | 1.000000 |
| rad37         | 5.32113e-43 | 1.000000 | 5.32114e-43 | 1.000000 |
| rad5          | 3.52515e-46 | 1.000000 | 3.52516e-46 | 1.000000 |
| PAH3+H        | 6.58677e-51 | 1.000000 | 6.58679e-51 | 1.000000 |
| rad59         | 3.52299e-51 | 1.000000 | 3.52300e-51 | 1.000000 |
| rad50         | 1.37488e-51 | 1.000000 | 1.37488e-51 | 1.000000 |
| rad19syn      | 6.81474e-60 | 1.000000 | 6.81475e-60 | 1.000000 |
| rad52         | 8.06042e-64 | 1.000000 | 8.06044e-64 | 1.000000 |
| rad54         | 8.69738e-65 | 1.000000 | 8.69740e-65 | 1.000000 |
| PAH10+CH3     | 5.98923e-65 | 1.000000 | 5.98924e-65 | 1.000000 |
| rad43         | 1.38737e-65 | 1.000000 | 1.38737e-65 | 1.000000 |
| rad62         | 4.27284e-68 | 1.000000 | 4.27285e-68 | 1.000000 |
| rad51         | 4.60677e-71 | 1.000000 | 4.60678e-71 | 1.000000 |
| rad70         | 5.68210e-74 | 1.000000 | 5.68211e-74 | 1.000000 |
| PhcycC3H3_A+H | 2.43776e-74 | 1.000000 | 2.43776e-74 | 1.000000 |
| rad55         | 1.31092e-74 | 1.000000 | 1.31092e-74 | 1.000000 |
| rad65         | 3.40352e-76 | 1.000000 | 3.40353e-76 | 1.000000 |
| rad58         | 8.28157e-78 | 1.000000 | 8.28159e-78 | 1.000000 |
| PAH1+H        | 1.24148e-79 | 1.000000 | 1.24148e-79 | 1.000000 |
| rad34         | 8.44297e-82 | 1.000000 | 8.44299e-82 | 1.000000 |
| rad42         | 6.97299e-86 | 1.000000 | 6.97301e-86 | 1.000000 |
| rad41         | 1.05028e-86 | 1.000000 | 1.05029e-86 | 1.000000 |
| rad47         | 5.59147e-90 | 1.000000 | 5.59148e-90 | 1.000000 |

0.100000000E-04 Pa, 60.0000000 K

=====

Rate constant | True (fraction)                      Effective (fraction)

-----

Total | 8.44107e-61 (1.00 ) 8.44104e-61 (1.00 )

| species       | PYtrue      | Cumul    | PYeffective | Cumul    |
|---------------|-------------|----------|-------------|----------|
| Indene+H      | 0.999797    | 0.999797 | 0.999800    | 0.999800 |
| rad6          | 0.000199912 | 0.999997 | 0.000199913 | 1.000000 |
| Benzyl+C2H2   | 3.25364e-06 | 1.000000 | 0.000000    | 1.000000 |
| rad2          | 4.65106e-08 | 1.000000 | 4.65107e-08 | 1.000000 |
| rad7          | 1.44675e-08 | 1.000000 | 1.44676e-08 | 1.000000 |
| rad11         | 3.54066e-09 | 1.000000 | 3.54068e-09 | 1.000000 |
| rad1          | 2.95646e-09 | 1.000000 | 2.95647e-09 | 1.000000 |
| rad10         | 2.36925e-09 | 1.000000 | 2.36925e-09 | 1.000000 |
| rad3          | 3.45565e-10 | 1.000000 | 3.45566e-10 | 1.000000 |
| rad4          | 1.74955e-10 | 1.000000 | 1.74955e-10 | 1.000000 |
| rad13         | 8.05132e-11 | 1.000000 | 8.05135e-11 | 1.000000 |
| rad35         | 9.62944e-13 | 1.000000 | 9.62947e-13 | 1.000000 |
| rad33         | 1.52282e-13 | 1.000000 | 1.52283e-13 | 1.000000 |
| PAH9+H        | 6.37571e-14 | 1.000000 | 6.37573e-14 | 1.000000 |
| rad28         | 3.12848e-14 | 1.000000 | 3.12849e-14 | 1.000000 |
| rad20         | 2.10364e-14 | 1.000000 | 2.10365e-14 | 1.000000 |
| rad21         | 1.31397e-14 | 1.000000 | 1.31398e-14 | 1.000000 |
| rad26         | 7.39485e-15 | 1.000000 | 7.39488e-15 | 1.000000 |
| rad23         | 2.17065e-15 | 1.000000 | 2.17066e-15 | 1.000000 |
| rad18         | 9.95898e-17 | 1.000000 | 9.95901e-17 | 1.000000 |
| rad38         | 7.72569e-17 | 1.000000 | 7.72572e-17 | 1.000000 |
| rad30         | 2.86532e-17 | 1.000000 | 2.86533e-17 | 1.000000 |
| rad22         | 2.82373e-17 | 1.000000 | 2.82374e-17 | 1.000000 |
| rad45         | 1.40531e-17 | 1.000000 | 1.40531e-17 | 1.000000 |
| rad27         | 6.67993e-18 | 1.000000 | 6.67995e-18 | 1.000000 |
| rad36         | 8.73190e-19 | 1.000000 | 8.73193e-19 | 1.000000 |
| rad31         | 7.97170e-19 | 1.000000 | 7.97173e-19 | 1.000000 |
| PhCHCCH2+H    | 5.39109e-19 | 1.000000 | 5.39111e-19 | 1.000000 |
| PhCCH+CH3     | 4.01913e-20 | 1.000000 | 4.01915e-20 | 1.000000 |
| PhCCCH3+H     | 7.28955e-21 | 1.000000 | 7.28958e-21 | 1.000000 |
| rad25         | 4.07044e-21 | 1.000000 | 4.07046e-21 | 1.000000 |
| rad15         | 1.11421e-21 | 1.000000 | 1.11422e-21 | 1.000000 |
| rad14         | 6.07081e-22 | 1.000000 | 6.07083e-22 | 1.000000 |
| rad24         | 4.91463e-22 | 1.000000 | 4.91465e-22 | 1.000000 |
| rad8          | 8.38459e-26 | 1.000000 | 8.38462e-26 | 1.000000 |
| rad9          | 3.77301e-28 | 1.000000 | 3.77302e-28 | 1.000000 |
| rad46         | 2.14985e-28 | 1.000000 | 2.14985e-28 | 1.000000 |
| PAH7+H        | 7.01834e-29 | 1.000000 | 7.01836e-29 | 1.000000 |
| Ph+MeAc       | 7.70203e-30 | 1.000000 | 7.70206e-30 | 1.000000 |
| rad12         | 2.63196e-30 | 1.000000 | 2.63197e-30 | 1.000000 |
| rad39         | 1.78820e-31 | 1.000000 | 1.78820e-31 | 1.000000 |
| Ph+Allene     | 4.70338e-34 | 1.000000 | 4.70339e-34 | 1.000000 |
| rad60syn      | 4.06837e-38 | 1.000000 | 4.06838e-38 | 1.000000 |
| rad60anti     | 4.75208e-40 | 1.000000 | 4.75210e-40 | 1.000000 |
| PhCH2CCH+H    | 1.07186e-41 | 1.000000 | 1.07186e-41 | 1.000000 |
| rad37         | 1.05515e-42 | 1.000000 | 1.05516e-42 | 1.000000 |
| rad5          | 7.08788e-46 | 1.000000 | 7.08790e-46 | 1.000000 |
| PAH3+H        | 1.33079e-50 | 1.000000 | 1.33079e-50 | 1.000000 |
| rad59         | 7.11380e-51 | 1.000000 | 7.11383e-51 | 1.000000 |
| rad50         | 2.73815e-51 | 1.000000 | 2.73815e-51 | 1.000000 |
| rad19syn      | 1.58429e-59 | 1.000000 | 1.58429e-59 | 1.000000 |
| rad52         | 1.85738e-63 | 1.000000 | 1.85738e-63 | 1.000000 |
| rad54         | 2.13999e-64 | 1.000000 | 2.14000e-64 | 1.000000 |
| PAH10+CH3     | 1.75053e-64 | 1.000000 | 1.75054e-64 | 1.000000 |
| rad43         | 4.07199e-65 | 1.000000 | 4.07201e-65 | 1.000000 |
| rad62         | 1.22139e-67 | 1.000000 | 1.22140e-67 | 1.000000 |
| rad51         | 1.17351e-70 | 1.000000 | 1.17351e-70 | 1.000000 |
| rad70         | 1.57108e-73 | 1.000000 | 1.57109e-73 | 1.000000 |
| PhcycC3H3_A+H | 6.79435e-74 | 1.000000 | 6.79437e-74 | 1.000000 |
| rad55         | 3.65058e-74 | 1.000000 | 3.65059e-74 | 1.000000 |
| rad65         | 9.19210e-76 | 1.000000 | 9.19213e-76 | 1.000000 |
| rad58         | 2.32414e-77 | 1.000000 | 2.32414e-77 | 1.000000 |
| PAH1+H        | 3.73669e-79 | 1.000000 | 3.73670e-79 | 1.000000 |
| rad34         | 2.58681e-81 | 1.000000 | 2.58682e-81 | 1.000000 |
| rad42         | 3.47485e-85 | 1.000000 | 3.47486e-85 | 1.000000 |
| rad41         | 9.24629e-86 | 1.000000 | 9.24632e-86 | 1.000000 |
| rad47         | 1.33784e-89 | 1.000000 | 1.33784e-89 | 1.000000 |

0.100000000E-04 Pa, 70.000000 K

=====  
Rate constant | True (fraction) | Effective (fraction)  
-----  
Total | 5.61998e-54 (1.00 ) | 5.61996e-54 (1.00 )

| species | PYtrue | Cumul | PYeffective | Cumul |
|---------|--------|-------|-------------|-------|
|---------|--------|-------|-------------|-------|

|               |             |          |             |          |
|---------------|-------------|----------|-------------|----------|
| Indene+H      | 0.999788    | 0.999788 | 0.999793    | 0.999793 |
| rad6          | 0.000207392 | 0.999995 | 0.000207393 | 1.00000  |
| Benzyl+C2H2   | 4.55719e-06 | 1.000000 | 0.00000     | 1.00000  |
| rad2          | 5.31791e-08 | 1.00000  | 5.31794e-08 | 1.00000  |
| rad7          | 1.50255e-08 | 1.00000  | 1.50255e-08 | 1.00000  |
| rad11         | 3.67727e-09 | 1.00000  | 3.67729e-09 | 1.00000  |
| rad1          | 3.38878e-09 | 1.00000  | 3.38880e-09 | 1.00000  |
| rad10         | 2.71451e-09 | 1.00000  | 2.71452e-09 | 1.00000  |
| rad3          | 3.81564e-10 | 1.00000  | 3.81566e-10 | 1.00000  |
| rad4          | 1.93304e-10 | 1.00000  | 1.93305e-10 | 1.00000  |
| rad13         | 8.36888e-11 | 1.00000  | 8.36892e-11 | 1.00000  |
| rad35         | 2.11107e-12 | 1.00000  | 2.11108e-12 | 1.00000  |
| PAH9+H        | 2.62294e-13 | 1.00000  | 2.62295e-13 | 1.00000  |
| rad33         | 1.58415e-13 | 1.00000  | 1.58415e-13 | 1.00000  |
| rad28         | 1.04108e-13 | 1.00000  | 1.04108e-13 | 1.00000  |
| rad26         | 2.42227e-14 | 1.00000  | 2.42228e-14 | 1.00000  |
| rad20         | 1.69943e-14 | 1.00000  | 1.69944e-14 | 1.00000  |
| rad21         | 1.06220e-14 | 1.00000  | 1.06221e-14 | 1.00000  |
| rad23         | 1.32838e-15 | 1.00000  | 1.32838e-15 | 1.00000  |
| rad30         | 1.03564e-15 | 1.00000  | 1.03565e-15 | 1.00000  |
| rad38         | 9.17848e-16 | 1.00000  | 9.17852e-16 | 1.00000  |
| rad18         | 8.04730e-17 | 1.00000  | 8.04734e-17 | 1.00000  |
| rad22         | 2.01272e-17 | 1.00000  | 2.01273e-17 | 1.00000  |
| rad27         | 1.84287e-17 | 1.00000  | 1.84287e-17 | 1.00000  |
| rad45         | 8.55690e-18 | 1.00000  | 8.55694e-18 | 1.00000  |
| PhCHCCH2+H    | 1.66861e-18 | 1.00000  | 1.66862e-18 | 1.00000  |
| rad31         | 9.25686e-19 | 1.00000  | 9.25690e-19 | 1.00000  |
| rad36         | 5.31268e-19 | 1.00000  | 5.31270e-19 | 1.00000  |
| PhCCH+CH3     | 1.19759e-19 | 1.00000  | 1.19760e-19 | 1.00000  |
| rad15         | 9.62134e-20 | 1.00000  | 9.62139e-20 | 1.00000  |
| PhCCCH3+H     | 2.14909e-20 | 1.00000  | 2.14910e-20 | 1.00000  |
| rad25         | 1.14590e-20 | 1.00000  | 1.14590e-20 | 1.00000  |
| rad14         | 1.66837e-21 | 1.00000  | 1.66838e-21 | 1.00000  |
| rad24         | 4.22051e-22 | 1.00000  | 4.22053e-22 | 1.00000  |
| rad8          | 2.34670e-25 | 1.00000  | 2.34671e-25 | 1.00000  |
| rad46         | 2.11034e-27 | 1.00000  | 2.11035e-27 | 1.00000  |
| rad9          | 1.04486e-27 | 1.00000  | 1.04486e-27 | 1.00000  |
| PAH7+H        | 1.93789e-28 | 1.00000  | 1.93790e-28 | 1.00000  |
| Ph+MeAc       | 2.17055e-29 | 1.00000  | 2.17056e-29 | 1.00000  |
| rad12         | 7.35626e-30 | 1.00000  | 7.35629e-30 | 1.00000  |
| rad39         | 4.98041e-31 | 1.00000  | 4.98043e-31 | 1.00000  |
| Ph+Allene     | 1.35323e-33 | 1.00000  | 1.35323e-33 | 1.00000  |
| rad60syn      | 1.16357e-37 | 1.00000  | 1.16358e-37 | 1.00000  |
| rad60anti     | 1.38459e-39 | 1.00000  | 1.38460e-39 | 1.00000  |
| PhCH2CCH+H    | 3.35986e-41 | 1.00000  | 3.35987e-41 | 1.00000  |
| rad37         | 3.55430e-42 | 1.00000  | 3.55432e-42 | 1.00000  |
| rad5          | 2.44131e-45 | 1.00000  | 2.44132e-45 | 1.00000  |
| PAH3+H        | 4.45738e-50 | 1.00000  | 4.45740e-50 | 1.00000  |
| rad59         | 2.38103e-50 | 1.00000  | 2.38104e-50 | 1.00000  |
| rad50         | 9.03521e-51 | 1.00000  | 9.03525e-51 | 1.00000  |
| rad19syn      | 6.31444e-59 | 1.00000  | 6.31446e-59 | 1.00000  |
| rad52         | 7.38526e-63 | 1.00000  | 7.38529e-63 | 1.00000  |
| PAH10+CH3     | 1.40347e-63 | 1.00000  | 1.40348e-63 | 1.00000  |
| rad54         | 9.21497e-64 | 1.00000  | 9.21501e-64 | 1.00000  |
| rad43         | 3.29664e-64 | 1.00000  | 3.29665e-64 | 1.00000  |
| rad62         | 9.14326e-67 | 1.00000  | 9.14331e-67 | 1.00000  |
| rad51         | 5.44006e-70 | 1.00000  | 5.44009e-70 | 1.00000  |
| rad70         | 8.17228e-73 | 1.00000  | 8.17231e-73 | 1.00000  |
| PhcycC3H3_A+H | 3.58845e-73 | 1.00000  | 3.58846e-73 | 1.00000  |
| rad55         | 1.92452e-73 | 1.00000  | 1.92453e-73 | 1.00000  |
| rad65         | 4.74565e-75 | 1.00000  | 4.74567e-75 | 1.00000  |
| rad58         | 1.24391e-76 | 1.00000  | 1.24392e-76 | 1.00000  |
| PAH1+H        | 2.35842e-78 | 1.00000  | 2.35843e-78 | 1.00000  |
| rad34         | 1.68872e-80 | 1.00000  | 1.68873e-80 | 1.00000  |
| rad42         | 1.13477e-83 | 1.00000  | 1.13477e-83 | 1.00000  |
| rad41         | 5.00583e-84 | 1.00000  | 5.00585e-84 | 1.00000  |
| rad47         | 7.15890e-89 | 1.00000  | 7.15893e-89 | 1.00000  |

0.100000000E-04 Pa, 80.000000 K

=====

| Rate constant | True (fraction)     | Effective (fraction) |
|---------------|---------------------|----------------------|
| Total         | 7.28864e-49 (1.00 ) | 7.28860e-49 (1.00 )  |

| species     | PYtrue      | Cumul    | PYeffective | Cumul    |
|-------------|-------------|----------|-------------|----------|
| Indene+H    | 0.999778    | 0.999778 | 0.999785    | 0.999785 |
| rad6        | 0.000215335 | 0.999993 | 0.000215336 | 1.00000  |
| Benzyl+C2H2 | 6.25307e-06 | 1.000000 | 0.00000     | 1.00000  |
| rad2        | 5.93756e-08 | 1.000000 | 5.93760e-08 | 1.00000  |

|               |             |          |             |         |
|---------------|-------------|----------|-------------|---------|
| rad7          | 1.56206e-08 | 1.000000 | 1.56207e-08 | 1.00000 |
| rad11         | 3.82332e-09 | 1.000000 | 3.82334e-09 | 1.00000 |
| rad1          | 3.79421e-09 | 1.000000 | 3.79423e-09 | 1.00000 |
| rad10         | 3.03701e-09 | 1.000000 | 3.03703e-09 | 1.00000 |
| rad3          | 4.15936e-10 | 1.000000 | 4.15939e-10 | 1.00000 |
| rad4          | 2.10869e-10 | 1.000000 | 2.10870e-10 | 1.00000 |
| rad13         | 8.70805e-11 | 1.000000 | 8.70811e-11 | 1.00000 |
| rad35         | 3.84615e-12 | 1.000000 | 3.84618e-12 | 1.00000 |
| PAH9+H        | 7.63817e-13 | 1.000000 | 7.63821e-13 | 1.00000 |
| rad28         | 4.70119e-13 | 1.000000 | 4.70122e-13 | 1.00000 |
| rad33         | 1.64980e-13 | 1.000000 | 1.64981e-13 | 1.00000 |
| rad26         | 1.10435e-13 | 1.000000 | 1.10435e-13 | 1.00000 |
| rad30         | 1.51683e-14 | 1.000000 | 1.51684e-14 | 1.00000 |
| rad20         | 1.41012e-14 | 1.000000 | 1.41013e-14 | 1.00000 |
| rad21         | 8.82042e-15 | 1.000000 | 8.82047e-15 | 1.00000 |
| rad38         | 5.80677e-15 | 1.000000 | 5.80680e-15 | 1.00000 |
| rad23         | 8.79964e-16 | 1.000000 | 8.79970e-16 | 1.00000 |
| rad18         | 6.67772e-17 | 1.000000 | 6.67776e-17 | 1.00000 |
| rad27         | 5.91242e-17 | 1.000000 | 5.91245e-17 | 1.00000 |
| rad22         | 1.51012e-17 | 1.000000 | 1.51013e-17 | 1.00000 |
| PhCHCCH2+H    | 1.05914e-17 | 1.000000 | 1.05914e-17 | 1.00000 |
| rad45         | 5.64907e-18 | 1.000000 | 5.64911e-18 | 1.00000 |
| rad15         | 4.85827e-18 | 1.000000 | 4.85830e-18 | 1.00000 |
| rad31         | 1.05375e-18 | 1.000000 | 1.05375e-18 | 1.00000 |
| PhCCH+CH3     | 8.18136e-19 | 1.000000 | 8.18141e-19 | 1.00000 |
| rad36         | 3.50491e-19 | 1.000000 | 3.50493e-19 | 1.00000 |
| PhCCCH3+H     | 1.50371e-19 | 1.000000 | 1.50371e-19 | 1.00000 |
| rad25         | 5.52579e-20 | 1.000000 | 5.52582e-20 | 1.00000 |
| rad14         | 8.45452e-21 | 1.000000 | 8.45458e-21 | 1.00000 |
| rad24         | 3.74260e-22 | 1.000000 | 3.74263e-22 | 1.00000 |
| rad8          | 1.82866e-24 | 1.000000 | 1.82867e-24 | 1.00000 |
| rad46         | 4.62265e-25 | 1.000000 | 4.62268e-25 | 1.00000 |
| rad9          | 6.88271e-27 | 1.000000 | 6.88275e-27 | 1.00000 |
| PAH7+H        | 1.27961e-27 | 1.000000 | 1.27962e-27 | 1.00000 |
| Ph+MeAc       | 1.47613e-28 | 1.000000 | 1.47614e-28 | 1.00000 |
| rad12         | 4.94066e-29 | 1.000000 | 4.94069e-29 | 1.00000 |
| rad39         | 3.34127e-30 | 1.000000 | 3.34129e-30 | 1.00000 |
| Ph+Allene     | 9.46760e-33 | 1.000000 | 9.46766e-33 | 1.00000 |
| rad60syn      | 8.07987e-37 | 1.000000 | 8.07992e-37 | 1.00000 |
| rad60anti     | 9.83932e-39 | 1.000000 | 9.83938e-39 | 1.00000 |
| PhCH2CCH+H    | 2.60350e-40 | 1.000000 | 2.60351e-40 | 1.00000 |
| rad37         | 3.17675e-41 | 1.000000 | 3.17677e-41 | 1.00000 |
| rad5          | 2.27113e-44 | 1.000000 | 2.27115e-44 | 1.00000 |
| PAH3+H        | 3.74192e-49 | 1.000000 | 3.74194e-49 | 1.00000 |
| rad59         | 1.99696e-49 | 1.000000 | 1.99697e-49 | 1.00000 |
| rad50         | 7.66737e-50 | 1.000000 | 7.66742e-50 | 1.00000 |
| rad19syn      | 6.90761e-58 | 1.000000 | 6.90766e-58 | 1.00000 |
| rad52         | 9.24318e-62 | 1.000000 | 9.24323e-62 | 1.00000 |
| PAH10+CH3     | 5.79413e-62 | 1.000000 | 5.79416e-62 | 1.00000 |
| rad43         | 1.37168e-62 | 1.000000 | 1.37169e-62 | 1.00000 |
| rad54         | 1.19425e-62 | 1.000000 | 1.19425e-62 | 1.00000 |
| rad62         | 3.90525e-65 | 1.000000 | 3.90527e-65 | 1.00000 |
| rad51         | 1.16140e-68 | 1.000000 | 1.16141e-68 | 1.00000 |
| rad70         | 1.87746e-71 | 1.000000 | 1.87748e-71 | 1.00000 |
| PhcycC3H3_A+H | 8.68931e-72 | 1.000000 | 8.68936e-72 | 1.00000 |
| rad55         | 4.62562e-72 | 1.000000 | 4.62565e-72 | 1.00000 |
| rad65         | 1.53262e-73 | 1.000000 | 1.53263e-73 | 1.00000 |
| rad58         | 3.15288e-75 | 1.000000 | 3.15290e-75 | 1.00000 |
| PAH1+H        | 1.04611e-76 | 1.000000 | 1.04612e-76 | 1.00000 |
| rad34         | 8.29473e-79 | 1.000000 | 8.29478e-79 | 1.00000 |
| rad42         | 2.16524e-81 | 1.000000 | 2.16526e-81 | 1.00000 |
| rad41         | 1.06088e-81 | 1.000000 | 1.06088e-81 | 1.00000 |
| rad47         | 4.21355e-87 | 1.000000 | 4.21358e-87 | 1.00000 |

0.100000000E-04 Pa, 90.000000 K

=====

| Rate constant | True (fraction)     | Effective (fraction) |
|---------------|---------------------|----------------------|
| Total         | 6.85154e-45 (1.00 ) | 6.85148e-45 (1.00 )  |

| species     | PYtrue      | Cumul    | PYeffective | Cumul    |
|-------------|-------------|----------|-------------|----------|
| Indene+H    | 0.999768    | 0.999768 | 0.999776    | 0.999776 |
| rad6        | 0.000223560 | 0.999992 | 0.000223562 | 1.000000 |
| Benzyl+C2H2 | 8.45076e-06 | 1.00000  | 0.00000     | 1.000000 |
| rad2        | 6.51564e-08 | 1.00000  | 6.51569e-08 | 1.000000 |
| rad7        | 1.62397e-08 | 1.00000  | 1.62398e-08 | 1.000000 |
| rad1        | 4.17642e-09 | 1.00000  | 4.17646e-09 | 1.000000 |
| rad11       | 3.97547e-09 | 1.00000  | 3.97550e-09 | 1.000000 |
| rad10       | 3.33898e-09 | 1.00000  | 3.33901e-09 | 1.000000 |

|               |             |         |             |          |
|---------------|-------------|---------|-------------|----------|
| rad3          | 4.48771e-10 | 1.00000 | 4.48775e-10 | 1.000000 |
| rad4          | 2.27697e-10 | 1.00000 | 2.27699e-10 | 1.000000 |
| rad13         | 9.06152e-11 | 1.00000 | 9.06160e-11 | 1.000000 |
| rad35         | 6.25344e-12 | 1.00000 | 6.25349e-12 | 1.000000 |
| rad28         | 2.25584e-12 | 1.00000 | 2.25586e-12 | 1.000000 |
| PAH9+H        | 1.77750e-12 | 1.00000 | 1.77751e-12 | 1.000000 |
| rad26         | 5.44895e-13 | 1.00000 | 5.44899e-13 | 1.000000 |
| rad33         | 1.71841e-13 | 1.00000 | 1.71843e-13 | 1.000000 |
| rad30         | 1.20940e-13 | 1.00000 | 1.20941e-13 | 1.000000 |
| rad38         | 2.43184e-14 | 1.00000 | 2.43186e-14 | 1.000000 |
| rad20         | 1.19293e-14 | 1.00000 | 1.19294e-14 | 1.000000 |
| rad21         | 7.46809e-15 | 1.00000 | 7.46815e-15 | 1.000000 |
| rad23         | 6.17511e-16 | 1.00000 | 6.17516e-16 | 1.000000 |
| rad27         | 1.80124e-16 | 1.00000 | 1.80125e-16 | 1.000000 |
| PhCHCCH2+H    | 1.41985e-16 | 1.00000 | 1.41986e-16 | 1.000000 |
| rad15         | 1.02413e-16 | 1.00000 | 1.02414e-16 | 1.000000 |
| rad18         | 5.64768e-17 | 1.00000 | 5.64773e-17 | 1.000000 |
| PhCCH+CH3     | 1.62056e-17 | 1.00000 | 1.62057e-17 | 1.000000 |
| rad22         | 1.17462e-17 | 1.00000 | 1.17463e-17 | 1.000000 |
| rad45         | 3.95395e-18 | 1.00000 | 3.95398e-18 | 1.000000 |
| PhCCCH3+H     | 3.41443e-18 | 1.00000 | 3.41446e-18 | 1.000000 |
| rad31         | 1.18221e-18 | 1.00000 | 1.18222e-18 | 1.000000 |
| rad25         | 3.56065e-19 | 1.00000 | 3.56068e-19 | 1.000000 |
| rad36         | 2.45183e-19 | 1.00000 | 2.45185e-19 | 1.000000 |
| rad14         | 6.61405e-20 | 1.00000 | 6.61410e-20 | 1.000000 |
| rad24         | 3.39852e-22 | 1.00000 | 3.39855e-22 | 1.000000 |
| rad8          | 1.35722e-22 | 1.00000 | 1.35723e-22 | 1.000000 |
| rad46         | 3.75736e-23 | 1.00000 | 3.75739e-23 | 1.000000 |
| rad9          | 1.44142e-24 | 1.00000 | 1.44143e-24 | 1.000000 |
| PAH7+H        | 2.60248e-25 | 1.00000 | 2.60250e-25 | 1.000000 |
| Ph+MeAc       | 1.03551e-26 | 1.00000 | 1.03552e-26 | 1.000000 |
| rad12         | 9.65509e-27 | 1.00000 | 9.65517e-27 | 1.000000 |
| rad39         | 1.97752e-28 | 1.00000 | 1.97753e-28 | 1.000000 |
| Ph+Allene     | 5.86191e-31 | 1.00000 | 5.86196e-31 | 1.000000 |
| rad60syn      | 4.96171e-35 | 1.00000 | 4.96175e-35 | 1.000000 |
| rad60anti     | 6.19659e-37 | 1.00000 | 6.19664e-37 | 1.000000 |
| PhCH2CCH+H    | 1.79586e-38 | 1.00000 | 1.79588e-38 | 1.000000 |
| rad37         | 2.36349e-39 | 1.00000 | 2.36351e-39 | 1.000000 |
| rad5          | 1.74792e-42 | 1.00000 | 1.74793e-42 | 1.000000 |
| PAH3+H        | 2.80853e-47 | 1.00000 | 2.80855e-47 | 1.000000 |
| rad59         | 1.49719e-47 | 1.00000 | 1.49720e-47 | 1.000000 |
| rad50         | 6.28087e-48 | 1.00000 | 6.28092e-48 | 1.000000 |
| rad19syn      | 7.33743e-56 | 1.00000 | 7.33750e-56 | 1.000000 |
| rad52         | 1.64457e-59 | 1.00000 | 1.64459e-59 | 1.000000 |
| PAH10+CH3     | 1.55866e-59 | 1.00000 | 1.55868e-59 | 1.000000 |
| rad43         | 3.69710e-60 | 1.00000 | 3.69714e-60 | 1.000000 |
| rad54         | 1.67480e-60 | 1.00000 | 1.67481e-60 | 1.000000 |
| rad62         | 1.20780e-62 | 1.00000 | 1.20781e-62 | 1.000000 |
| rad51         | 4.73612e-66 | 1.00000 | 4.73616e-66 | 1.000000 |
| rad70         | 6.05118e-69 | 1.00000 | 6.05123e-69 | 1.000000 |
| PhcycC3H3_A+H | 2.98191e-69 | 1.00000 | 2.98193e-69 | 1.000000 |
| rad55         | 1.57119e-69 | 1.00000 | 1.57120e-69 | 1.000000 |
| rad65         | 9.53006e-71 | 1.00000 | 9.53014e-71 | 1.000000 |
| rad58         | 1.14068e-72 | 1.00000 | 1.14069e-72 | 1.000000 |
| PAH1+H        | 6.36650e-74 | 1.00000 | 6.36655e-74 | 1.000000 |
| rad34         | 5.58584e-76 | 1.00000 | 5.58589e-76 | 1.000000 |
| rad42         | 2.10591e-78 | 1.00000 | 2.10593e-78 | 1.000000 |
| rad41         | 1.07265e-78 | 1.00000 | 1.07266e-78 | 1.000000 |
| rad47         | 3.95868e-84 | 1.00000 | 3.95871e-84 | 1.000000 |

0.100000000E-04 Pa, 100.000000 K

=====

| Rate constant | True (fraction)     | Effective (fraction) |
|---------------|---------------------|----------------------|
| Total         | 1.02671e-41 (1.00 ) | 1.02670e-41 (1.00 )  |

| species     | PYtrue      | Cumul    | PYeffective | Cumul    |
|-------------|-------------|----------|-------------|----------|
| Indene+H    | 0.999757    | 0.999757 | 0.999768    | 0.999768 |
| rad6        | 0.000231834 | 0.999989 | 0.000231837 | 1.000000 |
| Benzyl+C2H2 | 1.12940e-05 | 1.00000  | 0.00000     | 1.000000 |
| rad2        | 7.04856e-08 | 1.00000  | 7.04864e-08 | 1.000000 |
| rad7        | 1.68657e-08 | 1.00000  | 1.68659e-08 | 1.000000 |
| rad1        | 4.53324e-09 | 1.00000  | 4.53329e-09 | 1.000000 |
| rad11       | 4.12956e-09 | 1.00000  | 4.12961e-09 | 1.000000 |
| rad10       | 3.61917e-09 | 1.00000  | 3.61921e-09 | 1.000000 |
| rad3        | 4.79507e-10 | 1.00000  | 4.79512e-10 | 1.000000 |
| rad4        | 2.43507e-10 | 1.00000  | 2.43509e-10 | 1.000000 |
| rad13       | 9.41995e-11 | 1.00000  | 9.42006e-11 | 1.000000 |
| rad35       | 9.46016e-12 | 1.00000  | 9.46027e-12 | 1.000000 |

|               |             |         |             |         |
|---------------|-------------|---------|-------------|---------|
| rad28         | 9.40910e-12 | 1.00000 | 9.40920e-12 | 1.00000 |
| PAH9+H        | 3.55675e-12 | 1.00000 | 3.55679e-12 | 1.00000 |
| rad26         | 2.32116e-12 | 1.00000 | 2.32119e-12 | 1.00000 |
| rad30         | 6.32551e-13 | 1.00000 | 6.32558e-13 | 1.00000 |
| rad33         | 1.78823e-13 | 1.00000 | 1.78825e-13 | 1.00000 |
| rad38         | 7.69263e-14 | 1.00000 | 7.69272e-14 | 1.00000 |
| rad20         | 1.02390e-14 | 1.00000 | 1.02392e-14 | 1.00000 |
| rad21         | 6.41580e-15 | 1.00000 | 6.41587e-15 | 1.00000 |
| PhCHCCH2+H    | 1.90178e-15 | 1.00000 | 1.90180e-15 | 1.00000 |
| rad15         | 1.16422e-15 | 1.00000 | 1.16423e-15 | 1.00000 |
| rad27         | 4.73438e-16 | 1.00000 | 4.73443e-16 | 1.00000 |
| rad23         | 4.52970e-16 | 1.00000 | 4.52975e-16 | 1.00000 |
| PhCCH+CH3     | 3.27245e-16 | 1.00000 | 3.27249e-16 | 1.00000 |
| PhCCCH3+H     | 7.89080e-17 | 1.00000 | 7.89089e-17 | 1.00000 |
| rad18         | 4.84410e-17 | 1.00000 | 4.84416e-17 | 1.00000 |
| rad22         | 9.38052e-18 | 1.00000 | 9.38063e-18 | 1.00000 |
| rad45         | 2.89537e-18 | 1.00000 | 2.89541e-18 | 1.00000 |
| rad25         | 2.02432e-18 | 1.00000 | 2.02434e-18 | 1.00000 |
| rad31         | 1.31128e-18 | 1.00000 | 1.31129e-18 | 1.00000 |
| rad14         | 4.72359e-19 | 1.00000 | 4.72365e-19 | 1.00000 |
| rad36         | 1.79469e-19 | 1.00000 | 1.79471e-19 | 1.00000 |
| rad8          | 8.17820e-21 | 1.00000 | 8.17829e-21 | 1.00000 |
| rad46         | 1.26422e-21 | 1.00000 | 1.26424e-21 | 1.00000 |
| rad24         | 3.14308e-22 | 1.00000 | 3.14311e-22 | 1.00000 |
| rad9          | 1.75742e-22 | 1.00000 | 1.75744e-22 | 1.00000 |
| PAH7+H        | 4.71172e-23 | 1.00000 | 4.71177e-23 | 1.00000 |
| Ph+MeAc       | 1.61659e-23 | 1.00000 | 1.61661e-23 | 1.00000 |
| rad12         | 2.88163e-24 | 1.00000 | 2.88166e-24 | 1.00000 |
| rad39         | 3.60081e-25 | 1.00000 | 3.60085e-25 | 1.00000 |
| Ph+Allene     | 1.55407e-28 | 1.00000 | 1.55409e-28 | 1.00000 |
| rad60syn      | 1.30388e-32 | 1.00000 | 1.30389e-32 | 1.00000 |
| rad60anti     | 1.67212e-34 | 1.00000 | 1.67214e-34 | 1.00000 |
| PhCH2CCH+H    | 5.30724e-36 | 1.00000 | 5.30730e-36 | 1.00000 |
| rad37         | 6.82894e-37 | 1.00000 | 6.82901e-37 | 1.00000 |
| rad5          | 5.11951e-40 | 1.00000 | 5.11957e-40 | 1.00000 |
| PAH3+H        | 8.96846e-45 | 1.00000 | 8.96856e-45 | 1.00000 |
| rad59         | 4.77620e-45 | 1.00000 | 4.77625e-45 | 1.00000 |
| rad50         | 2.07910e-45 | 1.00000 | 2.07912e-45 | 1.00000 |
| rad19syn      | 3.22486e-53 | 1.00000 | 3.22490e-53 | 1.00000 |
| PAH10+CH3     | 1.17043e-56 | 1.00000 | 1.17044e-56 | 1.00000 |
| rad52         | 1.04986e-56 | 1.00000 | 1.04988e-56 | 1.00000 |
| rad43         | 2.77854e-57 | 1.00000 | 2.77858e-57 | 1.00000 |
| rad54         | 9.74144e-58 | 1.00000 | 9.74155e-58 | 1.00000 |
| rad62         | 1.06064e-59 | 1.00000 | 1.06065e-59 | 1.00000 |
| rad51         | 5.32236e-63 | 1.00000 | 5.32242e-63 | 1.00000 |
| rad70         | 7.30673e-66 | 1.00000 | 7.30682e-66 | 1.00000 |
| PhcycC3H3_A+H | 3.78815e-66 | 1.00000 | 3.78819e-66 | 1.00000 |
| rad55         | 1.97605e-66 | 1.00000 | 1.97607e-66 | 1.00000 |
| rad65         | 1.41688e-67 | 1.00000 | 1.41689e-67 | 1.00000 |
| rad58         | 1.50896e-69 | 1.00000 | 1.50898e-69 | 1.00000 |
| PAH1+H        | 1.26949e-70 | 1.00000 | 1.26950e-70 | 1.00000 |
| rad34         | 1.23066e-72 | 1.00000 | 1.23067e-72 | 1.00000 |
| rad42         | 5.50055e-75 | 1.00000 | 5.50061e-75 | 1.00000 |
| rad41         | 2.89149e-75 | 1.00000 | 2.89152e-75 | 1.00000 |
| rad47         | 7.64026e-81 | 1.00000 | 7.64034e-81 | 1.00000 |

0.100000000E-04 Pa, 110.000000 K

=====

| Rate constant | True (fraction)     | Effective (fraction) |
|---------------|---------------------|----------------------|
| Total         | 4.04932e-39 (1.00 ) | 4.04926e-39 (1.00 )  |

| species     | PYtrue      | Cumul    | PYeffective | Cumul    |
|-------------|-------------|----------|-------------|----------|
| Indene+H    | 0.999745    | 0.999745 | 0.999760    | 0.999760 |
| rad6        | 0.000239858 | 0.999985 | 0.000239862 | 1.000000 |
| Benzyl+C2H2 | 1.49693e-05 | 1.000000 | 0.000000    | 1.000000 |
| rad2        | 7.53570e-08 | 1.000000 | 7.53582e-08 | 1.000000 |
| rad7        | 1.74767e-08 | 1.000000 | 1.74770e-08 | 1.000000 |
| rad1        | 4.86436e-09 | 1.000000 | 4.86443e-09 | 1.000000 |
| rad11       | 4.28020e-09 | 1.000000 | 4.28026e-09 | 1.000000 |
| rad10       | 3.87631e-09 | 1.000000 | 3.87637e-09 | 1.000000 |
| rad3        | 5.07810e-10 | 1.000000 | 5.07818e-10 | 1.000000 |
| rad4        | 2.58130e-10 | 1.000000 | 2.58134e-10 | 1.000000 |
| rad13       | 9.77117e-11 | 1.000000 | 9.77131e-11 | 1.000000 |
| rad28       | 3.23634e-11 | 1.000000 | 3.23638e-11 | 1.000000 |
| rad35       | 1.36666e-11 | 1.000000 | 1.36668e-11 | 1.000000 |
| rad26       | 8.03935e-12 | 1.000000 | 8.03947e-12 | 1.000000 |
| PAH9+H      | 6.41357e-12 | 1.000000 | 6.41367e-12 | 1.000000 |
| rad30       | 2.44476e-12 | 1.000000 | 2.44480e-12 | 1.000000 |



|               |             |          |             |          |
|---------------|-------------|----------|-------------|----------|
| rad38         | 1.99950e-13 | 1.000000 | 1.99953e-13 | 1.000000 |
| rad33         | 1.85694e-13 | 1.000000 | 1.85697e-13 | 1.000000 |
| PhCHCCH2+H    | 1.86097e-14 | 1.000000 | 1.86099e-14 | 1.000000 |
| rad20         | 8.88640e-15 | 1.000000 | 8.88654e-15 | 1.000000 |
| rad15         | 8.47640e-15 | 1.000000 | 8.47652e-15 | 1.000000 |
| rad21         | 5.57377e-15 | 1.000000 | 5.57386e-15 | 1.000000 |
| PhCCH+CH3     | 4.45158e-15 | 1.000000 | 4.45165e-15 | 1.000000 |
| PhCCCH3+H     | 1.19019e-15 | 1.000000 | 1.19021e-15 | 1.000000 |
| rad27         | 1.06294e-15 | 1.000000 | 1.06296e-15 | 1.000000 |
| rad23         | 3.44404e-16 | 1.000000 | 3.44409e-16 | 1.000000 |
| rad18         | 4.19913e-17 | 1.000000 | 4.19920e-17 | 1.000000 |
| rad25         | 8.92086e-18 | 1.000000 | 8.92100e-18 | 1.000000 |
| rad22         | 7.64110e-18 | 1.000000 | 7.64122e-18 | 1.000000 |
| rad14         | 2.55035e-18 | 1.000000 | 2.55038e-18 | 1.000000 |
| rad45         | 2.19965e-18 | 1.000000 | 2.19968e-18 | 1.000000 |
| rad31         | 1.44083e-18 | 1.000000 | 1.44085e-18 | 1.000000 |
| rad8          | 2.54125e-19 | 1.000000 | 2.54129e-19 | 1.000000 |
| rad36         | 1.36313e-19 | 1.000000 | 1.36315e-19 | 1.000000 |
| rad46         | 2.24497e-20 | 1.000000 | 2.24500e-20 | 1.000000 |
| rad9          | 8.71605e-21 | 1.000000 | 8.71618e-21 | 1.000000 |
| PAH7+H        | 2.76796e-21 | 1.000000 | 2.76800e-21 | 1.000000 |
| Ph+MeAc       | 1.77213e-21 | 1.000000 | 1.77215e-21 | 1.000000 |
| rad24         | 2.94962e-22 | 1.000000 | 2.94966e-22 | 1.000000 |
| rad12         | 1.92009e-22 | 1.000000 | 1.92011e-22 | 1.000000 |
| rad39         | 3.71043e-23 | 1.000000 | 3.71048e-23 | 1.000000 |
| Ph+Allene     | 1.91647e-24 | 1.000000 | 1.91650e-24 | 1.000000 |
| rad60syn      | 2.70846e-26 | 1.000000 | 2.70850e-26 | 1.000000 |
| rad60anti     | 1.02858e-27 | 1.000000 | 1.02860e-27 | 1.000000 |
| PhCH2CCH+H    | 4.28168e-33 | 1.000000 | 4.28175e-33 | 1.000000 |
| rad37         | 5.08949e-34 | 1.000000 | 5.08957e-34 | 1.000000 |
| rad5          | 3.77768e-37 | 1.000000 | 3.77773e-37 | 1.000000 |
| PAH3+H        | 7.75167e-42 | 1.000000 | 7.75178e-42 | 1.000000 |
| rad59         | 4.12508e-42 | 1.000000 | 4.12514e-42 | 1.000000 |
| rad50         | 1.72188e-42 | 1.000000 | 1.72190e-42 | 1.000000 |
| rad19syn      | 3.27779e-50 | 1.000000 | 3.27784e-50 | 1.000000 |
| PAH10+CH3     | 1.44693e-53 | 1.000000 | 1.44695e-53 | 1.000000 |
| rad52         | 1.26784e-53 | 1.000000 | 1.26786e-53 | 1.000000 |
| rad43         | 3.43691e-54 | 1.000000 | 3.43696e-54 | 1.000000 |
| rad54         | 1.16904e-54 | 1.000000 | 1.16906e-54 | 1.000000 |
| rad62         | 1.53538e-56 | 1.000000 | 1.53540e-56 | 1.000000 |
| rad51         | 1.01086e-59 | 1.000000 | 1.01087e-59 | 1.000000 |
| rad70         | 1.55930e-62 | 1.000000 | 1.55932e-62 | 1.000000 |
| PhcycC3H3_A+H | 8.46720e-63 | 1.000000 | 8.46733e-63 | 1.000000 |
| rad55         | 4.36852e-63 | 1.000000 | 4.36859e-63 | 1.000000 |
| rad65         | 3.46625e-64 | 1.000000 | 3.46630e-64 | 1.000000 |
| rad58         | 3.49648e-66 | 1.000000 | 3.49653e-66 | 1.000000 |
| PAH1+H        | 4.36515e-67 | 1.000000 | 4.36522e-67 | 1.000000 |
| rad34         | 4.73644e-69 | 1.000000 | 4.73651e-69 | 1.000000 |
| rad42         | 2.34835e-71 | 1.000000 | 2.34839e-71 | 1.000000 |
| rad41         | 1.26676e-71 | 1.000000 | 1.26678e-71 | 1.000000 |
| rad47         | 2.40595e-77 | 1.000000 | 2.40599e-77 | 1.000000 |

0.100000000E-04 Pa, 120.000000 K

=====

| Rate constant | True (fraction)    | Effective (fraction) |
|---------------|--------------------|----------------------|
| Total         | 5.87106e-37 (1.00) | 5.87094e-37 (1.00)   |

| species     | PYtrue      | Cumul    | PYeffective | Cumul    |
|-------------|-------------|----------|-------------|----------|
| Indene+H    | 0.999733    | 0.999733 | 0.999753    | 0.999753 |
| rad6        | 0.000247264 | 0.999980 | 0.000247269 | 1.000000 |
| Benzyl+C2H2 | 1.97163e-05 | 1.000000 | 0.000000    | 1.000000 |
| rad2        | 7.96295e-08 | 1.000000 | 7.96310e-08 | 1.000000 |
| rad7        | 1.80459e-08 | 1.000000 | 1.80463e-08 | 1.000000 |
| rad1        | 5.16072e-09 | 1.000000 | 5.16082e-09 | 1.000000 |
| rad11       | 4.42081e-09 | 1.000000 | 4.42089e-09 | 1.000000 |
| rad10       | 4.10517e-09 | 1.000000 | 4.10525e-09 | 1.000000 |
| rad3        | 5.33346e-10 | 1.000000 | 5.33356e-10 | 1.000000 |
| rad4        | 2.71400e-10 | 1.000000 | 2.71405e-10 | 1.000000 |
| rad13       | 1.01002e-10 | 1.000000 | 1.01004e-10 | 1.000000 |
| rad28       | 9.27356e-11 | 1.000000 | 9.27374e-11 | 1.000000 |
| rad26       | 2.29148e-11 | 1.000000 | 2.29153e-11 | 1.000000 |
| rad35       | 1.91750e-11 | 1.000000 | 1.91754e-11 | 1.000000 |
| PAH9+H      | 1.07542e-11 | 1.000000 | 1.07544e-11 | 1.000000 |
| rad30       | 7.55918e-12 | 1.000000 | 7.55933e-12 | 1.000000 |
| rad38       | 4.51601e-13 | 1.000000 | 4.51610e-13 | 1.000000 |
| rad33       | 1.92171e-13 | 1.000000 | 1.92175e-13 | 1.000000 |
| PhCHCCH2+H  | 1.32769e-13 | 1.000000 | 1.32771e-13 | 1.000000 |
| rad15       | 4.43339e-14 | 1.000000 | 4.43347e-14 | 1.000000 |

|               |             |         |             |         |
|---------------|-------------|---------|-------------|---------|
| PhCCH+CH3     | 4.14434e-14 | 1.00000 | 4.14442e-14 | 1.00000 |
| PhCCCH3+H     | 1.20075e-14 | 1.00000 | 1.20077e-14 | 1.00000 |
| rad20         | 7.77976e-15 | 1.00000 | 7.77992e-15 | 1.00000 |
| rad21         | 4.88492e-15 | 1.00000 | 4.88502e-15 | 1.00000 |
| rad27         | 2.07622e-15 | 1.00000 | 2.07626e-15 | 1.00000 |
| rad23         | 2.69990e-16 | 1.00000 | 2.69996e-16 | 1.00000 |
| rad18         | 3.66971e-17 | 1.00000 | 3.66979e-17 | 1.00000 |
| rad25         | 3.07990e-17 | 1.00000 | 3.07996e-17 | 1.00000 |
| rad14         | 1.04606e-17 | 1.00000 | 1.04608e-17 | 1.00000 |
| rad22         | 6.31947e-18 | 1.00000 | 6.31959e-18 | 1.00000 |
| rad8          | 4.55295e-18 | 1.00000 | 4.55304e-18 | 1.00000 |
| rad45         | 1.72343e-18 | 1.00000 | 1.72346e-18 | 1.00000 |
| rad31         | 1.56969e-18 | 1.00000 | 1.56972e-18 | 1.00000 |
| rad46         | 2.47598e-19 | 1.00000 | 2.47603e-19 | 1.00000 |
| rad9          | 2.27576e-19 | 1.00000 | 2.27580e-19 | 1.00000 |
| rad36         | 1.06797e-19 | 1.00000 | 1.06799e-19 | 1.00000 |
| PAH7+H        | 8.18088e-20 | 1.00000 | 8.18104e-20 | 1.00000 |
| Ph+MeAc       | 7.39513e-20 | 1.00000 | 7.39528e-20 | 1.00000 |
| rad12         | 6.19902e-21 | 1.00000 | 6.19914e-21 | 1.00000 |
| rad39         | 1.50870e-21 | 1.00000 | 1.50873e-21 | 1.00000 |
| rad24         | 2.80155e-22 | 1.00000 | 2.80161e-22 | 1.00000 |
| Ph+Allene     | 1.55304e-22 | 1.00000 | 1.55307e-22 | 1.00000 |
| rad60syn      | 1.65777e-24 | 1.00000 | 1.65781e-24 | 1.00000 |
| rad60anti     | 9.96793e-26 | 1.00000 | 9.96813e-26 | 1.00000 |
| PhCH2CCH+H    | 2.56059e-30 | 1.00000 | 2.56064e-30 | 1.00000 |
| rad37         | 2.93910e-31 | 1.00000 | 2.93916e-31 | 1.00000 |
| rad5          | 2.17312e-34 | 1.00000 | 2.17316e-34 | 1.00000 |
| PAH3+H        | 4.99103e-39 | 1.00000 | 4.99113e-39 | 1.00000 |
| rad59         | 2.65377e-39 | 1.00000 | 2.65382e-39 | 1.00000 |
| rad50         | 1.04870e-39 | 1.00000 | 1.04872e-39 | 1.00000 |
| rad19syn      | 2.43264e-47 | 1.00000 | 2.43268e-47 | 1.00000 |
| PAH10+CH3     | 1.24638e-50 | 1.00000 | 1.24640e-50 | 1.00000 |
| rad52         | 1.02733e-50 | 1.00000 | 1.02735e-50 | 1.00000 |
| rad43         | 2.96267e-51 | 1.00000 | 2.96273e-51 | 1.00000 |
| rad54         | 1.00008e-51 | 1.00000 | 1.00010e-51 | 1.00000 |
| rad62         | 1.54946e-53 | 1.00000 | 1.54949e-53 | 1.00000 |
| rad51         | 1.27655e-56 | 1.00000 | 1.27657e-56 | 1.00000 |
| rad70         | 2.37431e-59 | 1.00000 | 2.37436e-59 | 1.00000 |
| PhcycC3H3_A+H | 1.35490e-59 | 1.00000 | 1.35493e-59 | 1.00000 |
| rad55         | 6.89519e-60 | 1.00000 | 6.89532e-60 | 1.00000 |
| rad65         | 5.64533e-61 | 1.00000 | 5.64544e-61 | 1.00000 |
| rad58         | 5.80548e-63 | 1.00000 | 5.80559e-63 | 1.00000 |
| PAH1+H        | 1.11326e-63 | 1.00000 | 1.11329e-63 | 1.00000 |
| rad34         | 1.38317e-65 | 1.00000 | 1.38320e-65 | 1.00000 |
| rad42         | 7.10958e-68 | 1.00000 | 7.10972e-68 | 1.00000 |
| rad41         | 3.89437e-68 | 1.00000 | 3.89444e-68 | 1.00000 |
| rad47         | 5.10015e-74 | 1.00000 | 5.10026e-74 | 1.00000 |

0.100000000E-04 Pa, 130.000000 K

=====

| Rate constant | True (fraction)     | Effective (fraction) |
|---------------|---------------------|----------------------|
| Total         | 3.94360e-35 (1.00 ) | 3.94350e-35 (1.00 )  |

| species     | PYtrue      | Cumul    | PYeffective | Cumul    |
|-------------|-------------|----------|-------------|----------|
| Indene+H    | 0.999720    | 0.999720 | 0.999746    | 0.999746 |
| rad6        | 0.000253639 | 0.999974 | 0.000253646 | 1.000000 |
| Benzyl+C2H2 | 2.58400e-05 | 0.999999 | 0.000000    | 1.000000 |
| rad2        | 8.33390e-08 | 1.000000 | 8.33411e-08 | 1.000000 |
| rad7        | 1.85429e-08 | 1.000000 | 1.85434e-08 | 1.000000 |
| rad1        | 5.42465e-09 | 1.000000 | 5.42479e-09 | 1.000000 |
| rad11       | 4.54390e-09 | 1.000000 | 4.54402e-09 | 1.000000 |
| rad10       | 4.30348e-09 | 1.000000 | 4.30359e-09 | 1.000000 |
| rad3        | 5.55353e-10 | 1.000000 | 5.55368e-10 | 1.000000 |
| rad4        | 2.82929e-10 | 1.000000 | 2.82936e-10 | 1.000000 |
| rad28       | 2.26863e-10 | 1.000000 | 2.26869e-10 | 1.000000 |
| rad13       | 1.03899e-10 | 1.000000 | 1.03902e-10 | 1.000000 |
| rad26       | 5.52789e-11 | 1.000000 | 5.52803e-11 | 1.000000 |
| rad35       | 2.64213e-11 | 1.000000 | 2.64220e-11 | 1.000000 |
| rad30       | 1.97538e-11 | 1.000000 | 1.97543e-11 | 1.000000 |
| PAH9+H      | 1.71339e-11 | 1.000000 | 1.71344e-11 | 1.000000 |
| rad38       | 9.20746e-13 | 1.000000 | 9.20769e-13 | 1.000000 |
| PhCHCCH2+H  | 7.26743e-13 | 1.000000 | 7.26762e-13 | 1.000000 |
| PhCCH+CH3   | 2.82693e-13 | 1.000000 | 2.82700e-13 | 1.000000 |
| rad33       | 1.97929e-13 | 1.000000 | 1.97934e-13 | 1.000000 |
| rad15       | 1.80313e-13 | 1.000000 | 1.80318e-13 | 1.000000 |
| PhCCCH3+H   | 8.72845e-14 | 1.000000 | 8.72868e-14 | 1.000000 |
| rad20       | 6.85817e-15 | 1.000000 | 6.85835e-15 | 1.000000 |
| rad21       | 4.31127e-15 | 1.000000 | 4.31139e-15 | 1.000000 |

|               |             |          |             |          |
|---------------|-------------|----------|-------------|----------|
| rad27         | 3.60877e-15 | 1.000000 | 3.60887e-15 | 1.000000 |
| rad23         | 2.17573e-16 | 1.000000 | 2.17578e-16 | 1.000000 |
| rad25         | 8.65499e-17 | 1.000000 | 8.65522e-17 | 1.000000 |
| rad8          | 5.29080e-17 | 1.000000 | 5.29094e-17 | 1.000000 |
| rad14         | 3.40163e-17 | 1.000000 | 3.40172e-17 | 1.000000 |
| rad18         | 3.22726e-17 | 1.000000 | 3.22734e-17 | 1.000000 |
| rad22         | 5.28859e-18 | 1.000000 | 5.28872e-18 | 1.000000 |
| rad9          | 3.63151e-18 | 1.000000 | 3.63160e-18 | 1.000000 |
| rad46         | 1.89856e-18 | 1.000000 | 1.89861e-18 | 1.000000 |
| Ph+MeAc       | 1.76066e-18 | 1.000000 | 1.76071e-18 | 1.000000 |
| rad31         | 1.69665e-18 | 1.000000 | 1.69669e-18 | 1.000000 |
| PAH7+H        | 1.43874e-18 | 1.000000 | 1.43877e-18 | 1.000000 |
| rad45         | 1.38872e-18 | 1.000000 | 1.38876e-18 | 1.000000 |
| rad12         | 1.17319e-19 | 1.000000 | 1.17322e-19 | 1.000000 |
| rad36         | 8.60685e-20 | 1.000000 | 8.60707e-20 | 1.000000 |
| rad39         | 3.48497e-20 | 1.000000 | 3.48506e-20 | 1.000000 |
| Ph+Allene     | 5.84424e-21 | 1.000000 | 5.84439e-21 | 1.000000 |
| rad24         | 2.68809e-22 | 1.000000 | 2.68816e-22 | 1.000000 |
| rad60syn      | 5.24597e-23 | 1.000000 | 5.24610e-23 | 1.000000 |
| rad60anti     | 4.01378e-24 | 1.000000 | 4.01388e-24 | 1.000000 |
| PhCH2CCH+H    | 1.64539e-25 | 1.000000 | 1.64543e-25 | 1.000000 |
| rad37         | 3.40781e-26 | 1.000000 | 3.40790e-26 | 1.000000 |
| rad5          | 1.70334e-31 | 1.000000 | 1.70339e-31 | 1.000000 |
| PAH3+H        | 4.28399e-36 | 1.000000 | 4.28410e-36 | 1.000000 |
| rad59         | 2.27581e-36 | 1.000000 | 2.27587e-36 | 1.000000 |
| rad50         | 8.46788e-37 | 1.000000 | 8.46810e-37 | 1.000000 |
| rad19syn      | 2.19757e-44 | 1.000000 | 2.19763e-44 | 1.000000 |
| PAH10+CH3     | 9.33628e-48 | 1.000000 | 9.33652e-48 | 1.000000 |
| rad52         | 8.29228e-48 | 1.000000 | 8.29249e-48 | 1.000000 |
| rad43         | 2.22038e-48 | 1.000000 | 2.22044e-48 | 1.000000 |
| rad54         | 8.74643e-49 | 1.000000 | 8.74666e-49 | 1.000000 |
| rad62         | 1.35154e-50 | 1.000000 | 1.35158e-50 | 1.000000 |
| rad51         | 1.51117e-53 | 1.000000 | 1.51121e-53 | 1.000000 |
| rad70         | 3.12659e-56 | 1.000000 | 3.12667e-56 | 1.000000 |
| PhcycC3H3_A+H | 1.87466e-56 | 1.000000 | 1.87471e-56 | 1.000000 |
| rad55         | 9.39047e-57 | 1.000000 | 9.39071e-57 | 1.000000 |
| rad65         | 8.59996e-58 | 1.000000 | 8.60018e-58 | 1.000000 |
| rad58         | 8.33278e-60 | 1.000000 | 8.33300e-60 | 1.000000 |
| PAH1+H        | 2.46341e-60 | 1.000000 | 2.46348e-60 | 1.000000 |
| rad34         | 3.51911e-62 | 1.000000 | 3.51920e-62 | 1.000000 |
| rad42         | 1.85941e-64 | 1.000000 | 1.85946e-64 | 1.000000 |
| rad41         | 1.02376e-64 | 1.000000 | 1.02378e-64 | 1.000000 |
| rad47         | 1.01712e-70 | 1.000000 | 1.01715e-70 | 1.000000 |

0.100000000E-04 Pa, 140.000000 K

=====

| Rate constant | True (fraction)     | Effective (fraction) |
|---------------|---------------------|----------------------|
| Total         | 1.44756e-33 (1.00 ) | 1.44751e-33 (1.00 )  |

| species     | PYtrue      | Cumul    | PYeffective | Cumul    |
|-------------|-------------|----------|-------------|----------|
| Indene+H    | 0.999708    | 0.999708 | 0.999741    | 0.999741 |
| rad6        | 0.000258554 | 0.999967 | 0.000258562 | 1.000000 |
| Benzyl+C2H2 | 3.37244e-05 | 1.00000  | 0.00000     | 1.000000 |
| rad2        | 8.62439e-08 | 1.00000  | 8.62468e-08 | 1.000000 |
| rad7        | 1.89359e-08 | 1.00000  | 1.89365e-08 | 1.000000 |
| rad1        | 5.64032e-09 | 1.00000  | 5.64051e-09 | 1.000000 |
| rad11       | 4.64170e-09 | 1.00000  | 4.64185e-09 | 1.000000 |
| rad10       | 4.46342e-09 | 1.00000  | 4.46357e-09 | 1.000000 |
| rad3        | 5.72592e-10 | 1.00000  | 5.72611e-10 | 1.000000 |
| rad28       | 4.85463e-10 | 1.00000  | 4.85480e-10 | 1.000000 |
| rad4        | 2.92084e-10 | 1.00000  | 2.92094e-10 | 1.000000 |
| rad26       | 1.15992e-10 | 1.00000  | 1.15996e-10 | 1.000000 |
| rad13       | 1.06226e-10 | 1.00000  | 1.06229e-10 | 1.000000 |
| rad30       | 4.53666e-11 | 1.00000  | 4.53682e-11 | 1.000000 |
| rad35       | 3.60123e-11 | 1.00000  | 3.60135e-11 | 1.000000 |
| PAH9+H      | 2.63303e-11 | 1.00000  | 2.63312e-11 | 1.000000 |
| PhCHCCH2+H  | 3.20638e-12 | 1.00000  | 3.20649e-12 | 1.000000 |
| rad38       | 1.74016e-12 | 1.00000  | 1.74022e-12 | 1.000000 |
| PhCCH+CH3   | 1.50123e-12 | 1.00000  | 1.50128e-12 | 1.000000 |
| rad15       | 6.03360e-13 | 1.00000  | 6.03380e-13 | 1.000000 |
| PhCCCH3+H   | 4.87641e-13 | 1.00000  | 4.87657e-13 | 1.000000 |
| rad33       | 2.02626e-13 | 1.00000  | 2.02633e-13 | 1.000000 |
| rad20       | 6.07955e-15 | 1.00000  | 6.07976e-15 | 1.000000 |
| rad27       | 5.69507e-15 | 1.00000  | 5.69526e-15 | 1.000000 |
| rad21       | 3.82662e-15 | 1.00000  | 3.82675e-15 | 1.000000 |
| rad8        | 4.36483e-16 | 1.00000  | 4.36498e-16 | 1.000000 |
| rad25       | 2.05404e-16 | 1.00000  | 2.05411e-16 | 1.000000 |
| rad23       | 1.80013e-16 | 1.00000  | 1.80019e-16 | 1.000000 |

|               |             |         |             |          |
|---------------|-------------|---------|-------------|----------|
| rad14         | 9.14498e-17 | 1.00000 | 9.14529e-17 | 1.000000 |
| rad9          | 3.93076e-17 | 1.00000 | 3.93089e-17 | 1.000000 |
| rad18         | 2.85208e-17 | 1.00000 | 2.85218e-17 | 1.000000 |
| Ph+MeAc       | 2.69708e-17 | 1.00000 | 2.69717e-17 | 1.000000 |
| PAH7+H        | 1.68208e-17 | 1.00000 | 1.68213e-17 | 1.000000 |
| rad46         | 1.09701e-17 | 1.00000 | 1.09705e-17 | 1.000000 |
| rad22         | 4.46725e-18 | 1.00000 | 4.46740e-18 | 1.000000 |
| rad31         | 1.81948e-18 | 1.00000 | 1.81954e-18 | 1.000000 |
| rad12         | 1.45893e-18 | 1.00000 | 1.45898e-18 | 1.000000 |
| rad45         | 1.15012e-18 | 1.00000 | 1.15015e-18 | 1.000000 |
| rad39         | 5.16699e-19 | 1.00000 | 5.16716e-19 | 1.000000 |
| Ph+Allene     | 1.30004e-19 | 1.00000 | 1.30008e-19 | 1.000000 |
| rad36         | 7.13065e-20 | 1.00000 | 7.13089e-20 | 1.000000 |
| rad60syn      | 1.00451e-21 | 1.00000 | 1.00454e-21 | 1.000000 |
| rad24         | 2.60205e-22 | 1.00000 | 2.60214e-22 | 1.000000 |
| rad60anti     | 9.33592e-23 | 1.00000 | 9.33623e-23 | 1.000000 |
| PhCH2CCH+H    | 1.18588e-23 | 1.00000 | 1.18592e-23 | 1.000000 |
| rad37         | 3.38520e-24 | 1.00000 | 3.38532e-24 | 1.000000 |
| rad5          | 6.96749e-27 | 1.00000 | 6.96773e-27 | 1.000000 |
| PAH3+H        | 1.15604e-28 | 1.00000 | 1.15608e-28 | 1.000000 |
| rad59         | 5.78022e-29 | 1.00000 | 5.78042e-29 | 1.000000 |
| rad50         | 7.59923e-30 | 1.00000 | 7.59948e-30 | 1.000000 |
| rad19syn      | 1.47639e-41 | 1.00000 | 1.47644e-41 | 1.000000 |
| rad52         | 4.37605e-45 | 1.00000 | 4.37619e-45 | 1.000000 |
| PAH10+CH3     | 4.36360e-45 | 1.00000 | 4.36375e-45 | 1.000000 |
| rad43         | 1.03797e-45 | 1.00000 | 1.03800e-45 | 1.000000 |
| rad54         | 5.35543e-46 | 1.00000 | 5.35561e-46 | 1.000000 |
| rad62         | 7.29274e-48 | 1.00000 | 7.29299e-48 | 1.000000 |
| rad51         | 1.10725e-50 | 1.00000 | 1.10729e-50 | 1.000000 |
| rad70         | 2.52153e-53 | 1.00000 | 2.52161e-53 | 1.000000 |
| PhcycC3H3_A+H | 1.58976e-53 | 1.00000 | 1.58981e-53 | 1.000000 |
| rad55         | 7.81968e-54 | 1.00000 | 7.81995e-54 | 1.000000 |
| rad65         | 8.14384e-55 | 1.00000 | 8.14411e-55 | 1.000000 |
| rad58         | 7.33193e-57 | 1.00000 | 7.33217e-57 | 1.000000 |
| PAH1+H        | 3.34063e-57 | 1.00000 | 3.34074e-57 | 1.000000 |
| rad34         | 5.47795e-59 | 1.00000 | 5.47813e-59 | 1.000000 |
| rad42         | 3.01440e-61 | 1.00000 | 3.01450e-61 | 1.000000 |
| rad41         | 1.65097e-61 | 1.00000 | 1.65102e-61 | 1.000000 |
| rad47         | 1.27343e-67 | 1.00000 | 1.27348e-67 | 1.000000 |

0.100000000E-04 Pa, 150.000000 K

=====  
Rate constant | True (fraction) | Effective (fraction)  
-----

Total | 3.27736e-32 (1.00) | 3.27722e-32 (1.00)

| species     | PYtrue      | Cumul    | PYeffective | Cumul    |
|-------------|-------------|----------|-------------|----------|
| Indene+H    | 0.999694    | 0.999694 | 0.999738    | 0.999738 |
| rad6        | 0.000261607 | 0.999956 | 0.000261619 | 1.000000 |
| Benzyl+C2H2 | 4.38485e-05 | 0.999999 | 0.00000     | 1.000000 |
| rad2        | 8.82829e-08 | 1.000000 | 8.82867e-08 | 1.000000 |
| rad7        | 1.91949e-08 | 1.000000 | 1.91958e-08 | 1.000000 |
| rad1        | 5.80340e-09 | 1.000000 | 5.80365e-09 | 1.000000 |
| rad11       | 4.70682e-09 | 1.000000 | 4.70703e-09 | 1.000000 |
| rad10       | 4.57895e-09 | 1.000000 | 4.57915e-09 | 1.000000 |
| rad28       | 9.27854e-10 | 1.000000 | 9.27895e-10 | 1.000000 |
| rad3        | 5.84890e-10 | 1.000000 | 5.84916e-10 | 1.000000 |
| rad4        | 2.98776e-10 | 1.000000 | 2.98789e-10 | 1.000000 |
| rad26       | 2.16651e-10 | 1.000000 | 2.16661e-10 | 1.000000 |
| rad13       | 1.07811e-10 | 1.000000 | 1.07816e-10 | 1.000000 |
| rad30       | 9.42098e-11 | 1.000000 | 9.42140e-11 | 1.000000 |
| rad35       | 4.87735e-11 | 1.000000 | 4.87757e-11 | 1.000000 |
| PAH9+H      | 3.94368e-11 | 1.000000 | 3.94385e-11 | 1.000000 |
| PhCHCCH2+H  | 1.18685e-11 | 1.000000 | 1.18691e-11 | 1.000000 |
| PhCCH+CH3   | 6.51050e-12 | 1.000000 | 6.51079e-12 | 1.000000 |
| rad38       | 3.10594e-12 | 1.000000 | 3.10608e-12 | 1.000000 |
| PhCCCH3+H   | 2.20211e-12 | 1.000000 | 2.20220e-12 | 1.000000 |
| rad15       | 1.73082e-12 | 1.000000 | 1.73089e-12 | 1.000000 |
| rad33       | 2.05936e-13 | 1.000000 | 2.05945e-13 | 1.000000 |
| rad27       | 8.29543e-15 | 1.000000 | 8.29579e-15 | 1.000000 |
| rad20       | 5.41398e-15 | 1.000000 | 5.41421e-15 | 1.000000 |
| rad21       | 3.41231e-15 | 1.000000 | 3.41246e-15 | 1.000000 |
| rad8        | 2.73611e-15 | 1.000000 | 2.73623e-15 | 1.000000 |
| rad25       | 4.24391e-16 | 1.000000 | 4.24410e-16 | 1.000000 |
| rad9        | 3.11832e-16 | 1.000000 | 3.11845e-16 | 1.000000 |
| Ph+MeAc     | 2.90250e-16 | 1.000000 | 2.90263e-16 | 1.000000 |
| rad14       | 2.10393e-16 | 1.000000 | 2.10402e-16 | 1.000000 |
| rad23       | 1.52962e-16 | 1.000000 | 1.52968e-16 | 1.000000 |
| PAH7+H      | 1.41946e-16 | 1.000000 | 1.41952e-16 | 1.000000 |

|               |             |          |             |          |
|---------------|-------------|----------|-------------|----------|
| rad46         | 5.06667e-17 | 1.000000 | 5.06689e-17 | 1.000000 |
| rad18         | 2.53019e-17 | 1.000000 | 2.53030e-17 | 1.000000 |
| rad12         | 1.29707e-17 | 1.000000 | 1.29713e-17 | 1.000000 |
| rad39         | 5.37735e-18 | 1.000000 | 5.37758e-18 | 1.000000 |
| rad22         | 3.80143e-18 | 1.000000 | 3.80160e-18 | 1.000000 |
| rad31         | 1.93580e-18 | 1.000000 | 1.93589e-18 | 1.000000 |
| Ph+Allene     | 1.92636e-18 | 1.000000 | 1.92644e-18 | 1.000000 |
| rad45         | 9.78583e-19 | 1.000000 | 9.78626e-19 | 1.000000 |
| rad36         | 6.07080e-20 | 1.000000 | 6.07106e-20 | 1.000000 |
| rad60syn      | 1.29360e-20 | 1.000000 | 1.29366e-20 | 1.000000 |
| rad60anti     | 1.42012e-21 | 1.000000 | 1.42019e-21 | 1.000000 |
| PhCH2CCH+H    | 3.70371e-22 | 1.000000 | 3.70387e-22 | 1.000000 |
| rad24         | 2.53853e-22 | 1.000000 | 2.53864e-22 | 1.000000 |
| rad37         | 1.02431e-22 | 1.000000 | 1.02435e-22 | 1.000000 |
| rad5          | 3.31059e-25 | 1.000000 | 3.31074e-25 | 1.000000 |
| PAH3+H        | 1.81873e-26 | 1.000000 | 1.81881e-26 | 1.000000 |
| rad59         | 8.19789e-27 | 1.000000 | 8.19825e-27 | 1.000000 |
| rad50         | 5.49367e-28 | 1.000000 | 5.49391e-28 | 1.000000 |
| rad19syn      | 2.98125e-38 | 1.000000 | 2.98139e-38 | 1.000000 |
| rad52         | 5.09112e-42 | 1.000000 | 5.09135e-42 | 1.000000 |
| PAH10+CH3     | 2.77656e-42 | 1.000000 | 2.77668e-42 | 1.000000 |
| rad54         | 8.68149e-43 | 1.000000 | 8.68187e-43 | 1.000000 |
| rad43         | 6.57572e-43 | 1.000000 | 6.57601e-43 | 1.000000 |
| rad62         | 5.00149e-45 | 1.000000 | 5.00171e-45 | 1.000000 |
| rad51         | 1.16009e-47 | 1.000000 | 1.16014e-47 | 1.000000 |
| rad70         | 2.34490e-50 | 1.000000 | 2.34500e-50 | 1.000000 |
| PhcycC3H3_A+H | 1.51526e-50 | 1.000000 | 1.51533e-50 | 1.000000 |
| rad55         | 7.36668e-51 | 1.000000 | 7.36701e-51 | 1.000000 |
| rad65         | 1.07924e-51 | 1.000000 | 1.07929e-51 | 1.000000 |
| rad58         | 7.17881e-54 | 1.000000 | 7.17912e-54 | 1.000000 |
| PAH1+H        | 4.37380e-54 | 1.000000 | 4.37399e-54 | 1.000000 |
| rad34         | 7.85600e-56 | 1.000000 | 7.85635e-56 | 1.000000 |
| rad42         | 5.31444e-58 | 1.000000 | 5.31467e-58 | 1.000000 |
| rad41         | 2.97611e-58 | 1.000000 | 2.97624e-58 | 1.000000 |
| rad47         | 2.22231e-64 | 1.000000 | 2.22241e-64 | 1.000000 |

0.100000000E-04 Pa, 160.000000 K

=====

| Rate constant | True (fraction)     | Effective (fraction) |
|---------------|---------------------|----------------------|
| Total         | 5.01169e-31 (1.00 ) | 5.01140e-31 (1.00 )  |

| species     | PYtrue      | Cumul    | PYeffective | Cumul    |
|-------------|-------------|----------|-------------|----------|
| Indene+H    | 0.999681    | 0.999681 | 0.999737    | 0.999737 |
| rad6        | 0.000262467 | 0.999943 | 0.000262482 | 0.999999 |
| Benzyl+C2H2 | 5.68042e-05 | 1.00000  | 0.00000     | 0.999999 |
| rad2        | 8.94099e-08 | 1.00000  | 8.94150e-08 | 1.000000 |
| rad7        | 1.92949e-08 | 1.00000  | 1.92960e-08 | 1.000000 |
| rad1        | 5.91039e-09 | 1.00000  | 5.91073e-09 | 1.000000 |
| rad11       | 4.73307e-09 | 1.00000  | 4.73334e-09 | 1.000000 |
| rad10       | 4.64750e-09 | 1.00000  | 4.64776e-09 | 1.000000 |
| rad28       | 1.61139e-09 | 1.00000  | 1.61148e-09 | 1.000000 |
| rad3        | 5.91612e-10 | 1.00000  | 5.91646e-10 | 1.000000 |
| rad26       | 3.67049e-10 | 1.00000  | 3.67070e-10 | 1.000000 |
| rad4        | 3.02673e-10 | 1.00000  | 3.02691e-10 | 1.000000 |
| rad30       | 1.80675e-10 | 1.00000  | 1.80685e-10 | 1.000000 |
| rad13       | 1.08512e-10 | 1.00000  | 1.08518e-10 | 1.000000 |
| rad35       | 6.58089e-11 | 1.00000  | 6.58127e-11 | 1.000000 |
| PAH9+H      | 5.79818e-11 | 1.00000  | 5.79851e-11 | 1.000000 |
| PhCHCCH2+H  | 3.80352e-11 | 1.00000  | 3.80374e-11 | 1.000000 |
| PhCCH+CH3   | 2.39261e-11 | 1.00000  | 2.39275e-11 | 1.000000 |
| PhCCCH3+H   | 8.35656e-12 | 1.00000  | 8.35704e-12 | 1.000000 |
| rad38       | 5.30501e-12 | 1.00000  | 5.30531e-12 | 1.000000 |
| rad15       | 4.38905e-12 | 1.00000  | 4.38930e-12 | 1.000000 |
| rad33       | 2.07578e-13 | 1.00000  | 2.07590e-13 | 1.000000 |
| rad8        | 1.37213e-14 | 1.00000  | 1.37221e-14 | 1.000000 |
| rad27       | 1.13004e-14 | 1.00000  | 1.13011e-14 | 1.000000 |
| rad20       | 4.83956e-15 | 1.00000  | 4.83984e-15 | 1.000000 |
| rad21       | 3.05473e-15 | 1.00000  | 3.05490e-15 | 1.000000 |
| Ph+MeAc     | 2.34296e-15 | 1.00000  | 2.34310e-15 | 1.000000 |
| rad9        | 1.92204e-15 | 1.00000  | 1.92215e-15 | 1.000000 |
| PAH7+H      | 9.19855e-16 | 1.00000  | 9.19907e-16 | 1.000000 |
| rad25       | 7.82037e-16 | 1.00000  | 7.82081e-16 | 1.000000 |
| rad14       | 4.25709e-16 | 1.00000  | 4.25733e-16 | 1.000000 |
| rad46       | 1.95487e-16 | 1.00000  | 1.95498e-16 | 1.000000 |
| rad23       | 1.33707e-16 | 1.00000  | 1.33714e-16 | 1.000000 |
| rad12       | 8.78391e-17 | 1.00000  | 8.78441e-17 | 1.000000 |
| rad39       | 4.19928e-17 | 1.00000  | 4.19952e-17 | 1.000000 |
| rad18       | 2.25138e-17 | 1.00000  | 2.25151e-17 | 1.000000 |

|               |             |         |             |          |
|---------------|-------------|---------|-------------|----------|
| Ph+Allene     | 2.05384e-17 | 1.00000 | 2.05396e-17 | 1.000000 |
| rad22         | 3.25399e-18 | 1.00000 | 3.25417e-18 | 1.000000 |
| rad31         | 2.04362e-18 | 1.00000 | 2.04374e-18 | 1.000000 |
| rad45         | 8.57235e-19 | 1.00000 | 8.57283e-19 | 1.000000 |
| rad60syn      | 1.20850e-19 | 1.00000 | 1.20857e-19 | 1.000000 |
| rad36         | 5.32255e-20 | 1.00000 | 5.32286e-20 | 1.000000 |
| rad60anti     | 1.53284e-20 | 1.00000 | 1.53292e-20 | 1.000000 |
| PhCH2CCH+H    | 7.06888e-21 | 1.00000 | 7.06928e-21 | 1.000000 |
| rad37         | 1.92182e-21 | 1.00000 | 1.92193e-21 | 1.000000 |
| rad24         | 2.49422e-22 | 1.00000 | 2.49436e-22 | 1.000000 |
| rad5          | 7.57332e-24 | 1.00000 | 7.57375e-24 | 1.000000 |
| PAH3+H        | 5.45432e-25 | 1.00000 | 5.45463e-25 | 1.000000 |
| rad59         | 2.30297e-25 | 1.00000 | 2.30310e-25 | 1.000000 |
| rad50         | 1.44925e-26 | 1.00000 | 1.44933e-26 | 1.000000 |
| rad19syn      | 3.66271e-35 | 1.00000 | 3.66292e-35 | 1.000000 |
| rad52         | 4.66857e-39 | 1.00000 | 4.66884e-39 | 1.000000 |
| PAH10+CH3     | 1.37533e-39 | 1.00000 | 1.37541e-39 | 1.000000 |
| rad54         | 1.04816e-39 | 1.00000 | 1.04822e-39 | 1.000000 |
| rad43         | 3.21951e-40 | 1.00000 | 3.21969e-40 | 1.000000 |
| rad62         | 2.33616e-42 | 1.00000 | 2.33630e-42 | 1.000000 |
| rad51         | 6.68249e-45 | 1.00000 | 6.68287e-45 | 1.000000 |
| rad70         | 1.33514e-47 | 1.00000 | 1.33521e-47 | 1.000000 |
| PhcycC3H3_A+H | 8.52497e-48 | 1.00000 | 8.52546e-48 | 1.000000 |
| rad55         | 4.13711e-48 | 1.00000 | 4.13734e-48 | 1.000000 |
| rad65         | 7.52129e-49 | 1.00000 | 7.52172e-49 | 1.000000 |
| rad58         | 4.07473e-51 | 1.00000 | 4.07496e-51 | 1.000000 |
| PAH1+H        | 2.97626e-51 | 1.00000 | 2.97643e-51 | 1.000000 |
| rad34         | 5.75510e-53 | 1.00000 | 5.75542e-53 | 1.000000 |
| rad42         | 4.98091e-55 | 1.00000 | 4.98119e-55 | 1.000000 |
| rad41         | 2.88072e-55 | 1.00000 | 2.88088e-55 | 1.000000 |
| rad47         | 2.05177e-61 | 1.00000 | 2.05189e-61 | 1.000000 |

0.100000000E-04 Pa, 170.000000 K

=====

| Rate constant | True (fraction)     | Effective (fraction) |
|---------------|---------------------|----------------------|
| Total         | 5.54821e-30 (1.00 ) | 5.54780e-30 (1.00 )  |

| species     | PYtrue      | Cumul    | PYeffective | Cumul    |
|-------------|-------------|----------|-------------|----------|
| Indene+H    | 0.999666    | 0.999666 | 0.999739    | 0.999739 |
| rad6        | 0.000260905 | 0.999927 | 0.000260924 | 1.000000 |
| Benzyl+C2H2 | 7.33171e-05 | 1.00000  | 0.00000     | 1.000000 |
| rad2        | 8.95155e-08 | 1.00000  | 8.95221e-08 | 1.000000 |
| rad7        | 1.92181e-08 | 1.00000  | 1.92195e-08 | 1.000000 |
| rad1        | 5.95339e-09 | 1.00000  | 5.95383e-09 | 1.000000 |
| rad11       | 4.71605e-09 | 1.00000  | 4.71640e-09 | 1.000000 |
| rad10       | 4.66397e-09 | 1.00000  | 4.66431e-09 | 1.000000 |
| rad28       | 2.57883e-09 | 1.00000  | 2.57902e-09 | 1.000000 |
| rad3        | 5.91477e-10 | 1.00000  | 5.91520e-10 | 1.000000 |
| rad26       | 5.72656e-10 | 1.00000  | 5.72698e-10 | 1.000000 |
| rad30       | 3.25110e-10 | 1.00000  | 3.25134e-10 | 1.000000 |
| rad4        | 3.03112e-10 | 1.00000  | 3.03134e-10 | 1.000000 |
| rad13       | 1.08225e-10 | 1.00000  | 1.08233e-10 | 1.000000 |
| PhCHCCH2+H  | 1.08160e-10 | 1.00000  | 1.08168e-10 | 1.000000 |
| rad35       | 8.85781e-11 | 1.00000  | 8.85846e-11 | 1.000000 |
| PAH9+H      | 8.40819e-11 | 1.00000  | 8.40881e-11 | 1.000000 |
| PhCCH+CH3   | 7.66786e-11 | 1.00000  | 7.66842e-11 | 1.000000 |
| PhCCCH3+H   | 2.74629e-11 | 1.00000  | 2.74649e-11 | 1.000000 |
| rad15       | 1.00702e-11 | 1.00000  | 1.00709e-11 | 1.000000 |
| rad38       | 8.75292e-12 | 1.00000  | 8.75356e-12 | 1.000000 |
| rad33       | 2.07350e-13 | 1.00000  | 2.07365e-13 | 1.000000 |
| rad8        | 5.72737e-14 | 1.00000  | 5.72779e-14 | 1.000000 |
| Ph+MeAc     | 1.49169e-14 | 1.00000  | 1.49180e-14 | 1.000000 |
| rad27       | 1.45484e-14 | 1.00000  | 1.45495e-14 | 1.000000 |
| rad9        | 9.62581e-15 | 1.00000  | 9.62652e-15 | 1.000000 |
| PAH7+H      | 4.80003e-15 | 1.00000  | 4.80038e-15 | 1.000000 |
| rad20       | 4.33994e-15 | 1.00000  | 4.34026e-15 | 1.000000 |
| rad21       | 2.74367e-15 | 1.00000  | 2.74388e-15 | 1.000000 |
| rad25       | 1.31001e-15 | 1.00000  | 1.31010e-15 | 1.000000 |
| rad14       | 7.74086e-16 | 1.00000  | 7.74143e-16 | 1.000000 |
| rad46       | 6.51609e-16 | 1.00000  | 6.51657e-16 | 1.000000 |
| rad12       | 4.75630e-16 | 1.00000  | 4.75665e-16 | 1.000000 |
| rad39       | 2.58953e-16 | 1.00000  | 2.58972e-16 | 1.000000 |
| Ph+Allene   | 1.67050e-16 | 1.00000  | 1.67063e-16 | 1.000000 |
| rad23       | 1.20572e-16 | 1.00000  | 1.20580e-16 | 1.000000 |
| rad18       | 2.00804e-17 | 1.00000  | 2.00818e-17 | 1.000000 |
| rad22       | 2.79860e-18 | 1.00000  | 2.79880e-18 | 1.000000 |
| rad31       | 2.14063e-18 | 1.00000  | 2.14079e-18 | 1.000000 |
| rad60syn    | 8.67669e-19 | 1.00000  | 8.67732e-19 | 1.000000 |

|               |             |         |             |         |
|---------------|-------------|---------|-------------|---------|
| rad45         | 7.76075e-19 | 1.00000 | 7.76132e-19 | 1.00000 |
| rad60anti     | 1.24864e-19 | 1.00000 | 1.24873e-19 | 1.00000 |
| PhCH2CCH+H    | 9.52329e-20 | 1.00000 | 9.52399e-20 | 1.00000 |
| rad36         | 4.82413e-20 | 1.00000 | 4.82448e-20 | 1.00000 |
| rad37         | 2.51629e-20 | 1.00000 | 2.51647e-20 | 1.00000 |
| rad24         | 2.46689e-22 | 1.00000 | 2.46707e-22 | 1.00000 |
| rad5          | 1.17139e-22 | 1.00000 | 1.17147e-22 | 1.00000 |
| PAH3+H        | 1.00146e-23 | 1.00000 | 1.00153e-23 | 1.00000 |
| rad59         | 4.07843e-24 | 1.00000 | 4.07873e-24 | 1.00000 |
| rad50         | 2.47923e-25 | 1.00000 | 2.47941e-25 | 1.00000 |
| rad19syn      | 3.67699e-29 | 1.00000 | 3.67726e-29 | 1.00000 |
| rad52         | 2.29678e-31 | 1.00000 | 2.29695e-31 | 1.00000 |
| rad54         | 8.12606e-37 | 1.00000 | 8.12665e-37 | 1.00000 |
| PAH10+CH3     | 6.62469e-37 | 1.00000 | 6.62517e-37 | 1.00000 |
| rad43         | 1.53283e-37 | 1.00000 | 1.53294e-37 | 1.00000 |
| rad62         | 9.67980e-40 | 1.00000 | 9.68051e-40 | 1.00000 |
| rad51         | 2.43478e-42 | 1.00000 | 2.43496e-42 | 1.00000 |
| rad70         | 5.74893e-45 | 1.00000 | 5.74935e-45 | 1.00000 |
| PhcycC3H3_A+H | 3.42160e-45 | 1.00000 | 3.42185e-45 | 1.00000 |
| rad55         | 1.68929e-45 | 1.00000 | 1.68942e-45 | 1.00000 |
| rad65         | 2.93293e-46 | 1.00000 | 2.93315e-46 | 1.00000 |
| rad58         | 1.58326e-48 | 1.00000 | 1.58338e-48 | 1.00000 |
| PAH1+H        | 1.12901e-48 | 1.00000 | 1.12909e-48 | 1.00000 |
| rad34         | 2.29523e-50 | 1.00000 | 2.29540e-50 | 1.00000 |
| rad42         | 2.62249e-52 | 1.00000 | 2.62268e-52 | 1.00000 |
| rad41         | 1.58271e-52 | 1.00000 | 1.58283e-52 | 1.00000 |
| rad47         | 1.04851e-58 | 1.00000 | 1.04859e-58 | 1.00000 |

0.100000000E-04 Pa, 180.000000 K

| Rate constant | True (fraction)     | Effective (fraction) |
|---------------|---------------------|----------------------|
| Total         | 4.69315e-29 (1.00 ) | 4.69271e-29 (1.00 )  |

| species     | PYtrue      | Cumul    | PYeffective | Cumul    |
|-------------|-------------|----------|-------------|----------|
| Indene+H    | 0.999649    | 0.999649 | 0.999743    | 0.999743 |
| rad6        | 0.000256819 | 0.999906 | 0.000256843 | 1.000000 |
| Benzyl+C2H2 | 9.42691e-05 | 1.00000  | 0.00000     | 1.000000 |
| rad2        | 8.86906e-08 | 1.00000  | 8.86989e-08 | 1.000000 |
| rad7        | 1.89558e-08 | 1.00000  | 1.89576e-08 | 1.000000 |
| rad1        | 5.93755e-09 | 1.00000  | 5.93811e-09 | 1.000000 |
| rad11       | 4.65360e-09 | 1.00000  | 4.65404e-09 | 1.000000 |
| rad10       | 4.62990e-09 | 1.00000  | 4.63034e-09 | 1.000000 |
| rad28       | 3.84721e-09 | 1.00000  | 3.84757e-09 | 1.000000 |
| rad26       | 8.32885e-10 | 1.00000  | 8.32963e-10 | 1.000000 |
| rad3        | 5.85593e-10 | 1.00000  | 5.85649e-10 | 1.000000 |
| rad30       | 5.55563e-10 | 1.00000  | 5.55615e-10 | 1.000000 |
| rad4        | 3.00647e-10 | 1.00000  | 3.00676e-10 | 1.000000 |
| PhCHCCH2+H  | 2.78263e-10 | 1.00000  | 2.78289e-10 | 1.000000 |
| PhCCH+CH3   | 2.19162e-10 | 1.00000  | 2.19183e-10 | 1.000000 |
| PAH9+H      | 1.20638e-10 | 1.00000  | 1.20649e-10 | 1.000000 |
| rad35       | 1.18993e-10 | 1.00000  | 1.19004e-10 | 1.000000 |
| rad13       | 1.06899e-10 | 1.00000  | 1.06909e-10 | 1.000000 |
| PhCCCH3+H   | 8.00263e-11 | 1.00000  | 8.00338e-11 | 1.000000 |
| rad15       | 2.12831e-11 | 1.00000  | 2.12851e-11 | 1.000000 |
| rad38       | 1.40451e-11 | 1.00000  | 1.40464e-11 | 1.000000 |
| rad8        | 2.05225e-13 | 1.00000  | 2.05245e-13 | 1.000000 |
| rad33       | 2.05144e-13 | 1.00000  | 2.05163e-13 | 1.000000 |
| Ph+MeAc     | 7.78939e-14 | 1.00000  | 7.79013e-14 | 1.000000 |
| rad9        | 4.05575e-14 | 1.00000  | 4.05614e-14 | 1.000000 |
| PAH7+H      | 2.09281e-14 | 1.00000  | 2.09301e-14 | 1.000000 |
| rad27       | 1.78505e-14 | 1.00000  | 1.78521e-14 | 1.000000 |
| rad20       | 3.90263e-15 | 1.00000  | 3.90300e-15 | 1.000000 |
| rad21       | 2.47138e-15 | 1.00000  | 2.47161e-15 | 1.000000 |
| rad12       | 2.13836e-15 | 1.00000  | 2.13857e-15 | 1.000000 |
| rad25       | 2.02523e-15 | 1.00000  | 2.02543e-15 | 1.000000 |
| rad46       | 1.92576e-15 | 1.00000  | 1.92594e-15 | 1.000000 |
| rad39       | 1.31198e-15 | 1.00000  | 1.31211e-15 | 1.000000 |
| rad14       | 1.28669e-15 | 1.00000  | 1.28682e-15 | 1.000000 |
| Ph+Allene   | 1.08453e-15 | 1.00000  | 1.08464e-15 | 1.000000 |
| rad23       | 1.12584e-16 | 1.00000  | 1.12594e-16 | 1.000000 |
| rad18       | 1.79434e-17 | 1.00000  | 1.79451e-17 | 1.000000 |
| rad60syn    | 5.00692e-18 | 1.00000  | 5.00740e-18 | 1.000000 |
| rad22       | 2.41616e-18 | 1.00000  | 2.41639e-18 | 1.000000 |
| rad31       | 2.22568e-18 | 1.00000  | 2.22589e-18 | 1.000000 |
| PhCH2CCH+H  | 9.66121e-19 | 1.00000  | 9.66212e-19 | 1.000000 |
| rad60anti   | 8.05140e-19 | 1.00000  | 8.05216e-19 | 1.000000 |
| rad45       | 7.28177e-19 | 1.00000  | 7.28245e-19 | 1.000000 |
| rad37       | 2.44811e-19 | 1.00000  | 2.44834e-19 | 1.000000 |

|               |             |         |             |          |
|---------------|-------------|---------|-------------|----------|
| rad36         | 4.53295e-20 | 1.00000 | 4.53338e-20 | 1.000000 |
| rad5          | 1.33457e-21 | 1.00000 | 1.33470e-21 | 1.000000 |
| rad24         | 2.45517e-22 | 1.00000 | 2.45540e-22 | 1.000000 |
| PAH3+H        | 1.31622e-22 | 1.00000 | 1.31635e-22 | 1.000000 |
| rad59         | 5.19688e-23 | 1.00000 | 5.19737e-23 | 1.000000 |
| rad50         | 3.08694e-24 | 1.00000 | 3.08723e-24 | 1.000000 |
| rad19syn      | 4.66083e-27 | 1.00000 | 4.66127e-27 | 1.000000 |
| rad52         | 1.37731e-29 | 1.00000 | 1.37744e-29 | 1.000000 |
| rad54         | 8.06631e-34 | 1.00000 | 8.06707e-34 | 1.000000 |
| PAH10+CH3     | 5.46348e-34 | 1.00000 | 5.46399e-34 | 1.000000 |
| rad43         | 1.25867e-34 | 1.00000 | 1.25879e-34 | 1.000000 |
| rad62         | 7.19498e-37 | 1.00000 | 7.19566e-37 | 1.000000 |
| rad51         | 1.15322e-39 | 1.00000 | 1.15332e-39 | 1.000000 |
| rad70         | 3.98411e-42 | 1.00000 | 3.98448e-42 | 1.000000 |
| PhcycC3H3_A+H | 2.07775e-42 | 1.00000 | 2.07795e-42 | 1.000000 |
| rad55         | 1.07125e-42 | 1.00000 | 1.07135e-42 | 1.000000 |
| rad65         | 9.17456e-44 | 1.00000 | 9.17542e-44 | 1.000000 |
| rad58         | 8.58855e-46 | 1.00000 | 8.58936e-46 | 1.000000 |
| PAH1+H        | 2.99040e-46 | 1.00000 | 2.99068e-46 | 1.000000 |
| rad34         | 5.91496e-48 | 1.00000 | 5.91552e-48 | 1.000000 |
| rad42         | 9.21677e-50 | 1.00000 | 9.21764e-50 | 1.000000 |
| rad41         | 5.89524e-50 | 1.00000 | 5.89580e-50 | 1.000000 |
| rad47         | 3.85150e-56 | 1.00000 | 3.85186e-56 | 1.000000 |

0.1000000000E-04 Pa, 190.000000 K

| Rate constant | True (fraction)     | Effective (fraction) |
|---------------|---------------------|----------------------|
| Total         | 3.16530e-28 (1.00 ) | 3.16492e-28 (1.00 )  |

| species     | PYtrue      | Cumul    | PYeffective | Cumul    |
|-------------|-------------|----------|-------------|----------|
| Indene+H    | 0.999629    | 0.999629 | 0.999750    | 0.999750 |
| rad6        | 0.000250240 | 0.999879 | 0.000250270 | 1.000000 |
| Benzyl+C2H2 | 0.000120724 | 1.000000 | 0.000000    | 1.000000 |
| rad2        | 8.68504e-08 | 1.000000 | 8.68609e-08 | 1.000000 |
| rad7        | 1.85092e-08 | 1.000000 | 1.85115e-08 | 1.000000 |
| rad1        | 5.85613e-09 | 1.000000 | 5.85684e-09 | 1.000000 |
| rad28       | 5.40110e-09 | 1.000000 | 5.40175e-09 | 1.000000 |
| rad11       | 4.54593e-09 | 1.000000 | 4.54648e-09 | 1.000000 |
| rad10       | 4.54382e-09 | 1.000000 | 4.54437e-09 | 1.000000 |
| rad26       | 1.14056e-09 | 1.000000 | 1.14069e-09 | 1.000000 |
| rad30       | 9.09946e-10 | 1.000000 | 9.10056e-10 | 1.000000 |
| PhCHCCH2+H  | 6.57705e-10 | 1.000000 | 6.57784e-10 | 1.000000 |
| rad3        | 5.73260e-10 | 1.000000 | 5.73330e-10 | 1.000000 |
| PhCCH+CH3   | 5.68658e-10 | 1.000000 | 5.68726e-10 | 1.000000 |
| rad4        | 2.94905e-10 | 1.000000 | 2.94941e-10 | 1.000000 |
| PhCCCH3+H   | 2.10666e-10 | 1.000000 | 2.10691e-10 | 1.000000 |
| PAH9+H      | 1.71587e-10 | 1.000000 | 1.71608e-10 | 1.000000 |
| rad35       | 1.59541e-10 | 1.000000 | 1.59561e-10 | 1.000000 |
| rad13       | 1.04535e-10 | 1.000000 | 1.04548e-10 | 1.000000 |
| rad15       | 4.20172e-11 | 1.000000 | 4.20223e-11 | 1.000000 |
| rad38       | 2.20250e-11 | 1.000000 | 2.20276e-11 | 1.000000 |
| rad8        | 6.46876e-13 | 1.000000 | 6.46954e-13 | 1.000000 |
| Ph+MeAc     | 3.44083e-13 | 1.000000 | 3.44125e-13 | 1.000000 |
| rad33       | 2.00954e-13 | 1.000000 | 2.00978e-13 | 1.000000 |
| rad9        | 1.47779e-13 | 1.000000 | 1.47796e-13 | 1.000000 |
| PAH7+H      | 7.84905e-14 | 1.000000 | 7.84999e-14 | 1.000000 |
| rad27       | 2.10154e-14 | 1.000000 | 2.10179e-14 | 1.000000 |
| rad12       | 8.22295e-15 | 1.000000 | 8.22394e-15 | 1.000000 |
| Ph+Allene   | 5.82461e-15 | 1.000000 | 5.82532e-15 | 1.000000 |
| rad39       | 5.63476e-15 | 1.000000 | 5.63544e-15 | 1.000000 |
| rad46       | 5.14971e-15 | 1.000000 | 5.15033e-15 | 1.000000 |
| rad20       | 3.51791e-15 | 1.000000 | 3.51833e-15 | 1.000000 |
| rad25       | 2.92477e-15 | 1.000000 | 2.92512e-15 | 1.000000 |
| rad21       | 2.23180e-15 | 1.000000 | 2.23207e-15 | 1.000000 |
| rad14       | 1.98196e-15 | 1.000000 | 1.98220e-15 | 1.000000 |
| rad23       | 1.09310e-16 | 1.000000 | 1.09323e-16 | 1.000000 |
| rad60syn    | 2.40558e-17 | 1.000000 | 2.40587e-17 | 1.000000 |
| rad18       | 1.60577e-17 | 1.000000 | 1.60596e-17 | 1.000000 |
| PhCH2CCH+H  | 7.72821e-18 | 1.000000 | 7.72914e-18 | 1.000000 |
| rad60anti   | 4.26706e-18 | 1.000000 | 4.26757e-18 | 1.000000 |
| rad31       | 2.29747e-18 | 1.000000 | 2.29775e-18 | 1.000000 |
| rad22       | 2.09250e-18 | 1.000000 | 2.09275e-18 | 1.000000 |
| rad37       | 1.85579e-18 | 1.000000 | 1.85601e-18 | 1.000000 |
| rad45       | 7.11660e-19 | 1.000000 | 7.11746e-19 | 1.000000 |
| rad36       | 4.43805e-20 | 1.000000 | 4.43859e-20 | 1.000000 |
| rad5        | 1.17854e-20 | 1.000000 | 1.17868e-20 | 1.000000 |
| PAH3+H      | 1.32121e-21 | 1.000000 | 1.32137e-21 | 1.000000 |
| rad59       | 5.06388e-22 | 1.000000 | 5.06450e-22 | 1.000000 |



|               |             |         |             |         |
|---------------|-------------|---------|-------------|---------|
| rad24         | 2.45832e-22 | 1.00000 | 2.45861e-22 | 1.00000 |
| rad50         | 2.96738e-23 | 1.00000 | 2.96774e-23 | 1.00000 |
| rad19syn      | 1.22398e-25 | 1.00000 | 1.22413e-25 | 1.00000 |
| rad54         | 5.45644e-28 | 1.00000 | 5.45710e-28 | 1.00000 |
| PAH10+CH3     | 3.67361e-28 | 1.00000 | 3.67405e-28 | 1.00000 |
| rad52         | 3.13060e-28 | 1.00000 | 3.13098e-28 | 1.00000 |
| rad43         | 8.93552e-29 | 1.00000 | 8.93660e-29 | 1.00000 |
| rad62         | 4.15605e-30 | 1.00000 | 4.15656e-30 | 1.00000 |
| rad51         | 2.56193e-31 | 1.00000 | 2.56224e-31 | 1.00000 |
| rad70         | 7.96712e-39 | 1.00000 | 7.96808e-39 | 1.00000 |
| PhcycC3H3_A+H | 3.95478e-39 | 1.00000 | 3.95526e-39 | 1.00000 |
| rad55         | 2.07959e-39 | 1.00000 | 2.07984e-39 | 1.00000 |
| rad65         | 5.51283e-41 | 1.00000 | 5.51349e-41 | 1.00000 |
| rad58         | 1.52868e-42 | 1.00000 | 1.52886e-42 | 1.00000 |
| PAH1+H        | 1.34067e-43 | 1.00000 | 1.34083e-43 | 1.00000 |
| rad34         | 1.87894e-45 | 1.00000 | 1.87917e-45 | 1.00000 |
| rad42         | 2.99108e-47 | 1.00000 | 2.99145e-47 | 1.00000 |
| rad41         | 2.03930e-47 | 1.00000 | 2.03955e-47 | 1.00000 |
| rad47         | 1.45212e-53 | 1.00000 | 1.45229e-53 | 1.00000 |

0.1000000000E-04 Pa, 200.000000 K

| Rate constant | True (fraction)     | Effective (fraction) |
|---------------|---------------------|----------------------|
| Total         | 1.76115e-27 (1.00 ) | 1.76088e-27 (1.00 )  |

| species     | PYtrue      | Cumul    | PYeffective | Cumul    |
|-------------|-------------|----------|-------------|----------|
| Indene+H    | 0.999605    | 0.999605 | 0.999759    | 0.999759 |
| rad6        | 0.000241325 | 0.999846 | 0.000241363 | 1.00000  |
| Benzyl+C2H2 | 0.000153953 | 1.00000  | 0.00000     | 1.00000  |
| rad2        | 8.41181e-08 | 1.00000  | 8.41311e-08 | 1.00000  |
| rad7        | 1.78888e-08 | 1.00000  | 1.78916e-08 | 1.00000  |
| rad28       | 7.19194e-09 | 1.00000  | 7.19305e-09 | 1.00000  |
| rad1        | 5.71615e-09 | 1.00000  | 5.71703e-09 | 1.00000  |
| rad10       | 4.41100e-09 | 1.00000  | 4.41168e-09 | 1.00000  |
| rad11       | 4.39555e-09 | 1.00000  | 4.39622e-09 | 1.00000  |
| rad26       | 1.48262e-09 | 1.00000  | 1.48285e-09 | 1.00000  |
| PhCHCCH2+H  | 1.44593e-09 | 1.00000  | 1.44615e-09 | 1.00000  |
| rad30       | 1.43871e-09 | 1.00000  | 1.43893e-09 | 1.00000  |
| PhCCH+CH3   | 1.35859e-09 | 1.00000  | 1.35880e-09 | 1.00000  |
| rad3        | 5.54959e-10 | 1.00000  | 5.55045e-10 | 1.00000  |
| PhCCCH3+H   | 5.08530e-10 | 1.00000  | 5.08608e-10 | 1.00000  |
| rad4        | 2.86115e-10 | 1.00000  | 2.86159e-10 | 1.00000  |
| PAH9+H      | 2.42226e-10 | 1.00000  | 2.42263e-10 | 1.00000  |
| rad35       | 2.13434e-10 | 1.00000  | 2.13467e-10 | 1.00000  |
| rad13       | 1.01188e-10 | 1.00000  | 1.01204e-10 | 1.00000  |
| rad15       | 7.83431e-11 | 1.00000  | 7.83552e-11 | 1.00000  |
| rad38       | 3.38745e-11 | 1.00000  | 3.38797e-11 | 1.00000  |
| rad8        | 1.82892e-12 | 1.00000  | 1.82920e-12 | 1.00000  |
| Ph+MeAc     | 1.31797e-12 | 1.00000  | 1.31818e-12 | 1.00000  |
| rad9        | 4.76001e-13 | 1.00000  | 4.76074e-13 | 1.00000  |
| PAH7+H      | 2.59177e-13 | 1.00000  | 2.59217e-13 | 1.00000  |
| rad33       | 1.94874e-13 | 1.00000  | 1.94904e-13 | 1.00000  |
| rad12       | 2.76951e-14 | 1.00000  | 2.76994e-14 | 1.00000  |
| Ph+Allene   | 2.66269e-14 | 1.00000  | 2.66310e-14 | 1.00000  |
| rad27       | 2.38716e-14 | 1.00000  | 2.38752e-14 | 1.00000  |
| rad39       | 2.10332e-14 | 1.00000  | 2.10365e-14 | 1.00000  |
| rad46       | 1.26622e-14 | 1.00000  | 1.26641e-14 | 1.00000  |
| rad25       | 3.98446e-15 | 1.00000  | 3.98507e-15 | 1.00000  |
| rad20       | 3.17808e-15 | 1.00000  | 3.17856e-15 | 1.00000  |
| rad14       | 2.86043e-15 | 1.00000  | 2.86087e-15 | 1.00000  |
| rad21       | 2.02014e-15 | 1.00000  | 2.02045e-15 | 1.00000  |
| rad23       | 1.10802e-16 | 1.00000  | 1.10819e-16 | 1.00000  |
| rad60syn    | 9.89763e-17 | 1.00000  | 9.89916e-17 | 1.00000  |
| PhCH2CCH+H  | 5.05089e-17 | 1.00000  | 5.05167e-17 | 1.00000  |
| rad60anti   | 1.91538e-17 | 1.00000  | 1.9157e-17  | 1.00000  |
| rad18       | 1.43874e-17 | 1.00000  | 1.43896e-17 | 1.00000  |
| rad37       | 1.13823e-17 | 1.00000  | 1.13840e-17 | 1.00000  |
| rad31       | 2.35610e-18 | 1.00000  | 2.35647e-18 | 1.00000  |
| rad22       | 1.81686e-18 | 1.00000  | 1.81714e-18 | 1.00000  |
| rad45       | 7.27984e-19 | 1.00000  | 7.28096e-19 | 1.00000  |
| rad5        | 8.37812e-20 | 1.00000  | 8.37941e-20 | 1.00000  |
| rad36       | 4.54965e-20 | 1.00000  | 4.55035e-20 | 1.00000  |
| PAH3+H      | 1.05455e-20 | 1.00000  | 1.05472e-20 | 1.00000  |
| rad59       | 3.92885e-21 | 1.00000  | 3.92945e-21 | 1.00000  |
| rad24       | 2.47614e-22 | 1.00000  | 2.47652e-22 | 1.00000  |
| rad50       | 2.28897e-22 | 1.00000  | 2.28932e-22 | 1.00000  |
| rad19syn    | 1.82520e-24 | 1.00000  | 1.82549e-24 | 1.00000  |
| rad54       | 1.37152e-26 | 1.00000  | 1.37173e-26 | 1.00000  |

|               |             |         |             |         |
|---------------|-------------|---------|-------------|---------|
| PAH10+CH3     | 9.40089e-27 | 1.00000 | 9.40234e-27 | 1.00000 |
| rad52         | 4.44080e-27 | 1.00000 | 4.44149e-27 | 1.00000 |
| rad43         | 2.30269e-27 | 1.00000 | 2.30305e-27 | 1.00000 |
| rad62         | 2.68723e-28 | 1.00000 | 2.68764e-28 | 1.00000 |
| rad51         | 1.45636e-29 | 1.00000 | 1.45658e-29 | 1.00000 |
| rad65         | 1.67714e-32 | 1.00000 | 1.67740e-32 | 1.00000 |
| rad70         | 1.91783e-35 | 1.00000 | 1.91813e-35 | 1.00000 |
| PhcycC3H3_A+H | 9.56169e-36 | 1.00000 | 9.56316e-36 | 1.00000 |
| rad55         | 5.03036e-36 | 1.00000 | 5.03113e-36 | 1.00000 |
| rad58         | 3.68343e-39 | 1.00000 | 3.68399e-39 | 1.00000 |
| PAH1+H        | 2.10607e-40 | 1.00000 | 2.10640e-40 | 1.00000 |
| rad34         | 2.01412e-42 | 1.00000 | 2.01443e-42 | 1.00000 |
| rad42         | 6.99839e-45 | 1.00000 | 6.99947e-45 | 1.00000 |
| rad41         | 4.82516e-45 | 1.00000 | 4.82590e-45 | 1.00000 |
| rad47         | 4.79961e-51 | 1.00000 | 4.80035e-51 | 1.00000 |

0.100000000E-04 Pa, 210.000000 K

=====  
Rate constant | True (fraction) | Effective (fraction)  
-----

Total | 8.30956e-27 (1.00) | 8.30794e-27 (1.00)

| species     | PYtrue      | Cumul    | PYeffective | Cumul    |
|-------------|-------------|----------|-------------|----------|
| Indene+H    | 0.999574    | 0.999574 | 0.999769    | 0.999769 |
| rad6        | 0.000230340 | 0.999804 | 0.000230385 | 0.999999 |
| Benzyl+C2H2 | 0.000195467 | 1.000000 | 0.000000    | 0.999999 |
| rad2        | 8.05017e-08 | 1.000000 | 8.05175e-08 | 0.999999 |
| rad7        | 1.71129e-08 | 1.000000 | 1.71163e-08 | 0.999999 |
| rad28       | 9.14298e-09 | 1.000000 | 9.14476e-09 | 0.999999 |
| rad1        | 5.51671e-09 | 1.000000 | 5.51779e-09 | 0.999999 |
| rad10       | 4.23452e-09 | 1.000000 | 4.23535e-09 | 1.000000 |
| rad11       | 4.20690e-09 | 1.000000 | 4.20773e-09 | 1.000000 |
| PhCCH+CH3   | 3.02303e-09 | 1.000000 | 3.02362e-09 | 1.000000 |
| PhCHCCH2+H  | 2.98630e-09 | 1.000000 | 2.98689e-09 | 1.000000 |
| rad30       | 2.20805e-09 | 1.000000 | 2.20848e-09 | 1.000000 |
| rad26       | 1.84183e-09 | 1.000000 | 1.84219e-09 | 1.000000 |
| PhCCCH3+H   | 1.13931e-09 | 1.000000 | 1.13954e-09 | 1.000000 |
| rad3        | 5.31845e-10 | 1.000000 | 5.31949e-10 | 1.000000 |
| PAH9+H      | 3.39616e-10 | 1.000000 | 3.39682e-10 | 1.000000 |
| rad35       | 2.84794e-10 | 1.000000 | 2.84849e-10 | 1.000000 |
| rad4        | 2.74852e-10 | 1.000000 | 2.74906e-10 | 1.000000 |
| rad15       | 1.39174e-10 | 1.000000 | 1.39202e-10 | 1.000000 |
| rad13       | 9.69571e-11 | 1.000000 | 9.69761e-11 | 1.000000 |
| rad38       | 5.12311e-11 | 1.000000 | 5.12411e-11 | 1.000000 |
| rad8        | 4.71184e-12 | 1.000000 | 4.71276e-12 | 1.000000 |
| Ph+MeAc     | 4.46616e-12 | 1.000000 | 4.46704e-12 | 1.000000 |
| rad9        | 1.37969e-12 | 1.000000 | 1.37996e-12 | 1.000000 |
| PAH7+H      | 7.67727e-13 | 1.000000 | 7.67877e-13 | 1.000000 |
| rad33       | 1.87086e-13 | 1.000000 | 1.87122e-13 | 1.000000 |
| Ph+Allene   | 1.06033e-13 | 1.000000 | 1.06054e-13 | 1.000000 |
| rad12       | 8.32756e-14 | 1.000000 | 8.32919e-14 | 1.000000 |
| rad39       | 6.96275e-14 | 1.000000 | 6.96411e-14 | 1.000000 |
| rad46       | 2.89966e-14 | 1.000000 | 2.90023e-14 | 1.000000 |
| rad27       | 2.62819e-14 | 1.000000 | 2.62870e-14 | 1.000000 |
| rad25       | 5.16150e-15 | 1.000000 | 5.16251e-15 | 1.000000 |
| rad14       | 3.90280e-15 | 1.000000 | 3.90357e-15 | 1.000000 |
| rad20       | 2.87693e-15 | 1.000000 | 2.87750e-15 | 1.000000 |
| rad21       | 1.83255e-15 | 1.000000 | 1.83291e-15 | 1.000000 |
| rad60syn    | 3.56769e-16 | 1.000000 | 3.56839e-16 | 1.000000 |
| PhCH2CCH+H  | 2.77642e-16 | 1.000000 | 2.77697e-16 | 1.000000 |
| rad23       | 1.17631e-16 | 1.000000 | 1.17654e-16 | 1.000000 |
| rad60anti   | 7.46097e-17 | 1.000000 | 7.46243e-17 | 1.000000 |
| rad37       | 5.82376e-17 | 1.000000 | 5.82490e-17 | 1.000000 |
| rad18       | 1.29036e-17 | 1.000000 | 1.29061e-17 | 1.000000 |
| rad31       | 2.40185e-18 | 1.000000 | 2.40232e-18 | 1.000000 |
| rad22       | 1.58097e-18 | 1.000000 | 1.58127e-18 | 1.000000 |
| rad45       | 7.82156e-19 | 1.000000 | 7.82309e-19 | 1.000000 |
| rad5        | 4.94537e-19 | 1.000000 | 4.94634e-19 | 1.000000 |
| PAH3+H      | 6.92407e-20 | 1.000000 | 6.92543e-20 | 1.000000 |
| rad36       | 4.90073e-20 | 1.000000 | 4.90169e-20 | 1.000000 |
| rad59       | 2.51008e-20 | 1.000000 | 2.51057e-20 | 1.000000 |
| rad50       | 1.46375e-21 | 1.000000 | 1.46403e-21 | 1.000000 |
| rad24       | 2.50893e-22 | 1.000000 | 2.50942e-22 | 1.000000 |
| rad19syn    | 2.00801e-23 | 1.000000 | 2.00840e-23 | 1.000000 |
| rad54       | 1.94312e-25 | 1.000000 | 1.94350e-25 | 1.000000 |
| PAH10+CH3   | 1.33341e-25 | 1.000000 | 1.33367e-25 | 1.000000 |
| rad52       | 4.73526e-26 | 1.000000 | 4.73618e-26 | 1.000000 |
| rad43       | 3.24682e-26 | 1.000000 | 3.24746e-26 | 1.000000 |
| rad62       | 4.87655e-27 | 1.000000 | 4.87750e-27 | 1.000000 |

|               |             |          |             |          |
|---------------|-------------|----------|-------------|----------|
| rad51         | 2.76098e-28 | 1.000000 | 2.76152e-28 | 1.000000 |
| rad70         | 4.15008e-29 | 1.000000 | 4.15089e-29 | 1.000000 |
| PhcycC3H3_A+H | 3.67768e-29 | 1.000000 | 3.67840e-29 | 1.000000 |
| rad55         | 1.45174e-29 | 1.000000 | 1.45202e-29 | 1.000000 |
| rad58         | 1.88404e-30 | 1.000000 | 1.88441e-30 | 1.000000 |
| rad65         | 8.86433e-31 | 1.000000 | 8.86606e-31 | 1.000000 |
| PAH1+H        | 5.49756e-37 | 1.000000 | 5.49864e-37 | 1.000000 |
| rad34         | 5.07942e-39 | 1.000000 | 5.08041e-39 | 1.000000 |
| rad42         | 2.00310e-42 | 1.000000 | 2.00349e-42 | 1.000000 |
| rad41         | 9.12520e-43 | 1.000000 | 9.12698e-43 | 1.000000 |
| rad47         | 4.20686e-48 | 1.000000 | 4.20768e-48 | 1.000000 |

0.100000000E-04 Pa, 220.000000 K

| Rate constant | True (fraction)     | Effective (fraction) |
|---------------|---------------------|----------------------|
| Total         | 3.40057e-26 (1.00 ) | 3.39973e-26 (1.00 )  |

| species       | PYtrue      | Cumul    | PYeffective | Cumul    |
|---------------|-------------|----------|-------------|----------|
| Indene+H      | 0.999535    | 0.999535 | 0.999782    | 0.999782 |
| Benzyl+C2H2   | 0.000247044 | 0.999782 | 0.00000     | 0.999782 |
| rad6          | 0.000217628 | 1.000000 | 0.000217682 | 1.000000 |
| rad2          | 7.63257e-08 | 1.000000 | 7.63446e-08 | 1.000000 |
| rad7          | 1.62061e-08 | 1.000000 | 1.62101e-08 | 1.000000 |
| rad28         | 1.11585e-08 | 1.000000 | 1.11612e-08 | 1.000000 |
| PhCCH+CH3     | 6.32348e-09 | 1.000000 | 6.32505e-09 | 1.000000 |
| PhCHCCH2+H    | 5.84142e-09 | 1.000000 | 5.84287e-09 | 1.000000 |
| rad1          | 5.27852e-09 | 1.000000 | 5.27983e-09 | 1.000000 |
| rad10         | 4.02345e-09 | 1.000000 | 4.02444e-09 | 1.000000 |
| rad11         | 3.98596e-09 | 1.000000 | 3.98695e-09 | 1.000000 |
| rad30         | 3.30373e-09 | 1.000000 | 3.30455e-09 | 1.000000 |
| PhCCCH3+H     | 2.39248e-09 | 1.000000 | 2.39307e-09 | 1.000000 |
| rad26         | 2.19894e-09 | 1.000000 | 2.19949e-09 | 1.000000 |
| rad3          | 5.04126e-10 | 1.000000 | 5.04250e-10 | 1.000000 |
| PAH9+H        | 4.73098e-10 | 1.000000 | 4.73214e-10 | 1.000000 |
| rad35         | 3.78876e-10 | 1.000000 | 3.78970e-10 | 1.000000 |
| rad4          | 2.61204e-10 | 1.000000 | 2.61269e-10 | 1.000000 |
| rad15         | 2.37222e-10 | 1.000000 | 2.37281e-10 | 1.000000 |
| rad13         | 9.19761e-11 | 1.000000 | 9.19989e-11 | 1.000000 |
| rad38         | 7.63391e-11 | 1.000000 | 7.63580e-11 | 1.000000 |
| Ph+MeAc       | 1.36102e-11 | 1.000000 | 1.36135e-11 | 1.000000 |
| rad8          | 1.12041e-11 | 1.000000 | 1.12069e-11 | 1.000000 |
| rad9          | 3.65124e-12 | 1.000000 | 3.65214e-12 | 1.000000 |
| PAH7+H        | 2.07147e-12 | 1.000000 | 2.07199e-12 | 1.000000 |
| Ph+Allene     | 3.74827e-13 | 1.000000 | 3.74920e-13 | 1.000000 |
| rad12         | 2.27061e-13 | 1.000000 | 2.27117e-13 | 1.000000 |
| rad39         | 2.07805e-13 | 1.000000 | 2.07856e-13 | 1.000000 |
| rad33         | 1.77836e-13 | 1.000000 | 1.77880e-13 | 1.000000 |
| rad46         | 6.24859e-14 | 1.000000 | 6.25013e-14 | 1.000000 |
| rad27         | 2.81519e-14 | 1.000000 | 2.81589e-14 | 1.000000 |
| rad25         | 6.39981e-15 | 1.000000 | 6.40139e-15 | 1.000000 |
| rad14         | 5.07154e-15 | 1.000000 | 5.07279e-15 | 1.000000 |
| rad20         | 2.60942e-15 | 1.000000 | 2.61006e-15 | 1.000000 |
| rad21         | 1.66589e-15 | 1.000000 | 1.66630e-15 | 1.000000 |
| PhCH2CCH+H    | 1.31432e-15 | 1.000000 | 1.31464e-15 | 1.000000 |
| rad60syn      | 1.14775e-15 | 1.000000 | 1.14804e-15 | 1.000000 |
| rad60anti     | 2.57259e-16 | 1.000000 | 2.57322e-16 | 1.000000 |
| rad37         | 2.54866e-16 | 1.000000 | 2.54928e-16 | 1.000000 |
| rad23         | 1.31018e-16 | 1.000000 | 1.31050e-16 | 1.000000 |
| rad18         | 1.15826e-17 | 1.000000 | 1.15855e-17 | 1.000000 |
| rad5          | 2.48569e-18 | 1.000000 | 2.48631e-18 | 1.000000 |
| rad31         | 2.43619e-18 | 1.000000 | 2.43679e-18 | 1.000000 |
| rad22         | 1.37831e-18 | 1.000000 | 1.37866e-18 | 1.000000 |
| rad45         | 8.84009e-19 | 1.000000 | 8.84227e-19 | 1.000000 |
| PAH3+H        | 3.84312e-19 | 1.000000 | 3.84407e-19 | 1.000000 |
| rad59         | 1.35685e-19 | 1.000000 | 1.35719e-19 | 1.000000 |
| rad36         | 5.55552e-20 | 1.000000 | 5.55689e-20 | 1.000000 |
| rad50         | 7.96590e-21 | 1.000000 | 7.96787e-21 | 1.000000 |
| rad24         | 2.55744e-22 | 1.000000 | 2.55807e-22 | 1.000000 |
| rad19syn      | 1.76796e-22 | 1.000000 | 1.76840e-22 | 1.000000 |
| rad54         | 2.07915e-24 | 1.000000 | 2.07967e-24 | 1.000000 |
| PAH10+CH3     | 1.42531e-24 | 1.000000 | 1.42566e-24 | 1.000000 |
| rad52         | 4.06722e-25 | 1.000000 | 4.06822e-25 | 1.000000 |
| rad43         | 3.45408e-25 | 1.000000 | 3.45494e-25 | 1.000000 |
| rad62         | 5.97311e-26 | 1.000000 | 5.97459e-26 | 1.000000 |
| rad51         | 3.50353e-27 | 1.000000 | 3.50439e-27 | 1.000000 |
| PhcycC3H3_A+H | 9.87065e-28 | 1.000000 | 9.87309e-28 | 1.000000 |
| rad70         | 8.97411e-28 | 1.000000 | 8.97632e-28 | 1.000000 |
| rad55         | 3.38152e-28 | 1.000000 | 3.38235e-28 | 1.000000 |

|        |             |          |             |          |
|--------|-------------|----------|-------------|----------|
| rad58  | 5.59629e-29 | 1.000000 | 5.59767e-29 | 1.000000 |
| rad65  | 1.55276e-29 | 1.000000 | 1.55314e-29 | 1.000000 |
| PAH1+H | 3.10927e-30 | 1.000000 | 3.11004e-30 | 1.000000 |
| rad34  | 2.04131e-36 | 1.000000 | 2.04182e-36 | 1.000000 |
| rad42  | 4.73523e-40 | 1.000000 | 4.73640e-40 | 1.000000 |
| rad47  | 1.49504e-40 | 1.000000 | 1.49541e-40 | 1.000000 |
| rad41  | 1.11525e-40 | 1.000000 | 1.11552e-40 | 1.000000 |

0.100000000E-04 Pa, 230.000000 K

| Rate constant | True (fraction)     | Effective (fraction) |
|---------------|---------------------|----------------------|
| Total         | 1.22972e-25 (1.00 ) | 1.22933e-25 (1.00 )  |

| species       | PYtrue      | Cumul    | PYeffective | Cumul    |
|---------------|-------------|----------|-------------|----------|
| Indene+H      | 0.999485    | 0.999485 | 0.999796    | 0.999796 |
| Benzyl+C2H2   | 0.000310766 | 0.999796 | 0.00000     | 0.999796 |
| rad6          | 0.000203585 | 0.999999 | 0.000203648 | 1.000000 |
| rad2          | 7.16055e-08 | 0.999999 | 7.16278e-08 | 1.000000 |
| rad7          | 1.51967e-08 | 0.999999 | 1.52014e-08 | 1.000000 |
| rad28         | 1.31350e-08 | 0.999999 | 1.31391e-08 | 1.000000 |
| PhCCH+CH3     | 1.25299e-08 | 0.999999 | 1.25338e-08 | 1.000000 |
| PhCHCCH2+H    | 1.08943e-08 | 0.999999 | 1.08977e-08 | 1.000000 |
| rad1          | 5.00128e-09 | 0.999999 | 5.00283e-09 | 1.000000 |
| rad30         | 4.83547e-09 | 0.999999 | 4.83697e-09 | 1.000000 |
| PhCCCH3+H     | 4.74733e-09 | 0.999999 | 4.74881e-09 | 1.000000 |
| rad10         | 3.78489e-09 | 0.999999 | 3.78607e-09 | 1.000000 |
| rad11         | 3.73965e-09 | 0.999999 | 3.74081e-09 | 1.000000 |
| rad26         | 2.53497e-09 | 0.999999 | 2.53576e-09 | 1.000000 |
| PAH9+H        | 6.54923e-10 | 0.999999 | 6.55127e-10 | 1.000000 |
| rad35         | 5.02338e-10 | 1.000000 | 5.02495e-10 | 1.000000 |
| rad3          | 4.73602e-10 | 1.000000 | 4.73749e-10 | 1.000000 |
| rad15         | 3.90170e-10 | 1.000000 | 3.90292e-10 | 1.000000 |
| rad4          | 2.46083e-10 | 1.000000 | 2.46159e-10 | 1.000000 |
| rad38         | 1.12242e-10 | 1.000000 | 1.12277e-10 | 1.000000 |
| rad13         | 8.64020e-11 | 1.000000 | 8.64289e-11 | 1.000000 |
| Ph+MeAc       | 3.78067e-11 | 1.000000 | 3.78184e-11 | 1.000000 |
| rad8          | 2.48505e-11 | 1.000000 | 2.48582e-11 | 1.000000 |
| rad9          | 8.92846e-12 | 1.000000 | 8.93124e-12 | 1.000000 |
| PAH7+H        | 5.15539e-12 | 1.000000 | 5.15699e-12 | 1.000000 |
| Ph+Allene     | 1.19471e-12 | 1.000000 | 1.19508e-12 | 1.000000 |
| rad12         | 5.68647e-13 | 1.000000 | 5.68824e-13 | 1.000000 |
| rad39         | 5.66794e-13 | 1.000000 | 5.66970e-13 | 1.000000 |
| rad33         | 1.67419e-13 | 1.000000 | 1.67471e-13 | 1.000000 |
| rad46         | 1.27775e-13 | 1.000000 | 1.27815e-13 | 1.000000 |
| rad27         | 2.94322e-14 | 1.000000 | 2.94414e-14 | 1.000000 |
| rad25         | 7.63693e-15 | 1.000000 | 7.63930e-15 | 1.000000 |
| rad14         | 6.31514e-15 | 1.000000 | 6.31711e-15 | 1.000000 |
| PhCH2CCH+H    | 5.46360e-15 | 1.000000 | 5.46530e-15 | 1.000000 |
| rad60syn      | 3.34625e-15 | 1.000000 | 3.34729e-15 | 1.000000 |
| rad20         | 2.37133e-15 | 1.000000 | 2.37207e-15 | 1.000000 |
| rad21         | 1.51755e-15 | 1.000000 | 1.51802e-15 | 1.000000 |
| rad37         | 9.73923e-16 | 1.000000 | 9.74226e-16 | 1.000000 |
| rad60anti     | 7.98151e-16 | 1.000000 | 7.98399e-16 | 1.000000 |
| rad23         | 1.53112e-16 | 1.000000 | 1.53159e-16 | 1.000000 |
| rad5          | 1.08621e-17 | 1.000000 | 1.08655e-17 | 1.000000 |
| rad18         | 1.04047e-17 | 1.000000 | 1.04079e-17 | 1.000000 |
| rad31         | 2.46078e-18 | 1.000000 | 2.46154e-18 | 1.000000 |
| PAH3+H        | 1.84375e-18 | 1.000000 | 1.84432e-18 | 1.000000 |
| rad22         | 1.20376e-18 | 1.000000 | 1.20414e-18 | 1.000000 |
| rad45         | 1.05287e-18 | 1.000000 | 1.05319e-18 | 1.000000 |
| rad59         | 6.34525e-19 | 1.000000 | 6.34722e-19 | 1.000000 |
| rad36         | 6.63965e-20 | 1.000000 | 6.64172e-20 | 1.000000 |
| rad50         | 3.76904e-20 | 1.000000 | 3.77021e-20 | 1.000000 |
| rad19syn      | 1.28681e-21 | 1.000000 | 1.28721e-21 | 1.000000 |
| rad24         | 2.62290e-22 | 1.000000 | 2.62372e-22 | 1.000000 |
| rad54         | 1.79666e-23 | 1.000000 | 1.79722e-23 | 1.000000 |
| PAH10+CH3     | 1.22743e-23 | 1.000000 | 1.22781e-23 | 1.000000 |
| rad43         | 2.95783e-24 | 1.000000 | 2.95875e-24 | 1.000000 |
| rad52         | 2.90478e-24 | 1.000000 | 2.90568e-24 | 1.000000 |
| rad62         | 5.74591e-25 | 1.000000 | 5.74770e-25 | 1.000000 |
| rad51         | 3.51923e-26 | 1.000000 | 3.52033e-26 | 1.000000 |
| PhcycC3H3_A+H | 1.69389e-26 | 1.000000 | 1.69442e-26 | 1.000000 |
| rad70         | 1.30478e-26 | 1.000000 | 1.30519e-26 | 1.000000 |
| rad55         | 5.18375e-27 | 1.000000 | 5.18536e-27 | 1.000000 |
| rad58         | 1.02415e-27 | 1.000000 | 1.02446e-27 | 1.000000 |
| PAH1+H        | 2.23668e-28 | 1.000000 | 2.23737e-28 | 1.000000 |
| rad65         | 2.00231e-28 | 1.000000 | 2.00293e-28 | 1.000000 |
| rad34         | 1.06742e-29 | 1.000000 | 1.06776e-29 | 1.000000 |

|       |             |          |             |          |
|-------|-------------|----------|-------------|----------|
| rad42 | 4.44128e-32 | 1.000000 | 4.44266e-32 | 1.000000 |
| rad41 | 7.74431e-33 | 1.000000 | 7.74671e-33 | 1.000000 |
| rad47 | 2.02044e-39 | 1.000000 | 2.02107e-39 | 1.000000 |

0.100000000E-04 Pa, 240.000000 K

| Rate constant | True (fraction)     | Effective (fraction) |
|---------------|---------------------|----------------------|
| Total         | 3.99091e-25 (1.00 ) | 3.98936e-25 (1.00 )  |

| species       | PYtrue      | Cumul    | PYeffective | Cumul    |
|---------------|-------------|----------|-------------|----------|
| Indene+H      | 0.999422    | 0.999422 | 0.999811    | 0.999811 |
| Benzyl+C2H2   | 0.000389043 | 0.999811 | 0.00000     | 0.999811 |
| rad6          | 0.000188624 | 1.000000 | 0.000188698 | 1.000000 |
| rad2          | 6.64706e-08 | 1.000000 | 6.64965e-08 | 1.000000 |
| PhCCH+CH3     | 2.36683e-08 | 1.000000 | 2.36775e-08 | 1.000000 |
| PhCHCCH2+H    | 1.94794e-08 | 1.000000 | 1.94869e-08 | 1.000000 |
| rad28         | 1.49726e-08 | 1.000000 | 1.49784e-08 | 1.000000 |
| rad7          | 1.41148e-08 | 1.000000 | 1.41203e-08 | 1.000000 |
| PhCCCH3+H     | 8.96104e-09 | 1.000000 | 8.96453e-09 | 1.000000 |
| rad30         | 6.94205e-09 | 1.000000 | 6.94475e-09 | 1.000000 |
| rad1          | 4.69250e-09 | 1.000000 | 4.69433e-09 | 1.000000 |
| rad10         | 3.52465e-09 | 1.000000 | 3.52603e-09 | 1.000000 |
| rad11         | 3.47531e-09 | 1.000000 | 3.47666e-09 | 1.000000 |
| rad26         | 2.83310e-09 | 1.000000 | 2.83420e-09 | 1.000000 |
| PAH9+H        | 9.01039e-10 | 1.000000 | 9.01390e-10 | 1.000000 |
| rad35         | 6.63558e-10 | 1.000000 | 6.63816e-10 | 1.000000 |
| rad15         | 6.22100e-10 | 1.000000 | 6.22342e-10 | 1.000000 |
| rad3          | 4.40091e-10 | 1.000000 | 4.40262e-10 | 1.000000 |
| rad4          | 2.29373e-10 | 1.000000 | 2.29462e-10 | 1.000000 |
| rad38         | 1.63026e-10 | 1.000000 | 1.63090e-10 | 1.000000 |
| Ph+MeAc       | 9.68146e-11 | 1.000000 | 9.68523e-11 | 1.000000 |
| rad13         | 8.04019e-11 | 1.000000 | 8.04332e-11 | 1.000000 |
| rad8          | 5.18620e-11 | 1.000000 | 5.18822e-11 | 1.000000 |
| rad9          | 2.03754e-11 | 1.000000 | 2.03833e-11 | 1.000000 |
| PAH7+H        | 1.19581e-11 | 1.000000 | 1.19628e-11 | 1.000000 |
| Ph+Allene     | 3.47827e-12 | 1.000000 | 3.47963e-12 | 1.000000 |
| rad39         | 1.42886e-12 | 1.000000 | 1.42942e-12 | 1.000000 |
| rad12         | 1.32202e-12 | 1.000000 | 1.32253e-12 | 1.000000 |
| rad46         | 2.49634e-13 | 1.000000 | 2.49732e-13 | 1.000000 |
| rad33         | 1.56149e-13 | 1.000000 | 1.56210e-13 | 1.000000 |
| rad27         | 3.01143e-14 | 1.000000 | 3.01260e-14 | 1.000000 |
| PhCH2CCH+H    | 2.02707e-14 | 1.000000 | 2.02785e-14 | 1.000000 |
| rad60syn      | 8.95429e-15 | 1.000000 | 8.95778e-15 | 1.000000 |
| rad25         | 8.81096e-15 | 1.000000 | 8.81439e-15 | 1.000000 |
| rad14         | 7.57424e-15 | 1.000000 | 7.57719e-15 | 1.000000 |
| rad37         | 3.30617e-15 | 1.000000 | 3.30745e-15 | 1.000000 |
| rad60anti     | 2.25866e-15 | 1.000000 | 2.25953e-15 | 1.000000 |
| rad20         | 2.15914e-15 | 1.000000 | 2.15998e-15 | 1.000000 |
| rad21         | 1.38534e-15 | 1.000000 | 1.38588e-15 | 1.000000 |
| rad23         | 1.87454e-16 | 1.000000 | 1.87527e-16 | 1.000000 |
| rad5          | 4.19875e-17 | 1.000000 | 4.20038e-17 | 1.000000 |
| rad18         | 9.35307e-18 | 1.000000 | 9.35671e-18 | 1.000000 |
| PAH3+H        | 7.78862e-18 | 1.000000 | 7.79165e-18 | 1.000000 |
| rad59         | 2.61498e-18 | 1.000000 | 2.61600e-18 | 1.000000 |
| rad31         | 2.47763e-18 | 1.000000 | 2.47860e-18 | 1.000000 |
| rad45         | 1.32074e-18 | 1.000000 | 1.32125e-18 | 1.000000 |
| rad22         | 1.05319e-18 | 1.000000 | 1.05360e-18 | 1.000000 |
| rad50         | 1.57823e-19 | 1.000000 | 1.57884e-19 | 1.000000 |
| rad36         | 8.36201e-20 | 1.000000 | 8.36526e-20 | 1.000000 |
| rad19syn      | 7.93125e-21 | 1.000000 | 7.93434e-21 | 1.000000 |
| rad24         | 2.70706e-22 | 1.000000 | 2.70811e-22 | 1.000000 |
| rad54         | 1.28739e-22 | 1.000000 | 1.28789e-22 | 1.000000 |
| PAH10+CH3     | 8.76197e-23 | 1.000000 | 8.76538e-23 | 1.000000 |
| rad43         | 2.10001e-23 | 1.000000 | 2.10083e-23 | 1.000000 |
| rad52         | 1.76521e-23 | 1.000000 | 1.76590e-23 | 1.000000 |
| rad62         | 4.48320e-24 | 1.000000 | 4.48495e-24 | 1.000000 |
| rad51         | 2.84575e-25 | 1.000000 | 2.84686e-25 | 1.000000 |
| PhcycC3H3_A+H | 1.83494e-25 | 1.000000 | 1.83566e-25 | 1.000000 |
| rad70         | 1.30434e-25 | 1.000000 | 1.30485e-25 | 1.000000 |
| rad55         | 5.31863e-26 | 1.000000 | 5.32070e-26 | 1.000000 |
| rad58         | 1.13976e-26 | 1.000000 | 1.14020e-26 | 1.000000 |
| PAH1+H        | 3.49019e-27 | 1.000000 | 3.49155e-27 | 1.000000 |
| rad65         | 1.89688e-27 | 1.000000 | 1.89762e-27 | 1.000000 |
| rad34         | 2.02062e-28 | 1.000000 | 2.02140e-28 | 1.000000 |
| rad42         | 2.62672e-30 | 1.000000 | 2.62774e-30 | 1.000000 |
| rad41         | 7.56110e-31 | 1.000000 | 7.56404e-31 | 1.000000 |
| rad47         | 1.87587e-38 | 1.000000 | 1.87660e-38 | 1.000000 |

0.100000000E-04 Pa, 250.000000 K

=====

| Rate constant | True (fraction)     | Effective (fraction) |
|---------------|---------------------|----------------------|
| Total         | 1.17763e-24 (1.00 ) | 1.17706e-24 (1.00 )  |

| species       | PYtrue      | Cumul    | PYeffective | Cumul    |
|---------------|-------------|----------|-------------|----------|
| Indene+H      | 0.999342    | 0.999342 | 0.999827    | 0.999827 |
| Benzyl+C2H2   | 0.000484657 | 0.999827 | 0.00000     | 0.999827 |
| rad6          | 0.000173154 | 1.000000 | 0.000173238 | 1.00000  |
| rad2          | 6.11904e-08 | 1.000000 | 6.12201e-08 | 1.00000  |
| PhCCH+CH3     | 4.28451e-08 | 1.000000 | 4.28658e-08 | 1.00000  |
| PhCHCCH2+H    | 3.35460e-08 | 1.000000 | 3.35623e-08 | 1.00000  |
| rad28         | 1.65842e-08 | 1.000000 | 1.65922e-08 | 1.00000  |
| PhCCCH3+H     | 1.61811e-08 | 1.000000 | 1.61889e-08 | 1.00000  |
| rad7          | 1.29902e-08 | 1.000000 | 1.29965e-08 | 1.00000  |
| rad30         | 9.79700e-09 | 1.000000 | 9.80175e-09 | 1.00000  |
| rad1          | 4.36984e-09 | 1.000000 | 4.37196e-09 | 1.00000  |
| rad10         | 3.25345e-09 | 1.000000 | 3.25503e-09 | 1.00000  |
| rad11         | 3.20025e-09 | 1.000000 | 3.20180e-09 | 1.00000  |
| rad26         | 3.08006e-09 | 1.000000 | 3.08155e-09 | 1.00000  |
| PAH9+H        | 1.23203e-09 | 1.000000 | 1.23263e-09 | 1.00000  |
| rad15         | 9.65196e-10 | 1.000000 | 9.65664e-10 | 1.00000  |
| rad35         | 8.73004e-10 | 1.000000 | 8.73427e-10 | 1.00000  |
| rad3          | 4.05425e-10 | 1.000000 | 4.05622e-10 | 1.00000  |
| rad38         | 2.34119e-10 | 1.000000 | 2.34233e-10 | 1.00000  |
| Ph+MeAc       | 2.30719e-10 | 1.000000 | 2.30831e-10 | 1.00000  |
| rad4          | 2.12009e-10 | 1.000000 | 2.12112e-10 | 1.00000  |
| rad8          | 1.02584e-10 | 1.000000 | 1.02634e-10 | 1.00000  |
| rad13         | 7.41422e-11 | 1.000000 | 7.41782e-11 | 1.00000  |
| rad9          | 4.37562e-11 | 1.000000 | 4.37774e-11 | 1.00000  |
| PAH7+H        | 2.60762e-11 | 1.000000 | 2.60889e-11 | 1.00000  |
| Ph+Allene     | 9.35100e-12 | 1.000000 | 9.35553e-12 | 1.00000  |
| rad39         | 3.36093e-12 | 1.000000 | 3.36256e-12 | 1.00000  |
| rad12         | 2.87859e-12 | 1.000000 | 2.87999e-12 | 1.00000  |
| rad46         | 4.68593e-13 | 1.000000 | 4.68820e-13 | 1.00000  |
| rad33         | 1.44340e-13 | 1.000000 | 1.44410e-13 | 1.00000  |
| PhCH2CCH+H    | 6.80431e-14 | 1.000000 | 6.80761e-14 | 1.00000  |
| rad27         | 3.02245e-14 | 1.000000 | 3.02392e-14 | 1.00000  |
| rad60syn      | 2.22272e-14 | 1.000000 | 2.22379e-14 | 1.00000  |
| rad37         | 1.01157e-14 | 1.000000 | 1.01206e-14 | 1.00000  |
| rad25         | 9.86658e-15 | 1.000000 | 9.87136e-15 | 1.00000  |
| rad14         | 8.78805e-15 | 1.000000 | 8.79231e-15 | 1.00000  |
| rad60anti     | 5.89682e-15 | 1.000000 | 5.89968e-15 | 1.00000  |
| rad20         | 1.96986e-15 | 1.000000 | 1.97082e-15 | 1.00000  |
| rad21         | 1.26741e-15 | 1.000000 | 1.26803e-15 | 1.00000  |
| rad23         | 2.39799e-16 | 1.000000 | 2.39916e-16 | 1.00000  |
| rad5          | 1.45673e-16 | 1.000000 | 1.45743e-16 | 1.00000  |
| PAH3+H        | 2.94243e-17 | 1.000000 | 2.94386e-17 | 1.00000  |
| rad59         | 9.64550e-18 | 1.000000 | 9.65017e-18 | 1.00000  |
| rad18         | 8.41357e-18 | 1.000000 | 8.41765e-18 | 1.00000  |
| rad31         | 2.48952e-18 | 1.000000 | 2.49073e-18 | 1.00000  |
| rad45         | 1.74048e-18 | 1.000000 | 1.74132e-18 | 1.00000  |
| rad22         | 9.23277e-19 | 1.000000 | 9.23724e-19 | 1.00000  |
| rad50         | 5.93637e-19 | 1.000000 | 5.93925e-19 | 1.00000  |
| rad36         | 1.10692e-19 | 1.000000 | 1.10746e-19 | 1.00000  |
| rad19syn      | 4.22739e-20 | 1.000000 | 4.22944e-20 | 1.00000  |
| rad54         | 7.86739e-22 | 1.000000 | 7.87121e-22 | 1.00000  |
| PAH10+CH3     | 5.33090e-22 | 1.000000 | 5.33349e-22 | 1.00000  |
| rad24         | 2.81222e-22 | 1.000000 | 2.81358e-22 | 1.00000  |
| rad43         | 1.27021e-22 | 1.000000 | 1.27082e-22 | 1.00000  |
| rad52         | 9.31754e-23 | 1.000000 | 9.32206e-23 | 1.00000  |
| rad62         | 2.94957e-23 | 1.000000 | 2.95100e-23 | 1.00000  |
| rad51         | 1.93290e-24 | 1.000000 | 1.93384e-24 | 1.00000  |
| PhcycC3H3_A+H | 1.51483e-24 | 1.000000 | 1.51557e-24 | 1.00000  |
| rad70         | 1.03241e-24 | 1.000000 | 1.03291e-24 | 1.00000  |
| rad55         | 4.27156e-25 | 1.000000 | 4.27363e-25 | 1.00000  |
| rad58         | 9.52951e-26 | 1.000000 | 9.53413e-26 | 1.00000  |
| PAH1+H        | 3.26066e-26 | 1.000000 | 3.26225e-26 | 1.00000  |
| rad65         | 1.44854e-26 | 1.000000 | 1.44924e-26 | 1.00000  |
| rad34         | 1.95406e-27 | 1.000000 | 1.95501e-27 | 1.00000  |
| rad42         | 2.76644e-29 | 1.000000 | 2.76778e-29 | 1.00000  |
| rad41         | 8.02591e-30 | 1.000000 | 8.02981e-30 | 1.00000  |
| rad47         | 1.43631e-37 | 1.000000 | 1.43700e-37 | 1.00000  |

0.100000000E-04 Pa, 260.000000 K

=====

| Rate constant | True (fraction) | Effective (fraction) |
|---------------|-----------------|----------------------|
|---------------|-----------------|----------------------|

Total | 3.19452e-24 (1.00 ) 3.19260e-24 (1.00 )

| species       | PYtrue      | Cumul    | PYeffective | Cumul    |
|---------------|-------------|----------|-------------|----------|
| Indene+H      | 0.999241    | 0.999241 | 0.999842    | 0.999842 |
| Benzyl+C2H2   | 0.000600783 | 0.999842 | 0.00000     | 0.999842 |
| rad6          | 0.000157552 | 0.999999 | 0.000157646 | 1.000000 |
| PhCCH+CH3     | 7.46582e-08 | 0.999999 | 7.47031e-08 | 1.000000 |
| PhCHCCH2+H    | 5.58567e-08 | 0.999999 | 5.58902e-08 | 1.000000 |
| rad2          | 5.58021e-08 | 1.000000 | 5.58356e-08 | 1.000000 |
| PhCCCH3+H     | 2.80827e-08 | 1.000000 | 2.80996e-08 | 1.000000 |
| rad28         | 1.79023e-08 | 1.000000 | 1.79131e-08 | 1.000000 |
| rad30         | 1.36150e-08 | 1.000000 | 1.36232e-08 | 1.000000 |
| rad7          | 1.18508e-08 | 1.000000 | 1.18579e-08 | 1.000000 |
| rad1          | 4.03484e-09 | 1.000000 | 4.03727e-09 | 1.000000 |
| rad26         | 3.26690e-09 | 1.000000 | 3.26886e-09 | 1.000000 |
| rad10         | 2.97648e-09 | 1.000000 | 2.97827e-09 | 1.000000 |
| rad11         | 2.92131e-09 | 1.000000 | 2.92307e-09 | 1.000000 |
| PAH9+H        | 1.67428e-09 | 1.000000 | 1.67529e-09 | 1.000000 |
| rad15         | 1.46175e-09 | 1.000000 | 1.46263e-09 | 1.000000 |
| rad35         | 1.14367e-09 | 1.000000 | 1.14436e-09 | 1.000000 |
| Ph+MeAc       | 5.15781e-10 | 1.000000 | 5.16091e-10 | 1.000000 |
| rad3          | 3.70340e-10 | 1.000000 | 3.70563e-10 | 1.000000 |
| rad38         | 3.32666e-10 | 1.000000 | 3.32866e-10 | 1.000000 |
| rad4          | 1.94359e-10 | 1.000000 | 1.94476e-10 | 1.000000 |
| rad8          | 1.93500e-10 | 1.000000 | 1.93616e-10 | 1.000000 |
| rad9          | 8.90465e-11 | 1.000000 | 8.91000e-11 | 1.000000 |
| rad13         | 6.77799e-11 | 1.000000 | 6.78207e-11 | 1.000000 |
| PAH7+H        | 5.38471e-11 | 1.000000 | 5.38795e-11 | 1.000000 |
| Ph+Allene     | 2.34277e-11 | 1.000000 | 2.34418e-11 | 1.000000 |
| rad39         | 7.43525e-12 | 1.000000 | 7.43972e-12 | 1.000000 |
| rad12         | 5.91446e-12 | 1.000000 | 5.91801e-12 | 1.000000 |
| rad46         | 8.49056e-13 | 1.000000 | 8.49566e-13 | 1.000000 |
| PhCH2CCH+H    | 2.09040e-13 | 1.000000 | 2.09165e-13 | 1.000000 |
| rad33         | 1.32293e-13 | 1.000000 | 1.32372e-13 | 1.000000 |
| rad60syn      | 5.16423e-14 | 1.000000 | 5.16734e-14 | 1.000000 |
| rad27         | 2.98161e-14 | 1.000000 | 2.98340e-14 | 1.000000 |
| rad37         | 2.82395e-14 | 1.000000 | 2.82565e-14 | 1.000000 |
| rad60anti     | 1.43405e-14 | 1.000000 | 1.43492e-14 | 1.000000 |
| rad25         | 1.07594e-14 | 1.000000 | 1.07658e-14 | 1.000000 |
| rad14         | 9.90032e-15 | 1.000000 | 9.90627e-15 | 1.000000 |
| rad20         | 1.80092e-15 | 1.000000 | 1.80200e-15 | 1.000000 |
| rad21         | 1.16217e-15 | 1.000000 | 1.16287e-15 | 1.000000 |
| rad5          | 4.59232e-16 | 1.000000 | 4.59508e-16 | 1.000000 |
| rad23         | 3.19483e-16 | 1.000000 | 3.19675e-16 | 1.000000 |
| PAH3+H        | 1.00723e-16 | 1.000000 | 1.00784e-16 | 1.000000 |
| rad59         | 3.22622e-17 | 1.000000 | 3.22816e-17 | 1.000000 |
| rad18         | 7.57382e-18 | 1.000000 | 7.57838e-18 | 1.000000 |
| rad31         | 2.49895e-18 | 1.000000 | 2.50046e-18 | 1.000000 |
| rad45         | 2.40481e-18 | 1.000000 | 2.40626e-18 | 1.000000 |
| rad50         | 2.03113e-18 | 1.000000 | 2.03235e-18 | 1.000000 |
| rad22         | 8.11378e-19 | 1.000000 | 8.11865e-19 | 1.000000 |
| rad19syn      | 1.98194e-19 | 1.000000 | 1.98314e-19 | 1.000000 |
| rad36         | 1.53719e-19 | 1.000000 | 1.53812e-19 | 1.000000 |
| rad54         | 4.18268e-21 | 1.000000 | 4.18520e-21 | 1.000000 |
| PAH10+CH3     | 2.81830e-21 | 1.000000 | 2.81999e-21 | 1.000000 |
| rad43         | 6.67166e-22 | 1.000000 | 6.67567e-22 | 1.000000 |
| rad52         | 4.34411e-22 | 1.000000 | 4.34672e-22 | 1.000000 |
| rad24         | 2.94139e-22 | 1.000000 | 2.94316e-22 | 1.000000 |
| rad62         | 1.67391e-22 | 1.000000 | 1.67491e-22 | 1.000000 |
| rad51         | 1.13377e-23 | 1.000000 | 1.13445e-23 | 1.000000 |
| PhcycC3H3_A+H | 1.04988e-23 | 1.000000 | 1.05051e-23 | 1.000000 |
| rad70         | 6.90229e-24 | 1.000000 | 6.90644e-24 | 1.000000 |
| rad55         | 2.89209e-24 | 1.000000 | 2.89383e-24 | 1.000000 |
| rad58         | 6.67420e-25 | 1.000000 | 6.67821e-25 | 1.000000 |
| PAH1+H        | 2.48957e-25 | 1.000000 | 2.49107e-25 | 1.000000 |
| rad65         | 9.40612e-26 | 1.000000 | 9.41178e-26 | 1.000000 |
| rad34         | 1.53044e-26 | 1.000000 | 1.53136e-26 | 1.000000 |
| rad42         | 2.29631e-28 | 1.000000 | 2.29769e-28 | 1.000000 |
| rad41         | 6.71427e-29 | 1.000000 | 6.71830e-29 | 1.000000 |
| rad47         | 9.26850e-37 | 1.000000 | 9.27408e-37 | 1.000000 |

0.100000000E-04 Pa, 270.00000 K

| Rate constant | True (fraction)     | Effective (fraction) |
|---------------|---------------------|----------------------|
| Total         | 8.04141e-24 (1.00 ) | 8.03545e-24 (1.00 )  |

| species | PYtrue | Cumul | PYeffective | Cumul |
|---------|--------|-------|-------------|-------|
|---------|--------|-------|-------------|-------|

|               |             |          |             |          |
|---------------|-------------|----------|-------------|----------|
| Indene+H      | 0.999116    | 0.999116 | 0.999857    | 0.999857 |
| Benzyl+C2H2   | 0.000741028 | 0.999857 | 0.00000     | 0.999857 |
| rad6          | 0.000142153 | 0.999999 | 0.000142259 | 0.999999 |
| PhCCH+CH3     | 1.25697e-07 | 0.999999 | 1.25791e-07 | 0.999999 |
| PhCHCCH2+H    | 9.02176e-08 | 0.999999 | 9.02845e-08 | 0.999999 |
| rad2          | 5.04975e-08 | 0.999999 | 5.05350e-08 | 1.000000 |
| PhCCCH3+H     | 4.70309e-08 | 0.999999 | 4.70658e-08 | 1.000000 |
| rad28         | 1.88824e-08 | 1.000000 | 1.88964e-08 | 1.000000 |
| rad30         | 1.86587e-08 | 1.000000 | 1.86725e-08 | 1.000000 |
| rad7          | 1.07216e-08 | 1.000000 | 1.07295e-08 | 1.000000 |
| rad1          | 3.70037e-09 | 1.000000 | 3.70312e-09 | 1.000000 |
| rad26         | 3.38913e-09 | 1.000000 | 3.39164e-09 | 1.000000 |
| rad10         | 2.70104e-09 | 1.000000 | 2.70304e-09 | 1.000000 |
| rad11         | 2.64462e-09 | 1.000000 | 2.64658e-09 | 1.000000 |
| PAH9+H        | 2.26131e-09 | 1.000000 | 2.26298e-09 | 1.000000 |
| rad15         | 2.16648e-09 | 1.000000 | 2.16808e-09 | 1.000000 |
| rad35         | 1.49158e-09 | 1.000000 | 1.49268e-09 | 1.000000 |
| Ph+MeAc       | 1.08901e-09 | 1.000000 | 1.08982e-09 | 1.000000 |
| rad38         | 4.67976e-10 | 1.000000 | 4.68323e-10 | 1.000000 |
| rad8          | 3.49859e-10 | 1.000000 | 3.50118e-10 | 1.000000 |
| rad3          | 3.35401e-10 | 1.000000 | 3.35649e-10 | 1.000000 |
| rad4          | 1.76707e-10 | 1.000000 | 1.76838e-10 | 1.000000 |
| rad9          | 1.72750e-10 | 1.000000 | 1.72878e-10 | 1.000000 |
| PAH7+H        | 1.05946e-10 | 1.000000 | 1.06024e-10 | 1.000000 |
| rad13         | 6.14556e-11 | 1.000000 | 6.15011e-11 | 1.000000 |
| Ph+Allene     | 5.51272e-11 | 1.000000 | 5.51681e-11 | 1.000000 |
| rad39         | 1.55755e-11 | 1.000000 | 1.55870e-11 | 1.000000 |
| rad12         | 1.15395e-11 | 1.000000 | 1.15480e-11 | 1.000000 |
| rad46         | 1.49075e-12 | 1.000000 | 1.49185e-12 | 1.000000 |
| PhCH2CCH+H    | 5.93545e-13 | 1.000000 | 5.93985e-13 | 1.000000 |
| rad33         | 1.20275e-13 | 1.000000 | 1.20365e-13 | 1.000000 |
| rad60syn      | 1.13160e-13 | 1.000000 | 1.13244e-13 | 1.000000 |
| rad37         | 7.26837e-14 | 1.000000 | 7.27376e-14 | 1.000000 |
| rad60anti     | 3.27520e-14 | 1.000000 | 3.27763e-14 | 1.000000 |
| rad27         | 2.89600e-14 | 1.000000 | 2.89815e-14 | 1.000000 |
| rad25         | 1.14582e-14 | 1.000000 | 1.14667e-14 | 1.000000 |
| rad14         | 1.08639e-14 | 1.000000 | 1.08719e-14 | 1.000000 |
| rad20         | 1.65008e-15 | 1.000000 | 1.65130e-15 | 1.000000 |
| rad5          | 1.32932e-15 | 1.000000 | 1.33031e-15 | 1.000000 |
| rad21         | 1.06823e-15 | 1.000000 | 1.06903e-15 | 1.000000 |
| rad23         | 4.41763e-16 | 1.000000 | 4.42091e-16 | 1.000000 |
| PAH3+H        | 3.15912e-16 | 1.000000 | 3.16146e-16 | 1.000000 |
| rad59         | 9.89461e-17 | 1.000000 | 9.90195e-17 | 1.000000 |
| rad18         | 6.82305e-18 | 1.000000 | 6.82811e-18 | 1.000000 |
| rad50         | 6.38911e-18 | 1.000000 | 6.39385e-18 | 1.000000 |
| rad45         | 3.47567e-18 | 1.000000 | 3.47825e-18 | 1.000000 |
| rad31         | 2.50881e-18 | 1.000000 | 2.51067e-18 | 1.000000 |
| rad19syn      | 8.29140e-19 | 1.000000 | 8.29755e-19 | 1.000000 |
| rad22         | 7.15417e-19 | 1.000000 | 7.15947e-19 | 1.000000 |
| rad36         | 2.23429e-19 | 1.000000 | 2.23595e-19 | 1.000000 |
| rad54         | 1.96542e-20 | 1.000000 | 1.96688e-20 | 1.000000 |
| PAH10+CH3     | 1.31519e-20 | 1.000000 | 1.31617e-20 | 1.000000 |
| rad43         | 3.09121e-21 | 1.000000 | 3.09350e-21 | 1.000000 |
| rad52         | 1.81420e-21 | 1.000000 | 1.81555e-21 | 1.000000 |
| rad62         | 8.33468e-22 | 1.000000 | 8.34086e-22 | 1.000000 |
| rad24         | 3.09839e-22 | 1.000000 | 3.10069e-22 | 1.000000 |
| PhcycC3H3_A+H | 6.28433e-23 | 1.000000 | 6.28899e-23 | 1.000000 |
| rad51         | 5.84528e-23 | 1.000000 | 5.84962e-23 | 1.000000 |
| rad70         | 3.99447e-23 | 1.000000 | 3.99743e-23 | 1.000000 |
| rad55         | 1.69371e-23 | 1.000000 | 1.69497e-23 | 1.000000 |
| rad58         | 4.03354e-24 | 1.000000 | 4.03653e-24 | 1.000000 |
| PAH1+H        | 1.62731e-24 | 1.000000 | 1.62852e-24 | 1.000000 |
| rad65         | 5.31208e-25 | 1.000000 | 5.31602e-25 | 1.000000 |
| rad34         | 1.02479e-25 | 1.000000 | 1.02555e-25 | 1.000000 |
| rad42         | 1.63123e-27 | 1.000000 | 1.63244e-27 | 1.000000 |
| rad41         | 4.81358e-28 | 1.000000 | 4.81715e-28 | 1.000000 |
| rad47         | 5.14497e-36 | 1.000000 | 5.14878e-36 | 1.000000 |

0.100000000E-04 Pa, 280.000000 K

=====

| Rate constant | True (fraction)     | Effective (fraction) |
|---------------|---------------------|----------------------|
| Total         | 1.89357e-23 (1.00 ) | 1.89185e-23 (1.00 )  |

| species     | PYtrue      | Cumul    | PYeffective | Cumul    |
|-------------|-------------|----------|-------------|----------|
| Indene+H    | 0.998963    | 0.998963 | 0.999872    | 0.999872 |
| Benzyl+C2H2 | 0.000909456 | 0.999872 | 0.00000     | 0.999872 |
| rad6        | 0.000127239 | 1.000000 | 0.000127355 | 0.999999 |
| PhCCH+CH3   | 2.05133e-07 | 1.000000 | 2.05320e-07 | 1.000000 |



|               |             |         |             |          |
|---------------|-------------|---------|-------------|----------|
| PhCCCH2+H     | 1.41741e-07 | 1.00000 | 1.41870e-07 | 1.000000 |
| PhCCCH3+H     | 7.62629e-08 | 1.00000 | 7.63323e-08 | 1.000000 |
| rad2          | 4.53411e-08 | 1.00000 | 4.53824e-08 | 1.000000 |
| rad30         | 2.52466e-08 | 1.00000 | 2.52696e-08 | 1.000000 |
| rad28         | 1.95036e-08 | 1.00000 | 1.95214e-08 | 1.000000 |
| rad7          | 9.62361e-09 | 1.00000 | 9.63237e-09 | 1.000000 |
| rad26         | 3.44646e-09 | 1.00000 | 3.44960e-09 | 1.000000 |
| rad1          | 3.37044e-09 | 1.00000 | 3.37351e-09 | 1.000000 |
| rad15         | 3.14918e-09 | 1.00000 | 3.15204e-09 | 1.000000 |
| PAH9+H        | 3.03538e-09 | 1.00000 | 3.03814e-09 | 1.000000 |
| rad10         | 2.43272e-09 | 1.00000 | 2.43493e-09 | 1.000000 |
| rad11         | 2.37535e-09 | 1.00000 | 2.37751e-09 | 1.000000 |
| Ph+MeAc       | 2.18432e-09 | 1.00000 | 2.18630e-09 | 1.000000 |
| rad35         | 1.93633e-09 | 1.00000 | 1.93809e-09 | 1.000000 |
| rad38         | 6.52072e-10 | 1.00000 | 6.52665e-10 | 1.000000 |
| rad8          | 6.09007e-10 | 1.00000 | 6.09561e-10 | 1.000000 |
| rad9          | 3.21099e-10 | 1.00000 | 3.21391e-10 | 1.000000 |
| rad3          | 3.01657e-10 | 1.00000 | 3.01932e-10 | 1.000000 |
| PAH7+H        | 1.99650e-10 | 1.00000 | 1.99831e-10 | 1.000000 |
| rad4          | 1.59595e-10 | 1.00000 | 1.59740e-10 | 1.000000 |
| Ph+Allene     | 1.22647e-10 | 1.00000 | 1.22759e-10 | 1.000000 |
| rad13         | 5.52889e-11 | 1.00000 | 5.53393e-11 | 1.000000 |
| rad39         | 3.10749e-11 | 1.00000 | 3.11032e-11 | 1.000000 |
| rad12         | 2.14947e-11 | 1.00000 | 2.15143e-11 | 1.000000 |
| rad46         | 2.54452e-12 | 1.00000 | 2.54683e-12 | 1.000000 |
| PhCH2CCH+H    | 1.57072e-12 | 1.00000 | 1.57215e-12 | 1.000000 |
| rad60syn      | 2.35372e-13 | 1.00000 | 2.35587e-13 | 1.000000 |
| rad37         | 1.74026e-13 | 1.00000 | 1.74184e-13 | 1.000000 |
| rad33         | 1.08519e-13 | 1.00000 | 1.08618e-13 | 1.000000 |
| rad60anti     | 7.07393e-14 | 1.00000 | 7.08037e-14 | 1.000000 |
| rad27         | 2.77373e-14 | 1.00000 | 2.77625e-14 | 1.000000 |
| rad25         | 1.19461e-14 | 1.00000 | 1.19569e-14 | 1.000000 |
| rad14         | 1.16436e-14 | 1.00000 | 1.16542e-14 | 1.000000 |
| rad5          | 3.56511e-15 | 1.00000 | 3.56836e-15 | 1.000000 |
| rad20         | 1.51542e-15 | 1.00000 | 1.51680e-15 | 1.000000 |
| rad21         | 9.84419e-16 | 1.00000 | 9.85315e-16 | 1.000000 |
| PAH3+H        | 9.16506e-16 | 1.00000 | 9.17340e-16 | 1.000000 |
| rad23         | 6.31798e-16 | 1.00000 | 6.32373e-16 | 1.000000 |
| rad59         | 2.80899e-16 | 1.00000 | 2.81155e-16 | 1.000000 |
| rad50         | 1.86453e-17 | 1.00000 | 1.86622e-17 | 1.000000 |
| rad18         | 6.15178e-18 | 1.00000 | 6.15738e-18 | 1.000000 |
| rad45         | 5.25161e-18 | 1.00000 | 5.25639e-18 | 1.000000 |
| rad19syn      | 3.13279e-18 | 1.00000 | 3.13564e-18 | 1.000000 |
| rad31         | 2.52203e-18 | 1.00000 | 2.52433e-18 | 1.000000 |
| rad22         | 6.33856e-19 | 1.00000 | 6.34433e-19 | 1.000000 |
| rad36         | 3.39714e-19 | 1.00000 | 3.40023e-19 | 1.000000 |
| rad54         | 8.26741e-20 | 1.00000 | 8.27494e-20 | 1.000000 |
| PAH10+CH3     | 5.48794e-20 | 1.00000 | 5.49294e-20 | 1.000000 |
| rad43         | 1.28002e-20 | 1.00000 | 1.28118e-20 | 1.000000 |
| rad52         | 6.86644e-21 | 1.00000 | 6.87269e-21 | 1.000000 |
| rad62         | 3.68990e-21 | 1.00000 | 3.69326e-21 | 1.000000 |
| PhcycC3H3_A+H | 3.28877e-22 | 1.00000 | 3.29176e-22 | 1.000000 |
| rad24         | 3.28806e-22 | 1.00000 | 3.29105e-22 | 1.000000 |
| rad51         | 2.68189e-22 | 1.00000 | 2.68433e-22 | 1.000000 |
| rad70         | 2.02728e-22 | 1.00000 | 2.02913e-22 | 1.000000 |
| rad55         | 8.68997e-23 | 1.00000 | 8.69788e-23 | 1.000000 |
| rad58         | 2.12890e-23 | 1.00000 | 2.13084e-23 | 1.000000 |
| PAH1+H        | 9.19432e-24 | 1.00000 | 9.20269e-24 | 1.000000 |
| rad65         | 2.64204e-24 | 1.00000 | 2.64445e-24 | 1.000000 |
| rad34         | 5.91302e-25 | 1.00000 | 5.91840e-25 | 1.000000 |
| rad42         | 9.90717e-27 | 1.00000 | 9.91619e-27 | 1.000000 |
| rad41         | 2.94679e-27 | 1.00000 | 2.94947e-27 | 1.000000 |
| rad47         | 2.49702e-35 | 1.00000 | 2.49929e-35 | 1.000000 |

0.100000000E-04 Pa, 290.000000 K

=====

| Rate constant | True (fraction) |          | Effective (fraction) |          |
|---------------|-----------------|----------|----------------------|----------|
| Total         | 4.20015e-23     | (1.00 )  | 4.19549e-23          | (1.00 )  |
| species       | PYtrue          | Cumul    | PYeffective          | Cumul    |
| Indene+H      | 0.998776        | 0.998776 | 0.999886             | 0.999886 |
| Benzyl+C2H2   | 0.00111061      | 0.999887 | 0.00000              | 0.999886 |
| rad6          | 0.000113032     | 1.000000 | 0.000113158          | 0.999999 |
| PhCCH+CH3     | 3.25389e-07     | 1.000000 | 3.25751e-07          | 0.999999 |
| PhCHCCH2+H    | 2.17127e-07     | 1.00000  | 2.17369e-07          | 1.000000 |
| PhCCCH3+H     | 1.20085e-07     | 1.00000  | 1.20219e-07          | 1.000000 |
| rad2          | 4.03696e-08     | 1.00000  | 4.04145e-08          | 1.000000 |
| rad30         | 3.37607e-08     | 1.00000  | 3.37982e-08          | 1.000000 |

|               |             |         |             |          |
|---------------|-------------|---------|-------------|----------|
| rad28         | 1.97670e-08 | 1.00000 | 1.97890e-08 | 1.000000 |
| rad7          | 8.57383e-09 | 1.00000 | 8.58337e-09 | 1.000000 |
| rad15         | 4.49771e-09 | 1.00000 | 4.50271e-09 | 1.000000 |
| Ph+MeAc       | 4.18297e-09 | 1.00000 | 4.18762e-09 | 1.000000 |
| PAH9+H        | 4.04942e-09 | 1.00000 | 4.05392e-09 | 1.000000 |
| rad26         | 3.44211e-09 | 1.00000 | 3.44594e-09 | 1.000000 |
| rad1          | 3.04722e-09 | 1.00000 | 3.05061e-09 | 1.000000 |
| rad35         | 2.50177e-09 | 1.00000 | 2.50455e-09 | 1.000000 |
| rad10         | 2.17402e-09 | 1.00000 | 2.17644e-09 | 1.000000 |
| rad11         | 2.11770e-09 | 1.00000 | 2.12006e-09 | 1.000000 |
| rad8          | 1.02448e-09 | 1.00000 | 1.02562e-09 | 1.000000 |
| rad38         | 9.00336e-10 | 1.00000 | 9.01337e-10 | 1.000000 |
| rad9          | 5.74337e-10 | 1.00000 | 5.74975e-10 | 1.000000 |
| PAH7+H        | 3.61954e-10 | 1.00000 | 3.62356e-10 | 1.000000 |
| rad3          | 2.69140e-10 | 1.00000 | 2.69439e-10 | 1.000000 |
| Ph+Allene     | 2.59473e-10 | 1.00000 | 2.59762e-10 | 1.000000 |
| rad4          | 1.43031e-10 | 1.00000 | 1.43190e-10 | 1.000000 |
| rad39         | 5.93418e-11 | 1.00000 | 5.94078e-11 | 1.000000 |
| rad13         | 4.93771e-11 | 1.00000 | 4.94320e-11 | 1.000000 |
| rad12         | 3.84021e-11 | 1.00000 | 3.84448e-11 | 1.000000 |
| rad46         | 4.23378e-12 | 1.00000 | 4.23849e-12 | 1.000000 |
| PhCH2CCH+H    | 3.90208e-12 | 1.00000 | 3.90642e-12 | 1.000000 |
| rad60syn      | 4.67305e-13 | 1.00000 | 4.67824e-13 | 1.000000 |
| rad37         | 3.90595e-13 | 1.00000 | 3.91029e-13 | 1.000000 |
| rad60anti     | 1.45354e-13 | 1.00000 | 1.45515e-13 | 1.000000 |
| rad33         | 9.72132e-14 | 1.00000 | 9.73213e-14 | 1.000000 |
| rad27         | 2.62315e-14 | 1.00000 | 2.62607e-14 | 1.000000 |
| rad25         | 1.22191e-14 | 1.00000 | 1.22327e-14 | 1.000000 |
| rad14         | 1.22178e-14 | 1.00000 | 1.22314e-14 | 1.000000 |
| rad5          | 8.92731e-15 | 1.00000 | 8.93723e-15 | 1.000000 |
| PAH3+H        | 2.47956e-15 | 1.00000 | 2.48231e-15 | 1.000000 |
| rad20         | 1.39523e-15 | 1.00000 | 1.39678e-15 | 1.000000 |
| rad23         | 9.31457e-16 | 1.00000 | 9.32492e-16 | 1.000000 |
| rad21         | 9.09674e-16 | 1.00000 | 9.10685e-16 | 1.000000 |
| rad59         | 7.44181e-16 | 1.00000 | 7.45008e-16 | 1.000000 |
| rad50         | 5.08733e-17 | 1.00000 | 5.09299e-17 | 1.000000 |
| rad19syn      | 1.08020e-17 | 1.00000 | 1.08140e-17 | 1.000000 |
| rad45         | 8.26430e-18 | 1.00000 | 8.27348e-18 | 1.000000 |
| rad18         | 5.55162e-18 | 1.00000 | 5.55779e-18 | 1.000000 |
| rad31         | 2.54121e-18 | 1.00000 | 2.54404e-18 | 1.000000 |
| rad22         | 5.65711e-19 | 1.00000 | 5.66340e-19 | 1.000000 |
| rad36         | 5.38293e-19 | 1.00000 | 5.38892e-19 | 1.000000 |
| rad54         | 3.14759e-19 | 1.00000 | 3.15109e-19 | 1.000000 |
| PAH10+CH3     | 2.07056e-19 | 1.00000 | 2.07287e-19 | 1.000000 |
| rad43         | 4.79058e-20 | 1.00000 | 4.79591e-20 | 1.000000 |
| rad52         | 2.37882e-20 | 1.00000 | 2.38146e-20 | 1.000000 |
| rad62         | 1.46946e-20 | 1.00000 | 1.47110e-20 | 1.000000 |
| PhcycC3H3_A+H | 1.52451e-21 | 1.00000 | 1.52620e-21 | 1.000000 |
| rad51         | 1.10723e-21 | 1.00000 | 1.10847e-21 | 1.000000 |
| rad70         | 9.13942e-22 | 1.00000 | 9.14959e-22 | 1.000000 |
| rad55         | 3.95673e-22 | 1.00000 | 3.96113e-22 | 1.000000 |
| rad24         | 3.51651e-22 | 1.00000 | 3.52042e-22 | 1.000000 |
| rad58         | 9.94323e-23 | 1.00000 | 9.95428e-23 | 1.000000 |
| PAH1+H        | 4.55729e-23 | 1.00000 | 4.56236e-23 | 1.000000 |
| rad65         | 1.17141e-23 | 1.00000 | 1.17271e-23 | 1.000000 |
| rad34         | 2.98551e-24 | 1.00000 | 2.98883e-24 | 1.000000 |
| rad42         | 5.23348e-26 | 1.00000 | 5.23930e-26 | 1.000000 |
| rad41         | 1.56769e-26 | 1.00000 | 1.56943e-26 | 1.000000 |
| rad47         | 1.07468e-34 | 1.00000 | 1.07587e-34 | 1.000000 |

0.100000000E-04 Pa, 300.000000 K

=====

| Rate constant | True (fraction)     | Effective (fraction) |
|---------------|---------------------|----------------------|
| Total         | 1.17740e-22 (1.00 ) | 1.17544e-22 (1.00 )  |

| species     | PYtrue      | Cumul    | PYeffective | Cumul    |
|-------------|-------------|----------|-------------|----------|
| Indene+H    | 0.998253    | 0.998253 | 0.999915    | 0.999915 |
| Benzyl+C2H2 | 0.00166156  | 0.999915 | 0.00000     | 0.999915 |
| rad6        | 8.40764e-05 | 0.999999 | 8.42163e-05 | 0.999999 |
| PhCCH+CH3   | 4.37162e-07 | 0.999999 | 4.37890e-07 | 1.000000 |
| PhCHCCH2+H  | 2.66378e-07 | 0.999999 | 2.66822e-07 | 1.000000 |
| PhCCCH3+H   | 1.55876e-07 | 0.999999 | 1.56136e-07 | 1.000000 |
| rad30       | 3.74939e-08 | 1.000000 | 3.75563e-08 | 1.000000 |
| rad2        | 2.94321e-08 | 1.000000 | 2.94811e-08 | 1.000000 |
| rad28       | 1.59645e-08 | 1.000000 | 1.59910e-08 | 1.000000 |
| rad7        | 7.47293e-09 | 1.000000 | 7.48537e-09 | 1.000000 |
| Ph+MeAc     | 6.10451e-09 | 1.000000 | 6.11467e-09 | 1.000000 |
| PAH9+H      | 5.54877e-09 | 1.000000 | 5.55800e-09 | 1.000000 |

|               |             |          |             |          |
|---------------|-------------|----------|-------------|----------|
| rad26         | 2.93991e-09 | 1.000000 | 2.94481e-09 | 1.000000 |
| rad35         | 2.76927e-09 | 1.000000 | 2.77388e-09 | 1.000000 |
| rad1          | 2.21783e-09 | 1.000000 | 2.22152e-09 | 1.000000 |
| rad10         | 1.88156e-09 | 1.000000 | 1.88469e-09 | 1.000000 |
| rad11         | 1.78801e-09 | 1.000000 | 1.79099e-09 | 1.000000 |
| rad38         | 1.02444e-09 | 1.000000 | 1.02614e-09 | 1.000000 |
| PAH7+H        | 6.46228e-10 | 1.000000 | 6.47303e-10 | 1.000000 |
| Ph+Allene     | 2.52088e-10 | 1.000000 | 2.52508e-10 | 1.000000 |
| rad3          | 2.04940e-10 | 1.000000 | 2.05281e-10 | 1.000000 |
| rad4          | 1.01917e-10 | 1.000000 | 1.02087e-10 | 1.000000 |
| rad39         | 8.65155e-11 | 1.000000 | 8.66595e-11 | 1.000000 |
| rad13         | 4.30141e-11 | 1.000000 | 4.30857e-11 | 1.000000 |
| rad19anti     | 1.63421e-11 | 1.000000 | 1.63693e-11 | 1.000000 |
| PhCH2CCH+H    | 7.51796e-12 | 1.000000 | 7.53047e-12 | 1.000000 |
| rad46         | 5.66751e-12 | 1.000000 | 5.67695e-12 | 1.000000 |
| rad60syn      | 7.07967e-13 | 1.000000 | 7.09145e-13 | 1.000000 |
| rad23         | 6.06523e-13 | 1.000000 | 6.07532e-13 | 1.000000 |
| rad37         | 6.05750e-13 | 1.000000 | 6.06758e-13 | 1.000000 |
| rad60anti     | 2.13244e-13 | 1.000000 | 2.13599e-13 | 1.000000 |
| rad33         | 1.03145e-13 | 1.000000 | 1.03316e-13 | 1.000000 |
| rad20         | 7.81434e-14 | 1.000000 | 7.82735e-14 | 1.000000 |
| rad21         | 4.99629e-14 | 1.000000 | 5.00461e-14 | 1.000000 |
| rad27         | 2.32396e-14 | 1.000000 | 2.32783e-14 | 1.000000 |
| rad45         | 1.52860e-14 | 1.000000 | 1.53114e-14 | 1.000000 |
| rad14         | 1.07232e-14 | 1.000000 | 1.07410e-14 | 1.000000 |
| rad25         | 9.52525e-15 | 1.000000 | 9.54111e-15 | 1.000000 |
| PAH3+H        | 6.24906e-15 | 1.000000 | 6.25946e-15 | 1.000000 |
| rad22         | 1.93225e-15 | 1.000000 | 1.93547e-15 | 1.000000 |
| rad18         | 1.88578e-15 | 1.000000 | 1.88892e-15 | 1.000000 |
| rad59         | 1.44646e-15 | 1.000000 | 1.44887e-15 | 1.000000 |
| rad36         | 5.21000e-16 | 1.000000 | 5.21867e-16 | 1.000000 |
| rad50         | 1.03025e-16 | 1.000000 | 1.03196e-16 | 1.000000 |
| rad19syn      | 2.69237e-17 | 1.000000 | 2.69686e-17 | 1.000000 |
| rad31         | 3.63614e-18 | 1.000000 | 3.64219e-18 | 1.000000 |
| rad67         | 1.20185e-18 | 1.000000 | 1.20385e-18 | 1.000000 |
| rad54         | 8.62496e-19 | 1.000000 | 8.63931e-19 | 1.000000 |
| PAH10+CH3     | 5.72001e-19 | 1.000000 | 5.72953e-19 | 1.000000 |
| rad24         | 1.73524e-19 | 1.000000 | 1.73813e-19 | 1.000000 |
| rad43         | 1.19057e-19 | 1.000000 | 1.19255e-19 | 1.000000 |
| rad52         | 6.28750e-20 | 1.000000 | 6.29796e-20 | 1.000000 |
| rad62         | 4.05066e-20 | 1.000000 | 4.05740e-20 | 1.000000 |
| PhcycC3H3_A+H | 7.38955e-21 | 1.000000 | 7.40185e-21 | 1.000000 |
| rad51         | 3.46096e-21 | 1.000000 | 3.46672e-21 | 1.000000 |
| rad70         | 3.35427e-21 | 1.000000 | 3.35986e-21 | 1.000000 |
| rad9          | 1.39157e-21 | 1.000000 | 1.39388e-21 | 1.000000 |
| rad55         | 1.33540e-21 | 1.000000 | 1.33762e-21 | 1.000000 |
| rad58         | 3.59869e-22 | 1.000000 | 3.60468e-22 | 1.000000 |
| PAH1+H        | 2.76412e-22 | 1.000000 | 2.76872e-22 | 1.000000 |
| rad65         | 4.20420e-23 | 1.000000 | 4.21120e-23 | 1.000000 |
| rad34         | 1.85427e-23 | 1.000000 | 1.85735e-23 | 1.000000 |
| rad15         | 8.27422e-25 | 1.000000 | 8.28799e-25 | 1.000000 |
| rad42         | 4.75224e-25 | 1.000000 | 4.76015e-25 | 1.000000 |
| rad41         | 1.44600e-25 | 1.000000 | 1.44841e-25 | 1.000000 |
| rad53         | 6.41329e-27 | 1.000000 | 6.42397e-27 | 1.000000 |
| rad64         | 1.37054e-27 | 1.000000 | 1.37282e-27 | 1.000000 |
| rad5          | 5.01136e-28 | 1.000000 | 5.01970e-28 | 1.000000 |
| rad12         | 1.01558e-28 | 1.000000 | 1.01727e-28 | 1.000000 |
| rad56         | 9.21003e-30 | 1.000000 | 9.22535e-30 | 1.000000 |
| rad61         | 1.39494e-30 | 1.000000 | 1.39726e-30 | 1.000000 |
| rad68syn      | 1.01956e-30 | 1.000000 | 1.02126e-30 | 1.000000 |
| rad68anti     | 7.27775e-31 | 1.000000 | 7.28987e-31 | 1.000000 |
| rad73         | 2.25622e-33 | 1.000000 | 2.25997e-33 | 1.000000 |
| rad47         | 2.39997e-34 | 1.000000 | 2.40397e-34 | 1.000000 |
| rad40syn      | 2.31451e-34 | 1.000000 | 2.31836e-34 | 1.000000 |
| rad40anti     | 7.03458e-35 | 1.000000 | 7.04628e-35 | 1.000000 |
| rad71         | 2.29516e-36 | 1.000000 | 2.29898e-36 | 1.000000 |
| PAH8+H        | 7.64559e-37 | 1.000000 | 7.65832e-37 | 1.000000 |
| rad72         | 4.04882e-42 | 1.000000 | 4.05556e-42 | 1.000000 |
| rad8          | 2.66433e-43 | 1.000000 | 2.66877e-43 | 1.000000 |

0.100000000E-04 Pa, 310.000000 K

=====

| Rate constant | True (fraction)     | Effective (fraction) |             |          |
|---------------|---------------------|----------------------|-------------|----------|
| Total         | 2.44453e-22 (1.00 ) | 2.44054e-22 (1.00 )  |             |          |
| species       | PYtrue              | Cumul                | PYeffective | Cumul    |
| Indene+H      | 0.998279            | 0.998279             | 0.999911    | 0.999911 |
| Benzy1+C2H2   | 0.00163184          | 0.999911             | 0.000000    | 0.999911 |

|               |             |          |             |          |
|---------------|-------------|----------|-------------|----------|
| rad6          | 8.73500e-05 | 0.999998 | 8.74928e-05 | 0.999998 |
| PhCCH+CH3     | 7.58753e-07 | 0.999999 | 7.59993e-07 | 0.999999 |
| PhCHCCH2+H    | 4.76052e-07 | 0.999999 | 4.76831e-07 | 1.000000 |
| PhCCCH3+H     | 2.75295e-07 | 1.000000 | 2.75745e-07 | 1.000000 |
| rad30         | 5.84649e-08 | 1.000000 | 5.85605e-08 | 1.000000 |
| rad2          | 3.13967e-08 | 1.000000 | 3.14480e-08 | 1.000000 |
| rad28         | 1.93121e-08 | 1.000000 | 1.93436e-08 | 1.000000 |
| Ph+MeAc       | 1.35761e-08 | 1.000000 | 1.35983e-08 | 1.000000 |
| rad15         | 8.75409e-09 | 1.000000 | 8.76840e-09 | 1.000000 |
| PAH9+H        | 7.07561e-09 | 1.000000 | 7.08717e-09 | 1.000000 |
| rad7          | 6.66608e-09 | 1.000000 | 6.67698e-09 | 1.000000 |
| rad35         | 4.11561e-09 | 1.000000 | 4.12233e-09 | 1.000000 |
| rad26         | 3.27400e-09 | 1.000000 | 3.27935e-09 | 1.000000 |
| rad8          | 2.64955e-09 | 1.000000 | 2.65388e-09 | 1.000000 |
| rad1          | 2.45126e-09 | 1.000000 | 2.45527e-09 | 1.000000 |
| rad10         | 1.70338e-09 | 1.000000 | 1.70617e-09 | 1.000000 |
| rad38         | 1.67243e-09 | 1.000000 | 1.67517e-09 | 1.000000 |
| rad9          | 1.66124e-09 | 1.000000 | 1.66395e-09 | 1.000000 |
| rad11         | 1.64893e-09 | 1.000000 | 1.65163e-09 | 1.000000 |
| PAH7+H        | 1.07506e-09 | 1.000000 | 1.07682e-09 | 1.000000 |
| Ph+Allene     | 1.01786e-09 | 1.000000 | 1.01952e-09 | 1.000000 |
| rad3          | 2.10231e-10 | 1.000000 | 2.10575e-10 | 1.000000 |
| rad39         | 1.92940e-10 | 1.000000 | 1.93255e-10 | 1.000000 |
| rad4          | 1.12836e-10 | 1.000000 | 1.13020e-10 | 1.000000 |
| rad12         | 1.09828e-10 | 1.000000 | 1.10007e-10 | 1.000000 |
| rad13         | 3.85914e-11 | 1.000000 | 3.86545e-11 | 1.000000 |
| PhCH2CCH+H    | 2.04080e-11 | 1.000000 | 2.04413e-11 | 1.000000 |
| rad46         | 1.09553e-11 | 1.000000 | 1.09732e-11 | 1.000000 |
| rad37         | 1.66317e-12 | 1.000000 | 1.66589e-12 | 1.000000 |
| rad60syn      | 1.63168e-12 | 1.000000 | 1.63435e-12 | 1.000000 |
| rad60anti     | 5.39032e-13 | 1.000000 | 5.39913e-13 | 1.000000 |
| rad33         | 7.64909e-14 | 1.000000 | 7.66159e-14 | 1.000000 |
| rad5          | 4.67623e-14 | 1.000000 | 4.68387e-14 | 1.000000 |
| rad27         | 2.26903e-14 | 1.000000 | 2.27274e-14 | 1.000000 |
| PAH3+H        | 1.51219e-14 | 1.000000 | 1.51466e-14 | 1.000000 |
| rad14         | 1.27263e-14 | 1.000000 | 1.27471e-14 | 1.000000 |
| rad25         | 1.21605e-14 | 1.000000 | 1.21803e-14 | 1.000000 |
| rad59         | 4.36100e-15 | 1.000000 | 4.36813e-15 | 1.000000 |
| rad23         | 2.18904e-15 | 1.000000 | 2.19262e-15 | 1.000000 |
| rad20         | 1.19248e-15 | 1.000000 | 1.19443e-15 | 1.000000 |
| rad21         | 7.83828e-16 | 1.000000 | 7.85110e-16 | 1.000000 |
| rad50         | 3.17584e-16 | 1.000000 | 3.18103e-16 | 1.000000 |
| rad19syn      | 1.01008e-16 | 1.000000 | 1.01173e-16 | 1.000000 |
| rad45         | 2.29927e-17 | 1.000000 | 2.30303e-17 | 1.000000 |
| rad18         | 4.53557e-18 | 1.000000 | 4.54298e-18 | 1.000000 |
| rad54         | 3.50794e-18 | 1.000000 | 3.51367e-18 | 1.000000 |
| rad31         | 2.61011e-18 | 1.000000 | 2.61438e-18 | 1.000000 |
| PAH10+CH3     | 2.26096e-18 | 1.000000 | 2.26466e-18 | 1.000000 |
| rad36         | 1.52132e-18 | 1.000000 | 1.52381e-18 | 1.000000 |
| rad43         | 5.14346e-19 | 1.000000 | 5.15187e-19 | 1.000000 |
| rad22         | 4.69016e-19 | 1.000000 | 4.69782e-19 | 1.000000 |
| rad52         | 2.26217e-19 | 1.000000 | 2.26587e-19 | 1.000000 |
| rad62         | 1.76309e-19 | 1.000000 | 1.76597e-19 | 1.000000 |
| PhcycC3H3_A+H | 2.37747e-20 | 1.000000 | 2.38136e-20 | 1.000000 |
| rad51         | 1.42634e-20 | 1.000000 | 1.42867e-20 | 1.000000 |
| rad70         | 1.35851e-20 | 1.000000 | 1.36073e-20 | 1.000000 |
| rad55         | 5.98365e-21 | 1.000000 | 5.99343e-21 | 1.000000 |
| rad58         | 1.57034e-21 | 1.000000 | 1.57291e-21 | 1.000000 |
| PAH1+H        | 7.93477e-22 | 1.000000 | 7.94774e-22 | 1.000000 |
| rad24         | 4.12279e-22 | 1.000000 | 4.12953e-22 | 1.000000 |
| rad65         | 1.69845e-22 | 1.000000 | 1.70123e-22 | 1.000000 |
| rad34         | 5.35996e-23 | 1.000000 | 5.36872e-23 | 1.000000 |
| rad42         | 1.01339e-24 | 1.000000 | 1.01505e-24 | 1.000000 |
| rad41         | 3.07226e-25 | 1.000000 | 3.07728e-25 | 1.000000 |
| rad47         | 1.45559e-33 | 1.000000 | 1.45797e-33 | 1.000000 |

0.100000000E-04 Pa, 400.000000 K

=====  
Rate constant | True (fraction) | Effective (fraction)  
-----  
Total | 3.60269e-20 (1.00) | 3.57081e-20 (1.00)

-----  
species | PYtrue | Cumul | PYeffective | Cumul  
-----  
Indene+H | 0.991108 | 0.991108 | 0.999957 | 0.999957  
Benzyl+C2H2 | 0.00884845 | 0.999956 | 0.000000 | 0.999957  
rad6 | 1.97050e-05 | 0.999976 | 1.98809e-05 | 0.999977  
PhCCH+CH3 | 1.23487e-05 | 0.999989 | 1.24589e-05 | 0.999989  
PhCHCCH2+H | 5.94908e-06 | 0.999994 | 6.00219e-06 | 0.999995  
PhCCCH3+H | 3.90680e-06 | 0.999998 | 3.94168e-06 | 0.999999

|               |             |          |             |          |
|---------------|-------------|----------|-------------|----------|
| Ph+MeAc       | 5.34641e-07 | 0.999999 | 5.39414e-07 | 1.000000 |
| rad30         | 4.02126e-07 | 0.999999 | 4.05716e-07 | 1.000000 |
| PAH9+H        | 6.80801e-08 | 0.999999 | 6.86879e-08 | 1.000000 |
| Ph+Allene     | 6.39783e-08 | 0.999999 | 6.45494e-08 | 1.000000 |
| PAH7+H        | 4.50259e-08 | 0.999999 | 4.54278e-08 | 1.000000 |
| rad35         | 2.73751e-08 | 1.000000 | 2.76195e-08 | 1.000000 |
| rad38         | 1.63212e-08 | 1.000000 | 1.64669e-08 | 1.000000 |
| rad28         | 8.85236e-09 | 1.000000 | 8.93139e-09 | 1.000000 |
| rad39         | 8.59856e-09 | 1.000000 | 8.67533e-09 | 1.000000 |
| rad2          | 7.59423e-09 | 1.000000 | 7.66202e-09 | 1.000000 |
| PhCH2CCH+H    | 4.56272e-09 | 1.000000 | 4.60346e-09 | 1.000000 |
| rad7          | 1.84793e-09 | 1.000000 | 1.86443e-09 | 1.000000 |
| rad26         | 1.56476e-09 | 1.000000 | 1.57873e-09 | 1.000000 |
| rad19anti     | 8.44415e-10 | 1.000000 | 8.51953e-10 | 1.000000 |
| rad1          | 7.06747e-10 | 1.000000 | 7.13056e-10 | 1.000000 |
| rad10         | 5.05435e-10 | 1.000000 | 5.09948e-10 | 1.000000 |
| rad11         | 4.53584e-10 | 1.000000 | 4.57634e-10 | 1.000000 |
| rad46         | 3.06009e-10 | 1.000000 | 3.08741e-10 | 1.000000 |
| rad37         | 1.38257e-10 | 1.000000 | 1.39491e-10 | 1.000000 |
| rad60syn      | 9.47275e-11 | 1.000000 | 9.55731e-11 | 1.000000 |
| rad3          | 5.78388e-11 | 1.000000 | 5.83552e-11 | 1.000000 |
| rad60anti     | 3.76555e-11 | 1.000000 | 3.79916e-11 | 1.000000 |
| rad4          | 3.04601e-11 | 1.000000 | 3.07320e-11 | 1.000000 |
| rad23         | 2.31390e-11 | 1.000000 | 2.33456e-11 | 1.000000 |
| rad13         | 1.12546e-11 | 1.000000 | 1.13550e-11 | 1.000000 |
| PAH3+H        | 6.50520e-12 | 1.000000 | 6.56327e-12 | 1.000000 |
| rad45         | 2.12680e-12 | 1.000000 | 2.14579e-12 | 1.000000 |
| rad59         | 1.36005e-12 | 1.000000 | 1.37219e-12 | 1.000000 |
| rad50         | 1.35995e-13 | 1.000000 | 1.37209e-13 | 1.000000 |
| rad19syn      | 1.28743e-13 | 1.000000 | 1.29893e-13 | 1.000000 |
| rad36         | 8.19611e-14 | 1.000000 | 8.26928e-14 | 1.000000 |
| rad20         | 4.10424e-14 | 1.000000 | 4.14088e-14 | 1.000000 |
| rad33         | 2.96737e-14 | 1.000000 | 2.99386e-14 | 1.000000 |
| rad21         | 2.87048e-14 | 1.000000 | 2.89610e-14 | 1.000000 |
| rad27         | 9.50724e-15 | 1.000000 | 9.59211e-15 | 1.000000 |
| rad54         | 8.91596e-15 | 1.000000 | 8.99555e-15 | 1.000000 |
| rad14         | 8.00086e-15 | 1.000000 | 8.07229e-15 | 1.000000 |
| rad25         | 7.18849e-15 | 1.000000 | 7.25266e-15 | 1.000000 |
| PAH10+CH3     | 4.84594e-15 | 1.000000 | 4.88920e-15 | 1.000000 |
| rad67         | 1.67320e-15 | 1.000000 | 1.68813e-15 | 1.000000 |
| rad22         | 8.77934e-16 | 1.000000 | 8.85772e-16 | 1.000000 |
| rad43         | 8.69705e-16 | 1.000000 | 8.77469e-16 | 1.000000 |
| rad18         | 7.76780e-16 | 1.000000 | 7.83714e-16 | 1.000000 |
| rad62         | 4.86646e-16 | 1.000000 | 4.90991e-16 | 1.000000 |
| rad52         | 4.03339e-16 | 1.000000 | 4.06939e-16 | 1.000000 |
| PhcycC3H3_A+H | 3.21885e-16 | 1.000000 | 3.24759e-16 | 1.000000 |
| rad70         | 1.20385e-16 | 1.000000 | 1.21459e-16 | 1.000000 |
| rad51         | 7.61881e-17 | 1.000000 | 7.68682e-17 | 1.000000 |
| rad55         | 5.04271e-17 | 1.000000 | 5.08773e-17 | 1.000000 |
| PAH1+H        | 2.44003e-17 | 1.000000 | 2.46181e-17 | 1.000000 |
| rad58         | 1.79710e-17 | 1.000000 | 1.81314e-17 | 1.000000 |
| rad31         | 6.44273e-18 | 1.000000 | 6.50025e-18 | 1.000000 |
| rad34         | 2.03114e-18 | 1.000000 | 2.04927e-18 | 1.000000 |
| rad65         | 1.53305e-18 | 1.000000 | 1.54673e-18 | 1.000000 |
| rad24         | 5.54383e-19 | 1.000000 | 5.59333e-19 | 1.000000 |
| rad42         | 7.25710e-20 | 1.000000 | 7.32189e-20 | 1.000000 |
| rad9          | 2.96167e-20 | 1.000000 | 2.98811e-20 | 1.000000 |
| rad41         | 2.24651e-20 | 1.000000 | 2.26657e-20 | 1.000000 |
| rad53         | 5.65489e-21 | 1.000000 | 5.70538e-21 | 1.000000 |
| rad64         | 1.81594e-21 | 1.000000 | 1.83215e-21 | 1.000000 |
| rad56         | 6.61256e-23 | 1.000000 | 6.67159e-23 | 1.000000 |
| rad15         | 1.86122e-23 | 1.000000 | 1.87783e-23 | 1.000000 |
| rad68syn      | 8.53806e-24 | 1.000000 | 8.61428e-24 | 1.000000 |
| rad68anti     | 6.16632e-24 | 1.000000 | 6.22137e-24 | 1.000000 |
| rad61         | 4.53302e-24 | 1.000000 | 4.57349e-24 | 1.000000 |
| rad73         | 2.92606e-25 | 1.000000 | 2.95218e-25 | 1.000000 |
| rad5          | 7.00544e-26 | 1.000000 | 7.06798e-26 | 1.000000 |
| rad40syn      | 4.87418e-26 | 1.000000 | 4.91770e-26 | 1.000000 |
| rad71         | 2.65191e-26 | 1.000000 | 2.67559e-26 | 1.000000 |
| PAH8+H        | 2.56940e-26 | 1.000000 | 2.59234e-26 | 1.000000 |
| rad12         | 1.61068e-26 | 1.000000 | 1.62506e-26 | 1.000000 |
| rad40anti     | 1.17016e-26 | 1.000000 | 1.18060e-26 | 1.000000 |
| rad72         | 1.07906e-29 | 1.000000 | 1.08869e-29 | 1.000000 |
| rad47         | 5.32431e-30 | 1.000000 | 5.37185e-30 | 1.000000 |
| rad8          | 1.01888e-39 | 1.000000 | 1.02798e-39 | 1.000000 |

0.100000000E-04 Pa, 500.000000 K

=====

Rate constant | True (fraction) | Effective (fraction)

-----

Total | 1.22595e-18 (1.00 ) 1.18787e-18 (1.00 )

| species       | PYtrue      | Cumul    | PYeffective | Cumul    |
|---------------|-------------|----------|-------------|----------|
| Indene+H      | 0.968761    | 0.968761 | 0.999819    | 0.999819 |
| Benzyl+C2H2   | 0.0310635   | 0.999825 | 0.00000     | 0.999819 |
| PhCCH+CH3     | 9.35885e-05 | 0.999918 | 9.65889e-05 | 0.999916 |
| PhCHCCH2+H    | 4.00537e-05 | 0.999958 | 4.13378e-05 | 0.999957 |
| PhCCCH3+H     | 2.54417e-05 | 0.999984 | 2.62573e-05 | 0.999983 |
| Ph+MeAc       | 7.07382e-06 | 0.999991 | 7.30061e-06 | 0.999990 |
| rad6          | 3.27488e-06 | 0.999994 | 3.37987e-06 | 0.999994 |
| rad30         | 2.19669e-06 | 0.999996 | 2.26711e-06 | 0.999996 |
| Ph+Allene     | 2.05092e-06 | 0.999998 | 2.11667e-06 | 0.999998 |
| PAH7+H        | 6.80733e-07 | 0.999999 | 7.02557e-07 | 0.999999 |
| PAH9+H        | 4.84045e-07 | 0.999999 | 4.99563e-07 | 0.999999 |
| PhCH2CCH+H    | 2.44800e-07 | 1.000000 | 2.52649e-07 | 1.000000 |
| rad35         | 1.65639e-07 | 1.000000 | 1.70949e-07 | 1.000000 |
| rad39         | 1.51518e-07 | 1.000000 | 1.56375e-07 | 1.000000 |
| rad38         | 1.34449e-07 | 1.000000 | 1.38759e-07 | 1.000000 |
| rad19anti     | 1.41563e-08 | 1.000000 | 1.46102e-08 | 1.000000 |
| rad46         | 5.06639e-09 | 1.000000 | 5.22882e-09 | 1.000000 |
| rad37         | 2.86985e-09 | 1.000000 | 2.96186e-09 | 1.000000 |
| rad28         | 2.41897e-09 | 1.000000 | 2.49652e-09 | 1.000000 |
| rad60syn      | 2.17485e-09 | 1.000000 | 2.24457e-09 | 1.000000 |
| rad2          | 1.87160e-09 | 1.000000 | 1.93160e-09 | 1.000000 |
| rad60anti     | 9.78348e-10 | 1.000000 | 1.00971e-09 | 1.000000 |
| PAH3+H        | 4.98713e-10 | 1.000000 | 5.14701e-10 | 1.000000 |
| rad26         | 4.19530e-10 | 1.000000 | 4.32979e-10 | 1.000000 |
| rad7          | 3.30489e-10 | 1.000000 | 3.41084e-10 | 1.000000 |
| rad23         | 2.59998e-10 | 1.000000 | 2.68334e-10 | 1.000000 |
| rad1          | 2.23545e-10 | 1.000000 | 2.30711e-10 | 1.000000 |
| rad10         | 1.07805e-10 | 1.000000 | 1.11261e-10 | 1.000000 |
| rad59         | 9.55001e-11 | 1.000000 | 9.85617e-11 | 1.000000 |
| rad11         | 8.44511e-11 | 1.000000 | 8.71586e-11 | 1.000000 |
| rad45         | 4.50137e-11 | 1.000000 | 4.64568e-11 | 1.000000 |
| rad19syn      | 2.21128e-11 | 1.000000 | 2.28217e-11 | 1.000000 |
| rad3          | 1.82238e-11 | 1.000000 | 1.88081e-11 | 1.000000 |
| rad50         | 1.38233e-11 | 1.000000 | 1.42664e-11 | 1.000000 |
| rad4          | 1.02674e-11 | 1.000000 | 1.05965e-11 | 1.000000 |
| rad54         | 2.40094e-12 | 1.000000 | 2.47791e-12 | 1.000000 |
| rad36         | 2.38810e-12 | 1.000000 | 2.46466e-12 | 1.000000 |
| rad13         | 2.22901e-12 | 1.000000 | 2.30047e-12 | 1.000000 |
| PAH10+CH3     | 9.70509e-13 | 1.000000 | 1.00162e-12 | 1.000000 |
| rad67         | 2.37494e-13 | 1.000000 | 2.45108e-13 | 1.000000 |
| PhcycC3H3_A+H | 2.03141e-13 | 1.000000 | 2.09654e-13 | 1.000000 |
| rad43         | 1.48455e-13 | 1.000000 | 1.53215e-13 | 1.000000 |
| rad62         | 1.23068e-13 | 1.000000 | 1.27014e-13 | 1.000000 |
| rad52         | 1.00213e-13 | 1.000000 | 1.03426e-13 | 1.000000 |
| rad70         | 6.56846e-14 | 1.000000 | 6.77905e-14 | 1.000000 |
| rad51         | 3.84948e-14 | 1.000000 | 3.97289e-14 | 1.000000 |
| rad20         | 3.28011e-14 | 1.000000 | 3.38526e-14 | 1.000000 |
| rad55         | 2.77306e-14 | 1.000000 | 2.86196e-14 | 1.000000 |
| rad21         | 2.58453e-14 | 1.000000 | 2.66739e-14 | 1.000000 |
| PAH1+H        | 2.28970e-14 | 1.000000 | 2.36311e-14 | 1.000000 |
| rad58         | 1.24938e-14 | 1.000000 | 1.28943e-14 | 1.000000 |
| rad33         | 7.09508e-15 | 1.000000 | 7.32255e-15 | 1.000000 |
| rad14         | 2.92863e-15 | 1.000000 | 3.02252e-15 | 1.000000 |
| rad25         | 2.69313e-15 | 1.000000 | 2.77947e-15 | 1.000000 |
| rad27         | 2.61232e-15 | 1.000000 | 2.69607e-15 | 1.000000 |
| rad34         | 2.11781e-15 | 1.000000 | 2.18571e-15 | 1.000000 |
| rad22         | 1.65627e-15 | 1.000000 | 1.70937e-15 | 1.000000 |
| rad65         | 9.82506e-16 | 1.000000 | 1.01400e-15 | 1.000000 |
| rad18         | 4.11241e-16 | 1.000000 | 4.24425e-16 | 1.000000 |
| rad42         | 8.25316e-17 | 1.000000 | 8.51775e-17 | 1.000000 |
| rad41         | 2.35446e-17 | 1.000000 | 2.42994e-17 | 1.000000 |
| rad53         | 2.01956e-17 | 1.000000 | 2.08430e-17 | 1.000000 |
| rad31         | 1.29790e-17 | 1.000000 | 1.33951e-17 | 1.000000 |
| rad64         | 7.89100e-18 | 1.000000 | 8.14398e-18 | 1.000000 |
| rad24         | 4.12101e-18 | 1.000000 | 4.25313e-18 | 1.000000 |
| rad9          | 8.84176e-19 | 1.000000 | 9.12522e-19 | 1.000000 |
| rad56         | 7.29092e-19 | 1.000000 | 7.52466e-19 | 1.000000 |
| rad73         | 1.39103e-19 | 1.000000 | 1.43563e-19 | 1.000000 |
| rad71         | 1.05019e-19 | 1.000000 | 1.08386e-19 | 1.000000 |
| rad68syn      | 1.00333e-19 | 1.000000 | 1.03550e-19 | 1.000000 |
| rad68anti     | 7.12922e-20 | 1.000000 | 7.35778e-20 | 1.000000 |
| rad61         | 3.11887e-20 | 1.000000 | 3.21886e-20 | 1.000000 |
| PAH8+H        | 2.47323e-21 | 1.000000 | 2.55252e-21 | 1.000000 |
| rad40syn      | 1.68839e-21 | 1.000000 | 1.74252e-21 | 1.000000 |
| rad72         | 1.17726e-21 | 1.000000 | 1.21500e-21 | 1.000000 |
| rad15         | 5.95514e-22 | 1.000000 | 6.14605e-22 | 1.000000 |

|           |             |         |             |         |
|-----------|-------------|---------|-------------|---------|
| rad40anti | 5.00701e-22 | 1.00000 | 5.16753e-22 | 1.00000 |
| rad12     | 5.40231e-24 | 1.00000 | 5.57550e-24 | 1.00000 |
| rad5      | 8.73236e-25 | 1.00000 | 9.01232e-25 | 1.00000 |
| rad47     | 2.95540e-27 | 1.00000 | 3.05015e-27 | 1.00000 |
| rad8      | 6.40754e-36 | 1.00000 | 6.61296e-36 | 1.00000 |

0.100000000E-04 Pa, 600.000000 K

| =====         |                 |         |                      |         |
|---------------|-----------------|---------|----------------------|---------|
| Rate constant | True (fraction) |         | Effective (fraction) |         |
| -----         |                 |         |                      |         |
| Total         | 1.36947e-17     | (1.00 ) | 1.26193e-17          | (1.00 ) |

| -----         |             |          |             |          |
|---------------|-------------|----------|-------------|----------|
| species       | PYtrue      | Cumul    | PYeffective | Cumul    |
| -----         |             |          |             |          |
| Indene+H      | 0.920850    | 0.920850 | 0.999325    | 0.999325 |
| Benzyl+C2H2   | 0.0785283   | 0.999378 | 0.00000     | 0.999325 |
| PhCCH+CH3     | 0.000333041 | 0.999711 | 0.000361423 | 0.999686 |
| PhCHCCH2+H    | 0.000137018 | 0.999848 | 0.000148695 | 0.999835 |
| PhCCCH3+H     | 7.54024e-05 | 0.999924 | 8.18282e-05 | 0.999917 |
| Ph+MeAc       | 3.38749e-05 | 0.999958 | 3.67618e-05 | 0.999954 |
| Ph+Allene     | 2.17077e-05 | 0.999979 | 2.35576e-05 | 0.999977 |
| rad30         | 7.59256e-06 | 0.999987 | 8.23960e-06 | 0.999986 |
| PAH7+H        | 4.39151e-06 | 0.999991 | 4.76575e-06 | 0.999990 |
| PhCH2CCH+H    | 3.66168e-06 | 0.999995 | 3.97373e-06 | 0.999994 |
| PAH9+H        | 2.21749e-06 | 0.999997 | 2.40646e-06 | 0.999997 |
| rad39         | 1.04275e-06 | 0.999998 | 1.13161e-06 | 0.999998 |
| rad38         | 6.77229e-07 | 0.999999 | 7.34943e-07 | 0.999999 |
| rad35         | 6.69665e-07 | 1.000000 | 7.26735e-07 | 0.999999 |
| rad6          | 4.69731e-07 | 1.00000  | 5.09761e-07 | 1.000000 |
| rad19anti     | 1.16219e-07 | 1.00000  | 1.26124e-07 | 1.000000 |
| rad46         | 4.03899e-08 | 1.00000  | 4.38320e-08 | 1.000000 |
| rad60syn      | 1.92850e-08 | 1.00000  | 2.09285e-08 | 1.000000 |
| rad37         | 1.80181e-08 | 1.00000  | 1.95536e-08 | 1.000000 |
| PAH3+H        | 9.89108e-09 | 1.00000  | 1.07340e-08 | 1.000000 |
| rad60anti     | 9.33103e-09 | 1.00000  | 1.01262e-08 | 1.000000 |
| rad59         | 1.75177e-09 | 1.00000  | 1.90106e-09 | 1.000000 |
| rad19syn      | 6.85596e-10 | 1.00000  | 7.44023e-10 | 1.000000 |
| rad2          | 6.33675e-10 | 1.00000  | 6.87677e-10 | 1.000000 |
| rad23         | 5.93958e-10 | 1.00000  | 6.44575e-10 | 1.000000 |
| rad28         | 4.81642e-10 | 1.00000  | 5.22688e-10 | 1.000000 |
| rad50         | 3.60425e-10 | 1.00000  | 3.91141e-10 | 1.000000 |
| rad45         | 1.15401e-10 | 1.00000  | 1.25236e-10 | 1.000000 |
| rad54         | 1.00687e-10 | 1.00000  | 1.09267e-10 | 1.000000 |
| rad1          | 9.35967e-11 | 1.00000  | 1.01573e-10 | 1.000000 |
| rad26         | 8.35661e-11 | 1.00000  | 9.06876e-11 | 1.000000 |
| rad7          | 5.24865e-11 | 1.00000  | 5.69594e-11 | 1.000000 |
| PAH10+CH3     | 2.91741e-11 | 1.00000  | 3.16604e-11 | 1.000000 |
| rad10         | 2.40906e-11 | 1.00000  | 2.61437e-11 | 1.000000 |
| PhcycC3H3_A+H | 1.50048e-11 | 1.00000  | 1.62835e-11 | 1.000000 |
| rad11         | 1.43159e-11 | 1.00000  | 1.55359e-11 | 1.000000 |
| rad36         | 9.40040e-12 | 1.00000  | 1.02015e-11 | 1.000000 |
| rad67         | 9.04185e-12 | 1.00000  | 9.81241e-12 | 1.000000 |
| rad3          | 6.95567e-12 | 1.00000  | 7.54844e-12 | 1.000000 |
| rad52         | 4.64030e-12 | 1.00000  | 5.03575e-12 | 1.000000 |
| rad62         | 4.44947e-12 | 1.00000  | 4.82866e-12 | 1.000000 |
| rad70         | 4.33482e-12 | 1.00000  | 4.70424e-12 | 1.000000 |
| rad4          | 4.24740e-12 | 1.00000  | 4.60936e-12 | 1.000000 |
| rad43         | 3.80299e-12 | 1.00000  | 4.12708e-12 | 1.000000 |
| rad51         | 2.85609e-12 | 1.00000  | 3.09949e-12 | 1.000000 |
| PAH1+H        | 2.14270e-12 | 1.00000  | 2.32530e-12 | 1.000000 |
| rad55         | 1.80946e-12 | 1.00000  | 1.96366e-12 | 1.000000 |
| rad58         | 1.01140e-12 | 1.00000  | 1.09759e-12 | 1.000000 |
| rad13         | 4.28234e-13 | 1.00000  | 4.64729e-13 | 1.000000 |
| rad34         | 2.13710e-13 | 1.00000  | 2.31922e-13 | 1.000000 |
| rad65         | 8.20556e-14 | 1.00000  | 8.90484e-14 | 1.000000 |
| rad20         | 4.39545e-14 | 1.00000  | 4.77003e-14 | 1.000000 |
| rad21         | 3.92672e-14 | 1.00000  | 4.26136e-14 | 1.000000 |
| rad42         | 8.05746e-15 | 1.00000  | 8.74412e-15 | 1.000000 |
| rad53         | 4.55866e-15 | 1.00000  | 4.94715e-15 | 1.000000 |
| rad22         | 2.61454e-15 | 1.00000  | 2.83735e-15 | 1.000000 |
| rad33         | 2.10731e-15 | 1.00000  | 2.28690e-15 | 1.000000 |
| rad41         | 2.02157e-15 | 1.00000  | 2.19385e-15 | 1.000000 |
| rad64         | 1.96388e-15 | 1.00000  | 2.13124e-15 | 1.000000 |
| rad71         | 9.74199e-16 | 1.00000  | 1.05722e-15 | 1.000000 |
| rad14         | 8.71152e-16 | 1.00000  | 9.45392e-16 | 1.000000 |
| rad25         | 8.43545e-16 | 1.00000  | 9.15432e-16 | 1.000000 |
| rad73         | 7.72431e-16 | 1.00000  | 8.38258e-16 | 1.000000 |
| rad27         | 7.16298e-16 | 1.00000  | 7.77342e-16 | 1.000000 |
| rad56         | 3.47902e-16 | 1.00000  | 3.77550e-16 | 1.000000 |
| rad18         | 3.12710e-16 | 1.00000  | 3.39359e-16 | 1.000000 |

|           |             |         |             |          |
|-----------|-------------|---------|-------------|----------|
| rad68syn  | 5.26701e-17 | 1.00000 | 5.71587e-17 | 1.000000 |
| rad24     | 5.16623e-17 | 1.00000 | 5.60650e-17 | 1.000000 |
| rad9      | 4.00412e-17 | 1.00000 | 4.34536e-17 | 1.000000 |
| rad68anti | 3.66776e-17 | 1.00000 | 3.98033e-17 | 1.000000 |
| rad72     | 2.76918e-17 | 1.00000 | 3.00517e-17 | 1.000000 |
| rad31     | 1.61077e-17 | 1.00000 | 1.74804e-17 | 1.000000 |
| rad61     | 1.50768e-17 | 1.00000 | 1.63616e-17 | 1.000000 |
| PAH8+H    | 1.32897e-17 | 1.00000 | 1.44222e-17 | 1.000000 |
| rad40syn  | 2.83757e-18 | 1.00000 | 3.07939e-18 | 1.000000 |
| rad40anti | 1.29560e-18 | 1.00000 | 1.40601e-18 | 1.000000 |
| rad15     | 2.60453e-20 | 1.00000 | 2.82649e-20 | 1.000000 |
| rad12     | 2.10365e-21 | 1.00000 | 2.28293e-21 | 1.000000 |
| rad5      | 3.67885e-24 | 1.00000 | 3.99236e-24 | 1.000000 |
| rad47     | 2.25346e-25 | 1.00000 | 2.44550e-25 | 1.000000 |
| rad8      | 9.50744e-32 | 1.00000 | 1.03177e-31 | 1.000000 |

0.1000000000E-04 Pa, 700.000000 K

| =====         |                     |          |                      |          |
|---------------|---------------------|----------|----------------------|----------|
| Rate constant | True (fraction)     |          | Effective (fraction) |          |
| -----         |                     |          |                      |          |
| Total         | 8.02260e-17 (1.00 ) |          | 6.78335e-17 (1.00 )  |          |
| species       | PYtrue              | Cumul    | PYeffective          | Cumul    |
| -----         |                     |          |                      |          |
| Indene+H      | 0.844045            | 0.844045 | 0.998243             | 0.998243 |
| Benzyl+C2H2   | 0.154470            | 0.998515 | 0.00000              | 0.998243 |
| PhCCH+CH3     | 0.000746432         | 0.999261 | 0.000882797          | 0.999126 |
| PhCHCCH2+H    | 0.000320584         | 0.999582 | 0.000379152          | 0.999505 |
| PhCCCH3+H     | 0.000136742         | 0.999719 | 0.000161723          | 0.999667 |
| Ph+Allene     | 0.000115963         | 0.999835 | 0.000137148          | 0.999804 |
| Ph+MeAc       | 8.86608e-05         | 0.999923 | 0.000104858          | 0.999909 |
| PhCH2CCH+H    | 2.52612e-05         | 0.999949 | 2.98762e-05          | 0.999939 |
| rad30         | 1.89338e-05         | 0.999968 | 2.23928e-05          | 0.999961 |
| PAH7+H        | 1.64063e-05         | 0.999984 | 1.94035e-05          | 0.999980 |
| PAH9+H        | 7.24068e-06         | 0.999991 | 8.56348e-06          | 0.999989 |
| rad39         | 3.97934e-06         | 0.999995 | 4.70633e-06          | 0.999994 |
| rad38         | 2.36435e-06         | 0.999998 | 2.79629e-06          | 0.999996 |
| rad35         | 1.97986e-06         | 1.000000 | 2.34155e-06          | 0.999999 |
| rad19anti     | 5.91543e-07         | 1.00000  | 6.99611e-07          | 0.999999 |
| rad46         | 1.95978e-07         | 1.00000  | 2.31781e-07          | 1.000000 |
| rad60syn      | 9.47747e-08         | 1.00000  | 1.12089e-07          | 1.000000 |
| PAH3+H        | 8.73470e-08         | 1.00000  | 1.03304e-07          | 1.000000 |
| rad6          | 6.55289e-08         | 1.00000  | 7.75003e-08          | 1.000000 |
| rad37         | 5.67281e-08         | 1.00000  | 6.70918e-08          | 1.00000  |
| rad60anti     | 4.82184e-08         | 1.00000  | 5.70274e-08          | 1.00000  |
| rad59         | 1.44140e-08         | 1.00000  | 1.70472e-08          | 1.00000  |
| rad19syn      | 7.75622e-09         | 1.00000  | 9.17320e-09          | 1.00000  |
| rad50         | 4.08954e-09         | 1.00000  | 4.83665e-09          | 1.00000  |
| rad54         | 1.41341e-09         | 1.00000  | 1.67162e-09          | 1.00000  |
| rad23         | 4.27548e-10         | 1.00000  | 5.05656e-10          | 1.00000  |
| PhcycC3H3_A+H | 3.16567e-10         | 1.00000  | 3.74401e-10          | 1.00000  |
| PAH10+CH3     | 2.96719e-10         | 1.00000  | 3.50927e-10          | 1.00000  |
| rad2          | 2.02223e-10         | 1.00000  | 2.39167e-10          | 1.00000  |
| rad67         | 1.46315e-10         | 1.00000  | 1.73045e-10          | 1.00000  |
| rad45         | 9.90424e-11         | 1.00000  | 1.17136e-10          | 1.00000  |
| rad28         | 8.51258e-11         | 1.00000  | 1.00677e-10          | 1.00000  |
| rad70         | 8.36666e-11         | 1.00000  | 9.89516e-11          | 1.00000  |
| rad52         | 7.84320e-11         | 1.00000  | 9.27607e-11          | 1.00000  |
| rad51         | 6.66724e-11         | 1.00000  | 7.88527e-11          | 1.00000  |
| rad62         | 5.24326e-11         | 1.00000  | 6.20115e-11          | 1.00000  |
| PAH1+H        | 5.21851e-11         | 1.00000  | 6.17188e-11          | 1.00000  |
| rad55         | 3.42220e-11         | 1.00000  | 4.04740e-11          | 1.00000  |
| rad1          | 3.31779e-11         | 1.00000  | 3.92391e-11          | 1.00000  |
| rad43         | 3.27264e-11         | 1.00000  | 3.87052e-11          | 1.00000  |
| rad58         | 2.36737e-11         | 1.00000  | 2.79986e-11          | 1.00000  |
| rad26         | 1.50390e-11         | 1.00000  | 1.77865e-11          | 1.00000  |
| rad7          | 8.48064e-12         | 1.00000  | 1.00300e-11          | 1.00000  |
| rad36         | 8.42456e-12         | 1.00000  | 9.96364e-12          | 1.00000  |
| rad10         | 5.65952e-12         | 1.00000  | 6.69346e-12          | 1.00000  |
| rad34         | 5.58027e-12         | 1.00000  | 6.59972e-12          | 1.00000  |
| rad11         | 2.59781e-12         | 1.00000  | 3.07241e-12          | 1.00000  |
| rad3          | 2.18884e-12         | 1.00000  | 2.58871e-12          | 1.00000  |
| rad65         | 2.03431e-12         | 1.00000  | 2.40596e-12          | 1.00000  |
| rad4          | 1.41184e-12         | 1.00000  | 1.66976e-12          | 1.00000  |
| rad53         | 2.08909e-13         | 1.00000  | 2.47075e-13          | 1.00000  |
| rad42         | 1.92481e-13         | 1.00000  | 2.27645e-13          | 1.00000  |
| rad13         | 1.02387e-13         | 1.00000  | 1.21092e-13          | 1.00000  |
| rad20         | 9.46322e-14         | 1.00000  | 1.11921e-13          | 1.00000  |
| rad64         | 9.18157e-14         | 1.00000  | 1.08589e-13          | 1.00000  |
| rad21         | 9.16215e-14         | 1.00000  | 1.08360e-13          | 1.00000  |



|           |             |         |             |         |
|-----------|-------------|---------|-------------|---------|
| rad41     | 4.15206e-14 | 1.00000 | 4.91060e-14 | 1.00000 |
| rad71     | 3.00439e-14 | 1.00000 | 3.55326e-14 | 1.00000 |
| rad56     | 2.68166e-14 | 1.00000 | 3.17158e-14 | 1.00000 |
| rad73     | 2.28916e-14 | 1.00000 | 2.70737e-14 | 1.00000 |
| rad68syn  | 4.06319e-15 | 1.00000 | 4.80549e-15 | 1.00000 |
| rad68anti | 2.80181e-15 | 1.00000 | 3.31367e-15 | 1.00000 |
| rad22     | 1.84969e-15 | 1.00000 | 2.18761e-15 | 1.00000 |
| rad9      | 1.66447e-15 | 1.00000 | 1.96855e-15 | 1.00000 |
| rad33     | 1.34132e-15 | 1.00000 | 1.58637e-15 | 1.00000 |
| rad72     | 9.63889e-16 | 1.00000 | 1.13998e-15 | 1.00000 |
| PAH8+H    | 8.05427e-16 | 1.00000 | 9.52570e-16 | 1.00000 |
| rad61     | 7.18099e-16 | 1.00000 | 8.49288e-16 | 1.00000 |
| rad24     | 5.53564e-16 | 1.00000 | 6.54694e-16 | 1.00000 |
| rad18     | 3.75656e-16 | 1.00000 | 4.44284e-16 | 1.00000 |
| rad25     | 3.17859e-16 | 1.00000 | 3.75929e-16 | 1.00000 |
| rad14     | 2.91819e-16 | 1.00000 | 3.45131e-16 | 1.00000 |
| rad27     | 2.65878e-16 | 1.00000 | 3.14451e-16 | 1.00000 |
| rad40syn  | 2.43475e-16 | 1.00000 | 2.87955e-16 | 1.00000 |
| rad40anti | 1.01881e-16 | 1.00000 | 1.20494e-16 | 1.00000 |
| rad31     | 1.07541e-17 | 1.00000 | 1.27187e-17 | 1.00000 |
| rad15     | 7.38639e-19 | 1.00000 | 8.73580e-19 | 1.00000 |
| rad12     | 2.79200e-19 | 1.00000 | 3.30207e-19 | 1.00000 |
| rad5      | 9.63145e-24 | 1.00000 | 1.13910e-23 | 1.00000 |
| rad47     | 4.49924e-24 | 1.00000 | 5.32120e-24 | 1.00000 |
| rad8      | 1.57142e-27 | 1.00000 | 1.85851e-27 | 1.00000 |

0.100000000E-04 Pa, 800.000000 K

=====  
Rate constant | True (fraction) | Effective (fraction)  
-----

Total | 3.12228e-16 (1.00 ) | 2.33587e-16 (1.00 )

| species       | PYtrue      | Cumul    | PYeffective | Cumul    |
|---------------|-------------|----------|-------------|----------|
| Indene+H      | 0.745326    | 0.745326 | 0.996252    | 0.996252 |
| Benzyl+C2H2   | 0.251870    | 0.997196 | 0.000000    | 0.996252 |
| PhCCH+CH3     | 0.00124162  | 0.998438 | 0.00165963  | 0.997912 |
| PhCHCCH2+H    | 0.000603920 | 0.999042 | 0.000807240 | 0.998719 |
| Ph+Allene     | 0.000391607 | 0.999433 | 0.000523448 | 0.999242 |
| PhCCCH3+H     | 0.000180412 | 0.999614 | 0.000241150 | 0.999483 |
| Ph+MeAc       | 0.000158702 | 0.999772 | 0.000212132 | 0.999696 |
| PhCH2CCH+H    | 0.000104747 | 0.999877 | 0.000140012 | 0.999836 |
| PAH7+H        | 4.20043e-05 | 0.999919 | 5.61457e-05 | 0.999892 |
| rad30         | 3.73181e-05 | 0.999956 | 4.98819e-05 | 0.999942 |
| PAH9+H        | 1.83028e-05 | 0.999975 | 2.44647e-05 | 0.999966 |
| rad39         | 1.01670e-05 | 0.999985 | 1.35899e-05 | 0.999980 |
| rad38         | 6.28641e-06 | 0.999991 | 8.40283e-06 | 0.999988 |
| rad35         | 4.61793e-06 | 0.999996 | 6.17263e-06 | 0.999994 |
| rad19anti     | 2.13374e-06 | 0.999998 | 2.85210e-06 | 0.999997 |
| rad46         | 6.69432e-07 | 0.999999 | 8.94808e-07 | 0.999998 |
| PAH3+H        | 4.55926e-07 | 0.999999 | 6.09421e-07 | 0.999999 |
| rad60syn      | 3.14534e-07 | 0.999999 | 4.20427e-07 | 0.999999 |
| rad60anti     | 1.66149e-07 | 0.999999 | 2.22085e-07 | 0.999999 |
| rad37         | 1.16536e-07 | 1.000000 | 1.55770e-07 | 0.999999 |
| rad59         | 7.05289e-08 | 1.000000 | 9.42736e-08 | 1.000000 |
| rad19syn      | 4.57469e-08 | 1.000000 | 6.11483e-08 | 1.000000 |
| rad50         | 2.67405e-08 | 1.000000 | 3.57431e-08 | 1.000000 |
| rad6          | 1.01422e-08 | 1.000000 | 1.35568e-08 | 1.000000 |
| rad54         | 9.79643e-09 | 1.000000 | 1.30946e-08 | 1.000000 |
| PhcycC3H3_A+H | 2.99418e-09 | 1.000000 | 4.00222e-09 | 1.000000 |
| PAH10+CH3     | 1.56116e-09 | 1.000000 | 2.08675e-09 | 1.000000 |
| rad67         | 1.31112e-09 | 1.000000 | 1.75252e-09 | 1.000000 |
| rad51         | 7.41561e-10 | 1.000000 | 9.91219e-10 | 1.000000 |
| rad70         | 7.37578e-10 | 1.000000 | 9.85895e-10 | 1.000000 |
| rad52         | 6.87557e-10 | 1.000000 | 9.19034e-10 | 1.000000 |
| PAH1+H        | 5.38448e-10 | 1.000000 | 7.19725e-10 | 1.000000 |
| rad62         | 3.04696e-10 | 1.000000 | 4.07277e-10 | 1.000000 |
| rad55         | 2.93956e-10 | 1.000000 | 3.92921e-10 | 1.000000 |
| rad58         | 2.53309e-10 | 1.000000 | 3.38589e-10 | 1.000000 |
| rad23         | 1.80748e-10 | 1.000000 | 2.41600e-10 | 1.000000 |
| rad43         | 1.42335e-10 | 1.000000 | 1.90255e-10 | 1.000000 |
| rad34         | 6.18306e-11 | 1.000000 | 8.26469e-11 | 1.000000 |
| rad45         | 5.36054e-11 | 1.000000 | 7.16525e-11 | 1.000000 |
| rad2          | 5.28843e-11 | 1.000000 | 7.06886e-11 | 1.000000 |
| rad65         | 2.33454e-11 | 1.000000 | 3.12050e-11 | 1.000000 |
| rad28         | 1.56362e-11 | 1.000000 | 2.09003e-11 | 1.000000 |
| rad1          | 8.48188e-12 | 1.000000 | 1.13375e-11 | 1.000000 |
| rad36         | 4.45839e-12 | 1.000000 | 5.95939e-12 | 1.000000 |
| rad53         | 3.49874e-12 | 1.000000 | 4.67665e-12 | 1.000000 |
| rad26         | 2.86266e-12 | 1.000000 | 3.82642e-12 | 1.000000 |

|           |             |          |             |          |
|-----------|-------------|----------|-------------|----------|
| rad42     | 1.90235e-12 | 1.000000 | 2.54281e-12 | 1.000000 |
| rad7      | 1.64594e-12 | 1.000000 | 2.20008e-12 | 1.000000 |
| rad64     | 1.51375e-12 | 1.000000 | 2.02337e-12 | 1.000000 |
| rad10     | 1.29110e-12 | 1.000000 | 1.72577e-12 | 1.000000 |
| rad56     | 6.64107e-13 | 1.000000 | 8.87689e-13 | 1.000000 |
| rad11     | 6.46909e-13 | 1.000000 | 8.64702e-13 | 1.000000 |
| rad3      | 5.83707e-13 | 1.000000 | 7.80222e-13 | 1.000000 |
| rad4      | 3.84053e-13 | 1.000000 | 5.13350e-13 | 1.000000 |
| rad41     | 3.48407e-13 | 1.000000 | 4.65704e-13 | 1.000000 |
| rad20     | 2.64419e-13 | 1.000000 | 3.53440e-13 | 1.000000 |
| rad21     | 2.51406e-13 | 1.000000 | 3.36046e-13 | 1.000000 |
| rad73     | 1.17591e-13 | 1.000000 | 1.57180e-13 | 1.000000 |
| rad71     | 1.07686e-13 | 1.000000 | 1.43940e-13 | 1.000000 |
| rad68syn  | 1.02599e-13 | 1.000000 | 1.37141e-13 | 1.000000 |
| rad68anti | 7.01223e-14 | 1.000000 | 9.37301e-14 | 1.000000 |
| rad13     | 5.15188e-14 | 1.000000 | 6.88635e-14 | 1.000000 |
| rad9      | 3.00314e-14 | 1.000000 | 4.01420e-14 | 1.000000 |
| PAH8+H    | 2.02031e-14 | 1.000000 | 2.70048e-14 | 1.000000 |
| rad61     | 1.14829e-14 | 1.000000 | 1.53488e-14 | 1.000000 |
| rad40syn  | 7.24502e-15 | 1.000000 | 9.68417e-15 | 1.000000 |
| rad72     | 3.10933e-15 | 1.000000 | 4.15613e-15 | 1.000000 |
| rad24     | 2.87053e-15 | 1.000000 | 3.83695e-15 | 1.000000 |
| rad40anti | 2.75204e-15 | 1.000000 | 3.67856e-15 | 1.000000 |
| rad33     | 2.07653e-15 | 1.000000 | 2.77562e-15 | 1.000000 |
| rad22     | 8.87359e-16 | 1.000000 | 1.18610e-15 | 1.000000 |
| rad18     | 7.61444e-16 | 1.000000 | 1.01780e-15 | 1.000000 |
| rad25     | 2.03273e-16 | 1.000000 | 2.71708e-16 | 1.000000 |
| rad27     | 1.65096e-16 | 1.000000 | 2.20678e-16 | 1.000000 |
| rad14     | 1.45786e-16 | 1.000000 | 1.94867e-16 | 1.000000 |
| rad15     | 8.03439e-18 | 1.000000 | 1.07393e-17 | 1.000000 |
| rad12     | 7.13554e-18 | 1.000000 | 9.53784e-18 | 1.000000 |
| rad31     | 5.78737e-18 | 1.000000 | 7.73578e-18 | 1.000000 |
| rad47     | 4.73561e-23 | 1.000000 | 6.32993e-23 | 1.000000 |
| rad5      | 2.27415e-23 | 1.000000 | 3.03978e-23 | 1.000000 |
| rad8      | 8.26834e-24 | 1.000000 | 1.10520e-23 | 1.000000 |

0.100000000E-04 Pa, 900.000000 K

=====

| Rate constant | True (fraction)     | Effective (fraction) |
|---------------|---------------------|----------------------|
| Total         | 9.21769e-16 (1.00 ) | 5.91948e-16 (1.00 )  |

| species       | PYtrue      | Cumul    | PYeffective | Cumul    |
|---------------|-------------|----------|-------------|----------|
| Indene+H      | 0.637601    | 0.637601 | 0.992859    | 0.992859 |
| Benzyl+CH2H2  | 0.357813    | 0.995414 | 0.00000     | 0.992859 |
| PhCCH+CH3     | 0.00168534  | 0.997099 | 0.00262438  | 0.995483 |
| PhCHCCH2+H    | 0.000988072 | 0.998087 | 0.00153861  | 0.997022 |
| Ph+Allene     | 0.000956826 | 0.999044 | 0.00148995  | 0.998512 |
| PhCH2CCH+H    | 0.000305642 | 0.999350 | 0.000475939 | 0.998988 |
| Ph+MeAc       | 0.000221700 | 0.999572 | 0.000345227 | 0.999333 |
| PhCCCH3+H     | 0.000192583 | 0.999764 | 0.000299885 | 0.999633 |
| PAH7+H        | 8.18813e-05 | 0.999846 | 0.000127504 | 0.999760 |
| rad30         | 6.20698e-05 | 0.999908 | 9.66537e-05 | 0.999857 |
| PAH9+H        | 3.81793e-05 | 0.999946 | 5.94521e-05 | 0.999917 |
| rad39         | 1.95088e-05 | 0.999966 | 3.03786e-05 | 0.999947 |
| rad38         | 1.36529e-05 | 0.999979 | 2.12600e-05 | 0.999968 |
| rad35         | 9.01876e-06 | 0.999988 | 1.40438e-05 | 0.999982 |
| rad19anti     | 5.95507e-06 | 0.999994 | 9.27312e-06 | 0.999992 |
| rad46         | 1.77410e-06 | 0.999996 | 2.76258e-06 | 0.999994 |
| PAH3+H        | 1.66000e-06 | 0.999998 | 2.58491e-06 | 0.999997 |
| rad60syn      | 7.95279e-07 | 0.999999 | 1.23839e-06 | 0.999998 |
| rad60anti     | 4.32684e-07 | 0.999999 | 6.73766e-07 | 0.999999 |
| rad59         | 2.41974e-07 | 0.999999 | 3.76797e-07 | 0.999999 |
| rad37         | 1.83190e-07 | 1.000000 | 2.85260e-07 | 0.999999 |
| rad19syn      | 1.72530e-07 | 1.000000 | 2.68660e-07 | 1.000000 |
| rad50         | 1.19165e-07 | 1.000000 | 1.85561e-07 | 1.000000 |
| rad54         | 4.18728e-08 | 1.000000 | 6.52034e-08 | 1.000000 |
| PhcycC3H3_A+H | 1.64006e-08 | 1.000000 | 2.55387e-08 | 1.000000 |
| rad67         | 7.68852e-09 | 1.000000 | 1.19724e-08 | 1.000000 |
| PAH10+CH3     | 5.46437e-09 | 1.000000 | 8.50900e-09 | 1.000000 |
| rad51         | 5.02950e-09 | 1.000000 | 7.83183e-09 | 1.000000 |
| rad52         | 3.84615e-09 | 1.000000 | 5.98914e-09 | 1.000000 |
| rad70         | 3.82635e-09 | 1.000000 | 5.95831e-09 | 1.000000 |
| PAH1+H        | 3.10823e-09 | 1.000000 | 4.84008e-09 | 1.000000 |
| rad6          | 1.67434e-09 | 1.000000 | 2.60725e-09 | 1.000000 |
| rad58         | 1.60256e-09 | 1.000000 | 2.49548e-09 | 1.000000 |
| rad55         | 1.47818e-09 | 1.000000 | 2.30179e-09 | 1.000000 |
| rad62         | 1.10199e-09 | 1.000000 | 1.71599e-09 | 1.000000 |
| rad43         | 3.94167e-10 | 1.000000 | 6.13788e-10 | 1.000000 |

|           |             |          |             |         |
|-----------|-------------|----------|-------------|---------|
| rad34     | 3.84581e-10 | 1.000000 | 5.98861e-10 | 1.00000 |
| rad65     | 1.60360e-10 | 1.000000 | 2.49709e-10 | 1.00000 |
| rad23     | 7.04990e-11 | 1.000000 | 1.09780e-10 | 1.00000 |
| rad53     | 2.97670e-11 | 1.000000 | 4.63526e-11 | 1.00000 |
| rad45     | 2.49643e-11 | 1.000000 | 3.88739e-11 | 1.00000 |
| rad64     | 1.24784e-11 | 1.000000 | 1.94311e-11 | 1.00000 |
| rad2      | 1.15958e-11 | 1.000000 | 1.80567e-11 | 1.00000 |
| rad42     | 1.04400e-11 | 1.000000 | 1.62569e-11 | 1.00000 |
| rad56     | 7.66816e-12 | 1.000000 | 1.19407e-11 | 1.00000 |
| rad28     | 2.98018e-12 | 1.000000 | 4.64068e-12 | 1.00000 |
| rad36     | 2.17475e-12 | 1.000000 | 3.38648e-12 | 1.00000 |
| rad1      | 1.96890e-12 | 1.000000 | 3.06593e-12 | 1.00000 |
| rad41     | 1.62840e-12 | 1.000000 | 2.53571e-12 | 1.00000 |
| rad68syn  | 1.23579e-12 | 1.000000 | 1.92434e-12 | 1.00000 |
| rad73     | 1.10908e-12 | 1.000000 | 1.72704e-12 | 1.00000 |
| rad68anti | 8.37799e-13 | 1.000000 | 1.30460e-12 | 1.00000 |
| rad20     | 6.04409e-13 | 1.000000 | 9.41174e-13 | 1.00000 |
| rad26     | 5.80519e-13 | 1.000000 | 9.03973e-13 | 1.00000 |
| rad21     | 5.11601e-13 | 1.000000 | 7.96654e-13 | 1.00000 |
| rad71     | 4.98599e-13 | 1.000000 | 7.76407e-13 | 1.00000 |
| rad7      | 4.08998e-13 | 1.000000 | 6.36884e-13 | 1.00000 |
| PAH8+H    | 3.70682e-13 | 1.000000 | 5.77218e-13 | 1.00000 |
| rad10     | 3.03676e-13 | 1.000000 | 4.72877e-13 | 1.00000 |
| rad11     | 2.88226e-13 | 1.000000 | 4.48820e-13 | 1.00000 |
| rad3      | 1.52040e-13 | 1.000000 | 2.36753e-13 | 1.00000 |
| rad9      | 1.37931e-13 | 1.000000 | 2.14783e-13 | 1.00000 |
| rad61     | 1.15880e-13 | 1.000000 | 1.80446e-13 | 1.00000 |
| rad40syn  | 1.14027e-13 | 1.000000 | 1.77560e-13 | 1.00000 |
| rad4      | 1.05716e-13 | 1.000000 | 1.64619e-13 | 1.00000 |
| rad13     | 7.07256e-14 | 1.000000 | 1.10132e-13 | 1.00000 |
| rad40anti | 4.55885e-14 | 1.000000 | 7.09894e-14 | 1.00000 |
| rad24     | 5.74732e-15 | 1.000000 | 8.94960e-15 | 1.00000 |
| rad72     | 3.82990e-15 | 1.000000 | 5.96383e-15 | 1.00000 |
| rad33     | 3.66700e-15 | 1.000000 | 5.71017e-15 | 1.00000 |
| rad18     | 2.21698e-15 | 1.000000 | 3.45223e-15 | 1.00000 |
| rad22     | 4.18734e-16 | 1.000000 | 6.52043e-16 | 1.00000 |
| rad25     | 2.20754e-16 | 1.000000 | 3.43754e-16 | 1.00000 |
| rad27     | 1.37385e-16 | 1.000000 | 2.13934e-16 | 1.00000 |
| rad14     | 1.05439e-16 | 1.000000 | 1.64187e-16 | 1.00000 |
| rad12     | 3.93756e-17 | 1.000000 | 6.13149e-17 | 1.00000 |
| rad15     | 2.74308e-17 | 1.000000 | 4.27146e-17 | 1.00000 |
| rad31     | 3.17850e-18 | 1.000000 | 4.94950e-18 | 1.00000 |
| rad8      | 5.05695e-21 | 1.000000 | 7.87458e-21 | 1.00000 |
| rad47     | 3.22876e-22 | 1.000000 | 5.02776e-22 | 1.00000 |
| rad5      | 5.34408e-23 | 1.000000 | 8.32170e-23 | 1.00000 |

0.100000000E-04 Pa, 1000.00000 K

=====

| Rate constant | True (fraction)     | Effective (fraction) |
|---------------|---------------------|----------------------|
| Total         | 2.23691e-15 (1.00 ) | 1.20781e-15 (1.00 )  |

| species       | PYtrue      | Cumul    | PYeffective | Cumul    |
|---------------|-------------|----------|-------------|----------|
| Indene+H      | 0.533143    | 0.533143 | 0.987405    | 0.987405 |
| Benzyl+C2H2   | 0.460056    | 0.993199 | 0.00000     | 0.987405 |
| PhCCH+CH3     | 0.00197845  | 0.995177 | 0.00366418  | 0.991069 |
| Ph+Allene     | 0.00184724  | 0.997025 | 0.00342117  | 0.994490 |
| PhCHCCH2+H    | 0.00145011  | 0.998475 | 0.00268567  | 0.997176 |
| PhCH2CCH+H    | 0.000695141 | 0.999170 | 0.00128743  | 0.998463 |
| Ph+MeAc       | 0.000262360 | 0.999432 | 0.000485903 | 0.998949 |
| PhCCCH3+H     | 0.000178027 | 0.999610 | 0.000329715 | 0.999279 |
| PAH7+H        | 0.000130563 | 0.999741 | 0.000241809 | 0.999521 |
| rad30         | 9.13367e-05 | 0.999832 | 0.000169160 | 0.999690 |
| PAH9+H        | 6.89547e-05 | 0.999901 | 0.000127707 | 0.999818 |
| rad39         | 3.03500e-05 | 0.999932 | 5.62096e-05 | 0.999874 |
| rad38         | 2.54970e-05 | 0.999957 | 4.72217e-05 | 0.999921 |
| rad35         | 1.54295e-05 | 0.999972 | 2.85761e-05 | 0.999950 |
| rad19anti     | 1.36963e-05 | 0.999986 | 2.53661e-05 | 0.999975 |
| PAH3+H        | 4.67729e-06 | 0.999991 | 8.66256e-06 | 0.999984 |
| rad46         | 3.89965e-06 | 0.999995 | 7.22232e-06 | 0.999991 |
| rad60syn      | 1.65646e-06 | 0.999996 | 3.06785e-06 | 0.999994 |
| rad60anti     | 9.23124e-07 | 0.999997 | 1.70967e-06 | 0.999996 |
| rad59         | 6.45414e-07 | 0.999998 | 1.19534e-06 | 0.999997 |
| rad19syn      | 4.72655e-07 | 0.999998 | 8.75378e-07 | 0.999998 |
| rad50         | 4.02267e-07 | 0.999999 | 7.45018e-07 | 0.999999 |
| rad37         | 2.45621e-07 | 0.999999 | 4.54902e-07 | 0.999999 |
| rad54         | 1.26767e-07 | 0.999999 | 2.34777e-07 | 0.999999 |
| PhcycC3H3_A+H | 6.09438e-08 | 0.999999 | 1.12871e-07 | 0.999999 |
| rad67         | 3.29353e-08 | 0.999999 | 6.09977e-08 | 0.999999 |

|           |             |          |             |          |
|-----------|-------------|----------|-------------|----------|
| rad51     | 2.38569e-08 | 0.999999 | 4.41841e-08 | 1.000000 |
| rad52     | 1.55663e-08 | 0.999999 | 2.88295e-08 | 1.000000 |
| PAH10+CH3 | 1.49502e-08 | 0.999999 | 2.76885e-08 | 1.000000 |
| rad70     | 1.36637e-08 | 0.999999 | 2.53058e-08 | 1.000000 |
| PAH1+H    | 1.19205e-08 | 0.999999 | 2.20772e-08 | 1.000000 |
| rad58     | 7.00658e-09 | 0.999999 | 1.29765e-08 | 1.000000 |
| rad55     | 5.08717e-09 | 0.999999 | 9.42168e-09 | 1.000000 |
| rad62     | 2.86002e-09 | 0.999999 | 5.29688e-09 | 1.000000 |
| rad34     | 1.59465e-09 | 0.999999 | 2.95337e-09 | 1.000000 |
| rad43     | 8.01058e-10 | 0.999999 | 1.48360e-09 | 1.000000 |
| rad65     | 7.61967e-10 | 0.999999 | 1.41120e-09 | 1.000000 |
| rad6      | 3.37440e-10 | 0.999999 | 6.24954e-10 | 1.000000 |
| rad53     | 1.57207e-10 | 0.999999 | 2.91154e-10 | 1.000000 |
| rad64     | 6.33006e-11 | 0.999999 | 1.17236e-10 | 1.000000 |
| rad56     | 5.17481e-11 | 0.999999 | 9.58399e-11 | 1.000000 |
| rad42     | 3.80337e-11 | 0.999999 | 7.04401e-11 | 1.000000 |
| rad23     | 3.06935e-11 | 0.999999 | 5.68458e-11 | 1.000000 |
| rad45     | 1.21337e-11 | 0.999999 | 2.24722e-11 | 1.000000 |
| rad73     | 1.18609e-11 | 0.999999 | 2.19669e-11 | 1.000000 |
| rad68syn  | 8.78419e-12 | 0.999999 | 1.62687e-11 | 1.000000 |
| rad68anti | 5.91483e-12 | 0.999999 | 1.09545e-11 | 1.000000 |
| rad71     | 5.78570e-12 | 0.999999 | 1.07154e-11 | 1.000000 |
| rad41     | 5.10940e-12 | 0.999999 | 9.46284e-12 | 1.000000 |
| PAH8+H    | 3.92502e-12 | 0.999999 | 7.26931e-12 | 1.000000 |
| rad2      | 2.67819e-12 | 0.999999 | 4.96014e-12 | 1.000000 |
| rad36     | 1.09309e-12 | 0.999999 | 2.02446e-12 | 1.000000 |
| rad40syn  | 1.02757e-12 | 0.999999 | 1.90311e-12 | 1.000000 |
| rad20     | 8.81741e-13 | 0.999999 | 1.63302e-12 | 1.000000 |
| rad61     | 8.00021e-13 | 0.999999 | 1.48168e-12 | 1.000000 |
| rad28     | 6.64541e-13 | 0.999999 | 1.23076e-12 | 1.000000 |
| rad21     | 6.41660e-13 | 0.999999 | 1.18838e-12 | 1.000000 |
| rad1      | 5.13938e-13 | 0.999999 | 9.51837e-13 | 1.000000 |
| rad40anti | 4.38220e-13 | 0.999999 | 8.11603e-13 | 1.000000 |
| rad11     | 3.01830e-13 | 0.999999 | 5.59003e-13 | 1.000000 |
| rad9      | 2.22252e-13 | 0.999999 | 4.11620e-13 | 1.000000 |
| rad7      | 2.00006e-13 | 0.999999 | 3.70420e-13 | 1.000000 |
| rad26     | 1.41862e-13 | 0.999999 | 2.62735e-13 | 1.000000 |
| rad13     | 1.28904e-13 | 0.999999 | 2.38736e-13 | 1.000000 |
| rad10     | 1.08319e-13 | 0.999999 | 2.00611e-13 | 1.000000 |
| rad3      | 4.60184e-14 | 0.999999 | 8.52281e-14 | 1.000000 |
| rad4      | 3.36418e-14 | 0.999999 | 6.23062e-14 | 1.000000 |
| rad72     | 1.80842e-14 | 0.999999 | 3.34927e-14 | 1.000000 |
| rad18     | 7.80221e-15 | 0.999999 | 1.44501e-14 | 1.000000 |
| rad24     | 5.90769e-15 | 0.999999 | 1.09413e-14 | 1.000000 |
| rad33     | 4.69874e-15 | 0.999999 | 8.70228e-15 | 1.000000 |
| rad25     | 3.13988e-16 | 0.999999 | 5.81520e-16 | 1.000000 |
| rad22     | 2.72434e-16 | 0.999999 | 5.04560e-16 | 1.000000 |
| rad27     | 1.11714e-16 | 0.999999 | 2.06899e-16 | 1.000000 |
| rad14     | 9.24384e-17 | 0.999999 | 1.71200e-16 | 1.000000 |
| rad12     | 8.61563e-17 | 0.999999 | 1.59565e-16 | 1.000000 |
| rad15     | 4.01058e-17 | 0.999999 | 7.42778e-17 | 1.000000 |
| rad31     | 1.86001e-18 | 0.999999 | 3.44483e-18 | 1.000000 |
| rad8      | 3.09659e-19 | 0.999999 | 5.73503e-19 | 1.000000 |
| rad47     | 1.58934e-21 | 0.999999 | 2.94352e-21 | 1.000000 |
| rad5      | 1.45269e-22 | 0.999999 | 2.69044e-22 | 1.000000 |

0.100000000E-04 Pa, 1100.00000 K

=====

| Rate constant | True (fraction)     | Effective (fraction) |
|---------------|---------------------|----------------------|
| Total         | 4.69847e-15 (1.00 ) | 2.11075e-15 (1.00 )  |

| species     | PYtrue      | Cumul    | PYeffective | Cumul    |
|-------------|-------------|----------|-------------|----------|
| Benzyl+C2H2 | 0.550759    | 0.550759 | 0.00000     | 0.00000  |
| Indene+H    | 0.439889    | 0.990648 | 0.979181    | 0.979181 |
| Ph+Allene   | 0.00299528  | 0.993643 | 0.00666742  | 0.985848 |
| PhCCH+CH3   | 0.00208760  | 0.995731 | 0.00464694  | 0.990495 |
| PhCHCCH2+H  | 0.00194544  | 0.997676 | 0.00433051  | 0.994826 |
| PhCH2CCH+H  | 0.00132191  | 0.998998 | 0.00294254  | 0.997768 |
| Ph+MeAc     | 0.000277389 | 0.999276 | 0.000617461 | 0.998386 |
| PAH7+H      | 0.000179385 | 0.999455 | 0.000399306 | 0.998785 |
| PhCCCH3+H   | 0.000149168 | 0.999604 | 0.000332043 | 0.999117 |
| rad30       | 0.000123015 | 0.999727 | 0.000273827 | 0.999391 |
| PAH9+H      | 0.000111696 | 0.999839 | 0.000248632 | 0.999640 |
| rad38       | 4.24978e-05 | 0.999881 | 9.45991e-05 | 0.999734 |
| rad39       | 4.04278e-05 | 0.999922 | 8.99912e-05 | 0.999824 |
| rad19anti   | 2.71780e-05 | 0.999949 | 6.04975e-05 | 0.999885 |
| rad35       | 2.39104e-05 | 0.999973 | 5.32238e-05 | 0.999938 |
| PAH3+H      | 1.09195e-05 | 0.999984 | 2.43064e-05 | 0.999962 |

|               |             |          |             |          |
|---------------|-------------|----------|-------------|----------|
| rad46         | 7.44861e-06 | 0.999991 | 1.65804e-05 | 0.999979 |
| rad60syn      | 2.99524e-06 | 0.999994 | 6.66734e-06 | 0.999986 |
| rad60anti     | 1.70291e-06 | 0.999996 | 3.79064e-06 | 0.999989 |
| rad59         | 1.43231e-06 | 0.999997 | 3.18828e-06 | 0.999993 |
| rad50         | 1.10325e-06 | 0.999998 | 2.45581e-06 | 0.999995 |
| rad19syn      | 1.02396e-06 | 1.000000 | 2.27932e-06 | 0.999997 |
| rad37         | 3.04609e-07 | 1.000000 | 6.78052e-07 | 0.999998 |
| rad54         | 2.97942e-07 | 1.000000 | 6.63211e-07 | 0.999999 |
| PhcycC3H3_A+H | 1.70469e-07 | 1.000000 | 3.79460e-07 | 0.999999 |
| rad67         | 1.11020e-07 | 1.000000 | 2.47128e-07 | 0.999999 |
| rad51         | 8.66322e-08 | 1.000000 | 1.92841e-07 | 0.999999 |
| rad52         | 4.94927e-08 | 1.000000 | 1.10169e-07 | 1.000000 |
| rad70         | 3.72387e-08 | 1.000000 | 8.28925e-08 | 1.000000 |
| PAH10+CH3     | 3.55700e-08 | 1.000000 | 7.91780e-08 | 1.000000 |
| PAH1+H        | 3.40420e-08 | 1.000000 | 7.57767e-08 | 1.000000 |
| rad58         | 2.33985e-08 | 1.000000 | 5.20844e-08 | 1.000000 |
| rad55         | 1.32727e-08 | 1.000000 | 2.95447e-08 | 1.000000 |
| rad62         | 5.84585e-09 | 1.000000 | 1.30127e-08 | 1.000000 |
| rad34         | 4.93271e-09 | 1.000000 | 1.09801e-08 | 1.000000 |
| rad65         | 2.75376e-09 | 1.000000 | 6.12979e-09 | 1.000000 |
| rad43         | 1.31323e-09 | 1.000000 | 2.92321e-09 | 1.000000 |
| rad53         | 5.86805e-10 | 1.000000 | 1.30621e-09 | 1.000000 |
| rad56         | 2.36331e-10 | 1.000000 | 5.26066e-10 | 1.000000 |
| rad64         | 2.26679e-10 | 1.000000 | 5.04583e-10 | 1.000000 |
| rad42         | 1.03252e-10 | 1.000000 | 2.29836e-10 | 1.000000 |
| rad6          | 9.09596e-11 | 1.000000 | 2.02474e-10 | 1.000000 |
| rad73         | 8.74477e-11 | 1.000000 | 1.94656e-10 | 1.000000 |
| rad71         | 5.10330e-11 | 1.000000 | 1.13598e-10 | 1.000000 |
| rad68syn      | 4.26222e-11 | 1.000000 | 9.48760e-11 | 1.000000 |
| rad68anti     | 2.85346e-11 | 1.000000 | 6.35172e-11 | 1.000000 |
| PAH8+H        | 2.67134e-11 | 1.000000 | 5.94633e-11 | 1.000000 |
| rad23         | 1.43975e-11 | 1.000000 | 3.20484e-11 | 1.000000 |
| rad41         | 1.21933e-11 | 1.000000 | 2.71419e-11 | 1.000000 |
| rad45         | 6.12660e-12 | 1.000000 | 1.36377e-11 | 1.000000 |
| rad40syn      | 6.09416e-12 | 1.000000 | 1.35655e-11 | 1.000000 |
| rad61         | 4.16733e-12 | 1.000000 | 9.27637e-12 | 1.000000 |
| rad40anti     | 2.75060e-12 | 1.000000 | 6.12276e-12 | 1.000000 |
| rad20         | 7.93855e-13 | 1.000000 | 1.76710e-12 | 1.000000 |
| rad2          | 6.97606e-13 | 1.000000 | 1.55285e-12 | 1.000000 |
| rad36         | 5.63061e-13 | 1.000000 | 1.25336e-12 | 1.000000 |
| rad21         | 5.10807e-13 | 1.000000 | 1.13704e-12 | 1.000000 |
| rad11         | 4.63039e-13 | 1.000000 | 1.03071e-12 | 1.000000 |
| rad72         | 2.33497e-13 | 1.000000 | 5.19759e-13 | 1.000000 |
| rad7          | 2.31747e-13 | 1.000000 | 5.15864e-13 | 1.000000 |
| rad9          | 2.26279e-13 | 1.000000 | 5.03691e-13 | 1.000000 |
| rad28         | 1.87366e-13 | 1.000000 | 4.17071e-13 | 1.000000 |
| rad13         | 1.66617e-13 | 1.000000 | 3.70885e-13 | 1.000000 |
| rad1          | 1.45902e-13 | 1.000000 | 3.24773e-13 | 1.000000 |
| rad10         | 6.51112e-14 | 1.000000 | 1.44936e-13 | 1.000000 |
| rad26         | 4.46585e-14 | 1.000000 | 9.94087e-14 | 1.000000 |
| rad18         | 2.44832e-14 | 1.000000 | 5.44989e-14 | 1.000000 |
| rad3          | 1.56448e-14 | 1.000000 | 3.48250e-14 | 1.000000 |
| rad4          | 1.17793e-14 | 1.000000 | 2.62205e-14 | 1.000000 |
| rad24         | 4.56170e-15 | 1.000000 | 1.01542e-14 | 1.000000 |
| rad33         | 3.94272e-15 | 1.000000 | 8.77639e-15 | 1.000000 |
| rad25         | 3.94361e-16 | 1.000000 | 8.77838e-16 | 1.000000 |
| rad22         | 3.18403e-16 | 1.000000 | 7.08758e-16 | 1.000000 |
| rad12         | 1.26339e-16 | 1.000000 | 2.81227e-16 | 1.000000 |
| rad14         | 7.49730e-17 | 1.000000 | 1.66888e-16 | 1.000000 |
| rad27         | 7.01551e-17 | 1.000000 | 1.56164e-16 | 1.000000 |
| rad15         | 4.17885e-17 | 1.000000 | 9.30201e-17 | 1.000000 |
| rad8          | 3.02695e-18 | 1.000000 | 6.73791e-18 | 1.000000 |
| rad31         | 1.11579e-18 | 1.000000 | 2.48372e-18 | 1.000000 |
| rad47         | 5.97467e-21 | 1.000000 | 1.32995e-20 | 1.000000 |
| rad5          | 4.64403e-22 | 1.000000 | 1.03375e-21 | 1.000000 |

0.100000000E-04 Pa, 1200.00000 K

=====  
Rate constant | True (fraction) | Effective (fraction)  
-----  
Total | 8.84330e-15 (1.00 ) | 3.30079e-15 (1.00 )

| species     | PYtrue     | Cumul    | PYeffective | Cumul    |
|-------------|------------|----------|-------------|----------|
| Benzyl+C2H2 | 0.626747   | 0.626747 | 0.00000     | 0.00000  |
| Indene+H    | 0.361139   | 0.987886 | 0.967544    | 0.967544 |
| Ph+Allene   | 0.00426331 | 0.992149 | 0.0114220   | 0.978966 |
| PhCHCCH2+H  | 0.00242727 | 0.994577 | 0.00650302  | 0.985469 |
| PhCH2CCH+H  | 0.00220912 | 0.996786 | 0.00591855  | 0.991388 |
| PhCCH+CH3   | 0.00203529 | 0.998821 | 0.00545285  | 0.996840 |

|               |             |          |             |          |
|---------------|-------------|----------|-------------|----------|
| Ph+MeAc       | 0.000271659 | 0.999093 | 0.000727813 | 0.997568 |
| PAH7+H        | 0.000220958 | 0.999314 | 0.000591978 | 0.998160 |
| PAH9+H        | 0.000166476 | 0.999480 | 0.000446015 | 0.998606 |
| rad30         | 0.000155353 | 0.999635 | 0.000416215 | 0.999022 |
| PhCCCH3+H     | 0.000117029 | 0.999752 | 0.000313538 | 0.999336 |
| rad38         | 6.49367e-05 | 0.999817 | 0.000173975 | 0.999510 |
| rad19anti     | 4.80909e-05 | 0.999865 | 0.000128843 | 0.999639 |
| rad39         | 4.80571e-05 | 0.999914 | 0.000128752 | 0.999768 |
| rad35         | 3.43899e-05 | 0.999948 | 9.21355e-05 | 0.999860 |
| PAH3+H        | 2.21253e-05 | 0.999970 | 5.92770e-05 | 0.999919 |
| rad46         | 1.27762e-05 | 0.999983 | 3.42294e-05 | 0.999953 |
| rad60syn      | 4.87439e-06 | 0.999988 | 1.30592e-05 | 0.999966 |
| rad60anti     | 2.81860e-06 | 0.999991 | 7.55145e-06 | 0.999974 |
| rad59         | 2.76936e-06 | 0.999993 | 7.41953e-06 | 0.999981 |
| rad50         | 2.57972e-06 | 0.999996 | 6.91145e-06 | 0.999988 |
| rad19syn      | 1.86136e-06 | 0.999998 | 4.98686e-06 | 0.999993 |
| rad54         | 5.79322e-07 | 0.999998 | 1.55209e-06 | 0.999995 |
| PhcycC3H3_A+H | 3.85542e-07 | 0.999999 | 1.03292e-06 | 0.999996 |
| rad37         | 3.71909e-07 | 0.999999 | 9.96399e-07 | 0.999997 |
| rad67         | 3.10056e-07 | 0.999999 | 8.30686e-07 | 0.999998 |
| rad51         | 2.56407e-07 | 1.000000 | 6.86951e-07 | 0.999998 |
| rad52         | 1.30814e-07 | 1.000000 | 3.50469e-07 | 0.999999 |
| rad70         | 8.31661e-08 | 1.000000 | 2.22814e-07 | 0.999999 |
| PAH10+CH3     | 7.86243e-08 | 1.000000 | 2.10646e-07 | 0.999999 |
| PAH1+H        | 7.84241e-08 | 1.000000 | 2.10109e-07 | 0.999999 |
| rad58         | 6.38230e-08 | 1.000000 | 1.70991e-07 | 0.999999 |
| rad55         | 2.81615e-08 | 1.000000 | 7.54487e-08 | 0.999999 |
| rad34         | 1.22937e-08 | 1.000000 | 3.29365e-08 | 0.999999 |
| rad62         | 1.00322e-08 | 1.000000 | 2.68777e-08 | 1.000000 |
| rad65         | 8.07954e-09 | 1.000000 | 2.16463e-08 | 1.000000 |
| rad43         | 1.86209e-09 | 1.000000 | 4.98881e-09 | 1.000000 |
| rad53         | 1.69057e-09 | 1.000000 | 4.52927e-09 | 1.000000 |
| rad56         | 8.06531e-10 | 1.000000 | 2.16081e-09 | 1.000000 |
| rad64         | 6.30249e-10 | 1.000000 | 1.68853e-09 | 1.000000 |
| rad73         | 4.67962e-10 | 1.000000 | 1.25374e-09 | 1.000000 |
| rad71         | 3.19770e-10 | 1.000000 | 8.56712e-10 | 1.000000 |
| rad42         | 2.25979e-10 | 1.000000 | 6.05431e-10 | 1.000000 |
| rad68syn      | 1.55936e-10 | 1.000000 | 4.17775e-10 | 1.000000 |
| PAH8+H        | 1.30631e-10 | 1.000000 | 3.49980e-10 | 1.000000 |
| rad68anti     | 1.03878e-10 | 1.000000 | 2.78304e-10 | 1.000000 |
| rad6          | 3.53904e-11 | 1.000000 | 9.48161e-11 | 1.000000 |
| rad40syn      | 2.64823e-11 | 1.000000 | 7.09498e-11 | 1.000000 |
| rad41         | 2.43325e-11 | 1.000000 | 6.51905e-11 | 1.000000 |
| rad61         | 1.76267e-11 | 1.000000 | 4.72246e-11 | 1.000000 |
| rad40anti     | 1.25562e-11 | 1.000000 | 3.36398e-11 | 1.000000 |
| rad23         | 7.09671e-12 | 1.000000 | 1.90131e-11 | 1.000000 |
| rad45         | 3.18122e-12 | 1.000000 | 8.52297e-12 | 1.000000 |
| rad72         | 2.17970e-12 | 1.000000 | 5.83974e-12 | 1.000000 |
| rad11         | 6.27188e-13 | 1.000000 | 1.68033e-12 | 1.000000 |
| rad20         | 5.25317e-13 | 1.000000 | 1.40740e-12 | 1.000000 |
| rad7          | 3.58619e-13 | 1.000000 | 9.60792e-13 | 1.000000 |
| rad21         | 3.17166e-13 | 1.000000 | 8.49734e-13 | 1.000000 |
| rad36         | 2.96768e-13 | 1.000000 | 7.95085e-13 | 1.000000 |
| rad9          | 1.99693e-13 | 1.000000 | 5.35007e-13 | 1.000000 |
| rad2          | 1.97813e-13 | 1.000000 | 5.29971e-13 | 1.000000 |
| rad13         | 1.37741e-13 | 1.000000 | 3.69028e-13 | 1.000000 |
| rad28         | 7.19927e-14 | 1.000000 | 1.92879e-13 | 1.000000 |
| rad18         | 5.20691e-14 | 1.000000 | 1.39501e-13 | 1.000000 |
| rad10         | 4.76684e-14 | 1.000000 | 1.27711e-13 | 1.000000 |
| rad1          | 4.34633e-14 | 1.000000 | 1.16444e-13 | 1.000000 |
| rad26         | 1.85498e-14 | 1.000000 | 4.96976e-14 | 1.000000 |
| rad3          | 5.72174e-15 | 1.000000 | 1.53294e-14 | 1.000000 |
| rad4          | 4.38408e-15 | 1.000000 | 1.17456e-14 | 1.000000 |
| rad24         | 3.33436e-15 | 1.000000 | 8.93325e-15 | 1.000000 |
| rad33         | 2.51841e-15 | 1.000000 | 6.74719e-15 | 1.000000 |
| rad22         | 7.69364e-16 | 1.000000 | 2.06124e-15 | 1.000000 |
| rad25         | 3.68477e-16 | 1.000000 | 9.87203e-16 | 1.000000 |
| rad12         | 1.57453e-16 | 1.000000 | 4.21839e-16 | 1.000000 |
| rad15         | 5.97254e-17 | 1.000000 | 1.60013e-16 | 1.000000 |
| rad14         | 4.93388e-17 | 1.000000 | 1.32186e-16 | 1.000000 |
| rad27         | 3.32785e-17 | 1.000000 | 8.91580e-17 | 1.000000 |
| rad8          | 9.89268e-18 | 1.000000 | 2.65039e-17 | 1.000000 |
| rad31         | 6.76592e-19 | 1.000000 | 1.81269e-18 | 1.000000 |
| rad47         | 1.81317e-20 | 1.000000 | 4.85775e-20 | 1.000000 |
| rad5          | 1.63898e-21 | 1.000000 | 4.39107e-21 | 1.000000 |

0.100000000E-04 Pa, 1300.00000 K

=====

Rate constant | True (fraction) | Effective (fraction)

-----

Total | 1.52810e-14 (1.00 ) 4.76644e-15 (1.00 )

| species       | PYtrue      | Cumul    | PYeffective | Cumul    |
|---------------|-------------|----------|-------------|----------|
| Benzyl+C2H2   | 0.688080    | 0.688080 | 0.000000    | 0.000000 |
| Indene+H      | 0.296944    | 0.985024 | 0.951986    | 0.951986 |
| Ph+Allene     | 0.00550433  | 0.990528 | 0.0176466   | 0.969633 |
| PhCH2CCH+H    | 0.00336231  | 0.993891 | 0.0107794   | 0.980412 |
| PhCHCCH2+H    | 0.00286585  | 0.996756 | 0.00918775  | 0.989600 |
| PhCCH+CH3     | 0.00187197  | 0.998628 | 0.00600145  | 0.995601 |
| Ph+MeAc       | 0.000252917 | 0.998881 | 0.000810838 | 0.996412 |
| PAH7+H        | 0.000251839 | 0.999133 | 0.000807383 | 0.997219 |
| PAH9+H        | 0.000232565 | 0.999366 | 0.000745592 | 0.997965 |
| rad30         | 0.000187145 | 0.999553 | 0.000599977 | 0.998565 |
| rad38         | 9.27358e-05 | 0.999646 | 0.000297306 | 0.998862 |
| PhCCCH3+H     | 8.81977e-05 | 0.999734 | 0.000282757 | 0.999145 |
| rad19anti     | 7.76866e-05 | 0.999812 | 0.000249059 | 0.999394 |
| rad39         | 5.27138e-05 | 0.999864 | 0.000168998 | 0.999563 |
| rad35         | 4.67240e-05 | 0.999911 | 0.000149795 | 0.999713 |
| PAH3+H        | 4.01931e-05 | 0.999951 | 0.000128857 | 0.999842 |
| rad46         | 2.01481e-05 | 0.999971 | 6.45939e-05 | 0.999906 |
| rad60syn      | 7.32140e-06 | 0.999979 | 2.34720e-05 | 0.999930 |
| rad50         | 5.32215e-06 | 0.999984 | 1.70625e-05 | 0.999947 |
| rad59         | 4.81766e-06 | 0.999989 | 1.54452e-05 | 0.999962 |
| rad60anti     | 4.29551e-06 | 0.999993 | 1.37712e-05 | 0.999976 |
| rad19syn      | 2.96344e-06 | 0.999996 | 9.50065e-06 | 0.999986 |
| rad54         | 9.75309e-07 | 0.999997 | 3.12679e-06 | 0.999989 |
| rad67         | 7.44257e-07 | 0.999998 | 2.38605e-06 | 0.999991 |
| PhcycC3H3_A+H | 7.41843e-07 | 0.999999 | 2.37831e-06 | 0.999993 |
| rad51         | 6.46585e-07 | 0.999999 | 2.07292e-06 | 0.999996 |
| rad37         | 4.66727e-07 | 1.000000 | 1.49630e-06 | 0.999997 |
| rad52         | 2.99170e-07 | 1.000000 | 9.59125e-07 | 0.999998 |
| PAH10+CH3     | 1.66594e-07 | 1.000000 | 5.34093e-07 | 0.999999 |
| rad70         | 1.60097e-07 | 1.000000 | 5.13264e-07 | 0.999999 |
| PAH1+H        | 1.54574e-07 | 1.000000 | 4.95557e-07 | 1.000000 |
| rad58         | 1.48959e-07 | 1.000000 | 4.77556e-07 | 1.000000 |
| rad55         | 5.10750e-08 | 1.000000 | 1.63744e-07 | 1.000000 |
| rad34         | 2.60671e-08 | 1.000000 | 8.35698e-08 | 1.000000 |
| rad65         | 2.01508e-08 | 1.000000 | 6.46025e-08 | 1.000000 |
| rad62         | 1.51327e-08 | 1.000000 | 4.85146e-08 | 1.000000 |
| rad53         | 3.99906e-09 | 1.000000 | 1.28208e-08 | 1.000000 |
| rad43         | 2.42224e-09 | 1.000000 | 7.76557e-09 | 1.000000 |
| rad56         | 2.20471e-09 | 1.000000 | 7.06819e-09 | 1.000000 |
| rad73         | 1.94725e-09 | 1.000000 | 6.24278e-09 | 1.000000 |
| rad71         | 1.52460e-09 | 1.000000 | 4.88777e-09 | 1.000000 |
| rad64         | 1.45722e-09 | 1.000000 | 4.67176e-09 | 1.000000 |
| PAH8+H        | 4.97086e-10 | 1.000000 | 1.59363e-09 | 1.000000 |
| rad68syn      | 4.61120e-10 | 1.000000 | 1.47833e-09 | 1.000000 |
| rad42         | 4.21653e-10 | 1.000000 | 1.35180e-09 | 1.000000 |
| rad68anti     | 3.05850e-10 | 1.000000 | 9.80538e-10 | 1.000000 |
| rad40syn      | 9.09557e-11 | 1.000000 | 2.91599e-10 | 1.000000 |
| rad61         | 6.30317e-11 | 1.000000 | 2.02076e-10 | 1.000000 |
| rad40anti     | 4.50261e-11 | 1.000000 | 1.44351e-10 | 1.000000 |
| rad41         | 4.39793e-11 | 1.000000 | 1.40995e-10 | 1.000000 |
| rad6          | 2.01141e-11 | 1.000000 | 6.44847e-11 | 1.000000 |
| rad72         | 1.45376e-11 | 1.000000 | 4.66069e-11 | 1.000000 |
| rad23         | 3.65136e-12 | 1.000000 | 1.17061e-11 | 1.000000 |
| rad45         | 1.69581e-12 | 1.000000 | 5.43666e-12 | 1.000000 |
| rad11         | 6.09155e-13 | 1.000000 | 1.95292e-12 | 1.000000 |
| rad7          | 4.50021e-13 | 1.000000 | 1.44274e-12 | 1.000000 |
| rad20         | 3.18168e-13 | 1.000000 | 1.02003e-12 | 1.000000 |
| rad21         | 1.87706e-13 | 1.000000 | 6.01774e-13 | 1.000000 |
| rad9          | 1.64787e-13 | 1.000000 | 5.28298e-13 | 1.000000 |
| rad36         | 1.60343e-13 | 1.000000 | 5.14050e-13 | 1.000000 |
| rad13         | 8.37788e-14 | 1.000000 | 2.68591e-13 | 1.000000 |
| rad18         | 6.76201e-14 | 1.000000 | 2.16786e-13 | 1.000000 |
| rad2          | 5.92328e-14 | 1.000000 | 1.89897e-13 | 1.000000 |
| rad28         | 3.93617e-14 | 1.000000 | 1.26192e-13 | 1.000000 |
| rad10         | 2.99310e-14 | 1.000000 | 9.59571e-14 | 1.000000 |
| rad1          | 1.34150e-14 | 1.000000 | 4.30077e-14 | 1.000000 |
| rad26         | 9.68013e-15 | 1.000000 | 3.10340e-14 | 1.000000 |
| rad22         | 2.64145e-15 | 1.000000 | 8.46835e-15 | 1.000000 |
| rad24         | 2.44030e-15 | 1.000000 | 7.82347e-15 | 1.000000 |
| rad3          | 2.20638e-15 | 1.000000 | 7.07353e-15 | 1.000000 |
| rad4          | 1.71117e-15 | 1.000000 | 5.48593e-15 | 1.000000 |
| rad33         | 1.48885e-15 | 1.000000 | 4.77318e-15 | 1.000000 |
| rad25         | 2.76126e-16 | 1.000000 | 8.85245e-16 | 1.000000 |
| rad15         | 2.10432e-16 | 1.000000 | 6.74633e-16 | 1.000000 |
| rad12         | 1.79600e-16 | 1.000000 | 5.75787e-16 | 1.000000 |
| rad14         | 2.71732e-17 | 1.000000 | 8.71158e-17 | 1.000000 |

|       |             |         |             |         |
|-------|-------------|---------|-------------|---------|
| rad8  | 1.89596e-17 | 1.00000 | 6.07834e-17 | 1.00000 |
| rad27 | 1.34962e-17 | 1.00000 | 4.32682e-17 | 1.00000 |
| rad31 | 4.14038e-19 | 1.00000 | 1.32738e-18 | 1.00000 |
| rad47 | 4.64663e-20 | 1.00000 | 1.48968e-19 | 1.00000 |
| rad5  | 5.66185e-21 | 1.00000 | 1.81516e-20 | 1.00000 |

0.100000000E-04 Pa, 1400.00000 K

| Rate constant | True (fraction)     | Effective (fraction) |
|---------------|---------------------|----------------------|
| Total         | 2.46691e-14 (1.00 ) | 6.50155e-15 (1.00 )  |

| species       | PYtrue      | Cumul    | PYeffective | Cumul    |
|---------------|-------------|----------|-------------|----------|
| Benzyl+C2H2   | 0.736450    | 0.736450 | 0.00000     | 0.00000  |
| Indene+H      | 0.245659    | 0.982109 | 0.932117    | 0.932117 |
| Ph+Allene     | 0.00660861  | 0.988718 | 0.0250754   | 0.957192 |
| PhCH2CCH+H    | 0.00478128  | 0.993499 | 0.0181419   | 0.975334 |
| PhCHCCH2+H    | 0.00325578  | 0.996755 | 0.0123536   | 0.987688 |
| PhCCH+CH3     | 0.00165084  | 0.998406 | 0.00626388  | 0.993952 |
| PAH9+H        | 0.000308661 | 0.998714 | 0.00117117  | 0.995123 |
| PAH7+H        | 0.000272630 | 0.998987 | 0.00103445  | 0.996157 |
| Ph+MeAc       | 0.000228420 | 0.999215 | 0.000866707 | 0.997024 |
| rad30         | 0.000217655 | 0.999433 | 0.000825859 | 0.997850 |
| rad38         | 0.000125529 | 0.999558 | 0.000476301 | 0.998326 |
| rad19anti     | 0.000116511 | 0.999675 | 0.000442085 | 0.998768 |
| PAH3+H        | 6.69984e-05 | 0.999742 | 0.000254215 | 0.999023 |
| PhCCCH3+H     | 6.53819e-05 | 0.999807 | 0.000248082 | 0.999271 |
| rad35         | 6.07397e-05 | 0.999868 | 0.000230468 | 0.999501 |
| rad39         | 5.49305e-05 | 0.999923 | 0.000208426 | 0.999710 |
| rad46         | 2.97185e-05 | 0.999953 | 0.000112762 | 0.999822 |
| rad60syn      | 1.03332e-05 | 0.999963 | 3.92077e-05 | 0.999862 |
| rad50         | 9.93210e-06 | 0.999973 | 3.76859e-05 | 0.999899 |
| rad59         | 7.71556e-06 | 0.999981 | 2.92756e-05 | 0.999928 |
| rad60anti     | 6.13929e-06 | 0.999987 | 2.32946e-05 | 0.999952 |
| rad19syn      | 4.26609e-06 | 0.999991 | 1.61870e-05 | 0.999968 |
| rad67         | 1.57759e-06 | 0.999993 | 5.98594e-06 | 0.999974 |
| rad54         | 1.46998e-06 | 0.999994 | 5.57763e-06 | 0.999980 |
| rad51         | 1.43445e-06 | 0.999996 | 5.44281e-06 | 0.999985 |
| PhcycC3H3_A+H | 1.26043e-06 | 0.999997 | 4.78252e-06 | 0.999990 |
| rad37         | 6.13241e-07 | 0.999997 | 2.32685e-06 | 0.999992 |
| rad52         | 6.09458e-07 | 0.999998 | 2.31250e-06 | 0.999994 |
| PAH10+CH3     | 3.40070e-07 | 0.999998 | 1.29034e-06 | 0.999996 |
| rad58         | 3.07503e-07 | 0.999999 | 1.16677e-06 | 0.999997 |
| rad70         | 2.75599e-07 | 0.999999 | 1.04572e-06 | 0.999998 |
| PAH1+H        | 2.72543e-07 | 0.999999 | 1.03413e-06 | 0.999999 |
| rad55         | 8.21114e-08 | 0.999999 | 3.11559e-07 | 0.999999 |
| rad34         | 4.89123e-08 | 0.999999 | 1.85590e-07 | 0.999999 |
| rad65         | 4.41608e-08 | 0.999999 | 1.67561e-07 | 1.000000 |
| rad62         | 2.07591e-08 | 0.999999 | 7.87674e-08 | 1.000000 |
| rad53         | 8.12265e-09 | 0.999999 | 3.08202e-08 | 1.000000 |
| rad73         | 6.62662e-09 | 0.999999 | 2.51437e-08 | 1.000000 |
| rad71         | 5.83660e-09 | 0.999999 | 2.21461e-08 | 1.000000 |
| rad56         | 5.07502e-09 | 0.999999 | 1.92564e-08 | 1.000000 |
| rad43         | 3.05585e-09 | 0.999999 | 1.15950e-08 | 1.000000 |
| rad64         | 2.94785e-09 | 0.999999 | 1.11852e-08 | 1.000000 |
| PAH8+H        | 1.55760e-09 | 0.999999 | 5.91010e-09 | 1.000000 |
| rad68syn      | 1.15822e-09 | 0.999999 | 4.39468e-09 | 1.000000 |
| rad68anti     | 7.65284e-10 | 0.999999 | 2.90376e-09 | 1.000000 |
| rad42         | 6.99013e-10 | 0.999999 | 2.65230e-09 | 1.000000 |
| rad40syn      | 2.60577e-10 | 0.999999 | 9.88719e-10 | 1.000000 |
| rad61         | 1.94739e-10 | 0.999999 | 7.38907e-10 | 1.000000 |
| rad40anti     | 1.33993e-10 | 0.999999 | 5.08417e-10 | 1.000000 |
| rad41         | 7.68994e-11 | 0.999999 | 2.91783e-10 | 1.000000 |
| rad72         | 7.37097e-11 | 0.999999 | 2.79681e-10 | 1.000000 |
| rad6          | 1.55477e-11 | 0.999999 | 5.89933e-11 | 1.000000 |
| rad23         | 1.96080e-12 | 0.999999 | 7.43997e-12 | 1.000000 |
| rad45         | 9.29279e-13 | 0.999999 | 3.52601e-12 | 1.000000 |
| rad11         | 4.33597e-13 | 0.999999 | 1.64522e-12 | 1.000000 |
| rad7          | 3.95337e-13 | 0.999999 | 1.50005e-12 | 1.000000 |
| rad20         | 1.95003e-13 | 0.999999 | 7.39910e-13 | 1.000000 |
| rad9          | 1.30624e-13 | 0.999999 | 4.95634e-13 | 1.000000 |
| rad21         | 1.13739e-13 | 0.999999 | 4.31567e-13 | 1.000000 |
| rad36         | 8.90137e-14 | 0.999999 | 3.37749e-13 | 1.000000 |
| rad18         | 5.84531e-14 | 0.999999 | 2.21792e-13 | 1.000000 |
| rad13         | 4.53313e-14 | 0.999999 | 1.72003e-13 | 1.000000 |
| rad28         | 2.96490e-14 | 0.999999 | 1.12499e-13 | 1.000000 |
| rad2          | 1.84932e-14 | 0.999999 | 7.01696e-14 | 1.000000 |
| rad10         | 1.44850e-14 | 0.999999 | 5.49614e-14 | 1.000000 |
| rad22         | 8.82156e-15 | 0.999999 | 3.34721e-14 | 1.000000 |



|       |             |          |             |          |
|-------|-------------|----------|-------------|----------|
| rad26 | 5.68325e-15 | 0.999999 | 2.15643e-14 | 1.000000 |
| rad1  | 4.28088e-15 | 0.999999 | 1.62432e-14 | 1.000000 |
| rad24 | 1.80067e-15 | 0.999999 | 6.83237e-15 | 1.000000 |
| rad3  | 8.90027e-16 | 0.999999 | 3.37708e-15 | 1.000000 |
| rad33 | 8.79969e-16 | 0.999999 | 3.33891e-15 | 1.000000 |
| rad4  | 6.96945e-16 | 0.999999 | 2.64446e-15 | 1.000000 |
| rad15 | 6.35707e-16 | 0.999999 | 2.41209e-15 | 1.000000 |
| rad12 | 1.93287e-16 | 0.999999 | 7.33399e-16 | 1.000000 |
| rad25 | 1.92135e-16 | 0.999999 | 7.29028e-16 | 1.000000 |
| rad8  | 2.79512e-17 | 0.999999 | 1.06057e-16 | 1.000000 |
| rad14 | 1.41992e-17 | 0.999999 | 5.38766e-17 | 1.000000 |
| rad27 | 5.43645e-18 | 0.999999 | 2.06278e-17 | 1.000000 |
| rad31 | 2.56226e-19 | 0.999999 | 9.72211e-19 | 1.000000 |
| rad47 | 1.04027e-19 | 0.999999 | 3.94715e-19 | 1.000000 |
| rad5  | 1.67107e-20 | 0.999999 | 6.34062e-20 | 1.000000 |

0.100000000E-04 Pa, 1500.00000 K

| Rate constant | True (fraction)     | Effective (fraction) |
|---------------|---------------------|----------------------|
| Total         | 3.76908e-14 (1.00 ) | 8.51560e-15 (1.00 )  |

| species       | PYtrue      | Cumul    | PYeffective | Cumul    |
|---------------|-------------|----------|-------------|----------|
| Benzyl+C2H2   | 0.774067    | 0.774067 | 0.00000     | 0.00000  |
| Indene+H      | 0.205065    | 0.979132 | 0.907636    | 0.907636 |
| Ph+Allene     | 0.00752036  | 0.986652 | 0.0332858   | 0.940922 |
| PhCH2CCH+H    | 0.00646723  | 0.993120 | 0.0286246   | 0.969546 |
| PhCHCCH2+H    | 0.00361205  | 0.996732 | 0.0159873   | 0.985534 |
| PhCCH+CH3     | 0.00141397  | 0.998146 | 0.00625837  | 0.991792 |
| PAH9+H        | 0.000393094 | 0.998539 | 0.00173987  | 0.993532 |
| PAH7+H        | 0.000286546 | 0.998825 | 0.00126828  | 0.994800 |
| rad30         | 0.000246477 | 0.999072 | 0.00109093  | 0.995891 |
| Ph+MeAc       | 0.000203626 | 0.999275 | 0.000901268 | 0.996792 |
| rad19anti     | 0.000164236 | 0.999440 | 0.000726923 | 0.997519 |
| rad38         | 0.000162728 | 0.999602 | 0.000720251 | 0.998240 |
| PAH3+H        | 0.000104218 | 0.999707 | 0.000461281 | 0.998701 |
| rad35         | 7.62565e-05 | 0.999783 | 0.000337518 | 0.999038 |
| rad39         | 5.58557e-05 | 0.999839 | 0.000247223 | 0.999286 |
| PhCCCH3+H     | 4.89506e-05 | 0.999888 | 0.000216660 | 0.999502 |
| rad46         | 4.15217e-05 | 0.999929 | 0.000183779 | 0.999686 |
| rad50         | 1.70754e-05 | 0.999946 | 7.55771e-05 | 0.999762 |
| rad60syn      | 1.38815e-05 | 0.999960 | 6.14410e-05 | 0.999823 |
| rad59         | 1.15663e-05 | 0.999972 | 5.11935e-05 | 0.999874 |
| rad60anti     | 8.33859e-06 | 0.999980 | 3.69074e-05 | 0.999911 |
| rad19syn      | 5.68956e-06 | 0.999986 | 2.51825e-05 | 0.999936 |
| rad67         | 3.01383e-06 | 0.999989 | 1.33395e-05 | 0.999950 |
| rad51         | 2.86542e-06 | 0.999992 | 1.26826e-05 | 0.999962 |
| rad54         | 2.03370e-06 | 0.999994 | 9.00134e-06 | 0.999971 |
| PhcycC3H3_A+H | 1.94411e-06 | 0.999996 | 8.60479e-06 | 0.999980 |
| rad52         | 1.12959e-06 | 0.999997 | 4.99968e-06 | 0.999985 |
| rad37         | 8.38280e-07 | 0.999997 | 3.71030e-06 | 0.999989 |
| PAH10+CH3     | 6.63376e-07 | 0.999998 | 2.93617e-06 | 0.999992 |
| rad58         | 5.75067e-07 | 0.999999 | 2.54530e-06 | 0.999994 |
| PAH1+H        | 4.44629e-07 | 0.999999 | 1.96797e-06 | 0.999996 |
| rad70         | 4.35873e-07 | 1.000000 | 1.92921e-06 | 0.999998 |
| rad55         | 1.20222e-07 | 1.000000 | 5.32112e-07 | 0.999999 |
| rad65         | 8.70999e-08 | 1.000000 | 3.85512e-07 | 0.999999 |
| rad34         | 8.35876e-08 | 1.000000 | 3.69966e-07 | 0.999999 |
| rad62         | 2.65880e-08 | 1.000000 | 1.17681e-07 | 0.999999 |
| rad73         | 1.91029e-08 | 1.000000 | 8.45513e-08 | 1.000000 |
| rad71         | 1.86182e-08 | 1.000000 | 8.24060e-08 | 1.000000 |
| rad53         | 1.46409e-08 | 1.000000 | 6.48019e-08 | 1.000000 |
| rad56         | 1.02046e-08 | 1.000000 | 4.51664e-08 | 1.000000 |
| rad64         | 5.41559e-09 | 1.000000 | 2.39699e-08 | 1.000000 |
| PAH8+H        | 4.18063e-09 | 1.000000 | 1.85038e-08 | 1.000000 |
| rad43         | 3.92947e-09 | 1.000000 | 1.73922e-08 | 1.000000 |
| rad68syn      | 2.56012e-09 | 1.000000 | 1.13313e-08 | 1.000000 |
| rad68anti     | 1.68587e-09 | 1.000000 | 7.46183e-09 | 1.000000 |
| rad42         | 1.06259e-09 | 1.000000 | 4.70314e-09 | 1.000000 |
| rad40syn      | 6.46765e-10 | 1.000000 | 2.86264e-09 | 1.000000 |
| rad61         | 5.26863e-10 | 1.000000 | 2.33195e-09 | 1.000000 |
| rad40anti     | 3.43892e-10 | 1.000000 | 1.52210e-09 | 1.000000 |
| rad72         | 2.96653e-10 | 1.000000 | 1.31301e-09 | 1.000000 |
| rad41         | 1.35344e-10 | 1.000000 | 5.99046e-10 | 1.000000 |
| rad6          | 1.41899e-11 | 1.000000 | 6.28060e-11 | 1.000000 |
| rad23         | 1.10925e-12 | 1.000000 | 4.90964e-12 | 1.000000 |
| rad45         | 5.24299e-13 | 1.000000 | 2.32060e-12 | 1.000000 |
| rad11         | 2.60370e-13 | 1.000000 | 1.15242e-12 | 1.000000 |
| rad7          | 2.59919e-13 | 1.000000 | 1.15043e-12 | 1.000000 |

|       |             |         |             |          |
|-------|-------------|---------|-------------|----------|
| rad20 | 1.23074e-13 | 1.00000 | 5.44737e-13 | 1.000000 |
| rad9  | 1.01189e-13 | 1.00000 | 4.47873e-13 | 1.000000 |
| rad21 | 7.10953e-14 | 1.00000 | 3.14675e-13 | 1.000000 |
| rad36 | 5.08603e-14 | 1.00000 | 2.25112e-13 | 1.000000 |
| rad18 | 4.05517e-14 | 1.00000 | 1.79485e-13 | 1.000000 |
| rad28 | 2.71691e-14 | 1.00000 | 1.20253e-13 | 1.000000 |
| rad13 | 2.40633e-14 | 1.00000 | 1.06507e-13 | 1.000000 |
| rad22 | 2.30141e-14 | 1.00000 | 1.01863e-13 | 1.000000 |
| rad2  | 6.00079e-15 | 1.00000 | 2.65601e-14 | 1.000000 |
| rad10 | 5.74655e-15 | 1.00000 | 2.54348e-14 | 1.000000 |
| rad26 | 3.31446e-15 | 1.00000 | 1.46701e-14 | 1.000000 |
| rad1  | 1.41445e-15 | 1.00000 | 6.26049e-15 | 1.000000 |
| rad24 | 1.34246e-15 | 1.00000 | 5.94185e-15 | 1.000000 |
| rad15 | 1.15007e-15 | 1.00000 | 5.09032e-15 | 1.000000 |
| rad33 | 5.25047e-16 | 1.00000 | 2.32391e-15 | 1.000000 |
| rad3  | 3.74244e-16 | 1.00000 | 1.65644e-15 | 1.000000 |
| rad4  | 2.95473e-16 | 1.00000 | 1.30779e-15 | 1.000000 |
| rad12 | 1.99725e-16 | 1.00000 | 8.84000e-16 | 1.000000 |
| rad25 | 1.32639e-16 | 1.00000 | 5.87072e-16 | 1.000000 |
| rad8  | 3.57803e-17 | 1.00000 | 1.58367e-16 | 1.000000 |
| rad14 | 7.59790e-18 | 1.00000 | 3.36290e-17 | 1.000000 |
| rad27 | 2.30908e-18 | 1.00000 | 1.02202e-17 | 1.000000 |
| rad47 | 2.08549e-19 | 1.00000 | 9.23059e-19 | 1.000000 |
| rad31 | 1.60839e-19 | 1.00000 | 7.11887e-19 | 1.000000 |
| rad5  | 3.76886e-20 | 1.00000 | 1.66813e-19 | 1.000000 |

0.100000000E-04 Pa, 1750.00000 K

| Rate constant | True (fraction)     | Effective (fraction) |
|---------------|---------------------|----------------------|
| Total         | 9.18604e-14 (1.00 ) | 1.49145e-14 (1.00 )  |

| species       | PYtrue      | Cumul    | PYeffective | Cumul    |
|---------------|-------------|----------|-------------|----------|
| Benzyl+C2H2   | 0.837640    | 0.837640 | 0.000000    | 0.000000 |
| Indene+H      | 0.133064    | 0.970704 | 0.819559    | 0.819559 |
| PhCH2CCH+H    | 0.0118056   | 0.982510 | 0.0727127   | 0.892272 |
| Ph+Allene     | 0.00950091  | 0.992011 | 0.0585175   | 0.950789 |
| PhCHCCH2+H    | 0.00446803  | 0.996479 | 0.0275192   | 0.978308 |
| PhCCH+CH3     | 0.000861597 | 0.997340 | 0.00530671  | 0.983615 |
| PAH9+H        | 0.000556652 | 0.997897 | 0.00342850  | 0.987044 |
| rad30         | 0.000325000 | 0.998222 | 0.00200173  | 0.989045 |
| rad19anti     | 0.000321503 | 0.998543 | 0.00198018  | 0.991026 |
| rad38         | 0.000287109 | 0.998830 | 0.00176835  | 0.992794 |
| PAH7+H        | 0.000286344 | 0.999117 | 0.00176363  | 0.994557 |
| PAH3+H        | 0.000275296 | 0.999392 | 0.00169559  | 0.996253 |
| Ph+MeAc       | 0.000167695 | 0.999560 | 0.00103286  | 0.997286 |
| rad35         | 0.000110066 | 0.999670 | 0.000677915 | 0.997964 |
| rad46         | 7.52920e-05 | 0.999745 | 0.000463735 | 0.998428 |
| rad39         | 5.82425e-05 | 0.999803 | 0.000358724 | 0.998786 |
| rad50         | 4.36581e-05 | 0.999847 | 0.000268897 | 0.999055 |
| PhCCCH3+H     | 3.20470e-05 | 0.999879 | 0.000197382 | 0.999253 |
| rad59         | 2.75338e-05 | 0.999907 | 0.000169584 | 0.999422 |
| rad60syn      | 2.64498e-05 | 0.999933 | 0.000162908 | 0.999585 |
| rad60anti     | 1.77452e-05 | 0.999951 | 0.000109295 | 0.999694 |
| rad51         | 1.06304e-05 | 0.999961 | 6.54744e-05 | 0.999760 |
| rad67         | 1.00266e-05 | 0.999971 | 6.17554e-05 | 0.999822 |
| rad19syn      | 8.12817e-06 | 0.999980 | 5.00626e-05 | 0.999872 |
| PhcycC3H3_A+H | 4.32964e-06 | 0.999984 | 2.66669e-05 | 0.999898 |
| rad52         | 3.62585e-06 | 0.999988 | 2.23321e-05 | 0.999921 |
| rad54         | 3.10468e-06 | 0.999991 | 1.91222e-05 | 0.999940 |
| PAH10+CH3     | 2.60306e-06 | 0.999993 | 1.60326e-05 | 0.999956 |
| rad58         | 2.01823e-06 | 0.999995 | 1.24306e-05 | 0.999968 |
| rad37         | 1.70772e-06 | 0.999997 | 1.05181e-05 | 0.999979 |
| PAH1+H        | 1.10635e-06 | 0.999998 | 6.81419e-06 | 0.999986 |
| rad70         | 1.04847e-06 | 0.999999 | 6.45765e-06 | 0.999992 |
| rad65         | 3.08348e-07 | 0.999999 | 1.89916e-06 | 0.999994 |
| rad34         | 2.42002e-07 | 1.000000 | 1.49052e-06 | 0.999995 |
| rad55         | 2.29000e-07 | 1.000000 | 1.41044e-06 | 0.999997 |
| rad71         | 1.90754e-07 | 1.000000 | 1.17488e-06 | 0.999998 |
| rad73         | 1.56380e-07 | 1.000000 | 9.63169e-07 | 0.999999 |
| rad53         | 4.44391e-08 | 1.000000 | 2.73707e-07 | 0.999999 |
| rad62         | 4.00911e-08 | 1.000000 | 2.46927e-07 | 1.000000 |
| rad56         | 3.57943e-08 | 1.000000 | 2.20463e-07 | 1.000000 |
| PAH8+H        | 2.43959e-08 | 1.000000 | 1.50258e-07 | 1.000000 |
| rad64         | 1.92943e-08 | 1.000000 | 1.18836e-07 | 1.000000 |
| rad68syn      | 1.20123e-08 | 1.000000 | 7.39857e-08 | 1.000000 |
| rad43         | 8.60713e-09 | 1.000000 | 5.30126e-08 | 1.000000 |
| rad68anti     | 7.79056e-09 | 1.000000 | 4.79832e-08 | 1.000000 |
| rad72         | 5.35934e-09 | 1.000000 | 3.30090e-08 | 1.000000 |

|           |             |         |             |         |
|-----------|-------------|---------|-------------|---------|
| rad40syn  | 3.52157e-09 | 1.00000 | 2.16899e-08 | 1.00000 |
| rad61     | 3.50342e-09 | 1.00000 | 2.15781e-08 | 1.00000 |
| rad42     | 2.39318e-09 | 1.00000 | 1.47399e-08 | 1.00000 |
| rad40anti | 2.09783e-09 | 1.00000 | 1.29208e-08 | 1.00000 |
| rad41     | 5.64325e-10 | 1.00000 | 3.47576e-09 | 1.00000 |
| rad6      | 7.97424e-12 | 1.00000 | 4.91145e-11 | 1.00000 |
| rad23     | 3.57697e-13 | 1.00000 | 2.20311e-12 | 1.00000 |
| rad22     | 5.56519e-14 | 1.00000 | 3.42768e-13 | 1.00000 |
| rad45     | 5.00911e-14 | 1.00000 | 3.08519e-13 | 1.00000 |
| rad7      | 2.70289e-14 | 1.00000 | 1.66475e-13 | 1.00000 |
| rad11     | 2.49424e-14 | 1.00000 | 1.53624e-13 | 1.00000 |
| rad28     | 1.73284e-14 | 1.00000 | 1.06728e-13 | 1.00000 |
| rad9      | 1.33505e-14 | 1.00000 | 8.22276e-14 | 1.00000 |
| rad20     | 1.26283e-14 | 1.00000 | 7.77797e-14 | 1.00000 |
| rad36     | 8.51426e-15 | 1.00000 | 5.24406e-14 | 1.00000 |
| rad21     | 6.65178e-15 | 1.00000 | 4.09693e-14 | 1.00000 |
| rad18     | 5.81036e-15 | 1.00000 | 3.57869e-14 | 1.00000 |
| rad13     | 1.40347e-15 | 1.00000 | 8.64421e-15 | 1.00000 |
| rad15     | 6.73091e-16 | 1.00000 | 4.14566e-15 | 1.00000 |
| rad26     | 4.57086e-16 | 1.00000 | 2.81526e-15 | 1.00000 |
| rad10     | 2.39951e-16 | 1.00000 | 1.47789e-15 | 1.00000 |
| rad24     | 1.70134e-16 | 1.00000 | 1.04788e-15 | 1.00000 |
| rad2      | 1.05776e-16 | 1.00000 | 6.51491e-16 | 1.00000 |
| rad12     | 4.26945e-17 | 1.00000 | 2.62962e-16 | 1.00000 |
| rad33     | 3.32919e-17 | 1.00000 | 2.05050e-16 | 1.00000 |
| rad1      | 2.67113e-17 | 1.00000 | 1.64519e-16 | 1.00000 |
| rad8      | 1.74118e-17 | 1.00000 | 1.07242e-16 | 1.00000 |
| rad25     | 1.29129e-17 | 1.00000 | 7.95327e-17 | 1.00000 |
| rad3      | 8.45032e-18 | 1.00000 | 5.20468e-17 | 1.00000 |
| rad4      | 5.36509e-18 | 1.00000 | 3.30444e-17 | 1.00000 |
| rad14     | 5.21561e-19 | 1.00000 | 3.21237e-18 | 1.00000 |
| rad47     | 2.44663e-19 | 1.00000 | 1.50692e-18 | 1.00000 |
| rad5      | 1.26240e-19 | 1.00000 | 7.77532e-19 | 1.00000 |
| rad27     | 9.07069e-20 | 1.00000 | 5.58677e-19 | 1.00000 |

0.100000000E-04 Pa, 2000.00000 K

=====

| Rate constant | True (fraction)     | Effective (fraction) |
|---------------|---------------------|----------------------|
| Total         | 1.85359e-13 (1.00 ) | 2.47588e-14 (1.00 )  |

| species       | PYtrue      | Cumul    | PYeffective | Cumul    |
|---------------|-------------|----------|-------------|----------|
| Benzyl+C2H2   | 0.866428    | 0.866428 | 0.00000     | 0.00000  |
| Indene+H      | 0.0943885   | 0.960816 | 0.706650    | 0.706650 |
| PhCH2CCH+H    | 0.0189358   | 0.979752 | 0.141765    | 0.848415 |
| Ph+Allene     | 0.0101088   | 0.989861 | 0.0756807   | 0.924096 |
| PhCHCCH2+H    | 0.00579099  | 0.995652 | 0.0433549   | 0.967451 |
| PAH9+H        | 0.000765251 | 0.996417 | 0.00572913  | 0.973180 |
| PhCCH+CH3     | 0.000550354 | 0.996968 | 0.00412028  | 0.977300 |
| PAH3+H        | 0.000526246 | 0.997494 | 0.00393980  | 0.981240 |
| rad19anti     | 0.000486607 | 0.997981 | 0.00364303  | 0.984883 |
| rad38         | 0.000411538 | 0.998392 | 0.00308103  | 0.987964 |
| rad30         | 0.000378289 | 0.998770 | 0.00283210  | 0.990796 |
| PAH7+H        | 0.000350388 | 0.999121 | 0.00262322  | 0.993419 |
| Ph+MeAc       | 0.000164748 | 0.999286 | 0.00123340  | 0.994653 |
| rad35         | 0.000155515 | 0.999441 | 0.00116428  | 0.995817 |
| rad46         | 0.000120109 | 0.999561 | 0.000899212 | 0.996716 |
| rad50         | 9.58270e-05 | 0.999657 | 0.000717420 | 0.997434 |
| rad39         | 7.87039e-05 | 0.999736 | 0.000589225 | 0.998023 |
| rad59         | 4.92026e-05 | 0.999785 | 0.000368361 | 0.998391 |
| rad60syn      | 4.01110e-05 | 0.999825 | 0.000300295 | 0.998691 |
| PhCCCH3+H     | 3.61306e-05 | 0.999861 | 0.000270495 | 0.998962 |
| rad51         | 2.92772e-05 | 0.999890 | 0.000219187 | 0.999181 |
| rad60anti     | 2.75040e-05 | 0.999918 | 0.000205912 | 0.999387 |
| rad67         | 2.43946e-05 | 0.999942 | 0.000182633 | 0.999570 |
| rad19syn      | 1.17085e-05 | 0.999954 | 8.76566e-05 | 0.999657 |
| rad52         | 8.84586e-06 | 0.999963 | 6.62255e-05 | 0.999723 |
| PAH10+CH3     | 7.72771e-06 | 0.999971 | 5.78543e-05 | 0.999781 |
| PhcycC3H3_A+H | 7.44556e-06 | 0.999978 | 5.57420e-05 | 0.999837 |
| rad58         | 5.03691e-06 | 0.999983 | 3.77093e-05 | 0.999875 |
| rad54         | 4.34710e-06 | 0.999987 | 3.25450e-05 | 0.999907 |
| rad37         | 3.43690e-06 | 0.999991 | 2.57307e-05 | 0.999933 |
| PAH1+H        | 2.74924e-06 | 0.999994 | 2.05825e-05 | 0.999954 |
| rad70         | 2.09354e-06 | 0.999996 | 1.56735e-05 | 0.999969 |
| rad71         | 1.06961e-06 | 0.999997 | 8.00777e-06 | 0.999977 |
| rad65         | 8.19688e-07 | 0.999998 | 6.13669e-06 | 0.999983 |
| rad73         | 7.43910e-07 | 0.999998 | 5.56936e-06 | 0.999989 |
| rad34         | 5.52321e-07 | 0.999999 | 4.13501e-06 | 0.999993 |
| rad55         | 3.53324e-07 | 0.999999 | 2.64520e-06 | 0.999996 |

|           |             |          |             |          |
|-----------|-------------|----------|-------------|----------|
| PAH8+H    | 1.14510e-07 | 0.999999 | 8.57294e-07 | 0.999997 |
| rad53     | 9.72438e-08 | 0.999999 | 7.28027e-07 | 0.999997 |
| rad56     | 9.21216e-08 | 1.000000 | 6.89678e-07 | 0.999998 |
| rad62     | 6.00485e-08 | 1.000000 | 4.49560e-07 | 0.999999 |
| rad64     | 5.57952e-08 | 1.000000 | 4.17717e-07 | 0.999999 |
| rad72     | 4.29766e-08 | 1.000000 | 3.21749e-07 | 0.999999 |
| rad68syn  | 4.11172e-08 | 1.000000 | 3.07828e-07 | 1.000000 |
| rad68anti | 2.65281e-08 | 1.000000 | 1.98605e-07 | 1.000000 |
| rad43     | 2.20258e-08 | 1.000000 | 1.64898e-07 | 1.000000 |
| rad61     | 1.54174e-08 | 1.000000 | 1.15424e-07 | 1.000000 |
| rad40syn  | 1.44056e-08 | 1.000000 | 1.07849e-07 | 1.000000 |
| rad40anti | 9.08224e-09 | 1.000000 | 6.79952e-08 | 1.000000 |
| rad42     | 4.93493e-09 | 1.000000 | 3.69459e-08 | 1.000000 |
| rad41     | 1.99345e-09 | 1.000000 | 1.49241e-08 | 1.000000 |
| rad6      | 9.90406e-13 | 1.000000 | 7.41478e-12 | 1.000000 |
| rad23     | 1.79200e-13 | 1.000000 | 1.34160e-12 | 1.000000 |
| rad45     | 1.66536e-14 | 1.000000 | 1.24679e-13 | 1.000000 |
| rad22     | 1.52720e-14 | 1.000000 | 1.14336e-13 | 1.000000 |
| rad9      | 6.78971e-15 | 1.000000 | 5.08319e-14 | 1.000000 |
| rad11     | 5.37279e-15 | 1.000000 | 4.02240e-14 | 1.000000 |
| rad20     | 5.29552e-15 | 1.000000 | 3.96455e-14 | 1.000000 |
| rad7      | 4.21579e-15 | 1.000000 | 3.15620e-14 | 1.000000 |
| rad28     | 3.29277e-15 | 1.000000 | 2.46517e-14 | 1.000000 |
| rad36     | 2.91161e-15 | 1.000000 | 2.17981e-14 | 1.000000 |
| rad21     | 2.72287e-15 | 1.000000 | 2.03851e-14 | 1.000000 |
| rad18     | 1.62503e-15 | 1.000000 | 1.21659e-14 | 1.000000 |
| rad15     | 3.62776e-16 | 1.000000 | 2.71596e-15 | 1.000000 |
| rad13     | 3.15031e-16 | 1.000000 | 2.35852e-15 | 1.000000 |
| rad24     | 9.49359e-17 | 1.000000 | 7.10748e-16 | 1.000000 |
| rad26     | 6.45678e-17 | 1.000000 | 4.83394e-16 | 1.000000 |
| rad12     | 3.72963e-17 | 1.000000 | 2.79223e-16 | 1.000000 |
| rad10     | 2.41085e-17 | 1.000000 | 1.80491e-16 | 1.000000 |
| rad8      | 2.00223e-17 | 1.000000 | 1.49899e-16 | 1.000000 |
| rad33     | 1.02785e-17 | 1.000000 | 7.69508e-17 | 1.000000 |
| rad2      | 9.84216e-18 | 1.000000 | 7.36844e-17 | 1.000000 |
| rad25     | 5.51560e-18 | 1.000000 | 4.12931e-17 | 1.000000 |
| rad1      | 2.62603e-18 | 1.000000 | 1.96601e-17 | 1.000000 |
| rad3      | 1.46294e-18 | 1.000000 | 1.09524e-17 | 1.000000 |
| rad4      | 9.35018e-19 | 1.000000 | 7.00012e-18 | 1.000000 |
| rad47     | 6.72667e-19 | 1.000000 | 5.03600e-18 | 1.000000 |
| rad5      | 1.87299e-19 | 1.000000 | 1.40224e-18 | 1.000000 |
| rad14     | 1.43912e-19 | 1.000000 | 1.07741e-18 | 1.000000 |
| rad27     | 2.36916e-20 | 1.000000 | 1.77370e-19 | 1.000000 |

0.100000000E-04 Pa, 2250.00000 K

| Rate constant | True (fraction)    | Effective (fraction) |
|---------------|--------------------|----------------------|
| Total         | 3.29136e-13 (1.00) | 4.00875e-14 (1.00)   |

| species       | PYtrue      | Cumul    | PYeffective | Cumul    |
|---------------|-------------|----------|-------------|----------|
| Benzyl+C2H2   | 0.878204    | 0.878204 | 0.00000     | 0.00000  |
| Indene+H      | 0.0703003   | 0.948504 | 0.577195    | 0.577195 |
| PhCH2CCH+H    | 0.0277459   | 0.976250 | 0.227806    | 0.805001 |
| Ph+Allene     | 0.0105974   | 0.986848 | 0.0870088   | 0.892010 |
| PhCHCCH2+H    | 0.00765656  | 0.994504 | 0.0628636   | 0.954873 |
| PAH9+H        | 0.000941856 | 0.995446 | 0.00773304  | 0.962606 |
| PAH3+H        | 0.000857236 | 0.996303 | 0.00703827  | 0.969645 |
| rad19anti     | 0.000629228 | 0.996932 | 0.00516623  | 0.974811 |
| rad38         | 0.000525523 | 0.997458 | 0.00431476  | 0.979126 |
| PAH7+H        | 0.000454502 | 0.997913 | 0.00373165  | 0.982857 |
| rad30         | 0.000417263 | 0.998330 | 0.00342591  | 0.986283 |
| PhCCH+CH3     | 0.000383697 | 0.998713 | 0.00315031  | 0.989434 |
| rad35         | 0.000200865 | 0.998914 | 0.00164918  | 0.991083 |
| Ph+MeAc       | 0.000197882 | 0.999112 | 0.00162470  | 0.992707 |
| rad50         | 0.000170940 | 0.999283 | 0.00140349  | 0.994111 |
| rad46         | 0.000166540 | 0.999450 | 0.00136737  | 0.995478 |
| rad39         | 0.000118806 | 0.999568 | 0.000975445 | 0.996454 |
| rad59         | 7.57691e-05 | 0.999644 | 0.000622096 | 0.997076 |
| rad51         | 6.22686e-05 | 0.999707 | 0.000511251 | 0.997587 |
| rad60syn      | 5.44510e-05 | 0.999761 | 0.000447066 | 0.998034 |
| PhCCCH3+H     | 5.15901e-05 | 0.999813 | 0.000423577 | 0.998458 |
| rad67         | 4.61782e-05 | 0.999859 | 0.000379142 | 0.998837 |
| rad60anti     | 3.79865e-05 | 0.999897 | 0.000311885 | 0.999149 |
| PAH10+CH3     | 1.71933e-05 | 0.999914 | 0.000141164 | 0.999290 |
| rad52         | 1.70844e-05 | 0.999931 | 0.000140270 | 0.999430 |
| rad19syn      | 1.63932e-05 | 0.999947 | 0.000134595 | 0.999565 |
| PhcycC3H3_A+H | 1.10275e-05 | 0.999958 | 9.05407e-05 | 0.999655 |
| rad58         | 1.00660e-05 | 0.999969 | 8.26458e-05 | 0.999738 |

|           |             |          |             |          |
|-----------|-------------|----------|-------------|----------|
| PAH1+H    | 5.96728e-06 | 0.999974 | 4.89939e-05 | 0.999787 |
| rad37     | 5.72356e-06 | 0.999980 | 4.69928e-05 | 0.999834 |
| rad54     | 5.39698e-06 | 0.999986 | 4.43115e-05 | 0.999878 |
| rad71     | 3.95691e-06 | 0.999990 | 3.24879e-05 | 0.999911 |
| rad70     | 3.69403e-06 | 0.999993 | 3.03296e-05 | 0.999941 |
| rad73     | 2.41459e-06 | 0.999996 | 1.98248e-05 | 0.999961 |
| rad65     | 1.68525e-06 | 0.999997 | 1.38367e-05 | 0.999975 |
| rad34     | 1.08371e-06 | 0.999998 | 8.89771e-06 | 0.999984 |
| rad55     | 4.74067e-07 | 0.999999 | 3.89229e-06 | 0.999988 |
| PAH8+H    | 3.91946e-07 | 0.999999 | 3.21804e-06 | 0.999991 |
| rad72     | 2.09318e-07 | 1.000000 | 1.71859e-06 | 0.999992 |
| rad56     | 1.86168e-07 | 1.000000 | 1.52852e-06 | 0.999994 |
| rad53     | 1.73183e-07 | 1.000000 | 1.42191e-06 | 0.999995 |
| rad64     | 1.33616e-07 | 1.000000 | 1.09704e-06 | 0.999997 |
| rad68syn  | 1.10265e-07 | 1.000000 | 9.05322e-07 | 0.999997 |
| rad62     | 9.48259e-08 | 1.000000 | 7.78561e-07 | 0.999998 |
| rad68anti | 7.08807e-08 | 1.000000 | 5.81961e-07 | 0.999999 |
| rad43     | 4.82400e-08 | 1.000000 | 3.96071e-07 | 0.999999 |
| rad61     | 4.62524e-08 | 1.000000 | 3.79752e-07 | 1.000000 |
| rad40syn  | 4.43238e-08 | 1.000000 | 3.63917e-07 | 1.000000 |
| rad40anti | 2.91751e-08 | 1.000000 | 2.39540e-07 | 1.000000 |
| rad42     | 1.00367e-08 | 1.000000 | 8.24055e-08 | 1.000000 |
| rad41     | 5.35211e-09 | 1.000000 | 4.39431e-08 | 1.000000 |
| rad6      | 1.25074e-13 | 1.000000 | 1.02691e-12 | 1.000000 |
| rad23     | 4.85212e-14 | 1.000000 | 3.98380e-13 | 1.000000 |
| rad45     | 6.43643e-15 | 1.000000 | 5.28458e-14 | 1.000000 |
| rad22     | 3.96293e-15 | 1.000000 | 3.25373e-14 | 1.000000 |
| rad9      | 3.52545e-15 | 1.000000 | 2.89454e-14 | 1.000000 |
| rad20     | 2.60557e-15 | 1.000000 | 2.13928e-14 | 1.000000 |
| rad11     | 1.62858e-15 | 1.000000 | 1.33713e-14 | 1.000000 |
| rad21     | 1.30011e-15 | 1.000000 | 1.06745e-14 | 1.000000 |
| rad36     | 1.15202e-15 | 1.000000 | 9.45854e-15 | 1.000000 |
| rad7      | 9.44221e-16 | 1.000000 | 7.75246e-15 | 1.000000 |
| rad18     | 6.17423e-16 | 1.000000 | 5.06931e-15 | 1.000000 |
| rad28     | 5.08049e-16 | 1.000000 | 4.17130e-15 | 1.000000 |
| rad15     | 2.11008e-16 | 1.000000 | 1.73247e-15 | 1.000000 |
| rad13     | 8.56538e-17 | 1.000000 | 7.03254e-16 | 1.000000 |
| rad24     | 5.70002e-17 | 1.000000 | 4.67996e-16 | 1.000000 |
| rad12     | 3.05352e-17 | 1.000000 | 2.50707e-16 | 1.000000 |
| rad26     | 2.25054e-17 | 1.000000 | 1.84779e-16 | 1.000000 |
| rad8      | 2.16858e-17 | 1.000000 | 1.78050e-16 | 1.000000 |
| rad10     | 7.20909e-18 | 1.000000 | 5.91897e-17 | 1.000000 |
| rad33     | 3.63728e-18 | 1.000000 | 2.98636e-17 | 1.000000 |
| rad25     | 2.84538e-18 | 1.000000 | 2.33618e-17 | 1.000000 |
| rad2      | 1.48538e-18 | 1.000000 | 1.21956e-17 | 1.000000 |
| rad47     | 1.41374e-18 | 1.000000 | 1.16074e-17 | 1.000000 |
| rad1      | 4.35915e-19 | 1.000000 | 3.57905e-18 | 1.000000 |
| rad3      | 3.18717e-19 | 1.000000 | 2.61681e-18 | 1.000000 |
| rad5      | 2.08792e-19 | 1.000000 | 1.71427e-18 | 1.000000 |
| rad4      | 2.03013e-19 | 1.000000 | 1.66682e-18 | 1.000000 |
| rad14     | 5.33284e-20 | 1.000000 | 4.37849e-19 | 1.000000 |
| rad27     | 1.32553e-20 | 1.000000 | 1.08832e-19 | 1.000000 |

0.100000000E-04 Pa, 2500.00000 K

| Rate constant | True (fraction)    | Effective (fraction) |
|---------------|--------------------|----------------------|
| Total         | 5.32896e-13 (1.00) | 6.40311e-14 (1.00)   |

| species     | PYtrue      | Cumul    | PYeffective | Cumul    |
|-------------|-------------|----------|-------------|----------|
| Benzyl+C2H2 | 0.879843    | 0.879843 | 0.00000     | 0.00000  |
| Indene+H    | 0.0541638   | 0.934007 | 0.450777    | 0.450777 |
| PhCH2CCH+H  | 0.0379681   | 0.971975 | 0.315989    | 0.766766 |
| Ph+Allene   | 0.0112444   | 0.983219 | 0.0935810   | 0.860347 |
| PhCHCCH2+H  | 0.00999485  | 0.993214 | 0.0831818   | 0.943529 |
| PAH3+H      | 0.00124356  | 0.994458 | 0.0103495   | 0.953878 |
| PAH9+H      | 0.00106545  | 0.995523 | 0.00886715  | 0.962745 |
| rad19anti   | 0.000731028 | 0.996254 | 0.00608396  | 0.968829 |
| rad38       | 0.000614393 | 0.996869 | 0.00511327  | 0.973943 |
| PAH7+H      | 0.000586817 | 0.997455 | 0.00488376  | 0.978826 |
| rad30       | 0.000442203 | 0.997898 | 0.00368022  | 0.982507 |
| PhCCH+CH3   | 0.000309130 | 0.998207 | 0.00257273  | 0.985079 |
| rad50       | 0.000261677 | 0.998468 | 0.00217780  | 0.987257 |
| Ph+MeAc     | 0.000256973 | 0.998725 | 0.00213865  | 0.989396 |
| rad35       | 0.000242192 | 0.998968 | 0.00201564  | 0.991411 |
| rad46       | 0.000207878 | 0.999175 | 0.00173006  | 0.993142 |
| rad39       | 0.000175772 | 0.999351 | 0.00146285  | 0.994604 |
| rad51       | 0.000109649 | 0.999461 | 0.000912547 | 0.995517 |
| rad59       | 0.000104825 | 0.999566 | 0.000872406 | 0.996389 |

|               |             |          |             |          |
|---------------|-------------|----------|-------------|----------|
| rad67         | 7.34547e-05 | 0.999639 | 0.000611325 | 0.997001 |
| PhCCCH3+H     | 7.22810e-05 | 0.999711 | 0.000601557 | 0.997602 |
| rad60syn      | 6.81857e-05 | 0.999780 | 0.000567474 | 0.998170 |
| rad60anti     | 4.82378e-05 | 0.999828 | 0.000401457 | 0.998571 |
| PAH10+CH3     | 3.08998e-05 | 0.999859 | 0.000257163 | 0.998828 |
| rad52         | 2.78077e-05 | 0.999887 | 0.000231429 | 0.999060 |
| rad19syn      | 2.34810e-05 | 0.999910 | 0.000195420 | 0.999255 |
| rad58         | 1.71635e-05 | 0.999927 | 0.000142842 | 0.999398 |
| PhcycC3H3_A+H | 1.49440e-05 | 0.999942 | 0.000124371 | 0.999522 |
| PAH1+H        | 1.13017e-05 | 0.999953 | 9.40581e-05 | 0.999616 |
| rad71         | 1.08628e-05 | 0.999964 | 9.04053e-05 | 0.999707 |
| rad37         | 8.12868e-06 | 0.999972 | 6.76507e-05 | 0.999774 |
| rad54         | 6.28002e-06 | 0.999979 | 5.22652e-05 | 0.999827 |
| rad70         | 5.97099e-06 | 0.999985 | 4.96933e-05 | 0.999876 |
| rad73         | 5.95726e-06 | 0.999991 | 4.95791e-05 | 0.999926 |
| rad65         | 2.87595e-06 | 0.999994 | 2.39350e-05 | 0.999950 |
| rad34         | 1.90624e-06 | 0.999995 | 1.58647e-05 | 0.999966 |
| PAH8+H        | 1.06524e-06 | 0.999997 | 8.86540e-06 | 0.999975 |
| rad72         | 7.14903e-07 | 0.999997 | 5.94976e-06 | 0.999981 |
| rad55         | 5.87553e-07 | 0.999998 | 4.88989e-06 | 0.999986 |
| rad56         | 3.21872e-07 | 0.999998 | 2.67877e-06 | 0.999988 |
| rad64         | 2.70859e-07 | 0.999998 | 2.25419e-06 | 0.999990 |
| rad53         | 2.70820e-07 | 0.999999 | 2.25389e-06 | 0.999993 |
| rad68syn      | 2.47504e-07 | 0.999999 | 2.05985e-06 | 0.999995 |
| rad68anti     | 1.58683e-07 | 0.999999 | 1.32064e-06 | 0.999996 |
| rad62         | 1.55148e-07 | 0.999999 | 1.29122e-06 | 0.999997 |
| rad40syn      | 1.10734e-07 | 0.999999 | 9.21579e-07 | 0.999998 |
| rad61         | 1.05680e-07 | 0.999999 | 8.79519e-07 | 0.999999 |
| rad43         | 8.79692e-08 | 1.000000 | 7.32121e-07 | 1.000000 |
| rad40anti     | 7.53435e-08 | 1.000000 | 6.27044e-07 | 1.000000 |
| rad42         | 1.97239e-08 | 1.000000 | 1.64152e-07 | 1.000000 |
| rad41         | 1.13877e-08 | 1.000000 | 9.47734e-08 | 1.000000 |
| rad6          | 2.26488e-14 | 1.000000 | 1.88494e-13 | 1.000000 |
| rad23         | 1.48432e-14 | 1.000000 | 1.23532e-13 | 1.000000 |
| rad45         | 2.79885e-15 | 1.000000 | 2.32933e-14 | 1.000000 |
| rad9          | 1.87439e-15 | 1.000000 | 1.55995e-14 | 1.000000 |
| rad20         | 1.43940e-15 | 1.000000 | 1.19794e-14 | 1.000000 |
| rad22         | 1.35210e-15 | 1.000000 | 1.12529e-14 | 1.000000 |
| rad21         | 6.94971e-16 | 1.000000 | 5.78387e-15 | 1.000000 |
| rad11         | 6.25795e-16 | 1.000000 | 5.20816e-15 | 1.000000 |
| rad36         | 5.10731e-16 | 1.000000 | 4.25054e-15 | 1.000000 |
| rad18         | 2.77736e-16 | 1.000000 | 2.31145e-15 | 1.000000 |
| rad7          | 2.64648e-16 | 1.000000 | 2.20252e-15 | 1.000000 |
| rad15         | 1.25435e-16 | 1.000000 | 1.04393e-15 | 1.000000 |
| rad28         | 1.20848e-16 | 1.000000 | 1.00575e-15 | 1.000000 |
| rad24         | 3.60418e-17 | 1.000000 | 2.99957e-16 | 1.000000 |
| rad13         | 2.74548e-17 | 1.000000 | 2.28492e-16 | 1.000000 |
| rad12         | 2.40046e-17 | 1.000000 | 1.99778e-16 | 1.000000 |
| rad8          | 2.25267e-17 | 1.000000 | 1.87478e-16 | 1.000000 |
| rad26         | 1.25006e-17 | 1.000000 | 1.04036e-16 | 1.000000 |
| rad10         | 4.03271e-18 | 1.000000 | 3.35621e-17 | 1.000000 |
| rad47         | 2.44566e-18 | 1.000000 | 2.03539e-17 | 1.000000 |
| rad25         | 1.71221e-18 | 1.000000 | 1.42498e-17 | 1.000000 |
| rad33         | 1.46760e-18 | 1.000000 | 1.22141e-17 | 1.000000 |
| rad2          | 4.56383e-19 | 1.000000 | 3.79824e-18 | 1.000000 |
| rad5          | 2.16558e-19 | 1.000000 | 1.80229e-18 | 1.000000 |
| rad1          | 1.54898e-19 | 1.000000 | 1.28914e-18 | 1.000000 |
| rad3          | 8.70980e-20 | 1.000000 | 7.24871e-19 | 1.000000 |
| rad4          | 5.46543e-20 | 1.000000 | 4.54859e-19 | 1.000000 |
| rad14         | 2.68051e-20 | 1.000000 | 2.23085e-19 | 1.000000 |
| rad27         | 1.07389e-20 | 1.000000 | 8.93744e-20 | 1.000000 |

0.100000000E-04 Pa, 2750.00000 K

=====

| Rate constant | True (fraction)     | Effective (fraction) |
|---------------|---------------------|----------------------|
| Total         | 8.05113e-13 (1.00 ) | 1.00487e-13 (1.00 )  |

| species     | PYtrue      | Cumul    | PYeffective | Cumul    |
|-------------|-------------|----------|-------------|----------|
| Benzyl+C2H2 | 0.875189    | 0.875189 | 0.00000     | 0.00000  |
| PhCH2CCH+H  | 0.0492371   | 0.924426 | 0.394492    | 0.394492 |
| Indene+H    | 0.0427171   | 0.967143 | 0.342254    | 0.736746 |
| PhCHCCH2+H  | 0.0126523   | 0.979795 | 0.101371    | 0.838117 |
| Ph+Allene   | 0.0121360   | 0.991931 | 0.0972347   | 0.935352 |
| PAH3+H      | 0.00165412  | 0.993586 | 0.0132530   | 0.948605 |
| PAH9+H      | 0.00112924  | 0.994715 | 0.00904761  | 0.957652 |
| rad19anti   | 0.000790044 | 0.995505 | 0.00632991  | 0.963982 |
| PAH7+H      | 0.000729333 | 0.996234 | 0.00584349  | 0.969826 |
| rad38       | 0.000670521 | 0.996905 | 0.00537228  | 0.975198 |

|               |             |          |             |          |
|---------------|-------------|----------|-------------|----------|
| rad30         | 0.000454283 | 0.997359 | 0.00363976  | 0.978838 |
| rad50         | 0.000356822 | 0.997716 | 0.00285889  | 0.981697 |
| Ph+MeAc       | 0.000331297 | 0.998047 | 0.00265438  | 0.984351 |
| PhCCH+CH3     | 0.000293338 | 0.998340 | 0.00235025  | 0.986701 |
| rad35         | 0.000276886 | 0.998617 | 0.00221844  | 0.988920 |
| rad39         | 0.000242689 | 0.998860 | 0.00194445  | 0.990864 |
| rad46         | 0.000239377 | 0.999099 | 0.00191791  | 0.992782 |
| rad51         | 0.000167552 | 0.999267 | 0.00134245  | 0.994125 |
| rad59         | 0.000133898 | 0.999401 | 0.00107280  | 0.995197 |
| rad67         | 0.000103303 | 0.999504 | 0.000827674 | 0.996025 |
| PhCCCH3+H     | 9.47597e-05 | 0.999599 | 0.000759224 | 0.996784 |
| rad60syn      | 8.03400e-05 | 0.999679 | 0.000643692 | 0.997428 |
| rad60anti     | 5.74980e-05 | 0.999737 | 0.000460680 | 0.997889 |
| PAH10+CH3     | 4.75540e-05 | 0.999784 | 0.000381007 | 0.998270 |
| rad52         | 3.97965e-05 | 0.999824 | 0.000318854 | 0.998588 |
| rad19syn      | 3.43481e-05 | 0.999858 | 0.000275200 | 0.998864 |
| rad58         | 2.60271e-05 | 0.999885 | 0.000208532 | 0.999072 |
| rad71         | 2.39120e-05 | 0.999908 | 0.000191585 | 0.999264 |
| PhcycC3H3_A+H | 1.91124e-05 | 0.999928 | 0.000153131 | 0.999417 |
| PAH1+H        | 1.89313e-05 | 0.999946 | 0.000151679 | 0.999569 |
| rad73         | 1.19963e-05 | 0.999958 | 9.61159e-05 | 0.999665 |
| rad37         | 1.02458e-05 | 0.999969 | 8.20902e-05 | 0.999747 |
| rad70         | 8.97456e-06 | 0.999978 | 7.19051e-05 | 0.999819 |
| rad54         | 7.04852e-06 | 0.999985 | 5.64734e-05 | 0.999875 |
| rad65         | 4.27356e-06 | 0.999989 | 3.42402e-05 | 0.999909 |
| rad34         | 3.06724e-06 | 0.999992 | 2.45750e-05 | 0.999934 |
| PAH8+H        | 2.42508e-06 | 0.999995 | 1.94299e-05 | 0.999953 |
| rad72         | 1.88022e-06 | 0.999996 | 1.50645e-05 | 0.999968 |
| rad55         | 6.94535e-07 | 0.999997 | 5.56468e-06 | 0.999974 |
| rad56         | 5.00306e-07 | 0.999998 | 4.00850e-06 | 0.999978 |
| rad68syn      | 4.83458e-07 | 0.999998 | 3.87351e-06 | 0.999982 |
| rad64         | 4.76899e-07 | 0.999999 | 3.82096e-06 | 0.999986 |
| rad53         | 3.88200e-07 | 0.999999 | 3.11030e-06 | 0.999989 |
| rad68anti     | 3.09361e-07 | 0.999999 | 2.47863e-06 | 0.999991 |
| rad62         | 2.47711e-07 | 0.999999 | 1.98468e-06 | 0.999993 |
| rad40syn      | 2.35491e-07 | 1.000000 | 1.88678e-06 | 0.999995 |
| rad61         | 1.98411e-07 | 1.000000 | 1.58969e-06 | 0.999997 |
| rad40anti     | 1.64464e-07 | 1.000000 | 1.31770e-06 | 0.999998 |
| rad43         | 1.38326e-07 | 1.000000 | 1.10828e-06 | 0.999999 |
| rad42         | 3.59374e-08 | 1.000000 | 2.87934e-07 | 1.000000 |
| rad41         | 2.03340e-08 | 1.000000 | 1.62918e-07 | 1.000000 |
| rad23         | 5.45461e-15 | 1.000000 | 4.37028e-14 | 1.000000 |
| rad6          | 5.33890e-15 | 1.000000 | 4.27758e-14 | 1.000000 |
| rad45         | 1.33227e-15 | 1.000000 | 1.06743e-14 | 1.000000 |
| rad9          | 1.02473e-15 | 1.000000 | 8.21027e-15 | 1.000000 |
| rad20         | 8.68783e-16 | 1.000000 | 6.96078e-15 | 1.000000 |
| rad22         | 5.53936e-16 | 1.000000 | 4.43819e-15 | 1.000000 |
| rad21         | 4.05053e-16 | 1.000000 | 3.24532e-15 | 1.000000 |
| rad11         | 2.91950e-16 | 1.000000 | 2.33913e-15 | 1.000000 |
| rad36         | 2.46981e-16 | 1.000000 | 1.97883e-15 | 1.000000 |
| rad18         | 1.40097e-16 | 1.000000 | 1.12247e-15 | 1.000000 |
| rad7          | 8.87372e-17 | 1.000000 | 7.10971e-16 | 1.000000 |
| rad15         | 7.56500e-17 | 1.000000 | 6.06115e-16 | 1.000000 |
| rad28         | 4.36118e-17 | 1.000000 | 3.49422e-16 | 1.000000 |
| rad24         | 2.36701e-17 | 1.000000 | 1.89647e-16 | 1.000000 |
| rad8          | 2.27048e-17 | 1.000000 | 1.81913e-16 | 1.000000 |
| rad12         | 1.84640e-17 | 1.000000 | 1.47935e-16 | 1.000000 |
| rad13         | 1.02992e-17 | 1.000000 | 8.25179e-17 | 1.000000 |
| rad26         | 7.74918e-18 | 1.000000 | 6.20872e-17 | 1.000000 |
| rad47         | 3.65965e-18 | 1.000000 | 2.93215e-17 | 1.000000 |
| rad10         | 2.66230e-18 | 1.000000 | 2.13306e-17 | 1.000000 |
| rad25         | 1.16293e-18 | 1.000000 | 9.31748e-18 | 1.000000 |
| rad33         | 6.71473e-19 | 1.000000 | 5.37991e-18 | 1.000000 |
| rad2          | 2.32645e-19 | 1.000000 | 1.86397e-18 | 1.000000 |
| rad5          | 2.15598e-19 | 1.000000 | 1.72739e-18 | 1.000000 |
| rad1          | 9.07949e-20 | 1.000000 | 7.27457e-19 | 1.000000 |
| rad3          | 2.95594e-20 | 1.000000 | 2.36833e-19 | 1.000000 |
| rad4          | 1.80904e-20 | 1.000000 | 1.44942e-19 | 1.000000 |
| rad14         | 1.77542e-20 | 1.000000 | 1.42248e-19 | 1.000000 |
| rad27         | 9.32033e-21 | 1.000000 | 7.46754e-20 | 1.000000 |

0.100000000E-04 Pa, 3000.00000 K

| =====         |                 |          |                      |         |
|---------------|-----------------|----------|----------------------|---------|
| Rate constant | True (fraction) |          | Effective (fraction) |         |
| -----         |                 |          |                      |         |
| Total         | 1.15309e-12     | (1.00 )  | 1.53862e-13          | (1.00 ) |
| species       | PYtrue          | Cumul    | PYeffective          | Cumul   |
| -----         |                 |          |                      |         |
| Benzyl+C2H2   | 0.866566        | 0.866566 | 0.00000              | 0.00000 |

|               |             |          |             |          |
|---------------|-------------|----------|-------------|----------|
| PhCH2CCH+H    | 0.0611725   | 0.927738 | 0.458447    | 0.458447 |
| Indene+H      | 0.0342672   | 0.962006 | 0.256810    | 0.715257 |
| PhCHCCH2+H    | 0.0154790   | 0.977485 | 0.116005    | 0.831262 |
| Ph+Allene     | 0.0132660   | 0.990751 | 0.0994201   | 0.930682 |
| PAH3+H        | 0.00205938  | 0.992810 | 0.0154337   | 0.946116 |
| PAH9+H        | 0.00113813  | 0.993948 | 0.00852950  | 0.954645 |
| PAH7+H        | 0.000866135 | 0.994814 | 0.00649110  | 0.961136 |
| rad19anti     | 0.000812999 | 0.995627 | 0.00609288  | 0.967229 |
| rad38         | 0.000693215 | 0.996321 | 0.00519518  | 0.972424 |
| rad30         | 0.000455427 | 0.996776 | 0.00341312  | 0.975838 |
| rad50         | 0.000445147 | 0.997221 | 0.00333608  | 0.979174 |
| Ph+MeAc       | 0.000411378 | 0.997633 | 0.00308300  | 0.982257 |
| PhCCH+CH3     | 0.000319072 | 0.997952 | 0.00239123  | 0.984648 |
| rad39         | 0.000311351 | 0.998263 | 0.00233337  | 0.986981 |
| rad35         | 0.000303822 | 0.998567 | 0.00227694  | 0.989258 |
| rad46         | 0.000258929 | 0.998826 | 0.00194050  | 0.991199 |
| rad51         | 0.000229661 | 0.999055 | 0.00172116  | 0.992920 |
| rad59         | 0.000160966 | 0.999216 | 0.00120633  | 0.994126 |
| rad67         | 0.000132859 | 0.999349 | 0.000995686 | 0.995122 |
| PhCCCH3+H     | 0.000117527 | 0.999467 | 0.000880786 | 0.996003 |
| rad60syn      | 9.03378e-05 | 0.999557 | 0.000677021 | 0.996680 |
| PAH10+CH3     | 6.53522e-05 | 0.999622 | 0.000489771 | 0.997169 |
| rad60anti     | 6.52879e-05 | 0.999688 | 0.000489289 | 0.997659 |
| rad52         | 5.15998e-05 | 0.999739 | 0.000386706 | 0.998045 |
| rad19syn      | 5.01057e-05 | 0.999789 | 0.000375508 | 0.998421 |
| rad71         | 4.45158e-05 | 0.999834 | 0.000333616 | 0.998755 |
| rad58         | 3.61220e-05 | 0.999870 | 0.000270710 | 0.999025 |
| PAH1+H        | 2.86271e-05 | 0.999899 | 0.000214541 | 0.999240 |
| PhcycC3H3_A+H | 2.34369e-05 | 0.999922 | 0.000175644 | 0.999415 |
| rad73         | 2.07080e-05 | 0.999943 | 0.000155192 | 0.999571 |
| rad70         | 1.26564e-05 | 0.999955 | 9.48509e-05 | 0.999666 |
| rad37         | 1.18404e-05 | 0.999967 | 8.87361e-05 | 0.999754 |
| rad54         | 7.74183e-06 | 0.999975 | 5.80198e-05 | 0.999812 |
| rad65         | 5.71876e-06 | 0.999981 | 4.28583e-05 | 0.999855 |
| PAH8+H        | 4.80152e-06 | 0.999986 | 3.59842e-05 | 0.999891 |
| rad34         | 4.57469e-06 | 0.999990 | 3.42843e-05 | 0.999925 |
| rad72         | 4.05904e-06 | 0.999994 | 3.04198e-05 | 0.999956 |
| rad68syn      | 8.44302e-07 | 0.999995 | 6.32747e-06 | 0.999962 |
| rad55         | 7.96394e-07 | 0.999996 | 5.96844e-06 | 0.999968 |
| rad64         | 7.49015e-07 | 0.999997 | 5.61336e-06 | 0.999974 |
| rad56         | 7.20451e-07 | 0.999997 | 5.39929e-06 | 0.999979 |
| rad68anti     | 5.39463e-07 | 0.999998 | 4.04291e-06 | 0.999983 |
| rad53         | 5.23143e-07 | 0.999998 | 3.92061e-06 | 0.999987 |
| rad40syn      | 4.40707e-07 | 0.999999 | 3.30280e-06 | 0.999990 |
| rad62         | 3.72784e-07 | 0.999999 | 2.79376e-06 | 0.999993 |
| rad61         | 3.22478e-07 | 0.999999 | 2.41676e-06 | 0.999996 |
| rad40anti     | 3.14359e-07 | 1.000000 | 2.35591e-06 | 0.999998 |
| rad43         | 1.94896e-07 | 1.000000 | 1.46061e-06 | 0.999999 |
| rad42         | 5.98145e-08 | 1.000000 | 4.48269e-07 | 1.000000 |
| rad41         | 3.19484e-08 | 1.000000 | 2.39432e-07 | 1.000000 |
| rad23         | 2.25673e-15 | 1.000000 | 1.69127e-14 | 1.000000 |
| rad6          | 1.54307e-15 | 1.000000 | 1.15643e-14 | 1.000000 |
| rad45         | 6.79823e-16 | 1.000000 | 5.09481e-15 | 1.000000 |
| rad9          | 5.78134e-16 | 1.000000 | 4.33273e-15 | 1.000000 |
| rad20         | 5.61879e-16 | 1.000000 | 4.21090e-15 | 1.000000 |
| rad22         | 2.56775e-16 | 1.000000 | 1.92436e-15 | 1.000000 |
| rad21         | 2.52565e-16 | 1.000000 | 1.89281e-15 | 1.000000 |
| rad11         | 1.59313e-16 | 1.000000 | 1.19394e-15 | 1.000000 |
| rad36         | 1.27648e-16 | 1.000000 | 9.56638e-16 | 1.000000 |
| rad18         | 7.69597e-17 | 1.000000 | 5.76761e-16 | 1.000000 |
| rad15         | 4.64724e-17 | 1.000000 | 3.48279e-16 | 1.000000 |
| rad7          | 3.48741e-17 | 1.000000 | 2.61358e-16 | 1.000000 |
| rad8          | 2.23533e-17 | 1.000000 | 1.67523e-16 | 1.000000 |
| rad28         | 2.05652e-17 | 1.000000 | 1.54122e-16 | 1.000000 |
| rad24         | 1.60028e-17 | 1.000000 | 1.19931e-16 | 1.000000 |
| rad12         | 1.40784e-17 | 1.000000 | 1.05508e-16 | 1.000000 |
| rad26         | 4.93205e-18 | 1.000000 | 3.69624e-17 | 1.000000 |
| rad47         | 4.90428e-18 | 1.000000 | 3.67543e-17 | 1.000000 |
| rad13         | 4.47287e-18 | 1.000000 | 3.35211e-17 | 1.000000 |
| rad10         | 1.80885e-18 | 1.000000 | 1.35561e-17 | 1.000000 |
| rad25         | 8.60189e-19 | 1.000000 | 6.44654e-18 | 1.000000 |
| rad33         | 3.44368e-19 | 1.000000 | 2.58081e-18 | 1.000000 |
| rad5          | 2.09261e-19 | 1.000000 | 1.56827e-18 | 1.000000 |
| rad2          | 1.42914e-19 | 1.000000 | 1.07104e-18 | 1.000000 |
| rad1          | 6.31232e-20 | 1.000000 | 4.73066e-19 | 1.000000 |
| rad14         | 1.40237e-20 | 1.000000 | 1.05098e-19 | 1.000000 |
| rad3          | 1.21880e-20 | 1.000000 | 9.13405e-20 | 1.000000 |
| rad27         | 8.01837e-21 | 1.000000 | 6.00923e-20 | 1.000000 |
| rad4          | 7.24035e-21 | 1.000000 | 5.42616e-20 | 1.000000 |



0.100000000E-04 Pa, 3250.00000 K

| =====         |                     |          |                      |          |
|---------------|---------------------|----------|----------------------|----------|
| Rate constant | True (fraction)     |          | Effective (fraction) |          |
| -----         |                     |          |                      |          |
| Total         | 1.58309e-12 (1.00 ) |          | 2.28795e-13 (1.00 )  |          |
| species       | PYtrue              | Cumul    | PYeffective          | Cumul    |
| -----         |                     |          |                      |          |
| Benzyl+C2H2   | 0.855476            | 0.855476 | 0.00000              | 0.00000  |
| PhCH2CCH+H    | 0.0734301           | 0.928906 | 0.508082             | 0.508082 |
| Indene+H      | 0.0278643           | 0.956770 | 0.192800             | 0.700882 |
| PhCHCCH2+H    | 0.0183610           | 0.975131 | 0.127045             | 0.827927 |
| Ph+Allene     | 0.0145940           | 0.989725 | 0.100980             | 0.928907 |
| PAH3+H        | 0.00243645          | 0.992162 | 0.0168585            | 0.945765 |
| PAH9+H        | 0.00110339          | 0.993265 | 0.00763468           | 0.953400 |
| PAH7+H        | 0.000986571         | 0.994252 | 0.00682634           | 0.960227 |
| rad19anti     | 0.000808911         | 0.995061 | 0.00559707           | 0.965824 |
| rad38         | 0.000686670         | 0.995747 | 0.00475125           | 0.970575 |
| rad50         | 0.000518179         | 0.996266 | 0.00358542           | 0.974160 |
| Ph+MeAc       | 0.000489465         | 0.996755 | 0.00338674           | 0.977547 |
| rad30         | 0.000447972         | 0.997203 | 0.00309964           | 0.980647 |
| PhCCH+CH3     | 0.000378211         | 0.997581 | 0.00261694           | 0.983264 |
| rad39         | 0.000374434         | 0.997956 | 0.00259081           | 0.985854 |
| rad35         | 0.000323023         | 0.998279 | 0.00223508           | 0.988089 |
| rad51         | 0.000289245         | 0.998568 | 0.00200136           | 0.990091 |
| rad46         | 0.000266714         | 0.998835 | 0.00184546           | 0.991936 |
| rad59         | 0.000184695         | 0.999019 | 0.00127795           | 0.993214 |
| rad67         | 0.000159865         | 0.999179 | 0.00110614           | 0.994320 |
| PhCCCH3+H     | 0.000140367         | 0.999320 | 0.000971235          | 0.995292 |
| rad60syn      | 9.79791e-05         | 0.999418 | 0.000677943          | 0.995959 |
| PAH10+CH3     | 8.26142e-05         | 0.999500 | 0.000571630          | 0.996541 |
| rad71         | 7.28074e-05         | 0.999573 | 0.000503773          | 0.997045 |
| rad60anti     | 7.14060e-05         | 0.999644 | 0.000494077          | 0.997539 |
| rad19syn      | 7.13406e-05         | 0.999716 | 0.000493624          | 0.998033 |
| rad52         | 6.19533e-05         | 0.999778 | 0.000428671          | 0.998461 |
| rad58         | 4.68388e-05         | 0.999825 | 0.000324090          | 0.998785 |
| PAH1+H        | 3.98744e-05         | 0.999864 | 0.000275902          | 0.999061 |
| rad73         | 3.17350e-05         | 0.999896 | 0.000219583          | 0.999281 |
| PhcycC3H3_A+H | 2.77967e-05         | 0.999924 | 0.000192333          | 0.999473 |
| rad70         | 1.68825e-05         | 0.999941 | 0.000116814          | 0.999590 |
| rad37         | 1.28499e-05         | 0.999954 | 8.89115e-05          | 0.999679 |
| PAH8+H        | 8.50457e-06         | 0.999962 | 5.88453e-05          | 0.999738 |
| rad54         | 8.38235e-06         | 0.999971 | 5.79997e-05          | 0.999796 |
| rad72         | 7.52648e-06         | 0.999978 | 5.20777e-05          | 0.999848 |
| rad65         | 7.06074e-06         | 0.999985 | 4.88551e-05          | 0.999897 |
| rad34         | 6.39568e-06         | 0.999992 | 4.42534e-05          | 0.999941 |
| rad68syn      | 1.34606e-06         | 0.999993 | 9.31375e-06          | 0.999950 |
| rad64         | 1.07438e-06         | 0.999994 | 7.43389e-06          | 0.999958 |
| rad56         | 9.79690e-07         | 0.999995 | 6.77873e-06          | 0.999965 |
| rad55         | 8.93999e-07         | 0.999996 | 6.18581e-06          | 0.999971 |
| rad68anti     | 8.59058e-07         | 0.999997 | 5.94405e-06          | 0.999977 |
| rad40syn      | 7.44327e-07         | 0.999997 | 5.15020e-06          | 0.999982 |
| rad53         | 6.73265e-07         | 0.999998 | 4.65850e-06          | 0.999986 |
| rad40anti     | 5.40357e-07         | 0.999999 | 3.73887e-06          | 0.999990 |
| rad62         | 5.25220e-07         | 0.999999 | 3.63414e-06          | 0.999994 |
| rad61         | 4.70536e-07         | 1.000000 | 3.25576e-06          | 0.999997 |
| rad43         | 2.53715e-07         | 1.000000 | 1.75552e-06          | 0.999999 |
| rad42         | 9.14458e-08         | 1.000000 | 6.32737e-07          | 0.999999 |
| rad41         | 4.57450e-08         | 1.000000 | 3.16522e-07          | 1.000000 |
| rad23         | 1.01591e-15         | 1.000000 | 7.02933e-15          | 1.000000 |
| rad6          | 5.32506e-16         | 1.000000 | 3.68455e-15          | 1.000000 |
| rad20         | 3.83869e-16         | 1.000000 | 2.65609e-15          | 1.000000 |
| rad45         | 3.66278e-16         | 1.000000 | 2.53437e-15          | 1.000000 |
| rad9          | 3.37288e-16         | 1.000000 | 2.33379e-15          | 1.000000 |
| rad21         | 1.66173e-16         | 1.000000 | 1.14980e-15          | 1.000000 |
| rad22         | 1.30771e-16         | 1.000000 | 9.04838e-16          | 1.000000 |
| rad11         | 9.80859e-17         | 1.000000 | 6.78682e-16          | 1.000000 |
| rad36         | 6.94804e-17         | 1.000000 | 4.80753e-16          | 1.000000 |
| rad18         | 4.51591e-17         | 1.000000 | 3.12467e-16          | 1.000000 |
| rad15         | 2.91826e-17         | 1.000000 | 2.01922e-16          | 1.000000 |
| rad8          | 2.15817e-17         | 1.000000 | 1.49330e-16          | 1.000000 |
| rad7          | 1.57411e-17         | 1.000000 | 1.08917e-16          | 1.000000 |
| rad28         | 1.13099e-17         | 1.000000 | 7.82561e-17          | 1.000000 |
| rad24         | 1.10778e-17         | 1.000000 | 7.66503e-17          | 1.000000 |
| rad12         | 1.07284e-17         | 1.000000 | 7.42324e-17          | 1.000000 |
| rad47         | 6.03541e-18         | 1.000000 | 4.17606e-17          | 1.000000 |
| rad26         | 3.17920e-18         | 1.000000 | 2.19977e-17          | 1.000000 |
| rad13         | 2.21089e-18         | 1.000000 | 1.52977e-17          | 1.000000 |
| rad10         | 1.23664e-18         | 1.000000 | 8.55664e-18          | 1.000000 |
| rad25         | 6.72544e-19         | 1.000000 | 4.65351e-18          | 1.000000 |

|       |             |         |             |          |
|-------|-------------|---------|-------------|----------|
| rad5  | 2.00894e-19 | 1.00000 | 1.39004e-18 | 1.000000 |
| rad33 | 1.94932e-19 | 1.00000 | 1.34878e-18 | 1.000000 |
| rad2  | 9.37040e-20 | 1.00000 | 6.48362e-19 | 1.000000 |
| rad1  | 4.62815e-20 | 1.00000 | 3.20234e-19 | 1.000000 |
| rad14 | 1.20218e-20 | 1.00000 | 8.31820e-20 | 1.000000 |
| rad27 | 6.78839e-21 | 1.00000 | 4.69707e-20 | 1.000000 |
| rad3  | 5.91479e-21 | 1.00000 | 4.09260e-20 | 1.000000 |
| rad4  | 3.41722e-21 | 1.00000 | 2.36446e-20 | 1.000000 |

0.100000000E-04 Pa, 3500.00000 K

| Rate constant | True (fraction)     | Effective (fraction) |
|---------------|---------------------|----------------------|
| Total         | 2.10046e-12 (1.00 ) | 3.29923e-13 (1.00 )  |

| species       | PYtrue      | Cumul    | PYeffective | Cumul    |
|---------------|-------------|----------|-------------|----------|
| Benzyl+C2H2   | 0.842928    | 0.842928 | 0.00000     | 0.00000  |
| PhCH2CCH+H    | 0.0857241   | 0.928652 | 0.545762    | 0.545762 |
| Indene+H      | 0.0229287   | 0.951581 | 0.145976    | 0.691738 |
| PhCHCCH2+H    | 0.0212218   | 0.972803 | 0.135108    | 0.826846 |
| Ph+Allene     | 0.0160719   | 0.988874 | 0.102322    | 0.929168 |
| PAH3+H        | 0.00277080  | 0.991645 | 0.0176403   | 0.946808 |
| PAH7+H        | 0.00108547  | 0.992731 | 0.00691065  | 0.953719 |
| PAH9+H        | 0.00103824  | 0.993769 | 0.00660998  | 0.960329 |
| rad19anti     | 0.000786012 | 0.994555 | 0.00500415  | 0.965333 |
| rad38         | 0.000657575 | 0.995213 | 0.00418645  | 0.969520 |
| rad50         | 0.000571322 | 0.995784 | 0.00363732  | 0.973157 |
| Ph+MeAc       | 0.000559758 | 0.996344 | 0.00356370  | 0.976721 |
| PhCCH+CH3     | 0.000466753 | 0.996810 | 0.00297158  | 0.979692 |
| rad30         | 0.000434295 | 0.997245 | 0.00276494  | 0.982457 |
| rad39         | 0.000426787 | 0.997672 | 0.00271714  | 0.985174 |
| rad51         | 0.000340822 | 0.998012 | 0.00216985  | 0.987344 |
| rad35         | 0.000335221 | 0.998348 | 0.00213419  | 0.989478 |
| rad46         | 0.000264413 | 0.998612 | 0.00168339  | 0.991162 |
| rad59         | 0.000204435 | 0.998816 | 0.00130154  | 0.992463 |
| rad67         | 0.000182834 | 0.998999 | 0.00116401  | 0.993627 |
| PhCCCH3+H     | 0.000163685 | 0.999163 | 0.00104210  | 0.994669 |
| rad71         | 0.000107601 | 0.999271 | 0.000685042 | 0.995354 |
| rad60syn      | 0.000103349 | 0.999374 | 0.000657969 | 0.996012 |
| PAH10+CH3     | 9.81181e-05 | 0.999472 | 0.000624669 | 0.996637 |
| rad19syn      | 9.79725e-05 | 0.999570 | 0.000623742 | 0.997261 |
| rad60anti     | 7.58697e-05 | 0.999646 | 0.000483025 | 0.997744 |
| rad52         | 7.00217e-05 | 0.999716 | 0.000445793 | 0.998190 |
| rad58         | 5.76196e-05 | 0.999773 | 0.000366835 | 0.998556 |
| PAH1+H        | 5.20523e-05 | 0.999826 | 0.000331391 | 0.998888 |
| rad73         | 4.43107e-05 | 0.999870 | 0.000282104 | 0.999170 |
| PhcycC3H3_A+H | 3.20633e-05 | 0.999902 | 0.000204131 | 0.999374 |
| rad70         | 2.14708e-05 | 0.999923 | 0.000136694 | 0.999511 |
| PAH8+H        | 1.37725e-05 | 0.999937 | 8.76827e-05 | 0.999598 |
| rad37         | 1.33235e-05 | 0.999950 | 8.48243e-05 | 0.999683 |
| rad72         | 1.23923e-05 | 0.999963 | 7.88958e-05 | 0.999762 |
| rad54         | 8.98058e-06 | 0.999972 | 5.71749e-05 | 0.999819 |
| rad34         | 8.46717e-06 | 0.999980 | 5.39063e-05 | 0.999873 |
| rad65         | 8.19015e-06 | 0.999988 | 5.21426e-05 | 0.999925 |
| rad68syn      | 1.99232e-06 | 0.999990 | 1.26841e-05 | 0.999938 |
| rad64         | 1.43496e-06 | 0.999992 | 9.13568e-06 | 0.999947 |
| rad56         | 1.27412e-06 | 0.999993 | 8.11171e-06 | 0.999955 |
| rad68anti     | 1.27030e-06 | 0.999994 | 8.08736e-06 | 0.999963 |
| rad40syn      | 1.15716e-06 | 0.999996 | 7.36708e-06 | 0.999971 |
| rad55         | 9.87613e-07 | 0.999997 | 6.28764e-06 | 0.999977 |
| rad40anti     | 8.52741e-07 | 0.999997 | 5.42898e-06 | 0.999982 |
| rad53         | 8.35966e-07 | 0.999998 | 5.32218e-06 | 0.999988 |
| rad62         | 6.97360e-07 | 0.999999 | 4.43975e-06 | 0.999992 |
| rad61         | 6.32568e-07 | 1.000000 | 4.02725e-06 | 0.999996 |
| rad43         | 3.12012e-07 | 1.000000 | 1.98643e-06 | 0.999998 |
| rad42         | 1.30122e-07 | 1.000000 | 8.28424e-07 | 0.999999 |
| rad41         | 6.11800e-08 | 1.000000 | 3.89503e-07 | 0.999999 |
| rad23         | 4.88742e-16 | 1.000000 | 3.11158e-15 | 0.999999 |
| rad20         | 2.74120e-16 | 1.000000 | 1.74519e-15 | 0.999999 |
| rad6          | 2.14822e-16 | 1.000000 | 1.36766e-15 | 0.999999 |
| rad45         | 2.06148e-16 | 1.000000 | 1.31244e-15 | 0.999999 |
| rad9          | 2.03548e-16 | 1.000000 | 1.29589e-15 | 0.999999 |
| rad21         | 1.14208e-16 | 1.000000 | 7.27102e-16 | 0.999999 |
| rad22         | 7.18444e-17 | 1.000000 | 4.57398e-16 | 0.999999 |
| rad11         | 6.60782e-17 | 1.000000 | 4.20687e-16 | 0.999999 |
| rad36         | 3.94179e-17 | 1.000000 | 2.50954e-16 | 0.999999 |
| rad18         | 2.79268e-17 | 1.000000 | 1.77796e-16 | 0.999999 |
| rad8          | 2.04865e-17 | 1.000000 | 1.30427e-16 | 0.999999 |
| rad15         | 1.87615e-17 | 1.000000 | 1.19445e-16 | 0.999999 |

|       |             |         |             |          |
|-------|-------------|---------|-------------|----------|
| rad12 | 8.20876e-18 | 1.00000 | 5.22611e-17 | 0.999999 |
| rad7  | 7.97863e-18 | 1.00000 | 5.07959e-17 | 0.999999 |
| rad24 | 7.82702e-18 | 1.00000 | 4.98307e-17 | 0.999999 |
| rad47 | 6.94994e-18 | 1.00000 | 4.42468e-17 | 0.999999 |
| rad28 | 6.78959e-18 | 1.00000 | 4.32259e-17 | 0.999999 |
| rad26 | 2.07582e-18 | 1.00000 | 1.32157e-17 | 0.999999 |
| rad13 | 1.21832e-18 | 1.00000 | 7.75641e-18 | 0.999999 |
| rad10 | 8.52080e-19 | 1.00000 | 5.42477e-18 | 0.999999 |
| rad25 | 5.44463e-19 | 1.00000 | 3.46632e-18 | 0.999999 |
| rad5  | 1.92302e-19 | 1.00000 | 1.22429e-18 | 0.999999 |
| rad33 | 1.19819e-19 | 1.00000 | 7.62829e-19 | 0.999999 |
| rad2  | 6.40730e-20 | 1.00000 | 4.07921e-19 | 0.999999 |
| rad1  | 3.47229e-20 | 1.00000 | 2.21064e-19 | 0.999999 |
| rad14 | 1.06170e-20 | 1.00000 | 6.75934e-20 | 0.999999 |
| rad27 | 5.69300e-21 | 1.00000 | 3.62445e-20 | 0.999999 |
| rad3  | 3.26571e-21 | 1.00000 | 2.07912e-20 | 0.999999 |
| rad4  | 1.84692e-21 | 1.00000 | 1.17584e-20 | 0.999999 |

0.100000000E-04 Pa, 3750.00000 K

| Rate constant | True (fraction)     | Effective (fraction) |
|---------------|---------------------|----------------------|
| Total         | 2.70978e-12 (1.00 ) | 4.61708e-13 (1.00 )  |

| species       | PYtrue      | Cumul    | PYeffective | Cumul    |
|---------------|-------------|----------|-------------|----------|
| Benzyl+C2H2   | 0.829614    | 0.829614 | 0.000000    | 0.000000 |
| PhCH2CCH+H    | 0.0978316   | 0.927446 | 0.574175    | 0.574175 |
| PhCHCCH2+H    | 0.0240141   | 0.951460 | 0.140939    | 0.715114 |
| Indene+H      | 0.0190788   | 0.970538 | 0.111974    | 0.827088 |
| Ph+Allene     | 0.0176550   | 0.988193 | 0.103617    | 0.930705 |
| PAH3+H        | 0.00305565  | 0.991249 | 0.0179337   | 0.948639 |
| PAH7+H        | 0.00116197  | 0.992411 | 0.00681959  | 0.955458 |
| PAH9+H        | 0.000955042 | 0.993366 | 0.00560515  | 0.961063 |
| rad19anti     | 0.000750872 | 0.994117 | 0.00440688  | 0.965470 |
| Ph+MeAc       | 0.000618509 | 0.994736 | 0.00363004  | 0.969100 |
| rad38         | 0.000613193 | 0.995349 | 0.00359884  | 0.972699 |
| rad50         | 0.000603635 | 0.995952 | 0.00354274  | 0.976242 |
| PhCCH+CH3     | 0.000581835 | 0.996534 | 0.00341479  | 0.979657 |
| rad39         | 0.000465790 | 0.997000 | 0.00273373  | 0.982390 |
| rad30         | 0.000416539 | 0.997417 | 0.00244467  | 0.984835 |
| rad51         | 0.000380994 | 0.997798 | 0.00223606  | 0.987071 |
| rad35         | 0.000341508 | 0.998139 | 0.00200431  | 0.989075 |
| rad46         | 0.000254425 | 0.998393 | 0.00149322  | 0.990569 |
| rad59         | 0.000220084 | 0.998614 | 0.00129168  | 0.991860 |
| rad67         | 0.000201013 | 0.998815 | 0.00117975  | 0.993040 |
| PhCCCH3+H     | 0.000187990 | 0.999003 | 0.00110331  | 0.994143 |
| rad71         | 0.000146780 | 0.999149 | 0.000861455 | 0.995005 |
| rad19syn      | 0.000129261 | 0.999279 | 0.000758633 | 0.995764 |
| PAH10+CH3     | 0.000111172 | 0.999390 | 0.000652468 | 0.996416 |
| rad60syn      | 0.000106707 | 0.999496 | 0.000626263 | 0.997042 |
| rad60anti     | 7.88382e-05 | 0.999575 | 0.000462703 | 0.997505 |
| rad52         | 7.54521e-05 | 0.999651 | 0.000442829 | 0.997948 |
| rad58         | 6.80261e-05 | 0.999719 | 0.000399246 | 0.998347 |
| PAH1+H        | 6.45813e-05 | 0.999783 | 0.000379028 | 0.998726 |
| rad73         | 5.74878e-05 | 0.999841 | 0.000337397 | 0.999063 |
| PhcycC3H3_A+H | 3.61213e-05 | 0.999877 | 0.000211996 | 0.999275 |
| rad70         | 2.62309e-05 | 0.999903 | 0.000153949 | 0.999429 |
| PAH8+H        | 2.07420e-05 | 0.999924 | 0.000121735 | 0.999551 |
| rad72         | 1.85748e-05 | 0.999943 | 0.000109016 | 0.999660 |
| rad37         | 1.33636e-05 | 0.999956 | 7.84314e-05 | 0.999739 |
| rad34         | 1.07116e-05 | 0.999967 | 6.28665e-05 | 0.999801 |
| rad54         | 9.53969e-06 | 0.999976 | 5.59886e-05 | 0.999857 |
| rad65         | 9.05125e-06 | 0.999985 | 5.31219e-05 | 0.999911 |
| rad68syn      | 2.77520e-06 | 0.999988 | 1.62877e-05 | 0.999927 |
| rad64         | 1.81236e-06 | 0.999990 | 1.06367e-05 | 0.999938 |
| rad68anti     | 1.76807e-06 | 0.999992 | 1.03768e-05 | 0.999948 |
| rad40syn      | 1.68193e-06 | 0.999993 | 9.87130e-06 | 0.999958 |
| rad56         | 1.59874e-06 | 0.999995 | 9.38301e-06 | 0.999967 |
| rad40anti     | 1.25564e-06 | 0.999996 | 7.36935e-06 | 0.999975 |
| rad55         | 1.07703e-06 | 0.999997 | 6.32112e-06 | 0.999981 |
| rad53         | 1.00840e-06 | 0.999998 | 5.91834e-06 | 0.999987 |
| rad62         | 8.81786e-07 | 0.999999 | 5.17522e-06 | 0.999992 |
| rad61         | 7.98455e-07 | 1.000000 | 4.68615e-06 | 0.999997 |
| rad43         | 3.67979e-07 | 1.000000 | 2.15967e-06 | 0.999999 |
| rad42         | 1.74775e-07 | 1.000000 | 1.02576e-06 | 1.000000 |
| rad41         | 7.77074e-08 | 1.000000 | 4.56066e-07 | 1.000000 |
| rad23         | 2.48397e-16 | 1.000000 | 1.45784e-15 | 1.000000 |
| rad20         | 2.02983e-16 | 1.000000 | 1.19131e-15 | 1.000000 |
| rad9          | 1.26927e-16 | 1.000000 | 7.44937e-16 | 1.000000 |

|       |             |         |             |         |
|-------|-------------|---------|-------------|---------|
| rad45 | 1.20285e-16 | 1.00000 | 7.05956e-16 | 1.00000 |
| rad6  | 9.90732e-17 | 1.00000 | 5.81462e-16 | 1.00000 |
| rad21 | 8.13804e-17 | 1.00000 | 4.77623e-16 | 1.00000 |
| rad11 | 4.75768e-17 | 1.00000 | 2.79229e-16 | 1.00000 |
| rad22 | 4.20267e-17 | 1.00000 | 2.46655e-16 | 1.00000 |
| rad36 | 2.31376e-17 | 1.00000 | 1.35795e-16 | 1.00000 |
| rad8  | 1.91572e-17 | 1.00000 | 1.12434e-16 | 1.00000 |
| rad18 | 1.80283e-17 | 1.00000 | 1.05808e-16 | 1.00000 |
| rad15 | 1.23480e-17 | 1.00000 | 7.24707e-17 | 1.00000 |
| rad47 | 7.59707e-18 | 1.00000 | 4.45873e-17 | 1.00000 |
| rad12 | 6.32118e-18 | 1.00000 | 3.70991e-17 | 1.00000 |
| rad24 | 5.63439e-18 | 1.00000 | 3.30683e-17 | 1.00000 |
| rad7  | 4.44234e-18 | 1.00000 | 2.60722e-17 | 1.00000 |
| rad28 | 4.30331e-18 | 1.00000 | 2.52562e-17 | 1.00000 |
| rad26 | 1.37572e-18 | 1.00000 | 8.07415e-18 | 1.00000 |
| rad13 | 7.33171e-19 | 1.00000 | 4.30299e-18 | 1.00000 |
| rad10 | 5.95155e-19 | 1.00000 | 3.49297e-18 | 1.00000 |
| rad25 | 4.50617e-19 | 1.00000 | 2.64468e-18 | 1.00000 |
| rad5  | 1.84077e-19 | 1.00000 | 1.08035e-18 | 1.00000 |
| rad33 | 7.87849e-20 | 1.00000 | 4.62390e-19 | 1.00000 |
| rad2  | 4.58048e-20 | 1.00000 | 2.68829e-19 | 1.00000 |
| rad1  | 2.64287e-20 | 1.00000 | 1.55110e-19 | 1.00000 |
| rad14 | 9.45605e-21 | 1.00000 | 5.54977e-20 | 1.00000 |
| rad27 | 4.76374e-21 | 1.00000 | 2.79584e-20 | 1.00000 |
| rad3  | 1.99207e-21 | 1.00000 | 1.16915e-20 | 1.00000 |
| rad4  | 1.11136e-21 | 1.00000 | 6.52257e-21 | 1.00000 |

0.100000000E-04 Pa, 4000.00000 K

=====

| Rate constant | True (fraction)     | Effective (fraction) |
|---------------|---------------------|----------------------|
| Total         | 3.41497e-12 (1.00 ) | 6.28297e-13 (1.00 )  |

| species       | PYtrue      | Cumul    | PYeffective | Cumul    |
|---------------|-------------|----------|-------------|----------|
| Benzyl+C2H2   | 0.816017    | 0.816017 | 0.00000     | 0.00000  |
| PhCH2CCH+H    | 0.109584    | 0.925601 | 0.595618    | 0.595618 |
| PhCHCCH2+H    | 0.0267098   | 0.952311 | 0.145175    | 0.740793 |
| Ph+Allene     | 0.0193046   | 0.971615 | 0.104926    | 0.845719 |
| Indene+H      | 0.0160484   | 0.987664 | 0.0872277   | 0.932947 |
| PAH3+H        | 0.00329013  | 0.990954 | 0.0178828   | 0.950829 |
| PAH7+H        | 0.00121791  | 0.992172 | 0.00661968  | 0.957449 |
| PAH9+H        | 0.000864009 | 0.993036 | 0.00469613  | 0.962145 |
| PhCCH+CH3     | 0.000720156 | 0.993756 | 0.00391424  | 0.966060 |
| rad19anti     | 0.000708493 | 0.994464 | 0.00385085  | 0.969910 |
| Ph+MeAc       | 0.000663934 | 0.995128 | 0.00360866  | 0.973519 |
| rad50         | 0.000616859 | 0.995745 | 0.00335280  | 0.976872 |
| rad38         | 0.000560144 | 0.996305 | 0.00304454  | 0.979916 |
| rad39         | 0.000491035 | 0.996796 | 0.00266891  | 0.982585 |
| rad51         | 0.000408498 | 0.997205 | 0.00222030  | 0.984806 |
| rad30         | 0.000396478 | 0.997601 | 0.00215497  | 0.986961 |
| rad35         | 0.000343096 | 0.997945 | 0.00186482  | 0.988825 |
| rad46         | 0.000239253 | 0.998184 | 0.00130041  | 0.990126 |
| rad59         | 0.000231903 | 0.998416 | 0.00126046  | 0.991386 |
| rad67         | 0.000214260 | 0.998630 | 0.00116456  | 0.992551 |
| PhCCCH3+H     | 0.000213580 | 0.998844 | 0.00116087  | 0.993712 |
| rad71         | 0.000187844 | 0.999031 | 0.00102098  | 0.994733 |
| rad19syn      | 0.000163941 | 0.999195 | 0.000891067 | 0.995624 |
| PAH10+CH3     | 0.000121536 | 0.999317 | 0.000660582 | 0.996284 |
| rad60syn      | 0.000108396 | 0.999425 | 0.000589161 | 0.996873 |
| rad60anti     | 8.05427e-05 | 0.999506 | 0.000437772 | 0.997311 |
| rad52         | 7.82960e-05 | 0.999584 | 0.000425560 | 0.997737 |
| rad58         | 7.77572e-05 | 0.999662 | 0.000422632 | 0.998159 |
| PAH1+H        | 7.70001e-05 | 0.999739 | 0.000418517 | 0.998578 |
| rad73         | 7.03552e-05 | 0.999809 | 0.000382400 | 0.998960 |
| PhcycC3H3_A+H | 3.98813e-05 | 0.999849 | 0.000216766 | 0.999177 |
| rad70         | 3.09908e-05 | 0.999880 | 0.000168444 | 0.999346 |
| PAH8+H        | 2.94355e-05 | 0.999910 | 0.000159990 | 0.999506 |
| rad72         | 2.58284e-05 | 0.999935 | 0.000140384 | 0.999646 |
| rad37         | 1.30848e-05 | 0.999948 | 7.11194e-05 | 0.999717 |
| rad34         | 1.30497e-05 | 0.999961 | 7.09289e-05 | 0.999788 |
| rad54         | 1.00584e-05 | 0.999972 | 5.46703e-05 | 0.999843 |
| rad65         | 9.63686e-06 | 0.999981 | 5.23790e-05 | 0.999895 |
| rad68syn      | 3.67778e-06 | 0.999985 | 1.99898e-05 | 0.999915 |
| rad68anti     | 2.34154e-06 | 0.999987 | 1.27269e-05 | 0.999928 |
| rad40syn      | 2.31359e-06 | 0.999990 | 1.25750e-05 | 0.999940 |
| rad64         | 2.19077e-06 | 0.999992 | 1.19074e-05 | 0.999952 |
| rad56         | 1.94741e-06 | 0.999994 | 1.05847e-05 | 0.999963 |
| rad40anti     | 1.74691e-06 | 0.999995 | 9.49492e-06 | 0.999972 |
| rad53         | 1.18744e-06 | 0.999997 | 6.45406e-06 | 0.999979 |

|       |             |          |             |          |
|-------|-------------|----------|-------------|----------|
| rad55 | 1.16170e-06 | 0.999998 | 6.31418e-06 | 0.999985 |
| rad62 | 1.07271e-06 | 0.999999 | 5.83046e-06 | 0.999991 |
| rad61 | 9.59661e-07 | 1.000000 | 5.21602e-06 | 0.999996 |
| rad43 | 4.20278e-07 | 1.000000 | 2.28433e-06 | 0.999998 |
| rad42 | 2.24298e-07 | 1.000000 | 1.21912e-06 | 1.000000 |
| rad41 | 9.47630e-08 | 1.000000 | 5.15063e-07 | 1.000000 |
| rad20 | 1.54922e-16 | 1.000000 | 8.42046e-16 | 1.000000 |
| rad23 | 1.32277e-16 | 1.000000 | 7.18960e-16 | 1.000000 |
| rad9  | 8.16260e-17 | 1.000000 | 4.43660e-16 | 1.000000 |
| rad45 | 7.23760e-17 | 1.000000 | 3.93384e-16 | 1.000000 |
| rad21 | 5.97853e-17 | 1.000000 | 3.24950e-16 | 1.000000 |
| rad6  | 5.10830e-17 | 1.000000 | 2.77650e-16 | 1.000000 |
| rad11 | 3.59958e-17 | 1.000000 | 1.95647e-16 | 1.000000 |
| rad22 | 2.59211e-17 | 1.000000 | 1.40888e-16 | 1.000000 |
| rad8  | 1.76788e-17 | 1.000000 | 9.60889e-17 | 1.000000 |
| rad36 | 1.39794e-17 | 1.000000 | 7.59818e-17 | 1.000000 |
| rad18 | 1.20669e-17 | 1.000000 | 6.55872e-17 | 1.000000 |
| rad15 | 8.31159e-18 | 1.000000 | 4.51757e-17 | 1.000000 |
| rad47 | 7.97227e-18 | 1.000000 | 4.33315e-17 | 1.000000 |
| rad12 | 4.90407e-18 | 1.000000 | 2.66550e-17 | 1.000000 |
| rad24 | 4.12849e-18 | 1.000000 | 2.24395e-17 | 1.000000 |
| rad28 | 2.83356e-18 | 1.000000 | 1.54012e-17 | 1.000000 |
| rad7  | 2.66546e-18 | 1.000000 | 1.44875e-17 | 1.000000 |
| rad26 | 9.26940e-19 | 1.000000 | 5.03817e-18 | 1.000000 |
| rad13 | 4.73268e-19 | 1.000000 | 2.57234e-18 | 1.000000 |
| rad10 | 4.23778e-19 | 1.000000 | 2.30335e-18 | 1.000000 |
| rad25 | 3.78502e-19 | 1.000000 | 2.05726e-18 | 1.000000 |
| rad5  | 1.76215e-19 | 1.000000 | 9.57779e-19 | 1.000000 |
| rad33 | 5.47163e-20 | 1.000000 | 2.97398e-19 | 1.000000 |
| rad2  | 3.44161e-20 | 1.000000 | 1.87061e-19 | 1.000000 |
| rad1  | 2.03418e-20 | 1.000000 | 1.10563e-19 | 1.000000 |
| rad14 | 8.43867e-21 | 1.000000 | 4.58665e-20 | 1.000000 |
| rad27 | 3.99728e-21 | 1.000000 | 2.17263e-20 | 1.000000 |
| rad3  | 1.31297e-21 | 1.000000 | 7.13634e-21 | 1.000000 |
| rad4  | 7.27123e-22 | 1.000000 | 3.95211e-21 | 1.000000 |

0.100000000E-05 Pa, 20.0000000 K

=====

| Rate constant | True (fraction)      | Effective (fraction) |
|---------------|----------------------|----------------------|
| Total         | 1.34336e-156 (1.00 ) | 1.34336e-156 (1.00 ) |

| species     | PYtrue      | Cumul    | PYeffective | Cumul    |
|-------------|-------------|----------|-------------|----------|
| Indene+H    | 0.999825    | 0.999825 | 0.999826    | 0.999826 |
| rad6        | 0.000173662 | 0.999999 | 0.000173662 | 1.000000 |
| Benzyl+C2H2 | 8.11928e-07 | 0.999999 | 0.000000    | 1.000000 |
| rad2        | 4.55167e-08 | 1.000000 | 4.55167e-08 | 1.000000 |
| rad7        | 1.25266e-08 | 1.000000 | 1.25266e-08 | 1.000000 |
| rad11       | 3.06203e-09 | 1.000000 | 3.06203e-09 | 1.000000 |
| rad1        | 2.87676e-09 | 1.000000 | 2.87676e-09 | 1.000000 |
| rad10       | 2.32083e-09 | 1.000000 | 2.32083e-09 | 1.000000 |
| rad3        | 3.22178e-10 | 1.000000 | 3.22178e-10 | 1.000000 |
| rad4        | 1.62878e-10 | 1.000000 | 1.62878e-10 | 1.000000 |
| rad13       | 6.96215e-11 | 1.000000 | 6.96215e-11 | 1.000000 |
| rad33       | 1.31442e-13 | 1.000000 | 1.31442e-13 | 1.000000 |
| rad20       | 1.15827e-14 | 1.000000 | 1.15827e-14 | 1.000000 |
| rad21       | 7.22378e-15 | 1.000000 | 7.22378e-15 | 1.000000 |
| rad28       | 5.06374e-15 | 1.000000 | 5.06374e-15 | 1.000000 |
| rad26       | 1.03712e-15 | 1.000000 | 1.03712e-15 | 1.000000 |
| rad23       | 3.52482e-16 | 1.000000 | 3.52482e-16 | 1.000000 |
| rad18       | 5.45674e-17 | 1.000000 | 5.45674e-17 | 1.000000 |
| rad35       | 4.14344e-17 | 1.000000 | 4.14344e-17 | 1.000000 |
| rad22       | 9.51121e-18 | 1.000000 | 9.51122e-18 | 1.000000 |
| PAH9+H      | 3.93911e-18 | 1.000000 | 3.93911e-18 | 1.000000 |
| rad45       | 2.23367e-18 | 1.000000 | 2.23367e-18 | 1.000000 |
| rad31       | 7.42915e-19 | 1.000000 | 7.42916e-19 | 1.000000 |
| rad27       | 6.90849e-19 | 1.000000 | 6.90850e-19 | 1.000000 |
| rad36       | 1.39140e-19 | 1.000000 | 1.39140e-19 | 1.000000 |
| rad30       | 9.81141e-20 | 1.000000 | 9.81142e-20 | 1.000000 |
| rad38       | 3.59059e-20 | 1.000000 | 3.59059e-20 | 1.000000 |
| PhCHCCH2+H  | 3.22908e-20 | 1.000000 | 3.22908e-20 | 1.000000 |
| PhCCH+CH3   | 1.73820e-21 | 1.000000 | 1.73820e-21 | 1.000000 |
| PhCCCH3+H   | 2.84217e-22 | 1.000000 | 2.84217e-22 | 1.000000 |
| rad24       | 2.32696e-22 | 1.000000 | 2.32696e-22 | 1.000000 |
| rad25       | 2.16728e-22 | 1.000000 | 2.16728e-22 | 1.000000 |
| rad15       | 5.31132e-23 | 1.000000 | 5.31133e-23 | 1.000000 |
| rad14       | 2.54766e-23 | 1.000000 | 2.54766e-23 | 1.000000 |
| rad8        | 1.86627e-27 | 1.000000 | 1.86627e-27 | 1.000000 |
| rad46       | 7.37213e-30 | 1.000000 | 7.37213e-30 | 1.000000 |

|               |             |          |             |          |
|---------------|-------------|----------|-------------|----------|
| rad9          | 6.64824e-30 | 1.000000 | 6.64824e-30 | 1.000000 |
| PAH7+H        | 1.11048e-30 | 1.000000 | 1.11048e-30 | 1.000000 |
| Ph+MeAc       | 1.09008e-31 | 1.000000 | 1.09009e-31 | 1.000000 |
| rad12         | 3.99190e-32 | 1.000000 | 3.99190e-32 | 1.000000 |
| rad39         | 2.47035e-33 | 1.000000 | 2.47035e-33 | 1.000000 |
| Ph+Allene     | 5.42307e-36 | 1.000000 | 5.42308e-36 | 1.000000 |
| rad60syn      | 4.83613e-40 | 1.000000 | 4.83613e-40 | 1.000000 |
| rad60anti     | 5.14823e-42 | 1.000000 | 5.14823e-42 | 1.000000 |
| PhCH2CCH+H    | 8.97403e-44 | 1.000000 | 8.97404e-44 | 1.000000 |
| rad37         | 8.01073e-45 | 1.000000 | 8.01074e-45 | 1.000000 |
| rad5          | 5.19976e-48 | 1.000000 | 5.19976e-48 | 1.000000 |
| PAH3+H        | 9.27465e-53 | 1.000000 | 9.27466e-53 | 1.000000 |
| rad59         | 4.96604e-53 | 1.000000 | 4.96605e-53 | 1.000000 |
| rad50         | 1.99839e-53 | 1.000000 | 1.99840e-53 | 1.000000 |
| rad19syn      | 7.36789e-62 | 1.000000 | 7.36790e-62 | 1.000000 |
| rad52         | 8.86214e-66 | 1.000000 | 8.86214e-66 | 1.000000 |
| rad54         | 8.52856e-67 | 1.000000 | 8.52856e-67 | 1.000000 |
| PAH10+CH3     | 5.49378e-67 | 1.000000 | 5.49378e-67 | 1.000000 |
| rad43         | 1.27739e-67 | 1.000000 | 1.27739e-67 | 1.000000 |
| rad62         | 3.81908e-70 | 1.000000 | 3.81908e-70 | 1.000000 |
| rad51         | 4.27147e-73 | 1.000000 | 4.27147e-73 | 1.000000 |
| rad70         | 4.59304e-76 | 1.000000 | 4.59304e-76 | 1.000000 |
| PhcycC3H3_A+H | 1.94535e-76 | 1.000000 | 1.94535e-76 | 1.000000 |
| rad55         | 1.04749e-76 | 1.000000 | 1.04749e-76 | 1.000000 |
| rad65         | 2.86784e-78 | 1.000000 | 2.86784e-78 | 1.000000 |
| rad58         | 6.53561e-80 | 1.000000 | 6.53561e-80 | 1.000000 |
| PAH1+H        | 8.73062e-82 | 1.000000 | 8.73063e-82 | 1.000000 |
| rad34         | 5.80243e-84 | 1.000000 | 5.80243e-84 | 1.000000 |
| rad42         | 4.13417e-88 | 1.000000 | 4.13417e-88 | 1.000000 |
| rad41         | 5.17096e-89 | 1.000000 | 5.17097e-89 | 1.000000 |
| rad47         | 1.60279e-92 | 1.000000 | 1.60279e-92 | 1.000000 |

0.100000000E-05 Pa, 30.0000000 K

=====

| Rate constant | True (fraction)      | Effective (fraction) |
|---------------|----------------------|----------------------|
| Total         | 1.15918e-108 (1.00 ) | 1.15918e-108 (1.00 ) |

| species     | PYtrue      | Cumul    | PYeffective | Cumul    |
|-------------|-------------|----------|-------------|----------|
| Indene+H    | 0.999831    | 0.999831 | 0.999832    | 0.999832 |
| rad6        | 0.000167915 | 0.999999 | 0.000167915 | 1.000000 |
| Benzyl+C2H2 | 1.04106e-06 | 1.000000 | 0.000000    | 1.000000 |
| rad2        | 5.06130e-08 | 1.000000 | 5.06130e-08 | 1.000000 |
| rad7        | 1.21136e-08 | 1.000000 | 1.21136e-08 | 1.000000 |
| rad1        | 3.20072e-09 | 1.000000 | 3.20073e-09 | 1.000000 |
| rad11       | 2.96020e-09 | 1.000000 | 2.96021e-09 | 1.000000 |
| rad10       | 2.58545e-09 | 1.000000 | 2.58546e-09 | 1.000000 |
| rad3        | 3.42643e-10 | 1.000000 | 3.42643e-10 | 1.000000 |
| rad4        | 1.73249e-10 | 1.000000 | 1.73250e-10 | 1.000000 |
| rad13       | 6.73489e-11 | 1.000000 | 6.73490e-11 | 1.000000 |
| rad33       | 1.27177e-13 | 1.000000 | 1.27178e-13 | 1.000000 |
| rad28       | 5.71523e-15 | 1.000000 | 5.71523e-15 | 1.000000 |
| rad20       | 5.66073e-15 | 1.000000 | 5.66074e-15 | 1.000000 |
| rad21       | 3.53099e-15 | 1.000000 | 3.53099e-15 | 1.000000 |
| rad35       | 3.27649e-15 | 1.000000 | 3.27649e-15 | 1.000000 |
| rad26       | 9.89796e-16 | 1.000000 | 9.89797e-16 | 1.000000 |
| rad23       | 6.09424e-17 | 1.000000 | 6.09425e-17 | 1.000000 |
| rad18       | 2.66584e-17 | 1.000000 | 2.66584e-17 | 1.000000 |
| PAH9+H      | 8.45243e-18 | 1.000000 | 8.45244e-18 | 1.000000 |
| rad22       | 3.28086e-18 | 1.000000 | 3.28086e-18 | 1.000000 |
| rad31       | 8.30294e-19 | 1.000000 | 8.30295e-19 | 1.000000 |
| rad27       | 5.26250e-19 | 1.000000 | 5.26251e-19 | 1.000000 |
| rad45       | 3.82256e-19 | 1.000000 | 3.82257e-19 | 1.000000 |
| rad30       | 1.09553e-19 | 1.000000 | 1.09553e-19 | 1.000000 |
| rad38       | 5.21975e-20 | 1.000000 | 5.21976e-20 | 1.000000 |
| rad36       | 2.38043e-20 | 1.000000 | 2.38043e-20 | 1.000000 |
| PhCHCCH2+H  | 1.72209e-20 | 1.000000 | 1.72209e-20 | 1.000000 |
| PhCCH+CH3   | 7.65492e-22 | 1.000000 | 7.65493e-22 | 1.000000 |
| PhCCCH3+H   | 1.18614e-22 | 1.000000 | 1.18614e-22 | 1.000000 |
| rad24       | 1.15447e-22 | 1.000000 | 1.15447e-22 | 1.000000 |
| rad25       | 8.83292e-23 | 1.000000 | 8.83293e-23 | 1.000000 |
| rad15       | 3.49627e-23 | 1.000000 | 3.49628e-23 | 1.000000 |
| rad14       | 8.65723e-24 | 1.000000 | 8.65723e-24 | 1.000000 |
| rad8        | 6.12861e-28 | 1.000000 | 6.12862e-28 | 1.000000 |
| rad46       | 2.87829e-30 | 1.000000 | 2.87829e-30 | 1.000000 |
| rad9        | 2.03006e-30 | 1.000000 | 2.03007e-30 | 1.000000 |
| PAH7+H      | 3.21324e-31 | 1.000000 | 3.21324e-31 | 1.000000 |
| Ph+MeAc     | 3.18040e-32 | 1.000000 | 3.18040e-32 | 1.000000 |
| rad12       | 1.17049e-32 | 1.000000 | 1.17049e-32 | 1.000000 |

|               |             |         |             |          |
|---------------|-------------|---------|-------------|----------|
| rad39         | 6.98400e-34 | 1.00000 | 6.98401e-34 | 1.000000 |
| Ph+Allene     | 1.53853e-36 | 1.00000 | 1.53853e-36 | 1.000000 |
| rad60syn      | 1.37528e-40 | 1.00000 | 1.37528e-40 | 1.000000 |
| rad60anti     | 1.45425e-42 | 1.00000 | 1.45425e-42 | 1.000000 |
| PhCH2CCH+H    | 2.53176e-44 | 1.00000 | 2.53177e-44 | 1.000000 |
| rad37         | 2.25702e-45 | 1.00000 | 2.25703e-45 | 1.000000 |
| rad5          | 1.47398e-48 | 1.00000 | 1.47399e-48 | 1.000000 |
| PAH3+H        | 2.64207e-53 | 1.00000 | 2.64207e-53 | 1.000000 |
| rad59         | 1.41451e-53 | 1.00000 | 1.41451e-53 | 1.000000 |
| rad50         | 5.67692e-54 | 1.00000 | 5.67692e-54 | 1.000000 |
| rad19syn      | 2.17235e-62 | 1.00000 | 2.17235e-62 | 1.000000 |
| rad52         | 2.60689e-66 | 1.00000 | 2.60690e-66 | 1.000000 |
| rad54         | 2.55238e-67 | 1.00000 | 2.55238e-67 | 1.000000 |
| PAH10+CH3     | 1.64247e-67 | 1.00000 | 1.64247e-67 | 1.000000 |
| rad43         | 3.83308e-68 | 1.00000 | 3.83308e-68 | 1.000000 |
| rad62         | 1.15488e-70 | 1.00000 | 1.15488e-70 | 1.000000 |
| rad51         | 1.28984e-73 | 1.00000 | 1.28984e-73 | 1.000000 |
| rad70         | 1.41750e-76 | 1.00000 | 1.41750e-76 | 1.000000 |
| PhcycC3H3_A+H | 6.01622e-77 | 1.00000 | 6.01622e-77 | 1.000000 |
| rad55         | 3.23881e-77 | 1.00000 | 3.23881e-77 | 1.000000 |
| rad65         | 8.79330e-79 | 1.00000 | 8.79331e-79 | 1.000000 |
| rad58         | 2.02486e-80 | 1.00000 | 2.02486e-80 | 1.000000 |
| PAH1+H        | 2.74084e-82 | 1.00000 | 2.74084e-82 | 1.000000 |
| rad34         | 1.83863e-84 | 1.00000 | 1.83863e-84 | 1.000000 |
| rad42         | 1.32770e-88 | 1.00000 | 1.32770e-88 | 1.000000 |
| rad41         | 1.67104e-89 | 1.00000 | 1.67104e-89 | 1.000000 |
| rad47         | 2.49896e-93 | 1.00000 | 2.49897e-93 | 1.000000 |

0.100000000E-05 Pa, 40.0000000 K

| Rate constant | True (fraction)     | Effective (fraction) |
|---------------|---------------------|----------------------|
| Total         | 1.02415e-84 (1.00 ) | 1.02415e-84 (1.00 )  |

| species     | PYtrue      | Cumul    | PYeffective | Cumul    |
|-------------|-------------|----------|-------------|----------|
| Indene+H    | 0.999834    | 0.999834 | 0.999836    | 0.999836 |
| rad6        | 0.000164083 | 0.999998 | 0.000164083 | 1.000000 |
| Benzyl+C2H2 | 1.52906e-06 | 1.000000 | 0.000000    | 1.000000 |
| rad2        | 5.16941e-08 | 1.000000 | 5.16942e-08 | 1.000000 |
| rad7        | 1.18440e-08 | 1.000000 | 1.18440e-08 | 1.000000 |
| rad1        | 3.27311e-09 | 1.000000 | 3.27311e-09 | 1.000000 |
| rad11       | 2.89433e-09 | 1.000000 | 2.89433e-09 | 1.000000 |
| rad10       | 2.64371e-09 | 1.000000 | 2.64371e-09 | 1.000000 |
| rad3        | 3.45717e-10 | 1.000000 | 3.45718e-10 | 1.000000 |
| rad4        | 1.74858e-10 | 1.000000 | 1.74859e-10 | 1.000000 |
| rad13       | 6.58765e-11 | 1.000000 | 6.58766e-11 | 1.000000 |
| rad33       | 1.24448e-13 | 1.000000 | 1.24448e-13 | 1.000000 |
| rad35       | 5.91499e-14 | 1.000000 | 5.91500e-14 | 1.000000 |
| rad28       | 7.24676e-15 | 1.000000 | 7.24677e-15 | 1.000000 |
| rad20       | 3.70200e-15 | 1.000000 | 3.70200e-15 | 1.000000 |
| rad21       | 2.30995e-15 | 1.000000 | 2.30995e-15 | 1.000000 |
| rad26       | 1.12087e-15 | 1.000000 | 1.12087e-15 | 1.000000 |
| PAH9+H      | 4.58259e-16 | 1.000000 | 4.58260e-16 | 1.000000 |
| rad23       | 2.33478e-17 | 1.000000 | 2.33478e-17 | 1.000000 |
| rad18       | 1.74436e-17 | 1.000000 | 1.74437e-17 | 1.000000 |
| rad22       | 1.85239e-18 | 1.000000 | 1.85239e-18 | 1.000000 |
| rad31       | 8.58861e-19 | 1.000000 | 8.58862e-19 | 1.000000 |
| rad27       | 5.45040e-19 | 1.000000 | 5.45041e-19 | 1.000000 |
| rad45       | 1.45960e-19 | 1.000000 | 1.45960e-19 | 1.000000 |
| rad30       | 1.39627e-19 | 1.000000 | 1.39628e-19 | 1.000000 |
| rad38       | 9.09841e-20 | 1.000000 | 9.09843e-20 | 1.000000 |
| PhCHCCH2+H  | 1.56154e-20 | 1.000000 | 1.56154e-20 | 1.000000 |
| rad36       | 9.08385e-21 | 1.000000 | 9.08386e-21 | 1.000000 |
| PhCCH+CH3   | 6.48680e-22 | 1.000000 | 6.48681e-22 | 1.000000 |
| PhCCCH3+H   | 9.88349e-23 | 1.000000 | 9.88350e-23 | 1.000000 |
| rad24       | 7.79971e-23 | 1.000000 | 7.79973e-23 | 1.000000 |
| rad25       | 6.47647e-23 | 1.000000 | 6.47648e-23 | 1.000000 |
| rad15       | 3.44035e-23 | 1.000000 | 3.44036e-23 | 1.000000 |
| rad14       | 5.85307e-24 | 1.000000 | 5.85308e-24 | 1.000000 |
| rad8        | 4.80367e-28 | 1.000000 | 4.80367e-28 | 1.000000 |
| rad46       | 2.34909e-30 | 1.000000 | 2.34910e-30 | 1.000000 |
| rad9        | 1.57492e-30 | 1.000000 | 1.57492e-30 | 1.000000 |
| PAH7+H      | 2.43737e-31 | 1.000000 | 2.43738e-31 | 1.000000 |
| Ph+MeAc     | 2.47936e-32 | 1.000000 | 2.47936e-32 | 1.000000 |
| rad12       | 9.04834e-33 | 1.000000 | 9.04836e-33 | 1.000000 |
| rad39       | 5.33275e-34 | 1.000000 | 5.33276e-34 | 1.000000 |
| Ph+Allene   | 1.21489e-36 | 1.000000 | 1.21489e-36 | 1.000000 |
| rad60syn    | 1.08272e-40 | 1.000000 | 1.08272e-40 | 1.000000 |
| rad60anti   | 1.15609e-42 | 1.000000 | 1.15609e-42 | 1.000000 |

|               |             |          |             |          |
|---------------|-------------|----------|-------------|----------|
| PhCH2CCH+H    | 2.09081e-44 | 1.000000 | 2.09081e-44 | 1.000000 |
| rad37         | 1.88724e-45 | 1.000000 | 1.88724e-45 | 1.000000 |
| rad5          | 1.24390e-48 | 1.000000 | 1.24390e-48 | 1.000000 |
| PAH3+H        | 2.25712e-53 | 1.000000 | 2.25712e-53 | 1.000000 |
| rad59         | 1.20803e-53 | 1.000000 | 1.20803e-53 | 1.000000 |
| rad50         | 4.80840e-54 | 1.000000 | 4.80841e-54 | 1.000000 |
| rad19syn      | 2.01616e-62 | 1.000000 | 2.01616e-62 | 1.000000 |
| rad52         | 2.40697e-66 | 1.000000 | 2.40698e-66 | 1.000000 |
| rad54         | 2.44750e-67 | 1.000000 | 2.44751e-67 | 1.000000 |
| PAH10+CH3     | 1.59445e-67 | 1.000000 | 1.59445e-67 | 1.000000 |
| rad43         | 3.72955e-68 | 1.000000 | 3.72955e-68 | 1.000000 |
| rad62         | 1.13780e-70 | 1.000000 | 1.13781e-70 | 1.000000 |
| rad51         | 1.26096e-73 | 1.000000 | 1.26096e-73 | 1.000000 |
| rad70         | 1.45156e-76 | 1.000000 | 1.45156e-76 | 1.000000 |
| PhcycC3H3_A+H | 6.18796e-77 | 1.000000 | 6.18797e-77 | 1.000000 |
| rad55         | 3.32981e-77 | 1.000000 | 3.32981e-77 | 1.000000 |
| rad65         | 8.88139e-79 | 1.000000 | 8.88141e-79 | 1.000000 |
| rad58         | 2.09063e-80 | 1.000000 | 2.09063e-80 | 1.000000 |
| PAH1+H        | 2.93049e-82 | 1.000000 | 2.93050e-82 | 1.000000 |
| rad34         | 1.99063e-84 | 1.000000 | 1.99064e-84 | 1.000000 |
| rad42         | 1.49015e-88 | 1.000000 | 1.49015e-88 | 1.000000 |
| rad41         | 1.93697e-89 | 1.000000 | 1.93697e-89 | 1.000000 |
| rad47         | 1.78864e-93 | 1.000000 | 1.78864e-93 | 1.000000 |

0.1000000000E-05 Pa, 50.0000000 K

| Rate constant | True (fraction)     | Effective (fraction) |
|---------------|---------------------|----------------------|
| Total         | 2.31816e-70 (1.00 ) | 2.31816e-70 (1.00 )  |

| species     | PYtrue      | Cumul    | PYeffective | Cumul    |
|-------------|-------------|----------|-------------|----------|
| Indene+H    | 0.999837    | 0.999837 | 0.999839    | 0.999839 |
| rad6        | 0.000160702 | 0.999998 | 0.000160702 | 1.000000 |
| Benzyl+C2H2 | 2.26165e-06 | 1.000000 | 0.000000    | 1.000000 |
| rad2        | 5.16724e-08 | 1.000000 | 5.16725e-08 | 1.000000 |
| rad7        | 1.16102e-08 | 1.000000 | 1.16102e-08 | 1.000000 |
| rad1        | 3.27748e-09 | 1.000000 | 3.27749e-09 | 1.000000 |
| rad11       | 2.83750e-09 | 1.000000 | 2.83750e-09 | 1.000000 |
| rad10       | 2.64507e-09 | 1.000000 | 2.64508e-09 | 1.000000 |
| rad3        | 3.43621e-10 | 1.000000 | 3.43622e-10 | 1.000000 |
| rad4        | 1.73875e-10 | 1.000000 | 1.73876e-10 | 1.000000 |
| rad13       | 6.46099e-11 | 1.000000 | 6.46101e-11 | 1.000000 |
| rad35       | 3.19921e-13 | 1.000000 | 3.19922e-13 | 1.000000 |
| rad33       | 1.22126e-13 | 1.000000 | 1.22126e-13 | 1.000000 |
| rad28       | 1.11752e-14 | 1.000000 | 1.11753e-14 | 1.000000 |
| PAH9+H      | 8.83170e-15 | 1.000000 | 8.83172e-15 | 1.000000 |
| rad20       | 2.70697e-15 | 1.000000 | 2.70698e-15 | 1.000000 |
| rad21       | 1.68987e-15 | 1.000000 | 1.68988e-15 | 1.000000 |
| rad26       | 1.59017e-15 | 1.000000 | 1.59018e-15 | 1.000000 |
| rad18       | 1.27661e-17 | 1.000000 | 1.27661e-17 | 1.000000 |
| rad23       | 1.20494e-17 | 1.000000 | 1.20494e-17 | 1.000000 |
| rad38       | 2.46126e-18 | 1.000000 | 2.46127e-18 | 1.000000 |
| rad22       | 1.24593e-18 | 1.000000 | 1.24593e-18 | 1.000000 |
| rad31       | 8.72983e-19 | 1.000000 | 8.72985e-19 | 1.000000 |
| rad27       | 7.31952e-19 | 1.000000 | 7.31954e-19 | 1.000000 |
| rad30       | 3.90071e-19 | 1.000000 | 3.90072e-19 | 1.000000 |
| rad45       | 7.52270e-20 | 1.000000 | 7.52271e-20 | 1.000000 |
| PhCHCCH2+H  | 2.04492e-20 | 1.000000 | 2.04493e-20 | 1.000000 |
| rad36       | 4.67811e-21 | 1.000000 | 4.67812e-21 | 1.000000 |
| PhCCH+CH3   | 8.28238e-22 | 1.000000 | 8.28240e-22 | 1.000000 |
| PhCCCH3+H   | 1.25649e-22 | 1.000000 | 1.25649e-22 | 1.000000 |
| rad25       | 7.04256e-23 | 1.000000 | 7.04257e-23 | 1.000000 |
| rad24       | 5.97044e-23 | 1.000000 | 5.97045e-23 | 1.000000 |
| rad15       | 4.68594e-23 | 1.000000 | 4.68595e-23 | 1.000000 |
| rad14       | 6.11282e-24 | 1.000000 | 6.11284e-24 | 1.000000 |
| rad8        | 6.08865e-28 | 1.000000 | 6.08867e-28 | 1.000000 |
| rad46       | 2.96779e-30 | 1.000000 | 2.96780e-30 | 1.000000 |
| rad9        | 2.01504e-30 | 1.000000 | 2.01504e-30 | 1.000000 |
| PAH7+H      | 3.08995e-31 | 1.000000 | 3.08995e-31 | 1.000000 |
| Ph+MeAc     | 3.25579e-32 | 1.000000 | 3.25580e-32 | 1.000000 |
| rad12       | 1.17219e-32 | 1.000000 | 1.17219e-32 | 1.000000 |
| rad39       | 6.88096e-34 | 1.000000 | 6.88098e-34 | 1.000000 |
| Ph+Allene   | 1.64079e-36 | 1.000000 | 1.64080e-36 | 1.000000 |
| rad60syn    | 1.45410e-40 | 1.000000 | 1.45411e-40 | 1.000000 |
| rad60anti   | 1.58038e-42 | 1.000000 | 1.58038e-42 | 1.000000 |
| PhCH2CCH+H  | 3.03649e-44 | 1.000000 | 3.03650e-44 | 1.000000 |
| rad37       | 2.81961e-45 | 1.000000 | 2.81962e-45 | 1.000000 |
| rad5        | 1.88175e-48 | 1.000000 | 1.88176e-48 | 1.000000 |
| PAH3+H      | 3.44650e-53 | 1.000000 | 3.44651e-53 | 1.000000 |



|               |             |         |             |          |
|---------------|-------------|---------|-------------|----------|
| rad59         | 1.84373e-53 | 1.00000 | 1.84373e-53 | 1.000000 |
| rad50         | 7.25386e-54 | 1.00000 | 7.25387e-54 | 1.000000 |
| rad19syn      | 3.46758e-62 | 1.00000 | 3.46758e-62 | 1.000000 |
| rad52         | 4.11324e-66 | 1.00000 | 4.11325e-66 | 1.000000 |
| rad54         | 4.40968e-67 | 1.00000 | 4.40969e-67 | 1.000000 |
| PAH10+CH3     | 3.06185e-67 | 1.00000 | 3.06185e-67 | 1.000000 |
| rad43         | 7.17763e-68 | 1.00000 | 7.17764e-68 | 1.000000 |
| rad62         | 2.18854e-70 | 1.00000 | 2.18854e-70 | 1.000000 |
| rad51         | 2.33883e-73 | 1.00000 | 2.33883e-73 | 1.000000 |
| rad70         | 2.87119e-76 | 1.00000 | 2.87120e-76 | 1.000000 |
| PhcycC3H3_A+H | 1.23167e-76 | 1.00000 | 1.23167e-76 | 1.000000 |
| rad55         | 6.62347e-77 | 1.00000 | 6.62349e-77 | 1.000000 |
| rad65         | 1.72611e-78 | 1.00000 | 1.72612e-78 | 1.000000 |
| rad58         | 4.18385e-80 | 1.00000 | 4.18386e-80 | 1.000000 |
| PAH1+H        | 6.17802e-82 | 1.00000 | 6.17803e-82 | 1.000000 |
| rad34         | 4.26176e-84 | 1.00000 | 4.26177e-84 | 1.000000 |
| rad42         | 3.61215e-88 | 1.00000 | 3.61216e-88 | 1.000000 |
| rad41         | 5.73276e-89 | 1.00000 | 5.73277e-89 | 1.000000 |
| rad47         | 2.83546e-93 | 1.00000 | 2.83547e-93 | 1.000000 |

0.1000000000E-05 Pa, 60.0000000 K

| Rate constant | True (fraction)     | Effective (fraction) |
|---------------|---------------------|----------------------|
| Total         | 8.44107e-61 (1.00 ) | 8.44104e-61 (1.00 )  |

| species     | PYtrue      | Cumul    | PYeffective | Cumul    |
|-------------|-------------|----------|-------------|----------|
| Indene+H    | 0.999840    | 0.999840 | 0.999843    | 0.999843 |
| rad6        | 0.000156913 | 0.999997 | 0.000156914 | 1.000000 |
| Benzyl+C2H2 | 3.25378e-06 | 1.00000  | 0.00000     | 1.000000 |
| rad2        | 5.10119e-08 | 1.00000  | 5.10120e-08 | 1.000000 |
| rad7        | 1.13487e-08 | 1.00000  | 1.13488e-08 | 1.000000 |
| rad1        | 3.24258e-09 | 1.00000  | 3.24259e-09 | 1.000000 |
| rad11       | 2.77409e-09 | 1.00000  | 2.77410e-09 | 1.000000 |
| rad10       | 2.61556e-09 | 1.00000  | 2.61557e-09 | 1.000000 |
| rad3        | 3.39205e-10 | 1.00000  | 3.39206e-10 | 1.000000 |
| rad4        | 1.71735e-10 | 1.00000  | 1.71736e-10 | 1.000000 |
| rad13       | 6.31951e-11 | 1.00000  | 6.31953e-11 | 1.000000 |
| rad35       | 9.63061e-13 | 1.00000  | 9.63064e-13 | 1.000000 |
| rad33       | 1.19536e-13 | 1.00000  | 1.19536e-13 | 1.000000 |
| PAH9+H      | 6.37693e-14 | 1.00000  | 6.37695e-14 | 1.000000 |
| rad28       | 2.29825e-14 | 1.00000  | 2.29826e-14 | 1.000000 |
| rad26       | 3.05525e-15 | 1.00000  | 3.05526e-15 | 1.000000 |
| rad20       | 2.10367e-15 | 1.00000  | 2.10368e-15 | 1.000000 |
| rad21       | 1.31402e-15 | 1.00000  | 1.31402e-15 | 1.000000 |
| rad38       | 7.73470e-17 | 1.00000  | 7.73472e-17 | 1.000000 |
| rad30       | 2.84827e-17 | 1.00000  | 2.84828e-17 | 1.000000 |
| rad18       | 9.92955e-18 | 1.00000  | 9.92958e-18 | 1.000000 |
| rad23       | 7.27732e-18 | 1.00000  | 7.27734e-18 | 1.000000 |
| rad27       | 1.36348e-18 | 1.00000  | 1.36348e-18 | 1.000000 |
| rad22       | 9.16415e-19 | 1.00000  | 9.16418e-19 | 1.000000 |
| rad31       | 8.79245e-19 | 1.00000  | 8.79248e-19 | 1.000000 |
| rad45       | 4.54288e-20 | 1.00000  | 4.54289e-20 | 1.000000 |
| PhCHCCH2+H  | 3.84228e-20 | 1.00000  | 3.84229e-20 | 1.000000 |
| rad36       | 2.82272e-21 | 1.00000  | 2.82273e-21 | 1.000000 |
| PhCCH+CH3   | 1.54648e-21 | 1.00000  | 1.54648e-21 | 1.000000 |
| rad15       | 5.64601e-22 | 1.00000  | 5.64603e-22 | 1.000000 |
| PhCCCH3+H   | 2.34983e-22 | 1.00000  | 2.34984e-22 | 1.000000 |
| rad25       | 1.12353e-22 | 1.00000  | 1.12354e-22 | 1.000000 |
| rad24       | 4.90214e-23 | 1.00000  | 4.90216e-23 | 1.000000 |
| rad14       | 9.53695e-24 | 1.00000  | 9.53698e-24 | 1.000000 |
| rad8        | 1.16866e-27 | 1.00000  | 1.16867e-27 | 1.000000 |
| rad46       | 5.55301e-30 | 1.00000  | 5.55303e-30 | 1.000000 |
| rad9        | 3.93600e-30 | 1.00000  | 3.93601e-30 | 1.000000 |
| PAH7+H      | 6.02975e-31 | 1.00000  | 6.02977e-31 | 1.000000 |
| Ph+MeAc     | 6.63291e-32 | 1.00000  | 6.63294e-32 | 1.000000 |
| rad12       | 2.34757e-32 | 1.00000  | 2.34758e-32 | 1.000000 |
| rad39       | 1.37485e-33 | 1.00000  | 1.37485e-33 | 1.000000 |
| Ph+Allene   | 3.45401e-36 | 1.00000  | 3.45402e-36 | 1.000000 |
| rad60syn    | 3.03884e-40 | 1.00000  | 3.03885e-40 | 1.000000 |
| rad60anti   | 3.37861e-42 | 1.00000  | 3.37862e-42 | 1.000000 |
| PhCH2CCH+H  | 7.00259e-44 | 1.00000  | 7.00262e-44 | 1.000000 |
| rad37       | 6.92810e-45 | 1.00000  | 6.92812e-45 | 1.000000 |
| rad5        | 4.70923e-48 | 1.00000  | 4.70924e-48 | 1.000000 |
| PAH3+H      | 8.45713e-53 | 1.00000  | 8.45716e-53 | 1.000000 |
| rad59       | 4.52146e-53 | 1.00000  | 4.52148e-53 | 1.000000 |
| rad50       | 1.75898e-53 | 1.00000  | 1.75899e-53 | 1.000000 |
| rad19syn    | 9.87448e-62 | 1.00000  | 9.87451e-62 | 1.000000 |
| rad52       | 1.17226e-65 | 1.00000  | 1.17227e-65 | 1.000000 |

|               |             |         |             |          |
|---------------|-------------|---------|-------------|----------|
| rad54         | 1.33266e-66 | 1.00000 | 1.33267e-66 | 1.000000 |
| PAH10+CH3     | 1.27994e-66 | 1.00000 | 1.27994e-66 | 1.000000 |
| rad43         | 3.01296e-67 | 1.00000 | 3.01297e-67 | 1.000000 |
| rad62         | 8.55783e-70 | 1.00000 | 8.55786e-70 | 1.000000 |
| rad51         | 7.47428e-73 | 1.00000 | 7.47430e-73 | 1.000000 |
| rad70         | 9.81867e-76 | 1.00000 | 9.81870e-76 | 1.000000 |
| PhcycC3H3_A+H | 4.24822e-76 | 1.00000 | 4.24823e-76 | 1.000000 |
| rad55         | 2.28243e-76 | 1.00000 | 2.28244e-76 | 1.000000 |
| rad65         | 5.91161e-78 | 1.00000 | 5.91163e-78 | 1.000000 |
| rad58         | 1.45389e-79 | 1.00000 | 1.45389e-79 | 1.000000 |
| PAH1+H        | 2.32040e-81 | 1.00000 | 2.32041e-81 | 1.000000 |
| rad34         | 1.62981e-83 | 1.00000 | 1.62981e-83 | 1.000000 |
| rad42         | 3.01634e-87 | 1.00000 | 3.01635e-87 | 1.000000 |
| rad41         | 9.74131e-88 | 1.00000 | 9.74134e-88 | 1.000000 |
| rad47         | 8.84038e-93 | 1.00000 | 8.84041e-93 | 1.000000 |

0.100000000E-05 Pa, 70.0000000 K

=====  
Rate constant | True (fraction) | Effective (fraction)  
-----

Total | 5.61998e-54 (1.00) | 5.61996e-54 (1.00)

| species     | PYtrue      | Cumul    | PYeffective | Cumul    |
|-------------|-------------|----------|-------------|----------|
| Indene+H    | 0.999843    | 0.999843 | 0.999848    | 0.999848 |
| rad6        | 0.000152308 | 0.999995 | 0.000152309 | 1.000000 |
| Benzyl+C2H2 | 4.55744e-06 | 1.000000 | 0.000000    | 1.000000 |
| rad2        | 4.98526e-08 | 1.000000 | 4.98528e-08 | 1.000000 |
| rad7        | 1.10293e-08 | 1.000000 | 1.10294e-08 | 1.000000 |
| rad1        | 3.17680e-09 | 1.000000 | 3.17682e-09 | 1.000000 |
| rad11       | 2.69658e-09 | 1.000000 | 2.69660e-09 | 1.000000 |
| rad10       | 2.55884e-09 | 1.000000 | 2.55885e-09 | 1.000000 |
| rad3        | 3.30667e-10 | 1.000000 | 3.30668e-10 | 1.000000 |
| rad4        | 1.67519e-10 | 1.000000 | 1.67520e-10 | 1.000000 |
| rad13       | 6.14605e-11 | 1.000000 | 6.14608e-11 | 1.000000 |
| rad35       | 2.11145e-12 | 1.000000 | 2.11145e-12 | 1.000000 |
| PAH9+H      | 2.62360e-13 | 1.000000 | 2.62361e-13 | 1.000000 |
| rad33       | 1.16349e-13 | 1.000000 | 1.16350e-13 | 1.000000 |
| rad28       | 8.28580e-14 | 1.000000 | 8.28584e-14 | 1.000000 |
| rad26       | 1.06610e-14 | 1.000000 | 1.06611e-14 | 1.000000 |
| rad20       | 1.69953e-15 | 1.000000 | 1.69954e-15 | 1.000000 |
| rad21       | 1.06230e-15 | 1.000000 | 1.06230e-15 | 1.000000 |
| rad30       | 1.03527e-15 | 1.000000 | 1.03527e-15 | 1.000000 |
| rad38       | 9.18281e-16 | 1.000000 | 9.18285e-16 | 1.000000 |
| rad18       | 8.02749e-18 | 1.000000 | 8.02753e-18 | 1.000000 |
| rad23       | 4.84667e-18 | 1.000000 | 4.84670e-18 | 1.000000 |
| rad27       | 4.00306e-18 | 1.000000 | 4.00308e-18 | 1.000000 |
| rad31       | 8.78505e-19 | 1.000000 | 8.78509e-19 | 1.000000 |
| rad22       | 7.11454e-19 | 1.000000 | 7.11458e-19 | 1.000000 |
| PhCHCCH2+H  | 1.56815e-19 | 1.000000 | 1.56816e-19 | 1.000000 |
| rad15       | 9.45252e-20 | 1.000000 | 9.45257e-20 | 1.000000 |
| rad45       | 3.02862e-20 | 1.000000 | 3.02864e-20 | 1.000000 |
| PhCCH+CH3   | 6.36477e-21 | 1.000000 | 6.36480e-21 | 1.000000 |
| rad36       | 1.88037e-21 | 1.000000 | 1.88037e-21 | 1.000000 |
| PhCCH3+H    | 9.67558e-22 | 1.000000 | 9.67562e-22 | 1.000000 |
| rad25       | 3.81871e-22 | 1.000000 | 3.81872e-22 | 1.000000 |
| rad24       | 4.21227e-23 | 1.000000 | 4.21229e-23 | 1.000000 |
| rad14       | 3.26019e-23 | 1.000000 | 3.26020e-23 | 1.000000 |
| rad8        | 4.23484e-27 | 1.000000 | 4.23486e-27 | 1.000000 |
| rad46       | 1.50867e-27 | 1.000000 | 1.50868e-27 | 1.000000 |
| rad9        | 1.45660e-29 | 1.000000 | 1.45661e-29 | 1.000000 |
| PAH7+H      | 2.27121e-30 | 1.000000 | 2.27122e-30 | 1.000000 |
| Ph+MeAc     | 2.60287e-31 | 1.000000 | 2.60288e-31 | 1.000000 |
| rad12       | 9.05218e-32 | 1.000000 | 9.05222e-32 | 1.000000 |
| rad39       | 5.31017e-33 | 1.000000 | 5.31019e-33 | 1.000000 |
| Ph+Allene   | 1.39669e-35 | 1.000000 | 1.39670e-35 | 1.000000 |
| rad60syn    | 1.21839e-39 | 1.000000 | 1.21840e-39 | 1.000000 |
| rad60anti   | 1.39092e-41 | 1.000000 | 1.39093e-41 | 1.000000 |
| PhCH2CCH+H  | 3.15111e-43 | 1.000000 | 3.15112e-43 | 1.000000 |
| rad37       | 3.63927e-44 | 1.000000 | 3.63928e-44 | 1.000000 |
| rad5        | 2.55782e-47 | 1.000000 | 2.55783e-47 | 1.000000 |
| PAH3+H      | 4.10408e-52 | 1.000000 | 4.10410e-52 | 1.000000 |
| rad59       | 2.19242e-52 | 1.000000 | 2.19243e-52 | 1.000000 |
| rad50       | 8.59310e-53 | 1.000000 | 8.59314e-53 | 1.000000 |
| rad19syn    | 5.89122e-61 | 1.000000 | 5.89124e-61 | 1.000000 |
| rad52       | 7.58238e-65 | 1.000000 | 7.58242e-65 | 1.000000 |
| PAH10+CH3   | 2.37278e-65 | 1.000000 | 2.37279e-65 | 1.000000 |
| rad54       | 8.80332e-66 | 1.000000 | 8.80336e-66 | 1.000000 |
| rad43       | 5.61621e-66 | 1.000000 | 5.61624e-66 | 1.000000 |
| rad62       | 1.45267e-68 | 1.000000 | 1.45268e-68 | 1.000000 |

|               |             |          |             |         |
|---------------|-------------|----------|-------------|---------|
| rad51         | 6.54373e-72 | 1.000000 | 6.54376e-72 | 1.00000 |
| rad70         | 8.56628e-75 | 1.000000 | 8.56632e-75 | 1.00000 |
| PhcycC3H3_A+H | 3.79566e-75 | 1.000000 | 3.79568e-75 | 1.00000 |
| rad55         | 2.03324e-75 | 1.000000 | 2.03325e-75 | 1.00000 |
| rad65         | 6.49074e-77 | 1.000000 | 6.49077e-77 | 1.00000 |
| rad58         | 1.32692e-78 | 1.000000 | 1.32692e-78 | 1.00000 |
| PAH1+H        | 2.78285e-80 | 1.000000 | 2.78287e-80 | 1.00000 |
| rad34         | 2.03835e-82 | 1.000000 | 2.03836e-82 | 1.00000 |
| rad42         | 2.48182e-85 | 1.000000 | 2.48183e-85 | 1.00000 |
| rad41         | 1.14756e-85 | 1.000000 | 1.14756e-85 | 1.00000 |
| rad47         | 1.29038e-91 | 1.000000 | 1.29039e-91 | 1.00000 |

0.100000000E-05 Pa, 80.000000 K

| Rate constant | True (fraction)     | Effective (fraction) |
|---------------|---------------------|----------------------|
| Total         | 7.28864e-49 (1.00 ) | 7.28860e-49 (1.00 )  |

| species       | PYtrue      | Cumul    | PYeffective | Cumul    |
|---------------|-------------|----------|-------------|----------|
| Indene+H      | 0.999847    | 0.999847 | 0.999853    | 0.999853 |
| rad6          | 0.000146707 | 0.999994 | 0.000146708 | 1.000000 |
| Benzyl+C2H2   | 6.25350e-06 | 1.000000 | 0.00000     | 1.000000 |
| rad2          | 4.82110e-08 | 1.00000  | 4.82113e-08 | 1.000000 |
| rad7          | 1.06381e-08 | 1.00000  | 1.06382e-08 | 1.000000 |
| rad1          | 3.08077e-09 | 1.00000  | 3.08079e-09 | 1.000000 |
| rad11         | 2.60156e-09 | 1.00000  | 2.60158e-09 | 1.000000 |
| rad10         | 2.47897e-09 | 1.00000  | 2.47898e-09 | 1.000000 |
| rad3          | 3.20155e-10 | 1.00000  | 3.20157e-10 | 1.000000 |
| rad4          | 1.62310e-10 | 1.00000  | 1.62311e-10 | 1.000000 |
| rad13         | 5.93273e-11 | 1.00000  | 5.93276e-11 | 1.000000 |
| rad35         | 3.84693e-12 | 1.00000  | 3.84695e-12 | 1.000000 |
| PAH9+H        | 7.64026e-13 | 1.00000  | 7.64031e-13 | 1.000000 |
| rad28         | 4.70010e-13 | 1.00000  | 4.70013e-13 | 1.000000 |
| rad33         | 1.12412e-13 | 1.00000  | 1.12413e-13 | 1.000000 |
| rad26         | 6.34645e-14 | 1.00000  | 6.34649e-14 | 1.000000 |
| rad30         | 1.51701e-14 | 1.00000  | 1.51702e-14 | 1.000000 |
| rad38         | 5.80911e-15 | 1.00000  | 5.80914e-15 | 1.000000 |
| rad20         | 1.41027e-15 | 1.00000  | 1.41028e-15 | 1.000000 |
| rad21         | 8.82161e-16 | 1.00000  | 8.82167e-16 | 1.000000 |
| rad27         | 1.45133e-17 | 1.00000  | 1.45134e-17 | 1.000000 |
| rad18         | 6.66372e-18 | 1.00000  | 6.66376e-18 | 1.000000 |
| rad15         | 4.85196e-18 | 1.00000  | 4.85199e-18 | 1.000000 |
| PhCHCCH2+H    | 3.85634e-18 | 1.00000  | 3.85637e-18 | 1.000000 |
| rad23         | 3.45202e-18 | 1.00000  | 3.45204e-18 | 1.000000 |
| rad31         | 8.70956e-19 | 1.00000  | 8.70962e-19 | 1.000000 |
| rad22         | 5.72386e-19 | 1.00000  | 5.72390e-19 | 1.000000 |
| PhCCH+CH3     | 2.53507e-19 | 1.00000  | 2.53509e-19 | 1.000000 |
| PhCCCH3+H     | 4.50364e-20 | 1.00000  | 4.50367e-20 | 1.000000 |
| rad45         | 2.16264e-20 | 1.00000  | 2.16265e-20 | 1.000000 |
| rad25         | 3.76523e-21 | 1.00000  | 3.76525e-21 | 1.000000 |
| rad36         | 1.34179e-21 | 1.00000  | 1.34180e-21 | 1.000000 |
| rad14         | 4.28117e-22 | 1.00000  | 4.28120e-22 | 1.000000 |
| rad24         | 3.73686e-23 | 1.00000  | 3.73688e-23 | 1.000000 |
| rad46         | 4.59045e-25 | 1.00000  | 4.59048e-25 | 1.000000 |
| rad8          | 4.32676e-25 | 1.00000  | 4.32679e-25 | 1.000000 |
| rad9          | 2.60161e-28 | 1.00000  | 2.60163e-28 | 1.000000 |
| PAH7+H        | 4.33072e-29 | 1.00000  | 4.33075e-29 | 1.000000 |
| Ph+MeAc       | 4.87474e-30 | 1.00000  | 4.87477e-30 | 1.000000 |
| rad12         | 1.69028e-30 | 1.00000  | 1.69029e-30 | 1.000000 |
| rad39         | 1.03273e-31 | 1.00000  | 1.03274e-31 | 1.000000 |
| Ph+Allene     | 2.74923e-34 | 1.00000  | 2.74924e-34 | 1.000000 |
| rad60syn      | 2.37614e-38 | 1.00000  | 2.37616e-38 | 1.000000 |
| rad60anti     | 2.79155e-40 | 1.00000  | 2.79157e-40 | 1.000000 |
| PhCH2CCH+H    | 6.97765e-42 | 1.00000  | 6.97769e-42 | 1.000000 |
| rad37         | 9.65300e-43 | 1.00000  | 9.65306e-43 | 1.000000 |
| rad5          | 7.07261e-46 | 1.00000  | 7.07265e-46 | 1.000000 |
| PAH3+H        | 9.94030e-51 | 1.00000  | 9.94036e-51 | 1.000000 |
| rad59         | 5.30437e-51 | 1.00000  | 5.30440e-51 | 1.000000 |
| rad50         | 2.23353e-51 | 1.00000  | 2.23354e-51 | 1.000000 |
| rad19syn      | 1.98032e-59 | 1.00000  | 1.98033e-59 | 1.000000 |
| rad52         | 3.64706e-63 | 1.00000  | 3.64708e-63 | 1.000000 |
| PAH10+CH3     | 2.69498e-63 | 1.00000  | 2.69500e-63 | 1.000000 |
| rad43         | 6.39055e-64 | 1.00000  | 6.39059e-64 | 1.000000 |
| rad54         | 3.69985e-64 | 1.00000  | 3.69987e-64 | 1.000000 |
| rad62         | 1.80199e-66 | 1.00000  | 1.80200e-66 | 1.000000 |
| rad51         | 6.34664e-70 | 1.00000  | 6.34668e-70 | 1.000000 |
| rad70         | 7.20939e-73 | 1.00000  | 7.20944e-73 | 1.000000 |
| PhcycC3H3_A+H | 3.38556e-73 | 1.00000  | 3.38558e-73 | 1.000000 |
| rad55         | 1.79855e-73 | 1.00000  | 1.79856e-73 | 1.000000 |

|        |             |         |             |          |
|--------|-------------|---------|-------------|----------|
| rad65  | 9.61201e-75 | 1.00000 | 9.61207e-75 | 1.000000 |
| rad58  | 1.24491e-76 | 1.00000 | 1.24492e-76 | 1.000000 |
| PAH1+H | 4.60075e-78 | 1.00000 | 4.60078e-78 | 1.000000 |
| rad34  | 3.69742e-80 | 1.00000 | 3.69745e-80 | 1.000000 |
| rad42  | 1.07300e-82 | 1.00000 | 1.07301e-82 | 1.000000 |
| rad41  | 5.27627e-83 | 1.00000 | 5.27630e-83 | 1.000000 |
| rad47  | 3.07382e-89 | 1.00000 | 3.07384e-89 | 1.000000 |

0.100000000E-05 Pa, 90.0000000 K

| Rate constant | True (fraction)     | Effective (fraction) |
|---------------|---------------------|----------------------|
| Total         | 6.85154e-45 (1.00 ) | 6.85148e-45 (1.00 )  |

| species       | PYtrue      | Cumul    | PYeffective | Cumul    |
|---------------|-------------|----------|-------------|----------|
| Indene+H      | 0.999851    | 0.999851 | 0.999860    | 0.999860 |
| rad6          | 0.000140067 | 0.999991 | 0.000140068 | 1.000000 |
| Benzyl+C2H2   | 8.45148e-06 | 1.000000 | 0.000000    | 1.000000 |
| rad2          | 4.61828e-08 | 1.000000 | 4.61832e-08 | 1.000000 |
| rad7          | 1.01714e-08 | 1.000000 | 1.01715e-08 | 1.000000 |
| rad1          | 2.96025e-09 | 1.000000 | 2.96027e-09 | 1.000000 |
| rad11         | 2.48809e-09 | 1.000000 | 2.48811e-09 | 1.000000 |
| rad10         | 2.37757e-09 | 1.000000 | 2.37759e-09 | 1.000000 |
| rad3          | 3.06880e-10 | 1.000000 | 3.06882e-10 | 1.000000 |
| rad4          | 1.55704e-10 | 1.000000 | 1.55706e-10 | 1.000000 |
| rad13         | 5.67728e-11 | 1.000000 | 5.67733e-11 | 1.000000 |
| rad35         | 6.25483e-12 | 1.000000 | 6.25488e-12 | 1.000000 |
| rad28         | 2.45420e-12 | 1.000000 | 2.45422e-12 | 1.000000 |
| PAH9+H        | 1.77801e-12 | 1.000000 | 1.77803e-12 | 1.000000 |
| rad26         | 3.51670e-13 | 1.000000 | 3.51673e-13 | 1.000000 |
| rad30         | 1.20964e-13 | 1.000000 | 1.20965e-13 | 1.000000 |
| rad33         | 1.07677e-13 | 1.000000 | 1.07678e-13 | 1.000000 |
| rad38         | 2.43280e-14 | 1.000000 | 2.43282e-14 | 1.000000 |
| rad20         | 1.19310e-15 | 1.000000 | 1.19311e-15 | 1.000000 |
| rad21         | 7.46945e-16 | 1.000000 | 7.46952e-16 | 1.000000 |
| PhCHCCH2+H    | 1.12216e-16 | 1.000000 | 1.12217e-16 | 1.000000 |
| rad15         | 1.02399e-16 | 1.000000 | 1.02400e-16 | 1.000000 |
| rad27         | 4.69026e-17 | 1.000000 | 4.69030e-17 | 1.000000 |
| PhCCH+CH3     | 1.25088e-17 | 1.000000 | 1.25089e-17 | 1.000000 |
| rad18         | 5.63744e-18 | 1.000000 | 5.63749e-18 | 1.000000 |
| PhCCCH3+H     | 2.64014e-18 | 1.000000 | 2.64016e-18 | 1.000000 |
| rad23         | 2.58358e-18 | 1.000000 | 2.58360e-18 | 1.000000 |
| rad31         | 8.56782e-19 | 1.000000 | 8.56789e-19 | 1.000000 |
| rad22         | 4.72092e-19 | 1.000000 | 4.72096e-19 | 1.000000 |
| rad25         | 3.74909e-20 | 1.000000 | 3.74912e-20 | 1.000000 |
| rad45         | 1.62211e-20 | 1.000000 | 1.62212e-20 | 1.000000 |
| rad14         | 5.98577e-21 | 1.000000 | 5.98582e-21 | 1.000000 |
| rad36         | 1.00586e-21 | 1.000000 | 1.00587e-21 | 1.000000 |
| rad8          | 1.14318e-22 | 1.000000 | 1.14319e-22 | 1.000000 |
| rad46         | 3.75460e-23 | 1.000000 | 3.75463e-23 | 1.000000 |
| rad24         | 3.39438e-23 | 1.000000 | 3.39440e-23 | 1.000000 |
| rad9          | 1.27051e-24 | 1.000000 | 1.27052e-24 | 1.000000 |
| PAH7+H        | 2.18162e-25 | 1.000000 | 2.18164e-25 | 1.000000 |
| rad12         | 7.66070e-27 | 1.000000 | 7.66076e-27 | 1.000000 |
| Ph+MeAc       | 2.60439e-27 | 1.000000 | 2.60441e-27 | 1.000000 |
| rad39         | 1.69764e-29 | 1.000000 | 1.69766e-29 | 1.000000 |
| Ph+Allene     | 4.61862e-32 | 1.000000 | 4.61865e-32 | 1.000000 |
| rad60syn      | 3.95472e-36 | 1.000000 | 3.95475e-36 | 1.000000 |
| rad60anti     | 4.78047e-38 | 1.000000 | 4.78051e-38 | 1.000000 |
| PhCH2CCH+H    | 1.31171e-39 | 1.000000 | 1.31172e-39 | 1.000000 |
| rad37         | 1.77038e-40 | 1.000000 | 1.77039e-40 | 1.000000 |
| rad5          | 1.31663e-43 | 1.000000 | 1.31665e-43 | 1.000000 |
| PAH3+H        | 2.02189e-48 | 1.000000 | 2.02191e-48 | 1.000000 |
| rad59         | 1.07787e-48 | 1.000000 | 1.07788e-48 | 1.000000 |
| rad50         | 4.76908e-49 | 1.000000 | 4.76912e-49 | 1.000000 |
| rad19syn      | 5.43973e-57 | 1.000000 | 5.43978e-57 | 1.000000 |
| rad52         | 1.43425e-60 | 1.000000 | 1.43426e-60 | 1.000000 |
| PAH10+CH3     | 1.29979e-60 | 1.000000 | 1.29980e-60 | 1.000000 |
| rad43         | 3.08391e-61 | 1.000000 | 3.08394e-61 | 1.000000 |
| rad54         | 1.28635e-61 | 1.000000 | 1.28636e-61 | 1.000000 |
| rad62         | 1.00726e-63 | 1.000000 | 1.00727e-63 | 1.000000 |
| rad51         | 4.44238e-67 | 1.000000 | 4.44242e-67 | 1.000000 |
| rad70         | 4.95483e-70 | 1.000000 | 4.95487e-70 | 1.000000 |
| PhcycC3H3_A+H | 2.44838e-70 | 1.000000 | 2.44840e-70 | 1.000000 |
| rad55         | 1.28953e-70 | 1.000000 | 1.28954e-70 | 1.000000 |
| rad65         | 9.07399e-72 | 1.000000 | 9.07406e-72 | 1.000000 |
| rad58         | 9.39284e-74 | 1.000000 | 9.39292e-74 | 1.000000 |
| PAH1+H        | 5.31824e-75 | 1.000000 | 5.31828e-75 | 1.000000 |
| rad34         | 4.67491e-77 | 1.000000 | 4.67495e-77 | 1.000000 |

|       |             |          |             |         |
|-------|-------------|----------|-------------|---------|
| rad42 | 1.77199e-79 | 1.000000 | 1.77201e-79 | 1.00000 |
| rad41 | 9.02764e-80 | 1.000000 | 9.02772e-80 | 1.00000 |
| rad47 | 3.81394e-86 | 1.000000 | 3.81397e-86 | 1.00000 |

0.100000000E-05 Pa, 100.000000 K

| Rate constant | True (fraction)     | Effective (fraction) |
|---------------|---------------------|----------------------|
| Total         | 1.02671e-41 (1.00 ) | 1.02670e-41 (1.00 )  |

| species       | PYtrue      | Cumul    | PYeffective | Cumul    |
|---------------|-------------|----------|-------------|----------|
| Indene+H      | 0.999856    | 0.999856 | 0.999867    | 0.999867 |
| rad6          | 0.000132452 | 0.999988 | 0.000132454 | 0.999999 |
| Benzyl+C2H2   | 1.12952e-05 | 1.000000 | 0.000000    | 0.999999 |
| rad2          | 4.38491e-08 | 1.000000 | 4.38496e-08 | 0.999999 |
| rad7          | 9.63323e-09 | 1.000000 | 9.63334e-09 | 1.000000 |
| rad1          | 2.82013e-09 | 1.000000 | 2.82016e-09 | 1.000000 |
| rad11         | 2.35713e-09 | 1.000000 | 2.35716e-09 | 1.000000 |
| rad10         | 2.25884e-09 | 1.000000 | 2.25887e-09 | 1.000000 |
| rad3          | 2.90471e-10 | 1.000000 | 2.90475e-10 | 1.000000 |
| rad4          | 1.47509e-10 | 1.000000 | 1.47511e-10 | 1.000000 |
| rad13         | 5.38181e-11 | 1.000000 | 5.38187e-11 | 1.000000 |
| rad28         | 9.82530e-12 | 1.000000 | 9.82541e-12 | 1.000000 |
| rad35         | 9.46245e-12 | 1.000000 | 9.46256e-12 | 1.000000 |
| PAH9+H        | 3.55784e-12 | 1.000000 | 3.55788e-12 | 1.000000 |
| rad26         | 1.46713e-12 | 1.000000 | 1.46714e-12 | 1.000000 |
| rad30         | 6.32692e-13 | 1.000000 | 6.32699e-13 | 1.000000 |
| rad33         | 1.02180e-13 | 1.000000 | 1.02182e-13 | 1.000000 |
| rad38         | 7.69564e-14 | 1.000000 | 7.69573e-14 | 1.000000 |
| PhCHCCH2+H    | 1.88871e-15 | 1.000000 | 1.88873e-15 | 1.000000 |
| rad15         | 1.16430e-15 | 1.000000 | 1.16431e-15 | 1.000000 |
| rad20         | 1.02409e-15 | 1.000000 | 1.02410e-15 | 1.000000 |
| rad21         | 6.41726e-16 | 1.000000 | 6.41733e-16 | 1.000000 |
| PhCCH+CH3     | 3.15507e-16 | 1.000000 | 3.15511e-16 | 1.000000 |
| rad27         | 1.23734e-16 | 1.000000 | 1.23736e-16 | 1.000000 |
| PhCCCH3+H     | 7.57567e-17 | 1.000000 | 7.57576e-17 | 1.000000 |
| rad18         | 4.83643e-18 | 1.000000 | 4.83648e-18 | 1.000000 |
| rad23         | 2.01042e-18 | 1.000000 | 2.01044e-18 | 1.000000 |
| rad31         | 8.36211e-19 | 1.000000 | 8.36220e-19 | 1.000000 |
| rad22         | 3.96428e-19 | 1.000000 | 3.96432e-19 | 1.000000 |
| rad25         | 2.51245e-19 | 1.000000 | 2.51248e-19 | 1.000000 |
| rad14         | 5.26780e-20 | 1.000000 | 5.26786e-20 | 1.000000 |
| rad45         | 1.26590e-20 | 1.000000 | 1.26592e-20 | 1.000000 |
| rad8          | 7.90501e-21 | 1.000000 | 7.90510e-21 | 1.000000 |
| rad46         | 1.26408e-21 | 1.000000 | 1.26410e-21 | 1.000000 |
| rad36         | 7.84669e-22 | 1.000000 | 7.84678e-22 | 1.000000 |
| rad9          | 1.71831e-22 | 1.000000 | 1.71832e-22 | 1.000000 |
| PAH7+H        | 4.59544e-23 | 1.000000 | 4.59549e-23 | 1.000000 |
| rad24         | 3.14002e-23 | 1.000000 | 3.14005e-23 | 1.000000 |
| Ph+MeAc       | 1.57874e-23 | 1.000000 | 1.57876e-23 | 1.000000 |
| rad12         | 2.82021e-24 | 1.000000 | 2.82024e-24 | 1.000000 |
| rad39         | 3.51233e-25 | 1.000000 | 3.51237e-25 | 1.000000 |
| Ph+Allene     | 1.51442e-29 | 1.000000 | 1.51444e-29 | 1.000000 |
| rad60syn      | 1.28402e-33 | 1.000000 | 1.28404e-33 | 1.000000 |
| rad60anti     | 1.59876e-35 | 1.000000 | 1.59878e-35 | 1.000000 |
| PhCH2CCH+H    | 4.82618e-37 | 1.000000 | 4.82624e-37 | 1.000000 |
| rad37         | 6.24223e-38 | 1.000000 | 6.24230e-38 | 1.000000 |
| rad5          | 4.68496e-41 | 1.000000 | 4.68501e-41 | 1.000000 |
| PAH3+H        | 8.03534e-46 | 1.000000 | 8.03543e-46 | 1.000000 |
| rad59         | 4.27952e-46 | 1.000000 | 4.27957e-46 | 1.000000 |
| rad50         | 1.90629e-46 | 1.000000 | 1.90631e-46 | 1.000000 |
| rad19syn      | 2.93660e-54 | 1.000000 | 2.93663e-54 | 1.000000 |
| PAH10+CH3     | 1.12420e-57 | 1.000000 | 1.12422e-57 | 1.000000 |
| rad52         | 1.01835e-57 | 1.000000 | 1.01836e-57 | 1.000000 |
| rad43         | 2.66909e-58 | 1.000000 | 2.66912e-58 | 1.000000 |
| rad54         | 9.07251e-59 | 1.000000 | 9.07261e-59 | 1.000000 |
| rad62         | 1.01904e-60 | 1.000000 | 1.01905e-60 | 1.000000 |
| rad51         | 5.26529e-64 | 1.000000 | 5.26535e-64 | 1.000000 |
| rad70         | 6.99764e-67 | 1.000000 | 6.99772e-67 | 1.000000 |
| PhcycC3H3_A+H | 3.63095e-67 | 1.000000 | 3.63099e-67 | 1.000000 |
| rad55         | 1.89378e-67 | 1.000000 | 1.89380e-67 | 1.000000 |
| rad65         | 1.40541e-68 | 1.000000 | 1.40543e-68 | 1.000000 |
| rad58         | 1.44755e-70 | 1.000000 | 1.44757e-70 | 1.000000 |
| PAH1+H        | 1.22259e-71 | 1.000000 | 1.22260e-71 | 1.000000 |
| rad34         | 1.18611e-73 | 1.000000 | 1.18612e-73 | 1.000000 |
| rad42         | 5.29899e-76 | 1.000000 | 5.29905e-76 | 1.000000 |
| rad41         | 2.78543e-76 | 1.000000 | 2.78546e-76 | 1.000000 |
| rad47         | 7.59005e-83 | 1.000000 | 7.59014e-83 | 1.000000 |

0.100000000E-05 Pa, 110.000000 K

=====

| Rate constant | True (fraction)     | Effective (fraction) |
|---------------|---------------------|----------------------|
| Total         | 4.04932e-39 (1.00 ) | 4.04926e-39 (1.00 )  |

| species       | PYtrue      | Cumul    | PYeffective | Cumul    |
|---------------|-------------|----------|-------------|----------|
| Indene+H      | 0.999861    | 0.999861 | 0.999876    | 0.999876 |
| rad6          | 0.000124010 | 0.999985 | 0.000124012 | 1.000000 |
| Benzyl+C2H2   | 1.49711e-05 | 1.000000 | 0.000000    | 1.000000 |
| rad2          | 4.11317e-08 | 1.000000 | 4.11323e-08 | 1.000000 |
| rad7          | 9.03374e-09 | 1.000000 | 9.03388e-09 | 1.000000 |
| rad1          | 2.65508e-09 | 1.000000 | 2.65512e-09 | 1.000000 |
| rad11         | 2.21113e-09 | 1.000000 | 2.21116e-09 | 1.000000 |
| rad10         | 2.12307e-09 | 1.000000 | 2.12310e-09 | 1.000000 |
| rad3          | 2.73576e-10 | 1.000000 | 2.73580e-10 | 1.000000 |
| rad4          | 1.39064e-10 | 1.000000 | 1.39067e-10 | 1.000000 |
| rad13         | 5.05180e-11 | 1.000000 | 5.05187e-11 | 1.000000 |
| rad28         | 3.05670e-11 | 1.000000 | 3.05675e-11 | 1.000000 |
| rad35         | 1.36702e-11 | 1.000000 | 1.36704e-11 | 1.000000 |
| PAH9+H        | 6.41561e-12 | 1.000000 | 6.41571e-12 | 1.000000 |
| rad26         | 4.68278e-12 | 1.000000 | 4.68285e-12 | 1.000000 |
| rad30         | 2.44532e-12 | 1.000000 | 2.44535e-12 | 1.000000 |
| rad38         | 2.00028e-13 | 1.000000 | 2.00031e-13 | 1.000000 |
| rad33         | 9.60223e-14 | 1.000000 | 9.60238e-14 | 1.000000 |
| PhCHCCH2+H    | 1.98131e-14 | 1.000000 | 1.98134e-14 | 1.000000 |
| rad15         | 8.47747e-15 | 1.000000 | 8.47760e-15 | 1.000000 |
| PhCCH+CH3     | 4.57503e-15 | 1.000000 | 4.57510e-15 | 1.000000 |
| PhCCCH3+H     | 1.21477e-15 | 1.000000 | 1.21479e-15 | 1.000000 |
| rad20         | 8.88835e-16 | 1.000000 | 8.88848e-16 | 1.000000 |
| rad21         | 5.57527e-16 | 1.000000 | 5.57535e-16 | 1.000000 |
| rad27         | 2.70677e-16 | 1.000000 | 2.70681e-16 | 1.000000 |
| rad18         | 4.19327e-18 | 1.000000 | 4.19334e-18 | 1.000000 |
| rad23         | 1.61625e-18 | 1.000000 | 1.61628e-18 | 1.000000 |
| rad25         | 1.17366e-18 | 1.000000 | 1.17368e-18 | 1.000000 |
| rad31         | 8.09502e-19 | 1.000000 | 8.09514e-19 | 1.000000 |
| rad22         | 3.37349e-19 | 1.000000 | 3.37354e-19 | 1.000000 |
| rad14         | 3.06615e-19 | 1.000000 | 3.06620e-19 | 1.000000 |
| rad8          | 2.54396e-19 | 1.000000 | 2.54400e-19 | 1.000000 |
| rad46         | 2.24506e-20 | 1.000000 | 2.24509e-20 | 1.000000 |
| rad45         | 1.02439e-20 | 1.000000 | 1.02440e-20 | 1.000000 |
| rad9          | 8.70784e-21 | 1.000000 | 8.70797e-21 | 1.000000 |
| PAH7+H        | 2.76478e-21 | 1.000000 | 2.76482e-21 | 1.000000 |
| Ph+MeAc       | 1.76895e-21 | 1.000000 | 1.76898e-21 | 1.000000 |
| rad36         | 6.34817e-22 | 1.000000 | 6.34827e-22 | 1.000000 |
| rad12         | 1.91682e-22 | 1.000000 | 1.91685e-22 | 1.000000 |
| rad39         | 3.70445e-23 | 1.000000 | 3.70451e-23 | 1.000000 |
| rad24         | 2.94733e-23 | 1.000000 | 2.94737e-23 | 1.000000 |
| Ph+Allene     | 1.91243e-24 | 1.000000 | 1.91246e-24 | 1.000000 |
| rad60syn      | 2.70844e-26 | 1.000000 | 2.70848e-26 | 1.000000 |
| rad60anti     | 1.02857e-27 | 1.000000 | 1.02859e-27 | 1.000000 |
| PhCH2CCH+H    | 4.18290e-34 | 1.000000 | 4.18296e-34 | 1.000000 |
| rad37         | 4.95345e-35 | 1.000000 | 4.95352e-35 | 1.000000 |
| rad5          | 3.67027e-38 | 1.000000 | 3.67032e-38 | 1.000000 |
| PAH3+H        | 7.46186e-43 | 1.000000 | 7.46197e-43 | 1.000000 |
| rad59         | 3.97121e-43 | 1.000000 | 3.97127e-43 | 1.000000 |
| rad50         | 1.67178e-43 | 1.000000 | 1.67180e-43 | 1.000000 |
| rad19syn      | 3.15924e-51 | 1.000000 | 3.15929e-51 | 1.000000 |
| PAH10+CH3     | 1.43288e-54 | 1.000000 | 1.43291e-54 | 1.000000 |
| rad52         | 1.25495e-54 | 1.000000 | 1.25497e-54 | 1.000000 |
| rad43         | 3.40374e-55 | 1.000000 | 3.40379e-55 | 1.000000 |
| rad54         | 1.14082e-55 | 1.000000 | 1.14084e-55 | 1.000000 |
| rad62         | 1.52082e-57 | 1.000000 | 1.52084e-57 | 1.000000 |
| rad51         | 1.00836e-60 | 1.000000 | 1.00837e-60 | 1.000000 |
| rad70         | 1.54344e-63 | 1.000000 | 1.54346e-63 | 1.000000 |
| PhcycC3H3_A+H | 8.38410e-64 | 1.000000 | 8.38422e-64 | 1.000000 |
| rad55         | 4.32533e-64 | 1.000000 | 4.32539e-64 | 1.000000 |
| rad65         | 3.46062e-65 | 1.000000 | 3.46067e-65 | 1.000000 |
| rad58         | 3.46326e-67 | 1.000000 | 3.46331e-67 | 1.000000 |
| PAH1+H        | 4.33115e-68 | 1.000000 | 4.33121e-68 | 1.000000 |
| rad34         | 4.70179e-70 | 1.000000 | 4.70186e-70 | 1.000000 |
| rad42         | 2.32896e-72 | 1.000000 | 2.32900e-72 | 1.000000 |
| rad41         | 1.25620e-72 | 1.000000 | 1.25622e-72 | 1.000000 |
| rad47         | 2.40293e-79 | 1.000000 | 2.40297e-79 | 1.000000 |

0.100000000E-05 Pa, 120.000000 K

=====

| Rate constant | True (fraction) | Effective (fraction) |
|---------------|-----------------|----------------------|
|---------------|-----------------|----------------------|

Total | 5.87106e-37 (1.00 ) 5.87094e-37 (1.00 )

| species       | PYtrue      | Cumul    | PYeffective | Cumul    |
|---------------|-------------|----------|-------------|----------|
| Indene+H      | 0.999865    | 0.999865 | 0.999885    | 0.999885 |
| rad6          | 0.000114942 | 0.999980 | 0.000114944 | 1.000000 |
| Benzyl+C2H2   | 1.97191e-05 | 1.000000 | 0.000000    | 1.000000 |
| rad2          | 3.81950e-08 | 1.000000 | 3.81958e-08 | 1.000000 |
| rad7          | 8.38725e-09 | 1.000000 | 8.38741e-09 | 1.000000 |
| rad1          | 2.47539e-09 | 1.000000 | 2.47544e-09 | 1.000000 |
| rad11         | 2.05356e-09 | 1.000000 | 2.05360e-09 | 1.000000 |
| rad10         | 1.97451e-09 | 1.000000 | 1.97455e-09 | 1.000000 |
| rad3          | 2.53683e-10 | 1.000000 | 2.53688e-10 | 1.000000 |
| rad4          | 1.29090e-10 | 1.000000 | 1.29092e-10 | 1.000000 |
| rad28         | 7.72987e-11 | 1.000000 | 7.73003e-11 | 1.000000 |
| rad13         | 4.69509e-11 | 1.000000 | 4.69518e-11 | 1.000000 |
| rad35         | 1.91804e-11 | 1.000000 | 1.91808e-11 | 1.000000 |
| rad26         | 1.20218e-11 | 1.000000 | 1.20221e-11 | 1.000000 |
| PAH9+H        | 1.07577e-11 | 1.000000 | 1.07579e-11 | 1.000000 |
| rad30         | 7.56086e-12 | 1.000000 | 7.56101e-12 | 1.000000 |
| rad38         | 4.51773e-13 | 1.000000 | 4.51782e-13 | 1.000000 |
| PhCHCCH2+H    | 1.44245e-13 | 1.000000 | 1.44247e-13 | 1.000000 |
| rad33         | 8.93487e-14 | 1.000000 | 8.93504e-14 | 1.000000 |
| rad15         | 4.43402e-14 | 1.000000 | 4.43411e-14 | 1.000000 |
| PhCCH+CH3     | 4.34622e-14 | 1.000000 | 4.34631e-14 | 1.000000 |
| PhCCCH3+H     | 1.25011e-14 | 1.000000 | 1.25014e-14 | 1.000000 |
| rad20         | 7.78171e-16 | 1.000000 | 7.78187e-16 | 1.000000 |
| rad27         | 5.07718e-16 | 1.000000 | 5.07728e-16 | 1.000000 |
| rad21         | 4.88642e-16 | 1.000000 | 4.88652e-16 | 1.000000 |
| rad8          | 4.61387e-18 | 1.000000 | 4.61396e-18 | 1.000000 |
| rad25         | 4.12090e-18 | 1.000000 | 4.12099e-18 | 1.000000 |
| rad18         | 3.66518e-18 | 1.000000 | 3.66525e-18 | 1.000000 |
| rad23         | 1.33772e-18 | 1.000000 | 1.33775e-18 | 1.000000 |
| rad14         | 1.29104e-18 | 1.000000 | 1.29106e-18 | 1.000000 |
| rad31         | 7.77595e-19 | 1.000000 | 7.77610e-19 | 1.000000 |
| rad22         | 2.89966e-19 | 1.000000 | 2.89972e-19 | 1.000000 |
| rad46         | 2.47621e-19 | 1.000000 | 2.47626e-19 | 1.000000 |
| rad9          | 2.29081e-19 | 1.000000 | 2.29086e-19 | 1.000000 |
| PAH7+H        | 8.24049e-20 | 1.000000 | 8.24065e-20 | 1.000000 |
| Ph+MeAc       | 7.41835e-20 | 1.000000 | 7.41850e-20 | 1.000000 |
| rad45         | 8.51295e-21 | 1.000000 | 8.51311e-21 | 1.000000 |
| rad12         | 6.23101e-21 | 1.000000 | 6.23113e-21 | 1.000000 |
| rad39         | 1.51505e-21 | 1.000000 | 1.51508e-21 | 1.000000 |
| rad36         | 5.27526e-22 | 1.000000 | 5.27537e-22 | 1.000000 |
| Ph+Allene     | 1.55505e-22 | 1.000000 | 1.55508e-22 | 1.000000 |
| rad24         | 2.79983e-23 | 1.000000 | 2.79988e-23 | 1.000000 |
| rad60syn      | 1.65778e-24 | 1.000000 | 1.65782e-24 | 1.000000 |
| rad60anti     | 9.96798e-26 | 1.000000 | 9.96817e-26 | 1.000000 |
| PhCH2CCH+H    | 2.55841e-31 | 1.000000 | 2.55846e-31 | 1.000000 |
| rad37         | 2.92178e-32 | 1.000000 | 2.92184e-32 | 1.000000 |
| rad5          | 2.15492e-35 | 1.000000 | 2.15496e-35 | 1.000000 |
| PAH3+H        | 4.91817e-40 | 1.000000 | 4.91826e-40 | 1.000000 |
| rad59         | 2.61528e-40 | 1.000000 | 2.61533e-40 | 1.000000 |
| rad50         | 1.03778e-40 | 1.000000 | 1.03780e-40 | 1.000000 |
| rad19syn      | 2.38633e-48 | 1.000000 | 2.38637e-48 | 1.000000 |
| PAH10+CH3     | 1.24241e-51 | 1.000000 | 1.24243e-51 | 1.000000 |
| rad52         | 1.02236e-51 | 1.000000 | 1.02238e-51 | 1.000000 |
| rad43         | 2.95334e-52 | 1.000000 | 2.95339e-52 | 1.000000 |
| rad54         | 9.88584e-53 | 1.000000 | 9.88603e-53 | 1.000000 |
| rad62         | 1.54478e-54 | 1.000000 | 1.54482e-54 | 1.000000 |
| rad51         | 1.27550e-57 | 1.000000 | 1.27552e-57 | 1.000000 |
| rad70         | 2.36709e-60 | 1.000000 | 2.36714e-60 | 1.000000 |
| PhcycC3H3_A+H | 1.35105e-60 | 1.000000 | 1.35108e-60 | 1.000000 |
| rad55         | 6.87524e-61 | 1.000000 | 6.87538e-61 | 1.000000 |
| rad65         | 5.64276e-62 | 1.000000 | 5.64287e-62 | 1.000000 |
| rad58         | 5.78986e-64 | 1.000000 | 5.78997e-64 | 1.000000 |
| PAH1+H        | 1.11141e-64 | 1.000000 | 1.11143e-64 | 1.000000 |
| rad34         | 1.38135e-66 | 1.000000 | 1.38138e-66 | 1.000000 |
| rad42         | 7.09346e-69 | 1.000000 | 7.09360e-69 | 1.000000 |
| rad41         | 3.88510e-69 | 1.000000 | 3.88518e-69 | 1.000000 |
| rad47         | 5.09859e-76 | 1.000000 | 5.09869e-76 | 1.000000 |

0.100000000E-05 Pa, 130.000000 K

=====

| Rate constant | True (fraction)     | Effective (fraction) |
|---------------|---------------------|----------------------|
| Total         | 3.94360e-35 (1.00 ) | 3.94350e-35 (1.00 )  |

| species | PYtrue | Cumul | PYeffective | Cumul |
|---------|--------|-------|-------------|-------|
|---------|--------|-------|-------------|-------|

|               |             |          |             |          |
|---------------|-------------|----------|-------------|----------|
| Indene+H      | 0.999869    | 0.999869 | 0.999894    | 0.999894 |
| rad6          | 0.000105480 | 0.999974 | 0.000105483 | 0.999999 |
| Benzyl+C2H2   | 2.58440e-05 | 1.00000  | 0.00000     | 0.999999 |
| rad2          | 3.50782e-08 | 1.00000  | 3.50791e-08 | 1.000000 |
| rad7          | 7.71032e-09 | 1.00000  | 7.71052e-09 | 1.000000 |
| rad1          | 2.28329e-09 | 1.00000  | 2.28335e-09 | 1.000000 |
| rad11         | 1.88847e-09 | 1.00000  | 1.88852e-09 | 1.000000 |
| rad10         | 1.81834e-09 | 1.00000  | 1.81839e-09 | 1.000000 |
| rad3          | 2.33857e-10 | 1.00000  | 2.33863e-10 | 1.000000 |
| rad28         | 1.65521e-10 | 1.00000  | 1.65525e-10 | 1.000000 |
| rad4          | 1.19140e-10 | 1.00000  | 1.19143e-10 | 1.000000 |
| rad13         | 4.32083e-11 | 1.00000  | 4.32094e-11 | 1.000000 |
| rad35         | 2.64291e-11 | 1.00000  | 2.64298e-11 | 1.000000 |
| rad26         | 2.59533e-11 | 1.00000  | 2.59540e-11 | 1.000000 |
| rad30         | 1.97580e-11 | 1.00000  | 1.97585e-11 | 1.000000 |
| PAH9+H        | 1.71397e-11 | 1.00000  | 1.71401e-11 | 1.000000 |
| rad38         | 9.21086e-13 | 1.00000  | 9.21110e-13 | 1.000000 |
| PhCHCCH2+H    | 7.91164e-13 | 1.00000  | 7.91185e-13 | 1.000000 |
| PhCCH+CH3     | 2.97852e-13 | 1.00000  | 2.97860e-13 | 1.000000 |
| rad15         | 1.80339e-13 | 1.00000  | 1.80344e-13 | 1.000000 |
| PhCCCH3+H     | 9.13497e-14 | 1.00000  | 9.13520e-14 | 1.000000 |
| rad33         | 8.23307e-14 | 1.00000  | 8.23328e-14 | 1.000000 |
| rad27         | 8.41764e-16 | 1.00000  | 8.41785e-16 | 1.000000 |
| rad20         | 6.86008e-16 | 1.00000  | 6.86026e-16 | 1.000000 |
| rad21         | 4.31274e-16 | 1.00000  | 4.31285e-16 | 1.000000 |
| rad8          | 5.38484e-17 | 1.00000  | 5.38498e-17 | 1.000000 |
| rad25         | 1.15687e-17 | 1.00000  | 1.15690e-17 | 1.000000 |
| rad14         | 4.22266e-18 | 1.00000  | 4.22277e-18 | 1.000000 |
| rad9          | 3.66572e-18 | 1.00000  | 3.66581e-18 | 1.000000 |
| rad18         | 3.22371e-18 | 1.00000  | 3.22379e-18 | 1.000000 |
| rad46         | 1.89877e-18 | 1.00000  | 1.89882e-18 | 1.000000 |
| Ph+MeAc       | 1.76943e-18 | 1.00000  | 1.76948e-18 | 1.000000 |
| PAH7+H        | 1.45388e-18 | 1.00000  | 1.45392e-18 | 1.000000 |
| rad23         | 1.13842e-18 | 1.00000  | 1.13845e-18 | 1.000000 |
| rad31         | 7.41592e-19 | 1.00000  | 7.41611e-19 | 1.000000 |
| rad22         | 2.51147e-19 | 1.00000  | 2.51153e-19 | 1.000000 |
| rad12         | 1.18241e-19 | 1.00000  | 1.18244e-19 | 1.000000 |
| rad39         | 3.50737e-20 | 1.00000  | 3.50746e-20 | 1.000000 |
| rad45         | 7.32326e-21 | 1.00000  | 7.32344e-21 | 1.000000 |
| Ph+Allene     | 5.85782e-21 | 1.00000  | 5.85797e-21 | 1.000000 |
| rad36         | 4.53872e-22 | 1.00000  | 4.53884e-22 | 1.000000 |
| rad60syn      | 5.24603e-23 | 1.00000  | 5.24616e-23 | 1.000000 |
| rad24         | 2.68680e-23 | 1.00000  | 2.68687e-23 | 1.000000 |
| rad60anti     | 4.01381e-24 | 1.00000  | 4.01392e-24 | 1.000000 |
| PhCH2CCH+H    | 1.64587e-25 | 1.00000  | 1.64591e-25 | 1.000000 |
| rad37         | 3.40660e-26 | 1.00000  | 3.40668e-26 | 1.000000 |
| rad5          | 1.70837e-32 | 1.00000  | 1.70842e-32 | 1.000000 |
| PAH3+H        | 4.27349e-37 | 1.00000  | 4.27360e-37 | 1.000000 |
| rad59         | 2.27045e-37 | 1.00000  | 2.27051e-37 | 1.000000 |
| rad50         | 8.46819e-38 | 1.00000  | 8.46841e-38 | 1.000000 |
| rad19syn      | 2.17431e-45 | 1.00000  | 2.17437e-45 | 1.000000 |
| PAH10+CH3     | 9.32526e-49 | 1.00000  | 9.32550e-49 | 1.000000 |
| rad52         | 8.26782e-49 | 1.00000  | 8.26803e-49 | 1.000000 |
| rad43         | 2.21782e-49 | 1.00000  | 2.21787e-49 | 1.000000 |
| rad54         | 8.68579e-50 | 1.00000  | 8.68602e-50 | 1.000000 |
| rad62         | 1.35015e-51 | 1.00000  | 1.35019e-51 | 1.000000 |
| rad51         | 1.51063e-54 | 1.00000  | 1.51067e-54 | 1.000000 |
| rad70         | 3.12366e-57 | 1.00000  | 3.12374e-57 | 1.000000 |
| PhcycC3H3_A+H | 1.87316e-57 | 1.00000  | 1.87321e-57 | 1.000000 |
| rad55         | 9.38261e-58 | 1.00000  | 9.38285e-58 | 1.000000 |
| rad65         | 8.59873e-59 | 1.00000  | 8.59895e-59 | 1.000000 |
| rad58         | 8.32691e-61 | 1.00000  | 8.32713e-61 | 1.000000 |
| PAH1+H        | 2.46337e-61 | 1.00000  | 2.46343e-61 | 1.000000 |
| rad34         | 3.51984e-63 | 1.00000  | 3.51993e-63 | 1.000000 |
| rad42         | 1.85855e-65 | 1.00000  | 1.85859e-65 | 1.000000 |
| rad41         | 1.02317e-65 | 1.00000  | 1.02320e-65 | 1.000000 |
| rad47         | 1.01707e-72 | 1.00000  | 1.01709e-72 | 1.000000 |

0.100000000E-05 Pa, 140.000000 K

=====

| Rate constant | True (fraction)     | Effective (fraction) |
|---------------|---------------------|----------------------|
| Total         | 1.44756e-33 (1.00 ) | 1.44751e-33 (1.00 )  |

| species     | PYtrue      | Cumul    | PYeffective | Cumul    |
|-------------|-------------|----------|-------------|----------|
| Indene+H    | 0.999870    | 0.999870 | 0.999904    | 0.999904 |
| rad6        | 9.58633e-05 | 0.999966 | 9.58665e-05 | 1.000000 |
| Benzyl+C2H2 | 3.37300e-05 | 1.000000 | 0.00000     | 1.000000 |
| rad2        | 3.20464e-08 | 1.000000 | 3.20475e-08 | 1.000000 |



|               |             |          |             |          |
|---------------|-------------|----------|-------------|----------|
| rad7          | 7.02004e-09 | 1.000000 | 7.02027e-09 | 1.000000 |
| rad1          | 2.09582e-09 | 1.000000 | 2.09589e-09 | 1.000000 |
| rad11         | 1.72002e-09 | 1.000000 | 1.72008e-09 | 1.000000 |
| rad10         | 1.66065e-09 | 1.000000 | 1.66070e-09 | 1.000000 |
| rad28         | 3.09977e-10 | 1.000000 | 3.09988e-10 | 1.000000 |
| rad3          | 2.12637e-10 | 1.000000 | 2.12644e-10 | 1.000000 |
| rad4          | 1.08468e-10 | 1.000000 | 1.08472e-10 | 1.000000 |
| rad26         | 4.87812e-11 | 1.000000 | 4.87829e-11 | 1.000000 |
| rad30         | 4.53758e-11 | 1.000000 | 4.53773e-11 | 1.000000 |
| rad13         | 3.93849e-11 | 1.000000 | 3.93862e-11 | 1.000000 |
| rad35         | 3.60233e-11 | 1.000000 | 3.60245e-11 | 1.000000 |
| PAH9+H        | 2.63391e-11 | 1.000000 | 2.63400e-11 | 1.000000 |
| PhCHCCH2+H    | 3.47228e-12 | 1.000000 | 3.47240e-12 | 1.000000 |
| rad38         | 1.74077e-12 | 1.000000 | 1.74083e-12 | 1.000000 |
| PhCCH+CH3     | 1.57917e-12 | 1.000000 | 1.57922e-12 | 1.000000 |
| rad15         | 6.03444e-13 | 1.000000 | 6.03464e-13 | 1.000000 |
| PhCCCH3+H     | 5.09980e-13 | 1.000000 | 5.09997e-13 | 1.000000 |
| rad33         | 7.51462e-14 | 1.000000 | 7.51487e-14 | 1.000000 |
| rad27         | 1.26371e-15 | 1.000000 | 1.26375e-15 | 1.000000 |
| rad20         | 6.08138e-16 | 1.000000 | 6.08159e-16 | 1.000000 |
| rad8          | 4.44687e-16 | 1.000000 | 4.44702e-16 | 1.000000 |
| rad21         | 3.82802e-16 | 1.000000 | 3.82815e-16 | 1.000000 |
| rad9          | 3.97084e-17 | 1.000000 | 3.97097e-17 | 1.000000 |
| rad25         | 2.72023e-17 | 1.000000 | 2.72032e-17 | 1.000000 |
| Ph+MeAc       | 2.71202e-17 | 1.000000 | 2.71211e-17 | 1.000000 |
| PAH7+H        | 1.70143e-17 | 1.000000 | 1.70149e-17 | 1.000000 |
| rad14         | 1.13118e-17 | 1.000000 | 1.13121e-17 | 1.000000 |
| rad46         | 1.09713e-17 | 1.000000 | 1.09717e-17 | 1.000000 |
| rad18         | 2.84927e-18 | 1.000000 | 2.84936e-18 | 1.000000 |
| rad12         | 1.47169e-18 | 1.000000 | 1.47174e-18 | 1.000000 |
| rad23         | 9.96566e-19 | 1.000000 | 9.96599e-19 | 1.000000 |
| rad31         | 7.02761e-19 | 1.000000 | 7.02785e-19 | 1.000000 |
| rad39         | 5.20377e-19 | 1.000000 | 5.20395e-19 | 1.000000 |
| rad22         | 2.18797e-19 | 1.000000 | 2.18804e-19 | 1.000000 |
| Ph+Allene     | 1.30350e-19 | 1.000000 | 1.30354e-19 | 1.000000 |
| rad45         | 6.48711e-21 | 1.000000 | 6.48733e-21 | 1.000000 |
| rad60syn      | 1.00452e-21 | 1.000000 | 1.00456e-21 | 1.000000 |
| rad36         | 4.02197e-22 | 1.000000 | 4.02211e-22 | 1.000000 |
| rad60anti     | 9.33601e-23 | 1.000000 | 9.33633e-23 | 1.000000 |
| rad24         | 2.60108e-23 | 1.000000 | 2.60117e-23 | 1.000000 |
| PhCH2CCH+H    | 1.18682e-23 | 1.000000 | 1.18686e-23 | 1.000000 |
| rad37         | 3.38804e-24 | 1.000000 | 3.38815e-24 | 1.000000 |
| rad5          | 6.97130e-27 | 1.000000 | 6.97153e-27 | 1.000000 |
| PAH3+H        | 1.15604e-28 | 1.000000 | 1.15608e-28 | 1.000000 |
| rad59         | 5.78020e-29 | 1.000000 | 5.78040e-29 | 1.000000 |
| rad50         | 7.59925e-30 | 1.000000 | 7.59950e-30 | 1.000000 |
| rad19syn      | 1.46757e-42 | 1.000000 | 1.46762e-42 | 1.000000 |
| rad52         | 4.36708e-46 | 1.000000 | 4.36723e-46 | 1.000000 |
| PAH10+CH3     | 4.36109e-46 | 1.000000 | 4.36124e-46 | 1.000000 |
| rad43         | 1.03739e-46 | 1.000000 | 1.03743e-46 | 1.000000 |
| rad54         | 5.32978e-47 | 1.000000 | 5.32996e-47 | 1.000000 |
| rad62         | 7.28966e-49 | 1.000000 | 7.28991e-49 | 1.000000 |
| rad51         | 1.10703e-51 | 1.000000 | 1.10706e-51 | 1.000000 |
| rad70         | 2.52080e-54 | 1.000000 | 2.52088e-54 | 1.000000 |
| PhcycC3H3_A+H | 1.58947e-54 | 1.000000 | 1.58952e-54 | 1.000000 |
| rad55         | 7.81801e-55 | 1.000000 | 7.81828e-55 | 1.000000 |
| rad65         | 8.14338e-56 | 1.000000 | 8.14365e-56 | 1.000000 |
| rad58         | 7.33109e-58 | 1.000000 | 7.33134e-58 | 1.000000 |
| PAH1+H        | 3.34189e-58 | 1.000000 | 3.34201e-58 | 1.000000 |
| rad34         | 5.48081e-60 | 1.000000 | 5.48099e-60 | 1.000000 |
| rad42         | 3.01460e-62 | 1.000000 | 3.01470e-62 | 1.000000 |
| rad41         | 1.65091e-62 | 1.000000 | 1.65097e-62 | 1.000000 |
| rad47         | 1.27344e-69 | 1.000000 | 1.27348e-69 | 1.000000 |

0.100000000E-05 Pa, 150.000000 K

=====

| Rate constant | True (fraction)     | Effective (fraction) |
|---------------|---------------------|----------------------|
| Total         | 3.27736e-32 (1.00 ) | 3.27722e-32 (1.00 )  |

| species     | PYtrue      | Cumul    | PYeffective | Cumul    |
|-------------|-------------|----------|-------------|----------|
| Indene+H    | 0.999870    | 0.999870 | 0.999914    | 0.999914 |
| rad6        | 8.63129e-05 | 0.999956 | 8.63167e-05 | 1.000000 |
| Benzyl+C2H2 | 4.38559e-05 | 1.000000 | 0.000000    | 1.000000 |
| rad2        | 2.87322e-08 | 1.000000 | 2.87335e-08 | 1.000000 |
| rad7        | 6.33252e-09 | 1.000000 | 6.33280e-09 | 1.000000 |
| rad1        | 1.88875e-09 | 1.000000 | 1.88884e-09 | 1.000000 |
| rad11       | 1.55216e-09 | 1.000000 | 1.55223e-09 | 1.000000 |
| rad10       | 1.49815e-09 | 1.000000 | 1.49822e-09 | 1.000000 |

|               |             |         |             |         |
|---------------|-------------|---------|-------------|---------|
| rad28         | 5.20504e-10 | 1.00000 | 5.20526e-10 | 1.00000 |
| rad3          | 1.91794e-10 | 1.00000 | 1.91803e-10 | 1.00000 |
| rad4          | 9.79731e-11 | 1.00000 | 9.79774e-11 | 1.00000 |
| rad30         | 9.42275e-11 | 1.00000 | 9.42316e-11 | 1.00000 |
| rad26         | 8.19700e-11 | 1.00000 | 8.19736e-11 | 1.00000 |
| rad35         | 4.87885e-11 | 1.00000 | 4.87907e-11 | 1.00000 |
| PAH9+H        | 3.94496e-11 | 1.00000 | 3.94514e-11 | 1.00000 |
| rad13         | 3.55703e-11 | 1.00000 | 3.55719e-11 | 1.00000 |
| PhCHCCH2+H    | 1.27496e-11 | 1.00000 | 1.27501e-11 | 1.00000 |
| PhCCH+CH3     | 6.81972e-12 | 1.00000 | 6.82002e-12 | 1.00000 |
| rad38         | 3.10698e-12 | 1.00000 | 3.10711e-12 | 1.00000 |
| PhCCCH3+H     | 2.29552e-12 | 1.00000 | 2.29562e-12 | 1.00000 |
| rad15         | 1.73104e-12 | 1.00000 | 1.73112e-12 | 1.00000 |
| rad33         | 6.79645e-14 | 1.00000 | 6.79675e-14 | 1.00000 |
| rad8          | 2.78607e-15 | 1.00000 | 2.78620e-15 | 1.00000 |
| rad27         | 1.75023e-15 | 1.00000 | 1.75031e-15 | 1.00000 |
| rad20         | 5.41570e-16 | 1.00000 | 5.41593e-16 | 1.00000 |
| rad21         | 3.41363e-16 | 1.00000 | 3.41378e-16 | 1.00000 |
| rad9          | 3.14960e-16 | 1.00000 | 3.14974e-16 | 1.00000 |
| Ph+MeAc       | 2.91849e-16 | 1.00000 | 2.91862e-16 | 1.00000 |
| PAH7+H        | 1.43566e-16 | 1.00000 | 1.43572e-16 | 1.00000 |
| rad25         | 5.54719e-17 | 1.00000 | 5.54743e-17 | 1.00000 |
| rad46         | 5.06722e-17 | 1.00000 | 5.06744e-17 | 1.00000 |
| rad14         | 2.58157e-17 | 1.00000 | 2.58168e-17 | 1.00000 |
| rad12         | 1.30845e-17 | 1.00000 | 1.30851e-17 | 1.00000 |
| rad39         | 5.41545e-18 | 1.00000 | 5.41569e-18 | 1.00000 |
| rad18         | 2.52794e-18 | 1.00000 | 2.52805e-18 | 1.00000 |
| Ph+Allene     | 1.93155e-18 | 1.00000 | 1.93164e-18 | 1.00000 |
| rad23         | 8.99176e-19 | 1.00000 | 8.99216e-19 | 1.00000 |
| rad31         | 6.61728e-19 | 1.00000 | 6.61757e-19 | 1.00000 |
| rad22         | 1.91467e-19 | 1.00000 | 1.91475e-19 | 1.00000 |
| rad60syn      | 1.29362e-20 | 1.00000 | 1.29367e-20 | 1.00000 |
| rad45         | 5.95664e-21 | 1.00000 | 5.95690e-21 | 1.00000 |
| rad60anti     | 1.42014e-21 | 1.00000 | 1.42020e-21 | 1.00000 |
| PhCH2CCH+H    | 3.70672e-22 | 1.00000 | 3.70688e-22 | 1.00000 |
| rad36         | 3.69530e-22 | 1.00000 | 3.69546e-22 | 1.00000 |
| rad37         | 1.02521e-22 | 1.00000 | 1.02525e-22 | 1.00000 |
| rad24         | 2.53781e-23 | 1.00000 | 2.53792e-23 | 1.00000 |
| rad5          | 3.31273e-25 | 1.00000 | 3.31287e-25 | 1.00000 |
| PAH3+H        | 1.81874e-26 | 1.00000 | 1.81882e-26 | 1.00000 |
| rad59         | 8.19792e-27 | 1.00000 | 8.19828e-27 | 1.00000 |
| rad50         | 5.49371e-28 | 1.00000 | 5.49395e-28 | 1.00000 |
| rad19syn      | 2.97474e-39 | 1.00000 | 2.97487e-39 | 1.00000 |
| rad52         | 5.08513e-43 | 1.00000 | 5.08535e-43 | 1.00000 |
| PAH10+CH3     | 2.77482e-43 | 1.00000 | 2.77494e-43 | 1.00000 |
| rad54         | 8.65582e-44 | 1.00000 | 8.65619e-44 | 1.00000 |
| rad43         | 6.57178e-44 | 1.00000 | 6.57206e-44 | 1.00000 |
| rad62         | 4.99939e-46 | 1.00000 | 4.99961e-46 | 1.00000 |
| rad51         | 1.15985e-48 | 1.00000 | 1.15991e-48 | 1.00000 |
| rad70         | 2.34413e-51 | 1.00000 | 2.34423e-51 | 1.00000 |
| PhcycC3H3_A+H | 1.51496e-51 | 1.00000 | 1.51502e-51 | 1.00000 |
| rad55         | 7.36493e-52 | 1.00000 | 7.36525e-52 | 1.00000 |
| rad65         | 1.07920e-52 | 1.00000 | 1.07925e-52 | 1.00000 |
| rad58         | 7.17791e-55 | 1.00000 | 7.17823e-55 | 1.00000 |
| PAH1+H        | 4.37510e-55 | 1.00000 | 4.37530e-55 | 1.00000 |
| rad34         | 7.85903e-57 | 1.00000 | 7.85938e-57 | 1.00000 |
| rad42         | 5.31525e-59 | 1.00000 | 5.31548e-59 | 1.00000 |
| rad41         | 2.97639e-59 | 1.00000 | 2.97652e-59 | 1.00000 |
| rad47         | 2.22231e-66 | 1.00000 | 2.22241e-66 | 1.00000 |

0.100000000E-05 Pa, 160.000000 K

=====

| Rate constant | True (fraction)     | Effective (fraction) |
|---------------|---------------------|----------------------|
| Total         | 5.01169e-31 (1.00 ) | 5.01140e-31 (1.00 )  |

| species     | PYtrue      | Cumul    | PYeffective | Cumul    |
|-------------|-------------|----------|-------------|----------|
| Indene+H    | 0.999866    | 0.999866 | 0.999923    | 0.999923 |
| rad6        | 7.70242e-05 | 0.999943 | 7.70286e-05 | 1.00000  |
| Benzyl+C2H2 | 5.68139e-05 | 1.000000 | 0.00000     | 1.00000  |
| rad2        | 2.58743e-08 | 1.000000 | 2.58758e-08 | 1.00000  |
| rad7        | 5.66199e-09 | 1.000000 | 5.66231e-09 | 1.00000  |
| rad1        | 1.71041e-09 | 1.000000 | 1.71050e-09 | 1.00000  |
| rad11       | 1.38836e-09 | 1.000000 | 1.38844e-09 | 1.00000  |
| rad10       | 1.34612e-09 | 1.000000 | 1.34620e-09 | 1.00000  |
| rad28       | 7.98881e-10 | 1.000000 | 7.98927e-10 | 1.00000  |
| rad30       | 1.80706e-10 | 1.000000 | 1.80716e-10 | 1.00000  |
| rad3        | 1.72502e-10 | 1.000000 | 1.72512e-10 | 1.00000  |
| rad26       | 1.25663e-10 | 1.000000 | 1.25670e-10 | 1.00000  |

|               |             |          |             |         |
|---------------|-------------|----------|-------------|---------|
| rad4          | 8.82533e-11 | 1.000000 | 8.82583e-11 | 1.00000 |
| rad35         | 6.58289e-11 | 1.000000 | 6.58326e-11 | 1.00000 |
| PAH9+H        | 5.80000e-11 | 1.000000 | 5.80033e-11 | 1.00000 |
| PhCHCCH2+H    | 4.04998e-11 | 1.000000 | 4.05021e-11 | 1.00000 |
| rad13         | 3.18441e-11 | 1.000000 | 3.18459e-11 | 1.00000 |
| PhCCH+CH3     | 2.49342e-11 | 1.000000 | 2.49356e-11 | 1.00000 |
| PhCCCH3+H     | 8.67443e-12 | 1.000000 | 8.67492e-12 | 1.00000 |
| rad38         | 5.30665e-12 | 1.000000 | 5.30695e-12 | 1.00000 |
| rad15         | 4.38958e-12 | 1.000000 | 4.38983e-12 | 1.00000 |
| rad33         | 6.09362e-14 | 1.000000 | 6.09397e-14 | 1.00000 |
| rad8          | 1.39546e-14 | 1.000000 | 1.39554e-14 | 1.00000 |
| Ph+MeAc       | 2.35516e-15 | 1.000000 | 2.35529e-15 | 1.00000 |
| rad27         | 2.26878e-15 | 1.000000 | 2.26890e-15 | 1.00000 |
| rad9          | 1.94016e-15 | 1.000000 | 1.94027e-15 | 1.00000 |
| PAH7+H        | 9.29778e-16 | 1.000000 | 9.29831e-16 | 1.00000 |
| rad20         | 4.84115e-16 | 1.000000 | 4.84142e-16 | 1.00000 |
| rad21         | 3.05594e-16 | 1.000000 | 3.05611e-16 | 1.00000 |
| rad46         | 1.95507e-16 | 1.000000 | 1.95518e-16 | 1.00000 |
| rad25         | 1.00721e-16 | 1.000000 | 1.00726e-16 | 1.00000 |
| rad12         | 8.85742e-17 | 1.000000 | 8.85792e-17 | 1.00000 |
| rad14         | 5.17082e-17 | 1.000000 | 5.17112e-17 | 1.00000 |
| rad39         | 4.22745e-17 | 1.000000 | 4.22769e-17 | 1.00000 |
| Ph+Allene     | 2.05913e-17 | 1.000000 | 2.05925e-17 | 1.00000 |
| rad18         | 2.24956e-18 | 1.000000 | 2.24969e-18 | 1.00000 |
| rad23         | 8.38946e-19 | 1.000000 | 8.38993e-19 | 1.00000 |
| rad31         | 6.20577e-19 | 1.000000 | 6.20612e-19 | 1.00000 |
| rad22         | 1.68123e-19 | 1.000000 | 1.68133e-19 | 1.00000 |
| rad60syn      | 1.20851e-19 | 1.000000 | 1.20858e-19 | 1.00000 |
| rad60anti     | 1.53285e-20 | 1.000000 | 1.53294e-20 | 1.00000 |
| PhCH2CCH+H    | 7.07445e-21 | 1.000000 | 7.07485e-21 | 1.00000 |
| rad45         | 5.69318e-21 | 1.000000 | 5.69350e-21 | 1.00000 |
| rad37         | 1.92352e-21 | 1.000000 | 1.92363e-21 | 1.00000 |
| rad36         | 3.53489e-22 | 1.000000 | 3.53509e-22 | 1.00000 |
| rad24         | 2.49368e-23 | 1.000000 | 2.49383e-23 | 1.00000 |
| rad5          | 7.57809e-24 | 1.000000 | 7.57852e-24 | 1.00000 |
| PAH3+H        | 5.45433e-25 | 1.000000 | 5.45464e-25 | 1.00000 |
| rad59         | 2.30298e-25 | 1.000000 | 2.30311e-25 | 1.00000 |
| rad50         | 1.44925e-26 | 1.000000 | 1.44934e-26 | 1.00000 |
| rad19syn      | 3.66157e-36 | 1.000000 | 3.66178e-36 | 1.00000 |
| rad52         | 4.66838e-40 | 1.000000 | 4.66864e-40 | 1.00000 |
| PAH10+CH3     | 1.37440e-40 | 1.000000 | 1.37448e-40 | 1.00000 |
| rad54         | 1.04673e-40 | 1.000000 | 1.04679e-40 | 1.00000 |
| rad43         | 3.21740e-41 | 1.000000 | 3.21758e-41 | 1.00000 |
| rad62         | 2.33482e-43 | 1.000000 | 2.33495e-43 | 1.00000 |
| rad51         | 6.68093e-46 | 1.000000 | 6.68131e-46 | 1.00000 |
| rad70         | 1.33443e-48 | 1.000000 | 1.33450e-48 | 1.00000 |
| PhcycC3H3_A+H | 8.52179e-49 | 1.000000 | 8.52227e-49 | 1.00000 |
| rad55         | 4.13536e-49 | 1.000000 | 4.13560e-49 | 1.00000 |
| rad65         | 7.52097e-50 | 1.000000 | 7.52139e-50 | 1.00000 |
| rad58         | 4.07363e-52 | 1.000000 | 4.07386e-52 | 1.00000 |
| PAH1+H        | 2.97688e-52 | 1.000000 | 2.97705e-52 | 1.00000 |
| rad34         | 5.75667e-54 | 1.000000 | 5.75700e-54 | 1.00000 |
| rad42         | 4.98161e-56 | 1.000000 | 4.98189e-56 | 1.00000 |
| rad41         | 2.88102e-56 | 1.000000 | 2.88119e-56 | 1.00000 |
| rad47         | 2.05177e-63 | 1.000000 | 2.05189e-63 | 1.00000 |

0.100000000E-05 Pa, 170.000000 K

=====

| Rate constant | True (fraction)     | Effective (fraction) |
|---------------|---------------------|----------------------|
| Total         | 5.54821e-30 (1.00 ) | 5.54780e-30 (1.00 )  |

| species     | PYtrue      | Cumul    | PYeffective | Cumul    |
|-------------|-------------|----------|-------------|----------|
| Indene+H    | 0.999858    | 0.999858 | 0.999932    | 0.999932 |
| Benzyl+C2H2 | 7.33295e-05 | 0.999931 | 0.00000     | 0.999932 |
| rad6        | 6.81560e-05 | 0.999999 | 6.81610e-05 | 1.00000  |
| rad2        | 2.27443e-08 | 1.000000 | 2.27460e-08 | 1.00000  |
| rad7        | 5.02012e-09 | 1.000000 | 5.02049e-09 | 1.00000  |
| rad1        | 1.51265e-09 | 1.000000 | 1.51276e-09 | 1.00000  |
| rad11       | 1.23148e-09 | 1.000000 | 1.23157e-09 | 1.00000  |
| rad10       | 1.19341e-09 | 1.000000 | 1.19350e-09 | 1.00000  |
| rad28       | 1.13765e-09 | 1.000000 | 1.13774e-09 | 1.00000  |
| rad30       | 3.25161e-10 | 1.000000 | 3.25185e-10 | 1.00000  |
| rad26       | 1.78532e-10 | 1.000000 | 1.78545e-10 | 1.00000  |
| rad3        | 1.52842e-10 | 1.000000 | 1.52853e-10 | 1.00000  |
| PhCHCCH2+H  | 1.14181e-10 | 1.000000 | 1.14189e-10 | 1.00000  |
| rad35       | 8.86039e-11 | 1.000000 | 8.86104e-11 | 1.00000  |
| PAH9+H      | 8.41067e-11 | 1.000000 | 8.41129e-11 | 1.00000  |
| PhCCH+CH3   | 7.94903e-11 | 1.000000 | 7.94962e-11 | 1.00000  |

|               |             |          |             |         |
|---------------|-------------|----------|-------------|---------|
| rad4          | 7.83264e-11 | 1.000000 | 7.83322e-11 | 1.00000 |
| PhCCCH3+H     | 2.83815e-11 | 1.000000 | 2.83836e-11 | 1.00000 |
| rad13         | 2.82715e-11 | 1.000000 | 2.82736e-11 | 1.00000 |
| rad15         | 1.00713e-11 | 1.000000 | 1.00720e-11 | 1.00000 |
| rad38         | 8.75538e-12 | 1.000000 | 8.75603e-12 | 1.00000 |
| rad8          | 5.81585e-14 | 1.000000 | 5.81627e-14 | 1.00000 |
| rad33         | 5.41860e-14 | 1.000000 | 5.41899e-14 | 1.00000 |
| Ph+MeAc       | 1.49883e-14 | 1.000000 | 1.49894e-14 | 1.00000 |
| rad9          | 9.70881e-15 | 1.000000 | 9.70953e-15 | 1.00000 |
| PAH7+H        | 4.84765e-15 | 1.000000 | 4.84801e-15 | 1.00000 |
| rad27         | 2.78350e-15 | 1.000000 | 2.78370e-15 | 1.00000 |
| rad46         | 6.51669e-16 | 1.000000 | 6.51717e-16 | 1.00000 |
| rad12         | 4.79324e-16 | 1.000000 | 4.79359e-16 | 1.00000 |
| rad20         | 4.34138e-16 | 1.000000 | 4.34170e-16 | 1.00000 |
| rad21         | 2.74478e-16 | 1.000000 | 2.74498e-16 | 1.00000 |
| rad39         | 2.60551e-16 | 1.000000 | 2.60570e-16 | 1.00000 |
| Ph+Allene     | 1.67450e-16 | 1.000000 | 1.67462e-16 | 1.00000 |
| rad25         | 1.66158e-16 | 1.000000 | 1.66170e-16 | 1.00000 |
| rad14         | 9.29947e-17 | 1.000000 | 9.30015e-17 | 1.00000 |
| rad18         | 2.00655e-18 | 1.000000 | 2.00669e-18 | 1.00000 |
| rad60syn      | 8.67680e-19 | 1.000000 | 8.67743e-19 | 1.00000 |
| rad23         | 8.12812e-19 | 1.000000 | 8.12871e-19 | 1.00000 |
| rad31         | 5.79068e-19 | 1.000000 | 5.79111e-19 | 1.00000 |
| rad22         | 1.48008e-19 | 1.000000 | 1.48018e-19 | 1.00000 |
| rad60anti     | 1.24865e-19 | 1.000000 | 1.24875e-19 | 1.00000 |
| PhCH2CCH+H    | 9.53035e-20 | 1.000000 | 9.53105e-20 | 1.00000 |
| rad37         | 2.51847e-20 | 1.000000 | 2.51865e-20 | 1.00000 |
| rad45         | 5.68747e-21 | 1.000000 | 5.68789e-21 | 1.00000 |
| rad36         | 3.53536e-22 | 1.000000 | 3.53562e-22 | 1.00000 |
| rad5          | 1.17209e-22 | 1.000000 | 1.17218e-22 | 1.00000 |
| rad24         | 2.46650e-23 | 1.000000 | 2.46668e-23 | 1.00000 |
| PAH3+H        | 1.00146e-23 | 1.000000 | 1.00154e-23 | 1.00000 |
| rad59         | 4.07844e-24 | 1.000000 | 4.07874e-24 | 1.00000 |
| rad50         | 2.47924e-25 | 1.000000 | 2.47942e-25 | 1.00000 |
| rad19syn      | 3.67677e-29 | 1.000000 | 3.67704e-29 | 1.00000 |
| rad52         | 2.29678e-31 | 1.000000 | 2.29695e-31 | 1.00000 |
| rad54         | 8.12265e-38 | 1.000000 | 8.12325e-38 | 1.00000 |
| PAH10+CH3     | 6.62248e-38 | 1.000000 | 6.62297e-38 | 1.00000 |
| rad43         | 1.53233e-38 | 1.000000 | 1.53244e-38 | 1.00000 |
| rad62         | 9.67466e-41 | 1.000000 | 9.67537e-41 | 1.00000 |
| rad51         | 2.43421e-43 | 1.000000 | 2.43439e-43 | 1.00000 |
| rad70         | 5.74490e-46 | 1.000000 | 5.74532e-46 | 1.00000 |
| PhcycC3H3_A+H | 3.41966e-46 | 1.000000 | 3.41991e-46 | 1.00000 |
| rad55         | 1.68826e-46 | 1.000000 | 1.68838e-46 | 1.00000 |
| rad65         | 2.93277e-47 | 1.000000 | 2.93299e-47 | 1.00000 |
| rad58         | 1.58254e-49 | 1.000000 | 1.58266e-49 | 1.00000 |
| PAH1+H        | 1.12915e-49 | 1.000000 | 1.12924e-49 | 1.00000 |
| rad34         | 2.29567e-51 | 1.000000 | 2.29584e-51 | 1.00000 |
| rad42         | 2.62279e-53 | 1.000000 | 2.62298e-53 | 1.00000 |
| rad41         | 1.58286e-53 | 1.000000 | 1.58297e-53 | 1.00000 |
| rad47         | 1.04851e-60 | 1.000000 | 1.04859e-60 | 1.00000 |

0.100000000E-05 Pa, 180.000000 K

=====

| Rate constant | True (fraction)     | Effective (fraction) |
|---------------|---------------------|----------------------|
| Total         | 4.69315e-29 (1.00 ) | 4.69271e-29 (1.00 )  |

| species     | PYtrue      | Cumul    | PYeffective | Cumul    |
|-------------|-------------|----------|-------------|----------|
| Indene+H    | 0.999846    | 0.999846 | 0.999940    | 0.999940 |
| Benzyl+C2H2 | 9.42845e-05 | 0.999940 | 0.00000     | 0.999940 |
| rad6        | 5.98288e-05 | 1.00000  | 5.98344e-05 | 1.000000 |
| rad2        | 2.01074e-08 | 1.00000  | 2.01093e-08 | 1.000000 |
| rad7        | 4.41588e-09 | 1.00000  | 4.41630e-09 | 1.000000 |
| rad28       | 1.52101e-09 | 1.00000  | 1.52115e-09 | 1.000000 |
| rad1        | 1.34612e-09 | 1.00000  | 1.34625e-09 | 1.000000 |
| rad11       | 1.08373e-09 | 1.00000  | 1.08383e-09 | 1.000000 |
| rad10       | 1.05313e-09 | 1.00000  | 1.05323e-09 | 1.000000 |
| rad30       | 5.55642e-10 | 1.00000  | 5.55694e-10 | 1.000000 |
| PhCHCCH2+H  | 2.91420e-10 | 1.00000  | 2.91448e-10 | 1.000000 |
| rad26       | 2.37968e-10 | 1.00000  | 2.37990e-10 | 1.000000 |
| PhCCH+CH3   | 2.26067e-10 | 1.00000  | 2.26088e-10 | 1.000000 |
| rad3        | 1.34925e-10 | 1.00000  | 1.34937e-10 | 1.000000 |
| PAH9+H      | 1.20671e-10 | 1.00000  | 1.20682e-10 | 1.000000 |
| rad35       | 1.19026e-10 | 1.00000  | 1.19037e-10 | 1.000000 |
| PhCCCH3+H   | 8.23498e-11 | 1.00000  | 8.23576e-11 | 1.000000 |
| rad4        | 6.92711e-11 | 1.00000  | 6.92776e-11 | 1.000000 |
| rad13       | 2.49033e-11 | 1.00000  | 2.49056e-11 | 1.000000 |
| rad15       | 2.12851e-11 | 1.00000  | 2.12872e-11 | 1.000000 |

|               |             |         |             |          |
|---------------|-------------|---------|-------------|----------|
| rad38         | 1.40486e-11 | 1.00000 | 1.40499e-11 | 1.000000 |
| rad8          | 2.08059e-13 | 1.00000 | 2.08078e-13 | 1.000000 |
| Ph+MeAc       | 7.82302e-14 | 1.00000 | 7.82376e-14 | 1.000000 |
| rad33         | 4.78106e-14 | 1.00000 | 4.78152e-14 | 1.000000 |
| rad9          | 4.08720e-14 | 1.00000 | 4.08759e-14 | 1.000000 |
| PAH7+H        | 2.11156e-14 | 1.00000 | 2.11176e-14 | 1.000000 |
| rad27         | 3.26070e-15 | 1.00000 | 3.26101e-15 | 1.000000 |
| rad12         | 2.15350e-15 | 1.00000 | 2.15370e-15 | 1.000000 |
| rad46         | 1.92592e-15 | 1.00000 | 1.92610e-15 | 1.000000 |
| rad39         | 1.31930e-15 | 1.00000 | 1.31942e-15 | 1.000000 |
| Ph+Allene     | 1.08689e-15 | 1.00000 | 1.08699e-15 | 1.000000 |
| rad20         | 3.90391e-16 | 1.00000 | 3.90428e-16 | 1.000000 |
| rad25         | 2.52999e-16 | 1.00000 | 2.53023e-16 | 1.000000 |
| rad21         | 2.47236e-16 | 1.00000 | 2.47260e-16 | 1.000000 |
| rad14         | 1.52856e-16 | 1.00000 | 1.52870e-16 | 1.000000 |
| rad60syn      | 5.00698e-18 | 1.00000 | 5.00745e-18 | 1.000000 |
| rad18         | 1.79311e-18 | 1.00000 | 1.79327e-18 | 1.000000 |
| PhCH2CCH+H    | 9.66782e-19 | 1.00000 | 9.66873e-19 | 1.000000 |
| rad23         | 8.21391e-19 | 1.00000 | 8.21469e-19 | 1.000000 |
| rad60anti     | 8.05148e-19 | 1.00000 | 8.05224e-19 | 1.000000 |
| rad31         | 5.39054e-19 | 1.00000 | 5.39104e-19 | 1.000000 |
| rad37         | 2.45014e-19 | 1.00000 | 2.45037e-19 | 1.000000 |
| rad22         | 1.30552e-19 | 1.00000 | 1.30564e-19 | 1.000000 |
| rad45         | 5.96969e-21 | 1.00000 | 5.97025e-21 | 1.000000 |
| rad5          | 1.33532e-21 | 1.00000 | 1.33545e-21 | 1.000000 |
| rad36         | 3.71617e-22 | 1.00000 | 3.71652e-22 | 1.000000 |
| PAH3+H        | 1.31622e-22 | 1.00000 | 1.31635e-22 | 1.000000 |
| rad59         | 5.19689e-23 | 1.00000 | 5.19738e-23 | 1.000000 |
| rad24         | 2.45487e-23 | 1.00000 | 2.45510e-23 | 1.000000 |
| rad50         | 3.08695e-24 | 1.00000 | 3.08724e-24 | 1.000000 |
| rad19syn      | 4.66133e-27 | 1.00000 | 4.66177e-27 | 1.000000 |
| rad52         | 1.37731e-29 | 1.00000 | 1.37744e-29 | 1.000000 |
| rad54         | 8.06844e-35 | 1.00000 | 8.06920e-35 | 1.000000 |
| PAH10+CH3     | 5.46486e-35 | 1.00000 | 5.46537e-35 | 1.000000 |
| rad43         | 1.25899e-35 | 1.00000 | 1.25911e-35 | 1.000000 |
| rad62         | 7.19420e-38 | 1.00000 | 7.19488e-38 | 1.000000 |
| rad51         | 1.15314e-40 | 1.00000 | 1.15324e-40 | 1.000000 |
| rad70         | 3.98177e-43 | 1.00000 | 3.98215e-43 | 1.000000 |
| PhcycC3H3_A+H | 2.07656e-43 | 1.00000 | 2.07675e-43 | 1.000000 |
| rad55         | 1.07063e-43 | 1.00000 | 1.07073e-43 | 1.000000 |
| rad65         | 9.17380e-45 | 1.00000 | 9.17467e-45 | 1.000000 |
| rad58         | 8.58390e-47 | 1.00000 | 8.58471e-47 | 1.000000 |
| PAH1+H        | 2.99042e-47 | 1.00000 | 2.99070e-47 | 1.000000 |
| rad34         | 5.91552e-49 | 1.00000 | 5.91608e-49 | 1.000000 |
| rad42         | 9.21753e-51 | 1.00000 | 9.21840e-51 | 1.000000 |
| rad41         | 5.89565e-51 | 1.00000 | 5.89620e-51 | 1.000000 |
| rad47         | 3.85148e-58 | 1.00000 | 3.85184e-58 | 1.000000 |

0.100000000E-05 Pa, 190.000000 K

=====

| Rate constant | True (fraction)     | Effective (fraction) |
|---------------|---------------------|----------------------|
| Total         | 3.16530e-28 (1.00 ) | 3.16492e-28 (1.00 )  |

| species     | PYtrue      | Cumul    | PYeffective | Cumul    |
|-------------|-------------|----------|-------------|----------|
| Indene+H    | 0.999827    | 0.999827 | 0.999948    | 0.999948 |
| Benzyl+C2H2 | 0.000120742 | 0.999948 | 0.00000     | 0.999948 |
| rad6        | 5.21252e-05 | 1.000000 | 5.21315e-05 | 1.000000 |
| rad2        | 1.76153e-08 | 1.000000 | 1.76174e-08 | 1.000000 |
| rad7        | 3.85550e-09 | 1.000000 | 3.85596e-09 | 1.000000 |
| rad28       | 1.92726e-09 | 1.000000 | 1.92750e-09 | 1.000000 |
| rad1        | 1.18776e-09 | 1.000000 | 1.18791e-09 | 1.000000 |
| rad11       | 9.46629e-10 | 1.000000 | 9.46743e-10 | 1.000000 |
| rad10       | 9.23381e-10 | 1.000000 | 9.23492e-10 | 1.000000 |
| rad30       | 9.10061e-10 | 1.000000 | 9.10171e-10 | 1.000000 |
| PhCHCCH2+H  | 6.83909e-10 | 1.000000 | 6.83991e-10 | 1.000000 |
| PhCCH+CH3   | 5.83910e-10 | 1.000000 | 5.83981e-10 | 1.000000 |
| rad26       | 3.00498e-10 | 1.000000 | 3.00534e-10 | 1.000000 |
| PhCCCH3+H   | 2.15926e-10 | 1.000000 | 2.15952e-10 | 1.000000 |
| PAH9+H      | 1.71630e-10 | 1.000000 | 1.71650e-10 | 1.000000 |
| rad35       | 1.59582e-10 | 1.000000 | 1.59601e-10 | 1.000000 |
| rad3        | 1.17766e-10 | 1.000000 | 1.17780e-10 | 1.000000 |
| rad4        | 6.05829e-11 | 1.000000 | 6.05902e-11 | 1.000000 |
| rad15       | 4.20209e-11 | 1.000000 | 4.20260e-11 | 1.000000 |
| rad38       | 2.20299e-11 | 1.000000 | 2.20326e-11 | 1.000000 |
| rad13       | 2.17748e-11 | 1.000000 | 2.17774e-11 | 1.000000 |
| rad8        | 6.54764e-13 | 1.000000 | 6.54843e-13 | 1.000000 |
| Ph+MeAc     | 3.45409e-13 | 1.000000 | 3.45451e-13 | 1.000000 |
| rad9        | 1.48797e-13 | 1.000000 | 1.48815e-13 | 1.000000 |

|               |             |          |             |         |
|---------------|-------------|----------|-------------|---------|
| PAH7+H        | 7.91171e-14 | 1.000000 | 7.91267e-14 | 1.00000 |
| rad33         | 4.18789e-14 | 1.000000 | 4.18840e-14 | 1.00000 |
| rad12         | 8.27534e-15 | 1.000000 | 8.27633e-15 | 1.00000 |
| Ph+Allene     | 5.83598e-15 | 1.000000 | 5.83668e-15 | 1.00000 |
| rad39         | 5.66278e-15 | 1.000000 | 5.66347e-15 | 1.00000 |
| rad46         | 5.15009e-15 | 1.000000 | 5.15071e-15 | 1.00000 |
| rad27         | 3.67272e-15 | 1.000000 | 3.67317e-15 | 1.00000 |
| rad25         | 3.60013e-16 | 1.000000 | 3.60056e-16 | 1.00000 |
| rad20         | 3.51902e-16 | 1.000000 | 3.51945e-16 | 1.00000 |
| rad14         | 2.32871e-16 | 1.000000 | 2.32900e-16 | 1.00000 |
| rad21         | 2.23266e-16 | 1.000000 | 2.23293e-16 | 1.00000 |
| rad60syn      | 2.40560e-17 | 1.000000 | 2.40589e-17 | 1.00000 |
| PhCH2CCH+H    | 7.73302e-18 | 1.000000 | 7.73395e-18 | 1.00000 |
| rad60anti     | 4.26710e-18 | 1.000000 | 4.26761e-18 | 1.00000 |
| rad37         | 1.85724e-18 | 1.000000 | 1.85747e-18 | 1.00000 |
| rad18         | 1.60473e-18 | 1.000000 | 1.60493e-18 | 1.00000 |
| rad23         | 8.69306e-19 | 1.000000 | 8.69411e-19 | 1.00000 |
| rad31         | 5.00851e-19 | 1.000000 | 5.00912e-19 | 1.00000 |
| rad22         | 1.15321e-19 | 1.000000 | 1.15335e-19 | 1.00000 |
| rad5          | 1.17915e-20 | 1.000000 | 1.17929e-20 | 1.00000 |
| rad45         | 6.59034e-21 | 1.000000 | 6.59114e-21 | 1.00000 |
| PAH3+H        | 1.32122e-21 | 1.000000 | 1.32138e-21 | 1.00000 |
| rad59         | 5.06390e-22 | 1.000000 | 5.06451e-22 | 1.00000 |
| rad36         | 4.10986e-22 | 1.000000 | 4.11036e-22 | 1.00000 |
| rad50         | 2.96740e-23 | 1.000000 | 2.96775e-23 | 1.00000 |
| rad24         | 2.45808e-23 | 1.000000 | 2.45838e-23 | 1.00000 |
| rad19syn      | 1.22410e-25 | 1.000000 | 1.22425e-25 | 1.00000 |
| rad54         | 5.45679e-28 | 1.000000 | 5.45744e-28 | 1.00000 |
| PAH10+CH3     | 3.67385e-28 | 1.000000 | 3.67429e-28 | 1.00000 |
| rad52         | 3.13060e-28 | 1.000000 | 3.13098e-28 | 1.00000 |
| rad43         | 8.93607e-29 | 1.000000 | 8.93715e-29 | 1.00000 |
| rad62         | 4.15620e-30 | 1.000000 | 4.15670e-30 | 1.00000 |
| rad51         | 2.56194e-31 | 1.000000 | 2.56224e-31 | 1.00000 |
| rad70         | 7.96556e-40 | 1.000000 | 7.96653e-40 | 1.00000 |
| PhcycC3H3_A+H | 3.95388e-40 | 1.000000 | 3.95435e-40 | 1.00000 |
| rad55         | 2.07913e-40 | 1.000000 | 2.07938e-40 | 1.00000 |
| rad65         | 5.51262e-42 | 1.000000 | 5.51329e-42 | 1.00000 |
| rad58         | 1.52829e-43 | 1.000000 | 1.52848e-43 | 1.00000 |
| PAH1+H        | 1.34035e-44 | 1.000000 | 1.34052e-44 | 1.00000 |
| rad34         | 1.87870e-46 | 1.000000 | 1.87893e-46 | 1.00000 |
| rad42         | 2.99123e-48 | 1.000000 | 2.99159e-48 | 1.00000 |
| rad41         | 2.03939e-48 | 1.000000 | 2.03964e-48 | 1.00000 |
| rad47         | 1.45209e-55 | 1.000000 | 1.45227e-55 | 1.00000 |

0.100000000E-05 Pa, 200.000000 K

=====

| Rate constant | True (fraction)     | Effective (fraction) |
|---------------|---------------------|----------------------|
| Total         | 1.76115e-27 (1.00 ) | 1.76088e-27 (1.00 )  |

| species     | PYtrue      | Cumul    | PYeffective | Cumul    |
|-------------|-------------|----------|-------------|----------|
| Indene+H    | 0.999801    | 0.999801 | 0.999955    | 0.999955 |
| Benzyl+C2H2 | 0.000153975 | 0.999955 | 0.00000     | 0.999955 |
| rad6        | 4.50936e-05 | 1.00000  | 4.51006e-05 | 1.00000  |
| rad2        | 1.52126e-08 | 1.00000  | 1.52149e-08 | 1.00000  |
| rad7        | 3.34273e-09 | 1.00000  | 3.34325e-09 | 1.00000  |
| rad28       | 2.33204e-09 | 1.00000  | 2.33240e-09 | 1.00000  |
| PhCHCCH2+H  | 1.49417e-09 | 1.00000  | 1.49440e-09 | 1.00000  |
| rad30       | 1.43887e-09 | 1.00000  | 1.43909e-09 | 1.00000  |
| PhCCH+CH3   | 1.38940e-09 | 1.00000  | 1.38961e-09 | 1.00000  |
| rad1        | 1.03375e-09 | 1.00000  | 1.03391e-09 | 1.00000  |
| rad11       | 8.21121e-10 | 1.00000  | 8.21248e-10 | 1.00000  |
| rad10       | 8.01392e-10 | 1.00000  | 8.01516e-10 | 1.00000  |
| PhCCCH3+H   | 5.19376e-10 | 1.00000  | 5.19456e-10 | 1.00000  |
| rad26       | 3.62312e-10 | 1.00000  | 3.62368e-10 | 1.00000  |
| PAH9+H      | 2.42279e-10 | 1.00000  | 2.42317e-10 | 1.00000  |
| rad35       | 2.13483e-10 | 1.00000  | 2.13516e-10 | 1.00000  |
| rad3        | 1.02122e-10 | 1.00000  | 1.02137e-10 | 1.00000  |
| rad15       | 7.83491e-11 | 1.00000  | 7.83612e-11 | 1.00000  |
| rad4        | 5.26498e-11 | 1.00000  | 5.26580e-11 | 1.00000  |
| rad38       | 3.38812e-11 | 1.00000  | 3.38864e-11 | 1.00000  |
| rad13       | 1.89078e-11 | 1.00000  | 1.89107e-11 | 1.00000  |
| rad8        | 1.84844e-12 | 1.00000  | 1.84873e-12 | 1.00000  |
| Ph+MeAc     | 1.32247e-12 | 1.00000  | 1.32267e-12 | 1.00000  |
| rad9        | 4.78889e-13 | 1.00000  | 4.78963e-13 | 1.00000  |
| PAH7+H      | 2.61002e-13 | 1.00000  | 2.61043e-13 | 1.00000  |
| rad33       | 3.64336e-14 | 1.00000  | 3.64392e-14 | 1.00000  |
| rad12       | 2.78525e-14 | 1.00000  | 2.78568e-14 | 1.00000  |
| Ph+Allene   | 2.66731e-14 | 1.00000  | 2.66772e-14 | 1.00000  |

|               |             |         |             |         |
|---------------|-------------|---------|-------------|---------|
| rad39         | 2.11257e-14 | 1.00000 | 2.11289e-14 | 1.00000 |
| rad46         | 1.26630e-14 | 1.00000 | 1.26649e-14 | 1.00000 |
| rad27         | 4.00003e-15 | 1.00000 | 4.00065e-15 | 1.00000 |
| rad25         | 4.83551e-16 | 1.00000 | 4.83626e-16 | 1.00000 |
| rad14         | 3.32526e-16 | 1.00000 | 3.32578e-16 | 1.00000 |
| rad20         | 3.17902e-16 | 1.00000 | 3.17951e-16 | 1.00000 |
| rad21         | 2.02087e-16 | 1.00000 | 2.02119e-16 | 1.00000 |
| rad60syn      | 9.89773e-17 | 1.00000 | 9.89926e-17 | 1.00000 |
| PhCH2CCH+H    | 5.05372e-17 | 1.00000 | 5.05450e-17 | 1.00000 |
| rad60anti     | 1.91539e-17 | 1.00000 | 1.91569e-17 | 1.00000 |
| rad37         | 1.13906e-17 | 1.00000 | 1.13924e-17 | 1.00000 |
| rad18         | 1.43786e-18 | 1.00000 | 1.43808e-18 | 1.00000 |
| rad23         | 9.66299e-19 | 1.00000 | 9.66448e-19 | 1.00000 |
| rad31         | 4.64688e-19 | 1.00000 | 4.64760e-19 | 1.00000 |
| rad22         | 1.01974e-19 | 1.00000 | 1.01990e-19 | 1.00000 |
| rad5          | 8.38208e-20 | 1.00000 | 8.38338e-20 | 1.00000 |
| PAH3+H        | 1.05456e-20 | 1.00000 | 1.05472e-20 | 1.00000 |
| rad45         | 7.69723e-21 | 1.00000 | 7.69842e-21 | 1.00000 |
| rad59         | 3.92886e-21 | 1.00000 | 3.92946e-21 | 1.00000 |
| rad36         | 4.81051e-22 | 1.00000 | 4.81125e-22 | 1.00000 |
| rad50         | 2.28898e-22 | 1.00000 | 2.28933e-22 | 1.00000 |
| rad24         | 2.47593e-23 | 1.00000 | 2.47631e-23 | 1.00000 |
| rad19syn      | 1.82536e-24 | 1.00000 | 1.82564e-24 | 1.00000 |
| rad54         | 1.37160e-26 | 1.00000 | 1.37181e-26 | 1.00000 |
| PAH10+CH3     | 9.40141e-27 | 1.00000 | 9.40285e-27 | 1.00000 |
| rad52         | 4.44081e-27 | 1.00000 | 4.44149e-27 | 1.00000 |
| rad43         | 2.30282e-27 | 1.00000 | 2.30317e-27 | 1.00000 |
| rad62         | 2.68734e-28 | 1.00000 | 2.68776e-28 | 1.00000 |
| rad51         | 1.45636e-29 | 1.00000 | 1.45659e-29 | 1.00000 |
| rad65         | 1.67715e-32 | 1.00000 | 1.67740e-32 | 1.00000 |
| rad70         | 1.91801e-36 | 1.00000 | 1.91830e-36 | 1.00000 |
| PhcycC3H3_A+H | 9.56224e-37 | 1.00000 | 9.56371e-37 | 1.00000 |
| rad55         | 5.03068e-37 | 1.00000 | 5.03145e-37 | 1.00000 |
| rad58         | 3.68354e-40 | 1.00000 | 3.68411e-40 | 1.00000 |
| PAH1+H        | 2.10572e-41 | 1.00000 | 2.10605e-41 | 1.00000 |
| rad34         | 2.01374e-43 | 1.00000 | 2.01405e-43 | 1.00000 |
| rad42         | 6.99850e-46 | 1.00000 | 6.99958e-46 | 1.00000 |
| rad41         | 4.82528e-46 | 1.00000 | 4.82602e-46 | 1.00000 |
| rad47         | 4.79948e-53 | 1.00000 | 4.80022e-53 | 1.00000 |

0.100000000E-05 Pa, 210.000000 K

=====  
Rate constant | True (fraction) | Effective (fraction)  
-----  
Total | 8.30956e-27 (1.00) | 8.30794e-27 (1.00)

| species     | PYtrue      | Cumul    | PYeffective | Cumul    |
|-------------|-------------|----------|-------------|----------|
| Indene+H    | 0.999766    | 0.999766 | 0.999961    | 0.999961 |
| Benzyl+C2H2 | 0.000195492 | 0.999961 | 0.00000     | 0.999961 |
| rad6        | 3.87528e-05 | 1.00000  | 3.87604e-05 | 1.000000 |
| rad2        | 1.31572e-08 | 1.00000  | 1.31598e-08 | 1.000000 |
| PhCCH+CH3   | 3.08068e-09 | 1.00000  | 3.08129e-09 | 1.000000 |
| PhCHCCH2+H  | 3.06933e-09 | 1.00000  | 3.06993e-09 | 1.000000 |
| rad7        | 2.87921e-09 | 1.00000  | 2.87977e-09 | 1.000000 |
| rad28       | 2.71152e-09 | 1.00000  | 2.71205e-09 | 1.000000 |
| rad30       | 2.20827e-09 | 1.00000  | 2.20870e-09 | 1.000000 |
| PhCCCH3+H   | 1.15996e-09 | 1.00000  | 1.16018e-09 | 1.000000 |
| rad1        | 9.01650e-10 | 1.00000  | 9.01826e-10 | 1.000000 |
| rad11       | 7.07612e-10 | 1.00000  | 7.07750e-10 | 1.000000 |
| rad10       | 6.93711e-10 | 1.00000  | 6.93846e-10 | 1.000000 |
| rad26       | 4.19758e-10 | 1.00000  | 4.19841e-10 | 1.000000 |
| PAH9+H      | 3.39682e-10 | 1.00000  | 3.39748e-10 | 1.000000 |
| rad35       | 2.84852e-10 | 1.00000  | 2.84908e-10 | 1.000000 |
| rad15       | 1.39184e-10 | 1.00000  | 1.39211e-10 | 1.000000 |
| rad3        | 8.83547e-11 | 1.00000  | 8.83720e-11 | 1.000000 |
| rad38       | 5.12398e-11 | 1.00000  | 5.12499e-11 | 1.000000 |
| rad4        | 4.56608e-11 | 1.00000  | 4.56698e-11 | 1.000000 |
| rad13       | 1.63122e-11 | 1.00000  | 1.63154e-11 | 1.000000 |
| rad8        | 4.75554e-12 | 1.00000  | 4.75647e-12 | 1.000000 |
| Ph+MeAc     | 4.47957e-12 | 1.00000  | 4.48045e-12 | 1.000000 |
| rad9        | 1.38701e-12 | 1.00000  | 1.38728e-12 | 1.000000 |
| PAH7+H      | 7.72460e-13 | 1.00000  | 7.72611e-13 | 1.000000 |
| Ph+Allene   | 1.06195e-13 | 1.00000  | 1.06216e-13 | 1.000000 |
| rad12       | 8.36946e-14 | 1.00000  | 8.37110e-14 | 1.000000 |
| rad39       | 6.98962e-14 | 1.00000  | 6.99099e-14 | 1.000000 |
| rad33       | 3.14949e-14 | 1.00000  | 3.15011e-14 | 1.000000 |
| rad46       | 2.89983e-14 | 1.00000  | 2.90039e-14 | 1.000000 |
| rad27       | 4.23177e-15 | 1.00000  | 4.23260e-15 | 1.000000 |
| rad25       | 6.18013e-16 | 1.00000  | 6.18134e-16 | 1.000000 |

|               |             |         |             |          |
|---------------|-------------|---------|-------------|----------|
| rad14         | 4.49111e-16 | 1.00000 | 4.49198e-16 | 1.000000 |
| rad60syn      | 3.56772e-16 | 1.00000 | 3.56842e-16 | 1.000000 |
| rad20         | 2.87772e-16 | 1.00000 | 2.87829e-16 | 1.000000 |
| PhCH2CCH+H    | 2.77781e-16 | 1.00000 | 2.77836e-16 | 1.000000 |
| rad21         | 1.83317e-16 | 1.00000 | 1.83353e-16 | 1.000000 |
| rad60anti     | 7.46102e-17 | 1.00000 | 7.46248e-17 | 1.000000 |
| rad37         | 5.82772e-17 | 1.00000 | 5.82886e-17 | 1.000000 |
| rad18         | 1.28959e-18 | 1.00000 | 1.28985e-18 | 1.000000 |
| rad23         | 1.12946e-18 | 1.00000 | 1.12968e-18 | 1.000000 |
| rad5          | 4.94750e-19 | 1.00000 | 4.94847e-19 | 1.000000 |
| rad31         | 4.31423e-19 | 1.00000 | 4.31507e-19 | 1.000000 |
| rad22         | 9.02409e-20 | 1.00000 | 9.02586e-20 | 1.000000 |
| PAH3+H        | 6.92409e-20 | 1.00000 | 6.92544e-20 | 1.000000 |
| rad59         | 2.51009e-20 | 1.00000 | 2.51058e-20 | 1.000000 |
| rad45         | 9.60173e-21 | 1.00000 | 9.60361e-21 | 1.000000 |
| rad50         | 1.46375e-21 | 1.00000 | 1.46404e-21 | 1.000000 |
| rad36         | 6.01612e-22 | 1.00000 | 6.01730e-22 | 1.000000 |
| rad24         | 2.50871e-23 | 1.00000 | 2.50920e-23 | 1.000000 |
| rad19syn      | 2.00816e-23 | 1.00000 | 2.00855e-23 | 1.000000 |
| rad54         | 1.94321e-25 | 1.00000 | 1.94359e-25 | 1.000000 |
| PAH10+CH3     | 1.33348e-25 | 1.00000 | 1.33374e-25 | 1.000000 |
| rad52         | 4.73526e-26 | 1.00000 | 4.73619e-26 | 1.000000 |
| rad43         | 3.24698e-26 | 1.00000 | 3.24761e-26 | 1.000000 |
| rad62         | 4.87673e-27 | 1.00000 | 4.87768e-27 | 1.000000 |
| rad51         | 2.76098e-28 | 1.00000 | 2.76152e-28 | 1.000000 |
| rad70         | 4.15016e-29 | 1.00000 | 4.15097e-29 | 1.000000 |
| PhcycC3H3_A+H | 3.67776e-29 | 1.00000 | 3.67847e-29 | 1.000000 |
| rad55         | 1.45177e-29 | 1.00000 | 1.45206e-29 | 1.000000 |
| rad58         | 1.88404e-30 | 1.00000 | 1.88441e-30 | 1.000000 |
| rad65         | 8.86433e-31 | 1.00000 | 8.86607e-31 | 1.000000 |
| PAH1+H        | 5.49758e-38 | 1.00000 | 5.49865e-38 | 1.000000 |
| rad34         | 5.07925e-40 | 1.00000 | 5.08025e-40 | 1.000000 |
| rad42         | 2.00302e-43 | 1.00000 | 2.00341e-43 | 1.000000 |
| rad41         | 9.12518e-44 | 1.00000 | 9.12696e-44 | 1.000000 |
| rad47         | 4.20710e-50 | 1.00000 | 4.20792e-50 | 1.000000 |

0.100000000E-05 Pa, 220.000000 K

=====

| Rate constant | True (fraction)     | Effective (fraction) |
|---------------|---------------------|----------------------|
| Total         | 3.40057e-26 (1.00 ) | 3.39973e-26 (1.00 )  |

| species     | PYtrue      | Cumul    | PYeffective | Cumul    |
|-------------|-------------|----------|-------------|----------|
| Indene+H    | 0.999720    | 0.999720 | 0.999967    | 0.999967 |
| Benzyl+C2H2 | 0.000247073 | 0.999967 | 0.00000     | 0.999967 |
| rad6        | 3.30975e-05 | 1.00000  | 3.31057e-05 | 1.00000  |
| rad2        | 1.12679e-08 | 1.00000  | 1.12707e-08 | 1.00000  |
| PhCCH+CH3   | 6.42448e-09 | 1.00000  | 6.42607e-09 | 1.00000  |
| PhCHCCH2+H  | 5.97625e-09 | 1.00000  | 5.97773e-09 | 1.00000  |
| rad30       | 3.30401e-09 | 1.00000  | 3.30483e-09 | 1.00000  |
| rad28       | 3.04503e-09 | 1.00000  | 3.04578e-09 | 1.00000  |
| rad7        | 2.46479e-09 | 1.00000  | 2.46540e-09 | 1.00000  |
| PhCCCH3+H   | 2.42916e-09 | 1.00000  | 2.42976e-09 | 1.00000  |
| rad1        | 7.79262e-10 | 1.00000  | 7.79455e-10 | 1.00000  |
| rad11       | 6.06075e-10 | 1.00000  | 6.06225e-10 | 1.00000  |
| rad10       | 5.96182e-10 | 1.00000  | 5.96330e-10 | 1.00000  |
| PAH9+H      | 4.73177e-10 | 1.00000  | 4.73294e-10 | 1.00000  |
| rad26       | 4.69738e-10 | 1.00000  | 4.69854e-10 | 1.00000  |
| rad35       | 3.78945e-10 | 1.00000  | 3.79038e-10 | 1.00000  |
| rad15       | 2.37236e-10 | 1.00000  | 2.37295e-10 | 1.00000  |
| rad38       | 7.63503e-11 | 1.00000  | 7.63692e-11 | 1.00000  |
| rad3        | 7.61821e-11 | 1.00000  | 7.62010e-11 | 1.00000  |
| rad4        | 3.94725e-11 | 1.00000  | 3.94822e-11 | 1.00000  |
| rad13       | 1.39880e-11 | 1.00000  | 1.39914e-11 | 1.00000  |
| Ph+MeAc     | 1.36460e-11 | 1.00000  | 1.36493e-11 | 1.00000  |
| rad8        | 1.12939e-11 | 1.00000  | 1.12967e-11 | 1.00000  |
| rad9        | 3.66808e-12 | 1.00000  | 3.66899e-12 | 1.00000  |
| PAH7+H      | 2.08257e-12 | 1.00000  | 2.08309e-12 | 1.00000  |
| Ph+Allene   | 3.75331e-13 | 1.00000  | 3.75424e-13 | 1.00000  |
| rad12       | 2.28067e-13 | 1.00000  | 2.28123e-13 | 1.00000  |
| rad39       | 2.08504e-13 | 1.00000  | 2.08556e-13 | 1.00000  |
| rad46       | 6.24889e-14 | 1.00000  | 6.25044e-14 | 1.00000  |
| rad33       | 2.70646e-14 | 1.00000  | 2.70712e-14 | 1.00000  |
| rad27       | 4.36516e-15 | 1.00000  | 4.36624e-15 | 1.00000  |
| PhCH2CCH+H  | 1.31490e-15 | 1.00000  | 1.31523e-15 | 1.00000  |
| rad60syn    | 1.14776e-15 | 1.00000  | 1.14805e-15 | 1.00000  |
| rad25       | 7.56577e-16 | 1.00000  | 7.56764e-16 | 1.00000  |
| rad14       | 5.77996e-16 | 1.00000  | 5.78139e-16 | 1.00000  |
| rad20       | 2.61006e-16 | 1.00000  | 2.61070e-16 | 1.00000  |



|               |             |         |             |         |
|---------------|-------------|---------|-------------|---------|
| rad60anti     | 2.57260e-16 | 1.00000 | 2.57324e-16 | 1.00000 |
| rad37         | 2.55026e-16 | 1.00000 | 2.55089e-16 | 1.00000 |
| rad21         | 1.66639e-16 | 1.00000 | 1.66680e-16 | 1.00000 |
| rad5          | 2.48666e-18 | 1.00000 | 2.48727e-18 | 1.00000 |
| rad23         | 1.38736e-18 | 1.00000 | 1.38770e-18 | 1.00000 |
| rad18         | 1.15759e-18 | 1.00000 | 1.15787e-18 | 1.00000 |
| rad31         | 4.01051e-19 | 1.00000 | 4.01150e-19 | 1.00000 |
| PAH3+H        | 3.84313e-19 | 1.00000 | 3.84408e-19 | 1.00000 |
| rad59         | 1.35685e-19 | 1.00000 | 1.35719e-19 | 1.00000 |
| rad22         | 7.99009e-20 | 1.00000 | 7.99206e-20 | 1.00000 |
| rad45         | 1.25183e-20 | 1.00000 | 1.25214e-20 | 1.00000 |
| rad50         | 7.96593e-21 | 1.00000 | 7.96790e-21 | 1.00000 |
| rad36         | 7.86705e-22 | 1.00000 | 7.86899e-22 | 1.00000 |
| rad19syn      | 1.76808e-22 | 1.00000 | 1.76852e-22 | 1.00000 |
| rad24         | 2.55719e-23 | 1.00000 | 2.55782e-23 | 1.00000 |
| rad54         | 2.07924e-24 | 1.00000 | 2.07976e-24 | 1.00000 |
| PAH10+CH3     | 1.42537e-24 | 1.00000 | 1.42572e-24 | 1.00000 |
| rad52         | 4.06722e-25 | 1.00000 | 4.06823e-25 | 1.00000 |
| rad43         | 3.45423e-25 | 1.00000 | 3.45508e-25 | 1.00000 |
| rad62         | 5.97331e-26 | 1.00000 | 5.97479e-26 | 1.00000 |
| rad51         | 3.50353e-27 | 1.00000 | 3.50440e-27 | 1.00000 |
| PhcycC3H3_A+H | 9.87083e-28 | 1.00000 | 9.87327e-28 | 1.00000 |
| rad70         | 8.97427e-28 | 1.00000 | 8.97648e-28 | 1.00000 |
| rad55         | 3.38158e-28 | 1.00000 | 3.38242e-28 | 1.00000 |
| rad58         | 5.59629e-29 | 1.00000 | 5.59767e-29 | 1.00000 |
| rad65         | 1.55276e-29 | 1.00000 | 1.55314e-29 | 1.00000 |
| PAH1+H        | 3.10930e-30 | 1.00000 | 3.11007e-30 | 1.00000 |
| rad34         | 2.04139e-37 | 1.00000 | 2.04190e-37 | 1.00000 |
| rad42         | 4.73511e-41 | 1.00000 | 4.73628e-41 | 1.00000 |
| rad47         | 1.49504e-41 | 1.00000 | 1.49541e-41 | 1.00000 |
| rad41         | 1.11523e-41 | 1.00000 | 1.11551e-41 | 1.00000 |

0.100000000E-05 Pa, 230.000000 K

=====

| Rate constant | True (fraction)     | Effective (fraction) |
|---------------|---------------------|----------------------|
| Total         | 1.22972e-25 (1.00 ) | 1.22933e-25 (1.00 )  |

| species     | PYtrue      | Cumul    | PYeffective | Cumul    |
|-------------|-------------|----------|-------------|----------|
| Indene+H    | 0.999661    | 0.999661 | 0.999972    | 0.999972 |
| Benzyl+C2H2 | 0.000310798 | 0.999972 | 0.00000     | 0.999972 |
| rad6        | 2.81038e-05 | 1.000000 | 2.81125e-05 | 1.00000  |
| PhCCH+CH3   | 1.26970e-08 | 1.000000 | 1.27009e-08 | 1.00000  |
| PhCHCCH2+H  | 1.11024e-08 | 1.000000 | 1.11059e-08 | 1.00000  |
| rad2        | 9.61670e-09 | 1.000000 | 9.61969e-09 | 1.00000  |
| rad30       | 4.83583e-09 | 1.000000 | 4.83733e-09 | 1.00000  |
| PhCCCH3+H   | 4.80870e-09 | 1.000000 | 4.81019e-09 | 1.00000  |
| rad28       | 3.31682e-09 | 1.000000 | 3.31785e-09 | 1.00000  |
| rad7        | 2.09795e-09 | 1.000000 | 2.09860e-09 | 1.00000  |
| rad1        | 6.71677e-10 | 1.000000 | 6.71886e-10 | 1.00000  |
| PAH9+H      | 6.55018e-10 | 1.000000 | 6.55221e-10 | 1.00000  |
| rad11       | 5.16152e-10 | 1.000000 | 5.16312e-10 | 1.00000  |
| rad26       | 5.09953e-10 | 1.000000 | 5.10112e-10 | 1.00000  |
| rad10       | 5.09042e-10 | 1.000000 | 5.09200e-10 | 1.00000  |
| rad35       | 5.02418e-10 | 1.000000 | 5.02574e-10 | 1.00000  |
| rad15       | 3.90190e-10 | 1.000000 | 3.90311e-10 | 1.00000  |
| rad38       | 1.12256e-10 | 1.000000 | 1.12291e-10 | 1.00000  |
| rad3        | 6.52178e-11 | 1.000000 | 6.52381e-11 | 1.00000  |
| Ph+MeAc     | 3.78935e-11 | 1.000000 | 3.79052e-11 | 1.00000  |
| rad4        | 3.38871e-11 | 1.000000 | 3.38976e-11 | 1.00000  |
| rad8        | 2.50216e-11 | 1.000000 | 2.50294e-11 | 1.00000  |
| rad13       | 1.19273e-11 | 1.000000 | 1.19310e-11 | 1.00000  |
| rad9        | 8.96409e-12 | 1.000000 | 8.96688e-12 | 1.00000  |
| PAH7+H      | 5.17926e-12 | 1.000000 | 5.18087e-12 | 1.00000  |
| Ph+Allene   | 1.19611e-12 | 1.000000 | 1.19648e-12 | 1.00000  |
| rad12       | 5.70855e-13 | 1.000000 | 5.71033e-13 | 1.00000  |
| rad39       | 5.68451e-13 | 1.000000 | 5.68628e-13 | 1.00000  |
| rad46       | 1.27780e-13 | 1.000000 | 1.27820e-13 | 1.00000  |
| rad33       | 2.31293e-14 | 1.000000 | 2.31365e-14 | 1.00000  |
| PhCH2CCH+H  | 5.46575e-15 | 1.000000 | 5.46744e-15 | 1.00000  |
| rad27       | 4.40409e-15 | 1.000000 | 4.40546e-15 | 1.00000  |
| rad60syn    | 3.34627e-15 | 1.000000 | 3.34731e-15 | 1.00000  |
| rad37       | 9.74485e-16 | 1.000000 | 9.74788e-16 | 1.00000  |
| rad25       | 8.92044e-16 | 1.000000 | 8.92321e-16 | 1.00000  |
| rad60anti   | 7.98155e-16 | 1.000000 | 7.98403e-16 | 1.00000  |
| rad14       | 7.13199e-16 | 1.000000 | 7.13421e-16 | 1.00000  |
| rad20       | 2.37183e-16 | 1.000000 | 2.37257e-16 | 1.00000  |
| rad21       | 1.51794e-16 | 1.000000 | 1.51842e-16 | 1.00000  |
| rad5        | 1.08659e-17 | 1.000000 | 1.08693e-17 | 1.00000  |

|               |             |          |             |         |
|---------------|-------------|----------|-------------|---------|
| PAH3+H        | 1.84375e-18 | 1.000000 | 1.84433e-18 | 1.00000 |
| rad23         | 1.78722e-18 | 1.000000 | 1.78778e-18 | 1.00000 |
| rad18         | 1.03986e-18 | 1.000000 | 1.04018e-18 | 1.00000 |
| rad59         | 6.34526e-19 | 1.000000 | 6.34723e-19 | 1.00000 |
| rad31         | 3.73694e-19 | 1.000000 | 3.73810e-19 | 1.00000 |
| rad22         | 7.07734e-20 | 1.000000 | 7.07954e-20 | 1.00000 |
| rad50         | 3.76905e-20 | 1.000000 | 3.77022e-20 | 1.00000 |
| rad45         | 1.73455e-20 | 1.000000 | 1.73508e-20 | 1.00000 |
| rad19syn      | 1.28689e-21 | 1.000000 | 1.28729e-21 | 1.00000 |
| rad36         | 1.09385e-21 | 1.000000 | 1.09419e-21 | 1.00000 |
| rad24         | 2.62259e-23 | 1.000000 | 2.62340e-23 | 1.00000 |
| rad54         | 1.79673e-23 | 1.000000 | 1.79729e-23 | 1.00000 |
| PAH10+CH3     | 1.22748e-23 | 1.000000 | 1.22786e-23 | 1.00000 |
| rad43         | 2.95795e-24 | 1.000000 | 2.95886e-24 | 1.00000 |
| rad52         | 2.90478e-24 | 1.000000 | 2.90569e-24 | 1.00000 |
| rad62         | 5.74609e-25 | 1.000000 | 5.74787e-25 | 1.00000 |
| rad51         | 3.51924e-26 | 1.000000 | 3.52033e-26 | 1.00000 |
| PhcycC3H3_A+H | 1.69392e-26 | 1.000000 | 1.69445e-26 | 1.00000 |
| rad70         | 1.30480e-26 | 1.000000 | 1.30521e-26 | 1.00000 |
| rad55         | 5.18384e-27 | 1.000000 | 5.18545e-27 | 1.00000 |
| rad58         | 1.02415e-27 | 1.000000 | 1.02446e-27 | 1.00000 |
| PAH1+H        | 2.23670e-28 | 1.000000 | 2.23740e-28 | 1.00000 |
| rad65         | 2.00231e-28 | 1.000000 | 2.00293e-28 | 1.00000 |
| rad34         | 1.06743e-29 | 1.000000 | 1.06777e-29 | 1.00000 |
| rad42         | 4.44131e-32 | 1.000000 | 4.44269e-32 | 1.00000 |
| rad41         | 7.74433e-33 | 1.000000 | 7.74673e-33 | 1.00000 |
| rad47         | 2.02044e-40 | 1.000000 | 2.02107e-40 | 1.00000 |

0.100000000E-05 Pa, 240.000000 K

| Rate constant | True (fraction)     | Effective (fraction) |
|---------------|---------------------|----------------------|
| Total         | 3.99091e-25 (1.00 ) | 3.98936e-25 (1.00 )  |

| species     | PYtrue      | Cumul    | PYeffective | Cumul    |
|-------------|-------------|----------|-------------|----------|
| Indene+H    | 0.999587    | 0.999587 | 0.999976    | 0.999976 |
| Benzyl+C2H2 | 0.000389079 | 0.999976 | 0.00000     | 0.999976 |
| rad6        | 2.37344e-05 | 1.000000 | 2.37436e-05 | 1.000000 |
| PhCCH+CH3   | 2.39311e-08 | 1.000000 | 2.39404e-08 | 1.000000 |
| PhCHCCH2+H  | 1.97866e-08 | 1.000000 | 1.97943e-08 | 1.000000 |
| PhCCCH3+H   | 9.05845e-09 | 1.000000 | 9.06198e-09 | 1.000000 |
| rad2        | 8.16671e-09 | 1.000000 | 8.16989e-09 | 1.000000 |
| rad30       | 6.94249e-09 | 1.000000 | 6.94519e-09 | 1.000000 |
| rad28       | 3.51690e-09 | 1.000000 | 3.51827e-09 | 1.000000 |
| rad7        | 1.77618e-09 | 1.000000 | 1.77687e-09 | 1.000000 |
| PAH9+H      | 9.01150e-10 | 1.000000 | 9.01501e-10 | 1.000000 |
| rad35       | 6.63648e-10 | 1.000000 | 6.63906e-10 | 1.000000 |
| rad15       | 6.22128e-10 | 1.000000 | 6.22370e-10 | 1.000000 |
| rad1        | 5.76530e-10 | 1.000000 | 5.76755e-10 | 1.000000 |
| rad26       | 5.39007e-10 | 1.000000 | 5.39217e-10 | 1.000000 |
| rad11       | 4.37235e-10 | 1.000000 | 4.37406e-10 | 1.000000 |
| rad10       | 4.34049e-10 | 1.000000 | 4.34218e-10 | 1.000000 |
| rad38       | 1.63043e-10 | 1.000000 | 1.63107e-10 | 1.000000 |
| Ph+MeAc     | 9.70080e-11 | 1.000000 | 9.70458e-11 | 1.000000 |
| rad3        | 5.49869e-11 | 1.000000 | 5.50083e-11 | 1.000000 |
| rad8        | 5.21675e-11 | 1.000000 | 5.21878e-11 | 1.000000 |
| rad4        | 2.86588e-11 | 1.000000 | 2.86700e-11 | 1.000000 |
| rad9        | 2.04454e-11 | 1.000000 | 2.04534e-11 | 1.000000 |
| PAH7+H      | 1.20057e-11 | 1.000000 | 1.20104e-11 | 1.000000 |
| rad13       | 1.01169e-11 | 1.000000 | 1.01208e-11 | 1.000000 |
| Ph+Allene   | 3.48182e-12 | 1.000000 | 3.48318e-12 | 1.000000 |
| rad39       | 1.43248e-12 | 1.000000 | 1.43304e-12 | 1.000000 |
| rad12       | 1.32650e-12 | 1.000000 | 1.32701e-12 | 1.000000 |
| rad46       | 2.49643e-13 | 1.000000 | 2.49741e-13 | 1.000000 |
| PhCH2CCH+H  | 2.02777e-14 | 1.000000 | 2.02856e-14 | 1.000000 |
| rad33       | 1.96653e-14 | 1.000000 | 1.96730e-14 | 1.000000 |
| rad60syn    | 8.95435e-15 | 1.000000 | 8.95784e-15 | 1.000000 |
| rad27       | 4.35744e-15 | 1.000000 | 4.35914e-15 | 1.000000 |
| rad37       | 3.30791e-15 | 1.000000 | 3.30920e-15 | 1.000000 |
| rad60anti   | 2.25867e-15 | 1.000000 | 2.25955e-15 | 1.000000 |
| rad25       | 1.01761e-15 | 1.000000 | 1.01801e-15 | 1.000000 |
| rad14       | 8.48089e-16 | 1.000000 | 8.48419e-16 | 1.000000 |
| rad20       | 2.15951e-16 | 1.000000 | 2.16036e-16 | 1.000000 |
| rad21       | 1.38564e-16 | 1.000000 | 1.38618e-16 | 1.000000 |
| rad5        | 4.20006e-17 | 1.000000 | 4.20170e-17 | 1.000000 |
| PAH3+H      | 7.78863e-18 | 1.000000 | 7.79166e-18 | 1.000000 |
| rad59       | 2.61499e-18 | 1.000000 | 2.61601e-18 | 1.000000 |
| rad23       | 2.40736e-18 | 1.000000 | 2.40830e-18 | 1.000000 |
| rad18       | 9.34758e-19 | 1.000000 | 9.35122e-19 | 1.000000 |

|               |             |          |             |          |
|---------------|-------------|----------|-------------|----------|
| rad31         | 3.49598e-19 | 1.000000 | 3.49734e-19 | 1.000000 |
| rad50         | 1.57823e-19 | 1.000000 | 1.57884e-19 | 1.000000 |
| rad22         | 6.27076e-20 | 1.000000 | 6.27320e-20 | 1.000000 |
| rad45         | 2.51930e-20 | 1.000000 | 2.52028e-20 | 1.000000 |
| rad19syn      | 7.93170e-21 | 1.000000 | 7.93479e-21 | 1.000000 |
| rad36         | 1.59505e-21 | 1.000000 | 1.59567e-21 | 1.000000 |
| rad54         | 1.28743e-22 | 1.000000 | 1.28794e-22 | 1.000000 |
| PAH10+CH3     | 8.76229e-23 | 1.000000 | 8.76570e-23 | 1.000000 |
| rad24         | 2.70664e-23 | 1.000000 | 2.70769e-23 | 1.000000 |
| rad43         | 2.10009e-23 | 1.000000 | 2.10090e-23 | 1.000000 |
| rad52         | 1.76521e-23 | 1.000000 | 1.76590e-23 | 1.000000 |
| rad62         | 4.48333e-24 | 1.000000 | 4.48507e-24 | 1.000000 |
| rad51         | 2.84575e-25 | 1.000000 | 2.84686e-25 | 1.000000 |
| PhcycC3H3_A+H | 1.83497e-25 | 1.000000 | 1.83568e-25 | 1.000000 |
| rad70         | 1.30436e-25 | 1.000000 | 1.30487e-25 | 1.000000 |
| rad55         | 5.31870e-26 | 1.000000 | 5.32077e-26 | 1.000000 |
| rad58         | 1.13976e-26 | 1.000000 | 1.14020e-26 | 1.000000 |
| PAH1+H        | 3.49022e-27 | 1.000000 | 3.49158e-27 | 1.000000 |
| rad65         | 1.89688e-27 | 1.000000 | 1.89762e-27 | 1.000000 |
| rad34         | 2.02063e-28 | 1.000000 | 2.02142e-28 | 1.000000 |
| rad42         | 2.62674e-30 | 1.000000 | 2.62776e-30 | 1.000000 |
| rad41         | 7.56115e-31 | 1.000000 | 7.56409e-31 | 1.000000 |
| rad47         | 1.87587e-39 | 1.000000 | 1.87660e-39 | 1.000000 |

0.100000000E-05 Pa, 250.000000 K

| Rate constant | True (fraction)     | Effective (fraction) |
|---------------|---------------------|----------------------|
| Total         | 1.17763e-24 (1.00 ) | 1.17706e-24 (1.00 )  |

| species     | PYtrue      | Cumul    | PYeffective | Cumul    |
|-------------|-------------|----------|-------------|----------|
| Indene+H    | 0.999495    | 0.999495 | 0.999980    | 0.999980 |
| Benzyl+C2H2 | 0.000484695 | 0.999980 | 0.000000    | 0.999980 |
| rad6        | 1.99430e-05 | 1.000000 | 1.99527e-05 | 1.000000 |
| PhCCH+CH3   | 4.32404e-08 | 1.000000 | 4.32614e-08 | 1.000000 |
| PhCHCCH2+H  | 3.39821e-08 | 1.000000 | 3.39985e-08 | 1.000000 |
| PhCCCH3+H   | 1.63287e-08 | 1.000000 | 1.63366e-08 | 1.000000 |
| rad30       | 9.79753e-09 | 1.000000 | 9.80228e-09 | 1.000000 |
| rad2        | 6.91820e-09 | 1.000000 | 6.92155e-09 | 1.000000 |
| rad28       | 3.64099e-09 | 1.000000 | 3.64275e-09 | 1.000000 |
| rad7        | 1.49628e-09 | 1.000000 | 1.49700e-09 | 1.000000 |
| PAH9+H      | 1.23216e-09 | 1.000000 | 1.23276e-09 | 1.000000 |
| rad15       | 9.65233e-10 | 1.000000 | 9.65701e-10 | 1.000000 |
| rad35       | 8.73105e-10 | 1.000000 | 8.73528e-10 | 1.000000 |
| rad26       | 5.56383e-10 | 1.000000 | 5.56653e-10 | 1.000000 |
| rad1        | 4.94055e-10 | 1.000000 | 4.94294e-10 | 1.000000 |
| rad11       | 3.68551e-10 | 1.000000 | 3.68730e-10 | 1.000000 |
| rad10       | 3.67466e-10 | 1.000000 | 3.67645e-10 | 1.000000 |
| rad38       | 2.34140e-10 | 1.000000 | 2.34254e-10 | 1.000000 |
| Ph+MeAc     | 2.31120e-10 | 1.000000 | 2.31232e-10 | 1.000000 |
| rad8        | 1.03099e-10 | 1.000000 | 1.03149e-10 | 1.000000 |
| rad3        | 4.66567e-11 | 1.000000 | 4.66794e-11 | 1.000000 |
| rad9        | 4.38853e-11 | 1.000000 | 4.39065e-11 | 1.000000 |
| PAH7+H      | 2.61651e-11 | 1.000000 | 2.61778e-11 | 1.000000 |
| rad4        | 2.43982e-11 | 1.000000 | 2.44100e-11 | 1.000000 |
| Ph+Allene   | 9.35927e-12 | 1.000000 | 9.36381e-12 | 1.000000 |
| rad13       | 8.53933e-12 | 1.000000 | 8.54348e-12 | 1.000000 |
| rad39       | 3.36826e-12 | 1.000000 | 3.36990e-12 | 1.000000 |
| rad12       | 2.88708e-12 | 1.000000 | 2.88848e-12 | 1.000000 |
| rad46       | 4.68608e-13 | 1.000000 | 4.68835e-13 | 1.000000 |
| PhCH2CCH+H  | 6.80638e-14 | 1.000000 | 6.80968e-14 | 1.000000 |
| rad60syn    | 2.22273e-14 | 1.000000 | 2.22381e-14 | 1.000000 |
| rad33       | 1.66409e-14 | 1.000000 | 1.66490e-14 | 1.000000 |
| rad37       | 1.01206e-14 | 1.000000 | 1.01255e-14 | 1.000000 |
| rad60anti   | 5.89685e-15 | 1.000000 | 5.89971e-15 | 1.000000 |
| rad27       | 4.23732e-15 | 1.000000 | 4.23938e-15 | 1.000000 |
| rad25       | 1.12750e-15 | 1.000000 | 1.12804e-15 | 1.000000 |
| rad14       | 9.76098e-16 | 1.000000 | 9.76571e-16 | 1.000000 |
| rad20       | 1.97012e-16 | 1.000000 | 1.97107e-16 | 1.000000 |
| rad5        | 1.45713e-16 | 1.000000 | 1.45784e-16 | 1.000000 |
| rad21       | 1.26762e-16 | 1.000000 | 1.26823e-16 | 1.000000 |
| PAH3+H      | 2.94243e-17 | 1.000000 | 2.94386e-17 | 1.000000 |
| rad59       | 9.64551e-18 | 1.000000 | 9.65019e-18 | 1.000000 |
| rad23       | 3.37954e-18 | 1.000000 | 3.38118e-18 | 1.000000 |
| rad18       | 8.40853e-19 | 1.000000 | 8.41261e-19 | 1.000000 |
| rad50       | 5.93639e-19 | 1.000000 | 5.93926e-19 | 1.000000 |
| rad31       | 3.28562e-19 | 1.000000 | 3.28721e-19 | 1.000000 |
| rad22       | 5.55760e-20 | 1.000000 | 5.56030e-20 | 1.000000 |
| rad19syn    | 4.22761e-20 | 1.000000 | 4.22966e-20 | 1.000000 |

|               |             |          |             |         |
|---------------|-------------|----------|-------------|---------|
| rad45         | 3.85210e-20 | 1.000000 | 3.85397e-20 | 1.00000 |
| rad36         | 2.44988e-21 | 1.000000 | 2.45107e-21 | 1.00000 |
| rad54         | 7.86764e-22 | 1.000000 | 7.87146e-22 | 1.00000 |
| PAH10+CH3     | 5.33108e-22 | 1.000000 | 5.33367e-22 | 1.00000 |
| rad43         | 1.27025e-22 | 1.000000 | 1.27087e-22 | 1.00000 |
| rad52         | 9.31755e-23 | 1.000000 | 9.32207e-23 | 1.00000 |
| rad62         | 2.94965e-23 | 1.000000 | 2.95108e-23 | 1.00000 |
| rad24         | 2.81166e-23 | 1.000000 | 2.81302e-23 | 1.00000 |
| rad51         | 1.93290e-24 | 1.000000 | 1.93384e-24 | 1.00000 |
| PhcycC3H3_A+H | 1.51485e-24 | 1.000000 | 1.51558e-24 | 1.00000 |
| rad70         | 1.03242e-24 | 1.000000 | 1.03292e-24 | 1.00000 |
| rad55         | 4.27162e-25 | 1.000000 | 4.27369e-25 | 1.00000 |
| rad58         | 9.52951e-26 | 1.000000 | 9.53413e-26 | 1.00000 |
| PAH1+H        | 3.26070e-26 | 1.000000 | 3.26228e-26 | 1.00000 |
| rad65         | 1.44854e-26 | 1.000000 | 1.44924e-26 | 1.00000 |
| rad34         | 1.95407e-27 | 1.000000 | 1.95502e-27 | 1.00000 |
| rad42         | 2.76646e-29 | 1.000000 | 2.76780e-29 | 1.00000 |
| rad41         | 8.02597e-30 | 1.000000 | 8.02986e-30 | 1.00000 |
| rad47         | 1.43631e-38 | 1.000000 | 1.43700e-38 | 1.00000 |

0.100000000E-05 Pa, 260.000000 K

| Rate constant | True (fraction)     | Effective (fraction) |
|---------------|---------------------|----------------------|
| Total         | 3.19452e-24 (1.00 ) | 3.19260e-24 (1.00 )  |

| species     | PYtrue      | Cumul    | PYeffective | Cumul    |
|-------------|-------------|----------|-------------|----------|
| Indene+H    | 0.999382    | 0.999382 | 0.999983    | 0.999983 |
| Benzyl+C2H2 | 0.000600824 | 0.999983 | 0.00000     | 0.999983 |
| rad6        | 1.66783e-05 | 1.000000 | 1.66883e-05 | 1.000000 |
| PhCCH+CH3   | 7.52300e-08 | 1.000000 | 7.52752e-08 | 1.000000 |
| PhCHCCH2+H  | 5.64542e-08 | 1.000000 | 5.64881e-08 | 1.000000 |
| PhCCCH3+H   | 2.82974e-08 | 1.000000 | 2.83144e-08 | 1.000000 |
| rad30       | 1.36156e-08 | 1.000000 | 1.36238e-08 | 1.000000 |
| rad2        | 5.82777e-09 | 1.000000 | 5.83128e-09 | 1.000000 |
| rad28       | 3.68999e-09 | 1.000000 | 3.69221e-09 | 1.000000 |
| PAH9+H      | 1.67443e-09 | 1.000000 | 1.67543e-09 | 1.000000 |
| rad15       | 1.46180e-09 | 1.000000 | 1.46267e-09 | 1.000000 |
| rad7        | 1.25464e-09 | 1.000000 | 1.25540e-09 | 1.000000 |
| rad35       | 1.14378e-09 | 1.000000 | 1.14447e-09 | 1.000000 |
| rad26       | 5.62340e-10 | 1.000000 | 5.62678e-10 | 1.000000 |
| Ph+MeAc     | 5.16556e-10 | 1.000000 | 5.16866e-10 | 1.000000 |
| rad1        | 4.21385e-10 | 1.000000 | 4.21638e-10 | 1.000000 |
| rad38       | 3.32691e-10 | 1.000000 | 3.32891e-10 | 1.000000 |
| rad10       | 3.10340e-10 | 1.000000 | 3.10527e-10 | 1.000000 |
| rad11       | 3.09225e-10 | 1.000000 | 3.09411e-10 | 1.000000 |
| rad8        | 1.94326e-10 | 1.000000 | 1.94443e-10 | 1.000000 |
| rad9        | 8.92712e-11 | 1.000000 | 8.93249e-11 | 1.000000 |
| PAH7+H      | 5.40036e-11 | 1.000000 | 5.40361e-11 | 1.000000 |
| rad3        | 3.95730e-11 | 1.000000 | 3.95968e-11 | 1.000000 |
| Ph+Allene   | 2.34456e-11 | 1.000000 | 2.34597e-11 | 1.000000 |
| rad4        | 2.07685e-11 | 1.000000 | 2.07809e-11 | 1.000000 |
| rad39       | 7.44920e-12 | 1.000000 | 7.45367e-12 | 1.000000 |
| rad13       | 7.17512e-12 | 1.000000 | 7.17944e-12 | 1.000000 |
| rad12       | 5.92959e-12 | 1.000000 | 5.93315e-12 | 1.000000 |
| rad46       | 8.49078e-13 | 1.000000 | 8.49589e-13 | 1.000000 |
| PhCH2CCH+H  | 2.09095e-13 | 1.000000 | 2.09221e-13 | 1.000000 |
| rad60syn    | 5.16426e-14 | 1.000000 | 5.16736e-14 | 1.000000 |
| rad37       | 2.82519e-14 | 1.000000 | 2.82689e-14 | 1.000000 |
| rad60anti   | 1.43406e-14 | 1.000000 | 1.43492e-14 | 1.000000 |
| rad33       | 1.40201e-14 | 1.000000 | 1.40285e-14 | 1.000000 |
| rad27       | 4.05754e-15 | 1.000000 | 4.05998e-15 | 1.000000 |
| rad25       | 1.21733e-15 | 1.000000 | 1.21806e-15 | 1.000000 |
| rad14       | 1.09135e-15 | 1.000000 | 1.09200e-15 | 1.000000 |
| rad5        | 4.59346e-16 | 1.000000 | 4.59622e-16 | 1.000000 |
| rad20       | 1.80107e-16 | 1.000000 | 1.80215e-16 | 1.000000 |
| rad21       | 1.16229e-16 | 1.000000 | 1.16299e-16 | 1.000000 |
| PAH3+H      | 1.00724e-16 | 1.000000 | 1.00784e-16 | 1.000000 |
| rad59       | 3.22623e-17 | 1.000000 | 3.22817e-17 | 1.000000 |
| rad23       | 4.92786e-18 | 1.000000 | 4.93082e-18 | 1.000000 |
| rad50       | 2.03113e-18 | 1.000000 | 2.03235e-18 | 1.000000 |
| rad18       | 7.56915e-19 | 1.000000 | 7.57371e-19 | 1.000000 |
| rad31       | 3.10687e-19 | 1.000000 | 3.10873e-19 | 1.000000 |
| rad19syn    | 1.98204e-19 | 1.000000 | 1.98323e-19 | 1.000000 |
| rad45       | 6.14440e-20 | 1.000000 | 6.14810e-20 | 1.000000 |
| rad22       | 4.92701e-20 | 1.000000 | 4.92997e-20 | 1.000000 |
| rad54       | 4.18281e-21 | 1.000000 | 4.18532e-21 | 1.000000 |
| rad36       | 3.92759e-21 | 1.000000 | 3.92995e-21 | 1.000000 |
| PAH10+CH3   | 2.81839e-21 | 1.000000 | 2.82008e-21 | 1.000000 |

|               |             |          |             |          |
|---------------|-------------|----------|-------------|----------|
| rad43         | 6.67186e-22 | 1.000000 | 6.67587e-22 | 1.000000 |
| rad52         | 4.34411e-22 | 1.000000 | 4.34672e-22 | 1.000000 |
| rad62         | 1.67394e-22 | 1.000000 | 1.67495e-22 | 1.000000 |
| rad24         | 2.94063e-23 | 1.000000 | 2.94239e-23 | 1.000000 |
| rad51         | 1.13377e-23 | 1.000000 | 1.13445e-23 | 1.000000 |
| PhcycC3H3_A+H | 1.04989e-23 | 1.000000 | 1.05052e-23 | 1.000000 |
| rad70         | 6.90236e-24 | 1.000000 | 6.90651e-24 | 1.000000 |
| rad55         | 2.89213e-24 | 1.000000 | 2.89387e-24 | 1.000000 |
| rad58         | 6.67420e-25 | 1.000000 | 6.67822e-25 | 1.000000 |
| PAH1+H        | 2.48959e-25 | 1.000000 | 2.49109e-25 | 1.000000 |
| rad65         | 9.40612e-26 | 1.000000 | 9.41178e-26 | 1.000000 |
| rad34         | 1.53045e-26 | 1.000000 | 1.53137e-26 | 1.000000 |
| rad42         | 2.29633e-28 | 1.000000 | 2.29771e-28 | 1.000000 |
| rad41         | 6.71431e-29 | 1.000000 | 6.71835e-29 | 1.000000 |
| rad47         | 9.26851e-38 | 1.000000 | 9.27408e-38 | 1.000000 |

0.100000000E-05 Pa, 270.000000 K

| Rate constant | True (fraction)     | Effective (fraction) |
|---------------|---------------------|----------------------|
| Total         | 8.04141e-24 (1.00 ) | 8.03545e-24 (1.00 )  |

| species       | PYtrue      | Cumul    | PYeffective | Cumul    |
|---------------|-------------|----------|-------------|----------|
| Indene+H      | 0.999245    | 0.999245 | 0.999986    | 0.999986 |
| Benzyl+C2H2   | 0.000741072 | 0.999986 | 0.00000     | 0.999986 |
| rad6          | 1.38867e-05 | 1.000000 | 1.38970e-05 | 1.000000 |
| PhCCH+CH3     | 1.26496e-07 | 1.000000 | 1.26589e-07 | 1.000000 |
| PhCHCCH2+H    | 9.10112e-08 | 1.000000 | 9.10787e-08 | 1.000000 |
| PhCCCH3+H     | 4.73318e-08 | 1.000000 | 4.73669e-08 | 1.000000 |
| rad30         | 1.86594e-08 | 1.000000 | 1.86733e-08 | 1.000000 |
| rad2          | 4.86524e-09 | 1.000000 | 4.86885e-09 | 1.000000 |
| rad28         | 3.66897e-09 | 1.000000 | 3.67169e-09 | 1.000000 |
| PAH9+H        | 2.26147e-09 | 1.000000 | 2.26315e-09 | 1.000000 |
| rad15         | 2.16654e-09 | 1.000000 | 2.16814e-09 | 1.000000 |
| rad35         | 1.49170e-09 | 1.000000 | 1.49281e-09 | 1.000000 |
| Ph+MeAc       | 1.09043e-09 | 1.000000 | 1.09124e-09 | 1.000000 |
| rad7          | 1.04750e-09 | 1.000000 | 1.04827e-09 | 1.000000 |
| rad26         | 5.57749e-10 | 1.000000 | 5.58163e-10 | 1.000000 |
| rad38         | 4.68005e-10 | 1.000000 | 4.68352e-10 | 1.000000 |
| rad1          | 3.56516e-10 | 1.000000 | 3.56781e-10 | 1.000000 |
| rad8          | 3.51124e-10 | 1.000000 | 3.51384e-10 | 1.000000 |
| rad10         | 2.60866e-10 | 1.000000 | 2.61059e-10 | 1.000000 |
| rad11         | 2.58338e-10 | 1.000000 | 2.58530e-10 | 1.000000 |
| rad9          | 1.73122e-10 | 1.000000 | 1.73250e-10 | 1.000000 |
| PAH7+H        | 1.06207e-10 | 1.000000 | 1.06286e-10 | 1.000000 |
| Ph+Allene     | 5.51635e-11 | 1.000000 | 5.52044e-11 | 1.000000 |
| rad3          | 3.29876e-11 | 1.000000 | 3.30121e-11 | 1.000000 |
| rad4          | 1.73797e-11 | 1.000000 | 1.73926e-11 | 1.000000 |
| rad39         | 1.56005e-11 | 1.000000 | 1.56121e-11 | 1.000000 |
| rad12         | 1.15650e-11 | 1.000000 | 1.15736e-11 | 1.000000 |
| rad13         | 6.00352e-12 | 1.000000 | 6.00797e-12 | 1.000000 |
| rad46         | 1.49078e-12 | 1.000000 | 1.49189e-12 | 1.000000 |
| PhCH2CCH+H    | 5.93683e-13 | 1.000000 | 5.94123e-13 | 1.000000 |
| rad60syn      | 1.13161e-13 | 1.000000 | 1.13244e-13 | 1.000000 |
| rad37         | 7.27126e-14 | 1.000000 | 7.27665e-14 | 1.000000 |
| rad60anti     | 3.27522e-14 | 1.000000 | 3.27765e-14 | 1.000000 |
| rad33         | 1.17644e-14 | 1.000000 | 1.17731e-14 | 1.000000 |
| rad27         | 3.83230e-15 | 1.000000 | 3.83514e-15 | 1.000000 |
| rad5          | 1.32962e-15 | 1.000000 | 1.33060e-15 | 1.000000 |
| rad25         | 1.28434e-15 | 1.000000 | 1.28529e-15 | 1.000000 |
| rad14         | 1.18910e-15 | 1.000000 | 1.18998e-15 | 1.000000 |
| PAH3+H        | 3.15912e-16 | 1.000000 | 3.16146e-16 | 1.000000 |
| rad20         | 1.65014e-16 | 1.000000 | 1.65136e-16 | 1.000000 |
| rad21         | 1.06829e-16 | 1.000000 | 1.06908e-16 | 1.000000 |
| rad59         | 9.89462e-17 | 1.000000 | 9.90196e-17 | 1.000000 |
| rad23         | 7.43988e-18 | 1.000000 | 7.44540e-18 | 1.000000 |
| rad50         | 6.38912e-18 | 1.000000 | 6.39386e-18 | 1.000000 |
| rad19syn      | 8.29175e-19 | 1.000000 | 8.29790e-19 | 1.000000 |
| rad18         | 6.81870e-19 | 1.000000 | 6.82375e-19 | 1.000000 |
| rad31         | 2.95874e-19 | 1.000000 | 2.96094e-19 | 1.000000 |
| rad45         | 1.02594e-19 | 1.000000 | 1.02670e-19 | 1.000000 |
| rad22         | 4.36967e-20 | 1.000000 | 4.37291e-20 | 1.000000 |
| rad54         | 1.96547e-20 | 1.000000 | 1.96693e-20 | 1.000000 |
| PAH10+CH3     | 1.31523e-20 | 1.000000 | 1.31620e-20 | 1.000000 |
| rad36         | 6.59511e-21 | 1.000000 | 6.60000e-21 | 1.000000 |
| rad43         | 3.09129e-21 | 1.000000 | 3.09358e-21 | 1.000000 |
| rad52         | 1.81421e-21 | 1.000000 | 1.81555e-21 | 1.000000 |
| rad62         | 8.33485e-22 | 1.000000 | 8.34104e-22 | 1.000000 |
| PhcycC3H3_A+H | 6.28439e-23 | 1.000000 | 6.28905e-23 | 1.000000 |

|        |             |         |             |         |
|--------|-------------|---------|-------------|---------|
| rad51  | 5.84528e-23 | 1.00000 | 5.84962e-23 | 1.00000 |
| rad70  | 3.99451e-23 | 1.00000 | 3.99748e-23 | 1.00000 |
| rad24  | 3.09736e-23 | 1.00000 | 3.09966e-23 | 1.00000 |
| rad55  | 1.69373e-23 | 1.00000 | 1.69499e-23 | 1.00000 |
| rad58  | 4.03354e-24 | 1.00000 | 4.03653e-24 | 1.00000 |
| PAH1+H | 1.62733e-24 | 1.00000 | 1.62853e-24 | 1.00000 |
| rad65  | 5.31208e-25 | 1.00000 | 5.31602e-25 | 1.00000 |
| rad34  | 1.02480e-25 | 1.00000 | 1.02556e-25 | 1.00000 |
| rad42  | 1.63124e-27 | 1.00000 | 1.63245e-27 | 1.00000 |
| rad41  | 4.81361e-28 | 1.00000 | 4.81718e-28 | 1.00000 |
| rad47  | 5.14497e-37 | 1.00000 | 5.14878e-37 | 1.00000 |

0.100000000E-05 Pa, 280.000000 K

| Rate constant | True (fraction)     | Effective (fraction) |
|---------------|---------------------|----------------------|
| Total         | 1.89357e-23 (1.00 ) | 1.89185e-23 (1.00 )  |

| species       | PYtrue      | Cumul    | PYeffective | Cumul    |
|---------------|-------------|----------|-------------|----------|
| Indene+H      | 0.999079    | 0.999079 | 0.999988    | 0.999988 |
| Benzyl+C2H2   | 0.000909501 | 0.999989 | 0.00000     | 0.999988 |
| rad6          | 1.15152e-05 | 1.00000  | 1.15257e-05 | 1.000000 |
| PhCCH+CH3     | 2.06213e-07 | 1.00000  | 2.06401e-07 | 1.000000 |
| PhCHCCH2+H    | 1.42765e-07 | 1.00000  | 1.42895e-07 | 1.000000 |
| PhCCCH3+H     | 7.66708e-08 | 1.00000  | 7.67406e-08 | 1.000000 |
| rad30         | 2.52474e-08 | 1.00000  | 2.52704e-08 | 1.000000 |
| rad2          | 4.07966e-09 | 1.00000  | 4.08338e-09 | 1.000000 |
| rad28         | 3.58602e-09 | 1.00000  | 3.58929e-09 | 1.000000 |
| rad15         | 3.14925e-09 | 1.00000  | 3.15212e-09 | 1.000000 |
| PAH9+H        | 3.03556e-09 | 1.00000  | 3.03833e-09 | 1.000000 |
| Ph+MeAc       | 2.18677e-09 | 1.00000  | 2.18876e-09 | 1.000000 |
| rad35         | 1.93646e-09 | 1.00000  | 1.93823e-09 | 1.000000 |
| rad7          | 8.71051e-10 | 1.00000  | 8.71844e-10 | 1.000000 |
| rad38         | 6.52105e-10 | 1.00000  | 6.52699e-10 | 1.000000 |
| rad8          | 6.10868e-10 | 1.00000  | 6.11424e-10 | 1.000000 |
| rad26         | 5.43913e-10 | 1.00000  | 5.44409e-10 | 1.000000 |
| rad9          | 3.21687e-10 | 1.00000  | 3.21980e-10 | 1.000000 |
| rad1          | 3.03263e-10 | 1.00000  | 3.03539e-10 | 1.000000 |
| rad10         | 2.18713e-10 | 1.00000  | 2.18912e-10 | 1.000000 |
| rad11         | 2.14969e-10 | 1.00000  | 2.15164e-10 | 1.000000 |
| PAH7+H        | 2.00067e-10 | 1.00000  | 2.00249e-10 | 1.000000 |
| Ph+Allene     | 1.22717e-10 | 1.00000  | 1.22828e-10 | 1.000000 |
| rad39         | 3.11176e-11 | 1.00000  | 3.11459e-11 | 1.000000 |
| rad3          | 2.77649e-11 | 1.00000  | 2.77902e-11 | 1.000000 |
| rad12         | 2.15358e-11 | 1.00000  | 2.15554e-11 | 1.000000 |
| rad4          | 1.46893e-11 | 1.00000  | 1.47027e-11 | 1.000000 |
| rad13         | 5.00369e-12 | 1.00000  | 5.00824e-12 | 1.000000 |
| rad46         | 2.54457e-12 | 1.00000  | 2.54688e-12 | 1.000000 |
| PhCH2CCH+H    | 1.57104e-12 | 1.00000  | 1.57247e-12 | 1.000000 |
| rad60syn      | 2.35373e-13 | 1.00000  | 2.35588e-13 | 1.000000 |
| rad37         | 1.74088e-13 | 1.00000  | 1.74247e-13 | 1.000000 |
| rad60anti     | 7.07396e-14 | 1.00000  | 7.08039e-14 | 1.000000 |
| rad33         | 9.83508e-15 | 1.00000  | 9.84403e-15 | 1.000000 |
| rad27         | 3.57518e-15 | 1.00000  | 3.57843e-15 | 1.000000 |
| rad5          | 3.56581e-15 | 1.00000  | 3.56906e-15 | 1.000000 |
| rad25         | 1.32734e-15 | 1.00000  | 1.32855e-15 | 1.000000 |
| rad14         | 1.26599e-15 | 1.00000  | 1.26714e-15 | 1.000000 |
| PAH3+H        | 9.16507e-16 | 1.00000  | 9.17341e-16 | 1.000000 |
| rad59         | 2.80900e-16 | 1.00000  | 2.81155e-16 | 1.000000 |
| rad20         | 1.51540e-16 | 1.00000  | 1.51678e-16 | 1.000000 |
| rad21         | 9.84410e-17 | 1.00000  | 9.85307e-17 | 1.000000 |
| rad50         | 1.86453e-17 | 1.00000  | 1.86623e-17 | 1.000000 |
| rad23         | 1.15940e-17 | 1.00000  | 1.16046e-17 | 1.000000 |
| rad19syn      | 3.13291e-18 | 1.00000  | 3.13576e-18 | 1.000000 |
| rad18         | 6.14769e-19 | 1.00000  | 6.15329e-19 | 1.000000 |
| rad31         | 2.84108e-19 | 1.00000  | 2.84367e-19 | 1.000000 |
| rad45         | 1.77643e-19 | 1.00000  | 1.77805e-19 | 1.000000 |
| rad54         | 8.26761e-20 | 1.00000  | 8.27513e-20 | 1.000000 |
| PAH10+CH3     | 5.48808e-20 | 1.00000  | 5.49308e-20 | 1.000000 |
| rad22         | 3.87763e-20 | 1.00000  | 3.88116e-20 | 1.000000 |
| rad43         | 1.28005e-20 | 1.00000  | 1.28122e-20 | 1.000000 |
| rad36         | 1.14913e-20 | 1.00000  | 1.15018e-20 | 1.000000 |
| rad52         | 6.86644e-21 | 1.00000  | 6.87269e-21 | 1.000000 |
| rad62         | 3.68997e-21 | 1.00000  | 3.69333e-21 | 1.000000 |
| PhcycC3H3_A+H | 3.28880e-22 | 1.00000  | 3.29180e-22 | 1.000000 |
| rad51         | 2.68189e-22 | 1.00000  | 2.68433e-22 | 1.000000 |
| rad70         | 2.02730e-22 | 1.00000  | 2.02915e-22 | 1.000000 |
| rad55         | 8.69006e-23 | 1.00000  | 8.69797e-23 | 1.000000 |
| rad24         | 3.28667e-23 | 1.00000  | 3.28966e-23 | 1.000000 |

|        |             |         |             |          |
|--------|-------------|---------|-------------|----------|
| rad58  | 2.12890e-23 | 1.00000 | 2.13084e-23 | 1.000000 |
| PAH1+H | 9.19439e-24 | 1.00000 | 9.20276e-24 | 1.000000 |
| rad65  | 2.64204e-24 | 1.00000 | 2.64445e-24 | 1.000000 |
| rad34  | 5.91305e-25 | 1.00000 | 5.91844e-25 | 1.000000 |
| rad42  | 9.90723e-27 | 1.00000 | 9.91625e-27 | 1.000000 |
| rad41  | 2.94681e-27 | 1.00000 | 2.94949e-27 | 1.000000 |
| rad47  | 2.49702e-36 | 1.00000 | 2.49929e-36 | 1.000000 |

0.100000000E-05 Pa, 290.000000 K

| Rate constant | True (fraction)     | Effective (fraction) |
|---------------|---------------------|----------------------|
| Total         | 4.20015e-23 (1.00 ) | 4.19549e-23 (1.00 )  |

| species       | PYtrue      | Cumul    | PYeffective | Cumul    |
|---------------|-------------|----------|-------------|----------|
| Indene+H      | 0.998879    | 0.998879 | 0.999990    | 0.999990 |
| Benzyl+C2H2   | 0.00111066  | 0.999990 | 0.00000     | 0.999990 |
| rad6          | 9.51234e-06 | 0.999999 | 9.52291e-06 | 1.000000 |
| PhCCH+CH3     | 3.26808e-07 | 0.999999 | 3.27171e-07 | 1.000000 |
| PhCHCCH2+H    | 2.18417e-07 | 1.000000 | 2.18660e-07 | 1.000000 |
| PhCCCH3+H     | 1.20622e-07 | 1.000000 | 1.20756e-07 | 1.000000 |
| rad30         | 3.37616e-08 | 1.000000 | 3.37991e-08 | 1.000000 |
| rad15         | 4.49780e-09 | 1.000000 | 4.50280e-09 | 1.000000 |
| Ph+MeAc       | 4.18703e-09 | 1.000000 | 4.19168e-09 | 1.000000 |
| PAH9+H        | 4.04962e-09 | 1.000000 | 4.05413e-09 | 1.000000 |
| rad28         | 3.45112e-09 | 1.000000 | 3.45496e-09 | 1.000000 |
| rad2          | 3.38497e-09 | 1.000000 | 3.38873e-09 | 1.000000 |
| rad35         | 2.50192e-09 | 1.000000 | 2.50470e-09 | 1.000000 |
| rad8          | 1.02712e-09 | 1.000000 | 1.02826e-09 | 1.000000 |
| rad38         | 9.00374e-10 | 1.000000 | 9.01376e-10 | 1.000000 |
| rad7          | 7.21639e-10 | 1.000000 | 7.22441e-10 | 1.000000 |
| rad9          | 5.75231e-10 | 1.000000 | 5.75870e-10 | 1.000000 |
| rad26         | 5.22395e-10 | 1.000000 | 5.22975e-10 | 1.000000 |
| PAH7+H        | 3.62593e-10 | 1.000000 | 3.62997e-10 | 1.000000 |
| Ph+Allene     | 2.59599e-10 | 1.000000 | 2.59888e-10 | 1.000000 |
| rad1          | 2.55508e-10 | 1.000000 | 2.55792e-10 | 1.000000 |
| rad10         | 1.82388e-10 | 1.000000 | 1.82590e-10 | 1.000000 |
| rad11         | 1.78221e-10 | 1.000000 | 1.78420e-10 | 1.000000 |
| rad39         | 5.94114e-11 | 1.000000 | 5.94775e-11 | 1.000000 |
| rad12         | 3.84655e-11 | 1.000000 | 3.85083e-11 | 1.000000 |
| rad3          | 2.32011e-11 | 1.000000 | 2.32269e-11 | 1.000000 |
| rad4          | 1.23299e-11 | 1.000000 | 1.23436e-11 | 1.000000 |
| rad46         | 4.23385e-12 | 1.000000 | 4.23855e-12 | 1.000000 |
| rad13         | 4.15539e-12 | 1.000000 | 4.16001e-12 | 1.000000 |
| PhCH2CCH+H    | 3.90276e-12 | 1.000000 | 3.90710e-12 | 1.000000 |
| rad60syn      | 4.67306e-13 | 1.000000 | 4.67826e-13 | 1.000000 |
| rad37         | 3.90721e-13 | 1.000000 | 3.91156e-13 | 1.000000 |
| rad60anti     | 1.45354e-13 | 1.000000 | 1.45516e-13 | 1.000000 |
| rad5          | 8.92887e-15 | 1.000000 | 8.93879e-15 | 1.000000 |
| rad33         | 8.19426e-15 | 1.000000 | 8.20337e-15 | 1.000000 |
| rad27         | 3.29852e-15 | 1.000000 | 3.30219e-15 | 1.000000 |
| PAH3+H        | 2.47956e-15 | 1.000000 | 2.48232e-15 | 1.000000 |
| rad25         | 1.34657e-15 | 1.000000 | 1.34806e-15 | 1.000000 |
| rad14         | 1.32015e-15 | 1.000000 | 1.32162e-15 | 1.000000 |
| rad59         | 7.44181e-16 | 1.000000 | 7.45009e-16 | 1.000000 |
| rad20         | 1.39514e-16 | 1.000000 | 1.39669e-16 | 1.000000 |
| rad21         | 9.09611e-17 | 1.000000 | 9.10623e-17 | 1.000000 |
| rad50         | 5.08734e-17 | 1.000000 | 5.09300e-17 | 1.000000 |
| rad23         | 1.85923e-17 | 1.000000 | 1.86129e-17 | 1.000000 |
| rad19syn      | 1.08023e-17 | 1.000000 | 1.08143e-17 | 1.000000 |
| rad18         | 5.54777e-19 | 1.000000 | 5.55394e-19 | 1.000000 |
| rad45         | 3.18702e-19 | 1.000000 | 3.19056e-19 | 1.000000 |
| rad54         | 3.14766e-19 | 1.000000 | 3.15116e-19 | 1.000000 |
| rad31         | 2.75271e-19 | 1.000000 | 2.75577e-19 | 1.000000 |
| PAH10+CH3     | 2.07061e-19 | 1.000000 | 2.07291e-19 | 1.000000 |
| rad43         | 4.79069e-20 | 1.000000 | 4.79602e-20 | 1.000000 |
| rad22         | 3.44413e-20 | 1.000000 | 3.44796e-20 | 1.000000 |
| rad52         | 2.37882e-20 | 1.000000 | 2.38146e-20 | 1.000000 |
| rad36         | 2.07586e-20 | 1.000000 | 2.07817e-20 | 1.000000 |
| rad62         | 1.46949e-20 | 1.000000 | 1.47112e-20 | 1.000000 |
| PhcycC3H3_A+H | 1.52452e-21 | 1.000000 | 1.52621e-21 | 1.000000 |
| rad51         | 1.10724e-21 | 1.000000 | 1.10847e-21 | 1.000000 |
| rad70         | 9.13951e-22 | 1.000000 | 9.14967e-22 | 1.000000 |
| rad55         | 3.95676e-22 | 1.000000 | 3.96116e-22 | 1.000000 |
| rad58         | 9.94323e-23 | 1.000000 | 9.95428e-23 | 1.000000 |
| PAH1+H        | 4.55733e-23 | 1.000000 | 4.56240e-23 | 1.000000 |
| rad24         | 3.51464e-23 | 1.000000 | 3.51855e-23 | 1.000000 |
| rad65         | 1.17141e-23 | 1.000000 | 1.17271e-23 | 1.000000 |
| rad34         | 2.98552e-24 | 1.000000 | 2.98884e-24 | 1.000000 |

|       |             |          |             |         |
|-------|-------------|----------|-------------|---------|
| rad42 | 5.23351e-26 | 1.000000 | 5.23933e-26 | 1.00000 |
| rad41 | 1.56770e-26 | 1.000000 | 1.56944e-26 | 1.00000 |
| rad47 | 1.07468e-35 | 1.000000 | 1.07587e-35 | 1.00000 |

0.100000000E-05 Pa, 300.000000 K

| Rate constant | True (fraction)     | Effective (fraction) |
|---------------|---------------------|----------------------|
| Total         | 1.17740e-22 (1.00 ) | 1.17544e-22 (1.00 )  |

| species       | PYtrue      | Cumul    | PYeffective | Cumul    |
|---------------|-------------|----------|-------------|----------|
| Indene+H      | 0.998329    | 0.998329 | 0.999991    | 0.999991 |
| Benzyl+C2H2   | 0.00166158  | 0.999991 | 0.00000     | 0.999991 |
| rad6          | 8.32690e-06 | 0.999999 | 8.34076e-06 | 0.999999 |
| PhCCH+CH3     | 4.36785e-07 | 0.999999 | 4.37512e-07 | 1.000000 |
| PhCHCCH2+H    | 2.66181e-07 | 1.000000 | 2.66624e-07 | 1.00000  |
| PhCCCH3+H     | 1.55731e-07 | 1.000000 | 1.55991e-07 | 1.00000  |
| rad30         | 3.74940e-08 | 1.000000 | 3.75564e-08 | 1.00000  |
| Ph+MeAc       | 6.10104e-09 | 1.000000 | 6.11120e-09 | 1.00000  |
| PAH9+H        | 5.54882e-09 | 1.000000 | 5.55805e-09 | 1.00000  |
| rad2          | 2.97975e-09 | 1.000000 | 2.98471e-09 | 1.00000  |
| rad28         | 2.86112e-09 | 1.000000 | 2.86588e-09 | 1.00000  |
| rad35         | 2.76931e-09 | 1.000000 | 2.77392e-09 | 1.00000  |
| rad38         | 1.02444e-09 | 1.000000 | 1.02615e-09 | 1.00000  |
| rad7          | 7.40315e-10 | 1.000000 | 7.41547e-10 | 1.00000  |
| PAH7+H        | 6.45761e-10 | 1.000000 | 6.46836e-10 | 1.00000  |
| rad26         | 3.89544e-10 | 1.000000 | 3.90193e-10 | 1.00000  |
| Ph+Allene     | 2.52018e-10 | 1.000000 | 2.52438e-10 | 1.00000  |
| rad1          | 2.24537e-10 | 1.000000 | 2.24910e-10 | 1.00000  |
| rad10         | 1.91296e-10 | 1.000000 | 1.91614e-10 | 1.00000  |
| rad11         | 1.77207e-10 | 1.000000 | 1.77502e-10 | 1.00000  |
| rad39         | 8.64663e-11 | 1.000000 | 8.66102e-11 | 1.00000  |
| rad3          | 2.13130e-11 | 1.000000 | 2.13485e-11 | 1.00000  |
| rad19anti     | 1.63377e-11 | 1.000000 | 1.63649e-11 | 1.00000  |
| rad4          | 1.05990e-11 | 1.000000 | 1.06166e-11 | 1.00000  |
| PhCH2CCH+H    | 7.51682e-12 | 1.000000 | 7.52933e-12 | 1.00000  |
| rad46         | 5.66748e-12 | 1.000000 | 5.67692e-12 | 1.00000  |
| rad13         | 4.26058e-12 | 1.000000 | 4.26767e-12 | 1.00000  |
| rad60syn      | 7.07966e-13 | 1.000000 | 7.09144e-13 | 1.00000  |
| rad37         | 6.05581e-13 | 1.000000 | 6.06589e-13 | 1.00000  |
| rad60anti     | 2.13244e-13 | 1.000000 | 2.13599e-13 | 1.00000  |
| rad23         | 2.47339e-14 | 1.000000 | 2.47750e-14 | 1.00000  |
| rad33         | 1.03097e-14 | 1.000000 | 1.03268e-14 | 1.00000  |
| rad20         | 7.81456e-15 | 1.000000 | 7.82757e-15 | 1.00000  |
| PAH3+H        | 6.24906e-15 | 1.000000 | 6.25946e-15 | 1.00000  |
| rad21         | 4.99659e-15 | 1.000000 | 5.00490e-15 | 1.00000  |
| rad27         | 2.75764e-15 | 1.000000 | 2.76223e-15 | 1.00000  |
| rad59         | 1.44646e-15 | 1.000000 | 1.44887e-15 | 1.00000  |
| rad45         | 1.25509e-15 | 1.000000 | 1.25718e-15 | 1.00000  |
| rad14         | 1.11112e-15 | 1.000000 | 1.11297e-15 | 1.00000  |
| rad25         | 9.85375e-16 | 1.000000 | 9.87015e-16 | 1.00000  |
| rad18         | 1.88507e-16 | 1.000000 | 1.88820e-16 | 1.00000  |
| rad22         | 1.58086e-16 | 1.000000 | 1.58349e-16 | 1.00000  |
| rad50         | 1.03024e-16 | 1.000000 | 1.03196e-16 | 1.00000  |
| rad36         | 4.27775e-17 | 1.000000 | 4.28487e-17 | 1.00000  |
| rad19syn      | 2.69221e-17 | 1.000000 | 2.69669e-17 | 1.00000  |
| rad67         | 1.20174e-18 | 1.000000 | 1.20374e-18 | 1.00000  |
| rad54         | 8.62471e-19 | 1.000000 | 8.63907e-19 | 1.00000  |
| PAH10+CH3     | 5.71975e-19 | 1.000000 | 5.72926e-19 | 1.00000  |
| rad31         | 4.25697e-19 | 1.000000 | 4.26405e-19 | 1.00000  |
| rad43         | 1.19051e-19 | 1.000000 | 1.19249e-19 | 1.00000  |
| rad52         | 6.28747e-20 | 1.000000 | 6.29794e-20 | 1.00000  |
| rad62         | 4.05054e-20 | 1.000000 | 4.05728e-20 | 1.00000  |
| rad24         | 1.73503e-20 | 1.000000 | 1.73792e-20 | 1.00000  |
| PhcycC3H3_A+H | 7.38945e-21 | 1.000000 | 7.40175e-21 | 1.00000  |
| rad51         | 3.46093e-21 | 1.000000 | 3.46669e-21 | 1.00000  |
| rad70         | 3.35423e-21 | 1.000000 | 3.35981e-21 | 1.00000  |
| rad55         | 1.33538e-21 | 1.000000 | 1.33760e-21 | 1.00000  |
| rad58         | 3.59869e-22 | 1.000000 | 3.60468e-22 | 1.00000  |
| PAH1+H        | 2.76409e-22 | 1.000000 | 2.76869e-22 | 1.00000  |
| rad65         | 4.20416e-23 | 1.000000 | 4.21116e-23 | 1.00000  |
| rad9          | 3.27654e-23 | 1.000000 | 3.28199e-23 | 1.00000  |
| rad34         | 1.85425e-23 | 1.000000 | 1.85734e-23 | 1.00000  |
| rad42         | 4.75218e-25 | 1.000000 | 4.76009e-25 | 1.00000  |
| rad41         | 1.44596e-25 | 1.000000 | 1.44836e-25 | 1.00000  |
| rad15         | 1.93907e-26 | 1.000000 | 1.94230e-26 | 1.00000  |
| rad53         | 6.41325e-27 | 1.000000 | 6.42392e-27 | 1.00000  |
| rad64         | 1.37052e-27 | 1.000000 | 1.37280e-27 | 1.00000  |
| rad5          | 2.48108e-29 | 1.000000 | 2.48521e-29 | 1.00000  |



|           |             |          |             |         |
|-----------|-------------|----------|-------------|---------|
| rad56     | 9.20945e-30 | 1.000000 | 9.22478e-30 | 1.00000 |
| rad12     | 9.05357e-30 | 1.000000 | 9.06864e-30 | 1.00000 |
| rad61     | 1.39479e-30 | 1.000000 | 1.39712e-30 | 1.00000 |
| rad68syn  | 1.01950e-30 | 1.000000 | 1.02120e-30 | 1.00000 |
| rad68anti | 7.27731e-31 | 1.000000 | 7.28943e-31 | 1.00000 |
| rad73     | 2.20221e-33 | 1.000000 | 2.20588e-33 | 1.00000 |
| rad40syn  | 2.30637e-34 | 1.000000 | 2.31021e-34 | 1.00000 |
| rad40anti | 7.00835e-35 | 1.000000 | 7.02002e-35 | 1.00000 |
| rad47     | 2.39996e-35 | 1.000000 | 2.40395e-35 | 1.00000 |
| rad71     | 2.29534e-37 | 1.000000 | 2.29916e-37 | 1.00000 |
| PAH8+H    | 7.76771e-38 | 1.000000 | 7.78063e-38 | 1.00000 |
| rad72     | 4.05059e-43 | 1.000000 | 4.05733e-43 | 1.00000 |
| rad8      | 2.66107e-44 | 1.000000 | 2.66550e-44 | 1.00000 |

0.100000000E-05 Pa, 310.000000 K

| Rate constant | True (fraction)     | Effective (fraction) |
|---------------|---------------------|----------------------|
| Total         | 2.44453e-22 (1.00 ) | 2.44054e-22 (1.00 )  |

| species       | PYtrue      | Cumul    | PYeffective | Cumul    |
|---------------|-------------|----------|-------------|----------|
| Indene+H      | 0.998360    | 0.998360 | 0.999992    | 0.999992 |
| Benzyl+C2H2   | 0.00163188  | 0.999992 | 0.00000     | 0.999992 |
| rad6          | 6.42435e-06 | 0.999998 | 6.43485e-06 | 0.999998 |
| PhCCH+CH3     | 7.61026e-07 | 0.999999 | 7.62270e-07 | 0.999999 |
| PhCHCCH2+H    | 4.77964e-07 | 1.000000 | 4.78746e-07 | 1.000000 |
| PhCCCH3+H     | 2.76155e-07 | 1.000000 | 2.76606e-07 | 1.000000 |
| rad30         | 5.84661e-08 | 1.000000 | 5.85617e-08 | 1.00000  |
| Ph+MeAc       | 1.35859e-08 | 1.000000 | 1.36082e-08 | 1.00000  |
| rad15         | 8.75421e-09 | 1.000000 | 8.76852e-09 | 1.00000  |
| PAH9+H        | 7.07585e-09 | 1.000000 | 7.08742e-09 | 1.00000  |
| rad35         | 4.11577e-09 | 1.000000 | 4.12250e-09 | 1.00000  |
| rad28         | 3.06881e-09 | 1.000000 | 3.07382e-09 | 1.00000  |
| rad8          | 2.65438e-09 | 1.000000 | 2.65872e-09 | 1.00000  |
| rad2          | 2.32242e-09 | 1.000000 | 2.32621e-09 | 1.00000  |
| rad38         | 1.67248e-09 | 1.000000 | 1.67522e-09 | 1.00000  |
| rad9          | 1.66309e-09 | 1.000000 | 1.66581e-09 | 1.00000  |
| PAH7+H        | 1.07641e-09 | 1.000000 | 1.07817e-09 | 1.00000  |
| Ph+Allene     | 1.01822e-09 | 1.000000 | 1.01988e-09 | 1.00000  |
| rad7          | 4.90348e-10 | 1.000000 | 4.91150e-10 | 1.00000  |
| rad26         | 4.62958e-10 | 1.000000 | 4.63714e-10 | 1.00000  |
| rad39         | 1.93104e-10 | 1.000000 | 1.93420e-10 | 1.00000  |
| rad1          | 1.81321e-10 | 1.000000 | 1.81617e-10 | 1.00000  |
| rad10         | 1.26434e-10 | 1.000000 | 1.26640e-10 | 1.00000  |
| rad11         | 1.21285e-10 | 1.000000 | 1.21483e-10 | 1.00000  |
| rad12         | 1.09962e-10 | 1.000000 | 1.10142e-10 | 1.00000  |
| PhCH2CCH+H    | 2.04107e-11 | 1.000000 | 2.04440e-11 | 1.00000  |
| rad3          | 1.61202e-11 | 1.000000 | 1.61466e-11 | 1.00000  |
| rad46         | 1.09554e-11 | 1.000000 | 1.09733e-11 | 1.00000  |
| rad4          | 8.65209e-12 | 1.000000 | 8.66624e-12 | 1.00000  |
| rad13         | 2.83830e-12 | 1.000000 | 2.84294e-12 | 1.00000  |
| rad37         | 1.66360e-12 | 1.000000 | 1.66632e-12 | 1.00000  |
| rad60syn      | 1.63169e-12 | 1.000000 | 1.63436e-12 | 1.00000  |
| rad60anti     | 5.39033e-13 | 1.000000 | 5.39914e-13 | 1.00000  |
| rad5          | 4.67687e-14 | 1.000000 | 4.68452e-14 | 1.00000  |
| PAH3+H        | 1.51219e-14 | 1.000000 | 1.51467e-14 | 1.00000  |
| rad33         | 5.63724e-15 | 1.000000 | 5.64646e-15 | 1.00000  |
| rad59         | 4.36101e-15 | 1.000000 | 4.36813e-15 | 1.00000  |
| rad27         | 2.72754e-15 | 1.000000 | 2.73200e-15 | 1.00000  |
| rad14         | 1.35958e-15 | 1.000000 | 1.36181e-15 | 1.00000  |
| rad25         | 1.32023e-15 | 1.000000 | 1.32239e-15 | 1.00000  |
| rad50         | 3.17584e-16 | 1.000000 | 3.18103e-16 | 1.00000  |
| rad20         | 1.19229e-16 | 1.000000 | 1.19424e-16 | 1.00000  |
| rad19syn      | 1.01011e-16 | 1.000000 | 1.01176e-16 | 1.00000  |
| rad21         | 7.83682e-17 | 1.000000 | 7.84963e-17 | 1.00000  |
| rad23         | 5.14346e-17 | 1.000000 | 5.15187e-17 | 1.00000  |
| rad54         | 3.50800e-18 | 1.000000 | 3.51374e-18 | 1.00000  |
| PAH10+CH3     | 2.26100e-18 | 1.000000 | 2.26470e-18 | 1.00000  |
| rad45         | 1.12764e-18 | 1.000000 | 1.12949e-18 | 1.00000  |
| rad43         | 5.14356e-19 | 1.000000 | 5.15196e-19 | 1.00000  |
| rad18         | 4.53212e-19 | 1.000000 | 4.53953e-19 | 1.00000  |
| rad31         | 2.66553e-19 | 1.000000 | 2.66989e-19 | 1.00000  |
| rad52         | 2.26217e-19 | 1.000000 | 2.26587e-19 | 1.00000  |
| rad62         | 1.76311e-19 | 1.000000 | 1.76599e-19 | 1.00000  |
| rad36         | 7.46110e-20 | 1.000000 | 7.47329e-20 | 1.00000  |
| rad22         | 2.73148e-20 | 1.000000 | 2.73594e-20 | 1.00000  |
| PhcycC3H3_A+H | 2.37749e-20 | 1.000000 | 2.38138e-20 | 1.00000  |
| rad51         | 1.42634e-20 | 1.000000 | 1.42867e-20 | 1.00000  |
| rad70         | 1.35852e-20 | 1.000000 | 1.36074e-20 | 1.00000  |

|        |             |          |             |         |
|--------|-------------|----------|-------------|---------|
| rad55  | 5.98370e-21 | 1.000000 | 5.99348e-21 | 1.00000 |
| rad58  | 1.57034e-21 | 1.000000 | 1.57291e-21 | 1.00000 |
| PAH1+H | 7.93482e-22 | 1.000000 | 7.94779e-22 | 1.00000 |
| rad65  | 1.69845e-22 | 1.000000 | 1.70123e-22 | 1.00000 |
| rad34  | 5.35999e-23 | 1.000000 | 5.36875e-23 | 1.00000 |
| rad24  | 4.11937e-23 | 1.000000 | 4.12611e-23 | 1.00000 |
| rad42  | 1.01340e-24 | 1.000000 | 1.01505e-24 | 1.00000 |
| rad41  | 3.07228e-25 | 1.000000 | 3.07730e-25 | 1.00000 |
| rad47  | 1.45559e-34 | 1.000000 | 1.45797e-34 | 1.00000 |

0.100000000E-05 Pa, 400.000000 K

| Rate constant | True (fraction)     | Effective (fraction) |
|---------------|---------------------|----------------------|
| Total         | 3.60269e-20 (1.00 ) | 3.57081e-20 (1.00 )  |

| species       | PYtrue      | Cumul    | PYeffective | Cumul    |
|---------------|-------------|----------|-------------|----------|
| Indene+H      | 0.991127    | 0.991127 | 0.999975    | 0.999975 |
| Benzyl+C2H2   | 0.00884847  | 0.999975 | 0.00000     | 0.999975 |
| PhCCH+CH3     | 1.23503e-05 | 0.999988 | 1.24606e-05 | 0.999987 |
| PhCHCCH2+H    | 5.95029e-06 | 0.999994 | 6.00341e-06 | 0.999993 |
| PhCCCH3+H     | 3.90739e-06 | 0.999998 | 3.94227e-06 | 0.999997 |
| rad6          | 1.21773e-06 | 0.999999 | 1.22861e-06 | 0.999999 |
| Ph+MeAc       | 5.34638e-07 | 0.999999 | 5.39411e-07 | 0.999999 |
| rad30         | 4.02126e-07 | 1.000000 | 4.05716e-07 | 1.000000 |
| PAH9+H        | 6.80802e-08 | 1.000000 | 6.86880e-08 | 1.000000 |
| Ph+Allene     | 6.39781e-08 | 1.000000 | 6.45492e-08 | 1.000000 |
| PAH7+H        | 4.50276e-08 | 1.000000 | 4.54296e-08 | 1.000000 |
| rad35         | 2.73752e-08 | 1.000000 | 2.76195e-08 | 1.000000 |
| rad38         | 1.63212e-08 | 1.000000 | 1.64669e-08 | 1.000000 |
| rad39         | 8.59870e-09 | 1.000000 | 8.67547e-09 | 1.000000 |
| PhCH2CCH+H    | 4.56270e-09 | 1.000000 | 4.60344e-09 | 1.000000 |
| rad28         | 1.14024e-09 | 1.000000 | 1.15042e-09 | 1.000000 |
| rad19anti     | 8.44423e-10 | 1.000000 | 8.51961e-10 | 1.000000 |
| rad2          | 5.50227e-10 | 1.000000 | 5.55139e-10 | 1.000000 |
| rad46         | 3.06009e-10 | 1.000000 | 3.08741e-10 | 1.000000 |
| rad26         | 1.79789e-10 | 1.000000 | 1.81394e-10 | 1.000000 |
| rad37         | 1.38254e-10 | 1.000000 | 1.39488e-10 | 1.000000 |
| rad7          | 1.14241e-10 | 1.000000 | 1.15261e-10 | 1.000000 |
| rad60syn      | 9.47275e-11 | 1.000000 | 9.55731e-11 | 1.000000 |
| rad1          | 5.12065e-11 | 1.000000 | 5.16636e-11 | 1.000000 |
| rad60anti     | 3.76555e-11 | 1.000000 | 3.79916e-11 | 1.000000 |
| rad10         | 3.62895e-11 | 1.000000 | 3.66135e-11 | 1.000000 |
| rad11         | 2.81089e-11 | 1.000000 | 2.83598e-11 | 1.000000 |
| PAH3+H        | 6.50520e-12 | 1.000000 | 6.56327e-12 | 1.000000 |
| rad3          | 4.47066e-12 | 1.000000 | 4.51057e-12 | 1.000000 |
| rad4          | 2.35442e-12 | 1.000000 | 2.37544e-12 | 1.000000 |
| rad23         | 1.46019e-12 | 1.000000 | 1.47323e-12 | 1.000000 |
| rad59         | 1.36005e-12 | 1.000000 | 1.37219e-12 | 1.000000 |
| rad13         | 6.95919e-13 | 1.000000 | 7.02132e-13 | 1.000000 |
| rad45         | 2.02204e-13 | 1.000000 | 2.04009e-13 | 1.000000 |
| rad50         | 1.35994e-13 | 1.000000 | 1.37208e-13 | 1.000000 |
| rad19syn      | 1.28743e-13 | 1.000000 | 1.29892e-13 | 1.000000 |
| rad54         | 8.91594e-15 | 1.000000 | 8.99553e-15 | 1.000000 |
| rad36         | 7.79504e-15 | 1.000000 | 7.86463e-15 | 1.000000 |
| PAH10+CH3     | 4.84581e-15 | 1.000000 | 4.88907e-15 | 1.000000 |
| rad20         | 4.10383e-15 | 1.000000 | 4.14047e-15 | 1.000000 |
| rad21         | 2.87006e-15 | 1.000000 | 2.89568e-15 | 1.000000 |
| rad33         | 1.89851e-15 | 1.000000 | 1.91545e-15 | 1.000000 |
| rad67         | 1.67319e-15 | 1.000000 | 1.68812e-15 | 1.000000 |
| rad27         | 1.01329e-15 | 1.000000 | 1.02233e-15 | 1.000000 |
| rad43         | 8.69683e-16 | 1.000000 | 8.77447e-16 | 1.000000 |
| rad14         | 8.20331e-16 | 1.000000 | 8.27655e-16 | 1.000000 |
| rad25         | 7.36004e-16 | 1.000000 | 7.42574e-16 | 1.000000 |
| rad62         | 4.86642e-16 | 1.000000 | 4.90986e-16 | 1.000000 |
| rad52         | 4.03330e-16 | 1.000000 | 4.06931e-16 | 1.000000 |
| PhcycC3H3_A+H | 3.21885e-16 | 1.000000 | 3.24758e-16 | 1.000000 |
| rad70         | 1.20384e-16 | 1.000000 | 1.21459e-16 | 1.000000 |
| rad18         | 7.76455e-17 | 1.000000 | 7.83386e-17 | 1.000000 |
| rad51         | 7.61824e-17 | 1.000000 | 7.68625e-17 | 1.000000 |
| rad22         | 5.30984e-17 | 1.000000 | 5.35725e-17 | 1.000000 |
| rad55         | 5.04270e-17 | 1.000000 | 5.08772e-17 | 1.000000 |
| PAH1+H        | 2.44002e-17 | 1.000000 | 2.46180e-17 | 1.000000 |
| rad58         | 1.79710e-17 | 1.000000 | 1.81314e-17 | 1.000000 |
| rad34         | 2.03113e-18 | 1.000000 | 2.04927e-18 | 1.000000 |
| rad65         | 1.53289e-18 | 1.000000 | 1.54658e-18 | 1.000000 |
| rad31         | 6.49905e-19 | 1.000000 | 6.55707e-19 | 1.000000 |
| rad42         | 7.25699e-20 | 1.000000 | 7.32177e-20 | 1.000000 |
| rad24         | 5.54105e-20 | 1.000000 | 5.59052e-20 | 1.000000 |

|           |             |         |             |          |
|-----------|-------------|---------|-------------|----------|
| rad41     | 2.24630e-20 | 1.00000 | 2.26635e-20 | 1.000000 |
| rad53     | 5.65476e-21 | 1.00000 | 5.70524e-21 | 1.000000 |
| rad64     | 1.81587e-21 | 1.00000 | 1.83208e-21 | 1.000000 |
| rad9      | 9.66098e-22 | 1.00000 | 9.74723e-22 | 1.000000 |
| rad56     | 6.61023e-23 | 1.00000 | 6.66924e-23 | 1.000000 |
| rad68syn  | 8.53525e-24 | 1.00000 | 8.61145e-24 | 1.000000 |
| rad68anti | 6.16440e-24 | 1.00000 | 6.21943e-24 | 1.000000 |
| rad61     | 4.52909e-24 | 1.00000 | 4.56952e-24 | 1.000000 |
| rad15     | 5.98908e-25 | 1.00000 | 6.04254e-25 | 1.000000 |
| rad73     | 2.17514e-25 | 1.00000 | 2.19456e-25 | 1.000000 |
| rad40syn  | 4.85313e-26 | 1.00000 | 4.89646e-26 | 1.000000 |
| PAH8+H    | 2.51497e-26 | 1.00000 | 2.53743e-26 | 1.000000 |
| rad40anti | 1.16119e-26 | 1.00000 | 1.17156e-26 | 1.000000 |
| rad71     | 8.27377e-27 | 1.00000 | 8.34763e-27 | 1.000000 |
| rad5      | 3.72307e-27 | 1.00000 | 3.75631e-27 | 1.000000 |
| rad12     | 1.57873e-27 | 1.00000 | 1.59283e-27 | 1.000000 |
| rad72     | 1.08002e-30 | 1.00000 | 1.08966e-30 | 1.000000 |
| rad47     | 5.32423e-31 | 1.00000 | 5.37176e-31 | 1.000000 |
| rad8      | 1.01982e-40 | 1.00000 | 1.02892e-40 | 1.000000 |

0.1000000000E-05 Pa, 500.000000 K

| Rate constant | True (fraction)     | Effective (fraction) |
|---------------|---------------------|----------------------|
| Total         | 1.22595e-18 (1.00 ) | 1.18787e-18 (1.00 )  |

| species       | PYtrue      | Cumul    | PYeffective | Cumul    |
|---------------|-------------|----------|-------------|----------|
| Indene+H      | 0.968764    | 0.968764 | 0.999822    | 0.999822 |
| Benzyl+C2H2   | 0.0310635   | 0.999827 | 0.00000     | 0.999822 |
| PhCCH+CH3     | 9.35926e-05 | 0.999921 | 9.65931e-05 | 0.999919 |
| PhCHCCH2+H    | 4.00559e-05 | 0.999961 | 4.13400e-05 | 0.999960 |
| PhCCCH3+H     | 2.54430e-05 | 0.999987 | 2.62587e-05 | 0.999986 |
| Ph+MeAc       | 7.07385e-06 | 0.999994 | 7.30064e-06 | 0.999993 |
| rad30         | 2.19669e-06 | 0.999996 | 2.26711e-06 | 0.999996 |
| Ph+Allene     | 2.05092e-06 | 0.999998 | 2.11667e-06 | 0.999998 |
| PAH7+H        | 6.80744e-07 | 0.999999 | 7.02569e-07 | 0.999999 |
| PAH9+H        | 4.84045e-07 | 0.999999 | 4.99563e-07 | 0.999999 |
| PhCH2CCH+H    | 2.44801e-07 | 0.999999 | 2.52649e-07 | 0.999999 |
| rad35         | 1.65639e-07 | 0.999999 | 1.70949e-07 | 1.000000 |
| rad6          | 1.53123e-07 | 1.000000 | 1.58032e-07 | 1.000000 |
| rad39         | 1.51519e-07 | 1.000000 | 1.56377e-07 | 1.000000 |
| rad38         | 1.34449e-07 | 1.000000 | 1.38759e-07 | 1.000000 |
| rad19anti     | 1.41564e-08 | 1.000000 | 1.46102e-08 | 1.000000 |
| rad46         | 5.06638e-09 | 1.000000 | 5.22881e-09 | 1.000000 |
| rad37         | 2.86983e-09 | 1.000000 | 2.96184e-09 | 1.000000 |
| rad60syn      | 2.17485e-09 | 1.000000 | 2.24457e-09 | 1.000000 |
| rad60anti     | 9.78348e-10 | 1.000000 | 1.00971e-09 | 1.000000 |
| PAH3+H        | 4.98713e-10 | 1.000000 | 5.14701e-10 | 1.000000 |
| rad28         | 2.54423e-10 | 1.000000 | 2.62580e-10 | 1.000000 |
| rad2          | 1.36264e-10 | 1.000000 | 1.40632e-10 | 1.000000 |
| rad59         | 9.55001e-11 | 1.000000 | 9.85617e-11 | 1.000000 |
| rad26         | 4.39218e-11 | 1.000000 | 4.53299e-11 | 1.000000 |
| rad19syn      | 2.21128e-11 | 1.000000 | 2.28217e-11 | 1.000000 |
| rad23         | 1.93673e-11 | 1.000000 | 1.99882e-11 | 1.000000 |
| rad1          | 1.62875e-11 | 1.000000 | 1.68097e-11 | 1.000000 |
| rad7          | 1.54636e-11 | 1.000000 | 1.59593e-11 | 1.000000 |
| rad50         | 1.38224e-11 | 1.000000 | 1.42655e-11 | 1.000000 |
| rad10         | 7.52890e-12 | 1.000000 | 7.77027e-12 | 1.000000 |
| rad45         | 4.40688e-12 | 1.000000 | 4.54817e-12 | 1.000000 |
| rad11         | 3.98297e-12 | 1.000000 | 4.11066e-12 | 1.000000 |
| rad54         | 2.40094e-12 | 1.000000 | 2.47791e-12 | 1.000000 |
| rad3          | 1.48452e-12 | 1.000000 | 1.53211e-12 | 1.000000 |
| PAH10+CH3     | 9.70427e-13 | 1.000000 | 1.00154e-12 | 1.000000 |
| rad4          | 8.36898e-13 | 1.000000 | 8.63728e-13 | 1.000000 |
| rad67         | 2.37493e-13 | 1.000000 | 2.45106e-13 | 1.000000 |
| rad36         | 2.34546e-13 | 1.000000 | 2.42065e-13 | 1.000000 |
| PhcycC3H3_A+H | 2.03140e-13 | 1.000000 | 2.09653e-13 | 1.000000 |
| rad43         | 1.48446e-13 | 1.000000 | 1.53205e-13 | 1.000000 |
| rad62         | 1.23066e-13 | 1.000000 | 1.27012e-13 | 1.000000 |
| rad13         | 1.04581e-13 | 1.000000 | 1.07934e-13 | 1.000000 |
| rad52         | 1.00177e-13 | 1.000000 | 1.03389e-13 | 1.000000 |
| rad70         | 6.56844e-14 | 1.000000 | 6.77902e-14 | 1.000000 |
| rad51         | 3.84314e-14 | 1.000000 | 3.96635e-14 | 1.000000 |
| rad55         | 2.77305e-14 | 1.000000 | 2.86195e-14 | 1.000000 |
| PAH1+H        | 2.28961e-14 | 1.000000 | 2.36301e-14 | 1.000000 |
| rad58         | 1.24937e-14 | 1.000000 | 1.28943e-14 | 1.000000 |
| rad20         | 3.27963e-15 | 1.000000 | 3.38477e-15 | 1.000000 |
| rad21         | 2.58399e-15 | 1.000000 | 2.66683e-15 | 1.000000 |
| rad34         | 2.11778e-15 | 1.000000 | 2.18567e-15 | 1.000000 |

|           |             |          |             |          |
|-----------|-------------|----------|-------------|----------|
| rad65     | 9.80634e-16 | 1.000000 | 1.01207e-15 | 1.000000 |
| rad33     | 3.77510e-16 | 1.000000 | 3.89613e-16 | 1.000000 |
| rad14     | 2.96012e-16 | 1.000000 | 3.05502e-16 | 1.000000 |
| rad25     | 2.71975e-16 | 1.000000 | 2.80694e-16 | 1.000000 |
| rad27     | 2.61647e-16 | 1.000000 | 2.70035e-16 | 1.000000 |
| rad42     | 8.25261e-17 | 1.000000 | 8.51719e-17 | 1.000000 |
| rad18     | 4.11061e-17 | 1.000000 | 4.24240e-17 | 1.000000 |
| rad22     | 3.13982e-17 | 1.000000 | 3.24048e-17 | 1.000000 |
| rad41     | 2.35270e-17 | 1.000000 | 2.42813e-17 | 1.000000 |
| rad53     | 2.01909e-17 | 1.000000 | 2.08382e-17 | 1.000000 |
| rad64     | 7.88259e-18 | 1.000000 | 8.13530e-18 | 1.000000 |
| rad31     | 1.29722e-18 | 1.000000 | 1.33881e-18 | 1.000000 |
| rad56     | 7.26649e-19 | 1.000000 | 7.49945e-19 | 1.000000 |
| rad24     | 4.11974e-19 | 1.000000 | 4.25181e-19 | 1.000000 |
| rad68syn  | 9.96811e-20 | 1.000000 | 1.02877e-19 | 1.000000 |
| rad68anti | 7.08607e-20 | 1.000000 | 7.31324e-20 | 1.000000 |
| rad9      | 3.99999e-20 | 1.000000 | 4.12823e-20 | 1.000000 |
| rad61     | 3.00192e-20 | 1.000000 | 3.09816e-20 | 1.000000 |
| rad73     | 1.98331e-20 | 1.000000 | 2.04690e-20 | 1.000000 |
| rad71     | 1.09384e-20 | 1.000000 | 1.12891e-20 | 1.000000 |
| PAH8+H    | 1.57845e-21 | 1.000000 | 1.62905e-21 | 1.000000 |
| rad40syn  | 1.53201e-21 | 1.000000 | 1.58112e-21 | 1.000000 |
| rad40anti | 4.14320e-22 | 1.000000 | 4.27602e-22 | 1.000000 |
| rad72     | 1.17730e-22 | 1.000000 | 1.21504e-22 | 1.000000 |
| rad15     | 2.63678e-23 | 1.000000 | 2.72131e-23 | 1.000000 |
| rad12     | 5.38750e-25 | 1.000000 | 5.56022e-25 | 1.000000 |
| rad5      | 4.96054e-26 | 1.000000 | 5.11957e-26 | 1.000000 |
| rad47     | 2.95503e-28 | 1.000000 | 3.04977e-28 | 1.000000 |
| rad8      | 6.41057e-37 | 1.000000 | 6.61609e-37 | 1.000000 |

0.100000000E-05 Pa, 600.000000 K

| Rate constant | True (fraction)     | Effective (fraction) |
|---------------|---------------------|----------------------|
| Total         | 1.36947e-17 (1.00 ) | 1.26193e-17 (1.00 )  |

| species       | PYtrue      | Cumul    | PYeffective | Cumul    |
|---------------|-------------|----------|-------------|----------|
| Indene+H      | 0.920850    | 0.920850 | 0.999325    | 0.999325 |
| Benzyl+C2H2   | 0.0785283   | 0.999378 | 0.000000    | 0.999325 |
| PhCCH+CH3     | 0.000333045 | 0.999711 | 0.000361427 | 0.999686 |
| PhCHCCH2+H    | 0.000137020 | 0.999848 | 0.000148697 | 0.999835 |
| PhCCH3+H      | 7.54034e-05 | 0.999924 | 8.18293e-05 | 0.999917 |
| Ph+MeAc       | 3.38749e-05 | 0.999958 | 3.67618e-05 | 0.999954 |
| Ph+Allene     | 2.17077e-05 | 0.999979 | 2.35577e-05 | 0.999977 |
| rad30         | 7.59256e-06 | 0.999987 | 8.23960e-06 | 0.999986 |
| PAH7+H        | 4.39152e-06 | 0.999991 | 4.76577e-06 | 0.999990 |
| PhCH2CCH+H    | 3.66168e-06 | 0.999995 | 3.97373e-06 | 0.999994 |
| PAH9+H        | 2.21748e-06 | 0.999997 | 2.40646e-06 | 0.999997 |
| rad39         | 1.04275e-06 | 0.999998 | 1.13161e-06 | 0.999998 |
| rad38         | 6.77227e-07 | 0.999999 | 7.34941e-07 | 0.999999 |
| rad35         | 6.69665e-07 | 1.000000 | 7.26734e-07 | 0.999999 |
| rad19anti     | 1.16219e-07 | 1.000000 | 1.26124e-07 | 0.999999 |
| rad46         | 4.03895e-08 | 1.000000 | 4.38315e-08 | 0.999999 |
| rad60syn      | 1.92850e-08 | 1.000000 | 2.09285e-08 | 0.999999 |
| rad6          | 1.87667e-08 | 1.000000 | 2.03660e-08 | 0.999999 |
| rad37         | 1.80180e-08 | 1.000000 | 1.95535e-08 | 0.999999 |
| PAH3+H        | 9.89107e-09 | 1.000000 | 1.07340e-08 | 0.999999 |
| rad60anti     | 9.33103e-09 | 1.000000 | 1.01262e-08 | 1.000000 |
| rad59         | 1.75177e-09 | 1.000000 | 1.90106e-09 | 1.000000 |
| rad19syn      | 6.85595e-10 | 1.000000 | 7.44022e-10 | 1.000000 |
| rad50         | 3.60228e-10 | 1.000000 | 3.90927e-10 | 1.000000 |
| rad54         | 1.00686e-10 | 1.000000 | 1.09267e-10 | 1.000000 |
| rad2          | 5.32767e-11 | 1.000000 | 5.78170e-11 | 1.000000 |
| rad23         | 4.59292e-11 | 1.000000 | 4.98433e-11 | 1.000000 |
| rad28         | 4.45418e-11 | 1.000000 | 4.83376e-11 | 1.000000 |
| PAH10+CH3     | 2.91658e-11 | 1.000000 | 3.16514e-11 | 1.000000 |
| PhcycC3H3_A+H | 1.50045e-11 | 1.000000 | 1.62832e-11 | 1.000000 |
| rad45         | 1.14034e-11 | 1.000000 | 1.23752e-11 | 1.000000 |
| rad67         | 9.04137e-12 | 1.000000 | 9.81188e-12 | 1.000000 |
| rad26         | 8.23884e-12 | 1.000000 | 8.94096e-12 | 1.000000 |
| rad1          | 7.93289e-12 | 1.000000 | 8.60893e-12 | 1.000000 |
| rad52         | 4.62559e-12 | 1.000000 | 5.01979e-12 | 1.000000 |
| rad62         | 4.44940e-12 | 1.000000 | 4.82858e-12 | 1.000000 |
| rad70         | 4.33465e-12 | 1.000000 | 4.70405e-12 | 1.000000 |
| rad43         | 3.80250e-12 | 1.000000 | 4.12655e-12 | 1.000000 |
| rad51         | 2.81279e-12 | 1.000000 | 3.05250e-12 | 1.000000 |
| PAH1+H        | 2.14140e-12 | 1.000000 | 2.32390e-12 | 1.000000 |
| rad7          | 2.10148e-12 | 1.000000 | 2.28057e-12 | 1.000000 |
| rad10         | 1.89230e-12 | 1.000000 | 2.05357e-12 | 1.000000 |

|           |             |          |             |          |
|-----------|-------------|----------|-------------|----------|
| rad55     | 1.80944e-12 | 1.000000 | 1.96365e-12 | 1.000000 |
| rad58     | 1.01135e-12 | 1.000000 | 1.09754e-12 | 1.000000 |
| rad36     | 9.33423e-13 | 1.000000 | 1.01297e-12 | 1.000000 |
| rad3      | 6.39072e-13 | 1.000000 | 6.93534e-13 | 1.000000 |
| rad11     | 5.88186e-13 | 1.000000 | 6.38311e-13 | 1.000000 |
| rad4      | 3.91384e-13 | 1.000000 | 4.24738e-13 | 1.000000 |
| rad34     | 2.13667e-13 | 1.000000 | 2.31876e-13 | 1.000000 |
| rad65     | 8.08720e-14 | 1.000000 | 8.77640e-14 | 1.000000 |
| rad13     | 1.75261e-14 | 1.000000 | 1.90197e-14 | 1.000000 |
| rad42     | 8.05572e-15 | 1.000000 | 8.74224e-15 | 1.000000 |
| rad53     | 4.55535e-15 | 1.000000 | 4.94356e-15 | 1.000000 |
| rad20     | 4.39498e-15 | 1.000000 | 4.76952e-15 | 1.000000 |
| rad21     | 3.92614e-15 | 1.000000 | 4.26073e-15 | 1.000000 |
| rad41     | 2.01529e-15 | 1.000000 | 2.18703e-15 | 1.000000 |
| rad64     | 1.94194e-15 | 1.000000 | 2.10743e-15 | 1.000000 |
| rad56     | 3.44827e-16 | 1.000000 | 3.74213e-16 | 1.000000 |
| rad33     | 1.28052e-16 | 1.000000 | 1.38965e-16 | 1.000000 |
| rad71     | 9.82662e-17 | 1.000000 | 1.06640e-16 | 1.000000 |
| rad14     | 8.72462e-17 | 1.000000 | 9.46814e-17 | 1.000000 |
| rad25     | 8.44629e-17 | 1.000000 | 9.16609e-17 | 1.000000 |
| rad73     | 8.36462e-17 | 1.000000 | 9.07746e-17 | 1.000000 |
| rad27     | 7.01139e-17 | 1.000000 | 7.60890e-17 | 1.000000 |
| rad68syn  | 4.95542e-17 | 1.000000 | 5.37772e-17 | 1.000000 |
| rad68anti | 3.46493e-17 | 1.000000 | 3.76021e-17 | 1.000000 |
| rad18     | 3.12589e-17 | 1.000000 | 3.39228e-17 | 1.000000 |
| rad22     | 3.06611e-17 | 1.000000 | 3.32740e-17 | 1.000000 |
| rad61     | 9.97019e-18 | 1.000000 | 1.08199e-17 | 1.000000 |
| rad24     | 5.16596e-18 | 1.000000 | 5.60620e-18 | 1.000000 |
| PAH8+H    | 3.29923e-18 | 1.000000 | 3.58039e-18 | 1.000000 |
| rad72     | 2.76861e-18 | 1.000000 | 3.00456e-18 | 1.000000 |
| rad9      | 2.44116e-18 | 1.000000 | 2.64920e-18 | 1.000000 |
| rad31     | 1.61052e-18 | 1.000000 | 1.74777e-18 | 1.000000 |
| rad40syn  | 1.59087e-18 | 1.000000 | 1.72644e-18 | 1.000000 |
| rad40anti | 5.23766e-19 | 1.000000 | 5.68401e-19 | 1.000000 |
| rad15     | 1.53607e-21 | 1.000000 | 1.66698e-21 | 1.000000 |
| rad12     | 2.10272e-22 | 1.000000 | 2.28191e-22 | 1.000000 |
| rad5      | 2.23230e-25 | 1.000000 | 2.42254e-25 | 1.000000 |
| rad47     | 2.24983e-26 | 1.000000 | 2.44156e-26 | 1.000000 |
| rad8      | 9.50884e-33 | 1.000000 | 1.03192e-32 | 1.000000 |

0.100000000E-05 Pa, 700.000000 K

=====  
Rate constant | True (fraction) | Effective (fraction)  
-----  
Total | 8.02260e-17 (1.00) | 6.78335e-17 (1.00)

| species       | PYtrue      | Cumul    | PYeffective | Cumul    |
|---------------|-------------|----------|-------------|----------|
| Indene+H      | 0.844045    | 0.844045 | 0.998243    | 0.998243 |
| Benzyl+C2H2   | 0.154470    | 0.998515 | 0.000000    | 0.998243 |
| PhCCH+CH3     | 0.000746434 | 0.999261 | 0.000882800 | 0.999126 |
| PhCHCCH2+H    | 0.000320585 | 0.999582 | 0.000379153 | 0.999505 |
| PhCCCH3+H     | 0.000136742 | 0.999719 | 0.000161723 | 0.999667 |
| Ph+Allene     | 0.000115963 | 0.999835 | 0.000137148 | 0.999804 |
| Ph+MeAc       | 8.86608e-05 | 0.999923 | 0.000104858 | 0.999909 |
| PhCH2CCH+H    | 2.52612e-05 | 0.999949 | 2.98762e-05 | 0.999939 |
| rad30         | 1.89338e-05 | 0.999968 | 2.23928e-05 | 0.999961 |
| PAH7+H        | 1.64063e-05 | 0.999984 | 1.94036e-05 | 0.999980 |
| PAH9+H        | 7.24066e-06 | 0.999991 | 8.56345e-06 | 0.999989 |
| rad39         | 3.97935e-06 | 0.999995 | 4.70633e-06 | 0.999994 |
| rad38         | 2.36433e-06 | 0.999998 | 2.79627e-06 | 0.999996 |
| rad35         | 1.97985e-06 | 1.000000 | 2.34155e-06 | 0.999999 |
| rad19anti     | 5.91542e-07 | 1.000000 | 6.99611e-07 | 0.999999 |
| rad46         | 1.95974e-07 | 1.000000 | 2.31777e-07 | 1.000000 |
| rad60syn      | 9.47747e-08 | 1.000000 | 1.12089e-07 | 1.000000 |
| PAH3+H        | 8.73469e-08 | 1.000000 | 1.03304e-07 | 1.000000 |
| rad37         | 5.67279e-08 | 1.000000 | 6.70914e-08 | 1.000000 |
| rad60anti     | 4.82184e-08 | 1.000000 | 5.70274e-08 | 1.000000 |
| rad59         | 1.44140e-08 | 1.000000 | 1.70472e-08 | 1.000000 |
| rad19syn      | 7.75621e-09 | 1.000000 | 9.17319e-09 | 1.000000 |
| rad50         | 4.08654e-09 | 1.000000 | 4.83310e-09 | 1.000000 |
| rad6          | 2.43333e-09 | 1.000000 | 2.87787e-09 | 1.000000 |
| rad54         | 1.41341e-09 | 1.000000 | 1.67162e-09 | 1.000000 |
| PhcycC3H3_A+H | 3.16563e-10 | 1.000000 | 3.74396e-10 | 1.000000 |
| PAH10+CH3     | 2.96596e-10 | 1.000000 | 3.50782e-10 | 1.000000 |
| rad67         | 1.46305e-10 | 1.000000 | 1.73033e-10 | 1.000000 |
| rad70         | 8.36629e-11 | 1.000000 | 9.89472e-11 | 1.000000 |
| rad52         | 7.81771e-11 | 1.000000 | 9.24593e-11 | 1.000000 |
| rad51         | 6.58276e-11 | 1.000000 | 7.78536e-11 | 1.000000 |
| rad62         | 5.24318e-11 | 1.000000 | 6.20105e-11 | 1.000000 |

|           |             |         |             |         |
|-----------|-------------|---------|-------------|---------|
| PAH1+H    | 5.21546e-11 | 1.00000 | 6.16827e-11 | 1.00000 |
| rad55     | 3.42218e-11 | 1.00000 | 4.04737e-11 | 1.00000 |
| rad23     | 3.33929e-11 | 1.00000 | 3.94934e-11 | 1.00000 |
| rad43     | 3.27212e-11 | 1.00000 | 3.86990e-11 | 1.00000 |
| rad58     | 2.36727e-11 | 1.00000 | 2.79974e-11 | 1.00000 |
| rad2      | 1.86229e-11 | 1.00000 | 2.20251e-11 | 1.00000 |
| rad45     | 9.84865e-12 | 1.00000 | 1.16479e-11 | 1.00000 |
| rad28     | 7.24759e-12 | 1.00000 | 8.57165e-12 | 1.00000 |
| rad34     | 5.57926e-12 | 1.00000 | 6.59853e-12 | 1.00000 |
| rad1      | 3.09508e-12 | 1.00000 | 3.66052e-12 | 1.00000 |
| rad65     | 2.01190e-12 | 1.00000 | 2.37945e-12 | 1.00000 |
| rad26     | 1.42608e-12 | 1.00000 | 1.68661e-12 | 1.00000 |
| rad36     | 8.39977e-13 | 1.00000 | 9.93433e-13 | 1.00000 |
| rad10     | 4.82648e-13 | 1.00000 | 5.70822e-13 | 1.00000 |
| rad7      | 3.17820e-13 | 1.00000 | 3.75883e-13 | 1.00000 |
| rad3      | 2.12094e-13 | 1.00000 | 2.50842e-13 | 1.00000 |
| rad53     | 2.08849e-13 | 1.00000 | 2.47004e-13 | 1.00000 |
| rad42     | 1.92435e-13 | 1.00000 | 2.27591e-13 | 1.00000 |
| rad4      | 1.37178e-13 | 1.00000 | 1.62239e-13 | 1.00000 |
| rad11     | 1.06314e-13 | 1.00000 | 1.25737e-13 | 1.00000 |
| rad64     | 9.12636e-14 | 1.00000 | 1.07937e-13 | 1.00000 |
| rad41     | 4.13109e-14 | 1.00000 | 4.88580e-14 | 1.00000 |
| rad56     | 2.67526e-14 | 1.00000 | 3.16401e-14 | 1.00000 |
| rad20     | 9.46278e-15 | 1.00000 | 1.11915e-14 | 1.00000 |
| rad21     | 9.16159e-15 | 1.00000 | 1.08353e-14 | 1.00000 |
| rad13     | 4.49323e-15 | 1.00000 | 5.31409e-15 | 1.00000 |
| rad68syn  | 3.97301e-15 | 1.00000 | 4.69884e-15 | 1.00000 |
| rad73     | 3.29111e-15 | 1.00000 | 3.89236e-15 | 1.00000 |
| rad71     | 3.21354e-15 | 1.00000 | 3.80061e-15 | 1.00000 |
| rad68anti | 2.74324e-15 | 1.00000 | 3.24440e-15 | 1.00000 |
| rad61     | 5.53927e-16 | 1.00000 | 6.55123e-16 | 1.00000 |
| PAH8+H    | 4.33772e-16 | 1.00000 | 5.13017e-16 | 1.00000 |
| rad40syn  | 1.94495e-16 | 1.00000 | 2.30027e-16 | 1.00000 |
| rad9      | 1.27613e-16 | 1.00000 | 1.50927e-16 | 1.00000 |
| rad33     | 1.13021e-16 | 1.00000 | 1.33668e-16 | 1.00000 |
| rad72     | 9.63740e-17 | 1.00000 | 1.13981e-16 | 1.00000 |
| rad40anti | 6.74024e-17 | 1.00000 | 7.97161e-17 | 1.00000 |
| rad24     | 5.53561e-17 | 1.00000 | 6.54690e-17 | 1.00000 |
| rad18     | 3.75549e-17 | 1.00000 | 4.44158e-17 | 1.00000 |
| rad25     | 3.17328e-17 | 1.00000 | 3.75300e-17 | 1.00000 |
| rad14     | 2.91204e-17 | 1.00000 | 3.44404e-17 | 1.00000 |
| rad27     | 2.61263e-17 | 1.00000 | 3.08993e-17 | 1.00000 |
| rad22     | 2.06510e-17 | 1.00000 | 2.44237e-17 | 1.00000 |
| rad31     | 1.07537e-18 | 1.00000 | 1.27183e-18 | 1.00000 |
| rad15     | 5.37488e-20 | 1.00000 | 6.35682e-20 | 1.00000 |
| rad12     | 2.79169e-20 | 1.00000 | 3.30170e-20 | 1.00000 |
| rad5      | 6.24763e-25 | 1.00000 | 7.38900e-25 | 1.00000 |
| rad47     | 4.46288e-25 | 1.00000 | 5.27820e-25 | 1.00000 |
| rad8      | 1.57147e-28 | 1.00000 | 1.85856e-28 | 1.00000 |

0.100000000E-05 Pa, 800.000000 K

=====

| Rate constant | True (fraction)     | Effective (fraction) |
|---------------|---------------------|----------------------|
| Total         | 3.12228e-16 (1.00 ) | 2.33587e-16 (1.00 )  |

| species     | PYtrue      | Cumul    | PYeffective | Cumul    |
|-------------|-------------|----------|-------------|----------|
| Indene+H    | 0.745326    | 0.745326 | 0.996252    | 0.996252 |
| Benzyl+C2H2 | 0.251870    | 0.997196 | 0.000000    | 0.996252 |
| PhCCH+CH3   | 0.00124162  | 0.998438 | 0.00165963  | 0.997912 |
| PhCHCCH2+H  | 0.000603920 | 0.999042 | 0.000807240 | 0.998719 |
| Ph+Allene   | 0.000391607 | 0.999433 | 0.000523449 | 0.999242 |
| PhCCCH3+H   | 0.000180412 | 0.999614 | 0.000241151 | 0.999483 |
| Ph+MeAc     | 0.000158702 | 0.999772 | 0.000212132 | 0.999696 |
| PhCH2CCH+H  | 0.000104747 | 0.999877 | 0.000140012 | 0.999836 |
| PAH7+H      | 4.20043e-05 | 0.999919 | 5.61457e-05 | 0.999892 |
| rad30       | 3.73181e-05 | 0.999956 | 4.98819e-05 | 0.999942 |
| PAH9+H      | 1.83027e-05 | 0.999975 | 2.44646e-05 | 0.999966 |
| rad39       | 1.01670e-05 | 0.999985 | 1.35899e-05 | 0.999980 |
| rad38       | 6.28638e-06 | 0.999991 | 8.40280e-06 | 0.999988 |
| rad35       | 4.61792e-06 | 0.999996 | 6.17262e-06 | 0.999994 |
| rad19anti   | 2.13374e-06 | 0.999998 | 2.85210e-06 | 0.999997 |
| rad46       | 6.69424e-07 | 0.999999 | 8.94797e-07 | 0.999998 |
| PAH3+H      | 4.55926e-07 | 0.999999 | 6.09421e-07 | 0.999999 |
| rad60syn    | 3.14534e-07 | 0.999999 | 4.20427e-07 | 0.999999 |
| rad60anti   | 1.66149e-07 | 0.999999 | 2.22085e-07 | 0.999999 |
| rad37       | 1.16536e-07 | 1.000000 | 1.55770e-07 | 0.999999 |
| rad59       | 7.05288e-08 | 1.000000 | 9.42735e-08 | 1.000000 |
| rad19syn    | 4.57469e-08 | 1.000000 | 6.11483e-08 | 1.000000 |

|               |             |          |             |          |
|---------------|-------------|----------|-------------|----------|
| rad50         | 2.67329e-08 | 1.000000 | 3.57329e-08 | 1.000000 |
| rad54         | 9.79642e-09 | 1.000000 | 1.30945e-08 | 1.000000 |
| PhcycC3H3_A+H | 2.99417e-09 | 1.000000 | 4.00220e-09 | 1.000000 |
| PAH10+CH3     | 1.56084e-09 | 1.000000 | 2.08632e-09 | 1.000000 |
| rad67         | 1.31109e-09 | 1.000000 | 1.75249e-09 | 1.000000 |
| rad51         | 7.39254e-10 | 1.000000 | 9.88135e-10 | 1.000000 |
| rad70         | 7.37567e-10 | 1.000000 | 9.85881e-10 | 1.000000 |
| rad52         | 6.86884e-10 | 1.000000 | 9.18135e-10 | 1.000000 |
| PAH1+H        | 5.38359e-10 | 1.000000 | 7.19607e-10 | 1.000000 |
| rad6          | 3.74261e-10 | 1.000000 | 5.00262e-10 | 1.000000 |
| rad62         | 3.04694e-10 | 1.000000 | 4.07275e-10 | 1.000000 |
| rad55         | 2.93956e-10 | 1.000000 | 3.92920e-10 | 1.000000 |
| rad58         | 2.53306e-10 | 1.000000 | 3.38585e-10 | 1.000000 |
| rad43         | 1.42322e-10 | 1.000000 | 1.90238e-10 | 1.000000 |
| rad34         | 6.18277e-11 | 1.000000 | 8.26430e-11 | 1.000000 |
| rad65         | 2.32848e-11 | 1.000000 | 3.11240e-11 | 1.000000 |
| rad23         | 1.41673e-11 | 1.000000 | 1.89369e-11 | 1.000000 |
| rad45         | 5.34726e-12 | 1.000000 | 7.14750e-12 | 1.000000 |
| rad2          | 5.08329e-12 | 1.000000 | 6.79466e-12 | 1.000000 |
| rad53         | 3.49858e-12 | 1.000000 | 4.67643e-12 | 1.000000 |
| rad42         | 1.90220e-12 | 1.000000 | 2.54260e-12 | 1.000000 |
| rad64         | 1.51212e-12 | 1.000000 | 2.02121e-12 | 1.000000 |
| rad28         | 1.26287e-12 | 1.000000 | 1.68804e-12 | 1.000000 |
| rad1          | 8.22887e-13 | 1.000000 | 1.09993e-12 | 1.000000 |
| rad56         | 6.63928e-13 | 1.000000 | 8.87450e-13 | 1.000000 |
| rad36         | 4.45244e-13 | 1.000000 | 5.95143e-13 | 1.000000 |
| rad41         | 3.47633e-13 | 1.000000 | 4.64670e-13 | 1.000000 |
| rad26         | 2.64467e-13 | 1.000000 | 3.53505e-13 | 1.000000 |
| rad10         | 1.12664e-13 | 1.000000 | 1.50595e-13 | 1.000000 |
| rad68syn      | 1.02323e-13 | 1.000000 | 1.36772e-13 | 1.000000 |
| rad68anti     | 6.99430e-14 | 1.000000 | 9.34904e-14 | 1.000000 |
| rad7          | 6.35128e-14 | 1.000000 | 8.48954e-14 | 1.000000 |
| rad73         | 5.80267e-14 | 1.000000 | 7.75624e-14 | 1.000000 |
| rad3          | 5.76410e-14 | 1.000000 | 7.70468e-14 | 1.000000 |
| rad4          | 3.79828e-14 | 1.000000 | 5.07703e-14 | 1.000000 |
| rad11         | 3.24878e-14 | 1.000000 | 4.34254e-14 | 1.000000 |
| rad20         | 2.64415e-14 | 1.000000 | 3.53435e-14 | 1.000000 |
| rad21         | 2.51401e-14 | 1.000000 | 3.36040e-14 | 1.000000 |
| rad71         | 2.44519e-14 | 1.000000 | 3.26840e-14 | 1.000000 |
| PAH8+H        | 1.88750e-14 | 1.000000 | 2.52296e-14 | 1.000000 |
| rad61         | 1.09408e-14 | 1.000000 | 1.46242e-14 | 1.000000 |
| rad40syn      | 7.06168e-15 | 1.000000 | 9.43911e-15 | 1.000000 |
| rad13         | 3.49327e-15 | 1.000000 | 4.66933e-15 | 1.000000 |
| rad9          | 2.63478e-15 | 1.000000 | 3.52182e-15 | 1.000000 |
| rad40anti     | 2.61401e-15 | 1.000000 | 3.49406e-15 | 1.000000 |
| rad72         | 3.20394e-16 | 1.000000 | 4.28259e-16 | 1.000000 |
| rad24         | 2.87053e-16 | 1.000000 | 3.83694e-16 | 1.000000 |
| rad33         | 2.01934e-16 | 1.000000 | 2.69918e-16 | 1.000000 |
| rad18         | 7.61308e-17 | 1.000000 | 1.01761e-16 | 1.000000 |
| rad25         | 2.03031e-17 | 1.000000 | 2.71385e-17 | 1.000000 |
| rad27         | 1.63908e-17 | 1.000000 | 2.19090e-17 | 1.000000 |
| rad14         | 1.45508e-17 | 1.000000 | 1.94495e-17 | 1.000000 |
| rad22         | 1.13534e-17 | 1.000000 | 1.51757e-17 | 1.000000 |
| rad12         | 7.13526e-19 | 1.000000 | 9.53746e-19 | 1.000000 |
| rad15         | 6.50528e-19 | 1.000000 | 8.69539e-19 | 1.000000 |
| rad31         | 5.78731e-19 | 1.000000 | 7.73571e-19 | 1.000000 |
| rad47         | 4.71421e-24 | 1.000000 | 6.30133e-24 | 1.000000 |
| rad5          | 1.57481e-24 | 1.000000 | 2.10499e-24 | 1.000000 |
| rad8          | 8.26837e-25 | 1.000000 | 1.10521e-24 | 1.000000 |

0.100000000E-05 Pa, 900.000000 K

=====

| Rate constant | True (fraction)    | Effective (fraction) |
|---------------|--------------------|----------------------|
| Total         | 9.21769e-16 (1.00) | 5.91948e-16 (1.00)   |

| species     | PYtrue      | Cumul    | PYeffective | Cumul    |
|-------------|-------------|----------|-------------|----------|
| Indene+H    | 0.637601    | 0.637601 | 0.992859    | 0.992859 |
| Benzyl+C2H2 | 0.357813    | 0.995414 | 0.000000    | 0.992859 |
| PhCCH+CH3   | 0.00168534  | 0.997099 | 0.00262438  | 0.995483 |
| PhCHCCH2+H  | 0.000988072 | 0.998087 | 0.00153861  | 0.997022 |
| Ph+Allene   | 0.000956826 | 0.999044 | 0.00148995  | 0.998512 |
| PhCH2CCH+H  | 0.000305642 | 0.999350 | 0.000475939 | 0.998988 |
| Ph+MeAc     | 0.000221700 | 0.999572 | 0.000345227 | 0.999333 |
| PhCCCH3+H   | 0.000192583 | 0.999764 | 0.000299886 | 0.999633 |
| PAH7+H      | 8.18813e-05 | 0.999846 | 0.000127504 | 0.999760 |
| rad30       | 6.20698e-05 | 0.999908 | 9.66537e-05 | 0.999857 |
| PAH9+H      | 3.81793e-05 | 0.999946 | 5.94520e-05 | 0.999917 |
| rad39       | 1.95088e-05 | 0.999966 | 3.03786e-05 | 0.999947 |

|               |             |          |             |          |
|---------------|-------------|----------|-------------|----------|
| rad38         | 1.36529e-05 | 0.999979 | 2.12599e-05 | 0.999968 |
| rad35         | 9.01875e-06 | 0.999988 | 1.40438e-05 | 0.999982 |
| rad19anti     | 5.95507e-06 | 0.999994 | 9.27312e-06 | 0.999992 |
| rad46         | 1.77409e-06 | 0.999996 | 2.76257e-06 | 0.999994 |
| PAH3+H        | 1.66000e-06 | 0.999998 | 2.58491e-06 | 0.999997 |
| rad60syn      | 7.95279e-07 | 0.999999 | 1.23839e-06 | 0.999998 |
| rad60anti     | 4.32684e-07 | 0.999999 | 6.73766e-07 | 0.999999 |
| rad59         | 2.41974e-07 | 0.999999 | 3.76797e-07 | 0.999999 |
| rad37         | 1.83190e-07 | 1.000000 | 2.85260e-07 | 0.999999 |
| rad19syn      | 1.72530e-07 | 1.000000 | 2.68660e-07 | 1.000000 |
| rad50         | 1.19158e-07 | 1.000000 | 1.85550e-07 | 1.000000 |
| rad54         | 4.18728e-08 | 1.000000 | 6.52034e-08 | 1.000000 |
| PhcycC3H3_A+H | 1.64006e-08 | 1.000000 | 2.55387e-08 | 1.000000 |
| rad67         | 7.68849e-09 | 1.000000 | 1.19724e-08 | 1.000000 |
| PAH10+CH3     | 5.46407e-09 | 1.000000 | 8.50854e-09 | 1.000000 |
| rad51         | 5.02728e-09 | 1.000000 | 7.82838e-09 | 1.000000 |
| rad52         | 3.84551e-09 | 1.000000 | 5.98815e-09 | 1.000000 |
| rad70         | 3.82634e-09 | 1.000000 | 5.95829e-09 | 1.000000 |
| PAH1+H        | 3.10815e-09 | 1.000000 | 4.83994e-09 | 1.000000 |
| rad58         | 1.60256e-09 | 1.000000 | 2.49547e-09 | 1.000000 |
| rad55         | 1.47818e-09 | 1.000000 | 2.30179e-09 | 1.000000 |
| rad62         | 1.10198e-09 | 1.000000 | 1.71599e-09 | 1.000000 |
| rad43         | 3.94155e-10 | 1.000000 | 6.13770e-10 | 1.000000 |
| rad34         | 3.84578e-10 | 1.000000 | 5.98857e-10 | 1.000000 |
| rad65         | 1.60302e-10 | 1.000000 | 2.49618e-10 | 1.000000 |
| rad6          | 6.48654e-11 | 1.000000 | 1.01007e-10 | 1.000000 |
| rad53         | 2.97669e-11 | 1.000000 | 4.63523e-11 | 1.000000 |
| rad64         | 1.24768e-11 | 1.000000 | 1.94286e-11 | 1.000000 |
| rad42         | 1.04398e-11 | 1.000000 | 1.62566e-11 | 1.000000 |
| rad56         | 7.66799e-12 | 1.000000 | 1.19404e-11 | 1.000000 |
| rad23         | 5.54051e-12 | 1.000000 | 8.62756e-12 | 1.000000 |
| rad45         | 2.49329e-12 | 1.000000 | 3.88250e-12 | 1.000000 |
| rad41         | 1.62757e-12 | 1.000000 | 2.53442e-12 | 1.000000 |
| rad68syn      | 1.23551e-12 | 1.000000 | 1.92390e-12 | 1.000000 |
| rad2          | 1.13689e-12 | 1.000000 | 1.77035e-12 | 1.000000 |
| rad73         | 1.04900e-12 | 1.000000 | 1.63349e-12 | 1.000000 |
| rad68anti     | 8.37617e-13 | 1.000000 | 1.30432e-12 | 1.000000 |
| rad71         | 4.13809e-13 | 1.000000 | 6.44374e-13 | 1.000000 |
| PAH8+H        | 3.69234e-13 | 1.000000 | 5.74963e-13 | 1.000000 |
| rad28         | 2.34305e-13 | 1.000000 | 3.64854e-13 | 1.000000 |
| rad36         | 2.17311e-13 | 1.000000 | 3.38393e-13 | 1.000000 |
| rad1          | 1.94039e-13 | 1.000000 | 3.02154e-13 | 1.000000 |
| rad61         | 1.15317e-13 | 1.000000 | 1.79569e-13 | 1.000000 |
| rad40syn      | 1.13823e-13 | 1.000000 | 1.77243e-13 | 1.000000 |
| rad20         | 6.04407e-14 | 1.000000 | 9.41170e-14 | 1.000000 |
| rad26         | 5.30037e-14 | 1.000000 | 8.25362e-14 | 1.000000 |
| rad21         | 5.11599e-14 | 1.000000 | 7.96651e-14 | 1.000000 |
| rad40anti     | 4.54316e-14 | 1.000000 | 7.07452e-14 | 1.000000 |
| rad10         | 2.65671e-14 | 1.000000 | 4.13698e-14 | 1.000000 |
| rad11         | 2.13477e-14 | 1.000000 | 3.32422e-14 | 1.000000 |
| rad7          | 1.93813e-14 | 1.000000 | 3.01802e-14 | 1.000000 |
| rad3          | 1.51228e-14 | 1.000000 | 2.35490e-14 | 1.000000 |
| rad9          | 1.29574e-14 | 1.000000 | 2.01770e-14 | 1.000000 |
| rad4          | 1.05223e-14 | 1.000000 | 1.63852e-14 | 1.000000 |
| rad13         | 6.55769e-15 | 1.000000 | 1.02115e-14 | 1.000000 |
| rad72         | 9.38094e-16 | 1.000000 | 1.46078e-15 | 1.000000 |
| rad24         | 5.74732e-16 | 1.000000 | 8.94960e-16 | 1.000000 |
| rad33         | 3.65385e-16 | 1.000000 | 5.68970e-16 | 1.000000 |
| rad18         | 2.21677e-16 | 1.000000 | 3.45191e-16 | 1.000000 |
| rad25         | 2.20683e-17 | 1.000000 | 3.43643e-17 | 1.000000 |
| rad27         | 1.37114e-17 | 1.000000 | 2.13510e-17 | 1.000000 |
| rad14         | 1.05356e-17 | 1.000000 | 1.64058e-17 | 1.000000 |
| rad22         | 7.85111e-18 | 1.000000 | 1.22256e-17 | 1.000000 |
| rad12         | 3.93751e-18 | 1.000000 | 6.13140e-18 | 1.000000 |
| rad15         | 2.28301e-18 | 1.000000 | 3.55506e-18 | 1.000000 |
| rad31         | 3.17849e-19 | 1.000000 | 4.94948e-19 | 1.000000 |
| rad8          | 5.05695e-22 | 1.000000 | 7.87458e-22 | 1.000000 |
| rad47         | 3.22626e-23 | 1.000000 | 5.02387e-23 | 1.000000 |
| rad5          | 3.96162e-24 | 1.000000 | 6.16895e-24 | 1.000000 |

0.100000000E-05 Pa, 1000.00000 K

=====

| Rate constant | True (fraction)     | Effective (fraction) |             |          |
|---------------|---------------------|----------------------|-------------|----------|
| Total         | 2.23691e-15 (1.00 ) | 1.20781e-15 (1.00 )  |             |          |
| species       | PYtrue              | Cumul                | PYeffective | Cumul    |
| Indene+H      | 0.533143            | 0.533143             | 0.987405    | 0.987405 |
| Benzy1+C2H2   | 0.460056            | 0.993199             | 0.00000     | 0.987405 |



|               |             |          |             |          |
|---------------|-------------|----------|-------------|----------|
| PhCCH+CH3     | 0.00197845  | 0.995177 | 0.00366418  | 0.991069 |
| Ph+Allene     | 0.00184724  | 0.997025 | 0.00342117  | 0.994490 |
| PhCHCCH2+H    | 0.00145011  | 0.998475 | 0.00268567  | 0.997176 |
| PhCH2CCH+H    | 0.000695141 | 0.999170 | 0.00128743  | 0.998463 |
| Ph+MeAc       | 0.000262360 | 0.999432 | 0.000485903 | 0.998949 |
| PhCCCH3+H     | 0.000178027 | 0.999610 | 0.000329715 | 0.999279 |
| PAH7+H        | 0.000130563 | 0.999741 | 0.000241809 | 0.999521 |
| rad30         | 9.13367e-05 | 0.999832 | 0.000169160 | 0.999690 |
| PAH9+H        | 6.89547e-05 | 0.999901 | 0.000127707 | 0.999818 |
| rad39         | 3.03500e-05 | 0.999932 | 5.62096e-05 | 0.999874 |
| rad38         | 2.54970e-05 | 0.999957 | 4.72217e-05 | 0.999921 |
| rad35         | 1.54295e-05 | 0.999972 | 2.85761e-05 | 0.999950 |
| rad19anti     | 1.36963e-05 | 0.999986 | 2.53661e-05 | 0.999975 |
| PAH3+H        | 4.67729e-06 | 0.999991 | 8.66256e-06 | 0.999984 |
| rad46         | 3.89964e-06 | 0.999995 | 7.22232e-06 | 0.999991 |
| rad60syn      | 1.65646e-06 | 0.999996 | 3.06785e-06 | 0.999994 |
| rad60anti     | 9.23124e-07 | 0.999997 | 1.70967e-06 | 0.999996 |
| rad59         | 6.45414e-07 | 0.999998 | 1.19534e-06 | 0.999997 |
| rad19syn      | 4.72655e-07 | 0.999998 | 8.75378e-07 | 0.999998 |
| rad50         | 4.02263e-07 | 0.999999 | 7.45009e-07 | 0.999999 |
| rad37         | 2.45621e-07 | 0.999999 | 4.54902e-07 | 0.999999 |
| rad54         | 1.26767e-07 | 0.999999 | 2.34777e-07 | 0.999999 |
| PhcycC3H3_A+H | 6.09438e-08 | 0.999999 | 1.12871e-07 | 0.999999 |
| rad67         | 3.29353e-08 | 0.999999 | 6.09977e-08 | 0.999999 |
| rad51         | 2.38555e-08 | 0.999999 | 4.41815e-08 | 1.000000 |
| rad52         | 1.55659e-08 | 0.999999 | 2.88288e-08 | 1.000000 |
| PAH10+CH3     | 1.49501e-08 | 0.999999 | 2.76882e-08 | 1.000000 |
| rad70         | 1.36637e-08 | 0.999999 | 2.53058e-08 | 1.000000 |
| PAH1+H        | 1.19204e-08 | 0.999999 | 2.20771e-08 | 1.000000 |
| rad58         | 7.00658e-09 | 0.999999 | 1.29765e-08 | 1.000000 |
| rad55         | 5.08717e-09 | 0.999999 | 9.42168e-09 | 1.000000 |
| rad62         | 2.86001e-09 | 0.999999 | 5.29688e-09 | 1.000000 |
| rad34         | 1.59465e-09 | 0.999999 | 2.95336e-09 | 1.000000 |
| rad43         | 8.01053e-10 | 0.999999 | 1.48359e-09 | 1.000000 |
| rad65         | 7.61930e-10 | 0.999999 | 1.41113e-09 | 1.000000 |
| rad53         | 1.57207e-10 | 0.999999 | 2.91154e-10 | 1.000000 |
| rad64         | 6.32995e-11 | 0.999999 | 1.17234e-10 | 1.000000 |
| rad56         | 5.17480e-11 | 0.999999 | 9.58397e-11 | 1.000000 |
| rad42         | 3.80336e-11 | 0.999999 | 7.04400e-11 | 1.000000 |
| rad6          | 1.44808e-11 | 0.999999 | 2.68191e-11 | 1.000000 |
| rad73         | 1.18222e-11 | 0.999999 | 2.18953e-11 | 1.000000 |
| rad68syn      | 8.78401e-12 | 0.999999 | 1.62684e-11 | 1.000000 |
| rad68anti     | 5.91471e-12 | 0.999999 | 1.09543e-11 | 1.000000 |
| rad71         | 5.73088e-12 | 0.999999 | 1.06139e-11 | 1.000000 |
| rad41         | 5.10896e-12 | 0.999999 | 9.46203e-12 | 1.000000 |
| PAH8+H        | 3.92411e-12 | 0.999999 | 7.26762e-12 | 1.000000 |
| rad23         | 2.41472e-12 | 0.999999 | 4.47217e-12 | 1.000000 |
| rad45         | 1.21238e-12 | 0.999999 | 2.24538e-12 | 1.000000 |
| rad40syn      | 1.02745e-12 | 0.999999 | 1.90288e-12 | 1.000000 |
| rad61         | 7.99677e-13 | 0.999999 | 1.48104e-12 | 1.000000 |
| rad40anti     | 4.38125e-13 | 0.999999 | 8.11427e-13 | 1.000000 |
| rad2          | 2.64680e-13 | 0.999999 | 4.90199e-13 | 1.000000 |
| rad36         | 1.09251e-13 | 0.999999 | 2.02338e-13 | 1.000000 |
| rad20         | 8.81740e-14 | 0.999999 | 1.63302e-13 | 1.000000 |
| rad21         | 6.41659e-14 | 0.999999 | 1.18838e-13 | 1.000000 |
| rad28         | 5.19967e-14 | 0.999999 | 9.63003e-14 | 1.000000 |
| rad1          | 5.09419e-14 | 0.999999 | 9.43468e-14 | 1.000000 |
| rad11         | 2.81451e-14 | 0.999999 | 5.21260e-14 | 1.000000 |
| rad9          | 2.15711e-14 | 0.999999 | 3.99507e-14 | 1.000000 |
| rad72         | 1.62011e-14 | 0.999999 | 3.00053e-14 | 1.000000 |
| rad7          | 1.42772e-14 | 0.999999 | 2.64419e-14 | 1.000000 |
| rad26         | 1.29509e-14 | 0.999999 | 2.39856e-14 | 1.000000 |
| rad13         | 1.27366e-14 | 0.999999 | 2.35888e-14 | 1.000000 |
| rad10         | 9.70978e-15 | 0.999999 | 1.79830e-14 | 1.000000 |
| rad3          | 4.58892e-15 | 0.999999 | 8.49890e-15 | 1.000000 |
| rad4          | 3.35589e-15 | 0.999999 | 6.21525e-15 | 1.000000 |
| rad18         | 7.80187e-16 | 0.999999 | 1.44494e-15 | 1.000000 |
| rad24         | 5.90769e-16 | 0.999999 | 1.09413e-15 | 1.000000 |
| rad33         | 4.69609e-16 | 0.999999 | 8.69737e-16 | 1.000000 |
| rad25         | 3.13969e-17 | 0.999999 | 5.81485e-17 | 1.000000 |
| rad27         | 1.11651e-17 | 0.999999 | 2.06784e-17 | 1.000000 |
| rad22         | 9.81358e-18 | 0.999999 | 1.81752e-17 | 1.000000 |
| rad14         | 9.24155e-18 | 0.999999 | 1.71158e-17 | 1.000000 |
| rad12         | 8.61559e-18 | 0.999999 | 1.59565e-17 | 1.000000 |
| rad15         | 3.27490e-18 | 0.999999 | 6.06526e-18 | 1.000000 |
| rad31         | 1.86001e-19 | 0.999999 | 3.44482e-19 | 1.000000 |
| rad8          | 3.09659e-20 | 0.999999 | 5.73503e-20 | 1.000000 |
| rad47         | 1.58918e-22 | 0.999999 | 2.94323e-22 | 1.000000 |
| rad5          | 1.14983e-23 | 0.999999 | 2.12953e-23 | 1.000000 |

0.100000000E-05 Pa, 1100.00000 K

| =====         |                     |          |                      |          |
|---------------|---------------------|----------|----------------------|----------|
| Rate constant | True (fraction)     |          | Effective (fraction) |          |
| -----         |                     |          |                      |          |
| Total         | 4.69847e-15 (1.00 ) |          | 2.11075e-15 (1.00 )  |          |
| species       | PYtrue              | Cumul    | PYeffective          | Cumul    |
| -----         |                     |          |                      |          |
| Benzyl+C2H2   | 0.550759            | 0.550759 | 0.000000             | 0.000000 |
| Indene+H      | 0.439889            | 0.990648 | 0.979181             | 0.979181 |
| Ph+Allene     | 0.00299528          | 0.993643 | 0.00666742           | 0.985848 |
| PhCCH+CH3     | 0.00208760          | 0.995731 | 0.00464694           | 0.990495 |
| PhCHCCH2+H    | 0.00194544          | 0.997676 | 0.00433051           | 0.994826 |
| PhCH2CCH+H    | 0.00132191          | 0.998998 | 0.00294254           | 0.997768 |
| Ph+MeAc       | 0.000277389         | 0.999276 | 0.000617461          | 0.998386 |
| PAH7+H        | 0.000179385         | 0.999455 | 0.000399306          | 0.998785 |
| PhCCCH3+H     | 0.000149168         | 0.999604 | 0.000332043          | 0.999117 |
| rad30         | 0.000123015         | 0.999727 | 0.000273827          | 0.999391 |
| PAH9+H        | 0.000111696         | 0.999839 | 0.000248632          | 0.999640 |
| rad38         | 4.24978e-05         | 0.999881 | 9.45991e-05          | 0.999734 |
| rad39         | 4.04278e-05         | 0.999922 | 8.99912e-05          | 0.999824 |
| rad19anti     | 2.71780e-05         | 0.999949 | 6.04975e-05          | 0.999885 |
| rad35         | 2.39104e-05         | 0.999973 | 5.32238e-05          | 0.999938 |
| PAH3+H        | 1.09195e-05         | 0.999984 | 2.43064e-05          | 0.999962 |
| rad46         | 7.44861e-06         | 0.999991 | 1.65804e-05          | 0.999979 |
| rad60syn      | 2.99524e-06         | 0.999994 | 6.66734e-06          | 0.999986 |
| rad60anti     | 1.70291e-06         | 0.999996 | 3.79064e-06          | 0.999989 |
| rad59         | 1.43231e-06         | 0.999997 | 3.18828e-06          | 0.999993 |
| rad50         | 1.10325e-06         | 0.999998 | 2.45580e-06          | 0.999995 |
| rad19syn      | 1.02396e-06         | 1.000000 | 2.27932e-06          | 0.999997 |
| rad37         | 3.04609e-07         | 1.000000 | 6.78052e-07          | 0.999998 |
| rad54         | 2.97942e-07         | 1.000000 | 6.63211e-07          | 0.999999 |
| PhcycC3H3_A+H | 1.70469e-07         | 1.000000 | 3.79460e-07          | 0.999999 |
| rad67         | 1.11020e-07         | 1.000000 | 2.47128e-07          | 0.999999 |
| rad51         | 8.66314e-08         | 1.000000 | 1.92839e-07          | 0.999999 |
| rad52         | 4.94925e-08         | 1.000000 | 1.10169e-07          | 1.000000 |
| rad70         | 3.72387e-08         | 1.000000 | 8.28925e-08          | 1.000000 |
| PAH10+CH3     | 3.55700e-08         | 1.000000 | 7.91778e-08          | 1.000000 |
| PAH1+H        | 3.40420e-08         | 1.000000 | 7.57766e-08          | 1.000000 |
| rad58         | 2.33985e-08         | 1.000000 | 5.20844e-08          | 1.000000 |
| rad55         | 1.32727e-08         | 1.000000 | 2.95447e-08          | 1.000000 |
| rad62         | 5.84585e-09         | 1.000000 | 1.30127e-08          | 1.000000 |
| rad34         | 4.93271e-09         | 1.000000 | 1.09801e-08          | 1.000000 |
| rad65         | 2.75373e-09         | 1.000000 | 6.12974e-09          | 1.000000 |
| rad43         | 1.31323e-09         | 1.000000 | 2.92321e-09          | 1.000000 |
| rad53         | 5.86805e-10         | 1.000000 | 1.30621e-09          | 1.000000 |
| rad56         | 2.36331e-10         | 1.000000 | 5.26066e-10          | 1.000000 |
| rad64         | 2.26679e-10         | 1.000000 | 5.04581e-10          | 1.000000 |
| rad42         | 1.03252e-10         | 1.000000 | 2.29836e-10          | 1.000000 |
| rad73         | 8.74261e-11         | 1.000000 | 1.94608e-10          | 1.000000 |
| rad71         | 5.10024e-11         | 1.000000 | 1.13530e-10          | 1.000000 |
| rad68syn      | 4.26221e-11         | 1.000000 | 9.48757e-11          | 1.000000 |
| rad68anti     | 2.85345e-11         | 1.000000 | 6.35171e-11          | 1.000000 |
| PAH8+H        | 2.67129e-11         | 1.000000 | 5.94622e-11          | 1.000000 |
| rad41         | 1.21931e-11         | 1.000000 | 2.71415e-11          | 1.000000 |
| rad40syn      | 6.09410e-12         | 1.000000 | 1.35653e-11          | 1.000000 |
| rad6          | 4.51434e-12         | 1.000000 | 1.00488e-11          | 1.000000 |
| rad61         | 4.16715e-12         | 1.000000 | 9.27598e-12          | 1.000000 |
| rad40anti     | 2.75055e-12         | 1.000000 | 6.12266e-12          | 1.000000 |
| rad23         | 1.13243e-12         | 1.000000 | 2.52077e-12          | 1.000000 |
| rad45         | 6.12258e-13         | 1.000000 | 1.36287e-12          | 1.000000 |
| rad72         | 2.32442e-13         | 1.000000 | 5.17410e-13          | 1.000000 |
| rad20         | 7.93855e-14         | 1.000000 | 1.76710e-13          | 1.000000 |
| rad2          | 6.91481e-14         | 1.000000 | 1.53922e-13          | 1.000000 |
| rad36         | 5.62815e-14         | 1.000000 | 1.25281e-13          | 1.000000 |
| rad21         | 5.10807e-14         | 1.000000 | 1.13704e-13          | 1.000000 |
| rad11         | 4.56768e-14         | 1.000000 | 1.01675e-13          | 1.000000 |
| rad9          | 2.22688e-14         | 1.000000 | 4.95697e-14          | 1.000000 |
| rad7          | 2.12894e-14         | 1.000000 | 4.73897e-14          | 1.000000 |
| rad13         | 1.66203e-14         | 1.000000 | 3.69963e-14          | 1.000000 |
| rad28         | 1.49154e-14         | 1.000000 | 3.32012e-14          | 1.000000 |
| rad1          | 1.44924e-14         | 1.000000 | 3.22598e-14          | 1.000000 |
| rad10         | 6.12656e-15         | 1.000000 | 1.36376e-14          | 1.000000 |
| rad26         | 4.12072e-15         | 1.000000 | 9.17263e-15          | 1.000000 |
| rad18         | 2.44827e-15         | 1.000000 | 5.44978e-15          | 1.000000 |
| rad3          | 1.56178e-15         | 1.000000 | 3.47647e-15          | 1.000000 |
| rad4          | 1.17613e-15         | 1.000000 | 2.61803e-15          | 1.000000 |
| rad24         | 4.56170e-16         | 1.000000 | 1.01542e-15          | 1.000000 |
| rad33         | 3.94222e-16         | 1.000000 | 8.77528e-16          | 1.000000 |
| rad25         | 3.94356e-17         | 1.000000 | 8.77827e-17          | 1.000000 |

|       |             |         |             |          |
|-------|-------------|---------|-------------|----------|
| rad22 | 2.18517e-17 | 1.00000 | 4.86414e-17 | 1.000000 |
| rad12 | 1.26339e-17 | 1.00000 | 2.81227e-17 | 1.000000 |
| rad14 | 7.49668e-18 | 1.00000 | 1.66874e-17 | 1.000000 |
| rad27 | 7.01408e-18 | 1.00000 | 1.56132e-17 | 1.000000 |
| rad15 | 3.31050e-18 | 1.00000 | 7.36909e-18 | 1.000000 |
| rad8  | 3.02695e-19 | 1.00000 | 6.73791e-19 | 1.000000 |
| rad31 | 1.11579e-19 | 1.00000 | 2.48372e-19 | 1.000000 |
| rad47 | 5.97459e-22 | 1.00000 | 1.32993e-21 | 1.000000 |
| rad5  | 3.90178e-23 | 1.00000 | 8.68527e-23 | 1.000000 |

0.100000000E-05 Pa, 1200.00000 K

| Rate constant | True (fraction)     | Effective (fraction) |
|---------------|---------------------|----------------------|
| Total         | 8.84330e-15 (1.00 ) | 3.30079e-15 (1.00 )  |

| species       | PYtrue      | Cumul    | PYeffective | Cumul    |
|---------------|-------------|----------|-------------|----------|
| Benzyl+C2H2   | 0.626747    | 0.626747 | 0.00000     | 0.00000  |
| Indene+H      | 0.361139    | 0.987886 | 0.967544    | 0.967544 |
| Ph+Allene     | 0.00426331  | 0.992149 | 0.0114220   | 0.978966 |
| PhCHCCH2+H    | 0.00242727  | 0.994577 | 0.00650302  | 0.985469 |
| PhCH2CCH+H    | 0.00220912  | 0.996786 | 0.00591855  | 0.991388 |
| PhCCH+CH3     | 0.00203529  | 0.998821 | 0.00545285  | 0.996840 |
| Ph+MeAc       | 0.000271659 | 0.999093 | 0.000727814 | 0.997568 |
| PAH7+H        | 0.000220958 | 0.999314 | 0.000591978 | 0.998160 |
| PAH9+H        | 0.000166476 | 0.999480 | 0.000446015 | 0.998606 |
| rad30         | 0.000155353 | 0.999635 | 0.000416215 | 0.999022 |
| PhCCCH3+H     | 0.000117029 | 0.999752 | 0.000313538 | 0.999336 |
| rad38         | 6.49367e-05 | 0.999817 | 0.000173975 | 0.999510 |
| rad19anti     | 4.80909e-05 | 0.999865 | 0.000128843 | 0.999639 |
| rad39         | 4.80571e-05 | 0.999914 | 0.000128752 | 0.999768 |
| rad35         | 3.43899e-05 | 0.999948 | 9.21355e-05 | 0.999860 |
| PAH3+H        | 2.21253e-05 | 0.999970 | 5.92770e-05 | 0.999919 |
| rad46         | 1.27762e-05 | 0.999983 | 3.42294e-05 | 0.999953 |
| rad60syn      | 4.87439e-06 | 0.999988 | 1.30592e-05 | 0.999966 |
| rad60anti     | 2.81860e-06 | 0.999991 | 7.55145e-06 | 0.999974 |
| rad59         | 2.76936e-06 | 0.999993 | 7.41953e-06 | 0.999981 |
| rad50         | 2.57972e-06 | 0.999996 | 6.91144e-06 | 0.999988 |
| rad19syn      | 1.86136e-06 | 0.999998 | 4.98686e-06 | 0.999993 |
| rad54         | 5.79322e-07 | 0.999998 | 1.55209e-06 | 0.999995 |
| PhcycC3H3_A+H | 3.85542e-07 | 0.999999 | 1.03292e-06 | 0.999996 |
| rad37         | 3.71909e-07 | 0.999999 | 9.96399e-07 | 0.999997 |
| rad67         | 3.10056e-07 | 0.999999 | 8.30686e-07 | 0.999998 |
| rad51         | 2.56406e-07 | 1.000000 | 6.86949e-07 | 0.999998 |
| rad52         | 1.30814e-07 | 1.000000 | 3.50469e-07 | 0.999999 |
| rad70         | 8.31661e-08 | 1.000000 | 2.22814e-07 | 0.999999 |
| PAH10+CH3     | 7.86243e-08 | 1.000000 | 2.10646e-07 | 0.999999 |
| PAH1+H        | 7.84240e-08 | 1.000000 | 2.10109e-07 | 0.999999 |
| rad58         | 6.38230e-08 | 1.000000 | 1.70991e-07 | 0.999999 |
| rad55         | 2.81615e-08 | 1.000000 | 7.54487e-08 | 0.999999 |
| rad34         | 1.22937e-08 | 1.000000 | 3.29365e-08 | 0.999999 |
| rad62         | 1.00322e-08 | 1.000000 | 2.68777e-08 | 1.000000 |
| rad65         | 8.07953e-09 | 1.000000 | 2.16462e-08 | 1.000000 |
| rad43         | 1.86209e-09 | 1.000000 | 4.98881e-09 | 1.000000 |
| rad53         | 1.69057e-09 | 1.000000 | 4.52927e-09 | 1.000000 |
| rad56         | 8.06531e-10 | 1.000000 | 2.16081e-09 | 1.000000 |
| rad64         | 6.30249e-10 | 1.000000 | 1.68853e-09 | 1.000000 |
| rad73         | 4.67950e-10 | 1.000000 | 1.25371e-09 | 1.000000 |
| rad71         | 3.19754e-10 | 1.000000 | 8.56667e-10 | 1.000000 |
| rad42         | 2.25979e-10 | 1.000000 | 6.05431e-10 | 1.000000 |
| rad68syn      | 1.55936e-10 | 1.000000 | 4.17774e-10 | 1.000000 |
| PAH8+H        | 1.30631e-10 | 1.000000 | 3.49980e-10 | 1.000000 |
| rad68anti     | 1.03878e-10 | 1.000000 | 2.78304e-10 | 1.000000 |
| rad40syn      | 2.64822e-11 | 1.000000 | 7.09498e-11 | 1.000000 |
| rad41         | 2.43325e-11 | 1.000000 | 6.51903e-11 | 1.000000 |
| rad61         | 1.76267e-11 | 1.000000 | 4.72244e-11 | 1.000000 |
| rad40anti     | 1.25562e-11 | 1.000000 | 3.36398e-11 | 1.000000 |
| rad72         | 2.17913e-12 | 1.000000 | 5.83821e-12 | 1.000000 |
| rad6          | 2.07210e-12 | 1.000000 | 5.55147e-12 | 1.000000 |
| rad23         | 5.57414e-13 | 1.000000 | 1.49339e-12 | 1.000000 |
| rad45         | 3.17945e-13 | 1.000000 | 8.51821e-13 | 1.000000 |
| rad11         | 6.25088e-14 | 1.000000 | 1.67470e-13 | 1.000000 |
| rad20         | 5.25317e-14 | 1.000000 | 1.40740e-13 | 1.000000 |
| rad7          | 3.51464e-14 | 1.000000 | 9.41623e-14 | 1.000000 |
| rad21         | 3.17166e-14 | 1.000000 | 8.49734e-14 | 1.000000 |
| rad36         | 2.96657e-14 | 1.000000 | 7.94787e-14 | 1.000000 |
| rad9          | 1.97551e-14 | 1.000000 | 5.29267e-14 | 1.000000 |
| rad2          | 1.96265e-14 | 1.000000 | 5.25824e-14 | 1.000000 |
| rad13         | 1.37634e-14 | 1.000000 | 3.68742e-14 | 1.000000 |

|       |             |         |             |          |
|-------|-------------|---------|-------------|----------|
| rad28 | 5.94815e-15 | 1.00000 | 1.59360e-14 | 1.000000 |
| rad18 | 5.20685e-15 | 1.00000 | 1.39499e-14 | 1.000000 |
| rad10 | 4.62908e-15 | 1.00000 | 1.24020e-14 | 1.000000 |
| rad1  | 4.32020e-15 | 1.00000 | 1.15745e-14 | 1.000000 |
| rad26 | 1.74177e-15 | 1.00000 | 4.66645e-15 | 1.000000 |
| rad3  | 5.71466e-16 | 1.00000 | 1.53104e-15 | 1.000000 |
| rad4  | 4.37928e-16 | 1.00000 | 1.17327e-15 | 1.000000 |
| rad24 | 3.33436e-16 | 1.00000 | 8.93325e-16 | 1.000000 |
| rad33 | 2.51831e-16 | 1.00000 | 6.74692e-16 | 1.000000 |
| rad22 | 7.03771e-17 | 1.00000 | 1.88550e-16 | 1.000000 |
| rad25 | 3.68476e-17 | 1.00000 | 9.87200e-17 | 1.000000 |
| rad12 | 1.57453e-17 | 1.00000 | 4.21838e-17 | 1.000000 |
| rad15 | 5.09924e-18 | 1.00000 | 1.36616e-17 | 1.000000 |
| rad14 | 4.93371e-18 | 1.00000 | 1.32181e-17 | 1.000000 |
| rad27 | 3.32751e-18 | 1.00000 | 8.91489e-18 | 1.000000 |
| rad8  | 9.89268e-19 | 1.00000 | 2.65039e-18 | 1.000000 |
| rad31 | 6.76592e-20 | 1.00000 | 1.81269e-19 | 1.000000 |
| rad47 | 1.81317e-21 | 1.00000 | 4.85774e-21 | 1.000000 |
| rad5  | 1.44852e-22 | 1.00000 | 3.88080e-22 | 1.000000 |

0.1000000000E-05 Pa, 1300.00000 K

| Rate constant | True (fraction)     | Effective (fraction) |
|---------------|---------------------|----------------------|
| Total         | 1.52810e-14 (1.00 ) | 4.76644e-15 (1.00 )  |

| species       | PYtrue      | Cumul    | PYeffective | Cumul    |
|---------------|-------------|----------|-------------|----------|
| Benzyl+C2H2   | 0.688080    | 0.688080 | 0.00000     | 0.00000  |
| Indene+H      | 0.296944    | 0.985024 | 0.951986    | 0.951986 |
| Ph+Allene     | 0.00550433  | 0.990528 | 0.0176466   | 0.969633 |
| PhCH2CCH+H    | 0.00336231  | 0.993891 | 0.0107794   | 0.980412 |
| PhCHCCH2+H    | 0.00286585  | 0.996756 | 0.00918775  | 0.989600 |
| PhCCH+CH3     | 0.00187197  | 0.998628 | 0.00600145  | 0.995601 |
| Ph+MeAc       | 0.000252917 | 0.998881 | 0.000810838 | 0.996412 |
| PAH7+H        | 0.000251839 | 0.999133 | 0.000807383 | 0.997219 |
| PAH9+H        | 0.000232565 | 0.999366 | 0.000745592 | 0.997965 |
| rad30         | 0.000187145 | 0.999553 | 0.000599977 | 0.998565 |
| rad38         | 9.27358e-05 | 0.999646 | 0.000297306 | 0.998862 |
| PhCCCH3+H     | 8.81977e-05 | 0.999734 | 0.000282757 | 0.999145 |
| rad19anti     | 7.76866e-05 | 0.999812 | 0.000249059 | 0.999394 |
| rad39         | 5.27138e-05 | 0.999864 | 0.000168998 | 0.999563 |
| rad35         | 4.67240e-05 | 0.999911 | 0.000149795 | 0.999713 |
| PAH3+H        | 4.01931e-05 | 0.999951 | 0.000128857 | 0.999842 |
| rad46         | 2.01481e-05 | 0.999971 | 6.45939e-05 | 0.999906 |
| rad60syn      | 7.32140e-06 | 0.999979 | 2.34720e-05 | 0.999930 |
| rad50         | 5.32215e-06 | 0.999984 | 1.70625e-05 | 0.999947 |
| rad59         | 4.81766e-06 | 0.999989 | 1.54452e-05 | 0.999962 |
| rad60anti     | 4.29551e-06 | 0.999993 | 1.37712e-05 | 0.999976 |
| rad19syn      | 2.96344e-06 | 0.999996 | 9.50065e-06 | 0.999986 |
| rad54         | 9.75309e-07 | 0.999997 | 3.12679e-06 | 0.999989 |
| rad67         | 7.44257e-07 | 0.999998 | 2.38605e-06 | 0.999991 |
| PhcycC3H3_A+H | 7.41843e-07 | 0.999999 | 2.37831e-06 | 0.999993 |
| rad51         | 6.46585e-07 | 0.999999 | 2.07292e-06 | 0.999996 |
| rad37         | 4.66727e-07 | 1.000000 | 1.49630e-06 | 0.999997 |
| rad52         | 2.99170e-07 | 1.000000 | 9.59124e-07 | 0.999998 |
| PAH10+CH3     | 1.66594e-07 | 1.000000 | 5.34093e-07 | 0.999999 |
| rad70         | 1.60097e-07 | 1.000000 | 5.13264e-07 | 0.999999 |
| PAH1+H        | 1.54574e-07 | 1.000000 | 4.95557e-07 | 1.000000 |
| rad58         | 1.48959e-07 | 1.000000 | 4.77556e-07 | 1.000000 |
| rad55         | 5.10750e-08 | 1.000000 | 1.63744e-07 | 1.000000 |
| rad34         | 2.60671e-08 | 1.000000 | 8.35698e-08 | 1.000000 |
| rad65         | 2.01508e-08 | 1.000000 | 6.46025e-08 | 1.000000 |
| rad62         | 1.51327e-08 | 1.000000 | 4.85146e-08 | 1.000000 |
| rad53         | 3.99906e-09 | 1.000000 | 1.28208e-08 | 1.000000 |
| rad43         | 2.42224e-09 | 1.000000 | 7.76557e-09 | 1.000000 |
| rad56         | 2.20471e-09 | 1.000000 | 7.06819e-09 | 1.000000 |
| rad73         | 1.94724e-09 | 1.000000 | 6.24276e-09 | 1.000000 |
| rad71         | 1.52459e-09 | 1.000000 | 4.88774e-09 | 1.000000 |
| rad64         | 1.45722e-09 | 1.000000 | 4.67176e-09 | 1.000000 |
| PAH8+H        | 4.97086e-10 | 1.000000 | 1.59363e-09 | 1.000000 |
| rad68syn      | 4.61120e-10 | 1.000000 | 1.47833e-09 | 1.000000 |
| rad42         | 4.21653e-10 | 1.000000 | 1.35180e-09 | 1.000000 |
| rad68anti     | 3.05850e-10 | 1.000000 | 9.80538e-10 | 1.000000 |
| rad40syn      | 9.09556e-11 | 1.000000 | 2.91599e-10 | 1.000000 |
| rad61         | 6.30316e-11 | 1.000000 | 2.02076e-10 | 1.000000 |
| rad40anti     | 4.50261e-11 | 1.000000 | 1.44351e-10 | 1.000000 |
| rad41         | 4.39793e-11 | 1.000000 | 1.40995e-10 | 1.000000 |
| rad72         | 1.45373e-11 | 1.000000 | 4.66059e-11 | 1.000000 |
| rad6          | 1.37737e-12 | 1.000000 | 4.41577e-12 | 1.000000 |

|       |             |         |             |         |
|-------|-------------|---------|-------------|---------|
| rad23 | 2.86098e-13 | 1.00000 | 9.17216e-13 | 1.00000 |
| rad45 | 1.69502e-13 | 1.00000 | 5.43413e-13 | 1.00000 |
| rad11 | 6.08414e-14 | 1.00000 | 1.95054e-13 | 1.00000 |
| rad7  | 4.47131e-14 | 1.00000 | 1.43348e-13 | 1.00000 |
| rad20 | 3.18168e-14 | 1.00000 | 1.02003e-13 | 1.00000 |
| rad21 | 1.87706e-14 | 1.00000 | 6.01774e-14 | 1.00000 |
| rad9  | 1.63350e-14 | 1.00000 | 5.23690e-14 | 1.00000 |
| rad36 | 1.60292e-14 | 1.00000 | 5.13889e-14 | 1.00000 |
| rad13 | 8.37499e-15 | 1.00000 | 2.68498e-14 | 1.00000 |
| rad18 | 6.76196e-15 | 1.00000 | 2.16785e-14 | 1.00000 |
| rad2  | 5.87509e-15 | 1.00000 | 1.88352e-14 | 1.00000 |
| rad28 | 3.41241e-15 | 1.00000 | 1.09400e-14 | 1.00000 |
| rad10 | 2.94454e-15 | 1.00000 | 9.44004e-15 | 1.00000 |
| rad1  | 1.33315e-15 | 1.00000 | 4.27399e-15 | 1.00000 |
| rad26 | 9.25211e-16 | 1.00000 | 2.96618e-15 | 1.00000 |
| rad22 | 2.58294e-16 | 1.00000 | 8.28077e-16 | 1.00000 |
| rad24 | 2.44030e-16 | 1.00000 | 7.82347e-16 | 1.00000 |
| rad3  | 2.20383e-16 | 1.00000 | 7.06537e-16 | 1.00000 |
| rad4  | 1.70945e-16 | 1.00000 | 5.48040e-16 | 1.00000 |
| rad33 | 1.48882e-16 | 1.00000 | 4.77309e-16 | 1.00000 |
| rad25 | 2.76125e-17 | 1.00000 | 8.85244e-17 | 1.00000 |
| rad15 | 2.03025e-17 | 1.00000 | 6.50887e-17 | 1.00000 |
| rad12 | 1.79600e-17 | 1.00000 | 5.75787e-17 | 1.00000 |
| rad14 | 2.71727e-18 | 1.00000 | 8.71143e-18 | 1.00000 |
| rad8  | 1.89596e-18 | 1.00000 | 6.07834e-18 | 1.00000 |
| rad27 | 1.34954e-18 | 1.00000 | 4.32654e-18 | 1.00000 |
| rad31 | 4.14038e-20 | 1.00000 | 1.32738e-19 | 1.00000 |
| rad47 | 4.64662e-21 | 1.00000 | 1.48968e-20 | 1.00000 |
| rad5  | 5.20688e-22 | 1.00000 | 1.66930e-21 | 1.00000 |

0.100000000E-05 Pa, 1400.00000 K

| Rate constant | True (fraction)     | Effective (fraction) |
|---------------|---------------------|----------------------|
| Total         | 2.46691e-14 (1.00 ) | 6.50155e-15 (1.00 )  |

| species       | PYtrue      | Cumul    | PYeffective | Cumul    |
|---------------|-------------|----------|-------------|----------|
| Benzyl+C2H2   | 0.736450    | 0.736450 | 0.00000     | 0.00000  |
| Indene+H      | 0.245659    | 0.982109 | 0.932117    | 0.932117 |
| Ph+Allene     | 0.00660861  | 0.988718 | 0.0250754   | 0.957192 |
| PhCH2CCH+H    | 0.00478128  | 0.993499 | 0.0181419   | 0.975334 |
| PhCHCCH2+H    | 0.00325578  | 0.996755 | 0.0123536   | 0.987688 |
| PhCCH+CH3     | 0.00165084  | 0.998406 | 0.00626388  | 0.993952 |
| PAH9+H        | 0.000308661 | 0.998714 | 0.00117117  | 0.995123 |
| PAH7+H        | 0.000272630 | 0.998987 | 0.00103445  | 0.996157 |
| Ph+MeAc       | 0.000228420 | 0.999215 | 0.000866707 | 0.997024 |
| rad30         | 0.000217655 | 0.999433 | 0.000825859 | 0.997850 |
| rad38         | 0.000125529 | 0.999558 | 0.000476301 | 0.998326 |
| rad19anti     | 0.000116511 | 0.999675 | 0.000442085 | 0.998768 |
| PAH3+H        | 6.69984e-05 | 0.999742 | 0.000254215 | 0.999023 |
| PhCCCH3+H     | 6.53819e-05 | 0.999807 | 0.000248082 | 0.999271 |
| rad35         | 6.07397e-05 | 0.999868 | 0.000230468 | 0.999501 |
| rad39         | 5.49305e-05 | 0.999923 | 0.000208426 | 0.999710 |
| rad46         | 2.97185e-05 | 0.999953 | 0.000112762 | 0.999822 |
| rad60syn      | 1.03332e-05 | 0.999963 | 3.92077e-05 | 0.999862 |
| rad50         | 9.93210e-06 | 0.999973 | 3.76859e-05 | 0.999899 |
| rad59         | 7.71556e-06 | 0.999981 | 2.92756e-05 | 0.999928 |
| rad60anti     | 6.13929e-06 | 0.999987 | 2.32946e-05 | 0.999952 |
| rad19syn      | 4.26609e-06 | 0.999991 | 1.61870e-05 | 0.999968 |
| rad67         | 1.57759e-06 | 0.999993 | 5.98594e-06 | 0.999974 |
| rad54         | 1.46998e-06 | 0.999994 | 5.57763e-06 | 0.999980 |
| rad51         | 1.43445e-06 | 0.999996 | 5.44280e-06 | 0.999985 |
| PhcycC3H3_A+H | 1.26043e-06 | 0.999997 | 4.78252e-06 | 0.999990 |
| rad37         | 6.13241e-07 | 0.999997 | 2.32685e-06 | 0.999992 |
| rad52         | 6.09458e-07 | 0.999998 | 2.31250e-06 | 0.999994 |
| PAH10+CH3     | 3.40070e-07 | 0.999998 | 1.29034e-06 | 0.999996 |
| rad58         | 3.07503e-07 | 0.999999 | 1.16677e-06 | 0.999997 |
| rad70         | 2.75599e-07 | 0.999999 | 1.04572e-06 | 0.999998 |
| PAH1+H        | 2.72543e-07 | 0.999999 | 1.03413e-06 | 0.999999 |
| rad55         | 8.21114e-08 | 0.999999 | 3.11559e-07 | 0.999999 |
| rad34         | 4.89123e-08 | 0.999999 | 1.85590e-07 | 0.999999 |
| rad65         | 4.41608e-08 | 0.999999 | 1.67561e-07 | 1.000000 |
| rad62         | 2.07591e-08 | 0.999999 | 7.87674e-08 | 1.000000 |
| rad53         | 8.12265e-09 | 0.999999 | 3.08202e-08 | 1.000000 |
| rad73         | 6.62662e-09 | 0.999999 | 2.51437e-08 | 1.000000 |
| rad71         | 5.83659e-09 | 0.999999 | 2.21461e-08 | 1.000000 |
| rad56         | 5.07502e-09 | 0.999999 | 1.92564e-08 | 1.000000 |
| rad43         | 3.05585e-09 | 0.999999 | 1.15950e-08 | 1.000000 |
| rad64         | 2.94785e-09 | 0.999999 | 1.11852e-08 | 1.000000 |

|           |             |          |             |          |
|-----------|-------------|----------|-------------|----------|
| PAH8+H    | 1.55760e-09 | 0.999999 | 5.91010e-09 | 1.000000 |
| rad68syn  | 1.15822e-09 | 0.999999 | 4.39468e-09 | 1.000000 |
| rad68anti | 7.65284e-10 | 0.999999 | 2.90376e-09 | 1.000000 |
| rad42     | 6.99013e-10 | 0.999999 | 2.65230e-09 | 1.000000 |
| rad40syn  | 2.60577e-10 | 0.999999 | 9.88719e-10 | 1.000000 |
| rad61     | 1.94739e-10 | 0.999999 | 7.38907e-10 | 1.000000 |
| rad40anti | 1.33993e-10 | 0.999999 | 5.08417e-10 | 1.000000 |
| rad41     | 7.68994e-11 | 0.999999 | 2.91783e-10 | 1.000000 |
| rad72     | 7.37095e-11 | 0.999999 | 2.79680e-10 | 1.000000 |
| rad6      | 1.21128e-12 | 0.999999 | 4.59603e-12 | 1.000000 |
| rad23     | 1.53189e-13 | 0.999999 | 5.81253e-13 | 1.000000 |
| rad45     | 9.28880e-14 | 0.999999 | 3.52450e-13 | 1.000000 |
| rad11     | 4.33333e-14 | 0.999999 | 1.64422e-13 | 1.000000 |
| rad7      | 3.94166e-14 | 0.999999 | 1.49561e-13 | 1.000000 |
| rad20     | 1.95003e-14 | 0.999999 | 7.39910e-14 | 1.000000 |
| rad9      | 1.29596e-14 | 0.999999 | 4.91734e-14 | 1.000000 |
| rad21     | 1.13739e-14 | 0.999999 | 4.31567e-14 | 1.000000 |
| rad36     | 8.89888e-15 | 0.999999 | 3.37655e-14 | 1.000000 |
| rad18     | 5.84529e-15 | 0.999999 | 2.21791e-14 | 1.000000 |
| rad13     | 4.53221e-15 | 0.999999 | 1.71968e-14 | 1.000000 |
| rad28     | 2.69053e-15 | 0.999999 | 1.02088e-14 | 1.000000 |
| rad2      | 1.83209e-15 | 0.999999 | 6.95161e-15 | 1.000000 |
| rad10     | 1.43189e-15 | 0.999999 | 5.43311e-15 | 1.000000 |
| rad22     | 8.74524e-16 | 0.999999 | 3.31825e-15 | 1.000000 |
| rad26     | 5.50711e-16 | 0.999999 | 2.08959e-15 | 1.000000 |
| rad1      | 4.25055e-16 | 0.999999 | 1.61281e-15 | 1.000000 |
| rad24     | 1.80067e-16 | 0.999999 | 6.83237e-16 | 1.000000 |
| rad3      | 8.88990e-17 | 0.999999 | 3.37314e-16 | 1.000000 |
| rad33     | 8.79960e-17 | 0.999999 | 3.33888e-16 | 1.000000 |
| rad4      | 6.96241e-17 | 0.999999 | 2.64178e-16 | 1.000000 |
| rad15     | 6.30404e-17 | 0.999999 | 2.39198e-16 | 1.000000 |
| rad12     | 1.93287e-17 | 0.999999 | 7.33399e-17 | 1.000000 |
| rad25     | 1.92135e-17 | 0.999999 | 7.29027e-17 | 1.000000 |
| rad8      | 2.79512e-18 | 0.999999 | 1.06057e-17 | 1.000000 |
| rad14     | 1.41990e-18 | 0.999999 | 5.38761e-18 | 1.000000 |
| rad27     | 5.43618e-19 | 0.999999 | 2.06268e-18 | 1.000000 |
| rad31     | 2.56226e-20 | 0.999999 | 9.72211e-20 | 1.000000 |
| rad47     | 1.04027e-20 | 0.999999 | 3.94715e-20 | 1.000000 |
| rad5      | 1.58192e-21 | 0.999999 | 6.00236e-21 | 1.000000 |

0.100000000E-05 Pa, 1500.00000 K

=====

| Rate constant | True (fraction)    | Effective (fraction) |
|---------------|--------------------|----------------------|
| Total         | 3.76908e-14 (1.00) | 8.51560e-15 (1.00)   |

| species       | PYtrue      | Cumul    | PYeffective | Cumul    |
|---------------|-------------|----------|-------------|----------|
| Benzyl+C2H2   | 0.774067    | 0.774067 | 0.00000     | 0.00000  |
| Indene+H      | 0.205065    | 0.979132 | 0.907636    | 0.907636 |
| Ph+Allene     | 0.00752036  | 0.986652 | 0.0332858   | 0.940922 |
| PhCH2CCH+H    | 0.00646723  | 0.993120 | 0.0286246   | 0.969546 |
| PhCHCCH2+H    | 0.00361205  | 0.996732 | 0.0159873   | 0.985534 |
| PhCCH+CH3     | 0.00141397  | 0.998146 | 0.00625837  | 0.991792 |
| PAH9+H        | 0.000393094 | 0.998539 | 0.00173987  | 0.993532 |
| PAH7+H        | 0.000286546 | 0.998825 | 0.00126828  | 0.994800 |
| rad30         | 0.000246477 | 0.999072 | 0.00109093  | 0.995891 |
| Ph+MeAc       | 0.000203626 | 0.999275 | 0.000901268 | 0.996792 |
| rad19anti     | 0.000164236 | 0.999440 | 0.000726923 | 0.997519 |
| rad38         | 0.000162728 | 0.999602 | 0.000720251 | 0.998240 |
| PAH3+H        | 0.000104218 | 0.999707 | 0.000461281 | 0.998701 |
| rad35         | 7.62565e-05 | 0.999783 | 0.000337518 | 0.999038 |
| rad39         | 5.58557e-05 | 0.999839 | 0.000247223 | 0.999286 |
| PhCCCH3+H     | 4.89506e-05 | 0.999888 | 0.000216660 | 0.999502 |
| rad46         | 4.15217e-05 | 0.999929 | 0.000183779 | 0.999686 |
| rad50         | 1.70754e-05 | 0.999946 | 7.55771e-05 | 0.999762 |
| rad60syn      | 1.38815e-05 | 0.999960 | 6.14410e-05 | 0.999823 |
| rad59         | 1.15663e-05 | 0.999972 | 5.11935e-05 | 0.999874 |
| rad60anti     | 8.33859e-06 | 0.999980 | 3.69074e-05 | 0.999911 |
| rad19syn      | 5.68956e-06 | 0.999986 | 2.51825e-05 | 0.999936 |
| rad67         | 3.01383e-06 | 0.999989 | 1.33395e-05 | 0.999950 |
| rad51         | 2.86542e-06 | 0.999992 | 1.26826e-05 | 0.999962 |
| rad54         | 2.03370e-06 | 0.999994 | 9.00134e-06 | 0.999971 |
| PhcycC3H3_A+H | 1.94411e-06 | 0.999996 | 8.60479e-06 | 0.999980 |
| rad52         | 1.12959e-06 | 0.999997 | 4.99968e-06 | 0.999985 |
| rad37         | 8.38280e-07 | 0.999997 | 3.71030e-06 | 0.999989 |
| PAH10+CH3     | 6.63376e-07 | 0.999998 | 2.93617e-06 | 0.999992 |
| rad58         | 5.75067e-07 | 0.999999 | 2.54530e-06 | 0.999994 |
| PAH1+H        | 4.44629e-07 | 0.999999 | 1.96797e-06 | 0.999996 |
| rad70         | 4.35873e-07 | 1.000000 | 1.92921e-06 | 0.999998 |

|           |             |          |             |          |
|-----------|-------------|----------|-------------|----------|
| rad55     | 1.20222e-07 | 1.000000 | 5.32112e-07 | 0.999999 |
| rad65     | 8.70999e-08 | 1.000000 | 3.85512e-07 | 0.999999 |
| rad34     | 8.35876e-08 | 1.000000 | 3.69966e-07 | 0.999999 |
| rad62     | 2.65880e-08 | 1.000000 | 1.17681e-07 | 0.999999 |
| rad73     | 1.91029e-08 | 1.000000 | 8.45513e-08 | 1.000000 |
| rad71     | 1.86182e-08 | 1.000000 | 8.24060e-08 | 1.000000 |
| rad53     | 1.46409e-08 | 1.000000 | 6.48019e-08 | 1.000000 |
| rad56     | 1.02046e-08 | 1.000000 | 4.51664e-08 | 1.000000 |
| rad64     | 5.41559e-09 | 1.000000 | 2.39699e-08 | 1.000000 |
| PAH8+H    | 4.18063e-09 | 1.000000 | 1.85038e-08 | 1.000000 |
| rad43     | 3.92947e-09 | 1.000000 | 1.73922e-08 | 1.000000 |
| rad68syn  | 2.56012e-09 | 1.000000 | 1.13313e-08 | 1.000000 |
| rad68anti | 1.68587e-09 | 1.000000 | 7.46183e-09 | 1.000000 |
| rad42     | 1.06259e-09 | 1.000000 | 4.70314e-09 | 1.000000 |
| rad40syn  | 6.46765e-10 | 1.000000 | 2.86264e-09 | 1.000000 |
| rad61     | 5.26863e-10 | 1.000000 | 2.33195e-09 | 1.000000 |
| rad40anti | 3.43892e-10 | 1.000000 | 1.52210e-09 | 1.000000 |
| rad72     | 2.96653e-10 | 1.000000 | 1.31301e-09 | 1.000000 |
| rad41     | 1.35344e-10 | 1.000000 | 5.99046e-10 | 1.000000 |
| rad6      | 1.21435e-12 | 1.000000 | 5.37481e-12 | 1.000000 |
| rad23     | 8.66738e-14 | 1.000000 | 3.83626e-13 | 1.000000 |
| rad45     | 5.24113e-14 | 1.000000 | 2.31977e-13 | 1.000000 |
| rad11     | 2.60274e-14 | 1.000000 | 1.15200e-13 | 1.000000 |
| rad7      | 2.59461e-14 | 1.000000 | 1.14840e-13 | 1.000000 |
| rad20     | 1.23074e-14 | 1.000000 | 5.44737e-14 | 1.000000 |
| rad9      | 1.00433e-14 | 1.000000 | 4.44526e-14 | 1.000000 |
| rad21     | 7.10953e-15 | 1.000000 | 3.14675e-14 | 1.000000 |
| rad36     | 5.08484e-15 | 1.000000 | 2.25060e-14 | 1.000000 |
| rad18     | 4.05516e-15 | 1.000000 | 1.79485e-14 | 1.000000 |
| rad28     | 2.55249e-15 | 1.000000 | 1.12975e-14 | 1.000000 |
| rad13     | 2.40598e-15 | 1.000000 | 1.06491e-14 | 1.000000 |
| rad22     | 2.29084e-15 | 1.000000 | 1.01395e-14 | 1.000000 |
| rad2      | 5.93073e-16 | 1.000000 | 2.62500e-15 | 1.000000 |
| rad10     | 5.69013e-16 | 1.000000 | 2.51851e-15 | 1.000000 |
| rad26     | 3.24113e-16 | 1.000000 | 1.43456e-15 | 1.000000 |
| rad1      | 1.40200e-16 | 1.000000 | 6.20538e-16 | 1.000000 |
| rad24     | 1.34246e-16 | 1.000000 | 5.94185e-16 | 1.000000 |
| rad15     | 1.14676e-16 | 1.000000 | 5.07568e-16 | 1.000000 |
| rad33     | 5.25043e-17 | 1.000000 | 2.32389e-16 | 1.000000 |
| rad3      | 3.73811e-17 | 1.000000 | 1.65452e-16 | 1.000000 |
| rad4      | 2.95179e-17 | 1.000000 | 1.30649e-16 | 1.000000 |
| rad12     | 1.99725e-17 | 1.000000 | 8.84000e-17 | 1.000000 |
| rad25     | 1.32639e-17 | 1.000000 | 5.87071e-17 | 1.000000 |
| rad8      | 3.57803e-18 | 1.000000 | 1.58367e-17 | 1.000000 |
| rad14     | 7.59785e-19 | 1.000000 | 3.36288e-18 | 1.000000 |
| rad27     | 2.30897e-19 | 1.000000 | 1.02197e-18 | 1.000000 |
| rad47     | 2.08549e-20 | 1.000000 | 9.23059e-20 | 1.000000 |
| rad31     | 1.60839e-20 | 1.000000 | 7.11887e-20 | 1.000000 |
| rad5      | 3.63829e-21 | 1.000000 | 1.61034e-20 | 1.000000 |

0.100000000E-05 Pa, 1750.00000 K

=====

| Rate constant | True (fraction)     | Effective (fraction) |
|---------------|---------------------|----------------------|
| Total         | 9.18604e-14 (1.00 ) | 1.49145e-14 (1.00 )  |

| species     | PYtrue      | Cumul    | PYeffective | Cumul    |
|-------------|-------------|----------|-------------|----------|
| Benzyl+C2H2 | 0.837640    | 0.837640 | 0.00000     | 0.00000  |
| Indene+H    | 0.133064    | 0.970704 | 0.819559    | 0.819559 |
| PhCH2CCH+H  | 0.0118056   | 0.982510 | 0.0727127   | 0.892272 |
| Ph+Allene   | 0.00950091  | 0.992011 | 0.0585175   | 0.950789 |
| PhCHCCH2+H  | 0.00446803  | 0.996479 | 0.0275192   | 0.978308 |
| PhCCH+CH3   | 0.000861597 | 0.997340 | 0.00530671  | 0.983615 |
| PAH9+H      | 0.000556652 | 0.997897 | 0.00342850  | 0.987044 |
| rad30       | 0.000325000 | 0.998222 | 0.00200173  | 0.989045 |
| rad19anti   | 0.000321503 | 0.998543 | 0.00198018  | 0.991026 |
| rad38       | 0.000287109 | 0.998830 | 0.00176835  | 0.992794 |
| PAH7+H      | 0.000286344 | 0.999117 | 0.00176363  | 0.994557 |
| PAH3+H      | 0.000275296 | 0.999392 | 0.00169559  | 0.996253 |
| Ph+MeAc     | 0.000167695 | 0.999560 | 0.00103286  | 0.997286 |
| rad35       | 0.000110066 | 0.999670 | 0.000677915 | 0.997964 |
| rad46       | 7.52920e-05 | 0.999745 | 0.000463735 | 0.998428 |
| rad39       | 5.82425e-05 | 0.999803 | 0.000358724 | 0.998786 |
| rad50       | 4.36581e-05 | 0.999847 | 0.000268897 | 0.999055 |
| PhCCCH3+H   | 3.20470e-05 | 0.999879 | 0.000197382 | 0.999253 |
| rad59       | 2.75338e-05 | 0.999907 | 0.000169584 | 0.999422 |
| rad60syn    | 2.64498e-05 | 0.999933 | 0.000162908 | 0.999585 |
| rad60anti   | 1.77452e-05 | 0.999951 | 0.000109295 | 0.999694 |
| rad51       | 1.06304e-05 | 0.999961 | 6.54744e-05 | 0.999760 |

|               |             |          |             |          |
|---------------|-------------|----------|-------------|----------|
| rad67         | 1.00266e-05 | 0.999971 | 6.17554e-05 | 0.999822 |
| rad19syn      | 8.12817e-06 | 0.999980 | 5.00626e-05 | 0.999872 |
| PhcycC3H3_A+H | 4.32964e-06 | 0.999984 | 2.66669e-05 | 0.999898 |
| rad52         | 3.62585e-06 | 0.999988 | 2.23321e-05 | 0.999921 |
| rad54         | 3.10468e-06 | 0.999991 | 1.91222e-05 | 0.999940 |
| PAH10+CH3     | 2.60306e-06 | 0.999993 | 1.60326e-05 | 0.999956 |
| rad58         | 2.01823e-06 | 0.999995 | 1.24306e-05 | 0.999968 |
| rad37         | 1.70772e-06 | 0.999997 | 1.05181e-05 | 0.999979 |
| PAH1+H        | 1.10635e-06 | 0.999998 | 6.81419e-06 | 0.999986 |
| rad70         | 1.04847e-06 | 0.999999 | 6.45765e-06 | 0.999992 |
| rad65         | 3.08348e-07 | 0.999999 | 1.89916e-06 | 0.999994 |
| rad34         | 2.42002e-07 | 1.000000 | 1.49052e-06 | 0.999995 |
| rad55         | 2.29000e-07 | 1.000000 | 1.41044e-06 | 0.999997 |
| rad71         | 1.90753e-07 | 1.000000 | 1.17488e-06 | 0.999998 |
| rad73         | 1.56380e-07 | 1.000000 | 9.63168e-07 | 0.999999 |
| rad53         | 4.44390e-08 | 1.000000 | 2.73707e-07 | 0.999999 |
| rad62         | 4.00911e-08 | 1.000000 | 2.46927e-07 | 1.000000 |
| rad56         | 3.57943e-08 | 1.000000 | 2.20463e-07 | 1.000000 |
| PAH8+H        | 2.43959e-08 | 1.000000 | 1.50258e-07 | 1.000000 |
| rad64         | 1.92943e-08 | 1.000000 | 1.18836e-07 | 1.000000 |
| rad68syn      | 1.20123e-08 | 1.000000 | 7.39857e-08 | 1.000000 |
| rad43         | 8.60713e-09 | 1.000000 | 5.30126e-08 | 1.000000 |
| rad68anti     | 7.79056e-09 | 1.000000 | 4.79832e-08 | 1.000000 |
| rad72         | 5.35920e-09 | 1.000000 | 3.30081e-08 | 1.000000 |
| rad40syn      | 3.52157e-09 | 1.000000 | 2.16899e-08 | 1.000000 |
| rad61         | 3.50342e-09 | 1.000000 | 2.15781e-08 | 1.000000 |
| rad42         | 2.39318e-09 | 1.000000 | 1.47399e-08 | 1.000000 |
| rad40anti     | 2.09783e-09 | 1.000000 | 1.29208e-08 | 1.000000 |
| rad41         | 5.64325e-10 | 1.000000 | 3.47576e-09 | 1.000000 |
| rad6          | 7.74036e-13 | 1.000000 | 4.76740e-12 | 1.000000 |
| rad23         | 3.29692e-14 | 1.000000 | 2.03062e-13 | 1.000000 |
| rad22         | 5.56105e-15 | 1.000000 | 3.42513e-14 | 1.000000 |
| rad45         | 5.00870e-15 | 1.000000 | 3.08493e-14 | 1.000000 |
| rad7          | 2.70131e-15 | 1.000000 | 1.66378e-14 | 1.000000 |
| rad11         | 2.49398e-15 | 1.000000 | 1.53608e-14 | 1.000000 |
| rad28         | 1.72342e-15 | 1.000000 | 1.06148e-14 | 1.000000 |
| rad9          | 1.33176e-15 | 1.000000 | 8.20250e-15 | 1.000000 |
| rad20         | 1.26283e-15 | 1.000000 | 7.77797e-15 | 1.000000 |
| rad36         | 8.51382e-16 | 1.000000 | 5.24379e-15 | 1.000000 |
| rad21         | 6.65178e-16 | 1.000000 | 4.09693e-15 | 1.000000 |
| rad18         | 5.81036e-16 | 1.000000 | 3.57869e-15 | 1.000000 |
| rad13         | 1.40338e-16 | 1.000000 | 8.64363e-16 | 1.000000 |
| rad15         | 6.72967e-17 | 1.000000 | 4.14490e-16 | 1.000000 |
| rad26         | 4.54938e-17 | 1.000000 | 2.80203e-16 | 1.000000 |
| rad10         | 2.38338e-17 | 1.000000 | 1.46796e-16 | 1.000000 |
| rad24         | 1.70134e-17 | 1.000000 | 1.04788e-16 | 1.000000 |
| rad2          | 1.03986e-17 | 1.000000 | 6.40464e-17 | 1.000000 |
| rad12         | 4.26945e-18 | 1.000000 | 2.62962e-17 | 1.000000 |
| rad33         | 3.32918e-18 | 1.000000 | 2.05049e-17 | 1.000000 |
| rad1          | 2.63873e-18 | 1.000000 | 1.62523e-17 | 1.000000 |
| rad8          | 1.74118e-18 | 1.000000 | 1.07242e-17 | 1.000000 |
| rad25         | 1.29129e-18 | 1.000000 | 7.95327e-18 | 1.000000 |
| rad3          | 8.44452e-19 | 1.000000 | 5.20111e-18 | 1.000000 |
| rad4          | 5.36191e-19 | 1.000000 | 3.30248e-18 | 1.000000 |
| rad14         | 5.21560e-20 | 1.000000 | 3.21236e-19 | 1.000000 |
| rad47         | 2.44663e-20 | 1.000000 | 1.50692e-19 | 1.000000 |
| rad5          | 1.25628e-20 | 1.000000 | 7.73761e-20 | 1.000000 |
| rad27         | 9.07045e-21 | 1.000000 | 5.58662e-20 | 1.000000 |

0.100000000E-05 Pa, 2000.00000 K

=====

| Rate constant | True (fraction)     | Effective (fraction) |
|---------------|---------------------|----------------------|
| Total         | 1.85359e-13 (1.00 ) | 2.47588e-14 (1.00 )  |

| species     | PYtrue      | Cumul    | PYeffective | Cumul    |
|-------------|-------------|----------|-------------|----------|
| Benzyl+C2H2 | 0.866428    | 0.866428 | 0.00000     | 0.00000  |
| Indene+H    | 0.0943885   | 0.960816 | 0.706650    | 0.706650 |
| PhCH2CCH+H  | 0.0189358   | 0.979752 | 0.141765    | 0.848415 |
| Ph+Allene   | 0.0101088   | 0.989861 | 0.0756807   | 0.924096 |
| PhCHCCH2+H  | 0.00579099  | 0.995652 | 0.0433549   | 0.967451 |
| PAH9+H      | 0.000765251 | 0.996417 | 0.00572913  | 0.973180 |
| PhCCH+CH3   | 0.000550354 | 0.996968 | 0.00412028  | 0.977300 |
| PAH3+H      | 0.000526246 | 0.997494 | 0.00393980  | 0.981240 |
| rad19anti   | 0.000486607 | 0.997981 | 0.00364303  | 0.984883 |
| rad38       | 0.000411538 | 0.998392 | 0.00308103  | 0.987964 |
| rad30       | 0.000378289 | 0.998770 | 0.00283210  | 0.990796 |
| PAH7+H      | 0.000350388 | 0.999121 | 0.00262322  | 0.993419 |
| Ph+MeAc     | 0.000164748 | 0.999286 | 0.00123340  | 0.994653 |



|               |             |          |             |          |
|---------------|-------------|----------|-------------|----------|
| rad35         | 0.000155515 | 0.999441 | 0.00116428  | 0.995817 |
| rad46         | 0.000120109 | 0.999561 | 0.000899212 | 0.996716 |
| rad50         | 9.58270e-05 | 0.999657 | 0.000717420 | 0.997434 |
| rad39         | 7.87039e-05 | 0.999736 | 0.000589225 | 0.998023 |
| rad59         | 4.92026e-05 | 0.999785 | 0.000368361 | 0.998391 |
| rad60syn      | 4.01110e-05 | 0.999825 | 0.000300295 | 0.998691 |
| PhCCCH3+H     | 3.61306e-05 | 0.999861 | 0.000270495 | 0.998962 |
| rad51         | 2.92772e-05 | 0.999890 | 0.000219187 | 0.999181 |
| rad60anti     | 2.75040e-05 | 0.999918 | 0.000205912 | 0.999387 |
| rad67         | 2.43946e-05 | 0.999942 | 0.000182633 | 0.999570 |
| rad19syn      | 1.17085e-05 | 0.999954 | 8.76566e-05 | 0.999657 |
| rad52         | 8.84586e-06 | 0.999963 | 6.62255e-05 | 0.999723 |
| PAH10+CH3     | 7.72771e-06 | 0.999971 | 5.78543e-05 | 0.999781 |
| PhcycC3H3_A+H | 7.44556e-06 | 0.999978 | 5.57420e-05 | 0.999837 |
| rad58         | 5.03691e-06 | 0.999983 | 3.77093e-05 | 0.999875 |
| rad54         | 4.34710e-06 | 0.999987 | 3.25450e-05 | 0.999907 |
| rad37         | 3.43690e-06 | 0.999991 | 2.57307e-05 | 0.999933 |
| PAH1+H        | 2.74924e-06 | 0.999994 | 2.05825e-05 | 0.999954 |
| rad70         | 2.09354e-06 | 0.999996 | 1.56735e-05 | 0.999969 |
| rad71         | 1.06961e-06 | 0.999997 | 8.00777e-06 | 0.999977 |
| rad65         | 8.19688e-07 | 0.999998 | 6.13669e-06 | 0.999983 |
| rad73         | 7.43910e-07 | 0.999998 | 5.56936e-06 | 0.999989 |
| rad34         | 5.52321e-07 | 0.999999 | 4.13501e-06 | 0.999993 |
| rad55         | 3.53324e-07 | 0.999999 | 2.64520e-06 | 0.999996 |
| PAH8+H        | 1.14510e-07 | 0.999999 | 8.57294e-07 | 0.999997 |
| rad53         | 9.72438e-08 | 0.999999 | 7.28027e-07 | 0.999997 |
| rad56         | 9.21215e-08 | 1.000000 | 6.89678e-07 | 0.999998 |
| rad62         | 6.00485e-08 | 1.000000 | 4.49560e-07 | 0.999999 |
| rad64         | 5.57952e-08 | 1.000000 | 4.17717e-07 | 0.999999 |
| rad72         | 4.29765e-08 | 1.000000 | 3.21748e-07 | 0.999999 |
| rad68syn      | 4.11172e-08 | 1.000000 | 3.07828e-07 | 1.000000 |
| rad68anti     | 2.65281e-08 | 1.000000 | 1.98605e-07 | 1.000000 |
| rad43         | 2.20258e-08 | 1.000000 | 1.64898e-07 | 1.000000 |
| rad61         | 1.54174e-08 | 1.000000 | 1.15424e-07 | 1.000000 |
| rad40syn      | 1.44056e-08 | 1.000000 | 1.07849e-07 | 1.000000 |
| rad40anti     | 9.08224e-09 | 1.000000 | 6.79952e-08 | 1.000000 |
| rad42         | 4.93493e-09 | 1.000000 | 3.69459e-08 | 1.000000 |
| rad41         | 1.99345e-09 | 1.000000 | 1.49241e-08 | 1.000000 |
| rad6          | 9.80065e-14 | 1.000000 | 7.33736e-13 | 1.000000 |
| rad23         | 1.73573e-14 | 1.000000 | 1.29947e-13 | 1.000000 |
| rad45         | 1.66528e-15 | 1.000000 | 1.24673e-14 | 1.000000 |
| rad22         | 1.52682e-15 | 1.000000 | 1.14307e-14 | 1.000000 |
| rad9          | 6.77369e-16 | 1.000000 | 5.07120e-15 | 1.000000 |
| rad11         | 5.37264e-16 | 1.000000 | 4.02228e-15 | 1.000000 |
| rad20         | 5.29552e-16 | 1.000000 | 3.96455e-15 | 1.000000 |
| rad7          | 4.21502e-16 | 1.000000 | 3.15562e-15 | 1.000000 |
| rad28         | 3.28663e-16 | 1.000000 | 2.46057e-15 | 1.000000 |
| rad36         | 2.91152e-16 | 1.000000 | 2.17974e-15 | 1.000000 |
| rad21         | 2.72287e-16 | 1.000000 | 2.03851e-15 | 1.000000 |
| rad18         | 1.62503e-16 | 1.000000 | 1.21659e-15 | 1.000000 |
| rad15         | 3.62738e-17 | 1.000000 | 2.71567e-16 | 1.000000 |
| rad13         | 3.15025e-17 | 1.000000 | 2.35847e-16 | 1.000000 |
| rad24         | 9.49359e-18 | 1.000000 | 7.10748e-17 | 1.000000 |
| rad26         | 6.44863e-18 | 1.000000 | 4.82784e-17 | 1.000000 |
| rad12         | 3.72963e-18 | 1.000000 | 2.79223e-17 | 1.000000 |
| rad10         | 2.40296e-18 | 1.000000 | 1.79900e-17 | 1.000000 |
| rad8          | 2.00223e-18 | 1.000000 | 1.49899e-17 | 1.000000 |
| rad33         | 1.02784e-18 | 1.000000 | 7.69507e-18 | 1.000000 |
| rad2          | 9.69523e-19 | 1.000000 | 7.25844e-18 | 1.000000 |
| rad25         | 5.51560e-19 | 1.000000 | 4.12931e-18 | 1.000000 |
| rad1          | 2.59944e-19 | 1.000000 | 1.94610e-18 | 1.000000 |
| rad3          | 1.46248e-19 | 1.000000 | 1.09490e-18 | 1.000000 |
| rad4          | 9.34765e-20 | 1.000000 | 6.99822e-19 | 1.000000 |
| rad47         | 6.72667e-20 | 1.000000 | 5.03600e-19 | 1.000000 |
| rad5          | 1.86983e-20 | 1.000000 | 1.39987e-19 | 1.000000 |
| rad14         | 1.43912e-20 | 1.000000 | 1.07741e-19 | 1.000000 |
| rad27         | 2.36914e-21 | 1.000000 | 1.77368e-20 | 1.000000 |

0.100000000E-05 Pa, 2250.00000 K

=====

| Rate constant | True (fraction)     | Effective (fraction) |             |          |
|---------------|---------------------|----------------------|-------------|----------|
| Total         | 3.29136e-13 (1.00 ) | 4.00875e-14 (1.00 )  |             |          |
| species       | PYtrue              | Cumul                | PYeffective | Cumul    |
| Benzyl+C2H2   | 0.878204            | 0.878204             | 0.00000     | 0.00000  |
| Indene+H      | 0.0703003           | 0.948504             | 0.577195    | 0.577195 |
| PhCH2CCH+H    | 0.0277459           | 0.976250             | 0.227806    | 0.805001 |
| Ph+Allene     | 0.0105974           | 0.986848             | 0.0870088   | 0.892010 |

|               |             |          |             |          |
|---------------|-------------|----------|-------------|----------|
| PhCHCCH2+H    | 0.00765656  | 0.994504 | 0.0628636   | 0.954873 |
| PAH9+H        | 0.000941856 | 0.995446 | 0.00773304  | 0.962606 |
| PAH3+H        | 0.000857236 | 0.996303 | 0.00703827  | 0.969645 |
| rad19anti     | 0.000629228 | 0.996932 | 0.00516623  | 0.974811 |
| rad38         | 0.000525523 | 0.997458 | 0.00431476  | 0.979126 |
| PAH7+H        | 0.000454502 | 0.997913 | 0.00373165  | 0.982857 |
| rad30         | 0.000417263 | 0.998330 | 0.00342591  | 0.986283 |
| PhCCH+CH3     | 0.000383697 | 0.998713 | 0.00315031  | 0.989434 |
| rad35         | 0.000200865 | 0.998914 | 0.00164918  | 0.991083 |
| Ph+MeAc       | 0.000197882 | 0.999112 | 0.00162470  | 0.992707 |
| rad50         | 0.000170940 | 0.999283 | 0.00140349  | 0.994111 |
| rad46         | 0.000166540 | 0.999450 | 0.00136737  | 0.995478 |
| rad39         | 0.000118806 | 0.999568 | 0.000975445 | 0.996454 |
| rad59         | 7.57691e-05 | 0.999644 | 0.000622096 | 0.997076 |
| rad51         | 6.22686e-05 | 0.999707 | 0.000511251 | 0.997587 |
| rad60syn      | 5.44510e-05 | 0.999761 | 0.000447066 | 0.998034 |
| PhCCCH3+H     | 5.15901e-05 | 0.999813 | 0.000423577 | 0.998458 |
| rad67         | 4.61782e-05 | 0.999859 | 0.000379142 | 0.998837 |
| rad60anti     | 3.79865e-05 | 0.999897 | 0.000311885 | 0.999149 |
| PAH10+CH3     | 1.71933e-05 | 0.999914 | 0.000141164 | 0.999290 |
| rad52         | 1.70844e-05 | 0.999931 | 0.000140270 | 0.999430 |
| rad19syn      | 1.63932e-05 | 0.999947 | 0.000134595 | 0.999565 |
| PhcycC3H3_A+H | 1.10275e-05 | 0.999958 | 9.05407e-05 | 0.999655 |
| rad58         | 1.00660e-05 | 0.999969 | 8.26458e-05 | 0.999738 |
| PAH1+H        | 5.96728e-06 | 0.999974 | 4.89939e-05 | 0.999787 |
| rad37         | 5.72356e-06 | 0.999980 | 4.69928e-05 | 0.999834 |
| rad54         | 5.39698e-06 | 0.999986 | 4.43115e-05 | 0.999878 |
| rad71         | 3.95691e-06 | 0.999990 | 3.24879e-05 | 0.999911 |
| rad70         | 3.69403e-06 | 0.999993 | 3.03296e-05 | 0.999941 |
| rad73         | 2.41459e-06 | 0.999996 | 1.98248e-05 | 0.999961 |
| rad65         | 1.68525e-06 | 0.999997 | 1.38367e-05 | 0.999975 |
| rad34         | 1.08371e-06 | 0.999998 | 8.89771e-06 | 0.999984 |
| rad55         | 4.74067e-07 | 0.999999 | 3.89229e-06 | 0.999988 |
| PAH8+H        | 3.91946e-07 | 0.999999 | 3.21804e-06 | 0.999991 |
| rad72         | 2.09318e-07 | 1.000000 | 1.71859e-06 | 0.999992 |
| rad56         | 1.86168e-07 | 1.000000 | 1.52852e-06 | 0.999994 |
| rad53         | 1.73183e-07 | 1.000000 | 1.42191e-06 | 0.999995 |
| rad64         | 1.33616e-07 | 1.000000 | 1.09704e-06 | 0.999997 |
| rad68syn      | 1.10265e-07 | 1.000000 | 9.05322e-07 | 0.999997 |
| rad62         | 9.48259e-08 | 1.000000 | 7.78561e-07 | 0.999998 |
| rad68anti     | 7.08807e-08 | 1.000000 | 5.81961e-07 | 0.999999 |
| rad43         | 4.82400e-08 | 1.000000 | 3.96071e-07 | 0.999999 |
| rad61         | 4.62524e-08 | 1.000000 | 3.79752e-07 | 1.000000 |
| rad40syn      | 4.43238e-08 | 1.000000 | 3.63917e-07 | 1.000000 |
| rad40anti     | 2.91751e-08 | 1.000000 | 2.39540e-07 | 1.000000 |
| rad42         | 1.00367e-08 | 1.000000 | 8.24055e-08 | 1.000000 |
| rad41         | 5.35211e-09 | 1.000000 | 4.39431e-08 | 1.000000 |
| rad6          | 1.24407e-14 | 1.000000 | 1.02143e-13 | 1.000000 |
| rad23         | 4.76025e-15 | 1.000000 | 3.90837e-14 | 1.000000 |
| rad45         | 6.43573e-16 | 1.000000 | 5.28401e-15 | 1.000000 |
| rad22         | 3.96245e-16 | 1.000000 | 3.25334e-15 | 1.000000 |
| rad9          | 3.51737e-16 | 1.000000 | 2.88791e-15 | 1.000000 |
| rad20         | 2.60557e-16 | 1.000000 | 2.13928e-15 | 1.000000 |
| rad11         | 1.62856e-16 | 1.000000 | 1.33712e-15 | 1.000000 |
| rad21         | 1.30011e-16 | 1.000000 | 1.06745e-15 | 1.000000 |
| rad36         | 1.15195e-16 | 1.000000 | 9.45798e-16 | 1.000000 |
| rad7          | 9.44146e-17 | 1.000000 | 7.75184e-16 | 1.000000 |
| rad18         | 6.17423e-17 | 1.000000 | 5.06931e-16 | 1.000000 |
| rad28         | 5.07665e-17 | 1.000000 | 4.16814e-16 | 1.000000 |
| rad15         | 2.10991e-17 | 1.000000 | 1.73232e-16 | 1.000000 |
| rad13         | 8.56531e-18 | 1.000000 | 7.03248e-17 | 1.000000 |
| rad24         | 5.70002e-18 | 1.000000 | 4.67996e-17 | 1.000000 |
| rad12         | 3.05351e-18 | 1.000000 | 2.50707e-17 | 1.000000 |
| rad26         | 2.24979e-18 | 1.000000 | 1.84717e-17 | 1.000000 |
| rad8          | 2.16858e-18 | 1.000000 | 1.78050e-17 | 1.000000 |
| rad10         | 7.20132e-19 | 1.000000 | 5.91259e-18 | 1.000000 |
| rad33         | 3.63727e-19 | 1.000000 | 2.98636e-18 | 1.000000 |
| rad25         | 2.84538e-19 | 1.000000 | 2.33618e-18 | 1.000000 |
| rad2          | 1.46860e-19 | 1.000000 | 1.20578e-18 | 1.000000 |
| rad47         | 1.41374e-19 | 1.000000 | 1.16074e-18 | 1.000000 |
| rad1          | 4.32884e-20 | 1.000000 | 3.55416e-19 | 1.000000 |
| rad3          | 3.18656e-20 | 1.000000 | 2.61630e-19 | 1.000000 |
| rad5          | 2.08627e-20 | 1.000000 | 1.71292e-19 | 1.000000 |
| rad4          | 2.02979e-20 | 1.000000 | 1.66654e-19 | 1.000000 |
| rad14         | 5.33284e-21 | 1.000000 | 4.37849e-20 | 1.000000 |
| rad27         | 1.32553e-21 | 1.000000 | 1.08832e-20 | 1.000000 |

0.100000000E-05 Pa, 2500.00000 K

=====  
Rate constant | True (fraction)                      Effective (fraction)

-----  
 Total | 5.32896e-13 (1.00 ) 6.40311e-14 (1.00 )  
 -----

| species       | PYtrue      | Cumul    | PYeffective | Cumul    |
|---------------|-------------|----------|-------------|----------|
| Benzyl+C2H2   | 0.879843    | 0.879843 | 0.00000     | 0.00000  |
| Indene+H      | 0.0541638   | 0.934007 | 0.450777    | 0.450777 |
| PhCH2CCH+H    | 0.0379681   | 0.971975 | 0.315989    | 0.766766 |
| Ph+Allene     | 0.0112444   | 0.983219 | 0.0935810   | 0.860347 |
| PhCHCCH2+H    | 0.00999485  | 0.993214 | 0.0831818   | 0.943529 |
| PAH3+H        | 0.00124356  | 0.994458 | 0.0103495   | 0.953878 |
| PAH9+H        | 0.00106545  | 0.995523 | 0.00886715  | 0.962745 |
| rad19anti     | 0.000731028 | 0.996254 | 0.00608396  | 0.968829 |
| rad38         | 0.000614393 | 0.996869 | 0.00511327  | 0.973943 |
| PAH7+H        | 0.000586817 | 0.997455 | 0.00488376  | 0.978826 |
| rad30         | 0.000442203 | 0.997898 | 0.00368022  | 0.982507 |
| PhCCH+CH3     | 0.000309130 | 0.998207 | 0.00257273  | 0.985079 |
| rad50         | 0.000261677 | 0.998468 | 0.00217780  | 0.987257 |
| Ph+MeAc       | 0.000256973 | 0.998725 | 0.00213865  | 0.989396 |
| rad35         | 0.000242192 | 0.998968 | 0.00201564  | 0.991411 |
| rad46         | 0.000207878 | 0.999175 | 0.00173006  | 0.993142 |
| rad39         | 0.000175772 | 0.999351 | 0.00146285  | 0.994604 |
| rad51         | 0.000109649 | 0.999461 | 0.000912547 | 0.995517 |
| rad59         | 0.000104825 | 0.999566 | 0.000872406 | 0.996389 |
| rad67         | 7.34547e-05 | 0.999639 | 0.000611325 | 0.997001 |
| PhCCCH3+H     | 7.22810e-05 | 0.999711 | 0.000601557 | 0.997602 |
| rad60syn      | 6.81857e-05 | 0.999780 | 0.000567474 | 0.998170 |
| rad60anti     | 4.82378e-05 | 0.999828 | 0.000401457 | 0.998571 |
| PAH10+CH3     | 3.08998e-05 | 0.999859 | 0.000257163 | 0.998828 |
| rad52         | 2.78077e-05 | 0.999887 | 0.000231429 | 0.999060 |
| rad19syn      | 2.34810e-05 | 0.999910 | 0.000195420 | 0.999255 |
| rad58         | 1.71635e-05 | 0.999927 | 0.000142842 | 0.999398 |
| PhcycC3H3_A+H | 1.49440e-05 | 0.999942 | 0.000124371 | 0.999522 |
| PAH1+H        | 1.13017e-05 | 0.999953 | 9.40581e-05 | 0.999616 |
| rad71         | 1.08628e-05 | 0.999964 | 9.04053e-05 | 0.999707 |
| rad37         | 8.12868e-06 | 0.999972 | 6.76507e-05 | 0.999774 |
| rad54         | 6.28002e-06 | 0.999979 | 5.22652e-05 | 0.999827 |
| rad70         | 5.97099e-06 | 0.999985 | 4.96933e-05 | 0.999876 |
| rad73         | 5.95726e-06 | 0.999991 | 4.95791e-05 | 0.999926 |
| rad65         | 2.87595e-06 | 0.999994 | 2.39350e-05 | 0.999950 |
| rad34         | 1.90624e-06 | 0.999995 | 1.58647e-05 | 0.999966 |
| PAH8+H        | 1.06524e-06 | 0.999997 | 8.86540e-06 | 0.999975 |
| rad72         | 7.14903e-07 | 0.999997 | 5.94976e-06 | 0.999981 |
| rad55         | 5.87553e-07 | 0.999998 | 4.88989e-06 | 0.999986 |
| rad56         | 3.21872e-07 | 0.999998 | 2.67877e-06 | 0.999988 |
| rad64         | 2.70855e-07 | 0.999998 | 2.25419e-06 | 0.999990 |
| rad53         | 2.70820e-07 | 0.999999 | 2.25389e-06 | 0.999993 |
| rad68syn      | 2.47504e-07 | 0.999999 | 2.05985e-06 | 0.999995 |
| rad68anti     | 1.58683e-07 | 0.999999 | 1.32064e-06 | 0.999996 |
| rad62         | 1.55148e-07 | 0.999999 | 1.29122e-06 | 0.999997 |
| rad40syn      | 1.10734e-07 | 0.999999 | 9.21579e-07 | 0.999998 |
| rad61         | 1.05680e-07 | 0.999999 | 8.79519e-07 | 0.999999 |
| rad43         | 8.79692e-08 | 1.000000 | 7.32121e-07 | 1.000000 |
| rad40anti     | 7.53435e-08 | 1.000000 | 6.27044e-07 | 1.000000 |
| rad42         | 1.97239e-08 | 1.000000 | 1.64152e-07 | 1.000000 |
| rad41         | 1.13877e-08 | 1.000000 | 9.47734e-08 | 1.000000 |
| rad6          | 2.25528e-15 | 1.000000 | 1.87695e-14 | 1.000000 |
| rad23         | 1.45954e-15 | 1.000000 | 1.21470e-14 | 1.000000 |
| rad45         | 2.79851e-16 | 1.000000 | 2.32906e-15 | 1.000000 |
| rad9          | 1.87019e-16 | 1.000000 | 1.55646e-15 | 1.000000 |
| rad20         | 1.43940e-16 | 1.000000 | 1.19794e-15 | 1.000000 |
| rad22         | 1.35198e-16 | 1.000000 | 1.12518e-15 | 1.000000 |
| rad21         | 6.94971e-17 | 1.000000 | 5.78387e-16 | 1.000000 |
| rad11         | 6.25792e-17 | 1.000000 | 5.20813e-16 | 1.000000 |
| rad36         | 5.10699e-17 | 1.000000 | 4.25028e-16 | 1.000000 |
| rad18         | 2.77736e-17 | 1.000000 | 2.31145e-16 | 1.000000 |
| rad7          | 2.64635e-17 | 1.000000 | 2.20242e-16 | 1.000000 |
| rad15         | 1.25426e-17 | 1.000000 | 1.04385e-16 | 1.000000 |
| rad28         | 1.20791e-17 | 1.000000 | 1.00528e-16 | 1.000000 |
| rad24         | 3.60418e-18 | 1.000000 | 2.99957e-17 | 1.000000 |
| rad13         | 2.74547e-18 | 1.000000 | 2.28491e-17 | 1.000000 |
| rad12         | 2.40046e-18 | 1.000000 | 1.99778e-17 | 1.000000 |
| rad8          | 2.25267e-18 | 1.000000 | 1.87478e-17 | 1.000000 |
| rad26         | 1.24984e-18 | 1.000000 | 1.04018e-17 | 1.000000 |
| rad10         | 4.03130e-19 | 1.000000 | 3.35504e-18 | 1.000000 |
| rad47         | 2.44566e-19 | 1.000000 | 2.03539e-18 | 1.000000 |
| rad25         | 1.71221e-19 | 1.000000 | 1.42498e-18 | 1.000000 |
| rad33         | 1.46760e-19 | 1.000000 | 1.22141e-18 | 1.000000 |
| rad2          | 4.53267e-20 | 1.000000 | 3.77230e-19 | 1.000000 |
| rad5          | 2.16435e-20 | 1.000000 | 1.80127e-19 | 1.000000 |

|       |             |          |             |         |
|-------|-------------|----------|-------------|---------|
| rad1  | 1.54334e-20 | 1.000000 | 1.28444e-19 | 1.00000 |
| rad3  | 8.70888e-21 | 1.000000 | 7.24794e-20 | 1.00000 |
| rad4  | 5.46493e-21 | 1.000000 | 4.54817e-20 | 1.00000 |
| rad14 | 2.68051e-21 | 1.000000 | 2.23085e-20 | 1.00000 |
| rad27 | 1.07389e-21 | 1.000000 | 8.93744e-21 | 1.00000 |

0.100000000E-05 Pa, 2750.00000 K

| Rate constant | True (fraction)     | Effective (fraction) |
|---------------|---------------------|----------------------|
| Total         | 8.05113e-13 (1.00 ) | 1.00487e-13 (1.00 )  |

| species       | PYtrue      | Cumul    | PYeffective | Cumul    |
|---------------|-------------|----------|-------------|----------|
| Benzyl+C2H2   | 0.875189    | 0.875189 | 0.00000     | 0.00000  |
| PhCH2CCH+H    | 0.0492371   | 0.924426 | 0.394492    | 0.394492 |
| Indene+H      | 0.0427171   | 0.967143 | 0.342254    | 0.736746 |
| PhCHCCH2+H    | 0.0126523   | 0.979795 | 0.101371    | 0.838117 |
| Ph+Allene     | 0.0121360   | 0.991931 | 0.0972347   | 0.935352 |
| PAH3+H        | 0.00165412  | 0.993586 | 0.0132530   | 0.948605 |
| PAH9+H        | 0.00112924  | 0.994715 | 0.00904761  | 0.957652 |
| rad19anti     | 0.000790044 | 0.995505 | 0.00632991  | 0.963982 |
| PAH7+H        | 0.000729333 | 0.996234 | 0.00584349  | 0.969826 |
| rad38         | 0.000670521 | 0.996905 | 0.00537228  | 0.975198 |
| rad30         | 0.000454283 | 0.997359 | 0.00363976  | 0.978838 |
| rad50         | 0.000356822 | 0.997716 | 0.00285889  | 0.981697 |
| Ph+MeAc       | 0.000331297 | 0.998047 | 0.00265438  | 0.984351 |
| PhCCH+CH3     | 0.000293338 | 0.998340 | 0.00235025  | 0.986701 |
| rad35         | 0.000276886 | 0.998617 | 0.00221844  | 0.988920 |
| rad39         | 0.000242689 | 0.998860 | 0.00194445  | 0.990864 |
| rad46         | 0.000239377 | 0.999099 | 0.00191791  | 0.992782 |
| rad51         | 0.000167552 | 0.999267 | 0.00134245  | 0.994125 |
| rad59         | 0.000133898 | 0.999401 | 0.00107280  | 0.995197 |
| rad67         | 0.000103303 | 0.999504 | 0.000827674 | 0.996025 |
| PhCCCH3+H     | 9.47597e-05 | 0.999599 | 0.000759224 | 0.996784 |
| rad60syn      | 8.03400e-05 | 0.999679 | 0.000643692 | 0.997428 |
| rad60anti     | 5.74980e-05 | 0.999737 | 0.000460680 | 0.997889 |
| PAH10+CH3     | 4.75540e-05 | 0.999784 | 0.000381007 | 0.998270 |
| rad52         | 3.97965e-05 | 0.999824 | 0.000318854 | 0.998588 |
| rad19syn      | 3.43481e-05 | 0.999858 | 0.000275200 | 0.998864 |
| rad58         | 2.60271e-05 | 0.999885 | 0.000208532 | 0.999072 |
| rad71         | 2.39120e-05 | 0.999908 | 0.000191585 | 0.999264 |
| PhcycC3H3_A+H | 1.91124e-05 | 0.999928 | 0.000153131 | 0.999417 |
| PAH1+H        | 1.89313e-05 | 0.999946 | 0.000151679 | 0.999569 |
| rad73         | 1.19963e-05 | 0.999958 | 9.61159e-05 | 0.999665 |
| rad37         | 1.02458e-05 | 0.999969 | 8.20902e-05 | 0.999747 |
| rad70         | 8.97456e-06 | 0.999978 | 7.19051e-05 | 0.999819 |
| rad54         | 7.04852e-06 | 0.999985 | 5.64734e-05 | 0.999875 |
| rad65         | 4.27356e-06 | 0.999989 | 3.42402e-05 | 0.999909 |
| rad34         | 3.06724e-06 | 0.999992 | 2.45750e-05 | 0.999934 |
| PAH8+H        | 2.42508e-06 | 0.999995 | 1.94299e-05 | 0.999953 |
| rad72         | 1.88022e-06 | 0.999996 | 1.50645e-05 | 0.999968 |
| rad55         | 6.94535e-07 | 0.999997 | 5.56468e-06 | 0.999974 |
| rad56         | 5.00306e-07 | 0.999998 | 4.00850e-06 | 0.999978 |
| rad68syn      | 4.83458e-07 | 0.999998 | 3.87351e-06 | 0.999982 |
| rad64         | 4.76899e-07 | 0.999999 | 3.82096e-06 | 0.999986 |
| rad53         | 3.88200e-07 | 0.999999 | 3.11030e-06 | 0.999989 |
| rad68anti     | 3.09361e-07 | 0.999999 | 2.47863e-06 | 0.999991 |
| rad62         | 2.47711e-07 | 0.999999 | 1.98468e-06 | 0.999993 |
| rad40syn      | 2.35491e-07 | 1.000000 | 1.88678e-06 | 0.999995 |
| rad61         | 1.98411e-07 | 1.000000 | 1.58969e-06 | 0.999997 |
| rad40anti     | 1.64464e-07 | 1.00000  | 1.31770e-06 | 0.999998 |
| rad43         | 1.38326e-07 | 1.00000  | 1.10828e-06 | 0.999999 |
| rad42         | 3.59374e-08 | 1.00000  | 2.87934e-07 | 1.000000 |
| rad41         | 2.03340e-08 | 1.00000  | 1.62918e-07 | 1.000000 |
| rad23         | 5.35648e-16 | 1.00000  | 4.29167e-15 | 1.000000 |
| rad6          | 5.31695e-16 | 1.00000  | 4.25999e-15 | 1.000000 |
| rad45         | 1.33230e-16 | 1.00000  | 1.06745e-15 | 1.000000 |
| rad9          | 1.02248e-16 | 1.00000  | 8.19219e-16 | 1.000000 |
| rad20         | 8.68783e-17 | 1.00000  | 6.96077e-16 | 1.000000 |
| rad22         | 5.53892e-17 | 1.00000  | 4.43783e-16 | 1.000000 |
| rad21         | 4.05053e-17 | 1.00000  | 3.24532e-16 | 1.000000 |
| rad11         | 2.91949e-17 | 1.00000  | 2.33912e-16 | 1.000000 |
| rad36         | 2.46981e-17 | 1.00000  | 1.97884e-16 | 1.000000 |
| rad18         | 1.40097e-17 | 1.00000  | 1.12247e-16 | 1.000000 |
| rad7          | 8.87341e-18 | 1.00000  | 7.10946e-17 | 1.000000 |
| rad15         | 7.56453e-18 | 1.00000  | 6.06077e-17 | 1.000000 |
| rad28         | 4.35951e-18 | 1.00000  | 3.49288e-17 | 1.000000 |
| rad24         | 2.36701e-18 | 1.00000  | 1.89647e-17 | 1.000000 |
| rad8          | 2.27048e-18 | 1.00000  | 1.81913e-17 | 1.000000 |

|       |             |         |             |          |
|-------|-------------|---------|-------------|----------|
| rad12 | 1.84640e-18 | 1.00000 | 1.47935e-17 | 1.000000 |
| rad13 | 1.02991e-18 | 1.00000 | 8.25176e-18 | 1.000000 |
| rad26 | 7.74816e-19 | 1.00000 | 6.20790e-18 | 1.000000 |
| rad47 | 3.65965e-19 | 1.00000 | 2.93215e-18 | 1.000000 |
| rad10 | 2.66191e-19 | 1.00000 | 2.13275e-18 | 1.000000 |
| rad25 | 1.16293e-19 | 1.00000 | 9.31748e-19 | 1.000000 |
| rad33 | 6.71473e-20 | 1.00000 | 5.37991e-19 | 1.000000 |
| rad2  | 2.31789e-20 | 1.00000 | 1.85712e-19 | 1.000000 |
| rad5  | 2.15491e-20 | 1.00000 | 1.72654e-19 | 1.000000 |
| rad1  | 9.06403e-21 | 1.00000 | 7.26219e-20 | 1.000000 |
| rad3  | 2.95575e-21 | 1.00000 | 2.36818e-20 | 1.000000 |
| rad4  | 1.80893e-21 | 1.00000 | 1.44934e-20 | 1.000000 |
| rad14 | 1.77541e-21 | 1.00000 | 1.42248e-20 | 1.000000 |
| rad27 | 9.32033e-22 | 1.00000 | 7.46754e-21 | 1.000000 |

0.100000000E-05 Pa, 3000.00000 K

| Rate constant | True (fraction)     | Effective (fraction) |
|---------------|---------------------|----------------------|
| Total         | 1.15309e-12 (1.00 ) | 1.53862e-13 (1.00 )  |

| species       | PYtrue      | Cumul    | PYeffective | Cumul    |
|---------------|-------------|----------|-------------|----------|
| Benzyl+C2H2   | 0.866566    | 0.866566 | 0.00000     | 0.00000  |
| PhCH2CCH+H    | 0.0611725   | 0.927738 | 0.458447    | 0.458447 |
| Indene+H      | 0.0342672   | 0.962006 | 0.256810    | 0.715257 |
| PhCHCCH2+H    | 0.0154790   | 0.977485 | 0.116005    | 0.831262 |
| Ph+Allene     | 0.0132660   | 0.990751 | 0.0994201   | 0.930682 |
| PAH3+H        | 0.00205938  | 0.992810 | 0.0154337   | 0.946116 |
| PAH9+H        | 0.00113813  | 0.993948 | 0.00852950  | 0.954645 |
| PAH7+H        | 0.000866135 | 0.994814 | 0.00649110  | 0.961136 |
| rad19anti     | 0.000812999 | 0.995627 | 0.00609288  | 0.967229 |
| rad38         | 0.000693215 | 0.996321 | 0.00519518  | 0.972424 |
| rad30         | 0.000455427 | 0.996776 | 0.00341312  | 0.975838 |
| rad50         | 0.000445147 | 0.997221 | 0.00333608  | 0.979174 |
| Ph+MeAc       | 0.000411378 | 0.997633 | 0.00308300  | 0.982257 |
| PhCCH+CH3     | 0.000319072 | 0.997952 | 0.00239123  | 0.984648 |
| rad39         | 0.000311351 | 0.998263 | 0.00233337  | 0.986981 |
| rad35         | 0.000303822 | 0.998567 | 0.00227694  | 0.989258 |
| rad46         | 0.000258929 | 0.998826 | 0.00194050  | 0.991199 |
| rad51         | 0.000229661 | 0.999055 | 0.00172116  | 0.992920 |
| rad59         | 0.000160966 | 0.999216 | 0.00120633  | 0.994126 |
| rad67         | 0.000132859 | 0.999349 | 0.000995686 | 0.995122 |
| PhCCCH3+H     | 0.000117527 | 0.999467 | 0.000880786 | 0.996003 |
| rad60syn      | 9.03378e-05 | 0.999557 | 0.000677021 | 0.996680 |
| PAH10+CH3     | 6.53522e-05 | 0.999622 | 0.000489771 | 0.997169 |
| rad60anti     | 6.52879e-05 | 0.999688 | 0.000489289 | 0.997659 |
| rad52         | 5.15998e-05 | 0.999739 | 0.000386706 | 0.998045 |
| rad19syn      | 5.01057e-05 | 0.999789 | 0.000375508 | 0.998421 |
| rad71         | 4.45158e-05 | 0.999834 | 0.000333616 | 0.998755 |
| rad58         | 3.61220e-05 | 0.999870 | 0.000270710 | 0.999025 |
| PAH1+H        | 2.86271e-05 | 0.999899 | 0.000214541 | 0.999240 |
| PhcycC3H3_A+H | 2.34369e-05 | 0.999922 | 0.000175644 | 0.999415 |
| rad73         | 2.07080e-05 | 0.999943 | 0.000155192 | 0.999571 |
| rad70         | 1.26564e-05 | 0.999955 | 9.48509e-05 | 0.999666 |
| rad37         | 1.18404e-05 | 0.999967 | 8.87361e-05 | 0.999754 |
| rad54         | 7.74183e-06 | 0.999975 | 5.80198e-05 | 0.999812 |
| rad65         | 5.71876e-06 | 0.999981 | 4.28583e-05 | 0.999855 |
| PAH8+H        | 4.80152e-06 | 0.999986 | 3.59842e-05 | 0.999891 |
| rad34         | 4.57469e-06 | 0.999990 | 3.42843e-05 | 0.999925 |
| rad72         | 4.05904e-06 | 0.999994 | 3.04198e-05 | 0.999956 |
| rad68syn      | 8.44302e-07 | 0.999995 | 6.32747e-06 | 0.999962 |
| rad55         | 7.96394e-07 | 0.999996 | 5.96844e-06 | 0.999968 |
| rad64         | 7.49015e-07 | 0.999997 | 5.61336e-06 | 0.999974 |
| rad56         | 7.20451e-07 | 0.999997 | 5.39929e-06 | 0.999979 |
| rad68anti     | 5.39463e-07 | 0.999998 | 4.04291e-06 | 0.999983 |
| rad53         | 5.23143e-07 | 0.999998 | 3.92061e-06 | 0.999987 |
| rad40syn      | 4.40707e-07 | 0.999999 | 3.30280e-06 | 0.999990 |
| rad62         | 3.72784e-07 | 0.999999 | 2.79376e-06 | 0.999993 |
| rad61         | 3.22478e-07 | 0.999999 | 2.41676e-06 | 0.999996 |
| rad40anti     | 3.14359e-07 | 1.000000 | 2.35591e-06 | 0.999998 |
| rad43         | 1.94896e-07 | 1.00000  | 1.46061e-06 | 0.999999 |
| rad42         | 5.98145e-08 | 1.00000  | 4.48269e-07 | 1.000000 |
| rad41         | 3.19484e-08 | 1.00000  | 2.39432e-07 | 1.00000  |
| rad23         | 2.21024e-16 | 1.00000  | 1.65643e-15 | 1.00000  |
| rad6          | 1.53637e-16 | 1.00000  | 1.15140e-15 | 1.00000  |
| rad45         | 6.79783e-17 | 1.00000  | 5.09452e-16 | 1.00000  |
| rad9          | 5.76875e-17 | 1.00000  | 4.32329e-16 | 1.00000  |
| rad20         | 5.61879e-17 | 1.00000  | 4.21090e-16 | 1.00000  |
| rad22         | 2.56756e-17 | 1.00000  | 1.92421e-16 | 1.00000  |

|       |             |         |             |         |
|-------|-------------|---------|-------------|---------|
| rad21 | 2.52565e-17 | 1.00000 | 1.89281e-16 | 1.00000 |
| rad11 | 1.59313e-17 | 1.00000 | 1.19394e-16 | 1.00000 |
| rad36 | 1.27644e-17 | 1.00000 | 9.56605e-17 | 1.00000 |
| rad18 | 7.69597e-18 | 1.00000 | 5.76761e-17 | 1.00000 |
| rad15 | 4.64698e-18 | 1.00000 | 3.48260e-17 | 1.00000 |
| rad7  | 3.48731e-18 | 1.00000 | 2.61351e-17 | 1.00000 |
| rad8  | 2.23533e-18 | 1.00000 | 1.67523e-17 | 1.00000 |
| rad28 | 2.05581e-18 | 1.00000 | 1.54069e-17 | 1.00000 |
| rad24 | 1.60028e-18 | 1.00000 | 1.19931e-17 | 1.00000 |
| rad12 | 1.40784e-18 | 1.00000 | 1.05508e-17 | 1.00000 |
| rad26 | 4.93148e-19 | 1.00000 | 3.69581e-18 | 1.00000 |
| rad47 | 4.90428e-19 | 1.00000 | 3.67543e-18 | 1.00000 |
| rad13 | 4.47286e-19 | 1.00000 | 3.35211e-18 | 1.00000 |
| rad10 | 1.80871e-19 | 1.00000 | 1.35551e-18 | 1.00000 |
| rad25 | 8.60189e-20 | 1.00000 | 6.44654e-19 | 1.00000 |
| rad33 | 3.44368e-20 | 1.00000 | 2.58081e-19 | 1.00000 |
| rad5  | 2.09165e-20 | 1.00000 | 1.56755e-19 | 1.00000 |
| rad2  | 1.42584e-20 | 1.00000 | 1.06857e-19 | 1.00000 |
| rad1  | 6.30643e-21 | 1.00000 | 4.72625e-20 | 1.00000 |
| rad14 | 1.40237e-21 | 1.00000 | 1.05098e-20 | 1.00000 |
| rad3  | 1.21870e-21 | 1.00000 | 9.13336e-21 | 1.00000 |
| rad27 | 8.01836e-22 | 1.00000 | 6.00923e-21 | 1.00000 |
| rad4  | 7.23983e-22 | 1.00000 | 5.42577e-21 | 1.00000 |

0.100000000E-05 Pa, 3250.00000 K

| Rate constant | True (fraction)     | Effective (fraction) |
|---------------|---------------------|----------------------|
| Total         | 1.58309e-12 (1.00 ) | 2.28795e-13 (1.00 )  |

| species       | PYtrue      | Cumul    | PYeffective | Cumul    |
|---------------|-------------|----------|-------------|----------|
| Benzyl+C2H2   | 0.855476    | 0.855476 | 0.00000     | 0.00000  |
| PhCH2CCH+H    | 0.0734301   | 0.928906 | 0.508082    | 0.508082 |
| Indene+H      | 0.0278643   | 0.956770 | 0.192800    | 0.700882 |
| PhCHCCH2+H    | 0.0183610   | 0.975131 | 0.127045    | 0.827927 |
| Ph+Allene     | 0.0145940   | 0.989725 | 0.100980    | 0.928907 |
| PAH3+H        | 0.00243645  | 0.992162 | 0.0168585   | 0.945765 |
| PAH9+H        | 0.00110339  | 0.993265 | 0.00763468  | 0.953400 |
| PAH7+H        | 0.000986571 | 0.994252 | 0.00682634  | 0.960227 |
| rad19anti     | 0.000808911 | 0.995061 | 0.00559707  | 0.965824 |
| rad38         | 0.000686670 | 0.995747 | 0.00475125  | 0.970575 |
| rad50         | 0.000518179 | 0.996266 | 0.00358542  | 0.974160 |
| Ph+MeAc       | 0.000489465 | 0.996755 | 0.00338674  | 0.977547 |
| rad30         | 0.000447972 | 0.997203 | 0.00309964  | 0.980647 |
| PhCCH+CH3     | 0.000378211 | 0.997581 | 0.00261694  | 0.983264 |
| rad39         | 0.000374434 | 0.997956 | 0.00259081  | 0.985854 |
| rad35         | 0.000323023 | 0.998279 | 0.00223508  | 0.988089 |
| rad51         | 0.000289245 | 0.998568 | 0.00200136  | 0.990091 |
| rad46         | 0.000266714 | 0.998835 | 0.00184546  | 0.991936 |
| rad59         | 0.000184695 | 0.999019 | 0.00127795  | 0.993214 |
| rad67         | 0.000159865 | 0.999179 | 0.00110614  | 0.994320 |
| PhCCCH3+H     | 0.000140367 | 0.999320 | 0.000971235 | 0.995292 |
| rad60syn      | 9.79791e-05 | 0.999418 | 0.000677943 | 0.995970 |
| PAH10+CH3     | 8.26142e-05 | 0.999500 | 0.000571630 | 0.996541 |
| rad71         | 7.28074e-05 | 0.999573 | 0.000503773 | 0.997045 |
| rad60anti     | 7.14060e-05 | 0.999644 | 0.000494077 | 0.997539 |
| rad19syn      | 7.13406e-05 | 0.999716 | 0.000493624 | 0.998033 |
| rad52         | 6.19533e-05 | 0.999778 | 0.000428671 | 0.998461 |
| rad58         | 4.68388e-05 | 0.999825 | 0.000324090 | 0.998785 |
| PAH1+H        | 3.98744e-05 | 0.999864 | 0.000275902 | 0.999061 |
| rad73         | 3.17350e-05 | 0.999896 | 0.000219583 | 0.999281 |
| PhcycC3H3_A+H | 2.77967e-05 | 0.999924 | 0.000192333 | 0.999473 |
| rad70         | 1.68825e-05 | 0.999941 | 0.000116814 | 0.999590 |
| rad37         | 1.28499e-05 | 0.999954 | 8.89115e-05 | 0.999679 |
| PAH8+H        | 8.50457e-06 | 0.999962 | 5.88453e-05 | 0.999738 |
| rad54         | 8.38235e-06 | 0.999971 | 5.79997e-05 | 0.999796 |
| rad72         | 7.52648e-06 | 0.999978 | 5.20777e-05 | 0.999848 |
| rad65         | 7.06074e-06 | 0.999985 | 4.88551e-05 | 0.999897 |
| rad34         | 6.39568e-06 | 0.999992 | 4.42534e-05 | 0.999941 |
| rad68syn      | 1.34606e-06 | 0.999993 | 9.31375e-06 | 0.999950 |
| rad64         | 1.07438e-06 | 0.999994 | 7.43389e-06 | 0.999958 |
| rad56         | 9.79690e-07 | 0.999995 | 6.77873e-06 | 0.999965 |
| rad55         | 8.93999e-07 | 0.999996 | 6.18581e-06 | 0.999971 |
| rad68anti     | 8.59058e-07 | 0.999997 | 5.94405e-06 | 0.999977 |
| rad40syn      | 7.44327e-07 | 0.999997 | 5.15020e-06 | 0.999982 |
| rad53         | 6.73265e-07 | 0.999998 | 4.65850e-06 | 0.999986 |
| rad40anti     | 5.40357e-07 | 0.999999 | 3.73887e-06 | 0.999990 |
| rad62         | 5.25220e-07 | 0.999999 | 3.63414e-06 | 0.999994 |
| rad61         | 4.70536e-07 | 1.000000 | 3.25576e-06 | 0.999997 |

|       |             |          |             |          |
|-------|-------------|----------|-------------|----------|
| rad43 | 2.53715e-07 | 1.000000 | 1.75552e-06 | 0.999999 |
| rad42 | 9.14458e-08 | 1.000000 | 6.32737e-07 | 0.999999 |
| rad41 | 4.57450e-08 | 1.000000 | 3.16522e-07 | 1.000000 |
| rad23 | 9.91775e-17 | 1.000000 | 6.86235e-16 | 1.000000 |
| rad6  | 5.29918e-17 | 1.000000 | 3.66664e-16 | 1.000000 |
| rad20 | 3.83869e-17 | 1.000000 | 2.65609e-16 | 1.000000 |
| rad45 | 3.66269e-17 | 1.000000 | 2.53431e-16 | 1.000000 |
| rad9  | 3.36555e-17 | 1.000000 | 2.32872e-16 | 1.000000 |
| rad21 | 1.66173e-17 | 1.000000 | 1.14980e-16 | 1.000000 |
| rad22 | 1.30762e-17 | 1.000000 | 9.04775e-17 | 1.000000 |
| rad11 | 9.80858e-18 | 1.000000 | 6.78681e-17 | 1.000000 |
| rad36 | 6.94793e-18 | 1.000000 | 4.80745e-17 | 1.000000 |
| rad18 | 4.51591e-18 | 1.000000 | 3.12467e-17 | 1.000000 |
| rad15 | 2.91811e-18 | 1.000000 | 2.01912e-17 | 1.000000 |
| rad8  | 2.15817e-18 | 1.000000 | 1.49330e-17 | 1.000000 |
| rad7  | 1.57407e-18 | 1.000000 | 1.08914e-17 | 1.000000 |
| rad28 | 1.13063e-18 | 1.000000 | 7.82311e-18 | 1.000000 |
| rad24 | 1.10778e-18 | 1.000000 | 7.66503e-18 | 1.000000 |
| rad12 | 1.07284e-18 | 1.000000 | 7.42324e-18 | 1.000000 |
| rad47 | 6.03541e-19 | 1.000000 | 4.17606e-18 | 1.000000 |
| rad26 | 3.17886e-19 | 1.000000 | 2.19954e-18 | 1.000000 |
| rad13 | 2.21088e-19 | 1.000000 | 1.52977e-18 | 1.000000 |
| rad10 | 1.23657e-19 | 1.000000 | 8.55618e-19 | 1.000000 |
| rad25 | 6.72544e-20 | 1.000000 | 4.65351e-19 | 1.000000 |
| rad5  | 2.00807e-20 | 1.000000 | 1.38943e-19 | 1.000000 |
| rad33 | 1.94932e-20 | 1.000000 | 1.34878e-19 | 1.000000 |
| rad2  | 9.35585e-21 | 1.000000 | 6.47356e-20 | 1.000000 |
| rad1  | 4.62553e-21 | 1.000000 | 3.20053e-20 | 1.000000 |
| rad14 | 1.20218e-21 | 1.000000 | 8.31820e-21 | 1.000000 |
| rad27 | 6.78839e-22 | 1.000000 | 4.69707e-21 | 1.000000 |
| rad3  | 5.91483e-22 | 1.000000 | 4.09263e-21 | 1.000000 |
| rad4  | 3.41721e-22 | 1.000000 | 2.36446e-21 | 1.000000 |

0.100000000E-05 Pa, 3500.00000 K

=====

| Rate constant | True (fraction)     | Effective (fraction) |
|---------------|---------------------|----------------------|
| Total         | 2.10046e-12 (1.00 ) | 3.29923e-13 (1.00 )  |

| species       | PYtrue      | Cumul    | PYeffective | Cumul    |
|---------------|-------------|----------|-------------|----------|
| Benzyl+C2H2   | 0.842928    | 0.842928 | 0.00000     | 0.00000  |
| PhCH2CCH+H    | 0.0857241   | 0.928652 | 0.545762    | 0.545762 |
| Indene+H      | 0.0229287   | 0.951581 | 0.145976    | 0.691738 |
| PhCHCCH2+H    | 0.0212218   | 0.972803 | 0.135108    | 0.826846 |
| Ph+Allene     | 0.0160719   | 0.988874 | 0.102322    | 0.929168 |
| PAH3+H        | 0.00277080  | 0.991645 | 0.0176403   | 0.946808 |
| PAH7+H        | 0.00108547  | 0.992731 | 0.00691065  | 0.953719 |
| PAH9+H        | 0.00103824  | 0.993769 | 0.00660998  | 0.960329 |
| rad19anti     | 0.000786012 | 0.994555 | 0.00500415  | 0.965333 |
| rad38         | 0.000657575 | 0.995213 | 0.00418645  | 0.969520 |
| rad50         | 0.000571322 | 0.995784 | 0.00363732  | 0.973157 |
| Ph+MeAc       | 0.000559758 | 0.996344 | 0.00356370  | 0.976721 |
| PhCCH+CH3     | 0.000466753 | 0.996810 | 0.00297158  | 0.979692 |
| rad30         | 0.000434295 | 0.997245 | 0.00276494  | 0.982457 |
| rad39         | 0.000426787 | 0.997672 | 0.00271714  | 0.985174 |
| rad51         | 0.000340822 | 0.998012 | 0.00216985  | 0.987344 |
| rad35         | 0.000335221 | 0.998348 | 0.00213419  | 0.989478 |
| rad46         | 0.000264413 | 0.998612 | 0.00168339  | 0.991162 |
| rad59         | 0.000204435 | 0.998816 | 0.00130154  | 0.992463 |
| rad67         | 0.000182834 | 0.998999 | 0.00116401  | 0.993627 |
| PhCCCH3+H     | 0.000163685 | 0.999163 | 0.00104210  | 0.994669 |
| rad71         | 0.000107601 | 0.999271 | 0.000685042 | 0.995354 |
| rad60syn      | 0.000103349 | 0.999374 | 0.000657969 | 0.996012 |
| PAH10+CH3     | 9.81181e-05 | 0.999472 | 0.000624669 | 0.996637 |
| rad19syn      | 9.79725e-05 | 0.999570 | 0.000623742 | 0.997261 |
| rad60anti     | 7.58697e-05 | 0.999646 | 0.000483025 | 0.997744 |
| rad52         | 7.00217e-05 | 0.999716 | 0.000445793 | 0.998190 |
| rad58         | 5.76196e-05 | 0.999773 | 0.000366835 | 0.998556 |
| PAH1+H        | 5.20523e-05 | 0.999826 | 0.000331391 | 0.998888 |
| rad73         | 4.43107e-05 | 0.999870 | 0.000282104 | 0.999170 |
| PhcycC3H3_A+H | 3.20633e-05 | 0.999902 | 0.000204131 | 0.999374 |
| rad70         | 2.14708e-05 | 0.999923 | 0.000136694 | 0.999511 |
| PAH8+H        | 1.37725e-05 | 0.999937 | 8.76827e-05 | 0.999598 |
| rad37         | 1.33235e-05 | 0.999950 | 8.48243e-05 | 0.999683 |
| rad72         | 1.23923e-05 | 0.999963 | 7.88958e-05 | 0.999762 |
| rad54         | 8.98058e-06 | 0.999972 | 5.71749e-05 | 0.999819 |
| rad34         | 8.46717e-06 | 0.999980 | 5.39063e-05 | 0.999873 |
| rad65         | 8.19015e-06 | 0.999988 | 5.21426e-05 | 0.999925 |
| rad68syn      | 1.99232e-06 | 0.999990 | 1.26841e-05 | 0.999938 |

|           |             |          |             |          |
|-----------|-------------|----------|-------------|----------|
| rad64     | 1.43496e-06 | 0.999992 | 9.13568e-06 | 0.999947 |
| rad56     | 1.27412e-06 | 0.999993 | 8.11171e-06 | 0.999955 |
| rad68anti | 1.27030e-06 | 0.999994 | 8.08736e-06 | 0.999963 |
| rad40syn  | 1.15716e-06 | 0.999996 | 7.36708e-06 | 0.999971 |
| rad55     | 9.87613e-07 | 0.999997 | 6.28764e-06 | 0.999977 |
| rad40anti | 8.52741e-07 | 0.999997 | 5.42898e-06 | 0.999982 |
| rad53     | 8.35966e-07 | 0.999998 | 5.32218e-06 | 0.999988 |
| rad62     | 6.97360e-07 | 0.999999 | 4.43975e-06 | 0.999992 |
| rad61     | 6.32568e-07 | 1.000000 | 4.02725e-06 | 0.999996 |
| rad43     | 3.12012e-07 | 1.000000 | 1.98643e-06 | 0.999998 |
| rad42     | 1.30122e-07 | 1.000000 | 8.28424e-07 | 0.999999 |
| rad41     | 6.11800e-08 | 1.000000 | 3.89503e-07 | 0.999999 |
| rad23     | 4.75472e-17 | 1.000000 | 3.02709e-16 | 0.999999 |
| rad20     | 2.74120e-17 | 1.000000 | 1.74519e-16 | 0.999999 |
| rad6      | 2.13604e-17 | 1.000000 | 1.35991e-16 | 0.999999 |
| rad45     | 2.06132e-17 | 1.000000 | 1.31234e-16 | 0.999999 |
| rad9      | 2.03104e-17 | 1.000000 | 1.29306e-16 | 0.999999 |
| rad21     | 1.14208e-17 | 1.000000 | 7.27102e-17 | 0.999999 |
| rad22     | 7.18396e-18 | 1.000000 | 4.57367e-17 | 0.999999 |
| rad11     | 6.60781e-18 | 1.000000 | 4.20687e-17 | 0.999999 |
| rad36     | 3.94163e-18 | 1.000000 | 2.50944e-17 | 0.999999 |
| rad18     | 2.79268e-18 | 1.000000 | 1.77796e-17 | 0.999999 |
| rad8      | 2.04865e-18 | 1.000000 | 1.30427e-17 | 0.999999 |
| rad15     | 1.87606e-18 | 1.000000 | 1.19439e-17 | 0.999999 |
| rad12     | 8.20876e-19 | 1.000000 | 5.22611e-18 | 0.999999 |
| rad7      | 7.97845e-19 | 1.000000 | 5.07948e-18 | 0.999999 |
| rad24     | 7.82702e-19 | 1.000000 | 4.98307e-18 | 0.999999 |
| rad47     | 6.94994e-19 | 1.000000 | 4.42468e-18 | 0.999999 |
| rad28     | 6.78754e-19 | 1.000000 | 4.32129e-18 | 0.999999 |
| rad26     | 2.07561e-19 | 1.000000 | 1.32144e-18 | 0.999999 |
| rad13     | 1.21831e-19 | 1.000000 | 7.75640e-19 | 0.999999 |
| rad10     | 8.52041e-20 | 1.000000 | 5.42452e-19 | 0.999999 |
| rad25     | 5.44463e-20 | 1.000000 | 3.46632e-19 | 0.999999 |
| rad5      | 1.92222e-20 | 1.000000 | 1.22378e-19 | 0.999999 |
| rad33     | 1.19819e-20 | 1.000000 | 7.62829e-20 | 0.999999 |
| rad2      | 6.39799e-21 | 1.000000 | 4.07328e-20 | 0.999999 |
| rad1      | 3.47065e-21 | 1.000000 | 2.20959e-20 | 0.999999 |
| rad14     | 1.06170e-21 | 1.000000 | 6.75934e-21 | 0.999999 |
| rad27     | 5.69300e-22 | 1.000000 | 3.62445e-21 | 0.999999 |
| rad3      | 3.26541e-22 | 1.000000 | 2.07893e-21 | 0.999999 |
| rad4      | 1.84676e-22 | 1.000000 | 1.17574e-21 | 0.999999 |

0.100000000E-05 Pa, 3750.00000 K

=====

| Rate constant | True (fraction)     | Effective (fraction) |
|---------------|---------------------|----------------------|
| Total         | 2.70978e-12 (1.00 ) | 4.61708e-13 (1.00 )  |

| species     | PYtrue      | Cumul    | PYeffective | Cumul    |
|-------------|-------------|----------|-------------|----------|
| Benzyl+C2H2 | 0.829614    | 0.829614 | 0.00000     | 0.00000  |
| PhCH2CCH+H  | 0.0978316   | 0.927446 | 0.574175    | 0.574175 |
| PhCHCCH2+H  | 0.0240141   | 0.951460 | 0.140939    | 0.715114 |
| Indene+H    | 0.0190788   | 0.970538 | 0.111974    | 0.827088 |
| Ph+Allene   | 0.0176550   | 0.988193 | 0.103617    | 0.930705 |
| PAH3+H      | 0.00305565  | 0.991249 | 0.0179337   | 0.948639 |
| PAH7+H      | 0.00116197  | 0.992411 | 0.00681959  | 0.955458 |
| PAH9+H      | 0.000955042 | 0.993366 | 0.00560515  | 0.961063 |
| rad19anti   | 0.000750872 | 0.994117 | 0.00440688  | 0.965470 |
| Ph+MeAc     | 0.000618509 | 0.994736 | 0.00363004  | 0.969100 |
| rad38       | 0.000613193 | 0.995349 | 0.00359884  | 0.972699 |
| rad50       | 0.000603635 | 0.995952 | 0.00354274  | 0.976242 |
| PhCCH+CH3   | 0.000581835 | 0.996534 | 0.00341479  | 0.979657 |
| rad39       | 0.000465790 | 0.997000 | 0.00273373  | 0.982390 |
| rad30       | 0.000416539 | 0.997417 | 0.00244467  | 0.984835 |
| rad51       | 0.000380994 | 0.997798 | 0.00223606  | 0.987071 |
| rad35       | 0.000341508 | 0.998139 | 0.00200431  | 0.989075 |
| rad46       | 0.000254425 | 0.998393 | 0.00149322  | 0.990569 |
| rad59       | 0.000220084 | 0.998614 | 0.00129168  | 0.991860 |
| rad67       | 0.000201013 | 0.998815 | 0.00117975  | 0.993040 |
| PhCCH3+H    | 0.000187990 | 0.999003 | 0.00110331  | 0.994143 |
| rad71       | 0.000146780 | 0.999149 | 0.000861455 | 0.995005 |
| rad19syn    | 0.000129261 | 0.999279 | 0.000758633 | 0.995764 |
| PAH10+CH3   | 0.000111172 | 0.999390 | 0.000652468 | 0.996416 |
| rad60syn    | 0.000106707 | 0.999496 | 0.000626263 | 0.997042 |
| rad60anti   | 7.88382e-05 | 0.999575 | 0.000462703 | 0.997505 |
| rad52       | 7.54521e-05 | 0.999651 | 0.000442829 | 0.997948 |
| rad58       | 6.80261e-05 | 0.999719 | 0.000399246 | 0.998347 |
| PAH1+H      | 6.45813e-05 | 0.999783 | 0.000379028 | 0.998726 |
| rad73       | 5.74878e-05 | 0.999841 | 0.000337397 | 0.999063 |



|               |             |          |             |          |
|---------------|-------------|----------|-------------|----------|
| PhcycC3H3_A+H | 3.61213e-05 | 0.999877 | 0.000211996 | 0.999275 |
| rad70         | 2.62309e-05 | 0.999903 | 0.000153949 | 0.999429 |
| PAH8+H        | 2.07420e-05 | 0.999924 | 0.000121735 | 0.999551 |
| rad72         | 1.85748e-05 | 0.999943 | 0.000109016 | 0.999660 |
| rad37         | 1.33636e-05 | 0.999956 | 7.84314e-05 | 0.999739 |
| rad34         | 1.07116e-05 | 0.999967 | 6.28665e-05 | 0.999801 |
| rad54         | 9.53969e-06 | 0.999976 | 5.59886e-05 | 0.999857 |
| rad65         | 9.05125e-06 | 0.999985 | 5.31219e-05 | 0.999911 |
| rad68syn      | 2.77520e-06 | 0.999988 | 1.62877e-05 | 0.999927 |
| rad64         | 1.81236e-06 | 0.999990 | 1.06367e-05 | 0.999938 |
| rad68anti     | 1.76807e-06 | 0.999992 | 1.03768e-05 | 0.999948 |
| rad40syn      | 1.68193e-06 | 0.999993 | 9.87130e-06 | 0.999958 |
| rad56         | 1.59874e-06 | 0.999995 | 9.38301e-06 | 0.999967 |
| rad40anti     | 1.25564e-06 | 0.999996 | 7.36935e-06 | 0.999975 |
| rad55         | 1.07703e-06 | 0.999997 | 6.32112e-06 | 0.999981 |
| rad53         | 1.00840e-06 | 0.999998 | 5.91834e-06 | 0.999987 |
| rad62         | 8.81786e-07 | 0.999999 | 5.17522e-06 | 0.999992 |
| rad61         | 7.98455e-07 | 1.000000 | 4.68615e-06 | 0.999997 |
| rad43         | 3.67979e-07 | 1.000000 | 2.15967e-06 | 0.999999 |
| rad42         | 1.74775e-07 | 1.000000 | 1.02576e-06 | 1.000000 |
| rad41         | 7.77074e-08 | 1.000000 | 4.56066e-07 | 1.000000 |
| rad23         | 2.40787e-17 | 1.000000 | 1.41318e-16 | 1.000000 |
| rad20         | 2.02983e-17 | 1.000000 | 1.19131e-16 | 1.000000 |
| rad9          | 1.26646e-17 | 1.000000 | 7.43290e-17 | 1.000000 |
| rad45         | 1.20281e-17 | 1.000000 | 7.05934e-17 | 1.000000 |
| rad6          | 9.84001e-18 | 1.000000 | 5.77512e-17 | 1.000000 |
| rad21         | 8.13804e-18 | 1.000000 | 4.77623e-17 | 1.000000 |
| rad11         | 4.75768e-18 | 1.000000 | 2.79229e-17 | 1.000000 |
| rad22         | 4.20240e-18 | 1.000000 | 2.46640e-17 | 1.000000 |
| rad36         | 2.31372e-18 | 1.000000 | 1.35792e-17 | 1.000000 |
| rad8          | 1.91572e-18 | 1.000000 | 1.12434e-17 | 1.000000 |
| rad18         | 1.80283e-18 | 1.000000 | 1.05808e-17 | 1.000000 |
| rad15         | 1.23474e-18 | 1.000000 | 7.24673e-18 | 1.000000 |
| rad47         | 7.59707e-19 | 1.000000 | 4.45873e-18 | 1.000000 |
| rad12         | 6.32118e-19 | 1.000000 | 3.70991e-18 | 1.000000 |
| rad24         | 5.63439e-19 | 1.000000 | 3.30683e-18 | 1.000000 |
| rad7          | 4.44225e-19 | 1.000000 | 2.60716e-18 | 1.000000 |
| rad28         | 4.30207e-19 | 1.000000 | 2.52489e-18 | 1.000000 |
| rad26         | 1.37559e-19 | 1.000000 | 8.07337e-19 | 1.000000 |
| rad13         | 7.33170e-20 | 1.000000 | 4.30299e-19 | 1.000000 |
| rad10         | 5.95132e-20 | 1.000000 | 3.49284e-19 | 1.000000 |
| rad25         | 4.50617e-20 | 1.000000 | 2.64468e-19 | 1.000000 |
| rad5          | 1.84004e-20 | 1.000000 | 1.07992e-19 | 1.000000 |
| rad33         | 7.87849e-21 | 1.000000 | 4.62390e-20 | 1.000000 |
| rad2          | 4.57536e-21 | 1.000000 | 2.68529e-20 | 1.000000 |
| rad1          | 2.64196e-21 | 1.000000 | 1.55057e-20 | 1.000000 |
| rad14         | 9.45605e-22 | 1.000000 | 5.54977e-21 | 1.000000 |
| rad27         | 4.76374e-22 | 1.000000 | 2.79584e-21 | 1.000000 |
| rad3          | 1.99201e-22 | 1.000000 | 1.16911e-21 | 1.000000 |
| rad4          | 1.11132e-22 | 1.000000 | 6.52234e-22 | 1.000000 |

0.100000000E-05 Pa, 4000.00000 K

=====

| Rate constant | True (fraction)     | Effective (fraction) |
|---------------|---------------------|----------------------|
| Total         | 3.41497e-12 (1.00 ) | 6.28297e-13 (1.00 )  |

| species     | PYtrue      | Cumul    | PYeffective | Cumul    |
|-------------|-------------|----------|-------------|----------|
| Benzyl+C2H2 | 0.816017    | 0.816017 | 0.00000     | 0.00000  |
| PhCH2CCH+H  | 0.109584    | 0.925601 | 0.595618    | 0.595618 |
| PhCHCCH2+H  | 0.0267098   | 0.952311 | 0.145175    | 0.740793 |
| Ph+Allene   | 0.0193046   | 0.971615 | 0.104926    | 0.845719 |
| Indene+H    | 0.0160484   | 0.987664 | 0.0872277   | 0.932947 |
| PAH3+H      | 0.00329013  | 0.990954 | 0.0178828   | 0.950829 |
| PAH7+H      | 0.00121791  | 0.992172 | 0.00661968  | 0.957449 |
| PAH9+H      | 0.000864009 | 0.993036 | 0.00469613  | 0.962145 |
| PhCCH+CH3   | 0.000720156 | 0.993756 | 0.00391424  | 0.966060 |
| rad19anti   | 0.000708493 | 0.994464 | 0.00385085  | 0.969910 |
| Ph+MeAc     | 0.000663934 | 0.995128 | 0.00360866  | 0.973519 |
| rad50       | 0.000616859 | 0.995745 | 0.00335280  | 0.976872 |
| rad38       | 0.000560144 | 0.996305 | 0.00304454  | 0.979916 |
| rad39       | 0.000491035 | 0.996796 | 0.00266891  | 0.982585 |
| rad51       | 0.000408498 | 0.997205 | 0.00222030  | 0.984806 |
| rad30       | 0.000396478 | 0.997601 | 0.00215497  | 0.986961 |
| rad35       | 0.000343096 | 0.997945 | 0.00186482  | 0.988825 |
| rad46       | 0.000239253 | 0.998184 | 0.00130041  | 0.990126 |
| rad59       | 0.000231903 | 0.998416 | 0.00126046  | 0.991386 |
| rad67       | 0.000214260 | 0.998630 | 0.00116456  | 0.992551 |
| PhCCCH3+H   | 0.000213580 | 0.998844 | 0.00116087  | 0.993712 |

|               |             |          |             |          |
|---------------|-------------|----------|-------------|----------|
| rad71         | 0.000187844 | 0.999031 | 0.00102098  | 0.994733 |
| rad19syn      | 0.000163941 | 0.999195 | 0.000891067 | 0.995624 |
| PAH10+CH3     | 0.000121536 | 0.999317 | 0.000660582 | 0.996284 |
| rad60syn      | 0.000108396 | 0.999425 | 0.000589161 | 0.996873 |
| rad60anti     | 8.05427e-05 | 0.999506 | 0.000437772 | 0.997311 |
| rad52         | 7.82960e-05 | 0.999584 | 0.000425560 | 0.997737 |
| rad58         | 7.77572e-05 | 0.999662 | 0.000422632 | 0.998159 |
| PAH1+H        | 7.70001e-05 | 0.999739 | 0.000418517 | 0.998578 |
| rad73         | 7.03552e-05 | 0.999809 | 0.000382400 | 0.998960 |
| PhcycC3H3_A+H | 3.98813e-05 | 0.999849 | 0.000216766 | 0.999177 |
| rad70         | 3.09908e-05 | 0.999880 | 0.000168444 | 0.999346 |
| PAH8+H        | 2.94355e-05 | 0.999910 | 0.000159990 | 0.999506 |
| rad72         | 2.58284e-05 | 0.999935 | 0.000140384 | 0.999646 |
| rad37         | 1.30848e-05 | 0.999948 | 7.11194e-05 | 0.999717 |
| rad34         | 1.30497e-05 | 0.999961 | 7.09289e-05 | 0.999788 |
| rad54         | 1.00584e-05 | 0.999972 | 5.46703e-05 | 0.999843 |
| rad65         | 9.63686e-06 | 0.999981 | 5.23790e-05 | 0.999895 |
| rad68syn      | 3.67778e-06 | 0.999985 | 1.99898e-05 | 0.999915 |
| rad68anti     | 2.34154e-06 | 0.999987 | 1.27269e-05 | 0.999928 |
| rad40syn      | 2.31359e-06 | 0.999990 | 1.25750e-05 | 0.999940 |
| rad64         | 2.19077e-06 | 0.999992 | 1.19074e-05 | 0.999952 |
| rad56         | 1.94741e-06 | 0.999994 | 1.05847e-05 | 0.999963 |
| rad40anti     | 1.74691e-06 | 0.999995 | 9.49492e-06 | 0.999972 |
| rad53         | 1.18744e-06 | 0.999997 | 6.45406e-06 | 0.999979 |
| rad55         | 1.16170e-06 | 0.999998 | 6.31418e-06 | 0.999985 |
| rad62         | 1.07271e-06 | 0.999999 | 5.83046e-06 | 0.999991 |
| rad61         | 9.59661e-07 | 1.000000 | 5.21602e-06 | 0.999996 |
| rad43         | 4.20278e-07 | 1.000000 | 2.28433e-06 | 0.999998 |
| rad42         | 2.24298e-07 | 1.000000 | 1.21912e-06 | 1.000000 |
| rad41         | 9.47630e-08 | 1.000000 | 5.15063e-07 | 1.000000 |
| rad20         | 1.54922e-17 | 1.000000 | 8.42046e-17 | 1.000000 |
| rad23         | 1.27763e-17 | 1.000000 | 6.94429e-17 | 1.000000 |
| rad9          | 8.14417e-18 | 1.000000 | 4.42658e-17 | 1.000000 |
| rad45         | 7.23756e-18 | 1.000000 | 3.93381e-17 | 1.000000 |
| rad21         | 5.97853e-18 | 1.000000 | 3.24950e-17 | 1.000000 |
| rad6          | 5.06618e-18 | 1.000000 | 2.75361e-17 | 1.000000 |
| rad11         | 3.59957e-18 | 1.000000 | 1.95647e-17 | 1.000000 |
| rad22         | 2.59195e-18 | 1.000000 | 1.40879e-17 | 1.000000 |
| rad8          | 1.76788e-18 | 1.000000 | 9.60889e-18 | 1.000000 |
| rad36         | 1.39793e-18 | 1.000000 | 7.59812e-18 | 1.000000 |
| rad18         | 1.20669e-18 | 1.000000 | 6.55872e-18 | 1.000000 |
| rad15         | 8.31120e-19 | 1.000000 | 4.51737e-18 | 1.000000 |
| rad47         | 7.97227e-19 | 1.000000 | 4.33315e-18 | 1.000000 |
| rad12         | 4.90407e-19 | 1.000000 | 2.66550e-18 | 1.000000 |
| rad24         | 4.12849e-19 | 1.000000 | 2.24395e-18 | 1.000000 |
| rad28         | 2.83278e-19 | 1.000000 | 1.53970e-18 | 1.000000 |
| rad7          | 2.66540e-19 | 1.000000 | 1.44872e-18 | 1.000000 |
| rad26         | 9.26855e-20 | 1.000000 | 5.03771e-19 | 1.000000 |
| rad13         | 4.73267e-20 | 1.000000 | 2.57234e-19 | 1.000000 |
| rad10         | 4.23761e-20 | 1.000000 | 2.30326e-19 | 1.000000 |
| rad25         | 3.78502e-20 | 1.000000 | 2.05726e-19 | 1.000000 |
| rad5          | 1.76148e-20 | 1.000000 | 9.57414e-20 | 1.000000 |
| rad33         | 5.47163e-21 | 1.000000 | 2.97398e-20 | 1.000000 |
| rad2          | 3.43806e-21 | 1.000000 | 1.86868e-20 | 1.000000 |
| rad1          | 2.03353e-21 | 1.000000 | 1.10528e-20 | 1.000000 |
| rad14         | 8.43867e-22 | 1.000000 | 4.58665e-21 | 1.000000 |
| rad27         | 3.99728e-22 | 1.000000 | 2.17263e-21 | 1.000000 |
| rad3          | 1.31292e-22 | 1.000000 | 7.13610e-22 | 1.000000 |
| rad4          | 7.27100e-23 | 1.000000 | 3.95199e-22 | 1.000000 |

0.100000000E-06 Pa, 20.0000000 K

=====

| Rate constant | True (fraction)      | Effective (fraction) |
|---------------|----------------------|----------------------|
| Total         | 1.34336e-156 (1.00 ) | 1.34336e-156 (1.00 ) |

| species     | PYtrue      | Cumul    | PYeffective | Cumul    |
|-------------|-------------|----------|-------------|----------|
| Indene+H    | 0.999878    | 0.999878 | 0.999879    | 0.999879 |
| rad6        | 0.000121071 | 0.999999 | 0.000121071 | 1.000000 |
| Benzyl+C2H2 | 8.11973e-07 | 1.000000 | 0.000000    | 1.000000 |
| rad2        | 3.93189e-08 | 1.000000 | 3.93190e-08 | 1.000000 |
| rad7        | 8.73046e-09 | 1.000000 | 8.73047e-09 | 1.000000 |
| rad1        | 2.48505e-09 | 1.000000 | 2.48505e-09 | 1.000000 |
| rad11       | 2.13278e-09 | 1.000000 | 2.13279e-09 | 1.000000 |
| rad10       | 2.01099e-09 | 1.000000 | 2.01100e-09 | 1.000000 |
| rad3        | 2.60396e-10 | 1.000000 | 2.60396e-10 | 1.000000 |
| rad4        | 1.31644e-10 | 1.000000 | 1.31644e-10 | 1.000000 |
| rad13       | 4.85376e-11 | 1.000000 | 4.85376e-11 | 1.000000 |
| rad33       | 9.16493e-14 | 1.000000 | 9.16494e-14 | 1.000000 |

|               |             |          |             |         |
|---------------|-------------|----------|-------------|---------|
| rad28         | 1.23554e-15 | 1.000000 | 1.23554e-15 | 1.00000 |
| rad20         | 1.15838e-15 | 1.000000 | 1.15838e-15 | 1.00000 |
| rad21         | 7.22467e-16 | 1.000000 | 7.22467e-16 | 1.00000 |
| rad26         | 1.21913e-16 | 1.000000 | 1.21913e-16 | 1.00000 |
| rad35         | 4.19637e-17 | 1.000000 | 4.19637e-17 | 1.00000 |
| rad18         | 5.44946e-18 | 1.000000 | 5.44946e-18 | 1.00000 |
| PAH9+H        | 5.25667e-18 | 1.000000 | 5.25667e-18 | 1.00000 |
| rad23         | 1.63823e-18 | 1.000000 | 1.63823e-18 | 1.00000 |
| rad31         | 6.55984e-19 | 1.000000 | 6.55984e-19 | 1.00000 |
| rad22         | 4.40466e-19 | 1.000000 | 4.40466e-19 | 1.00000 |
| rad27         | 5.40047e-20 | 1.000000 | 5.40047e-20 | 1.00000 |
| rad38         | 2.79413e-20 | 1.000000 | 2.79413e-20 | 1.00000 |
| rad30         | 2.60578e-20 | 1.000000 | 2.60578e-20 | 1.00000 |
| rad45         | 1.01731e-20 | 1.000000 | 1.01731e-20 | 1.00000 |
| PhCHCCH2+H    | 1.19439e-21 | 1.000000 | 1.19439e-21 | 1.00000 |
| rad36         | 6.33704e-22 | 1.000000 | 6.33704e-22 | 1.00000 |
| PhCCH+CH3     | 4.20775e-23 | 1.000000 | 4.20775e-23 | 1.00000 |
| rad24         | 2.32430e-23 | 1.000000 | 2.32430e-23 | 1.00000 |
| PhCCCH3+H     | 6.12756e-24 | 1.000000 | 6.12757e-24 | 1.00000 |
| rad15         | 3.20891e-24 | 1.000000 | 3.20892e-24 | 1.00000 |
| rad25         | 2.24987e-24 | 1.000000 | 2.24987e-24 | 1.00000 |
| rad14         | 1.65882e-25 | 1.000000 | 1.65882e-25 | 1.00000 |
| rad8          | 2.44393e-29 | 1.000000 | 2.44393e-29 | 1.00000 |
| rad46         | 1.38474e-31 | 1.000000 | 1.38474e-31 | 1.00000 |
| rad9          | 7.49477e-32 | 1.000000 | 7.49478e-32 | 1.00000 |
| PAH7+H        | 1.05274e-32 | 1.000000 | 1.05274e-32 | 1.00000 |
| Ph+MeAc       | 1.10602e-33 | 1.000000 | 1.10602e-33 | 1.00000 |
| rad12         | 4.04461e-34 | 1.000000 | 4.04462e-34 | 1.00000 |
| rad39         | 2.23916e-35 | 1.000000 | 2.23916e-35 | 1.00000 |
| Ph+Allene     | 5.11794e-38 | 1.000000 | 5.11795e-38 | 1.00000 |
| rad60syn      | 4.60138e-42 | 1.000000 | 4.60139e-42 | 1.00000 |
| rad60anti     | 4.78085e-44 | 1.000000 | 4.78085e-44 | 1.00000 |
| PhCH2CCH+H    | 7.99613e-46 | 1.000000 | 7.99613e-46 | 1.00000 |
| rad37         | 6.96746e-47 | 1.000000 | 6.96747e-47 | 1.00000 |
| rad5          | 4.58043e-50 | 1.000000 | 4.58043e-50 | 1.00000 |
| PAH3+H        | 8.15120e-55 | 1.000000 | 8.15121e-55 | 1.00000 |
| rad59         | 4.36479e-55 | 1.000000 | 4.36479e-55 | 1.00000 |
| rad50         | 1.76366e-55 | 1.000000 | 1.76367e-55 | 1.00000 |
| rad19syn      | 6.40504e-64 | 1.000000 | 6.40504e-64 | 1.00000 |
| rad52         | 7.71766e-68 | 1.000000 | 7.71767e-68 | 1.00000 |
| rad54         | 7.40362e-69 | 1.000000 | 7.40362e-69 | 1.00000 |
| PAH10+CH3     | 4.68943e-69 | 1.000000 | 4.68943e-69 | 1.00000 |
| rad43         | 1.10487e-69 | 1.000000 | 1.10487e-69 | 1.00000 |
| rad62         | 3.30787e-72 | 1.000000 | 3.30787e-72 | 1.00000 |
| rad51         | 3.71134e-75 | 1.000000 | 3.71135e-75 | 1.00000 |
| rad70         | 3.98183e-78 | 1.000000 | 3.98184e-78 | 1.00000 |
| PhcycC3H3_A+H | 1.68640e-78 | 1.000000 | 1.68640e-78 | 1.00000 |
| rad55         | 9.08060e-79 | 1.000000 | 9.08061e-79 | 1.00000 |
| rad65         | 2.49069e-80 | 1.000000 | 2.49069e-80 | 1.00000 |
| rad58         | 5.66543e-82 | 1.000000 | 5.66543e-82 | 1.00000 |
| PAH1+H        | 7.43843e-84 | 1.000000 | 7.43843e-84 | 1.00000 |
| rad34         | 5.02797e-86 | 1.000000 | 5.02797e-86 | 1.00000 |
| rad42         | 3.57745e-90 | 1.000000 | 3.57745e-90 | 1.00000 |
| rad41         | 4.46080e-91 | 1.000000 | 4.46081e-91 | 1.00000 |
| rad47         | 1.39106e-95 | 1.000000 | 1.39106e-95 | 1.00000 |

0.100000000E-06 Pa, 30.0000000 K

=====

| Rate constant | True (fraction)      | Effective (fraction) |
|---------------|----------------------|----------------------|
| Total         | 1.15918e-108 (1.00 ) | 1.15918e-108 (1.00 ) |

| species     | PYtrue      | Cumul    | PYeffective | Cumul    |
|-------------|-------------|----------|-------------|----------|
| Indene+H    | 0.999912    | 0.999912 | 0.999913    | 0.999913 |
| rad6        | 8.71192e-05 | 0.999999 | 8.71193e-05 | 1.00000  |
| Benzyl+C2H2 | 1.04113e-06 | 1.00000  | 0.00000     | 1.00000  |
| rad2        | 2.84436e-08 | 1.00000  | 2.84436e-08 | 1.00000  |
| rad7        | 6.28398e-09 | 1.00000  | 6.28399e-09 | 1.00000  |
| rad1        | 1.79875e-09 | 1.00000  | 1.79875e-09 | 1.00000  |
| rad11       | 1.53519e-09 | 1.00000  | 1.53519e-09 | 1.00000  |
| rad10       | 1.45717e-09 | 1.00000  | 1.45717e-09 | 1.00000  |
| rad3        | 1.88961e-10 | 1.00000  | 1.88962e-10 | 1.00000  |
| rad4        | 9.55440e-11 | 1.00000  | 9.55441e-11 | 1.00000  |
| rad13       | 3.49425e-11 | 1.00000  | 3.49426e-11 | 1.00000  |
| rad33       | 6.60015e-14 | 1.00000  | 6.60016e-14 | 1.00000  |
| rad35       | 3.28380e-15 | 1.00000  | 3.28381e-15 | 1.00000  |
| rad28       | 5.71913e-16 | 1.00000  | 5.71913e-16 | 1.00000  |
| rad20       | 5.66180e-16 | 1.00000  | 5.66180e-16 | 1.00000  |
| rad21       | 3.53178e-16 | 1.00000  | 3.53179e-16 | 1.00000  |

|               |             |         |             |         |
|---------------|-------------|---------|-------------|---------|
| rad26         | 4.27518e-17 | 1.00000 | 4.27519e-17 | 1.00000 |
| PAH9+H        | 8.18355e-18 | 1.00000 | 8.18355e-18 | 1.00000 |
| rad18         | 2.66439e-18 | 1.00000 | 2.66440e-18 | 1.00000 |
| rad31         | 4.87549e-19 | 1.00000 | 4.87550e-19 | 1.00000 |
| rad23         | 3.87975e-19 | 1.00000 | 3.87975e-19 | 1.00000 |
| rad22         | 2.00287e-19 | 1.00000 | 2.00287e-19 | 1.00000 |
| rad38         | 1.96506e-20 | 1.00000 | 1.96506e-20 | 1.00000 |
| rad27         | 1.81829e-20 | 1.00000 | 1.81829e-20 | 1.00000 |
| rad30         | 1.42517e-20 | 1.00000 | 1.42517e-20 | 1.00000 |
| rad45         | 2.42727e-21 | 1.00000 | 2.42728e-21 | 1.00000 |
| PhCHCCH2+H    | 5.18987e-22 | 1.00000 | 5.18987e-22 | 1.00000 |
| rad36         | 1.51154e-22 | 1.00000 | 1.51154e-22 | 1.00000 |
| PhCCH+CH3     | 1.77700e-23 | 1.00000 | 1.77700e-23 | 1.00000 |
| rad24         | 1.15401e-23 | 1.00000 | 1.15401e-23 | 1.00000 |
| PhCCCH3+H     | 2.57115e-24 | 1.00000 | 2.57115e-24 | 1.00000 |
| rad15         | 1.45082e-24 | 1.00000 | 1.45083e-24 | 1.00000 |
| rad25         | 5.34264e-25 | 1.00000 | 5.34265e-25 | 1.00000 |
| rad14         | 3.75414e-26 | 1.00000 | 3.75414e-26 | 1.00000 |
| rad8          | 1.00646e-29 | 1.00000 | 1.00646e-29 | 1.00000 |
| rad46         | 5.77724e-32 | 1.00000 | 5.77725e-32 | 1.00000 |
| rad9          | 3.08517e-32 | 1.00000 | 3.08517e-32 | 1.00000 |
| PAH7+H        | 4.19860e-33 | 1.00000 | 4.19861e-33 | 1.00000 |
| Ph+MeAc       | 4.57353e-34 | 1.00000 | 4.57353e-34 | 1.00000 |
| rad12         | 1.65483e-34 | 1.00000 | 1.65483e-34 | 1.00000 |
| rad39         | 9.00858e-36 | 1.00000 | 9.00859e-36 | 1.00000 |
| Ph+Allene     | 2.13527e-38 | 1.00000 | 2.13528e-38 | 1.00000 |
| rad60syn      | 1.91658e-42 | 1.00000 | 1.91658e-42 | 1.00000 |
| rad60anti     | 2.00202e-44 | 1.00000 | 2.00202e-44 | 1.00000 |
| PhCH2CCH+H    | 3.41396e-46 | 1.00000 | 3.41396e-46 | 1.00000 |
| rad37         | 2.98208e-47 | 1.00000 | 2.98208e-47 | 1.00000 |
| rad5          | 1.97369e-50 | 1.00000 | 1.97369e-50 | 1.00000 |
| PAH3+H        | 3.53841e-55 | 1.00000 | 3.53842e-55 | 1.00000 |
| rad59         | 1.89446e-55 | 1.00000 | 1.89446e-55 | 1.00000 |
| rad50         | 7.63232e-56 | 1.00000 | 7.63233e-56 | 1.00000 |
| rad19syn      | 2.89357e-64 | 1.00000 | 2.89357e-64 | 1.00000 |
| rad52         | 3.48153e-68 | 1.00000 | 3.48154e-68 | 1.00000 |
| rad54         | 3.39743e-69 | 1.00000 | 3.39743e-69 | 1.00000 |
| PAH10+CH3     | 2.15130e-69 | 1.00000 | 2.15130e-69 | 1.00000 |
| rad43         | 5.08412e-70 | 1.00000 | 5.08413e-70 | 1.00000 |
| rad62         | 1.53422e-72 | 1.00000 | 1.53423e-72 | 1.00000 |
| rad51         | 1.72066e-75 | 1.00000 | 1.72067e-75 | 1.00000 |
| rad70         | 1.88557e-78 | 1.00000 | 1.88557e-78 | 1.00000 |
| PhcycC3H3_A+H | 8.00263e-79 | 1.00000 | 8.00264e-79 | 1.00000 |
| rad55         | 4.30822e-79 | 1.00000 | 4.30822e-79 | 1.00000 |
| rad65         | 1.17304e-80 | 1.00000 | 1.17304e-80 | 1.00000 |
| rad58         | 2.69342e-82 | 1.00000 | 2.69342e-82 | 1.00000 |
| PAH1+H        | 3.58717e-84 | 1.00000 | 3.58718e-84 | 1.00000 |
| rad34         | 2.44522e-86 | 1.00000 | 2.44522e-86 | 1.00000 |
| rad42         | 1.76315e-90 | 1.00000 | 1.76315e-90 | 1.00000 |
| rad41         | 2.21146e-91 | 1.00000 | 2.21146e-91 | 1.00000 |
| rad47         | 3.33196e-96 | 1.00000 | 3.33197e-96 | 1.00000 |

0.100000000E-06 Pa, 40.0000000 K

=====

| Rate constant | True (fraction)     | Effective (fraction) |
|---------------|---------------------|----------------------|
| Total         | 1.02415e-84 (1.00 ) | 1.02415e-84 (1.00 )  |

| species     | PYtrue      | Cumul    | PYeffective | Cumul    |
|-------------|-------------|----------|-------------|----------|
| Indene+H    | 0.999933    | 0.999933 | 0.999934    | 0.999934 |
| rad6        | 6.57221e-05 | 0.999999 | 6.57222e-05 | 1.000000 |
| Benzyl+C2H2 | 1.52917e-06 | 1.000000 | 0.000000    | 1.000000 |
| rad2        | 2.16718e-08 | 1.000000 | 2.16718e-08 | 1.000000 |
| rad7        | 4.74359e-09 | 1.000000 | 4.74359e-09 | 1.000000 |
| rad1        | 1.37219e-09 | 1.000000 | 1.37219e-09 | 1.000000 |
| rad11       | 1.15902e-09 | 1.000000 | 1.15902e-09 | 1.000000 |
| rad10       | 1.10974e-09 | 1.000000 | 1.10975e-09 | 1.000000 |
| rad3        | 1.43285e-10 | 1.000000 | 1.43286e-10 | 1.000000 |
| rad4        | 7.24715e-11 | 1.000000 | 7.24716e-11 | 1.000000 |
| rad13       | 2.63864e-11 | 1.000000 | 2.63864e-11 | 1.000000 |
| rad35       | 5.91643e-14 | 1.000000 | 5.91643e-14 | 1.000000 |
| rad33       | 4.98676e-14 | 1.000000 | 4.98677e-14 | 1.000000 |
| rad28       | 4.83901e-16 | 1.000000 | 4.83902e-16 | 1.000000 |
| PAH9+H      | 4.55784e-16 | 1.000000 | 4.55785e-16 | 1.000000 |
| rad20       | 3.70282e-16 | 1.000000 | 3.70283e-16 | 1.000000 |
| rad21       | 2.31056e-16 | 1.000000 | 2.31057e-16 | 1.000000 |
| rad26       | 3.12012e-17 | 1.000000 | 3.12013e-17 | 1.000000 |
| rad18       | 1.74387e-18 | 1.000000 | 1.74387e-18 | 1.000000 |
| rad31       | 3.81060e-19 | 1.000000 | 3.81061e-19 | 1.000000 |

|               |             |         |             |          |
|---------------|-------------|---------|-------------|----------|
| rad23         | 1.77344e-19 | 1.00000 | 1.77345e-19 | 1.000000 |
| rad22         | 1.27774e-19 | 1.00000 | 1.27774e-19 | 1.000000 |
| rad38         | 3.23488e-20 | 1.00000 | 3.23489e-20 | 1.000000 |
| rad30         | 1.39570e-20 | 1.00000 | 1.39570e-20 | 1.000000 |
| rad27         | 1.28829e-20 | 1.00000 | 1.28829e-20 | 1.000000 |
| rad45         | 1.11119e-21 | 1.00000 | 1.11119e-21 | 1.000000 |
| PhCHCCH2+H    | 4.82377e-22 | 1.00000 | 4.82377e-22 | 1.000000 |
| rad36         | 6.91553e-23 | 1.00000 | 6.91554e-23 | 1.000000 |
| PhCCH+CH3     | 1.65545e-23 | 1.00000 | 1.65545e-23 | 1.000000 |
| rad24         | 7.79848e-24 | 1.00000 | 7.79849e-24 | 1.000000 |
| PhCCCH3+H     | 2.40134e-24 | 1.00000 | 2.40135e-24 | 1.000000 |
| rad15         | 1.35074e-24 | 1.00000 | 1.35075e-24 | 1.000000 |
| rad25         | 3.40355e-25 | 1.00000 | 3.40356e-25 | 1.000000 |
| rad14         | 2.37284e-26 | 1.00000 | 2.37284e-26 | 1.000000 |
| rad8          | 9.60226e-30 | 1.00000 | 9.60228e-30 | 1.000000 |
| rad46         | 5.41249e-32 | 1.00000 | 5.41250e-32 | 1.000000 |
| rad9          | 2.98412e-32 | 1.00000 | 2.98412e-32 | 1.000000 |
| PAH7+H        | 4.03585e-33 | 1.00000 | 4.03586e-33 | 1.000000 |
| Ph+MeAc       | 4.52426e-34 | 1.00000 | 4.52427e-34 | 1.000000 |
| rad12         | 1.61861e-34 | 1.00000 | 1.61861e-34 | 1.000000 |
| rad39         | 8.79886e-36 | 1.00000 | 8.79887e-36 | 1.000000 |
| Ph+Allene     | 2.16367e-38 | 1.00000 | 2.16368e-38 | 1.000000 |
| rad60syn      | 1.93371e-42 | 1.00000 | 1.93371e-42 | 1.000000 |
| rad60anti     | 2.04769e-44 | 1.00000 | 2.04769e-44 | 1.000000 |
| PhCH2CCH+H    | 3.65157e-46 | 1.00000 | 3.65157e-46 | 1.000000 |
| rad37         | 3.23948e-47 | 1.00000 | 3.23948e-47 | 1.000000 |
| rad5          | 2.16223e-50 | 1.00000 | 2.16223e-50 | 1.000000 |
| PAH3+H        | 3.92382e-55 | 1.00000 | 3.92383e-55 | 1.000000 |
| rad59         | 2.10012e-55 | 1.00000 | 2.10012e-55 | 1.000000 |
| rad50         | 8.39719e-56 | 1.00000 | 8.39720e-56 | 1.000000 |
| rad19syn      | 3.49198e-64 | 1.00000 | 3.49198e-64 | 1.000000 |
| rad52         | 4.18523e-68 | 1.00000 | 4.18523e-68 | 1.000000 |
| rad54         | 4.23707e-69 | 1.00000 | 4.23708e-69 | 1.000000 |
| PAH10+CH3     | 2.72120e-69 | 1.00000 | 2.72121e-69 | 1.000000 |
| rad43         | 6.43876e-70 | 1.00000 | 6.43877e-70 | 1.000000 |
| rad62         | 1.96667e-72 | 1.00000 | 1.96667e-72 | 1.000000 |
| rad51         | 2.19135e-75 | 1.00000 | 2.19135e-75 | 1.000000 |
| rad70         | 2.51178e-78 | 1.00000 | 2.51178e-78 | 1.000000 |
| PhcycC3H3_A+H | 1.07075e-78 | 1.00000 | 1.07075e-78 | 1.000000 |
| rad55         | 5.76183e-79 | 1.00000 | 5.76184e-79 | 1.000000 |
| rad65         | 1.54386e-80 | 1.00000 | 1.54387e-80 | 1.000000 |
| rad58         | 3.61762e-82 | 1.00000 | 3.61763e-82 | 1.000000 |
| PAH1+H        | 4.99754e-84 | 1.00000 | 4.99755e-84 | 1.000000 |
| rad34         | 3.44407e-86 | 1.00000 | 3.44408e-86 | 1.000000 |
| rad42         | 2.57437e-90 | 1.00000 | 2.57437e-90 | 1.000000 |
| rad41         | 3.33529e-91 | 1.00000 | 3.33530e-91 | 1.000000 |
| rad47         | 3.10867e-96 | 1.00000 | 3.10868e-96 | 1.000000 |

0.100000000E-06 Pa, 50.0000000 K

=====

| Rate constant | True (fraction)     | Effective (fraction) |
|---------------|---------------------|----------------------|
| Total         | 2.31816e-70 (1.00 ) | 2.31816e-70 (1.00 )  |

| species     | PYtrue      | Cumul    | PYeffective | Cumul    |
|-------------|-------------|----------|-------------|----------|
| Indene+H    | 0.999947    | 0.999947 | 0.999949    | 0.999949 |
| rad6        | 5.06987e-05 | 0.999998 | 5.06988e-05 | 1.000000 |
| Benzyl+C2H2 | 2.26183e-06 | 1.000000 | 0.000000    | 1.000000 |
| rad2        | 1.67092e-08 | 1.000000 | 1.67092e-08 | 1.000000 |
| rad7        | 3.66255e-09 | 1.000000 | 3.66256e-09 | 1.000000 |
| rad1        | 1.05983e-09 | 1.000000 | 1.05984e-09 | 1.000000 |
| rad11       | 8.95050e-10 | 1.000000 | 8.95052e-10 | 1.000000 |
| rad10       | 8.61545e-10 | 1.000000 | 8.61547e-10 | 1.000000 |
| rad3        | 1.12630e-10 | 1.000000 | 1.12630e-10 | 1.000000 |
| rad4        | 5.69916e-11 | 1.000000 | 5.69917e-11 | 1.000000 |
| rad13       | 2.03833e-11 | 1.000000 | 2.03834e-11 | 1.000000 |
| rad35       | 3.19975e-13 | 1.000000 | 3.19975e-13 | 1.000000 |
| rad33       | 3.85506e-14 | 1.000000 | 3.85506e-14 | 1.000000 |
| PAH9+H      | 8.82698e-15 | 1.000000 | 8.82700e-15 | 1.000000 |
| rad28       | 6.21566e-16 | 1.000000 | 6.21567e-16 | 1.000000 |
| rad20       | 2.70761e-16 | 1.000000 | 2.70762e-16 | 1.000000 |
| rad21       | 1.69034e-16 | 1.000000 | 1.69035e-16 | 1.000000 |
| rad26       | 3.63887e-17 | 1.000000 | 3.63888e-17 | 1.000000 |
| rad38       | 2.35297e-18 | 1.000000 | 2.35297e-18 | 1.000000 |
| rad18       | 1.27640e-18 | 1.000000 | 1.27641e-18 | 1.000000 |
| rad31       | 3.05716e-19 | 1.000000 | 3.05716e-19 | 1.000000 |
| rad30       | 1.92142e-19 | 1.000000 | 1.92142e-19 | 1.000000 |
| rad23       | 1.03654e-19 | 1.000000 | 1.03654e-19 | 1.000000 |
| rad22       | 9.22150e-20 | 1.000000 | 9.22152e-20 | 1.000000 |

|               |             |          |             |          |
|---------------|-------------|----------|-------------|----------|
| rad27         | 1.49082e-20 | 1.000000 | 1.49083e-20 | 1.000000 |
| PhCHCCH2+H    | 7.02688e-22 | 1.000000 | 7.02689e-22 | 1.000000 |
| rad45         | 6.59607e-22 | 1.000000 | 6.59608e-22 | 1.000000 |
| rad36         | 4.10187e-23 | 1.000000 | 4.10188e-23 | 1.000000 |
| PhCCH+CH3     | 2.44486e-23 | 1.000000 | 2.44486e-23 | 1.000000 |
| rad24         | 5.97018e-24 | 1.000000 | 5.97019e-24 | 1.000000 |
| PhCCCH3+H     | 3.57012e-24 | 1.000000 | 3.57013e-24 | 1.000000 |
| rad15         | 2.14969e-24 | 1.000000 | 2.14970e-24 | 1.000000 |
| rad25         | 3.72955e-25 | 1.000000 | 3.72956e-25 | 1.000000 |
| rad14         | 2.61396e-26 | 1.000000 | 2.61396e-26 | 1.000000 |
| rad8          | 1.48714e-29 | 1.000000 | 1.48714e-29 | 1.000000 |
| rad46         | 8.09549e-32 | 1.000000 | 8.09551e-32 | 1.000000 |
| rad9          | 4.71493e-32 | 1.000000 | 4.71494e-32 | 1.000000 |
| PAH7+H        | 6.40094e-33 | 1.000000 | 6.40095e-33 | 1.000000 |
| Ph+MeAc       | 7.41898e-34 | 1.000000 | 7.41900e-34 | 1.000000 |
| rad12         | 2.61754e-34 | 1.000000 | 2.61755e-34 | 1.000000 |
| rad39         | 1.42610e-35 | 1.000000 | 1.42611e-35 | 1.000000 |
| Ph+Allene     | 3.66134e-38 | 1.000000 | 3.66134e-38 | 1.000000 |
| rad60syn      | 3.25179e-42 | 1.000000 | 3.25180e-42 | 1.000000 |
| rad60anti     | 3.51190e-44 | 1.000000 | 3.51191e-44 | 1.000000 |
| PhCH2CCH+H    | 6.67592e-46 | 1.000000 | 6.67593e-46 | 1.000000 |
| rad37         | 6.13427e-47 | 1.000000 | 6.13428e-47 | 1.000000 |
| rad5          | 4.14284e-50 | 1.000000 | 4.14285e-50 | 1.000000 |
| PAH3+H        | 7.55121e-55 | 1.000000 | 7.55123e-55 | 1.000000 |
| rad59         | 4.03964e-55 | 1.000000 | 4.03965e-55 | 1.000000 |
| rad50         | 1.60017e-55 | 1.000000 | 1.60017e-55 | 1.000000 |
| rad19syn      | 7.57692e-64 | 1.000000 | 7.57694e-64 | 1.000000 |
| rad52         | 9.06326e-68 | 1.000000 | 9.06328e-68 | 1.000000 |
| rad54         | 9.63262e-69 | 1.000000 | 9.63264e-69 | 1.000000 |
| PAH10+CH3     | 6.70784e-69 | 1.000000 | 6.70786e-69 | 1.000000 |
| rad43         | 1.58841e-69 | 1.000000 | 1.58841e-69 | 1.000000 |
| rad62         | 4.81616e-72 | 1.000000 | 4.81617e-72 | 1.000000 |
| rad51         | 5.16428e-75 | 1.000000 | 5.16429e-75 | 1.000000 |
| rad70         | 6.27058e-78 | 1.000000 | 6.27059e-78 | 1.000000 |
| PhcycC3H3_A+H | 2.68991e-78 | 1.000000 | 2.68991e-78 | 1.000000 |
| rad55         | 1.44654e-78 | 1.000000 | 1.44655e-78 | 1.000000 |
| rad65         | 3.81855e-80 | 1.000000 | 3.81856e-80 | 1.000000 |
| rad58         | 9.13788e-82 | 1.000000 | 9.13790e-82 | 1.000000 |
| PAH1+H        | 1.33209e-83 | 1.000000 | 1.33209e-83 | 1.000000 |
| rad34         | 9.30777e-86 | 1.000000 | 9.30779e-86 | 1.000000 |
| rad42         | 8.02678e-90 | 1.000000 | 8.02680e-90 | 1.000000 |
| rad41         | 1.31630e-90 | 1.000000 | 1.31631e-90 | 1.000000 |
| rad47         | 6.29845e-96 | 1.000000 | 6.29846e-96 | 1.000000 |

0.100000000E-06 Pa, 60.0000000 K

=====  
Rate constant | True (fraction) | Effective (fraction)  
-----  
Total | 8.44107e-61 (1.00) | 8.44104e-61 (1.00)

| species     | PYtrue      | Cumul    | PYeffective | Cumul    |
|-------------|-------------|----------|-------------|----------|
| Indene+H    | 0.999957    | 0.999957 | 0.999960    | 0.999960 |
| rad6        | 3.96148e-05 | 0.999997 | 3.96150e-05 | 1.000000 |
| Benzyl+C2H2 | 3.25405e-06 | 1.000000 | 0.000000    | 1.000000 |
| rad2        | 1.33716e-08 | 1.000000 | 1.33716e-08 | 1.000000 |
| rad7        | 2.86499e-09 | 1.000000 | 2.86500e-09 | 1.000000 |
| rad1        | 8.49969e-10 | 1.000000 | 8.49972e-10 | 1.000000 |
| rad11       | 7.00300e-10 | 1.000000 | 7.00302e-10 | 1.000000 |
| rad10       | 6.81521e-10 | 1.000000 | 6.81524e-10 | 1.000000 |
| rad3        | 8.80061e-11 | 1.000000 | 8.80064e-11 | 1.000000 |
| rad4        | 4.45563e-11 | 1.000000 | 4.45565e-11 | 1.000000 |
| rad13       | 1.59545e-11 | 1.000000 | 1.59545e-11 | 1.000000 |
| rad35       | 9.63218e-13 | 1.000000 | 9.63221e-13 | 1.000000 |
| PAH9+H      | 6.37684e-14 | 1.000000 | 6.37686e-14 | 1.000000 |
| rad33       | 3.02005e-14 | 1.000000 | 3.02006e-14 | 1.000000 |
| rad28       | 1.72725e-15 | 1.000000 | 1.72726e-15 | 1.000000 |
| rad20       | 2.10416e-16 | 1.000000 | 2.10417e-16 | 1.000000 |
| rad21       | 1.31438e-16 | 1.000000 | 1.31438e-16 | 1.000000 |
| rad26       | 9.10431e-17 | 1.000000 | 9.10434e-17 | 1.000000 |
| rad38       | 7.71328e-17 | 1.000000 | 7.71331e-17 | 1.000000 |
| rad30       | 2.80870e-17 | 1.000000 | 2.80871e-17 | 1.000000 |
| rad18       | 9.92860e-19 | 1.000000 | 9.92863e-19 | 1.000000 |
| rad31       | 2.49603e-19 | 1.000000 | 2.49604e-19 | 1.000000 |
| rad22       | 7.10413e-20 | 1.000000 | 7.10415e-20 | 1.000000 |
| rad23       | 6.89814e-20 | 1.000000 | 6.89816e-20 | 1.000000 |
| rad27       | 4.05977e-20 | 1.000000 | 4.05979e-20 | 1.000000 |
| PhCHCCH2+H  | 1.70061e-21 | 1.000000 | 1.70061e-21 | 1.000000 |
| rad15       | 4.80576e-22 | 1.000000 | 4.80578e-22 | 1.000000 |
| rad45       | 4.43082e-22 | 1.000000 | 4.43083e-22 | 1.000000 |

|               |             |          |             |          |
|---------------|-------------|----------|-------------|----------|
| PhCCH+CH3     | 5.83546e-23 | 1.000000 | 5.83548e-23 | 1.000000 |
| rad36         | 2.75310e-23 | 1.000000 | 2.75310e-23 | 1.000000 |
| PhCCCH3+H     | 8.49691e-24 | 1.000000 | 8.49693e-24 | 1.000000 |
| rad24         | 4.90222e-24 | 1.000000 | 4.90224e-24 | 1.000000 |
| rad25         | 7.92142e-25 | 1.000000 | 7.92145e-25 | 1.000000 |
| rad14         | 5.30868e-26 | 1.000000 | 5.30869e-26 | 1.000000 |
| rad8          | 3.73760e-29 | 1.000000 | 3.73761e-29 | 1.000000 |
| rad46         | 1.94166e-31 | 1.000000 | 1.94166e-31 | 1.000000 |
| rad9          | 1.21066e-31 | 1.000000 | 1.21066e-31 | 1.000000 |
| PAH7+H        | 1.66610e-32 | 1.000000 | 1.66610e-32 | 1.000000 |
| Ph+MeAc       | 2.01048e-33 | 1.000000 | 2.01049e-33 | 1.000000 |
| rad12         | 6.97789e-34 | 1.000000 | 6.97791e-34 | 1.000000 |
| rad39         | 3.80595e-35 | 1.000000 | 3.80596e-35 | 1.000000 |
| Ph+Allene     | 1.02232e-37 | 1.000000 | 1.02233e-37 | 1.000000 |
| rad60syn      | 9.01016e-42 | 1.000000 | 9.01019e-42 | 1.000000 |
| rad60anti     | 9.96754e-44 | 1.000000 | 9.96757e-44 | 1.000000 |
| PhCH2CCH+H    | 2.04923e-45 | 1.000000 | 2.04924e-45 | 1.000000 |
| rad37         | 2.05484e-46 | 1.000000 | 2.05484e-46 | 1.000000 |
| rad5          | 1.41436e-49 | 1.000000 | 1.41436e-49 | 1.000000 |
| PAH3+H        | 2.46981e-54 | 1.000000 | 2.46982e-54 | 1.000000 |
| rad59         | 1.32045e-54 | 1.000000 | 1.32045e-54 | 1.000000 |
| rad50         | 5.21351e-55 | 1.000000 | 5.21353e-55 | 1.000000 |
| rad19syn      | 2.88578e-63 | 1.000000 | 2.88579e-63 | 1.000000 |
| rad52         | 3.53383e-67 | 1.000000 | 3.53385e-67 | 1.000000 |
| PAH10+CH3     | 4.22252e-68 | 1.000000 | 4.22253e-68 | 1.000000 |
| rad54         | 3.90075e-68 | 1.000000 | 3.90076e-68 | 1.000000 |
| rad43         | 1.00076e-68 | 1.000000 | 1.00076e-68 | 1.000000 |
| rad62         | 2.74432e-71 | 1.000000 | 2.74433e-71 | 1.000000 |
| rad51         | 2.31535e-74 | 1.000000 | 2.31535e-74 | 1.000000 |
| rad70         | 2.88930e-77 | 1.000000 | 2.88931e-77 | 1.000000 |
| PhcycC3H3_A+H | 1.25072e-77 | 1.000000 | 1.25072e-77 | 1.000000 |
| rad55         | 6.71935e-78 | 1.000000 | 6.71937e-78 | 1.000000 |
| rad65         | 1.87001e-79 | 1.000000 | 1.87002e-79 | 1.000000 |
| rad58         | 4.28305e-81 | 1.000000 | 4.28306e-81 | 1.000000 |
| PAH1+H        | 6.80837e-83 | 1.000000 | 6.80839e-83 | 1.000000 |
| rad34         | 4.83316e-85 | 1.000000 | 4.83318e-85 | 1.000000 |
| rad42         | 1.10109e-88 | 1.000000 | 1.10110e-88 | 1.000000 |
| rad41         | 3.86886e-89 | 1.000000 | 3.86888e-89 | 1.000000 |
| rad47         | 2.95133e-95 | 1.000000 | 2.95134e-95 | 1.000000 |

0.100000000E-06 Pa, 70.0000000 K

=====  
Rate constant | True (fraction) | Effective (fraction)  
-----

Total | 5.61998e-54 (1.00) | 5.61996e-54 (1.00)

| species     | PYtrue      | Cumul    | PYeffective | Cumul    |
|-------------|-------------|----------|-------------|----------|
| Indene+H    | 0.999964    | 0.999964 | 0.999969    | 0.999969 |
| rad6        | 3.12245e-05 | 0.999995 | 3.12247e-05 | 1.000000 |
| Benzyl+C2H2 | 4.55784e-06 | 1.000000 | 0.000000    | 1.000000 |
| rad2        | 1.04376e-08 | 1.000000 | 1.04376e-08 | 1.000000 |
| rad7        | 2.26101e-09 | 1.000000 | 2.26103e-09 | 1.000000 |
| rad1        | 6.65123e-10 | 1.000000 | 6.65126e-10 | 1.000000 |
| rad11       | 5.52810e-10 | 1.000000 | 5.52812e-10 | 1.000000 |
| rad10       | 5.41185e-10 | 1.000000 | 5.41188e-10 | 1.000000 |
| rad3        | 6.97007e-11 | 1.000000 | 6.97010e-11 | 1.000000 |
| rad4        | 3.53110e-11 | 1.000000 | 3.53112e-11 | 1.000000 |
| rad13       | 1.25999e-11 | 1.000000 | 1.26000e-11 | 1.000000 |
| rad35       | 2.11179e-12 | 1.000000 | 2.11180e-12 | 1.000000 |
| PAH9+H      | 2.62385e-13 | 1.000000 | 2.62386e-13 | 1.000000 |
| rad33       | 2.38742e-14 | 1.000000 | 2.38743e-14 | 1.000000 |
| rad28       | 1.65235e-14 | 1.000000 | 1.65236e-14 | 1.000000 |
| rad30       | 1.03428e-15 | 1.000000 | 1.03428e-15 | 1.000000 |
| rad26       | 9.33663e-16 | 1.000000 | 9.33667e-16 | 1.000000 |
| rad38       | 9.17922e-16 | 1.000000 | 9.17926e-16 | 1.000000 |
| rad20       | 1.69989e-16 | 1.000000 | 1.69990e-16 | 1.000000 |
| rad21       | 1.06257e-16 | 1.000000 | 1.06257e-16 | 1.000000 |
| rad18       | 8.02697e-19 | 1.000000 | 8.02701e-19 | 1.000000 |
| rad27       | 2.54493e-19 | 1.000000 | 2.54494e-19 | 1.000000 |
| rad31       | 2.06164e-19 | 1.000000 | 2.06165e-19 | 1.000000 |
| rad15       | 9.42712e-20 | 1.000000 | 9.42716e-20 | 1.000000 |
| rad22       | 5.70007e-20 | 1.000000 | 5.70010e-20 | 1.000000 |
| rad23       | 4.97894e-20 | 1.000000 | 4.97897e-20 | 1.000000 |
| PhCHCCH2+H  | 4.06907e-20 | 1.000000 | 4.06909e-20 | 1.000000 |
| PhCCH+CH3   | 1.48086e-21 | 1.000000 | 1.48086e-21 | 1.000000 |
| rad45       | 3.19590e-22 | 1.000000 | 3.19592e-22 | 1.000000 |
| PhCCCH3+H   | 2.14666e-22 | 1.000000 | 2.14667e-22 | 1.000000 |
| rad36       | 1.98423e-23 | 1.000000 | 1.98423e-23 | 1.000000 |
| rad25       | 1.27158e-23 | 1.000000 | 1.27159e-23 | 1.000000 |

|               |             |          |             |         |
|---------------|-------------|----------|-------------|---------|
| rad24         | 4.21246e-24 | 1.000000 | 4.21248e-24 | 1.00000 |
| rad14         | 9.58128e-25 | 1.000000 | 9.58132e-25 | 1.00000 |
| rad46         | 1.49057e-27 | 1.000000 | 1.49058e-27 | 1.00000 |
| rad8          | 2.16468e-28 | 1.000000 | 2.16469e-28 | 1.00000 |
| rad9          | 7.18738e-31 | 1.000000 | 7.18742e-31 | 1.00000 |
| PAH7+H        | 1.05703e-31 | 1.000000 | 1.05704e-31 | 1.00000 |
| Ph+MeAc       | 1.27683e-32 | 1.000000 | 1.27683e-32 | 1.00000 |
| rad12         | 4.39614e-33 | 1.000000 | 4.39616e-33 | 1.00000 |
| rad39         | 2.46127e-34 | 1.000000 | 2.46128e-34 | 1.00000 |
| Ph+Allene     | 6.67431e-37 | 1.000000 | 6.67434e-37 | 1.00000 |
| rad60syn      | 5.83053e-41 | 1.000000 | 5.83055e-41 | 1.00000 |
| rad60anti     | 6.62999e-43 | 1.000000 | 6.63002e-43 | 1.00000 |
| PhCH2CCH+H    | 1.49433e-44 | 1.000000 | 1.49433e-44 | 1.00000 |
| rad37         | 1.82042e-45 | 1.000000 | 1.82043e-45 | 1.00000 |
| rad5          | 1.29519e-48 | 1.000000 | 1.29520e-48 | 1.00000 |
| PAH3+H        | 1.94829e-53 | 1.000000 | 1.94829e-53 | 1.00000 |
| rad59         | 1.04075e-53 | 1.000000 | 1.04075e-53 | 1.00000 |
| rad50         | 4.22205e-54 | 1.000000 | 4.22207e-54 | 1.00000 |
| rad19syn      | 2.84492e-62 | 1.000000 | 2.84494e-62 | 1.00000 |
| rad52         | 4.06212e-66 | 1.000000 | 4.06214e-66 | 1.00000 |
| PAH10+CH3     | 1.43886e-66 | 1.000000 | 1.43887e-66 | 1.00000 |
| rad54         | 4.31323e-67 | 1.000000 | 4.31325e-67 | 1.00000 |
| rad43         | 3.41120e-67 | 1.000000 | 3.41122e-67 | 1.00000 |
| rad62         | 8.67064e-70 | 1.000000 | 8.67068e-70 | 1.00000 |
| rad51         | 3.93840e-73 | 1.000000 | 3.93842e-73 | 1.00000 |
| rad70         | 4.40691e-76 | 1.000000 | 4.40693e-76 | 1.00000 |
| PhcycC3H3_A+H | 1.96118e-76 | 1.000000 | 1.96118e-76 | 1.00000 |
| rad55         | 1.04996e-76 | 1.000000 | 1.04996e-76 | 1.00000 |
| rad65         | 4.19991e-78 | 1.000000 | 4.19993e-78 | 1.00000 |
| rad58         | 6.88600e-80 | 1.000000 | 6.88603e-80 | 1.00000 |
| PAH1+H        | 1.51052e-81 | 1.000000 | 1.51052e-81 | 1.00000 |
| rad34         | 1.11516e-83 | 1.000000 | 1.11517e-83 | 1.00000 |
| rad42         | 1.59557e-86 | 1.000000 | 1.59558e-86 | 1.00000 |
| rad41         | 7.44211e-87 | 1.000000 | 7.44215e-87 | 1.00000 |
| rad47         | 9.42643e-94 | 1.000000 | 9.42647e-94 | 1.00000 |

0.100000000E-06 Pa, 80.0000000 K

=====

| Rate constant | True (fraction)     | Effective (fraction) |
|---------------|---------------------|----------------------|
| Total         | 7.28864e-49 (1.00 ) | 7.28860e-49 (1.00 )  |

| species     | PYtrue      | Cumul    | PYeffective | Cumul    |
|-------------|-------------|----------|-------------|----------|
| Indene+H    | 0.999969    | 0.999969 | 0.999975    | 0.999975 |
| rad6        | 2.47695e-05 | 0.999994 | 2.47696e-05 | 1.000000 |
| Benzyl+C2H2 | 6.25406e-06 | 1.00000  | 0.00000     | 1.000000 |
| rad2        | 8.60134e-09 | 1.00000  | 8.60139e-09 | 1.000000 |
| rad7        | 1.79604e-09 | 1.00000  | 1.79606e-09 | 1.000000 |
| rad1        | 5.49640e-10 | 1.00000  | 5.49644e-10 | 1.000000 |
| rad11       | 4.39250e-10 | 1.00000  | 4.39253e-10 | 1.000000 |
| rad10       | 4.37105e-10 | 1.00000  | 4.37108e-10 | 1.000000 |
| rad3        | 5.65130e-11 | 1.00000  | 5.65134e-11 | 1.000000 |
| rad4        | 2.86506e-11 | 1.00000  | 2.86508e-11 | 1.000000 |
| rad13       | 1.00166e-11 | 1.00000  | 1.00167e-11 | 1.000000 |
| rad35       | 3.84755e-12 | 1.00000  | 3.84757e-12 | 1.000000 |
| PAH9+H      | 7.64124e-13 | 1.00000  | 7.64129e-13 | 1.000000 |
| rad28       | 1.45529e-13 | 1.00000  | 1.45530e-13 | 1.000000 |
| rad33       | 1.90000e-14 | 1.00000  | 1.90001e-14 | 1.000000 |
| rad30       | 1.51678e-14 | 1.00000  | 1.51679e-14 | 1.000000 |
| rad26       | 9.47165e-15 | 1.00000  | 9.47171e-15 | 1.000000 |
| rad38       | 5.80891e-15 | 1.00000  | 5.80894e-15 | 1.000000 |
| rad20       | 1.41053e-16 | 1.00000  | 1.41054e-16 | 1.000000 |
| rad21       | 8.82357e-17 | 1.00000  | 8.82362e-17 | 1.000000 |
| rad15       | 4.85077e-18 | 1.00000  | 4.85080e-18 | 1.000000 |
| PhCHCCH2+H  | 3.15085e-18 | 1.00000  | 3.15087e-18 | 1.000000 |
| rad27       | 1.35813e-18 | 1.00000  | 1.35814e-18 | 1.000000 |
| rad18       | 6.66336e-19 | 1.00000  | 6.66340e-19 | 1.000000 |
| PhCCH+CH3   | 2.15008e-19 | 1.00000  | 2.15009e-19 | 1.000000 |
| rad31       | 1.72300e-19 | 1.00000  | 1.72301e-19 | 1.000000 |
| rad22       | 4.70085e-20 | 1.00000  | 4.70088e-20 | 1.000000 |
| PhCCCH3+H   | 3.85865e-20 | 1.00000  | 3.85868e-20 | 1.000000 |
| rad23       | 3.80104e-20 | 1.00000  | 3.80106e-20 | 1.000000 |
| rad25       | 2.95579e-22 | 1.00000  | 2.95581e-22 | 1.000000 |
| rad45       | 2.46402e-22 | 1.00000  | 2.46404e-22 | 1.000000 |
| rad14       | 3.37357e-23 | 1.00000  | 3.37359e-23 | 1.000000 |
| rad36       | 1.52878e-23 | 1.00000  | 1.52879e-23 | 1.000000 |
| rad24       | 3.73707e-24 | 1.00000  | 3.73709e-24 | 1.000000 |
| rad46       | 4.58870e-25 | 1.00000  | 4.58873e-25 | 1.000000 |
| rad8        | 3.75347e-25 | 1.00000  | 3.75350e-25 | 1.000000 |



|               |             |         |             |          |
|---------------|-------------|---------|-------------|----------|
| rad9          | 2.22223e-29 | 1.00000 | 2.22225e-29 | 1.000000 |
| PAH7+H        | 3.65305e-30 | 1.00000 | 3.65307e-30 | 1.000000 |
| Ph+MeAc       | 4.10394e-31 | 1.00000 | 4.10397e-31 | 1.000000 |
| rad12         | 1.42820e-31 | 1.00000 | 1.42821e-31 | 1.000000 |
| rad39         | 8.62451e-33 | 1.00000 | 8.62457e-33 | 1.000000 |
| Ph+Allene     | 2.28276e-35 | 1.00000 | 2.28277e-35 | 1.000000 |
| rad60syn      | 1.97555e-39 | 1.00000 | 1.97557e-39 | 1.000000 |
| rad60anti     | 2.31244e-41 | 1.00000 | 2.31245e-41 | 1.000000 |
| PhCH2CCH+H    | 5.74824e-43 | 1.00000 | 5.74828e-43 | 1.000000 |
| rad37         | 8.09165e-44 | 1.00000 | 8.09170e-44 | 1.000000 |
| rad5          | 5.94737e-47 | 1.00000 | 5.94740e-47 | 1.000000 |
| PAH3+H        | 8.18659e-52 | 1.00000 | 8.18664e-52 | 1.000000 |
| rad59         | 4.36846e-52 | 1.00000 | 4.36849e-52 | 1.000000 |
| rad50         | 1.88642e-52 | 1.00000 | 1.88643e-52 | 1.000000 |
| rad19syn      | 1.64998e-60 | 1.00000 | 1.64999e-60 | 1.000000 |
| rad52         | 3.27469e-64 | 1.00000 | 3.27471e-64 | 1.000000 |
| PAH10+CH3     | 2.36265e-64 | 1.00000 | 2.36266e-64 | 1.000000 |
| rad43         | 5.60321e-65 | 1.00000 | 5.60325e-65 | 1.000000 |
| rad54         | 3.11434e-65 | 1.00000 | 3.11436e-65 | 1.000000 |
| rad62         | 1.57893e-67 | 1.00000 | 1.57894e-67 | 1.000000 |
| rad51         | 5.95521e-71 | 1.00000 | 5.95524e-71 | 1.000000 |
| rad70         | 6.21615e-74 | 1.00000 | 6.21618e-74 | 1.000000 |
| PhcycC3H3_A+H | 2.92332e-74 | 1.00000 | 2.92334e-74 | 1.000000 |
| rad55         | 1.55268e-74 | 1.00000 | 1.55269e-74 | 1.000000 |
| rad65         | 9.14447e-76 | 1.00000 | 9.14453e-76 | 1.000000 |
| rad58         | 1.07662e-77 | 1.00000 | 1.07662e-77 | 1.000000 |
| PAH1+H        | 4.01712e-79 | 1.00000 | 4.01714e-79 | 1.000000 |
| rad34         | 3.23206e-81 | 1.00000 | 3.23208e-81 | 1.000000 |
| rad42         | 9.45905e-84 | 1.00000 | 9.45911e-84 | 1.000000 |
| rad41         | 4.65276e-84 | 1.00000 | 4.65279e-84 | 1.000000 |
| rad47         | 2.96656e-91 | 1.00000 | 2.96658e-91 | 1.000000 |

0.100000000E-06 Pa, 90.0000000 K

| Rate constant | True (fraction)     | Effective (fraction) |
|---------------|---------------------|----------------------|
| Total         | 6.85154e-45 (1.00 ) | 6.85148e-45 (1.00 )  |

| species     | PYtrue      | Cumul    | PYeffective | Cumul    |
|-------------|-------------|----------|-------------|----------|
| Indene+H    | 0.999972    | 0.999972 | 0.999980    | 0.999980 |
| rad6        | 1.97453e-05 | 0.999992 | 1.97455e-05 | 1.000000 |
| Benzyl+C2H2 | 8.45224e-06 | 1.00000  | 0.00000     | 1.000000 |
| rad2        | 6.87691e-09 | 1.00000  | 6.87697e-09 | 1.000000 |
| rad7        | 1.43383e-09 | 1.00000  | 1.43384e-09 | 1.000000 |
| rad1        | 4.40800e-10 | 1.00000  | 4.40803e-10 | 1.000000 |
| rad10       | 3.50927e-10 | 1.00000  | 3.50930e-10 | 1.000000 |
| rad11       | 3.50773e-10 | 1.00000  | 3.50776e-10 | 1.000000 |
| rad3        | 4.54960e-11 | 1.00000  | 4.54964e-11 | 1.000000 |
| rad4        | 2.30837e-11 | 1.00000  | 2.30839e-11 | 1.000000 |
| rad13       | 8.00333e-12 | 1.00000  | 8.00340e-12 | 1.000000 |
| rad35       | 6.25580e-12 | 1.00000  | 6.25586e-12 | 1.000000 |
| PAH9+H      | 1.77825e-12 | 1.00000  | 1.77827e-12 | 1.000000 |
| rad28       | 8.09606e-13 | 1.00000  | 8.09613e-13 | 1.000000 |
| rad30       | 1.20962e-13 | 1.00000  | 1.20963e-13 | 1.000000 |
| rad26       | 5.89894e-14 | 1.00000  | 5.89899e-14 | 1.000000 |
| rad38       | 2.43293e-14 | 1.00000  | 2.43295e-14 | 1.000000 |
| rad33       | 1.51989e-14 | 1.00000  | 1.51991e-14 | 1.000000 |
| rad20       | 1.19328e-16 | 1.00000  | 1.19329e-16 | 1.000000 |
| PhCHCCH2+H  | 1.07786e-16 | 1.00000  | 1.07786e-16 | 1.000000 |
| rad15       | 1.02394e-16 | 1.00000  | 1.02395e-16 | 1.000000 |
| rad21       | 7.47082e-17 | 1.00000  | 7.47088e-17 | 1.000000 |
| PhCCH+CH3   | 1.21303e-17 | 1.00000  | 1.21304e-17 | 1.000000 |
| rad27       | 5.05326e-18 | 1.00000  | 5.05330e-18 | 1.000000 |
| PhCCCH3+H   | 2.56664e-18 | 1.00000  | 2.56667e-18 | 1.000000 |
| rad18       | 5.63711e-19 | 1.00000  | 5.63716e-19 | 1.000000 |
| rad31       | 1.45060e-19 | 1.00000  | 1.45061e-19 | 1.000000 |
| rad22       | 3.95289e-20 | 1.00000  | 3.95292e-20 | 1.000000 |
| rad23       | 3.02621e-20 | 1.00000  | 3.02624e-20 | 1.000000 |
| rad25       | 3.56388e-21 | 1.00000  | 3.56391e-21 | 1.000000 |
| rad14       | 5.68715e-22 | 1.00000  | 5.68720e-22 | 1.000000 |
| rad45       | 1.98533e-22 | 1.00000  | 1.98534e-22 | 1.000000 |
| rad8        | 1.12638e-22 | 1.00000  | 1.12639e-22 | 1.000000 |
| rad46       | 3.75436e-23 | 1.00000  | 3.75439e-23 | 1.000000 |
| rad36       | 1.23109e-23 | 1.00000  | 1.23110e-23 | 1.000000 |
| rad24       | 3.39455e-24 | 1.00000  | 3.39458e-24 | 1.000000 |
| rad9        | 1.25680e-24 | 1.00000  | 1.25681e-24 | 1.000000 |
| PAH7+H      | 2.14723e-25 | 1.00000  | 2.14724e-25 | 1.000000 |
| rad12       | 7.49255e-27 | 1.00000  | 7.49261e-27 | 1.000000 |
| Ph+MeAc     | 1.94112e-27 | 1.00000  | 1.94114e-27 | 1.000000 |

|               |             |         |             |          |
|---------------|-------------|---------|-------------|----------|
| rad39         | 1.67226e-30 | 1.00000 | 1.67228e-30 | 1.000000 |
| Ph+Allene     | 4.50860e-33 | 1.00000 | 4.50863e-33 | 1.000000 |
| rad60syn      | 3.86508e-37 | 1.00000 | 3.86512e-37 | 1.000000 |
| rad60anti     | 4.65646e-39 | 1.00000 | 4.65650e-39 | 1.000000 |
| PhCH2CCH+H    | 1.27056e-40 | 1.00000 | 1.27057e-40 | 1.000000 |
| rad37         | 1.71812e-41 | 1.00000 | 1.71813e-41 | 1.000000 |
| rad5          | 1.27832e-44 | 1.00000 | 1.27833e-44 | 1.000000 |
| PAH3+H        | 1.95550e-49 | 1.00000 | 1.95551e-49 | 1.000000 |
| rad59         | 1.04248e-49 | 1.00000 | 1.04249e-49 | 1.000000 |
| rad50         | 4.64139e-50 | 1.00000 | 4.64143e-50 | 1.000000 |
| rad19syn      | 5.27322e-58 | 1.00000 | 5.27327e-58 | 1.000000 |
| rad52         | 1.41591e-61 | 1.00000 | 1.41592e-61 | 1.000000 |
| PAH10+CH3     | 1.27177e-61 | 1.00000 | 1.27178e-61 | 1.000000 |
| rad43         | 3.01751e-62 | 1.00000 | 3.01753e-62 | 1.000000 |
| rad54         | 1.25060e-62 | 1.00000 | 1.25061e-62 | 1.000000 |
| rad62         | 9.85553e-65 | 1.00000 | 9.85562e-65 | 1.000000 |
| rad51         | 4.41441e-68 | 1.00000 | 4.41445e-68 | 1.000000 |
| rad70         | 4.84132e-71 | 1.00000 | 4.84136e-71 | 1.000000 |
| PhcycC3H3_A+H | 2.39279e-71 | 1.00000 | 2.39281e-71 | 1.000000 |
| rad55         | 1.26021e-71 | 1.00000 | 1.26022e-71 | 1.000000 |
| rad65         | 9.02792e-73 | 1.00000 | 9.02799e-73 | 1.000000 |
| rad58         | 9.18199e-75 | 1.00000 | 9.18206e-75 | 1.000000 |
| PAH1+H        | 5.20426e-76 | 1.00000 | 5.20430e-76 | 1.000000 |
| rad34         | 4.57539e-78 | 1.00000 | 4.57543e-78 | 1.000000 |
| rad42         | 1.73494e-80 | 1.00000 | 1.73496e-80 | 1.000000 |
| rad41         | 8.83901e-81 | 1.00000 | 8.83908e-81 | 1.000000 |
| rad47         | 3.79848e-88 | 1.00000 | 3.79851e-88 | 1.000000 |

0.100000000E-06 Pa, 100.000000 K

| Rate constant | True (fraction)     | Effective (fraction) |
|---------------|---------------------|----------------------|
| Total         | 1.02671e-41 (1.00 ) | 1.02670e-41 (1.00 )  |

| species     | PYtrue      | Cumul    | PYeffective | Cumul    |
|-------------|-------------|----------|-------------|----------|
| Indene+H    | 0.999973    | 0.999973 | 0.999984    | 0.999984 |
| rad6        | 1.58000e-05 | 0.999989 | 1.58002e-05 | 1.000000 |
| Benzyl+C2H2 | 1.12961e-05 | 1.00000  | 0.00000     | 1.000000 |
| rad2        | 5.43751e-09 | 1.00000  | 5.43757e-09 | 1.000000 |
| rad7        | 1.14911e-09 | 1.00000  | 1.14912e-09 | 1.000000 |
| rad1        | 3.49710e-10 | 1.00000  | 3.49714e-10 | 1.000000 |
| rad10       | 2.83039e-10 | 1.00000  | 2.83043e-10 | 1.000000 |
| rad11       | 2.81209e-10 | 1.00000  | 2.81212e-10 | 1.000000 |
| rad3        | 3.78262e-11 | 1.00000  | 3.78266e-11 | 1.000000 |
| rad4        | 1.92092e-11 | 1.00000  | 1.92094e-11 | 1.000000 |
| rad35       | 9.46385e-12 | 1.00000  | 9.46396e-12 | 1.000000 |
| rad13       | 6.41987e-12 | 1.00000  | 6.41995e-12 | 1.000000 |
| PAH9+H      | 3.55831e-12 | 1.00000  | 3.55835e-12 | 1.000000 |
| rad28       | 3.09469e-12 | 1.00000  | 3.09473e-12 | 1.000000 |
| rad30       | 6.32703e-13 | 1.00000  | 6.32710e-13 | 1.000000 |
| rad26       | 2.46353e-13 | 1.00000  | 2.46355e-13 | 1.000000 |
| rad38       | 7.69626e-14 | 1.00000  | 7.69635e-14 | 1.000000 |
| rad33       | 1.22073e-14 | 1.00000  | 1.22075e-14 | 1.000000 |
| PhCHCCH2+H  | 1.87699e-15 | 1.00000  | 1.87701e-15 | 1.000000 |
| rad15       | 1.16430e-15 | 1.00000  | 1.16431e-15 | 1.000000 |
| PhCCH+CH3   | 3.13705e-16 | 1.00000  | 3.13709e-16 | 1.000000 |
| rad20       | 1.02421e-16 | 1.00000  | 1.02422e-16 | 1.000000 |
| PhCCCH3+H   | 7.53398e-17 | 1.00000  | 7.53407e-17 | 1.000000 |
| rad21       | 6.41815e-17 | 1.00000  | 6.41822e-17 | 1.000000 |
| rad27       | 1.40132e-17 | 1.00000  | 1.40133e-17 | 1.000000 |
| rad18       | 4.83607e-19 | 1.00000  | 4.83613e-19 | 1.000000 |
| rad31       | 1.23048e-19 | 1.00000  | 1.23049e-19 | 1.000000 |
| rad22       | 3.37142e-20 | 1.00000  | 3.37146e-20 | 1.000000 |
| rad25       | 2.51875e-20 | 1.00000  | 2.51878e-20 | 1.000000 |
| rad23       | 2.49205e-20 | 1.00000  | 2.49208e-20 | 1.000000 |
| rad8        | 7.87851e-21 | 1.00000  | 7.87860e-21 | 1.000000 |
| rad14       | 5.24900e-21 | 1.00000  | 5.24905e-21 | 1.000000 |
| rad46       | 1.26406e-21 | 1.00000  | 1.26408e-21 | 1.000000 |
| rad9        | 1.71458e-22 | 1.00000  | 1.71460e-22 | 1.000000 |
| rad45       | 1.71150e-22 | 1.00000  | 1.71152e-22 | 1.000000 |
| PAH7+H      | 4.58436e-23 | 1.00000  | 4.58441e-23 | 1.000000 |
| Ph+MeAc     | 1.57507e-23 | 1.00000  | 1.57509e-23 | 1.000000 |
| rad36       | 1.06088e-23 | 1.00000  | 1.06089e-23 | 1.000000 |
| rad24       | 3.14014e-24 | 1.00000  | 3.14018e-24 | 1.000000 |
| rad12       | 2.81433e-24 | 1.00000  | 2.81436e-24 | 1.000000 |
| rad39       | 3.50378e-25 | 1.00000  | 3.50382e-25 | 1.000000 |
| Ph+Allene   | 1.51049e-30 | 1.00000  | 1.51050e-30 | 1.000000 |
| rad60syn    | 1.28206e-34 | 1.00000  | 1.28207e-34 | 1.000000 |
| rad60anti   | 1.59149e-36 | 1.00000  | 1.59151e-36 | 1.000000 |

|               |             |         |             |          |
|---------------|-------------|---------|-------------|----------|
| PhCH2CCH+H    | 4.77986e-38 | 1.00000 | 4.77992e-38 | 1.000000 |
| rad37         | 6.18562e-39 | 1.00000 | 6.18569e-39 | 1.000000 |
| rad5          | 4.64305e-42 | 1.00000 | 4.64310e-42 | 1.000000 |
| PAH3+H        | 7.94639e-47 | 1.00000 | 7.94648e-47 | 1.000000 |
| rad59         | 4.23217e-47 | 1.00000 | 4.23222e-47 | 1.000000 |
| rad50         | 1.88978e-47 | 1.00000 | 1.88980e-47 | 1.000000 |
| rad19syn      | 2.90899e-55 | 1.00000 | 2.90902e-55 | 1.000000 |
| PAH10+CH3     | 1.11946e-58 | 1.00000 | 1.11947e-58 | 1.000000 |
| rad52         | 1.01533e-58 | 1.00000 | 1.01534e-58 | 1.000000 |
| rad43         | 2.65785e-59 | 1.00000 | 2.65788e-59 | 1.000000 |
| rad54         | 9.00736e-60 | 1.00000 | 9.00746e-60 | 1.000000 |
| rad62         | 1.01477e-61 | 1.00000 | 1.01478e-61 | 1.000000 |
| rad51         | 5.25966e-65 | 1.00000 | 5.25972e-65 | 1.000000 |
| rad70         | 6.96618e-68 | 1.00000 | 6.96626e-68 | 1.000000 |
| PhcycC3H3_A+H | 3.61492e-68 | 1.00000 | 3.61496e-68 | 1.000000 |
| rad55         | 1.88539e-68 | 1.00000 | 1.88541e-68 | 1.000000 |
| rad65         | 1.40425e-69 | 1.00000 | 1.40427e-69 | 1.000000 |
| rad58         | 1.44128e-71 | 1.00000 | 1.44129e-71 | 1.000000 |
| PAH1+H        | 1.21775e-72 | 1.00000 | 1.21776e-72 | 1.000000 |
| rad34         | 1.18150e-74 | 1.00000 | 1.18152e-74 | 1.000000 |
| rad42         | 5.27812e-77 | 1.00000 | 5.27818e-77 | 1.000000 |
| rad41         | 2.77444e-77 | 1.00000 | 2.77448e-77 | 1.000000 |
| rad47         | 7.58490e-85 | 1.00000 | 7.58499e-85 | 1.000000 |

0.1000000000E-06 Pa, 110.000000 K

| Rate constant | True (fraction)    | Effective (fraction) |
|---------------|--------------------|----------------------|
| Total         | 4.04932e-39 (1.00) | 4.04926e-39 (1.00)   |

| species     | PYtrue      | Cumul    | PYeffective | Cumul    |
|-------------|-------------|----------|-------------|----------|
| Indene+H    | 0.999972    | 0.999972 | 0.999987    | 0.999987 |
| Benzyl+C2H2 | 1.49723e-05 | 0.999987 | 0.00000     | 0.999987 |
| rad6        | 1.26799e-05 | 1.000000 | 1.26801e-05 | 1.000000 |
| rad2        | 4.45548e-09 | 1.000000 | 4.45555e-09 | 1.000000 |
| rad7        | 9.23676e-10 | 1.000000 | 9.23690e-10 | 1.000000 |
| rad1        | 2.87605e-10 | 1.000000 | 2.87609e-10 | 1.000000 |
| rad10       | 2.29725e-10 | 1.000000 | 2.29728e-10 | 1.000000 |
| rad11       | 2.26119e-10 | 1.000000 | 2.26123e-10 | 1.000000 |
| rad3        | 2.95776e-11 | 1.000000 | 2.95780e-11 | 1.000000 |
| rad4        | 1.50349e-11 | 1.000000 | 1.50351e-11 | 1.000000 |
| rad35       | 1.36721e-11 | 1.000000 | 1.36723e-11 | 1.000000 |
| rad28       | 8.92692e-12 | 1.000000 | 8.92705e-12 | 1.000000 |
| PAH9+H      | 6.41642e-12 | 1.000000 | 6.41651e-12 | 1.000000 |
| rad13       | 5.16542e-12 | 1.000000 | 5.16550e-12 | 1.000000 |
| rad30       | 2.44539e-12 | 1.000000 | 2.44542e-12 | 1.000000 |
| rad26       | 7.63096e-13 | 1.000000 | 7.63108e-13 | 1.000000 |
| rad38       | 2.00045e-13 | 1.000000 | 2.00048e-13 | 1.000000 |
| PhCHCCH2+H  | 1.98961e-14 | 1.000000 | 1.98964e-14 | 1.000000 |
| rad33       | 9.83536e-15 | 1.000000 | 9.83551e-15 | 1.000000 |
| rad15       | 8.47755e-15 | 1.000000 | 8.47768e-15 | 1.000000 |
| PhCCH+CH3   | 4.58339e-15 | 1.000000 | 4.58346e-15 | 1.000000 |
| PhCCCH3+H   | 1.21641e-15 | 1.000000 | 1.21643e-15 | 1.000000 |
| rad20       | 8.88901e-17 | 1.000000 | 8.88914e-17 | 1.000000 |
| rad21       | 5.57578e-17 | 1.000000 | 5.57586e-17 | 1.000000 |
| rad27       | 3.11351e-17 | 1.000000 | 3.11356e-17 | 1.000000 |
| rad18       | 4.19288e-19 | 1.000000 | 4.19294e-19 | 1.000000 |
| rad8        | 2.54404e-19 | 1.000000 | 2.54407e-19 | 1.000000 |
| rad25       | 1.19894e-19 | 1.000000 | 1.19896e-19 | 1.000000 |
| rad31       | 1.05157e-19 | 1.000000 | 1.05158e-19 | 1.000000 |
| rad14       | 3.10616e-20 | 1.000000 | 3.10621e-20 | 1.000000 |
| rad22       | 2.90602e-20 | 1.000000 | 2.90606e-20 | 1.000000 |
| rad46       | 2.24507e-20 | 1.000000 | 2.24510e-20 | 1.000000 |
| rad23       | 2.11304e-20 | 1.000000 | 2.11307e-20 | 1.000000 |
| rad9        | 8.70688e-21 | 1.000000 | 8.70701e-21 | 1.000000 |
| PAH7+H      | 2.76443e-21 | 1.000000 | 2.76447e-21 | 1.000000 |
| Ph+MeAc     | 1.76863e-21 | 1.000000 | 1.76865e-21 | 1.000000 |
| rad12       | 1.91648e-22 | 1.000000 | 1.91651e-22 | 1.000000 |
| rad45       | 1.46592e-22 | 1.000000 | 1.46594e-22 | 1.000000 |
| rad39       | 3.70384e-23 | 1.000000 | 3.70390e-23 | 1.000000 |
| rad36       | 9.08436e-24 | 1.000000 | 9.08450e-24 | 1.000000 |
| rad24       | 2.94740e-24 | 1.000000 | 2.94744e-24 | 1.000000 |
| Ph+Allene   | 1.91203e-24 | 1.000000 | 1.91206e-24 | 1.000000 |
| rad60syn    | 2.70844e-26 | 1.000000 | 2.70848e-26 | 1.000000 |
| rad60anti   | 1.02857e-27 | 1.000000 | 1.02859e-27 | 1.000000 |
| PhCH2CCH+H  | 4.17303e-35 | 1.000000 | 4.17309e-35 | 1.000000 |
| rad37       | 4.93990e-36 | 1.000000 | 4.93998e-36 | 1.000000 |
| rad5        | 3.65960e-39 | 1.000000 | 3.65965e-39 | 1.000000 |
| PAH3+H      | 7.43322e-44 | 1.000000 | 7.43333e-44 | 1.000000 |

|               |             |          |             |          |
|---------------|-------------|----------|-------------|----------|
| rad59         | 3.95600e-44 | 1.000000 | 3.95606e-44 | 1.000000 |
| rad50         | 1.66682e-44 | 1.000000 | 1.66684e-44 | 1.000000 |
| rad19syn      | 3.14759e-52 | 1.000000 | 3.14764e-52 | 1.000000 |
| PAH10+CH3     | 1.43147e-55 | 1.000000 | 1.43150e-55 | 1.000000 |
| rad52         | 1.25369e-55 | 1.000000 | 1.25371e-55 | 1.000000 |
| rad43         | 3.40041e-56 | 1.000000 | 3.40046e-56 | 1.000000 |
| rad54         | 1.13804e-56 | 1.000000 | 1.13806e-56 | 1.000000 |
| rad62         | 1.51936e-58 | 1.000000 | 1.51938e-58 | 1.000000 |
| rad51         | 1.00811e-61 | 1.000000 | 1.00812e-61 | 1.000000 |
| rad70         | 1.54185e-64 | 1.000000 | 1.54187e-64 | 1.000000 |
| PhcycC3H3_A+H | 8.37578e-65 | 1.000000 | 8.37591e-65 | 1.000000 |
| rad55         | 4.32101e-65 | 1.000000 | 4.32107e-65 | 1.000000 |
| rad65         | 3.46006e-66 | 1.000000 | 3.46011e-66 | 1.000000 |
| rad58         | 3.45994e-68 | 1.000000 | 3.45999e-68 | 1.000000 |
| PAH1+H        | 4.32774e-69 | 1.000000 | 4.32780e-69 | 1.000000 |
| rad34         | 4.69833e-71 | 1.000000 | 4.69840e-71 | 1.000000 |
| rad42         | 2.32701e-73 | 1.000000 | 2.32705e-73 | 1.000000 |
| rad41         | 1.25513e-73 | 1.000000 | 1.25515e-73 | 1.000000 |
| rad47         | 2.40263e-81 | 1.000000 | 2.40266e-81 | 1.000000 |

0.100000000E-06 Pa, 120.000000 K

| Rate constant | True (fraction)     | Effective (fraction) |
|---------------|---------------------|----------------------|
| Total         | 5.87106e-37 (1.00 ) | 5.87094e-37 (1.00 )  |

| species     | PYtrue      | Cumul    | PYeffective | Cumul    |
|-------------|-------------|----------|-------------|----------|
| Indene+H    | 0.999970    | 0.999970 | 0.999990    | 0.999990 |
| Benzyl+C2H2 | 1.97206e-05 | 0.999990 | 0.00000     | 0.999990 |
| rad6        | 1.01983e-05 | 1.000000 | 1.01985e-05 | 1.000000 |
| rad2        | 3.62236e-09 | 1.000000 | 3.62243e-09 | 1.000000 |
| rad7        | 7.44158e-10 | 1.000000 | 7.44173e-10 | 1.000000 |
| rad1        | 2.34762e-10 | 1.000000 | 2.34767e-10 | 1.000000 |
| rad10       | 1.87529e-10 | 1.000000 | 1.87533e-10 | 1.000000 |
| rad11       | 1.82239e-10 | 1.000000 | 1.82243e-10 | 1.000000 |
| rad3        | 2.42383e-11 | 1.000000 | 2.42388e-11 | 1.000000 |
| rad28       | 2.08106e-11 | 1.000000 | 2.08110e-11 | 1.000000 |
| rad35       | 1.91828e-11 | 1.000000 | 1.91832e-11 | 1.000000 |
| rad4        | 1.23340e-11 | 1.000000 | 1.23342e-11 | 1.000000 |
| PAH9+H      | 1.07590e-11 | 1.000000 | 1.07592e-11 | 1.000000 |
| rad30       | 7.56110e-12 | 1.000000 | 7.56125e-12 | 1.000000 |
| rad13       | 4.16577e-12 | 1.000000 | 4.16586e-12 | 1.000000 |
| rad26       | 1.88652e-12 | 1.000000 | 1.88655e-12 | 1.000000 |
| rad38       | 4.51811e-13 | 1.000000 | 4.51820e-13 | 1.000000 |
| PhCHCCH2+H  | 1.45344e-13 | 1.000000 | 1.45347e-13 | 1.000000 |
| rad15       | 4.43409e-14 | 1.000000 | 4.43418e-14 | 1.000000 |
| PhCCH+CH3   | 4.36541e-14 | 1.000000 | 4.36550e-14 | 1.000000 |
| PhCCCH3+H   | 1.25481e-14 | 1.000000 | 1.25483e-14 | 1.000000 |
| rad33       | 7.94350e-15 | 1.000000 | 7.94365e-15 | 1.000000 |
| rad20       | 7.78197e-17 | 1.000000 | 7.78212e-17 | 1.000000 |
| rad27       | 5.84797e-17 | 1.000000 | 5.84808e-17 | 1.000000 |
| rad21       | 4.88662e-17 | 1.000000 | 4.88671e-17 | 1.000000 |
| rad8        | 4.61979e-18 | 1.000000 | 4.61988e-18 | 1.000000 |
| rad25       | 4.23996e-19 | 1.000000 | 4.24005e-19 | 1.000000 |
| rad18       | 3.66474e-19 | 1.000000 | 3.66481e-19 | 1.000000 |
| rad46       | 2.47623e-19 | 1.000000 | 2.47628e-19 | 1.000000 |
| rad9        | 2.29229e-19 | 1.000000 | 2.29234e-19 | 1.000000 |
| rad14       | 1.31637e-19 | 1.000000 | 1.31639e-19 | 1.000000 |
| rad31       | 9.05861e-20 | 1.000000 | 9.05879e-20 | 1.000000 |
| PAH7+H      | 8.24636e-20 | 1.000000 | 8.24653e-20 | 1.000000 |
| Ph+MeAc     | 7.42065e-20 | 1.000000 | 7.42080e-20 | 1.000000 |
| rad22       | 2.52489e-20 | 1.000000 | 2.52494e-20 | 1.000000 |
| rad23       | 1.84146e-20 | 1.000000 | 1.84150e-20 | 1.000000 |
| rad12       | 6.23417e-21 | 1.000000 | 6.23429e-21 | 1.000000 |
| rad39       | 1.51567e-21 | 1.000000 | 1.51570e-21 | 1.000000 |
| Ph+Allene   | 1.55525e-22 | 1.000000 | 1.55528e-22 | 1.000000 |
| rad45       | 1.33661e-22 | 1.000000 | 1.33663e-22 | 1.000000 |
| rad36       | 8.28261e-24 | 1.000000 | 8.28278e-24 | 1.000000 |
| rad24       | 2.79983e-24 | 1.000000 | 2.79988e-24 | 1.000000 |
| rad60syn    | 1.65778e-24 | 1.000000 | 1.65782e-24 | 1.000000 |
| rad60anti   | 9.96798e-26 | 1.000000 | 9.96818e-26 | 1.000000 |
| PhCH2CCH+H  | 2.55818e-32 | 1.000000 | 2.55823e-32 | 1.000000 |
| rad37       | 2.92004e-33 | 1.000000 | 2.92009e-33 | 1.000000 |
| rad5        | 2.15309e-36 | 1.000000 | 2.15313e-36 | 1.000000 |
| PAH3+H      | 4.91089e-41 | 1.000000 | 4.91099e-41 | 1.000000 |
| rad59       | 2.61143e-41 | 1.000000 | 2.61148e-41 | 1.000000 |
| rad50       | 1.03669e-41 | 1.000000 | 1.03671e-41 | 1.000000 |
| rad19syn    | 2.38174e-49 | 1.000000 | 2.38178e-49 | 1.000000 |
| PAH10+CH3   | 1.24201e-52 | 1.000000 | 1.24203e-52 | 1.000000 |

|               |             |          |             |          |
|---------------|-------------|----------|-------------|----------|
| rad52         | 1.02187e-52 | 1.000000 | 1.02189e-52 | 1.000000 |
| rad43         | 2.95240e-53 | 1.000000 | 2.95246e-53 | 1.000000 |
| rad54         | 9.87444e-54 | 1.000000 | 9.87463e-54 | 1.000000 |
| rad62         | 1.54432e-55 | 1.000000 | 1.54435e-55 | 1.000000 |
| rad51         | 1.27539e-58 | 1.000000 | 1.27542e-58 | 1.000000 |
| rad70         | 2.36637e-61 | 1.000000 | 2.36642e-61 | 1.000000 |
| PhcycC3H3_A+H | 1.35066e-61 | 1.000000 | 1.35069e-61 | 1.000000 |
| rad55         | 6.87326e-62 | 1.000000 | 6.87339e-62 | 1.000000 |
| rad65         | 5.64250e-63 | 1.000000 | 5.64262e-63 | 1.000000 |
| rad58         | 5.78830e-65 | 1.000000 | 5.78842e-65 | 1.000000 |
| PAH1+H        | 1.11123e-65 | 1.000000 | 1.11125e-65 | 1.000000 |
| rad34         | 1.38118e-67 | 1.000000 | 1.38120e-67 | 1.000000 |
| rad42         | 7.09185e-70 | 1.000000 | 7.09199e-70 | 1.000000 |
| rad41         | 3.88418e-70 | 1.000000 | 3.88425e-70 | 1.000000 |
| rad47         | 5.09844e-78 | 1.000000 | 5.09854e-78 | 1.000000 |

0.100000000E-06 Pa, 130.000000 K

| =====         |                     |          |                      |          |
|---------------|---------------------|----------|----------------------|----------|
| Rate constant | True (fraction)     |          | Effective (fraction) |          |
| -----         |                     |          |                      |          |
| Total         | 3.94360e-35 (1.00 ) |          | 3.94350e-35 (1.00 )  |          |
| species       | PYtrue              | Cumul    | PYeffective          | Cumul    |
| -----         |                     |          |                      |          |
| Indene+H      | 0.999966            | 0.999966 | 0.999992             | 0.999992 |
| Benzyl+C2H2   | 2.58458e-05         | 0.999992 | 0.000000             | 0.999992 |
| rad6          | 8.21559e-06         | 1.000000 | 8.21580e-06          | 1.000000 |
| rad2          | 2.93695e-09         | 1.000000 | 2.93703e-09          | 1.000000 |
| rad7          | 6.00531e-10         | 1.000000 | 6.00547e-10          | 1.000000 |
| rad1          | 1.91170e-10         | 1.000000 | 1.91175e-10          | 1.000000 |
| rad10         | 1.52606e-10         | 1.000000 | 1.52610e-10          | 1.000000 |
| rad11         | 1.47122e-10         | 1.000000 | 1.47126e-10          | 1.000000 |
| rad28         | 4.11620e-11         | 1.000000 | 4.11631e-11          | 1.000000 |
| rad35         | 2.64321e-11         | 1.000000 | 2.64328e-11          | 1.000000 |
| rad30         | 1.97586e-11         | 1.000000 | 1.97591e-11          | 1.000000 |
| rad3          | 1.97073e-11         | 1.000000 | 1.97078e-11          | 1.000000 |
| PAH9+H        | 1.71414e-11         | 1.000000 | 1.71419e-11          | 1.000000 |
| rad4          | 1.00400e-11         | 1.000000 | 1.00403e-11          | 1.000000 |
| rad26         | 3.92013e-12         | 1.000000 | 3.92023e-12          | 1.000000 |
| rad13         | 3.36539e-12         | 1.000000 | 3.36547e-12          | 1.000000 |
| rad38         | 9.21158e-13         | 1.000000 | 9.21181e-13          | 1.000000 |
| PhCHCCH2+H    | 7.97825e-13         | 1.000000 | 7.97846e-13          | 1.000000 |
| PhCCH+CH3     | 2.99386e-13         | 1.000000 | 2.99393e-13          | 1.000000 |
| rad15         | 1.80342e-13         | 1.000000 | 1.80347e-13          | 1.000000 |
| PhCCCH3+H     | 9.17592e-14         | 1.000000 | 9.17616e-14          | 1.000000 |
| rad33         | 6.42724e-15         | 1.000000 | 6.42740e-15          | 1.000000 |
| rad27         | 9.64820e-17         | 1.000000 | 9.64845e-17          | 1.000000 |
| rad20         | 6.86000e-17         | 1.000000 | 6.86018e-17          | 1.000000 |
| rad8          | 5.39424e-17         | 1.000000 | 5.39438e-17          | 1.000000 |
| rad21         | 4.31269e-17         | 1.000000 | 4.31280e-17          | 1.000000 |
| rad9          | 3.66914e-18         | 1.000000 | 3.66923e-18          | 1.000000 |
| rad46         | 1.89879e-18         | 1.000000 | 1.89884e-18          | 1.000000 |
| Ph+MeAc       | 1.77031e-18         | 1.000000 | 1.77036e-18          | 1.000000 |
| PAH7+H        | 1.45539e-18         | 1.000000 | 1.45543e-18          | 1.000000 |
| rad25         | 1.19313e-18         | 1.000000 | 1.19316e-18          | 1.000000 |
| rad14         | 4.31579e-19         | 1.000000 | 4.31590e-19          | 1.000000 |
| rad18         | 3.22323e-19         | 1.000000 | 3.22331e-19          | 1.000000 |
| rad12         | 1.18333e-19         | 1.000000 | 1.18336e-19          | 1.000000 |
| rad31         | 7.84765e-20         | 1.000000 | 7.84785e-20          | 1.000000 |
| rad39         | 3.50961e-20         | 1.000000 | 3.50971e-20          | 1.000000 |
| rad22         | 2.20704e-20         | 1.000000 | 2.20709e-20          | 1.000000 |
| rad23         | 1.64907e-20         | 1.000000 | 1.64911e-20          | 1.000000 |
| Ph+Allene     | 5.85917e-21         | 1.000000 | 5.85933e-21          | 1.000000 |
| rad45         | 1.24392e-22         | 1.000000 | 1.24396e-22          | 1.000000 |
| rad60syn      | 5.24603e-23         | 1.000000 | 5.24617e-23          | 1.000000 |
| rad36         | 7.70947e-24         | 1.000000 | 7.70967e-24          | 1.000000 |
| rad60anti     | 4.01382e-24         | 1.000000 | 4.01392e-24          | 1.000000 |
| rad24         | 2.68673e-24         | 1.000000 | 2.68680e-24          | 1.000000 |
| PhCH2CCH+H    | 1.64592e-25         | 1.000000 | 1.64596e-25          | 1.000000 |
| rad37         | 3.40647e-26         | 1.000000 | 3.40656e-26          | 1.000000 |
| rad5          | 1.70888e-33         | 1.000000 | 1.70892e-33          | 1.000000 |
| PAH3+H        | 4.27243e-38         | 1.000000 | 4.27254e-38          | 1.000000 |
| rad59         | 2.26992e-38         | 1.000000 | 2.26997e-38          | 1.000000 |
| rad50         | 8.46822e-39         | 1.000000 | 8.46844e-39          | 1.000000 |
| rad19syn      | 2.17200e-46         | 1.000000 | 2.17206e-46          | 1.000000 |
| PAH10+CH3     | 9.32416e-50         | 1.000000 | 9.32440e-50          | 1.000000 |
| rad52         | 8.26538e-50         | 1.000000 | 8.26560e-50          | 1.000000 |
| rad43         | 2.21756e-50         | 1.000000 | 2.21762e-50          | 1.000000 |
| rad54         | 8.67976e-51         | 1.000000 | 8.67998e-51          | 1.000000 |
| rad62         | 1.35001e-52         | 1.000000 | 1.35005e-52          | 1.000000 |

|               |             |         |             |         |
|---------------|-------------|---------|-------------|---------|
| rad51         | 1.51058e-55 | 1.00000 | 1.51062e-55 | 1.00000 |
| rad70         | 3.12337e-58 | 1.00000 | 3.12345e-58 | 1.00000 |
| PhcycC3H3_A+H | 1.87301e-58 | 1.00000 | 1.87306e-58 | 1.00000 |
| rad55         | 9.38183e-59 | 1.00000 | 9.38207e-59 | 1.00000 |
| rad65         | 8.59860e-60 | 1.00000 | 8.59883e-60 | 1.00000 |
| rad58         | 8.32633e-62 | 1.00000 | 8.32654e-62 | 1.00000 |
| PAH1+H        | 2.46337e-62 | 1.00000 | 2.46343e-62 | 1.00000 |
| rad34         | 3.51992e-64 | 1.00000 | 3.52001e-64 | 1.00000 |
| rad42         | 1.85846e-66 | 1.00000 | 1.85851e-66 | 1.00000 |
| rad41         | 1.02311e-66 | 1.00000 | 1.02314e-66 | 1.00000 |
| rad47         | 1.01706e-74 | 1.00000 | 1.01709e-74 | 1.00000 |

0.100000000E-06 Pa, 140.000000 K

| Rate constant | True (fraction)     | Effective (fraction) |
|---------------|---------------------|----------------------|
| Total         | 1.44756e-33 (1.00 ) | 1.44751e-33 (1.00 )  |

| species       | PYtrue      | Cumul    | PYeffective | Cumul    |
|---------------|-------------|----------|-------------|----------|
| Indene+H      | 0.999960    | 0.999960 | 0.999993    | 0.999993 |
| Benzyl+C2H2   | 3.37321e-05 | 0.999994 | 0.00000     | 0.999993 |
| rad6          | 6.62558e-06 | 1.00000  | 6.62581e-06 | 1.000000 |
| rad2          | 2.41993e-09 | 1.00000  | 2.42001e-09 | 1.000000 |
| rad7          | 4.85186e-10 | 1.00000  | 4.85203e-10 | 1.000000 |
| rad1          | 1.58262e-10 | 1.00000  | 1.58268e-10 | 1.000000 |
| rad10         | 1.24613e-10 | 1.00000  | 1.24617e-10 | 1.000000 |
| rad11         | 1.18912e-10 | 1.00000  | 1.18916e-10 | 1.000000 |
| rad28         | 7.15397e-11 | 1.00000  | 7.15421e-11 | 1.000000 |
| rad30         | 4.53771e-11 | 1.00000  | 4.53786e-11 | 1.000000 |
| rad35         | 3.60270e-11 | 1.00000  | 3.60282e-11 | 1.000000 |
| PAH9+H        | 2.63415e-11 | 1.00000  | 2.63424e-11 | 1.000000 |
| rad3          | 1.62265e-11 | 1.00000  | 1.62270e-11 | 1.000000 |
| rad4          | 8.27728e-12 | 1.00000  | 8.27756e-12 | 1.000000 |
| rad26         | 7.10643e-12 | 1.00000  | 7.10667e-12 | 1.000000 |
| PhCHCCH2+H    | 3.50052e-12 | 1.00000  | 3.50063e-12 | 1.000000 |
| rad13         | 2.72209e-12 | 1.00000  | 2.72218e-12 | 1.000000 |
| rad38         | 1.74089e-12 | 1.00000  | 1.74095e-12 | 1.000000 |
| PhCCH+CH3     | 1.58723e-12 | 1.00000  | 1.58728e-12 | 1.000000 |
| rad15         | 6.03454e-13 | 1.00000  | 6.03474e-13 | 1.000000 |
| PhCCCH3+H     | 5.12276e-13 | 1.00000  | 5.12294e-13 | 1.000000 |
| rad33         | 5.20726e-15 | 1.00000  | 5.20743e-15 | 1.000000 |
| rad8          | 4.45515e-16 | 1.00000  | 4.45530e-16 | 1.000000 |
| rad27         | 1.43743e-16 | 1.00000  | 1.43748e-16 | 1.000000 |
| rad20         | 6.08106e-17 | 1.00000  | 6.08126e-17 | 1.000000 |
| rad9          | 3.97487e-17 | 1.00000  | 3.97500e-17 | 1.000000 |
| rad21         | 3.82778e-17 | 1.00000  | 3.82791e-17 | 1.000000 |
| Ph+MeAc       | 2.71352e-17 | 1.00000  | 2.71361e-17 | 1.000000 |
| PAH7+H        | 1.70337e-17 | 1.00000  | 1.70343e-17 | 1.000000 |
| rad46         | 1.09715e-17 | 1.00000  | 1.09718e-17 | 1.000000 |
| rad25         | 2.80601e-18 | 1.00000  | 2.80611e-18 | 1.000000 |
| rad12         | 1.47297e-18 | 1.00000  | 1.47302e-18 | 1.000000 |
| rad14         | 1.15671e-18 | 1.00000  | 1.15675e-18 | 1.000000 |
| rad39         | 5.20746e-19 | 1.00000  | 5.20764e-19 | 1.000000 |
| rad18         | 2.84876e-19 | 1.00000  | 2.84886e-19 | 1.000000 |
| Ph+Allene     | 1.30384e-19 | 1.00000  | 1.30389e-19 | 1.000000 |
| rad31         | 6.83600e-20 | 1.00000  | 6.83623e-20 | 1.000000 |
| rad22         | 1.93806e-20 | 1.00000  | 1.93813e-20 | 1.000000 |
| rad23         | 1.52067e-20 | 1.00000  | 1.52072e-20 | 1.000000 |
| rad60syn      | 1.00452e-21 | 1.00000  | 1.00456e-21 | 1.000000 |
| rad45         | 1.20727e-22 | 1.00000  | 1.20731e-22 | 1.000000 |
| rad60anti     | 9.33602e-23 | 1.00000  | 9.33634e-23 | 1.000000 |
| PhCH2CCH+H    | 1.18691e-23 | 1.00000  | 1.18695e-23 | 1.000000 |
| rad36         | 7.48500e-24 | 1.00000  | 7.48525e-24 | 1.000000 |
| rad37         | 3.38832e-24 | 1.00000  | 3.38843e-24 | 1.000000 |
| rad24         | 2.60095e-24 | 1.00000  | 2.60104e-24 | 1.000000 |
| rad5          | 6.97168e-27 | 1.00000  | 6.97191e-27 | 1.000000 |
| PAH3+H        | 1.15604e-28 | 1.00000  | 1.15608e-28 | 1.000000 |
| rad59         | 5.78020e-29 | 1.00000  | 5.78040e-29 | 1.000000 |
| rad50         | 7.59925e-30 | 1.00000  | 7.59951e-30 | 1.000000 |
| rad19syn      | 1.46669e-43 | 1.00000  | 1.46674e-43 | 1.000000 |
| rad52         | 4.36618e-47 | 1.00000  | 4.36633e-47 | 1.000000 |
| PAH10+CH3     | 4.36084e-47 | 1.00000  | 4.36099e-47 | 1.000000 |
| rad43         | 1.03733e-47 | 1.00000  | 1.03737e-47 | 1.000000 |
| rad54         | 5.32723e-48 | 1.00000  | 5.32741e-48 | 1.000000 |
| rad62         | 7.28936e-50 | 1.00000  | 7.28960e-50 | 1.000000 |
| rad51         | 1.10700e-52 | 1.00000  | 1.10704e-52 | 1.000000 |
| rad70         | 2.52073e-55 | 1.00000  | 2.52081e-55 | 1.000000 |
| PhcycC3H3_A+H | 1.58944e-55 | 1.00000  | 1.58950e-55 | 1.000000 |
| rad55         | 7.81785e-56 | 1.00000  | 7.81811e-56 | 1.000000 |

|        |             |         |             |          |
|--------|-------------|---------|-------------|----------|
| rad65  | 8.14333e-57 | 1.00000 | 8.14361e-57 | 1.000000 |
| rad58  | 7.33101e-59 | 1.00000 | 7.33126e-59 | 1.000000 |
| PAH1+H | 3.34202e-59 | 1.00000 | 3.34214e-59 | 1.000000 |
| rad34  | 5.48110e-61 | 1.00000 | 5.48129e-61 | 1.000000 |
| rad42  | 3.01462e-63 | 1.00000 | 3.01472e-63 | 1.000000 |
| rad41  | 1.65091e-63 | 1.00000 | 1.65096e-63 | 1.000000 |
| rad47  | 1.27344e-71 | 1.00000 | 1.27348e-71 | 1.000000 |

0.100000000E-06 Pa, 150.000000 K

| Rate constant | True (fraction)     | Effective (fraction) |
|---------------|---------------------|----------------------|
| Total         | 3.27736e-32 (1.00 ) | 3.27722e-32 (1.00 )  |

| species       | PYtrue      | Cumul    | PYeffective | Cumul    |
|---------------|-------------|----------|-------------|----------|
| Indene+H      | 0.999951    | 0.999951 | 0.999995    | 0.999995 |
| Benzyl+C2H2   | 4.38584e-05 | 0.999995 | 0.00000     | 0.999995 |
| rad6          | 5.34686e-06 | 1.00000  | 5.34709e-06 | 1.00000  |
| rad2          | 1.95716e-09 | 1.00000  | 1.95725e-09 | 1.00000  |
| rad7          | 3.92282e-10 | 1.00000  | 3.92299e-10 | 1.00000  |
| rad1          | 1.28657e-10 | 1.00000  | 1.28663e-10 | 1.00000  |
| rad28         | 1.12101e-10 | 1.00000  | 1.12105e-10 | 1.00000  |
| rad10         | 1.02579e-10 | 1.00000  | 1.02584e-10 | 1.00000  |
| rad11         | 9.61830e-11 | 1.00000  | 9.61872e-11 | 1.00000  |
| rad30         | 9.42300e-11 | 1.00000  | 9.42342e-11 | 1.00000  |
| rad35         | 4.87929e-11 | 1.00000  | 4.87950e-11 | 1.00000  |
| PAH9+H        | 3.94528e-11 | 1.00000  | 3.94545e-11 | 1.00000  |
| rad3          | 1.35018e-11 | 1.00000  | 1.35023e-11 | 1.00000  |
| PhCHCCH2+H    | 1.28440e-11 | 1.00000  | 1.28445e-11 | 1.00000  |
| rad26         | 1.15494e-11 | 1.00000  | 1.15499e-11 | 1.00000  |
| rad4          | 6.89703e-12 | 1.00000  | 6.89734e-12 | 1.00000  |
| PhCCH+CH3     | 6.85195e-12 | 1.00000  | 6.85225e-12 | 1.00000  |
| rad38         | 3.10717e-12 | 1.00000  | 3.10730e-12 | 1.00000  |
| PhCCCH3+H     | 2.30520e-12 | 1.00000  | 2.30530e-12 | 1.00000  |
| rad13         | 2.20350e-12 | 1.00000  | 2.20359e-12 | 1.00000  |
| rad15         | 1.73107e-12 | 1.00000  | 1.73115e-12 | 1.00000  |
| rad33         | 4.22263e-15 | 1.00000  | 4.22281e-15 | 1.00000  |
| rad8          | 2.79114e-15 | 1.00000  | 2.79126e-15 | 1.00000  |
| rad9          | 3.15275e-16 | 1.00000  | 3.15289e-16 | 1.00000  |
| Ph+MeAc       | 2.92010e-16 | 1.00000  | 2.92023e-16 | 1.00000  |
| rad27         | 1.97358e-16 | 1.00000  | 1.97367e-16 | 1.00000  |
| PAH7+H        | 1.43729e-16 | 1.00000  | 1.43735e-16 | 1.00000  |
| rad20         | 5.41518e-17 | 1.00000  | 5.41542e-17 | 1.00000  |
| rad46         | 5.06728e-17 | 1.00000  | 5.06750e-17 | 1.00000  |
| rad21         | 3.41325e-17 | 1.00000  | 3.41340e-17 | 1.00000  |
| rad12         | 1.30959e-17 | 1.00000  | 1.30965e-17 | 1.00000  |
| rad25         | 5.71707e-18 | 1.00000  | 5.71732e-18 | 1.00000  |
| rad39         | 5.41928e-18 | 1.00000  | 5.41952e-18 | 1.00000  |
| rad14         | 2.63876e-18 | 1.00000  | 2.63888e-18 | 1.00000  |
| Ph+Allene     | 1.93207e-18 | 1.00000  | 1.93216e-18 | 1.00000  |
| rad18         | 2.52741e-19 | 1.00000  | 2.52753e-19 | 1.00000  |
| rad31         | 6.00390e-20 | 1.00000  | 6.00416e-20 | 1.00000  |
| rad22         | 1.70777e-20 | 1.00000  | 1.70785e-20 | 1.00000  |
| rad23         | 1.44843e-20 | 1.00000  | 1.44850e-20 | 1.00000  |
| rad60syn      | 1.29362e-20 | 1.00000  | 1.29368e-20 | 1.00000  |
| rad60anti     | 1.42014e-21 | 1.00000  | 1.42020e-21 | 1.00000  |
| PhCH2CCH+H    | 3.70702e-22 | 1.00000  | 3.70718e-22 | 1.00000  |
| rad45         | 1.25477e-22 | 1.00000  | 1.25483e-22 | 1.00000  |
| rad37         | 1.02530e-22 | 1.00000  | 1.02534e-22 | 1.00000  |
| rad36         | 7.78422e-24 | 1.00000  | 7.78457e-24 | 1.00000  |
| rad24         | 2.53762e-24 | 1.00000  | 2.53773e-24 | 1.00000  |
| rad5          | 3.31294e-25 | 1.00000  | 3.31309e-25 | 1.00000  |
| PAH3+H        | 1.81874e-26 | 1.00000  | 1.81882e-26 | 1.00000  |
| rad59         | 8.19792e-27 | 1.00000  | 8.19828e-27 | 1.00000  |
| rad50         | 5.49371e-28 | 1.00000  | 5.49395e-28 | 1.00000  |
| rad19syn      | 2.97409e-40 | 1.00000  | 2.97422e-40 | 1.00000  |
| rad52         | 5.08453e-44 | 1.00000  | 5.08475e-44 | 1.00000  |
| PAH10+CH3     | 2.77465e-44 | 1.00000  | 2.77477e-44 | 1.00000  |
| rad54         | 8.65325e-45 | 1.00000  | 8.65363e-45 | 1.00000  |
| rad43         | 6.57138e-45 | 1.00000  | 6.57167e-45 | 1.00000  |
| rad62         | 4.99919e-47 | 1.00000  | 4.99940e-47 | 1.00000  |
| rad51         | 1.15983e-49 | 1.00000  | 1.15988e-49 | 1.00000  |
| rad70         | 2.34406e-52 | 1.00000  | 2.34416e-52 | 1.00000  |
| PhcycC3H3_A+H | 1.51493e-52 | 1.00000  | 1.51499e-52 | 1.00000  |
| rad55         | 7.36476e-53 | 1.00000  | 7.36508e-53 | 1.00000  |
| rad65         | 1.07919e-53 | 1.00000  | 1.07924e-53 | 1.00000  |
| rad58         | 7.17783e-56 | 1.00000  | 7.17814e-56 | 1.00000  |
| PAH1+H        | 4.37524e-56 | 1.00000  | 4.37543e-56 | 1.00000  |
| rad34         | 7.85934e-58 | 1.00000  | 7.85968e-58 | 1.00000  |

|       |             |         |             |         |
|-------|-------------|---------|-------------|---------|
| rad42 | 5.31533e-60 | 1.00000 | 5.31556e-60 | 1.00000 |
| rad41 | 2.97642e-60 | 1.00000 | 2.97655e-60 | 1.00000 |
| rad47 | 2.22231e-68 | 1.00000 | 2.22241e-68 | 1.00000 |

0.100000000E-06 Pa, 160.000000 K

| =====         |                 |          |                      |          |
|---------------|-----------------|----------|----------------------|----------|
| Rate constant | True (fraction) |          | Effective (fraction) |          |
| -----         |                 |          |                      |          |
| Total         | 5.01169e-31     | (1.00 )  | 5.01140e-31          | (1.00 )  |
| species       | PYtrue          | Cumul    | PYeffective          | Cumul    |
| -----         |                 |          |                      |          |
| Indene+H      | 0.999939        | 0.999939 | 0.999996             | 0.999996 |
| Benzyl+C2H2   | 5.68167e-05     | 0.999996 | 0.00000              | 0.999996 |
| rad6          | 4.31621e-06     | 1.00000  | 4.31645e-06          | 1.00000  |
| rad2          | 1.64665e-09     | 1.00000  | 1.64674e-09          | 1.00000  |
| rad7          | 3.17281e-10     | 1.00000  | 3.17299e-10          | 1.00000  |
| rad30         | 1.80710e-10     | 1.00000  | 1.80720e-10          | 1.00000  |
| rad28         | 1.61454e-10     | 1.00000  | 1.61463e-10          | 1.00000  |
| rad1          | 1.08851e-10     | 1.00000  | 1.08857e-10          | 1.00000  |
| rad10         | 8.43710e-11     | 1.00000  | 8.43758e-11          | 1.00000  |
| rad11         | 7.78281e-11     | 1.00000  | 7.78325e-11          | 1.00000  |
| rad35         | 6.58339e-11     | 1.00000  | 6.58377e-11          | 1.00000  |
| PAH9+H        | 5.80039e-11     | 1.00000  | 5.80072e-11          | 1.00000  |
| PhCHCCH2+H    | 4.07642e-11     | 1.00000  | 4.07665e-11          | 1.00000  |
| PhCCH+CH3     | 2.50395e-11     | 1.00000  | 2.50409e-11          | 1.00000  |
| rad26         | 1.71743e-11     | 1.00000  | 1.71753e-11          | 1.00000  |
| rad3          | 1.06832e-11     | 1.00000  | 1.06838e-11          | 1.00000  |
| PhCCCH3+H     | 8.70744e-12     | 1.00000  | 8.70794e-12          | 1.00000  |
| rad4          | 5.46561e-12     | 1.00000  | 5.46592e-12          | 1.00000  |
| rad38         | 5.30693e-12     | 1.00000  | 5.30723e-12          | 1.00000  |
| rad15         | 4.38964e-12     | 1.00000  | 4.38989e-12          | 1.00000  |
| rad13         | 1.78445e-12     | 1.00000  | 1.78456e-12          | 1.00000  |
| rad8          | 1.39783e-14     | 1.00000  | 1.39791e-14          | 1.00000  |
| rad33         | 3.42602e-15     | 1.00000  | 3.42622e-15          | 1.00000  |
| Ph+MeAc       | 2.35638e-15     | 1.00000  | 2.35652e-15          | 1.00000  |
| rad9          | 1.94199e-15     | 1.00000  | 1.94210e-15          | 1.00000  |
| PAH7+H        | 9.30779e-16     | 1.00000  | 9.30831e-16          | 1.00000  |
| rad27         | 2.53544e-16     | 1.00000  | 2.53559e-16          | 1.00000  |
| rad46         | 1.95509e-16     | 1.00000  | 1.95520e-16          | 1.00000  |
| rad12         | 8.86482e-17     | 1.00000  | 8.86533e-17          | 1.00000  |
| rad20         | 4.84050e-17     | 1.00000  | 4.84077e-17          | 1.00000  |
| rad39         | 4.23028e-17     | 1.00000  | 4.23052e-17          | 1.00000  |
| rad21         | 3.05546e-17     | 1.00000  | 3.05563e-17          | 1.00000  |
| Ph+Allene     | 2.05966e-17     | 1.00000  | 2.05978e-17          | 1.00000  |
| rad25         | 1.03660e-17     | 1.00000  | 1.03666e-17          | 1.00000  |
| rad14         | 5.28082e-18     | 1.00000  | 5.28112e-18          | 1.00000  |
| rad18         | 2.24903e-19     | 1.00000  | 2.24916e-19          | 1.00000  |
| rad60syn      | 1.20851e-19     | 1.00000  | 1.20858e-19          | 1.00000  |
| rad31         | 5.30680e-20     | 1.00000  | 5.30710e-20          | 1.00000  |
| rad60anti     | 1.53286e-20     | 1.00000  | 1.53294e-20          | 1.00000  |
| rad22         | 1.50875e-20     | 1.00000  | 1.50884e-20          | 1.00000  |
| rad23         | 1.43091e-20     | 1.00000  | 1.43099e-20          | 1.00000  |
| PhCH2CCH+H    | 7.07501e-21     | 1.00000  | 7.07541e-21          | 1.00000  |
| rad37         | 1.92369e-21     | 1.00000  | 1.92380e-21          | 1.00000  |
| rad45         | 1.34118e-22     | 1.00000  | 1.34126e-22          | 1.00000  |
| rad36         | 8.32741e-24     | 1.00000  | 8.32789e-24          | 1.00000  |
| rad5          | 7.57857e-24     | 1.00000  | 7.57900e-24          | 1.00000  |
| rad24         | 2.49343e-24     | 1.00000  | 2.49358e-24          | 1.00000  |
| PAH3+H        | 5.45434e-25     | 1.00000  | 5.45465e-25          | 1.00000  |
| rad59         | 2.30298e-25     | 1.00000  | 2.30311e-25          | 1.00000  |
| rad50         | 1.44925e-26     | 1.00000  | 1.44934e-26          | 1.00000  |
| rad19syn      | 3.66146e-37     | 1.00000  | 3.66167e-37          | 1.00000  |
| rad52         | 4.66836e-41     | 1.00000  | 4.66862e-41          | 1.00000  |
| PAH10+CH3     | 1.37431e-41     | 1.00000  | 1.37439e-41          | 1.00000  |
| rad54         | 1.04659e-41     | 1.00000  | 1.04665e-41          | 1.00000  |
| rad43         | 3.21719e-42     | 1.00000  | 3.21737e-42          | 1.00000  |
| rad62         | 2.33468e-44     | 1.00000  | 2.33481e-44          | 1.00000  |
| rad51         | 6.68078e-47     | 1.00000  | 6.68116e-47          | 1.00000  |
| rad70         | 1.33436e-49     | 1.00000  | 1.33443e-49          | 1.00000  |
| PhcycC3H3_A+H | 8.52147e-50     | 1.00000  | 8.52195e-50          | 1.00000  |
| rad55         | 4.13519e-50     | 1.00000  | 4.13542e-50          | 1.00000  |
| rad65         | 7.52093e-51     | 1.00000  | 7.52136e-51          | 1.00000  |
| rad58         | 4.07352e-53     | 1.00000  | 4.07375e-53          | 1.00000  |
| PAH1+H        | 2.97695e-53     | 1.00000  | 2.97711e-53          | 1.00000  |
| rad34         | 5.75683e-55     | 1.00000  | 5.75716e-55          | 1.00000  |
| rad42         | 4.98168e-57     | 1.00000  | 4.98196e-57          | 1.00000  |
| rad41         | 2.88105e-57     | 1.00000  | 2.88122e-57          | 1.00000  |
| rad47         | 2.05177e-65     | 1.00000  | 2.05189e-65          | 1.00000  |



0.100000000E-06 Pa, 170.000000 K

=====

| Rate constant | True (fraction)     | Effective (fraction) |
|---------------|---------------------|----------------------|
| Total         | 5.54821e-30 (1.00 ) | 5.54780e-30 (1.00 )  |

| species       | PYtrue      | Cumul    | PYeffective | Cumul    |
|---------------|-------------|----------|-------------|----------|
| Indene+H      | 0.999923    | 0.999923 | 0.999997    | 0.999997 |
| Benzyl+C2H2   | 7.33326e-05 | 0.999996 | 0.00000     | 0.999997 |
| rad6          | 3.48419e-06 | 1.000000 | 3.48445e-06 | 1.00000  |
| rad2          | 1.27135e-09 | 1.000000 | 1.27145e-09 | 1.00000  |
| rad30         | 3.25168e-10 | 1.000000 | 3.25192e-10 | 1.00000  |
| rad7          | 2.56634e-10 | 1.000000 | 2.56653e-10 | 1.00000  |
| rad28         | 2.16900e-10 | 1.000000 | 2.16916e-10 | 1.00000  |
| PhCHCCH2+H    | 1.14825e-10 | 1.000000 | 1.14833e-10 | 1.00000  |
| rad35         | 8.86097e-11 | 1.000000 | 8.86162e-11 | 1.00000  |
| rad1          | 8.45536e-11 | 1.000000 | 8.45598e-11 | 1.00000  |
| PAH9+H        | 8.41116e-11 | 1.000000 | 8.41178e-11 | 1.00000  |
| PhCCH+CH3     | 7.97837e-11 | 1.000000 | 7.97896e-11 | 1.00000  |
| rad10         | 6.78244e-11 | 1.000000 | 6.78293e-11 | 1.00000  |
| rad11         | 6.29806e-11 | 1.000000 | 6.29852e-11 | 1.00000  |
| PhCCCH3+H     | 2.84769e-11 | 1.000000 | 2.84790e-11 | 1.00000  |
| rad26         | 2.37341e-11 | 1.000000 | 2.37358e-11 | 1.00000  |
| rad15         | 1.00714e-11 | 1.000000 | 1.00722e-11 | 1.00000  |
| rad3          | 9.03169e-12 | 1.000000 | 9.03235e-12 | 1.00000  |
| rad38         | 8.75578e-12 | 1.000000 | 8.75642e-12 | 1.00000  |
| rad4          | 4.62844e-12 | 1.000000 | 4.62877e-12 | 1.00000  |
| rad13         | 1.44527e-12 | 1.000000 | 1.44538e-12 | 1.00000  |
| rad8          | 5.82484e-14 | 1.000000 | 5.82526e-14 | 1.00000  |
| Ph+MeAc       | 1.49954e-14 | 1.000000 | 1.49965e-14 | 1.00000  |
| rad9          | 9.71719e-15 | 1.000000 | 9.71790e-15 | 1.00000  |
| PAH7+H        | 4.85245e-15 | 1.000000 | 4.85281e-15 | 1.00000  |
| rad33         | 2.78037e-15 | 1.000000 | 2.78057e-15 | 1.00000  |
| rad46         | 6.51676e-16 | 1.000000 | 6.51723e-16 | 1.00000  |
| rad12         | 4.79696e-16 | 1.000000 | 4.79731e-16 | 1.00000  |
| rad27         | 3.08338e-16 | 1.000000 | 3.08361e-16 | 1.00000  |
| rad39         | 2.60712e-16 | 1.000000 | 2.60731e-16 | 1.00000  |
| Ph+Allene     | 1.67490e-16 | 1.000000 | 1.67502e-16 | 1.00000  |
| rad20         | 4.34064e-17 | 1.000000 | 4.34096e-17 | 1.00000  |
| rad21         | 2.74422e-17 | 1.000000 | 2.74443e-17 | 1.00000  |
| rad25         | 1.70729e-17 | 1.000000 | 1.70742e-17 | 1.00000  |
| rad14         | 9.48704e-18 | 1.000000 | 9.48774e-18 | 1.00000  |
| rad60syn      | 8.67681e-19 | 1.000000 | 8.67744e-19 | 1.00000  |
| rad18         | 2.00601e-19 | 1.000000 | 2.00616e-19 | 1.00000  |
| rad60anti     | 1.24865e-19 | 1.000000 | 1.24875e-19 | 1.00000  |
| PhCH2CCH+H    | 9.53106e-20 | 1.000000 | 9.53176e-20 | 1.00000  |
| rad31         | 4.71084e-20 | 1.000000 | 4.71119e-20 | 1.00000  |
| rad37         | 2.51869e-20 | 1.000000 | 2.51887e-20 | 1.00000  |
| rad23         | 1.47369e-20 | 1.000000 | 1.47380e-20 | 1.00000  |
| rad22         | 1.33547e-20 | 1.000000 | 1.33557e-20 | 1.00000  |
| rad45         | 1.50778e-22 | 1.000000 | 1.50789e-22 | 1.00000  |
| rad5          | 1.17216e-22 | 1.000000 | 1.17225e-22 | 1.00000  |
| PAH3+H        | 1.00146e-23 | 1.000000 | 1.00154e-23 | 1.00000  |
| rad36         | 9.37242e-24 | 1.000000 | 9.37310e-24 | 1.00000  |
| rad59         | 4.07844e-24 | 1.000000 | 4.07874e-24 | 1.00000  |
| rad24         | 2.46619e-24 | 1.000000 | 2.46637e-24 | 1.00000  |
| rad50         | 2.47924e-25 | 1.000000 | 2.47942e-25 | 1.00000  |
| rad19syn      | 3.67675e-29 | 1.000000 | 3.67702e-29 | 1.00000  |
| rad52         | 2.29678e-31 | 1.000000 | 2.29695e-31 | 1.00000  |
| rad54         | 8.12231e-39 | 1.000000 | 8.12291e-39 | 1.00000  |
| PAH10+CH3     | 6.62226e-39 | 1.000000 | 6.62274e-39 | 1.00000  |
| rad43         | 1.53228e-39 | 1.000000 | 1.53239e-39 | 1.00000  |
| rad62         | 9.67415e-42 | 1.000000 | 9.67486e-42 | 1.00000  |
| rad51         | 2.43415e-44 | 1.000000 | 2.43433e-44 | 1.00000  |
| rad70         | 5.74450e-47 | 1.000000 | 5.74492e-47 | 1.00000  |
| PhcycC3H3_A+H | 3.41947e-47 | 1.000000 | 3.41972e-47 | 1.00000  |
| rad55         | 1.68816e-47 | 1.000000 | 1.68828e-47 | 1.00000  |
| rad65         | 2.93276e-48 | 1.000000 | 2.93297e-48 | 1.00000  |
| rad58         | 1.58247e-50 | 1.000000 | 1.58258e-50 | 1.00000  |
| PAH1+H        | 1.12917e-50 | 1.000000 | 1.12925e-50 | 1.00000  |
| rad34         | 2.29571e-52 | 1.000000 | 2.29588e-52 | 1.00000  |
| rad42         | 2.62282e-54 | 1.000000 | 2.62301e-54 | 1.00000  |
| rad41         | 1.58287e-54 | 1.000000 | 1.58299e-54 | 1.00000  |
| rad47         | 1.04851e-62 | 1.000000 | 1.04858e-62 | 1.00000  |

0.100000000E-06 Pa, 180.000000 K

=====

| Rate constant | True (fraction) | Effective (fraction) |
|---------------|-----------------|----------------------|
|---------------|-----------------|----------------------|

Total | 4.69315e-29 (1.00 ) 4.69271e-29 (1.00 )

| species       | PYtrue      | Cumul    | PYeffective | Cumul    |
|---------------|-------------|----------|-------------|----------|
| Indene+H      | 0.999903    | 0.999903 | 0.999997    | 0.999997 |
| Benzyl+C2H2   | 9.42878e-05 | 0.999997 | 0.00000     | 0.999997 |
| rad6          | 2.81183e-06 | 1.00000  | 2.81210e-06 | 1.000000 |
| rad2          | 1.11327e-09 | 1.00000  | 1.11337e-09 | 1.000000 |
| rad30         | 5.55652e-10 | 1.00000  | 5.55704e-10 | 1.000000 |
| PhCHCCH2+H    | 2.92822e-10 | 1.00000  | 2.92849e-10 | 1.000000 |
| rad28         | 2.74914e-10 | 1.00000  | 2.74940e-10 | 1.000000 |
| PhCCH+CH3     | 2.26786e-10 | 1.00000  | 2.26807e-10 | 1.000000 |
| rad7          | 2.07538e-10 | 1.00000  | 2.07558e-10 | 1.000000 |
| PAH9+H        | 1.20677e-10 | 1.00000  | 1.20688e-10 | 1.000000 |
| rad35         | 1.19033e-10 | 1.00000  | 1.19044e-10 | 1.000000 |
| PhCCCH3+H     | 8.25906e-11 | 1.00000  | 8.25984e-11 | 1.000000 |
| rad1          | 7.45298e-11 | 1.00000  | 7.45368e-11 | 1.000000 |
| rad10         | 5.66397e-11 | 1.00000  | 5.66451e-11 | 1.000000 |
| rad11         | 5.09568e-11 | 1.00000  | 5.09616e-11 | 1.000000 |
| rad26         | 3.08513e-11 | 1.00000  | 3.08542e-11 | 1.000000 |
| rad15         | 2.12854e-11 | 1.00000  | 2.12874e-11 | 1.000000 |
| rad38         | 1.40491e-11 | 1.00000  | 1.40505e-11 | 1.000000 |
| rad3          | 7.52133e-12 | 1.00000  | 7.52204e-12 | 1.000000 |
| rad4          | 3.86149e-12 | 1.00000  | 3.86186e-12 | 1.000000 |
| rad13         | 1.17041e-12 | 1.00000  | 1.17052e-12 | 1.000000 |
| rad8          | 2.08346e-13 | 1.00000  | 2.08366e-13 | 1.000000 |
| Ph+MeAc       | 7.82640e-14 | 1.00000  | 7.82713e-14 | 1.000000 |
| rad9          | 4.09038e-14 | 1.00000  | 4.09076e-14 | 1.000000 |
| PAH7+H        | 2.11345e-14 | 1.00000  | 2.11365e-14 | 1.000000 |
| rad33         | 2.25640e-15 | 1.00000  | 2.25661e-15 | 1.000000 |
| rad12         | 2.15502e-15 | 1.00000  | 2.15523e-15 | 1.000000 |
| rad46         | 1.92593e-15 | 1.00000  | 1.92611e-15 | 1.000000 |
| rad39         | 1.32003e-15 | 1.00000  | 1.32016e-15 | 1.000000 |
| Ph+Allene     | 1.08713e-15 | 1.00000  | 1.08723e-15 | 1.000000 |
| rad27         | 3.58163e-16 | 1.00000  | 3.58197e-16 | 1.000000 |
| rad20         | 3.90311e-17 | 1.00000  | 3.90348e-17 | 1.000000 |
| rad25         | 2.59516e-17 | 1.00000  | 2.59541e-17 | 1.000000 |
| rad21         | 2.47176e-17 | 1.00000  | 2.47200e-17 | 1.000000 |
| rad14         | 1.55757e-17 | 1.00000  | 1.55771e-17 | 1.000000 |
| rad60syn      | 5.00699e-18 | 1.00000  | 5.00746e-18 | 1.000000 |
| PhCH2CCH+H    | 9.66848e-19 | 1.00000  | 9.66939e-19 | 1.000000 |
| rad60anti     | 8.05148e-19 | 1.00000  | 8.05224e-19 | 1.000000 |
| rad37         | 2.45034e-19 | 1.00000  | 2.45057e-19 | 1.000000 |
| rad18         | 1.79258e-19 | 1.00000  | 1.79275e-19 | 1.000000 |
| rad31         | 4.22731e-20 | 1.00000  | 4.22771e-20 | 1.000000 |
| rad23         | 1.58850e-20 | 1.00000  | 1.58865e-20 | 1.000000 |
| rad22         | 1.18372e-20 | 1.00000  | 1.18383e-20 | 1.000000 |
| rad5          | 1.33540e-21 | 1.00000  | 1.33552e-21 | 1.000000 |
| rad45         | 1.79978e-22 | 1.00000  | 1.79995e-22 | 1.000000 |
| PAH3+H        | 1.31623e-22 | 1.00000  | 1.31635e-22 | 1.000000 |
| rad59         | 5.19690e-23 | 1.00000  | 5.19739e-23 | 1.000000 |
| rad36         | 1.12038e-23 | 1.00000  | 1.12049e-23 | 1.000000 |
| rad50         | 3.08695e-24 | 1.00000  | 3.08725e-24 | 1.000000 |
| rad24         | 2.45452e-24 | 1.00000  | 2.45475e-24 | 1.000000 |
| rad19syn      | 4.66138e-27 | 1.00000  | 4.66182e-27 | 1.000000 |
| rad52         | 1.37731e-29 | 1.00000  | 1.37744e-29 | 1.000000 |
| rad54         | 8.06866e-36 | 1.00000  | 8.06942e-36 | 1.000000 |
| PAH10+CH3     | 5.46500e-36 | 1.00000  | 5.46551e-36 | 1.000000 |
| rad43         | 1.25902e-36 | 1.00000  | 1.25914e-36 | 1.000000 |
| rad62         | 7.19412e-39 | 1.00000  | 7.19480e-39 | 1.000000 |
| rad51         | 1.15313e-41 | 1.00000  | 1.15324e-41 | 1.000000 |
| rad70         | 3.98154e-44 | 1.00000  | 3.98192e-44 | 1.000000 |
| PhcycC3H3_A+H | 2.07644e-44 | 1.00000  | 2.07663e-44 | 1.000000 |
| rad55         | 1.07056e-44 | 1.00000  | 1.07066e-44 | 1.000000 |
| rad65         | 9.17373e-46 | 1.00000  | 9.17459e-46 | 1.000000 |
| rad58         | 8.58343e-48 | 1.00000  | 8.58424e-48 | 1.000000 |
| PAH1+H        | 2.99042e-48 | 1.00000  | 2.99070e-48 | 1.000000 |
| rad34         | 5.91557e-50 | 1.00000  | 5.91613e-50 | 1.000000 |
| rad42         | 9.21760e-52 | 1.00000  | 9.21847e-52 | 1.000000 |
| rad41         | 5.89569e-52 | 1.00000  | 5.89624e-52 | 1.000000 |
| rad47         | 3.85148e-60 | 1.00000  | 3.85184e-60 | 1.000000 |

0.100000000E-06 Pa, 190.00000 K

| Rate constant | True (fraction)     | Effective (fraction) |
|---------------|---------------------|----------------------|
| Total         | 3.16530e-28 (1.00 ) | 3.16492e-28 (1.00 )  |

| species | PYtrue | Cumul | PYeffective | Cumul |
|---------|--------|-------|-------------|-------|
|---------|--------|-------|-------------|-------|

|               |             |          |             |          |
|---------------|-------------|----------|-------------|----------|
| Indene+H      | 0.999877    | 0.999877 | 0.999998    | 0.999998 |
| Benzyl+C2H2   | 0.000120746 | 0.999998 | 0.00000     | 0.999998 |
| rad6          | 2.26814e-06 | 1.00000  | 2.26842e-06 | 1.00000  |
| rad30         | 9.10076e-10 | 1.00000  | 9.10186e-10 | 1.00000  |
| rad2          | 8.90137e-10 | 1.00000  | 8.90245e-10 | 1.00000  |
| PhCHCCH2+H    | 6.86686e-10 | 1.00000  | 6.86768e-10 | 1.00000  |
| PhCCH+CH3     | 5.85494e-10 | 1.00000  | 5.85564e-10 | 1.00000  |
| rad28         | 3.31719e-10 | 1.00000  | 3.31759e-10 | 1.00000  |
| PhCCCH3+H     | 2.16470e-10 | 1.00000  | 2.16496e-10 | 1.00000  |
| PAH9+H        | 1.71637e-10 | 1.00000  | 1.71657e-10 | 1.00000  |
| rad7          | 1.67767e-10 | 1.00000  | 1.67787e-10 | 1.00000  |
| rad35         | 1.59589e-10 | 1.00000  | 1.59608e-10 | 1.00000  |
| rad1          | 6.00200e-11 | 1.00000  | 6.00272e-11 | 1.00000  |
| rad10         | 4.64246e-11 | 1.00000  | 4.64302e-11 | 1.00000  |
| rad15         | 4.20213e-11 | 1.00000  | 4.20264e-11 | 1.00000  |
| rad11         | 4.12125e-11 | 1.00000  | 4.12175e-11 | 1.00000  |
| rad26         | 3.80809e-11 | 1.00000  | 3.80855e-11 | 1.00000  |
| rad38         | 2.20306e-11 | 1.00000  | 2.20333e-11 | 1.00000  |
| rad3          | 6.08346e-12 | 1.00000  | 6.08419e-12 | 1.00000  |
| rad4          | 3.12953e-12 | 1.00000  | 3.12991e-12 | 1.00000  |
| rad13         | 9.47500e-13 | 1.00000  | 9.47614e-13 | 1.00000  |
| rad8          | 6.55564e-13 | 1.00000  | 6.55643e-13 | 1.00000  |
| Ph+MeAc       | 3.45542e-13 | 1.00000  | 3.45584e-13 | 1.00000  |
| rad9          | 1.48900e-13 | 1.00000  | 1.48917e-13 | 1.00000  |
| PAH7+H        | 7.91803e-14 | 1.00000  | 7.91899e-14 | 1.00000  |
| rad12         | 8.28061e-15 | 1.00000  | 8.28161e-15 | 1.00000  |
| Ph+Allene     | 5.83712e-15 | 1.00000  | 5.83782e-15 | 1.00000  |
| rad39         | 5.66560e-15 | 1.00000  | 5.66628e-15 | 1.00000  |
| rad46         | 5.15013e-15 | 1.00000  | 5.15075e-15 | 1.00000  |
| rad33         | 1.83081e-15 | 1.00000  | 1.83103e-15 | 1.00000  |
| rad27         | 4.00215e-16 | 1.00000  | 4.00264e-16 | 1.00000  |
| rad25         | 3.68657e-17 | 1.00000  | 3.68701e-17 | 1.00000  |
| rad20         | 3.51819e-17 | 1.00000  | 3.51862e-17 | 1.00000  |
| rad60syn      | 2.40561e-17 | 1.00000  | 2.40590e-17 | 1.00000  |
| rad14         | 2.37009e-17 | 1.00000  | 2.37037e-17 | 1.00000  |
| rad21         | 2.23203e-17 | 1.00000  | 2.23230e-17 | 1.00000  |
| PhCH2CCH+H    | 7.73350e-18 | 1.00000  | 7.73444e-18 | 1.00000  |
| rad60anti     | 4.26710e-18 | 1.00000  | 4.26761e-18 | 1.00000  |
| rad37         | 1.85739e-18 | 1.00000  | 1.85761e-18 | 1.00000  |
| rad18         | 1.60422e-19 | 1.00000  | 1.60441e-19 | 1.00000  |
| rad31         | 3.81455e-20 | 1.00000  | 3.81501e-20 | 1.00000  |
| rad23         | 1.79890e-20 | 1.00000  | 1.79911e-20 | 1.00000  |
| rad5          | 1.17921e-20 | 1.00000  | 1.17935e-20 | 1.00000  |
| rad22         | 1.05022e-20 | 1.00000  | 1.05034e-20 | 1.00000  |
| PAH3+H        | 1.32122e-21 | 1.00000  | 1.32138e-21 | 1.00000  |
| rad59         | 5.06390e-22 | 1.00000  | 5.06451e-22 | 1.00000  |
| rad45         | 2.29218e-22 | 1.00000  | 2.29246e-22 | 1.00000  |
| rad50         | 2.96740e-23 | 1.00000  | 2.96776e-23 | 1.00000  |
| rad36         | 1.42945e-23 | 1.00000  | 1.42963e-23 | 1.00000  |
| rad24         | 2.45767e-24 | 1.00000  | 2.45797e-24 | 1.00000  |
| rad19syn      | 1.22411e-25 | 1.00000  | 1.22426e-25 | 1.00000  |
| rad54         | 5.45682e-28 | 1.00000  | 5.45748e-28 | 1.00000  |
| PAH10+CH3     | 3.67387e-28 | 1.00000  | 3.67431e-28 | 1.00000  |
| rad52         | 3.13061e-28 | 1.00000  | 3.13098e-28 | 1.00000  |
| rad43         | 8.93612e-29 | 1.00000  | 8.93720e-29 | 1.00000  |
| rad62         | 4.15621e-30 | 1.00000  | 4.15671e-30 | 1.00000  |
| rad51         | 2.56194e-31 | 1.00000  | 2.56225e-31 | 1.00000  |
| rad70         | 7.96541e-41 | 1.00000  | 7.96637e-41 | 1.00000  |
| PhcycC3H3_A+H | 3.95379e-41 | 1.00000  | 3.95426e-41 | 1.00000  |
| rad55         | 2.07908e-41 | 1.00000  | 2.07933e-41 | 1.00000  |
| rad65         | 5.51260e-43 | 1.00000  | 5.51327e-43 | 1.00000  |
| rad58         | 1.52825e-44 | 1.00000  | 1.52844e-44 | 1.00000  |
| PAH1+H        | 1.34032e-45 | 1.00000  | 1.34049e-45 | 1.00000  |
| rad34         | 1.87868e-47 | 1.00000  | 1.87891e-47 | 1.00000  |
| rad42         | 2.99124e-49 | 1.00000  | 2.99160e-49 | 1.00000  |
| rad41         | 2.03940e-49 | 1.00000  | 2.03965e-49 | 1.00000  |
| rad47         | 1.45209e-57 | 1.00000  | 1.45227e-57 | 1.00000  |

0.100000000E-06 Pa, 200.00000 K

=====

| Rate constant | True (fraction)     | Effective (fraction) |
|---------------|---------------------|----------------------|
| Total         | 1.76115e-27 (1.00 ) | 1.76088e-27 (1.00 )  |

| species     | PYtrue      | Cumul    | PYeffective | Cumul    |
|-------------|-------------|----------|-------------|----------|
| Indene+H    | 0.999844    | 0.999844 | 0.999998    | 0.999998 |
| Benzyl+C2H2 | 0.000153979 | 0.999998 | 0.00000     | 0.999998 |
| rad6        | 1.82841e-06 | 1.00000  | 1.82869e-06 | 1.00000  |
| PhCHCCH2+H  | 1.49926e-09 | 1.00000  | 1.49949e-09 | 1.00000  |

|               |             |          |             |          |
|---------------|-------------|----------|-------------|----------|
| rad30         | 1.43889e-09 | 1.000000 | 1.43911e-09 | 1.000000 |
| PhCCH+CH3     | 1.39259e-09 | 1.000000 | 1.39280e-09 | 1.000000 |
| rad2          | 7.30169e-10 | 1.000000 | 7.30281e-10 | 1.000000 |
| PhCCCH3+H     | 5.20495e-10 | 1.000000 | 5.20575e-10 | 1.000000 |
| rad28         | 3.83794e-10 | 1.000000 | 3.83853e-10 | 1.000000 |
| PAH9+H        | 2.42287e-10 | 1.000000 | 2.42325e-10 | 1.000000 |
| rad35         | 2.13492e-10 | 1.000000 | 2.13524e-10 | 1.000000 |
| rad7          | 1.35539e-10 | 1.000000 | 1.35560e-10 | 1.000000 |
| rad15         | 7.83498e-11 | 1.000000 | 7.83618e-11 | 1.000000 |
| rad1          | 4.96180e-11 | 1.000000 | 4.96256e-11 | 1.000000 |
| rad26         | 4.49744e-11 | 1.000000 | 4.49813e-11 | 1.000000 |
| rad10         | 3.79736e-11 | 1.000000 | 3.79794e-11 | 1.000000 |
| rad38         | 3.38821e-11 | 1.000000 | 3.38873e-11 | 1.000000 |
| rad11         | 3.33134e-11 | 1.000000 | 3.33185e-11 | 1.000000 |
| rad3          | 4.97136e-12 | 1.000000 | 4.97213e-12 | 1.000000 |
| rad4          | 2.56303e-12 | 1.000000 | 2.56342e-12 | 1.000000 |
| rad8          | 1.85042e-12 | 1.000000 | 1.85071e-12 | 1.000000 |
| Ph+MeAc       | 1.32292e-12 | 1.000000 | 1.32313e-12 | 1.000000 |
| rad13         | 7.66661e-13 | 1.000000 | 7.66779e-13 | 1.000000 |
| rad9          | 4.79180e-13 | 1.000000 | 4.79254e-13 | 1.000000 |
| PAH7+H        | 2.61186e-13 | 1.000000 | 2.61227e-13 | 1.000000 |
| rad12         | 2.78683e-14 | 1.000000 | 2.78726e-14 | 1.000000 |
| Ph+Allene     | 2.66777e-14 | 1.000000 | 2.66818e-14 | 1.000000 |
| rad39         | 2.11350e-14 | 1.000000 | 2.11382e-14 | 1.000000 |
| rad46         | 1.26631e-14 | 1.000000 | 1.26650e-14 | 1.000000 |
| rad33         | 1.48499e-15 | 1.000000 | 1.48522e-15 | 1.000000 |
| rad27         | 4.32633e-16 | 1.000000 | 4.32700e-16 | 1.000000 |
| rad60syn      | 9.89774e-17 | 1.000000 | 9.89927e-17 | 1.000000 |
| PhCH2CCH+H    | 5.05401e-17 | 1.000000 | 5.05479e-17 | 1.000000 |
| rad25         | 4.94340e-17 | 1.000000 | 4.94417e-17 | 1.000000 |
| rad14         | 3.38039e-17 | 1.000000 | 3.38091e-17 | 1.000000 |
| rad20         | 3.17819e-17 | 1.000000 | 3.17868e-17 | 1.000000 |
| rad21         | 2.02024e-17 | 1.000000 | 2.02055e-17 | 1.000000 |
| rad60anti     | 1.91539e-17 | 1.000000 | 1.91569e-17 | 1.000000 |
| rad37         | 1.13914e-17 | 1.000000 | 1.13932e-17 | 1.000000 |
| rad18         | 1.43736e-19 | 1.000000 | 1.43758e-19 | 1.000000 |
| rad5          | 8.38248e-20 | 1.000000 | 8.38377e-20 | 1.000000 |
| rad31         | 3.46842e-20 | 1.000000 | 3.46895e-20 | 1.000000 |
| rad23         | 2.14287e-20 | 1.000000 | 2.14320e-20 | 1.000000 |
| PAH3+H        | 1.05456e-20 | 1.000000 | 1.05472e-20 | 1.000000 |
| rad22         | 9.32362e-21 | 1.000000 | 9.32506e-21 | 1.000000 |
| rad59         | 3.92886e-21 | 1.000000 | 3.92946e-21 | 1.000000 |
| rad45         | 3.03475e-22 | 1.000000 | 3.03522e-22 | 1.000000 |
| rad50         | 2.28898e-22 | 1.000000 | 2.28933e-22 | 1.000000 |
| rad36         | 1.89660e-23 | 1.000000 | 1.89689e-23 | 1.000000 |
| rad24         | 2.47547e-24 | 1.000000 | 2.47586e-24 | 1.000000 |
| rad19syn      | 1.82537e-24 | 1.000000 | 1.82565e-24 | 1.000000 |
| rad54         | 1.37160e-26 | 1.000000 | 1.37181e-26 | 1.000000 |
| PAH10+CH3     | 9.40146e-27 | 1.000000 | 9.40291e-27 | 1.000000 |
| rad52         | 4.44081e-27 | 1.000000 | 4.44149e-27 | 1.000000 |
| rad43         | 2.30283e-27 | 1.000000 | 2.30318e-27 | 1.000000 |
| rad62         | 2.68735e-28 | 1.000000 | 2.68777e-28 | 1.000000 |
| rad51         | 1.45636e-29 | 1.000000 | 1.45659e-29 | 1.000000 |
| rad65         | 1.67715e-32 | 1.000000 | 1.67740e-32 | 1.000000 |
| rad70         | 1.91803e-37 | 1.000000 | 1.91832e-37 | 1.000000 |
| PhcycC3H3_A+H | 9.56229e-38 | 1.000000 | 9.56376e-38 | 1.000000 |
| rad55         | 5.03071e-38 | 1.000000 | 5.03148e-38 | 1.000000 |
| rad58         | 3.68356e-41 | 1.000000 | 3.68412e-41 | 1.000000 |
| PAH1+H        | 2.10569e-42 | 1.000000 | 2.10601e-42 | 1.000000 |
| rad34         | 2.01371e-44 | 1.000000 | 2.01402e-44 | 1.000000 |
| rad42         | 6.99851e-47 | 1.000000 | 6.99959e-47 | 1.000000 |
| rad41         | 4.82529e-47 | 1.000000 | 4.82603e-47 | 1.000000 |
| rad47         | 4.79946e-55 | 1.000000 | 4.80020e-55 | 1.000000 |

0.100000000E-06 Pa, 210.000000 K

=====

| Rate constant | True (fraction)     | Effective (fraction) |
|---------------|---------------------|----------------------|
| Total         | 8.30956e-27 (1.00 ) | 8.30794e-27 (1.00 )  |

| species     | PYtrue      | Cumul    | PYeffective | Cumul    |
|-------------|-------------|----------|-------------|----------|
| Indene+H    | 0.999803    | 0.999803 | 0.999999    | 0.999999 |
| Benzyl+C2H2 | 0.000195496 | 0.999998 | 0.00000     | 0.999999 |
| rad6        | 1.47280e-06 | 1.000000 | 1.47309e-06 | 1.000000 |
| PhCCH+CH3   | 3.08663e-09 | 1.000000 | 3.08723e-09 | 1.000000 |
| PhCHCCH2+H  | 3.07804e-09 | 1.000000 | 3.07864e-09 | 1.000000 |
| rad30       | 2.20829e-09 | 1.000000 | 2.20873e-09 | 1.000000 |
| PhCCCH3+H   | 1.16208e-09 | 1.000000 | 1.16231e-09 | 1.000000 |
| rad2        | 5.91370e-10 | 1.000000 | 5.91485e-10 | 1.000000 |

|               |             |          |             |         |
|---------------|-------------|----------|-------------|---------|
| rad28         | 4.28260e-10 | 1.000000 | 4.28344e-10 | 1.00000 |
| PAH9+H        | 3.39691e-10 | 1.000000 | 3.39758e-10 | 1.00000 |
| rad35         | 2.84861e-10 | 1.000000 | 2.84917e-10 | 1.00000 |
| rad15         | 1.39185e-10 | 1.000000 | 1.39212e-10 | 1.00000 |
| rad7          | 1.09426e-10 | 1.000000 | 1.09447e-10 | 1.00000 |
| rad38         | 5.12410e-11 | 1.000000 | 5.12510e-11 | 1.00000 |
| rad26         | 5.11342e-11 | 1.000000 | 5.11442e-11 | 1.00000 |
| rad1          | 4.05259e-11 | 1.000000 | 4.05338e-11 | 1.00000 |
| rad10         | 3.11395e-11 | 1.000000 | 3.11456e-11 | 1.00000 |
| rad11         | 2.69101e-11 | 1.000000 | 2.69154e-11 | 1.00000 |
| rad8          | 4.75997e-12 | 1.000000 | 4.76090e-12 | 1.00000 |
| Ph+MeAc       | 4.48092e-12 | 1.000000 | 4.48179e-12 | 1.00000 |
| rad3          | 4.17883e-12 | 1.000000 | 4.17965e-12 | 1.00000 |
| rad4          | 2.15958e-12 | 1.000000 | 2.16000e-12 | 1.00000 |
| rad9          | 1.38775e-12 | 1.000000 | 1.38802e-12 | 1.00000 |
| PAH7+H        | 7.72936e-13 | 1.000000 | 7.73087e-13 | 1.00000 |
| rad13         | 6.19952e-13 | 1.000000 | 6.20073e-13 | 1.00000 |
| Ph+Allene     | 1.06212e-13 | 1.000000 | 1.06232e-13 | 1.00000 |
| rad12         | 8.37368e-14 | 1.000000 | 8.37532e-14 | 1.00000 |
| rad39         | 6.99232e-14 | 1.000000 | 6.99368e-14 | 1.00000 |
| rad46         | 2.89984e-14 | 1.000000 | 2.90041e-14 | 1.00000 |
| rad33         | 1.20394e-15 | 1.000000 | 1.20417e-15 | 1.00000 |
| rad27         | 4.54519e-16 | 1.000000 | 4.54608e-16 | 1.00000 |
| rad60syn      | 3.56772e-16 | 1.000000 | 3.56842e-16 | 1.00000 |
| PhCH2CCH+H    | 2.77795e-16 | 1.000000 | 2.77849e-16 | 1.00000 |
| rad60anti     | 7.46103e-17 | 1.000000 | 7.46249e-17 | 1.00000 |
| rad25         | 6.30799e-17 | 1.000000 | 6.30923e-17 | 1.00000 |
| rad37         | 5.82812e-17 | 1.000000 | 5.82926e-17 | 1.00000 |
| rad14         | 4.56042e-17 | 1.000000 | 4.56131e-17 | 1.00000 |
| rad20         | 2.87689e-17 | 1.000000 | 2.87746e-17 | 1.00000 |
| rad21         | 1.83254e-17 | 1.000000 | 1.83290e-17 | 1.00000 |
| rad5          | 4.94771e-19 | 1.000000 | 4.94868e-19 | 1.00000 |
| rad18         | 1.28912e-19 | 1.000000 | 1.28937e-19 | 1.00000 |
| PAH3+H        | 6.92409e-20 | 1.000000 | 6.92544e-20 | 1.00000 |
| rad31         | 3.17993e-20 | 1.000000 | 3.18055e-20 | 1.00000 |
| rad23         | 2.68452e-20 | 1.000000 | 2.68504e-20 | 1.00000 |
| rad59         | 2.51009e-20 | 1.000000 | 2.51058e-20 | 1.00000 |
| rad22         | 8.28060e-21 | 1.000000 | 8.28222e-21 | 1.00000 |
| rad50         | 1.46375e-21 | 1.000000 | 1.46404e-21 | 1.00000 |
| rad45         | 4.18953e-22 | 1.000000 | 4.19035e-22 | 1.00000 |
| rad36         | 2.62504e-23 | 1.000000 | 2.62555e-23 | 1.00000 |
| rad19syn      | 2.00818e-23 | 1.000000 | 2.00857e-23 | 1.00000 |
| rad24         | 2.50821e-24 | 1.000000 | 2.50870e-24 | 1.00000 |
| rad54         | 1.94322e-25 | 1.000000 | 1.94360e-25 | 1.00000 |
| PAH10+CH3     | 1.33349e-25 | 1.000000 | 1.33375e-25 | 1.00000 |
| rad52         | 4.73526e-26 | 1.000000 | 4.73619e-26 | 1.00000 |
| rad43         | 3.24699e-26 | 1.000000 | 3.24763e-26 | 1.00000 |
| rad62         | 4.87675e-27 | 1.000000 | 4.87770e-27 | 1.00000 |
| rad51         | 2.76098e-28 | 1.000000 | 2.76152e-28 | 1.00000 |
| rad70         | 4.15017e-29 | 1.000000 | 4.15098e-29 | 1.00000 |
| PhcycC3H3_A+H | 3.67776e-29 | 1.000000 | 3.67848e-29 | 1.00000 |
| rad55         | 1.45178e-29 | 1.000000 | 1.45206e-29 | 1.00000 |
| rad58         | 1.88404e-30 | 1.000000 | 1.88441e-30 | 1.00000 |
| rad65         | 8.86433e-31 | 1.000000 | 8.86607e-31 | 1.00000 |
| PAH1+H        | 5.49758e-39 | 1.000000 | 5.49865e-39 | 1.00000 |
| rad34         | 5.07924e-41 | 1.000000 | 5.08023e-41 | 1.00000 |
| rad42         | 2.00301e-44 | 1.000000 | 2.00340e-44 | 1.00000 |
| rad41         | 9.12517e-45 | 1.000000 | 9.12696e-45 | 1.00000 |
| rad47         | 4.20713e-52 | 1.000000 | 4.20795e-52 | 1.00000 |

0.100000000E-06 Pa, 220.000000 K

=====

| Rate constant | True (fraction)     | Effective (fraction) |
|---------------|---------------------|----------------------|
| Total         | 3.40057e-26 (1.00 ) | 3.39973e-26 (1.00 )  |

| species     | PYtrue      | Cumul    | PYeffective | Cumul    |
|-------------|-------------|----------|-------------|----------|
| Indene+H    | 0.999752    | 0.999752 | 0.999999    | 0.999999 |
| Benzyl+C2H2 | 0.000247078 | 0.999999 | 0.00000     | 0.999999 |
| rad6        | 1.18533e-06 | 1.00000  | 1.18562e-06 | 1.00000  |
| PhCCH+CH3   | 6.43487e-09 | 1.00000  | 6.43646e-09 | 1.00000  |
| PhCHCCH2+H  | 5.99032e-09 | 1.00000  | 5.99180e-09 | 1.00000  |
| rad30       | 3.30404e-09 | 1.00000  | 3.30486e-09 | 1.00000  |
| PhCCCH3+H   | 2.43292e-09 | 1.00000  | 2.43352e-09 | 1.00000  |
| PAH9+H      | 4.73188e-10 | 1.00000  | 4.73305e-10 | 1.00000  |
| rad2        | 4.70481e-10 | 1.00000  | 4.70598e-10 | 1.00000  |
| rad28       | 4.63089e-10 | 1.00000  | 4.63204e-10 | 1.00000  |
| rad35       | 3.78955e-10 | 1.00000  | 3.79048e-10 | 1.00000  |
| rad15       | 2.37238e-10 | 1.00000  | 2.37296e-10 | 1.00000  |

|               |             |         |             |         |
|---------------|-------------|---------|-------------|---------|
| rad7          | 8.82733e-11 | 1.00000 | 8.82951e-11 | 1.00000 |
| rad38         | 7.63517e-11 | 1.00000 | 7.63705e-11 | 1.00000 |
| rad26         | 5.62501e-11 | 1.00000 | 5.62640e-11 | 1.00000 |
| rad1          | 3.25374e-11 | 1.00000 | 3.25454e-11 | 1.00000 |
| rad10         | 2.54960e-11 | 1.00000 | 2.55023e-11 | 1.00000 |
| rad11         | 2.17210e-11 | 1.00000 | 2.17263e-11 | 1.00000 |
| Ph+MeAc       | 1.36495e-11 | 1.00000 | 1.36529e-11 | 1.00000 |
| rad8          | 1.13030e-11 | 1.00000 | 1.13058e-11 | 1.00000 |
| rad9          | 3.66978e-12 | 1.00000 | 3.67068e-12 | 1.00000 |
| rad3          | 3.40634e-12 | 1.00000 | 3.40719e-12 | 1.00000 |
| PAH7+H        | 2.08369e-12 | 1.00000 | 2.08421e-12 | 1.00000 |
| rad4          | 1.76494e-12 | 1.00000 | 1.76537e-12 | 1.00000 |
| rad13         | 5.00960e-13 | 1.00000 | 5.01083e-13 | 1.00000 |
| Ph+Allene     | 3.75382e-13 | 1.00000 | 3.75474e-13 | 1.00000 |
| rad12         | 2.28168e-13 | 1.00000 | 2.28224e-13 | 1.00000 |
| rad39         | 2.08575e-13 | 1.00000 | 2.08626e-13 | 1.00000 |
| rad46         | 6.24893e-14 | 1.00000 | 6.25047e-14 | 1.00000 |
| PhCH2CCH+H    | 1.31496e-15 | 1.00000 | 1.31529e-15 | 1.00000 |
| rad60syn      | 1.14776e-15 | 1.00000 | 1.14805e-15 | 1.00000 |
| rad33         | 9.75564e-16 | 1.00000 | 9.75805e-16 | 1.00000 |
| rad27         | 4.65817e-16 | 1.00000 | 4.65933e-16 | 1.00000 |
| rad60anti     | 2.57261e-16 | 1.00000 | 2.57324e-16 | 1.00000 |
| rad37         | 2.55042e-16 | 1.00000 | 2.55105e-16 | 1.00000 |
| rad25         | 7.71069e-17 | 1.00000 | 7.71260e-17 | 1.00000 |
| rad14         | 5.86286e-17 | 1.00000 | 5.86431e-17 | 1.00000 |
| rad20         | 2.60925e-17 | 1.00000 | 2.60990e-17 | 1.00000 |
| rad21         | 1.66578e-17 | 1.00000 | 1.66619e-17 | 1.00000 |
| rad5          | 2.48675e-18 | 1.00000 | 2.48737e-18 | 1.00000 |
| PAH3+H        | 3.84313e-19 | 1.00000 | 3.84408e-19 | 1.00000 |
| rad59         | 1.35685e-19 | 1.00000 | 1.35719e-19 | 1.00000 |
| rad18         | 1.15714e-19 | 1.00000 | 1.15743e-19 | 1.00000 |
| rad23         | 3.52949e-20 | 1.00000 | 3.53037e-20 | 1.00000 |
| rad31         | 2.94011e-20 | 1.00000 | 2.94083e-20 | 1.00000 |
| rad50         | 7.96594e-21 | 1.00000 | 7.96790e-21 | 1.00000 |
| rad22         | 7.35584e-21 | 1.00000 | 7.35766e-21 | 1.00000 |
| rad45         | 5.89569e-22 | 1.00000 | 5.89714e-22 | 1.00000 |
| rad19syn      | 1.76809e-22 | 1.00000 | 1.76853e-22 | 1.00000 |
| rad36         | 3.70510e-23 | 1.00000 | 3.70601e-23 | 1.00000 |
| rad24         | 2.55665e-24 | 1.00000 | 2.55728e-24 | 1.00000 |
| rad54         | 2.07925e-24 | 1.00000 | 2.07977e-24 | 1.00000 |
| PAH10+CH3     | 1.42538e-24 | 1.00000 | 1.42573e-24 | 1.00000 |
| rad52         | 4.06722e-25 | 1.00000 | 4.06823e-25 | 1.00000 |
| rad43         | 3.45425e-25 | 1.00000 | 3.45510e-25 | 1.00000 |
| rad62         | 5.97333e-26 | 1.00000 | 5.97481e-26 | 1.00000 |
| rad51         | 3.50353e-27 | 1.00000 | 3.50440e-27 | 1.00000 |
| PhcycC3H3_A+H | 9.87085e-28 | 1.00000 | 9.87329e-28 | 1.00000 |
| rad70         | 8.97428e-28 | 1.00000 | 8.97650e-28 | 1.00000 |
| rad55         | 3.38159e-28 | 1.00000 | 3.38243e-28 | 1.00000 |
| rad58         | 5.59629e-29 | 1.00000 | 5.59768e-29 | 1.00000 |
| rad65         | 1.55276e-29 | 1.00000 | 1.55314e-29 | 1.00000 |
| PAH1+H        | 3.10930e-30 | 1.00000 | 3.11007e-30 | 1.00000 |
| rad34         | 2.04140e-38 | 1.00000 | 2.04191e-38 | 1.00000 |
| rad42         | 4.73510e-42 | 1.00000 | 4.73627e-42 | 1.00000 |
| rad47         | 1.49504e-42 | 1.00000 | 1.49541e-42 | 1.00000 |
| rad41         | 1.11523e-42 | 1.00000 | 1.11551e-42 | 1.00000 |

0.100000000E-06 Pa, 230.000000 K

=====

| Rate constant | True (fraction)     | Effective (fraction) |
|---------------|---------------------|----------------------|
| Total         | 1.22972e-25 (1.00 ) | 1.22933e-25 (1.00 )  |

| species     | PYtrue      | Cumul    | PYeffective | Cumul    |
|-------------|-------------|----------|-------------|----------|
| Indene+H    | 0.999688    | 0.999688 | 0.999999    | 0.999999 |
| Benzyl+C2H2 | 0.000310802 | 0.999999 | 0.00000     | 0.999999 |
| rad6        | 9.53078e-07 | 1.000000 | 9.53374e-07 | 1.000000 |
| PhCCH+CH3   | 1.27141e-08 | 1.000000 | 1.27181e-08 | 1.000000 |
| PhCHCCH2+H  | 1.11240e-08 | 1.000000 | 1.11275e-08 | 1.000000 |
| rad30       | 4.83587e-09 | 1.000000 | 4.83737e-09 | 1.000000 |
| PhCCCH3+H   | 4.81498e-09 | 1.000000 | 4.81647e-09 | 1.000000 |
| PAH9+H      | 6.55030e-10 | 1.000000 | 6.55233e-10 | 1.000000 |
| rad35       | 5.02428e-10 | 1.000000 | 5.02585e-10 | 1.000000 |
| rad28       | 4.87168e-10 | 1.000000 | 4.87320e-10 | 1.000000 |
| rad2        | 3.99030e-10 | 1.000000 | 3.99154e-10 | 1.000000 |
| rad15       | 3.90192e-10 | 1.000000 | 3.90314e-10 | 1.000000 |
| rad38       | 1.12258e-10 | 1.000000 | 1.12293e-10 | 1.000000 |
| rad7        | 7.11485e-11 | 1.000000 | 7.11706e-11 | 1.000000 |
| rad26       | 6.01174e-11 | 1.000000 | 6.01361e-11 | 1.000000 |
| Ph+MeAc     | 3.79022e-11 | 1.000000 | 3.79140e-11 | 1.000000 |

|               |             |          |             |          |
|---------------|-------------|----------|-------------|----------|
| rad1          | 2.78702e-11 | 1.000000 | 2.78789e-11 | 1.000000 |
| rad8          | 2.50389e-11 | 1.000000 | 2.50467e-11 | 1.000000 |
| rad10         | 2.11100e-11 | 1.000000 | 2.11165e-11 | 1.000000 |
| rad11         | 1.75179e-11 | 1.000000 | 1.75233e-11 | 1.000000 |
| rad9          | 8.96768e-12 | 1.000000 | 8.97046e-12 | 1.000000 |
| PAH7+H        | 5.18166e-12 | 1.000000 | 5.18327e-12 | 1.000000 |
| rad3          | 2.85981e-12 | 1.000000 | 2.86070e-12 | 1.000000 |
| rad4          | 1.48595e-12 | 1.000000 | 1.48642e-12 | 1.000000 |
| Ph+Allene     | 1.19625e-12 | 1.000000 | 1.19662e-12 | 1.000000 |
| rad12         | 5.71077e-13 | 1.000000 | 5.71255e-13 | 1.000000 |
| rad39         | 5.68618e-13 | 1.000000 | 5.68795e-13 | 1.000000 |
| rad13         | 4.04493e-13 | 1.000000 | 4.04619e-13 | 1.000000 |
| rad46         | 1.27781e-13 | 1.000000 | 1.27821e-13 | 1.000000 |
| PhCH2CCH+H    | 5.46596e-15 | 1.000000 | 5.46766e-15 | 1.000000 |
| rad60syn      | 3.34628e-15 | 1.000000 | 3.34732e-15 | 1.000000 |
| rad37         | 9.74541e-16 | 1.000000 | 9.74844e-16 | 1.000000 |
| rad60anti     | 7.98156e-16 | 1.000000 | 7.98404e-16 | 1.000000 |
| rad33         | 7.90055e-16 | 1.000000 | 7.90301e-16 | 1.000000 |
| rad27         | 4.67155e-16 | 1.000000 | 4.67300e-16 | 1.000000 |
| rad25         | 9.07843e-17 | 1.000000 | 9.08125e-17 | 1.000000 |
| rad14         | 7.22695e-17 | 1.000000 | 7.22919e-17 | 1.000000 |
| rad20         | 2.37105e-17 | 1.000000 | 2.37179e-17 | 1.000000 |
| rad21         | 1.51735e-17 | 1.000000 | 1.51782e-17 | 1.000000 |
| rad5          | 1.08663e-17 | 1.000000 | 1.08697e-17 | 1.000000 |
| PAH3+H        | 1.84375e-18 | 1.000000 | 1.84433e-18 | 1.000000 |
| rad59         | 6.34526e-19 | 1.000000 | 6.34724e-19 | 1.000000 |
| rad18         | 1.03944e-19 | 1.000000 | 1.03977e-19 | 1.000000 |
| rad23         | 4.85828e-20 | 1.000000 | 4.85979e-20 | 1.000000 |
| rad50         | 3.76905e-20 | 1.000000 | 3.77022e-20 | 1.000000 |
| rad31         | 2.74459e-20 | 1.000000 | 2.74544e-20 | 1.000000 |
| rad22         | 6.53495e-21 | 1.000000 | 6.53698e-21 | 1.000000 |
| rad19syn      | 1.28690e-21 | 1.000000 | 1.28730e-21 | 1.000000 |
| rad45         | 9.26716e-22 | 1.000000 | 9.27004e-22 | 1.000000 |
| rad36         | 5.84410e-23 | 1.000000 | 5.84592e-23 | 1.000000 |
| rad54         | 1.79674e-23 | 1.000000 | 1.79730e-23 | 1.000000 |
| PAH10+CH3     | 1.22748e-23 | 1.000000 | 1.22786e-23 | 1.000000 |
| rad43         | 2.95796e-24 | 1.000000 | 2.95888e-24 | 1.000000 |
| rad52         | 2.90478e-24 | 1.000000 | 2.90569e-24 | 1.000000 |
| rad24         | 2.62200e-24 | 1.000000 | 2.62281e-24 | 1.000000 |
| rad62         | 5.74610e-25 | 1.000000 | 5.74789e-25 | 1.000000 |
| rad51         | 3.51924e-26 | 1.000000 | 3.52033e-26 | 1.000000 |
| PhcycC3H3_A+H | 1.69392e-26 | 1.000000 | 1.69445e-26 | 1.000000 |
| rad70         | 1.30480e-26 | 1.000000 | 1.30521e-26 | 1.000000 |
| rad55         | 5.18384e-27 | 1.000000 | 5.18546e-27 | 1.000000 |
| rad58         | 1.02415e-27 | 1.000000 | 1.02446e-27 | 1.000000 |
| PAH1+H        | 2.23671e-28 | 1.000000 | 2.23740e-28 | 1.000000 |
| rad65         | 2.00231e-28 | 1.000000 | 2.00293e-28 | 1.000000 |
| rad34         | 1.06744e-29 | 1.000000 | 1.06777e-29 | 1.000000 |
| rad42         | 4.44131e-32 | 1.000000 | 4.44269e-32 | 1.000000 |
| rad41         | 7.74433e-33 | 1.000000 | 7.74674e-33 | 1.000000 |
| rad47         | 2.02044e-41 | 1.000000 | 2.02107e-41 | 1.000000 |

0.100000000E-06 Pa, 240.000000 K

=====

| Rate constant | True (fraction)    | Effective (fraction) |
|---------------|--------------------|----------------------|
| Total         | 3.99091e-25 (1.00) | 3.98936e-25 (1.00)   |

| species     | PYtrue      | Cumul    | PYeffective | Cumul    |
|-------------|-------------|----------|-------------|----------|
| Indene+H    | 0.999610    | 0.999610 | 0.999999    | 0.999999 |
| Benzyl+C2H2 | 0.000389083 | 0.999999 | 0.00000     | 0.999999 |
| rad6        | 7.65585e-07 | 1.000000 | 7.65883e-07 | 1.000000 |
| PhCCH+CH3   | 2.39579e-08 | 1.000000 | 2.39673e-08 | 1.000000 |
| PhCHCCH2+H  | 1.98184e-08 | 1.000000 | 1.98261e-08 | 1.000000 |
| PhCCCH3+H   | 9.06840e-09 | 1.000000 | 9.07193e-09 | 1.000000 |
| rad30       | 6.94254e-09 | 1.000000 | 6.94524e-09 | 1.000000 |
| PAH9+H      | 9.01164e-10 | 1.000000 | 9.01514e-10 | 1.000000 |
| rad35       | 6.63660e-10 | 1.000000 | 6.63918e-10 | 1.000000 |
| rad15       | 6.22130e-10 | 1.000000 | 6.22373e-10 | 1.000000 |
| rad28       | 5.00240e-10 | 1.000000 | 5.00435e-10 | 1.000000 |
| rad2        | 3.32906e-10 | 1.000000 | 3.33036e-10 | 1.000000 |
| rad38       | 1.63045e-10 | 1.000000 | 1.63109e-10 | 1.000000 |
| Ph+MeAc     | 9.70274e-11 | 1.000000 | 9.70652e-11 | 1.000000 |
| rad26       | 6.26392e-11 | 1.000000 | 6.26636e-11 | 1.000000 |
| rad7        | 5.72942e-11 | 1.000000 | 5.73165e-11 | 1.000000 |
| rad8        | 5.21984e-11 | 1.000000 | 5.22187e-11 | 1.000000 |
| rad1        | 2.35016e-11 | 1.000000 | 2.35107e-11 | 1.000000 |
| rad9        | 2.04525e-11 | 1.000000 | 2.04605e-11 | 1.000000 |
| rad10       | 1.74726e-11 | 1.000000 | 1.74794e-11 | 1.000000 |

|               |             |          |             |          |
|---------------|-------------|----------|-------------|----------|
| rad11         | 1.41158e-11 | 1.000000 | 1.41213e-11 | 1.000000 |
| PAH7+H        | 1.20105e-11 | 1.000000 | 1.20152e-11 | 1.000000 |
| Ph+Allene     | 3.48218e-12 | 1.000000 | 3.48353e-12 | 1.000000 |
| rad3          | 2.36676e-12 | 1.000000 | 2.36768e-12 | 1.000000 |
| rad39         | 1.43284e-12 | 1.000000 | 1.43340e-12 | 1.000000 |
| rad12         | 1.32695e-12 | 1.000000 | 1.32747e-12 | 1.000000 |
| rad4          | 1.23354e-12 | 1.000000 | 1.23402e-12 | 1.000000 |
| rad13         | 3.26338e-13 | 1.000000 | 3.26465e-13 | 1.000000 |
| rad46         | 2.49644e-13 | 1.000000 | 2.49742e-13 | 1.000000 |
| PhCH2CCH+H    | 2.02784e-14 | 1.000000 | 2.02863e-14 | 1.000000 |
| rad60syn      | 8.95436e-15 | 1.000000 | 8.95784e-15 | 1.000000 |
| rad37         | 3.30809e-15 | 1.000000 | 3.30938e-15 | 1.000000 |
| rad60anti     | 2.25867e-15 | 1.000000 | 2.25955e-15 | 1.000000 |
| rad33         | 6.39442e-16 | 1.000000 | 6.39691e-16 | 1.000000 |
| rad27         | 4.59639e-16 | 1.000000 | 4.59818e-16 | 1.000000 |
| rad25         | 1.03426e-16 | 1.000000 | 1.03466e-16 | 1.000000 |
| rad14         | 8.58558e-17 | 1.000000 | 8.58892e-17 | 1.000000 |
| rad5          | 4.20019e-17 | 1.000000 | 4.20183e-17 | 1.000000 |
| rad20         | 2.15877e-17 | 1.000000 | 2.15961e-17 | 1.000000 |
| rad21         | 1.38507e-17 | 1.000000 | 1.38561e-17 | 1.000000 |
| PAH3+H        | 7.78863e-18 | 1.000000 | 7.79166e-18 | 1.000000 |
| rad59         | 2.61499e-18 | 1.000000 | 2.61601e-18 | 1.000000 |
| rad50         | 1.57823e-19 | 1.000000 | 1.57885e-19 | 1.000000 |
| rad18         | 9.34368e-20 | 1.000000 | 9.34732e-20 | 1.000000 |
| rad23         | 6.97568e-20 | 1.000000 | 6.97839e-20 | 1.000000 |
| rad31         | 2.58576e-20 | 1.000000 | 2.58677e-20 | 1.000000 |
| rad19syn      | 7.93175e-21 | 1.000000 | 7.93483e-21 | 1.000000 |
| rad22         | 5.80573e-21 | 1.000000 | 5.80799e-21 | 1.000000 |
| rad45         | 1.43528e-21 | 1.000000 | 1.43583e-21 | 1.000000 |
| rad54         | 1.28744e-22 | 1.000000 | 1.28794e-22 | 1.000000 |
| rad36         | 9.08733e-23 | 1.000000 | 9.09087e-23 | 1.000000 |
| PAH10+CH3     | 8.76232e-23 | 1.000000 | 8.76573e-23 | 1.000000 |
| rad43         | 2.10010e-23 | 1.000000 | 2.10091e-23 | 1.000000 |
| rad52         | 1.76521e-23 | 1.000000 | 1.76590e-23 | 1.000000 |
| rad62         | 4.48334e-24 | 1.000000 | 4.48508e-24 | 1.000000 |
| rad24         | 2.70600e-24 | 1.000000 | 2.70706e-24 | 1.000000 |
| rad51         | 2.84575e-25 | 1.000000 | 2.84686e-25 | 1.000000 |
| PhcycC3H3_A+H | 1.83497e-25 | 1.000000 | 1.83568e-25 | 1.000000 |
| rad70         | 1.30436e-25 | 1.000000 | 1.30487e-25 | 1.000000 |
| rad55         | 5.31871e-26 | 1.000000 | 5.32078e-26 | 1.000000 |
| rad58         | 1.13976e-26 | 1.000000 | 1.14020e-26 | 1.000000 |
| PAH1+H        | 3.49023e-27 | 1.000000 | 3.49159e-27 | 1.000000 |
| rad65         | 1.89688e-27 | 1.000000 | 1.89762e-27 | 1.000000 |
| rad34         | 2.02063e-28 | 1.000000 | 2.02142e-28 | 1.000000 |
| rad42         | 2.62674e-30 | 1.000000 | 2.62776e-30 | 1.000000 |
| rad41         | 7.56115e-31 | 1.000000 | 7.56410e-31 | 1.000000 |
| rad47         | 1.87587e-40 | 1.000000 | 1.87660e-40 | 1.000000 |

0.100000000E-06 Pa, 250.000000 K

=====

| Rate constant | True (fraction)     | Effective (fraction) |
|---------------|---------------------|----------------------|
| Total         | 1.17763e-24 (1.00 ) | 1.17706e-24 (1.00 )  |

| species     | PYtrue      | Cumul    | PYeffective | Cumul    |
|-------------|-------------|----------|-------------|----------|
| Indene+H    | 0.999515    | 0.999515 | 0.999999    | 0.999999 |
| Benzyl+C2H2 | 0.000484700 | 1.000000 | 0.000000    | 0.999999 |
| rad6        | 6.14362e-07 | 1.000000 | 6.14660e-07 | 1.000000 |
| PhCCH+CH3   | 4.32808e-08 | 1.000000 | 4.33018e-08 | 1.000000 |
| PhCHCCH2+H  | 3.40270e-08 | 1.000000 | 3.40435e-08 | 1.000000 |
| PhCCCH3+H   | 1.63437e-08 | 1.000000 | 1.63516e-08 | 1.000000 |
| rad30       | 9.79759e-09 | 1.000000 | 9.80234e-09 | 1.000000 |
| PAH9+H      | 1.23218e-09 | 1.000000 | 1.23277e-09 | 1.000000 |
| rad15       | 9.65236e-10 | 1.000000 | 9.65704e-10 | 1.000000 |
| rad35       | 8.73117e-10 | 1.000000 | 8.73541e-10 | 1.000000 |
| rad28       | 5.02768e-10 | 1.000000 | 5.03012e-10 | 1.000000 |
| rad2        | 2.69037e-10 | 1.000000 | 2.69167e-10 | 1.000000 |
| rad38       | 2.34143e-10 | 1.000000 | 2.34256e-10 | 1.000000 |
| Ph+MeAc     | 2.31160e-10 | 1.000000 | 2.31272e-10 | 1.000000 |
| rad8        | 1.03151e-10 | 1.000000 | 1.03201e-10 | 1.000000 |
| rad26       | 6.38157e-11 | 1.000000 | 6.38466e-11 | 1.000000 |
| rad7        | 4.60951e-11 | 1.000000 | 4.61174e-11 | 1.000000 |
| rad9        | 4.38982e-11 | 1.000000 | 4.39195e-11 | 1.000000 |
| PAH7+H      | 2.61740e-11 | 1.000000 | 2.61867e-11 | 1.000000 |
| rad1        | 1.92129e-11 | 1.000000 | 1.92222e-11 | 1.000000 |
| rad10       | 1.44177e-11 | 1.000000 | 1.44247e-11 | 1.000000 |
| rad11       | 1.13643e-11 | 1.000000 | 1.13698e-11 | 1.000000 |
| Ph+Allene   | 9.36010e-12 | 1.000000 | 9.36464e-12 | 1.000000 |
| rad39       | 3.36900e-12 | 1.000000 | 3.37063e-12 | 1.000000 |



|               |             |         |             |          |
|---------------|-------------|---------|-------------|----------|
| rad12         | 2.88793e-12 | 1.00000 | 2.88934e-12 | 1.000000 |
| rad3          | 1.94869e-12 | 1.00000 | 1.94963e-12 | 1.000000 |
| rad4          | 1.01903e-12 | 1.00000 | 1.01952e-12 | 1.000000 |
| rad46         | 4.68609e-13 | 1.00000 | 4.68837e-13 | 1.000000 |
| rad13         | 2.63066e-13 | 1.00000 | 2.63193e-13 | 1.000000 |
| PhCH2CCH+H    | 6.80659e-14 | 1.00000 | 6.80989e-14 | 1.000000 |
| rad60syn      | 2.22273e-14 | 1.00000 | 2.22381e-14 | 1.000000 |
| rad37         | 1.01211e-14 | 1.00000 | 1.01260e-14 | 1.000000 |
| rad60anti     | 5.89685e-15 | 1.00000 | 5.89971e-15 | 1.000000 |
| rad33         | 5.17237e-16 | 1.00000 | 5.17488e-16 | 1.000000 |
| rad27         | 4.44667e-16 | 1.00000 | 4.44883e-16 | 1.000000 |
| rad5          | 1.45717e-16 | 1.00000 | 1.45788e-16 | 1.000000 |
| rad25         | 1.14451e-16 | 1.00000 | 1.14507e-16 | 1.000000 |
| rad14         | 9.87261e-17 | 1.00000 | 9.87740e-17 | 1.000000 |
| PAH3+H        | 2.94243e-17 | 1.00000 | 2.94386e-17 | 1.000000 |
| rad20         | 1.96942e-17 | 1.00000 | 1.97037e-17 | 1.000000 |
| rad21         | 1.26708e-17 | 1.00000 | 1.26769e-17 | 1.000000 |
| rad59         | 9.64551e-18 | 1.00000 | 9.65019e-18 | 1.000000 |
| rad50         | 5.93639e-19 | 1.00000 | 5.93927e-19 | 1.000000 |
| rad23         | 1.04154e-19 | 1.00000 | 1.04205e-19 | 1.000000 |
| rad18         | 8.40491e-20 | 1.00000 | 8.40899e-20 | 1.000000 |
| rad19syn      | 4.22763e-20 | 1.00000 | 4.22968e-20 | 1.000000 |
| rad31         | 2.45985e-20 | 1.00000 | 2.46105e-20 | 1.000000 |
| rad22         | 5.15773e-21 | 1.00000 | 5.16023e-21 | 1.000000 |
| rad45         | 2.37065e-21 | 1.00000 | 2.37180e-21 | 1.000000 |
| rad54         | 7.86767e-22 | 1.00000 | 7.87148e-22 | 1.000000 |
| PAH10+CH3     | 5.33110e-22 | 1.00000 | 5.33368e-22 | 1.000000 |
| rad36         | 1.50771e-22 | 1.00000 | 1.50844e-22 | 1.000000 |
| rad43         | 1.27026e-22 | 1.00000 | 1.27087e-22 | 1.000000 |
| rad52         | 9.31755e-23 | 1.00000 | 9.32207e-23 | 1.000000 |
| rad62         | 2.94966e-23 | 1.00000 | 2.95109e-23 | 1.000000 |
| rad24         | 2.81097e-24 | 1.00000 | 2.81233e-24 | 1.000000 |
| rad51         | 1.93290e-24 | 1.00000 | 1.93384e-24 | 1.000000 |
| PhcycC3H3_A+H | 1.51485e-24 | 1.00000 | 1.51559e-24 | 1.000000 |
| rad70         | 1.03242e-24 | 1.00000 | 1.03293e-24 | 1.000000 |
| rad55         | 4.27163e-25 | 1.00000 | 4.27370e-25 | 1.000000 |
| rad58         | 9.52951e-26 | 1.00000 | 9.53413e-26 | 1.000000 |
| PAH1+H        | 3.26070e-26 | 1.00000 | 3.26228e-26 | 1.000000 |
| rad65         | 1.44854e-26 | 1.00000 | 1.44924e-26 | 1.000000 |
| rad34         | 1.95407e-27 | 1.00000 | 1.95502e-27 | 1.000000 |
| rad42         | 2.76646e-29 | 1.00000 | 2.76780e-29 | 1.000000 |
| rad41         | 8.02597e-30 | 1.00000 | 8.02987e-30 | 1.000000 |
| rad47         | 1.43631e-39 | 1.00000 | 1.43700e-39 | 1.000000 |

0.100000000E-06 Pa, 260.000000 K

=====  
Rate constant | True (fraction) | Effective (fraction)  
-----

Total | 3.19452e-24 (1.00) | 3.19260e-24 (1.00)

| species     | PYtrue      | Cumul    | PYeffective | Cumul    |
|-------------|-------------|----------|-------------|----------|
| Indene+H    | 0.999398    | 0.999398 | 0.999999    | 0.999999 |
| Benzyl+C2H2 | 0.000600829 | 0.999999 | 0.00000     | 0.999999 |
| rad6        | 4.92515e-07 | 0.999999 | 4.92811e-07 | 0.999999 |
| PhCCH+CH3   | 7.52882e-08 | 0.999999 | 7.53334e-08 | 1.000000 |
| PhCHCCH2+H  | 5.65156e-08 | 0.999999 | 5.65495e-08 | 1.000000 |
| PhCCCH3+H   | 2.83192e-08 | 0.999999 | 2.83362e-08 | 1.000000 |
| rad30       | 1.36157e-08 | 0.999999 | 1.36239e-08 | 1.000000 |
| PAH9+H      | 1.67445e-09 | 0.999999 | 1.67545e-09 | 1.000000 |
| rad15       | 1.46180e-09 | 0.999999 | 1.46268e-09 | 1.000000 |
| rad35       | 1.14380e-09 | 0.999999 | 1.14448e-09 | 1.000000 |
| Ph+MeAc     | 5.16634e-10 | 1.000000 | 5.16944e-10 | 1.000000 |
| rad28       | 4.95758e-10 | 1.000000 | 4.96056e-10 | 1.000000 |
| rad38       | 3.32693e-10 | 1.000000 | 3.32893e-10 | 1.000000 |
| rad2        | 2.26468e-10 | 1.000000 | 2.26604e-10 | 1.000000 |
| rad8        | 1.94409e-10 | 1.000000 | 1.94526e-10 | 1.000000 |
| rad9        | 8.92938e-11 | 1.000000 | 8.93475e-11 | 1.000000 |
| rad26       | 6.37266e-11 | 1.000000 | 6.37649e-11 | 1.000000 |
| PAH7+H      | 5.40193e-11 | 1.000000 | 5.40518e-11 | 1.000000 |
| rad7        | 3.70508e-11 | 1.000000 | 3.70731e-11 | 1.000000 |
| Ph+Allene   | 2.34474e-11 | 1.000000 | 2.34615e-11 | 1.000000 |
| rad1        | 1.63752e-11 | 1.000000 | 1.63850e-11 | 1.000000 |
| rad10       | 1.18994e-11 | 1.000000 | 1.19066e-11 | 1.000000 |
| rad11       | 9.14096e-12 | 1.000000 | 9.14645e-12 | 1.000000 |
| rad39       | 7.45059e-12 | 1.000000 | 7.45507e-12 | 1.000000 |
| rad12       | 5.93111e-12 | 1.000000 | 5.93467e-12 | 1.000000 |
| rad3        | 1.63246e-12 | 1.000000 | 1.63345e-12 | 1.000000 |
| rad4        | 8.56739e-13 | 1.000000 | 8.57254e-13 | 1.000000 |
| rad46       | 8.49081e-13 | 1.000000 | 8.49591e-13 | 1.000000 |

|               |             |          |             |          |
|---------------|-------------|----------|-------------|----------|
| rad13         | 2.11887e-13 | 1.000000 | 2.12015e-13 | 1.000000 |
| PhCH2CCH+H    | 2.09101e-13 | 1.000000 | 2.09226e-13 | 1.000000 |
| rad60syn      | 5.16426e-14 | 1.000000 | 5.16737e-14 | 1.000000 |
| rad37         | 2.82532e-14 | 1.000000 | 2.82701e-14 | 1.000000 |
| rad60anti     | 1.43406e-14 | 1.000000 | 1.43492e-14 | 1.000000 |
| rad5          | 4.59357e-16 | 1.000000 | 4.59634e-16 | 1.000000 |
| rad27         | 4.23771e-16 | 1.000000 | 4.24026e-16 | 1.000000 |
| rad33         | 4.18153e-16 | 1.000000 | 4.18404e-16 | 1.000000 |
| rad25         | 1.23426e-16 | 1.000000 | 1.23501e-16 | 1.000000 |
| rad14         | 1.10290e-16 | 1.000000 | 1.10356e-16 | 1.000000 |
| PAH3+H        | 1.00724e-16 | 1.000000 | 1.00784e-16 | 1.000000 |
| rad59         | 3.22623e-17 | 1.000000 | 3.22817e-17 | 1.000000 |
| rad20         | 1.80041e-17 | 1.000000 | 1.80149e-17 | 1.000000 |
| rad21         | 1.16178e-17 | 1.000000 | 1.16248e-17 | 1.000000 |
| rad50         | 2.03113e-18 | 1.000000 | 2.03235e-18 | 1.000000 |
| rad19syn      | 1.98205e-19 | 1.000000 | 1.98324e-19 | 1.000000 |
| rad23         | 1.61223e-19 | 1.000000 | 1.61320e-19 | 1.000000 |
| rad18         | 7.56582e-20 | 1.000000 | 7.57036e-20 | 1.000000 |
| rad31         | 2.36293e-20 | 1.000000 | 2.36435e-20 | 1.000000 |
| rad22         | 4.58187e-21 | 1.000000 | 4.58462e-21 | 1.000000 |
| rad54         | 4.18282e-21 | 1.000000 | 4.18533e-21 | 1.000000 |
| rad45         | 4.17021e-21 | 1.000000 | 4.17271e-21 | 1.000000 |
| PAH10+CH3     | 2.81839e-21 | 1.000000 | 2.82009e-21 | 1.000000 |
| rad43         | 6.67188e-22 | 1.000000 | 6.67589e-22 | 1.000000 |
| rad52         | 4.34411e-22 | 1.000000 | 4.34673e-22 | 1.000000 |
| rad36         | 2.66566e-22 | 1.000000 | 2.66726e-22 | 1.000000 |
| rad62         | 1.67395e-22 | 1.000000 | 1.67496e-22 | 1.000000 |
| rad51         | 1.13377e-23 | 1.000000 | 1.13445e-23 | 1.000000 |
| PhcycC3H3_A+H | 1.04989e-23 | 1.000000 | 1.05052e-23 | 1.000000 |
| rad70         | 6.90237e-24 | 1.000000 | 6.90652e-24 | 1.000000 |
| rad24         | 2.93989e-24 | 1.000000 | 2.94166e-24 | 1.000000 |
| rad55         | 2.89213e-24 | 1.000000 | 2.89387e-24 | 1.000000 |
| rad58         | 6.67420e-25 | 1.000000 | 6.67822e-25 | 1.000000 |
| PAH1+H        | 2.48959e-25 | 1.000000 | 2.49109e-25 | 1.000000 |
| rad65         | 9.40613e-26 | 1.000000 | 9.41178e-26 | 1.000000 |
| rad34         | 1.53045e-26 | 1.000000 | 1.53137e-26 | 1.000000 |
| rad42         | 2.29633e-28 | 1.000000 | 2.29771e-28 | 1.000000 |
| rad41         | 6.71432e-29 | 1.000000 | 6.71835e-29 | 1.000000 |
| rad47         | 9.26851e-39 | 1.000000 | 9.27408e-39 | 1.000000 |

0.100000000E-06 Pa, 270.000000 K

=====

| Rate constant | True (fraction)     | Effective (fraction) |
|---------------|---------------------|----------------------|
| Total         | 8.04141e-24 (1.00 ) | 8.03545e-24 (1.00 )  |

| species     | PYtrue      | Cumul    | PYeffective | Cumul    |
|-------------|-------------|----------|-------------|----------|
| Indene+H    | 0.999258    | 0.999258 | 0.999999    | 0.999999 |
| Benzyl+C2H2 | 0.000741077 | 0.999999 | 0.00000     | 0.999999 |
| rad6        | 3.94443e-07 | 0.999999 | 3.94735e-07 | 0.999999 |
| PhCCH+CH3   | 1.26577e-07 | 1.000000 | 1.26671e-07 | 1.000000 |
| PhCHCCH2+H  | 9.10925e-08 | 1.000000 | 9.11600e-08 | 1.000000 |
| PhCCCH3+H   | 4.73623e-08 | 1.000000 | 4.73975e-08 | 1.000000 |
| rad30       | 1.86595e-08 | 1.000000 | 1.86734e-08 | 1.000000 |
| PAH9+H      | 2.26149e-09 | 1.000000 | 2.26317e-09 | 1.000000 |
| rad15       | 2.16654e-09 | 1.000000 | 2.16815e-09 | 1.000000 |
| rad35       | 1.49171e-09 | 1.000000 | 1.49282e-09 | 1.000000 |
| Ph+MeAc     | 1.09057e-09 | 1.000000 | 1.09138e-09 | 1.000000 |
| rad28       | 4.80576e-10 | 1.000000 | 4.80932e-10 | 1.000000 |
| rad38       | 4.68008e-10 | 1.000000 | 4.68355e-10 | 1.000000 |
| rad8        | 3.51251e-10 | 1.000000 | 3.51511e-10 | 1.000000 |
| rad2        | 1.84510e-10 | 1.000000 | 1.84647e-10 | 1.000000 |
| rad9        | 1.73159e-10 | 1.000000 | 1.73287e-10 | 1.000000 |
| PAH7+H      | 1.06233e-10 | 1.000000 | 1.06312e-10 | 1.000000 |
| rad26       | 6.25097e-11 | 1.000000 | 6.25561e-11 | 1.000000 |
| Ph+Allene   | 5.51671e-11 | 1.000000 | 5.52081e-11 | 1.000000 |
| rad7        | 2.97541e-11 | 1.000000 | 2.97762e-11 | 1.000000 |
| rad39       | 1.56030e-11 | 1.000000 | 1.56146e-11 | 1.000000 |
| rad1        | 1.35207e-11 | 1.000000 | 1.35307e-11 | 1.000000 |
| rad12       | 1.15676e-11 | 1.000000 | 1.15762e-11 | 1.000000 |
| rad10       | 9.74777e-12 | 1.000000 | 9.75500e-12 | 1.000000 |
| rad11       | 7.34620e-12 | 1.000000 | 7.35165e-12 | 1.000000 |
| rad46       | 1.49078e-12 | 1.000000 | 1.49189e-12 | 1.000000 |
| rad3        | 1.34234e-12 | 1.000000 | 1.34334e-12 | 1.000000 |
| rad4        | 7.07219e-13 | 1.000000 | 7.07744e-13 | 1.000000 |
| PhCH2CCH+H  | 5.93697e-13 | 1.000000 | 5.94137e-13 | 1.000000 |
| rad13       | 1.70529e-13 | 1.000000 | 1.70655e-13 | 1.000000 |
| rad60syn    | 1.13161e-13 | 1.000000 | 1.13245e-13 | 1.000000 |
| rad37       | 7.27155e-14 | 1.000000 | 7.27694e-14 | 1.000000 |

|               |             |          |             |          |
|---------------|-------------|----------|-------------|----------|
| rad60anti     | 3.27522e-14 | 1.000000 | 3.27765e-14 | 1.000000 |
| rad5          | 1.32965e-15 | 1.000000 | 1.33063e-15 | 1.000000 |
| rad27         | 3.98477e-16 | 1.000000 | 3.98773e-16 | 1.000000 |
| rad33         | 3.37876e-16 | 1.000000 | 3.38127e-16 | 1.000000 |
| PAH3+H        | 3.15912e-16 | 1.000000 | 3.16146e-16 | 1.000000 |
| rad25         | 1.30079e-16 | 1.000000 | 1.30176e-16 | 1.000000 |
| rad14         | 1.20074e-16 | 1.000000 | 1.20163e-16 | 1.000000 |
| rad59         | 9.89462e-17 | 1.000000 | 9.90196e-17 | 1.000000 |
| rad20         | 1.64953e-17 | 1.000000 | 1.65075e-17 | 1.000000 |
| rad21         | 1.06781e-17 | 1.000000 | 1.06860e-17 | 1.000000 |
| rad50         | 6.38912e-18 | 1.000000 | 6.39386e-18 | 1.000000 |
| rad19syn      | 8.29179e-19 | 1.000000 | 8.29794e-19 | 1.000000 |
| rad23         | 2.57887e-19 | 1.000000 | 2.58078e-19 | 1.000000 |
| rad18         | 6.81563e-20 | 1.000000 | 6.82068e-20 | 1.000000 |
| rad31         | 2.29308e-20 | 1.000000 | 2.29478e-20 | 1.000000 |
| rad54         | 1.96548e-20 | 1.000000 | 1.96693e-20 | 1.000000 |
| PAH10+CH3     | 1.31523e-20 | 1.000000 | 1.31621e-20 | 1.000000 |
| rad45         | 7.00045e-21 | 1.000000 | 7.00564e-21 | 1.000000 |
| rad22         | 4.07024e-21 | 1.000000 | 4.07325e-21 | 1.000000 |
| rad43         | 3.09130e-21 | 1.000000 | 3.09359e-21 | 1.000000 |
| rad52         | 1.81421e-21 | 1.000000 | 1.81555e-21 | 1.000000 |
| rad62         | 8.33487e-22 | 1.000000 | 8.34105e-22 | 1.000000 |
| rad36         | 4.50028e-22 | 1.000000 | 4.50361e-22 | 1.000000 |
| PhcycC3H3_A+H | 6.28440e-23 | 1.000000 | 6.28906e-23 | 1.000000 |
| rad51         | 5.84528e-23 | 1.000000 | 5.84962e-23 | 1.000000 |
| rad70         | 3.99452e-23 | 1.000000 | 3.99748e-23 | 1.000000 |
| rad55         | 1.69373e-23 | 1.000000 | 1.69499e-23 | 1.000000 |
| rad58         | 4.03354e-24 | 1.000000 | 4.03653e-24 | 1.000000 |
| rad24         | 3.09656e-24 | 1.000000 | 3.09886e-24 | 1.000000 |
| PAH1+H        | 1.62733e-24 | 1.000000 | 1.62853e-24 | 1.000000 |
| rad65         | 5.31208e-25 | 1.000000 | 5.31602e-25 | 1.000000 |
| rad34         | 1.02480e-25 | 1.000000 | 1.02556e-25 | 1.000000 |
| rad42         | 1.63125e-27 | 1.000000 | 1.63246e-27 | 1.000000 |
| rad41         | 4.81362e-28 | 1.000000 | 4.81719e-28 | 1.000000 |
| rad47         | 5.14497e-38 | 1.000000 | 5.14878e-38 | 1.000000 |

0.100000000E-06 Pa, 280.000000 K

=====

| Rate constant | True (fraction)     | Effective (fraction) |
|---------------|---------------------|----------------------|
| Total         | 1.89357e-23 (1.00 ) | 1.89185e-23 (1.00 )  |

| species     | PYtrue      | Cumul    | PYeffective | Cumul    |
|-------------|-------------|----------|-------------|----------|
| Indene+H    | 0.999090    | 0.999090 | 0.999999    | 0.999999 |
| Benzyl+C2H2 | 0.000909507 | 1.000000 | 0.000000    | 0.999999 |
| rad6        | 3.15595e-07 | 1.000000 | 3.15883e-07 | 0.999999 |
| PhCCH+CH3   | 2.06323e-07 | 1.000000 | 2.06510e-07 | 1.000000 |
| PhCHCCH2+H  | 1.42870e-07 | 1.000000 | 1.43000e-07 | 1.000000 |
| PhCCCH3+H   | 7.67122e-08 | 1.000000 | 7.67820e-08 | 1.000000 |
| rad30       | 2.52475e-08 | 1.000000 | 2.52705e-08 | 1.000000 |
| rad15       | 3.14926e-09 | 1.000000 | 3.15212e-09 | 1.000000 |
| PAH9+H      | 3.03558e-09 | 1.000000 | 3.03835e-09 | 1.000000 |
| Ph+MeAc     | 2.18702e-09 | 1.000000 | 2.18901e-09 | 1.000000 |
| rad35       | 1.93648e-09 | 1.000000 | 1.93824e-09 | 1.000000 |
| rad38       | 6.52109e-10 | 1.000000 | 6.52702e-10 | 1.000000 |
| rad8        | 6.11055e-10 | 1.000000 | 6.11611e-10 | 1.000000 |
| rad28       | 4.58776e-10 | 1.000000 | 4.59193e-10 | 1.000000 |
| rad9        | 3.21746e-10 | 1.000000 | 3.22039e-10 | 1.000000 |
| PAH7+H      | 2.00109e-10 | 1.000000 | 2.00291e-10 | 1.000000 |
| rad2        | 1.49710e-10 | 1.000000 | 1.49846e-10 | 1.000000 |
| Ph+Allene   | 1.22724e-10 | 1.000000 | 1.22835e-10 | 1.000000 |
| rad26       | 6.03399e-11 | 1.000000 | 6.03948e-11 | 1.000000 |
| rad39       | 3.11219e-11 | 1.000000 | 3.11502e-11 | 1.000000 |
| rad7        | 2.38735e-11 | 1.000000 | 2.38952e-11 | 1.000000 |
| rad12       | 2.15400e-11 | 1.000000 | 2.15596e-11 | 1.000000 |
| rad1        | 1.11287e-11 | 1.000000 | 1.11389e-11 | 1.000000 |
| rad10       | 8.09040e-12 | 1.000000 | 8.09777e-12 | 1.000000 |
| rad11       | 5.89889e-12 | 1.000000 | 5.90426e-12 | 1.000000 |
| rad46       | 2.54457e-12 | 1.000000 | 2.54689e-12 | 1.000000 |
| PhCH2CCH+H  | 1.57107e-12 | 1.000000 | 1.57250e-12 | 1.000000 |
| rad3        | 1.13310e-12 | 1.000000 | 1.13413e-12 | 1.000000 |
| rad4        | 5.99480e-13 | 1.000000 | 6.00025e-13 | 1.000000 |
| rad60syn    | 2.35373e-13 | 1.000000 | 2.35588e-13 | 1.000000 |
| rad37       | 1.74095e-13 | 1.000000 | 1.74253e-13 | 1.000000 |
| rad13       | 1.37138e-13 | 1.000000 | 1.37263e-13 | 1.000000 |
| rad60anti   | 7.07396e-14 | 1.000000 | 7.08040e-14 | 1.000000 |
| rad5        | 3.56588e-15 | 1.000000 | 3.56913e-15 | 1.000000 |
| PAH3+H      | 9.16507e-16 | 1.000000 | 9.17341e-16 | 1.000000 |
| rad27       | 3.70222e-16 | 1.000000 | 3.70559e-16 | 1.000000 |

|               |             |         |             |          |
|---------------|-------------|---------|-------------|----------|
| rad59         | 2.80900e-16 | 1.00000 | 2.81156e-16 | 1.000000 |
| rad33         | 2.72890e-16 | 1.00000 | 2.73138e-16 | 1.000000 |
| rad25         | 1.34298e-16 | 1.00000 | 1.34420e-16 | 1.000000 |
| rad14         | 1.27744e-16 | 1.00000 | 1.27860e-16 | 1.000000 |
| rad50         | 1.86453e-17 | 1.00000 | 1.86623e-17 | 1.000000 |
| rad20         | 1.51483e-17 | 1.00000 | 1.51621e-17 | 1.000000 |
| rad21         | 9.83966e-18 | 1.00000 | 9.84862e-18 | 1.000000 |
| rad19syn      | 3.13292e-18 | 1.00000 | 3.13577e-18 | 1.000000 |
| rad23         | 4.25168e-19 | 1.00000 | 4.25555e-19 | 1.000000 |
| rad54         | 8.26763e-20 | 1.00000 | 8.27515e-20 | 1.000000 |
| rad18         | 6.14488e-20 | 1.00000 | 6.15048e-20 | 1.000000 |
| PAH10+CH3     | 5.48809e-20 | 1.00000 | 5.49309e-20 | 1.000000 |
| rad31         | 2.24898e-20 | 1.00000 | 2.25103e-20 | 1.000000 |
| rad45         | 1.29627e-20 | 1.00000 | 1.29745e-20 | 1.000000 |
| rad43         | 1.28005e-20 | 1.00000 | 1.28122e-20 | 1.000000 |
| rad52         | 6.86644e-21 | 1.00000 | 6.87269e-21 | 1.000000 |
| rad62         | 3.68998e-21 | 1.00000 | 3.69334e-21 | 1.000000 |
| rad22         | 3.61585e-21 | 1.00000 | 3.61914e-21 | 1.000000 |
| rad36         | 8.38525e-22 | 1.00000 | 8.39288e-22 | 1.000000 |
| PhcycC3H3_A+H | 3.28881e-22 | 1.00000 | 3.29180e-22 | 1.000000 |
| rad51         | 2.68189e-22 | 1.00000 | 2.68433e-22 | 1.000000 |
| rad70         | 2.02731e-22 | 1.00000 | 2.02915e-22 | 1.000000 |
| rad55         | 8.69007e-23 | 1.00000 | 8.69798e-23 | 1.000000 |
| rad58         | 2.12890e-23 | 1.00000 | 2.13084e-23 | 1.000000 |
| PAH1+H        | 9.19440e-24 | 1.00000 | 9.20277e-24 | 1.000000 |
| rad24         | 3.28580e-24 | 1.00000 | 3.28879e-24 | 1.000000 |
| rad65         | 2.64204e-24 | 1.00000 | 2.64445e-24 | 1.000000 |
| rad34         | 5.91306e-25 | 1.00000 | 5.91844e-25 | 1.000000 |
| rad42         | 9.90724e-27 | 1.00000 | 9.91626e-27 | 1.000000 |
| rad41         | 2.94681e-27 | 1.00000 | 2.94949e-27 | 1.000000 |
| rad47         | 2.49702e-37 | 1.00000 | 2.49929e-37 | 1.000000 |

0.100000000E-06 Pa, 290.000000 K

=====

| Rate constant | True (fraction)     | Effective (fraction) |
|---------------|---------------------|----------------------|
| Total         | 4.20015e-23 (1.00 ) | 4.19549e-23 (1.00 )  |

| species     | PYtrue      | Cumul    | PYeffective | Cumul    |
|-------------|-------------|----------|-------------|----------|
| Indene+H    | 0.998888    | 0.998888 | 0.999999    | 0.999999 |
| Benzyl+C2H2 | 0.00111066  | 0.999999 | 0.00000     | 0.999999 |
| PhCCH+CH3   | 3.26952e-07 | 0.999999 | 3.27315e-07 | 0.999999 |
| rad6        | 2.52275e-07 | 0.999999 | 2.52555e-07 | 1.000000 |
| PhCHCCH2+H  | 2.18549e-07 | 0.999999 | 2.18792e-07 | 1.000000 |
| PhCCCH3+H   | 1.20677e-07 | 1.000000 | 1.20811e-07 | 1.000000 |
| rad30       | 3.37617e-08 | 1.000000 | 3.37992e-08 | 1.000000 |
| rad15       | 4.49781e-09 | 1.000000 | 4.50281e-09 | 1.000000 |
| Ph+MeAc     | 4.18743e-09 | 1.000000 | 4.19209e-09 | 1.000000 |
| PAH9+H      | 4.04965e-09 | 1.000000 | 4.05415e-09 | 1.000000 |
| rad35       | 2.50193e-09 | 1.000000 | 2.50471e-09 | 1.000000 |
| rad8        | 1.02739e-09 | 1.000000 | 1.02853e-09 | 1.000000 |
| rad38       | 9.00378e-10 | 1.000000 | 9.01380e-10 | 1.000000 |
| rad9        | 5.75320e-10 | 1.000000 | 5.75960e-10 | 1.000000 |
| rad28       | 4.31960e-10 | 1.000000 | 4.32441e-10 | 1.000000 |
| PAH7+H      | 3.62658e-10 | 1.000000 | 3.63061e-10 | 1.000000 |
| Ph+Allene   | 2.59612e-10 | 1.000000 | 2.59900e-10 | 1.000000 |
| rad2        | 1.29077e-10 | 1.000000 | 1.29220e-10 | 1.000000 |
| rad39       | 5.94184e-11 | 1.000000 | 5.94845e-11 | 1.000000 |
| rad26       | 5.74092e-11 | 1.000000 | 5.74731e-11 | 1.000000 |
| rad12       | 3.84719e-11 | 1.000000 | 3.85146e-11 | 1.000000 |
| rad7        | 1.91390e-11 | 1.000000 | 1.91603e-11 | 1.000000 |
| rad1        | 9.74300e-12 | 1.000000 | 9.75383e-12 | 1.000000 |
| rad10       | 6.81893e-12 | 1.000000 | 6.82651e-12 | 1.000000 |
| rad11       | 4.73295e-12 | 1.000000 | 4.73821e-12 | 1.000000 |
| rad46       | 4.23385e-12 | 1.000000 | 4.23856e-12 | 1.000000 |
| PhCH2CCH+H  | 3.90283e-12 | 1.000000 | 3.90717e-12 | 1.000000 |
| rad3        | 9.44025e-13 | 1.000000 | 9.45074e-13 | 1.000000 |
| rad4        | 5.01690e-13 | 1.000000 | 5.02248e-13 | 1.000000 |
| rad60syn    | 4.67307e-13 | 1.000000 | 4.67826e-13 | 1.000000 |
| rad37       | 3.90734e-13 | 1.000000 | 3.91168e-13 | 1.000000 |
| rad60anti   | 1.45354e-13 | 1.000000 | 1.45516e-13 | 1.000000 |
| rad13       | 1.10207e-13 | 1.000000 | 1.10330e-13 | 1.000000 |
| rad5        | 8.92902e-15 | 1.000000 | 8.93895e-15 | 1.000000 |
| PAH3+H      | 2.47956e-15 | 1.000000 | 2.48232e-15 | 1.000000 |
| rad59       | 7.44181e-16 | 1.000000 | 7.45009e-16 | 1.000000 |
| rad27       | 3.40279e-16 | 1.000000 | 3.40657e-16 | 1.000000 |
| rad33       | 2.20322e-16 | 1.000000 | 2.20567e-16 | 1.000000 |
| rad25       | 1.36114e-16 | 1.000000 | 1.36265e-16 | 1.000000 |
| rad14       | 1.33117e-16 | 1.000000 | 1.33265e-16 | 1.000000 |

|               |             |          |             |          |
|---------------|-------------|----------|-------------|----------|
| rad50         | 5.08734e-17 | 1.000000 | 5.09300e-17 | 1.000000 |
| rad20         | 1.39462e-17 | 1.000000 | 1.39617e-17 | 1.000000 |
| rad19syn      | 1.08024e-17 | 1.000000 | 1.08144e-17 | 1.000000 |
| rad21         | 9.09197e-18 | 1.000000 | 9.10208e-18 | 1.000000 |
| rad23         | 7.20268e-19 | 1.000000 | 7.21069e-19 | 1.000000 |
| rad54         | 3.14766e-19 | 1.000000 | 3.15116e-19 | 1.000000 |
| PAH10+CH3     | 2.07062e-19 | 1.000000 | 2.07292e-19 | 1.000000 |
| rad18         | 5.54520e-20 | 1.000000 | 5.55137e-20 | 1.000000 |
| rad43         | 4.79070e-20 | 1.000000 | 4.79603e-20 | 1.000000 |
| rad45         | 2.39484e-20 | 1.000000 | 2.39750e-20 | 1.000000 |
| rad52         | 2.37882e-20 | 1.000000 | 2.38146e-20 | 1.000000 |
| rad31         | 2.22986e-20 | 1.000000 | 2.23234e-20 | 1.000000 |
| rad62         | 1.46949e-20 | 1.000000 | 1.47112e-20 | 1.000000 |
| rad22         | 3.21254e-21 | 1.000000 | 3.21612e-21 | 1.000000 |
| rad36         | 1.55990e-21 | 1.000000 | 1.56163e-21 | 1.000000 |
| PhcycC3H3_A+H | 1.52452e-21 | 1.000000 | 1.52622e-21 | 1.000000 |
| rad51         | 1.10724e-21 | 1.000000 | 1.10847e-21 | 1.000000 |
| rad70         | 9.13951e-22 | 1.000000 | 9.14968e-22 | 1.000000 |
| rad55         | 3.95677e-22 | 1.000000 | 3.96117e-22 | 1.000000 |
| rad58         | 9.94323e-23 | 1.000000 | 9.95428e-23 | 1.000000 |
| PAH1+H        | 4.55733e-23 | 1.000000 | 4.56240e-23 | 1.000000 |
| rad65         | 1.17141e-23 | 1.000000 | 1.17271e-23 | 1.000000 |
| rad24         | 3.51369e-24 | 1.000000 | 3.51759e-24 | 1.000000 |
| rad34         | 2.98552e-24 | 1.000000 | 2.98884e-24 | 1.000000 |
| rad42         | 5.23352e-26 | 1.000000 | 5.23933e-26 | 1.000000 |
| rad41         | 1.56770e-26 | 1.000000 | 1.56944e-26 | 1.000000 |
| rad47         | 1.07468e-36 | 1.000000 | 1.07587e-36 | 1.000000 |

0.100000000E-06 Pa, 300.000000 K

| Rate constant | True (fraction)     | Effective (fraction) |
|---------------|---------------------|----------------------|
| Total         | 1.17740e-22 (1.00 ) | 1.17544e-22 (1.00 )  |

| species     | PYtrue      | Cumul    | PYeffective | Cumul    |
|-------------|-------------|----------|-------------|----------|
| Indene+H    | 0.998337    | 0.998337 | 0.999999    | 0.999999 |
| Benzyl+C2H2 | 0.00166158  | 0.999999 | 0.00000     | 0.999999 |
| PhCCH+CH3   | 4.36745e-07 | 0.999999 | 4.37472e-07 | 0.999999 |
| rad6        | 3.75945e-07 | 0.999999 | 3.76570e-07 | 1.000000 |
| PhCHCCH2+H  | 2.66159e-07 | 1.000000 | 2.66602e-07 | 1.000000 |
| PhCCCH3+H   | 1.55716e-07 | 1.000000 | 1.55975e-07 | 1.000000 |
| rad30       | 3.74940e-08 | 1.000000 | 3.75564e-08 | 1.000000 |
| Ph+MeAc     | 6.10069e-09 | 1.000000 | 6.11085e-09 | 1.000000 |
| PAH9+H      | 5.54882e-09 | 1.000000 | 5.55806e-09 | 1.000000 |
| rad35       | 2.76931e-09 | 1.000000 | 2.77392e-09 | 1.000000 |
| rad38       | 1.02444e-09 | 1.000000 | 1.02615e-09 | 1.000000 |
| PAH7+H      | 6.45714e-10 | 1.000000 | 6.46789e-10 | 1.000000 |
| rad28       | 4.04902e-10 | 1.000000 | 4.05576e-10 | 1.000000 |
| Ph+Allene   | 2.52011e-10 | 1.000000 | 2.52431e-10 | 1.000000 |
| rad2        | 1.91987e-10 | 1.000000 | 1.92307e-10 | 1.000000 |
| rad39       | 8.64614e-11 | 1.000000 | 8.66053e-11 | 1.000000 |
| rad26       | 4.04141e-11 | 1.000000 | 4.04814e-11 | 1.000000 |
| rad7        | 3.34336e-11 | 1.000000 | 3.34892e-11 | 1.000000 |
| rad19anti   | 1.63372e-11 | 1.000000 | 1.63644e-11 | 1.000000 |
| rad1        | 1.44660e-11 | 1.000000 | 1.44901e-11 | 1.000000 |
| rad10       | 1.22781e-11 | 1.000000 | 1.22985e-11 | 1.000000 |
| rad11       | 8.04899e-12 | 1.000000 | 8.06239e-12 | 1.000000 |
| PhCH2CCH+H  | 7.51671e-12 | 1.000000 | 7.52922e-12 | 1.000000 |
| rad46       | 5.66748e-12 | 1.000000 | 5.67691e-12 | 1.000000 |
| rad3        | 1.40579e-12 | 1.000000 | 1.40813e-12 | 1.000000 |
| rad60syn    | 7.07965e-13 | 1.000000 | 7.09144e-13 | 1.000000 |
| rad4        | 6.99101e-13 | 1.000000 | 7.00264e-13 | 1.000000 |
| rad37       | 6.05564e-13 | 1.000000 | 6.06572e-13 | 1.000000 |
| rad60anti   | 2.13244e-13 | 1.000000 | 2.13599e-13 | 1.000000 |
| rad13       | 1.92493e-13 | 1.000000 | 1.92813e-13 | 1.000000 |
| PAH3+H      | 6.24906e-15 | 1.000000 | 6.25946e-15 | 1.000000 |
| rad23       | 1.58597e-15 | 1.000000 | 1.58861e-15 | 1.000000 |
| rad59       | 1.44646e-15 | 1.000000 | 1.44887e-15 | 1.000000 |
| rad20       | 7.81392e-16 | 1.000000 | 7.82693e-16 | 1.000000 |
| rad21       | 4.99595e-16 | 1.000000 | 5.00427e-16 | 1.000000 |
| rad33       | 4.91764e-16 | 1.000000 | 4.92582e-16 | 1.000000 |
| rad27       | 2.81294e-16 | 1.000000 | 2.81763e-16 | 1.000000 |
| rad45       | 1.22376e-16 | 1.000000 | 1.22579e-16 | 1.000000 |
| rad14       | 1.11434e-16 | 1.000000 | 1.11619e-16 | 1.000000 |
| rad50       | 1.03024e-16 | 1.000000 | 1.03196e-16 | 1.000000 |
| rad25       | 9.88104e-17 | 1.000000 | 9.89748e-17 | 1.000000 |
| rad19syn    | 2.69219e-17 | 1.000000 | 2.69667e-17 | 1.000000 |
| rad18       | 1.88482e-17 | 1.000000 | 1.88795e-17 | 1.000000 |
| rad22       | 1.54334e-17 | 1.000000 | 1.54591e-17 | 1.000000 |

|               |             |          |             |         |
|---------------|-------------|----------|-------------|---------|
| rad36         | 4.17065e-18 | 1.000000 | 4.17759e-18 | 1.00000 |
| rad67         | 1.20173e-18 | 1.000000 | 1.20373e-18 | 1.00000 |
| rad54         | 8.62469e-19 | 1.000000 | 8.63904e-19 | 1.00000 |
| PAH10+CH3     | 5.71972e-19 | 1.000000 | 5.72924e-19 | 1.00000 |
| rad43         | 1.19051e-19 | 1.000000 | 1.19249e-19 | 1.00000 |
| rad52         | 6.28747e-20 | 1.000000 | 6.29793e-20 | 1.00000 |
| rad31         | 4.09473e-20 | 1.000000 | 4.10154e-20 | 1.00000 |
| rad62         | 4.05053e-20 | 1.000000 | 4.05727e-20 | 1.00000 |
| PhcycC3H3_A+H | 7.38944e-21 | 1.000000 | 7.40174e-21 | 1.00000 |
| rad51         | 3.46093e-21 | 1.000000 | 3.46669e-21 | 1.00000 |
| rad70         | 3.35423e-21 | 1.000000 | 3.35981e-21 | 1.00000 |
| rad24         | 1.73491e-21 | 1.000000 | 1.73780e-21 | 1.00000 |
| rad55         | 1.33538e-21 | 1.000000 | 1.33760e-21 | 1.00000 |
| rad58         | 3.59869e-22 | 1.000000 | 3.60468e-22 | 1.00000 |
| PAH1+H        | 2.76409e-22 | 1.000000 | 2.76869e-22 | 1.00000 |
| rad65         | 4.20416e-23 | 1.000000 | 4.21115e-23 | 1.00000 |
| rad34         | 1.85425e-23 | 1.000000 | 1.85734e-23 | 1.00000 |
| rad9          | 1.46614e-24 | 1.000000 | 1.46859e-24 | 1.00000 |
| rad42         | 4.75218e-25 | 1.000000 | 4.76009e-25 | 1.00000 |
| rad41         | 1.44595e-25 | 1.000000 | 1.44836e-25 | 1.00000 |
| rad53         | 6.41325e-27 | 1.000000 | 6.42392e-27 | 1.00000 |
| rad64         | 1.37052e-27 | 1.000000 | 1.37280e-27 | 1.00000 |
| rad15         | 8.60949e-28 | 1.000000 | 8.62382e-28 | 1.00000 |
| rad56         | 9.20940e-30 | 1.000000 | 9.22472e-30 | 1.00000 |
| rad5          | 1.63075e-30 | 1.000000 | 1.63346e-30 | 1.00000 |
| rad61         | 1.39478e-30 | 1.000000 | 1.39710e-30 | 1.00000 |
| rad68syn      | 1.01950e-30 | 1.000000 | 1.02119e-30 | 1.00000 |
| rad12         | 8.87202e-31 | 1.000000 | 8.88679e-31 | 1.00000 |
| rad68anti     | 7.27727e-31 | 1.000000 | 7.28938e-31 | 1.00000 |
| rad73         | 2.19681e-33 | 1.000000 | 2.20047e-33 | 1.00000 |
| rad40syn      | 2.30555e-34 | 1.000000 | 2.30938e-34 | 1.00000 |
| rad40anti     | 7.00569e-35 | 1.000000 | 7.01735e-35 | 1.00000 |
| rad47         | 2.39996e-36 | 1.000000 | 2.40395e-36 | 1.00000 |
| rad71         | 2.29535e-38 | 1.000000 | 2.29917e-38 | 1.00000 |
| PAH8+H        | 7.77967e-39 | 1.000000 | 7.79262e-39 | 1.00000 |
| rad72         | 4.05077e-44 | 1.000000 | 4.05751e-44 | 1.00000 |
| rad8          | 2.66072e-45 | 1.000000 | 2.66515e-45 | 1.00000 |

0.100000000E-06 Pa, 310.000000 K

=====

| Rate constant | True (fraction)     | Effective (fraction) |
|---------------|---------------------|----------------------|
| Total         | 2.44453e-22 (1.00 ) | 2.44054e-22 (1.00 )  |

| species     | PYtrue      | Cumul    | PYeffective | Cumul    |
|-------------|-------------|----------|-------------|----------|
| Indene+H    | 0.998366    | 0.998366 | 0.999998    | 0.999998 |
| Benzyl+C2H2 | 0.00163189  | 0.999998 | 0.00000     | 0.999998 |
| PhCCH+CH3   | 7.61255e-07 | 0.999999 | 7.62500e-07 | 0.999999 |
| PhCHCCH2+H  | 4.78158e-07 | 0.999999 | 4.78940e-07 | 0.999999 |
| PhCCH3+H    | 2.76241e-07 | 0.999999 | 2.76693e-07 | 1.000000 |
| rad6        | 1.60781e-07 | 1.000000 | 1.61044e-07 | 1.000000 |
| rad30       | 5.84662e-08 | 1.000000 | 5.85618e-08 | 1.000000 |
| Ph+MeAc     | 1.35869e-08 | 1.000000 | 1.36091e-08 | 1.000000 |
| rad15       | 8.75423e-09 | 1.000000 | 8.76854e-09 | 1.000000 |
| PAH9+H      | 7.07588e-09 | 1.000000 | 7.08744e-09 | 1.000000 |
| rad35       | 4.11579e-09 | 1.000000 | 4.12252e-09 | 1.000000 |
| rad8        | 2.65486e-09 | 1.000000 | 2.65920e-09 | 1.000000 |
| rad38       | 1.67249e-09 | 1.000000 | 1.67522e-09 | 1.000000 |
| rad9        | 1.66328e-09 | 1.000000 | 1.66600e-09 | 1.000000 |
| PAH7+H      | 1.07654e-09 | 1.000000 | 1.07830e-09 | 1.000000 |
| Ph+Allene   | 1.01825e-09 | 1.000000 | 1.01992e-09 | 1.000000 |
| rad28       | 3.69298e-10 | 1.000000 | 3.69902e-10 | 1.000000 |
| rad39       | 1.93121e-10 | 1.000000 | 1.93436e-10 | 1.000000 |
| rad12       | 1.09975e-10 | 1.000000 | 1.10155e-10 | 1.000000 |
| rad2        | 8.94971e-11 | 1.000000 | 8.96434e-11 | 1.000000 |
| rad26       | 5.00310e-11 | 1.000000 | 5.01128e-11 | 1.000000 |
| PhCH2CCH+H  | 2.04109e-11 | 1.000000 | 2.04443e-11 | 1.000000 |
| rad7        | 1.22723e-11 | 1.000000 | 1.22924e-11 | 1.000000 |
| rad46       | 1.09555e-11 | 1.000000 | 1.09734e-11 | 1.000000 |
| rad1        | 6.98748e-12 | 1.000000 | 6.99891e-12 | 1.000000 |
| rad10       | 4.66781e-12 | 1.000000 | 4.67544e-12 | 1.000000 |
| rad11       | 3.04024e-12 | 1.000000 | 3.04521e-12 | 1.000000 |
| rad37       | 1.66365e-12 | 1.000000 | 1.66637e-12 | 1.000000 |
| rad60syn    | 1.63169e-12 | 1.000000 | 1.63436e-12 | 1.000000 |
| rad3        | 6.52702e-13 | 1.000000 | 6.53769e-13 | 1.000000 |
| rad60anti   | 5.39033e-13 | 1.000000 | 5.39914e-13 | 1.000000 |
| rad4        | 3.50318e-13 | 1.000000 | 3.50890e-13 | 1.000000 |
| rad13       | 7.10359e-14 | 1.000000 | 7.11520e-14 | 1.000000 |
| rad5        | 4.67693e-14 | 1.000000 | 4.68458e-14 | 1.000000 |

|               |             |          |             |          |
|---------------|-------------|----------|-------------|----------|
| PAH3+H        | 1.51219e-14 | 1.000000 | 1.51467e-14 | 1.000000 |
| rad59         | 4.36101e-15 | 1.000000 | 4.36813e-15 | 1.000000 |
| rad50         | 3.17584e-16 | 1.000000 | 3.18103e-16 | 1.000000 |
| rad27         | 2.79474e-16 | 1.000000 | 2.79931e-16 | 1.000000 |
| rad33         | 1.43513e-16 | 1.000000 | 1.43747e-16 | 1.000000 |
| rad14         | 1.36923e-16 | 1.000000 | 1.37147e-16 | 1.000000 |
| rad25         | 1.33224e-16 | 1.000000 | 1.33441e-16 | 1.000000 |
| rad19syn      | 1.01011e-16 | 1.000000 | 1.01176e-16 | 1.000000 |
| rad20         | 1.19184e-17 | 1.000000 | 1.19379e-17 | 1.000000 |
| rad21         | 7.83325e-18 | 1.000000 | 7.84606e-18 | 1.000000 |
| rad54         | 3.50801e-18 | 1.000000 | 3.51374e-18 | 1.000000 |
| PAH10+CH3     | 2.26101e-18 | 1.000000 | 2.26470e-18 | 1.000000 |
| rad23         | 2.21421e-18 | 1.000000 | 2.21783e-18 | 1.000000 |
| rad43         | 5.14357e-19 | 1.000000 | 5.15197e-19 | 1.000000 |
| rad52         | 2.26217e-19 | 1.000000 | 2.26587e-19 | 1.000000 |
| rad62         | 1.76311e-19 | 1.000000 | 1.76600e-19 | 1.000000 |
| rad45         | 9.46255e-20 | 1.000000 | 9.47801e-20 | 1.000000 |
| rad18         | 4.53000e-20 | 1.000000 | 4.53741e-20 | 1.000000 |
| PhcycC3H3_A+H | 2.37749e-20 | 1.000000 | 2.38138e-20 | 1.000000 |
| rad31         | 2.26092e-20 | 1.000000 | 2.26462e-20 | 1.000000 |
| rad51         | 1.42634e-20 | 1.000000 | 1.42867e-20 | 1.000000 |
| rad70         | 1.35852e-20 | 1.000000 | 1.36074e-20 | 1.000000 |
| rad36         | 6.26090e-21 | 1.000000 | 6.27114e-21 | 1.000000 |
| rad55         | 5.98370e-21 | 1.000000 | 5.99348e-21 | 1.000000 |
| rad22         | 2.53800e-21 | 1.000000 | 2.54215e-21 | 1.000000 |
| rad58         | 1.57034e-21 | 1.000000 | 1.57291e-21 | 1.000000 |
| PAH1+H        | 7.93483e-22 | 1.000000 | 7.94780e-22 | 1.000000 |
| rad65         | 1.69845e-22 | 1.000000 | 1.70123e-22 | 1.000000 |
| rad34         | 5.35999e-23 | 1.000000 | 5.36875e-23 | 1.000000 |
| rad24         | 4.11818e-24 | 1.000000 | 4.12491e-24 | 1.000000 |
| rad42         | 1.01340e-24 | 1.000000 | 1.01506e-24 | 1.000000 |
| rad41         | 3.07228e-25 | 1.000000 | 3.07730e-25 | 1.000000 |
| rad47         | 1.45559e-35 | 1.000000 | 1.45797e-35 | 1.000000 |

0.100000000E-06 Pa, 400.000000 K

| Rate constant | True (fraction)     | Effective (fraction) |
|---------------|---------------------|----------------------|
| Total         | 3.60269e-20 (1.00 ) | 3.57081e-20 (1.00 )  |

| species     | PYtrue      | Cumul    | PYeffective | Cumul    |
|-------------|-------------|----------|-------------|----------|
| Indene+H    | 0.991128    | 0.991128 | 0.999976    | 0.999976 |
| Benzyl+C2H2 | 0.00884848  | 0.999976 | 0.000000    | 0.999976 |
| PhCCH+CH3   | 1.23505e-05 | 0.999989 | 1.24607e-05 | 0.999988 |
| PhCHCCH2+H  | 5.95041e-06 | 0.999995 | 6.00353e-06 | 0.999994 |
| PhCCCH3+H   | 3.90745e-06 | 0.999999 | 3.94233e-06 | 0.999998 |
| Ph+MeAc     | 5.34638e-07 | 0.999999 | 5.39411e-07 | 0.999999 |
| rad30       | 4.02127e-07 | 1.000000 | 4.05716e-07 | 0.999999 |
| PAH9+H      | 6.80803e-08 | 1.000000 | 6.86880e-08 | 0.999999 |
| Ph+Allene   | 6.39781e-08 | 1.000000 | 6.45492e-08 | 0.999999 |
| rad6        | 4.55137e-08 | 1.000000 | 4.59200e-08 | 1.000000 |
| PAH7+H      | 4.50277e-08 | 1.000000 | 4.54297e-08 | 1.000000 |
| rad35       | 2.73752e-08 | 1.000000 | 2.76196e-08 | 1.000000 |
| rad38       | 1.63212e-08 | 1.000000 | 1.64670e-08 | 1.000000 |
| rad39       | 8.59872e-09 | 1.000000 | 8.67548e-09 | 1.000000 |
| PhCH2CCH+H  | 4.56270e-09 | 1.000000 | 4.60343e-09 | 1.000000 |
| rad19anti   | 8.44423e-10 | 1.000000 | 8.51962e-10 | 1.000000 |
| rad46       | 3.06009e-10 | 1.000000 | 3.08741e-10 | 1.000000 |
| rad37       | 1.38254e-10 | 1.000000 | 1.39488e-10 | 1.000000 |
| rad28       | 1.31607e-10 | 1.000000 | 1.32782e-10 | 1.000000 |
| rad60syn    | 9.47275e-11 | 1.000000 | 9.55731e-11 | 1.000000 |
| rad2        | 3.90465e-11 | 1.000000 | 3.93950e-11 | 1.000000 |
| rad60anti   | 3.76555e-11 | 1.000000 | 3.79916e-11 | 1.000000 |
| rad26       | 1.83160e-11 | 1.000000 | 1.84795e-11 | 1.000000 |
| PAH3+H      | 6.50520e-12 | 1.000000 | 6.56327e-12 | 1.000000 |
| rad7        | 4.27316e-12 | 1.000000 | 4.31131e-12 | 1.000000 |
| rad1        | 3.63437e-12 | 1.000000 | 3.66681e-12 | 1.000000 |
| rad10       | 2.48566e-12 | 1.000000 | 2.50785e-12 | 1.000000 |
| rad59       | 1.36005e-12 | 1.000000 | 1.37219e-12 | 1.000000 |
| rad11       | 1.06613e-12 | 1.000000 | 1.07565e-12 | 1.000000 |
| rad3        | 3.36896e-13 | 1.000000 | 3.39903e-13 | 1.000000 |
| rad4        | 1.77417e-13 | 1.000000 | 1.79001e-13 | 1.000000 |
| rad50       | 1.35994e-13 | 1.000000 | 1.37208e-13 | 1.000000 |
| rad19syn    | 1.28743e-13 | 1.000000 | 1.29892e-13 | 1.000000 |
| rad23       | 1.17244e-13 | 1.000000 | 1.18290e-13 | 1.000000 |
| rad13       | 2.60868e-14 | 1.000000 | 2.63196e-14 | 1.000000 |
| rad45       | 1.99287e-14 | 1.000000 | 2.01066e-14 | 1.000000 |
| rad54       | 8.91593e-15 | 1.000000 | 8.99553e-15 | 1.000000 |
| PAH10+CH3   | 4.84580e-15 | 1.000000 | 4.88906e-15 | 1.000000 |

|               |             |          |             |          |
|---------------|-------------|----------|-------------|----------|
| rad67         | 1.67319e-15 | 1.000000 | 1.68812e-15 | 1.000000 |
| rad43         | 8.69681e-16 | 1.000000 | 8.77445e-16 | 1.000000 |
| rad36         | 7.68374e-16 | 1.000000 | 7.75233e-16 | 1.000000 |
| rad62         | 4.86641e-16 | 1.000000 | 4.90986e-16 | 1.000000 |
| rad20         | 4.10347e-16 | 1.000000 | 4.14011e-16 | 1.000000 |
| rad52         | 4.03329e-16 | 1.000000 | 4.06930e-16 | 1.000000 |
| PhcycC3H3_A+H | 3.21885e-16 | 1.000000 | 3.24758e-16 | 1.000000 |
| rad21         | 2.86968e-16 | 1.000000 | 2.89530e-16 | 1.000000 |
| rad70         | 1.20384e-16 | 1.000000 | 1.21459e-16 | 1.000000 |
| rad27         | 1.02192e-16 | 1.000000 | 1.03104e-16 | 1.000000 |
| rad33         | 8.25327e-17 | 1.000000 | 8.32695e-17 | 1.000000 |
| rad14         | 8.22398e-17 | 1.000000 | 8.29740e-17 | 1.000000 |
| rad51         | 7.61818e-17 | 1.000000 | 7.68620e-17 | 1.000000 |
| rad25         | 7.37754e-17 | 1.000000 | 7.44340e-17 | 1.000000 |
| rad55         | 5.04270e-17 | 1.000000 | 5.08772e-17 | 1.000000 |
| PAH1+H        | 2.44002e-17 | 1.000000 | 2.46180e-17 | 1.000000 |
| rad58         | 1.79710e-17 | 1.000000 | 1.81314e-17 | 1.000000 |
| rad18         | 7.76344e-18 | 1.000000 | 7.83275e-18 | 1.000000 |
| rad22         | 4.97938e-18 | 1.000000 | 5.02383e-18 | 1.000000 |
| rad34         | 2.03113e-18 | 1.000000 | 2.04927e-18 | 1.000000 |
| rad65         | 1.53288e-18 | 1.000000 | 1.54656e-18 | 1.000000 |
| rad42         | 7.25697e-20 | 1.000000 | 7.32176e-20 | 1.000000 |
| rad31         | 6.45179e-20 | 1.000000 | 6.50939e-20 | 1.000000 |
| rad41         | 2.24628e-20 | 1.000000 | 2.26633e-20 | 1.000000 |
| rad53         | 5.65474e-21 | 1.000000 | 5.70523e-21 | 1.000000 |
| rad24         | 5.54056e-21 | 1.000000 | 5.59003e-21 | 1.000000 |
| rad64         | 1.81586e-21 | 1.000000 | 1.83207e-21 | 1.000000 |
| rad56         | 6.61000e-23 | 1.000000 | 6.66901e-23 | 1.000000 |
| rad9          | 5.29178e-23 | 1.000000 | 5.33902e-23 | 1.000000 |
| rad68syn      | 8.53497e-24 | 1.000000 | 8.61117e-24 | 1.000000 |
| rad68anti     | 6.16421e-24 | 1.000000 | 6.21924e-24 | 1.000000 |
| rad61         | 4.52870e-24 | 1.000000 | 4.56913e-24 | 1.000000 |
| rad73         | 2.10005e-25 | 1.000000 | 2.11880e-25 | 1.000000 |
| rad40syn      | 4.85102e-26 | 1.000000 | 4.89433e-26 | 1.000000 |
| rad15         | 3.22086e-26 | 1.000000 | 3.24962e-26 | 1.000000 |
| PAH8+H        | 2.50951e-26 | 1.000000 | 2.53192e-26 | 1.000000 |
| rad40anti     | 1.16029e-26 | 1.000000 | 1.17065e-26 | 1.000000 |
| rad71         | 6.44920e-27 | 1.000000 | 6.50678e-27 | 1.000000 |
| rad5          | 2.60549e-28 | 1.000000 | 2.62875e-28 | 1.000000 |
| rad12         | 1.57228e-28 | 1.000000 | 1.58631e-28 | 1.000000 |
| rad72         | 1.08944e-31 | 1.000000 | 1.09917e-31 | 1.000000 |
| rad47         | 5.32422e-32 | 1.000000 | 5.37175e-32 | 1.000000 |
| rad8          | 1.01991e-41 | 1.000000 | 1.02902e-41 | 1.000000 |

0.100000000E-06 Pa, 500.000000 K

=====

| Rate constant | True (fraction)     | Effective (fraction) |
|---------------|---------------------|----------------------|
| Total         | 1.22595e-18 (1.00 ) | 1.18787e-18 (1.00 )  |

| species     | PYtrue      | Cumul    | PYeffective | Cumul    |
|-------------|-------------|----------|-------------|----------|
| Indene+H    | 0.968764    | 0.968764 | 0.999822    | 0.999822 |
| Benzyl+C2H2 | 0.0310635   | 0.999827 | 0.00000     | 0.999822 |
| PhCCH+CH3   | 9.35930e-05 | 0.999921 | 9.65935e-05 | 0.999919 |
| PhCHCCH2+H  | 4.00561e-05 | 0.999961 | 4.13403e-05 | 0.999960 |
| PhCCCH3+H   | 2.54431e-05 | 0.999987 | 2.62588e-05 | 0.999986 |
| Ph+MeAc     | 7.07386e-06 | 0.999994 | 7.30064e-06 | 0.999993 |
| rad30       | 2.19669e-06 | 0.999996 | 2.26711e-06 | 0.999996 |
| Ph+Allene   | 2.05092e-06 | 0.999998 | 2.11667e-06 | 0.999998 |
| PAH7+H      | 6.80746e-07 | 0.999999 | 7.02570e-07 | 0.999999 |
| PAH9+H      | 4.84045e-07 | 0.999999 | 4.99563e-07 | 0.999999 |
| PhCH2CCH+H  | 2.44801e-07 | 0.999999 | 2.52649e-07 | 0.999999 |
| rad35       | 1.65639e-07 | 0.999999 | 1.70949e-07 | 1.000000 |
| rad39       | 1.51520e-07 | 1.000000 | 1.56377e-07 | 1.000000 |
| rad38       | 1.34449e-07 | 1.000000 | 1.38759e-07 | 1.000000 |
| rad19anti   | 1.41564e-08 | 1.000000 | 1.46102e-08 | 1.000000 |
| rad6        | 5.35879e-09 | 1.000000 | 5.53059e-09 | 1.000000 |
| rad46       | 5.06638e-09 | 1.000000 | 5.22881e-09 | 1.000000 |
| rad37       | 2.86983e-09 | 1.000000 | 2.96184e-09 | 1.000000 |
| rad60syn    | 2.17485e-09 | 1.000000 | 2.24457e-09 | 1.000000 |
| rad60anti   | 9.78348e-10 | 1.000000 | 1.00971e-09 | 1.000000 |
| PAH3+H      | 4.98713e-10 | 1.000000 | 5.14701e-10 | 1.000000 |
| rad59       | 9.55001e-11 | 1.000000 | 9.85617e-11 | 1.000000 |
| rad28       | 2.60536e-11 | 1.000000 | 2.68888e-11 | 1.000000 |
| rad19syn    | 2.21128e-11 | 1.000000 | 2.28217e-11 | 1.000000 |
| rad50       | 1.38223e-11 | 1.000000 | 1.42654e-11 | 1.000000 |
| rad2        | 1.13045e-11 | 1.000000 | 1.16670e-11 | 1.000000 |
| rad26       | 4.41982e-12 | 1.000000 | 4.56152e-12 | 1.000000 |
| rad54       | 2.40094e-12 | 1.000000 | 2.47791e-12 | 1.000000 |



|               |             |          |             |          |
|---------------|-------------|----------|-------------|----------|
| rad23         | 1.68173e-12 | 1.000000 | 1.73565e-12 | 1.000000 |
| rad1          | 1.35182e-12 | 1.000000 | 1.39516e-12 | 1.000000 |
| PAH10+CH3     | 9.70419e-13 | 1.000000 | 1.00153e-12 | 1.000000 |
| rad10         | 6.01796e-13 | 1.000000 | 6.21090e-13 | 1.000000 |
| rad7          | 5.42423e-13 | 1.000000 | 5.59813e-13 | 1.000000 |
| rad45         | 4.37927e-13 | 1.000000 | 4.51967e-13 | 1.000000 |
| rad67         | 2.37492e-13 | 1.000000 | 2.45106e-13 | 1.000000 |
| PhcycC3H3_A+H | 2.03140e-13 | 1.000000 | 2.09652e-13 | 1.000000 |
| rad43         | 1.48445e-13 | 1.000000 | 1.53204e-13 | 1.000000 |
| rad11         | 1.44590e-13 | 1.000000 | 1.49225e-13 | 1.000000 |
| rad3          | 1.35867e-13 | 1.000000 | 1.40223e-13 | 1.000000 |
| rad62         | 1.23066e-13 | 1.000000 | 1.27012e-13 | 1.000000 |
| rad52         | 1.00173e-13 | 1.000000 | 1.03385e-13 | 1.000000 |
| rad4          | 7.66066e-14 | 1.000000 | 7.90626e-14 | 1.000000 |
| rad70         | 6.56843e-14 | 1.000000 | 6.77901e-14 | 1.000000 |
| rad51         | 3.84251e-14 | 1.000000 | 3.96570e-14 | 1.000000 |
| rad55         | 2.77305e-14 | 1.000000 | 2.86195e-14 | 1.000000 |
| rad36         | 2.33314e-14 | 1.000000 | 2.40794e-14 | 1.000000 |
| PAH1+H        | 2.28960e-14 | 1.000000 | 2.36300e-14 | 1.000000 |
| rad58         | 1.24937e-14 | 1.000000 | 1.28942e-14 | 1.000000 |
| rad13         | 3.71271e-15 | 1.000000 | 3.83174e-15 | 1.000000 |
| rad34         | 2.11777e-15 | 1.000000 | 2.18567e-15 | 1.000000 |
| rad65         | 9.80446e-16 | 1.000000 | 1.01188e-15 | 1.000000 |
| rad20         | 3.27943e-16 | 1.000000 | 3.38457e-16 | 1.000000 |
| rad21         | 2.58376e-16 | 1.000000 | 2.66660e-16 | 1.000000 |
| rad42         | 8.25256e-17 | 1.000000 | 8.51713e-17 | 1.000000 |
| rad14         | 2.96351e-17 | 1.000000 | 3.05852e-17 | 1.000000 |
| rad25         | 2.72261e-17 | 1.000000 | 2.80990e-17 | 1.000000 |
| rad27         | 2.61888e-17 | 1.000000 | 2.70284e-17 | 1.000000 |
| rad41         | 2.35253e-17 | 1.000000 | 2.42795e-17 | 1.000000 |
| rad53         | 2.01904e-17 | 1.000000 | 2.08377e-17 | 1.000000 |
| rad33         | 1.94950e-17 | 1.000000 | 2.01200e-17 | 1.000000 |
| rad64         | 7.88175e-18 | 1.000000 | 8.13443e-18 | 1.000000 |
| rad18         | 4.11012e-18 | 1.000000 | 4.24189e-18 | 1.000000 |
| rad22         | 1.92267e-18 | 1.000000 | 1.98431e-18 | 1.000000 |
| rad56         | 7.26405e-19 | 1.000000 | 7.49693e-19 | 1.000000 |
| rad31         | 1.29648e-19 | 1.000000 | 1.33804e-19 | 1.000000 |
| rad68syn      | 9.96159e-20 | 1.000000 | 1.02810e-19 | 1.000000 |
| rad68anti     | 7.08175e-20 | 1.000000 | 7.30879e-20 | 1.000000 |
| rad24         | 4.11956e-20 | 1.000000 | 4.25163e-20 | 1.000000 |
| rad61         | 2.99027e-20 | 1.000000 | 3.08614e-20 | 1.000000 |
| rad73         | 7.90615e-21 | 1.000000 | 8.15962e-21 | 1.000000 |
| rad9          | 2.63820e-21 | 1.000000 | 2.72278e-21 | 1.000000 |
| rad71         | 1.53029e-21 | 1.000000 | 1.57935e-21 | 1.000000 |
| rad40syn      | 1.51638e-21 | 1.000000 | 1.56500e-21 | 1.000000 |
| PAH8+H        | 1.48901e-21 | 1.000000 | 1.53675e-21 | 1.000000 |
| rad40anti     | 4.05698e-22 | 1.000000 | 4.18704e-22 | 1.000000 |
| rad72         | 1.17772e-23 | 1.000000 | 1.21547e-23 | 1.000000 |
| rad15         | 1.69738e-24 | 1.000000 | 1.75180e-24 | 1.000000 |
| rad12         | 5.38395e-26 | 1.000000 | 5.55656e-26 | 1.000000 |
| rad5          | 3.66314e-27 | 1.000000 | 3.78058e-27 | 1.000000 |
| rad47         | 2.95499e-29 | 1.000000 | 3.04973e-29 | 1.000000 |
| rad8          | 6.41088e-38 | 1.000000 | 6.61640e-38 | 1.000000 |

0.100000000E-06 Pa, 600.000000 K

=====

Rate constant | True (fraction) | Effective (fraction)

-----  
Total | 1.36947e-17 (1.00 ) | 1.26193e-17 (1.00 )

| species     | PYtrue      | Cumul    | PYeffective | Cumul    |
|-------------|-------------|----------|-------------|----------|
| Indene+H    | 0.920850    | 0.920850 | 0.999326    | 0.999326 |
| Benzyl+C2H2 | 0.0785283   | 0.999378 | 0.000000    | 0.999326 |
| PhCCH+CH3   | 0.000333045 | 0.999711 | 0.000361427 | 0.999687 |
| PhCHCCH2+H  | 0.000137020 | 0.999848 | 0.000148697 | 0.999836 |
| PhCCCH3+H   | 7.54035e-05 | 0.999924 | 8.18295e-05 | 0.999918 |
| Ph+MeAc     | 3.38749e-05 | 0.999958 | 3.67618e-05 | 0.999955 |
| Ph+Allene   | 2.17077e-05 | 0.999979 | 2.35577e-05 | 0.999978 |
| rad30       | 7.59256e-06 | 0.999987 | 8.23960e-06 | 0.999987 |
| PAH7+H      | 4.39153e-06 | 0.999991 | 4.76577e-06 | 0.999991 |
| PhCH2CCH+H  | 3.66168e-06 | 0.999995 | 3.97373e-06 | 0.999995 |
| PAH9+H      | 2.21748e-06 | 0.999997 | 2.40646e-06 | 0.999998 |
| rad39       | 1.04275e-06 | 0.999998 | 1.13162e-06 | 0.999999 |
| rad38       | 6.77227e-07 | 0.999999 | 7.34941e-07 | 1.000000 |
| rad35       | 6.69664e-07 | 1.000000 | 7.26734e-07 | 1.000000 |
| rad19anti   | 1.16219e-07 | 1.000000 | 1.26124e-07 | 1.000000 |
| rad46       | 4.03895e-08 | 1.000000 | 4.38315e-08 | 1.000000 |
| rad60syn    | 1.92850e-08 | 1.000000 | 2.09285e-08 | 1.000000 |
| rad37       | 1.80180e-08 | 1.000000 | 1.95535e-08 | 1.000000 |

|               |             |          |             |         |
|---------------|-------------|----------|-------------|---------|
| PAH3+H        | 9.89107e-09 | 1.000000 | 1.07340e-08 | 1.00000 |
| rad60anti     | 9.33103e-09 | 1.000000 | 1.01262e-08 | 1.00000 |
| rad59         | 1.75177e-09 | 1.000000 | 1.90106e-09 | 1.00000 |
| rad19syn      | 6.85595e-10 | 1.000000 | 7.44022e-10 | 1.00000 |
| rad6          | 6.58453e-10 | 1.000000 | 7.14567e-10 | 1.00000 |
| rad50         | 3.60208e-10 | 1.000000 | 3.90905e-10 | 1.00000 |
| rad54         | 1.00686e-10 | 1.000000 | 1.09267e-10 | 1.00000 |
| PAH10+CH3     | 2.91650e-11 | 1.000000 | 3.16505e-11 | 1.00000 |
| PhcycC3H3_A+H | 1.50044e-11 | 1.000000 | 1.62831e-11 | 1.00000 |
| rad67         | 9.04132e-12 | 1.000000 | 9.81183e-12 | 1.00000 |
| rad2          | 5.01547e-12 | 1.000000 | 5.44290e-12 | 1.00000 |
| rad52         | 4.62412e-12 | 1.000000 | 5.01819e-12 | 1.00000 |
| rad62         | 4.44939e-12 | 1.000000 | 4.82857e-12 | 1.00000 |
| rad70         | 4.33463e-12 | 1.000000 | 4.70403e-12 | 1.00000 |
| rad28         | 4.24036e-12 | 1.000000 | 4.60173e-12 | 1.00000 |
| rad23         | 4.06543e-12 | 1.000000 | 4.41189e-12 | 1.00000 |
| rad43         | 3.80245e-12 | 1.000000 | 4.12650e-12 | 1.00000 |
| rad51         | 2.80846e-12 | 1.000000 | 3.04780e-12 | 1.00000 |
| PAH1+H        | 2.14128e-12 | 1.000000 | 2.32376e-12 | 1.00000 |
| rad55         | 1.80944e-12 | 1.000000 | 1.96364e-12 | 1.00000 |
| rad45         | 1.13882e-12 | 1.000000 | 1.23587e-12 | 1.00000 |
| rad58         | 1.01135e-12 | 1.000000 | 1.09753e-12 | 1.00000 |
| rad26         | 8.22515e-13 | 1.000000 | 8.92611e-13 | 1.00000 |
| rad1          | 7.49063e-13 | 1.000000 | 8.12899e-13 | 1.00000 |
| rad34         | 2.13663e-13 | 1.000000 | 2.31871e-13 | 1.00000 |
| rad10         | 1.72259e-13 | 1.000000 | 1.86939e-13 | 1.00000 |
| rad36         | 9.32566e-14 | 1.000000 | 1.01204e-13 | 1.00000 |
| rad65         | 8.07537e-14 | 1.000000 | 8.76355e-14 | 1.00000 |
| rad7          | 7.43010e-14 | 1.000000 | 8.06330e-14 | 1.00000 |
| rad3          | 6.18801e-14 | 1.000000 | 6.71535e-14 | 1.00000 |
| rad4          | 3.79621e-14 | 1.000000 | 4.11972e-14 | 1.00000 |
| rad11         | 2.27190e-14 | 1.000000 | 2.46551e-14 | 1.00000 |
| rad42         | 8.05555e-15 | 1.000000 | 8.74205e-15 | 1.00000 |
| rad53         | 4.55502e-15 | 1.000000 | 4.94320e-15 | 1.00000 |
| rad41         | 2.01468e-15 | 1.000000 | 2.18637e-15 | 1.00000 |
| rad64         | 1.93975e-15 | 1.000000 | 2.10505e-15 | 1.00000 |
| rad13         | 6.66204e-16 | 1.000000 | 7.22978e-16 | 1.00000 |
| rad20         | 4.39486e-16 | 1.000000 | 4.76939e-16 | 1.00000 |
| rad21         | 3.92599e-16 | 1.000000 | 4.26056e-16 | 1.00000 |
| rad56         | 3.44520e-16 | 1.000000 | 3.73880e-16 | 1.00000 |
| rad68syn      | 4.92427e-17 | 1.000000 | 5.34391e-17 | 1.00000 |
| rad68anti     | 3.44465e-17 | 1.000000 | 3.73820e-17 | 1.00000 |
| rad73         | 1.47846e-17 | 1.000000 | 1.60445e-17 | 1.00000 |
| rad71         | 1.06943e-17 | 1.000000 | 1.16057e-17 | 1.00000 |
| rad33         | 9.54003e-18 | 1.000000 | 1.03530e-17 | 1.00000 |
| rad61         | 9.46168e-18 | 1.000000 | 1.02680e-17 | 1.00000 |
| rad14         | 8.72642e-18 | 1.000000 | 9.47009e-18 | 1.00000 |
| rad25         | 8.44777e-18 | 1.000000 | 9.16769e-18 | 1.00000 |
| rad27         | 6.99722e-18 | 1.000000 | 7.59353e-18 | 1.00000 |
| rad18         | 3.12562e-18 | 1.000000 | 3.39199e-18 | 1.00000 |
| PAH8+H        | 2.30133e-18 | 1.000000 | 2.49745e-18 | 1.00000 |
| rad40syn      | 1.46649e-18 | 1.000000 | 1.59147e-18 | 1.00000 |
| rad22         | 1.01005e-18 | 1.000000 | 1.09613e-18 | 1.00000 |
| rad24         | 5.16592e-19 | 1.000000 | 5.60616e-19 | 1.00000 |
| rad40anti     | 4.46859e-19 | 1.000000 | 4.84941e-19 | 1.00000 |
| rad72         | 2.76909e-19 | 1.000000 | 3.00507e-19 | 1.00000 |
| rad9          | 1.89093e-19 | 1.000000 | 2.05208e-19 | 1.00000 |
| rad31         | 1.61044e-19 | 1.000000 | 1.74769e-19 | 1.00000 |
| rad15         | 1.15191e-22 | 1.000000 | 1.25007e-22 | 1.00000 |
| rad12         | 2.10247e-23 | 1.000000 | 2.28164e-23 | 1.00000 |
| rad5          | 1.72883e-26 | 1.000000 | 1.87617e-26 | 1.00000 |
| rad47         | 2.24947e-27 | 1.000000 | 2.44117e-27 | 1.00000 |
| rad8          | 9.50898e-34 | 1.000000 | 1.03193e-33 | 1.00000 |

0.100000000E-06 Pa, 700.000000 K

=====

| Rate constant | True (fraction)     | Effective (fraction) |
|---------------|---------------------|----------------------|
| Total         | 8.02260e-17 (1.00 ) | 6.78335e-17 (1.00 )  |

| species     | PYtrue      | Cumul    | PYeffective | Cumul    |
|-------------|-------------|----------|-------------|----------|
| Indene+H    | 0.844045    | 0.844045 | 0.998243    | 0.998243 |
| Benzyl+C2H2 | 0.154470    | 0.998515 | 0.00000     | 0.998243 |
| PhCCH+CH3   | 0.000746434 | 0.999261 | 0.000882800 | 0.999126 |
| PhCHCCH2+H  | 0.000320585 | 0.999582 | 0.000379153 | 0.999505 |
| PhCCCH3+H   | 0.000136742 | 0.999719 | 0.000161724 | 0.999667 |
| Ph+Allene   | 0.000115963 | 0.999835 | 0.000137148 | 0.999804 |
| Ph+MeAc     | 8.86607e-05 | 0.999923 | 0.000104858 | 0.999909 |
| PhCH2CCH+H  | 2.52612e-05 | 0.999949 | 2.98762e-05 | 0.999939 |

|               |             |          |             |          |
|---------------|-------------|----------|-------------|----------|
| rad30         | 1.89338e-05 | 0.999968 | 2.23928e-05 | 0.999961 |
| PAH7+H        | 1.64063e-05 | 0.999984 | 1.94036e-05 | 0.999980 |
| PAH9+H        | 7.24066e-06 | 0.999991 | 8.56345e-06 | 0.999989 |
| rad39         | 3.97935e-06 | 0.999995 | 4.70633e-06 | 0.999994 |
| rad38         | 2.36433e-06 | 0.999998 | 2.79627e-06 | 0.999996 |
| rad35         | 1.97985e-06 | 1.000000 | 2.34155e-06 | 0.999999 |
| rad19anti     | 5.91542e-07 | 1.000000 | 6.99611e-07 | 0.999999 |
| rad46         | 1.95974e-07 | 1.000000 | 2.31776e-07 | 1.000000 |
| rad60syn      | 9.47747e-08 | 1.000000 | 1.12089e-07 | 1.000000 |
| PAH3+H        | 8.73469e-08 | 1.000000 | 1.03304e-07 | 1.000000 |
| rad37         | 5.67278e-08 | 1.000000 | 6.70914e-08 | 1.000000 |
| rad60anti     | 4.82184e-08 | 1.000000 | 5.70274e-08 | 1.000000 |
| rad59         | 1.44140e-08 | 1.000000 | 1.70472e-08 | 1.000000 |
| rad19syn      | 7.75621e-09 | 1.000000 | 9.17319e-09 | 1.000000 |
| rad50         | 4.08624e-09 | 1.000000 | 4.83275e-09 | 1.000000 |
| rad54         | 1.41341e-09 | 1.000000 | 1.67162e-09 | 1.000000 |
| PhcycC3H3_A+H | 3.16562e-10 | 1.000000 | 3.74395e-10 | 1.000000 |
| PAH10+CH3     | 2.96584e-10 | 1.000000 | 3.50767e-10 | 1.000000 |
| rad67         | 1.46304e-10 | 1.000000 | 1.73032e-10 | 1.000000 |
| rad6          | 8.94947e-11 | 1.000000 | 1.05844e-10 | 1.000000 |
| rad70         | 8.36625e-11 | 1.000000 | 9.89468e-11 | 1.000000 |
| rad52         | 7.81517e-11 | 1.000000 | 9.24292e-11 | 1.000000 |
| rad51         | 6.57432e-11 | 1.000000 | 7.77537e-11 | 1.000000 |
| rad62         | 5.24317e-11 | 1.000000 | 6.20104e-11 | 1.000000 |
| PAH1+H        | 5.21516e-11 | 1.000000 | 6.16791e-11 | 1.000000 |
| rad55         | 3.42217e-11 | 1.000000 | 4.04737e-11 | 1.000000 |
| rad43         | 3.27207e-11 | 1.000000 | 3.86984e-11 | 1.000000 |
| rad58         | 2.36726e-11 | 1.000000 | 2.79973e-11 | 1.000000 |
| rad34         | 5.57916e-12 | 1.000000 | 6.59841e-12 | 1.000000 |
| rad23         | 2.97441e-12 | 1.000000 | 3.51780e-12 | 1.000000 |
| rad65         | 2.00966e-12 | 1.000000 | 2.37681e-12 | 1.000000 |
| rad2          | 1.81937e-12 | 1.000000 | 2.15175e-12 | 1.000000 |
| rad45         | 9.84239e-13 | 1.000000 | 1.16405e-12 | 1.000000 |
| rad28         | 6.59799e-13 | 1.000000 | 7.80337e-13 | 1.000000 |
| rad1          | 3.03681e-13 | 1.000000 | 3.59161e-13 | 1.000000 |
| rad53         | 2.08843e-13 | 1.000000 | 2.46997e-13 | 1.000000 |
| rad42         | 1.92431e-13 | 1.000000 | 2.27586e-13 | 1.000000 |
| rad26         | 1.41647e-13 | 1.000000 | 1.67524e-13 | 1.000000 |
| rad64         | 9.12085e-14 | 1.000000 | 1.07871e-13 | 1.000000 |
| rad36         | 8.39640e-14 | 1.000000 | 9.93034e-14 | 1.000000 |
| rad10         | 4.57098e-14 | 1.000000 | 5.40605e-14 | 1.000000 |
| rad41         | 4.12906e-14 | 1.000000 | 4.88339e-14 | 1.000000 |
| rad56         | 2.67462e-14 | 1.000000 | 3.16325e-14 | 1.000000 |
| rad3          | 2.10679e-14 | 1.000000 | 2.49168e-14 | 1.000000 |
| rad4          | 1.36341e-14 | 1.000000 | 1.61249e-14 | 1.000000 |
| rad7          | 1.20300e-14 | 1.000000 | 1.42278e-14 | 1.000000 |
| rad11         | 5.02032e-15 | 1.000000 | 5.93748e-15 | 1.000000 |
| rad68syn      | 3.96400e-15 | 1.000000 | 4.68818e-15 | 1.000000 |
| rad68anti     | 2.73739e-15 | 1.000000 | 3.23748e-15 | 1.000000 |
| rad73         | 1.33260e-15 | 1.000000 | 1.57605e-15 | 1.000000 |
| rad20         | 9.46269e-16 | 1.000000 | 1.11914e-15 | 1.000000 |
| rad21         | 9.16148e-16 | 1.000000 | 1.08352e-15 | 1.000000 |
| rad61         | 5.37647e-16 | 1.000000 | 6.35870e-16 | 1.000000 |
| rad71         | 5.32619e-16 | 1.000000 | 6.29923e-16 | 1.000000 |
| PAH8+H        | 3.96819e-16 | 1.000000 | 4.69313e-16 | 1.000000 |
| rad13         | 2.39641e-16 | 1.000000 | 2.83421e-16 | 1.000000 |
| rad40syn      | 1.89641e-16 | 1.000000 | 2.24287e-16 | 1.000000 |
| rad40anti     | 6.39971e-17 | 1.000000 | 7.56887e-17 | 1.000000 |
| rad9          | 1.11477e-17 | 1.000000 | 1.31842e-17 | 1.000000 |
| rad33         | 1.06453e-17 | 1.000000 | 1.25900e-17 | 1.000000 |
| rad72         | 9.69148e-18 | 1.000000 | 1.14620e-17 | 1.000000 |
| rad24         | 5.53560e-18 | 1.000000 | 6.54690e-18 | 1.000000 |
| rad18         | 3.75530e-18 | 1.000000 | 4.44135e-18 | 1.000000 |
| rad25         | 3.17282e-18 | 1.000000 | 3.75246e-18 | 1.000000 |
| rad14         | 2.91151e-18 | 1.000000 | 3.44342e-18 | 1.000000 |
| rad27         | 2.60802e-18 | 1.000000 | 3.08448e-18 | 1.000000 |
| rad22         | 6.11254e-19 | 1.000000 | 7.22924e-19 | 1.000000 |
| rad31         | 1.07536e-19 | 1.000000 | 1.27182e-19 | 1.000000 |
| rad15         | 4.48796e-21 | 1.000000 | 5.30787e-21 | 1.000000 |
| rad12         | 2.79160e-21 | 1.000000 | 3.30160e-21 | 1.000000 |
| rad5          | 5.05198e-26 | 1.000000 | 5.97492e-26 | 1.000000 |
| rad47         | 4.45924e-26 | 1.000000 | 5.27390e-26 | 1.000000 |
| rad8          | 1.57148e-29 | 1.000000 | 1.85857e-29 | 1.000000 |

0.100000000E-06 Pa, 800.000000 K

=====

| Rate constant | True (fraction)     | Effective (fraction) |
|---------------|---------------------|----------------------|
| Total         | 3.12228e-16 (1.00 ) | 2.33587e-16 (1.00 )  |

| species       | PYtrue      | Cumul    | PYeffective | Cumul    |
|---------------|-------------|----------|-------------|----------|
| Indene+H      | 0.745326    | 0.745326 | 0.996252    | 0.996252 |
| Benzyl+C2H2   | 0.251870    | 0.997196 | 0.00000     | 0.996252 |
| PhCCH+CH3     | 0.00124162  | 0.998438 | 0.00165963  | 0.997912 |
| PhCHCCH2+H    | 0.000603921 | 0.999042 | 0.000807240 | 0.998719 |
| Ph+Allene     | 0.000391607 | 0.999433 | 0.000523449 | 0.999242 |
| PhCCCH3+H     | 0.000180412 | 0.999614 | 0.000241151 | 0.999483 |
| Ph+MeAc       | 0.000158702 | 0.999772 | 0.000212132 | 0.999696 |
| PhCH2CCH+H    | 0.000104747 | 0.999877 | 0.000140012 | 0.999836 |
| PAH7+H        | 4.20043e-05 | 0.999919 | 5.61457e-05 | 0.999892 |
| rad30         | 3.73181e-05 | 0.999956 | 4.98819e-05 | 0.999942 |
| PAH9+H        | 1.83027e-05 | 0.999975 | 2.44646e-05 | 0.999966 |
| rad39         | 1.01670e-05 | 0.999985 | 1.35899e-05 | 0.999980 |
| rad38         | 6.28638e-06 | 0.999991 | 8.40280e-06 | 0.999988 |
| rad35         | 4.61792e-06 | 0.999996 | 6.17262e-06 | 0.999994 |
| rad19anti     | 2.13374e-06 | 0.999998 | 2.85210e-06 | 0.999997 |
| rad46         | 6.69423e-07 | 0.999999 | 8.94796e-07 | 0.999998 |
| PAH3+H        | 4.55926e-07 | 0.999999 | 6.09421e-07 | 0.999999 |
| rad60syn      | 3.14534e-07 | 0.999999 | 4.20427e-07 | 0.999999 |
| rad60anti     | 1.66149e-07 | 0.999999 | 2.22085e-07 | 0.999999 |
| rad37         | 1.16536e-07 | 1.000000 | 1.55770e-07 | 0.999999 |
| rad59         | 7.05288e-08 | 1.000000 | 9.42735e-08 | 1.000000 |
| rad19syn      | 4.57469e-08 | 1.000000 | 6.11483e-08 | 1.000000 |
| rad50         | 2.67321e-08 | 1.000000 | 3.57319e-08 | 1.000000 |
| rad54         | 9.79642e-09 | 1.000000 | 1.30945e-08 | 1.000000 |
| PhcycC3H3_A+H | 2.99417e-09 | 1.000000 | 4.00220e-09 | 1.000000 |
| PAH10+CH3     | 1.56081e-09 | 1.000000 | 2.08628e-09 | 1.000000 |
| rad67         | 1.31109e-09 | 1.000000 | 1.75248e-09 | 1.000000 |
| rad51         | 7.39023e-10 | 1.000000 | 9.87827e-10 | 1.000000 |
| rad70         | 7.37566e-10 | 1.000000 | 9.85880e-10 | 1.000000 |
| rad52         | 6.86817e-10 | 1.000000 | 9.18045e-10 | 1.000000 |
| PAH1+H        | 5.38350e-10 | 1.000000 | 7.19595e-10 | 1.000000 |
| rad62         | 3.04694e-10 | 1.000000 | 4.07274e-10 | 1.000000 |
| rad55         | 2.93955e-10 | 1.000000 | 3.92920e-10 | 1.000000 |
| rad58         | 2.53305e-10 | 1.000000 | 3.38585e-10 | 1.000000 |
| rad43         | 1.42321e-10 | 1.000000 | 1.90236e-10 | 1.000000 |
| rad34         | 6.18274e-11 | 1.000000 | 8.26426e-11 | 1.000000 |
| rad65         | 2.32787e-11 | 1.000000 | 3.11159e-11 | 1.000000 |
| rad6          | 1.48826e-11 | 1.000000 | 1.98931e-11 | 1.000000 |
| rad53         | 3.49856e-12 | 1.000000 | 4.67641e-12 | 1.000000 |
| rad42         | 1.90218e-12 | 1.000000 | 2.54258e-12 | 1.000000 |
| rad64         | 1.51196e-12 | 1.000000 | 2.02099e-12 | 1.000000 |
| rad23         | 1.26392e-12 | 1.000000 | 1.68944e-12 | 1.000000 |
| rad56         | 6.63910e-13 | 1.000000 | 8.87426e-13 | 1.000000 |
| rad45         | 5.34864e-13 | 1.000000 | 7.14934e-13 | 1.000000 |
| rad2          | 5.03097e-13 | 1.000000 | 6.72473e-13 | 1.000000 |
| rad41         | 3.47558e-13 | 1.000000 | 4.64569e-13 | 1.000000 |
| rad28         | 1.11838e-13 | 1.000000 | 1.49491e-13 | 1.000000 |
| rad68syn      | 1.02296e-13 | 1.000000 | 1.36735e-13 | 1.000000 |
| rad1          | 8.16592e-14 | 1.000000 | 1.09151e-13 | 1.000000 |
| rad68anti     | 6.99251e-14 | 1.000000 | 9.34665e-14 | 1.000000 |
| rad73         | 5.20757e-14 | 1.000000 | 6.96079e-14 | 1.000000 |
| rad36         | 4.45261e-14 | 1.000000 | 5.95166e-14 | 1.000000 |
| rad26         | 2.61780e-14 | 1.000000 | 3.49913e-14 | 1.000000 |
| PAH8+H        | 1.87431e-14 | 1.000000 | 2.50532e-14 | 1.000000 |
| rad71         | 1.61360e-14 | 1.000000 | 2.15685e-14 | 1.000000 |
| rad61         | 1.08870e-14 | 1.000000 | 1.45522e-14 | 1.000000 |
| rad10         | 1.08103e-14 | 1.000000 | 1.44497e-14 | 1.000000 |
| rad40syn      | 7.04350e-15 | 1.000000 | 9.41482e-15 | 1.000000 |
| rad3          | 5.75478e-15 | 1.000000 | 7.69222e-15 | 1.000000 |
| rad4          | 3.79232e-15 | 1.000000 | 5.06906e-15 | 1.000000 |
| rad7          | 2.82119e-15 | 1.000000 | 3.77099e-15 | 1.000000 |
| rad20         | 2.64415e-15 | 1.000000 | 3.53434e-15 | 1.000000 |
| rad40anti     | 2.60037e-15 | 1.000000 | 3.47582e-15 | 1.000000 |
| rad21         | 2.51401e-15 | 1.000000 | 3.36039e-15 | 1.000000 |
| rad11         | 2.16871e-15 | 1.000000 | 2.89885e-15 | 1.000000 |
| rad13         | 2.95002e-16 | 1.000000 | 3.94319e-16 | 1.000000 |
| rad9          | 2.46611e-16 | 1.000000 | 3.29636e-16 | 1.000000 |
| rad72         | 4.17522e-17 | 1.000000 | 5.58088e-17 | 1.000000 |
| rad24         | 2.87053e-17 | 1.000000 | 3.83694e-17 | 1.000000 |
| rad33         | 2.00452e-17 | 1.000000 | 2.67937e-17 | 1.000000 |
| rad18         | 7.61287e-18 | 1.000000 | 1.01759e-17 | 1.000000 |
| rad25         | 2.03009e-18 | 1.000000 | 2.71355e-18 | 1.000000 |
| rad27         | 1.63788e-18 | 1.000000 | 2.18930e-18 | 1.000000 |
| rad14         | 1.45482e-18 | 1.000000 | 1.94461e-18 | 1.000000 |
| rad22         | 4.55057e-19 | 1.000000 | 6.08260e-19 | 1.000000 |
| rad12         | 7.13518e-20 | 1.000000 | 9.53736e-20 | 1.000000 |
| rad31         | 5.78730e-20 | 1.000000 | 7.73570e-20 | 1.000000 |
| rad15         | 5.71506e-20 | 1.000000 | 7.63913e-20 | 1.000000 |

|       |             |          |             |          |
|-------|-------------|----------|-------------|----------|
| rad47 | 4.71208e-25 | 1.000000 | 6.29847e-25 | 1.000000 |
| rad5  | 1.32002e-25 | 1.000000 | 1.76443e-25 | 1.000000 |
| rad8  | 8.26838e-26 | 1.000000 | 1.10521e-25 | 1.000000 |

0.100000000E-06 Pa, 900.000000 K

| Rate constant | True (fraction)     | Effective (fraction) |
|---------------|---------------------|----------------------|
| Total         | 9.21769e-16 (1.00 ) | 5.91948e-16 (1.00 )  |

| species       | PYtrue      | Cumul    | PYeffective | Cumul    |
|---------------|-------------|----------|-------------|----------|
| Indene+H      | 0.637601    | 0.637601 | 0.992859    | 0.992859 |
| Benzyl+C2H2   | 0.357813    | 0.995414 | 0.000000    | 0.992859 |
| PhCCH+CH3     | 0.00168534  | 0.997099 | 0.00262438  | 0.995483 |
| PhCHCCH2+H    | 0.000988072 | 0.998087 | 0.00153861  | 0.997022 |
| Ph+Allene     | 0.000956826 | 0.999044 | 0.00148995  | 0.998512 |
| PhCH2CCH+H    | 0.000305642 | 0.999350 | 0.000475939 | 0.998988 |
| Ph+MeAc       | 0.000221700 | 0.999572 | 0.000345227 | 0.999333 |
| PhCCCH3+H     | 0.000192583 | 0.999764 | 0.000299886 | 0.999633 |
| PAH7+H        | 8.18813e-05 | 0.999846 | 0.000127504 | 0.999760 |
| rad30         | 6.20698e-05 | 0.999908 | 9.66537e-05 | 0.999857 |
| PAH9+H        | 3.81793e-05 | 0.999946 | 5.94520e-05 | 0.999917 |
| rad39         | 1.95088e-05 | 0.999966 | 3.03786e-05 | 0.999947 |
| rad38         | 1.36528e-05 | 0.999979 | 2.12599e-05 | 0.999968 |
| rad35         | 9.01875e-06 | 0.999988 | 1.40438e-05 | 0.999982 |
| rad19anti     | 5.95507e-06 | 0.999994 | 9.27312e-06 | 0.999992 |
| rad46         | 1.77409e-06 | 0.999996 | 2.76257e-06 | 0.999994 |
| PAH3+H        | 1.66000e-06 | 0.999998 | 2.58491e-06 | 0.999997 |
| rad60syn      | 7.95279e-07 | 0.999999 | 1.23839e-06 | 0.999998 |
| rad60anti     | 4.32684e-07 | 0.999999 | 6.73766e-07 | 0.999999 |
| rad59         | 2.41974e-07 | 0.999999 | 3.76797e-07 | 0.999999 |
| rad37         | 1.83190e-07 | 1.000000 | 2.85260e-07 | 0.999999 |
| rad19syn      | 1.72530e-07 | 1.000000 | 2.68660e-07 | 1.000000 |
| rad50         | 1.19157e-07 | 1.000000 | 1.85549e-07 | 1.000000 |
| rad54         | 4.18728e-08 | 1.000000 | 6.52034e-08 | 1.000000 |
| PhcycC3H3_A+H | 1.64006e-08 | 1.000000 | 2.55387e-08 | 1.000000 |
| rad67         | 7.68849e-09 | 1.000000 | 1.19724e-08 | 1.000000 |
| PAH10+CH3     | 5.46405e-09 | 1.000000 | 8.50850e-09 | 1.000000 |
| rad51         | 5.02706e-09 | 1.000000 | 7.82803e-09 | 1.000000 |
| rad52         | 3.84545e-09 | 1.000000 | 5.98805e-09 | 1.000000 |
| rad70         | 3.82633e-09 | 1.000000 | 5.95829e-09 | 1.000000 |
| PAH1+H        | 3.10814e-09 | 1.000000 | 4.83993e-09 | 1.000000 |
| rad58         | 1.60256e-09 | 1.000000 | 2.49547e-09 | 1.000000 |
| rad55         | 1.47818e-09 | 1.000000 | 2.30179e-09 | 1.000000 |
| rad62         | 1.10198e-09 | 1.000000 | 1.71599e-09 | 1.000000 |
| rad43         | 3.94154e-10 | 1.000000 | 6.13768e-10 | 1.000000 |
| rad34         | 3.84578e-10 | 1.000000 | 5.98856e-10 | 1.000000 |
| rad65         | 1.60296e-10 | 1.000000 | 2.49609e-10 | 1.000000 |
| rad53         | 2.97668e-11 | 1.000000 | 4.63523e-11 | 1.000000 |
| rad64         | 1.24766e-11 | 1.000000 | 1.94283e-11 | 1.000000 |
| rad42         | 1.04398e-11 | 1.000000 | 1.62566e-11 | 1.000000 |
| rad56         | 7.66797e-12 | 1.000000 | 1.19404e-11 | 1.000000 |
| rad6          | 2.88207e-12 | 1.000000 | 4.48790e-12 | 1.000000 |
| rad41         | 1.62749e-12 | 1.000000 | 2.53429e-12 | 1.000000 |
| rad68syn      | 1.23548e-12 | 1.000000 | 1.92386e-12 | 1.000000 |
| rad73         | 1.04300e-12 | 1.000000 | 1.62414e-12 | 1.000000 |
| rad68anti     | 8.37599e-13 | 1.000000 | 1.30429e-12 | 1.000000 |
| rad23         | 4.95066e-13 | 1.000000 | 7.70906e-13 | 1.000000 |
| rad71         | 4.05336e-13 | 1.000000 | 6.31181e-13 | 1.000000 |
| PAH8+H        | 3.69089e-13 | 1.000000 | 5.74738e-13 | 1.000000 |
| rad45         | 2.49273e-13 | 1.000000 | 3.88163e-13 | 1.000000 |
| rad61         | 1.15261e-13 | 1.000000 | 1.79482e-13 | 1.000000 |
| rad40syn      | 1.13803e-13 | 1.000000 | 1.77212e-13 | 1.000000 |
| rad2          | 1.13241e-13 | 1.000000 | 1.76337e-13 | 1.000000 |
| rad40anti     | 4.54161e-14 | 1.000000 | 7.07209e-14 | 1.000000 |
| rad36         | 2.17274e-14 | 1.000000 | 3.38334e-14 | 1.000000 |
| rad28         | 2.05151e-14 | 1.000000 | 3.19457e-14 | 1.000000 |
| rad1          | 1.93464e-14 | 1.000000 | 3.01259e-14 | 1.000000 |
| rad20         | 6.04407e-15 | 1.000000 | 9.41170e-15 | 1.000000 |
| rad26         | 5.23883e-15 | 1.000000 | 8.15779e-15 | 1.000000 |
| rad21         | 5.11598e-15 | 1.000000 | 7.96650e-15 | 1.000000 |
| rad10         | 2.55431e-15 | 1.000000 | 3.97752e-15 | 1.000000 |
| rad11         | 1.89826e-15 | 1.000000 | 2.95593e-15 | 1.000000 |
| rad3          | 1.51132e-15 | 1.000000 | 2.35339e-15 | 1.000000 |
| rad9          | 1.25607e-15 | 1.000000 | 1.95593e-15 | 1.000000 |
| rad7          | 1.20233e-15 | 1.000000 | 1.87225e-15 | 1.000000 |
| rad4          | 1.05160e-15 | 1.000000 | 1.63753e-15 | 1.000000 |
| rad72         | 6.49141e-16 | 1.000000 | 1.01083e-15 | 1.000000 |
| rad13         | 6.40392e-16 | 1.000000 | 9.97204e-16 | 1.000000 |

|       |             |          |             |         |
|-------|-------------|----------|-------------|---------|
| rad24 | 5.74732e-17 | 1.000000 | 8.94960e-17 | 1.00000 |
| rad33 | 3.65086e-17 | 1.000000 | 5.68504e-17 | 1.00000 |
| rad18 | 2.21675e-17 | 1.000000 | 3.45187e-17 | 1.00000 |
| rad25 | 2.20676e-18 | 1.000000 | 3.43632e-18 | 1.00000 |
| rad27 | 1.37086e-18 | 1.000000 | 2.13468e-18 | 1.00000 |
| rad14 | 1.05348e-18 | 1.000000 | 1.64046e-18 | 1.00000 |
| rad22 | 4.86628e-19 | 1.000000 | 7.57766e-19 | 1.00000 |
| rad12 | 3.93749e-19 | 1.000000 | 6.13138e-19 | 1.00000 |
| rad15 | 2.02870e-19 | 1.000000 | 3.15904e-19 | 1.00000 |
| rad31 | 3.17849e-20 | 1.000000 | 4.94948e-20 | 1.00000 |
| rad8  | 5.05695e-23 | 1.000000 | 7.87458e-23 | 1.00000 |
| rad47 | 3.22602e-24 | 1.000000 | 5.02348e-24 | 1.00000 |
| rad5  | 3.44652e-25 | 1.000000 | 5.36685e-25 | 1.00000 |

0.100000000E-06 Pa, 1000.00000 K

| Rate constant | True (fraction)     | Effective (fraction) |
|---------------|---------------------|----------------------|
| Total         | 2.23691e-15 (1.00 ) | 1.20781e-15 (1.00 )  |

| species       | PYtrue      | Cumul    | PYeffective | Cumul    |
|---------------|-------------|----------|-------------|----------|
| Indene+H      | 0.533143    | 0.533143 | 0.987405    | 0.987405 |
| Benzyl+C2H2   | 0.460056    | 0.993199 | 0.00000     | 0.987405 |
| PhCCH+CH3     | 0.00197845  | 0.995177 | 0.00366418  | 0.991069 |
| Ph+Allene     | 0.00184724  | 0.997025 | 0.00342117  | 0.994490 |
| PhCHCCH2+H    | 0.00145011  | 0.998475 | 0.00268567  | 0.997176 |
| PhCH2CCH+H    | 0.000695141 | 0.999170 | 0.00128743  | 0.998463 |
| Ph+MeAc       | 0.000262360 | 0.999432 | 0.000485903 | 0.998949 |
| PhCCCH3+H     | 0.000178027 | 0.999610 | 0.000329715 | 0.999279 |
| PAH7+H        | 0.000130563 | 0.999741 | 0.000241809 | 0.999521 |
| rad30         | 9.13367e-05 | 0.999832 | 0.000169160 | 0.999690 |
| PAH9+H        | 6.89547e-05 | 0.999901 | 0.000127707 | 0.999818 |
| rad39         | 3.03500e-05 | 0.999932 | 5.62096e-05 | 0.999874 |
| rad38         | 2.54970e-05 | 0.999957 | 4.72216e-05 | 0.999921 |
| rad35         | 1.54295e-05 | 0.999972 | 2.85761e-05 | 0.999950 |
| rad19anti     | 1.36963e-05 | 0.999986 | 2.53661e-05 | 0.999975 |
| PAH3+H        | 4.67729e-06 | 0.999991 | 8.66256e-06 | 0.999984 |
| rad46         | 3.89964e-06 | 0.999995 | 7.22231e-06 | 0.999991 |
| rad60syn      | 1.65646e-06 | 0.999996 | 3.06785e-06 | 0.999994 |
| rad60anti     | 9.23124e-07 | 0.999997 | 1.70967e-06 | 0.999996 |
| rad59         | 6.45414e-07 | 0.999998 | 1.19534e-06 | 0.999997 |
| rad19syn      | 4.72655e-07 | 0.999998 | 8.75378e-07 | 0.999998 |
| rad50         | 4.02263e-07 | 0.999999 | 7.45009e-07 | 0.999999 |
| rad37         | 2.45621e-07 | 0.999999 | 4.54902e-07 | 0.999999 |
| rad54         | 1.26767e-07 | 0.999999 | 2.34777e-07 | 0.999999 |
| PhcycC3H3_A+H | 6.09438e-08 | 0.999999 | 1.12871e-07 | 0.999999 |
| rad67         | 3.29353e-08 | 0.999999 | 6.09977e-08 | 0.999999 |
| rad51         | 2.38554e-08 | 0.999999 | 4.41812e-08 | 1.000000 |
| rad52         | 1.55659e-08 | 0.999999 | 2.88287e-08 | 1.000000 |
| PAH10+CH3     | 1.49501e-08 | 0.999999 | 2.76882e-08 | 1.000000 |
| rad70         | 1.36637e-08 | 0.999999 | 2.53058e-08 | 1.000000 |
| PAH1+H        | 1.19204e-08 | 0.999999 | 2.20771e-08 | 1.000000 |
| rad58         | 7.00658e-09 | 0.999999 | 1.29765e-08 | 1.000000 |
| rad55         | 5.08717e-09 | 0.999999 | 9.42168e-09 | 1.000000 |
| rad62         | 2.86001e-09 | 0.999999 | 5.29688e-09 | 1.000000 |
| rad34         | 1.59465e-09 | 0.999999 | 2.95336e-09 | 1.000000 |
| rad43         | 8.01052e-10 | 0.999999 | 1.48358e-09 | 1.000000 |
| rad65         | 7.61926e-10 | 0.999999 | 1.41112e-09 | 1.000000 |
| rad53         | 1.57207e-10 | 0.999999 | 2.91154e-10 | 1.000000 |
| rad64         | 6.32994e-11 | 0.999999 | 1.17233e-10 | 1.000000 |
| rad56         | 5.17480e-11 | 0.999999 | 9.58396e-11 | 1.000000 |
| rad42         | 3.80336e-11 | 0.999999 | 7.04399e-11 | 1.000000 |
| rad73         | 1.18183e-11 | 0.999999 | 2.18881e-11 | 1.000000 |
| rad68syn      | 8.78399e-12 | 0.999999 | 1.62684e-11 | 1.000000 |
| rad68anti     | 5.91470e-12 | 0.999999 | 1.09543e-11 | 1.000000 |
| rad71         | 5.72540e-12 | 0.999999 | 1.06037e-11 | 1.000000 |
| rad41         | 5.10892e-12 | 0.999999 | 9.46194e-12 | 1.000000 |
| PAH8+H        | 3.92401e-12 | 0.999999 | 7.26745e-12 | 1.000000 |
| rad40syn      | 1.02744e-12 | 0.999999 | 1.90286e-12 | 1.000000 |
| rad61         | 7.99643e-13 | 0.999999 | 1.48097e-12 | 1.000000 |
| rad6          | 7.36260e-13 | 0.999999 | 1.36359e-12 | 1.000000 |
| rad40anti     | 4.38115e-13 | 0.999999 | 8.11409e-13 | 1.000000 |
| rad23         | 2.15946e-13 | 0.999999 | 3.99942e-13 | 1.000000 |
| rad45         | 1.21202e-13 | 0.999999 | 2.24471e-13 | 1.000000 |
| rad2          | 2.64290e-14 | 0.999999 | 4.89476e-14 | 1.000000 |
| rad72         | 1.60130e-14 | 0.999999 | 2.96567e-14 | 1.000000 |
| rad36         | 1.09233e-14 | 0.999999 | 2.02304e-14 | 1.000000 |
| rad20         | 8.81739e-15 | 0.999999 | 1.63302e-14 | 1.000000 |
| rad21         | 6.41659e-15 | 0.999999 | 1.18838e-14 | 1.000000 |

|       |             |          |             |          |
|-------|-------------|----------|-------------|----------|
| rad1  | 5.08838e-15 | 0.999999 | 9.42392e-15 | 1.000000 |
| rad28 | 4.55960e-15 | 0.999999 | 8.44458e-15 | 1.000000 |
| rad11 | 2.75240e-15 | 0.999999 | 5.09757e-15 | 1.000000 |
| rad9  | 2.12584e-15 | 0.999999 | 3.93714e-15 | 1.000000 |
| rad26 | 1.28016e-15 | 0.999999 | 2.37091e-15 | 1.000000 |
| rad13 | 1.26932e-15 | 0.999999 | 2.35083e-15 | 1.000000 |
| rad7  | 1.23078e-15 | 0.999999 | 2.27945e-15 | 1.000000 |
| rad10 | 9.53684e-16 | 0.999999 | 1.76627e-15 | 1.000000 |
| rad3  | 4.58474e-16 | 0.999999 | 8.49115e-16 | 1.000000 |
| rad4  | 3.35336e-16 | 0.999999 | 6.21058e-16 | 1.000000 |
| rad18 | 7.80183e-17 | 0.999999 | 1.44494e-16 | 1.000000 |
| rad24 | 5.90769e-17 | 0.999999 | 1.09413e-16 | 1.000000 |
| rad33 | 4.69552e-17 | 0.999999 | 8.69632e-17 | 1.000000 |
| rad25 | 3.13967e-18 | 0.999999 | 5.81481e-18 | 1.000000 |
| rad27 | 1.11645e-18 | 0.999999 | 2.06772e-18 | 1.000000 |
| rad14 | 9.24133e-19 | 0.999999 | 1.71154e-18 | 1.000000 |
| rad12 | 8.61558e-19 | 0.999999 | 1.59564e-18 | 1.000000 |
| rad22 | 8.27248e-19 | 0.999999 | 1.53210e-18 | 1.000000 |
| rad15 | 2.87767e-19 | 0.999999 | 5.32957e-19 | 1.000000 |
| rad31 | 1.86001e-20 | 0.999999 | 3.44482e-20 | 1.000000 |
| rad8  | 3.09659e-21 | 0.999999 | 5.73503e-21 | 1.000000 |
| rad47 | 1.58916e-23 | 0.999999 | 2.94320e-23 | 1.000000 |
| rad5  | 1.03419e-24 | 0.999999 | 1.91537e-24 | 1.000000 |

0.1000000000E-06 Pa, 1100.00000 K

| Rate constant | True (fraction)     | Effective (fraction) |
|---------------|---------------------|----------------------|
| Total         | 4.69847e-15 (1.00 ) | 2.11075e-15 (1.00 )  |

| species       | PYtrue      | Cumul    | PYeffective | Cumul    |
|---------------|-------------|----------|-------------|----------|
| Benzyl+C2H2   | 0.550759    | 0.550759 | 0.000000    | 0.000000 |
| Indene+H      | 0.439889    | 0.990648 | 0.979181    | 0.979181 |
| Ph+Allene     | 0.00299528  | 0.993643 | 0.00666742  | 0.985848 |
| PhCCH+CH3     | 0.00208760  | 0.995731 | 0.00464694  | 0.990495 |
| PhCHCCH2+H    | 0.00194544  | 0.997676 | 0.00433051  | 0.994826 |
| PhCH2CCH+H    | 0.00132191  | 0.998998 | 0.00294254  | 0.997768 |
| Ph+MeAc       | 0.000277389 | 0.999276 | 0.000617461 | 0.998386 |
| PAH7+H        | 0.000179385 | 0.999455 | 0.000399306 | 0.998785 |
| PhCCCH3+H     | 0.000149168 | 0.999604 | 0.000332043 | 0.999117 |
| rad30         | 0.000123015 | 0.999727 | 0.000273827 | 0.999391 |
| PAH9+H        | 0.000111696 | 0.999839 | 0.000248632 | 0.999640 |
| rad38         | 4.24978e-05 | 0.999881 | 9.45991e-05 | 0.999734 |
| rad39         | 4.04278e-05 | 0.999922 | 8.99912e-05 | 0.999824 |
| rad19anti     | 2.71780e-05 | 0.999949 | 6.04975e-05 | 0.999885 |
| rad35         | 2.39104e-05 | 0.999973 | 5.32238e-05 | 0.999938 |
| PAH3+H        | 1.09195e-05 | 0.999984 | 2.43064e-05 | 0.999962 |
| rad46         | 7.44861e-06 | 0.999991 | 1.65804e-05 | 0.999979 |
| rad60syn      | 2.99524e-06 | 0.999994 | 6.66734e-06 | 0.999986 |
| rad60anti     | 1.70291e-06 | 0.999996 | 3.79064e-06 | 0.999989 |
| rad59         | 1.43231e-06 | 0.999997 | 3.18828e-06 | 0.999993 |
| rad50         | 1.10325e-06 | 0.999998 | 2.45580e-06 | 0.999995 |
| rad19syn      | 1.02396e-06 | 1.000000 | 2.27932e-06 | 0.999997 |
| rad37         | 3.04609e-07 | 1.000000 | 6.78052e-07 | 0.999998 |
| rad54         | 2.97942e-07 | 1.000000 | 6.63211e-07 | 0.999999 |
| PhcycC3H3_A+H | 1.70469e-07 | 1.000000 | 3.79460e-07 | 0.999999 |
| rad67         | 1.11020e-07 | 1.000000 | 2.47128e-07 | 0.999999 |
| rad51         | 8.66313e-08 | 1.000000 | 1.92839e-07 | 0.999999 |
| rad52         | 4.94924e-08 | 1.000000 | 1.10169e-07 | 1.000000 |
| rad70         | 3.72387e-08 | 1.000000 | 8.28925e-08 | 1.000000 |
| PAH10+CH3     | 3.55700e-08 | 1.000000 | 7.91778e-08 | 1.000000 |
| PAH1+H        | 3.40420e-08 | 1.000000 | 7.57766e-08 | 1.000000 |
| rad58         | 2.33985e-08 | 1.000000 | 5.20844e-08 | 1.000000 |
| rad55         | 1.32727e-08 | 1.000000 | 2.95447e-08 | 1.000000 |
| rad62         | 5.84585e-09 | 1.000000 | 1.30127e-08 | 1.000000 |
| rad34         | 4.93270e-09 | 1.000000 | 1.09801e-08 | 1.000000 |
| rad65         | 2.75373e-09 | 1.000000 | 6.12974e-09 | 1.000000 |
| rad43         | 1.31323e-09 | 1.000000 | 2.92321e-09 | 1.000000 |
| rad53         | 5.86805e-10 | 1.000000 | 1.30621e-09 | 1.000000 |
| rad56         | 2.36331e-10 | 1.000000 | 5.26066e-10 | 1.000000 |
| rad64         | 2.26679e-10 | 1.000000 | 5.04581e-10 | 1.000000 |
| rad42         | 1.03252e-10 | 1.000000 | 2.29836e-10 | 1.000000 |
| rad73         | 8.74239e-11 | 1.000000 | 1.94603e-10 | 1.000000 |
| rad71         | 5.09993e-11 | 1.000000 | 1.13523e-10 | 1.000000 |
| rad68syn      | 4.26221e-11 | 1.000000 | 9.48757e-11 | 1.000000 |
| rad68anti     | 2.85345e-11 | 1.000000 | 6.35171e-11 | 1.000000 |
| PAH8+H        | 2.67129e-11 | 1.000000 | 5.94621e-11 | 1.000000 |
| rad41         | 1.21931e-11 | 1.000000 | 2.71415e-11 | 1.000000 |
| rad40syn      | 6.09410e-12 | 1.000000 | 1.35653e-11 | 1.000000 |

|           |             |         |             |          |
|-----------|-------------|---------|-------------|----------|
| rad61     | 4.16713e-12 | 1.00000 | 9.27594e-12 | 1.000000 |
| rad40anti | 2.75055e-12 | 1.00000 | 6.12265e-12 | 1.000000 |
| rad6      | 2.65944e-13 | 1.00000 | 5.91985e-13 | 1.000000 |
| rad72     | 2.32337e-13 | 1.00000 | 5.17175e-13 | 1.000000 |
| rad23     | 1.01281e-13 | 1.00000 | 2.25448e-13 | 1.000000 |
| rad45     | 6.12250e-14 | 1.00000 | 1.36285e-13 | 1.000000 |
| rad20     | 7.93855e-15 | 1.00000 | 1.76710e-14 | 1.000000 |
| rad2      | 6.90607e-15 | 1.00000 | 1.53727e-14 | 1.000000 |
| rad36     | 5.62816e-15 | 1.00000 | 1.25281e-14 | 1.000000 |
| rad21     | 5.10807e-15 | 1.00000 | 1.13704e-14 | 1.000000 |
| rad11     | 4.54888e-15 | 1.00000 | 1.01257e-14 | 1.000000 |
| rad9      | 2.20983e-15 | 1.00000 | 4.91903e-15 | 1.000000 |
| rad7      | 2.06279e-15 | 1.00000 | 4.59172e-15 | 1.000000 |
| rad13     | 1.66086e-15 | 1.00000 | 3.69703e-15 | 1.000000 |
| rad1      | 1.44780e-15 | 1.00000 | 3.22276e-15 | 1.000000 |
| rad28     | 1.32558e-15 | 1.00000 | 2.95072e-15 | 1.000000 |
| rad10     | 6.05448e-16 | 1.00000 | 1.34771e-15 | 1.000000 |
| rad26     | 4.07925e-16 | 1.00000 | 9.08031e-16 | 1.000000 |
| rad18     | 2.44826e-16 | 1.00000 | 5.44977e-16 | 1.000000 |
| rad3      | 1.56099e-16 | 1.00000 | 3.47472e-16 | 1.000000 |
| rad4      | 1.17559e-16 | 1.00000 | 2.61684e-16 | 1.000000 |
| rad24     | 4.56170e-17 | 1.00000 | 1.01542e-16 | 1.000000 |
| rad33     | 3.94211e-17 | 1.00000 | 8.77504e-17 | 1.000000 |
| rad25     | 3.94356e-18 | 1.00000 | 8.77826e-18 | 1.000000 |
| rad22     | 2.09469e-18 | 1.00000 | 4.66274e-18 | 1.000000 |
| rad12     | 1.26339e-18 | 1.00000 | 2.81227e-18 | 1.000000 |
| rad14     | 7.49662e-19 | 1.00000 | 1.66873e-18 | 1.000000 |
| rad27     | 7.01394e-19 | 1.00000 | 1.56129e-18 | 1.000000 |
| rad15     | 2.87176e-19 | 1.00000 | 6.39246e-19 | 1.000000 |
| rad8      | 3.02695e-20 | 1.00000 | 6.73791e-20 | 1.000000 |
| rad31     | 1.11579e-20 | 1.00000 | 2.48372e-20 | 1.000000 |
| rad47     | 5.97458e-23 | 1.00000 | 1.32993e-22 | 1.000000 |
| rad5      | 3.61148e-24 | 1.00000 | 8.03907e-24 | 1.000000 |

0.100000000E-06 Pa, 1200.00000 K

| Rate constant | True (fraction)     | Effective (fraction) |
|---------------|---------------------|----------------------|
| Total         | 8.84330e-15 (1.00 ) | 3.30079e-15 (1.00 )  |

| species       | PYtrue      | Cumul    | PYeffective | Cumul    |
|---------------|-------------|----------|-------------|----------|
| Benzyl+C2H2   | 0.626747    | 0.626747 | 0.00000     | 0.00000  |
| Indene+H      | 0.361139    | 0.987886 | 0.967544    | 0.967544 |
| Ph+Allene     | 0.00426331  | 0.992149 | 0.0114220   | 0.978966 |
| PhCHCCH2+H    | 0.00242727  | 0.994577 | 0.00650302  | 0.985469 |
| PhCH2CCH+H    | 0.00220912  | 0.996786 | 0.00591855  | 0.991388 |
| PhCCH+CH3     | 0.00203529  | 0.998821 | 0.00545285  | 0.996840 |
| Ph+MeAc       | 0.000271659 | 0.999093 | 0.000727814 | 0.997568 |
| PAH7+H        | 0.000220958 | 0.999314 | 0.000591978 | 0.998160 |
| PAH9+H        | 0.000166476 | 0.999480 | 0.000446015 | 0.998606 |
| rad30         | 0.000155353 | 0.999635 | 0.000416215 | 0.999022 |
| PhCCCH3+H     | 0.000117029 | 0.999752 | 0.000313538 | 0.999336 |
| rad38         | 6.49367e-05 | 0.999817 | 0.000173975 | 0.999510 |
| rad19anti     | 4.80909e-05 | 0.999865 | 0.000128843 | 0.999639 |
| rad39         | 4.80571e-05 | 0.999914 | 0.000128752 | 0.999768 |
| rad35         | 3.43899e-05 | 0.999948 | 9.21355e-05 | 0.999860 |
| PAH3+H        | 2.21253e-05 | 0.999970 | 5.92770e-05 | 0.999919 |
| rad46         | 1.27762e-05 | 0.999983 | 3.42294e-05 | 0.999953 |
| rad60syn      | 4.87439e-06 | 0.999988 | 1.30592e-05 | 0.999966 |
| rad60anti     | 2.81860e-06 | 0.999991 | 7.55145e-06 | 0.999974 |
| rad59         | 2.76936e-06 | 0.999993 | 7.41953e-06 | 0.999981 |
| rad50         | 2.57972e-06 | 0.999996 | 6.91144e-06 | 0.999988 |
| rad19syn      | 1.86136e-06 | 0.999998 | 4.98686e-06 | 0.999993 |
| rad54         | 5.79322e-07 | 0.999998 | 1.55209e-06 | 0.999995 |
| PhcycC3H3_A+H | 3.85542e-07 | 0.999999 | 1.03292e-06 | 0.999996 |
| rad37         | 3.71909e-07 | 0.999999 | 9.96399e-07 | 0.999997 |
| rad67         | 3.10056e-07 | 0.999999 | 8.30686e-07 | 0.999998 |
| rad51         | 2.56406e-07 | 1.000000 | 6.86949e-07 | 0.999998 |
| rad52         | 1.30814e-07 | 1.000000 | 3.50469e-07 | 0.999999 |
| rad70         | 8.31661e-08 | 1.000000 | 2.22814e-07 | 0.999999 |
| PAH10+CH3     | 7.86243e-08 | 1.000000 | 2.10646e-07 | 0.999999 |
| PAH1+H        | 7.84240e-08 | 1.000000 | 2.10109e-07 | 0.999999 |
| rad58         | 6.38230e-08 | 1.000000 | 1.70991e-07 | 0.999999 |
| rad55         | 2.81615e-08 | 1.000000 | 7.54487e-08 | 0.999999 |
| rad34         | 1.22937e-08 | 1.000000 | 3.29365e-08 | 0.999999 |
| rad62         | 1.00322e-08 | 1.000000 | 2.68777e-08 | 1.000000 |
| rad65         | 8.07952e-09 | 1.000000 | 2.16462e-08 | 1.000000 |
| rad43         | 1.86209e-09 | 1.000000 | 4.98881e-09 | 1.000000 |
| rad53         | 1.69057e-09 | 1.000000 | 4.52927e-09 | 1.000000 |



|           |             |         |             |          |
|-----------|-------------|---------|-------------|----------|
| rad56     | 8.06531e-10 | 1.00000 | 2.16081e-09 | 1.000000 |
| rad64     | 6.30249e-10 | 1.00000 | 1.68853e-09 | 1.000000 |
| rad73     | 4.67949e-10 | 1.00000 | 1.25370e-09 | 1.000000 |
| rad71     | 3.19752e-10 | 1.00000 | 8.56663e-10 | 1.000000 |
| rad42     | 2.25979e-10 | 1.00000 | 6.05431e-10 | 1.000000 |
| rad68syn  | 1.55936e-10 | 1.00000 | 4.17774e-10 | 1.000000 |
| PAH8+H    | 1.30631e-10 | 1.00000 | 3.49980e-10 | 1.000000 |
| rad68anti | 1.03878e-10 | 1.00000 | 2.78304e-10 | 1.000000 |
| rad40syn  | 2.64822e-11 | 1.00000 | 7.09497e-11 | 1.000000 |
| rad41     | 2.43325e-11 | 1.00000 | 6.51903e-11 | 1.000000 |
| rad61     | 1.76266e-11 | 1.00000 | 4.72244e-11 | 1.000000 |
| rad40anti | 1.25561e-11 | 1.00000 | 3.36398e-11 | 1.000000 |
| rad72     | 2.17907e-12 | 1.00000 | 5.83806e-12 | 1.000000 |
| rad6      | 1.40665e-13 | 1.00000 | 3.76863e-13 | 1.000000 |
| rad23     | 4.97935e-14 | 1.00000 | 1.33404e-13 | 1.000000 |
| rad45     | 3.17908e-14 | 1.00000 | 8.51721e-14 | 1.000000 |
| rad11     | 6.24456e-15 | 1.00000 | 1.67301e-14 | 1.000000 |
| rad20     | 5.25317e-15 | 1.00000 | 1.40740e-14 | 1.000000 |
| rad7      | 3.48868e-15 | 1.00000 | 9.34669e-15 | 1.000000 |
| rad21     | 3.17166e-15 | 1.00000 | 8.49734e-15 | 1.000000 |
| rad36     | 2.96639e-15 | 1.00000 | 7.94739e-15 | 1.000000 |
| rad9      | 1.96547e-15 | 1.00000 | 5.26579e-15 | 1.000000 |
| rad2      | 1.95952e-15 | 1.00000 | 5.24985e-15 | 1.000000 |
| rad13     | 1.37603e-15 | 1.00000 | 3.68658e-15 | 1.000000 |
| rad28     | 5.40644e-16 | 1.00000 | 1.44846e-15 | 1.000000 |
| rad18     | 5.20685e-16 | 1.00000 | 1.39499e-15 | 1.000000 |
| rad10     | 4.60242e-16 | 1.00000 | 1.23306e-15 | 1.000000 |
| rad1      | 4.31509e-16 | 1.00000 | 1.15607e-15 | 1.000000 |
| rad26     | 1.72820e-16 | 1.00000 | 4.63011e-16 | 1.000000 |
| rad3      | 5.71265e-17 | 1.00000 | 1.53050e-16 | 1.000000 |
| rad4      | 4.37806e-17 | 1.00000 | 1.17295e-16 | 1.000000 |
| rad24     | 3.33436e-17 | 1.00000 | 8.93325e-17 | 1.000000 |
| rad33     | 2.51829e-17 | 1.00000 | 6.74686e-17 | 1.000000 |
| rad22     | 6.97546e-18 | 1.00000 | 1.86883e-17 | 1.000000 |
| rad25     | 3.68476e-18 | 1.00000 | 9.87200e-18 | 1.000000 |
| rad12     | 1.57452e-18 | 1.00000 | 4.21838e-18 | 1.000000 |
| rad14     | 4.93370e-19 | 1.00000 | 1.32181e-18 | 1.000000 |
| rad15     | 4.68608e-19 | 1.00000 | 1.25547e-18 | 1.000000 |
| rad27     | 3.32748e-19 | 1.00000 | 8.91480e-19 | 1.000000 |
| rad8      | 9.89268e-20 | 1.00000 | 2.65039e-19 | 1.000000 |
| rad31     | 6.76592e-21 | 1.00000 | 1.81269e-20 | 1.000000 |
| rad47     | 1.81317e-22 | 1.00000 | 4.85774e-22 | 1.000000 |
| rad5      | 1.37247e-23 | 1.00000 | 3.67705e-23 | 1.000000 |

0.100000000E-06 Pa, 1300.00000 K

=====  
Rate constant | True (fraction) | Effective (fraction)  
-----

Total | 1.52810e-14 (1.00) | 4.76644e-15 (1.00)

| species       | PYtrue      | Cumul    | PYeffective | Cumul    |
|---------------|-------------|----------|-------------|----------|
| Benzyl+C2H2   | 0.688080    | 0.688080 | 0.00000     | 0.00000  |
| Indene+H      | 0.296944    | 0.985024 | 0.951986    | 0.951986 |
| Ph+Allene     | 0.00550433  | 0.990528 | 0.0176466   | 0.969633 |
| PhCH2CCH+H    | 0.00336231  | 0.993891 | 0.0107794   | 0.980412 |
| PhCHCCH2+H    | 0.00286585  | 0.996756 | 0.00918775  | 0.989600 |
| PhCCH+CH3     | 0.00187197  | 0.998628 | 0.00600145  | 0.995601 |
| Ph+MeAc       | 0.000252917 | 0.998881 | 0.000810838 | 0.996412 |
| PAH7+H        | 0.000251839 | 0.999133 | 0.000807383 | 0.997219 |
| PAH9+H        | 0.000232565 | 0.999366 | 0.000745592 | 0.997965 |
| rad30         | 0.000187145 | 0.999553 | 0.000599977 | 0.998565 |
| rad38         | 9.27358e-05 | 0.999646 | 0.000297306 | 0.998862 |
| PhCCCH3+H     | 8.81977e-05 | 0.999734 | 0.000282757 | 0.999145 |
| rad19anti     | 7.76866e-05 | 0.999812 | 0.000249059 | 0.999394 |
| rad39         | 5.27138e-05 | 0.999864 | 0.000168998 | 0.999563 |
| rad35         | 4.67240e-05 | 0.999911 | 0.000149795 | 0.999713 |
| PAH3+H        | 4.01931e-05 | 0.999951 | 0.000128857 | 0.999842 |
| rad46         | 2.01481e-05 | 0.999971 | 6.45939e-05 | 0.999906 |
| rad60syn      | 7.32140e-06 | 0.999979 | 2.34720e-05 | 0.999930 |
| rad50         | 5.32215e-06 | 0.999984 | 1.70625e-05 | 0.999947 |
| rad59         | 4.81766e-06 | 0.999989 | 1.54452e-05 | 0.999962 |
| rad60anti     | 4.29551e-06 | 0.999993 | 1.37712e-05 | 0.999976 |
| rad19syn      | 2.96344e-06 | 0.999996 | 9.50065e-06 | 0.999986 |
| rad54         | 9.75309e-07 | 0.999997 | 3.12679e-06 | 0.999989 |
| rad67         | 7.44257e-07 | 0.999998 | 2.38605e-06 | 0.999991 |
| PhcycC3H3_A+H | 7.41843e-07 | 0.999999 | 2.37831e-06 | 0.999993 |
| rad51         | 6.46585e-07 | 0.999999 | 2.07292e-06 | 0.999996 |
| rad37         | 4.66727e-07 | 1.000000 | 1.49630e-06 | 0.999997 |
| rad52         | 2.99170e-07 | 1.000000 | 9.59124e-07 | 0.999998 |

|           |             |         |             |          |
|-----------|-------------|---------|-------------|----------|
| PAH10+CH3 | 1.66594e-07 | 1.00000 | 5.34093e-07 | 0.999999 |
| rad70     | 1.60097e-07 | 1.00000 | 5.13264e-07 | 0.999999 |
| PAH1+H    | 1.54574e-07 | 1.00000 | 4.95557e-07 | 1.000000 |
| rad58     | 1.48959e-07 | 1.00000 | 4.77556e-07 | 1.000000 |
| rad55     | 5.10750e-08 | 1.00000 | 1.63744e-07 | 1.000000 |
| rad34     | 2.60671e-08 | 1.00000 | 8.35698e-08 | 1.000000 |
| rad65     | 2.01508e-08 | 1.00000 | 6.46025e-08 | 1.000000 |
| rad62     | 1.51327e-08 | 1.00000 | 4.85146e-08 | 1.000000 |
| rad53     | 3.99906e-09 | 1.00000 | 1.28208e-08 | 1.000000 |
| rad43     | 2.42224e-09 | 1.00000 | 7.76557e-09 | 1.000000 |
| rad56     | 2.20471e-09 | 1.00000 | 7.06819e-09 | 1.000000 |
| rad73     | 1.94724e-09 | 1.00000 | 6.24276e-09 | 1.000000 |
| rad71     | 1.52459e-09 | 1.00000 | 4.88774e-09 | 1.000000 |
| rad64     | 1.45722e-09 | 1.00000 | 4.67176e-09 | 1.000000 |
| PAH8+H    | 4.97086e-10 | 1.00000 | 1.59363e-09 | 1.000000 |
| rad68syn  | 4.61120e-10 | 1.00000 | 1.47833e-09 | 1.000000 |
| rad42     | 4.21653e-10 | 1.00000 | 1.35180e-09 | 1.000000 |
| rad68anti | 3.05850e-10 | 1.00000 | 9.80538e-10 | 1.000000 |
| rad40syn  | 9.09556e-11 | 1.00000 | 2.91599e-10 | 1.000000 |
| rad61     | 6.30316e-11 | 1.00000 | 2.02076e-10 | 1.000000 |
| rad40anti | 4.50261e-11 | 1.00000 | 1.44351e-10 | 1.000000 |
| rad41     | 4.39793e-11 | 1.00000 | 1.40995e-10 | 1.000000 |
| rad72     | 1.45373e-11 | 1.00000 | 4.66058e-11 | 1.000000 |
| rad6      | 1.05532e-13 | 1.00000 | 3.38331e-13 | 1.000000 |
| rad23     | 2.55088e-14 | 1.00000 | 8.17800e-14 | 1.000000 |
| rad45     | 1.69460e-14 | 1.00000 | 5.43279e-14 | 1.000000 |
| rad11     | 6.08184e-15 | 1.00000 | 1.94981e-14 | 1.000000 |
| rad7      | 4.46029e-15 | 1.00000 | 1.42995e-14 | 1.000000 |
| rad20     | 3.18168e-15 | 1.00000 | 1.02003e-14 | 1.000000 |
| rad21     | 1.87706e-15 | 1.00000 | 6.01774e-15 | 1.000000 |
| rad9      | 1.62686e-15 | 1.00000 | 5.21564e-15 | 1.000000 |
| rad36     | 1.60265e-15 | 1.00000 | 5.13802e-15 | 1.000000 |
| rad13     | 8.37407e-16 | 1.00000 | 2.68468e-15 | 1.000000 |
| rad18     | 6.76196e-16 | 1.00000 | 2.16785e-15 | 1.000000 |
| rad2      | 5.86246e-16 | 1.00000 | 1.87948e-15 | 1.000000 |
| rad28     | 3.18200e-16 | 1.00000 | 1.02013e-15 | 1.000000 |
| rad10     | 2.93219e-16 | 1.00000 | 9.40044e-16 | 1.000000 |
| rad1      | 1.33099e-16 | 1.00000 | 4.26707e-16 | 1.000000 |
| rad26     | 9.20089e-17 | 1.00000 | 2.94976e-16 | 1.000000 |
| rad22     | 2.57704e-17 | 1.00000 | 8.26184e-17 | 1.000000 |
| rad24     | 2.44030e-17 | 1.00000 | 7.82347e-17 | 1.000000 |
| rad3      | 2.20492e-17 | 1.00000 | 7.06885e-17 | 1.000000 |
| rad4      | 1.71012e-17 | 1.00000 | 5.48254e-17 | 1.000000 |
| rad33     | 1.48882e-17 | 1.00000 | 4.77307e-17 | 1.000000 |
| rad25     | 2.76125e-18 | 1.00000 | 8.85244e-18 | 1.000000 |
| rad15     | 1.99694e-18 | 1.00000 | 6.40207e-18 | 1.000000 |
| rad12     | 1.79600e-18 | 1.00000 | 5.75787e-18 | 1.000000 |
| rad14     | 2.71727e-19 | 1.00000 | 8.71141e-19 | 1.000000 |
| rad8      | 1.89596e-19 | 1.00000 | 6.07834e-19 | 1.000000 |
| rad27     | 1.34953e-19 | 1.00000 | 4.32651e-19 | 1.000000 |
| rad31     | 4.14038e-21 | 1.00000 | 1.32738e-20 | 1.000000 |
| rad47     | 4.64662e-22 | 1.00000 | 1.48968e-21 | 1.000000 |
| rad5      | 5.02253e-23 | 1.00000 | 1.61020e-22 | 1.000000 |

0.100000000E-06 Pa, 1400.00000 K

=====  
Rate constant | True (fraction) | Effective (fraction)  
-----

Total | 2.46691e-14 (1.00 ) | 6.50155e-15 (1.00 )

| species     | PYtrue      | Cumul    | PYeffective | Cumul    |
|-------------|-------------|----------|-------------|----------|
| Benzyl+C2H2 | 0.736450    | 0.736450 | 0.00000     | 0.00000  |
| Indene+H    | 0.245659    | 0.982109 | 0.932117    | 0.932117 |
| Ph+Allene   | 0.00660861  | 0.988718 | 0.0250754   | 0.957192 |
| PhCH2CCH+H  | 0.00478128  | 0.993499 | 0.0181419   | 0.975334 |
| PhCHCCH2+H  | 0.00325578  | 0.996755 | 0.0123536   | 0.987688 |
| PhCCH+CH3   | 0.00165084  | 0.998406 | 0.00626388  | 0.993952 |
| PAH9+H      | 0.000308661 | 0.998714 | 0.00117117  | 0.995123 |
| PAH7+H      | 0.000272630 | 0.998987 | 0.00103445  | 0.996157 |
| Ph+MeAc     | 0.000228420 | 0.999215 | 0.000866707 | 0.997024 |
| rad30       | 0.000217655 | 0.999433 | 0.000825859 | 0.997850 |
| rad38       | 0.000125529 | 0.999558 | 0.000476301 | 0.998326 |
| rad19anti   | 0.000116511 | 0.999675 | 0.000442085 | 0.998768 |
| PAH3+H      | 6.69984e-05 | 0.999742 | 0.000254215 | 0.999023 |
| PhCCCH3+H   | 6.53819e-05 | 0.999807 | 0.000248082 | 0.999271 |
| rad35       | 6.07397e-05 | 0.999868 | 0.000230468 | 0.999501 |
| rad39       | 5.49305e-05 | 0.999923 | 0.000208426 | 0.999710 |
| rad46       | 2.97185e-05 | 0.999953 | 0.000112762 | 0.999822 |
| rad60syn    | 1.03332e-05 | 0.999963 | 3.92077e-05 | 0.999862 |

|               |             |          |             |          |
|---------------|-------------|----------|-------------|----------|
| rad50         | 9.93210e-06 | 0.999973 | 3.76859e-05 | 0.999899 |
| rad59         | 7.71556e-06 | 0.999981 | 2.92756e-05 | 0.999928 |
| rad60anti     | 6.13929e-06 | 0.999987 | 2.32946e-05 | 0.999952 |
| rad19syn      | 4.26609e-06 | 0.999991 | 1.61870e-05 | 0.999968 |
| rad67         | 1.57759e-06 | 0.999993 | 5.98594e-06 | 0.999974 |
| rad54         | 1.46998e-06 | 0.999994 | 5.57763e-06 | 0.999980 |
| rad51         | 1.43445e-06 | 0.999996 | 5.44280e-06 | 0.999985 |
| PhcycC3H3_A+H | 1.26043e-06 | 0.999997 | 4.78252e-06 | 0.999990 |
| rad37         | 6.13241e-07 | 0.999997 | 2.32685e-06 | 0.999992 |
| rad52         | 6.09458e-07 | 0.999998 | 2.31250e-06 | 0.999994 |
| PAH10+CH3     | 3.40070e-07 | 0.999998 | 1.29034e-06 | 0.999996 |
| rad58         | 3.07503e-07 | 0.999999 | 1.16677e-06 | 0.999997 |
| rad70         | 2.75599e-07 | 0.999999 | 1.04572e-06 | 0.999998 |
| PAH1+H        | 2.72543e-07 | 0.999999 | 1.03413e-06 | 0.999999 |
| rad55         | 8.21114e-08 | 0.999999 | 3.11559e-07 | 0.999999 |
| rad34         | 4.89123e-08 | 0.999999 | 1.85590e-07 | 0.999999 |
| rad65         | 4.41608e-08 | 0.999999 | 1.67561e-07 | 1.000000 |
| rad62         | 2.07591e-08 | 0.999999 | 7.87674e-08 | 1.000000 |
| rad53         | 8.12265e-09 | 0.999999 | 3.08202e-08 | 1.000000 |
| rad73         | 6.62662e-09 | 0.999999 | 2.51437e-08 | 1.000000 |
| rad71         | 5.83659e-09 | 0.999999 | 2.21461e-08 | 1.000000 |
| rad56         | 5.57502e-09 | 0.999999 | 1.92564e-08 | 1.000000 |
| rad43         | 3.05585e-09 | 0.999999 | 1.15950e-08 | 1.000000 |
| rad64         | 2.94785e-09 | 0.999999 | 1.11852e-08 | 1.000000 |
| PAH8+H        | 1.55760e-09 | 0.999999 | 5.91010e-09 | 1.000000 |
| rad68syn      | 1.15822e-09 | 0.999999 | 4.39468e-09 | 1.000000 |
| rad68anti     | 7.65284e-10 | 0.999999 | 2.90376e-09 | 1.000000 |
| rad42         | 6.99013e-10 | 0.999999 | 2.65230e-09 | 1.000000 |
| rad40syn      | 2.60577e-10 | 0.999999 | 9.88719e-10 | 1.000000 |
| rad61         | 1.94739e-10 | 0.999999 | 7.38907e-10 | 1.000000 |
| rad40anti     | 1.33993e-10 | 0.999999 | 5.08417e-10 | 1.000000 |
| rad41         | 7.68994e-11 | 0.999999 | 2.91783e-10 | 1.000000 |
| rad72         | 7.37095e-11 | 0.999999 | 2.79680e-10 | 1.000000 |
| rad6          | 1.01945e-13 | 0.999999 | 3.86813e-13 | 1.000000 |
| rad23         | 1.36476e-14 | 0.999999 | 5.17839e-14 | 1.000000 |
| rad45         | 9.28919e-15 | 0.999999 | 3.52464e-14 | 1.000000 |
| rad11         | 4.33247e-15 | 0.999999 | 1.64389e-14 | 1.000000 |
| rad7          | 3.93690e-15 | 0.999999 | 1.49380e-14 | 1.000000 |
| rad20         | 1.95003e-15 | 0.999999 | 7.39910e-15 | 1.000000 |
| rad9          | 1.29129e-15 | 0.999999 | 4.89961e-15 | 1.000000 |
| rad21         | 1.13739e-15 | 0.999999 | 4.31567e-15 | 1.000000 |
| rad36         | 8.89899e-16 | 0.999999 | 3.37659e-15 | 1.000000 |
| rad18         | 5.84528e-16 | 0.999999 | 2.21791e-15 | 1.000000 |
| rad13         | 4.53189e-16 | 0.999999 | 1.71956e-15 | 1.000000 |
| rad28         | 2.56609e-16 | 0.999999 | 9.73664e-16 | 1.000000 |
| rad2          | 1.82818e-16 | 0.999999 | 6.93675e-16 | 1.000000 |
| rad10         | 1.42747e-16 | 0.999999 | 5.41633e-16 | 1.000000 |
| rad22         | 8.73723e-17 | 0.999999 | 3.31521e-16 | 1.000000 |
| rad26         | 5.48603e-17 | 0.999999 | 2.08159e-16 | 1.000000 |
| rad1          | 4.24341e-17 | 0.999999 | 1.61010e-16 | 1.000000 |
| rad24         | 1.80067e-17 | 0.999999 | 6.83237e-17 | 1.000000 |
| rad3          | 8.89168e-18 | 0.999999 | 3.37382e-17 | 1.000000 |
| rad33         | 8.79958e-18 | 0.999999 | 3.33887e-17 | 1.000000 |
| rad4          | 6.96340e-18 | 0.999999 | 2.64216e-17 | 1.000000 |
| rad15         | 6.28107e-18 | 0.999999 | 2.38326e-17 | 1.000000 |
| rad12         | 1.93287e-18 | 0.999999 | 7.33399e-18 | 1.000000 |
| rad25         | 1.92135e-18 | 0.999999 | 7.29027e-18 | 1.000000 |
| rad8          | 2.79512e-19 | 0.999999 | 1.06057e-18 | 1.000000 |
| rad14         | 1.41990e-19 | 0.999999 | 5.38760e-19 | 1.000000 |
| rad27         | 5.43615e-20 | 0.999999 | 2.06267e-19 | 1.000000 |
| rad31         | 2.56226e-21 | 0.999999 | 9.72211e-21 | 1.000000 |
| rad47         | 1.04027e-21 | 0.999999 | 3.94715e-21 | 1.000000 |
| rad5          | 1.54554e-22 | 0.999999 | 5.86431e-22 | 1.000000 |

0.100000000E-06 Pa, 1500.00000 K

=====

| Rate constant | True (fraction)    | Effective (fraction) |
|---------------|--------------------|----------------------|
| Total         | 3.76908e-14 (1.00) | 8.51560e-15 (1.00)   |

| species     | PYtrue      | Cumul    | PYeffective | Cumul    |
|-------------|-------------|----------|-------------|----------|
| Benzyl+C2H2 | 0.774067    | 0.774067 | 0.00000     | 0.00000  |
| Indene+H    | 0.205065    | 0.979132 | 0.907636    | 0.907636 |
| Ph+Allene   | 0.00752036  | 0.986652 | 0.0332858   | 0.940922 |
| PhCH2CCH+H  | 0.00646723  | 0.993120 | 0.0286246   | 0.969546 |
| PhCHCCH2+H  | 0.00361205  | 0.996732 | 0.0159873   | 0.985534 |
| PhCCH+CH3   | 0.00141397  | 0.998146 | 0.00625837  | 0.991792 |
| PAH9+H      | 0.000393094 | 0.998539 | 0.00173987  | 0.993532 |
| PAH7+H      | 0.000286546 | 0.998825 | 0.00126828  | 0.994800 |

|               |             |          |             |          |
|---------------|-------------|----------|-------------|----------|
| rad30         | 0.000246477 | 0.999072 | 0.00109093  | 0.995891 |
| Ph+MeAc       | 0.000203626 | 0.999275 | 0.000901268 | 0.996792 |
| rad19anti     | 0.000164236 | 0.999440 | 0.000726923 | 0.997519 |
| rad38         | 0.000162728 | 0.999602 | 0.000720251 | 0.998240 |
| PAH3+H        | 0.000104218 | 0.999707 | 0.000461281 | 0.998701 |
| rad35         | 7.62565e-05 | 0.999783 | 6.000337518 | 0.999038 |
| rad39         | 5.58557e-05 | 0.999839 | 0.000247223 | 0.999286 |
| PhCCCH3+H     | 4.89506e-05 | 0.999888 | 0.000216660 | 0.999502 |
| rad46         | 4.15217e-05 | 0.999929 | 0.000183779 | 0.999686 |
| rad50         | 1.70754e-05 | 0.999946 | 7.55771e-05 | 0.999762 |
| rad60syn      | 1.38815e-05 | 0.999960 | 6.14410e-05 | 0.999823 |
| rad59         | 1.15663e-05 | 0.999972 | 5.11935e-05 | 0.999874 |
| rad60anti     | 8.33859e-06 | 0.999980 | 3.69074e-05 | 0.999911 |
| rad19syn      | 5.68956e-06 | 0.999986 | 2.51825e-05 | 0.999936 |
| rad67         | 3.01383e-06 | 0.999989 | 1.33395e-05 | 0.999950 |
| rad51         | 2.86542e-06 | 0.999992 | 1.26826e-05 | 0.999962 |
| rad54         | 2.03370e-06 | 0.999994 | 9.00134e-06 | 0.999971 |
| PhcycC3H3_A+H | 1.94411e-06 | 0.999996 | 8.60479e-06 | 0.999980 |
| rad52         | 1.12959e-06 | 0.999997 | 4.99968e-06 | 0.999985 |
| rad37         | 8.38280e-07 | 0.999997 | 3.71030e-06 | 0.999989 |
| PAH10+CH3     | 6.63376e-07 | 0.999998 | 2.93617e-06 | 0.999992 |
| rad58         | 5.75067e-07 | 0.999999 | 2.54530e-06 | 0.999994 |
| PAH1+H        | 4.44629e-07 | 0.999999 | 1.96797e-06 | 0.999996 |
| rad70         | 4.35873e-07 | 1.000000 | 1.92921e-06 | 0.999998 |
| rad55         | 1.20222e-07 | 1.000000 | 5.32112e-07 | 0.999999 |
| rad65         | 8.70999e-08 | 1.000000 | 3.85512e-07 | 0.999999 |
| rad34         | 8.35876e-08 | 1.000000 | 3.69966e-07 | 0.999999 |
| rad62         | 2.65880e-08 | 1.000000 | 1.17681e-07 | 0.999999 |
| rad73         | 1.91029e-08 | 1.000000 | 8.45513e-08 | 1.000000 |
| rad71         | 1.86182e-08 | 1.000000 | 8.24060e-08 | 1.000000 |
| rad53         | 1.46409e-08 | 1.000000 | 6.48019e-08 | 1.000000 |
| rad56         | 1.02046e-08 | 1.000000 | 4.51664e-08 | 1.000000 |
| rad64         | 5.41559e-09 | 1.000000 | 2.39699e-08 | 1.000000 |
| PAH8+H        | 4.18063e-09 | 1.000000 | 1.85038e-08 | 1.000000 |
| rad43         | 3.92947e-09 | 1.000000 | 1.73922e-08 | 1.000000 |
| rad68syn      | 2.56012e-09 | 1.000000 | 1.13313e-08 | 1.000000 |
| rad68anti     | 1.68587e-09 | 1.000000 | 7.46183e-09 | 1.000000 |
| rad42         | 1.06259e-09 | 1.000000 | 4.70314e-09 | 1.000000 |
| rad40syn      | 6.46765e-10 | 1.000000 | 2.86264e-09 | 1.000000 |
| rad61         | 5.26863e-10 | 1.000000 | 2.33195e-09 | 1.000000 |
| rad40anti     | 3.43892e-10 | 1.000000 | 1.52210e-09 | 1.000000 |
| rad72         | 2.96653e-10 | 1.000000 | 1.31301e-09 | 1.000000 |
| rad41         | 1.35344e-10 | 1.000000 | 5.99046e-10 | 1.000000 |
| rad6          | 1.09169e-13 | 1.000000 | 4.83193e-13 | 1.000000 |
| rad23         | 7.72826e-15 | 1.000000 | 3.42060e-14 | 1.000000 |
| rad45         | 5.23954e-15 | 1.000000 | 2.31907e-14 | 1.000000 |
| rad11         | 2.60240e-15 | 1.000000 | 1.15185e-14 | 1.000000 |
| rad7          | 2.59262e-15 | 1.000000 | 1.14752e-14 | 1.000000 |
| rad20         | 1.23074e-15 | 1.000000 | 5.44737e-15 | 1.000000 |
| rad9          | 1.00094e-15 | 1.000000 | 4.43025e-15 | 1.000000 |
| rad21         | 7.10953e-16 | 1.000000 | 3.14675e-15 | 1.000000 |
| rad36         | 5.08397e-16 | 1.000000 | 2.25021e-15 | 1.000000 |
| rad18         | 4.05516e-16 | 1.000000 | 1.79485e-15 | 1.000000 |
| rad28         | 2.47531e-16 | 1.000000 | 1.09560e-15 | 1.000000 |
| rad13         | 2.40585e-16 | 1.000000 | 1.06485e-15 | 1.000000 |
| rad22         | 2.28971e-16 | 1.000000 | 1.01345e-15 | 1.000000 |
| rad2          | 5.90717e-17 | 1.000000 | 2.61457e-16 | 1.000000 |
| rad10         | 5.67311e-17 | 1.000000 | 2.51097e-16 | 1.000000 |
| rad26         | 3.23234e-17 | 1.000000 | 1.43066e-16 | 1.000000 |
| rad1          | 1.39797e-17 | 1.000000 | 6.18757e-17 | 1.000000 |
| rad24         | 1.34246e-17 | 1.000000 | 5.94185e-17 | 1.000000 |
| rad15         | 1.14537e-17 | 1.000000 | 5.06952e-17 | 1.000000 |
| rad33         | 5.25042e-18 | 1.000000 | 2.32388e-17 | 1.000000 |
| rad3          | 3.73576e-18 | 1.000000 | 1.65348e-17 | 1.000000 |
| rad4          | 2.95030e-18 | 1.000000 | 1.30583e-17 | 1.000000 |
| rad12         | 1.99725e-18 | 1.000000 | 8.84000e-18 | 1.000000 |
| rad25         | 1.32639e-18 | 1.000000 | 5.87071e-18 | 1.000000 |
| rad8          | 3.57803e-19 | 1.000000 | 1.58367e-18 | 1.000000 |
| rad14         | 7.59784e-20 | 1.000000 | 3.36288e-19 | 1.000000 |
| rad27         | 2.30896e-20 | 1.000000 | 1.02197e-19 | 1.000000 |
| rad47         | 2.08549e-21 | 1.000000 | 9.23059e-21 | 1.000000 |
| rad31         | 1.60839e-21 | 1.000000 | 7.11887e-21 | 1.000000 |
| rad5          | 3.58501e-22 | 1.000000 | 1.58676e-21 | 1.000000 |

0.100000000E-06 Pa, 1750.00000 K

| Rate constant | True (fraction)     | Effective (fraction) |
|---------------|---------------------|----------------------|
| Total         | 9.18604e-14 (1.00 ) | 1.49145e-14 (1.00 )  |

| species       | PYtrue      | Cumul    | PYeffective | Cumul    |
|---------------|-------------|----------|-------------|----------|
| Benzyl+C2H2   | 0.837640    | 0.837640 | 0.000000    | 0.000000 |
| Indene+H      | 0.133064    | 0.970704 | 0.819559    | 0.819559 |
| PhCH2CCH+H    | 0.0118056   | 0.982510 | 0.0727127   | 0.892272 |
| Ph+Allene     | 0.00950091  | 0.992011 | 0.0585175   | 0.950789 |
| PhCHCCH2+H    | 0.00446803  | 0.996479 | 0.0275192   | 0.978308 |
| PhCCH+CH3     | 0.000861597 | 0.997340 | 0.00530671  | 0.983615 |
| PAH9+H        | 0.000556652 | 0.997897 | 0.00342850  | 0.987044 |
| rad30         | 0.000325000 | 0.998222 | 0.00200173  | 0.989045 |
| rad19anti     | 0.000321503 | 0.998543 | 0.00198018  | 0.991026 |
| rad38         | 0.000287109 | 0.998830 | 0.00176835  | 0.992794 |
| PAH7+H        | 0.000286344 | 0.999117 | 0.00176363  | 0.994557 |
| PAH3+H        | 0.000275296 | 0.999392 | 0.00169559  | 0.996253 |
| Ph+MeAc       | 0.000167695 | 0.999560 | 0.00103286  | 0.997286 |
| rad35         | 0.000110066 | 0.999670 | 0.000677915 | 0.997964 |
| rad46         | 7.52920e-05 | 0.999745 | 0.000463735 | 0.998428 |
| rad39         | 5.82425e-05 | 0.999803 | 0.000358724 | 0.998786 |
| rad50         | 4.36581e-05 | 0.999847 | 0.000268897 | 0.999055 |
| PhCCCH3+H     | 3.20470e-05 | 0.999879 | 0.000197382 | 0.999253 |
| rad59         | 2.75338e-05 | 0.999907 | 0.000169584 | 0.999422 |
| rad60syn      | 2.64498e-05 | 0.999933 | 0.000162908 | 0.999585 |
| rad60anti     | 1.77452e-05 | 0.999951 | 0.000109295 | 0.999694 |
| rad51         | 1.06304e-05 | 0.999961 | 6.54744e-05 | 0.999760 |
| rad67         | 1.00266e-05 | 0.999971 | 6.17554e-05 | 0.999822 |
| rad19syn      | 8.12817e-06 | 0.999980 | 5.00626e-05 | 0.999872 |
| PhcycC3H3_A+H | 4.32964e-06 | 0.999984 | 2.66669e-05 | 0.999898 |
| rad52         | 3.62585e-06 | 0.999988 | 2.23321e-05 | 0.999921 |
| rad54         | 3.10468e-06 | 0.999991 | 1.91222e-05 | 0.999940 |
| PAH10+CH3     | 2.60306e-06 | 0.999993 | 1.60326e-05 | 0.999956 |
| rad58         | 2.01823e-06 | 0.999995 | 1.24306e-05 | 0.999968 |
| rad37         | 1.70772e-06 | 0.999997 | 1.05181e-05 | 0.999979 |
| PAH1+H        | 1.10635e-06 | 0.999998 | 6.81419e-06 | 0.999986 |
| rad70         | 1.04847e-06 | 0.999999 | 6.45765e-06 | 0.999992 |
| rad65         | 3.08348e-07 | 0.999999 | 1.89916e-06 | 0.999994 |
| rad34         | 2.42002e-07 | 1.000000 | 1.49052e-06 | 0.999995 |
| rad55         | 2.29000e-07 | 1.000000 | 1.41044e-06 | 0.999997 |
| rad71         | 1.90753e-07 | 1.000000 | 1.17488e-06 | 0.999998 |
| rad73         | 1.56380e-07 | 1.000000 | 9.63167e-07 | 0.999999 |
| rad53         | 4.44390e-08 | 1.000000 | 2.73707e-07 | 0.999999 |
| rad62         | 4.00911e-08 | 1.000000 | 2.46927e-07 | 1.000000 |
| rad56         | 3.57943e-08 | 1.000000 | 2.20463e-07 | 1.000000 |
| PAH8+H        | 2.43959e-08 | 1.000000 | 1.50258e-07 | 1.000000 |
| rad64         | 1.92943e-08 | 1.000000 | 1.18836e-07 | 1.000000 |
| rad68syn      | 1.20123e-08 | 1.000000 | 7.39857e-08 | 1.000000 |
| rad43         | 8.60713e-09 | 1.000000 | 5.30126e-08 | 1.000000 |
| rad68anti     | 7.79056e-09 | 1.000000 | 4.79832e-08 | 1.000000 |
| rad72         | 5.35919e-09 | 1.000000 | 3.30080e-08 | 1.000000 |
| rad40syn      | 3.52157e-09 | 1.000000 | 2.16899e-08 | 1.000000 |
| rad61         | 3.50342e-09 | 1.000000 | 2.15781e-08 | 1.000000 |
| rad42         | 2.39318e-09 | 1.000000 | 1.47399e-08 | 1.000000 |
| rad40anti     | 2.09783e-09 | 1.000000 | 1.29208e-08 | 1.000000 |
| rad41         | 5.64325e-10 | 1.000000 | 3.47576e-09 | 1.000000 |
| rad6          | 7.59604e-14 | 1.000000 | 4.67851e-13 | 1.000000 |
| rad23         | 3.15789e-15 | 1.000000 | 1.94499e-14 | 1.000000 |
| rad22         | 5.56063e-16 | 1.000000 | 3.42487e-15 | 1.000000 |
| rad45         | 5.00907e-16 | 1.000000 | 3.08516e-15 | 1.000000 |
| rad7          | 2.70054e-16 | 1.000000 | 1.66330e-15 | 1.000000 |
| rad11         | 2.49387e-16 | 1.000000 | 1.53601e-15 | 1.000000 |
| rad28         | 1.72237e-16 | 1.000000 | 1.06084e-15 | 1.000000 |
| rad9          | 1.33104e-16 | 1.000000 | 8.19807e-16 | 1.000000 |
| rad20         | 1.26283e-16 | 1.000000 | 7.77797e-16 | 1.000000 |
| rad36         | 8.51411e-17 | 1.000000 | 5.24397e-16 | 1.000000 |
| rad21         | 6.65178e-17 | 1.000000 | 4.09693e-16 | 1.000000 |
| rad18         | 5.81036e-17 | 1.000000 | 3.57869e-16 | 1.000000 |
| rad13         | 1.40334e-17 | 1.000000 | 8.64338e-17 | 1.000000 |
| rad15         | 6.72941e-18 | 1.000000 | 4.14474e-17 | 1.000000 |
| rad26         | 4.54711e-18 | 1.000000 | 2.80063e-17 | 1.000000 |
| rad10         | 2.37769e-18 | 1.000000 | 1.46446e-17 | 1.000000 |
| rad24         | 1.70134e-18 | 1.000000 | 1.04788e-17 | 1.000000 |
| rad2          | 1.03383e-18 | 1.000000 | 6.36748e-18 | 1.000000 |
| rad12         | 4.26945e-19 | 1.000000 | 2.62962e-18 | 1.000000 |
| rad33         | 3.32918e-19 | 1.000000 | 2.05049e-18 | 1.000000 |
| rad1          | 2.62779e-19 | 1.000000 | 1.61849e-18 | 1.000000 |
| rad8          | 1.74118e-19 | 1.000000 | 1.07242e-18 | 1.000000 |
| rad25         | 1.29129e-19 | 1.000000 | 7.95327e-19 | 1.000000 |
| rad3          | 8.44323e-20 | 1.000000 | 5.20031e-19 | 1.000000 |
| rad4          | 5.36109e-20 | 1.000000 | 3.30198e-19 | 1.000000 |
| rad14         | 5.21560e-21 | 1.000000 | 3.21236e-20 | 1.000000 |
| rad47         | 2.44663e-21 | 1.000000 | 1.50692e-20 | 1.000000 |

|       |             |         |             |         |
|-------|-------------|---------|-------------|---------|
| rad5  | 1.25555e-21 | 1.00000 | 7.73314e-21 | 1.00000 |
| rad27 | 9.07042e-22 | 1.00000 | 5.58661e-21 | 1.00000 |

0.100000000E-06 Pa, 2000.00000 K

=====

| Rate constant | True (fraction)     | Effective (fraction) |
|---------------|---------------------|----------------------|
| Total         | 1.85359e-13 (1.00 ) | 2.47588e-14 (1.00 )  |

| species       | PYtrue      | Cumul    | PYeffective | Cumul    |
|---------------|-------------|----------|-------------|----------|
| Benzyl+C2H2   | 0.866428    | 0.866428 | 0.00000     | 0.00000  |
| Indene+H      | 0.0943885   | 0.960816 | 0.706650    | 0.706650 |
| PhCH2CCH+H    | 0.0189358   | 0.979752 | 0.141765    | 0.848415 |
| Ph+Allene     | 0.0101088   | 0.989861 | 0.0756807   | 0.924096 |
| PhCHCCH2+H    | 0.00579099  | 0.995652 | 0.0433549   | 0.967451 |
| PAH9+H        | 0.000765251 | 0.996417 | 0.00572913  | 0.973180 |
| PhCCH+CH3     | 0.000550354 | 0.996968 | 0.00412028  | 0.977300 |
| PAH3+H        | 0.000526246 | 0.997494 | 0.00393980  | 0.981240 |
| rad19anti     | 0.000486607 | 0.997981 | 0.00364303  | 0.984883 |
| rad38         | 0.000411538 | 0.998392 | 0.00308103  | 0.987964 |
| rad30         | 0.000378289 | 0.998770 | 0.00283210  | 0.990796 |
| PAH7+H        | 0.000350388 | 0.999121 | 0.00262322  | 0.993419 |
| Ph+MeAc       | 0.000164748 | 0.999286 | 0.00123340  | 0.994653 |
| rad35         | 0.000155515 | 0.999441 | 0.00116428  | 0.995817 |
| rad46         | 0.000120109 | 0.999561 | 0.000899212 | 0.996716 |
| rad50         | 9.58270e-05 | 0.999657 | 0.000717420 | 0.997434 |
| rad39         | 7.87039e-05 | 0.999736 | 0.000589225 | 0.998023 |
| rad59         | 4.92026e-05 | 0.999785 | 0.000368361 | 0.998391 |
| rad60syn      | 4.01110e-05 | 0.999825 | 0.000300295 | 0.998691 |
| PhCCCH3+H     | 3.61306e-05 | 0.999861 | 0.000270495 | 0.998962 |
| rad51         | 2.92772e-05 | 0.999890 | 0.000219187 | 0.999181 |
| rad60anti     | 2.75040e-05 | 0.999918 | 0.000205912 | 0.999387 |
| rad67         | 2.43946e-05 | 0.999942 | 0.000182633 | 0.999570 |
| rad19syn      | 1.17085e-05 | 0.999954 | 8.76566e-05 | 0.999657 |
| rad52         | 8.84586e-06 | 0.999963 | 6.62255e-05 | 0.999723 |
| PAH10+CH3     | 7.72771e-06 | 0.999971 | 5.78543e-05 | 0.999781 |
| PhcycC3H3_A+H | 7.44556e-06 | 0.999978 | 5.57420e-05 | 0.999837 |
| rad58         | 5.03691e-06 | 0.999983 | 3.77093e-05 | 0.999875 |
| rad54         | 4.34710e-06 | 0.999987 | 3.25450e-05 | 0.999907 |
| rad37         | 3.43690e-06 | 0.999991 | 2.57307e-05 | 0.999933 |
| PAH1+H        | 2.74924e-06 | 0.999994 | 2.05825e-05 | 0.999954 |
| rad70         | 2.09354e-06 | 0.999996 | 1.56735e-05 | 0.999969 |
| rad71         | 1.06961e-06 | 0.999997 | 8.00777e-06 | 0.999977 |
| rad65         | 8.19688e-07 | 0.999998 | 6.13669e-06 | 0.999983 |
| rad73         | 7.43910e-07 | 0.999998 | 5.56936e-06 | 0.999989 |
| rad34         | 5.52321e-07 | 0.999999 | 4.13501e-06 | 0.999993 |
| rad55         | 3.53324e-07 | 0.999999 | 2.64520e-06 | 0.999996 |
| PAH8+H        | 1.14510e-07 | 0.999999 | 8.57294e-07 | 0.999997 |
| rad53         | 9.72438e-08 | 0.999999 | 7.28027e-07 | 0.999997 |
| rad56         | 9.21215e-08 | 1.000000 | 6.89678e-07 | 0.999998 |
| rad62         | 6.00485e-08 | 1.000000 | 4.49560e-07 | 0.999999 |
| rad64         | 5.57952e-08 | 1.000000 | 4.17717e-07 | 0.999999 |
| rad72         | 4.29765e-08 | 1.000000 | 3.21748e-07 | 0.999999 |
| rad68syn      | 4.11172e-08 | 1.000000 | 3.07828e-07 | 1.000000 |
| rad68anti     | 2.65281e-08 | 1.000000 | 1.98605e-07 | 1.000000 |
| rad43         | 2.20258e-08 | 1.000000 | 1.64898e-07 | 1.000000 |
| rad61         | 1.54174e-08 | 1.000000 | 1.15424e-07 | 1.000000 |
| rad40syn      | 1.44056e-08 | 1.000000 | 1.07849e-07 | 1.000000 |
| rad40anti     | 9.08224e-09 | 1.000000 | 6.79952e-08 | 1.000000 |
| rad42         | 4.93493e-09 | 1.000000 | 3.69459e-08 | 1.000000 |
| rad41         | 1.99345e-09 | 1.000000 | 1.49241e-08 | 1.000000 |
| rad6          | 9.73561e-15 | 1.000000 | 7.28867e-14 | 1.000000 |
| rad23         | 1.70878e-15 | 1.000000 | 1.27930e-14 | 1.000000 |
| rad45         | 1.66572e-16 | 1.000000 | 1.24706e-15 | 1.000000 |
| rad22         | 1.52678e-16 | 1.000000 | 1.14304e-15 | 1.000000 |
| rad9          | 6.77035e-17 | 1.000000 | 5.06869e-16 | 1.000000 |
| rad11         | 5.37257e-17 | 1.000000 | 4.02223e-16 | 1.000000 |
| rad20         | 5.29552e-17 | 1.000000 | 3.96455e-16 | 1.000000 |
| rad7          | 4.21463e-17 | 1.000000 | 3.15533e-16 | 1.000000 |
| rad28         | 3.28595e-17 | 1.000000 | 2.46007e-16 | 1.000000 |
| rad36         | 2.91187e-17 | 1.000000 | 2.18001e-16 | 1.000000 |
| rad21         | 2.72287e-17 | 1.000000 | 2.03851e-16 | 1.000000 |
| rad18         | 1.62503e-17 | 1.000000 | 1.21659e-16 | 1.000000 |
| rad15         | 3.62730e-18 | 1.000000 | 2.71562e-17 | 1.000000 |
| rad13         | 3.15022e-18 | 1.000000 | 2.35844e-17 | 1.000000 |
| rad24         | 9.49359e-19 | 1.000000 | 7.10748e-18 | 1.000000 |
| rad26         | 6.44777e-19 | 1.000000 | 4.82719e-18 | 1.000000 |
| rad12         | 3.72963e-19 | 1.000000 | 2.79223e-18 | 1.000000 |
| rad10         | 2.40007e-19 | 1.000000 | 1.79684e-18 | 1.000000 |

|       |             |          |             |         |
|-------|-------------|----------|-------------|---------|
| rad8  | 2.00223e-19 | 1.000000 | 1.49899e-18 | 1.00000 |
| rad33 | 1.02784e-19 | 1.000000 | 7.69507e-19 | 1.00000 |
| rad2  | 9.63944e-20 | 1.000000 | 7.21667e-19 | 1.00000 |
| rad25 | 5.51560e-20 | 1.000000 | 4.12931e-19 | 1.00000 |
| rad1  | 2.58949e-20 | 1.000000 | 1.93865e-19 | 1.00000 |
| rad3  | 1.46313e-20 | 1.000000 | 1.09539e-19 | 1.00000 |
| rad4  | 9.35110e-21 | 1.000000 | 7.00080e-20 | 1.00000 |
| rad47 | 6.72667e-21 | 1.000000 | 5.03600e-20 | 1.00000 |
| rad5  | 1.86946e-21 | 1.000000 | 1.39959e-20 | 1.00000 |
| rad14 | 1.43912e-21 | 1.000000 | 1.07741e-20 | 1.00000 |
| rad27 | 2.36914e-22 | 1.000000 | 1.77368e-21 | 1.00000 |

0.100000000E-06 Pa, 2250.00000 K

| Rate constant | True (fraction)     | Effective (fraction) |
|---------------|---------------------|----------------------|
| Total         | 3.29136e-13 (1.00 ) | 4.00875e-14 (1.00 )  |

| species       | PYtrue      | Cumul    | PYeffective | Cumul    |
|---------------|-------------|----------|-------------|----------|
| Benzyl+C2H2   | 0.878204    | 0.878204 | 0.00000     | 0.00000  |
| Indene+H      | 0.0703003   | 0.948504 | 0.577195    | 0.577195 |
| PhCH2CCH+H    | 0.0277459   | 0.976250 | 0.227806    | 0.805001 |
| Ph+Allene     | 0.0105974   | 0.986848 | 0.0870088   | 0.892010 |
| PhCHCCH2+H    | 0.00765656  | 0.994504 | 0.0628636   | 0.954873 |
| PAH9+H        | 0.000941856 | 0.995446 | 0.00773304  | 0.962609 |
| PAH3+H        | 0.000857236 | 0.996303 | 0.00703827  | 0.969645 |
| rad19anti     | 0.000629228 | 0.996932 | 0.00516623  | 0.974811 |
| rad38         | 0.000525523 | 0.997458 | 0.00431476  | 0.979126 |
| PAH7+H        | 0.000454502 | 0.997913 | 0.00373165  | 0.982857 |
| rad30         | 0.000417263 | 0.998330 | 0.00342591  | 0.986283 |
| PhCCH+CH3     | 0.000383697 | 0.998713 | 0.00315031  | 0.989434 |
| rad35         | 0.000200865 | 0.998914 | 0.00164918  | 0.991083 |
| Ph+MeAc       | 0.000197882 | 0.999112 | 0.00162470  | 0.992707 |
| rad50         | 0.000170940 | 0.999283 | 0.00140349  | 0.994111 |
| rad46         | 0.000166540 | 0.999450 | 0.00136737  | 0.995478 |
| rad39         | 0.000118806 | 0.999568 | 0.000975445 | 0.996454 |
| rad59         | 7.57691e-05 | 0.999644 | 0.000622096 | 0.997076 |
| rad51         | 6.22686e-05 | 0.999707 | 0.000511251 | 0.997587 |
| rad60syn      | 5.44510e-05 | 0.999761 | 0.000447066 | 0.998034 |
| PhCCCH3+H     | 5.15901e-05 | 0.999813 | 0.000423577 | 0.998458 |
| rad67         | 4.61782e-05 | 0.999859 | 0.000379142 | 0.998837 |
| rad60anti     | 3.79865e-05 | 0.999897 | 0.000311885 | 0.999149 |
| PAH10+CH3     | 1.71933e-05 | 0.999914 | 0.000141164 | 0.999290 |
| rad52         | 1.70844e-05 | 0.999931 | 0.000140270 | 0.999430 |
| rad19syn      | 1.63932e-05 | 0.999947 | 0.000134595 | 0.999565 |
| PhcycC3H3_A+H | 1.10275e-05 | 0.999958 | 9.05407e-05 | 0.999655 |
| rad58         | 1.00660e-05 | 0.999969 | 8.26458e-05 | 0.999738 |
| PAH1+H        | 5.96728e-06 | 0.999974 | 4.89939e-05 | 0.999787 |
| rad37         | 5.72356e-06 | 0.999980 | 4.69928e-05 | 0.999834 |
| rad54         | 5.39698e-06 | 0.999986 | 4.43115e-05 | 0.999878 |
| rad71         | 3.95691e-06 | 0.999990 | 3.24879e-05 | 0.999911 |
| rad70         | 3.69403e-06 | 0.999993 | 3.03296e-05 | 0.999941 |
| rad73         | 2.41459e-06 | 0.999996 | 1.98248e-05 | 0.999961 |
| rad65         | 1.68525e-06 | 0.999997 | 1.38367e-05 | 0.999975 |
| rad34         | 1.08371e-06 | 0.999998 | 8.89771e-06 | 0.999984 |
| rad55         | 4.74067e-07 | 0.999999 | 3.89229e-06 | 0.999988 |
| PAH8+H        | 3.91946e-07 | 0.999999 | 3.21804e-06 | 0.999991 |
| rad72         | 2.09318e-07 | 1.000000 | 1.71859e-06 | 0.999992 |
| rad56         | 1.86168e-07 | 1.000000 | 1.52852e-06 | 0.999994 |
| rad53         | 1.73183e-07 | 1.000000 | 1.42191e-06 | 0.999995 |
| rad64         | 1.33616e-07 | 1.000000 | 1.09704e-06 | 0.999997 |
| rad68syn      | 1.10265e-07 | 1.000000 | 9.05322e-07 | 0.999997 |
| rad62         | 9.48259e-08 | 1.000000 | 7.78561e-07 | 0.999998 |
| rad68anti     | 7.08807e-08 | 1.000000 | 5.81961e-07 | 0.999999 |
| rad43         | 4.82400e-08 | 1.000000 | 3.96071e-07 | 0.999999 |
| rad61         | 4.62524e-08 | 1.000000 | 3.79752e-07 | 1.000000 |
| rad40syn      | 4.43238e-08 | 1.000000 | 3.63917e-07 | 1.000000 |
| rad40anti     | 2.91751e-08 | 1.000000 | 2.39540e-07 | 1.000000 |
| rad42         | 1.00367e-08 | 1.000000 | 8.24055e-08 | 1.000000 |
| rad41         | 5.35211e-09 | 1.000000 | 4.39431e-08 | 1.000000 |
| rad6          | 1.23986e-15 | 1.000000 | 1.01798e-14 | 1.000000 |
| rad23         | 4.71797e-16 | 1.000000 | 3.87365e-15 | 1.000000 |
| rad45         | 6.43386e-17 | 1.000000 | 5.28247e-16 | 1.000000 |
| rad22         | 3.96240e-17 | 1.000000 | 3.25330e-16 | 1.000000 |
| rad9          | 3.51575e-17 | 1.000000 | 2.88658e-16 | 1.000000 |
| rad20         | 2.60557e-17 | 1.000000 | 2.13928e-16 | 1.000000 |
| rad11         | 1.62856e-17 | 1.000000 | 1.33711e-16 | 1.000000 |
| rad21         | 1.30011e-17 | 1.000000 | 1.06745e-16 | 1.000000 |
| rad36         | 1.15181e-17 | 1.000000 | 9.45687e-17 | 1.000000 |

|       |             |         |             |         |
|-------|-------------|---------|-------------|---------|
| rad7  | 9.44108e-18 | 1.00000 | 7.75152e-17 | 1.00000 |
| rad18 | 6.17423e-18 | 1.00000 | 5.06931e-17 | 1.00000 |
| rad28 | 5.07623e-18 | 1.00000 | 4.16780e-17 | 1.00000 |
| rad15 | 2.10988e-18 | 1.00000 | 1.73230e-17 | 1.00000 |
| rad13 | 8.56528e-19 | 1.00000 | 7.03246e-18 | 1.00000 |
| rad24 | 5.70002e-19 | 1.00000 | 4.67996e-18 | 1.00000 |
| rad12 | 3.05351e-19 | 1.00000 | 2.50707e-18 | 1.00000 |
| rad26 | 2.24971e-19 | 1.00000 | 1.84711e-18 | 1.00000 |
| rad8  | 2.16858e-19 | 1.00000 | 1.78050e-18 | 1.00000 |
| rad10 | 7.19852e-20 | 1.00000 | 5.91029e-19 | 1.00000 |
| rad33 | 3.63727e-20 | 1.00000 | 2.98636e-19 | 1.00000 |
| rad25 | 2.84538e-20 | 1.00000 | 2.33618e-19 | 1.00000 |
| rad2  | 1.46214e-20 | 1.00000 | 1.20048e-19 | 1.00000 |
| rad47 | 1.41374e-20 | 1.00000 | 1.16074e-19 | 1.00000 |
| rad1  | 4.31729e-21 | 1.00000 | 3.54468e-20 | 1.00000 |
| rad3  | 3.18704e-21 | 1.00000 | 2.61669e-20 | 1.00000 |
| rad5  | 2.08608e-21 | 1.00000 | 1.71276e-20 | 1.00000 |
| rad4  | 2.02996e-21 | 1.00000 | 1.66668e-20 | 1.00000 |
| rad14 | 5.33284e-22 | 1.00000 | 4.37849e-21 | 1.00000 |
| rad27 | 1.32553e-22 | 1.00000 | 1.08832e-21 | 1.00000 |

0.100000000E-06 Pa, 2500.00000 K

| =====         |                     |          |                      |          |
|---------------|---------------------|----------|----------------------|----------|
| Rate constant | True (fraction)     |          | Effective (fraction) |          |
| -----         |                     |          |                      |          |
| Total         | 5.32896e-13 (1.00 ) |          | 6.40311e-14 (1.00 )  |          |
| species       | PYtrue              | Cumul    | PYeffective          | Cumul    |
| -----         |                     |          |                      |          |
| Benzyl+C2H2   | 0.879843            | 0.879843 | 0.00000              | 0.00000  |
| Indene+H      | 0.0541638           | 0.934007 | 0.450777             | 0.450777 |
| PhCH2CCH+H    | 0.0379681           | 0.971975 | 0.315989             | 0.766766 |
| Ph+Allene     | 0.0112444           | 0.983219 | 0.0935810            | 0.860347 |
| PhCHCCH2+H    | 0.00999485          | 0.993214 | 0.0831818            | 0.943529 |
| PAH3+H        | 0.00124356          | 0.994458 | 0.0103495            | 0.953878 |
| PAH9+H        | 0.00106545          | 0.995523 | 0.00886715           | 0.962745 |
| rad19anti     | 0.000731028         | 0.996254 | 0.00608396           | 0.968829 |
| rad38         | 0.000614393         | 0.996869 | 0.00511327           | 0.973943 |
| PAH7+H        | 0.000586817         | 0.997455 | 0.00488376           | 0.978826 |
| rad30         | 0.000442203         | 0.997898 | 0.00368022           | 0.982507 |
| PhCCH+CH3     | 0.000309130         | 0.998207 | 0.00257273           | 0.985079 |
| rad50         | 0.000261677         | 0.998468 | 0.00217780           | 0.987257 |
| Ph+MeAc       | 0.000256973         | 0.998725 | 0.00213865           | 0.989396 |
| rad35         | 0.000242192         | 0.998968 | 0.00201564           | 0.991411 |
| rad46         | 0.000207878         | 0.999175 | 0.00173006           | 0.993142 |
| rad39         | 0.000175772         | 0.999351 | 0.00146285           | 0.994604 |
| rad51         | 0.000109649         | 0.999461 | 0.000912547          | 0.995517 |
| rad59         | 0.000104825         | 0.999566 | 0.000872406          | 0.996389 |
| rad67         | 7.34547e-05         | 0.999639 | 0.000611325          | 0.997001 |
| PhCCCH3+H     | 7.22810e-05         | 0.999711 | 0.000601557          | 0.997602 |
| rad60syn      | 6.81857e-05         | 0.999780 | 0.000567474          | 0.998170 |
| rad60anti     | 4.82378e-05         | 0.999828 | 0.000401457          | 0.998571 |
| PAH10+CH3     | 3.08998e-05         | 0.999859 | 0.000257163          | 0.998828 |
| rad52         | 2.78077e-05         | 0.999887 | 0.000231429          | 0.999060 |
| rad19syn      | 2.34810e-05         | 0.999910 | 0.000195420          | 0.999255 |
| rad58         | 1.71635e-05         | 0.999927 | 0.000142842          | 0.999398 |
| PhcycC3H3_A+H | 1.49440e-05         | 0.999942 | 0.000124371          | 0.999522 |
| PAH1+H        | 1.13017e-05         | 0.999953 | 9.40581e-05          | 0.999616 |
| rad71         | 1.08628e-05         | 0.999964 | 9.04053e-05          | 0.999707 |
| rad37         | 8.12868e-06         | 0.999972 | 6.76507e-05          | 0.999774 |
| rad54         | 6.28002e-06         | 0.999979 | 5.22652e-05          | 0.999827 |
| rad70         | 5.97099e-06         | 0.999985 | 4.96933e-05          | 0.999876 |
| rad73         | 5.95726e-06         | 0.999991 | 4.95791e-05          | 0.999926 |
| rad65         | 2.87595e-06         | 0.999994 | 2.39350e-05          | 0.999950 |
| rad34         | 1.90624e-06         | 0.999995 | 1.58647e-05          | 0.999966 |
| PAH8+H        | 1.06524e-06         | 0.999997 | 8.86540e-06          | 0.999975 |
| rad72         | 7.14903e-07         | 0.999997 | 5.94976e-06          | 0.999981 |
| rad55         | 5.87553e-07         | 0.999998 | 4.88989e-06          | 0.999986 |
| rad56         | 3.21872e-07         | 0.999998 | 2.67877e-06          | 0.999988 |
| rad64         | 2.70855e-07         | 0.999998 | 2.25419e-06          | 0.999990 |
| rad53         | 2.70820e-07         | 0.999999 | 2.25389e-06          | 0.999993 |
| rad68syn      | 2.47504e-07         | 0.999999 | 2.05985e-06          | 0.999995 |
| rad68anti     | 1.58683e-07         | 0.999999 | 1.32064e-06          | 0.999996 |
| rad62         | 1.55148e-07         | 0.999999 | 1.29122e-06          | 0.999997 |
| rad40syn      | 1.10734e-07         | 0.999999 | 9.21579e-07          | 0.999998 |
| rad61         | 1.05680e-07         | 0.999999 | 8.79519e-07          | 0.999999 |
| rad43         | 8.79692e-08         | 1.000000 | 7.32121e-07          | 1.000000 |
| rad40anti     | 7.53435e-08         | 1.000000 | 6.27044e-07          | 1.000000 |
| rad42         | 1.97239e-08         | 1.000000 | 1.64152e-07          | 1.000000 |
| rad41         | 1.13877e-08         | 1.000000 | 9.47734e-08          | 1.000000 |



|       |             |          |             |         |
|-------|-------------|----------|-------------|---------|
| rad6  | 2.24920e-16 | 1.000000 | 1.87189e-15 | 1.00000 |
| rad23 | 1.44860e-16 | 1.000000 | 1.20559e-15 | 1.00000 |
| rad45 | 2.79853e-17 | 1.000000 | 2.32907e-16 | 1.00000 |
| rad9  | 1.86938e-17 | 1.000000 | 1.55578e-16 | 1.00000 |
| rad20 | 1.43940e-17 | 1.000000 | 1.19794e-16 | 1.00000 |
| rad22 | 1.35197e-17 | 1.000000 | 1.12517e-16 | 1.00000 |
| rad21 | 6.94971e-18 | 1.000000 | 5.78387e-17 | 1.00000 |
| rad11 | 6.25790e-18 | 1.000000 | 5.20812e-17 | 1.00000 |
| rad36 | 5.10699e-18 | 1.000000 | 4.25028e-17 | 1.00000 |
| rad18 | 2.77736e-18 | 1.000000 | 2.31145e-17 | 1.00000 |
| rad7  | 2.64628e-18 | 1.000000 | 2.20236e-17 | 1.00000 |
| rad15 | 1.25424e-18 | 1.000000 | 1.04384e-17 | 1.00000 |
| rad28 | 1.20785e-18 | 1.000000 | 1.00523e-17 | 1.00000 |
| rad24 | 3.60418e-19 | 1.000000 | 2.99957e-18 | 1.00000 |
| rad13 | 2.74546e-19 | 1.000000 | 2.28490e-18 | 1.00000 |
| rad12 | 2.40046e-19 | 1.000000 | 1.99778e-18 | 1.00000 |
| rad8  | 2.25267e-19 | 1.000000 | 1.87478e-18 | 1.00000 |
| rad26 | 1.24982e-19 | 1.000000 | 1.04016e-18 | 1.00000 |
| rad10 | 4.03082e-20 | 1.000000 | 3.35463e-19 | 1.00000 |
| rad47 | 2.44566e-20 | 1.000000 | 2.03539e-19 | 1.00000 |
| rad25 | 1.71221e-20 | 1.000000 | 1.42498e-19 | 1.00000 |
| rad33 | 1.46760e-20 | 1.000000 | 1.22141e-19 | 1.00000 |
| rad2  | 4.51653e-21 | 1.000000 | 3.75887e-20 | 1.00000 |
| rad5  | 2.16420e-21 | 1.000000 | 1.80115e-20 | 1.00000 |
| rad1  | 1.54067e-21 | 1.000000 | 1.28222e-20 | 1.00000 |
| rad3  | 8.70402e-22 | 1.000000 | 7.24390e-21 | 1.00000 |
| rad4  | 5.46245e-22 | 1.000000 | 4.54611e-21 | 1.00000 |
| rad14 | 2.68051e-22 | 1.000000 | 2.23085e-21 | 1.00000 |
| rad27 | 1.07389e-22 | 1.000000 | 8.93744e-22 | 1.00000 |

0.100000000E-06 Pa, 2750.00000 K

| Rate constant | True (fraction)     | Effective (fraction) |
|---------------|---------------------|----------------------|
| Total         | 8.05113e-13 (1.00 ) | 1.00487e-13 (1.00 )  |

| species       | PYtrue      | Cumul    | PYeffective | Cumul    |
|---------------|-------------|----------|-------------|----------|
| Benzyl+C2H2   | 0.875189    | 0.875189 | 0.00000     | 0.00000  |
| PhCH2CCH+H    | 0.0492371   | 0.924426 | 0.394492    | 0.394492 |
| Indene+H      | 0.0427171   | 0.967143 | 0.342254    | 0.736746 |
| PhCHCCH2+H    | 0.0126523   | 0.979795 | 0.101371    | 0.838117 |
| Ph+Allene     | 0.0121360   | 0.991931 | 0.0972347   | 0.935352 |
| PAH3+H        | 0.00165412  | 0.993586 | 0.0132530   | 0.948605 |
| PAH9+H        | 0.00112924  | 0.994715 | 0.00904761  | 0.957652 |
| rad19anti     | 0.000790044 | 0.995505 | 0.00632991  | 0.963982 |
| PAH7+H        | 0.000729333 | 0.996234 | 0.00584349  | 0.969826 |
| rad38         | 0.000670521 | 0.996905 | 0.00537228  | 0.975198 |
| rad30         | 0.000454283 | 0.997359 | 0.00363976  | 0.978838 |
| rad50         | 0.000356822 | 0.997716 | 0.00285889  | 0.981697 |
| Ph+MeAc       | 0.000331297 | 0.998047 | 0.00265438  | 0.984351 |
| PhCCH+CH3     | 0.000293338 | 0.998340 | 0.00235025  | 0.986701 |
| rad35         | 0.000276886 | 0.998617 | 0.00221844  | 0.988920 |
| rad39         | 0.000242689 | 0.998860 | 0.00194445  | 0.990864 |
| rad46         | 0.000239377 | 0.999099 | 0.00191791  | 0.992782 |
| rad51         | 0.000167552 | 0.999267 | 0.00134245  | 0.994125 |
| rad59         | 0.000133898 | 0.999401 | 0.00107280  | 0.995197 |
| rad67         | 0.000103303 | 0.999504 | 0.000827674 | 0.996025 |
| PhCCCH3+H     | 9.47597e-05 | 0.999599 | 0.000759224 | 0.996784 |
| rad60syn      | 8.03400e-05 | 0.999679 | 0.000643692 | 0.997428 |
| rad60anti     | 5.74980e-05 | 0.999737 | 0.000460680 | 0.997889 |
| PAH10+CH3     | 4.75540e-05 | 0.999784 | 0.000381007 | 0.998270 |
| rad52         | 3.97965e-05 | 0.999824 | 0.000318854 | 0.998588 |
| rad19syn      | 3.43481e-05 | 0.999858 | 0.000275200 | 0.998864 |
| rad58         | 2.60271e-05 | 0.999885 | 0.000208532 | 0.999072 |
| rad71         | 2.39120e-05 | 0.999908 | 0.000191585 | 0.999264 |
| PhcycC3H3_A+H | 1.91124e-05 | 0.999928 | 0.000153131 | 0.999417 |
| PAH1+H        | 1.89313e-05 | 0.999946 | 0.000151679 | 0.999569 |
| rad73         | 1.19963e-05 | 0.999958 | 9.61159e-05 | 0.999665 |
| rad37         | 1.02458e-05 | 0.999969 | 8.20902e-05 | 0.999747 |
| rad70         | 8.97456e-06 | 0.999978 | 7.19051e-05 | 0.999819 |
| rad54         | 7.04852e-06 | 0.999985 | 5.64734e-05 | 0.999875 |
| rad65         | 4.27356e-06 | 0.999989 | 3.42402e-05 | 0.999909 |
| rad34         | 3.06724e-06 | 0.999992 | 2.45750e-05 | 0.999934 |
| PAH8+H        | 2.42508e-06 | 0.999995 | 1.94299e-05 | 0.999953 |
| rad72         | 1.88022e-06 | 0.999996 | 1.50645e-05 | 0.999968 |
| rad55         | 6.94535e-07 | 0.999997 | 5.56468e-06 | 0.999974 |
| rad56         | 5.00306e-07 | 0.999998 | 4.00850e-06 | 0.999978 |
| rad68syn      | 4.83458e-07 | 0.999998 | 3.87351e-06 | 0.999982 |
| rad64         | 4.76899e-07 | 0.999999 | 3.82096e-06 | 0.999986 |

|           |             |          |             |          |
|-----------|-------------|----------|-------------|----------|
| rad53     | 3.88200e-07 | 0.999999 | 3.11030e-06 | 0.999989 |
| rad68anti | 3.09361e-07 | 0.999999 | 2.47863e-06 | 0.999991 |
| rad62     | 2.47711e-07 | 0.999999 | 1.98468e-06 | 0.999993 |
| rad40syn  | 2.35491e-07 | 1.000000 | 1.88678e-06 | 0.999995 |
| rad61     | 1.98411e-07 | 1.000000 | 1.58969e-06 | 0.999997 |
| rad40anti | 1.64464e-07 | 1.000000 | 1.31770e-06 | 0.999998 |
| rad43     | 1.38326e-07 | 1.000000 | 1.10828e-06 | 0.999999 |
| rad42     | 3.59374e-08 | 1.000000 | 2.87934e-07 | 1.000000 |
| rad41     | 2.03340e-08 | 1.000000 | 1.62918e-07 | 1.000000 |
| rad23     | 5.31481e-17 | 1.000000 | 4.25828e-16 | 1.000000 |
| rad6      | 5.30301e-17 | 1.000000 | 4.24882e-16 | 1.000000 |
| rad45     | 1.33239e-17 | 1.000000 | 1.06753e-16 | 1.000000 |
| rad9      | 1.02205e-17 | 1.000000 | 8.18878e-17 | 1.000000 |
| rad20     | 8.68783e-18 | 1.000000 | 6.96077e-17 | 1.000000 |
| rad22     | 5.53887e-18 | 1.000000 | 4.43780e-17 | 1.000000 |
| rad21     | 4.05053e-18 | 1.000000 | 3.24532e-17 | 1.000000 |
| rad11     | 2.91949e-18 | 1.000000 | 2.33912e-17 | 1.000000 |
| rad36     | 2.46984e-18 | 1.000000 | 1.97886e-17 | 1.000000 |
| rad18     | 1.40097e-18 | 1.000000 | 1.12247e-17 | 1.000000 |
| rad7      | 8.87325e-19 | 1.000000 | 7.10933e-18 | 1.000000 |
| rad15     | 7.56444e-19 | 1.000000 | 6.06070e-18 | 1.000000 |
| rad28     | 4.35932e-19 | 1.000000 | 3.49273e-18 | 1.000000 |
| rad24     | 2.36701e-19 | 1.000000 | 1.89647e-18 | 1.000000 |
| rad8      | 2.27048e-19 | 1.000000 | 1.81913e-18 | 1.000000 |
| rad12     | 1.84640e-19 | 1.000000 | 1.47935e-18 | 1.000000 |
| rad13     | 1.02991e-19 | 1.000000 | 8.25175e-19 | 1.000000 |
| rad26     | 7.74805e-20 | 1.000000 | 6.20781e-19 | 1.000000 |
| rad47     | 3.65965e-20 | 1.000000 | 2.93215e-19 | 1.000000 |
| rad10     | 2.66186e-20 | 1.000000 | 2.13271e-19 | 1.000000 |
| rad25     | 1.16293e-20 | 1.000000 | 9.31748e-20 | 1.000000 |
| rad33     | 6.71473e-21 | 1.000000 | 5.37991e-20 | 1.000000 |
| rad2      | 2.31701e-21 | 1.000000 | 1.85641e-20 | 1.000000 |
| rad5      | 2.15479e-21 | 1.000000 | 1.72644e-20 | 1.000000 |
| rad1      | 9.06205e-22 | 1.000000 | 7.26061e-21 | 1.000000 |
| rad3      | 2.95709e-22 | 1.000000 | 2.36925e-21 | 1.000000 |
| rad4      | 1.80962e-22 | 1.000000 | 1.44989e-21 | 1.000000 |
| rad14     | 1.77541e-22 | 1.000000 | 1.42248e-21 | 1.000000 |
| rad27     | 9.32033e-23 | 1.000000 | 7.46754e-22 | 1.000000 |

0.100000000E-06 Pa, 3000.00000 K

=====

| Rate constant | True (fraction)     | Effective (fraction) |
|---------------|---------------------|----------------------|
| Total         | 1.15309e-12 (1.00 ) | 1.53862e-13 (1.00 )  |

| species       | PYtrue      | Cumul    | PYeffective | Cumul    |
|---------------|-------------|----------|-------------|----------|
| Benzyl+C2H2   | 0.866566    | 0.866566 | 0.00000     | 0.00000  |
| PhCH2CCH+H    | 0.0611725   | 0.927738 | 0.458447    | 0.458447 |
| Indene+H      | 0.0342672   | 0.962006 | 0.256810    | 0.715257 |
| PhCHCCH2+H    | 0.0154790   | 0.977485 | 0.116005    | 0.831262 |
| Ph+Allene     | 0.0132660   | 0.990751 | 0.0994201   | 0.930682 |
| PAH3+H        | 0.00205938  | 0.992810 | 0.0154337   | 0.946116 |
| PAH9+H        | 0.00113813  | 0.993948 | 0.00852950  | 0.954645 |
| PAH7+H        | 0.000866135 | 0.994814 | 0.00649110  | 0.961136 |
| rad19anti     | 0.000812999 | 0.995627 | 0.00609288  | 0.967229 |
| rad38         | 0.000693215 | 0.996321 | 0.00519518  | 0.972424 |
| rad30         | 0.000455427 | 0.996776 | 0.00341312  | 0.975838 |
| rad50         | 0.000445147 | 0.997221 | 0.00333608  | 0.979174 |
| Ph+MeAc       | 0.000411378 | 0.997633 | 0.00308300  | 0.982257 |
| PhCCH+CH3     | 0.000319072 | 0.997952 | 0.00239123  | 0.984648 |
| rad39         | 0.000311351 | 0.998263 | 0.00233337  | 0.986981 |
| rad35         | 0.000303822 | 0.998567 | 0.00227694  | 0.989258 |
| rad46         | 0.000258929 | 0.998826 | 0.00194050  | 0.991199 |
| rad51         | 0.000229661 | 0.999055 | 0.00172116  | 0.992920 |
| rad59         | 0.000160966 | 0.999216 | 0.00120633  | 0.994126 |
| rad67         | 0.000132859 | 0.999349 | 0.000995686 | 0.995122 |
| PhCCCH3+H     | 0.000117527 | 0.999467 | 0.000880786 | 0.996003 |
| rad60syn      | 9.03378e-05 | 0.999557 | 0.000677021 | 0.996680 |
| PAH10+CH3     | 6.53522e-05 | 0.999622 | 0.000489771 | 0.997169 |
| rad60anti     | 6.52879e-05 | 0.999688 | 0.000489289 | 0.997659 |
| rad52         | 5.15998e-05 | 0.999739 | 0.000386706 | 0.998045 |
| rad19syn      | 5.01057e-05 | 0.999789 | 0.000375508 | 0.998421 |
| rad71         | 4.45158e-05 | 0.999834 | 0.000333616 | 0.998755 |
| rad58         | 3.61220e-05 | 0.999870 | 0.000270710 | 0.999025 |
| PAH1+H        | 2.86271e-05 | 0.999899 | 0.000214541 | 0.999240 |
| PhcycC3H3_A+H | 2.34369e-05 | 0.999922 | 0.000175644 | 0.999415 |
| rad73         | 2.07080e-05 | 0.999943 | 0.000155192 | 0.999571 |
| rad70         | 1.26564e-05 | 0.999955 | 9.48509e-05 | 0.999666 |
| rad37         | 1.18404e-05 | 0.999967 | 8.87361e-05 | 0.999754 |

|           |             |          |             |          |
|-----------|-------------|----------|-------------|----------|
| rad54     | 7.74183e-06 | 0.999975 | 5.80198e-05 | 0.999812 |
| rad65     | 5.71876e-06 | 0.999981 | 4.28583e-05 | 0.999855 |
| PAH8+H    | 4.80152e-06 | 0.999986 | 3.59842e-05 | 0.999891 |
| rad34     | 4.57469e-06 | 0.999990 | 3.42843e-05 | 0.999925 |
| rad72     | 4.05904e-06 | 0.999994 | 3.04198e-05 | 0.999956 |
| rad68syn  | 8.44302e-07 | 0.999995 | 6.32747e-06 | 0.999962 |
| rad55     | 7.96394e-07 | 0.999996 | 5.96844e-06 | 0.999968 |
| rad64     | 7.49015e-07 | 0.999997 | 5.61336e-06 | 0.999974 |
| rad56     | 7.20451e-07 | 0.999997 | 5.39929e-06 | 0.999979 |
| rad68anti | 5.39463e-07 | 0.999998 | 4.04291e-06 | 0.999983 |
| rad53     | 5.23143e-07 | 0.999998 | 3.92061e-06 | 0.999987 |
| rad40syn  | 4.40707e-07 | 0.999999 | 3.30280e-06 | 0.999990 |
| rad62     | 3.72784e-07 | 0.999999 | 2.79376e-06 | 0.999993 |
| rad61     | 3.22478e-07 | 0.999999 | 2.41676e-06 | 0.999996 |
| rad40anti | 3.14359e-07 | 1.000000 | 2.35591e-06 | 0.999998 |
| rad43     | 1.94896e-07 | 1.000000 | 1.46061e-06 | 0.999999 |
| rad42     | 5.98145e-08 | 1.000000 | 4.48269e-07 | 1.000000 |
| rad41     | 3.19484e-08 | 1.000000 | 2.39432e-07 | 1.000000 |
| rad23     | 2.19120e-17 | 1.000000 | 1.64216e-16 | 1.000000 |
| rad6      | 1.53209e-17 | 1.000000 | 1.14820e-16 | 1.000000 |
| rad45     | 6.79750e-18 | 1.000000 | 5.09427e-17 | 1.000000 |
| rad9      | 5.76643e-18 | 1.000000 | 4.32155e-17 | 1.000000 |
| rad20     | 5.61879e-18 | 1.000000 | 4.21090e-17 | 1.000000 |
| rad22     | 2.56754e-18 | 1.000000 | 1.92420e-17 | 1.000000 |
| rad21     | 2.52565e-18 | 1.000000 | 1.89281e-17 | 1.000000 |
| rad11     | 1.59312e-18 | 1.000000 | 1.19394e-17 | 1.000000 |
| rad36     | 1.27639e-18 | 1.000000 | 9.56565e-18 | 1.000000 |
| rad18     | 7.69597e-19 | 1.000000 | 5.76761e-18 | 1.000000 |
| rad15     | 4.64693e-19 | 1.000000 | 3.48256e-18 | 1.000000 |
| rad7      | 3.48726e-19 | 1.000000 | 2.61347e-18 | 1.000000 |
| rad8      | 2.23533e-19 | 1.000000 | 1.67523e-18 | 1.000000 |
| rad28     | 2.05574e-19 | 1.000000 | 1.54064e-18 | 1.000000 |
| rad24     | 1.60028e-19 | 1.000000 | 1.19931e-18 | 1.000000 |
| rad12     | 1.40784e-19 | 1.000000 | 1.05508e-18 | 1.000000 |
| rad26     | 4.93142e-20 | 1.000000 | 3.69577e-19 | 1.000000 |
| rad47     | 4.90428e-20 | 1.000000 | 3.67543e-19 | 1.000000 |
| rad13     | 4.47285e-20 | 1.000000 | 3.35210e-19 | 1.000000 |
| rad10     | 1.80870e-20 | 1.000000 | 1.35550e-19 | 1.000000 |
| rad25     | 8.60189e-21 | 1.000000 | 6.44654e-20 | 1.000000 |
| rad33     | 3.44368e-21 | 1.000000 | 2.58081e-20 | 1.000000 |
| rad5      | 2.09154e-21 | 1.000000 | 1.56747e-20 | 1.000000 |
| rad2      | 1.42548e-21 | 1.000000 | 1.06830e-20 | 1.000000 |
| rad1      | 6.30583e-22 | 1.000000 | 4.72580e-21 | 1.000000 |
| rad14     | 1.40237e-22 | 1.000000 | 1.05098e-21 | 1.000000 |
| rad3      | 1.21823e-22 | 1.000000 | 9.12984e-22 | 1.000000 |
| rad27     | 8.01836e-23 | 1.000000 | 6.00923e-22 | 1.000000 |
| rad4      | 7.23748e-23 | 1.000000 | 5.42401e-22 | 1.000000 |

0.100000000E-06 Pa, 3250.00000 K

=====

| Rate constant | True (fraction)     | Effective (fraction) |
|---------------|---------------------|----------------------|
| Total         | 1.58309e-12 (1.00 ) | 2.28795e-13 (1.00 )  |

| species     | PYtrue      | Cumul    | PYeffective | Cumul    |
|-------------|-------------|----------|-------------|----------|
| Benzyl+C2H2 | 0.855476    | 0.855476 | 0.00000     | 0.00000  |
| PhCH2CCH+H  | 0.0734301   | 0.928906 | 0.508082    | 0.508082 |
| Indene+H    | 0.0278643   | 0.956770 | 0.192800    | 0.700882 |
| PhCHCCH2+H  | 0.0183610   | 0.975131 | 0.127045    | 0.827927 |
| Ph+Allene   | 0.0145940   | 0.989725 | 0.100980    | 0.928907 |
| PAH3+H      | 0.00243645  | 0.992162 | 0.0168585   | 0.945765 |
| PAH9+H      | 0.00110339  | 0.993265 | 0.00763468  | 0.953400 |
| PAH7+H      | 0.000986571 | 0.994252 | 0.00682634  | 0.960227 |
| rad19anti   | 0.000808911 | 0.995061 | 0.00559707  | 0.965824 |
| rad38       | 0.000686670 | 0.995747 | 0.00475125  | 0.970575 |
| rad50       | 0.000518179 | 0.996266 | 0.00358542  | 0.974160 |
| Ph+MeAc     | 0.000489465 | 0.996755 | 0.00338674  | 0.977547 |
| rad30       | 0.000447972 | 0.997203 | 0.00309964  | 0.980647 |
| PhCCH+CH3   | 0.000378211 | 0.997581 | 0.00261694  | 0.983264 |
| rad39       | 0.000374434 | 0.997956 | 0.00259081  | 0.985854 |
| rad35       | 0.000323023 | 0.998279 | 0.00223508  | 0.988089 |
| rad51       | 0.000289245 | 0.998568 | 0.00200136  | 0.990091 |
| rad46       | 0.000266714 | 0.998835 | 0.00184546  | 0.991936 |
| rad59       | 0.000184695 | 0.999019 | 0.00127795  | 0.993214 |
| rad67       | 0.000159865 | 0.999179 | 0.00110614  | 0.994320 |
| PhCCCH3+H   | 0.000140367 | 0.999320 | 0.000971235 | 0.995292 |
| rad60syn    | 9.79791e-05 | 0.999418 | 0.000677943 | 0.995970 |
| PAH10+CH3   | 8.26142e-05 | 0.999500 | 0.000571630 | 0.996541 |
| rad71       | 7.28074e-05 | 0.999573 | 0.000503773 | 0.997045 |

|               |             |          |             |          |
|---------------|-------------|----------|-------------|----------|
| rad60anti     | 7.14060e-05 | 0.999644 | 0.000494077 | 0.997539 |
| rad19syn      | 7.13406e-05 | 0.999716 | 0.000493624 | 0.998033 |
| rad52         | 6.19533e-05 | 0.999778 | 0.000428671 | 0.998461 |
| rad58         | 4.68388e-05 | 0.999825 | 0.000324090 | 0.998785 |
| PAH1+H        | 3.98744e-05 | 0.999864 | 0.000275902 | 0.999061 |
| rad73         | 3.17350e-05 | 0.999896 | 0.000219583 | 0.999281 |
| PhcycC3H3_A+H | 2.77967e-05 | 0.999924 | 0.000192333 | 0.999473 |
| rad70         | 1.68825e-05 | 0.999941 | 0.000116814 | 0.999590 |
| rad37         | 1.28499e-05 | 0.999954 | 8.89115e-05 | 0.999679 |
| PAH8+H        | 8.50457e-06 | 0.999962 | 5.88453e-05 | 0.999738 |
| rad54         | 8.38235e-06 | 0.999971 | 5.79997e-05 | 0.999796 |
| rad72         | 7.52648e-06 | 0.999978 | 5.20777e-05 | 0.999848 |
| rad65         | 7.06074e-06 | 0.999985 | 4.88551e-05 | 0.999897 |
| rad34         | 6.39568e-06 | 0.999992 | 4.42534e-05 | 0.999941 |
| rad68syn      | 1.34606e-06 | 0.999993 | 9.31375e-06 | 0.999950 |
| rad64         | 1.07438e-06 | 0.999994 | 7.43389e-06 | 0.999958 |
| rad56         | 9.79690e-07 | 0.999995 | 6.77873e-06 | 0.999965 |
| rad55         | 8.93999e-07 | 0.999996 | 6.18581e-06 | 0.999971 |
| rad68anti     | 8.59058e-07 | 0.999997 | 5.94405e-06 | 0.999977 |
| rad40syn      | 7.44327e-07 | 0.999997 | 5.15020e-06 | 0.999982 |
| rad53         | 6.73265e-07 | 0.999998 | 4.65850e-06 | 0.999986 |
| rad40anti     | 5.40357e-07 | 0.999999 | 3.73887e-06 | 0.999990 |
| rad62         | 5.25220e-07 | 0.999999 | 3.63414e-06 | 0.999994 |
| rad61         | 4.70536e-07 | 1.000000 | 3.25576e-06 | 0.999997 |
| rad43         | 2.53715e-07 | 1.000000 | 1.75552e-06 | 0.999999 |
| rad42         | 9.14458e-08 | 1.000000 | 6.32737e-07 | 0.999999 |
| rad41         | 4.57450e-08 | 1.000000 | 3.16522e-07 | 1.000000 |
| rad23         | 9.82219e-18 | 1.000000 | 6.79623e-17 | 1.000000 |
| rad6          | 5.28260e-18 | 1.000000 | 3.65517e-17 | 1.000000 |
| rad20         | 3.83869e-18 | 1.000000 | 2.65609e-17 | 1.000000 |
| rad45         | 3.66253e-18 | 1.000000 | 2.53420e-17 | 1.000000 |
| rad9          | 3.36424e-18 | 1.000000 | 2.32780e-17 | 1.000000 |
| rad21         | 1.66173e-18 | 1.000000 | 1.14980e-17 | 1.000000 |
| rad22         | 1.30761e-18 | 1.000000 | 9.04769e-18 | 1.000000 |
| rad11         | 9.80858e-19 | 1.000000 | 6.78681e-18 | 1.000000 |
| rad36         | 6.94769e-19 | 1.000000 | 4.80729e-18 | 1.000000 |
| rad18         | 4.51591e-19 | 1.000000 | 3.12467e-18 | 1.000000 |
| rad15         | 2.91808e-19 | 1.000000 | 2.01910e-18 | 1.000000 |
| rad8          | 2.15817e-19 | 1.000000 | 1.49330e-18 | 1.000000 |
| rad7          | 1.57405e-19 | 1.000000 | 1.08913e-18 | 1.000000 |
| rad28         | 1.13059e-19 | 1.000000 | 7.82284e-19 | 1.000000 |
| rad24         | 1.10778e-19 | 1.000000 | 7.66503e-19 | 1.000000 |
| rad12         | 1.07284e-19 | 1.000000 | 7.42324e-19 | 1.000000 |
| rad47         | 6.03541e-20 | 1.000000 | 4.17606e-19 | 1.000000 |
| rad26         | 3.17882e-20 | 1.000000 | 2.19951e-19 | 1.000000 |
| rad13         | 2.21088e-20 | 1.000000 | 1.52977e-19 | 1.000000 |
| rad10         | 1.23658e-20 | 1.000000 | 8.55621e-20 | 1.000000 |
| rad25         | 6.72544e-21 | 1.000000 | 4.65351e-20 | 1.000000 |
| rad5          | 2.00797e-21 | 1.000000 | 1.38937e-20 | 1.000000 |
| rad33         | 1.94932e-21 | 1.000000 | 1.34878e-20 | 1.000000 |
| rad2          | 9.35340e-22 | 1.000000 | 6.47187e-21 | 1.000000 |
| rad1          | 4.62523e-22 | 1.000000 | 3.20032e-21 | 1.000000 |
| rad14         | 1.20218e-22 | 1.000000 | 8.31820e-22 | 1.000000 |
| rad27         | 6.78839e-23 | 1.000000 | 4.69707e-22 | 1.000000 |
| rad3          | 5.91066e-23 | 1.000000 | 4.08974e-22 | 1.000000 |
| rad4          | 3.41504e-23 | 1.000000 | 2.36295e-22 | 1.000000 |

0.100000000E-06 Pa, 3500.00000 K

| Rate constant | True (fraction)     |          | Effective (fraction) |          |
|---------------|---------------------|----------|----------------------|----------|
| Total         | 2.10046e-12 (1.00 ) |          | 3.29923e-13 (1.00 )  |          |
| species       | PYtrue              | Cumul    | PYeffective          | Cumul    |
| Benzy1+C2H2   | 0.842928            | 0.842928 | 0.00000              | 0.00000  |
| PhCH2CCH+H    | 0.0857241           | 0.928652 | 0.545762             | 0.545762 |
| Indene+H      | 0.0229287           | 0.951581 | 0.145976             | 0.691738 |
| PhCHCCH2+H    | 0.0212218           | 0.972803 | 0.135108             | 0.826846 |
| Ph+Allene     | 0.0160719           | 0.988874 | 0.102322             | 0.929168 |
| PAH3+H        | 0.00277080          | 0.991645 | 0.0176403            | 0.946808 |
| PAH7+H        | 0.00108547          | 0.992731 | 0.00691065           | 0.953719 |
| PAH9+H        | 0.00103824          | 0.993769 | 0.00660998           | 0.960329 |
| rad19anti     | 0.000786012         | 0.994555 | 0.00500415           | 0.965333 |
| rad38         | 0.000657575         | 0.995213 | 0.00418645           | 0.969520 |
| rad50         | 0.000571322         | 0.995784 | 0.00363732           | 0.973157 |
| Ph+MeAc       | 0.000559758         | 0.996344 | 0.00356370           | 0.976721 |
| PhCCH+CH3     | 0.000466753         | 0.996810 | 0.00297158           | 0.979692 |
| rad30         | 0.000434295         | 0.997245 | 0.00276494           | 0.982457 |
| rad39         | 0.000426787         | 0.997672 | 0.00271714           | 0.985174 |

|               |             |          |             |          |
|---------------|-------------|----------|-------------|----------|
| rad51         | 0.000340822 | 0.998012 | 0.00216985  | 0.987344 |
| rad35         | 0.000335221 | 0.998348 | 0.00213419  | 0.989478 |
| rad46         | 0.000264413 | 0.998612 | 0.00168339  | 0.991162 |
| rad59         | 0.000204435 | 0.998816 | 0.00130154  | 0.992463 |
| rad67         | 0.000182834 | 0.998999 | 0.00116401  | 0.993627 |
| PhCCH3+H      | 0.000163685 | 0.999163 | 0.00104210  | 0.994669 |
| rad71         | 0.000107601 | 0.999271 | 0.000685042 | 0.995354 |
| rad60syn      | 0.000103349 | 0.999374 | 0.000657969 | 0.996012 |
| PAH10+CH3     | 9.81181e-05 | 0.999472 | 0.000624669 | 0.996637 |
| rad19syn      | 9.79725e-05 | 0.999570 | 0.000623742 | 0.997261 |
| rad60anti     | 7.58697e-05 | 0.999646 | 0.000483025 | 0.997744 |
| rad52         | 7.00217e-05 | 0.999716 | 0.000445793 | 0.998190 |
| rad58         | 5.76196e-05 | 0.999773 | 0.000366835 | 0.998556 |
| PAH1+H        | 5.20523e-05 | 0.999826 | 0.000331391 | 0.998888 |
| rad73         | 4.43107e-05 | 0.999870 | 0.000282104 | 0.999170 |
| PhcycC3H3_A+H | 3.20633e-05 | 0.999902 | 0.000204131 | 0.999374 |
| rad70         | 2.14708e-05 | 0.999923 | 0.000136694 | 0.999511 |
| PAH8+H        | 1.37725e-05 | 0.999937 | 8.76827e-05 | 0.999598 |
| rad37         | 1.33235e-05 | 0.999950 | 8.48243e-05 | 0.999683 |
| rad72         | 1.23923e-05 | 0.999963 | 7.88958e-05 | 0.999762 |
| rad54         | 8.98058e-06 | 0.999972 | 5.71749e-05 | 0.999819 |
| rad34         | 8.46717e-06 | 0.999980 | 5.39063e-05 | 0.999873 |
| rad65         | 8.19015e-06 | 0.999988 | 5.21426e-05 | 0.999925 |
| rad68syn      | 1.99232e-06 | 0.999990 | 1.26841e-05 | 0.999938 |
| rad64         | 1.43496e-06 | 0.999992 | 9.13568e-06 | 0.999947 |
| rad56         | 1.27412e-06 | 0.999993 | 8.11171e-06 | 0.999955 |
| rad68anti     | 1.27030e-06 | 0.999994 | 8.08736e-06 | 0.999963 |
| rad40syn      | 1.15716e-06 | 0.999996 | 7.36708e-06 | 0.999971 |
| rad55         | 9.87613e-07 | 0.999997 | 6.28764e-06 | 0.999977 |
| rad40anti     | 8.52741e-07 | 0.999997 | 5.42898e-06 | 0.999982 |
| rad53         | 8.35966e-07 | 0.999998 | 5.32218e-06 | 0.999988 |
| rad62         | 6.97360e-07 | 0.999999 | 4.43975e-06 | 0.999992 |
| rad61         | 6.32568e-07 | 1.000000 | 4.02725e-06 | 0.999996 |
| rad43         | 3.12012e-07 | 1.000000 | 1.98643e-06 | 0.999998 |
| rad42         | 1.30122e-07 | 1.000000 | 8.28424e-07 | 0.999999 |
| rad41         | 6.11800e-08 | 1.000000 | 3.89503e-07 | 0.999999 |
| rad23         | 4.70388e-18 | 1.000000 | 2.99472e-17 | 0.999999 |
| rad20         | 2.74120e-18 | 1.000000 | 1.74519e-17 | 0.999999 |
| rad6          | 2.12820e-18 | 1.000000 | 1.35492e-17 | 0.999999 |
| rad45         | 2.06276e-18 | 1.000000 | 1.31325e-17 | 0.999999 |
| rad9          | 2.03025e-18 | 1.000000 | 1.29256e-17 | 0.999999 |
| rad21         | 1.14208e-18 | 1.000000 | 7.27102e-18 | 0.999999 |
| rad22         | 7.18391e-19 | 1.000000 | 4.57364e-18 | 0.999999 |
| rad11         | 6.60781e-19 | 1.000000 | 4.20686e-18 | 0.999999 |
| rad36         | 3.94285e-19 | 1.000000 | 2.51022e-18 | 0.999999 |
| rad18         | 2.79268e-19 | 1.000000 | 1.77796e-18 | 0.999999 |
| rad8          | 2.04865e-19 | 1.000000 | 1.30427e-18 | 0.999999 |
| rad15         | 1.87604e-19 | 1.000000 | 1.19438e-18 | 0.999999 |
| rad12         | 8.20876e-20 | 1.000000 | 5.22611e-19 | 0.999999 |
| rad7          | 7.97836e-20 | 1.000000 | 5.07942e-19 | 0.999999 |
| rad24         | 7.82702e-20 | 1.000000 | 4.98307e-19 | 0.999999 |
| rad47         | 6.94994e-20 | 1.000000 | 4.42468e-19 | 0.999999 |
| rad28         | 6.78732e-20 | 1.000000 | 4.32115e-19 | 0.999999 |
| rad26         | 2.07559e-20 | 1.000000 | 1.32143e-19 | 0.999999 |
| rad13         | 1.21831e-20 | 1.000000 | 7.75639e-20 | 0.999999 |
| rad10         | 8.52033e-21 | 1.000000 | 5.42447e-20 | 0.999999 |
| rad25         | 5.44463e-21 | 1.000000 | 3.46632e-20 | 0.999999 |
| rad5          | 1.92213e-21 | 1.000000 | 1.22373e-20 | 0.999999 |
| rad33         | 1.19819e-21 | 1.000000 | 7.62829e-21 | 0.999999 |
| rad2          | 6.39728e-22 | 1.000000 | 4.07283e-21 | 0.999999 |
| rad1          | 3.47051e-22 | 1.000000 | 2.20950e-21 | 0.999999 |
| rad14         | 1.06170e-22 | 1.000000 | 6.75934e-22 | 0.999999 |
| rad27         | 5.69300e-23 | 1.000000 | 3.62445e-22 | 0.999999 |
| rad3          | 3.26514e-23 | 1.000000 | 2.07875e-22 | 0.999999 |
| rad4          | 1.84664e-23 | 1.000000 | 1.17566e-22 | 0.999999 |

0.100000000E-06 Pa, 3750.00000 K

=====  
Rate constant | True (fraction) | Effective (fraction)  
-----  
Total | 2.70978e-12 (1.00 ) | 4.61708e-13 (1.00 )

| species     | PYtrue     | Cumul    | PYeffective | Cumul    |
|-------------|------------|----------|-------------|----------|
| Benzyl+C2H2 | 0.829614   | 0.829614 | 0.00000     | 0.00000  |
| PhCH2CCH+H  | 0.0978316  | 0.927446 | 0.574175    | 0.574175 |
| PhCHCCH2+H  | 0.0240141  | 0.951460 | 0.140939    | 0.715114 |
| Indene+H    | 0.0190788  | 0.970538 | 0.111974    | 0.827088 |
| Ph+Allene   | 0.0176550  | 0.988193 | 0.103617    | 0.930705 |
| PAH3+H      | 0.00305565 | 0.991249 | 0.0179337   | 0.948639 |

|               |             |          |             |          |
|---------------|-------------|----------|-------------|----------|
| PAH7+H        | 0.00116197  | 0.992411 | 0.00681959  | 0.955458 |
| PAH9+H        | 0.000955042 | 0.993366 | 0.00560515  | 0.961063 |
| rad19anti     | 0.000750872 | 0.994117 | 0.00440688  | 0.965470 |
| Ph+MeAc       | 0.000618509 | 0.994736 | 0.00363004  | 0.969100 |
| rad38         | 0.000613193 | 0.995349 | 0.00359884  | 0.972699 |
| rad50         | 0.000603635 | 0.995952 | 0.00354274  | 0.976242 |
| PhCCH+CH3     | 0.000581835 | 0.996534 | 0.00341479  | 0.979657 |
| rad39         | 0.000465790 | 0.997000 | 0.00273373  | 0.982390 |
| rad30         | 0.000416539 | 0.997417 | 0.00244467  | 0.984835 |
| rad51         | 0.000380994 | 0.997798 | 0.00223606  | 0.987071 |
| rad35         | 0.000341508 | 0.998139 | 0.00200431  | 0.989075 |
| rad46         | 0.000254425 | 0.998393 | 0.00149322  | 0.990569 |
| rad59         | 0.000220084 | 0.998614 | 0.00129168  | 0.991860 |
| rad67         | 0.000201013 | 0.998815 | 0.00117975  | 0.993040 |
| PhCCCH3+H     | 0.000187990 | 0.999003 | 0.00110331  | 0.994143 |
| rad71         | 0.000146780 | 0.999149 | 0.000861455 | 0.995005 |
| rad19syn      | 0.000129261 | 0.999279 | 0.000758633 | 0.995764 |
| PAH10+CH3     | 0.000111172 | 0.999390 | 0.000652468 | 0.996416 |
| rad60syn      | 0.000106707 | 0.999496 | 0.000626263 | 0.997042 |
| rad60anti     | 7.88382e-05 | 0.999575 | 0.000462703 | 0.997505 |
| rad52         | 7.54521e-05 | 0.999651 | 0.000442829 | 0.997948 |
| rad58         | 6.80261e-05 | 0.999719 | 0.000399246 | 0.998347 |
| PAH1+H        | 6.45813e-05 | 0.999783 | 0.000379028 | 0.998726 |
| rad73         | 5.74878e-05 | 0.999841 | 0.000337397 | 0.999063 |
| PhcycC3H3_A+H | 3.61213e-05 | 0.999877 | 0.000211996 | 0.999275 |
| rad70         | 2.62309e-05 | 0.999903 | 0.000153949 | 0.999429 |
| PAH8+H        | 2.07420e-05 | 0.999924 | 0.000121735 | 0.999551 |
| rad72         | 1.85748e-05 | 0.999943 | 0.000109016 | 0.999660 |
| rad37         | 1.33636e-05 | 0.999956 | 7.84314e-05 | 0.999739 |
| rad34         | 1.07116e-05 | 0.999967 | 6.28665e-05 | 0.999801 |
| rad54         | 9.53969e-06 | 0.999976 | 5.59886e-05 | 0.999857 |
| rad65         | 9.05125e-06 | 0.999985 | 5.31219e-05 | 0.999911 |
| rad68syn      | 2.77520e-06 | 0.999988 | 1.62877e-05 | 0.999927 |
| rad64         | 1.81236e-06 | 0.999990 | 1.06367e-05 | 0.999938 |
| rad68anti     | 1.76807e-06 | 0.999992 | 1.03768e-05 | 0.999948 |
| rad40syn      | 1.68193e-06 | 0.999993 | 9.87130e-06 | 0.999958 |
| rad56         | 1.59874e-06 | 0.999995 | 9.38301e-06 | 0.999967 |
| rad40anti     | 1.25564e-06 | 0.999996 | 7.36935e-06 | 0.999975 |
| rad55         | 1.07703e-06 | 0.999997 | 6.32112e-06 | 0.999981 |
| rad53         | 1.00840e-06 | 0.999998 | 5.91834e-06 | 0.999987 |
| rad62         | 8.81786e-07 | 0.999999 | 5.17522e-06 | 0.999992 |
| rad61         | 7.98455e-07 | 1.000000 | 4.68615e-06 | 0.999997 |
| rad43         | 3.67979e-07 | 1.000000 | 2.15967e-06 | 0.999999 |
| rad42         | 1.74775e-07 | 1.000000 | 1.02576e-06 | 1.000000 |
| rad41         | 7.77074e-08 | 1.000000 | 4.56066e-07 | 1.000000 |
| rad23         | 2.37942e-18 | 1.000000 | 1.39649e-17 | 1.000000 |
| rad20         | 2.02983e-18 | 1.000000 | 1.19131e-17 | 1.000000 |
| rad9          | 1.26598e-18 | 1.000000 | 7.43005e-18 | 1.000000 |
| rad45         | 1.20296e-18 | 1.000000 | 7.06018e-18 | 1.000000 |
| rad6          | 9.79646e-19 | 1.000000 | 5.74955e-18 | 1.000000 |
| rad21         | 8.13804e-19 | 1.000000 | 4.77623e-18 | 1.000000 |
| rad11         | 4.75768e-19 | 1.000000 | 2.79229e-18 | 1.000000 |
| rad22         | 4.20238e-19 | 1.000000 | 2.46638e-18 | 1.000000 |
| rad36         | 2.31389e-19 | 1.000000 | 1.35802e-18 | 1.000000 |
| rad8          | 1.91572e-19 | 1.000000 | 1.12434e-18 | 1.000000 |
| rad18         | 1.80283e-19 | 1.000000 | 1.05808e-18 | 1.000000 |
| rad15         | 1.23473e-19 | 1.000000 | 7.24667e-19 | 1.000000 |
| rad47         | 7.59707e-20 | 1.000000 | 4.45873e-19 | 1.000000 |
| rad12         | 6.32118e-20 | 1.000000 | 3.70991e-19 | 1.000000 |
| rad24         | 5.63439e-20 | 1.000000 | 3.30683e-19 | 1.000000 |
| rad7          | 4.44220e-20 | 1.000000 | 2.60713e-19 | 1.000000 |
| rad28         | 4.30194e-20 | 1.000000 | 2.52482e-19 | 1.000000 |
| rad26         | 1.37558e-20 | 1.000000 | 8.07329e-20 | 1.000000 |
| rad13         | 7.33170e-21 | 1.000000 | 4.30298e-20 | 1.000000 |
| rad10         | 5.95129e-21 | 1.000000 | 3.49282e-20 | 1.000000 |
| rad25         | 4.50617e-21 | 1.000000 | 2.64468e-20 | 1.000000 |
| rad5          | 1.83996e-21 | 1.000000 | 1.07988e-20 | 1.000000 |
| rad33         | 7.87849e-22 | 1.000000 | 4.62390e-21 | 1.000000 |
| rad2          | 4.57549e-22 | 1.000000 | 2.68536e-21 | 1.000000 |
| rad1          | 2.64192e-22 | 1.000000 | 1.55055e-21 | 1.000000 |
| rad14         | 9.45605e-23 | 1.000000 | 5.54977e-22 | 1.000000 |
| rad27         | 4.76374e-23 | 1.000000 | 2.79584e-22 | 1.000000 |
| rad3          | 1.99099e-23 | 1.000000 | 1.16851e-22 | 1.000000 |
| rad4          | 1.11080e-23 | 1.000000 | 6.51931e-23 | 1.000000 |

0.100000000E-06 Pa, 4000.00000 K

| Rate constant | True (fraction)     | Effective (fraction) |
|---------------|---------------------|----------------------|
| Total         | 3.41497e-12 (1.00 ) | 6.28297e-13 (1.00 )  |

| species       | PYtrue      | Cumul    | PYeffective | Cumul    |
|---------------|-------------|----------|-------------|----------|
| Benzyl+C2H2   | 0.816017    | 0.816017 | 0.00000     | 0.00000  |
| PhCH2CCH+H    | 0.109584    | 0.925601 | 0.595618    | 0.595618 |
| PhCHCCH2+H    | 0.0267098   | 0.952311 | 0.145175    | 0.740793 |
| Ph+Allene     | 0.0193046   | 0.971615 | 0.104926    | 0.845719 |
| Indene+H      | 0.0160484   | 0.987664 | 0.0872277   | 0.932947 |
| PAH3+H        | 0.00329013  | 0.990954 | 0.0178828   | 0.950829 |
| PAH7+H        | 0.00121791  | 0.992172 | 0.00661968  | 0.957449 |
| PAH9+H        | 0.000864009 | 0.993036 | 0.00469613  | 0.962145 |
| PhCCH+CH3     | 0.000720156 | 0.993756 | 0.00391424  | 0.966060 |
| rad19anti     | 0.000708493 | 0.994464 | 0.00385085  | 0.969910 |
| Ph+MeAc       | 0.000663934 | 0.995128 | 0.00360866  | 0.973519 |
| rad50         | 0.000616859 | 0.995745 | 0.00335280  | 0.976872 |
| rad38         | 0.000560144 | 0.996305 | 0.00304454  | 0.979916 |
| rad39         | 0.000491035 | 0.996796 | 0.00266891  | 0.982585 |
| rad51         | 0.000408498 | 0.997205 | 0.00222030  | 0.984806 |
| rad30         | 0.000396478 | 0.997601 | 0.00215497  | 0.986961 |
| rad35         | 0.000343096 | 0.997945 | 0.00186482  | 0.988825 |
| rad46         | 0.000239253 | 0.998184 | 0.00130041  | 0.990126 |
| rad59         | 0.000231903 | 0.998416 | 0.00126046  | 0.991386 |
| rad67         | 0.000214260 | 0.998630 | 0.00116456  | 0.992551 |
| PhCCCH3+H     | 0.000213580 | 0.998844 | 0.00116087  | 0.993712 |
| rad71         | 0.000187844 | 0.999031 | 0.00102098  | 0.994733 |
| rad19syn      | 0.000163941 | 0.999195 | 0.000891067 | 0.995624 |
| PAH10+CH3     | 0.000121536 | 0.999317 | 0.000660582 | 0.996284 |
| rad60syn      | 0.000108396 | 0.999425 | 0.000589161 | 0.996873 |
| rad60anti     | 8.05427e-05 | 0.999506 | 0.000437772 | 0.997311 |
| rad52         | 7.82960e-05 | 0.999584 | 0.000425560 | 0.997737 |
| rad58         | 7.77572e-05 | 0.999662 | 0.000422632 | 0.998159 |
| PAH1+H        | 7.70001e-05 | 0.999739 | 0.000418517 | 0.998578 |
| rad73         | 7.03552e-05 | 0.999809 | 0.000382400 | 0.998960 |
| PhcycC3H3_A+H | 3.98813e-05 | 0.999849 | 0.000216766 | 0.999177 |
| rad70         | 3.09908e-05 | 0.999880 | 0.000168444 | 0.999346 |
| PAH8+H        | 2.94355e-05 | 0.999910 | 0.000159990 | 0.999506 |
| rad72         | 2.58284e-05 | 0.999935 | 0.000140384 | 0.999646 |
| rad37         | 1.30848e-05 | 0.999948 | 7.11194e-05 | 0.999717 |
| rad34         | 1.30497e-05 | 0.999961 | 7.09289e-05 | 0.999788 |
| rad54         | 1.00584e-05 | 0.999972 | 5.46703e-05 | 0.999843 |
| rad65         | 9.63686e-06 | 0.999981 | 5.23790e-05 | 0.999895 |
| rad68syn      | 3.67778e-06 | 0.999985 | 1.99898e-05 | 0.999915 |
| rad68anti     | 2.34154e-06 | 0.999987 | 1.27269e-05 | 0.999928 |
| rad40syn      | 2.31359e-06 | 0.999990 | 1.25750e-05 | 0.999940 |
| rad64         | 2.19077e-06 | 0.999992 | 1.19074e-05 | 0.999952 |
| rad56         | 1.94741e-06 | 0.999994 | 1.05847e-05 | 0.999963 |
| rad40anti     | 1.74691e-06 | 0.999995 | 9.49492e-06 | 0.999972 |
| rad53         | 1.18744e-06 | 0.999997 | 6.45406e-06 | 0.999979 |
| rad55         | 1.16170e-06 | 0.999998 | 6.31418e-06 | 0.999985 |
| rad62         | 1.07271e-06 | 0.999999 | 5.83046e-06 | 0.999991 |
| rad61         | 9.59661e-07 | 1.000000 | 5.21602e-06 | 0.999996 |
| rad43         | 4.20278e-07 | 1.00000  | 2.28433e-06 | 0.999998 |
| rad42         | 2.24298e-07 | 1.00000  | 1.21912e-06 | 1.000000 |
| rad41         | 9.47630e-08 | 1.00000  | 5.15063e-07 | 1.00000  |
| rad20         | 1.54922e-18 | 1.00000  | 8.42046e-18 | 1.00000  |
| rad23         | 1.26119e-18 | 1.00000  | 6.85494e-18 | 1.00000  |
| rad9          | 8.14103e-19 | 1.00000  | 4.42487e-18 | 1.00000  |
| rad45         | 7.23642e-19 | 1.00000  | 3.93319e-18 | 1.00000  |
| rad21         | 5.97853e-19 | 1.00000  | 3.24950e-18 | 1.00000  |
| rad6          | 5.03877e-19 | 1.00000  | 2.73871e-18 | 1.00000  |
| rad11         | 3.59957e-19 | 1.00000  | 1.95647e-18 | 1.00000  |
| rad22         | 2.59193e-19 | 1.00000  | 1.40879e-18 | 1.00000  |
| rad8          | 1.76788e-19 | 1.00000  | 9.60889e-19 | 1.00000  |
| rad36         | 1.39784e-19 | 1.00000  | 7.59765e-19 | 1.00000  |
| rad18         | 1.20669e-19 | 1.00000  | 6.55872e-19 | 1.00000  |
| rad15         | 8.31114e-20 | 1.00000  | 4.51733e-19 | 1.00000  |
| rad47         | 7.97227e-20 | 1.00000  | 4.33315e-19 | 1.00000  |
| rad12         | 4.90407e-20 | 1.00000  | 2.66550e-19 | 1.00000  |
| rad24         | 4.12849e-20 | 1.00000  | 2.24395e-19 | 1.00000  |
| rad28         | 2.83270e-20 | 1.00000  | 1.53965e-19 | 1.00000  |
| rad7          | 2.66536e-20 | 1.00000  | 1.44870e-19 | 1.00000  |
| rad26         | 9.26846e-21 | 1.00000  | 5.03766e-20 | 1.00000  |
| rad13         | 4.73267e-21 | 1.00000  | 2.57233e-20 | 1.00000  |
| rad10         | 4.23764e-21 | 1.00000  | 2.30327e-20 | 1.00000  |
| rad25         | 3.78502e-21 | 1.00000  | 2.05726e-20 | 1.00000  |
| rad5          | 1.76141e-21 | 1.00000  | 9.57373e-21 | 1.00000  |
| rad33         | 5.47163e-22 | 1.00000  | 2.97398e-21 | 1.00000  |
| rad2          | 3.43906e-22 | 1.00000  | 1.86922e-21 | 1.00000  |
| rad1          | 2.03371e-22 | 1.00000  | 1.10538e-21 | 1.00000  |
| rad14         | 8.43867e-23 | 1.00000  | 4.58665e-22 | 1.00000  |

|       |             |         |             |         |
|-------|-------------|---------|-------------|---------|
| rad27 | 3.99728e-23 | 1.00000 | 2.17263e-22 | 1.00000 |
| rad3  | 1.31271e-23 | 1.00000 | 7.13495e-23 | 1.00000 |
| rad4  | 7.26951e-24 | 1.00000 | 3.95118e-23 | 1.00000 |

0.100000000E-07 Pa, 20.0000000 K

| Rate constant | True (fraction)      | Effective (fraction) |
|---------------|----------------------|----------------------|
| Total         | 1.34336e-156 (1.00 ) | 1.34336e-156 (1.00 ) |

| species       | PYtrue      | Cumul    | PYeffective | Cumul    |
|---------------|-------------|----------|-------------|----------|
| Indene+H      | 0.999980    | 0.999980 | 0.999981    | 0.999981 |
| rad6          | 1.94358e-05 | 0.999999 | 1.94358e-05 | 1.00000  |
| Benzyl+C2H2   | 8.12017e-07 | 1.00000  | 0.00000     | 1.00000  |
| rad2          | 6.85642e-09 | 1.00000  | 6.85643e-09 | 1.00000  |
| rad7          | 1.40148e-09 | 1.00000  | 1.40148e-09 | 1.00000  |
| rad1          | 4.33342e-10 | 1.00000  | 4.33343e-10 | 1.00000  |
| rad10         | 3.48405e-10 | 1.00000  | 3.48405e-10 | 1.00000  |
| rad11         | 3.42413e-10 | 1.00000  | 3.42413e-10 | 1.00000  |
| rad3          | 4.66919e-11 | 1.00000  | 4.66919e-11 | 1.00000  |
| rad4          | 2.36052e-11 | 1.00000  | 2.36052e-11 | 1.00000  |
| rad13         | 7.79185e-12 | 1.00000  | 7.79186e-12 | 1.00000  |
| rad33         | 1.47321e-14 | 1.00000  | 1.47321e-14 | 1.00000  |
| rad20         | 1.15855e-16 | 1.00000  | 1.15855e-16 | 1.00000  |
| rad21         | 7.22593e-17 | 1.00000  | 7.22593e-17 | 1.00000  |
| rad28         | 3.06625e-17 | 1.00000  | 3.06625e-17 | 1.00000  |
| rad35         | 2.38079e-17 | 1.00000  | 2.38079e-17 | 1.00000  |
| rad26         | 1.31183e-18 | 1.00000  | 1.31183e-18 | 1.00000  |
| PAH9+H        | 1.29896e-18 | 1.00000  | 1.29896e-18 | 1.00000  |
| rad18         | 5.44938e-19 | 1.00000  | 5.44939e-19 | 1.00000  |
| rad31         | 1.28733e-19 | 1.00000  | 1.28733e-19 | 1.00000  |
| rad22         | 3.85281e-20 | 1.00000  | 3.85281e-20 | 1.00000  |
| rad23         | 2.17436e-20 | 1.00000  | 2.17436e-20 | 1.00000  |
| rad38         | 3.05499e-21 | 1.00000  | 3.05499e-21 | 1.00000  |
| rad30         | 1.64849e-21 | 1.00000  | 1.64850e-21 | 1.00000  |
| rad27         | 5.35674e-22 | 1.00000  | 5.35675e-22 | 1.00000  |
| rad45         | 1.38036e-22 | 1.00000  | 1.38036e-22 | 1.00000  |
| PhCHCCH2+H    | 4.68650e-23 | 1.00000  | 4.68650e-23 | 1.00000  |
| rad36         | 8.59858e-24 | 1.00000  | 8.59859e-24 | 1.00000  |
| rad24         | 2.32442e-24 | 1.00000  | 2.32442e-24 | 1.00000  |
| PhCCH+CH3     | 1.54839e-24 | 1.00000  | 1.54839e-24 | 1.00000  |
| PhCCH3+H      | 2.21776e-25 | 1.00000  | 2.21776e-25 | 1.00000  |
| rad15         | 1.37216e-25 | 1.00000  | 1.37217e-25 | 1.00000  |
| rad25         | 1.07310e-26 | 1.00000  | 1.07310e-26 | 1.00000  |
| rad14         | 7.16033e-28 | 1.00000  | 7.16033e-28 | 1.00000  |
| rad8          | 8.31652e-31 | 1.00000  | 8.31653e-31 | 1.00000  |
| rad46         | 4.94932e-33 | 1.00000  | 4.94932e-33 | 1.00000  |
| rad9          | 2.51311e-33 | 1.00000  | 2.51311e-33 | 1.00000  |
| PAH7+H        | 3.26938e-34 | 1.00000  | 3.26938e-34 | 1.00000  |
| Ph+MeAc       | 3.66125e-35 | 1.00000  | 3.66125e-35 | 1.00000  |
| rad12         | 1.31917e-35 | 1.00000  | 1.31917e-35 | 1.00000  |
| rad39         | 6.99002e-37 | 1.00000  | 6.99003e-37 | 1.00000  |
| Ph+Allene     | 1.68449e-39 | 1.00000  | 1.68450e-39 | 1.00000  |
| rad60syn      | 1.51575e-43 | 1.00000  | 1.51576e-43 | 1.00000  |
| rad60anti     | 1.57098e-45 | 1.00000  | 1.57098e-45 | 1.00000  |
| PhCH2CCH+H    | 2.61654e-47 | 1.00000  | 2.61655e-47 | 1.00000  |
| rad37         | 2.25688e-48 | 1.00000  | 2.25688e-48 | 1.00000  |
| rad5          | 1.49475e-51 | 1.00000  | 1.49475e-51 | 1.00000  |
| PAH3+H        | 2.66369e-56 | 1.00000  | 2.66369e-56 | 1.00000  |
| rad59         | 1.42636e-56 | 1.00000  | 1.42636e-56 | 1.00000  |
| rad50         | 5.78550e-57 | 1.00000  | 5.78551e-57 | 1.00000  |
| rad19syn      | 2.09081e-65 | 1.00000  | 2.09081e-65 | 1.00000  |
| rad52         | 2.52803e-69 | 1.00000  | 2.52803e-69 | 1.00000  |
| rad54         | 2.41647e-70 | 1.00000  | 2.41648e-70 | 1.00000  |
| PAH10+CH3     | 1.51759e-70 | 1.00000  | 1.51759e-70 | 1.00000  |
| rad43         | 3.59903e-71 | 1.00000  | 3.59903e-71 | 1.00000  |
| rad62         | 1.07860e-73 | 1.00000  | 1.07860e-73 | 1.00000  |
| rad51         | 1.21540e-76 | 1.00000  | 1.21540e-76 | 1.00000  |
| rad70         | 1.29948e-79 | 1.00000  | 1.29948e-79 | 1.00000  |
| PhcycC3H3_A+H | 5.50359e-80 | 1.00000  | 5.50360e-80 | 1.00000  |
| rad55         | 2.96348e-80 | 1.00000  | 2.96348e-80 | 1.00000  |
| rad65         | 8.15978e-82 | 1.00000  | 8.15979e-82 | 1.00000  |
| rad58         | 1.84896e-83 | 1.00000  | 1.84896e-83 | 1.00000  |
| PAH1+H        | 2.40719e-85 | 1.00000  | 2.40719e-85 | 1.00000  |
| rad34         | 1.64084e-87 | 1.00000  | 1.64084e-87 | 1.00000  |
| rad42         | 1.16666e-91 | 1.00000  | 1.16666e-91 | 1.00000  |
| rad41         | 1.45228e-92 | 1.00000  | 1.45228e-92 | 1.00000  |
| rad47         | 4.55509e-98 | 1.00000  | 4.55509e-98 | 1.00000  |



0.100000000E-07 Pa, 30.0000000 K

=====

| Rate constant | True (fraction)      | Effective (fraction) |
|---------------|----------------------|----------------------|
| Total         | 1.15918e-108 (1.00 ) | 1.15918e-108 (1.00 ) |

| species       | PYtrue      | Cumul    | PYeffective | Cumul    |
|---------------|-------------|----------|-------------|----------|
| Indene+H      | 0.999992    | 0.999992 | 0.999993    | 0.999993 |
| rad6          | 7.10704e-06 | 0.999999 | 7.10705e-06 | 1.00000  |
| Benzyl+C2H2   | 1.04117e-06 | 1.00000  | 0.00000     | 1.00000  |
| rad2          | 2.56999e-09 | 1.00000  | 2.56999e-09 | 1.00000  |
| rad7          | 5.12631e-10 | 1.00000  | 5.12632e-10 | 1.00000  |
| rad1          | 1.62524e-10 | 1.00000  | 1.62524e-10 | 1.00000  |
| rad10         | 1.35927e-10 | 1.00000  | 1.35927e-10 | 1.00000  |
| rad11         | 1.25279e-10 | 1.00000  | 1.25279e-10 | 1.00000  |
| rad3          | 1.74977e-11 | 1.00000  | 1.74977e-11 | 1.00000  |
| rad4          | 8.84732e-12 | 1.00000  | 8.84733e-12 | 1.00000  |
| rad13         | 2.85056e-12 | 1.00000  | 2.85056e-12 | 1.00000  |
| rad33         | 5.39822e-15 | 1.00000  | 5.39822e-15 | 1.00000  |
| rad35         | 3.25539e-15 | 1.00000  | 3.25540e-15 | 1.00000  |
| rad20         | 5.66191e-17 | 1.00000  | 5.66192e-17 | 1.00000  |
| rad21         | 3.53187e-17 | 1.00000  | 3.53187e-17 | 1.00000  |
| rad28         | 1.06316e-17 | 1.00000  | 1.06316e-17 | 1.00000  |
| PAH9+H        | 3.91794e-18 | 1.00000  | 3.91794e-18 | 1.00000  |
| rad26         | 3.92448e-19 | 1.00000  | 3.92449e-19 | 1.00000  |
| rad18         | 2.66425e-19 | 1.00000  | 2.66425e-19 | 1.00000  |
| rad31         | 5.63654e-20 | 1.00000  | 5.63654e-20 | 1.00000  |
| rad22         | 1.86723e-20 | 1.00000  | 1.86723e-20 | 1.00000  |
| rad23         | 7.28669e-21 | 1.00000  | 7.28670e-21 | 1.00000  |
| rad38         | 1.82339e-21 | 1.00000  | 1.82339e-21 | 1.00000  |
| rad30         | 9.48865e-22 | 1.00000  | 9.48866e-22 | 1.00000  |
| rad27         | 1.57733e-22 | 1.00000  | 1.57733e-22 | 1.00000  |
| rad45         | 4.51822e-23 | 1.00000  | 4.51823e-23 | 1.00000  |
| PhCHCCH2+H    | 2.66764e-23 | 1.00000  | 2.66764e-23 | 1.00000  |
| rad36         | 2.81364e-24 | 1.00000  | 2.81364e-24 | 1.00000  |
| rad24         | 1.15401e-24 | 1.00000  | 1.15401e-24 | 1.00000  |
| PhCCH+CH3     | 8.83937e-25 | 1.00000  | 8.83938e-25 | 1.00000  |
| PhCCCH3+H     | 1.26810e-25 | 1.00000  | 1.26810e-25 | 1.00000  |
| rad15         | 7.79989e-26 | 1.00000  | 7.79990e-26 | 1.00000  |
| rad25         | 3.04252e-27 | 1.00000  | 3.04252e-27 | 1.00000  |
| rad14         | 2.02756e-28 | 1.00000  | 2.02756e-28 | 1.00000  |
| rad8          | 4.81195e-31 | 1.00000  | 4.81196e-31 | 1.00000  |
| rad46         | 2.83755e-33 | 1.00000  | 2.83756e-33 | 1.00000  |
| rad9          | 1.46473e-33 | 1.00000  | 1.46473e-33 | 1.00000  |
| PAH7+H        | 1.90057e-34 | 1.00000  | 1.90057e-34 | 1.00000  |
| Ph+MeAc       | 2.15663e-35 | 1.00000  | 2.15663e-35 | 1.00000  |
| rad12         | 7.72970e-36 | 1.00000  | 7.72971e-36 | 1.00000  |
| rad39         | 4.09542e-37 | 1.00000  | 4.09543e-37 | 1.00000  |
| Ph+Allene     | 1.00439e-39 | 1.00000  | 1.00440e-39 | 1.00000  |
| rad60syn      | 9.01909e-44 | 1.00000  | 9.01910e-44 | 1.00000  |
| rad60anti     | 9.40955e-46 | 1.00000  | 9.40956e-46 | 1.00000  |
| PhCH2CCH+H    | 1.60122e-47 | 1.00000  | 1.60122e-47 | 1.00000  |
| rad37         | 1.38976e-48 | 1.00000  | 1.38976e-48 | 1.00000  |
| rad5          | 9.24015e-52 | 1.00000  | 9.24016e-52 | 1.00000  |
| PAH3+H        | 1.65849e-56 | 1.00000  | 1.65849e-56 | 1.00000  |
| rad59         | 8.87953e-57 | 1.00000  | 8.87954e-57 | 1.00000  |
| rad50         | 3.58992e-57 | 1.00000  | 3.58993e-57 | 1.00000  |
| rad19syn      | 1.35551e-65 | 1.00000  | 1.35551e-65 | 1.00000  |
| rad52         | 1.63634e-69 | 1.00000  | 1.63634e-69 | 1.00000  |
| rad54         | 1.59145e-70 | 1.00000  | 1.59145e-70 | 1.00000  |
| PAH10+CH3     | 1.00204e-70 | 1.00000  | 1.00204e-70 | 1.00000  |
| rad43         | 2.37758e-71 | 1.00000  | 2.37758e-71 | 1.00000  |
| rad62         | 7.18084e-74 | 1.00000  | 7.18084e-74 | 1.00000  |
| rad51         | 8.08635e-77 | 1.00000  | 8.08636e-77 | 1.00000  |
| rad70         | 8.83204e-80 | 1.00000  | 8.83205e-80 | 1.00000  |
| PhcycC3H3_A+H | 3.74845e-80 | 1.00000  | 3.74845e-80 | 1.00000  |
| rad55         | 2.01798e-80 | 1.00000  | 2.01798e-80 | 1.00000  |
| rad65         | 5.51488e-82 | 1.00000  | 5.51489e-82 | 1.00000  |
| rad58         | 1.26163e-83 | 1.00000  | 1.26163e-83 | 1.00000  |
| PAH1+H        | 1.67159e-85 | 1.00000  | 1.67159e-85 | 1.00000  |
| rad34         | 1.14533e-87 | 1.00000  | 1.14533e-87 | 1.00000  |
| rad42         | 8.25297e-92 | 1.00000  | 8.25298e-92 | 1.00000  |
| rad41         | 1.03344e-92 | 1.00000  | 1.03344e-92 | 1.00000  |
| rad47         | 1.56588e-98 | 1.00000  | 1.56588e-98 | 1.00000  |

0.100000000E-07 Pa, 40.0000000 K

=====

| Rate constant | True (fraction) | Effective (fraction) |
|---------------|-----------------|----------------------|
|---------------|-----------------|----------------------|

-----

Total | 1.02415e-84 (1.00 ) 1.02415e-84 (1.00 )

| species       | PYtrue      | Cumul    | PYeffective | Cumul    |
|---------------|-------------|----------|-------------|----------|
| Indene+H      | 0.999995    | 0.999995 | 0.999996    | 0.999996 |
| rad6          | 3.67253e-06 | 0.999999 | 3.67254e-06 | 1.000000 |
| Benzyl+C2H2   | 1.52923e-06 | 1.000000 | 0.000000    | 1.000000 |
| rad2          | 1.46848e-09 | 1.000000 | 1.46848e-09 | 1.000000 |
| rad7          | 2.65069e-10 | 1.000000 | 2.65069e-10 | 1.000000 |
| rad1          | 9.29794e-11 | 1.000000 | 9.29795e-11 | 1.000000 |
| rad10         | 7.57555e-11 | 1.000000 | 7.57556e-11 | 1.000000 |
| rad11         | 6.47984e-11 | 1.000000 | 6.47985e-11 | 1.000000 |
| rad3          | 9.78515e-12 | 1.000000 | 9.78516e-12 | 1.000000 |
| rad4          | 4.94918e-12 | 1.000000 | 4.94919e-12 | 1.000000 |
| rad13         | 1.47447e-12 | 1.000000 | 1.47447e-12 | 1.000000 |
| rad35         | 5.91308e-14 | 1.000000 | 5.91309e-14 | 1.000000 |
| rad33         | 2.79712e-15 | 1.000000 | 2.79713e-15 | 1.000000 |
| PAH9+H        | 4.50505e-16 | 1.000000 | 4.50506e-16 | 1.000000 |
| rad20         | 3.70261e-17 | 1.000000 | 3.70262e-17 | 1.000000 |
| rad21         | 2.31041e-17 | 1.000000 | 2.31041e-17 | 1.000000 |
| rad28         | 8.23542e-18 | 1.000000 | 8.23543e-18 | 1.000000 |
| rad26         | 2.88473e-19 | 1.000000 | 2.88473e-19 | 1.000000 |
| rad18         | 1.74370e-19 | 1.000000 | 1.74370e-19 | 1.000000 |
| rad31         | 3.40345e-20 | 1.000000 | 3.40346e-20 | 1.000000 |
| rad38         | 1.34141e-20 | 1.000000 | 1.34141e-20 | 1.000000 |
| rad22         | 1.21736e-20 | 1.000000 | 1.21737e-20 | 1.000000 |
| rad23         | 4.07783e-21 | 1.000000 | 4.07784e-21 | 1.000000 |
| rad30         | 1.09202e-21 | 1.000000 | 1.09202e-21 | 1.000000 |
| rad27         | 1.14093e-22 | 1.000000 | 1.14094e-22 | 1.000000 |
| PhCHCCH2+H    | 2.94533e-23 | 1.000000 | 2.94533e-23 | 1.000000 |
| rad45         | 2.61368e-23 | 1.000000 | 2.61368e-23 | 1.000000 |
| rad36         | 1.62663e-24 | 1.000000 | 1.62664e-24 | 1.000000 |
| PhCCH+CH3     | 9.88346e-25 | 1.000000 | 9.88347e-25 | 1.000000 |
| rad24         | 7.79811e-25 | 1.000000 | 7.79812e-25 | 1.000000 |
| PhCCCH3+H     | 1.42546e-25 | 1.000000 | 1.42546e-25 | 1.000000 |
| rad15         | 8.50359e-26 | 1.000000 | 8.50360e-26 | 1.000000 |
| rad25         | 2.22959e-27 | 1.000000 | 2.22960e-27 | 1.000000 |
| rad14         | 1.49878e-28 | 1.000000 | 1.49878e-28 | 1.000000 |
| rad8          | 5.58080e-31 | 1.000000 | 5.58081e-31 | 1.000000 |
| rad46         | 3.20601e-33 | 1.000000 | 3.20602e-33 | 1.000000 |
| rad9          | 1.72575e-33 | 1.000000 | 1.72575e-33 | 1.000000 |
| PAH7+H        | 2.25337e-34 | 1.000000 | 2.25337e-34 | 1.000000 |
| Ph+MeAc       | 2.60488e-35 | 1.000000 | 2.60488e-35 | 1.000000 |
| rad12         | 9.25424e-36 | 1.000000 | 9.25425e-36 | 1.000000 |
| rad39         | 4.92969e-37 | 1.000000 | 4.92970e-37 | 1.000000 |
| Ph+Allene     | 1.24343e-39 | 1.000000 | 1.24343e-39 | 1.000000 |
| rad60syn      | 1.11161e-43 | 1.000000 | 1.11161e-43 | 1.000000 |
| rad60anti     | 1.17614e-45 | 1.000000 | 1.17614e-45 | 1.000000 |
| PhCH2CCH+H    | 2.09438e-47 | 1.000000 | 2.09438e-47 | 1.000000 |
| rad37         | 1.84969e-48 | 1.000000 | 1.84970e-48 | 1.000000 |
| rad5          | 1.23871e-51 | 1.000000 | 1.23872e-51 | 1.000000 |
| PAH3+H        | 2.24953e-56 | 1.000000 | 2.24953e-56 | 1.000000 |
| rad59         | 1.20400e-56 | 1.000000 | 1.20400e-56 | 1.000000 |
| rad50         | 4.83052e-57 | 1.000000 | 4.83053e-57 | 1.000000 |
| rad19syn      | 2.00119e-65 | 1.000000 | 2.00119e-65 | 1.000000 |
| rad52         | 2.40680e-69 | 1.000000 | 2.40680e-69 | 1.000000 |
| rad54         | 2.42808e-70 | 1.000000 | 2.42809e-70 | 1.000000 |
| PAH10+CH3     | 1.55281e-70 | 1.000000 | 1.55281e-70 | 1.000000 |
| rad43         | 3.68489e-71 | 1.000000 | 3.68490e-71 | 1.000000 |
| rad62         | 1.12624e-73 | 1.000000 | 1.12624e-73 | 1.000000 |
| rad51         | 1.26033e-76 | 1.000000 | 1.26033e-76 | 1.000000 |
| rad70         | 1.43933e-79 | 1.000000 | 1.43933e-79 | 1.000000 |
| PhcycC3H3_A+H | 6.13572e-80 | 1.000000 | 6.13573e-80 | 1.000000 |
| rad55         | 3.30172e-80 | 1.000000 | 3.30173e-80 | 1.000000 |
| rad65         | 8.88306e-82 | 1.000000 | 8.88308e-82 | 1.000000 |
| rad58         | 2.07307e-83 | 1.000000 | 2.07307e-83 | 1.000000 |
| PAH1+H        | 2.85303e-85 | 1.000000 | 2.85303e-85 | 1.000000 |
| rad34         | 1.97354e-87 | 1.000000 | 1.97355e-87 | 1.000000 |
| rad42         | 1.47409e-91 | 1.000000 | 1.47409e-91 | 1.000000 |
| rad41         | 1.90649e-92 | 1.000000 | 1.90650e-92 | 1.000000 |
| rad47         | 1.78862e-98 | 1.000000 | 1.78862e-98 | 1.000000 |

0.100000000E-07 Pa, 50.000000 K

=====  
Rate constant | True (fraction) | Effective (fraction)  
-----  
Total | 2.31816e-70 (1.00 ) | 2.31816e-70 (1.00 )

| species | PYtrue | Cumul | PYeffective | Cumul |
|---------|--------|-------|-------------|-------|
|---------|--------|-------|-------------|-------|

|               |             |          |             |          |
|---------------|-------------|----------|-------------|----------|
| Indene+H      | 0.999996    | 0.999996 | 0.999998    | 0.999998 |
| Benzyl+C2H2   | 2.26191e-06 | 0.999998 | 0.00000     | 0.999998 |
| rad6          | 2.20659e-06 | 1.00000  | 2.20659e-06 | 1.00000  |
| rad2          | 8.94617e-10 | 1.00000  | 8.94619e-10 | 1.00000  |
| rad7          | 1.59407e-10 | 1.00000  | 1.59408e-10 | 1.00000  |
| rad1          | 5.67438e-11 | 1.00000  | 5.67439e-11 | 1.00000  |
| rad10         | 4.80840e-11 | 1.00000  | 4.80841e-11 | 1.00000  |
| rad11         | 3.89823e-11 | 1.00000  | 3.89824e-11 | 1.00000  |
| rad3          | 6.01734e-12 | 1.00000  | 6.01735e-12 | 1.00000  |
| rad4          | 3.04482e-12 | 1.00000  | 3.04483e-12 | 1.00000  |
| rad13         | 8.87160e-13 | 1.00000  | 8.87162e-13 | 1.00000  |
| rad35         | 3.19950e-13 | 1.00000  | 3.19950e-13 | 1.00000  |
| PAH9+H        | 8.81971e-15 | 1.00000  | 8.81973e-15 | 1.00000  |
| rad33         | 1.68619e-15 | 1.00000  | 1.68620e-15 | 1.00000  |
| rad20         | 2.70732e-17 | 1.00000  | 2.70732e-17 | 1.00000  |
| rad21         | 1.69013e-17 | 1.00000  | 1.69014e-17 | 1.00000  |
| rad28         | 1.15469e-17 | 1.00000  | 1.15469e-17 | 1.00000  |
| rad38         | 2.32528e-18 | 1.00000  | 2.32529e-18 | 1.00000  |
| rad26         | 3.77091e-19 | 1.00000  | 3.77091e-19 | 1.00000  |
| rad30         | 1.73820e-19 | 1.00000  | 1.73820e-19 | 1.00000  |
| rad18         | 1.27624e-19 | 1.00000  | 1.27624e-19 | 1.00000  |
| rad31         | 2.34935e-20 | 1.00000  | 2.34936e-20 | 1.00000  |
| rad22         | 8.88303e-21 | 1.00000  | 8.88305e-21 | 1.00000  |
| rad23         | 2.74505e-21 | 1.00000  | 2.74506e-21 | 1.00000  |
| rad27         | 1.83248e-22 | 1.00000  | 1.83248e-22 | 1.00000  |
| PhCHCCH2+H    | 4.93564e-23 | 1.00000  | 4.93566e-23 | 1.00000  |
| rad45         | 1.68913e-23 | 1.00000  | 1.68913e-23 | 1.00000  |
| PhCCH+CH3     | 1.68772e-24 | 1.00000  | 1.68772e-24 | 1.00000  |
| rad36         | 1.05041e-24 | 1.00000  | 1.05041e-24 | 1.00000  |
| rad24         | 5.96969e-25 | 1.00000  | 5.96970e-25 | 1.00000  |
| rad15         | 3.46067e-25 | 1.00000  | 3.46068e-25 | 1.00000  |
| PhCCCH3+H     | 2.45428e-25 | 1.00000  | 2.45429e-25 | 1.00000  |
| rad25         | 2.78169e-27 | 1.00000  | 2.78170e-27 | 1.00000  |
| rad14         | 1.88679e-28 | 1.00000  | 1.88679e-28 | 1.00000  |
| rad8          | 1.00610e-30 | 1.00000  | 1.00610e-30 | 1.00000  |
| rad46         | 5.55516e-33 | 1.00000  | 5.55517e-33 | 1.00000  |
| rad9          | 3.17520e-33 | 1.00000  | 3.17520e-33 | 1.00000  |
| PAH7+H        | 4.19159e-34 | 1.00000  | 4.19160e-34 | 1.00000  |
| Ph+MeAc       | 4.98430e-35 | 1.00000  | 4.98432e-35 | 1.00000  |
| rad12         | 1.74868e-35 | 1.00000  | 1.74868e-35 | 1.00000  |
| rad39         | 9.36551e-37 | 1.00000  | 9.36553e-37 | 1.00000  |
| Ph+Allene     | 2.45387e-39 | 1.00000  | 2.45387e-39 | 1.00000  |
| rad60syn      | 2.17989e-43 | 1.00000  | 2.17989e-43 | 1.00000  |
| rad60anti     | 2.35277e-45 | 1.00000  | 2.35277e-45 | 1.00000  |
| PhCH2CCH+H    | 4.46770e-47 | 1.00000  | 4.46771e-47 | 1.00000  |
| rad37         | 4.09809e-48 | 1.00000  | 4.09810e-48 | 1.00000  |
| rad5          | 2.77519e-51 | 1.00000  | 2.77520e-51 | 1.00000  |
| PAH3+H        | 5.05187e-56 | 1.00000  | 5.05188e-56 | 1.00000  |
| rad59         | 2.70258e-56 | 1.00000  | 2.70259e-56 | 1.00000  |
| rad50         | 1.07478e-56 | 1.00000  | 1.07478e-56 | 1.00000  |
| rad19syn      | 5.06781e-65 | 1.00000  | 5.06782e-65 | 1.00000  |
| rad52         | 6.09384e-69 | 1.00000  | 6.09385e-69 | 1.00000  |
| rad54         | 6.44267e-70 | 1.00000  | 6.44268e-70 | 1.00000  |
| PAH10+CH3     | 4.49621e-70 | 1.00000  | 4.49622e-70 | 1.00000  |
| rad43         | 1.06701e-70 | 1.00000  | 1.06701e-70 | 1.00000  |
| rad62         | 3.22933e-73 | 1.00000  | 3.22933e-73 | 1.00000  |
| rad51         | 3.47782e-76 | 1.00000  | 3.47783e-76 | 1.00000  |
| rad70         | 4.19406e-79 | 1.00000  | 4.19407e-79 | 1.00000  |
| PhcycC3H3_A+H | 1.79914e-79 | 1.00000  | 1.79915e-79 | 1.00000  |
| rad55         | 9.67522e-80 | 1.00000  | 9.67525e-80 | 1.00000  |
| rad65         | 2.57475e-81 | 1.00000  | 2.57475e-81 | 1.00000  |
| rad58         | 6.11212e-83 | 1.00000  | 6.11213e-83 | 1.00000  |
| PAH1+H        | 8.88421e-85 | 1.00000  | 8.88423e-85 | 1.00000  |
| rad34         | 6.22573e-87 | 1.00000  | 6.22575e-87 | 1.00000  |
| rad42         | 5.40019e-91 | 1.00000  | 5.40020e-91 | 1.00000  |
| rad41         | 8.95054e-92 | 1.00000  | 8.95056e-92 | 1.00000  |
| rad47         | 4.25783e-98 | 1.00000  | 4.25784e-98 | 1.00000  |

0.100000000E-07 Pa, 60.000000 K

=====

| Rate constant | True (fraction)     | Effective (fraction) |
|---------------|---------------------|----------------------|
| Total         | 8.44107e-61 (1.00 ) | 8.44104e-61 (1.00 )  |

| species     | PYtrue      | Cumul    | PYeffective | Cumul    |
|-------------|-------------|----------|-------------|----------|
| Indene+H    | 0.999995    | 0.999995 | 0.999999    | 0.999999 |
| Benzyl+C2H2 | 3.25416e-06 | 0.999998 | 0.00000     | 0.999999 |
| rad6        | 1.44364e-06 | 1.00000  | 1.44365e-06 | 1.00000  |
| rad2        | 7.16067e-10 | 1.00000  | 7.16070e-10 | 1.00000  |

|               |             |          |             |         |
|---------------|-------------|----------|-------------|---------|
| rad7          | 1.04406e-10 | 1.000000 | 1.04407e-10 | 1.00000 |
| rad1          | 4.55169e-11 | 1.000000 | 4.55171e-11 | 1.00000 |
| rad10         | 3.38280e-11 | 1.000000 | 3.38281e-11 | 1.00000 |
| rad11         | 2.55420e-11 | 1.000000 | 2.55421e-11 | 1.00000 |
| rad3          | 4.85518e-12 | 1.000000 | 4.85520e-12 | 1.00000 |
| rad4          | 2.45812e-12 | 1.000000 | 2.45813e-12 | 1.00000 |
| rad35         | 9.63222e-13 | 1.000000 | 9.63225e-13 | 1.00000 |
| rad13         | 5.81415e-13 | 1.000000 | 5.81417e-13 | 1.00000 |
| PAH9+H        | 6.37597e-14 | 1.000000 | 6.37599e-14 | 1.00000 |
| rad33         | 1.10737e-15 | 1.000000 | 1.10737e-15 | 1.00000 |
| rad28         | 1.27028e-16 | 1.000000 | 1.27028e-16 | 1.00000 |
| rad38         | 7.70811e-17 | 1.000000 | 7.70813e-17 | 1.00000 |
| rad30         | 2.80484e-17 | 1.000000 | 2.80485e-17 | 1.00000 |
| rad20         | 2.10386e-17 | 1.000000 | 2.10387e-17 | 1.00000 |
| rad21         | 1.31416e-17 | 1.000000 | 1.31417e-17 | 1.00000 |
| rad26         | 3.74619e-18 | 1.000000 | 3.74620e-18 | 1.00000 |
| rad18         | 9.92708e-20 | 1.000000 | 9.92711e-20 | 1.00000 |
| rad31         | 1.75002e-20 | 1.000000 | 1.75002e-20 | 1.00000 |
| rad22         | 6.88933e-21 | 1.000000 | 6.88935e-21 | 1.00000 |
| rad23         | 2.03591e-21 | 1.000000 | 2.03591e-21 | 1.00000 |
| rad27         | 2.00425e-21 | 1.000000 | 2.00426e-21 | 1.00000 |
| rad15         | 4.76551e-22 | 1.000000 | 4.76552e-22 | 1.00000 |
| PhCHCCH2+H    | 2.09245e-22 | 1.000000 | 2.09246e-22 | 1.00000 |
| rad45         | 1.43140e-23 | 1.000000 | 1.43141e-23 | 1.00000 |
| PhCCH+CH3     | 5.30016e-24 | 1.000000 | 5.30018e-24 | 1.00000 |
| rad36         | 8.89403e-25 | 1.000000 | 8.89406e-25 | 1.00000 |
| PhCCCH3+H     | 6.72246e-25 | 1.000000 | 6.72249e-25 | 1.00000 |
| rad24         | 4.90171e-25 | 1.000000 | 4.90172e-25 | 1.00000 |
| rad25         | 1.74234e-26 | 1.000000 | 1.74234e-26 | 1.00000 |
| rad14         | 8.90808e-28 | 1.000000 | 8.90811e-28 | 1.00000 |
| rad8          | 2.92007e-30 | 1.000000 | 2.92008e-30 | 1.00000 |
| rad46         | 1.53297e-32 | 1.000000 | 1.53297e-32 | 1.00000 |
| rad9          | 9.41258e-33 | 1.000000 | 9.41261e-33 | 1.00000 |
| PAH7+H        | 1.26892e-33 | 1.000000 | 1.26893e-33 | 1.00000 |
| Ph+MeAc       | 1.56312e-34 | 1.000000 | 1.56313e-34 | 1.00000 |
| rad12         | 5.40099e-35 | 1.000000 | 5.40101e-35 | 1.00000 |
| rad39         | 2.90437e-36 | 1.000000 | 2.90438e-36 | 1.00000 |
| Ph+Allene     | 7.91787e-39 | 1.000000 | 7.91789e-39 | 1.00000 |
| rad60syn      | 6.97958e-43 | 1.000000 | 6.97961e-43 | 1.00000 |
| rad60anti     | 7.71754e-45 | 1.000000 | 7.71757e-45 | 1.00000 |
| PhCH2CCH+H    | 1.58555e-46 | 1.000000 | 1.58556e-46 | 1.00000 |
| rad37         | 1.59791e-47 | 1.000000 | 1.59791e-47 | 1.00000 |
| rad5          | 1.10268e-50 | 1.000000 | 1.10269e-50 | 1.00000 |
| PAH3+H        | 1.91088e-55 | 1.000000 | 1.91089e-55 | 1.00000 |
| rad59         | 1.02162e-55 | 1.000000 | 1.02163e-55 | 1.00000 |
| rad50         | 4.05761e-56 | 1.000000 | 4.05763e-56 | 1.00000 |
| rad19syn      | 2.23411e-64 | 1.000000 | 2.23412e-64 | 1.00000 |
| rad52         | 2.77035e-68 | 1.000000 | 2.77036e-68 | 1.00000 |
| PAH10+CH3     | 3.37782e-69 | 1.000000 | 3.37783e-69 | 1.00000 |
| rad54         | 3.02142e-69 | 1.000000 | 3.02143e-69 | 1.00000 |
| rad43         | 8.01446e-70 | 1.000000 | 8.01449e-70 | 1.00000 |
| rad62         | 2.17870e-72 | 1.000000 | 2.17870e-72 | 1.00000 |
| rad51         | 1.83391e-75 | 1.000000 | 1.83391e-75 | 1.00000 |
| rad70         | 2.24151e-78 | 1.000000 | 2.24152e-78 | 1.00000 |
| PhcycC3H3_A+H | 9.70443e-79 | 1.000000 | 9.70446e-79 | 1.00000 |
| rad55         | 5.21351e-79 | 1.000000 | 5.21353e-79 | 1.00000 |
| rad65         | 1.49246e-80 | 1.000000 | 1.49246e-80 | 1.00000 |
| rad58         | 3.32393e-82 | 1.000000 | 3.32394e-82 | 1.00000 |
| PAH1+H        | 5.28330e-84 | 1.000000 | 5.28332e-84 | 1.00000 |
| rad34         | 3.75789e-86 | 1.000000 | 3.75790e-86 | 1.00000 |
| rad42         | 9.01483e-90 | 1.000000 | 9.01486e-90 | 1.00000 |
| rad41         | 3.22345e-90 | 1.000000 | 3.22346e-90 | 1.00000 |
| rad47         | 2.40005e-97 | 1.000000 | 2.40005e-97 | 1.00000 |

0.100000000E-07 Pa, 70.0000000 K

=====

| Rate constant | True (fraction)     | Effective (fraction) |
|---------------|---------------------|----------------------|
| Total         | 5.61998e-54 (1.00 ) | 5.61996e-54 (1.00 )  |

| species     | PYtrue      | Cumul    | PYeffective | Cumul    |
|-------------|-------------|----------|-------------|----------|
| Indene+H    | 0.999994    | 0.999994 | 0.999999    | 0.999999 |
| Benzyl+C2H2 | 4.55797e-06 | 0.999999 | 0.00000     | 0.999999 |
| rad6        | 9.97779e-07 | 1.000000 | 9.97783e-07 | 1.000000 |
| rad2        | 5.11586e-10 | 1.000000 | 5.11589e-10 | 1.000000 |
| rad7        | 7.22511e-11 | 1.000000 | 7.22514e-11 | 1.000000 |
| rad1        | 3.26004e-11 | 1.000000 | 3.26006e-11 | 1.000000 |
| rad10       | 2.41244e-11 | 1.000000 | 2.41245e-11 | 1.000000 |
| rad11       | 1.76831e-11 | 1.000000 | 1.76831e-11 | 1.000000 |

|               |             |          |             |          |
|---------------|-------------|----------|-------------|----------|
| rad3          | 3.64995e-12 | 1.000000 | 3.64996e-12 | 1.000000 |
| rad35         | 2.11184e-12 | 1.000000 | 2.11185e-12 | 1.000000 |
| rad4          | 1.84909e-12 | 1.000000 | 1.84910e-12 | 1.000000 |
| rad13         | 4.02634e-13 | 1.000000 | 4.02636e-13 | 1.000000 |
| PAH9+H        | 2.62379e-13 | 1.000000 | 2.62380e-13 | 1.000000 |
| rad28         | 2.39440e-15 | 1.000000 | 2.39441e-15 | 1.000000 |
| rad30         | 1.03416e-15 | 1.000000 | 1.03417e-15 | 1.000000 |
| rad38         | 9.17825e-16 | 1.000000 | 9.17829e-16 | 1.000000 |
| rad33         | 7.68564e-16 | 1.000000 | 7.68568e-16 | 1.000000 |
| rad26         | 8.94199e-17 | 1.000000 | 8.94204e-17 | 1.000000 |
| rad20         | 1.69962e-17 | 1.000000 | 1.69963e-17 | 1.000000 |
| rad21         | 1.06236e-17 | 1.000000 | 1.06237e-17 | 1.000000 |
| rad15         | 9.42543e-20 | 1.000000 | 9.42547e-20 | 1.000000 |
| rad18         | 8.02562e-20 | 1.000000 | 8.02566e-20 | 1.000000 |
| PhCHCCH2+H    | 3.37815e-20 | 1.000000 | 3.37817e-20 | 1.000000 |
| rad27         | 2.19442e-20 | 1.000000 | 2.19443e-20 | 1.000000 |
| rad31         | 1.37244e-20 | 1.000000 | 1.37245e-20 | 1.000000 |
| rad22         | 5.55277e-21 | 1.000000 | 5.55280e-21 | 1.000000 |
| rad23         | 1.60222e-21 | 1.000000 | 1.60223e-21 | 1.000000 |
| PhCCH+CH3     | 1.21460e-21 | 1.000000 | 1.21461e-21 | 1.000000 |
| PhCCCH3+H     | 1.74448e-22 | 1.000000 | 1.74449e-22 | 1.000000 |
| rad45         | 1.22744e-23 | 1.000000 | 1.22745e-23 | 1.000000 |
| rad25         | 1.07430e-24 | 1.000000 | 1.07430e-24 | 1.000000 |
| rad36         | 7.62082e-25 | 1.000000 | 7.62085e-25 | 1.000000 |
| rad24         | 4.21195e-25 | 1.000000 | 4.21197e-25 | 1.000000 |
| rad14         | 8.02086e-26 | 1.000000 | 8.02089e-26 | 1.000000 |
| rad46         | 1.48963e-27 | 1.000000 | 1.48963e-27 | 1.000000 |
| rad8          | 1.95625e-29 | 1.000000 | 1.95626e-29 | 1.000000 |
| rad9          | 6.46952e-32 | 1.000000 | 6.46955e-32 | 1.000000 |
| PAH7+H        | 9.47146e-33 | 1.000000 | 9.47150e-33 | 1.000000 |
| Ph+MeAc       | 1.14960e-33 | 1.000000 | 1.14961e-33 | 1.000000 |
| rad12         | 3.95291e-34 | 1.000000 | 3.95292e-34 | 1.000000 |
| rad39         | 2.20393e-35 | 1.000000 | 2.20394e-35 | 1.000000 |
| Ph+Allene     | 5.98858e-38 | 1.000000 | 5.98861e-38 | 1.000000 |
| rad60syn      | 5.23222e-42 | 1.000000 | 5.23224e-42 | 1.000000 |
| rad60anti     | 5.94746e-44 | 1.000000 | 5.94749e-44 | 1.000000 |
| PhCH2CCH+H    | 1.34001e-45 | 1.000000 | 1.34001e-45 | 1.000000 |
| rad37         | 1.64706e-46 | 1.000000 | 1.64707e-46 | 1.000000 |
| rad5          | 1.17380e-49 | 1.000000 | 1.17381e-49 | 1.000000 |
| PAH3+H        | 1.74768e-54 | 1.000000 | 1.74769e-54 | 1.000000 |
| rad59         | 9.33580e-55 | 1.000000 | 9.33584e-55 | 1.000000 |
| rad50         | 3.81532e-55 | 1.000000 | 3.81534e-55 | 1.000000 |
| rad19syn      | 2.55957e-63 | 1.000000 | 2.55958e-63 | 1.000000 |
| rad52         | 3.73268e-67 | 1.000000 | 3.73270e-67 | 1.000000 |
| PAH10+CH3     | 1.33782e-67 | 1.000000 | 1.33783e-67 | 1.000000 |
| rad54         | 3.88983e-68 | 1.000000 | 3.88985e-68 | 1.000000 |
| rad43         | 3.17216e-68 | 1.000000 | 3.17217e-68 | 1.000000 |
| rad62         | 8.04536e-71 | 1.000000 | 8.04540e-71 | 1.000000 |
| rad51         | 3.69147e-74 | 1.000000 | 3.69149e-74 | 1.000000 |
| rad70         | 4.00500e-77 | 1.000000 | 4.00502e-77 | 1.000000 |
| PhcycC3H3_A+H | 1.78350e-77 | 1.000000 | 1.78351e-77 | 1.000000 |
| rad55         | 9.54751e-78 | 1.000000 | 9.54755e-78 | 1.000000 |
| rad65         | 3.98013e-79 | 1.000000 | 3.98015e-79 | 1.000000 |
| rad58         | 6.26652e-81 | 1.000000 | 6.26655e-81 | 1.000000 |
| PAH1+H        | 1.38412e-82 | 1.000000 | 1.38412e-82 | 1.000000 |
| rad34         | 1.02272e-84 | 1.000000 | 1.02273e-84 | 1.000000 |
| rad42         | 1.49440e-87 | 1.000000 | 1.49441e-87 | 1.000000 |
| rad41         | 6.97752e-88 | 1.000000 | 6.97756e-88 | 1.000000 |
| rad47         | 9.08462e-96 | 1.000000 | 9.08466e-96 | 1.000000 |

0.100000000E-07 Pa, 80.000000 K

=====

| Rate constant | True (fraction)     | Effective (fraction) |
|---------------|---------------------|----------------------|
| Total         | 7.28864e-49 (1.00 ) | 7.28860e-49 (1.00 )  |

| species     | PYtrue      | Cumul    | PYeffective | Cumul    |
|-------------|-------------|----------|-------------|----------|
| Indene+H    | 0.999993    | 0.999993 | 0.999999    | 0.999999 |
| Benzyl+C2H2 | 6.25422e-06 | 0.999999 | 0.00000     | 0.999999 |
| rad6        | 7.16332e-07 | 1.000000 | 7.16336e-07 | 1.000000 |
| rad2        | 3.55380e-10 | 1.000000 | 3.55382e-10 | 1.000000 |
| rad7        | 5.19419e-11 | 1.000000 | 5.19422e-11 | 1.000000 |
| rad1        | 2.27092e-11 | 1.000000 | 2.27094e-11 | 1.000000 |
| rad10       | 1.88020e-11 | 1.000000 | 1.88021e-11 | 1.000000 |
| rad11       | 1.27183e-11 | 1.000000 | 1.27183e-11 | 1.000000 |
| rad35       | 3.84766e-12 | 1.000000 | 3.84769e-12 | 1.000000 |
| rad3        | 2.22422e-12 | 1.000000 | 2.22423e-12 | 1.000000 |
| rad4        | 1.12762e-12 | 1.000000 | 1.12763e-12 | 1.000000 |
| PAH9+H      | 7.64129e-13 | 1.000000 | 7.64133e-13 | 1.000000 |

|               |             |          |             |          |
|---------------|-------------|----------|-------------|----------|
| rad13         | 2.89683e-13 | 1.000000 | 2.89685e-13 | 1.000000 |
| rad28         | 2.22364e-14 | 1.000000 | 2.22366e-14 | 1.000000 |
| rad30         | 1.51675e-14 | 1.000000 | 1.51676e-14 | 1.000000 |
| rad38         | 5.80878e-15 | 1.000000 | 5.80882e-15 | 1.000000 |
| rad26         | 1.01526e-15 | 1.000000 | 1.01527e-15 | 1.000000 |
| rad33         | 5.54273e-16 | 1.000000 | 5.54276e-16 | 1.000000 |
| rad20         | 1.41028e-17 | 1.000000 | 1.41029e-17 | 1.000000 |
| rad21         | 8.82175e-18 | 1.000000 | 8.82180e-18 | 1.000000 |
| rad15         | 4.85066e-18 | 1.000000 | 4.85069e-18 | 1.000000 |
| PhCHCCH2+H    | 3.09140e-18 | 1.000000 | 3.09142e-18 | 1.000000 |
| PhCCH+CH3     | 2.11832e-19 | 1.000000 | 2.11833e-19 | 1.000000 |
| rad27         | 1.31493e-19 | 1.000000 | 1.31494e-19 | 1.000000 |
| rad18         | 6.66217e-20 | 1.000000 | 6.66221e-20 | 1.000000 |
| PhCCCH3+H     | 3.80553e-20 | 1.000000 | 3.80555e-20 | 1.000000 |
| rad31         | 1.11174e-20 | 1.000000 | 1.11175e-20 | 1.000000 |
| rad22         | 4.59438e-21 | 1.000000 | 4.59440e-21 | 1.000000 |
| rad23         | 1.31475e-21 | 1.000000 | 1.31476e-21 | 1.000000 |
| rad25         | 2.87701e-23 | 1.000000 | 2.87702e-23 | 1.000000 |
| rad45         | 8.28759e-24 | 1.000000 | 8.28764e-24 | 1.000000 |
| rad14         | 3.29233e-24 | 1.000000 | 3.29235e-24 | 1.000000 |
| rad36         | 5.14194e-25 | 1.000000 | 5.14197e-25 | 1.000000 |
| rad46         | 4.58856e-25 | 1.000000 | 4.58858e-25 | 1.000000 |
| rad24         | 3.73658e-25 | 1.000000 | 3.73661e-25 | 1.000000 |
| rad8          | 3.70531e-25 | 1.000000 | 3.70534e-25 | 1.000000 |
| rad9          | 2.18527e-30 | 1.000000 | 2.18528e-30 | 1.000000 |
| PAH7+H        | 3.59095e-31 | 1.000000 | 3.59097e-31 | 1.000000 |
| Ph+MeAc       | 4.02952e-32 | 1.000000 | 4.02954e-32 | 1.000000 |
| rad12         | 1.40295e-32 | 1.000000 | 1.40296e-32 | 1.000000 |
| rad39         | 8.46808e-34 | 1.000000 | 8.46813e-34 | 1.000000 |
| Ph+Allene     | 2.23839e-36 | 1.000000 | 2.23840e-36 | 1.000000 |
| rad60syn      | 1.93741e-40 | 1.000000 | 1.93742e-40 | 1.000000 |
| rad60anti     | 2.26695e-42 | 1.000000 | 2.26696e-42 | 1.000000 |
| PhCH2CCH+H    | 5.63195e-44 | 1.000000 | 5.63199e-44 | 1.000000 |
| rad37         | 7.93933e-45 | 1.000000 | 7.93938e-45 | 1.000000 |
| rad5          | 5.83681e-48 | 1.000000 | 5.83685e-48 | 1.000000 |
| PAH3+H        | 8.02053e-53 | 1.000000 | 8.02058e-53 | 1.000000 |
| rad59         | 4.27984e-53 | 1.000000 | 4.27987e-53 | 1.000000 |
| rad50         | 1.85357e-53 | 1.000000 | 1.85359e-53 | 1.000000 |
| rad19syn      | 1.61806e-61 | 1.000000 | 1.61807e-61 | 1.000000 |
| rad52         | 3.23881e-65 | 1.000000 | 3.23883e-65 | 1.000000 |
| PAH10+CH3     | 2.32666e-65 | 1.000000 | 2.32668e-65 | 1.000000 |
| rad43         | 5.51792e-66 | 1.000000 | 5.51795e-66 | 1.000000 |
| rad54         | 3.05672e-66 | 1.000000 | 3.05674e-66 | 1.000000 |
| rad62         | 1.55482e-68 | 1.000000 | 1.55483e-68 | 1.000000 |
| rad51         | 5.91617e-72 | 1.000000 | 5.91621e-72 | 1.000000 |
| rad70         | 6.11331e-75 | 1.000000 | 6.11335e-75 | 1.000000 |
| PhcycC3H3_A+H | 2.87530e-75 | 1.000000 | 2.87532e-75 | 1.000000 |
| rad55         | 1.52714e-75 | 1.000000 | 1.52715e-75 | 1.000000 |
| rad65         | 9.09664e-77 | 1.000000 | 9.09670e-77 | 1.000000 |
| rad58         | 1.05908e-78 | 1.000000 | 1.05909e-78 | 1.000000 |
| PAH1+H        | 3.95476e-80 | 1.000000 | 3.95478e-80 | 1.000000 |
| rad34         | 3.18215e-82 | 1.000000 | 3.18217e-82 | 1.000000 |
| rad42         | 9.31934e-85 | 1.000000 | 9.31940e-85 | 1.000000 |
| rad41         | 4.58417e-85 | 1.000000 | 4.58420e-85 | 1.000000 |
| rad47         | 2.95523e-93 | 1.000000 | 2.95525e-93 | 1.000000 |

0.100000000E-07 Pa, 90.000000 K

=====

| Rate constant | True (fraction)     | Effective (fraction) |
|---------------|---------------------|----------------------|
| Total         | 6.85154e-45 (1.00 ) | 6.85148e-45 (1.00 )  |

| species     | PYtrue      | Cumul    | PYeffective | Cumul    |
|-------------|-------------|----------|-------------|----------|
| Indene+H    | 0.999991    | 0.999991 | 0.999999    | 0.999999 |
| Benzyl+C2H2 | 8.45242e-06 | 0.999999 | 0.00000     | 0.999999 |
| rad6        | 5.28610e-07 | 1.000000 | 5.28614e-07 | 1.000000 |
| rad2        | 2.67117e-10 | 1.000000 | 2.67119e-10 | 1.000000 |
| rad7        | 3.83861e-11 | 1.000000 | 3.83864e-11 | 1.000000 |
| rad1        | 1.71217e-11 | 1.000000 | 1.71219e-11 | 1.000000 |
| rad10       | 1.44654e-11 | 1.000000 | 1.44655e-11 | 1.000000 |
| rad11       | 9.40355e-12 | 1.000000 | 9.40363e-12 | 1.000000 |
| rad35       | 6.25598e-12 | 1.000000 | 6.25604e-12 | 1.000000 |
| rad3        | 1.77975e-12 | 1.000000 | 1.77976e-12 | 1.000000 |
| PAH9+H      | 1.77828e-12 | 1.000000 | 1.77829e-12 | 1.000000 |
| rad4        | 9.03002e-13 | 1.000000 | 9.03009e-13 | 1.000000 |
| rad13       | 2.14262e-13 | 1.000000 | 2.14264e-13 | 1.000000 |
| rad30       | 1.20961e-13 | 1.000000 | 1.20962e-13 | 1.000000 |
| rad28       | 1.19867e-13 | 1.000000 | 1.19868e-13 | 1.000000 |
| rad38       | 2.43293e-14 | 1.000000 | 2.43295e-14 | 1.000000 |

|               |             |          |             |          |
|---------------|-------------|----------|-------------|----------|
| rad26         | 6.40308e-15 | 1.000000 | 6.40313e-15 | 1.000000 |
| rad33         | 4.11003e-16 | 1.000000 | 4.11007e-16 | 1.000000 |
| PhCHCCH2+H    | 1.07355e-16 | 1.000000 | 1.07356e-16 | 1.000000 |
| rad15         | 1.02394e-16 | 1.000000 | 1.02394e-16 | 1.000000 |
| PhCCH+CH3     | 1.20942e-17 | 1.000000 | 1.20943e-17 | 1.000000 |
| rad20         | 1.19307e-17 | 1.000000 | 1.19308e-17 | 1.000000 |
| rad21         | 7.46921e-18 | 1.000000 | 7.46927e-18 | 1.000000 |
| PhCCCH3+H     | 2.55962e-18 | 1.000000 | 2.55964e-18 | 1.000000 |
| rad27         | 5.04736e-19 | 1.000000 | 5.04741e-19 | 1.000000 |
| rad18         | 5.63608e-20 | 1.000000 | 5.63613e-20 | 1.000000 |
| rad31         | 9.22741e-21 | 1.000000 | 9.22748e-21 | 1.000000 |
| rad22         | 3.87297e-21 | 1.000000 | 3.87300e-21 | 1.000000 |
| rad23         | 1.11364e-21 | 1.000000 | 1.11365e-21 | 1.000000 |
| rad25         | 3.54280e-22 | 1.000000 | 3.54283e-22 | 1.000000 |
| rad8          | 1.12475e-22 | 1.000000 | 1.12476e-22 | 1.000000 |
| rad14         | 5.65635e-23 | 1.000000 | 5.65639e-23 | 1.000000 |
| rad46         | 3.75433e-23 | 1.000000 | 3.75437e-23 | 1.000000 |
| rad45         | 7.31664e-24 | 1.000000 | 7.31670e-24 | 1.000000 |
| rad9          | 1.25546e-24 | 1.000000 | 1.25547e-24 | 1.000000 |
| rad36         | 4.53697e-25 | 1.000000 | 4.53701e-25 | 1.000000 |
| rad24         | 3.39410e-25 | 1.000000 | 3.39412e-25 | 1.000000 |
| PAH7+H        | 2.14386e-25 | 1.000000 | 2.14388e-25 | 1.000000 |
| rad12         | 7.47603e-27 | 1.000000 | 7.47609e-27 | 1.000000 |
| Ph+MeAc       | 1.87582e-27 | 1.000000 | 1.87584e-27 | 1.000000 |
| rad39         | 1.66980e-31 | 1.000000 | 1.66981e-31 | 1.000000 |
| Ph+Allene     | 4.49776e-34 | 1.000000 | 4.49780e-34 | 1.000000 |
| rad60syn      | 3.85625e-38 | 1.000000 | 3.85628e-38 | 1.000000 |
| rad60anti     | 4.64425e-40 | 1.000000 | 4.64429e-40 | 1.000000 |
| PhCH2CCH+H    | 1.26652e-41 | 1.000000 | 1.26653e-41 | 1.000000 |
| rad37         | 1.71294e-42 | 1.000000 | 1.71296e-42 | 1.000000 |
| rad5          | 1.27452e-45 | 1.000000 | 1.27453e-45 | 1.000000 |
| PAH3+H        | 1.94898e-50 | 1.000000 | 1.94900e-50 | 1.000000 |
| rad59         | 1.03901e-50 | 1.000000 | 1.03902e-50 | 1.000000 |
| rad50         | 4.62886e-51 | 1.000000 | 4.62889e-51 | 1.000000 |
| rad19syn      | 5.25671e-59 | 1.000000 | 5.25676e-59 | 1.000000 |
| rad52         | 1.41410e-62 | 1.000000 | 1.41411e-62 | 1.000000 |
| PAH10+CH3     | 1.26888e-62 | 1.000000 | 1.26889e-62 | 1.000000 |
| rad43         | 3.01066e-63 | 1.000000 | 3.01069e-63 | 1.000000 |
| rad54         | 1.24702e-63 | 1.000000 | 1.24703e-63 | 1.000000 |
| rad62         | 9.83316e-66 | 1.000000 | 9.83324e-66 | 1.000000 |
| rad51         | 4.41160e-69 | 1.000000 | 4.41163e-69 | 1.000000 |
| rad70         | 4.82971e-72 | 1.000000 | 4.82975e-72 | 1.000000 |
| PhcycC3H3_A+H | 2.38710e-72 | 1.000000 | 2.38712e-72 | 1.000000 |
| rad55         | 1.25720e-72 | 1.000000 | 1.25721e-72 | 1.000000 |
| rad65         | 9.02323e-74 | 1.000000 | 9.02330e-74 | 1.000000 |
| rad58         | 9.16037e-76 | 1.000000 | 9.16045e-76 | 1.000000 |
| PAH1+H        | 5.19249e-77 | 1.000000 | 5.19254e-77 | 1.000000 |
| rad34         | 4.56511e-79 | 1.000000 | 4.56515e-79 | 1.000000 |
| rad42         | 1.73111e-81 | 1.000000 | 1.73112e-81 | 1.000000 |
| rad41         | 8.81948e-82 | 1.000000 | 8.81956e-82 | 1.000000 |
| rad47         | 3.79689e-90 | 1.000000 | 3.79692e-90 | 1.000000 |

0.100000000E-07 Pa, 100.000000 K

=====

| Rate constant | True (fraction)     | Effective (fraction) |
|---------------|---------------------|----------------------|
| Total         | 1.02671e-41 (1.00 ) | 1.02670e-41 (1.00 )  |

| species     | PYtrue      | Cumul    | PYeffective | Cumul   |
|-------------|-------------|----------|-------------|---------|
| Indene+H    | 0.999988    | 0.999988 | 1.00000     | 1.00000 |
| Benzyl+C2H2 | 1.12963e-05 | 0.999999 | 0.00000     | 1.00000 |
| rad6        | 3.98155e-07 | 1.000000 | 3.98160e-07 | 1.00000 |
| rad2        | 2.61683e-10 | 1.000000 | 2.61686e-10 | 1.00000 |
| rad7        | 2.89575e-11 | 1.000000 | 2.89579e-11 | 1.00000 |
| rad1        | 1.68299e-11 | 1.000000 | 1.68301e-11 | 1.00000 |
| rad10       | 1.15000e-11 | 1.000000 | 1.15002e-11 | 1.00000 |
| rad35       | 9.46410e-12 | 1.000000 | 9.46421e-12 | 1.00000 |
| rad11       | 7.09741e-12 | 1.000000 | 7.09749e-12 | 1.00000 |
| PAH9+H      | 3.55837e-12 | 1.000000 | 3.55841e-12 | 1.00000 |
| rad3        | 1.81561e-12 | 1.000000 | 1.81563e-12 | 1.00000 |
| rad4        | 9.22014e-13 | 1.000000 | 9.22025e-13 | 1.00000 |
| rad30       | 6.32703e-13 | 1.000000 | 6.32711e-13 | 1.00000 |
| rad28       | 4.39874e-13 | 1.000000 | 4.39879e-13 | 1.00000 |
| rad13       | 1.61781e-13 | 1.000000 | 1.61783e-13 | 1.00000 |
| rad38       | 7.69632e-14 | 1.000000 | 7.69640e-14 | 1.00000 |
| rad26       | 2.66435e-14 | 1.000000 | 2.66438e-14 | 1.00000 |
| PhCHCCH2+H  | 1.87575e-15 | 1.000000 | 1.87577e-15 | 1.00000 |
| rad15       | 1.16430e-15 | 1.000000 | 1.16431e-15 | 1.00000 |
| PhCCH+CH3   | 3.13523e-16 | 1.000000 | 3.13527e-16 | 1.00000 |

|               |             |          |             |         |
|---------------|-------------|----------|-------------|---------|
| rad33         | 3.11169e-16 | 1.000000 | 3.11172e-16 | 1.00000 |
| PhCCCH3+H     | 7.52980e-17 | 1.000000 | 7.52989e-17 | 1.00000 |
| rad20         | 1.02402e-17 | 1.000000 | 1.02403e-17 | 1.00000 |
| rad21         | 6.41673e-18 | 1.000000 | 6.41680e-18 | 1.00000 |
| rad27         | 1.41440e-18 | 1.000000 | 1.41442e-18 | 1.00000 |
| rad18         | 4.83518e-20 | 1.000000 | 4.83523e-20 | 1.00000 |
| rad8          | 7.87588e-21 | 1.000000 | 7.87597e-21 | 1.00000 |
| rad31         | 7.81918e-21 | 1.000000 | 7.81927e-21 | 1.00000 |
| rad22         | 3.30973e-21 | 1.000000 | 3.30977e-21 | 1.00000 |
| rad25         | 2.51837e-21 | 1.000000 | 2.51840e-21 | 1.00000 |
| rad46         | 1.26406e-21 | 1.000000 | 1.26408e-21 | 1.00000 |
| rad23         | 9.68262e-22 | 1.000000 | 9.68273e-22 | 1.00000 |
| rad14         | 5.24612e-22 | 1.000000 | 5.24618e-22 | 1.00000 |
| rad9          | 1.71421e-22 | 1.000000 | 1.71423e-22 | 1.00000 |
| PAH7+H        | 4.58325e-23 | 1.000000 | 4.58330e-23 | 1.00000 |
| Ph+MeAc       | 1.57471e-23 | 1.000000 | 1.57473e-23 | 1.00000 |
| rad45         | 6.81754e-24 | 1.000000 | 6.81762e-24 | 1.00000 |
| rad12         | 2.81374e-24 | 1.000000 | 2.81377e-24 | 1.00000 |
| rad36         | 4.22580e-25 | 1.000000 | 4.22585e-25 | 1.00000 |
| rad39         | 3.50292e-25 | 1.000000 | 3.50296e-25 | 1.00000 |
| rad24         | 3.13971e-25 | 1.000000 | 3.13975e-25 | 1.00000 |
| Ph+Allene     | 1.51009e-31 | 1.000000 | 1.51011e-31 | 1.00000 |
| rad60syn      | 1.28186e-35 | 1.000000 | 1.28188e-35 | 1.00000 |
| rad60anti     | 1.59076e-37 | 1.000000 | 1.59078e-37 | 1.00000 |
| PhCH2CCH+H    | 4.77525e-39 | 1.000000 | 4.77530e-39 | 1.00000 |
| rad37         | 6.17998e-40 | 1.000000 | 6.18005e-40 | 1.00000 |
| rad5          | 4.63887e-43 | 1.000000 | 4.63892e-43 | 1.00000 |
| PAH3+H        | 7.93754e-48 | 1.000000 | 7.93763e-48 | 1.00000 |
| rad59         | 4.22746e-48 | 1.000000 | 4.22750e-48 | 1.00000 |
| rad50         | 1.88814e-48 | 1.000000 | 1.88816e-48 | 1.00000 |
| rad19syn      | 2.90624e-56 | 1.000000 | 2.90627e-56 | 1.00000 |
| PAH10+CH3     | 1.11898e-59 | 1.000000 | 1.11900e-59 | 1.00000 |
| rad52         | 1.01503e-59 | 1.000000 | 1.01504e-59 | 1.00000 |
| rad43         | 2.65672e-60 | 1.000000 | 2.65675e-60 | 1.00000 |
| rad54         | 9.00085e-61 | 1.000000 | 9.00095e-61 | 1.00000 |
| rad62         | 1.01434e-62 | 1.000000 | 1.01435e-62 | 1.00000 |
| rad51         | 5.25909e-66 | 1.000000 | 5.25915e-66 | 1.00000 |
| rad70         | 6.96302e-69 | 1.000000 | 6.96310e-69 | 1.00000 |
| PhcycC3H3_A+H | 3.61331e-69 | 1.000000 | 3.61335e-69 | 1.00000 |
| rad55         | 1.88455e-69 | 1.000000 | 1.88457e-69 | 1.00000 |
| rad65         | 1.40414e-70 | 1.000000 | 1.40415e-70 | 1.00000 |
| rad58         | 1.44065e-72 | 1.000000 | 1.44066e-72 | 1.00000 |
| PAH1+H        | 1.21726e-73 | 1.000000 | 1.21728e-73 | 1.00000 |
| rad34         | 1.18104e-75 | 1.000000 | 1.18105e-75 | 1.00000 |
| rad42         | 5.27602e-78 | 1.000000 | 5.27608e-78 | 1.00000 |
| rad41         | 2.77334e-78 | 1.000000 | 2.77337e-78 | 1.00000 |
| rad47         | 7.58438e-87 | 1.000000 | 7.58447e-87 | 1.00000 |

0.100000000E-07 Pa, 110.000000 K

=====

| Rate constant | True (fraction)     | Effective (fraction) |
|---------------|---------------------|----------------------|
| Total         | 4.04932e-39 (1.00 ) | 4.04926e-39 (1.00 )  |

| species     | PYtrue      | Cumul    | PYeffective | Cumul   |
|-------------|-------------|----------|-------------|---------|
| Indene+H    | 0.999985    | 0.999985 | 1.00000     | 1.00000 |
| Benzyl+C2H2 | 1.49726e-05 | 1.000000 | 0.00000     | 1.00000 |
| rad6        | 3.04603e-07 | 1.00000  | 3.04608e-07 | 1.00000 |
| rad2        | 1.60116e-10 | 1.00000  | 1.60118e-10 | 1.00000 |
| rad7        | 2.21894e-11 | 1.00000  | 2.21898e-11 | 1.00000 |
| rad35       | 1.36724e-11 | 1.00000  | 1.36726e-11 | 1.00000 |
| rad1        | 1.03356e-11 | 1.00000  | 1.03357e-11 | 1.00000 |
| rad10       | 8.68649e-12 | 1.00000  | 8.68662e-12 | 1.00000 |
| PAH9+H      | 6.41652e-12 | 1.00000  | 6.41662e-12 | 1.00000 |
| rad11       | 5.44146e-12 | 1.00000  | 5.44154e-12 | 1.00000 |
| rad30       | 2.44539e-12 | 1.00000  | 2.44543e-12 | 1.00000 |
| rad28       | 1.22100e-12 | 1.00000  | 1.22102e-12 | 1.00000 |
| rad3        | 1.06125e-12 | 1.00000  | 1.06126e-12 | 1.00000 |
| rad4        | 5.39455e-13 | 1.00000  | 5.39463e-13 | 1.00000 |
| rad38       | 2.00047e-13 | 1.00000  | 2.00050e-13 | 1.00000 |
| rad13       | 1.24089e-13 | 1.00000  | 1.24091e-13 | 1.00000 |
| rad26       | 8.19707e-14 | 1.00000  | 8.19720e-14 | 1.00000 |
| PhCHCCH2+H  | 1.99040e-14 | 1.00000  | 1.99043e-14 | 1.00000 |
| rad15       | 8.47756e-15 | 1.00000  | 8.47769e-15 | 1.00000 |
| PhCCH+CH3   | 4.58419e-15 | 1.00000  | 4.58426e-15 | 1.00000 |
| PhCCCH3+H   | 1.21657e-15 | 1.00000  | 1.21659e-15 | 1.00000 |
| rad33       | 2.39356e-16 | 1.00000  | 2.39359e-16 | 1.00000 |
| rad20       | 8.88733e-18 | 1.00000  | 8.88746e-18 | 1.00000 |
| rad21       | 5.57453e-18 | 1.00000  | 5.57462e-18 | 1.00000 |



|               |             |         |             |         |
|---------------|-------------|---------|-------------|---------|
| rad27         | 3.15430e-18 | 1.00000 | 3.15435e-18 | 1.00000 |
| rad8          | 2.54404e-19 | 1.00000 | 2.54408e-19 | 1.00000 |
| rad18         | 4.19210e-20 | 1.00000 | 4.19216e-20 | 1.00000 |
| rad46         | 2.24507e-20 | 1.00000 | 2.24510e-20 | 1.00000 |
| rad25         | 1.20128e-20 | 1.00000 | 1.20130e-20 | 1.00000 |
| rad9          | 8.70678e-21 | 1.00000 | 8.70691e-21 | 1.00000 |
| rad31         | 6.71218e-21 | 1.00000 | 6.71228e-21 | 1.00000 |
| rad14         | 3.10989e-21 | 1.00000 | 3.10994e-21 | 1.00000 |
| rad22         | 2.85738e-21 | 1.00000 | 2.85742e-21 | 1.00000 |
| PAH7+H        | 2.76439e-21 | 1.00000 | 2.76443e-21 | 1.00000 |
| Ph+MeAc       | 1.76860e-21 | 1.00000 | 1.76862e-21 | 1.00000 |
| rad23         | 8.61307e-22 | 1.00000 | 8.61320e-22 | 1.00000 |
| rad12         | 1.91645e-22 | 1.00000 | 1.91647e-22 | 1.00000 |
| rad39         | 3.70378e-23 | 1.00000 | 3.70384e-23 | 1.00000 |
| rad45         | 5.84413e-24 | 1.00000 | 5.84422e-24 | 1.00000 |
| Ph+Allene     | 1.91199e-24 | 1.00000 | 1.91202e-24 | 1.00000 |
| rad36         | 3.62164e-25 | 1.00000 | 3.62169e-25 | 1.00000 |
| rad24         | 2.94699e-25 | 1.00000 | 2.94704e-25 | 1.00000 |
| rad60syn      | 2.70844e-26 | 1.00000 | 2.70848e-26 | 1.00000 |
| rad60anti     | 1.02857e-27 | 1.00000 | 1.02859e-27 | 1.00000 |
| PhCH2CCH+H    | 4.17204e-36 | 1.00000 | 4.17211e-36 | 1.00000 |
| rad37         | 4.93855e-37 | 1.00000 | 4.93862e-37 | 1.00000 |
| rad5          | 3.65853e-40 | 1.00000 | 3.65859e-40 | 1.00000 |
| PAH3+H        | 7.43036e-45 | 1.00000 | 7.43047e-45 | 1.00000 |
| rad59         | 3.95449e-45 | 1.00000 | 3.95454e-45 | 1.00000 |
| rad50         | 1.66632e-45 | 1.00000 | 1.66635e-45 | 1.00000 |
| rad19syn      | 3.14643e-53 | 1.00000 | 3.14648e-53 | 1.00000 |
| PAH10+CH3     | 1.43133e-56 | 1.00000 | 1.43136e-56 | 1.00000 |
| rad52         | 1.25356e-56 | 1.00000 | 1.25358e-56 | 1.00000 |
| rad43         | 3.40008e-57 | 1.00000 | 3.40013e-57 | 1.00000 |
| rad54         | 1.13777e-57 | 1.00000 | 1.13778e-57 | 1.00000 |
| rad62         | 1.51921e-59 | 1.00000 | 1.51923e-59 | 1.00000 |
| rad51         | 1.00808e-62 | 1.00000 | 1.00810e-62 | 1.00000 |
| rad70         | 1.54169e-65 | 1.00000 | 1.54172e-65 | 1.00000 |
| PhcycC3H3_A+H | 8.37495e-66 | 1.00000 | 8.37508e-66 | 1.00000 |
| rad55         | 4.32057e-66 | 1.00000 | 4.32064e-66 | 1.00000 |
| rad65         | 3.46000e-67 | 1.00000 | 3.46005e-67 | 1.00000 |
| rad58         | 3.45961e-69 | 1.00000 | 3.45966e-69 | 1.00000 |
| PAH1+H        | 4.32740e-70 | 1.00000 | 4.32746e-70 | 1.00000 |
| rad34         | 4.69798e-72 | 1.00000 | 4.69805e-72 | 1.00000 |
| rad42         | 2.32682e-74 | 1.00000 | 2.32685e-74 | 1.00000 |
| rad41         | 1.25503e-74 | 1.00000 | 1.25505e-74 | 1.00000 |
| rad47         | 2.40260e-83 | 1.00000 | 2.40263e-83 | 1.00000 |

0.100000000E-07 Pa, 120.000000 K

=====  
Rate constant | True (fraction) | Effective (fraction)  
-----  
Total | 5.87106e-37 (1.00) | 5.87094e-37 (1.00)

| species     | PYtrue      | Cumul    | PYeffective | Cumul   |
|-------------|-------------|----------|-------------|---------|
| Indene+H    | 0.999980    | 0.999980 | 1.00000     | 1.00000 |
| Benzyl+C2H2 | 1.97208e-05 | 1.00000  | 0.00000     | 1.00000 |
| rad6        | 2.35845e-07 | 1.00000  | 2.35850e-07 | 1.00000 |
| rad2        | 1.25873e-10 | 1.00000  | 1.25875e-10 | 1.00000 |
| rad35       | 1.91832e-11 | 1.00000  | 1.91836e-11 | 1.00000 |
| rad7        | 1.72096e-11 | 1.00000  | 1.72100e-11 | 1.00000 |
| PAH9+H      | 1.07591e-11 | 1.00000  | 1.07593e-11 | 1.00000 |
| rad1        | 8.15776e-12 | 1.00000  | 8.15792e-12 | 1.00000 |
| rad30       | 7.56112e-12 | 1.00000  | 7.56127e-12 | 1.00000 |
| rad10       | 6.58121e-12 | 1.00000  | 6.58134e-12 | 1.00000 |
| rad11       | 4.22263e-12 | 1.00000  | 4.22272e-12 | 1.00000 |
| rad28       | 2.75081e-12 | 1.00000  | 2.75086e-12 | 1.00000 |
| rad3        | 8.43366e-13 | 1.00000  | 8.43383e-13 | 1.00000 |
| rad38       | 4.51815e-13 | 1.00000  | 4.51824e-13 | 1.00000 |
| rad4        | 4.29159e-13 | 1.00000  | 4.29167e-13 | 1.00000 |
| rad26       | 2.01219e-13 | 1.00000  | 2.01223e-13 | 1.00000 |
| PhCHCCH2+H  | 1.45453e-13 | 1.00000  | 1.45456e-13 | 1.00000 |
| rad13       | 9.63389e-14 | 1.00000  | 9.63408e-14 | 1.00000 |
| rad15       | 4.43409e-14 | 1.00000  | 4.43418e-14 | 1.00000 |
| PhCCH+CH3   | 4.36732e-14 | 1.00000  | 4.36741e-14 | 1.00000 |
| PhCCCH3+H   | 1.25527e-14 | 1.00000  | 1.25530e-14 | 1.00000 |
| rad33       | 1.86396e-16 | 1.00000  | 1.86400e-16 | 1.00000 |
| rad20       | 7.78050e-18 | 1.00000  | 7.78065e-18 | 1.00000 |
| rad27       | 5.93098e-18 | 1.00000  | 5.93109e-18 | 1.00000 |
| rad21       | 4.88553e-18 | 1.00000  | 4.88563e-18 | 1.00000 |
| rad8        | 4.62038e-18 | 1.00000  | 4.62047e-18 | 1.00000 |
| rad46       | 2.47624e-19 | 1.00000  | 2.47629e-19 | 1.00000 |
| rad9        | 2.29244e-19 | 1.00000  | 2.29249e-19 | 1.00000 |

|               |             |          |             |         |
|---------------|-------------|----------|-------------|---------|
| PAH7+H        | 8.24695e-20 | 1.000000 | 8.24711e-20 | 1.00000 |
| Ph+MeAc       | 7.42088e-20 | 1.000000 | 7.42103e-20 | 1.00000 |
| rad25         | 4.25173e-20 | 1.000000 | 4.25182e-20 | 1.00000 |
| rad18         | 3.66406e-20 | 1.000000 | 3.66414e-20 | 1.00000 |
| rad14         | 1.31887e-20 | 1.000000 | 1.31890e-20 | 1.00000 |
| rad12         | 6.23448e-21 | 1.000000 | 6.23461e-21 | 1.00000 |
| rad31         | 5.83452e-21 | 1.000000 | 5.83463e-21 | 1.00000 |
| rad22         | 2.48590e-21 | 1.000000 | 2.48595e-21 | 1.00000 |
| rad39         | 1.51574e-21 | 1.000000 | 1.51577e-21 | 1.00000 |
| rad23         | 7.84618e-22 | 1.000000 | 7.84633e-22 | 1.00000 |
| Ph+Allene     | 1.55527e-22 | 1.000000 | 1.55530e-22 | 1.00000 |
| rad45         | 6.84605e-24 | 1.000000 | 6.84619e-24 | 1.00000 |
| rad60syn      | 1.65778e-24 | 1.000000 | 1.65782e-24 | 1.00000 |
| rad36         | 4.24239e-25 | 1.000000 | 4.24248e-25 | 1.00000 |
| rad24         | 2.79945e-25 | 1.000000 | 2.79950e-25 | 1.00000 |
| rad60anti     | 9.96798e-26 | 1.000000 | 9.96818e-26 | 1.00000 |
| PhCH2CCH+H    | 2.55816e-33 | 1.000000 | 2.55821e-33 | 1.00000 |
| rad37         | 2.91986e-34 | 1.000000 | 2.91992e-34 | 1.00000 |
| rad5          | 2.15291e-37 | 1.000000 | 2.15295e-37 | 1.00000 |
| PAH3+H        | 4.91016e-42 | 1.000000 | 4.91026e-42 | 1.00000 |
| rad59         | 2.61105e-42 | 1.000000 | 2.61110e-42 | 1.00000 |
| rad50         | 1.03658e-42 | 1.000000 | 1.03660e-42 | 1.00000 |
| rad19syn      | 2.38128e-50 | 1.000000 | 2.38132e-50 | 1.00000 |
| PAH10+CH3     | 1.24197e-53 | 1.000000 | 1.24199e-53 | 1.00000 |
| rad52         | 1.02182e-53 | 1.000000 | 1.02184e-53 | 1.00000 |
| rad43         | 2.95231e-54 | 1.000000 | 2.95237e-54 | 1.00000 |
| rad54         | 9.87330e-55 | 1.000000 | 9.87349e-55 | 1.00000 |
| rad62         | 1.54427e-56 | 1.000000 | 1.54430e-56 | 1.00000 |
| rad51         | 1.27538e-59 | 1.000000 | 1.27541e-59 | 1.00000 |
| rad70         | 2.36630e-62 | 1.000000 | 2.36635e-62 | 1.00000 |
| PhcycC3H3_A+H | 1.35063e-62 | 1.000000 | 1.35065e-62 | 1.00000 |
| rad55         | 6.87306e-63 | 1.000000 | 6.87320e-63 | 1.00000 |
| rad65         | 5.64248e-64 | 1.000000 | 5.64259e-64 | 1.00000 |
| rad58         | 5.78815e-66 | 1.000000 | 5.78826e-66 | 1.00000 |
| PAH1+H        | 1.11121e-66 | 1.000000 | 1.11123e-66 | 1.00000 |
| rad34         | 1.38116e-68 | 1.000000 | 1.38119e-68 | 1.00000 |
| rad42         | 7.09169e-71 | 1.000000 | 7.09183e-71 | 1.00000 |
| rad41         | 3.88408e-71 | 1.000000 | 3.88416e-71 | 1.00000 |
| rad47         | 5.09842e-80 | 1.000000 | 5.09852e-80 | 1.00000 |

0.100000000E-07 Pa, 130.000000 K

=====  
Rate constant | True (fraction) | Effective (fraction)  
-----  
Total | 3.94360e-35 (1.00) | 3.94350e-35 (1.00)

| species     | PYtrue      | Cumul    | PYeffective | Cumul   |
|-------------|-------------|----------|-------------|---------|
| Indene+H    | 0.999974    | 0.999974 | 1.00000     | 1.00000 |
| Benzyl+C2H2 | 2.58461e-05 | 1.000000 | 0.00000     | 1.00000 |
| rad6        | 1.84318e-07 | 1.00000  | 1.84323e-07 | 1.00000 |
| rad2        | 1.01707e-10 | 1.00000  | 1.01709e-10 | 1.00000 |
| rad35       | 2.64326e-11 | 1.00000  | 2.64332e-11 | 1.00000 |
| rad30       | 1.97587e-11 | 1.00000  | 1.97592e-11 | 1.00000 |
| PAH9+H      | 1.71416e-11 | 1.00000  | 1.71421e-11 | 1.00000 |
| rad7        | 1.34733e-11 | 1.00000  | 1.34736e-11 | 1.00000 |
| rad1        | 6.62010e-12 | 1.00000  | 6.62027e-12 | 1.00000 |
| rad10       | 5.85146e-12 | 1.00000  | 5.85161e-12 | 1.00000 |
| rad28       | 5.28054e-12 | 1.00000  | 5.28068e-12 | 1.00000 |
| rad11       | 3.30780e-12 | 1.00000  | 3.30788e-12 | 1.00000 |
| rad38       | 9.21165e-13 | 1.00000  | 9.21189e-13 | 1.00000 |
| PhCHCCH2+H  | 7.98492e-13 | 1.00000  | 7.98512e-13 | 1.00000 |
| rad3        | 7.45831e-13 | 1.00000  | 7.45851e-13 | 1.00000 |
| rad26       | 4.15386e-13 | 1.00000  | 4.15397e-13 | 1.00000 |
| rad4        | 3.79968e-13 | 1.00000  | 3.79978e-13 | 1.00000 |
| PhCCH+CH3   | 2.99539e-13 | 1.00000  | 2.99547e-13 | 1.00000 |
| rad15       | 1.80343e-13 | 1.00000  | 1.80347e-13 | 1.00000 |
| PhCCCH3+H   | 9.18002e-14 | 1.00000  | 9.18025e-14 | 1.00000 |
| rad13       | 7.55044e-14 | 1.00000  | 7.55063e-14 | 1.00000 |
| rad33       | 1.46561e-16 | 1.00000  | 1.46564e-16 | 1.00000 |
| rad8        | 5.39518e-17 | 1.00000  | 5.39532e-17 | 1.00000 |
| rad27       | 9.78454e-18 | 1.00000  | 9.78479e-18 | 1.00000 |
| rad20       | 6.85873e-18 | 1.00000  | 6.85890e-18 | 1.00000 |
| rad21       | 4.31174e-18 | 1.00000  | 4.31185e-18 | 1.00000 |
| rad9        | 3.66948e-18 | 1.00000  | 3.66957e-18 | 1.00000 |
| rad46       | 1.89879e-18 | 1.00000  | 1.89884e-18 | 1.00000 |
| Ph+MeAc     | 1.77040e-18 | 1.00000  | 1.77044e-18 | 1.00000 |
| PAH7+H      | 1.45554e-18 | 1.00000  | 1.45558e-18 | 1.00000 |
| rad25       | 1.19679e-19 | 1.00000  | 1.19682e-19 | 1.00000 |
| rad12       | 1.18342e-19 | 1.00000  | 1.18345e-19 | 1.00000 |

|               |             |         |             |         |
|---------------|-------------|---------|-------------|---------|
| rad14         | 4.32515e-20 | 1.00000 | 4.32526e-20 | 1.00000 |
| rad39         | 3.50984e-20 | 1.00000 | 3.50993e-20 | 1.00000 |
| rad18         | 3.22264e-20 | 1.00000 | 3.22273e-20 | 1.00000 |
| Ph+Allene     | 5.85931e-21 | 1.00000 | 5.85946e-21 | 1.00000 |
| rad31         | 5.17527e-21 | 1.00000 | 5.17541e-21 | 1.00000 |
| rad22         | 2.17537e-21 | 1.00000 | 2.17542e-21 | 1.00000 |
| rad23         | 7.32877e-22 | 1.00000 | 7.32896e-22 | 1.00000 |
| rad60syn      | 5.24603e-23 | 1.00000 | 5.24617e-23 | 1.00000 |
| rad45         | 6.20408e-24 | 1.00000 | 6.20424e-24 | 1.00000 |
| rad60anti     | 4.01382e-24 | 1.00000 | 4.01392e-24 | 1.00000 |
| rad36         | 3.84501e-25 | 1.00000 | 3.84510e-25 | 1.00000 |
| rad24         | 2.68637e-25 | 1.00000 | 2.68644e-25 | 1.00000 |
| PhCH2CCH+H    | 1.64592e-25 | 1.00000 | 1.64596e-25 | 1.00000 |
| rad37         | 3.40646e-26 | 1.00000 | 3.40655e-26 | 1.00000 |
| rad5          | 1.70893e-34 | 1.00000 | 1.70897e-34 | 1.00000 |
| PAH3+H        | 4.27233e-39 | 1.00000 | 4.27244e-39 | 1.00000 |
| rad59         | 2.26986e-39 | 1.00000 | 2.26992e-39 | 1.00000 |
| rad50         | 8.46822e-40 | 1.00000 | 8.46844e-40 | 1.00000 |
| rad19syn      | 2.17177e-47 | 1.00000 | 2.17182e-47 | 1.00000 |
| PAH10+CH3     | 9.32405e-51 | 1.00000 | 9.32429e-51 | 1.00000 |
| rad52         | 8.26514e-51 | 1.00000 | 8.26535e-51 | 1.00000 |
| rad43         | 2.21754e-51 | 1.00000 | 2.21759e-51 | 1.00000 |
| rad54         | 8.67916e-52 | 1.00000 | 8.67938e-52 | 1.00000 |
| rad62         | 1.35000e-53 | 1.00000 | 1.35004e-53 | 1.00000 |
| rad51         | 1.51057e-56 | 1.00000 | 1.51061e-56 | 1.00000 |
| rad70         | 3.12334e-59 | 1.00000 | 3.12342e-59 | 1.00000 |
| PhcycC3H3_A+H | 1.87300e-59 | 1.00000 | 1.87305e-59 | 1.00000 |
| rad55         | 9.38175e-60 | 1.00000 | 9.38200e-60 | 1.00000 |
| rad65         | 8.59859e-61 | 1.00000 | 8.59881e-61 | 1.00000 |
| rad58         | 8.32627e-63 | 1.00000 | 8.32649e-63 | 1.00000 |
| PAH1+H        | 2.46337e-63 | 1.00000 | 2.46343e-63 | 1.00000 |
| rad34         | 3.51992e-65 | 1.00000 | 3.52001e-65 | 1.00000 |
| rad42         | 1.85845e-67 | 1.00000 | 1.85850e-67 | 1.00000 |
| rad41         | 1.02311e-67 | 1.00000 | 1.02313e-67 | 1.00000 |
| rad47         | 1.01706e-76 | 1.00000 | 1.01709e-76 | 1.00000 |

0.100000000E-07 Pa, 140.000000 K

=====

| Rate constant | True (fraction)     | Effective (fraction) |
|---------------|---------------------|----------------------|
| Total         | 1.44756e-33 (1.00 ) | 1.44751e-33 (1.00 )  |

| species     | PYtrue      | Cumul    | PYeffective | Cumul   |
|-------------|-------------|----------|-------------|---------|
| Indene+H    | 0.999966    | 0.999966 | 1.00000     | 1.00000 |
| Benzyl+C2H2 | 3.37324e-05 | 1.00000  | 0.00000     | 1.00000 |
| rad6        | 1.45098e-07 | 1.00000  | 1.45103e-07 | 1.00000 |
| rad2        | 1.07375e-10 | 1.00000  | 1.07379e-10 | 1.00000 |
| rad30       | 4.53772e-11 | 1.00000  | 4.53788e-11 | 1.00000 |
| rad35       | 3.60275e-11 | 1.00000  | 3.60287e-11 | 1.00000 |
| PAH9+H      | 2.63418e-11 | 1.00000  | 2.63427e-11 | 1.00000 |
| rad7        | 1.06257e-11 | 1.00000  | 1.06260e-11 | 1.00000 |
| rad28       | 8.94079e-12 | 1.00000  | 8.94109e-12 | 1.00000 |
| rad1        | 7.02228e-12 | 1.00000  | 7.02252e-12 | 1.00000 |
| rad10       | 4.98675e-12 | 1.00000  | 4.98691e-12 | 1.00000 |
| PhCHCCH2+H  | 3.50335e-12 | 1.00000  | 3.50347e-12 | 1.00000 |
| rad11       | 2.61029e-12 | 1.00000  | 2.61038e-12 | 1.00000 |
| rad38       | 1.74091e-12 | 1.00000  | 1.74097e-12 | 1.00000 |
| PhCCH+CH3   | 1.58803e-12 | 1.00000  | 1.58809e-12 | 1.00000 |
| rad3        | 8.13368e-13 | 1.00000  | 8.13396e-13 | 1.00000 |
| rad26       | 7.48573e-13 | 1.00000  | 7.48598e-13 | 1.00000 |
| rad15       | 6.03455e-13 | 1.00000  | 6.03475e-13 | 1.00000 |
| PhCCCH3+H   | 5.12507e-13 | 1.00000  | 5.12524e-13 | 1.00000 |
| rad4        | 4.14905e-13 | 1.00000  | 4.14919e-13 | 1.00000 |
| rad13       | 5.96141e-14 | 1.00000  | 5.96161e-14 | 1.00000 |
| rad8        | 4.45598e-16 | 1.00000  | 4.45613e-16 | 1.00000 |
| rad33       | 1.16117e-16 | 1.00000  | 1.16121e-16 | 1.00000 |
| rad9        | 3.97527e-17 | 1.00000  | 3.97541e-17 | 1.00000 |
| Ph+MeAc     | 2.71366e-17 | 1.00000  | 2.71376e-17 | 1.00000 |
| PAH7+H      | 1.70357e-17 | 1.00000  | 1.70363e-17 | 1.00000 |
| rad27       | 1.45690e-17 | 1.00000  | 1.45695e-17 | 1.00000 |
| rad46       | 1.09715e-17 | 1.00000  | 1.09719e-17 | 1.00000 |
| rad20       | 6.07995e-18 | 1.00000  | 6.08015e-18 | 1.00000 |
| rad21       | 3.82696e-18 | 1.00000  | 3.82709e-18 | 1.00000 |
| rad12       | 1.47310e-18 | 1.00000  | 1.47315e-18 | 1.00000 |
| rad39       | 5.20783e-19 | 1.00000  | 5.20801e-19 | 1.00000 |
| rad25       | 2.81476e-19 | 1.00000  | 2.81485e-19 | 1.00000 |
| Ph+Allene   | 1.30388e-19 | 1.00000  | 1.30392e-19 | 1.00000 |
| rad14       | 1.15929e-19 | 1.00000  | 1.15933e-19 | 1.00000 |
| rad18       | 2.84825e-20 | 1.00000  | 2.84835e-20 | 1.00000 |

|               |             |          |             |         |
|---------------|-------------|----------|-------------|---------|
| rad31         | 4.61011e-21 | 1.000000 | 4.61026e-21 | 1.00000 |
| rad22         | 1.91207e-21 | 1.000000 | 1.91214e-21 | 1.00000 |
| rad60syn      | 1.00452e-21 | 1.000000 | 1.00456e-21 | 1.00000 |
| rad23         | 7.03066e-22 | 1.000000 | 7.03089e-22 | 1.00000 |
| rad60anti     | 9.33602e-23 | 1.000000 | 9.33634e-23 | 1.00000 |
| PhCH2CCH+H    | 1.18692e-23 | 1.000000 | 1.18696e-23 | 1.00000 |
| rad45         | 7.57143e-24 | 1.000000 | 7.57168e-24 | 1.00000 |
| rad37         | 3.38835e-24 | 1.000000 | 3.38846e-24 | 1.00000 |
| rad36         | 4.69433e-25 | 1.000000 | 4.69449e-25 | 1.00000 |
| rad24         | 2.60061e-25 | 1.000000 | 2.60070e-25 | 1.00000 |
| rad5          | 6.97171e-27 | 1.000000 | 6.97195e-27 | 1.00000 |
| PAH3+H        | 1.15604e-28 | 1.000000 | 1.15608e-28 | 1.00000 |
| rad59         | 5.78020e-29 | 1.000000 | 5.78040e-29 | 1.00000 |
| rad50         | 7.59925e-30 | 1.000000 | 7.59951e-30 | 1.00000 |
| rad19syn      | 1.46661e-44 | 1.000000 | 1.46666e-44 | 1.00000 |
| rad52         | 4.36609e-48 | 1.000000 | 4.36624e-48 | 1.00000 |
| PAH10+CH3     | 4.36082e-48 | 1.000000 | 4.36097e-48 | 1.00000 |
| rad43         | 1.03733e-48 | 1.000000 | 1.03736e-48 | 1.00000 |
| rad54         | 5.32697e-49 | 1.000000 | 5.32715e-49 | 1.00000 |
| rad62         | 7.28933e-51 | 1.000000 | 7.28957e-51 | 1.00000 |
| rad51         | 1.10700e-53 | 1.000000 | 1.10704e-53 | 1.00000 |
| rad70         | 2.52072e-56 | 1.000000 | 2.52081e-56 | 1.00000 |
| PhcycC3H3_A+H | 1.58944e-56 | 1.000000 | 1.58949e-56 | 1.00000 |
| rad55         | 7.81783e-57 | 1.000000 | 7.81809e-57 | 1.00000 |
| rad65         | 8.14333e-58 | 1.000000 | 8.14360e-58 | 1.00000 |
| rad58         | 7.33100e-60 | 1.000000 | 7.33125e-60 | 1.00000 |
| PAH1+H        | 3.34204e-60 | 1.000000 | 3.34215e-60 | 1.00000 |
| rad34         | 5.48113e-62 | 1.000000 | 5.48131e-62 | 1.00000 |
| rad42         | 3.01462e-64 | 1.000000 | 3.01472e-64 | 1.00000 |
| rad41         | 1.65091e-64 | 1.000000 | 1.65096e-64 | 1.00000 |
| rad47         | 1.27344e-73 | 1.000000 | 1.27348e-73 | 1.00000 |

0.100000000E-07 Pa, 150.000000 K

=====

| Rate constant | True (fraction)     | Effective (fraction) |
|---------------|---------------------|----------------------|
| Total         | 3.27736e-32 (1.00 ) | 3.27722e-32 (1.00 )  |

| species     | PYtrue      | Cumul    | PYeffective | Cumul   |
|-------------|-------------|----------|-------------|---------|
| Indene+H    | 0.999956    | 0.999956 | 1.00000     | 1.00000 |
| Benzyl+C2H2 | 4.38587e-05 | 1.000000 | 0.00000     | 1.00000 |
| rad6        | 1.14871e-07 | 1.000000 | 1.14876e-07 | 1.00000 |
| rad30       | 9.42303e-11 | 1.000000 | 9.42344e-11 | 1.00000 |
| rad2        | 6.64426e-11 | 1.000000 | 6.64455e-11 | 1.00000 |
| rad35       | 4.87934e-11 | 1.000000 | 4.87956e-11 | 1.00000 |
| PAH9+H      | 3.94532e-11 | 1.000000 | 3.94549e-11 | 1.00000 |
| rad28       | 1.36929e-11 | 1.000000 | 1.36935e-11 | 1.00000 |
| PhCHCCH2+H  | 1.28535e-11 | 1.000000 | 1.28540e-11 | 1.00000 |
| rad7        | 8.42791e-12 | 1.000000 | 8.42828e-12 | 1.00000 |
| PhCCH+CH3   | 6.85519e-12 | 1.000000 | 6.85549e-12 | 1.00000 |
| rad1        | 4.36763e-12 | 1.000000 | 4.36782e-12 | 1.00000 |
| rad10       | 3.74892e-12 | 1.000000 | 3.74909e-12 | 1.00000 |
| rad38       | 3.10719e-12 | 1.000000 | 3.10732e-12 | 1.00000 |
| PhCCCH3+H   | 2.30617e-12 | 1.000000 | 2.30627e-12 | 1.00000 |
| rad11       | 2.07173e-12 | 1.000000 | 2.07182e-12 | 1.00000 |
| rad15       | 1.73107e-12 | 1.000000 | 1.73115e-12 | 1.00000 |
| rad26       | 1.21020e-12 | 1.000000 | 1.21026e-12 | 1.00000 |
| rad3        | 4.21497e-13 | 1.000000 | 4.21515e-13 | 1.00000 |
| rad4        | 2.15310e-13 | 1.000000 | 2.15320e-13 | 1.00000 |
| rad13       | 4.73406e-14 | 1.000000 | 4.73427e-14 | 1.00000 |
| rad8        | 2.79165e-15 | 1.000000 | 2.79177e-15 | 1.00000 |
| rad9        | 3.15307e-16 | 1.000000 | 3.15321e-16 | 1.00000 |
| Ph+MeAc     | 2.92026e-16 | 1.000000 | 2.92039e-16 | 1.00000 |
| PAH7+H      | 1.43745e-16 | 1.000000 | 1.43751e-16 | 1.00000 |
| rad33       | 9.25522e-17 | 1.000000 | 9.25562e-17 | 1.00000 |
| rad46       | 5.06729e-17 | 1.000000 | 5.06751e-17 | 1.00000 |
| rad27       | 1.99868e-17 | 1.000000 | 1.99877e-17 | 1.00000 |
| rad12       | 1.30971e-17 | 1.000000 | 1.30976e-17 | 1.00000 |
| rad39       | 5.41967e-18 | 1.000000 | 5.41990e-18 | 1.00000 |
| rad20       | 5.41421e-18 | 1.000000 | 5.41445e-18 | 1.00000 |
| rad21       | 3.41253e-18 | 1.000000 | 3.41268e-18 | 1.00000 |
| Ph+Allene   | 1.93212e-18 | 1.000000 | 1.93221e-18 | 1.00000 |
| rad25       | 5.73447e-19 | 1.000000 | 5.73472e-19 | 1.00000 |
| rad14       | 2.64457e-19 | 1.000000 | 2.64469e-19 | 1.00000 |
| rad18       | 2.52697e-20 | 1.000000 | 2.52708e-20 | 1.00000 |
| rad60syn    | 1.29362e-20 | 1.000000 | 1.29368e-20 | 1.00000 |
| rad31       | 4.12320e-21 | 1.000000 | 4.12338e-21 | 1.00000 |
| rad22       | 1.68626e-21 | 1.000000 | 1.68634e-21 | 1.00000 |
| rad60anti   | 1.42014e-21 | 1.000000 | 1.42020e-21 | 1.00000 |

|               |             |          |             |         |
|---------------|-------------|----------|-------------|---------|
| rad23         | 6.96400e-22 | 1.000000 | 6.96430e-22 | 1.00000 |
| PhCH2CCH+H    | 3.70705e-22 | 1.000000 | 3.70721e-22 | 1.00000 |
| rad37         | 1.02531e-22 | 1.000000 | 1.02535e-22 | 1.00000 |
| rad45         | 7.95299e-24 | 1.000000 | 7.95334e-24 | 1.00000 |
| rad36         | 4.93361e-25 | 1.000000 | 4.93383e-25 | 1.00000 |
| rad5          | 3.31296e-25 | 1.000000 | 3.31311e-25 | 1.00000 |
| rad24         | 2.53730e-25 | 1.000000 | 2.53741e-25 | 1.00000 |
| PAH3+H        | 1.81874e-26 | 1.000000 | 1.81882e-26 | 1.00000 |
| rad59         | 8.19792e-27 | 1.000000 | 8.19828e-27 | 1.00000 |
| rad50         | 5.49371e-28 | 1.000000 | 5.49395e-28 | 1.00000 |
| rad19syn      | 2.97402e-41 | 1.000000 | 2.97415e-41 | 1.00000 |
| rad52         | 5.08447e-45 | 1.000000 | 5.08469e-45 | 1.00000 |
| PAH10+CH3     | 2.77463e-45 | 1.000000 | 2.77475e-45 | 1.00000 |
| rad54         | 8.65299e-46 | 1.000000 | 8.65337e-46 | 1.00000 |
| rad43         | 6.57134e-46 | 1.000000 | 6.57163e-46 | 1.00000 |
| rad62         | 4.99916e-48 | 1.000000 | 4.99938e-48 | 1.00000 |
| rad51         | 1.15983e-50 | 1.000000 | 1.15988e-50 | 1.00000 |
| rad70         | 2.34405e-53 | 1.000000 | 2.34415e-53 | 1.00000 |
| PhcycC3H3_A+H | 1.51492e-53 | 1.000000 | 1.51499e-53 | 1.00000 |
| rad55         | 7.36474e-54 | 1.000000 | 7.36506e-54 | 1.00000 |
| rad65         | 1.07919e-54 | 1.000000 | 1.07924e-54 | 1.00000 |
| rad58         | 7.17782e-57 | 1.000000 | 7.17813e-57 | 1.00000 |
| PAH1+H        | 4.37525e-57 | 1.000000 | 4.37544e-57 | 1.00000 |
| rad34         | 7.85937e-59 | 1.000000 | 7.85971e-59 | 1.00000 |
| rad42         | 5.31534e-61 | 1.000000 | 5.31557e-61 | 1.00000 |
| rad41         | 2.97642e-61 | 1.000000 | 2.97655e-61 | 1.00000 |
| rad47         | 2.22231e-70 | 1.000000 | 2.22241e-70 | 1.00000 |

0.100000000E-07 Pa, 160.000000 K

| Rate constant | True (fraction)     | Effective (fraction) |
|---------------|---------------------|----------------------|
| Total         | 5.01169e-31 (1.00 ) | 5.01140e-31 (1.00 )  |

| species     | PYtrue      | Cumul    | PYeffective | Cumul   |
|-------------|-------------|----------|-------------|---------|
| Indene+H    | 0.999943    | 0.999943 | 1.00000     | 1.00000 |
| Benzyl+C2H2 | 5.68170e-05 | 1.000000 | 0.00000     | 1.00000 |
| rad6        | 9.13399e-08 | 1.000000 | 9.13451e-08 | 1.00000 |
| rad30       | 1.80711e-10 | 1.000000 | 1.80721e-10 | 1.00000 |
| rad2        | 7.37042e-11 | 1.000000 | 7.37084e-11 | 1.00000 |
| rad35       | 6.58346e-11 | 1.000000 | 6.58383e-11 | 1.00000 |
| PAH9+H      | 5.80044e-11 | 1.000000 | 5.80077e-11 | 1.00000 |
| PhCHCCH2+H  | 4.07908e-11 | 1.000000 | 4.07931e-11 | 1.00000 |
| PhCCH+CH3   | 2.50501e-11 | 1.000000 | 2.50515e-11 | 1.00000 |
| rad28       | 1.93288e-11 | 1.000000 | 1.93299e-11 | 1.00000 |
| PhCCCH3+H   | 8.71075e-12 | 1.000000 | 8.71125e-12 | 1.00000 |
| rad7        | 6.71452e-12 | 1.000000 | 6.71490e-12 | 1.00000 |
| rad38       | 5.30696e-12 | 1.000000 | 5.30726e-12 | 1.00000 |
| rad1        | 4.87237e-12 | 1.000000 | 4.87264e-12 | 1.00000 |
| rad15       | 4.38964e-12 | 1.000000 | 4.38989e-12 | 1.00000 |
| rad10       | 3.40705e-12 | 1.000000 | 3.40724e-12 | 1.00000 |
| rad26       | 1.79125e-12 | 1.000000 | 1.79136e-12 | 1.00000 |
| rad11       | 1.65166e-12 | 1.000000 | 1.65175e-12 | 1.00000 |
| rad3        | 5.34163e-13 | 1.000000 | 5.34193e-13 | 1.00000 |
| rad4        | 2.73284e-13 | 1.000000 | 2.73299e-13 | 1.00000 |
| rad13       | 3.77638e-14 | 1.000000 | 3.77660e-14 | 1.00000 |
| rad8        | 1.39807e-14 | 1.000000 | 1.39815e-14 | 1.00000 |
| Ph+MeAc     | 2.35651e-15 | 1.000000 | 2.35664e-15 | 1.00000 |
| rad9        | 1.94217e-15 | 1.000000 | 1.94228e-15 | 1.00000 |
| PAH7+H      | 9.30879e-16 | 1.000000 | 9.30932e-16 | 1.00000 |
| rad46       | 1.95509e-16 | 1.000000 | 1.95521e-16 | 1.00000 |
| rad12       | 8.86556e-17 | 1.000000 | 8.86607e-17 | 1.00000 |
| rad33       | 7.41214e-17 | 1.000000 | 7.41256e-17 | 1.00000 |
| rad39       | 4.23057e-17 | 1.000000 | 4.23081e-17 | 1.00000 |
| rad27       | 2.56540e-17 | 1.000000 | 2.56554e-17 | 1.00000 |
| Ph+Allene   | 2.05972e-17 | 1.000000 | 2.05983e-17 | 1.00000 |
| rad20       | 4.83966e-18 | 1.000000 | 4.83993e-18 | 1.00000 |
| rad21       | 3.05483e-18 | 1.000000 | 3.05500e-18 | 1.00000 |
| rad25       | 1.03962e-18 | 1.000000 | 1.03968e-18 | 1.00000 |
| rad14       | 5.29202e-19 | 1.000000 | 5.29232e-19 | 1.00000 |
| rad60syn    | 1.20851e-19 | 1.000000 | 1.20858e-19 | 1.00000 |
| rad18       | 2.24864e-20 | 1.000000 | 2.24877e-20 | 1.00000 |
| rad60anti   | 1.53286e-20 | 1.000000 | 1.53294e-20 | 1.00000 |
| PhCH2CCH+H  | 7.07506e-21 | 1.000000 | 7.07546e-21 | 1.00000 |
| rad31       | 3.75035e-21 | 1.000000 | 3.75056e-21 | 1.00000 |
| rad37       | 1.92371e-21 | 1.000000 | 1.92382e-21 | 1.00000 |
| rad22       | 1.49083e-21 | 1.000000 | 1.49091e-21 | 1.00000 |
| rad23       | 7.15198e-22 | 1.000000 | 7.15238e-22 | 1.00000 |
| rad45       | 1.00861e-23 | 1.000000 | 1.00867e-23 | 1.00000 |

|               |             |          |             |         |
|---------------|-------------|----------|-------------|---------|
| rad5          | 7.57862e-24 | 1.000000 | 7.57905e-24 | 1.00000 |
| rad36         | 6.26224e-25 | 1.000000 | 6.26260e-25 | 1.00000 |
| PAH3+H        | 5.45434e-25 | 1.000000 | 5.45465e-25 | 1.00000 |
| rad24         | 2.49313e-25 | 1.000000 | 2.49327e-25 | 1.00000 |
| rad59         | 2.30298e-25 | 1.000000 | 2.30311e-25 | 1.00000 |
| rad50         | 1.44925e-26 | 1.000000 | 1.44934e-26 | 1.00000 |
| rad19syn      | 3.66145e-38 | 1.000000 | 3.66166e-38 | 1.00000 |
| rad52         | 4.66836e-42 | 1.000000 | 4.66862e-42 | 1.00000 |
| PAH10+CH3     | 1.37430e-42 | 1.000000 | 1.37438e-42 | 1.00000 |
| rad54         | 1.04657e-42 | 1.000000 | 1.04663e-42 | 1.00000 |
| rad43         | 3.21717e-43 | 1.000000 | 3.21735e-43 | 1.00000 |
| rad62         | 2.33467e-45 | 1.000000 | 2.33480e-45 | 1.00000 |
| rad51         | 6.68076e-48 | 1.000000 | 6.68114e-48 | 1.00000 |
| rad70         | 1.33435e-50 | 1.000000 | 1.33443e-50 | 1.00000 |
| PhcycC3H3_A+H | 8.52144e-51 | 1.000000 | 8.52192e-51 | 1.00000 |
| rad55         | 4.13517e-51 | 1.000000 | 4.13541e-51 | 1.00000 |
| rad65         | 7.52093e-52 | 1.000000 | 7.52136e-52 | 1.00000 |
| rad58         | 4.07351e-54 | 1.000000 | 4.07374e-54 | 1.00000 |
| PAH1+H        | 2.97695e-54 | 1.000000 | 2.97712e-54 | 1.00000 |
| rad34         | 5.75684e-56 | 1.000000 | 5.75717e-56 | 1.00000 |
| rad42         | 4.98169e-58 | 1.000000 | 4.98197e-58 | 1.00000 |
| rad41         | 2.88106e-58 | 1.000000 | 2.88122e-58 | 1.00000 |
| rad47         | 2.05177e-67 | 1.000000 | 2.05189e-67 | 1.00000 |

0.100000000E-07 Pa, 170.000000 K

| Rate constant | True (fraction)     | Effective (fraction) |
|---------------|---------------------|----------------------|
| Total         | 5.54821e-30 (1.00 ) | 5.54780e-30 (1.00 )  |

| species     | PYtrue      | Cumul    | PYeffective | Cumul   |
|-------------|-------------|----------|-------------|---------|
| Indene+H    | 0.999927    | 0.999927 | 1.00000     | 1.00000 |
| Benzyl+C2H2 | 7.33329e-05 | 1.00000  | 0.00000     | 1.00000 |
| rad6        | 7.28739e-08 | 1.00000  | 7.28793e-08 | 1.00000 |
| rad30       | 3.25169e-10 | 1.00000  | 3.25193e-10 | 1.00000 |
| PhCHCCH2+H  | 1.14889e-10 | 1.00000  | 1.14898e-10 | 1.00000 |
| rad35       | 8.86104e-11 | 1.00000  | 8.86169e-11 | 1.00000 |
| PAH9+H      | 8.41121e-11 | 1.00000  | 8.41183e-11 | 1.00000 |
| PhCCH+CH3   | 7.98132e-11 | 1.00000  | 7.98190e-11 | 1.00000 |
| rad2        | 4.74786e-11 | 1.00000  | 4.74820e-11 | 1.00000 |
| PhCCCH3+H   | 2.84864e-11 | 1.00000  | 2.84885e-11 | 1.00000 |
| rad28       | 2.55100e-11 | 1.00000  | 2.55119e-11 | 1.00000 |
| rad15       | 1.00714e-11 | 1.00000  | 1.00722e-11 | 1.00000 |
| rad38       | 8.75582e-12 | 1.00000  | 8.75646e-12 | 1.00000 |
| rad7        | 5.36782e-12 | 1.00000  | 5.36821e-12 | 1.00000 |
| rad1        | 3.15755e-12 | 1.00000  | 3.15778e-12 | 1.00000 |
| rad10       | 2.71020e-12 | 1.00000  | 2.71039e-12 | 1.00000 |
| rad26       | 2.46523e-12 | 1.00000  | 2.46541e-12 | 1.00000 |
| rad11       | 1.32133e-12 | 1.00000  | 1.32143e-12 | 1.00000 |
| rad3        | 3.07382e-13 | 1.00000  | 3.07404e-13 | 1.00000 |
| rad4        | 1.57522e-13 | 1.00000  | 1.57533e-13 | 1.00000 |
| rad8        | 5.82574e-14 | 1.00000  | 5.82616e-14 | 1.00000 |
| rad13       | 3.02297e-14 | 1.00000  | 3.02319e-14 | 1.00000 |
| Ph+MeAc     | 1.49961e-14 | 1.00000  | 1.49972e-14 | 1.00000 |
| rad9        | 9.71803e-15 | 1.00000  | 9.71874e-15 | 1.00000 |
| PAH7+H      | 4.85293e-15 | 1.00000  | 4.85329e-15 | 1.00000 |
| rad46       | 6.51676e-16 | 1.00000  | 6.51724e-16 | 1.00000 |
| rad12       | 4.79733e-16 | 1.00000  | 4.79768e-16 | 1.00000 |
| rad39       | 2.60728e-16 | 1.00000  | 2.60747e-16 | 1.00000 |
| Ph+Allene   | 1.67494e-16 | 1.00000  | 1.67506e-16 | 1.00000 |
| rad33       | 5.95850e-17 | 1.00000  | 5.95894e-17 | 1.00000 |
| rad27       | 3.11696e-17 | 1.00000  | 3.11719e-17 | 1.00000 |
| rad20       | 4.33990e-18 | 1.00000  | 4.34022e-18 | 1.00000 |
| rad21       | 2.74367e-18 | 1.00000  | 2.74388e-18 | 1.00000 |
| rad25       | 1.71199e-18 | 1.00000  | 1.71211e-18 | 1.00000 |
| rad14       | 9.50614e-19 | 1.00000  | 9.50684e-19 | 1.00000 |
| rad60syn    | 8.67681e-19 | 1.00000  | 8.67744e-19 | 1.00000 |
| rad60anti   | 1.24865e-19 | 1.00000  | 1.24875e-19 | 1.00000 |
| PhCH2CCH+H  | 9.53113e-20 | 1.00000  | 9.53183e-20 | 1.00000 |
| rad37       | 2.51871e-20 | 1.00000  | 2.51889e-20 | 1.00000 |
| rad18       | 2.00568e-20 | 1.00000  | 2.00582e-20 | 1.00000 |
| rad31       | 3.41676e-21 | 1.00000  | 3.41701e-21 | 1.00000 |
| rad22       | 1.32045e-21 | 1.00000  | 1.32055e-21 | 1.00000 |
| rad23       | 7.65045e-22 | 1.00000  | 7.65101e-22 | 1.00000 |
| rad5        | 1.17217e-22 | 1.00000  | 1.17225e-22 | 1.00000 |
| rad45       | 1.02905e-23 | 1.00000  | 1.02912e-23 | 1.00000 |
| PAH3+H      | 1.00146e-23 | 1.00000  | 1.00154e-23 | 1.00000 |
| rad59       | 4.07844e-24 | 1.00000  | 4.07874e-24 | 1.00000 |
| rad36       | 6.39667e-25 | 1.00000  | 6.39714e-25 | 1.00000 |

|               |             |         |             |         |
|---------------|-------------|---------|-------------|---------|
| rad50         | 2.47924e-25 | 1.00000 | 2.47942e-25 | 1.00000 |
| rad24         | 2.46591e-25 | 1.00000 | 2.46609e-25 | 1.00000 |
| rad19syn      | 3.67674e-29 | 1.00000 | 3.67701e-29 | 1.00000 |
| rad52         | 2.29678e-31 | 1.00000 | 2.29695e-31 | 1.00000 |
| rad54         | 8.12228e-40 | 1.00000 | 8.12287e-40 | 1.00000 |
| PAH10+CH3     | 6.62224e-40 | 1.00000 | 6.62272e-40 | 1.00000 |
| rad43         | 1.53227e-40 | 1.00000 | 1.53238e-40 | 1.00000 |
| rad62         | 9.67410e-43 | 1.00000 | 9.67481e-43 | 1.00000 |
| rad51         | 2.43414e-45 | 1.00000 | 2.43432e-45 | 1.00000 |
| rad70         | 5.74446e-48 | 1.00000 | 5.74488e-48 | 1.00000 |
| PhcycC3H3_A+H | 3.41945e-48 | 1.00000 | 3.41970e-48 | 1.00000 |
| rad55         | 1.68815e-48 | 1.00000 | 1.68827e-48 | 1.00000 |
| rad65         | 2.93276e-49 | 1.00000 | 2.93297e-49 | 1.00000 |
| rad58         | 1.58246e-51 | 1.00000 | 1.58258e-51 | 1.00000 |
| PAH1+H        | 1.12917e-51 | 1.00000 | 1.12925e-51 | 1.00000 |
| rad34         | 2.29572e-53 | 1.00000 | 2.29589e-53 | 1.00000 |
| rad42         | 2.62282e-55 | 1.00000 | 2.62302e-55 | 1.00000 |
| rad41         | 1.58287e-55 | 1.00000 | 1.58299e-55 | 1.00000 |
| rad47         | 1.04851e-64 | 1.00000 | 1.04858e-64 | 1.00000 |

0.1000000000E-07 Pa, 180.000000 K

| Rate constant | True (fraction)     | Effective (fraction) |
|---------------|---------------------|----------------------|
| Total         | 4.69315e-29 (1.00 ) | 4.69271e-29 (1.00 )  |

| species     | PYtrue      | Cumul    | PYeffective | Cumul   |
|-------------|-------------|----------|-------------|---------|
| Indene+H    | 0.999906    | 0.999906 | 1.00000     | 1.00000 |
| Benzyl+C2H2 | 9.42882e-05 | 1.00000  | 0.00000     | 1.00000 |
| rad6        | 5.82896e-08 | 1.00000  | 5.82951e-08 | 1.00000 |
| rad30       | 5.55653e-10 | 1.00000  | 5.55705e-10 | 1.00000 |
| PhCHCCH2+H  | 2.92963e-10 | 1.00000  | 2.92990e-10 | 1.00000 |
| PhCCH+CH3   | 2.26858e-10 | 1.00000  | 2.26879e-10 | 1.00000 |
| PAH9+H      | 1.20677e-10 | 1.00000  | 1.20689e-10 | 1.00000 |
| rad35       | 1.19033e-10 | 1.00000  | 1.19045e-10 | 1.00000 |
| PhCCCH3+H   | 8.26148e-11 | 1.00000  | 8.26226e-11 | 1.00000 |
| rad2        | 6.56724e-11 | 1.00000  | 6.56785e-11 | 1.00000 |
| rad28       | 3.18290e-11 | 1.00000  | 3.18320e-11 | 1.00000 |
| rad15       | 2.12854e-11 | 1.00000  | 2.12874e-11 | 1.00000 |
| rad38       | 1.40492e-11 | 1.00000  | 1.40505e-11 | 1.00000 |
| rad1        | 4.39653e-12 | 1.00000  | 4.39695e-12 | 1.00000 |
| rad7        | 4.30245e-12 | 1.00000  | 4.30285e-12 | 1.00000 |
| rad26       | 3.19276e-12 | 1.00000  | 3.19306e-12 | 1.00000 |
| rad10       | 2.56383e-12 | 1.00000  | 2.56407e-12 | 1.00000 |
| rad11       | 1.05987e-12 | 1.00000  | 1.05997e-12 | 1.00000 |
| rad3        | 4.81749e-13 | 1.00000  | 4.81794e-13 | 1.00000 |
| rad4        | 2.47334e-13 | 1.00000  | 2.47357e-13 | 1.00000 |
| rad8        | 2.08375e-13 | 1.00000  | 2.08395e-13 | 1.00000 |
| Ph+MeAc     | 7.82673e-14 | 1.00000  | 7.82747e-14 | 1.00000 |
| rad9        | 4.09070e-14 | 1.00000  | 4.09108e-14 | 1.00000 |
| rad13       | 2.42636e-14 | 1.00000  | 2.42659e-14 | 1.00000 |
| PAH7+H      | 2.11364e-14 | 1.00000  | 2.11384e-14 | 1.00000 |
| rad12       | 2.15518e-15 | 1.00000  | 2.15538e-15 | 1.00000 |
| rad46       | 1.92593e-15 | 1.00000  | 1.92612e-15 | 1.00000 |
| rad39       | 1.32011e-15 | 1.00000  | 1.32023e-15 | 1.00000 |
| Ph+Allene   | 1.08715e-15 | 1.00000  | 1.08725e-15 | 1.00000 |
| rad33       | 4.80425e-17 | 1.00000  | 4.80471e-17 | 1.00000 |
| rad27       | 3.61742e-17 | 1.00000  | 3.61776e-17 | 1.00000 |
| rad60syn    | 5.00699e-18 | 1.00000  | 5.00746e-18 | 1.00000 |
| rad20       | 3.90247e-18 | 1.00000  | 3.90284e-18 | 1.00000 |
| rad25       | 2.60185e-18 | 1.00000  | 2.60210e-18 | 1.00000 |
| rad21       | 2.47128e-18 | 1.00000  | 2.47152e-18 | 1.00000 |
| rad14       | 1.56052e-18 | 1.00000  | 1.56067e-18 | 1.00000 |
| PhCH2CCH+H  | 9.66854e-19 | 1.00000  | 9.66946e-19 | 1.00000 |
| rad60anti   | 8.05149e-19 | 1.00000  | 8.05224e-19 | 1.00000 |
| rad37       | 2.45036e-19 | 1.00000  | 2.45059e-19 | 1.00000 |
| rad18       | 1.79229e-20 | 1.00000  | 1.79245e-20 | 1.00000 |
| rad31       | 3.15373e-21 | 1.00000  | 3.15402e-21 | 1.00000 |
| rad5        | 1.33540e-21 | 1.00000  | 1.33553e-21 | 1.00000 |
| rad22       | 1.17107e-21 | 1.00000  | 1.17118e-21 | 1.00000 |
| rad23       | 8.57175e-22 | 1.00000  | 8.57256e-22 | 1.00000 |
| PAH3+H      | 1.31623e-22 | 1.00000  | 1.31635e-22 | 1.00000 |
| rad59       | 5.19690e-23 | 1.00000  | 5.19739e-23 | 1.00000 |
| rad45       | 1.40713e-23 | 1.00000  | 1.40726e-23 | 1.00000 |
| rad50       | 3.08696e-24 | 1.00000  | 3.08725e-24 | 1.00000 |
| rad36       | 8.75945e-25 | 1.00000  | 8.76028e-25 | 1.00000 |
| rad24       | 2.45424e-25 | 1.00000  | 2.45447e-25 | 1.00000 |
| rad19syn    | 4.66138e-27 | 1.00000  | 4.66182e-27 | 1.00000 |
| rad52       | 1.37731e-29 | 1.00000  | 1.37744e-29 | 1.00000 |

|               |             |         |             |         |
|---------------|-------------|---------|-------------|---------|
| rad54         | 8.06868e-37 | 1.00000 | 8.06944e-37 | 1.00000 |
| PAH10+CH3     | 5.46501e-37 | 1.00000 | 5.46553e-37 | 1.00000 |
| rad43         | 1.25902e-37 | 1.00000 | 1.25914e-37 | 1.00000 |
| rad62         | 7.19412e-40 | 1.00000 | 7.19479e-40 | 1.00000 |
| rad51         | 1.15313e-42 | 1.00000 | 1.15324e-42 | 1.00000 |
| rad70         | 3.98152e-45 | 1.00000 | 3.98189e-45 | 1.00000 |
| PhcycC3H3_A+H | 2.07643e-45 | 1.00000 | 2.07662e-45 | 1.00000 |
| rad55         | 1.07056e-45 | 1.00000 | 1.07066e-45 | 1.00000 |
| rad65         | 9.17372e-47 | 1.00000 | 9.17459e-47 | 1.00000 |
| rad58         | 8.58339e-49 | 1.00000 | 8.58420e-49 | 1.00000 |
| PAH1+H        | 2.99042e-49 | 1.00000 | 2.99070e-49 | 1.00000 |
| rad34         | 5.91558e-51 | 1.00000 | 5.91614e-51 | 1.00000 |
| rad42         | 9.21761e-53 | 1.00000 | 9.21848e-53 | 1.00000 |
| rad41         | 5.89569e-53 | 1.00000 | 5.89625e-53 | 1.00000 |
| rad47         | 3.85148e-62 | 1.00000 | 3.85184e-62 | 1.00000 |

0.100000000E-07 Pa, 190.000000 K

| =====         |                     |          |                      |         |
|---------------|---------------------|----------|----------------------|---------|
| Rate constant | True (fraction)     |          | Effective (fraction) |         |
| -----         |                     |          |                      |         |
| Total         | 3.16530e-28 (1.00 ) |          | 3.16492e-28 (1.00 )  |         |
| species       | PYtrue              | Cumul    | PYeffective          | Cumul   |
| -----         |                     |          |                      |         |
| Indene+H      | 0.999879            | 0.999879 | 1.00000              | 1.00000 |
| Benzyl+C2H2   | 0.000120746         | 1.00000  | 0.00000              | 1.00000 |
| rad6          | 4.67121e-08         | 1.00000  | 4.67178e-08          | 1.00000 |
| rad30         | 9.10077e-10         | 1.00000  | 9.10187e-10          | 1.00000 |
| PhCHCCH2+H    | 6.86965e-10         | 1.00000  | 6.87048e-10          | 1.00000 |
| PhCCH+CH3     | 5.85653e-10         | 1.00000  | 5.85723e-10          | 1.00000 |
| PhCCH3+H      | 2.16525e-10         | 1.00000  | 2.16551e-10          | 1.00000 |
| PAH9+H        | 1.71637e-10         | 1.00000  | 1.71658e-10          | 1.00000 |
| rad35         | 1.59590e-10         | 1.00000  | 1.59609e-10          | 1.00000 |
| rad15         | 4.20213e-11         | 1.00000  | 4.20264e-11          | 1.00000 |
| rad2          | 3.88050e-11         | 1.00000  | 3.88097e-11          | 1.00000 |
| rad28         | 3.78724e-11         | 1.00000  | 3.78770e-11          | 1.00000 |
| rad38         | 2.20307e-11         | 1.00000  | 2.20334e-11          | 1.00000 |
| rad26         | 3.92809e-12         | 1.00000  | 3.92857e-12          | 1.00000 |
| rad7          | 3.45527e-12         | 1.00000  | 3.45569e-12          | 1.00000 |
| rad1          | 2.61658e-12         | 1.00000  | 2.61690e-12          | 1.00000 |
| rad10         | 2.14587e-12         | 1.00000  | 2.14613e-12          | 1.00000 |
| rad11         | 8.51837e-13         | 1.00000  | 8.51939e-13          | 1.00000 |
| rad8          | 6.55644e-13         | 1.00000  | 6.55724e-13          | 1.00000 |
| Ph+MeAc       | 3.45556e-13         | 1.00000  | 3.45597e-13          | 1.00000 |
| rad3          | 2.02266e-13         | 1.00000  | 2.02290e-13          | 1.00000 |
| rad9          | 1.48910e-13         | 1.00000  | 1.48928e-13          | 1.00000 |
| rad4          | 1.04051e-13         | 1.00000  | 1.04064e-13          | 1.00000 |
| PAH7+H        | 7.91866e-14         | 1.00000  | 7.91962e-14          | 1.00000 |
| rad13         | 1.95145e-14         | 1.00000  | 1.95168e-14          | 1.00000 |
| rad12         | 8.28114e-15         | 1.00000  | 8.28214e-15          | 1.00000 |
| Ph+Allene     | 5.83723e-15         | 1.00000  | 5.83794e-15          | 1.00000 |
| rad39         | 5.66588e-15         | 1.00000  | 5.66657e-15          | 1.00000 |
| rad46         | 5.15013e-15         | 1.00000  | 5.15075e-15          | 1.00000 |
| rad27         | 4.03873e-17         | 1.00000  | 4.03921e-17          | 1.00000 |
| rad33         | 3.88274e-17         | 1.00000  | 3.88321e-17          | 1.00000 |
| rad60syn      | 2.40561e-17         | 1.00000  | 2.40590e-17          | 1.00000 |
| PhCH2CCH+H    | 7.73355e-18         | 1.00000  | 7.73448e-18          | 1.00000 |
| rad60anti     | 4.26710e-18         | 1.00000  | 4.26761e-18          | 1.00000 |
| rad25         | 3.69544e-18         | 1.00000  | 3.69588e-18          | 1.00000 |
| rad20         | 3.51764e-18         | 1.00000  | 3.51806e-18          | 1.00000 |
| rad14         | 2.37430e-18         | 1.00000  | 2.37459e-18          | 1.00000 |
| rad21         | 2.23161e-18         | 1.00000  | 2.23188e-18          | 1.00000 |
| rad37         | 1.85740e-18         | 1.00000  | 1.85763e-18          | 1.00000 |
| rad18         | 1.60396e-20         | 1.00000  | 1.60416e-20          | 1.00000 |
| rad5          | 1.17921e-20         | 1.00000  | 1.17936e-20          | 1.00000 |
| rad31         | 2.92082e-21         | 1.00000  | 2.92117e-21          | 1.00000 |
| PAH3+H        | 1.32122e-21         | 1.00000  | 1.32138e-21          | 1.00000 |
| rad22         | 1.03953e-21         | 1.00000  | 1.03965e-21          | 1.00000 |
| rad23         | 1.00657e-21         | 1.00000  | 1.00669e-21          | 1.00000 |
| rad59         | 5.06390e-22         | 1.00000  | 5.06451e-22          | 1.00000 |
| rad50         | 2.96740e-23         | 1.00000  | 2.96776e-23          | 1.00000 |
| rad45         | 1.81919e-23         | 1.00000  | 1.81941e-23          | 1.00000 |
| rad36         | 1.13441e-24         | 1.00000  | 1.13455e-24          | 1.00000 |
| rad24         | 2.45741e-25         | 1.00000  | 2.45771e-25          | 1.00000 |
| rad19syn      | 1.22411e-25         | 1.00000  | 1.22426e-25          | 1.00000 |
| rad54         | 5.45682e-28         | 1.00000  | 5.45748e-28          | 1.00000 |
| PAH10+CH3     | 3.67387e-28         | 1.00000  | 3.67432e-28          | 1.00000 |
| rad52         | 3.13061e-28         | 1.00000  | 3.13098e-28          | 1.00000 |
| rad43         | 8.93613e-29         | 1.00000  | 8.93721e-29          | 1.00000 |
| rad62         | 4.15621e-30         | 1.00000  | 4.15672e-30          | 1.00000 |



|               |             |          |             |         |
|---------------|-------------|----------|-------------|---------|
| rad51         | 2.56194e-31 | 1.000000 | 2.56225e-31 | 1.00000 |
| rad70         | 7.96539e-42 | 1.000000 | 7.96636e-42 | 1.00000 |
| PhcycC3H3_A+H | 3.95378e-42 | 1.000000 | 3.95426e-42 | 1.00000 |
| rad55         | 2.07908e-42 | 1.000000 | 2.07933e-42 | 1.00000 |
| rad65         | 5.51260e-44 | 1.000000 | 5.51327e-44 | 1.00000 |
| rad58         | 1.52825e-45 | 1.000000 | 1.52844e-45 | 1.00000 |
| PAH1+H        | 1.34032e-46 | 1.000000 | 1.34048e-46 | 1.00000 |
| rad34         | 1.87868e-48 | 1.000000 | 1.87890e-48 | 1.00000 |
| rad42         | 2.99124e-50 | 1.000000 | 2.99160e-50 | 1.00000 |
| rad41         | 2.03940e-50 | 1.000000 | 2.03965e-50 | 1.00000 |
| rad47         | 1.45209e-59 | 1.000000 | 1.45227e-59 | 1.00000 |

0.100000000E-07 Pa, 200.000000 K

| Rate constant | True (fraction)     | Effective (fraction) |
|---------------|---------------------|----------------------|
| Total         | 1.76115e-27 (1.00 ) | 1.76088e-27 (1.00 )  |

| species       | PYtrue      | Cumul    | PYeffective | Cumul   |
|---------------|-------------|----------|-------------|---------|
| Indene+H      | 0.999846    | 0.999846 | 1.00000     | 1.00000 |
| Benzyl+C2H2   | 0.000153979 | 1.000000 | 0.00000     | 1.00000 |
| rad6          | 3.74850e-08 | 1.000000 | 3.74908e-08 | 1.00000 |
| PhCHCCH2+H    | 1.49977e-09 | 1.000000 | 1.50000e-09 | 1.00000 |
| rad30         | 1.43889e-09 | 1.000000 | 1.43911e-09 | 1.00000 |
| PhCCH+CH3     | 1.39291e-09 | 1.000000 | 1.39312e-09 | 1.00000 |
| PhCCCH3+H     | 5.20607e-10 | 1.000000 | 5.20687e-10 | 1.00000 |
| PAH9+H        | 2.42288e-10 | 1.000000 | 2.42326e-10 | 1.00000 |
| rad35         | 2.13492e-10 | 1.000000 | 2.13525e-10 | 1.00000 |
| rad15         | 7.83498e-11 | 1.000000 | 7.83619e-11 | 1.00000 |
| rad28         | 4.32741e-11 | 1.000000 | 4.32808e-11 | 1.00000 |
| rad38         | 3.38822e-11 | 1.000000 | 3.38874e-11 | 1.00000 |
| rad2          | 1.88751e-11 | 1.000000 | 1.88780e-11 | 1.00000 |
| rad26         | 4.62564e-12 | 1.000000 | 4.62636e-12 | 1.00000 |
| rad7          | 2.77886e-12 | 1.000000 | 2.77929e-12 | 1.00000 |
| rad8          | 1.85062e-12 | 1.000000 | 1.85090e-12 | 1.00000 |
| rad10         | 1.53970e-12 | 1.000000 | 1.53993e-12 | 1.00000 |
| Ph+MeAc       | 1.32297e-12 | 1.000000 | 1.32317e-12 | 1.00000 |
| rad1          | 1.28263e-12 | 1.000000 | 1.28283e-12 | 1.00000 |
| rad11         | 6.85641e-13 | 1.000000 | 6.85746e-13 | 1.00000 |
| rad9          | 4.79210e-13 | 1.000000 | 4.79283e-13 | 1.00000 |
| rad3          | 3.94688e-13 | 1.000000 | 3.94749e-13 | 1.00000 |
| PAH7+H        | 2.61205e-13 | 1.000000 | 2.61245e-13 | 1.00000 |
| rad4          | 2.03488e-13 | 1.000000 | 2.03520e-13 | 1.00000 |
| rad12         | 2.78699e-14 | 1.000000 | 2.78742e-14 | 1.00000 |
| Ph+Allene     | 2.66782e-14 | 1.000000 | 2.66823e-14 | 1.00000 |
| rad39         | 2.11359e-14 | 1.000000 | 2.11392e-14 | 1.00000 |
| rad13         | 1.57184e-14 | 1.000000 | 1.57208e-14 | 1.00000 |
| rad46         | 1.26631e-14 | 1.000000 | 1.26650e-14 | 1.00000 |
| rad60syn      | 9.89774e-17 | 1.000000 | 9.89927e-17 | 1.00000 |
| PhCH2CCH+H    | 5.05404e-17 | 1.000000 | 5.05481e-17 | 1.00000 |
| rad27         | 4.36239e-17 | 1.000000 | 4.36306e-17 | 1.00000 |
| rad33         | 3.14383e-17 | 1.000000 | 3.14431e-17 | 1.00000 |
| rad60anti     | 1.91539e-17 | 1.000000 | 1.91569e-17 | 1.00000 |
| rad37         | 1.13915e-17 | 1.000000 | 1.13933e-17 | 1.00000 |
| rad25         | 4.95447e-18 | 1.000000 | 4.95523e-18 | 1.00000 |
| rad14         | 3.38600e-18 | 1.000000 | 3.38652e-18 | 1.00000 |
| rad20         | 3.17770e-18 | 1.000000 | 3.17819e-18 | 1.00000 |
| rad21         | 2.01988e-18 | 1.000000 | 2.02019e-18 | 1.00000 |
| rad5          | 8.38252e-20 | 1.000000 | 8.38381e-20 | 1.00000 |
| rad18         | 1.43714e-20 | 1.000000 | 1.43736e-20 | 1.00000 |
| PAH3+H        | 1.05456e-20 | 1.000000 | 1.05472e-20 | 1.00000 |
| rad59         | 3.92886e-21 | 1.000000 | 3.92946e-21 | 1.00000 |
| rad31         | 2.71348e-21 | 1.000000 | 2.71389e-21 | 1.00000 |
| rad23         | 1.24334e-21 | 1.000000 | 1.24353e-21 | 1.00000 |
| rad22         | 9.23299e-22 | 1.000000 | 9.23441e-22 | 1.00000 |
| rad50         | 2.28898e-22 | 1.000000 | 2.28933e-22 | 1.00000 |
| rad45         | 1.75292e-23 | 1.000000 | 1.75319e-23 | 1.00000 |
| rad19syn      | 1.82537e-24 | 1.000000 | 1.82565e-24 | 1.00000 |
| rad36         | 1.09552e-24 | 1.000000 | 1.09569e-24 | 1.00000 |
| rad24         | 2.47522e-25 | 1.000000 | 2.47560e-25 | 1.00000 |
| rad54         | 1.37160e-26 | 1.000000 | 1.37181e-26 | 1.00000 |
| PAH10+CH3     | 9.40146e-27 | 1.000000 | 9.40291e-27 | 1.00000 |
| rad52         | 4.44081e-27 | 1.000000 | 4.44149e-27 | 1.00000 |
| rad43         | 2.30283e-27 | 1.000000 | 2.30318e-27 | 1.00000 |
| rad62         | 2.68736e-28 | 1.000000 | 2.68777e-28 | 1.00000 |
| rad51         | 1.45636e-29 | 1.000000 | 1.45659e-29 | 1.00000 |
| rad65         | 1.67715e-32 | 1.000000 | 1.67740e-32 | 1.00000 |
| rad70         | 1.91803e-38 | 1.000000 | 1.91832e-38 | 1.00000 |
| PhcycC3H3_A+H | 9.56230e-39 | 1.000000 | 9.56377e-39 | 1.00000 |

|        |             |         |             |         |
|--------|-------------|---------|-------------|---------|
| rad55  | 5.03071e-39 | 1.00000 | 5.03149e-39 | 1.00000 |
| rad58  | 3.68356e-42 | 1.00000 | 3.68412e-42 | 1.00000 |
| PAH1+H | 2.10568e-43 | 1.00000 | 2.10601e-43 | 1.00000 |
| rad34  | 2.01370e-45 | 1.00000 | 2.01401e-45 | 1.00000 |
| rad42  | 6.99851e-48 | 1.00000 | 6.99959e-48 | 1.00000 |
| rad41  | 4.82529e-48 | 1.00000 | 4.82603e-48 | 1.00000 |
| rad47  | 4.79946e-57 | 1.00000 | 4.80020e-57 | 1.00000 |

0.100000000E-07 Pa, 210.000000 K

| Rate constant | True (fraction)     | Effective (fraction) |
|---------------|---------------------|----------------------|
| Total         | 8.30956e-27 (1.00 ) | 8.30794e-27 (1.00 )  |

| species       | PYtrue      | Cumul    | PYeffective | Cumul   |
|---------------|-------------|----------|-------------|---------|
| Indene+H      | 0.999804    | 0.999804 | 1.00000     | 1.00000 |
| Benzyl+C2H2   | 0.000195497 | 0.999999 | 0.00000     | 1.00000 |
| rad6          | 3.01087e-08 | 1.000000 | 3.01146e-08 | 1.00000 |
| PhCCH+CH3     | 3.08723e-09 | 1.000000 | 3.08783e-09 | 1.00000 |
| PhCHCCH2+H    | 3.07891e-09 | 1.000000 | 3.07952e-09 | 1.00000 |
| rad30         | 2.20830e-09 | 1.000000 | 2.20873e-09 | 1.00000 |
| PhCCCH3+H     | 1.16229e-09 | 1.000000 | 1.16252e-09 | 1.00000 |
| PAH9+H        | 3.39692e-10 | 1.000000 | 3.39759e-10 | 1.00000 |
| rad35         | 2.84862e-10 | 1.000000 | 2.84918e-10 | 1.00000 |
| rad15         | 1.39185e-10 | 1.000000 | 1.39212e-10 | 1.00000 |
| rad38         | 5.12411e-11 | 1.000000 | 5.12511e-11 | 1.00000 |
| rad28         | 4.77504e-11 | 1.000000 | 4.77597e-11 | 1.00000 |
| rad2          | 3.58848e-11 | 1.000000 | 3.58918e-11 | 1.00000 |
| rad26         | 5.24543e-12 | 1.000000 | 5.24646e-12 | 1.00000 |
| rad8          | 4.76041e-12 | 1.000000 | 4.76134e-12 | 1.00000 |
| Ph+MeAc       | 4.48105e-12 | 1.000000 | 4.48193e-12 | 1.00000 |
| rad1          | 2.45922e-12 | 1.000000 | 2.45970e-12 | 1.00000 |
| rad7          | 2.23711e-12 | 1.000000 | 2.23755e-12 | 1.00000 |
| rad10         | 1.43814e-12 | 1.000000 | 1.43842e-12 | 1.00000 |
| rad9          | 1.38782e-12 | 1.000000 | 1.38810e-12 | 1.00000 |
| PAH7+H        | 7.72984e-13 | 1.000000 | 7.73135e-13 | 1.00000 |
| rad11         | 5.52448e-13 | 1.000000 | 5.52556e-13 | 1.00000 |
| rad3          | 2.98595e-13 | 1.000000 | 2.98654e-13 | 1.00000 |
| rad4          | 1.54312e-13 | 1.000000 | 1.54342e-13 | 1.00000 |
| Ph+Allene     | 1.06213e-13 | 1.000000 | 1.06234e-13 | 1.00000 |
| rad12         | 8.37410e-14 | 1.000000 | 8.37574e-14 | 1.00000 |
| rad39         | 6.99259e-14 | 1.000000 | 6.99395e-14 | 1.00000 |
| rad46         | 2.89984e-14 | 1.000000 | 2.90041e-14 | 1.00000 |
| rad13         | 1.26744e-14 | 1.000000 | 1.26769e-14 | 1.00000 |
| rad60syn      | 3.56772e-16 | 1.000000 | 3.56842e-16 | 1.00000 |
| PhCH2CCH+H    | 2.77797e-16 | 1.000000 | 2.77851e-16 | 1.00000 |
| rad60anti     | 7.46103e-17 | 1.000000 | 7.46249e-17 | 1.00000 |
| rad37         | 5.82816e-17 | 1.000000 | 5.82930e-17 | 1.00000 |
| rad27         | 4.57965e-17 | 1.000000 | 4.58055e-17 | 1.00000 |
| rad33         | 2.54931e-17 | 1.000000 | 2.54981e-17 | 1.00000 |
| rad25         | 6.32110e-18 | 1.000000 | 6.32233e-18 | 1.00000 |
| rad14         | 4.56747e-18 | 1.000000 | 4.56836e-18 | 1.00000 |
| rad20         | 2.87647e-18 | 1.000000 | 2.87704e-18 | 1.00000 |
| rad21         | 1.83222e-18 | 1.000000 | 1.83258e-18 | 1.00000 |
| rad5          | 4.94773e-19 | 1.000000 | 4.94870e-19 | 1.00000 |
| PAH3+H        | 6.92409e-20 | 1.000000 | 6.92544e-20 | 1.00000 |
| rad59         | 2.51009e-20 | 1.000000 | 2.51058e-20 | 1.00000 |
| rad18         | 1.28893e-20 | 1.000000 | 1.28918e-20 | 1.00000 |
| rad31         | 2.56052e-21 | 1.000000 | 2.56102e-21 | 1.00000 |
| rad23         | 1.61390e-21 | 1.000000 | 1.61421e-21 | 1.00000 |
| rad50         | 1.46375e-21 | 1.000000 | 1.46404e-21 | 1.00000 |
| rad22         | 8.20353e-22 | 1.000000 | 8.20514e-22 | 1.00000 |
| rad45         | 3.34042e-23 | 1.000000 | 3.34107e-23 | 1.00000 |
| rad19syn      | 2.00818e-23 | 1.000000 | 2.00857e-23 | 1.00000 |
| rad36         | 2.09305e-24 | 1.000000 | 2.09346e-24 | 1.00000 |
| rad24         | 2.50797e-25 | 1.000000 | 2.50846e-25 | 1.00000 |
| rad54         | 1.94322e-25 | 1.000000 | 1.94360e-25 | 1.00000 |
| PAH10+CH3     | 1.33349e-25 | 1.000000 | 1.33375e-25 | 1.00000 |
| rad52         | 4.73526e-26 | 1.000000 | 4.73619e-26 | 1.00000 |
| rad43         | 3.24699e-26 | 1.000000 | 3.24763e-26 | 1.00000 |
| rad62         | 4.87675e-27 | 1.000000 | 4.87770e-27 | 1.00000 |
| rad51         | 2.76098e-28 | 1.000000 | 2.76152e-28 | 1.00000 |
| rad70         | 4.15017e-29 | 1.000000 | 4.15098e-29 | 1.00000 |
| PhcycC3H3_A+H | 3.67776e-29 | 1.000000 | 3.67848e-29 | 1.00000 |
| rad55         | 1.45178e-29 | 1.000000 | 1.45206e-29 | 1.00000 |
| rad58         | 1.88404e-30 | 1.000000 | 1.88441e-30 | 1.00000 |
| rad65         | 8.86433e-31 | 1.000000 | 8.86607e-31 | 1.00000 |
| PAH1+H        | 5.49758e-40 | 1.000000 | 5.49865e-40 | 1.00000 |
| rad34         | 5.07923e-42 | 1.000000 | 5.08023e-42 | 1.00000 |

|       |             |          |             |         |
|-------|-------------|----------|-------------|---------|
| rad42 | 2.00301e-45 | 1.000000 | 2.00340e-45 | 1.00000 |
| rad41 | 9.12517e-46 | 1.000000 | 9.12696e-46 | 1.00000 |
| rad47 | 4.20713e-54 | 1.000000 | 4.20795e-54 | 1.00000 |

0.100000000E-07 Pa, 220.000000 K

| Rate constant | True (fraction)     | Effective (fraction) |
|---------------|---------------------|----------------------|
| Total         | 3.40057e-26 (1.00 ) | 3.39973e-26 (1.00 )  |

| species       | PYtrue      | Cumul    | PYeffective | Cumul   |
|---------------|-------------|----------|-------------|---------|
| Indene+H      | 0.999753    | 0.999753 | 1.00000     | 1.00000 |
| Benzyl+C2H2   | 0.000247078 | 1.00000  | 0.00000     | 1.00000 |
| rad6          | 2.41981e-08 | 1.00000  | 2.42041e-08 | 1.00000 |
| PhCCH+CH3     | 6.43591e-09 | 1.00000  | 6.43750e-09 | 1.00000 |
| PhCHCCH2+H    | 5.99173e-09 | 1.00000  | 5.99321e-09 | 1.00000 |
| rad30         | 3.30405e-09 | 1.00000  | 3.30486e-09 | 1.00000 |
| PhCCCH3+H     | 2.43330e-09 | 1.00000  | 2.43390e-09 | 1.00000 |
| PAH9+H        | 4.73189e-10 | 1.00000  | 4.73306e-10 | 1.00000 |
| rad35         | 3.78956e-10 | 1.00000  | 3.79049e-10 | 1.00000 |
| rad15         | 2.37238e-10 | 1.00000  | 2.37297e-10 | 1.00000 |
| rad38         | 7.63518e-11 | 1.00000  | 7.63707e-11 | 1.00000 |
| rad28         | 5.11166e-11 | 1.00000  | 5.11292e-11 | 1.00000 |
| rad2          | 1.84443e-11 | 1.00000  | 1.84489e-11 | 1.00000 |
| Ph+MeAc       | 1.36499e-11 | 1.00000  | 1.36533e-11 | 1.00000 |
| rad8          | 1.13039e-11 | 1.00000  | 1.13067e-11 | 1.00000 |
| rad26         | 5.75664e-12 | 1.00000  | 5.75806e-12 | 1.00000 |
| rad9          | 3.66995e-12 | 1.00000  | 3.67085e-12 | 1.00000 |
| PAH7+H        | 2.08380e-12 | 1.00000  | 2.08432e-12 | 1.00000 |
| rad7          | 1.80216e-12 | 1.00000  | 1.80261e-12 | 1.00000 |
| rad1          | 1.27563e-12 | 1.00000  | 1.27595e-12 | 1.00000 |
| rad10         | 1.05659e-12 | 1.00000  | 1.05685e-12 | 1.00000 |
| rad11         | 4.45442e-13 | 1.00000  | 4.45553e-13 | 1.00000 |
| Ph+Allene     | 3.75387e-13 | 1.00000  | 3.75479e-13 | 1.00000 |
| rad12         | 2.28178e-13 | 1.00000  | 2.28234e-13 | 1.00000 |
| rad39         | 2.08582e-13 | 1.00000  | 2.08633e-13 | 1.00000 |
| rad3          | 1.29495e-13 | 1.00000  | 1.29527e-13 | 1.00000 |
| rad4          | 6.70957e-14 | 1.00000  | 6.71123e-14 | 1.00000 |
| rad46         | 6.24893e-14 | 1.00000  | 6.25047e-14 | 1.00000 |
| rad13         | 1.02275e-14 | 1.00000  | 1.02300e-14 | 1.00000 |
| PhCH2CCH+H    | 1.31497e-15 | 1.00000  | 1.31529e-15 | 1.00000 |
| rad60syn      | 1.14776e-15 | 1.00000  | 1.14805e-15 | 1.00000 |
| rad60anti     | 2.57261e-16 | 1.00000  | 2.57324e-16 | 1.00000 |
| rad37         | 2.55043e-16 | 1.00000  | 2.55106e-16 | 1.00000 |
| rad27         | 4.69024e-17 | 1.00000  | 4.69140e-17 | 1.00000 |
| rad33         | 2.06966e-17 | 1.00000  | 2.07017e-17 | 1.00000 |
| rad25         | 7.72553e-18 | 1.00000  | 7.72744e-18 | 1.00000 |
| rad14         | 5.87129e-18 | 1.00000  | 5.87274e-18 | 1.00000 |
| rad20         | 2.60888e-18 | 1.00000  | 2.60953e-18 | 1.00000 |
| rad5          | 2.48676e-18 | 1.00000  | 2.48738e-18 | 1.00000 |
| rad21         | 1.66550e-18 | 1.00000  | 1.66591e-18 | 1.00000 |
| PAH3+H        | 3.84313e-19 | 1.00000  | 3.84408e-19 | 1.00000 |
| rad59         | 1.35685e-19 | 1.00000  | 1.35719e-19 | 1.00000 |
| rad18         | 1.15697e-20 | 1.00000  | 1.15726e-20 | 1.00000 |
| rad50         | 7.96594e-21 | 1.00000  | 7.96790e-21 | 1.00000 |
| rad31         | 2.41803e-21 | 1.00000  | 2.41863e-21 | 1.00000 |
| rad23         | 2.18988e-21 | 1.00000  | 2.19042e-21 | 1.00000 |
| rad22         | 7.29015e-22 | 1.00000  | 7.29195e-22 | 1.00000 |
| rad19syn      | 1.76810e-22 | 1.00000  | 1.76853e-22 | 1.00000 |
| rad45         | 4.01427e-23 | 1.00000  | 4.01527e-23 | 1.00000 |
| rad36         | 2.52284e-24 | 1.00000  | 2.52347e-24 | 1.00000 |
| rad54         | 2.07925e-24 | 1.00000  | 2.07977e-24 | 1.00000 |
| PAH10+CH3     | 1.42538e-24 | 1.00000  | 1.42573e-24 | 1.00000 |
| rad52         | 4.06722e-25 | 1.00000  | 4.06823e-25 | 1.00000 |
| rad43         | 3.45425e-25 | 1.00000  | 3.45510e-25 | 1.00000 |
| rad24         | 2.55641e-25 | 1.00000  | 2.55704e-25 | 1.00000 |
| rad62         | 5.97333e-26 | 1.00000  | 5.97481e-26 | 1.00000 |
| rad51         | 3.50353e-27 | 1.00000  | 3.50440e-27 | 1.00000 |
| PhcycC3H3_A+H | 9.87085e-28 | 1.00000  | 9.87329e-28 | 1.00000 |
| rad70         | 8.97428e-28 | 1.00000  | 8.97650e-28 | 1.00000 |
| rad55         | 3.38159e-28 | 1.00000  | 3.38243e-28 | 1.00000 |
| rad58         | 5.59629e-29 | 1.00000  | 5.59768e-29 | 1.00000 |
| rad65         | 1.55276e-29 | 1.00000  | 1.55314e-29 | 1.00000 |
| PAH1+H        | 3.10930e-30 | 1.00000  | 3.11007e-30 | 1.00000 |
| rad34         | 2.04140e-39 | 1.00000  | 2.04191e-39 | 1.00000 |
| rad42         | 4.73510e-43 | 1.00000  | 4.73627e-43 | 1.00000 |
| rad47         | 1.49504e-43 | 1.00000  | 1.49541e-43 | 1.00000 |
| rad41         | 1.11523e-43 | 1.00000  | 1.11551e-43 | 1.00000 |

0.100000000E-07 Pa, 230.000000 K

=====

| Rate constant | True (fraction)     | Effective (fraction) |
|---------------|---------------------|----------------------|
| Total         | 1.22972e-25 (1.00 ) | 1.22933e-25 (1.00 )  |

| species       | PYtrue      | Cumul    | PYeffective | Cumul   |
|---------------|-------------|----------|-------------|---------|
| Indene+H      | 0.999689    | 0.999689 | 1.00000     | 1.00000 |
| Benzyl+C2H2   | 0.000310803 | 1.000000 | 0.00000     | 1.00000 |
| rad6          | 1.94541e-08 | 1.000000 | 1.94601e-08 | 1.00000 |
| PhCCH+CH3     | 1.27158e-08 | 1.000000 | 1.27198e-08 | 1.00000 |
| PhCHCCH2+H    | 1.11262e-08 | 1.000000 | 1.11297e-08 | 1.00000 |
| rad30         | 4.83587e-09 | 1.000000 | 4.83738e-09 | 1.00000 |
| PhCCCH3+H     | 4.81561e-09 | 1.000000 | 4.81710e-09 | 1.00000 |
| PAH9+H        | 6.55031e-10 | 1.000000 | 6.55235e-10 | 1.00000 |
| rad35         | 5.02430e-10 | 1.000000 | 5.02586e-10 | 1.00000 |
| rad15         | 3.90193e-10 | 1.000000 | 3.90314e-10 | 1.00000 |
| rad38         | 1.12258e-10 | 1.000000 | 1.12293e-10 | 1.00000 |
| rad28         | 5.32882e-11 | 1.000000 | 5.33047e-11 | 1.00000 |
| Ph+MeAc       | 3.79030e-11 | 1.000000 | 3.79148e-11 | 1.00000 |
| rad8          | 2.50406e-11 | 1.000000 | 2.50484e-11 | 1.00000 |
| rad2          | 1.70464e-11 | 1.000000 | 1.70517e-11 | 1.00000 |
| rad9          | 8.96803e-12 | 1.000000 | 8.97082e-12 | 1.00000 |
| rad26         | 6.13935e-12 | 1.000000 | 6.14126e-12 | 1.00000 |
| PAH7+H        | 5.18190e-12 | 1.000000 | 5.18351e-12 | 1.00000 |
| rad7          | 1.45235e-12 | 1.000000 | 1.45280e-12 | 1.00000 |
| Ph+Allene     | 1.19626e-12 | 1.000000 | 1.19664e-12 | 1.00000 |
| rad1          | 1.19057e-12 | 1.000000 | 1.19094e-12 | 1.00000 |
| rad10         | 9.43803e-13 | 1.000000 | 9.44096e-13 | 1.00000 |
| rad12         | 5.71099e-13 | 1.000000 | 5.71277e-13 | 1.00000 |
| rad39         | 5.68635e-13 | 1.000000 | 5.68811e-13 | 1.00000 |
| rad11         | 3.59323e-13 | 1.000000 | 3.59435e-13 | 1.00000 |
| rad46         | 1.27781e-13 | 1.000000 | 1.27821e-13 | 1.00000 |
| rad3          | 1.12661e-13 | 1.000000 | 1.12696e-13 | 1.00000 |
| rad4          | 5.85380e-14 | 1.000000 | 5.85562e-14 | 1.00000 |
| rad13         | 8.25700e-15 | 1.000000 | 8.25956e-15 | 1.00000 |
| PhCH2CCH+H    | 5.46598e-15 | 1.000000 | 5.46768e-15 | 1.00000 |
| rad60syn      | 3.34628e-15 | 1.000000 | 3.34732e-15 | 1.00000 |
| rad37         | 9.74547e-16 | 1.000000 | 9.74850e-16 | 1.00000 |
| rad60anti     | 7.98156e-16 | 1.000000 | 7.98404e-16 | 1.00000 |
| rad27         | 4.70068e-17 | 1.000000 | 4.70214e-17 | 1.00000 |
| rad33         | 1.68188e-17 | 1.000000 | 1.68240e-17 | 1.00000 |
| rad5          | 1.08663e-17 | 1.000000 | 1.08697e-17 | 1.00000 |
| rad25         | 9.09459e-18 | 1.000000 | 9.09742e-18 | 1.00000 |
| rad14         | 7.23659e-18 | 1.000000 | 7.23884e-18 | 1.00000 |
| rad20         | 2.37073e-18 | 1.000000 | 2.37147e-18 | 1.00000 |
| PAH3+H        | 1.84376e-18 | 1.000000 | 1.84433e-18 | 1.00000 |
| rad21         | 1.51711e-18 | 1.000000 | 1.51758e-18 | 1.00000 |
| rad59         | 6.34526e-19 | 1.000000 | 6.34724e-19 | 1.00000 |
| rad50         | 3.76905e-20 | 1.000000 | 3.77022e-20 | 1.00000 |
| rad18         | 1.03930e-20 | 1.000000 | 1.03962e-20 | 1.00000 |
| rad23         | 3.10815e-21 | 1.000000 | 3.10912e-21 | 1.00000 |
| rad31         | 2.31178e-21 | 1.000000 | 2.31249e-21 | 1.00000 |
| rad19syn      | 1.28690e-21 | 1.000000 | 1.28730e-21 | 1.00000 |
| rad22         | 6.47882e-22 | 1.000000 | 6.48083e-22 | 1.00000 |
| rad45         | 5.65710e-23 | 1.000000 | 5.65886e-23 | 1.00000 |
| rad54         | 1.79674e-23 | 1.000000 | 1.79730e-23 | 1.00000 |
| PAH10+CH3     | 1.22748e-23 | 1.000000 | 1.22786e-23 | 1.00000 |
| rad36         | 3.56769e-24 | 1.000000 | 3.56880e-24 | 1.00000 |
| rad43         | 2.95796e-24 | 1.000000 | 2.95888e-24 | 1.00000 |
| rad52         | 2.90478e-24 | 1.000000 | 2.90569e-24 | 1.00000 |
| rad62         | 5.74611e-25 | 1.000000 | 5.74789e-25 | 1.00000 |
| rad24         | 2.62177e-25 | 1.000000 | 2.62258e-25 | 1.00000 |
| rad51         | 3.51924e-26 | 1.000000 | 3.52033e-26 | 1.00000 |
| PhcycC3H3_A+H | 1.69392e-26 | 1.000000 | 1.69445e-26 | 1.00000 |
| rad70         | 1.30480e-26 | 1.000000 | 1.30521e-26 | 1.00000 |
| rad55         | 5.18385e-27 | 1.000000 | 5.18546e-27 | 1.00000 |
| rad58         | 1.02415e-27 | 1.000000 | 1.02446e-27 | 1.00000 |
| PAH1+H        | 2.23671e-28 | 1.000000 | 2.23740e-28 | 1.00000 |
| rad65         | 2.00231e-28 | 1.000000 | 2.00293e-28 | 1.00000 |
| rad34         | 1.06744e-29 | 1.000000 | 1.06777e-29 | 1.00000 |
| rad42         | 4.44131e-32 | 1.000000 | 4.44269e-32 | 1.00000 |
| rad41         | 7.74433e-33 | 1.000000 | 7.74674e-33 | 1.00000 |
| rad47         | 2.02044e-42 | 1.000000 | 2.02107e-42 | 1.00000 |

0.100000000E-07 Pa, 240.000000 K

=====

| Rate constant | True (fraction) | Effective (fraction) |
|---------------|-----------------|----------------------|
|---------------|-----------------|----------------------|

Total | 3.99091e-25 (1.00 ) 3.98936e-25 (1.00 )

| species       | PYtrue      | Cumul    | PYeffective | Cumul   |
|---------------|-------------|----------|-------------|---------|
| Indene+H      | 0.999611    | 0.999611 | 1.00000     | 1.00000 |
| Benzyl+C2H2   | 0.000389084 | 1.00000  | 0.00000     | 1.00000 |
| PhCCH+CH3     | 2.39606e-08 | 1.00000  | 2.39699e-08 | 1.00000 |
| PhCHCCH2+H    | 1.98215e-08 | 1.00000  | 1.98293e-08 | 1.00000 |
| rad6          | 1.56418e-08 | 1.00000  | 1.56479e-08 | 1.00000 |
| PhCCCH3+H     | 9.06939e-09 | 1.00000  | 9.07292e-09 | 1.00000 |
| rad30         | 6.94255e-09 | 1.00000  | 6.94525e-09 | 1.00000 |
| PAH9+H        | 9.01165e-10 | 1.00000  | 9.01516e-10 | 1.00000 |
| rad35         | 6.63661e-10 | 1.00000  | 6.63919e-10 | 1.00000 |
| rad15         | 6.22131e-10 | 1.00000  | 6.22373e-10 | 1.00000 |
| rad38         | 1.63045e-10 | 1.00000  | 1.63109e-10 | 1.00000 |
| Ph+MeAc       | 9.70294e-11 | 1.00000  | 9.70671e-11 | 1.00000 |
| rad28         | 5.42700e-11 | 1.00000  | 5.42911e-11 | 1.00000 |
| rad8          | 5.22015e-11 | 1.00000  | 5.22218e-11 | 1.00000 |
| rad2          | 2.31349e-11 | 1.00000  | 2.31439e-11 | 1.00000 |
| rad9          | 2.04532e-11 | 1.00000  | 2.04612e-11 | 1.00000 |
| PAH7+H        | 1.20110e-11 | 1.00000  | 1.20157e-11 | 1.00000 |
| rad26         | 6.38457e-12 | 1.00000  | 6.38706e-12 | 1.00000 |
| Ph+Allene     | 3.48221e-12 | 1.00000  | 3.48357e-12 | 1.00000 |
| rad1          | 1.63335e-12 | 1.00000  | 1.63399e-12 | 1.00000 |
| rad39         | 1.43288e-12 | 1.00000  | 1.43344e-12 | 1.00000 |
| rad12         | 1.32699e-12 | 1.00000  | 1.32751e-12 | 1.00000 |
| rad7          | 1.17066e-12 | 1.00000  | 1.17112e-12 | 1.00000 |
| rad10         | 8.38463e-13 | 1.00000  | 8.38790e-13 | 1.00000 |
| rad11         | 2.89921e-13 | 1.00000  | 2.90034e-13 | 1.00000 |
| rad46         | 2.49645e-13 | 1.00000  | 2.49742e-13 | 1.00000 |
| rad3          | 1.86352e-13 | 1.00000  | 1.86425e-13 | 1.00000 |
| rad4          | 9.71248e-14 | 1.00000  | 9.71626e-14 | 1.00000 |
| PhCH2CCH+H    | 2.02784e-14 | 1.00000  | 2.02863e-14 | 1.00000 |
| rad60syn      | 8.95436e-15 | 1.00000  | 8.95784e-15 | 1.00000 |
| rad13         | 6.66797e-15 | 1.00000  | 6.67056e-15 | 1.00000 |
| rad37         | 3.30811e-15 | 1.00000  | 3.30939e-15 | 1.00000 |
| rad60anti     | 2.25867e-15 | 1.00000  | 2.25955e-15 | 1.00000 |
| rad27         | 4.62228e-17 | 1.00000  | 4.62408e-17 | 1.00000 |
| rad5          | 4.20021e-17 | 1.00000  | 4.20184e-17 | 1.00000 |
| rad33         | 1.36786e-17 | 1.00000  | 1.36839e-17 | 1.00000 |
| rad25         | 1.03596e-17 | 1.00000  | 1.03636e-17 | 1.00000 |
| rad14         | 8.59620e-18 | 1.00000  | 8.59955e-18 | 1.00000 |
| PAH3+H        | 7.78863e-18 | 1.00000  | 7.79166e-18 | 1.00000 |
| rad59         | 2.61499e-18 | 1.00000  | 2.61601e-18 | 1.00000 |
| rad20         | 2.15849e-18 | 1.00000  | 2.15933e-18 | 1.00000 |
| rad21         | 1.38485e-18 | 1.00000  | 1.38539e-18 | 1.00000 |
| rad50         | 1.57823e-19 | 1.00000  | 1.57885e-19 | 1.00000 |
| rad18         | 9.34240e-21 | 1.00000  | 9.34604e-21 | 1.00000 |
| rad19syn      | 7.93175e-21 | 1.00000  | 7.93484e-21 | 1.00000 |
| rad23         | 4.58922e-21 | 1.00000  | 4.59101e-21 | 1.00000 |
| rad31         | 2.22581e-21 | 1.00000  | 2.22667e-21 | 1.00000 |
| rad22         | 5.75765e-22 | 1.00000  | 5.75989e-22 | 1.00000 |
| rad54         | 1.28744e-22 | 1.00000  | 1.28794e-22 | 1.00000 |
| PAH10+CH3     | 8.76232e-23 | 1.00000  | 8.76573e-23 | 1.00000 |
| rad45         | 8.19327e-23 | 1.00000  | 8.19646e-23 | 1.00000 |
| rad43         | 2.10010e-23 | 1.00000  | 2.10091e-23 | 1.00000 |
| rad52         | 1.76521e-23 | 1.00000  | 1.76590e-23 | 1.00000 |
| rad36         | 5.18731e-24 | 1.00000  | 5.18932e-24 | 1.00000 |
| rad62         | 4.48334e-24 | 1.00000  | 4.48509e-24 | 1.00000 |
| rad51         | 2.84575e-25 | 1.00000  | 2.84686e-25 | 1.00000 |
| rad24         | 2.70578e-25 | 1.00000  | 2.70683e-25 | 1.00000 |
| PhcycC3H3_A+H | 1.83497e-25 | 1.00000  | 1.83568e-25 | 1.00000 |
| rad70         | 1.30436e-25 | 1.00000  | 1.30487e-25 | 1.00000 |
| rad55         | 5.31871e-26 | 1.00000  | 5.32078e-26 | 1.00000 |
| rad58         | 1.13976e-26 | 1.00000  | 1.14020e-26 | 1.00000 |
| PAH1+H        | 3.49023e-27 | 1.00000  | 3.49159e-27 | 1.00000 |
| rad65         | 1.89688e-27 | 1.00000  | 1.89762e-27 | 1.00000 |
| rad34         | 2.02063e-28 | 1.00000  | 2.02142e-28 | 1.00000 |
| rad42         | 2.62674e-30 | 1.00000  | 2.62776e-30 | 1.00000 |
| rad41         | 7.56115e-31 | 1.00000  | 7.56410e-31 | 1.00000 |
| rad47         | 1.87587e-41 | 1.00000  | 1.87660e-41 | 1.00000 |

0.100000000E-07 Pa, 250.00000 K

=====

| Rate constant | True (fraction)     | Effective (fraction) |
|---------------|---------------------|----------------------|
| Total         | 1.17763e-24 (1.00 ) | 1.17706e-24 (1.00 )  |

| species | PYtrue | Cumul | PYeffective | Cumul |
|---------|--------|-------|-------------|-------|
|---------|--------|-------|-------------|-------|

-----

|               |             |          |             |         |
|---------------|-------------|----------|-------------|---------|
| Indene+H      | 0.999515    | 0.999515 | 1.00000     | 1.00000 |
| Benzyl+C2H2   | 0.000484700 | 1.000000 | 0.00000     | 1.00000 |
| PhCCH+CH3     | 4.32848e-08 | 1.000000 | 4.33058e-08 | 1.00000 |
| PhCHCCH2+H    | 3.40315e-08 | 1.000000 | 3.40480e-08 | 1.00000 |
| PhCCCH3+H     | 1.63452e-08 | 1.000000 | 1.63532e-08 | 1.00000 |
| rad6          | 1.25760e-08 | 1.000000 | 1.25821e-08 | 1.00000 |
| rad30         | 9.79760e-09 | 1.000000 | 9.80235e-09 | 1.00000 |
| PAH9+H        | 1.23218e-09 | 1.000000 | 1.23278e-09 | 1.00000 |
| rad15         | 9.65237e-10 | 1.000000 | 9.65705e-10 | 1.00000 |
| rad35         | 8.73119e-10 | 1.000000 | 8.73542e-10 | 1.00000 |
| rad38         | 2.34143e-10 | 1.000000 | 2.34256e-10 | 1.00000 |
| Ph+MeAc       | 2.31164e-10 | 1.000000 | 2.31276e-10 | 1.00000 |
| rad8          | 1.03157e-10 | 1.000000 | 1.03207e-10 | 1.00000 |
| rad28         | 5.41388e-11 | 1.000000 | 5.41650e-11 | 1.00000 |
| rad9          | 4.38995e-11 | 1.000000 | 4.39208e-11 | 1.00000 |
| PAH7+H        | 2.61749e-11 | 1.000000 | 2.61876e-11 | 1.00000 |
| rad2          | 2.13925e-11 | 1.000000 | 2.14029e-11 | 1.00000 |
| Ph+Allene     | 9.36018e-12 | 1.000000 | 9.36472e-12 | 1.00000 |
| rad26         | 6.49313e-12 | 1.000000 | 6.49628e-12 | 1.00000 |
| rad39         | 3.36907e-12 | 1.000000 | 3.37071e-12 | 1.00000 |
| rad12         | 2.88802e-12 | 1.000000 | 2.88942e-12 | 1.00000 |
| rad1          | 1.52770e-12 | 1.000000 | 1.52844e-12 | 1.00000 |
| rad7          | 9.43627e-13 | 1.000000 | 9.44085e-13 | 1.00000 |
| rad10         | 7.84838e-13 | 1.000000 | 7.85219e-13 | 1.00000 |
| rad46         | 4.68609e-13 | 1.000000 | 4.68837e-13 | 1.00000 |
| rad11         | 2.33943e-13 | 1.000000 | 2.34057e-13 | 1.00000 |
| rad3          | 1.65714e-13 | 1.000000 | 1.65794e-13 | 1.00000 |
| rad4          | 8.66526e-14 | 1.000000 | 8.66946e-14 | 1.00000 |
| PhCH2CCH+H    | 6.80661e-14 | 1.000000 | 6.80991e-14 | 1.00000 |
| rad60syn      | 2.22273e-14 | 1.000000 | 2.22381e-14 | 1.00000 |
| rad37         | 1.01211e-14 | 1.000000 | 1.01260e-14 | 1.00000 |
| rad60anti     | 5.89685e-15 | 1.000000 | 5.89971e-15 | 1.00000 |
| rad13         | 5.38540e-15 | 1.000000 | 5.38801e-15 | 1.00000 |
| rad5          | 1.45718e-16 | 1.000000 | 1.45789e-16 | 1.00000 |
| rad27         | 4.46926e-17 | 1.000000 | 4.47143e-17 | 1.00000 |
| PAH3+H        | 2.94243e-17 | 1.000000 | 2.94386e-17 | 1.00000 |
| rad25         | 1.14625e-17 | 1.000000 | 1.14681e-17 | 1.00000 |
| rad33         | 1.11326e-17 | 1.000000 | 1.11380e-17 | 1.00000 |
| rad14         | 9.88393e-18 | 1.000000 | 9.88873e-18 | 1.00000 |
| rad59         | 9.64551e-18 | 1.000000 | 9.65019e-18 | 1.00000 |
| rad20         | 1.96917e-18 | 1.000000 | 1.97013e-18 | 1.00000 |
| rad21         | 1.26689e-18 | 1.000000 | 1.26750e-18 | 1.00000 |
| rad50         | 5.93639e-19 | 1.000000 | 5.93927e-19 | 1.00000 |
| rad19syn      | 4.22763e-20 | 1.000000 | 4.22968e-20 | 1.00000 |
| rad18         | 8.40380e-21 | 1.000000 | 8.40787e-21 | 1.00000 |
| rad23         | 7.05681e-21 | 1.000000 | 7.06023e-21 | 1.00000 |
| rad31         | 2.16295e-21 | 1.000000 | 2.16400e-21 | 1.00000 |
| rad54         | 7.86767e-22 | 1.000000 | 7.87149e-22 | 1.00000 |
| PAH10+CH3     | 5.33110e-22 | 1.000000 | 5.33369e-22 | 1.00000 |
| rad22         | 5.11642e-22 | 1.000000 | 5.11891e-22 | 1.00000 |
| rad45         | 2.07084e-22 | 1.000000 | 2.07184e-22 | 1.00000 |
| rad43         | 1.27026e-22 | 1.000000 | 1.27087e-22 | 1.00000 |
| rad52         | 9.31755e-23 | 1.000000 | 9.32207e-23 | 1.00000 |
| rad62         | 2.94966e-23 | 1.000000 | 2.95109e-23 | 1.00000 |
| rad36         | 1.31694e-23 | 1.000000 | 1.31757e-23 | 1.00000 |
| rad51         | 1.93290e-24 | 1.000000 | 1.93384e-24 | 1.00000 |
| PhcycC3H3_A+H | 1.51485e-24 | 1.000000 | 1.51559e-24 | 1.00000 |
| rad70         | 1.03242e-24 | 1.000000 | 1.03293e-24 | 1.00000 |
| rad55         | 4.27163e-25 | 1.000000 | 4.27370e-25 | 1.00000 |
| rad24         | 2.81075e-25 | 1.000000 | 2.81211e-25 | 1.00000 |
| rad58         | 9.52951e-26 | 1.000000 | 9.53413e-26 | 1.00000 |
| PAH1+H        | 3.26070e-26 | 1.000000 | 3.26228e-26 | 1.00000 |
| rad65         | 1.44854e-26 | 1.000000 | 1.44924e-26 | 1.00000 |
| rad34         | 1.95407e-27 | 1.000000 | 1.95502e-27 | 1.00000 |
| rad42         | 2.76646e-29 | 1.000000 | 2.76780e-29 | 1.00000 |
| rad41         | 8.02597e-30 | 1.000000 | 8.02987e-30 | 1.00000 |
| rad47         | 1.43631e-40 | 1.000000 | 1.43700e-40 | 1.00000 |

0.100000000E-07 Pa, 260.000000 K

=====

| Rate constant | True (fraction)     | Effective (fraction) |
|---------------|---------------------|----------------------|
| Total         | 3.19452e-24 (1.00 ) | 3.19260e-24 (1.00 )  |

| species     | PYtrue      | Cumul    | PYeffective | Cumul   |
|-------------|-------------|----------|-------------|---------|
| Indene+H    | 0.999399    | 0.999399 | 1.00000     | 1.00000 |
| Benzyl+C2H2 | 0.000600830 | 1.000000 | 0.00000     | 1.00000 |
| PhCCH+CH3   | 7.52940e-08 | 1.000000 | 7.53393e-08 | 1.00000 |
| PhCHCCH2+H  | 5.65217e-08 | 1.000000 | 5.65557e-08 | 1.00000 |

|               |             |          |             |         |
|---------------|-------------|----------|-------------|---------|
| PhCCCH3+H     | 2.83214e-08 | 1.000000 | 2.83384e-08 | 1.00000 |
| rad30         | 1.36157e-08 | 1.00000  | 1.36239e-08 | 1.00000 |
| rad6          | 1.01092e-08 | 1.00000  | 1.01153e-08 | 1.00000 |
| PAH9+H        | 1.67445e-09 | 1.00000  | 1.67545e-09 | 1.00000 |
| rad15         | 1.46180e-09 | 1.00000  | 1.46268e-09 | 1.00000 |
| rad35         | 1.14380e-09 | 1.00000  | 1.14449e-09 | 1.00000 |
| Ph+MeAc       | 5.16641e-10 | 1.00000  | 5.16952e-10 | 1.00000 |
| rad38         | 3.32694e-10 | 1.00000  | 3.32894e-10 | 1.00000 |
| rad8          | 1.94417e-10 | 1.00000  | 1.94534e-10 | 1.00000 |
| rad9          | 8.92961e-11 | 1.00000  | 8.93498e-11 | 1.00000 |
| PAH7+H        | 5.40209e-11 | 1.00000  | 5.40534e-11 | 1.00000 |
| rad28         | 5.30227e-11 | 1.00000  | 5.30546e-11 | 1.00000 |
| Ph+Allene     | 2.34476e-11 | 1.00000  | 2.34617e-11 | 1.00000 |
| rad2          | 1.08613e-11 | 1.00000  | 1.08678e-11 | 1.00000 |
| rad39         | 7.45073e-12 | 1.00000  | 7.45521e-12 | 1.00000 |
| rad26         | 6.47376e-12 | 1.00000  | 6.47765e-12 | 1.00000 |
| rad12         | 5.93126e-12 | 1.00000  | 5.93483e-12 | 1.00000 |
| rad46         | 8.49081e-13 | 1.00000  | 8.49591e-13 | 1.00000 |
| rad1          | 7.85338e-13 | 1.00000  | 7.85810e-13 | 1.00000 |
| rad7          | 7.60549e-13 | 1.00000  | 7.61007e-13 | 1.00000 |
| rad10         | 5.93558e-13 | 1.00000  | 5.93915e-13 | 1.00000 |
| PhCH2CCH+H    | 2.09101e-13 | 1.00000  | 2.09227e-13 | 1.00000 |
| rad11         | 1.88766e-13 | 1.00000  | 1.88879e-13 | 1.00000 |
| rad3          | 8.51900e-14 | 1.00000  | 8.52412e-14 | 1.00000 |
| rad60syn      | 5.16426e-14 | 1.00000  | 5.16737e-14 | 1.00000 |
| rad4          | 4.47065e-14 | 1.00000  | 4.47334e-14 | 1.00000 |
| rad37         | 2.82533e-14 | 1.00000  | 2.82703e-14 | 1.00000 |
| rad60anti     | 1.43406e-14 | 1.00000  | 1.43492e-14 | 1.00000 |
| rad13         | 4.34955e-15 | 1.00000  | 4.35216e-15 | 1.00000 |
| rad5          | 4.59359e-16 | 1.00000  | 4.59635e-16 | 1.00000 |
| PAH3+H        | 1.00724e-16 | 1.00000  | 1.00784e-16 | 1.00000 |
| rad27         | 4.25706e-17 | 1.00000  | 4.25962e-17 | 1.00000 |
| rad59         | 3.22623e-17 | 1.00000  | 3.22817e-17 | 1.00000 |
| rad25         | 1.23599e-17 | 1.00000  | 1.23673e-17 | 1.00000 |
| rad14         | 1.10407e-17 | 1.00000  | 1.10474e-17 | 1.00000 |
| rad33         | 9.06648e-18 | 1.00000  | 9.07193e-18 | 1.00000 |
| rad50         | 2.03113e-18 | 1.00000  | 2.03235e-18 | 1.00000 |
| rad20         | 1.80019e-18 | 1.00000  | 1.80128e-18 | 1.00000 |
| rad21         | 1.16162e-18 | 1.00000  | 1.16232e-18 | 1.00000 |
| rad19syn      | 1.98205e-19 | 1.00000  | 1.98324e-19 | 1.00000 |
| rad23         | 1.11963e-20 | 1.00000  | 1.12030e-20 | 1.00000 |
| rad18         | 7.56484e-21 | 1.00000  | 7.56939e-21 | 1.00000 |
| rad54         | 4.18282e-21 | 1.00000  | 4.18533e-21 | 1.00000 |
| PAH10+CH3     | 2.81840e-21 | 1.00000  | 2.82009e-21 | 1.00000 |
| rad31         | 2.11274e-21 | 1.00000  | 2.11401e-21 | 1.00000 |
| rad43         | 6.67188e-22 | 1.00000  | 6.67589e-22 | 1.00000 |
| rad22         | 4.54627e-22 | 1.00000  | 4.54900e-22 | 1.00000 |
| rad52         | 4.34411e-22 | 1.00000  | 4.34673e-22 | 1.00000 |
| rad45         | 4.04277e-22 | 1.00000  | 4.04520e-22 | 1.00000 |
| rad62         | 1.67395e-22 | 1.00000  | 1.67496e-22 | 1.00000 |
| rad36         | 2.58386e-23 | 1.00000  | 2.58541e-23 | 1.00000 |
| rad51         | 1.13377e-23 | 1.00000  | 1.13445e-23 | 1.00000 |
| PhcycC3H3_A+H | 1.04989e-23 | 1.00000  | 1.05052e-23 | 1.00000 |
| rad70         | 6.90237e-24 | 1.00000  | 6.90652e-24 | 1.00000 |
| rad55         | 2.89213e-24 | 1.00000  | 2.89387e-24 | 1.00000 |
| rad58         | 6.67420e-25 | 1.00000  | 6.67822e-25 | 1.00000 |
| rad24         | 2.93967e-25 | 1.00000  | 2.94143e-25 | 1.00000 |
| PAH1+H        | 2.48959e-25 | 1.00000  | 2.49109e-25 | 1.00000 |
| rad65         | 9.40613e-26 | 1.00000  | 9.41178e-26 | 1.00000 |
| rad34         | 1.53045e-26 | 1.00000  | 1.53137e-26 | 1.00000 |
| rad42         | 2.29633e-28 | 1.00000  | 2.29771e-28 | 1.00000 |
| rad41         | 6.71432e-29 | 1.00000  | 6.71835e-29 | 1.00000 |
| rad47         | 9.26851e-40 | 1.00000  | 9.27408e-40 | 1.00000 |

0.100000000E-07 Pa, 270.000000 K

=====

| Rate constant | True (fraction)     | Effective (fraction) |
|---------------|---------------------|----------------------|
| Total         | 8.04141e-24 (1.00 ) | 8.03545e-24 (1.00 )  |

| species     | PYtrue      | Cumul    | PYeffective | Cumul   |
|-------------|-------------|----------|-------------|---------|
| Indene+H    | 0.999259    | 0.999259 | 1.00000     | 1.00000 |
| Benzyl+C2H2 | 0.000741077 | 1.00000  | 0.00000     | 1.00000 |
| PhCCH+CH3   | 1.26585e-07 | 1.00000  | 1.26679e-07 | 1.00000 |
| PhCHCCH2+H  | 9.11006e-08 | 1.00000  | 9.11682e-08 | 1.00000 |
| PhCCCH3+H   | 4.73654e-08 | 1.00000  | 4.74005e-08 | 1.00000 |
| rad30       | 1.86595e-08 | 1.00000  | 1.86734e-08 | 1.00000 |
| rad6        | 8.12419e-09 | 1.00000  | 8.13022e-09 | 1.00000 |
| PAH9+H      | 2.26149e-09 | 1.00000  | 2.26317e-09 | 1.00000 |

|               |             |         |             |         |
|---------------|-------------|---------|-------------|---------|
| rad15         | 2.16654e-09 | 1.00000 | 2.16815e-09 | 1.00000 |
| rad35         | 1.49172e-09 | 1.00000 | 1.49282e-09 | 1.00000 |
| Ph+MeAc       | 1.09059e-09 | 1.00000 | 1.09140e-09 | 1.00000 |
| rad38         | 4.68008e-10 | 1.00000 | 4.68355e-10 | 1.00000 |
| rad8          | 3.51264e-10 | 1.00000 | 3.51524e-10 | 1.00000 |
| rad9          | 1.73163e-10 | 1.00000 | 1.73291e-10 | 1.00000 |
| PAH7+H        | 1.06236e-10 | 1.00000 | 1.06315e-10 | 1.00000 |
| Ph+Allene     | 5.51675e-11 | 1.00000 | 5.52084e-11 | 1.00000 |
| rad28         | 5.10816e-11 | 1.00000 | 5.11194e-11 | 1.00000 |
| rad39         | 1.56033e-11 | 1.00000 | 1.56148e-11 | 1.00000 |
| rad12         | 1.15678e-11 | 1.00000 | 1.15764e-11 | 1.00000 |
| rad2          | 1.12842e-11 | 1.00000 | 1.12926e-11 | 1.00000 |
| rad26         | 6.34096e-12 | 1.00000 | 6.34566e-12 | 1.00000 |
| rad46         | 1.49078e-12 | 1.00000 | 1.49189e-12 | 1.00000 |
| rad1          | 8.26796e-13 | 1.00000 | 8.27409e-13 | 1.00000 |
| rad7          | 6.12883e-13 | 1.00000 | 6.13337e-13 | 1.00000 |
| PhCH2CCH+H    | 5.93698e-13 | 1.00000 | 5.94138e-13 | 1.00000 |
| rad10         | 5.73880e-13 | 1.00000 | 5.74306e-13 | 1.00000 |
| rad11         | 1.52296e-13 | 1.00000 | 1.52409e-13 | 1.00000 |
| rad60syn      | 1.13161e-13 | 1.00000 | 1.13245e-13 | 1.00000 |
| rad37         | 7.27158e-14 | 1.00000 | 7.27697e-14 | 1.00000 |
| rad3          | 4.99308e-14 | 1.00000 | 4.99678e-14 | 1.00000 |
| rad60anti     | 3.27522e-14 | 1.00000 | 3.27765e-14 | 1.00000 |
| rad4          | 2.63047e-14 | 1.00000 | 2.63242e-14 | 1.00000 |
| rad13         | 3.51269e-15 | 1.00000 | 3.51530e-15 | 1.00000 |
| rad5          | 1.32965e-15 | 1.00000 | 1.33064e-15 | 1.00000 |
| PAH3+H        | 3.15912e-16 | 1.00000 | 3.16146e-16 | 1.00000 |
| rad59         | 9.89462e-17 | 1.00000 | 9.90196e-17 | 1.00000 |
| rad27         | 4.00111e-17 | 1.00000 | 4.00408e-17 | 1.00000 |
| rad25         | 1.30247e-17 | 1.00000 | 1.30343e-17 | 1.00000 |
| rad14         | 1.20192e-17 | 1.00000 | 1.20281e-17 | 1.00000 |
| rad33         | 7.38862e-18 | 1.00000 | 7.39410e-18 | 1.00000 |
| rad50         | 6.38912e-18 | 1.00000 | 6.39386e-18 | 1.00000 |
| rad20         | 1.64934e-18 | 1.00000 | 1.65056e-18 | 1.00000 |
| rad21         | 1.06767e-18 | 1.00000 | 1.06846e-18 | 1.00000 |
| rad19syn      | 8.29179e-19 | 1.00000 | 8.29794e-19 | 1.00000 |
| rad54         | 1.96548e-20 | 1.00000 | 1.96693e-20 | 1.00000 |
| rad23         | 1.83200e-20 | 1.00000 | 1.83335e-20 | 1.00000 |
| PAH10+CH3     | 1.31523e-20 | 1.00000 | 1.31621e-20 | 1.00000 |
| rad18         | 6.81478e-21 | 1.00000 | 6.81983e-21 | 1.00000 |
| rad43         | 3.09130e-21 | 1.00000 | 3.09359e-21 | 1.00000 |
| rad31         | 2.08808e-21 | 1.00000 | 2.08963e-21 | 1.00000 |
| rad52         | 1.81421e-21 | 1.00000 | 1.81555e-21 | 1.00000 |
| rad62         | 8.33487e-22 | 1.00000 | 8.34105e-22 | 1.00000 |
| rad45         | 6.99388e-22 | 1.00000 | 6.99907e-22 | 1.00000 |
| rad22         | 4.03940e-22 | 1.00000 | 4.04239e-22 | 1.00000 |
| PhcycC3H3_A+H | 6.28440e-23 | 1.00000 | 6.28906e-23 | 1.00000 |
| rad51         | 5.84528e-23 | 1.00000 | 5.84962e-23 | 1.00000 |
| rad36         | 4.49648e-23 | 1.00000 | 4.49982e-23 | 1.00000 |
| rad70         | 3.99452e-23 | 1.00000 | 3.99748e-23 | 1.00000 |
| rad55         | 1.69373e-23 | 1.00000 | 1.69499e-23 | 1.00000 |
| rad58         | 4.03354e-24 | 1.00000 | 4.03653e-24 | 1.00000 |
| PAH1+H        | 1.62733e-24 | 1.00000 | 1.62853e-24 | 1.00000 |
| rad65         | 5.31208e-25 | 1.00000 | 5.31602e-25 | 1.00000 |
| rad24         | 3.09634e-25 | 1.00000 | 3.09863e-25 | 1.00000 |
| rad34         | 1.02480e-25 | 1.00000 | 1.02556e-25 | 1.00000 |
| rad42         | 1.63125e-27 | 1.00000 | 1.63246e-27 | 1.00000 |
| rad41         | 4.81362e-28 | 1.00000 | 4.81719e-28 | 1.00000 |
| rad47         | 5.14497e-39 | 1.00000 | 5.14878e-39 | 1.00000 |

0.100000000E-07 Pa, 280.000000 K

=====

| Rate constant | True (fraction)     | Effective (fraction) |
|---------------|---------------------|----------------------|
| Total         | 1.89357e-23 (1.00 ) | 1.89185e-23 (1.00 )  |

| species     | PYtrue      | Cumul    | PYeffective | Cumul   |
|-------------|-------------|----------|-------------|---------|
| Indene+H    | 0.999090    | 0.999090 | 1.00000     | 1.00000 |
| Benzyl+C2H2 | 0.000909507 | 1.000000 | 0.00000     | 1.00000 |
| PhCCH+CH3   | 2.06334e-07 | 1.000000 | 2.06521e-07 | 1.00000 |
| PhCHCCH2+H  | 1.42880e-07 | 1.000000 | 1.43011e-07 | 1.00000 |
| PhCCCH3+H   | 7.67163e-08 | 1.000000 | 7.67862e-08 | 1.00000 |
| rad30       | 2.52475e-08 | 1.000000 | 2.52705e-08 | 1.00000 |
| rad6        | 6.52680e-09 | 1.000000 | 6.53275e-09 | 1.00000 |
| rad15       | 3.14926e-09 | 1.000000 | 3.15213e-09 | 1.00000 |
| PAH9+H      | 3.03559e-09 | 1.000000 | 3.03835e-09 | 1.00000 |
| Ph+MeAc     | 2.18704e-09 | 1.000000 | 2.18903e-09 | 1.00000 |
| rad35       | 1.93648e-09 | 1.000000 | 1.93824e-09 | 1.00000 |
| rad38       | 6.52109e-10 | 1.000000 | 6.52703e-10 | 1.00000 |



|               |             |          |             |         |
|---------------|-------------|----------|-------------|---------|
| rad8          | 6.11074e-10 | 1.000000 | 6.11630e-10 | 1.00000 |
| rad9          | 3.21752e-10 | 1.000000 | 3.22045e-10 | 1.00000 |
| PAH7+H        | 2.00113e-10 | 1.000000 | 2.00295e-10 | 1.00000 |
| Ph+Allene     | 1.22724e-10 | 1.000000 | 1.22836e-10 | 1.00000 |
| rad28         | 4.84891e-11 | 1.000000 | 4.85332e-11 | 1.00000 |
| rad39         | 3.11223e-11 | 1.000000 | 3.11507e-11 | 1.00000 |
| rad12         | 2.15404e-11 | 1.000000 | 2.15600e-11 | 1.00000 |
| rad2          | 8.19470e-12 | 1.000000 | 8.20216e-12 | 1.00000 |
| rad26         | 6.11273e-12 | 1.000000 | 6.11829e-12 | 1.00000 |
| rad46         | 2.54457e-12 | 1.000000 | 2.54689e-12 | 1.00000 |
| PhCH2CCH+H    | 1.57107e-12 | 1.000000 | 1.57250e-12 | 1.00000 |
| rad1          | 6.09168e-13 | 1.000000 | 6.09723e-13 | 1.00000 |
| rad7          | 4.93768e-13 | 1.000000 | 4.94217e-13 | 1.00000 |
| rad10         | 4.39963e-13 | 1.000000 | 4.40364e-13 | 1.00000 |
| rad60syn      | 2.35373e-13 | 1.000000 | 2.35588e-13 | 1.00000 |
| rad37         | 1.74095e-13 | 1.000000 | 1.74254e-13 | 1.00000 |
| rad11         | 1.22850e-13 | 1.000000 | 1.22962e-13 | 1.00000 |
| rad60anti     | 7.07396e-14 | 1.000000 | 7.08040e-14 | 1.00000 |
| rad3          | 5.41148e-14 | 1.000000 | 5.41641e-14 | 1.00000 |
| rad4          | 2.86300e-14 | 1.000000 | 2.86560e-14 | 1.00000 |
| rad5          | 3.56589e-15 | 1.000000 | 3.56914e-15 | 1.00000 |
| rad13         | 2.83649e-15 | 1.000000 | 2.83908e-15 | 1.00000 |
| PAH3+H        | 9.16507e-16 | 1.000000 | 9.17341e-16 | 1.00000 |
| rad59         | 2.80900e-16 | 1.000000 | 2.81156e-16 | 1.00000 |
| rad27         | 3.71577e-17 | 1.000000 | 3.71915e-17 | 1.00000 |
| rad50         | 1.86453e-17 | 1.000000 | 1.86623e-17 | 1.00000 |
| rad25         | 1.34457e-17 | 1.000000 | 1.34579e-17 | 1.00000 |
| rad14         | 1.27860e-17 | 1.000000 | 1.27976e-17 | 1.00000 |
| rad33         | 6.02534e-18 | 1.000000 | 6.03082e-18 | 1.00000 |
| rad19syn      | 3.13292e-18 | 1.000000 | 3.13577e-18 | 1.00000 |
| rad20         | 1.51466e-18 | 1.000000 | 1.51604e-18 | 1.00000 |
| rad21         | 9.83837e-19 | 1.000000 | 9.84733e-19 | 1.00000 |
| rad54         | 8.26763e-20 | 1.000000 | 8.27515e-20 | 1.00000 |
| PAH10+CH3     | 5.48810e-20 | 1.000000 | 5.49309e-20 | 1.00000 |
| rad23         | 3.09193e-20 | 1.000000 | 3.09474e-20 | 1.00000 |
| rad43         | 1.28005e-20 | 1.000000 | 1.28122e-20 | 1.00000 |
| rad52         | 6.86644e-21 | 1.000000 | 6.87269e-21 | 1.00000 |
| rad18         | 6.14414e-21 | 1.000000 | 6.14974e-21 | 1.00000 |
| rad62         | 3.68998e-21 | 1.000000 | 3.69334e-21 | 1.00000 |
| rad31         | 2.07620e-21 | 1.000000 | 2.07809e-21 | 1.00000 |
| rad45         | 8.96906e-22 | 1.000000 | 8.97723e-22 | 1.00000 |
| rad22         | 3.58894e-22 | 1.000000 | 3.59221e-22 | 1.00000 |
| PhcycC3H3_A+H | 3.28881e-22 | 1.000000 | 3.29180e-22 | 1.00000 |
| rad51         | 2.68189e-22 | 1.000000 | 2.68433e-22 | 1.00000 |
| rad70         | 2.02731e-22 | 1.000000 | 2.02915e-22 | 1.00000 |
| rad55         | 8.69007e-23 | 1.000000 | 8.69799e-23 | 1.00000 |
| rad36         | 5.80251e-23 | 1.000000 | 5.80779e-23 | 1.00000 |
| rad58         | 2.12890e-23 | 1.000000 | 2.13084e-23 | 1.00000 |
| PAH1+H        | 9.19440e-24 | 1.000000 | 9.20277e-24 | 1.00000 |
| rad65         | 2.64204e-24 | 1.000000 | 2.64445e-24 | 1.00000 |
| rad34         | 5.91306e-25 | 1.000000 | 5.91844e-25 | 1.00000 |
| rad24         | 3.28558e-25 | 1.000000 | 3.28857e-25 | 1.00000 |
| rad42         | 9.90724e-27 | 1.000000 | 9.91626e-27 | 1.00000 |
| rad41         | 2.94681e-27 | 1.000000 | 2.94949e-27 | 1.00000 |
| rad47         | 2.49702e-38 | 1.000000 | 2.49929e-38 | 1.00000 |

0.100000000E-07 Pa, 290.000000 K

=====

| Rate constant | True (fraction)     | Effective (fraction) |
|---------------|---------------------|----------------------|
| Total         | 4.20015e-23 (1.00 ) | 4.19549e-23 (1.00 )  |

| species     | PYtrue      | Cumul    | PYeffective | Cumul    |
|-------------|-------------|----------|-------------|----------|
| Indene+H    | 0.998889    | 0.998889 | 0.999999    | 0.999999 |
| Benzyl+C2H2 | 0.00111067  | 1.000000 | 0.000000    | 0.999999 |
| PhCCH+CH3   | 3.26966e-07 | 1.000000 | 3.27330e-07 | 0.999999 |
| PhCHCCH2+H  | 2.18562e-07 | 1.000000 | 2.18805e-07 | 1.000000 |
| PhCCCH3+H   | 1.20682e-07 | 1.000000 | 1.20816e-07 | 1.000000 |
| rad30       | 3.37617e-08 | 1.000000 | 3.37992e-08 | 1.000000 |
| rad6        | 5.24160e-09 | 1.000000 | 5.24743e-09 | 1.000000 |
| rad15       | 4.49781e-09 | 1.000000 | 4.50281e-09 | 1.000000 |
| Ph+MeAc     | 4.18748e-09 | 1.000000 | 4.19213e-09 | 1.000000 |
| PAH9+H      | 4.04965e-09 | 1.000000 | 4.05415e-09 | 1.000000 |
| rad35       | 2.50193e-09 | 1.000000 | 2.50472e-09 | 1.000000 |
| rad8        | 1.02741e-09 | 1.000000 | 1.02855e-09 | 1.000000 |
| rad38       | 9.00379e-10 | 1.000000 | 9.01380e-10 | 1.000000 |
| rad9        | 5.75329e-10 | 1.000000 | 5.75969e-10 | 1.000000 |
| PAH7+H      | 3.62664e-10 | 1.000000 | 3.63067e-10 | 1.000000 |
| Ph+Allene   | 2.59613e-10 | 1.000000 | 2.59902e-10 | 1.000000 |

|               |             |         |             |          |
|---------------|-------------|---------|-------------|----------|
| rad39         | 5.94191e-11 | 1.00000 | 5.94852e-11 | 1.000000 |
| rad28         | 4.54187e-11 | 1.00000 | 4.54692e-11 | 1.000000 |
| rad12         | 3.84725e-11 | 1.00000 | 3.85153e-11 | 1.000000 |
| rad26         | 5.80877e-12 | 1.00000 | 5.81523e-12 | 1.000000 |
| rad2          | 4.25230e-12 | 1.00000 | 4.25703e-12 | 1.000000 |
| rad46         | 4.23385e-12 | 1.00000 | 4.23856e-12 | 1.000000 |
| PhCH2CCH+H    | 3.90284e-12 | 1.00000 | 3.90718e-12 | 1.000000 |
| rad60syn      | 4.67307e-13 | 1.00000 | 4.67826e-13 | 1.000000 |
| rad7          | 3.97696e-13 | 1.00000 | 3.98138e-13 | 1.000000 |
| rad37         | 3.90735e-13 | 1.00000 | 3.91170e-13 | 1.000000 |
| rad10         | 3.41829e-13 | 1.00000 | 3.42209e-13 | 1.000000 |
| rad1          | 3.20987e-13 | 1.00000 | 3.21344e-13 | 1.000000 |
| rad60anti     | 1.45354e-13 | 1.00000 | 1.45516e-13 | 1.000000 |
| rad11         | 9.90784e-14 | 1.00000 | 9.91885e-14 | 1.000000 |
| rad3          | 5.26932e-14 | 1.00000 | 5.27518e-14 | 1.000000 |
| rad4          | 2.80035e-14 | 1.00000 | 2.80347e-14 | 1.000000 |
| rad5          | 8.92904e-15 | 1.00000 | 8.93897e-15 | 1.000000 |
| PAH3+H        | 2.47956e-15 | 1.00000 | 2.48232e-15 | 1.000000 |
| rad13         | 2.29012e-15 | 1.00000 | 2.29267e-15 | 1.000000 |
| rad59         | 7.44181e-16 | 1.00000 | 7.45009e-16 | 1.000000 |
| rad50         | 5.08734e-17 | 1.00000 | 5.09300e-17 | 1.000000 |
| rad27         | 3.41387e-17 | 1.00000 | 3.41766e-17 | 1.000000 |
| rad25         | 1.36262e-17 | 1.00000 | 1.36414e-17 | 1.000000 |
| rad14         | 1.33229e-17 | 1.00000 | 1.33377e-17 | 1.000000 |
| rad19syn      | 1.08024e-17 | 1.00000 | 1.08144e-17 | 1.000000 |
| rad33         | 4.91724e-18 | 1.00000 | 4.92270e-18 | 1.000000 |
| rad20         | 1.39447e-18 | 1.00000 | 1.39602e-18 | 1.000000 |
| rad21         | 9.09084e-19 | 1.00000 | 9.10095e-19 | 1.000000 |
| rad54         | 3.14766e-19 | 1.00000 | 3.15116e-19 | 1.000000 |
| PAH10+CH3     | 2.07062e-19 | 1.00000 | 2.07292e-19 | 1.000000 |
| rad23         | 5.34811e-20 | 1.00000 | 5.35406e-20 | 1.000000 |
| rad43         | 4.79070e-20 | 1.00000 | 4.79603e-20 | 1.000000 |
| rad52         | 2.37882e-20 | 1.00000 | 2.38146e-20 | 1.000000 |
| rad62         | 1.46949e-20 | 1.00000 | 1.47112e-20 | 1.000000 |
| rad18         | 5.54456e-21 | 1.00000 | 5.55072e-21 | 1.000000 |
| rad31         | 2.08369e-21 | 1.00000 | 2.08600e-21 | 1.000000 |
| rad45         | 2.03030e-21 | 1.00000 | 2.03256e-21 | 1.000000 |
| PhcycC3H3_A+H | 1.52452e-21 | 1.00000 | 1.52622e-21 | 1.000000 |
| rad51         | 1.10724e-21 | 1.00000 | 1.10847e-21 | 1.000000 |
| rad70         | 9.13951e-22 | 1.00000 | 9.14968e-22 | 1.000000 |
| rad55         | 3.95677e-22 | 1.00000 | 3.96117e-22 | 1.000000 |
| rad22         | 3.18881e-22 | 1.00000 | 3.19236e-22 | 1.000000 |
| rad36         | 1.32238e-22 | 1.00000 | 1.32385e-22 | 1.000000 |
| rad58         | 9.94323e-23 | 1.00000 | 9.95428e-23 | 1.000000 |
| PAH1+H        | 4.55733e-23 | 1.00000 | 4.56240e-23 | 1.000000 |
| rad65         | 1.17141e-23 | 1.00000 | 1.17271e-23 | 1.000000 |
| rad34         | 2.98552e-24 | 1.00000 | 2.98884e-24 | 1.000000 |
| rad24         | 3.51346e-25 | 1.00000 | 3.51736e-25 | 1.000000 |
| rad42         | 5.23352e-26 | 1.00000 | 5.23933e-26 | 1.000000 |
| rad41         | 1.56770e-26 | 1.00000 | 1.56944e-26 | 1.000000 |
| rad47         | 1.07468e-37 | 1.00000 | 1.07587e-37 | 1.000000 |

0.100000000E-07 Pa, 300.000000 K

=====

| Rate constant | True (fraction)     | Effective (fraction) |
|---------------|---------------------|----------------------|
| Total         | 1.17740e-22 (1.00 ) | 1.17544e-22 (1.00 )  |

| species     | PYtrue      | Cumul    | PYeffective | Cumul    |
|-------------|-------------|----------|-------------|----------|
| Indene+H    | 0.998337    | 0.998337 | 0.999999    | 0.999999 |
| Benzyl+C2H2 | 0.00166158  | 0.999999 | 0.00000     | 0.999999 |
| PhCCH+CH3   | 4.36741e-07 | 0.999999 | 4.37468e-07 | 0.999999 |
| PhCHCCH2+H  | 2.66157e-07 | 0.999999 | 2.66600e-07 | 1.000000 |
| PhCCCH3+H   | 1.55715e-07 | 0.999999 | 1.55974e-07 | 1.000000 |
| rad30       | 3.74940e-08 | 0.999999 | 3.75564e-08 | 1.000000 |
| rad6        | 1.39457e-08 | 0.999999 | 1.39689e-08 | 1.000000 |
| Ph+MeAc     | 6.10066e-09 | 0.999999 | 6.11081e-09 | 1.000000 |
| PAH9+H      | 5.54882e-09 | 1.000000 | 5.55806e-09 | 1.000000 |
| rad35       | 2.76931e-09 | 1.000000 | 2.77392e-09 | 1.000000 |
| rad38       | 1.02444e-09 | 1.000000 | 1.02615e-09 | 1.000000 |
| PAH7+H      | 6.45710e-10 | 1.000000 | 6.46784e-10 | 1.000000 |
| Ph+Allene   | 2.52011e-10 | 1.000000 | 2.52430e-10 | 1.000000 |
| rad39       | 8.64609e-11 | 1.000000 | 8.66048e-11 | 1.000000 |
| rad28       | 4.39880e-11 | 1.000000 | 4.40612e-11 | 1.000000 |
| rad19anti   | 1.63372e-11 | 1.000000 | 1.63644e-11 | 1.000000 |
| rad2        | 1.02193e-11 | 1.000000 | 1.02363e-11 | 1.000000 |
| PhCH2CCH+H  | 7.51670e-12 | 1.000000 | 7.52921e-12 | 1.000000 |
| rad46       | 5.66748e-12 | 1.000000 | 5.67691e-12 | 1.000000 |
| rad26       | 4.05677e-12 | 1.000000 | 4.06352e-12 | 1.000000 |

|               |             |          |             |          |
|---------------|-------------|----------|-------------|----------|
| rad7          | 1.24147e-12 | 1.000000 | 1.24353e-12 | 1.000000 |
| rad10         | 8.03861e-13 | 1.000000 | 8.05199e-13 | 1.000000 |
| rad1          | 7.70242e-13 | 1.000000 | 7.71524e-13 | 1.000000 |
| rad60syn      | 7.07965e-13 | 1.000000 | 7.09144e-13 | 1.000000 |
| rad37         | 6.05562e-13 | 1.000000 | 6.06570e-13 | 1.000000 |
| rad11         | 3.05179e-13 | 1.000000 | 3.05687e-13 | 1.000000 |
| rad60anti     | 2.13244e-13 | 1.000000 | 2.13599e-13 | 1.000000 |
| rad3          | 1.93082e-13 | 1.000000 | 1.93404e-13 | 1.000000 |
| rad4          | 9.60408e-14 | 1.000000 | 9.62006e-14 | 1.000000 |
| rad13         | 7.15883e-15 | 1.000000 | 7.17074e-15 | 1.000000 |
| PAH3+H        | 6.24906e-15 | 1.000000 | 6.25946e-15 | 1.000000 |
| rad59         | 1.44646e-15 | 1.000000 | 1.44887e-15 | 1.000000 |
| rad23         | 1.44418e-16 | 1.000000 | 1.44658e-16 | 1.000000 |
| rad50         | 1.03024e-16 | 1.000000 | 1.03196e-16 | 1.000000 |
| rad20         | 7.81366e-17 | 1.000000 | 7.82666e-17 | 1.000000 |
| rad21         | 4.99569e-17 | 1.000000 | 5.00401e-17 | 1.000000 |
| rad27         | 2.81854e-17 | 1.000000 | 2.82323e-17 | 1.000000 |
| rad19syn      | 2.69219e-17 | 1.000000 | 2.69667e-17 | 1.000000 |
| rad33         | 2.16544e-17 | 1.000000 | 2.16904e-17 | 1.000000 |
| rad14         | 1.11465e-17 | 1.000000 | 1.11650e-17 | 1.000000 |
| rad25         | 9.88368e-18 | 1.000000 | 9.90013e-18 | 1.000000 |
| rad45         | 9.24312e-18 | 1.000000 | 9.25850e-18 | 1.000000 |
| rad18         | 1.88474e-18 | 1.000000 | 1.88787e-18 | 1.000000 |
| rad22         | 1.53948e-18 | 1.000000 | 1.54204e-18 | 1.000000 |
| rad67         | 1.20173e-18 | 1.000000 | 1.20373e-18 | 1.000000 |
| rad54         | 8.62468e-19 | 1.000000 | 8.63904e-19 | 1.000000 |
| PAH10+CH3     | 5.71972e-19 | 1.000000 | 5.72924e-19 | 1.000000 |
| rad36         | 3.15061e-19 | 1.000000 | 3.15586e-19 | 1.000000 |
| rad43         | 1.19050e-19 | 1.000000 | 1.19249e-19 | 1.000000 |
| rad52         | 6.28747e-20 | 1.000000 | 6.29793e-20 | 1.000000 |
| rad62         | 4.05052e-20 | 1.000000 | 4.05727e-20 | 1.000000 |
| PhcycC3H3_A+H | 7.38944e-21 | 1.000000 | 7.40173e-21 | 1.000000 |
| rad31         | 4.01814e-21 | 1.000000 | 4.02483e-21 | 1.000000 |
| rad51         | 3.46093e-21 | 1.000000 | 3.46669e-21 | 1.000000 |
| rad70         | 3.35423e-21 | 1.000000 | 3.35981e-21 | 1.000000 |
| rad55         | 1.33538e-21 | 1.000000 | 1.33760e-21 | 1.000000 |
| rad58         | 3.59869e-22 | 1.000000 | 3.60468e-22 | 1.000000 |
| PAH1+H        | 2.76409e-22 | 1.000000 | 2.76869e-22 | 1.000000 |
| rad24         | 1.73488e-22 | 1.000000 | 1.73776e-22 | 1.000000 |
| rad65         | 4.20415e-23 | 1.000000 | 4.21115e-23 | 1.000000 |
| rad34         | 1.85425e-23 | 1.000000 | 1.85734e-23 | 1.000000 |
| rad42         | 4.75218e-25 | 1.000000 | 4.76009e-25 | 1.000000 |
| rad41         | 1.44595e-25 | 1.000000 | 1.44836e-25 | 1.000000 |
| rad9          | 1.17249e-25 | 1.000000 | 1.17444e-25 | 1.000000 |
| rad53         | 6.41324e-27 | 1.000000 | 6.42392e-27 | 1.000000 |
| rad64         | 1.37052e-27 | 1.000000 | 1.37280e-27 | 1.000000 |
| rad15         | 6.86063e-29 | 1.000000 | 6.87204e-29 | 1.000000 |
| rad56         | 9.20939e-30 | 1.000000 | 9.22472e-30 | 1.000000 |
| rad61         | 1.39478e-30 | 1.000000 | 1.39710e-30 | 1.000000 |
| rad68syn      | 1.01949e-30 | 1.000000 | 1.02119e-30 | 1.000000 |
| rad68anti     | 7.27727e-31 | 1.000000 | 7.28938e-31 | 1.000000 |
| rad5          | 1.48576e-31 | 1.000000 | 1.48824e-31 | 1.000000 |
| rad12         | 8.84323e-32 | 1.000000 | 8.85795e-32 | 1.000000 |
| rad73         | 2.19627e-33 | 1.000000 | 2.19993e-33 | 1.000000 |
| rad40syn      | 2.30546e-34 | 1.000000 | 2.30930e-34 | 1.000000 |
| rad40anti     | 7.00542e-35 | 1.000000 | 7.01708e-35 | 1.000000 |
| rad47         | 2.39996e-37 | 1.000000 | 2.40395e-37 | 1.000000 |
| rad71         | 2.29536e-39 | 1.000000 | 2.29918e-39 | 1.000000 |
| PAH8+H        | 7.78004e-40 | 1.000000 | 7.79299e-40 | 1.000000 |
| rad72         | 4.05077e-45 | 1.000000 | 4.05751e-45 | 1.000000 |
| rad8          | 2.66068e-46 | 1.000000 | 2.66511e-46 | 1.000000 |

0.100000000E-07 Pa, 310.000000 K

=====

Rate constant | True (fraction) | Effective (fraction)

-----  
Total | 2.44453e-22 (1.00 ) | 2.44054e-22 (1.00 )

| species     | PYtrue      | Cumul    | PYeffective | Cumul    |
|-------------|-------------|----------|-------------|----------|
| Indene+H    | 0.998366    | 0.998366 | 0.999998    | 0.999998 |
| Benzyl+C2H2 | 0.00163189  | 0.999998 | 0.000000    | 0.999998 |
| PhCCH+CH3   | 7.61278e-07 | 0.999999 | 7.62523e-07 | 0.999999 |
| PhCHCCH2+H  | 4.78178e-07 | 0.999999 | 4.78959e-07 | 0.999999 |
| PhCCCH3+H   | 2.76250e-07 | 0.999999 | 2.76702e-07 | 1.000000 |
| rad30       | 5.84662e-08 | 0.999999 | 5.85618e-08 | 1.000000 |
| Ph+MeAc     | 1.35870e-08 | 0.999999 | 1.36092e-08 | 1.000000 |
| rad15       | 8.75423e-09 | 0.999999 | 8.76854e-09 | 1.000000 |
| PAH9+H      | 7.07588e-09 | 0.999999 | 7.08745e-09 | 1.000000 |
| rad35       | 4.11579e-09 | 0.999999 | 4.12252e-09 | 1.000000 |

|               |             |          |             |          |
|---------------|-------------|----------|-------------|----------|
| rad6          | 3.37678e-09 | 1.000000 | 3.38230e-09 | 1.000000 |
| rad8          | 2.65491e-09 | 1.000000 | 2.65925e-09 | 1.000000 |
| rad38         | 1.67249e-09 | 1.000000 | 1.67522e-09 | 1.000000 |
| rad9          | 1.66330e-09 | 1.000000 | 1.66602e-09 | 1.000000 |
| PAH7+H        | 1.07655e-09 | 1.000000 | 1.07831e-09 | 1.000000 |
| Ph+Allene     | 1.01826e-09 | 1.000000 | 1.01992e-09 | 1.000000 |
| rad39         | 1.93122e-10 | 1.000000 | 1.93438e-10 | 1.000000 |
| rad12         | 1.09977e-10 | 1.000000 | 1.10157e-10 | 1.000000 |
| rad28         | 3.84767e-11 | 1.000000 | 3.85396e-11 | 1.000000 |
| PhCH2CCH+H    | 2.04110e-11 | 1.000000 | 2.04443e-11 | 1.000000 |
| rad46         | 1.09555e-11 | 1.000000 | 1.09734e-11 | 1.000000 |
| rad2          | 7.26377e-12 | 1.000000 | 7.27564e-12 | 1.000000 |
| rad26         | 5.05140e-12 | 1.000000 | 5.05966e-12 | 1.000000 |
| rad37         | 1.66365e-12 | 1.000000 | 1.66637e-12 | 1.000000 |
| rad60syn      | 1.63169e-12 | 1.000000 | 1.63436e-12 | 1.000000 |
| rad1          | 5.67012e-13 | 1.000000 | 5.67939e-13 | 1.000000 |
| rad60anti     | 5.39033e-13 | 1.000000 | 5.39914e-13 | 1.000000 |
| rad10         | 3.05259e-13 | 1.000000 | 3.05758e-13 | 1.000000 |
| rad7          | 2.57776e-13 | 1.000000 | 2.58197e-13 | 1.000000 |
| rad11         | 6.44059e-14 | 1.000000 | 6.45112e-14 | 1.000000 |
| rad3          | 5.90184e-14 | 1.000000 | 5.91149e-14 | 1.000000 |
| rad5          | 4.67694e-14 | 1.000000 | 4.68459e-14 | 1.000000 |
| rad4          | 3.16768e-14 | 1.000000 | 3.17286e-14 | 1.000000 |
| PAH3+H        | 1.51219e-14 | 1.000000 | 1.51467e-14 | 1.000000 |
| rad59         | 4.36101e-15 | 1.000000 | 4.36813e-15 | 1.000000 |
| rad13         | 1.49218e-15 | 1.000000 | 1.49462e-15 | 1.000000 |
| rad50         | 3.17584e-16 | 1.000000 | 3.18103e-16 | 1.000000 |
| rad19syn      | 1.01011e-16 | 1.000000 | 1.01176e-16 | 1.000000 |
| rad27         | 2.80184e-17 | 1.000000 | 2.80642e-17 | 1.000000 |
| rad14         | 1.37021e-17 | 1.000000 | 1.37245e-17 | 1.000000 |
| rad25         | 1.33345e-17 | 1.000000 | 1.33563e-17 | 1.000000 |
| rad54         | 3.50801e-18 | 1.000000 | 3.51374e-18 | 1.000000 |
| rad33         | 3.28356e-18 | 1.000000 | 3.28892e-18 | 1.000000 |
| PAH10+CH3     | 2.26101e-18 | 1.000000 | 2.26470e-18 | 1.000000 |
| rad20         | 1.19173e-18 | 1.000000 | 1.19368e-18 | 1.000000 |
| rad21         | 7.83236e-19 | 1.000000 | 7.84516e-19 | 1.000000 |
| rad43         | 5.14357e-19 | 1.000000 | 5.15197e-19 | 1.000000 |
| rad52         | 2.26217e-19 | 1.000000 | 2.26587e-19 | 1.000000 |
| rad62         | 1.76311e-19 | 1.000000 | 1.76600e-19 | 1.000000 |
| rad23         | 1.71321e-19 | 1.000000 | 1.71601e-19 | 1.000000 |
| PhcycC3H3_A+H | 2.37749e-20 | 1.000000 | 2.38138e-20 | 1.000000 |
| rad51         | 1.42634e-20 | 1.000000 | 1.42867e-20 | 1.000000 |
| rad70         | 1.35852e-20 | 1.000000 | 1.36074e-20 | 1.000000 |
| rad45         | 1.14736e-20 | 1.000000 | 1.14924e-20 | 1.000000 |
| rad55         | 5.98370e-21 | 1.000000 | 5.99349e-21 | 1.000000 |
| rad18         | 4.52951e-21 | 1.000000 | 4.53691e-21 | 1.000000 |
| rad31         | 2.16234e-21 | 1.000000 | 2.16587e-21 | 1.000000 |
| rad58         | 1.57034e-21 | 1.000000 | 1.57291e-21 | 1.000000 |
| PAH1+H        | 7.93483e-22 | 1.000000 | 7.94780e-22 | 1.000000 |
| rad36         | 7.59191e-22 | 1.000000 | 7.60432e-22 | 1.000000 |
| rad22         | 2.51837e-22 | 1.000000 | 2.52249e-22 | 1.000000 |
| rad65         | 1.69845e-22 | 1.000000 | 1.70123e-22 | 1.000000 |
| rad34         | 5.35999e-23 | 1.000000 | 5.36875e-23 | 1.000000 |
| rad42         | 1.01340e-24 | 1.000000 | 1.01506e-24 | 1.000000 |
| rad24         | 4.11793e-25 | 1.000000 | 4.12466e-25 | 1.000000 |
| rad41         | 3.07228e-25 | 1.000000 | 3.07730e-25 | 1.000000 |
| rad47         | 1.45559e-36 | 1.000000 | 1.45797e-36 | 1.000000 |

0.100000000E-07 Pa, 400.000000 K

=====

| Rate constant | True (fraction)     | Effective (fraction) |
|---------------|---------------------|----------------------|
| Total         | 3.60269e-20 (1.00 ) | 3.57081e-20 (1.00 )  |

| species     | PYtrue      | Cumul    | PYeffective | Cumul    |
|-------------|-------------|----------|-------------|----------|
| Indene+H    | 0.991128    | 0.991128 | 0.999976    | 0.999976 |
| Benzyl+C2H2 | 0.00884848  | 0.999976 | 0.000000    | 0.999976 |
| PhCCH+CH3   | 1.23505e-05 | 0.999989 | 1.24608e-05 | 0.999988 |
| PhCHCCH2+H  | 5.95042e-06 | 0.999995 | 6.00354e-06 | 0.999994 |
| PhCCH3+H    | 3.90745e-06 | 0.999999 | 3.94234e-06 | 0.999998 |
| Ph+MeAc     | 5.34638e-07 | 0.999999 | 5.39411e-07 | 0.999999 |
| rad30       | 4.02127e-07 | 1.000000 | 4.05716e-07 | 0.999999 |
| PAH9+H      | 6.80803e-08 | 1.000000 | 6.86880e-08 | 0.999999 |
| Ph+Allene   | 6.39781e-08 | 1.000000 | 6.45492e-08 | 0.999999 |
| PAH7+H      | 4.50278e-08 | 1.000000 | 4.54297e-08 | 1.000000 |
| rad35       | 2.73752e-08 | 1.000000 | 2.76196e-08 | 1.000000 |
| rad38       | 1.63212e-08 | 1.000000 | 1.64670e-08 | 1.000000 |
| rad39       | 8.59872e-09 | 1.000000 | 8.67548e-09 | 1.000000 |
| PhCH2CCH+H  | 4.56270e-09 | 1.000000 | 4.60343e-09 | 1.000000 |

|               |             |          |             |          |
|---------------|-------------|----------|-------------|----------|
| rad6          | 1.72298e-09 | 1.000000 | 1.73836e-09 | 1.000000 |
| rad19anti     | 8.44423e-10 | 1.000000 | 8.51962e-10 | 1.000000 |
| rad46         | 3.06009e-10 | 1.000000 | 3.08741e-10 | 1.000000 |
| rad37         | 1.38254e-10 | 1.000000 | 1.39488e-10 | 1.000000 |
| rad60syn      | 9.47275e-11 | 1.000000 | 9.55731e-11 | 1.000000 |
| rad60anti     | 3.76555e-11 | 1.000000 | 3.79916e-11 | 1.000000 |
| rad28         | 1.36043e-11 | 1.000000 | 1.37258e-11 | 1.000000 |
| PAH3+H        | 6.50520e-12 | 1.000000 | 6.56327e-12 | 1.000000 |
| rad2          | 2.74108e-12 | 1.000000 | 2.76555e-12 | 1.000000 |
| rad26         | 1.83513e-12 | 1.000000 | 1.85151e-12 | 1.000000 |
| rad59         | 1.36005e-12 | 1.000000 | 1.37219e-12 | 1.000000 |
| rad1          | 2.55749e-13 | 1.000000 | 2.58032e-13 | 1.000000 |
| rad10         | 2.50860e-13 | 1.000000 | 2.53099e-13 | 1.000000 |
| rad7          | 1.62158e-13 | 1.000000 | 1.63606e-13 | 1.000000 |
| rad50         | 1.35994e-13 | 1.000000 | 1.37208e-13 | 1.000000 |
| rad19syn      | 1.28743e-13 | 1.000000 | 1.29892e-13 | 1.000000 |
| rad11         | 4.21856e-14 | 1.000000 | 4.25622e-14 | 1.000000 |
| rad3          | 2.35485e-14 | 1.000000 | 2.37587e-14 | 1.000000 |
| rad4          | 1.24117e-14 | 1.000000 | 1.25225e-14 | 1.000000 |
| rad23         | 1.09009e-14 | 1.000000 | 1.09982e-14 | 1.000000 |
| rad54         | 8.91593e-15 | 1.000000 | 8.99553e-15 | 1.000000 |
| PAH10+CH3     | 4.84579e-15 | 1.000000 | 4.88906e-15 | 1.000000 |
| rad45         | 1.77026e-15 | 1.000000 | 1.78607e-15 | 1.000000 |
| rad67         | 1.67319e-15 | 1.000000 | 1.68812e-15 | 1.000000 |
| rad13         | 9.96379e-16 | 1.000000 | 1.00527e-15 | 1.000000 |
| rad43         | 8.69681e-16 | 1.000000 | 8.77445e-16 | 1.000000 |
| rad62         | 4.86641e-16 | 1.000000 | 4.90986e-16 | 1.000000 |
| rad52         | 4.03329e-16 | 1.000000 | 4.06930e-16 | 1.000000 |
| PhcycC3H3_A+H | 3.21885e-16 | 1.000000 | 3.24758e-16 | 1.000000 |
| rad70         | 1.20384e-16 | 1.000000 | 1.21459e-16 | 1.000000 |
| rad51         | 7.61818e-17 | 1.000000 | 7.68619e-17 | 1.000000 |
| rad36         | 6.82457e-17 | 1.000000 | 6.88549e-17 | 1.000000 |
| rad55         | 5.04270e-17 | 1.000000 | 5.08771e-17 | 1.000000 |
| rad20         | 4.10338e-17 | 1.000000 | 4.14001e-17 | 1.000000 |
| rad21         | 2.86958e-17 | 1.000000 | 2.89520e-17 | 1.000000 |
| PAH1+H        | 2.44002e-17 | 1.000000 | 2.46180e-17 | 1.000000 |
| rad58         | 1.79710e-17 | 1.000000 | 1.81314e-17 | 1.000000 |
| rad27         | 1.02284e-17 | 1.000000 | 1.03197e-17 | 1.000000 |
| rad14         | 8.22605e-18 | 1.000000 | 8.29949e-18 | 1.000000 |
| rad25         | 7.37929e-18 | 1.000000 | 7.44517e-18 | 1.000000 |
| rad33         | 4.40182e-18 | 1.000000 | 4.44112e-18 | 1.000000 |
| rad34         | 2.03113e-18 | 1.000000 | 2.04927e-18 | 1.000000 |
| rad65         | 1.53287e-18 | 1.000000 | 1.54656e-18 | 1.000000 |
| rad18         | 7.76319e-19 | 1.000000 | 7.83249e-19 | 1.000000 |
| rad22         | 4.94649e-19 | 1.000000 | 4.99065e-19 | 1.000000 |
| rad42         | 7.25697e-20 | 1.000000 | 7.32176e-20 | 1.000000 |
| rad41         | 2.24628e-20 | 1.000000 | 2.26633e-20 | 1.000000 |
| rad31         | 6.44234e-21 | 1.000000 | 6.49985e-21 | 1.000000 |
| rad53         | 5.65474e-21 | 1.000000 | 5.70523e-21 | 1.000000 |
| rad64         | 1.81586e-21 | 1.000000 | 1.83207e-21 | 1.000000 |
| rad24         | 5.54049e-22 | 1.000000 | 5.58995e-22 | 1.000000 |
| rad56         | 6.60997e-23 | 1.000000 | 6.66898e-23 | 1.000000 |
| rad68syn      | 8.53494e-24 | 1.000000 | 8.61114e-24 | 1.000000 |
| rad68anti     | 6.16419e-24 | 1.000000 | 6.21922e-24 | 1.000000 |
| rad9          | 4.54397e-24 | 1.000000 | 4.58454e-24 | 1.000000 |
| rad61         | 4.52866e-24 | 1.000000 | 4.56909e-24 | 1.000000 |
| rad73         | 2.09254e-25 | 1.000000 | 2.11122e-25 | 1.000000 |
| rad40syn      | 4.85081e-26 | 1.000000 | 4.89411e-26 | 1.000000 |
| PAH8+H        | 2.50897e-26 | 1.000000 | 2.53137e-26 | 1.000000 |
| rad40anti     | 1.16020e-26 | 1.000000 | 1.17056e-26 | 1.000000 |
| rad71         | 6.26674e-27 | 1.000000 | 6.32269e-27 | 1.000000 |
| rad15         | 2.74665e-27 | 1.000000 | 2.77117e-27 | 1.000000 |
| rad5          | 2.42636e-29 | 1.000000 | 2.44803e-29 | 1.000000 |
| rad12         | 1.57122e-29 | 1.000000 | 1.58524e-29 | 1.000000 |
| rad72         | 1.18364e-32 | 1.000000 | 1.19421e-32 | 1.000000 |
| rad47         | 5.32422e-33 | 1.000000 | 5.37175e-33 | 1.000000 |
| rad8          | 1.01992e-42 | 1.000000 | 1.02902e-42 | 1.000000 |

0.100000000E-07 Pa, 500.000000 K

=====

| Rate constant | True (fraction)     | Effective (fraction) |
|---------------|---------------------|----------------------|
| Total         | 1.22595e-18 (1.00 ) | 1.18787e-18 (1.00 )  |

| species     | PYtrue      | Cumul    | PYeffective | Cumul    |
|-------------|-------------|----------|-------------|----------|
| Indene+H    | 0.968764    | 0.968764 | 0.999822    | 0.999822 |
| Benzyl+C2H2 | 0.0310635   | 0.999827 | 0.00000     | 0.999822 |
| PhCCH+CH3   | 9.35930e-05 | 0.999921 | 9.65935e-05 | 0.999919 |
| PhCHCCH2+H  | 4.00561e-05 | 0.999961 | 4.13403e-05 | 0.999960 |

|               |             |          |             |          |
|---------------|-------------|----------|-------------|----------|
| PhCCCH3+H     | 2.54431e-05 | 0.999987 | 2.62588e-05 | 0.999986 |
| Ph+MeAc       | 7.07386e-06 | 0.999994 | 7.30064e-06 | 0.999993 |
| rad30         | 2.19669e-06 | 0.999996 | 2.26711e-06 | 0.999996 |
| Ph+Allene     | 2.05092e-06 | 0.999998 | 2.11667e-06 | 0.999998 |
| PAH7+H        | 6.80746e-07 | 0.999999 | 7.02570e-07 | 0.999999 |
| PAH9+H        | 4.84045e-07 | 0.999999 | 4.99563e-07 | 0.999999 |
| PhCH2CCH+H    | 2.44801e-07 | 0.999999 | 2.52649e-07 | 0.999999 |
| rad35         | 1.65639e-07 | 0.999999 | 1.70949e-07 | 1.000000 |
| rad39         | 1.51520e-07 | 1.000000 | 1.56377e-07 | 1.000000 |
| rad38         | 1.34449e-07 | 1.000000 | 1.38759e-07 | 1.000000 |
| rad19anti     | 1.41564e-08 | 1.000000 | 1.46102e-08 | 1.000000 |
| rad46         | 5.06638e-09 | 1.000000 | 5.22881e-09 | 1.000000 |
| rad37         | 2.86983e-09 | 1.000000 | 2.96184e-09 | 1.000000 |
| rad60syn      | 2.17485e-09 | 1.000000 | 2.24457e-09 | 1.000000 |
| rad60anti     | 9.78348e-10 | 1.000000 | 1.00971e-09 | 1.000000 |
| PAH3+H        | 4.98713e-10 | 1.000000 | 5.14701e-10 | 1.000000 |
| rad6          | 2.13335e-10 | 1.000000 | 2.20174e-10 | 1.000000 |
| rad59         | 9.55001e-11 | 1.000000 | 9.85617e-11 | 1.000000 |
| rad19syn      | 2.21128e-11 | 1.000000 | 2.28217e-11 | 1.000000 |
| rad50         | 1.38223e-11 | 1.000000 | 1.42654e-11 | 1.000000 |
| rad28         | 2.61904e-12 | 1.000000 | 2.70300e-12 | 1.000000 |
| rad54         | 2.40094e-12 | 1.000000 | 2.47791e-12 | 1.000000 |
| rad2          | 1.14218e-12 | 1.000000 | 1.17880e-12 | 1.000000 |
| PAH10+CH3     | 9.70418e-13 | 1.000000 | 1.00153e-12 | 1.000000 |
| rad26         | 4.42272e-13 | 1.000000 | 4.56451e-13 | 1.000000 |
| rad67         | 2.37492e-13 | 1.000000 | 2.45106e-13 | 1.000000 |
| PhcycC3H3_A+H | 2.03140e-13 | 1.000000 | 2.09652e-13 | 1.000000 |
| rad23         | 1.63066e-13 | 1.000000 | 1.68294e-13 | 1.000000 |
| rad43         | 1.48445e-13 | 1.000000 | 1.53204e-13 | 1.000000 |
| rad1          | 1.37217e-13 | 1.000000 | 1.41616e-13 | 1.000000 |
| rad62         | 1.23066e-13 | 1.000000 | 1.27012e-13 | 1.000000 |
| rad52         | 1.00173e-13 | 1.000000 | 1.03384e-13 | 1.000000 |
| rad10         | 7.16763e-14 | 1.000000 | 7.39742e-14 | 1.000000 |
| rad70         | 6.56843e-14 | 1.000000 | 6.77901e-14 | 1.000000 |
| rad45         | 4.11039e-14 | 1.000000 | 4.24217e-14 | 1.000000 |
| rad51         | 3.84245e-14 | 1.000000 | 3.96563e-14 | 1.000000 |
| rad55         | 2.77305e-14 | 1.000000 | 2.86195e-14 | 1.000000 |
| PAH1+H        | 2.28960e-14 | 1.000000 | 2.36300e-14 | 1.000000 |
| rad7          | 2.17299e-14 | 1.000000 | 2.24265e-14 | 1.000000 |
| rad3          | 1.27305e-14 | 1.000000 | 1.31386e-14 | 1.000000 |
| rad58         | 1.24937e-14 | 1.000000 | 1.28942e-14 | 1.000000 |
| rad4          | 7.20272e-15 | 1.000000 | 7.43363e-15 | 1.000000 |
| rad11         | 6.30837e-15 | 1.000000 | 6.51062e-15 | 1.000000 |
| rad36         | 2.22616e-15 | 1.000000 | 2.29753e-15 | 1.000000 |
| rad34         | 2.11777e-15 | 1.000000 | 2.18567e-15 | 1.000000 |
| rad65         | 9.80428e-16 | 1.000000 | 1.01186e-15 | 1.000000 |
| rad13         | 1.53273e-16 | 1.000000 | 1.58186e-16 | 1.000000 |
| rad42         | 8.25256e-17 | 1.000000 | 8.51713e-17 | 1.000000 |
| rad20         | 3.27940e-17 | 1.000000 | 3.38453e-17 | 1.000000 |
| rad21         | 2.58372e-17 | 1.000000 | 2.66655e-17 | 1.000000 |
| rad41         | 2.35251e-17 | 1.000000 | 2.42793e-17 | 1.000000 |
| rad53         | 2.01904e-17 | 1.000000 | 2.08377e-17 | 1.000000 |
| rad64         | 7.88166e-18 | 1.000000 | 8.13434e-18 | 1.000000 |
| rad14         | 2.96386e-18 | 1.000000 | 3.05888e-18 | 1.000000 |
| rad25         | 2.72290e-18 | 1.000000 | 2.81020e-18 | 1.000000 |
| rad27         | 2.61919e-18 | 1.000000 | 2.70316e-18 | 1.000000 |
| rad33         | 1.39637e-18 | 1.000000 | 1.44114e-18 | 1.000000 |
| rad56         | 7.26381e-19 | 1.000000 | 7.49668e-19 | 1.000000 |
| rad18         | 4.11003e-19 | 1.000000 | 4.24179e-19 | 1.000000 |
| rad22         | 1.80361e-19 | 1.000000 | 1.86144e-19 | 1.000000 |
| rad68syn      | 9.96094e-20 | 1.000000 | 1.02803e-19 | 1.000000 |
| rad68anti     | 7.08132e-20 | 1.000000 | 7.30835e-20 | 1.000000 |
| rad61         | 2.98911e-20 | 1.000000 | 3.08494e-20 | 1.000000 |
| rad31         | 1.29639e-20 | 1.000000 | 1.33795e-20 | 1.000000 |
| rad73         | 6.71346e-21 | 1.000000 | 6.92869e-21 | 1.000000 |
| rad24         | 4.11954e-21 | 1.000000 | 4.25161e-21 | 1.000000 |
| rad40syn      | 1.51482e-21 | 1.000000 | 1.56339e-21 | 1.000000 |
| PAH8+H        | 1.48007e-21 | 1.000000 | 1.52752e-21 | 1.000000 |
| rad71         | 5.89485e-22 | 1.000000 | 6.08384e-22 | 1.000000 |
| rad40anti     | 4.04837e-22 | 1.000000 | 4.17815e-22 | 1.000000 |
| rad9          | 2.38945e-22 | 1.000000 | 2.46606e-22 | 1.000000 |
| rad72         | 1.18192e-24 | 1.000000 | 1.21981e-24 | 1.000000 |
| rad15         | 1.52529e-25 | 1.000000 | 1.57419e-25 | 1.000000 |
| rad12         | 5.38335e-27 | 1.000000 | 5.55593e-27 | 1.000000 |
| rad5          | 3.46325e-28 | 1.000000 | 3.57428e-28 | 1.000000 |
| rad47         | 2.95499e-30 | 1.000000 | 3.04973e-30 | 1.000000 |
| rad8          | 6.41091e-39 | 1.000000 | 6.61644e-39 | 1.000000 |

0.100000000E-07 Pa, 600.000000 K

=====

| Rate constant | True (fraction) |          | Effective (fraction) |          |
|---------------|-----------------|----------|----------------------|----------|
| -----         | -----           |          | -----                |          |
| Total         | 1.36947e-17     | (1.00 )  | 1.26193e-17          | (1.00 )  |
| species       | PYtrue          | Cumul    | PYeffective          | Cumul    |
| -----         | -----           | -----    | -----                | -----    |
| Indene+H      | 0.920850        | 0.920850 | 0.999326             | 0.999326 |
| Benzyl+C2H2   | 0.0785283       | 0.999378 | 0.00000              | 0.999326 |
| PhCCH+CH3     | 0.000333045     | 0.999711 | 0.000361427          | 0.999687 |
| PhCHCCH2+H    | 0.000137020     | 0.999848 | 0.000148697          | 0.999836 |
| PhCCCH3+H     | 7.54035e-05     | 0.999924 | 8.18295e-05          | 0.999918 |
| Ph+MeAc       | 3.38749e-05     | 0.999958 | 3.67618e-05          | 0.999955 |
| Ph+Allene     | 2.17077e-05     | 0.999979 | 2.35577e-05          | 0.999978 |
| rad30         | 7.59256e-06     | 0.999987 | 8.23960e-06          | 0.999987 |
| PAH7+H        | 4.39153e-06     | 0.999991 | 4.76577e-06          | 0.999991 |
| PhCH2CCH+H    | 3.66168e-06     | 0.999995 | 3.97373e-06          | 0.999995 |
| PAH9+H        | 2.21748e-06     | 0.999997 | 2.40646e-06          | 0.999998 |
| rad39         | 1.04275e-06     | 0.999998 | 1.13162e-06          | 0.999999 |
| rad38         | 6.77227e-07     | 0.999999 | 7.34941e-07          | 1.000000 |
| rad35         | 6.69664e-07     | 1.000000 | 7.26734e-07          | 1.000000 |
| rad19anti     | 1.16219e-07     | 1.000000 | 1.26124e-07          | 1.000000 |
| rad46         | 4.03894e-08     | 1.000000 | 4.38315e-08          | 1.000000 |
| rad60syn      | 1.92850e-08     | 1.000000 | 2.09285e-08          | 1.000000 |
| rad37         | 1.80180e-08     | 1.000000 | 1.95535e-08          | 1.000000 |
| PAH3+H        | 9.89107e-09     | 1.000000 | 1.07340e-08          | 1.000000 |
| rad60anti     | 9.33103e-09     | 1.000000 | 1.01262e-08          | 1.000000 |
| rad59         | 1.75177e-09     | 1.000000 | 1.90106e-09          | 1.000000 |
| rad19syn      | 6.85595e-10     | 1.000000 | 7.44022e-10          | 1.000000 |
| rad50         | 3.60206e-10     | 1.000000 | 3.90903e-10          | 1.000000 |
| rad54         | 1.00686e-10     | 1.000000 | 1.09267e-10          | 1.000000 |
| PAH10+CH3     | 2.91649e-11     | 1.000000 | 3.16504e-11          | 1.000000 |
| rad6          | 2.80218e-11     | 1.000000 | 3.04098e-11          | 1.000000 |
| PhcycC3H3_A+H | 1.50044e-11     | 1.000000 | 1.62831e-11          | 1.000000 |
| rad67         | 9.04132e-12     | 1.000000 | 9.81183e-12          | 1.000000 |
| rad52         | 4.62397e-12     | 1.000000 | 5.01803e-12          | 1.000000 |
| rad62         | 4.44939e-12     | 1.000000 | 4.82857e-12          | 1.000000 |
| rad70         | 4.33463e-12     | 1.000000 | 4.70403e-12          | 1.000000 |
| rad43         | 3.80244e-12     | 1.000000 | 4.12649e-12          | 1.000000 |
| rad51         | 2.80803e-12     | 1.000000 | 3.04733e-12          | 1.000000 |
| PAH1+H        | 2.14126e-12     | 1.000000 | 2.32374e-12          | 1.000000 |
| rad55         | 1.80944e-12     | 1.000000 | 1.96364e-12          | 1.000000 |
| rad58         | 1.01134e-12     | 1.000000 | 1.09753e-12          | 1.000000 |
| rad2          | 5.00661e-13     | 1.000000 | 5.43328e-13          | 1.000000 |
| rad28         | 4.19392e-13     | 1.000000 | 4.55133e-13          | 1.000000 |
| rad23         | 3.99372e-13     | 1.000000 | 4.33406e-13          | 1.000000 |
| rad34         | 2.13662e-13     | 1.000000 | 2.31871e-13          | 1.000000 |
| rad45         | 1.14384e-13     | 1.000000 | 1.24131e-13          | 1.000000 |
| rad26         | 8.22379e-14     | 1.000000 | 8.92462e-14          | 1.000000 |
| rad65         | 8.07418e-14     | 1.000000 | 8.76227e-14          | 1.000000 |
| rad1          | 7.49083e-14     | 1.000000 | 8.12920e-14          | 1.000000 |
| rad10         | 1.80791e-14     | 1.000000 | 1.96198e-14          | 1.000000 |
| rad36         | 9.33317e-15     | 1.000000 | 1.01286e-14          | 1.000000 |
| rad42         | 8.05554e-15     | 1.000000 | 8.74203e-15          | 1.000000 |
| rad3          | 6.94605e-15     | 1.000000 | 7.53800e-15          | 1.000000 |
| rad53         | 4.55499e-15     | 1.000000 | 4.94317e-15          | 1.000000 |
| rad4          | 4.21481e-15     | 1.000000 | 4.57400e-15          | 1.000000 |
| rad7          | 3.21943e-15     | 1.000000 | 3.49379e-15          | 1.000000 |
| rad41         | 2.01462e-15     | 1.000000 | 2.18630e-15          | 1.000000 |
| rad64         | 1.93953e-15     | 1.000000 | 2.10482e-15          | 1.000000 |
| rad11         | 1.17052e-15     | 1.000000 | 1.27027e-15          | 1.000000 |
| rad56         | 3.44489e-16     | 1.000000 | 3.73846e-16          | 1.000000 |
| rad68syn      | 4.92115e-17     | 1.000000 | 5.34053e-17          | 1.000000 |
| rad20         | 4.39483e-17     | 1.000000 | 4.76937e-17          | 1.000000 |
| rad21         | 3.92596e-17     | 1.000000 | 4.26054e-17          | 1.000000 |
| rad68anti     | 3.44262e-17     | 1.000000 | 3.73600e-17          | 1.000000 |
| rad13         | 3.32182e-17     | 1.000000 | 3.60490e-17          | 1.000000 |
| rad61         | 9.41089e-18     | 1.000000 | 1.02129e-17          | 1.000000 |
| rad73         | 7.89870e-18     | 1.000000 | 8.57183e-18          | 1.000000 |
| PAH8+H        | 2.20157e-18     | 1.000000 | 2.38919e-18          | 1.000000 |
| rad71         | 1.93751e-18     | 1.000000 | 2.10262e-18          | 1.000000 |
| rad40syn      | 1.45406e-18     | 1.000000 | 1.57798e-18          | 1.000000 |
| rad14         | 8.72660e-19     | 1.000000 | 9.47029e-19          | 1.000000 |
| rad33         | 8.65162e-19     | 1.000000 | 9.38892e-19          | 1.000000 |
| rad25         | 8.44792e-19     | 1.000000 | 9.16786e-19          | 1.000000 |
| rad27         | 6.99590e-19     | 1.000000 | 7.59209e-19          | 1.000000 |
| rad40anti     | 4.39177e-19     | 1.000000 | 4.76604e-19          | 1.000000 |
| rad18         | 3.12558e-19     | 1.000000 | 3.39194e-19          | 1.000000 |
| rad22         | 8.10338e-20     | 1.000000 | 8.79395e-20          | 1.000000 |
| rad24         | 5.16591e-20     | 1.000000 | 5.60616e-20          | 1.000000 |
| rad72         | 2.77500e-20     | 1.000000 | 3.01148e-20          | 1.000000 |

|       |             |          |             |         |
|-------|-------------|----------|-------------|---------|
| rad9  | 1.78355e-20 | 1.000000 | 1.93554e-20 | 1.00000 |
| rad31 | 1.61043e-20 | 1.000000 | 1.74767e-20 | 1.00000 |
| rad15 | 1.07632e-23 | 1.000000 | 1.16805e-23 | 1.00000 |
| rad12 | 2.10242e-24 | 1.000000 | 2.28159e-24 | 1.00000 |
| rad5  | 1.65326e-27 | 1.000000 | 1.79415e-27 | 1.00000 |
| rad47 | 2.24943e-28 | 1.000000 | 2.44113e-28 | 1.00000 |
| rad8  | 9.50900e-35 | 1.000000 | 1.03194e-34 | 1.00000 |

0.100000000E-07 Pa, 700.000000 K

| Rate constant | True (fraction)     | Effective (fraction) |
|---------------|---------------------|----------------------|
| Total         | 8.02260e-17 (1.00 ) | 6.78335e-17 (1.00 )  |

| species       | PYtrue      | Cumul    | PYeffective | Cumul    |
|---------------|-------------|----------|-------------|----------|
| Indene+H      | 0.844045    | 0.844045 | 0.998243    | 0.998243 |
| Benzyl+C2H2   | 0.154470    | 0.998515 | 0.00000     | 0.998243 |
| PhCCH+CH3     | 0.000746434 | 0.999261 | 0.000882800 | 0.999126 |
| PhCHCCH2+H    | 0.000320585 | 0.999582 | 0.000379153 | 0.999505 |
| PhCCCH3+H     | 0.000136742 | 0.999719 | 0.000161724 | 0.999667 |
| Ph+Allene     | 0.000115963 | 0.999835 | 0.000137148 | 0.999804 |
| Ph+MeAc       | 8.86607e-05 | 0.999923 | 0.000104858 | 0.999909 |
| PhCH2CCH+H    | 2.52612e-05 | 0.999949 | 2.98762e-05 | 0.999939 |
| rad30         | 1.89338e-05 | 0.999968 | 2.23928e-05 | 0.999961 |
| PAH7+H        | 1.64063e-05 | 0.999984 | 1.94036e-05 | 0.999980 |
| PAH9+H        | 7.24066e-06 | 0.999991 | 8.56345e-06 | 0.999989 |
| rad39         | 3.97935e-06 | 0.999995 | 4.70633e-06 | 0.999994 |
| rad38         | 2.36433e-06 | 0.999998 | 2.79627e-06 | 0.999996 |
| rad35         | 1.97985e-06 | 1.000000 | 2.34155e-06 | 0.999999 |
| rad19anti     | 5.91542e-07 | 1.00000  | 6.99611e-07 | 0.999999 |
| rad46         | 1.95974e-07 | 1.00000  | 2.31776e-07 | 1.000000 |
| rad60syn      | 9.47747e-08 | 1.00000  | 1.12089e-07 | 1.000000 |
| PAH3+H        | 8.73469e-08 | 1.00000  | 1.03304e-07 | 1.000000 |
| rad37         | 5.67278e-08 | 1.00000  | 6.70914e-08 | 1.000000 |
| rad60anti     | 4.82184e-08 | 1.00000  | 5.70274e-08 | 1.00000  |
| rad59         | 1.44140e-08 | 1.00000  | 1.70472e-08 | 1.00000  |
| rad19syn      | 7.75621e-09 | 1.00000  | 9.17319e-09 | 1.00000  |
| rad50         | 4.08621e-09 | 1.00000  | 4.83271e-09 | 1.00000  |
| rad54         | 1.41341e-09 | 1.00000  | 1.67162e-09 | 1.00000  |
| PhcycC3H3_A+H | 3.16562e-10 | 1.00000  | 3.74395e-10 | 1.00000  |
| PAH10+CH3     | 2.96583e-10 | 1.00000  | 3.50766e-10 | 1.00000  |
| rad67         | 1.46304e-10 | 1.00000  | 1.73032e-10 | 1.00000  |
| rad70         | 8.36625e-11 | 1.00000  | 9.89467e-11 | 1.00000  |
| rad52         | 7.81491e-11 | 1.00000  | 9.24262e-11 | 1.00000  |
| rad51         | 6.57347e-11 | 1.00000  | 7.77438e-11 | 1.00000  |
| rad62         | 5.24317e-11 | 1.00000  | 6.20104e-11 | 1.00000  |
| PAH1+H        | 5.21513e-11 | 1.00000  | 6.16787e-11 | 1.00000  |
| rad55         | 3.42217e-11 | 1.00000  | 4.04737e-11 | 1.00000  |
| rad43         | 3.27206e-11 | 1.00000  | 3.86983e-11 | 1.00000  |
| rad58         | 2.36726e-11 | 1.00000  | 2.79973e-11 | 1.00000  |
| rad34         | 5.57915e-12 | 1.00000  | 6.59840e-12 | 1.00000  |
| rad6          | 4.12147e-12 | 1.00000  | 4.87442e-12 | 1.00000  |
| rad65         | 2.00944e-12 | 1.00000  | 2.37654e-12 | 1.00000  |
| rad23         | 2.89145e-13 | 1.00000  | 3.41969e-13 | 1.00000  |
| rad53         | 2.08843e-13 | 1.00000  | 2.46996e-13 | 1.00000  |
| rad42         | 1.92430e-13 | 1.00000  | 2.27585e-13 | 1.00000  |
| rad2          | 1.80322e-13 | 1.00000  | 2.13265e-13 | 1.00000  |
| rad45         | 9.76480e-14 | 1.00000  | 1.15487e-13 | 1.00000  |
| rad64         | 9.12030e-14 | 1.00000  | 1.07865e-13 | 1.00000  |
| rad28         | 6.46412e-14 | 1.00000  | 7.64505e-14 | 1.00000  |
| rad41         | 4.12886e-14 | 1.00000  | 4.88315e-14 | 1.00000  |
| rad1          | 3.03647e-14 | 1.00000  | 3.59120e-14 | 1.00000  |
| rad56         | 2.67456e-14 | 1.00000  | 3.16317e-14 | 1.00000  |
| rad26         | 1.41549e-14 | 1.00000  | 1.67408e-14 | 1.00000  |
| rad36         | 8.36073e-15 | 1.00000  | 9.88815e-15 | 1.00000  |
| rad10         | 4.94589e-15 | 1.00000  | 5.84946e-15 | 1.00000  |
| rad68syn      | 3.96310e-15 | 1.00000  | 4.68712e-15 | 1.00000  |
| rad68anti     | 2.73680e-15 | 1.00000  | 3.23679e-15 | 1.00000  |
| rad3          | 2.05088e-15 | 1.00000  | 2.42555e-15 | 1.00000  |
| rad4          | 1.33385e-15 | 1.00000  | 1.57753e-15 | 1.00000  |
| rad73         | 1.13675e-15 | 1.00000  | 1.34443e-15 | 1.00000  |
| rad7          | 5.86101e-16 | 1.00000  | 6.93176e-16 | 1.00000  |
| rad61         | 5.36023e-16 | 1.00000  | 6.33948e-16 | 1.00000  |
| PAH8+H        | 3.93128e-16 | 1.00000  | 4.64949e-16 | 1.00000  |
| rad11         | 3.32186e-16 | 1.00000  | 3.92873e-16 | 1.00000  |
| rad71         | 2.64533e-16 | 1.00000  | 3.12861e-16 | 1.00000  |
| rad40syn      | 1.89157e-16 | 1.00000  | 2.23714e-16 | 1.00000  |
| rad20         | 9.46268e-17 | 1.00000  | 1.11914e-16 | 1.00000  |
| rad21         | 9.16147e-17 | 1.00000  | 1.08352e-16 | 1.00000  |



|           |             |         |             |         |
|-----------|-------------|---------|-------------|---------|
| rad40anti | 6.36576e-17 | 1.00000 | 7.52872e-17 | 1.00000 |
| rad13     | 1.76005e-17 | 1.00000 | 2.08160e-17 | 1.00000 |
| rad9      | 1.08171e-18 | 1.00000 | 1.27933e-18 | 1.00000 |
| rad33     | 1.04823e-18 | 1.00000 | 1.23973e-18 | 1.00000 |
| rad72     | 1.02341e-18 | 1.00000 | 1.21038e-18 | 1.00000 |
| rad24     | 5.53560e-19 | 1.00000 | 6.54690e-19 | 1.00000 |
| rad18     | 3.75527e-19 | 1.00000 | 4.44132e-19 | 1.00000 |
| rad25     | 3.17277e-19 | 1.00000 | 3.75240e-19 | 1.00000 |
| rad14     | 2.91146e-19 | 1.00000 | 3.44336e-19 | 1.00000 |
| rad27     | 2.60757e-19 | 1.00000 | 3.08394e-19 | 1.00000 |
| rad22     | 4.70653e-20 | 1.00000 | 5.56637e-20 | 1.00000 |
| rad31     | 1.07536e-20 | 1.00000 | 1.27182e-20 | 1.00000 |
| rad15     | 4.30266e-22 | 1.00000 | 5.08871e-22 | 1.00000 |
| rad12     | 2.79159e-22 | 1.00000 | 3.30158e-22 | 1.00000 |
| rad5      | 4.87552e-27 | 1.00000 | 5.76623e-27 | 1.00000 |
| rad47     | 4.45888e-27 | 1.00000 | 5.27347e-27 | 1.00000 |
| rad8      | 1.57148e-30 | 1.00000 | 1.85857e-30 | 1.00000 |

0.100000000E-07 Pa, 800.000000 K

| Rate constant | True (fraction)     | Effective (fraction) |
|---------------|---------------------|----------------------|
| Total         | 3.12228e-16 (1.00 ) | 2.33587e-16 (1.00 )  |

| species       | PYtrue      | Cumul    | PYeffective | Cumul    |
|---------------|-------------|----------|-------------|----------|
| Indene+H      | 0.745326    | 0.745326 | 0.996252    | 0.996252 |
| Benzyl+C2H2   | 0.251870    | 0.997196 | 0.00000     | 0.996252 |
| PhCCH+CH3     | 0.00124162  | 0.998438 | 0.00165963  | 0.997912 |
| PhCHCCH2+H    | 0.000603921 | 0.999042 | 0.000807240 | 0.998719 |
| Ph+Allene     | 0.000391607 | 0.999433 | 0.000523449 | 0.999242 |
| PhCCCH3+H     | 0.000180412 | 0.999614 | 0.000241151 | 0.999483 |
| Ph+MeAc       | 0.000158702 | 0.999772 | 0.000212132 | 0.999696 |
| PhCH2CCH+H    | 0.000104747 | 0.999877 | 0.000140012 | 0.999836 |
| PAH7+H        | 4.20043e-05 | 0.999919 | 5.61457e-05 | 0.999892 |
| rad30         | 3.73181e-05 | 0.999956 | 4.98819e-05 | 0.999942 |
| PAH9+H        | 1.83027e-05 | 0.999975 | 2.44646e-05 | 0.999966 |
| rad39         | 1.01670e-05 | 0.999985 | 1.35899e-05 | 0.999980 |
| rad38         | 6.28638e-06 | 0.999991 | 8.40280e-06 | 0.999988 |
| rad35         | 4.61792e-06 | 0.999996 | 6.17262e-06 | 0.999994 |
| rad19anti     | 2.13374e-06 | 0.999998 | 2.85210e-06 | 0.999997 |
| rad46         | 6.69423e-07 | 0.999999 | 8.94796e-07 | 0.999998 |
| PAH3+H        | 4.55926e-07 | 0.999999 | 6.09421e-07 | 0.999999 |
| rad60syn      | 3.14534e-07 | 0.999999 | 4.20427e-07 | 0.999999 |
| rad60anti     | 1.66149e-07 | 0.999999 | 2.22085e-07 | 0.999999 |
| rad37         | 1.16536e-07 | 1.00000  | 1.55770e-07 | 0.999999 |
| rad59         | 7.05288e-08 | 1.00000  | 9.42735e-08 | 1.00000  |
| rad19syn      | 4.57469e-08 | 1.00000  | 6.11483e-08 | 1.00000  |
| rad50         | 2.67320e-08 | 1.00000  | 3.57318e-08 | 1.00000  |
| rad54         | 9.79642e-09 | 1.00000  | 1.30945e-08 | 1.00000  |
| PhcycC3H3_A+H | 2.99417e-09 | 1.00000  | 4.00220e-09 | 1.00000  |
| PAH10+CH3     | 1.56080e-09 | 1.00000  | 2.08627e-09 | 1.00000  |
| rad67         | 1.31109e-09 | 1.00000  | 1.75248e-09 | 1.00000  |
| rad51         | 7.39000e-10 | 1.00000  | 9.87797e-10 | 1.00000  |
| rad70         | 7.37566e-10 | 1.00000  | 9.85880e-10 | 1.00000  |
| rad52         | 6.86810e-10 | 1.00000  | 9.18036e-10 | 1.00000  |
| PAH1+H        | 5.38349e-10 | 1.00000  | 7.19593e-10 | 1.00000  |
| rad62         | 3.04694e-10 | 1.00000  | 4.07274e-10 | 1.00000  |
| rad55         | 2.93955e-10 | 1.00000  | 3.92920e-10 | 1.00000  |
| rad58         | 2.53305e-10 | 1.00000  | 3.38585e-10 | 1.00000  |
| rad43         | 1.42321e-10 | 1.00000  | 1.90236e-10 | 1.00000  |
| rad34         | 6.18274e-11 | 1.00000  | 8.26426e-11 | 1.00000  |
| rad65         | 2.32781e-11 | 1.00000  | 3.11151e-11 | 1.00000  |
| rad53         | 3.49856e-12 | 1.00000  | 4.67641e-12 | 1.00000  |
| rad42         | 1.90218e-12 | 1.00000  | 2.54258e-12 | 1.00000  |
| rad64         | 1.51195e-12 | 1.00000  | 2.02097e-12 | 1.00000  |
| rad6          | 7.47715e-13 | 1.00000  | 9.99446e-13 | 1.00000  |
| rad56         | 6.63908e-13 | 1.00000  | 8.87424e-13 | 1.00000  |
| rad41         | 3.47550e-13 | 1.00000  | 4.64559e-13 | 1.00000  |
| rad23         | 1.23808e-13 | 1.00000  | 1.65490e-13 | 1.00000  |
| rad68syn      | 1.02293e-13 | 1.00000  | 1.36731e-13 | 1.00000  |
| rad68anti     | 6.99233e-14 | 1.00000  | 9.34641e-14 | 1.00000  |
| rad45         | 5.34164e-14 | 1.00000  | 7.14000e-14 | 1.00000  |
| rad73         | 5.14806e-14 | 1.00000  | 6.88124e-14 | 1.00000  |
| rad2          | 4.98435e-14 | 1.00000  | 6.66241e-14 | 1.00000  |
| PAH8+H        | 1.87299e-14 | 1.00000  | 2.50356e-14 | 1.00000  |
| rad71         | 1.53044e-14 | 1.00000  | 2.04568e-14 | 1.00000  |
| rad28         | 1.08916e-14 | 1.00000  | 1.45584e-14 | 1.00000  |
| rad61         | 1.08816e-14 | 1.00000  | 1.45451e-14 | 1.00000  |
| rad1          | 8.12735e-15 | 1.00000  | 1.08636e-14 | 1.00000  |

|           |             |          |             |          |
|-----------|-------------|----------|-------------|----------|
| rad40syn  | 7.04169e-15 | 1.000000 | 9.41239e-15 | 1.000000 |
| rad36     | 4.45006e-15 | 1.000000 | 5.94825e-15 | 1.000000 |
| rad26     | 2.61506e-15 | 1.000000 | 3.49546e-15 | 1.000000 |
| rad40anti | 2.59900e-15 | 1.000000 | 3.47400e-15 | 1.000000 |
| rad10     | 1.10462e-15 | 1.000000 | 1.47650e-15 | 1.000000 |
| rad3      | 5.71613e-16 | 1.000000 | 7.64056e-16 | 1.000000 |
| rad4      | 3.76944e-16 | 1.000000 | 5.03848e-16 | 1.000000 |
| rad20     | 2.64415e-16 | 1.000000 | 3.53434e-16 | 1.000000 |
| rad21     | 2.51401e-16 | 1.000000 | 3.36039e-16 | 1.000000 |
| rad11     | 1.83864e-16 | 1.000000 | 2.45765e-16 | 1.000000 |
| rad7      | 1.67754e-16 | 1.000000 | 2.24231e-16 | 1.000000 |
| rad13     | 2.78707e-17 | 1.000000 | 3.72538e-17 | 1.000000 |
| rad9      | 2.43047e-17 | 1.000000 | 3.24872e-17 | 1.000000 |
| rad72     | 1.38864e-17 | 1.000000 | 1.85614e-17 | 1.000000 |
| rad24     | 2.87053e-18 | 1.000000 | 3.83694e-18 | 1.000000 |
| rad33     | 2.00112e-18 | 1.000000 | 2.67483e-18 | 1.000000 |
| rad18     | 7.61284e-19 | 1.000000 | 1.01758e-18 | 1.000000 |
| rad25     | 2.03007e-19 | 1.000000 | 2.71352e-19 | 1.000000 |
| rad27     | 1.63776e-19 | 1.000000 | 2.18914e-19 | 1.000000 |
| rad14     | 1.45479e-19 | 1.000000 | 1.94457e-19 | 1.000000 |
| rad22     | 3.89744e-20 | 1.000000 | 5.20958e-20 | 1.000000 |
| rad12     | 7.13517e-21 | 1.000000 | 9.53734e-21 | 1.000000 |
| rad31     | 5.78730e-21 | 1.000000 | 7.73569e-21 | 1.000000 |
| rad15     | 5.54191e-21 | 1.000000 | 7.40769e-21 | 1.000000 |
| rad47     | 4.71186e-26 | 1.000000 | 6.29819e-26 | 1.000000 |
| rad5      | 1.28240e-26 | 1.000000 | 1.71414e-26 | 1.000000 |
| rad8      | 8.26838e-27 | 1.000000 | 1.10521e-26 | 1.000000 |

0.100000000E-07 Pa, 900.000000 K

| Rate constant | True (fraction)     | Effective (fraction) |
|---------------|---------------------|----------------------|
| Total         | 9.21769e-16 (1.00 ) | 5.91948e-16 (1.00 )  |

| species       | PYtrue      | Cumul    | PYeffective | Cumul    |
|---------------|-------------|----------|-------------|----------|
| Indene+H      | 0.637601    | 0.637601 | 0.992859    | 0.992859 |
| Benzyl+CH2H   | 0.357813    | 0.995414 | 0.000000    | 0.992859 |
| PhCCH+CH3     | 0.00168534  | 0.997099 | 0.00262438  | 0.995483 |
| PhCHCCH2+H    | 0.000988072 | 0.998087 | 0.00153861  | 0.997022 |
| Ph+Allene     | 0.000956826 | 0.999044 | 0.00148995  | 0.998512 |
| PhCH2CCH+H    | 0.000305642 | 0.999350 | 0.000475939 | 0.998988 |
| Ph+MeAc       | 0.000221700 | 0.999572 | 0.000345227 | 0.999333 |
| PhCCCH3+H     | 0.000192583 | 0.999764 | 0.000299886 | 0.999633 |
| PAH7+H        | 8.18813e-05 | 0.999846 | 0.000127504 | 0.999760 |
| rad30         | 6.20698e-05 | 0.999908 | 9.66537e-05 | 0.999857 |
| PAH9+H        | 3.81793e-05 | 0.999946 | 5.94520e-05 | 0.999917 |
| rad39         | 1.95088e-05 | 0.999966 | 3.03786e-05 | 0.999947 |
| rad38         | 1.36528e-05 | 0.999979 | 2.12599e-05 | 0.999968 |
| rad35         | 9.01875e-06 | 0.999988 | 1.40438e-05 | 0.999982 |
| rad19anti     | 5.95507e-06 | 0.999994 | 9.27312e-06 | 0.999992 |
| rad46         | 1.77409e-06 | 0.999996 | 2.76257e-06 | 0.999994 |
| PAH3+H        | 1.66000e-06 | 0.999998 | 2.58491e-06 | 0.999997 |
| rad60syn      | 7.95279e-07 | 0.999999 | 1.23839e-06 | 0.999998 |
| rad60anti     | 4.32684e-07 | 0.999999 | 6.73766e-07 | 0.999999 |
| rad59         | 2.41974e-07 | 0.999999 | 3.76797e-07 | 0.999999 |
| rad37         | 1.83190e-07 | 1.000000 | 2.85260e-07 | 0.999999 |
| rad19syn      | 1.72530e-07 | 1.000000 | 2.68660e-07 | 1.000000 |
| rad50         | 1.19157e-07 | 1.000000 | 1.85549e-07 | 1.000000 |
| rad54         | 4.18728e-08 | 1.000000 | 6.52034e-08 | 1.000000 |
| PhcycC3H3_A+H | 1.64006e-08 | 1.000000 | 2.55387e-08 | 1.000000 |
| rad67         | 7.68849e-09 | 1.000000 | 1.19724e-08 | 1.000000 |
| PAH10+CH3     | 5.46404e-09 | 1.000000 | 8.50849e-09 | 1.000000 |
| rad51         | 5.02704e-09 | 1.000000 | 7.82800e-09 | 1.000000 |
| rad52         | 3.84544e-09 | 1.000000 | 5.98804e-09 | 1.000000 |
| rad70         | 3.82633e-09 | 1.000000 | 5.95829e-09 | 1.000000 |
| PAH1+H        | 3.10814e-09 | 1.000000 | 4.83992e-09 | 1.000000 |
| rad58         | 1.60256e-09 | 1.000000 | 2.49547e-09 | 1.000000 |
| rad55         | 1.47818e-09 | 1.000000 | 2.30179e-09 | 1.000000 |
| rad62         | 1.10198e-09 | 1.000000 | 1.71599e-09 | 1.000000 |
| rad43         | 3.94154e-10 | 1.000000 | 6.13768e-10 | 1.000000 |
| rad34         | 3.84578e-10 | 1.000000 | 5.98856e-10 | 1.000000 |
| rad65         | 1.60295e-10 | 1.000000 | 2.49608e-10 | 1.000000 |
| rad53         | 2.97668e-11 | 1.000000 | 4.63523e-11 | 1.000000 |
| rad64         | 1.24766e-11 | 1.000000 | 1.94283e-11 | 1.000000 |
| rad42         | 1.04398e-11 | 1.000000 | 1.62566e-11 | 1.000000 |
| rad56         | 7.66797e-12 | 1.000000 | 1.19404e-11 | 1.000000 |
| rad41         | 1.62748e-12 | 1.000000 | 2.53428e-12 | 1.000000 |
| rad68syn      | 1.23548e-12 | 1.000000 | 1.92386e-12 | 1.000000 |
| rad73         | 1.04240e-12 | 1.000000 | 1.62321e-12 | 1.000000 |

|           |             |          |             |         |
|-----------|-------------|----------|-------------|---------|
| rad68anti | 8.37597e-13 | 1.000000 | 1.30429e-12 | 1.00000 |
| rad71     | 4.04489e-13 | 1.000000 | 6.29862e-13 | 1.00000 |
| PAH8+H    | 3.69075e-13 | 1.000000 | 5.74716e-13 | 1.00000 |
| rad6      | 1.60394e-13 | 1.000000 | 2.49761e-13 | 1.00000 |
| rad61     | 1.15255e-13 | 1.000000 | 1.79473e-13 | 1.00000 |
| rad40syn  | 1.13801e-13 | 1.000000 | 1.77209e-13 | 1.00000 |
| rad23     | 4.84401e-14 | 1.000000 | 7.54299e-14 | 1.00000 |
| rad40anti | 4.54145e-14 | 1.000000 | 7.07185e-14 | 1.00000 |
| rad45     | 2.48923e-14 | 1.000000 | 3.87618e-14 | 1.00000 |
| rad2      | 1.12670e-14 | 1.000000 | 1.75448e-14 | 1.00000 |
| rad36     | 2.17075e-15 | 1.000000 | 3.38024e-15 | 1.00000 |
| rad28     | 1.99401e-15 | 1.000000 | 3.10503e-15 | 1.00000 |
| rad1      | 1.92643e-15 | 1.000000 | 2.99979e-15 | 1.00000 |
| rad72     | 6.20248e-16 | 1.000000 | 9.65836e-16 | 1.00000 |
| rad20     | 6.04407e-16 | 1.000000 | 9.41170e-16 | 1.00000 |
| rad26     | 5.23255e-16 | 1.000000 | 8.14802e-16 | 1.00000 |
| rad21     | 5.11598e-16 | 1.000000 | 7.96650e-16 | 1.00000 |
| rad10     | 2.44215e-16 | 1.000000 | 3.80286e-16 | 1.00000 |
| rad11     | 1.82482e-16 | 1.000000 | 2.84158e-16 | 1.00000 |
| rad3      | 1.51670e-16 | 1.000000 | 2.36178e-16 | 1.00000 |
| rad9      | 1.24776e-16 | 1.000000 | 1.94299e-16 | 1.00000 |
| rad4      | 1.05459e-16 | 1.000000 | 1.64219e-16 | 1.00000 |
| rad7      | 9.50904e-17 | 1.000000 | 1.48073e-16 | 1.00000 |
| rad13     | 6.35842e-17 | 1.000000 | 9.90119e-17 | 1.00000 |
| rad24     | 5.74732e-18 | 1.000000 | 8.94960e-18 | 1.00000 |
| rad33     | 3.65020e-18 | 1.000000 | 5.68402e-18 | 1.00000 |
| rad18     | 2.21674e-18 | 1.000000 | 3.45186e-18 | 1.00000 |
| rad25     | 2.20676e-19 | 1.000000 | 3.43631e-19 | 1.00000 |
| rad27     | 1.37084e-19 | 1.000000 | 2.13464e-19 | 1.00000 |
| rad14     | 1.05348e-19 | 1.000000 | 1.64045e-19 | 1.00000 |
| rad22     | 4.58170e-20 | 1.000000 | 7.13452e-20 | 1.00000 |
| rad12     | 3.93749e-20 | 1.000000 | 6.13137e-20 | 1.00000 |
| rad15     | 1.97315e-20 | 1.000000 | 3.07254e-20 | 1.00000 |
| rad31     | 3.17849e-21 | 1.000000 | 4.94948e-21 | 1.00000 |
| rad8      | 5.05695e-24 | 1.000000 | 7.87458e-24 | 1.00000 |
| rad47     | 3.22599e-25 | 1.000000 | 5.02344e-25 | 1.00000 |
| rad5      | 3.37098e-26 | 1.000000 | 5.24922e-26 | 1.00000 |

0.100000000E-07 Pa, 1000.00000 K

| Rate constant | True (fraction)     | Effective (fraction) |
|---------------|---------------------|----------------------|
| Total         | 2.23691e-15 (1.00 ) | 1.20781e-15 (1.00 )  |

| species       | PYtrue      | Cumul    | PYeffective | Cumul    |
|---------------|-------------|----------|-------------|----------|
| Indene+H      | 0.533143    | 0.533143 | 0.987405    | 0.987405 |
| Benzyl+C2H2   | 0.460056    | 0.993199 | 0.000000    | 0.987405 |
| PhCCH+CH3     | 0.00197845  | 0.995177 | 0.00366418  | 0.991069 |
| Ph+Allene     | 0.00184724  | 0.997025 | 0.00342117  | 0.994490 |
| PhCHCCH2+H    | 0.00145011  | 0.998475 | 0.00268567  | 0.997176 |
| PhCH2CCH+H    | 0.000695141 | 0.999170 | 0.00128743  | 0.998463 |
| Ph+MeAc       | 0.000262360 | 0.999432 | 0.000485903 | 0.998949 |
| PhCCCH3+H     | 0.000178027 | 0.999610 | 0.000329715 | 0.999279 |
| PAH7+H        | 0.000130563 | 0.999741 | 0.000241809 | 0.999521 |
| rad30         | 9.13367e-05 | 0.999832 | 0.000169160 | 0.999690 |
| PAH9+H        | 6.89547e-05 | 0.999901 | 0.000127707 | 0.999818 |
| rad39         | 3.03500e-05 | 0.999932 | 5.62096e-05 | 0.999874 |
| rad38         | 2.54970e-05 | 0.999957 | 4.72216e-05 | 0.999921 |
| rad35         | 1.54295e-05 | 0.999972 | 2.85761e-05 | 0.999950 |
| rad19anti     | 1.36963e-05 | 0.999986 | 2.53661e-05 | 0.999975 |
| PAH3+H        | 4.67729e-06 | 0.999991 | 8.66256e-06 | 0.999984 |
| rad46         | 3.89964e-06 | 0.999995 | 7.22231e-06 | 0.999991 |
| rad60syn      | 1.65646e-06 | 0.999996 | 3.06785e-06 | 0.999994 |
| rad60anti     | 9.23124e-07 | 0.999997 | 1.70967e-06 | 0.999996 |
| rad59         | 6.45414e-07 | 0.999998 | 1.19534e-06 | 0.999997 |
| rad19syn      | 4.72655e-07 | 0.999998 | 8.75378e-07 | 0.999998 |
| rad50         | 4.02263e-07 | 0.999999 | 7.45009e-07 | 0.999999 |
| rad37         | 2.45621e-07 | 0.999999 | 4.54902e-07 | 0.999999 |
| rad54         | 1.26767e-07 | 0.999999 | 2.34777e-07 | 0.999999 |
| PhcycC3H3_A+H | 6.09438e-08 | 0.999999 | 1.12871e-07 | 0.999999 |
| rad67         | 3.29353e-08 | 0.999999 | 6.09977e-08 | 0.999999 |
| rad51         | 2.38554e-08 | 0.999999 | 4.41812e-08 | 1.000000 |
| rad52         | 1.55659e-08 | 0.999999 | 2.88287e-08 | 1.000000 |
| PAH10+CH3     | 1.49501e-08 | 0.999999 | 2.76882e-08 | 1.000000 |
| rad70         | 1.36637e-08 | 0.999999 | 2.53058e-08 | 1.000000 |
| PAH1+H        | 1.19204e-08 | 0.999999 | 2.20771e-08 | 1.000000 |
| rad58         | 7.00658e-09 | 0.999999 | 1.29765e-08 | 1.000000 |
| rad55         | 5.08717e-09 | 0.999999 | 9.42168e-09 | 1.000000 |
| rad62         | 2.86001e-09 | 0.999999 | 5.29688e-09 | 1.000000 |

|           |             |          |             |          |
|-----------|-------------|----------|-------------|----------|
| rad34     | 1.59465e-09 | 0.999999 | 2.95336e-09 | 1.000000 |
| rad43     | 8.01052e-10 | 0.999999 | 1.48358e-09 | 1.000000 |
| rad65     | 7.61926e-10 | 0.999999 | 1.41112e-09 | 1.000000 |
| rad53     | 1.57207e-10 | 0.999999 | 2.91154e-10 | 1.000000 |
| rad64     | 6.32994e-11 | 0.999999 | 1.17233e-10 | 1.000000 |
| rad56     | 5.17480e-11 | 0.999999 | 9.58396e-11 | 1.000000 |
| rad42     | 3.80336e-11 | 0.999999 | 7.04399e-11 | 1.000000 |
| rad73     | 1.18180e-11 | 0.999999 | 2.18874e-11 | 1.000000 |
| rad68syn  | 8.78399e-12 | 0.999999 | 1.62684e-11 | 1.000000 |
| rad68anti | 5.91470e-12 | 0.999999 | 1.09543e-11 | 1.000000 |
| rad71     | 5.72485e-12 | 0.999999 | 1.06027e-11 | 1.000000 |
| rad41     | 5.10891e-12 | 0.999999 | 9.46194e-12 | 1.000000 |
| PAH8+H    | 3.92401e-12 | 0.999999 | 7.26744e-12 | 1.000000 |
| rad40syn  | 1.02743e-12 | 0.999999 | 1.90286e-12 | 1.000000 |
| rad61     | 7.99639e-13 | 0.999999 | 1.48097e-12 | 1.000000 |
| rad40anti | 4.38114e-13 | 0.999999 | 8.11407e-13 | 1.000000 |
| rad6      | 4.57650e-14 | 0.999999 | 8.47589e-14 | 1.000000 |
| rad23     | 2.11577e-14 | 0.999999 | 3.91850e-14 | 1.000000 |
| rad72     | 1.59942e-14 | 0.999999 | 2.96219e-14 | 1.000000 |
| rad45     | 1.21106e-14 | 0.999999 | 2.24293e-14 | 1.000000 |
| rad2      | 2.63639e-15 | 0.999999 | 4.88272e-15 | 1.000000 |
| rad36     | 1.09171e-15 | 0.999999 | 2.02190e-15 | 1.000000 |
| rad20     | 8.81739e-16 | 0.999999 | 1.63302e-15 | 1.000000 |
| rad21     | 6.41659e-16 | 0.999999 | 1.18838e-15 | 1.000000 |
| rad1      | 5.07816e-16 | 0.999999 | 9.40498e-16 | 1.000000 |
| rad28     | 4.43554e-16 | 0.999999 | 8.21483e-16 | 1.000000 |
| rad11     | 2.73273e-16 | 0.999999 | 5.06115e-16 | 1.000000 |
| rad9      | 2.11940e-16 | 0.999999 | 3.92523e-16 | 1.000000 |
| rad26     | 1.27864e-16 | 0.999999 | 2.36810e-16 | 1.000000 |
| rad13     | 1.26802e-16 | 0.999999 | 2.34844e-16 | 1.000000 |
| rad7      | 1.15976e-16 | 0.999999 | 2.14793e-16 | 1.000000 |
| rad10     | 9.31693e-17 | 0.999999 | 1.72554e-16 | 1.000000 |
| rad3      | 4.58357e-17 | 0.999999 | 8.48898e-17 | 1.000000 |
| rad4      | 3.35226e-17 | 0.999999 | 6.20855e-17 | 1.000000 |
| rad18     | 7.80183e-18 | 0.999999 | 1.44493e-17 | 1.000000 |
| rad24     | 5.90769e-18 | 0.999999 | 1.09413e-17 | 1.000000 |
| rad33     | 4.69540e-18 | 0.999999 | 8.69609e-18 | 1.000000 |
| rad25     | 3.13967e-19 | 0.999999 | 5.81481e-19 | 1.000000 |
| rad27     | 1.11645e-19 | 0.999999 | 2.06771e-19 | 1.000000 |
| rad14     | 9.24131e-20 | 0.999999 | 1.71153e-19 | 1.000000 |
| rad12     | 8.61558e-20 | 0.999999 | 1.59564e-19 | 1.000000 |
| rad22     | 8.12619e-20 | 0.999999 | 1.50501e-19 | 1.000000 |
| rad15     | 2.79340e-20 | 0.999999 | 5.17351e-20 | 1.000000 |
| rad31     | 1.86001e-21 | 0.999999 | 3.44482e-21 | 1.000000 |
| rad8      | 3.09659e-22 | 0.999999 | 5.73503e-22 | 1.000000 |
| rad47     | 1.58916e-24 | 0.999999 | 2.94319e-24 | 1.000000 |
| rad5      | 1.01729e-25 | 0.999999 | 1.88406e-25 | 1.000000 |

0.100000000E-07 Pa, 1100.00000 K

=====

| Rate constant | True (fraction)     | Effective (fraction) |
|---------------|---------------------|----------------------|
| Total         | 4.69847e-15 (1.00 ) | 2.11075e-15 (1.00 )  |

| species     | PYtrue      | Cumul    | PYeffective | Cumul    |
|-------------|-------------|----------|-------------|----------|
| Benzyl+C2H2 | 0.550759    | 0.550759 | 0.00000     | 0.00000  |
| Indene+H    | 0.439889    | 0.990648 | 0.979181    | 0.979181 |
| Ph+Allene   | 0.00299528  | 0.993643 | 0.00666742  | 0.985848 |
| PhCCH+CH3   | 0.00208760  | 0.995731 | 0.00464694  | 0.990495 |
| PhCHCCH2+H  | 0.00194544  | 0.997676 | 0.00433051  | 0.994826 |
| PhCH2CCH+H  | 0.00132191  | 0.998998 | 0.00294254  | 0.997768 |
| Ph+MeAc     | 0.000277389 | 0.999276 | 0.000617461 | 0.998386 |
| PAH7+H      | 0.000179385 | 0.999455 | 0.000399306 | 0.998785 |
| PhCCCH3+H   | 0.000149168 | 0.999604 | 0.000332043 | 0.999117 |
| rad30       | 0.000123015 | 0.999727 | 0.000273827 | 0.999391 |
| PAH9+H      | 0.000111696 | 0.999839 | 0.000248632 | 0.999640 |
| rad38       | 4.24978e-05 | 0.999881 | 9.45991e-05 | 0.999734 |
| rad39       | 4.04278e-05 | 0.999922 | 8.99912e-05 | 0.999824 |
| rad19anti   | 2.71780e-05 | 0.999949 | 6.04975e-05 | 0.999885 |
| rad35       | 2.39104e-05 | 0.999973 | 5.32238e-05 | 0.999938 |
| PAH3+H      | 1.09195e-05 | 0.999984 | 2.43064e-05 | 0.999962 |
| rad46       | 7.44861e-06 | 0.999991 | 1.65804e-05 | 0.999979 |
| rad60syn    | 2.99524e-06 | 0.999994 | 6.66734e-06 | 0.999986 |
| rad60anti   | 1.70291e-06 | 0.999996 | 3.79064e-06 | 0.999989 |
| rad59       | 1.43231e-06 | 0.999997 | 3.18828e-06 | 0.999993 |
| rad50       | 1.10325e-06 | 0.999998 | 2.45580e-06 | 0.999995 |
| rad19syn    | 1.02396e-06 | 1.000000 | 2.27932e-06 | 0.999997 |
| rad37       | 3.04609e-07 | 1.000000 | 6.78052e-07 | 0.999998 |
| rad54       | 2.97942e-07 | 1.000000 | 6.63211e-07 | 0.999999 |

|               |             |         |             |          |
|---------------|-------------|---------|-------------|----------|
| PhcycC3H3_A+H | 1.70469e-07 | 1.00000 | 3.79460e-07 | 0.999999 |
| rad67         | 1.11020e-07 | 1.00000 | 2.47128e-07 | 0.999999 |
| rad51         | 8.66313e-08 | 1.00000 | 1.92839e-07 | 0.999999 |
| rad52         | 4.94924e-08 | 1.00000 | 1.10169e-07 | 1.000000 |
| rad70         | 3.72387e-08 | 1.00000 | 8.28925e-08 | 1.000000 |
| PAH10+CH3     | 3.55700e-08 | 1.00000 | 7.91778e-08 | 1.000000 |
| PAH1+H        | 3.40420e-08 | 1.00000 | 7.57766e-08 | 1.000000 |
| rad58         | 2.33985e-08 | 1.00000 | 5.20844e-08 | 1.000000 |
| rad55         | 1.32727e-08 | 1.00000 | 2.95447e-08 | 1.000000 |
| rad62         | 5.84585e-09 | 1.00000 | 1.30127e-08 | 1.000000 |
| rad34         | 4.93270e-09 | 1.00000 | 1.09801e-08 | 1.000000 |
| rad65         | 2.75373e-09 | 1.00000 | 6.12974e-09 | 1.000000 |
| rad43         | 1.31323e-09 | 1.00000 | 2.92321e-09 | 1.000000 |
| rad53         | 5.86805e-10 | 1.00000 | 1.30621e-09 | 1.000000 |
| rad56         | 2.36331e-10 | 1.00000 | 5.26066e-10 | 1.000000 |
| rad64         | 2.26679e-10 | 1.00000 | 5.04581e-10 | 1.000000 |
| rad42         | 1.03252e-10 | 1.00000 | 2.29836e-10 | 1.000000 |
| rad73         | 8.74237e-11 | 1.00000 | 1.94603e-10 | 1.000000 |
| rad71         | 5.09990e-11 | 1.00000 | 1.13522e-10 | 1.000000 |
| rad68syn      | 4.26221e-11 | 1.00000 | 9.48757e-11 | 1.000000 |
| rad68anti     | 2.85345e-11 | 1.00000 | 6.35171e-11 | 1.000000 |
| PAH8+H        | 2.67128e-11 | 1.00000 | 5.94621e-11 | 1.000000 |
| rad41         | 1.21931e-11 | 1.00000 | 2.71415e-11 | 1.000000 |
| rad40syn      | 6.09410e-12 | 1.00000 | 1.35653e-11 | 1.000000 |
| rad61         | 4.16713e-12 | 1.00000 | 9.27593e-12 | 1.000000 |
| rad40anti     | 2.75055e-12 | 1.00000 | 6.12265e-12 | 1.000000 |
| rad72         | 2.32326e-13 | 1.00000 | 5.17152e-13 | 1.000000 |
| rad6          | 1.84785e-14 | 1.00000 | 4.11326e-14 | 1.000000 |
| rad23         | 9.95711e-15 | 1.00000 | 2.21643e-14 | 1.000000 |
| rad45         | 6.13006e-15 | 1.00000 | 1.36454e-14 | 1.000000 |
| rad20         | 7.93855e-16 | 1.00000 | 1.76710e-15 | 1.000000 |
| rad2          | 6.89860e-16 | 1.00000 | 1.53561e-15 | 1.000000 |
| rad36         | 5.63192e-16 | 1.00000 | 1.25365e-15 | 1.000000 |
| rad21         | 5.10807e-16 | 1.00000 | 1.13704e-15 | 1.000000 |
| rad11         | 4.54274e-16 | 1.00000 | 1.01120e-15 | 1.000000 |
| rad9          | 2.20641e-16 | 1.00000 | 4.91141e-16 | 1.000000 |
| rad7          | 2.03769e-16 | 1.00000 | 4.53586e-16 | 1.000000 |
| rad13         | 1.66050e-16 | 1.00000 | 3.69622e-16 | 1.000000 |
| rad1          | 1.44673e-16 | 1.00000 | 3.22039e-16 | 1.000000 |
| rad28         | 1.29379e-16 | 1.00000 | 2.87995e-16 | 1.000000 |
| rad10         | 6.00329e-17 | 1.00000 | 1.33632e-16 | 1.000000 |
| rad26         | 4.07504e-17 | 1.00000 | 9.07094e-17 | 1.000000 |
| rad18         | 2.44826e-17 | 1.00000 | 5.44977e-17 | 1.000000 |
| rad3          | 1.55588e-17 | 1.00000 | 3.46334e-17 | 1.000000 |
| rad4          | 1.17248e-17 | 1.00000 | 2.60992e-17 | 1.000000 |
| rad24         | 4.56170e-18 | 1.00000 | 1.01542e-17 | 1.000000 |
| rad33         | 3.94209e-18 | 1.00000 | 8.77499e-18 | 1.000000 |
| rad25         | 3.94356e-19 | 1.00000 | 8.77826e-19 | 1.000000 |
| rad22         | 2.08609e-19 | 1.00000 | 4.64358e-19 | 1.000000 |
| rad12         | 1.26339e-19 | 1.00000 | 2.81227e-19 | 1.000000 |
| rad14         | 7.49662e-20 | 1.00000 | 1.66873e-19 | 1.000000 |
| rad27         | 7.01392e-20 | 1.00000 | 1.56128e-19 | 1.000000 |
| rad15         | 2.78226e-20 | 1.00000 | 6.19324e-20 | 1.000000 |
| rad8          | 3.02695e-21 | 1.00000 | 6.73791e-21 | 1.000000 |
| rad31         | 1.11579e-21 | 1.00000 | 2.48372e-21 | 1.000000 |
| rad47         | 5.97458e-24 | 1.00000 | 1.32993e-23 | 1.000000 |
| rad5          | 3.56911e-25 | 1.00000 | 7.94476e-25 | 1.000000 |

0.100000000E-07 Pa, 1200.00000 K

=====

| Rate constant | True (fraction)     | Effective (fraction) |
|---------------|---------------------|----------------------|
| Total         | 8.84330e-15 (1.00 ) | 3.30079e-15 (1.00 )  |

| species     | PYtrue      | Cumul    | PYeffective | Cumul    |
|-------------|-------------|----------|-------------|----------|
| Benzyl+C2H2 | 0.626747    | 0.626747 | 0.00000     | 0.00000  |
| Indene+H    | 0.361139    | 0.987886 | 0.967544    | 0.967544 |
| Ph+Allene   | 0.00426331  | 0.992149 | 0.0114220   | 0.978966 |
| PhCHCCH2+H  | 0.00242727  | 0.994577 | 0.00650302  | 0.985469 |
| PhCH2CCH+H  | 0.00220912  | 0.996786 | 0.00591855  | 0.991388 |
| PhCCH+CH3   | 0.00203529  | 0.998821 | 0.00545285  | 0.996840 |
| Ph+MeAc     | 0.000271659 | 0.999093 | 0.000727814 | 0.997568 |
| PAH7+H      | 0.000220958 | 0.999314 | 0.000591978 | 0.998160 |
| PAH9+H      | 0.000166476 | 0.999480 | 0.000446015 | 0.998606 |
| rad30       | 0.000155353 | 0.999635 | 0.000416215 | 0.999022 |
| PhCCCH3+H   | 0.000117029 | 0.999752 | 0.000313538 | 0.999336 |
| rad38       | 6.49367e-05 | 0.999817 | 0.000173975 | 0.999510 |
| rad19anti   | 4.80909e-05 | 0.999865 | 0.000128843 | 0.999639 |
| rad39       | 4.80571e-05 | 0.999914 | 0.000128752 | 0.999768 |

|               |             |          |             |          |
|---------------|-------------|----------|-------------|----------|
| rad35         | 3.43899e-05 | 0.999948 | 9.21355e-05 | 0.999860 |
| PAH3+H        | 2.21253e-05 | 0.999970 | 5.92770e-05 | 0.999919 |
| rad46         | 1.27762e-05 | 0.999983 | 3.42294e-05 | 0.999953 |
| rad60syn      | 4.87439e-06 | 0.999988 | 1.30592e-05 | 0.999966 |
| rad60anti     | 2.81860e-06 | 0.999991 | 7.55145e-06 | 0.999974 |
| rad59         | 2.76936e-06 | 0.999993 | 7.41953e-06 | 0.999981 |
| rad50         | 2.57972e-06 | 0.999996 | 6.91144e-06 | 0.999988 |
| rad19syn      | 1.86136e-06 | 0.999998 | 4.98686e-06 | 0.999993 |
| rad54         | 5.79322e-07 | 0.999998 | 1.55209e-06 | 0.999995 |
| PhcycC3H3_A+H | 3.85542e-07 | 0.999999 | 1.03292e-06 | 0.999996 |
| rad37         | 3.71909e-07 | 0.999999 | 9.96399e-07 | 0.999997 |
| rad67         | 3.10056e-07 | 0.999999 | 8.30686e-07 | 0.999998 |
| rad51         | 2.56406e-07 | 1.000000 | 6.86949e-07 | 0.999998 |
| rad52         | 1.30814e-07 | 1.000000 | 3.50469e-07 | 0.999999 |
| rad70         | 8.31661e-08 | 1.000000 | 2.22814e-07 | 0.999999 |
| PAH10+CH3     | 7.86243e-08 | 1.000000 | 2.10646e-07 | 0.999999 |
| PAH1+H        | 7.84240e-08 | 1.000000 | 2.10109e-07 | 0.999999 |
| rad58         | 6.38230e-08 | 1.000000 | 1.70991e-07 | 0.999999 |
| rad55         | 2.81615e-08 | 1.000000 | 7.54487e-08 | 0.999999 |
| rad34         | 1.22937e-08 | 1.000000 | 3.29365e-08 | 0.999999 |
| rad62         | 1.00322e-08 | 1.000000 | 2.68777e-08 | 1.000000 |
| rad65         | 8.07952e-09 | 1.000000 | 2.16462e-08 | 1.000000 |
| rad43         | 1.86209e-09 | 1.000000 | 4.98881e-09 | 1.000000 |
| rad53         | 1.69057e-09 | 1.000000 | 4.52927e-09 | 1.000000 |
| rad56         | 8.06531e-10 | 1.000000 | 2.16081e-09 | 1.000000 |
| rad64         | 6.30249e-10 | 1.000000 | 1.68853e-09 | 1.000000 |
| rad73         | 4.67949e-10 | 1.000000 | 1.25370e-09 | 1.000000 |
| rad71         | 3.19752e-10 | 1.000000 | 8.56663e-10 | 1.000000 |
| rad42         | 2.25979e-10 | 1.000000 | 6.05431e-10 | 1.000000 |
| rad68syn      | 1.55936e-10 | 1.000000 | 4.17774e-10 | 1.000000 |
| PAH8+H        | 1.30631e-10 | 1.000000 | 3.49980e-10 | 1.000000 |
| rad68anti     | 1.03878e-10 | 1.000000 | 2.78304e-10 | 1.000000 |
| rad40syn      | 2.64822e-11 | 1.000000 | 7.09497e-11 | 1.000000 |
| rad41         | 2.43325e-11 | 1.000000 | 6.51903e-11 | 1.000000 |
| rad61         | 1.76266e-11 | 1.000000 | 4.72244e-11 | 1.000000 |
| rad40anti     | 1.25561e-11 | 1.000000 | 3.36398e-11 | 1.000000 |
| rad72         | 2.17907e-12 | 1.000000 | 5.83804e-12 | 1.000000 |
| rad6          | 1.08161e-14 | 1.000000 | 2.89780e-14 | 1.000000 |
| rad23         | 4.89177e-15 | 1.000000 | 1.31058e-14 | 1.000000 |
| rad45         | 3.17746e-15 | 1.000000 | 8.51288e-15 | 1.000000 |
| rad11         | 6.24238e-16 | 1.000000 | 1.67243e-15 | 1.000000 |
| rad20         | 5.25317e-16 | 1.000000 | 1.40740e-15 | 1.000000 |
| rad7          | 3.47828e-16 | 1.000000 | 9.31883e-16 | 1.000000 |
| rad21         | 3.17166e-16 | 1.000000 | 8.49734e-16 | 1.000000 |
| rad36         | 2.96656e-16 | 1.000000 | 7.94786e-16 | 1.000000 |
| rad9          | 1.96351e-16 | 1.000000 | 5.26052e-16 | 1.000000 |
| rad2          | 1.96239e-16 | 1.000000 | 5.25754e-16 | 1.000000 |
| rad13         | 1.37592e-16 | 1.000000 | 3.68630e-16 | 1.000000 |
| rad28         | 5.30340e-17 | 1.000000 | 1.42086e-16 | 1.000000 |
| rad18         | 5.20685e-17 | 1.000000 | 1.39499e-16 | 1.000000 |
| rad10         | 4.61282e-17 | 1.000000 | 1.23584e-16 | 1.000000 |
| rad1          | 4.32051e-17 | 1.000000 | 1.15753e-16 | 1.000000 |
| rad26         | 1.72683e-17 | 1.000000 | 4.62643e-17 | 1.000000 |
| rad3          | 5.69373e-18 | 1.000000 | 1.52543e-17 | 1.000000 |
| rad4          | 4.36561e-18 | 1.000000 | 1.16961e-17 | 1.000000 |
| rad24         | 3.33436e-18 | 1.000000 | 8.93325e-18 | 1.000000 |
| rad33         | 2.51828e-18 | 1.000000 | 6.74684e-18 | 1.000000 |
| rad22         | 6.96946e-19 | 1.000000 | 1.86722e-18 | 1.000000 |
| rad25         | 3.68476e-19 | 1.000000 | 9.87200e-19 | 1.000000 |
| rad12         | 1.57452e-19 | 1.000000 | 4.21838e-19 | 1.000000 |
| rad14         | 4.93370e-20 | 1.000000 | 1.32181e-19 | 1.000000 |
| rad15         | 4.60488e-20 | 1.000000 | 1.23372e-19 | 1.000000 |
| rad27         | 3.32748e-20 | 1.000000 | 8.91479e-20 | 1.000000 |
| rad8          | 9.89268e-21 | 1.000000 | 2.65039e-20 | 1.000000 |
| rad31         | 6.76592e-22 | 1.000000 | 1.81269e-21 | 1.000000 |
| rad47         | 1.81317e-23 | 1.000000 | 4.85774e-23 | 1.000000 |
| rad5          | 1.36139e-24 | 1.000000 | 3.64735e-24 | 1.000000 |

0.100000000E-07 Pa, 1300.00000 K

=====

| Rate constant | True (fraction)     | Effective (fraction) |             |          |
|---------------|---------------------|----------------------|-------------|----------|
| Total         | 1.52810e-14 (1.00 ) | 4.76644e-15 (1.00 )  |             |          |
| species       | PYtrue              | Cumul                | PYeffective | Cumul    |
| Benzyl+C2H2   | 0.688080            | 0.688080             | 0.00000     | 0.00000  |
| Indene+H      | 0.296944            | 0.985024             | 0.951986    | 0.951986 |
| Ph+Allene     | 0.00550433          | 0.990528             | 0.0176466   | 0.969633 |
| PhCH2CCH+H    | 0.00336231          | 0.993891             | 0.0107794   | 0.980412 |

|               |             |          |             |          |
|---------------|-------------|----------|-------------|----------|
| PhCHCCH2+H    | 0.00286585  | 0.996756 | 0.00918775  | 0.989600 |
| PhCCH+CH3     | 0.00187197  | 0.998628 | 0.00600145  | 0.995601 |
| Ph+MeAc       | 0.000252917 | 0.998881 | 0.000810838 | 0.996412 |
| PAH7+H        | 0.000251839 | 0.999133 | 0.000807383 | 0.997219 |
| PAH9+H        | 0.000232565 | 0.999366 | 0.000745592 | 0.997965 |
| rad30         | 0.000187145 | 0.999553 | 0.000599977 | 0.998565 |
| rad38         | 9.27358e-05 | 0.999646 | 0.000297306 | 0.998862 |
| PhCCCH3+H     | 8.81977e-05 | 0.999734 | 0.000282757 | 0.999145 |
| rad19anti     | 7.76866e-05 | 0.999812 | 0.000249059 | 0.999394 |
| rad39         | 5.27138e-05 | 0.999864 | 0.000168998 | 0.999563 |
| rad35         | 4.67240e-05 | 0.999911 | 0.000149795 | 0.999713 |
| PAH3+H        | 4.01931e-05 | 0.999951 | 0.000128857 | 0.999842 |
| rad46         | 2.01481e-05 | 0.999971 | 6.45939e-05 | 0.999906 |
| rad60syn      | 7.32140e-06 | 0.999979 | 2.34720e-05 | 0.999930 |
| rad50         | 5.32215e-06 | 0.999984 | 1.70625e-05 | 0.999947 |
| rad59         | 4.81766e-06 | 0.999989 | 1.54452e-05 | 0.999962 |
| rad60anti     | 4.29551e-06 | 0.999993 | 1.37712e-05 | 0.999976 |
| rad19syn      | 2.96344e-06 | 0.999996 | 9.50065e-06 | 0.999986 |
| rad54         | 9.75309e-07 | 0.999997 | 3.12679e-06 | 0.999989 |
| rad67         | 7.44257e-07 | 0.999998 | 2.38605e-06 | 0.999991 |
| PhcycC3H3_A+H | 7.41843e-07 | 0.999999 | 2.37831e-06 | 0.999993 |
| rad51         | 6.46585e-07 | 0.999999 | 2.07292e-06 | 0.999996 |
| rad37         | 4.66727e-07 | 1.000000 | 1.49630e-06 | 0.999997 |
| rad52         | 2.99170e-07 | 1.000000 | 9.59124e-07 | 0.999998 |
| PAH10+CH3     | 1.66594e-07 | 1.000000 | 5.34093e-07 | 0.999999 |
| rad70         | 1.60097e-07 | 1.000000 | 5.13264e-07 | 0.999999 |
| PAH1+H        | 1.54574e-07 | 1.000000 | 4.95557e-07 | 1.000000 |
| rad58         | 1.48959e-07 | 1.000000 | 4.77556e-07 | 1.000000 |
| rad55         | 5.10750e-08 | 1.000000 | 1.63744e-07 | 1.000000 |
| rad34         | 2.60671e-08 | 1.000000 | 8.35698e-08 | 1.000000 |
| rad65         | 2.01508e-08 | 1.000000 | 6.46025e-08 | 1.000000 |
| rad62         | 1.51327e-08 | 1.000000 | 4.85146e-08 | 1.000000 |
| rad53         | 3.99906e-09 | 1.000000 | 1.28208e-08 | 1.000000 |
| rad43         | 2.42224e-09 | 1.000000 | 7.76557e-09 | 1.000000 |
| rad56         | 2.20471e-09 | 1.000000 | 7.06819e-09 | 1.000000 |
| rad73         | 1.94724e-09 | 1.000000 | 6.24276e-09 | 1.000000 |
| rad71         | 1.52459e-09 | 1.000000 | 4.88774e-09 | 1.000000 |
| rad64         | 1.45722e-09 | 1.000000 | 4.67176e-09 | 1.000000 |
| PAH8+H        | 4.97086e-10 | 1.000000 | 1.59363e-09 | 1.000000 |
| rad68syn      | 4.61120e-10 | 1.000000 | 1.47833e-09 | 1.000000 |
| rad42         | 4.21653e-10 | 1.000000 | 1.35180e-09 | 1.000000 |
| rad68anti     | 3.05850e-10 | 1.000000 | 9.80538e-10 | 1.000000 |
| rad40syn      | 9.09556e-11 | 1.000000 | 2.91599e-10 | 1.000000 |
| rad61         | 6.30316e-11 | 1.000000 | 2.02076e-10 | 1.000000 |
| rad40anti     | 4.50261e-11 | 1.000000 | 1.44351e-10 | 1.000000 |
| rad41         | 4.39793e-11 | 1.000000 | 1.40995e-10 | 1.000000 |
| rad72         | 1.45373e-11 | 1.000000 | 4.66058e-11 | 1.000000 |
| rad6          | 8.82438e-15 | 1.000000 | 2.82905e-14 | 1.000000 |
| rad23         | 2.50258e-15 | 1.000000 | 8.02314e-15 | 1.000000 |
| rad45         | 1.69377e-15 | 1.000000 | 5.43015e-15 | 1.000000 |
| rad11         | 6.08100e-16 | 1.000000 | 1.94954e-15 | 1.000000 |
| rad7          | 4.45559e-16 | 1.000000 | 1.42844e-15 | 1.000000 |
| rad20         | 3.18168e-16 | 1.000000 | 1.02003e-15 | 1.000000 |
| rad21         | 1.87706e-16 | 1.000000 | 6.01774e-16 | 1.000000 |
| rad9          | 1.62559e-16 | 1.000000 | 5.21157e-16 | 1.000000 |
| rad36         | 1.60258e-16 | 1.000000 | 5.13778e-16 | 1.000000 |
| rad13         | 8.37374e-17 | 1.000000 | 2.68458e-16 | 1.000000 |
| rad18         | 6.76196e-17 | 1.000000 | 2.16785e-16 | 1.000000 |
| rad2          | 5.85657e-17 | 1.000000 | 1.87758e-16 | 1.000000 |
| rad28         | 3.13832e-17 | 1.000000 | 1.00613e-16 | 1.000000 |
| rad10         | 2.92974e-17 | 1.000000 | 9.39260e-17 | 1.000000 |
| rad1          | 1.33026e-17 | 1.000000 | 4.26474e-17 | 1.000000 |
| rad26         | 9.19572e-18 | 1.000000 | 2.94810e-17 | 1.000000 |
| rad22         | 2.57645e-18 | 1.000000 | 8.25998e-18 | 1.000000 |
| rad24         | 2.44030e-18 | 1.000000 | 7.82347e-18 | 1.000000 |
| rad3          | 2.18795e-18 | 1.000000 | 7.01445e-18 | 1.000000 |
| rad4          | 1.69930e-18 | 1.000000 | 5.44787e-18 | 1.000000 |
| rad33         | 1.48882e-18 | 1.000000 | 4.77307e-18 | 1.000000 |
| rad25         | 2.76125e-19 | 1.000000 | 8.85244e-19 | 1.000000 |
| rad15         | 1.99059e-19 | 1.000000 | 6.38173e-19 | 1.000000 |
| rad12         | 1.79600e-19 | 1.000000 | 5.75787e-19 | 1.000000 |
| rad14         | 2.71727e-20 | 1.000000 | 8.71141e-20 | 1.000000 |
| rad8          | 1.89596e-20 | 1.000000 | 6.07834e-20 | 1.000000 |
| rad27         | 1.34953e-20 | 1.000000 | 4.32651e-20 | 1.000000 |
| rad31         | 4.14038e-22 | 1.000000 | 1.32738e-21 | 1.000000 |
| rad47         | 4.64662e-23 | 1.000000 | 1.48968e-22 | 1.000000 |
| rad5          | 4.99573e-24 | 1.000000 | 1.60160e-23 | 1.000000 |

0.100000000E-07 Pa, 1400.00000 K

=====

| Rate constant | True (fraction) |          | Effective (fraction) |          |
|---------------|-----------------|----------|----------------------|----------|
| -----         | -----           |          | -----                |          |
| Total         | 2.46691e-14     | (1.00 )  | 6.50155e-15          | (1.00 )  |
| species       | PYtrue          | Cumul    | PYeffective          | Cumul    |
| -----         | -----           | -----    | -----                | -----    |
| Benzyl+C2H2   | 0.736450        | 0.736450 | 0.000000             | 0.000000 |
| Indene+H      | 0.245659        | 0.982109 | 0.932117             | 0.932117 |
| Ph+Allene     | 0.00660861      | 0.988718 | 0.0250754            | 0.957192 |
| PhCH2CCH+H    | 0.00478128      | 0.993499 | 0.0181419            | 0.975334 |
| PhCHCCH2+H    | 0.00325578      | 0.996755 | 0.0123536            | 0.987688 |
| PhCCH+CH3     | 0.00165084      | 0.998406 | 0.00626388           | 0.993952 |
| PAH9+H        | 0.000308661     | 0.998714 | 0.00117117           | 0.995123 |
| PAH7+H        | 0.000272630     | 0.998987 | 0.00103445           | 0.996157 |
| Ph+MeAc       | 0.000228420     | 0.999215 | 0.000866707          | 0.997024 |
| rad30         | 0.000217655     | 0.999433 | 0.000825859          | 0.997850 |
| rad38         | 0.000125529     | 0.999558 | 0.000476301          | 0.998326 |
| rad19anti     | 0.000116511     | 0.999675 | 0.000442085          | 0.998768 |
| PAH3+H        | 6.69984e-05     | 0.999742 | 0.000254215          | 0.999023 |
| PhCCCH3+H     | 6.53819e-05     | 0.999807 | 0.000248082          | 0.999271 |
| rad35         | 6.07397e-05     | 0.999868 | 0.000230468          | 0.999501 |
| rad39         | 5.49305e-05     | 0.999923 | 0.000208426          | 0.999710 |
| rad46         | 2.97185e-05     | 0.999953 | 0.000112762          | 0.999822 |
| rad60syn      | 1.03332e-05     | 0.999963 | 3.92077e-05          | 0.999862 |
| rad50         | 9.93210e-06     | 0.999973 | 3.76859e-05          | 0.999899 |
| rad59         | 7.71556e-06     | 0.999981 | 2.92756e-05          | 0.999928 |
| rad60anti     | 6.13929e-06     | 0.999987 | 2.32946e-05          | 0.999952 |
| rad19syn      | 4.26609e-06     | 0.999991 | 1.61870e-05          | 0.999968 |
| rad67         | 1.57759e-06     | 0.999993 | 5.98594e-06          | 0.999974 |
| rad54         | 1.46998e-06     | 0.999994 | 5.57763e-06          | 0.999980 |
| rad51         | 1.43445e-06     | 0.999996 | 5.44280e-06          | 0.999985 |
| PhcycC3H3_A+H | 1.26043e-06     | 0.999997 | 4.78252e-06          | 0.999990 |
| rad37         | 6.13241e-07     | 0.999997 | 2.32685e-06          | 0.999992 |
| rad52         | 6.09458e-07     | 0.999998 | 2.31250e-06          | 0.999994 |
| PAH10+CH3     | 3.40070e-07     | 0.999998 | 1.29034e-06          | 0.999996 |
| rad58         | 3.07503e-07     | 0.999999 | 1.16677e-06          | 0.999997 |
| rad70         | 2.75599e-07     | 0.999999 | 1.04572e-06          | 0.999998 |
| PAH1+H        | 2.72543e-07     | 0.999999 | 1.03413e-06          | 0.999999 |
| rad55         | 8.21114e-08     | 0.999999 | 3.11559e-07          | 0.999999 |
| rad34         | 4.89123e-08     | 0.999999 | 1.85590e-07          | 0.999999 |
| rad65         | 4.41608e-08     | 0.999999 | 1.67561e-07          | 1.000000 |
| rad62         | 2.07591e-08     | 0.999999 | 7.87674e-08          | 1.000000 |
| rad53         | 8.12265e-09     | 0.999999 | 3.08202e-08          | 1.000000 |
| rad73         | 6.62662e-09     | 0.999999 | 2.51437e-08          | 1.000000 |
| rad71         | 5.83659e-09     | 0.999999 | 2.21461e-08          | 1.000000 |
| rad56         | 5.07502e-09     | 0.999999 | 1.92564e-08          | 1.000000 |
| rad43         | 3.05585e-09     | 0.999999 | 1.15950e-08          | 1.000000 |
| rad64         | 2.94785e-09     | 0.999999 | 1.11852e-08          | 1.000000 |
| PAH8+H        | 1.55760e-09     | 0.999999 | 5.91010e-09          | 1.000000 |
| rad68syn      | 1.15822e-09     | 0.999999 | 4.39468e-09          | 1.000000 |
| rad68anti     | 7.65284e-10     | 0.999999 | 2.90376e-09          | 1.000000 |
| rad42         | 6.99013e-10     | 0.999999 | 2.65230e-09          | 1.000000 |
| rad40syn      | 2.60577e-10     | 0.999999 | 9.88719e-10          | 1.000000 |
| rad61         | 1.94739e-10     | 0.999999 | 7.38907e-10          | 1.000000 |
| rad40anti     | 1.33993e-10     | 0.999999 | 5.08417e-10          | 1.000000 |
| rad41         | 7.68994e-11     | 0.999999 | 2.91783e-10          | 1.000000 |
| rad72         | 7.37095e-11     | 0.999999 | 2.79680e-10          | 1.000000 |
| rad6          | 9.08754e-11     | 0.999999 | 3.44813e-11          | 1.000000 |
| rad23         | 1.33510e-15     | 0.999999 | 5.06585e-15          | 1.000000 |
| rad45         | 9.27271e-16     | 0.999999 | 3.51839e-15          | 1.000000 |
| rad11         | 4.33213e-16     | 0.999999 | 1.64376e-15          | 1.000000 |
| rad7          | 3.93474e-16     | 0.999999 | 1.49298e-15          | 1.000000 |
| rad20         | 1.95003e-16     | 0.999999 | 7.39910e-16          | 1.000000 |
| rad9          | 1.29041e-16     | 0.999999 | 4.89628e-16          | 1.000000 |
| rad21         | 1.13739e-16     | 0.999999 | 4.31567e-16          | 1.000000 |
| rad36         | 8.89051e-17     | 0.999999 | 3.37337e-16          | 1.000000 |
| rad18         | 5.84528e-17     | 0.999999 | 2.21791e-16          | 1.000000 |
| rad13         | 4.53177e-17     | 0.999999 | 1.71951e-16          | 1.000000 |
| rad28         | 2.54254e-17     | 0.999999 | 9.64731e-17          | 1.000000 |
| rad2          | 1.82890e-17     | 0.999999 | 6.93949e-17          | 1.000000 |
| rad10         | 1.42472e-17     | 0.999999 | 5.40590e-17          | 1.000000 |
| rad22         | 8.73643e-18     | 0.999999 | 3.31491e-17          | 1.000000 |
| rad26         | 5.48391e-18     | 0.999999 | 2.08079e-17          | 1.000000 |
| rad1          | 4.24225e-18     | 0.999999 | 1.60966e-17          | 1.000000 |
| rad24         | 1.80067e-18     | 0.999999 | 6.83237e-18          | 1.000000 |
| rad3          | 8.94565e-19     | 0.999999 | 3.39430e-18          | 1.000000 |
| rad33         | 8.79957e-19     | 0.999999 | 3.33887e-18          | 1.000000 |
| rad4          | 6.99876e-19     | 0.999999 | 2.65558e-18          | 1.000000 |
| rad15         | 6.27680e-19     | 0.999999 | 2.38164e-18          | 1.000000 |
| rad12         | 1.93287e-19     | 0.999999 | 7.33399e-19          | 1.000000 |



|       |             |          |             |          |
|-------|-------------|----------|-------------|----------|
| rad25 | 1.92135e-19 | 0.999999 | 7.29027e-19 | 1.000000 |
| rad8  | 2.79512e-20 | 0.999999 | 1.06057e-19 | 1.000000 |
| rad14 | 1.41990e-20 | 0.999999 | 5.38760e-20 | 1.000000 |
| rad27 | 5.43615e-21 | 0.999999 | 2.06266e-20 | 1.000000 |
| rad31 | 2.56226e-22 | 0.999999 | 9.72211e-22 | 1.000000 |
| rad47 | 1.04027e-22 | 0.999999 | 3.94715e-22 | 1.000000 |
| rad5  | 1.54027e-23 | 0.999999 | 5.84433e-23 | 1.000000 |

0.100000000E-07 Pa, 1500.00000 K

| Rate constant | True (fraction)     | Effective (fraction) |
|---------------|---------------------|----------------------|
| Total         | 3.76908e-14 (1.00 ) | 8.51560e-15 (1.00 )  |

| species       | PYtrue      | Cumul    | PYeffective | Cumul    |
|---------------|-------------|----------|-------------|----------|
| Benzyl+C2H2   | 0.774067    | 0.774067 | 0.000000    | 0.000000 |
| Indene+H      | 0.205065    | 0.979132 | 0.907636    | 0.907636 |
| Ph+Allene     | 0.00752036  | 0.986652 | 0.0332858   | 0.940922 |
| PhCH2CCH+H    | 0.00646723  | 0.993120 | 0.0286246   | 0.969546 |
| PhCHCCH2+H    | 0.00361205  | 0.996732 | 0.0159873   | 0.985534 |
| PhCCH+CH3     | 0.00141397  | 0.998146 | 0.00625837  | 0.991792 |
| PAH9+H        | 0.000393094 | 0.998539 | 0.00173987  | 0.993532 |
| PAH7+H        | 0.000286546 | 0.998825 | 0.00126828  | 0.994800 |
| rad30         | 0.000246477 | 0.999072 | 0.00109093  | 0.995891 |
| Ph+MeAc       | 0.000203626 | 0.999275 | 0.000901268 | 0.996759 |
| rad19anti     | 0.000164236 | 0.999440 | 0.000726923 | 0.997519 |
| rad38         | 0.000162728 | 0.999602 | 0.000720251 | 0.998240 |
| PAH3+H        | 0.000104218 | 0.999707 | 0.000461281 | 0.998701 |
| rad35         | 7.62565e-05 | 0.999783 | 0.000337518 | 0.999038 |
| rad39         | 5.58557e-05 | 0.999839 | 0.000247223 | 0.999286 |
| PhCCCH3+H     | 4.89506e-05 | 0.999888 | 0.000216660 | 0.999502 |
| rad46         | 4.15217e-05 | 0.999929 | 0.000183779 | 0.999686 |
| rad50         | 1.70754e-05 | 0.999946 | 7.55771e-05 | 0.999762 |
| rad60syn      | 1.38815e-05 | 0.999960 | 6.14410e-05 | 0.999823 |
| rad59         | 1.15663e-05 | 0.999972 | 5.11935e-05 | 0.999874 |
| rad60anti     | 8.33859e-06 | 0.999980 | 3.69074e-05 | 0.999911 |
| rad19syn      | 5.68956e-06 | 0.999986 | 2.51825e-05 | 0.999936 |
| rad67         | 3.01383e-06 | 0.999989 | 1.33395e-05 | 0.999950 |
| rad51         | 2.86542e-06 | 0.999992 | 1.26826e-05 | 0.999962 |
| rad54         | 2.03370e-06 | 0.999994 | 9.00134e-06 | 0.999971 |
| PhcycC3H3_A+H | 1.94411e-06 | 0.999996 | 8.60479e-06 | 0.999980 |
| rad52         | 1.12959e-06 | 0.999997 | 4.99968e-06 | 0.999985 |
| rad37         | 8.38280e-07 | 0.999997 | 3.71030e-06 | 0.999989 |
| PAH10+CH3     | 6.63376e-07 | 0.999998 | 2.93617e-06 | 0.999992 |
| rad58         | 5.75067e-07 | 0.999999 | 2.54530e-06 | 0.999994 |
| PAH1+H        | 4.44629e-07 | 0.999999 | 1.96797e-06 | 0.999996 |
| rad70         | 4.35873e-07 | 1.000000 | 1.92921e-06 | 0.999998 |
| rad55         | 1.20222e-07 | 1.000000 | 5.32112e-07 | 0.999999 |
| rad65         | 8.70999e-08 | 1.000000 | 3.85512e-07 | 0.999999 |
| rad34         | 8.35876e-08 | 1.000000 | 3.69966e-07 | 0.999999 |
| rad62         | 2.65880e-08 | 1.000000 | 1.17681e-07 | 0.999999 |
| rad73         | 1.91029e-08 | 1.000000 | 8.45513e-08 | 1.000000 |
| rad71         | 1.86182e-08 | 1.000000 | 8.24060e-08 | 1.000000 |
| rad53         | 1.46409e-08 | 1.000000 | 6.48019e-08 | 1.000000 |
| rad56         | 1.02046e-08 | 1.000000 | 4.51664e-08 | 1.000000 |
| rad64         | 5.41559e-09 | 1.000000 | 2.39699e-08 | 1.000000 |
| PAH8+H        | 4.18063e-09 | 1.000000 | 1.85038e-08 | 1.000000 |
| rad43         | 3.92947e-09 | 1.000000 | 1.73922e-08 | 1.000000 |
| rad68syn      | 2.56012e-09 | 1.000000 | 1.13313e-08 | 1.000000 |
| rad68anti     | 1.68587e-09 | 1.000000 | 7.46183e-09 | 1.000000 |
| rad42         | 1.06259e-09 | 1.000000 | 4.70314e-09 | 1.000000 |
| rad40syn      | 6.46765e-10 | 1.000000 | 2.86264e-09 | 1.000000 |
| rad61         | 5.26863e-10 | 1.000000 | 2.33195e-09 | 1.000000 |
| rad40anti     | 3.43892e-10 | 1.000000 | 1.52210e-09 | 1.000000 |
| rad72         | 2.96653e-10 | 1.000000 | 1.31301e-09 | 1.000000 |
| rad41         | 1.35344e-10 | 1.000000 | 5.99046e-10 | 1.000000 |
| rad6          | 1.01719e-14 | 1.000000 | 4.50219e-14 | 1.000000 |
| rad23         | 7.57282e-16 | 1.000000 | 3.35180e-15 | 1.000000 |
| rad45         | 5.23540e-16 | 1.000000 | 2.31724e-15 | 1.000000 |
| rad11         | 2.60226e-16 | 1.000000 | 1.15178e-15 | 1.000000 |
| rad7          | 2.59166e-16 | 1.000000 | 1.14709e-15 | 1.000000 |
| rad20         | 1.23074e-16 | 1.000000 | 5.44737e-16 | 1.000000 |
| rad9          | 1.00031e-16 | 1.000000 | 4.42748e-16 | 1.000000 |
| rad21         | 7.10953e-17 | 1.000000 | 3.14675e-16 | 1.000000 |
| rad36         | 5.08126e-17 | 1.000000 | 2.24901e-16 | 1.000000 |
| rad18         | 4.05516e-17 | 1.000000 | 1.79485e-16 | 1.000000 |
| rad28         | 2.46076e-17 | 1.000000 | 1.08915e-16 | 1.000000 |
| rad13         | 2.40579e-17 | 1.000000 | 1.06483e-16 | 1.000000 |
| rad22         | 2.28960e-17 | 1.000000 | 1.01340e-16 | 1.000000 |

|       |             |         |             |          |
|-------|-------------|---------|-------------|----------|
| rad2  | 5.90115e-18 | 1.00000 | 2.61190e-17 | 1.000000 |
| rad10 | 5.66110e-18 | 1.00000 | 2.50565e-17 | 1.000000 |
| rad26 | 3.23146e-18 | 1.00000 | 1.43027e-17 | 1.000000 |
| rad1  | 1.39612e-18 | 1.00000 | 6.17934e-18 | 1.000000 |
| rad24 | 1.34246e-18 | 1.00000 | 5.94185e-18 | 1.000000 |
| rad15 | 1.14512e-18 | 1.00000 | 5.06840e-18 | 1.000000 |
| rad33 | 5.25041e-19 | 1.00000 | 2.32388e-18 | 1.000000 |
| rad3  | 3.75274e-19 | 1.00000 | 1.66100e-18 | 1.000000 |
| rad4  | 2.96106e-19 | 1.00000 | 1.31059e-18 | 1.000000 |
| rad12 | 1.99725e-19 | 1.00000 | 8.84000e-19 | 1.000000 |
| rad25 | 1.32639e-19 | 1.00000 | 5.87071e-19 | 1.000000 |
| rad8  | 3.57803e-20 | 1.00000 | 1.58367e-19 | 1.000000 |
| rad14 | 7.59784e-21 | 1.00000 | 3.36288e-20 | 1.000000 |
| rad27 | 2.30896e-21 | 1.00000 | 1.02197e-20 | 1.000000 |
| rad47 | 2.08549e-22 | 1.00000 | 9.23059e-22 | 1.000000 |
| rad31 | 1.60839e-22 | 1.00000 | 7.11887e-22 | 1.000000 |
| rad5  | 3.57735e-23 | 1.00000 | 1.58337e-22 | 1.000000 |

0.100000000E-07 Pa, 1750.00000 K

| Rate constant | True (fraction)     | Effective (fraction) |
|---------------|---------------------|----------------------|
| Total         | 9.18604e-14 (1.00 ) | 1.49145e-14 (1.00 )  |

| species       | PYtrue      | Cumul    | PYeffective | Cumul    |
|---------------|-------------|----------|-------------|----------|
| Benzyl+C2H2   | 0.837640    | 0.837640 | 0.000000    | 0.000000 |
| Indene+H      | 0.133064    | 0.970704 | 0.819559    | 0.819559 |
| PhCH2CCH+H    | 0.0118056   | 0.982510 | 0.0727127   | 0.892272 |
| Ph+Allene     | 0.00950091  | 0.992011 | 0.0585175   | 0.950789 |
| PhCHCCH2+H    | 0.00446803  | 0.996479 | 0.0275192   | 0.978308 |
| PhCCH+CH3     | 0.000861597 | 0.997340 | 0.00530671  | 0.983615 |
| PAH9+H        | 0.000556652 | 0.997897 | 0.00342850  | 0.987044 |
| rad30         | 0.000325000 | 0.998222 | 0.00200173  | 0.989045 |
| rad19anti     | 0.000321503 | 0.998543 | 0.00198018  | 0.991026 |
| rad38         | 0.000287109 | 0.998830 | 0.00176835  | 0.992794 |
| PAH7+H        | 0.000286344 | 0.999117 | 0.00176363  | 0.994557 |
| PAH3+H        | 0.000275290 | 0.999392 | 0.00169559  | 0.996253 |
| Ph+MeAc       | 0.000167695 | 0.999560 | 0.00103286  | 0.997286 |
| rad35         | 0.000110066 | 0.999670 | 0.000677915 | 0.997964 |
| rad46         | 7.52920e-05 | 0.999745 | 0.000463735 | 0.998428 |
| rad39         | 5.82425e-05 | 0.999803 | 0.000358724 | 0.998786 |
| rad50         | 4.36581e-05 | 0.999847 | 0.000268897 | 0.999055 |
| PhCCCH3+H     | 3.20470e-05 | 0.999879 | 0.000197382 | 0.999253 |
| rad59         | 2.75338e-05 | 0.999907 | 0.000169584 | 0.999422 |
| rad60syn      | 2.64498e-05 | 0.999933 | 0.000162908 | 0.999585 |
| rad60anti     | 1.77452e-05 | 0.999951 | 0.000109295 | 0.999694 |
| rad51         | 1.06304e-05 | 0.999961 | 6.54744e-05 | 0.999760 |
| rad67         | 1.00266e-05 | 0.999971 | 6.17554e-05 | 0.999822 |
| rad19syn      | 8.12817e-06 | 0.999980 | 5.00626e-05 | 0.999872 |
| PhcycC3H3_A+H | 4.32964e-06 | 0.999984 | 2.66669e-05 | 0.999898 |
| rad52         | 3.62585e-06 | 0.999988 | 2.23321e-05 | 0.999921 |
| rad54         | 3.10468e-06 | 0.999991 | 1.91222e-05 | 0.999940 |
| PAH10+CH3     | 2.60306e-06 | 0.999993 | 1.60326e-05 | 0.999956 |
| rad58         | 2.01823e-06 | 0.999995 | 1.24306e-05 | 0.999968 |
| rad37         | 1.70772e-06 | 0.999997 | 1.05181e-05 | 0.999979 |
| PAH1+H        | 1.10635e-06 | 0.999998 | 6.81419e-06 | 0.999986 |
| rad70         | 1.04847e-06 | 0.999999 | 6.45765e-06 | 0.999992 |
| rad65         | 3.08348e-07 | 0.999999 | 1.89916e-06 | 0.999994 |
| rad34         | 2.42002e-07 | 1.000000 | 1.49052e-06 | 0.999995 |
| rad55         | 2.29000e-07 | 1.000000 | 1.41044e-06 | 0.999997 |
| rad71         | 1.90753e-07 | 1.000000 | 1.17488e-06 | 0.999998 |
| rad73         | 1.56380e-07 | 1.000000 | 9.63167e-07 | 0.999999 |
| rad53         | 4.44390e-08 | 1.000000 | 2.73707e-07 | 0.999999 |
| rad62         | 4.00911e-08 | 1.000000 | 2.46927e-07 | 1.000000 |
| rad56         | 3.57943e-08 | 1.000000 | 2.20463e-07 | 1.000000 |
| PAH8+H        | 2.43959e-08 | 1.000000 | 1.50258e-07 | 1.000000 |
| rad64         | 1.92943e-08 | 1.000000 | 1.18836e-07 | 1.000000 |
| rad68syn      | 1.20123e-08 | 1.000000 | 7.39857e-08 | 1.000000 |
| rad43         | 8.60713e-09 | 1.000000 | 5.30126e-08 | 1.000000 |
| rad68anti     | 7.79056e-09 | 1.000000 | 4.79832e-08 | 1.000000 |
| rad72         | 5.35919e-09 | 1.000000 | 3.30080e-08 | 1.000000 |
| rad40syn      | 3.52157e-09 | 1.000000 | 2.16899e-08 | 1.000000 |
| rad61         | 3.50342e-09 | 1.000000 | 2.15781e-08 | 1.000000 |
| rad42         | 2.39318e-09 | 1.000000 | 1.47399e-08 | 1.000000 |
| rad40anti     | 2.09783e-09 | 1.000000 | 1.29208e-08 | 1.000000 |
| rad41         | 5.64325e-10 | 1.000000 | 3.47576e-09 | 1.000000 |
| rad6          | 7.45196e-15 | 1.000000 | 4.58977e-14 | 1.000000 |
| rad23         | 3.13672e-16 | 1.000000 | 1.93195e-15 | 1.000000 |
| rad22         | 5.56059e-17 | 1.000000 | 3.42485e-16 | 1.000000 |

|       |             |         |             |         |
|-------|-------------|---------|-------------|---------|
| rad45 | 5.00861e-17 | 1.00000 | 3.08487e-16 | 1.00000 |
| rad7  | 2.69993e-17 | 1.00000 | 1.66293e-16 | 1.00000 |
| rad11 | 2.49379e-17 | 1.00000 | 1.53596e-16 | 1.00000 |
| rad28 | 1.72227e-17 | 1.00000 | 1.06077e-16 | 1.00000 |
| rad9  | 1.33096e-17 | 1.00000 | 8.19757e-17 | 1.00000 |
| rad20 | 1.26283e-17 | 1.00000 | 7.77797e-17 | 1.00000 |
| rad36 | 8.51233e-18 | 1.00000 | 5.24287e-17 | 1.00000 |
| rad21 | 6.65178e-18 | 1.00000 | 4.09693e-17 | 1.00000 |
| rad18 | 5.81036e-18 | 1.00000 | 3.57869e-17 | 1.00000 |
| rad13 | 1.40331e-18 | 1.00000 | 8.64322e-18 | 1.00000 |
| rad15 | 6.72938e-19 | 1.00000 | 4.14472e-18 | 1.00000 |
| rad26 | 4.54689e-19 | 1.00000 | 2.80049e-18 | 1.00000 |
| rad10 | 2.37613e-19 | 1.00000 | 1.46349e-18 | 1.00000 |
| rad24 | 1.70134e-19 | 1.00000 | 1.04788e-18 | 1.00000 |
| rad2  | 1.03136e-19 | 1.00000 | 6.35229e-19 | 1.00000 |
| rad12 | 4.26945e-20 | 1.00000 | 2.62962e-19 | 1.00000 |
| rad33 | 3.32918e-20 | 1.00000 | 2.05049e-19 | 1.00000 |
| rad1  | 2.62290e-20 | 1.00000 | 1.61548e-19 | 1.00000 |
| rad8  | 1.74118e-20 | 1.00000 | 1.07242e-19 | 1.00000 |
| rad25 | 1.29129e-20 | 1.00000 | 7.95327e-20 | 1.00000 |
| rad3  | 8.45284e-21 | 1.00000 | 5.20623e-20 | 1.00000 |
| rad4  | 5.36622e-21 | 1.00000 | 3.30513e-20 | 1.00000 |
| rad14 | 5.21560e-22 | 1.00000 | 3.21236e-21 | 1.00000 |
| rad47 | 2.44663e-22 | 1.00000 | 1.50692e-21 | 1.00000 |
| rad5  | 1.25548e-22 | 1.00000 | 7.73268e-22 | 1.00000 |
| rad27 | 9.07042e-23 | 1.00000 | 5.58660e-22 | 1.00000 |

0.100000000E-07 Pa, 2000.00000 K

=====

| Rate constant | True (fraction)     | Effective (fraction) |
|---------------|---------------------|----------------------|
| Total         | 1.85359e-13 (1.00 ) | 2.47588e-14 (1.00 )  |

| species       | PYtrue      | Cumul    | PYeffective | Cumul    |
|---------------|-------------|----------|-------------|----------|
| Benzyl+C2H2   | 0.866428    | 0.866428 | 0.00000     | 0.00000  |
| Indene+H      | 0.0943885   | 0.960816 | 0.706650    | 0.706650 |
| PhCH2CCH+H    | 0.0189358   | 0.979752 | 0.141765    | 0.848415 |
| Ph+Allene     | 0.0101088   | 0.989861 | 0.0756807   | 0.924096 |
| PhCHCCH2+H    | 0.00579099  | 0.995652 | 0.0433549   | 0.967451 |
| PAH9+H        | 0.000765251 | 0.996417 | 0.00572913  | 0.973180 |
| PhCCH+CH3     | 0.000550354 | 0.996968 | 0.00412028  | 0.977300 |
| PAH3+H        | 0.000526246 | 0.997494 | 0.00393980  | 0.981240 |
| rad19anti     | 0.000486607 | 0.997981 | 0.00364303  | 0.984883 |
| rad38         | 0.000411538 | 0.998392 | 0.00308103  | 0.987964 |
| rad30         | 0.000378289 | 0.998770 | 0.00283210  | 0.990796 |
| PAH7+H        | 0.000350388 | 0.999121 | 0.00262322  | 0.993419 |
| Ph+MeAc       | 0.000164748 | 0.999286 | 0.00123340  | 0.994653 |
| rad35         | 0.000155515 | 0.999441 | 0.00116428  | 0.995817 |
| rad46         | 0.000120109 | 0.999561 | 0.000899212 | 0.996716 |
| rad50         | 9.58270e-05 | 0.999657 | 0.000717420 | 0.997434 |
| rad39         | 7.87039e-05 | 0.999736 | 0.000589225 | 0.998023 |
| rad59         | 4.92026e-05 | 0.999785 | 0.000368361 | 0.998391 |
| rad60syn      | 4.01110e-05 | 0.999825 | 0.000300295 | 0.998691 |
| PhCCH3+H      | 3.61306e-05 | 0.999861 | 0.000270495 | 0.998962 |
| rad51         | 2.92772e-05 | 0.999890 | 0.000219187 | 0.999181 |
| rad60anti     | 2.75040e-05 | 0.999918 | 0.000205912 | 0.999387 |
| rad67         | 2.43946e-05 | 0.999942 | 0.000182633 | 0.999570 |
| rad19syn      | 1.17085e-05 | 0.999954 | 8.76566e-05 | 0.999657 |
| rad52         | 8.84586e-06 | 0.999963 | 6.62255e-05 | 0.999723 |
| PAH10+CH3     | 7.72771e-06 | 0.999971 | 5.78543e-05 | 0.999781 |
| PhcycC3H3_A+H | 7.44556e-06 | 0.999978 | 5.57420e-05 | 0.999837 |
| rad58         | 5.03691e-06 | 0.999983 | 3.77093e-05 | 0.999875 |
| rad54         | 4.34710e-06 | 0.999987 | 3.25450e-05 | 0.999907 |
| rad37         | 3.43690e-06 | 0.999991 | 2.57307e-05 | 0.999933 |
| PAH1+H        | 2.74924e-06 | 0.999994 | 2.05825e-05 | 0.999954 |
| rad70         | 2.09354e-06 | 0.999996 | 1.56735e-05 | 0.999969 |
| rad71         | 1.06961e-06 | 0.999997 | 8.00777e-06 | 0.999977 |
| rad65         | 8.19688e-07 | 0.999998 | 6.13669e-06 | 0.999983 |
| rad73         | 7.43910e-07 | 0.999998 | 5.56936e-06 | 0.999989 |
| rad34         | 5.52321e-07 | 0.999999 | 4.13501e-06 | 0.999993 |
| rad55         | 3.53324e-07 | 0.999999 | 2.64520e-06 | 0.999996 |
| PAH8+H        | 1.14510e-07 | 0.999999 | 8.57294e-07 | 0.999997 |
| rad53         | 9.72438e-08 | 0.999999 | 7.28027e-07 | 0.999997 |
| rad56         | 9.21215e-08 | 1.000000 | 6.89678e-07 | 0.999998 |
| rad62         | 6.00485e-08 | 1.000000 | 4.49560e-07 | 0.999999 |
| rad64         | 5.57952e-08 | 1.000000 | 4.17717e-07 | 0.999999 |
| rad72         | 4.29765e-08 | 1.000000 | 3.21748e-07 | 0.999999 |
| rad68syn      | 4.11172e-08 | 1.000000 | 3.07828e-07 | 1.000000 |
| rad68anti     | 2.65281e-08 | 1.000000 | 1.98605e-07 | 1.000000 |

|           |             |          |             |          |
|-----------|-------------|----------|-------------|----------|
| rad43     | 2.20258e-08 | 1.000000 | 1.64898e-07 | 1.000000 |
| rad61     | 1.54174e-08 | 1.000000 | 1.15424e-07 | 1.00000  |
| rad40syn  | 1.44056e-08 | 1.000000 | 1.07849e-07 | 1.00000  |
| rad40anti | 9.08224e-09 | 1.000000 | 6.79952e-08 | 1.00000  |
| rad42     | 4.93493e-09 | 1.000000 | 3.69459e-08 | 1.00000  |
| rad41     | 1.99345e-09 | 1.000000 | 1.49241e-08 | 1.00000  |
| rad6      | 9.66907e-16 | 1.000000 | 7.23885e-15 | 1.00000  |
| rad23     | 1.70461e-16 | 1.000000 | 1.27617e-15 | 1.00000  |
| rad45     | 1.66156e-17 | 1.000000 | 1.24394e-16 | 1.00000  |
| rad22     | 1.52678e-17 | 1.000000 | 1.14304e-16 | 1.00000  |
| rad9      | 6.76997e-18 | 1.000000 | 5.06841e-17 | 1.00000  |
| rad11     | 5.37252e-18 | 1.000000 | 4.02220e-17 | 1.00000  |
| rad20     | 5.29552e-18 | 1.000000 | 3.96455e-17 | 1.00000  |
| rad7      | 4.21431e-18 | 1.000000 | 3.15509e-17 | 1.00000  |
| rad28     | 3.28588e-18 | 1.000000 | 2.46001e-17 | 1.00000  |
| rad36     | 2.90787e-18 | 1.000000 | 2.17701e-17 | 1.00000  |
| rad21     | 2.72287e-18 | 1.000000 | 2.03851e-17 | 1.00000  |
| rad18     | 1.62503e-18 | 1.000000 | 1.21659e-17 | 1.00000  |
| rad15     | 3.62729e-19 | 1.000000 | 2.71561e-18 | 1.00000  |
| rad13     | 3.15020e-19 | 1.000000 | 2.35843e-18 | 1.00000  |
| rad24     | 9.49359e-20 | 1.000000 | 7.10748e-19 | 1.00000  |
| rad26     | 6.44768e-20 | 1.000000 | 4.82713e-19 | 1.00000  |
| rad12     | 3.72963e-20 | 1.000000 | 2.79223e-19 | 1.00000  |
| rad10     | 2.39921e-20 | 1.000000 | 1.79619e-19 | 1.00000  |
| rad8      | 2.00223e-20 | 1.000000 | 1.49899e-19 | 1.00000  |
| rad33     | 1.02784e-20 | 1.000000 | 7.69507e-20 | 1.00000  |
| rad2      | 9.59654e-21 | 1.000000 | 7.18455e-20 | 1.00000  |
| rad25     | 5.51560e-21 | 1.000000 | 4.12931e-20 | 1.00000  |
| rad1      | 2.58244e-21 | 1.000000 | 1.93337e-20 | 1.00000  |
| rad3      | 1.45930e-21 | 1.000000 | 1.09252e-20 | 1.00000  |
| rad4      | 9.33309e-22 | 1.000000 | 6.98732e-21 | 1.00000  |
| rad47     | 6.72667e-22 | 1.000000 | 5.03600e-21 | 1.00000  |
| rad5      | 1.86942e-22 | 1.000000 | 1.39956e-21 | 1.00000  |
| rad14     | 1.43912e-22 | 1.000000 | 1.07741e-21 | 1.00000  |
| rad27     | 2.36914e-23 | 1.000000 | 1.77368e-22 | 1.00000  |

0.100000000E-07 Pa, 2250.00000 K

=====

| Rate constant | True (fraction)     | Effective (fraction) |
|---------------|---------------------|----------------------|
| Total         | 3.29136e-13 (1.00 ) | 4.00875e-14 (1.00 )  |

| species       | PYtrue      | Cumul    | PYeffective | Cumul    |
|---------------|-------------|----------|-------------|----------|
| Benzyl+C2H2   | 0.878204    | 0.878204 | 0.00000     | 0.00000  |
| Indene+H      | 0.0703003   | 0.948504 | 0.577195    | 0.577195 |
| PhCH2CCH+H    | 0.0277459   | 0.976250 | 0.227806    | 0.805001 |
| Ph+Allene     | 0.0105974   | 0.986848 | 0.0870088   | 0.892010 |
| PhCHCCH2+H    | 0.00765656  | 0.994504 | 0.0628636   | 0.954873 |
| PAH9+H        | 0.000941856 | 0.995446 | 0.00773304  | 0.962606 |
| PAH3+H        | 0.000857236 | 0.996303 | 0.00703827  | 0.969645 |
| rad19anti     | 0.000629228 | 0.996932 | 0.00516623  | 0.974811 |
| rad38         | 0.000525523 | 0.997458 | 0.00431476  | 0.979126 |
| PAH7+H        | 0.000454502 | 0.997913 | 0.00373165  | 0.982857 |
| rad30         | 0.000417263 | 0.998330 | 0.00342591  | 0.986283 |
| PhCCH+CH3     | 0.000383697 | 0.998713 | 0.00315031  | 0.989434 |
| rad35         | 0.000200865 | 0.998914 | 0.00164918  | 0.991083 |
| Ph+MeAc       | 0.000197882 | 0.999112 | 0.00162470  | 0.992707 |
| rad50         | 0.000170940 | 0.999283 | 0.00140349  | 0.994111 |
| rad46         | 0.000166540 | 0.999450 | 0.00136737  | 0.995478 |
| rad39         | 0.000118806 | 0.999568 | 0.000975445 | 0.996454 |
| rad59         | 7.57691e-05 | 0.999644 | 0.000622096 | 0.997076 |
| rad51         | 6.22686e-05 | 0.999707 | 0.000511251 | 0.997587 |
| rad60syn      | 5.44510e-05 | 0.999761 | 0.000447066 | 0.998034 |
| PhCCCH3+H     | 5.15901e-05 | 0.999813 | 0.000423577 | 0.998458 |
| rad67         | 4.61782e-05 | 0.999859 | 0.000379142 | 0.998837 |
| rad60anti     | 3.79865e-05 | 0.999897 | 0.000311885 | 0.999149 |
| PAH10+CH3     | 1.71933e-05 | 0.999914 | 0.000141164 | 0.999290 |
| rad52         | 1.70844e-05 | 0.999931 | 0.000140270 | 0.999430 |
| rad19syn      | 1.63932e-05 | 0.999947 | 0.000134595 | 0.999565 |
| PhcycC3H3_A+H | 1.10275e-05 | 0.999958 | 9.05407e-05 | 0.999655 |
| rad58         | 1.00660e-05 | 0.999969 | 8.26458e-05 | 0.999738 |
| PAH1+H        | 5.96728e-06 | 0.999974 | 4.89939e-05 | 0.999787 |
| rad37         | 5.72356e-06 | 0.999980 | 4.69928e-05 | 0.999834 |
| rad54         | 5.39698e-06 | 0.999986 | 4.43115e-05 | 0.999878 |
| rad71         | 3.95691e-06 | 0.999990 | 3.24879e-05 | 0.999911 |
| rad70         | 3.69403e-06 | 0.999993 | 3.03296e-05 | 0.999941 |
| rad73         | 2.41459e-06 | 0.999996 | 1.98248e-05 | 0.999961 |
| rad65         | 1.68525e-06 | 0.999997 | 1.38367e-05 | 0.999975 |
| rad34         | 1.08371e-06 | 0.999998 | 8.89771e-06 | 0.999984 |

|           |             |          |             |          |
|-----------|-------------|----------|-------------|----------|
| rad55     | 4.74067e-07 | 0.999999 | 3.89229e-06 | 0.999988 |
| PAH8+H    | 3.91946e-07 | 0.999999 | 3.21804e-06 | 0.999991 |
| rad72     | 2.09318e-07 | 1.000000 | 1.71859e-06 | 0.999992 |
| rad56     | 1.86168e-07 | 1.000000 | 1.52852e-06 | 0.999994 |
| rad53     | 1.73183e-07 | 1.000000 | 1.42191e-06 | 0.999995 |
| rad64     | 1.33616e-07 | 1.000000 | 1.09704e-06 | 0.999997 |
| rad68syn  | 1.10265e-07 | 1.000000 | 9.05322e-07 | 0.999997 |
| rad62     | 9.48259e-08 | 1.000000 | 7.78561e-07 | 0.999998 |
| rad68anti | 7.08807e-08 | 1.000000 | 5.81961e-07 | 0.999999 |
| rad43     | 4.82400e-08 | 1.000000 | 3.96071e-07 | 0.999999 |
| rad61     | 4.62524e-08 | 1.000000 | 3.79752e-07 | 1.000000 |
| rad40syn  | 4.43238e-08 | 1.000000 | 3.63917e-07 | 1.000000 |
| rad40anti | 2.91751e-08 | 1.000000 | 2.39540e-07 | 1.000000 |
| rad42     | 1.00367e-08 | 1.000000 | 8.24055e-08 | 1.000000 |
| rad41     | 5.35211e-09 | 1.000000 | 4.39431e-08 | 1.000000 |
| rad6      | 1.23551e-16 | 1.000000 | 1.01441e-15 | 1.000000 |
| rad23     | 4.71182e-17 | 1.000000 | 3.86861e-16 | 1.000000 |
| rad45     | 6.43582e-18 | 1.000000 | 5.28408e-17 | 1.000000 |
| rad22     | 3.96239e-18 | 1.000000 | 3.25329e-17 | 1.000000 |
| rad9      | 3.51557e-18 | 1.000000 | 2.88643e-17 | 1.000000 |
| rad20     | 2.60557e-18 | 1.000000 | 2.13928e-17 | 1.000000 |
| rad11     | 1.62855e-18 | 1.000000 | 1.33711e-17 | 1.000000 |
| rad21     | 1.30011e-18 | 1.000000 | 1.06745e-17 | 1.000000 |
| rad36     | 1.15193e-18 | 1.000000 | 9.45782e-18 | 1.000000 |
| rad7      | 9.44076e-19 | 1.000000 | 7.75126e-18 | 1.000000 |
| rad18     | 6.17423e-19 | 1.000000 | 5.06931e-18 | 1.000000 |
| rad28     | 5.07618e-19 | 1.000000 | 4.16776e-18 | 1.000000 |
| rad15     | 2.10987e-19 | 1.000000 | 1.73229e-18 | 1.000000 |
| rad13     | 8.56525e-20 | 1.000000 | 7.03244e-19 | 1.000000 |
| rad24     | 5.70002e-20 | 1.000000 | 4.67996e-19 | 1.000000 |
| rad12     | 3.05351e-20 | 1.000000 | 2.50707e-19 | 1.000000 |
| rad26     | 2.24970e-20 | 1.000000 | 1.84710e-19 | 1.000000 |
| rad8      | 2.16858e-20 | 1.000000 | 1.78050e-19 | 1.000000 |
| rad10     | 7.19717e-21 | 1.000000 | 5.90918e-20 | 1.000000 |
| rad33     | 3.63727e-21 | 1.000000 | 2.98636e-20 | 1.000000 |
| rad25     | 2.84538e-21 | 1.000000 | 2.33618e-20 | 1.000000 |
| rad2      | 1.45518e-21 | 1.000000 | 1.19476e-20 | 1.000000 |
| rad47     | 1.41374e-21 | 1.000000 | 1.16074e-20 | 1.000000 |
| rad1      | 4.30616e-22 | 1.000000 | 3.53554e-21 | 1.000000 |
| rad3      | 3.17691e-22 | 1.000000 | 2.60838e-21 | 1.000000 |
| rad5      | 2.08606e-22 | 1.000000 | 1.71275e-21 | 1.000000 |
| rad4      | 2.02506e-22 | 1.000000 | 1.66266e-21 | 1.000000 |
| rad14     | 5.33284e-23 | 1.000000 | 4.37849e-22 | 1.000000 |
| rad27     | 1.32553e-23 | 1.000000 | 1.08832e-22 | 1.000000 |

0.100000000E-07 Pa, 2500.00000 K

=====

| Rate constant | True (fraction)     | Effective (fraction) |
|---------------|---------------------|----------------------|
| Total         | 5.32896e-13 (1.00 ) | 6.40311e-14 (1.00 )  |

| species     | PYtrue      | Cumul    | PYeffective | Cumul    |
|-------------|-------------|----------|-------------|----------|
| Benzyl+C2H2 | 0.879843    | 0.879843 | 0.00000     | 0.00000  |
| Indene+H    | 0.0541638   | 0.934007 | 0.450777    | 0.450777 |
| PhCH2CCH+H  | 0.0379681   | 0.971975 | 0.315989    | 0.766766 |
| Ph+Allene   | 0.0112444   | 0.983219 | 0.0935810   | 0.860347 |
| PhCHCCH2+H  | 0.00999485  | 0.993214 | 0.0831818   | 0.943529 |
| PAH3+H      | 0.00124356  | 0.994458 | 0.0103495   | 0.953878 |
| PAH9+H      | 0.00106545  | 0.995523 | 0.00886715  | 0.962745 |
| rad19anti   | 0.000731028 | 0.996254 | 0.00608396  | 0.968829 |
| rad38       | 0.000614393 | 0.996869 | 0.00511327  | 0.973943 |
| PAH7+H      | 0.000586817 | 0.997455 | 0.00488376  | 0.978826 |
| rad30       | 0.000442203 | 0.997898 | 0.00368022  | 0.982507 |
| PhCCH+CH3   | 0.000309130 | 0.998207 | 0.00257273  | 0.985079 |
| rad50       | 0.000261677 | 0.998468 | 0.00217780  | 0.987257 |
| Ph+MeAc     | 0.000256973 | 0.998725 | 0.00213865  | 0.989396 |
| rad35       | 0.000242192 | 0.998968 | 0.00201564  | 0.991411 |
| rad46       | 0.000207878 | 0.999175 | 0.00173006  | 0.993142 |
| rad39       | 0.000175772 | 0.999351 | 0.00146285  | 0.994604 |
| rad51       | 0.000109649 | 0.999461 | 0.000912547 | 0.995517 |
| rad59       | 0.000104825 | 0.999566 | 0.000872406 | 0.996389 |
| rad67       | 7.34547e-05 | 0.999639 | 0.000611325 | 0.997001 |
| PhCCCH3+H   | 7.22810e-05 | 0.999711 | 0.000601557 | 0.997602 |
| rad60syn    | 6.81857e-05 | 0.999780 | 0.000567474 | 0.998170 |
| rad60anti   | 4.82378e-05 | 0.999828 | 0.000401457 | 0.998571 |
| PAH10+CH3   | 3.08998e-05 | 0.999859 | 0.000257163 | 0.998828 |
| rad52       | 2.78077e-05 | 0.999887 | 0.000231429 | 0.999060 |
| rad19syn    | 2.34810e-05 | 0.999910 | 0.000195420 | 0.999255 |
| rad58       | 1.71635e-05 | 0.999927 | 0.000142842 | 0.999398 |

|               |             |          |             |          |
|---------------|-------------|----------|-------------|----------|
| PhcycC3H3_A+H | 1.49440e-05 | 0.999942 | 0.000124371 | 0.999522 |
| PAH1+H        | 1.13017e-05 | 0.999953 | 9.40581e-05 | 0.999616 |
| rad71         | 1.08628e-05 | 0.999964 | 9.04053e-05 | 0.999707 |
| rad37         | 8.12868e-06 | 0.999972 | 6.76507e-05 | 0.999774 |
| rad54         | 6.28002e-06 | 0.999979 | 5.22652e-05 | 0.999827 |
| rad70         | 5.97099e-06 | 0.999985 | 4.96933e-05 | 0.999876 |
| rad73         | 5.95726e-06 | 0.999991 | 4.95791e-05 | 0.999926 |
| rad65         | 2.87595e-06 | 0.999994 | 2.39350e-05 | 0.999950 |
| rad34         | 1.90624e-06 | 0.999995 | 1.58647e-05 | 0.999966 |
| PAH8+H        | 1.06524e-06 | 0.999997 | 8.86540e-06 | 0.999975 |
| rad72         | 7.14903e-07 | 0.999997 | 5.94976e-06 | 0.999981 |
| rad55         | 5.87553e-07 | 0.999998 | 4.88989e-06 | 0.999986 |
| rad56         | 3.21872e-07 | 0.999998 | 2.67877e-06 | 0.999988 |
| rad64         | 2.70855e-07 | 0.999998 | 2.25419e-06 | 0.999990 |
| rad53         | 2.70820e-07 | 0.999999 | 2.25389e-06 | 0.999993 |
| rad68syn      | 2.47504e-07 | 0.999999 | 2.05985e-06 | 0.999995 |
| rad68anti     | 1.58683e-07 | 0.999999 | 1.32064e-06 | 0.999996 |
| rad62         | 1.55148e-07 | 0.999999 | 1.29122e-06 | 0.999997 |
| rad40syn      | 1.10734e-07 | 0.999999 | 9.21579e-07 | 0.999998 |
| rad61         | 1.05680e-07 | 0.999999 | 8.79519e-07 | 0.999999 |
| rad43         | 8.79692e-08 | 1.000000 | 7.32121e-07 | 1.000000 |
| rad40anti     | 7.53435e-08 | 1.000000 | 6.27044e-07 | 1.000000 |
| rad42         | 1.97239e-08 | 1.000000 | 1.64152e-07 | 1.000000 |
| rad41         | 1.13877e-08 | 1.000000 | 9.47734e-08 | 1.000000 |
| rad6          | 2.24292e-17 | 1.000000 | 1.86666e-16 | 1.000000 |
| rad23         | 1.44709e-17 | 1.000000 | 1.20433e-16 | 1.000000 |
| rad45         | 2.79514e-18 | 1.000000 | 2.32625e-17 | 1.000000 |
| rad9          | 1.86929e-18 | 1.000000 | 1.55571e-17 | 1.000000 |
| rad20         | 1.43940e-18 | 1.000000 | 1.19794e-17 | 1.000000 |
| rad22         | 1.35197e-18 | 1.000000 | 1.12517e-17 | 1.000000 |
| rad21         | 6.94971e-19 | 1.000000 | 5.78387e-18 | 1.000000 |
| rad11         | 6.25789e-19 | 1.000000 | 5.20811e-18 | 1.000000 |
| rad36         | 5.10358e-19 | 1.000000 | 4.24744e-18 | 1.000000 |
| rad18         | 2.77736e-19 | 1.000000 | 2.31145e-18 | 1.000000 |
| rad7          | 2.64623e-19 | 1.000000 | 2.20231e-18 | 1.000000 |
| rad15         | 1.25424e-19 | 1.000000 | 1.04384e-18 | 1.000000 |
| rad28         | 1.20784e-19 | 1.000000 | 1.00522e-18 | 1.000000 |
| rad24         | 3.60418e-20 | 1.000000 | 2.99957e-19 | 1.000000 |
| rad13         | 2.74546e-20 | 1.000000 | 2.28490e-19 | 1.000000 |
| rad12         | 2.40046e-20 | 1.000000 | 1.99778e-19 | 1.000000 |
| rad8          | 2.25267e-20 | 1.000000 | 1.87478e-19 | 1.000000 |
| rad26         | 1.24982e-20 | 1.000000 | 1.04016e-19 | 1.000000 |
| rad10         | 4.03027e-21 | 1.000000 | 3.35418e-20 | 1.000000 |
| rad47         | 2.44566e-21 | 1.000000 | 2.03539e-20 | 1.000000 |
| rad25         | 1.71221e-21 | 1.000000 | 1.42498e-20 | 1.000000 |
| rad33         | 1.46760e-21 | 1.000000 | 1.22141e-20 | 1.000000 |
| rad2          | 4.48822e-22 | 1.000000 | 3.73531e-21 | 1.000000 |
| rad5          | 2.16419e-22 | 1.000000 | 1.80114e-21 | 1.000000 |
| rad1          | 1.53605e-22 | 1.000000 | 1.27837e-21 | 1.000000 |
| rad3          | 8.66759e-23 | 1.000000 | 7.21357e-22 | 1.000000 |
| rad4          | 5.44455e-23 | 1.000000 | 4.53121e-22 | 1.000000 |
| rad14         | 2.68051e-23 | 1.000000 | 2.23085e-22 | 1.000000 |
| rad27         | 1.07389e-23 | 1.000000 | 8.93744e-23 | 1.000000 |

0.100000000E-07 Pa, 2750.00000 K

| =====         |                     |          |                      |          |
|---------------|---------------------|----------|----------------------|----------|
| Rate constant | True (fraction)     |          | Effective (fraction) |          |
| -----         |                     |          |                      |          |
| Total         | 8.05113e-13 (1.00 ) |          | 1.00487e-13 (1.00 )  |          |
| species       | PYtrue              | Cumul    | PYeffective          | Cumul    |
| -----         |                     |          |                      |          |
| Benzyl+C2H2   | 0.875189            | 0.875189 | 0.00000              | 0.00000  |
| PhCH2CCH+H    | 0.0492371           | 0.924426 | 0.394492             | 0.394492 |
| Indene+H      | 0.0427171           | 0.967143 | 0.342254             | 0.736746 |
| PhCHCCH2+H    | 0.0126523           | 0.979795 | 0.101371             | 0.838117 |
| Ph+Allene     | 0.0121360           | 0.991931 | 0.0972347            | 0.935352 |
| PAH3+H        | 0.00165412          | 0.993586 | 0.0132530            | 0.948605 |
| PAH9+H        | 0.00112924          | 0.994715 | 0.00904761           | 0.957652 |
| rad19anti     | 0.000790044         | 0.995505 | 0.00632991           | 0.963982 |
| PAH7+H        | 0.000729333         | 0.996234 | 0.00584349           | 0.969826 |
| rad38         | 0.000670521         | 0.996905 | 0.00537228           | 0.975198 |
| rad30         | 0.000454283         | 0.997359 | 0.00363976           | 0.978838 |
| rad50         | 0.000356822         | 0.997716 | 0.00285889           | 0.981697 |
| Ph+MeAc       | 0.000331297         | 0.998047 | 0.00265438           | 0.984351 |
| PhCCH+CH3     | 0.000293338         | 0.998340 | 0.00235025           | 0.986701 |
| rad35         | 0.000276886         | 0.998617 | 0.00221844           | 0.988920 |
| rad39         | 0.000242689         | 0.998860 | 0.00194445           | 0.990864 |
| rad46         | 0.000239377         | 0.999099 | 0.00191791           | 0.992782 |
| rad51         | 0.000167552         | 0.999267 | 0.00134245           | 0.994125 |

|               |             |          |             |          |
|---------------|-------------|----------|-------------|----------|
| rad59         | 0.000133898 | 0.999401 | 0.00107280  | 0.995197 |
| rad67         | 0.000103303 | 0.999504 | 0.000827674 | 0.996025 |
| PhCCCH3+H     | 9.47597e-05 | 0.999599 | 0.000759224 | 0.996784 |
| rad60syn      | 8.03400e-05 | 0.999679 | 0.000643692 | 0.997428 |
| rad60anti     | 5.74980e-05 | 0.999737 | 0.000460680 | 0.997889 |
| PAH10+CH3     | 4.75540e-05 | 0.999784 | 0.000381007 | 0.998270 |
| rad52         | 3.97965e-05 | 0.999824 | 0.000318854 | 0.998588 |
| rad19syn      | 3.43481e-05 | 0.999858 | 0.000275200 | 0.998864 |
| rad58         | 2.60271e-05 | 0.999885 | 0.000208532 | 0.999072 |
| rad71         | 2.39120e-05 | 0.999908 | 0.000191585 | 0.999264 |
| PhcycC3H3_A+H | 1.91124e-05 | 0.999928 | 0.000153131 | 0.999417 |
| PAH1+H        | 1.89313e-05 | 0.999946 | 0.000151679 | 0.999569 |
| rad73         | 1.19963e-05 | 0.999958 | 9.61159e-05 | 0.999665 |
| rad37         | 1.02458e-05 | 0.999969 | 8.20902e-05 | 0.999747 |
| rad70         | 8.97456e-06 | 0.999978 | 7.19051e-05 | 0.999819 |
| rad54         | 7.04852e-06 | 0.999985 | 5.64734e-05 | 0.999875 |
| rad65         | 4.27356e-06 | 0.999989 | 3.42402e-05 | 0.999909 |
| rad34         | 3.06724e-06 | 0.999992 | 2.45750e-05 | 0.999934 |
| PAH8+H        | 2.42508e-06 | 0.999995 | 1.94299e-05 | 0.999953 |
| rad72         | 1.88022e-06 | 0.999996 | 1.50645e-05 | 0.999968 |
| rad55         | 6.94535e-07 | 0.999997 | 5.56468e-06 | 0.999974 |
| rad56         | 5.00306e-07 | 0.999998 | 4.00850e-06 | 0.999978 |
| rad68syn      | 4.83458e-07 | 0.999998 | 3.87351e-06 | 0.999982 |
| rad64         | 4.76899e-07 | 0.999999 | 3.82096e-06 | 0.999986 |
| rad53         | 3.88200e-07 | 0.999999 | 3.11030e-06 | 0.999989 |
| rad68anti     | 3.09361e-07 | 0.999999 | 2.47863e-06 | 0.999991 |
| rad62         | 2.47711e-07 | 0.999999 | 1.98468e-06 | 0.999993 |
| rad40syn      | 2.35491e-07 | 1.000000 | 1.88678e-06 | 0.999995 |
| rad61         | 1.98411e-07 | 1.000000 | 1.58969e-06 | 0.999997 |
| rad40anti     | 1.64464e-07 | 1.000000 | 1.31770e-06 | 0.999998 |
| rad43         | 1.38326e-07 | 1.000000 | 1.10828e-06 | 0.999999 |
| rad42         | 3.59374e-08 | 1.000000 | 2.87934e-07 | 1.000000 |
| rad41         | 2.03340e-08 | 1.000000 | 1.62918e-07 | 1.000000 |
| rad23         | 5.30879e-18 | 1.000000 | 4.25346e-17 | 1.000000 |
| rad6          | 5.28864e-18 | 1.000000 | 4.23731e-17 | 1.000000 |
| rad45         | 1.32784e-18 | 1.000000 | 1.06388e-17 | 1.000000 |
| rad9          | 1.02201e-18 | 1.000000 | 8.18840e-18 | 1.000000 |
| rad20         | 6.68783e-19 | 1.000000 | 6.96077e-18 | 1.000000 |
| rad22         | 5.53887e-19 | 1.000000 | 4.43779e-18 | 1.000000 |
| rad21         | 4.05053e-19 | 1.000000 | 3.24532e-18 | 1.000000 |
| rad11         | 2.91948e-19 | 1.000000 | 2.33912e-18 | 1.000000 |
| rad36         | 2.46584e-19 | 1.000000 | 1.97566e-18 | 1.000000 |
| rad18         | 1.40097e-19 | 1.000000 | 1.12247e-18 | 1.000000 |
| rad7          | 8.87312e-20 | 1.000000 | 7.10923e-19 | 1.000000 |
| rad15         | 7.56443e-20 | 1.000000 | 6.06070e-19 | 1.000000 |
| rad28         | 4.35931e-20 | 1.000000 | 3.49272e-19 | 1.000000 |
| rad24         | 2.36701e-20 | 1.000000 | 1.89647e-19 | 1.000000 |
| rad8          | 2.27048e-20 | 1.000000 | 1.81913e-19 | 1.000000 |
| rad12         | 1.84640e-20 | 1.000000 | 1.47935e-19 | 1.000000 |
| rad13         | 1.02991e-20 | 1.000000 | 8.25175e-20 | 1.000000 |
| rad26         | 7.74804e-21 | 1.000000 | 6.20781e-20 | 1.000000 |
| rad47         | 3.65965e-21 | 1.000000 | 2.93215e-20 | 1.000000 |
| rad10         | 2.66170e-21 | 1.000000 | 2.13258e-20 | 1.000000 |
| rad25         | 1.16293e-21 | 1.000000 | 9.31748e-21 | 1.000000 |
| rad33         | 6.71473e-22 | 1.000000 | 5.37991e-21 | 1.000000 |
| rad2          | 2.31086e-22 | 1.000000 | 1.85148e-21 | 1.000000 |
| rad5          | 2.15478e-22 | 1.000000 | 1.72643e-21 | 1.000000 |
| rad1          | 9.05097e-23 | 1.000000 | 7.25172e-22 | 1.000000 |
| rad3          | 2.97035e-23 | 1.000000 | 2.37987e-22 | 1.000000 |
| rad4          | 1.81557e-23 | 1.000000 | 1.45465e-22 | 1.000000 |
| rad14         | 1.77541e-23 | 1.000000 | 1.42248e-22 | 1.000000 |
| rad27         | 9.32033e-24 | 1.000000 | 7.46754e-23 | 1.000000 |

0.100000000E-07 Pa, 3000.00000 K

=====

| Rate constant | True (fraction)     | Effective (fraction) |
|---------------|---------------------|----------------------|
| Total         | 1.15309e-12 (1.00 ) | 1.53862e-13 (1.00 )  |

| species     | PYtrue      | Cumul    | PYeffective | Cumul    |
|-------------|-------------|----------|-------------|----------|
| Benzyl+C2H2 | 0.866566    | 0.866566 | 0.00000     | 0.00000  |
| PhCH2CCH+H  | 0.0611725   | 0.927738 | 0.458447    | 0.458447 |
| Indene+H    | 0.0342672   | 0.962006 | 0.256810    | 0.715257 |
| PhCHCCH2+H  | 0.0154790   | 0.977485 | 0.116005    | 0.831262 |
| Ph+Allene   | 0.0132660   | 0.990751 | 0.0994201   | 0.930682 |
| PAH3+H      | 0.00205938  | 0.992810 | 0.0154337   | 0.946116 |
| PAH9+H      | 0.00113813  | 0.993948 | 0.00852950  | 0.954645 |
| PAH7+H      | 0.000866135 | 0.994814 | 0.00649110  | 0.961136 |
| rad19anti   | 0.000812999 | 0.995627 | 0.00609288  | 0.967229 |

|               |             |          |             |          |
|---------------|-------------|----------|-------------|----------|
| rad38         | 0.000693215 | 0.996321 | 0.00519518  | 0.972424 |
| rad30         | 0.000455427 | 0.996776 | 0.00341312  | 0.975838 |
| rad50         | 0.000445147 | 0.997221 | 0.00333608  | 0.979174 |
| Ph+MeAc       | 0.000411378 | 0.997633 | 0.00308300  | 0.982257 |
| PhCCH+CH3     | 0.000319072 | 0.997952 | 0.00239123  | 0.984648 |
| rad39         | 0.000311351 | 0.998263 | 0.00233337  | 0.986981 |
| rad35         | 0.000303822 | 0.998567 | 0.00227694  | 0.989258 |
| rad46         | 0.000258929 | 0.998826 | 0.00194050  | 0.991199 |
| rad51         | 0.000229661 | 0.999055 | 0.00172116  | 0.992920 |
| rad59         | 0.000160966 | 0.999216 | 0.00120633  | 0.994126 |
| rad67         | 0.000132859 | 0.999349 | 0.000995686 | 0.995122 |
| PhCCCH3+H     | 0.000117527 | 0.999467 | 0.000880786 | 0.996003 |
| rad60syn      | 9.03378e-05 | 0.999557 | 0.000677021 | 0.996680 |
| PAH10+CH3     | 6.53522e-05 | 0.999622 | 0.000489771 | 0.997169 |
| rad60anti     | 6.52879e-05 | 0.999688 | 0.000489289 | 0.997659 |
| rad52         | 5.15998e-05 | 0.999739 | 0.000386706 | 0.998045 |
| rad19syn      | 5.01057e-05 | 0.999789 | 0.000375508 | 0.998421 |
| rad71         | 4.45158e-05 | 0.999834 | 0.000333616 | 0.998755 |
| rad58         | 3.61220e-05 | 0.999870 | 0.000270710 | 0.999025 |
| PAH1+H        | 2.86271e-05 | 0.999899 | 0.000214541 | 0.999240 |
| PhcycC3H3_A+H | 2.34369e-05 | 0.999922 | 0.000175644 | 0.999415 |
| rad73         | 2.07080e-05 | 0.999943 | 0.000155192 | 0.999571 |
| rad70         | 1.26564e-05 | 0.999955 | 9.48509e-05 | 0.999666 |
| rad37         | 1.18404e-05 | 0.999967 | 8.87361e-05 | 0.999754 |
| rad54         | 7.74183e-06 | 0.999975 | 5.80198e-05 | 0.999812 |
| rad65         | 5.71876e-06 | 0.999981 | 4.28583e-05 | 0.999855 |
| PAH8+H        | 4.80152e-06 | 0.999986 | 3.59842e-05 | 0.999891 |
| rad34         | 4.57469e-06 | 0.999990 | 3.42843e-05 | 0.999925 |
| rad72         | 4.05904e-06 | 0.999994 | 3.04198e-05 | 0.999956 |
| rad68syn      | 8.44302e-07 | 0.999995 | 6.32747e-06 | 0.999962 |
| rad55         | 7.96394e-07 | 0.999996 | 5.96844e-06 | 0.999968 |
| rad64         | 7.49015e-07 | 0.999997 | 5.61336e-06 | 0.999974 |
| rad56         | 7.20451e-07 | 0.999997 | 5.39929e-06 | 0.999979 |
| rad68anti     | 5.39463e-07 | 0.999998 | 4.04291e-06 | 0.999983 |
| rad53         | 5.23143e-07 | 0.999998 | 3.92061e-06 | 0.999987 |
| rad40syn      | 4.40707e-07 | 0.999999 | 3.30280e-06 | 0.999990 |
| rad62         | 3.72784e-07 | 0.999999 | 2.79376e-06 | 0.999993 |
| rad61         | 3.22478e-07 | 0.999999 | 2.41676e-06 | 0.999996 |
| rad40anti     | 3.14359e-07 | 1.000000 | 2.35591e-06 | 0.999998 |
| rad43         | 1.94896e-07 | 1.000000 | 1.46061e-06 | 0.999999 |
| rad42         | 5.98145e-08 | 1.000000 | 4.48269e-07 | 1.000000 |
| rad41         | 3.19484e-08 | 1.000000 | 2.39432e-07 | 1.000000 |
| rad23         | 2.18831e-18 | 1.000000 | 1.63999e-17 | 1.000000 |
| rad6          | 1.52770e-18 | 1.000000 | 1.14491e-17 | 1.000000 |
| rad45         | 6.76395e-19 | 1.000000 | 5.06912e-18 | 1.000000 |
| rad9          | 5.76618e-19 | 1.000000 | 4.32136e-18 | 1.000000 |
| rad20         | 5.61879e-19 | 1.000000 | 4.21090e-18 | 1.000000 |
| rad22         | 2.56754e-19 | 1.000000 | 1.92420e-18 | 1.000000 |
| rad21         | 2.52565e-19 | 1.000000 | 1.89281e-18 | 1.000000 |
| rad11         | 1.59312e-19 | 1.000000 | 1.19394e-18 | 1.000000 |
| rad36         | 1.27347e-19 | 1.000000 | 9.54383e-19 | 1.000000 |
| rad18         | 7.69597e-20 | 1.000000 | 5.76761e-19 | 1.000000 |
| rad15         | 4.64693e-20 | 1.000000 | 3.48256e-19 | 1.000000 |
| rad7          | 3.48722e-20 | 1.000000 | 2.61344e-19 | 1.000000 |
| rad8          | 2.23533e-20 | 1.000000 | 1.67523e-19 | 1.000000 |
| rad28         | 2.05573e-20 | 1.000000 | 1.54063e-19 | 1.000000 |
| rad24         | 1.60028e-20 | 1.000000 | 1.19931e-19 | 1.000000 |
| rad12         | 1.40784e-20 | 1.000000 | 1.05508e-19 | 1.000000 |
| rad26         | 4.93141e-21 | 1.000000 | 3.69576e-20 | 1.000000 |
| rad47         | 4.90428e-21 | 1.000000 | 3.67543e-20 | 1.000000 |
| rad13         | 4.47285e-21 | 1.000000 | 3.35210e-20 | 1.000000 |
| rad10         | 1.80858e-21 | 1.000000 | 1.35541e-20 | 1.000000 |
| rad25         | 8.60189e-22 | 1.000000 | 6.44654e-21 | 1.000000 |
| rad33         | 3.44368e-22 | 1.000000 | 2.58081e-21 | 1.000000 |
| rad5          | 2.09153e-22 | 1.000000 | 1.56746e-21 | 1.000000 |
| rad2          | 1.41788e-22 | 1.000000 | 1.06260e-21 | 1.000000 |
| rad1          | 6.29354e-23 | 1.000000 | 4.71659e-22 | 1.000000 |
| rad14         | 1.40237e-23 | 1.000000 | 1.05098e-22 | 1.000000 |
| rad3          | 1.22193e-23 | 1.000000 | 9.15754e-23 | 1.000000 |
| rad27         | 8.01836e-24 | 1.000000 | 6.00923e-23 | 1.000000 |
| rad4          | 7.25388e-24 | 1.000000 | 5.43629e-23 | 1.000000 |

0.100000000E-07 Pa, 3250.00000 K

=====

| Rate constant | True (fraction)     | Effective (fraction) |
|---------------|---------------------|----------------------|
| Total         | 1.58309e-12 (1.00 ) | 2.28795e-13 (1.00 )  |

| species | PYtrue | Cumul | PYeffective | Cumul |
|---------|--------|-------|-------------|-------|
| -----   |        |       |             |       |



|               |             |          |             |          |
|---------------|-------------|----------|-------------|----------|
| Benzy1+C2H2   | 0.855476    | 0.855476 | 0.00000     | 0.00000  |
| PhCH2CCH+H    | 0.0734301   | 0.928906 | 0.508082    | 0.508082 |
| Indene+H      | 0.0278643   | 0.956770 | 0.192800    | 0.700882 |
| PhCHCCH2+H    | 0.0183610   | 0.975131 | 0.127045    | 0.827927 |
| Ph+Allene     | 0.0145940   | 0.989725 | 0.100980    | 0.928907 |
| PAH3+H        | 0.00243645  | 0.992162 | 0.0168585   | 0.945765 |
| PAH9+H        | 0.00110339  | 0.993265 | 0.00763468  | 0.953400 |
| PAH7+H        | 0.000986571 | 0.994252 | 0.00682634  | 0.960227 |
| rad19anti     | 0.000808911 | 0.995061 | 0.00559707  | 0.965824 |
| rad38         | 0.000686670 | 0.995747 | 0.00475125  | 0.970575 |
| rad50         | 0.000518179 | 0.996266 | 0.00358542  | 0.974160 |
| Ph+MeAc       | 0.000489465 | 0.996755 | 0.00338674  | 0.977547 |
| rad30         | 0.000447972 | 0.997203 | 0.00309964  | 0.980647 |
| PhCCH+CH3     | 0.000378211 | 0.997581 | 0.00261694  | 0.983264 |
| rad39         | 0.000374434 | 0.997956 | 0.00259081  | 0.985854 |
| rad35         | 0.000323023 | 0.998279 | 0.00223508  | 0.988089 |
| rad51         | 0.000289245 | 0.998568 | 0.00200136  | 0.990091 |
| rad46         | 0.000266714 | 0.998835 | 0.00184546  | 0.991936 |
| rad59         | 0.000184695 | 0.999019 | 0.00127795  | 0.993214 |
| rad67         | 0.000159865 | 0.999179 | 0.00110614  | 0.994320 |
| PhCCCH3+H     | 0.000140367 | 0.999320 | 0.000971235 | 0.995292 |
| rad60syn      | 9.79791e-05 | 0.999418 | 0.000677943 | 0.995970 |
| PAH10+CH3     | 8.26142e-05 | 0.999500 | 0.000571630 | 0.996541 |
| rad71         | 7.28074e-05 | 0.999573 | 0.000503773 | 0.997045 |
| rad60anti     | 7.14060e-05 | 0.999644 | 0.000494077 | 0.997539 |
| rad19syn      | 7.13406e-05 | 0.999716 | 0.000493624 | 0.998033 |
| rad52         | 6.19533e-05 | 0.999778 | 0.000428671 | 0.998461 |
| rad58         | 4.68388e-05 | 0.999825 | 0.000324090 | 0.998785 |
| PAH1+H        | 3.98744e-05 | 0.999864 | 0.000275902 | 0.999061 |
| rad73         | 3.17350e-05 | 0.999896 | 0.000219583 | 0.999281 |
| PhcycC3H3_A+H | 2.77967e-05 | 0.999924 | 0.000192333 | 0.999473 |
| rad70         | 1.68825e-05 | 0.999941 | 0.000116814 | 0.999590 |
| rad37         | 1.28499e-05 | 0.999954 | 8.89115e-05 | 0.999679 |
| PAH8+H        | 8.50457e-06 | 0.999962 | 5.88453e-05 | 0.999738 |
| rad54         | 8.38235e-06 | 0.999971 | 5.79997e-05 | 0.999796 |
| rad72         | 7.52648e-06 | 0.999978 | 5.20777e-05 | 0.999848 |
| rad65         | 7.06074e-06 | 0.999985 | 4.88551e-05 | 0.999897 |
| rad34         | 6.39568e-06 | 0.999992 | 4.42534e-05 | 0.999941 |
| rad68syn      | 1.34606e-06 | 0.999993 | 9.31375e-06 | 0.999950 |
| rad64         | 1.07438e-06 | 0.999994 | 7.43389e-06 | 0.999958 |
| rad56         | 9.79690e-07 | 0.999995 | 6.77873e-06 | 0.999965 |
| rad55         | 8.93999e-07 | 0.999996 | 6.18581e-06 | 0.999971 |
| rad68anti     | 8.59058e-07 | 0.999997 | 5.94405e-06 | 0.999977 |
| rad40syn      | 7.44327e-07 | 0.999997 | 5.15020e-06 | 0.999982 |
| rad53         | 6.73265e-07 | 0.999998 | 4.65850e-06 | 0.999986 |
| rad40anti     | 5.40357e-07 | 0.999999 | 3.73887e-06 | 0.999990 |
| rad62         | 5.25220e-07 | 0.999999 | 3.63414e-06 | 0.999994 |
| rad61         | 4.70536e-07 | 1.000000 | 3.25576e-06 | 0.999997 |
| rad43         | 2.53715e-07 | 1.000000 | 1.75552e-06 | 0.999999 |
| rad42         | 9.14458e-08 | 1.000000 | 6.32737e-07 | 0.999999 |
| rad41         | 4.57450e-08 | 1.000000 | 3.16522e-07 | 1.000000 |
| rad23         | 9.80702e-19 | 1.000000 | 6.78574e-18 | 1.000000 |
| rad6          | 5.26566e-19 | 1.000000 | 3.64345e-18 | 1.000000 |
| rad20         | 3.83869e-19 | 1.000000 | 2.65609e-18 | 1.000000 |
| rad45         | 3.64247e-19 | 1.000000 | 2.52032e-18 | 1.000000 |
| rad9          | 3.36409e-19 | 1.000000 | 2.32771e-18 | 1.000000 |
| rad21         | 1.66173e-19 | 1.000000 | 1.14980e-18 | 1.000000 |
| rad22         | 1.30761e-19 | 1.000000 | 9.04768e-19 | 1.000000 |
| rad11         | 9.80857e-20 | 1.000000 | 6.78681e-19 | 1.000000 |
| rad36         | 6.92991e-20 | 1.000000 | 4.79499e-19 | 1.000000 |
| rad18         | 4.51591e-20 | 1.000000 | 3.12467e-19 | 1.000000 |
| rad15         | 2.91808e-20 | 1.000000 | 2.01909e-19 | 1.000000 |
| rad8          | 2.15817e-20 | 1.000000 | 1.49330e-19 | 1.000000 |
| rad7          | 1.57403e-20 | 1.000000 | 1.08912e-19 | 1.000000 |
| rad28         | 1.13059e-20 | 1.000000 | 7.82282e-20 | 1.000000 |
| rad24         | 1.10778e-20 | 1.000000 | 7.66503e-20 | 1.000000 |
| rad12         | 1.07284e-20 | 1.000000 | 7.42324e-20 | 1.000000 |
| rad47         | 6.03541e-21 | 1.000000 | 4.17606e-20 | 1.000000 |
| rad26         | 3.17882e-21 | 1.000000 | 2.19951e-20 | 1.000000 |
| rad13         | 2.21088e-21 | 1.000000 | 1.52976e-20 | 1.000000 |
| rad10         | 1.23647e-21 | 1.000000 | 8.55547e-21 | 1.000000 |
| rad25         | 6.72544e-22 | 1.000000 | 4.65351e-21 | 1.000000 |
| rad5          | 2.00796e-22 | 1.000000 | 1.38936e-21 | 1.000000 |
| rad33         | 1.94932e-22 | 1.000000 | 1.34878e-21 | 1.000000 |
| rad2          | 9.29106e-23 | 1.000000 | 6.42873e-22 | 1.000000 |
| rad1          | 4.61497e-23 | 1.000000 | 3.19322e-22 | 1.000000 |
| rad14         | 1.20218e-23 | 1.000000 | 8.31820e-23 | 1.000000 |
| rad27         | 6.78839e-24 | 1.000000 | 4.69707e-23 | 1.000000 |
| rad3          | 5.91907e-24 | 1.000000 | 4.09556e-23 | 1.000000 |
| rad4          | 3.41848e-24 | 1.000000 | 2.36534e-23 | 1.000000 |

0.100000000E-07 Pa, 3500.00000 K

=====

Rate constant | True (fraction) | Effective (fraction)  
-----

Total | 2.10046e-12 (1.00 ) | 3.29923e-13 (1.00 )

| species       | PYtrue      | Cumul    | PYeffective | Cumul    |
|---------------|-------------|----------|-------------|----------|
| Benzyl+C2H2   | 0.842928    | 0.842928 | 0.00000     | 0.00000  |
| PhCH2CCH+H    | 0.0857241   | 0.928652 | 0.545762    | 0.545762 |
| Indene+H      | 0.0229287   | 0.951581 | 0.145976    | 0.691738 |
| PhCHCCH2+H    | 0.0212218   | 0.972803 | 0.135108    | 0.826846 |
| Ph+Allene     | 0.0160719   | 0.988874 | 0.102322    | 0.929168 |
| PAH3+H        | 0.00277080  | 0.991645 | 0.0176403   | 0.946808 |
| PAH7+H        | 0.00108547  | 0.992731 | 0.00691065  | 0.953719 |
| PAH9+H        | 0.00103824  | 0.993769 | 0.00660998  | 0.960329 |
| rad19anti     | 0.000786012 | 0.994555 | 0.00500415  | 0.965333 |
| rad38         | 0.000657575 | 0.995213 | 0.00418645  | 0.969520 |
| rad50         | 0.000571322 | 0.995784 | 0.00363732  | 0.973157 |
| Ph+MeAc       | 0.000559758 | 0.996344 | 0.00356370  | 0.976721 |
| PhCCH+CH3     | 0.000466753 | 0.996810 | 0.00297158  | 0.979692 |
| rad30         | 0.000434295 | 0.997245 | 0.00276494  | 0.982457 |
| rad39         | 0.000426787 | 0.997672 | 0.00271714  | 0.985174 |
| rad51         | 0.000340822 | 0.998012 | 0.00216985  | 0.987344 |
| rad35         | 0.000335221 | 0.998348 | 0.00213419  | 0.989478 |
| rad46         | 0.000264413 | 0.998612 | 0.00168339  | 0.991162 |
| rad59         | 0.000204435 | 0.998816 | 0.00130154  | 0.992463 |
| rad67         | 0.000182834 | 0.998999 | 0.00116401  | 0.993627 |
| PhCCCH3+H     | 0.000163685 | 0.999163 | 0.00104210  | 0.994669 |
| rad71         | 0.000107601 | 0.999271 | 0.000685042 | 0.995354 |
| rad60syn      | 0.000103349 | 0.999374 | 0.000657969 | 0.996012 |
| PAH10+CH3     | 9.81181e-05 | 0.999472 | 0.000624669 | 0.996637 |
| rad19syn      | 9.79725e-05 | 0.999570 | 0.000623742 | 0.997261 |
| rad60anti     | 7.58697e-05 | 0.999646 | 0.000483025 | 0.997744 |
| rad52         | 7.00217e-05 | 0.999716 | 0.000445793 | 0.998190 |
| rad58         | 5.76196e-05 | 0.999773 | 0.000366835 | 0.998556 |
| PAH1+H        | 5.20523e-05 | 0.999826 | 0.000331391 | 0.998888 |
| rad73         | 4.43107e-05 | 0.999870 | 0.000282104 | 0.999170 |
| PhcycC3H3_A+H | 3.20633e-05 | 0.999902 | 0.000204131 | 0.999374 |
| rad70         | 2.14708e-05 | 0.999923 | 0.000136694 | 0.999511 |
| PAH8+H        | 1.37725e-05 | 0.999937 | 8.76827e-05 | 0.999598 |
| rad37         | 1.33235e-05 | 0.999950 | 8.48243e-05 | 0.999683 |
| rad72         | 1.23923e-05 | 0.999963 | 7.88958e-05 | 0.999762 |
| rad54         | 8.98058e-06 | 0.999972 | 5.71749e-05 | 0.999819 |
| rad34         | 8.46717e-06 | 0.999980 | 5.39063e-05 | 0.999873 |
| rad65         | 8.19015e-06 | 0.999988 | 5.21426e-05 | 0.999925 |
| rad68syn      | 1.99232e-06 | 0.999990 | 1.26841e-05 | 0.999938 |
| rad64         | 1.43496e-06 | 0.999992 | 9.13568e-06 | 0.999947 |
| rad56         | 1.27412e-06 | 0.999993 | 8.11171e-06 | 0.999955 |
| rad68anti     | 1.27030e-06 | 0.999994 | 8.08736e-06 | 0.999963 |
| rad40syn      | 1.15716e-06 | 0.999996 | 7.36708e-06 | 0.999971 |
| rad55         | 9.87613e-07 | 0.999997 | 6.28764e-06 | 0.999977 |
| rad40anti     | 8.52741e-07 | 0.999997 | 5.42898e-06 | 0.999982 |
| rad53         | 8.35966e-07 | 0.999998 | 5.32218e-06 | 0.999988 |
| rad62         | 6.97360e-07 | 0.999999 | 4.43975e-06 | 0.999992 |
| rad61         | 6.32568e-07 | 1.000000 | 4.02725e-06 | 0.999996 |
| rad43         | 3.12012e-07 | 1.000000 | 1.98643e-06 | 0.999998 |
| rad42         | 1.30122e-07 | 1.000000 | 8.28424e-07 | 0.999999 |
| rad41         | 6.11800e-08 | 1.000000 | 3.89503e-07 | 0.999999 |
| rad23         | 4.69576e-19 | 1.000000 | 2.98956e-18 | 0.999999 |
| rad20         | 2.74120e-19 | 1.000000 | 1.74519e-18 | 0.999999 |
| rad6          | 2.12025e-19 | 1.000000 | 1.34986e-18 | 0.999999 |
| rad45         | 2.04720e-19 | 1.000000 | 1.30335e-18 | 0.999999 |
| rad9          | 2.03017e-19 | 1.000000 | 1.29251e-18 | 0.999999 |
| rad21         | 1.14208e-19 | 1.000000 | 7.27102e-19 | 0.999999 |
| rad22         | 7.18391e-20 | 1.000000 | 4.57364e-19 | 0.999999 |
| rad11         | 6.60781e-20 | 1.000000 | 4.20686e-19 | 0.999999 |
| rad36         | 3.92925e-20 | 1.000000 | 2.50156e-19 | 0.999999 |
| rad18         | 2.79268e-20 | 1.000000 | 1.77796e-19 | 0.999999 |
| rad8          | 2.04865e-20 | 1.000000 | 1.30427e-19 | 0.999999 |
| rad15         | 1.87604e-20 | 1.000000 | 1.19438e-19 | 0.999999 |
| rad12         | 8.20876e-21 | 1.000000 | 5.22611e-20 | 0.999999 |
| rad7          | 7.97828e-21 | 1.000000 | 5.07938e-20 | 0.999999 |
| rad24         | 7.82702e-21 | 1.000000 | 4.98307e-20 | 0.999999 |
| rad47         | 6.94994e-21 | 1.000000 | 4.42468e-20 | 0.999999 |
| rad28         | 6.78730e-21 | 1.000000 | 4.32114e-20 | 0.999999 |
| rad26         | 2.07559e-21 | 1.000000 | 1.32143e-20 | 0.999999 |
| rad13         | 1.21831e-21 | 1.000000 | 7.75639e-21 | 0.999999 |
| rad10         | 8.51962e-22 | 1.000000 | 5.42402e-21 | 0.999999 |

|       |             |         |             |          |
|-------|-------------|---------|-------------|----------|
| rad25 | 5.44463e-22 | 1.00000 | 3.46632e-21 | 0.999999 |
| rad5  | 1.92213e-22 | 1.00000 | 1.22372e-21 | 0.999999 |
| rad33 | 1.19819e-22 | 1.00000 | 7.62829e-22 | 0.999999 |
| rad2  | 6.33804e-23 | 1.00000 | 4.03512e-22 | 0.999999 |
| rad1  | 3.46118e-23 | 1.00000 | 2.20356e-22 | 0.999999 |
| rad14 | 1.06170e-23 | 1.00000 | 6.75934e-23 | 0.999999 |
| rad27 | 5.69300e-24 | 1.00000 | 3.62445e-23 | 0.999999 |
| rad3  | 3.26133e-24 | 1.00000 | 2.07633e-23 | 0.999999 |
| rad4  | 1.84456e-24 | 1.00000 | 1.17434e-23 | 0.999999 |

0.100000000E-07 Pa, 3750.00000 K

| Rate constant | True (fraction)     | Effective (fraction) |
|---------------|---------------------|----------------------|
| Total         | 2.70978e-12 (1.00 ) | 4.61708e-13 (1.00 )  |

| species       | PYtrue      | Cumul    | PYeffective | Cumul    |
|---------------|-------------|----------|-------------|----------|
| Benzyl+C2H2   | 0.829614    | 0.829614 | 0.00000     | 0.00000  |
| PhCH2CCH+H    | 0.0978316   | 0.927446 | 0.574175    | 0.574175 |
| PhCHCCH2+H    | 0.0240141   | 0.951460 | 0.140939    | 0.715114 |
| Indene+H      | 0.0190788   | 0.970538 | 0.111974    | 0.827088 |
| Ph+Allene     | 0.0176550   | 0.988193 | 0.103617    | 0.930705 |
| PAH3+H        | 0.00305565  | 0.991249 | 0.0179337   | 0.948639 |
| PAH7+H        | 0.00116197  | 0.992411 | 0.00681959  | 0.955458 |
| PAH9+H        | 0.000955042 | 0.993366 | 0.00560515  | 0.961063 |
| rad19anti     | 0.000750872 | 0.994117 | 0.00440688  | 0.965470 |
| Ph+MeAc       | 0.000618509 | 0.994736 | 0.00363004  | 0.969100 |
| rad38         | 0.000613193 | 0.995349 | 0.00359884  | 0.972699 |
| rad50         | 0.000603635 | 0.995952 | 0.00354274  | 0.976242 |
| PhCCH+CH3     | 0.000581835 | 0.996534 | 0.00341479  | 0.979657 |
| rad39         | 0.000465790 | 0.997000 | 0.00273373  | 0.982390 |
| rad30         | 0.000416539 | 0.997417 | 0.00244467  | 0.984835 |
| rad51         | 0.000380994 | 0.997798 | 0.00223606  | 0.987071 |
| rad35         | 0.000341508 | 0.998139 | 0.00200431  | 0.989075 |
| rad46         | 0.000254425 | 0.998393 | 0.00149322  | 0.990569 |
| rad59         | 0.000220084 | 0.998614 | 0.00129168  | 0.991860 |
| rad67         | 0.000201013 | 0.998815 | 0.00117975  | 0.993040 |
| PhCCCH3+H     | 0.000187990 | 0.999003 | 0.00110331  | 0.994143 |
| rad71         | 0.000146780 | 0.999149 | 0.000861455 | 0.995005 |
| rad19syn      | 0.000129261 | 0.999279 | 0.000758633 | 0.995764 |
| PAH10+CH3     | 0.000111172 | 0.999390 | 0.000652468 | 0.996416 |
| rad60syn      | 0.000106707 | 0.999496 | 0.000626263 | 0.997042 |
| rad60anti     | 7.88382e-05 | 0.999575 | 0.000462703 | 0.997505 |
| rad52         | 7.54521e-05 | 0.999651 | 0.000442829 | 0.997948 |
| rad58         | 6.80261e-05 | 0.999719 | 0.000399246 | 0.998347 |
| PAH1+H        | 6.45813e-05 | 0.999783 | 0.000379028 | 0.998726 |
| rad73         | 5.74878e-05 | 0.999841 | 0.000337397 | 0.999063 |
| PhcycC3H3_A+H | 3.61213e-05 | 0.999877 | 0.000211996 | 0.999275 |
| rad70         | 2.62309e-05 | 0.999903 | 0.000153949 | 0.999429 |
| PAH8+H        | 2.07420e-05 | 0.999924 | 0.000121735 | 0.999551 |
| rad72         | 1.85748e-05 | 0.999943 | 0.000109016 | 0.999660 |
| rad37         | 1.33636e-05 | 0.999956 | 7.84314e-05 | 0.999739 |
| rad34         | 1.07116e-05 | 0.999967 | 6.28665e-05 | 0.999801 |
| rad54         | 9.53969e-06 | 0.999976 | 5.59886e-05 | 0.999857 |
| rad65         | 9.05125e-06 | 0.999985 | 5.31219e-05 | 0.999911 |
| rad68syn      | 2.77520e-06 | 0.999988 | 1.62877e-05 | 0.999927 |
| rad64         | 1.81236e-06 | 0.999990 | 1.06367e-05 | 0.999938 |
| rad68anti     | 1.76807e-06 | 0.999992 | 1.03768e-05 | 0.999948 |
| rad40syn      | 1.68193e-06 | 0.999993 | 9.87130e-06 | 0.999958 |
| rad56         | 1.59874e-06 | 0.999995 | 9.38301e-06 | 0.999967 |
| rad40anti     | 1.25564e-06 | 0.999996 | 7.36935e-06 | 0.999975 |
| rad55         | 1.07703e-06 | 0.999997 | 6.32112e-06 | 0.999981 |
| rad53         | 1.00840e-06 | 0.999998 | 5.91834e-06 | 0.999987 |
| rad62         | 8.81786e-07 | 0.999999 | 5.17522e-06 | 0.999992 |
| rad61         | 7.98455e-07 | 1.00000  | 4.68615e-06 | 0.999997 |
| rad43         | 3.67979e-07 | 1.00000  | 2.15967e-06 | 0.999999 |
| rad42         | 1.74775e-07 | 1.00000  | 1.02576e-06 | 1.00000  |
| rad41         | 7.77074e-08 | 1.00000  | 4.56066e-07 | 1.00000  |
| rad23         | 2.37576e-19 | 1.00000  | 1.39434e-18 | 1.00000  |
| rad20         | 2.02983e-19 | 1.00000  | 1.19131e-18 | 1.00000  |
| rad9          | 1.26593e-19 | 1.00000  | 7.42974e-19 | 1.00000  |
| rad45         | 1.19947e-19 | 1.00000  | 7.03971e-19 | 1.00000  |
| rad6          | 9.75256e-20 | 1.00000  | 5.72379e-19 | 1.00000  |
| rad21         | 8.13804e-20 | 1.00000  | 4.77623e-19 | 1.00000  |
| rad11         | 4.75768e-20 | 1.00000  | 2.79229e-19 | 1.00000  |
| rad22         | 4.20237e-20 | 1.00000  | 2.46638e-19 | 1.00000  |
| rad36         | 2.31100e-20 | 1.00000  | 1.35633e-19 | 1.00000  |
| rad8          | 1.91572e-20 | 1.00000  | 1.12434e-19 | 1.00000  |
| rad18         | 1.80283e-20 | 1.00000  | 1.05808e-19 | 1.00000  |

|       |             |         |             |         |
|-------|-------------|---------|-------------|---------|
| rad15 | 1.23473e-20 | 1.00000 | 7.24667e-20 | 1.00000 |
| rad47 | 7.59707e-21 | 1.00000 | 4.45873e-20 | 1.00000 |
| rad12 | 6.32118e-21 | 1.00000 | 3.70991e-20 | 1.00000 |
| rad24 | 5.63439e-21 | 1.00000 | 3.30683e-20 | 1.00000 |
| rad7  | 4.44215e-21 | 1.00000 | 2.60711e-20 | 1.00000 |
| rad28 | 4.30193e-21 | 1.00000 | 2.52481e-20 | 1.00000 |
| rad26 | 1.37558e-21 | 1.00000 | 8.07328e-21 | 1.00000 |
| rad13 | 7.33170e-22 | 1.00000 | 4.30298e-21 | 1.00000 |
| rad10 | 5.95068e-22 | 1.00000 | 3.49246e-21 | 1.00000 |
| rad25 | 4.50617e-22 | 1.00000 | 2.64468e-21 | 1.00000 |
| rad5  | 1.83996e-22 | 1.00000 | 1.07987e-21 | 1.00000 |
| rad33 | 7.87849e-23 | 1.00000 | 4.62390e-22 | 1.00000 |
| rad2  | 4.53930e-23 | 1.00000 | 2.66412e-22 | 1.00000 |
| rad1  | 2.63611e-23 | 1.00000 | 1.54714e-22 | 1.00000 |
| rad14 | 9.45605e-24 | 1.00000 | 5.54977e-23 | 1.00000 |
| rad27 | 4.76374e-24 | 1.00000 | 2.79584e-23 | 1.00000 |
| rad3  | 1.99186e-24 | 1.00000 | 1.16902e-23 | 1.00000 |
| rad4  | 1.11090e-24 | 1.00000 | 6.51989e-24 | 1.00000 |

0.100000000E-07 Pa, 4000.00000 K

=====

| Rate constant | True (fraction)     | Effective (fraction) |
|---------------|---------------------|----------------------|
| Total         | 3.41497e-12 (1.00 ) | 6.28297e-13 (1.00 )  |

| species       | PYtrue      | Cumul    | PYeffective | Cumul    |
|---------------|-------------|----------|-------------|----------|
| Benzyl+C2H2   | 0.816017    | 0.816017 | 0.00000     | 0.00000  |
| PhCH2CCH+H    | 0.109584    | 0.925601 | 0.595618    | 0.595618 |
| PhCHCCH2+H    | 0.0267098   | 0.952311 | 0.145175    | 0.740793 |
| Ph+Allene     | 0.0193046   | 0.971615 | 0.104926    | 0.845719 |
| Indene+H      | 0.0160484   | 0.987664 | 0.0872277   | 0.932947 |
| PAH3+H        | 0.00329013  | 0.990954 | 0.0178828   | 0.950829 |
| PAH7+H        | 0.00121791  | 0.992172 | 0.00661968  | 0.957449 |
| PAH9+H        | 0.000864009 | 0.993036 | 0.00469613  | 0.962145 |
| PhCCH+CH3     | 0.000720156 | 0.993756 | 0.00391424  | 0.966060 |
| rad19anti     | 0.000708493 | 0.994464 | 0.00385085  | 0.969910 |
| Ph+MeAc       | 0.000663934 | 0.995128 | 0.00360866  | 0.973519 |
| rad50         | 0.000616859 | 0.995745 | 0.00335280  | 0.976872 |
| rad38         | 0.000560144 | 0.996305 | 0.00304454  | 0.979916 |
| rad39         | 0.000491035 | 0.996796 | 0.00266891  | 0.982585 |
| rad51         | 0.000408498 | 0.997205 | 0.00222030  | 0.984806 |
| rad30         | 0.000396478 | 0.997601 | 0.00215497  | 0.986961 |
| rad35         | 0.000343096 | 0.997945 | 0.00186482  | 0.988825 |
| rad46         | 0.000239253 | 0.998184 | 0.00130041  | 0.990126 |
| rad59         | 0.000231903 | 0.998416 | 0.00126046  | 0.991386 |
| rad67         | 0.000214260 | 0.998630 | 0.00116456  | 0.992551 |
| PhCCCH3+H     | 0.000213580 | 0.998844 | 0.00116087  | 0.993712 |
| rad71         | 0.000187844 | 0.999031 | 0.00102098  | 0.994733 |
| rad19syn      | 0.000163941 | 0.999195 | 0.000891067 | 0.995624 |
| PAH10+CH3     | 0.000121536 | 0.999317 | 0.000660582 | 0.996284 |
| rad60syn      | 0.000108396 | 0.999425 | 0.000589161 | 0.996873 |
| rad60anti     | 8.05427e-05 | 0.999506 | 0.000437772 | 0.997311 |
| rad52         | 7.82960e-05 | 0.999584 | 0.000425560 | 0.997737 |
| rad58         | 7.77572e-05 | 0.999662 | 0.000422632 | 0.998159 |
| PAH1+H        | 7.70001e-05 | 0.999739 | 0.000418517 | 0.998578 |
| rad73         | 7.03552e-05 | 0.999809 | 0.000382400 | 0.998960 |
| PhcycC3H3_A+H | 3.98813e-05 | 0.999849 | 0.000216766 | 0.999177 |
| rad70         | 3.09908e-05 | 0.999880 | 0.000168444 | 0.999346 |
| PAH8+H        | 2.94355e-05 | 0.999910 | 0.000159990 | 0.999506 |
| rad72         | 2.58284e-05 | 0.999935 | 0.000140384 | 0.999646 |
| rad37         | 1.30848e-05 | 0.999948 | 7.11194e-05 | 0.999717 |
| rad34         | 1.30497e-05 | 0.999961 | 7.09289e-05 | 0.999788 |
| rad54         | 1.00584e-05 | 0.999972 | 5.46703e-05 | 0.999843 |
| rad65         | 9.63686e-06 | 0.999981 | 5.23790e-05 | 0.999895 |
| rad68syn      | 3.67778e-06 | 0.999985 | 1.99898e-05 | 0.999915 |
| rad68anti     | 2.34154e-06 | 0.999987 | 1.27269e-05 | 0.999928 |
| rad40syn      | 2.31359e-06 | 0.999990 | 1.25750e-05 | 0.999940 |
| rad64         | 2.19077e-06 | 0.999992 | 1.19074e-05 | 0.999952 |
| rad56         | 1.94741e-06 | 0.999994 | 1.05847e-05 | 0.999963 |
| rad40anti     | 1.74691e-06 | 0.999995 | 9.49492e-06 | 0.999972 |
| rad53         | 1.18744e-06 | 0.999997 | 6.45406e-06 | 0.999979 |
| rad55         | 1.16170e-06 | 0.999998 | 6.31418e-06 | 0.999985 |
| rad62         | 1.07271e-06 | 0.999999 | 5.83046e-06 | 0.999991 |
| rad61         | 9.59661e-07 | 1.000000 | 5.21602e-06 | 0.999996 |
| rad43         | 4.20278e-07 | 1.000000 | 2.28433e-06 | 0.999998 |
| rad42         | 2.24298e-07 | 1.000000 | 1.21912e-06 | 1.000000 |
| rad41         | 9.47630e-08 | 1.000000 | 5.15063e-07 | 1.000000 |
| rad20         | 1.54922e-19 | 1.000000 | 8.42046e-19 | 1.000000 |
| rad23         | 1.25894e-19 | 1.000000 | 6.84269e-19 | 1.000000 |

|       |             |         |             |         |
|-------|-------------|---------|-------------|---------|
| rad9  | 8.14070e-20 | 1.00000 | 4.42469e-19 | 1.00000 |
| rad45 | 7.20885e-20 | 1.00000 | 3.91821e-19 | 1.00000 |
| rad21 | 5.97853e-20 | 1.00000 | 3.24950e-19 | 1.00000 |
| rad6  | 5.01136e-20 | 1.00000 | 2.72381e-19 | 1.00000 |
| rad11 | 3.59957e-20 | 1.00000 | 1.95647e-19 | 1.00000 |
| rad22 | 2.59193e-20 | 1.00000 | 1.40878e-19 | 1.00000 |
| rad8  | 1.76788e-20 | 1.00000 | 9.60889e-20 | 1.00000 |
| rad36 | 1.39553e-20 | 1.00000 | 7.58509e-20 | 1.00000 |
| rad18 | 1.20669e-20 | 1.00000 | 6.55872e-20 | 1.00000 |
| rad15 | 8.31113e-21 | 1.00000 | 4.51733e-20 | 1.00000 |
| rad47 | 7.97227e-21 | 1.00000 | 4.33315e-20 | 1.00000 |
| rad12 | 4.90407e-21 | 1.00000 | 2.66550e-20 | 1.00000 |
| rad24 | 4.12849e-21 | 1.00000 | 2.24395e-20 | 1.00000 |
| rad28 | 2.83269e-21 | 1.00000 | 1.53965e-20 | 1.00000 |
| rad7  | 2.66534e-21 | 1.00000 | 1.44868e-20 | 1.00000 |
| rad26 | 9.26845e-22 | 1.00000 | 5.03766e-21 | 1.00000 |
| rad13 | 4.73266e-22 | 1.00000 | 2.57233e-21 | 1.00000 |
| rad10 | 4.23710e-22 | 1.00000 | 2.30298e-21 | 1.00000 |
| rad25 | 3.78502e-22 | 1.00000 | 2.05726e-21 | 1.00000 |
| rad5  | 1.76140e-22 | 1.00000 | 9.57369e-22 | 1.00000 |
| rad33 | 5.47163e-23 | 1.00000 | 2.97398e-22 | 1.00000 |
| rad2  | 3.40425e-23 | 1.00000 | 1.85030e-22 | 1.00000 |
| rad1  | 2.02816e-23 | 1.00000 | 1.10236e-22 | 1.00000 |
| rad14 | 8.43867e-24 | 1.00000 | 4.58665e-23 | 1.00000 |
| rad27 | 3.99728e-24 | 1.00000 | 2.17263e-23 | 1.00000 |
| rad3  | 1.31167e-24 | 1.00000 | 7.12928e-24 | 1.00000 |
| rad4  | 7.26202e-25 | 1.00000 | 3.94711e-24 | 1.00000 |

0.100000000E-08 Pa, 20.0000000 K

| Rate constant | True (fraction)      | Effective (fraction) |
|---------------|----------------------|----------------------|
| Total         | 1.34336e-156 (1.00 ) | 1.34336e-156 (1.00 ) |

| species     | PYtrue      | Cumul    | PYeffective | Cumul    |
|-------------|-------------|----------|-------------|----------|
| Indene+H    | 0.999999    | 0.999999 | 0.999999    | 0.999999 |
| Benzyl+C2H2 | 8.12023e-07 | 1.000000 | 0.000000    | 0.999999 |
| rad6        | 5.48658e-07 | 1.000000 | 5.48659e-07 | 1.000000 |
| rad2        | 2.48183e-10 | 1.000000 | 2.48183e-10 | 1.000000 |
| rad7        | 3.95632e-11 | 1.000000 | 3.95632e-11 | 1.000000 |
| rad1        | 1.56859e-11 | 1.000000 | 1.56859e-11 | 1.000000 |
| rad10       | 1.49292e-11 | 1.000000 | 1.49292e-11 | 1.000000 |
| rad11       | 9.67960e-12 | 1.000000 | 9.67961e-12 | 1.000000 |
| rad3        | 1.60490e-12 | 1.000000 | 1.60490e-12 | 1.000000 |
| rad4        | 8.11363e-13 | 1.000000 | 8.11363e-13 | 1.000000 |
| rad13       | 2.19960e-13 | 1.000000 | 2.19961e-13 | 1.000000 |
| rad33       | 4.19943e-16 | 1.000000 | 4.19944e-16 | 1.000000 |
| rad20       | 1.15839e-17 | 1.000000 | 1.15840e-17 | 1.000000 |
| rad35       | 1.04100e-17 | 1.000000 | 1.04101e-17 | 1.000000 |
| rad21       | 7.22479e-18 | 1.000000 | 7.22479e-18 | 1.000000 |
| rad28       | 3.79708e-19 | 1.000000 | 3.79709e-19 | 1.000000 |
| PAH9+H      | 1.40351e-19 | 1.000000 | 1.40351e-19 | 1.000000 |
| rad18       | 5.44867e-20 | 1.000000 | 5.44867e-20 | 1.000000 |
| rad26       | 1.19386e-20 | 1.000000 | 1.19386e-20 | 1.000000 |
| rad31       | 8.49765e-21 | 1.000000 | 8.49765e-21 | 1.000000 |
| rad22       | 3.79581e-21 | 1.000000 | 3.79581e-21 | 1.000000 |
| rad23       | 9.24342e-22 | 1.000000 | 9.24342e-22 | 1.000000 |
| rad38       | 2.78579e-22 | 1.000000 | 2.78579e-22 | 1.000000 |
| rad30       | 1.38666e-22 | 1.000000 | 1.38666e-22 | 1.000000 |
| rad45       | 5.64815e-24 | 1.000000 | 5.64815e-24 | 1.000000 |
| rad27       | 4.79386e-24 | 1.000000 | 4.79387e-24 | 1.000000 |
| PhCHCCH2+H  | 3.72658e-24 | 1.000000 | 3.72659e-24 | 1.000000 |
| rad36       | 3.51833e-25 | 1.000000 | 3.51833e-25 | 1.000000 |
| rad24       | 2.32418e-25 | 1.000000 | 2.32418e-25 | 1.000000 |
| PhCCH+CH3   | 1.22308e-25 | 1.000000 | 1.22308e-25 | 1.000000 |
| PhCCH3+H    | 1.74860e-26 | 1.000000 | 1.74861e-26 | 1.000000 |
| rad15       | 1.10167e-26 | 1.000000 | 1.10167e-26 | 1.000000 |
| rad25       | 8.72072e-29 | 1.000000 | 8.72073e-29 | 1.000000 |
| rad14       | 5.75296e-30 | 1.000000 | 5.75297e-30 | 1.000000 |
| rad8        | 6.51606e-32 | 1.000000 | 6.51607e-32 | 1.000000 |
| rad46       | 3.90408e-34 | 1.000000 | 3.90408e-34 | 1.000000 |
| rad9        | 1.96679e-34 | 1.000000 | 1.96679e-34 | 1.000000 |
| PAH7+H      | 2.52710e-35 | 1.000000 | 2.52710e-35 | 1.000000 |
| Ph+MeAc     | 2.86072e-36 | 1.000000 | 2.86072e-36 | 1.000000 |
| rad12       | 1.02827e-36 | 1.000000 | 1.02827e-36 | 1.000000 |
| rad39       | 5.41050e-38 | 1.000000 | 5.41051e-38 | 1.000000 |
| Ph+Allene   | 1.31585e-40 | 1.000000 | 1.31585e-40 | 1.000000 |
| rad60syn    | 1.18415e-44 | 1.000000 | 1.18415e-44 | 1.000000 |
| rad60anti   | 1.22699e-46 | 1.000000 | 1.22699e-46 | 1.000000 |

|               |              |         |              |          |
|---------------|--------------|---------|--------------|----------|
| PhCH2CCH+H    | 2.04275e-48  | 1.00000 | 2.04275e-48  | 1.000000 |
| rad37         | 1.75900e-49  | 1.00000 | 1.75900e-49  | 1.000000 |
| rad5          | 1.16630e-52  | 1.00000 | 1.16630e-52  | 1.000000 |
| PAH3+H        | 2.07928e-57  | 1.00000 | 2.07929e-57  | 1.000000 |
| rad59         | 1.11342e-57  | 1.00000 | 1.11342e-57  | 1.000000 |
| rad50         | 4.52304e-58  | 1.00000 | 4.52305e-58  | 1.000000 |
| rad19syn      | 1.63192e-66  | 1.00000 | 1.63192e-66  | 1.000000 |
| rad52         | 1.97601e-70  | 1.00000 | 1.97601e-70  | 1.000000 |
| rad54         | 1.88609e-71  | 1.00000 | 1.88609e-71  | 1.000000 |
| PAH10+CH3     | 1.18276e-71  | 1.00000 | 1.18276e-71  | 1.000000 |
| rad43         | 2.80770e-72  | 1.00000 | 2.80770e-72  | 1.000000 |
| rad62         | 8.41665e-75  | 1.00000 | 8.41666e-75  | 1.000000 |
| rad51         | 9.49978e-78  | 1.00000 | 9.49979e-78  | 1.000000 |
| rad70         | 1.01425e-80  | 1.00000 | 1.01425e-80  | 1.000000 |
| PhcycC3H3_A+H | 4.29558e-81  | 1.00000 | 4.29559e-81  | 1.000000 |
| rad55         | 2.31301e-81  | 1.00000 | 2.31301e-81  | 1.000000 |
| rad65         | 6.37897e-83  | 1.00000 | 6.37898e-83  | 1.000000 |
| rad58         | 1.44314e-84  | 1.00000 | 1.44314e-84  | 1.000000 |
| PAH1+H        | 1.87633e-86  | 1.00000 | 1.87633e-86  | 1.000000 |
| rad34         | 1.28068e-88  | 1.00000 | 1.28068e-88  | 1.000000 |
| rad42         | 9.10431e-93  | 1.00000 | 9.10432e-93  | 1.000000 |
| rad41         | 1.13284e-93  | 1.00000 | 1.13284e-93  | 1.000000 |
| rad47         | 3.56031e-100 | 1.00000 | 3.56032e-100 | 1.000000 |

0.100000000E-08 Pa, 30.0000000 K

| =====         |                 |          |                      |                      |
|---------------|-----------------|----------|----------------------|----------------------|
| Rate constant | True (fraction) |          | Effective (fraction) |                      |
| -----         |                 |          |                      |                      |
| Total         | 1.15918e-108    | (1.00    | )                    | 1.15918e-108 (1.00 ) |
| species       | PYtrue          | Cumul    | PYeffective          | Cumul                |
| -----         |                 |          |                      |                      |
| Indene+H      | 0.999999        | 0.999999 | 1.00000              | 1.00000              |
| Benzyl+C2H2   | 1.04118e-06     | 1.00000  | 0.00000              | 1.00000              |
| rad6          | 1.72289e-07     | 1.00000  | 1.72289e-07          | 1.00000              |
| rad2          | 8.29247e-11     | 1.00000  | 8.29248e-11          | 1.00000              |
| rad7          | 1.24274e-11     | 1.00000  | 1.24274e-11          | 1.00000              |
| rad10         | 5.68586e-12     | 1.00000  | 5.68587e-12          | 1.00000              |
| rad1          | 5.24414e-12     | 1.00000  | 5.24415e-12          | 1.00000              |
| rad11         | 3.04399e-12     | 1.00000  | 3.04400e-12          | 1.00000              |
| rad3          | 5.88213e-13     | 1.00000  | 5.88214e-13          | 1.00000              |
| rad4          | 2.97412e-13     | 1.00000  | 2.97412e-13          | 1.00000              |
| rad13         | 6.91043e-14     | 1.00000  | 6.91044e-14          | 1.00000              |
| rad35         | 3.24587e-15     | 1.00000  | 3.24587e-15          | 1.00000              |
| rad33         | 1.32953e-16     | 1.00000  | 1.32953e-16          | 1.00000              |
| rad20         | 5.66128e-18     | 1.00000  | 5.66128e-18          | 1.00000              |
| rad21         | 3.53141e-18     | 1.00000  | 3.53141e-18          | 1.00000              |
| PAH9+H        | 3.16495e-18     | 1.00000  | 3.16495e-18          | 1.00000              |
| rad28         | 1.21017e-19     | 1.00000  | 1.21017e-19          | 1.00000              |
| rad18         | 2.66397e-20     | 1.00000  | 2.66398e-20          | 1.00000              |
| rad31         | 3.83735e-21     | 1.00000  | 3.83736e-21          | 1.00000              |
| rad26         | 3.72784e-21     | 1.00000  | 3.72784e-21          | 1.00000              |
| rad22         | 1.85323e-21     | 1.00000  | 1.85323e-21          | 1.00000              |
| rad23         | 4.17003e-22     | 1.00000  | 4.17004e-22          | 1.00000              |
| rad38         | 1.74709e-22     | 1.00000  | 1.74709e-22          | 1.00000              |
| rad30         | 8.65603e-23     | 1.00000  | 8.65604e-23          | 1.00000              |
| PhCHCCH2+H    | 2.36580e-24     | 1.00000  | 2.36580e-24          | 1.00000              |
| rad45         | 1.93545e-24     | 1.00000  | 1.93545e-24          | 1.00000              |
| rad27         | 1.48501e-24     | 1.00000  | 1.48501e-24          | 1.00000              |
| rad36         | 1.20520e-25     | 1.00000  | 1.20520e-25          | 1.00000              |
| rad24         | 1.15391e-25     | 1.00000  | 1.15391e-25          | 1.00000              |
| PhCCH+CH3     | 7.81319e-26     | 1.00000  | 7.81319e-26          | 1.00000              |
| PhCCCH3+H     | 1.11986e-26     | 1.00000  | 1.11986e-26          | 1.00000              |
| rad15         | 6.95065e-27     | 1.00000  | 6.95066e-27          | 1.00000              |
| rad25         | 2.72777e-29     | 1.00000  | 2.72778e-29          | 1.00000              |
| rad14         | 1.80747e-30     | 1.00000  | 1.80747e-30          | 1.00000              |
| rad8          | 4.23610e-32     | 1.00000  | 4.23610e-32          | 1.00000              |
| rad46         | 2.50676e-34     | 1.00000  | 2.50676e-34          | 1.00000              |
| rad9          | 1.28871e-34     | 1.00000  | 1.28871e-34          | 1.00000              |
| PAH7+H        | 1.66139e-35     | 1.00000  | 1.66139e-35          | 1.00000              |
| Ph+MeAc       | 1.89592e-36     | 1.00000  | 1.89592e-36          | 1.00000              |
| rad12         | 6.78691e-37     | 1.00000  | 6.78692e-37          | 1.00000              |
| rad39         | 3.58270e-38     | 1.00000  | 3.58270e-38          | 1.00000              |
| Ph+Allene     | 8.82875e-41     | 1.00000  | 8.82876e-41          | 1.00000              |
| rad60syn      | 7.92825e-45     | 1.00000  | 7.92826e-45          | 1.00000              |
| rad60anti     | 8.27047e-47     | 1.00000  | 8.27047e-47          | 1.00000              |
| PhCH2CCH+H    | 1.40708e-48     | 1.00000  | 1.40709e-48          | 1.00000              |
| rad37         | 1.22018e-49     | 1.00000  | 1.22018e-49          | 1.00000              |
| rad5          | 8.11731e-53     | 1.00000  | 8.11732e-53          | 1.00000              |
| PAH3+H        | 1.45732e-57     | 1.00000  | 1.45732e-57          | 1.00000              |

|               |              |         |              |         |
|---------------|--------------|---------|--------------|---------|
| rad59         | 7.80247e-58  | 1.00000 | 7.80247e-58  | 1.00000 |
| rad50         | 3.15729e-58  | 1.00000 | 3.15729e-58  | 1.00000 |
| rad19syn      | 1.19102e-66  | 1.00000 | 1.19103e-66  | 1.00000 |
| rad52         | 1.43901e-70  | 1.00000 | 1.43901e-70  | 1.00000 |
| rad54         | 1.39833e-71  | 1.00000 | 1.39833e-71  | 1.00000 |
| PAH10+CH3     | 8.79717e-72  | 1.00000 | 8.79718e-72  | 1.00000 |
| rad43         | 2.08839e-72  | 1.00000 | 2.08839e-72  | 1.00000 |
| rad62         | 6.30846e-75  | 1.00000 | 6.30846e-75  | 1.00000 |
| rad51         | 7.11111e-78  | 1.00000 | 7.11112e-78  | 1.00000 |
| rad70         | 7.76024e-81  | 1.00000 | 7.76025e-81  | 1.00000 |
| PhcycC3H3_A+H | 3.29356e-81  | 1.00000 | 3.29356e-81  | 1.00000 |
| rad55         | 1.77309e-81  | 1.00000 | 1.77309e-81  | 1.00000 |
| rad65         | 4.85027e-83  | 1.00000 | 4.85028e-83  | 1.00000 |
| rad58         | 1.10853e-84  | 1.00000 | 1.10853e-84  | 1.00000 |
| PAH1+H        | 1.46772e-86  | 1.00000 | 1.46772e-86  | 1.00000 |
| rad34         | 1.00634e-88  | 1.00000 | 1.00634e-88  | 1.00000 |
| rad42         | 7.25050e-93  | 1.00000 | 7.25050e-93  | 1.00000 |
| rad41         | 9.07615e-94  | 1.00000 | 9.07616e-94  | 1.00000 |
| rad47         | 1.37704e-100 | 1.00000 | 1.37704e-100 | 1.00000 |

0.1000000000E-08 Pa, 40.0000000 K

| Rate constant | True (fraction)     | Effective (fraction) |
|---------------|---------------------|----------------------|
| Total         | 1.02415e-84 (1.00 ) | 1.02415e-84 (1.00 )  |

| species     | PYtrue      | Cumul    | PYeffective | Cumul   |
|-------------|-------------|----------|-------------|---------|
| Indene+H    | 0.999998    | 0.999998 | 1.00000     | 1.00000 |
| Benzyl+C2H2 | 1.52923e-06 | 1.00000  | 0.00000     | 1.00000 |
| rad6        | 8.79583e-08 | 1.00000  | 8.79584e-08 | 1.00000 |
| rad2        | 7.09830e-11 | 1.00000  | 7.09831e-11 | 1.00000 |
| rad7        | 6.34865e-12 | 1.00000  | 6.34866e-12 | 1.00000 |
| rad1        | 4.49457e-12 | 1.00000  | 4.49458e-12 | 1.00000 |
| rad10       | 3.58145e-12 | 1.00000  | 3.58145e-12 | 1.00000 |
| rad11       | 1.55655e-12 | 1.00000  | 1.55656e-12 | 1.00000 |
| rad3        | 4.19301e-13 | 1.00000  | 4.19302e-13 | 1.00000 |
| rad4        | 2.12077e-13 | 1.00000  | 2.12077e-13 | 1.00000 |
| rad35       | 5.91220e-14 | 1.00000  | 5.91221e-14 | 1.00000 |
| rad13       | 3.53147e-14 | 1.00000  | 3.53148e-14 | 1.00000 |
| PAH9+H      | 4.49703e-16 | 1.00000  | 4.49704e-16 | 1.00000 |
| rad33       | 6.83744e-17 | 1.00000  | 6.83745e-17 | 1.00000 |
| rad20       | 3.70227e-18 | 1.00000  | 3.70228e-18 | 1.00000 |
| rad21       | 2.31016e-18 | 1.00000  | 2.31016e-18 | 1.00000 |
| rad28       | 9.13355e-20 | 1.00000  | 9.13357e-20 | 1.00000 |
| rad18       | 1.74355e-20 | 1.00000  | 1.74355e-20 | 1.00000 |
| rad38       | 1.16620e-20 | 1.00000  | 1.16620e-20 | 1.00000 |
| rad26       | 2.80569e-21 | 1.00000  | 2.80570e-21 | 1.00000 |
| rad31       | 2.43662e-21 | 1.00000  | 2.43663e-21 | 1.00000 |
| rad22       | 1.21114e-21 | 1.00000  | 1.21114e-21 | 1.00000 |
| rad23       | 2.67024e-22 | 1.00000  | 2.67024e-22 | 1.00000 |
| rad30       | 1.73401e-22 | 1.00000  | 1.73401e-22 | 1.00000 |
| PhCHCCH2+H  | 2.73209e-24 | 1.00000  | 2.73209e-24 | 1.00000 |
| rad45       | 1.80749e-24 | 1.00000  | 1.80749e-24 | 1.00000 |
| rad27       | 1.11886e-24 | 1.00000  | 1.11887e-24 | 1.00000 |
| rad36       | 1.12492e-25 | 1.00000  | 1.12492e-25 | 1.00000 |
| PhCCH+CH3   | 9.14707e-26 | 1.00000  | 9.14708e-26 | 1.00000 |
| rad24       | 7.79756e-26 | 1.00000  | 7.79757e-26 | 1.00000 |
| PhCCH3+H    | 1.31847e-26 | 1.00000  | 1.31847e-26 | 1.00000 |
| rad15       | 7.91308e-27 | 1.00000  | 7.91309e-27 | 1.00000 |
| rad25       | 2.08334e-29 | 1.00000  | 2.08334e-29 | 1.00000 |
| rad14       | 1.39512e-30 | 1.00000  | 1.39513e-30 | 1.00000 |
| rad8        | 5.15092e-32 | 1.00000  | 5.15093e-32 | 1.00000 |
| rad46       | 2.96593e-34 | 1.00000  | 2.96594e-34 | 1.00000 |
| rad9        | 1.59210e-34 | 1.00000  | 1.59210e-34 | 1.00000 |
| PAH7+H      | 2.06964e-35 | 1.00000  | 2.06964e-35 | 1.00000 |
| Ph+MeAc     | 2.40196e-36 | 1.00000  | 2.40196e-36 | 1.00000 |
| rad12       | 8.52615e-37 | 1.00000  | 8.52616e-37 | 1.00000 |
| rad39       | 4.53009e-38 | 1.00000  | 4.53010e-38 | 1.00000 |
| Ph+Allene   | 1.14641e-40 | 1.00000  | 1.14641e-40 | 1.00000 |
| rad60syn    | 1.02490e-44 | 1.00000  | 1.02490e-44 | 1.00000 |
| rad60anti   | 1.08432e-46 | 1.00000  | 1.08432e-46 | 1.00000 |
| PhCH2CCH+H  | 1.93058e-48 | 1.00000  | 1.93059e-48 | 1.00000 |
| rad37       | 1.70407e-49 | 1.00000  | 1.70407e-49 | 1.00000 |
| rad5        | 1.14164e-52 | 1.00000  | 1.14164e-52 | 1.00000 |
| PAH3+H      | 2.07351e-57 | 1.00000  | 2.07351e-57 | 1.00000 |
| rad59       | 1.10979e-57 | 1.00000  | 1.10979e-57 | 1.00000 |
| rad50       | 4.45552e-58 | 1.00000  | 4.45552e-58 | 1.00000 |
| rad19syn    | 1.84452e-66 | 1.00000  | 1.84453e-66 | 1.00000 |
| rad52       | 2.21991e-70 | 1.00000  | 2.21991e-70 | 1.00000 |

|               |              |          |              |         |
|---------------|--------------|----------|--------------|---------|
| rad54         | 2.23799e-71  | 1.000000 | 2.23799e-71  | 1.00000 |
| PAH10+CH3     | 1.43043e-71  | 1.000000 | 1.43044e-71  | 1.00000 |
| rad43         | 3.39564e-72  | 1.000000 | 3.39565e-72  | 1.00000 |
| rad62         | 1.03795e-74  | 1.000000 | 1.03795e-74  | 1.00000 |
| rad51         | 1.16250e-77  | 1.000000 | 1.16250e-77  | 1.00000 |
| rad70         | 1.32664e-80  | 1.000000 | 1.32664e-80  | 1.00000 |
| PhcycC3H3_A+H | 5.65534e-81  | 1.000000 | 5.65535e-81  | 1.00000 |
| rad55         | 3.04322e-81  | 1.000000 | 3.04323e-81  | 1.00000 |
| rad65         | 8.19423e-83  | 1.000000 | 8.19424e-83  | 1.00000 |
| rad58         | 1.91078e-84  | 1.000000 | 1.91078e-84  | 1.00000 |
| PAH1+H        | 2.62843e-86  | 1.000000 | 2.62843e-86  | 1.00000 |
| rad34         | 1.81903e-88  | 1.000000 | 1.81903e-88  | 1.00000 |
| rad42         | 1.35850e-92  | 1.000000 | 1.35850e-92  | 1.00000 |
| rad41         | 1.75648e-93  | 1.000000 | 1.75648e-93  | 1.00000 |
| rad47         | 1.64992e-100 | 1.000000 | 1.64992e-100 | 1.00000 |

0.100000000E-08 Pa, 50.0000000 K

| Rate constant | True (fraction) |          | Effective (fraction) |         |
|---------------|-----------------|----------|----------------------|---------|
| -----         | -----           |          | -----                |         |
| Total         | 2.31816e-70     | (1.00 )  | 2.31816e-70          | (1.00 ) |
| species       | PYtrue          | Cumul    | PYeffective          | Cumul   |
| -----         | -----           | -----    | -----                | -----   |
| Indene+H      | 0.999998        | 0.999998 | 1.00000              | 1.00000 |
| Benzyl+C2H2   | 2.26192e-06     | 1.00000  | 0.00000              | 1.00000 |
| rad6          | 5.37126e-08     | 1.00000  | 5.37127e-08          | 1.00000 |
| rad2          | 8.01475e-11     | 1.00000  | 8.01476e-11          | 1.00000 |
| rad1          | 5.08337e-12     | 1.00000  | 5.08338e-12          | 1.00000 |
| rad7          | 3.88041e-12     | 1.00000  | 3.88041e-12          | 1.00000 |
| rad10         | 2.69696e-12     | 1.00000  | 2.69697e-12          | 1.00000 |
| rad11         | 9.52260e-13     | 1.00000  | 9.52263e-13          | 1.00000 |
| rad3          | 6.37809e-13     | 1.00000  | 6.37810e-13          | 1.00000 |
| rad4          | 3.22740e-13     | 1.00000  | 3.22741e-13          | 1.00000 |
| rad35         | 3.19943e-13     | 1.00000  | 3.19943e-13          | 1.00000 |
| rad13         | 2.15957e-14     | 1.00000  | 2.15958e-14          | 1.00000 |
| PAH9+H        | 8.81866e-15     | 1.00000  | 8.81868e-15          | 1.00000 |
| rad33         | 4.20566e-17     | 1.00000  | 4.20567e-17          | 1.00000 |
| rad20         | 2.70711e-18     | 1.00000  | 2.70712e-18          | 1.00000 |
| rad38         | 2.32259e-18     | 1.00000  | 2.32260e-18          | 1.00000 |
| rad21         | 1.68998e-18     | 1.00000  | 1.68998e-18          | 1.00000 |
| rad28         | 2.57585e-19     | 1.00000  | 2.57585e-19          | 1.00000 |
| rad30         | 1.72368e-19     | 1.00000  | 1.72368e-19          | 1.00000 |
| rad18         | 1.27615e-20     | 1.00000  | 1.27615e-20          | 1.00000 |
| rad26         | 6.03664e-21     | 1.00000  | 6.03665e-21          | 1.00000 |
| rad31         | 1.83754e-21     | 1.00000  | 1.83755e-21          | 1.00000 |
| rad22         | 8.84814e-22     | 1.00000  | 8.84816e-22          | 1.00000 |
| rad23         | 1.94643e-22     | 1.00000  | 1.94643e-22          | 1.00000 |
| rad27         | 6.14386e-24     | 1.00000  | 6.14388e-24          | 1.00000 |
| PhCHCCH2+H    | 4.70695e-24     | 1.00000  | 4.70696e-24          | 1.00000 |
| rad45         | 1.66695e-24     | 1.00000  | 1.66695e-24          | 1.00000 |
| rad15         | 2.19757e-25     | 1.00000  | 2.19757e-25          | 1.00000 |
| PhCCH+CH3     | 1.60669e-25     | 1.00000  | 1.60669e-25          | 1.00000 |
| rad36         | 1.03653e-25     | 1.00000  | 1.03653e-25          | 1.00000 |
| rad24         | 5.96933e-26     | 1.00000  | 5.96935e-26          | 1.00000 |
| PhCCCH3+H     | 2.33547e-26     | 1.00000  | 2.33548e-26          | 1.00000 |
| rad25         | 2.84184e-29     | 1.00000  | 2.84185e-29          | 1.00000 |
| rad14         | 1.83005e-30     | 1.00000  | 1.83005e-30          | 1.00000 |
| rad8          | 9.55861e-32     | 1.00000  | 9.55863e-32          | 1.00000 |
| rad46         | 5.28630e-34     | 1.00000  | 5.28631e-34          | 1.00000 |
| rad9          | 3.01521e-34     | 1.00000  | 3.01522e-34          | 1.00000 |
| PAH7+H        | 3.96692e-35     | 1.00000  | 3.96692e-35          | 1.00000 |
| Ph+MeAc       | 4.73213e-36     | 1.00000  | 4.73214e-36          | 1.00000 |
| rad12         | 1.65912e-36     | 1.00000  | 1.65913e-36          | 1.00000 |
| rad39         | 8.86704e-38     | 1.00000  | 8.86706e-38          | 1.00000 |
| Ph+Allene     | 2.32911e-40     | 1.00000  | 2.32911e-40          | 1.00000 |
| rad60syn      | 2.06910e-44     | 1.00000  | 2.06911e-44          | 1.00000 |
| rad60anti     | 2.23306e-46     | 1.00000  | 2.23307e-46          | 1.00000 |
| PhCH2CCH+H    | 4.23993e-48     | 1.00000  | 4.23994e-48          | 1.00000 |
| rad37         | 3.88854e-49     | 1.00000  | 3.88855e-49          | 1.00000 |
| rad5          | 2.63409e-52     | 1.00000  | 2.63410e-52          | 1.00000 |
| PAH3+H        | 4.79417e-57     | 1.00000  | 4.79418e-57          | 1.00000 |
| rad59         | 2.56473e-57     | 1.00000  | 2.56473e-57          | 1.00000 |
| rad50         | 1.02061e-57     | 1.00000  | 1.02061e-57          | 1.00000 |
| rad19syn      | 4.80919e-66     | 1.00000  | 4.80920e-66          | 1.00000 |
| rad52         | 5.78777e-70     | 1.00000  | 5.78778e-70          | 1.00000 |
| rad54         | 6.11389e-71     | 1.00000  | 6.11390e-71          | 1.00000 |
| PAH10+CH3     | 4.26832e-71     | 1.00000  | 4.26833e-71          | 1.00000 |
| rad43         | 1.01318e-71     | 1.00000  | 1.01318e-71          | 1.00000 |
| rad62         | 3.06561e-74     | 1.00000  | 3.06562e-74          | 1.00000 |



|               |              |         |              |         |
|---------------|--------------|---------|--------------|---------|
| rad51         | 3.30400e-77  | 1.00000 | 3.30401e-77  | 1.00000 |
| rad70         | 3.98004e-80  | 1.00000 | 3.98005e-80  | 1.00000 |
| PhcycC3H3_A+H | 1.70734e-80  | 1.00000 | 1.70734e-80  | 1.00000 |
| rad55         | 9.18151e-81  | 1.00000 | 9.18153e-81  | 1.00000 |
| rad65         | 2.44655e-82  | 1.00000 | 2.44656e-82  | 1.00000 |
| rad58         | 5.80027e-84  | 1.00000 | 5.80028e-84  | 1.00000 |
| PAH1+H        | 8.42798e-86  | 1.00000 | 8.42800e-86  | 1.00000 |
| rad34         | 5.90808e-88  | 1.00000 | 5.90809e-88  | 1.00000 |
| rad42         | 5.12886e-92  | 1.00000 | 5.12887e-92  | 1.00000 |
| rad41         | 8.51349e-93  | 1.00000 | 8.51351e-93  | 1.00000 |
| rad47         | 4.04752e-100 | 1.00000 | 4.04753e-100 | 1.00000 |

0.100000000E-08 Pa, 60.0000000 K

| Rate constant | True (fraction)     | Effective (fraction) |
|---------------|---------------------|----------------------|
| Total         | 8.44107e-61 (1.00 ) | 8.44104e-61 (1.00 )  |

| species       | PYtrue      | Cumul    | PYeffective | Cumul   |
|---------------|-------------|----------|-------------|---------|
| Indene+H      | 0.999997    | 0.999997 | 1.00000     | 1.00000 |
| Benzyl+C2H2   | 3.25417e-06 | 1.00000  | 0.00000     | 1.00000 |
| rad6          | 3.60046e-08 | 1.00000  | 3.60047e-08 | 1.00000 |
| rad2          | 1.49544e-11 | 1.00000  | 1.49545e-11 | 1.00000 |
| rad7          | 2.60400e-12 | 1.00000  | 2.60400e-12 | 1.00000 |
| rad10         | 1.53578e-12 | 1.00000  | 1.53579e-12 | 1.00000 |
| rad35         | 9.63220e-13 | 1.00000  | 9.63223e-13 | 1.00000 |
| rad1          | 9.50583e-13 | 1.00000  | 9.50586e-13 | 1.00000 |
| rad11         | 6.39596e-13 | 1.00000  | 6.39598e-13 | 1.00000 |
| rad3          | 6.99112e-14 | 1.00000  | 6.99114e-14 | 1.00000 |
| PAH9+H        | 6.37584e-14 | 1.00000  | 6.37586e-14 | 1.00000 |
| rad4          | 3.53939e-14 | 1.00000  | 3.53940e-14 | 1.00000 |
| rad13         | 1.45010e-14 | 1.00000  | 1.45010e-14 | 1.00000 |
| rad38         | 7.70757e-17 | 1.00000  | 7.70760e-17 | 1.00000 |
| rad33         | 2.83996e-17 | 1.00000  | 2.83997e-17 | 1.00000 |
| rad30         | 2.80450e-17 | 1.00000  | 2.80451e-17 | 1.00000 |
| rad28         | 1.21185e-17 | 1.00000  | 1.21185e-17 | 1.00000 |
| rad20         | 2.10372e-18 | 1.00000  | 2.10373e-18 | 1.00000 |
| rad21         | 1.31406e-18 | 1.00000  | 1.31406e-18 | 1.00000 |
| rad26         | 3.19061e-19 | 1.00000  | 3.19062e-19 | 1.00000 |
| rad18         | 9.92647e-21 | 1.00000  | 9.92650e-21 | 1.00000 |
| rad31         | 1.39603e-21 | 1.00000  | 1.39603e-21 | 1.00000 |
| rad22         | 6.86722e-22 | 1.00000  | 6.86725e-22 | 1.00000 |
| rad15         | 4.76227e-22 | 1.00000  | 4.76228e-22 | 1.00000 |
| rad27         | 1.79872e-22 | 1.00000  | 1.79872e-22 | 1.00000 |
| rad23         | 1.51968e-22 | 1.00000  | 1.51968e-22 | 1.00000 |
| PhCHCCH2+H    | 9.14388e-23 | 1.00000  | 9.14391e-23 | 1.00000 |
| PhCCH+CH3     | 1.17179e-24 | 1.00000  | 1.17180e-24 | 1.00000 |
| rad45         | 4.80046e-25 | 1.00000  | 4.80047e-25 | 1.00000 |
| PhCCCH3+H     | 6.53793e-26 | 1.00000  | 6.53796e-26 | 1.00000 |
| rad24         | 4.90146e-26 | 1.00000  | 4.90147e-26 | 1.00000 |
| rad36         | 2.98264e-26 | 1.00000  | 2.98265e-26 | 1.00000 |
| rad25         | 1.23188e-27 | 1.00000  | 1.23189e-27 | 1.00000 |
| rad14         | 5.34126e-29 | 1.00000  | 5.34128e-29 | 1.00000 |
| rad8          | 2.83636e-31 | 1.00000  | 2.83637e-31 | 1.00000 |
| rad46         | 1.49068e-33 | 1.00000  | 1.49069e-33 | 1.00000 |
| rad9          | 9.13796e-34 | 1.00000  | 9.13799e-34 | 1.00000 |
| PAH7+H        | 1.22910e-34 | 1.00000  | 1.22911e-34 | 1.00000 |
| Ph+MeAc       | 1.51761e-35 | 1.00000  | 1.51761e-35 | 1.00000 |
| rad12         | 5.24114e-36 | 1.00000  | 5.24115e-36 | 1.00000 |
| rad39         | 2.81390e-37 | 1.00000  | 2.81391e-37 | 1.00000 |
| Ph+Allene     | 7.68392e-40 | 1.00000  | 7.68395e-40 | 1.00000 |
| rad60syn      | 6.77348e-44 | 1.00000  | 6.77350e-44 | 1.00000 |
| rad60anti     | 7.48930e-46 | 1.00000  | 7.48932e-46 | 1.00000 |
| PhCH2CCH+H    | 1.53856e-47 | 1.00000  | 1.53856e-47 | 1.00000 |
| rad37         | 1.55158e-48 | 1.00000  | 1.55159e-48 | 1.00000 |
| rad5          | 1.07102e-51 | 1.00000  | 1.07103e-51 | 1.00000 |
| PAH3+H        | 1.85425e-56 | 1.00000  | 1.85425e-56 | 1.00000 |
| rad59         | 9.91347e-57 | 1.00000  | 9.91350e-57 | 1.00000 |
| rad50         | 3.94049e-57 | 1.00000  | 3.94051e-57 | 1.00000 |
| rad19syn      | 2.16809e-65 | 1.00000  | 2.16809e-65 | 1.00000 |
| rad52         | 2.69300e-69 | 1.00000  | 2.69301e-69 | 1.00000 |
| PAH10+CH3     | 3.29131e-70 | 1.00000  | 3.29132e-70 | 1.00000 |
| rad54         | 2.93231e-70 | 1.00000  | 2.93232e-70 | 1.00000 |
| rad43         | 7.81009e-71 | 1.00000  | 7.81011e-71 | 1.00000 |
| rad62         | 2.12090e-73 | 1.00000  | 2.12090e-73 | 1.00000 |
| rad51         | 1.78512e-76 | 1.00000  | 1.78513e-76 | 1.00000 |
| rad70         | 2.17584e-79 | 1.00000  | 2.17585e-79 | 1.00000 |
| PhcycC3H3_A+H | 9.42027e-80 | 1.00000  | 9.42030e-80 | 1.00000 |
| rad55         | 5.06085e-80 | 1.00000  | 5.06086e-80 | 1.00000 |

|        |             |         |             |         |
|--------|-------------|---------|-------------|---------|
| rad65  | 1.45419e-81 | 1.00000 | 1.45419e-81 | 1.00000 |
| rad58  | 3.22668e-83 | 1.00000 | 3.22670e-83 | 1.00000 |
| PAH1+H | 5.12884e-85 | 1.00000 | 5.12886e-85 | 1.00000 |
| rad34  | 3.64880e-87 | 1.00000 | 3.64881e-87 | 1.00000 |
| rad42  | 8.80819e-91 | 1.00000 | 8.80822e-91 | 1.00000 |
| rad41  | 3.15601e-91 | 1.00000 | 3.15602e-91 | 1.00000 |
| rad47  | 2.34414e-99 | 1.00000 | 2.34415e-99 | 1.00000 |

0.100000000E-08 Pa, 70.0000000 K

| Rate constant | True (fraction)     | Effective (fraction) |
|---------------|---------------------|----------------------|
| Total         | 5.61998e-54 (1.00 ) | 5.61996e-54 (1.00 )  |

| species       | PYtrue      | Cumul    | PYeffective | Cumul   |
|---------------|-------------|----------|-------------|---------|
| Indene+H      | 0.999995    | 0.999995 | 1.00000     | 1.00000 |
| Benzyl+C2H2   | 4.55799e-06 | 1.000000 | 0.00000     | 1.00000 |
| rad6          | 2.55533e-08 | 1.000000 | 2.55534e-08 | 1.00000 |
| rad2          | 5.41981e-11 | 1.000000 | 5.41983e-11 | 1.00000 |
| rad1          | 3.45340e-12 | 1.000000 | 3.45341e-12 | 1.00000 |
| rad10         | 2.28653e-12 | 1.000000 | 2.28654e-12 | 1.00000 |
| rad35         | 2.11185e-12 | 1.000000 | 2.11185e-12 | 1.00000 |
| rad7          | 1.85044e-12 | 1.000000 | 1.85045e-12 | 1.00000 |
| rad3          | 5.62342e-13 | 1.000000 | 5.62344e-13 | 1.00000 |
| rad11         | 4.54911e-13 | 1.000000 | 4.54913e-13 | 1.00000 |
| rad4          | 2.84890e-13 | 1.000000 | 2.84891e-13 | 1.00000 |
| PAH9+H        | 2.62378e-13 | 1.000000 | 2.62379e-13 | 1.00000 |
| rad13         | 1.03119e-14 | 1.000000 | 1.03119e-14 | 1.00000 |
| rad30         | 1.03415e-15 | 1.000000 | 1.03416e-15 | 1.00000 |
| rad38         | 9.17815e-16 | 1.000000 | 9.17819e-16 | 1.00000 |
| rad28         | 2.55506e-16 | 1.000000 | 2.55507e-16 | 1.00000 |
| rad33         | 2.03089e-17 | 1.000000 | 2.03090e-17 | 1.00000 |
| rad26         | 8.90463e-18 | 1.000000 | 8.90467e-18 | 1.00000 |
| rad20         | 1.69952e-18 | 1.000000 | 1.69953e-18 | 1.00000 |
| rad21         | 1.06229e-18 | 1.000000 | 1.06229e-18 | 1.00000 |
| rad15         | 9.42528e-20 | 1.000000 | 9.42532e-20 | 1.00000 |
| PhCHCCH2+H    | 3.31541e-20 | 1.000000 | 3.31542e-20 | 1.00000 |
| rad18         | 8.02518e-21 | 1.000000 | 8.02522e-21 | 1.00000 |
| rad27         | 2.15748e-21 | 1.000000 | 2.15749e-21 | 1.00000 |
| PhCCH+CH3     | 1.19058e-21 | 1.000000 | 1.19058e-21 | 1.00000 |
| rad31         | 1.13453e-21 | 1.000000 | 1.13454e-21 | 1.00000 |
| rad22         | 5.53763e-22 | 1.000000 | 5.53766e-22 | 1.00000 |
| PhCCCH3+H     | 1.70824e-22 | 1.000000 | 1.70825e-22 | 1.00000 |
| rad23         | 1.24360e-22 | 1.000000 | 1.24361e-22 | 1.00000 |
| rad45         | 5.56195e-25 | 1.000000 | 5.56198e-25 | 1.00000 |
| rad25         | 1.05600e-25 | 1.000000 | 1.05600e-25 | 1.00000 |
| rad24         | 4.21177e-26 | 1.000000 | 4.21178e-26 | 1.00000 |
| rad36         | 3.45371e-26 | 1.000000 | 3.45372e-26 | 1.00000 |
| rad14         | 7.87773e-27 | 1.000000 | 7.87777e-27 | 1.00000 |
| rad46         | 1.48954e-27 | 1.000000 | 1.48955e-27 | 1.00000 |
| rad8          | 1.93522e-30 | 1.000000 | 1.93523e-30 | 1.00000 |
| rad9          | 6.39739e-33 | 1.000000 | 6.39741e-33 | 1.00000 |
| PAH7+H        | 9.36414e-34 | 1.000000 | 9.36418e-34 | 1.00000 |
| Ph+MeAc       | 1.13683e-34 | 1.000000 | 1.13683e-34 | 1.00000 |
| rad12         | 3.90851e-35 | 1.000000 | 3.90852e-35 | 1.00000 |
| rad39         | 2.17871e-36 | 1.000000 | 2.17872e-36 | 1.00000 |
| Ph+Allene     | 5.91993e-39 | 1.000000 | 5.91995e-39 | 1.00000 |
| rad60syn      | 5.17230e-43 | 1.000000 | 5.17233e-43 | 1.00000 |
| rad60anti     | 5.87915e-45 | 1.000000 | 5.87917e-45 | 1.00000 |
| PhCH2CCH+H    | 1.32457e-46 | 1.000000 | 1.32457e-46 | 1.00000 |
| rad37         | 1.62965e-47 | 1.000000 | 1.62965e-47 | 1.00000 |
| rad5          | 1.16159e-50 | 1.000000 | 1.16159e-50 | 1.00000 |
| PAH3+H        | 1.72762e-55 | 1.000000 | 1.72762e-55 | 1.00000 |
| rad59         | 9.22859e-56 | 1.000000 | 9.22864e-56 | 1.00000 |
| rad50         | 3.77464e-56 | 1.000000 | 3.77466e-56 | 1.00000 |
| rad19syn      | 2.53098e-64 | 1.000000 | 2.53099e-64 | 1.00000 |
| rad52         | 3.69968e-68 | 1.000000 | 3.69970e-68 | 1.00000 |
| PAH10+CH3     | 1.32746e-68 | 1.000000 | 1.32746e-68 | 1.00000 |
| rad54         | 3.84737e-69 | 1.000000 | 3.84739e-69 | 1.00000 |
| rad43         | 3.14762e-69 | 1.000000 | 3.14763e-69 | 1.00000 |
| rad62         | 7.98133e-72 | 1.000000 | 7.98137e-72 | 1.00000 |
| rad51         | 3.66669e-75 | 1.000000 | 3.66670e-75 | 1.00000 |
| rad70         | 3.96452e-78 | 1.000000 | 3.96454e-78 | 1.00000 |
| PhcycC3H3_A+H | 1.76560e-78 | 1.000000 | 1.76560e-78 | 1.00000 |
| rad55         | 9.45158e-79 | 1.000000 | 9.45162e-79 | 1.00000 |
| rad65         | 3.95802e-80 | 1.000000 | 3.95804e-80 | 1.00000 |
| rad58         | 6.20407e-82 | 1.000000 | 6.20410e-82 | 1.00000 |
| PAH1+H        | 1.37134e-83 | 1.000000 | 1.37134e-83 | 1.00000 |
| rad34         | 1.01335e-85 | 1.000000 | 1.01336e-85 | 1.00000 |

|       |             |          |             |         |
|-------|-------------|----------|-------------|---------|
| rad42 | 1.48394e-88 | 1.000000 | 1.48394e-88 | 1.00000 |
| rad41 | 6.92941e-89 | 1.000000 | 6.92944e-89 | 1.00000 |
| rad47 | 9.05008e-98 | 1.000000 | 9.05012e-98 | 1.00000 |

0.100000000E-08 Pa, 80.0000000 K

| Rate constant | True (fraction)     | Effective (fraction) |
|---------------|---------------------|----------------------|
| Total         | 7.28864e-49 (1.00 ) | 7.28860e-49 (1.00 )  |

| species       | PYtrue      | Cumul    | PYeffective | Cumul   |
|---------------|-------------|----------|-------------|---------|
| Indene+H      | 0.999994    | 0.999994 | 1.00000     | 1.00000 |
| Benzyl+C2H2   | 6.25424e-06 | 1.00000  | 0.00000     | 1.00000 |
| rad6          | 1.88411e-08 | 1.00000  | 1.88412e-08 | 1.00000 |
| rad2          | 1.71521e-11 | 1.00000  | 1.71522e-11 | 1.00000 |
| rad35         | 3.84767e-12 | 1.00000  | 3.84770e-12 | 1.00000 |
| rad7          | 1.36625e-12 | 1.00000  | 1.36626e-12 | 1.00000 |
| rad1          | 1.09610e-12 | 1.00000  | 1.09611e-12 | 1.00000 |
| rad10         | 1.05864e-12 | 1.00000  | 1.05865e-12 | 1.00000 |
| PAH9+H        | 7.64129e-13 | 1.00000  | 7.64133e-13 | 1.00000 |
| rad11         | 3.36178e-13 | 1.00000  | 3.36180e-13 | 1.00000 |
| rad3          | 8.81141e-14 | 1.00000  | 8.81146e-14 | 1.00000 |
| rad4          | 4.46752e-14 | 1.00000  | 4.46754e-14 | 1.00000 |
| rad30         | 1.51675e-14 | 1.00000  | 1.51676e-14 | 1.00000 |
| rad13         | 7.61958e-15 | 1.00000  | 7.61962e-15 | 1.00000 |
| rad38         | 5.80877e-15 | 1.00000  | 5.80880e-15 | 1.00000 |
| rad28         | 2.37234e-15 | 1.00000  | 2.37236e-15 | 1.00000 |
| rad26         | 1.02315e-16 | 1.00000  | 1.02315e-16 | 1.00000 |
| rad33         | 1.50916e-17 | 1.00000  | 1.50917e-17 | 1.00000 |
| rad15         | 4.85065e-18 | 1.00000  | 4.85068e-18 | 1.00000 |
| PhCHCCH2+H    | 3.08560e-18 | 1.00000  | 3.08562e-18 | 1.00000 |
| rad20         | 1.41021e-18 | 1.00000  | 1.41022e-18 | 1.00000 |
| rad21         | 8.82120e-19 | 1.00000  | 8.82125e-19 | 1.00000 |
| PhCCH+CH3     | 2.11522e-19 | 1.00000  | 2.11524e-19 | 1.00000 |
| PhCCCH3+H     | 3.80034e-20 | 1.00000  | 3.80037e-20 | 1.00000 |
| rad27         | 1.31014e-20 | 1.00000  | 1.31014e-20 | 1.00000 |
| rad18         | 6.66184e-21 | 1.00000  | 6.66189e-21 | 1.00000 |
| rad31         | 9.13767e-22 | 1.00000  | 9.13773e-22 | 1.00000 |
| rad22         | 4.58345e-22 | 1.00000  | 4.58348e-22 | 1.00000 |
| rad23         | 1.04672e-22 | 1.00000  | 1.04673e-22 | 1.00000 |
| rad25         | 2.86927e-24 | 1.00000  | 2.86929e-24 | 1.00000 |
| rad45         | 1.10122e-24 | 1.00000  | 1.10122e-24 | 1.00000 |
| rad46         | 4.58854e-25 | 1.00000  | 4.58857e-25 | 1.00000 |
| rad8          | 3.70059e-25 | 1.00000  | 3.70061e-25 | 1.00000 |
| rad14         | 3.28440e-25 | 1.00000  | 3.28442e-25 | 1.00000 |
| rad36         | 6.83449e-26 | 1.00000  | 6.83453e-26 | 1.00000 |
| rad24         | 3.73644e-26 | 1.00000  | 3.73646e-26 | 1.00000 |
| rad9          | 2.18158e-31 | 1.00000  | 2.18159e-31 | 1.00000 |
| PAH7+H        | 3.58499e-32 | 1.00000  | 3.58501e-32 | 1.00000 |
| Ph+MeAc       | 4.02209e-33 | 1.00000  | 4.02211e-33 | 1.00000 |
| rad12         | 1.40043e-33 | 1.00000  | 1.40044e-33 | 1.00000 |
| rad39         | 8.45294e-35 | 1.00000  | 8.45300e-35 | 1.00000 |
| Ph+Allene     | 2.23396e-37 | 1.00000  | 2.23398e-37 | 1.00000 |
| rad60syn      | 1.93361e-41 | 1.00000  | 1.93362e-41 | 1.00000 |
| rad60anti     | 2.26242e-43 | 1.00000  | 2.26243e-43 | 1.00000 |
| PhCH2CCH+H    | 5.62037e-45 | 1.00000  | 5.62041e-45 | 1.00000 |
| rad37         | 7.92408e-46 | 1.00000  | 7.92413e-46 | 1.00000 |
| rad5          | 5.82574e-49 | 1.00000  | 5.82577e-49 | 1.00000 |
| PAH3+H        | 8.00399e-54 | 1.00000  | 8.00404e-54 | 1.00000 |
| rad59         | 4.27101e-54 | 1.00000  | 4.27104e-54 | 1.00000 |
| rad50         | 1.85030e-54 | 1.00000  | 1.85031e-54 | 1.00000 |
| rad19syn      | 1.61487e-62 | 1.00000  | 1.61488e-62 | 1.00000 |
| rad52         | 3.23522e-66 | 1.00000  | 3.23524e-66 | 1.00000 |
| PAH10+CH3     | 2.32300e-66 | 1.00000  | 2.32302e-66 | 1.00000 |
| rad43         | 5.50924e-67 | 1.00000  | 5.50928e-67 | 1.00000 |
| rad54         | 3.05094e-67 | 1.00000  | 3.05096e-67 | 1.00000 |
| rad62         | 1.55237e-69 | 1.00000  | 1.55238e-69 | 1.00000 |
| rad51         | 5.91225e-73 | 1.00000  | 5.91229e-73 | 1.00000 |
| rad70         | 6.10292e-76 | 1.00000  | 6.10295e-76 | 1.00000 |
| PhcycC3H3_A+H | 2.87044e-76 | 1.00000  | 2.87046e-76 | 1.00000 |
| rad55         | 1.52456e-76 | 1.00000  | 1.52457e-76 | 1.00000 |
| rad65         | 9.09182e-78 | 1.00000  | 9.09187e-78 | 1.00000 |
| rad58         | 1.05731e-79 | 1.00000  | 1.05731e-79 | 1.00000 |
| PAH1+H        | 3.94843e-81 | 1.00000  | 3.94845e-81 | 1.00000 |
| rad34         | 3.17708e-83 | 1.00000  | 3.17710e-83 | 1.00000 |
| rad42         | 9.30510e-86 | 1.00000  | 9.30515e-86 | 1.00000 |
| rad41         | 4.57718e-86 | 1.00000  | 4.57720e-86 | 1.00000 |
| rad47         | 2.95408e-95 | 1.00000  | 2.95410e-95 | 1.00000 |

0.100000000E-08 Pa, 90.0000000 K

=====  
Rate constant | True (fraction)                      Effective (fraction)  
-----

Total            | 6.85154e-45 (1.00     ) 6.85148e-45 (1.00     )

| species       | PYtrue      | Cumul    | PYeffective | Cumul   |
|---------------|-------------|----------|-------------|---------|
| Indene+H      | 0.999992    | 0.999992 | 1.00000     | 1.00000 |
| Benzyl+C2H2   | 8.45244e-06 | 1.00000  | 0.00000     | 1.00000 |
| rad6          | 1.42698e-08 | 1.00000  | 1.42699e-08 | 1.00000 |
| rad2          | 1.54297e-11 | 1.00000  | 1.54298e-11 | 1.00000 |
| rad35         | 6.25600e-12 | 1.00000  | 6.25606e-12 | 1.00000 |
| PAH9+H        | 1.77828e-12 | 1.00000  | 1.77830e-12 | 1.00000 |
| rad10         | 1.25241e-12 | 1.00000  | 1.25242e-12 | 1.00000 |
| rad7          | 1.03628e-12 | 1.00000  | 1.03629e-12 | 1.00000 |
| rad1          | 9.88990e-13 | 1.00000  | 9.88998e-13 | 1.00000 |
| rad11         | 2.55219e-13 | 1.00000  | 2.55221e-13 | 1.00000 |
| rad30         | 1.20961e-13 | 1.00000  | 1.20962e-13 | 1.00000 |
| rad3          | 5.99856e-14 | 1.00000  | 5.99861e-14 | 1.00000 |
| rad4          | 3.04341e-14 | 1.00000  | 3.04344e-14 | 1.00000 |
| rad38         | 2.43293e-14 | 1.00000  | 2.43295e-14 | 1.00000 |
| rad28         | 1.26903e-14 | 1.00000  | 1.26904e-14 | 1.00000 |
| rad13         | 5.78425e-15 | 1.00000  | 5.78430e-15 | 1.00000 |
| rad26         | 6.46004e-16 | 1.00000  | 6.46009e-16 | 1.00000 |
| PhCHCCH2+H    | 1.07312e-16 | 1.00000  | 1.07313e-16 | 1.00000 |
| rad15         | 1.02394e-16 | 1.00000  | 1.02394e-16 | 1.00000 |
| PhCCH+CH3     | 1.20906e-17 | 1.00000  | 1.20907e-17 | 1.00000 |
| rad33         | 1.15228e-17 | 1.00000  | 1.15229e-17 | 1.00000 |
| PhCCCH3+H     | 2.55892e-18 | 1.00000  | 2.55894e-18 | 1.00000 |
| rad20         | 1.19301e-18 | 1.00000  | 1.19302e-18 | 1.00000 |
| rad21         | 7.46878e-19 | 1.00000  | 7.46884e-19 | 1.00000 |
| rad27         | 5.04605e-20 | 1.00000  | 5.04609e-20 | 1.00000 |
| rad18         | 5.63582e-21 | 1.00000  | 5.63587e-21 | 1.00000 |
| rad31         | 7.91304e-22 | 1.00000  | 7.91311e-22 | 1.00000 |
| rad22         | 3.86478e-22 | 1.00000  | 3.86481e-22 | 1.00000 |
| rad8          | 1.12459e-22 | 1.00000  | 1.12460e-22 | 1.00000 |
| rad23         | 9.07237e-23 | 1.00000  | 9.07245e-23 | 1.00000 |
| rad46         | 3.75433e-23 | 1.00000  | 3.75436e-23 | 1.00000 |
| rad25         | 3.54068e-23 | 1.00000  | 3.54071e-23 | 1.00000 |
| rad14         | 5.65327e-24 | 1.00000  | 5.65332e-24 | 1.00000 |
| rad9          | 1.25533e-24 | 1.00000  | 1.25534e-24 | 1.00000 |
| PAH7+H        | 2.14352e-25 | 1.00000  | 2.14354e-25 | 1.00000 |
| rad45         | 1.84987e-25 | 1.00000  | 1.84988e-25 | 1.00000 |
| rad24         | 3.39397e-26 | 1.00000  | 3.39400e-26 | 1.00000 |
| rad36         | 1.14702e-26 | 1.00000  | 1.14703e-26 | 1.00000 |
| rad12         | 7.47438e-27 | 1.00000  | 7.47444e-27 | 1.00000 |
| Ph+MeAc       | 1.86930e-27 | 1.00000  | 1.86932e-27 | 1.00000 |
| rad39         | 1.66955e-32 | 1.00000  | 1.66957e-32 | 1.00000 |
| Ph+Allene     | 4.49668e-35 | 1.00000  | 4.49672e-35 | 1.00000 |
| rad60syn      | 3.85537e-39 | 1.00000  | 3.85540e-39 | 1.00000 |
| rad60anti     | 4.64303e-41 | 1.00000  | 4.64307e-41 | 1.00000 |
| PhCH2CCH+H    | 1.26612e-42 | 1.00000  | 1.26613e-42 | 1.00000 |
| rad37         | 1.71242e-43 | 1.00000  | 1.71244e-43 | 1.00000 |
| rad5          | 1.27414e-46 | 1.00000  | 1.27415e-46 | 1.00000 |
| PAH3+H        | 1.94833e-51 | 1.00000  | 1.94834e-51 | 1.00000 |
| rad59         | 1.03866e-51 | 1.00000  | 1.03867e-51 | 1.00000 |
| rad50         | 4.62760e-52 | 1.00000  | 4.62764e-52 | 1.00000 |
| rad19syn      | 5.25506e-60 | 1.00000  | 5.25511e-60 | 1.00000 |
| rad52         | 1.41391e-63 | 1.00000  | 1.41393e-63 | 1.00000 |
| PAH10+CH3     | 1.26859e-63 | 1.00000  | 1.26860e-63 | 1.00000 |
| rad43         | 3.00997e-64 | 1.00000  | 3.01000e-64 | 1.00000 |
| rad54         | 1.24666e-64 | 1.00000  | 1.24667e-64 | 1.00000 |
| rad62         | 9.83091e-67 | 1.00000  | 9.83099e-67 | 1.00000 |
| rad51         | 4.41131e-70 | 1.00000  | 4.41135e-70 | 1.00000 |
| rad70         | 4.82854e-73 | 1.00000  | 4.82858e-73 | 1.00000 |
| PhcycC3H3_A+H | 2.38653e-73 | 1.00000  | 2.38655e-73 | 1.00000 |
| rad55         | 1.25690e-73 | 1.00000  | 1.25691e-73 | 1.00000 |
| rad65         | 9.02275e-75 | 1.00000  | 9.02283e-75 | 1.00000 |
| rad58         | 9.15820e-77 | 1.00000  | 9.15827e-77 | 1.00000 |
| PAH1+H        | 5.19131e-78 | 1.00000  | 5.19136e-78 | 1.00000 |
| rad34         | 4.56408e-80 | 1.00000  | 4.56412e-80 | 1.00000 |
| rad42         | 1.73072e-82 | 1.00000  | 1.73074e-82 | 1.00000 |
| rad41         | 8.81752e-83 | 1.00000  | 8.81759e-83 | 1.00000 |
| rad47         | 3.79673e-92 | 1.00000  | 3.79676e-92 | 1.00000 |

0.100000000E-08 Pa, 100.000000 K

=====  
Rate constant | True (fraction)                      Effective (fraction)  
-----

Total | 1.02671e-41 (1.00 ) 1.02670e-41 (1.00 )

| species       | PYtrue      | Cumul    | PYeffective | Cumul   |
|---------------|-------------|----------|-------------|---------|
| Indene+H      | 0.999989    | 0.999989 | 1.00000     | 1.00000 |
| Benzyl+C2H2   | 1.12964e-05 | 1.00000  | 0.00000     | 1.00000 |
| rad6          | 1.10205e-08 | 1.00000  | 1.10206e-08 | 1.00000 |
| rad35         | 9.46413e-12 | 1.00000  | 9.46424e-12 | 1.00000 |
| rad2          | 4.56597e-12 | 1.00000  | 4.56602e-12 | 1.00000 |
| PAH9+H        | 3.55837e-12 | 1.00000  | 3.55841e-12 | 1.00000 |
| rad7          | 8.01557e-13 | 1.00000  | 8.01566e-13 | 1.00000 |
| rad10         | 6.92256e-13 | 1.00000  | 6.92264e-13 | 1.00000 |
| rad30         | 6.32704e-13 | 1.00000  | 6.32711e-13 | 1.00000 |
| rad1          | 2.93641e-13 | 1.00000  | 2.93645e-13 | 1.00000 |
| rad11         | 1.97593e-13 | 1.00000  | 1.97596e-13 | 1.00000 |
| rad38         | 7.69632e-14 | 1.00000  | 7.69641e-14 | 1.00000 |
| rad28         | 4.62233e-14 | 1.00000  | 4.62238e-14 | 1.00000 |
| rad3          | 1.22193e-14 | 1.00000  | 1.22194e-14 | 1.00000 |
| rad4          | 6.20480e-15 | 1.00000  | 6.20487e-15 | 1.00000 |
| rad13         | 4.47814e-15 | 1.00000  | 4.47819e-15 | 1.00000 |
| rad26         | 2.68674e-15 | 1.00000  | 2.68677e-15 | 1.00000 |
| PhCHCCH2+H    | 1.87562e-15 | 1.00000  | 1.87564e-15 | 1.00000 |
| rad15         | 1.16430e-15 | 1.00000  | 1.16431e-15 | 1.00000 |
| PhCCH+CH3     | 3.13505e-16 | 1.00000  | 3.13508e-16 | 1.00000 |
| PhCCCH3+H     | 7.52938e-17 | 1.00000  | 7.52947e-17 | 1.00000 |
| rad33         | 8.97406e-18 | 1.00000  | 8.97416e-18 | 1.00000 |
| rad20         | 1.02397e-18 | 1.00000  | 1.02398e-18 | 1.00000 |
| rad21         | 6.41639e-19 | 1.00000  | 6.41646e-19 | 1.00000 |
| rad27         | 1.41564e-19 | 1.00000  | 1.41565e-19 | 1.00000 |
| rad8          | 7.87562e-21 | 1.00000  | 7.87571e-21 | 1.00000 |
| rad18         | 4.83498e-21 | 1.00000  | 4.83503e-21 | 1.00000 |
| rad46         | 1.26406e-21 | 1.00000  | 1.26408e-21 | 1.00000 |
| rad31         | 6.70040e-22 | 1.00000  | 6.70048e-22 | 1.00000 |
| rad22         | 3.30342e-22 | 1.00000  | 3.30346e-22 | 1.00000 |
| rad25         | 2.51833e-22 | 1.00000  | 2.51836e-22 | 1.00000 |
| rad9          | 1.71417e-22 | 1.00000  | 1.71419e-22 | 1.00000 |
| rad23         | 8.01527e-23 | 1.00000  | 8.01536e-23 | 1.00000 |
| rad14         | 5.24582e-23 | 1.00000  | 5.24588e-23 | 1.00000 |
| PAH7+H        | 4.58314e-23 | 1.00000  | 4.58319e-23 | 1.00000 |
| Ph+MeAc       | 1.57467e-23 | 1.00000  | 1.57469e-23 | 1.00000 |
| rad12         | 2.81368e-24 | 1.00000  | 2.81372e-24 | 1.00000 |
| rad39         | 3.50284e-25 | 1.00000  | 3.50288e-25 | 1.00000 |
| rad45         | 1.87985e-25 | 1.00000  | 1.87987e-25 | 1.00000 |
| rad24         | 3.13961e-26 | 1.00000  | 3.13965e-26 | 1.00000 |
| rad36         | 1.16521e-26 | 1.00000  | 1.16522e-26 | 1.00000 |
| Ph+Allene     | 1.51006e-32 | 1.00000  | 1.51007e-32 | 1.00000 |
| rad60syn      | 1.28184e-36 | 1.00000  | 1.28186e-36 | 1.00000 |
| rad60anti     | 1.59069e-38 | 1.00000  | 1.59071e-38 | 1.00000 |
| PhCH2CCH+H    | 4.77479e-40 | 1.00000  | 4.77484e-40 | 1.00000 |
| rad37         | 6.17942e-41 | 1.00000  | 6.17949e-41 | 1.00000 |
| rad5          | 4.63845e-44 | 1.00000  | 4.63850e-44 | 1.00000 |
| PAH3+H        | 7.93665e-49 | 1.00000  | 7.93674e-49 | 1.00000 |
| rad59         | 4.22698e-49 | 1.00000  | 4.22703e-49 | 1.00000 |
| rad50         | 1.88798e-49 | 1.00000  | 1.88800e-49 | 1.00000 |
| rad19syn      | 2.90597e-57 | 1.00000  | 2.90600e-57 | 1.00000 |
| PAH10+CH3     | 1.11894e-60 | 1.00000  | 1.11895e-60 | 1.00000 |
| rad52         | 1.01500e-60 | 1.00000  | 1.01501e-60 | 1.00000 |
| rad43         | 2.65661e-61 | 1.00000  | 2.65664e-61 | 1.00000 |
| rad54         | 9.00020e-62 | 1.00000  | 9.00030e-62 | 1.00000 |
| rad62         | 1.01430e-63 | 1.00000  | 1.01431e-63 | 1.00000 |
| rad51         | 5.25904e-67 | 1.00000  | 5.25910e-67 | 1.00000 |
| rad70         | 6.96271e-70 | 1.00000  | 6.96279e-70 | 1.00000 |
| PhcycC3H3_A+H | 3.61315e-70 | 1.00000  | 3.61319e-70 | 1.00000 |
| rad55         | 1.88446e-70 | 1.00000  | 1.88448e-70 | 1.00000 |
| rad65         | 1.40412e-71 | 1.00000  | 1.40414e-71 | 1.00000 |
| rad58         | 1.44058e-73 | 1.00000  | 1.44060e-73 | 1.00000 |
| PAH1+H        | 1.21721e-74 | 1.00000  | 1.21723e-74 | 1.00000 |
| rad34         | 1.18099e-76 | 1.00000  | 1.18101e-76 | 1.00000 |
| rad42         | 5.27581e-79 | 1.00000  | 5.27587e-79 | 1.00000 |
| rad41         | 2.77323e-79 | 1.00000  | 2.77326e-79 | 1.00000 |
| rad47         | 7.58433e-89 | 1.00000  | 7.58442e-89 | 1.00000 |

0.100000000E-08 Pa, 110.00000 K

=====

| Rate constant | True (fraction)     | Effective (fraction) |
|---------------|---------------------|----------------------|
| Total         | 4.04932e-39 (1.00 ) | 4.04926e-39 (1.00 )  |

| species | PYtrue | Cumul | PYeffective | Cumul |
|---------|--------|-------|-------------|-------|
|---------|--------|-------|-------------|-------|

|               |             |          |             |         |
|---------------|-------------|----------|-------------|---------|
| Indene+H      | 0.999985    | 0.999985 | 1.00000     | 1.00000 |
| Benzyl+C2H2   | 1.49726e-05 | 1.000000 | 0.00000     | 1.00000 |
| rad6          | 8.63539e-09 | 1.000000 | 8.63552e-09 | 1.00000 |
| rad35         | 1.36724e-11 | 1.000000 | 1.36726e-11 | 1.00000 |
| rad2          | 7.89015e-12 | 1.000000 | 7.89027e-12 | 1.00000 |
| PAH9+H        | 6.41653e-12 | 1.000000 | 6.41663e-12 | 1.00000 |
| rad3          | 4.19476e-12 | 1.000000 | 4.19483e-12 | 1.00000 |
| rad30         | 2.44539e-12 | 1.000000 | 2.44543e-12 | 1.00000 |
| rad4          | 2.13202e-12 | 1.000000 | 2.13205e-12 | 1.00000 |
| rad7          | 6.29100e-13 | 1.000000 | 6.29110e-13 | 1.00000 |
| rad10         | 5.96662e-13 | 1.000000 | 5.96671e-13 | 1.00000 |
| rad1          | 5.09284e-13 | 1.000000 | 5.09292e-13 | 1.00000 |
| rad38         | 2.00047e-13 | 1.000000 | 2.00050e-13 | 1.00000 |
| rad11         | 1.55228e-13 | 1.000000 | 1.55230e-13 | 1.00000 |
| rad28         | 1.27486e-13 | 1.000000 | 1.27488e-13 | 1.00000 |
| PhCHCCH2+H    | 1.99048e-14 | 1.000000 | 1.99051e-14 | 1.00000 |
| rad15         | 8.47756e-15 | 1.000000 | 8.47769e-15 | 1.00000 |
| rad26         | 8.25952e-15 | 1.000000 | 8.25965e-15 | 1.00000 |
| PhCCH+CH3     | 4.58427e-15 | 1.000000 | 4.58434e-15 | 1.00000 |
| rad13         | 3.51806e-15 | 1.000000 | 3.51811e-15 | 1.00000 |
| PhCCCH3+H     | 1.21659e-15 | 1.000000 | 1.21661e-15 | 1.00000 |
| rad33         | 7.09356e-18 | 1.000000 | 7.09367e-18 | 1.00000 |
| rad20         | 8.88697e-19 | 1.000000 | 8.88710e-19 | 1.00000 |
| rad21         | 5.57427e-19 | 1.000000 | 5.57435e-19 | 1.00000 |
| rad27         | 3.15833e-19 | 1.000000 | 3.15838e-19 | 1.00000 |
| rad8          | 2.54404e-19 | 1.000000 | 2.54408e-19 | 1.00000 |
| rad46         | 2.24507e-20 | 1.000000 | 2.24510e-20 | 1.00000 |
| rad9          | 8.70677e-21 | 1.000000 | 8.70691e-21 | 1.00000 |
| rad18         | 4.19194e-21 | 1.000000 | 4.19200e-21 | 1.00000 |
| PAH7+H        | 2.76439e-21 | 1.000000 | 2.76443e-21 | 1.00000 |
| Ph+MeAc       | 1.76859e-21 | 1.000000 | 1.76862e-21 | 1.00000 |
| rad25         | 1.20151e-21 | 1.000000 | 1.20153e-21 | 1.00000 |
| rad31         | 6.03087e-22 | 1.000000 | 6.03096e-22 | 1.00000 |
| rad14         | 3.11026e-22 | 1.000000 | 3.11031e-22 | 1.00000 |
| rad22         | 2.85241e-22 | 1.000000 | 2.85245e-22 | 1.00000 |
| rad12         | 1.91644e-22 | 1.000000 | 1.91647e-22 | 1.00000 |
| rad23         | 7.26012e-23 | 1.000000 | 7.26023e-23 | 1.00000 |
| rad39         | 3.70378e-23 | 1.000000 | 3.70383e-23 | 1.00000 |
| Ph+Allene     | 1.91198e-24 | 1.000000 | 1.91201e-24 | 1.00000 |
| rad45         | 4.13507e-25 | 1.000000 | 4.13513e-25 | 1.00000 |
| rad24         | 2.94690e-26 | 1.000000 | 2.94695e-26 | 1.00000 |
| rad60syn      | 2.70844e-26 | 1.000000 | 2.70848e-26 | 1.00000 |
| rad36         | 2.56258e-26 | 1.000000 | 2.56261e-26 | 1.00000 |
| rad60anti     | 1.02857e-27 | 1.000000 | 1.02859e-27 | 1.00000 |
| PhCH2CCH+H    | 4.17194e-37 | 1.000000 | 4.17201e-37 | 1.00000 |
| rad37         | 4.93841e-38 | 1.000000 | 4.93849e-38 | 1.00000 |
| rad5          | 3.65842e-41 | 1.000000 | 3.65848e-41 | 1.00000 |
| PAH3+H        | 7.43007e-46 | 1.000000 | 7.43018e-46 | 1.00000 |
| rad59         | 3.95433e-46 | 1.000000 | 3.95439e-46 | 1.00000 |
| rad50         | 1.66627e-46 | 1.000000 | 1.66630e-46 | 1.00000 |
| rad19syn      | 3.14632e-54 | 1.000000 | 3.14636e-54 | 1.00000 |
| PAH10+CH3     | 1.43132e-57 | 1.000000 | 1.43134e-57 | 1.00000 |
| rad52         | 1.25355e-57 | 1.000000 | 1.25357e-57 | 1.00000 |
| rad43         | 3.40004e-58 | 1.000000 | 3.40010e-58 | 1.00000 |
| rad54         | 1.13774e-58 | 1.000000 | 1.13775e-58 | 1.00000 |
| rad62         | 1.51919e-60 | 1.000000 | 1.51922e-60 | 1.00000 |
| rad51         | 1.00808e-63 | 1.000000 | 1.00810e-63 | 1.00000 |
| rad70         | 1.54168e-66 | 1.000000 | 1.54170e-66 | 1.00000 |
| PhcycC3H3_A+H | 8.37487e-67 | 1.000000 | 8.37499e-67 | 1.00000 |
| rad55         | 4.32053e-67 | 1.000000 | 4.32060e-67 | 1.00000 |
| rad65         | 3.45999e-68 | 1.000000 | 3.46005e-68 | 1.00000 |
| rad58         | 3.45957e-70 | 1.000000 | 3.45962e-70 | 1.00000 |
| PAH1+H        | 4.32736e-71 | 1.000000 | 4.32743e-71 | 1.00000 |
| rad34         | 4.69795e-73 | 1.000000 | 4.69802e-73 | 1.00000 |
| rad42         | 2.32680e-75 | 1.000000 | 2.32683e-75 | 1.00000 |
| rad41         | 1.25502e-75 | 1.000000 | 1.25503e-75 | 1.00000 |
| rad47         | 2.40259e-85 | 1.000000 | 2.40263e-85 | 1.00000 |

0.100000000E-08 Pa, 120.000000 K

=====

| Rate constant | True (fraction)     | Effective (fraction) |
|---------------|---------------------|----------------------|
| Total         | 5.87106e-37 (1.00 ) | 5.87094e-37 (1.00 )  |

| species     | PYtrue      | Cumul    | PYeffective | Cumul   |
|-------------|-------------|----------|-------------|---------|
| Indene+H    | 0.999980    | 0.999980 | 1.00000     | 1.00000 |
| Benzyl+C2H2 | 1.97209e-05 | 1.000000 | 0.00000     | 1.00000 |
| rad6        | 6.84079e-09 | 1.000000 | 6.84092e-09 | 1.00000 |
| rad35       | 1.91833e-11 | 1.000000 | 1.91836e-11 | 1.00000 |

|               |             |          |             |         |
|---------------|-------------|----------|-------------|---------|
| PAH9+H        | 1.07591e-11 | 1.000000 | 1.07594e-11 | 1.00000 |
| rad2          | 8.95611e-12 | 1.000000 | 8.95628e-12 | 1.00000 |
| rad30         | 7.56113e-12 | 1.000000 | 7.56127e-12 | 1.00000 |
| rad3          | 6.58899e-13 | 1.000000 | 6.58912e-13 | 1.00000 |
| rad1          | 5.80505e-13 | 1.000000 | 5.80516e-13 | 1.00000 |
| rad7          | 4.99205e-13 | 1.000000 | 4.99215e-13 | 1.00000 |
| rad38         | 4.51816e-13 | 1.000000 | 4.51824e-13 | 1.00000 |
| rad10         | 3.76081e-13 | 1.000000 | 3.76088e-13 | 1.00000 |
| rad4          | 3.35286e-13 | 1.000000 | 3.35293e-13 | 1.00000 |
| rad28         | 2.85668e-13 | 1.000000 | 2.85674e-13 | 1.00000 |
| PhCHCCH2+H    | 1.45464e-13 | 1.000000 | 1.45466e-13 | 1.00000 |
| rad11         | 1.23297e-13 | 1.000000 | 1.23300e-13 | 1.00000 |
| rad15         | 4.43409e-14 | 1.000000 | 4.43418e-14 | 1.00000 |
| PhCCH+CH3     | 4.36751e-14 | 1.000000 | 4.36760e-14 | 1.00000 |
| rad26         | 2.02593e-14 | 1.000000 | 2.02597e-14 | 1.00000 |
| PhCCCH3+H     | 1.25532e-14 | 1.000000 | 1.25534e-14 | 1.00000 |
| rad13         | 2.79451e-15 | 1.000000 | 2.79457e-15 | 1.00000 |
| rad33         | 5.67084e-18 | 1.000000 | 5.67095e-18 | 1.00000 |
| rad8          | 4.62044e-18 | 1.000000 | 4.62053e-18 | 1.00000 |
| rad20         | 7.78021e-19 | 1.000000 | 7.78036e-19 | 1.00000 |
| rad27         | 5.93929e-19 | 1.000000 | 5.93941e-19 | 1.00000 |
| rad21         | 4.88531e-19 | 1.000000 | 4.88541e-19 | 1.00000 |
| rad46         | 2.47624e-19 | 1.000000 | 2.47629e-19 | 1.00000 |
| rad9          | 2.29246e-19 | 1.000000 | 2.29250e-19 | 1.00000 |
| PAH7+H        | 8.24701e-20 | 1.000000 | 8.24717e-20 | 1.00000 |
| Ph+MeAc       | 7.42090e-20 | 1.000000 | 7.42105e-20 | 1.00000 |
| rad12         | 6.23451e-21 | 1.000000 | 6.23464e-21 | 1.00000 |
| rad25         | 4.25291e-21 | 1.000000 | 4.25299e-21 | 1.00000 |
| rad18         | 3.66393e-21 | 1.000000 | 3.66401e-21 | 1.00000 |
| rad39         | 1.51574e-21 | 1.000000 | 1.51577e-21 | 1.00000 |
| rad14         | 1.31912e-21 | 1.000000 | 1.31915e-21 | 1.00000 |
| rad31         | 5.25280e-22 | 1.000000 | 5.25290e-22 | 1.00000 |
| rad22         | 2.48192e-22 | 1.000000 | 2.48197e-22 | 1.00000 |
| Ph+Allene     | 1.55527e-22 | 1.000000 | 1.55530e-22 | 1.00000 |
| rad23         | 6.68834e-23 | 1.000000 | 6.68847e-23 | 1.00000 |
| rad60syn      | 1.65778e-24 | 1.000000 | 1.65782e-24 | 1.00000 |
| rad45         | 1.29751e-24 | 1.000000 | 1.29754e-24 | 1.00000 |
| rad60anti     | 9.96798e-26 | 1.000000 | 9.96818e-26 | 1.00000 |
| rad36         | 8.03879e-26 | 1.000000 | 8.03894e-26 | 1.00000 |
| rad24         | 2.79937e-26 | 1.000000 | 2.79943e-26 | 1.00000 |
| PhCH2CCH+H    | 2.55816e-34 | 1.000000 | 2.55821e-34 | 1.00000 |
| rad37         | 2.91984e-35 | 1.000000 | 2.91990e-35 | 1.00000 |
| rad5          | 2.15289e-38 | 1.000000 | 2.15293e-38 | 1.00000 |
| PAH3+H        | 4.91009e-43 | 1.000000 | 4.91019e-43 | 1.00000 |
| rad59         | 2.61101e-43 | 1.000000 | 2.61106e-43 | 1.00000 |
| rad50         | 1.03657e-43 | 1.000000 | 1.03659e-43 | 1.00000 |
| rad19syn      | 2.38123e-51 | 1.000000 | 2.38128e-51 | 1.00000 |
| PAH10+CH3     | 1.24197e-54 | 1.000000 | 1.24199e-54 | 1.00000 |
| rad52         | 1.02181e-54 | 1.000000 | 1.02183e-54 | 1.00000 |
| rad43         | 2.95230e-55 | 1.000000 | 2.95236e-55 | 1.00000 |
| rad54         | 9.87318e-56 | 1.000000 | 9.87338e-56 | 1.00000 |
| rad62         | 1.54427e-57 | 1.000000 | 1.54430e-57 | 1.00000 |
| rad51         | 1.27538e-60 | 1.000000 | 1.27541e-60 | 1.00000 |
| rad70         | 2.36629e-63 | 1.000000 | 2.36634e-63 | 1.00000 |
| PhcycC3H3_A+H | 1.35062e-63 | 1.000000 | 1.35065e-63 | 1.00000 |
| rad55         | 6.87304e-64 | 1.000000 | 6.87318e-64 | 1.00000 |
| rad65         | 5.64248e-65 | 1.000000 | 5.64259e-65 | 1.00000 |
| rad58         | 5.78813e-67 | 1.000000 | 5.78825e-67 | 1.00000 |
| PAH1+H        | 1.11121e-67 | 1.000000 | 1.11123e-67 | 1.00000 |
| rad34         | 1.38116e-69 | 1.000000 | 1.38118e-69 | 1.00000 |
| rad42         | 7.09167e-72 | 1.000000 | 7.09181e-72 | 1.00000 |
| rad41         | 3.88407e-72 | 1.000000 | 3.88415e-72 | 1.00000 |
| rad47         | 5.09842e-82 | 1.000000 | 5.09852e-82 | 1.00000 |

0.100000000E-08 Pa, 130.000000 K

=====

| Rate constant | True (fraction)     | Effective (fraction) |
|---------------|---------------------|----------------------|
| Total         | 3.94360e-35 (1.00 ) | 3.94350e-35 (1.00 )  |

| species     | PYtrue      | Cumul    | PYeffective | Cumul   |
|-------------|-------------|----------|-------------|---------|
| Indene+H    | 0.999974    | 0.999974 | 1.00000     | 1.00000 |
| Benzyl+C2H2 | 2.58461e-05 | 1.000000 | 0.00000     | 1.00000 |
| rad6        | 5.46424e-09 | 1.000000 | 5.46438e-09 | 1.00000 |
| rad2        | 3.02297e-11 | 1.000000 | 3.02305e-11 | 1.00000 |
| rad35       | 2.64326e-11 | 1.000000 | 2.64333e-11 | 1.00000 |
| rad30       | 1.97587e-11 | 1.000000 | 1.97592e-11 | 1.00000 |
| PAH9+H      | 1.71417e-11 | 1.000000 | 1.71421e-11 | 1.00000 |
| rad3        | 2.87180e-12 | 1.000000 | 2.87188e-12 | 1.00000 |

|               |             |          |             |         |
|---------------|-------------|----------|-------------|---------|
| rad1          | 1.96770e-12 | 1.000000 | 1.96775e-12 | 1.00000 |
| rad4          | 1.46302e-12 | 1.000000 | 1.46306e-12 | 1.00000 |
| rad38         | 9.21166e-13 | 1.000000 | 9.21190e-13 | 1.00000 |
| rad10         | 8.31411e-13 | 1.000000 | 8.31433e-13 | 1.00000 |
| PhCHCCH2+H    | 7.98558e-13 | 1.000000 | 7.98579e-13 | 1.00000 |
| rad28         | 5.45882e-13 | 1.000000 | 5.45897e-13 | 1.00000 |
| rad7          | 3.99453e-13 | 1.000000 | 3.99464e-13 | 1.00000 |
| PhCCH+CH3     | 2.99554e-13 | 1.000000 | 2.99562e-13 | 1.00000 |
| rad15         | 1.80343e-13 | 1.000000 | 1.80347e-13 | 1.00000 |
| rad11         | 9.87592e-14 | 1.000000 | 9.87617e-14 | 1.00000 |
| PhCCCH3+H     | 9.18043e-14 | 1.000000 | 9.18066e-14 | 1.00000 |
| rad26         | 4.17922e-14 | 1.000000 | 4.17933e-14 | 1.00000 |
| rad13         | 2.23853e-15 | 1.000000 | 2.23859e-15 | 1.00000 |
| rad8          | 5.39528e-17 | 1.000000 | 5.39542e-17 | 1.00000 |
| rad33         | 4.57309e-18 | 1.000000 | 4.57321e-18 | 1.00000 |
| rad9          | 3.66951e-18 | 1.000000 | 3.66961e-18 | 1.00000 |
| rad46         | 1.89879e-18 | 1.000000 | 1.89884e-18 | 1.00000 |
| Ph+MeAc       | 1.77041e-18 | 1.000000 | 1.77045e-18 | 1.00000 |
| PAH7+H        | 1.45556e-18 | 1.000000 | 1.45560e-18 | 1.00000 |
| rad27         | 9.79828e-19 | 1.000000 | 9.79853e-19 | 1.00000 |
| rad20         | 6.85849e-19 | 1.000000 | 6.85866e-19 | 1.00000 |
| rad21         | 4.31156e-19 | 1.000000 | 4.31167e-19 | 1.00000 |
| rad12         | 1.18343e-19 | 1.000000 | 1.18346e-19 | 1.00000 |
| rad39         | 3.50986e-20 | 1.000000 | 3.50995e-20 | 1.00000 |
| rad25         | 1.19716e-20 | 1.000000 | 1.19719e-20 | 1.00000 |
| Ph+Allene     | 5.85932e-21 | 1.000000 | 5.85947e-21 | 1.00000 |
| rad14         | 4.32608e-21 | 1.000000 | 4.32619e-21 | 1.00000 |
| rad18         | 3.22254e-21 | 1.000000 | 3.22262e-21 | 1.00000 |
| rad31         | 5.00526e-22 | 1.000000 | 5.00538e-22 | 1.00000 |
| rad22         | 2.17214e-22 | 1.000000 | 2.17219e-22 | 1.00000 |
| rad23         | 6.36142e-23 | 1.000000 | 6.36158e-23 | 1.00000 |
| rad60syn      | 5.24603e-23 | 1.000000 | 5.24617e-23 | 1.00000 |
| rad60anti     | 4.01382e-24 | 1.000000 | 4.01392e-24 | 1.00000 |
| rad45         | 3.72978e-25 | 1.000000 | 3.72988e-25 | 1.00000 |
| PhCH2CCH+H    | 1.64592e-25 | 1.000000 | 1.64596e-25 | 1.00000 |
| rad37         | 3.40646e-26 | 1.000000 | 3.40655e-26 | 1.00000 |
| rad24         | 2.68631e-26 | 1.000000 | 2.68638e-26 | 1.00000 |
| rad36         | 2.31166e-26 | 1.000000 | 2.31172e-26 | 1.00000 |
| rad5          | 1.70893e-35 | 1.000000 | 1.70898e-35 | 1.00000 |
| PAH3+H        | 4.27232e-40 | 1.000000 | 4.27243e-40 | 1.00000 |
| rad59         | 2.26986e-40 | 1.000000 | 2.26991e-40 | 1.00000 |
| rad50         | 8.46822e-41 | 1.000000 | 8.46844e-41 | 1.00000 |
| rad19syn      | 2.17174e-48 | 1.000000 | 2.17180e-48 | 1.00000 |
| PAH10+CH3     | 9.32404e-52 | 1.000000 | 9.32428e-52 | 1.00000 |
| rad52         | 8.26512e-52 | 1.000000 | 8.26533e-52 | 1.00000 |
| rad43         | 2.21753e-52 | 1.000000 | 2.21759e-52 | 1.00000 |
| rad54         | 8.67909e-53 | 1.000000 | 8.67932e-53 | 1.00000 |
| rad62         | 1.35000e-54 | 1.000000 | 1.35003e-54 | 1.00000 |
| rad51         | 1.51057e-57 | 1.000000 | 1.51061e-57 | 1.00000 |
| rad70         | 3.12334e-60 | 1.000000 | 3.12342e-60 | 1.00000 |
| PhcycC3H3_A+H | 1.87300e-60 | 1.000000 | 1.87305e-60 | 1.00000 |
| rad55         | 9.38175e-61 | 1.000000 | 9.38199e-61 | 1.00000 |
| rad65         | 8.59859e-62 | 1.000000 | 8.59881e-62 | 1.00000 |
| rad58         | 8.32627e-64 | 1.000000 | 8.32648e-64 | 1.00000 |
| PAH1+H        | 2.46337e-64 | 1.000000 | 2.46343e-64 | 1.00000 |
| rad34         | 3.51992e-66 | 1.000000 | 3.52001e-66 | 1.00000 |
| rad42         | 1.85845e-68 | 1.000000 | 1.85850e-68 | 1.00000 |
| rad41         | 1.02311e-68 | 1.000000 | 1.02313e-68 | 1.00000 |
| rad47         | 1.01706e-78 | 1.000000 | 1.01709e-78 | 1.00000 |

0.100000000E-08 Pa, 140.000000 K

=====

| Rate constant | True (fraction)     | Effective (fraction) |
|---------------|---------------------|----------------------|
| Total         | 1.44756e-33 (1.00 ) | 1.44751e-33 (1.00 )  |

| species     | PYtrue      | Cumul    | PYeffective | Cumul   |
|-------------|-------------|----------|-------------|---------|
| Indene+H    | 0.999966    | 0.999966 | 1.00000     | 1.00000 |
| Benzyl+C2H2 | 3.37324e-05 | 1.000000 | 0.00000     | 1.00000 |
| rad6        | 4.39223e-09 | 1.000000 | 4.39238e-09 | 1.00000 |
| rad2        | 6.22414e-11 | 1.000000 | 6.22435e-11 | 1.00000 |
| rad30       | 4.53773e-11 | 1.000000 | 4.53788e-11 | 1.00000 |
| rad35       | 3.60275e-11 | 1.000000 | 3.60287e-11 | 1.00000 |
| PAH9+H      | 2.63418e-11 | 1.000000 | 2.63427e-11 | 1.00000 |
| rad1        | 4.07027e-12 | 1.000000 | 4.07040e-12 | 1.00000 |
| PhCHCCH2+H  | 3.50364e-12 | 1.000000 | 3.50376e-12 | 1.00000 |
| rad38       | 1.74091e-12 | 1.000000 | 1.74097e-12 | 1.00000 |
| PhCCH+CH3   | 1.58811e-12 | 1.000000 | 1.58817e-12 | 1.00000 |
| rad28       | 9.20695e-13 | 1.000000 | 9.20726e-13 | 1.00000 |



|               |             |          |             |          |
|---------------|-------------|----------|-------------|----------|
| rad3          | 8.20403e-13 | 1.000000 | 8.20430e-13 | 1.000000 |
| rad15         | 6.03455e-13 | 1.000000 | 6.03475e-13 | 1.000000 |
| rad10         | 5.18359e-13 | 1.000000 | 5.18376e-13 | 1.000000 |
| PhCCCH3+H     | 5.12530e-13 | 1.000000 | 5.12547e-13 | 1.000000 |
| rad4          | 4.18560e-13 | 1.000000 | 4.18574e-13 | 1.000000 |
| rad7          | 3.21672e-13 | 1.000000 | 3.21682e-13 | 1.000000 |
| rad11         | 7.96116e-14 | 1.000000 | 7.96143e-14 | 1.000000 |
| rad26         | 7.52663e-14 | 1.000000 | 7.52689e-14 | 1.000000 |
| rad13         | 1.80470e-15 | 1.000000 | 1.80476e-15 | 1.000000 |
| rad8          | 4.45606e-16 | 1.000000 | 4.45621e-16 | 1.000000 |
| rad9          | 3.97531e-17 | 1.000000 | 3.97545e-17 | 1.000000 |
| Ph+MeAc       | 2.71368e-17 | 1.000000 | 2.71377e-17 | 1.000000 |
| PAH7+H        | 1.70359e-17 | 1.000000 | 1.70365e-17 | 1.000000 |
| rad46         | 1.09715e-17 | 1.000000 | 1.09719e-17 | 1.000000 |
| rad33         | 3.71279e-18 | 1.000000 | 3.71291e-18 | 1.000000 |
| rad12         | 1.47311e-18 | 1.000000 | 1.47316e-18 | 1.000000 |
| rad27         | 1.45886e-18 | 1.000000 | 1.45891e-18 | 1.000000 |
| rad20         | 6.07975e-19 | 1.000000 | 6.07995e-19 | 1.000000 |
| rad39         | 5.20787e-19 | 1.000000 | 5.20804e-19 | 1.000000 |
| rad21         | 3.82681e-19 | 1.000000 | 3.82694e-19 | 1.000000 |
| Ph+Allene     | 1.30388e-19 | 1.000000 | 1.30393e-19 | 1.000000 |
| rad25         | 2.81563e-20 | 1.000000 | 2.81573e-20 | 1.000000 |
| rad14         | 1.15955e-20 | 1.000000 | 1.15959e-20 | 1.000000 |
| rad18         | 2.84816e-21 | 1.000000 | 2.84826e-21 | 1.000000 |
| rad60syn      | 1.00452e-21 | 1.000000 | 1.00456e-21 | 1.000000 |
| rad31         | 4.40581e-22 | 1.000000 | 4.40596e-22 | 1.000000 |
| rad22         | 1.90942e-22 | 1.000000 | 1.90949e-22 | 1.000000 |
| rad60anti     | 9.33602e-23 | 1.000000 | 9.33634e-23 | 1.000000 |
| rad23         | 6.14911e-23 | 1.000000 | 6.14932e-23 | 1.000000 |
| PhCH2CCH+H    | 1.18693e-23 | 1.000000 | 1.18697e-23 | 1.000000 |
| rad37         | 3.38835e-24 | 1.000000 | 3.38846e-24 | 1.000000 |
| rad45         | 1.85921e-25 | 1.000000 | 1.85927e-25 | 1.000000 |
| rad24         | 2.60055e-26 | 1.000000 | 2.60064e-26 | 1.000000 |
| rad36         | 1.15268e-26 | 1.000000 | 1.15272e-26 | 1.000000 |
| rad5          | 6.97172e-27 | 1.000000 | 6.97195e-27 | 1.000000 |
| PAH3+H        | 1.15604e-28 | 1.000000 | 1.15608e-28 | 1.000000 |
| rad59         | 5.78020e-29 | 1.000000 | 5.78040e-29 | 1.000000 |
| rad50         | 7.59925e-30 | 1.000000 | 7.59951e-30 | 1.000000 |
| rad19syn      | 1.46660e-45 | 1.000000 | 1.46665e-45 | 1.000000 |
| rad52         | 4.36609e-49 | 1.000000 | 4.36623e-49 | 1.000000 |
| PAH10+CH3     | 4.36082e-49 | 1.000000 | 4.36096e-49 | 1.000000 |
| rad43         | 1.03733e-49 | 1.000000 | 1.03736e-49 | 1.000000 |
| rad54         | 5.32695e-50 | 1.000000 | 5.32712e-50 | 1.000000 |
| rad62         | 7.28932e-52 | 1.000000 | 7.28957e-52 | 1.000000 |
| rad51         | 1.10700e-54 | 1.000000 | 1.10704e-54 | 1.000000 |
| rad70         | 2.52072e-57 | 1.000000 | 2.52080e-57 | 1.000000 |
| PhcycC3H3_A+H | 1.58944e-57 | 1.000000 | 1.58949e-57 | 1.000000 |
| rad55         | 7.81783e-58 | 1.000000 | 7.81809e-58 | 1.000000 |
| rad65         | 8.14333e-59 | 1.000000 | 8.14360e-59 | 1.000000 |
| rad58         | 7.33100e-61 | 1.000000 | 7.33125e-61 | 1.000000 |
| PAH1+H        | 3.34204e-61 | 1.000000 | 3.34215e-61 | 1.000000 |
| rad34         | 5.48113e-63 | 1.000000 | 5.48132e-63 | 1.000000 |
| rad42         | 3.01462e-65 | 1.000000 | 3.01472e-65 | 1.000000 |
| rad41         | 1.65091e-65 | 1.000000 | 1.65096e-65 | 1.000000 |
| rad47         | 1.27344e-75 | 1.000000 | 1.27348e-75 | 1.000000 |

0.100000000E-08 Pa, 150.000000 K

=====

| Rate constant | True (fraction)     | Effective (fraction) |
|---------------|---------------------|----------------------|
| Total         | 3.27736e-32 (1.00 ) | 3.27722e-32 (1.00 )  |

| species     | PYtrue      | Cumul    | PYeffective | Cumul   |
|-------------|-------------|----------|-------------|---------|
| Indene+H    | 0.999956    | 0.999956 | 1.00000     | 1.00000 |
| Benzyl+C2H2 | 4.38587e-05 | 1.000000 | 0.00000     | 1.00000 |
| rad6        | 3.54735e-09 | 1.000000 | 3.54751e-09 | 1.00000 |
| rad30       | 9.42303e-11 | 1.000000 | 9.42345e-11 | 1.00000 |
| rad35       | 4.87935e-11 | 1.000000 | 4.87956e-11 | 1.00000 |
| PAH9+H      | 3.94532e-11 | 1.000000 | 3.94549e-11 | 1.00000 |
| rad2        | 1.67320e-11 | 1.000000 | 1.67327e-11 | 1.00000 |
| PhCHCCH2+H  | 1.28544e-11 | 1.000000 | 1.28550e-11 | 1.00000 |
| PhCCH+CH3   | 6.85551e-12 | 1.000000 | 6.85581e-12 | 1.00000 |
| rad38       | 3.10719e-12 | 1.000000 | 3.10733e-12 | 1.00000 |
| PhCCCH3+H   | 2.30627e-12 | 1.000000 | 2.30637e-12 | 1.00000 |
| rad15       | 1.73107e-12 | 1.000000 | 1.73115e-12 | 1.00000 |
| rad28       | 1.40540e-12 | 1.000000 | 1.40546e-12 | 1.00000 |
| rad1        | 1.10009e-12 | 1.000000 | 1.10014e-12 | 1.00000 |
| rad10       | 3.41450e-13 | 1.000000 | 3.41465e-13 | 1.00000 |
| rad7        | 2.60286e-13 | 1.000000 | 2.60297e-13 | 1.00000 |

|               |             |          |             |         |
|---------------|-------------|----------|-------------|---------|
| rad3          | 2.09344e-13 | 1.000000 | 2.09354e-13 | 1.00000 |
| rad26         | 1.21613e-13 | 1.000000 | 1.21618e-13 | 1.00000 |
| rad4          | 1.06963e-13 | 1.000000 | 1.06968e-13 | 1.00000 |
| rad11         | 6.44885e-14 | 1.000000 | 6.44914e-14 | 1.00000 |
| rad8          | 2.79170e-15 | 1.000000 | 2.79182e-15 | 1.00000 |
| rad13         | 1.46205e-15 | 1.000000 | 1.46212e-15 | 1.00000 |
| rad9          | 3.15310e-16 | 1.000000 | 3.15324e-16 | 1.00000 |
| Ph+MeAc       | 2.92028e-16 | 1.000000 | 2.92040e-16 | 1.00000 |
| PAH7+H        | 1.43747e-16 | 1.000000 | 1.43753e-16 | 1.00000 |
| rad46         | 5.06729e-17 | 1.000000 | 5.06751e-17 | 1.00000 |
| rad12         | 1.30972e-17 | 1.000000 | 1.30978e-17 | 1.00000 |
| rad39         | 5.41970e-18 | 1.000000 | 5.41994e-18 | 1.00000 |
| rad33         | 3.03017e-18 | 1.000000 | 3.03031e-18 | 1.00000 |
| rad27         | 2.00122e-18 | 1.000000 | 2.00131e-18 | 1.00000 |
| Ph+Allene     | 1.93213e-18 | 1.000000 | 1.93221e-18 | 1.00000 |
| rad20         | 5.41405e-19 | 1.000000 | 5.41429e-19 | 1.00000 |
| rad21         | 3.41241e-19 | 1.000000 | 3.41256e-19 | 1.00000 |
| rad25         | 5.73621e-20 | 1.000000 | 5.73646e-20 | 1.00000 |
| rad14         | 2.64515e-20 | 1.000000 | 2.64527e-20 | 1.00000 |
| rad60syn      | 1.29362e-20 | 1.000000 | 1.29368e-20 | 1.00000 |
| rad18         | 2.52690e-21 | 1.000000 | 2.52701e-21 | 1.00000 |
| rad60anti     | 1.42014e-21 | 1.000000 | 1.42020e-21 | 1.00000 |
| rad31         | 3.93434e-22 | 1.000000 | 3.93451e-22 | 1.00000 |
| PhCH2CCH+H    | 3.70705e-22 | 1.000000 | 3.70721e-22 | 1.00000 |
| rad22         | 1.68407e-22 | 1.000000 | 1.68415e-22 | 1.00000 |
| rad37         | 1.02531e-22 | 1.000000 | 1.02535e-22 | 1.00000 |
| rad23         | 6.16177e-23 | 1.000000 | 6.16204e-23 | 1.00000 |
| rad45         | 2.21833e-24 | 1.000000 | 2.21843e-24 | 1.00000 |
| rad5          | 3.31296e-25 | 1.000000 | 3.31311e-25 | 1.00000 |
| rad36         | 1.37577e-25 | 1.000000 | 1.37583e-25 | 1.00000 |
| rad24         | 2.53725e-26 | 1.000000 | 2.53736e-26 | 1.00000 |
| PAH3+H        | 1.81874e-26 | 1.000000 | 1.81882e-26 | 1.00000 |
| rad59         | 8.19792e-27 | 1.000000 | 8.19828e-27 | 1.00000 |
| rad50         | 5.49371e-28 | 1.000000 | 5.49395e-28 | 1.00000 |
| rad19syn      | 2.97402e-42 | 1.000000 | 2.97415e-42 | 1.00000 |
| rad52         | 5.08446e-46 | 1.000000 | 5.08468e-46 | 1.00000 |
| PAH10+CH3     | 2.77463e-46 | 1.000000 | 2.77475e-46 | 1.00000 |
| rad54         | 8.65297e-47 | 1.000000 | 8.65335e-47 | 1.00000 |
| rad43         | 6.57134e-47 | 1.000000 | 6.57163e-47 | 1.00000 |
| rad62         | 4.99916e-49 | 1.000000 | 4.99938e-49 | 1.00000 |
| rad51         | 1.15983e-51 | 1.000000 | 1.15988e-51 | 1.00000 |
| rad70         | 2.34405e-54 | 1.000000 | 2.34415e-54 | 1.00000 |
| PhcycC3H3_A+H | 1.51492e-54 | 1.000000 | 1.51499e-54 | 1.00000 |
| rad55         | 7.36474e-55 | 1.000000 | 7.36506e-55 | 1.00000 |
| rad65         | 1.07919e-55 | 1.000000 | 1.07924e-55 | 1.00000 |
| rad58         | 7.17782e-58 | 1.000000 | 7.17813e-58 | 1.00000 |
| PAH1+H        | 4.37525e-58 | 1.000000 | 4.37544e-58 | 1.00000 |
| rad34         | 7.85937e-60 | 1.000000 | 7.85972e-60 | 1.00000 |
| rad42         | 5.31534e-62 | 1.000000 | 5.31557e-62 | 1.00000 |
| rad41         | 2.97642e-62 | 1.000000 | 2.97655e-62 | 1.00000 |
| rad47         | 2.22231e-72 | 1.000000 | 2.22241e-72 | 1.00000 |

0.100000000E-08 Pa, 160.000000 K

=====

| Rate constant | True (fraction)     | Effective (fraction) |
|---------------|---------------------|----------------------|
| Total         | 5.01169e-31 (1.00 ) | 5.01140e-31 (1.00 )  |

| species     | PYtrue      | Cumul    | PYeffective | Cumul   |
|-------------|-------------|----------|-------------|---------|
| Indene+H    | 0.999943    | 0.999943 | 1.00000     | 1.00000 |
| Benzyl+C2H2 | 5.68171e-05 | 1.000000 | 0.00000     | 1.00000 |
| rad6        | 2.87517e-09 | 1.000000 | 2.87533e-09 | 1.00000 |
| rad30       | 1.80711e-10 | 1.000000 | 1.80721e-10 | 1.00000 |
| rad35       | 6.58346e-11 | 1.000000 | 6.58384e-11 | 1.00000 |
| PAH9+H      | 5.80045e-11 | 1.000000 | 5.80077e-11 | 1.00000 |
| PhCHCCH2+H  | 4.07935e-11 | 1.000000 | 4.07958e-11 | 1.00000 |
| PhCCH+CH3   | 2.50511e-11 | 1.000000 | 2.50525e-11 | 1.00000 |
| PhCCCH3+H   | 8.71109e-12 | 1.000000 | 8.71158e-12 | 1.00000 |
| rad38       | 5.30696e-12 | 1.000000 | 5.30726e-12 | 1.00000 |
| rad15       | 4.38965e-12 | 1.000000 | 4.38989e-12 | 1.00000 |
| rad2        | 2.73502e-12 | 1.000000 | 2.73518e-12 | 1.00000 |
| rad28       | 1.97820e-12 | 1.000000 | 1.97831e-12 | 1.00000 |
| rad10       | 2.34401e-13 | 1.000000 | 2.34414e-13 | 1.00000 |
| rad7        | 2.11376e-13 | 1.000000 | 2.11388e-13 | 1.00000 |
| rad1        | 1.80791e-13 | 1.000000 | 1.80801e-13 | 1.00000 |
| rad26       | 1.79913e-13 | 1.000000 | 1.79923e-13 | 1.00000 |
| rad11       | 5.24293e-14 | 1.000000 | 5.24323e-14 | 1.00000 |
| rad3        | 4.42712e-14 | 1.000000 | 4.42737e-14 | 1.00000 |
| rad4        | 2.26500e-14 | 1.000000 | 2.26513e-14 | 1.00000 |

|               |             |          |             |         |
|---------------|-------------|----------|-------------|---------|
| rad8          | 1.39809e-14 | 1.000000 | 1.39817e-14 | 1.00000 |
| Ph+MeAc       | 2.35652e-15 | 1.000000 | 2.35665e-15 | 1.00000 |
| rad9          | 1.94219e-15 | 1.000000 | 1.94230e-15 | 1.00000 |
| rad13         | 1.18882e-15 | 1.000000 | 1.18889e-15 | 1.00000 |
| PAH7+H        | 9.30889e-16 | 1.000000 | 9.30942e-16 | 1.00000 |
| rad46         | 1.95509e-16 | 1.000000 | 1.95521e-16 | 1.00000 |
| rad12         | 8.86564e-17 | 1.000000 | 8.86614e-17 | 1.00000 |
| rad39         | 4.23059e-17 | 1.000000 | 4.23083e-17 | 1.00000 |
| Ph+Allene     | 2.05972e-17 | 1.000000 | 2.05984e-17 | 1.00000 |
| rad27         | 2.56842e-18 | 1.000000 | 2.56857e-18 | 1.00000 |
| rad33         | 2.48318e-18 | 1.000000 | 2.48332e-18 | 1.00000 |
| rad20         | 4.83952e-19 | 1.000000 | 4.83979e-19 | 1.00000 |
| rad21         | 3.05473e-19 | 1.000000 | 3.05490e-19 | 1.00000 |
| rad60syn      | 1.20851e-19 | 1.000000 | 1.20858e-19 | 1.00000 |
| rad25         | 1.03992e-19 | 1.000000 | 1.03998e-19 | 1.00000 |
| rad14         | 5.29314e-20 | 1.000000 | 5.29344e-20 | 1.00000 |
| rad60anti     | 1.53286e-20 | 1.000000 | 1.53294e-20 | 1.00000 |
| PhCH2CCH+H    | 7.07507e-21 | 1.000000 | 7.07547e-21 | 1.00000 |
| rad18         | 2.24858e-21 | 1.000000 | 2.24871e-21 | 1.00000 |
| rad37         | 1.92371e-21 | 1.000000 | 1.92382e-21 | 1.00000 |
| rad31         | 3.55473e-22 | 1.000000 | 3.55493e-22 | 1.00000 |
| rad22         | 1.48900e-22 | 1.000000 | 1.48909e-22 | 1.00000 |
| rad23         | 6.34851e-23 | 1.000000 | 6.34887e-23 | 1.00000 |
| rad5          | 7.57862e-24 | 1.000000 | 7.57905e-24 | 1.00000 |
| rad45         | 6.32675e-25 | 1.000000 | 6.32711e-25 | 1.00000 |
| PAH3+H        | 5.45434e-25 | 1.000000 | 5.45465e-25 | 1.00000 |
| rad59         | 2.30298e-25 | 1.000000 | 2.30311e-25 | 1.00000 |
| rad36         | 3.92717e-26 | 1.000000 | 3.92739e-26 | 1.00000 |
| rad24         | 2.49308e-26 | 1.000000 | 2.49323e-26 | 1.00000 |
| rad50         | 1.44925e-26 | 1.000000 | 1.44934e-26 | 1.00000 |
| rad19syn      | 3.66145e-39 | 1.000000 | 3.66166e-39 | 1.00000 |
| rad52         | 4.66836e-43 | 1.000000 | 4.66862e-43 | 1.00000 |
| PAH10+CH3     | 1.37430e-43 | 1.000000 | 1.37438e-43 | 1.00000 |
| rad54         | 1.04657e-43 | 1.000000 | 1.04663e-43 | 1.00000 |
| rad43         | 3.21717e-44 | 1.000000 | 3.21735e-44 | 1.00000 |
| rad62         | 2.33467e-46 | 1.000000 | 2.33480e-46 | 1.00000 |
| rad51         | 6.68076e-49 | 1.000000 | 6.68114e-49 | 1.00000 |
| rad70         | 1.33435e-51 | 1.000000 | 1.33442e-51 | 1.00000 |
| PhcycC3H3_A+H | 8.52143e-52 | 1.000000 | 8.52192e-52 | 1.00000 |
| rad55         | 4.13517e-52 | 1.000000 | 4.13540e-52 | 1.00000 |
| rad65         | 7.52093e-53 | 1.000000 | 7.52136e-53 | 1.00000 |
| rad58         | 4.07351e-55 | 1.000000 | 4.07374e-55 | 1.00000 |
| PAH1+H        | 2.97695e-55 | 1.000000 | 2.97712e-55 | 1.00000 |
| rad34         | 5.75685e-57 | 1.000000 | 5.75717e-57 | 1.00000 |
| rad42         | 4.98169e-59 | 1.000000 | 4.98197e-59 | 1.00000 |
| rad41         | 2.88106e-59 | 1.000000 | 2.88122e-59 | 1.00000 |
| rad47         | 2.05177e-69 | 1.000000 | 2.05189e-69 | 1.00000 |

0.100000000E-08 Pa, 170.000000 K

=====

| Rate constant | True (fraction)     | Effective (fraction) |
|---------------|---------------------|----------------------|
| Total         | 5.54821e-30 (1.00 ) | 5.54780e-30 (1.00 )  |

| species     | PYtrue      | Cumul    | PYeffective | Cumul   |
|-------------|-------------|----------|-------------|---------|
| Indene+H    | 0.999927    | 0.999927 | 1.00000     | 1.00000 |
| Benzyl+C2H2 | 7.33330e-05 | 1.00000  | 0.00000     | 1.00000 |
| rad6        | 2.33641e-09 | 1.00000  | 2.33658e-09 | 1.00000 |
| rad30       | 3.25169e-10 | 1.00000  | 3.25193e-10 | 1.00000 |
| PhCHCCH2+H  | 1.14896e-10 | 1.00000  | 1.14904e-10 | 1.00000 |
| rad35       | 8.86105e-11 | 1.00000  | 8.86170e-11 | 1.00000 |
| PAH9+H      | 8.41122e-11 | 1.00000  | 8.41184e-11 | 1.00000 |
| PhCCH+CH3   | 7.98161e-11 | 1.00000  | 7.98220e-11 | 1.00000 |
| PhCCCH3+H   | 2.84874e-11 | 1.00000  | 2.84895e-11 | 1.00000 |
| rad15       | 1.00714e-11 | 1.00000  | 1.00722e-11 | 1.00000 |
| rad38       | 8.75582e-12 | 1.00000  | 8.75646e-12 | 1.00000 |
| rad28       | 2.60438e-12 | 1.00000  | 2.60457e-12 | 1.00000 |
| rad2        | 5.45873e-13 | 1.00000  | 5.45913e-13 | 1.00000 |
| rad26       | 2.47499e-13 | 1.00000  | 2.47517e-13 | 1.00000 |
| rad7        | 1.72113e-13 | 1.00000  | 1.72126e-13 | 1.00000 |
| rad10       | 1.66176e-13 | 1.00000  | 1.66188e-13 | 1.00000 |
| rad8        | 5.82583e-14 | 1.00000  | 5.82625e-14 | 1.00000 |
| rad11       | 4.27405e-14 | 1.00000  | 4.27437e-14 | 1.00000 |
| rad1        | 3.63138e-14 | 1.00000  | 3.63165e-14 | 1.00000 |
| Ph+MeAc     | 1.49962e-14 | 1.00000  | 1.49973e-14 | 1.00000 |
| rad3        | 1.07883e-14 | 1.00000  | 1.07891e-14 | 1.00000 |
| rad9        | 9.71811e-15 | 1.00000  | 9.71883e-15 | 1.00000 |
| rad4        | 5.52806e-15 | 1.00000  | 5.52846e-15 | 1.00000 |
| PAH7+H      | 4.85298e-15 | 1.00000  | 4.85334e-15 | 1.00000 |

|               |             |         |             |         |
|---------------|-------------|---------|-------------|---------|
| rad13         | 9.69283e-16 | 1.00000 | 9.69354e-16 | 1.00000 |
| rad46         | 6.51676e-16 | 1.00000 | 6.51724e-16 | 1.00000 |
| rad12         | 4.79737e-16 | 1.00000 | 4.79772e-16 | 1.00000 |
| rad39         | 2.60729e-16 | 1.00000 | 2.60749e-16 | 1.00000 |
| Ph+Allene     | 1.67494e-16 | 1.00000 | 1.67506e-16 | 1.00000 |
| rad27         | 3.12036e-18 | 1.00000 | 3.12059e-18 | 1.00000 |
| rad33         | 2.04141e-18 | 1.00000 | 2.04156e-18 | 1.00000 |
| rad60syn      | 8.67681e-19 | 1.00000 | 8.67744e-19 | 1.00000 |
| rad20         | 4.33979e-19 | 1.00000 | 4.34011e-19 | 1.00000 |
| rad21         | 2.74359e-19 | 1.00000 | 2.74379e-19 | 1.00000 |
| rad25         | 1.71246e-19 | 1.00000 | 1.71258e-19 | 1.00000 |
| rad60anti     | 1.24865e-19 | 1.00000 | 1.24875e-19 | 1.00000 |
| PhCH2CCH+H    | 9.53114e-20 | 1.00000 | 9.53184e-20 | 1.00000 |
| rad14         | 9.50806e-20 | 1.00000 | 9.50875e-20 | 1.00000 |
| rad37         | 2.51871e-20 | 1.00000 | 2.51890e-20 | 1.00000 |
| rad18         | 2.00562e-21 | 1.00000 | 2.00577e-21 | 1.00000 |
| rad31         | 3.24434e-22 | 1.00000 | 3.24458e-22 | 1.00000 |
| rad22         | 1.31892e-22 | 1.00000 | 1.31902e-22 | 1.00000 |
| rad5          | 1.17217e-22 | 1.00000 | 1.17226e-22 | 1.00000 |
| rad23         | 6.84664e-23 | 1.00000 | 6.84715e-23 | 1.00000 |
| PAH3+H        | 1.00146e-23 | 1.00000 | 1.00154e-23 | 1.00000 |
| rad59         | 4.07844e-24 | 1.00000 | 4.07874e-24 | 1.00000 |
| rad50         | 2.47924e-25 | 1.00000 | 2.47943e-25 | 1.00000 |
| rad45         | 2.26957e-25 | 1.00000 | 2.26973e-25 | 1.00000 |
| rad24         | 2.46586e-26 | 1.00000 | 2.46604e-26 | 1.00000 |
| rad36         | 1.41157e-26 | 1.00000 | 1.41167e-26 | 1.00000 |
| rad19syn      | 3.67674e-29 | 1.00000 | 3.67701e-29 | 1.00000 |
| rad52         | 2.29678e-31 | 1.00000 | 2.29695e-31 | 1.00000 |
| rad54         | 8.12227e-41 | 1.00000 | 8.12287e-41 | 1.00000 |
| PAH10+CH3     | 6.62223e-41 | 1.00000 | 6.62272e-41 | 1.00000 |
| rad43         | 1.53227e-41 | 1.00000 | 1.53238e-41 | 1.00000 |
| rad62         | 9.67409e-44 | 1.00000 | 9.67480e-44 | 1.00000 |
| rad51         | 2.43414e-46 | 1.00000 | 2.43432e-46 | 1.00000 |
| rad70         | 5.74445e-49 | 1.00000 | 5.74488e-49 | 1.00000 |
| PhcycC3H3_A+H | 3.41945e-49 | 1.00000 | 3.41970e-49 | 1.00000 |
| rad55         | 1.68814e-49 | 1.00000 | 1.68827e-49 | 1.00000 |
| rad65         | 2.93276e-50 | 1.00000 | 2.93297e-50 | 1.00000 |
| rad58         | 1.58246e-52 | 1.00000 | 1.58258e-52 | 1.00000 |
| PAH1+H        | 1.12917e-52 | 1.00000 | 1.12925e-52 | 1.00000 |
| rad34         | 2.29572e-54 | 1.00000 | 2.29589e-54 | 1.00000 |
| rad42         | 2.62282e-56 | 1.00000 | 2.62302e-56 | 1.00000 |
| rad41         | 1.58287e-56 | 1.00000 | 1.58299e-56 | 1.00000 |
| rad47         | 1.04851e-66 | 1.00000 | 1.04858e-66 | 1.00000 |

0.100000000E-08 Pa, 180.000000 K

=====  
Rate constant | True (fraction) | Effective (fraction)  
-----  
Total | 4.69315e-29 (1.00) | 4.69271e-29 (1.00)

| species     | PYtrue      | Cumul    | PYeffective | Cumul   |
|-------------|-------------|----------|-------------|---------|
| Indene+H    | 0.999906    | 0.999906 | 1.00000     | 1.00000 |
| Benzyl+C2H2 | 9.42883e-05 | 1.00000  | 0.00000     | 1.00000 |
| rad6        | 1.90209e-09 | 1.00000  | 1.90227e-09 | 1.00000 |
| rad30       | 5.55653e-10 | 1.00000  | 5.55706e-10 | 1.00000 |
| PhCHCCH2+H  | 2.92977e-10 | 1.00000  | 2.93005e-10 | 1.00000 |
| PhCCH+CH3   | 2.26865e-10 | 1.00000  | 2.26887e-10 | 1.00000 |
| PAH9+H      | 1.20677e-10 | 1.00000  | 1.20689e-10 | 1.00000 |
| rad35       | 1.19033e-10 | 1.00000  | 1.19045e-10 | 1.00000 |
| PhCCCH3+H   | 8.26172e-11 | 1.00000  | 8.26250e-11 | 1.00000 |
| rad15       | 2.12854e-11 | 1.00000  | 2.12874e-11 | 1.00000 |
| rad38       | 1.40492e-11 | 1.00000  | 1.40505e-11 | 1.00000 |
| rad28       | 3.24250e-12 | 1.00000  | 3.24281e-12 | 1.00000 |
| rad26       | 3.20416e-13 | 1.00000  | 3.20446e-13 | 1.00000 |
| rad2        | 2.54470e-13 | 1.00000  | 2.54494e-13 | 1.00000 |
| rad8        | 2.08378e-13 | 1.00000  | 2.08398e-13 | 1.00000 |
| rad7        | 1.40410e-13 | 1.00000  | 1.40424e-13 | 1.00000 |
| rad10       | 1.20876e-13 | 1.00000  | 1.20887e-13 | 1.00000 |
| Ph+MeAc     | 7.82677e-14 | 1.00000  | 7.82751e-14 | 1.00000 |
| rad9        | 4.09073e-14 | 1.00000  | 4.09111e-14 | 1.00000 |
| rad11       | 3.49102e-14 | 1.00000  | 3.49135e-14 | 1.00000 |
| PAH7+H      | 2.11366e-14 | 1.00000  | 2.11385e-14 | 1.00000 |
| rad1        | 1.70366e-14 | 1.00000  | 1.70383e-14 | 1.00000 |
| rad3        | 4.42831e-15 | 1.00000  | 4.42873e-15 | 1.00000 |
| rad4        | 2.27348e-15 | 1.00000  | 2.27369e-15 | 1.00000 |
| rad12       | 2.15519e-15 | 1.00000  | 2.15539e-15 | 1.00000 |
| rad46       | 1.92593e-15 | 1.00000  | 1.92612e-15 | 1.00000 |
| rad39       | 1.32011e-15 | 1.00000  | 1.32024e-15 | 1.00000 |
| Ph+Allene   | 1.08715e-15 | 1.00000  | 1.08726e-15 | 1.00000 |

|               |             |         |             |         |
|---------------|-------------|---------|-------------|---------|
| rad13         | 7.91845e-16 | 1.00000 | 7.91920e-16 | 1.00000 |
| rad60syn      | 5.00699e-18 | 1.00000 | 5.00746e-18 | 1.00000 |
| rad27         | 3.62105e-18 | 1.00000 | 3.62139e-18 | 1.00000 |
| rad33         | 1.68238e-18 | 1.00000 | 1.68254e-18 | 1.00000 |
| PhCH2CCH+H    | 9.66855e-19 | 1.00000 | 9.66946e-19 | 1.00000 |
| rad60anti     | 8.05149e-19 | 1.00000 | 8.05224e-19 | 1.00000 |
| rad20         | 3.90237e-19 | 1.00000 | 3.90274e-19 | 1.00000 |
| rad25         | 2.60252e-19 | 1.00000 | 2.60277e-19 | 1.00000 |
| rad21         | 2.47121e-19 | 1.00000 | 2.47144e-19 | 1.00000 |
| rad37         | 2.45037e-19 | 1.00000 | 2.45060e-19 | 1.00000 |
| rad14         | 1.56082e-19 | 1.00000 | 1.56097e-19 | 1.00000 |
| rad18         | 1.79224e-21 | 1.00000 | 1.79241e-21 | 1.00000 |
| rad5          | 1.33540e-21 | 1.00000 | 1.33553e-21 | 1.00000 |
| rad31         | 2.98790e-22 | 1.00000 | 2.98818e-22 | 1.00000 |
| PAH3+H        | 1.31623e-22 | 1.00000 | 1.31635e-22 | 1.00000 |
| rad22         | 1.16979e-22 | 1.00000 | 1.16990e-22 | 1.00000 |
| rad23         | 7.72360e-23 | 1.00000 | 7.72433e-23 | 1.00000 |
| rad59         | 5.19690e-23 | 1.00000 | 5.19739e-23 | 1.00000 |
| rad50         | 3.08696e-24 | 1.00000 | 3.08725e-24 | 1.00000 |
| rad45         | 2.35765e-25 | 1.00000 | 2.35787e-25 | 1.00000 |
| rad24         | 2.45420e-26 | 1.00000 | 2.45443e-26 | 1.00000 |
| rad36         | 1.46817e-26 | 1.00000 | 1.46831e-26 | 1.00000 |
| rad19syn      | 4.66138e-27 | 1.00000 | 4.66182e-27 | 1.00000 |
| rad52         | 1.37731e-29 | 1.00000 | 1.37744e-29 | 1.00000 |
| rad54         | 8.06868e-38 | 1.00000 | 8.06944e-38 | 1.00000 |
| PAH10+CH3     | 5.46501e-38 | 1.00000 | 5.46553e-38 | 1.00000 |
| rad43         | 1.25902e-38 | 1.00000 | 1.25914e-38 | 1.00000 |
| rad62         | 7.19411e-41 | 1.00000 | 7.19479e-41 | 1.00000 |
| rad51         | 1.15313e-43 | 1.00000 | 1.15324e-43 | 1.00000 |
| rad70         | 3.98152e-46 | 1.00000 | 3.98189e-46 | 1.00000 |
| PhcycC3H3_A+H | 2.07642e-46 | 1.00000 | 2.07662e-46 | 1.00000 |
| rad55         | 1.07056e-46 | 1.00000 | 1.07066e-46 | 1.00000 |
| rad65         | 9.17372e-48 | 1.00000 | 9.17458e-48 | 1.00000 |
| rad58         | 8.58338e-50 | 1.00000 | 8.58419e-50 | 1.00000 |
| PAH1+H        | 2.99042e-50 | 1.00000 | 2.99070e-50 | 1.00000 |
| rad34         | 5.91558e-52 | 1.00000 | 5.91614e-52 | 1.00000 |
| rad42         | 9.21761e-54 | 1.00000 | 9.21848e-54 | 1.00000 |
| rad41         | 5.89569e-54 | 1.00000 | 5.89625e-54 | 1.00000 |
| rad47         | 3.85148e-64 | 1.00000 | 3.85184e-64 | 1.00000 |

0.100000000E-08 Pa, 190.000000 K

=====  
Rate constant | True (fraction) | Effective (fraction)  
-----  
Total | 3.16530e-28 (1.00) | 3.16492e-28 (1.00)

| species     | PYtrue      | Cumul    | PYeffective | Cumul   |
|-------------|-------------|----------|-------------|---------|
| Indene+H    | 0.999879    | 0.999879 | 1.00000     | 1.00000 |
| Benzyl+C2H2 | 0.000120746 | 1.00000  | 0.00000     | 1.00000 |
| rad6        | 1.55042e-09 | 1.00000  | 1.55060e-09 | 1.00000 |
| rad30       | 9.10077e-10 | 1.00000  | 9.10187e-10 | 1.00000 |
| PhCHCCH2+H  | 6.86993e-10 | 1.00000  | 6.87076e-10 | 1.00000 |
| PhCCH+CH3   | 5.85668e-10 | 1.00000  | 5.85739e-10 | 1.00000 |
| PhCCCH3+H   | 2.16530e-10 | 1.00000  | 2.16556e-10 | 1.00000 |
| PAH9+H      | 1.71637e-10 | 1.00000  | 1.71658e-10 | 1.00000 |
| rad35       | 1.59590e-10 | 1.00000  | 1.59609e-10 | 1.00000 |
| rad15       | 4.20213e-11 | 1.00000  | 4.20264e-11 | 1.00000 |
| rad38       | 2.20307e-11 | 1.00000  | 2.20334e-11 | 1.00000 |
| rad28       | 3.85087e-12 | 1.00000  | 3.85133e-12 | 1.00000 |
| rad2        | 1.07517e-12 | 1.00000  | 1.07530e-12 | 1.00000 |
| rad8        | 6.55652e-13 | 1.00000  | 6.55732e-13 | 1.00000 |
| rad26       | 3.94076e-13 | 1.00000  | 3.94123e-13 | 1.00000 |
| Ph+MeAc     | 3.45557e-13 | 1.00000  | 3.45599e-13 | 1.00000 |
| rad9        | 1.48911e-13 | 1.00000  | 1.48929e-13 | 1.00000 |
| rad7        | 1.14696e-13 | 1.00000  | 1.14710e-13 | 1.00000 |
| rad10       | 8.97950e-14 | 1.00000  | 8.98059e-14 | 1.00000 |
| PAH7+H      | 7.91873e-14 | 1.00000  | 7.91968e-14 | 1.00000 |
| rad1        | 7.25073e-14 | 1.00000  | 7.25160e-14 | 1.00000 |
| rad11       | 2.85530e-14 | 1.00000  | 2.85564e-14 | 1.00000 |
| rad12       | 8.28119e-15 | 1.00000  | 8.28219e-15 | 1.00000 |
| Ph+Allene   | 5.83724e-15 | 1.00000  | 5.83795e-15 | 1.00000 |
| rad39       | 5.66591e-15 | 1.00000  | 5.66659e-15 | 1.00000 |
| rad46       | 5.15013e-15 | 1.00000  | 5.15075e-15 | 1.00000 |
| rad3        | 1.48700e-15 | 1.00000  | 1.48718e-15 | 1.00000 |
| rad4        | 7.64823e-16 | 1.00000  | 7.64916e-16 | 1.00000 |
| rad13       | 6.47775e-16 | 1.00000  | 6.47853e-16 | 1.00000 |
| rad60syn    | 2.40561e-17 | 1.00000  | 2.40590e-17 | 1.00000 |
| PhCH2CCH+H  | 7.73355e-18 | 1.00000  | 7.73449e-18 | 1.00000 |
| rad60anti   | 4.26710e-18 | 1.00000  | 4.26761e-18 | 1.00000 |

|               |             |          |             |         |
|---------------|-------------|----------|-------------|---------|
| rad27         | 4.04242e-18 | 1.000000 | 4.04291e-18 | 1.00000 |
| rad37         | 1.85740e-18 | 1.000000 | 1.85763e-18 | 1.00000 |
| rad33         | 1.38916e-18 | 1.000000 | 1.38933e-18 | 1.00000 |
| rad25         | 3.69633e-19 | 1.000000 | 3.69677e-19 | 1.00000 |
| rad20         | 3.51755e-19 | 1.000000 | 3.51798e-19 | 1.00000 |
| rad14         | 2.37472e-19 | 1.000000 | 2.37501e-19 | 1.00000 |
| rad21         | 2.23155e-19 | 1.000000 | 2.23182e-19 | 1.00000 |
| rad5          | 1.17921e-20 | 1.000000 | 1.17936e-20 | 1.00000 |
| rad18         | 1.60393e-21 | 1.000000 | 1.60412e-21 | 1.00000 |
| PAH3+H        | 1.32122e-21 | 1.000000 | 1.32138e-21 | 1.00000 |
| rad59         | 5.06390e-22 | 1.000000 | 5.06451e-22 | 1.00000 |
| rad31         | 2.77497e-22 | 1.000000 | 2.77530e-22 | 1.00000 |
| rad22         | 1.03844e-22 | 1.000000 | 1.03857e-22 | 1.00000 |
| rad23         | 9.14623e-23 | 1.000000 | 9.14733e-23 | 1.00000 |
| rad50         | 2.96740e-23 | 1.000000 | 2.96776e-23 | 1.00000 |
| rad45         | 1.30044e-25 | 1.000000 | 1.30059e-25 | 1.00000 |
| rad19syn      | 1.22411e-25 | 1.000000 | 1.22426e-25 | 1.00000 |
| rad24         | 2.45737e-26 | 1.000000 | 2.45767e-26 | 1.00000 |
| rad36         | 8.11216e-27 | 1.000000 | 8.11314e-27 | 1.00000 |
| rad54         | 5.45682e-28 | 1.000000 | 5.45748e-28 | 1.00000 |
| PAH10+CH3     | 3.67387e-28 | 1.000000 | 3.67432e-28 | 1.00000 |
| rad52         | 3.13061e-28 | 1.000000 | 3.13098e-28 | 1.00000 |
| rad43         | 8.93613e-29 | 1.000000 | 8.93721e-29 | 1.00000 |
| rad62         | 4.15621e-30 | 1.000000 | 4.15672e-30 | 1.00000 |
| rad51         | 2.56194e-31 | 1.000000 | 2.56225e-31 | 1.00000 |
| rad70         | 7.96539e-43 | 1.000000 | 7.96635e-43 | 1.00000 |
| PhcycC3H3_A+H | 3.95378e-43 | 1.000000 | 3.95425e-43 | 1.00000 |
| rad55         | 2.07908e-43 | 1.000000 | 2.07933e-43 | 1.00000 |
| rad65         | 5.51260e-45 | 1.000000 | 5.51327e-45 | 1.00000 |
| rad58         | 1.52825e-46 | 1.000000 | 1.52844e-46 | 1.00000 |
| PAH1+H        | 1.34032e-47 | 1.000000 | 1.34048e-47 | 1.00000 |
| rad34         | 1.87868e-49 | 1.000000 | 1.87890e-49 | 1.00000 |
| rad42         | 2.99124e-51 | 1.000000 | 2.99160e-51 | 1.00000 |
| rad41         | 2.03940e-51 | 1.000000 | 2.03965e-51 | 1.00000 |
| rad47         | 1.45209e-61 | 1.000000 | 1.45227e-61 | 1.00000 |

0.100000000E-08 Pa, 200.000000 K

=====

| Rate constant | True (fraction)     | Effective (fraction) |
|---------------|---------------------|----------------------|
| Total         | 1.76115e-27 (1.00 ) | 1.76088e-27 (1.00 )  |

| species     | PYtrue      | Cumul    | PYeffective | Cumul   |
|-------------|-------------|----------|-------------|---------|
| Indene+H    | 0.999846    | 0.999846 | 1.00000     | 1.00000 |
| Benzyl+C2H2 | 0.000153979 | 1.000000 | 0.00000     | 1.00000 |
| PhCHCCH2+H  | 1.49982e-09 | 1.000000 | 1.50005e-09 | 1.00000 |
| rad30       | 1.43889e-09 | 1.000000 | 1.43911e-09 | 1.00000 |
| PhCCH+CH3   | 1.39294e-09 | 1.000000 | 1.39315e-09 | 1.00000 |
| rad6        | 1.26471e-09 | 1.000000 | 1.26491e-09 | 1.00000 |
| PhCCCH3+H   | 5.20618e-10 | 1.000000 | 5.20698e-10 | 1.00000 |
| PAH9+H      | 2.42288e-10 | 1.000000 | 2.42326e-10 | 1.00000 |
| rad35       | 2.13493e-10 | 1.000000 | 2.13525e-10 | 1.00000 |
| rad15       | 7.83498e-11 | 1.000000 | 7.83619e-11 | 1.00000 |
| rad38       | 3.38822e-11 | 1.000000 | 3.38874e-11 | 1.00000 |
| rad28       | 4.39278e-12 | 1.000000 | 4.39346e-12 | 1.00000 |
| rad8        | 1.85064e-12 | 1.000000 | 1.85092e-12 | 1.00000 |
| Ph+MeAc     | 1.32297e-12 | 1.000000 | 1.32317e-12 | 1.00000 |
| rad9        | 4.79212e-13 | 1.000000 | 4.79286e-13 | 1.00000 |
| rad26       | 4.63913e-13 | 1.000000 | 4.63985e-13 | 1.00000 |
| rad2        | 3.79032e-13 | 1.000000 | 3.79090e-13 | 1.00000 |
| PAH7+H      | 2.61207e-13 | 1.000000 | 2.61247e-13 | 1.00000 |
| rad7        | 9.37671e-14 | 1.000000 | 9.37815e-14 | 1.00000 |
| rad10       | 6.78872e-14 | 1.000000 | 6.78976e-14 | 1.00000 |
| rad12       | 2.78701e-14 | 1.000000 | 2.78744e-14 | 1.00000 |
| Ph+Allene   | 2.66782e-14 | 1.000000 | 2.66824e-14 | 1.00000 |
| rad1        | 2.57642e-14 | 1.000000 | 2.57682e-14 | 1.00000 |
| rad11       | 2.33739e-14 | 1.000000 | 2.33775e-14 | 1.00000 |
| rad39       | 2.11360e-14 | 1.000000 | 2.11392e-14 | 1.00000 |
| rad46       | 1.26631e-14 | 1.000000 | 1.26650e-14 | 1.00000 |
| rad3        | 1.95316e-15 | 1.000000 | 1.95346e-15 | 1.00000 |
| rad4        | 1.00724e-15 | 1.000000 | 1.00739e-15 | 1.00000 |
| rad13       | 5.30390e-16 | 1.000000 | 5.30472e-16 | 1.00000 |
| rad60syn    | 9.89774e-17 | 1.000000 | 9.89927e-17 | 1.00000 |
| PhCH2CCH+H  | 5.05404e-17 | 1.000000 | 5.05482e-17 | 1.00000 |
| rad60anti   | 1.91539e-17 | 1.000000 | 1.91569e-17 | 1.00000 |
| rad37       | 1.13915e-17 | 1.000000 | 1.13933e-17 | 1.00000 |
| rad27       | 4.36603e-18 | 1.000000 | 4.36671e-18 | 1.00000 |
| rad33       | 1.14877e-18 | 1.000000 | 1.14895e-18 | 1.00000 |
| rad25       | 4.95558e-19 | 1.000000 | 4.95634e-19 | 1.00000 |

|               |             |          |             |         |
|---------------|-------------|----------|-------------|---------|
| rad14         | 3.38656e-19 | 1.000000 | 3.38708e-19 | 1.00000 |
| rad20         | 3.17763e-19 | 1.000000 | 3.17812e-19 | 1.00000 |
| rad21         | 2.01982e-19 | 1.000000 | 2.02013e-19 | 1.00000 |
| rad5          | 8.38252e-20 | 1.000000 | 8.38382e-20 | 1.00000 |
| PAH3+H        | 1.05456e-20 | 1.000000 | 1.05472e-20 | 1.00000 |
| rad59         | 3.92886e-21 | 1.000000 | 3.92946e-21 | 1.00000 |
| rad18         | 1.43711e-21 | 1.000000 | 1.43733e-21 | 1.00000 |
| rad31         | 2.59800e-22 | 1.000000 | 2.59840e-22 | 1.00000 |
| rad50         | 2.28898e-22 | 1.000000 | 2.28933e-22 | 1.00000 |
| rad23         | 1.13760e-22 | 1.000000 | 1.13777e-22 | 1.00000 |
| rad22         | 9.22379e-23 | 1.000000 | 9.22521e-23 | 1.00000 |
| rad19syn      | 1.82537e-24 | 1.000000 | 1.82565e-24 | 1.00000 |
| rad45         | 1.69259e-24 | 1.000000 | 1.69285e-24 | 1.00000 |
| rad36         | 1.05826e-25 | 1.000000 | 1.05842e-25 | 1.00000 |
| rad24         | 2.47519e-26 | 1.000000 | 2.47557e-26 | 1.00000 |
| rad54         | 1.37160e-26 | 1.000000 | 1.37181e-26 | 1.00000 |
| PAH10+CH3     | 9.40146e-27 | 1.000000 | 9.40291e-27 | 1.00000 |
| rad52         | 4.44081e-27 | 1.000000 | 4.44149e-27 | 1.00000 |
| rad43         | 2.30283e-27 | 1.000000 | 2.30318e-27 | 1.00000 |
| rad62         | 2.68736e-28 | 1.000000 | 2.68777e-28 | 1.00000 |
| rad51         | 1.45636e-29 | 1.000000 | 1.45659e-29 | 1.00000 |
| rad65         | 1.67715e-32 | 1.000000 | 1.67740e-32 | 1.00000 |
| rad70         | 1.91803e-39 | 1.000000 | 1.91832e-39 | 1.00000 |
| PhcycC3H3_A+H | 9.56230e-40 | 1.000000 | 9.56377e-40 | 1.00000 |
| rad55         | 5.03071e-40 | 1.000000 | 5.03149e-40 | 1.00000 |
| rad58         | 3.68356e-43 | 1.000000 | 3.68412e-43 | 1.00000 |
| PAH1+H        | 2.10568e-44 | 1.000000 | 2.10601e-44 | 1.00000 |
| rad34         | 2.01370e-46 | 1.000000 | 2.01401e-46 | 1.00000 |
| rad42         | 6.99851e-49 | 1.000000 | 6.99959e-49 | 1.00000 |
| rad41         | 4.82529e-49 | 1.000000 | 4.82603e-49 | 1.00000 |
| rad47         | 4.79946e-59 | 1.000000 | 4.80020e-59 | 1.00000 |

0.100000000E-08 Pa, 210.000000 K

=====

| Rate constant | True (fraction)     | Effective (fraction) |
|---------------|---------------------|----------------------|
| Total         | 8.30956e-27 (1.00 ) | 8.30794e-27 (1.00 )  |

| species     | PYtrue      | Cumul    | PYeffective | Cumul   |
|-------------|-------------|----------|-------------|---------|
| Indene+H    | 0.999804    | 0.999804 | 1.00000     | 1.00000 |
| Benzyl+C2H2 | 0.000195497 | 0.999999 | 0.00000     | 1.00000 |
| PhCCH+CH3   | 3.08729e-09 | 1.000000 | 3.08789e-09 | 1.00000 |
| PhCHCCH2+H  | 3.07900e-09 | 1.000000 | 3.07960e-09 | 1.00000 |
| rad30       | 2.20830e-09 | 1.000000 | 2.20873e-09 | 1.00000 |
| PhCCCH3+H   | 1.16232e-09 | 1.000000 | 1.16254e-09 | 1.00000 |
| rad6        | 1.03204e-09 | 1.000000 | 1.03224e-09 | 1.00000 |
| PAH9+H      | 3.39692e-10 | 1.000000 | 3.39759e-10 | 1.00000 |
| rad35       | 2.84863e-10 | 1.000000 | 2.84918e-10 | 1.00000 |
| rad15       | 1.39185e-10 | 1.000000 | 1.39212e-10 | 1.00000 |
| rad38       | 5.12411e-11 | 1.000000 | 5.12511e-11 | 1.00000 |
| rad28       | 4.84001e-12 | 1.000000 | 4.84095e-12 | 1.00000 |
| rad8        | 4.76045e-12 | 1.000000 | 4.76138e-12 | 1.00000 |
| Ph+MeAc     | 4.48106e-12 | 1.000000 | 4.48194e-12 | 1.00000 |
| rad9        | 1.38783e-12 | 1.000000 | 1.38810e-12 | 1.00000 |
| PAH7+H      | 7.72989e-13 | 1.000000 | 7.73140e-13 | 1.00000 |
| rad26       | 5.25928e-13 | 1.000000 | 5.26031e-13 | 1.00000 |
| rad2        | 2.30548e-13 | 1.000000 | 2.30593e-13 | 1.00000 |
| Ph+Allene   | 1.06213e-13 | 1.000000 | 1.06234e-13 | 1.00000 |
| rad12       | 8.37414e-14 | 1.000000 | 8.37578e-14 | 1.00000 |
| rad7        | 7.66911e-14 | 1.000000 | 7.67061e-14 | 1.00000 |
| rad39       | 6.99261e-14 | 1.000000 | 6.99398e-14 | 1.00000 |
| rad10       | 5.20940e-14 | 1.000000 | 5.21041e-14 | 1.00000 |
| rad46       | 2.89984e-14 | 1.000000 | 2.90041e-14 | 1.00000 |
| rad11       | 1.91438e-14 | 1.000000 | 1.91476e-14 | 1.00000 |
| rad1        | 1.58008e-14 | 1.000000 | 1.58039e-14 | 1.00000 |
| rad3        | 1.05031e-15 | 1.000000 | 1.05051e-15 | 1.00000 |
| rad4        | 5.42799e-16 | 1.000000 | 5.42905e-16 | 1.00000 |
| rad13       | 4.34502e-16 | 1.000000 | 4.34587e-16 | 1.00000 |
| rad60syn    | 3.56772e-16 | 1.000000 | 3.56842e-16 | 1.00000 |
| PhCH2CCH+H  | 2.77797e-16 | 1.000000 | 2.77851e-16 | 1.00000 |
| rad60anti   | 7.46103e-17 | 1.000000 | 7.46249e-17 | 1.00000 |
| rad37       | 5.82816e-17 | 1.000000 | 5.82930e-17 | 1.00000 |
| rad27       | 4.58313e-18 | 1.000000 | 4.58402e-18 | 1.00000 |
| rad33       | 9.51113e-19 | 1.000000 | 9.51299e-19 | 1.00000 |
| rad25       | 6.32241e-19 | 1.000000 | 6.32365e-19 | 1.00000 |
| rad5        | 4.94773e-19 | 1.000000 | 4.94870e-19 | 1.00000 |
| rad14       | 4.56817e-19 | 1.000000 | 4.56907e-19 | 1.00000 |
| rad20       | 2.87641e-19 | 1.000000 | 2.87697e-19 | 1.00000 |
| rad21       | 1.83217e-19 | 1.000000 | 1.83253e-19 | 1.00000 |

|               |             |          |             |         |
|---------------|-------------|----------|-------------|---------|
| PAH3+H        | 6.92409e-20 | 1.000000 | 6.92544e-20 | 1.00000 |
| rad59         | 2.51009e-20 | 1.000000 | 2.51058e-20 | 1.00000 |
| rad50         | 1.46375e-21 | 1.000000 | 1.46404e-21 | 1.00000 |
| rad18         | 1.28890e-21 | 1.000000 | 1.28915e-21 | 1.00000 |
| rad31         | 2.45147e-22 | 1.000000 | 2.45195e-22 | 1.00000 |
| rad23         | 1.48041e-22 | 1.000000 | 1.48069e-22 | 1.00000 |
| rad22         | 8.19572e-23 | 1.000000 | 8.19732e-23 | 1.00000 |
| rad19syn      | 2.00818e-23 | 1.000000 | 2.00857e-23 | 1.00000 |
| rad45         | 1.11082e-24 | 1.000000 | 1.11104e-24 | 1.00000 |
| rad54         | 1.94322e-25 | 1.000000 | 1.94360e-25 | 1.00000 |
| PAH10+CH3     | 1.33349e-25 | 1.000000 | 1.33375e-25 | 1.00000 |
| rad36         | 6.95515e-26 | 1.000000 | 6.95651e-26 | 1.00000 |
| rad52         | 4.73526e-26 | 1.000000 | 4.73619e-26 | 1.00000 |
| rad43         | 3.24699e-26 | 1.000000 | 3.24763e-26 | 1.00000 |
| rad24         | 2.50794e-26 | 1.000000 | 2.50843e-26 | 1.00000 |
| rad62         | 4.87675e-27 | 1.000000 | 4.87770e-27 | 1.00000 |
| rad51         | 2.76098e-28 | 1.000000 | 2.76152e-28 | 1.00000 |
| rad70         | 4.15017e-29 | 1.000000 | 4.15098e-29 | 1.00000 |
| PhcycC3H3_A+H | 3.67776e-29 | 1.000000 | 3.67848e-29 | 1.00000 |
| rad55         | 1.45178e-29 | 1.000000 | 1.45206e-29 | 1.00000 |
| rad58         | 1.88404e-30 | 1.000000 | 1.88441e-30 | 1.00000 |
| rad65         | 8.86433e-31 | 1.000000 | 8.86607e-31 | 1.00000 |
| PAH1+H        | 5.49758e-41 | 1.000000 | 5.49865e-41 | 1.00000 |
| rad34         | 5.07923e-43 | 1.000000 | 5.08023e-43 | 1.00000 |
| rad42         | 2.00301e-46 | 1.000000 | 2.00340e-46 | 1.00000 |
| rad41         | 9.12517e-47 | 1.000000 | 9.12696e-47 | 1.00000 |
| rad47         | 4.20713e-56 | 1.000000 | 4.20795e-56 | 1.00000 |

0.100000000E-08 Pa, 220.000000 K

| Rate constant | True (fraction)     | Effective (fraction) |
|---------------|---------------------|----------------------|
| Total         | 3.40057e-26 (1.00 ) | 3.39973e-26 (1.00 )  |

| species    | PYtrue      | Cumul    | PYeffective | Cumul   |
|------------|-------------|----------|-------------|---------|
| Indene+H   | 0.999753    | 0.999753 | 1.00000     | 1.00000 |
| Benzyl+CH2 | 0.000247078 | 1.00000  | 0.00000     | 1.00000 |
| PhCCH+CH3  | 6.43602e-09 | 1.00000  | 6.43761e-09 | 1.00000 |
| PhCHCCH2+H | 5.99187e-09 | 1.00000  | 5.99335e-09 | 1.00000 |
| rad30      | 3.30405e-09 | 1.00000  | 3.30486e-09 | 1.00000 |
| PhCCCH3+H  | 2.43334e-09 | 1.00000  | 2.43394e-09 | 1.00000 |
| rad6       | 8.42233e-10 | 1.00000  | 8.42441e-10 | 1.00000 |
| PAH9+H     | 4.73189e-10 | 1.00000  | 4.73306e-10 | 1.00000 |
| rad35      | 3.78956e-10 | 1.00000  | 3.79049e-10 | 1.00000 |
| rad15      | 2.37238e-10 | 1.00000  | 2.37297e-10 | 1.00000 |
| rad38      | 7.63518e-11 | 1.00000  | 7.63707e-11 | 1.00000 |
| Ph+MeAc    | 1.36499e-11 | 1.00000  | 1.36533e-11 | 1.00000 |
| rad8       | 1.13040e-11 | 1.00000  | 1.13068e-11 | 1.00000 |
| rad28      | 5.17439e-12 | 1.00000  | 5.17567e-12 | 1.00000 |
| rad9       | 3.66996e-12 | 1.00000  | 3.67087e-12 | 1.00000 |
| PAH7+H     | 2.08381e-12 | 1.00000  | 2.08433e-12 | 1.00000 |
| rad26      | 5.77042e-13 | 1.00000  | 5.77185e-13 | 1.00000 |
| Ph+Allene  | 3.75387e-13 | 1.00000  | 3.75480e-13 | 1.00000 |
| rad12      | 2.28179e-13 | 1.00000  | 2.28235e-13 | 1.00000 |
| rad39      | 2.08582e-13 | 1.00000  | 2.08634e-13 | 1.00000 |
| rad2       | 9.43761e-14 | 1.00000  | 9.43994e-14 | 1.00000 |
| rad7       | 6.27337e-14 | 1.00000  | 6.27492e-14 | 1.00000 |
| rad46      | 6.24893e-14 | 1.00000  | 6.25047e-14 | 1.00000 |
| rad10      | 4.04908e-14 | 1.00000  | 4.05008e-14 | 1.00000 |
| rad11      | 1.56826e-14 | 1.00000  | 1.56864e-14 | 1.00000 |
| rad1       | 6.52804e-15 | 1.00000  | 6.52965e-15 | 1.00000 |
| PhCH2CCH+H | 1.31497e-15 | 1.00000  | 1.31529e-15 | 1.00000 |
| rad60syn   | 1.14776e-15 | 1.00000  | 1.14805e-15 | 1.00000 |
| rad3       | 4.84379e-16 | 1.00000  | 4.84499e-16 | 1.00000 |
| rad13      | 3.56030e-16 | 1.00000  | 3.56117e-16 | 1.00000 |
| rad60anti  | 2.57261e-16 | 1.00000  | 2.57324e-16 | 1.00000 |
| rad37      | 2.55043e-16 | 1.00000  | 2.55106e-16 | 1.00000 |
| rad4       | 2.50963e-16 | 1.00000  | 2.51025e-16 | 1.00000 |
| rad27      | 4.69347e-18 | 1.00000  | 4.69463e-18 | 1.00000 |
| rad5       | 2.48677e-18 | 1.00000  | 2.48738e-18 | 1.00000 |
| rad33      | 7.88218e-19 | 1.00000  | 7.88413e-19 | 1.00000 |
| rad25      | 7.72702e-19 | 1.00000  | 7.72893e-19 | 1.00000 |
| rad14      | 5.87214e-19 | 1.00000  | 5.87359e-19 | 1.00000 |
| PAH3+H     | 3.84313e-19 | 1.00000  | 3.84408e-19 | 1.00000 |
| rad20      | 2.60883e-19 | 1.00000  | 2.60947e-19 | 1.00000 |
| rad21      | 1.66546e-19 | 1.00000  | 1.66587e-19 | 1.00000 |
| rad59      | 1.35685e-19 | 1.00000  | 1.35719e-19 | 1.00000 |
| rad50      | 7.96594e-21 | 1.00000  | 7.96790e-21 | 1.00000 |
| rad18      | 1.15695e-21 | 1.00000  | 1.15723e-21 | 1.00000 |



|               |             |         |             |         |
|---------------|-------------|---------|-------------|---------|
| rad31         | 2.33127e-22 | 1.00000 | 2.33185e-22 | 1.00000 |
| rad23         | 2.01557e-22 | 1.00000 | 2.01607e-22 | 1.00000 |
| rad19syn      | 1.76810e-22 | 1.00000 | 1.76853e-22 | 1.00000 |
| rad22         | 7.28349e-23 | 1.00000 | 7.28529e-23 | 1.00000 |
| rad54         | 2.07925e-24 | 1.00000 | 2.07977e-24 | 1.00000 |
| rad45         | 1.88068e-24 | 1.00000 | 1.88114e-24 | 1.00000 |
| PAH10+CH3     | 1.42538e-24 | 1.00000 | 1.42573e-24 | 1.00000 |
| rad52         | 4.06722e-25 | 1.00000 | 4.06823e-25 | 1.00000 |
| rad43         | 3.45425e-25 | 1.00000 | 3.45510e-25 | 1.00000 |
| rad36         | 1.18126e-25 | 1.00000 | 1.18155e-25 | 1.00000 |
| rad62         | 5.97333e-26 | 1.00000 | 5.97481e-26 | 1.00000 |
| rad24         | 2.55638e-26 | 1.00000 | 2.55701e-26 | 1.00000 |
| rad51         | 3.50353e-27 | 1.00000 | 3.50440e-27 | 1.00000 |
| PhcycC3H3_A+H | 9.87085e-28 | 1.00000 | 9.87329e-28 | 1.00000 |
| rad70         | 8.97428e-28 | 1.00000 | 8.97650e-28 | 1.00000 |
| rad55         | 3.38159e-28 | 1.00000 | 3.38243e-28 | 1.00000 |
| rad58         | 5.59629e-29 | 1.00000 | 5.59768e-29 | 1.00000 |
| rad65         | 1.55276e-29 | 1.00000 | 1.55314e-29 | 1.00000 |
| PAH1+H        | 3.10930e-30 | 1.00000 | 3.11007e-30 | 1.00000 |
| rad34         | 2.04140e-40 | 1.00000 | 2.04191e-40 | 1.00000 |
| rad42         | 4.73510e-44 | 1.00000 | 4.73627e-44 | 1.00000 |
| rad47         | 1.49504e-44 | 1.00000 | 1.49541e-44 | 1.00000 |
| rad41         | 1.11523e-44 | 1.00000 | 1.11551e-44 | 1.00000 |

0.100000000E-08 Pa, 230.000000 K

| Rate constant | True (fraction)     | Effective (fraction) |
|---------------|---------------------|----------------------|
| Total         | 1.22972e-25 (1.00 ) | 1.22933e-25 (1.00 )  |

| species     | PYtrue      | Cumul    | PYeffective | Cumul   |
|-------------|-------------|----------|-------------|---------|
| Indene+H    | 0.999689    | 0.999689 | 1.00000     | 1.00000 |
| Benzyl+C2H2 | 0.000310803 | 1.00000  | 0.00000     | 1.00000 |
| PhCCH+CH3   | 1.27160e-08 | 1.00000  | 1.27200e-08 | 1.00000 |
| PhCHCCH2+H  | 1.11264e-08 | 1.00000  | 1.11299e-08 | 1.00000 |
| rad30       | 4.83587e-09 | 1.00000  | 4.83738e-09 | 1.00000 |
| PhCCCH3+H   | 4.81567e-09 | 1.00000  | 4.81717e-09 | 1.00000 |
| rad6        | 6.87221e-10 | 1.00000  | 6.87435e-10 | 1.00000 |
| PAH9+H      | 6.55031e-10 | 1.00000  | 6.55235e-10 | 1.00000 |
| rad35       | 5.02430e-10 | 1.00000  | 5.02586e-10 | 1.00000 |
| rad15       | 3.90193e-10 | 1.00000  | 3.90314e-10 | 1.00000 |
| rad38       | 1.12258e-10 | 1.00000  | 1.12293e-10 | 1.00000 |
| Ph+MeAc     | 3.79031e-11 | 1.00000  | 3.79149e-11 | 1.00000 |
| rad8        | 2.50408e-11 | 1.00000  | 2.50486e-11 | 1.00000 |
| rad9        | 8.96807e-12 | 1.00000  | 8.97086e-12 | 1.00000 |
| rad28       | 5.38787e-12 | 1.00000  | 5.38954e-12 | 1.00000 |
| PAH7+H      | 5.18193e-12 | 1.00000  | 5.18354e-12 | 1.00000 |
| Ph+Allene   | 1.19627e-12 | 1.00000  | 1.19664e-12 | 1.00000 |
| rad26       | 6.15268e-13 | 1.00000  | 6.15459e-13 | 1.00000 |
| rad12       | 5.71101e-13 | 1.00000  | 5.71279e-13 | 1.00000 |
| rad39       | 5.68636e-13 | 1.00000  | 5.68813e-13 | 1.00000 |
| rad46       | 1.27781e-13 | 1.00000  | 1.27821e-13 | 1.00000 |
| rad7        | 5.13119e-14 | 1.00000  | 5.13279e-14 | 1.00000 |
| rad10       | 3.18271e-14 | 1.00000  | 3.18370e-14 | 1.00000 |
| rad2        | 3.17958e-14 | 1.00000  | 3.18057e-14 | 1.00000 |
| rad11       | 1.28469e-14 | 1.00000  | 1.28509e-14 | 1.00000 |
| PhCH2CCH+H  | 5.46598e-15 | 1.00000  | 5.46768e-15 | 1.00000 |
| rad60syn    | 3.34628e-15 | 1.00000  | 3.34732e-15 | 1.00000 |
| rad1        | 2.22105e-15 | 1.00000  | 2.22174e-15 | 1.00000 |
| rad37       | 9.74547e-16 | 1.00000  | 9.74850e-16 | 1.00000 |
| rad60anti   | 7.98156e-16 | 1.00000  | 7.98404e-16 | 1.00000 |
| rad13       | 2.91729e-16 | 1.00000  | 2.91819e-16 | 1.00000 |
| rad3        | 2.65261e-16 | 1.00000  | 2.65344e-16 | 1.00000 |
| rad4        | 1.37805e-16 | 1.00000  | 1.37848e-16 | 1.00000 |
| rad5        | 1.08663e-17 | 1.00000  | 1.08697e-17 | 1.00000 |
| rad27       | 4.70362e-18 | 1.00000  | 4.70508e-18 | 1.00000 |
| PAH3+H      | 1.84376e-18 | 1.00000  | 1.84433e-18 | 1.00000 |
| rad25       | 9.09621e-19 | 1.00000  | 9.09904e-19 | 1.00000 |
| rad14       | 7.23756e-19 | 1.00000  | 7.23981e-19 | 1.00000 |
| rad33       | 6.53749e-19 | 1.00000  | 6.53952e-19 | 1.00000 |
| rad59       | 6.34526e-19 | 1.00000  | 6.34724e-19 | 1.00000 |
| rad20       | 2.37069e-19 | 1.00000  | 2.37142e-19 | 1.00000 |
| rad21       | 1.51707e-19 | 1.00000  | 1.51754e-19 | 1.00000 |
| rad50       | 3.76905e-20 | 1.00000  | 3.77022e-20 | 1.00000 |
| rad19syn    | 1.28690e-21 | 1.00000  | 1.28730e-21 | 1.00000 |
| rad18       | 1.03928e-21 | 1.00000  | 1.03960e-21 | 1.00000 |
| rad23       | 2.87142e-22 | 1.00000  | 2.87231e-22 | 1.00000 |
| rad31       | 2.23435e-22 | 1.00000  | 2.23505e-22 | 1.00000 |
| rad22       | 6.47313e-23 | 1.00000  | 6.47514e-23 | 1.00000 |

|               |             |          |             |         |
|---------------|-------------|----------|-------------|---------|
| rad54         | 1.79674e-23 | 1.000000 | 1.79730e-23 | 1.00000 |
| PAH10+CH3     | 1.22748e-23 | 1.000000 | 1.22786e-23 | 1.00000 |
| rad43         | 2.95796e-24 | 1.000000 | 2.95888e-24 | 1.00000 |
| rad52         | 2.90478e-24 | 1.000000 | 2.90569e-24 | 1.00000 |
| rad45         | 1.59960e-24 | 1.000000 | 1.60010e-24 | 1.00000 |
| rad62         | 5.74611e-25 | 1.000000 | 5.74789e-25 | 1.00000 |
| rad36         | 1.00884e-25 | 1.000000 | 1.00915e-25 | 1.00000 |
| rad51         | 3.51924e-26 | 1.000000 | 3.52033e-26 | 1.00000 |
| rad24         | 2.62174e-26 | 1.000000 | 2.62255e-26 | 1.00000 |
| PhcycC3H3_A+H | 1.69392e-26 | 1.000000 | 1.69445e-26 | 1.00000 |
| rad70         | 1.30480e-26 | 1.000000 | 1.30521e-26 | 1.00000 |
| rad55         | 5.18385e-27 | 1.000000 | 5.18546e-27 | 1.00000 |
| rad58         | 1.02415e-27 | 1.000000 | 1.02446e-27 | 1.00000 |
| PAH1+H        | 2.23671e-28 | 1.000000 | 2.23740e-28 | 1.00000 |
| rad65         | 2.00231e-28 | 1.000000 | 2.00293e-28 | 1.00000 |
| rad34         | 1.06744e-29 | 1.000000 | 1.06777e-29 | 1.00000 |
| rad42         | 4.44131e-32 | 1.000000 | 4.44269e-32 | 1.00000 |
| rad41         | 7.74433e-33 | 1.000000 | 7.74674e-33 | 1.00000 |
| rad47         | 2.02044e-43 | 1.000000 | 2.02107e-43 | 1.00000 |

0.1000000000E-08 Pa, 240.000000 K

| Rate constant | True (fraction)     | Effective (fraction) |
|---------------|---------------------|----------------------|
| Total         | 3.99091e-25 (1.00 ) | 3.98936e-25 (1.00 )  |

| species     | PYtrue      | Cumul    | PYeffective | Cumul   |
|-------------|-------------|----------|-------------|---------|
| Indene+H    | 0.999611    | 0.999611 | 1.00000     | 1.00000 |
| Benzyl+C2H2 | 0.000389084 | 1.00000  | 0.00000     | 1.00000 |
| PhCCH+CH3   | 2.39609e-08 | 1.00000  | 2.39702e-08 | 1.00000 |
| PhCHCCH2+H  | 1.98219e-08 | 1.00000  | 1.98296e-08 | 1.00000 |
| PhCCCH3+H   | 9.06949e-09 | 1.00000  | 9.07302e-09 | 1.00000 |
| rad30       | 6.94255e-09 | 1.00000  | 6.94525e-09 | 1.00000 |
| PAH9+H      | 9.01165e-10 | 1.00000  | 9.01516e-10 | 1.00000 |
| rad35       | 6.63661e-10 | 1.00000  | 6.63919e-10 | 1.00000 |
| rad15       | 6.22131e-10 | 1.00000  | 6.22373e-10 | 1.00000 |
| rad6        | 5.60550e-10 | 1.00000  | 5.60769e-10 | 1.00000 |
| rad38       | 1.63045e-10 | 1.00000  | 1.63109e-10 | 1.00000 |
| Ph+MeAc     | 9.70296e-11 | 1.00000  | 9.70673e-11 | 1.00000 |
| rad8        | 5.22018e-11 | 1.00000  | 5.22221e-11 | 1.00000 |
| rad9        | 2.04533e-11 | 1.00000  | 2.04612e-11 | 1.00000 |
| PAH7+H      | 1.20110e-11 | 1.00000  | 1.20157e-11 | 1.00000 |
| rad28       | 5.48135e-12 | 1.00000  | 5.48349e-12 | 1.00000 |
| Ph+Allene   | 3.48222e-12 | 1.00000  | 3.48357e-12 | 1.00000 |
| rad2        | 1.45640e-12 | 1.00000  | 1.45697e-12 | 1.00000 |
| rad39       | 1.43288e-12 | 1.00000  | 1.43344e-12 | 1.00000 |
| rad12       | 1.32700e-12 | 1.00000  | 1.32751e-12 | 1.00000 |
| rad26       | 6.39716e-13 | 1.00000  | 6.39965e-13 | 1.00000 |
| rad46       | 2.49645e-13 | 1.00000  | 2.49742e-13 | 1.00000 |
| rad10       | 1.35811e-13 | 1.00000  | 1.35864e-13 | 1.00000 |
| rad1        | 1.02869e-13 | 1.00000  | 1.02909e-13 | 1.00000 |
| rad7        | 4.19587e-14 | 1.00000  | 4.19750e-14 | 1.00000 |
| PhCH2CCH+H  | 2.02784e-14 | 1.00000  | 2.02863e-14 | 1.00000 |
| rad11       | 1.05221e-14 | 1.00000  | 1.05261e-14 | 1.00000 |
| rad60syn    | 8.95436e-15 | 1.00000  | 8.95784e-15 | 1.00000 |
| rad37       | 3.30811e-15 | 1.00000  | 3.30939e-15 | 1.00000 |
| rad60anti   | 2.25867e-15 | 1.00000  | 2.25955e-15 | 1.00000 |
| rad13       | 2.39001e-16 | 1.00000  | 2.39094e-16 | 1.00000 |
| rad5        | 4.20021e-17 | 1.00000  | 4.20184e-17 | 1.00000 |
| PAH3+H      | 7.78863e-18 | 1.00000  | 7.79166e-18 | 1.00000 |
| rad27       | 4.62490e-18 | 1.00000  | 4.62670e-18 | 1.00000 |
| rad59       | 2.61499e-18 | 1.00000  | 2.61601e-18 | 1.00000 |
| rad25       | 1.03613e-18 | 1.00000  | 1.03653e-18 | 1.00000 |
| rad14       | 8.59727e-19 | 1.00000  | 8.60062e-19 | 1.00000 |
| rad33       | 5.42609e-19 | 1.00000  | 5.42820e-19 | 1.00000 |
| rad20       | 2.15845e-19 | 1.00000  | 2.15929e-19 | 1.00000 |
| rad50       | 1.57823e-19 | 1.00000  | 1.57885e-19 | 1.00000 |
| rad21       | 1.38483e-19 | 1.00000  | 1.38536e-19 | 1.00000 |
| rad19syn    | 7.93175e-21 | 1.00000  | 7.93484e-21 | 1.00000 |
| rad18       | 9.34223e-22 | 1.00000  | 9.34586e-22 | 1.00000 |
| rad4        | 7.77229e-22 | 1.00000  | 7.77532e-22 | 1.00000 |
| rad3        | 6.24809e-22 | 1.00000  | 6.25052e-22 | 1.00000 |
| rad23       | 4.34499e-22 | 1.00000  | 4.34668e-22 | 1.00000 |
| rad31       | 2.25772e-22 | 1.00000  | 2.25860e-22 | 1.00000 |
| rad54       | 1.28744e-22 | 1.00000  | 1.28794e-22 | 1.00000 |
| PAH10+CH3   | 8.76232e-23 | 1.00000  | 8.76573e-23 | 1.00000 |
| rad22       | 5.75278e-23 | 1.00000  | 5.75502e-23 | 1.00000 |
| rad43       | 2.10010e-23 | 1.00000  | 2.10091e-23 | 1.00000 |
| rad52       | 1.76521e-23 | 1.00000  | 1.76590e-23 | 1.00000 |

|               |             |         |             |         |
|---------------|-------------|---------|-------------|---------|
| rad62         | 4.48334e-24 | 1.00000 | 4.48509e-24 | 1.00000 |
| rad45         | 1.25252e-24 | 1.00000 | 1.25301e-24 | 1.00000 |
| rad51         | 2.84575e-25 | 1.00000 | 2.84686e-25 | 1.00000 |
| PhcycC3H3_A+H | 1.83497e-25 | 1.00000 | 1.83568e-25 | 1.00000 |
| rad70         | 1.30436e-25 | 1.00000 | 1.30487e-25 | 1.00000 |
| rad36         | 7.93626e-26 | 1.00000 | 7.93935e-26 | 1.00000 |
| rad55         | 5.31871e-26 | 1.00000 | 5.32078e-26 | 1.00000 |
| rad24         | 2.70575e-26 | 1.00000 | 2.70680e-26 | 1.00000 |
| rad58         | 1.13976e-26 | 1.00000 | 1.14020e-26 | 1.00000 |
| PAH1+H        | 3.49023e-27 | 1.00000 | 3.49159e-27 | 1.00000 |
| rad65         | 1.89688e-27 | 1.00000 | 1.89762e-27 | 1.00000 |
| rad34         | 2.02063e-28 | 1.00000 | 2.02142e-28 | 1.00000 |
| rad42         | 2.62674e-30 | 1.00000 | 2.62776e-30 | 1.00000 |
| rad41         | 7.56115e-31 | 1.00000 | 7.56410e-31 | 1.00000 |
| rad47         | 1.87587e-42 | 1.00000 | 1.87660e-42 | 1.00000 |

0.100000000E-08 Pa, 250.000000 K

| =====         |                     |          |                      |         |
|---------------|---------------------|----------|----------------------|---------|
| Rate constant | True (fraction)     |          | Effective (fraction) |         |
| -----         |                     |          |                      |         |
| Total         | 1.17763e-24 (1.00 ) |          | 1.17706e-24 (1.00 )  |         |
| species       | PYtrue              | Cumul    | PYeffective          | Cumul   |
| -----         |                     |          |                      |         |
| Indene+H      | 0.999515            | 0.999515 | 1.00000              | 1.00000 |
| Benzyl+C2H2   | 0.000484700         | 1.000000 | 0.00000              | 1.00000 |
| PhCCH+CH3     | 4.32852e-08         | 1.000000 | 4.33062e-08          | 1.00000 |
| PhCHCCH2+H    | 3.40319e-08         | 1.000000 | 3.40485e-08          | 1.00000 |
| PhCCCH3+H     | 1.63454e-08         | 1.000000 | 1.63533e-08          | 1.00000 |
| rad30         | 9.79760e-09         | 1.000000 | 9.80235e-09          | 1.00000 |
| PAH9+H        | 1.23218e-09         | 1.000000 | 1.23278e-09          | 1.00000 |
| rad15         | 9.65237e-10         | 1.000000 | 9.65705e-10          | 1.00000 |
| rad35         | 8.73119e-10         | 1.000000 | 8.73542e-10          | 1.00000 |
| rad6          | 4.57010e-10         | 1.000000 | 4.57232e-10          | 1.00000 |
| rad38         | 2.34143e-10         | 1.000000 | 2.34256e-10          | 1.00000 |
| Ph+MeAc       | 2.31164e-10         | 1.000000 | 2.31276e-10          | 1.00000 |
| rad8          | 1.03157e-10         | 1.000000 | 1.03207e-10          | 1.00000 |
| rad9          | 4.38997e-11         | 1.000000 | 4.39210e-11          | 1.00000 |
| PAH7+H        | 2.61750e-11         | 1.000000 | 2.61877e-11          | 1.00000 |
| Ph+Allene     | 9.36019e-12         | 1.000000 | 9.36473e-12          | 1.00000 |
| rad28         | 5.46290e-12         | 1.000000 | 5.46555e-12          | 1.00000 |
| rad39         | 3.36908e-12         | 1.000000 | 3.37072e-12          | 1.00000 |
| rad12         | 2.88803e-12         | 1.000000 | 2.88943e-12          | 1.00000 |
| rad26         | 6.50475e-13         | 1.000000 | 6.50791e-13          | 1.00000 |
| rad2          | 6.17398e-13         | 1.000000 | 6.17697e-13          | 1.00000 |
| rad46         | 4.68609e-13         | 1.000000 | 4.68837e-13          | 1.00000 |
| rad10         | 9.92117e-14         | 1.000000 | 9.92598e-14          | 1.00000 |
| PhCH2CCH+H    | 6.80661e-14         | 1.000000 | 6.80991e-14          | 1.00000 |
| rad1          | 4.41144e-14         | 1.000000 | 4.41358e-14          | 1.00000 |
| rad7          | 3.42968e-14         | 1.000000 | 3.43134e-14          | 1.00000 |
| rad60syn      | 2.22273e-14         | 1.000000 | 2.22381e-14          | 1.00000 |
| rad37         | 1.01211e-14         | 1.000000 | 1.01260e-14          | 1.00000 |
| rad11         | 8.61522e-15         | 1.000000 | 8.61940e-15          | 1.00000 |
| rad60anti     | 5.89685e-15         | 1.000000 | 5.89971e-15          | 1.00000 |
| rad13         | 1.95744e-16         | 1.000000 | 1.95839e-16          | 1.00000 |
| rad5          | 1.45718e-16         | 1.000000 | 1.45789e-16          | 1.00000 |
| PAH3+H        | 2.94243e-17         | 1.000000 | 2.94386e-17          | 1.00000 |
| rad59         | 9.64551e-18         | 1.000000 | 9.65019e-18          | 1.00000 |
| rad27         | 4.47155e-18         | 1.000000 | 4.47371e-18          | 1.00000 |
| rad25         | 1.14642e-18         | 1.000000 | 1.14698e-18          | 1.00000 |
| rad14         | 9.88507e-19         | 1.000000 | 9.88986e-19          | 1.00000 |
| rad50         | 5.93639e-19         | 1.000000 | 5.93927e-19          | 1.00000 |
| rad33         | 4.50667e-19         | 1.000000 | 4.50886e-19          | 1.00000 |
| rad20         | 1.96914e-19         | 1.000000 | 1.97009e-19          | 1.00000 |
| rad21         | 1.26686e-19         | 1.000000 | 1.26748e-19          | 1.00000 |
| rad19syn      | 4.22763e-20         | 1.000000 | 4.22968e-20          | 1.00000 |
| rad18         | 8.40365e-22         | 1.000000 | 8.40772e-22          | 1.00000 |
| rad54         | 7.86767e-22         | 1.000000 | 7.87149e-22          | 1.00000 |
| rad23         | 6.68719e-22         | 1.000000 | 6.69043e-22          | 1.00000 |
| PAH10+CH3     | 5.33110e-22         | 1.000000 | 5.33369e-22          | 1.00000 |
| rad4          | 3.59129e-22         | 1.000000 | 3.59303e-22          | 1.00000 |
| rad3          | 2.70941e-22         | 1.000000 | 2.71073e-22          | 1.00000 |
| rad31         | 2.17807e-22         | 1.000000 | 2.17913e-22          | 1.00000 |
| rad43         | 1.27026e-22         | 1.000000 | 1.27087e-22          | 1.00000 |
| rad52         | 9.31755e-23         | 1.000000 | 9.32207e-23          | 1.00000 |
| rad22         | 5.11225e-23         | 1.000000 | 5.11472e-23          | 1.00000 |
| rad62         | 2.94966e-23         | 1.000000 | 2.95109e-23          | 1.00000 |
| rad51         | 1.93290e-24         | 1.000000 | 1.93384e-24          | 1.00000 |
| rad45         | 1.71791e-24         | 1.000000 | 1.71875e-24          | 1.00000 |
| PhcycC3H3_A+H | 1.51485e-24         | 1.000000 | 1.51559e-24          | 1.00000 |

|        |             |          |             |         |
|--------|-------------|----------|-------------|---------|
| rad70  | 1.03242e-24 | 1.000000 | 1.03293e-24 | 1.00000 |
| rad55  | 4.27163e-25 | 1.000000 | 4.27370e-25 | 1.00000 |
| rad36  | 1.09421e-25 | 1.000000 | 1.09474e-25 | 1.00000 |
| rad58  | 9.52951e-26 | 1.000000 | 9.53413e-26 | 1.00000 |
| PAH1+H | 3.26070e-26 | 1.000000 | 3.26228e-26 | 1.00000 |
| rad24  | 2.81072e-26 | 1.000000 | 2.81208e-26 | 1.00000 |
| rad65  | 1.44854e-26 | 1.000000 | 1.44924e-26 | 1.00000 |
| rad34  | 1.95407e-27 | 1.000000 | 1.95502e-27 | 1.00000 |
| rad42  | 2.76646e-29 | 1.000000 | 2.76780e-29 | 1.00000 |
| rad41  | 8.02597e-30 | 1.000000 | 8.02987e-30 | 1.00000 |
| rad47  | 1.43631e-41 | 1.000000 | 1.43700e-41 | 1.00000 |

0.1000000000E-08 Pa, 260.000000 K

| Rate constant | True (fraction)     | Effective (fraction) |
|---------------|---------------------|----------------------|
| Total         | 3.19452e-24 (1.00 ) | 3.19260e-24 (1.00 )  |

| species       | PYtrue      | Cumul    | PYeffective | Cumul   |
|---------------|-------------|----------|-------------|---------|
| Indene+H      | 0.999399    | 0.999399 | 1.00000     | 1.00000 |
| Benzyl+C2H2   | 0.000600830 | 1.000000 | 0.00000     | 1.00000 |
| PhCCH+CH3     | 7.52946e-08 | 1.000000 | 7.53399e-08 | 1.00000 |
| PhCHCCH2+H    | 5.65223e-08 | 1.000000 | 5.65563e-08 | 1.00000 |
| PhCCCH3+H     | 2.83216e-08 | 1.000000 | 2.83386e-08 | 1.00000 |
| rad30         | 1.36157e-08 | 1.000000 | 1.36239e-08 | 1.00000 |
| PAH9+H        | 1.67445e-09 | 1.000000 | 1.67545e-09 | 1.00000 |
| rad15         | 1.46180e-09 | 1.000000 | 1.46268e-09 | 1.00000 |
| rad35         | 1.14380e-09 | 1.000000 | 1.14449e-09 | 1.00000 |
| Ph+MeAc       | 5.16642e-10 | 1.000000 | 5.16953e-10 | 1.00000 |
| rad6          | 3.72384e-10 | 1.000000 | 3.72608e-10 | 1.00000 |
| rad38         | 3.32694e-10 | 1.000000 | 3.32894e-10 | 1.00000 |
| rad8          | 1.94418e-10 | 1.000000 | 1.94535e-10 | 1.00000 |
| rad9          | 8.92963e-11 | 1.000000 | 8.93500e-11 | 1.00000 |
| PAH7+H        | 5.40210e-11 | 1.000000 | 5.40535e-11 | 1.00000 |
| Ph+Allene     | 2.34476e-11 | 1.000000 | 2.34617e-11 | 1.00000 |
| rad39         | 7.45075e-12 | 1.000000 | 7.45523e-12 | 1.00000 |
| rad12         | 5.93128e-12 | 1.000000 | 5.93484e-12 | 1.00000 |
| rad28         | 5.34569e-12 | 1.000000 | 5.34891e-12 | 1.00000 |
| rad46         | 8.49081e-13 | 1.000000 | 8.49591e-13 | 1.00000 |
| rad26         | 6.48428e-13 | 1.000000 | 6.48818e-13 | 1.00000 |
| rad2          | 2.16085e-13 | 1.000000 | 2.16215e-13 | 1.00000 |
| PhCH2CCH+H    | 2.09101e-13 | 1.000000 | 2.09227e-13 | 1.00000 |
| rad10         | 7.38830e-14 | 1.000000 | 7.39275e-14 | 1.00000 |
| rad60syn      | 5.16426e-14 | 1.000000 | 5.16737e-14 | 1.00000 |
| rad37         | 2.82533e-14 | 1.000000 | 2.82703e-14 | 1.00000 |
| rad7          | 2.80204e-14 | 1.000000 | 2.80372e-14 | 1.00000 |
| rad1          | 1.56235e-14 | 1.000000 | 1.56329e-14 | 1.00000 |
| rad60anti     | 1.43406e-14 | 1.000000 | 1.43492e-14 | 1.00000 |
| rad11         | 7.05117e-15 | 1.000000 | 7.05541e-15 | 1.00000 |
| rad5          | 4.59359e-16 | 1.000000 | 4.59635e-16 | 1.00000 |
| rad13         | 1.60256e-16 | 1.000000 | 1.60352e-16 | 1.00000 |
| PAH3+H        | 1.00724e-16 | 1.000000 | 1.00784e-16 | 1.00000 |
| rad59         | 3.22623e-17 | 1.000000 | 3.22817e-17 | 1.00000 |
| rad27         | 4.25902e-18 | 1.000000 | 4.26158e-18 | 1.00000 |
| rad50         | 2.03113e-18 | 1.000000 | 2.03235e-18 | 1.00000 |
| rad25         | 1.23616e-18 | 1.000000 | 1.23691e-18 | 1.00000 |
| rad14         | 1.10419e-18 | 1.000000 | 1.10485e-18 | 1.00000 |
| rad33         | 3.74562e-19 | 1.000000 | 3.74787e-19 | 1.00000 |
| rad19syn      | 1.98205e-19 | 1.000000 | 1.98324e-19 | 1.00000 |
| rad20         | 1.80017e-19 | 1.000000 | 1.80125e-19 | 1.00000 |
| rad21         | 1.16160e-19 | 1.000000 | 1.16229e-19 | 1.00000 |
| rad54         | 4.18282e-21 | 1.000000 | 4.18533e-21 | 1.00000 |
| PAH10+CH3     | 2.81840e-21 | 1.000000 | 2.82009e-21 | 1.00000 |
| rad23         | 1.06284e-21 | 1.000000 | 1.06348e-21 | 1.00000 |
| rad18         | 7.56471e-22 | 1.000000 | 7.56926e-22 | 1.00000 |
| rad43         | 6.67188e-22 | 1.000000 | 6.67589e-22 | 1.00000 |
| rad52         | 4.34411e-22 | 1.000000 | 4.34673e-22 | 1.00000 |
| rad31         | 2.12270e-22 | 1.000000 | 2.12397e-22 | 1.00000 |
| rad4          | 1.73856e-22 | 1.000000 | 1.73961e-22 | 1.00000 |
| rad62         | 1.67395e-22 | 1.000000 | 1.67496e-22 | 1.00000 |
| rad3          | 1.20919e-22 | 1.000000 | 1.20992e-22 | 1.00000 |
| rad22         | 4.54267e-23 | 1.000000 | 4.54540e-23 | 1.00000 |
| rad51         | 1.13377e-23 | 1.000000 | 1.13445e-23 | 1.00000 |
| PhcycC3H3_A+H | 1.04989e-23 | 1.000000 | 1.05052e-23 | 1.00000 |
| rad70         | 6.90237e-24 | 1.000000 | 6.90652e-24 | 1.00000 |
| rad55         | 2.89213e-24 | 1.000000 | 2.89387e-24 | 1.00000 |
| rad45         | 2.46945e-24 | 1.000000 | 2.47093e-24 | 1.00000 |
| rad58         | 6.67420e-25 | 1.000000 | 6.67822e-25 | 1.00000 |
| PAH1+H        | 2.48959e-25 | 1.000000 | 2.49109e-25 | 1.00000 |

|       |             |         |             |         |
|-------|-------------|---------|-------------|---------|
| rad36 | 1.57872e-25 | 1.00000 | 1.57967e-25 | 1.00000 |
| rad65 | 9.40613e-26 | 1.00000 | 9.41178e-26 | 1.00000 |
| rad24 | 2.93964e-26 | 1.00000 | 2.94141e-26 | 1.00000 |
| rad34 | 1.53045e-26 | 1.00000 | 1.53137e-26 | 1.00000 |
| rad42 | 2.29633e-28 | 1.00000 | 2.29771e-28 | 1.00000 |
| rad41 | 6.71432e-29 | 1.00000 | 6.71835e-29 | 1.00000 |
| rad47 | 9.26851e-41 | 1.00000 | 9.27408e-41 | 1.00000 |

0.100000000E-08 Pa, 270.000000 K

| Rate constant | True (fraction)     | Effective (fraction) |
|---------------|---------------------|----------------------|
| Total         | 8.04141e-24 (1.00 ) | 8.03545e-24 (1.00 )  |

| species       | PYtrue      | Cumul    | PYeffective | Cumul   |
|---------------|-------------|----------|-------------|---------|
| Indene+H      | 0.999259    | 0.999259 | 1.00000     | 1.00000 |
| Benzyl+C2H2   | 0.000741078 | 1.00000  | 0.00000     | 1.00000 |
| PhCCH+CH3     | 1.26586e-07 | 1.00000  | 1.26679e-07 | 1.00000 |
| PhCHCCH2+H    | 9.11015e-08 | 1.00000  | 9.11690e-08 | 1.00000 |
| PhCCCH3+H     | 4.73657e-08 | 1.00000  | 4.74008e-08 | 1.00000 |
| rad30         | 1.86595e-08 | 1.00000  | 1.86734e-08 | 1.00000 |
| PAH9+H        | 2.26149e-09 | 1.00000  | 2.26317e-09 | 1.00000 |
| rad15         | 2.16654e-09 | 1.00000  | 2.16815e-09 | 1.00000 |
| rad35         | 1.49172e-09 | 1.00000  | 1.49282e-09 | 1.00000 |
| Ph+MeAc       | 1.09059e-09 | 1.00000  | 1.09140e-09 | 1.00000 |
| rad38         | 4.68008e-10 | 1.00000  | 4.68356e-10 | 1.00000 |
| rad8          | 3.51265e-10 | 1.00000  | 3.51525e-10 | 1.00000 |
| rad6          | 3.03238e-10 | 1.00000  | 3.03463e-10 | 1.00000 |
| rad9          | 1.73163e-10 | 1.00000  | 1.73291e-10 | 1.00000 |
| PAH7+H        | 1.06236e-10 | 1.00000  | 1.06315e-10 | 1.00000 |
| Ph+Allene     | 5.51675e-11 | 1.00000  | 5.52085e-11 | 1.00000 |
| rad39         | 1.56033e-11 | 1.00000  | 1.56149e-11 | 1.00000 |
| rad12         | 1.15679e-11 | 1.00000  | 1.15765e-11 | 1.00000 |
| rad28         | 5.14598e-12 | 1.00000  | 5.14980e-12 | 1.00000 |
| rad46         | 1.49078e-12 | 1.00000  | 1.49189e-12 | 1.00000 |
| rad26         | 6.35029e-13 | 1.00000  | 6.35500e-13 | 1.00000 |
| PhCH2CCH+H    | 5.93698e-13 | 1.00000  | 5.94138e-13 | 1.00000 |
| rad2          | 2.90325e-13 | 1.00000  | 2.90540e-13 | 1.00000 |
| rad60syn      | 1.13161e-13 | 1.00000  | 1.13245e-13 | 1.00000 |
| rad37         | 7.27158e-14 | 1.00000  | 7.27698e-14 | 1.00000 |
| rad10         | 5.59337e-14 | 1.00000  | 5.59752e-14 | 1.00000 |
| rad60anti     | 3.27522e-14 | 1.00000  | 3.27765e-14 | 1.00000 |
| rad7          | 2.28801e-14 | 1.00000  | 2.28971e-14 | 1.00000 |
| rad1          | 2.12928e-14 | 1.00000  | 2.13086e-14 | 1.00000 |
| rad11         | 5.76849e-15 | 1.00000  | 5.77277e-15 | 1.00000 |
| rad5          | 1.32965e-15 | 1.00000  | 1.33064e-15 | 1.00000 |
| PAH3+H        | 3.15912e-16 | 1.00000  | 3.16146e-16 | 1.00000 |
| rad13         | 1.31144e-16 | 1.00000  | 1.31241e-16 | 1.00000 |
| rad59         | 9.89462e-17 | 1.00000  | 9.90196e-17 | 1.00000 |
| rad50         | 6.38912e-18 | 1.00000  | 6.39386e-18 | 1.00000 |
| rad27         | 4.00275e-18 | 1.00000  | 4.00572e-18 | 1.00000 |
| rad25         | 1.30263e-18 | 1.00000  | 1.30360e-18 | 1.00000 |
| rad14         | 1.20203e-18 | 1.00000  | 1.20293e-18 | 1.00000 |
| rad19syn      | 8.29179e-19 | 1.00000  | 8.29794e-19 | 1.00000 |
| rad33         | 3.11538e-19 | 1.00000  | 3.11769e-19 | 1.00000 |
| rad20         | 1.64931e-19 | 1.00000  | 1.65054e-19 | 1.00000 |
| rad21         | 1.06765e-19 | 1.00000  | 1.06844e-19 | 1.00000 |
| rad54         | 1.96548e-20 | 1.00000  | 1.96693e-20 | 1.00000 |
| PAH10+CH3     | 1.31523e-20 | 1.00000  | 1.31621e-20 | 1.00000 |
| rad43         | 3.09130e-21 | 1.00000  | 3.09359e-21 | 1.00000 |
| rad52         | 1.81421e-21 | 1.00000  | 1.81555e-21 | 1.00000 |
| rad23         | 1.74924e-21 | 1.00000  | 1.75053e-21 | 1.00000 |
| rad62         | 8.33487e-22 | 1.00000  | 8.34105e-22 | 1.00000 |
| rad18         | 6.81467e-22 | 1.00000  | 6.81972e-22 | 1.00000 |
| rad31         | 2.08921e-22 | 1.00000  | 2.09076e-22 | 1.00000 |
| rad4          | 1.05521e-22 | 1.00000  | 1.05599e-22 | 1.00000 |
| rad3          | 6.69537e-23 | 1.00000  | 6.70033e-23 | 1.00000 |
| PhcycC3H3_A+H | 6.28440e-23 | 1.00000  | 6.28906e-23 | 1.00000 |
| rad51         | 5.84528e-23 | 1.00000  | 5.84962e-23 | 1.00000 |
| rad22         | 4.03628e-23 | 1.00000  | 4.03927e-23 | 1.00000 |
| rad70         | 3.99452e-23 | 1.00000  | 3.99748e-23 | 1.00000 |
| rad55         | 1.69373e-23 | 1.00000  | 1.69499e-23 | 1.00000 |
| rad45         | 9.33161e-24 | 1.00000  | 9.33853e-24 | 1.00000 |
| rad58         | 4.03354e-24 | 1.00000  | 4.03653e-24 | 1.00000 |
| PAH1+H        | 1.62733e-24 | 1.00000  | 1.62853e-24 | 1.00000 |
| rad36         | 5.99910e-25 | 1.00000  | 6.00355e-25 | 1.00000 |
| rad65         | 5.31208e-25 | 1.00000  | 5.31602e-25 | 1.00000 |
| rad34         | 1.02480e-25 | 1.00000  | 1.02556e-25 | 1.00000 |
| rad24         | 3.09631e-26 | 1.00000  | 3.09861e-26 | 1.00000 |

|       |             |         |             |         |
|-------|-------------|---------|-------------|---------|
| rad42 | 1.63125e-27 | 1.00000 | 1.63246e-27 | 1.00000 |
| rad41 | 4.81362e-28 | 1.00000 | 4.81719e-28 | 1.00000 |
| rad47 | 5.14497e-40 | 1.00000 | 5.14878e-40 | 1.00000 |

0.100000000E-08 Pa, 280.000000 K

| Rate constant | True (fraction)     | Effective (fraction) |
|---------------|---------------------|----------------------|
| Total         | 1.89357e-23 (1.00 ) | 1.89185e-23 (1.00 )  |

| species       | PYtrue      | Cumul    | PYeffective | Cumul   |
|---------------|-------------|----------|-------------|---------|
| Indene+H      | 0.999090    | 0.999090 | 1.00000     | 1.00000 |
| Benzyl+C2H2   | 0.000909507 | 1.000000 | 0.00000     | 1.00000 |
| PhCCH+CH3     | 2.06335e-07 | 1.000000 | 2.06522e-07 | 1.00000 |
| PhCHCCH2+H    | 1.42881e-07 | 1.000000 | 1.43012e-07 | 1.00000 |
| PhCCCH3+H     | 7.67167e-08 | 1.000000 | 7.67866e-08 | 1.00000 |
| rad30         | 2.52475e-08 | 1.000000 | 2.52705e-08 | 1.00000 |
| rad15         | 3.14926e-09 | 1.000000 | 3.15213e-09 | 1.00000 |
| PAH9+H        | 3.03559e-09 | 1.000000 | 3.03835e-09 | 1.00000 |
| Ph+MeAc       | 2.18704e-09 | 1.000000 | 2.18903e-09 | 1.00000 |
| rad35         | 1.93648e-09 | 1.000000 | 1.93824e-09 | 1.00000 |
| rad38         | 6.52109e-10 | 1.000000 | 6.52703e-10 | 1.00000 |
| rad8          | 6.11075e-10 | 1.000000 | 6.11632e-10 | 1.00000 |
| rad9          | 3.21753e-10 | 1.000000 | 3.22045e-10 | 1.00000 |
| rad6          | 2.46767e-10 | 1.000000 | 2.46991e-10 | 1.00000 |
| PAH7+H        | 2.00114e-10 | 1.000000 | 2.00296e-10 | 1.00000 |
| Ph+Allene     | 1.22724e-10 | 1.000000 | 1.22836e-10 | 1.00000 |
| rad39         | 3.11224e-11 | 1.000000 | 3.11507e-11 | 1.00000 |
| rad12         | 2.15404e-11 | 1.000000 | 2.15600e-11 | 1.00000 |
| rad28         | 4.88137e-12 | 1.000000 | 4.88581e-12 | 1.00000 |
| rad46         | 2.54457e-12 | 1.000000 | 2.54689e-12 | 1.00000 |
| PhCH2CCH+H    | 1.57107e-12 | 1.000000 | 1.57251e-12 | 1.00000 |
| rad26         | 6.12089e-13 | 1.000000 | 6.12646e-13 | 1.00000 |
| rad60syn      | 2.35373e-13 | 1.000000 | 2.35588e-13 | 1.00000 |
| rad2          | 1.85319e-13 | 1.000000 | 1.85488e-13 | 1.00000 |
| rad37         | 1.74095e-13 | 1.000000 | 1.74254e-13 | 1.00000 |
| rad60anti     | 7.07396e-14 | 1.000000 | 7.08040e-14 | 1.00000 |
| rad10         | 4.29587e-14 | 1.000000 | 4.29978e-14 | 1.00000 |
| rad7          | 1.86721e-14 | 1.000000 | 1.86891e-14 | 1.00000 |
| rad1          | 1.37743e-14 | 1.000000 | 1.37868e-14 | 1.00000 |
| rad11         | 4.71692e-15 | 1.000000 | 4.72121e-15 | 1.00000 |
| rad5          | 3.56589e-15 | 1.000000 | 3.56914e-15 | 1.00000 |
| PAH3+H        | 9.16507e-16 | 1.000000 | 9.17341e-16 | 1.00000 |
| rad59         | 2.80900e-16 | 1.000000 | 2.81156e-16 | 1.00000 |
| rad13         | 1.07272e-16 | 1.000000 | 1.07369e-16 | 1.00000 |
| rad50         | 1.86453e-17 | 1.000000 | 1.86623e-17 | 1.00000 |
| rad27         | 3.71713e-18 | 1.000000 | 3.72051e-18 | 1.00000 |
| rad19syn      | 3.13292e-18 | 1.000000 | 3.13577e-18 | 1.00000 |
| rad25         | 1.34473e-18 | 1.000000 | 1.34595e-18 | 1.00000 |
| rad14         | 1.27872e-18 | 1.000000 | 1.27988e-18 | 1.00000 |
| rad33         | 2.59333e-19 | 1.000000 | 2.59570e-19 | 1.00000 |
| rad20         | 1.51464e-19 | 1.000000 | 1.51602e-19 | 1.00000 |
| rad21         | 9.83820e-20 | 1.000000 | 9.84716e-20 | 1.00000 |
| rad54         | 8.26763e-20 | 1.000000 | 8.27515e-20 | 1.00000 |
| PAH10+CH3     | 5.48810e-20 | 1.000000 | 5.49309e-20 | 1.00000 |
| rad43         | 1.28005e-20 | 1.000000 | 1.28122e-20 | 1.00000 |
| rad52         | 6.86644e-21 | 1.000000 | 6.87269e-21 | 1.00000 |
| rad62         | 3.68998e-21 | 1.000000 | 3.69334e-21 | 1.00000 |
| rad23         | 2.94369e-21 | 1.000000 | 2.94637e-21 | 1.00000 |
| rad18         | 6.14405e-22 | 1.000000 | 6.14964e-22 | 1.00000 |
| PhcycC3H3_A+H | 3.28881e-22 | 1.000000 | 3.29180e-22 | 1.00000 |
| rad51         | 2.68189e-22 | 1.000000 | 2.68433e-22 | 1.00000 |
| rad31         | 2.07619e-22 | 1.000000 | 2.07808e-22 | 1.00000 |
| rad70         | 2.02731e-22 | 1.000000 | 2.02915e-22 | 1.00000 |
| rad55         | 8.69007e-23 | 1.000000 | 8.69799e-23 | 1.00000 |
| rad4          | 5.06569e-23 | 1.000000 | 5.07030e-23 | 1.00000 |
| rad22         | 3.58622e-23 | 1.000000 | 3.58949e-23 | 1.00000 |
| rad3          | 2.82334e-23 | 1.000000 | 2.82591e-23 | 1.00000 |
| rad58         | 2.12890e-23 | 1.000000 | 2.13084e-23 | 1.00000 |
| rad45         | 9.92839e-24 | 1.000000 | 9.93743e-24 | 1.00000 |
| PAH1+H        | 9.19440e-24 | 1.000000 | 9.20277e-24 | 1.00000 |
| rad65         | 2.64204e-24 | 1.000000 | 2.64445e-24 | 1.00000 |
| rad36         | 6.42139e-25 | 1.000000 | 6.42723e-25 | 1.00000 |
| rad34         | 5.91306e-25 | 1.000000 | 5.91844e-25 | 1.00000 |
| rad24         | 3.28555e-26 | 1.000000 | 3.28854e-26 | 1.00000 |
| rad42         | 9.90724e-27 | 1.000000 | 9.91626e-27 | 1.00000 |
| rad41         | 2.94681e-27 | 1.000000 | 2.94949e-27 | 1.00000 |
| rad47         | 2.49702e-39 | 1.000000 | 2.49929e-39 | 1.00000 |

0.100000000E-08 Pa, 290.000000 K

=====  
Rate constant | True (fraction)                      Effective (fraction)  
-----  
Total            | 4.20015e-23 (1.00     ) 4.19549e-23 (1.00     )

| species       | PYtrue      | Cumul    | PYeffective | Cumul    |
|---------------|-------------|----------|-------------|----------|
| Indene+H      | 0.998889    | 0.998889 | 0.999999    | 0.999999 |
| Benzyl+C2H2   | 0.00111067  | 1.000000 | 0.000000    | 0.999999 |
| PhCCH+CH3     | 3.26967e-07 | 1.000000 | 3.27331e-07 | 0.999999 |
| PhCHCCH2+H    | 2.18563e-07 | 1.000000 | 2.18806e-07 | 1.000000 |
| PhCCCH3+H     | 1.20683e-07 | 1.000000 | 1.20817e-07 | 1.000000 |
| rad30         | 3.37617e-08 | 1.000000 | 3.37992e-08 | 1.000000 |
| rad15         | 4.49781e-09 | 1.000000 | 4.50281e-09 | 1.000000 |
| Ph+MeAc       | 4.18748e-09 | 1.000000 | 4.19214e-09 | 1.000000 |
| PAH9+H        | 4.04965e-09 | 1.000000 | 4.05415e-09 | 1.000000 |
| rad35         | 2.50193e-09 | 1.000000 | 2.50472e-09 | 1.000000 |
| rad8          | 1.02741e-09 | 1.000000 | 1.02856e-09 | 1.000000 |
| rad38         | 9.00379e-10 | 1.000000 | 9.01380e-10 | 1.000000 |
| rad9          | 5.75330e-10 | 1.000000 | 5.75970e-10 | 1.000000 |
| PAH7+H        | 3.62665e-10 | 1.000000 | 3.63068e-10 | 1.000000 |
| Ph+Allene     | 2.59613e-10 | 1.000000 | 2.59902e-10 | 1.000000 |
| rad6          | 2.00676e-10 | 1.000000 | 2.00899e-10 | 1.000000 |
| rad39         | 5.94192e-11 | 1.000000 | 5.94852e-11 | 1.000000 |
| rad12         | 3.84726e-11 | 1.000000 | 3.85153e-11 | 1.000000 |
| rad28         | 4.56933e-12 | 1.000000 | 4.57441e-12 | 1.000000 |
| rad46         | 4.23385e-12 | 1.000000 | 4.23856e-12 | 1.000000 |
| PhCH2CCH+H    | 3.90284e-12 | 1.000000 | 3.90718e-12 | 1.000000 |
| rad26         | 5.81579e-13 | 1.000000 | 5.82226e-13 | 1.000000 |
| rad60syn      | 4.67307e-13 | 1.000000 | 4.67826e-13 | 1.000000 |
| rad37         | 3.90735e-13 | 1.000000 | 3.91170e-13 | 1.000000 |
| rad60anti     | 1.45354e-13 | 1.000000 | 1.45516e-13 | 1.000000 |
| rad2          | 7.03595e-14 | 1.000000 | 7.04377e-14 | 1.000000 |
| rad10         | 3.34191e-14 | 1.000000 | 3.34562e-14 | 1.000000 |
| rad7          | 1.52290e-14 | 1.000000 | 1.52459e-14 | 1.000000 |
| rad5          | 8.92904e-15 | 1.000000 | 8.93897e-15 | 1.000000 |
| rad3          | 8.37963e-15 | 1.000000 | 8.38895e-15 | 1.000000 |
| rad1          | 5.31559e-15 | 1.000000 | 5.32150e-15 | 1.000000 |
| rad4          | 4.45235e-15 | 1.000000 | 4.45730e-15 | 1.000000 |
| rad11         | 3.85522e-15 | 1.000000 | 3.85950e-15 | 1.000000 |
| PAH3+H        | 2.47956e-15 | 1.000000 | 2.48232e-15 | 1.000000 |
| rad59         | 7.44181e-16 | 1.000000 | 7.45009e-16 | 1.000000 |
| rad13         | 8.77040e-17 | 1.000000 | 8.78015e-17 | 1.000000 |
| rad50         | 5.08734e-17 | 1.000000 | 5.09300e-17 | 1.000000 |
| rad19syn      | 1.08024e-17 | 1.000000 | 1.08144e-17 | 1.000000 |
| rad27         | 3.41498e-18 | 1.000000 | 3.41878e-18 | 1.000000 |
| rad25         | 1.36277e-18 | 1.000000 | 1.36429e-18 | 1.000000 |
| rad14         | 1.33240e-18 | 1.000000 | 1.33388e-18 | 1.000000 |
| rad54         | 3.14766e-19 | 1.000000 | 3.15116e-19 | 1.000000 |
| rad33         | 2.16081e-19 | 1.000000 | 2.16322e-19 | 1.000000 |
| PAH10+CH3     | 2.07062e-19 | 1.000000 | 2.07292e-19 | 1.000000 |
| rad20         | 1.39445e-19 | 1.000000 | 1.39600e-19 | 1.000000 |
| rad21         | 9.09069e-20 | 1.000000 | 9.10080e-20 | 1.000000 |
| rad43         | 4.79070e-20 | 1.000000 | 4.79603e-20 | 1.000000 |
| rad52         | 2.37882e-20 | 1.000000 | 2.38146e-20 | 1.000000 |
| rad62         | 1.46949e-20 | 1.000000 | 1.47112e-20 | 1.000000 |
| rad23         | 5.09436e-21 | 1.000000 | 5.10002e-21 | 1.000000 |
| PhcycC3H3_A+H | 1.52452e-21 | 1.000000 | 1.52622e-21 | 1.000000 |
| rad51         | 1.10724e-21 | 1.000000 | 1.10847e-21 | 1.000000 |
| rad70         | 9.13951e-22 | 1.000000 | 9.14968e-22 | 1.000000 |
| rad18         | 5.54447e-22 | 1.000000 | 5.55064e-22 | 1.000000 |
| rad55         | 3.95677e-22 | 1.000000 | 3.96117e-22 | 1.000000 |
| rad31         | 2.08299e-22 | 1.000000 | 2.08530e-22 | 1.000000 |
| rad58         | 9.94323e-23 | 1.000000 | 9.95428e-23 | 1.000000 |
| PAH1+H        | 4.55733e-23 | 1.000000 | 4.56240e-23 | 1.000000 |
| rad22         | 3.18641e-23 | 1.000000 | 3.18996e-23 | 1.000000 |
| rad45         | 1.73265e-23 | 1.000000 | 1.73458e-23 | 1.000000 |
| rad65         | 1.17141e-23 | 1.000000 | 1.17271e-23 | 1.000000 |
| rad34         | 2.98552e-24 | 1.000000 | 2.98884e-24 | 1.000000 |
| rad36         | 1.12915e-24 | 1.000000 | 1.13041e-24 | 1.000000 |
| rad42         | 5.23352e-26 | 1.000000 | 5.23933e-26 | 1.000000 |
| rad24         | 3.51343e-26 | 1.000000 | 3.51733e-26 | 1.000000 |
| rad41         | 1.56770e-26 | 1.000000 | 1.56944e-26 | 1.000000 |
| rad47         | 1.07468e-38 | 1.000000 | 1.07587e-38 | 1.000000 |

0.100000000E-08 Pa, 300.000000 K

=====  
Rate constant | True (fraction)                      Effective (fraction)  
-----

Total | 1.17740e-22 (1.00 ) 1.17544e-22 (1.00 )

| species       | PYtrue      | Cumul    | PYeffective | Cumul    |
|---------------|-------------|----------|-------------|----------|
| Indene+H      | 0.998338    | 0.998338 | 0.999999    | 0.999999 |
| Benzyl+C2H2   | 0.00166158  | 1.000000 | 0.000000    | 0.999999 |
| PhCCH+CH3     | 4.36741e-07 | 1.000000 | 4.37468e-07 | 0.999999 |
| PhCHCCH2+H    | 2.66156e-07 | 1.000000 | 2.66599e-07 | 1.000000 |
| PhCCCH3+H     | 1.55714e-07 | 1.000000 | 1.55974e-07 | 1.000000 |
| rad30         | 3.74940e-08 | 1.000000 | 3.75564e-08 | 1.000000 |
| Ph+MeAc       | 6.10066e-09 | 1.000000 | 6.11081e-09 | 1.000000 |
| PAH9+H        | 5.54882e-09 | 1.000000 | 5.55806e-09 | 1.000000 |
| rad35         | 2.76931e-09 | 1.000000 | 2.77392e-09 | 1.000000 |
| rad38         | 1.02444e-09 | 1.000000 | 1.02615e-09 | 1.000000 |
| PAH7+H        | 6.45709e-10 | 1.000000 | 6.46784e-10 | 1.000000 |
| rad6          | 6.42658e-10 | 1.000000 | 6.43728e-10 | 1.000000 |
| Ph+Allene     | 2.52011e-10 | 1.000000 | 2.52430e-10 | 1.000000 |
| rad39         | 8.64609e-11 | 1.000000 | 8.66048e-11 | 1.000000 |
| rad19anti     | 1.63372e-11 | 1.000000 | 1.63644e-11 | 1.000000 |
| PhCH2CCH+H    | 7.51670e-12 | 1.000000 | 7.52921e-12 | 1.000000 |
| rad46         | 5.66748e-12 | 1.000000 | 5.67691e-12 | 1.000000 |
| rad28         | 4.44134e-12 | 1.000000 | 4.44873e-12 | 1.000000 |
| rad60syn      | 7.07965e-13 | 1.000000 | 7.09144e-13 | 1.000000 |
| rad37         | 6.05562e-13 | 1.000000 | 6.06570e-13 | 1.000000 |
| rad26         | 4.05831e-13 | 1.000000 | 4.06507e-13 | 1.000000 |
| rad2          | 2.79227e-13 | 1.000000 | 2.79692e-13 | 1.000000 |
| rad60anti     | 2.13244e-13 | 1.000000 | 2.13599e-13 | 1.000000 |
| rad10         | 1.40094e-13 | 1.000000 | 1.40327e-13 | 1.000000 |
| rad7          | 5.73340e-14 | 1.000000 | 5.74295e-14 | 1.000000 |
| rad1          | 2.10123e-14 | 1.000000 | 2.10473e-14 | 1.000000 |
| rad11         | 1.47074e-14 | 1.000000 | 1.47319e-14 | 1.000000 |
| PAH3+H        | 6.24906e-15 | 1.000000 | 6.25946e-15 | 1.000000 |
| rad59         | 1.44646e-15 | 1.000000 | 1.44887e-15 | 1.000000 |
| rad3          | 9.54195e-16 | 1.000000 | 9.55783e-16 | 1.000000 |
| rad4          | 4.73988e-16 | 1.000000 | 4.74777e-16 | 1.000000 |
| rad13         | 3.31674e-16 | 1.000000 | 3.32226e-16 | 1.000000 |
| rad50         | 1.03024e-16 | 1.000000 | 1.03196e-16 | 1.000000 |
| rad19syn      | 2.69219e-17 | 1.000000 | 2.69667e-17 | 1.000000 |
| rad23         | 1.63769e-17 | 1.000000 | 1.64042e-17 | 1.000000 |
| rad20         | 7.81361e-18 | 1.000000 | 7.82661e-18 | 1.000000 |
| rad21         | 4.99565e-18 | 1.000000 | 5.00396e-18 | 1.000000 |
| rad27         | 2.81910e-18 | 1.000000 | 2.82379e-18 | 1.000000 |
| rad33         | 1.31828e-18 | 1.000000 | 1.32048e-18 | 1.000000 |
| rad45         | 1.24547e-18 | 1.000000 | 1.24754e-18 | 1.000000 |
| rad67         | 1.20173e-18 | 1.000000 | 1.20373e-18 | 1.000000 |
| rad14         | 1.11468e-18 | 1.000000 | 1.11653e-18 | 1.000000 |
| rad25         | 9.88394e-19 | 1.000000 | 9.90039e-19 | 1.000000 |
| rad54         | 8.62468e-19 | 1.000000 | 8.63904e-19 | 1.000000 |
| PAH10+CH3     | 5.71972e-19 | 1.000000 | 5.72924e-19 | 1.000000 |
| rad18         | 1.88472e-19 | 1.000000 | 1.88786e-19 | 1.000000 |
| rad22         | 1.53908e-19 | 1.000000 | 1.54164e-19 | 1.000000 |
| rad43         | 1.19050e-19 | 1.000000 | 1.19249e-19 | 1.000000 |
| rad52         | 6.28747e-20 | 1.000000 | 6.29793e-20 | 1.000000 |
| rad36         | 4.25700e-20 | 1.000000 | 4.26409e-20 | 1.000000 |
| rad62         | 4.05052e-20 | 1.000000 | 4.05727e-20 | 1.000000 |
| PhcycC3H3_A+H | 7.38944e-21 | 1.000000 | 7.40173e-21 | 1.000000 |
| rad51         | 3.46093e-21 | 1.000000 | 3.46669e-21 | 1.000000 |
| rad70         | 3.35423e-21 | 1.000000 | 3.35981e-21 | 1.000000 |
| rad55         | 1.33538e-21 | 1.000000 | 1.33760e-21 | 1.000000 |
| rad31         | 4.05135e-22 | 1.000000 | 4.05810e-22 | 1.000000 |
| rad58         | 3.59869e-22 | 1.000000 | 3.60468e-22 | 1.000000 |
| PAH1+H        | 2.76409e-22 | 1.000000 | 2.76869e-22 | 1.000000 |
| rad65         | 4.20415e-23 | 1.000000 | 4.21115e-23 | 1.000000 |
| rad34         | 1.85425e-23 | 1.000000 | 1.85734e-23 | 1.000000 |
| rad24         | 1.73487e-23 | 1.000000 | 1.73776e-23 | 1.000000 |
| rad42         | 4.75218e-25 | 1.000000 | 4.76009e-25 | 1.000000 |
| rad41         | 1.44595e-25 | 1.000000 | 1.44836e-25 | 1.000000 |
| rad9          | 1.13977e-26 | 1.000000 | 1.14166e-26 | 1.000000 |
| rad53         | 6.41324e-27 | 1.000000 | 6.42392e-27 | 1.000000 |
| rad64         | 1.37052e-27 | 1.000000 | 1.37280e-27 | 1.000000 |
| rad56         | 9.20939e-30 | 1.000000 | 9.22472e-30 | 1.000000 |
| rad15         | 6.66576e-30 | 1.000000 | 6.67685e-30 | 1.000000 |
| rad61         | 1.39478e-30 | 1.000000 | 1.39710e-30 | 1.000000 |
| rad68syn      | 1.01949e-30 | 1.000000 | 1.02119e-30 | 1.000000 |
| rad68anti     | 7.27726e-31 | 1.000000 | 7.28938e-31 | 1.000000 |
| rad5          | 1.47008e-32 | 1.000000 | 1.47253e-32 | 1.000000 |
| rad12         | 8.84003e-33 | 1.000000 | 8.85475e-33 | 1.000000 |
| rad73         | 2.19622e-33 | 1.000000 | 2.19987e-33 | 1.000000 |
| rad40syn      | 2.30545e-34 | 1.000000 | 2.30929e-34 | 1.000000 |
| rad40anti     | 7.00540e-35 | 1.000000 | 7.01706e-35 | 1.000000 |



|        |             |         |             |          |
|--------|-------------|---------|-------------|----------|
| rad47  | 2.39996e-38 | 1.00000 | 2.40395e-38 | 1.000000 |
| rad71  | 2.29536e-40 | 1.00000 | 2.29918e-40 | 1.000000 |
| PAH8+H | 7.78000e-41 | 1.00000 | 7.79295e-41 | 1.000000 |
| rad72  | 4.05077e-46 | 1.00000 | 4.05751e-46 | 1.000000 |
| rad8   | 2.66068e-47 | 1.00000 | 2.66511e-47 | 1.000000 |

0.100000000E-08 Pa, 310.000000 K

| Rate constant | True (fraction)     | Effective (fraction) |
|---------------|---------------------|----------------------|
| Total         | 2.44453e-22 (1.00 ) | 2.44054e-22 (1.00 )  |

| species       | PYtrue      | Cumul    | PYeffective | Cumul    |
|---------------|-------------|----------|-------------|----------|
| Indene+H      | 0.998366    | 0.998366 | 0.999998    | 0.999998 |
| Benzyl+C2H2   | 0.00163189  | 0.999998 | 0.00000     | 0.999998 |
| PhCCH+CH3     | 7.61281e-07 | 0.999999 | 7.62525e-07 | 0.999999 |
| PhCHCCH2+H    | 4.78180e-07 | 0.999999 | 4.78961e-07 | 0.999999 |
| PhCCCH3+H     | 2.76251e-07 | 0.999999 | 2.76703e-07 | 1.000000 |
| rad30         | 5.84662e-08 | 0.999999 | 5.85618e-08 | 1.000000 |
| Ph+MeAc       | 1.35870e-08 | 0.999999 | 1.36092e-08 | 1.000000 |
| rad15         | 8.75423e-09 | 0.999999 | 8.76854e-09 | 1.000000 |
| PAH9+H        | 7.07588e-09 | 0.999999 | 7.08745e-09 | 1.000000 |
| rad35         | 4.11579e-09 | 0.999999 | 4.12252e-09 | 1.000000 |
| rad8          | 2.65492e-09 | 1.000000 | 2.65926e-09 | 1.000000 |
| rad38         | 1.67249e-09 | 1.000000 | 1.67522e-09 | 1.000000 |
| rad9          | 1.66330e-09 | 1.000000 | 1.66602e-09 | 1.000000 |
| PAH7+H        | 1.07656e-09 | 1.000000 | 1.07832e-09 | 1.000000 |
| Ph+Allene     | 1.01826e-09 | 1.000000 | 1.01992e-09 | 1.000000 |
| rad39         | 1.93123e-10 | 1.000000 | 1.93438e-10 | 1.000000 |
| rad6          | 1.32445e-10 | 1.000000 | 1.32662e-10 | 1.000000 |
| rad12         | 1.09977e-10 | 1.000000 | 1.10157e-10 | 1.000000 |
| PhCH2CCH+H    | 2.04110e-11 | 1.000000 | 2.04443e-11 | 1.000000 |
| rad46         | 1.09555e-11 | 1.000000 | 1.09734e-11 | 1.000000 |
| rad28         | 3.86659e-12 | 1.000000 | 3.87291e-12 | 1.000000 |
| rad37         | 1.66365e-12 | 1.000000 | 1.66637e-12 | 1.000000 |
| rad60syn      | 1.63169e-12 | 1.000000 | 1.63436e-12 | 1.000000 |
| rad60anti     | 5.39033e-13 | 1.000000 | 5.39914e-13 | 1.000000 |
| rad26         | 5.05639e-13 | 1.000000 | 5.06465e-13 | 1.000000 |
| rad2          | 2.29684e-13 | 1.000000 | 2.30059e-13 | 1.000000 |
| rad5          | 4.67694e-14 | 1.000000 | 4.68459e-14 | 1.000000 |
| rad10         | 2.09272e-14 | 1.000000 | 2.09614e-14 | 1.000000 |
| rad1          | 1.79250e-14 | 1.000000 | 1.79543e-14 | 1.000000 |
| PAH3+H        | 1.51219e-14 | 1.000000 | 1.51467e-14 | 1.000000 |
| rad7          | 1.01130e-14 | 1.000000 | 1.01295e-14 | 1.000000 |
| rad59         | 4.36101e-15 | 1.000000 | 4.36813e-15 | 1.000000 |
| rad11         | 2.57186e-15 | 1.000000 | 2.57606e-15 | 1.000000 |
| rad50         | 3.17584e-16 | 1.000000 | 3.18103e-16 | 1.000000 |
| rad19syn      | 1.01011e-16 | 1.000000 | 1.01176e-16 | 1.000000 |
| rad13         | 5.85486e-17 | 1.000000 | 5.86443e-17 | 1.000000 |
| rad54         | 3.50801e-18 | 1.000000 | 3.51374e-18 | 1.000000 |
| rad27         | 2.80255e-18 | 1.000000 | 2.80713e-18 | 1.000000 |
| PAH10+CH3     | 2.26101e-18 | 1.000000 | 2.26470e-18 | 1.000000 |
| rad14         | 1.37030e-18 | 1.000000 | 1.37254e-18 | 1.000000 |
| rad25         | 1.33358e-18 | 1.000000 | 1.33576e-18 | 1.000000 |
| rad43         | 5.14357e-19 | 1.000000 | 5.15197e-19 | 1.000000 |
| rad52         | 2.26217e-19 | 1.000000 | 2.26587e-19 | 1.000000 |
| rad62         | 1.76311e-19 | 1.000000 | 1.76600e-19 | 1.000000 |
| rad33         | 1.50539e-19 | 1.000000 | 1.50785e-19 | 1.000000 |
| rad20         | 1.19171e-19 | 1.000000 | 1.19366e-19 | 1.000000 |
| rad21         | 7.83225e-20 | 1.000000 | 7.84505e-20 | 1.000000 |
| PhcycC3H3_A+H | 2.37749e-20 | 1.000000 | 2.38138e-20 | 1.000000 |
| rad23         | 1.63531e-20 | 1.000000 | 1.63798e-20 | 1.000000 |
| rad51         | 1.42634e-20 | 1.000000 | 1.42867e-20 | 1.000000 |
| rad70         | 1.35852e-20 | 1.000000 | 1.36074e-20 | 1.000000 |
| rad55         | 5.98370e-21 | 1.000000 | 5.99349e-21 | 1.000000 |
| rad58         | 1.57034e-21 | 1.000000 | 1.57291e-21 | 1.000000 |
| rad4          | 1.26663e-21 | 1.000000 | 1.26870e-21 | 1.000000 |
| PAH1+H        | 7.93483e-22 | 1.000000 | 7.94780e-22 | 1.000000 |
| rad3          | 7.77127e-22 | 1.000000 | 7.78397e-22 | 1.000000 |
| rad18         | 4.52945e-22 | 1.000000 | 4.53685e-22 | 1.000000 |
| rad31         | 2.15645e-22 | 1.000000 | 2.15997e-22 | 1.000000 |
| rad65         | 1.69845e-22 | 1.000000 | 1.70123e-22 | 1.000000 |
| rad34         | 5.35999e-23 | 1.000000 | 5.36875e-23 | 1.000000 |
| rad45         | 2.84057e-23 | 1.000000 | 2.84521e-23 | 1.000000 |
| rad22         | 2.51639e-23 | 1.000000 | 2.52050e-23 | 1.000000 |
| rad36         | 1.88284e-24 | 1.000000 | 1.88591e-24 | 1.000000 |
| rad42         | 1.01340e-24 | 1.000000 | 1.01506e-24 | 1.000000 |
| rad41         | 3.07228e-25 | 1.000000 | 3.07730e-25 | 1.000000 |
| rad24         | 4.11790e-26 | 1.000000 | 4.12463e-26 | 1.000000 |

rad47 | 1.45559e-37 1.000000 | 1.45797e-37 1.000000

0.100000000E-08 Pa, 400.000000 K

=====  
Rate constant | True (fraction) | Effective (fraction)  
-----  
Total | 3.60269e-20 (1.00 ) | 3.57081e-20 (1.00 )

| species       | PYtrue      | Cumul    | PYeffective | Cumul    |
|---------------|-------------|----------|-------------|----------|
| Indene+H      | 0.991128    | 0.991128 | 0.999976    | 0.999976 |
| Benzyl+C2H2   | 0.00884848  | 0.999976 | 0.00000     | 0.999976 |
| PhCCH+CH3     | 1.23505e-05 | 0.999989 | 1.24608e-05 | 0.999988 |
| PhCHCCH2+H    | 5.95042e-06 | 0.999995 | 6.00355e-06 | 0.999994 |
| PhCCCH3+H     | 3.90745e-06 | 0.999999 | 3.94234e-06 | 0.999998 |
| Ph+MeAc       | 5.34638e-07 | 0.999999 | 5.39411e-07 | 0.999999 |
| rad30         | 4.02127e-07 | 1.000000 | 4.05716e-07 | 0.999999 |
| PAH9+H        | 6.80803e-08 | 1.000000 | 6.86880e-08 | 0.999999 |
| Ph+Allene     | 6.39781e-08 | 1.000000 | 6.45492e-08 | 0.999999 |
| PAH7+H        | 4.50278e-08 | 1.000000 | 4.54297e-08 | 1.000000 |
| rad35         | 2.73752e-08 | 1.000000 | 2.76196e-08 | 1.000000 |
| rad38         | 1.63212e-08 | 1.000000 | 1.64670e-08 | 1.000000 |
| rad39         | 8.59872e-09 | 1.000000 | 8.67548e-09 | 1.000000 |
| PhCH2CCH+H    | 4.56270e-09 | 1.000000 | 4.60343e-09 | 1.000000 |
| rad19anti     | 8.44423e-10 | 1.000000 | 8.51962e-10 | 1.000000 |
| rad46         | 3.06009e-10 | 1.000000 | 3.08741e-10 | 1.000000 |
| rad37         | 1.38254e-10 | 1.000000 | 1.39488e-10 | 1.000000 |
| rad60syn      | 9.47275e-11 | 1.000000 | 9.55731e-11 | 1.000000 |
| rad6          | 8.51274e-11 | 1.000000 | 8.58874e-11 | 1.000000 |
| rad60anti     | 3.76555e-11 | 1.000000 | 3.79916e-11 | 1.000000 |
| PAH3+H        | 6.50520e-12 | 1.000000 | 6.56327e-12 | 1.000000 |
| rad28         | 1.36563e-12 | 1.000000 | 1.37782e-12 | 1.000000 |
| rad59         | 1.36005e-12 | 1.000000 | 1.37219e-12 | 1.000000 |
| rad26         | 1.83548e-13 | 1.000000 | 1.85187e-13 | 1.000000 |
| rad50         | 1.35994e-13 | 1.000000 | 1.37208e-13 | 1.000000 |
| rad19syn      | 1.28743e-13 | 1.000000 | 1.29892e-13 | 1.000000 |
| rad54         | 8.91593e-15 | 1.000000 | 8.99553e-15 | 1.000000 |
| rad7          | 8.04767e-15 | 1.000000 | 8.11952e-15 | 1.000000 |
| PAH10+CH3     | 4.84579e-15 | 1.000000 | 4.88906e-15 | 1.000000 |
| rad11         | 2.24877e-15 | 1.000000 | 2.26885e-15 | 1.000000 |
| rad67         | 1.67319e-15 | 1.000000 | 1.68812e-15 | 1.000000 |
| rad23         | 1.17196e-15 | 1.000000 | 1.18242e-15 | 1.000000 |
| rad10         | 1.11708e-15 | 1.000000 | 1.12705e-15 | 1.000000 |
| rad43         | 8.69681e-16 | 1.000000 | 8.77445e-16 | 1.000000 |
| rad62         | 4.86641e-16 | 1.000000 | 4.90986e-16 | 1.000000 |
| rad52         | 4.03329e-16 | 1.000000 | 4.06930e-16 | 1.000000 |
| PhcycC3H3_A+H | 3.21885e-16 | 1.000000 | 3.24758e-16 | 1.000000 |
| rad70         | 1.20384e-16 | 1.000000 | 1.21459e-16 | 1.000000 |
| rad51         | 7.61818e-17 | 1.000000 | 7.68619e-17 | 1.000000 |
| rad45         | 5.34980e-17 | 1.000000 | 5.39756e-17 | 1.000000 |
| rad55         | 5.04270e-17 | 1.000000 | 5.08771e-17 | 1.000000 |
| rad13         | 5.00152e-17 | 1.000000 | 5.04617e-17 | 1.000000 |
| PAH1+H        | 2.44002e-17 | 1.000000 | 2.46180e-17 | 1.000000 |
| rad58         | 1.79710e-17 | 1.000000 | 1.81314e-17 | 1.000000 |
| rad4          | 1.64632e-17 | 1.000000 | 1.66101e-17 | 1.000000 |
| rad3          | 1.02690e-17 | 1.000000 | 1.03607e-17 | 1.000000 |
| rad20         | 4.10337e-18 | 1.000000 | 4.14000e-18 | 1.000000 |
| rad21         | 2.86957e-18 | 1.000000 | 2.89519e-18 | 1.000000 |
| rad1          | 2.73838e-18 | 1.000000 | 2.76282e-18 | 1.000000 |
| rad36         | 2.29959e-18 | 1.000000 | 2.32012e-18 | 1.000000 |
| rad34         | 2.03113e-18 | 1.000000 | 2.04927e-18 | 1.000000 |
| rad65         | 1.53287e-18 | 1.000000 | 1.54656e-18 | 1.000000 |
| rad27         | 1.02293e-18 | 1.000000 | 1.03206e-18 | 1.000000 |
| rad14         | 8.22626e-19 | 1.000000 | 8.29970e-19 | 1.000000 |
| rad25         | 7.37946e-19 | 1.000000 | 7.44534e-19 | 1.000000 |
| rad33         | 3.27723e-19 | 1.000000 | 3.30649e-19 | 1.000000 |
| rad2          | 1.01835e-19 | 1.000000 | 1.02744e-19 | 1.000000 |
| rad18         | 7.76315e-20 | 1.000000 | 7.83245e-20 | 1.000000 |
| rad42         | 7.25697e-20 | 1.000000 | 7.32176e-20 | 1.000000 |
| rad22         | 4.94318e-20 | 1.000000 | 4.98731e-20 | 1.000000 |
| rad41         | 2.24628e-20 | 1.000000 | 2.26633e-20 | 1.000000 |
| rad53         | 5.65474e-21 | 1.000000 | 5.70523e-21 | 1.000000 |
| rad64         | 1.81586e-21 | 1.000000 | 1.83207e-21 | 1.000000 |
| rad31         | 6.42829e-22 | 1.000000 | 6.48567e-22 | 1.000000 |
| rad56         | 6.60997e-23 | 1.000000 | 6.66898e-23 | 1.000000 |
| rad24         | 5.54048e-23 | 1.000000 | 5.58994e-23 | 1.000000 |
| rad68syn      | 8.53494e-24 | 1.000000 | 8.61113e-24 | 1.000000 |
| rad68anti     | 6.16419e-24 | 1.000000 | 6.21922e-24 | 1.000000 |
| rad61         | 4.52865e-24 | 1.000000 | 4.56908e-24 | 1.000000 |
| rad9          | 4.46072e-25 | 1.000000 | 4.50054e-25 | 1.000000 |

|           |             |          |             |          |
|-----------|-------------|----------|-------------|----------|
| rad73     | 2.09179e-25 | 1.000000 | 2.11046e-25 | 1.000000 |
| rad40syn  | 4.85079e-26 | 1.000000 | 4.89409e-26 | 1.000000 |
| PAH8+H    | 2.50891e-26 | 1.000000 | 2.53131e-26 | 1.000000 |
| rad40anti | 1.16020e-26 | 1.000000 | 1.17055e-26 | 1.000000 |
| rad71     | 6.24850e-27 | 1.000000 | 6.30428e-27 | 1.000000 |
| rad15     | 2.69385e-28 | 1.000000 | 2.71790e-28 | 1.000000 |
| rad5      | 2.40724e-30 | 1.000000 | 2.42873e-30 | 1.000000 |
| rad12     | 1.57110e-30 | 1.000000 | 1.58512e-30 | 1.000000 |
| rad72     | 2.12563e-33 | 1.000000 | 2.14460e-33 | 1.000000 |
| rad47     | 5.32422e-34 | 1.000000 | 5.37175e-34 | 1.000000 |
| rad8      | 1.01992e-43 | 1.000000 | 1.02903e-43 | 1.000000 |

0.100000000E-08 Pa, 500.000000 K

| Rate constant | True (fraction)     | Effective (fraction) |
|---------------|---------------------|----------------------|
| Total         | 1.22595e-18 (1.00 ) | 1.18787e-18 (1.00 )  |

| species       | PYtrue      | Cumul    | PYeffective | Cumul    |
|---------------|-------------|----------|-------------|----------|
| Indene+H      | 0.968764    | 0.968764 | 0.999822    | 0.999822 |
| Benzyl+C2H2   | 0.0310635   | 0.999827 | 0.00000     | 0.999822 |
| PhCCH+CH3     | 9.35930e-05 | 0.999921 | 9.65935e-05 | 0.999919 |
| PhCHCCH2+H    | 4.00561e-05 | 0.999961 | 4.13403e-05 | 0.999960 |
| PhCCCH3+H     | 2.54431e-05 | 0.999987 | 2.62588e-05 | 0.999986 |
| Ph+MeAc       | 7.07386e-06 | 0.999994 | 7.30064e-06 | 0.999993 |
| rad30         | 2.19669e-06 | 0.999996 | 2.26711e-06 | 0.999996 |
| Ph+Allene     | 2.05092e-06 | 0.999998 | 2.11667e-06 | 0.999998 |
| PAH7+H        | 6.80746e-07 | 0.999999 | 7.02570e-07 | 0.999999 |
| PAH9+H        | 4.84045e-07 | 0.999999 | 4.99563e-07 | 0.999999 |
| PhCH2CCH+H    | 2.44801e-07 | 0.999999 | 2.52649e-07 | 0.999999 |
| rad35         | 1.65639e-07 | 0.999999 | 1.70949e-07 | 1.000000 |
| rad39         | 1.51520e-07 | 1.000000 | 1.56377e-07 | 1.000000 |
| rad38         | 1.34449e-07 | 1.000000 | 1.38759e-07 | 1.000000 |
| rad19anti     | 1.41564e-08 | 1.000000 | 1.46102e-08 | 1.000000 |
| rad46         | 5.06638e-09 | 1.000000 | 5.22881e-09 | 1.000000 |
| rad37         | 2.86983e-09 | 1.000000 | 2.96184e-09 | 1.000000 |
| rad60syn      | 2.17485e-09 | 1.000000 | 2.24457e-09 | 1.000000 |
| rad60anti     | 9.78348e-10 | 1.000000 | 1.00971e-09 | 1.000000 |
| PAH3+H        | 4.98713e-10 | 1.000000 | 5.14701e-10 | 1.000000 |
| rad59         | 9.55001e-11 | 1.000000 | 9.85617e-11 | 1.000000 |
| rad19syn      | 2.21128e-11 | 1.000000 | 2.28217e-11 | 1.000000 |
| rad50         | 1.38223e-11 | 1.000000 | 1.42654e-11 | 1.000000 |
| rad6          | 1.12852e-11 | 1.000000 | 1.16470e-11 | 1.000000 |
| rad54         | 2.40094e-12 | 1.000000 | 2.47791e-12 | 1.000000 |
| PAH10+CH3     | 9.70418e-13 | 1.000000 | 1.00153e-12 | 1.000000 |
| rad2          | 3.40631e-13 | 1.000000 | 3.51551e-13 | 1.000000 |
| rad28         | 2.62061e-13 | 1.000000 | 2.70462e-13 | 1.000000 |
| rad67         | 2.37492e-13 | 1.000000 | 2.45106e-13 | 1.000000 |
| PhcycC3H3_A+H | 2.03140e-13 | 1.000000 | 2.09652e-13 | 1.000000 |
| rad43         | 1.48445e-13 | 1.000000 | 1.53204e-13 | 1.000000 |
| rad62         | 1.23066e-13 | 1.000000 | 1.27012e-13 | 1.000000 |
| rad52         | 1.00173e-13 | 1.000000 | 1.03384e-13 | 1.000000 |
| rad70         | 6.56843e-14 | 1.000000 | 6.77901e-14 | 1.000000 |
| rad26         | 4.42301e-14 | 1.000000 | 4.56481e-14 | 1.000000 |
| rad1          | 3.97315e-14 | 1.000000 | 4.10052e-14 | 1.000000 |
| rad51         | 3.84244e-14 | 1.000000 | 3.96563e-14 | 1.000000 |
| rad55         | 2.77305e-14 | 1.000000 | 2.86195e-14 | 1.000000 |
| PAH1+H        | 2.28960e-14 | 1.000000 | 2.36300e-14 | 1.000000 |
| rad23         | 1.79820e-14 | 1.000000 | 1.85585e-14 | 1.000000 |
| rad58         | 1.24937e-14 | 1.000000 | 1.28942e-14 | 1.000000 |
| rad10         | 8.01059e-15 | 1.000000 | 8.26740e-15 | 1.000000 |
| rad45         | 5.12416e-15 | 1.000000 | 5.28843e-15 | 1.000000 |
| rad34         | 2.11777e-15 | 1.000000 | 2.18567e-15 | 1.000000 |
| rad7          | 1.16118e-15 | 1.000000 | 1.19841e-15 | 1.000000 |
| rad65         | 9.80426e-16 | 1.000000 | 1.01186e-15 | 1.000000 |
| rad3          | 6.78159e-16 | 1.000000 | 6.99900e-16 | 1.000000 |
| rad4          | 4.13239e-16 | 1.000000 | 4.26487e-16 | 1.000000 |
| rad11         | 3.80306e-16 | 1.000000 | 3.92498e-16 | 1.000000 |
| rad36         | 2.67671e-16 | 1.000000 | 2.76252e-16 | 1.000000 |
| rad42         | 8.25255e-17 | 1.000000 | 8.51713e-17 | 1.000000 |
| rad41         | 2.35251e-17 | 1.000000 | 2.42793e-17 | 1.000000 |
| rad53         | 2.01904e-17 | 1.000000 | 2.08377e-17 | 1.000000 |
| rad13         | 8.56241e-18 | 1.000000 | 8.83691e-18 | 1.000000 |
| rad64         | 7.88165e-18 | 1.000000 | 8.13433e-18 | 1.000000 |
| rad20         | 3.27939e-18 | 1.000000 | 3.38453e-18 | 1.000000 |
| rad21         | 2.58371e-18 | 1.000000 | 2.66655e-18 | 1.000000 |
| rad56         | 7.26378e-19 | 1.000000 | 7.49666e-19 | 1.000000 |
| rad14         | 2.96389e-19 | 1.000000 | 3.05891e-19 | 1.000000 |
| rad25         | 2.72293e-19 | 1.000000 | 2.81023e-19 | 1.000000 |

|           |             |          |             |          |
|-----------|-------------|----------|-------------|----------|
| rad27     | 2.61923e-19 | 1.000000 | 2.70320e-19 | 1.000000 |
| rad33     | 1.23911e-19 | 1.000000 | 1.27883e-19 | 1.000000 |
| rad68syn  | 9.96087e-20 | 1.000000 | 1.02802e-19 | 1.000000 |
| rad68anti | 7.08128e-20 | 1.000000 | 7.30830e-20 | 1.000000 |
| rad18     | 4.11001e-20 | 1.000000 | 4.24178e-20 | 1.000000 |
| rad61     | 2.98900e-20 | 1.000000 | 3.08482e-20 | 1.000000 |
| rad22     | 1.79177e-20 | 1.000000 | 1.84922e-20 | 1.000000 |
| rad73     | 6.59419e-21 | 1.000000 | 6.80559e-21 | 1.000000 |
| rad40syn  | 1.51467e-21 | 1.000000 | 1.56323e-21 | 1.000000 |
| PAH8+H    | 1.47917e-21 | 1.000000 | 1.52659e-21 | 1.000000 |
| rad31     | 1.29644e-21 | 1.000000 | 1.33800e-21 | 1.000000 |
| rad71     | 4.95405e-22 | 1.000000 | 5.11287e-22 | 1.000000 |
| rad24     | 4.11953e-22 | 1.000000 | 4.25160e-22 | 1.000000 |
| rad40anti | 4.04750e-22 | 1.000000 | 4.17726e-22 | 1.000000 |
| rad9      | 2.36160e-23 | 1.000000 | 2.43731e-23 | 1.000000 |
| rad72     | 1.22398e-25 | 1.000000 | 1.26322e-25 | 1.000000 |
| rad15     | 1.50601e-26 | 1.000000 | 1.55430e-26 | 1.000000 |
| rad12     | 5.38328e-28 | 1.000000 | 5.55586e-28 | 1.000000 |
| rad5      | 3.44207e-29 | 1.000000 | 3.55242e-29 | 1.000000 |
| rad47     | 2.95499e-31 | 1.000000 | 3.04973e-31 | 1.000000 |
| rad8      | 6.41091e-40 | 1.000000 | 6.61644e-40 | 1.000000 |

0.100000000E-08 Pa, 600.000000 K

| Rate constant | True (fraction)     | Effective (fraction) |
|---------------|---------------------|----------------------|
| Total         | 1.36947e-17 (1.00 ) | 1.26193e-17 (1.00 )  |

| species       | PYtrue      | Cumul    | PYeffective | Cumul    |
|---------------|-------------|----------|-------------|----------|
| Indene+H      | 0.920850    | 0.920850 | 0.999326    | 0.999326 |
| Benzyl+C2H2   | 0.0785283   | 0.999378 | 0.00000     | 0.999326 |
| PhCCH+CH3     | 0.000333045 | 0.999711 | 0.000361427 | 0.999687 |
| PhCHCCH2+H    | 0.000137020 | 0.999848 | 0.000148697 | 0.999836 |
| PhCCCH3+H     | 7.54035e-05 | 0.999924 | 8.18295e-05 | 0.999918 |
| Ph+MeAc       | 3.38749e-05 | 0.999958 | 3.67618e-05 | 0.999955 |
| Ph+Allene     | 2.17077e-05 | 0.999979 | 2.35577e-05 | 0.999978 |
| rad30         | 7.59256e-06 | 0.999987 | 8.23960e-06 | 0.999987 |
| PAH7+H        | 4.39153e-06 | 0.999991 | 4.76577e-06 | 0.999991 |
| PhCH2CCH+H    | 3.66168e-06 | 0.999995 | 3.97373e-06 | 0.999995 |
| PAH9+H        | 2.21748e-06 | 0.999997 | 2.40646e-06 | 0.999998 |
| rad39         | 1.04275e-06 | 0.999998 | 1.13162e-06 | 0.999999 |
| rad38         | 6.77227e-07 | 0.999999 | 7.34941e-07 | 1.000000 |
| rad35         | 6.69664e-07 | 1.000000 | 7.26734e-07 | 1.000000 |
| rad19anti     | 1.16219e-07 | 1.000000 | 1.26124e-07 | 1.000000 |
| rad46         | 4.03894e-08 | 1.000000 | 4.38315e-08 | 1.000000 |
| rad60syn      | 1.92850e-08 | 1.000000 | 2.09285e-08 | 1.000000 |
| rad37         | 1.80180e-08 | 1.000000 | 1.95535e-08 | 1.000000 |
| PAH3+H        | 9.89107e-09 | 1.000000 | 1.07340e-08 | 1.000000 |
| rad60anti     | 9.33103e-09 | 1.000000 | 1.01262e-08 | 1.000000 |
| rad59         | 1.75177e-09 | 1.000000 | 1.90106e-09 | 1.000000 |
| rad19syn      | 6.85595e-10 | 1.000000 | 7.44022e-10 | 1.000000 |
| rad50         | 3.60206e-10 | 1.000000 | 3.90903e-10 | 1.000000 |
| rad54         | 1.00686e-10 | 1.000000 | 1.09267e-10 | 1.000000 |
| PAH10+CH3     | 2.91649e-11 | 1.000000 | 3.16504e-11 | 1.000000 |
| PhcycC3H3_A+H | 1.50044e-11 | 1.000000 | 1.62831e-11 | 1.000000 |
| rad67         | 9.04132e-12 | 1.000000 | 9.81183e-12 | 1.000000 |
| rad52         | 4.62396e-12 | 1.000000 | 5.01802e-12 | 1.000000 |
| rad62         | 4.44939e-12 | 1.000000 | 4.82857e-12 | 1.000000 |
| rad70         | 4.33463e-12 | 1.000000 | 4.70403e-12 | 1.000000 |
| rad43         | 3.80244e-12 | 1.000000 | 4.12649e-12 | 1.000000 |
| rad51         | 2.80799e-12 | 1.000000 | 3.04729e-12 | 1.000000 |
| PAH1+H        | 2.14126e-12 | 1.000000 | 2.32374e-12 | 1.000000 |
| rad55         | 1.80944e-12 | 1.000000 | 1.96364e-12 | 1.000000 |
| rad6          | 1.58575e-12 | 1.000000 | 1.72089e-12 | 1.000000 |
| rad58         | 1.01134e-12 | 1.000000 | 1.09753e-12 | 1.000000 |
| rad34         | 2.13662e-13 | 1.000000 | 2.31871e-13 | 1.000000 |
| rad65         | 8.07407e-14 | 1.000000 | 8.76214e-14 | 1.000000 |
| rad2          | 5.16890e-14 | 1.000000 | 5.60940e-14 | 1.000000 |
| rad28         | 4.18866e-14 | 1.000000 | 4.54562e-14 | 1.000000 |
| rad23         | 4.07597e-14 | 1.000000 | 4.42333e-14 | 1.000000 |
| rad45         | 1.26667e-14 | 1.000000 | 1.37462e-14 | 1.000000 |
| rad26         | 8.22365e-15 | 1.000000 | 8.92448e-15 | 1.000000 |
| rad42         | 8.05553e-15 | 1.000000 | 8.74203e-15 | 1.000000 |
| rad1          | 7.56052e-15 | 1.000000 | 8.20484e-15 | 1.000000 |
| rad53         | 4.55499e-15 | 1.000000 | 4.94316e-15 | 1.000000 |
| rad41         | 2.01461e-15 | 1.000000 | 2.18630e-15 | 1.000000 |
| rad64         | 1.93951e-15 | 1.000000 | 2.10479e-15 | 1.000000 |
| rad10         | 1.58553e-15 | 1.000000 | 1.72065e-15 | 1.000000 |
| rad3          | 1.45825e-15 | 1.000000 | 1.58253e-15 | 1.000000 |

|           |             |          |             |         |
|-----------|-------------|----------|-------------|---------|
| rad4      | 9.75435e-16 | 1.000000 | 1.05856e-15 | 1.00000 |
| rad36     | 9.72998e-16 | 1.000000 | 1.05592e-15 | 1.00000 |
| rad56     | 3.44486e-16 | 1.000000 | 3.73843e-16 | 1.00000 |
| rad7      | 1.86847e-16 | 1.000000 | 2.02770e-16 | 1.00000 |
| rad11     | 8.24465e-17 | 1.000000 | 8.94726e-17 | 1.00000 |
| rad68syn  | 4.92084e-17 | 1.000000 | 5.34020e-17 | 1.00000 |
| rad68anti | 3.44242e-17 | 1.000000 | 3.73578e-17 | 1.00000 |
| rad61     | 9.40581e-18 | 1.000000 | 1.02074e-17 | 1.00000 |
| rad73     | 7.21013e-18 | 1.000000 | 7.82459e-18 | 1.00000 |
| rad20     | 4.39483e-18 | 1.000000 | 4.76936e-18 | 1.00000 |
| rad21     | 3.92596e-18 | 1.000000 | 4.26053e-18 | 1.00000 |
| rad13     | 2.26026e-18 | 1.000000 | 2.45288e-18 | 1.00000 |
| PAH8+H    | 2.19160e-18 | 1.000000 | 2.37837e-18 | 1.00000 |
| rad40syn  | 1.45282e-18 | 1.000000 | 1.57663e-18 | 1.00000 |
| rad71     | 1.06185e-18 | 1.000000 | 1.15234e-18 | 1.00000 |
| rad40anti | 4.38409e-19 | 1.000000 | 4.75770e-19 | 1.00000 |
| rad14     | 8.72662e-20 | 1.000000 | 9.47031e-20 | 1.00000 |
| rad25     | 8.44794e-20 | 1.000000 | 9.16787e-20 | 1.00000 |
| rad33     | 8.40642e-20 | 1.000000 | 9.12282e-20 | 1.00000 |
| rad27     | 6.99577e-20 | 1.000000 | 7.59195e-20 | 1.00000 |
| rad18     | 3.12557e-20 | 1.000000 | 3.39194e-20 | 1.00000 |
| rad22     | 7.90443e-21 | 1.000000 | 8.57805e-21 | 1.00000 |
| rad24     | 5.16591e-21 | 1.000000 | 5.60616e-21 | 1.00000 |
| rad72     | 2.83473e-21 | 1.000000 | 3.07631e-21 | 1.00000 |
| rad9      | 1.77142e-21 | 1.000000 | 1.92238e-21 | 1.00000 |
| rad31     | 1.61043e-21 | 1.000000 | 1.74767e-21 | 1.00000 |
| rad15     | 1.06777e-24 | 1.000000 | 1.15877e-24 | 1.00000 |
| rad12     | 2.10242e-25 | 1.000000 | 2.28158e-25 | 1.00000 |
| rad5      | 1.64529e-28 | 1.000000 | 1.78550e-28 | 1.00000 |
| rad47     | 2.24943e-29 | 1.000000 | 2.44113e-29 | 1.00000 |
| rad8      | 9.50900e-36 | 1.000000 | 1.03194e-35 | 1.00000 |

0.100000000E-08 Pa, 700.000000 K

=====

| Rate constant | True (fraction)     | Effective (fraction) |
|---------------|---------------------|----------------------|
| Total         | 8.02260e-17 (1.00 ) | 6.78335e-17 (1.00 )  |

| species       | PYtrue      | Cumul    | PYeffective | Cumul    |
|---------------|-------------|----------|-------------|----------|
| Indene+H      | 0.844045    | 0.844045 | 0.998243    | 0.998243 |
| Benzyl+CH2    | 0.154470    | 0.998515 | 0.00000     | 0.998243 |
| PhCCH+CH3     | 0.000746434 | 0.999261 | 0.000882800 | 0.999126 |
| PhCHCCH2+H    | 0.000320585 | 0.999582 | 0.000379153 | 0.999505 |
| PhCCCH3+H     | 0.000136742 | 0.999719 | 0.000161724 | 0.999667 |
| Ph+Allene     | 0.000115963 | 0.999835 | 0.000137148 | 0.999804 |
| Ph+MeAc       | 8.86607e-05 | 0.999923 | 0.000104858 | 0.999909 |
| PhCH2CCH+H    | 2.52612e-05 | 0.999949 | 2.98762e-05 | 0.999939 |
| rad30         | 1.89338e-05 | 0.999968 | 2.23928e-05 | 0.999961 |
| PAH7+H        | 1.64063e-05 | 0.999984 | 1.94036e-05 | 0.999980 |
| PAH9+H        | 7.24066e-06 | 0.999991 | 8.56345e-06 | 0.999989 |
| rad39         | 3.97935e-06 | 0.999995 | 4.70633e-06 | 0.999994 |
| rad38         | 2.36433e-06 | 0.999998 | 2.79627e-06 | 0.999996 |
| rad35         | 1.97985e-06 | 1.000000 | 2.34155e-06 | 0.999999 |
| rad19anti     | 5.91542e-07 | 1.00000  | 6.99611e-07 | 0.999999 |
| rad46         | 1.95974e-07 | 1.00000  | 2.31776e-07 | 1.000000 |
| rad60syn      | 9.47747e-08 | 1.00000  | 1.12089e-07 | 1.000000 |
| PAH3+H        | 8.73469e-08 | 1.00000  | 1.03304e-07 | 1.000000 |
| rad37         | 5.67278e-08 | 1.00000  | 6.70914e-08 | 1.000000 |
| rad60anti     | 4.82184e-08 | 1.00000  | 5.70274e-08 | 1.00000  |
| rad59         | 1.44140e-08 | 1.00000  | 1.70472e-08 | 1.00000  |
| rad19syn      | 7.75621e-09 | 1.00000  | 9.17319e-09 | 1.00000  |
| rad50         | 4.08620e-09 | 1.00000  | 4.83271e-09 | 1.00000  |
| rad54         | 1.41341e-09 | 1.00000  | 1.67162e-09 | 1.00000  |
| PhcycC3H3_A+H | 3.16562e-10 | 1.00000  | 3.74395e-10 | 1.00000  |
| PAH10+CH3     | 2.96583e-10 | 1.00000  | 3.50766e-10 | 1.00000  |
| rad67         | 1.46304e-10 | 1.00000  | 1.73032e-10 | 1.00000  |
| rad70         | 8.36625e-11 | 1.00000  | 9.89467e-11 | 1.00000  |
| rad52         | 7.81489e-11 | 1.00000  | 9.24259e-11 | 1.00000  |
| rad51         | 6.57339e-11 | 1.00000  | 7.77428e-11 | 1.00000  |
| rad62         | 5.24317e-11 | 1.00000  | 6.20104e-11 | 1.00000  |
| PAH1+H        | 5.21512e-11 | 1.00000  | 6.16787e-11 | 1.00000  |
| rad55         | 3.42217e-11 | 1.00000  | 4.04737e-11 | 1.00000  |
| rad43         | 3.27206e-11 | 1.00000  | 3.86983e-11 | 1.00000  |
| rad58         | 2.36726e-11 | 1.00000  | 2.79973e-11 | 1.00000  |
| rad34         | 5.57915e-12 | 1.00000  | 6.59840e-12 | 1.00000  |
| rad65         | 2.00942e-12 | 1.00000  | 2.37651e-12 | 1.00000  |
| rad6          | 2.49583e-13 | 1.00000  | 2.95180e-13 | 1.00000  |
| rad53         | 2.08843e-13 | 1.00000  | 2.46996e-13 | 1.00000  |
| rad42         | 1.92430e-13 | 1.00000  | 2.27585e-13 | 1.00000  |

|           |             |         |             |         |
|-----------|-------------|---------|-------------|---------|
| rad64     | 9.12024e-14 | 1.00000 | 1.07864e-13 | 1.00000 |
| rad41     | 4.12884e-14 | 1.00000 | 4.88313e-14 | 1.00000 |
| rad2      | 3.53650e-14 | 1.00000 | 4.18258e-14 | 1.00000 |
| rad23     | 2.83336e-14 | 1.00000 | 3.35098e-14 | 1.00000 |
| rad56     | 2.67455e-14 | 1.00000 | 3.16317e-14 | 1.00000 |
| rad45     | 9.48741e-15 | 1.00000 | 1.12207e-14 | 1.00000 |
| rad28     | 6.44912e-15 | 1.00000 | 7.62730e-15 | 1.00000 |
| rad1      | 4.75007e-15 | 1.00000 | 5.61786e-15 | 1.00000 |
| rad68syn  | 3.96301e-15 | 1.00000 | 4.68701e-15 | 1.00000 |
| rad68anti | 2.73674e-15 | 1.00000 | 3.23672e-15 | 1.00000 |
| rad26     | 1.41539e-15 | 1.00000 | 1.67397e-15 | 1.00000 |
| rad73     | 1.11718e-15 | 1.00000 | 1.32128e-15 | 1.00000 |
| rad36     | 8.25825e-16 | 1.00000 | 9.76695e-16 | 1.00000 |
| rad10     | 5.70588e-16 | 1.00000 | 6.74828e-16 | 1.00000 |
| rad61     | 5.35861e-16 | 1.00000 | 6.33757e-16 | 1.00000 |
| PAH8+H    | 3.92760e-16 | 1.00000 | 4.64513e-16 | 1.00000 |
| rad71     | 2.37745e-16 | 1.00000 | 2.81178e-16 | 1.00000 |
| rad40syn  | 1.89109e-16 | 1.00000 | 2.23657e-16 | 1.00000 |
| rad3      | 9.82953e-17 | 1.00000 | 1.16253e-16 | 1.00000 |
| rad4      | 8.73903e-17 | 1.00000 | 1.03356e-16 | 1.00000 |
| rad40anti | 6.36238e-17 | 1.00000 | 7.52472e-17 | 1.00000 |
| rad7      | 3.79579e-17 | 1.00000 | 4.48924e-17 | 1.00000 |
| rad11     | 2.77304e-17 | 1.00000 | 3.27964e-17 | 1.00000 |
| rad20     | 9.46268e-18 | 1.00000 | 1.11914e-17 | 1.00000 |
| rad21     | 9.16147e-18 | 1.00000 | 1.08352e-17 | 1.00000 |
| rad13     | 1.55297e-18 | 1.00000 | 1.83668e-18 | 1.00000 |
| rad72     | 1.57268e-19 | 1.00000 | 1.85999e-19 | 1.00000 |
| rad9      | 1.07795e-19 | 1.00000 | 1.27488e-19 | 1.00000 |
| rad33     | 1.04391e-19 | 1.00000 | 1.23462e-19 | 1.00000 |
| rad24     | 5.53560e-20 | 1.00000 | 6.54690e-20 | 1.00000 |
| rad18     | 3.75527e-20 | 1.00000 | 4.44131e-20 | 1.00000 |
| rad25     | 3.17277e-20 | 1.00000 | 3.75240e-20 | 1.00000 |
| rad14     | 2.91146e-20 | 1.00000 | 3.44335e-20 | 1.00000 |
| rad27     | 2.60752e-20 | 1.00000 | 3.08389e-20 | 1.00000 |
| rad22     | 4.56715e-21 | 1.00000 | 5.40153e-21 | 1.00000 |
| rad31     | 1.07536e-21 | 1.00000 | 1.27182e-21 | 1.00000 |
| rad15     | 4.28152e-23 | 1.00000 | 5.06371e-23 | 1.00000 |
| rad12     | 2.79158e-23 | 1.00000 | 3.30158e-23 | 1.00000 |
| rad5      | 4.85697e-28 | 1.00000 | 5.74429e-28 | 1.00000 |
| rad47     | 4.45885e-28 | 1.00000 | 5.27343e-28 | 1.00000 |
| rad8      | 1.57148e-31 | 1.00000 | 1.85857e-31 | 1.00000 |

0.100000000E-08 Pa, 800.000000 K

=====

| Rate constant | True (fraction)     | Effective (fraction) |
|---------------|---------------------|----------------------|
| Total         | 3.12228e-16 (1.00 ) | 2.33587e-16 (1.00 )  |

| species       | PYtrue      | Cumul    | PYeffective | Cumul    |
|---------------|-------------|----------|-------------|----------|
| Indene+H      | 0.745326    | 0.745326 | 0.996252    | 0.996252 |
| Benzyl+C2H2   | 0.251870    | 0.997196 | 0.000000    | 0.996252 |
| PhCCH+CH3     | 0.00124162  | 0.998438 | 0.00165963  | 0.997912 |
| PhCHCCH2+H    | 0.000603921 | 0.999042 | 0.000807240 | 0.998719 |
| Ph+Allene     | 0.000391607 | 0.999433 | 0.000523449 | 0.999242 |
| PhCCCH3+H     | 0.000180412 | 0.999614 | 0.000241151 | 0.999483 |
| Ph+MeAc       | 0.000158702 | 0.999772 | 0.000212132 | 0.999696 |
| PhCH2CCH+H    | 0.000104747 | 0.999877 | 0.000140012 | 0.999836 |
| PAH7+H        | 4.20043e-05 | 0.999919 | 5.61457e-05 | 0.999892 |
| rad30         | 3.73181e-05 | 0.999956 | 4.98819e-05 | 0.999942 |
| PAH9+H        | 1.83027e-05 | 0.999975 | 2.44646e-05 | 0.999966 |
| rad39         | 1.01670e-05 | 0.999985 | 1.35899e-05 | 0.999980 |
| rad38         | 6.28638e-06 | 0.999991 | 8.40280e-06 | 0.999988 |
| rad35         | 4.61792e-06 | 0.999996 | 6.17262e-06 | 0.999994 |
| rad19anti     | 2.13374e-06 | 0.999998 | 2.85210e-06 | 0.999997 |
| rad46         | 6.69423e-07 | 0.999999 | 8.94796e-07 | 0.999998 |
| PAH3+H        | 4.55926e-07 | 0.999999 | 6.09421e-07 | 0.999999 |
| rad60syn      | 3.14534e-07 | 0.999999 | 4.20427e-07 | 0.999999 |
| rad60anti     | 1.66149e-07 | 0.999999 | 2.22085e-07 | 0.999999 |
| rad37         | 1.16536e-07 | 1.000000 | 1.55770e-07 | 0.999999 |
| rad59         | 7.05288e-08 | 1.000000 | 9.42735e-08 | 1.000000 |
| rad19syn      | 4.57469e-08 | 1.000000 | 6.11483e-08 | 1.000000 |
| rad50         | 2.67320e-08 | 1.000000 | 3.57318e-08 | 1.000000 |
| rad54         | 9.79642e-09 | 1.000000 | 1.30945e-08 | 1.000000 |
| PhcycC3H3_A+H | 2.99417e-09 | 1.000000 | 4.00220e-09 | 1.000000 |
| PAH10+CH3     | 1.56080e-09 | 1.000000 | 2.08627e-09 | 1.000000 |
| rad67         | 1.31109e-09 | 1.000000 | 1.75248e-09 | 1.000000 |
| rad51         | 7.38998e-10 | 1.000000 | 9.87794e-10 | 1.000000 |
| rad70         | 7.37566e-10 | 1.000000 | 9.85880e-10 | 1.000000 |
| rad52         | 6.86809e-10 | 1.000000 | 9.18035e-10 | 1.000000 |

|           |             |          |             |          |
|-----------|-------------|----------|-------------|----------|
| PAH1+H    | 5.38349e-10 | 1.000000 | 7.19593e-10 | 1.000000 |
| rad62     | 3.04694e-10 | 1.000000 | 4.07274e-10 | 1.000000 |
| rad55     | 2.93955e-10 | 1.000000 | 3.92920e-10 | 1.000000 |
| rad58     | 2.53305e-10 | 1.000000 | 3.38585e-10 | 1.000000 |
| rad43     | 1.42321e-10 | 1.000000 | 1.90236e-10 | 1.000000 |
| rad34     | 6.18274e-11 | 1.000000 | 8.26426e-11 | 1.000000 |
| rad65     | 2.32781e-11 | 1.000000 | 3.11150e-11 | 1.000000 |
| rad53     | 3.49856e-12 | 1.000000 | 4.67641e-12 | 1.000000 |
| rad42     | 1.90218e-12 | 1.000000 | 2.54258e-12 | 1.000000 |
| rad64     | 1.51194e-12 | 1.000000 | 2.02097e-12 | 1.000000 |
| rad56     | 6.63908e-13 | 1.000000 | 8.87424e-13 | 1.000000 |
| rad41     | 3.47549e-13 | 1.000000 | 4.64558e-13 | 1.000000 |
| rad68syn  | 1.02292e-13 | 1.000000 | 1.36731e-13 | 1.000000 |
| rad68anti | 6.99231e-14 | 1.000000 | 9.34639e-14 | 1.000000 |
| rad73     | 5.14212e-14 | 1.000000 | 6.87330e-14 | 1.000000 |
| rad6      | 4.82657e-14 | 1.000000 | 6.45151e-14 | 1.000000 |
| PAH8+H    | 1.87286e-14 | 1.000000 | 2.50338e-14 | 1.000000 |
| rad71     | 1.52214e-14 | 1.000000 | 2.03460e-14 | 1.000000 |
| rad23     | 1.30053e-14 | 1.000000 | 1.73838e-14 | 1.000000 |
| rad61     | 1.08811e-14 | 1.000000 | 1.45443e-14 | 1.000000 |
| rad40syn  | 7.04151e-15 | 1.000000 | 9.41215e-15 | 1.000000 |
| rad2      | 5.90819e-15 | 1.000000 | 7.89729e-15 | 1.000000 |
| rad45     | 5.86025e-15 | 1.000000 | 7.83320e-15 | 1.000000 |
| rad40anti | 2.59887e-15 | 1.000000 | 3.47382e-15 | 1.000000 |
| rad28     | 1.08589e-15 | 1.000000 | 1.45147e-15 | 1.000000 |
| rad1      | 8.83147e-16 | 1.000000 | 1.18047e-15 | 1.000000 |
| rad36     | 4.61609e-16 | 1.000000 | 6.17017e-16 | 1.000000 |
| rad26     | 2.61478e-16 | 1.000000 | 3.49510e-16 | 1.000000 |
| rad10     | 1.01288e-16 | 1.000000 | 1.35388e-16 | 1.000000 |
| rad3      | 3.65175e-17 | 1.000000 | 4.88117e-17 | 1.000000 |
| rad4      | 2.83744e-17 | 1.000000 | 3.79271e-17 | 1.000000 |
| rad20     | 2.64415e-17 | 1.000000 | 3.53434e-17 | 1.000000 |
| rad21     | 2.51401e-17 | 1.000000 | 3.36039e-17 | 1.000000 |
| rad11     | 1.72868e-17 | 1.000000 | 2.31067e-17 | 1.000000 |
| rad7      | 1.27399e-17 | 1.000000 | 1.70290e-17 | 1.000000 |
| rad72     | 1.11076e-17 | 1.000000 | 1.48472e-17 | 1.000000 |
| rad13     | 2.73326e-18 | 1.000000 | 3.65346e-18 | 1.000000 |
| rad9      | 2.42639e-18 | 1.000000 | 3.24328e-18 | 1.000000 |
| rad24     | 2.87053e-19 | 1.000000 | 3.83694e-19 | 1.000000 |
| rad33     | 2.00025e-19 | 1.000000 | 2.67366e-19 | 1.000000 |
| rad18     | 7.61284e-20 | 1.000000 | 1.01758e-19 | 1.000000 |
| rad25     | 2.03006e-20 | 1.000000 | 2.71352e-20 | 1.000000 |
| rad27     | 1.63775e-20 | 1.000000 | 2.18913e-20 | 1.000000 |
| rad14     | 1.45479e-20 | 1.000000 | 1.94457e-20 | 1.000000 |
| rad22     | 3.83297e-21 | 1.000000 | 5.12340e-21 | 1.000000 |
| rad12     | 7.13516e-22 | 1.000000 | 9.53734e-22 | 1.000000 |
| rad31     | 5.78730e-22 | 1.000000 | 7.73569e-22 | 1.000000 |
| rad15     | 5.52202e-22 | 1.000000 | 7.38110e-22 | 1.000000 |
| rad47     | 4.71184e-27 | 1.000000 | 6.29816e-27 | 1.000000 |
| rad5      | 1.27845e-27 | 1.000000 | 1.70886e-27 | 1.000000 |
| rad8      | 8.26838e-28 | 1.000000 | 1.10521e-27 | 1.000000 |

0.100000000E-08 Pa, 900.000000 K

=====

| Rate constant | True (fraction)     | Effective (fraction) |
|---------------|---------------------|----------------------|
| Total         | 9.21769e-16 (1.00 ) | 5.91948e-16 (1.00 )  |

| species     | PYtrue      | Cumul    | PYeffective | Cumul    |
|-------------|-------------|----------|-------------|----------|
| Indene+H    | 0.637601    | 0.637601 | 0.992859    | 0.992859 |
| Benzyl+C2H2 | 0.357813    | 0.995414 | 0.000000    | 0.992859 |
| PhCCH+CH3   | 0.00168534  | 0.997099 | 0.00262438  | 0.995483 |
| PhCHCCH2+H  | 0.000988072 | 0.998087 | 0.00153861  | 0.997022 |
| Ph+Allene   | 0.000956826 | 0.999044 | 0.00148995  | 0.998512 |
| PhCH2CCH+H  | 0.000305642 | 0.999350 | 0.000475939 | 0.998988 |
| Ph+MeAc     | 0.000221700 | 0.999572 | 0.000345227 | 0.999333 |
| PhCCCH3+H   | 0.000192583 | 0.999764 | 0.000299886 | 0.999633 |
| PAH7+H      | 8.18813e-05 | 0.999846 | 0.000127504 | 0.999760 |
| rad30       | 6.20698e-05 | 0.999908 | 9.66537e-05 | 0.999857 |
| PAH9+H      | 3.81793e-05 | 0.999946 | 5.94520e-05 | 0.999917 |
| rad39       | 1.95088e-05 | 0.999966 | 3.03786e-05 | 0.999947 |
| rad38       | 1.36528e-05 | 0.999979 | 2.12599e-05 | 0.999968 |
| rad35       | 9.01875e-06 | 0.999988 | 1.40438e-05 | 0.999982 |
| rad19anti   | 5.95507e-06 | 0.999994 | 9.27312e-06 | 0.999992 |
| rad46       | 1.77409e-06 | 0.999996 | 2.76257e-06 | 0.999994 |
| PAH3+H      | 1.66000e-06 | 0.999998 | 2.58491e-06 | 0.999997 |
| rad60syn    | 7.95279e-07 | 0.999999 | 1.23839e-06 | 0.999998 |
| rad60anti   | 4.32684e-07 | 0.999999 | 6.73766e-07 | 0.999999 |
| rad59       | 2.41974e-07 | 0.999999 | 3.76797e-07 | 0.999999 |

|               |             |          |             |          |
|---------------|-------------|----------|-------------|----------|
| rad37         | 1.83190e-07 | 1.000000 | 2.85260e-07 | 0.999999 |
| rad19syn      | 1.72530e-07 | 1.000000 | 2.68660e-07 | 1.000000 |
| rad50         | 1.19157e-07 | 1.000000 | 1.85549e-07 | 1.000000 |
| rad54         | 4.18728e-08 | 1.000000 | 6.52034e-08 | 1.000000 |
| PhcycC3H3_A+H | 1.64006e-08 | 1.000000 | 2.55387e-08 | 1.000000 |
| rad67         | 7.68849e-09 | 1.000000 | 1.19724e-08 | 1.000000 |
| PAH10+CH3     | 5.46404e-09 | 1.000000 | 8.50849e-09 | 1.000000 |
| rad51         | 5.02704e-09 | 1.000000 | 7.82799e-09 | 1.000000 |
| rad52         | 3.84544e-09 | 1.000000 | 5.98804e-09 | 1.000000 |
| rad70         | 3.82633e-09 | 1.000000 | 5.95829e-09 | 1.000000 |
| PAH1+H        | 3.10814e-09 | 1.000000 | 4.83992e-09 | 1.000000 |
| rad58         | 1.60256e-09 | 1.000000 | 2.49547e-09 | 1.000000 |
| rad55         | 1.47818e-09 | 1.000000 | 2.30179e-09 | 1.000000 |
| rad62         | 1.10198e-09 | 1.000000 | 1.71599e-09 | 1.000000 |
| rad43         | 3.94154e-10 | 1.000000 | 6.13768e-10 | 1.000000 |
| rad34         | 3.84578e-10 | 1.000000 | 5.98856e-10 | 1.000000 |
| rad65         | 1.60295e-10 | 1.000000 | 2.49608e-10 | 1.000000 |
| rad53         | 2.97668e-11 | 1.000000 | 4.63523e-11 | 1.000000 |
| rad64         | 1.24766e-11 | 1.000000 | 1.94283e-11 | 1.000000 |
| rad42         | 1.04398e-11 | 1.000000 | 1.62566e-11 | 1.000000 |
| rad56         | 7.66797e-12 | 1.000000 | 1.19404e-11 | 1.000000 |
| rad41         | 1.62748e-12 | 1.000000 | 2.53428e-12 | 1.000000 |
| rad68syn      | 1.23548e-12 | 1.000000 | 1.92386e-12 | 1.000000 |
| rad73         | 1.04234e-12 | 1.000000 | 1.62311e-12 | 1.000000 |
| rad68anti     | 8.37597e-13 | 1.000000 | 1.30429e-12 | 1.000000 |
| rad71         | 4.04405e-13 | 1.000000 | 6.29730e-13 | 1.000000 |
| PAH8+H        | 3.69074e-13 | 1.000000 | 5.74714e-13 | 1.000000 |
| rad61         | 1.15255e-13 | 1.000000 | 1.79472e-13 | 1.000000 |
| rad40syn      | 1.13801e-13 | 1.000000 | 1.77208e-13 | 1.000000 |
| rad40anti     | 4.54143e-14 | 1.000000 | 7.07183e-14 | 1.000000 |
| rad6          | 1.11328e-14 | 1.000000 | 1.73357e-14 | 1.000000 |
| rad23         | 4.91684e-15 | 1.000000 | 7.65640e-15 | 1.000000 |
| rad45         | 2.56979e-15 | 1.000000 | 4.00162e-15 | 1.000000 |
| rad2          | 1.16881e-15 | 1.000000 | 1.82004e-15 | 1.000000 |
| rad72         | 6.17366e-16 | 1.000000 | 9.61349e-16 | 1.000000 |
| rad36         | 2.20196e-16 | 1.000000 | 3.42885e-16 | 1.000000 |
| rad28         | 1.98762e-16 | 1.000000 | 3.09508e-16 | 1.000000 |
| rad1          | 1.95590e-16 | 1.000000 | 3.04569e-16 | 1.000000 |
| rad20         | 6.04407e-17 | 1.000000 | 9.41170e-17 | 1.000000 |
| rad26         | 5.23192e-17 | 1.000000 | 8.14704e-17 | 1.000000 |
| rad21         | 5.11598e-17 | 1.000000 | 7.96650e-17 | 1.000000 |
| rad10         | 2.14429e-17 | 1.000000 | 3.33904e-17 | 1.000000 |
| rad11         | 1.79970e-17 | 1.000000 | 2.80245e-17 | 1.000000 |
| rad9          | 1.24681e-17 | 1.000000 | 1.94151e-17 | 1.000000 |
| rad3          | 1.19654e-17 | 1.000000 | 1.86323e-17 | 1.000000 |
| rad4          | 9.01294e-18 | 1.000000 | 1.40348e-17 | 1.000000 |
| rad7          | 8.57470e-18 | 1.000000 | 1.33523e-17 | 1.000000 |
| rad13         | 6.34328e-18 | 1.000000 | 9.87762e-18 | 1.000000 |
| rad24         | 5.74732e-19 | 1.000000 | 8.94960e-19 | 1.000000 |
| rad33         | 3.65004e-19 | 1.000000 | 5.68376e-19 | 1.000000 |
| rad18         | 2.21674e-19 | 1.000000 | 3.45186e-19 | 1.000000 |
| rad25         | 2.20675e-20 | 1.000000 | 3.43631e-20 | 1.000000 |
| rad27         | 1.37083e-20 | 1.000000 | 2.13463e-20 | 1.000000 |
| rad14         | 1.05347e-20 | 1.000000 | 1.64045e-20 | 1.000000 |
| rad22         | 4.55355e-21 | 1.000000 | 7.09068e-21 | 1.000000 |
| rad12         | 3.93749e-21 | 1.000000 | 6.13137e-21 | 1.000000 |
| rad15         | 1.96679e-21 | 1.000000 | 3.06264e-21 | 1.000000 |
| rad31         | 3.17849e-22 | 1.000000 | 4.94948e-22 | 1.000000 |
| rad8          | 5.05695e-25 | 1.000000 | 7.87458e-25 | 1.000000 |
| rad47         | 3.22599e-26 | 1.000000 | 5.02344e-26 | 1.000000 |
| rad5          | 3.36305e-27 | 1.000000 | 5.23687e-27 | 1.000000 |

0.100000000E-08 Pa, 1000.00000 K

=====

| Rate constant | True (fraction)     | Effective (fraction) |
|---------------|---------------------|----------------------|
| Total         | 2.23691e-15 (1.00 ) | 1.20781e-15 (1.00 )  |

| species     | PYtrue      | Cumul    | PYeffective | Cumul    |
|-------------|-------------|----------|-------------|----------|
| Indene+H    | 0.533143    | 0.533143 | 0.987405    | 0.987405 |
| Benzyl+C2H2 | 0.460056    | 0.993199 | 0.000000    | 0.987405 |
| PhCCH+CH3   | 0.00197845  | 0.995177 | 0.00366418  | 0.991069 |
| Ph+Allene   | 0.00184724  | 0.997025 | 0.00342117  | 0.994490 |
| PhCHCCH2+H  | 0.00145011  | 0.998475 | 0.00268567  | 0.997176 |
| PhCH2CCH+H  | 0.000695141 | 0.999170 | 0.00128743  | 0.998463 |
| Ph+MeAc     | 0.000262360 | 0.999432 | 0.000485903 | 0.998949 |
| PhCCCH3+H   | 0.000178027 | 0.999610 | 0.000329715 | 0.999279 |
| PAH7+H      | 0.000130563 | 0.999741 | 0.000241809 | 0.999521 |
| rad30       | 9.13367e-05 | 0.999832 | 0.000169160 | 0.999690 |



|               |             |          |             |          |
|---------------|-------------|----------|-------------|----------|
| PAH9+H        | 6.89547e-05 | 0.999901 | 0.000127707 | 0.999818 |
| rad39         | 3.03500e-05 | 0.999932 | 5.62096e-05 | 0.999874 |
| rad38         | 2.54970e-05 | 0.999957 | 4.72216e-05 | 0.999921 |
| rad35         | 1.54295e-05 | 0.999972 | 2.85761e-05 | 0.999950 |
| rad19anti     | 1.36963e-05 | 0.999986 | 2.53661e-05 | 0.999975 |
| PAH3+H        | 4.67729e-06 | 0.999991 | 8.66256e-06 | 0.999984 |
| rad46         | 3.89964e-06 | 0.999995 | 7.22231e-06 | 0.999991 |
| rad60syn      | 1.65646e-06 | 0.999996 | 3.06785e-06 | 0.999994 |
| rad60anti     | 9.23124e-07 | 0.999997 | 1.70967e-06 | 0.999996 |
| rad59         | 6.45414e-07 | 0.999998 | 1.19534e-06 | 0.999997 |
| rad19syn      | 4.72655e-07 | 0.999998 | 8.75378e-07 | 0.999998 |
| rad50         | 4.02263e-07 | 0.999999 | 7.45009e-07 | 0.999999 |
| rad37         | 2.45621e-07 | 0.999999 | 4.54902e-07 | 0.999999 |
| rad54         | 1.26767e-07 | 0.999999 | 2.34777e-07 | 0.999999 |
| PhcycC3H3_A+H | 6.09438e-08 | 0.999999 | 1.12871e-07 | 0.999999 |
| rad67         | 3.29353e-08 | 0.999999 | 6.09977e-08 | 0.999999 |
| rad51         | 2.38554e-08 | 0.999999 | 4.41812e-08 | 1.000000 |
| rad52         | 1.55659e-08 | 0.999999 | 2.88287e-08 | 1.000000 |
| PAH10+CH3     | 1.49501e-08 | 0.999999 | 2.76882e-08 | 1.000000 |
| rad70         | 1.36637e-08 | 0.999999 | 2.53058e-08 | 1.000000 |
| PAH1+H        | 1.19204e-08 | 0.999999 | 2.20771e-08 | 1.000000 |
| rad58         | 7.00658e-09 | 0.999999 | 1.29765e-08 | 1.000000 |
| rad55         | 5.08717e-09 | 0.999999 | 9.42168e-09 | 1.000000 |
| rad62         | 2.86001e-09 | 0.999999 | 5.29688e-09 | 1.000000 |
| rad34         | 1.59465e-09 | 0.999999 | 2.95336e-09 | 1.000000 |
| rad43         | 8.01052e-10 | 0.999999 | 1.48358e-09 | 1.000000 |
| rad65         | 7.61926e-10 | 0.999999 | 1.41112e-09 | 1.000000 |
| rad53         | 1.57207e-10 | 0.999999 | 2.91154e-10 | 1.000000 |
| rad64         | 6.32994e-11 | 0.999999 | 1.17233e-10 | 1.000000 |
| rad56         | 5.17480e-11 | 0.999999 | 9.58396e-11 | 1.000000 |
| rad42         | 3.80336e-11 | 0.999999 | 7.04399e-11 | 1.000000 |
| rad73         | 1.18179e-11 | 0.999999 | 2.18873e-11 | 1.000000 |
| rad68syn      | 8.78399e-12 | 0.999999 | 1.62684e-11 | 1.000000 |
| rad68anti     | 5.91470e-12 | 0.999999 | 1.09543e-11 | 1.000000 |
| rad71         | 5.72480e-12 | 0.999999 | 1.06026e-11 | 1.000000 |
| rad41         | 5.10891e-12 | 0.999999 | 9.46194e-12 | 1.000000 |
| PAH8+H        | 3.92400e-12 | 0.999999 | 7.26744e-12 | 1.000000 |
| rad40syn      | 1.02743e-12 | 0.999999 | 1.90286e-12 | 1.000000 |
| rad61         | 7.99639e-13 | 0.999999 | 1.48097e-12 | 1.000000 |
| rad40anti     | 4.38114e-13 | 0.999999 | 8.11407e-13 | 1.000000 |
| rad72         | 1.59923e-14 | 0.999999 | 2.96184e-14 | 1.000000 |
| rad6          | 3.41944e-15 | 0.999999 | 6.33295e-15 | 1.000000 |
| rad23         | 2.10416e-15 | 0.999999 | 3.89701e-15 | 1.000000 |
| rad45         | 1.24477e-15 | 0.999999 | 2.30538e-15 | 1.000000 |
| rad2          | 2.67911e-16 | 0.999999 | 4.96183e-16 | 1.000000 |
| rad36         | 1.10480e-16 | 0.999999 | 2.04613e-16 | 1.000000 |
| rad20         | 8.81739e-17 | 0.999999 | 1.63302e-16 | 1.000000 |
| rad21         | 6.41659e-17 | 0.999999 | 1.18838e-16 | 1.000000 |
| rad1          | 5.09969e-17 | 0.999999 | 9.44486e-17 | 1.000000 |
| rad28         | 4.42180e-17 | 0.999999 | 8.18938e-17 | 1.000000 |
| rad11         | 2.72580e-17 | 0.999999 | 5.04830e-17 | 1.000000 |
| rad9          | 2.11868e-17 | 0.999999 | 3.92388e-17 | 1.000000 |
| rad26         | 1.27849e-17 | 0.999999 | 2.36782e-17 | 1.000000 |
| rad13         | 1.26758e-17 | 0.999999 | 2.34762e-17 | 1.000000 |
| rad7          | 1.13206e-17 | 0.999999 | 2.09663e-17 | 1.000000 |
| rad10         | 8.13677e-18 | 0.999999 | 1.50697e-17 | 1.000000 |
| rad3          | 3.90079e-18 | 0.999999 | 7.22443e-18 | 1.000000 |
| rad4          | 3.00260e-18 | 0.999999 | 5.56095e-18 | 1.000000 |
| rad18         | 7.80183e-19 | 0.999999 | 1.44493e-18 | 1.000000 |
| rad24         | 5.90769e-19 | 0.999999 | 1.09413e-18 | 1.000000 |
| rad33         | 4.69537e-19 | 0.999999 | 8.69603e-19 | 1.000000 |
| rad25         | 3.13967e-20 | 0.999999 | 5.81481e-20 | 1.000000 |
| rad27         | 1.11645e-20 | 0.999999 | 2.06771e-20 | 1.000000 |
| rad14         | 9.24131e-21 | 0.999999 | 1.71153e-20 | 1.000000 |
| rad12         | 8.61558e-21 | 0.999999 | 1.59564e-20 | 1.000000 |
| rad22         | 8.11171e-21 | 0.999999 | 1.50233e-20 | 1.000000 |
| rad15         | 2.78384e-21 | 0.999999 | 5.15579e-21 | 1.000000 |
| rad31         | 1.86001e-22 | 0.999999 | 3.44482e-22 | 1.000000 |
| rad8          | 3.09659e-23 | 0.999999 | 5.73503e-23 | 1.000000 |
| rad47         | 1.58916e-25 | 0.999999 | 2.94319e-25 | 1.000000 |
| rad5          | 1.01551e-26 | 0.999999 | 1.88078e-26 | 1.000000 |

0.100000000E-08 Pa, 1100.00000 K  
=====

| Rate constant | True (fraction)     | Effective (fraction) |
|---------------|---------------------|----------------------|
| Total         | 4.69847e-15 (1.00 ) | 2.11075e-15 (1.00 )  |
| species       | PYtrue Cumul        | PYeffective Cumul    |

-----

|               |             |          |             |          |
|---------------|-------------|----------|-------------|----------|
| Benzyl+C2H2   | 0.550759    | 0.550759 | 0.00000     | 0.00000  |
| Indene+H      | 0.439889    | 0.990648 | 0.979181    | 0.979181 |
| Ph+Allene     | 0.00299528  | 0.993643 | 0.00666742  | 0.985848 |
| PhCCH+CH3     | 0.00208760  | 0.995731 | 0.00464694  | 0.990495 |
| PhCHCCH2+H    | 0.00194544  | 0.997676 | 0.00433051  | 0.994826 |
| PhCH2CCH+H    | 0.00132191  | 0.998998 | 0.00294254  | 0.997768 |
| Ph+MeAc       | 0.000277389 | 0.999276 | 0.000617461 | 0.998386 |
| PAH7+H        | 0.000179385 | 0.999455 | 0.000399306 | 0.998785 |
| PhCCCH3+H     | 0.000149168 | 0.999604 | 0.000332043 | 0.999117 |
| rad30         | 0.000123015 | 0.999727 | 0.000273827 | 0.999391 |
| PAH9+H        | 0.000111696 | 0.999839 | 0.000248632 | 0.999640 |
| rad38         | 4.24978e-05 | 0.999881 | 9.45991e-05 | 0.999734 |
| rad39         | 4.04278e-05 | 0.999922 | 8.99912e-05 | 0.999824 |
| rad19anti     | 2.71780e-05 | 0.999949 | 6.04975e-05 | 0.999885 |
| rad35         | 2.39104e-05 | 0.999973 | 5.32238e-05 | 0.999938 |
| PAH3+H        | 1.09195e-05 | 0.999984 | 2.43064e-05 | 0.999962 |
| rad46         | 7.44861e-06 | 0.999991 | 1.65804e-05 | 0.999979 |
| rad60syn      | 2.99524e-06 | 0.999994 | 6.66734e-06 | 0.999986 |
| rad60anti     | 1.70291e-06 | 0.999996 | 3.79064e-06 | 0.999989 |
| rad59         | 1.43231e-06 | 0.999997 | 3.18828e-06 | 0.999993 |
| rad50         | 1.10325e-06 | 0.999998 | 2.45580e-06 | 0.999995 |
| rad19syn      | 1.02396e-06 | 1.000000 | 2.27932e-06 | 0.999997 |
| rad37         | 3.04609e-07 | 1.000000 | 6.78052e-07 | 0.999998 |
| rad54         | 2.97942e-07 | 1.000000 | 6.63211e-07 | 0.999999 |
| PhcycC3H3_A+H | 1.70469e-07 | 1.000000 | 3.79460e-07 | 0.999999 |
| rad67         | 1.11020e-07 | 1.000000 | 2.47128e-07 | 0.999999 |
| rad51         | 8.66313e-08 | 1.000000 | 1.92839e-07 | 0.999999 |
| rad52         | 4.94924e-08 | 1.000000 | 1.10169e-07 | 1.000000 |
| rad70         | 3.72387e-08 | 1.000000 | 8.28925e-08 | 1.000000 |
| PAH10+CH3     | 3.55700e-08 | 1.000000 | 7.91778e-08 | 1.000000 |
| PAH1+H        | 3.40420e-08 | 1.000000 | 7.57766e-08 | 1.000000 |
| rad58         | 2.33985e-08 | 1.000000 | 5.20844e-08 | 1.000000 |
| rad55         | 1.32727e-08 | 1.000000 | 2.95447e-08 | 1.000000 |
| rad62         | 5.84585e-09 | 1.000000 | 1.30127e-08 | 1.000000 |
| rad34         | 4.93270e-09 | 1.000000 | 1.09801e-08 | 1.000000 |
| rad65         | 2.75373e-09 | 1.000000 | 6.12974e-09 | 1.000000 |
| rad43         | 1.31323e-09 | 1.000000 | 2.92321e-09 | 1.000000 |
| rad53         | 5.86805e-10 | 1.000000 | 1.30621e-09 | 1.000000 |
| rad56         | 2.36331e-10 | 1.000000 | 5.26066e-10 | 1.000000 |
| rad64         | 2.26679e-10 | 1.000000 | 5.04581e-10 | 1.000000 |
| rad42         | 1.03252e-10 | 1.000000 | 2.29836e-10 | 1.000000 |
| rad73         | 8.74237e-11 | 1.000000 | 1.94603e-10 | 1.000000 |
| rad71         | 5.09990e-11 | 1.000000 | 1.13522e-10 | 1.000000 |
| rad68syn      | 4.26221e-11 | 1.000000 | 9.48757e-11 | 1.000000 |
| rad68anti     | 2.85345e-11 | 1.000000 | 6.35171e-11 | 1.000000 |
| PAH8+H        | 2.67128e-11 | 1.000000 | 5.94621e-11 | 1.000000 |
| rad41         | 1.21931e-11 | 1.000000 | 2.71415e-11 | 1.000000 |
| rad40syn      | 6.09410e-12 | 1.000000 | 1.35653e-11 | 1.000000 |
| rad61         | 4.16713e-12 | 1.000000 | 9.27593e-12 | 1.000000 |
| rad40anti     | 2.75055e-12 | 1.000000 | 6.12265e-12 | 1.000000 |
| rad72         | 2.32325e-13 | 1.000000 | 5.17150e-13 | 1.000000 |
| rad6          | 1.48218e-15 | 1.000000 | 3.29930e-15 | 1.000000 |
| rad23         | 9.89761e-16 | 1.000000 | 2.20318e-15 | 1.000000 |
| rad45         | 6.20612e-16 | 1.000000 | 1.38147e-15 | 1.000000 |
| rad20         | 7.93855e-17 | 1.000000 | 1.76710e-16 | 1.000000 |
| rad2          | 6.88211e-17 | 1.000000 | 1.53194e-16 | 1.000000 |
| rad36         | 5.65988e-17 | 1.000000 | 1.25988e-16 | 1.000000 |
| rad21         | 5.10807e-17 | 1.000000 | 1.13704e-16 | 1.000000 |
| rad11         | 4.54048e-17 | 1.000000 | 1.01070e-16 | 1.000000 |
| rad9          | 2.20602e-17 | 1.000000 | 4.91055e-17 | 1.000000 |
| rad7          | 2.02745e-17 | 1.000000 | 4.51305e-17 | 1.000000 |
| rad13         | 1.66037e-17 | 1.000000 | 3.69594e-17 | 1.000000 |
| rad1          | 1.44067e-17 | 1.000000 | 3.20689e-17 | 1.000000 |
| rad28         | 1.29028e-17 | 1.000000 | 2.87213e-17 | 1.000000 |
| rad10         | 5.59533e-18 | 1.000000 | 1.24551e-17 | 1.000000 |
| rad26         | 4.07462e-18 | 1.000000 | 9.07000e-18 | 1.000000 |
| rad18         | 2.44826e-18 | 1.000000 | 5.44977e-18 | 1.000000 |
| rad3          | 1.36025e-18 | 1.000000 | 3.02787e-18 | 1.000000 |
| rad4          | 1.06829e-18 | 1.000000 | 2.37798e-18 | 1.000000 |
| rad24         | 4.56170e-19 | 1.000000 | 1.01542e-18 | 1.000000 |
| rad33         | 3.94208e-19 | 1.000000 | 8.77497e-19 | 1.000000 |
| rad25         | 3.94356e-20 | 1.000000 | 8.77826e-20 | 1.000000 |
| rad22         | 2.08523e-20 | 1.000000 | 4.64168e-20 | 1.000000 |
| rad12         | 1.26339e-20 | 1.000000 | 2.81227e-20 | 1.000000 |
| rad14         | 7.49662e-21 | 1.000000 | 1.66873e-20 | 1.000000 |
| rad27         | 7.01392e-21 | 1.000000 | 1.56128e-20 | 1.000000 |
| rad15         | 2.77218e-21 | 1.000000 | 6.17081e-21 | 1.000000 |
| rad8          | 3.02695e-22 | 1.000000 | 6.73791e-22 | 1.000000 |
| rad31         | 1.11579e-22 | 1.000000 | 2.48372e-22 | 1.000000 |
| rad47         | 5.97458e-25 | 1.000000 | 1.32993e-24 | 1.000000 |

rad5 | 3.56467e-26 1.00000 | 7.93487e-26 1.000000

0.100000000E-08 Pa, 1200.00000 K

=====  
Rate constant | True (fraction) | Effective (fraction)  
-----  
Total | 8.84330e-15 (1.00 ) | 3.30079e-15 (1.00 )

| species       | PYtrue      | Cumul    | PYeffective | Cumul    |
|---------------|-------------|----------|-------------|----------|
| Benzyl+C2H2   | 0.626747    | 0.626747 | 0.00000     | 0.00000  |
| Indene+H      | 0.361139    | 0.987886 | 0.967544    | 0.967544 |
| Ph+Allene     | 0.00426331  | 0.992149 | 0.0114220   | 0.978966 |
| PhCHCCH2+H    | 0.00242727  | 0.994577 | 0.00650302  | 0.985469 |
| PhCH2CCH+H    | 0.00220912  | 0.996786 | 0.00591855  | 0.991388 |
| PhCCH+CH3     | 0.00203529  | 0.998821 | 0.00545285  | 0.996840 |
| Ph+MeAc       | 0.000271659 | 0.999093 | 0.000727814 | 0.997568 |
| PAH7+H        | 0.000220958 | 0.999314 | 0.000591978 | 0.998160 |
| PAH9+H        | 0.000166476 | 0.999480 | 0.000446015 | 0.998606 |
| rad30         | 0.000155353 | 0.999635 | 0.000416215 | 0.999022 |
| PhCCCH3+H     | 0.000117029 | 0.999752 | 0.000313538 | 0.999336 |
| rad38         | 6.49367e-05 | 0.999817 | 0.000173975 | 0.999510 |
| rad19anti     | 4.80909e-05 | 0.999865 | 0.000128843 | 0.999639 |
| rad39         | 4.80571e-05 | 0.999914 | 0.000128752 | 0.999768 |
| rad35         | 3.43899e-05 | 0.999948 | 9.21355e-05 | 0.999860 |
| PAH3+H        | 2.21253e-05 | 0.999970 | 5.92770e-05 | 0.999919 |
| rad46         | 1.27762e-05 | 0.999983 | 3.42294e-05 | 0.999953 |
| rad60syn      | 4.87439e-06 | 0.999988 | 1.30592e-05 | 0.999966 |
| rad60anti     | 2.81860e-06 | 0.999991 | 7.55145e-06 | 0.999974 |
| rad59         | 2.76936e-06 | 0.999993 | 7.41953e-06 | 0.999981 |
| rad50         | 2.57972e-06 | 0.999996 | 6.91144e-06 | 0.999988 |
| rad19syn      | 1.86136e-06 | 0.999998 | 4.98686e-06 | 0.999993 |
| rad54         | 5.79322e-07 | 0.999998 | 1.55209e-06 | 0.999995 |
| PhcycC3H3_A+H | 3.85542e-07 | 0.999999 | 1.03292e-06 | 0.999996 |
| rad37         | 3.71909e-07 | 0.999999 | 9.96399e-07 | 0.999997 |
| rad67         | 3.10056e-07 | 0.999999 | 8.30686e-07 | 0.999998 |
| rad51         | 2.56406e-07 | 1.000000 | 6.86949e-07 | 0.999998 |
| rad52         | 1.30814e-07 | 1.000000 | 3.50469e-07 | 0.999999 |
| rad70         | 8.31661e-08 | 1.000000 | 2.22814e-07 | 0.999999 |
| PAH10+CH3     | 7.86243e-08 | 1.000000 | 2.10646e-07 | 0.999999 |
| PAH1+H        | 7.84240e-08 | 1.000000 | 2.10109e-07 | 0.999999 |
| rad58         | 6.38230e-08 | 1.000000 | 1.70991e-07 | 0.999999 |
| rad55         | 2.81615e-08 | 1.000000 | 7.54487e-08 | 0.999999 |
| rad34         | 1.22937e-08 | 1.000000 | 3.29365e-08 | 0.999999 |
| rad62         | 1.00322e-08 | 1.000000 | 2.68777e-08 | 1.000000 |
| rad65         | 8.07952e-09 | 1.000000 | 2.16462e-08 | 1.000000 |
| rad43         | 1.86209e-09 | 1.000000 | 4.98881e-09 | 1.000000 |
| rad53         | 1.69057e-09 | 1.000000 | 4.52927e-09 | 1.000000 |
| rad56         | 8.06531e-10 | 1.000000 | 2.16081e-09 | 1.000000 |
| rad64         | 6.30249e-10 | 1.000000 | 1.68853e-09 | 1.000000 |
| rad73         | 4.67949e-10 | 1.000000 | 1.25370e-09 | 1.000000 |
| rad71         | 3.19752e-10 | 1.000000 | 8.56663e-10 | 1.000000 |
| rad42         | 2.25979e-10 | 1.000000 | 6.05431e-10 | 1.000000 |
| rad68syn      | 1.55936e-10 | 1.000000 | 4.17774e-10 | 1.000000 |
| PAH8+H        | 1.30631e-10 | 1.000000 | 3.49980e-10 | 1.000000 |
| rad68anti     | 1.03878e-10 | 1.000000 | 2.78304e-10 | 1.000000 |
| rad40syn      | 2.64822e-11 | 1.000000 | 7.09497e-11 | 1.000000 |
| rad41         | 2.43325e-11 | 1.000000 | 6.51903e-11 | 1.000000 |
| rad61         | 1.76266e-11 | 1.000000 | 4.72244e-11 | 1.000000 |
| rad40anti     | 1.25561e-11 | 1.000000 | 3.36398e-11 | 1.000000 |
| rad72         | 2.17907e-12 | 1.000000 | 5.83804e-12 | 1.000000 |
| rad6          | 9.23755e-16 | 1.000000 | 2.47487e-15 | 1.000000 |
| rad23         | 4.82969e-16 | 1.000000 | 1.29395e-15 | 1.000000 |
| rad45         | 3.19983e-16 | 1.000000 | 8.57281e-16 | 1.000000 |
| rad11         | 6.24154e-17 | 1.000000 | 1.67220e-16 | 1.000000 |
| rad20         | 5.25317e-17 | 1.000000 | 1.40740e-16 | 1.000000 |
| rad7          | 3.47383e-17 | 1.000000 | 9.30690e-17 | 1.000000 |
| rad21         | 3.17166e-17 | 1.000000 | 8.49734e-17 | 1.000000 |
| rad36         | 2.97281e-17 | 1.000000 | 7.96460e-17 | 1.000000 |
| rad9          | 1.96329e-17 | 1.000000 | 5.25993e-17 | 1.000000 |
| rad2          | 1.93977e-17 | 1.000000 | 5.19693e-17 | 1.000000 |
| rad13         | 1.37588e-17 | 1.000000 | 3.68619e-17 | 1.000000 |
| rad28         | 5.29203e-18 | 1.000000 | 1.41781e-17 | 1.000000 |
| rad18         | 5.20685e-18 | 1.000000 | 1.39499e-17 | 1.000000 |
| rad10         | 4.44569e-18 | 1.000000 | 1.19107e-17 | 1.000000 |
| rad1          | 4.27822e-18 | 1.000000 | 1.14620e-17 | 1.000000 |
| rad26         | 1.72669e-18 | 1.000000 | 4.62607e-18 | 1.000000 |
| rad3          | 5.02108e-19 | 1.000000 | 1.34522e-18 | 1.000000 |
| rad4          | 4.00088e-19 | 1.000000 | 1.07189e-18 | 1.000000 |
| rad24         | 3.33436e-19 | 1.000000 | 8.93325e-19 | 1.000000 |

|       |             |         |             |          |
|-------|-------------|---------|-------------|----------|
| rad33 | 2.51828e-19 | 1.00000 | 6.74684e-19 | 1.000000 |
| rad22 | 6.96886e-20 | 1.00000 | 1.86706e-19 | 1.000000 |
| rad25 | 3.68476e-20 | 1.00000 | 9.87200e-20 | 1.000000 |
| rad12 | 1.57452e-20 | 1.00000 | 4.21838e-20 | 1.000000 |
| rad14 | 4.93370e-21 | 1.00000 | 1.32181e-20 | 1.000000 |
| rad15 | 4.59581e-21 | 1.00000 | 1.23129e-20 | 1.000000 |
| rad27 | 3.32748e-21 | 1.00000 | 8.91479e-21 | 1.000000 |
| rad8  | 9.89268e-22 | 1.00000 | 2.65039e-21 | 1.000000 |
| rad31 | 6.76592e-23 | 1.00000 | 1.81269e-22 | 1.000000 |
| rad47 | 1.81317e-24 | 1.00000 | 4.85774e-24 | 1.000000 |
| rad5  | 1.36023e-25 | 1.00000 | 3.64424e-25 | 1.000000 |

0.1000000000E-08 Pa, 1300.00000 K

| Rate constant | True (fraction)     | Effective (fraction) |
|---------------|---------------------|----------------------|
| Total         | 1.52810e-14 (1.00 ) | 4.76644e-15 (1.00 )  |

| species       | PYtrue      | Cumul    | PYeffective | Cumul    |
|---------------|-------------|----------|-------------|----------|
| Benzyl+C2H2   | 0.688080    | 0.688080 | 0.000000    | 0.000000 |
| Indene+H      | 0.296944    | 0.985024 | 0.951986    | 0.951986 |
| Ph+Allene     | 0.00550433  | 0.990528 | 0.0176466   | 0.969633 |
| PhCH2CCH+H    | 0.00336231  | 0.993891 | 0.0107794   | 0.980412 |
| PhCHCCH2+H    | 0.00286585  | 0.996756 | 0.00918775  | 0.989600 |
| PhCCH+CH3     | 0.00187197  | 0.998628 | 0.00600145  | 0.995601 |
| Ph+MeAc       | 0.000252917 | 0.998881 | 0.000810838 | 0.996412 |
| PAH7+H        | 0.000251839 | 0.999133 | 0.000807383 | 0.997219 |
| PAH9+H        | 0.000232565 | 0.999366 | 0.000745592 | 0.997965 |
| rad30         | 0.000187145 | 0.999553 | 0.000599977 | 0.998565 |
| rad38         | 9.27358e-05 | 0.999646 | 0.000297306 | 0.998862 |
| PhCCCH3+H     | 8.81977e-05 | 0.999734 | 0.000282757 | 0.999145 |
| rad19anti     | 7.76866e-05 | 0.999812 | 0.000249059 | 0.999394 |
| rad39         | 5.27138e-05 | 0.999864 | 0.000168998 | 0.999563 |
| rad35         | 4.67240e-05 | 0.999911 | 0.000149795 | 0.999713 |
| PAH3+H        | 4.01931e-05 | 0.999951 | 0.000128857 | 0.999842 |
| rad46         | 2.01481e-05 | 0.999971 | 6.45939e-05 | 0.999906 |
| rad60syn      | 7.32140e-06 | 0.999979 | 2.34720e-05 | 0.999930 |
| rad50         | 5.32215e-06 | 0.999984 | 1.70625e-05 | 0.999947 |
| rad59         | 4.81766e-06 | 0.999989 | 1.54452e-05 | 0.999962 |
| rad60anti     | 4.29551e-06 | 0.999993 | 1.37712e-05 | 0.999976 |
| rad19syn      | 2.96344e-06 | 0.999996 | 9.50065e-06 | 0.999986 |
| rad54         | 9.75309e-07 | 0.999997 | 3.12679e-06 | 0.999989 |
| rad67         | 7.44257e-07 | 0.999998 | 2.38605e-06 | 0.999991 |
| PhcycC3H3_A+H | 7.41843e-07 | 0.999999 | 2.37831e-06 | 0.999993 |
| rad51         | 6.46585e-07 | 0.999999 | 2.07292e-06 | 0.999996 |
| rad37         | 4.66727e-07 | 1.000000 | 1.49630e-06 | 0.999997 |
| rad52         | 2.99170e-07 | 1.000000 | 9.59124e-07 | 0.999998 |
| PAH10+CH3     | 1.66594e-07 | 1.000000 | 5.34093e-07 | 0.999999 |
| rad70         | 1.60097e-07 | 1.000000 | 5.13264e-07 | 0.999999 |
| PAH1+H        | 1.54574e-07 | 1.000000 | 4.95557e-07 | 1.000000 |
| rad58         | 1.48959e-07 | 1.000000 | 4.77556e-07 | 1.000000 |
| rad55         | 5.10750e-08 | 1.000000 | 1.63744e-07 | 1.000000 |
| rad34         | 2.60671e-08 | 1.000000 | 8.35698e-08 | 1.000000 |
| rad65         | 2.01508e-08 | 1.000000 | 6.46025e-08 | 1.000000 |
| rad62         | 1.51327e-08 | 1.000000 | 4.85146e-08 | 1.000000 |
| rad53         | 3.99906e-09 | 1.000000 | 1.28208e-08 | 1.000000 |
| rad43         | 2.42224e-09 | 1.000000 | 7.76557e-09 | 1.000000 |
| rad56         | 2.20471e-09 | 1.000000 | 7.06819e-09 | 1.000000 |
| rad73         | 1.94724e-09 | 1.000000 | 6.24276e-09 | 1.000000 |
| rad71         | 1.52459e-09 | 1.000000 | 4.88774e-09 | 1.000000 |
| rad64         | 1.45722e-09 | 1.000000 | 4.67176e-09 | 1.000000 |
| PAH8+H        | 4.97086e-10 | 1.000000 | 1.59363e-09 | 1.000000 |
| rad68syn      | 4.61120e-10 | 1.000000 | 1.47833e-09 | 1.000000 |
| rad42         | 4.21653e-10 | 1.000000 | 1.35180e-09 | 1.000000 |
| rad68anti     | 3.05850e-10 | 1.000000 | 9.80538e-10 | 1.000000 |
| rad40syn      | 9.09556e-11 | 1.000000 | 2.91599e-10 | 1.000000 |
| rad61         | 6.30316e-11 | 1.000000 | 2.02076e-10 | 1.000000 |
| rad40anti     | 4.50261e-11 | 1.000000 | 1.44351e-10 | 1.000000 |
| rad41         | 4.39793e-11 | 1.000000 | 1.40995e-10 | 1.000000 |
| rad72         | 1.45373e-11 | 1.000000 | 4.66058e-11 | 1.000000 |
| rad6          | 7.93287e-16 | 1.000000 | 2.54324e-15 | 1.000000 |
| rad23         | 2.47408e-16 | 1.000000 | 7.93177e-16 | 1.000000 |
| rad45         | 1.69445e-16 | 1.000000 | 5.43232e-16 | 1.000000 |
| rad11         | 6.08066e-17 | 1.000000 | 1.94943e-16 | 1.000000 |
| rad7          | 4.45349e-17 | 1.000000 | 1.42776e-16 | 1.000000 |
| rad20         | 3.18168e-17 | 1.000000 | 1.02003e-16 | 1.000000 |
| rad21         | 1.87706e-17 | 1.000000 | 6.01774e-17 | 1.000000 |
| rad9          | 1.62545e-17 | 1.000000 | 5.21112e-17 | 1.000000 |
| rad36         | 1.60118e-17 | 1.000000 | 5.13329e-17 | 1.000000 |

|       |             |         |             |         |
|-------|-------------|---------|-------------|---------|
| rad13 | 8.37361e-18 | 1.00000 | 2.68454e-17 | 1.00000 |
| rad18 | 6.76196e-18 | 1.00000 | 2.16785e-17 | 1.00000 |
| rad2  | 5.75958e-18 | 1.00000 | 1.84649e-17 | 1.00000 |
| rad28 | 3.13351e-18 | 1.00000 | 1.00459e-17 | 1.00000 |
| rad10 | 2.88296e-18 | 1.00000 | 9.24262e-18 | 1.00000 |
| rad1  | 1.31482e-18 | 1.00000 | 4.21523e-18 | 1.00000 |
| rad26 | 9.19520e-19 | 1.00000 | 2.94793e-18 | 1.00000 |
| rad22 | 2.57640e-19 | 1.00000 | 8.25979e-19 | 1.00000 |
| rad24 | 2.44030e-19 | 1.00000 | 7.82347e-19 | 1.00000 |
| rad3  | 1.94271e-19 | 1.00000 | 6.22822e-19 | 1.00000 |
| rad4  | 1.56579e-19 | 1.00000 | 5.01985e-19 | 1.00000 |
| rad33 | 1.48882e-19 | 1.00000 | 4.77307e-19 | 1.00000 |
| rad25 | 2.76125e-20 | 1.00000 | 8.85244e-20 | 1.00000 |
| rad15 | 1.98989e-20 | 1.00000 | 6.37948e-20 | 1.00000 |
| rad12 | 1.79600e-20 | 1.00000 | 5.75787e-20 | 1.00000 |
| rad14 | 2.71726e-21 | 1.00000 | 8.71141e-21 | 1.00000 |
| rad8  | 1.89596e-21 | 1.00000 | 6.07834e-21 | 1.00000 |
| rad27 | 1.34953e-21 | 1.00000 | 4.32651e-21 | 1.00000 |
| rad31 | 4.14038e-23 | 1.00000 | 1.32738e-22 | 1.00000 |
| rad47 | 4.64662e-24 | 1.00000 | 1.48968e-23 | 1.00000 |
| rad5  | 4.99292e-25 | 1.00000 | 1.60070e-24 | 1.00000 |

0.100000000E-08 Pa, 1400.00000 K

| Rate constant | True (fraction)     | Effective (fraction) |
|---------------|---------------------|----------------------|
| Total         | 2.46691e-14 (1.00 ) | 6.50155e-15 (1.00 )  |

| species       | PYtrue      | Cumul    | PYeffective | Cumul    |
|---------------|-------------|----------|-------------|----------|
| Benzyl+C2H2   | 0.736450    | 0.736450 | 0.00000     | 0.00000  |
| Indene+H      | 0.245659    | 0.982109 | 0.932117    | 0.932117 |
| Ph+Allene     | 0.00660861  | 0.988718 | 0.0250754   | 0.957192 |
| PhCH2CCH+H    | 0.00478128  | 0.993499 | 0.0181419   | 0.975334 |
| PhCHCCH2+H    | 0.00325578  | 0.996755 | 0.0123536   | 0.987688 |
| PhCCH+CH3     | 0.00165084  | 0.998406 | 0.00626388  | 0.993952 |
| PAH9+H        | 0.000308661 | 0.998714 | 0.00117117  | 0.995123 |
| PAH7+H        | 0.000272630 | 0.998987 | 0.00103445  | 0.996157 |
| Ph+MeAc       | 0.000228420 | 0.999215 | 0.000866707 | 0.997024 |
| rad30         | 0.000217655 | 0.999433 | 0.000825859 | 0.997850 |
| rad38         | 0.000125529 | 0.999558 | 0.000476301 | 0.998326 |
| rad19anti     | 0.000116511 | 0.999675 | 0.000442085 | 0.998768 |
| PAH3+H        | 6.69984e-05 | 0.999742 | 0.000254215 | 0.999023 |
| PhCCCH3+H     | 6.53819e-05 | 0.999807 | 0.000248082 | 0.999271 |
| rad35         | 6.07397e-05 | 0.999868 | 0.000230468 | 0.999501 |
| rad39         | 5.49305e-05 | 0.999923 | 0.000208426 | 0.999710 |
| rad46         | 2.97185e-05 | 0.999953 | 0.000112762 | 0.999822 |
| rad60syn      | 1.03332e-05 | 0.999963 | 3.92077e-05 | 0.999862 |
| rad50         | 9.93210e-06 | 0.999973 | 3.76859e-05 | 0.999899 |
| rad59         | 7.71556e-06 | 0.999981 | 2.92756e-05 | 0.999928 |
| rad60anti     | 6.13929e-06 | 0.999987 | 2.32946e-05 | 0.999952 |
| rad19syn      | 4.26609e-06 | 0.999991 | 1.61870e-05 | 0.999968 |
| rad67         | 1.57759e-06 | 0.999993 | 5.98594e-06 | 0.999974 |
| rad54         | 1.46998e-06 | 0.999994 | 5.57763e-06 | 0.999980 |
| rad51         | 1.43445e-06 | 0.999996 | 5.44280e-06 | 0.999985 |
| PhcycC3H3_A+H | 1.26043e-06 | 0.999997 | 4.78252e-06 | 0.999990 |
| rad37         | 6.13241e-07 | 0.999997 | 2.32685e-06 | 0.999992 |
| rad52         | 6.09458e-07 | 0.999998 | 2.31250e-06 | 0.999994 |
| PAH10+CH3     | 3.40070e-07 | 0.999998 | 1.29034e-06 | 0.999996 |
| rad58         | 3.07503e-07 | 0.999999 | 1.16677e-06 | 0.999997 |
| rad70         | 2.75599e-07 | 0.999999 | 1.04572e-06 | 0.999998 |
| PAH1+H        | 2.72543e-07 | 0.999999 | 1.03413e-06 | 0.999999 |
| rad55         | 8.21114e-08 | 0.999999 | 3.11559e-07 | 0.999999 |
| rad34         | 4.89123e-08 | 0.999999 | 1.85590e-07 | 0.999999 |
| rad65         | 4.41608e-08 | 0.999999 | 1.67561e-07 | 1.000000 |
| rad62         | 2.07591e-08 | 0.999999 | 7.87674e-08 | 1.000000 |
| rad53         | 8.12265e-09 | 0.999999 | 3.08202e-08 | 1.000000 |
| rad73         | 6.62662e-09 | 0.999999 | 2.51437e-08 | 1.000000 |
| rad71         | 5.83659e-09 | 0.999999 | 2.21461e-08 | 1.000000 |
| rad56         | 5.07502e-09 | 0.999999 | 1.92564e-08 | 1.000000 |
| rad43         | 3.05585e-09 | 0.999999 | 1.15950e-08 | 1.000000 |
| rad64         | 2.94785e-09 | 0.999999 | 1.11852e-08 | 1.000000 |
| PAH8+H        | 1.55760e-09 | 0.999999 | 5.91010e-09 | 1.000000 |
| rad68syn      | 1.15822e-09 | 0.999999 | 4.39468e-09 | 1.000000 |
| rad68anti     | 7.65284e-10 | 0.999999 | 2.90376e-09 | 1.000000 |
| rad42         | 6.99013e-10 | 0.999999 | 2.65230e-09 | 1.000000 |
| rad40syn      | 2.60577e-10 | 0.999999 | 9.88719e-10 | 1.000000 |
| rad61         | 1.94739e-10 | 0.999999 | 7.38907e-10 | 1.000000 |
| rad40anti     | 1.33993e-10 | 0.999999 | 5.08417e-10 | 1.000000 |
| rad41         | 7.68994e-11 | 0.999999 | 2.91783e-10 | 1.000000 |

|       |             |          |             |          |
|-------|-------------|----------|-------------|----------|
| rad72 | 7.37095e-11 | 0.999999 | 2.79680e-10 | 1.000000 |
| rad6  | 8.49230e-16 | 0.999999 | 3.22228e-15 | 1.000000 |
| rad45 | 8.20203e-17 | 0.999999 | 3.11214e-16 | 1.000000 |
| rad11 | 4.33198e-17 | 0.999999 | 1.64371e-16 | 1.000000 |
| rad7  | 3.93372e-17 | 0.999999 | 1.49259e-16 | 1.000000 |
| rad20 | 1.95003e-17 | 0.999999 | 7.39910e-17 | 1.000000 |
| rad9  | 1.29032e-17 | 0.999999 | 4.89591e-17 | 1.000000 |
| rad21 | 1.13739e-17 | 0.999999 | 4.31567e-17 | 1.000000 |
| rad36 | 8.44250e-18 | 0.999999 | 3.20338e-17 | 1.000000 |
| rad18 | 5.84528e-18 | 0.999999 | 2.21791e-17 | 1.000000 |
| rad13 | 4.53171e-18 | 0.999999 | 1.71949e-17 | 1.000000 |
| rad28 | 2.53995e-18 | 0.999999 | 9.63748e-18 | 1.000000 |
| rad2  | 1.54831e-18 | 0.999999 | 5.87482e-18 | 1.000000 |
| rad10 | 1.40850e-18 | 0.999999 | 5.34434e-18 | 1.000000 |
| rad22 | 8.73635e-19 | 0.999999 | 3.31488e-18 | 1.000000 |
| rad26 | 5.48369e-19 | 0.999999 | 2.08071e-18 | 1.000000 |
| rad1  | 3.94335e-19 | 0.999999 | 1.49625e-18 | 1.000000 |
| rad23 | 3.39192e-19 | 0.999999 | 1.28701e-18 | 1.000000 |
| rad24 | 1.80067e-19 | 0.999999 | 6.83237e-19 | 1.000000 |
| rad33 | 8.79957e-20 | 0.999999 | 3.33886e-19 | 1.000000 |
| rad3  | 7.84525e-20 | 0.999999 | 2.97676e-19 | 1.000000 |
| rad4  | 6.38573e-20 | 0.999999 | 2.42297e-19 | 1.000000 |
| rad15 | 6.27633e-20 | 0.999999 | 2.38146e-19 | 1.000000 |
| rad12 | 1.93287e-20 | 0.999999 | 7.33399e-20 | 1.000000 |
| rad25 | 1.92135e-20 | 0.999999 | 7.29027e-20 | 1.000000 |
| rad8  | 2.79512e-21 | 0.999999 | 1.06057e-20 | 1.000000 |
| rad14 | 1.41990e-21 | 0.999999 | 5.38760e-21 | 1.000000 |
| rad27 | 5.43615e-22 | 0.999999 | 2.06266e-21 | 1.000000 |
| rad31 | 2.56226e-23 | 0.999999 | 9.72211e-23 | 1.000000 |
| rad47 | 1.04027e-23 | 0.999999 | 3.94715e-23 | 1.000000 |
| rad5  | 1.53972e-24 | 0.999999 | 5.84224e-24 | 1.000000 |

0.100000000E-08 Pa, 1500.00000 K

=====

| Rate constant | True (fraction)     | Effective (fraction) |
|---------------|---------------------|----------------------|
| Total         | 3.76908e-14 (1.00 ) | 8.51560e-15 (1.00 )  |

| species       | PYtrue      | Cumul    | PYeffective | Cumul    |
|---------------|-------------|----------|-------------|----------|
| Benzyl+C2H2   | 0.774067    | 0.774067 | 0.00000     | 0.00000  |
| Indene+H      | 0.205065    | 0.979132 | 0.907636    | 0.907636 |
| Ph+Allene     | 0.00752036  | 0.986652 | 0.0332858   | 0.940922 |
| PhCH2CCH+H    | 0.00646723  | 0.993120 | 0.0286246   | 0.969546 |
| PhCHCCH2+H    | 0.00361205  | 0.996732 | 0.0159873   | 0.985534 |
| PhCCH+CH3     | 0.00141397  | 0.998146 | 0.00625837  | 0.991792 |
| PAH9+H        | 0.000393094 | 0.998539 | 0.00173987  | 0.993532 |
| PAH7+H        | 0.000286546 | 0.998825 | 0.00126828  | 0.994800 |
| rad30         | 0.000246477 | 0.999072 | 0.00109093  | 0.995891 |
| Ph+MeAc       | 0.000203626 | 0.999275 | 0.000901268 | 0.996792 |
| rad19anti     | 0.000164236 | 0.999440 | 0.000726923 | 0.997519 |
| rad38         | 0.000162728 | 0.999602 | 0.000720251 | 0.998240 |
| PAH3+H        | 0.000104218 | 0.999707 | 0.000461281 | 0.998701 |
| rad35         | 7.62565e-05 | 0.999783 | 0.000337518 | 0.999038 |
| rad39         | 5.58557e-05 | 0.999839 | 0.000247223 | 0.999286 |
| PhCCCH3+H     | 4.89506e-05 | 0.999888 | 0.000216660 | 0.999502 |
| rad46         | 4.15217e-05 | 0.999929 | 0.000183779 | 0.999686 |
| rad50         | 1.70754e-05 | 0.999946 | 7.55771e-05 | 0.999762 |
| rad60syn      | 1.38815e-05 | 0.999960 | 6.14410e-05 | 0.999823 |
| rad59         | 1.15663e-05 | 0.999972 | 5.11935e-05 | 0.999874 |
| rad60anti     | 8.33859e-06 | 0.999980 | 3.69074e-05 | 0.999911 |
| rad19syn      | 5.68956e-06 | 0.999986 | 2.51825e-05 | 0.999936 |
| rad67         | 3.01383e-06 | 0.999989 | 1.33395e-05 | 0.999950 |
| rad51         | 2.86542e-06 | 0.999992 | 1.26826e-05 | 0.999962 |
| rad54         | 2.03370e-06 | 0.999994 | 9.00134e-06 | 0.999971 |
| PhcycC3H3_A+H | 1.94411e-06 | 0.999996 | 8.60479e-06 | 0.999980 |
| rad52         | 1.12959e-06 | 0.999997 | 4.99968e-06 | 0.999985 |
| rad37         | 8.38280e-07 | 0.999997 | 3.71030e-06 | 0.999989 |
| PAH10+CH3     | 6.63376e-07 | 0.999998 | 2.93617e-06 | 0.999992 |
| rad58         | 5.75067e-07 | 0.999999 | 2.54530e-06 | 0.999994 |
| PAH1+H        | 4.44629e-07 | 0.999999 | 1.96797e-06 | 0.999996 |
| rad70         | 4.35873e-07 | 1.000000 | 1.92921e-06 | 0.999998 |
| rad55         | 1.20222e-07 | 1.000000 | 5.32112e-07 | 0.999999 |
| rad65         | 8.70999e-08 | 1.000000 | 3.85512e-07 | 0.999999 |
| rad34         | 8.35876e-08 | 1.000000 | 3.69966e-07 | 0.999999 |
| rad62         | 2.65880e-08 | 1.000000 | 1.17681e-07 | 0.999999 |
| rad73         | 1.91029e-08 | 1.000000 | 8.45513e-08 | 1.000000 |
| rad71         | 1.86182e-08 | 1.000000 | 8.24060e-08 | 1.000000 |
| rad53         | 1.46409e-08 | 1.000000 | 6.48019e-08 | 1.000000 |
| rad56         | 1.02046e-08 | 1.000000 | 4.51664e-08 | 1.000000 |

|           |             |         |             |          |
|-----------|-------------|---------|-------------|----------|
| rad64     | 5.41559e-09 | 1.00000 | 2.39699e-08 | 1.000000 |
| PAH8+H    | 4.18063e-09 | 1.00000 | 1.85038e-08 | 1.000000 |
| rad43     | 3.92947e-09 | 1.00000 | 1.73922e-08 | 1.000000 |
| rad68syn  | 2.56012e-09 | 1.00000 | 1.13313e-08 | 1.000000 |
| rad68anti | 1.68587e-09 | 1.00000 | 7.46183e-09 | 1.000000 |
| rad42     | 1.06259e-09 | 1.00000 | 4.70314e-09 | 1.000000 |
| rad40syn  | 6.46765e-10 | 1.00000 | 2.86264e-09 | 1.000000 |
| rad61     | 5.26863e-10 | 1.00000 | 2.33195e-09 | 1.000000 |
| rad40anti | 3.43892e-10 | 1.00000 | 1.52210e-09 | 1.000000 |
| rad72     | 2.96653e-10 | 1.00000 | 1.31301e-09 | 1.000000 |
| rad41     | 1.35344e-10 | 1.00000 | 5.99046e-10 | 1.000000 |
| rad6      | 9.76078e-16 | 1.00000 | 4.32021e-15 | 1.000000 |
| rad45     | 4.62801e-17 | 1.00000 | 2.04840e-16 | 1.000000 |
| rad11     | 2.60220e-17 | 1.00000 | 1.15176e-16 | 1.000000 |
| rad7      | 2.59119e-17 | 1.00000 | 1.14689e-16 | 1.000000 |
| rad20     | 1.23074e-17 | 1.00000 | 5.44737e-17 | 1.000000 |
| rad9      | 1.00024e-17 | 1.00000 | 4.42718e-17 | 1.000000 |
| rad21     | 7.10953e-18 | 1.00000 | 3.14675e-17 | 1.000000 |
| rad36     | 4.82685e-18 | 1.00000 | 2.13641e-17 | 1.000000 |
| rad18     | 4.05516e-18 | 1.00000 | 1.79485e-17 | 1.000000 |
| rad28     | 2.45916e-18 | 1.00000 | 1.08845e-17 | 1.000000 |
| rad13     | 2.40577e-18 | 1.00000 | 1.06482e-17 | 1.000000 |
| rad22     | 2.28959e-18 | 1.00000 | 1.01339e-17 | 1.000000 |
| rad23     | 1.66438e-18 | 1.00000 | 7.36670e-18 | 1.000000 |
| rad10     | 5.61902e-19 | 1.00000 | 2.48703e-18 | 1.000000 |
| rad2      | 5.00333e-19 | 1.00000 | 2.21452e-18 | 1.000000 |
| rad26     | 3.23137e-19 | 1.00000 | 1.43024e-18 | 1.000000 |
| rad24     | 1.34246e-19 | 1.00000 | 5.94185e-19 | 1.000000 |
| rad1      | 1.29995e-19 | 1.00000 | 5.75372e-19 | 1.000000 |
| rad15     | 1.14509e-19 | 1.00000 | 5.06828e-19 | 1.000000 |
| rad33     | 5.25041e-20 | 1.00000 | 2.32388e-19 | 1.000000 |
| rad3      | 3.29908e-20 | 1.00000 | 1.46020e-19 | 1.000000 |
| rad4      | 2.70900e-20 | 1.00000 | 1.19903e-19 | 1.000000 |
| rad12     | 1.99725e-20 | 1.00000 | 8.84000e-20 | 1.000000 |
| rad25     | 1.32639e-20 | 1.00000 | 5.87071e-20 | 1.000000 |
| rad8      | 3.57803e-21 | 1.00000 | 1.58367e-20 | 1.000000 |
| rad14     | 7.59784e-22 | 1.00000 | 3.36288e-21 | 1.000000 |
| rad27     | 2.30896e-22 | 1.00000 | 1.02197e-21 | 1.000000 |
| rad47     | 2.08549e-23 | 1.00000 | 9.23059e-23 | 1.000000 |
| rad31     | 1.60839e-23 | 1.00000 | 7.11887e-23 | 1.000000 |
| rad5      | 3.57655e-24 | 1.00000 | 1.58302e-23 | 1.000000 |

0.100000000E-08 Pa, 1750.00000 K

| Rate constant | True (fraction)     | Effective (fraction) |
|---------------|---------------------|----------------------|
| Total         | 9.18604e-14 (1.00 ) | 1.49145e-14 (1.00 )  |

| species       | PYtrue      | Cumul    | PYeffective | Cumul    |
|---------------|-------------|----------|-------------|----------|
| Benzyl+C2H2   | 0.837640    | 0.837640 | 0.00000     | 0.00000  |
| Indene+H      | 0.133064    | 0.970704 | 0.819559    | 0.819559 |
| PhCH2CCH+H    | 0.0118056   | 0.982510 | 0.0727127   | 0.892272 |
| Ph+Allene     | 0.00950091  | 0.992011 | 0.0585175   | 0.950789 |
| PhCHCCH2+H    | 0.00446803  | 0.996479 | 0.0275192   | 0.978308 |
| PhCCH+CH3     | 0.000861597 | 0.997340 | 0.00530671  | 0.983615 |
| PAH9+H        | 0.000556652 | 0.997897 | 0.00342850  | 0.987044 |
| rad30         | 0.000325000 | 0.998222 | 0.00200173  | 0.989045 |
| rad19anti     | 0.000321503 | 0.998543 | 0.00198018  | 0.991026 |
| rad38         | 0.000287109 | 0.998830 | 0.00176835  | 0.992794 |
| PAH7+H        | 0.000286344 | 0.999117 | 0.00176363  | 0.994557 |
| PAH3+H        | 0.000275296 | 0.999392 | 0.00169559  | 0.996253 |
| Ph+MeAc       | 0.000167695 | 0.999560 | 0.00103286  | 0.997286 |
| rad35         | 0.000110066 | 0.999670 | 0.000677915 | 0.997964 |
| rad46         | 7.52920e-05 | 0.999745 | 0.000463735 | 0.998428 |
| rad39         | 5.82425e-05 | 0.999803 | 0.000358724 | 0.998786 |
| rad50         | 4.36581e-05 | 0.999847 | 0.000268897 | 0.999055 |
| PhCCCH3+H     | 3.20470e-05 | 0.999879 | 0.000197382 | 0.999253 |
| rad59         | 2.75338e-05 | 0.999907 | 0.000169584 | 0.999422 |
| rad60syn      | 2.64498e-05 | 0.999933 | 0.000162908 | 0.999585 |
| rad60anti     | 1.77452e-05 | 0.999951 | 0.000109295 | 0.999694 |
| rad51         | 1.06304e-05 | 0.999961 | 6.54744e-05 | 0.999760 |
| rad67         | 1.00266e-05 | 0.999971 | 6.17554e-05 | 0.999822 |
| rad19syn      | 8.12817e-06 | 0.999980 | 5.00626e-05 | 0.999872 |
| PhcycC3H3_A+H | 4.32964e-06 | 0.999984 | 2.66669e-05 | 0.999898 |
| rad52         | 3.62585e-06 | 0.999988 | 2.23321e-05 | 0.999921 |
| rad54         | 3.10468e-06 | 0.999991 | 1.91222e-05 | 0.999940 |
| PAH10+CH3     | 2.60306e-06 | 0.999993 | 1.60326e-05 | 0.999956 |
| rad58         | 2.01823e-06 | 0.999995 | 1.24306e-05 | 0.999968 |
| rad37         | 1.70772e-06 | 0.999997 | 1.05181e-05 | 0.999979 |

|           |             |          |             |          |
|-----------|-------------|----------|-------------|----------|
| PAH1+H    | 1.10635e-06 | 0.999998 | 6.81419e-06 | 0.999986 |
| rad70     | 1.04847e-06 | 0.999999 | 6.45765e-06 | 0.999992 |
| rad65     | 3.08348e-07 | 0.999999 | 1.89916e-06 | 0.999994 |
| rad34     | 2.42002e-07 | 1.000000 | 1.49052e-06 | 0.999995 |
| rad55     | 2.29000e-07 | 1.000000 | 1.41044e-06 | 0.999997 |
| rad71     | 1.90753e-07 | 1.000000 | 1.17488e-06 | 0.999998 |
| rad73     | 1.56380e-07 | 1.000000 | 9.63167e-07 | 0.999999 |
| rad53     | 4.44390e-08 | 1.000000 | 2.73707e-07 | 0.999999 |
| rad62     | 4.00911e-08 | 1.000000 | 2.46927e-07 | 1.000000 |
| rad56     | 3.57943e-08 | 1.000000 | 2.20463e-07 | 1.000000 |
| PAH8+H    | 2.43959e-08 | 1.000000 | 1.50258e-07 | 1.000000 |
| rad64     | 1.92943e-08 | 1.000000 | 1.18836e-07 | 1.000000 |
| rad68syn  | 1.20123e-08 | 1.000000 | 7.39857e-08 | 1.000000 |
| rad43     | 8.60713e-09 | 1.000000 | 5.30126e-08 | 1.000000 |
| rad68anti | 7.79056e-09 | 1.000000 | 4.79832e-08 | 1.000000 |
| rad72     | 5.35919e-09 | 1.000000 | 3.30080e-08 | 1.000000 |
| rad40syn  | 3.52157e-09 | 1.000000 | 2.16899e-08 | 1.000000 |
| rad61     | 3.50342e-09 | 1.000000 | 2.15781e-08 | 1.000000 |
| rad42     | 2.39318e-09 | 1.000000 | 1.47399e-08 | 1.000000 |
| rad40anti | 2.09783e-09 | 1.000000 | 1.29208e-08 | 1.000000 |
| rad41     | 5.64325e-10 | 1.000000 | 3.47576e-09 | 1.000000 |
| rad6      | 7.39278e-16 | 1.000000 | 4.55332e-15 | 1.000000 |
| rad23     | 2.74781e-17 | 1.000000 | 1.69241e-16 | 1.000000 |
| rad22     | 5.56058e-18 | 1.000000 | 3.42484e-17 | 1.000000 |
| rad45     | 4.78435e-18 | 1.000000 | 2.94675e-17 | 1.000000 |
| rad7      | 2.69969e-18 | 1.000000 | 1.66278e-17 | 1.000000 |
| rad11     | 2.49376e-18 | 1.000000 | 1.53595e-17 | 1.000000 |
| rad28     | 1.72226e-18 | 1.000000 | 1.06076e-17 | 1.000000 |
| rad9      | 1.33095e-18 | 1.000000 | 8.19752e-18 | 1.000000 |
| rad20     | 1.26283e-18 | 1.000000 | 7.77797e-18 | 1.000000 |
| rad36     | 8.35505e-19 | 1.000000 | 5.14600e-18 | 1.000000 |
| rad21     | 6.65178e-19 | 1.000000 | 4.09693e-18 | 1.000000 |
| rad18     | 5.81036e-19 | 1.000000 | 3.57869e-18 | 1.000000 |
| rad13     | 1.40330e-19 | 1.000000 | 8.64316e-19 | 1.000000 |
| rad15     | 6.72937e-20 | 1.000000 | 4.14472e-19 | 1.000000 |
| rad26     | 4.54686e-20 | 1.000000 | 2.80048e-19 | 1.000000 |
| rad10     | 2.37213e-20 | 1.000000 | 1.46103e-19 | 1.000000 |
| rad24     | 1.70134e-20 | 1.000000 | 1.04788e-19 | 1.000000 |
| rad2      | 9.71002e-21 | 1.000000 | 5.98055e-20 | 1.000000 |
| rad12     | 4.26945e-21 | 1.000000 | 2.62962e-20 | 1.000000 |
| rad33     | 3.32918e-21 | 1.000000 | 2.05049e-20 | 1.000000 |
| rad1      | 2.55696e-21 | 1.000000 | 1.57487e-20 | 1.000000 |
| rad8      | 1.74118e-21 | 1.000000 | 1.07242e-20 | 1.000000 |
| rad25     | 1.29129e-21 | 1.000000 | 7.95327e-21 | 1.000000 |
| rad3      | 8.06122e-22 | 1.000000 | 4.96503e-21 | 1.000000 |
| rad4      | 5.19118e-22 | 1.000000 | 3.19732e-21 | 1.000000 |
| rad14     | 5.21560e-23 | 1.000000 | 3.21236e-22 | 1.000000 |
| rad47     | 2.44663e-23 | 1.000000 | 1.50692e-22 | 1.000000 |
| rad5      | 1.25547e-23 | 1.000000 | 7.73264e-23 | 1.000000 |
| rad27     | 9.07042e-24 | 1.000000 | 5.58660e-23 | 1.000000 |

0.100000000E-08 Pa, 2000.00000 K

=====

| Rate constant | True (fraction)     | Effective (fraction) |
|---------------|---------------------|----------------------|
| Total         | 1.85359e-13 (1.00 ) | 2.47588e-14 (1.00 )  |

| species     | PYtrue      | Cumul    | PYeffective | Cumul    |
|-------------|-------------|----------|-------------|----------|
| Benzyl+C2H2 | 0.866428    | 0.866428 | 0.00000     | 0.00000  |
| Indene+H    | 0.0943885   | 0.960816 | 0.706650    | 0.706650 |
| PhCH2CCH+H  | 0.0189358   | 0.979752 | 0.141765    | 0.848415 |
| Ph+Allene   | 0.0101088   | 0.989861 | 0.0756807   | 0.924096 |
| PhCHCCH2+H  | 0.00579099  | 0.995652 | 0.0433549   | 0.967451 |
| PAH9+H      | 0.000765251 | 0.996417 | 0.00572913  | 0.973180 |
| PhCCH+CH3   | 0.000550354 | 0.996968 | 0.00412028  | 0.977300 |
| PAH3+H      | 0.000526246 | 0.997494 | 0.00393980  | 0.981240 |
| rad19anti   | 0.000486607 | 0.997981 | 0.00364303  | 0.984883 |
| rad38       | 0.000411538 | 0.998392 | 0.00308103  | 0.987964 |
| rad30       | 0.000378289 | 0.998770 | 0.00283210  | 0.990796 |
| PAH7+H      | 0.000350388 | 0.999121 | 0.00262322  | 0.993419 |
| Ph+MeAc     | 0.000164748 | 0.999286 | 0.00123340  | 0.994653 |
| rad35       | 0.000155515 | 0.999441 | 0.00116428  | 0.995817 |
| rad46       | 0.000120109 | 0.999561 | 0.000899212 | 0.996716 |
| rad50       | 9.58270e-05 | 0.999657 | 0.000717420 | 0.997434 |
| rad39       | 7.87039e-05 | 0.999736 | 0.000589225 | 0.998023 |
| rad59       | 4.92026e-05 | 0.999785 | 0.000368361 | 0.998391 |
| rad60syn    | 4.01110e-05 | 0.999825 | 0.000300295 | 0.998691 |
| PhCCCH3+H   | 3.61306e-05 | 0.999861 | 0.000270495 | 0.998962 |
| rad51       | 2.92772e-05 | 0.999890 | 0.000219187 | 0.999181 |



|               |             |          |             |          |
|---------------|-------------|----------|-------------|----------|
| rad60anti     | 2.75040e-05 | 0.999918 | 0.000205912 | 0.999387 |
| rad67         | 2.43946e-05 | 0.999942 | 0.000182633 | 0.999570 |
| rad19syn      | 1.17085e-05 | 0.999954 | 8.76566e-05 | 0.999657 |
| rad52         | 8.84586e-06 | 0.999963 | 6.62255e-05 | 0.999723 |
| PAH10+CH3     | 7.72771e-06 | 0.999971 | 5.78543e-05 | 0.999781 |
| PhcycC3H3_A+H | 7.44556e-06 | 0.999978 | 5.57420e-05 | 0.999837 |
| rad58         | 5.03691e-06 | 0.999983 | 3.77093e-05 | 0.999875 |
| rad54         | 4.34710e-06 | 0.999987 | 3.25450e-05 | 0.999907 |
| rad37         | 3.43690e-06 | 0.999991 | 2.57307e-05 | 0.999933 |
| PAH1+H        | 2.74924e-06 | 0.999994 | 2.05825e-05 | 0.999954 |
| rad70         | 2.09354e-06 | 0.999996 | 1.56735e-05 | 0.999969 |
| rad71         | 1.06961e-06 | 0.999997 | 8.00777e-06 | 0.999977 |
| rad65         | 8.19688e-07 | 0.999998 | 6.13669e-06 | 0.999983 |
| rad73         | 7.43910e-07 | 0.999998 | 5.56936e-06 | 0.999989 |
| rad34         | 5.52321e-07 | 0.999999 | 4.13501e-06 | 0.999993 |
| rad55         | 3.53324e-07 | 0.999999 | 2.64520e-06 | 0.999996 |
| PAH8+H        | 1.14510e-07 | 0.999999 | 8.57294e-07 | 0.999997 |
| rad53         | 9.72438e-08 | 0.999999 | 7.28027e-07 | 0.999997 |
| rad56         | 9.21215e-08 | 1.000000 | 6.89678e-07 | 0.999998 |
| rad62         | 6.00485e-08 | 1.000000 | 4.49560e-07 | 0.999999 |
| rad64         | 5.57952e-08 | 1.000000 | 4.17717e-07 | 0.999999 |
| rad72         | 4.29765e-08 | 1.000000 | 3.21748e-07 | 0.999999 |
| rad68syn      | 4.11172e-08 | 1.000000 | 3.07828e-07 | 1.000000 |
| rad68anti     | 2.65281e-08 | 1.000000 | 1.98605e-07 | 1.000000 |
| rad43         | 2.20258e-08 | 1.000000 | 1.64898e-07 | 1.000000 |
| rad61         | 1.54174e-08 | 1.000000 | 1.15424e-07 | 1.000000 |
| rad40syn      | 1.44056e-08 | 1.000000 | 1.07849e-07 | 1.000000 |
| rad40anti     | 9.08224e-09 | 1.000000 | 6.79952e-08 | 1.000000 |
| rad42         | 4.93493e-09 | 1.000000 | 3.69459e-08 | 1.000000 |
| rad41         | 1.99345e-09 | 1.000000 | 1.49241e-08 | 1.000000 |
| rad6          | 9.64299e-17 | 1.000000 | 7.21933e-16 | 1.000000 |
| rad23         | 1.62949e-17 | 1.000000 | 1.21994e-16 | 1.000000 |
| rad45         | 1.59012e-18 | 1.000000 | 1.19046e-17 | 1.000000 |
| rad22         | 1.52678e-18 | 1.000000 | 1.14304e-17 | 1.000000 |
| rad9          | 6.76994e-19 | 1.000000 | 5.06839e-18 | 1.000000 |
| rad11         | 5.37251e-19 | 1.000000 | 4.02218e-18 | 1.000000 |
| rad20         | 5.29552e-19 | 1.000000 | 3.96455e-18 | 1.000000 |
| rad7          | 4.21419e-19 | 1.000000 | 3.15500e-18 | 1.000000 |
| rad28         | 3.28588e-19 | 1.000000 | 2.46001e-18 | 1.000000 |
| rad36         | 2.85828e-19 | 1.000000 | 2.13988e-18 | 1.000000 |
| rad21         | 2.72287e-19 | 1.000000 | 2.03851e-18 | 1.000000 |
| rad18         | 1.62503e-19 | 1.000000 | 1.21659e-18 | 1.000000 |
| rad15         | 3.62729e-20 | 1.000000 | 2.71561e-19 | 1.000000 |
| rad13         | 3.15019e-20 | 1.000000 | 2.35842e-19 | 1.000000 |
| rad24         | 9.49359e-21 | 1.000000 | 7.10748e-20 | 1.000000 |
| rad26         | 6.44767e-21 | 1.000000 | 4.82712e-20 | 1.000000 |
| rad12         | 3.72963e-21 | 1.000000 | 2.79223e-20 | 1.000000 |
| rad10         | 2.39717e-21 | 1.000000 | 1.79467e-20 | 1.000000 |
| rad8          | 2.00223e-21 | 1.000000 | 1.49899e-20 | 1.000000 |
| rad33         | 1.02784e-21 | 1.000000 | 7.69507e-21 | 1.000000 |
| rad2          | 9.05340e-22 | 1.000000 | 6.77792e-21 | 1.000000 |
| rad25         | 5.51560e-22 | 1.000000 | 4.12931e-21 | 1.000000 |
| rad1          | 2.52367e-22 | 1.000000 | 1.88938e-21 | 1.000000 |
| rad3          | 1.39618e-22 | 1.000000 | 1.04527e-21 | 1.000000 |
| rad4          | 9.05253e-23 | 1.000000 | 6.77727e-22 | 1.000000 |
| rad47         | 6.72667e-23 | 1.000000 | 5.03600e-22 | 1.000000 |
| rad5          | 1.86942e-23 | 1.000000 | 1.39956e-22 | 1.000000 |
| rad14         | 1.43912e-23 | 1.000000 | 1.07741e-22 | 1.000000 |
| rad27         | 2.36914e-24 | 1.000000 | 1.77368e-23 | 1.000000 |

0.100000000E-08 Pa, 2250.00000 K

=====

| Rate constant | True (fraction)     | Effective (fraction) |
|---------------|---------------------|----------------------|
| Total         | 3.29136e-13 (1.00 ) | 4.00875e-14 (1.00 )  |

| species     | PYtrue      | Cumul    | PYeffective | Cumul    |
|-------------|-------------|----------|-------------|----------|
| Benzyl+C2H2 | 0.878204    | 0.878204 | 0.00000     | 0.00000  |
| Indene+H    | 0.0703003   | 0.948504 | 0.577195    | 0.577195 |
| PhCH2CCH+H  | 0.0277459   | 0.976250 | 0.227806    | 0.805001 |
| Ph+Allene   | 0.0105974   | 0.986848 | 0.0870088   | 0.892010 |
| PhCHCCH2+H  | 0.00765656  | 0.994504 | 0.0628636   | 0.954873 |
| PAH9+H      | 0.000941856 | 0.995446 | 0.00773304  | 0.962606 |
| PAH3+H      | 0.000857236 | 0.996303 | 0.00703827  | 0.969645 |
| rad19anti   | 0.000629228 | 0.996932 | 0.00516623  | 0.974811 |
| rad38       | 0.000525523 | 0.997458 | 0.00431476  | 0.979126 |
| PAH7+H      | 0.000454502 | 0.997913 | 0.00373165  | 0.982857 |
| rad30       | 0.000417263 | 0.998330 | 0.00342591  | 0.986283 |
| PhCCH+CH3   | 0.000383697 | 0.998713 | 0.00315031  | 0.989434 |

|               |             |          |             |          |
|---------------|-------------|----------|-------------|----------|
| rad35         | 0.000200865 | 0.998914 | 0.00164918  | 0.991083 |
| Ph+MeAc       | 0.000197882 | 0.999112 | 0.00162470  | 0.992707 |
| rad50         | 0.000170940 | 0.999283 | 0.00140349  | 0.994111 |
| rad46         | 0.000166540 | 0.999450 | 0.00136737  | 0.995478 |
| rad39         | 0.000118806 | 0.999568 | 0.000975445 | 0.996454 |
| rad59         | 7.57691e-05 | 0.999644 | 0.000622096 | 0.997076 |
| rad51         | 6.22686e-05 | 0.999707 | 0.000511251 | 0.997587 |
| rad60syn      | 5.44510e-05 | 0.999761 | 0.000447066 | 0.998034 |
| PhCCCH3+H     | 5.15901e-05 | 0.999813 | 0.000423577 | 0.998458 |
| rad67         | 4.61782e-05 | 0.999859 | 0.000379142 | 0.998837 |
| rad60anti     | 3.79865e-05 | 0.999897 | 0.000311885 | 0.999149 |
| PAH10+CH3     | 1.71933e-05 | 0.999914 | 0.000141164 | 0.999290 |
| rad52         | 1.70844e-05 | 0.999931 | 0.000140270 | 0.999430 |
| rad19syn      | 1.63932e-05 | 0.999947 | 0.000134595 | 0.999565 |
| PhcycC3H3_A+H | 1.10275e-05 | 0.999958 | 9.05407e-05 | 0.999655 |
| rad58         | 1.00660e-05 | 0.999969 | 8.26458e-05 | 0.999738 |
| PAH1+H        | 5.96728e-06 | 0.999974 | 4.89939e-05 | 0.999787 |
| rad37         | 5.72356e-06 | 0.999980 | 4.69928e-05 | 0.999834 |
| rad54         | 5.39698e-06 | 0.999986 | 4.43115e-05 | 0.999878 |
| rad71         | 3.95691e-06 | 0.999990 | 3.24879e-05 | 0.999911 |
| rad70         | 3.69403e-06 | 0.999993 | 3.03296e-05 | 0.999941 |
| rad73         | 2.41459e-06 | 0.999996 | 1.98248e-05 | 0.999961 |
| rad65         | 1.68525e-06 | 0.999997 | 1.38367e-05 | 0.999975 |
| rad34         | 1.08371e-06 | 0.999998 | 8.89771e-06 | 0.999984 |
| rad55         | 4.74067e-07 | 0.999999 | 3.89229e-06 | 0.999988 |
| PAH8+H        | 3.91946e-07 | 0.999999 | 3.21804e-06 | 0.999991 |
| rad72         | 2.09318e-07 | 1.000000 | 1.71859e-06 | 0.999992 |
| rad56         | 1.86168e-07 | 1.000000 | 1.52852e-06 | 0.999994 |
| rad53         | 1.73183e-07 | 1.000000 | 1.42191e-06 | 0.999995 |
| rad64         | 1.33616e-07 | 1.000000 | 1.09704e-06 | 0.999997 |
| rad68syn      | 1.10265e-07 | 1.000000 | 9.05322e-07 | 0.999997 |
| rad62         | 9.48259e-08 | 1.000000 | 7.78561e-07 | 0.999998 |
| rad68anti     | 7.08807e-08 | 1.000000 | 5.81961e-07 | 0.999999 |
| rad43         | 4.82400e-08 | 1.000000 | 3.96071e-07 | 0.999999 |
| rad61         | 4.62524e-08 | 1.000000 | 3.79752e-07 | 1.000000 |
| rad40syn      | 4.43238e-08 | 1.000000 | 3.63917e-07 | 1.000000 |
| rad40anti     | 2.91751e-08 | 1.000000 | 2.39540e-07 | 1.000000 |
| rad42         | 1.00367e-08 | 1.000000 | 8.24055e-08 | 1.000000 |
| rad41         | 5.35211e-09 | 1.000000 | 4.39431e-08 | 1.000000 |
| rad6          | 1.23390e-17 | 1.000000 | 1.01308e-16 | 1.000000 |
| rad23         | 4.57028e-18 | 1.000000 | 3.75240e-17 | 1.000000 |
| rad45         | 6.14366e-19 | 1.000000 | 5.04421e-18 | 1.000000 |
| rad22         | 3.96239e-19 | 1.000000 | 3.25329e-18 | 1.000000 |
| rad9          | 3.51555e-19 | 1.000000 | 2.88642e-18 | 1.000000 |
| rad20         | 2.60557e-19 | 1.000000 | 2.13928e-18 | 1.000000 |
| rad11         | 1.62855e-19 | 1.000000 | 1.33711e-18 | 1.000000 |
| rad21         | 1.30011e-19 | 1.000000 | 1.06745e-18 | 1.000000 |
| rad36         | 1.13126e-19 | 1.000000 | 9.28815e-19 | 1.000000 |
| rad7          | 9.44064e-20 | 1.000000 | 7.75117e-19 | 1.000000 |
| rad18         | 6.17423e-20 | 1.000000 | 5.06931e-19 | 1.000000 |
| rad28         | 5.07618e-20 | 1.000000 | 4.16776e-19 | 1.000000 |
| rad15         | 2.10987e-20 | 1.000000 | 1.73229e-19 | 1.000000 |
| rad13         | 8.56525e-21 | 1.000000 | 7.03243e-20 | 1.000000 |
| rad24         | 5.70002e-21 | 1.000000 | 4.67996e-20 | 1.000000 |
| rad12         | 3.05351e-21 | 1.000000 | 2.50707e-20 | 1.000000 |
| rad26         | 2.24970e-21 | 1.000000 | 1.84710e-20 | 1.000000 |
| rad8          | 2.16858e-21 | 1.000000 | 1.78050e-20 | 1.000000 |
| rad10         | 7.19426e-22 | 1.000000 | 5.90679e-21 | 1.000000 |
| rad33         | 3.63727e-22 | 1.000000 | 2.98636e-21 | 1.000000 |
| rad25         | 2.84538e-22 | 1.000000 | 2.33618e-21 | 1.000000 |
| rad47         | 1.41374e-22 | 1.000000 | 1.16074e-21 | 1.000000 |
| rad2          | 1.36938e-22 | 1.000000 | 1.12432e-21 | 1.000000 |
| rad1          | 4.21273e-23 | 1.000000 | 3.45883e-22 | 1.000000 |
| rad3          | 3.04273e-23 | 1.000000 | 2.49821e-22 | 1.000000 |
| rad5          | 2.08606e-23 | 1.000000 | 1.71275e-22 | 1.000000 |
| rad4          | 1.96579e-23 | 1.000000 | 1.61400e-22 | 1.000000 |
| rad14         | 5.33284e-24 | 1.000000 | 4.37849e-23 | 1.000000 |
| rad27         | 1.32553e-24 | 1.000000 | 1.08832e-23 | 1.000000 |

0.100000000E-08 Pa, 2500.00000 K

| Rate constant | True (fraction)    | Effective (fraction) |             |          |
|---------------|--------------------|----------------------|-------------|----------|
| Total         | 5.32896e-13 (1.00) | 6.40311e-14 (1.00)   |             |          |
| species       | PYtrue             | Cumul                | PYeffective | Cumul    |
| Benzyl+C2H2   | 0.879843           | 0.879843             | 0.00000     | 0.00000  |
| Indene+H      | 0.0541638          | 0.934007             | 0.450777    | 0.450777 |
| PhCH2CCH+H    | 0.0379681          | 0.971975             | 0.315989    | 0.766766 |

|               |             |          |             |          |
|---------------|-------------|----------|-------------|----------|
| Ph+Allene     | 0.0112444   | 0.983219 | 0.0935810   | 0.860347 |
| PhCHCCH2+H    | 0.00999485  | 0.993214 | 0.0831818   | 0.943529 |
| PAH3+H        | 0.00124356  | 0.994458 | 0.0103495   | 0.953878 |
| PAH9+H        | 0.00106545  | 0.995523 | 0.00886715  | 0.962745 |
| rad19anti     | 0.000731028 | 0.996254 | 0.00608396  | 0.968829 |
| rad38         | 0.000614393 | 0.996869 | 0.00511327  | 0.973943 |
| PAH7+H        | 0.000586817 | 0.997455 | 0.00488376  | 0.978826 |
| rad30         | 0.000442203 | 0.997898 | 0.00368022  | 0.982507 |
| PhCCH+CH3     | 0.000309130 | 0.998207 | 0.00257273  | 0.985079 |
| rad50         | 0.000261677 | 0.998468 | 0.00217780  | 0.987257 |
| Ph+MeAc       | 0.000256973 | 0.998725 | 0.00213865  | 0.989396 |
| rad35         | 0.000242192 | 0.998968 | 0.00201564  | 0.991411 |
| rad46         | 0.000207878 | 0.999175 | 0.00173006  | 0.993142 |
| rad39         | 0.000175772 | 0.999351 | 0.00146285  | 0.994604 |
| rad51         | 0.000109649 | 0.999461 | 0.000912547 | 0.995517 |
| rad59         | 0.000104825 | 0.999566 | 0.000872406 | 0.996389 |
| rad67         | 7.34547e-05 | 0.999639 | 0.000611325 | 0.997001 |
| PhCCCH3+H     | 7.22810e-05 | 0.999711 | 0.000601557 | 0.997602 |
| rad60syn      | 6.81857e-05 | 0.999780 | 0.000567474 | 0.998170 |
| rad60anti     | 4.82378e-05 | 0.999828 | 0.000401457 | 0.998571 |
| PAH10+CH3     | 3.08998e-05 | 0.999859 | 0.000257163 | 0.998828 |
| rad52         | 2.78077e-05 | 0.999887 | 0.000231429 | 0.999060 |
| rad19syn      | 2.34810e-05 | 0.999910 | 0.000195420 | 0.999255 |
| rad58         | 1.71635e-05 | 0.999927 | 0.000142842 | 0.999398 |
| PhcycC3H3_A+H | 1.49440e-05 | 0.999942 | 0.000124371 | 0.999522 |
| PAH1+H        | 1.13017e-05 | 0.999953 | 9.40581e-05 | 0.999616 |
| rad71         | 1.08628e-05 | 0.999964 | 9.04053e-05 | 0.999707 |
| rad37         | 8.12868e-06 | 0.999972 | 6.76507e-05 | 0.999774 |
| rad54         | 6.28002e-06 | 0.999979 | 5.22652e-05 | 0.999827 |
| rad70         | 5.97099e-06 | 0.999985 | 4.96933e-05 | 0.999876 |
| rad73         | 5.95726e-06 | 0.999991 | 4.95791e-05 | 0.999926 |
| rad65         | 2.87595e-06 | 0.999994 | 2.39350e-05 | 0.999950 |
| rad34         | 1.90624e-06 | 0.999995 | 1.58647e-05 | 0.999966 |
| PAH8+H        | 1.06524e-06 | 0.999997 | 8.86540e-06 | 0.999975 |
| rad72         | 7.14903e-07 | 0.999997 | 5.94976e-06 | 0.999981 |
| rad55         | 5.87553e-07 | 0.999998 | 4.88989e-06 | 0.999986 |
| rad56         | 3.21872e-07 | 0.999998 | 2.67877e-06 | 0.999988 |
| rad64         | 2.70855e-07 | 0.999998 | 2.25419e-06 | 0.999990 |
| rad53         | 2.70820e-07 | 0.999999 | 2.25389e-06 | 0.999993 |
| rad68syn      | 2.47504e-07 | 0.999999 | 2.05985e-06 | 0.999995 |
| rad68anti     | 1.58683e-07 | 0.999999 | 1.32064e-06 | 0.999996 |
| rad62         | 1.55148e-07 | 0.999999 | 1.29122e-06 | 0.999997 |
| rad40syn      | 1.10734e-07 | 0.999999 | 9.21579e-07 | 0.999998 |
| rad61         | 1.05680e-07 | 0.999999 | 8.79519e-07 | 0.999999 |
| rad43         | 8.79692e-08 | 1.000000 | 7.32121e-07 | 1.000000 |
| rad40anti     | 7.53435e-08 | 1.000000 | 6.27044e-07 | 1.000000 |
| rad42         | 1.97239e-08 | 1.000000 | 1.64152e-07 | 1.000000 |
| rad41         | 1.13877e-08 | 1.000000 | 9.47734e-08 | 1.000000 |
| rad6          | 2.24069e-18 | 1.000000 | 1.86480e-17 | 1.000000 |
| rad23         | 1.40850e-18 | 1.000000 | 1.17222e-17 | 1.000000 |
| rad45         | 2.67080e-19 | 1.000000 | 2.22277e-18 | 1.000000 |
| rad9          | 1.86928e-19 | 1.000000 | 1.55570e-18 | 1.000000 |
| rad20         | 1.43940e-19 | 1.000000 | 1.19794e-18 | 1.000000 |
| rad22         | 1.35197e-19 | 1.000000 | 1.12517e-18 | 1.000000 |
| rad21         | 6.94971e-20 | 1.000000 | 5.78387e-19 | 1.000000 |
| rad11         | 6.25789e-20 | 1.000000 | 5.20811e-19 | 1.000000 |
| rad36         | 5.01656e-20 | 1.000000 | 4.17501e-19 | 1.000000 |
| rad18         | 2.77736e-20 | 1.000000 | 2.31145e-19 | 1.000000 |
| rad7          | 2.64621e-20 | 1.000000 | 2.20230e-19 | 1.000000 |
| rad15         | 1.25424e-20 | 1.000000 | 1.04384e-19 | 1.000000 |
| rad28         | 1.20784e-20 | 1.000000 | 1.00522e-19 | 1.000000 |
| rad24         | 3.60418e-21 | 1.000000 | 2.99957e-20 | 1.000000 |
| rad13         | 2.74546e-21 | 1.000000 | 2.28490e-20 | 1.000000 |
| rad12         | 2.40046e-21 | 1.000000 | 1.99778e-20 | 1.000000 |
| rad8          | 2.25267e-21 | 1.000000 | 1.87478e-20 | 1.000000 |
| rad26         | 1.24982e-21 | 1.000000 | 1.04016e-20 | 1.000000 |
| rad10         | 4.02925e-22 | 1.000000 | 3.35333e-21 | 1.000000 |
| rad47         | 2.44566e-22 | 1.000000 | 2.03539e-21 | 1.000000 |
| rad25         | 1.71221e-22 | 1.000000 | 1.42498e-21 | 1.000000 |
| rad33         | 1.46760e-22 | 1.000000 | 1.22141e-21 | 1.000000 |
| rad2          | 4.21048e-23 | 1.000000 | 3.50416e-22 | 1.000000 |
| rad5          | 2.16419e-23 | 1.000000 | 1.80114e-22 | 1.000000 |
| rad1          | 1.50589e-23 | 1.000000 | 1.25327e-22 | 1.000000 |
| rad3          | 8.31877e-24 | 1.000000 | 6.92327e-23 | 1.000000 |
| rad4          | 5.29134e-24 | 1.000000 | 4.40370e-23 | 1.000000 |
| rad14         | 2.68051e-24 | 1.000000 | 2.23085e-23 | 1.000000 |
| rad27         | 1.07389e-24 | 1.000000 | 8.93744e-24 | 1.000000 |

0.100000000E-08 Pa, 2750.00000 K

=====

| Rate constant | True (fraction) |          | Effective (fraction) |          |
|---------------|-----------------|----------|----------------------|----------|
| -----         | -----           |          | -----                |          |
| Total         | 8.05113e-13     | (1.00 )  | 1.00487e-13          | (1.00 )  |
| species       | PYtrue          | Cumul    | PYeffective          | Cumul    |
| -----         | -----           | -----    | -----                | -----    |
| Benzyl+C2H2   | 0.875189        | 0.875189 | 0.00000              | 0.00000  |
| PhCH2CCH+H    | 0.0492371       | 0.924426 | 0.394492             | 0.394492 |
| Indene+H      | 0.0427171       | 0.967143 | 0.342254             | 0.736746 |
| PhCHCCH2+H    | 0.0126523       | 0.979795 | 0.101371             | 0.838117 |
| Ph+Allene     | 0.0121360       | 0.991931 | 0.0972347            | 0.935352 |
| PAH3+H        | 0.00165412      | 0.993586 | 0.0132530            | 0.948605 |
| PAH9+H        | 0.00112924      | 0.994715 | 0.00904761           | 0.957652 |
| rad19anti     | 0.000790044     | 0.995505 | 0.00632991           | 0.963982 |
| PAH7+H        | 0.000729333     | 0.996234 | 0.00584349           | 0.969826 |
| rad38         | 0.000670521     | 0.996905 | 0.00537228           | 0.975198 |
| rad30         | 0.000454283     | 0.997359 | 0.00363976           | 0.978838 |
| rad50         | 0.000356822     | 0.997716 | 0.00285889           | 0.981697 |
| Ph+MeAc       | 0.000331297     | 0.998047 | 0.00265438           | 0.984351 |
| PhCCH+CH3     | 0.000293338     | 0.998340 | 0.00235025           | 0.986701 |
| rad35         | 0.000276886     | 0.998617 | 0.00221844           | 0.988920 |
| rad39         | 0.000242689     | 0.998860 | 0.00194445           | 0.990864 |
| rad46         | 0.000239377     | 0.999099 | 0.00191791           | 0.992782 |
| rad51         | 0.000167552     | 0.999267 | 0.00134245           | 0.994125 |
| rad59         | 0.000133898     | 0.999401 | 0.00107280           | 0.995197 |
| rad67         | 0.000103303     | 0.999504 | 0.000827674          | 0.996025 |
| PhCCCH3+H     | 9.47597e-05     | 0.999599 | 0.000759224          | 0.996784 |
| rad60syn      | 8.03400e-05     | 0.999679 | 0.000643692          | 0.997428 |
| rad60anti     | 5.74980e-05     | 0.999737 | 0.000460680          | 0.997889 |
| PAH10+CH3     | 4.75540e-05     | 0.999784 | 0.000381007          | 0.998270 |
| rad52         | 3.97965e-05     | 0.999824 | 0.000318854          | 0.998588 |
| rad19syn      | 3.43481e-05     | 0.999858 | 0.000275200          | 0.998864 |
| rad58         | 2.60271e-05     | 0.999885 | 0.000208532          | 0.999072 |
| rad71         | 2.39120e-05     | 0.999908 | 0.000191585          | 0.999264 |
| PhcycC3H3_A+H | 1.91124e-05     | 0.999928 | 0.000153131          | 0.999417 |
| PAH1+H        | 1.89313e-05     | 0.999946 | 0.000151679          | 0.999569 |
| rad73         | 1.19963e-05     | 0.999958 | 9.61159e-05          | 0.999665 |
| rad37         | 1.02458e-05     | 0.999969 | 8.20902e-05          | 0.999747 |
| rad70         | 8.97456e-06     | 0.999978 | 7.19051e-05          | 0.999819 |
| rad54         | 7.04852e-06     | 0.999985 | 5.64734e-05          | 0.999875 |
| rad65         | 4.27356e-06     | 0.999989 | 3.42402e-05          | 0.999909 |
| rad34         | 3.06724e-06     | 0.999992 | 2.45750e-05          | 0.999934 |
| PAH8+H        | 2.42508e-06     | 0.999995 | 1.94299e-05          | 0.999953 |
| rad72         | 1.88022e-06     | 0.999996 | 1.50645e-05          | 0.999968 |
| rad55         | 6.94535e-07     | 0.999997 | 5.56468e-06          | 0.999974 |
| rad56         | 5.00306e-07     | 0.999998 | 4.00850e-06          | 0.999978 |
| rad68syn      | 4.83458e-07     | 0.999998 | 3.87351e-06          | 0.999982 |
| rad64         | 4.76899e-07     | 0.999999 | 3.82096e-06          | 0.999986 |
| rad53         | 3.88200e-07     | 0.999999 | 3.11030e-06          | 0.999989 |
| rad68anti     | 3.09361e-07     | 0.999999 | 2.47863e-06          | 0.999991 |
| rad62         | 2.47711e-07     | 0.999999 | 1.98468e-06          | 0.999993 |
| rad40syn      | 2.35491e-07     | 1.000000 | 1.88678e-06          | 0.999995 |
| rad61         | 1.98411e-07     | 1.000000 | 1.58969e-06          | 0.999997 |
| rad40anti     | 1.64464e-07     | 1.000000 | 1.31770e-06          | 0.999998 |
| rad43         | 1.38326e-07     | 1.000000 | 1.10828e-06          | 0.999999 |
| rad42         | 3.59374e-08     | 1.000000 | 2.87934e-07          | 1.000000 |
| rad41         | 2.03340e-08     | 1.000000 | 1.62918e-07          | 1.000000 |
| rad6          | 5.28374e-19     | 1.000000 | 4.23339e-18          | 1.000000 |
| rad23         | 5.15566e-19     | 1.000000 | 4.13076e-18          | 1.000000 |
| rad45         | 1.27103e-19     | 1.000000 | 1.01836e-18          | 1.000000 |
| rad9          | 1.02200e-19     | 1.000000 | 8.18837e-19          | 1.000000 |
| rad20         | 8.68783e-20     | 1.000000 | 6.96077e-19          | 1.000000 |
| rad22         | 5.53887e-20     | 1.000000 | 4.43779e-19          | 1.000000 |
| rad21         | 4.05053e-20     | 1.000000 | 3.24532e-19          | 1.000000 |
| rad11         | 2.91948e-20     | 1.000000 | 2.33912e-19          | 1.000000 |
| rad36         | 2.42641e-20     | 1.000000 | 1.94406e-19          | 1.000000 |
| rad18         | 1.40097e-20     | 1.000000 | 1.12247e-19          | 1.000000 |
| rad7          | 8.87307e-21     | 1.000000 | 7.10919e-20          | 1.000000 |
| rad15         | 7.56443e-21     | 1.000000 | 6.06070e-20          | 1.000000 |
| rad28         | 4.35930e-21     | 1.000000 | 3.49272e-20          | 1.000000 |
| rad24         | 2.36701e-21     | 1.000000 | 1.89647e-20          | 1.000000 |
| rad8          | 2.27048e-21     | 1.000000 | 1.81913e-20          | 1.000000 |
| rad12         | 1.84640e-21     | 1.000000 | 1.47935e-20          | 1.000000 |
| rad13         | 1.02991e-21     | 1.000000 | 8.25174e-21          | 1.000000 |
| rad26         | 7.74804e-22     | 1.000000 | 6.20780e-21          | 1.000000 |
| rad47         | 3.65965e-22     | 1.000000 | 2.93215e-21          | 1.000000 |
| rad10         | 2.66088e-22     | 1.000000 | 2.13193e-21          | 1.000000 |
| rad25         | 1.16293e-22     | 1.000000 | 9.31748e-22          | 1.000000 |
| rad33         | 6.71473e-23     | 1.000000 | 5.37991e-22          | 1.000000 |
| rad5          | 2.15478e-23     | 1.000000 | 1.72643e-22          | 1.000000 |

|       |             |         |             |          |
|-------|-------------|---------|-------------|----------|
| rad2  | 2.14422e-23 | 1.00000 | 1.71797e-22 | 1.000000 |
| rad1  | 8.86322e-24 | 1.00000 | 7.10130e-23 | 1.000000 |
| rad3  | 2.82498e-24 | 1.00000 | 2.26340e-23 | 1.000000 |
| rad14 | 1.77541e-24 | 1.00000 | 1.42248e-23 | 1.000000 |
| rad4  | 1.75074e-24 | 1.00000 | 1.40271e-23 | 1.000000 |
| rad27 | 9.32033e-25 | 1.00000 | 7.46754e-24 | 1.000000 |

0.100000000E-08 Pa, 3000.00000 K

=====

| Rate constant | True (fraction)     | Effective (fraction) |
|---------------|---------------------|----------------------|
| Total         | 1.15309e-12 (1.00 ) | 1.53862e-13 (1.00 )  |

| species       | PYtrue      | Cumul    | PYeffective | Cumul    |
|---------------|-------------|----------|-------------|----------|
| Benzyl+C2H2   | 0.866566    | 0.866566 | 0.00000     | 0.00000  |
| PhCH2CCH+H    | 0.0611725   | 0.927738 | 0.458447    | 0.458447 |
| Indene+H      | 0.0342672   | 0.962006 | 0.256810    | 0.715257 |
| PhCHCCH2+H    | 0.0154790   | 0.977485 | 0.116005    | 0.831262 |
| Ph+Allene     | 0.0132660   | 0.990751 | 0.0994201   | 0.930682 |
| PAH3+H        | 0.00205938  | 0.992810 | 0.0154337   | 0.946116 |
| PAH9+H        | 0.00113813  | 0.993948 | 0.00852950  | 0.954645 |
| PAH7+H        | 0.000866135 | 0.994814 | 0.00649110  | 0.961136 |
| rad19anti     | 0.000812999 | 0.995627 | 0.00609288  | 0.967229 |
| rad38         | 0.000693215 | 0.996321 | 0.00519518  | 0.972424 |
| rad30         | 0.000455427 | 0.996776 | 0.00341312  | 0.975838 |
| rad50         | 0.000445147 | 0.997221 | 0.00333608  | 0.979174 |
| Ph+MeAc       | 0.000411378 | 0.997633 | 0.00308300  | 0.982257 |
| PhCCH+CH3     | 0.000319072 | 0.997952 | 0.00239123  | 0.984648 |
| rad39         | 0.000311351 | 0.998263 | 0.00233337  | 0.986981 |
| rad35         | 0.000303822 | 0.998567 | 0.00227694  | 0.989258 |
| rad46         | 0.000258929 | 0.998826 | 0.00194050  | 0.991199 |
| rad51         | 0.000229661 | 0.999055 | 0.00172116  | 0.992920 |
| rad59         | 0.000160966 | 0.999216 | 0.00120633  | 0.994126 |
| rad67         | 0.000132859 | 0.999349 | 0.000995686 | 0.995122 |
| PhCCCH3+H     | 0.000117527 | 0.999467 | 0.000880786 | 0.996003 |
| rad60syn      | 9.03378e-05 | 0.999557 | 0.000677021 | 0.996680 |
| PAH10+CH3     | 6.53522e-05 | 0.999622 | 0.000489771 | 0.997169 |
| rad60anti     | 6.52879e-05 | 0.999688 | 0.000489289 | 0.997659 |
| rad52         | 5.15998e-05 | 0.999739 | 0.000386706 | 0.998045 |
| rad19syn      | 5.01057e-05 | 0.999789 | 0.000375508 | 0.998421 |
| rad71         | 4.45158e-05 | 0.999834 | 0.000333616 | 0.998755 |
| rad58         | 3.61220e-05 | 0.999870 | 0.000270710 | 0.999025 |
| PAH1+H        | 2.86271e-05 | 0.999899 | 0.000214541 | 0.999240 |
| PhcycC3H3_A+H | 2.34369e-05 | 0.999922 | 0.000175644 | 0.999415 |
| rad73         | 2.07080e-05 | 0.999943 | 0.000155192 | 0.999571 |
| rad70         | 1.26564e-05 | 0.999955 | 9.48509e-05 | 0.999666 |
| rad37         | 1.18404e-05 | 0.999967 | 8.87361e-05 | 0.999754 |
| rad54         | 7.74183e-06 | 0.999975 | 5.80198e-05 | 0.999812 |
| rad65         | 5.71876e-06 | 0.999981 | 4.28583e-05 | 0.999855 |
| PAH8+H        | 4.80152e-06 | 0.999986 | 3.59842e-05 | 0.999891 |
| rad34         | 4.57469e-06 | 0.999990 | 3.42843e-05 | 0.999925 |
| rad72         | 4.05904e-06 | 0.999994 | 3.04198e-05 | 0.999956 |
| rad68syn      | 8.44302e-07 | 0.999995 | 6.32747e-06 | 0.999962 |
| rad55         | 7.96394e-07 | 0.999996 | 5.96844e-06 | 0.999968 |
| rad64         | 7.49015e-07 | 0.999997 | 5.61336e-06 | 0.999974 |
| rad56         | 7.20451e-07 | 0.999997 | 5.39929e-06 | 0.999979 |
| rad68anti     | 5.39463e-07 | 0.999998 | 4.04291e-06 | 0.999983 |
| rad53         | 5.23143e-07 | 0.999998 | 3.92061e-06 | 0.999987 |
| rad40syn      | 4.40707e-07 | 0.999999 | 3.30280e-06 | 0.999990 |
| rad62         | 3.72784e-07 | 0.999999 | 2.79376e-06 | 0.999993 |
| rad61         | 3.22478e-07 | 0.999999 | 2.41676e-06 | 0.999996 |
| rad40anti     | 3.14359e-07 | 1.000000 | 2.35591e-06 | 0.999998 |
| rad43         | 1.94896e-07 | 1.00000  | 1.46061e-06 | 0.999999 |
| rad42         | 5.98145e-08 | 1.00000  | 4.48269e-07 | 1.000000 |
| rad41         | 3.19484e-08 | 1.00000  | 2.39432e-07 | 1.00000  |
| rad23         | 2.11558e-19 | 1.00000  | 1.58549e-18 | 1.00000  |
| rad6          | 1.52626e-19 | 1.00000  | 1.14383e-18 | 1.00000  |
| rad45         | 6.48444e-20 | 1.00000  | 4.85965e-19 | 1.00000  |
| rad9          | 5.76615e-20 | 1.00000  | 4.32134e-19 | 1.00000  |
| rad20         | 5.61879e-20 | 1.00000  | 4.21090e-19 | 1.00000  |
| rad22         | 2.56754e-20 | 1.00000  | 1.92420e-19 | 1.00000  |
| rad21         | 2.52565e-20 | 1.00000  | 1.89281e-19 | 1.00000  |
| rad11         | 1.59312e-20 | 1.00000  | 1.19394e-19 | 1.00000  |
| rad36         | 1.25425e-20 | 1.00000  | 9.39973e-20 | 1.00000  |
| rad18         | 7.69597e-21 | 1.00000  | 5.76761e-20 | 1.00000  |
| rad15         | 4.64692e-21 | 1.00000  | 3.48256e-20 | 1.00000  |
| rad7          | 3.48721e-21 | 1.00000  | 2.61343e-20 | 1.00000  |
| rad8          | 2.23533e-21 | 1.00000  | 1.67523e-20 | 1.00000  |
| rad28         | 2.05573e-21 | 1.00000  | 1.54063e-20 | 1.00000  |

|       |             |         |             |         |
|-------|-------------|---------|-------------|---------|
| rad24 | 1.60028e-21 | 1.00000 | 1.19931e-20 | 1.00000 |
| rad12 | 1.40784e-21 | 1.00000 | 1.05508e-20 | 1.00000 |
| rad26 | 4.93141e-22 | 1.00000 | 3.69576e-21 | 1.00000 |
| rad47 | 4.90428e-22 | 1.00000 | 3.67543e-21 | 1.00000 |
| rad13 | 4.47285e-22 | 1.00000 | 3.35210e-21 | 1.00000 |
| rad10 | 1.80807e-22 | 1.00000 | 1.35502e-21 | 1.00000 |
| rad25 | 8.60189e-23 | 1.00000 | 6.44654e-22 | 1.00000 |
| rad33 | 3.44368e-23 | 1.00000 | 2.58081e-22 | 1.00000 |
| rad5  | 2.09153e-23 | 1.00000 | 1.56746e-22 | 1.00000 |
| rad2  | 1.31329e-23 | 1.00000 | 9.84221e-23 | 1.00000 |
| rad1  | 6.17670e-24 | 1.00000 | 4.62902e-23 | 1.00000 |
| rad14 | 1.40237e-24 | 1.00000 | 1.05098e-23 | 1.00000 |
| rad3  | 1.16561e-24 | 1.00000 | 8.73550e-24 | 1.00000 |
| rad27 | 8.01836e-25 | 1.00000 | 6.00923e-24 | 1.00000 |
| rad4  | 7.00366e-25 | 1.00000 | 5.24877e-24 | 1.00000 |

0.100000000E-08 Pa, 3250.00000 K

| Rate constant | True (fraction)     | Effective (fraction) |
|---------------|---------------------|----------------------|
| Total         | 1.58309e-12 (1.00 ) | 2.28795e-13 (1.00 )  |

| species       | PYtrue      | Cumul    | PYeffective | Cumul    |
|---------------|-------------|----------|-------------|----------|
| Benzyl+C2H2   | 0.855476    | 0.855476 | 0.00000     | 0.00000  |
| PhCH2CCH+H    | 0.0734301   | 0.928906 | 0.508082    | 0.508082 |
| Indene+H      | 0.0278643   | 0.956770 | 0.192800    | 0.700882 |
| PhCHCCH2+H    | 0.0183610   | 0.975131 | 0.127045    | 0.827927 |
| Ph+Allene     | 0.0145940   | 0.989725 | 0.100980    | 0.928907 |
| PAH3+H        | 0.00243645  | 0.992162 | 0.0168585   | 0.945765 |
| PAH9+H        | 0.00110339  | 0.993265 | 0.00763468  | 0.953400 |
| PAH7+H        | 0.000986571 | 0.994252 | 0.00682634  | 0.960227 |
| rad19anti     | 0.000808911 | 0.995061 | 0.00559707  | 0.965824 |
| rad38         | 0.000686670 | 0.995747 | 0.00475125  | 0.970575 |
| rad50         | 0.000518179 | 0.996266 | 0.00358542  | 0.974160 |
| Ph+MeAc       | 0.000489465 | 0.996755 | 0.00338674  | 0.977547 |
| rad30         | 0.000447972 | 0.997203 | 0.00309964  | 0.980647 |
| PhCCH+CH3     | 0.000378211 | 0.997581 | 0.00261694  | 0.983264 |
| rad39         | 0.000374434 | 0.997956 | 0.00259081  | 0.985854 |
| rad35         | 0.000323023 | 0.998279 | 0.00223508  | 0.988089 |
| rad51         | 0.000289245 | 0.998568 | 0.00200136  | 0.990091 |
| rad46         | 0.000266714 | 0.998835 | 0.00184546  | 0.991936 |
| rad59         | 0.000184695 | 0.999019 | 0.00127795  | 0.993214 |
| rad67         | 0.000159865 | 0.999179 | 0.00110614  | 0.994320 |
| PhCCCH3+H     | 0.000140367 | 0.999320 | 0.000971235 | 0.995292 |
| rad60syn      | 9.79791e-05 | 0.999418 | 0.000677943 | 0.995970 |
| PAH10+CH3     | 8.26142e-05 | 0.999500 | 0.000571630 | 0.996541 |
| rad71         | 7.28074e-05 | 0.999573 | 0.000503773 | 0.997045 |
| rad60anti     | 7.14060e-05 | 0.999644 | 0.000494077 | 0.997539 |
| rad19syn      | 7.13406e-05 | 0.999716 | 0.000493624 | 0.998033 |
| rad52         | 6.19533e-05 | 0.999778 | 0.000428671 | 0.998461 |
| rad58         | 4.68388e-05 | 0.999825 | 0.000324090 | 0.998785 |
| PAH1+H        | 3.98744e-05 | 0.999864 | 0.000275902 | 0.999061 |
| rad73         | 3.17350e-05 | 0.999896 | 0.000219583 | 0.999281 |
| PhcycC3H3_A+H | 2.77967e-05 | 0.999924 | 0.000192333 | 0.999473 |
| rad70         | 1.68825e-05 | 0.999941 | 0.000116814 | 0.999590 |
| rad37         | 1.28499e-05 | 0.999954 | 8.89115e-05 | 0.999679 |
| PAH8+H        | 8.50457e-06 | 0.999962 | 5.88453e-05 | 0.999738 |
| rad54         | 8.38233e-06 | 0.999971 | 5.79997e-05 | 0.999796 |
| rad72         | 7.52648e-06 | 0.999978 | 5.20777e-05 | 0.999848 |
| rad65         | 7.06074e-06 | 0.999985 | 4.88551e-05 | 0.999897 |
| rad34         | 6.39568e-06 | 0.999992 | 4.42534e-05 | 0.999941 |
| rad68syn      | 1.34606e-06 | 0.999993 | 9.31375e-06 | 0.999950 |
| rad64         | 1.07438e-06 | 0.999994 | 7.43389e-06 | 0.999958 |
| rad56         | 9.79690e-07 | 0.999995 | 6.77873e-06 | 0.999965 |
| rad55         | 8.93999e-07 | 0.999996 | 6.18581e-06 | 0.999971 |
| rad68anti     | 8.59058e-07 | 0.999997 | 5.94405e-06 | 0.999977 |
| rad40syn      | 7.44327e-07 | 0.999997 | 5.15020e-06 | 0.999982 |
| rad53         | 6.73265e-07 | 0.999998 | 4.65850e-06 | 0.999986 |
| rad40anti     | 5.40357e-07 | 0.999999 | 3.73887e-06 | 0.999990 |
| rad62         | 5.25220e-07 | 0.999999 | 3.63414e-06 | 0.999994 |
| rad61         | 4.70536e-07 | 1.000000 | 3.25576e-06 | 0.999997 |
| rad43         | 2.53715e-07 | 1.000000 | 1.75552e-06 | 0.999999 |
| rad42         | 9.14458e-08 | 1.000000 | 6.32737e-07 | 0.999999 |
| rad41         | 4.57450e-08 | 1.000000 | 3.16522e-07 | 1.000000 |
| rad23         | 9.42805e-20 | 1.000000 | 6.52352e-19 | 1.000000 |
| rad6          | 5.26031e-20 | 1.000000 | 3.63974e-19 | 1.000000 |
| rad20         | 3.83869e-20 | 1.000000 | 2.65609e-19 | 1.000000 |
| rad45         | 3.49316e-20 | 1.000000 | 2.41701e-19 | 1.000000 |
| rad9          | 3.36408e-20 | 1.000000 | 2.32770e-19 | 1.000000 |

|       |             |         |             |          |
|-------|-------------|---------|-------------|----------|
| rad21 | 1.66173e-20 | 1.00000 | 1.14980e-19 | 1.000000 |
| rad22 | 1.30761e-20 | 1.00000 | 9.04768e-20 | 1.000000 |
| rad11 | 9.80857e-21 | 1.00000 | 6.78681e-20 | 1.000000 |
| rad36 | 6.82785e-21 | 1.00000 | 4.72437e-20 | 1.000000 |
| rad18 | 4.51591e-21 | 1.00000 | 3.12467e-20 | 1.000000 |
| rad15 | 2.91808e-21 | 1.00000 | 2.01909e-20 | 1.000000 |
| rad8  | 2.15817e-21 | 1.00000 | 1.49330e-20 | 1.000000 |
| rad7  | 1.57403e-21 | 1.00000 | 1.08911e-20 | 1.000000 |
| rad28 | 1.13058e-21 | 1.00000 | 7.82281e-21 | 1.000000 |
| rad24 | 1.10778e-21 | 1.00000 | 7.66503e-21 | 1.000000 |
| rad12 | 1.07284e-21 | 1.00000 | 7.42324e-21 | 1.000000 |
| rad47 | 6.03541e-22 | 1.00000 | 4.17606e-21 | 1.000000 |
| rad26 | 3.17882e-22 | 1.00000 | 2.19951e-21 | 1.000000 |
| rad13 | 2.21088e-22 | 1.00000 | 1.52976e-21 | 1.000000 |
| rad10 | 1.23614e-22 | 1.00000 | 8.55316e-22 | 1.000000 |
| rad25 | 6.72544e-23 | 1.00000 | 4.65351e-22 | 1.000000 |
| rad5  | 2.00796e-23 | 1.00000 | 1.38936e-22 | 1.000000 |
| rad33 | 1.94932e-23 | 1.00000 | 1.34878e-22 | 1.000000 |
| rad2  | 8.57644e-24 | 1.00000 | 5.93426e-23 | 1.000000 |
| rad1  | 4.53583e-24 | 1.00000 | 3.13846e-23 | 1.000000 |
| rad14 | 1.20218e-24 | 1.00000 | 8.31820e-24 | 1.000000 |
| rad27 | 6.78839e-25 | 1.00000 | 4.69707e-24 | 1.000000 |
| rad3  | 5.66016e-25 | 1.00000 | 3.91641e-24 | 1.000000 |
| rad4  | 3.30389e-25 | 1.00000 | 2.28605e-24 | 1.000000 |

0.100000000E-08 Pa, 3500.00000 K

| =====         |                     |          |                      |          |
|---------------|---------------------|----------|----------------------|----------|
| Rate constant | True (fraction)     |          | Effective (fraction) |          |
| -----         |                     |          |                      |          |
| Total         | 2.10046e-12 (1.00 ) |          | 3.29923e-13 (1.00 )  |          |
| species       | PYtrue              | Cumul    | PYeffective          | Cumul    |
| -----         |                     |          |                      |          |
| Benzyl+C2H2   | 0.842928            | 0.842928 | 0.00000              | 0.00000  |
| PhCH2CCH+H    | 0.0857241           | 0.928652 | 0.545762             | 0.545762 |
| Indene+H      | 0.0229287           | 0.951581 | 0.145976             | 0.691738 |
| PhCHCCH2+H    | 0.0212218           | 0.972803 | 0.135108             | 0.826846 |
| Ph+Allene     | 0.0160719           | 0.988874 | 0.102322             | 0.929168 |
| PAH3+H        | 0.00277080          | 0.991645 | 0.0176403            | 0.946808 |
| PAH7+H        | 0.00108547          | 0.992731 | 0.00691065           | 0.953719 |
| PAH9+H        | 0.00103824          | 0.993769 | 0.00660998           | 0.960329 |
| rad19anti     | 0.000786012         | 0.994555 | 0.00500415           | 0.965333 |
| rad38         | 0.000657575         | 0.995213 | 0.00418645           | 0.969520 |
| rad50         | 0.000571322         | 0.995784 | 0.00363732           | 0.973157 |
| Ph+MeAc       | 0.000559758         | 0.996344 | 0.00356370           | 0.976721 |
| PhCCH+CH3     | 0.000466753         | 0.996810 | 0.00297158           | 0.979692 |
| rad30         | 0.000434295         | 0.997245 | 0.00276494           | 0.982457 |
| rad39         | 0.000426787         | 0.997672 | 0.00271714           | 0.985174 |
| rad51         | 0.000340822         | 0.998012 | 0.00216985           | 0.987344 |
| rad35         | 0.000335221         | 0.998348 | 0.00213419           | 0.989478 |
| rad46         | 0.000264413         | 0.998612 | 0.00168339           | 0.991162 |
| rad59         | 0.000204435         | 0.998816 | 0.00130154           | 0.992463 |
| rad67         | 0.000182834         | 0.998999 | 0.00116401           | 0.993627 |
| PhCCCH3+H     | 0.000163685         | 0.999163 | 0.00104210           | 0.994669 |
| rad71         | 0.000107601         | 0.999271 | 0.000685042          | 0.995354 |
| rad60syn      | 0.000103349         | 0.999374 | 0.000657969          | 0.996012 |
| PAH10+CH3     | 9.81181e-05         | 0.999472 | 0.000624669          | 0.996637 |
| rad19syn      | 9.79725e-05         | 0.999570 | 0.000623742          | 0.997261 |
| rad60anti     | 7.58697e-05         | 0.999646 | 0.000483025          | 0.997744 |
| rad52         | 7.00217e-05         | 0.999716 | 0.000445793          | 0.998190 |
| rad58         | 5.76196e-05         | 0.999773 | 0.000366835          | 0.998556 |
| PAH1+H        | 5.20523e-05         | 0.999826 | 0.000331391          | 0.998888 |
| rad73         | 4.43107e-05         | 0.999870 | 0.000282104          | 0.999170 |
| PhcycC3H3_A+H | 3.20633e-05         | 0.999902 | 0.000204131          | 0.999374 |
| rad70         | 2.14708e-05         | 0.999923 | 0.000136694          | 0.999511 |
| PAH8+H        | 1.37725e-05         | 0.999937 | 8.76827e-05          | 0.999598 |
| rad37         | 1.33235e-05         | 0.999950 | 8.48243e-05          | 0.999683 |
| rad72         | 1.23923e-05         | 0.999963 | 7.88958e-05          | 0.999762 |
| rad54         | 8.98058e-06         | 0.999972 | 5.71749e-05          | 0.999819 |
| rad34         | 8.46717e-06         | 0.999980 | 5.39063e-05          | 0.999873 |
| rad65         | 8.19015e-06         | 0.999988 | 5.21426e-05          | 0.999925 |
| rad68syn      | 1.99232e-06         | 0.999990 | 1.26841e-05          | 0.999938 |
| rad64         | 1.43496e-06         | 0.999992 | 9.13568e-06          | 0.999947 |
| rad56         | 1.27412e-06         | 0.999993 | 8.11171e-06          | 0.999955 |
| rad68anti     | 1.27030e-06         | 0.999994 | 8.08736e-06          | 0.999963 |
| rad40syn      | 1.15716e-06         | 0.999996 | 7.36708e-06          | 0.999971 |
| rad55         | 9.87613e-07         | 0.999997 | 6.28764e-06          | 0.999977 |
| rad40anti     | 8.52741e-07         | 0.999997 | 5.42898e-06          | 0.999982 |
| rad53         | 8.35966e-07         | 0.999998 | 5.32218e-06          | 0.999988 |
| rad62         | 6.97360e-07         | 0.999999 | 4.43975e-06          | 0.999992 |

|       |             |          |             |          |
|-------|-------------|----------|-------------|----------|
| rad61 | 6.32568e-07 | 1.000000 | 4.02725e-06 | 0.999996 |
| rad43 | 3.12012e-07 | 1.000000 | 1.98643e-06 | 0.999998 |
| rad42 | 1.30122e-07 | 1.000000 | 8.28424e-07 | 0.999999 |
| rad41 | 6.11800e-08 | 1.000000 | 3.89503e-07 | 0.999999 |
| rad23 | 4.48616e-20 | 1.000000 | 2.85612e-19 | 0.999999 |
| rad20 | 2.74120e-20 | 1.000000 | 1.74519e-19 | 0.999999 |
| rad6  | 2.11781e-20 | 1.000000 | 1.34830e-19 | 0.999999 |
| rad9  | 2.03016e-20 | 1.000000 | 1.29250e-19 | 0.999999 |
| rad45 | 1.96578e-20 | 1.000000 | 1.25151e-19 | 0.999999 |
| rad21 | 1.14208e-20 | 1.000000 | 7.27102e-20 | 0.999999 |
| rad22 | 7.18391e-21 | 1.000000 | 4.57364e-20 | 0.999999 |
| rad11 | 6.60781e-21 | 1.000000 | 4.20686e-20 | 0.999999 |
| rad36 | 3.87398e-21 | 1.000000 | 2.46637e-20 | 0.999999 |
| rad18 | 2.79268e-21 | 1.000000 | 1.77796e-20 | 0.999999 |
| rad8  | 2.04865e-21 | 1.000000 | 1.30427e-20 | 0.999999 |
| rad15 | 1.87604e-21 | 1.000000 | 1.19438e-20 | 0.999999 |
| rad12 | 8.20876e-22 | 1.000000 | 5.22611e-21 | 0.999999 |
| rad7  | 7.97826e-22 | 1.000000 | 5.07936e-21 | 0.999999 |
| rad24 | 7.82702e-22 | 1.000000 | 4.98307e-21 | 0.999999 |
| rad47 | 6.94994e-22 | 1.000000 | 4.42468e-21 | 0.999999 |
| rad28 | 6.78730e-22 | 1.000000 | 4.32113e-21 | 0.999999 |
| rad26 | 2.07559e-22 | 1.000000 | 1.32143e-21 | 0.999999 |
| rad13 | 1.21831e-22 | 1.000000 | 7.75639e-22 | 0.999999 |
| rad10 | 8.51738e-23 | 1.000000 | 5.42259e-22 | 0.999999 |
| rad25 | 5.44463e-23 | 1.000000 | 3.46632e-22 | 0.999999 |
| rad5  | 1.92212e-23 | 1.000000 | 1.22372e-22 | 0.999999 |
| rad33 | 1.19819e-23 | 1.000000 | 7.62829e-23 | 0.999999 |
| rad2  | 5.84158e-24 | 1.000000 | 3.71904e-23 | 0.999999 |
| rad1  | 3.40679e-24 | 1.000000 | 2.16893e-23 | 0.999999 |
| rad14 | 1.06170e-24 | 1.000000 | 6.75934e-24 | 0.999999 |
| rad27 | 5.69300e-25 | 1.000000 | 3.62445e-24 | 0.999999 |
| rad3  | 3.12656e-25 | 1.000000 | 1.99052e-24 | 0.999999 |
| rad4  | 1.78499e-25 | 1.000000 | 1.13641e-24 | 0.999999 |

0.100000000E-08 Pa, 3750.00000 K

| Rate constant | True (fraction)     | Effective (fraction) |
|---------------|---------------------|----------------------|
| Total         | 2.70978e-12 (1.00 ) | 4.61708e-13 (1.00 )  |

| species       | PYtrue      | Cumul    | PYeffective | Cumul    |
|---------------|-------------|----------|-------------|----------|
| Benzyl+C2H2   | 0.829614    | 0.829614 | 0.00000     | 0.00000  |
| PhCH2CCH+H    | 0.0978316   | 0.927446 | 0.574175    | 0.574175 |
| PhCHCCH2+H    | 0.0240141   | 0.951460 | 0.140939    | 0.715114 |
| Indene+H      | 0.0190788   | 0.970538 | 0.111974    | 0.827088 |
| Ph+Allene     | 0.0176550   | 0.988193 | 0.103617    | 0.930705 |
| PAH3+H        | 0.00305565  | 0.991249 | 0.0179337   | 0.948639 |
| PAH7+H        | 0.00116197  | 0.992411 | 0.00681959  | 0.955458 |
| PAH9+H        | 0.000955042 | 0.993366 | 0.00560515  | 0.961063 |
| rad19anti     | 0.000750872 | 0.994117 | 0.00440688  | 0.965470 |
| Ph+MeAc       | 0.000618509 | 0.994736 | 0.00363004  | 0.969100 |
| rad38         | 0.000613193 | 0.995349 | 0.00359884  | 0.972699 |
| rad50         | 0.000603635 | 0.995952 | 0.00354274  | 0.976242 |
| PhCCH+CH3     | 0.000581835 | 0.996534 | 0.00341479  | 0.979657 |
| rad39         | 0.000465790 | 0.997000 | 0.00273373  | 0.982390 |
| rad30         | 0.000416539 | 0.997417 | 0.00244467  | 0.984835 |
| rad51         | 0.000380994 | 0.997798 | 0.00223606  | 0.987071 |
| rad35         | 0.000341508 | 0.998139 | 0.00200431  | 0.989075 |
| rad46         | 0.000254425 | 0.998393 | 0.00149322  | 0.990569 |
| rad59         | 0.000220084 | 0.998614 | 0.00129168  | 0.991860 |
| rad67         | 0.000201013 | 0.998815 | 0.00117975  | 0.993040 |
| PhCCCH3+H     | 0.000187990 | 0.999003 | 0.00110331  | 0.994143 |
| rad71         | 0.000146780 | 0.999149 | 0.000861455 | 0.995005 |
| rad19syn      | 0.000129261 | 0.999279 | 0.000758633 | 0.995764 |
| PAH10+CH3     | 0.000111172 | 0.999390 | 0.000652468 | 0.996416 |
| rad60syn      | 0.000106707 | 0.999496 | 0.000626263 | 0.997042 |
| rad60anti     | 7.88382e-05 | 0.999575 | 0.000462703 | 0.997505 |
| rad52         | 7.54521e-05 | 0.999651 | 0.000442829 | 0.997948 |
| rad58         | 6.80261e-05 | 0.999719 | 0.000399246 | 0.998347 |
| PAH1+H        | 6.45813e-05 | 0.999783 | 0.000379028 | 0.998726 |
| rad73         | 5.74878e-05 | 0.999841 | 0.000337397 | 0.999063 |
| PhcycC3H3_A+H | 3.61213e-05 | 0.999877 | 0.000211996 | 0.999275 |
| rad70         | 2.62309e-05 | 0.999903 | 0.000153949 | 0.999429 |
| PAH8+H        | 2.07420e-05 | 0.999924 | 0.000121735 | 0.999551 |
| rad72         | 1.85748e-05 | 0.999943 | 0.000109016 | 0.999660 |
| rad37         | 1.33636e-05 | 0.999956 | 7.84314e-05 | 0.999739 |
| rad34         | 1.07116e-05 | 0.999967 | 6.28665e-05 | 0.999801 |
| rad54         | 9.53969e-06 | 0.999976 | 5.59886e-05 | 0.999857 |
| rad65         | 9.05125e-06 | 0.999985 | 5.31219e-05 | 0.999911 |



|           |             |          |             |          |
|-----------|-------------|----------|-------------|----------|
| rad68syn  | 2.77520e-06 | 0.999988 | 1.62877e-05 | 0.999927 |
| rad64     | 1.81236e-06 | 0.999990 | 1.06367e-05 | 0.999938 |
| rad68anti | 1.76807e-06 | 0.999992 | 1.03768e-05 | 0.999948 |
| rad40syn  | 1.68193e-06 | 0.999993 | 9.87130e-06 | 0.999958 |
| rad56     | 1.59874e-06 | 0.999995 | 9.38301e-06 | 0.999967 |
| rad40anti | 1.25564e-06 | 0.999996 | 7.36935e-06 | 0.999975 |
| rad55     | 1.07703e-06 | 0.999997 | 6.32112e-06 | 0.999981 |
| rad53     | 1.00840e-06 | 0.999998 | 5.91834e-06 | 0.999987 |
| rad62     | 8.81786e-07 | 0.999999 | 5.17522e-06 | 0.999992 |
| rad61     | 7.98455e-07 | 1.000000 | 4.68615e-06 | 0.999997 |
| rad43     | 3.67979e-07 | 1.000000 | 2.15967e-06 | 0.999999 |
| rad42     | 1.74775e-07 | 1.000000 | 1.02576e-06 | 1.000000 |
| rad41     | 7.77074e-08 | 1.000000 | 4.56066e-07 | 1.000000 |
| rad23     | 2.25414e-20 | 1.000000 | 1.32296e-19 | 1.000000 |
| rad20     | 2.02983e-20 | 1.000000 | 1.19131e-19 | 1.000000 |
| rad9      | 1.26592e-20 | 1.000000 | 7.42971e-20 | 1.000000 |
| rad45     | 1.14691e-20 | 1.000000 | 6.73121e-20 | 1.000000 |
| rad6      | 9.73951e-21 | 1.000000 | 5.71613e-20 | 1.000000 |
| rad21     | 8.13804e-21 | 1.000000 | 4.77623e-20 | 1.000000 |
| rad11     | 4.75768e-21 | 1.000000 | 2.79229e-20 | 1.000000 |
| rad22     | 4.20237e-21 | 1.000000 | 2.46638e-20 | 1.000000 |
| rad36     | 2.27412e-21 | 1.000000 | 1.33468e-20 | 1.000000 |
| rad8      | 1.91572e-21 | 1.000000 | 1.12434e-20 | 1.000000 |
| rad18     | 1.80283e-21 | 1.000000 | 1.05808e-20 | 1.000000 |
| rad15     | 1.23473e-21 | 1.000000 | 7.24666e-21 | 1.000000 |
| rad47     | 7.59707e-22 | 1.000000 | 4.45873e-21 | 1.000000 |
| rad12     | 6.32118e-22 | 1.000000 | 3.70991e-21 | 1.000000 |
| rad24     | 5.63439e-22 | 1.000000 | 3.30683e-21 | 1.000000 |
| rad7      | 4.44214e-22 | 1.000000 | 2.60710e-21 | 1.000000 |
| rad28     | 4.30193e-22 | 1.000000 | 2.52481e-21 | 1.000000 |
| rad26     | 1.37558e-22 | 1.000000 | 8.07328e-22 | 1.000000 |
| rad13     | 7.33169e-23 | 1.000000 | 4.30298e-22 | 1.000000 |
| rad10     | 5.94914e-23 | 1.000000 | 3.49156e-22 | 1.000000 |
| rad25     | 4.50617e-23 | 1.000000 | 2.64468e-22 | 1.000000 |
| rad5      | 1.83995e-23 | 1.000000 | 1.07987e-22 | 1.000000 |
| rad33     | 7.87849e-24 | 1.000000 | 4.62390e-23 | 1.000000 |
| rad2      | 4.16497e-24 | 1.000000 | 2.44443e-23 | 1.000000 |
| rad1      | 2.59494e-24 | 1.000000 | 1.52297e-23 | 1.000000 |
| rad14     | 9.45605e-25 | 1.000000 | 5.54977e-24 | 1.000000 |
| rad27     | 4.76374e-25 | 1.000000 | 2.79584e-24 | 1.000000 |
| rad3      | 1.90775e-25 | 1.000000 | 1.11966e-24 | 1.000000 |
| rad4      | 1.07383e-25 | 1.000000 | 6.30233e-25 | 1.000000 |

0.100000000E-08 Pa, 4000.00000 K

=====

| Rate constant | True (fraction)     | Effective (fraction) |
|---------------|---------------------|----------------------|
| Total         | 3.41497e-12 (1.00 ) | 6.28297e-13 (1.00 )  |

| species     | PYtrue      | Cumul    | PYeffective | Cumul    |
|-------------|-------------|----------|-------------|----------|
| Benzyl+C2H2 | 0.816017    | 0.816017 | 0.000000    | 0.000000 |
| PhCH2CCH+H  | 0.109584    | 0.925601 | 0.595618    | 0.595618 |
| PhCHCCH2+H  | 0.0267098   | 0.952311 | 0.145175    | 0.740793 |
| Ph+Allene   | 0.0193046   | 0.971615 | 0.104926    | 0.845719 |
| Indene+H    | 0.0160484   | 0.987664 | 0.0872277   | 0.932947 |
| PAH3+H      | 0.00329013  | 0.990954 | 0.0178828   | 0.950829 |
| PAH7+H      | 0.00121791  | 0.992172 | 0.00661968  | 0.957449 |
| PAH9+H      | 0.000864009 | 0.993036 | 0.00469613  | 0.962145 |
| PhCCH+CH3   | 0.000720156 | 0.993756 | 0.00391424  | 0.966060 |
| rad19anti   | 0.000708493 | 0.994464 | 0.00385085  | 0.969910 |
| Ph+MeAc     | 0.000663934 | 0.995128 | 0.00360866  | 0.973519 |
| rad50       | 0.000616859 | 0.995745 | 0.00335280  | 0.976872 |
| rad38       | 0.000560144 | 0.996305 | 0.00304454  | 0.979916 |
| rad39       | 0.000491035 | 0.996796 | 0.00266891  | 0.982585 |
| rad51       | 0.000408498 | 0.997205 | 0.00222030  | 0.984806 |
| rad30       | 0.000396478 | 0.997601 | 0.00215497  | 0.986961 |
| rad35       | 0.000343096 | 0.997945 | 0.00186482  | 0.988825 |
| rad46       | 0.000239253 | 0.998184 | 0.00130041  | 0.990126 |
| rad59       | 0.000231903 | 0.998416 | 0.00126046  | 0.991386 |
| rad67       | 0.000214260 | 0.998630 | 0.00116456  | 0.992551 |
| PhCCCH3+H   | 0.000213580 | 0.998844 | 0.00116087  | 0.993712 |
| rad71       | 0.000187844 | 0.999031 | 0.00102098  | 0.994733 |
| rad19syn    | 0.000163941 | 0.999195 | 0.000891067 | 0.995624 |
| PAH10+CH3   | 0.000121536 | 0.999317 | 0.000660582 | 0.996284 |
| rad60syn    | 0.000108396 | 0.999425 | 0.000589161 | 0.996873 |
| rad60anti   | 8.05427e-05 | 0.999506 | 0.000437772 | 0.997311 |
| rad52       | 7.82960e-05 | 0.999584 | 0.000425560 | 0.997737 |
| rad58       | 7.77572e-05 | 0.999662 | 0.000422632 | 0.998159 |
| PAH1+H      | 7.70001e-05 | 0.999739 | 0.000418517 | 0.998578 |

|               |             |          |             |          |
|---------------|-------------|----------|-------------|----------|
| rad73         | 7.03552e-05 | 0.999809 | 0.000382400 | 0.998960 |
| PhcycC3H3_A+H | 3.98813e-05 | 0.999849 | 0.000216766 | 0.999177 |
| rad70         | 3.09908e-05 | 0.999880 | 0.000168444 | 0.999346 |
| PAH8+H        | 2.94355e-05 | 0.999910 | 0.000159990 | 0.999506 |
| rad72         | 2.58284e-05 | 0.999935 | 0.000140384 | 0.999646 |
| rad37         | 1.30848e-05 | 0.999948 | 7.11194e-05 | 0.999717 |
| rad34         | 1.30497e-05 | 0.999961 | 7.09289e-05 | 0.999788 |
| rad54         | 1.00584e-05 | 0.999972 | 5.46703e-05 | 0.999843 |
| rad65         | 9.63686e-06 | 0.999981 | 5.23790e-05 | 0.999895 |
| rad68syn      | 3.67778e-06 | 0.999985 | 1.99898e-05 | 0.999915 |
| rad68anti     | 2.34154e-06 | 0.999987 | 1.27269e-05 | 0.999928 |
| rad40syn      | 2.31359e-06 | 0.999990 | 1.25750e-05 | 0.999940 |
| rad64         | 2.19077e-06 | 0.999992 | 1.19074e-05 | 0.999952 |
| rad56         | 1.94741e-06 | 0.999994 | 1.05847e-05 | 0.999963 |
| rad40anti     | 1.74691e-06 | 0.999995 | 9.49492e-06 | 0.999972 |
| rad53         | 1.18744e-06 | 0.999997 | 6.45406e-06 | 0.999979 |
| rad55         | 1.16170e-06 | 0.999998 | 6.31418e-06 | 0.999985 |
| rad62         | 1.07271e-06 | 0.999999 | 5.83046e-06 | 0.999991 |
| rad61         | 9.59661e-07 | 1.000000 | 5.21602e-06 | 0.999996 |
| rad43         | 4.20278e-07 | 1.000000 | 2.28433e-06 | 0.999998 |
| rad42         | 2.24298e-07 | 1.000000 | 1.21912e-06 | 1.000000 |
| rad41         | 9.47630e-08 | 1.000000 | 5.15063e-07 | 1.000000 |
| rad20         | 1.54922e-20 | 1.000000 | 8.42046e-20 | 1.000000 |
| rad23         | 1.18657e-20 | 1.000000 | 6.44931e-20 | 1.000000 |
| rad9          | 8.14066e-21 | 1.000000 | 4.42467e-20 | 1.000000 |
| rad45         | 6.90049e-21 | 1.000000 | 3.75061e-20 | 1.000000 |
| rad21         | 5.97853e-21 | 1.000000 | 3.24950e-20 | 1.000000 |
| rad6          | 5.00342e-21 | 1.000000 | 2.71950e-20 | 1.000000 |
| rad11         | 3.59957e-21 | 1.000000 | 1.95647e-20 | 1.000000 |
| rad22         | 2.59193e-21 | 1.000000 | 1.40878e-20 | 1.000000 |
| rad8          | 1.76788e-21 | 1.000000 | 9.60889e-21 | 1.000000 |
| rad36         | 1.37405e-21 | 1.000000 | 7.46835e-21 | 1.000000 |
| rad18         | 1.20669e-21 | 1.000000 | 6.55872e-21 | 1.000000 |
| rad15         | 8.31113e-22 | 1.000000 | 4.51733e-21 | 1.000000 |
| rad47         | 7.97227e-22 | 1.000000 | 4.33315e-21 | 1.000000 |
| rad12         | 4.90407e-22 | 1.000000 | 2.66550e-21 | 1.000000 |
| rad24         | 4.12849e-22 | 1.000000 | 2.24395e-21 | 1.000000 |
| rad28         | 2.83269e-22 | 1.000000 | 1.53965e-21 | 1.000000 |
| rad7          | 2.66533e-22 | 1.000000 | 1.44868e-21 | 1.000000 |
| rad26         | 9.26845e-23 | 1.000000 | 5.03766e-22 | 1.000000 |
| rad13         | 4.73266e-23 | 1.000000 | 2.57233e-22 | 1.000000 |
| rad10         | 4.23601e-23 | 1.000000 | 2.30239e-22 | 1.000000 |
| rad25         | 3.78502e-23 | 1.000000 | 2.05726e-22 | 1.000000 |
| rad5          | 1.76140e-23 | 1.000000 | 9.57369e-23 | 1.000000 |
| rad33         | 5.47163e-24 | 1.000000 | 2.97398e-23 | 1.000000 |
| rad2          | 3.12685e-24 | 1.000000 | 1.69953e-23 | 1.000000 |
| rad1          | 1.99797e-24 | 1.000000 | 1.08595e-23 | 1.000000 |
| rad14         | 8.43867e-25 | 1.000000 | 4.58665e-24 | 1.000000 |
| rad27         | 3.99728e-25 | 1.000000 | 2.17263e-24 | 1.000000 |
| rad3          | 1.25759e-25 | 1.000000 | 6.83532e-25 | 1.000000 |
| rad4          | 7.02476e-26 | 1.000000 | 3.81815e-25 | 1.000000 |

## Tabulated effective product yields for the major products

- The re-dissociation fractions listed below are the yields prior to factoring out re-dissociation.
- N/A denotes calculations using a mechanism that did not include the product/intermediate. This is mainly in low-temperature reaction conditions where the energy ceiling used was below the ground state energy of some of the energetically higher-lying isomers and transition states. In the high-temperature regime, it is usually an indication that thermal isomerisation is sufficiently fast to compete on the timescales we are interested in, and are hence included in the kinetic analysis.

| Indene+H    |             |             |             |             |             |  |
|-------------|-------------|-------------|-------------|-------------|-------------|--|
| =====       |             |             |             |             |             |  |
| Pa\K        | 20.0000     | 30.0000     | 40.0000     | 50.0000     | 60.0000     |  |
| 1.00000e+08 | 1.18838e-13 | 4.87498e-13 | 1.09769e-12 | 1.96413e-12 | 3.11510e-12 |  |
| 1.00000e+07 | 1.18835e-11 | 4.87480e-11 | 1.09762e-10 | 1.96398e-10 | 3.11480e-10 |  |
| 1.00000e+06 | 1.18813e-09 | 4.87292e-09 | 1.09699e-08 | 1.96246e-08 | 3.11174e-08 |  |
| 100000.     | 1.18588e-07 | 4.85428e-07 | 1.09070e-06 | 1.94743e-06 | 3.08174e-06 |  |
| 10000.0     | 1.16413e-05 | 4.68001e-05 | 0.000103377 | 0.000181548 | 0.000282627 |  |
| 1000.00     | 0.00100011  | 0.00360551  | 0.00731423  | 0.0119359   | 0.0173740   |  |
| 100.000     | 0.0481014   | 0.117076    | 0.175024    | 0.221281    | 0.258315    |  |
| 10.0000     | 0.358661    | 0.447670    | 0.502662    | 0.547212    | 0.585581    |  |
| 1.00000     | 0.709562    | 0.820191    | 0.861452    | 0.881179    | 0.892571    |  |
| 0.100000    | 0.918715    | 0.944366    | 0.960012    | 0.970521    | 0.977870    |  |
| 0.0100000   | 0.993232    | 0.998689    | 0.999482    | 0.999677    | 0.999737    |  |
| 0.00100000  | 0.999814    | 0.999815    | 0.999810    | 0.999803    | 0.999794    |  |
| 0.000100000 | 0.999818    | 0.999815    | 0.999810    | 0.999803    | 0.999794    |  |
| 1.00000e-05 | 0.999819    | 0.999817    | 0.999813    | 0.999807    | 0.999800    |  |
| 1.00000e-06 | 0.999826    | 0.999832    | 0.999836    | 0.999839    | 0.999843    |  |
| 1.00000e-07 | 0.999879    | 0.999913    | 0.999934    | 0.999949    | 0.999960    |  |
| 1.00000e-08 | 0.999981    | 0.999993    | 0.999996    | 0.999998    | 0.999999    |  |
| 1.00000e-09 | 0.999999    | 1.000000    | 1.000000    | 1.000000    | 1.000000    |  |
| Pa\K        | 70.0000     | 80.0000     | 90.0000     | 100.000     | 110.000     |  |
| 1.00000e+08 | 4.59247e-12 | 6.45503e-12 | 8.78315e-12 | 1.16851e-11 | 1.53062e-11 |  |
| 1.00000e+07 | 4.59192e-10 | 6.45411e-10 | 8.78168e-10 | 1.16829e-09 | 1.53027e-09 |  |
| 1.00000e+06 | 4.58642e-08 | 6.44490e-08 | 8.76694e-08 | 1.16600e-07 | 1.52680e-07 |  |
| 100000.     | 4.53268e-06 | 6.35517e-06 | 8.62405e-06 | 1.14397e-05 | 1.49356e-05 |  |
| 10000.0     | 0.000408911 | 0.000563799 | 0.000751964 | 0.000979602 | 0.00125475  |  |
| 1000.00     | 0.0235783   | 0.0305288   | 0.0382254   | 0.0466803   | 0.0559114   |  |
| 100.000     | 0.288477    | 0.313596    | 0.335038    | 0.353814    | 0.370687    |  |
| 10.0000     | 0.619357    | 0.649422    | 0.676366    | 0.700615    | 0.722491    |  |
| 1.00000     | 0.900252    | 0.906115    | 0.911029    | 0.915428    | 0.919544    |  |
| 0.100000    | 0.983151    | 0.987024    | 0.989911    | 0.992089    | 0.993749    |  |
| 0.0100000   | 0.999755    | 0.999757    | 0.999751    | 0.999740    | 0.999727    |  |
| 0.00100000  | 0.999784    | 0.999773    | 0.999760    | 0.999746    | 0.999731    |  |
| 0.000100000 | 0.999785    | 0.999774    | 0.999762    | 0.999749    | 0.999734    |  |
| 1.00000e-05 | 0.999793    | 0.999785    | 0.999776    | 0.999768    | 0.999760    |  |
| 1.00000e-06 | 0.999848    | 0.999853    | 0.999860    | 0.999867    | 0.999876    |  |
| 1.00000e-07 | 0.999969    | 0.999975    | 0.999980    | 0.999984    | 0.999987    |  |
| 1.00000e-08 | 0.999999    | 0.999999    | 0.999999    | 1.000000    | 1.000000    |  |
| 1.00000e-09 | 1.000000    | 1.000000    | 1.000000    | 1.000000    | 1.000000    |  |
| Pa\K        | 120.000     | 130.000     | 140.000     | 150.000     | 160.000     |  |
| 1.00000e+08 | 1.98403e-11 | 2.55471e-11 | 3.27731e-11 | 4.19821e-11 | 5.37939e-11 |  |
| 1.00000e+07 | 1.98351e-09 | 2.55393e-09 | 3.27616e-09 | 4.19650e-09 | 5.37684e-09 |  |
| 1.00000e+06 | 1.97832e-07 | 2.54621e-07 | 3.26472e-07 | 4.17952e-07 | 5.35159e-07 |  |
| 100000.     | 1.92887e-05 | 2.47327e-05 | 3.15757e-05 | 4.02230e-05 | 5.12068e-05 |  |
| 10000.0     | 0.00158771  | 0.00199153  | 0.00248255  | 0.00308107  | 0.00381202  |  |
| 1000.00     | 0.0659373   | 0.0767713   | 0.0884173   | 0.100865    | 0.114089    |  |
| 100.000     | 0.386238    | 0.400920    | 0.415092    | 0.429039    | 0.442988    |  |
| 10.0000     | 0.742245    | 0.760080    | 0.776166    | 0.790652    | 0.803673    |  |
| 1.00000     | 0.923512    | 0.927407    | 0.931275    | 0.935138    | 0.939005    |  |
| 0.100000    | 0.995023    | 0.996006    | 0.996765    | 0.997352    | 0.997805    |  |
| 0.0100000   | 0.999710    | 0.999691    | 0.999669    | 0.999644    | 0.999616    |  |
| 0.00100000  | 0.999713    | 0.999693    | 0.999671    | 0.999647    | 0.999619    |  |
| 0.000100000 | 0.999718    | 0.999700    | 0.999681    | 0.999660    | 0.999638    |  |
| 1.00000e-05 | 0.999753    | 0.999746    | 0.999741    | 0.999738    | 0.999737    |  |
| 1.00000e-06 | 0.999885    | 0.999894    | 0.999904    | 0.999914    | 0.999923    |  |
| 1.00000e-07 | 0.999990    | 0.999992    | 0.999993    | 0.999995    | 0.999996    |  |
| 1.00000e-08 | 1.000000    | 1.000000    | 1.000000    | 1.000000    | 1.000000    |  |

| 1.00000e-09 | 1.00000     | 1.00000     | 1.00000     | 1.00000     | 1.00000     |
|-------------|-------------|-------------|-------------|-------------|-------------|
| Pa\K        | 170.000     | 180.000     | 190.000     | 200.000     | 210.000     |
| 1.00000e+08 | 6.90387e-11 | 8.88277e-11 | 1.14650e-10 | 1.48502e-10 | 1.93057e-10 |
| 1.00000e+07 | 6.90005e-09 | 8.87703e-09 | 1.14563e-08 | 1.48369e-08 | 1.92854e-08 |
| 1.00000e+06 | 6.86231e-07 | 8.82031e-07 | 1.13706e-06 | 1.47066e-06 | 1.90861e-06 |
| 100000.     | 6.52240e-05 | 8.31851e-05 | 0.000106276 | 0.000136036 | 0.000174456 |
| 10000.0     | 0.00470559  | 0.00579792  | 0.00713160  | 0.00875592  | 0.0107269   |
| 1000.00     | 0.128044    | 0.142670    | 0.157888    | 0.173610    | 0.189740    |
| 100.000     | 0.457119    | 0.471568    | 0.486432    | 0.501771    | 0.517605    |
| 10.0000     | 0.815358    | 0.825830    | 0.835212    | 0.843627    | 0.851196    |
| 1.00000     | 0.942872    | 0.946726    | 0.950549    | 0.954318    | 0.958006    |
| 0.100000    | 0.998153    | 0.998416    | 0.998613    | 0.998756    | 0.998854    |
| 0.0100000   | 0.999585    | 0.999550    | 0.999510    | 0.999466    | 0.999418    |
| 0.00100000  | 0.999589    | 0.999555    | 0.999518    | 0.999478    | 0.999436    |
| 0.000100000 | 0.999616    | 0.999593    | 0.999572    | 0.999551    | 0.999533    |
| 1.00000e-05 | 0.999739    | 0.999743    | 0.999750    | 0.999759    | 0.999769    |
| 1.00000e-06 | 0.999932    | 0.999940    | 0.999948    | 0.999955    | 0.999961    |
| 1.00000e-07 | 0.999997    | 0.999997    | 0.999998    | 0.999998    | 0.999999    |
| 1.00000e-08 | 1.00000     | 1.00000     | 1.00000     | 1.00000     | 1.00000     |
| 1.00000e-09 | 1.00000     | 1.00000     | 1.00000     | 1.00000     | 1.00000     |

| Pa\K        | 220.000     | 230.000     | 240.000     | 250.000     | 260.000     |
|-------------|-------------|-------------|-------------|-------------|-------------|
| 1.00000e+08 | 2.51899e-10 | 3.29824e-10 | 4.33247e-10 | 5.70738e-10 | 7.53726e-10 |
| 1.00000e+07 | 2.51585e-08 | 3.29336e-08 | 4.32489e-08 | 5.69555e-08 | 7.51877e-08 |
| 1.00000e+06 | 2.48526e-06 | 3.24621e-06 | 4.25200e-06 | 5.58266e-06 | 7.34379e-06 |
| 100000.     | 0.000224094 | 0.000288229 | 0.000371030 | 0.000477765 | 0.000615045 |
| 10000.0     | 0.0131067   | 0.0159628   | 0.0193665   | 0.0233905   | 0.0281068   |
| 1000.00     | 0.206181    | 0.222839    | 0.239630    | 0.256481    | 0.273339    |
| 100.000     | 0.533925    | 0.550685    | 0.567815    | 0.585218    | 0.602779    |
| 10.0000     | 0.858037    | 0.864265    | 0.869992    | 0.875320    | 0.880344    |
| 1.00000     | 0.961585    | 0.965030    | 0.968315    | 0.971419    | 0.974324    |
| 0.100000    | 0.998916    | 0.998948    | 0.998954    | 0.998939    | 0.998903    |
| 0.0100000   | 0.999364    | 0.999305    | 0.999241    | 0.999171    | 0.999096    |
| 0.00100000  | 0.999390    | 0.999343    | 0.999295    | 0.999246    | 0.999199    |
| 0.000100000 | 0.999517    | 0.999505    | 0.999497    | 0.999494    | 0.999496    |
| 1.00000e-05 | 0.999782    | 0.999796    | 0.999811    | 0.999827    | 0.999842    |
| 1.00000e-06 | 0.999967    | 0.999972    | 0.999976    | 0.999980    | 0.999983    |
| 1.00000e-07 | 0.999999    | 0.999999    | 0.999999    | 0.999999    | 0.999999    |
| 1.00000e-08 | 1.00000     | 1.00000     | 1.00000     | 1.00000     | 1.00000     |
| 1.00000e-09 | 1.00000     | 1.00000     | 1.00000     | 1.00000     | 1.00000     |

| Pa\K        | 270.000     | 280.000     | 290.000     | 300.000     | 310.000     |
|-------------|-------------|-------------|-------------|-------------|-------------|
| 1.00000e+08 | 9.97425e-10 | 1.32205e-09 | 1.75440e-09 | 9.39515e-09 | 3.09529e-09 |
| 1.00000e+07 | 9.94532e-08 | 1.31752e-07 | 1.74731e-07 | 9.24340e-07 | 3.07800e-07 |
| 1.00000e+06 | 9.67416e-06 | 1.27554e-05 | 1.68245e-05 | 8.15187e-05 | 2.92454e-05 |
| 100000.     | 0.000791091 | 0.00101604  | 0.00130227  | 0.00458193  | 0.00212124  |
| 10000.0     | 0.0335833   | 0.0398808   | 0.0470499   | 0.0878929   | 0.0641379   |
| 1000.00     | 0.290165    | 0.306940    | 0.323661    | 0.373205    | 0.356995    |
| 100.000     | 0.620370    | 0.637860    | 0.655115    | 0.699050    | 0.688435    |
| 10.0000     | 0.885147    | 0.889801    | 0.894365    | 0.909477    | 0.903394    |
| 1.00000     | 0.977016    | 0.979489    | 0.981737    | 0.986104    | 0.985565    |
| 0.100000    | 0.998851    | 0.998783    | 0.998702    | 0.998644    | 0.998500    |
| 0.0100000   | 0.999016    | 0.998931    | 0.998843    | 0.998886    | 0.998660    |
| 0.00100000  | 0.999154    | 0.999112    | 0.999075    | 0.999194    | 0.999020    |
| 0.000100000 | 0.999502    | 0.999513    | 0.999528    | 0.999634    | 0.999569    |
| 1.00000e-05 | 0.999857    | 0.999872    | 0.999886    | 0.999915    | 0.999911    |
| 1.00000e-06 | 0.999986    | 0.999988    | 0.999990    | 0.999991    | 0.999992    |
| 1.00000e-07 | 0.999999    | 0.999999    | 0.999999    | 0.999999    | 0.999998    |
| 1.00000e-08 | 1.00000     | 1.00000     | 0.999999    | 0.999999    | 0.999998    |
| 1.00000e-09 | 1.00000     | 1.00000     | 0.999999    | 0.999999    | 0.999998    |

| Pa\K        | 400.000     | 500.000     | 600.000     | 700.000    | 800.000   |
|-------------|-------------|-------------|-------------|------------|-----------|
| 1.00000e+08 | 1.66297e-07 | 3.13601e-06 | 7.68547e-05 | 0.00168333 | 0.0122067 |
| 1.00000e+07 | 1.55120e-05 | 0.000255320 | 0.00374370  | 0.0258722  | 0.0772151 |
| 1.00000e+06 | 0.00105785  | 0.0103490   | 0.0609019   | 0.172033   | 0.294629  |
| 100000.     | 0.0308663   | 0.120742    | 0.287942    | 0.464352   | 0.599685  |
| 10000.0     | 0.227430    | 0.410124    | 0.607113    | 0.761421   | 0.846819  |
| 1000.00     | 0.544247    | 0.717636    | 0.851940    | 0.923562   | 0.947010  |
| 100.000     | 0.825218    | 0.905405    | 0.951949    | 0.971192   | 0.975320  |
| 10.0000     | 0.952693    | 0.977059    | 0.984938    | 0.987010   | 0.987663  |
| 1.00000     | 0.993953    | 0.994021    | 0.993364    | 0.993763   | 0.993632  |
| 0.100000    | 0.997444    | 0.996648    | 0.996934    | 0.997015   | 0.995743  |
| 0.0100000   | 0.998316    | 0.998535    | 0.998723    | 0.998036   | 0.996190  |
| 0.00100000  | 0.999285    | 0.999515    | 0.999234    | 0.998221   | 0.996247  |
| 0.000100000 | 0.999815    | 0.999780    | 0.999317    | 0.998241   | 0.996252  |

|             |          |          |          |          |          |
|-------------|----------|----------|----------|----------|----------|
| 1.00000e-05 | 0.999957 | 0.999819 | 0.999325 | 0.998243 | 0.996252 |
| 1.00000e-06 | 0.999975 | 0.999822 | 0.999325 | 0.998243 | 0.996252 |
| 1.00000e-07 | 0.999976 | 0.999822 | 0.999326 | 0.998243 | 0.996252 |
| 1.00000e-08 | 0.999976 | 0.999822 | 0.999326 | 0.998243 | 0.996252 |
| 1.00000e-09 | 0.999976 | 0.999822 | 0.999326 | 0.998243 | 0.996252 |

Pa\K | 900.000 | 1000.00 | 1100.00 | 1200.00 | 1300.00

|             |           |           |           |           |           |
|-------------|-----------|-----------|-----------|-----------|-----------|
| 1.00000e+08 | 0.0321108 | 0.0506179 | 0.0666869 | 0.0741470 | 0.0731887 |
| 1.00000e+07 | 0.135252  | 0.183520  | 0.232697  | 0.272099  | 0.296104  |
| 1.00000e+06 | 0.397297  | 0.477944  | 0.550614  | 0.604255  | 0.636897  |
| 100000.     | 0.698239  | 0.764108  | 0.807820  | 0.830786  | 0.837580  |
| 10000.0     | 0.889386  | 0.907621  | 0.914672  | 0.914719  | 0.908119  |
| 1000.00     | 0.952974  | 0.954432  | 0.953711  | 0.948841  | 0.938073  |
| 100.000     | 0.976163  | 0.975574  | 0.971662  | 0.962885  | 0.948879  |
| 10.0000     | 0.987336  | 0.984355  | 0.977624  | 0.966720  | 0.951483  |
| 1.00000     | 0.991617  | 0.986879  | 0.978961  | 0.967442  | 0.951927  |
| 0.100000    | 0.992679  | 0.987345  | 0.979160  | 0.967535  | 0.951980  |
| 0.0100000   | 0.992842  | 0.987401  | 0.979180  | 0.967544  | 0.951985  |
| 0.00100000  | 0.992858  | 0.987405  | 0.979181  | 0.967544  | 0.951986  |
| 0.000100000 | 0.992859  | 0.987405  | 0.979181  | 0.967544  | 0.951986  |
| 1.00000e-05 | 0.992859  | 0.987405  | 0.979181  | 0.967544  | 0.951986  |
| 1.00000e-06 | 0.992859  | 0.987405  | 0.979181  | 0.967544  | 0.951986  |
| 1.00000e-07 | 0.992859  | 0.987405  | 0.979181  | 0.967544  | 0.951986  |
| 1.00000e-08 | 0.992859  | 0.987405  | 0.979181  | 0.967544  | 0.951986  |
| 1.00000e-09 | 0.992859  | 0.987405  | 0.979181  | 0.967544  | 0.951986  |

Pa\K | 1400.00 | 1500.00 | 1750.00 | 2000.00 | 2250.00

|             |           |           |           |           |          |
|-------------|-----------|-----------|-----------|-----------|----------|
| 1.00000e+08 | 0.0695476 | 0.0660887 | 0.0781390 | 0.0896257 | 0.100846 |
| 1.00000e+07 | 0.312943  | 0.325217  | 0.251282  | 0.277484  | 0.278999 |
| 1.00000e+06 | 0.655736  | 0.663269  | 0.511873  | 0.486221  | 0.426996 |
| 100000.     | 0.833406  | 0.820997  | 0.670428  | 0.607286  | 0.518150 |
| 10000.0     | 0.895110  | 0.876255  | 0.771537  | 0.682226  | 0.566017 |
| 1000.00     | 0.921316  | 0.899026  | 0.810835  | 0.703156  | 0.575873 |
| 100.000     | 0.929832  | 0.905862  | 0.818292  | 0.706228  | 0.577056 |
| 10.0000     | 0.931763  | 0.907368  | 0.819399  | 0.706603  | 0.577181 |
| 1.00000     | 0.932077  | 0.907606  | 0.819542  | 0.706645  | 0.577194 |
| 0.100000    | 0.932114  | 0.907633  | 0.819557  | 0.706650  | 0.577195 |
| 0.0100000   | 0.932117  | 0.907636  | 0.819559  | 0.706650  | 0.577195 |
| 0.00100000  | 0.932117  | 0.907636  | 0.819559  | 0.706650  | 0.577195 |
| 0.000100000 | 0.932117  | 0.907636  | 0.819559  | 0.706650  | 0.577195 |
| 1.00000e-05 | 0.932117  | 0.907636  | 0.819559  | 0.706650  | 0.577195 |
| 1.00000e-06 | 0.932117  | 0.907636  | 0.819559  | 0.706650  | 0.577195 |
| 1.00000e-07 | 0.932117  | 0.907636  | 0.819559  | 0.706650  | 0.577195 |
| 1.00000e-08 | 0.932117  | 0.907636  | 0.819559  | 0.706650  | 0.577195 |
| 1.00000e-09 | 0.932117  | 0.907636  | 0.819559  | 0.706650  | 0.577195 |

Pa\K | 2500.00 | 2750.00 | 3000.00 | 3250.00 | 3500.00

|             |          |          |          |           |           |
|-------------|----------|----------|----------|-----------|-----------|
| 1.00000e+08 | 0.108225 | 0.109754 | 0.105412 | 0.0968718 | 0.0863018 |
| 1.00000e+07 | 0.256488 | 0.220947 | 0.183100 | 0.148942  | 0.120429  |
| 1.00000e+06 | 0.355422 | 0.285858 | 0.225384 | 0.176120  | 0.137497  |
| 100000.     | 0.419800 | 0.327378 | 0.250062 | 0.189864  | 0.144754  |
| 10000.0     | 0.446087 | 0.340364 | 0.256065 | 0.192515  | 0.145873  |
| 1000.00     | 0.450285 | 0.342070 | 0.256741 | 0.192776  | 0.145968  |
| 100.000     | 0.450728 | 0.342236 | 0.256803 | 0.192798  | 0.145975  |
| 10.0000     | 0.450772 | 0.342252 | 0.256809 | 0.192800  | 0.145976  |
| 1.00000     | 0.450776 | 0.342254 | 0.256810 | 0.192800  | 0.145976  |
| 0.100000    | 0.450777 | 0.342254 | 0.256810 | 0.192800  | 0.145976  |
| 0.0100000   | 0.450777 | 0.342254 | 0.256810 | 0.192800  | 0.145976  |
| 0.00100000  | 0.450777 | 0.342254 | 0.256810 | 0.192800  | 0.145976  |
| 0.000100000 | 0.450777 | 0.342254 | 0.256810 | 0.192800  | 0.145976  |
| 1.00000e-05 | 0.450777 | 0.342254 | 0.256810 | 0.192800  | 0.145976  |
| 1.00000e-06 | 0.450777 | 0.342254 | 0.256810 | 0.192800  | 0.145976  |
| 1.00000e-07 | 0.450777 | 0.342254 | 0.256810 | 0.192800  | 0.145976  |
| 1.00000e-08 | 0.450777 | 0.342254 | 0.256810 | 0.192800  | 0.145976  |
| 1.00000e-09 | 0.450777 | 0.342254 | 0.256810 | 0.192800  | 0.145976  |

Pa\K | 3750.00 | 4000.00

|             |           |           |
|-------------|-----------|-----------|
| 1.00000e+08 | 0.0754305 | 0.0652782 |
| 1.00000e+07 | 0.0974780 | 0.0793006 |
| 1.00000e+06 | 0.107863  | 0.0853671 |
| 100000.     | 0.111502  | 0.0870766 |
| 10000.0     | 0.111943  | 0.0872242 |
| 1000.00     | 0.111972  | 0.0872282 |
| 100.000     | 0.111974  | 0.0872278 |
| 10.0000     | 0.111974  | 0.0872277 |
| 1.00000     | 0.111974  | 0.0872277 |

|             |          |           |
|-------------|----------|-----------|
| 0.100000    | 0.111974 | 0.0872277 |
| 0.0100000   | 0.111974 | 0.0872277 |
| 0.00100000  | 0.111974 | 0.0872277 |
| 0.000100000 | 0.111974 | 0.0872277 |
| 1.00000e-05 | 0.111974 | 0.0872277 |
| 1.00000e-06 | 0.111974 | 0.0872277 |
| 1.00000e-07 | 0.111974 | 0.0872277 |
| 1.00000e-08 | 0.111974 | 0.0872277 |
| 1.00000e-09 | 0.111974 | 0.0872277 |

rad20

=====

| Pa\K        | 20.0000     | 30.0000     | 40.0000     | 50.0000     | 60.0000     |
|-------------|-------------|-------------|-------------|-------------|-------------|
| 1.00000e+08 | 0.999996    | 0.999992    | 0.999987    | 0.999983    | 0.999979    |
| 1.00000e+07 | 0.999959    | 0.999916    | 0.999874    | 0.999832    | 0.999789    |
| 1.00000e+06 | 0.999585    | 0.999161    | 0.998744    | 0.998324    | 0.997895    |
| 100000.     | 0.995873    | 0.991690    | 0.987614    | 0.983551    | 0.979448    |
| 10000.0     | 0.960581    | 0.924121    | 0.891567    | 0.861736    | 0.833971    |
| 1000.00     | 0.729617    | 0.596076    | 0.514849    | 0.455715    | 0.408146    |
| 100.000     | 0.262593    | 0.123854    | 0.0669264   | 0.0393506   | 0.0245605   |
| 10.0000     | 0.00446395  | 0.000553051 | 0.000154424 | 6.16189e-05 | 3.00512e-05 |
| 1.00000     | 3.57626e-06 | 4.76274e-07 | 1.63001e-07 | 7.82091e-08 | 4.46330e-08 |
| 0.100000    | 9.42460e-09 | 2.26081e-09 | 1.08569e-09 | 6.62621e-10 | 4.55946e-10 |
| 0.0100000   | 1.80056e-10 | 7.21685e-11 | 4.38915e-11 | 3.08986e-11 | 2.34547e-11 |
| 0.00100000  | 1.22196e-11 | 5.81550e-12 | 3.77036e-12 | 2.74500e-12 | 2.12761e-12 |
| 0.000100000 | 1.16456e-12 | 5.67584e-13 | 3.70853e-13 | 2.71050e-13 | 2.10580e-13 |
| 1.00000e-05 | 1.15882e-13 | 5.66189e-14 | 3.70237e-14 | 2.70708e-14 | 2.10365e-14 |
| 1.00000e-06 | 1.15827e-14 | 5.66074e-15 | 3.70200e-15 | 2.70698e-15 | 2.10368e-15 |
| 1.00000e-07 | 1.15838e-15 | 5.66180e-16 | 3.70283e-16 | 2.70762e-16 | 2.10417e-16 |
| 1.00000e-08 | 1.15855e-16 | 5.66192e-17 | 3.70262e-17 | 2.70732e-17 | 2.10387e-17 |
| 1.00000e-09 | 1.15840e-17 | 5.66128e-18 | 3.70228e-18 | 2.70712e-18 | 2.10373e-18 |

| Pa\K        | 70.0000     | 80.0000     | 90.0000     | 100.000     | 110.000     |
|-------------|-------------|-------------|-------------|-------------|-------------|
| 1.00000e+08 | 0.999974    | 0.999970    | 0.999965    | 0.999960    | 0.999954    |
| 1.00000e+07 | 0.999745    | 0.999698    | 0.999650    | 0.999598    | 0.999543    |
| 1.00000e+06 | 0.997454    | 0.996995    | 0.996512    | 0.996001    | 0.995456    |
| 100000.     | 0.975261    | 0.970951    | 0.966474    | 0.961789    | 0.956851    |
| 10000.0     | 0.807831    | 0.782983    | 0.759165    | 0.736165    | 0.713807    |
| 1000.00     | 0.367638    | 0.331953    | 0.299863    | 0.270636    | 0.243813    |
| 100.000     | 0.0160326   | 0.0108368   | 0.00753061  | 0.00535160  | 0.00387356  |
| 10.0000     | 1.66627e-05 | 1.00954e-05 | 6.52377e-06 | 4.42577e-06 | 3.11782e-06 |
| 1.00000     | 2.83221e-08 | 1.93047e-08 | 1.38507e-08 | 1.03258e-08 | 7.92886e-09 |
| 0.100000    | 3.37015e-10 | 2.61127e-10 | 2.09119e-10 | 1.71564e-10 | 1.43347e-10 |
| 0.0100000   | 1.86468e-11 | 1.52927e-11 | 1.28222e-11 | 1.09278e-11 | 9.42972e-12 |
| 0.00100000  | 1.71581e-12 | 1.42192e-12 | 1.20177e-12 | 1.03071e-12 | 8.94000e-13 |
| 0.000100000 | 1.70089e-13 | 1.41117e-13 | 1.19370e-13 | 1.02449e-13 | 8.89094e-14 |
| 1.00000e-05 | 1.69944e-14 | 1.41013e-14 | 1.19294e-14 | 1.02392e-14 | 8.88654e-15 |
| 1.00000e-06 | 1.69954e-15 | 1.41028e-15 | 1.19311e-15 | 1.02410e-15 | 8.88848e-16 |
| 1.00000e-07 | 1.69990e-16 | 1.41054e-16 | 1.19329e-16 | 1.02422e-16 | 8.88914e-17 |
| 1.00000e-08 | 1.69963e-17 | 1.41029e-17 | 1.19308e-17 | 1.02403e-17 | 8.88746e-18 |
| 1.00000e-09 | 1.69953e-18 | 1.41022e-18 | 1.19302e-18 | 1.02398e-18 | 8.88710e-19 |

| Pa\K        | 120.000     | 130.000     | 140.000     | 150.000     | 160.000     |
|-------------|-------------|-------------|-------------|-------------|-------------|
| 1.00000e+08 | 0.999948    | 0.999942    | 0.999935    | 0.999927    | 0.999918    |
| 1.00000e+07 | 0.999484    | 0.999419    | 0.999349    | 0.999271    | 0.999185    |
| 1.00000e+06 | 0.994868    | 0.994232    | 0.993537    | 0.992774    | 0.991932    |
| 100000.     | 0.951612    | 0.946020    | 0.940023    | 0.933566    | 0.926591    |
| 10000.0     | 0.691945    | 0.670453    | 0.649219    | 0.628147    | 0.607149    |
| 1000.00     | 0.219095    | 0.196280    | 0.175227    | 0.155837    | 0.138030    |
| 100.000     | 0.00284674  | 0.00211892  | 0.00159422  | 0.00121045  | 0.000926285 |
| 10.0000     | 2.26296e-06 | 1.68245e-06 | 1.27562e-06 | 9.82945e-07 | 7.67699e-07 |
| 1.00000     | 6.23191e-09 | 4.99081e-09 | 4.05851e-09 | 3.34244e-09 | 2.78209e-09 |
| 0.100000    | 1.21479e-10 | 1.04105e-10 | 9.00224e-11 | 7.84197e-11 | 6.87302e-11 |
| 0.0100000   | 8.21596e-12 | 7.21336e-12 | 6.37215e-12 | 5.65732e-12 | 5.04358e-12 |
| 0.00100000  | 7.82269e-13 | 6.89302e-13 | 6.10815e-13 | 5.43766e-13 | 4.85931e-13 |
| 0.000100000 | 7.78331e-14 | 6.86096e-14 | 6.08175e-14 | 5.41572e-14 | 4.84094e-14 |
| 1.00000e-05 | 7.77992e-15 | 6.85835e-15 | 6.07976e-15 | 5.41421e-15 | 4.83984e-15 |
| 1.00000e-06 | 7.78187e-16 | 6.86026e-16 | 6.08159e-16 | 5.41593e-16 | 4.84142e-16 |
| 1.00000e-07 | 7.78212e-17 | 6.86018e-17 | 6.08126e-17 | 5.41542e-17 | 4.84077e-17 |
| 1.00000e-08 | 7.78065e-18 | 6.85890e-18 | 6.08015e-18 | 5.41445e-18 | 4.83993e-18 |
| 1.00000e-09 | 7.78036e-19 | 6.85866e-19 | 6.07995e-19 | 5.41429e-19 | 4.83979e-19 |

| Pa\K        | 170.000  | 180.000  | 190.000  | 200.000  | 210.000  |
|-------------|----------|----------|----------|----------|----------|
| 1.00000e+08 | 0.999909 | 0.999898 | 0.999886 | 0.999873 | 0.999858 |
| 1.00000e+07 | 0.999090 | 0.998983 | 0.998863 | 0.998729 | 0.998578 |
| 1.00000e+06 | 0.990998 | 0.989959 | 0.988799 | 0.987501 | 0.986046 |

|             |             |             |             |             |             |
|-------------|-------------|-------------|-------------|-------------|-------------|
| 100000.     | 0.919043    | 0.910864    | 0.902001    | 0.892404    | 0.882029    |
| 10000.0     | 0.586149    | 0.565077    | 0.543874    | 0.522495    | 0.500905    |
| 1000.00     | 0.121742    | 0.106910    | 0.0934749   | 0.0813703   | 0.0705269   |
| 100.000     | 0.000713629 | 0.000553034 | 0.000430799 | 0.000337124 | 0.000264909 |
| 10.0000     | 6.06425e-07 | 4.83666e-07 | 3.88957e-07 | 3.15044e-07 | 2.56789e-07 |
| 1.00000     | 2.33663e-09 | 1.97773e-09 | 1.68525e-09 | 1.44457e-09 | 1.24485e-09 |
| 0.100000    | 6.05479e-11 | 5.35746e-11 | 4.75863e-11 | 4.24116e-11 | 3.79168e-11 |
| 0.0100000   | 4.51216e-12 | 4.04887e-12 | 3.64274e-12 | 3.28512e-12 | 2.96913e-12 |
| 0.00100000  | 4.35653e-13 | 3.91663e-13 | 3.52979e-13 | 3.18821e-13 | 2.88562e-13 |
| 0.000100000 | 4.34103e-14 | 3.90350e-14 | 3.51861e-14 | 3.17866e-14 | 2.87744e-14 |
| 1.00000e-05 | 4.34026e-15 | 3.90300e-15 | 3.51833e-15 | 3.17856e-15 | 2.87750e-15 |
| 1.00000e-06 | 4.34170e-16 | 3.90428e-16 | 3.51945e-16 | 3.17951e-16 | 2.87829e-16 |
| 1.00000e-07 | 4.34096e-17 | 3.90348e-17 | 3.51862e-17 | 3.17868e-17 | 2.87746e-17 |
| 1.00000e-08 | 4.34022e-18 | 3.90284e-18 | 3.51806e-18 | 3.17819e-18 | 2.87704e-18 |
| 1.00000e-09 | 4.34011e-19 | 3.90274e-19 | 3.51798e-19 | 3.17812e-19 | 2.87697e-19 |

| Pa\K        | 220.000     | 230.000     | 240.000     | 250.000     | 260.000     |
|-------------|-------------|-------------|-------------|-------------|-------------|
| 1.00000e+08 | 0.999840    | 0.999821    | 0.999799    | 0.999774    | 0.999746    |
| 1.00000e+07 | 0.998407    | 0.998214    | 0.997996    | 0.997750    | 0.997471    |
| 1.00000e+06 | 0.984413    | 0.982580    | 0.980522    | 0.978212    | 0.975621    |
| 100000.     | 0.870839    | 0.858803    | 0.845902    | 0.832128    | 0.817480    |
| 10000.0     | 0.479086    | 0.457038    | 0.434780    | 0.412353    | 0.389816    |
| 1000.00     | 0.0608696   | 0.0523186   | 0.0447908   | 0.0382010   | 0.0324639   |
| 100.000     | 0.000208947 | 0.000165380 | 0.000131324 | 0.000104605 | 8.35713e-05 |
| 10.0000     | 2.10484e-07 | 1.73409e-07 | 1.43535e-07 | 1.19331e-07 | 9.96253e-08 |
| 1.00000     | 1.07792e-09 | 9.37535e-10 | 8.18847e-10 | 7.18039e-10 | 6.32075e-10 |
| 0.100000    | 3.39961e-11 | 3.05645e-11 | 2.75526e-11 | 2.49032e-11 | 2.25687e-11 |
| 0.0100000   | 2.68915e-12 | 2.44056e-12 | 2.21948e-12 | 2.02267e-12 | 1.84732e-12 |
| 0.00100000  | 2.61692e-13 | 2.37786e-13 | 2.16488e-13 | 1.97495e-13 | 1.80549e-13 |
| 0.000100000 | 2.60989e-14 | 2.37181e-14 | 2.15966e-14 | 1.97045e-14 | 1.80161e-14 |
| 1.00000e-05 | 2.61006e-15 | 2.37207e-15 | 2.15998e-15 | 1.97082e-15 | 1.80200e-15 |
| 1.00000e-06 | 2.61070e-16 | 2.37257e-16 | 2.16036e-16 | 1.97107e-16 | 1.80215e-16 |
| 1.00000e-07 | 2.60990e-17 | 2.37179e-17 | 2.15961e-17 | 1.97037e-17 | 1.80149e-17 |
| 1.00000e-08 | 2.60953e-18 | 2.37147e-18 | 2.15933e-18 | 1.97013e-18 | 1.80128e-18 |
| 1.00000e-09 | 2.60947e-19 | 2.37142e-19 | 2.15929e-19 | 1.97009e-19 | 1.80125e-19 |

| Pa\K        | 270.000     | 280.000     | 290.000     | 300.000     | 310.000     |
|-------------|-------------|-------------|-------------|-------------|-------------|
| 1.00000e+08 | 0.999714    | 0.999678    | 0.999637    | 0.999344    | 0.999539    |
| 1.00000e+07 | 0.997155    | 0.996797    | 0.996393    | 0.993536    | 0.995421    |
| 1.00000e+06 | 0.972720    | 0.969476    | 0.965855    | 0.942669    | 0.957343    |
| 100000.     | 0.801972    | 0.785625    | 0.768471    | 0.687743    | 0.731907    |
| 10000.0     | 0.367247    | 0.344741    | 0.322407    | 0.242872    | 0.278725    |
| 1000.00     | 0.0274954   | 0.0232141   | 0.0195424   | 0.0150564   | 0.0137428   |
| 100.000     | 6.69633e-05 | 5.38119e-05 | 4.33696e-05 | 0.000107072 | 2.84227e-05 |
| 10.0000     | 8.35127e-08 | 7.02875e-08 | 5.93943e-08 | 7.49837e-07 | 4.29334e-08 |
| 1.00000     | 5.58518e-10 | 4.95389e-10 | 4.41071e-10 | 1.70249e-08 | 3.53767e-10 |
| 0.100000    | 2.05089e-11 | 1.86897e-11 | 1.70822e-11 | 9.11360e-10 | 1.44056e-11 |
| 0.0100000   | 1.69104e-12 | 1.55175e-12 | 1.42762e-12 | 7.96230e-11 | 1.21868e-12 |
| 0.00100000  | 1.65426e-13 | 1.51930e-13 | 1.39890e-13 | 7.83866e-12 | 1.19596e-13 |
| 0.000100000 | 1.65090e-14 | 1.51640e-14 | 1.39639e-14 | 7.82709e-13 | 1.19409e-14 |
| 1.00000e-05 | 1.65130e-15 | 1.51680e-15 | 1.39678e-15 | 7.82735e-14 | 1.19443e-15 |
| 1.00000e-06 | 1.65136e-16 | 1.51678e-16 | 1.39669e-16 | 7.82757e-15 | 1.19424e-16 |
| 1.00000e-07 | 1.65075e-17 | 1.51621e-17 | 1.39617e-17 | 7.82693e-16 | 1.19379e-17 |
| 1.00000e-08 | 1.65056e-18 | 1.51604e-18 | 1.39602e-18 | 7.82666e-17 | 1.19368e-18 |
| 1.00000e-09 | 1.65054e-19 | 1.51602e-19 | 1.39600e-19 | 7.82661e-18 | 1.19366e-19 |

| Pa\K        | 400.000     | 500.000     | 600.000     | 700.000     | 800.000     |
|-------------|-------------|-------------|-------------|-------------|-------------|
| 1.00000e+08 | 0.997763    | 0.992365    | 0.973741    | 0.920285    | 0.851728    |
| 1.00000e+07 | 0.978773    | 0.936009    | 0.839564    | 0.697517    | 0.594088    |
| 1.00000e+06 | 0.848328    | 0.683738    | 0.484436    | 0.321200    | 0.246091    |
| 100000.     | 0.468310    | 0.260056    | 0.125061    | 0.0650235   | 0.0473231   |
| 10000.0     | 0.0935713   | 0.0293102   | 0.00973552  | 0.00462942  | 0.00371829  |
| 1000.00     | 0.00300743  | 0.000678684 | 0.000228775 | 0.000141371 | 0.000161748 |
| 100.000     | 2.17158e-05 | 6.76529e-06 | 3.82021e-06 | 4.14571e-06 | 7.58260e-06 |
| 10.0000     | 2.37676e-07 | 1.22836e-07 | 1.15401e-07 | 1.94347e-07 | 4.87020e-07 |
| 1.00000     | 7.40796e-09 | 5.15387e-09 | 6.33789e-09 | 1.33352e-08 | 3.91072e-08 |
| 0.100000    | 4.60488e-10 | 3.64152e-10 | 5.00180e-10 | 1.15139e-09 | 3.59247e-09 |
| 0.0100000   | 4.18823e-11 | 3.41091e-11 | 4.79365e-11 | 1.12275e-10 | 3.54138e-10 |
| 0.00100000  | 4.14421e-12 | 3.38735e-12 | 4.77310e-12 | 1.11984e-11 | 3.53563e-11 |
| 0.000100000 | 4.14079e-13 | 3.38569e-13 | 4.77100e-13 | 1.11938e-12 | 3.53464e-12 |
| 1.00000e-05 | 4.14088e-14 | 3.38526e-14 | 4.77003e-14 | 1.11921e-13 | 3.53440e-13 |
| 1.00000e-06 | 4.14047e-15 | 3.38477e-15 | 4.76952e-15 | 1.11915e-14 | 3.53435e-14 |
| 1.00000e-07 | 4.14011e-16 | 3.38457e-16 | 4.76939e-16 | 1.11914e-15 | 3.53434e-15 |
| 1.00000e-08 | 4.14001e-17 | 3.38453e-17 | 4.76937e-17 | 1.11914e-16 | 3.53434e-16 |
| 1.00000e-09 | 4.14000e-18 | 3.38453e-18 | 4.76936e-18 | 1.11914e-17 | 3.53434e-17 |

| Pa\K | 900.000 | 1000.00 | 1100.00 | 1200.00 | 1300.00 |
|------|---------|---------|---------|---------|---------|
|------|---------|---------|---------|---------|---------|

|             |             |             |             |             |             |
|-------------|-------------|-------------|-------------|-------------|-------------|
| 1.00000e+08 | 0.811591    | 0.778116    | 0.715851    | 0.664972    | 0.643721    |
| 1.00000e+07 | 0.552760    | 0.523359    | 0.455952    | 0.378322    | 0.326325    |
| 1.00000e+06 | 0.221378    | 0.200909    | 0.158353    | 0.114039    | 0.0850712   |
| 100000.     | 0.0422439   | 0.0369822   | 0.0269756   | 0.0176254   | 0.0119030   |
| 10000.0     | 0.00372390  | 0.00354259  | 0.00270464  | 0.00178798  | 0.00119214  |
| 1000.00     | 0.000220170 | 0.000260067 | 0.000227338 | 0.000161781 | 0.000111380 |
| 100.000     | 1.42941e-05 | 2.04921e-05 | 1.99807e-05 | 1.50625e-05 | 1.06448e-05 |
| 10.0000     | 1.12117e-06 | 1.79660e-06 | 1.86134e-06 | 1.44852e-06 | 1.03864e-06 |
| 1.00000     | 9.94270e-08 | 1.68263e-07 | 1.79598e-07 | 1.41998e-07 | 1.02567e-07 |
| 0.100000    | 9.49536e-09 | 1.64089e-08 | 1.77165e-08 | 1.40936e-08 | 1.02089e-08 |
| 0.0100000   | 9.42205e-10 | 1.63397e-09 | 1.76763e-09 | 1.40763e-09 | 1.02013e-09 |
| 0.00100000  | 9.41326e-11 | 1.63314e-10 | 1.76716e-10 | 1.40743e-10 | 1.02004e-10 |
| 0.000100000 | 9.41196e-12 | 1.63304e-11 | 1.76711e-11 | 1.40740e-11 | 1.02003e-11 |
| 1.00000e-05 | 9.41174e-13 | 1.63302e-12 | 1.76710e-12 | 1.40740e-12 | 1.02003e-12 |
| 1.00000e-06 | 9.41170e-14 | 1.63302e-13 | 1.76710e-13 | 1.40740e-13 | 1.02003e-13 |
| 1.00000e-07 | 9.41170e-15 | 1.63302e-14 | 1.76710e-14 | 1.40740e-14 | 1.02003e-14 |
| 1.00000e-08 | 9.41170e-16 | 1.63302e-15 | 1.76710e-15 | 1.40740e-15 | 1.02003e-15 |
| 1.00000e-09 | 9.41170e-17 | 1.63302e-16 | 1.76710e-16 | 1.40740e-16 | 1.02003e-16 |

Pa\K | 1400.00 | 1500.00 | 1750.00 | 2000.00 | 2250.00

|             |             |             |             |             |             |
|-------------|-------------|-------------|-------------|-------------|-------------|
| 1.00000e+08 | 0.631423    | 0.618720    | 0.0958965   | 0.0830003   | 0.0705299   |
| 1.00000e+07 | 0.291194    | 0.262092    | 0.0377355   | 0.0261100   | 0.0175382   |
| 1.00000e+06 | 0.0665751   | 0.0532072   | 0.00702174  | 0.00394049  | 0.00223887  |
| 100000.     | 0.00851225  | 0.00629485  | 0.000801365 | 0.000414827 | 0.000225462 |
| 10000.0     | 0.000835708 | 0.000606658 | 7.99710e-05 | 4.08604e-05 | 2.20737e-05 |
| 1000.00     | 7.90491e-05 | 5.76491e-05 | 7.89993e-06 | 4.02951e-06 | 2.17464e-06 |
| 100.000     | 7.63887e-06 | 5.59738e-06 | 7.84255e-07 | 3.99743e-07 | 2.15673e-07 |
| 10.0000     | 7.49936e-07 | 5.50971e-07 | 7.81158e-08 | 3.98087e-08 | 2.14778e-08 |
| 1.00000     | 7.42908e-08 | 5.46572e-08 | 7.78915e-09 | 3.96967e-09 | 2.14184e-09 |
| 0.100000    | 7.40360e-09 | 5.45007e-09 | 7.77950e-10 | 3.96523e-10 | 2.13962e-10 |
| 0.0100000   | 7.39960e-10 | 5.44766e-10 | 7.77813e-11 | 3.96462e-11 | 2.13932e-11 |
| 0.00100000  | 7.39915e-11 | 5.44740e-11 | 7.77799e-12 | 3.96455e-12 | 2.13929e-12 |
| 0.000100000 | 7.39910e-12 | 5.44737e-12 | 7.77797e-13 | 3.96455e-13 | 2.13928e-13 |
| 1.00000e-05 | 7.39910e-13 | 5.44737e-13 | 7.77797e-14 | 3.96455e-14 | 2.13928e-14 |
| 1.00000e-06 | 7.39910e-14 | 5.44737e-14 | 7.77797e-15 | 3.96455e-15 | 2.13928e-15 |
| 1.00000e-07 | 7.39910e-15 | 5.44737e-15 | 7.77797e-16 | 3.96455e-16 | 2.13928e-16 |
| 1.00000e-08 | 7.39910e-16 | 5.44737e-16 | 7.77797e-17 | 3.96455e-17 | 2.13928e-17 |
| 1.00000e-09 | 7.39910e-17 | 5.44737e-17 | 7.77797e-18 | 3.96455e-18 | 2.13928e-18 |

Pa\K | 2500.00 | 2750.00 | 3000.00 | 3250.00 | 3500.00

|             |             |             |             |             |             |
|-------------|-------------|-------------|-------------|-------------|-------------|
| 1.00000e+08 | 0.0576435   | 0.0452099   | 0.0342671   | 0.0254138   | 0.0186888   |
| 1.00000e+07 | 0.0113630   | 0.00723266  | 0.00462039  | 0.00300864  | 0.00201354  |
| 1.00000e+06 | 0.00128740  | 0.000758203 | 0.000461777 | 0.000292212 | 0.000192250 |
| 100000.     | 0.000126643 | 7.36668e-05 | 4.45683e-05 | 2.81009e-05 | 1.84521e-05 |
| 10000.0     | 1.23616e-05 | 7.18010e-06 | 4.34127e-06 | 2.73678e-06 | 1.79721e-06 |
| 1000.00     | 1.21743e-06 | 7.07150e-07 | 4.27634e-07 | 2.69645e-07 | 1.77114e-07 |
| 100.000     | 1.20745e-07 | 7.01453e-08 | 4.24256e-08 | 2.67556e-08 | 1.75767e-08 |
| 10.0000     | 1.20253e-08 | 6.98661e-09 | 4.22604e-09 | 2.66536e-09 | 1.75110e-09 |
| 1.00000     | 1.19928e-09 | 6.96809e-10 | 4.21508e-10 | 2.65858e-10 | 1.74674e-10 |
| 0.100000    | 1.19811e-10 | 6.96170e-11 | 4.21142e-11 | 2.65640e-11 | 1.74538e-11 |
| 0.0100000   | 1.19795e-11 | 6.96087e-12 | 4.21096e-12 | 2.65612e-12 | 1.74521e-12 |
| 0.00100000  | 1.19794e-12 | 6.96078e-13 | 4.21091e-13 | 2.65610e-13 | 1.74519e-13 |
| 0.000100000 | 1.19794e-13 | 6.96078e-14 | 4.21090e-14 | 2.65609e-14 | 1.74519e-14 |
| 1.00000e-05 | 1.19794e-14 | 6.96078e-15 | 4.21090e-15 | 2.65609e-15 | 1.74519e-15 |
| 1.00000e-06 | 1.19794e-15 | 6.96077e-16 | 4.21090e-16 | 2.65609e-16 | 1.74519e-16 |
| 1.00000e-07 | 1.19794e-16 | 6.96077e-17 | 4.21090e-17 | 2.65609e-17 | 1.74519e-17 |
| 1.00000e-08 | 1.19794e-17 | 6.96077e-18 | 4.21090e-18 | 2.65609e-18 | 1.74519e-18 |
| 1.00000e-09 | 1.19794e-18 | 6.96077e-19 | 4.21090e-19 | 2.65609e-19 | 1.74519e-19 |

Pa\K | 3750.00 | 4000.00

|             |             |             |
|-------------|-------------|-------------|
| 1.00000e+08 | 0.0137772   | 0.0102583   |
| 1.00000e+07 | 0.00138907  | 0.000987663 |
| 1.00000e+06 | 0.000131270 | 9.27554e-05 |
| 100000.     | 1.25867e-05 | 8.88988e-06 |
| 10000.0     | 1.22618e-06 | 8.66264e-07 |
| 1000.00     | 1.20867e-07 | 8.54086e-08 |
| 100.000     | 1.19964e-08 | 8.47809e-09 |
| 10.0000     | 1.19524e-09 | 8.44747e-10 |
| 1.00000     | 1.19232e-10 | 8.42727e-11 |
| 0.100000    | 1.19143e-11 | 8.42128e-12 |
| 0.0100000   | 1.19132e-12 | 8.42054e-13 |
| 0.00100000  | 1.19131e-13 | 8.42047e-14 |
| 0.000100000 | 1.19131e-14 | 8.42046e-15 |
| 1.00000e-05 | 1.19131e-15 | 8.42046e-16 |
| 1.00000e-06 | 1.19131e-16 | 8.42046e-17 |
| 1.00000e-07 | 1.19131e-17 | 8.42046e-18 |



1.00000e-08 | 1.19131e-18 8.42046e-19  
1.00000e-09 | 1.19131e-19 8.42046e-20

PhCH2CCH+H

=====

| Pa\K        | 20.0000     | 30.0000     | 40.0000     | 50.0000     | 60.0000     |
|-------------|-------------|-------------|-------------|-------------|-------------|
| 1.00000e+08 | 8.27399e-45 | 2.44302e-44 | 7.98747e-44 | 3.20616e-43 | 1.57212e-42 |
| 1.00000e+07 | 8.25897e-44 | 2.43425e-43 | 7.94571e-43 | 3.18446e-42 | 1.55918e-41 |
| 1.00000e+06 | 8.13041e-43 | 2.37120e-42 | 7.69048e-42 | 3.06825e-41 | 1.49592e-40 |
| 100000.     | 8.69865e-42 | 3.55107e-41 | 1.55337e-40 | 7.59385e-40 | 4.18688e-39 |
| 10000.0     | 6.56911e-40 | 3.29029e-39 | 1.20792e-38 | 4.67023e-38 | 2.04174e-37 |
| 1000.00     | 1.38105e-38 | 2.50797e-38 | 5.20908e-38 | 1.35870e-37 | 4.41739e-37 |
| 100.000     | 1.66017e-38 | 1.64028e-38 | 2.32033e-38 | 4.48609e-38 | 1.16424e-37 |
| 10.0000     | 1.22660e-39 | 3.34368e-40 | 3.82437e-40 | 9.06910e-40 | 3.11948e-39 |
| 1.00000     | 2.80206e-40 | 7.19757e-40 | 1.93406e-39 | 6.02010e-39 | 2.28271e-38 |
| 0.100000    | 2.59580e-39 | 6.90940e-39 | 1.83840e-38 | 5.63154e-38 | 2.10486e-37 |
| 0.0100000   | 2.33945e-38 | 5.62412e-38 | 1.36314e-37 | 3.83181e-37 | 1.32258e-36 |
| 0.00100000  | 9.65820e-38 | 1.18674e-37 | 1.71722e-37 | 3.18176e-37 | 7.75651e-37 |
| 0.000100000 | 1.30461e-38 | 3.67821e-39 | 2.49158e-39 | 2.90468e-39 | 5.20383e-39 |
| 1.00000e-05 | 3.54548e-41 | 7.02413e-42 | 4.61891e-42 | 5.60380e-42 | 1.07186e-41 |
| 1.00000e-06 | 8.79404e-44 | 2.53177e-44 | 2.09081e-44 | 3.03650e-44 | 7.00262e-44 |
| 1.00000e-07 | 7.99613e-46 | 3.41396e-46 | 3.65157e-46 | 6.67593e-46 | 2.04924e-45 |
| 1.00000e-08 | 2.61655e-47 | 1.60122e-47 | 2.09438e-47 | 4.46771e-47 | 1.58556e-46 |
| 1.00000e-09 | 2.04275e-48 | 1.40709e-48 | 1.93059e-48 | 4.23994e-48 | 1.53856e-47 |

| Pa\K        | 70.0000     | 80.0000     | 90.0000     | 100.000     | 110.000     |
|-------------|-------------|-------------|-------------|-------------|-------------|
| 1.00000e+08 | 9.58849e-42 | 7.76210e-41 | 9.51451e-40 | 2.11336e-38 | 9.60142e-37 |
| 1.00000e+07 | 9.49612e-41 | 7.67709e-40 | 9.39944e-39 | 2.08628e-37 | 9.47903e-36 |
| 1.00000e+06 | 9.06649e-40 | 7.28619e-39 | 8.85703e-38 | 1.95009e-36 | 8.79436e-35 |
| 100000.     | 2.70451e-38 | 2.21503e-37 | 2.63839e-36 | 5.43998e-35 | 2.15204e-33 |
| 10000.0     | 1.06434e-36 | 7.23299e-36 | 7.54931e-35 | 1.52325e-33 | 6.87767e-32 |
| 1000.00     | 1.85706e-36 | 1.13834e-35 | 1.32081e-34 | 3.85429e-33 | 2.87513e-31 |
| 100.000     | 4.28993e-37 | 2.63290e-36 | 3.63798e-35 | 1.43946e-33 | 1.73211e-31 |
| 10.0000     | 1.51307e-38 | 1.19670e-37 | 2.06282e-36 | 9.71896e-35 | 1.61329e-32 |
| 1.00000     | 1.16412e-37 | 9.64438e-37 | 1.72782e-35 | 7.58245e-34 | 7.52076e-32 |
| 0.100000    | 1.06376e-36 | 8.79950e-36 | 1.58160e-34 | 6.94149e-33 | 6.83163e-31 |
| 0.0100000   | 6.20706e-36 | 4.79231e-35 | 8.08843e-34 | 3.37743e-32 | 3.28794e-30 |
| 0.00100000  | 2.70660e-36 | 1.62086e-35 | 2.24856e-34 | 8.81562e-33 | 1.10944e-30 |
| 0.000100000 | 1.46839e-38 | 7.78413e-38 | 1.29426e-36 | 1.16584e-34 | 5.26621e-32 |
| 1.00000e-05 | 3.35987e-41 | 2.60351e-40 | 1.79588e-38 | 5.30730e-36 | 4.28175e-33 |
| 1.00000e-06 | 3.15112e-43 | 6.97769e-42 | 1.31172e-39 | 4.82624e-37 | 4.18296e-34 |
| 1.00000e-07 | 1.49433e-44 | 5.74828e-43 | 1.27057e-40 | 4.77992e-38 | 4.17309e-35 |
| 1.00000e-08 | 1.34001e-45 | 5.63199e-44 | 1.26653e-41 | 4.77530e-39 | 4.17211e-36 |
| 1.00000e-09 | 1.32457e-46 | 5.62041e-45 | 1.26613e-42 | 4.77484e-40 | 4.17201e-37 |

| Pa\K        | 120.000     | 130.000     | 140.000     | 150.000     | 160.000     |
|-------------|-------------|-------------|-------------|-------------|-------------|
| 1.00000e+08 | 6.85796e-35 | 6.24693e-33 | 5.38241e-31 | 4.90044e-29 | 1.69755e-27 |
| 1.00000e+07 | 6.77488e-34 | 6.17918e-32 | 5.33300e-30 | 4.86837e-28 | 1.68656e-26 |
| 1.00000e+06 | 6.25390e-33 | 5.70185e-31 | 4.94765e-29 | 4.59780e-27 | 1.59218e-25 |
| 100000.     | 1.27279e-31 | 8.89520e-30 | 5.54821e-28 | 3.99334e-26 | 1.28525e-24 |
| 10000.0     | 4.82655e-30 | 3.88309e-28 | 1.98490e-26 | 7.12669e-25 | 1.62981e-23 |
| 1000.00     | 3.03930e-29 | 4.00115e-27 | 2.33657e-25 | 7.60206e-24 | 1.55088e-22 |
| 100.000     | 3.09382e-29 | 1.06077e-26 | 7.08618e-25 | 2.25516e-23 | 4.40667e-22 |
| 10.0000     | 5.03542e-30 | 1.19131e-26 | 8.67752e-25 | 2.77291e-23 | 5.38805e-22 |
| 1.00000     | 9.59801e-30 | 1.32846e-26 | 9.68539e-25 | 3.11934e-23 | 6.11358e-22 |
| 0.100000    | 8.44218e-29 | 2.52733e-26 | 1.73886e-24 | 5.74536e-23 | 1.16252e-21 |
| 0.0100000   | 4.22833e-28 | 9.24597e-26 | 6.03100e-24 | 1.94144e-22 | 3.83961e-21 |
| 0.00100000  | 2.32404e-28 | 1.57419e-25 | 1.08714e-23 | 3.39485e-22 | 6.50199e-21 |
| 0.000100000 | 2.57536e-29 | 1.64043e-25 | 1.17655e-23 | 3.67396e-22 | 7.01398e-21 |
| 1.00000e-05 | 2.56064e-30 | 1.64543e-25 | 1.18592e-23 | 3.70387e-22 | 7.06928e-21 |
| 1.00000e-06 | 2.55846e-31 | 1.64591e-25 | 1.18686e-23 | 3.70688e-22 | 7.07485e-21 |
| 1.00000e-07 | 2.55823e-32 | 1.64596e-25 | 1.18695e-23 | 3.70718e-22 | 7.07541e-21 |
| 1.00000e-08 | 2.55821e-33 | 1.64596e-25 | 1.18696e-23 | 3.70721e-22 | 7.07546e-21 |
| 1.00000e-09 | 2.55821e-34 | 1.64596e-25 | 1.18697e-23 | 3.70721e-22 | 7.07547e-21 |

| Pa\K        | 170.000     | 180.000     | 190.000     | 200.000     | 210.000     |
|-------------|-------------|-------------|-------------|-------------|-------------|
| 1.00000e+08 | 3.59092e-26 | 5.41563e-25 | 6.27545e-24 | 5.78698e-23 | 4.39425e-22 |
| 1.00000e+07 | 3.56652e-25 | 5.37638e-24 | 6.22642e-23 | 5.73800e-22 | 4.35379e-21 |
| 1.00000e+06 | 3.35630e-24 | 5.03935e-23 | 5.80841e-22 | 5.32431e-21 | 4.01596e-20 |
| 100000.     | 2.59789e-23 | 3.77973e-22 | 4.23738e-21 | 3.78694e-20 | 2.78768e-19 |
| 10000.0     | 2.65072e-22 | 3.27245e-21 | 3.20489e-20 | 2.56123e-19 | 1.71466e-18 |
| 1000.00     | 2.25751e-21 | 2.49534e-20 | 2.18821e-19 | 1.57212e-18 | 9.50870e-18 |
| 100.000     | 6.09987e-21 | 6.37953e-20 | 5.27530e-19 | 3.57020e-18 | 2.03470e-17 |
| 10.0000     | 7.39185e-21 | 7.64904e-20 | 6.25456e-19 | 4.18671e-18 | 2.36168e-17 |
| 1.00000     | 8.47095e-21 | 8.86921e-20 | 7.35481e-19 | 5.00464e-18 | 2.87720e-17 |
| 0.100000    | 1.66881e-20 | 1.81518e-19 | 1.56641e-18 | 1.10920e-17 | 6.62749e-17 |

|             |             |             |             |             |             |
|-------------|-------------|-------------|-------------|-------------|-------------|
| 0.0100000   | 5.38083e-20 | 5.69331e-19 | 4.75471e-18 | 3.24260e-17 | 1.85730e-16 |
| 0.00100000  | 8.80606e-20 | 8.98946e-19 | 7.23832e-18 | 4.76167e-17 | 2.63387e-16 |
| 0.000100000 | 9.45388e-20 | 9.59651e-19 | 7.68141e-18 | 5.02357e-17 | 2.76316e-16 |
| 1.00000e-05 | 9.52399e-20 | 9.66212e-19 | 7.72914e-18 | 5.05167e-17 | 2.77697e-16 |
| 1.00000e-06 | 9.53105e-20 | 9.66873e-19 | 7.73395e-18 | 5.05450e-17 | 2.77836e-16 |
| 1.00000e-07 | 9.53176e-20 | 9.66939e-19 | 7.73444e-18 | 5.05479e-17 | 2.77849e-16 |
| 1.00000e-08 | 9.53183e-20 | 9.66946e-19 | 7.73448e-18 | 5.05481e-17 | 2.77851e-16 |
| 1.00000e-09 | 9.53184e-20 | 9.66946e-19 | 7.73449e-18 | 5.05482e-17 | 2.77851e-16 |

| Pa\K        | 220.000     | 230.000     | 240.000     | 250.000     | 260.000     |
|-------------|-------------|-------------|-------------|-------------|-------------|
| 1.00000e+08 | 2.82248e-21 | 1.56684e-20 | 7.65315e-20 | 3.33954e-19 | 1.31871e-18 |
| 1.00000e+07 | 2.79410e-20 | 1.54958e-19 | 7.56063e-19 | 3.29516e-18 | 1.29942e-17 |
| 1.00000e+06 | 2.56034e-19 | 1.40963e-18 | 6.82309e-18 | 2.94797e-17 | 1.15160e-16 |
| 100000.     | 1.73496e-18 | 9.32371e-18 | 4.40388e-17 | 1.85593e-16 | 7.06812e-16 |
| 10000.0     | 9.82880e-18 | 4.91320e-17 | 2.17557e-16 | 8.64928e-16 | 3.12328e-15 |
| 1000.00     | 4.95082e-17 | 2.26024e-16 | 9.18913e-16 | 3.37073e-15 | 1.12810e-14 |
| 100.000     | 9.99501e-17 | 4.31399e-16 | 1.66243e-15 | 5.79719e-15 | 1.85032e-14 |
| 10.0000     | 1.14949e-16 | 4.92231e-16 | 1.88469e-15 | 6.54069e-15 | 2.08119e-14 |
| 1.00000     | 1.43122e-16 | 6.28152e-16 | 2.47220e-15 | 8.84371e-15 | 2.90824e-14 |
| 0.100000    | 3.41742e-16 | 1.54890e-15 | 6.26480e-15 | 2.29009e-14 | 7.64704e-14 |
| 0.0100000   | 9.14354e-16 | 3.94362e-15 | 1.51422e-14 | 5.24654e-14 | 1.65939e-13 |
| 0.00100000  | 1.25418e-15 | 5.24206e-15 | 1.95459e-14 | 6.59087e-14 | 2.03315e-13 |
| 0.000100000 | 1.30884e-15 | 5.44394e-15 | 2.02087e-14 | 6.78704e-14 | 2.08612e-13 |
| 1.00000e-05 | 1.31464e-15 | 5.46530e-15 | 2.02785e-14 | 6.80761e-14 | 2.09165e-13 |
| 1.00000e-06 | 1.31523e-15 | 5.46744e-15 | 2.02856e-14 | 6.80968e-14 | 2.09221e-13 |
| 1.00000e-07 | 1.31529e-15 | 5.46766e-15 | 2.02863e-14 | 6.80989e-14 | 2.09226e-13 |
| 1.00000e-08 | 1.31529e-15 | 5.46768e-15 | 2.02863e-14 | 6.80991e-14 | 2.09227e-13 |
| 1.00000e-09 | 1.31529e-15 | 5.46768e-15 | 2.02863e-14 | 6.80991e-14 | 2.09227e-13 |

| Pa\K        | 270.000     | 280.000     | 290.000     | 300.000     | 310.000     |
|-------------|-------------|-------------|-------------|-------------|-------------|
| 1.00000e+08 | 4.76407e-18 | 1.58932e-17 | 4.93508e-17 | 1.81271e-14 | 3.93848e-16 |
| 1.00000e+07 | 4.68728e-17 | 1.56109e-16 | 4.83851e-16 | 1.52597e-13 | 3.84526e-15 |
| 1.00000e+06 | 4.11200e-16 | 1.35462e-15 | 4.14999e-15 | 7.21000e-13 | 3.21576e-14 |
| 100000.     | 2.45915e-15 | 7.88945e-15 | 2.35265e-14 | 1.20004e-12 | 1.72526e-13 |
| 10000.0     | 1.03468e-14 | 3.17184e-14 | 9.06504e-14 | 1.45901e-12 | 6.15217e-13 |
| 1000.00     | 3.47776e-14 | 9.95782e-14 | 2.66716e-13 | 1.10515e-12 | 1.60455e-12 |
| 100.000     | 5.45810e-14 | 1.50038e-13 | 3.87106e-13 | 9.16621e-13 | 2.18196e-12 |
| 10.0000     | 6.13132e-14 | 1.68652e-13 | 4.36270e-13 | 1.61454e-12 | 2.48718e-12 |
| 1.00000     | 8.87540e-14 | 2.53370e-13 | 6.81117e-13 | 5.20050e-12 | 4.19885e-12 |
| 0.100000    | 2.35381e-13 | 6.73091e-13 | 1.80025e-12 | 9.96898e-12 | 1.07808e-11 |
| 0.0100000   | 4.83829e-13 | 1.31156e-12 | 3.32982e-12 | 8.73783e-12 | 1.80727e-11 |
| 0.00100000  | 5.79434e-13 | 1.53850e-12 | 3.83353e-12 | 7.66157e-12 | 2.01532e-11 |
| 0.000100000 | 5.92614e-13 | 1.56899e-12 | 3.89959e-12 | 7.54187e-12 | 2.04145e-11 |
| 1.00000e-05 | 5.93985e-13 | 1.57215e-12 | 3.90642e-12 | 7.53047e-12 | 2.04413e-11 |
| 1.00000e-06 | 5.94123e-13 | 1.57247e-12 | 3.90710e-12 | 7.52933e-12 | 2.04440e-11 |
| 1.00000e-07 | 5.94137e-13 | 1.57250e-12 | 3.90717e-12 | 7.52922e-12 | 2.04443e-11 |
| 1.00000e-08 | 5.94138e-13 | 1.57250e-12 | 3.90718e-12 | 7.52921e-12 | 2.04443e-11 |
| 1.00000e-09 | 5.94138e-13 | 1.57251e-12 | 3.90718e-12 | 7.52921e-12 | 2.04443e-11 |

| Pa\K        | 400.000     | 500.000     | 600.000     | 700.000     | 800.000     |
|-------------|-------------|-------------|-------------|-------------|-------------|
| 1.00000e+08 | 1.30680e-11 | 4.18209e-09 | 7.62320e-07 | 6.11645e-05 | 0.00116679  |
| 1.00000e+07 | 9.96154e-11 | 1.74843e-07 | 9.91718e-06 | 0.000110854 | 0.000858575 |
| 1.00000e+06 | 1.26868e-09 | 4.12667e-06 | 0.000115291 | 0.000408884 | 0.000851541 |
| 100000.     | 7.60021e-09 | 6.14917e-06 | 0.000142138 | 0.000522610 | 0.000916043 |
| 10000.0     | 3.65386e-09 | 1.46658e-06 | 4.82825e-05 | 0.000297659 | 0.000688027 |
| 1000.00     | 9.21335e-10 | 2.38049e-07 | 1.45942e-05 | 0.000144331 | 0.000421490 |
| 100.000     | 7.84951e-10 | 1.01445e-07 | 5.23637e-06 | 5.82765e-05 | 0.000210849 |
| 10.0000     | 1.38324e-09 | 1.35041e-07 | 3.46005e-06 | 3.21196e-05 | 0.000147414 |
| 1.00000     | 3.11857e-09 | 2.14912e-07 | 3.81172e-06 | 2.99239e-05 | 0.000140637 |
| 0.100000    | 4.45460e-09 | 2.48182e-07 | 3.95647e-06 | 2.98803e-05 | 0.000140074 |
| 0.0100000   | 4.61726e-09 | 2.52330e-07 | 3.97228e-06 | 2.98768e-05 | 0.000140018 |
| 0.00100000  | 4.60567e-09 | 2.52621e-07 | 3.97360e-06 | 2.98762e-05 | 0.000140012 |
| 0.000100000 | 4.60366e-09 | 2.52646e-07 | 3.97372e-06 | 2.98762e-05 | 0.000140012 |
| 1.00000e-05 | 4.60346e-09 | 2.52649e-07 | 3.97373e-06 | 2.98762e-05 | 0.000140012 |
| 1.00000e-06 | 4.60344e-09 | 2.52649e-07 | 3.97373e-06 | 2.98762e-05 | 0.000140012 |
| 1.00000e-07 | 4.60343e-09 | 2.52649e-07 | 3.97373e-06 | 2.98762e-05 | 0.000140012 |
| 1.00000e-08 | 4.60343e-09 | 2.52649e-07 | 3.97373e-06 | 2.98762e-05 | 0.000140012 |
| 1.00000e-09 | 4.60343e-09 | 2.52649e-07 | 3.97373e-06 | 2.98762e-05 | 0.000140012 |

| Pa\K        | 900.000     | 1000.00    | 1100.00    | 1200.00    | 1300.00   |
|-------------|-------------|------------|------------|------------|-----------|
| 1.00000e+08 | 0.00598222  | 0.0156364  | 0.0290286  | 0.0383983  | 0.0412567 |
| 1.00000e+07 | 0.00410044  | 0.0132929  | 0.0312170  | 0.0499834  | 0.0606247 |
| 1.00000e+06 | 0.00213626  | 0.00651803 | 0.0167402  | 0.0282757  | 0.0362433 |
| 100000.     | 0.00147847  | 0.00293581 | 0.00635959 | 0.0113178  | 0.0172048 |
| 10000.0     | 0.00114022  | 0.00198445 | 0.00388174 | 0.00734667 | 0.0126307 |
| 1000.00     | 0.000798010 | 0.00157784 | 0.00327547 | 0.00638082 | 0.0113578 |

|             |             |            |            |            |           |
|-------------|-------------|------------|------------|------------|-----------|
| 100.000     | 0.000546183 | 0.00134762 | 0.00301515 | 0.00601910 | 0.0109047 |
| 10.0000     | 0.000483711 | 0.00129540 | 0.00295328 | 0.00593337 | 0.0107978 |
| 1.00000     | 0.000476733 | 0.00128834 | 0.00294378 | 0.00592022 | 0.0107814 |
| 0.100000    | 0.000476019 | 0.00128753 | 0.00294267 | 0.00591872 | 0.0107796 |
| 0.0100000   | 0.000475947 | 0.00128744 | 0.00294255 | 0.00591856 | 0.0107794 |
| 0.00100000  | 0.000475940 | 0.00128743 | 0.00294254 | 0.00591855 | 0.0107794 |
| 0.000100000 | 0.000475939 | 0.00128743 | 0.00294254 | 0.00591855 | 0.0107794 |
| 1.00000e-05 | 0.000475939 | 0.00128743 | 0.00294254 | 0.00591855 | 0.0107794 |
| 1.00000e-06 | 0.000475939 | 0.00128743 | 0.00294254 | 0.00591855 | 0.0107794 |
| 1.00000e-07 | 0.000475939 | 0.00128743 | 0.00294254 | 0.00591855 | 0.0107794 |
| 1.00000e-08 | 0.000475939 | 0.00128743 | 0.00294254 | 0.00591855 | 0.0107794 |
| 1.00000e-09 | 0.000475939 | 0.00128743 | 0.00294254 | 0.00591855 | 0.0107794 |

| Pa\K        | 1400.00   | 1500.00   | 1750.00   | 2000.00  | 2250.00  |
|-------------|-----------|-----------|-----------|----------|----------|
| 1.00000e+08 | 0.0416065 | 0.0419579 | 0.460876  | 0.445140 | 0.435866 |
| 1.00000e+07 | 0.0651421 | 0.0679084 | 0.283560  | 0.276995 | 0.300263 |
| 1.00000e+06 | 0.0421641 | 0.0484930 | 0.128185  | 0.168729 | 0.238216 |
| 100000.     | 0.0244223 | 0.0336798 | 0.0810214 | 0.144320 | 0.228217 |
| 10000.0     | 0.0200530 | 0.0301780 | 0.0738615 | 0.141707 | 0.227645 |
| 1000.00     | 0.0187423 | 0.0291361 | 0.0729337 | 0.141708 | 0.227764 |
| 100.000     | 0.0182761 | 0.0287465 | 0.0727646 | 0.141757 | 0.227800 |
| 10.0000     | 0.0181619 | 0.0286433 | 0.0727211 | 0.141764 | 0.227805 |
| 1.00000     | 0.0181441 | 0.0286267 | 0.0727137 | 0.141765 | 0.227806 |
| 0.100000    | 0.0181421 | 0.0286248 | 0.0727128 | 0.141765 | 0.227806 |
| 0.0100000   | 0.0181419 | 0.0286246 | 0.0727127 | 0.141765 | 0.227806 |
| 0.00100000  | 0.0181419 | 0.0286246 | 0.0727127 | 0.141765 | 0.227806 |
| 0.000100000 | 0.0181419 | 0.0286246 | 0.0727127 | 0.141765 | 0.227806 |
| 1.00000e-05 | 0.0181419 | 0.0286246 | 0.0727127 | 0.141765 | 0.227806 |
| 1.00000e-06 | 0.0181419 | 0.0286246 | 0.0727127 | 0.141765 | 0.227806 |
| 1.00000e-07 | 0.0181419 | 0.0286246 | 0.0727127 | 0.141765 | 0.227806 |
| 1.00000e-08 | 0.0181419 | 0.0286246 | 0.0727127 | 0.141765 | 0.227806 |
| 1.00000e-09 | 0.0181419 | 0.0286246 | 0.0727127 | 0.141765 | 0.227806 |

| Pa\K        | 2500.00  | 2750.00  | 3000.00  | 3250.00  | 3500.00  |
|-------------|----------|----------|----------|----------|----------|
| 1.00000e+08 | 0.438888 | 0.454835 | 0.480146 | 0.509454 | 0.538202 |
| 1.00000e+07 | 0.347714 | 0.404971 | 0.459739 | 0.506130 | 0.543073 |
| 1.00000e+06 | 0.318817 | 0.394450 | 0.457575 | 0.507146 | 0.544994 |
| 100000.     | 0.315823 | 0.394218 | 0.458201 | 0.507897 | 0.545634 |
| 10000.0     | 0.315897 | 0.394437 | 0.458411 | 0.508058 | 0.545746 |
| 1000.00     | 0.315973 | 0.394485 | 0.458443 | 0.508080 | 0.545761 |
| 100.000     | 0.315987 | 0.394491 | 0.458447 | 0.508082 | 0.545762 |
| 10.0000     | 0.315988 | 0.394492 | 0.458447 | 0.508082 | 0.545762 |
| 1.00000     | 0.315989 | 0.394492 | 0.458447 | 0.508082 | 0.545762 |
| 0.100000    | 0.315989 | 0.394492 | 0.458447 | 0.508082 | 0.545762 |
| 0.0100000   | 0.315989 | 0.394492 | 0.458447 | 0.508082 | 0.545762 |
| 0.00100000  | 0.315989 | 0.394492 | 0.458447 | 0.508082 | 0.545762 |
| 0.000100000 | 0.315989 | 0.394492 | 0.458447 | 0.508082 | 0.545762 |
| 1.00000e-05 | 0.315989 | 0.394492 | 0.458447 | 0.508082 | 0.545762 |
| 1.00000e-06 | 0.315989 | 0.394492 | 0.458447 | 0.508082 | 0.545762 |
| 1.00000e-07 | 0.315989 | 0.394492 | 0.458447 | 0.508082 | 0.545762 |
| 1.00000e-08 | 0.315989 | 0.394492 | 0.458447 | 0.508082 | 0.545762 |
| 1.00000e-09 | 0.315989 | 0.394492 | 0.458447 | 0.508082 | 0.545762 |

| Pa\K        | 3750.00  | 4000.00  |
|-------------|----------|----------|
| 1.00000e+08 | 0.563761 | 0.585189 |
| 1.00000e+07 | 0.571662 | 0.593539 |
| 1.00000e+06 | 0.573604 | 0.595212 |
| 100000.     | 0.574088 | 0.595561 |
| 10000.0     | 0.574164 | 0.595611 |
| 1000.00     | 0.574174 | 0.595618 |
| 100.000     | 0.574175 | 0.595618 |
| 10.0000     | 0.574175 | 0.595618 |
| 1.00000     | 0.574175 | 0.595618 |
| 0.100000    | 0.574175 | 0.595618 |
| 0.0100000   | 0.574175 | 0.595618 |
| 0.00100000  | 0.574175 | 0.595618 |
| 0.000100000 | 0.574175 | 0.595618 |
| 1.00000e-05 | 0.574175 | 0.595618 |
| 1.00000e-06 | 0.574175 | 0.595618 |
| 1.00000e-07 | 0.574175 | 0.595618 |
| 1.00000e-08 | 0.574175 | 0.595618 |
| 1.00000e-09 | 0.574175 | 0.595618 |

rad22

=====

| Pa\K | 20.0000 | 30.0000 | 40.0000 | 50.0000 | 60.0000 |
|------|---------|---------|---------|---------|---------|
|------|---------|---------|---------|---------|---------|

|             |             |             |             |             |             |
|-------------|-------------|-------------|-------------|-------------|-------------|
| 1.00000e+08 | 4.00050e-12 | 1.63960e-11 | 3.68510e-11 | 6.57746e-11 | 1.04004e-10 |
| 1.00000e+07 | 4.00031e-10 | 1.63944e-09 | 3.68455e-09 | 6.57614e-09 | 1.03978e-08 |
| 1.00000e+06 | 3.99833e-08 | 1.63780e-07 | 3.67903e-07 | 6.56293e-07 | 1.03714e-06 |
| 100000.     | 3.97871e-06 | 1.62158e-05 | 3.62453e-05 | 6.43323e-05 | 0.000101138 |
| 10000.0     | 0.000379079 | 0.00147283  | 0.00314495  | 0.00533735  | 0.00802423  |
| 1000.00     | 0.0249838   | 0.0705316   | 0.117269    | 0.161498    | 0.202477    |
| 100.000     | 0.347846    | 0.490768    | 0.544295    | 0.565451    | 0.572539    |
| 10.0000     | 0.558297    | 0.494154    | 0.437267    | 0.387831    | 0.344386    |
| 1.00000     | 0.205427    | 0.0827633   | 0.0396524   | 0.0211777   | 0.0122045   |
| 0.100000    | 0.00171192  | 0.000186772 | 6.09448e-05 | 3.10712e-05 | 1.92540e-05 |
| 0.0100000   | 4.26368e-06 | 6.31954e-07 | 1.72568e-07 | 6.35989e-08 | 2.81244e-08 |
| 0.00100000  | 1.87447e-09 | 1.11747e-10 | 2.30576e-11 | 7.77632e-12 | 3.40754e-12 |
| 0.000100000 | 3.08682e-13 | 3.61644e-14 | 1.20021e-14 | 5.72659e-15 | 3.27786e-15 |
| 1.00000e-05 | 7.02087e-16 | 1.61966e-16 | 7.36238e-17 | 4.27920e-17 | 2.82374e-17 |
| 1.00000e-06 | 9.51122e-18 | 3.28086e-18 | 1.85239e-18 | 1.24593e-18 | 9.16418e-19 |
| 1.00000e-07 | 4.40466e-19 | 2.00287e-19 | 1.27774e-19 | 9.22152e-20 | 7.10415e-20 |
| 1.00000e-08 | 3.85281e-20 | 1.86723e-20 | 1.21737e-20 | 8.88305e-21 | 6.88935e-21 |
| 1.00000e-09 | 3.79581e-21 | 1.85323e-21 | 1.21114e-21 | 8.84816e-22 | 6.86725e-22 |

| Pa\K        | 70.0000     | 80.0000     | 90.0000     | 100.000     | 110.000     |
|-------------|-------------|-------------|-------------|-------------|-------------|
| 1.00000e+08 | 1.52792e-10 | 2.13897e-10 | 2.89702e-10 | 3.83390e-10 | 4.99168e-10 |
| 1.00000e+07 | 1.52745e-08 | 2.13818e-08 | 2.89577e-08 | 3.83197e-08 | 4.98878e-08 |
| 1.00000e+06 | 1.52274e-06 | 2.13032e-06 | 2.88328e-06 | 3.81276e-06 | 4.95990e-06 |
| 100000.     | 0.000147687 | 0.000205428 | 0.000276317 | 0.000362930 | 0.000468609 |
| 10000.0     | 0.0112001   | 0.0148761   | 0.0190769   | 0.0238389   | 0.0292080   |
| 1000.00     | 0.240216    | 0.274933    | 0.306874    | 0.336258    | 0.363260    |
| 100.000     | 0.572686    | 0.569029    | 0.563060    | 0.555524    | 0.546798    |
| 10.0000     | 0.305856    | 0.271447    | 0.240559    | 0.212740    | 0.187640    |
| 1.00000     | 0.00744452  | 0.00474612  | 0.00313491  | 0.00213194  | 0.00148590  |
| 0.100000    | 1.30976e-05 | 9.36505e-06 | 6.89661e-06 | 5.17577e-06 | 3.93461e-06 |
| 0.0100000   | 1.40626e-08 | 7.67935e-09 | 4.47967e-09 | 2.74994e-09 | 1.75775e-09 |
| 0.00100000  | 1.75502e-12 | 1.00770e-12 | 6.25179e-13 | 4.10809e-13 | 2.82093e-13 |
| 0.000100000 | 2.09130e-15 | 1.43296e-15 | 1.03216e-15 | 7.71115e-16 | 5.92192e-16 |
| 1.00000e-05 | 2.01273e-17 | 1.51013e-17 | 1.17463e-17 | 9.38063e-18 | 7.64122e-18 |
| 1.00000e-06 | 7.11458e-19 | 5.72390e-19 | 4.72096e-19 | 3.96432e-19 | 3.37354e-19 |
| 1.00000e-07 | 5.70010e-20 | 4.70088e-20 | 3.95292e-20 | 3.37146e-20 | 2.90606e-20 |
| 1.00000e-08 | 5.55280e-21 | 4.59440e-21 | 3.87300e-21 | 3.30977e-21 | 2.85742e-21 |
| 1.00000e-09 | 5.53766e-22 | 4.58348e-22 | 3.86481e-22 | 3.30346e-22 | 2.85245e-22 |

| Pa\K        | 120.000     | 130.000     | 140.000     | 150.000     | 160.000     |
|-------------|-------------|-------------|-------------|-------------|-------------|
| 1.00000e+08 | 6.42585e-10 | 8.20932e-10 | 1.04378e-09 | 1.32368e-09 | 1.67706e-09 |
| 1.00000e+07 | 6.42154e-08 | 8.20299e-08 | 1.04285e-07 | 1.32232e-07 | 1.67507e-07 |
| 1.00000e+06 | 6.37876e-06 | 8.14015e-06 | 1.03367e-05 | 1.30891e-05 | 1.65548e-05 |
| 100000.     | 0.000597650 | 0.000755525 | 0.000949155 | 0.00118722  | 0.00148052  |
| 10000.0     | 0.0352378   | 0.0419878   | 0.0495203   | 0.0578978   | 0.0671797   |
| 1000.00     | 0.388015    | 0.410623    | 0.431156    | 0.449669    | 0.466203    |
| 100.000     | 0.537070    | 0.526419    | 0.514869    | 0.502413    | 0.489030    |
| 10.0000     | 0.164986    | 0.144558    | 0.126174    | 0.109678    | 0.0949313   |
| 1.00000     | 0.00105776  | 0.000767082 | 0.000565585 | 0.000423333 | 0.000321258 |
| 0.100000    | 3.01846e-06 | 2.33104e-06 | 1.80903e-06 | 1.40907e-06 | 1.10055e-06 |
| 0.0100000   | 1.16088e-09 | 7.87565e-10 | 5.46421e-10 | 3.86378e-10 | 2.77699e-10 |
| 0.00100000  | 2.00520e-13 | 1.46543e-13 | 1.09550e-13 | 8.34546e-14 | 6.46004e-14 |
| 0.000100000 | 4.64584e-16 | 3.70649e-16 | 2.99713e-16 | 2.45014e-16 | 2.02108e-16 |
| 1.00000e-05 | 6.31959e-18 | 5.28872e-18 | 4.46740e-18 | 3.80160e-18 | 3.25417e-18 |
| 1.00000e-06 | 2.89972e-19 | 2.51153e-19 | 2.18804e-19 | 1.91475e-19 | 1.68133e-19 |
| 1.00000e-07 | 2.52494e-20 | 2.20709e-20 | 1.93813e-20 | 1.70785e-20 | 1.50884e-20 |
| 1.00000e-08 | 2.48595e-21 | 2.17542e-21 | 1.91214e-21 | 1.68634e-21 | 1.49091e-21 |
| 1.00000e-09 | 2.48197e-22 | 2.17219e-22 | 1.90949e-22 | 1.68415e-22 | 1.48909e-22 |

| Pa\K        | 170.000     | 180.000     | 190.000     | 200.000     | 210.000     |
|-------------|-------------|-------------|-------------|-------------|-------------|
| 1.00000e+08 | 2.12543e-09 | 2.69694e-09 | 3.42835e-09 | 4.36770e-09 | 5.57761e-09 |
| 1.00000e+07 | 2.12252e-07 | 2.69265e-07 | 3.42201e-07 | 4.35826e-07 | 5.56353e-07 |
| 1.00000e+06 | 2.09383e-05 | 2.65049e-05 | 3.35980e-05 | 4.26614e-05 | 5.42662e-05 |
| 100000.     | 0.00184236  | 0.00228900  | 0.00284005  | 0.00351893  | 0.00435324  |
| 10000.0     | 0.0774182   | 0.0886547   | 0.100916    | 0.114209    | 0.128522    |
| 1000.00     | 0.480792    | 0.493469    | 0.504268    | 0.513223    | 0.520374    |
| 100.000     | 0.474699    | 0.459405    | 0.443151    | 0.425957    | 0.407871    |
| 10.0000     | 0.0818069   | 0.0701826   | 0.0599407   | 0.0509658   | 0.0431451   |
| 1.00000     | 0.000246919 | 0.000192032 | 0.000150981 | 0.000119897 | 9.60800e-05 |
| 0.100000    | 8.61358e-07 | 6.75197e-07 | 5.29893e-07 | 4.16237e-07 | 3.27199e-07 |
| 0.0100000   | 2.02441e-10 | 1.49445e-10 | 1.11580e-10 | 8.41848e-11 | 6.41476e-11 |
| 0.00100000  | 5.07041e-14 | 4.02912e-14 | 3.23818e-14 | 2.63084e-14 | 2.16067e-14 |
| 0.000100000 | 1.67973e-16 | 1.40502e-16 | 1.18187e-16 | 9.99263e-17 | 8.49030e-17 |
| 1.00000e-05 | 2.79880e-18 | 2.41639e-18 | 2.09275e-18 | 1.81714e-18 | 1.58127e-18 |
| 1.00000e-06 | 1.48018e-19 | 1.30564e-19 | 1.15335e-19 | 1.01990e-19 | 9.02586e-20 |
| 1.00000e-07 | 1.33557e-20 | 1.18383e-20 | 1.05034e-20 | 9.32506e-21 | 8.28222e-21 |
| 1.00000e-08 | 1.32055e-21 | 1.17118e-21 | 1.03965e-21 | 9.23441e-22 | 8.20514e-22 |

1.00000e-09 | 1.31902e-22 1.16990e-22 1.03857e-22 9.22521e-23 8.19732e-23

Pa\K | 220.000 230.000 240.000 250.000 260.000

|             |             |             |             |             |             |
|-------------|-------------|-------------|-------------|-------------|-------------|
| 1.00000e+08 | 7.13973e-09 | 9.16026e-09 | 1.17771e-08 | 1.51692e-08 | 1.95679e-08 |
| 1.00000e+07 | 7.11863e-07 | 9.12853e-07 | 1.17293e-06 | 1.50970e-06 | 1.94587e-06 |
| 1.00000e+06 | 6.91456e-05 | 8.82366e-05 | 0.000112732 | 0.000144143 | 0.000184371 |
| 100000.     | 0.00537508  | 0.00662121  | 0.00813307  | 0.00995662  | 0.0121419   |
| 10000.0     | 0.143816    | 0.160027    | 0.177064    | 0.194811    | 0.213127    |
| 1000.00     | 0.525762    | 0.529427    | 0.531411    | 0.531757    | 0.530504    |
| 100.000     | 0.388966    | 0.369343    | 0.349130    | 0.328475    | 0.307548    |
| 10.0000     | 0.0363684   | 0.0305290   | 0.0255251   | 0.0212599   | 0.0176434   |
| 1.00000     | 7.76209e-05 | 6.31570e-05 | 5.17050e-05 | 4.25491e-05 | 3.51633e-05 |
| 0.100000    | 2.57371e-07 | 2.02568e-07 | 1.59536e-07 | 1.25739e-07 | 9.91896e-08 |
| 0.0100000   | 4.93531e-11 | 3.83407e-11 | 3.00871e-11 | 2.38667e-11 | 1.91593e-11 |
| 0.00100000  | 1.79478e-14 | 1.50957e-14 | 1.28801e-14 | 1.11777e-14 | 9.90069e-15 |
| 0.000100000 | 7.25027e-17 | 6.22596e-17 | 5.38212e-17 | 4.69245e-17 | 4.13826e-17 |
| 1.00000e-05 | 1.37866e-18 | 1.20414e-18 | 1.05360e-18 | 9.23724e-19 | 8.11865e-19 |
| 1.00000e-06 | 7.99206e-20 | 7.07954e-20 | 6.27320e-20 | 5.56030e-20 | 4.92997e-20 |
| 1.00000e-07 | 7.35766e-21 | 6.53698e-21 | 5.80799e-21 | 5.16023e-21 | 4.58462e-21 |
| 1.00000e-08 | 7.29195e-22 | 6.48083e-22 | 5.75989e-22 | 5.11891e-22 | 4.54900e-22 |
| 1.00000e-09 | 7.28529e-23 | 6.47514e-23 | 5.75502e-23 | 5.11472e-23 | 4.54540e-23 |

Pa\K | 270.000 280.000 290.000 300.000 310.000

|             |             |             |             |             |             |
|-------------|-------------|-------------|-------------|-------------|-------------|
| 1.00000e+08 | 2.52719e-08 | 3.26658e-08 | 4.22439e-08 | 1.95620e-07 | 7.06615e-08 |
| 1.00000e+07 | 2.51068e-06 | 3.24164e-06 | 4.18673e-06 | 1.89730e-05 | 6.98072e-06 |
| 1.00000e+06 | 0.000235800 | 0.000301391 | 0.000384803 | 0.00148997  | 0.000623994 |
| 100000.     | 0.0147421   | 0.0178132   | 0.0214118   | 0.0496252   | 0.0304153   |
| 10000.0     | 0.231850    | 0.250801    | 0.269788    | 0.343223    | 0.307073    |
| 1000.00     | 0.527689    | 0.523349    | 0.517520    | 0.490097    | 0.501551    |
| 100.000     | 0.286529    | 0.265603    | 0.244955    | 0.198346    | 0.205189    |
| 10.0000     | 0.0145920   | 0.0120297   | 0.00988771  | 0.00984889  | 0.00662660  |
| 1.00000     | 2.91577e-05 | 2.42401e-05 | 2.01897e-05 | 4.27274e-05 | 1.40525e-05 |
| 0.100000    | 7.83332e-08 | 6.19488e-08 | 4.90777e-08 | 1.37586e-07 | 3.10240e-08 |
| 0.0100000   | 1.55886e-11 | 1.28805e-11 | 1.08341e-11 | 3.45129e-10 | 8.17601e-12 |
| 0.00100000  | 8.98937e-15 | 8.40725e-15 | 8.13893e-15 | 2.48619e-12 | 8.58791e-15 |
| 0.000100000 | 3.70777e-17 | 3.39623e-17 | 3.20673e-17 | 4.58960e-14 | 3.25755e-17 |
| 1.00000e-05 | 7.15947e-19 | 6.34433e-19 | 5.66340e-19 | 1.93547e-15 | 4.69782e-19 |
| 1.00000e-06 | 4.37291e-20 | 3.88116e-20 | 3.44796e-20 | 1.58349e-16 | 2.73594e-20 |
| 1.00000e-07 | 4.07325e-21 | 3.61914e-21 | 3.21612e-21 | 1.54591e-17 | 2.54215e-21 |
| 1.00000e-08 | 4.04239e-22 | 3.59221e-22 | 3.19236e-22 | 1.54204e-18 | 2.52249e-22 |
| 1.00000e-09 | 4.03927e-23 | 3.58949e-23 | 3.18996e-23 | 1.54164e-19 | 2.52050e-23 |

Pa\K | 400.000 500.000 600.000 700.000 800.000

|             |             |             |             |             |             |
|-------------|-------------|-------------|-------------|-------------|-------------|
| 1.00000e+08 | 2.58880e-06 | 3.51159e-05 | 0.000530201 | 0.00555667  | 0.0161137   |
| 1.00000e+07 | 0.000229524 | 0.00229820  | 0.0157251   | 0.0538574   | 0.0781209   |
| 1.00000e+06 | 0.0116411   | 0.0541993   | 0.141857    | 0.215053    | 0.205673    |
| 100000.     | 0.158898    | 0.295572    | 0.357531    | 0.314142    | 0.218873    |
| 10000.0     | 0.444248    | 0.403962    | 0.275972    | 0.149944    | 0.0717350   |
| 1000.00     | 0.339084    | 0.168118    | 0.0632086   | 0.0201786   | 0.00648253  |
| 100.000     | 0.0659889   | 0.0159592   | 0.00330365  | 0.000680259 | 0.000174131 |
| 10.0000     | 0.00150827  | 0.000217595 | 3.44789e-05 | 6.87901e-06 | 2.27144e-06 |
| 1.00000     | 6.15200e-06 | 1.07977e-06 | 2.81039e-07 | 9.63002e-08 | 4.66992e-08 |
| 0.100000    | 2.45563e-08 | 1.01385e-08 | 6.81570e-09 | 3.51055e-09 | 1.60155e-09 |
| 0.0100000   | 1.54142e-10 | 2.21258e-10 | 2.59120e-10 | 1.62756e-10 | 7.49618e-11 |
| 0.00100000  | 2.23657e-12 | 6.31646e-12 | 9.83100e-12 | 7.00561e-12 | 3.42281e-12 |
| 0.000100000 | 4.11711e-14 | 1.44000e-13 | 2.53350e-13 | 1.92376e-13 | 9.90887e-14 |
| 1.00000e-05 | 8.85772e-16 | 1.70937e-15 | 2.83735e-15 | 2.18761e-15 | 1.18610e-15 |
| 1.00000e-06 | 5.35725e-17 | 3.24048e-17 | 3.32740e-17 | 2.44237e-17 | 1.51757e-17 |
| 1.00000e-07 | 5.02383e-18 | 1.98431e-18 | 1.09613e-18 | 7.22924e-19 | 6.08260e-19 |
| 1.00000e-08 | 4.99065e-19 | 1.86144e-19 | 8.79395e-20 | 5.56637e-20 | 5.20958e-20 |
| 1.00000e-09 | 4.98731e-20 | 1.84922e-20 | 8.57805e-21 | 5.40153e-21 | 5.12340e-21 |

Pa\K | 900.000 1000.00 1100.00 1200.00 1300.00

|             |             |             |             |             |             |
|-------------|-------------|-------------|-------------|-------------|-------------|
| 1.00000e+08 | 0.0170163   | 0.0132705   | 0.0117107   | 0.0100651   | 0.00850990  |
| 1.00000e+07 | 0.0647081   | 0.0426022   | 0.0288743   | 0.0219072   | 0.0188036   |
| 1.00000e+06 | 0.148771    | 0.0954752   | 0.0602955   | 0.0399676   | 0.0301635   |
| 100000.     | 0.129168    | 0.0696455   | 0.0360593   | 0.0197905   | 0.0129141   |
| 10000.0     | 0.0310057   | 0.0131616   | 0.00574597  | 0.00284672  | 0.00176264  |
| 1000.00     | 0.00213090  | 0.000806661 | 0.000351537 | 0.000182743 | 0.000120859 |
| 100.000     | 5.77452e-05 | 2.71052e-05 | 1.48455e-05 | 9.07111e-06 | 6.71179e-06 |
| 10.0000     | 1.26739e-06 | 9.33611e-07 | 6.60191e-07 | 4.61210e-07 | 3.68613e-07 |
| 1.00000     | 3.58942e-08 | 3.26456e-08 | 2.66006e-08 | 2.05339e-08 | 1.78477e-08 |
| 0.100000    | 9.46410e-10 | 7.62178e-10 | 6.44964e-10 | 5.58695e-10 | 5.94216e-10 |
| 0.0100000   | 3.64228e-11 | 2.23323e-11 | 1.63215e-11 | 1.49158e-11 | 2.19868e-11 |
| 0.00100000  | 1.66718e-12 | 9.74110e-13 | 6.74724e-13 | 6.63920e-13 | 1.32036e-12 |
| 0.000100000 | 4.97204e-14 | 3.01996e-14 | 2.34643e-14 | 3.27788e-14 | 9.70053e-14 |

|             |             |             |             |             |             |
|-------------|-------------|-------------|-------------|-------------|-------------|
| 1.00000e-05 | 6.52043e-16 | 5.04560e-16 | 7.08758e-16 | 2.06124e-15 | 8.46835e-15 |
| 1.00000e-06 | 1.22256e-17 | 1.81752e-17 | 4.86414e-17 | 1.88550e-16 | 8.28077e-16 |
| 1.00000e-07 | 7.57766e-19 | 1.53210e-18 | 4.66274e-18 | 1.86883e-17 | 8.26184e-17 |
| 1.00000e-08 | 7.13452e-20 | 1.50501e-19 | 4.64358e-19 | 1.86722e-18 | 8.25998e-18 |
| 1.00000e-09 | 7.09068e-21 | 1.50233e-20 | 4.64168e-20 | 1.86706e-19 | 8.25979e-19 |

| Pa\K        | 1400.00     | 1500.00     | 1750.00     | 2000.00     | 2250.00     |
|-------------|-------------|-------------|-------------|-------------|-------------|
| 1.00000e+08 | 0.00843023  | 0.0105553   | 0.00329166  | 0.00334589  | 0.00358608  |
| 1.00000e+07 | 0.0190444   | 0.0221921   | 0.0160988   | 0.00975528  | 0.00613256  |
| 1.00000e+06 | 0.0269121   | 0.0270211   | 0.0181164   | 0.00650349  | 0.00241019  |
| 100000.     | 0.0102031   | 0.00910547  | 0.00469730  | 0.00123422  | 0.000355357 |
| 10000.0     | 0.00135287  | 0.00118220  | 0.000579639 | 0.000141987 | 3.84275e-05 |
| 1000.00     | 9.96574e-05 | 9.37286e-05 | 5.47621e-05 | 1.40167e-05 | 3.78117e-06 |
| 100.000     | 6.09495e-06 | 6.35322e-06 | 4.88516e-06 | 1.33546e-06 | 3.64021e-07 |
| 10.0000     | 3.61260e-07 | 4.19376e-07 | 4.39135e-07 | 1.27238e-07 | 3.50682e-08 |
| 1.00000     | 1.97055e-08 | 2.69917e-08 | 4.03616e-08 | 1.22451e-08 | 3.40707e-09 |
| 0.100000    | 9.08509e-10 | 1.70723e-09 | 3.77142e-09 | 1.18637e-09 | 3.32554e-10 |
| 0.0100000   | 5.22589e-11 | 1.29224e-10 | 3.61152e-10 | 1.16533e-10 | 3.28685e-11 |
| 0.00100000  | 4.05614e-12 | 1.13076e-11 | 3.51534e-11 | 1.15370e-11 | 3.26880e-12 |
| 0.000100000 | 3.53313e-13 | 1.04862e-12 | 3.44817e-12 | 1.14570e-12 | 3.25702e-13 |
| 1.00000e-05 | 3.34721e-14 | 1.01863e-13 | 3.42768e-13 | 1.14336e-13 | 3.25373e-14 |
| 1.00000e-06 | 3.31825e-15 | 1.01395e-14 | 3.42513e-14 | 1.14307e-14 | 3.25334e-15 |
| 1.00000e-07 | 3.31521e-16 | 1.01345e-15 | 3.42487e-15 | 1.14304e-15 | 3.25330e-16 |
| 1.00000e-08 | 3.31491e-17 | 1.01340e-16 | 3.42485e-16 | 1.14304e-16 | 3.25329e-17 |
| 1.00000e-09 | 3.31488e-18 | 1.01339e-17 | 3.42484e-17 | 1.14304e-17 | 3.25329e-18 |

| Pa\K        | 2500.00     | 2750.00     | 3000.00     | 3250.00     | 3500.00     |
|-------------|-------------|-------------|-------------|-------------|-------------|
| 1.00000e+08 | 0.00377010  | 0.00365875  | 0.00327043  | 0.00273121  | 0.00217257  |
| 1.00000e+07 | 0.00401764  | 0.00250324  | 0.00149782  | 0.000886635 | 0.000531408 |
| 1.00000e+06 | 0.00103488  | 0.000474632 | 0.000229960 | 0.000118256 | 6.46148e-05 |
| 100000.     | 0.000130596 | 5.49093e-05 | 2.53517e-05 | 1.26850e-05 | 6.82424e-06 |
| 10000.0     | 1.35806e-05 | 5.57717e-06 | 2.53884e-06 | 1.26025e-06 | 6.75397e-07 |
| 1000.00     | 1.32109e-06 | 5.37004e-07 | 2.42348e-07 | 1.19375e-07 | 6.35163e-08 |
| 100.000     | 1.26630e-07 | 5.10528e-08 | 2.28123e-08 | 1.11140e-08 | 5.84488e-09 |
| 10.0000     | 1.21578e-08 | 4.86107e-09 | 2.14867e-09 | 1.03383e-09 | 5.36341e-10 |
| 1.00000     | 1.17846e-09 | 4.68097e-10 | 2.05071e-10 | 9.76324e-11 | 5.00529e-11 |
| 0.100000    | 1.14758e-10 | 4.53084e-11 | 1.96878e-11 | 9.28238e-12 | 4.70665e-12 |
| 0.0100000   | 1.13457e-11 | 4.47324e-12 | 1.93969e-12 | 9.12235e-13 | 4.61261e-13 |
| 0.00100000  | 1.12935e-12 | 4.45294e-13 | 1.93055e-13 | 9.07702e-14 | 4.58830e-14 |
| 0.000100000 | 1.12614e-13 | 4.44119e-14 | 1.92558e-14 | 9.05386e-15 | 4.57664e-15 |
| 1.00000e-05 | 1.12529e-14 | 4.43819e-15 | 1.92436e-15 | 9.04838e-16 | 4.57398e-16 |
| 1.00000e-06 | 1.12518e-15 | 4.43783e-16 | 1.92421e-16 | 9.04775e-17 | 4.57367e-17 |
| 1.00000e-07 | 1.12517e-16 | 4.43780e-17 | 1.92420e-17 | 9.04769e-18 | 4.57364e-18 |
| 1.00000e-08 | 1.12517e-17 | 4.43779e-18 | 1.92420e-18 | 9.04768e-19 | 4.57364e-19 |
| 1.00000e-09 | 1.12517e-18 | 4.43779e-19 | 1.92420e-19 | 9.04768e-20 | 4.57364e-20 |

| Pa\K        | 3750.00     | 4000.00     |
|-------------|-------------|-------------|
| 1.00000e+08 | 0.00167659  | 0.00127395  |
| 1.00000e+07 | 0.000326872 | 0.000207651 |
| 1.00000e+06 | 3.73986e-05 | 2.28190e-05 |
| 100000.     | 3.91850e-06 | 2.38467e-06 |
| 10000.0     | 3.87376e-07 | 2.35861e-07 |
| 1000.00     | 3.61781e-08 | 2.18797e-08 |
| 100.000     | 3.28935e-09 | 1.96534e-09 |
| 10.0000     | 2.97540e-10 | 1.75173e-10 |
| 1.00000     | 2.74107e-11 | 1.59175e-11 |
| 0.100000    | 2.54655e-12 | 1.45972e-12 |
| 0.0100000   | 2.48816e-13 | 1.42170e-13 |
| 0.00100000  | 2.47422e-14 | 1.41324e-14 |
| 0.000100000 | 2.46795e-15 | 1.40965e-15 |
| 1.00000e-05 | 2.46655e-16 | 1.40888e-16 |
| 1.00000e-06 | 2.46640e-17 | 1.40879e-17 |
| 1.00000e-07 | 2.46638e-18 | 1.40879e-18 |
| 1.00000e-08 | 2.46638e-19 | 1.40878e-19 |
| 1.00000e-09 | 2.46638e-20 | 1.40878e-20 |

rad21

=====

| Pa\K        | 20.0000     | 30.0000     | 40.0000     | 50.0000     | 60.0000     |
|-------------|-------------|-------------|-------------|-------------|-------------|
| 1.00000e+08 | 3.64035e-06 | 7.36733e-06 | 1.10374e-05 | 1.47309e-05 | 1.84988e-05 |
| 1.00000e+07 | 3.64013e-05 | 7.36642e-05 | 0.000110353 | 0.000147273 | 0.000184930 |
| 1.00000e+06 | 0.000363792 | 0.000735737 | 0.00110150  | 0.00146911  | 0.00184357  |
| 100000.     | 0.00361593  | 0.00726776  | 0.0108147   | 0.0143356   | 0.0178770   |
| 10000.0     | 0.0340646   | 0.0645408   | 0.0907773   | 0.113885    | 0.134474    |
| 1000.00     | 0.202823    | 0.257143    | 0.263695    | 0.254053    | 0.238469    |
| 100.000     | 0.163580    | 0.0776894   | 0.0418124   | 0.0244966   | 0.0152469   |

|             |             |             |             |             |             |
|-------------|-------------|-------------|-------------|-------------|-------------|
| 10.0000     | 0.00274537  | 0.000338530 | 9.44854e-05 | 3.77306e-05 | 1.84228e-05 |
| 1.00000     | 2.20943e-06 | 2.97519e-07 | 1.02397e-07 | 4.92746e-08 | 2.81646e-08 |
| 0.100000    | 5.95673e-09 | 1.42750e-09 | 6.84912e-10 | 4.17764e-10 | 2.87348e-10 |
| 0.0100000   | 1.13057e-10 | 4.52004e-11 | 2.74665e-11 | 1.93318e-11 | 1.46766e-11 |
| 0.00100000  | 7.62851e-12 | 3.62931e-12 | 2.35336e-12 | 1.71401e-12 | 1.32920e-12 |
| 0.000100000 | 7.26376e-13 | 3.54056e-13 | 2.31407e-13 | 1.69209e-13 | 1.31534e-13 |
| 1.00000e-05 | 7.22725e-14 | 3.53170e-14 | 2.31016e-14 | 1.68991e-14 | 1.31398e-14 |
| 1.00000e-06 | 7.22378e-15 | 3.53099e-15 | 2.30995e-15 | 1.68988e-15 | 1.31402e-15 |
| 1.00000e-07 | 7.22467e-16 | 3.53179e-16 | 2.31057e-16 | 1.69035e-16 | 1.31438e-16 |
| 1.00000e-08 | 7.22593e-17 | 3.53187e-17 | 2.31041e-17 | 1.69014e-17 | 1.31417e-17 |
| 1.00000e-09 | 7.22479e-18 | 3.53141e-18 | 2.31016e-18 | 1.68998e-18 | 1.31406e-18 |

| Pa\K        | 70.0000     | 80.0000     | 90.0000     | 100.000     | 110.000     |
|-------------|-------------|-------------|-------------|-------------|-------------|
| 1.00000e+08 | 2.23832e-05 | 2.64266e-05 | 3.06740e-05 | 3.51748e-05 | 3.99840e-05 |
| 1.00000e+07 | 0.000223748 | 0.000264148 | 0.000306580 | 0.000351537 | 0.000399565 |
| 1.00000e+06 | 0.00222906  | 0.00262971  | 0.00304988  | 0.00349431  | 0.00396826  |
| 100000.     | 0.0214749   | 0.0251626   | 0.0289730   | 0.0329393   | 0.0370955   |
| 10000.0     | 0.152936    | 0.169543    | 0.184487    | 0.197898    | 0.209860    |
| 1000.00     | 0.220883    | 0.202956    | 0.185421    | 0.168610    | 0.152672    |
| 100.000     | 0.00993126  | 0.00670121  | 0.00465023  | 0.00330090  | 0.00238698  |
| 10.0000     | 1.02288e-05 | 6.20608e-06 | 4.01616e-06 | 2.72845e-06 | 1.92479e-06 |
| 1.00000     | 1.78876e-08 | 1.21985e-08 | 8.75480e-09 | 6.52818e-09 | 5.01364e-09 |
| 0.100000    | 2.12349e-10 | 1.64523e-10 | 1.31766e-10 | 1.08126e-10 | 9.03730e-11 |
| 0.0100000   | 1.16723e-11 | 9.57761e-12 | 8.03554e-12 | 6.85353e-12 | 5.91907e-12 |
| 0.00100000  | 1.07261e-12 | 8.89538e-13 | 7.52420e-13 | 6.45901e-13 | 5.60778e-13 |
| 0.000100000 | 1.06313e-13 | 8.82703e-14 | 7.47297e-14 | 6.41949e-14 | 5.57660e-14 |
| 1.00000e-05 | 1.06221e-14 | 8.82047e-15 | 7.46815e-15 | 6.41587e-15 | 5.57386e-15 |
| 1.00000e-06 | 1.06230e-15 | 8.82167e-16 | 7.46952e-16 | 6.41733e-16 | 5.57535e-16 |
| 1.00000e-07 | 1.06257e-16 | 8.82362e-17 | 7.47088e-17 | 6.41822e-17 | 5.57586e-17 |
| 1.00000e-08 | 1.06237e-17 | 8.82180e-18 | 7.46927e-18 | 6.41680e-18 | 5.57462e-18 |
| 1.00000e-09 | 1.06229e-18 | 8.82125e-19 | 7.46884e-19 | 6.41646e-19 | 5.57435e-19 |

| Pa\K        | 120.000     | 130.000     | 140.000     | 150.000     | 160.000     |
|-------------|-------------|-------------|-------------|-------------|-------------|
| 1.00000e+08 | 4.51635e-05 | 5.07832e-05 | 5.69228e-05 | 6.36722e-05 | 7.11338e-05 |
| 1.00000e+07 | 0.000451280 | 0.000507379 | 0.000568652 | 0.000635992 | 0.000710413 |
| 1.00000e+06 | 0.00447758  | 0.00502885  | 0.00562945  | 0.00628765  | 0.00701271  |
| 100000.     | 0.0414765   | 0.0461176   | 0.0510544   | 0.0563213   | 0.0619507   |
| 10000.0     | 0.220418    | 0.229591    | 0.237379    | 0.243767    | 0.248733    |
| 1000.00     | 0.137670    | 0.123627    | 0.110545    | 0.0984188   | 0.0872342   |
| 100.000     | 0.00175286  | 0.00130387  | 0.000980469 | 0.000744119 | 0.000569225 |
| 10.0000     | 1.39894e-06 | 1.04144e-06 | 7.90607e-07 | 6.09947e-07 | 4.76929e-07 |
| 1.00000     | 3.94130e-09 | 3.15700e-09 | 2.56788e-09 | 2.11542e-09 | 1.76139e-09 |
| 0.100000    | 7.66207e-11 | 6.57000e-11 | 5.68520e-11 | 4.95646e-11 | 4.34810e-11 |
| 0.0100000   | 5.16215e-12 | 4.53701e-12 | 4.01257e-12 | 3.56696e-12 | 3.18438e-12 |
| 0.00100000  | 4.9214e-13  | 4.33335e-13 | 3.84472e-13 | 3.42728e-13 | 3.06719e-13 |
| 0.000100000 | 4.88712e-14 | 4.31298e-14 | 3.82795e-14 | 3.41334e-14 | 3.05551e-14 |
| 1.00000e-05 | 4.88502e-15 | 4.31139e-15 | 3.82675e-15 | 3.41246e-15 | 3.05490e-15 |
| 1.00000e-06 | 4.88652e-16 | 4.31285e-16 | 3.82815e-16 | 3.41378e-16 | 3.05611e-16 |
| 1.00000e-07 | 4.88671e-17 | 4.31280e-17 | 3.82791e-17 | 3.41340e-17 | 3.05563e-17 |
| 1.00000e-08 | 4.88563e-18 | 4.31185e-18 | 3.82709e-18 | 3.41268e-18 | 3.05500e-18 |
| 1.00000e-09 | 4.88541e-19 | 4.31167e-19 | 3.82694e-19 | 3.41256e-19 | 3.05490e-19 |

| Pa\K        | 170.000     | 180.000     | 190.000     | 200.000     | 210.000     |
|-------------|-------------|-------------|-------------|-------------|-------------|
| 1.00000e+08 | 7.94230e-05 | 8.86705e-05 | 9.90240e-05 | 0.000110650 | 0.000123735 |
| 1.00000e+07 | 0.000793057 | 0.000885218 | 0.000988348 | 0.00110408  | 0.00123427  |
| 1.00000e+06 | 0.00781492  | 0.00870573  | 0.00969775  | 0.0108049   | 0.0120423   |
| 100000.     | 0.0679715   | 0.0744070   | 0.0812734   | 0.0885776   | 0.0963154   |
| 10000.0     | 0.252256    | 0.254320    | 0.254918    | 0.254059    | 0.251768    |
| 1000.00     | 0.0769730   | 0.0676113   | 0.0591198   | 0.0514633   | 0.0446015   |
| 100.000     | 0.000438419 | 0.000339685 | 0.000264565 | 0.000207018 | 0.000162666 |
| 10.0000     | 3.77152e-07 | 3.01118e-07 | 2.42394e-07 | 1.96515e-07 | 1.60319e-07 |
| 1.00000     | 1.47997e-09 | 1.25326e-09 | 1.06853e-09 | 9.16520e-10 | 7.90389e-10 |
| 0.100000    | 3.83451e-11 | 3.39693e-11 | 3.02123e-11 | 2.69664e-11 | 2.41475e-11 |
| 0.0100000   | 2.85311e-12 | 2.56429e-12 | 2.31109e-12 | 2.08813e-12 | 1.89110e-12 |
| 0.00100000  | 2.75411e-13 | 2.48017e-13 | 2.23923e-13 | 2.02645e-13 | 1.83795e-13 |
| 0.000100000 | 2.74427e-14 | 2.47183e-14 | 2.23214e-14 | 2.02040e-14 | 1.83276e-14 |
| 1.00000e-05 | 2.74388e-15 | 2.47161e-15 | 2.23207e-15 | 2.02045e-15 | 1.83291e-15 |
| 1.00000e-06 | 2.74498e-16 | 2.47260e-16 | 2.23293e-16 | 2.02119e-16 | 1.83353e-16 |
| 1.00000e-07 | 2.74443e-17 | 2.47200e-17 | 2.23230e-17 | 2.02055e-17 | 1.83290e-17 |
| 1.00000e-08 | 2.74388e-18 | 2.47152e-18 | 2.23188e-18 | 2.02019e-18 | 1.83258e-18 |
| 1.00000e-09 | 2.74379e-19 | 2.47144e-19 | 2.23182e-19 | 2.02013e-19 | 1.83253e-19 |

| Pa\K        | 220.000     | 230.000     | 240.000     | 250.000     | 260.000     |
|-------------|-------------|-------------|-------------|-------------|-------------|
| 1.00000e+08 | 0.000138490 | 0.000155152 | 0.000173987 | 0.000195292 | 0.000219401 |
| 1.00000e+07 | 0.00138095  | 0.00154646  | 0.00173336  | 0.00194453  | 0.00218318  |
| 1.00000e+06 | 0.0134265   | 0.0149753   | 0.0167078   | 0.0186441   | 0.0208056   |

|             |             |             |             |             |             |
|-------------|-------------|-------------|-------------|-------------|-------------|
| 100000.     | 0.104469    | 0.113007    | 0.121882    | 0.131028    | 0.140366    |
| 10000.0     | 0.248089    | 0.243087    | 0.236849    | 0.229477    | 0.221093    |
| 1000.00     | 0.0384889   | 0.0330763   | 0.0283118   | 0.0241416   | 0.0205119   |
| 100.000     | 0.000128305 | 0.000101559 | 8.06549e-05 | 6.42557e-05 | 5.13469e-05 |
| 10.0000     | 1.31521e-07 | 1.08442e-07 | 8.98305e-08 | 7.47391e-08 | 6.24438e-08 |
| 1.00000     | 6.84976e-10 | 5.96332e-10 | 5.21390e-10 | 4.57742e-10 | 4.03471e-10 |
| 0.100000    | 2.16890e-11 | 1.95376e-11 | 1.76496e-11 | 1.59893e-11 | 1.45267e-11 |
| 0.0100000   | 1.71651e-12 | 1.56148e-12 | 1.42362e-12 | 1.30090e-12 | 1.19159e-12 |
| 0.00100000  | 1.67052e-13 | 1.52156e-13 | 1.38884e-13 | 1.27050e-13 | 1.16493e-13 |
| 0.000100000 | 1.66608e-14 | 1.51774e-14 | 1.38556e-14 | 1.26767e-14 | 1.16250e-14 |
| 1.00000e-05 | 1.66630e-15 | 1.51802e-15 | 1.38588e-15 | 1.26803e-15 | 1.16287e-15 |
| 1.00000e-06 | 1.66680e-16 | 1.51842e-16 | 1.38618e-16 | 1.26823e-16 | 1.16299e-16 |
| 1.00000e-07 | 1.66619e-17 | 1.51782e-17 | 1.38561e-17 | 1.26769e-17 | 1.16248e-17 |
| 1.00000e-08 | 1.66591e-18 | 1.51758e-18 | 1.38539e-18 | 1.26750e-18 | 1.16232e-18 |
| 1.00000e-09 | 1.66587e-19 | 1.51754e-19 | 1.38536e-19 | 1.26748e-19 | 1.16229e-19 |

| Pa\K        | 270.000     | 280.000     | 290.000     | 300.000     | 310.000     |
|-------------|-------------|-------------|-------------|-------------|-------------|
| 1.00000e+08 | 0.000246686 | 0.000277564 | 0.000312496 | 0.000560862 | 0.000396646 |
| 1.00000e+07 | 0.00245287  | 0.00275754  | 0.00310155  | 0.00550520  | 0.00392726  |
| 1.00000e+06 | 0.0232142   | 0.0258923   | 0.0288626   | 0.0469139   | 0.0357669   |
| 100000.     | 0.149800    | 0.159221    | 0.168510    | 0.195659    | 0.186175    |
| 10000.0     | 0.211834    | 0.201844    | 0.191277    | 0.148413    | 0.169031    |
| 1000.00     | 0.0173692   | 0.0146619   | 0.0123409   | 0.00987632  | 0.00867618  |
| 100.000     | 4.11540e-05 | 3.30823e-05 | 2.66729e-05 | 6.86385e-05 | 1.74969e-05 |
| 10.0000     | 5.23839e-08 | 4.41219e-08 | 3.73132e-08 | 4.77196e-07 | 2.70178e-08 |
| 1.00000     | 3.57038e-10 | 3.17193e-10 | 2.82918e-10 | 1.08409e-08 | 2.27857e-10 |
| 0.100000    | 1.32368e-11 | 1.20983e-11 | 1.10930e-11 | 5.81937e-10 | 9.42193e-12 |
| 0.0100000   | 1.09420e-12 | 1.00744e-12 | 9.30192e-13 | 5.08912e-11 | 8.00426e-13 |
| 0.00100000  | 1.07075e-13 | 9.86747e-14 | 9.11875e-14 | 5.01080e-12 | 7.85930e-14 |
| 0.000100000 | 1.06866e-14 | 9.84951e-15 | 9.10333e-15 | 5.00383e-13 | 7.84799e-15 |
| 1.00000e-05 | 1.06903e-15 | 9.85315e-16 | 9.10685e-16 | 5.00461e-14 | 7.85110e-16 |
| 1.00000e-06 | 1.06908e-16 | 9.85307e-17 | 9.10623e-17 | 5.00490e-15 | 7.84963e-17 |
| 1.00000e-07 | 1.06860e-17 | 9.84862e-18 | 9.10208e-18 | 5.00427e-16 | 7.84606e-18 |
| 1.00000e-08 | 1.06846e-18 | 9.84733e-19 | 9.10095e-19 | 5.00401e-17 | 7.84516e-19 |
| 1.00000e-09 | 1.06844e-19 | 9.84716e-20 | 9.10080e-20 | 5.00396e-18 | 7.84505e-20 |

| Pa\K        | 400.000     | 500.000     | 600.000     | 700.000     | 800.000     |
|-------------|-------------|-------------|-------------|-------------|-------------|
| 1.00000e+08 | 0.00189059  | 0.00634544  | 0.0208641   | 0.0538144   | 0.0751252   |
| 1.00000e+07 | 0.0176237   | 0.0499365   | 0.105895    | 0.143513    | 0.139020    |
| 1.00000e+06 | 0.110794    | 0.179043    | 0.188454    | 0.149684    | 0.119912    |
| 100000.     | 0.211208    | 0.146996    | 0.0790164   | 0.0442834   | 0.0332580   |
| 10000.0     | 0.0610948   | 0.0198627   | 0.00690713  | 0.00348007  | 0.00287836  |
| 1000.00     | 0.00199395  | 0.000461659 | 0.000163569 | 0.000107920 | 0.000128044 |
| 100.000     | 1.41510e-05 | 4.57476e-06 | 2.76492e-06 | 3.26842e-06 | 6.23256e-06 |
| 10.0000     | 1.55622e-07 | 8.53909e-08 | 8.83582e-08 | 1.64328e-07 | 4.23449e-07 |
| 1.00000     | 4.98761e-09 | 3.81184e-09 | 5.28233e-09 | 1.22120e-08 | 3.59093e-08 |
| 0.100000    | 3.19119e-10 | 2.83066e-10 | 4.40765e-10 | 1.10325e-09 | 3.39456e-09 |
| 0.0100000   | 2.92518e-11 | 2.68260e-11 | 4.27506e-11 | 1.08577e-10 | 3.36505e-10 |
| 0.00100000  | 2.89740e-12 | 2.66826e-12 | 4.26359e-12 | 1.08419e-11 | 3.36160e-11 |
| 0.000100000 | 2.89577e-13 | 2.66774e-13 | 4.26247e-13 | 1.08380e-12 | 3.36072e-12 |
| 1.00000e-05 | 2.89610e-14 | 2.66739e-14 | 4.26136e-14 | 1.08360e-13 | 3.36046e-13 |
| 1.00000e-06 | 2.89568e-15 | 2.66683e-15 | 4.26073e-15 | 1.08353e-14 | 3.36040e-14 |
| 1.00000e-07 | 2.89530e-16 | 2.66660e-16 | 4.26056e-16 | 1.08352e-15 | 3.36039e-15 |
| 1.00000e-08 | 2.89520e-17 | 2.66655e-17 | 4.26054e-17 | 1.08352e-16 | 3.36039e-16 |
| 1.00000e-09 | 2.89519e-18 | 2.66655e-18 | 4.26053e-18 | 1.08352e-17 | 3.36039e-17 |

| Pa\K        | 900.000     | 1000.00     | 1100.00     | 1200.00     | 1300.00     |
|-------------|-------------|-------------|-------------|-------------|-------------|
| 1.00000e+08 | 0.0742036   | 0.0738100   | 0.0942984   | 0.119314    | 0.132130    |
| 1.00000e+07 | 0.123925    | 0.104954    | 0.0873713   | 0.0820142   | 0.0830805   |
| 1.00000e+06 | 0.103460    | 0.0851271   | 0.0620779   | 0.0455006   | 0.0363378   |
| 100000.     | 0.0285825   | 0.0227929   | 0.0152144   | 0.00964619  | 0.00656003  |
| 10000.0     | 0.00277093  | 0.00239551  | 0.00166066  | 0.00104688  | 0.000689821 |
| 1000.00     | 0.000167572 | 0.000179104 | 0.000141747 | 9.58380e-05 | 6.49545e-05 |
| 100.000     | 1.11692e-05 | 1.43288e-05 | 1.25918e-05 | 8.99229e-06 | 6.24059e-06 |
| 10.0000     | 9.05530e-07 | 1.27906e-06 | 1.18559e-06 | 8.70324e-07 | 6.11266e-07 |
| 1.00000     | 8.27246e-08 | 1.21545e-07 | 1.15205e-07 | 8.56181e-08 | 6.04737e-08 |
| 0.100000    | 8.01465e-09 | 1.19278e-08 | 1.13948e-08 | 8.50767e-09 | 6.02240e-09 |
| 0.0100000   | 7.97328e-10 | 1.18896e-09 | 1.13735e-09 | 8.49859e-10 | 6.01829e-10 |
| 0.00100000  | 7.96778e-11 | 1.18847e-10 | 1.13708e-10 | 8.49749e-11 | 6.01781e-11 |
| 0.000100000 | 7.96674e-12 | 1.18839e-11 | 1.13705e-11 | 8.49736e-12 | 6.01775e-12 |
| 1.00000e-05 | 7.96654e-13 | 1.18838e-12 | 1.13704e-12 | 8.49734e-13 | 6.01774e-13 |
| 1.00000e-06 | 7.96651e-14 | 1.18838e-13 | 1.13704e-13 | 8.49734e-14 | 6.01774e-14 |
| 1.00000e-07 | 7.96650e-15 | 1.18838e-14 | 1.13704e-14 | 8.49734e-15 | 6.01774e-15 |
| 1.00000e-08 | 7.96650e-16 | 1.18838e-15 | 1.13704e-15 | 8.49734e-16 | 6.01774e-16 |
| 1.00000e-09 | 7.96650e-17 | 1.18838e-16 | 1.13704e-16 | 8.49734e-17 | 6.01774e-17 |

| Pa\K | 1400.00 | 1500.00 | 1750.00 | 2000.00 | 2250.00 |
|------|---------|---------|---------|---------|---------|
|------|---------|---------|---------|---------|---------|



|             |             |             |             |             |             |
|-------------|-------------|-------------|-------------|-------------|-------------|
| 1.00000e+08 | 0.138105    | 0.142128    | 0.0111496   | 0.0121380   | 0.0125777   |
| 1.00000e+07 | 0.0843503   | 0.0842175   | 0.0100882   | 0.00840437  | 0.00637904  |
| 1.00000e+06 | 0.0303609   | 0.0255644   | 0.00319626  | 0.00186609  | 0.00106948  |
| 100000.     | 0.00474154  | 0.00352946  | 0.000411623 | 0.000210805 | 0.000112148 |
| 10000.0     | 0.000481362 | 0.000347604 | 4.17999e-05 | 2.09585e-05 | 1.10268e-05 |
| 1000.00     | 4.57560e-05 | 3.31232e-05 | 4.14725e-06 | 2.07064e-06 | 1.08605e-06 |
| 100.000     | 4.43815e-06 | 3.22488e-06 | 4.12660e-07 | 2.05538e-07 | 1.07666e-07 |
| 10.0000     | 4.36824e-07 | 3.18016e-07 | 4.11399e-08 | 2.04717e-08 | 1.07200e-08 |
| 1.00000     | 4.33188e-08 | 3.15687e-08 | 4.10282e-09 | 2.04126e-09 | 1.06883e-09 |
| 0.100000    | 4.31816e-09 | 3.14827e-09 | 4.09775e-10 | 2.03887e-10 | 1.06763e-10 |
| 0.0100000   | 4.31596e-10 | 3.14692e-10 | 4.09702e-11 | 2.03854e-11 | 1.06747e-11 |
| 0.00100000  | 4.31570e-11 | 3.14677e-11 | 4.09694e-12 | 2.03851e-12 | 1.06745e-12 |
| 0.000100000 | 4.31567e-12 | 3.14675e-12 | 4.09693e-13 | 2.03851e-13 | 1.06745e-13 |
| 1.00000e-05 | 4.31567e-13 | 3.14675e-13 | 4.09693e-14 | 2.03851e-14 | 1.06745e-14 |
| 1.00000e-06 | 4.31567e-14 | 3.14675e-14 | 4.09693e-15 | 2.03851e-15 | 1.06745e-15 |
| 1.00000e-07 | 4.31567e-15 | 3.14675e-15 | 4.09693e-16 | 2.03851e-16 | 1.06745e-16 |
| 1.00000e-08 | 4.31567e-16 | 3.14675e-16 | 4.09693e-17 | 2.03851e-17 | 1.06745e-17 |
| 1.00000e-09 | 4.31567e-17 | 3.14675e-17 | 4.09693e-18 | 2.03851e-18 | 1.06745e-18 |

Pa\K | 2500.00 2750.00 3000.00 3250.00 3500.00

|             |             |             |             |             |             |
|-------------|-------------|-------------|-------------|-------------|-------------|
| 1.00000e+08 | 0.0121787   | 0.0110042   | 0.00936133  | 0.00761076  | 0.00600991  |
| 1.00000e+07 | 0.00446176  | 0.00296576  | 0.00193247  | 0.00126279  | 0.000838802 |
| 1.00000e+06 | 0.000609430 | 0.000352004 | 0.000208963 | 0.000128404 | 8.18424e-05 |
| 100000.     | 6.13066e-05 | 3.45744e-05 | 2.02268e-05 | 1.23105e-05 | 7.79465e-06 |
| 10000.0     | 5.98768e-06 | 3.36260e-06 | 1.96191e-06 | 1.19198e-06 | 7.53873e-07 |
| 1000.00     | 5.88738e-07 | 3.30364e-07 | 1.92680e-07 | 1.17044e-07 | 7.40167e-08 |
| 100.000     | 5.83408e-08 | 3.27345e-08 | 1.90920e-08 | 1.15977e-08 | 7.33430e-09 |
| 10.0000     | 5.80850e-09 | 3.25913e-09 | 1.90087e-09 | 1.15471e-09 | 7.30230e-10 |
| 1.00000     | 5.79110e-10 | 3.24926e-10 | 1.89505e-10 | 1.15114e-10 | 7.27936e-11 |
| 0.100000    | 5.78480e-11 | 3.24582e-11 | 1.89309e-11 | 1.14996e-11 | 7.27204e-12 |
| 0.0100000   | 5.78397e-12 | 3.24538e-12 | 1.89283e-12 | 1.14981e-12 | 7.27113e-13 |
| 0.00100000  | 5.78388e-13 | 3.24533e-13 | 1.89281e-13 | 1.14980e-13 | 7.27103e-14 |
| 0.000100000 | 5.78387e-14 | 3.24532e-14 | 1.89281e-14 | 1.14980e-14 | 7.27102e-15 |
| 1.00000e-05 | 5.78387e-15 | 3.24532e-15 | 1.89281e-15 | 1.14980e-15 | 7.27102e-16 |
| 1.00000e-06 | 5.78387e-16 | 3.24532e-16 | 1.89281e-16 | 1.14980e-16 | 7.27102e-17 |
| 1.00000e-07 | 5.78387e-17 | 3.24532e-17 | 1.89281e-17 | 1.14980e-17 | 7.27102e-18 |
| 1.00000e-08 | 5.78387e-18 | 3.24532e-18 | 1.89281e-18 | 1.14980e-18 | 7.27102e-19 |
| 1.00000e-09 | 5.78387e-19 | 3.24532e-19 | 1.89281e-19 | 1.14980e-19 | 7.27102e-20 |

Pa\K | 3750.00 4000.00

|             |             |             |
|-------------|-------------|-------------|
| 1.00000e+08 | 0.00467433  | 0.00361844  |
| 1.00000e+07 | 0.000570104 | 0.000397415 |
| 1.00000e+06 | 5.40624e-05 | 3.69302e-05 |
| 100000.     | 5.12470e-06 | 3.48887e-06 |
| 10000.0     | 4.95265e-07 | 3.36995e-07 |
| 1000.00     | 4.86224e-08 | 3.30820e-08 |
| 100.000     | 4.81802e-09 | 3.27812e-09 |
| 10.0000     | 4.79693e-10 | 3.26371e-10 |
| 1.00000     | 4.78164e-11 | 3.25314e-11 |
| 0.100000    | 4.77689e-12 | 3.24994e-12 |
| 0.0100000   | 4.77630e-13 | 3.24954e-13 |
| 0.00100000  | 4.77624e-14 | 3.24950e-14 |
| 0.000100000 | 4.77623e-15 | 3.24950e-15 |
| 1.00000e-05 | 4.77623e-16 | 3.24950e-16 |
| 1.00000e-06 | 4.77623e-17 | 3.24950e-17 |
| 1.00000e-07 | 4.77623e-18 | 3.24950e-18 |
| 1.00000e-08 | 4.77623e-19 | 3.24950e-19 |
| 1.00000e-09 | 4.77623e-20 | 3.24950e-20 |

rad18

=====

Pa\K | 20.0000 30.0000 40.0000 50.0000 60.0000

|             |             |             |             |             |             |
|-------------|-------------|-------------|-------------|-------------|-------------|
| 1.00000e+08 | 5.08657e-07 | 1.03027e-06 | 1.54603e-06 | 2.06796e-06 | 2.60361e-06 |
| 1.00000e+07 | 5.08644e-06 | 1.03021e-05 | 1.54591e-05 | 2.06775e-05 | 2.60328e-05 |
| 1.00000e+06 | 5.08516e-05 | 0.000102969 | 0.000154473 | 0.000206563 | 0.000259993 |
| 100000.     | 0.000507242 | 0.00102448  | 0.00153306  | 0.00204484  | 0.00256709  |
| 10000.0     | 0.00494986  | 0.00976289  | 0.0142882   | 0.0186547   | 0.0229346   |
| 1000.00     | 0.0406223   | 0.0698750   | 0.0921401   | 0.110100    | 0.124901    |
| 100.000     | 0.162658    | 0.166999    | 0.143612    | 0.117826    | 0.0951548   |
| 10.0000     | 0.0355676   | 0.00741670  | 0.00240863  | 0.000998576 | 0.000482759 |
| 1.00000     | 4.43185e-05 | 3.54984e-06 | 8.49769e-07 | 3.12681e-07 | 1.44621e-07 |
| 0.100000    | 1.43244e-08 | 1.54978e-09 | 4.66932e-10 | 2.05647e-10 | 1.10279e-10 |
| 0.0100000   | 1.86628e-11 | 3.51876e-12 | 1.45315e-12 | 7.96957e-13 | 5.05650e-13 |
| 0.00100000  | 1.51675e-13 | 4.92028e-14 | 2.72823e-14 | 1.82226e-14 | 1.33683e-14 |
| 0.000100000 | 6.34254e-15 | 2.88033e-15 | 1.83920e-15 | 1.32952e-15 | 1.02640e-15 |
| 1.00000e-05 | 5.53655e-16 | 2.68518e-16 | 1.75288e-16 | 1.28132e-16 | 9.95901e-17 |

|             |             |             |             |             |             |
|-------------|-------------|-------------|-------------|-------------|-------------|
| 1.00000e-06 | 5.45674e-17 | 2.66584e-17 | 1.74437e-17 | 1.27661e-17 | 9.92958e-18 |
| 1.00000e-07 | 5.44946e-18 | 2.66440e-18 | 1.74387e-18 | 1.27641e-18 | 9.92863e-19 |
| 1.00000e-08 | 5.44939e-19 | 2.66425e-19 | 1.74370e-19 | 1.27624e-19 | 9.92711e-20 |
| 1.00000e-09 | 5.44867e-20 | 2.66398e-20 | 1.74355e-20 | 1.27615e-20 | 9.92650e-21 |

| Pa\K        | 70.0000     | 80.0000     | 90.0000     | 100.000     | 110.000     |
|-------------|-------------|-------------|-------------|-------------|-------------|
| 1.00000e+08 | 3.15942e-06 | 3.74194e-06 | 4.35827e-06 | 5.01629e-06 | 5.72490e-06 |
| 1.00000e+07 | 3.15893e-05 | 3.74125e-05 | 4.35732e-05 | 5.01503e-05 | 5.72325e-05 |
| 1.00000e+06 | 0.000315399 | 0.000373431 | 0.000434788 | 0.000500248 | 0.000570682 |
| 100000.     | 0.00310580  | 0.00366690  | 0.00425666  | 0.00488185  | 0.00554989  |
| 10000.0     | 0.0271792   | 0.0314314   | 0.0357297   | 0.0401093   | 0.0446031   |
| 1000.00     | 0.137155    | 0.147232    | 0.155373    | 0.161735    | 0.166425    |
| 100.000     | 0.0764441   | 0.0613368   | 0.0492290   | 0.0395411   | 0.0317844   |
| 10.0000     | 0.000259334 | 0.000150372 | 9.23575e-05 | 5.93148e-05 | 3.94665e-05 |
| 1.00000     | 7.70648e-08 | 4.51943e-08 | 2.83883e-08 | 1.87706e-08 | 1.29117e-08 |
| 0.100000    | 6.66656e-11 | 4.36533e-11 | 3.02483e-11 | 2.18536e-11 | 1.62991e-11 |
| 0.0100000   | 3.50402e-13 | 2.57445e-13 | 1.97089e-13 | 1.55494e-13 | 1.25498e-13 |
| 0.00100000  | 1.03742e-14 | 8.35420e-15 | 6.90328e-15 | 5.81203e-15 | 4.96199e-15 |
| 0.000100000 | 8.25604e-16 | 6.82839e-16 | 5.76067e-16 | 4.93128e-16 | 4.26787e-16 |
| 1.00000e-05 | 8.04734e-17 | 6.67776e-17 | 5.64773e-17 | 4.84416e-17 | 4.19920e-17 |
| 1.00000e-06 | 8.02753e-18 | 6.66376e-18 | 5.63749e-18 | 4.83648e-18 | 4.19334e-18 |
| 1.00000e-07 | 8.02701e-19 | 6.66340e-19 | 5.63716e-19 | 4.83613e-19 | 4.19294e-19 |
| 1.00000e-08 | 8.02566e-20 | 6.66221e-20 | 5.63613e-20 | 4.83523e-20 | 4.19216e-20 |
| 1.00000e-09 | 8.02522e-21 | 6.66189e-21 | 5.63587e-21 | 4.83503e-21 | 4.19200e-21 |

| Pa\K        | 120.000     | 130.000     | 140.000     | 150.000     | 160.000     |
|-------------|-------------|-------------|-------------|-------------|-------------|
| 1.00000e+08 | 6.49423e-06 | 7.33589e-06 | 8.26315e-06 | 9.29122e-06 | 1.04375e-05 |
| 1.00000e+07 | 6.49209e-05 | 7.33314e-05 | 8.25963e-05 | 9.28672e-05 | 0.000104317 |
| 1.00000e+06 | 0.000647083 | 0.000730581 | 0.000822464 | 0.000924203 | 0.00103747  |
| 100000.     | 0.00626903  | 0.00704835  | 0.00789792  | 0.00882880  | 0.00985304  |
| 10000.0     | 0.0492414   | 0.0540520   | 0.0590591   | 0.0642823   | 0.0697348   |
| 1000.00     | 0.169515    | 0.171065    | 0.171125    | 0.169754    | 0.167021    |
| 100.000     | 0.0255648   | 0.0205697   | 0.0165526   | 0.0133183   | 0.0107126   |
| 10.0000     | 2.70214e-05 | 1.89389e-05 | 1.35340e-05 | 9.83002e-06 | 7.23836e-06 |
| 1.00000     | 9.16281e-09 | 6.66738e-09 | 4.95177e-09 | 3.74029e-09 | 2.86540e-09 |
| 0.100000    | 1.24620e-11 | 9.71824e-12 | 7.70036e-12 | 6.18157e-12 | 5.01617e-12 |
| 0.0100000   | 1.03079e-13 | 8.58401e-14 | 7.22724e-14 | 6.13892e-14 | 5.25210e-14 |
| 0.00100000  | 4.28145e-15 | 3.72460e-15 | 3.26094e-15 | 2.86935e-15 | 2.53484e-15 |
| 0.000100000 | 3.72485e-16 | 3.27208e-16 | 2.88892e-16 | 2.56073e-16 | 2.27689e-16 |
| 1.00000e-05 | 3.66979e-17 | 3.22734e-17 | 2.85218e-17 | 2.53030e-17 | 2.25151e-17 |
| 1.00000e-06 | 3.66525e-18 | 3.22379e-18 | 2.84936e-18 | 2.52805e-18 | 2.24969e-18 |
| 1.00000e-07 | 3.66481e-19 | 3.22331e-19 | 2.84886e-19 | 2.52753e-19 | 2.24916e-19 |
| 1.00000e-08 | 3.66414e-20 | 3.22273e-20 | 2.84835e-20 | 2.52708e-20 | 2.24877e-20 |
| 1.00000e-09 | 3.66401e-21 | 3.22262e-21 | 2.84826e-21 | 2.52701e-21 | 2.24871e-21 |

| Pa\K        | 170.000     | 180.000     | 190.000     | 200.000     | 210.000     |
|-------------|-------------|-------------|-------------|-------------|-------------|
| 1.00000e+08 | 1.17218e-05 | 1.31669e-05 | 1.47984e-05 | 1.66458e-05 | 1.87422e-05 |
| 1.00000e+07 | 0.000117145 | 0.000131574 | 0.000147863 | 0.000166301 | 0.000187220 |
| 1.00000e+06 | 0.00116416  | 0.00130641  | 0.00146666  | 0.00164763  | 0.00185238  |
| 100000.     | 0.0109837   | 0.0122348   | 0.0136213   | 0.0151588   | 0.0168635   |
| 10000.0     | 0.0754220   | 0.0813390   | 0.0874690   | 0.0937810   | 0.100229    |
| 1000.00     | 0.163014    | 0.157843    | 0.151634    | 0.144536    | 0.136710    |
| 100.000     | 0.00861240  | 0.00691967  | 0.00555568  | 0.00445711  | 0.00357292  |
| 10.0000     | 5.39261e-06 | 4.05799e-06 | 3.08026e-06 | 2.35583e-06 | 1.81377e-06 |
| 1.00000     | 2.22149e-09 | 1.73989e-09 | 1.37466e-09 | 1.09440e-09 | 8.77100e-10 |
| 0.100000    | 4.10736e-12 | 3.38889e-12 | 2.81431e-12 | 2.35025e-12 | 1.97230e-12 |
| 0.0100000   | 4.51999e-14 | 3.90901e-14 | 3.39449e-14 | 2.95794e-14 | 2.58522e-14 |
| 0.00100000  | 2.24640e-15 | 1.99583e-15 | 1.77685e-15 | 1.58454e-15 | 1.41504e-15 |
| 0.000100000 | 2.02947e-16 | 1.81245e-16 | 1.62114e-16 | 1.45184e-16 | 1.30157e-16 |
| 1.00000e-05 | 2.00818e-17 | 1.79451e-17 | 1.60596e-17 | 1.43896e-17 | 1.29061e-17 |
| 1.00000e-06 | 2.00669e-18 | 1.79327e-18 | 1.60493e-18 | 1.43808e-18 | 1.28985e-18 |
| 1.00000e-07 | 2.00616e-19 | 1.79275e-19 | 1.60441e-19 | 1.43758e-19 | 1.28937e-19 |
| 1.00000e-08 | 2.00582e-20 | 1.79245e-20 | 1.60416e-20 | 1.43736e-20 | 1.28918e-20 |
| 1.00000e-09 | 2.00577e-21 | 1.79241e-21 | 1.60412e-21 | 1.43733e-21 | 1.28915e-21 |

| Pa\K        | 220.000     | 230.000     | 240.000     | 250.000     | 260.000     |
|-------------|-------------|-------------|-------------|-------------|-------------|
| 1.00000e+08 | 2.11255e-05 | 2.38383e-05 | 2.69290e-05 | 3.04521e-05 | 3.44692e-05 |
| 1.00000e+07 | 0.000210993 | 0.000238042 | 0.000268847 | 0.000303943 | 0.000343936 |
| 1.00000e+06 | 0.00208434  | 0.00234731  | 0.00264555  | 0.00298373  | 0.00336702  |
| 100000.     | 0.0187520   | 0.0208412   | 0.0231476   | 0.0256872   | 0.0284749   |
| 10000.0     | 0.106751    | 0.113268    | 0.119685    | 0.125898    | 0.131788    |
| 1000.00     | 0.128327    | 0.119559    | 0.110579    | 0.101545    | 0.0926049   |
| 100.000     | 0.00286184  | 0.00229052  | 0.00183192  | 0.00146418  | 0.00116958  |
| 10.0000     | 1.40468e-06 | 1.09360e-06 | 8.55492e-07 | 6.72154e-07 | 5.30247e-07 |
| 1.00000     | 7.70712e-10 | 5.73114e-10 | 4.66743e-10 | 3.81798e-10 | 3.13599e-10 |
| 0.100000    | 1.66226e-12 | 1.40635e-12 | 1.19399e-12 | 1.01695e-12 | 8.68767e-13 |

|             |             |             |             |             |             |
|-------------|-------------|-------------|-------------|-------------|-------------|
| 0.0100000   | 2.26535e-14 | 1.98966e-14 | 1.75118e-14 | 1.54429e-14 | 1.36436e-14 |
| 0.00100000  | 1.26519e-15 | 1.13242e-15 | 1.01458e-15 | 9.09862e-16 | 8.16723e-16 |
| 0.000100000 | 1.16790e-16 | 1.04878e-16 | 9.42521e-17 | 8.47647e-17 | 7.62899e-17 |
| 1.00000e-05 | 1.15855e-17 | 1.04079e-17 | 9.35671e-18 | 8.41765e-18 | 7.57838e-18 |
| 1.00000e-06 | 1.15787e-18 | 1.04018e-18 | 9.35122e-19 | 8.41261e-19 | 7.57371e-19 |
| 1.00000e-07 | 1.15743e-19 | 1.03977e-19 | 9.34732e-20 | 8.40899e-20 | 7.57036e-20 |
| 1.00000e-08 | 1.15726e-20 | 1.03962e-20 | 9.34604e-21 | 8.40787e-21 | 7.56939e-21 |
| 1.00000e-09 | 1.15723e-21 | 1.03960e-21 | 9.34586e-22 | 8.40772e-22 | 7.56926e-22 |

| Pa\K        | 270.000     | 280.000     | 290.000     | 300.000     | 310.000     |
|-------------|-------------|-------------|-------------|-------------|-------------|
| 1.00000e+08 | 3.90494e-05 | 4.42705e-05 | 5.02196e-05 | 9.44831e-05 | 6.47037e-05 |
| 1.00000e+07 | 0.000389505 | 0.000441409 | 0.000500498 | 0.000936453 | 0.000644123 |
| 1.00000e+06 | 0.00380107  | 0.00429201  | 0.00484652  | 0.00867843  | 0.00617534  |
| 100000.     | 0.0315240   | 0.0348456   | 0.0384480   | 0.0574153   | 0.0465093   |
| 10000.0     | 0.137234    | 0.142113    | 0.146309    | 0.145427    | 0.152240    |
| 1000.00     | 0.0838877   | 0.0755018   | 0.0675341   | 0.0466225   | 0.0530945   |
| 100.000     | 0.000933818 | 0.000745302 | 0.000594697 | 0.000738916 | 0.000378553 |
| 10.0000     | 4.19891e-07 | 3.33704e-07 | 2.66130e-07 | 1.86334e-06 | 1.70978e-07 |
| 1.00000     | 2.58582e-10 | 2.14006e-10 | 1.77748e-10 | 7.21877e-09 | 1.23907e-10 |
| 0.100000    | 7.44290e-13 | 6.39399e-13 | 5.50764e-13 | 8.48440e-11 | 4.11915e-13 |
| 0.0100000   | 1.20755e-14 | 1.07065e-14 | 9.50961e-15 | 2.70536e-12 | 7.54368e-15 |
| 0.00100000  | 7.33830e-16 | 6.60027e-16 | 5.94299e-16 | 1.97472e-13 | 4.83612e-16 |
| 0.000100000 | 6.87177e-17 | 6.19513e-17 | 5.59051e-17 | 1.89646e-14 | 4.56779e-17 |
| 1.00000e-05 | 6.82811e-18 | 6.15738e-18 | 5.55779e-18 | 1.88892e-15 | 4.54298e-18 |
| 1.00000e-06 | 6.82375e-19 | 6.15329e-19 | 5.55394e-19 | 1.88820e-16 | 4.53953e-19 |
| 1.00000e-07 | 6.82068e-20 | 6.15048e-20 | 5.55137e-20 | 1.88795e-17 | 4.53741e-20 |
| 1.00000e-08 | 6.81983e-21 | 6.14974e-21 | 5.55072e-21 | 1.88787e-18 | 4.53691e-21 |
| 1.00000e-09 | 6.81972e-22 | 6.14964e-22 | 5.55064e-22 | 1.88786e-19 | 4.53685e-22 |

| Pa\K        | 400.000     | 500.000     | 600.000     | 700.000     | 800.000     |
|-------------|-------------|-------------|-------------|-------------|-------------|
| 1.00000e+08 | 0.000343640 | 0.00124178  | 0.00455115  | 0.0146464   | 0.0245281   |
| 1.00000e+07 | 0.00331789  | 0.0109269   | 0.0301558   | 0.0557769   | 0.0569644   |
| 1.00000e+06 | 0.0262993   | 0.0618971   | 0.0979892   | 0.0961917   | 0.0638145   |
| 100000.     | 0.108361    | 0.127412    | 0.0938251   | 0.0495619   | 0.0235534   |
| 10000.0     | 0.108918    | 0.0501088   | 0.0174757   | 0.00579002  | 0.00234254  |
| 1000.00     | 0.0120468   | 0.00254782  | 0.000560185 | 0.000159821 | 7.44224e-05 |
| 100.000     | 0.000108492 | 1.87620e-05 | 4.58638e-06 | 1.89293e-06 | 1.47344e-06 |
| 10.0000     | 3.22809e-07 | 7.83081e-08 | 3.05930e-08 | 2.16258e-08 | 2.77780e-08 |
| 1.00000     | 1.72386e-09 | 5.75819e-10 | 3.03080e-10 | 2.80148e-10 | 4.72029e-10 |
| 0.100000    | 2.64351e-11 | 1.12746e-11 | 7.34479e-12 | 8.08482e-12 | 1.61042e-11 |
| 0.0100000   | 1.02494e-12 | 5.19606e-13 | 3.94871e-13 | 4.96772e-13 | 1.10517e-12 |
| 0.00100000  | 8.08979e-14 | 4.34491e-14 | 3.45396e-14 | 4.50201e-14 | 1.02789e-13 |
| 0.000100000 | 7.85953e-15 | 4.25397e-15 | 3.40010e-15 | 4.44967e-15 | 1.01895e-14 |
| 1.00000e-05 | 7.83714e-16 | 4.24425e-16 | 3.39359e-16 | 4.44284e-16 | 1.01780e-15 |
| 1.00000e-06 | 7.83386e-17 | 4.24240e-17 | 3.39228e-17 | 4.44158e-17 | 1.01761e-16 |
| 1.00000e-07 | 7.83275e-18 | 4.24189e-18 | 3.39199e-18 | 4.44135e-18 | 1.01759e-17 |
| 1.00000e-08 | 7.83249e-19 | 4.24179e-19 | 3.39194e-19 | 4.44132e-19 | 1.01758e-18 |
| 1.00000e-09 | 7.83245e-20 | 4.24178e-20 | 3.39194e-20 | 4.44131e-20 | 1.01758e-19 |

| Pa\K        | 900.000     | 1000.00     | 1100.00     | 1200.00     | 1300.00     |
|-------------|-------------|-------------|-------------|-------------|-------------|
| 1.00000e+08 | 0.0215666   | 0.0151334   | 0.0131314   | 0.0147939   | 0.0194132   |
| 1.00000e+07 | 0.0392829   | 0.0267579   | 0.0237081   | 0.0254365   | 0.0273346   |
| 1.00000e+06 | 0.0366181   | 0.0244731   | 0.0212627   | 0.0212658   | 0.0202485   |
| 100000.     | 0.0119404   | 0.00773683  | 0.00633728  | 0.00578791  | 0.00495872  |
| 10000.0     | 0.00120217  | 0.000829148 | 0.000697540 | 0.000638012 | 0.000543868 |
| 1000.00     | 4.97683e-05 | 4.36372e-05 | 4.33857e-05 | 4.54675e-05 | 4.33163e-05 |
| 100.000     | 1.56089e-06 | 1.88162e-06 | 2.36592e-06 | 3.04704e-06 | 3.36910e-06 |
| 10.0000     | 4.35180e-08 | 7.22290e-08 | 1.25760e-07 | 2.12339e-07 | 2.73746e-07 |
| 1.00000     | 1.04547e-09 | 2.74950e-09 | 7.54503e-09 | 1.65681e-08 | 2.39471e-08 |
| 0.100000    | 4.70962e-11 | 1.73259e-10 | 6.02018e-10 | 1.47619e-09 | 2.24215e-09 |
| 0.0100000   | 3.64407e-12 | 1.49152e-11 | 5.54680e-11 | 1.40910e-10 | 2.18078e-10 |
| 0.00100000  | 3.47445e-13 | 1.45033e-12 | 5.46081e-12 | 1.39657e-11 | 2.16929e-11 |
| 0.000100000 | 3.45464e-14 | 1.44555e-13 | 5.45095e-13 | 1.39516e-12 | 2.16800e-12 |
| 1.00000e-05 | 3.45223e-15 | 1.44501e-14 | 5.44989e-14 | 1.39501e-13 | 2.16786e-13 |
| 1.00000e-06 | 3.45191e-16 | 1.44494e-15 | 5.44978e-15 | 1.39499e-14 | 2.16785e-14 |
| 1.00000e-07 | 3.45187e-17 | 1.44494e-16 | 5.44977e-16 | 1.39499e-15 | 2.16785e-15 |
| 1.00000e-08 | 3.45186e-18 | 1.44493e-17 | 5.44977e-17 | 1.39499e-16 | 2.16785e-16 |
| 1.00000e-09 | 3.45186e-19 | 1.44493e-18 | 5.44977e-18 | 1.39499e-17 | 2.16785e-17 |

| Pa\K        | 1400.00     | 1500.00     | 1750.00     | 2000.00     | 2250.00     |
|-------------|-------------|-------------|-------------|-------------|-------------|
| 1.00000e+08 | 0.0260687   | 0.0320353   | 0.00397051  | 0.00388914  | 0.00392429  |
| 1.00000e+07 | 0.0280827   | 0.0289097   | 0.00578895  | 0.00385264  | 0.00263435  |
| 1.00000e+06 | 0.0170982   | 0.0138680   | 0.00249012  | 0.00106870  | 0.000514716 |
| 100000.     | 0.00368326  | 0.00256798  | 0.000379976 | 0.000132738 | 5.68557e-05 |
| 10000.0     | 0.000397741 | 0.000268821 | 3.95407e-05 | 1.32951e-05 | 5.58128e-06 |
| 1000.00     | 3.41282e-05 | 2.40105e-05 | 3.83951e-06 | 1.29098e-06 | 5.39511e-07 |

|             |             |             |             |             |             |
|-------------|-------------|-------------|-------------|-------------|-------------|
| 100.000     | 2.90275e-06 | 2.14481e-06 | 3.72632e-07 | 1.25701e-07 | 5.24120e-08 |
| 10.0000     | 2.55267e-07 | 1.96612e-07 | 3.64385e-08 | 1.23297e-08 | 5.13490e-09 |
| 1.00000     | 2.35589e-08 | 1.86534e-08 | 3.60059e-09 | 1.22160e-09 | 5.08811e-10 |
| 0.100000    | 2.26372e-09 | 1.81812e-09 | 3.58271e-10 | 1.21746e-10 | 5.07243e-11 |
| 0.0100000   | 2.22582e-10 | 1.79882e-10 | 3.57914e-11 | 1.21669e-11 | 5.06965e-12 |
| 0.00100000  | 2.21878e-11 | 1.79529e-11 | 3.57874e-12 | 1.21660e-12 | 5.06934e-13 |
| 0.000100000 | 2.21800e-12 | 1.79489e-12 | 3.57869e-13 | 1.21660e-13 | 5.06931e-14 |
| 1.00000e-05 | 2.21792e-13 | 1.79485e-13 | 3.57869e-14 | 1.21659e-14 | 5.06931e-15 |
| 1.00000e-06 | 2.21791e-14 | 1.79485e-14 | 3.57869e-15 | 1.21659e-15 | 5.06931e-16 |
| 1.00000e-07 | 2.21791e-15 | 1.79485e-15 | 3.57869e-16 | 1.21659e-16 | 5.06931e-17 |
| 1.00000e-08 | 2.21791e-16 | 1.79485e-16 | 3.57869e-17 | 1.21659e-17 | 5.06931e-18 |
| 1.00000e-09 | 2.21791e-17 | 1.79485e-17 | 3.57869e-18 | 1.21659e-18 | 5.06931e-19 |

| Pa\K        | 2500.00     | 2750.00     | 3000.00     | 3250.00     | 3500.00     |
|-------------|-------------|-------------|-------------|-------------|-------------|
| 1.00000e+08 | 0.00369859  | 0.00321180  | 0.00259406  | 0.00198369  | 0.00146422  |
| 1.00000e+07 | 0.00168432  | 0.00102180  | 0.000607126 | 0.000362310 | 0.000220472 |
| 1.00000e+06 | 0.000255240 | 0.000130406 | 6.93327e-05 | 3.85514e-05 | 2.24280e-05 |
| 100000.     | 2.64799e-05 | 1.30865e-05 | 6.83262e-06 | 3.76003e-06 | 2.17395e-06 |
| 10000.0     | 2.57056e-06 | 1.26143e-06 | 6.55221e-07 | 3.59033e-07 | 2.06776e-07 |
| 1000.00     | 2.47345e-07 | 1.20854e-07 | 6.25072e-08 | 3.41015e-08 | 1.95496e-08 |
| 100.000     | 2.39525e-08 | 1.16631e-08 | 6.01035e-09 | 3.26631e-09 | 1.86473e-09 |
| 10.0000     | 2.34194e-09 | 1.13776e-09 | 5.84904e-10 | 3.17047e-10 | 1.80505e-10 |
| 1.00000     | 2.31974e-10 | 1.12643e-10 | 5.78781e-11 | 3.13557e-11 | 1.78416e-11 |
| 0.100000    | 2.31278e-11 | 1.12308e-11 | 5.77067e-12 | 3.12628e-12 | 1.77886e-12 |
| 0.0100000   | 2.31159e-12 | 1.12253e-12 | 5.76794e-13 | 3.12484e-13 | 1.77806e-13 |
| 0.00100000  | 2.31146e-13 | 1.12247e-13 | 5.76764e-14 | 3.12469e-14 | 1.77797e-14 |
| 0.000100000 | 2.31145e-14 | 1.12247e-14 | 5.76761e-15 | 3.12468e-15 | 1.77796e-15 |
| 1.00000e-05 | 2.31145e-15 | 1.12247e-15 | 5.76761e-16 | 3.12467e-16 | 1.77796e-16 |
| 1.00000e-06 | 2.31145e-16 | 1.12247e-16 | 5.76761e-17 | 3.12467e-17 | 1.77796e-17 |
| 1.00000e-07 | 2.31145e-17 | 1.12247e-17 | 5.76761e-18 | 3.12467e-18 | 1.77796e-18 |
| 1.00000e-08 | 2.31145e-18 | 1.12247e-18 | 5.76761e-19 | 3.12467e-19 | 1.77796e-19 |
| 1.00000e-09 | 2.31145e-19 | 1.12247e-19 | 5.76761e-20 | 3.12467e-20 | 1.77796e-20 |

| Pa\K        | 3750.00     | 4000.00     |
|-------------|-------------|-------------|
| 1.00000e+08 | 0.00106085  | 0.000764164 |
| 1.00000e+07 | 0.000137845 | 8.88126e-05 |
| 1.00000e+06 | 1.36240e-05 | 8.61572e-06 |
| 100000.     | 1.31551e-06 | 8.29894e-07 |
| 10000.0     | 1.24652e-07 | 7.83364e-08 |
| 1000.00     | 1.17278e-08 | 7.33217e-09 |
| 100.000     | 1.11367e-09 | 6.92946e-10 |
| 10.0000     | 1.07487e-10 | 6.66720e-11 |
| 1.00000     | 1.06178e-11 | 6.58174e-12 |
| 0.100000    | 1.05861e-12 | 6.56191e-13 |
| 0.0100000   | 1.05814e-13 | 6.55905e-14 |
| 0.00100000  | 1.05809e-14 | 6.55875e-15 |
| 0.000100000 | 1.05809e-15 | 6.55872e-16 |
| 1.00000e-05 | 1.05808e-16 | 6.55872e-17 |
| 1.00000e-06 | 1.05808e-17 | 6.55872e-18 |
| 1.00000e-07 | 1.05808e-18 | 6.55872e-19 |
| 1.00000e-08 | 1.05808e-19 | 6.55872e-20 |
| 1.00000e-09 | 1.05808e-20 | 6.55872e-21 |

PhHCCH2+H  
=====

| Pa\K        | 20.0000     | 30.0000     | 40.0000     | 50.0000     | 60.0000     |
|-------------|-------------|-------------|-------------|-------------|-------------|
| 1.00000e+08 | 5.91399e-41 | 6.15499e-40 | 3.30395e-39 | 1.52381e-38 | 6.95278e-38 |
| 1.00000e+07 | 5.91146e-38 | 6.14968e-37 | 3.29974e-36 | 1.52126e-35 | 6.93851e-35 |
| 1.00000e+06 | 5.88620e-35 | 6.09702e-34 | 3.25808e-33 | 1.49614e-32 | 6.79815e-32 |
| 100000.     | 5.64226e-32 | 5.60564e-31 | 2.88154e-30 | 1.27587e-29 | 5.60204e-29 |
| 10000.0     | 3.85690e-29 | 2.81192e-28 | 1.13002e-27 | 4.08225e-27 | 1.51053e-26 |
| 1000.00     | 4.95517e-27 | 1.55276e-26 | 3.71868e-26 | 9.30865e-26 | 2.62918e-25 |
| 100.000     | 3.31222e-26 | 5.27103e-26 | 9.91761e-26 | 2.25486e-25 | 6.29989e-25 |
| 10.0000     | 6.35942e-26 | 8.04205e-26 | 1.17859e-25 | 2.12669e-25 | 4.89827e-25 |
| 1.00000     | 1.42281e-26 | 6.49798e-27 | 1.15764e-26 | 3.73052e-26 | 1.50901e-25 |
| 0.100000    | 7.47061e-26 | 4.52280e-25 | 1.69628e-24 | 6.01850e-24 | 2.34042e-23 |
| 0.0100000   | 9.81151e-24 | 4.81293e-23 | 1.61587e-22 | 5.28459e-22 | 1.91899e-21 |
| 0.00100000  | 6.57221e-22 | 2.37963e-21 | 6.44119e-21 | 1.77151e-20 | 5.54534e-20 |
| 0.000100000 | 1.28057e-20 | 3.05096e-20 | 6.58637e-20 | 1.54374e-19 | 4.25426e-19 |
| 1.00000e-05 | 6.79922e-20 | 9.57165e-20 | 1.42078e-19 | 2.48092e-19 | 5.39111e-19 |
| 1.00000e-06 | 3.22908e-20 | 1.72209e-20 | 1.56154e-20 | 2.04493e-20 | 3.84229e-20 |
| 1.00000e-07 | 1.19439e-21 | 5.18987e-22 | 4.82377e-22 | 7.02689e-22 | 1.70061e-21 |
| 1.00000e-08 | 4.68650e-23 | 2.66764e-23 | 2.94533e-23 | 4.93566e-23 | 2.09246e-22 |
| 1.00000e-09 | 3.72659e-24 | 2.36580e-24 | 2.73209e-24 | 4.70696e-24 | 9.14391e-23 |

| Pa\K | 70.0000 | 80.0000 | 90.0000 | 100.000 | 110.000 |
|------|---------|---------|---------|---------|---------|
|------|---------|---------|---------|---------|---------|

|             |             |             |             |             |             |
|-------------|-------------|-------------|-------------|-------------|-------------|
| 1.00000e+08 | 3.41917e-37 | 1.97893e-36 | 1.48360e-35 | 1.49589e-34 | 1.80997e-33 |
| 1.00000e+07 | 3.41091e-34 | 1.97352e-33 | 1.47920e-32 | 1.49129e-31 | 1.80426e-30 |
| 1.00000e+06 | 3.33001e-31 | 1.92065e-30 | 1.43630e-29 | 1.44645e-28 | 1.74877e-27 |
| 100000.     | 2.65879e-28 | 1.49262e-27 | 1.09598e-26 | 1.09602e-25 | 1.32100e-24 |
| 10000.0     | 6.22437e-26 | 3.14990e-25 | 2.21490e-24 | 2.27351e-23 | 2.85751e-22 |
| 1000.00     | 9.03067e-25 | 4.30717e-24 | 3.49423e-23 | 4.81708e-22 | 7.60167e-21 |
| 100.000     | 2.33952e-24 | 1.37456e-23 | 1.62108e-22 | 3.18220e-21 | 5.99650e-20 |
| 10.0000     | 1.60031e-24 | 1.00466e-23 | 2.01485e-22 | 6.35507e-21 | 1.45056e-19 |
| 1.00000     | 7.83662e-25 | 6.71697e-24 | 1.79361e-22 | 6.85541e-21 | 1.69139e-19 |
| 0.100000    | 1.14229e-22 | 8.12556e-22 | 8.63678e-21 | 1.10690e-19 | 1.35079e-18 |
| 0.0100000   | 8.81841e-21 | 5.95738e-20 | 5.97740e-19 | 6.90479e-18 | 7.19529e-17 |
| 0.00100000  | 2.24071e-19 | 1.37748e-18 | 1.31537e-17 | 1.44635e-16 | 1.39563e-15 |
| 0.000100000 | 1.55254e-18 | 9.10545e-18 | 8.92963e-17 | 9.98358e-16 | 9.33857e-15 |
| 1.00000e-05 | 1.66862e-18 | 1.05914e-17 | 1.41986e-16 | 1.90180e-15 | 1.86099e-14 |
| 1.00000e-06 | 1.56816e-19 | 3.85637e-18 | 1.12217e-16 | 1.88873e-15 | 1.98134e-14 |
| 1.00000e-07 | 4.06909e-20 | 3.15087e-18 | 1.07786e-16 | 1.87701e-15 | 1.98964e-14 |
| 1.00000e-08 | 3.37817e-20 | 3.09142e-18 | 1.07356e-16 | 1.87577e-15 | 1.99043e-14 |
| 1.00000e-09 | 3.31542e-20 | 3.08562e-18 | 1.07313e-16 | 1.87564e-15 | 1.99051e-14 |

| Pa\K        | 120.000     | 130.000     | 140.000     | 150.000     | 160.000     |
|-------------|-------------|-------------|-------------|-------------|-------------|
| 1.00000e+08 | 2.18159e-32 | 2.32756e-31 | 2.11255e-30 | 1.63145e-29 | 1.08761e-28 |
| 1.00000e+07 | 2.17438e-29 | 2.31927e-28 | 2.10424e-27 | 1.62422e-26 | 1.08211e-25 |
| 1.00000e+06 | 2.10458e-26 | 2.23925e-25 | 2.02430e-24 | 1.55511e-23 | 1.02994e-22 |
| 100000.     | 1.57588e-23 | 1.64775e-22 | 1.45187e-21 | 1.07909e-20 | 6.86703e-20 |
| 10000.0     | 3.43793e-21 | 3.49045e-20 | 2.90390e-19 | 1.99884e-18 | 1.16213e-17 |
| 1000.00     | 1.01217e-19 | 1.04705e-18 | 8.47824e-18 | 5.53630e-17 | 3.00854e-16 |
| 100.000     | 8.47329e-19 | 8.77415e-18 | 6.89688e-17 | 4.29297e-16 | 2.19697e-15 |
| 10.0000     | 2.16273e-18 | 2.22675e-17 | 1.69218e-16 | 1.00389e-15 | 4.86103e-15 |
| 1.00000     | 2.59275e-18 | 2.68818e-17 | 2.03957e-16 | 1.20476e-15 | 5.81210e-15 |
| 0.100000    | 1.39368e-17 | 1.17434e-16 | 8.12265e-16 | 4.70614e-15 | 2.33816e-14 |
| 0.0100000   | 6.17473e-16 | 4.32790e-15 | 2.52251e-14 | 1.25111e-13 | 5.39579e-13 |
| 0.00100000  | 1.08438e-14 | 6.79437e-14 | 3.51842e-13 | 1.54647e-12 | 5.90547e-12 |
| 0.000100000 | 6.78744e-14 | 3.89078e-13 | 1.81797e-12 | 7.14966e-12 | 2.43204e-11 |
| 1.00000e-05 | 1.32771e-13 | 7.26762e-13 | 3.20649e-12 | 1.18691e-11 | 3.80374e-11 |
| 1.00000e-06 | 1.44247e-13 | 7.91185e-13 | 3.47240e-12 | 1.27501e-11 | 4.05021e-11 |
| 1.00000e-07 | 1.45347e-13 | 7.97846e-13 | 3.50063e-12 | 1.28445e-11 | 4.07665e-11 |
| 1.00000e-08 | 1.45456e-13 | 7.98512e-13 | 3.50347e-12 | 1.28540e-11 | 4.07931e-11 |
| 1.00000e-09 | 1.45466e-13 | 7.98579e-13 | 3.50376e-12 | 1.28550e-11 | 4.07958e-11 |

| Pa\K        | 170.000     | 180.000     | 190.000     | 200.000     | 210.000     |
|-------------|-------------|-------------|-------------|-------------|-------------|
| 1.00000e+08 | 6.37083e-28 | 3.33480e-27 | 1.58309e-26 | 6.90085e-26 | 2.79094e-25 |
| 1.00000e+07 | 6.33380e-25 | 3.31238e-24 | 1.57072e-23 | 6.83805e-23 | 2.76133e-22 |
| 1.00000e+06 | 5.98520e-22 | 3.10329e-21 | 1.45674e-20 | 6.26730e-20 | 2.49645e-19 |
| 100000.     | 3.80932e-19 | 1.87347e-18 | 8.29047e-18 | 3.34241e-17 | 1.24053e-16 |
| 10000.0     | 5.83249e-17 | 2.57678e-16 | 1.01905e-15 | 3.65848e-15 | 1.20630e-14 |
| 1000.00     | 1.39871e-15 | 5.69306e-15 | 2.06721e-14 | 6.79969e-14 | 2.05143e-13 |
| 100.000     | 9.53515e-15 | 3.59905e-14 | 1.20571e-13 | 3.64480e-13 | 1.00779e-12 |
| 10.0000     | 1.98971e-14 | 7.07763e-14 | 2.23665e-13 | 6.39182e-13 | 1.67584e-12 |
| 1.00000     | 2.37719e-14 | 8.49118e-14 | 2.71302e-13 | 7.90813e-13 | 2.13763e-12 |
| 0.100000    | 1.01798e-13 | 3.95561e-13 | 1.39240e-12 | 4.49326e-12 | 1.34204e-11 |
| 0.0100000   | 2.06156e-12 | 7.08656e-12 | 2.21962e-11 | 6.40051e-11 | 1.71363e-10 |
| 0.00100000  | 1.99727e-11 | 6.07698e-11 | 1.68488e-10 | 4.30218e-10 | 1.02076e-09 |
| 0.000100000 | 7.31731e-11 | 1.98303e-10 | 4.91307e-10 | 1.12647e-09 | 2.41442e-09 |
| 1.00000e-05 | 1.08168e-10 | 2.78289e-10 | 6.57784e-10 | 1.44615e-09 | 2.98689e-09 |
| 1.00000e-06 | 1.14189e-10 | 2.91448e-10 | 6.83991e-10 | 1.49440e-09 | 3.06993e-09 |
| 1.00000e-07 | 1.14833e-10 | 2.92849e-10 | 6.86768e-10 | 1.49949e-09 | 3.07864e-09 |
| 1.00000e-08 | 1.14898e-10 | 2.92990e-10 | 6.87048e-10 | 1.50000e-09 | 3.07952e-09 |
| 1.00000e-09 | 1.14904e-10 | 2.93005e-10 | 6.87076e-10 | 1.50005e-09 | 3.07960e-09 |

| Pa\K        | 220.000     | 230.000     | 240.000     | 250.000     | 260.000     |
|-------------|-------------|-------------|-------------|-------------|-------------|
| 1.00000e+08 | 1.05627e-24 | 3.76755e-24 | 1.27401e-23 | 4.10461e-23 | 1.26524e-22 |
| 1.00000e+07 | 1.04320e-21 | 3.71323e-21 | 1.25263e-20 | 4.02456e-20 | 1.23663e-19 |
| 1.00000e+06 | 9.28413e-19 | 3.24588e-18 | 1.07294e-17 | 3.36927e-17 | 1.00914e-16 |
| 100000.     | 4.27552e-16 | 1.37834e-15 | 4.18179e-15 | 1.20021e-14 | 3.27324e-14 |
| 10000.0     | 3.68865e-14 | 1.05453e-13 | 2.83773e-13 | 7.22932e-13 | 1.75207e-12 |
| 1000.00     | 5.73458e-13 | 1.49779e-12 | 3.68062e-12 | 8.55937e-12 | 1.89304e-11 |
| 100.000     | 2.57745e-12 | 6.15459e-12 | 1.38297e-11 | 2.94400e-11 | 5.97110e-11 |
| 10.0000     | 4.07919e-12 | 9.30962e-12 | 2.00869e-11 | 4.12660e-11 | 8.12146e-11 |
| 1.00000     | 5.43150e-12 | 1.31173e-11 | 3.03734e-11 | 6.78705e-11 | 1.47009e-10 |
| 0.100000    | 3.73893e-11 | 9.77899e-11 | 2.41399e-10 | 5.65012e-10 | 1.25882e-09 |
| 0.0100000   | 4.28962e-10 | 1.00984e-09 | 2.24690e-09 | 4.74558e-09 | 9.55073e-09 |
| 0.00100000  | 2.26766e-09 | 4.74803e-09 | 9.42376e-09 | 1.78200e-08 | 3.22481e-08 |
| 0.000100000 | 4.87835e-09 | 9.35746e-09 | 1.71412e-08 | 3.01370e-08 | 5.10734e-08 |
| 1.00000e-05 | 5.84287e-09 | 1.08977e-08 | 1.94869e-08 | 3.35623e-08 | 5.58902e-08 |
| 1.00000e-06 | 5.97773e-09 | 1.11059e-08 | 1.97943e-08 | 3.39985e-08 | 5.64881e-08 |
| 1.00000e-07 | 5.99180e-09 | 1.11275e-08 | 1.98261e-08 | 3.40435e-08 | 5.65495e-08 |
| 1.00000e-08 | 5.99321e-09 | 1.11297e-08 | 1.98293e-08 | 3.40480e-08 | 5.65557e-08 |

1.00000e-09 | 5.99335e-09 1.11299e-08 1.98296e-08 3.40485e-08 5.65563e-08

Pa\K | 270.000 280.000 290.000 300.000 310.000

1.00000e+08 | 3.74473e-22 1.06735e-21 2.93706e-21 5.44096e-18 2.01601e-20  
1.00000e+07 | 3.64679e-19 1.03517e-18 2.83530e-18 4.11833e-15 1.92511e-17  
1.00000e+06 | 2.89264e-16 7.95815e-16 2.10651e-15 1.02994e-12 1.32491e-14  
100000. | 8.51514e-14 2.12009e-13 5.06693e-13 3.35927e-11 2.58574e-12  
10000.0 | 4.05640e-12 9.00377e-12 1.92199e-11 2.02897e-10 7.87246e-11  
1000.00 | 3.99877e-11 8.09744e-11 1.57704e-10 5.24469e-10 5.38229e-10  
100.000 | 1.15960e-10 2.16551e-10 3.90338e-10 6.58386e-10 1.15519e-09  
10.0000 | 1.53946e-10 2.82401e-10 5.03470e-10 1.06824e-09 1.49082e-09  
1.00000 | 3.09520e-10 6.34405e-10 1.26671e-09 6.74301e-09 4.67247e-09  
0.100000 | 2.67880e-09 5.46128e-09 1.06952e-08 4.52298e-08 3.67043e-08  
0.0100000 | 1.83791e-08 3.39250e-08 6.02398e-08 1.51858e-07 1.70880e-07  
0.00100000 | 5.60716e-08 9.40081e-08 1.52457e-07 2.46929e-07 3.66939e-07  
0.000100000 | 8.37355e-08 1.33232e-07 2.06286e-07 2.66998e-07 4.59861e-07  
1.00000e-05 | 1.002845e-08 1.41870e-07 2.17369e-07 2.66822e-07 4.76831e-07  
1.00000e-06 | 9.10787e-08 1.42895e-07 2.18660e-07 2.66624e-07 4.78746e-07  
1.00000e-07 | 9.11600e-08 1.43000e-07 2.18792e-07 2.66602e-07 4.78940e-07  
1.00000e-08 | 9.11682e-08 1.43011e-07 2.18805e-07 2.66600e-07 4.78959e-07  
1.00000e-09 | 9.11690e-08 1.43012e-07 2.18806e-07 2.66599e-07 4.78961e-07

Pa\K | 400.000 500.000 600.000 700.000 800.000

1.00000e+08 | 1.06625e-14 1.18878e-10 4.72526e-08 1.17696e-05 0.000334057  
1.00000e+07 | 7.90730e-12 9.15498e-08 5.44132e-06 6.56651e-05 0.000544428  
1.00000e+06 | 1.12195e-09 2.72822e-06 7.78863e-05 0.000292227 0.000690059  
100000. | 1.27722e-08 4.84551e-06 0.000100020 0.000374808 0.000706903  
10000.0 | 2.62888e-08 2.02272e-06 4.13768e-05 0.000229367 0.000549111  
1000.00 | 3.86253e-08 1.01649e-06 1.85143e-05 0.000137584 0.000430655  
100.000 | 4.99511e-08 1.29931e-06 1.80351e-05 0.000127701 0.000465850  
10.0000 | 1.42387e-07 4.42548e-06 4.57571e-05 0.000221644 0.000648929  
1.00000 | 7.63942e-07 1.52339e-05 9.77441e-05 0.000326514 0.000770362  
0.100000 | 2.68335e-06 3.06319e-05 0.000135337 0.000369865 0.000802447  
0.0100000 | 4.92760e-06 3.91513e-05 0.000146786 0.000378120 0.000806776  
0.00100000 | 5.84520e-06 4.10823e-05 0.000148499 0.000379051 0.000807194  
0.000100000 | 5.98900e-06 4.13150e-05 0.000148677 0.000379142 0.000807235  
1.00000e-05 | 6.00219e-06 4.13378e-05 0.000148695 0.000379152 0.000807240  
1.00000e-06 | 6.00341e-06 4.13400e-05 0.000148697 0.000379153 0.000807240  
1.00000e-07 | 6.00353e-06 4.13403e-05 0.000148697 0.000379153 0.000807240  
1.00000e-08 | 6.00354e-06 4.13403e-05 0.000148697 0.000379153 0.000807240  
1.00000e-09 | 6.00355e-06 4.13403e-05 0.000148697 0.000379153 0.000807240

Pa\K | 900.000 1000.00 1100.00 1200.00 1300.00

1.00000e+08 | 0.00156461 0.00311458 0.00438553 0.00474342 0.00422415  
1.00000e+07 | 0.00222524 0.00564062 0.0105027 0.0146008 0.0167160  
1.00000e+06 | 0.00176198 0.00454431 0.00967866 0.0147142 0.0179745  
100000. | 0.00125018 0.00248603 0.00489188 0.00804217 0.0113204  
10000.0 | 0.00101077 0.00193045 0.00372963 0.00643871 0.00961613  
1000.00 | 0.000982436 0.00208220 0.00392858 0.00641289 0.00930365  
100.000 | 0.00118214 0.00241262 0.00419184 0.00647635 0.00921816  
10.0000 | 0.00142344 0.00262164 0.00430534 0.00649997 0.00919410  
1.00000 | 0.00151913 0.00267716 0.00432771 0.00650284 0.00918858  
0.100000 | 0.00153654 0.00268484 0.00433024 0.00650299 0.00918782  
0.0100000 | 0.00153841 0.00268558 0.00433048 0.00650301 0.00918776  
0.00100000 | 0.00153858 0.00268566 0.00433050 0.00650302 0.00918775  
0.000100000 | 0.00153860 0.00268567 0.00433051 0.00650302 0.00918775  
1.00000e-05 | 0.00153861 0.00268567 0.00433051 0.00650302 0.00918775  
1.00000e-06 | 0.00153861 0.00268567 0.00433051 0.00650302 0.00918775  
1.00000e-07 | 0.00153861 0.00268567 0.00433051 0.00650302 0.00918775  
1.00000e-08 | 0.00153861 0.00268567 0.00433051 0.00650302 0.00918775  
1.00000e-09 | 0.00153861 0.00268567 0.00433051 0.00650302 0.00918775

Pa\K | 1400.00 1500.00 1750.00 2000.00 2250.00

1.00000e+08 | 0.00355766 0.00318526 0.154362 0.159119 0.161676  
1.00000e+07 | 0.0175520 0.0179755 0.144806 0.137328 0.131652  
1.00000e+06 | 0.0201116 0.0218927 0.0710964 0.0751394 0.0853865  
100000. | 0.0145210 0.0177289 0.0384841 0.0518223 0.0685705  
10000.0 | 0.0129193 0.0163627 0.0295629 0.0445691 0.0635930  
1000.00 | 0.0125020 0.0160467 0.0276516 0.0433997 0.0629125  
100.000 | 0.0123942 0.0160098 0.0275195 0.0433500 0.0628662  
10.0000 | 0.0123617 0.0159928 0.0275193 0.0433540 0.0628638  
1.00000 | 0.0123546 0.0159880 0.0275193 0.0433548 0.0628636  
0.100000 | 0.0123537 0.0159873 0.0275192 0.0433549 0.0628636  
0.0100000 | 0.0123536 0.0159873 0.0275192 0.0433549 0.0628636  
0.00100000 | 0.0123536 0.0159873 0.0275192 0.0433549 0.0628636  
0.000100000 | 0.0123536 0.0159873 0.0275192 0.0433549 0.0628636

|             |           |           |           |           |           |
|-------------|-----------|-----------|-----------|-----------|-----------|
| 1.00000e-05 | 0.0123536 | 0.0159873 | 0.0275192 | 0.0433549 | 0.0628636 |
| 1.00000e-06 | 0.0123536 | 0.0159873 | 0.0275192 | 0.0433549 | 0.0628636 |
| 1.00000e-07 | 0.0123536 | 0.0159873 | 0.0275192 | 0.0433549 | 0.0628636 |
| 1.00000e-08 | 0.0123536 | 0.0159873 | 0.0275192 | 0.0433549 | 0.0628636 |
| 1.00000e-09 | 0.0123536 | 0.0159873 | 0.0275192 | 0.0433549 | 0.0628636 |

Pa\K | 2500.00 2750.00 3000.00 3250.00 3500.00

|             |           |          |          |          |          |
|-------------|-----------|----------|----------|----------|----------|
| 1.00000e+08 | 0.161819  | 0.159985 | 0.157143 | 0.154275 | 0.151998 |
| 1.00000e+07 | 0.129758  | 0.130949 | 0.133743 | 0.137074 | 0.140386 |
| 1.00000e+06 | 0.0977723 | 0.109801 | 0.120366 | 0.129075 | 0.135940 |
| 100000.     | 0.0863737 | 0.102889 | 0.116636 | 0.127272 | 0.135170 |
| 10000.0     | 0.0835498 | 0.101526 | 0.116060 | 0.127059 | 0.135109 |
| 1000.00     | 0.0832117 | 0.101384 | 0.116009 | 0.127045 | 0.135108 |
| 100.000     | 0.0831842 | 0.101372 | 0.116005 | 0.127045 | 0.135108 |
| 10.0000     | 0.0831820 | 0.101371 | 0.116005 | 0.127045 | 0.135108 |
| 1.00000     | 0.0831818 | 0.101371 | 0.116005 | 0.127045 | 0.135108 |
| 0.100000    | 0.0831818 | 0.101371 | 0.116005 | 0.127045 | 0.135108 |
| 0.0100000   | 0.0831818 | 0.101371 | 0.116005 | 0.127045 | 0.135108 |
| 0.00100000  | 0.0831818 | 0.101371 | 0.116005 | 0.127045 | 0.135108 |
| 0.000100000 | 0.0831818 | 0.101371 | 0.116005 | 0.127045 | 0.135108 |
| 1.00000e-05 | 0.0831818 | 0.101371 | 0.116005 | 0.127045 | 0.135108 |
| 1.00000e-06 | 0.0831818 | 0.101371 | 0.116005 | 0.127045 | 0.135108 |
| 1.00000e-07 | 0.0831818 | 0.101371 | 0.116005 | 0.127045 | 0.135108 |
| 1.00000e-08 | 0.0831818 | 0.101371 | 0.116005 | 0.127045 | 0.135108 |
| 1.00000e-09 | 0.0831818 | 0.101371 | 0.116005 | 0.127045 | 0.135108 |

Pa\K | 3750.00 4000.00

|             |          |          |
|-------------|----------|----------|
| 1.00000e+08 | 0.150527 | 0.149820 |
| 1.00000e+07 | 0.143431 | 0.146111 |
| 1.00000e+06 | 0.141203 | 0.145191 |
| 100000.     | 0.140938 | 0.145154 |
| 10000.0     | 0.140935 | 0.145170 |
| 1000.00     | 0.140938 | 0.145174 |
| 100.000     | 0.140939 | 0.145175 |
| 10.0000     | 0.140939 | 0.145175 |
| 1.00000     | 0.140939 | 0.145175 |
| 0.100000    | 0.140939 | 0.145175 |
| 0.0100000   | 0.140939 | 0.145175 |
| 0.00100000  | 0.140939 | 0.145175 |
| 0.000100000 | 0.140939 | 0.145175 |
| 1.00000e-05 | 0.140939 | 0.145175 |
| 1.00000e-06 | 0.140939 | 0.145175 |
| 1.00000e-07 | 0.140939 | 0.145175 |
| 1.00000e-08 | 0.140939 | 0.145175 |
| 1.00000e-09 | 0.140939 | 0.145175 |

Ph+Allene

=====

Pa\K | 20.0000 30.0000 40.0000 50.0000 60.0000

|             |             |             |             |             |             |
|-------------|-------------|-------------|-------------|-------------|-------------|
| 1.00000e+08 | 1.27002e-46 | 1.40283e-45 | 8.52998e-45 | 4.69128e-44 | 2.64938e-43 |
| 1.00000e+07 | 1.26884e-43 | 1.40022e-42 | 8.50650e-42 | 4.67432e-41 | 2.63758e-40 |
| 1.00000e+06 | 1.25718e-40 | 1.37451e-39 | 8.27676e-39 | 4.50951e-38 | 2.52371e-37 |
| 100000.     | 1.14865e-37 | 1.15129e-36 | 6.40399e-36 | 3.24211e-35 | 1.69431e-34 |
| 10000.0     | 5.46782e-35 | 3.27288e-34 | 1.25246e-33 | 4.72383e-33 | 1.93648e-32 |
| 1000.00     | 2.46507e-33 | 5.40729e-33 | 1.15819e-32 | 2.92619e-32 | 8.92376e-32 |
| 100.000     | 5.49376e-33 | 7.13849e-33 | 1.21650e-32 | 2.65978e-32 | 7.45033e-32 |
| 10.0000     | 2.31133e-33 | 1.09729e-33 | 9.19952e-34 | 1.22652e-33 | 2.47363e-33 |
| 1.00000     | 6.01626e-35 | 1.24975e-34 | 3.14374e-34 | 9.11355e-34 | 3.18918e-33 |
| 0.100000    | 4.49263e-34 | 1.17984e-33 | 3.02124e-33 | 8.73610e-33 | 3.04116e-32 |
| 0.0100000   | 4.36348e-33 | 1.11069e-32 | 2.76151e-32 | 7.76867e-32 | 2.63636e-31 |
| 0.00100000  | 3.30143e-32 | 6.55080e-32 | 1.31510e-31 | 3.06490e-31 | 8.78810e-31 |
| 0.000100000 | 4.87414e-32 | 3.31417e-32 | 3.31132e-32 | 4.67079e-32 | 9.13973e-32 |
| 1.00000e-05 | 1.29369e-33 | 3.26087e-34 | 2.22723e-34 | 2.62241e-34 | 4.70339e-34 |
| 1.00000e-06 | 5.42308e-36 | 1.53853e-36 | 1.21489e-36 | 1.64080e-36 | 3.45402e-36 |
| 1.00000e-07 | 5.11795e-38 | 2.13528e-38 | 2.16368e-38 | 3.66134e-38 | 1.02233e-37 |
| 1.00000e-08 | 1.68450e-39 | 1.00440e-39 | 1.24343e-39 | 2.45387e-39 | 7.91789e-39 |
| 1.00000e-09 | 1.31585e-40 | 8.82876e-41 | 1.14641e-40 | 2.32911e-40 | 7.68395e-40 |

Pa\K | 70.0000 80.0000 90.0000 100.000 110.000

|             |             |             |             |             |             |
|-------------|-------------|-------------|-------------|-------------|-------------|
| 1.00000e+08 | 1.66169e-42 | 1.26856e-41 | 1.33873e-40 | 2.22575e-39 | 5.87471e-38 |
| 1.00000e+07 | 1.65295e-39 | 1.26093e-38 | 1.32984e-37 | 2.21024e-36 | 5.83429e-35 |
| 1.00000e+06 | 1.56910e-36 | 1.18819e-35 | 1.24557e-34 | 2.06374e-33 | 5.45316e-32 |
| 100000.     | 9.88582e-34 | 7.07267e-33 | 7.09758e-32 | 1.15585e-30 | 3.11129e-29 |
| 10000.0     | 9.22202e-32 | 5.61348e-31 | 5.13137e-30 | 8.64080e-29 | 2.81466e-27 |
| 1000.00     | 3.45209e-31 | 1.92213e-30 | 2.00153e-29 | 5.12943e-28 | 3.08116e-26 |
| 100.000     | 2.85983e-31 | 1.77848e-30 | 2.43518e-29 | 9.35474e-28 | 1.09263e-25 |

|             |             |             |             |             |             |
|-------------|-------------|-------------|-------------|-------------|-------------|
| 10.0000     | 7.89548e-33 | 4.93198e-32 | 1.14167e-30 | 1.34542e-28 | 1.18124e-25 |
| 1.00000     | 1.49000e-32 | 1.12562e-31 | 1.85705e-30 | 8.34926e-29 | 1.21893e-25 |
| 0.100000    | 1.41834e-31 | 1.07571e-30 | 1.76461e-29 | 7.05419e-28 | 1.78205e-25 |
| 0.0100000   | 1.20102e-30 | 8.91562e-30 | 1.43625e-28 | 5.69141e-27 | 6.40797e-25 |
| 0.00100000  | 3.43728e-30 | 2.22564e-29 | 3.24662e-28 | 1.30919e-26 | 1.88704e-24 |
| 0.000100000 | 2.65163e-31 | 1.38969e-30 | 2.22277e-29 | 1.89181e-27 | 1.95541e-24 |
| 1.00000e-05 | 1.35323e-33 | 9.46766e-33 | 5.86196e-31 | 1.55409e-28 | 1.91650e-24 |
| 1.00000e-06 | 1.39670e-35 | 2.74924e-34 | 4.61865e-32 | 1.51444e-29 | 1.91246e-24 |
| 1.00000e-07 | 6.67434e-37 | 2.28277e-35 | 4.50863e-33 | 1.51050e-30 | 1.91206e-24 |
| 1.00000e-08 | 5.98861e-38 | 2.23840e-36 | 4.49780e-34 | 1.51011e-31 | 1.91202e-24 |
| 1.00000e-09 | 5.91995e-39 | 2.23398e-37 | 4.49672e-35 | 1.51007e-32 | 1.91201e-24 |

| Pa\K        | 120.000     | 130.000     | 140.000     | 150.000     | 160.000     |
|-------------|-------------|-------------|-------------|-------------|-------------|
| 1.00000e+08 | 1.84509e-36 | 5.18947e-35 | 1.14225e-33 | 1.93404e-32 | 2.55709e-31 |
| 1.00000e+07 | 1.83265e-33 | 5.15402e-32 | 1.13406e-30 | 1.91908e-29 | 2.53541e-28 |
| 1.00000e+06 | 1.71554e-30 | 4.82123e-29 | 1.05750e-27 | 1.78024e-26 | 2.33574e-25 |
| 100000.     | 9.99715e-28 | 2.81645e-26 | 6.08255e-25 | 9.94875e-24 | 1.25608e-22 |
| 10000.0     | 1.05775e-25 | 3.17279e-24 | 6.84327e-23 | 1.07754e-21 | 1.28171e-20 |
| 1000.00     | 1.57480e-24 | 5.28582e-23 | 1.17018e-21 | 1.81492e-20 | 2.07983e-19 |
| 100.000     | 6.87448e-24 | 2.42976e-22 | 5.35753e-21 | 8.05691e-20 | 8.81939e-19 |
| 10.0000     | 9.30976e-24 | 3.49264e-22 | 7.80494e-21 | 1.16643e-19 | 1.25689e-18 |
| 1.00000     | 9.90955e-24 | 3.76011e-22 | 8.45068e-21 | 1.26760e-19 | 1.37032e-18 |
| 0.100000    | 1.33625e-23 | 5.03141e-22 | 1.14369e-20 | 1.75374e-19 | 1.95294e-18 |
| 0.0100000   | 4.14085e-23 | 1.51233e-21 | 3.44782e-20 | 5.37442e-19 | 6.11275e-18 |
| 0.00100000  | 1.25166e-22 | 4.48226e-21 | 9.88327e-20 | 1.47677e-18 | 1.60032e-17 |
| 0.000100000 | 1.53175e-22 | 5.70831e-21 | 1.26597e-19 | 1.87567e-18 | 2.00232e-17 |
| 1.00000e-05 | 1.55307e-22 | 5.84439e-21 | 1.30008e-19 | 1.92644e-18 | 2.05396e-17 |
| 1.00000e-06 | 1.55508e-22 | 5.85797e-21 | 1.30354e-19 | 1.93164e-18 | 2.05925e-17 |
| 1.00000e-07 | 1.55528e-22 | 5.85933e-21 | 1.30389e-19 | 1.93216e-18 | 2.05978e-17 |
| 1.00000e-08 | 1.55530e-22 | 5.85946e-21 | 1.30392e-19 | 1.93221e-18 | 2.05983e-17 |
| 1.00000e-09 | 1.55530e-22 | 5.85947e-21 | 1.30393e-19 | 1.93221e-18 | 2.05984e-17 |

| Pa\K        | 170.000     | 180.000     | 190.000     | 200.000     | 210.000     |
|-------------|-------------|-------------|-------------|-------------|-------------|
| 1.00000e+08 | 2.71780e-30 | 2.38957e-29 | 1.78397e-28 | 1.15577e-27 | 6.62045e-27 |
| 1.00000e+07 | 2.69224e-27 | 2.36441e-26 | 1.76281e-25 | 1.14026e-24 | 6.51956e-24 |
| 1.00000e+06 | 2.45904e-24 | 2.13761e-23 | 1.57463e-22 | 1.00444e-21 | 5.65204e-21 |
| 100000.     | 1.26248e-21 | 1.04055e-20 | 7.22133e-20 | 4.31477e-19 | 2.26205e-18 |
| 10000.0     | 1.19684e-19 | 9.07795e-19 | 5.75852e-18 | 3.13008e-17 | 1.48778e-16 |
| 1000.00     | 1.84607e-18 | 1.31938e-17 | 7.83793e-17 | 3.97206e-16 | 1.75419e-15 |
| 100.000     | 7.40780e-18 | 4.97997e-17 | 2.77201e-16 | 1.31324e-15 | 5.41555e-15 |
| 10.0000     | 1.03443e-17 | 6.80026e-17 | 3.69987e-16 | 1.71413e-15 | 6.92037e-15 |
| 1.00000     | 1.13204e-17 | 7.47891e-17 | 4.09635e-16 | 1.91470e-15 | 7.81959e-15 |
| 0.100000    | 1.67303e-17 | 1.15319e-16 | 6.62692e-16 | 3.26594e-15 | 1.41202e-14 |
| 0.0100000   | 5.34701e-17 | 3.74961e-16 | 2.17903e-15 | 1.07778e-14 | 4.63674e-14 |
| 0.00100000  | 1.32764e-16 | 8.80219e-16 | 4.82714e-15 | 2.25147e-14 | 9.13660e-14 |
| 0.000100000 | 1.63171e-16 | 1.06165e-15 | 5.71436e-15 | 2.61793e-14 | 1.04464e-13 |
| 1.00000e-05 | 1.67063e-16 | 1.08464e-15 | 5.82532e-15 | 2.66310e-14 | 1.06054e-13 |
| 1.00000e-06 | 1.67462e-16 | 1.08699e-15 | 5.83668e-15 | 2.66772e-14 | 1.06216e-13 |
| 1.00000e-07 | 1.67502e-16 | 1.08723e-15 | 5.83782e-15 | 2.66818e-14 | 1.06232e-13 |
| 1.00000e-08 | 1.67506e-16 | 1.08725e-15 | 5.83794e-15 | 2.66823e-14 | 1.06234e-13 |
| 1.00000e-09 | 1.67506e-16 | 1.08726e-15 | 5.83795e-15 | 2.66824e-14 | 1.06234e-13 |

| Pa\K        | 220.000     | 230.000     | 240.000     | 250.000     | 260.000     |
|-------------|-------------|-------------|-------------|-------------|-------------|
| 1.00000e+08 | 3.40619e-26 | 1.59485e-25 | 6.87031e-25 | 2.74802e-24 | 1.02848e-23 |
| 1.00000e+07 | 3.34712e-23 | 1.56334e-22 | 6.71548e-22 | 2.67741e-21 | 9.98366e-21 |
| 1.00000e+06 | 2.84952e-20 | 1.30387e-19 | 5.47340e-19 | 2.12692e-18 | 7.70902e-18 |
| 100000.     | 1.05718e-17 | 4.46346e-17 | 1.72152e-16 | 6.12303e-16 | 2.02444e-15 |
| 10000.0     | 6.28927e-16 | 2.39809e-15 | 8.34573e-15 | 2.67742e-14 | 7.98500e-14 |
| 1000.00     | 6.87107e-15 | 2.42219e-14 | 7.77927e-14 | 2.29981e-13 | 6.31353e-13 |
| 100.000     | 1.98036e-14 | 6.52134e-14 | 1.95892e-13 | 5.42623e-13 | 1.39890e-12 |
| 10.0000     | 2.48125e-14 | 8.02561e-14 | 2.37266e-13 | 6.48238e-13 | 1.65211e-12 |
| 1.00000     | 2.84497e-14 | 9.37120e-14 | 2.83285e-13 | 7.94940e-13 | 2.09092e-12 |
| 0.100000    | 5.45411e-14 | 1.91000e-13 | 6.13632e-13 | 1.82606e-12 | 5.07285e-12 |
| 0.0100000   | 1.76627e-13 | 6.04633e-13 | 1.88322e-12 | 5.39318e-12 | 1.43291e-11 |
| 0.00100000  | 3.28670e-13 | 1.06445e-12 | 3.14422e-12 | 8.56371e-12 | 2.17065e-11 |
| 0.000100000 | 3.69979e-13 | 1.18130e-12 | 3.44469e-12 | 9.27401e-12 | 2.32651e-11 |
| 1.00000e-05 | 3.74920e-13 | 1.19508e-12 | 3.47963e-12 | 9.35553e-12 | 2.34418e-11 |
| 1.00000e-06 | 3.75424e-13 | 1.19648e-12 | 3.48318e-12 | 9.36381e-12 | 2.34597e-11 |
| 1.00000e-07 | 3.75474e-13 | 1.19662e-12 | 3.48353e-12 | 9.36464e-12 | 2.34615e-11 |
| 1.00000e-08 | 3.75479e-13 | 1.19664e-12 | 3.48357e-12 | 9.36472e-12 | 2.34617e-11 |
| 1.00000e-09 | 3.75480e-13 | 1.19664e-12 | 3.48357e-12 | 9.36473e-12 | 2.34617e-11 |

| Pa\K        | 270.000     | 280.000     | 290.000     | 300.000     | 310.000     |
|-------------|-------------|-------------|-------------|-------------|-------------|
| 1.00000e+08 | 3.62489e-23 | 1.20951e-22 | 3.83705e-22 | 1.66631e-18 | 3.36098e-21 |
| 1.00000e+07 | 3.50417e-20 | 1.16381e-19 | 3.67310e-19 | 1.17221e-15 | 3.18003e-18 |
| 1.00000e+06 | 2.62278e-17 | 8.42053e-17 | 2.56243e-16 | 2.21517e-13 | 2.04890e-15 |



|             |             |             |             |             |             |
|-------------|-------------|-------------|-------------|-------------|-------------|
| 100000.     | 6.26453e-15 | 1.82494e-14 | 5.02992e-14 | 4.30058e-12 | 3.29045e-13 |
| 10000.0     | 2.22970e-13 | 5.86527e-13 | 1.46111e-12 | 1.42701e-11 | 7.83694e-12 |
| 1000.00     | 1.62156e-12 | 3.92173e-12 | 8.98139e-12 | 1.89917e-11 | 4.07657e-11 |
| 100.000     | 3.38296e-12 | 7.72620e-12 | 1.67621e-11 | 1.71909e-11 | 6.89692e-11 |
| 10.0000     | 3.95942e-12 | 8.98488e-12 | 1.94217e-11 | 2.68537e-11 | 8.00483e-11 |
| 1.00000     | 5.19750e-12 | 1.22945e-11 | 2.78347e-11 | 9.00066e-11 | 1.27369e-10 |
| 0.100000    | 1.32409e-11 | 3.26476e-11 | 7.63924e-11 | 2.40745e-10 | 3.63016e-10 |
| 0.0100000   | 3.55934e-11 | 8.32159e-11 | 1.84188e-10 | 2.91828e-10 | 7.81007e-10 |
| 0.00100000  | 5.16088e-11 | 1.15878e-10 | 2.47150e-10 | 2.60246e-10 | 9.82657e-10 |
| 0.000100000 | 5.48093e-11 | 1.22072e-10 | 2.58513e-10 | 2.53212e-10 | 1.01593e-09 |
| 1.00000e-05 | 5.51681e-11 | 1.22759e-10 | 2.59762e-10 | 2.52508e-10 | 1.01952e-09 |
| 1.00000e-06 | 5.52044e-11 | 1.22828e-10 | 2.59888e-10 | 2.52438e-10 | 1.01988e-09 |
| 1.00000e-07 | 5.52081e-11 | 1.22835e-10 | 2.59900e-10 | 2.52431e-10 | 1.01992e-09 |
| 1.00000e-08 | 5.52084e-11 | 1.22836e-10 | 2.59902e-10 | 2.52430e-10 | 1.01992e-09 |
| 1.00000e-09 | 5.52085e-11 | 1.22836e-10 | 2.59902e-10 | 2.52430e-10 | 1.01992e-09 |

| Pa\K        | 400.000     | 500.000     | 600.000     | 700.000     | 800.000     |
|-------------|-------------|-------------|-------------|-------------|-------------|
| 1.00000e+08 | 6.17278e-15 | 1.71591e-10 | 6.03185e-08 | 1.46526e-05 | 0.000459396 |
| 1.00000e+07 | 6.73780e-12 | 1.44203e-07 | 8.26733e-06 | 8.37511e-05 | 0.000634565 |
| 1.00000e+06 | 1.14017e-09 | 4.66988e-06 | 0.000128953 | 0.000454486 | 0.000929727 |
| 100000.     | 1.09265e-08 | 8.99676e-06 | 0.000186499 | 0.000636259 | 0.00108801  |
| 10000.0     | 8.69496e-09 | 2.86400e-06 | 7.77627e-05 | 0.000405868 | 0.000886407 |
| 1000.00     | 4.94741e-09 | 6.33441e-07 | 2.71602e-05 | 0.000218512 | 0.000635883 |
| 100.000     | 5.31172e-09 | 3.86871e-07 | 1.29643e-05 | 0.000123158 | 0.000491152 |
| 10.0000     | 1.12318e-08 | 7.84454e-07 | 1.54749e-05 | 0.000119976 | 0.000501422 |
| 1.00000     | 3.23152e-08 | 1.57714e-06 | 2.13188e-05 | 0.000133468 | 0.000519910 |
| 0.100000    | 5.70059e-08 | 2.02423e-06 | 2.32648e-05 | 0.000136738 | 0.000523093 |
| 0.0100000   | 6.42284e-08 | 2.10831e-06 | 2.35300e-05 | 0.000137109 | 0.000523414 |
| 0.00100000  | 6.45633e-08 | 2.11594e-06 | 2.35550e-05 | 0.000137144 | 0.000523445 |
| 0.000100000 | 6.45513e-08 | 2.11660e-06 | 2.35574e-05 | 0.000137148 | 0.000523448 |
| 1.00000e-05 | 6.45494e-08 | 2.11667e-06 | 2.35576e-05 | 0.000137148 | 0.000523448 |
| 1.00000e-06 | 6.45492e-08 | 2.11667e-06 | 2.35577e-05 | 0.000137148 | 0.000523449 |
| 1.00000e-07 | 6.45492e-08 | 2.11667e-06 | 2.35577e-05 | 0.000137148 | 0.000523449 |
| 1.00000e-08 | 6.45492e-08 | 2.11667e-06 | 2.35577e-05 | 0.000137148 | 0.000523449 |
| 1.00000e-09 | 6.45492e-08 | 2.11667e-06 | 2.35577e-05 | 0.000137148 | 0.000523449 |

| Pa\K        | 900.000    | 1000.00    | 1100.00    | 1200.00    | 1300.00    |
|-------------|------------|------------|------------|------------|------------|
| 1.00000e+08 | 0.00239367 | 0.00504817 | 0.00733509 | 0.00809329 | 0.00728643 |
| 1.00000e+07 | 0.00292807 | 0.00870805 | 0.0179871  | 0.0264169  | 0.0311148  |
| 1.00000e+06 | 0.00222223 | 0.00648982 | 0.0155831  | 0.0254243  | 0.0329468  |
| 100000.     | 0.00176512 | 0.00365958 | 0.00807464 | 0.0149300  | 0.0232776  |
| 10000.0     | 0.00152541 | 0.00300081 | 0.00646705 | 0.0125070  | 0.0203239  |
| 1000.00     | 0.00140907 | 0.00320039 | 0.00670415 | 0.0120577  | 0.0188551  |
| 100.000     | 0.00141148 | 0.00336400 | 0.00672635 | 0.0116316  | 0.0179758  |
| 10.0000     | 0.00147041 | 0.00341622 | 0.00668455 | 0.0114605  | 0.0177007  |
| 1.00000     | 0.00148779 | 0.00342119 | 0.00666992 | 0.0114267  | 0.0176529  |
| 0.100000    | 0.00148975 | 0.00342119 | 0.00666769 | 0.0114225  | 0.0176472  |
| 0.0100000   | 0.00148993 | 0.00342117 | 0.00666745 | 0.0114221  | 0.0176466  |
| 0.00100000  | 0.00148995 | 0.00342117 | 0.00666743 | 0.0114220  | 0.0176466  |
| 0.000100000 | 0.00148995 | 0.00342117 | 0.00666742 | 0.0114220  | 0.0176466  |
| 1.00000e-05 | 0.00148995 | 0.00342117 | 0.00666742 | 0.0114220  | 0.0176466  |
| 1.00000e-06 | 0.00148995 | 0.00342117 | 0.00666742 | 0.0114220  | 0.0176466  |
| 1.00000e-07 | 0.00148995 | 0.00342117 | 0.00666742 | 0.0114220  | 0.0176466  |
| 1.00000e-08 | 0.00148995 | 0.00342117 | 0.00666742 | 0.0114220  | 0.0176466  |
| 1.00000e-09 | 0.00148995 | 0.00342117 | 0.00666742 | 0.0114220  | 0.0176466  |

| Pa\K        | 1400.00    | 1500.00    | 1750.00   | 2000.00   | 2250.00   |
|-------------|------------|------------|-----------|-----------|-----------|
| 1.00000e+08 | 0.00610721 | 0.00532375 | 0.0897954 | 0.0889295 | 0.0879099 |
| 1.00000e+07 | 0.0328835  | 0.0330394  | 0.0816064 | 0.0830512 | 0.0864434 |
| 1.00000e+06 | 0.0384667  | 0.0427383  | 0.0681939 | 0.0819093 | 0.0903348 |
| 100000.     | 0.0316884  | 0.0395106  | 0.0652042 | 0.0821829 | 0.0903193 |
| 10000.0     | 0.0286981  | 0.0370614  | 0.0625425 | 0.0788630 | 0.0882320 |
| 1000.00     | 0.0265949  | 0.0348563  | 0.0600109 | 0.0765612 | 0.0872652 |
| 100.000     | 0.0254680  | 0.0336879  | 0.0588643 | 0.0758377 | 0.0870457 |
| 10.0000     | 0.0251380  | 0.0333494  | 0.0585700 | 0.0757009 | 0.0870130 |
| 1.00000     | 0.0250825  | 0.0332930  | 0.0585234 | 0.0756829 | 0.0870092 |
| 0.100000    | 0.0250761  | 0.0332865  | 0.0585181 | 0.0756810 | 0.0870089 |
| 0.0100000   | 0.0250755  | 0.0332859  | 0.0585176 | 0.0756808 | 0.0870088 |
| 0.00100000  | 0.0250754  | 0.0332858  | 0.0585175 | 0.0756807 | 0.0870088 |
| 0.000100000 | 0.0250754  | 0.0332858  | 0.0585175 | 0.0756807 | 0.0870088 |
| 1.00000e-05 | 0.0250754  | 0.0332858  | 0.0585175 | 0.0756807 | 0.0870088 |
| 1.00000e-06 | 0.0250754  | 0.0332858  | 0.0585175 | 0.0756807 | 0.0870088 |
| 1.00000e-07 | 0.0250754  | 0.0332858  | 0.0585175 | 0.0756807 | 0.0870088 |
| 1.00000e-08 | 0.0250754  | 0.0332858  | 0.0585175 | 0.0756807 | 0.0870088 |
| 1.00000e-09 | 0.0250754  | 0.0332858  | 0.0585175 | 0.0756807 | 0.0870088 |

| Pa\K | 2500.00 | 2750.00 | 3000.00 | 3250.00 | 3500.00 |
|------|---------|---------|---------|---------|---------|
|------|---------|---------|---------|---------|---------|

|             |           |           |           |           |           |
|-------------|-----------|-----------|-----------|-----------|-----------|
| 1.00000e+08 | 0.0875443 | 0.0882624 | 0.0900366 | 0.0925112 | 0.0952722 |
| 1.00000e+07 | 0.0902905 | 0.0937074 | 0.0964782 | 0.0987526 | 0.100717  |
| 1.00000e+06 | 0.0946699 | 0.0972354 | 0.0990751 | 0.100616  | 0.102039  |
| 100000.     | 0.0946897 | 0.0974859 | 0.0994242 | 0.100937  | 0.102283  |
| 10000.0     | 0.0939024 | 0.0972987 | 0.0994253 | 0.100975  | 0.102317  |
| 1000.00     | 0.0936347 | 0.0972437 | 0.0994207 | 0.100979  | 0.102321  |
| 100.000     | 0.0935876 | 0.0972356 | 0.0994202 | 0.100980  | 0.102322  |
| 10.0000     | 0.0935817 | 0.0972348 | 0.0994201 | 0.100980  | 0.102322  |
| 1.00000     | 0.0935811 | 0.0972347 | 0.0994201 | 0.100980  | 0.102322  |
| 0.100000    | 0.0935810 | 0.0972347 | 0.0994201 | 0.100980  | 0.102322  |
| 0.0100000   | 0.0935810 | 0.0972347 | 0.0994201 | 0.100980  | 0.102322  |
| 0.00100000  | 0.0935810 | 0.0972347 | 0.0994201 | 0.100980  | 0.102322  |
| 0.000100000 | 0.0935810 | 0.0972347 | 0.0994201 | 0.100980  | 0.102322  |
| 1.00000e-05 | 0.0935810 | 0.0972347 | 0.0994201 | 0.100980  | 0.102322  |
| 1.00000e-06 | 0.0935810 | 0.0972347 | 0.0994201 | 0.100980  | 0.102322  |
| 1.00000e-07 | 0.0935810 | 0.0972347 | 0.0994201 | 0.100980  | 0.102322  |
| 1.00000e-08 | 0.0935810 | 0.0972347 | 0.0994201 | 0.100980  | 0.102322  |
| 1.00000e-09 | 0.0935810 | 0.0972347 | 0.0994201 | 0.100980  | 0.102322  |

Pa\K | 3750.00 4000.00

|             |           |          |
|-------------|-----------|----------|
| 1.00000e+08 | 0.0980254 | 0.100620 |
| 1.00000e+07 | 0.102498  | 0.104162 |
| 1.00000e+06 | 0.103423  | 0.104800 |
| 100000.     | 0.103591  | 0.104909 |
| 10000.0     | 0.103614  | 0.104924 |
| 1000.00     | 0.103617  | 0.104925 |
| 100.000     | 0.103617  | 0.104926 |
| 10.0000     | 0.103617  | 0.104926 |
| 1.00000     | 0.103617  | 0.104926 |
| 0.100000    | 0.103617  | 0.104926 |
| 0.0100000   | 0.103617  | 0.104926 |
| 0.00100000  | 0.103617  | 0.104926 |
| 0.000100000 | 0.103617  | 0.104926 |
| 1.00000e-05 | 0.103617  | 0.104926 |
| 1.00000e-06 | 0.103617  | 0.104926 |
| 1.00000e-07 | 0.103617  | 0.104926 |
| 1.00000e-08 | 0.103617  | 0.104926 |
| 1.00000e-09 | 0.103617  | 0.104926 |

rad23

=====

Pa\K | 20.0000 30.0000 40.0000 50.0000 60.0000

|             |             |             |             |             |             |
|-------------|-------------|-------------|-------------|-------------|-------------|
| 1.00000e+08 | 3.38759e-21 | 2.81496e-20 | 9.51322e-20 | 2.27833e-19 | 4.55620e-19 |
| 1.00000e+07 | 3.40139e-18 | 2.84665e-17 | 9.69338e-17 | 2.33933e-16 | 4.71451e-16 |
| 1.00000e+06 | 3.65210e-15 | 3.26664e-14 | 1.17581e-13 | 2.97717e-13 | 6.26090e-13 |
| 100000.     | 5.60670e-12 | 5.73555e-11 | 2.15758e-10 | 5.51392e-10 | 1.15131e-09 |
| 10000.0     | 9.27875e-09 | 7.79688e-08 | 2.56751e-07 | 5.93965e-07 | 1.14296e-06 |
| 1000.00     | 7.09304e-06 | 4.24151e-05 | 0.000109413 | 0.000207265 | 0.000335405 |
| 100.000     | 0.00119716  | 0.00371050  | 0.00646158  | 0.00923520  | 0.0119852   |
| 10.0000     | 0.0229571   | 0.0390938   | 0.0498424   | 0.0579065   | 0.0643951   |
| 1.00000     | 0.0811500   | 0.0934390   | 0.0954997   | 0.0944543   | 0.0922223   |
| 0.100000    | 0.0773913   | 0.0540478   | 0.0389254   | 0.0286812   | 0.0214933   |
| 0.0100000   | 0.00647300  | 0.00110928  | 0.000322593 | 0.000123728 | 5.63028e-05 |
| 0.00100000  | 4.12141e-06 | 2.59341e-07 | 5.36097e-08 | 1.77617e-08 | 7.57489e-09 |
| 0.000100000 | 5.60392e-10 | 4.49035e-11 | 1.12627e-11 | 4.33763e-12 | 2.09189e-12 |
| 1.00000e-05 | 2.32530e-13 | 2.80552e-14 | 8.83631e-15 | 3.98539e-15 | 2.17066e-15 |
| 1.00000e-06 | 3.52482e-16 | 6.09425e-17 | 2.33478e-17 | 1.20494e-17 | 7.27734e-18 |
| 1.00000e-07 | 1.63823e-18 | 3.87975e-19 | 1.77345e-19 | 1.03654e-19 | 6.89816e-20 |
| 1.00000e-08 | 2.17436e-20 | 7.28670e-21 | 4.07784e-21 | 2.74506e-21 | 2.03591e-21 |
| 1.00000e-09 | 9.24342e-22 | 4.17004e-22 | 2.67024e-22 | 1.94643e-22 | 1.51968e-22 |

Pa\K | 70.0000 80.0000 90.0000 100.000 110.000

|             |             |             |             |             |             |
|-------------|-------------|-------------|-------------|-------------|-------------|
| 1.00000e+08 | 8.17339e-19 | 1.36659e-18 | 2.17953e-18 | 3.36667e-18 | 5.09109e-18 |
| 1.00000e+07 | 8.52423e-16 | 1.43685e-15 | 2.31102e-15 | 3.60176e-15 | 5.49876e-15 |
| 1.00000e+06 | 1.17642e-12 | 2.05428e-12 | 3.41447e-12 | 5.48843e-12 | 8.62774e-12 |
| 100000.     | 2.12917e-09 | 3.64022e-09 | 5.90318e-09 | 9.23267e-09 | 1.40879e-08 |
| 10000.0     | 1.96753e-06 | 3.14814e-06 | 4.78948e-06 | 7.02983e-06 | 1.00531e-05 |
| 1000.00     | 0.000494112 | 0.000684659 | 0.000909319 | 0.00117136  | 0.00147506  |
| 100.000     | 0.0147096   | 0.0174215   | 0.0201383   | 0.0228787   | 0.0256609   |
| 10.0000     | 0.0698428   | 0.0745409   | 0.0786613   | 0.0823116   | 0.0855611   |
| 1.00000     | 0.0894670   | 0.0864498   | 0.0832809   | 0.0800075   | 0.0766495   |
| 0.100000    | 0.0163168   | 0.0125121   | 0.00967022  | 0.00751976  | 0.00587547  |
| 0.0100000   | 2.87736e-05 | 1.59865e-05 | 9.45688e-06 | 5.87236e-06 | 3.78949e-06 |
| 0.00100000  | 3.77885e-09 | 2.09658e-09 | 1.25565e-09 | 7.96451e-10 | 5.28238e-10 |
| 0.000100000 | 1.15855e-12 | 7.04508e-13 | 4.58224e-13 | 3.13583e-13 | 2.23370e-13 |
| 1.00000e-05 | 1.32838e-15 | 8.79970e-16 | 6.17516e-16 | 4.52975e-16 | 3.44409e-16 |

|             |             |             |             |             |             |
|-------------|-------------|-------------|-------------|-------------|-------------|
| 1.00000e-06 | 4.84670e-18 | 3.45204e-18 | 2.58360e-18 | 2.01044e-18 | 1.61628e-18 |
| 1.00000e-07 | 4.97897e-20 | 3.80106e-20 | 3.02624e-20 | 2.49208e-20 | 2.11307e-20 |
| 1.00000e-08 | 1.60223e-21 | 1.31476e-21 | 1.11365e-21 | 9.68273e-22 | 8.61320e-22 |
| 1.00000e-09 | 1.24361e-22 | 1.04673e-22 | 9.07245e-23 | 8.01536e-23 | 7.26023e-23 |

| Pa\K        | 120.000     | 130.000     | 140.000     | 150.000     | 160.000     |
|-------------|-------------|-------------|-------------|-------------|-------------|
| 1.00000e+08 | 7.59670e-18 | 1.12524e-17 | 1.66216e-17 | 2.45715e-17 | 3.64461e-17 |
| 1.00000e+07 | 8.29002e-15 | 1.24183e-14 | 1.85720e-14 | 2.78316e-14 | 4.19076e-14 |
| 1.00000e+06 | 1.33735e-11 | 2.05675e-11 | 3.15293e-11 | 4.83416e-11 | 7.43063e-11 |
| 100000.     | 2.11463e-08 | 3.14138e-08 | 4.63909e-08 | 6.83206e-08 | 1.00556e-07 |
| 10000.0     | 1.41044e-05 | 1.95095e-05 | 2.66996e-05 | 3.62415e-05 | 4.88746e-05 |
| 1000.00     | 0.00182572  | 0.00222972  | 0.00269455  | 0.00322881  | 0.00384231  |
| 100.000     | 0.0285021   | 0.0314180   | 0.0344224   | 0.0375270   | 0.0407405   |
| 10.0000     | 0.0884560   | 0.0910266   | 0.0932925   | 0.0952656   | 0.0969522   |
| 1.00000     | 0.0732149   | 0.0697080   | 0.0661333   | 0.0624982   | 0.0588137   |
| 0.100000    | 0.00460768  | 0.00362363  | 0.00285576  | 0.00225408  | 0.00178113  |
| 0.0100000   | 2.52264e-06 | 1.72279e-06 | 1.20192e-06 | 8.53827e-07 | 6.16037e-07 |
| 0.00100000  | 3.63084e-10 | 2.56998e-10 | 1.86471e-10 | 1.38242e-10 | 1.04484e-10 |
| 0.000100000 | 1.64418e-13 | 1.24460e-13 | 9.65927e-14 | 7.67333e-14 | 6.23701e-14 |
| 1.00000e-05 | 2.69996e-16 | 2.17578e-16 | 1.80019e-16 | 1.52968e-16 | 1.33714e-16 |
| 1.00000e-06 | 1.33775e-18 | 1.13845e-18 | 9.96599e-19 | 8.99216e-19 | 8.38993e-19 |
| 1.00000e-07 | 1.84150e-20 | 1.64911e-20 | 1.52072e-20 | 1.44850e-20 | 1.43099e-20 |
| 1.00000e-08 | 7.84633e-22 | 7.32896e-22 | 7.03089e-22 | 6.96430e-22 | 7.15238e-22 |
| 1.00000e-09 | 6.68847e-23 | 6.36158e-23 | 6.14932e-23 | 6.16204e-23 | 6.34887e-23 |

| Pa\K        | 170.000     | 180.000     | 190.000     | 200.000     | 210.000     |
|-------------|-------------|-------------|-------------|-------------|-------------|
| 1.00000e+08 | 5.43420e-17 | 8.15462e-17 | 1.23236e-16 | 1.87594e-16 | 2.87595e-16 |
| 1.00000e+07 | 6.35289e-14 | 9.70779e-14 | 1.49632e-13 | 2.32677e-13 | 3.64912e-13 |
| 1.00000e+06 | 1.14676e-10 | 1.77820e-10 | 2.77093e-10 | 4.33784e-10 | 6.81799e-10 |
| 100000.     | 1.48102e-07 | 2.18408e-07 | 3.22509e-07 | 4.76665e-07 | 7.04663e-07 |
| 10000.0     | 6.55552e-05 | 8.75089e-05 | 0.000116291 | 0.000153858 | 0.000202642 |
| 1000.00     | 0.00454603  | 0.00535212  | 0.00627392  | 0.00732583  | 0.00852320  |
| 100.000     | 0.0440685   | 0.0475129   | 0.0510716   | 0.0547380   | 0.0585012   |
| 10.0000     | 0.0983541   | 0.0994700   | 0.100296    | 0.100825    | 0.101050    |
| 1.00000     | 0.0550956   | 0.0513639   | 0.0476425   | 0.0439578   | 0.0403382   |
| 0.100000    | 0.00140846  | 0.00111431  | 0.000881841 | 0.000697991 | 0.00052530  |
| 0.0100000   | 4.50538e-07 | 3.33499e-07 | 2.49583e-07 | 1.88699e-07 | 1.44071e-07 |
| 0.00100000  | 8.04015e-11 | 6.29564e-11 | 5.01722e-11 | 4.07326e-11 | 3.37451e-11 |
| 0.000100000 | 5.19081e-14 | 4.43132e-14 | 3.89096e-14 | 3.52632e-14 | 3.31155e-14 |
| 1.00000e-05 | 1.20580e-16 | 1.12594e-16 | 1.09323e-16 | 1.10819e-16 | 1.17654e-16 |
| 1.00000e-06 | 8.12871e-19 | 8.21469e-19 | 8.69411e-19 | 9.66448e-19 | 1.12968e-18 |
| 1.00000e-07 | 1.47380e-20 | 1.58865e-20 | 1.79911e-20 | 2.14320e-20 | 2.68504e-20 |
| 1.00000e-08 | 7.65101e-22 | 8.57256e-22 | 1.00669e-21 | 1.24353e-21 | 1.61421e-21 |
| 1.00000e-09 | 6.84715e-23 | 7.72433e-23 | 9.14733e-23 | 1.13777e-22 | 1.48069e-22 |

| Pa\K        | 220.000     | 230.000     | 240.000     | 250.000     | 260.000     |
|-------------|-------------|-------------|-------------|-------------|-------------|
| 1.00000e+08 | 4.43854e-16 | 6.89171e-16 | 1.07578e-15 | 1.68692e-15 | 2.65511e-15 |
| 1.00000e+07 | 5.76875e-13 | 9.18502e-13 | 1.47152e-12 | 2.36968e-12 | 3.83163e-12 |
| 1.00000e+06 | 1.07501e-09 | 1.69877e-09 | 2.68775e-09 | 4.25360e-09 | 6.72726e-09 |
| 100000.     | 1.04103e-06 | 1.53549e-06 | 2.25894e-06 | 3.31159e-06 | 4.83375e-06 |
| 10000.0     | 0.000265642 | 0.000346522 | 0.000449710 | 0.000580523 | 0.000745286 |
| 1000.00     | 0.00988217  | 0.0114193   | 0.0131513   | 0.0150944   | 0.0172638   |
| 100.000     | 0.0623455   | 0.0662504   | 0.0701914   | 0.0741396   | 0.0780629   |
| 10.0000     | 0.100962    | 0.100552    | 0.0998116   | 0.0987343   | 0.0973156   |
| 1.00000     | 0.0368119   | 0.0334064   | 0.0301463   | 0.0270534   | 0.0241449   |
| 0.100000    | 0.000437427 | 0.000346353 | 0.000274309 | 0.000217337 | 0.000172302 |
| 0.0100000   | 1.11071e-07 | 8.64863e-08 | 6.80583e-08 | 5.41799e-08 | 4.36957e-08 |
| 0.00100000  | 2.85969e-11 | 2.48657e-11 | 2.22631e-11 | 2.05999e-11 | 1.97645e-11 |
| 0.000100000 | 3.23484e-14 | 3.29736e-14 | 3.51412e-14 | 3.91716e-14 | 4.56171e-14 |
| 1.00000e-05 | 1.31050e-16 | 1.53159e-16 | 1.87527e-16 | 2.39916e-16 | 3.19675e-16 |
| 1.00000e-06 | 1.38770e-18 | 1.78778e-18 | 2.40830e-18 | 3.38118e-18 | 4.93082e-18 |
| 1.00000e-07 | 3.53037e-20 | 4.85979e-20 | 6.97839e-20 | 1.04205e-19 | 1.61320e-19 |
| 1.00000e-08 | 2.19042e-21 | 3.10912e-21 | 4.59101e-21 | 7.06023e-21 | 1.12030e-20 |
| 1.00000e-09 | 2.01607e-22 | 2.87231e-22 | 4.34668e-22 | 6.69043e-22 | 1.06348e-21 |

| Pa\K        | 270.000     | 280.000     | 290.000     | 300.000     | 310.000     |
|-------------|-------------|-------------|-------------|-------------|-------------|
| 1.00000e+08 | 4.19136e-15 | 6.63124e-15 | 1.05079e-14 | 2.86013e-13 | 2.64512e-14 |
| 1.00000e+07 | 6.21439e-12 | 1.00997e-11 | 1.64335e-11 | 5.25313e-10 | 4.35339e-11 |
| 1.00000e+06 | 1.06236e-08 | 1.67392e-08 | 2.63001e-08 | 4.85047e-07 | 6.42489e-08 |
| 100000.     | 7.02009e-06 | 1.01383e-05 | 1.45536e-05 | 0.000108000 | 2.94257e-05 |
| 10000.0     | 0.000951482 | 0.00120790  | 0.00152481  | 0.00433025  | 0.00238981  |
| 1000.00     | 0.0196732   | 0.0223335   | 0.0252524   | 0.0362707   | 0.0318758   |
| 100.000     | 0.0819263   | 0.0856926   | 0.0893231   | 0.0918051   | 0.0960199   |
| 10.0000     | 0.0955546   | 0.0934549   | 0.0910253   | 0.0762118   | 0.0852406   |
| 1.00000     | 0.0214338   | 0.0189283   | 0.0166320   | 0.0122968   | 0.0126611   |
| 0.100000    | 0.000136719 | 0.000108615 | 8.64289e-05 | 0.000138016 | 5.51096e-05 |

|             |             |             |             |             |             |
|-------------|-------------|-------------|-------------|-------------|-------------|
| 0.0100000   | 3.57689e-08 | 2.97891e-08 | 2.53102e-08 | 3.04400e-07 | 1.96398e-08 |
| 0.00100000  | 1.97121e-11 | 2.04616e-11 | 2.20998e-11 | 1.58919e-09 | 2.88139e-11 |
| 0.000100000 | 5.53650e-14 | 6.98062e-14 | 9.11044e-14 | 2.30925e-11 | 1.69600e-13 |
| 1.00000e-05 | 4.42091e-16 | 6.32373e-16 | 9.32492e-16 | 6.07532e-13 | 2.19262e-15 |
| 1.00000e-06 | 7.44540e-18 | 1.16046e-17 | 1.86129e-17 | 2.47750e-14 | 5.15187e-17 |
| 1.00000e-07 | 2.58078e-19 | 4.25555e-19 | 7.21069e-19 | 1.58861e-15 | 2.21783e-18 |
| 1.00000e-08 | 1.83335e-20 | 3.09474e-20 | 5.35406e-20 | 1.44658e-16 | 1.71601e-19 |
| 1.00000e-09 | 1.75053e-21 | 2.94637e-21 | 5.10002e-21 | 1.64042e-17 | 1.63798e-20 |

| Pa\K        | 400.000     | 500.000     | 600.000     | 700.000     | 800.000     |
|-------------|-------------|-------------|-------------|-------------|-------------|
| 1.00000e+08 | 8.72991e-11 | 1.16422e-07 | 1.10508e-05 | 0.000235964 | 0.00131253  |
| 1.00000e+07 | 1.52918e-07 | 3.41175e-05 | 0.000559768 | 0.00309859  | 0.00770474  |
| 1.00000e+06 | 5.31400e-05 | 0.00160658  | 0.00506317  | 0.00989860  | 0.0168867   |
| 100000.     | 0.00273835  | 0.0155566   | 0.0219705   | 0.0260863   | 0.0310235   |
| 10000.0     | 0.0248232   | 0.0509751   | 0.0536809   | 0.0451631   | 0.0335299   |
| 1000.00     | 0.0754926   | 0.0879319   | 0.0620863   | 0.0321021   | 0.0151692   |
| 100.000     | 0.0974694   | 0.0654203   | 0.0299914   | 0.0107423   | 0.00375117  |
| 10.0000     | 0.0408060   | 0.0156411   | 0.00527891  | 0.00160085  | 0.000495370 |
| 1.00000     | 0.00306877  | 0.000863179 | 0.000350732 | 0.000134026 | 4.70482e-05 |
| 0.100000    | 3.14528e-05 | 2.32116e-05 | 2.09369e-05 | 1.11093e-05 | 4.43815e-06 |
| 0.0100000   | 3.74539e-07 | 1.03545e-06 | 1.47875e-06 | 9.37410e-07 | 4.04675e-07 |
| 0.00100000  | 1.08122e-08 | 5.93393e-08 | 1.10236e-07 | 7.82266e-08 | 3.56277e-08 |
| 0.000100000 | 4.48217e-10 | 3.85734e-09 | 8.49998e-09 | 6.48327e-09 | 3.05918e-09 |
| 1.00000e-05 | 2.33456e-11 | 2.68334e-10 | 6.44575e-10 | 5.05656e-10 | 2.41600e-10 |
| 1.00000e-06 | 1.47323e-12 | 1.99882e-11 | 4.98433e-11 | 3.94934e-11 | 1.89369e-11 |
| 1.00000e-07 | 1.18290e-13 | 1.73565e-12 | 4.41189e-12 | 3.51780e-12 | 1.68944e-12 |
| 1.00000e-08 | 1.09982e-14 | 1.68294e-13 | 4.33406e-13 | 3.41969e-13 | 1.65490e-13 |
| 1.00000e-09 | 1.18242e-15 | 1.85585e-14 | 4.42333e-14 | 3.35098e-14 | 1.73838e-14 |

| Pa\K        | 900.000     | 1000.00     | 1100.00     | 1200.00     | 1300.00     |
|-------------|-------------|-------------|-------------|-------------|-------------|
| 1.00000e+08 | 0.00267939  | 0.00350980  | 0.00406665  | 0.00406960  | 0.00368784  |
| 1.00000e+07 | 0.0112034   | 0.0124105   | 0.0130554   | 0.0131921   | 0.0125711   |
| 1.00000e+06 | 0.0216901   | 0.0222292   | 0.0206841   | 0.0180516   | 0.0150975   |
| 100000.     | 0.0308566   | 0.0256583   | 0.0190008   | 0.0132644   | 0.00958232  |
| 10000.0     | 0.0221002   | 0.0135427   | 0.00823301  | 0.00531440  | 0.00389505  |
| 1000.00     | 0.00732243  | 0.00387279  | 0.00226428  | 0.00145790  | 0.00105015  |
| 100.000     | 0.00149959  | 0.000725238 | 0.000398724 | 0.000240853 | 0.000161141 |
| 10.0000     | 0.000184784 | 8.74911e-05 | 4.74668e-05 | 2.81265e-05 | 1.81817e-05 |
| 1.00000     | 1.88137e-05 | 9.24575e-06 | 5.08913e-06 | 3.01279e-06 | 1.91269e-06 |
| 0.100000    | 1.86705e-06 | 9.34206e-07 | 5.17301e-07 | 3.05943e-07 | 1.92082e-07 |
| 0.0100000   | 1.75713e-07 | 8.90469e-08 | 4.96277e-08 | 2.94099e-08 | 1.83607e-08 |
| 0.00100000  | 1.58574e-08 | 8.13699e-09 | 4.57089e-09 | 2.71818e-09 | 1.69091e-09 |
| 0.000100000 | 1.38413e-09 | 7.15986e-10 | 4.03850e-10 | 2.40125e-10 | 1.48512e-10 |
| 1.00000e-05 | 1.09780e-10 | 5.68458e-11 | 3.20484e-11 | 1.90131e-11 | 1.17061e-11 |
| 1.00000e-06 | 8.62756e-12 | 4.47217e-12 | 2.52077e-12 | 1.49339e-12 | 9.17216e-13 |
| 1.00000e-07 | 7.70906e-13 | 3.99942e-13 | 2.25448e-13 | 1.33404e-13 | 8.17800e-14 |
| 1.00000e-08 | 7.54299e-14 | 3.91850e-14 | 2.21643e-14 | 1.31058e-14 | 8.02314e-15 |
| 1.00000e-09 | 7.65640e-15 | 3.89701e-15 | 2.20318e-15 | 1.29395e-15 | 7.93177e-16 |

| Pa\K        | 1400.00     | 1500.00     | 1750.00     | 2000.00     | 2250.00     |
|-------------|-------------|-------------|-------------|-------------|-------------|
| 1.00000e+08 | 0.00340879  | 0.00367865  | 0.000658540 | 0.00113917  | 0.00157336  |
| 1.00000e+07 | 0.0121882   | 0.0134055   | 0.00250360  | 0.00274927  | 0.00237586  |
| 1.00000e+06 | 0.0133524   | 0.0136558   | 0.00659181  | 0.00528935  | 0.00302863  |
| 100000.     | 0.00797783  | 0.00797075  | 0.00653166  | 0.00428530  | 0.00178689  |
| 10000.0     | 0.00337583  | 0.00340088  | 0.00274869  | 0.00134985  | 0.000410195 |
| 1000.00     | 0.000860897 | 0.000789635 | 0.000482548 | 0.000192210 | 4.99034e-05 |
| 100.000     | 0.000120784 | 0.000100207 | 4.95612e-05 | 1.94250e-05 | 4.96222e-06 |
| 10.0000     | 1.28874e-05 | 9.96556e-06 | 4.32753e-06 | 1.82256e-06 | 4.77432e-07 |
| 1.00000     | 1.30493e-06 | 9.55830e-07 | 3.75209e-07 | 1.70573e-07 | 4.59414e-08 |
| 0.100000    | 1.27825e-07 | 9.01153e-08 | 3.31277e-08 | 1.60829e-08 | 4.43906e-09 |
| 0.0100000   | 1.20245e-08 | 8.25769e-09 | 2.96986e-09 | 1.52746e-09 | 4.30648e-10 |
| 0.00100000  | 1.09415e-09 | 7.36993e-10 | 2.69258e-10 | 1.45984e-10 | 4.19246e-11 |
| 0.000100000 | 9.49982e-11 | 6.30312e-11 | 2.41997e-11 | 1.39377e-11 | 4.07618e-12 |
| 1.00000e-05 | 7.43997e-12 | 4.90964e-12 | 2.20311e-12 | 1.34160e-12 | 3.98380e-13 |
| 1.00000e-06 | 5.81253e-13 | 3.83626e-13 | 2.03062e-13 | 1.29947e-13 | 3.90837e-14 |
| 1.00000e-07 | 5.17839e-14 | 3.42060e-14 | 1.94499e-14 | 1.27930e-14 | 3.87365e-15 |
| 1.00000e-08 | 5.06585e-15 | 3.35180e-15 | 1.93195e-15 | 1.27617e-15 | 3.86861e-16 |
| 1.00000e-09 | 1.28701e-18 | 7.36670e-18 | 1.69241e-16 | 1.21994e-16 | 3.75240e-17 |

| Pa\K        | 2500.00     | 2750.00     | 3000.00     | 3250.00     | 3500.00     |
|-------------|-------------|-------------|-------------|-------------|-------------|
| 1.00000e+08 | 0.00183139  | 0.00188659  | 0.00180409  | 0.00163784  | 0.00143196  |
| 1.00000e+07 | 0.00210381  | 0.00174225  | 0.00134616  | 0.000993799 | 0.000715936 |
| 1.00000e+06 | 0.00186809  | 0.00115786  | 0.000699824 | 0.000415755 | 0.000245803 |
| 100000.     | 0.000796356 | 0.000371782 | 0.000176208 | 8.51454e-05 | 4.23512e-05 |
| 10000.0     | 0.000139816 | 5.37189e-05 | 2.22118e-05 | 9.76606e-06 | 4.55167e-06 |
| 1000.00     | 1.53184e-05 | 5.54044e-06 | 2.21265e-06 | 9.52610e-07 | 4.37780e-07 |

|             |             |             |             |             |             |
|-------------|-------------|-------------|-------------|-------------|-------------|
| 100.000     | 1.49840e-06 | 5.36142e-07 | 2.12510e-07 | 9.09271e-08 | 4.15382e-08 |
| 10.0000     | 1.44592e-07 | 5.16101e-08 | 2.03760e-08 | 8.67856e-09 | 3.94489e-09 |
| 1.00000     | 1.39844e-08 | 4.98439e-09 | 1.96104e-09 | 8.31692e-10 | 3.76297e-10 |
| 0.100000    | 1.35766e-09 | 4.83260e-10 | 1.89500e-10 | 8.00396e-11 | 3.60525e-11 |
| 0.0100000   | 1.32263e-10 | 4.70163e-11 | 1.83777e-11 | 7.73165e-12 | 3.46766e-12 |
| 0.00100000  | 1.29218e-11 | 4.58678e-12 | 1.78715e-12 | 7.48921e-13 | 3.34459e-13 |
| 0.000100000 | 1.26044e-12 | 4.46564e-13 | 1.73336e-13 | 7.23055e-14 | 3.21319e-14 |
| 1.00000e-05 | 1.23532e-13 | 4.37028e-14 | 1.69127e-14 | 7.02933e-15 | 3.11158e-15 |
| 1.00000e-06 | 1.21470e-14 | 4.29167e-15 | 1.65643e-15 | 6.86235e-16 | 3.02709e-16 |
| 1.00000e-07 | 1.20559e-15 | 4.25828e-16 | 1.64216e-16 | 6.79623e-17 | 2.99472e-17 |
| 1.00000e-08 | 1.20433e-16 | 4.25346e-17 | 1.63999e-17 | 6.78574e-18 | 2.98956e-18 |
| 1.00000e-09 | 1.17222e-17 | 4.13076e-18 | 1.58549e-18 | 6.52352e-19 | 2.85612e-19 |

Pa\K | 3750.00 4000.00

|             |             |             |
|-------------|-------------|-------------|
| 1.00000e+08 | 0.00121950  | 0.00102099  |
| 1.00000e+07 | 0.000510536 | 0.000363659 |
| 1.00000e+06 | 0.000146074 | 8.79252e-05 |
| 100000.     | 2.18335e-05 | 1.17132e-05 |
| 10000.0     | 2.24301e-06 | 1.16551e-06 |
| 1000.00     | 2.13373e-07 | 1.09728e-07 |
| 100.000     | 2.01149e-08 | 1.02654e-08 |
| 10.0000     | 1.89999e-09 | 9.63885e-10 |
| 1.00000     | 1.80350e-10 | 9.10230e-11 |
| 0.100000    | 1.71986e-11 | 8.63836e-12 |
| 0.0100000   | 1.64680e-12 | 8.23303e-13 |
| 0.00100000  | 1.58130e-13 | 7.86969e-14 |
| 0.000100000 | 1.51150e-14 | 7.48425e-15 |
| 1.00000e-05 | 1.45784e-15 | 7.18960e-16 |
| 1.00000e-06 | 1.41318e-16 | 6.94429e-17 |
| 1.00000e-07 | 1.39649e-17 | 6.85494e-18 |
| 1.00000e-08 | 1.39434e-18 | 6.84269e-19 |
| 1.00000e-09 | 1.32296e-19 | 6.44931e-20 |

rad45

=====

Pa\K | 20.0000 30.0000 40.0000 50.0000 60.0000

|             |             |             |             |             |             |
|-------------|-------------|-------------|-------------|-------------|-------------|
| 1.00000e+08 | 8.69426e-17 | 6.85944e-16 | 2.25600e-15 | 5.32645e-15 | 1.05728e-14 |
| 1.00000e+07 | 7.92036e-14 | 6.70759e-13 | 2.28543e-12 | 5.49161e-12 | 1.09898e-11 |
| 1.00000e+06 | 8.18467e-11 | 6.61967e-10 | 2.16436e-09 | 5.00636e-09 | 9.66076e-09 |
| 100000.     | 6.09627e-08 | 3.75781e-07 | 9.96836e-07 | 1.94618e-06 | 3.25736e-06 |
| 10000.0     | 1.28463e-05 | 5.14243e-05 | 0.000111338 | 0.000191650 | 0.000292645 |
| 1000.00     | 0.000888226 | 0.00255852  | 0.00433744  | 0.00608952  | 0.00778184  |
| 100.000     | 0.0131518   | 0.0186506   | 0.0204791   | 0.0209246   | 0.0207571   |
| 10.0000     | 0.0161474   | 0.00998038  | 0.00695647  | 0.00542473  | 0.00461815  |
| 1.00000     | 0.00341719  | 0.00321735  | 0.00301626  | 0.00281498  | 0.00263150  |
| 0.100000    | 0.00188210  | 0.00114274  | 0.000764066 | 0.000535817 | 0.000387144 |
| 0.0100000   | 0.000102123 | 1.56179e-05 | 4.27838e-06 | 1.57745e-06 | 6.97357e-07 |
| 0.00100000  | 4.59594e-08 | 2.64742e-09 | 5.22786e-10 | 1.68101e-10 | 7.01472e-11 |
| 0.000100000 | 4.79315e-12 | 3.59557e-13 | 8.71541e-14 | 3.28246e-14 | 1.55763e-14 |
| 1.00000e-05 | 1.63379e-15 | 1.88673e-16 | 5.82750e-17 | 2.59912e-17 | 1.40531e-17 |
| 1.00000e-06 | 2.23367e-18 | 3.82257e-19 | 1.45960e-19 | 7.52271e-20 | 4.54289e-20 |
| 1.00000e-07 | 1.01731e-20 | 2.42728e-21 | 1.11119e-21 | 6.59608e-22 | 4.43083e-22 |
| 1.00000e-08 | 1.38036e-22 | 4.51823e-23 | 2.61368e-23 | 1.68913e-23 | 1.43141e-23 |
| 1.00000e-09 | 5.64815e-24 | 1.93545e-24 | 1.80749e-24 | 1.66695e-24 | 4.80047e-25 |

Pa\K | 70.0000 80.0000 90.0000 100.000 110.000

|             |             |             |             |             |             |
|-------------|-------------|-------------|-------------|-------------|-------------|
| 1.00000e+08 | 1.88925e-14 | 3.15191e-14 | 5.01919e-14 | 7.74108e-14 | 1.16823e-13 |
| 1.00000e+07 | 1.96940e-11 | 3.28480e-11 | 5.21930e-11 | 8.02149e-11 | 1.20514e-10 |
| 1.00000e+06 | 1.67076e-08 | 2.68988e-08 | 4.12411e-08 | 6.11082e-08 | 8.83952e-08 |
| 100000.     | 4.98287e-06 | 7.19962e-06 | 1.00151e-05 | 1.35761e-05 | 1.80801e-05 |
| 10000.0     | 0.000415477 | 0.000562149 | 0.000735513 | 0.000939288 | 0.00117809  |
| 1000.00     | 0.00940987  | 0.0109784   | 0.0124948   | 0.0139657   | 0.0153966   |
| 100.000     | 0.0202914   | 0.0196735   | 0.0189770   | 0.0182413   | 0.0174885   |
| 10.0000     | 0.00418529  | 0.00395412  | 0.00383532  | 0.00378021  | 0.00376118  |
| 1.00000     | 0.00246646  | 0.00231680  | 0.00217929  | 0.00205118  | 0.00193031  |
| 0.100000    | 0.000285616 | 0.000213975 | 0.000162181 | 0.000124032 | 9.55231e-05 |
| 0.0100000   | 3.48450e-07 | 1.90102e-07 | 1.10763e-07 | 6.79016e-08 | 4.33359e-08 |
| 0.00100000  | 3.44102e-11 | 1.88349e-11 | 1.11549e-11 | 7.00920e-12 | 4.61159e-12 |
| 0.000100000 | 8.52015e-15 | 5.12993e-15 | 3.30964e-15 | 2.24983e-15 | 1.59357e-15 |
| 1.00000e-05 | 8.55694e-18 | 5.64911e-18 | 3.95398e-18 | 2.89541e-18 | 2.19968e-18 |
| 1.00000e-06 | 3.02864e-20 | 2.16265e-20 | 1.62212e-20 | 1.26592e-20 | 1.02440e-20 |
| 1.00000e-07 | 3.19592e-22 | 2.46404e-22 | 1.98534e-22 | 1.71152e-22 | 1.46594e-22 |
| 1.00000e-08 | 1.22745e-23 | 8.28764e-24 | 7.31670e-24 | 6.81762e-24 | 5.84422e-24 |
| 1.00000e-09 | 5.56198e-25 | 1.10122e-24 | 1.84988e-25 | 1.87987e-25 | 4.13513e-25 |

Pa\K | 120.000 130.000 140.000 150.000 160.000

|             |             |             |             |             |             |
|-------------|-------------|-------------|-------------|-------------|-------------|
| 1.00000e+08 | 1.73815e-13 | 2.56406e-13 | 3.76630e-13 | 5.52626e-13 | 8.11859e-13 |
| 1.00000e+07 | 1.78358e-10 | 2.61518e-10 | 3.81518e-10 | 5.55513e-10 | 8.09096e-10 |
| 1.00000e+06 | 1.25734e-07 | 1.76789e-07 | 2.46668e-07 | 3.42484e-07 | 4.74122e-07 |
| 100000.     | 2.37912e-05 | 3.10607e-05 | 4.03527e-05 | 5.22776e-05 | 6.76327e-05 |
| 10000.0     | 0.00145748  | 0.00178396  | 0.00216493  | 0.00260866  | 0.00312414  |
| 1000.00     | 0.0167911   | 0.0181507   | 0.0194752   | 0.0207624   | 0.0220083   |
| 100.000     | 0.0167320   | 0.0159805   | 0.0152403   | 0.0145165   | 0.0138139   |
| 10.0000     | 0.00376198  | 0.00377276  | 0.00378734  | 0.00380179  | 0.00381349  |
| 1.00000     | 0.00181501  | 0.00170405  | 0.00159652  | 0.00149184  | 0.00138966  |
| 0.100000    | 7.39705e-05 | 5.75268e-05 | 4.48888e-05 | 3.51189e-05 | 2.75313e-05 |
| 0.0100000   | 2.85726e-08 | 1.93498e-08 | 1.34002e-08 | 9.45750e-09 | 6.78454e-09 |
| 0.00100000  | 3.14792e-12 | 2.21484e-12 | 1.59869e-12 | 1.17986e-12 | 8.88274e-13 |
| 0.000100000 | 1.16741e-15 | 8.80185e-16 | 6.80839e-16 | 5.39364e-16 | 4.37450e-16 |
| 1.00000e-05 | 1.72346e-18 | 1.38876e-18 | 1.15015e-18 | 9.78626e-19 | 8.57283e-19 |
| 1.00000e-06 | 8.51311e-21 | 7.32344e-21 | 6.48733e-21 | 5.95690e-21 | 5.69350e-21 |
| 1.00000e-07 | 1.33663e-22 | 1.24396e-22 | 1.20731e-22 | 1.25483e-22 | 1.34126e-22 |
| 1.00000e-08 | 6.84619e-24 | 6.20424e-24 | 7.57168e-24 | 7.95334e-24 | 1.00867e-23 |
| 1.00000e-09 | 1.29754e-24 | 3.72988e-25 | 1.85927e-25 | 2.21843e-24 | 6.32711e-25 |

Pa\K | 170.000 180.000 190.000 200.000 210.000

|             |             |             |             |             |             |
|-------------|-------------|-------------|-------------|-------------|-------------|
| 1.00000e+08 | 1.19602e-12 | 1.76854e-12 | 2.62599e-12 | 3.91543e-12 | 5.86073e-12 |
| 1.00000e+07 | 1.18049e-09 | 1.72679e-09 | 2.53314e-09 | 3.72631e-09 | 5.49442e-09 |
| 1.00000e+06 | 6.55280e-07 | 9.04877e-07 | 1.24894e-06 | 1.72312e-06 | 2.37600e-06 |
| 100000.     | 8.74517e-05 | 0.000113065 | 0.000146165 | 0.000188891 | 0.000243907 |
| 10000.0     | 0.00372089  | 0.00440868  | 0.00519723  | 0.00609583  | 0.00711286  |
| 1000.00     | 0.0232077   | 0.0243539   | 0.0254390   | 0.0264547   | 0.0273918   |
| 100.000     | 0.0131371   | 0.0124906   | 0.0118787   | 0.0113056   | 0.0107746   |
| 10.0000     | 0.00382064  | 0.00382197  | 0.00381655  | 0.00380365  | 0.00378267  |
| 1.00000     | 0.00128986  | 0.00119251  | 0.00109780  | 0.00100603  | 0.000917579 |
| 0.100000    | 2.16173e-05 | 1.69947e-05 | 1.33739e-05 | 1.05332e-05 | 8.30199e-06 |
| 0.0100000   | 4.93692e-09 | 3.63837e-09 | 2.71252e-09 | 2.04419e-09 | 1.55653e-09 |
| 0.00100000  | 6.81257e-13 | 5.31943e-13 | 4.22942e-13 | 3.42740e-13 | 2.83565e-13 |
| 0.000100000 | 3.63456e-16 | 3.09937e-16 | 2.71980e-16 | 2.46510e-16 | 2.31666e-16 |
| 1.00000e-05 | 7.76132e-19 | 7.28245e-19 | 7.11746e-19 | 7.28096e-19 | 7.82309e-19 |
| 1.00000e-06 | 5.68789e-21 | 5.97025e-21 | 6.59114e-21 | 7.69842e-21 | 9.60361e-21 |
| 1.00000e-07 | 1.50789e-22 | 1.79995e-22 | 2.29246e-22 | 3.03522e-22 | 4.19035e-22 |
| 1.00000e-08 | 1.02912e-23 | 1.40726e-23 | 1.81941e-23 | 1.75319e-23 | 3.34107e-23 |
| 1.00000e-09 | 2.26973e-25 | 2.35787e-25 | 1.30059e-25 | 1.69285e-24 | 1.11104e-24 |

Pa\K | 220.000 230.000 240.000 250.000 260.000

|             |             |             |             |             |             |
|-------------|-------------|-------------|-------------|-------------|-------------|
| 1.00000e+08 | 8.80215e-12 | 1.32558e-11 | 2.00026e-11 | 3.02201e-11 | 4.56774e-11 |
| 1.00000e+07 | 8.11552e-09 | 1.19987e-08 | 1.77422e-08 | 2.62163e-08 | 3.86772e-08 |
| 1.00000e+06 | 3.27346e-06 | 4.50429e-06 | 6.18747e-06 | 8.48139e-06 | 1.15954e-05 |
| 100000.     | 0.000314493 | 0.000404637 | 0.000519118 | 0.000663573 | 0.000844552 |
| 10000.0     | 0.00825536  | 0.00952849  | 0.0109351   | 0.0124754   | 0.0141463   |
| 1000.00     | 0.0282409   | 0.0289928   | 0.0296384   | 0.0301696   | 0.0305791   |
| 100.000     | 0.0102887   | 0.00984974  | 0.00945874  | 0.00911558  | 0.00881911  |
| 10.0000     | 0.00375313  | 0.00371464  | 0.00366687  | 0.00360960  | 0.00354274  |
| 1.00000     | 0.000832836 | 0.000752191 | 0.000675993 | 0.000604534 | 0.000538026 |
| 0.100000    | 6.54804e-06 | 5.16850e-06 | 4.08306e-06 | 3.22882e-06 | 2.55646e-06 |
| 0.0100000   | 1.19741e-09 | 9.30867e-10 | 7.31737e-10 | 5.82224e-10 | 4.69599e-10 |
| 0.00100000  | 2.40101e-13 | 2.08707e-13 | 1.86914e-13 | 1.73109e-13 | 1.66371e-13 |
| 0.000100000 | 2.26675e-16 | 2.31676e-16 | 2.47882e-16 | 2.77874e-16 | 3.26121e-16 |
| 1.00000e-05 | 8.84227e-19 | 1.05319e-18 | 1.32125e-18 | 1.74132e-18 | 2.40626e-18 |
| 1.00000e-06 | 1.25214e-20 | 1.73508e-20 | 2.52028e-20 | 3.85397e-20 | 6.14810e-20 |
| 1.00000e-07 | 5.89714e-22 | 9.27004e-22 | 1.43583e-21 | 2.37180e-21 | 4.17271e-21 |
| 1.00000e-08 | 4.01527e-23 | 5.65886e-23 | 8.19646e-23 | 2.07184e-22 | 4.04520e-22 |
| 1.00000e-09 | 1.88114e-24 | 1.60010e-24 | 1.25301e-24 | 1.71875e-24 | 2.47093e-24 |

Pa\K | 270.000 280.000 290.000 300.000 310.000

|             |             |             |             |             |             |
|-------------|-------------|-------------|-------------|-------------|-------------|
| 1.00000e+08 | 6.90218e-11 | 1.04196e-10 | 1.57046e-10 | 2.31575e-09 | 3.54276e-10 |
| 1.00000e+07 | 5.69261e-08 | 8.35256e-08 | 1.22093e-07 | 1.20283e-06 | 2.57347e-07 |
| 1.00000e+06 | 1.58042e-05 | 2.14655e-05 | 2.90412e-05 | 0.000150522 | 5.24604e-05 |
| 100000.     | 0.00106954  | 0.00134693  | 0.00168599  | 0.00455474  | 0.00258971  |
| 10000.0     | 0.0159415   | 0.0178510   | 0.0198613   | 0.0261840   | 0.0241116   |
| 1000.00     | 0.0308614   | 0.0310126   | 0.0310312   | 0.0267764   | 0.0306769   |
| 100.000     | 0.00856720  | 0.00835688  | 0.00818445  | 0.00835685  | 0.00793601  |
| 10.0000     | 0.00346630  | 0.00338047  | 0.00328559  | 0.00311469  | 0.00307104  |
| 1.00000     | 0.000476599 | 0.000420292 | 0.000369061 | 0.000312203 | 0.000281273 |
| 0.100000    | 2.02720e-06 | 1.61057e-06 | 1.28258e-06 | 2.35470e-06 | 8.21097e-07 |
| 0.0100000   | 3.84685e-10 | 3.20827e-10 | 2.73188e-10 | 3.84427e-09 | 2.13540e-10 |
| 0.00100000  | 1.66371e-13 | 1.73362e-13 | 1.88258e-13 | 1.80560e-11 | 2.49838e-13 |
| 0.000100000 | 4.00009e-16 | 5.11540e-16 | 6.80399e-16 | 3.19218e-13 | 1.34214e-15 |
| 1.00000e-05 | 3.47825e-18 | 5.25639e-18 | 8.27348e-18 | 1.53114e-14 | 2.30303e-17 |
| 1.00000e-06 | 1.02670e-19 | 1.77805e-19 | 3.19056e-19 | 1.25718e-15 | 1.12949e-18 |
| 1.00000e-07 | 7.00564e-21 | 1.29745e-20 | 2.39750e-20 | 1.22579e-16 | 9.47801e-20 |
| 1.00000e-08 | 6.99907e-22 | 8.97723e-22 | 2.03256e-21 | 9.25850e-18 | 1.14924e-20 |

1.00000e-09 | 9.33853e-24 9.93743e-24 1.73458e-23 1.24754e-18 2.84521e-23

Pa\K | 400.000 500.000 600.000 700.000 800.000

-----  
1.00000e+08 | 1.10216e-07 4.16175e-06 0.000123884 0.00201644 0.00880007  
1.00000e+07 | 2.92903e-05 0.000408804 0.00289697 0.0117481 0.0241000  
1.00000e+06 | 0.00162611 0.00757926 0.0131892 0.0140827 0.0158763  
100000. | 0.0178088 0.0280258 0.0211563 0.0100915 0.00633805  
10000.0 | 0.0359673 0.0283862 0.0165479 0.00729588 0.00396134  
1000.00 | 0.0203888 0.0158304 0.0103508 0.00477088 0.00239863  
100.000 | 0.00791428 0.00686837 0.00415523 0.00171680 0.000737296  
10.0000 | 0.00197312 0.00120518 0.000625144 0.000243951 9.83497e-05  
1.00000 | 9.84960e-05 5.67453e-05 4.04202e-05 2.00480e-05 9.09408e-06  
0.100000 | 8.24916e-07 1.78681e-06 2.48461e-06 1.62171e-06 8.28905e-07  
0.0100000 | 1.18730e-08 9.40357e-08 1.83093e-07 1.40543e-07 7.77056e-08  
0.00100000 | 4.57303e-10 6.43495e-09 1.49842e-08 1.27611e-08 7.44034e-09  
0.000100000 | 2.64965e-11 5.08424e-10 1.31673e-09 1.19938e-09 7.23899e-10  
1.00000e-05 | 2.14579e-12 4.64568e-11 1.25236e-10 1.17136e-10 7.16525e-11  
1.00000e-06 | 2.04009e-13 4.54817e-12 1.23752e-11 1.16479e-11 7.14750e-12  
1.00000e-07 | 2.01066e-14 4.51967e-13 1.23587e-12 1.16405e-12 7.14934e-13  
1.00000e-08 | 1.78607e-15 4.24217e-14 1.24131e-13 1.15487e-13 7.14000e-14  
1.00000e-09 | 5.39756e-17 5.28843e-15 1.37462e-14 1.12207e-14 7.83320e-15

Pa\K | 900.000 1000.00 1100.00 1200.00 1300.00

-----  
1.00000e+08 | 0.0159770 0.0209988 0.0251523 0.0267259 0.0267109  
1.00000e+07 | 0.0338867 0.0427293 0.0535664 0.0620899 0.0665878  
1.00000e+06 | 0.0185219 0.0214620 0.0242683 0.0260020 0.0266831  
100000. | 0.00585457 0.00614558 0.00645388 0.00659206 0.00654670  
10000.0 | 0.00310670 0.00287296 0.00271304 0.00250382 0.00223001  
1000.00 | 0.00157320 0.00118784 0.000915347 0.000692583 0.000510901  
100.000 | 0.000384857 0.000233187 0.000149031 9.68750e-05 6.34134e-05  
10.0000 | 4.64725e-05 2.58770e-05 1.55507e-05 9.68596e-06 6.16182e-06  
1.00000 | 4.44104e-06 2.48297e-06 1.48835e-06 9.24427e-07 5.87168e-07  
0.100000 | 4.21524e-07 2.38531e-07 1.43552e-07 8.93291e-08 5.68206e-08  
0.0100000 | 4.06394e-08 2.32078e-08 1.40161e-08 8.73783e-09 5.56499e-09  
0.00100000 | 3.96695e-09 2.27993e-09 1.38039e-09 8.61650e-10 5.49211e-10  
0.000100000 | 3.90825e-10 2.25556e-10 1.36788e-10 8.54546e-11 5.44961e-11  
1.00000e-05 | 3.88739e-11 2.24722e-11 1.36377e-11 8.52297e-12 5.43666e-12  
1.00000e-06 | 3.88250e-12 2.24538e-12 1.36287e-12 8.51821e-13 5.43413e-13  
1.00000e-07 | 3.88163e-13 2.24471e-13 1.36285e-13 8.51721e-14 5.43279e-14  
1.00000e-08 | 3.87618e-14 2.24293e-14 1.36454e-14 8.51288e-15 5.43015e-15  
1.00000e-09 | 4.00162e-15 2.30538e-15 1.38147e-15 8.57281e-16 5.43232e-16

Pa\K | 1400.00 1500.00 1750.00 2000.00 2250.00

-----  
1.00000e+08 | 0.0269195 0.0274481 0.00204070 0.00217464 0.00229076  
1.00000e+07 | 0.0691353 0.0705181 0.00129996 0.00136993 0.00132814  
1.00000e+06 | 0.0266933 0.0261707 0.00103831 0.000928585 0.000753681  
100000. | 0.00633027 0.00596082 0.000665406 0.000465191 0.000294995  
10000.0 | 0.00191288 0.00158403 0.000210884 0.000107250 5.21158e-05  
1000.00 | 0.000368685 0.000261842 3.11300e-05 1.31540e-05 5.69275e-06  
100.000 | 4.17566e-05 2.76972e-05 3.26031e-06 1.31887e-06 5.58848e-07  
10.0000 | 3.98394e-06 2.61373e-06 3.20520e-07 1.29255e-07 5.47059e-08  
1.00000 | 3.79529e-07 2.49129e-07 3.15477e-08 1.27347e-08 5.39307e-09  
0.100000 | 3.67755e-08 2.41673e-08 3.12263e-09 1.26126e-09 5.34346e-10  
0.0100000 | 3.60527e-09 2.37092e-09 3.10244e-10 1.25343e-10 5.31134e-11  
0.00100000 | 3.56005e-10 2.34208e-10 3.08994e-11 1.24856e-11 5.29144e-12  
0.000100000 | 3.53375e-11 2.32537e-11 3.08594e-12 1.24707e-12 5.28560e-13  
1.00000e-05 | 3.52601e-12 2.32060e-12 3.08519e-13 1.24679e-13 5.28458e-14  
1.00000e-06 | 3.52450e-13 2.31977e-13 3.08493e-14 1.24673e-14 5.28401e-15  
1.00000e-07 | 3.52464e-14 2.31907e-14 3.08516e-15 1.24706e-15 5.28247e-16  
1.00000e-08 | 3.51839e-15 2.31724e-15 3.08487e-16 1.24394e-16 5.28408e-17  
1.00000e-09 | 3.11214e-16 2.04840e-16 2.94675e-17 1.19046e-17 5.04421e-18

Pa\K | 2500.00 2750.00 3000.00 3250.00 3500.00

-----  
1.00000e+08 | 0.00232832 0.00225812 0.00208900 0.00185790 0.00160598  
1.00000e+07 | 0.00118505 0.000986637 0.000782854 0.000602946 0.000456430  
1.00000e+06 | 0.000567157 0.000399737 0.000268605 0.000175058 0.000112181  
100000. | 0.000173301 9.64845e-05 5.24114e-05 2.84114e-05 1.55910e-05  
10000.0 | 2.48410e-05 1.18753e-05 5.79877e-06 2.92145e-06 1.52442e-06  
1000.00 | 2.53472e-06 1.16667e-06 5.57862e-07 2.77705e-07 1.43857e-07  
100.000 | 2.46315e-07 1.12848e-07 5.38438e-08 2.67746e-08 1.38610e-08  
10.0000 | 2.40974e-08 1.10380e-08 5.26656e-09 2.61899e-09 1.35590e-09  
1.00000 | 2.37613e-09 1.08856e-09 5.19440e-10 2.58335e-10 1.33755e-10  
0.100000 | 2.35467e-10 1.07883e-10 5.14839e-11 2.56064e-11 1.32587e-11  
0.0100000 | 2.34073e-11 1.07252e-11 5.11850e-12 2.54588e-12 1.31828e-12  
0.00100000 | 2.33217e-12 1.06866e-12 5.10044e-13 2.53705e-13 1.31378e-13  
0.000100000 | 2.32975e-13 1.06761e-13 5.09564e-14 2.53476e-14 1.31264e-14

|             |             |             |             |             |             |
|-------------|-------------|-------------|-------------|-------------|-------------|
| 1.00000e-05 | 2.32933e-14 | 1.06743e-14 | 5.09481e-15 | 2.53437e-15 | 1.31244e-15 |
| 1.00000e-06 | 2.32906e-15 | 1.06745e-15 | 5.09452e-16 | 2.53431e-16 | 1.31234e-16 |
| 1.00000e-07 | 2.32907e-16 | 1.06753e-16 | 5.09427e-17 | 2.53420e-17 | 1.31325e-17 |
| 1.00000e-08 | 2.32625e-17 | 1.06388e-17 | 5.06912e-18 | 2.52032e-18 | 1.30335e-18 |
| 1.00000e-09 | 2.22277e-18 | 1.01836e-18 | 4.85965e-19 | 2.41701e-19 | 1.25151e-19 |

Pa\K | 3750.00 4000.00

|             |             |             |
|-------------|-------------|-------------|
| 1.00000e+08 | 0.00136307  | 0.00114501  |
| 1.00000e+07 | 0.000342278 | 0.000255607 |
| 1.00000e+06 | 7.14277e-05 | 4.55583e-05 |
| 100000.     | 8.73193e-06 | 5.01299e-06 |
| 10000.0     | 8.24170e-07 | 4.61144e-07 |
| 1000.00     | 7.73966e-08 | 4.31409e-08 |
| 100.000     | 7.45372e-09 | 4.15259e-09 |
| 10.0000     | 7.29155e-10 | 4.06221e-10 |
| 1.00000     | 7.19334e-11 | 4.00770e-11 |
| 0.100000    | 7.13089e-12 | 3.97309e-12 |
| 0.0100000   | 7.09034e-13 | 3.95064e-13 |
| 0.00100000  | 7.06652e-14 | 3.93757e-14 |
| 0.000100000 | 7.06059e-15 | 3.93437e-15 |
| 1.00000e-05 | 7.05956e-16 | 3.93384e-16 |
| 1.00000e-06 | 7.05934e-17 | 3.93381e-17 |
| 1.00000e-07 | 7.06018e-18 | 3.93319e-18 |
| 1.00000e-08 | 7.03971e-19 | 3.91821e-19 |
| 1.00000e-09 | 6.73121e-20 | 3.75061e-20 |

rad6

====

Pa\K | 20.0000 30.0000 40.0000 50.0000 60.0000

|             |             |             |             |             |             |
|-------------|-------------|-------------|-------------|-------------|-------------|
| 1.00000e+08 | 4.56654e-25 | 3.91085e-24 | 1.40428e-23 | 3.65294e-23 | 8.07044e-23 |
| 1.00000e+07 | 4.56331e-22 | 3.90808e-21 | 1.40331e-20 | 3.65044e-20 | 8.06484e-20 |
| 1.00000e+06 | 4.56020e-19 | 3.90421e-18 | 1.40138e-17 | 3.64386e-17 | 8.04657e-17 |
| 100000.     | 4.54130e-16 | 3.87165e-15 | 1.38381e-14 | 3.58234e-14 | 7.87356e-14 |
| 10000.0     | 4.36146e-13 | 3.57270e-12 | 1.22860e-11 | 3.06003e-11 | 6.46400e-11 |
| 1000.00     | 3.09656e-10 | 1.95686e-09 | 5.47668e-09 | 1.14369e-08 | 2.06264e-08 |
| 100.000     | 6.20881e-08 | 2.20095e-07 | 4.35984e-07 | 7.10177e-07 | 1.05304e-06 |
| 10.0000     | 1.96181e-06 | 4.48437e-06 | 7.25354e-06 | 1.04309e-05 | 1.41517e-05 |
| 1.00000     | 2.18748e-05 | 4.19043e-05 | 6.06014e-05 | 7.91240e-05 | 9.78954e-05 |
| 0.100000    | 0.000119066 | 0.000155176 | 0.000173567 | 0.000187191 | 0.000199359 |
| 0.0100000   | 0.000180263 | 0.000184375 | 0.000190025 | 0.000197407 | 0.000206107 |
| 0.00100000  | 0.000181993 | 0.000184715 | 0.000190134 | 0.000197433 | 0.000206086 |
| 0.000100000 | 0.000181921 | 0.000184548 | 0.000189861 | 0.000197025 | 0.000205502 |
| 1.00000e-05 | 0.000181132 | 0.000182895 | 0.000187191 | 0.000193078 | 0.000199913 |
| 1.00000e-06 | 0.000173662 | 0.000167915 | 0.000164083 | 0.000160702 | 0.000156914 |
| 1.00000e-07 | 0.000121071 | 8.71193e-05 | 6.57222e-05 | 5.06988e-05 | 3.96150e-05 |
| 1.00000e-08 | 1.94358e-05 | 7.10705e-06 | 3.67254e-06 | 2.20659e-06 | 1.44365e-06 |
| 1.00000e-09 | 5.48659e-07 | 1.72289e-07 | 8.79584e-08 | 5.37127e-08 | 3.60047e-08 |

Pa\K | 70.0000 80.0000 90.0000 100.000 110.000

|             |             |             |             |             |             |
|-------------|-------------|-------------|-------------|-------------|-------------|
| 1.00000e+08 | 1.62479e-22 | 3.09856e-22 | 5.73411e-22 | 1.04657e-21 | 1.90535e-21 |
| 1.00000e+07 | 1.62363e-19 | 3.09623e-19 | 5.72949e-19 | 1.04565e-18 | 1.90349e-18 |
| 1.00000e+06 | 1.61911e-16 | 3.08579e-16 | 5.70624e-16 | 1.04056e-15 | 1.89234e-15 |
| 100000.     | 1.57616e-13 | 2.98660e-13 | 5.48615e-13 | 9.92606e-13 | 1.78822e-12 |
| 10000.0     | 1.24114e-10 | 2.24875e-10 | 3.93290e-10 | 6.73736e-10 | 1.14140e-09 |
| 1000.00     | 3.41894e-08 | 5.38142e-08 | 8.19979e-08 | 1.22431e-07 | 1.80555e-07 |
| 100.000     | 1.48220e-06 | 2.02383e-06 | 2.71501e-06 | 3.60736e-06 | 4.77228e-06 |
| 10.0000     | 1.85730e-05 | 2.38928e-05 | 3.03600e-05 | 3.82808e-05 | 4.80252e-05 |
| 1.00000     | 0.000117175 | 0.000137182 | 0.000158114 | 0.000180160 | 0.000203513 |
| 0.100000    | 0.000211353 | 0.000223843 | 0.000237264 | 0.000251945 | 0.000268178 |
| 0.0100000   | 0.000216007 | 0.000227155 | 0.000239673 | 0.000253726 | 0.000269506 |
| 0.00100000  | 0.000215947 | 0.000227054 | 0.000239522 | 0.000253505 | 0.000269187 |
| 0.000100000 | 0.000215128 | 0.000225915 | 0.000237937 | 0.000251288 | 0.000266062 |
| 1.00000e-05 | 0.000207393 | 0.000215336 | 0.000223562 | 0.000231837 | 0.000239862 |
| 1.00000e-06 | 0.000152309 | 0.000146708 | 0.000140068 | 0.000132454 | 0.000124012 |
| 1.00000e-07 | 3.12247e-05 | 2.47696e-05 | 1.97455e-05 | 1.58002e-05 | 1.26801e-05 |
| 1.00000e-08 | 9.97783e-07 | 7.16336e-07 | 5.28614e-07 | 3.98160e-07 | 3.04608e-07 |
| 1.00000e-09 | 2.55534e-08 | 1.88412e-08 | 1.42699e-08 | 1.10206e-08 | 8.63552e-09 |

Pa\K | 120.000 130.000 140.000 150.000 160.000

|             |             |             |             |             |             |
|-------------|-------------|-------------|-------------|-------------|-------------|
| 1.00000e+08 | 3.48677e-21 | 6.44488e-21 | 1.20619e-20 | 2.28705e-20 | 4.38963e-20 |
| 1.00000e+07 | 3.48296e-18 | 6.43686e-18 | 1.20446e-17 | 2.28321e-17 | 4.38097e-17 |
| 1.00000e+06 | 3.45831e-15 | 6.38160e-15 | 1.19187e-14 | 2.25406e-14 | 4.31256e-14 |
| 100000.     | 3.23094e-12 | 5.87966e-12 | 1.07968e-11 | 2.00046e-11 | 3.73450e-11 |
| 10000.0     | 1.92399e-09 | 3.23802e-09 | 5.44872e-09 | 9.16744e-09 | 1.54071e-08 |
| 1000.00     | 2.64373e-07 | 3.85595e-07 | 5.61253e-07 | 8.15956e-07 | 1.18499e-06 |
| 100.000     | 6.30793e-06 | 8.34830e-06 | 1.10745e-05 | 1.47286e-05 | 1.96290e-05 |



|             |             |             |             |             |             |
|-------------|-------------|-------------|-------------|-------------|-------------|
| 10.0000     | 6.00278e-05 | 7.47837e-05 | 9.28373e-05 | 0.000114765 | 0.000141155 |
| 1.00000     | 0.000228379 | 0.000254989 | 0.000283599 | 0.000314498 | 0.000348004 |
| 0.100000    | 0.000286244 | 0.000306432 | 0.000329039 | 0.000354383 | 0.000382798 |
| 0.0100000   | 0.000287235 | 0.000307161 | 0.000329555 | 0.000354710 | 0.000382938 |
| 0.00100000  | 0.000286772 | 0.000306483 | 0.000328551 | 0.000353208 | 0.000380672 |
| 0.000100000 | 0.000282327 | 0.000300110 | 0.000319364 | 0.000339948 | 0.000361595 |
| 1.00000e-05 | 0.000247269 | 0.000253646 | 0.000258562 | 0.000261619 | 0.000262482 |
| 1.00000e-06 | 0.000114944 | 0.000105483 | 9.58665e-05 | 8.63167e-05 | 7.70286e-05 |
| 1.00000e-07 | 1.01985e-05 | 8.21580e-06 | 6.62581e-06 | 5.34709e-06 | 4.31645e-06 |
| 1.00000e-08 | 2.35850e-07 | 1.84323e-07 | 1.45103e-07 | 1.14876e-07 | 9.13451e-08 |
| 1.00000e-09 | 6.84092e-09 | 5.46438e-09 | 4.39238e-09 | 3.54751e-09 | 2.87533e-09 |

| Pa\K        | 170.000     | 180.000     | 190.000     | 200.000     | 210.000     |
|-------------|-------------|-------------|-------------|-------------|-------------|
| 1.00000e+08 | 8.51361e-20 | 1.66476e-19 | 3.27396e-19 | 6.45998e-19 | 1.27597e-18 |
| 1.00000e+07 | 8.49369e-17 | 1.66012e-16 | 3.26307e-16 | 6.43427e-16 | 1.26990e-15 |
| 1.00000e+06 | 8.33151e-14 | 1.62142e-13 | 3.17048e-13 | 6.21287e-13 | 1.21715e-12 |
| 100000.     | 7.00786e-11 | 1.31817e-10 | 2.47812e-10 | 4.64314e-10 | 8.64812e-10 |
| 10000.0     | 2.58257e-08 | 4.31011e-08 | 7.14942e-08 | 1.17680e-07 | 1.91946e-07 |
| 1000.00     | 1.71850e-06 | 2.48715e-06 | 3.58939e-06 | 5.16099e-06 | 7.38676e-06 |
| 100.000     | 2.61873e-05 | 3.49251e-05 | 4.64881e-05 | 6.16550e-05 | 8.13406e-05 |
| 10.0000     | 0.000172583 | 0.000209591 | 0.000252671 | 0.000302256 | 0.000358714 |
| 1.00000     | 0.000384469 | 0.000424273 | 0.000467825 | 0.000515561 | 0.000567936 |
| 0.100000    | 0.000414636 | 0.000450270 | 0.000490088 | 0.000534497 | 0.000583916 |
| 0.0100000   | 0.000414568 | 0.000449939 | 0.000489395 | 0.000533276 | 0.000581902 |
| 0.00100000  | 0.000411131 | 0.000444717 | 0.000481480 | 0.000521354 | 0.000564122 |
| 0.000100000 | 0.000383901 | 0.000406321 | 0.000428186 | 0.000448735 | 0.000467163 |
| 1.00000e-05 | 0.000260924 | 0.000256843 | 0.000250270 | 0.000241363 | 0.000230385 |
| 1.00000e-06 | 6.81610e-05 | 5.98344e-05 | 5.21315e-05 | 4.51006e-05 | 3.87604e-05 |
| 1.00000e-07 | 3.48445e-06 | 2.81210e-06 | 2.26842e-06 | 1.82869e-06 | 1.47309e-06 |
| 1.00000e-08 | 7.28793e-08 | 5.82951e-08 | 4.67178e-08 | 3.74908e-08 | 3.01146e-08 |
| 1.00000e-09 | 2.33658e-09 | 1.90227e-09 | 1.55060e-09 | 1.26491e-09 | 1.03224e-09 |

| Pa\K        | 220.000     | 230.000     | 240.000     | 250.000     | 260.000     |
|-------------|-------------|-------------|-------------|-------------|-------------|
| 1.00000e+08 | 2.51781e-18 | 4.95462e-18 | 9.70848e-18 | 1.89190e-17 | 3.66274e-17 |
| 1.00000e+07 | 2.50348e-15 | 4.92098e-15 | 9.62998e-15 | 1.87373e-14 | 3.62108e-14 |
| 1.00000e+06 | 2.37862e-12 | 4.62794e-12 | 8.94934e-12 | 1.71753e-11 | 3.26731e-11 |
| 100000.     | 1.59763e-09 | 2.92183e-09 | 5.28181e-09 | 9.42601e-09 | 1.65914e-08 |
| 10000.0     | 3.09885e-07 | 4.94737e-07 | 7.80556e-07 | 1.21641e-06 | 1.87182e-06 |
| 1000.00     | 1.05149e-05 | 1.48739e-05 | 2.08913e-05 | 2.91143e-05 | 4.02300e-05 |
| 100.000     | 0.000106587 | 0.000138548 | 0.000178457 | 0.000227590 | 0.000287225 |
| 10.0000     | 0.000422354 | 0.000493435 | 0.000572181 | 0.000658797 | 0.000753481 |
| 1.00000     | 0.000625428 | 0.000688531 | 0.000757751 | 0.000833602 | 0.000916603 |
| 0.100000    | 0.000638774 | 0.000699507 | 0.000766546 | 0.000840316 | 0.000921216 |
| 0.0100000   | 0.000635559 | 0.000694475 | 0.000758788 | 0.000828518 | 0.000903529 |
| 0.00100000  | 0.000609390 | 0.000656567 | 0.000704856 | 0.000753266 | 0.000800648 |
| 0.000100000 | 0.000482683 | 0.000494582 | 0.000502279 | 0.000505368 | 0.000503643 |
| 1.00000e-05 | 0.000217682 | 0.000203648 | 0.000188698 | 0.000173238 | 0.000157646 |
| 1.00000e-06 | 3.31057e-05 | 2.81125e-05 | 2.37436e-05 | 1.99527e-05 | 1.66883e-05 |
| 1.00000e-07 | 1.18562e-06 | 9.53374e-07 | 7.65883e-07 | 6.14660e-07 | 4.92811e-07 |
| 1.00000e-08 | 2.42041e-08 | 1.94601e-08 | 1.56479e-08 | 1.25821e-08 | 1.01153e-08 |
| 1.00000e-09 | 8.42441e-10 | 6.87435e-10 | 5.60769e-10 | 4.57232e-10 | 3.72608e-10 |

| Pa\K        | 270.000     | 280.000     | 290.000     | 300.000     | 310.000     |
|-------------|-------------|-------------|-------------|-------------|-------------|
| 1.00000e+08 | 7.03901e-17 | 1.34193e-16 | 2.53655e-16 | 2.21021e-14 | 8.82114e-16 |
| 1.00000e+07 | 6.94447e-14 | 1.32072e-13 | 2.48953e-13 | 1.96082e-11 | 8.59854e-13 |
| 1.00000e+06 | 6.15459e-11 | 1.14698e-10 | 2.11328e-10 | 9.55448e-09 | 6.91754e-10 |
| 100000.     | 2.87841e-08 | 4.91963e-08 | 8.28129e-08 | 1.09116e-06 | 2.24076e-07 |
| 10000.0     | 2.84367e-06 | 4.26479e-06 | 6.31436e-06 | 2.50257e-05 | 1.33228e-05 |
| 1000.00     | 5.50842e-05 | 7.46968e-05 | 0.000100271 | 0.000203058 | 0.000175026 |
| 100.000     | 0.000358590 | 0.000442820 | 0.000540917 | 0.000717972 | 0.000781892 |
| 10.0000     | 0.000856444 | 0.000967916 | 0.00108816  | 0.00114803  | 0.00135613  |
| 1.00000     | 0.00100727  | 0.00110613  | 0.00121366  | 0.00122983  | 0.00145665  |
| 0.100000    | 0.00100961  | 0.00110580  | 0.00121001  | 0.00121485  | 0.00144278  |
| 0.0100000   | 0.000983494 | 0.00106786  | 0.00115583  | 0.00111249  | 0.00133809  |
| 0.00100000  | 0.000845742 | 0.000887243 | 0.000923878 | 0.000804223 | 0.000978054 |
| 0.000100000 | 0.000497104 | 0.000485950 | 0.000470556 | 0.000364490 | 0.000429190 |
| 1.00000e-05 | 0.000142259 | 0.000127355 | 0.000113158 | 8.42163e-05 | 8.74928e-05 |
| 1.00000e-06 | 1.38970e-05 | 1.15257e-05 | 9.52291e-06 | 8.34076e-06 | 6.43485e-06 |
| 1.00000e-07 | 3.94735e-07 | 3.15883e-07 | 2.52555e-07 | 3.76570e-07 | 1.61044e-07 |
| 1.00000e-08 | 8.13022e-09 | 6.53275e-09 | 5.24743e-09 | 1.39689e-08 | 3.38230e-09 |
| 1.00000e-09 | 3.03463e-10 | 2.46991e-10 | 2.00899e-10 | 6.43728e-10 | 1.32662e-10 |

| Pa\K        | 400.000     | 500.000     | 600.000     | 700.000     | 800.000    |
|-------------|-------------|-------------|-------------|-------------|------------|
| 1.00000e+08 | 6.22012e-12 | 2.05039e-09 | 6.65452e-07 | 7.91016e-05 | 0.00112515 |
| 1.00000e+07 | 4.19412e-09 | 6.49079e-07 | 4.01751e-05 | 0.000830898 | 0.00490702 |
| 1.00000e+06 | 8.88290e-07 | 3.56407e-05 | 0.000516131 | 0.00339581  | 0.0110817  |

|             |             |             |             |             |             |
|-------------|-------------|-------------|-------------|-------------|-------------|
| 100000.     | 3.50447e-05 | 0.000460228 | 0.00265849  | 0.00842261  | 0.0172684   |
| 10000.0     | 0.000364154 | 0.00225805  | 0.00701272  | 0.0139998   | 0.0216575   |
| 1000.00     | 0.00146886  | 0.00481618  | 0.00986530  | 0.0157494   | 0.0213280   |
| 100.000     | 0.00260359  | 0.00584342  | 0.0101453   | 0.0143438   | 0.0163905   |
| 10.0000     | 0.00291480  | 0.00578838  | 0.00885253  | 0.00999877  | 0.00854202  |
| 1.00000     | 0.00026370  | 0.00498018  | 0.00577961  | 0.00454868  | 0.00271675  |
| 0.100000    | 0.00251002  | 0.00318668  | 0.00241961  | 0.00125352  | 0.000524864 |
| 0.0100000   | 0.00166169  | 0.00129252  | 0.000607669 | 0.000210304 | 6.42833e-05 |
| 0.00100000  | 0.000691618 | 0.000307797 | 9.17063e-05 | 2.23344e-05 | 5.27439e-06 |
| 0.000100000 | 0.000161589 | 4.24053e-05 | 8.56670e-06 | 1.57678e-06 | 3.07641e-07 |
| 1.00000e-05 | 1.98809e-05 | 3.37987e-06 | 5.09761e-07 | 7.75003e-08 | 1.35568e-08 |
| 1.00000e-06 | 1.22861e-06 | 1.58032e-07 | 2.03660e-08 | 2.87787e-09 | 5.00262e-10 |
| 1.00000e-07 | 4.59200e-08 | 5.53059e-09 | 7.14567e-10 | 1.05844e-10 | 1.98931e-11 |
| 1.00000e-08 | 1.73836e-09 | 2.20174e-10 | 3.04098e-11 | 4.87442e-12 | 9.99446e-13 |
| 1.00000e-09 | 8.58874e-11 | 1.16470e-11 | 1.72089e-12 | 2.95180e-13 | 6.45151e-14 |

| Pa\K        | 900.000     | 1000.00     | 1100.00     | 1200.00     | 1300.00     |
|-------------|-------------|-------------|-------------|-------------|-------------|
| 1.00000e+08 | 0.00329648  | 0.00484909  | 0.00566242  | 0.00535965  | 0.00429335  |
| 1.00000e+07 | 0.0112067   | 0.0144343   | 0.0142611   | 0.0120343   | 0.00958627  |
| 1.00000e+06 | 0.0212070   | 0.0276236   | 0.0271803   | 0.0220661   | 0.0165466   |
| 100000.     | 0.0266120   | 0.0332149   | 0.0345606   | 0.0301118   | 0.0233224   |
| 10000.0     | 0.0285775   | 0.0324693   | 0.0309736   | 0.0246026   | 0.0176734   |
| 1000.00     | 0.0244648   | 0.0232716   | 0.0182280   | 0.0122304   | 0.00788341  |
| 100.000     | 0.0148620   | 0.0109045   | 0.00673412  | 0.00379334  | 0.00220676  |
| 10.0000     | 0.00565499  | 0.00311187  | 0.00152611  | 0.000737052 | 0.000393161 |
| 1.00000     | 0.00129612  | 0.000545090 | 0.000219326 | 9.36982e-05 | 4.68251e-05 |
| 0.100000    | 0.000186057 | 6.23229e-05 | 2.14757e-05 | 8.41790e-06 | 4.06096e-06 |
| 0.0100000   | 1.77807e-05 | 4.98871e-06 | 1.54523e-06 | 5.80627e-07 | 2.82141e-07 |
| 0.00100000  | 1.20507e-06 | 2.99478e-07 | 8.80506e-08 | 3.34601e-08 | 1.72966e-08 |
| 0.000100000 | 6.19701e-08 | 1.45473e-08 | 4.32821e-09 | 1.77118e-09 | 1.03064e-09 |
| 1.00000e-05 | 2.60725e-09 | 6.24954e-10 | 2.02474e-10 | 9.48161e-11 | 6.44847e-11 |
| 1.00000e-06 | 1.01007e-10 | 2.68191e-11 | 1.00488e-11 | 5.55147e-12 | 4.41577e-12 |
| 1.00000e-07 | 4.48790e-12 | 1.36359e-12 | 5.91985e-13 | 3.76863e-13 | 3.38331e-13 |
| 1.00000e-08 | 2.49761e-13 | 8.47589e-14 | 4.11326e-14 | 2.89780e-14 | 2.82905e-14 |
| 1.00000e-09 | 1.73357e-14 | 6.33295e-15 | 3.29930e-15 | 2.47487e-15 | 2.54324e-15 |

| Pa\K        | 1400.00     | 1500.00     | 1750.00     | 2000.00     | 2250.00     |
|-------------|-------------|-------------|-------------|-------------|-------------|
| 1.00000e+08 | 0.00339940  | 0.00315830  | 0.000845230 | 0.000819381 | 0.000903196 |
| 1.00000e+07 | 0.00831999  | 0.00875152  | 0.00219207  | 0.00195842  | 0.00186034  |
| 1.00000e+06 | 0.0134487   | 0.0128787   | 0.00858240  | 0.00477319  | 0.00269417  |
| 100000.     | 0.0185712   | 0.0164509   | 0.0104454   | 0.00400165  | 0.00149150  |
| 10000.0     | 0.0131882   | 0.0108530   | 0.00587683  | 0.00164835  | 0.000426663 |
| 1000.00     | 0.00550184  | 0.00427515  | 0.00192923  | 0.000398399 | 7.59944e-05 |
| 100.000     | 0.00144854  | 0.00106744  | 0.000399350 | 6.40301e-05 | 9.88611e-06 |
| 10.0000     | 0.000244915 | 0.000172733 | 5.68321e-05 | 7.79089e-06 | 1.07658e-06 |
| 1.00000     | 2.81781e-05 | 1.94614e-05 | 6.28125e-06 | 8.14467e-07 | 1.08592e-07 |
| 0.100000    | 2.43608e-06 | 1.71253e-06 | 6.12084e-07 | 8.03729e-08 | 1.07224e-08 |
| 0.0100000   | 1.76715e-07 | 1.32717e-07 | 5.73962e-08 | 7.83768e-09 | 1.05686e-09 |
| 0.00100000  | 1.19259e-08 | 9.97587e-09 | 5.38552e-09 | 7.65938e-10 | 1.04415e-10 |
| 0.000100000 | 8.14286e-10 | 7.71805e-10 | 5.11197e-10 | 7.51986e-11 | 1.03432e-11 |
| 1.00000e-05 | 5.89933e-11 | 6.28060e-11 | 4.91145e-11 | 7.41478e-12 | 1.02691e-12 |
| 1.00000e-06 | 4.59603e-12 | 5.37481e-12 | 4.76740e-12 | 7.33736e-13 | 1.02143e-13 |
| 1.00000e-07 | 3.86813e-13 | 4.83193e-13 | 4.67851e-13 | 7.28867e-14 | 1.01798e-14 |
| 1.00000e-08 | 3.44813e-14 | 4.50219e-14 | 4.58977e-14 | 7.23885e-15 | 1.01441e-15 |
| 1.00000e-09 | 3.22228e-15 | 4.32021e-15 | 4.55332e-15 | 7.21933e-16 | 1.01308e-16 |

| Pa\K        | 2500.00     | 2750.00     | 3000.00     | 3250.00     | 3500.00     |
|-------------|-------------|-------------|-------------|-------------|-------------|
| 1.00000e+08 | 0.00104673  | 0.00120316  | 0.00131697  | 0.00134586  | 0.00128575  |
| 1.00000e+07 | 0.00179583  | 0.00155318  | 0.00120322  | 0.000861039 | 0.000586975 |
| 1.00000e+06 | 0.00159751  | 0.000889364 | 0.000466691 | 0.000238791 | 0.000123037 |
| 100000.     | 0.000594207 | 0.000232820 | 9.09346e-05 | 3.67857e-05 | 1.59054e-05 |
| 10000.0     | 0.000122599 | 3.69588e-05 | 1.18577e-05 | 4.18387e-06 | 1.65818e-06 |
| 1000.00     | 1.72388e-05 | 4.40898e-06 | 1.27260e-06 | 4.21813e-07 | 1.61511e-07 |
| 100.000     | 1.95098e-06 | 4.59864e-07 | 1.26994e-07 | 4.11394e-08 | 1.55536e-08 |
| 10.0000     | 1.99808e-07 | 4.57036e-08 | 1.24430e-08 | 4.00028e-09 | 1.50372e-09 |
| 1.00000     | 1.98045e-08 | 4.49564e-09 | 1.21925e-09 | 3.90775e-10 | 1.46370e-10 |
| 0.100000    | 1.95276e-09 | 4.42792e-10 | 1.19943e-10 | 3.83737e-11 | 1.43361e-11 |
| 0.0100000   | 1.92895e-10 | 4.37470e-11 | 1.18426e-11 | 3.78390e-12 | 1.41076e-12 |
| 0.00100000  | 1.91017e-11 | 4.33322e-12 | 1.17238e-12 | 3.74157e-13 | 1.39243e-13 |
| 0.000100000 | 1.89578e-12 | 4.30146e-13 | 1.16328e-13 | 3.70900e-14 | 1.37828e-14 |
| 1.00000e-05 | 1.88494e-13 | 4.27758e-14 | 1.15643e-14 | 3.68455e-15 | 1.36766e-15 |
| 1.00000e-06 | 1.87695e-14 | 4.25999e-15 | 1.15140e-15 | 3.66664e-16 | 1.35991e-16 |
| 1.00000e-07 | 1.87189e-15 | 4.24882e-16 | 1.14820e-16 | 3.65517e-17 | 1.35492e-17 |
| 1.00000e-08 | 1.86666e-16 | 4.23731e-17 | 1.14491e-17 | 3.64345e-18 | 1.34986e-18 |
| 1.00000e-09 | 1.86480e-17 | 4.23339e-18 | 1.14383e-18 | 3.63974e-19 | 1.34830e-19 |

Pa\K | 3750.00 4000.00

|             |             |             |
|-------------|-------------|-------------|
| 1.00000e+08 | 0.00116149  | 0.00100602  |
| 1.00000e+07 | 0.000390708 | 0.000258726 |
| 1.00000e+06 | 6.53775e-05 | 3.63713e-05 |
| 100000.     | 7.48200e-06 | 3.84806e-06 |
| 10000.0     | 7.41430e-07 | 3.71023e-07 |
| 1000.00     | 7.08727e-08 | 3.50712e-08 |
| 100.000     | 6.76552e-09 | 3.32210e-09 |
| 10.0000     | 6.50251e-10 | 3.17183e-10 |
| 1.00000     | 6.30087e-11 | 3.05656e-11 |
| 0.100000    | 6.14971e-12 | 2.97018e-12 |
| 0.0100000   | 6.03474e-13 | 2.90430e-13 |
| 0.00100000  | 5.94123e-14 | 2.85007e-14 |
| 0.000100000 | 5.86885e-15 | 2.80800e-15 |
| 1.00000e-05 | 5.81462e-16 | 2.77650e-16 |
| 1.00000e-06 | 5.77512e-17 | 2.75361e-17 |
| 1.00000e-07 | 5.74955e-18 | 2.73871e-18 |
| 1.00000e-08 | 5.72379e-19 | 2.72381e-19 |
| 1.00000e-09 | 5.71613e-20 | 2.71950e-20 |

PAH3+H

=====

| Pa\K        | 20.0000     | 30.0000     | 40.0000     | 50.0000     | 60.0000     |
|-------------|-------------|-------------|-------------|-------------|-------------|
| 1.00000e+08 | 5.19573e-50 | 3.01240e-49 | 1.38730e-48 | 6.83364e-48 | 3.81701e-47 |
| 1.00000e+07 | 5.18976e-48 | 3.00541e-47 | 1.38250e-46 | 6.80227e-46 | 3.79518e-45 |
| 1.00000e+06 | 5.13084e-46 | 2.93744e-45 | 1.33643e-44 | 6.50501e-44 | 3.59088e-43 |
| 100000.     | 4.61333e-44 | 2.40605e-43 | 1.01089e-42 | 4.58609e-42 | 2.37636e-41 |
| 10000.0     | 2.35624e-42 | 8.26642e-42 | 2.50528e-41 | 8.47416e-41 | 3.34817e-40 |
| 1000.00     | 8.89549e-42 | 4.42304e-42 | 3.34889e-42 | 3.95796e-42 | 6.89811e-42 |
| 100.000     | 5.33803e-44 | 4.18103e-44 | 4.52116e-44 | 6.42891e-44 | 1.22654e-43 |
| 10.0000     | 1.56653e-45 | 1.62128e-45 | 3.09960e-45 | 7.30224e-45 | 2.13782e-44 |
| 1.00000     | 5.03955e-46 | 1.76515e-46 | 1.70342e-46 | 3.69908e-46 | 1.28878e-45 |
| 0.100000    | 1.16808e-46 | 3.10957e-46 | 8.42355e-46 | 2.66112e-45 | 1.03495e-44 |
| 0.0100000   | 9.42128e-46 | 2.05418e-45 | 4.65395e-45 | 1.25168e-44 | 4.20510e-44 |
| 0.00100000  | 1.81643e-45 | 1.35824e-45 | 1.45660e-45 | 2.22994e-45 | 4.80446e-45 |
| 0.000100000 | 3.79316e-47 | 7.07622e-48 | 4.17965e-48 | 4.66583e-48 | 8.37211e-48 |
| 1.00000e-05 | 4.17910e-50 | 7.83887e-51 | 5.21984e-51 | 6.58679e-51 | 1.33079e-50 |
| 1.00000e-06 | 9.27466e-53 | 2.64207e-53 | 2.25712e-53 | 3.44651e-53 | 8.45716e-53 |
| 1.00000e-07 | 8.15121e-55 | 3.53842e-55 | 3.92383e-55 | 7.55123e-55 | 2.46982e-54 |
| 1.00000e-08 | 2.66369e-56 | 1.65849e-56 | 2.24953e-56 | 5.05188e-56 | 1.91089e-55 |
| 1.00000e-09 | 2.07929e-57 | 1.45732e-57 | 2.07351e-57 | 4.79418e-57 | 1.85425e-56 |

| Pa\K        | 70.0000     | 80.0000     | 90.0000     | 100.0000    | 110.0000    |
|-------------|-------------|-------------|-------------|-------------|-------------|
| 1.00000e+08 | 2.53429e-46 | 2.16662e-45 | 2.73855e-44 | 6.11474e-43 | 2.69229e-41 |
| 1.00000e+07 | 2.51694e-44 | 2.14942e-43 | 2.71416e-42 | 6.05637e-41 | 2.66649e-39 |
| 1.00000e+06 | 2.35668e-42 | 1.99250e-41 | 2.49405e-40 | 5.53381e-39 | 2.43619e-37 |
| 100000.     | 1.47308e-40 | 1.18408e-39 | 1.42248e-38 | 3.08052e-37 | 1.36000e-35 |
| 10000.0     | 1.61319e-39 | 1.03096e-38 | 1.02780e-37 | 2.03187e-36 | 9.63193e-35 |
| 1000.00     | 1.76650e-41 | 7.28456e-41 | 6.57807e-40 | 2.18487e-38 | 3.17912e-36 |
| 100.000     | 3.42194e-43 | 1.65834e-42 | 1.73025e-41 | 4.99518e-40 | 8.04142e-38 |
| 10.0000     | 8.21476e-44 | 4.67394e-43 | 4.96331e-42 | 1.32935e-40 | 1.28443e-38 |
| 1.00000     | 6.61990e-45 | 5.70938e-44 | 1.08208e-42 | 5.10786e-41 | 5.79416e-39 |
| 0.100000    | 5.47615e-44 | 4.76354e-43 | 9.03242e-42 | 4.19228e-40 | 4.37325e-38 |
| 0.0100000   | 1.94581e-43 | 1.49605e-42 | 2.53457e-41 | 1.06928e-39 | 1.05746e-37 |
| 0.00100000  | 1.54969e-44 | 8.85380e-44 | 1.19937e-42 | 4.67423e-41 | 5.92836e-39 |
| 0.000100000 | 2.42770e-47 | 1.34511e-46 | 2.36909e-45 | 2.27997e-43 | 1.09745e-40 |
| 1.00000e-05 | 4.45740e-50 | 3.74194e-49 | 2.80855e-47 | 8.96856e-45 | 7.75178e-42 |
| 1.00000e-06 | 4.10410e-52 | 9.94036e-51 | 2.02191e-48 | 8.03543e-46 | 7.46197e-43 |
| 1.00000e-07 | 1.94829e-53 | 8.18664e-52 | 1.95551e-49 | 7.94648e-47 | 7.43333e-44 |
| 1.00000e-08 | 1.74769e-54 | 8.02058e-53 | 1.94900e-50 | 7.93763e-48 | 7.43047e-45 |
| 1.00000e-09 | 1.72762e-55 | 8.00404e-54 | 1.94834e-51 | 7.93674e-49 | 7.43018e-46 |

| Pa\K        | 120.0000    | 130.0000    | 140.0000    | 150.0000    | 160.0000    |
|-------------|-------------|-------------|-------------|-------------|-------------|
| 1.00000e+08 | 1.80869e-39 | 1.47561e-37 | 1.08356e-35 | 6.20699e-34 | 1.87956e-32 |
| 1.00000e+07 | 1.79203e-37 | 1.46313e-35 | 1.07546e-33 | 6.16490e-32 | 1.86638e-30 |
| 1.00000e+06 | 1.64312e-35 | 1.35113e-33 | 1.00233e-31 | 5.78373e-30 | 1.74745e-28 |
| 100000.     | 9.36313e-34 | 8.01251e-32 | 6.28574e-30 | 3.77792e-28 | 1.13074e-26 |
| 10000.0     | 7.78067e-33 | 8.52870e-31 | 9.32153e-29 | 6.90314e-27 | 2.02947e-25 |
| 1000.00     | 7.12982e-34 | 2.34248e-31 | 1.26949e-28 | 1.60604e-26 | 4.78428e-25 |
| 100.000     | 3.21623e-35 | 2.10230e-32 | 1.16573e-28 | 1.78514e-26 | 5.34849e-25 |
| 10.0000     | 3.49711e-36 | 2.16653e-33 | 1.15112e-28 | 1.80521e-26 | 5.41245e-25 |
| 1.00000     | 9.88093e-37 | 3.32492e-34 | 1.14972e-28 | 1.80749e-26 | 5.41978e-25 |
| 0.100000    | 5.74987e-36 | 9.51984e-34 | 1.15092e-28 | 1.80916e-26 | 5.42536e-25 |
| 0.0100000   | 1.38782e-35 | 2.51938e-33 | 1.15543e-28 | 1.81477e-26 | 5.44273e-25 |
| 0.00100000  | 1.26394e-36 | 4.93831e-34 | 1.15627e-28 | 1.81826e-26 | 5.45298e-25 |
| 0.000100000 | 5.72801e-38 | 4.38368e-35 | 1.15610e-28 | 1.81876e-26 | 5.45447e-25 |
| 1.00000e-05 | 4.99113e-39 | 4.28410e-36 | 1.15608e-28 | 1.81881e-26 | 5.45463e-25 |

|             |             |             |             |             |             |
|-------------|-------------|-------------|-------------|-------------|-------------|
| 1.00000e-06 | 4.91826e-40 | 4.27360e-37 | 1.15608e-28 | 1.81882e-26 | 5.45464e-25 |
| 1.00000e-07 | 4.91099e-41 | 4.27254e-38 | 1.15608e-28 | 1.81882e-26 | 5.45465e-25 |
| 1.00000e-08 | 4.91026e-42 | 4.27244e-39 | 1.15608e-28 | 1.81882e-26 | 5.45465e-25 |
| 1.00000e-09 | 4.91019e-43 | 4.27243e-40 | 1.15608e-28 | 1.81882e-26 | 5.45465e-25 |

| Pa\K        | 170.000     | 180.000     | 190.000     | 200.000     | 210.000     |
|-------------|-------------|-------------|-------------|-------------|-------------|
| 1.00000e+08 | 3.80712e-31 | 5.67374e-30 | 6.60443e-29 | 6.19579e-28 | 4.83442e-27 |
| 1.00000e+07 | 3.77859e-29 | 5.62778e-28 | 6.54598e-27 | 6.13559e-26 | 4.78263e-25 |
| 1.00000e+06 | 3.52309e-27 | 5.21984e-26 | 6.03289e-25 | 5.61353e-24 | 4.33964e-23 |
| 100000.     | 2.23458e-25 | 3.23064e-24 | 3.62689e-23 | 3.26732e-22 | 2.43734e-21 |
| 10000.0     | 3.81673e-24 | 5.19648e-23 | 5.44314e-22 | 4.54923e-21 | 3.13304e-20 |
| 1000.00     | 8.80337e-24 | 1.16210e-22 | 1.17321e-21 | 9.42392e-21 | 6.22885e-20 |
| 100.000     | 9.82149e-24 | 1.29134e-22 | 1.29693e-21 | 1.03581e-20 | 6.80536e-20 |
| 10.0000     | 9.93702e-24 | 1.30599e-22 | 1.31093e-21 | 1.04634e-20 | 6.87016e-20 |
| 1.00000     | 9.95045e-24 | 1.30772e-22 | 1.31262e-21 | 1.04765e-20 | 6.87856e-20 |
| 0.100000    | 9.96174e-24 | 1.30934e-22 | 1.31441e-21 | 1.04923e-20 | 6.88996e-20 |
| 0.0100000   | 9.99433e-24 | 1.31371e-22 | 1.31887e-21 | 1.05283e-20 | 6.91386e-20 |
| 0.00100000  | 1.00124e-23 | 1.31598e-22 | 1.32104e-21 | 1.05447e-20 | 6.92392e-20 |
| 0.000100000 | 1.00151e-23 | 1.31631e-22 | 1.32134e-21 | 1.05469e-20 | 6.92528e-20 |
| 1.00000e-05 | 1.00153e-23 | 1.31635e-22 | 1.32137e-21 | 1.05472e-20 | 6.92543e-20 |
| 1.00000e-06 | 1.00154e-23 | 1.31635e-22 | 1.32138e-21 | 1.05472e-20 | 6.92544e-20 |
| 1.00000e-07 | 1.00154e-23 | 1.31635e-22 | 1.32138e-21 | 1.05472e-20 | 6.92544e-20 |
| 1.00000e-08 | 1.00154e-23 | 1.31635e-22 | 1.32138e-21 | 1.05472e-20 | 6.92544e-20 |
| 1.00000e-09 | 1.00154e-23 | 1.31635e-22 | 1.32138e-21 | 1.05472e-20 | 6.92544e-20 |

| Pa\K        | 220.000     | 230.000     | 240.000     | 250.000     | 260.000     |
|-------------|-------------|-------------|-------------|-------------|-------------|
| 1.00000e+08 | 3.21930e-26 | 1.86778e-25 | 9.60229e-25 | 4.43817e-24 | 1.86687e-23 |
| 1.00000e+07 | 3.18113e-24 | 1.84317e-23 | 9.46139e-23 | 4.36553e-22 | 1.83275e-21 |
| 1.00000e+06 | 2.85959e-22 | 1.63946e-21 | 8.31721e-21 | 3.78785e-20 | 1.56752e-19 |
| 100000.     | 1.54432e-20 | 8.48246e-20 | 4.10829e-19 | 1.77996e-18 | 6.98302e-18 |
| 10000.0     | 1.82484e-19 | 9.18263e-19 | 4.06401e-18 | 1.60601e-17 | 5.74001e-17 |
| 1000.00     | 3.48042e-19 | 1.68074e-18 | 7.14520e-18 | 2.71578e-17 | 9.35017e-17 |
| 100.000     | 3.77970e-19 | 1.81449e-18 | 7.66978e-18 | 2.89928e-17 | 9.93042e-17 |
| 10.0000     | 3.81323e-19 | 1.82943e-18 | 7.72827e-18 | 2.91971e-17 | 9.99496e-17 |
| 1.00000     | 3.81779e-19 | 1.83159e-18 | 7.73735e-18 | 2.92317e-17 | 1.00071e-16 |
| 0.100000    | 3.82476e-19 | 1.83528e-18 | 7.75446e-18 | 2.93025e-17 | 1.00335e-16 |
| 0.0100000   | 3.83810e-19 | 1.84167e-18 | 7.78134e-18 | 2.94028e-17 | 1.00672e-16 |
| 0.00100000  | 3.84331e-19 | 1.84399e-18 | 7.79037e-18 | 2.94342e-17 | 1.00771e-16 |
| 0.000100000 | 3.84400e-19 | 1.84429e-18 | 7.79153e-18 | 2.94382e-17 | 1.00783e-16 |
| 1.00000e-05 | 3.84407e-19 | 1.84432e-18 | 7.79165e-18 | 2.94386e-17 | 1.00784e-16 |
| 1.00000e-06 | 3.84408e-19 | 1.84433e-18 | 7.79166e-18 | 2.94386e-17 | 1.00784e-16 |
| 1.00000e-07 | 3.84408e-19 | 1.84433e-18 | 7.79166e-18 | 2.94386e-17 | 1.00784e-16 |
| 1.00000e-08 | 3.84408e-19 | 1.84433e-18 | 7.79166e-18 | 2.94386e-17 | 1.00784e-16 |
| 1.00000e-09 | 3.84408e-19 | 1.84433e-18 | 7.79166e-18 | 2.94386e-17 | 1.00784e-16 |

| Pa\K        | 270.000     | 280.000     | 290.000     | 300.000     | 310.000     |
|-------------|-------------|-------------|-------------|-------------|-------------|
| 1.00000e+08 | 7.22036e-23 | 2.58959e-22 | 8.67372e-22 | 2.75472e-21 | 8.10418e-21 |
| 1.00000e+07 | 7.07300e-21 | 2.53062e-20 | 8.45369e-20 | 2.22016e-19 | 7.85154e-19 |
| 1.00000e+06 | 5.95484e-19 | 2.09445e-18 | 6.86942e-18 | 7.92233e-18 | 6.13049e-17 |
| 100000.     | 2.50628e-17 | 8.30167e-17 | 2.55678e-16 | 3.48081e-16 | 1.99818e-15 |
| 10000.0     | 1.87585e-16 | 5.65815e-16 | 1.58801e-15 | 1.31419e-15 | 1.03526e-14 |
| 1000.00     | 2.94858e-16 | 8.59801e-16 | 2.33729e-15 | 7.05911e-15 | 1.43780e-14 |
| 100.000     | 3.11636e-16 | 9.04597e-16 | 2.44866e-15 | 6.30098e-15 | 1.49496e-14 |
| 10.0000     | 3.13503e-16 | 9.09588e-16 | 2.46110e-15 | 6.23269e-15 | 1.50143e-14 |
| 1.00000     | 3.13897e-16 | 9.10792e-16 | 2.46458e-15 | 6.26773e-15 | 1.50390e-14 |
| 0.100000    | 3.14794e-16 | 9.13594e-16 | 2.47268e-15 | 6.28928e-15 | 1.50943e-14 |
| 0.0100000   | 3.15827e-16 | 9.16501e-16 | 2.48026e-15 | 6.26613e-15 | 1.51365e-14 |
| 0.00100000  | 3.16108e-16 | 9.17242e-16 | 2.48208e-15 | 6.26005e-15 | 1.51455e-14 |
| 0.000100000 | 3.16142e-16 | 9.17331e-16 | 2.48229e-15 | 6.25951e-15 | 1.51465e-14 |
| 1.00000e-05 | 3.16146e-16 | 9.17340e-16 | 2.48231e-15 | 6.25946e-15 | 1.51466e-14 |
| 1.00000e-06 | 3.16146e-16 | 9.17341e-16 | 2.48232e-15 | 6.25946e-15 | 1.51467e-14 |
| 1.00000e-07 | 3.16146e-16 | 9.17341e-16 | 2.48232e-15 | 6.25946e-15 | 1.51467e-14 |
| 1.00000e-08 | 3.16146e-16 | 9.17341e-16 | 2.48232e-15 | 6.25946e-15 | 1.51467e-14 |
| 1.00000e-09 | 3.16146e-16 | 9.17341e-16 | 2.48232e-15 | 6.25946e-15 | 1.51467e-14 |

| Pa\K        | 400.000     | 500.000     | 600.000     | 700.000     | 800.000     |
|-------------|-------------|-------------|-------------|-------------|-------------|
| 1.00000e+08 | 4.26218e-15 | 8.59723e-12 | 3.89480e-09 | 6.47049e-07 | 1.79489e-05 |
| 1.00000e+07 | 3.43550e-13 | 5.32450e-09 | 3.19728e-07 | 2.69488e-06 | 1.43327e-05 |
| 1.00000e+06 | 1.84820e-11 | 1.21697e-07 | 4.22172e-06 | 1.51575e-05 | 2.69884e-05 |
| 100000.     | 9.20702e-11 | 1.05748e-07 | 4.01396e-06 | 1.79294e-05 | 3.21555e-05 |
| 10000.0     | 3.55361e-11 | 1.49519e-08 | 9.37064e-07 | 8.51648e-06 | 2.17863e-05 |
| 1000.00     | 8.54883e-12 | 1.84053e-09 | 2.35555e-07 | 3.69462e-06 | 1.16491e-05 |
| 100.000     | 6.67821e-12 | 7.11686e-10 | 6.82070e-08 | 1.15873e-06 | 3.72398e-06 |
| 10.0000     | 6.54114e-12 | 5.42129e-10 | 1.92841e-08 | 2.52643e-07 | 1.02318e-06 |
| 1.00000     | 6.55263e-12 | 5.17290e-10 | 1.15569e-08 | 1.17530e-07 | 6.49602e-07 |
| 0.100000    | 6.56373e-12 | 5.14948e-10 | 1.08119e-08 | 1.04644e-07 | 6.13265e-07 |

|             |             |             |             |             |             |
|-------------|-------------|-------------|-------------|-------------|-------------|
| 0.0100000   | 6.56351e-12 | 5.14723e-10 | 1.07416e-08 | 1.03434e-07 | 6.09795e-07 |
| 0.00100000  | 6.56329e-12 | 5.14703e-10 | 1.07347e-08 | 1.03317e-07 | 6.09458e-07 |
| 0.000100000 | 6.56327e-12 | 5.14701e-10 | 1.07341e-08 | 1.03305e-07 | 6.09424e-07 |
| 1.00000e-05 | 6.56327e-12 | 5.14701e-10 | 1.07340e-08 | 1.03304e-07 | 6.09421e-07 |
| 1.00000e-06 | 6.56327e-12 | 5.14701e-10 | 1.07340e-08 | 1.03304e-07 | 6.09421e-07 |
| 1.00000e-07 | 6.56327e-12 | 5.14701e-10 | 1.07340e-08 | 1.03304e-07 | 6.09421e-07 |
| 1.00000e-08 | 6.56327e-12 | 5.14701e-10 | 1.07340e-08 | 1.03304e-07 | 6.09421e-07 |
| 1.00000e-09 | 6.56327e-12 | 5.14701e-10 | 1.07340e-08 | 1.03304e-07 | 6.09421e-07 |

| Pa\K        | 900.000     | 1000.00     | 1100.00     | 1200.00     | 1300.00     |
|-------------|-------------|-------------|-------------|-------------|-------------|
| 1.00000e+08 | 0.000124695 | 0.000430138 | 0.000954847 | 0.00137153  | 0.00146389  |
| 1.00000e+07 | 6.48128e-05 | 0.000249737 | 0.000728686 | 0.00142560  | 0.00213891  |
| 1.00000e+06 | 4.69524e-05 | 0.000110106 | 0.000293032 | 0.000573803 | 0.000939349 |
| 100000.     | 4.58490e-05 | 6.75017e-05 | 0.000115672 | 0.000192513 | 0.000310843 |
| 10000.0     | 3.35728e-05 | 4.49878e-05 | 6.43265e-05 | 0.000101771 | 0.000173144 |
| 1000.00     | 1.80093e-05 | 2.39297e-05 | 3.75365e-05 | 7.01425e-05 | 0.000137657 |
| 100.000     | 6.24876e-06 | 1.16267e-05 | 2.64305e-05 | 6.07577e-05 | 0.000128900 |
| 10.0000     | 3.02707e-06 | 8.99088e-06 | 2.45268e-05 | 5.94237e-05 | 0.000128957 |
| 1.00000     | 2.62784e-06 | 8.69419e-06 | 2.43275e-05 | 5.92910e-05 | 0.000128867 |
| 0.100000    | 2.58905e-06 | 8.66561e-06 | 2.43085e-05 | 5.92783e-05 | 0.000128858 |
| 0.0100000   | 2.58532e-06 | 8.66286e-06 | 2.43066e-05 | 5.92771e-05 | 0.000128857 |
| 0.00100000  | 2.58495e-06 | 8.66259e-06 | 2.43065e-05 | 5.92770e-05 | 0.000128857 |
| 0.000100000 | 2.58492e-06 | 8.66256e-06 | 2.43064e-05 | 5.92770e-05 | 0.000128857 |
| 1.00000e-05 | 2.58491e-06 | 8.66256e-06 | 2.43064e-05 | 5.92770e-05 | 0.000128857 |
| 1.00000e-06 | 2.58491e-06 | 8.66256e-06 | 2.43064e-05 | 5.92770e-05 | 0.000128857 |
| 1.00000e-07 | 2.58491e-06 | 8.66256e-06 | 2.43064e-05 | 5.92770e-05 | 0.000128857 |
| 1.00000e-08 | 2.58491e-06 | 8.66256e-06 | 2.43064e-05 | 5.92770e-05 | 0.000128857 |
| 1.00000e-09 | 2.58491e-06 | 8.66256e-06 | 2.43064e-05 | 5.92770e-05 | 0.000128857 |

| Pa\K        | 1400.00     | 1500.00     | 1750.00    | 2000.00    | 2250.00    |
|-------------|-------------|-------------|------------|------------|------------|
| 1.00000e+08 | 0.00139253  | 0.00133536  | 0.0272779  | 0.0312149  | 0.0325534  |
| 1.00000e+07 | 0.00273657  | 0.00313153  | 0.0332896  | 0.0326941  | 0.0275526  |
| 1.00000e+06 | 0.00138787  | 0.00173933  | 0.0142834  | 0.0125060  | 0.0116761  |
| 100000.     | 0.000492920 | 0.000716440 | 0.00375552 | 0.00520022 | 0.00767861 |
| 10000.0     | 0.000300228 | 0.000503888 | 0.00196151 | 0.00409358 | 0.00711351 |
| 1000.00     | 0.000261391 | 0.000466707 | 0.00172435 | 0.00395517 | 0.00704562 |
| 100.000     | 0.000254958 | 0.000461748 | 0.00169826 | 0.00394119 | 0.00703895 |
| 10.0000     | 0.000254283 | 0.000461318 | 0.00169584 | 0.00393993 | 0.00703834 |
| 1.00000     | 0.000254222 | 0.000461284 | 0.00169561 | 0.00393981 | 0.00703828 |
| 0.100000    | 0.000254216 | 0.000461281 | 0.00169559 | 0.00393980 | 0.00703827 |
| 0.0100000   | 0.000254215 | 0.000461281 | 0.00169559 | 0.00393980 | 0.00703827 |
| 0.00100000  | 0.000254215 | 0.000461281 | 0.00169559 | 0.00393980 | 0.00703827 |
| 0.000100000 | 0.000254215 | 0.000461281 | 0.00169559 | 0.00393980 | 0.00703827 |
| 1.00000e-05 | 0.000254215 | 0.000461281 | 0.00169559 | 0.00393980 | 0.00703827 |
| 1.00000e-06 | 0.000254215 | 0.000461281 | 0.00169559 | 0.00393980 | 0.00703827 |
| 1.00000e-07 | 0.000254215 | 0.000461281 | 0.00169559 | 0.00393980 | 0.00703827 |
| 1.00000e-08 | 0.000254215 | 0.000461281 | 0.00169559 | 0.00393980 | 0.00703827 |
| 1.00000e-09 | 0.000254215 | 0.000461281 | 0.00169559 | 0.00393980 | 0.00703827 |

| Pa\K        | 2500.00   | 2750.00   | 3000.00   | 3250.00   | 3500.00   |
|-------------|-----------|-----------|-----------|-----------|-----------|
| 1.00000e+08 | 0.0318075 | 0.0296679 | 0.0269865 | 0.0244351 | 0.0223247 |
| 1.00000e+07 | 0.0229145 | 0.0202551 | 0.0191238 | 0.0187379 | 0.0185714 |
| 1.00000e+06 | 0.0126076 | 0.0143117 | 0.0159215 | 0.0170793 | 0.0177372 |
| 100000.     | 0.0106424 | 0.0133811 | 0.0154883 | 0.0168810 | 0.0176492 |
| 10000.0     | 0.0103818 | 0.0132662 | 0.0154390 | 0.0168605 | 0.0176410 |
| 1000.00     | 0.0103526 | 0.0132542 | 0.0154342 | 0.0168586 | 0.0176404 |
| 100.000     | 0.0103498 | 0.0132531 | 0.0154337 | 0.0168585 | 0.0176403 |
| 10.0000     | 0.0103495 | 0.0132530 | 0.0154337 | 0.0168585 | 0.0176403 |
| 1.00000     | 0.0103495 | 0.0132530 | 0.0154337 | 0.0168585 | 0.0176403 |
| 0.100000    | 0.0103495 | 0.0132530 | 0.0154337 | 0.0168585 | 0.0176403 |
| 0.0100000   | 0.0103495 | 0.0132530 | 0.0154337 | 0.0168585 | 0.0176403 |
| 0.00100000  | 0.0103495 | 0.0132530 | 0.0154337 | 0.0168585 | 0.0176403 |
| 0.000100000 | 0.0103495 | 0.0132530 | 0.0154337 | 0.0168585 | 0.0176403 |
| 1.00000e-05 | 0.0103495 | 0.0132530 | 0.0154337 | 0.0168585 | 0.0176403 |
| 1.00000e-06 | 0.0103495 | 0.0132530 | 0.0154337 | 0.0168585 | 0.0176403 |
| 1.00000e-07 | 0.0103495 | 0.0132530 | 0.0154337 | 0.0168585 | 0.0176403 |
| 1.00000e-08 | 0.0103495 | 0.0132530 | 0.0154337 | 0.0168585 | 0.0176403 |
| 1.00000e-09 | 0.0103495 | 0.0132530 | 0.0154337 | 0.0168585 | 0.0176403 |

| Pa\K        | 3750.00   | 4000.00   |
|-------------|-----------|-----------|
| 1.00000e+08 | 0.0206828 | 0.0194124 |
| 1.00000e+07 | 0.0183786 | 0.0180822 |
| 1.00000e+06 | 0.0179735 | 0.0178968 |
| 100000.     | 0.0179367 | 0.0178834 |
| 10000.0     | 0.0179338 | 0.0178827 |
| 1000.00     | 0.0179337 | 0.0178827 |

|             |           |           |
|-------------|-----------|-----------|
| 100.000     | 0.0179337 | 0.0178828 |
| 10.0000     | 0.0179337 | 0.0178828 |
| 1.00000     | 0.0179337 | 0.0178828 |
| 0.100000    | 0.0179337 | 0.0178828 |
| 0.0100000   | 0.0179337 | 0.0178828 |
| 0.00100000  | 0.0179337 | 0.0178828 |
| 0.000100000 | 0.0179337 | 0.0178828 |
| 1.00000e-05 | 0.0179337 | 0.0178828 |
| 1.00000e-06 | 0.0179337 | 0.0178828 |
| 1.00000e-07 | 0.0179337 | 0.0178828 |
| 1.00000e-08 | 0.0179337 | 0.0178828 |
| 1.00000e-09 | 0.0179337 | 0.0178828 |

rad11

=====

| Pa\K        | 20.0000     | 30.0000     | 40.0000     | 50.0000     | 60.0000     |
|-------------|-------------|-------------|-------------|-------------|-------------|
| 1.00000e+08 | 4.10061e-16 | 1.71394e-15 | 4.00566e-15 | 7.53559e-15 | 1.26790e-14 |
| 1.00000e+07 | 4.10044e-14 | 1.71380e-13 | 4.00515e-13 | 7.53431e-13 | 1.26762e-12 |
| 1.00000e+06 | 4.09876e-12 | 1.71237e-11 | 4.00013e-11 | 7.52158e-11 | 1.26490e-10 |
| 100000.     | 4.08204e-10 | 1.69824e-09 | 3.95054e-09 | 7.39635e-09 | 1.23821e-08 |
| 10000.0     | 3.92135e-08 | 1.56773e-07 | 3.50958e-07 | 6.32450e-07 | 1.01846e-06 |
| 1000.00     | 2.77813e-06 | 8.52167e-06 | 1.54505e-05 | 2.32646e-05 | 3.19323e-05 |
| 100.000     | 5.33906e-05 | 9.00011e-05 | 0.000114301 | 0.000133543 | 0.000150433 |
| 10.0000     | 0.000153150 | 0.000167000 | 0.000174348 | 0.000180912 | 0.000187400 |
| 1.00000     | 0.000158733 | 0.000142868 | 0.000130022 | 0.000119006 | 0.000109010 |
| 0.100000    | 6.35073e-05 | 2.99382e-05 | 1.68745e-05 | 1.05040e-05 | 6.96888e-06 |
| 0.0100000   | 1.82173e-06 | 3.94133e-07 | 1.61305e-07 | 8.61502e-08 | 5.34538e-08 |
| 0.00100000  | 1.58210e-08 | 6.65321e-09 | 5.11305e-09 | 4.64319e-09 | 4.50448e-09 |
| 0.000100000 | 3.57139e-09 | 3.42444e-09 | 3.46423e-09 | 3.56743e-09 | 3.70613e-09 |
| 1.00000e-05 | 3.22401e-09 | 3.23927e-09 | 3.31211e-09 | 3.41696e-09 | 3.54068e-09 |
| 1.00000e-06 | 3.06203e-09 | 2.96021e-09 | 2.89433e-09 | 2.83750e-09 | 2.77410e-09 |
| 1.00000e-07 | 2.13279e-09 | 1.53519e-09 | 1.15902e-09 | 8.95052e-10 | 7.00302e-10 |
| 1.00000e-08 | 3.42413e-10 | 1.25279e-10 | 6.47985e-11 | 3.89824e-11 | 2.55421e-11 |
| 1.00000e-09 | 9.67961e-12 | 3.04400e-12 | 1.55656e-12 | 9.52263e-13 | 6.39598e-13 |

| Pa\K        | 70.0000     | 80.0000     | 90.0000     | 100.000     | 110.000     |
|-------------|-------------|-------------|-------------|-------------|-------------|
| 1.00000e+08 | 1.99808e-14 | 3.02387e-14 | 4.46250e-14 | 6.48728e-14 | 9.35581e-14 |
| 1.00000e+07 | 1.99755e-12 | 3.02290e-12 | 4.46080e-12 | 6.48435e-12 | 9.35082e-12 |
| 1.00000e+06 | 1.99226e-10 | 3.01325e-10 | 4.44383e-10 | 6.45516e-10 | 9.30115e-10 |
| 100000.     | 1.94075e-08 | 2.91974e-08 | 4.28043e-08 | 6.17611e-08 | 8.83045e-08 |
| 10000.0     | 1.53347e-06 | 2.21162e-06 | 3.09949e-06 | 4.25984e-06 | 5.77621e-06 |
| 1000.00     | 4.15251e-05 | 5.21796e-05 | 6.40783e-05 | 7.74401e-05 | 9.25159e-05 |
| 100.000     | 0.000166288 | 0.000181894 | 0.000197782 | 0.000214344 | 0.000231893 |
| 10.0000     | 0.000193963 | 0.000200638 | 0.000207393 | 0.000214139 | 0.000220733 |
| 1.00000     | 9.96755e-05 | 9.08428e-05 | 8.24423e-05 | 7.44526e-05 | 6.68785e-05 |
| 0.100000    | 4.83473e-06 | 3.46657e-06 | 2.54892e-06 | 1.91145e-06 | 1.45611e-06 |
| 0.0100000   | 3.66339e-08 | 2.70153e-08 | 2.11159e-08 | 1.73293e-08 | 1.48363e-08 |
| 0.00100000  | 4.51415e-09 | 4.60962e-09 | 4.76572e-09 | 4.97187e-09 | 5.22415e-09 |
| 0.000100000 | 3.87169e-09 | 4.06198e-09 | 4.27725e-09 | 4.51867e-09 | 4.78767e-09 |
| 1.00000e-05 | 3.67729e-09 | 3.82334e-09 | 3.97550e-09 | 4.12961e-09 | 4.28026e-09 |
| 1.00000e-06 | 2.69660e-09 | 2.60158e-09 | 2.48811e-09 | 2.35716e-09 | 2.21116e-09 |
| 1.00000e-07 | 5.52812e-10 | 4.39253e-10 | 3.50776e-10 | 2.81212e-10 | 2.26123e-10 |
| 1.00000e-08 | 1.76831e-11 | 1.27183e-11 | 9.40363e-12 | 7.09749e-12 | 5.44154e-12 |
| 1.00000e-09 | 4.54913e-13 | 3.36180e-13 | 2.55221e-13 | 1.97596e-13 | 1.55230e-13 |

| Pa\K        | 120.000     | 130.000     | 140.000     | 150.000     | 160.000     |
|-------------|-------------|-------------|-------------|-------------|-------------|
| 1.00000e+08 | 1.34529e-13 | 1.93558e-13 | 2.79325e-13 | 4.04904e-13 | 5.90007e-13 |
| 1.00000e+07 | 1.34445e-11 | 1.93414e-11 | 2.79079e-11 | 4.04480e-11 | 5.89271e-11 |
| 1.00000e+06 | 1.33603e-09 | 1.91985e-09 | 2.76639e-09 | 4.00289e-09 | 5.82018e-09 |
| 100000.     | 1.25703e-07 | 1.78732e-07 | 2.54350e-07 | 3.62659e-07 | 5.18245e-07 |
| 10000.0     | 7.75855e-06 | 1.03498e-05 | 1.37335e-05 | 1.81416e-05 | 2.38632e-05 |
| 1000.00     | 0.000109585 | 0.000128953 | 0.000150948 | 0.000175913 | 0.000204204 |
| 100.000     | 0.000250687 | 0.000270940 | 0.000292820 | 0.000316444 | 0.000341864 |
| 10.0000     | 0.000226983 | 0.000232655 | 0.000237487 | 0.000241203 | 0.000243539 |
| 1.00000     | 5.97381e-05 | 5.30535e-05 | 4.68447e-05 | 4.11253e-05 | 3.59012e-05 |
| 0.100000    | 1.12348e-06 | 8.76023e-07 | 6.89182e-07 | 5.46394e-07 | 4.36204e-07 |
| 0.0100000   | 1.31863e-08 | 1.21167e-08 | 1.14679e-08 | 1.11395e-08 | 1.10670e-08 |
| 0.00100000  | 5.52215e-09 | 5.86743e-09 | 6.26269e-09 | 6.71129e-09 | 7.21670e-09 |
| 0.000100000 | 5.08543e-09 | 5.41247e-09 | 5.76808e-09 | 6.14985e-09 | 6.55315e-09 |
| 1.00000e-05 | 4.42089e-09 | 4.54402e-09 | 4.64185e-09 | 4.70703e-09 | 4.73334e-09 |
| 1.00000e-06 | 2.05360e-09 | 1.88852e-09 | 1.72008e-09 | 1.55223e-09 | 1.38844e-09 |
| 1.00000e-07 | 1.82243e-10 | 1.47126e-10 | 1.18916e-10 | 9.61872e-11 | 7.78325e-11 |
| 1.00000e-08 | 4.22272e-12 | 3.30788e-12 | 2.61038e-12 | 2.07182e-12 | 1.65175e-12 |
| 1.00000e-09 | 1.23300e-13 | 9.87617e-14 | 7.96143e-14 | 6.44914e-14 | 5.24323e-14 |

| Pa\K | 170.000 | 180.000 | 190.000 | 200.000 | 210.000 |
|------|---------|---------|---------|---------|---------|
|------|---------|---------|---------|---------|---------|

|             |             |             |             |             |             |
|-------------|-------------|-------------|-------------|-------------|-------------|
| 1.00000e+08 | 8.64345e-13 | 1.27267e-12 | 1.88226e-12 | 2.79406e-12 | 4.15902e-12 |
| 1.00000e+07 | 8.63060e-11 | 1.27041e-10 | 1.87827e-10 | 2.78697e-10 | 4.14643e-10 |
| 1.00000e+06 | 8.50423e-09 | 1.24827e-08 | 1.83930e-08 | 2.71820e-08 | 4.02493e-08 |
| 100000.     | 7.42022e-07 | 1.06372e-06 | 1.52517e-06 | 2.18463e-06 | 3.12218e-06 |
| 10000.0     | 3.12530e-05 | 4.07384e-05 | 5.28264e-05 | 6.81070e-05 | 8.72542e-05 |
| 1000.00     | 0.000236183 | 0.000272207 | 0.000312621 | 0.000357747 | 0.000407870 |
| 100.000     | 0.000369053 | 0.000397886 | 0.000428131 | 0.000459431 | 0.000491310 |
| 10.0000     | 0.000244263 | 0.000243196 | 0.000240232 | 0.000235344 | 0.000228589 |
| 1.00000     | 3.11693e-05 | 2.69183e-05 | 2.31296e-05 | 1.97783e-05 | 1.68355e-05 |
| 0.100000    | 3.50515e-07 | 2.83487e-07 | 2.30836e-07 | 1.89378e-07 | 1.56708e-07 |
| 0.0100000   | 1.12084e-08 | 1.15365e-08 | 1.20338e-08 | 1.26891e-08 | 1.34957e-08 |
| 0.00100000  | 7.78212e-09 | 8.40993e-09 | 9.10112e-09 | 9.85464e-09 | 1.06667e-08 |
| 0.000100000 | 6.97086e-09 | 7.39324e-09 | 7.80822e-09 | 8.20194e-09 | 8.55963e-09 |
| 1.00000e-05 | 4.71640e-09 | 4.65404e-09 | 4.54648e-09 | 4.39622e-09 | 4.20773e-09 |
| 1.00000e-06 | 1.23157e-09 | 1.08383e-09 | 9.46743e-10 | 8.21248e-10 | 7.07750e-10 |
| 1.00000e-07 | 6.29852e-11 | 5.09616e-11 | 4.12175e-11 | 3.33185e-11 | 2.69154e-11 |
| 1.00000e-08 | 1.32143e-12 | 1.05997e-12 | 8.51939e-13 | 6.85746e-13 | 5.52556e-13 |
| 1.00000e-09 | 4.27437e-14 | 3.49135e-14 | 2.85564e-14 | 2.33775e-14 | 1.91476e-14 |

| Pa\K        | 220.000     | 230.000     | 240.000     | 250.000     | 260.000     |
|-------------|-------------|-------------|-------------|-------------|-------------|
| 1.00000e+08 | 6.20215e-12 | 9.25743e-12 | 1.38184e-11 | 2.06110e-11 | 3.06975e-11 |
| 1.00000e+07 | 6.17976e-10 | 9.21762e-10 | 1.37478e-09 | 2.04862e-09 | 3.04776e-09 |
| 1.00000e+06 | 5.96522e-08 | 8.83956e-08 | 1.30838e-07 | 1.93255e-07 | 2.84603e-07 |
| 100000.     | 4.44649e-06 | 6.30297e-06 | 8.88332e-06 | 1.24365e-05 | 1.72806e-05 |
| 10000.0     | 0.000111023 | 0.000140243 | 0.000175804 | 0.000218642 | 0.000269715 |
| 1000.00     | 0.000463221 | 0.000523959 | 0.000590148 | 0.000661740 | 0.000738543 |
| 100.000     | 0.000523170 | 0.000554311 | 0.000583962 | 0.000611311 | 0.000635554 |
| 10.0000     | 0.000220102 | 0.000210083 | 0.000198786 | 0.000186496 | 0.000173514 |
| 1.00000     | 1.42690e-05 | 1.20453e-05 | 1.01304e-05 | 8.49084e-06 | 7.09473e-06 |
| 0.100000    | 1.30996e-07 | 1.10831e-07 | 9.51204e-08 | 8.30076e-08 | 7.38207e-08 |
| 0.0100000   | 1.44493e-08 | 1.55469e-08 | 1.67854e-08 | 1.81609e-08 | 1.96668e-08 |
| 0.00100000  | 1.15303e-08 | 1.24347e-08 | 1.33653e-08 | 1.43037e-08 | 1.52286e-08 |
| 0.000100000 | 8.86663e-09 | 9.10954e-09 | 9.27719e-09 | 9.36147e-09 | 9.35785e-09 |
| 1.00000e-05 | 3.98695e-09 | 3.74081e-09 | 3.47666e-09 | 3.20180e-09 | 2.92307e-09 |
| 1.00000e-06 | 6.06225e-10 | 5.16312e-10 | 4.37406e-10 | 3.68730e-10 | 3.09411e-10 |
| 1.00000e-07 | 2.17263e-11 | 1.75233e-11 | 1.41213e-11 | 1.13698e-11 | 9.14645e-12 |
| 1.00000e-08 | 4.45553e-13 | 3.59435e-13 | 2.90034e-13 | 2.34057e-13 | 1.88879e-13 |
| 1.00000e-09 | 1.56864e-14 | 1.28509e-14 | 1.05261e-14 | 8.61940e-15 | 7.05541e-15 |

| Pa\K        | 270.000     | 280.000     | 290.000     | 300.000     | 310.000     |
|-------------|-------------|-------------|-------------|-------------|-------------|
| 1.00000e+08 | 4.56240e-11 | 6.76292e-11 | 9.99362e-11 | 9.89840e-10 | 2.15869e-10 |
| 1.00000e+07 | 4.52388e-09 | 6.69578e-09 | 9.87729e-09 | 9.40488e-08 | 2.12446e-08 |
| 1.00000e+06 | 4.17559e-07 | 6.09898e-07 | 8.86300e-07 | 6.49159e-06 | 1.83925e-06 |
| 100000.     | 2.38161e-05 | 3.25385e-05 | 4.40512e-05 | 0.000153590 | 7.84674e-05 |
| 10000.0     | 0.000329982 | 0.000400367 | 0.000481734 | 0.000740595 | 0.000680367 |
| 1000.00     | 0.000820206 | 0.000906194 | 0.000995781 | 0.000980152 | 0.00118185  |
| 100.000     | 0.000655937 | 0.000671801 | 0.000682623 | 0.000524404 | 0.000687873 |
| 10.0000     | 0.000160137 | 0.000146648 | 0.000133298 | 8.96181e-05 | 0.000107853 |
| 1.00000     | 5.91198e-06 | 4.91481e-06 | 4.07791e-06 | 3.74643e-06 | 2.79654e-06 |
| 0.100000    | 6.70277e-08 | 6.22059e-08 | 5.90170e-08 | 9.49984e-08 | 5.64976e-08 |
| 0.0100000   | 2.12938e-08 | 2.30283e-08 | 2.48521e-08 | 2.69694e-08 | 2.86706e-08 |
| 0.00100000  | 1.61162e-08 | 1.69418e-08 | 1.76809e-08 | 1.74408e-08 | 1.88124e-08 |
| 0.000100000 | 9.26556e-09 | 9.08747e-09 | 8.82968e-09 | 7.76988e-09 | 8.11197e-09 |
| 1.00000e-05 | 2.64658e-09 | 2.37751e-09 | 2.12006e-09 | 1.79099e-09 | 1.65163e-09 |
| 1.00000e-06 | 2.58530e-10 | 2.15164e-10 | 1.78420e-10 | 1.77502e-10 | 1.21483e-10 |
| 1.00000e-07 | 7.35165e-12 | 5.90426e-12 | 4.73821e-12 | 8.06239e-12 | 3.04521e-12 |
| 1.00000e-08 | 1.52409e-13 | 1.22962e-13 | 9.91885e-14 | 3.05687e-13 | 6.45112e-14 |
| 1.00000e-09 | 5.77277e-15 | 4.72121e-15 | 3.85950e-15 | 1.47319e-14 | 2.57606e-15 |

| Pa\K        | 400.000     | 500.000     | 600.000     | 700.000     | 800.000     |
|-------------|-------------|-------------|-------------|-------------|-------------|
| 1.00000e+08 | 3.62756e-08 | 1.27094e-06 | 4.87096e-05 | 0.00104265  | 0.00442048  |
| 1.00000e+07 | 3.01095e-06 | 6.83069e-05 | 0.000921559 | 0.00522350  | 0.0102596   |
| 1.00000e+06 | 0.000118792 | 0.00107283  | 0.00469267  | 0.0103042   | 0.0123585   |
| 100000.     | 0.00108369  | 0.00372831  | 0.00703128  | 0.00820660  | 0.00688480  |
| 10000.0     | 0.00220266  | 0.00363594  | 0.00360828  | 0.00249486  | 0.00151035  |
| 1000.00     | 0.00148804  | 0.00122431  | 0.000648776 | 0.000280616 | 0.000133454 |
| 100.000     | 0.000356229 | 0.000142003 | 4.45719e-05 | 1.51077e-05 | 8.13109e-06 |
| 10.0000     | 2.66887e-05 | 6.32483e-06 | 1.91799e-06 | 1.15212e-06 | 1.09396e-06 |
| 1.00000     | 7.72177e-07 | 3.23100e-07 | 2.88744e-07 | 2.61727e-07 | 2.22445e-07 |
| 0.100000    | 8.29142e-08 | 1.00823e-07 | 8.64963e-08 | 5.64728e-08 | 3.46343e-08 |
| 0.0100000   | 4.08606e-08 | 3.49159e-08 | 1.91977e-08 | 8.49799e-09 | 3.80767e-09 |
| 0.00100000  | 1.60941e-08 | 7.98613e-09 | 2.79883e-09 | 8.70608e-10 | 2.99969e-10 |
| 0.000100000 | 3.72315e-09 | 1.09289e-09 | 2.59861e-10 | 6.11051e-11 | 1.76751e-11 |
| 1.00000e-05 | 4.57634e-10 | 8.71586e-11 | 1.55359e-11 | 3.07241e-12 | 8.64702e-13 |
| 1.00000e-06 | 2.83598e-11 | 4.11066e-12 | 6.38311e-13 | 1.25737e-13 | 4.34254e-14 |
| 1.00000e-07 | 1.07565e-12 | 1.49225e-13 | 2.46551e-14 | 5.93748e-15 | 2.89885e-15 |
| 1.00000e-08 | 4.25622e-14 | 6.51062e-15 | 1.27027e-15 | 3.92873e-16 | 2.45765e-16 |

1.00000e-09 | 2.26885e-15 3.92498e-16 8.94726e-17 3.27964e-17 2.31067e-17

| Pa\K        | 900.000     | 1000.00     | 1100.00     | 1200.00     | 1300.00     |
|-------------|-------------|-------------|-------------|-------------|-------------|
| 1.00000e+08 | 0.00522882  | 0.00440009  | 0.00517469  | 0.00793512  | 0.0129928   |
| 1.00000e+07 | 0.00953417  | 0.00705624  | 0.00662431  | 0.00815432  | 0.0110940   |
| 1.00000e+06 | 0.0101477   | 0.00822085  | 0.00824756  | 0.00955363  | 0.0106480   |
| 100000.     | 0.00501247  | 0.00415369  | 0.00425808  | 0.00476204  | 0.00481762  |
| 10000.0     | 0.000951894 | 0.000776236 | 0.000822385 | 0.000946917 | 0.000945776 |
| 1000.00     | 8.18715e-05 | 7.75423e-05 | 0.000100787 | 0.000133441 | 0.000140370 |
| 100.000     | 7.22076e-06 | 9.39780e-06 | 1.41093e-05 | 1.91887e-05 | 1.98964e-05 |
| 10.0000     | 1.18362e-06 | 1.45267e-06 | 1.93994e-06 | 2.41871e-06 | 2.39319e-06 |
| 1.00000     | 1.88902e-07 | 1.83867e-07 | 2.10529e-07 | 2.46637e-07 | 2.41332e-07 |
| 0.100000    | 2.20694e-08 | 1.74591e-08 | 1.84537e-08 | 2.20365e-08 | 2.24102e-08 |
| 0.0100000   | 1.89822e-09 | 1.33102e-09 | 1.47245e-09 | 1.93396e-09 | 2.08600e-09 |
| 0.00100000  | 1.26932e-10 | 9.17191e-11 | 1.20559e-10 | 1.77109e-10 | 1.99839e-10 |
| 0.000100000 | 7.37140e-12 | 6.65978e-12 | 1.07526e-11 | 1.70028e-11 | 1.96195e-11 |
| 1.00000e-05 | 4.48820e-13 | 5.59003e-13 | 1.03071e-12 | 1.68033e-12 | 1.95292e-12 |
| 1.00000e-06 | 3.32422e-14 | 5.21260e-14 | 1.01675e-13 | 1.67470e-13 | 1.95054e-13 |
| 1.00000e-07 | 2.95593e-15 | 5.09757e-15 | 1.01257e-14 | 1.67301e-14 | 1.94981e-14 |
| 1.00000e-08 | 2.84158e-16 | 5.06115e-16 | 1.01120e-15 | 1.67243e-15 | 1.94954e-15 |
| 1.00000e-09 | 2.80245e-17 | 5.04830e-17 | 1.01070e-16 | 1.67220e-16 | 1.94943e-16 |

| Pa\K        | 1400.00     | 1500.00     | 1750.00     | 2000.00     | 2250.00     |
|-------------|-------------|-------------|-------------|-------------|-------------|
| 1.00000e+08 | 0.0185394   | 0.0225527   | 0.00255673  | 0.00286570  | 0.00326153  |
| 1.00000e+07 | 0.0150823   | 0.0189618   | 0.00260810  | 0.00263496  | 0.00247507  |
| 1.00000e+06 | 0.0108602   | 0.0107835   | 0.00232941  | 0.00134624  | 0.000768895 |
| 100000.     | 0.00417680  | 0.00339058  | 0.000585574 | 0.000236692 | 0.000106355 |
| 10000.0     | 0.000768688 | 0.000563742 | 8.41158e-05 | 2.96430e-05 | 1.20620e-05 |
| 1000.00     | 0.000113636 | 8.03665e-05 | 1.12246e-05 | 3.53314e-06 | 1.30660e-06 |
| 100.000     | 1.57024e-05 | 1.07238e-05 | 1.39234e-06 | 3.91850e-07 | 1.34953e-07 |
| 10.0000     | 1.83958e-06 | 1.22738e-06 | 1.52924e-07 | 4.04987e-08 | 1.35409e-08 |
| 1.00000     | 1.86061e-07 | 1.24335e-07 | 1.55743e-08 | 4.05834e-09 | 1.34807e-09 |
| 0.100000    | 1.77732e-08 | 1.20787e-08 | 1.55068e-09 | 4.04215e-10 | 1.34238e-10 |
| 0.0100000   | 1.70535e-09 | 1.17759e-09 | 1.54131e-10 | 4.02811e-11 | 1.33845e-11 |
| 0.00100000  | 1.66543e-10 | 1.16083e-10 | 1.53762e-11 | 4.02359e-12 | 1.33734e-12 |
| 0.000100000 | 1.64906e-11 | 1.15400e-11 | 1.53660e-12 | 4.02267e-13 | 1.33717e-13 |
| 1.00000e-05 | 1.64522e-12 | 1.15242e-12 | 1.53624e-13 | 4.02240e-14 | 1.33713e-14 |
| 1.00000e-06 | 1.64422e-13 | 1.15200e-13 | 1.53608e-14 | 4.02228e-15 | 1.33712e-15 |
| 1.00000e-07 | 1.64389e-14 | 1.15185e-14 | 1.53601e-15 | 4.02223e-16 | 1.33711e-16 |
| 1.00000e-08 | 1.64376e-15 | 1.15178e-15 | 1.53596e-16 | 4.02220e-17 | 1.33711e-17 |
| 1.00000e-09 | 1.64371e-16 | 1.15176e-16 | 1.53595e-17 | 4.02218e-18 | 1.33711e-18 |

| Pa\K        | 2500.00     | 2750.00     | 3000.00     | 3250.00     | 3500.00     |
|-------------|-------------|-------------|-------------|-------------|-------------|
| 1.00000e+08 | 0.00368436  | 0.00394180  | 0.00391143  | 0.00361733  | 0.00317061  |
| 1.00000e+07 | 0.00201985  | 0.00148388  | 0.00103292  | 0.000709077 | 0.000491845 |
| 1.00000e+06 | 0.000420525 | 0.000230135 | 0.000130822 | 7.86207e-05 | 5.00943e-05 |
| 100000.     | 4.96981e-05 | 2.45545e-05 | 1.30922e-05 | 7.57447e-06 | 4.72399e-06 |
| 10000.0     | 5.22320e-06 | 2.45287e-06 | 1.27145e-06 | 7.25804e-07 | 4.50151e-07 |
| 1000.00     | 5.32105e-07 | 2.42406e-07 | 1.24146e-07 | 7.05900e-08 | 4.37385e-08 |
| 100.000     | 5.31748e-08 | 2.39422e-08 | 1.22218e-08 | 6.94500e-09 | 4.30340e-09 |
| 10.0000     | 5.28112e-09 | 2.37168e-09 | 1.21019e-09 | 6.87730e-10 | 4.26202e-10 |
| 1.00000     | 5.24878e-10 | 2.35668e-10 | 1.20264e-10 | 6.83516e-11 | 4.23629e-11 |
| 0.100000    | 5.22683e-11 | 2.34708e-11 | 1.19784e-11 | 6.80832e-12 | 4.21984e-12 |
| 0.0100000   | 5.21252e-12 | 2.34091e-12 | 1.19479e-12 | 6.79135e-13 | 4.20954e-13 |
| 0.00100000  | 5.20876e-13 | 2.33936e-13 | 1.19404e-13 | 6.78736e-14 | 4.20718e-14 |
| 0.000100000 | 5.20824e-14 | 2.33916e-14 | 1.19395e-14 | 6.78688e-15 | 4.20690e-15 |
| 1.00000e-05 | 5.20816e-15 | 2.33913e-15 | 1.19394e-15 | 6.78682e-16 | 4.20687e-16 |
| 1.00000e-06 | 5.20813e-16 | 2.33912e-16 | 1.19394e-16 | 6.78681e-17 | 4.20687e-17 |
| 1.00000e-07 | 5.20812e-17 | 2.33912e-17 | 1.19394e-17 | 6.78681e-18 | 4.20686e-18 |
| 1.00000e-08 | 5.20811e-18 | 2.33912e-18 | 1.19394e-18 | 6.78681e-19 | 4.20686e-19 |
| 1.00000e-09 | 5.20811e-19 | 2.33912e-19 | 1.19394e-19 | 6.78681e-20 | 4.20686e-20 |

| Pa\K        | 3750.00     | 4000.00     |
|-------------|-------------|-------------|
| 1.00000e+08 | 0.00268302  | 0.00222626  |
| 1.00000e+07 | 0.000348871 | 0.000254151 |
| 1.00000e+06 | 3.36824e-05 | 2.37292e-05 |
| 100000.     | 3.14002e-06 | 2.19919e-06 |
| 10000.0     | 2.98634e-07 | 2.09078e-07 |
| 1000.00     | 2.90167e-08 | 2.03213e-08 |
| 100.000     | 2.85548e-09 | 2.00020e-09 |
| 10.0000     | 2.82838e-10 | 1.98144e-10 |
| 1.00000     | 2.81151e-11 | 1.96974e-11 |
| 0.100000    | 2.80069e-12 | 1.96223e-12 |
| 0.0100000   | 2.79398e-13 | 1.95761e-13 |
| 0.00100000  | 2.79249e-14 | 1.95660e-14 |
| 0.000100000 | 2.79231e-15 | 1.95648e-15 |



1.00000e-05 | 2.79229e-16 1.95647e-16  
 1.00000e-06 | 2.79229e-17 1.95647e-17  
 1.00000e-07 | 2.79229e-18 1.95647e-18  
 1.00000e-08 | 2.79229e-19 1.95647e-19  
 1.00000e-09 | 2.79229e-20 1.95647e-20

rad50  
 =====

| Pa\K        | 20.0000     | 30.0000     | 40.0000     | 50.0000     | 60.0000     |
|-------------|-------------|-------------|-------------|-------------|-------------|
| 1.00000e+08 | 5.92591e-60 | 1.41281e-58 | 1.51000e-57 | 1.40448e-56 | 1.33591e-55 |
| 1.00000e+07 | 5.21664e-56 | 1.16855e-54 | 1.19950e-53 | 1.08124e-52 | 1.00251e-51 |
| 1.00000e+06 | 3.65523e-52 | 7.11509e-51 | 6.46925e-50 | 5.25492e-49 | 4.46413e-48 |
| 100000.     | 1.05252e-48 | 1.23231e-47 | 8.22887e-47 | 5.41092e-46 | 3.96372e-45 |
| 10000.0     | 4.23536e-46 | 2.31918e-45 | 1.01861e-44 | 5.27437e-44 | 3.45266e-43 |
| 1000.00     | 1.02276e-44 | 2.56819e-44 | 8.62377e-44 | 4.23048e-43 | 2.90729e-42 |
| 100.000     | 3.09665e-44 | 7.76664e-44 | 2.35151e-43 | 8.51135e-43 | 3.84859e-42 |
| 10.0000     | 2.20138e-43 | 4.22312e-43 | 8.47983e-43 | 2.03135e-42 | 5.98778e-42 |
| 1.00000     | 1.62829e-43 | 5.47473e-44 | 3.24468e-44 | 3.12882e-44 | 4.61079e-44 |
| 0.100000    | 9.12300e-47 | 2.85743e-47 | 6.87450e-47 | 2.13608e-46 | 8.22193e-46 |
| 0.0100000   | 7.91133e-47 | 1.78241e-46 | 4.13210e-46 | 1.12910e-45 | 3.83395e-45 |
| 0.00100000  | 1.95252e-46 | 1.66101e-46 | 1.93229e-46 | 3.10907e-46 | 6.90850e-46 |
| 0.000100000 | 6.56708e-48 | 1.34209e-48 | 8.14621e-49 | 9.15109e-49 | 1.63595e-48 |
| 1.00000e-05 | 8.77639e-51 | 1.66212e-51 | 1.10151e-51 | 1.37488e-51 | 2.73815e-51 |
| 1.00000e-06 | 1.99840e-53 | 5.67692e-54 | 4.80841e-54 | 7.25387e-54 | 1.75899e-53 |
| 1.00000e-07 | 1.76367e-55 | 7.63233e-56 | 8.39720e-56 | 1.60017e-55 | 5.21353e-55 |
| 1.00000e-08 | 5.78551e-57 | 3.58993e-57 | 4.83053e-57 | 1.07478e-56 | 4.05763e-56 |
| 1.00000e-09 | 4.52305e-58 | 3.15729e-58 | 4.45552e-58 | 1.02061e-57 | 3.94051e-57 |

| Pa\K        | 70.0000     | 80.0000     | 90.0000     | 100.000     | 110.000     |
|-------------|-------------|-------------|-------------|-------------|-------------|
| 1.00000e+08 | 1.41902e-54 | 1.84916e-53 | 3.34290e-52 | 9.43873e-51 | 4.24845e-49 |
| 1.00000e+07 | 1.04362e-50 | 1.34088e-49 | 2.40711e-48 | 6.79975e-47 | 3.07807e-45 |
| 1.00000e+06 | 4.32823e-47 | 5.26645e-46 | 9.10580e-45 | 2.51456e-43 | 1.12394e-41 |
| 100000.     | 3.48021e-44 | 3.99612e-43 | 6.73197e-42 | 1.83784e-40 | 8.08737e-39 |
| 10000.0     | 2.98170e-42 | 3.59346e-41 | 6.48776e-40 | 1.83464e-38 | 7.83542e-37 |
| 1000.00     | 2.74201e-41 | 3.58395e-40 | 6.70098e-39 | 1.83605e-37 | 7.27458e-36 |
| 100.000     | 2.31147e-41 | 1.99711e-40 | 2.76815e-39 | 6.98950e-38 | 3.50494e-36 |
| 10.0000     | 2.30035e-41 | 1.29891e-40 | 1.35257e-39 | 3.41925e-38 | 2.32361e-36 |
| 1.00000     | 1.06450e-43 | 4.51817e-43 | 5.57948e-42 | 3.30276e-40 | 7.66006e-38 |
| 0.100000    | 4.30485e-45 | 3.70751e-44 | 7.07068e-43 | 3.67074e-41 | 6.44425e-39 |
| 0.0100000   | 1.78609e-44 | 1.37837e-43 | 2.33905e-42 | 9.89638e-41 | 1.00082e-38 |
| 0.00100000  | 2.27022e-45 | 1.31033e-44 | 1.78310e-43 | 6.98032e-42 | 9.04858e-40 |
| 0.000100000 | 4.69947e-48 | 2.57189e-47 | 4.53568e-46 | 4.58412e-44 | 2.26746e-41 |
| 1.00000e-05 | 9.03525e-51 | 7.66742e-50 | 6.28092e-48 | 2.07912e-45 | 1.72190e-42 |
| 1.00000e-06 | 8.59314e-53 | 2.23354e-51 | 4.76912e-49 | 1.90631e-46 | 1.67180e-43 |
| 1.00000e-07 | 4.22207e-54 | 1.88643e-52 | 4.64143e-50 | 1.88980e-47 | 1.66684e-44 |
| 1.00000e-08 | 3.81534e-55 | 1.85359e-53 | 4.62889e-51 | 1.88816e-48 | 1.66635e-45 |
| 1.00000e-09 | 3.77466e-56 | 1.85031e-54 | 4.62764e-52 | 1.88800e-49 | 1.66630e-46 |

| Pa\K        | 120.000     | 130.000     | 140.000     | 150.000     | 160.000     |
|-------------|-------------|-------------|-------------|-------------|-------------|
| 1.00000e+08 | 2.47533e-47 | 1.50473e-45 | 7.65519e-44 | 3.07047e-42 | 8.74407e-41 |
| 1.00000e+07 | 1.80475e-43 | 1.10219e-41 | 5.61841e-40 | 2.24849e-38 | 6.36652e-37 |
| 1.00000e+06 | 6.52832e-40 | 3.95892e-38 | 1.99895e-36 | 7.83302e-35 | 2.13841e-33 |
| 100000.     | 4.59180e-37 | 2.72753e-35 | 1.35581e-33 | 5.14366e-32 | 1.32770e-30 |
| 10000.0     | 4.16904e-35 | 2.32462e-33 | 1.12176e-31 | 4.09009e-30 | 9.89832e-29 |
| 1000.00     | 3.63687e-34 | 2.00586e-32 | 1.04326e-30 | 4.00805e-29 | 9.55619e-28 |
| 100.000     | 2.65484e-34 | 2.45691e-32 | 2.32333e-30 | 1.20523e-28 | 3.13584e-27 |
| 10.0000     | 2.50253e-34 | 3.57451e-32 | 6.15136e-30 | 3.72139e-28 | 9.78335e-27 |
| 1.00000     | 2.11697e-35 | 7.66801e-33 | 7.46720e-30 | 5.20421e-28 | 1.37054e-26 |
| 0.100000    | 1.87663e-36 | 8.61055e-34 | 7.53138e-30 | 5.41986e-28 | 1.42940e-26 |
| 0.0100000   | 1.40940e-36 | 3.08926e-34 | 7.57377e-30 | 5.46887e-28 | 1.44285e-26 |
| 0.00100000  | 1.99439e-37 | 7.98968e-35 | 7.59703e-30 | 5.49042e-28 | 1.44842e-26 |
| 0.000100000 | 1.15681e-38 | 8.45915e-36 | 7.59928e-30 | 5.49358e-28 | 1.44924e-26 |
| 1.00000e-05 | 1.04872e-39 | 8.46810e-37 | 7.59948e-30 | 5.49391e-28 | 1.44933e-26 |
| 1.00000e-06 | 1.03780e-40 | 8.46841e-38 | 7.59950e-30 | 5.49395e-28 | 1.44934e-26 |
| 1.00000e-07 | 1.03671e-41 | 8.46844e-39 | 7.59951e-30 | 5.49395e-28 | 1.44934e-26 |
| 1.00000e-08 | 1.03660e-42 | 8.46844e-40 | 7.59951e-30 | 5.49395e-28 | 1.44934e-26 |
| 1.00000e-09 | 1.03659e-43 | 8.46844e-41 | 7.59951e-30 | 5.49395e-28 | 1.44934e-26 |

| Pa\K        | 170.000     | 180.000     | 190.000     | 200.000     | 210.000     |
|-------------|-------------|-------------|-------------|-------------|-------------|
| 1.00000e+08 | 1.85490e-39 | 3.05347e-38 | 4.07442e-37 | 4.50193e-36 | 4.22734e-35 |
| 1.00000e+07 | 1.34004e-35 | 2.18567e-34 | 2.88432e-33 | 3.14815e-32 | 2.91704e-31 |
| 1.00000e+06 | 4.30402e-32 | 6.67783e-31 | 8.33595e-30 | 8.57741e-29 | 7.47177e-28 |
| 100000.     | 2.50027e-29 | 3.60787e-28 | 4.16173e-27 | 3.94371e-26 | 3.15529e-25 |
| 10000.0     | 1.73309e-27 | 2.31482e-26 | 2.45940e-25 | 2.14130e-24 | 1.57096e-23 |
| 1000.00     | 1.61335e-26 | 2.05429e-25 | 2.06333e-24 | 1.68732e-23 | 1.15613e-22 |
| 100.000     | 5.49638e-26 | 7.11820e-25 | 7.19352e-24 | 5.87354e-23 | 3.99596e-22 |

|             |             |             |             |             |             |
|-------------|-------------|-------------|-------------|-------------|-------------|
| 10.0000     | 1.69385e-25 | 2.14636e-24 | 2.10701e-23 | 1.66243e-22 | 1.08809e-21 |
| 1.00000     | 2.34697e-25 | 2.92810e-24 | 2.82189e-23 | 2.18285e-22 | 1.39993e-21 |
| 0.100000    | 2.44558e-25 | 3.04585e-24 | 2.92894e-23 | 2.26027e-22 | 1.44608e-21 |
| 0.0100000   | 2.46874e-25 | 3.07458e-24 | 2.95627e-23 | 2.28103e-22 | 1.45910e-21 |
| 0.00100000  | 2.47792e-25 | 3.08549e-24 | 2.96619e-23 | 2.28822e-22 | 1.46339e-21 |
| 0.000100000 | 2.47927e-25 | 3.08706e-24 | 2.96759e-23 | 2.28922e-22 | 1.46397e-21 |
| 1.00000e-05 | 2.47941e-25 | 3.08723e-24 | 2.96774e-23 | 2.28932e-22 | 1.46403e-21 |
| 1.00000e-06 | 2.47942e-25 | 3.08724e-24 | 2.96775e-23 | 2.28933e-22 | 1.46404e-21 |
| 1.00000e-07 | 2.47942e-25 | 3.08725e-24 | 2.96776e-23 | 2.28933e-22 | 1.46404e-21 |
| 1.00000e-08 | 2.47942e-25 | 3.08725e-24 | 2.96776e-23 | 2.28933e-22 | 1.46404e-21 |
| 1.00000e-09 | 2.47943e-25 | 3.08725e-24 | 2.96776e-23 | 2.28933e-22 | 1.46404e-21 |

| Pa\K        | 220.000     | 230.000     | 240.000     | 250.000     | 260.000     |
|-------------|-------------|-------------|-------------|-------------|-------------|
| 1.00000e+08 | 3.45219e-34 | 2.50001e-33 | 1.62814e-32 | 9.66065e-32 | 5.28407e-31 |
| 1.00000e+07 | 2.34804e-30 | 1.67380e-29 | 1.07208e-28 | 6.25311e-28 | 3.36102e-27 |
| 1.00000e+06 | 5.63926e-27 | 3.75927e-26 | 2.24837e-25 | 1.22376e-24 | 6.13836e-24 |
| 100000.     | 2.18203e-24 | 1.33019e-23 | 7.27022e-23 | 3.61705e-22 | 1.66049e-21 |
| 10000.0     | 9.94386e-23 | 5.54020e-22 | 2.76412e-21 | 1.25377e-20 | 5.23954e-20 |
| 1000.00     | 6.79828e-22 | 3.49974e-21 | 1.60416e-20 | 6.64212e-20 | 2.51532e-19 |
| 100.000     | 2.32244e-21 | 1.17674e-20 | 5.28652e-20 | 2.13592e-19 | 7.85477e-19 |
| 10.0000     | 6.06096e-21 | 2.93397e-20 | 1.25600e-19 | 4.82543e-19 | 1.68458e-18 |
| 1.00000     | 7.64054e-21 | 3.62524e-20 | 1.52211e-19 | 5.74000e-19 | 1.96873e-18 |
| 0.100000    | 7.87381e-21 | 3.72753e-20 | 1.56177e-19 | 5.87816e-19 | 2.01255e-18 |
| 0.0100000   | 7.94307e-21 | 3.75942e-20 | 1.57471e-19 | 5.92511e-19 | 2.02797e-18 |
| 0.00100000  | 7.96470e-21 | 3.76886e-20 | 1.57833e-19 | 5.93754e-19 | 2.03183e-18 |
| 0.000100000 | 7.96757e-21 | 3.77008e-20 | 1.57879e-19 | 5.93909e-19 | 2.03230e-18 |
| 1.00000e-05 | 7.96787e-21 | 3.77021e-20 | 1.57884e-19 | 5.93925e-19 | 2.03235e-18 |
| 1.00000e-06 | 7.96790e-21 | 3.77022e-20 | 1.57884e-19 | 5.93926e-19 | 2.03235e-18 |
| 1.00000e-07 | 7.96790e-21 | 3.77022e-20 | 1.57885e-19 | 5.93927e-19 | 2.03235e-18 |
| 1.00000e-08 | 7.96790e-21 | 3.77022e-20 | 1.57885e-19 | 5.93927e-19 | 2.03235e-18 |
| 1.00000e-09 | 7.96790e-21 | 3.77022e-20 | 1.57885e-19 | 5.93927e-19 | 2.03235e-18 |

| Pa\K        | 270.000     | 280.000     | 290.000     | 300.000     | 310.000     |
|-------------|-------------|-------------|-------------|-------------|-------------|
| 1.00000e+08 | 2.69035e-30 | 1.28507e-29 | 5.79619e-29 | 2.21861e-22 | 1.01205e-27 |
| 1.00000e+07 | 1.68155e-26 | 7.89545e-26 | 3.50275e-25 | 7.17933e-19 | 5.92843e-24 |
| 1.00000e+06 | 2.86887e-23 | 1.26118e-22 | 5.25683e-22 | 4.50395e-16 | 7.96552e-21 |
| 100000.     | 7.12007e-21 | 2.88406e-20 | 1.11391e-19 | 2.93404e-14 | 1.48204e-18 |
| 10000.0     | 2.04144e-19 | 7.49420e-19 | 2.61622e-18 | 9.07877e-14 | 2.82253e-17 |
| 1000.00     | 8.80550e-19 | 2.87618e-18 | 8.83689e-18 | 1.95560e-14 | 7.13652e-17 |
| 100.000     | 2.65605e-18 | 8.33040e-18 | 2.44152e-17 | 2.38002e-15 | 1.75452e-16 |
| 10.0000     | 5.40079e-18 | 1.60459e-17 | 4.45232e-17 | 3.00389e-16 | 2.86562e-16 |
| 1.00000     | 6.20723e-18 | 1.81545e-17 | 4.96394e-17 | 1.20828e-16 | 3.11133e-16 |
| 0.100000    | 6.33510e-18 | 1.85013e-17 | 5.05196e-17 | 1.05845e-16 | 3.15899e-16 |
| 0.0100000   | 6.38142e-18 | 1.86297e-17 | 5.08503e-17 | 1.03559e-16 | 3.17709e-16 |
| 0.00100000  | 6.39239e-18 | 1.86585e-17 | 5.09208e-17 | 1.03230e-16 | 3.18059e-16 |
| 0.000100000 | 6.39371e-18 | 1.86619e-17 | 5.09290e-17 | 1.03199e-16 | 3.18098e-16 |
| 1.00000e-05 | 6.39385e-18 | 1.86622e-17 | 5.09299e-17 | 1.03196e-16 | 3.18103e-16 |
| 1.00000e-06 | 6.39386e-18 | 1.86623e-17 | 5.09300e-17 | 1.03196e-16 | 3.18103e-16 |
| 1.00000e-07 | 6.39386e-18 | 1.86623e-17 | 5.09300e-17 | 1.03196e-16 | 3.18103e-16 |
| 1.00000e-08 | 6.39386e-18 | 1.86623e-17 | 5.09300e-17 | 1.03196e-16 | 3.18103e-16 |
| 1.00000e-09 | 6.39386e-18 | 1.86623e-17 | 5.09300e-17 | 1.03196e-16 | 3.18103e-16 |

| Pa\K        | 400.000     | 500.000     | 600.000     | 700.000     | 800.000     |
|-------------|-------------|-------------|-------------|-------------|-------------|
| 1.00000e+08 | 4.06338e-15 | 4.13511e-10 | 6.66041e-08 | 1.37239e-06 | 6.04405e-06 |
| 1.00000e+07 | 5.56923e-12 | 1.94478e-07 | 1.07076e-05 | 6.60333e-05 | 0.000148674 |
| 1.00000e+06 | 5.78869e-10 | 3.89988e-06 | 0.000132637 | 0.000466981 | 0.000764333 |
| 100000.     | 2.97404e-09 | 3.32093e-06 | 0.000124146 | 0.000553071 | 0.000974604 |
| 10000.0     | 9.71453e-10 | 4.56213e-07 | 2.86625e-05 | 0.000260446 | 0.000656835 |
| 1000.00     | 6.80208e-11 | 4.20441e-08 | 6.95962e-06 | 0.000111167 | 0.000342623 |
| 100.000     | 6.01779e-12 | 6.37701e-09 | 1.78064e-06 | 3.26817e-05 | 9.67264e-05 |
| 10.0000     | 8.50367e-13 | 9.61445e-10 | 2.65860e-07 | 4.63171e-06 | 1.28928e-05 |
| 1.00000     | 2.15756e-13 | 1.15260e-10 | 2.60535e-08 | 4.46232e-07 | 1.28639e-06 |
| 0.100000    | 1.45229e-13 | 2.42600e-11 | 2.83248e-09 | 4.64826e-08 | 1.55558e-07 |
| 0.0100000   | 1.38019e-13 | 1.52644e-11 | 6.31420e-10 | 8.88002e-09 | 4.74026e-08 |
| 0.00100000  | 1.37289e-13 | 1.43654e-11 | 4.14821e-10 | 5.23139e-09 | 3.68805e-08 |
| 0.000100000 | 1.37216e-13 | 1.42754e-11 | 3.93288e-10 | 4.87226e-09 | 3.58456e-08 |
| 1.00000e-05 | 1.37209e-13 | 1.42664e-11 | 3.91141e-10 | 4.83665e-09 | 3.57431e-08 |
| 1.00000e-06 | 1.37208e-13 | 1.42655e-11 | 3.90927e-10 | 4.83310e-09 | 3.57329e-08 |
| 1.00000e-07 | 1.37208e-13 | 1.42654e-11 | 3.90905e-10 | 4.83275e-09 | 3.57319e-08 |
| 1.00000e-08 | 1.37208e-13 | 1.42654e-11 | 3.90903e-10 | 4.83271e-09 | 3.57318e-08 |
| 1.00000e-09 | 1.37208e-13 | 1.42654e-11 | 3.90903e-10 | 4.83271e-09 | 3.57318e-08 |

| Pa\K        | 900.000     | 1000.00     | 1100.00     | 1200.00     | 1300.00     |
|-------------|-------------|-------------|-------------|-------------|-------------|
| 1.00000e+08 | 1.10598e-05 | 1.50186e-05 | 1.89188e-05 | 2.12628e-05 | 2.24639e-05 |
| 1.00000e+07 | 0.000218380 | 0.000287870 | 0.000382534 | 0.000471045 | 0.000534946 |
| 1.00000e+06 | 0.00100454  | 0.00123540  | 0.00148405  | 0.00168999  | 0.00182885  |

|             |             |             |             |             |             |
|-------------|-------------|-------------|-------------|-------------|-------------|
| 100000.     | 0.00129784  | 0.00154332  | 0.00172573  | 0.00184076  | 0.00188436  |
| 10000.0     | 0.000958579 | 0.00109934  | 0.00112431  | 0.00107564  | 0.000980897 |
| 1000.00     | 0.000479259 | 0.000472591 | 0.000401758 | 0.000319731 | 0.000250834 |
| 100.000     | 0.000114144 | 9.28545e-05 | 6.76230e-05 | 5.08956e-05 | 4.62683e-05 |
| 10.0000     | 1.39697e-05 | 1.10014e-05 | 9.27974e-06 | 1.13241e-05 | 1.99099e-05 |
| 1.00000     | 1.52765e-06 | 1.73771e-06 | 3.11224e-06 | 7.33414e-06 | 1.73347e-05 |
| 0.100000    | 3.15176e-07 | 8.41114e-07 | 2.51939e-06 | 6.95241e-06 | 1.70889e-05 |
| 0.0100000   | 1.98216e-07 | 7.54415e-07 | 2.46203e-06 | 6.91546e-06 | 1.70651e-05 |
| 0.00100000  | 1.86798e-07 | 7.45937e-07 | 2.45642e-06 | 6.91184e-06 | 1.70628e-05 |
| 0.000100000 | 1.85673e-07 | 7.45101e-07 | 2.45586e-06 | 6.91148e-06 | 1.70626e-05 |
| 1.00000e-05 | 1.85561e-07 | 7.45018e-07 | 2.45581e-06 | 6.91145e-06 | 1.70625e-05 |
| 1.00000e-06 | 1.85550e-07 | 7.45009e-07 | 2.45580e-06 | 6.91144e-06 | 1.70625e-05 |
| 1.00000e-07 | 1.85549e-07 | 7.45009e-07 | 2.45580e-06 | 6.91144e-06 | 1.70625e-05 |
| 1.00000e-08 | 1.85549e-07 | 7.45009e-07 | 2.45580e-06 | 6.91144e-06 | 1.70625e-05 |
| 1.00000e-09 | 1.85549e-07 | 7.45009e-07 | 2.45580e-06 | 6.91144e-06 | 1.70625e-05 |

| Pa\K        | 1400.00     | 1500.00     | 1750.00     | 2000.00     | 2250.00    |
|-------------|-------------|-------------|-------------|-------------|------------|
| 1.00000e+08 | 2.38624e-05 | 2.55583e-05 | 0.00491181  | 0.00563276  | 0.00630671 |
| 1.00000e+07 | 0.000585714 | 0.000627705 | 0.0141010   | 0.0153937   | 0.0153741  |
| 1.00000e+06 | 0.00191557  | 0.00195903  | 0.0215186   | 0.0198088   | 0.0166893  |
| 100000.     | 0.00186778  | 0.00180688  | 0.0158004   | 0.0118343   | 0.00847771 |
| 10000.0     | 0.000866873 | 0.000759926 | 0.00528411  | 0.00336459  | 0.00271133 |
| 1000.00     | 0.000206945 | 0.000195458 | 0.00101021  | 0.00104460  | 0.00154806 |
| 100.000     | 5.69957e-05 | 8.83503e-05 | 0.000346603 | 0.000750280 | 0.00141771 |
| 10.0000     | 3.95340e-05 | 7.67854e-05 | 0.000276546 | 0.000720642 | 0.00140488 |
| 1.00000     | 3.78624e-05 | 7.56925e-05 | 0.000269650 | 0.000717737 | 0.00140363 |
| 0.100000    | 3.77030e-05 | 7.55883e-05 | 0.000268971 | 0.000717451 | 0.00140351 |
| 0.0100000   | 3.76876e-05 | 7.55782e-05 | 0.000268904 | 0.000717423 | 0.00140349 |
| 0.00100000  | 3.76861e-05 | 7.55772e-05 | 0.000268898 | 0.000717420 | 0.00140349 |
| 0.000100000 | 3.76859e-05 | 7.55771e-05 | 0.000268897 | 0.000717420 | 0.00140349 |
| 1.00000e-05 | 3.76859e-05 | 7.55771e-05 | 0.000268897 | 0.000717420 | 0.00140349 |
| 1.00000e-06 | 3.76859e-05 | 7.55771e-05 | 0.000268897 | 0.000717420 | 0.00140349 |
| 1.00000e-07 | 3.76859e-05 | 7.55771e-05 | 0.000268897 | 0.000717420 | 0.00140349 |
| 1.00000e-08 | 3.76859e-05 | 7.55771e-05 | 0.000268897 | 0.000717420 | 0.00140349 |
| 1.00000e-09 | 3.76859e-05 | 7.55771e-05 | 0.000268897 | 0.000717420 | 0.00140349 |

| Pa\K        | 2500.00    | 2750.00    | 3000.00    | 3250.00    | 3500.00    |
|-------------|------------|------------|------------|------------|------------|
| 1.00000e+08 | 0.00675059 | 0.00684906 | 0.00659848 | 0.00609481 | 0.00546515 |
| 1.00000e+07 | 0.0140737  | 0.0120553  | 0.00992240 | 0.00803035 | 0.00649503 |
| 1.00000e+06 | 0.0131107  | 0.00997472 | 0.00763422 | 0.00603118 | 0.00495972 |
| 100000.     | 0.00615217 | 0.00490631 | 0.00433270 | 0.00405125 | 0.00384696 |
| 10000.0     | 0.00277406 | 0.00312081 | 0.00344909 | 0.00363334 | 0.00365700 |
| 1000.00     | 0.00223914 | 0.00288465 | 0.00334684 | 0.00358985 | 0.00363908 |
| 100.000     | 0.00218376 | 0.00286137 | 0.00333710 | 0.00358583 | 0.00363749 |
| 10.0000     | 0.00217838 | 0.00285913 | 0.00333618 | 0.00358546 | 0.00363734 |
| 1.00000     | 0.00217786 | 0.00285892 | 0.00333609 | 0.00358542 | 0.00363733 |
| 0.100000    | 0.00217781 | 0.00285889 | 0.00333608 | 0.00358542 | 0.00363732 |
| 0.0100000   | 0.00217780 | 0.00285889 | 0.00333608 | 0.00358542 | 0.00363732 |
| 0.00100000  | 0.00217780 | 0.00285889 | 0.00333608 | 0.00358542 | 0.00363732 |
| 0.000100000 | 0.00217780 | 0.00285889 | 0.00333608 | 0.00358542 | 0.00363732 |
| 1.00000e-05 | 0.00217780 | 0.00285889 | 0.00333608 | 0.00358542 | 0.00363732 |
| 1.00000e-06 | 0.00217780 | 0.00285889 | 0.00333608 | 0.00358542 | 0.00363732 |
| 1.00000e-07 | 0.00217780 | 0.00285889 | 0.00333608 | 0.00358542 | 0.00363732 |
| 1.00000e-08 | 0.00217780 | 0.00285889 | 0.00333608 | 0.00358542 | 0.00363732 |
| 1.00000e-09 | 0.00217780 | 0.00285889 | 0.00333608 | 0.00358542 | 0.00363732 |

| Pa\K        | 3750.00    | 4000.00    |
|-------------|------------|------------|
| 1.00000e+08 | 0.00481260 | 0.00419959 |
| 1.00000e+07 | 0.00530163 | 0.00438853 |
| 1.00000e+06 | 0.00422278 | 0.00368204 |
| 100000.     | 0.00363232 | 0.00338752 |
| 10000.0     | 0.00355025 | 0.00335516 |
| 1000.00     | 0.00354336 | 0.00335296 |
| 100.000     | 0.00354280 | 0.00335281 |
| 10.0000     | 0.00354274 | 0.00335280 |
| 1.00000     | 0.00354274 | 0.00335280 |
| 0.100000    | 0.00354274 | 0.00335280 |
| 0.0100000   | 0.00354274 | 0.00335280 |
| 0.00100000  | 0.00354274 | 0.00335280 |
| 0.000100000 | 0.00354274 | 0.00335280 |
| 1.00000e-05 | 0.00354274 | 0.00335280 |
| 1.00000e-06 | 0.00354274 | 0.00335280 |
| 1.00000e-07 | 0.00354274 | 0.00335280 |
| 1.00000e-08 | 0.00354274 | 0.00335280 |
| 1.00000e-09 | 0.00354274 | 0.00335280 |

rad9

====

| Pa\K        | 20.0000     | 30.0000     | 40.0000     | 50.0000     | 60.0000     |
|-------------|-------------|-------------|-------------|-------------|-------------|
| 1.00000e+08 | 3.65947e-43 | 3.08226e-42 | 1.61672e-41 | 7.81088e-41 | 3.88407e-40 |
| 1.00000e+07 | 2.19117e-40 | 2.24581e-39 | 1.24652e-38 | 6.09256e-38 | 2.99450e-37 |
| 1.00000e+06 | 2.03301e-37 | 2.13808e-36 | 1.18963e-35 | 5.79364e-35 | 2.82918e-34 |
| 100000.     | 1.90893e-34 | 1.90727e-33 | 1.00980e-32 | 4.69195e-32 | 2.19172e-31 |
| 10000.0     | 1.17023e-31 | 8.00813e-31 | 3.16709e-30 | 1.16169e-29 | 4.45664e-29 |
| 1000.00     | 1.05023e-29 | 2.88831e-29 | 6.59205e-29 | 1.64308e-28 | 4.74253e-28 |
| 100.000     | 4.56052e-29 | 6.85158e-29 | 1.26769e-28 | 2.88985e-28 | 8.19869e-28 |
| 10.0000     | 5.81736e-29 | 5.50109e-29 | 6.68989e-29 | 1.07090e-28 | 2.28884e-28 |
| 1.00000     | 3.60444e-30 | 1.38122e-30 | 2.00563e-30 | 4.72862e-30 | 1.46325e-29 |
| 0.100000    | 2.35157e-30 | 6.06436e-30 | 1.49543e-29 | 4.09132e-29 | 1.33155e-28 |
| 0.0100000   | 2.38212e-29 | 6.16141e-29 | 1.51106e-28 | 4.10597e-28 | 1.32710e-27 |
| 0.00100000  | 2.27307e-28 | 5.40728e-28 | 1.23237e-27 | 3.13301e-27 | 9.51937e-27 |
| 0.000100000 | 1.19581e-27 | 1.73000e-27 | 2.68017e-27 | 4.97177e-27 | 1.15888e-26 |
| 1.00000e-05 | 4.67100e-28 | 2.06186e-28 | 1.69315e-28 | 2.11116e-28 | 3.77302e-28 |
| 1.00000e-06 | 6.64824e-30 | 2.03007e-30 | 1.57492e-30 | 2.01504e-30 | 3.93601e-30 |
| 1.00000e-07 | 7.49478e-32 | 3.08517e-32 | 2.98412e-32 | 4.71494e-32 | 1.21066e-31 |
| 1.00000e-08 | 2.51311e-33 | 1.46473e-33 | 1.72575e-33 | 3.17520e-33 | 9.41261e-33 |
| 1.00000e-09 | 1.96679e-34 | 1.28871e-34 | 1.59210e-34 | 3.01522e-34 | 9.13799e-34 |

| Pa\K        | 70.0000     | 80.0000     | 90.0000     | 100.000     | 110.000     |
|-------------|-------------|-------------|-------------|-------------|-------------|
| 1.00000e+08 | 2.14712e-39 | 1.44702e-38 | 1.34733e-37 | 1.96807e-36 | 4.78044e-35 |
| 1.00000e+07 | 1.60783e-36 | 1.03299e-35 | 8.89804e-35 | 1.12024e-33 | 1.95526e-32 |
| 1.00000e+06 | 1.50601e-33 | 9.57022e-33 | 8.12141e-32 | 9.95190e-31 | 1.60826e-29 |
| 100000.     | 1.11950e-30 | 6.86095e-30 | 5.67318e-29 | 6.88451e-28 | 1.10753e-26 |
| 10000.0     | 1.93390e-28 | 1.04785e-27 | 8.19534e-27 | 1.03938e-25 | 1.82759e-24 |
| 1000.00     | 1.69354e-27 | 8.54073e-27 | 7.78564e-26 | 1.45953e-24 | 3.59145e-23 |
| 100.000     | 3.11965e-27 | 1.89091e-26 | 2.49659e-25 | 7.23991e-24 | 2.26188e-22 |
| 10.0000     | 7.16157e-28 | 4.33856e-27 | 1.30347e-25 | 9.12847e-24 | 3.97447e-22 |
| 1.00000     | 6.24980e-29 | 4.82899e-28 | 7.04147e-26 | 8.39490e-24 | 4.15667e-22 |
| 0.100000    | 5.76111e-28 | 4.03627e-27 | 1.21137e-25 | 9.99278e-24 | 4.71530e-22 |
| 0.0100000   | 5.70369e-27 | 3.96740e-26 | 6.57998e-25 | 2.66127e-23 | 1.01291e-21 |
| 0.00100000  | 3.86114e-26 | 2.54989e-25 | 3.84102e-24 | 1.29476e-22 | 4.42549e-21 |
| 0.000100000 | 3.75401e-26 | 2.10012e-25 | 3.87496e-24 | 2.06877e-22 | 8.52993e-21 |
| 1.00000e-05 | 1.04486e-27 | 6.88275e-27 | 1.44143e-24 | 1.75744e-22 | 8.71618e-21 |
| 1.00000e-06 | 1.45661e-29 | 2.60163e-28 | 1.27052e-24 | 1.71832e-22 | 8.70797e-21 |
| 1.00000e-07 | 7.18742e-31 | 2.22225e-29 | 1.25681e-24 | 1.71460e-22 | 8.70701e-21 |
| 1.00000e-08 | 6.46955e-32 | 2.18528e-30 | 1.25547e-24 | 1.71423e-22 | 8.70691e-21 |
| 1.00000e-09 | 6.39741e-33 | 2.18159e-31 | 1.25534e-24 | 1.71419e-22 | 8.70691e-21 |

| Pa\K        | 120.000     | 130.000     | 140.000     | 150.000     | 160.000     |
|-------------|-------------|-------------|-------------|-------------|-------------|
| 1.00000e+08 | 1.74813e-33 | 7.21050e-32 | 2.27592e-30 | 5.18231e-29 | 8.59079e-28 |
| 1.00000e+07 | 4.18681e-31 | 1.06969e-29 | 2.67676e-28 | 5.54215e-27 | 8.83413e-26 |
| 1.00000e+06 | 2.74958e-28 | 4.39596e-27 | 6.49093e-26 | 8.95813e-25 | 1.11456e-23 |
| 100000.     | 1.83645e-25 | 2.64239e-24 | 3.12539e-23 | 3.06575e-22 | 2.56536e-21 |
| 10000.0     | 3.18219e-23 | 4.54252e-22 | 5.07598e-21 | 4.49171e-20 | 3.23509e-19 |
| 1000.00     | 7.36927e-22 | 1.11065e-20 | 1.23612e-19 | 1.05457e-18 | 7.17552e-18 |
| 100.000     | 5.06490e-21 | 7.75526e-20 | 8.46089e-19 | 6.93288e-18 | 4.47192e-17 |
| 10.0000     | 9.92489e-21 | 1.55956e-19 | 1.68410e-18 | 1.34206e-17 | 8.34376e-17 |
| 1.00000     | 1.08479e-20 | 1.73198e-19 | 1.87819e-18 | 1.49518e-17 | 9.26528e-17 |
| 0.100000    | 1.22201e-20 | 1.95910e-19 | 2.14541e-18 | 1.73258e-17 | 1.09409e-16 |
| 0.0100000   | 2.49464e-20 | 4.02628e-19 | 4.55755e-18 | 3.85990e-17 | 2.57775e-16 |
| 0.00100000  | 1.03887e-19 | 1.63512e-18 | 1.81525e-17 | 1.50432e-16 | 9.77043e-16 |
| 0.000100000 | 2.10363e-19 | 3.29575e-18 | 3.55624e-17 | 2.83152e-16 | 1.75704e-15 |
| 1.00000e-05 | 2.27580e-19 | 3.63160e-18 | 3.93089e-17 | 3.11845e-16 | 1.92215e-15 |
| 1.00000e-06 | 2.29086e-19 | 3.66581e-18 | 3.97097e-17 | 3.14974e-16 | 1.94027e-15 |
| 1.00000e-07 | 2.29234e-19 | 3.66923e-18 | 3.97500e-17 | 3.15289e-16 | 1.94210e-15 |
| 1.00000e-08 | 2.29249e-19 | 3.66957e-18 | 3.97541e-17 | 3.15321e-16 | 1.94228e-15 |
| 1.00000e-09 | 2.29250e-19 | 3.66961e-18 | 3.97545e-17 | 3.15324e-16 | 1.94230e-15 |

| Pa\K        | 170.000     | 180.000     | 190.000     | 200.000     | 210.000     |
|-------------|-------------|-------------|-------------|-------------|-------------|
| 1.00000e+08 | 1.08182e-26 | 1.07418e-25 | 8.69299e-25 | 5.89447e-24 | 3.42958e-23 |
| 1.00000e+07 | 1.09270e-24 | 1.07499e-23 | 8.65181e-23 | 5.84444e-22 | 3.39034e-21 |
| 1.00000e+06 | 1.19770e-22 | 1.08631e-21 | 8.31025e-21 | 5.41897e-20 | 3.05796e-19 |
| 100000.     | 1.88279e-20 | 1.23315e-19 | 7.25850e-19 | 3.84595e-18 | 1.83677e-17 |
| 10000.0     | 1.95250e-18 | 1.01371e-17 | 4.62875e-17 | 1.89247e-16 | 7.02745e-16 |
| 1000.00     | 4.03278e-17 | 1.92765e-16 | 8.02665e-16 | 2.96899e-15 | 9.91208e-15 |
| 100.000     | 2.36066e-16 | 1.05251e-15 | 4.06586e-15 | 1.38942e-14 | 4.27220e-14 |
| 10.0000     | 4.22652e-16 | 1.80497e-15 | 6.67758e-15 | 2.18732e-14 | 6.45731e-14 |
| 1.00000     | 4.67488e-16 | 1.98916e-15 | 7.33881e-15 | 2.40066e-14 | 7.09036e-14 |
| 0.100000    | 5.65316e-16 | 2.47667e-15 | 9.46400e-15 | 3.22680e-14 | 9.99793e-14 |
| 0.0100000   | 1.41465e-15 | 6.58851e-15 | 2.67054e-14 | 9.60919e-14 | 3.11797e-13 |
| 0.00100000  | 5.17446e-15 | 2.30691e-14 | 8.88310e-14 | 3.01660e-13 | 9.18974e-13 |
| 0.000100000 | 8.87012e-15 | 3.76864e-14 | 1.38444e-13 | 4.49399e-13 | 1.31196e-12 |
| 1.00000e-05 | 9.62652e-15 | 4.05614e-14 | 1.47796e-13 | 4.76074e-13 | 1.37996e-12 |

|             |             |             |             |             |             |
|-------------|-------------|-------------|-------------|-------------|-------------|
| 1.00000e-06 | 9.70953e-15 | 4.08759e-14 | 1.48815e-13 | 4.78963e-13 | 1.38728e-12 |
| 1.00000e-07 | 9.71790e-15 | 4.09076e-14 | 1.48917e-13 | 4.79254e-13 | 1.38802e-12 |
| 1.00000e-08 | 9.71874e-15 | 4.09108e-14 | 1.48928e-13 | 4.79283e-13 | 1.38810e-12 |
| 1.00000e-09 | 9.71883e-15 | 4.09111e-14 | 1.48929e-13 | 4.79286e-13 | 1.38810e-12 |

| Pa\K        | 220.000     | 230.000     | 240.000     | 250.000     | 260.000     |
|-------------|-------------|-------------|-------------|-------------|-------------|
| 1.00000e+08 | 1.74693e-22 | 7.92274e-22 | 3.24500e-21 | 1.21487e-20 | 4.20016e-20 |
| 1.00000e+07 | 1.72237e-20 | 7.79129e-20 | 3.18276e-19 | 1.18824e-18 | 4.09564e-18 |
| 1.00000e+06 | 1.51675e-18 | 6.70825e-18 | 2.67963e-17 | 9.77594e-17 | 3.28886e-16 |
| 100000.     | 7.93144e-17 | 3.11223e-16 | 1.11669e-15 | 3.68867e-15 | 1.12934e-14 |
| 10000.0     | 2.39672e-15 | 7.57379e-15 | 2.23332e-14 | 6.18123e-14 | 1.61383e-13 |
| 1000.00     | 3.02586e-14 | 8.53678e-14 | 2.24557e-13 | 5.54792e-13 | 1.29535e-12 |
| 100.000     | 1.19867e-13 | 3.10490e-13 | 7.49792e-13 | 1.70201e-12 | 3.65723e-12 |
| 10.0000     | 1.74321e-13 | 4.35542e-13 | 1.01728e-12 | 2.23996e-12 | 4.68290e-12 |
| 1.00000     | 1.91922e-13 | 4.82061e-13 | 1.13536e-12 | 2.52963e-12 | 5.37209e-12 |
| 0.100000    | 2.85688e-13 | 7.61808e-13 | 1.91350e-12 | 4.56047e-12 | 1.03712e-11 |
| 0.0100000   | 9.23001e-13 | 2.52582e-12 | 6.42512e-12 | 1.53166e-11 | 3.44261e-11 |
| 0.00100000  | 2.54711e-12 | 6.49916e-12 | 1.54179e-11 | 3.42915e-11 | 7.20184e-11 |
| 0.000100000 | 3.49477e-12 | 8.59642e-12 | 1.97215e-11 | 4.25511e-11 | 8.69546e-11 |
| 1.00000e-05 | 3.65214e-12 | 8.93124e-12 | 2.03833e-11 | 4.37774e-11 | 8.91000e-11 |
| 1.00000e-06 | 3.66899e-12 | 8.96688e-12 | 2.04534e-11 | 4.39065e-11 | 8.93249e-11 |
| 1.00000e-07 | 3.67068e-12 | 8.97046e-12 | 2.04605e-11 | 4.39195e-11 | 8.93475e-11 |
| 1.00000e-08 | 3.67085e-12 | 8.97082e-12 | 2.04612e-11 | 4.39208e-11 | 8.93498e-11 |
| 1.00000e-09 | 3.67087e-12 | 8.97086e-12 | 2.04612e-11 | 4.39210e-11 | 8.93500e-11 |

| Pa\K        | 270.000     | 280.000     | 290.000     | 300.000     | 310.000     |
|-------------|-------------|-------------|-------------|-------------|-------------|
| 1.00000e+08 | 1.35273e-19 | 4.08870e-19 | 1.16719e-18 | 3.30624e-13 | 8.18036e-18 |
| 1.00000e+07 | 1.31468e-17 | 3.95915e-17 | 1.12564e-16 | 7.43259e-12 | 7.81592e-16 |
| 1.00000e+06 | 1.02883e-15 | 3.01412e-15 | 8.32064e-15 | 5.56789e-11 | 5.41437e-14 |
| 100000.     | 3.22542e-14 | 8.64469e-14 | 2.18609e-13 | 5.78697e-10 | 1.19688e-12 |
| 10000.0     | 3.99222e-13 | 9.39436e-13 | 2.11048e-12 | 3.59827e-09 | 9.38874e-12 |
| 1000.00     | 2.87326e-12 | 6.08213e-12 | 1.23349e-11 | 4.85596e-09 | 4.52211e-11 |
| 100.000     | 7.48364e-12 | 1.46580e-11 | 2.76039e-11 | 4.48965e-09 | 8.83138e-11 |
| 10.0000     | 9.35180e-12 | 1.79322e-11 | 3.31641e-11 | 2.61764e-09 | 1.03310e-10 |
| 1.00000     | 1.09440e-11 | 2.15044e-11 | 4.09447e-11 | 3.64433e-10 | 1.37040e-10 |
| 0.100000    | 2.26023e-11 | 4.73592e-11 | 9.56524e-11 | 4.10824e-12 | 3.52238e-10 |
| 0.0100000   | 7.33431e-11 | 1.48798e-10 | 2.88664e-10 | 7.83350e-15 | 9.63699e-10 |
| 0.00100000  | 1.43700e-10 | 2.73858e-10 | 5.00776e-10 | 1.97687e-17 | 1.50232e-09 |
| 0.000100000 | 1.69311e-10 | 3.15724e-10 | 5.66335e-10 | 1.15008e-19 | 1.64590e-09 |
| 1.00000e-05 | 1.72878e-10 | 3.21391e-10 | 5.74975e-10 | 1.39388e-21 | 1.66395e-09 |
| 1.00000e-06 | 1.73250e-10 | 3.21980e-10 | 5.75870e-10 | 3.28199e-23 | 1.66581e-09 |
| 1.00000e-07 | 1.73287e-10 | 3.22039e-10 | 5.75960e-10 | 1.46859e-24 | 1.66600e-09 |
| 1.00000e-08 | 1.73291e-10 | 3.22045e-10 | 5.75969e-10 | 1.17444e-25 | 1.66602e-09 |
| 1.00000e-09 | 1.73291e-10 | 3.22045e-10 | 5.75970e-10 | 1.14166e-26 | 1.66602e-09 |

| Pa\K        | 400.000     | 500.000     | 600.000     | 700.000     | 800.000     |
|-------------|-------------|-------------|-------------|-------------|-------------|
| 1.00000e+08 | 8.48022e-11 | 1.02586e-08 | 9.41585e-07 | 4.73815e-05 | 0.000616788 |
| 1.00000e+07 | 1.28361e-09 | 1.35146e-07 | 5.40226e-06 | 6.63870e-05 | 0.000346708 |
| 1.00000e+06 | 8.02845e-09 | 6.61248e-07 | 8.32449e-06 | 4.05536e-05 | 0.000125268 |
| 100000.     | 3.79598e-08 | 9.46325e-07 | 5.97013e-06 | 1.82983e-05 | 4.37162e-05 |
| 10000.0     | 8.10293e-08 | 8.44410e-07 | 4.03757e-06 | 1.00849e-05 | 2.20283e-05 |
| 1000.00     | 6.62799e-08 | 6.43611e-07 | 2.14441e-06 | 4.48697e-06 | 9.92202e-06 |
| 100.000     | 6.11601e-08 | 2.70368e-07 | 5.79777e-07 | 1.08010e-06 | 2.54223e-06 |
| 10.0000     | 1.75171e-08 | 3.82829e-08 | 5.74210e-08 | 1.11819e-07 | 3.09893e-07 |
| 1.00000     | 9.89868e-10 | 1.32716e-09 | 2.04827e-09 | 5.90557e-09 | 2.27985e-08 |
| 0.100000    | 7.89977e-12 | 1.35597e-11 | 4.18621e-11 | 2.41779e-10 | 1.41974e-09 |
| 0.0100000   | 2.67010e-14 | 1.13339e-13 | 8.94765e-13 | 1.02209e-11 | 9.09115e-11 |
| 0.00100000  | 1.45872e-16 | 1.45584e-15 | 2.46879e-14 | 5.03319e-13 | 6.38004e-12 |
| 0.000100000 | 1.56346e-18 | 2.96910e-17 | 9.10015e-16 | 2.93190e-14 | 4.88515e-13 |
| 1.00000e-05 | 2.98811e-20 | 9.12522e-19 | 4.34536e-17 | 1.96855e-15 | 4.01420e-14 |
| 1.00000e-06 | 9.74723e-22 | 4.12823e-20 | 2.64920e-18 | 1.50927e-16 | 3.52182e-15 |
| 1.00000e-07 | 5.33902e-23 | 2.72278e-21 | 2.05208e-19 | 1.31842e-17 | 3.29636e-16 |
| 1.00000e-08 | 4.58454e-24 | 2.46606e-22 | 1.93554e-20 | 1.27933e-18 | 3.24872e-17 |
| 1.00000e-09 | 4.50054e-25 | 2.43731e-23 | 1.92238e-21 | 1.27488e-19 | 3.24328e-18 |

| Pa\K        | 900.000     | 1000.00     | 1100.00     | 1200.00     | 1300.00     |
|-------------|-------------|-------------|-------------|-------------|-------------|
| 1.00000e+08 | 0.00266166  | 0.00578932  | 0.00889791  | 0.0105216   | 0.0108630   |
| 1.00000e+07 | 0.00136717  | 0.00435555  | 0.00974708  | 0.0148071   | 0.0175739   |
| 1.00000e+06 | 0.000324509 | 0.000850983 | 0.00201265  | 0.00322983  | 0.00394219  |
| 100000.     | 8.66399e-05 | 0.000145149 | 0.000247838 | 0.000389559 | 0.000560981 |
| 10000.0     | 3.99797e-05 | 5.66347e-05 | 8.43538e-05 | 0.000129963 | 0.000185958 |
| 1000.00     | 1.82385e-05 | 2.42480e-05 | 3.08864e-05 | 3.91302e-05 | 4.59428e-05 |
| 100.000     | 4.64582e-06 | 5.55050e-06 | 5.90949e-06 | 6.23801e-06 | 6.29900e-06 |
| 10.0000     | 5.91585e-07 | 6.81588e-07 | 6.74438e-07 | 6.64756e-07 | 6.39188e-07 |
| 1.00000     | 5.09059e-08 | 6.30728e-08 | 6.39258e-08 | 6.32372e-08 | 6.07424e-08 |
| 0.100000    | 3.97094e-09 | 5.54786e-09 | 5.93125e-09 | 5.98752e-09 | 5.79675e-09 |

|             |             |             |             |             |             |
|-------------|-------------|-------------|-------------|-------------|-------------|
| 0.0100000   | 3.18316e-10 | 4.97618e-10 | 5.58386e-10 | 5.74096e-10 | 5.59784e-10 |
| 0.00100000  | 2.68273e-11 | 4.58100e-11 | 5.33712e-11 | 5.56532e-11 | 5.45641e-11 |
| 0.000100000 | 2.35989e-12 | 4.30664e-12 | 5.16131e-12 | 5.43946e-12 | 5.35500e-12 |
| 1.00000e-05 | 2.14783e-13 | 4.11620e-13 | 5.03691e-13 | 5.35007e-13 | 5.28298e-13 |
| 1.00000e-06 | 2.01770e-14 | 3.99507e-14 | 4.95697e-14 | 5.29267e-14 | 5.23690e-14 |
| 1.00000e-07 | 1.95593e-15 | 3.93714e-15 | 4.91903e-15 | 5.26579e-15 | 5.21564e-15 |
| 1.00000e-08 | 1.94299e-16 | 3.92523e-16 | 4.91141e-16 | 5.26052e-16 | 5.21157e-16 |
| 1.00000e-09 | 1.94151e-17 | 3.92388e-17 | 4.91055e-17 | 5.25993e-17 | 5.21112e-17 |

| Pa\K        | 1400.00     | 1500.00     | 1750.00     | 2000.00     | 2250.00     |
|-------------|-------------|-------------|-------------|-------------|-------------|
| 1.00000e+08 | 0.0109312   | 0.0111314   | 0.00239591  | 0.00239063  | 0.00241883  |
| 1.00000e+07 | 0.0188115   | 0.0195022   | 0.000714405 | 0.000854494 | 0.00107357  |
| 1.00000e+06 | 0.00439400  | 0.00488623  | 0.000350663 | 0.000537470 | 0.000646396 |
| 100000.     | 0.000771230 | 0.00102036  | 0.000199348 | 0.000231618 | 0.000199633 |
| 10000.0     | 0.000241715 | 0.000288158 | 5.68502e-05 | 4.61264e-05 | 3.02388e-05 |
| 1000.00     | 4.95686e-05 | 4.98747e-05 | 8.23953e-06 | 5.47249e-06 | 3.20818e-06 |
| 100.000     | 6.04609e-06 | 5.56431e-06 | 8.77557e-07 | 5.49204e-07 | 3.14009e-07 |
| 10.0000     | 5.93786e-07 | 5.34613e-07 | 8.69640e-08 | 5.38083e-08 | 3.06471e-08 |
| 1.00000     | 5.63330e-08 | 5.06422e-08 | 8.55540e-09 | 5.28611e-09 | 3.00961e-09 |
| 0.100000    | 5.39351e-09 | 4.85564e-09 | 8.44306e-10 | 5.21698e-10 | 2.97034e-10 |
| 0.0100000   | 5.22408e-10 | 4.70950e-10 | 8.36047e-11 | 5.16678e-11 | 2.94190e-11 |
| 0.00100000  | 5.10379e-11 | 4.60580e-11 | 8.29975e-12 | 5.12993e-12 | 2.92102e-12 |
| 0.000100000 | 5.01754e-12 | 4.53144e-12 | 8.25510e-13 | 5.10282e-13 | 2.90567e-13 |
| 1.00000e-05 | 4.95634e-13 | 4.47873e-13 | 8.22276e-14 | 5.08319e-14 | 2.89454e-14 |
| 1.00000e-06 | 4.91734e-14 | 4.44526e-14 | 8.20250e-15 | 5.07120e-15 | 2.88791e-15 |
| 1.00000e-07 | 4.89961e-15 | 4.43025e-15 | 8.19807e-16 | 5.06869e-16 | 2.88658e-16 |
| 1.00000e-08 | 4.89628e-16 | 4.42748e-16 | 8.19757e-17 | 5.06841e-17 | 2.88643e-17 |
| 1.00000e-09 | 4.89591e-17 | 4.42718e-17 | 8.19752e-18 | 5.06839e-18 | 2.88642e-18 |

| Pa\K        | 2500.00     | 2750.00     | 3000.00     | 3250.00     | 3500.00     |
|-------------|-------------|-------------|-------------|-------------|-------------|
| 1.00000e+08 | 0.00246733  | 0.00251834  | 0.00254352  | 0.00251451  | 0.00241666  |
| 1.00000e+07 | 0.00126381  | 0.00132702  | 0.00124536  | 0.00106718  | 0.000855421 |
| 1.00000e+06 | 0.000617419 | 0.000495185 | 0.000353382 | 0.000235315 | 0.000151422 |
| 100000.     | 0.000139673 | 8.62613e-05 | 5.01363e-05 | 2.86318e-05 | 1.64923e-05 |
| 10000.0     | 1.74811e-05 | 9.52805e-06 | 5.12097e-06 | 2.78832e-06 | 1.56045e-06 |
| 1000.00     | 1.74903e-06 | 9.25238e-07 | 4.89733e-07 | 2.64484e-07 | 1.47303e-07 |
| 100.000     | 1.69463e-07 | 8.92629e-08 | 4.71498e-08 | 2.54310e-08 | 1.41482e-08 |
| 10.0000     | 1.65186e-08 | 8.69647e-09 | 4.59190e-09 | 2.47567e-09 | 1.37653e-09 |
| 1.00000     | 1.62198e-09 | 8.53826e-10 | 4.50759e-10 | 2.42955e-10 | 1.35034e-10 |
| 0.100000    | 1.60081e-10 | 8.42638e-11 | 4.44798e-11 | 2.39692e-11 | 1.33179e-11 |
| 0.0100000   | 1.58549e-11 | 8.34535e-12 | 4.40478e-12 | 2.37326e-12 | 1.31834e-12 |
| 0.00100000  | 1.57423e-12 | 8.28581e-13 | 4.37302e-13 | 2.35586e-13 | 1.30844e-13 |
| 0.000100000 | 1.56596e-13 | 8.24204e-14 | 4.34968e-14 | 2.34307e-14 | 1.30117e-14 |
| 1.00000e-05 | 1.55995e-14 | 8.21027e-15 | 4.33273e-15 | 2.33379e-15 | 1.29589e-15 |
| 1.00000e-06 | 1.55646e-15 | 8.19219e-16 | 4.32329e-16 | 2.32872e-16 | 1.29306e-16 |
| 1.00000e-07 | 1.55578e-16 | 8.18878e-17 | 4.32155e-17 | 2.32780e-17 | 1.29256e-17 |
| 1.00000e-08 | 1.55571e-17 | 8.18840e-18 | 4.32136e-18 | 2.32771e-18 | 1.29251e-18 |
| 1.00000e-09 | 1.55570e-18 | 8.18837e-19 | 4.32134e-19 | 2.32770e-19 | 1.29250e-19 |

| Pa\K        | 3750.00     | 4000.00     |
|-------------|-------------|-------------|
| 1.00000e+08 | 0.00225363  | 0.00204270  |
| 1.00000e+07 | 0.000655090 | 0.000487575 |
| 1.00000e+06 | 9.64619e-05 | 6.18006e-05 |
| 100000.     | 9.71955e-06 | 5.90002e-06 |
| 10000.0     | 9.03407e-07 | 5.42065e-07 |
| 1000.00     | 8.49931e-08 | 5.08541e-08 |
| 100.000     | 8.15395e-09 | 4.87218e-09 |
| 10.0000     | 7.92745e-10 | 4.73237e-10 |
| 1.00000     | 7.77227e-11 | 4.63644e-11 |
| 0.100000    | 7.66233e-12 | 4.56841e-12 |
| 0.0100000   | 7.58253e-13 | 4.51902e-13 |
| 0.00100000  | 7.52383e-14 | 4.48268e-14 |
| 0.000100000 | 7.48072e-15 | 4.45600e-15 |
| 1.00000e-05 | 7.44937e-16 | 4.43660e-16 |
| 1.00000e-06 | 7.43290e-17 | 4.42658e-17 |
| 1.00000e-07 | 7.43005e-18 | 4.42487e-18 |
| 1.00000e-08 | 7.42974e-19 | 4.42469e-19 |
| 1.00000e-09 | 7.42971e-20 | 4.42467e-20 |

PAH9+H

=====

| Pa\K        | 20.0000     | 30.0000     | 40.0000     | 50.0000     | 60.0000     |
|-------------|-------------|-------------|-------------|-------------|-------------|
| 1.00000e+08 | 1.59579e-42 | 2.98909e-41 | 1.88083e-40 | 8.13443e-40 | 2.96699e-39 |
| 1.00000e+07 | 1.59790e-38 | 3.00200e-37 | 1.89589e-36 | 8.23292e-36 | 3.01602e-35 |
| 1.00000e+06 | 1.65976e-34 | 3.25320e-33 | 2.13286e-32 | 9.58264e-32 | 3.62313e-31 |
| 100000.     | 2.20606e-30 | 4.83387e-29 | 3.32837e-28 | 1.53102e-27 | 5.85020e-27 |

|             |             |             |             |             |             |
|-------------|-------------|-------------|-------------|-------------|-------------|
| 10000.0     | 3.27925e-26 | 6.11603e-25 | 3.71400e-24 | 1.54642e-23 | 5.43710e-23 |
| 1000.00     | 2.12244e-22 | 2.58267e-21 | 1.18615e-20 | 4.01669e-20 | 1.20122e-19 |
| 100.000     | 2.40977e-19 | 1.54471e-18 | 5.01250e-18 | 1.35711e-17 | 3.48375e-17 |
| 10.0000     | 3.66671e-17 | 1.43915e-16 | 3.64018e-16 | 8.42030e-16 | 1.95630e-15 |
| 1.00000     | 1.25099e-15 | 3.22295e-15 | 6.50981e-15 | 1.31895e-14 | 2.87888e-14 |
| 0.100000    | 1.06158e-14 | 1.72512e-14 | 2.65478e-14 | 4.66413e-14 | 1.01439e-13 |
| 0.0100000   | 1.19582e-14 | 9.02907e-15 | 1.04040e-14 | 2.20147e-14 | 7.92356e-14 |
| 0.00100000  | 1.63476e-15 | 1.03269e-15 | 1.57418e-15 | 1.03351e-14 | 6.55599e-14 |
| 0.000100000 | 1.62760e-16 | 1.06192e-16 | 5.62955e-16 | 8.96915e-15 | 6.39169e-14 |
| 1.00000e-05 | 1.65579e-17 | 1.41017e-17 | 4.62284e-16 | 8.83358e-15 | 6.37573e-14 |
| 1.00000e-06 | 3.93911e-18 | 8.45244e-18 | 4.58260e-16 | 8.83172e-15 | 6.37695e-14 |
| 1.00000e-07 | 5.25667e-18 | 8.18355e-18 | 4.55785e-16 | 8.82700e-15 | 6.37686e-14 |
| 1.00000e-08 | 1.29896e-18 | 3.91794e-18 | 4.50506e-16 | 8.81973e-15 | 6.37599e-14 |
| 1.00000e-09 | 1.40351e-19 | 3.16495e-18 | 4.49704e-16 | 8.81868e-15 | 6.37586e-14 |

Pa\K | 70.0000 80.0000 90.0000 100.000 110.000

|             |             |             |             |             |             |
|-------------|-------------|-------------|-------------|-------------|-------------|
| 1.00000e+08 | 9.97119e-39 | 3.22396e-38 | 1.02483e-37 | 3.24064e-37 | 1.02655e-36 |
| 1.00000e+07 | 1.01832e-34 | 3.30923e-34 | 1.05797e-33 | 3.36786e-33 | 1.07535e-32 |
| 1.00000e+06 | 1.26041e-30 | 4.21712e-30 | 1.38863e-29 | 4.55810e-29 | 1.50260e-28 |
| 100000.     | 2.04039e-26 | 6.80230e-26 | 2.21841e-25 | 7.16294e-25 | 2.30463e-24 |
| 10000.0     | 1.76109e-22 | 5.46626e-22 | 1.65369e-21 | 4.91214e-21 | 1.43790e-20 |
| 1000.00     | 3.40136e-19 | 9.33740e-19 | 2.49538e-18 | 6.49139e-18 | 1.64571e-17 |
| 100.000     | 8.82543e-17 | 2.20321e-16 | 5.35074e-16 | 1.25504e-15 | 2.84406e-15 |
| 10.0000     | 4.64770e-15 | 1.09946e-14 | 2.51448e-14 | 5.48945e-14 | 1.14476e-13 |
| 1.00000     | 6.69092e-14 | 1.55228e-13 | 3.42652e-13 | 7.09394e-13 | 1.38313e-12 |
| 0.100000    | 2.50121e-13 | 6.00468e-13 | 1.31338e-12 | 2.60756e-12 | 4.77431e-12 |
| 0.0100000   | 2.72348e-13 | 7.52949e-13 | 1.72448e-12 | 3.43765e-12 | 6.20404e-12 |
| 0.00100000  | 2.63564e-13 | 7.62893e-13 | 1.77211e-12 | 3.54434e-12 | 6.39142e-12 |
| 0.000100000 | 2.62394e-13 | 7.63685e-13 | 1.77688e-12 | 3.55531e-12 | 6.41085e-12 |
| 1.00000e-05 | 2.62295e-13 | 7.63821e-13 | 1.77751e-12 | 3.55679e-12 | 6.41367e-12 |
| 1.00000e-06 | 2.62361e-13 | 7.64031e-13 | 1.77803e-12 | 3.55788e-12 | 6.41571e-12 |
| 1.00000e-07 | 2.62386e-13 | 7.64129e-13 | 1.77827e-12 | 3.55835e-12 | 6.41651e-12 |
| 1.00000e-08 | 2.62380e-13 | 7.64133e-13 | 1.77829e-12 | 3.55841e-12 | 6.41662e-12 |
| 1.00000e-09 | 2.62379e-13 | 7.64133e-13 | 1.77830e-12 | 3.55841e-12 | 6.41663e-12 |

Pa\K | 120.000 130.000 140.000 150.000 160.000

|             |             |             |             |             |             |
|-------------|-------------|-------------|-------------|-------------|-------------|
| 1.00000e+08 | 3.27071e-36 | 1.04971e-35 | 3.39178e-35 | 1.10124e-34 | 3.58324e-34 |
| 1.00000e+07 | 3.45871e-32 | 1.12250e-31 | 3.67455e-31 | 1.21108e-30 | 4.00824e-30 |
| 1.00000e+06 | 4.99332e-28 | 1.67389e-27 | 5.65125e-27 | 1.91551e-26 | 6.49381e-26 |
| 100000.     | 7.41048e-24 | 2.38208e-23 | 7.64211e-23 | 2.43999e-22 | 7.72732e-22 |
| 10000.0     | 4.15552e-20 | 1.18615e-19 | 3.34168e-19 | 9.27893e-19 | 2.53525e-18 |
| 1000.00     | 4.07692e-17 | 9.89711e-17 | 2.35970e-16 | 5.53336e-16 | 1.27704e-15 |
| 100.000     | 6.25373e-15 | 1.34110e-14 | 2.81652e-14 | 5.80892e-14 | 1.17834e-13 |
| 10.0000     | 2.29504e-13 | 4.45599e-13 | 8.43099e-13 | 1.56161e-12 | 2.84006e-12 |
| 1.00000     | 2.56495e-12 | 4.56940e-12 | 7.88329e-12 | 1.32492e-11 | 2.17804e-11 |
| 0.100000    | 8.20788e-12 | 1.34537e-11 | 2.12765e-11 | 3.27504e-11 | 4.93771e-11 |
| 0.0100000   | 1.04304e-11 | 1.66723e-11 | 2.57063e-11 | 3.86230e-11 | 5.69464e-11 |
| 0.00100000  | 1.07194e-11 | 1.70832e-11 | 2.62594e-11 | 3.93397e-11 | 5.78502e-11 |
| 0.000100000 | 1.07495e-11 | 1.71263e-11 | 2.63181e-11 | 3.94175e-11 | 5.79521e-11 |
| 1.00000e-05 | 1.07544e-11 | 1.71344e-11 | 2.63312e-11 | 3.94385e-11 | 5.79851e-11 |
| 1.00000e-06 | 1.07579e-11 | 1.71401e-11 | 2.63400e-11 | 3.94514e-11 | 5.80033e-11 |
| 1.00000e-07 | 1.07592e-11 | 1.71419e-11 | 2.63424e-11 | 3.94545e-11 | 5.80072e-11 |
| 1.00000e-08 | 1.07593e-11 | 1.71421e-11 | 2.63427e-11 | 3.94549e-11 | 5.80077e-11 |
| 1.00000e-09 | 1.07594e-11 | 1.71421e-11 | 2.63427e-11 | 3.94549e-11 | 5.80077e-11 |

Pa\K | 170.000 180.000 190.000 200.000 210.000

|             |             |             |             |             |             |
|-------------|-------------|-------------|-------------|-------------|-------------|
| 1.00000e+08 | 1.16502e-33 | 3.77413e-33 | 1.21504e-32 | 3.87854e-32 | 1.22522e-31 |
| 1.00000e+07 | 1.32826e-29 | 4.39452e-29 | 1.44769e-28 | 4.73758e-28 | 1.53701e-27 |
| 1.00000e+06 | 2.19330e-25 | 7.35370e-25 | 2.43982e-24 | 7.98941e-24 | 2.57681e-23 |
| 100000.     | 2.41923e-21 | 7.46464e-21 | 2.26413e-20 | 6.73703e-20 | 1.96369e-19 |
| 10000.0     | 6.80528e-18 | 1.79229e-17 | 4.62692e-17 | 1.17018e-16 | 2.89869e-16 |
| 1000.00     | 2.90130e-15 | 6.48797e-15 | 1.42773e-14 | 3.09069e-14 | 6.57944e-14 |
| 100.000     | 2.35244e-13 | 4.62245e-13 | 8.93837e-13 | 1.70046e-12 | 3.18199e-12 |
| 10.0000     | 5.08069e-12 | 8.94876e-12 | 1.55244e-11 | 2.65276e-11 | 4.46431e-11 |
| 1.00000     | 3.51159e-11 | 5.56239e-11 | 8.66671e-11 | 1.32941e-10 | 2.00898e-10 |
| 0.100000    | 7.32387e-11 | 1.07194e-10 | 1.55133e-10 | 2.22295e-10 | 3.15682e-10 |
| 0.0100000   | 8.27856e-11 | 1.19032e-10 | 1.69608e-10 | 2.39793e-10 | 3.36624e-10 |
| 0.00100000  | 8.39035e-11 | 1.20395e-10 | 1.71256e-10 | 2.41772e-10 | 3.38998e-10 |
| 0.000100000 | 8.40371e-11 | 1.20572e-10 | 1.71495e-10 | 2.42101e-10 | 3.39457e-10 |
| 1.00000e-05 | 8.40881e-11 | 1.20649e-10 | 1.71608e-10 | 2.42263e-10 | 3.39682e-10 |
| 1.00000e-06 | 8.41129e-11 | 1.20682e-10 | 1.71650e-10 | 2.42317e-10 | 3.39748e-10 |
| 1.00000e-07 | 8.41178e-11 | 1.20688e-10 | 1.71657e-10 | 2.42325e-10 | 3.39758e-10 |
| 1.00000e-08 | 8.41183e-11 | 1.20689e-10 | 1.71658e-10 | 2.42326e-10 | 3.39759e-10 |
| 1.00000e-09 | 8.41184e-11 | 1.20689e-10 | 1.71658e-10 | 2.42326e-10 | 3.39759e-10 |

Pa\K | 220.000 230.000 240.000 250.000 260.000

|             |             |             |             |             |             |
|-------------|-------------|-------------|-------------|-------------|-------------|
| 1.00000e+08 | 3.82432e-31 | 1.17806e-30 | 3.57825e-30 | 1.07108e-29 | 3.15867e-29 |
| 1.00000e+07 | 4.93549e-27 | 1.56664e-26 | 4.91151e-26 | 1.52003e-25 | 4.64348e-25 |
| 1.00000e+06 | 8.17327e-23 | 2.54691e-22 | 7.79292e-22 | 2.34116e-21 | 6.90859e-21 |
| 100000.     | 5.60160e-19 | 1.56322e-18 | 4.26826e-18 | 1.14100e-17 | 2.98973e-17 |
| 10000.0     | 7.03393e-16 | 1.67276e-15 | 3.90149e-15 | 8.93355e-15 | 2.01083e-14 |
| 1000.00     | 1.37690e-13 | 2.83183e-13 | 5.72263e-13 | 1.13616e-12 | 2.21615e-12 |
| 100.000     | 5.85585e-12 | 1.05978e-11 | 1.88626e-11 | 3.30210e-11 | 5.68676e-11 |
| 10.0000     | 7.39765e-11 | 1.20676e-10 | 1.93761e-10 | 3.06187e-10 | 4.76194e-10 |
| 1.00000     | 2.99281e-10 | 4.39778e-10 | 6.37815e-10 | 9.13529e-10 | 1.29292e-09 |
| 0.100000    | 4.44565e-10 | 6.21117e-10 | 8.61197e-10 | 1.18529e-09 | 1.61966e-09 |
| 0.0100000   | 4.69413e-10 | 6.50374e-10 | 8.95411e-10 | 1.22507e-09 | 1.66567e-09 |
| 0.00100000  | 4.72264e-10 | 6.53818e-10 | 8.99606e-10 | 1.23023e-09 | 1.67211e-09 |
| 0.000100000 | 4.72908e-10 | 6.54721e-10 | 9.00866e-10 | 1.23197e-09 | 1.67447e-09 |
| 1.00000e-05 | 4.73214e-10 | 6.55127e-10 | 9.01390e-10 | 1.23263e-09 | 1.67529e-09 |
| 1.00000e-06 | 4.73294e-10 | 6.55221e-10 | 9.01501e-10 | 1.23276e-09 | 1.67543e-09 |
| 1.00000e-07 | 4.73305e-10 | 6.55233e-10 | 9.01514e-10 | 1.23277e-09 | 1.67545e-09 |
| 1.00000e-08 | 4.73306e-10 | 6.55235e-10 | 9.01516e-10 | 1.23278e-09 | 1.67545e-09 |
| 1.00000e-09 | 4.73306e-10 | 6.55235e-10 | 9.01516e-10 | 1.23278e-09 | 1.67545e-09 |

Pa\K | 270.000      280.000      290.000      300.000      310.000

|             |             |             |             |             |             |
|-------------|-------------|-------------|-------------|-------------|-------------|
| 1.00000e+08 | 9.17726e-29 | 2.62746e-28 | 7.41519e-28 | 6.67905e-23 | 5.66726e-27 |
| 1.00000e+07 | 1.40064e-24 | 4.17448e-24 | 1.23057e-23 | 1.74036e-18 | 1.03959e-22 |
| 1.00000e+06 | 2.00441e-20 | 5.72620e-20 | 1.61400e-19 | 9.98057e-15 | 1.24397e-18 |
| 100000.     | 7.69238e-17 | 1.94818e-16 | 4.87221e-16 | 5.71861e-12 | 2.98309e-15 |
| 10000.0     | 4.45623e-14 | 9.74153e-14 | 2.10537e-13 | 1.90505e-10 | 9.60386e-13 |
| 1000.00     | 4.24749e-12 | 8.00130e-12 | 1.48205e-11 | 7.11572e-10 | 4.84510e-11 |
| 100.000     | 9.63653e-11 | 1.60719e-10 | 2.63892e-10 | 2.00396e-09 | 6.79654e-10 |
| 10.0000     | 7.28957e-10 | 1.09857e-09 | 1.63040e-09 | 4.44160e-09 | 3.43496e-09 |
| 1.00000     | 1.80923e-09 | 2.50457e-09 | 3.43179e-09 | 5.41457e-09 | 6.26068e-09 |
| 0.100000    | 2.19770e-09 | 2.96156e-09 | 3.96402e-09 | 5.52705e-09 | 6.96276e-09 |
| 0.0100000   | 2.25072e-09 | 3.02249e-09 | 4.03398e-09 | 5.54527e-09 | 7.05524e-09 |
| 0.00100000  | 2.25884e-09 | 3.03284e-09 | 4.04725e-09 | 5.55431e-09 | 7.07710e-09 |
| 0.000100000 | 2.26199e-09 | 3.03695e-09 | 4.05253e-09 | 5.55749e-09 | 7.08533e-09 |
| 1.00000e-05 | 2.26298e-09 | 3.03814e-09 | 4.05392e-09 | 5.55800e-09 | 7.08717e-09 |
| 1.00000e-06 | 2.26315e-09 | 3.03833e-09 | 4.05413e-09 | 5.55805e-09 | 7.08742e-09 |
| 1.00000e-07 | 2.26317e-09 | 3.03835e-09 | 4.05415e-09 | 5.55806e-09 | 7.08744e-09 |
| 1.00000e-08 | 2.26317e-09 | 3.03835e-09 | 4.05415e-09 | 5.55806e-09 | 7.08745e-09 |
| 1.00000e-09 | 2.26317e-09 | 3.03835e-09 | 4.05415e-09 | 5.55806e-09 | 7.08745e-09 |

Pa\K | 400.000      500.000      600.000      700.000      800.000

|             |             |             |             |             |             |
|-------------|-------------|-------------|-------------|-------------|-------------|
| 1.00000e+08 | 4.72337e-15 | 7.85080e-10 | 1.38319e-07 | 3.01666e-06 | 1.48859e-05 |
| 1.00000e+07 | 2.77786e-11 | 8.78997e-07 | 4.69985e-05 | 0.000289806 | 0.000648071 |
| 1.00000e+06 | 9.20680e-09 | 2.75682e-05 | 0.000700070 | 0.00231807  | 0.00368910  |
| 100000.     | 1.71471e-07 | 5.87440e-05 | 0.000962324 | 0.00320493  | 0.00515180  |
| 10000.0     | 2.74201e-07 | 2.56368e-05 | 0.000397559 | 0.00194462  | 0.00401386  |
| 1000.00     | 1.30000e-07 | 6.87905e-06 | 0.000136939 | 0.000950456 | 0.00226073  |
| 100.000     | 8.78467e-08 | 2.13186e-06 | 3.96205e-05 | 0.000292730 | 0.000665627 |
| 10.0000     | 7.49242e-08 | 7.74121e-07 | 7.98994e-06 | 4.89021e-05 | 0.000109855 |
| 1.00000     | 6.92041e-08 | 5.26714e-07 | 2.94448e-06 | 1.24140e-05 | 3.27625e-05 |
| 0.100000    | 6.85117e-08 | 5.01464e-07 | 2.45686e-06 | 8.92668e-06 | 2.52590e-05 |
| 0.0100000   | 6.86108e-08 | 4.99558e-07 | 2.41136e-06 | 8.59875e-06 | 2.45420e-05 |
| 0.00100000  | 6.86741e-08 | 4.99568e-07 | 2.40694e-06 | 8.56693e-06 | 2.44722e-05 |
| 0.000100000 | 6.86864e-08 | 4.99563e-07 | 2.40650e-06 | 8.56379e-06 | 2.44654e-05 |
| 1.00000e-05 | 6.86879e-08 | 4.99563e-07 | 2.40646e-06 | 8.56348e-06 | 2.44647e-05 |
| 1.00000e-06 | 6.86880e-08 | 4.99563e-07 | 2.40646e-06 | 8.56345e-06 | 2.44646e-05 |
| 1.00000e-07 | 6.86880e-08 | 4.99563e-07 | 2.40646e-06 | 8.56345e-06 | 2.44646e-05 |
| 1.00000e-08 | 6.86880e-08 | 4.99563e-07 | 2.40646e-06 | 8.56345e-06 | 2.44646e-05 |
| 1.00000e-09 | 6.86880e-08 | 4.99563e-07 | 2.40646e-06 | 8.56345e-06 | 2.44646e-05 |

Pa\K | 900.000      1000.00      1100.00      1200.00      1300.00

|             |             |             |             |             |             |
|-------------|-------------|-------------|-------------|-------------|-------------|
| 1.00000e+08 | 3.65877e-05 | 6.57939e-05 | 9.82738e-05 | 0.000125413 | 0.000146663 |
| 1.00000e+07 | 0.000953759 | 0.00129456  | 0.00178987  | 0.00226862  | 0.00263600  |
| 1.00000e+06 | 0.00476392  | 0.00583462  | 0.00704826  | 0.00807766  | 0.00878903  |
| 100000.     | 0.00662116  | 0.00778477  | 0.00870734  | 0.00932577  | 0.00961764  |
| 10000.0     | 0.00544509  | 0.00610452  | 0.00624365  | 0.00606597  | 0.00571981  |
| 1000.00     | 0.00288383  | 0.00279958  | 0.00246420  | 0.00215443  | 0.00199999  |
| 100.000     | 0.000738274 | 0.000653940 | 0.000613363 | 0.000688320 | 0.000903580 |
| 10.0000     | 0.000141629 | 0.000186334 | 0.000286836 | 0.000470321 | 0.000760979 |
| 1.00000     | 6.74466e-05 | 0.000133377 | 0.000252304 | 0.000448340 | 0.000747060 |
| 0.100000    | 6.02237e-05 | 0.000128256 | 0.000248988 | 0.000446240 | 0.000745734 |
| 0.0100000   | 5.95274e-05 | 0.000127761 | 0.000248667 | 0.000446037 | 0.000745606 |
| 0.00100000  | 5.94594e-05 | 0.000127712 | 0.000248636 | 0.000446017 | 0.000745593 |
| 0.000100000 | 5.94527e-05 | 0.000127708 | 0.000248633 | 0.000446015 | 0.000745592 |
| 1.00000e-05 | 5.94521e-05 | 0.000127707 | 0.000248632 | 0.000446015 | 0.000745592 |
| 1.00000e-06 | 5.94520e-05 | 0.000127707 | 0.000248632 | 0.000446015 | 0.000745592 |
| 1.00000e-07 | 5.94520e-05 | 0.000127707 | 0.000248632 | 0.000446015 | 0.000745592 |
| 1.00000e-08 | 5.94520e-05 | 0.000127707 | 0.000248632 | 0.000446015 | 0.000745592 |



1.00000e-09 | 5.94520e-05 0.000127707 0.000248632 0.000446015 0.000745592

| Pa\K        | 1400.00     | 1500.00     | 1750.00    | 2000.00    | 2250.00    |
|-------------|-------------|-------------|------------|------------|------------|
| 1.00000e+08 | 0.000164556 | 0.000167916 | 0.00372147 | 0.00454362 | 0.00522861 |
| 1.00000e+07 | 0.00295615  | 0.00324249  | 0.0105709  | 0.0129737  | 0.0140984  |
| 1.00000e+06 | 0.00927548  | 0.00960375  | 0.0173826  | 0.0186062  | 0.0179963  |
| 100000.     | 0.00965813  | 0.00954263  | 0.0151518  | 0.0146224  | 0.0136373  |
| 10000.0     | 0.00535336  | 0.00509917  | 0.00751180 | 0.00808889 | 0.00898082 |
| 1000.00     | 0.00205922  | 0.00235117  | 0.00404635 | 0.00603107 | 0.00787624 |
| 100.000     | 0.00127308  | 0.00180506  | 0.00349310 | 0.00575931 | 0.00774704 |
| 10.0000     | 0.00118090  | 0.00174599  | 0.00343482 | 0.00573206 | 0.00773439 |
| 1.00000     | 0.00117210  | 0.00174045  | 0.00342912 | 0.00572942 | 0.00773317 |
| 0.100000    | 0.00117126  | 0.00173992  | 0.00342856 | 0.00572916 | 0.00773305 |
| 0.0100000   | 0.00117118  | 0.00173987  | 0.00342851 | 0.00572914 | 0.00773304 |
| 0.00100000  | 0.00117117  | 0.00173987  | 0.00342850 | 0.00572913 | 0.00773304 |
| 0.000100000 | 0.00117117  | 0.00173987  | 0.00342850 | 0.00572913 | 0.00773304 |
| 1.00000e-05 | 0.00117117  | 0.00173987  | 0.00342850 | 0.00572913 | 0.00773304 |
| 1.00000e-06 | 0.00117117  | 0.00173987  | 0.00342850 | 0.00572913 | 0.00773304 |
| 1.00000e-07 | 0.00117117  | 0.00173987  | 0.00342850 | 0.00572913 | 0.00773304 |
| 1.00000e-08 | 0.00117117  | 0.00173987  | 0.00342850 | 0.00572913 | 0.00773304 |
| 1.00000e-09 | 0.00117117  | 0.00173987  | 0.00342850 | 0.00572913 | 0.00773304 |

| Pa\K        | 2500.00    | 2750.00    | 3000.00    | 3250.00    | 3500.00    |
|-------------|------------|------------|------------|------------|------------|
| 1.00000e+08 | 0.00565494 | 0.00575982 | 0.00555270 | 0.00512354 | 0.00458700 |
| 1.00000e+07 | 0.0132217  | 0.0113682  | 0.00937308 | 0.00762612 | 0.00621942 |
| 1.00000e+06 | 0.0151354  | 0.0121795  | 0.00982152 | 0.00802599 | 0.00662965 |
| 100000.     | 0.0118032  | 0.0102592  | 0.00895866 | 0.00775566 | 0.00662453 |
| 10000.0     | 0.00936833 | 0.00921999 | 0.00858096 | 0.00764589 | 0.00660938 |
| 1000.00     | 0.00891973 | 0.00906434 | 0.00853400 | 0.00763539 | 0.00660968 |
| 100.000     | 0.00887217 | 0.00904916 | 0.00852989 | 0.00763472 | 0.00660993 |
| 10.0000     | 0.00886763 | 0.00904775 | 0.00852953 | 0.00763468 | 0.00660997 |
| 1.00000     | 0.00886719 | 0.00904762 | 0.00852950 | 0.00763468 | 0.00660998 |
| 0.100000    | 0.00886715 | 0.00904761 | 0.00852950 | 0.00763468 | 0.00660998 |
| 0.0100000   | 0.00886715 | 0.00904761 | 0.00852950 | 0.00763468 | 0.00660998 |
| 0.00100000  | 0.00886715 | 0.00904761 | 0.00852950 | 0.00763468 | 0.00660998 |
| 0.000100000 | 0.00886715 | 0.00904761 | 0.00852950 | 0.00763468 | 0.00660998 |
| 1.00000e-05 | 0.00886715 | 0.00904761 | 0.00852950 | 0.00763468 | 0.00660998 |
| 1.00000e-06 | 0.00886715 | 0.00904761 | 0.00852950 | 0.00763468 | 0.00660998 |
| 1.00000e-07 | 0.00886715 | 0.00904761 | 0.00852950 | 0.00763468 | 0.00660998 |
| 1.00000e-08 | 0.00886715 | 0.00904761 | 0.00852950 | 0.00763468 | 0.00660998 |
| 1.00000e-09 | 0.00886715 | 0.00904761 | 0.00852950 | 0.00763468 | 0.00660998 |

| Pa\K        | 3750.00    | 4000.00    |
|-------------|------------|------------|
| 1.00000e+08 | 0.00403452 | 0.00352005 |
| 1.00000e+07 | 0.00511751 | 0.00425450 |
| 1.00000e+06 | 0.00550769 | 0.00458692 |
| 100000.     | 0.00559021 | 0.00467785 |
| 10000.0     | 0.00560206 | 0.00469325 |
| 1000.00     | 0.00560471 | 0.00469576 |
| 100.000     | 0.00560510 | 0.00469609 |
| 10.0000     | 0.00560515 | 0.00469612 |
| 1.00000     | 0.00560515 | 0.00469613 |
| 0.100000    | 0.00560515 | 0.00469613 |
| 0.0100000   | 0.00560515 | 0.00469613 |
| 0.00100000  | 0.00560515 | 0.00469613 |
| 0.000100000 | 0.00560515 | 0.00469613 |
| 1.00000e-05 | 0.00560515 | 0.00469613 |
| 1.00000e-06 | 0.00560515 | 0.00469613 |
| 1.00000e-07 | 0.00560515 | 0.00469613 |
| 1.00000e-08 | 0.00560515 | 0.00469613 |
| 1.00000e-09 | 0.00560515 | 0.00469613 |

rad39

====

| Pa\K        | 20.0000     | 30.0000     | 40.0000     | 50.0000     | 60.0000     |
|-------------|-------------|-------------|-------------|-------------|-------------|
| 1.00000e+08 | 1.17641e-59 | 2.64247e-58 | 2.43879e-57 | 1.82728e-56 | 1.33034e-55 |
| 1.00000e+07 | 1.15663e-55 | 2.55426e-54 | 2.31946e-53 | 1.71070e-52 | 1.22633e-51 |
| 1.00000e+06 | 9.86040e-52 | 1.88861e-50 | 1.51741e-49 | 1.00405e-48 | 6.52488e-48 |
| 100000.     | 3.52554e-48 | 4.10476e-47 | 2.41016e-46 | 1.26563e-45 | 6.83896e-45 |
| 10000.0     | 1.89255e-45 | 1.01487e-44 | 3.64833e-44 | 1.34105e-43 | 5.50072e-43 |
| 1000.00     | 8.35336e-44 | 6.30436e-43 | 3.25265e-42 | 1.47893e-41 | 6.85202e-41 |
| 100.000     | 2.89607e-41 | 1.89624e-40 | 8.05062e-40 | 3.30136e-39 | 1.48136e-38 |
| 10.0000     | 5.20573e-39 | 2.95490e-38 | 1.13855e-37 | 4.33360e-37 | 1.84098e-36 |
| 1.00000     | 5.55066e-37 | 2.89912e-36 | 1.08209e-35 | 4.01344e-35 | 1.66689e-34 |
| 0.100000    | 5.44561e-35 | 2.83311e-34 | 1.04465e-33 | 3.82277e-33 | 1.57014e-32 |
| 0.0100000   | 5.13644e-33 | 2.52360e-32 | 8.82909e-32 | 3.07807e-31 | 1.20870e-30 |

|             |             |             |             |             |             |
|-------------|-------------|-------------|-------------|-------------|-------------|
| 0.00100000  | 3.18158e-31 | 1.09461e-30 | 2.89598e-30 | 7.99961e-30 | 2.56981e-29 |
| 0.00100000  | 2.80094e-30 | 3.23575e-30 | 4.23198e-30 | 6.98087e-30 | 1.50089e-29 |
| 1.00000e-05 | 3.62478e-31 | 1.16800e-31 | 8.53129e-32 | 1.01442e-31 | 1.78820e-31 |
| 1.00000e-06 | 2.47035e-33 | 6.98401e-34 | 5.33276e-34 | 6.88098e-34 | 1.37485e-33 |
| 1.00000e-07 | 2.23916e-35 | 9.00859e-36 | 8.79887e-36 | 1.42611e-35 | 3.80596e-35 |
| 1.00000e-08 | 6.99003e-37 | 4.09543e-37 | 4.92970e-37 | 9.36553e-37 | 2.90438e-36 |
| 1.00000e-09 | 5.41051e-38 | 3.58270e-38 | 4.53010e-38 | 8.86706e-38 | 2.81391e-37 |

| Pa\K        | 70.0000     | 80.0000     | 90.0000     | 100.000     | 110.000     |
|-------------|-------------|-------------|-------------|-------------|-------------|
| 1.00000e+08 | 1.04011e-54 | 9.66464e-54 | 1.21464e-52 | 2.34586e-51 | 7.08433e-50 |
| 1.00000e+07 | 9.44309e-51 | 8.64690e-50 | 1.07277e-48 | 2.05388e-47 | 6.18885e-46 |
| 1.00000e+06 | 4.59490e-47 | 3.88401e-46 | 4.51421e-45 | 8.32280e-44 | 2.51337e-42 |
| 100000.     | 4.13206e-44 | 3.07684e-43 | 3.25684e-42 | 5.78997e-41 | 1.83942e-39 |
| 10000.0     | 2.67169e-42 | 1.68495e-41 | 1.63158e-40 | 3.07831e-39 | 1.32070e-37 |
| 1000.00     | 3.61865e-40 | 2.54094e-39 | 3.02792e-38 | 7.36997e-37 | 2.96924e-35 |
| 100.000     | 8.20785e-38 | 6.74342e-37 | 1.05459e-35 | 3.40146e-34 | 1.58032e-32 |
| 10.0000     | 9.88656e-36 | 8.14326e-35 | 1.35614e-33 | 5.00083e-32 | 2.58871e-30 |
| 1.00000     | 8.83123e-34 | 7.33025e-33 | 1.27303e-31 | 5.00435e-30 | 2.70457e-28 |
| 0.100000    | 8.27042e-32 | 6.87555e-31 | 1.20235e-29 | 4.75723e-28 | 2.56299e-26 |
| 0.0100000   | 6.10601e-30 | 4.88287e-29 | 8.24813e-28 | 3.18690e-26 | 1.63734e-24 |
| 0.00100000  | 1.08760e-28 | 7.44135e-28 | 1.12096e-26 | 4.42117e-25 | 2.26942e-23 |
| 0.000100000 | 4.60237e-29 | 2.48311e-28 | 3.98229e-27 | 4.57250e-25 | 3.73477e-23 |
| 1.00000e-05 | 4.98043e-31 | 3.34129e-30 | 1.97753e-28 | 3.60085e-25 | 3.71048e-23 |
| 1.00000e-06 | 5.31019e-33 | 1.03274e-31 | 1.69766e-29 | 3.51237e-25 | 3.70451e-23 |
| 1.00000e-07 | 2.46128e-34 | 8.62457e-33 | 1.67228e-30 | 3.50382e-25 | 3.70390e-23 |
| 1.00000e-08 | 2.20394e-35 | 8.46813e-34 | 1.66981e-31 | 3.50296e-25 | 3.70384e-23 |
| 1.00000e-09 | 2.17872e-36 | 8.45300e-35 | 1.66957e-32 | 3.50288e-25 | 3.70383e-23 |

| Pa\K        | 120.000     | 130.000     | 140.000     | 150.000     | 160.000     |
|-------------|-------------|-------------|-------------|-------------|-------------|
| 1.00000e+08 | 2.64849e-48 | 9.58244e-47 | 2.87209e-45 | 6.99974e-44 | 1.36385e-42 |
| 1.00000e+07 | 2.31369e-44 | 8.35067e-43 | 2.48641e-41 | 5.99635e-40 | 1.15232e-38 |
| 1.00000e+06 | 9.53279e-41 | 3.43967e-39 | 1.00153e-37 | 2.32039e-36 | 4.23035e-35 |
| 100000.     | 7.47194e-38 | 2.76978e-36 | 7.89673e-35 | 1.73241e-33 | 2.92932e-32 |
| 10000.0     | 6.95237e-36 | 2.87918e-34 | 8.27296e-33 | 1.73301e-31 | 2.72246e-30 |
| 1000.00     | 1.18089e-33 | 3.74447e-32 | 8.88333e-31 | 1.61766e-29 | 2.31152e-28 |
| 100.000     | 6.18627e-31 | 1.79152e-29 | 3.78490e-28 | 6.07038e-27 | 7.65391e-26 |
| 10.0000     | 1.03464e-28 | 2.92912e-27 | 5.93468e-26 | 9.04973e-25 | 1.08316e-23 |
| 1.00000     | 1.09299e-26 | 3.08609e-25 | 6.19491e-24 | 9.31663e-23 | 1.09574e-21 |
| 0.100000    | 1.02115e-24 | 2.81371e-23 | 5.45678e-22 | 7.82537e-21 | 8.66044e-20 |
| 0.0100000   | 6.04164e-23 | 1.50510e-21 | 2.59199e-20 | 3.24425e-19 | 3.09217e-18 |
| 0.00100000  | 7.76104e-22 | 1.72452e-20 | 2.59715e-19 | 2.81266e-18 | 2.30976e-17 |
| 0.000100000 | 1.43859e-21 | 3.26130e-20 | 4.81180e-19 | 5.01440e-18 | 3.93244e-17 |
| 1.00000e-05 | 1.50873e-21 | 3.48506e-20 | 5.16716e-19 | 5.37758e-18 | 4.19952e-17 |
| 1.00000e-06 | 1.51508e-21 | 3.50746e-20 | 5.20395e-19 | 5.41569e-18 | 4.22769e-17 |
| 1.00000e-07 | 1.51570e-21 | 3.50971e-20 | 5.20764e-19 | 5.41952e-18 | 4.23052e-17 |
| 1.00000e-08 | 1.51577e-21 | 3.50993e-20 | 5.20801e-19 | 5.41990e-18 | 4.23081e-17 |
| 1.00000e-09 | 1.51577e-21 | 3.50995e-20 | 5.20804e-19 | 5.41994e-18 | 4.23083e-17 |

| Pa\K        | 170.000     | 180.000     | 190.000     | 200.000     | 210.000     |
|-------------|-------------|-------------|-------------|-------------|-------------|
| 1.00000e+08 | 2.17376e-41 | 2.89663e-40 | 3.32271e-39 | 3.31869e-38 | 2.93058e-37 |
| 1.00000e+07 | 1.80626e-37 | 2.36098e-36 | 2.64830e-35 | 2.57936e-34 | 2.21515e-33 |
| 1.00000e+06 | 6.23536e-34 | 7.61434e-33 | 7.92546e-32 | 7.13036e-31 | 5.63628e-30 |
| 100000.     | 3.95134e-31 | 4.37629e-30 | 4.09560e-29 | 3.29581e-28 | 2.32146e-27 |
| 10000.0     | 3.36275e-29 | 3.38574e-28 | 2.86774e-27 | 2.08830e-26 | 1.33364e-25 |
| 1000.00     | 2.68110e-27 | 2.59639e-26 | 2.15374e-25 | 1.55764e-24 | 9.98007e-24 |
| 100.000     | 7.86774e-25 | 6.79271e-24 | 5.05270e-23 | 3.30054e-22 | 1.92436e-21 |
| 10.0000     | 1.05833e-22 | 8.71021e-22 | 6.19560e-21 | 3.88228e-20 | 2.17673e-19 |
| 1.00000     | 1.04758e-20 | 8.39147e-20 | 5.76838e-19 | 3.46458e-18 | 1.84456e-17 |
| 0.100000    | 7.67805e-19 | 5.61856e-18 | 3.47670e-17 | 1.85541e-16 | 8.68117e-16 |
| 0.0100000   | 2.33607e-17 | 1.44603e-16 | 7.53685e-16 | 3.38310e-15 | 1.33258e-14 |
| 0.00100000  | 1.50327e-16 | 8.03825e-16 | 3.63622e-15 | 1.42520e-14 | 4.93590e-14 |
| 0.000100000 | 2.43836e-16 | 1.24275e-15 | 5.36902e-15 | 2.01547e-14 | 6.70706e-14 |
| 1.00000e-05 | 2.58972e-16 | 1.31211e-15 | 5.63544e-15 | 2.10365e-14 | 6.96411e-14 |
| 1.00000e-06 | 2.60570e-16 | 1.31942e-15 | 5.66347e-15 | 2.11289e-14 | 6.99099e-14 |
| 1.00000e-07 | 2.60731e-16 | 1.32016e-15 | 5.66628e-15 | 2.11382e-14 | 6.99368e-14 |
| 1.00000e-08 | 2.60747e-16 | 1.32023e-15 | 5.66657e-15 | 2.11392e-14 | 6.99395e-14 |
| 1.00000e-09 | 2.60749e-16 | 1.32024e-15 | 5.66659e-15 | 2.11392e-14 | 6.99398e-14 |

| Pa\K        | 220.000     | 230.000     | 240.000     | 250.000     | 260.000     |
|-------------|-------------|-------------|-------------|-------------|-------------|
| 1.00000e+08 | 2.32276e-36 | 1.67917e-35 | 1.11259e-34 | 6.78917e-34 | 3.84293e-33 |
| 1.00000e+07 | 1.70301e-32 | 1.19020e-31 | 7.60787e-31 | 4.47556e-30 | 2.44196e-29 |
| 1.00000e+06 | 3.97579e-29 | 2.53883e-28 | 1.48029e-27 | 7.94822e-27 | 3.96443e-26 |
| 100000.     | 1.45446e-26 | 8.21926e-26 | 4.23579e-25 | 2.01202e-24 | 8.90033e-24 |
| 10000.0     | 7.59860e-25 | 3.91931e-24 | 1.85198e-23 | 8.10301e-23 | 3.31433e-22 |
| 1000.00     | 5.74321e-23 | 3.00261e-22 | 1.43894e-21 | 6.37047e-21 | 2.62313e-20 |
| 100.000     | 1.01516e-20 | 4.89975e-20 | 2.18292e-19 | 9.04370e-19 | 3.50565e-18 |

|             |             |             |             |             |             |
|-------------|-------------|-------------|-------------|-------------|-------------|
| 10.0000     | 1.10573e-18 | 5.13873e-18 | 2.20153e-17 | 8.74899e-17 | 3.24154e-16 |
| 1.00000     | 8.80652e-17 | 3.80609e-16 | 1.50101e-15 | 5.43923e-15 | 1.82233e-14 |
| 0.100000    | 3.61086e-15 | 1.35111e-14 | 4.59488e-14 | 1.43303e-13 | 4.13096e-13 |
| 0.0100000   | 4.67889e-14 | 1.48399e-13 | 4.29992e-13 | 1.14933e-12 | 2.85774e-12 |
| 0.00100000  | 1.53524e-13 | 4.34708e-13 | 1.13339e-12 | 2.74734e-12 | 6.24256e-12 |
| 0.000100000 | 2.01138e-13 | 5.51001e-13 | 1.39448e-12 | 3.29149e-12 | 7.30417e-12 |
| 1.00000e-05 | 2.07856e-13 | 5.66970e-13 | 1.42942e-12 | 3.36256e-12 | 7.43972e-12 |
| 1.00000e-06 | 2.08556e-13 | 5.68628e-13 | 1.43304e-12 | 3.36990e-12 | 7.45367e-12 |
| 1.00000e-07 | 2.08626e-13 | 5.68795e-13 | 1.43340e-12 | 3.37063e-12 | 7.45507e-12 |
| 1.00000e-08 | 2.08633e-13 | 5.68811e-13 | 1.43344e-12 | 3.37071e-12 | 7.45521e-12 |
| 1.00000e-09 | 2.08634e-13 | 5.68813e-13 | 1.43344e-12 | 3.37072e-12 | 7.45523e-12 |

| Pa\K        | 270.000     | 280.000     | 290.000     | 300.000     | 310.000     |
|-------------|-------------|-------------|-------------|-------------|-------------|
| 1.00000e+08 | 2.02736e-32 | 9.99465e-32 | 4.61737e-31 | 1.48723e-23 | 8.21179e-30 |
| 1.00000e+07 | 1.24280e-28 | 5.92213e-28 | 2.65198e-27 | 4.58728e-20 | 4.47871e-26 |
| 1.00000e+06 | 1.85048e-25 | 8.13180e-25 | 3.38347e-24 | 2.75786e-17 | 5.07461e-23 |
| 100000.     | 3.70325e-23 | 1.46336e-22 | 5.54493e-22 | 1.57401e-15 | 7.26217e-21 |
| 10000.0     | 1.27814e-21 | 4.68181e-21 | 1.63991e-20 | 3.97419e-15 | 1.80024e-19 |
| 1000.00     | 1.01029e-19 | 3.65574e-19 | 1.24725e-18 | 1.05079e-15 | 1.22972e-17 |
| 100.000     | 1.27784e-17 | 4.39688e-17 | 1.43244e-16 | 1.14086e-14 | 1.30149e-15 |
| 10.0000     | 1.12445e-15 | 3.66505e-15 | 1.12600e-14 | 4.31419e-13 | 8.99926e-14 |
| 1.00000     | 5.67648e-14 | 1.65239e-13 | 4.51610e-13 | 7.07271e-12 | 2.83969e-12 |
| 0.100000    | 1.10836e-12 | 2.78502e-12 | 6.58997e-12 | 4.17307e-11 | 3.14100e-11 |
| 0.0100000   | 6.65812e-12 | 1.46284e-11 | 3.04777e-11 | 8.66792e-11 | 1.15003e-10 |
| 0.00100000  | 1.33902e-11 | 2.72783e-11 | 5.30555e-11 | 9.06035e-11 | 1.77775e-10 |
| 0.000100000 | 1.53429e-11 | 3.06855e-11 | 5.87252e-11 | 8.71489e-11 | 1.91639e-10 |
| 1.00000e-05 | 1.55870e-11 | 3.11032e-11 | 5.94078e-11 | 8.66595e-11 | 1.93255e-10 |
| 1.00000e-06 | 1.56121e-11 | 3.11459e-11 | 5.94775e-11 | 8.66102e-11 | 1.93420e-10 |
| 1.00000e-07 | 1.56146e-11 | 3.11502e-11 | 5.94845e-11 | 8.66053e-11 | 1.93436e-10 |
| 1.00000e-08 | 1.56148e-11 | 3.11507e-11 | 5.94852e-11 | 8.66048e-11 | 1.93438e-10 |
| 1.00000e-09 | 1.56149e-11 | 3.11507e-11 | 5.94852e-11 | 8.66048e-11 | 1.93438e-10 |

| Pa\K        | 400.000     | 500.000     | 600.000     | 700.000     | 800.000     |
|-------------|-------------|-------------|-------------|-------------|-------------|
| 1.00000e+08 | 1.24641e-15 | 1.71845e-10 | 2.85602e-08 | 6.00762e-07 | 3.22917e-06 |
| 1.00000e+07 | 1.78466e-12 | 8.71842e-08 | 4.92675e-06 | 3.05328e-05 | 6.92469e-05 |
| 1.00000e+06 | 1.72505e-10 | 1.68591e-06 | 6.08360e-05 | 0.000216627 | 0.000356512 |
| 100000.     | 7.58091e-10 | 1.25529e-06 | 5.40530e-05 | 0.000251522 | 0.000449447 |
| 10000.0     | 2.17399e-10 | 1.61334e-07 | 1.18077e-05 | 0.000115281 | 0.000298156 |
| 1000.00     | 1.76261e-11 | 1.71989e-08 | 2.88791e-06 | 4.91881e-05 | 0.000156844 |
| 100.000     | 2.09396e-11 | 6.72718e-09 | 8.67224e-07 | 1.57737e-05 | 5.06973e-05 |
| 10.0000     | 3.25450e-10 | 2.79980e-08 | 5.97655e-07 | 5.26057e-06 | 1.73674e-05 |
| 1.00000     | 2.23645e-09 | 8.76945e-08 | 9.20426e-07 | 4.55880e-06 | 1.38142e-05 |
| 0.100000    | 6.05007e-09 | 1.38771e-07 | 1.09407e-06 | 4.67926e-06 | 1.36056e-05 |
| 0.0100000   | 8.29152e-09 | 1.54165e-07 | 1.12748e-06 | 4.70345e-06 | 1.35913e-05 |
| 0.00100000  | 8.25472e-09 | 1.56170e-07 | 1.13121e-06 | 4.70604e-06 | 1.35901e-05 |
| 0.000100000 | 8.67385e-09 | 1.56357e-07 | 1.13157e-06 | 4.70630e-06 | 1.35899e-05 |
| 1.00000e-05 | 8.67533e-09 | 1.56375e-07 | 1.13161e-06 | 4.70633e-06 | 1.35899e-05 |
| 1.00000e-06 | 8.67547e-09 | 1.56377e-07 | 1.13161e-06 | 4.70633e-06 | 1.35899e-05 |
| 1.00000e-07 | 8.67548e-09 | 1.56377e-07 | 1.13162e-06 | 4.70633e-06 | 1.35899e-05 |
| 1.00000e-08 | 8.67548e-09 | 1.56377e-07 | 1.13162e-06 | 4.70633e-06 | 1.35899e-05 |
| 1.00000e-09 | 8.67548e-09 | 1.56377e-07 | 1.13162e-06 | 4.70633e-06 | 1.35899e-05 |

| Pa\K        | 900.000     | 1000.00     | 1100.00     | 1200.00     | 1300.00     |
|-------------|-------------|-------------|-------------|-------------|-------------|
| 1.00000e+08 | 8.70918e-06 | 1.41408e-05 | 1.89335e-05 | 2.18078e-05 | 2.29903e-05 |
| 1.00000e+07 | 0.000105028 | 0.000150283 | 0.000217395 | 0.000279889 | 0.000321725 |
| 1.00000e+06 | 0.000471499 | 0.000590619 | 0.000733928 | 0.000859990 | 0.000944903 |
| 100000.     | 0.000602904 | 0.000725242 | 0.000830290 | 0.000916909 | 0.000973038 |
| 10000.0     | 0.000441884 | 0.000519440 | 0.000559680 | 0.000581705 | 0.000583361 |
| 1000.00     | 0.000229552 | 0.000249318 | 0.000254084 | 0.000261259 | 0.000271066 |
| 100.000     | 7.42489e-05 | 9.15168e-05 | 0.000116002 | 0.000147858 | 0.000182807 |
| 10.0000     | 3.48797e-05 | 5.98131e-05 | 9.27250e-05 | 0.000130840 | 0.000170565 |
| 1.00000     | 3.07574e-05 | 5.65489e-05 | 9.02638e-05 | 0.000128966 | 0.000169161 |
| 0.100000    | 3.04138e-05 | 5.62424e-05 | 9.00178e-05 | 0.000128773 | 0.000169014 |
| 0.0100000   | 3.03820e-05 | 5.62127e-05 | 8.99938e-05 | 0.000128754 | 0.000168999 |
| 0.00100000  | 3.03790e-05 | 5.62099e-05 | 8.99915e-05 | 0.000128752 | 0.000168998 |
| 0.000100000 | 3.03787e-05 | 5.62096e-05 | 8.99912e-05 | 0.000128752 | 0.000168998 |
| 1.00000e-05 | 3.03786e-05 | 5.62096e-05 | 8.99912e-05 | 0.000128752 | 0.000168998 |
| 1.00000e-06 | 3.03786e-05 | 5.62096e-05 | 8.99912e-05 | 0.000128752 | 0.000168998 |
| 1.00000e-07 | 3.03786e-05 | 5.62096e-05 | 8.99912e-05 | 0.000128752 | 0.000168998 |
| 1.00000e-08 | 3.03786e-05 | 5.62096e-05 | 8.99912e-05 | 0.000128752 | 0.000168998 |
| 1.00000e-09 | 3.03786e-05 | 5.62096e-05 | 8.99912e-05 | 0.000128752 | 0.000168998 |

| Pa\K        | 1400.00     | 1500.00     | 1750.00    | 2000.00    | 2250.00    |
|-------------|-------------|-------------|------------|------------|------------|
| 1.00000e+08 | 2.35416e-05 | 2.32366e-05 | 0.00453421 | 0.00517780 | 0.00577042 |
| 1.00000e+07 | 0.000349646 | 0.000367578 | 0.0122690  | 0.0133119  | 0.0132450  |
| 1.00000e+06 | 0.000995429 | 0.00101993  | 0.0178671  | 0.0163934  | 0.0137986  |

|             |             |             |             |             |             |
|-------------|-------------|-------------|-------------|-------------|-------------|
| 100000.     | 0.000992061 | 0.000979847 | 0.0128922   | 0.00957878  | 0.00677154  |
| 10000.0     | 0.000564188 | 0.000534559 | 0.00437308  | 0.00270322  | 0.00203411  |
| 1000.00     | 0.000282469 | 0.000297461 | 0.000948213 | 0.000847795 | 0.00109166  |
| 100.000     | 0.000217947 | 0.000253296 | 0.000420349 | 0.000615016 | 0.000986834 |
| 10.0000     | 0.000209544 | 0.000247954 | 0.000364818 | 0.000591750 | 0.000976559 |
| 1.00000     | 0.000208544 | 0.000247300 | 0.000359326 | 0.000589474 | 0.000975555 |
| 0.100000    | 0.000208437 | 0.000247230 | 0.000358784 | 0.000589250 | 0.000975456 |
| 0.0100000   | 0.000208427 | 0.000247223 | 0.000358730 | 0.000589228 | 0.000975446 |
| 0.00100000  | 0.000208426 | 0.000247223 | 0.000358725 | 0.000589226 | 0.000975445 |
| 0.000100000 | 0.000208426 | 0.000247223 | 0.000358724 | 0.000589225 | 0.000975445 |
| 1.00000e-05 | 0.000208426 | 0.000247223 | 0.000358724 | 0.000589225 | 0.000975445 |
| 1.00000e-06 | 0.000208426 | 0.000247223 | 0.000358724 | 0.000589225 | 0.000975445 |
| 1.00000e-07 | 0.000208426 | 0.000247223 | 0.000358724 | 0.000589225 | 0.000975445 |
| 1.00000e-08 | 0.000208426 | 0.000247223 | 0.000358724 | 0.000589225 | 0.000975445 |
| 1.00000e-09 | 0.000208426 | 0.000247223 | 0.000358724 | 0.000589225 | 0.000975445 |

| Pa\K        | 2500.00    | 2750.00    | 3000.00    | 3250.00    | 3500.00    |
|-------------|------------|------------|------------|------------|------------|
| 1.00000e+08 | 0.00615020 | 0.00621830 | 0.00597672 | 0.00551469 | 0.00494621 |
| 1.00000e+07 | 0.0121041  | 0.0103671  | 0.00854108 | 0.00692364 | 0.00561278 |
| 1.00000e+06 | 0.0108106  | 0.00817382 | 0.00620328 | 0.00486670 | 0.00399664 |
| 100000.     | 0.00478102 | 0.00369435 | 0.00321044 | 0.00301612 | 0.00291786 |
| 10000.0     | 0.00195578 | 0.00216682 | 0.00243265 | 0.00263483 | 0.00273636 |
| 1000.00     | 0.00151343 | 0.00196634 | 0.00234287 | 0.00259493 | 0.00271889 |
| 100.000     | 0.00146776 | 0.00194656 | 0.00233428 | 0.00259120 | 0.00271731 |
| 10.0000     | 0.00146333 | 0.00194466 | 0.00233346 | 0.00259085 | 0.00271716 |
| 1.00000     | 0.00146290 | 0.00194447 | 0.00233338 | 0.00259081 | 0.00271714 |
| 0.100000    | 0.00146286 | 0.00194445 | 0.00233337 | 0.00259081 | 0.00271714 |
| 0.0100000   | 0.00146285 | 0.00194445 | 0.00233337 | 0.00259081 | 0.00271714 |
| 0.00100000  | 0.00146285 | 0.00194445 | 0.00233337 | 0.00259081 | 0.00271714 |
| 0.000100000 | 0.00146285 | 0.00194445 | 0.00233337 | 0.00259081 | 0.00271714 |
| 1.00000e-05 | 0.00146285 | 0.00194445 | 0.00233337 | 0.00259081 | 0.00271714 |
| 1.00000e-06 | 0.00146285 | 0.00194445 | 0.00233337 | 0.00259081 | 0.00271714 |
| 1.00000e-07 | 0.00146285 | 0.00194445 | 0.00233337 | 0.00259081 | 0.00271714 |
| 1.00000e-08 | 0.00146285 | 0.00194445 | 0.00233337 | 0.00259081 | 0.00271714 |
| 1.00000e-09 | 0.00146285 | 0.00194445 | 0.00233337 | 0.00259081 | 0.00271714 |

| Pa\K        | 3750.00    | 4000.00    |
|-------------|------------|------------|
| 1.00000e+08 | 0.00436204 | 0.00381613 |
| 1.00000e+07 | 0.00459693 | 0.00382421 |
| 1.00000e+06 | 0.00342386 | 0.00302450 |
| 100000.     | 0.00282534 | 0.00270837 |
| 10000.0     | 0.00274181 | 0.00267199 |
| 1000.00     | 0.00273444 | 0.00266916 |
| 100.000     | 0.00273379 | 0.00266893 |
| 10.0000     | 0.00273373 | 0.00266891 |
| 1.00000     | 0.00273373 | 0.00266891 |
| 0.100000    | 0.00273373 | 0.00266891 |
| 0.0100000   | 0.00273373 | 0.00266891 |
| 0.00100000  | 0.00273373 | 0.00266891 |
| 0.000100000 | 0.00273373 | 0.00266891 |
| 1.00000e-05 | 0.00273373 | 0.00266891 |
| 1.00000e-06 | 0.00273373 | 0.00266891 |
| 1.00000e-07 | 0.00273373 | 0.00266891 |
| 1.00000e-08 | 0.00273373 | 0.00266891 |
| 1.00000e-09 | 0.00273373 | 0.00266891 |

rad51

=====

| Pa\K        | 20.0000     | 30.0000     | 40.0000     | 50.0000     | 60.0000     |
|-------------|-------------|-------------|-------------|-------------|-------------|
| 1.00000e+08 | 1.20233e-73 | 6.10150e-72 | 1.18040e-70 | 1.99017e-69 | 3.54125e-68 |
| 1.00000e+07 | 6.54115e-69 | 2.30047e-67 | 3.45652e-66 | 4.77879e-65 | 7.18114e-64 |
| 1.00000e+06 | 8.23348e-65 | 1.68287e-63 | 1.83316e-62 | 2.01910e-61 | 2.56295e-60 |
| 100000.     | 1.45366e-61 | 1.47646e-60 | 1.08480e-59 | 9.36257e-59 | 1.03618e-57 |
| 10000.0     | 1.90034e-59 | 7.97842e-59 | 3.98527e-58 | 3.06871e-57 | 3.61570e-56 |
| 1000.00     | 1.40557e-58 | 3.56281e-58 | 1.54265e-57 | 1.10908e-56 | 1.25656e-55 |
| 100.000     | 6.03398e-58 | 1.60407e-57 | 4.84268e-57 | 1.93653e-56 | 1.05935e-55 |
| 10.0000     | 1.61010e-57 | 1.34356e-57 | 1.56048e-57 | 2.66939e-57 | 6.61225e-57 |
| 1.00000     | 8.46887e-60 | 5.15995e-61 | 6.52856e-61 | 2.21974e-60 | 1.03979e-59 |
| 0.100000    | 5.25758e-61 | 1.16872e-60 | 2.87457e-60 | 8.81784e-60 | 3.49630e-59 |
| 0.0100000   | 7.40513e-61 | 4.46125e-61 | 4.38369e-61 | 6.72815e-61 | 1.54567e-60 |
| 0.00100000  | 4.02810e-63 | 4.39036e-64 | 2.07720e-64 | 2.17033e-64 | 3.99621e-64 |
| 0.000100000 | 5.99288e-67 | 6.67048e-68 | 3.68316e-68 | 4.48902e-68 | 9.53558e-68 |
| 1.00000e-05 | 2.18690e-70 | 4.07922e-71 | 3.04377e-71 | 4.60678e-71 | 1.17351e-70 |
| 1.00000e-06 | 4.27147e-73 | 1.28984e-73 | 1.26096e-73 | 2.33883e-73 | 7.47430e-73 |
| 1.00000e-07 | 3.71135e-75 | 1.72067e-75 | 2.19135e-75 | 5.16429e-75 | 2.31535e-74 |
| 1.00000e-08 | 1.21540e-76 | 8.08636e-77 | 1.26033e-76 | 3.47783e-76 | 1.83391e-75 |
| 1.00000e-09 | 9.49979e-78 | 7.11112e-78 | 1.16250e-77 | 3.30401e-77 | 1.78513e-76 |

| Pa\K        | 70.0000     | 80.0000     | 90.0000     | 100.000     | 110.000     |
|-------------|-------------|-------------|-------------|-------------|-------------|
| 1.00000e+08 | 7.32008e-67 | 1.94392e-65 | 7.60268e-64 | 5.04447e-62 | 5.92819e-60 |
| 1.00000e+07 | 1.27669e-62 | 2.95808e-61 | 1.02583e-59 | 6.17181e-58 | 6.75936e-56 |
| 1.00000e+06 | 4.02960e-59 | 8.60856e-58 | 2.86123e-56 | 1.69677e-54 | 1.84431e-52 |
| 100000.     | 1.55369e-56 | 3.41487e-55 | 1.22705e-53 | 7.87921e-52 | 8.84486e-50 |
| 10000.0     | 6.42442e-55 | 1.74544e-53 | 7.55438e-52 | 5.33692e-50 | 5.85843e-48 |
| 1000.00     | 2.17853e-54 | 5.70102e-53 | 2.27125e-51 | 1.38788e-49 | 1.26907e-47 |
| 100.000     | 8.31076e-55 | 1.00582e-53 | 2.08902e-52 | 8.44807e-51 | 7.24912e-49 |
| 10.0000     | 2.44354e-56 | 1.49877e-55 | 1.90659e-54 | 6.63079e-53 | 6.99522e-51 |
| 1.00000     | 6.81605e-59 | 7.42502e-58 | 1.77755e-56 | 1.05690e-54 | 1.44589e-52 |
| 0.100000    | 1.95460e-58 | 1.84543e-57 | 3.87869e-56 | 2.02941e-54 | 2.41910e-52 |
| 0.0100000   | 5.54933e-60 | 3.63095e-59 | 5.61629e-58 | 2.28722e-56 | 2.29406e-54 |
| 0.00100000  | 1.25891e-63 | 7.67502e-63 | 1.19292e-61 | 6.19967e-60 | 1.91941e-57 |
| 0.000100000 | 3.46273e-67 | 2.62815e-66 | 1.10584e-64 | 6.06973e-62 | 1.03901e-58 |
| 1.00000e-05 | 5.44009e-70 | 1.16141e-68 | 4.73616e-66 | 5.32242e-63 | 1.01087e-59 |
| 1.00000e-06 | 6.44376e-72 | 6.34668e-70 | 6.44242e-67 | 5.26535e-64 | 1.00837e-60 |
| 1.00000e-07 | 3.93842e-73 | 5.95524e-71 | 4.41445e-68 | 5.25972e-65 | 1.00812e-61 |
| 1.00000e-08 | 3.69149e-74 | 5.91621e-72 | 4.41163e-69 | 5.25915e-66 | 1.00810e-62 |
| 1.00000e-09 | 3.66670e-75 | 5.91229e-73 | 4.41135e-70 | 5.25910e-67 | 1.00810e-63 |

| Pa\K        | 120.000     | 130.000     | 140.000     | 150.000     | 160.000     |
|-------------|-------------|-------------|-------------|-------------|-------------|
| 1.00000e+08 | 9.73798e-58 | 1.79971e-55 | 2.93392e-53 | 4.62350e-51 | 5.37865e-49 |
| 1.00000e+07 | 1.05281e-53 | 1.86895e-51 | 2.94278e-49 | 4.58686e-47 | 5.31285e-45 |
| 1.00000e+06 | 2.83589e-50 | 4.92976e-48 | 7.56988e-46 | 1.13800e-43 | 1.27235e-41 |
| 100000.     | 1.34634e-47 | 2.24733e-45 | 3.28227e-43 | 4.53508e-41 | 4.67176e-39 |
| 10000.0     | 8.16947e-46 | 1.21364e-43 | 1.58480e-41 | 1.91211e-39 | 1.75250e-37 |
| 1000.00     | 1.50243e-45 | 1.99984e-43 | 2.46811e-41 | 3.08283e-39 | 3.07550e-37 |
| 100.000     | 1.00211e-46 | 1.80262e-44 | 3.06543e-42 | 6.57931e-40 | 1.08771e-37 |
| 10.0000     | 1.31506e-48 | 3.59609e-46 | 9.50235e-44 | 3.92545e-41 | 1.16487e-38 |
| 1.00000     | 2.65413e-50 | 7.32473e-48 | 2.36915e-45 | 1.57190e-42 | 7.00675e-40 |
| 0.100000    | 3.67643e-50 | 7.10534e-48 | 1.30727e-45 | 4.73274e-43 | 1.49771e-40 |
| 0.0100000   | 3.27159e-52 | 7.65519e-50 | 2.32461e-47 | 1.72194e-44 | 8.88419e-42 |
| 0.00100000  | 1.50858e-54 | 1.60212e-51 | 1.13989e-48 | 1.18959e-45 | 6.86114e-43 |
| 0.000100000 | 1.28783e-55 | 1.51688e-52 | 1.10964e-49 | 1.16256e-46 | 6.69850e-44 |
| 1.00000e-05 | 1.27657e-56 | 1.51121e-53 | 1.10729e-50 | 1.16014e-47 | 6.68287e-45 |
| 1.00000e-06 | 1.27552e-57 | 1.51067e-54 | 1.10706e-51 | 1.15991e-48 | 6.68131e-46 |
| 1.00000e-07 | 1.27542e-58 | 1.51062e-55 | 1.10704e-52 | 1.15988e-49 | 6.68116e-47 |
| 1.00000e-08 | 1.27541e-59 | 1.51061e-56 | 1.10704e-53 | 1.15988e-50 | 6.68114e-48 |
| 1.00000e-09 | 1.27541e-60 | 1.51061e-57 | 1.10704e-54 | 1.15988e-51 | 6.68114e-49 |

| Pa\K        | 170.000     | 180.000     | 190.000     | 200.000     | 210.000     |
|-------------|-------------|-------------|-------------|-------------|-------------|
| 1.00000e+08 | 4.49349e-47 | 2.69940e-45 | 1.29406e-43 | 4.32362e-42 | 1.03573e-40 |
| 1.00000e+07 | 4.44131e-43 | 2.68951e-41 | 1.32132e-39 | 4.39986e-38 | 1.01682e-36 |
| 1.00000e+06 | 1.02847e-39 | 6.04507e-38 | 2.90234e-36 | 9.28895e-35 | 2.01982e-33 |
| 100000.     | 3.49193e-37 | 1.90426e-35 | 8.52939e-34 | 2.53541e-32 | 5.05770e-31 |
| 10000.0     | 1.18425e-35 | 5.91330e-34 | 2.49241e-32 | 6.98572e-31 | 1.28799e-29 |
| 1000.00     | 2.33998e-35 | 1.37295e-33 | 8.05513e-32 | 2.68299e-30 | 4.98541e-29 |
| 100.000     | 1.31952e-35 | 1.27816e-33 | 1.72074e-31 | 7.66501e-30 | 1.48883e-28 |
| 10.0000     | 2.34385e-36 | 3.96868e-34 | 2.45856e-31 | 1.30862e-29 | 2.49237e-28 |
| 1.00000     | 1.91332e-37 | 4.38392e-35 | 2.52132e-31 | 1.42139e-29 | 2.69664e-28 |
| 0.100000    | 3.62654e-38 | 8.76383e-36 | 2.54737e-31 | 1.44663e-29 | 2.74437e-28 |
| 0.0100000   | 3.02738e-39 | 1.20108e-36 | 2.56020e-31 | 1.45524e-29 | 2.75929e-28 |
| 0.00100000  | 2.49797e-40 | 1.16162e-37 | 2.56203e-31 | 1.45645e-29 | 2.76129e-28 |
| 0.000100000 | 2.44070e-41 | 1.15412e-38 | 2.56222e-31 | 1.45657e-29 | 2.76150e-28 |
| 1.00000e-05 | 2.43496e-42 | 1.15332e-39 | 2.56224e-31 | 1.45658e-29 | 2.76152e-28 |
| 1.00000e-06 | 2.43439e-43 | 1.15324e-40 | 2.56224e-31 | 1.45659e-29 | 2.76152e-28 |
| 1.00000e-07 | 2.43433e-44 | 1.15324e-41 | 2.56225e-31 | 1.45659e-29 | 2.76152e-28 |
| 1.00000e-08 | 2.43432e-45 | 1.15324e-42 | 2.56225e-31 | 1.45659e-29 | 2.76152e-28 |
| 1.00000e-09 | 2.43432e-46 | 1.15324e-43 | 2.56225e-31 | 1.45659e-29 | 2.76152e-28 |

| Pa\K        | 220.000     | 230.000     | 240.000     | 250.000     | 260.000     |
|-------------|-------------|-------------|-------------|-------------|-------------|
| 1.00000e+08 | 1.89258e-39 | 2.90363e-38 | 3.63063e-37 | 3.80629e-36 | 3.47498e-35 |
| 1.00000e+07 | 1.76002e-35 | 2.55037e-34 | 2.99265e-33 | 2.93253e-32 | 2.50103e-31 |
| 1.00000e+06 | 3.27759e-32 | 4.41497e-31 | 4.84463e-30 | 4.48347e-29 | 3.62747e-28 |
| 100000.     | 7.58221e-30 | 9.36573e-29 | 9.55250e-28 | 8.34196e-27 | 6.41939e-26 |
| 10000.0     | 1.78664e-28 | 2.03143e-27 | 1.91584e-26 | 1.55130e-25 | 1.10675e-24 |
| 1000.00     | 6.62570e-28 | 7.12024e-27 | 6.22075e-26 | 4.58741e-25 | 2.93916e-24 |
| 100.000     | 1.96397e-27 | 2.06406e-26 | 1.74155e-25 | 1.23142e-24 | 7.51657e-24 |
| 10.0000     | 3.18444e-27 | 3.22336e-26 | 2.62484e-25 | 1.79450e-24 | 1.05924e-23 |
| 1.00000     | 3.42548e-27 | 3.44518e-26 | 2.78920e-25 | 1.89662e-24 | 1.11375e-23 |
| 0.100000    | 3.48436e-27 | 3.50199e-26 | 2.83323e-25 | 1.92529e-24 | 1.12983e-23 |
| 0.0100000   | 3.50184e-27 | 3.51803e-26 | 2.84518e-25 | 1.93280e-24 | 1.13389e-23 |
| 0.00100000  | 3.50413e-27 | 3.52009e-26 | 2.84669e-25 | 1.93373e-24 | 1.13439e-23 |
| 0.000100000 | 3.50437e-27 | 3.52031e-26 | 2.84684e-25 | 1.93383e-24 | 1.13444e-23 |
| 1.00000e-05 | 3.50439e-27 | 3.52033e-26 | 2.84686e-25 | 1.93384e-24 | 1.13445e-23 |

|             |             |             |             |             |             |
|-------------|-------------|-------------|-------------|-------------|-------------|
| 1.00000e-06 | 3.50440e-27 | 3.52033e-26 | 2.84686e-25 | 1.93384e-24 | 1.13445e-23 |
| 1.00000e-07 | 3.50440e-27 | 3.52033e-26 | 2.84686e-25 | 1.93384e-24 | 1.13445e-23 |
| 1.00000e-08 | 3.50440e-27 | 3.52033e-26 | 2.84686e-25 | 1.93384e-24 | 1.13445e-23 |
| 1.00000e-09 | 3.50440e-27 | 3.52033e-26 | 2.84686e-25 | 1.93384e-24 | 1.13445e-23 |

| Pa\K        | 270.000     | 280.000     | 290.000     | 300.000     | 310.000     |
|-------------|-------------|-------------|-------------|-------------|-------------|
| 1.00000e+08 | 2.80800e-34 | 2.02877e-33 | 1.32244e-32 | 8.60431e-24 | 4.23877e-31 |
| 1.00000e+07 | 1.88965e-30 | 1.27898e-29 | 7.83410e-29 | 2.24347e-20 | 2.24730e-27 |
| 1.00000e+06 | 2.61126e-27 | 1.69209e-26 | 9.97108e-26 | 1.23683e-17 | 2.68041e-24 |
| 100000.     | 4.42869e-25 | 2.77303e-24 | 1.59129e-23 | 5.38684e-16 | 4.12951e-22 |
| 10000.0     | 7.07908e-24 | 4.11333e-23 | 2.19440e-22 | 7.31913e-16 | 4.96718e-21 |
| 1000.00     | 1.66520e-23 | 8.44932e-23 | 3.88484e-22 | 4.45670e-17 | 6.36055e-21 |
| 100.000     | 4.03170e-23 | 1.92372e-22 | 8.25725e-22 | 9.82358e-19 | 1.14998e-20 |
| 10.0000     | 5.49457e-23 | 2.53596e-22 | 1.05304e-21 | 3.84648e-20 | 1.37191e-20 |
| 1.00000     | 5.74870e-23 | 2.64065e-22 | 1.09150e-21 | 6.58459e-21 | 1.40948e-20 |
| 0.100000    | 5.82772e-23 | 2.67511e-22 | 1.10498e-21 | 3.77367e-21 | 1.42491e-20 |
| 0.0100000   | 5.84702e-23 | 2.68325e-22 | 1.10806e-21 | 3.49615e-21 | 1.42824e-20 |
| 0.00100000  | 5.84935e-23 | 2.68422e-22 | 1.10842e-21 | 3.46962e-21 | 1.42862e-20 |
| 0.000100000 | 5.84959e-23 | 2.68432e-22 | 1.10846e-21 | 3.46698e-21 | 1.42866e-20 |
| 1.00000e-05 | 5.84962e-23 | 2.68433e-22 | 1.10847e-21 | 3.46672e-21 | 1.42867e-20 |
| 1.00000e-06 | 5.84962e-23 | 2.68433e-22 | 1.10847e-21 | 3.46669e-21 | 1.42867e-20 |
| 1.00000e-07 | 5.84962e-23 | 2.68433e-22 | 1.10847e-21 | 3.46669e-21 | 1.42867e-20 |
| 1.00000e-08 | 5.84962e-23 | 2.68433e-22 | 1.10847e-21 | 3.46669e-21 | 1.42867e-20 |
| 1.00000e-09 | 5.84962e-23 | 2.68433e-22 | 1.10847e-21 | 3.46669e-21 | 1.42867e-20 |

| Pa\K        | 400.000     | 500.000     | 600.000     | 700.000     | 800.000     |
|-------------|-------------|-------------|-------------|-------------|-------------|
| 1.00000e+08 | 1.00074e-15 | 1.36801e-10 | 2.19458e-08 | 4.43542e-07 | 1.96636e-06 |
| 1.00000e+07 | 1.17487e-12 | 6.14903e-08 | 3.50274e-06 | 2.17043e-05 | 4.91523e-05 |
| 1.00000e+06 | 8.97335e-11 | 1.09787e-06 | 4.22569e-05 | 0.000152320 | 0.000251964 |
| 100000.     | 2.63915e-10 | 6.25710e-07 | 3.46370e-05 | 0.000171825 | 0.000312493 |
| 10000.0     | 3.91950e-11 | 5.05949e-08 | 6.62279e-06 | 7.52102e-05 | 0.000201858 |
| 1000.00     | 1.08635e-12 | 3.25208e-09 | 1.51863e-06 | 3.13757e-05 | 0.000103701 |
| 100.000     | 5.12404e-14 | 4.59881e-10 | 3.90059e-07 | 9.21711e-06 | 2.92069e-05 |
| 10.0000     | 5.71635e-15 | 6.88194e-11 | 5.83168e-08 | 1.30542e-06 | 3.88373e-06 |
| 1.00000     | 7.00027e-16 | 7.37977e-12 | 5.63289e-09 | 1.24504e-07 | 3.78669e-07 |
| 0.100000    | 1.39968e-16 | 7.65700e-13 | 5.38135e-10 | 1.18108e-08 | 3.71736e-08 |
| 0.0100000   | 8.31889e-17 | 1.12218e-13 | 5.57401e-11 | 1.21751e-09 | 4.51223e-09 |
| 0.00100000  | 7.74954e-17 | 4.69174e-14 | 8.28660e-12 | 1.89993e-10 | 1.33470e-09 |
| 0.000100000 | 7.69253e-17 | 4.03825e-14 | 3.56982e-12 | 8.88758e-11 | 1.02217e-09 |
| 1.00000e-05 | 7.68682e-17 | 3.97289e-14 | 3.09949e-12 | 7.88527e-11 | 9.91219e-10 |
| 1.00000e-06 | 7.68625e-17 | 3.96635e-14 | 3.05250e-12 | 7.78536e-11 | 9.88135e-10 |
| 1.00000e-07 | 7.68620e-17 | 3.96570e-14 | 3.04780e-12 | 7.77537e-11 | 9.87827e-10 |
| 1.00000e-08 | 7.68619e-17 | 3.96563e-14 | 3.04733e-12 | 7.77438e-11 | 9.87797e-10 |
| 1.00000e-09 | 7.68619e-17 | 3.96563e-14 | 3.04729e-12 | 7.77428e-11 | 9.87794e-10 |

| Pa\K        | 900.000     | 1000.00     | 1100.00     | 1200.00     | 1300.00     |
|-------------|-------------|-------------|-------------|-------------|-------------|
| 1.00000e+08 | 3.52990e-06 | 4.71311e-06 | 5.89929e-06 | 6.62302e-06 | 7.00513e-06 |
| 1.00000e+07 | 7.21996e-05 | 9.50560e-05 | 0.000126276 | 0.000155559 | 0.000176785 |
| 1.00000e+06 | 0.000333230 | 0.000410909 | 0.000493965 | 0.000562682 | 0.000609006 |
| 100000.     | 0.000421282 | 0.000503186 | 0.000563132 | 0.000600566 | 0.000614284 |
| 10000.0     | 0.000301558 | 0.000348746 | 0.000357486 | 0.000341754 | 0.000310354 |
| 1000.00     | 0.000149192 | 0.000148547 | 0.000126391 | 9.97685e-05 | 7.62649e-05 |
| 100.000     | 3.54425e-05 | 2.89988e-05 | 2.07660e-05 | 1.46027e-05 | 1.13310e-05 |
| 10.0000     | 4.29331e-06 | 3.26793e-06 | 2.34696e-06 | 2.08296e-06 | 2.97555e-06 |
| 1.00000     | 4.25092e-07 | 3.56208e-07 | 4.00064e-07 | 8.20683e-07 | 2.15921e-06 |
| 0.100000    | 4.81302e-08 | 7.43898e-08 | 2.12914e-07 | 6.99912e-07 | 2.08129e-06 |
| 0.0100000   | 1.17662e-08 | 4.71378e-08 | 1.94806e-07 | 6.88220e-07 | 2.07374e-06 |
| 0.00100000  | 8.21615e-09 | 4.44729e-08 | 1.93033e-07 | 6.87075e-07 | 2.07300e-06 |
| 0.000100000 | 7.86648e-09 | 4.42101e-08 | 1.92858e-07 | 6.86962e-07 | 2.07293e-06 |
| 1.00000e-05 | 7.83183e-09 | 4.41841e-08 | 1.92841e-07 | 6.86951e-07 | 2.07292e-06 |
| 1.00000e-06 | 7.82838e-09 | 4.41815e-08 | 1.92839e-07 | 6.86949e-07 | 2.07292e-06 |
| 1.00000e-07 | 7.82803e-09 | 4.41812e-08 | 1.92839e-07 | 6.86949e-07 | 2.07292e-06 |
| 1.00000e-08 | 7.82800e-09 | 4.41812e-08 | 1.92839e-07 | 6.86949e-07 | 2.07292e-06 |
| 1.00000e-09 | 7.82799e-09 | 4.41812e-08 | 1.92839e-07 | 6.86949e-07 | 2.07292e-06 |

| Pa\K        | 1400.00     | 1500.00     | 1750.00     | 2000.00     | 2250.00     |
|-------------|-------------|-------------|-------------|-------------|-------------|
| 1.00000e+08 | 7.45425e-06 | 7.99315e-06 | 0.00397396  | 0.00457415  | 0.00514087  |
| 1.00000e+07 | 0.000193715 | 0.000207771 | 0.0116065   | 0.0127528   | 0.0128180   |
| 1.00000e+06 | 0.000637803 | 0.000651983 | 0.0173912   | 0.0160046   | 0.0134872   |
| 100000.     | 0.000607707 | 0.000585744 | 0.0124380   | 0.00915301  | 0.00634584  |
| 10000.0     | 0.000271520 | 0.000233338 | 0.00402573  | 0.00232113  | 0.00157817  |
| 1000.00     | 5.93110e-05 | 5.10005e-05 | 0.000649677 | 0.000478288 | 0.000629062 |
| 100.000     | 1.15814e-05 | 1.67622e-05 | 0.000126717 | 0.000245222 | 0.000522849 |
| 10.0000     | 6.03047e-06 | 1.30688e-05 | 7.15052e-05 | 0.000221742 | 0.000512387 |
| 1.00000     | 5.49895e-06 | 1.27195e-05 | 6.60688e-05 | 0.000219439 | 0.000511363 |
| 0.100000    | 5.44826e-06 | 1.26862e-05 | 6.55333e-05 | 0.000219212 | 0.000511262 |

|             |             |             |             |             |             |
|-------------|-------------|-------------|-------------|-------------|-------------|
| 0.0100000   | 5.44334e-06 | 1.26830e-05 | 6.54802e-05 | 0.000219190 | 0.000511252 |
| 0.00100000  | 5.44286e-06 | 1.26827e-05 | 6.54750e-05 | 0.000219187 | 0.000511251 |
| 0.000100000 | 5.44281e-06 | 1.26826e-05 | 6.54744e-05 | 0.000219187 | 0.000511251 |
| 1.00000e-05 | 5.44281e-06 | 1.26826e-05 | 6.54744e-05 | 0.000219187 | 0.000511251 |
| 1.00000e-06 | 5.44280e-06 | 1.26826e-05 | 6.54744e-05 | 0.000219187 | 0.000511251 |
| 1.00000e-07 | 5.44280e-06 | 1.26826e-05 | 6.54744e-05 | 0.000219187 | 0.000511251 |
| 1.00000e-08 | 5.44280e-06 | 1.26826e-05 | 6.54744e-05 | 0.000219187 | 0.000511251 |
| 1.00000e-09 | 5.44280e-06 | 1.26826e-05 | 6.54744e-05 | 0.000219187 | 0.000511251 |

| Pa\K        | 2500.00     | 2750.00    | 3000.00    | 3250.00    | 3500.00    |
|-------------|-------------|------------|------------|------------|------------|
| 1.00000e+08 | 0.00552148  | 0.00561889 | 0.00542644 | 0.00502028 | 0.00450424 |
| 1.00000e+07 | 0.0117563   | 0.0100515  | 0.00823124 | 0.00660965 | 0.00529383 |
| 1.00000e+06 | 0.0104730   | 0.00777918 | 0.00576541 | 0.00441038 | 0.00354394 |
| 100000.     | 0.00428527  | 0.00313809 | 0.00263178 | 0.00244948 | 0.00238526 |
| 10000.0     | 0.00141383  | 0.00157074 | 0.00182443 | 0.00204798 | 0.00219069 |
| 1000.00     | 0.000964170 | 0.00136499 | 0.00173108 | 0.00200575 | 0.00217176 |
| 100.000     | 0.000917573 | 0.00134463 | 0.00172211 | 0.00200178 | 0.00217003 |
| 10.0000     | 0.000913039 | 0.00134266 | 0.00172125 | 0.00200140 | 0.00216986 |
| 1.00000     | 0.000912596 | 0.00134247 | 0.00172117 | 0.00200137 | 0.00216985 |
| 0.100000    | 0.000912552 | 0.00134245 | 0.00172116 | 0.00200136 | 0.00216985 |
| 0.0100000   | 0.000912548 | 0.00134245 | 0.00172116 | 0.00200136 | 0.00216985 |
| 0.00100000  | 0.000912547 | 0.00134245 | 0.00172116 | 0.00200136 | 0.00216985 |
| 0.000100000 | 0.000912547 | 0.00134245 | 0.00172116 | 0.00200136 | 0.00216985 |
| 1.00000e-05 | 0.000912547 | 0.00134245 | 0.00172116 | 0.00200136 | 0.00216985 |
| 1.00000e-06 | 0.000912547 | 0.00134245 | 0.00172116 | 0.00200136 | 0.00216985 |
| 1.00000e-07 | 0.000912547 | 0.00134245 | 0.00172116 | 0.00200136 | 0.00216985 |
| 1.00000e-08 | 0.000912547 | 0.00134245 | 0.00172116 | 0.00200136 | 0.00216985 |
| 1.00000e-09 | 0.000912547 | 0.00134245 | 0.00172116 | 0.00200136 | 0.00216985 |

| Pa\K        | 3750.00    | 4000.00    |
|-------------|------------|------------|
| 1.00000e+08 | 0.00396417 | 0.00345319 |
| 1.00000e+07 | 0.00427598 | 0.00350500 |
| 1.00000e+06 | 0.00298972 | 0.00261660 |
| 100000.     | 0.00233677 | 0.00226520 |
| 10000.0     | 0.00224512 | 0.00222397 |
| 1000.00     | 0.00223687 | 0.00222061 |
| 100.000     | 0.00223614 | 0.00222033 |
| 10.0000     | 0.00223607 | 0.00222030 |
| 1.00000     | 0.00223606 | 0.00222030 |
| 0.100000    | 0.00223606 | 0.00222030 |
| 0.0100000   | 0.00223606 | 0.00222030 |
| 0.00100000  | 0.00223606 | 0.00222030 |
| 0.000100000 | 0.00223606 | 0.00222030 |
| 1.00000e-05 | 0.00223606 | 0.00222030 |
| 1.00000e-06 | 0.00223606 | 0.00222030 |
| 1.00000e-07 | 0.00223606 | 0.00222030 |
| 1.00000e-08 | 0.00223606 | 0.00222030 |
| 1.00000e-09 | 0.00223606 | 0.00222030 |

rad71  
=====

| Pa\K        | 20.0000 | 30.0000 | 40.0000 | 50.0000 | 60.0000 |
|-------------|---------|---------|---------|---------|---------|
| 1.00000e+08 | N/A     | N/A     | N/A     | N/A     | N/A     |
| 1.00000e+07 | N/A     | N/A     | N/A     | N/A     | N/A     |
| 1.00000e+06 | N/A     | N/A     | N/A     | N/A     | N/A     |
| 100000.     | N/A     | N/A     | N/A     | N/A     | N/A     |
| 10000.0     | N/A     | N/A     | N/A     | N/A     | N/A     |
| 1000.00     | N/A     | N/A     | N/A     | N/A     | N/A     |
| 100.000     | N/A     | N/A     | N/A     | N/A     | N/A     |
| 10.0000     | N/A     | N/A     | N/A     | N/A     | N/A     |
| 1.00000     | N/A     | N/A     | N/A     | N/A     | N/A     |
| 0.100000    | N/A     | N/A     | N/A     | N/A     | N/A     |
| 0.0100000   | N/A     | N/A     | N/A     | N/A     | N/A     |
| 0.00100000  | N/A     | N/A     | N/A     | N/A     | N/A     |
| 0.000100000 | N/A     | N/A     | N/A     | N/A     | N/A     |
| 1.00000e-05 | N/A     | N/A     | N/A     | N/A     | N/A     |
| 1.00000e-06 | N/A     | N/A     | N/A     | N/A     | N/A     |
| 1.00000e-07 | N/A     | N/A     | N/A     | N/A     | N/A     |
| 1.00000e-08 | N/A     | N/A     | N/A     | N/A     | N/A     |
| 1.00000e-09 | N/A     | N/A     | N/A     | N/A     | N/A     |

| Pa\K        | 70.0000 | 80.0000 | 90.0000 | 100.000 | 110.000 |
|-------------|---------|---------|---------|---------|---------|
| 1.00000e+08 | N/A     | N/A     | N/A     | N/A     | N/A     |
| 1.00000e+07 | N/A     | N/A     | N/A     | N/A     | N/A     |
| 1.00000e+06 | N/A     | N/A     | N/A     | N/A     | N/A     |
| 100000.     | N/A     | N/A     | N/A     | N/A     | N/A     |





|             |     |     |     |             |     |
|-------------|-----|-----|-----|-------------|-----|
| 1.00000e+08 | N/A | N/A | N/A | 4.31416e-28 | N/A |
| 1.00000e+07 | N/A | N/A | N/A | 1.62819e-24 | N/A |
| 1.00000e+06 | N/A | N/A | N/A | 5.75334e-22 | N/A |
| 100000.     | N/A | N/A | N/A | 5.42524e-21 | N/A |
| 10000.0     | N/A | N/A | N/A | 3.57476e-22 | N/A |
| 1000.00     | N/A | N/A | N/A | 1.98077e-25 | N/A |
| 100.000     | N/A | N/A | N/A | 1.21790e-28 | N/A |
| 10.0000     | N/A | N/A | N/A | 2.83717e-30 | N/A |
| 1.00000     | N/A | N/A | N/A | 2.32985e-31 | N/A |
| 0.100000    | N/A | N/A | N/A | 2.29073e-32 | N/A |
| 0.0100000   | N/A | N/A | N/A | 2.29185e-33 | N/A |
| 0.00100000  | N/A | N/A | N/A | 2.29578e-34 | N/A |
| 0.000100000 | N/A | N/A | N/A | 2.29814e-35 | N/A |
| 1.00000e-05 | N/A | N/A | N/A | 2.29898e-36 | N/A |
| 1.00000e-06 | N/A | N/A | N/A | 2.29916e-37 | N/A |
| 1.00000e-07 | N/A | N/A | N/A | 2.29917e-38 | N/A |
| 1.00000e-08 | N/A | N/A | N/A | 2.29918e-39 | N/A |
| 1.00000e-09 | N/A | N/A | N/A | 2.29918e-40 | N/A |

| Pa\K        | 400.000     | 500.000     | 600.000     | 700.000     | 800.000     |
|-------------|-------------|-------------|-------------|-------------|-------------|
| 1.00000e+08 | 1.64343e-17 | 3.74311e-12 | 4.66209e-10 | 8.42641e-09 | 3.73519e-08 |
| 1.00000e+07 | 1.83760e-14 | 2.21961e-09 | 1.22235e-07 | 6.93597e-07 | 1.55749e-06 |
| 1.00000e+06 | 5.66629e-13 | 3.25256e-08 | 1.62024e-06 | 6.07270e-06 | 1.02860e-05 |
| 100000.     | 2.48492e-13 | 6.39121e-09 | 1.01154e-06 | 6.37359e-06 | 1.24862e-05 |
| 10000.0     | 2.70513e-15 | 1.30696e-10 | 1.38099e-07 | 2.45103e-06 | 7.46707e-06 |
| 1000.00     | 6.98725e-18 | 4.91548e-12 | 3.03280e-08 | 9.97055e-07 | 3.75189e-06 |
| 100.000     | 1.68591e-19 | 6.77969e-13 | 7.88438e-09 | 2.93509e-07 | 1.05396e-06 |
| 10.0000     | 1.81449e-20 | 1.02099e-13 | 1.18250e-09 | 4.15955e-08 | 1.40085e-07 |
| 1.00000     | 2.00920e-21 | 1.09050e-14 | 1.14049e-10 | 3.95992e-09 | 1.36258e-08 |
| 0.100000    | 2.03511e-22 | 1.07851e-15 | 1.08304e-11 | 3.73031e-10 | 1.30551e-09 |
| 0.0100000   | 2.04146e-23 | 1.07785e-16 | 1.06621e-12 | 3.62174e-11 | 1.27175e-10 |
| 0.00100000  | 2.05026e-24 | 1.07864e-17 | 1.06003e-13 | 3.56610e-12 | 1.25364e-11 |
| 0.000100000 | 2.10813e-25 | 1.07933e-18 | 1.05726e-14 | 3.53882e-13 | 1.26052e-12 |
| 1.00000e-05 | 2.67559e-26 | 1.08386e-19 | 1.05722e-15 | 3.55326e-14 | 1.43940e-13 |
| 1.00000e-06 | 8.34763e-27 | 1.12891e-20 | 1.06640e-16 | 3.80061e-15 | 3.26840e-14 |
| 1.00000e-07 | 6.50678e-27 | 1.57935e-21 | 1.16057e-17 | 6.29923e-16 | 2.15685e-14 |
| 1.00000e-08 | 6.32269e-27 | 6.08384e-22 | 2.10262e-18 | 3.12861e-16 | 2.04568e-14 |
| 1.00000e-09 | 6.30428e-27 | 5.11287e-22 | 1.15234e-18 | 2.81178e-16 | 2.03460e-14 |

| Pa\K        | 900.000     | 1000.00     | 1100.00     | 1200.00     | 1300.00     |
|-------------|-------------|-------------|-------------|-------------|-------------|
| 1.00000e+08 | 7.02399e-08 | 9.74393e-08 | 1.24999e-07 | 1.42770e-07 | 1.53049e-07 |
| 1.00000e+07 | 2.35181e-06 | 3.16918e-06 | 4.28310e-06 | 5.34820e-06 | 6.14608e-06 |
| 1.00000e+06 | 1.38872e-05 | 1.73178e-05 | 2.09265e-05 | 2.39160e-05 | 2.59466e-05 |
| 100000.     | 1.73604e-05 | 2.09794e-05 | 2.35473e-05 | 2.51219e-05 | 2.56779e-05 |
| 10000.0     | 1.17363e-05 | 1.38327e-05 | 1.42695e-05 | 1.36590e-05 | 1.23723e-05 |
| 1000.00     | 5.71579e-06 | 5.81552e-06 | 4.98294e-06 | 3.92610e-06 | 2.94966e-06 |
| 100.000     | 1.35499e-06 | 1.13213e-06 | 8.11322e-07 | 5.51436e-07 | 3.71881e-07 |
| 10.0000     | 1.63842e-07 | 1.26039e-07 | 8.50399e-08 | 5.60834e-08 | 4.06654e-08 |
| 1.00000     | 1.59534e-08 | 1.22088e-08 | 8.28331e-09 | 6.14720e-09 | 8.30810e-09 |
| 0.100000    | 1.54149e-09 | 1.19157e-09 | 9.04960e-10 | 1.36948e-09 | 5.21959e-09 |
| 0.0100000   | 1.51200e-10 | 1.26189e-10 | 1.91053e-10 | 9.06940e-10 | 4.92030e-09 |
| 0.00100000  | 1.54705e-11 | 2.20059e-11 | 1.21176e-10 | 8.61629e-10 | 4.89096e-09 |
| 0.000100000 | 2.10111e-12 | 1.17338e-11 | 1.14282e-10 | 8.57156e-10 | 4.88806e-09 |
| 1.00000e-05 | 7.76407e-13 | 1.07154e-11 | 1.13598e-10 | 8.56712e-10 | 4.88777e-09 |
| 1.00000e-06 | 6.44374e-13 | 1.06139e-11 | 1.13530e-10 | 8.56667e-10 | 4.88774e-09 |
| 1.00000e-07 | 6.31181e-13 | 1.06037e-11 | 1.13523e-10 | 8.56663e-10 | 4.88774e-09 |
| 1.00000e-08 | 6.29862e-13 | 1.06027e-11 | 1.13522e-10 | 8.56663e-10 | 4.88774e-09 |
| 1.00000e-09 | 6.29730e-13 | 1.06026e-11 | 1.13522e-10 | 8.56663e-10 | 4.88774e-09 |

| Pa\K        | 1400.00     | 1500.00     | 1750.00     | 2000.00     | 2250.00     |
|-------------|-------------|-------------|-------------|-------------|-------------|
| 1.00000e+08 | 1.64744e-07 | 1.78571e-07 | 0.00289093  | 0.00335202  | 0.00379045  |
| 1.00000e+07 | 6.79873e-06 | 7.35283e-06 | 0.0101732   | 0.0111794   | 0.0112406   |
| 1.00000e+06 | 2.72123e-05 | 2.78295e-05 | 0.0153456   | 0.0139773   | 0.0116785   |
| 100000.     | 2.53438e-05 | 2.43000e-05 | 0.0106274   | 0.00762249  | 0.00505983  |
| 10000.0     | 1.07210e-05 | 8.98874e-06 | 0.00337700  | 0.00177697  | 0.000937916 |
| 1000.00     | 2.16461e-06 | 1.61138e-06 | 0.000498707 | 0.000225382 | 0.000132131 |
| 100.000     | 2.65991e-07 | 2.45039e-07 | 5.33215e-05 | 2.98423e-05 | 4.22974e-05 |
| 10.0000     | 4.54922e-08 | 9.78096e-08 | 6.30919e-06 | 1.01508e-05 | 3.34492e-05 |
| 1.00000     | 2.43770e-08 | 8.38787e-08 | 1.68088e-06 | 8.21914e-06 | 3.25827e-05 |
| 0.100000    | 2.23628e-08 | 8.25492e-08 | 1.22501e-06 | 8.02872e-06 | 3.24973e-05 |
| 0.0100000   | 2.21674e-08 | 8.24201e-08 | 1.17986e-06 | 8.00985e-06 | 3.24889e-05 |
| 0.00100000  | 2.21482e-08 | 8.24074e-08 | 1.17537e-06 | 8.00797e-06 | 3.24880e-05 |
| 0.000100000 | 2.21463e-08 | 8.24061e-08 | 1.17492e-06 | 8.00779e-06 | 3.24879e-05 |
| 1.00000e-05 | 2.21461e-08 | 8.24060e-08 | 1.17488e-06 | 8.00777e-06 | 3.24879e-05 |
| 1.00000e-06 | 2.21461e-08 | 8.24060e-08 | 1.17488e-06 | 8.00777e-06 | 3.24879e-05 |
| 1.00000e-07 | 2.21461e-08 | 8.24060e-08 | 1.17488e-06 | 8.00777e-06 | 3.24879e-05 |
| 1.00000e-08 | 2.21461e-08 | 8.24060e-08 | 1.17488e-06 | 8.00777e-06 | 3.24879e-05 |

1.00000e-09 | 2.21461e-08 8.24060e-08 1.17488e-06 8.00777e-06 3.24879e-05

Pa\K | 2500.00 2750.00 3000.00 3250.00 3500.00

-----  
1.00000e+08 | 0.00409279 0.00418441 0.00405787 0.00376832 0.00339295  
1.00000e+07 | 0.0103126 0.00880159 0.00716904 0.00569959 0.00450075  
1.00000e+06 | 0.00892111 0.00639008 0.00444875 0.00312879 0.00231020  
100000. | 0.00307453 0.00184371 0.00121885 0.000972729 0.000933015  
10000.0 | 0.000527437 0.000399041 0.000433347 0.000552751 0.000709564  
1000.00 | 0.000135336 0.000212094 0.000343258 0.000508444 0.000687356  
100.000 | 9.47831e-05 0.000193574 0.000334548 0.000504224 0.000685264  
10.0000 | 9.08340e-05 0.000191780 0.000333707 0.000503817 0.000685063  
1.00000 | 9.04476e-05 0.000191605 0.000333625 0.000503778 0.000685044  
0.100000 | 9.04095e-05 0.000191587 0.000333617 0.000503774 0.000685042  
0.0100000 | 9.04058e-05 0.000191586 0.000333616 0.000503773 0.000685042  
0.00100000 | 9.04054e-05 0.000191586 0.000333616 0.000503773 0.000685042  
0.000100000 | 9.04053e-05 0.000191585 0.000333616 0.000503773 0.000685042  
1.00000e-05 | 9.04053e-05 0.000191585 0.000333616 0.000503773 0.000685042  
1.00000e-06 | 9.04053e-05 0.000191585 0.000333616 0.000503773 0.000685042  
1.00000e-07 | 9.04053e-05 0.000191585 0.000333616 0.000503773 0.000685042  
1.00000e-08 | 9.04053e-05 0.000191585 0.000333616 0.000503773 0.000685042  
1.00000e-09 | 9.04053e-05 0.000191585 0.000333616 0.000503773 0.000685042

Pa\K | 3750.00 4000.00

-----  
1.00000e+08 | 0.00299658 0.00262014  
1.00000e+07 | 0.00357788 0.00289354  
1.00000e+06 | 0.00184287 0.00159894  
100000. | 0.000992425 0.00108956  
10000.0 | 0.000873864 0.00102723  
1000.00 | 0.000862615 0.00102156  
100.000 | 0.000861566 0.00102104  
10.0000 | 0.000861466 0.00102099  
1.00000 | 0.000861456 0.00102098  
0.100000 | 0.000861455 0.00102098  
0.0100000 | 0.000861455 0.00102098  
0.00100000 | 0.000861455 0.00102098  
0.000100000 | 0.000861455 0.00102098  
1.00000e-05 | 0.000861455 0.00102098  
1.00000e-06 | 0.000861455 0.00102098  
1.00000e-07 | 0.000861455 0.00102098  
1.00000e-08 | 0.000861455 0.00102098  
1.00000e-09 | 0.000861455 0.00102098

PAH7+H

=====

Pa\K | 20.0000 30.0000 40.0000 50.0000 60.0000

-----  
1.00000e+08 | 9.05508e-49 1.03441e-47 6.76346e-47 4.12176e-46 2.63233e-45  
1.00000e+07 | 8.87627e-46 9.93987e-45 6.37750e-44 3.81638e-43 2.39447e-42  
1.00000e+06 | 7.36784e-43 7.00769e-42 3.91657e-41 2.07792e-40 1.17120e-39  
100000. | 2.32944e-40 1.30483e-39 5.23903e-39 2.17948e-38 1.01218e-37  
10000.0 | 9.57365e-39 2.26408e-38 5.22663e-38 1.43769e-37 4.79399e-37  
1000.00 | 1.05164e-38 4.62725e-39 4.17426e-39 7.68663e-39 2.70508e-38  
100.000 | 1.38953e-39 7.50874e-39 3.09455e-38 1.24846e-37 5.51369e-37  
10.0000 | 2.14311e-37 1.26999e-36 4.92756e-36 1.85797e-35 7.75190e-35  
1.00000 | 2.52309e-35 1.31234e-34 4.83354e-34 1.75863e-33 7.13645e-33  
0.100000 | 2.48860e-33 1.28985e-32 4.70315e-32 1.69213e-31 6.80601e-31  
0.0100000 | 2.40562e-31 1.20430e-30 4.25039e-30 1.48344e-29 5.80001e-29  
0.00100000 | 1.78530e-29 7.01028e-29 2.02564e-28 5.95114e-28 1.99796e-27  
0.000100000 | 3.05615e-28 4.74018e-28 7.29325e-28 1.33147e-27 3.05873e-27  
1.00000e-05 | 1.05890e-28 4.16855e-29 3.25918e-29 3.96927e-29 7.01836e-29  
1.00000e-06 | 1.11048e-30 3.21324e-31 2.43738e-31 3.08995e-31 6.02977e-31  
1.00000e-07 | 1.05274e-32 4.19861e-33 4.03586e-33 6.40095e-33 1.66610e-32  
1.00000e-08 | 3.26938e-34 1.90057e-34 2.25337e-34 4.19160e-34 1.26893e-33  
1.00000e-09 | 2.52710e-35 1.66139e-35 2.06964e-35 3.96692e-35 1.22911e-34

Pa\K | 70.0000 80.0000 90.0000 100.000 110.000

-----  
1.00000e+08 | 1.89248e-44 1.67130e-43 2.05440e-42 4.01685e-41 1.29394e-39  
1.00000e+07 | 1.69201e-41 1.46983e-40 1.78082e-39 3.44890e-38 1.10995e-36  
1.00000e+06 | 7.51595e-39 5.99447e-38 6.77473e-37 1.26012e-35 4.08449e-34  
100000. | 5.53368e-37 3.86574e-36 3.95757e-35 7.05573e-34 2.40631e-32  
10000.0 | 1.99602e-36 1.12272e-35 1.00691e-34 1.85717e-33 8.65024e-32  
1000.00 | 1.62207e-37 1.51258e-36 2.14968e-35 4.89072e-34 2.55122e-32  
100.000 | 2.99843e-36 2.39521e-35 3.53857e-34 9.95602e-33 3.60363e-31  
10.0000 | 4.06705e-34 3.25708e-33 5.19858e-32 1.67443e-30 6.47152e-29  
1.00000 | 3.68401e-32 2.97286e-31 4.98293e-30 1.72277e-28 6.92508e-27  
0.100000 | 3.5092e-30 2.83622e-29 4.80217e-28 1.67505e-26 6.72627e-25  
0.0100000 | 2.90601e-28 2.29782e-27 3.81092e-26 1.30350e-24 5.02028e-23

|             |             |             |             |             |             |
|-------------|-------------|-------------|-------------|-------------|-------------|
| 0.00100000  | 8.72903e-27 | 6.10852e-26 | 9.32112e-25 | 3.11955e-23 | 1.12983e-21 |
| 0.000100000 | 9.79783e-27 | 5.43535e-26 | 9.55246e-25 | 5.77082e-23 | 2.72046e-21 |
| 1.00000e-05 | 1.93790e-28 | 1.27962e-27 | 2.60250e-25 | 4.71177e-23 | 2.76800e-21 |
| 1.00000e-06 | 2.27122e-30 | 4.33075e-29 | 2.18164e-25 | 4.59549e-23 | 2.76482e-21 |
| 1.00000e-07 | 1.05704e-31 | 3.65307e-30 | 2.14724e-25 | 4.58441e-23 | 2.76447e-21 |
| 1.00000e-08 | 9.47150e-33 | 3.59097e-31 | 2.14388e-25 | 4.58330e-23 | 2.76443e-21 |
| 1.00000e-09 | 9.36418e-34 | 3.58501e-32 | 2.14354e-25 | 4.58319e-23 | 2.76443e-21 |

| Pa\K        | 120.000     | 130.000     | 140.000     | 150.000     | 160.000     |
|-------------|-------------|-------------|-------------|-------------|-------------|
| 1.00000e+08 | 5.42608e-38 | 2.17022e-36 | 6.59477e-35 | 1.48386e-33 | 2.49283e-32 |
| 1.00000e+07 | 4.67868e-35 | 1.87902e-33 | 5.70113e-32 | 1.27548e-30 | 2.12426e-29 |
| 1.00000e+06 | 1.79587e-32 | 7.46461e-31 | 2.26867e-29 | 4.97964e-28 | 8.03363e-27 |
| 100000.     | 1.20712e-30 | 5.54462e-29 | 1.72326e-27 | 3.71649e-26 | 5.76574e-25 |
| 10000.0     | 7.66799e-30 | 4.73719e-28 | 1.59889e-26 | 3.47368e-25 | 5.24740e-24 |
| 1000.00     | 9.07317e-30 | 7.57441e-28 | 2.80774e-26 | 6.31591e-25 | 9.65124e-24 |
| 100.000     | 1.99982e-29 | 1.07645e-27 | 3.67281e-26 | 8.12225e-25 | 1.24449e-23 |
| 10.0000     | 1.96970e-27 | 4.41402e-26 | 7.43913e-25 | 9.84470e-24 | 1.05804e-22 |
| 1.00000     | 2.11808e-25 | 4.65092e-24 | 7.52394e-23 | 9.40604e-22 | 9.47081e-21 |
| 0.100000    | 2.03786e-23 | 4.39606e-22 | 6.92311e-21 | 8.32648e-20 | 7.95837e-19 |
| 0.0100000   | 1.42970e-21 | 2.83586e-20 | 4.02225e-19 | 4.26863e-18 | 3.53631e-17 |
| 0.00100000  | 2.90310e-20 | 5.03957e-19 | 6.13581e-18 | 5.52552e-17 | 3.86178e-16 |
| 0.000100000 | 7.50346e-20 | 1.28907e-18 | 1.49951e-17 | 1.26956e-16 | 8.28664e-16 |
| 1.00000e-05 | 8.18104e-20 | 1.43877e-18 | 1.68213e-17 | 1.41952e-16 | 9.19907e-16 |
| 1.00000e-06 | 8.24065e-20 | 1.45392e-18 | 1.70149e-17 | 1.43572e-16 | 9.29831e-16 |
| 1.00000e-07 | 8.24653e-20 | 1.45543e-18 | 1.70343e-17 | 1.43735e-16 | 9.30831e-16 |
| 1.00000e-08 | 8.24711e-20 | 1.45558e-18 | 1.70363e-17 | 1.43751e-16 | 9.30932e-16 |
| 1.00000e-09 | 8.24717e-20 | 1.45560e-18 | 1.70365e-17 | 1.43753e-16 | 9.30942e-16 |

| Pa\K        | 170.000     | 180.000     | 190.000     | 200.000     | 210.000     |
|-------------|-------------|-------------|-------------|-------------|-------------|
| 1.00000e+08 | 3.24346e-31 | 3.38107e-30 | 2.91253e-29 | 2.12643e-28 | 1.34526e-27 |
| 1.00000e+07 | 2.73363e-28 | 2.81251e-27 | 2.38629e-26 | 1.71263e-25 | 1.06298e-24 |
| 1.00000e+06 | 9.92783e-26 | 9.74491e-25 | 7.84520e-24 | 5.31901e-23 | 3.10697e-22 |
| 100000.     | 6.75912e-24 | 6.23364e-23 | 4.68033e-22 | 2.94280e-21 | 1.58683e-20 |
| 10000.0     | 5.87634e-23 | 5.11630e-22 | 3.59924e-21 | 2.11073e-20 | 1.05885e-19 |
| 1000.00     | 1.08216e-22 | 9.39463e-22 | 6.58425e-21 | 3.85051e-20 | 1.92988e-19 |
| 100.000     | 1.41163e-22 | 1.24463e-21 | 8.87205e-21 | 5.27699e-20 | 2.68788e-19 |
| 10.0000     | 9.48874e-22 | 7.24861e-21 | 4.80251e-20 | 2.80364e-19 | 1.46383e-18 |
| 1.00000     | 7.95141e-20 | 5.71667e-19 | 3.59207e-18 | 2.00261e-17 | 1.00227e-16 |
| 0.100000    | 6.24712e-18 | 4.13283e-17 | 2.35187e-16 | 1.17040e-15 | 5.16378e-15 |
| 0.0100000   | 2.37062e-16 | 1.32457e-15 | 6.32028e-15 | 2.62761e-14 | 9.67852e-14 |
| 0.00100000  | 2.18067e-15 | 1.02817e-14 | 4.15762e-14 | 1.47377e-13 | 4.66272e-13 |
| 0.000100000 | 4.36300e-15 | 1.92046e-14 | 7.27110e-14 | 2.42273e-13 | 7.23733e-13 |
| 1.00000e-05 | 4.80038e-15 | 2.09301e-14 | 7.84999e-14 | 2.59217e-13 | 7.67877e-13 |
| 1.00000e-06 | 4.84801e-15 | 2.11176e-14 | 7.91267e-14 | 2.61043e-13 | 7.72611e-13 |
| 1.00000e-07 | 4.85281e-15 | 2.11365e-14 | 7.91899e-14 | 2.61227e-13 | 7.73087e-13 |
| 1.00000e-08 | 4.85329e-15 | 2.11384e-14 | 7.91962e-14 | 2.61245e-13 | 7.73135e-13 |
| 1.00000e-09 | 4.85334e-15 | 2.11385e-14 | 7.91968e-14 | 2.61247e-13 | 7.73140e-13 |

| Pa\K        | 220.000     | 230.000     | 240.000     | 250.000     | 260.000     |
|-------------|-------------|-------------|-------------|-------------|-------------|
| 1.00000e+08 | 7.51413e-27 | 3.76416e-26 | 1.71334e-25 | 7.16482e-25 | 2.77840e-24 |
| 1.00000e+07 | 5.81331e-24 | 2.84533e-23 | 1.26275e-22 | 5.13756e-22 | 1.93416e-21 |
| 1.00000e+06 | 1.59376e-21 | 7.29487e-21 | 3.01950e-20 | 1.14308e-19 | 3.99571e-19 |
| 100000.     | 7.48521e-20 | 3.14036e-19 | 1.18822e-18 | 4.10263e-18 | 1.30559e-17 |
| 10000.0     | 4.64202e-19 | 1.81045e-18 | 6.37628e-18 | 2.05374e-17 | 6.11483e-17 |
| 1000.00     | 8.47147e-19 | 3.31505e-18 | 1.17339e-17 | 3.80221e-17 | 1.13929e-16 |
| 100.000     | 1.19784e-18 | 4.75465e-18 | 1.70659e-17 | 5.61146e-17 | 1.70957e-16 |
| 10.0000     | 6.92829e-18 | 3.00718e-17 | 1.20843e-16 | 4.53022e-16 | 1.59368e-15 |
| 1.00000     | 4.54488e-16 | 1.88136e-15 | 7.15509e-15 | 2.51425e-14 | 8.20513e-14 |
| 0.100000    | 2.04347e-14 | 7.32701e-14 | 2.40157e-13 | 7.25260e-13 | 2.03223e-12 |
| 0.0100000   | 3.20323e-13 | 9.64021e-13 | 2.66530e-12 | 6.82969e-12 | 1.63449e-11 |
| 0.00100000  | 1.33645e-12 | 3.51381e-12 | 8.56383e-12 | 1.95198e-11 | 4.19264e-11 |
| 0.000100000 | 1.96792e-12 | 4.93202e-12 | 1.15119e-11 | 2.52431e-11 | 5.23836e-11 |
| 1.00000e-05 | 2.07199e-12 | 5.15699e-12 | 1.19628e-11 | 2.60889e-11 | 5.38795e-11 |
| 1.00000e-06 | 2.08309e-12 | 5.18087e-12 | 1.20104e-11 | 2.61778e-11 | 5.40361e-11 |
| 1.00000e-07 | 2.08421e-12 | 5.18327e-12 | 1.20152e-11 | 2.61867e-11 | 5.40518e-11 |
| 1.00000e-08 | 2.08432e-12 | 5.18351e-12 | 1.20157e-11 | 2.61876e-11 | 5.40534e-11 |
| 1.00000e-09 | 2.08433e-12 | 5.18354e-12 | 1.20157e-11 | 2.61877e-11 | 5.40535e-11 |

| Pa\K        | 270.000     | 280.000     | 290.000     | 300.000     | 310.000     |
|-------------|-------------|-------------|-------------|-------------|-------------|
| 1.00000e+08 | 1.00696e-23 | 3.43308e-23 | 1.10699e-22 | 6.46004e-19 | 9.90074e-22 |
| 1.00000e+07 | 6.79095e-21 | 2.23836e-20 | 6.96442e-20 | 1.38273e-16 | 5.77136e-19 |
| 1.00000e+06 | 1.30016e-18 | 3.96526e-18 | 1.14013e-17 | 4.33005e-15 | 8.05106e-17 |
| 100000.     | 3.86214e-17 | 1.06981e-16 | 2.79246e-16 | 4.75096e-14 | 1.62640e-15 |
| 10000.0     | 1.69853e-16 | 4.43644e-16 | 1.09703e-15 | 1.61138e-13 | 5.82307e-15 |
| 1000.00     | 3.18347e-16 | 8.35498e-16 | 2.07222e-15 | 5.50791e-14 | 1.09825e-14 |
| 100.000     | 4.87452e-16 | 1.31257e-15 | 3.36485e-15 | 6.46501e-14 | 1.96126e-14 |

|             |             |             |             |             |             |
|-------------|-------------|-------------|-------------|-------------|-------------|
| 10.0000     | 5.28439e-15 | 1.65712e-14 | 4.92727e-14 | 1.94292e-12 | 3.74423e-13 |
| 1.00000     | 2.49871e-13 | 7.13231e-13 | 1.91618e-12 | 3.40119e-11 | 1.17111e-11 |
| 0.100000    | 5.31699e-12 | 1.30625e-11 | 3.02880e-11 | 2.27176e-10 | 1.39380e-10 |
| 0.0100000   | 3.67792e-11 | 7.82748e-11 | 1.58381e-10 | 5.63208e-10 | 5.67350e-10 |
| 0.00100000  | 8.54119e-11 | 1.65956e-10 | 3.09040e-10 | 6.69092e-10 | 9.58888e-10 |
| 0.000100000 | 1.03512e-10 | 1.95805e-10 | 3.56165e-10 | 6.51729e-10 | 1.06368e-09 |
| 1.00000e-05 | 1.06024e-10 | 1.99831e-10 | 3.62356e-10 | 6.47303e-10 | 1.07682e-09 |
| 1.00000e-06 | 1.06286e-10 | 2.00249e-10 | 3.62997e-10 | 6.46836e-10 | 1.07817e-09 |
| 1.00000e-07 | 1.06312e-10 | 2.00291e-10 | 3.63061e-10 | 6.46789e-10 | 1.07830e-09 |
| 1.00000e-08 | 1.06315e-10 | 2.00295e-10 | 3.63067e-10 | 6.46784e-10 | 1.07831e-09 |
| 1.00000e-09 | 1.06315e-10 | 2.00296e-10 | 3.63068e-10 | 6.46784e-10 | 1.07832e-09 |

| Pa\K        | 400.000     | 500.000     | 600.000     | 700.000     | 800.000     |
|-------------|-------------|-------------|-------------|-------------|-------------|
| 1.00000e+08 | 3.89723e-15 | 2.94645e-10 | 5.11514e-08 | 1.45116e-06 | 1.85555e-05 |
| 1.00000e+07 | 4.82181e-12 | 1.84833e-07 | 1.02302e-05 | 6.34290e-05 | 0.000147331 |
| 1.00000e+06 | 6.12544e-10 | 4.07337e-06 | 0.000132115 | 0.000460024 | 0.000749556 |
| 100000.     | 3.82443e-09 | 4.16217e-06 | 0.000133477 | 0.000561879 | 0.000972834 |
| 10000.0     | 1.55299e-09 | 7.24972e-07 | 3.45525e-05 | 0.000277362 | 0.000674864 |
| 1000.00     | 1.53235e-10 | 8.77156e-08 | 8.97618e-06 | 0.000121923 | 0.000365120 |
| 100.000     | 9.99062e-11 | 3.08108e-08 | 2.82054e-06 | 4.13100e-05 | 0.000130116 |
| 10.0000     | 1.39094e-09 | 1.16559e-07 | 2.33945e-06 | 1.82459e-05 | 6.11910e-05 |
| 1.00000     | 9.97872e-09 | 3.72979e-07 | 3.80285e-06 | 1.84073e-05 | 5.60132e-05 |
| 0.100000    | 2.89223e-08 | 6.09134e-07 | 4.58340e-06 | 1.92441e-05 | 5.61043e-05 |
| 0.0100000   | 4.22468e-08 | 6.89271e-07 | 4.74448e-06 | 1.93864e-05 | 5.61411e-05 |
| 0.00100000  | 4.51672e-08 | 7.01256e-07 | 4.76365e-06 | 1.94018e-05 | 5.61453e-05 |
| 0.000100000 | 4.54098e-08 | 7.02442e-07 | 4.76556e-06 | 1.94034e-05 | 5.61457e-05 |
| 1.00000e-05 | 4.54278e-08 | 7.02557e-07 | 4.76575e-06 | 1.94035e-05 | 5.61457e-05 |
| 1.00000e-06 | 4.54296e-08 | 7.02569e-07 | 4.76577e-06 | 1.94036e-05 | 5.61457e-05 |
| 1.00000e-07 | 4.54297e-08 | 7.02570e-07 | 4.76577e-06 | 1.94036e-05 | 5.61457e-05 |
| 1.00000e-08 | 4.54297e-08 | 7.02570e-07 | 4.76577e-06 | 1.94036e-05 | 5.61457e-05 |
| 1.00000e-09 | 4.54297e-08 | 7.02570e-07 | 4.76577e-06 | 1.94036e-05 | 5.61457e-05 |

| Pa\K        | 900.000     | 1000.00     | 1100.00     | 1200.00     | 1300.00     |
|-------------|-------------|-------------|-------------|-------------|-------------|
| 1.00000e+08 | 7.93979e-05 | 0.000140878 | 0.000186144 | 0.000205492 | 0.000207350 |
| 1.00000e+07 | 0.000255491 | 0.000470913 | 0.000820356 | 0.00113989  | 0.00133365  |
| 1.00000e+06 | 0.000993808 | 0.00130348  | 0.00178002  | 0.00224777  | 0.00256063  |
| 100000.     | 0.00129241  | 0.00157411  | 0.00187887  | 0.00219931  | 0.00247369  |
| 10000.0     | 0.000982864 | 0.00117406  | 0.00133832  | 0.00152174  | 0.00168781  |
| 1000.00     | 0.000535890 | 0.000625086 | 0.000727051 | 0.000870269 | 0.00103570  |
| 100.000     | 0.000210797 | 0.000307459 | 0.000450415 | 0.000634146 | 0.000841862 |
| 10.0000     | 0.000134277 | 0.000247802 | 0.000404750 | 0.000596998 | 0.000811787 |
| 1.00000     | 0.000127904 | 0.000242345 | 0.000399869 | 0.000592519 | 0.000807865 |
| 0.100000    | 0.000127535 | 0.000241861 | 0.000399362 | 0.000592031 | 0.000807430 |
| 0.0100000   | 0.000127507 | 0.000241814 | 0.000399312 | 0.000591983 | 0.000807387 |
| 0.00100000  | 0.000127504 | 0.000241810 | 0.000399307 | 0.000591978 | 0.000807383 |
| 0.000100000 | 0.000127504 | 0.000241809 | 0.000399306 | 0.000591978 | 0.000807383 |
| 1.00000e-05 | 0.000127504 | 0.000241809 | 0.000399306 | 0.000591978 | 0.000807383 |
| 1.00000e-06 | 0.000127504 | 0.000241809 | 0.000399306 | 0.000591978 | 0.000807383 |
| 1.00000e-07 | 0.000127504 | 0.000241809 | 0.000399306 | 0.000591978 | 0.000807383 |
| 1.00000e-08 | 0.000127504 | 0.000241809 | 0.000399306 | 0.000591978 | 0.000807383 |
| 1.00000e-09 | 0.000127504 | 0.000241809 | 0.000399306 | 0.000591978 | 0.000807383 |

| Pa\K        | 1400.00     | 1500.00     | 1750.00    | 2000.00    | 2250.00    |
|-------------|-------------|-------------|------------|------------|------------|
| 1.00000e+08 | 0.000206233 | 0.000202952 | 0.00902394 | 0.00998758 | 0.0106862  |
| 1.00000e+07 | 0.00143543  | 0.00147629  | 0.0151909  | 0.0151105  | 0.0141267  |
| 1.00000e+06 | 0.00274038  | 0.00283729  | 0.0150010  | 0.0137259  | 0.0120634  |
| 100000.     | 0.00265626  | 0.00275717  | 0.0105652  | 0.00879615 | 0.00752825 |
| 10000.0     | 0.00180464  | 0.00188936  | 0.00459086 | 0.00409183 | 0.00443519 |
| 1000.00     | 0.00120878  | 0.00139057  | 0.00218513 | 0.00280387 | 0.00380868 |
| 100.000     | 0.00106098  | 0.00128699  | 0.00181006 | 0.00264159 | 0.00373920 |
| 10.0000     | 0.00103804  | 0.00127093  | 0.00176854 | 0.00262506 | 0.00373239 |
| 1.00000     | 0.00103485  | 0.00126858  | 0.00176413 | 0.00262340 | 0.00373172 |
| 0.100000    | 0.00103449  | 0.00126831  | 0.00176368 | 0.00262323 | 0.00373166 |
| 0.0100000   | 0.00103446  | 0.00126828  | 0.00176364 | 0.00262322 | 0.00373165 |
| 0.00100000  | 0.00103445  | 0.00126828  | 0.00176363 | 0.00262322 | 0.00373165 |
| 0.000100000 | 0.00103445  | 0.00126828  | 0.00176363 | 0.00262322 | 0.00373165 |
| 1.00000e-05 | 0.00103445  | 0.00126828  | 0.00176363 | 0.00262322 | 0.00373165 |
| 1.00000e-06 | 0.00103445  | 0.00126828  | 0.00176363 | 0.00262322 | 0.00373165 |
| 1.00000e-07 | 0.00103445  | 0.00126828  | 0.00176363 | 0.00262322 | 0.00373165 |
| 1.00000e-08 | 0.00103445  | 0.00126828  | 0.00176363 | 0.00262322 | 0.00373165 |
| 1.00000e-09 | 0.00103445  | 0.00126828  | 0.00176363 | 0.00262322 | 0.00373165 |

| Pa\K        | 2500.00   | 2750.00    | 3000.00    | 3250.00    | 3500.00    |
|-------------|-----------|------------|------------|------------|------------|
| 1.00000e+08 | 0.0109217 | 0.0106496  | 0.00999043 | 0.00914564 | 0.00828853 |
| 1.00000e+07 | 0.0126339 | 0.0110826  | 0.00974072 | 0.00868103 | 0.00787063 |
| 1.00000e+06 | 0.0104676 | 0.00922185 | 0.00835636 | 0.00776977 | 0.00734242 |

|             |            |            |            |            |            |
|-------------|------------|------------|------------|------------|------------|
| 100000.     | 0.00693031 | 0.00684114 | 0.00693995 | 0.00701303 | 0.00698025 |
| 10000.0     | 0.00519261 | 0.00597176 | 0.00654177 | 0.00684496 | 0.00691651 |
| 1000.00     | 0.00491527 | 0.00585597 | 0.00649583 | 0.00682798 | 0.00691110 |
| 100.000     | 0.00488680 | 0.00584468 | 0.00649155 | 0.00682649 | 0.00691069 |
| 10.0000     | 0.00488406 | 0.00584360 | 0.00649115 | 0.00682636 | 0.00691065 |
| 1.00000     | 0.00488379 | 0.00584350 | 0.00649111 | 0.00682634 | 0.00691065 |
| 0.100000    | 0.00488377 | 0.00584349 | 0.00649110 | 0.00682634 | 0.00691065 |
| 0.0100000   | 0.00488376 | 0.00584349 | 0.00649110 | 0.00682634 | 0.00691065 |
| 0.00100000  | 0.00488376 | 0.00584349 | 0.00649110 | 0.00682634 | 0.00691065 |
| 0.000100000 | 0.00488376 | 0.00584349 | 0.00649110 | 0.00682634 | 0.00691065 |
| 1.00000e-05 | 0.00488376 | 0.00584349 | 0.00649110 | 0.00682634 | 0.00691065 |
| 1.00000e-06 | 0.00488376 | 0.00584349 | 0.00649110 | 0.00682634 | 0.00691065 |
| 1.00000e-07 | 0.00488376 | 0.00584349 | 0.00649110 | 0.00682634 | 0.00691065 |
| 1.00000e-08 | 0.00488376 | 0.00584349 | 0.00649110 | 0.00682634 | 0.00691065 |
| 1.00000e-09 | 0.00488376 | 0.00584349 | 0.00649110 | 0.00682634 | 0.00691065 |

| Pa\K        | 3750.00    | 4000.00    |
|-------------|------------|------------|
| 1.00000e+08 | 0.00751750 | 0.00686637 |
| 1.00000e+07 | 0.00724698 | 0.00675315 |
| 1.00000e+06 | 0.00698934 | 0.00666589 |
| 100000.     | 0.00684006 | 0.00662116 |
| 10000.0     | 0.00682065 | 0.00661913 |
| 1000.00     | 0.00681962 | 0.00661958 |
| 100.000     | 0.00681959 | 0.00661967 |
| 10.0000     | 0.00681959 | 0.00661968 |
| 1.00000     | 0.00681959 | 0.00661968 |
| 0.100000    | 0.00681959 | 0.00661968 |
| 0.0100000   | 0.00681959 | 0.00661968 |
| 0.00100000  | 0.00681959 | 0.00661968 |
| 0.000100000 | 0.00681959 | 0.00661968 |
| 1.00000e-05 | 0.00681959 | 0.00661968 |
| 1.00000e-06 | 0.00681959 | 0.00661968 |
| 1.00000e-07 | 0.00681959 | 0.00661968 |
| 1.00000e-08 | 0.00681959 | 0.00661968 |
| 1.00000e-09 | 0.00681959 | 0.00661968 |

rad38  
=====

| Pa\K        | 20.0000     | 30.0000     | 40.0000     | 50.0000     | 60.0000     |
|-------------|-------------|-------------|-------------|-------------|-------------|
| 1.00000e+08 | 2.92319e-40 | 1.09158e-38 | 1.04125e-37 | 6.22474e-37 | 3.01419e-36 |
| 1.00000e+07 | 2.19715e-35 | 6.63428e-34 | 5.40197e-33 | 2.85075e-32 | 1.24702e-31 |
| 1.00000e+06 | 6.07207e-31 | 1.25440e-29 | 8.39297e-29 | 3.89988e-28 | 1.55584e-27 |
| 100000.     | 5.45902e-27 | 8.15086e-26 | 4.45217e-25 | 1.78203e-24 | 6.33069e-24 |
| 10000.0     | 1.38039e-23 | 1.31958e-22 | 5.65814e-22 | 1.92531e-21 | 6.07465e-21 |
| 1000.00     | 7.82365e-21 | 4.33756e-20 | 1.33441e-19 | 3.61470e-19 | 9.72190e-19 |
| 100.000     | 5.28473e-19 | 1.40963e-18 | 3.00330e-18 | 6.60203e-18 | 1.58889e-17 |
| 10.0000     | 3.60108e-18 | 5.82665e-18 | 1.03534e-17 | 2.11511e-17 | 5.04502e-17 |
| 1.00000     | 1.52273e-17 | 3.58184e-17 | 7.07710e-17 | 1.42702e-16 | 3.19145e-16 |
| 0.100000    | 9.30927e-17 | 1.28507e-16 | 1.77009e-16 | 2.81507e-16 | 5.75821e-16 |
| 0.0100000   | 4.72937e-17 | 2.73601e-17 | 2.75588e-17 | 4.34430e-17 | 1.57746e-16 |
| 0.00100000  | 3.38142e-18 | 2.01622e-18 | 2.25315e-18 | 6.03685e-18 | 8.50060e-17 |
| 0.000100000 | 2.99010e-19 | 1.91015e-19 | 2.31332e-19 | 2.69416e-18 | 7.78404e-17 |
| 1.00000e-05 | 3.52836e-20 | 3.20977e-20 | 6.02495e-20 | 2.41698e-18 | 7.72572e-17 |
| 1.00000e-06 | 3.59059e-20 | 5.21976e-20 | 9.09843e-20 | 2.46127e-18 | 7.73472e-17 |
| 1.00000e-07 | 2.79413e-20 | 1.96506e-20 | 3.23489e-20 | 2.35297e-18 | 7.71331e-17 |
| 1.00000e-08 | 3.05499e-21 | 1.82339e-21 | 1.34141e-20 | 2.32529e-18 | 7.70813e-17 |
| 1.00000e-09 | 2.78579e-22 | 1.74709e-22 | 1.16620e-20 | 2.32260e-18 | 7.70760e-17 |

| Pa\K        | 70.0000     | 80.0000     | 90.0000     | 100.0000    | 110.0000    |
|-------------|-------------|-------------|-------------|-------------|-------------|
| 1.00000e+08 | 1.32334e-35 | 5.57023e-35 | 2.30089e-34 | 9.37201e-34 | 3.75528e-33 |
| 1.00000e+07 | 5.03174e-31 | 1.97134e-30 | 7.63776e-30 | 2.92705e-29 | 1.10371e-28 |
| 1.00000e+06 | 5.84875e-27 | 2.16312e-26 | 7.96154e-26 | 2.90087e-25 | 1.03745e-24 |
| 100000.     | 2.16940e-23 | 7.42629e-23 | 2.54502e-22 | 8.61746e-22 | 2.84690e-21 |
| 10000.0     | 1.90285e-20 | 6.05825e-20 | 1.93932e-19 | 6.09554e-19 | 1.84832e-18 |
| 1000.00     | 2.73397e-18 | 8.07254e-18 | 2.41133e-17 | 6.98115e-17 | 1.91344e-16 |
| 100.000     | 4.31366e-17 | 1.28207e-16 | 3.83331e-16 | 1.07921e-15 | 2.79628e-15 |
| 10.0000     | 1.46340e-16 | 4.81835e-16 | 1.55536e-15 | 4.54783e-15 | 1.19211e-14 |
| 1.00000     | 8.54276e-16 | 2.64863e-15 | 8.29438e-15 | 2.39281e-14 | 6.21996e-14 |
| 0.100000    | 1.71481e-15 | 6.28806e-15 | 2.16942e-14 | 6.42517e-14 | 1.64279e-13 |
| 0.0100000   | 1.06954e-15 | 5.97682e-15 | 2.41676e-14 | 7.55827e-14 | 1.95810e-13 |
| 0.00100000  | 9.33121e-16 | 5.82376e-15 | 2.42997e-14 | 7.67740e-14 | 1.99477e-13 |
| 0.000100000 | 9.18861e-16 | 5.80692e-15 | 2.43116e-14 | 7.68960e-14 | 1.99860e-13 |
| 1.00000e-05 | 9.17852e-16 | 5.80680e-15 | 2.43186e-14 | 7.69272e-14 | 1.99953e-13 |
| 1.00000e-06 | 9.18285e-16 | 5.80914e-15 | 2.43282e-14 | 7.69573e-14 | 2.00031e-13 |
| 1.00000e-07 | 9.17926e-16 | 5.80894e-15 | 2.43295e-14 | 7.69635e-14 | 2.00048e-13 |
| 1.00000e-08 | 9.17829e-16 | 5.80882e-15 | 2.43295e-14 | 7.69640e-14 | 2.00050e-13 |
| 1.00000e-09 | 9.17819e-16 | 5.80880e-15 | 2.43295e-14 | 7.69641e-14 | 2.00050e-13 |

| Pa\K        | 120.000     | 130.000     | 140.000     | 150.000     | 160.000     |
|-------------|-------------|-------------|-------------|-------------|-------------|
| 1.00000e+08 | 1.47545e-32 | 5.67270e-32 | 2.13224e-31 | 7.83318e-31 | 2.81255e-30 |
| 1.00000e+07 | 4.07719e-28 | 1.47249e-27 | 5.19614e-27 | 1.79179e-26 | 6.03930e-26 |
| 1.00000e+06 | 3.62132e-24 | 1.23081e-23 | 4.07132e-23 | 1.31106e-22 | 4.11217e-22 |
| 100000.     | 9.11785e-21 | 2.82673e-20 | 8.48973e-20 | 2.47372e-19 | 7.00230e-19 |
| 10000.0     | 5.36760e-18 | 1.49209e-17 | 3.97956e-17 | 1.02146e-16 | 2.53049e-16 |
| 1000.00     | 4.93843e-16 | 1.20471e-15 | 2.79611e-15 | 6.21537e-15 | 1.33065e-14 |
| 100.000     | 6.68540e-15 | 1.49158e-14 | 3.14356e-14 | 6.32428e-14 | 1.22476e-13 |
| 10.0000     | 2.84515e-14 | 6.30551e-14 | 1.31993e-13 | 2.64388e-13 | 5.11493e-13 |
| 1.00000     | 1.46979e-13 | 3.20828e-13 | 6.56630e-13 | 1.27520e-12 | 2.37103e-12 |
| 0.100000    | 3.72635e-13 | 7.69954e-13 | 1.48011e-12 | 2.68964e-12 | 4.67504e-12 |
| 0.0100000   | 4.42205e-13 | 9.02708e-13 | 1.70908e-12 | 3.05627e-12 | 5.22979e-12 |
| 0.00100000  | 4.50500e-13 | 9.18551e-13 | 1.73617e-12 | 3.09913e-12 | 5.29383e-12 |
| 0.000100000 | 4.51378e-13 | 9.20260e-13 | 1.73918e-12 | 3.10411e-12 | 5.30176e-12 |
| 1.00000e-05 | 4.51610e-13 | 9.20769e-13 | 1.74022e-12 | 3.10608e-12 | 5.30531e-12 |
| 1.00000e-06 | 4.51782e-13 | 9.21110e-13 | 1.74083e-12 | 3.10711e-12 | 5.30695e-12 |
| 1.00000e-07 | 4.51820e-13 | 9.21181e-13 | 1.74095e-12 | 3.10730e-12 | 5.30723e-12 |
| 1.00000e-08 | 4.51824e-13 | 9.21189e-13 | 1.74097e-12 | 3.10732e-12 | 5.30726e-12 |
| 1.00000e-09 | 4.51824e-13 | 9.21190e-13 | 1.74097e-12 | 3.10733e-12 | 5.30726e-12 |

| Pa\K        | 170.000     | 180.000     | 190.000     | 200.000     | 210.000     |
|-------------|-------------|-------------|-------------|-------------|-------------|
| 1.00000e+08 | 9.87124e-30 | 3.38707e-29 | 1.13646e-28 | 3.72976e-28 | 1.19777e-27 |
| 1.00000e+07 | 1.99014e-25 | 6.41288e-25 | 2.02094e-24 | 6.22942e-24 | 1.87854e-23 |
| 1.00000e+06 | 1.25687e-21 | 3.74523e-21 | 1.08848e-20 | 3.08684e-20 | 8.54643e-20 |
| 100000.     | 1.92766e-18 | 5.16488e-18 | 1.34773e-17 | 3.42688e-17 | 8.49557e-17 |
| 10000.0     | 6.06543e-16 | 1.40965e-15 | 3.18238e-15 | 6.99042e-15 | 1.49637e-14 |
| 1000.00     | 2.75623e-14 | 5.54355e-14 | 1.08572e-13 | 2.07539e-13 | 3.87922e-13 |
| 100.000     | 2.29810e-13 | 4.19919e-13 | 7.50175e-13 | 1.31441e-12 | 2.26447e-12 |
| 10.0000     | 9.61926e-13 | 1.76609e-12 | 3.17437e-12 | 5.59531e-12 | 9.68184e-12 |
| 1.00000     | 4.24906e-12 | 7.37552e-12 | 1.24472e-11 | 2.04833e-11 | 3.29462e-11 |
| 0.100000    | 7.84041e-12 | 1.27684e-11 | 2.02883e-11 | 3.15659e-11 | 4.82203e-11 |
| 0.0100000   | 8.64339e-12 | 1.38901e-11 | 2.18102e-11 | 3.35812e-11 | 5.08347e-11 |
| 0.00100000  | 8.73503e-12 | 1.40170e-11 | 2.19819e-11 | 3.38094e-11 | 5.11349e-11 |
| 0.000100000 | 8.74746e-12 | 1.40363e-11 | 2.20118e-11 | 3.38557e-11 | 5.12059e-11 |
| 1.00000e-05 | 8.75356e-12 | 1.40464e-11 | 2.20276e-11 | 3.38797e-11 | 5.12411e-11 |
| 1.00000e-06 | 8.75603e-12 | 1.40499e-11 | 2.20326e-11 | 3.38864e-11 | 5.12499e-11 |
| 1.00000e-07 | 8.75642e-12 | 1.40505e-11 | 2.20333e-11 | 3.38873e-11 | 5.12510e-11 |
| 1.00000e-08 | 8.75646e-12 | 1.40505e-11 | 2.20334e-11 | 3.38874e-11 | 5.12511e-11 |
| 1.00000e-09 | 8.75646e-12 | 1.40505e-11 | 2.20334e-11 | 3.38874e-11 | 5.12511e-11 |

| Pa\K        | 220.000     | 230.000     | 240.000     | 250.000     | 260.000     |
|-------------|-------------|-------------|-------------|-------------|-------------|
| 1.00000e+08 | 3.76573e-27 | 1.15979e-26 | 3.50194e-26 | 1.03763e-25 | 3.02042e-25 |
| 1.00000e+07 | 5.54369e-23 | 1.60162e-22 | 4.53261e-22 | 1.25740e-21 | 3.42244e-21 |
| 1.00000e+06 | 2.31149e-19 | 6.11145e-19 | 1.58089e-18 | 4.00486e-18 | 9.94710e-18 |
| 100000.     | 2.05479e-16 | 4.85250e-16 | 1.11995e-15 | 2.52907e-15 | 5.59558e-15 |
| 10000.0     | 3.12619e-14 | 6.38381e-14 | 1.27613e-13 | 2.50115e-13 | 4.81418e-13 |
| 1000.00     | 7.10112e-13 | 1.27476e-12 | 2.24681e-12 | 3.89228e-12 | 6.63417e-12 |
| 100.000     | 3.84372e-12 | 6.43853e-12 | 1.06565e-11 | 1.74440e-11 | 2.82598e-11 |
| 10.0000     | 1.64556e-11 | 2.74813e-11 | 4.51044e-11 | 7.27665e-11 | 1.15414e-10 |
| 1.00000     | 5.18962e-11 | 8.01888e-11 | 1.21722e-10 | 1.81744e-10 | 2.67228e-10 |
| 0.100000    | 7.24751e-11 | 1.07350e-10 | 1.56902e-10 | 2.26528e-10 | 3.23334e-10 |
| 0.0100000   | 7.58074e-11 | 1.11533e-10 | 1.62085e-10 | 2.32879e-10 | 3.31045e-10 |
| 0.00100000  | 7.62001e-11 | 1.12047e-10 | 1.62760e-10 | 2.33772e-10 | 3.32234e-10 |
| 0.000100000 | 7.63080e-11 | 1.12208e-10 | 1.62998e-10 | 2.34113e-10 | 3.32713e-10 |
| 1.00000e-05 | 7.63580e-11 | 1.12277e-10 | 1.63090e-10 | 2.34233e-10 | 3.32866e-10 |
| 1.00000e-06 | 7.63692e-11 | 1.12291e-10 | 1.63107e-10 | 2.34254e-10 | 3.32891e-10 |
| 1.00000e-07 | 7.63705e-11 | 1.12293e-10 | 1.63109e-10 | 2.34256e-10 | 3.32893e-10 |
| 1.00000e-08 | 7.63707e-11 | 1.12293e-10 | 1.63109e-10 | 2.34256e-10 | 3.32894e-10 |
| 1.00000e-09 | 7.63707e-11 | 1.12293e-10 | 1.63109e-10 | 2.34256e-10 | 3.32894e-10 |

| Pa\K        | 270.000     | 280.000     | 290.000     | 300.000     | 310.000     |
|-------------|-------------|-------------|-------------|-------------|-------------|
| 1.00000e+08 | 8.64875e-25 | 2.43975e-24 | 6.79132e-24 | 8.00125e-24 | 5.09005e-23 |
| 1.00000e+07 | 9.14994e-21 | 2.40606e-20 | 6.23281e-20 | 2.67276e-19 | 4.02761e-19 |
| 1.00000e+06 | 2.42554e-17 | 5.81577e-17 | 1.37369e-16 | 1.98197e-16 | 7.39117e-16 |
| 100000.     | 1.21492e-14 | 2.59355e-14 | 5.45569e-14 | 2.29020e-13 | 2.33482e-13 |
| 10000.0     | 9.11558e-13 | 1.70100e-12 | 3.13401e-12 | 2.63161e-12 | 1.03226e-11 |
| 1000.00     | 1.11362e-11 | 1.84279e-11 | 3.00898e-11 | 4.11445e-11 | 7.73822e-11 |
| 100.000     | 4.53281e-11 | 7.20020e-11 | 1.13275e-10 | 5.60519e-10 | 2.72315e-10 |
| 10.0000     | 1.80012e-10 | 2.76185e-10 | 4.16980e-10 | 9.28640e-10 | 9.07413e-10 |
| 1.00000     | 3.87333e-10 | 5.53949e-10 | 7.82360e-10 | 1.02163e-09 | 1.50743e-09 |
| 0.100000    | 4.56586e-10 | 6.38261e-10 | 8.83696e-10 | 1.02278e-09 | 1.64877e-09 |
| 0.0100000   | 4.65881e-10 | 6.49409e-10 | 8.97023e-10 | 1.02412e-09 | 1.66781e-09 |
| 0.00100000  | 4.67474e-10 | 6.51548e-10 | 8.99895e-10 | 1.02561e-09 | 1.67290e-09 |
| 0.000100000 | 4.68132e-10 | 6.52431e-10 | 9.01055e-10 | 1.02609e-09 | 1.67478e-09 |
| 1.00000e-05 | 4.68323e-10 | 6.52665e-10 | 9.01337e-10 | 1.02614e-09 | 1.67517e-09 |

|             |             |             |             |             |             |
|-------------|-------------|-------------|-------------|-------------|-------------|
| 1.00000e-06 | 4.68352e-10 | 6.52699e-10 | 9.01376e-10 | 1.02615e-09 | 1.67522e-09 |
| 1.00000e-07 | 4.68355e-10 | 6.52702e-10 | 9.01380e-10 | 1.02615e-09 | 1.67522e-09 |
| 1.00000e-08 | 4.68355e-10 | 6.52703e-10 | 9.01380e-10 | 1.02615e-09 | 1.67522e-09 |
| 1.00000e-09 | 4.68356e-10 | 6.52703e-10 | 9.01380e-10 | 1.02615e-09 | 1.67522e-09 |

| Pa\K        | 400.000     | 500.000     | 600.000     | 700.000     | 800.000     |
|-------------|-------------|-------------|-------------|-------------|-------------|
| 1.00000e+08 | 2.73869e-14 | 1.10350e-09 | 1.62083e-07 | 3.21816e-06 | 1.39263e-05 |
| 1.00000e+07 | 4.29997e-11 | 5.28068e-07 | 2.62131e-05 | 0.000158690 | 0.000350618 |
| 1.00000e+06 | 7.72195e-09 | 1.40545e-05 | 0.000348015 | 0.00115063  | 0.00183145  |
| 100000.     | 1.05583e-07 | 2.75048e-05 | 0.000457166 | 0.00155203  | 0.00251301  |
| 10000.0     | 1.35681e-07 | 1.10219e-05 | 0.000179507 | 0.000917679 | 0.00192742  |
| 1000.00     | 5.13744e-08 | 2.70806e-06 | 5.95213e-05 | 0.000441226 | 0.00107520  |
| 100.000     | 2.69894e-08 | 7.62704e-07 | 1.67731e-05 | 0.000134506 | 0.000313591 |
| 10.0000     | 1.92394e-08 | 2.41661e-07 | 3.13615e-06 | 2.14857e-05 | 4.90437e-05 |
| 1.00000     | 1.67471e-08 | 1.49193e-07 | 9.67194e-07 | 4.58174e-06 | 1.23544e-05 |
| 0.100000    | 1.64430e-08 | 1.39598e-07 | 7.56880e-07 | 2.96490e-06 | 8.78133e-06 |
| 0.0100000   | 1.64524e-08 | 1.38822e-07 | 7.37090e-07 | 2.81267e-06 | 8.43966e-06 |
| 0.00100000  | 1.64645e-08 | 1.38764e-07 | 7.35154e-07 | 2.79789e-06 | 8.40643e-06 |
| 0.000100000 | 1.64667e-08 | 1.38760e-07 | 7.34962e-07 | 2.79643e-06 | 8.40316e-06 |
| 1.00000e-05 | 1.64669e-08 | 1.38759e-07 | 7.34943e-07 | 2.79629e-06 | 8.40283e-06 |
| 1.00000e-06 | 1.64669e-08 | 1.38759e-07 | 7.34941e-07 | 2.79627e-06 | 8.40280e-06 |
| 1.00000e-07 | 1.64670e-08 | 1.38759e-07 | 7.34941e-07 | 2.79627e-06 | 8.40280e-06 |
| 1.00000e-08 | 1.64670e-08 | 1.38759e-07 | 7.34941e-07 | 2.79627e-06 | 8.40280e-06 |
| 1.00000e-09 | 1.64670e-08 | 1.38759e-07 | 7.34941e-07 | 2.79627e-06 | 8.40280e-06 |

| Pa\K        | 900.000     | 1000.00     | 1100.00     | 1200.00     | 1300.00     |
|-------------|-------------|-------------|-------------|-------------|-------------|
| 1.00000e+08 | 2.45693e-05 | 3.25303e-05 | 4.05701e-05 | 4.54761e-05 | 4.80529e-05 |
| 1.00000e+07 | 0.000504245 | 0.000656853 | 0.000868488 | 0.00106746  | 0.00121178  |
| 1.00000e+06 | 0.00236230  | 0.00288091  | 0.00345210  | 0.00392721  | 0.00424941  |
| 100000.     | 0.00323800  | 0.00380684  | 0.00424954  | 0.00453918  | 0.00466586  |
| 10000.0     | 0.00263119  | 0.00295353  | 0.00301577  | 0.00291756  | 0.00273061  |
| 1000.00     | 0.00138226  | 0.00134031  | 0.00116948  | 0.00100448  | 0.000908364 |
| 100.000     | 0.000347893 | 0.000301586 | 0.000271345 | 0.000291638 | 0.000374198 |
| 10.0000     | 6.08031e-05 | 7.55630e-05 | 0.000113115 | 0.000185780 | 0.000304797 |
| 1.00000     | 2.51088e-05 | 4.99639e-05 | 9.63794e-05 | 0.000175105 | 0.000298021 |
| 0.100000    | 2.16316e-05 | 4.74871e-05 | 9.47715e-05 | 0.000174084 | 0.000297375 |
| 0.0100000   | 2.12962e-05 | 4.72476e-05 | 9.46160e-05 | 0.000173986 | 0.000297313 |
| 0.00100000  | 2.12635e-05 | 4.72242e-05 | 9.46007e-05 | 0.000173976 | 0.000297307 |
| 0.000100000 | 2.12603e-05 | 4.72219e-05 | 9.45992e-05 | 0.000173975 | 0.000297306 |
| 1.00000e-05 | 2.12600e-05 | 4.72217e-05 | 9.45991e-05 | 0.000173975 | 0.000297306 |
| 1.00000e-06 | 2.12599e-05 | 4.72217e-05 | 9.45991e-05 | 0.000173975 | 0.000297306 |
| 1.00000e-07 | 2.12599e-05 | 4.72216e-05 | 9.45991e-05 | 0.000173975 | 0.000297306 |
| 1.00000e-08 | 2.12599e-05 | 4.72216e-05 | 9.45991e-05 | 0.000173975 | 0.000297306 |
| 1.00000e-09 | 2.12599e-05 | 4.72216e-05 | 9.45991e-05 | 0.000173975 | 0.000297306 |

| Pa\K        | 1400.00     | 1500.00     | 1750.00    | 2000.00    | 2250.00    |
|-------------|-------------|-------------|------------|------------|------------|
| 1.00000e+08 | 5.10744e-05 | 5.46883e-05 | 0.00247366 | 0.00285332 | 0.00321319 |
| 1.00000e+07 | 0.00132713  | 0.00142295  | 0.00808360 | 0.00891518 | 0.00899218 |
| 1.00000e+06 | 0.00445490  | 0.00456432  | 0.0140360  | 0.0132455  | 0.0115212  |
| 100000.     | 0.00466167  | 0.00456751  | 0.0118115  | 0.00984306 | 0.00817873 |
| 10000.0     | 0.00252602  | 0.00236777  | 0.00518643 | 0.00480085 | 0.00507830 |
| 1000.00     | 0.000909808 | 0.00101904  | 0.00228138 | 0.00329707 | 0.00439993 |
| 100.000     | 0.000526028 | 0.000752129 | 0.00182206 | 0.00310263 | 0.00432307 |
| 10.0000     | 0.000481048 | 0.000723248 | 0.00177362 | 0.00308313 | 0.00431557 |
| 1.00000     | 0.000476753 | 0.000720536 | 0.00176887 | 0.00308123 | 0.00431484 |
| 0.100000    | 0.000476344 | 0.000720278 | 0.00176840 | 0.00308105 | 0.00431477 |
| 0.0100000   | 0.000476305 | 0.000720253 | 0.00176835 | 0.00308103 | 0.00431476 |
| 0.00100000  | 0.000476301 | 0.000720251 | 0.00176835 | 0.00308103 | 0.00431476 |
| 0.000100000 | 0.000476301 | 0.000720251 | 0.00176835 | 0.00308103 | 0.00431476 |
| 1.00000e-05 | 0.000476301 | 0.000720251 | 0.00176835 | 0.00308103 | 0.00431476 |
| 1.00000e-06 | 0.000476301 | 0.000720251 | 0.00176835 | 0.00308103 | 0.00431476 |
| 1.00000e-07 | 0.000476301 | 0.000720251 | 0.00176835 | 0.00308103 | 0.00431476 |
| 1.00000e-08 | 0.000476301 | 0.000720251 | 0.00176835 | 0.00308103 | 0.00431476 |
| 1.00000e-09 | 0.000476301 | 0.000720251 | 0.00176835 | 0.00308103 | 0.00431476 |

| Pa\K        | 2500.00    | 2750.00    | 3000.00    | 3250.00    | 3500.00    |
|-------------|------------|------------|------------|------------|------------|
| 1.00000e+08 | 0.00345940 | 0.00353059 | 0.00342137 | 0.00317806 | 0.00286447 |
| 1.00000e+07 | 0.00832133 | 0.00722457 | 0.00604283 | 0.00497471 | 0.00408467 |
| 1.00000e+06 | 0.00951544 | 0.00771844 | 0.00628195 | 0.00516813 | 0.00429048 |
| 100000.     | 0.00700055 | 0.00618431 | 0.00550366 | 0.00484888 | 0.00420482 |
| 10000.0     | 0.00541327 | 0.00547983 | 0.00522947 | 0.00475960 | 0.00418652 |
| 1000.00     | 0.00514395 | 0.00538250 | 0.00519814 | 0.00475180 | 0.00418629 |
| 100.000     | 0.00511620 | 0.00537323 | 0.00519544 | 0.00475129 | 0.00418642 |
| 10.0000     | 0.00511355 | 0.00537237 | 0.00519520 | 0.00475125 | 0.00418645 |
| 1.00000     | 0.00511329 | 0.00537229 | 0.00519518 | 0.00475125 | 0.00418645 |
| 0.100000    | 0.00511327 | 0.00537228 | 0.00519518 | 0.00475125 | 0.00418645 |

|             |            |            |            |            |            |
|-------------|------------|------------|------------|------------|------------|
| 0.0100000   | 0.00511327 | 0.00537228 | 0.00519518 | 0.00475125 | 0.00418645 |
| 0.00100000  | 0.00511327 | 0.00537228 | 0.00519518 | 0.00475125 | 0.00418645 |
| 0.000100000 | 0.00511327 | 0.00537228 | 0.00519518 | 0.00475125 | 0.00418645 |
| 1.00000e-05 | 0.00511327 | 0.00537228 | 0.00519518 | 0.00475125 | 0.00418645 |
| 1.00000e-06 | 0.00511327 | 0.00537228 | 0.00519518 | 0.00475125 | 0.00418645 |
| 1.00000e-07 | 0.00511327 | 0.00537228 | 0.00519518 | 0.00475125 | 0.00418645 |
| 1.00000e-08 | 0.00511327 | 0.00537228 | 0.00519518 | 0.00475125 | 0.00418645 |
| 1.00000e-09 | 0.00511327 | 0.00537228 | 0.00519518 | 0.00475125 | 0.00418645 |

Pa\K | 3750.00 4000.00

|             |            |            |
|-------------|------------|------------|
| 1.00000e+08 | 0.00253338 | 0.00221746 |
| 1.00000e+07 | 0.00336676 | 0.00279179 |
| 1.00000e+06 | 0.00357834 | 0.00298777 |
| 100000.     | 0.00359180 | 0.00303218 |
| 10000.0     | 0.00359683 | 0.00304245 |
| 1000.00     | 0.00359855 | 0.00304427 |
| 100.000     | 0.00359880 | 0.00304451 |
| 10.0000     | 0.00359884 | 0.00304453 |
| 1.00000     | 0.00359884 | 0.00304454 |
| 0.100000    | 0.00359884 | 0.00304454 |
| 0.0100000   | 0.00359884 | 0.00304454 |
| 0.00100000  | 0.00359884 | 0.00304454 |
| 0.000100000 | 0.00359884 | 0.00304454 |
| 1.00000e-05 | 0.00359884 | 0.00304454 |
| 1.00000e-06 | 0.00359884 | 0.00304454 |
| 1.00000e-07 | 0.00359884 | 0.00304454 |
| 1.00000e-08 | 0.00359884 | 0.00304454 |
| 1.00000e-09 | 0.00359884 | 0.00304454 |

rad36

=====

Pa\K | 20.0000 30.0000 40.0000 50.0000 60.0000

|             |             |             |             |             |             |
|-------------|-------------|-------------|-------------|-------------|-------------|
| 1.00000e+08 | 8.16642e-18 | 1.03761e-16 | 4.10078e-16 | 1.05054e-15 | 2.16089e-15 |
| 1.00000e+07 | 1.55471e-14 | 1.12956e-13 | 3.50568e-13 | 7.90156e-13 | 1.50706e-12 |
| 1.00000e+06 | 9.43727e-12 | 6.56881e-11 | 1.98850e-10 | 4.37683e-10 | 8.15053e-10 |
| 100000.     | 4.59559e-09 | 2.62313e-08 | 6.74325e-08 | 1.29359e-07 | 2.14045e-07 |
| 10000.0     | 8.22739e-07 | 3.24830e-06 | 6.99732e-06 | 1.20086e-05 | 1.82972e-05 |
| 1000.00     | 5.54916e-05 | 0.000159561 | 0.000270211 | 0.000378977 | 0.000483831 |
| 100.000     | 0.000819494 | 0.00116160  | 0.00127465  | 0.00130133  | 0.00128983  |
| 10.0000     | 0.00100589  | 0.000621519 | 0.000432943 | 0.000337348 | 0.000286951 |
| 1.00000     | 0.000212865 | 0.000200355 | 0.000187718 | 0.000175054 | 0.000163509 |
| 0.100000    | 0.000117240 | 7.11618e-05 | 4.75519e-05 | 3.33207e-05 | 2.40552e-05 |
| 0.0100000   | 6.36146e-06 | 9.72574e-07 | 2.66266e-07 | 9.80961e-08 | 4.33304e-08 |
| 0.00100000  | 2.86291e-09 | 1.64863e-10 | 3.25357e-11 | 1.04536e-11 | 4.35860e-12 |
| 0.000100000 | 2.98598e-13 | 2.23907e-14 | 5.42406e-15 | 2.04125e-15 | 9.67835e-16 |
| 1.00000e-05 | 1.01772e-16 | 1.17493e-17 | 3.62676e-18 | 1.61630e-18 | 8.73193e-19 |
| 1.00000e-06 | 1.39140e-19 | 2.38043e-20 | 9.08386e-21 | 4.67812e-21 | 2.82273e-21 |
| 1.00000e-07 | 6.33704e-22 | 1.51154e-22 | 6.91554e-23 | 4.10188e-23 | 2.75310e-23 |
| 1.00000e-08 | 8.59859e-24 | 2.81364e-24 | 1.62664e-24 | 1.05041e-24 | 8.89406e-25 |
| 1.00000e-09 | 3.51833e-25 | 1.20520e-25 | 1.12492e-25 | 1.03653e-25 | 2.98265e-26 |

Pa\K | 70.0000 80.0000 90.0000 100.000 110.000

|             |             |             |             |             |             |
|-------------|-------------|-------------|-------------|-------------|-------------|
| 1.00000e+08 | 3.91002e-15 | 6.52559e-15 | 1.03274e-14 | 1.57744e-14 | 2.35352e-14 |
| 1.00000e+07 | 2.59957e-12 | 4.20164e-12 | 6.50079e-12 | 9.76419e-12 | 1.43773e-11 |
| 1.00000e+06 | 1.37176e-09 | 2.16121e-09 | 3.25532e-09 | 4.75250e-09 | 6.78865e-09 |
| 100000.     | 3.24774e-07 | 4.66399e-07 | 6.45728e-07 | 8.72065e-07 | 1.15796e-06 |
| 10000.0     | 2.59335e-05 | 3.50420e-05 | 4.58012e-05 | 5.84447e-05 | 7.32641e-05 |
| 1000.00     | 0.000584541 | 0.000681469 | 0.000775126 | 0.000865996 | 0.000954475 |
| 100.000     | 0.00125989  | 0.00122068  | 0.00117681  | 0.00113073  | 0.00108381  |
| 10.0000     | 0.000259852 | 0.000245331 | 0.000237828 | 0.000234317 | 0.000233083 |
| 1.00000     | 0.000153134 | 0.000143744 | 0.000135137 | 0.000127143 | 0.000119623 |
| 0.100000    | 1.77329e-05 | 1.32759e-05 | 1.00568e-05 | 7.68813e-06 | 5.91962e-06 |
| 0.0100000   | 2.16341e-08 | 1.17947e-08 | 6.86841e-09 | 4.20887e-09 | 2.68555e-09 |
| 0.00100000  | 2.13641e-12 | 1.16860e-12 | 6.91712e-13 | 4.34465e-13 | 2.85783e-13 |
| 0.000100000 | 5.28986e-16 | 3.18281e-16 | 2.05230e-16 | 1.39455e-16 | 9.87543e-17 |
| 1.00000e-05 | 5.31270e-19 | 3.50493e-19 | 2.45185e-19 | 1.79471e-19 | 1.36315e-19 |
| 1.00000e-06 | 1.88037e-21 | 1.34180e-21 | 1.00587e-21 | 7.84678e-22 | 6.34827e-22 |
| 1.00000e-07 | 1.98423e-23 | 1.52879e-23 | 1.23110e-23 | 1.06089e-23 | 9.08450e-24 |
| 1.00000e-08 | 7.62085e-25 | 5.14197e-25 | 4.53701e-25 | 4.22585e-25 | 3.62169e-25 |
| 1.00000e-09 | 3.45372e-26 | 6.83453e-26 | 1.14703e-26 | 1.16522e-26 | 2.56261e-26 |

Pa\K | 120.000 130.000 140.000 150.000 160.000

|             |             |             |             |             |             |
|-------------|-------------|-------------|-------------|-------------|-------------|
| 1.00000e+08 | 3.45924e-14 | 5.04027e-14 | 7.31372e-14 | 1.06049e-13 | 1.54029e-13 |
| 1.00000e+07 | 2.09018e-11 | 3.01617e-11 | 4.33722e-11 | 6.23319e-11 | 8.97096e-11 |
| 1.00000e+06 | 9.55245e-09 | 1.33065e-08 | 1.84167e-08 | 2.53920e-08 | 3.49399e-08 |
| 100000.     | 1.52021e-06 | 1.98118e-06 | 2.57053e-06 | 3.32734e-06 | 4.30285e-06 |



|             |             |             |             |             |             |
|-------------|-------------|-------------|-------------|-------------|-------------|
| 10000.0     | 9.06115e-05 | 0.000110901 | 0.000134609 | 0.000162270 | 0.000194475 |
| 1000.00     | 0.00104084  | 0.00112527  | 0.00120780  | 0.00128838  | 0.00136684  |
| 100.000     | 0.00103688  | 0.000990452 | 0.000944916 | 0.000900579 | 0.000857726 |
| 10.0000     | 0.000233122 | 0.000233824 | 0.000234814 | 0.000235851 | 0.000236779 |
| 1.00000     | 0.000112472 | 0.000105611 | 9.89832e-05 | 9.25485e-05 | 8.62837e-05 |
| 0.100000    | 4.58377e-06 | 3.56533e-06 | 2.78308e-06 | 2.17866e-06 | 1.70942e-06 |
| 0.0100000   | 1.77058e-09 | 1.19924e-09 | 8.30806e-10 | 5.86711e-10 | 4.21251e-10 |
| 0.00100000  | 1.95069e-13 | 1.37269e-13 | 9.91178e-14 | 7.31944e-14 | 5.51528e-14 |
| 0.000100000 | 7.23416e-17 | 5.45510e-17 | 4.22116e-17 | 3.34603e-17 | 2.71612e-17 |
| 1.00000e-05 | 1.06799e-19 | 8.60707e-20 | 7.13089e-20 | 6.07106e-20 | 5.32286e-20 |
| 1.00000e-06 | 5.27537e-22 | 4.53884e-22 | 4.02211e-22 | 3.69546e-22 | 3.53509e-22 |
| 1.00000e-07 | 8.28278e-24 | 7.70967e-24 | 7.48525e-24 | 7.78457e-24 | 8.32789e-24 |
| 1.00000e-08 | 4.24248e-25 | 3.84510e-25 | 4.69449e-25 | 4.93383e-25 | 6.26260e-25 |
| 1.00000e-09 | 8.03894e-26 | 2.31172e-26 | 1.15272e-26 | 1.37583e-25 | 3.92739e-26 |

| Pa\K        | 170.000     | 180.000     | 190.000     | 200.000     | 210.000     |
|-------------|-------------|-------------|-------------|-------------|-------------|
| 1.00000e+08 | 2.24454e-13 | 3.28471e-13 | 4.82946e-13 | 7.13408e-13 | 1.05849e-12 |
| 1.00000e+07 | 1.29470e-10 | 1.87503e-10 | 2.72558e-10 | 3.97604e-10 | 5.81823e-10 |
| 1.00000e+06 | 4.80413e-08 | 6.60527e-08 | 9.08440e-08 | 1.24984e-07 | 1.71986e-07 |
| 100000.     | 5.56378e-06 | 7.19640e-06 | 9.31133e-06 | 1.20491e-05 | 1.55866e-05 |
| 10000.0     | 0.000231857 | 0.000275082 | 0.000324833 | 0.000381784 | 0.000446587 |
| 1000.00     | 0.00144296  | 0.00151640  | 0.00158678  | 0.00165368  | 0.00171663  |
| 100.000     | 0.000816631 | 0.000777567 | 0.000740798 | 0.000706574 | 0.000675114 |
| 10.0000     | 0.000237494 | 0.000237921 | 0.000238008 | 0.000237715 | 0.000237010 |
| 1.00000     | 0.01787e-05 | 7.42346e-05 | 6.84609e-05 | 6.28735e-05 | 5.74925e-05 |
| 0.100000    | 1.34374e-06 | 1.05793e-06 | 8.34022e-07 | 6.58289e-07 | 5.20175e-07 |
| 0.0100000   | 3.06882e-10 | 2.26491e-10 | 1.69158e-10 | 1.27755e-10 | 9.75271e-11 |
| 0.00100000  | 4.23473e-14 | 3.31138e-14 | 2.63755e-14 | 2.14201e-14 | 1.77672e-14 |
| 0.000100000 | 2.25926e-17 | 1.92938e-17 | 1.69612e-17 | 1.54060e-17 | 1.45154e-17 |
| 1.00000e-05 | 4.82448e-20 | 4.53338e-20 | 4.43859e-20 | 4.55035e-20 | 4.90169e-20 |
| 1.00000e-06 | 3.53562e-22 | 3.71652e-22 | 4.11036e-22 | 4.81125e-22 | 6.01730e-22 |
| 1.00000e-07 | 9.37310e-24 | 1.12049e-23 | 1.42963e-23 | 1.89689e-23 | 2.62555e-23 |
| 1.00000e-08 | 6.39714e-25 | 8.76028e-25 | 1.13455e-24 | 1.09569e-24 | 2.09346e-24 |
| 1.00000e-09 | 1.41167e-26 | 1.46831e-26 | 8.11314e-27 | 1.05842e-25 | 6.95651e-26 |

| Pa\K        | 220.000     | 230.000     | 240.000     | 250.000     | 260.000     |
|-------------|-------------|-------------|-------------|-------------|-------------|
| 1.00000e+08 | 1.57657e-12 | 2.35578e-12 | 3.52881e-12 | 5.29488e-12 | 7.95222e-12 |
| 1.00000e+07 | 8.53494e-10 | 1.25415e-09 | 1.84449e-09 | 2.71284e-09 | 3.98695e-09 |
| 1.00000e+06 | 2.36641e-07 | 3.25445e-07 | 4.47166e-07 | 6.13580e-07 | 8.40411e-07 |
| 100000.     | 2.01437e-05 | 2.59912e-05 | 3.34580e-05 | 4.29387e-05 | 5.49006e-05 |
| 10000.0     | 0.000519835 | 0.00062045  | 0.000693625 | 0.000794850 | 0.000905838 |
| 1000.00     | 0.00177514  | 0.00182871  | 0.00187685  | 0.00191909  | 0.00195501  |
| 100.000     | 0.000646600 | 0.000621162 | 0.000598874 | 0.000579750 | 0.000563741 |
| 10.0000     | 0.000235864 | 0.000234255 | 0.000232162 | 0.000229567 | 0.000226458 |
| 1.00000     | 5.23392e-05 | 4.74351e-05 | 4.27993e-05 | 3.84476e-05 | 3.43915e-05 |
| 0.100000    | 4.11509e-07 | 3.25939e-07 | 2.58512e-07 | 2.05349e-07 | 1.63413e-07 |
| 0.0100000   | 7.52510e-11 | 5.87029e-11 | 4.63286e-11 | 3.70287e-11 | 3.00175e-11 |
| 0.00100000  | 1.50890e-14 | 1.31616e-14 | 1.18341e-14 | 1.10095e-14 | 1.06347e-14 |
| 0.000100000 | 1.42453e-17 | 1.46101e-17 | 1.56942e-17 | 1.76724e-17 | 2.08462e-17 |
| 1.00000e-05 | 5.55689e-20 | 6.64172e-20 | 8.36526e-20 | 1.10746e-19 | 1.53812e-19 |
| 1.00000e-06 | 7.86899e-22 | 1.09419e-21 | 1.59567e-21 | 2.45107e-21 | 3.92995e-21 |
| 1.00000e-07 | 3.70601e-23 | 5.84592e-23 | 9.09087e-23 | 1.50844e-22 | 2.66726e-22 |
| 1.00000e-08 | 2.52347e-24 | 3.56880e-24 | 5.18932e-24 | 1.31757e-23 | 2.58541e-23 |
| 1.00000e-09 | 1.18155e-25 | 1.00915e-25 | 7.93935e-26 | 1.09474e-25 | 1.57967e-25 |

| Pa\K        | 270.000     | 280.000     | 290.000     | 300.000     | 310.000     |
|-------------|-------------|-------------|-------------|-------------|-------------|
| 1.00000e+08 | 1.19456e-11 | 1.79361e-11 | 2.69019e-11 | 2.82669e-10 | 6.02017e-11 |
| 1.00000e+07 | 5.85055e-09 | 8.56632e-09 | 1.25073e-08 | 7.01846e-08 | 2.63831e-08 |
| 1.00000e+06 | 1.14852e-06 | 1.56544e-06 | 2.12721e-06 | 5.73795e-06 | 3.88638e-06 |
| 100000.     | 6.98894e-05 | 8.85335e-05 | 0.000111546 | 0.000157280 | 0.000173939 |
| 10000.0     | 0.00102653  | 0.00115666  | 0.00129576  | 0.000893614 | 0.00159785  |
| 1000.00     | 0.00198423  | 0.00200647  | 0.00202154  | 0.000912737 | 0.00203007  |
| 100.000     | 0.000550742 | 0.000540596 | 0.000533101 | 0.000284829 | 0.000525097 |
| 10.0000     | 0.000222827 | 0.000218675 | 0.000214007 | 0.000106158 | 0.000203197 |
| 1.00000     | 3.06376e-05 | 2.71877e-05 | 2.40388e-05 | 1.06408e-05 | 1.86106e-05 |
| 0.100000    | 1.30316e-07 | 1.04184e-07 | 8.35409e-08 | 8.02550e-08 | 5.43282e-08 |
| 0.0100000   | 2.47290e-11 | 2.07535e-11 | 1.77940e-11 | 1.31024e-10 | 1.41289e-11 |
| 0.00100000  | 1.06950e-14 | 1.12144e-14 | 1.22622e-14 | 6.15401e-13 | 1.65306e-14 |
| 0.000100000 | 2.57141e-17 | 3.30903e-17 | 4.43177e-17 | 1.08799e-14 | 8.88034e-17 |
| 1.00000e-05 | 2.23595e-19 | 3.40023e-19 | 5.38892e-19 | 5.21867e-16 | 1.52381e-18 |
| 1.00000e-06 | 6.60000e-21 | 1.15018e-20 | 2.07817e-20 | 4.28487e-17 | 7.47329e-20 |
| 1.00000e-07 | 4.50361e-22 | 8.39288e-22 | 1.56163e-21 | 4.17759e-18 | 6.27114e-21 |
| 1.00000e-08 | 4.49982e-23 | 5.80779e-23 | 1.32385e-22 | 3.15586e-19 | 7.60432e-22 |
| 1.00000e-09 | 6.00355e-25 | 6.42723e-25 | 1.13041e-24 | 4.26409e-20 | 1.88591e-24 |

| Pa\K | 400.000 | 500.000 | 600.000 | 700.000 | 800.000 |
|------|---------|---------|---------|---------|---------|
|------|---------|---------|---------|---------|---------|

|             |             |             |             |             |             |
|-------------|-------------|-------------|-------------|-------------|-------------|
| 1.00000e+08 | 1.11132e-08 | 3.86339e-07 | 1.15073e-05 | 0.000212062 | 0.00103944  |
| 1.00000e+07 | 1.67010e-06 | 2.51043e-05 | 0.000204668 | 0.00101651  | 0.00252316  |
| 1.00000e+06 | 6.76105e-05 | 0.000372491 | 0.000804889 | 0.00108848  | 0.00153531  |
| 100000.     | 0.000688820 | 0.00131154  | 0.00124933  | 0.000732609 | 0.000555242 |
| 10000.0     | 0.00137935  | 0.00132081  | 0.000970465 | 0.000509490 | 0.000316906 |
| 1000.00     | 0.000781236 | 0.000736168 | 0.000604585 | 0.000323320 | 0.000182040 |
| 100.000     | 0.000303224 | 0.000319438 | 0.000242172 | 0.000114220 | 5.44740e-05 |
| 10.0000     | 7.55970e-05 | 5.61116e-05 | 3.67784e-05 | 1.63752e-05 | 7.28708e-06 |
| 1.00000     | 3.77378e-06 | 2.65739e-06 | 2.48436e-06 | 1.41128e-06 | 6.92561e-07 |
| 0.100000    | 3.16105e-08 | 8.54119e-08 | 1.64357e-07 | 1.20957e-07 | 6.49757e-08 |
| 0.0100000   | 4.55335e-10 | 4.63333e-09 | 1.30442e-08 | 1.10294e-08 | 6.23826e-09 |
| 0.00100000  | 1.75663e-11 | 3.27557e-10 | 1.13879e-09 | 1.04282e-09 | 6.08268e-10 |
| 0.000100000 | 1.01991e-12 | 2.66302e-11 | 1.05099e-10 | 1.00868e-10 | 5.99214e-11 |
| 1.00000e-05 | 8.26928e-14 | 2.46466e-12 | 1.02015e-11 | 9.96364e-11 | 5.95939e-12 |
| 1.00000e-06 | 7.86463e-15 | 2.42065e-13 | 1.01297e-12 | 9.93433e-13 | 5.95143e-13 |
| 1.00000e-07 | 7.75233e-16 | 2.40794e-14 | 1.01204e-13 | 9.93034e-14 | 5.95166e-14 |
| 1.00000e-08 | 6.88549e-17 | 2.29753e-15 | 1.01286e-14 | 9.88815e-15 | 5.94825e-15 |
| 1.00000e-09 | 2.32012e-18 | 2.76252e-16 | 1.05592e-15 | 9.76695e-16 | 6.17017e-16 |

| Pa\K        | 900.000     | 1000.00     | 1100.00     | 1200.00     | 1300.00     |
|-------------|-------------|-------------|-------------|-------------|-------------|
| 1.00000e+08 | 0.00180292  | 0.00224555  | 0.00261695  | 0.00274739  | 0.00273138  |
| 1.00000e+07 | 0.00357882  | 0.00436235  | 0.00535715  | 0.00614933  | 0.00656498  |
| 1.00000e+06 | 0.00187018  | 0.00212578  | 0.00236859  | 0.00251967  | 0.00257742  |
| 100000.     | 0.000552825 | 0.000583212 | 0.000610401 | 0.000622518 | 0.000618447 |
| 10000.0     | 0.000271118 | 0.000258374 | 0.000246837 | 0.000229398 | 0.000205519 |
| 1000.00     | 0.000131439 | 0.000103708 | 8.15331e-05 | 6.24316e-05 | 4.64918e-05 |
| 100.000     | 3.15203e-05 | 2.01132e-05 | 1.31813e-05 | 8.70281e-06 | 5.76875e-06 |
| 10.0000     | 3.81584e-06 | 2.24083e-06 | 1.38287e-06 | 8.76141e-07 | 5.65221e-07 |
| 1.00000     | 3.70264e-07 | 2.17331e-07 | 1.33597e-07 | 8.43879e-08 | 5.43672e-08 |
| 0.100000    | 3.56704e-08 | 2.10875e-08 | 1.29934e-08 | 8.21858e-09 | 5.30171e-09 |
| 0.0100000   | 3.48049e-09 | 2.06800e-09 | 1.27691e-09 | 8.08721e-10 | 5.22246e-10 |
| 0.00100000  | 3.42783e-10 | 2.04341e-10 | 1.26350e-10 | 8.00910e-11 | 5.17528e-11 |
| 0.000100000 | 3.39724e-11 | 2.02926e-11 | 1.25586e-11 | 7.96479e-12 | 5.14859e-12 |
| 1.00000e-05 | 3.38648e-12 | 2.02446e-12 | 1.25336e-12 | 7.95085e-13 | 5.14050e-13 |
| 1.00000e-06 | 3.38393e-13 | 2.02338e-13 | 1.25281e-13 | 7.94787e-14 | 5.13889e-14 |
| 1.00000e-07 | 3.38334e-14 | 2.02304e-14 | 1.25281e-14 | 7.94739e-15 | 5.13802e-15 |
| 1.00000e-08 | 3.38024e-15 | 2.02190e-15 | 1.25365e-15 | 7.94786e-16 | 5.13778e-16 |
| 1.00000e-09 | 3.42885e-16 | 2.04613e-16 | 1.25988e-16 | 7.96460e-17 | 5.13329e-17 |

| Pa\K        | 1400.00     | 1500.00     | 1750.00     | 2000.00     | 2250.00     |
|-------------|-------------|-------------|-------------|-------------|-------------|
| 1.00000e+08 | 0.00274543  | 0.00279412  | 0.000372219 | 0.000395635 | 0.000416090 |
| 1.00000e+07 | 0.00680063  | 0.00692738  | 0.000233035 | 0.000245426 | 0.000238128 |
| 1.00000e+06 | 0.00257491  | 0.00252324  | 0.000180779 | 0.000163142 | 0.000133498 |
| 100000.     | 0.000598869 | 0.000565064 | 0.000113325 | 8.04840e-05 | 5.17074e-05 |
| 10000.0     | 0.000177291 | 0.000147640 | 3.53980e-05 | 1.83758e-05 | 9.08799e-06 |
| 1000.00     | 3.38463e-05 | 2.42474e-05 | 5.19271e-06 | 2.25093e-06 | 9.95367e-07 |
| 100.000     | 3.84313e-06 | 2.57815e-06 | 5.45117e-07 | 2.26710e-07 | 9.82979e-08 |
| 10.0000     | 3.70212e-07 | 2.45914e-07 | 5.38520e-08 | 2.23346e-08 | 9.67567e-09 |
| 1.00000     | 3.56101e-08 | 2.36730e-08 | 5.32265e-09 | 2.20978e-09 | 9.57978e-10 |
| 0.100000    | 3.47709e-09 | 2.31422e-09 | 5.28485e-10 | 2.19551e-10 | 9.52217e-11 |
| 0.0100000   | 3.42817e-10 | 2.28328e-10 | 5.26240e-11 | 2.18685e-11 | 9.48686e-12 |
| 0.00100000  | 3.39888e-11 | 2.26462e-11 | 5.24910e-12 | 2.18169e-12 | 9.46579e-13 |
| 0.000100000 | 3.38234e-12 | 2.25411e-12 | 5.24487e-13 | 2.18011e-13 | 9.45963e-14 |
| 1.00000e-05 | 3.37749e-13 | 2.25112e-13 | 5.24406e-14 | 2.17981e-14 | 9.45854e-15 |
| 1.00000e-06 | 3.37655e-14 | 2.25060e-14 | 5.24379e-15 | 2.17974e-15 | 9.45798e-16 |
| 1.00000e-07 | 3.37659e-15 | 2.25021e-15 | 5.24397e-16 | 2.18001e-16 | 9.45687e-17 |
| 1.00000e-08 | 3.37337e-16 | 2.24901e-16 | 5.24287e-17 | 2.17701e-17 | 9.45782e-18 |
| 1.00000e-09 | 3.20338e-17 | 2.13641e-17 | 5.14600e-18 | 2.13988e-18 | 9.28815e-19 |

| Pa\K        | 2500.00     | 2750.00     | 3000.00     | 3250.00     | 3500.00     |
|-------------|-------------|-------------|-------------|-------------|-------------|
| 1.00000e+08 | 0.000422520 | 0.000409577 | 0.000378812 | 0.000336880 | 0.000291213 |
| 1.00000e+07 | 0.000212878 | 0.000177644 | 0.000141266 | 0.000109008 | 8.26376e-05 |
| 1.00000e+06 | 0.000101205 | 7.17804e-05 | 4.84818e-05 | 3.17258e-05 | 2.03925e-05 |
| 100000.     | 3.07139e-05 | 1.72611e-05 | 9.45097e-06 | 5.15684e-06 | 2.84456e-06 |
| 10000.0     | 4.39744e-06 | 2.12926e-06 | 1.05089e-06 | 5.34062e-07 | 2.80584e-07 |
| 1000.00     | 4.51166e-07 | 2.10735e-07 | 1.01980e-07 | 5.12559e-08 | 2.67518e-08 |
| 100.000     | 4.41472e-08 | 2.05385e-08 | 9.92213e-09 | 4.98324e-09 | 2.59993e-09 |
| 10.0000     | 4.34421e-09 | 2.02114e-09 | 9.76588e-10 | 4.90572e-10 | 2.55991e-10 |
| 1.00000     | 4.30270e-10 | 2.00235e-10 | 9.67705e-11 | 4.86191e-11 | 2.53739e-11 |
| 0.100000    | 4.27786e-11 | 1.99112e-11 | 9.62403e-12 | 4.83578e-12 | 2.52397e-12 |
| 0.0100000   | 4.26259e-12 | 1.98420e-12 | 9.59136e-13 | 4.81967e-13 | 2.51570e-13 |
| 0.00100000  | 4.25354e-13 | 1.98014e-13 | 9.57232e-14 | 4.81036e-14 | 2.51095e-14 |
| 0.000100000 | 4.25099e-14 | 1.97903e-14 | 9.56726e-15 | 4.80795e-15 | 2.50975e-15 |
| 1.00000e-05 | 4.25054e-15 | 1.97883e-15 | 9.56638e-16 | 4.80753e-16 | 2.50954e-16 |
| 1.00000e-06 | 4.25028e-16 | 1.97884e-16 | 9.56605e-17 | 4.80745e-17 | 2.50944e-17 |
| 1.00000e-07 | 4.25028e-17 | 1.97886e-17 | 9.56565e-18 | 4.80729e-18 | 2.51022e-18 |
| 1.00000e-08 | 4.24744e-18 | 1.97566e-18 | 9.54383e-19 | 4.79499e-19 | 2.50156e-19 |

1.00000e-09 | 4.17501e-19 1.94406e-19 9.39973e-20 4.72437e-20 2.46637e-20

Pa\K | 3750.00 4000.00

-----  
1.00000e+08 | 0.000247195 0.000207680  
1.00000e+07 | 6.20281e-05 4.63410e-05  
1.00000e+06 | 1.30109e-05 8.30739e-06  
100000. | 1.59921e-06 9.20317e-07  
10000.0 | 1.52468e-07 8.55980e-08  
1000.00 | 1.44738e-08 8.09877e-09  
100.000 | 1.40629e-09 7.86638e-10  
10.0000 | 1.38482e-10 7.74675e-11  
1.00000 | 1.37278e-11 7.68000e-12  
0.100000 | 1.36561e-12 7.64032e-13  
0.0100000 | 1.36119e-13 7.61589e-14  
0.00100000 | 1.35868e-14 7.60212e-15  
0.000100000 | 1.35806e-15 7.59876e-16  
1.00000e-05 | 1.35795e-16 7.59818e-17  
1.00000e-06 | 1.35792e-17 7.59812e-18  
1.00000e-07 | 1.35802e-18 7.59765e-19  
1.00000e-08 | 1.35633e-19 7.58509e-20  
1.00000e-09 | 1.33468e-20 7.46835e-21

rad46

=====

Pa\K | 20.0000 30.0000 40.0000 50.0000 60.0000

-----  
1.00000e+08 | 2.05236e-45 4.24110e-44 3.32842e-43 1.98995e-42 1.10014e-41  
1.00000e+07 | 1.88102e-41 3.71000e-40 2.82945e-39 1.65774e-38 9.02723e-38  
1.00000e+06 | 1.49819e-37 2.82622e-36 2.06780e-35 1.16355e-34 6.10049e-34  
100000. | 8.15424e-34 1.11164e-32 6.50099e-32 3.10046e-31 1.43177e-30  
10000.0 | 1.13546e-30 9.34632e-30 4.06687e-29 1.57782e-28 6.26413e-28  
1000.00 | 2.26497e-28 8.69737e-28 2.48488e-27 7.48791e-27 2.56791e-26  
100.000 | 3.12162e-27 6.11859e-27 1.33349e-26 3.52280e-26 1.12240e-25  
10.0000 | 9.06714e-27 2.25087e-26 5.28742e-26 1.28692e-25 3.47374e-25  
1.00000 | 7.72565e-26 1.37014e-25 2.29963e-25 4.24850e-25 9.12451e-25  
0.100000 | 7.31454e-26 3.25898e-26 2.31583e-26 2.46311e-26 3.89072e-26  
0.0100000 | 5.50610e-28 1.29826e-28 1.00011e-28 1.45336e-28 3.80504e-28  
0.00100000 | 8.31414e-30 1.01494e-29 2.02230e-29 4.92068e-29 1.49583e-28  
0.000100000 | 2.47726e-29 5.12575e-29 1.02321e-28 2.27518e-28 6.04806e-28  
1.00000e-05 | 6.49250e-29 6.17990e-29 7.26270e-29 1.09182e-28 2.14985e-28  
1.00000e-06 | 7.37213e-30 2.87829e-30 2.34910e-30 2.96780e-30 5.55303e-30  
1.00000e-07 | 1.38474e-31 5.77725e-32 5.41250e-32 8.09551e-32 1.94166e-31  
1.00000e-08 | 4.94932e-33 2.83756e-33 3.20602e-33 5.55517e-33 1.53297e-32  
1.00000e-09 | 3.90408e-34 2.50676e-34 2.96594e-34 5.28631e-34 1.49069e-33

Pa\K | 70.0000 80.0000 90.0000 100.000 110.000

-----  
1.00000e+08 | 6.22767e-41 3.91265e-40 2.89852e-39 2.52987e-38 2.39171e-37  
1.00000e+07 | 5.05365e-37 3.15183e-36 2.32652e-35 2.02905e-34 1.91812e-33  
1.00000e+06 | 3.30038e-33 1.99908e-32 1.44199e-31 1.23512e-30 1.14681e-29  
100000. | 7.02060e-30 3.95036e-29 2.70983e-28 2.24653e-27 2.02446e-26  
10000.0 | 2.75274e-27 1.43837e-26 9.46173e-26 7.68177e-25 6.76457e-24  
1000.00 | 1.04862e-25 5.35591e-25 3.57069e-24 2.99417e-23 2.68829e-22  
100.000 | 4.39036e-25 2.22635e-24 1.58638e-23 1.53185e-22 1.56304e-21  
10.0000 | 1.12600e-24 5.00219e-24 3.69388e-23 4.27064e-22 5.09221e-21  
1.00000 | 2.47975e-24 1.02770e-23 8.86108e-23 1.28863e-21 1.72920e-20  
0.100000 | 1.08555e-25 1.19015e-24 4.53980e-23 1.30172e-21 2.19829e-20  
0.0100000 | 3.94491e-27 5.01305e-25 3.81630e-23 1.26523e-21 2.23543e-20  
0.00100000 | 2.18007e-27 4.64976e-25 3.75569e-23 1.26188e-21 2.23971e-20  
0.000100000 | 3.64914e-27 4.70909e-25 3.76165e-23 1.26371e-21 2.24334e-20  
1.00000e-05 | 2.11035e-27 4.62268e-25 3.75739e-23 1.26424e-21 2.24500e-20  
1.00000e-06 | 1.50868e-27 4.59048e-25 3.75463e-23 1.26410e-21 2.24509e-20  
1.00000e-07 | 1.49058e-27 4.58873e-25 3.75439e-23 1.26408e-21 2.24510e-20  
1.00000e-08 | 1.48963e-27 4.58858e-25 3.75437e-23 1.26408e-21 2.24510e-20  
1.00000e-09 | 1.48955e-27 4.58857e-25 3.75436e-23 1.26408e-21 2.24510e-20

Pa\K | 120.000 130.000 140.000 150.000 160.000

-----  
1.00000e+08 | 2.19940e-36 1.83712e-35 1.35966e-34 8.91769e-34 5.23724e-33  
1.00000e+07 | 1.76203e-32 1.46801e-31 1.08211e-30 7.05954e-30 4.11886e-29  
1.00000e+06 | 1.02985e-28 8.33130e-28 5.92220e-27 3.70162e-26 2.05683e-25  
100000. | 1.74737e-25 1.34097e-24 8.93708e-24 5.18811e-23 2.65741e-22  
10000.0 | 5.59991e-23 4.03556e-22 2.48137e-21 1.31087e-20 6.04632e-20  
1000.00 | 2.19705e-21 1.51638e-20 8.73513e-20 4.25926e-19 1.79534e-18  
100.000 | 1.36819e-20 9.62881e-20 5.48296e-19 2.59447e-18 1.04992e-17  
10.0000 | 4.89381e-20 3.63827e-19 2.14459e-18 1.03886e-17 4.27441e-17  
1.00000 | 1.72914e-19 1.28737e-18 7.44409e-18 3.49158e-17 1.37821e-16  
0.100000 | 2.37931e-19 1.81217e-18 1.04571e-17 4.83602e-17 1.87070e-16  
0.0100000 | 2.46051e-19 1.88521e-18 1.08905e-17 5.03008e-17 1.94108e-16

|             |             |             |             |             |             |
|-------------|-------------|-------------|-------------|-------------|-------------|
| 0.00100000  | 2.46967e-19 | 1.89355e-18 | 1.09408e-17 | 5.05318e-17 | 1.94973e-16 |
| 0.000100000 | 2.47397e-19 | 1.89699e-18 | 1.09614e-17 | 5.06286e-17 | 1.95352e-16 |
| 1.00000e-05 | 2.47603e-19 | 1.89861e-18 | 1.09705e-17 | 5.06689e-17 | 1.95498e-16 |
| 1.00000e-06 | 2.47626e-19 | 1.89882e-18 | 1.09717e-17 | 5.06744e-17 | 1.95518e-16 |
| 1.00000e-07 | 2.47628e-19 | 1.89884e-18 | 1.09718e-17 | 5.06750e-17 | 1.95520e-16 |
| 1.00000e-08 | 2.47629e-19 | 1.89884e-18 | 1.09719e-17 | 5.06751e-17 | 1.95521e-16 |
| 1.00000e-09 | 2.47629e-19 | 1.89884e-18 | 1.09719e-17 | 5.06751e-17 | 1.95521e-16 |

| Pa\K        | 170.000     | 180.000     | 190.000     | 200.000     | 210.000     |
|-------------|-------------|-------------|-------------|-------------|-------------|
| 1.00000e+08 | 2.79035e-32 | 1.36583e-31 | 6.21043e-31 | 2.64775e-30 | 1.06665e-29 |
| 1.00000e+07 | 2.17750e-28 | 1.05628e-27 | 4.75362e-27 | 2.00310e-26 | 7.96424e-26 |
| 1.00000e+06 | 1.02994e-24 | 4.70895e-24 | 1.98856e-23 | 7.83244e-23 | 2.90101e-22 |
| 100000.     | 1.21922e-21 | 5.08205e-21 | 1.94842e-20 | 6.94291e-20 | 2.31953e-19 |
| 10000.0     | 2.47799e-19 | 9.17060e-19 | 3.10787e-18 | 9.75948e-18 | 2.86813e-17 |
| 1000.00     | 6.67987e-18 | 2.23462e-17 | 6.82667e-17 | 1.92922e-16 | 5.09724e-16 |
| 100.000     | 3.72805e-17 | 1.18679e-16 | 3.44765e-16 | 9.27215e-16 | 2.33568e-15 |
| 10.0000     | 1.53544e-16 | 4.92318e-16 | 1.43408e-15 | 3.84871e-15 | 9.62349e-15 |
| 1.00000     | 4.71631e-16 | 1.43285e-15 | 3.93868e-15 | 9.94647e-15 | 2.33615e-14 |
| 0.100000    | 6.25527e-16 | 1.85490e-15 | 4.97680e-15 | 1.22761e-14 | 2.81962e-14 |
| 0.0100000   | 6.47157e-16 | 1.91307e-15 | 5.11707e-15 | 1.25850e-14 | 2.88268e-14 |
| 0.00100000  | 6.49933e-16 | 1.92096e-15 | 5.13740e-15 | 1.26335e-14 | 2.89354e-14 |
| 0.000100000 | 6.51204e-16 | 1.92471e-15 | 5.14734e-15 | 1.26575e-14 | 2.89887e-14 |
| 1.00000e-05 | 6.51657e-16 | 1.92594e-15 | 5.15033e-15 | 1.26641e-14 | 2.90023e-14 |
| 1.00000e-06 | 6.51717e-16 | 1.92610e-15 | 5.15071e-15 | 1.26649e-14 | 2.90039e-14 |
| 1.00000e-07 | 6.51723e-16 | 1.92611e-15 | 5.15075e-15 | 1.26650e-14 | 2.90041e-14 |
| 1.00000e-08 | 6.51724e-16 | 1.92612e-15 | 5.15075e-15 | 1.26650e-14 | 2.90041e-14 |
| 1.00000e-09 | 6.51724e-16 | 1.92612e-15 | 5.15075e-15 | 1.26650e-14 | 2.90041e-14 |

| Pa\K        | 220.000     | 230.000     | 240.000     | 250.000     | 260.000     |
|-------------|-------------|-------------|-------------|-------------|-------------|
| 1.00000e+08 | 4.08642e-29 | 1.49690e-28 | 5.26718e-28 | 1.78757e-27 | 5.87278e-27 |
| 1.00000e+07 | 3.00690e-25 | 1.08382e-24 | 3.74684e-24 | 1.24741e-23 | 4.01428e-23 |
| 1.00000e+06 | 1.01736e-21 | 3.39784e-21 | 1.08622e-20 | 3.33862e-20 | 9.90668e-20 |
| 100000.     | 7.31897e-19 | 2.19489e-18 | 6.29027e-18 | 1.73124e-17 | 4.59689e-17 |
| 10000.0     | 7.95443e-17 | 2.09672e-16 | 5.28512e-16 | 1.28082e-15 | 2.99870e-15 |
| 1000.00     | 1.27019e-15 | 3.00700e-15 | 6.80387e-15 | 1.47897e-14 | 3.10199e-14 |
| 100.000     | 5.56319e-15 | 1.26246e-14 | 2.74642e-14 | 5.75590e-14 | 1.16676e-13 |
| 10.0000     | 2.26218e-14 | 5.03570e-14 | 1.06786e-13 | 2.16786e-13 | 4.23070e-13 |
| 1.00000     | 5.15457e-14 | 1.07723e-13 | 2.14677e-13 | 4.10269e-13 | 7.55445e-13 |
| 0.100000    | 6.09265e-14 | 1.24893e-13 | 2.44541e-13 | 4.59933e-13 | 8.34818e-13 |
| 0.0100000   | 6.21348e-14 | 1.27088e-13 | 2.48357e-13 | 4.66327e-13 | 8.45214e-13 |
| 0.00100000  | 6.23650e-14 | 1.27553e-13 | 2.49258e-13 | 4.68001e-13 | 8.48211e-13 |
| 0.000100000 | 6.24754e-14 | 1.27768e-13 | 2.49652e-13 | 4.68691e-13 | 8.49363e-13 |
| 1.00000e-05 | 6.25013e-14 | 1.27815e-13 | 2.49732e-13 | 4.68820e-13 | 8.49566e-13 |
| 1.00000e-06 | 6.25044e-14 | 1.27820e-13 | 2.49741e-13 | 4.68835e-13 | 8.49589e-13 |
| 1.00000e-07 | 6.25047e-14 | 1.27821e-13 | 2.49742e-13 | 4.68837e-13 | 8.49591e-13 |
| 1.00000e-08 | 6.25047e-14 | 1.27821e-13 | 2.49742e-13 | 4.68837e-13 | 8.49591e-13 |
| 1.00000e-09 | 6.25047e-14 | 1.27821e-13 | 2.49742e-13 | 4.68837e-13 | 8.49591e-13 |

| Pa\K        | 270.000     | 280.000     | 290.000     | 300.000     | 310.000     |
|-------------|-------------|-------------|-------------|-------------|-------------|
| 1.00000e+08 | 1.87414e-26 | 5.82824e-26 | 1.77167e-25 | 6.43798e-25 | 1.54607e-24 |
| 1.00000e+07 | 1.25308e-22 | 3.80704e-22 | 1.12941e-21 | 2.23948e-21 | 9.36866e-21 |
| 1.00000e+06 | 2.84898e-19 | 7.97080e-19 | 2.17781e-18 | 1.58698e-17 | 1.53727e-17 |
| 100000.     | 1.18275e-16 | 2.96170e-16 | 7.25012e-16 | 1.57862e-15 | 4.13479e-15 |
| 10000.0     | 6.81252e-15 | 1.50800e-14 | 3.26521e-14 | 1.26078e-13 | 1.45414e-13 |
| 1000.00     | 6.30149e-14 | 1.24399e-13 | 2.39358e-13 | 1.11242e-12 | 8.29228e-12 |
| 100.000     | 2.29486e-13 | 4.39095e-13 | 8.19025e-13 | 8.40076e-12 | 2.65741e-11 |
| 10.0000     | 7.96509e-13 | 1.45108e-12 | 2.56493e-12 | 7.46471e-12 | 7.38726e-11 |
| 1.00000     | 1.34558e-12 | 2.32621e-12 | 3.91445e-12 | 5.96467e-12 | 1.03204e-11 |
| 0.100000    | 1.46803e-12 | 2.50924e-12 | 4.18040e-12 | 5.68949e-12 | 1.08420e-11 |
| 0.0100000   | 1.48452e-12 | 2.53488e-12 | 4.21961e-12 | 5.67573e-12 | 1.09300e-11 |
| 0.00100000  | 1.48970e-12 | 2.54353e-12 | 4.23357e-12 | 5.67792e-12 | 1.09633e-11 |
| 0.000100000 | 1.49154e-12 | 2.54638e-12 | 4.23784e-12 | 5.67719e-12 | 1.09720e-11 |
| 1.00000e-05 | 1.49185e-12 | 2.54683e-12 | 4.23849e-12 | 5.67695e-12 | 1.09732e-11 |
| 1.00000e-06 | 1.49189e-12 | 2.54688e-12 | 4.23855e-12 | 5.67692e-12 | 1.09733e-11 |
| 1.00000e-07 | 1.49189e-12 | 2.54689e-12 | 4.23856e-12 | 5.67691e-12 | 1.09734e-11 |
| 1.00000e-08 | 1.49189e-12 | 2.54689e-12 | 4.23856e-12 | 5.67691e-12 | 1.09734e-11 |
| 1.00000e-09 | 1.49189e-12 | 2.54689e-12 | 4.23856e-12 | 5.67691e-12 | 1.09734e-11 |

| Pa\K        | 400.000     | 500.000     | 600.000     | 700.000     | 800.000     |
|-------------|-------------|-------------|-------------|-------------|-------------|
| 1.00000e+08 | 7.02782e-15 | 3.84955e-10 | 5.91431e-08 | 1.21085e-06 | 5.27535e-06 |
| 1.00000e+07 | 1.11246e-11 | 1.86466e-07 | 9.56371e-06 | 5.83206e-05 | 0.000129728 |
| 1.00000e+06 | 1.74275e-09 | 4.58347e-06 | 0.000124426 | 0.000419165 | 0.000672807 |
| 100000.     | 1.83884e-08 | 7.18252e-06 | 0.000148232 | 0.000544138 | 0.000903455 |
| 10000.0     | 1.61933e-08 | 2.14107e-06 | 4.95172e-05 | 0.000299297 | 0.000665213 |
| 1000.00     | 3.76147e-09 | 3.84281e-07 | 1.45278e-05 | 0.000137281 | 0.000361670 |
| 100.000     | 1.10825e-09 | 8.13821e-08 | 3.84220e-06 | 4.09269e-05 | 0.000103486 |

|             |             |             |             |             |             |
|-------------|-------------|-------------|-------------|-------------|-------------|
| 10.0000     | 4.63110e-10 | 1.70334e-08 | 6.09438e-07 | 5.99849e-06 | 1.45477e-05 |
| 1.00000     | 3.25510e-10 | 6.47410e-09 | 9.87220e-08 | 7.82852e-07 | 2.22280e-06 |
| 0.100000    | 3.09781e-10 | 5.34863e-09 | 4.90650e-08 | 2.83840e-07 | 1.02202e-06 |
| 0.0100000   | 3.08782e-10 | 5.24060e-09 | 4.43473e-08 | 2.36839e-07 | 9.07186e-07 |
| 0.00100000  | 3.08747e-10 | 5.22999e-09 | 4.38828e-08 | 2.32275e-07 | 8.96015e-07 |
| 0.000100000 | 3.08742e-10 | 5.22892e-09 | 4.38366e-08 | 2.31826e-07 | 8.94916e-07 |
| 1.00000e-05 | 3.08741e-10 | 5.22882e-09 | 4.38320e-08 | 2.31781e-07 | 8.94808e-07 |
| 1.00000e-06 | 3.08741e-10 | 5.22881e-09 | 4.38315e-08 | 2.31777e-07 | 8.94797e-07 |
| 1.00000e-07 | 3.08741e-10 | 5.22881e-09 | 4.38315e-08 | 2.31776e-07 | 8.94796e-07 |
| 1.00000e-08 | 3.08741e-10 | 5.22881e-09 | 4.38315e-08 | 2.31776e-07 | 8.94796e-07 |
| 1.00000e-09 | 3.08741e-10 | 5.22881e-09 | 4.38315e-08 | 2.31776e-07 | 8.94796e-07 |

| Pa\K        | 900.000     | 1000.00     | 1100.00     | 1200.00     | 1300.00     |
|-------------|-------------|-------------|-------------|-------------|-------------|
| 1.00000e+08 | 9.53504e-06 | 1.28576e-05 | 1.61467e-05 | 1.81229e-05 | 1.91352e-05 |
| 1.00000e+07 | 0.000188414 | 0.000246896 | 0.000327172 | 0.000402323 | 0.000456613 |
| 1.00000e+06 | 0.000872979 | 0.00106749  | 0.00128014  | 0.00145670  | 0.00157613  |
| 100000.     | 0.00117551  | 0.00138654  | 0.00154835  | 0.00165284  | 0.00169629  |
| 10000.0     | 0.000926711 | 0.00104645  | 0.00106783  | 0.00102770  | 0.000952007 |
| 1000.00     | 0.000477182 | 0.000463620 | 0.000398635 | 0.000331213 | 0.000284613 |
| 100.000     | 0.000116174 | 9.66938e-05 | 7.91931e-05 | 7.61680e-05 | 9.22002e-05 |
| 10.0000     | 1.64876e-05 | 1.71888e-05 | 2.31387e-05 | 3.84374e-05 | 6.72846e-05 |
| 1.00000     | 4.09874e-06 | 8.18679e-06 | 1.72112e-05 | 3.46323e-05 | 6.48509e-05 |
| 0.100000    | 2.89161e-06 | 7.31568e-06 | 1.66415e-05 | 3.42684e-05 | 6.46188e-05 |
| 0.0100000   | 2.77518e-06 | 7.23145e-06 | 1.65864e-05 | 3.42332e-05 | 6.45963e-05 |
| 0.00100000  | 2.76382e-06 | 7.22322e-06 | 1.65810e-05 | 3.42298e-05 | 6.45941e-05 |
| 0.000100000 | 2.76270e-06 | 7.22240e-06 | 1.65805e-05 | 3.42294e-05 | 6.45939e-05 |
| 1.00000e-05 | 2.76258e-06 | 7.22232e-06 | 1.65804e-05 | 3.42294e-05 | 6.45939e-05 |
| 1.00000e-06 | 2.76257e-06 | 7.22232e-06 | 1.65804e-05 | 3.42294e-05 | 6.45939e-05 |
| 1.00000e-07 | 2.76257e-06 | 7.22231e-06 | 1.65804e-05 | 3.42294e-05 | 6.45939e-05 |
| 1.00000e-08 | 2.76257e-06 | 7.22231e-06 | 1.65804e-05 | 3.42294e-05 | 6.45939e-05 |
| 1.00000e-09 | 2.76257e-06 | 7.22231e-06 | 1.65804e-05 | 3.42294e-05 | 6.45939e-05 |

| Pa\K        | 1400.00     | 1500.00     | 1750.00     | 2000.00     | 2250.00    |
|-------------|-------------|-------------|-------------|-------------|------------|
| 1.00000e+08 | 2.03209e-05 | 2.17624e-05 | 0.00126789  | 0.00145679  | 0.00163411 |
| 1.00000e+07 | 0.000499823 | 0.000535615 | 0.00387957  | 0.00424673  | 0.00425368 |
| 1.00000e+06 | 0.00165172  | 0.00169119  | 0.00642053  | 0.00599286  | 0.00514332 |
| 100000.     | 0.00169004  | 0.00164906  | 0.00514392  | 0.00412849  | 0.00328283 |
| 10000.0     | 0.000866672 | 0.000795914 | 0.00202473  | 0.00170074  | 0.00173644 |
| 1000.00     | 0.000270207 | 0.000293497 | 0.000696546 | 0.000999294 | 0.00140840 |
| 100.000     | 0.000130790 | 0.000195488 | 0.000488129 | 0.000909241 | 0.00137138 |
| 10.0000     | 0.000114486 | 0.000184883 | 0.000466132 | 0.000900192 | 0.00136776 |
| 1.00000     | 0.000112927 | 0.000183884 | 0.000463971 | 0.000899308 | 0.00136741 |
| 0.100000    | 0.000112778 | 0.000183789 | 0.000463758 | 0.000899222 | 0.00136737 |
| 0.0100000   | 0.000112764 | 0.000183780 | 0.000463737 | 0.000899213 | 0.00136737 |
| 0.00100000  | 0.000112763 | 0.000183779 | 0.000463735 | 0.000899212 | 0.00136737 |
| 0.000100000 | 0.000112762 | 0.000183779 | 0.000463735 | 0.000899212 | 0.00136737 |
| 1.00000e-05 | 0.000112762 | 0.000183779 | 0.000463735 | 0.000899212 | 0.00136737 |
| 1.00000e-06 | 0.000112762 | 0.000183779 | 0.000463735 | 0.000899212 | 0.00136737 |
| 1.00000e-07 | 0.000112762 | 0.000183779 | 0.000463735 | 0.000899212 | 0.00136737 |
| 1.00000e-08 | 0.000112762 | 0.000183779 | 0.000463735 | 0.000899212 | 0.00136737 |
| 1.00000e-09 | 0.000112762 | 0.000183779 | 0.000463735 | 0.000899212 | 0.00136737 |

| Pa\K        | 2500.00    | 2750.00    | 3000.00    | 3250.00    | 3500.00    |
|-------------|------------|------------|------------|------------|------------|
| 1.00000e+08 | 0.00175240 | 0.00178150 | 0.00172007 | 0.00159261 | 0.00143176 |
| 1.00000e+07 | 0.00391523 | 0.00338279 | 0.00281663 | 0.00230995 | 0.00189231 |
| 1.00000e+06 | 0.00418288 | 0.00333932 | 0.00268490 | 0.00219799 | 0.00183055 |
| 100000.     | 0.00271515 | 0.00237276 | 0.00213259 | 0.00191914 | 0.00170755 |
| 10000.0     | 0.00188318 | 0.00197736 | 0.00196212 | 0.00185251 | 0.00168512 |
| 1000.00     | 0.00174577 | 0.00192365 | 0.00194246 | 0.00184604 | 0.00168349 |
| 100.000     | 0.00173157 | 0.00191845 | 0.00194068 | 0.00184551 | 0.00168339 |
| 10.0000     | 0.00173020 | 0.00191796 | 0.00194052 | 0.00184547 | 0.00168339 |
| 1.00000     | 0.00173007 | 0.00191791 | 0.00194050 | 0.00184546 | 0.00168339 |
| 0.100000    | 0.00173006 | 0.00191791 | 0.00194050 | 0.00184546 | 0.00168339 |
| 0.0100000   | 0.00173006 | 0.00191791 | 0.00194050 | 0.00184546 | 0.00168339 |
| 0.00100000  | 0.00173006 | 0.00191791 | 0.00194050 | 0.00184546 | 0.00168339 |
| 0.000100000 | 0.00173006 | 0.00191791 | 0.00194050 | 0.00184546 | 0.00168339 |
| 1.00000e-05 | 0.00173006 | 0.00191791 | 0.00194050 | 0.00184546 | 0.00168339 |
| 1.00000e-06 | 0.00173006 | 0.00191791 | 0.00194050 | 0.00184546 | 0.00168339 |
| 1.00000e-07 | 0.00173006 | 0.00191791 | 0.00194050 | 0.00184546 | 0.00168339 |
| 1.00000e-08 | 0.00173006 | 0.00191791 | 0.00194050 | 0.00184546 | 0.00168339 |
| 1.00000e-09 | 0.00173006 | 0.00191791 | 0.00194050 | 0.00184546 | 0.00168339 |

| Pa\K        | 3750.00    | 4000.00    |
|-------------|------------|------------|
| 1.00000e+08 | 0.00126404 | 0.00110556 |
| 1.00000e+07 | 0.00155971 | 0.00129694 |
| 1.00000e+06 | 0.00154214 | 0.00130704 |

|             |            |            |
|-------------|------------|------------|
| 100000.     | 0.00149825 | 0.00129890 |
| 10000.0     | 0.00149317 | 0.00129988 |
| 1000.00     | 0.00149318 | 0.00130033 |
| 100.000     | 0.00149322 | 0.00130040 |
| 10.0000     | 0.00149322 | 0.00130040 |
| 1.00000     | 0.00149322 | 0.00130040 |
| 0.100000    | 0.00149322 | 0.00130041 |
| 0.0100000   | 0.00149322 | 0.00130041 |
| 0.00100000  | 0.00149322 | 0.00130041 |
| 0.000100000 | 0.00149322 | 0.00130041 |
| 1.00000e-05 | 0.00149322 | 0.00130041 |
| 1.00000e-06 | 0.00149322 | 0.00130041 |
| 1.00000e-07 | 0.00149322 | 0.00130041 |
| 1.00000e-08 | 0.00149322 | 0.00130041 |
| 1.00000e-09 | 0.00149322 | 0.00130041 |

rad19anti

=====

Pa\K | 20.0000 30.0000 40.0000 50.0000 60.0000

|             |     |     |     |     |     |
|-------------|-----|-----|-----|-----|-----|
| 1.00000e+08 | N/A | N/A | N/A | N/A | N/A |
| 1.00000e+07 | N/A | N/A | N/A | N/A | N/A |
| 1.00000e+06 | N/A | N/A | N/A | N/A | N/A |
| 100000.     | N/A | N/A | N/A | N/A | N/A |
| 10000.0     | N/A | N/A | N/A | N/A | N/A |
| 1000.00     | N/A | N/A | N/A | N/A | N/A |
| 100.000     | N/A | N/A | N/A | N/A | N/A |
| 10.0000     | N/A | N/A | N/A | N/A | N/A |
| 1.00000     | N/A | N/A | N/A | N/A | N/A |
| 0.100000    | N/A | N/A | N/A | N/A | N/A |
| 0.0100000   | N/A | N/A | N/A | N/A | N/A |
| 0.00100000  | N/A | N/A | N/A | N/A | N/A |
| 0.000100000 | N/A | N/A | N/A | N/A | N/A |
| 1.00000e-05 | N/A | N/A | N/A | N/A | N/A |
| 1.00000e-06 | N/A | N/A | N/A | N/A | N/A |
| 1.00000e-07 | N/A | N/A | N/A | N/A | N/A |
| 1.00000e-08 | N/A | N/A | N/A | N/A | N/A |
| 1.00000e-09 | N/A | N/A | N/A | N/A | N/A |

Pa\K | 70.0000 80.0000 90.0000 100.0000 110.0000

|             |     |     |     |     |     |
|-------------|-----|-----|-----|-----|-----|
| 1.00000e+08 | N/A | N/A | N/A | N/A | N/A |
| 1.00000e+07 | N/A | N/A | N/A | N/A | N/A |
| 1.00000e+06 | N/A | N/A | N/A | N/A | N/A |
| 100000.     | N/A | N/A | N/A | N/A | N/A |
| 10000.0     | N/A | N/A | N/A | N/A | N/A |
| 1000.00     | N/A | N/A | N/A | N/A | N/A |
| 100.000     | N/A | N/A | N/A | N/A | N/A |
| 10.0000     | N/A | N/A | N/A | N/A | N/A |
| 1.00000     | N/A | N/A | N/A | N/A | N/A |
| 0.100000    | N/A | N/A | N/A | N/A | N/A |
| 0.0100000   | N/A | N/A | N/A | N/A | N/A |
| 0.00100000  | N/A | N/A | N/A | N/A | N/A |
| 0.000100000 | N/A | N/A | N/A | N/A | N/A |
| 1.00000e-05 | N/A | N/A | N/A | N/A | N/A |
| 1.00000e-06 | N/A | N/A | N/A | N/A | N/A |
| 1.00000e-07 | N/A | N/A | N/A | N/A | N/A |
| 1.00000e-08 | N/A | N/A | N/A | N/A | N/A |
| 1.00000e-09 | N/A | N/A | N/A | N/A | N/A |

Pa\K | 120.0000 130.0000 140.0000 150.0000 160.0000

|             |     |     |     |     |     |
|-------------|-----|-----|-----|-----|-----|
| 1.00000e+08 | N/A | N/A | N/A | N/A | N/A |
| 1.00000e+07 | N/A | N/A | N/A | N/A | N/A |
| 1.00000e+06 | N/A | N/A | N/A | N/A | N/A |
| 100000.     | N/A | N/A | N/A | N/A | N/A |
| 10000.0     | N/A | N/A | N/A | N/A | N/A |
| 1000.00     | N/A | N/A | N/A | N/A | N/A |
| 100.000     | N/A | N/A | N/A | N/A | N/A |
| 10.0000     | N/A | N/A | N/A | N/A | N/A |
| 1.00000     | N/A | N/A | N/A | N/A | N/A |
| 0.100000    | N/A | N/A | N/A | N/A | N/A |
| 0.0100000   | N/A | N/A | N/A | N/A | N/A |
| 0.00100000  | N/A | N/A | N/A | N/A | N/A |
| 0.000100000 | N/A | N/A | N/A | N/A | N/A |
| 1.00000e-05 | N/A | N/A | N/A | N/A | N/A |
| 1.00000e-06 | N/A | N/A | N/A | N/A | N/A |
| 1.00000e-07 | N/A | N/A | N/A | N/A | N/A |
| 1.00000e-08 | N/A | N/A | N/A | N/A | N/A |
| 1.00000e-09 | N/A | N/A | N/A | N/A | N/A |

| Pa\K        | 170.000 | 180.000 | 190.000 | 200.000 | 210.000 |
|-------------|---------|---------|---------|---------|---------|
| 1.00000e+08 | N/A     | N/A     | N/A     | N/A     | N/A     |
| 1.00000e+07 | N/A     | N/A     | N/A     | N/A     | N/A     |
| 1.00000e+06 | N/A     | N/A     | N/A     | N/A     | N/A     |
| 100000.     | N/A     | N/A     | N/A     | N/A     | N/A     |
| 10000.0     | N/A     | N/A     | N/A     | N/A     | N/A     |
| 1000.00     | N/A     | N/A     | N/A     | N/A     | N/A     |
| 100.000     | N/A     | N/A     | N/A     | N/A     | N/A     |
| 10.0000     | N/A     | N/A     | N/A     | N/A     | N/A     |
| 1.00000     | N/A     | N/A     | N/A     | N/A     | N/A     |
| 0.100000    | N/A     | N/A     | N/A     | N/A     | N/A     |
| 0.0100000   | N/A     | N/A     | N/A     | N/A     | N/A     |
| 0.00100000  | N/A     | N/A     | N/A     | N/A     | N/A     |
| 0.000100000 | N/A     | N/A     | N/A     | N/A     | N/A     |
| 1.00000e-05 | N/A     | N/A     | N/A     | N/A     | N/A     |
| 1.00000e-06 | N/A     | N/A     | N/A     | N/A     | N/A     |
| 1.00000e-07 | N/A     | N/A     | N/A     | N/A     | N/A     |
| 1.00000e-08 | N/A     | N/A     | N/A     | N/A     | N/A     |
| 1.00000e-09 | N/A     | N/A     | N/A     | N/A     | N/A     |

| Pa\K        | 220.000 | 230.000 | 240.000 | 250.000 | 260.000 |
|-------------|---------|---------|---------|---------|---------|
| 1.00000e+08 | N/A     | N/A     | N/A     | N/A     | N/A     |
| 1.00000e+07 | N/A     | N/A     | N/A     | N/A     | N/A     |
| 1.00000e+06 | N/A     | N/A     | N/A     | N/A     | N/A     |
| 100000.     | N/A     | N/A     | N/A     | N/A     | N/A     |
| 10000.0     | N/A     | N/A     | N/A     | N/A     | N/A     |
| 1000.00     | N/A     | N/A     | N/A     | N/A     | N/A     |
| 100.000     | N/A     | N/A     | N/A     | N/A     | N/A     |
| 10.0000     | N/A     | N/A     | N/A     | N/A     | N/A     |
| 1.00000     | N/A     | N/A     | N/A     | N/A     | N/A     |
| 0.100000    | N/A     | N/A     | N/A     | N/A     | N/A     |
| 0.0100000   | N/A     | N/A     | N/A     | N/A     | N/A     |
| 0.00100000  | N/A     | N/A     | N/A     | N/A     | N/A     |
| 0.000100000 | N/A     | N/A     | N/A     | N/A     | N/A     |
| 1.00000e-05 | N/A     | N/A     | N/A     | N/A     | N/A     |
| 1.00000e-06 | N/A     | N/A     | N/A     | N/A     | N/A     |
| 1.00000e-07 | N/A     | N/A     | N/A     | N/A     | N/A     |
| 1.00000e-08 | N/A     | N/A     | N/A     | N/A     | N/A     |
| 1.00000e-09 | N/A     | N/A     | N/A     | N/A     | N/A     |

| Pa\K        | 270.000 | 280.000 | 290.000 | 300.000     | 310.000 |
|-------------|---------|---------|---------|-------------|---------|
| 1.00000e+08 | N/A     | N/A     | N/A     | 1.37099e-21 | N/A     |
| 1.00000e+07 | N/A     | N/A     | N/A     | 4.53115e-19 | N/A     |
| 1.00000e+06 | N/A     | N/A     | N/A     | 3.43923e-17 | N/A     |
| 100000.     | N/A     | N/A     | N/A     | 1.11914e-15 | N/A     |
| 10000.0     | N/A     | N/A     | N/A     | 1.79103e-14 | N/A     |
| 1000.00     | N/A     | N/A     | N/A     | 1.56754e-13 | N/A     |
| 100.000     | N/A     | N/A     | N/A     | 1.20327e-12 | N/A     |
| 10.0000     | N/A     | N/A     | N/A     | 5.15506e-12 | N/A     |
| 1.00000     | N/A     | N/A     | N/A     | 9.65742e-12 | N/A     |
| 0.100000    | N/A     | N/A     | N/A     | 1.27458e-11 | N/A     |
| 0.0100000   | N/A     | N/A     | N/A     | 1.58151e-11 | N/A     |
| 0.00100000  | N/A     | N/A     | N/A     | 1.65674e-11 | N/A     |
| 0.000100000 | N/A     | N/A     | N/A     | 1.64095e-11 | N/A     |
| 1.00000e-05 | N/A     | N/A     | N/A     | 1.63693e-11 | N/A     |
| 1.00000e-06 | N/A     | N/A     | N/A     | 1.63649e-11 | N/A     |
| 1.00000e-07 | N/A     | N/A     | N/A     | 1.63644e-11 | N/A     |
| 1.00000e-08 | N/A     | N/A     | N/A     | 1.63644e-11 | N/A     |
| 1.00000e-09 | N/A     | N/A     | N/A     | 1.63644e-11 | N/A     |

| Pa\K        | 400.000     | 500.000     | 600.000     | 700.000     | 800.000     |
|-------------|-------------|-------------|-------------|-------------|-------------|
| 1.00000e+08 | 6.95653e-18 | 1.06255e-12 | 3.85895e-10 | 2.07884e-07 | 5.12395e-06 |
| 1.00000e+07 | 3.73449e-14 | 3.72133e-09 | 2.41354e-07 | 2.37076e-06 | 1.65964e-05 |
| 1.00000e+06 | 1.06143e-11 | 1.37766e-07 | 4.61799e-06 | 1.67043e-05 | 3.35714e-05 |
| 100000.     | 9.47416e-11 | 1.71216e-07 | 5.29968e-06 | 2.14896e-05 | 3.94900e-05 |
| 10000.0     | 5.24023e-11 | 3.21801e-08 | 1.52745e-06 | 1.14621e-05 | 2.86350e-05 |
| 1000.00     | 4.50303e-11 | 6.49135e-09 | 4.46413e-07 | 5.32971e-06 | 1.63145e-05 |
| 100.000     | 1.70299e-10 | 6.29350e-09 | 1.73690e-07 | 1.96358e-06 | 6.51041e-06 |
| 10.0000     | 3.49391e-10 | 8.30708e-09 | 1.10990e-07 | 8.39293e-07 | 3.31168e-06 |
| 1.00000     | 5.09261e-10 | 1.14303e-08 | 1.18518e-07 | 7.09583e-07 | 2.90189e-06 |
| 0.100000    | 7.09698e-10 | 1.38189e-08 | 1.25013e-07 | 7.01363e-07 | 2.85861e-06 |
| 0.0100000   | 8.28183e-10 | 1.45162e-08 | 1.26053e-07 | 6.99911e-07 | 2.85287e-06 |
| 0.00100000  | 8.50345e-10 | 1.46025e-08 | 1.26121e-07 | 6.99646e-07 | 2.85218e-06 |
| 0.000100000 | 8.51863e-10 | 1.46096e-08 | 1.26123e-07 | 6.99614e-07 | 2.85210e-06 |
| 1.00000e-05 | 8.51953e-10 | 1.46102e-08 | 1.26124e-07 | 6.99611e-07 | 2.85210e-06 |

|             |             |             |             |             |             |
|-------------|-------------|-------------|-------------|-------------|-------------|
| 1.00000e-06 | 8.51961e-10 | 1.46102e-08 | 1.26124e-07 | 6.99611e-07 | 2.85210e-06 |
| 1.00000e-07 | 8.51962e-10 | 1.46102e-08 | 1.26124e-07 | 6.99611e-07 | 2.85210e-06 |
| 1.00000e-08 | 8.51962e-10 | 1.46102e-08 | 1.26124e-07 | 6.99611e-07 | 2.85210e-06 |
| 1.00000e-09 | 8.51962e-10 | 1.46102e-08 | 1.26124e-07 | 6.99611e-07 | 2.85210e-06 |

| Pa\K        | 900.000     | 1000.00     | 1100.00     | 1200.00     | 1300.00     |
|-------------|-------------|-------------|-------------|-------------|-------------|
| 1.00000e+08 | 1.35517e-05 | 1.84430e-05 | 2.29370e-05 | 2.54706e-05 | 2.64142e-05 |
| 1.00000e+07 | 5.47914e-05 | 0.000127494 | 0.000242742 | 0.000351562 | 0.000420648 |
| 1.00000e+06 | 7.06707e-05 | 0.000176452 | 0.000409424 | 0.000655969 | 0.000807829 |
| 100000.     | 6.40843e-05 | 0.000115078 | 0.000218020 | 0.000346648 | 0.000478103 |
| 10000.0     | 4.88760e-05 | 7.99783e-05 | 0.000134355 | 0.000219422 | 0.000344370 |
| 1000.00     | 2.91815e-05 | 5.00734e-05 | 8.94382e-05 | 0.000159597 | 0.000277811 |
| 100.000     | 1.39967e-05 | 3.06309e-05 | 6.60579e-05 | 0.000134107 | 0.000253505 |
| 10.0000     | 9.85533e-06 | 2.60034e-05 | 6.11454e-05 | 0.000129427 | 0.000249535 |
| 1.00000     | 9.33780e-06 | 2.54331e-05 | 6.05622e-05 | 0.000128899 | 0.000249104 |
| 0.100000    | 9.28059e-06 | 2.53730e-05 | 6.05037e-05 | 0.000128848 | 0.000249063 |
| 0.0100000   | 9.27391e-06 | 2.53668e-05 | 6.04981e-05 | 0.000128843 | 0.000249059 |
| 0.00100000  | 9.27319e-06 | 2.53662e-05 | 6.04975e-05 | 0.000128843 | 0.000249059 |
| 0.000100000 | 9.27312e-06 | 2.53662e-05 | 6.04975e-05 | 0.000128843 | 0.000249059 |
| 1.00000e-05 | 9.27312e-06 | 2.53661e-05 | 6.04975e-05 | 0.000128843 | 0.000249059 |
| 1.00000e-06 | 9.27312e-06 | 2.53661e-05 | 6.04975e-05 | 0.000128843 | 0.000249059 |
| 1.00000e-07 | 9.27312e-06 | 2.53661e-05 | 6.04975e-05 | 0.000128843 | 0.000249059 |
| 1.00000e-08 | 9.27312e-06 | 2.53661e-05 | 6.04975e-05 | 0.000128843 | 0.000249059 |
| 1.00000e-09 | 9.27312e-06 | 2.53661e-05 | 6.04975e-05 | 0.000128843 | 0.000249059 |

| Pa\K        | 1400.00     | 1500.00     | 1750.00    | 2000.00    | 2250.00    |
|-------------|-------------|-------------|------------|------------|------------|
| 1.00000e+08 | 2.74130e-05 | 2.90494e-05 | 0.00233229 | 0.00248388 | 0.00260679 |
| 1.00000e+07 | 0.000463810 | 0.000498393 | 0.00284950 | 0.00281568 | 0.00291425 |
| 1.00000e+06 | 0.000908402 | 0.00101682  | 0.00171577 | 0.00228726 | 0.00331207 |
| 100000.     | 0.000640379 | 0.000864669 | 0.00154210 | 0.00296153 | 0.00454581 |
| 10000.0     | 0.000528027 | 0.000791942 | 0.00185724 | 0.00350783 | 0.00506983 |
| 1000.00     | 0.000465476 | 0.000743002 | 0.00196306 | 0.00362603 | 0.00515534 |
| 100.000     | 0.000445412 | 0.000729023 | 0.00197827 | 0.00364114 | 0.00516508 |
| 10.0000     | 0.000442432 | 0.000727135 | 0.00197998 | 0.00364283 | 0.00516611 |
| 1.00000     | 0.000442117 | 0.000726942 | 0.00198016 | 0.00364301 | 0.00516622 |
| 0.100000    | 0.000442087 | 0.000726925 | 0.00198018 | 0.00364303 | 0.00516623 |
| 0.0100000   | 0.000442085 | 0.000726924 | 0.00198018 | 0.00364303 | 0.00516623 |
| 0.00100000  | 0.000442085 | 0.000726923 | 0.00198018 | 0.00364303 | 0.00516623 |
| 0.000100000 | 0.000442085 | 0.000726923 | 0.00198018 | 0.00364303 | 0.00516623 |
| 1.00000e-05 | 0.000442085 | 0.000726923 | 0.00198018 | 0.00364303 | 0.00516623 |
| 1.00000e-06 | 0.000442085 | 0.000726923 | 0.00198018 | 0.00364303 | 0.00516623 |
| 1.00000e-07 | 0.000442085 | 0.000726923 | 0.00198018 | 0.00364303 | 0.00516623 |
| 1.00000e-08 | 0.000442085 | 0.000726923 | 0.00198018 | 0.00364303 | 0.00516623 |
| 1.00000e-09 | 0.000442085 | 0.000726923 | 0.00198018 | 0.00364303 | 0.00516623 |

| Pa\K        | 2500.00    | 2750.00    | 3000.00    | 3250.00    | 3500.00    |
|-------------|------------|------------|------------|------------|------------|
| 1.00000e+08 | 0.00268612 | 0.00272452 | 0.00273398 | 0.00272432 | 0.00269706 |
| 1.00000e+07 | 0.00318186 | 0.00352922 | 0.00381651 | 0.00394879 | 0.00390641 |
| 1.00000e+06 | 0.00438430 | 0.00509889 | 0.00532662 | 0.00516518 | 0.00477683 |
| 100000.     | 0.00566501 | 0.00609398 | 0.00597370 | 0.00554072 | 0.00497878 |
| 10000.0     | 0.00602920 | 0.00630255 | 0.00608018 | 0.00559144 | 0.00500176 |
| 1000.00     | 0.00607814 | 0.00632709 | 0.00609159 | 0.00559651 | 0.00500391 |
| 100.000     | 0.00608336 | 0.00632962 | 0.00609275 | 0.00559701 | 0.00500412 |
| 10.0000     | 0.00608389 | 0.00632988 | 0.00609286 | 0.00559706 | 0.00500415 |
| 1.00000     | 0.00608395 | 0.00632991 | 0.00609288 | 0.00559707 | 0.00500415 |
| 0.100000    | 0.00608395 | 0.00632991 | 0.00609288 | 0.00559707 | 0.00500415 |
| 0.0100000   | 0.00608396 | 0.00632991 | 0.00609288 | 0.00559707 | 0.00500415 |
| 0.00100000  | 0.00608396 | 0.00632991 | 0.00609288 | 0.00559707 | 0.00500415 |
| 0.000100000 | 0.00608396 | 0.00632991 | 0.00609288 | 0.00559707 | 0.00500415 |
| 1.00000e-05 | 0.00608396 | 0.00632991 | 0.00609288 | 0.00559707 | 0.00500415 |
| 1.00000e-06 | 0.00608396 | 0.00632991 | 0.00609288 | 0.00559707 | 0.00500415 |
| 1.00000e-07 | 0.00608396 | 0.00632991 | 0.00609288 | 0.00559707 | 0.00500415 |
| 1.00000e-08 | 0.00608396 | 0.00632991 | 0.00609288 | 0.00559707 | 0.00500415 |
| 1.00000e-09 | 0.00608396 | 0.00632991 | 0.00609288 | 0.00559707 | 0.00500415 |

| Pa\K        | 3750.00    | 4000.00    |
|-------------|------------|------------|
| 1.00000e+08 | 0.00264789 | 0.00257258 |
| 1.00000e+07 | 0.00372237 | 0.00344864 |
| 1.00000e+06 | 0.00429380 | 0.00379822 |
| 100000.     | 0.00439610 | 0.00384678 |
| 10000.0     | 0.00440594 | 0.00385055 |
| 1000.00     | 0.00440679 | 0.00385082 |
| 100.000     | 0.00440687 | 0.00385085 |
| 10.0000     | 0.00440688 | 0.00385085 |
| 1.00000     | 0.00440688 | 0.00385085 |
| 0.100000    | 0.00440688 | 0.00385085 |



|             |            |            |
|-------------|------------|------------|
| 0.0100000   | 0.00440688 | 0.00385085 |
| 0.00100000  | 0.00440688 | 0.00385085 |
| 0.000100000 | 0.00440688 | 0.00385085 |
| 1.00000e-05 | 0.00440688 | 0.00385085 |
| 1.00000e-06 | 0.00440688 | 0.00385085 |
| 1.00000e-07 | 0.00440688 | 0.00385085 |
| 1.00000e-08 | 0.00440688 | 0.00385085 |
| 1.00000e-09 | 0.00440688 | 0.00385085 |

PhCCH+CH3

=====

| Pa\K        | 20.0000     | 30.0000     | 40.0000     | 50.0000     | 60.0000     |
|-------------|-------------|-------------|-------------|-------------|-------------|
| 1.00000e+08 | 2.48045e-64 | 3.64997e-62 | 8.34242e-61 | 1.03164e-59 | 9.89601e-59 |
| 1.00000e+07 | 1.01019e-57 | 1.02986e-55 | 1.89873e-54 | 2.02124e-53 | 1.72980e-52 |
| 1.00000e+06 | 1.46386e-51 | 1.25718e-49 | 2.16113e-48 | 2.20852e-47 | 1.83771e-46 |
| 100000.     | 1.47215e-45 | 1.18198e-43 | 1.93448e-42 | 1.89204e-41 | 1.51046e-40 |
| 10000.0     | 1.00188e-39 | 5.79604e-38 | 7.24491e-37 | 5.61724e-36 | 3.65438e-35 |
| 1000.00     | 1.06627e-34 | 2.21218e-33 | 1.44954e-32 | 7.06157e-32 | 3.23921e-31 |
| 100.000     | 2.83097e-31 | 2.26209e-30 | 1.00673e-29 | 4.08293e-29 | 1.75261e-28 |
| 10.0000     | 1.07973e-28 | 7.84298e-28 | 3.28954e-27 | 1.26201e-26 | 5.17999e-26 |
| 1.00000     | 2.05923e-26 | 9.25813e-26 | 2.86252e-25 | 8.76364e-25 | 3.00867e-24 |
| 0.100000    | 7.35687e-25 | 2.11063e-24 | 5.24526e-24 | 1.39961e-23 | 4.36910e-23 |
| 0.0100000   | 1.03044e-23 | 3.02804e-23 | 7.97041e-23 | 2.24416e-22 | 7.35119e-22 |
| 0.00100000  | 1.88580e-22 | 5.54467e-22 | 1.37713e-21 | 3.62067e-21 | 1.10549e-20 |
| 0.000100000 | 2.25630e-21 | 4.99352e-21 | 1.03538e-20 | 2.36334e-20 | 6.39784e-20 |
| 1.00000e-05 | 8.23160e-21 | 9.36271e-21 | 1.22052e-20 | 1.95796e-20 | 4.01915e-20 |
| 1.00000e-06 | 1.73820e-21 | 7.65493e-22 | 6.48681e-22 | 8.28240e-22 | 1.54648e-21 |
| 1.00000e-07 | 4.20775e-23 | 1.77700e-23 | 1.65545e-23 | 2.44486e-23 | 5.83548e-23 |
| 1.00000e-08 | 1.54839e-24 | 8.83938e-25 | 9.88347e-25 | 1.68772e-24 | 5.30018e-24 |
| 1.00000e-09 | 1.22308e-25 | 7.81319e-26 | 9.14708e-26 | 1.60669e-25 | 1.17180e-24 |

| Pa\K        | 70.0000     | 80.0000     | 90.0000     | 100.000     | 110.000     |
|-------------|-------------|-------------|-------------|-------------|-------------|
| 1.00000e+08 | 8.81610e-58 | 8.33498e-57 | 9.37358e-56 | 1.33062e-54 | 2.28647e-53 |
| 1.00000e+07 | 1.40553e-51 | 1.23092e-50 | 1.30127e-49 | 1.76524e-48 | 2.93669e-47 |
| 1.00000e+06 | 1.46164e-45 | 1.25825e-44 | 1.31194e-43 | 1.76054e-42 | 2.90084e-41 |
| 100000.     | 1.15458e-39 | 9.57297e-39 | 9.64375e-38 | 1.25195e-36 | 1.98283e-35 |
| 10000.0     | 2.33331e-34 | 1.66230e-33 | 1.48970e-32 | 1.76099e-31 | 2.50005e-30 |
| 1000.00     | 1.60758e-30 | 9.95009e-30 | 8.79562e-29 | 1.08927e-27 | 1.53978e-26 |
| 100.000     | 9.02557e-28 | 6.47884e-27 | 7.09868e-26 | 1.02644e-24 | 1.51119e-23 |
| 10.0000     | 2.60195e-25 | 1.87055e-24 | 2.06962e-23 | 2.89777e-22 | 3.88419e-21 |
| 1.00000     | 1.31614e-23 | 8.70698e-23 | 9.41771e-22 | 1.28533e-20 | 1.60542e-19 |
| 0.100000    | 1.79439e-22 | 1.16485e-21 | 1.31413e-20 | 1.89180e-19 | 2.43263e-18 |
| 0.0100000   | 3.14959e-21 | 2.10373e-20 | 2.37730e-19 | 3.39044e-18 | 4.33400e-17 |
| 0.00100000  | 4.42138e-20 | 2.79379e-19 | 3.08835e-18 | 4.35086e-17 | 5.39988e-16 |
| 0.000100000 | 2.30868e-19 | 1.37644e-18 | 1.57333e-17 | 2.30715e-16 | 2.82708e-15 |
| 1.00000e-05 | 1.19760e-19 | 8.18141e-19 | 1.62057e-17 | 3.27249e-16 | 4.45165e-15 |
| 1.00000e-06 | 6.36480e-21 | 2.53509e-19 | 1.25089e-17 | 3.15511e-16 | 4.57510e-15 |
| 1.00000e-07 | 1.48086e-21 | 2.15009e-19 | 1.21304e-17 | 3.13709e-16 | 4.58346e-15 |
| 1.00000e-08 | 1.21461e-21 | 2.11833e-19 | 1.20943e-17 | 3.13527e-16 | 4.58426e-15 |
| 1.00000e-09 | 1.19058e-21 | 2.11524e-19 | 1.20907e-17 | 3.13508e-16 | 4.58434e-15 |

| Pa\K        | 120.000     | 130.000     | 140.000     | 150.000     | 160.000     |
|-------------|-------------|-------------|-------------|-------------|-------------|
| 1.00000e+08 | 4.27035e-52 | 7.91647e-51 | 1.38178e-49 | 2.22764e-48 | 3.28201e-47 |
| 1.00000e+07 | 5.33300e-46 | 9.59636e-45 | 1.61940e-43 | 2.51313e-42 | 3.54993e-41 |
| 1.00000e+06 | 5.21115e-40 | 9.25062e-39 | 1.53483e-37 | 2.33251e-36 | 3.21284e-35 |
| 100000.     | 3.37593e-34 | 5.57983e-33 | 8.46582e-32 | 1.15436e-30 | 1.40203e-29 |
| 10000.0     | 3.65611e-29 | 4.97151e-28 | 6.01156e-27 | 6.39099e-26 | 5.98188e-25 |
| 1000.00     | 2.07059e-25 | 2.45043e-24 | 2.50595e-23 | 2.22470e-22 | 1.73251e-21 |
| 100.000     | 1.94769e-22 | 2.10105e-21 | 1.89613e-20 | 1.45047e-19 | 9.55133e-19 |
| 10.0000     | 4.34289e-20 | 3.93274e-19 | 2.91676e-18 | 1.81101e-17 | 9.62953e-17 |
| 1.00000     | 1.61542e-18 | 1.29489e-17 | 8.47380e-17 | 4.66874e-16 | 2.22827e-15 |
| 0.100000    | 2.48017e-17 | 2.00628e-16 | 1.32778e-15 | 7.42644e-15 | 3.60720e-14 |
| 0.0100000   | 4.39404e-16 | 3.51549e-15 | 2.27956e-14 | 1.23494e-13 | 5.74114e-13 |
| 0.00100000  | 5.21984e-15 | 3.92694e-14 | 2.36876e-13 | 1.18326e-12 | 5.03405e-12 |
| 0.000100000 | 2.59193e-14 | 1.80531e-13 | 9.93732e-13 | 4.49175e-12 | 1.72194e-11 |
| 1.00000e-05 | 4.14442e-14 | 2.82700e-13 | 1.50128e-12 | 6.51079e-12 | 2.39275e-11 |
| 1.00000e-06 | 4.34631e-14 | 2.97860e-13 | 1.57922e-12 | 6.82002e-12 | 2.49356e-11 |
| 1.00000e-07 | 4.36550e-14 | 2.99393e-13 | 1.58728e-12 | 6.85225e-12 | 2.50409e-11 |
| 1.00000e-08 | 4.36741e-14 | 2.99547e-13 | 1.58809e-12 | 6.85549e-12 | 2.50515e-11 |
| 1.00000e-09 | 4.36760e-14 | 2.99562e-13 | 1.58817e-12 | 6.85581e-12 | 2.50525e-11 |

| Pa\K        | 170.000     | 180.000     | 190.000     | 200.000     | 210.000     |
|-------------|-------------|-------------|-------------|-------------|-------------|
| 1.00000e+08 | 4.41396e-46 | 5.42413e-45 | 6.14784e-44 | 6.42608e-43 | 6.21139e-42 |
| 1.00000e+07 | 4.56130e-40 | 5.33893e-39 | 5.74630e-38 | 5.68832e-37 | 5.19296e-36 |
| 1.00000e+06 | 4.00688e-34 | 4.52981e-33 | 4.67923e-32 | 4.41759e-31 | 3.82147e-30 |
| 100000.     | 1.51685e-28 | 1.46617e-27 | 1.27469e-26 | 1.00068e-25 | 7.13105e-25 |

|             |             |             |             |             |             |
|-------------|-------------|-------------|-------------|-------------|-------------|
| 10000.0     | 4.96447e-24 | 3.68424e-23 | 2.46684e-22 | 1.50153e-21 | 8.36696e-21 |
| 1000.00     | 1.19676e-20 | 7.40486e-20 | 4.13840e-19 | 2.10349e-18 | 9.78186e-18 |
| 100.000     | 5.49332e-18 | 2.79527e-17 | 1.27285e-16 | 5.23953e-16 | 1.96753e-15 |
| 10.0000     | 4.47590e-16 | 1.85151e-15 | 6.92220e-15 | 2.37027e-14 | 7.51863e-14 |
| 1.00000     | 9.43817e-15 | 3.61867e-14 | 1.27581e-13 | 4.18687e-13 | 1.29064e-12 |
| 0.100000    | 1.55423e-13 | 6.03724e-13 | 2.14042e-12 | 6.99316e-12 | 2.12187e-11 |
| 0.0100000   | 2.34132e-12 | 8.52508e-12 | 2.81081e-11 | 8.48717e-11 | 2.36844e-10 |
| 0.00100000  | 1.86658e-11 | 6.14590e-11 | 1.82453e-10 | 4.94534e-10 | 1.23672e-09 |
| 0.000100000 | 5.74749e-11 | 1.70609e-10 | 4.58182e-10 | 1.12891e-09 | 2.58131e-09 |
| 1.00000e-05 | 7.66842e-11 | 2.19183e-10 | 5.68726e-10 | 1.35880e-09 | 3.02362e-09 |
| 1.00000e-06 | 7.94962e-11 | 2.26088e-10 | 5.83981e-10 | 1.38961e-09 | 3.08129e-09 |
| 1.00000e-07 | 7.97896e-11 | 2.26807e-10 | 5.85564e-10 | 1.39280e-09 | 3.08723e-09 |
| 1.00000e-08 | 7.98190e-11 | 2.26879e-10 | 5.85723e-10 | 1.39312e-09 | 3.08783e-09 |
| 1.00000e-09 | 7.98220e-11 | 2.26887e-10 | 5.85739e-10 | 1.39315e-09 | 3.08789e-09 |

Pa\K | 220.000 230.000 240.000 250.000 260.000

|             |             |             |             |             |             |
|-------------|-------------|-------------|-------------|-------------|-------------|
| 1.00000e+08 | 5.57607e-41 | 4.69873e-40 | 3.69434e-39 | 2.69313e-38 | 1.82259e-37 |
| 1.00000e+07 | 4.39009e-35 | 3.47318e-34 | 2.55937e-33 | 1.74599e-32 | 1.10557e-31 |
| 1.00000e+06 | 3.04149e-29 | 2.24446e-28 | 1.53288e-27 | 9.67312e-27 | 5.65638e-26 |
| 100000.     | 4.64084e-24 | 2.77530e-23 | 1.53139e-22 | 7.83009e-22 | 3.72582e-21 |
| 10000.0     | 4.29529e-20 | 2.04260e-19 | 9.03925e-19 | 3.73773e-18 | 1.44929e-17 |
| 1000.00     | 4.18364e-17 | 1.65350e-16 | 6.06596e-16 | 2.07431e-15 | 6.63880e-15 |
| 100.000     | 6.79595e-15 | 2.17549e-14 | 6.49886e-14 | 1.82322e-13 | 4.83143e-13 |
| 10.0000     | 2.23110e-13 | 6.24544e-13 | 1.66081e-12 | 4.21995e-12 | 1.02934e-11 |
| 1.00000     | 3.76185e-12 | 1.04160e-11 | 2.74880e-11 | 6.93103e-11 | 1.67312e-10 |
| 0.100000    | 6.01741e-11 | 1.60362e-10 | 4.03484e-10 | 9.62415e-10 | 2.18412e-09 |
| 0.0100000   | 6.15448e-10 | 1.49860e-09 | 3.43785e-09 | 7.46504e-09 | 1.54077e-08 |
| 0.00100000  | 2.87891e-09 | 6.28579e-09 | 1.29572e-08 | 2.53605e-08 | 4.73662e-08 |
| 0.000100000 | 5.52976e-09 | 1.11862e-08 | 2.15103e-08 | 3.95386e-08 | 6.98016e-08 |
| 1.00000e-05 | 6.32505e-09 | 1.25338e-08 | 2.36775e-08 | 4.28658e-08 | 7.47031e-08 |
| 1.00000e-06 | 6.42607e-09 | 1.27009e-08 | 2.39404e-08 | 4.32614e-08 | 7.52752e-08 |
| 1.00000e-07 | 6.43646e-09 | 1.27181e-08 | 2.39673e-08 | 4.33018e-08 | 7.53334e-08 |
| 1.00000e-08 | 6.43750e-09 | 1.27198e-08 | 2.39699e-08 | 4.33058e-08 | 7.53393e-08 |
| 1.00000e-09 | 6.43761e-09 | 1.27200e-08 | 2.39702e-08 | 4.33062e-08 | 7.53399e-08 |

Pa\K | 270.000 280.000 290.000 300.000 310.000

|             |             |             |             |             |             |
|-------------|-------------|-------------|-------------|-------------|-------------|
| 1.00000e+08 | 1.14272e-36 | 6.61236e-36 | 3.52300e-35 | 1.91044e-27 | 7.78557e-34 |
| 1.00000e+07 | 6.49730e-31 | 3.53663e-30 | 1.78190e-29 | 2.37165e-22 | 3.59752e-28 |
| 1.00000e+06 | 3.06898e-25 | 1.54469e-24 | 7.21596e-24 | 3.59374e-18 | 1.26515e-22 |
| 100000.     | 1.65591e-20 | 6.89265e-20 | 2.69323e-19 | 2.70355e-15 | 3.42750e-18 |
| 10000.0     | 5.28601e-17 | 1.81841e-16 | 5.91403e-16 | 1.79402e-13 | 5.33025e-15 |
| 1000.00     | 1.99643e-14 | 5.66249e-14 | 1.52030e-13 | 5.28092e-12 | 9.42386e-13 |
| 100.000     | 1.21575e-12 | 2.91894e-12 | 6.71583e-12 | 8.86486e-11 | 3.17567e-11 |
| 10.0000     | 2.41911e-11 | 5.49306e-11 | 1.20762e-10 | 1.25106e-09 | 5.32757e-10 |
| 1.00000     | 3.87345e-10 | 8.61470e-10 | 1.84364e-09 | 1.41405e-08 | 7.57393e-09 |
| 0.100000    | 4.73116e-09 | 9.81037e-09 | 1.95239e-08 | 9.24641e-08 | 6.90069e-08 |
| 0.0100000   | 3.03414e-08 | 5.72023e-08 | 1.03571e-07 | 2.84244e-07 | 3.04201e-07 |
| 0.00100000  | 8.47915e-08 | 1.46048e-07 | 2.42883e-07 | 4.22726e-07 | 6.11835e-07 |
| 0.000100000 | 1.18832e-07 | 1.95766e-07 | 3.13021e-07 | 4.39898e-07 | 7.39119e-07 |
| 1.00000e-05 | 1.25791e-07 | 2.05320e-07 | 3.25751e-07 | 4.37890e-07 | 7.59993e-07 |
| 1.00000e-06 | 1.26589e-07 | 2.06401e-07 | 3.27171e-07 | 4.37512e-07 | 7.62270e-07 |
| 1.00000e-07 | 1.26671e-07 | 2.06510e-07 | 3.27315e-07 | 4.37472e-07 | 7.62500e-07 |
| 1.00000e-08 | 1.26679e-07 | 2.06521e-07 | 3.27330e-07 | 4.37468e-07 | 7.62523e-07 |
| 1.00000e-09 | 1.26679e-07 | 2.06522e-07 | 3.27331e-07 | 4.37468e-07 | 7.62525e-07 |

Pa\K | 400.000 500.000 600.000 700.000 800.000

|             |             |             |             |             |             |
|-------------|-------------|-------------|-------------|-------------|-------------|
| 1.00000e+08 | 6.25479e-18 | 2.03216e-12 | 4.48342e-10 | 4.50019e-08 | 1.44583e-06 |
| 1.00000e+07 | 6.54257e-14 | 4.41063e-09 | 2.62434e-07 | 1.86814e-06 | 7.86599e-06 |
| 1.00000e+06 | 3.15068e-11 | 2.05264e-07 | 5.39507e-06 | 1.80429e-05 | 3.24661e-05 |
| 100000.     | 7.79411e-10 | 7.39167e-07 | 1.09780e-05 | 3.10970e-05 | 5.22999e-05 |
| 10000.0     | 1.38309e-09 | 5.36639e-07 | 8.40815e-06 | 3.08695e-05 | 7.62274e-05 |
| 1000.00     | 2.49745e-09 | 3.38221e-07 | 7.26972e-06 | 4.81292e-05 | 0.000204690 |
| 100.000     | 2.49702e-08 | 1.41410e-06 | 2.35692e-05 | 0.000164792 | 0.000617973 |
| 10.0000     | 2.58386e-07 | 9.44083e-06 | 9.94844e-05 | 0.000454643 | 0.00119996  |
| 1.00000     | 1.74784e-06 | 3.66142e-05 | 0.000234634 | 0.000739883 | 0.00154826  |
| 0.100000    | 6.05163e-06 | 7.34248e-05 | 0.000329473 | 0.000857238 | 0.00164382  |
| 0.0100000   | 1.06057e-05 | 9.22233e-05 | 0.000357012 | 0.000879857 | 0.00165795  |
| 0.00100000  | 1.22248e-05 | 9.61081e-05 | 0.000360975 | 0.000882503 | 0.00165946  |
| 0.000100000 | 1.24407e-05 | 9.65465e-05 | 0.000361382 | 0.000882770 | 0.00165962  |
| 1.00000e-05 | 1.24589e-05 | 9.65889e-05 | 0.000361423 | 0.000882797 | 0.00165963  |
| 1.00000e-06 | 1.24606e-05 | 9.65931e-05 | 0.000361427 | 0.000882800 | 0.00165963  |
| 1.00000e-07 | 1.24607e-05 | 9.65935e-05 | 0.000361427 | 0.000882800 | 0.00165963  |
| 1.00000e-08 | 1.24608e-05 | 9.65935e-05 | 0.000361427 | 0.000882800 | 0.00165963  |
| 1.00000e-09 | 1.24608e-05 | 9.65935e-05 | 0.000361427 | 0.000882800 | 0.00165963  |

Pa\K | 900.000 1000.00 1100.00 1200.00 1300.00

|             |             |             |             |             |             |
|-------------|-------------|-------------|-------------|-------------|-------------|
| 1.00000e+08 | 9.69701e-06 | 2.54019e-05 | 4.28309e-05 | 5.20817e-05 | 5.04913e-05 |
| 1.00000e+07 | 3.96128e-05 | 0.000156199 | 0.000370017 | 0.000571847 | 0.000684093 |
| 1.00000e+06 | 8.01174e-05 | 0.000284104 | 0.000704489 | 0.00113962  | 0.00145077  |
| 100000.     | 0.000111326 | 0.000329824 | 0.000824344 | 0.00156463  | 0.00229570  |
| 10000.0     | 0.000223075 | 0.000659759 | 0.00154928  | 0.00273128  | 0.00372940  |
| 1000.00     | 0.000673024 | 0.00162171  | 0.00293472  | 0.00420767  | 0.00508608  |
| 100.000     | 0.00153442  | 0.00279110  | 0.00407632  | 0.00511224  | 0.00578032  |
| 10.0000     | 0.00227108  | 0.00344957  | 0.00453519  | 0.00539643  | 0.00596847  |
| 1.00000     | 0.00255910  | 0.00363201  | 0.00463245  | 0.00544613  | 0.00599768  |
| 0.100000    | 0.00261642  | 0.00366058  | 0.00464536  | 0.00545210  | 0.00600102  |
| 0.0100000   | 0.00262355  | 0.00366380  | 0.00464677  | 0.00545276  | 0.00600140  |
| 0.00100000  | 0.00262429  | 0.00366414  | 0.00464692  | 0.00545284  | 0.00600145  |
| 0.000100000 | 0.00262437  | 0.00366418  | 0.00464694  | 0.00545285  | 0.00600145  |
| 1.00000e-05 | 0.00262438  | 0.00366418  | 0.00464694  | 0.00545285  | 0.00600145  |
| 1.00000e-06 | 0.00262438  | 0.00366418  | 0.00464694  | 0.00545285  | 0.00600145  |
| 1.00000e-07 | 0.00262438  | 0.00366418  | 0.00464694  | 0.00545285  | 0.00600145  |
| 1.00000e-08 | 0.00262438  | 0.00366418  | 0.00464694  | 0.00545285  | 0.00600145  |
| 1.00000e-09 | 0.00262438  | 0.00366418  | 0.00464694  | 0.00545285  | 0.00600145  |

| Pa\K        | 1400.00     | 1500.00     | 1750.00    | 2000.00    | 2250.00    |
|-------------|-------------|-------------|------------|------------|------------|
| 1.00000e+08 | 4.22461e-05 | 3.12530e-05 | 0.00602281 | 0.00621178 | 0.00627731 |
| 1.00000e+07 | 0.000712945 | 0.000676791 | 0.00543609 | 0.00496791 | 0.00445324 |
| 1.00000e+06 | 0.00162588  | 0.00171334  | 0.00309134 | 0.00291578 | 0.00275968 |
| 100000.     | 0.00277411  | 0.00300631  | 0.00320914 | 0.00298835 | 0.00271177 |
| 10000.0     | 0.00428709  | 0.00447470  | 0.00411995 | 0.00356511 | 0.00297152 |
| 1000.00     | 0.00551256  | 0.00559287  | 0.00488500 | 0.00396480 | 0.00311111 |
| 100.000     | 0.00609184  | 0.00610816  | 0.00521741 | 0.00409340 | 0.00314468 |
| 10.0000     | 0.00623931  | 0.00623705  | 0.00529435 | 0.00411695 | 0.00314968 |
| 1.00000     | 0.00626111  | 0.00625599  | 0.00530535 | 0.00411993 | 0.00315025 |
| 0.100000    | 0.00626356  | 0.00625811  | 0.00530657 | 0.00412025 | 0.00315031 |
| 0.0100000   | 0.00626384  | 0.00625834  | 0.00530669 | 0.00412028 | 0.00315031 |
| 0.00100000  | 0.00626387  | 0.00625837  | 0.00530670 | 0.00412028 | 0.00315031 |
| 0.000100000 | 0.00626388  | 0.00625837  | 0.00530671 | 0.00412028 | 0.00315031 |
| 1.00000e-05 | 0.00626388  | 0.00625837  | 0.00530671 | 0.00412028 | 0.00315031 |
| 1.00000e-06 | 0.00626388  | 0.00625837  | 0.00530671 | 0.00412028 | 0.00315031 |
| 1.00000e-07 | 0.00626388  | 0.00625837  | 0.00530671 | 0.00412028 | 0.00315031 |
| 1.00000e-08 | 0.00626388  | 0.00625837  | 0.00530671 | 0.00412028 | 0.00315031 |
| 1.00000e-09 | 0.00626388  | 0.00625837  | 0.00530671 | 0.00412028 | 0.00315031 |

| Pa\K        | 2500.00    | 2750.00    | 3000.00    | 3250.00    | 3500.00    |
|-------------|------------|------------|------------|------------|------------|
| 1.00000e+08 | 0.00619970 | 0.00598963 | 0.00570334 | 0.00541613 | 0.00519037 |
| 1.00000e+07 | 0.00400705 | 0.00368141 | 0.00349569 | 0.00345839 | 0.00356734 |
| 1.00000e+06 | 0.00262290 | 0.00254197 | 0.00257680 | 0.00275263 | 0.00305834 |
| 100000.     | 0.00246322 | 0.00234554 | 0.00240679 | 0.00263052 | 0.00298015 |
| 10000.0     | 0.00253057 | 0.00234355 | 0.00239158 | 0.00261802 | 0.00297233 |
| 1000.00     | 0.00256501 | 0.00234907 | 0.00239120 | 0.00261704 | 0.00297165 |
| 100.000     | 0.00257176 | 0.00235012 | 0.00239123 | 0.00261695 | 0.00297159 |
| 10.0000     | 0.00257263 | 0.00235024 | 0.00239123 | 0.00261694 | 0.00297158 |
| 1.00000     | 0.00257272 | 0.00235025 | 0.00239123 | 0.00261694 | 0.00297158 |
| 0.100000    | 0.00257273 | 0.00235025 | 0.00239123 | 0.00261694 | 0.00297158 |
| 0.0100000   | 0.00257273 | 0.00235025 | 0.00239123 | 0.00261694 | 0.00297158 |
| 0.00100000  | 0.00257273 | 0.00235025 | 0.00239123 | 0.00261694 | 0.00297158 |
| 0.000100000 | 0.00257273 | 0.00235025 | 0.00239123 | 0.00261694 | 0.00297158 |
| 1.00000e-05 | 0.00257273 | 0.00235025 | 0.00239123 | 0.00261694 | 0.00297158 |
| 1.00000e-06 | 0.00257273 | 0.00235025 | 0.00239123 | 0.00261694 | 0.00297158 |
| 1.00000e-07 | 0.00257273 | 0.00235025 | 0.00239123 | 0.00261694 | 0.00297158 |
| 1.00000e-08 | 0.00257273 | 0.00235025 | 0.00239123 | 0.00261694 | 0.00297158 |
| 1.00000e-09 | 0.00257273 | 0.00235025 | 0.00239123 | 0.00261694 | 0.00297158 |

| Pa\K        | 3750.00    | 4000.00    |
|-------------|------------|------------|
| 1.00000e+08 | 0.00506166 | 0.00504077 |
| 1.00000e+07 | 0.00380677 | 0.00414970 |
| 1.00000e+06 | 0.00346532 | 0.00394070 |
| 100000.     | 0.00341950 | 0.00391649 |
| 10000.0     | 0.00341521 | 0.00391443 |
| 1000.00     | 0.00341483 | 0.00391426 |
| 100.000     | 0.00341480 | 0.00391425 |
| 10.0000     | 0.00341480 | 0.00391424 |
| 1.00000     | 0.00341480 | 0.00391424 |
| 0.100000    | 0.00341479 | 0.00391424 |
| 0.0100000   | 0.00341479 | 0.00391424 |
| 0.00100000  | 0.00341479 | 0.00391424 |
| 0.000100000 | 0.00341479 | 0.00391424 |
| 1.00000e-05 | 0.00341479 | 0.00391424 |
| 1.00000e-06 | 0.00341479 | 0.00391424 |
| 1.00000e-07 | 0.00341479 | 0.00391424 |
| 1.00000e-08 | 0.00341479 | 0.00391424 |

1.00000e-09 | 0.00341479 0.00391424

rad73

=====

| Pa\K        | 20.0000 | 30.0000 | 40.0000 | 50.0000 | 60.0000 |
|-------------|---------|---------|---------|---------|---------|
| 1.00000e+08 | N/A     | N/A     | N/A     | N/A     | N/A     |
| 1.00000e+07 | N/A     | N/A     | N/A     | N/A     | N/A     |
| 1.00000e+06 | N/A     | N/A     | N/A     | N/A     | N/A     |
| 100000.     | N/A     | N/A     | N/A     | N/A     | N/A     |
| 10000.0     | N/A     | N/A     | N/A     | N/A     | N/A     |
| 1000.00     | N/A     | N/A     | N/A     | N/A     | N/A     |
| 100.000     | N/A     | N/A     | N/A     | N/A     | N/A     |
| 10.0000     | N/A     | N/A     | N/A     | N/A     | N/A     |
| 1.00000     | N/A     | N/A     | N/A     | N/A     | N/A     |
| 0.100000    | N/A     | N/A     | N/A     | N/A     | N/A     |
| 0.0100000   | N/A     | N/A     | N/A     | N/A     | N/A     |
| 0.00100000  | N/A     | N/A     | N/A     | N/A     | N/A     |
| 0.000100000 | N/A     | N/A     | N/A     | N/A     | N/A     |
| 1.00000e-05 | N/A     | N/A     | N/A     | N/A     | N/A     |
| 1.00000e-06 | N/A     | N/A     | N/A     | N/A     | N/A     |
| 1.00000e-07 | N/A     | N/A     | N/A     | N/A     | N/A     |
| 1.00000e-08 | N/A     | N/A     | N/A     | N/A     | N/A     |
| 1.00000e-09 | N/A     | N/A     | N/A     | N/A     | N/A     |

| Pa\K        | 70.0000 | 80.0000 | 90.0000 | 100.000 | 110.000 |
|-------------|---------|---------|---------|---------|---------|
| 1.00000e+08 | N/A     | N/A     | N/A     | N/A     | N/A     |
| 1.00000e+07 | N/A     | N/A     | N/A     | N/A     | N/A     |
| 1.00000e+06 | N/A     | N/A     | N/A     | N/A     | N/A     |
| 100000.     | N/A     | N/A     | N/A     | N/A     | N/A     |
| 10000.0     | N/A     | N/A     | N/A     | N/A     | N/A     |
| 1000.00     | N/A     | N/A     | N/A     | N/A     | N/A     |
| 100.000     | N/A     | N/A     | N/A     | N/A     | N/A     |
| 10.0000     | N/A     | N/A     | N/A     | N/A     | N/A     |
| 1.00000     | N/A     | N/A     | N/A     | N/A     | N/A     |
| 0.100000    | N/A     | N/A     | N/A     | N/A     | N/A     |
| 0.0100000   | N/A     | N/A     | N/A     | N/A     | N/A     |
| 0.00100000  | N/A     | N/A     | N/A     | N/A     | N/A     |
| 0.000100000 | N/A     | N/A     | N/A     | N/A     | N/A     |
| 1.00000e-05 | N/A     | N/A     | N/A     | N/A     | N/A     |
| 1.00000e-06 | N/A     | N/A     | N/A     | N/A     | N/A     |
| 1.00000e-07 | N/A     | N/A     | N/A     | N/A     | N/A     |
| 1.00000e-08 | N/A     | N/A     | N/A     | N/A     | N/A     |
| 1.00000e-09 | N/A     | N/A     | N/A     | N/A     | N/A     |

| Pa\K        | 120.000 | 130.000 | 140.000 | 150.000 | 160.000 |
|-------------|---------|---------|---------|---------|---------|
| 1.00000e+08 | N/A     | N/A     | N/A     | N/A     | N/A     |
| 1.00000e+07 | N/A     | N/A     | N/A     | N/A     | N/A     |
| 1.00000e+06 | N/A     | N/A     | N/A     | N/A     | N/A     |
| 100000.     | N/A     | N/A     | N/A     | N/A     | N/A     |
| 10000.0     | N/A     | N/A     | N/A     | N/A     | N/A     |
| 1000.00     | N/A     | N/A     | N/A     | N/A     | N/A     |
| 100.000     | N/A     | N/A     | N/A     | N/A     | N/A     |
| 10.0000     | N/A     | N/A     | N/A     | N/A     | N/A     |
| 1.00000     | N/A     | N/A     | N/A     | N/A     | N/A     |
| 0.100000    | N/A     | N/A     | N/A     | N/A     | N/A     |
| 0.0100000   | N/A     | N/A     | N/A     | N/A     | N/A     |
| 0.00100000  | N/A     | N/A     | N/A     | N/A     | N/A     |
| 0.000100000 | N/A     | N/A     | N/A     | N/A     | N/A     |
| 1.00000e-05 | N/A     | N/A     | N/A     | N/A     | N/A     |
| 1.00000e-06 | N/A     | N/A     | N/A     | N/A     | N/A     |
| 1.00000e-07 | N/A     | N/A     | N/A     | N/A     | N/A     |
| 1.00000e-08 | N/A     | N/A     | N/A     | N/A     | N/A     |
| 1.00000e-09 | N/A     | N/A     | N/A     | N/A     | N/A     |

| Pa\K        | 170.000 | 180.000 | 190.000 | 200.000 | 210.000 |
|-------------|---------|---------|---------|---------|---------|
| 1.00000e+08 | N/A     | N/A     | N/A     | N/A     | N/A     |
| 1.00000e+07 | N/A     | N/A     | N/A     | N/A     | N/A     |
| 1.00000e+06 | N/A     | N/A     | N/A     | N/A     | N/A     |
| 100000.     | N/A     | N/A     | N/A     | N/A     | N/A     |
| 10000.0     | N/A     | N/A     | N/A     | N/A     | N/A     |
| 1000.00     | N/A     | N/A     | N/A     | N/A     | N/A     |
| 100.000     | N/A     | N/A     | N/A     | N/A     | N/A     |
| 10.0000     | N/A     | N/A     | N/A     | N/A     | N/A     |
| 1.00000     | N/A     | N/A     | N/A     | N/A     | N/A     |
| 0.100000    | N/A     | N/A     | N/A     | N/A     | N/A     |
| 0.0100000   | N/A     | N/A     | N/A     | N/A     | N/A     |

|             |     |     |     |     |     |
|-------------|-----|-----|-----|-----|-----|
| 0.00100000  | N/A | N/A | N/A | N/A | N/A |
| 0.000100000 | N/A | N/A | N/A | N/A | N/A |
| 1.00000e-05 | N/A | N/A | N/A | N/A | N/A |
| 1.00000e-06 | N/A | N/A | N/A | N/A | N/A |
| 1.00000e-07 | N/A | N/A | N/A | N/A | N/A |
| 1.00000e-08 | N/A | N/A | N/A | N/A | N/A |
| 1.00000e-09 | N/A | N/A | N/A | N/A | N/A |

| Pa\K        | 220.000 | 230.000 | 240.000 | 250.000 | 260.000 |
|-------------|---------|---------|---------|---------|---------|
| 1.00000e+08 | N/A     | N/A     | N/A     | N/A     | N/A     |
| 1.00000e+07 | N/A     | N/A     | N/A     | N/A     | N/A     |
| 1.00000e+06 | N/A     | N/A     | N/A     | N/A     | N/A     |
| 100000.     | N/A     | N/A     | N/A     | N/A     | N/A     |
| 10000.0     | N/A     | N/A     | N/A     | N/A     | N/A     |
| 1000.00     | N/A     | N/A     | N/A     | N/A     | N/A     |
| 100.000     | N/A     | N/A     | N/A     | N/A     | N/A     |
| 10.0000     | N/A     | N/A     | N/A     | N/A     | N/A     |
| 1.00000     | N/A     | N/A     | N/A     | N/A     | N/A     |
| 0.100000    | N/A     | N/A     | N/A     | N/A     | N/A     |
| 0.0100000   | N/A     | N/A     | N/A     | N/A     | N/A     |
| 0.00100000  | N/A     | N/A     | N/A     | N/A     | N/A     |
| 0.000100000 | N/A     | N/A     | N/A     | N/A     | N/A     |
| 1.00000e-05 | N/A     | N/A     | N/A     | N/A     | N/A     |
| 1.00000e-06 | N/A     | N/A     | N/A     | N/A     | N/A     |
| 1.00000e-07 | N/A     | N/A     | N/A     | N/A     | N/A     |
| 1.00000e-08 | N/A     | N/A     | N/A     | N/A     | N/A     |
| 1.00000e-09 | N/A     | N/A     | N/A     | N/A     | N/A     |

| Pa\K        | 270.000 | 280.000 | 290.000 | 300.000     | 310.000 |
|-------------|---------|---------|---------|-------------|---------|
| 1.00000e+08 | N/A     | N/A     | N/A     | 9.55888e-28 | N/A     |
| 1.00000e+07 | N/A     | N/A     | N/A     | 3.83297e-24 | N/A     |
| 1.00000e+06 | N/A     | N/A     | N/A     | 1.53814e-21 | N/A     |
| 100000.     | N/A     | N/A     | N/A     | 2.02715e-20 | N/A     |
| 10000.0     | N/A     | N/A     | N/A     | 2.54486e-21 | N/A     |
| 1000.00     | N/A     | N/A     | N/A     | 3.48427e-24 | N/A     |
| 100.000     | N/A     | N/A     | N/A     | 3.14817e-27 | N/A     |
| 10.0000     | N/A     | N/A     | N/A     | 7.42996e-29 | N/A     |
| 1.00000     | N/A     | N/A     | N/A     | 6.10334e-30 | N/A     |
| 0.100000    | N/A     | N/A     | N/A     | 6.01946e-31 | N/A     |
| 0.0100000   | N/A     | N/A     | N/A     | 6.21770e-32 | N/A     |
| 0.00100000  | N/A     | N/A     | N/A     | 8.20481e-33 | N/A     |
| 0.000100000 | N/A     | N/A     | N/A     | 2.80077e-33 | N/A     |
| 1.00000e-05 | N/A     | N/A     | N/A     | 2.25997e-33 | N/A     |
| 1.00000e-06 | N/A     | N/A     | N/A     | 2.20588e-33 | N/A     |
| 1.00000e-07 | N/A     | N/A     | N/A     | 2.20047e-33 | N/A     |
| 1.00000e-08 | N/A     | N/A     | N/A     | 2.19993e-33 | N/A     |
| 1.00000e-09 | N/A     | N/A     | N/A     | 2.19987e-33 | N/A     |

| Pa\K        | 400.000     | 500.000     | 600.000     | 700.000     | 800.000     |
|-------------|-------------|-------------|-------------|-------------|-------------|
| 1.00000e+08 | 1.33488e-17 | 2.81639e-12 | 3.62136e-10 | 6.61141e-09 | 2.90813e-08 |
| 1.00000e+07 | 1.52760e-14 | 1.59741e-09 | 8.82018e-08 | 5.02281e-07 | 1.12259e-06 |
| 1.00000e+06 | 5.73076e-13 | 2.42176e-08 | 1.15042e-06 | 4.26802e-06 | 7.18127e-06 |
| 100000.     | 3.86397e-13 | 5.88487e-09 | 7.54637e-07 | 4.54856e-06 | 8.78469e-06 |
| 10000.0     | 7.25441e-15 | 1.55538e-10 | 1.08511e-07 | 1.78619e-06 | 5.32445e-06 |
| 1000.00     | 2.72744e-17 | 6.22721e-12 | 2.38909e-08 | 7.28522e-07 | 2.68396e-06 |
| 100.000     | 6.92487e-19 | 8.59756e-13 | 6.20068e-09 | 2.14335e-07 | 7.54218e-07 |
| 10.0000     | 7.46810e-20 | 1.29439e-13 | 9.29664e-10 | 3.03712e-08 | 1.00248e-07 |
| 1.00000     | 8.27075e-21 | 1.38246e-14 | 8.96707e-11 | 2.89192e-09 | 9.75105e-09 |
| 0.100000    | 8.37895e-22 | 1.36728e-15 | 8.51604e-12 | 2.72468e-10 | 9.34313e-10 |
| 0.0100000   | 8.42128e-23 | 1.36650e-16 | 8.38398e-13 | 2.64571e-11 | 9.10635e-11 |
| 0.00100000  | 8.62358e-24 | 1.36805e-17 | 8.33613e-14 | 2.60619e-12 | 9.02548e-12 |
| 0.000100000 | 1.05274e-24 | 1.37446e-18 | 8.32059e-15 | 2.59637e-13 | 9.56224e-13 |
| 1.00000e-05 | 2.95218e-25 | 1.43563e-19 | 8.38258e-16 | 2.70737e-14 | 1.57180e-13 |
| 1.00000e-06 | 2.19456e-25 | 2.04690e-20 | 9.07746e-17 | 3.89236e-15 | 7.75624e-14 |
| 1.00000e-07 | 2.11880e-25 | 8.15962e-21 | 1.60445e-17 | 1.57605e-15 | 6.96079e-14 |
| 1.00000e-08 | 2.11122e-25 | 6.92869e-21 | 8.57183e-18 | 1.34443e-15 | 6.88124e-14 |
| 1.00000e-09 | 2.11046e-25 | 6.80559e-21 | 7.82459e-18 | 1.32128e-15 | 6.87330e-14 |

| Pa\K        | 900.000     | 1000.00     | 1100.00     | 1200.00     | 1300.00     |
|-------------|-------------|-------------|-------------|-------------|-------------|
| 1.00000e+08 | 5.42964e-08 | 7.50063e-08 | 9.59596e-08 | 1.09374e-07 | 1.17041e-07 |
| 1.00000e+07 | 1.68503e-06 | 2.26189e-06 | 3.04892e-06 | 3.79949e-06 | 4.35923e-06 |
| 1.00000e+06 | 9.65301e-06 | 1.20126e-05 | 1.45044e-05 | 1.65698e-05 | 1.79720e-05 |
| 100000.     | 1.21415e-05 | 1.46395e-05 | 1.64222e-05 | 1.75192e-05 | 1.79086e-05 |
| 10000.0     | 8.29300e-06 | 9.74054e-06 | 1.00359e-05 | 9.60298e-06 | 8.69895e-06 |
| 1000.00     | 4.04862e-06 | 4.10337e-06 | 3.51090e-06 | 2.76527e-06 | 2.07934e-06 |
| 100.000     | 9.60039e-07 | 7.99015e-07 | 5.71853e-07 | 3.89023e-07 | 2.64649e-07 |

|             |             |             |             |             |             |
|-------------|-------------|-------------|-------------|-------------|-------------|
| 10.0000     | 1.16090e-07 | 8.89685e-08 | 6.00434e-08 | 4.01503e-08 | 3.14349e-08 |
| 1.00000     | 1.13048e-08 | 8.63096e-09 | 5.95198e-09 | 4.97988e-09 | 8.65113e-09 |
| 0.100000    | 1.09338e-09 | 8.55371e-10 | 7.52341e-10 | 1.61488e-09 | 6.47642e-09 |
| 0.0100000   | 1.08308e-10 | 1.03464e-10 | 2.49240e-10 | 1.28911e-09 | 6.26569e-09 |
| 0.00100000  | 1.21383e-11 | 2.99354e-11 | 1.99997e-10 | 1.25720e-09 | 6.24502e-09 |
| 0.000100000 | 2.66563e-12 | 2.26857e-11 | 1.95138e-10 | 1.25405e-09 | 6.24298e-09 |
| 1.00000e-05 | 1.72704e-12 | 2.19669e-11 | 1.94656e-10 | 1.25374e-09 | 6.24278e-09 |
| 1.00000e-06 | 1.63349e-12 | 2.18953e-11 | 1.94608e-10 | 1.25371e-09 | 6.24276e-09 |
| 1.00000e-07 | 1.62414e-12 | 2.18881e-11 | 1.94603e-10 | 1.25370e-09 | 6.24276e-09 |
| 1.00000e-08 | 1.62321e-12 | 2.18874e-11 | 1.94603e-10 | 1.25370e-09 | 6.24276e-09 |
| 1.00000e-09 | 1.62311e-12 | 2.18873e-11 | 1.94603e-10 | 1.25370e-09 | 6.24276e-09 |

| Pa\K        | 1400.00     | 1500.00     | 1750.00     | 2000.00     | 2250.00     |
|-------------|-------------|-------------|-------------|-------------|-------------|
| 1.00000e+08 | 1.25783e-07 | 1.36136e-07 | 0.000935186 | 0.00108205  | 0.00122128  |
| 1.00000e+07 | 4.81555e-06 | 5.20184e-06 | 0.00316504  | 0.00347591  | 0.00349224  |
| 1.00000e+06 | 1.88466e-05 | 1.92748e-05 | 0.00478529  | 0.00436461  | 0.00364831  |
| 100000.     | 1.76810e-05 | 1.69650e-05 | 0.00333247  | 0.00239737  | 0.00159710  |
| 10000.0     | 7.54393e-06 | 6.34207e-06 | 0.00106040  | 0.000562148 | 0.000304440 |
| 1000.00     | 1.53317e-06 | 1.16050e-06 | 0.000157120 | 7.39904e-05 | 5.11597e-05 |
| 100.000     | 1.96809e-07 | 1.99013e-07 | 1.73303e-05 | 1.24424e-05 | 2.29097e-05 |
| 10.0000     | 4.15793e-08 | 9.53920e-08 | 2.57467e-06 | 6.24393e-06 | 2.01271e-05 |
| 1.00000     | 2.67143e-08 | 8.55877e-08 | 1.12199e-06 | 5.63589e-06 | 1.98546e-05 |
| 0.100000    | 2.52963e-08 | 8.46521e-08 | 9.78902e-07 | 5.57596e-06 | 1.98278e-05 |
| 0.0100000   | 2.51587e-08 | 8.45612e-08 | 9.64732e-07 | 5.57002e-06 | 1.98251e-05 |
| 0.00100000  | 2.51452e-08 | 8.45523e-08 | 9.63323e-07 | 5.56943e-06 | 1.98248e-05 |
| 0.000100000 | 2.51439e-08 | 8.45514e-08 | 9.63183e-07 | 5.56937e-06 | 1.98248e-05 |
| 1.00000e-05 | 2.51437e-08 | 8.45513e-08 | 9.63169e-07 | 5.56936e-06 | 1.98248e-05 |
| 1.00000e-06 | 2.51437e-08 | 8.45513e-08 | 9.63168e-07 | 5.56936e-06 | 1.98248e-05 |
| 1.00000e-07 | 2.51437e-08 | 8.45513e-08 | 9.63167e-07 | 5.56936e-06 | 1.98248e-05 |
| 1.00000e-08 | 2.51437e-08 | 8.45513e-08 | 9.63167e-07 | 5.56936e-06 | 1.98248e-05 |
| 1.00000e-09 | 2.51437e-08 | 8.45513e-08 | 9.63167e-07 | 5.56936e-06 | 1.98248e-05 |

| Pa\K        | 2500.00     | 2750.00     | 3000.00     | 3250.00     | 3500.00     |
|-------------|-------------|-------------|-------------|-------------|-------------|
| 1.00000e+08 | 0.00131649  | 0.00134396  | 0.00130159  | 0.00120731  | 0.00108598  |
| 1.00000e+07 | 0.00320252  | 0.00273371  | 0.00222891  | 0.00177596  | 0.00140744  |
| 1.00000e+06 | 0.00279161  | 0.00201050  | 0.00141592  | 0.00101486  | 0.000767370 |
| 100000.     | 0.000982823 | 0.000610319 | 0.000428619 | 0.000362789 | 0.000356630 |
| 10000.0     | 0.000186507 | 0.000160795 | 0.000186034 | 0.000234539 | 0.000289458 |
| 1000.00     | 6.36593e-05 | 0.000102509 | 0.000158172 | 0.000221007 | 0.000282796 |
| 100.000     | 5.09509e-05 | 9.67356e-05 | 0.000155480 | 0.000219720 | 0.000282170 |
| 10.0000     | 4.97134e-05 | 9.61765e-05 | 0.000155221 | 0.000219596 | 0.000282110 |
| 1.00000     | 4.95924e-05 | 9.61219e-05 | 0.000155195 | 0.000219584 | 0.000282105 |
| 0.100000    | 4.95805e-05 | 9.61165e-05 | 0.000155193 | 0.000219583 | 0.000282104 |
| 0.0100000   | 4.95793e-05 | 9.61160e-05 | 0.000155192 | 0.000219583 | 0.000282104 |
| 0.00100000  | 4.95792e-05 | 9.61159e-05 | 0.000155192 | 0.000219583 | 0.000282104 |
| 0.000100000 | 4.95791e-05 | 9.61159e-05 | 0.000155192 | 0.000219583 | 0.000282104 |
| 1.00000e-05 | 4.95791e-05 | 9.61159e-05 | 0.000155192 | 0.000219583 | 0.000282104 |
| 1.00000e-06 | 4.95791e-05 | 9.61159e-05 | 0.000155192 | 0.000219583 | 0.000282104 |
| 1.00000e-07 | 4.95791e-05 | 9.61159e-05 | 0.000155192 | 0.000219583 | 0.000282104 |
| 1.00000e-08 | 4.95791e-05 | 9.61159e-05 | 0.000155192 | 0.000219583 | 0.000282104 |
| 1.00000e-09 | 4.95791e-05 | 9.61159e-05 | 0.000155192 | 0.000219583 | 0.000282104 |

| Pa\K        | 3750.00     | 4000.00     |
|-------------|-------------|-------------|
| 1.00000e+08 | 0.000958347 | 0.000837410 |
| 1.00000e+07 | 0.00112413  | 0.000913681 |
| 1.00000e+06 | 0.000625182 | 0.000548147 |
| 100000.     | 0.000375925 | 0.000402007 |
| 10000.0     | 0.000341025 | 0.000384163 |
| 1000.00     | 0.000337734 | 0.000382561 |
| 100.000     | 0.000337429 | 0.000382415 |
| 10.0000     | 0.000337400 | 0.000382401 |
| 1.00000     | 0.000337397 | 0.000382400 |
| 0.100000    | 0.000337397 | 0.000382400 |
| 0.0100000   | 0.000337397 | 0.000382400 |
| 0.00100000  | 0.000337397 | 0.000382400 |
| 0.000100000 | 0.000337397 | 0.000382400 |
| 1.00000e-05 | 0.000337397 | 0.000382400 |
| 1.00000e-06 | 0.000337397 | 0.000382400 |
| 1.00000e-07 | 0.000337397 | 0.000382400 |
| 1.00000e-08 | 0.000337397 | 0.000382400 |
| 1.00000e-09 | 0.000337397 | 0.000382400 |

rad30  
=====

| Pa\K        | 20.0000     | 30.0000     | 40.0000     | 50.0000     | 60.0000     |
|-------------|-------------|-------------|-------------|-------------|-------------|
| 1.00000e+08 | 4.07086e-27 | 1.96240e-26 | 6.13680e-26 | 1.74698e-25 | 5.00128e-25 |

|             |             |             |             |             |             |
|-------------|-------------|-------------|-------------|-------------|-------------|
| 1.00000e+07 | 4.07057e-25 | 1.96212e-24 | 6.13552e-24 | 1.74651e-23 | 4.99965e-23 |
| 1.00000e+06 | 4.06771e-23 | 1.95936e-22 | 6.12281e-22 | 1.74181e-21 | 4.98336e-21 |
| 100000.     | 4.03941e-21 | 1.93230e-20 | 5.99959e-20 | 1.69664e-19 | 4.82836e-19 |
| 10000.0     | 3.78359e-19 | 1.70894e-18 | 5.05802e-18 | 1.37381e-17 | 3.78182e-17 |
| 1000.00     | 2.47703e-17 | 8.86220e-17 | 2.20755e-16 | 5.20809e-16 | 1.27918e-15 |
| 100.000     | 4.20364e-16 | 5.94735e-16 | 7.90035e-16 | 1.20772e-15 | 2.29047e-15 |
| 10.0000     | 1.36447e-16 | 6.22637e-17 | 5.72333e-17 | 8.32745e-17 | 2.13753e-16 |
| 1.00000     | 5.43377e-18 | 3.07608e-18 | 3.41789e-18 | 6.03715e-18 | 4.35594e-17 |
| 0.100000    | 4.14752e-19 | 2.66146e-19 | 3.13563e-19 | 7.30401e-19 | 2.95502e-17 |
| 0.0100000   | 4.02301e-20 | 2.60272e-20 | 3.09504e-20 | 2.27585e-19 | 2.81809e-17 |
| 0.00100000  | 4.28360e-21 | 3.41420e-21 | 5.01688e-21 | 1.82098e-19 | 2.80560e-17 |
| 0.000100000 | 3.78748e-21 | 8.45786e-21 | 1.83762e-20 | 2.14870e-19 | 2.81449e-17 |
| 1.00000e-05 | 2.90207e-20 | 6.09246e-20 | 1.18653e-19 | 4.22623e-19 | 2.86533e-17 |
| 1.00000e-06 | 9.81142e-20 | 1.09553e-19 | 1.39628e-19 | 3.90072e-19 | 2.84828e-17 |
| 1.00000e-07 | 2.60578e-20 | 1.42517e-20 | 1.39570e-20 | 1.92142e-19 | 2.80871e-17 |
| 1.00000e-08 | 1.64850e-21 | 9.48866e-22 | 1.09202e-21 | 1.73820e-19 | 2.80485e-17 |
| 1.00000e-09 | 1.38666e-22 | 8.65604e-23 | 1.73401e-22 | 1.72368e-19 | 2.80451e-17 |

Pa\K | 70.0000      80.0000      90.0000      100.000      110.000

|             |             |             |             |             |             |
|-------------|-------------|-------------|-------------|-------------|-------------|
| 1.00000e+08 | 1.53288e-24 | 5.23379e-24 | 1.95518e-23 | 7.42785e-23 | 2.68296e-22 |
| 1.00000e+07 | 1.53230e-22 | 5.23166e-22 | 1.95434e-21 | 7.42448e-21 | 2.68164e-20 |
| 1.00000e+06 | 1.52659e-20 | 5.21047e-20 | 1.94599e-19 | 7.39099e-19 | 2.66858e-18 |
| 100000.     | 1.47269e-18 | 5.01168e-18 | 1.86817e-17 | 7.08077e-17 | 2.54859e-16 |
| 10000.0     | 1.12537e-16 | 3.77577e-16 | 1.39762e-15 | 5.25615e-15 | 1.86635e-14 |
| 1000.00     | 3.51516e-15 | 1.13980e-14 | 4.20358e-14 | 1.56800e-13 | 5.40038e-13 |
| 100.000     | 6.18747e-15 | 2.58269e-14 | 1.26720e-13 | 5.54538e-13 | 2.00902e-12 |
| 10.0000     | 1.60443e-15 | 1.67170e-14 | 1.22830e-13 | 6.25973e-13 | 2.39700e-12 |
| 1.00000     | 1.08801e-15 | 1.53177e-14 | 1.21100e-13 | 6.31696e-13 | 2.43908e-12 |
| 0.100000    | 1.03898e-15 | 1.51745e-14 | 1.20909e-13 | 6.32247e-13 | 2.44334e-12 |
| 0.0100000   | 1.03409e-15 | 1.51600e-14 | 1.20890e-13 | 6.32302e-13 | 2.44377e-12 |
| 0.00100000  | 1.03364e-15 | 1.51588e-14 | 1.20889e-13 | 6.32313e-13 | 2.44384e-12 |
| 0.000100000 | 1.03396e-15 | 1.51604e-14 | 1.20898e-13 | 6.32359e-13 | 2.44404e-12 |
| 1.00000e-05 | 1.03565e-15 | 1.51684e-14 | 1.20941e-13 | 6.32558e-13 | 2.44480e-12 |
| 1.00000e-06 | 1.03527e-15 | 1.51702e-14 | 1.20965e-13 | 6.32699e-13 | 2.44535e-12 |
| 1.00000e-07 | 1.03428e-15 | 1.51679e-14 | 1.20963e-13 | 6.32710e-13 | 2.44542e-12 |
| 1.00000e-08 | 1.03417e-15 | 1.51676e-14 | 1.20962e-13 | 6.32711e-13 | 2.44543e-12 |
| 1.00000e-09 | 1.03416e-15 | 1.51676e-14 | 1.20962e-13 | 6.32711e-13 | 2.44543e-12 |

Pa\K | 120.000      130.000      140.000      150.000      160.000

|             |             |             |             |             |             |
|-------------|-------------|-------------|-------------|-------------|-------------|
| 1.00000e+08 | 8.93476e-22 | 2.73267e-21 | 7.73718e-21 | 2.05079e-20 | 5.14365e-20 |
| 1.00000e+07 | 8.92990e-20 | 2.73099e-19 | 7.73170e-19 | 2.04910e-18 | 5.13867e-18 |
| 1.00000e+06 | 8.88178e-18 | 2.71436e-17 | 7.67763e-17 | 2.03246e-16 | 5.08980e-16 |
| 100000.     | 8.44411e-16 | 2.56507e-15 | 7.20025e-15 | 1.88838e-14 | 4.67649e-14 |
| 10000.0     | 6.05880e-14 | 1.79168e-13 | 4.86659e-13 | 1.22798e-12 | 2.90937e-12 |
| 1000.00     | 1.66168e-12 | 4.56881e-12 | 1.13597e-11 | 2.59038e-11 | 5.48787e-11 |
| 100.000     | 6.09583e-12 | 1.59520e-11 | 3.70326e-11 | 7.80678e-11 | 1.52233e-10 |
| 10.0000     | 7.38942e-12 | 1.93048e-11 | 4.43782e-11 | 9.22972e-11 | 1.77313e-10 |
| 1.00000     | 7.53907e-12 | 1.96999e-11 | 4.52454e-11 | 9.39679e-11 | 1.80233e-10 |
| 0.100000    | 7.55437e-12 | 1.97404e-11 | 4.53344e-11 | 9.41393e-11 | 1.80532e-10 |
| 0.0100000   | 7.55592e-12 | 1.97445e-11 | 4.53434e-11 | 9.41569e-11 | 1.80563e-10 |
| 0.00100000  | 7.55616e-12 | 1.97453e-11 | 4.53452e-11 | 9.41613e-11 | 1.80573e-10 |
| 0.000100000 | 7.55687e-12 | 1.97475e-11 | 4.53517e-11 | 9.41779e-11 | 1.80613e-10 |
| 1.00000e-05 | 7.55933e-12 | 1.97543e-11 | 4.53682e-11 | 9.42140e-11 | 1.80685e-10 |
| 1.00000e-06 | 7.56101e-12 | 1.97585e-11 | 4.53773e-11 | 9.42316e-11 | 1.80716e-10 |
| 1.00000e-07 | 7.56125e-12 | 1.97591e-11 | 4.53786e-11 | 9.42342e-11 | 1.80720e-10 |
| 1.00000e-08 | 7.56127e-12 | 1.97592e-11 | 4.53788e-11 | 9.42344e-11 | 1.80721e-10 |
| 1.00000e-09 | 7.56127e-12 | 1.97592e-11 | 4.53788e-11 | 9.42345e-11 | 1.80721e-10 |

Pa\K | 170.000      180.000      190.000      200.000      210.000

|             |             |             |             |             |             |
|-------------|-------------|-------------|-------------|-------------|-------------|
| 1.00000e+08 | 1.23194e-19 | 2.83824e-19 | 6.32583e-19 | 1.36992e-18 | 2.89231e-18 |
| 1.00000e+07 | 1.23053e-17 | 2.83439e-17 | 6.31562e-17 | 1.36729e-16 | 2.88571e-16 |
| 1.00000e+06 | 1.21676e-15 | 2.79691e-15 | 6.21685e-15 | 1.34199e-14 | 2.82259e-14 |
| 100000.     | 1.10336e-13 | 2.49785e-13 | 5.45575e-13 | 1.15452e-12 | 2.37457e-12 |
| 10000.0     | 6.53021e-12 | 1.39842e-11 | 2.87268e-11 | 5.68423e-11 | 1.08683e-10 |
| 1000.00     | 1.09202e-10 | 2.05929e-10 | 3.70688e-10 | 6.40698e-10 | 1.06841e-09 |
| 100.000     | 2.78593e-10 | 4.83896e-10 | 8.04789e-10 | 1.29051e-09 | 2.00611e-09 |
| 10.0000     | 3.19627e-10 | 5.47126e-10 | 8.97556e-10 | 1.42119e-09 | 2.18402e-09 |
| 1.00000     | 3.24355e-10 | 5.54333e-10 | 9.08019e-10 | 1.43578e-09 | 2.20370e-09 |
| 0.100000    | 3.24839e-10 | 5.55071e-10 | 9.09090e-10 | 1.43727e-09 | 2.20572e-09 |
| 0.0100000   | 3.24890e-10 | 5.55151e-10 | 9.09212e-10 | 1.43746e-09 | 2.20600e-09 |
| 0.00100000  | 3.24913e-10 | 5.55203e-10 | 9.09325e-10 | 1.43769e-09 | 2.20648e-09 |
| 0.000100000 | 3.25001e-10 | 5.55384e-10 | 9.09677e-10 | 1.43834e-09 | 2.20761e-09 |
| 1.00000e-05 | 3.25134e-10 | 5.55615e-10 | 9.10056e-10 | 1.43893e-09 | 2.20848e-09 |
| 1.00000e-06 | 3.25185e-10 | 5.55694e-10 | 9.10171e-10 | 1.43909e-09 | 2.20870e-09 |
| 1.00000e-07 | 3.25192e-10 | 5.55704e-10 | 9.10186e-10 | 1.43911e-09 | 2.20873e-09 |
| 1.00000e-08 | 3.25193e-10 | 5.55705e-10 | 9.10187e-10 | 1.43911e-09 | 2.20873e-09 |
| 1.00000e-09 | 3.25193e-10 | 5.55706e-10 | 9.10187e-10 | 1.43911e-09 | 2.20873e-09 |

| Pa\K        | 220.000     | 230.000     | 240.000     | 250.000     | 260.000     |
|-------------|-------------|-------------|-------------|-------------|-------------|
| 1.00000e+08 | 5.96885e-18 | 1.20645e-17 | 2.39219e-17 | 4.65917e-17 | 8.92293e-17 |
| 1.00000e+07 | 5.95263e-16 | 1.20256e-15 | 2.38303e-15 | 4.63807e-15 | 8.87520e-15 |
| 1.00000e+06 | 5.79902e-14 | 1.16603e-13 | 2.29811e-13 | 4.44481e-13 | 8.44446e-13 |
| 100000.     | 4.75834e-12 | 9.30714e-12 | 1.77945e-11 | 3.32927e-11 | 6.10083e-11 |
| 10000.0     | 2.01295e-10 | 3.61860e-10 | 6.32405e-10 | 1.07601e-09 | 1.78466e-09 |
| 1000.00     | 1.72580e-09 | 2.70931e-09 | 4.14539e-09 | 6.19675e-09 | 9.06911e-09 |
| 100.000     | 3.03629e-09 | 4.48982e-09 | 6.50458e-09 | 9.25336e-09 | 1.29502e-08 |
| 10.0000     | 3.27159e-09 | 4.79338e-09 | 6.88787e-09 | 9.72829e-09 | 1.35290e-08 |
| 1.00000     | 3.29739e-09 | 4.82640e-09 | 6.92927e-09 | 9.77927e-09 | 1.35908e-08 |
| 0.100000    | 3.30004e-09 | 4.82981e-09 | 6.93359e-09 | 9.78467e-09 | 1.35975e-08 |
| 0.0100000   | 3.30048e-09 | 4.83052e-09 | 6.93476e-09 | 9.78668e-09 | 1.36009e-08 |
| 0.00100000  | 3.30141e-09 | 4.83224e-09 | 6.93784e-09 | 9.79195e-09 | 1.36097e-08 |
| 0.000100000 | 3.30329e-09 | 4.83524e-09 | 6.94244e-09 | 9.79875e-09 | 1.36194e-08 |
| 1.00000e-05 | 3.30455e-09 | 4.83697e-09 | 6.94475e-09 | 9.80175e-09 | 1.36232e-08 |
| 1.00000e-06 | 3.30483e-09 | 4.83733e-09 | 6.94519e-09 | 9.80228e-09 | 1.36238e-08 |
| 1.00000e-07 | 3.30486e-09 | 4.83737e-09 | 6.94524e-09 | 9.80234e-09 | 1.36239e-08 |
| 1.00000e-08 | 3.30486e-09 | 4.83738e-09 | 6.94525e-09 | 9.80235e-09 | 1.36239e-08 |
| 1.00000e-09 | 3.30486e-09 | 4.83738e-09 | 6.94525e-09 | 9.80235e-09 | 1.36239e-08 |

| Pa\K        | 270.000     | 280.000     | 290.000     | 300.000     | 310.000     |
|-------------|-------------|-------------|-------------|-------------|-------------|
| 1.00000e+08 | 1.68181e-16 | 3.12213e-16 | 5.71235e-16 | 2.05684e-14 | 1.83494e-15 |
| 1.00000e+07 | 1.67122e-14 | 3.09902e-14 | 5.66281e-14 | 1.94337e-12 | 1.81327e-13 |
| 1.00000e+06 | 1.57713e-12 | 2.89752e-12 | 5.23948e-12 | 1.36531e-10 | 1.63657e-11 |
| 100000.     | 1.09576e-10 | 1.93009e-10 | 3.33575e-10 | 3.95791e-09 | 9.42743e-10 |
| 10000.0     | 2.88889e-09 | 4.56908e-09 | 7.06838e-09 | 2.33364e-08 | 1.58966e-08 |
| 1000.00     | 1.30185e-08 | 1.83593e-08 | 2.54722e-08 | 3.57780e-08 | 4.69219e-08 |
| 100.000     | 1.78573e-08 | 2.42930e-08 | 3.26395e-08 | 3.73176e-08 | 5.69659e-08 |
| 10.0000     | 1.85524e-08 | 2.51167e-08 | 3.36040e-08 | 3.74499e-08 | 5.82474e-08 |
| 1.00000     | 1.86263e-08 | 2.52040e-08 | 3.37060e-08 | 3.74644e-08 | 5.83829e-08 |
| 0.100000    | 1.86347e-08 | 2.52145e-08 | 3.37195e-08 | 3.74769e-08 | 5.84069e-08 |
| 0.0100000   | 1.86406e-08 | 2.52245e-08 | 3.37360e-08 | 3.75081e-08 | 5.84493e-08 |
| 0.00100000  | 1.86544e-08 | 2.52459e-08 | 3.37679e-08 | 3.75416e-08 | 5.85140e-08 |
| 0.000100000 | 1.86679e-08 | 2.52639e-08 | 3.37915e-08 | 3.75545e-08 | 5.85516e-08 |
| 1.00000e-05 | 1.86725e-08 | 2.52696e-08 | 3.37982e-08 | 3.75563e-08 | 5.85605e-08 |
| 1.00000e-06 | 1.86733e-08 | 2.52704e-08 | 3.37991e-08 | 3.75564e-08 | 5.85617e-08 |
| 1.00000e-07 | 1.86734e-08 | 2.52705e-08 | 3.37992e-08 | 3.75564e-08 | 5.85618e-08 |
| 1.00000e-08 | 1.86734e-08 | 2.52705e-08 | 3.37992e-08 | 3.75564e-08 | 5.85618e-08 |
| 1.00000e-09 | 1.86734e-08 | 2.52705e-08 | 3.37992e-08 | 3.75564e-08 | 5.85618e-08 |

| Pa\K        | 400.000     | 500.000     | 600.000     | 700.000     | 800.000     |
|-------------|-------------|-------------|-------------|-------------|-------------|
| 1.00000e+08 | 2.79531e-12 | 3.24457e-10 | 4.02659e-08 | 2.54284e-06 | 3.30479e-05 |
| 1.00000e+07 | 2.30755e-10 | 1.96638e-08 | 8.40559e-07 | 1.20251e-05 | 6.37142e-05 |
| 1.00000e+06 | 1.02303e-08 | 3.95815e-07 | 5.92573e-06 | 2.81694e-05 | 7.78442e-05 |
| 100000.     | 1.24247e-07 | 1.55537e-06 | 1.00400e-05 | 3.25113e-05 | 7.02888e-05 |
| 10000.0     | 3.28504e-07 | 2.17151e-06 | 9.20877e-06 | 2.81429e-05 | 6.22595e-05 |
| 1000.00     | 3.94567e-07 | 2.25135e-06 | 8.54317e-06 | 2.50196e-05 | 5.62981e-05 |
| 100.000     | 4.02929e-07 | 2.25368e-06 | 8.27416e-06 | 2.30540e-05 | 5.14874e-05 |
| 10.0000     | 4.03801e-07 | 2.25345e-06 | 8.20349e-06 | 2.24073e-05 | 4.99965e-05 |
| 1.00000     | 4.04106e-07 | 2.25792e-06 | 8.21835e-06 | 2.23726e-05 | 4.98754e-05 |
| 0.100000    | 4.04724e-07 | 2.26362e-06 | 8.23427e-06 | 2.23885e-05 | 4.98800e-05 |
| 0.0100000   | 4.05376e-07 | 2.26639e-06 | 8.23882e-06 | 2.23923e-05 | 4.98817e-05 |
| 0.00100000  | 4.05655e-07 | 2.26702e-06 | 8.23952e-06 | 2.23928e-05 | 4.98819e-05 |
| 0.000100000 | 4.05709e-07 | 2.26710e-06 | 8.23960e-06 | 2.23928e-05 | 4.98819e-05 |
| 1.00000e-05 | 4.05716e-07 | 2.26711e-06 | 8.23960e-06 | 2.23928e-05 | 4.98819e-05 |
| 1.00000e-06 | 4.05716e-07 | 2.26711e-06 | 8.23960e-06 | 2.23928e-05 | 4.98819e-05 |
| 1.00000e-07 | 4.05716e-07 | 2.26711e-06 | 8.23960e-06 | 2.23928e-05 | 4.98819e-05 |
| 1.00000e-08 | 4.05716e-07 | 2.26711e-06 | 8.23960e-06 | 2.23928e-05 | 4.98819e-05 |
| 1.00000e-09 | 4.05716e-07 | 2.26711e-06 | 8.23960e-06 | 2.23928e-05 | 4.98819e-05 |

| Pa\K        | 900.000     | 1000.00     | 1100.00     | 1200.00     | 1300.00     |
|-------------|-------------|-------------|-------------|-------------|-------------|
| 1.00000e+08 | 0.000134472 | 0.000316861 | 0.000561768 | 0.000724694 | 0.000740256 |
| 1.00000e+07 | 0.000179220 | 0.000383327 | 0.000719757 | 0.00110390  | 0.00143614  |
| 1.00000e+06 | 0.000165199 | 0.000310087 | 0.000535384 | 0.000803585 | 0.00109824  |
| 100000.     | 0.000129808 | 0.000220608 | 0.000350750 | 0.000516127 | 0.000718885 |
| 10000.0     | 0.000113988 | 0.000189626 | 0.000296681 | 0.000440317 | 0.000624032 |
| 1000.00     | 0.000104698 | 0.000176688 | 0.000280196 | 0.000421380 | 0.000603901 |
| 100.000     | 9.82787e-05 | 0.000170328 | 0.000274614 | 0.000416744 | 0.000600286 |
| 10.0000     | 9.67623e-05 | 0.000169230 | 0.000273876 | 0.000416251 | 0.000599995 |
| 1.00000     | 9.66539e-05 | 0.000169162 | 0.000273830 | 0.000416217 | 0.000599978 |
| 0.100000    | 9.66532e-05 | 0.000169160 | 0.000273827 | 0.000416215 | 0.000599977 |
| 0.0100000   | 9.66537e-05 | 0.000169160 | 0.000273827 | 0.000416215 | 0.000599977 |
| 0.00100000  | 9.66537e-05 | 0.000169160 | 0.000273827 | 0.000416215 | 0.000599977 |
| 0.000100000 | 9.66537e-05 | 0.000169160 | 0.000273827 | 0.000416215 | 0.000599977 |
| 1.00000e-05 | 9.66537e-05 | 0.000169160 | 0.000273827 | 0.000416215 | 0.000599977 |



|             |             |             |             |             |             |
|-------------|-------------|-------------|-------------|-------------|-------------|
| 1.00000e-06 | 9.66537e-05 | 0.000169160 | 0.000273827 | 0.000416215 | 0.000599977 |
| 1.00000e-07 | 9.66537e-05 | 0.000169160 | 0.000273827 | 0.000416215 | 0.000599977 |
| 1.00000e-08 | 9.66537e-05 | 0.000169160 | 0.000273827 | 0.000416215 | 0.000599977 |
| 1.00000e-09 | 9.66537e-05 | 0.000169160 | 0.000273827 | 0.000416215 | 0.000599977 |

| Pa\K        | 1400.00     | 1500.00     | 1750.00    | 2000.00    | 2250.00    |
|-------------|-------------|-------------|------------|------------|------------|
| 1.00000e+08 | 0.000690907 | 0.000653913 | 0.00250367 | 0.00282498 | 0.00304149 |
| 1.00000e+07 | 0.00169249  | 0.00186588  | 0.00403006 | 0.00419530 | 0.00411762 |
| 1.00000e+06 | 0.00140066  | 0.00164447  | 0.00303398 | 0.00336811 | 0.00363601 |
| 100000.     | 0.000956049 | 0.00120902  | 0.00217786 | 0.00291274 | 0.00345371 |
| 10000.0     | 0.000848136 | 0.00110839  | 0.00202159 | 0.00284030 | 0.00342853 |
| 1000.00     | 0.000828435 | 0.00109202  | 0.00200229 | 0.00283223 | 0.00342598 |
| 100.000     | 0.000825938 | 0.00109077  | 0.00200147 | 0.00283201 | 0.00342589 |
| 10.0000     | 0.000825853 | 0.00109089  | 0.00200168 | 0.00283209 | 0.00342590 |
| 1.00000     | 0.000825858 | 0.00109093  | 0.00200172 | 0.00283210 | 0.00342590 |
| 0.100000    | 0.000825859 | 0.00109093  | 0.00200172 | 0.00283210 | 0.00342591 |
| 0.0100000   | 0.000825859 | 0.00109093  | 0.00200172 | 0.00283210 | 0.00342591 |
| 0.00100000  | 0.000825859 | 0.00109093  | 0.00200173 | 0.00283210 | 0.00342591 |
| 0.000100000 | 0.000825859 | 0.00109093  | 0.00200173 | 0.00283210 | 0.00342591 |
| 1.00000e-05 | 0.000825859 | 0.00109093  | 0.00200173 | 0.00283210 | 0.00342591 |
| 1.00000e-06 | 0.000825859 | 0.00109093  | 0.00200173 | 0.00283210 | 0.00342591 |
| 1.00000e-07 | 0.000825859 | 0.00109093  | 0.00200173 | 0.00283210 | 0.00342591 |
| 1.00000e-08 | 0.000825859 | 0.00109093  | 0.00200173 | 0.00283210 | 0.00342591 |
| 1.00000e-09 | 0.000825859 | 0.00109093  | 0.00200173 | 0.00283210 | 0.00342591 |

| Pa\K        | 2500.00    | 2750.00    | 3000.00    | 3250.00    | 3500.00    |
|-------------|------------|------------|------------|------------|------------|
| 1.00000e+08 | 0.00313438 | 0.00310249 | 0.00296694 | 0.00276278 | 0.00252531 |
| 1.00000e+07 | 0.00394360 | 0.00369969 | 0.00339820 | 0.00306669 | 0.00273434 |
| 1.00000e+06 | 0.00374177 | 0.00364814 | 0.00340673 | 0.00309146 | 0.00275846 |
| 100000.     | 0.00368656 | 0.00363945 | 0.00341149 | 0.00309820 | 0.00276394 |
| 10000.0     | 0.00368068 | 0.00363959 | 0.00341287 | 0.00309945 | 0.00276481 |
| 1000.00     | 0.00368022 | 0.00363972 | 0.00341308 | 0.00309961 | 0.00276493 |
| 100.000     | 0.00368022 | 0.00363975 | 0.00341311 | 0.00309963 | 0.00276494 |
| 10.0000     | 0.00368022 | 0.00363976 | 0.00341312 | 0.00309964 | 0.00276494 |
| 1.00000     | 0.00368022 | 0.00363976 | 0.00341312 | 0.00309964 | 0.00276494 |
| 0.100000    | 0.00368022 | 0.00363976 | 0.00341312 | 0.00309964 | 0.00276494 |
| 0.0100000   | 0.00368022 | 0.00363976 | 0.00341312 | 0.00309964 | 0.00276494 |
| 0.00100000  | 0.00368022 | 0.00363976 | 0.00341312 | 0.00309964 | 0.00276494 |
| 0.000100000 | 0.00368022 | 0.00363976 | 0.00341312 | 0.00309964 | 0.00276494 |
| 1.00000e-05 | 0.00368022 | 0.00363976 | 0.00341312 | 0.00309964 | 0.00276494 |
| 1.00000e-06 | 0.00368022 | 0.00363976 | 0.00341312 | 0.00309964 | 0.00276494 |
| 1.00000e-07 | 0.00368022 | 0.00363976 | 0.00341312 | 0.00309964 | 0.00276494 |
| 1.00000e-08 | 0.00368022 | 0.00363976 | 0.00341312 | 0.00309964 | 0.00276494 |
| 1.00000e-09 | 0.00368022 | 0.00363976 | 0.00341312 | 0.00309964 | 0.00276494 |

| Pa\K        | 3750.00    | 4000.00    |
|-------------|------------|------------|
| 1.00000e+08 | 0.00228143 | 0.00204802 |
| 1.00000e+07 | 0.00242163 | 0.00213934 |
| 1.00000e+06 | 0.00244026 | 0.00215219 |
| 100000.     | 0.00244404 | 0.00215459 |
| 10000.0     | 0.00244459 | 0.00215492 |
| 1000.00     | 0.00244466 | 0.00215496 |
| 100.000     | 0.00244467 | 0.00215497 |
| 10.0000     | 0.00244467 | 0.00215497 |
| 1.00000     | 0.00244467 | 0.00215497 |
| 0.100000    | 0.00244467 | 0.00215497 |
| 0.0100000   | 0.00244467 | 0.00215497 |
| 0.00100000  | 0.00244467 | 0.00215497 |
| 0.000100000 | 0.00244467 | 0.00215497 |
| 1.00000e-05 | 0.00244467 | 0.00215497 |
| 1.00000e-06 | 0.00244467 | 0.00215497 |
| 1.00000e-07 | 0.00244467 | 0.00215497 |
| 1.00000e-08 | 0.00244467 | 0.00215497 |
| 1.00000e-09 | 0.00244467 | 0.00215497 |

Ph+MeAc

=====

| Pa\K        | 20.0000     | 30.0000     | 40.0000     | 50.0000     | 60.0000     |
|-------------|-------------|-------------|-------------|-------------|-------------|
| 1.00000e+08 | 7.91728e-71 | 8.20016e-69 | 2.02796e-67 | 3.18621e-66 | 4.18211e-65 |
| 1.00000e+07 | 2.70547e-64 | 4.00263e-62 | 9.81582e-61 | 1.38939e-59 | 1.60399e-58 |
| 1.00000e+06 | 7.90534e-58 | 7.74461e-56 | 1.56259e-54 | 1.96431e-53 | 2.08784e-52 |
| 100000.     | 8.54770e-52 | 6.97167e-50 | 1.24868e-48 | 1.42095e-47 | 1.38078e-46 |
| 10000.0     | 3.79160e-46 | 1.67307e-44 | 1.89264e-43 | 1.48653e-42 | 1.05808e-41 |
| 1000.00     | 8.98408e-42 | 1.10927e-40 | 6.10195e-40 | 2.94568e-39 | 1.47595e-38 |
| 100.000     | 4.90419e-39 | 3.37370e-38 | 1.56287e-37 | 7.16908e-37 | 3.66822e-36 |
| 10.0000     | 1.24744e-36 | 9.77565e-36 | 4.78523e-35 | 2.23717e-34 | 1.15412e-33 |

|             |             |             |             |             |             |
|-------------|-------------|-------------|-------------|-------------|-------------|
| 1.00000     | 3.45778e-34 | 2.13697e-33 | 8.76039e-33 | 3.55811e-32 | 1.63634e-31 |
| 0.100000    | 4.21063e-32 | 2.11620e-31 | 7.66991e-31 | 2.81872e-30 | 1.18616e-29 |
| 0.0100000   | 2.48619e-30 | 8.63685e-30 | 2.41288e-29 | 7.18666e-29 | 2.51566e-28 |
| 0.00100000  | 3.68287e-29 | 8.42781e-29 | 1.86014e-28 | 4.63717e-28 | 1.39570e-27 |
| 0.000100000 | 1.25263e-28 | 1.33584e-28 | 1.71547e-28 | 2.81691e-28 | 6.05800e-28 |
| 1.00000e-05 | 1.47782e-29 | 4.86749e-30 | 3.60257e-30 | 4.32683e-30 | 7.70206e-30 |
| 1.00000e-06 | 1.09009e-31 | 3.18040e-32 | 2.47936e-32 | 3.25580e-32 | 6.63294e-32 |
| 1.00000e-07 | 1.10602e-33 | 4.57353e-34 | 4.52427e-34 | 7.41900e-34 | 2.01049e-33 |
| 1.00000e-08 | 3.66125e-35 | 2.15663e-35 | 2.60488e-35 | 4.98432e-35 | 1.56313e-34 |
| 1.00000e-09 | 2.86072e-36 | 1.89592e-36 | 2.40196e-36 | 4.73214e-36 | 1.51761e-35 |

| Pa\K        | 70.0000     | 80.0000     | 90.0000     | 100.000     | 110.000     |
|-------------|-------------|-------------|-------------|-------------|-------------|
| 1.00000e+08 | 5.32864e-64 | 7.52457e-63 | 1.36423e-61 | 3.61611e-60 | 1.41049e-58 |
| 1.00000e+07 | 1.79169e-57 | 2.22318e-56 | 3.56209e-55 | 8.46588e-54 | 3.03849e-52 |
| 1.00000e+06 | 2.19026e-51 | 2.58401e-50 | 3.97258e-49 | 9.14177e-48 | 3.20782e-46 |
| 100000.     | 1.33335e-45 | 1.45798e-44 | 2.10020e-43 | 4.61211e-42 | 1.57262e-40 |
| 10000.0     | 7.84069e-41 | 6.89398e-40 | 8.53470e-39 | 1.77942e-37 | 6.25576e-36 |
| 1000.00     | 8.57659e-38 | 6.72928e-37 | 9.08563e-36 | 2.53600e-34 | 1.21945e-32 |
| 100.000     | 2.35574e-35 | 2.26992e-34 | 4.11935e-33 | 1.46183e-31 | 7.61683e-30 |
| 10.0000     | 7.51948e-33 | 7.47855e-32 | 1.41264e-30 | 4.98770e-29 | 2.29987e-27 |
| 1.00000     | 9.75156e-31 | 9.18215e-30 | 1.71298e-28 | 6.12909e-27 | 2.78644e-25 |
| 0.100000    | 6.52332e-29 | 5.72392e-28 | 1.01267e-26 | 3.55313e-25 | 1.58966e-23 |
| 0.0100000   | 1.16680e-27 | 8.74162e-27 | 1.38885e-25 | 5.04890e-24 | 2.44648e-22 |
| 0.00100000  | 5.65265e-27 | 3.75139e-26 | 5.55809e-25 | 2.29455e-23 | 1.27551e-21 |
| 0.000100000 | 1.86258e-27 | 1.00967e-26 | 1.64784e-25 | 2.02815e-23 | 1.79024e-21 |
| 1.00000e-05 | 2.17056e-29 | 1.47614e-28 | 1.03552e-26 | 1.61661e-23 | 1.77215e-21 |
| 1.00000e-06 | 2.60288e-31 | 4.87477e-30 | 2.60441e-27 | 1.57876e-23 | 1.76898e-21 |
| 1.00000e-07 | 1.27683e-32 | 4.10397e-31 | 1.94114e-27 | 1.57509e-23 | 1.76865e-21 |
| 1.00000e-08 | 1.14961e-33 | 4.02954e-32 | 1.87584e-27 | 1.57473e-23 | 1.76862e-21 |
| 1.00000e-09 | 1.13683e-34 | 4.02211e-33 | 1.86932e-27 | 1.57469e-23 | 1.76862e-21 |

| Pa\K        | 120.000     | 130.000     | 140.000     | 150.000     | 160.000     |
|-------------|-------------|-------------|-------------|-------------|-------------|
| 1.00000e+08 | 6.60779e-57 | 3.04929e-55 | 1.21045e-53 | 4.09341e-52 | 1.13526e-50 |
| 1.00000e+07 | 1.32937e-50 | 5.71672e-49 | 2.09479e-47 | 6.47494e-46 | 1.63483e-44 |
| 1.00000e+06 | 1.37743e-44 | 5.80102e-43 | 2.07199e-41 | 6.20595e-40 | 1.51115e-38 |
| 100000.     | 6.53381e-39 | 2.60707e-37 | 8.61628e-36 | 2.32375e-34 | 4.99769e-33 |
| 10000.0     | 2.60236e-34 | 9.66978e-33 | 2.80579e-31 | 6.34956e-30 | 1.12243e-28 |
| 1000.00     | 5.83822e-31 | 2.19169e-29 | 5.98797e-28 | 1.22558e-26 | 1.92267e-25 |
| 100.000     | 3.48326e-28 | 1.17909e-26 | 2.84023e-25 | 5.04078e-24 | 6.81875e-23 |
| 10.0000     | 8.76993e-26 | 2.45541e-24 | 4.97545e-23 | 7.55531e-22 | 8.91642e-21 |
| 1.00000     | 1.00714e-23 | 2.62388e-22 | 4.91886e-21 | 6.89071e-20 | 7.49470e-19 |
| 0.100000    | 5.48031e-22 | 1.32945e-20 | 2.28366e-19 | 2.89525e-18 | 2.82638e-17 |
| 0.0100000   | 8.50410e-21 | 1.99556e-19 | 3.24074e-18 | 3.83272e-17 | 3.46303e-16 |
| 0.00100000  | 4.54487e-20 | 1.03968e-18 | 1.60300e-17 | 1.77222e-16 | 1.48295e-15 |
| 0.000100000 | 7.16217e-20 | 1.67279e-18 | 2.55221e-17 | 2.74945e-16 | 2.22681e-15 |
| 1.00000e-05 | 7.39528e-20 | 1.76071e-18 | 2.69717e-17 | 2.90263e-16 | 2.34310e-15 |
| 1.00000e-06 | 7.41850e-20 | 1.76948e-18 | 2.71211e-17 | 2.91862e-16 | 2.35529e-15 |
| 1.00000e-07 | 7.42080e-20 | 1.77036e-18 | 2.71361e-17 | 2.92023e-16 | 2.35652e-15 |
| 1.00000e-08 | 7.42103e-20 | 1.77044e-18 | 2.71376e-17 | 2.92039e-16 | 2.35664e-15 |
| 1.00000e-09 | 7.42105e-20 | 1.77045e-18 | 2.71377e-17 | 2.92040e-16 | 2.35665e-15 |

| Pa\K        | 170.000     | 180.000     | 190.000     | 200.000     | 210.000     |
|-------------|-------------|-------------|-------------|-------------|-------------|
| 1.00000e+08 | 2.61867e-49 | 5.09602e-48 | 8.70118e-47 | 1.29756e-45 | 1.70664e-44 |
| 1.00000e+07 | 3.43066e-43 | 6.08053e-42 | 9.45480e-41 | 1.28665e-39 | 1.54702e-38 |
| 1.00000e+06 | 3.04456e-37 | 5.15808e-36 | 7.61093e-35 | 9.76957e-34 | 1.10164e-32 |
| 100000.     | 8.74637e-32 | 1.26968e-30 | 1.57379e-29 | 1.67811e-28 | 1.56050e-27 |
| 10000.0     | 1.59670e-27 | 1.87641e-26 | 1.87174e-25 | 1.61011e-24 | 1.21390e-23 |
| 1000.00     | 2.39868e-24 | 2.45276e-23 | 2.11099e-22 | 1.55907e-21 | 1.00533e-20 |
| 100.000     | 7.30727e-22 | 6.41036e-21 | 4.73507e-20 | 3.01318e-19 | 1.68452e-18 |
| 10.0000     | 8.48199e-20 | 6.70798e-19 | 4.52537e-18 | 2.65825e-17 | 1.38252e-16 |
| 1.00000     | 6.55773e-18 | 4.75458e-17 | 2.92708e-16 | 1.56102e-15 | 7.33260e-15 |
| 0.100000    | 2.20698e-16 | 1.42327e-15 | 7.78383e-15 | 3.68953e-14 | 1.54318e-13 |
| 0.0100000   | 2.49024e-15 | 1.47381e-14 | 7.37813e-14 | 3.19493e-13 | 1.21891e-12 |
| 0.00100000  | 9.82015e-15 | 5.33567e-14 | 2.44938e-13 | 9.72930e-13 | 3.41011e-12 |
| 0.000100000 | 1.42384e-14 | 7.46926e-14 | 3.31444e-13 | 1.27505e-12 | 4.33804e-12 |
| 1.00000e-05 | 1.49180e-14 | 7.79013e-14 | 3.44125e-13 | 1.31818e-12 | 4.46704e-12 |
| 1.00000e-06 | 1.49894e-14 | 7.82376e-14 | 3.45451e-13 | 1.32267e-12 | 4.48045e-12 |
| 1.00000e-07 | 1.49965e-14 | 7.82713e-14 | 3.45584e-13 | 1.32313e-12 | 4.48179e-12 |
| 1.00000e-08 | 1.49972e-14 | 7.82747e-14 | 3.45597e-13 | 1.32317e-12 | 4.48193e-12 |
| 1.00000e-09 | 1.49973e-14 | 7.82751e-14 | 3.45599e-13 | 1.32317e-12 | 4.48194e-12 |

| Pa\K        | 220.000     | 230.000     | 240.000     | 250.000     | 260.000     |
|-------------|-------------|-------------|-------------|-------------|-------------|
| 1.00000e+08 | 2.00182e-43 | 2.15419e-42 | 2.08608e-41 | 1.79979e-40 | 1.39994e-39 |
| 1.00000e+07 | 1.66116e-37 | 1.63952e-36 | 1.46356e-35 | 1.16690e-34 | 8.41978e-34 |
| 1.00000e+06 | 1.10396e-31 | 1.00563e-30 | 8.25539e-30 | 6.07876e-29 | 4.05709e-28 |
| 100000.     | 1.28377e-26 | 9.47962e-26 | 6.31342e-25 | 3.81530e-24 | 2.10830e-23 |

|             |             |             |             |             |             |
|-------------|-------------|-------------|-------------|-------------|-------------|
| 10000.0     | 8.13724e-23 | 4.90775e-22 | 2.68593e-21 | 1.34436e-20 | 6.19600e-20 |
| 1000.00     | 5.74393e-20 | 2.94383e-19 | 1.36766e-18 | 5.81356e-18 | 2.27969e-17 |
| 100.000     | 8.41060e-18 | 3.80200e-17 | 1.57382e-16 | 6.02197e-16 | 2.14642e-15 |
| 10.0000     | 6.45241e-16 | 2.73184e-15 | 1.05859e-14 | 3.78232e-14 | 1.25402e-13 |
| 1.00000     | 3.07641e-14 | 1.16653e-13 | 4.03836e-13 | 1.28755e-12 | 3.80952e-12 |
| 0.100000    | 5.78069e-13 | 1.96343e-12 | 6.10957e-12 | 1.75689e-11 | 4.70367e-11 |
| 0.0100000   | 4.15998e-12 | 1.28637e-11 | 3.64314e-11 | 9.53715e-11 | 2.32610e-10 |
| 0.00100000  | 1.07188e-11 | 3.06253e-11 | 8.04431e-11 | 1.96125e-10 | 4.47461e-10 |
| 0.000100000 | 1.32681e-11 | 3.69784e-11 | 9.49746e-11 | 2.26935e-10 | 5.08523e-10 |
| 1.00000e-05 | 1.36135e-11 | 3.78184e-11 | 9.68523e-11 | 2.30831e-10 | 5.16091e-10 |
| 1.00000e-06 | 1.36493e-11 | 3.79052e-11 | 9.70458e-11 | 2.31232e-10 | 5.16866e-10 |
| 1.00000e-07 | 1.36529e-11 | 3.79140e-11 | 9.70652e-11 | 2.31272e-10 | 5.16944e-10 |
| 1.00000e-08 | 1.36533e-11 | 3.79148e-11 | 9.70671e-11 | 2.31276e-10 | 5.16952e-10 |
| 1.00000e-09 | 1.36533e-11 | 3.79149e-11 | 9.70673e-11 | 2.31276e-10 | 5.16953e-10 |

| Pa\K        | 270.000     | 280.000     | 290.000     | 300.000     | 310.000     |
|-------------|-------------|-------------|-------------|-------------|-------------|
| 1.00000e+08 | 9.84302e-39 | 6.25333e-38 | 3.59519e-37 | 1.48410e-28 | 8.90436e-36 |
| 1.00000e+07 | 5.52182e-33 | 3.29294e-32 | 1.79025e-31 | 1.13291e-23 | 4.06657e-30 |
| 1.00000e+06 | 2.46595e-27 | 1.36715e-26 | 6.93371e-26 | 1.88896e-19 | 1.38470e-24 |
| 100000.     | 1.07138e-22 | 5.02555e-22 | 2.18352e-21 | 1.43859e-16 | 3.31687e-20 |
| 10000.0     | 2.64461e-19 | 1.05029e-18 | 3.89662e-18 | 5.46226e-15 | 4.43306e-17 |
| 1000.00     | 8.30712e-17 | 2.83117e-16 | 9.07603e-16 | 1.25934e-13 | 7.91293e-15 |
| 100.000     | 7.17165e-15 | 2.25772e-14 | 6.72466e-14 | 3.82841e-12 | 5.11894e-13 |
| 10.0000     | 3.87943e-13 | 1.12535e-12 | 3.07466e-12 | 7.37081e-11 | 1.94840e-11 |
| 1.00000     | 1.05295e-11 | 2.73471e-11 | 6.70820e-11 | 7.34492e-10 | 3.46110e-10 |
| 0.100000    | 1.17990e-10 | 2.78848e-10 | 6.23871e-10 | 3.40948e-09 | 2.69386e-09 |
| 0.0100000   | 5.32217e-10 | 1.14922e-09 | 2.35426e-09 | 6.40299e-09 | 8.59091e-09 |
| 0.00100000  | 9.62024e-10 | 1.96082e-09 | 3.80866e-09 | 6.41208e-09 | 1.26564e-08 |
| 0.000100000 | 1.07596e-09 | 2.16222e-09 | 4.14771e-09 | 6.14920e-09 | 1.35016e-08 |
| 1.00000e-05 | 1.08982e-09 | 2.18630e-09 | 4.18762e-09 | 6.11467e-09 | 1.35983e-08 |
| 1.00000e-06 | 1.09124e-09 | 2.18876e-09 | 4.19168e-09 | 6.11120e-09 | 1.36082e-08 |
| 1.00000e-07 | 1.09138e-09 | 2.18901e-09 | 4.19209e-09 | 6.11085e-09 | 1.36091e-08 |
| 1.00000e-08 | 1.09140e-09 | 2.18903e-09 | 4.19213e-09 | 6.11081e-09 | 1.36092e-08 |
| 1.00000e-09 | 1.09140e-09 | 2.18903e-09 | 4.19214e-09 | 6.11081e-09 | 1.36092e-08 |

| Pa\K        | 400.000     | 500.000     | 600.000     | 700.000     | 800.000     |
|-------------|-------------|-------------|-------------|-------------|-------------|
| 1.00000e+08 | 2.12754e-18 | 9.55020e-13 | 2.34291e-10 | 3.83679e-08 | 1.01085e-06 |
| 1.00000e+07 | 3.54988e-14 | 3.05428e-09 | 1.84602e-07 | 1.31017e-06 | 5.47170e-06 |
| 1.00000e+06 | 1.13139e-11 | 1.02508e-07 | 3.13824e-06 | 1.08126e-05 | 1.88224e-05 |
| 100000.     | 1.51225e-10 | 1.86702e-07 | 4.16075e-06 | 1.49410e-05 | 2.56269e-05 |
| 10000.0     | 1.80726e-10 | 8.50148e-08 | 1.87157e-06 | 9.82410e-06 | 2.42291e-05 |
| 1000.00     | 2.43690e-10 | 4.99904e-08 | 1.28330e-06 | 1.00730e-05 | 3.97060e-05 |
| 100.000     | 2.70529e-09 | 2.09725e-07 | 3.79296e-06 | 2.72491e-05 | 9.91329e-05 |
| 10.0000     | 2.56463e-08 | 1.18601e-06 | 1.39199e-05 | 6.66684e-05 | 0.000175694 |
| 1.00000     | 1.41737e-07 | 3.81921e-06 | 2.83951e-05 | 9.71373e-05 | 0.000209211 |
| 0.100000    | 3.78212e-07 | 6.40240e-06 | 3.55562e-05 | 0.000104663 | 0.000212787 |
| 0.0100000   | 5.19815e-07 | 7.21164e-06 | 3.67101e-05 | 0.000104958 | 0.000212284 |
| 0.00100000  | 5.39003e-07 | 7.29555e-06 | 3.67630e-05 | 0.000104873 | 0.000212148 |
| 0.000100000 | 5.39430e-07 | 7.30028e-06 | 3.67620e-05 | 0.000104860 | 0.000212133 |
| 1.00000e-05 | 5.39414e-07 | 7.30061e-06 | 3.67618e-05 | 0.000104858 | 0.000212132 |
| 1.00000e-06 | 5.39411e-07 | 7.30064e-06 | 3.67618e-05 | 0.000104858 | 0.000212132 |
| 1.00000e-07 | 5.39411e-07 | 7.30064e-06 | 3.67618e-05 | 0.000104858 | 0.000212132 |
| 1.00000e-08 | 5.39411e-07 | 7.30064e-06 | 3.67618e-05 | 0.000104858 | 0.000212132 |
| 1.00000e-09 | 5.39411e-07 | 7.30064e-06 | 3.67618e-05 | 0.000104858 | 0.000212132 |

| Pa\K        | 900.000     | 1000.00     | 1100.00     | 1200.00     | 1300.00     |
|-------------|-------------|-------------|-------------|-------------|-------------|
| 1.00000e+08 | 3.83327e-06 | 7.54381e-06 | 1.15536e-05 | 1.37521e-05 | 1.36013e-05 |
| 1.00000e+07 | 1.84116e-05 | 5.32664e-05 | 0.000115193 | 0.000174906 | 0.000210175 |
| 1.00000e+06 | 3.48264e-05 | 8.82123e-05 | 0.000203133 | 0.000326739 | 0.000412872 |
| 100000.     | 4.14646e-05 | 8.38857e-05 | 0.000175433 | 0.000308493 | 0.000442470 |
| 10000.0     | 5.23223e-05 | 0.000119733 | 0.000249472 | 0.000420896 | 0.000572666 |
| 1000.00     | 0.000112415 | 0.000245227 | 0.000420725 | 0.000589260 | 0.000711848 |
| 100.000     | 0.000231258 | 0.000398223 | 0.000561972 | 0.000694678 | 0.000788175 |
| 10.0000     | 0.000321778 | 0.000473552 | 0.000611465 | 0.000724478 | 0.000808256 |
| 1.00000     | 0.000345185 | 0.000486244 | 0.000617589 | 0.000727744 | 0.000810649 |
| 0.100000    | 0.000345801 | 0.000486154 | 0.000617533 | 0.000727815 | 0.000810815 |
| 0.0100000   | 0.000345315 | 0.000485934 | 0.000617468 | 0.000727812 | 0.000810834 |
| 0.00100000  | 0.000345235 | 0.000485906 | 0.000617462 | 0.000727813 | 0.000810838 |
| 0.000100000 | 0.000345227 | 0.000485903 | 0.000617461 | 0.000727813 | 0.000810838 |
| 1.00000e-05 | 0.000345227 | 0.000485903 | 0.000617461 | 0.000727813 | 0.000810838 |
| 1.00000e-06 | 0.000345227 | 0.000485903 | 0.000617461 | 0.000727814 | 0.000810838 |
| 1.00000e-07 | 0.000345227 | 0.000485903 | 0.000617461 | 0.000727814 | 0.000810838 |
| 1.00000e-08 | 0.000345227 | 0.000485903 | 0.000617461 | 0.000727814 | 0.000810838 |
| 1.00000e-09 | 0.000345227 | 0.000485903 | 0.000617461 | 0.000727814 | 0.000810838 |

| Pa\K | 1400.00 | 1500.00 | 1750.00 | 2000.00 | 2250.00 |
|------|---------|---------|---------|---------|---------|
|------|---------|---------|---------|---------|---------|

|             |             |             |            |            |            |
|-------------|-------------|-------------|------------|------------|------------|
| 1.00000e+08 | 1.21812e-05 | 1.03818e-05 | 0.00350319 | 0.00371029 | 0.00386559 |
| 1.00000e+07 | 0.000223766 | 0.000222632 | 0.00371452 | 0.00360219 | 0.00353169 |
| 1.00000e+06 | 0.000466155 | 0.000504812 | 0.00194076 | 0.00210695 | 0.00237513 |
| 100000.     | 0.000545691 | 0.000621735 | 0.00122257 | 0.00149473 | 0.00183683 |
| 10000.0     | 0.000673753 | 0.000735732 | 0.00102279 | 0.00126126 | 0.00165111 |
| 1000.00     | 0.000787056 | 0.000831661 | 0.00100603 | 0.00122923 | 0.00162596 |
| 100.000     | 0.000848032 | 0.000884582 | 0.00102541 | 0.00123201 | 0.00162467 |
| 10.0000     | 0.000864257 | 0.000898908 | 0.00103176 | 0.00123320 | 0.00162469 |
| 1.00000     | 0.000866460 | 0.000901008 | 0.00103274 | 0.00123338 | 0.00162469 |
| 0.100000    | 0.000866677 | 0.000901237 | 0.00103285 | 0.00123340 | 0.00162470 |
| 0.0100000   | 0.000866703 | 0.000901264 | 0.00103286 | 0.00123340 | 0.00162470 |
| 0.00100000  | 0.000866707 | 0.000901267 | 0.00103286 | 0.00123340 | 0.00162470 |
| 0.000100000 | 0.000866707 | 0.000901268 | 0.00103286 | 0.00123340 | 0.00162470 |
| 1.00000e-05 | 0.000866707 | 0.000901268 | 0.00103286 | 0.00123340 | 0.00162470 |
| 1.00000e-06 | 0.000866707 | 0.000901268 | 0.00103286 | 0.00123340 | 0.00162470 |
| 1.00000e-07 | 0.000866707 | 0.000901268 | 0.00103286 | 0.00123340 | 0.00162470 |
| 1.00000e-08 | 0.000866707 | 0.000901268 | 0.00103286 | 0.00123340 | 0.00162470 |
| 1.00000e-09 | 0.000866707 | 0.000901268 | 0.00103286 | 0.00123340 | 0.00162470 |

Pa\K | 2500.00 2750.00 3000.00 3250.00 3500.00

|             |            |            |            |            |            |
|-------------|------------|------------|------------|------------|------------|
| 1.00000e+08 | 0.00394562 | 0.00395008 | 0.00389735 | 0.00381185 | 0.00371188 |
| 1.00000e+07 | 0.00353107 | 0.00357686 | 0.00363432 | 0.00367842 | 0.00369291 |
| 1.00000e+06 | 0.00267520 | 0.00297793 | 0.00325102 | 0.00346193 | 0.00359094 |
| 100000.     | 0.00226479 | 0.00271580 | 0.00310861 | 0.00339568 | 0.00356577 |
| 10000.0     | 0.00215331 | 0.00266076 | 0.00308529 | 0.00338734 | 0.00356370 |
| 1000.00     | 0.00213980 | 0.00265491 | 0.00308317 | 0.00338677 | 0.00356368 |
| 100.000     | 0.00213874 | 0.00265443 | 0.00308301 | 0.00338674 | 0.00356370 |
| 10.0000     | 0.00213865 | 0.00265439 | 0.00308300 | 0.00338674 | 0.00356370 |
| 1.00000     | 0.00213865 | 0.00265439 | 0.00308300 | 0.00338674 | 0.00356370 |
| 0.100000    | 0.00213865 | 0.00265438 | 0.00308300 | 0.00338674 | 0.00356370 |
| 0.0100000   | 0.00213865 | 0.00265438 | 0.00308300 | 0.00338674 | 0.00356370 |
| 0.00100000  | 0.00213865 | 0.00265438 | 0.00308300 | 0.00338674 | 0.00356370 |
| 0.000100000 | 0.00213865 | 0.00265438 | 0.00308300 | 0.00338674 | 0.00356370 |
| 1.00000e-05 | 0.00213865 | 0.00265438 | 0.00308300 | 0.00338674 | 0.00356370 |
| 1.00000e-06 | 0.00213865 | 0.00265438 | 0.00308300 | 0.00338674 | 0.00356370 |
| 1.00000e-07 | 0.00213865 | 0.00265438 | 0.00308300 | 0.00338674 | 0.00356370 |
| 1.00000e-08 | 0.00213865 | 0.00265438 | 0.00308300 | 0.00338674 | 0.00356370 |
| 1.00000e-09 | 0.00213865 | 0.00265438 | 0.00308300 | 0.00338674 | 0.00356370 |

Pa\K | 3750.00 4000.00

|             |            |            |
|-------------|------------|------------|
| 1.00000e+08 | 0.00360592 | 0.00349556 |
| 1.00000e+07 | 0.00366855 | 0.00360319 |
| 1.00000e+06 | 0.00363543 | 0.00360555 |
| 100000.     | 0.00362961 | 0.00360754 |
| 10000.0     | 0.00362985 | 0.00360846 |
| 1000.00     | 0.00363001 | 0.00360863 |
| 100.000     | 0.00363003 | 0.00360866 |
| 10.0000     | 0.00363004 | 0.00360866 |
| 1.00000     | 0.00363004 | 0.00360866 |
| 0.100000    | 0.00363004 | 0.00360866 |
| 0.0100000   | 0.00363004 | 0.00360866 |
| 0.00100000  | 0.00363004 | 0.00360866 |
| 0.000100000 | 0.00363004 | 0.00360866 |
| 1.00000e-05 | 0.00363004 | 0.00360866 |
| 1.00000e-06 | 0.00363004 | 0.00360866 |
| 1.00000e-07 | 0.00363004 | 0.00360866 |
| 1.00000e-08 | 0.00363004 | 0.00360866 |
| 1.00000e-09 | 0.00363004 | 0.00360866 |

rad35

=====

Pa\K | 20.0000 30.0000 40.0000 50.0000 60.0000

|             |             |             |             |             |             |
|-------------|-------------|-------------|-------------|-------------|-------------|
| 1.00000e+08 | 3.57958e-42 | 6.61880e-41 | 4.05240e-40 | 1.68050e-39 | 5.77429e-39 |
| 1.00000e+07 | 3.58365e-38 | 6.64368e-37 | 4.08072e-36 | 1.69829e-35 | 5.85817e-35 |
| 1.00000e+06 | 3.70710e-34 | 7.14232e-33 | 4.53974e-32 | 1.94945e-31 | 6.92680e-31 |
| 100000.     | 4.83834e-30 | 1.04424e-28 | 7.00148e-28 | 3.09082e-27 | 1.11390e-26 |
| 10000.0     | 7.34480e-26 | 1.37607e-24 | 8.21873e-24 | 3.30422e-23 | 1.09865e-22 |
| 1000.00     | 5.20810e-22 | 6.57234e-21 | 3.02525e-20 | 9.99970e-20 | 2.83330e-19 |
| 100.000     | 7.19600e-19 | 4.87124e-18 | 1.59463e-17 | 4.22657e-17 | 1.02015e-16 |
| 10.0000     | 1.34241e-16 | 5.49151e-16 | 1.40618e-15 | 3.22382e-15 | 7.05076e-15 |
| 1.00000     | 5.47678e-15 | 1.49052e-14 | 3.11125e-14 | 6.42343e-14 | 1.32354e-13 |
| 0.100000    | 5.77153e-14 | 1.03478e-13 | 1.76160e-13 | 3.41627e-13 | 6.96633e-13 |
| 0.0100000   | 1.04723e-13 | 9.58772e-14 | 1.50255e-13 | 3.88036e-13 | 9.70170e-13 |
| 0.00100000  | 2.22422e-14 | 1.76111e-14 | 7.21110e-14 | 3.29662e-13 | 9.65449e-13 |
| 0.000100000 | 2.42860e-15 | 4.75044e-15 | 6.04544e-14 | 3.20858e-13 | 9.63173e-13 |
| 1.00000e-05 | 2.53480e-16 | 3.39739e-15 | 5.92426e-14 | 3.19950e-13 | 9.62947e-13 |
| 1.00000e-06 | 4.14345e-17 | 3.27649e-15 | 5.91500e-14 | 3.19922e-13 | 9.63064e-13 |

1.00000e-07 | 4.19637e-17 3.28381e-15 5.91643e-14 3.19975e-13 9.63221e-13  
1.00000e-08 | 2.38079e-17 3.25540e-15 5.91309e-14 3.19950e-13 9.63225e-13  
1.00000e-09 | 1.04101e-17 3.24587e-15 5.91221e-14 3.19943e-13 9.63223e-13

| Pa\K        | 70.0000     | 80.0000     | 90.0000     | 100.000     | 110.000     |
|-------------|-------------|-------------|-------------|-------------|-------------|
| 1.00000e+08 | 1.79299e-38 | 5.27133e-38 | 1.51027e-37 | 4.29880e-37 | 1.23392e-36 |
| 1.00000e+07 | 1.82686e-34 | 5.39699e-34 | 1.55495e-33 | 4.45441e-33 | 1.28474e-32 |
| 1.00000e+06 | 2.22379e-30 | 6.76614e-30 | 2.01001e-29 | 5.94566e-29 | 1.77297e-28 |
| 100000.     | 3.59665e-26 | 1.09336e-25 | 3.22430e-25 | 9.40092e-25 | 2.74129e-24 |
| 10000.0     | 3.29171e-22 | 9.28542e-22 | 2.52971e-21 | 6.76194e-21 | 1.79001e-20 |
| 1000.00     | 7.36079e-19 | 1.80913e-18 | 4.28197e-18 | 9.87589e-18 | 2.23779e-17 |
| 100.000     | 2.31885e-16 | 5.02768e-16 | 1.04975e-15 | 2.13017e-15 | 4.23504e-15 |
| 10.0000     | 1.47373e-14 | 2.93736e-14 | 5.60912e-14 | 1.03490e-13 | 1.86094e-13 |
| 1.00000     | 2.62296e-13 | 4.91678e-13 | 8.74331e-13 | 1.48986e-12 | 2.45831e-12 |
| 0.100000    | 1.34865e-12 | 2.40855e-12 | 4.00151e-12 | 6.28698e-12 | 9.48351e-12 |
| 0.0100000   | 2.02429e-12 | 3.64462e-12 | 5.92717e-12 | 9.00569e-12 | 1.30830e-11 |
| 0.00100000  | 2.10299e-12 | 3.82553e-12 | 6.21947e-12 | 9.41262e-12 | 1.36053e-11 |
| 0.000100000 | 2.11030e-12 | 3.84418e-12 | 6.25014e-12 | 9.45540e-12 | 1.36601e-11 |
| 1.00000e-05 | 2.11108e-12 | 3.84618e-12 | 6.25349e-12 | 9.46027e-12 | 1.36668e-11 |
| 1.00000e-06 | 2.11145e-12 | 3.84695e-12 | 6.25488e-12 | 9.46256e-12 | 1.36704e-11 |
| 1.00000e-07 | 2.11180e-12 | 3.84757e-12 | 6.25586e-12 | 9.46396e-12 | 1.36723e-11 |
| 1.00000e-08 | 2.11185e-12 | 3.84769e-12 | 6.25604e-12 | 9.46421e-12 | 1.36726e-11 |
| 1.00000e-09 | 2.11185e-12 | 3.84770e-12 | 6.25606e-12 | 9.46424e-12 | 1.36726e-11 |

| Pa\K        | 120.000     | 130.000     | 140.000     | 150.000     | 160.000     |
|-------------|-------------|-------------|-------------|-------------|-------------|
| 1.00000e+08 | 3.79051e-36 | 2.44721e-35 | 5.97210e-34 | 1.52975e-32 | 2.83593e-31 |
| 1.00000e+07 | 3.75863e-32 | 1.13024e-31 | 3.93294e-31 | 2.54330e-30 | 3.13625e-29 |
| 1.00000e+06 | 5.36350e-28 | 1.64867e-27 | 5.14427e-27 | 1.63304e-26 | 5.39611e-26 |
| 100000.     | 8.03955e-24 | 2.37416e-23 | 7.04707e-23 | 2.09530e-22 | 6.21635e-22 |
| 10000.0     | 4.71407e-20 | 1.23636e-19 | 3.22541e-19 | 8.35065e-19 | 2.13999e-18 |
| 1000.00     | 5.00797e-17 | 1.11006e-16 | 2.43979e-16 | 5.31673e-16 | 1.14797e-15 |
| 100.000     | 8.30024e-15 | 1.61003e-14 | 3.09709e-14 | 5.91113e-14 | 1.11889e-13 |
| 10.0000     | 3.28454e-13 | 5.71868e-13 | 9.85189e-13 | 1.68191e-12 | 2.84665e-12 |
| 1.00000     | 3.96124e-12 | 6.27113e-12 | 9.79118e-12 | 1.51079e-11 | 2.30596e-11 |
| 0.100000    | 1.38977e-11 | 1.99581e-11 | 2.82564e-11 | 3.95972e-11 | 5.50610e-11 |
| 0.0100000   | 1.84612e-11 | 2.55736e-11 | 3.50237e-11 | 4.76324e-11 | 6.44987e-11 |
| 0.00100000  | 1.90996e-11 | 2.63306e-11 | 3.59041e-11 | 4.86440e-11 | 6.56524e-11 |
| 0.000100000 | 1.91665e-11 | 2.64098e-11 | 3.59967e-11 | 4.87519e-11 | 6.57785e-11 |
| 1.00000e-05 | 1.91754e-11 | 2.64220e-11 | 3.60135e-11 | 4.87757e-11 | 6.58127e-11 |
| 1.00000e-06 | 1.91808e-11 | 2.64298e-11 | 3.60245e-11 | 4.87907e-11 | 6.58326e-11 |
| 1.00000e-07 | 1.91832e-11 | 2.64328e-11 | 3.60282e-11 | 4.87950e-11 | 6.58377e-11 |
| 1.00000e-08 | 1.91836e-11 | 2.64332e-11 | 3.60287e-11 | 4.87956e-11 | 6.58383e-11 |
| 1.00000e-09 | 1.91836e-11 | 2.64333e-11 | 3.60287e-11 | 4.87956e-11 | 6.58384e-11 |

| Pa\K        | 170.000     | 180.000     | 190.000     | 200.000     | 210.000     |
|-------------|-------------|-------------|-------------|-------------|-------------|
| 1.00000e+08 | 3.91311e-30 | 4.19277e-29 | 3.62353e-28 | 2.60421e-27 | 1.59782e-26 |
| 1.00000e+07 | 3.98870e-28 | 4.19719e-27 | 3.60829e-26 | 2.58754e-25 | 1.58537e-24 |
| 1.00000e+06 | 1.99533e-25 | 9.07537e-25 | 4.99326e-24 | 2.91322e-23 | 1.62177e-22 |
| 100000.     | 1.83396e-21 | 5.36954e-21 | 1.56057e-20 | 4.51429e-20 | 1.30511e-19 |
| 10000.0     | 5.41504e-18 | 1.35025e-17 | 3.31279e-17 | 7.98936e-17 | 1.89298e-16 |
| 1000.00     | 2.45358e-15 | 5.18595e-15 | 1.08295e-14 | 2.23244e-14 | 4.53959e-14 |
| 100.000     | 2.09842e-13 | 3.89487e-13 | 7.14674e-13 | 1.29516e-12 | 2.31632e-12 |
| 10.0000     | 4.77555e-12 | 7.93631e-12 | 1.30557e-11 | 2.12438e-11 | 3.41656e-11 |
| 1.00000     | 3.48230e-11 | 5.20224e-11 | 7.68630e-11 | 1.12295e-10 | 1.62208e-10 |
| 0.100000    | 7.60827e-11 | 1.04550e-10 | 1.42924e-10 | 1.94394e-10 | 2.63057e-10 |
| 0.0100000   | 8.70762e-11 | 1.17270e-10 | 1.57559e-10 | 2.11146e-10 | 2.82138e-10 |
| 0.00100000  | 8.83859e-11 | 1.18754e-10 | 1.59238e-10 | 2.13045e-10 | 2.84293e-10 |
| 0.000100000 | 8.85355e-11 | 1.18935e-10 | 1.59462e-10 | 2.13331e-10 | 2.84667e-10 |
| 1.00000e-05 | 8.85846e-11 | 1.19004e-10 | 1.59561e-10 | 2.13467e-10 | 2.84849e-10 |
| 1.00000e-06 | 8.86104e-11 | 1.19037e-10 | 1.59601e-10 | 2.13516e-10 | 2.84908e-10 |
| 1.00000e-07 | 8.86162e-11 | 1.19044e-10 | 1.59608e-10 | 2.13524e-10 | 2.84917e-10 |
| 1.00000e-08 | 8.86169e-11 | 1.19045e-10 | 1.59609e-10 | 2.13525e-10 | 2.84918e-10 |
| 1.00000e-09 | 8.86170e-11 | 1.19045e-10 | 1.59609e-10 | 2.13525e-10 | 2.84918e-10 |

| Pa\K        | 220.000     | 230.000     | 240.000     | 250.000     | 260.000     |
|-------------|-------------|-------------|-------------|-------------|-------------|
| 1.00000e+08 | 8.55428e-26 | 4.06919e-25 | 1.74596e-24 | 6.84292e-24 | 2.47579e-23 |
| 1.00000e+07 | 8.47737e-24 | 4.02762e-23 | 1.72580e-22 | 6.75371e-22 | 2.43937e-21 |
| 1.00000e+06 | 8.25274e-22 | 3.80485e-21 | 1.59547e-20 | 6.13193e-20 | 2.17793e-19 |
| 100000.     | 3.78347e-19 | 1.09981e-18 | 3.19192e-18 | 9.18000e-18 | 2.59452e-17 |
| 10000.0     | 4.40614e-16 | 1.00778e-15 | 2.26623e-15 | 5.01428e-15 | 1.09269e-14 |
| 1000.00     | 9.09995e-14 | 1.79726e-13 | 3.49576e-13 | 6.69415e-13 | 1.26180e-12 |
| 100.000     | 4.08588e-12 | 7.10579e-12 | 1.21808e-11 | 2.05790e-11 | 3.42655e-11 |
| 10.0000     | 5.42724e-11 | 8.51042e-11 | 1.31674e-10 | 2.00945e-10 | 3.02401e-10 |
| 1.00000     | 2.31666e-10 | 3.27184e-10 | 4.57051e-10 | 6.31705e-10 | 8.64172e-10 |
| 0.100000    | 3.54144e-10 | 4.74285e-10 | 6.31829e-10 | 8.37211e-10 | 1.10339e-09 |
| 0.0100000   | 3.75778e-10 | 4.98705e-10 | 6.59276e-10 | 8.67941e-10 | 1.13768e-09 |

|             |             |             |             |             |             |
|-------------|-------------|-------------|-------------|-------------|-------------|
| 0.00100000  | 3.78233e-10 | 5.01521e-10 | 6.62537e-10 | 8.71762e-10 | 1.14222e-09 |
| 0.00100000  | 3.78729e-10 | 5.02184e-10 | 6.63425e-10 | 8.72944e-10 | 1.14377e-09 |
| 1.00000e-05 | 3.78970e-10 | 5.02495e-10 | 6.63816e-10 | 8.73427e-10 | 1.14436e-09 |
| 1.00000e-06 | 3.79038e-10 | 5.02574e-10 | 6.63906e-10 | 8.73528e-10 | 1.14447e-09 |
| 1.00000e-07 | 3.79048e-10 | 5.02585e-10 | 6.63918e-10 | 8.73541e-10 | 1.14448e-09 |
| 1.00000e-08 | 3.79049e-10 | 5.02586e-10 | 6.63919e-10 | 8.73542e-10 | 1.14449e-09 |
| 1.00000e-09 | 3.79049e-10 | 5.02586e-10 | 6.63919e-10 | 8.73542e-10 | 1.14449e-09 |

| Pa\K        | 270.000     | 280.000     | 290.000     | 300.000     | 310.000     |
|-------------|-------------|-------------|-------------|-------------|-------------|
| 1.00000e+08 | 8.34261e-23 | 2.63766e-22 | 7.87321e-22 | 8.03066e-19 | 6.01928e-21 |
| 1.00000e+07 | 8.20415e-21 | 2.58831e-20 | 7.70735e-20 | 6.77352e-17 | 5.85977e-19 |
| 1.00000e+06 | 7.20389e-19 | 2.23416e-18 | 6.53489e-18 | 5.16144e-15 | 4.78164e-17 |
| 100000.     | 7.15458e-17 | 1.91554e-16 | 4.96707e-16 | 1.47927e-12 | 3.03600e-15 |
| 10000.0     | 2.34788e-14 | 4.98132e-14 | 1.04527e-13 | 5.60120e-11 | 4.49003e-13 |
| 1000.00     | 2.34105e-12 | 4.27556e-12 | 7.68855e-12 | 2.52101e-10 | 2.37726e-11 |
| 100.000     | 5.62338e-11 | 9.09700e-11 | 1.45086e-10 | 8.34139e-10 | 3.53916e-10 |
| 10.0000     | 4.48723e-10 | 6.56556e-10 | 9.47376e-10 | 2.06646e-09 | 1.89379e-09 |
| 1.00000     | 1.17056e-09 | 1.57064e-09 | 2.08845e-09 | 2.66730e-09 | 3.59944e-09 |
| 0.100000    | 1.44635e-09 | 1.88566e-09 | 2.44514e-09 | 2.75465e-09 | 4.04554e-09 |
| 0.0100000   | 1.48450e-09 | 1.92803e-09 | 2.49216e-09 | 2.76699e-09 | 4.10364e-09 |
| 0.00100000  | 1.48996e-09 | 1.93469e-09 | 2.50036e-09 | 2.77176e-09 | 4.11625e-09 |
| 0.000100000 | 1.49199e-09 | 1.93728e-09 | 2.50362e-09 | 2.77355e-09 | 4.12115e-09 |
| 1.00000e-05 | 1.49268e-09 | 1.93809e-09 | 2.50455e-09 | 2.77388e-09 | 4.12233e-09 |
| 1.00000e-06 | 1.49281e-09 | 1.93823e-09 | 2.50470e-09 | 2.77392e-09 | 4.12250e-09 |
| 1.00000e-07 | 1.49282e-09 | 1.93824e-09 | 2.50471e-09 | 2.77392e-09 | 4.12252e-09 |
| 1.00000e-08 | 1.49282e-09 | 1.93824e-09 | 2.50472e-09 | 2.77392e-09 | 4.12252e-09 |
| 1.00000e-09 | 1.49282e-09 | 1.93824e-09 | 2.50472e-09 | 2.77392e-09 | 4.12252e-09 |

| Pa\K        | 400.000     | 500.000     | 600.000     | 700.000     | 800.000     |
|-------------|-------------|-------------|-------------|-------------|-------------|
| 1.00000e+08 | 1.53864e-15 | 1.10447e-10 | 1.95627e-08 | 4.77216e-07 | 3.55542e-06 |
| 1.00000e+07 | 4.40360e-12 | 1.23599e-07 | 6.52058e-06 | 4.02018e-05 | 9.07209e-05 |
| 1.00000e+06 | 1.58994e-09 | 4.08223e-06 | 9.84162e-05 | 0.000322329 | 0.000511049 |
| 100000.     | 3.38922e-08 | 9.85979e-06 | 0.000143946 | 0.000457019 | 0.000723426 |
| 10000.0     | 6.38995e-08 | 4.99298e-06 | 6.55751e-05 | 0.000291054 | 0.000579691 |
| 1000.00     | 3.64909e-08 | 1.55325e-06 | 2.44518e-05 | 0.000147427 | 0.000333316 |
| 100.000     | 2.97327e-08 | 5.55039e-07 | 7.49254e-06 | 4.65685e-05 | 0.000100460 |
| 10.0000     | 2.87779e-08 | 2.37555e-07 | 1.74694e-06 | 8.62636e-06 | 1.87341e-05 |
| 1.00000     | 2.76576e-08 | 1.77258e-07 | 8.24136e-07 | 2.94019e-06 | 7.39195e-06 |
| 0.100000    | 2.75277e-08 | 1.71269e-07 | 7.35664e-07 | 2.39787e-06 | 6.28925e-06 |
| 0.0100000   | 2.75829e-08 | 1.70940e-07 | 7.27587e-07 | 2.34702e-06 | 6.18397e-06 |
| 0.00100000  | 2.76126e-08 | 1.70946e-07 | 7.26818e-07 | 2.34209e-06 | 6.17374e-06 |
| 0.000100000 | 2.76187e-08 | 1.70949e-07 | 7.26742e-07 | 2.34160e-06 | 6.17273e-06 |
| 1.00000e-05 | 2.76195e-08 | 1.70949e-07 | 7.26735e-07 | 2.34155e-06 | 6.17263e-06 |
| 1.00000e-06 | 2.76195e-08 | 1.70949e-07 | 7.26734e-07 | 2.34155e-06 | 6.17262e-06 |
| 1.00000e-07 | 2.76196e-08 | 1.70949e-07 | 7.26734e-07 | 2.34155e-06 | 6.17262e-06 |
| 1.00000e-08 | 2.76196e-08 | 1.70949e-07 | 7.26734e-07 | 2.34155e-06 | 6.17262e-06 |
| 1.00000e-09 | 2.76196e-08 | 1.70949e-07 | 7.26734e-07 | 2.34155e-06 | 6.17262e-06 |

| Pa\K        | 900.000     | 1000.00     | 1100.00     | 1200.00     | 1300.00     |
|-------------|-------------|-------------|-------------|-------------|-------------|
| 1.00000e+08 | 1.42451e-05 | 3.86157e-05 | 7.69375e-05 | 0.000106943 | 0.000115202 |
| 1.00000e+07 | 0.000137615 | 0.000199669 | 0.000303220 | 0.000417672 | 0.000515774 |
| 1.00000e+06 | 0.000659894 | 0.000814061 | 0.00100019  | 0.00116817  | 0.00129568  |
| 100000.     | 0.000924957 | 0.00108775  | 0.00122220  | 0.00131827  | 0.00137300  |
| 10000.0     | 0.000776802 | 0.000869192 | 0.000892919 | 0.000876591 | 0.000841728 |
| 1000.00     | 0.000418787 | 0.000408106 | 0.000366438 | 0.000332785 | 0.000325850 |
| 100.000     | 0.000111658 | 0.000103551 | 0.000104938 | 0.000126365 | 0.000172021 |
| 10.0000     | 2.58615e-05 | 3.69287e-05 | 5.86405e-05 | 9.55686e-05 | 0.000151958 |
| 1.00000     | 1.51927e-05 | 2.93835e-05 | 5.37442e-05 | 9.24638e-05 | 0.000150001 |
| 0.100000    | 1.41547e-05 | 2.86542e-05 | 5.32742e-05 | 9.21672e-05 | 0.000149815 |
| 0.0100000   | 1.40546e-05 | 2.85837e-05 | 5.32288e-05 | 9.21386e-05 | 0.000149797 |
| 0.00100000  | 1.40449e-05 | 2.85768e-05 | 5.32243e-05 | 9.21358e-05 | 0.000149795 |
| 0.000100000 | 1.40439e-05 | 2.85761e-05 | 5.32239e-05 | 9.21355e-05 | 0.000149795 |
| 1.00000e-05 | 1.40438e-05 | 2.85761e-05 | 5.32238e-05 | 9.21355e-05 | 0.000149795 |
| 1.00000e-06 | 1.40438e-05 | 2.85761e-05 | 5.32238e-05 | 9.21355e-05 | 0.000149795 |
| 1.00000e-07 | 1.40438e-05 | 2.85761e-05 | 5.32238e-05 | 9.21355e-05 | 0.000149795 |
| 1.00000e-08 | 1.40438e-05 | 2.85761e-05 | 5.32238e-05 | 9.21355e-05 | 0.000149795 |
| 1.00000e-09 | 1.40438e-05 | 2.85761e-05 | 5.32238e-05 | 9.21355e-05 | 0.000149795 |

| Pa\K        | 1400.00     | 1500.00     | 1750.00     | 2000.00     | 2250.00     |
|-------------|-------------|-------------|-------------|-------------|-------------|
| 1.00000e+08 | 0.000112586 | 0.000109019 | 0.000212180 | 0.000242344 | 0.000258556 |
| 1.00000e+07 | 0.000598366 | 0.000662602 | 0.00323832  | 0.00346264  | 0.00334312  |
| 1.00000e+06 | 0.00139606  | 0.00146831  | 0.00289044  | 0.00298574  | 0.00293623  |
| 100000.     | 0.00139878  | 0.00140769  | 0.00209155  | 0.00219850  | 0.00229844  |
| 10000.0     | 0.000810161 | 0.000801144 | 0.00115450  | 0.00143412  | 0.00178530  |
| 1000.00     | 0.000354578 | 0.000422471 | 0.000749938 | 0.00119873  | 0.00166474  |
| 100.000     | 0.000244727 | 0.000346565 | 0.000685412 | 0.00116770  | 0.00165069  |

|             |             |             |             |            |            |
|-------------|-------------|-------------|-------------|------------|------------|
| 10.0000     | 0.000231826 | 0.000338365 | 0.000678646 | 0.00116461 | 0.00164933 |
| 1.00000     | 0.000230597 | 0.000337599 | 0.000677987 | 0.00116431 | 0.00164920 |
| 0.100000    | 0.000230480 | 0.000337526 | 0.000677922 | 0.00116428 | 0.00164918 |
| 0.0100000   | 0.000230469 | 0.000337519 | 0.000677916 | 0.00116428 | 0.00164918 |
| 0.00100000  | 0.000230468 | 0.000337518 | 0.000677915 | 0.00116428 | 0.00164918 |
| 0.000100000 | 0.000230468 | 0.000337518 | 0.000677915 | 0.00116428 | 0.00164918 |
| 1.00000e-05 | 0.000230468 | 0.000337518 | 0.000677915 | 0.00116428 | 0.00164918 |
| 1.00000e-06 | 0.000230468 | 0.000337518 | 0.000677915 | 0.00116428 | 0.00164918 |
| 1.00000e-07 | 0.000230468 | 0.000337518 | 0.000677915 | 0.00116428 | 0.00164918 |
| 1.00000e-08 | 0.000230468 | 0.000337518 | 0.000677915 | 0.00116428 | 0.00164918 |
| 1.00000e-09 | 0.000230468 | 0.000337518 | 0.000677915 | 0.00116428 | 0.00164918 |

| Pa\K        | 2500.00    | 2750.00    | 3000.00    | 3250.00    | 3500.00    |
|-------------|------------|------------|------------|------------|------------|
| 1.00000e+08 | 0.00261592 | 0.00253791 | 0.00239159 | 0.00221866 | 0.00204750 |
| 1.00000e+07 | 0.00304800 | 0.00274155 | 0.00248096 | 0.00226886 | 0.00209260 |
| 1.00000e+06 | 0.00273474 | 0.00254446 | 0.00239025 | 0.00225311 | 0.00211839 |
| 100000.     | 0.00232187 | 0.00233603 | 0.00231333 | 0.00224183 | 0.00213206 |
| 10000.0     | 0.00206770 | 0.00223504 | 0.00228115 | 0.00223549 | 0.00213367 |
| 1000.00     | 0.00202105 | 0.00222001 | 0.00227727 | 0.00223507 | 0.00213410 |
| 100.000     | 0.00201615 | 0.00221858 | 0.00227696 | 0.00223508 | 0.00213418 |
| 10.0000     | 0.00201569 | 0.00221845 | 0.00227694 | 0.00223508 | 0.00213418 |
| 1.00000     | 0.00201564 | 0.00221844 | 0.00227694 | 0.00223508 | 0.00213419 |
| 0.100000    | 0.00201564 | 0.00221844 | 0.00227694 | 0.00223508 | 0.00213419 |
| 0.0100000   | 0.00201564 | 0.00221844 | 0.00227694 | 0.00223508 | 0.00213419 |
| 0.00100000  | 0.00201564 | 0.00221844 | 0.00227694 | 0.00223508 | 0.00213419 |
| 0.000100000 | 0.00201564 | 0.00221844 | 0.00227694 | 0.00223508 | 0.00213419 |
| 1.00000e-05 | 0.00201564 | 0.00221844 | 0.00227694 | 0.00223508 | 0.00213419 |
| 1.00000e-06 | 0.00201564 | 0.00221844 | 0.00227694 | 0.00223508 | 0.00213419 |
| 1.00000e-07 | 0.00201564 | 0.00221844 | 0.00227694 | 0.00223508 | 0.00213419 |
| 1.00000e-08 | 0.00201564 | 0.00221844 | 0.00227694 | 0.00223508 | 0.00213419 |
| 1.00000e-09 | 0.00201564 | 0.00221844 | 0.00227694 | 0.00223508 | 0.00213419 |

| Pa\K        | 3750.00    | 4000.00    |
|-------------|------------|------------|
| 1.00000e+08 | 0.00189102 | 0.00175223 |
| 1.00000e+07 | 0.00193998 | 0.00180314 |
| 1.00000e+06 | 0.00198189 | 0.00184561 |
| 100000.     | 0.00200063 | 0.00186171 |
| 10000.0     | 0.00200373 | 0.00186437 |
| 1000.00     | 0.00200424 | 0.00186476 |
| 100.000     | 0.00200430 | 0.00186481 |
| 10.0000     | 0.00200431 | 0.00186482 |
| 1.00000     | 0.00200431 | 0.00186482 |
| 0.100000    | 0.00200431 | 0.00186482 |
| 0.0100000   | 0.00200431 | 0.00186482 |
| 0.00100000  | 0.00200431 | 0.00186482 |
| 0.000100000 | 0.00200431 | 0.00186482 |
| 1.00000e-05 | 0.00200431 | 0.00186482 |
| 1.00000e-06 | 0.00200431 | 0.00186482 |
| 1.00000e-07 | 0.00200431 | 0.00186482 |
| 1.00000e-08 | 0.00200431 | 0.00186482 |
| 1.00000e-09 | 0.00200431 | 0.00186482 |

rad24  
=====

| Pa\K        | 20.0000     | 30.0000     | 40.0000     | 50.0000     | 60.0000     |
|-------------|-------------|-------------|-------------|-------------|-------------|
| 1.00000e+08 | 1.47758e-13 | 6.07632e-13 | 1.37591e-12 | 2.48146e-12 | 3.97310e-12 |
| 1.00000e+07 | 1.46899e-11 | 6.00526e-11 | 1.35202e-10 | 2.42454e-10 | 3.85990e-10 |
| 1.00000e+06 | 1.38648e-09 | 5.35019e-09 | 1.14009e-08 | 1.93818e-08 | 2.92762e-08 |
| 100000.     | 8.15269e-08 | 2.00029e-07 | 2.92665e-07 | 3.60130e-07 | 4.09252e-07 |
| 10000.0     | 3.76295e-07 | 2.53307e-07 | 1.73248e-07 | 1.26060e-07 | 9.65583e-08 |
| 1000.00     | 2.39031e-08 | 5.52206e-09 | 2.34938e-09 | 1.33100e-09 | 8.95133e-10 |
| 100.000     | 2.88781e-10 | 2.25259e-10 | 2.15087e-10 | 2.06081e-10 | 1.96854e-10 |
| 10.0000     | 1.37056e-10 | 8.01526e-11 | 5.48781e-11 | 4.24788e-11 | 3.60602e-11 |
| 1.00000     | 2.61468e-11 | 2.46398e-11 | 2.32392e-11 | 2.18452e-11 | 2.05784e-11 |
| 0.100000    | 1.49632e-11 | 9.43330e-12 | 6.49116e-12 | 4.66205e-12 | 3.43927e-12 |
| 0.0100000   | 9.70088e-13 | 1.61110e-13 | 4.64099e-14 | 1.77505e-14 | 8.08036e-15 |
| 0.00100000  | 5.81969e-16 | 3.68441e-17 | 7.72996e-18 | 2.61949e-18 | 1.15256e-18 |
| 0.000100000 | 1.07445e-19 | 1.88903e-20 | 9.79705e-21 | 6.80011e-21 | 5.33174e-21 |
| 1.00000e-05 | 2.38693e-21 | 1.16467e-21 | 7.83937e-22 | 5.99112e-22 | 4.91465e-22 |
| 1.00000e-06 | 2.32696e-22 | 1.15447e-22 | 7.79973e-23 | 5.97045e-23 | 4.90216e-23 |
| 1.00000e-07 | 2.32430e-23 | 1.15401e-23 | 7.79849e-24 | 5.97019e-24 | 4.90224e-24 |
| 1.00000e-08 | 2.32442e-24 | 1.15401e-24 | 7.79812e-25 | 5.96970e-25 | 4.90172e-25 |
| 1.00000e-09 | 2.32418e-25 | 1.15391e-25 | 7.79757e-26 | 5.96935e-26 | 4.90147e-26 |

| Pa\K        | 70.0000     | 80.0000     | 90.0000     | 100.000     | 110.000     |
|-------------|-------------|-------------|-------------|-------------|-------------|
| 1.00000e+08 | 5.92123e-12 | 8.42429e-12 | 1.16177e-11 | 1.56866e-11 | 2.08830e-11 |

|             |             |             |             |             |             |
|-------------|-------------|-------------|-------------|-------------|-------------|
| 1.00000e+07 | 5.71934e-10 | 8.08884e-10 | 1.10864e-09 | 1.48723e-09 | 1.96626e-09 |
| 1.00000e+06 | 4.11674e-08 | 5.52344e-08 | 7.17518e-08 | 9.10948e-08 | 1.13748e-07 |
| 100000.     | 4.45844e-07 | 4.74125e-07 | 4.97041e-07 | 5.16644e-07 | 5.34375e-07 |
| 10000.0     | 7.69883e-08 | 6.33581e-08 | 5.34823e-08 | 4.60914e-08 | 4.04085e-08 |
| 1000.00     | 6.75520e-10 | 5.53135e-10 | 4.80494e-10 | 4.35794e-10 | 4.07939e-10 |
| 100.000     | 1.87732e-10 | 1.78924e-10 | 1.70503e-10 | 1.62478e-10 | 1.54829e-10 |
| 10.0000     | 3.26695e-11 | 3.09040e-11 | 3.00472e-11 | 2.97120e-11 | 2.96793e-11 |
| 1.00000     | 1.94404e-11 | 1.84079e-11 | 1.74568e-11 | 1.65665e-11 | 1.57210e-11 |
| 0.100000    | 2.58516e-12 | 1.97018e-12 | 1.51732e-12 | 1.17805e-12 | 9.20431e-13 |
| 0.0100000   | 4.13859e-15 | 2.30731e-15 | 1.37087e-15 | 8.55627e-16 | 5.55347e-16 |
| 0.00100000  | 5.99112e-19 | 3.50271e-19 | 2.23828e-19 | 1.53528e-19 | 1.11666e-19 |
| 0.000100000 | 4.46671e-21 | 3.90175e-21 | 3.50831e-21 | 3.22260e-21 | 3.00947e-21 |
| 1.00000e-05 | 4.22053e-22 | 3.74263e-22 | 3.39855e-22 | 3.14311e-22 | 2.94966e-22 |
| 1.00000e-06 | 4.21229e-23 | 3.73688e-23 | 3.39440e-23 | 3.14005e-23 | 2.94737e-23 |
| 1.00000e-07 | 4.21248e-24 | 3.73709e-24 | 3.39458e-24 | 3.14018e-24 | 2.94744e-24 |
| 1.00000e-08 | 4.21197e-25 | 3.73661e-25 | 3.39412e-25 | 3.13975e-25 | 2.94704e-25 |
| 1.00000e-09 | 4.21178e-26 | 3.73646e-26 | 3.39400e-26 | 3.13965e-26 | 2.94695e-26 |

| Pa\K        | 120.000     | 130.000     | 140.000     | 150.000     | 160.000     |
|-------------|-------------|-------------|-------------|-------------|-------------|
| 1.00000e+08 | 2.75506e-11 | 3.61578e-11 | 4.73437e-11 | 6.19809e-11 | 8.12604e-11 |
| 1.00000e+07 | 2.57482e-09 | 3.35201e-09 | 4.35024e-09 | 5.63969e-09 | 7.31399e-09 |
| 1.00000e+06 | 1.40313e-07 | 1.71524e-07 | 2.08255e-07 | 2.51529e-07 | 3.02522e-07 |
| 100000.     | 5.51267e-07 | 5.68066e-07 | 5.85319e-07 | 6.03425e-07 | 6.22673e-07 |
| 10000.0     | 3.59375e-08 | 3.23493e-08 | 2.94188e-08 | 2.69877e-08 | 2.49422e-08 |
| 1000.00     | 3.90814e-10 | 3.80824e-10 | 3.75734e-10 | 3.74089e-10 | 3.74892e-10 |
| 100.000     | 1.47533e-10 | 1.40567e-10 | 1.33915e-10 | 1.27571e-10 | 1.21538e-10 |
| 10.0000     | 2.98205e-11 | 3.00575e-11 | 3.03412e-11 | 3.06399e-11 | 3.09325e-11 |
| 1.00000     | 1.49078e-11 | 1.41175e-11 | 1.33434e-11 | 1.25807e-11 | 1.18270e-11 |
| 0.100000    | 7.22710e-13 | 5.69669e-13 | 4.50406e-13 | 3.56964e-13 | 2.83440e-13 |
| 0.0100000   | 3.72064e-16 | 2.55879e-16 | 1.79881e-16 | 1.28843e-16 | 9.37941e-17 |
| 0.00100000  | 8.53695e-20 | 6.81388e-20 | 5.64697e-20 | 4.83665e-20 | 4.26410e-20 |
| 0.000100000 | 2.84800e-21 | 2.72509e-21 | 2.63219e-21 | 2.56358e-21 | 2.51544e-21 |
| 1.00000e-05 | 2.80161e-22 | 2.68816e-22 | 2.60214e-22 | 2.53864e-22 | 2.49436e-22 |
| 1.00000e-06 | 2.79988e-23 | 2.68687e-23 | 2.60117e-23 | 2.53792e-23 | 2.49383e-23 |
| 1.00000e-07 | 2.79988e-24 | 2.68680e-24 | 2.60104e-24 | 2.53773e-24 | 2.49358e-24 |
| 1.00000e-08 | 2.79950e-25 | 2.68644e-25 | 2.60070e-25 | 2.53741e-25 | 2.49327e-25 |
| 1.00000e-09 | 2.79943e-26 | 2.68638e-26 | 2.60064e-26 | 2.53736e-26 | 2.49323e-26 |

| Pa\K        | 170.000     | 180.000     | 190.000     | 200.000     | 210.000     |
|-------------|-------------|-------------|-------------|-------------|-------------|
| 1.00000e+08 | 1.06809e-10 | 1.40846e-10 | 1.86402e-10 | 2.47603e-10 | 3.30066e-10 |
| 1.00000e+07 | 9.49782e-09 | 1.23566e-08 | 1.61088e-08 | 2.10418e-08 | 2.75317e-08 |
| 1.00000e+06 | 3.62573e-07 | 4.33174e-07 | 5.15971e-07 | 6.12756e-07 | 7.25451e-07 |
| 100000.     | 6.43258e-07 | 6.65304e-07 | 6.88865e-07 | 7.13937e-07 | 7.40460e-07 |
| 10000.0     | 2.31988e-08 | 2.16953e-08 | 2.03846e-08 | 1.92308e-08 | 1.82062e-08 |
| 1000.00     | 3.77432e-10 | 3.81181e-10 | 3.85727e-10 | 3.90739e-10 | 3.95939e-10 |
| 100.000     | 1.15826e-10 | 1.10453e-10 | 1.05441e-10 | 1.00812e-10 | 9.65916e-11 |
| 10.0000     | 3.12041e-11 | 3.14441e-11 | 3.16442e-11 | 3.17977e-11 | 3.18989e-11 |
| 1.00000     | 1.10812e-11 | 1.03441e-11 | 9.61732e-12 | 8.90374e-12 | 8.20674e-12 |
| 0.100000    | 2.25395e-13 | 1.79453e-13 | 1.43018e-13 | 1.14081e-13 | 9.10737e-14 |
| 0.0100000   | 6.92636e-17 | 5.18123e-17 | 3.92218e-17 | 3.00278e-17 | 2.32440e-17 |
| 0.00100000  | 3.85591e-20 | 3.56539e-20 | 3.36214e-20 | 3.22614e-20 | 3.14420e-20 |
| 0.000100000 | 2.48520e-21 | 2.47128e-21 | 2.47277e-21 | 2.48940e-21 | 2.52141e-21 |
| 1.00000e-05 | 2.46707e-22 | 2.45540e-22 | 2.45861e-22 | 2.47652e-22 | 2.50942e-22 |
| 1.00000e-06 | 2.46668e-23 | 2.45510e-23 | 2.45838e-23 | 2.47631e-23 | 2.50920e-23 |
| 1.00000e-07 | 2.46637e-24 | 2.45475e-24 | 2.45797e-24 | 2.47586e-24 | 2.50870e-24 |
| 1.00000e-08 | 2.46609e-25 | 2.45447e-25 | 2.45771e-25 | 2.47560e-25 | 2.50846e-25 |
| 1.00000e-09 | 2.46604e-26 | 2.45443e-26 | 2.45767e-26 | 2.47557e-26 | 2.50843e-26 |

| Pa\K        | 220.000     | 230.000     | 240.000     | 250.000     | 260.000     |
|-------------|-------------|-------------|-------------|-------------|-------------|
| 1.00000e+08 | 4.41417e-10 | 5.91989e-10 | 7.95741e-10 | 1.07147e-09 | 1.44441e-09 |
| 1.00000e+07 | 3.60670e-08 | 4.72791e-08 | 6.19770e-08 | 8.11898e-08 | 1.06215e-07 |
| 1.00000e+06 | 8.56093e-07 | 1.00682e-06 | 1.17983e-06 | 1.37740e-06 | 1.60182e-06 |
| 100000.     | 7.68324e-07 | 7.97372e-07 | 8.27405e-07 | 8.58191e-07 | 8.89470e-07 |
| 10000.0     | 1.72891e-08 | 1.64628e-08 | 1.57139e-08 | 1.50322e-08 | 1.44094e-08 |
| 1000.00     | 4.01093e-10 | 4.05996e-10 | 4.10467e-10 | 4.14352e-10 | 4.17518e-10 |
| 100.000     | 9.27988e-11 | 8.94501e-11 | 8.65555e-11 | 8.41182e-11 | 8.21339e-11 |
| 10.0000     | 3.19427e-11 | 3.19244e-11 | 3.18400e-11 | 3.16857e-11 | 3.14585e-11 |
| 1.00000     | 7.53010e-12 | 6.87767e-12 | 6.25313e-12 | 5.65977e-12 | 5.10031e-12 |
| 0.100000    | 7.27670e-14 | 5.81928e-14 | 4.65857e-14 | 3.73396e-14 | 2.99728e-14 |
| 0.0100000   | 1.81943e-17 | 1.44082e-17 | 1.15533e-17 | 9.39265e-18 | 7.75533e-18 |
| 0.00100000  | 3.10779e-20 | 3.11179e-20 | 3.15365e-20 | 3.23298e-20 | 3.35136e-20 |
| 0.000100000 | 2.56952e-21 | 2.63496e-21 | 2.71951e-21 | 2.82556e-21 | 2.95621e-21 |
| 1.00000e-05 | 2.55807e-22 | 2.62372e-22 | 2.70811e-22 | 2.81358e-22 | 2.94316e-22 |
| 1.00000e-06 | 2.55782e-23 | 2.62340e-23 | 2.70769e-23 | 2.81302e-23 | 2.94239e-23 |
| 1.00000e-07 | 2.55728e-24 | 2.62281e-24 | 2.70706e-24 | 2.81233e-24 | 2.94166e-24 |
| 1.00000e-08 | 2.55704e-25 | 2.62258e-25 | 2.70683e-25 | 2.81211e-25 | 2.94143e-25 |
| 1.00000e-09 | 2.55701e-26 | 2.62255e-26 | 2.70680e-26 | 2.81208e-26 | 2.94141e-26 |



| Pa\K        | 270.000     | 280.000     | 290.000     | 300.000     | 310.000     |
|-------------|-------------|-------------|-------------|-------------|-------------|
| 1.00000e+08 | 1.94829e-09 | 2.62801e-09 | 3.54311e-09 | 1.96244e-08 | 6.41841e-09 |
| 1.00000e+07 | 1.38674e-07 | 1.80574e-07 | 2.34377e-07 | 8.66554e-07 | 3.90236e-07 |
| 1.00000e+06 | 1.85537e-06 | 2.14032e-06 | 2.45888e-06 | 4.43559e-06 | 3.20532e-06 |
| 100000.     | 9.20965e-07 | 9.52390e-07 | 9.83462e-07 | 1.33274e-06 | 1.04349e-06 |
| 10000.0     | 1.38392e-08 | 1.33164e-08 | 1.28370e-08 | 3.87220e-08 | 1.19968e-08 |
| 1000.00     | 4.19854e-10 | 4.21278e-10 | 4.21736e-10 | 7.48031e-10 | 4.19689e-10 |
| 100.000     | 8.05914e-11 | 7.94732e-11 | 7.87560e-11 | 1.01294e-10 | 7.84114e-11 |
| 10.0000     | 3.11562e-11 | 3.07777e-11 | 3.03232e-11 | 3.49725e-11 | 2.91940e-11 |
| 1.00000     | 4.57685e-12 | 4.09074e-12 | 3.64264e-12 | 3.75087e-12 | 2.85975e-12 |
| 0.100000    | 2.41028e-14 | 1.94251e-14 | 1.56972e-14 | 3.69869e-14 | 1.03587e-14 |
| 0.0100000   | 6.51737e-18 | 5.58847e-18 | 4.90300e-18 | 2.55131e-16 | 4.08716e-18 |
| 0.00100000  | 3.51234e-20 | 3.72164e-20 | 3.98753e-20 | 1.78024e-17 | 4.73879e-20 |
| 0.000100000 | 3.11544e-21 | 3.30836e-21 | 3.54143e-21 | 1.74140e-18 | 4.16336e-21 |
| 1.00000e-05 | 3.10069e-22 | 3.29105e-22 | 3.52042e-22 | 1.73813e-19 | 4.12953e-22 |
| 1.00000e-06 | 3.09966e-23 | 3.28966e-23 | 3.51855e-23 | 1.73792e-20 | 4.12611e-23 |
| 1.00000e-07 | 3.09886e-24 | 3.28879e-24 | 3.51759e-24 | 1.73780e-21 | 4.12491e-24 |
| 1.00000e-08 | 3.09863e-25 | 3.28857e-25 | 3.51736e-25 | 1.73776e-22 | 4.12466e-25 |
| 1.00000e-09 | 3.09861e-26 | 3.28854e-26 | 3.51733e-26 | 1.73776e-23 | 4.12463e-26 |

| Pa\K        | 400.000     | 500.000     | 600.000     | 700.000     | 800.000     |
|-------------|-------------|-------------|-------------|-------------|-------------|
| 1.00000e+08 | 3.15157e-07 | 3.90588e-06 | 3.82945e-05 | 0.000272840 | 0.000841460 |
| 1.00000e+07 | 6.69329e-06 | 3.45671e-05 | 0.000140931 | 0.000448388 | 0.000890828 |
| 1.00000e+06 | 1.29856e-05 | 3.18072e-05 | 7.61667e-05 | 0.000178777 | 0.000345078 |
| 100000.     | 1.95215e-06 | 3.16740e-06 | 6.85117e-06 | 1.88937e-05 | 4.77781e-05 |
| 10000.0     | 4.15400e-08 | 6.92514e-08 | 2.16514e-07 | 1.01207e-06 | 3.81254e-06 |
| 1000.00     | 7.88090e-10 | 1.54081e-09 | 8.06324e-09 | 6.39980e-08 | 3.26569e-07 |
| 100.000     | 1.35269e-10 | 2.19984e-10 | 7.99094e-10 | 6.35159e-09 | 3.53731e-08 |
| 10.0000     | 3.09837e-11 | 3.28028e-11 | 9.03274e-11 | 6.82544e-10 | 3.78992e-09 |
| 1.00000     | 1.62179e-12 | 1.57866e-12 | 7.05474e-12 | 6.66730e-11 | 3.82756e-10 |
| 0.100000    | 1.90722e-14 | 6.19224e-14 | 5.94181e-13 | 6.56884e-12 | 3.83471e-11 |
| 0.0100000   | 6.82783e-16 | 4.63829e-15 | 5.67874e-14 | 6.55121e-13 | 3.83683e-12 |
| 0.00100000  | 5.78116e-17 | 4.32961e-16 | 5.62086e-15 | 6.54811e-14 | 3.83701e-13 |
| 0.000100000 | 5.61668e-18 | 4.26361e-17 | 5.60859e-16 | 6.54717e-15 | 3.83696e-14 |
| 1.00000e-05 | 5.59333e-19 | 4.25313e-18 | 5.60650e-17 | 6.54694e-16 | 3.83695e-15 |
| 1.00000e-06 | 5.59052e-20 | 4.25181e-19 | 5.60620e-18 | 6.54690e-17 | 3.83694e-16 |
| 1.00000e-07 | 5.59003e-21 | 4.25163e-20 | 5.60616e-19 | 6.54690e-18 | 3.83694e-17 |
| 1.00000e-08 | 5.58995e-22 | 4.25161e-21 | 5.60616e-20 | 6.54690e-19 | 3.83694e-18 |
| 1.00000e-09 | 5.58994e-23 | 4.25160e-22 | 5.60616e-21 | 6.54690e-20 | 3.83694e-19 |

| Pa\K        | 900.000     | 1000.00     | 1100.00     | 1200.00     | 1300.00     |
|-------------|-------------|-------------|-------------|-------------|-------------|
| 1.00000e+08 | 0.00123911  | 0.00180245  | 0.00263859  | 0.00307254  | 0.00311221  |
| 1.00000e+07 | 0.00104759  | 0.00102051  | 0.00120777  | 0.00145968  | 0.00160666  |
| 1.00000e+06 | 0.000433493 | 0.000412540 | 0.000405067 | 0.000417925 | 0.000420940 |
| 100000.     | 7.23306e-05 | 7.33907e-05 | 6.75864e-05 | 6.32361e-05 | 5.88254e-05 |
| 10000.0     | 7.20376e-06 | 8.22669e-06 | 7.86364e-06 | 7.32276e-06 | 6.72537e-06 |
| 1000.00     | 7.39102e-07 | 9.30112e-07 | 9.07826e-07 | 8.32225e-07 | 7.47886e-07 |
| 100.000     | 8.37981e-08 | 1.04849e-07 | 9.91224e-08 | 8.81671e-08 | 7.76469e-08 |
| 10.0000     | 8.84029e-09 | 1.08627e-08 | 1.01175e-08 | 8.91712e-09 | 7.81565e-09 |
| 1.00000     | 8.92943e-10 | 1.09298e-09 | 1.01498e-09 | 8.93153e-10 | 7.82269e-10 |
| 0.100000    | 8.94689e-11 | 1.09402e-10 | 1.01539e-10 | 8.93314e-11 | 7.82343e-11 |
| 0.0100000   | 8.94949e-12 | 1.09413e-11 | 1.01542e-11 | 8.93325e-12 | 7.82347e-12 |
| 0.00100000  | 8.94963e-13 | 1.09413e-12 | 1.01542e-12 | 8.93325e-13 | 7.82347e-13 |
| 0.000100000 | 8.94961e-14 | 1.09413e-13 | 1.01542e-13 | 8.93325e-14 | 7.82347e-14 |
| 1.00000e-05 | 8.94960e-15 | 1.09413e-14 | 1.01542e-14 | 8.93325e-15 | 7.82347e-15 |
| 1.00000e-06 | 8.94960e-16 | 1.09413e-15 | 1.01542e-15 | 8.93325e-16 | 7.82347e-16 |
| 1.00000e-07 | 8.94960e-17 | 1.09413e-16 | 1.01542e-16 | 8.93325e-17 | 7.82347e-17 |
| 1.00000e-08 | 8.94960e-18 | 1.09413e-17 | 1.01542e-17 | 8.93325e-18 | 7.82347e-18 |
| 1.00000e-09 | 8.94960e-19 | 1.09413e-18 | 1.01542e-18 | 8.93325e-19 | 7.82347e-19 |

| Pa\K        | 1400.00     | 1500.00     | 1750.00     | 2000.00     | 2250.00     |
|-------------|-------------|-------------|-------------|-------------|-------------|
| 1.00000e+08 | 0.00308289  | 0.00308545  | 0.000336618 | 0.000364088 | 0.000385278 |
| 1.00000e+07 | 0.00167631  | 0.00170503  | 0.000177448 | 0.000172990 | 0.000151895 |
| 1.00000e+06 | 0.000410013 | 0.000389058 | 4.83682e-05 | 3.69657e-05 | 2.69263e-05 |
| 100000.     | 5.38593e-05 | 4.86623e-05 | 7.13087e-06 | 5.27995e-06 | 3.77870e-06 |
| 10000.0     | 6.08585e-06 | 5.44006e-06 | 9.30079e-07 | 6.63261e-07 | 4.50737e-07 |
| 1000.00     | 6.63377e-07 | 5.82629e-07 | 1.02695e-07 | 7.04209e-08 | 4.66110e-08 |
| 100.000     | 6.80035e-08 | 5.92348e-08 | 1.04503e-08 | 7.10001e-09 | 4.67811e-09 |
| 10.0000     | 6.82808e-09 | 5.93932e-09 | 1.04754e-09 | 7.10669e-10 | 4.67978e-10 |
| 1.00000     | 6.83195e-10 | 5.94160e-10 | 1.04785e-10 | 7.10741e-11 | 4.67994e-11 |
| 0.100000    | 6.83235e-11 | 5.94184e-11 | 1.04788e-11 | 7.10747e-12 | 4.67996e-12 |
| 0.0100000   | 6.83237e-12 | 5.94185e-12 | 1.04788e-12 | 7.10748e-13 | 4.67996e-13 |
| 0.00100000  | 6.83237e-13 | 5.94185e-13 | 1.04788e-13 | 7.10748e-14 | 4.67996e-14 |
| 0.000100000 | 6.83237e-14 | 5.94185e-14 | 1.04788e-14 | 7.10748e-15 | 4.67996e-15 |
| 1.00000e-05 | 6.83237e-15 | 5.94185e-15 | 1.04788e-15 | 7.10748e-16 | 4.67996e-16 |

|             |             |             |             |             |             |
|-------------|-------------|-------------|-------------|-------------|-------------|
| 1.00000e-06 | 6.83237e-16 | 5.94185e-16 | 1.04788e-16 | 7.10748e-17 | 4.67996e-17 |
| 1.00000e-07 | 6.83237e-17 | 5.94185e-17 | 1.04788e-17 | 7.10748e-18 | 4.67996e-18 |
| 1.00000e-08 | 6.83237e-18 | 5.94185e-18 | 1.04788e-18 | 7.10748e-19 | 4.67996e-19 |
| 1.00000e-09 | 6.83237e-19 | 5.94185e-19 | 1.04788e-19 | 7.10748e-20 | 4.67996e-20 |

| Pa\K        | 2500.00     | 2750.00     | 3000.00     | 3250.00     | 3500.00     |
|-------------|-------------|-------------|-------------|-------------|-------------|
| 1.00000e+08 | 0.000388667 | 0.000370009 | 0.000333202 | 0.000286896 | 0.000239425 |
| 1.00000e+07 | 0.000121942 | 9.21336e-05 | 6.74506e-05 | 4.88793e-05 | 3.55026e-05 |
| 1.00000e+06 | 1.90761e-05 | 1.33037e-05 | 9.21014e-06 | 6.36807e-06 | 4.41766e-06 |
| 100000.     | 2.60324e-06 | 1.73710e-06 | 1.14024e-06 | 7.47039e-07 | 4.93546e-07 |
| 10000.0     | 2.94365e-07 | 1.88042e-07 | 1.19587e-07 | 7.66692e-08 | 4.99300e-08 |
| 1000.00     | 2.99476e-08 | 1.89557e-08 | 1.19939e-08 | 7.66769e-09 | 4.98551e-09 |
| 100.000     | 2.99917e-09 | 1.89642e-09 | 1.19933e-09 | 7.66540e-10 | 4.98337e-10 |
| 10.0000     | 2.99954e-10 | 1.89647e-10 | 1.19931e-10 | 7.66507e-11 | 4.98311e-11 |
| 1.00000     | 2.99957e-11 | 1.89647e-11 | 1.19931e-11 | 7.66503e-12 | 4.98308e-12 |
| 0.100000    | 2.99957e-12 | 1.89647e-12 | 1.19931e-12 | 7.66503e-13 | 4.98307e-13 |
| 0.0100000   | 2.99957e-13 | 1.89647e-13 | 1.19931e-13 | 7.66503e-14 | 4.98307e-14 |
| 0.00100000  | 2.99957e-14 | 1.89647e-14 | 1.19931e-14 | 7.66503e-15 | 4.98307e-15 |
| 0.000100000 | 2.99957e-15 | 1.89647e-15 | 1.19931e-15 | 7.66503e-16 | 4.98307e-16 |
| 1.00000e-05 | 2.99957e-16 | 1.89647e-16 | 1.19931e-16 | 7.66503e-17 | 4.98307e-17 |
| 1.00000e-06 | 2.99957e-17 | 1.89647e-17 | 1.19931e-17 | 7.66503e-18 | 4.98307e-18 |
| 1.00000e-07 | 2.99957e-18 | 1.89647e-18 | 1.19931e-18 | 7.66503e-19 | 4.98307e-19 |
| 1.00000e-08 | 2.99957e-19 | 1.89647e-19 | 1.19931e-19 | 7.66503e-20 | 4.98307e-20 |
| 1.00000e-09 | 2.99957e-20 | 1.89647e-20 | 1.19931e-20 | 7.66503e-21 | 4.98307e-21 |

| Pa\K        | 3750.00     | 4000.00     |
|-------------|-------------|-------------|
| 1.00000e+08 | 0.000196085 | 0.000159119 |
| 1.00000e+07 | 2.60043e-05 | 1.92573e-05 |
| 1.00000e+06 | 3.08643e-06 | 2.17879e-06 |
| 100000.     | 3.30929e-07 | 2.26043e-07 |
| 10000.0     | 3.31666e-08 | 2.25183e-08 |
| 1000.00     | 3.30867e-09 | 2.24527e-09 |
| 100.000     | 3.30704e-10 | 2.24410e-10 |
| 10.0000     | 3.30685e-11 | 2.24396e-11 |
| 1.00000     | 3.30683e-12 | 2.24395e-12 |
| 0.100000    | 3.30683e-13 | 2.24395e-13 |
| 0.0100000   | 3.30683e-14 | 2.24395e-14 |
| 0.00100000  | 3.30683e-15 | 2.24395e-15 |
| 0.000100000 | 3.30683e-16 | 2.24395e-16 |
| 1.00000e-05 | 3.30683e-17 | 2.24395e-17 |
| 1.00000e-06 | 3.30683e-18 | 2.24395e-18 |
| 1.00000e-07 | 3.30683e-19 | 2.24395e-19 |
| 1.00000e-08 | 3.30683e-20 | 2.24395e-20 |
| 1.00000e-09 | 3.30683e-21 | 2.24395e-21 |

rad72

=====

| Pa\K        | 20.0000 | 30.0000 | 40.0000 | 50.0000 | 60.0000 |
|-------------|---------|---------|---------|---------|---------|
| 1.00000e+08 | N/A     | N/A     | N/A     | N/A     | N/A     |
| 1.00000e+07 | N/A     | N/A     | N/A     | N/A     | N/A     |
| 1.00000e+06 | N/A     | N/A     | N/A     | N/A     | N/A     |
| 100000.     | N/A     | N/A     | N/A     | N/A     | N/A     |
| 10000.0     | N/A     | N/A     | N/A     | N/A     | N/A     |
| 1000.00     | N/A     | N/A     | N/A     | N/A     | N/A     |
| 100.000     | N/A     | N/A     | N/A     | N/A     | N/A     |
| 10.0000     | N/A     | N/A     | N/A     | N/A     | N/A     |
| 1.00000     | N/A     | N/A     | N/A     | N/A     | N/A     |
| 0.100000    | N/A     | N/A     | N/A     | N/A     | N/A     |
| 0.0100000   | N/A     | N/A     | N/A     | N/A     | N/A     |
| 0.00100000  | N/A     | N/A     | N/A     | N/A     | N/A     |
| 0.000100000 | N/A     | N/A     | N/A     | N/A     | N/A     |
| 1.00000e-05 | N/A     | N/A     | N/A     | N/A     | N/A     |
| 1.00000e-06 | N/A     | N/A     | N/A     | N/A     | N/A     |
| 1.00000e-07 | N/A     | N/A     | N/A     | N/A     | N/A     |
| 1.00000e-08 | N/A     | N/A     | N/A     | N/A     | N/A     |
| 1.00000e-09 | N/A     | N/A     | N/A     | N/A     | N/A     |

| Pa\K        | 70.0000 | 80.0000 | 90.0000 | 100.000 | 110.000 |
|-------------|---------|---------|---------|---------|---------|
| 1.00000e+08 | N/A     | N/A     | N/A     | N/A     | N/A     |
| 1.00000e+07 | N/A     | N/A     | N/A     | N/A     | N/A     |
| 1.00000e+06 | N/A     | N/A     | N/A     | N/A     | N/A     |
| 100000.     | N/A     | N/A     | N/A     | N/A     | N/A     |
| 10000.0     | N/A     | N/A     | N/A     | N/A     | N/A     |
| 1000.00     | N/A     | N/A     | N/A     | N/A     | N/A     |
| 100.000     | N/A     | N/A     | N/A     | N/A     | N/A     |
| 10.0000     | N/A     | N/A     | N/A     | N/A     | N/A     |

|             |     |     |     |     |     |
|-------------|-----|-----|-----|-----|-----|
| 1.00000     | N/A | N/A | N/A | N/A | N/A |
| 0.100000    | N/A | N/A | N/A | N/A | N/A |
| 0.0100000   | N/A | N/A | N/A | N/A | N/A |
| 0.00100000  | N/A | N/A | N/A | N/A | N/A |
| 0.000100000 | N/A | N/A | N/A | N/A | N/A |
| 1.00000e-05 | N/A | N/A | N/A | N/A | N/A |
| 1.00000e-06 | N/A | N/A | N/A | N/A | N/A |
| 1.00000e-07 | N/A | N/A | N/A | N/A | N/A |
| 1.00000e-08 | N/A | N/A | N/A | N/A | N/A |
| 1.00000e-09 | N/A | N/A | N/A | N/A | N/A |

Pa\K | 120.000 130.000 140.000 150.000 160.000

|             |     |     |     |     |     |
|-------------|-----|-----|-----|-----|-----|
| 1.00000e+08 | N/A | N/A | N/A | N/A | N/A |
| 1.00000e+07 | N/A | N/A | N/A | N/A | N/A |
| 1.00000e+06 | N/A | N/A | N/A | N/A | N/A |
| 100000.     | N/A | N/A | N/A | N/A | N/A |
| 10000.0     | N/A | N/A | N/A | N/A | N/A |
| 1000.00     | N/A | N/A | N/A | N/A | N/A |
| 100.000     | N/A | N/A | N/A | N/A | N/A |
| 10.0000     | N/A | N/A | N/A | N/A | N/A |
| 1.00000     | N/A | N/A | N/A | N/A | N/A |
| 0.100000    | N/A | N/A | N/A | N/A | N/A |
| 0.0100000   | N/A | N/A | N/A | N/A | N/A |
| 0.00100000  | N/A | N/A | N/A | N/A | N/A |
| 0.000100000 | N/A | N/A | N/A | N/A | N/A |
| 1.00000e-05 | N/A | N/A | N/A | N/A | N/A |
| 1.00000e-06 | N/A | N/A | N/A | N/A | N/A |
| 1.00000e-07 | N/A | N/A | N/A | N/A | N/A |
| 1.00000e-08 | N/A | N/A | N/A | N/A | N/A |
| 1.00000e-09 | N/A | N/A | N/A | N/A | N/A |

Pa\K | 170.000 180.000 190.000 200.000 210.000

|             |     |     |     |     |     |
|-------------|-----|-----|-----|-----|-----|
| 1.00000e+08 | N/A | N/A | N/A | N/A | N/A |
| 1.00000e+07 | N/A | N/A | N/A | N/A | N/A |
| 1.00000e+06 | N/A | N/A | N/A | N/A | N/A |
| 100000.     | N/A | N/A | N/A | N/A | N/A |
| 10000.0     | N/A | N/A | N/A | N/A | N/A |
| 1000.00     | N/A | N/A | N/A | N/A | N/A |
| 100.000     | N/A | N/A | N/A | N/A | N/A |
| 10.0000     | N/A | N/A | N/A | N/A | N/A |
| 1.00000     | N/A | N/A | N/A | N/A | N/A |
| 0.100000    | N/A | N/A | N/A | N/A | N/A |
| 0.0100000   | N/A | N/A | N/A | N/A | N/A |
| 0.00100000  | N/A | N/A | N/A | N/A | N/A |
| 0.000100000 | N/A | N/A | N/A | N/A | N/A |
| 1.00000e-05 | N/A | N/A | N/A | N/A | N/A |
| 1.00000e-06 | N/A | N/A | N/A | N/A | N/A |
| 1.00000e-07 | N/A | N/A | N/A | N/A | N/A |
| 1.00000e-08 | N/A | N/A | N/A | N/A | N/A |
| 1.00000e-09 | N/A | N/A | N/A | N/A | N/A |

Pa\K | 220.000 230.000 240.000 250.000 260.000

|             |     |     |     |     |     |
|-------------|-----|-----|-----|-----|-----|
| 1.00000e+08 | N/A | N/A | N/A | N/A | N/A |
| 1.00000e+07 | N/A | N/A | N/A | N/A | N/A |
| 1.00000e+06 | N/A | N/A | N/A | N/A | N/A |
| 100000.     | N/A | N/A | N/A | N/A | N/A |
| 10000.0     | N/A | N/A | N/A | N/A | N/A |
| 1000.00     | N/A | N/A | N/A | N/A | N/A |
| 100.000     | N/A | N/A | N/A | N/A | N/A |
| 10.0000     | N/A | N/A | N/A | N/A | N/A |
| 1.00000     | N/A | N/A | N/A | N/A | N/A |
| 0.100000    | N/A | N/A | N/A | N/A | N/A |
| 0.0100000   | N/A | N/A | N/A | N/A | N/A |
| 0.00100000  | N/A | N/A | N/A | N/A | N/A |
| 0.000100000 | N/A | N/A | N/A | N/A | N/A |
| 1.00000e-05 | N/A | N/A | N/A | N/A | N/A |
| 1.00000e-06 | N/A | N/A | N/A | N/A | N/A |
| 1.00000e-07 | N/A | N/A | N/A | N/A | N/A |
| 1.00000e-08 | N/A | N/A | N/A | N/A | N/A |
| 1.00000e-09 | N/A | N/A | N/A | N/A | N/A |

Pa\K | 270.000 280.000 290.000 300.000 310.000

|             |     |     |     |             |     |
|-------------|-----|-----|-----|-------------|-----|
| 1.00000e+08 | N/A | N/A | N/A | 1.22117e-30 | N/A |
| 1.00000e+07 | N/A | N/A | N/A | 3.75362e-27 | N/A |
| 1.00000e+06 | N/A | N/A | N/A | 8.90211e-25 | N/A |
| 100000.     | N/A | N/A | N/A | 2.94009e-24 | N/A |

|             |     |     |     |             |     |
|-------------|-----|-----|-----|-------------|-----|
| 10000.0     | N/A | N/A | N/A | 2.22133e-26 | N/A |
| 1000.00     | N/A | N/A | N/A | 7.54933e-31 | N/A |
| 100.000     | N/A | N/A | N/A | 2.16888e-34 | N/A |
| 10.0000     | N/A | N/A | N/A | 4.91049e-36 | N/A |
| 1.00000     | N/A | N/A | N/A | 4.02796e-37 | N/A |
| 0.100000    | N/A | N/A | N/A | 3.97095e-38 | N/A |
| 0.0100000   | N/A | N/A | N/A | 3.99445e-39 | N/A |
| 0.00100000  | N/A | N/A | N/A | 4.02619e-40 | N/A |
| 0.000100000 | N/A | N/A | N/A | 4.04731e-41 | N/A |
| 1.00000e-05 | N/A | N/A | N/A | 4.05556e-42 | N/A |
| 1.00000e-06 | N/A | N/A | N/A | 4.05733e-43 | N/A |
| 1.00000e-07 | N/A | N/A | N/A | 4.05751e-44 | N/A |
| 1.00000e-08 | N/A | N/A | N/A | 4.05751e-45 | N/A |
| 1.00000e-09 | N/A | N/A | N/A | 4.05751e-46 | N/A |

| Pa\K        | 400.000     | 500.000     | 600.000     | 700.000     | 800.000     |
|-------------|-------------|-------------|-------------|-------------|-------------|
| 1.00000e+08 | 4.40252e-19 | 1.15205e-13 | 1.38174e-11 | 2.48106e-10 | 1.11742e-09 |
| 1.00000e+07 | 4.68709e-16 | 7.32989e-11 | 4.05207e-09 | 2.30875e-08 | 5.24758e-08 |
| 1.00000e+06 | 9.53137e-15 | 1.00961e-09 | 5.48963e-08 | 2.10190e-07 | 3.60929e-07 |
| 100000.     | 1.42038e-15 | 1.30962e-10 | 3.13196e-08 | 2.14096e-07 | 4.30805e-07 |
| 10000.0     | 3.63928e-18 | 1.62409e-12 | 3.92757e-09 | 7.94814e-08 | 2.51645e-07 |
| 1000.00     | 4.07160e-21 | 5.54922e-14 | 8.60714e-10 | 3.22223e-08 | 1.25784e-07 |
| 100.000     | 9.01419e-23 | 7.63443e-15 | 2.24292e-10 | 9.49609e-09 | 3.53165e-08 |
| 10.0000     | 9.65126e-24 | 1.14980e-15 | 3.36549e-11 | 1.34609e-09 | 4.69383e-09 |
| 1.00000     | 1.06823e-24 | 1.22808e-16 | 3.24556e-12 | 1.28107e-10 | 4.56555e-10 |
| 0.100000    | 1.08211e-25 | 1.21459e-17 | 3.08177e-13 | 1.20646e-11 | 4.37426e-11 |
| 0.0100000   | 1.08554e-26 | 1.21385e-18 | 3.03377e-14 | 1.17118e-12 | 4.26054e-12 |
| 0.00100000  | 1.08757e-27 | 1.21469e-19 | 3.01613e-15 | 1.15301e-13 | 4.19388e-13 |
| 0.000100000 | 1.08840e-28 | 1.21496e-20 | 3.00795e-16 | 1.14334e-14 | 4.15692e-14 |
| 1.00000e-05 | 1.08869e-29 | 1.21500e-21 | 3.00517e-17 | 1.13998e-15 | 4.15613e-15 |
| 1.00000e-06 | 1.08966e-30 | 1.21504e-22 | 3.00456e-18 | 1.13981e-16 | 4.28259e-16 |
| 1.00000e-07 | 1.09917e-31 | 1.21547e-23 | 3.00507e-19 | 1.14620e-17 | 5.58088e-17 |
| 1.00000e-08 | 1.19421e-32 | 1.21981e-24 | 3.01148e-20 | 1.21038e-18 | 1.85614e-17 |
| 1.00000e-09 | 2.14460e-33 | 1.26322e-25 | 3.07631e-21 | 1.85999e-19 | 1.48472e-17 |

| Pa\K        | 900.000     | 1000.00     | 1100.00     | 1200.00     | 1300.00     |
|-------------|-------------|-------------|-------------|-------------|-------------|
| 1.00000e+08 | 2.12873e-09 | 2.97512e-09 | 3.83482e-09 | 4.39576e-09 | 4.72657e-09 |
| 1.00000e+07 | 8.01079e-08 | 1.08644e-07 | 1.47420e-07 | 1.84617e-07 | 2.12644e-07 |
| 1.00000e+06 | 4.91400e-07 | 6.15134e-07 | 7.44312e-07 | 8.51149e-07 | 9.23734e-07 |
| 100000.     | 6.05746e-07 | 7.35145e-07 | 8.26011e-07 | 8.81354e-07 | 9.00727e-07 |
| 10000.0     | 4.02071e-07 | 4.76910e-07 | 4.93069e-07 | 4.72326e-07 | 4.27859e-07 |
| 1000.00     | 1.95032e-07 | 1.99824e-07 | 1.71665e-07 | 1.35372e-07 | 1.01643e-07 |
| 100.000     | 4.62129e-08 | 3.88854e-08 | 2.79385e-08 | 1.89875e-08 | 1.27044e-08 |
| 10.0000     | 5.58770e-09 | 4.32862e-09 | 2.92529e-09 | 1.90976e-09 | 1.28056e-09 |
| 1.00000     | 5.44063e-10 | 4.18991e-10 | 2.81875e-10 | 1.88227e-10 | 1.64572e-10 |
| 0.100000    | 5.25519e-11 | 4.05914e-11 | 2.77733e-11 | 2.35171e-11 | 5.80510e-11 |
| 0.0100000   | 5.13619e-12 | 3.99958e-12 | 3.18721e-12 | 7.57134e-12 | 4.77289e-11 |
| 0.00100000  | 5.07110e-13 | 4.21282e-13 | 7.80733e-13 | 6.00924e-12 | 4.67168e-11 |
| 0.000100000 | 5.11433e-14 | 6.84715e-14 | 5.43308e-13 | 5.85504e-12 | 4.66168e-11 |
| 1.00000e-05 | 5.96383e-15 | 3.34927e-14 | 5.19759e-13 | 5.83974e-12 | 4.66069e-11 |
| 1.00000e-06 | 1.46078e-15 | 3.00053e-14 | 5.17410e-13 | 5.83821e-12 | 4.66059e-11 |
| 1.00000e-07 | 1.01083e-15 | 2.96567e-14 | 5.17175e-13 | 5.83806e-12 | 4.66058e-11 |
| 1.00000e-08 | 9.65836e-16 | 2.96219e-14 | 5.17152e-13 | 5.83804e-12 | 4.66058e-11 |
| 1.00000e-09 | 9.61349e-16 | 2.96184e-14 | 5.17150e-13 | 5.83804e-12 | 4.66058e-11 |

| Pa\K        | 1400.00     | 1500.00     | 1750.00     | 2000.00     | 2250.00     |
|-------------|-------------|-------------|-------------|-------------|-------------|
| 1.00000e+08 | 5.10162e-09 | 5.54372e-09 | 0.000539067 | 0.000626716 | 0.000710360 |
| 1.00000e+07 | 2.35663e-07 | 2.55274e-07 | 0.00197785  | 0.00217431  | 0.00218786  |
| 1.00000e+06 | 9.68890e-07 | 9.90705e-07 | 0.00295752  | 0.00268850  | 0.00224543  |
| 100000.     | 8.88589e-07 | 8.51064e-07 | 0.00203283  | 0.00145279  | 0.000961402 |
| 10000.0     | 3.70431e-07 | 3.09519e-07 | 0.000645072 | 0.000337094 | 0.000174163 |
| 1000.00     | 7.42128e-08 | 5.40887e-08 | 9.50893e-05 | 4.16850e-05 | 2.06861e-05 |
| 100.000     | 8.69208e-09 | 6.92535e-09 | 9.99572e-06 | 4.47622e-06 | 3.58578e-06 |
| 10.0000     | 1.08508e-09 | 1.84460e-09 | 1.01392e-06 | 7.29519e-07 | 1.90157e-06 |
| 1.00000     | 3.56644e-10 | 1.36384e-09 | 1.29679e-07 | 3.61969e-07 | 1.73663e-06 |
| 0.100000    | 2.87155e-10 | 1.31795e-09 | 4.25857e-08 | 3.25735e-07 | 1.72038e-06 |
| 0.0100000   | 2.80414e-10 | 1.31350e-09 | 3.39602e-08 | 3.22145e-07 | 1.71876e-06 |
| 0.00100000  | 2.79752e-10 | 1.31306e-09 | 3.31029e-08 | 3.21788e-07 | 1.71860e-06 |
| 0.000100000 | 2.79687e-10 | 1.31302e-09 | 3.30175e-08 | 3.21752e-07 | 1.71859e-06 |
| 1.00000e-05 | 2.79681e-10 | 1.31301e-09 | 3.30090e-08 | 3.21749e-07 | 1.71859e-06 |
| 1.00000e-06 | 2.79680e-10 | 1.31301e-09 | 3.30081e-08 | 3.21748e-07 | 1.71859e-06 |
| 1.00000e-07 | 2.79680e-10 | 1.31301e-09 | 3.30080e-08 | 3.21748e-07 | 1.71859e-06 |
| 1.00000e-08 | 2.79680e-10 | 1.31301e-09 | 3.30080e-08 | 3.21748e-07 | 1.71859e-06 |
| 1.00000e-09 | 2.79680e-10 | 1.31301e-09 | 3.30080e-08 | 3.21748e-07 | 1.71859e-06 |

| Pa\K | 2500.00 | 2750.00 | 3000.00 | 3250.00 | 3500.00 |
|------|---------|---------|---------|---------|---------|
|------|---------|---------|---------|---------|---------|

|             |             |             |             |             |             |
|-------------|-------------|-------------|-------------|-------------|-------------|
| 1.00000e+08 | 0.000768611 | 0.000787252 | 0.000764668 | 0.000711080 | 0.000640962 |
| 1.00000e+07 | 0.00200803  | 0.00171328  | 0.00139351  | 0.00110441  | 0.000867456 |
| 1.00000e+06 | 0.00171279  | 0.00121963  | 0.000837229 | 0.000573582 | 0.000407701 |
| 100000.     | 0.000577447 | 0.000332989 | 0.000202160 | 0.000144257 | 0.000128598 |
| 10000.0     | 8.94711e-05 | 5.49054e-05 | 4.97372e-05 | 6.17010e-05 | 8.38206e-05 |
| 1000.00     | 1.45339e-05 | 1.90030e-05 | 3.22883e-05 | 5.29967e-05 | 7.93621e-05 |
| 100.000     | 6.78620e-06 | 1.54464e-05 | 3.06005e-05 | 5.21665e-05 | 7.89408e-05 |
| 10.0000     | 6.03167e-06 | 1.51019e-05 | 3.04375e-05 | 5.20864e-05 | 7.89002e-05 |
| 1.00000     | 5.95784e-06 | 1.50682e-05 | 3.04216e-05 | 5.20786e-05 | 7.88963e-05 |
| 0.100000    | 5.95056e-06 | 1.50649e-05 | 3.04200e-05 | 5.20778e-05 | 7.88959e-05 |
| 0.0100000   | 5.94984e-06 | 1.50645e-05 | 3.04198e-05 | 5.20777e-05 | 7.88958e-05 |
| 0.00100000  | 5.94977e-06 | 1.50645e-05 | 3.04198e-05 | 5.20777e-05 | 7.88958e-05 |
| 0.000100000 | 5.94976e-06 | 1.50645e-05 | 3.04198e-05 | 5.20777e-05 | 7.88958e-05 |
| 1.00000e-05 | 5.94976e-06 | 1.50645e-05 | 3.04198e-05 | 5.20777e-05 | 7.88958e-05 |
| 1.00000e-06 | 5.94976e-06 | 1.50645e-05 | 3.04198e-05 | 5.20777e-05 | 7.88958e-05 |
| 1.00000e-07 | 5.94976e-06 | 1.50645e-05 | 3.04198e-05 | 5.20777e-05 | 7.88958e-05 |
| 1.00000e-08 | 5.94976e-06 | 1.50645e-05 | 3.04198e-05 | 5.20777e-05 | 7.88958e-05 |
| 1.00000e-09 | 5.94976e-06 | 1.50645e-05 | 3.04198e-05 | 5.20777e-05 | 7.88958e-05 |

|             |             |             |
|-------------|-------------|-------------|
| Pa\K        | 3750.00     | 4000.00     |
| 1.00000e+08 | 0.000566562 | 0.000495680 |
| 1.00000e+07 | 0.000684397 | 0.000548668 |
| 1.00000e+06 | 0.000312356 | 0.000263788 |
| 100000.     | 0.000135991 | 0.000155040 |
| 10000.0     | 0.000111587 | 0.000141736 |
| 1000.00     | 0.000109257 | 0.000140510 |
| 100.000     | 0.000109039 | 0.000140396 |
| 10.0000     | 0.000109018 | 0.000140385 |
| 1.00000     | 0.000109016 | 0.000140384 |
| 0.100000    | 0.000109016 | 0.000140384 |
| 0.0100000   | 0.000109016 | 0.000140384 |
| 0.00100000  | 0.000109016 | 0.000140384 |
| 0.000100000 | 0.000109016 | 0.000140384 |
| 1.00000e-05 | 0.000109016 | 0.000140384 |
| 1.00000e-06 | 0.000109016 | 0.000140384 |
| 1.00000e-07 | 0.000109016 | 0.000140384 |
| 1.00000e-08 | 0.000109016 | 0.000140384 |
| 1.00000e-09 | 0.000109016 | 0.000140384 |

rad52

=====

|             |             |             |             |             |             |
|-------------|-------------|-------------|-------------|-------------|-------------|
| Pa\K        | 20.0000     | 30.0000     | 40.0000     | 50.0000     | 60.0000     |
| 1.00000e+08 | 3.73627e-69 | 1.81947e-67 | 3.19758e-66 | 4.68500e-65 | 7.00722e-64 |
| 1.00000e+07 | 2.12762e-64 | 7.32425e-63 | 1.01223e-61 | 1.22837e-60 | 1.56545e-59 |
| 1.00000e+06 | 3.01088e-60 | 6.24057e-59 | 6.39609e-58 | 6.27176e-57 | 6.79867e-56 |
| 100000.     | 6.86665e-57 | 7.43254e-56 | 5.26293e-55 | 4.06193e-54 | 3.78529e-53 |
| 10000.0     | 1.41277e-54 | 6.50425e-54 | 3.02973e-53 | 1.95346e-52 | 1.79363e-51 |
| 1000.00     | 1.54540e-53 | 3.81597e-53 | 1.49761e-52 | 9.41941e-52 | 8.91644e-51 |
| 100.000     | 5.42678e-53 | 1.54302e-52 | 4.70195e-52 | 1.80694e-51 | 9.17180e-51 |
| 10.0000     | 2.58661e-52 | 3.31056e-52 | 5.09058e-52 | 1.03719e-51 | 2.82447e-51 |
| 1.00000     | 1.33338e-53 | 1.20307e-54 | 4.04771e-55 | 3.81235e-55 | 8.76488e-55 |
| 0.100000    | 3.67662e-56 | 9.33878e-56 | 2.51469e-55 | 8.15352e-55 | 3.33011e-54 |
| 0.0100000   | 1.56153e-55 | 1.98049e-55 | 3.06789e-55 | 6.30487e-55 | 1.75080e-54 |
| 0.00100000  | 1.51182e-56 | 3.20403e-57 | 1.89791e-57 | 2.13473e-57 | 3.93439e-57 |
| 0.000100000 | 9.76214e-60 | 1.19159e-60 | 6.46252e-61 | 7.40827e-61 | 1.44332e-60 |
| 1.00000e-05 | 4.43412e-63 | 8.15054e-64 | 5.76528e-64 | 8.06044e-64 | 1.85738e-63 |
| 1.00000e-06 | 8.86214e-66 | 2.60690e-66 | 2.40698e-66 | 4.11325e-66 | 1.17227e-65 |
| 1.00000e-07 | 7.71767e-68 | 3.48154e-68 | 4.18523e-68 | 9.06328e-68 | 3.53385e-67 |
| 1.00000e-08 | 2.52803e-69 | 1.63634e-69 | 2.40680e-69 | 6.09385e-69 | 2.77036e-68 |
| 1.00000e-09 | 1.97601e-70 | 1.43901e-70 | 2.21991e-70 | 5.78778e-70 | 2.69301e-69 |

|             |             |             |             |             |             |
|-------------|-------------|-------------|-------------|-------------|-------------|
| Pa\K        | 70.0000     | 80.0000     | 90.0000     | 100.000     | 110.000     |
| 1.00000e+08 | 1.18543e-62 | 2.51326e-61 | 7.62577e-60 | 3.77703e-58 | 3.15573e-56 |
| 1.00000e+07 | 2.29616e-58 | 4.27736e-57 | 1.15769e-55 | 5.23073e-54 | 4.10961e-52 |
| 1.00000e+06 | 8.81583e-55 | 1.50181e-53 | 3.83552e-52 | 1.67617e-50 | 1.28815e-48 |
| 100000.     | 4.53422e-52 | 7.58826e-51 | 1.98948e-49 | 9.00706e-48 | 6.95988e-46 |
| 10000.0     | 2.36915e-50 | 4.63854e-49 | 1.41656e-47 | 6.95775e-46 | 5.25431e-44 |
| 1000.00     | 1.23185e-49 | 2.47576e-48 | 7.37723e-47 | 3.30663e-45 | 2.18485e-43 |
| 100.000     | 6.48632e-50 | 6.89251e-49 | 1.22515e-47 | 4.13310e-46 | 2.88334e-44 |
| 10.0000     | 1.07445e-50 | 6.39652e-50 | 7.46279e-49 | 2.24884e-47 | 1.94260e-45 |
| 1.00000     | 4.06671e-54 | 3.66861e-53 | 7.85709e-52 | 4.62614e-50 | 8.09927e-48 |
| 0.100000    | 1.88110e-53 | 1.76816e-52 | 3.65655e-51 | 1.86510e-49 | 2.15765e-47 |
| 0.0100000   | 7.09327e-54 | 4.98856e-53 | 8.00046e-52 | 3.28540e-50 | 3.24389e-48 |
| 0.00100000  | 1.18983e-56 | 6.76986e-56 | 9.54517e-55 | 4.07719e-53 | 6.59202e-51 |
| 0.000100000 | 4.70565e-60 | 3.03901e-59 | 7.37444e-58 | 1.53648e-55 | 1.42155e-52 |
| 1.00000e-05 | 7.38529e-63 | 9.24323e-62 | 1.64459e-59 | 1.04988e-56 | 1.26786e-53 |
| 1.00000e-06 | 7.58242e-65 | 3.64708e-63 | 1.43426e-60 | 1.01836e-57 | 1.25497e-54 |

|             |             |             |             |             |             |
|-------------|-------------|-------------|-------------|-------------|-------------|
| 1.00000e-07 | 4.06214e-66 | 3.27471e-64 | 1.41592e-61 | 1.01534e-58 | 1.25371e-55 |
| 1.00000e-08 | 3.73270e-67 | 3.23883e-65 | 1.41411e-62 | 1.01504e-59 | 1.25358e-56 |
| 1.00000e-09 | 3.69970e-68 | 3.23524e-66 | 1.41393e-63 | 1.01501e-60 | 1.25357e-57 |

| Pa\K        | 120.000     | 130.000     | 140.000     | 150.000     | 160.000     |
|-------------|-------------|-------------|-------------|-------------|-------------|
| 1.00000e+08 | 3.55925e-54 | 4.38385e-52 | 4.68922e-50 | 4.58623e-48 | 3.24124e-46 |
| 1.00000e+07 | 4.45039e-50 | 5.35517e-48 | 5.63994e-46 | 5.60803e-44 | 4.04285e-42 |
| 1.00000e+06 | 1.36492e-46 | 1.60499e-44 | 1.65128e-42 | 1.61360e-40 | 1.14989e-38 |
| 100000.     | 7.19657e-44 | 8.08996e-42 | 7.91903e-40 | 7.25699e-38 | 4.91183e-36 |
| 10000.0     | 5.00302e-42 | 5.04892e-40 | 4.46436e-38 | 3.64110e-36 | 2.25575e-34 |
| 1000.00     | 1.84746e-41 | 1.74049e-39 | 1.50984e-37 | 1.31849e-35 | 9.16665e-34 |
| 100.000     | 3.15898e-42 | 4.39417e-40 | 5.64762e-38 | 8.98339e-36 | 1.08843e-33 |
| 10.0000     | 2.83336e-43 | 5.72838e-41 | 1.07683e-38 | 3.12552e-36 | 6.84562e-34 |
| 1.00000     | 2.41955e-45 | 1.08813e-42 | 3.94329e-40 | 2.27744e-37 | 8.83578e-35 |
| 0.100000    | 3.20668e-45 | 6.28625e-43 | 1.21663e-40 | 4.64743e-38 | 1.50739e-35 |
| 0.0100000   | 4.38786e-46 | 8.67115e-44 | 1.82208e-41 | 9.27199e-39 | 4.23497e-36 |
| 0.00100000  | 2.15497e-45 | 1.20762e-45 | 5.50744e-43 | 5.73541e-40 | 4.67849e-37 |
| 0.000100000 | 1.08160e-49 | 8.54683e-47 | 4.46729e-44 | 5.15121e-41 | 4.67068e-38 |
| 1.00000e-05 | 1.02735e-50 | 8.29249e-48 | 4.37619e-45 | 5.09135e-42 | 4.66884e-39 |
| 1.00000e-06 | 1.02238e-51 | 8.26803e-49 | 4.36723e-46 | 5.08535e-43 | 4.66864e-40 |
| 1.00000e-07 | 1.02189e-52 | 8.26560e-50 | 4.36633e-47 | 5.08475e-44 | 4.66862e-41 |
| 1.00000e-08 | 1.02184e-53 | 8.26535e-51 | 4.36624e-48 | 5.08469e-45 | 4.66862e-42 |
| 1.00000e-09 | 1.02183e-54 | 8.26533e-52 | 4.36623e-49 | 5.08468e-46 | 4.66862e-43 |

| Pa\K        | 170.000     | 180.000     | 190.000     | 200.000     | 210.000     |
|-------------|-------------|-------------|-------------|-------------|-------------|
| 1.00000e+08 | 1.61331e-44 | 5.62864e-43 | 1.49712e-41 | 2.98595e-40 | 4.69922e-39 |
| 1.00000e+07 | 2.04027e-40 | 7.05393e-39 | 1.82673e-37 | 3.47826e-36 | 5.17217e-35 |
| 1.00000e+06 | 5.74883e-37 | 1.93209e-35 | 4.75427e-34 | 8.49304e-33 | 1.18039e-31 |
| 100000.     | 2.37180e-34 | 7.58876e-33 | 1.72999e-31 | 2.84487e-30 | 3.64539e-29 |
| 10000.0     | 1.04411e-32 | 3.19018e-31 | 6.74560e-30 | 1.02512e-28 | 1.21642e-27 |
| 1000.00     | 5.18539e-32 | 1.75883e-30 | 3.74268e-29 | 5.47965e-28 | 6.16440e-27 |
| 100.000     | 1.18972e-31 | 5.27464e-30 | 1.21268e-28 | 1.79949e-27 | 2.01134e-26 |
| 10.0000     | 2.16615e-31 | 1.15227e-29 | 2.62634e-28 | 3.76685e-27 | 4.06052e-26 |
| 1.00000     | 2.26673e-31 | 1.33468e-29 | 3.03362e-28 | 4.30848e-27 | 4.60000e-26 |
| 0.100000    | 2.27954e-31 | 1.36328e-29 | 3.10001e-28 | 4.39990e-27 | 4.69413e-26 |
| 0.0100000   | 2.29415e-31 | 1.37485e-29 | 3.12557e-28 | 4.43447e-27 | 4.72927e-26 |
| 0.00100000  | 2.29667e-31 | 1.37716e-29 | 3.13040e-28 | 4.44073e-27 | 4.73544e-26 |
| 0.000100000 | 2.29692e-31 | 1.37742e-29 | 3.13092e-28 | 4.44142e-27 | 4.73611e-26 |
| 1.00000e-05 | 2.29695e-31 | 1.37744e-29 | 3.13098e-28 | 4.44149e-27 | 4.73618e-26 |
| 1.00000e-06 | 2.29695e-31 | 1.37744e-29 | 3.13098e-28 | 4.44149e-27 | 4.73619e-26 |
| 1.00000e-07 | 2.29695e-31 | 1.37744e-29 | 3.13098e-28 | 4.44149e-27 | 4.73619e-26 |
| 1.00000e-08 | 2.29695e-31 | 1.37744e-29 | 3.13098e-28 | 4.44149e-27 | 4.73619e-26 |
| 1.00000e-09 | 2.29695e-31 | 1.37744e-29 | 3.13098e-28 | 4.44149e-27 | 4.73619e-26 |

| Pa\K        | 220.000     | 230.000     | 240.000     | 250.000     | 260.000     |
|-------------|-------------|-------------|-------------|-------------|-------------|
| 1.00000e+08 | 6.10387e-38 | 6.79940e-37 | 6.54320e-36 | 5.53547e-35 | 4.19294e-34 |
| 1.00000e+07 | 6.31422e-34 | 6.58405e-33 | 5.91400e-32 | 4.66190e-31 | 3.28682e-30 |
| 1.00000e+06 | 1.34555e-30 | 1.30472e-29 | 1.09123e-28 | 8.03461e-28 | 5.30458e-27 |
| 100000.     | 3.83678e-28 | 3.42648e-27 | 2.64816e-26 | 1.80984e-25 | 1.11406e-24 |
| 10000.0     | 1.18539e-26 | 9.77633e-26 | 6.97258e-25 | 4.39155e-24 | 2.48638e-23 |
| 1000.00     | 5.64220e-26 | 4.33341e-25 | 2.85195e-24 | 1.64118e-23 | 8.39769e-23 |
| 100.000     | 1.81372e-25 | 1.36285e-24 | 8.71949e-24 | 4.84832e-23 | 2.38193e-22 |
| 10.0000     | 3.52583e-25 | 2.54576e-24 | 1.56364e-23 | 8.33969e-23 | 3.92747e-22 |
| 1.00000     | 3.95622e-25 | 2.82933e-24 | 1.72170e-23 | 9.10031e-23 | 4.24868e-22 |
| 0.100000    | 4.03406e-25 | 2.88273e-24 | 1.75282e-23 | 9.25763e-23 | 4.31881e-22 |
| 0.0100000   | 4.06276e-25 | 2.90211e-24 | 1.76391e-23 | 9.31254e-23 | 4.34270e-22 |
| 0.00100000  | 4.06764e-25 | 2.90530e-24 | 1.76569e-23 | 9.32106e-23 | 4.34630e-22 |
| 0.000100000 | 4.06817e-25 | 2.90565e-24 | 1.76588e-23 | 9.32197e-23 | 4.34668e-22 |
| 1.00000e-05 | 4.06822e-25 | 2.90568e-24 | 1.76590e-23 | 9.32206e-23 | 4.34672e-22 |
| 1.00000e-06 | 4.06823e-25 | 2.90569e-24 | 1.76590e-23 | 9.32207e-23 | 4.34672e-22 |
| 1.00000e-07 | 4.06823e-25 | 2.90569e-24 | 1.76590e-23 | 9.32207e-23 | 4.34673e-22 |
| 1.00000e-08 | 4.06823e-25 | 2.90569e-24 | 1.76590e-23 | 9.32207e-23 | 4.34673e-22 |
| 1.00000e-09 | 4.06823e-25 | 2.90569e-24 | 1.76590e-23 | 9.32207e-23 | 4.34673e-22 |

| Pa\K        | 270.000     | 280.000     | 290.000     | 300.000     | 310.000     |
|-------------|-------------|-------------|-------------|-------------|-------------|
| 1.00000e+08 | 2.87833e-33 | 1.80590e-32 | 1.04270e-31 | 7.20635e-24 | 2.76019e-30 |
| 1.00000e+07 | 2.10000e-29 | 1.22764e-28 | 6.62017e-28 | 1.93391e-20 | 1.54739e-26 |
| 1.00000e+06 | 3.18445e-26 | 1.75713e-25 | 8.99081e-25 | 1.12591e-17 | 1.92281e-23 |
| 100000.     | 6.27111e-24 | 3.26824e-23 | 1.59237e-22 | 5.91825e-16 | 3.16196e-21 |
| 10000.0     | 1.28477e-22 | 6.13663e-22 | 2.73790e-21 | 1.16810e-15 | 4.56914e-20 |
| 1000.00     | 3.87493e-22 | 1.63155e-21 | 6.33333e-21 | 1.26296e-16 | 7.74062e-20 |
| 100.000     | 1.04828e-21 | 4.18020e-21 | 1.52527e-20 | 5.87481e-18 | 1.60724e-19 |
| 10.0000     | 1.65616e-21 | 6.32676e-21 | 2.21147e-20 | 3.41535e-19 | 2.13871e-19 |
| 1.00000     | 1.77681e-21 | 6.73435e-21 | 2.33636e-20 | 8.83819e-20 | 2.22826e-19 |
| 0.100000    | 1.80476e-21 | 6.83507e-21 | 2.36950e-20 | 6.59985e-20 | 2.25638e-19 |
| 0.0100000   | 1.81403e-21 | 6.86751e-21 | 2.37985e-20 | 6.32609e-20 | 2.26464e-19 |

|             |             |             |             |             |             |
|-------------|-------------|-------------|-------------|-------------|-------------|
| 0.00100000  | 1.81539e-21 | 6.87215e-21 | 2.38129e-20 | 6.30067e-20 | 2.26574e-19 |
| 0.000100000 | 1.81554e-21 | 6.87264e-21 | 2.38145e-20 | 6.29821e-20 | 2.26585e-19 |
| 1.00000e-05 | 1.81555e-21 | 6.87269e-21 | 2.38146e-20 | 6.29796e-20 | 2.26587e-19 |
| 1.00000e-06 | 1.81555e-21 | 6.87269e-21 | 2.38146e-20 | 6.29794e-20 | 2.26587e-19 |
| 1.00000e-07 | 1.81555e-21 | 6.87269e-21 | 2.38146e-20 | 6.29793e-20 | 2.26587e-19 |
| 1.00000e-08 | 1.81555e-21 | 6.87269e-21 | 2.38146e-20 | 6.29793e-20 | 2.26587e-19 |
| 1.00000e-09 | 1.81555e-21 | 6.87269e-21 | 2.38146e-20 | 6.29793e-20 | 2.26587e-19 |

| Pa\K        | 400.000     | 500.000     | 600.000     | 700.000     | 800.000     |
|-------------|-------------|-------------|-------------|-------------|-------------|
| 1.00000e+08 | 3.33588e-16 | 3.87836e-11 | 6.14757e-09 | 1.23849e-07 | 5.46793e-07 |
| 1.00000e+07 | 4.10714e-13 | 1.75790e-08 | 9.83006e-07 | 6.06784e-06 | 1.36840e-05 |
| 1.00000e+06 | 3.65599e-11 | 3.32274e-07 | 1.20166e-05 | 4.27831e-05 | 7.03426e-05 |
| 100000.     | 1.41611e-10 | 2.32075e-07 | 1.05295e-05 | 4.94716e-05 | 8.84969e-05 |
| 10000.0     | 3.05391e-11 | 2.42827e-08 | 2.20423e-06 | 2.24411e-05 | 5.83753e-05 |
| 1000.00     | 1.28198e-12 | 1.82517e-09 | 5.17322e-07 | 9.45749e-06 | 3.02030e-05 |
| 100.000     | 7.69265e-14 | 2.63814e-10 | 1.32520e-07 | 2.77861e-06 | 8.51505e-06 |
| 10.0000     | 9.04316e-15 | 3.94396e-11 | 1.97928e-08 | 3.93548e-07 | 1.13292e-06 |
| 1.00000     | 1.36026e-15 | 4.29969e-12 | 1.91637e-09 | 3.76108e-08 | 1.11031e-07 |
| 0.100000    | 5.03597e-16 | 5.18515e-13 | 1.86756e-10 | 3.63137e-09 | 1.14680e-08 |
| 0.0100000   | 4.16622e-16 | 1.44874e-13 | 2.29172e-11 | 4.36257e-10 | 1.94558e-09 |
| 0.00100000  | 4.07900e-16 | 1.07536e-13 | 6.79785e-12 | 1.26291e-10 | 1.01918e-09 |
| 0.000100000 | 4.07027e-16 | 1.03800e-13 | 5.19553e-12 | 9.57848e-11 | 9.28057e-10 |
| 1.00000e-05 | 4.06939e-16 | 1.03426e-13 | 5.03575e-12 | 9.27607e-11 | 9.19034e-10 |
| 1.00000e-06 | 4.06931e-16 | 1.03389e-13 | 5.01979e-12 | 9.24593e-11 | 9.18135e-10 |
| 1.00000e-07 | 4.06930e-16 | 1.03385e-13 | 5.01819e-12 | 9.24292e-11 | 9.18045e-10 |
| 1.00000e-08 | 4.06930e-16 | 1.03384e-13 | 5.01803e-12 | 9.24262e-11 | 9.18036e-10 |
| 1.00000e-09 | 4.06930e-16 | 1.03384e-13 | 5.01802e-12 | 9.24259e-11 | 9.18035e-10 |

| Pa\K        | 900.000     | 1000.00     | 1100.00     | 1200.00     | 1300.00     |
|-------------|-------------|-------------|-------------|-------------|-------------|
| 1.00000e+08 | 9.78666e-07 | 1.30481e-06 | 1.63215e-06 | 1.83186e-06 | 1.93726e-06 |
| 1.00000e+07 | 2.00329e-05 | 2.63309e-05 | 3.49529e-05 | 4.30424e-05 | 4.89071e-05 |
| 1.00000e+06 | 9.26686e-05 | 0.000114073 | 0.000137061 | 0.000156097 | 0.000168937 |
| 100000.     | 0.000118520 | 0.000141223 | 0.000157969 | 0.000168477 | 0.000172388 |
| 10000.0     | 8.61679e-05 | 9.92197e-05 | 0.000101576 | 9.71230e-05 | 8.83498e-05 |
| 1000.00     | 4.28403e-05 | 4.24402e-05 | 3.60776e-05 | 2.85615e-05 | 2.20662e-05 |
| 100.000     | 1.01868e-05 | 8.30249e-06 | 5.97649e-06 | 4.31456e-06 | 3.59432e-06 |
| 10.0000     | 1.23734e-06 | 9.50048e-07 | 7.24429e-07 | 7.48152e-07 | 1.21605e-06 |
| 1.00000     | 1.25881e-07 | 1.17993e-07 | 1.69260e-07 | 3.88565e-07 | 9.83684e-07 |
| 0.100000    | 1.75680e-08 | 3.74611e-08 | 1.15893e-07 | 3.54162e-07 | 9.61507e-07 |
| 0.0100000   | 7.11958e-09 | 2.96736e-08 | 1.10730e-07 | 3.50831e-07 | 9.59358e-07 |
| 0.00100000  | 6.09956e-09 | 2.89121e-08 | 1.10224e-07 | 3.50505e-07 | 9.59147e-07 |
| 0.000100000 | 5.99909e-09 | 2.88370e-08 | 1.10174e-07 | 3.50473e-07 | 9.59127e-07 |
| 1.00000e-05 | 5.98914e-09 | 2.88295e-08 | 1.10169e-07 | 3.50469e-07 | 9.59125e-07 |
| 1.00000e-06 | 5.98815e-09 | 2.88288e-08 | 1.10169e-07 | 3.50469e-07 | 9.59124e-07 |
| 1.00000e-07 | 5.98805e-09 | 2.88287e-08 | 1.10169e-07 | 3.50469e-07 | 9.59124e-07 |
| 1.00000e-08 | 5.98804e-09 | 2.88287e-08 | 1.10169e-07 | 3.50469e-07 | 9.59124e-07 |
| 1.00000e-09 | 5.98804e-09 | 2.88287e-08 | 1.10169e-07 | 3.50469e-07 | 9.59124e-07 |

| Pa\K        | 1400.00     | 1500.00     | 1750.00     | 2000.00     | 2250.00     |
|-------------|-------------|-------------|-------------|-------------|-------------|
| 1.00000e+08 | 2.06129e-06 | 2.21021e-06 | 0.000646036 | 0.000744032 | 0.000836637 |
| 1.00000e+07 | 5.35868e-05 | 5.74739e-05 | 0.00192709  | 0.00211895  | 0.00213058  |
| 1.00000e+06 | 0.000176944 | 0.000180930 | 0.000295425 | 0.000272645 | 0.000230398 |
| 100000.     | 0.000170695 | 0.000164815 | 0.000214742 | 0.000159815 | 0.000113092 |
| 10000.0     | 7.76391e-05 | 6.73405e-05 | 0.000705583 | 0.000429005 | 0.000322657 |
| 1000.00     | 1.76203e-05 | 1.58691e-05 | 0.000123207 | 0.000111012 | 0.000160432 |
| 100.000     | 4.05777e-06 | 6.15733e-06 | 3.29072e-05 | 7.07254e-05 | 0.000142254 |
| 10.0000     | 2.47956e-06 | 5.10924e-06 | 2.33734e-05 | 6.66670e-05 | 0.000140464 |
| 1.00000     | 2.32846e-06 | 5.01015e-06 | 2.24348e-05 | 6.62690e-05 | 0.000140289 |
| 0.100000    | 2.31405e-06 | 5.00070e-06 | 2.23423e-05 | 6.62298e-05 | 0.000140272 |
| 0.0100000   | 2.31265e-06 | 4.99978e-06 | 2.23331e-05 | 6.62259e-05 | 0.000140270 |
| 0.00100000  | 2.31251e-06 | 4.99969e-06 | 2.23322e-05 | 6.62255e-05 | 0.000140270 |
| 0.000100000 | 2.31250e-06 | 4.99968e-06 | 2.23321e-05 | 6.62255e-05 | 0.000140270 |
| 1.00000e-05 | 2.31250e-06 | 4.99968e-06 | 2.23321e-05 | 6.62255e-05 | 0.000140270 |
| 1.00000e-06 | 2.31250e-06 | 4.99968e-06 | 2.23321e-05 | 6.62255e-05 | 0.000140270 |
| 1.00000e-07 | 2.31250e-06 | 4.99968e-06 | 2.23321e-05 | 6.62255e-05 | 0.000140270 |
| 1.00000e-08 | 2.31250e-06 | 4.99968e-06 | 2.23321e-05 | 6.62255e-05 | 0.000140270 |
| 1.00000e-09 | 2.31250e-06 | 4.99968e-06 | 2.23321e-05 | 6.62255e-05 | 0.000140270 |

| Pa\K        | 2500.00     | 2750.00     | 3000.00     | 3250.00     | 3500.00     |
|-------------|-------------|-------------|-------------|-------------|-------------|
| 1.00000e+08 | 0.000899060 | 0.000915443 | 0.000884624 | 0.000818953 | 0.000735306 |
| 1.00000e+07 | 0.00195611  | 0.00167581  | 0.00137664  | 0.00111008  | 0.000893348 |
| 1.00000e+06 | 0.00180207  | 0.00135678  | 0.00102433  | 0.000798524 | 0.000650262 |
| 100000.     | 0.000796090 | 0.000614115 | 0.000533013 | 0.000498582 | 0.000478156 |
| 10000.0     | 0.000315878 | 0.000356566 | 0.000403321 | 0.000435912 | 0.000448881 |
| 1000.00     | 0.000240127 | 0.000322572 | 0.000388296 | 0.000429347 | 0.000446073 |
| 100.000     | 0.000232275 | 0.000319213 | 0.000386858 | 0.000428735 | 0.000445819 |

|             |             |             |             |             |             |
|-------------|-------------|-------------|-------------|-------------|-------------|
| 10.0000     | 0.000231512 | 0.000318889 | 0.000386721 | 0.000428677 | 0.000445796 |
| 1.00000     | 0.000231437 | 0.000318857 | 0.000386707 | 0.000428672 | 0.000445793 |
| 0.100000    | 0.000231430 | 0.000318854 | 0.000386706 | 0.000428671 | 0.000445793 |
| 0.0100000   | 0.000231429 | 0.000318854 | 0.000386706 | 0.000428671 | 0.000445793 |
| 0.00100000  | 0.000231429 | 0.000318854 | 0.000386706 | 0.000428671 | 0.000445793 |
| 0.000100000 | 0.000231429 | 0.000318854 | 0.000386706 | 0.000428671 | 0.000445793 |
| 1.00000e-05 | 0.000231429 | 0.000318854 | 0.000386706 | 0.000428671 | 0.000445793 |
| 1.00000e-06 | 0.000231429 | 0.000318854 | 0.000386706 | 0.000428671 | 0.000445793 |
| 1.00000e-07 | 0.000231429 | 0.000318854 | 0.000386706 | 0.000428671 | 0.000445793 |
| 1.00000e-08 | 0.000231429 | 0.000318854 | 0.000386706 | 0.000428671 | 0.000445793 |
| 1.00000e-09 | 0.000231429 | 0.000318854 | 0.000386706 | 0.000428671 | 0.000445793 |

|             |             |             |
|-------------|-------------|-------------|
| Pa\K        | 3750.00     | 4000.00     |
| -----       |             |             |
| 1.00000e+08 | 0.000647640 | 0.000564585 |
| 1.00000e+07 | 0.000724863 | 0.000596133 |
| 1.00000e+06 | 0.000550837 | 0.000479716 |
| 100000.     | 0.000457211 | 0.000431502 |
| 10000.0     | 0.000444080 | 0.000426007 |
| 1000.00     | 0.000442937 | 0.000425595 |
| 100.000     | 0.000442839 | 0.000425563 |
| 10.0000     | 0.000442830 | 0.000425560 |
| 1.00000     | 0.000442829 | 0.000425560 |
| 0.100000    | 0.000442829 | 0.000425560 |
| 0.0100000   | 0.000442829 | 0.000425560 |
| 0.00100000  | 0.000442829 | 0.000425560 |
| 0.000100000 | 0.000442829 | 0.000425560 |
| 1.00000e-05 | 0.000442829 | 0.000425560 |
| 1.00000e-06 | 0.000442829 | 0.000425560 |
| 1.00000e-07 | 0.000442829 | 0.000425560 |
| 1.00000e-08 | 0.000442829 | 0.000425560 |
| 1.00000e-09 | 0.000442829 | 0.000425560 |

rad59  
=====

|             |             |             |             |             |             |
|-------------|-------------|-------------|-------------|-------------|-------------|
| Pa\K        | 20.0000     | 30.0000     | 40.0000     | 50.0000     | 60.0000     |
| -----       |             |             |             |             |             |
| 1.00000e+08 | 2.55002e-50 | 1.47680e-49 | 6.78488e-49 | 3.33068e-48 | 1.85249e-47 |
| 1.00000e+07 | 2.54712e-48 | 1.47342e-47 | 6.76172e-47 | 3.31560e-46 | 1.84204e-45 |
| 1.00000e+06 | 2.51858e-46 | 1.44052e-45 | 6.53927e-45 | 3.17258e-44 | 1.74420e-43 |
| 100000.     | 2.26742e-44 | 1.18259e-43 | 4.96145e-43 | 2.24507e-42 | 1.15933e-41 |
| 10000.0     | 1.16510e-42 | 4.10265e-42 | 1.24592e-41 | 4.21763e-41 | 1.66616e-40 |
| 1000.00     | 4.52586e-42 | 2.28091e-42 | 1.73719e-42 | 2.05698e-42 | 3.58218e-42 |
| 100.000     | 2.70134e-44 | 2.12389e-44 | 2.31099e-44 | 3.29566e-44 | 6.28223e-44 |
| 10.0000     | 7.96139e-46 | 8.07456e-46 | 1.54602e-45 | 3.64781e-45 | 1.06859e-44 |
| 1.00000     | 2.57271e-46 | 9.05372e-47 | 8.58432e-47 | 1.83029e-46 | 6.31181e-46 |
| 0.100000    | 5.72443e-47 | 1.52407e-46 | 4.12632e-46 | 1.30207e-45 | 5.05598e-45 |
| 0.0100000   | 4.64896e-46 | 1.01973e-45 | 2.31991e-45 | 6.25729e-45 | 2.10629e-44 |
| 0.00100000  | 9.29126e-46 | 7.05409e-46 | 7.61771e-46 | 1.17050e-45 | 2.52699e-45 |
| 0.000100000 | 2.01589e-47 | 3.77417e-48 | 2.23116e-48 | 2.49091e-48 | 4.46835e-48 |
| 1.00000e-05 | 2.23615e-50 | 4.19535e-51 | 2.79305e-51 | 3.52300e-51 | 7.11383e-51 |
| 1.00000e-06 | 4.96605e-53 | 1.41451e-53 | 1.20803e-53 | 1.84373e-53 | 4.52148e-53 |
| 1.00000e-07 | 4.36479e-55 | 1.89446e-55 | 2.10012e-55 | 4.03965e-55 | 1.32045e-54 |
| 1.00000e-08 | 1.42636e-56 | 8.87954e-57 | 1.20400e-56 | 2.70259e-56 | 1.02163e-55 |
| 1.00000e-09 | 1.11342e-57 | 7.80247e-58 | 1.10979e-57 | 2.56473e-57 | 9.91350e-57 |

|             |             |             |             |             |             |
|-------------|-------------|-------------|-------------|-------------|-------------|
| Pa\K        | 70.0000     | 80.0000     | 90.0000     | 100.000     | 110.000     |
| -----       |             |             |             |             |             |
| 1.00000e+08 | 1.22393e-46 | 1.04064e-45 | 1.30739e-44 | 2.89934e-43 | 1.26630e-41 |
| 1.00000e+07 | 1.21567e-44 | 1.03251e-43 | 1.29593e-42 | 2.87215e-41 | 1.25440e-39 |
| 1.00000e+06 | 1.13932e-42 | 9.58183e-42 | 1.19238e-40 | 2.62825e-39 | 1.14801e-37 |
| 100000.     | 7.15714e-41 | 5.72621e-40 | 6.84339e-39 | 1.47337e-37 | 6.46018e-36 |
| 10000.0     | 8.02108e-40 | 5.11897e-39 | 5.09339e-38 | 1.00423e-36 | 4.74196e-35 |
| 1000.00     | 9.15038e-42 | 3.76098e-41 | 3.38986e-40 | 1.12935e-38 | 1.64933e-36 |
| 100.000     | 1.74165e-43 | 8.33646e-43 | 8.59478e-42 | 2.49270e-40 | 4.16025e-38 |
| 10.0000     | 4.10499e-44 | 2.33292e-43 | 2.47233e-42 | 6.61252e-41 | 6.48178e-39 |
| 1.00000     | 3.22303e-45 | 2.76798e-44 | 5.22803e-43 | 2.46215e-41 | 2.80333e-39 |
| 0.100000    | 2.67018e-44 | 2.31776e-43 | 4.38461e-42 | 2.03000e-40 | 2.11223e-38 |
| 0.0100000   | 9.75905e-44 | 7.50930e-43 | 1.27272e-41 | 5.36982e-40 | 5.30948e-38 |
| 0.00100000  | 8.15985e-45 | 4.66432e-44 | 6.31912e-43 | 2.46223e-41 | 3.12151e-39 |
| 0.000100000 | 1.29508e-47 | 7.17096e-47 | 1.26194e-45 | 1.21325e-43 | 5.83473e-41 |
| 1.00000e-05 | 2.38104e-50 | 1.99697e-49 | 1.49720e-47 | 4.77625e-45 | 4.12514e-42 |
| 1.00000e-06 | 2.19243e-52 | 5.30440e-51 | 1.07788e-48 | 4.27957e-46 | 3.97127e-43 |
| 1.00000e-07 | 1.04075e-53 | 4.36849e-52 | 1.04249e-49 | 4.23222e-47 | 3.95606e-44 |
| 1.00000e-08 | 9.33584e-55 | 4.27987e-53 | 1.03902e-50 | 4.22750e-48 | 3.95454e-45 |
| 1.00000e-09 | 9.22864e-56 | 4.27104e-54 | 1.03867e-51 | 4.22703e-49 | 3.95439e-46 |

|             |             |             |             |             |             |
|-------------|-------------|-------------|-------------|-------------|-------------|
| Pa\K        | 120.000     | 130.000     | 140.000     | 150.000     | 160.000     |
| -----       |             |             |             |             |             |
| 1.00000e+08 | 8.42621e-40 | 6.79043e-38 | 4.90746e-36 | 2.63037e-34 | 7.55040e-33 |



|             |             |             |             |             |             |
|-------------|-------------|-------------|-------------|-------------|-------------|
| 1.00000e+07 | 8.35039e-38 | 6.73464e-36 | 4.87207e-34 | 2.61301e-32 | 7.49869e-31 |
| 1.00000e+06 | 7.67119e-36 | 6.23244e-34 | 4.55178e-32 | 2.45535e-30 | 7.03123e-29 |
| 100000.     | 4.41171e-34 | 3.73568e-32 | 2.89124e-30 | 1.61700e-28 | 4.58393e-27 |
| 10000.0     | 3.81138e-33 | 4.14862e-31 | 4.49920e-29 | 3.03004e-27 | 8.41030e-26 |
| 1000.00     | 3.69786e-34 | 1.21251e-31 | 6.45665e-29 | 7.20526e-27 | 2.01451e-25 |
| 100.000     | 1.68808e-35 | 1.10583e-32 | 5.85504e-29 | 8.04256e-27 | 2.25778e-25 |
| 10.0000     | 1.81185e-36 | 1.13779e-33 | 5.75857e-29 | 8.13685e-27 | 2.28540e-25 |
| 1.00000     | 4.86547e-37 | 1.69478e-34 | 5.74889e-29 | 8.14749e-27 | 2.28854e-25 |
| 0.100000    | 2.77049e-36 | 4.58211e-34 | 5.75436e-29 | 8.15474e-27 | 2.29079e-25 |
| 0.0100000   | 6.96544e-36 | 1.26376e-33 | 5.77721e-29 | 8.17956e-27 | 2.29796e-25 |
| 0.00100000  | 6.65121e-37 | 2.59692e-34 | 5.78186e-29 | 8.19567e-27 | 2.30238e-25 |
| 0.000100000 | 3.04269e-38 | 2.32654e-35 | 5.78059e-29 | 8.19801e-27 | 2.30303e-25 |
| 1.00000e-05 | 2.65382e-39 | 2.27587e-36 | 5.78042e-29 | 8.19825e-27 | 2.30310e-25 |
| 1.00000e-06 | 2.61533e-40 | 2.27051e-37 | 5.78040e-29 | 8.19828e-27 | 2.30311e-25 |
| 1.00000e-07 | 2.61148e-41 | 2.26997e-38 | 5.78040e-29 | 8.19828e-27 | 2.30311e-25 |
| 1.00000e-08 | 2.61110e-42 | 2.26992e-39 | 5.78040e-29 | 8.19828e-27 | 2.30311e-25 |
| 1.00000e-09 | 2.61106e-43 | 2.26991e-40 | 5.78040e-29 | 8.19828e-27 | 2.30311e-25 |

| Pa\K        | 170.000     | 180.000     | 190.000     | 200.000     | 210.000     |
|-------------|-------------|-------------|-------------|-------------|-------------|
| 1.00000e+08 | 1.46839e-31 | 2.11218e-30 | 2.37594e-29 | 2.15840e-28 | 1.63324e-27 |
| 1.00000e+07 | 1.45766e-29 | 2.09552e-28 | 2.35552e-27 | 2.13806e-26 | 1.61630e-25 |
| 1.00000e+06 | 1.36135e-27 | 1.94732e-26 | 2.17568e-25 | 1.96109e-24 | 1.47080e-23 |
| 100000.     | 8.70695e-26 | 1.21661e-24 | 1.32200e-23 | 1.15510e-22 | 8.36997e-22 |
| 10000.0     | 1.52350e-24 | 2.00921e-23 | 2.04176e-22 | 1.65838e-21 | 1.11136e-20 |
| 1000.00     | 3.57448e-24 | 4.57417e-23 | 4.48245e-22 | 3.49996e-21 | 2.25108e-20 |
| 100.000     | 3.99883e-24 | 5.09740e-23 | 4.96963e-22 | 3.85811e-21 | 2.46651e-20 |
| 10.0000     | 4.04707e-24 | 5.15681e-23 | 5.02482e-22 | 3.89856e-21 | 2.49076e-20 |
| 1.00000     | 4.05262e-24 | 5.16375e-23 | 5.03140e-22 | 3.90351e-21 | 2.49383e-20 |
| 0.100000    | 4.05697e-24 | 5.16979e-23 | 5.03784e-22 | 3.90899e-21 | 2.49768e-20 |
| 0.0100000   | 4.06993e-24 | 5.18663e-23 | 5.05455e-22 | 3.92217e-21 | 2.50620e-20 |
| 0.00100000  | 4.07750e-24 | 5.19588e-23 | 5.06313e-22 | 3.92847e-21 | 2.50999e-20 |
| 0.000100000 | 4.07861e-24 | 5.19723e-23 | 5.06437e-22 | 3.92936e-21 | 2.51052e-20 |
| 1.00000e-05 | 4.07873e-24 | 5.19737e-23 | 5.06450e-22 | 3.92945e-21 | 2.51057e-20 |
| 1.00000e-06 | 4.07874e-24 | 5.19738e-23 | 5.06451e-22 | 3.92946e-21 | 2.51058e-20 |
| 1.00000e-07 | 4.07874e-24 | 5.19739e-23 | 5.06451e-22 | 3.92946e-21 | 2.51058e-20 |
| 1.00000e-08 | 4.07874e-24 | 5.19739e-23 | 5.06451e-22 | 3.92946e-21 | 2.51058e-20 |
| 1.00000e-09 | 4.07874e-24 | 5.19739e-23 | 5.06451e-22 | 3.92946e-21 | 2.51058e-20 |

| Pa\K        | 220.000     | 230.000     | 240.000     | 250.000     | 260.000     |
|-------------|-------------|-------------|-------------|-------------|-------------|
| 1.00000e+08 | 1.05589e-26 | 5.95347e-26 | 2.97768e-25 | 1.34038e-24 | 5.49676e-24 |
| 1.00000e+07 | 1.04378e-24 | 5.87770e-24 | 2.93551e-23 | 1.31922e-22 | 5.39991e-22 |
| 1.00000e+06 | 9.41321e-23 | 5.24725e-22 | 2.59112e-21 | 1.14989e-20 | 4.64184e-20 |
| 100000.     | 5.15756e-21 | 2.75825e-20 | 1.30220e-19 | 5.50575e-19 | 2.11012e-18 |
| 10000.0     | 6.30550e-20 | 3.09392e-19 | 1.33649e-18 | 5.15967e-18 | 1.80312e-17 |
| 1000.00     | 1.22510e-19 | 5.76743e-19 | 2.39226e-18 | 8.87882e-18 | 2.98734e-17 |
| 100.000     | 1.33419e-19 | 6.24338e-19 | 2.57466e-18 | 9.50267e-18 | 3.18036e-17 |
| 10.0000     | 1.34643e-19 | 6.29662e-19 | 2.59501e-18 | 9.57214e-18 | 3.20183e-17 |
| 1.00000     | 1.34804e-19 | 6.30403e-19 | 2.59803e-18 | 9.58329e-18 | 3.20562e-17 |
| 0.100000    | 1.35034e-19 | 6.31586e-19 | 2.60339e-18 | 9.60500e-18 | 3.21354e-17 |
| 0.0100000   | 1.35498e-19 | 6.33765e-19 | 2.61235e-18 | 9.63779e-18 | 3.22437e-17 |
| 0.00100000  | 1.35690e-19 | 6.34600e-19 | 2.61554e-18 | 9.64864e-18 | 3.22770e-17 |
| 0.000100000 | 1.35716e-19 | 6.34711e-19 | 2.61596e-18 | 9.65003e-18 | 3.22812e-17 |
| 1.00000e-05 | 1.35719e-19 | 6.34722e-19 | 2.61600e-18 | 9.65017e-18 | 3.22816e-17 |
| 1.00000e-06 | 1.35719e-19 | 6.34723e-19 | 2.61601e-18 | 9.65019e-18 | 3.22817e-17 |
| 1.00000e-07 | 1.35719e-19 | 6.34724e-19 | 2.61601e-18 | 9.65019e-18 | 3.22817e-17 |
| 1.00000e-08 | 1.35719e-19 | 6.34724e-19 | 2.61601e-18 | 9.65019e-18 | 3.22817e-17 |
| 1.00000e-09 | 1.35719e-19 | 6.34724e-19 | 2.61601e-18 | 9.65019e-18 | 3.22817e-17 |

| Pa\K        | 270.000     | 280.000     | 290.000     | 300.000     | 310.000     |
|-------------|-------------|-------------|-------------|-------------|-------------|
| 1.00000e+08 | 2.07480e-23 | 7.27029e-23 | 2.38194e-22 | 5.28839e-19 | 2.13743e-21 |
| 1.00000e+07 | 2.03398e-21 | 7.11061e-21 | 2.32362e-20 | 4.30328e-17 | 2.07294e-19 |
| 1.00000e+06 | 1.72197e-19 | 5.92070e-19 | 1.90045e-18 | 1.58770e-15 | 1.63021e-17 |
| 100000.     | 7.40637e-18 | 2.40158e-17 | 7.24801e-17 | 7.49929e-15 | 5.45551e-16 |
| 10000.0     | 5.76638e-17 | 1.70339e-16 | 4.68547e-16 | 2.91884e-15 | 2.94037e-15 |
| 1000.00     | 9.21317e-17 | 2.62930e-16 | 7.00014e-16 | 1.61430e-15 | 4.13899e-15 |
| 100.000     | 9.75966e-17 | 2.77226e-16 | 7.34858e-16 | 1.45730e-15 | 4.31117e-15 |
| 10.0000     | 9.82041e-17 | 2.78816e-16 | 7.38742e-16 | 1.44239e-15 | 4.33055e-15 |
| 1.00000     | 9.83235e-17 | 2.79170e-16 | 7.39734e-16 | 1.44994e-15 | 4.33728e-15 |
| 0.100000    | 9.85878e-17 | 2.79980e-16 | 7.42038e-16 | 1.45546e-15 | 4.35250e-15 |
| 0.0100000   | 9.89131e-17 | 2.80880e-16 | 7.44348e-16 | 1.45046e-15 | 4.36498e-15 |
| 0.00100000  | 9.90067e-17 | 2.81123e-16 | 7.44931e-16 | 1.44901e-15 | 4.36777e-15 |
| 0.000100000 | 9.90183e-17 | 2.81152e-16 | 7.45001e-16 | 1.44888e-15 | 4.36810e-15 |
| 1.00000e-05 | 9.90195e-17 | 2.81155e-16 | 7.45008e-16 | 1.44887e-15 | 4.36813e-15 |
| 1.00000e-06 | 9.90196e-17 | 2.81155e-16 | 7.45009e-16 | 1.44887e-15 | 4.36813e-15 |
| 1.00000e-07 | 9.90196e-17 | 2.81156e-16 | 7.45009e-16 | 1.44887e-15 | 4.36813e-15 |
| 1.00000e-08 | 9.90196e-17 | 2.81156e-16 | 7.45009e-16 | 1.44887e-15 | 4.36813e-15 |
| 1.00000e-09 | 9.90196e-17 | 2.81156e-16 | 7.45009e-16 | 1.44887e-15 | 4.36813e-15 |

| Pa\K        | 400.000     | 500.000     | 600.000     | 700.000     | 800.000     |
|-------------|-------------|-------------|-------------|-------------|-------------|
| 1.00000e+08 | 7.37442e-16 | 1.04909e-12 | 4.80727e-10 | 7.52885e-08 | 1.91242e-06 |
| 1.00000e+07 | 5.40265e-14 | 4.95636e-10 | 3.00176e-08 | 2.78598e-07 | 1.61911e-06 |
| 1.00000e+06 | 2.37132e-12 | 1.15805e-08 | 3.86835e-07 | 1.39342e-06 | 2.57207e-06 |
| 100000.     | 1.21830e-11 | 1.12471e-08 | 3.83141e-07 | 1.65899e-06 | 2.97937e-06 |
| 10000.0     | 5.52702e-12 | 1.83105e-09 | 9.54449e-08 | 8.10737e-07 | 2.05136e-06 |
| 1000.00     | 1.69081e-12 | 2.70539e-10 | 2.50692e-08 | 3.58728e-07 | 1.11954e-06 |
| 100.000     | 1.39010e-12 | 1.24346e-10 | 7.81739e-09 | 1.17491e-07 | 3.83669e-07 |
| 10.0000     | 1.36672e-12 | 1.02015e-10 | 2.77868e-09 | 3.12503e-08 | 1.32694e-07 |
| 1.00000     | 1.36964e-12 | 9.88567e-11 | 1.98523e-09 | 1.83989e-08 | 9.80000e-08 |
| 0.100000    | 1.37223e-12 | 9.85887e-11 | 1.90899e-09 | 1.71744e-08 | 9.46297e-08 |
| 0.0100000   | 1.37224e-12 | 9.85640e-11 | 1.90183e-09 | 1.70596e-08 | 9.43082e-08 |
| 0.00100000  | 1.37220e-12 | 9.85619e-11 | 1.90113e-09 | 1.70484e-08 | 9.42769e-08 |
| 0.000100000 | 1.37219e-12 | 9.85618e-11 | 1.90106e-09 | 1.70474e-08 | 9.42739e-08 |
| 1.00000e-05 | 1.37219e-12 | 9.85617e-11 | 1.90106e-09 | 1.70472e-08 | 9.42736e-08 |
| 1.00000e-06 | 1.37219e-12 | 9.85617e-11 | 1.90106e-09 | 1.70472e-08 | 9.42735e-08 |
| 1.00000e-07 | 1.37219e-12 | 9.85617e-11 | 1.90106e-09 | 1.70472e-08 | 9.42735e-08 |
| 1.00000e-08 | 1.37219e-12 | 9.85617e-11 | 1.90106e-09 | 1.70472e-08 | 9.42735e-08 |
| 1.00000e-09 | 1.37219e-12 | 9.85617e-11 | 1.90106e-09 | 1.70472e-08 | 9.42735e-08 |

| Pa\K        | 900.000     | 1000.00     | 1100.00     | 1200.00     | 1300.00     |
|-------------|-------------|-------------|-------------|-------------|-------------|
| 1.00000e+08 | 1.24356e-05 | 4.09675e-05 | 8.85651e-05 | 0.000125622 | 0.000133369 |
| 1.00000e+07 | 7.15096e-06 | 2.57581e-05 | 7.14054e-05 | 0.000136017 | 0.000200914 |
| 1.00000e+06 | 4.78915e-06 | 1.15773e-05 | 2.98815e-05 | 5.72923e-05 | 9.25635e-05 |
| 100000.     | 4.36288e-06 | 6.73824e-06 | 1.19069e-05 | 2.01175e-05 | 3.26924e-05 |
| 10000.0     | 3.22209e-06 | 4.53543e-06 | 6.88508e-06 | 1.13583e-05 | 1.95568e-05 |
| 1000.00     | 1.79546e-06 | 2.59550e-06 | 4.40195e-06 | 8.41773e-06 | 1.62540e-05 |
| 100.000     | 7.13695e-07 | 1.46675e-06 | 3.38249e-06 | 7.55490e-06 | 1.55403e-05 |
| 10.0000     | 4.17398e-07 | 1.22532e-06 | 3.20836e-06 | 7.43289e-06 | 1.54542e-05 |
| 1.00000     | 3.80732e-07 | 1.19822e-06 | 3.19020e-06 | 7.42080e-06 | 1.54460e-05 |
| 0.100000    | 3.77176e-07 | 1.19561e-06 | 3.18846e-06 | 7.41965e-06 | 1.54453e-05 |
| 0.0100000   | 3.76834e-07 | 1.19536e-06 | 3.18830e-06 | 7.41954e-06 | 1.54452e-05 |
| 0.00100000  | 3.76801e-07 | 1.19534e-06 | 3.18828e-06 | 7.41953e-06 | 1.54452e-05 |
| 0.000100000 | 3.76797e-07 | 1.19534e-06 | 3.18828e-06 | 7.41953e-06 | 1.54452e-05 |
| 1.00000e-05 | 3.76797e-07 | 1.19534e-06 | 3.18828e-06 | 7.41953e-06 | 1.54452e-05 |
| 1.00000e-06 | 3.76797e-07 | 1.19534e-06 | 3.18828e-06 | 7.41953e-06 | 1.54452e-05 |
| 1.00000e-07 | 3.76797e-07 | 1.19534e-06 | 3.18828e-06 | 7.41953e-06 | 1.54452e-05 |
| 1.00000e-08 | 3.76797e-07 | 1.19534e-06 | 3.18828e-06 | 7.41953e-06 | 1.54452e-05 |
| 1.00000e-09 | 3.76797e-07 | 1.19534e-06 | 3.18828e-06 | 7.41953e-06 | 1.54452e-05 |

| Pa\K        | 1400.00     | 1500.00     | 1750.00     | 2000.00     | 2250.00     |
|-------------|-------------|-------------|-------------|-------------|-------------|
| 1.00000e+08 | 0.000126542 | 0.000121123 | 0.00180931  | 0.00206217  | 0.00215698  |
| 1.00000e+07 | 0.000254631 | 0.000290077 | 0.00226760  | 0.00223175  | 0.00192273  |
| 1.00000e+06 | 0.000134959 | 0.000168407 | 0.00101594  | 0.000930768 | 0.000919673 |
| 100000.     | 5.15555e-05 | 7.46470e-05 | 0.000308665 | 0.000451483 | 0.000663250 |
| 10000.0     | 3.35213e-05 | 5.50800e-05 | 0.000187535 | 0.000378489 | 0.000626916 |
| 1000.00     | 2.99305e-05 | 5.16793e-05 | 0.000171490 | 0.000369349 | 0.000622559 |
| 100.000     | 2.93422e-05 | 5.12334e-05 | 0.000169754 | 0.000368446 | 0.000622138 |
| 10.0000     | 2.92816e-05 | 5.11965e-05 | 0.000169599 | 0.000368368 | 0.000622100 |
| 1.00000     | 2.92761e-05 | 5.11937e-05 | 0.000169586 | 0.000368361 | 0.000622097 |
| 0.100000    | 2.92756e-05 | 5.11935e-05 | 0.000169585 | 0.000368361 | 0.000622097 |
| 0.0100000   | 2.92756e-05 | 5.11935e-05 | 0.000169584 | 0.000368361 | 0.000622096 |
| 0.00100000  | 2.92756e-05 | 5.11935e-05 | 0.000169584 | 0.000368361 | 0.000622096 |
| 0.000100000 | 2.92756e-05 | 5.11935e-05 | 0.000169584 | 0.000368361 | 0.000622096 |
| 1.00000e-05 | 2.92756e-05 | 5.11935e-05 | 0.000169584 | 0.000368361 | 0.000622096 |
| 1.00000e-06 | 2.92756e-05 | 5.11935e-05 | 0.000169584 | 0.000368361 | 0.000622096 |
| 1.00000e-07 | 2.92756e-05 | 5.11935e-05 | 0.000169584 | 0.000368361 | 0.000622096 |
| 1.00000e-08 | 2.92756e-05 | 5.11935e-05 | 0.000169584 | 0.000368361 | 0.000622096 |
| 1.00000e-09 | 2.92756e-05 | 5.11935e-05 | 0.000169584 | 0.000368361 | 0.000622096 |

| Pa\K        | 2500.00     | 2750.00    | 3000.00    | 3250.00    | 3500.00    |
|-------------|-------------|------------|------------|------------|------------|
| 1.00000e+08 | 0.00212263  | 0.00199965 | 0.00183836 | 0.00167872 | 0.00153997 |
| 1.00000e+07 | 0.00164992  | 0.00149400 | 0.00142098 | 0.00138289 | 0.00135086 |
| 1.00000e+06 | 0.00101333  | 0.00113655 | 0.00123438 | 0.00128988 | 0.00130632 |
| 100000.     | 0.000890638 | 0.00108045 | 0.00120941 | 0.00127912 | 0.00130193 |
| 10000.0     | 0.000874409 | 0.00107359 | 0.00120662 | 0.00127805 | 0.00130156 |
| 1000.00     | 0.000872595 | 0.00107288 | 0.00120636 | 0.00127796 | 0.00130154 |
| 100.000     | 0.000872423 | 0.00107281 | 0.00120633 | 0.00127795 | 0.00130154 |
| 10.0000     | 0.000872407 | 0.00107280 | 0.00120633 | 0.00127795 | 0.00130154 |
| 1.00000     | 0.000872406 | 0.00107280 | 0.00120633 | 0.00127795 | 0.00130154 |
| 0.100000    | 0.000872406 | 0.00107280 | 0.00120633 | 0.00127795 | 0.00130154 |
| 0.0100000   | 0.000872406 | 0.00107280 | 0.00120633 | 0.00127795 | 0.00130154 |
| 0.00100000  | 0.000872406 | 0.00107280 | 0.00120633 | 0.00127795 | 0.00130154 |
| 0.000100000 | 0.000872406 | 0.00107280 | 0.00120633 | 0.00127795 | 0.00130154 |
| 1.00000e-05 | 0.000872406 | 0.00107280 | 0.00120633 | 0.00127795 | 0.00130154 |

|             |             |            |            |            |            |
|-------------|-------------|------------|------------|------------|------------|
| 1.00000e-06 | 0.000872406 | 0.00107280 | 0.00120633 | 0.00127795 | 0.00130154 |
| 1.00000e-07 | 0.000872406 | 0.00107280 | 0.00120633 | 0.00127795 | 0.00130154 |
| 1.00000e-08 | 0.000872406 | 0.00107280 | 0.00120633 | 0.00127795 | 0.00130154 |
| 1.00000e-09 | 0.000872406 | 0.00107280 | 0.00120633 | 0.00127795 | 0.00130154 |

|      |         |         |
|------|---------|---------|
| Pa\K | 3750.00 | 4000.00 |
|------|---------|---------|

|             |            |            |
|-------------|------------|------------|
| 1.00000e+08 | 0.00142521 | 0.00133033 |
| 1.00000e+07 | 0.00131358 | 0.00126917 |
| 1.00000e+06 | 0.00129335 | 0.00126084 |
| 100000.     | 0.00129177 | 0.00126044 |
| 10000.0     | 0.00129168 | 0.00126045 |
| 1000.00     | 0.00129167 | 0.00126045 |
| 100.000     | 0.00129168 | 0.00126046 |
| 10.0000     | 0.00129168 | 0.00126046 |
| 1.00000     | 0.00129168 | 0.00126046 |
| 0.100000    | 0.00129168 | 0.00126046 |
| 0.0100000   | 0.00129168 | 0.00126046 |
| 0.00100000  | 0.00129168 | 0.00126046 |
| 0.000100000 | 0.00129168 | 0.00126046 |
| 1.00000e-05 | 0.00129168 | 0.00126046 |
| 1.00000e-06 | 0.00129168 | 0.00126046 |
| 1.00000e-07 | 0.00129168 | 0.00126046 |
| 1.00000e-08 | 0.00129168 | 0.00126046 |
| 1.00000e-09 | 0.00129168 | 0.00126046 |

rad8

====

|      |         |         |         |         |         |
|------|---------|---------|---------|---------|---------|
| Pa\K | 20.0000 | 30.0000 | 40.0000 | 50.0000 | 60.0000 |
|------|---------|---------|---------|---------|---------|

|             |             |             |             |             |             |
|-------------|-------------|-------------|-------------|-------------|-------------|
| 1.00000e+08 | 9.98060e-35 | 2.71911e-34 | 7.51194e-34 | 2.37912e-33 | 8.78002e-33 |
| 1.00000e+07 | 9.97343e-34 | 2.71519e-33 | 7.49601e-33 | 2.37255e-32 | 8.75043e-32 |
| 1.00000e+06 | 9.90229e-33 | 2.67666e-32 | 7.34056e-32 | 2.30888e-31 | 8.46592e-31 |
| 100000.     | 9.24637e-32 | 2.34772e-31 | 6.10223e-31 | 1.83245e-30 | 6.45480e-30 |
| 10000.0     | 5.77227e-31 | 1.15789e-30 | 2.57067e-30 | 6.78832e-30 | 2.13633e-29 |
| 1000.00     | 9.55212e-31 | 6.31966e-31 | 6.02071e-31 | 8.24943e-31 | 1.55371e-30 |
| 100.000     | 9.77695e-33 | 3.00833e-33 | 3.89931e-33 | 7.06927e-33 | 1.56465e-32 |
| 10.0000     | 7.48790e-34 | 4.25954e-34 | 1.16678e-33 | 5.13826e-33 | 2.60090e-32 |
| 1.00000     | 1.31116e-32 | 9.93099e-32 | 4.30890e-31 | 1.74517e-30 | 7.73628e-30 |
| 0.100000    | 2.69149e-30 | 1.44835e-29 | 5.33307e-29 | 1.93830e-28 | 7.92424e-28 |
| 0.0100000   | 2.39154e-28 | 1.02593e-27 | 3.20040e-27 | 1.00927e-26 | 3.62586e-26 |
| 0.00100000  | 7.56809e-27 | 2.04944e-26 | 4.89864e-26 | 1.27599e-25 | 3.92768e-25 |
| 0.000100000 | 5.99533e-26 | 1.06223e-25 | 1.88514e-25 | 3.84741e-25 | 9.60545e-25 |
| 1.00000e-05 | 6.01180e-26 | 3.64504e-26 | 3.42383e-26 | 4.55339e-26 | 8.38462e-26 |
| 1.00000e-06 | 1.86627e-27 | 6.12862e-28 | 4.80367e-28 | 6.08867e-28 | 1.16867e-27 |
| 1.00000e-07 | 2.44393e-29 | 1.00646e-29 | 9.60228e-30 | 1.48714e-29 | 3.73761e-29 |
| 1.00000e-08 | 8.31653e-31 | 4.81196e-31 | 5.58081e-31 | 1.00610e-30 | 2.92008e-30 |
| 1.00000e-09 | 6.51607e-32 | 4.23610e-32 | 5.15093e-32 | 9.55863e-32 | 2.83637e-31 |

|      |         |         |         |         |         |
|------|---------|---------|---------|---------|---------|
| Pa\K | 70.0000 | 80.0000 | 90.0000 | 100.000 | 110.000 |
|------|---------|---------|---------|---------|---------|

|             |             |             |             |             |             |
|-------------|-------------|-------------|-------------|-------------|-------------|
| 1.00000e+08 | 3.90244e-32 | 2.25109e-31 | 1.93487e-30 | 2.97828e-29 | 8.95044e-28 |
| 1.00000e+07 | 3.88709e-31 | 2.24114e-30 | 1.92573e-29 | 2.96469e-28 | 8.91785e-27 |
| 1.00000e+06 | 3.74049e-30 | 2.14664e-29 | 1.83937e-28 | 2.83638e-27 | 8.60920e-26 |
| 100000.     | 2.75599e-29 | 1.53938e-28 | 1.30082e-27 | 2.03798e-26 | 6.61909e-25 |
| 10000.0     | 8.25590e-29 | 4.24996e-28 | 3.45733e-27 | 5.83823e-26 | 2.51109e-24 |
| 1000.00     | 4.10428e-30 | 1.76506e-29 | 2.04319e-28 | 1.13646e-26 | 2.68854e-24 |
| 100.000     | 4.43739e-32 | 2.04468e-31 | 5.29575e-30 | 1.07165e-27 | 2.55109e-24 |
| 10.0000     | 1.63085e-31 | 1.50156e-30 | 2.38458e-29 | 6.57117e-28 | 2.54977e-24 |
| 1.00000     | 4.33160e-29 | 3.69980e-28 | 5.63382e-27 | 1.28583e-25 | 5.49656e-24 |
| 0.100000    | 4.17062e-27 | 3.41357e-26 | 5.10362e-25 | 1.15514e-23 | 2.62124e-22 |
| 0.0100000   | 1.69056e-25 | 1.24154e-24 | 1.73941e-23 | 3.85011e-22 | 8.36487e-21 |
| 0.00100000  | 1.60306e-24 | 1.05977e-23 | 1.47017e-22 | 3.50358e-21 | 7.92896e-20 |
| 0.000100000 | 3.27052e-24 | 1.90553e-23 | 2.97836e-22 | 9.08484e-21 | 2.30407e-19 |
| 1.00000e-05 | 2.34671e-25 | 1.82867e-24 | 1.35723e-22 | 8.17829e-21 | 2.54129e-19 |
| 1.00000e-06 | 4.23486e-27 | 4.32679e-25 | 1.14319e-22 | 7.90510e-21 | 2.54400e-19 |
| 1.00000e-07 | 2.16469e-28 | 3.75350e-25 | 1.12639e-22 | 7.87860e-21 | 2.54407e-19 |
| 1.00000e-08 | 1.95626e-29 | 3.70534e-25 | 1.12476e-22 | 7.87597e-21 | 2.54408e-19 |
| 1.00000e-09 | 1.93523e-30 | 3.70061e-25 | 1.12460e-22 | 7.87571e-21 | 2.54408e-19 |

|      |         |         |         |         |         |
|------|---------|---------|---------|---------|---------|
| Pa\K | 120.000 | 130.000 | 140.000 | 150.000 | 160.000 |
|------|---------|---------|---------|---------|---------|

|             |             |             |             |             |             |
|-------------|-------------|-------------|-------------|-------------|-------------|
| 1.00000e+08 | 2.89193e-26 | 7.17037e-25 | 1.25982e-23 | 1.60446e-22 | 1.54444e-21 |
| 1.00000e+07 | 2.88312e-25 | 7.15024e-24 | 1.25632e-22 | 1.59989e-21 | 1.53979e-20 |
| 1.00000e+06 | 2.79941e-24 | 6.95872e-23 | 1.22314e-21 | 1.55654e-20 | 1.49596e-19 |
| 100000.     | 2.24303e-23 | 5.67135e-22 | 1.00088e-20 | 1.27003e-19 | 1.21205e-18 |
| 10000.0     | 9.78919e-23 | 2.61630e-21 | 4.69258e-20 | 5.93538e-19 | 5.58465e-18 |
| 1000.00     | 1.46405e-22 | 4.39971e-21 | 8.23059e-20 | 1.05096e-18 | 9.81970e-18 |
| 100.000     | 1.51201e-22 | 4.69372e-21 | 8.89929e-20 | 1.14166e-18 | 1.06685e-17 |
| 10.0000     | 1.51948e-22 | 4.73003e-21 | 8.97955e-20 | 1.15247e-18 | 1.07695e-17 |

|             |             |             |             |             |             |
|-------------|-------------|-------------|-------------|-------------|-------------|
| 1.00000     | 2.06631e-22 | 5.50927e-21 | 9.84529e-20 | 1.22978e-18 | 1.13414e-17 |
| 0.100000    | 4.74623e-21 | 6.58906e-20 | 7.13696e-19 | 6.19622e-18 | 4.41637e-17 |
| 0.0100000   | 1.39257e-19 | 1.70729e-18 | 1.58315e-17 | 1.15500e-16 | 6.87830e-16 |
| 0.00100000  | 1.30758e-18 | 1.53620e-17 | 1.33672e-16 | 9.02018e-16 | 4.91628e-15 |
| 0.000100000 | 3.86700e-18 | 4.41331e-17 | 3.64558e-16 | 2.30793e-15 | 1.17331e-14 |
| 1.00000e-05 | 4.55304e-18 | 5.29094e-17 | 4.36498e-16 | 2.73623e-15 | 1.37221e-14 |
| 1.00000e-06 | 4.61396e-18 | 5.38498e-17 | 4.44702e-16 | 2.78620e-15 | 1.39554e-14 |
| 1.00000e-07 | 4.61988e-18 | 5.39438e-17 | 4.45530e-16 | 2.79126e-15 | 1.39791e-14 |
| 1.00000e-08 | 4.62047e-18 | 5.39532e-17 | 4.45613e-16 | 2.79177e-15 | 1.39815e-14 |
| 1.00000e-09 | 4.62053e-18 | 5.39542e-17 | 4.45621e-16 | 2.79182e-15 | 1.39817e-14 |

| Pa\K        | 170.000     | 180.000     | 190.000     | 200.000     | 210.000     |
|-------------|-------------|-------------|-------------|-------------|-------------|
| 1.00000e+08 | 1.17128e-20 | 7.25579e-20 | 3.78431e-19 | 1.70392e-18 | 6.76202e-18 |
| 1.00000e+07 | 1.16751e-19 | 7.23049e-19 | 3.76991e-18 | 1.69680e-17 | 6.73087e-17 |
| 1.00000e+06 | 1.13207e-18 | 6.99407e-18 | 3.63623e-17 | 1.63125e-16 | 6.44661e-16 |
| 100000.     | 9.08206e-18 | 5.54395e-17 | 2.84280e-16 | 1.25587e-15 | 4.88057e-15 |
| 10000.0     | 4.09690e-17 | 2.43637e-16 | 1.21253e-15 | 5.18315e-15 | 1.94408e-14 |
| 1000.00     | 7.08877e-17 | 4.12660e-16 | 2.00424e-15 | 8.34693e-15 | 3.04772e-14 |
| 100.000     | 7.68376e-17 | 4.45672e-16 | 2.15522e-15 | 8.93408e-15 | 3.24669e-14 |
| 10.0000     | 7.75456e-17 | 4.49609e-16 | 2.17331e-15 | 9.00514e-15 | 3.27116e-14 |
| 1.00000     | 8.11406e-17 | 4.69223e-16 | 2.26781e-15 | 9.41268e-15 | 3.43029e-14 |
| 0.100000    | 2.63843e-16 | 1.34621e-15 | 5.96883e-15 | 2.33649e-14 | 8.19107e-14 |
| 0.0100000   | 3.44877e-15 | 1.49286e-14 | 5.69222e-14 | 1.94303e-13 | 6.01605e-13 |
| 0.00100000  | 2.23820e-14 | 8.74669e-14 | 2.99960e-13 | 9.19124e-13 | 2.55386e-12 |
| 0.000100000 | 4.97171e-14 | 1.80871e-13 | 5.78502e-13 | 1.65815e-12 | 4.32595e-12 |
| 1.00000e-05 | 5.72779e-14 | 2.05245e-13 | 6.46954e-13 | 1.82920e-12 | 4.71276e-12 |
| 1.00000e-06 | 5.81627e-14 | 2.08078e-13 | 6.54843e-13 | 1.84873e-12 | 4.75647e-12 |
| 1.00000e-07 | 5.82526e-14 | 2.08366e-13 | 6.55643e-13 | 1.85071e-12 | 4.76090e-12 |
| 1.00000e-08 | 5.82616e-14 | 2.08395e-13 | 6.55724e-13 | 1.85090e-12 | 4.76134e-12 |
| 1.00000e-09 | 5.82625e-14 | 2.08398e-13 | 6.55732e-13 | 1.85092e-12 | 4.76138e-12 |

| Pa\K        | 220.000     | 230.000     | 240.000     | 250.000     | 260.000     |
|-------------|-------------|-------------|-------------|-------------|-------------|
| 1.00000e+08 | 2.40617e-17 | 7.78773e-17 | 2.32018e-16 | 6.42715e-16 | 1.66950e-15 |
| 1.00000e+07 | 2.39392e-16 | 7.74374e-16 | 2.30561e-15 | 6.38226e-15 | 1.65651e-14 |
| 1.00000e+06 | 2.28315e-15 | 7.35063e-15 | 2.17709e-14 | 5.99154e-14 | 1.54516e-13 |
| 100000.     | 1.69749e-14 | 5.36015e-14 | 1.55513e-13 | 4.18726e-13 | 1.05521e-12 |
| 10000.0     | 6.51174e-14 | 1.97643e-13 | 5.50262e-13 | 1.41976e-12 | 3.42443e-12 |
| 1000.00     | 9.93567e-14 | 2.93578e-13 | 7.96139e-13 | 2.00239e-12 | 4.71245e-12 |
| 100.000     | 1.05349e-13 | 3.09877e-13 | 8.36708e-13 | 2.09582e-12 | 4.91341e-12 |
| 10.0000     | 1.06105e-13 | 3.12008e-13 | 8.42299e-13 | 2.10967e-12 | 4.94619e-12 |
| 1.00000     | 1.11783e-13 | 3.30674e-13 | 8.99200e-13 | 2.27151e-12 | 5.37802e-12 |
| 0.100000    | 2.60440e-13 | 7.59374e-13 | 2.04984e-12 | 5.16478e-12 | 1.22318e-11 |
| 0.0100000   | 1.70794e-12 | 4.48627e-12 | 1.09868e-11 | 2.52519e-11 | 5.47834e-11 |
| 0.00100000  | 6.51410e-12 | 1.54099e-11 | 3.41033e-11 | 7.11285e-11 | 1.40698e-10 |
| 0.000100000 | 1.04045e-11 | 2.33140e-11 | 4.90994e-11 | 9.79016e-11 | 1.85971e-10 |
| 1.00000e-05 | 1.12069e-11 | 2.48582e-11 | 5.18822e-11 | 1.02634e-10 | 1.93616e-10 |
| 1.00000e-06 | 1.12967e-11 | 2.50294e-11 | 5.21878e-11 | 1.03149e-10 | 1.94443e-10 |
| 1.00000e-07 | 1.13058e-11 | 2.50467e-11 | 5.22187e-11 | 1.03201e-10 | 1.94526e-10 |
| 1.00000e-08 | 1.13067e-11 | 2.50484e-11 | 5.22218e-11 | 1.03207e-10 | 1.94534e-10 |
| 1.00000e-09 | 1.13068e-11 | 2.50486e-11 | 5.22221e-11 | 1.03207e-10 | 1.94535e-10 |

| Pa\K        | 270.000     | 280.000     | 290.000     | 300.000     | 310.000     |
|-------------|-------------|-------------|-------------|-------------|-------------|
| 1.00000e+08 | 4.09594e-15 | 9.54953e-15 | 2.12693e-14 | 4.77162e-13 | 9.36057e-14 |
| 1.00000e+07 | 4.06041e-14 | 9.45713e-14 | 2.10397e-13 | 4.47878e-13 | 9.23486e-13 |
| 1.00000e+06 | 3.76090e-13 | 8.69237e-13 | 1.91769e-12 | 3.41079e-12 | 8.25950e-12 |
| 100000.     | 2.50666e-12 | 5.64739e-12 | 1.21299e-11 | 5.82724e-11 | 4.93336e-11 |
| 10000.0     | 7.77853e-12 | 1.67451e-11 | 3.43499e-11 | 6.48889e-11 | 1.27363e-10 |
| 1000.00     | 1.04554e-11 | 2.20098e-11 | 4.42034e-11 | 1.31837e-10 | 1.57680e-10 |
| 100.000     | 1.08623e-11 | 2.27904e-11 | 4.56309e-11 | 6.31005e-10 | 1.61897e-10 |
| 10.0000     | 1.09373e-11 | 2.29577e-11 | 4.59961e-11 | 1.57609e-09 | 1.63534e-10 |
| 1.00000     | 1.20234e-11 | 2.55441e-11 | 5.18508e-11 | 1.54022e-09 | 1.89670e-10 |
| 0.100000    | 2.73924e-11 | 5.83040e-11 | 1.18470e-10 | 1.12939e-09 | 4.31900e-10 |
| 0.0100000   | 1.12754e-10 | 2.21159e-10 | 4.15061e-10 | 7.96567e-09 | 1.29900e-09 |
| 0.00100000  | 2.65402e-10 | 4.79681e-10 | 8.34130e-10 | 2.21814e-09 | 2.27845e-09 |
| 0.000100000 | 3.38320e-10 | 5.92086e-10 | 1.00067e-09 | 2.67570e-09 | 2.60772e-09 |
| 1.00000e-05 | 3.50118e-10 | 6.09561e-10 | 1.02562e-09 | 2.66877e-09 | 2.65388e-09 |
| 1.00000e-06 | 3.51384e-10 | 6.11424e-10 | 1.02826e-09 | 2.66550e-09 | 2.65872e-09 |
| 1.00000e-07 | 3.51511e-10 | 6.11611e-10 | 1.02853e-09 | 2.66515e-09 | 2.65920e-09 |
| 1.00000e-08 | 3.51524e-10 | 6.11630e-10 | 1.02855e-09 | 2.66511e-09 | 2.65925e-09 |
| 1.00000e-09 | 3.51525e-10 | 6.11632e-10 | 1.02856e-09 | 2.66511e-09 | 2.65926e-09 |

| Pa\K        | 400.000     | 500.000     | 600.000     | 700.000     | 800.000     |
|-------------|-------------|-------------|-------------|-------------|-------------|
| 1.00000e+08 | 6.17416e-11 | 2.98882e-09 | 7.51991e-08 | 1.00149e-06 | 7.13926e-06 |
| 1.00000e+07 | 5.73068e-12 | 8.17032e-11 | 8.14763e-10 | 8.90114e-09 | 1.24325e-07 |
| 1.00000e+06 | 6.23404e-17 | 1.16409e-15 | 4.18043e-14 | 3.24810e-12 | 3.61207e-10 |
| 100000.     | 8.16755e-24 | 1.96215e-21 | 1.25019e-18 | 1.58895e-15 | 1.58967e-12 |

|             |             |             |             |             |             |
|-------------|-------------|-------------|-------------|-------------|-------------|
| 10000.0     | 9.33636e-29 | 1.91565e-25 | 9.80067e-22 | 7.69048e-18 | 2.81851e-14 |
| 1000.00     | 7.71815e-32 | 5.35121e-28 | 8.53062e-24 | 1.73175e-19 | 1.22039e-15 |
| 100.000     | 7.23750e-34 | 9.37041e-30 | 2.65519e-25 | 8.64894e-21 | 8.42992e-17 |
| 10.0000     | 2.53335e-35 | 4.54258e-31 | 1.75377e-26 | 7.38706e-22 | 8.13076e-18 |
| 1.00000     | 2.81062e-36 | 6.21231e-32 | 2.70690e-27 | 1.06329e-22 | 9.57013e-19 |
| 0.100000    | 1.25356e-36 | 2.01870e-32 | 6.02232e-28 | 1.56873e-23 | 1.07042e-19 |
| 0.0100000   | 4.94039e-37 | 4.69543e-33 | 9.15203e-29 | 1.80698e-24 | 1.10060e-20 |
| 0.00100000  | 9.07310e-38 | 6.27882e-34 | 1.01590e-29 | 1.85259e-25 | 1.10471e-21 |
| 0.000100000 | 1.01761e-38 | 6.58138e-35 | 1.03026e-30 | 1.85795e-26 | 1.10516e-22 |
| 1.00000e-05 | 1.02798e-39 | 6.61296e-36 | 1.03177e-31 | 1.85851e-27 | 1.10520e-23 |
| 1.00000e-06 | 1.02892e-40 | 6.61609e-37 | 1.03192e-32 | 1.85856e-28 | 1.10521e-24 |
| 1.00000e-07 | 1.02902e-41 | 6.61640e-38 | 1.03193e-33 | 1.85857e-29 | 1.10521e-25 |
| 1.00000e-08 | 1.02902e-42 | 6.61644e-39 | 1.03194e-34 | 1.85857e-30 | 1.10521e-26 |
| 1.00000e-09 | 1.02903e-43 | 6.61644e-40 | 1.03194e-35 | 1.85857e-31 | 1.10521e-27 |

| Pa\K        | 900.000     | 1000.00     | 1100.00     | 1200.00     | 1300.00     |
|-------------|-------------|-------------|-------------|-------------|-------------|
| 1.00000e+08 | 3.54367e-05 | 0.000175428 | 0.000680551 | 0.00137538  | 0.00182944  |
| 1.00000e+07 | 1.42660e-06 | 1.09084e-05 | 5.34524e-05 | 0.000155822 | 0.000264065 |
| 1.00000e+06 | 2.02413e-08 | 3.82801e-07 | 2.47290e-06 | 7.76415e-06 | 1.45403e-05 |
| 100000.     | 3.65856e-10 | 1.41142e-08 | 1.19566e-07 | 4.03671e-07 | 8.30656e-07 |
| 10000.0     | 1.42953e-11 | 8.25895e-10 | 8.45311e-09 | 3.09373e-08 | 6.78132e-08 |
| 1000.00     | 9.17319e-13 | 6.51293e-11 | 7.35809e-10 | 2.80976e-09 | 6.32132e-09 |
| 100.000     | 7.64966e-14 | 5.91655e-12 | 6.94327e-11 | 2.70375e-10 | 6.15855e-10 |
| 10.0000     | 7.47575e-15 | 5.74986e-13 | 6.78523e-12 | 2.66302e-11 | 6.09707e-11 |
| 1.00000     | 7.71846e-16 | 5.73025e-14 | 6.74332e-13 | 2.65197e-12 | 6.08068e-12 |
| 0.100000    | 7.84796e-17 | 5.73409e-15 | 6.73843e-14 | 2.65055e-13 | 6.07858e-13 |
| 0.0100000   | 7.87153e-18 | 5.73491e-16 | 6.73796e-15 | 2.65041e-14 | 6.07836e-14 |
| 0.00100000  | 7.87426e-19 | 5.73501e-17 | 6.73791e-16 | 2.65039e-15 | 6.07834e-15 |
| 0.000100000 | 7.87455e-20 | 5.73503e-18 | 6.73791e-17 | 2.65039e-16 | 6.07834e-16 |
| 1.00000e-05 | 7.87458e-21 | 5.73503e-19 | 6.73791e-18 | 2.65039e-17 | 6.07834e-17 |
| 1.00000e-06 | 7.87458e-22 | 5.73503e-20 | 6.73791e-19 | 2.65039e-18 | 6.07834e-18 |
| 1.00000e-07 | 7.87458e-23 | 5.73503e-21 | 6.73791e-20 | 2.65039e-19 | 6.07834e-19 |
| 1.00000e-08 | 7.87458e-24 | 5.73503e-22 | 6.73791e-21 | 2.65039e-20 | 6.07834e-20 |
| 1.00000e-09 | 7.87458e-25 | 5.73503e-23 | 6.73791e-22 | 2.65039e-21 | 6.07834e-21 |

| Pa\K        | 1400.00     | 1500.00     | 1750.00     | 2000.00     | 2250.00     |
|-------------|-------------|-------------|-------------|-------------|-------------|
| 1.00000e+08 | 0.00205125  | 0.00215874  | 0.00146018  | 0.00143337  | 0.00143048  |
| 1.00000e+07 | 0.000333070 | 0.000372415 | 0.000159719 | 0.000171628 | 0.000185583 |
| 1.00000e+06 | 2.03293e-05 | 2.52606e-05 | 1.29787e-05 | 1.63027e-05 | 1.88249e-05 |
| 100000.     | 1.32549e-07 | 1.86336e-06 | 1.13704e-06 | 1.55385e-06 | 1.83406e-06 |
| 10000.0     | 1.14768e-07 | 1.68227e-07 | 1.09335e-07 | 1.52152e-07 | 1.80531e-07 |
| 1000.00     | 1.09092e-08 | 1.61962e-08 | 1.07955e-08 | 1.50833e-08 | 1.79139e-08 |
| 100.000     | 1.07084e-09 | 1.59632e-09 | 1.07483e-09 | 1.50220e-09 | 1.78416e-09 |
| 10.0000     | 1.06296e-10 | 1.58661e-10 | 1.07280e-10 | 1.49949e-10 | 1.78106e-10 |
| 1.00000     | 1.06086e-11 | 1.58403e-11 | 1.07246e-11 | 1.49904e-11 | 1.78056e-11 |
| 0.100000    | 1.06060e-12 | 1.58371e-12 | 1.07242e-12 | 1.49900e-12 | 1.78050e-12 |
| 0.0100000   | 1.06057e-13 | 1.58367e-13 | 1.07242e-13 | 1.49899e-13 | 1.78050e-13 |
| 0.00100000  | 1.06057e-14 | 1.58367e-14 | 1.07242e-14 | 1.49899e-14 | 1.78050e-14 |
| 0.000100000 | 1.06057e-15 | 1.58367e-15 | 1.07242e-15 | 1.49899e-15 | 1.78050e-15 |
| 1.00000e-05 | 1.06057e-16 | 1.58367e-16 | 1.07242e-16 | 1.49899e-16 | 1.78050e-16 |
| 1.00000e-06 | 1.06057e-17 | 1.58367e-17 | 1.07242e-17 | 1.49899e-17 | 1.78050e-17 |
| 1.00000e-07 | 1.06057e-18 | 1.58367e-18 | 1.07242e-18 | 1.49899e-18 | 1.78050e-18 |
| 1.00000e-08 | 1.06057e-19 | 1.58367e-19 | 1.07242e-19 | 1.49899e-19 | 1.78050e-19 |
| 1.00000e-09 | 1.06057e-20 | 1.58367e-20 | 1.07242e-20 | 1.49899e-20 | 1.78050e-20 |

| Pa\K        | 2500.00     | 2750.00     | 3000.00     | 3250.00     | 3500.00     |
|-------------|-------------|-------------|-------------|-------------|-------------|
| 1.00000e+08 | 0.00144341  | 0.00144925  | 0.00142932  | 0.00137703  | 0.00129638  |
| 1.00000e+07 | 0.000193378 | 0.000190905 | 0.000179619 | 0.000163133 | 0.000144622 |
| 1.00000e+06 | 1.97315e-05 | 1.91693e-05 | 1.76898e-05 | 1.57965e-05 | 1.38145e-05 |
| 100000.     | 1.92797e-06 | 1.86997e-06 | 1.72181e-06 | 1.53462e-06 | 1.34014e-06 |
| 10000.0     | 1.90014e-07 | 1.84326e-07 | 1.69708e-07 | 1.51248e-07 | 1.32077e-07 |
| 1000.00     | 1.88598e-08 | 1.82975e-08 | 1.68479e-08 | 1.50164e-08 | 1.31142e-08 |
| 100.000     | 1.87847e-09 | 1.82256e-09 | 1.67826e-09 | 1.49590e-09 | 1.30647e-09 |
| 10.0000     | 1.87533e-10 | 1.81963e-10 | 1.67567e-10 | 1.49367e-10 | 1.30458e-10 |
| 1.00000     | 1.87484e-11 | 1.81919e-11 | 1.67528e-11 | 1.49334e-11 | 1.30430e-11 |
| 0.100000    | 1.87478e-12 | 1.81914e-12 | 1.67524e-12 | 1.49330e-12 | 1.30428e-12 |
| 0.0100000   | 1.87478e-13 | 1.81913e-13 | 1.67523e-13 | 1.49330e-13 | 1.30427e-13 |
| 0.00100000  | 1.87478e-14 | 1.81913e-14 | 1.67523e-14 | 1.49330e-14 | 1.30427e-14 |
| 0.000100000 | 1.87478e-15 | 1.81913e-15 | 1.67523e-15 | 1.49330e-15 | 1.30427e-15 |
| 1.00000e-05 | 1.87478e-16 | 1.81913e-16 | 1.67523e-16 | 1.49330e-16 | 1.30427e-16 |
| 1.00000e-06 | 1.87478e-17 | 1.81913e-17 | 1.67523e-17 | 1.49330e-17 | 1.30427e-17 |
| 1.00000e-07 | 1.87478e-18 | 1.81913e-18 | 1.67523e-18 | 1.49330e-18 | 1.30427e-18 |
| 1.00000e-08 | 1.87478e-19 | 1.81913e-19 | 1.67523e-19 | 1.49330e-19 | 1.30427e-19 |
| 1.00000e-09 | 1.87478e-20 | 1.81913e-20 | 1.67523e-20 | 1.49330e-20 | 1.30427e-20 |

Pa\K | 3750.00 4000.00

|             |             |             |
|-------------|-------------|-------------|
| 1.00000e+08 | 0.00119637  | 0.00108633  |
| 1.00000e+07 | 0.000126132 | 0.000108786 |
| 1.00000e+06 | 1.19186e-05 | 1.01909e-05 |
| 100000.     | 1.15501e-06 | 9.86868e-07 |
| 10000.0     | 1.13836e-07 | 9.72706e-08 |
| 1000.00     | 1.13039e-08 | 9.65973e-09 |
| 100.000     | 1.12617e-09 | 9.62406e-10 |
| 10.0000     | 1.12459e-10 | 9.61096e-11 |
| 1.00000     | 1.12437e-11 | 9.60910e-12 |
| 0.100000    | 1.12434e-12 | 9.60891e-13 |
| 0.0100000   | 1.12434e-13 | 9.60889e-14 |
| 0.00100000  | 1.12434e-14 | 9.60889e-15 |
| 0.000100000 | 1.12434e-15 | 9.60889e-16 |
| 1.00000e-05 | 1.12434e-16 | 9.60889e-17 |
| 1.00000e-06 | 1.12434e-17 | 9.60889e-18 |
| 1.00000e-07 | 1.12434e-18 | 9.60889e-19 |
| 1.00000e-08 | 1.12434e-19 | 9.60889e-20 |
| 1.00000e-09 | 1.12434e-20 | 9.60889e-21 |

rad47

====

| Pa\K        | 20.0000      | 30.0000      | 40.0000      | 50.0000      | 60.0000     |
|-------------|--------------|--------------|--------------|--------------|-------------|
| 1.00000e+08 | 1.90699e-79  | 5.49481e-78  | 8.79735e-77  | 1.45627e-75  | 2.80239e-74 |
| 1.00000e+07 | 1.63275e-75  | 4.32234e-74  | 6.47935e-73  | 1.01310e-71  | 1.85675e-70 |
| 1.00000e+06 | 8.89129e-72  | 1.68238e-70  | 1.97106e-69  | 2.56360e-68  | 4.11651e-67 |
| 100000.     | 9.41462e-69  | 8.38884e-68  | 6.40599e-67  | 6.50023e-66  | 9.33637e-65 |
| 10000.0     | 5.34250e-67  | 1.80663e-66  | 9.46327e-66  | 8.89036e-65  | 1.40297e-63 |
| 1000.00     | 1.41417e-66  | 2.83045e-66  | 1.10799e-65  | 7.77669e-65  | 9.48641e-64 |
| 100.000     | 1.87074e-66  | 2.52766e-66  | 5.29667e-66  | 1.71693e-65  | 8.41860e-65 |
| 10.0000     | 2.31651e-67  | 4.55816e-68  | 2.24765e-68  | 2.23235e-68  | 3.94534e-68 |
| 1.00000     | 8.88403e-72  | 6.72016e-72  | 1.40411e-71  | 4.18295e-71  | 1.72067e-70 |
| 0.100000    | 2.39327e-72  | 1.74821e-72  | 2.16057e-72  | 4.09205e-72  | 1.13706e-71 |
| 0.0100000   | 2.63829e-74  | 2.35975e-75  | 8.66581e-76  | 7.39276e-76  | 1.17034e-75 |
| 0.00100000  | 4.42632e-79  | 1.52328e-80  | 4.42262e-81  | 3.59583e-81  | 5.82065e-81 |
| 0.000100000 | 2.54853e-84  | 1.37627e-85  | 5.45245e-86  | 5.61150e-86  | 1.10490e-85 |
| 1.00000e-05 | 8.30128e-89  | 7.94863e-90  | 4.33405e-90  | 5.59148e-90  | 1.33784e-89 |
| 1.00000e-06 | 1.60279e-92  | 2.49897e-93  | 1.78864e-93  | 2.83547e-93  | 8.84041e-93 |
| 1.00000e-07 | 1.39106e-95  | 3.33197e-96  | 3.10868e-96  | 6.29846e-96  | 2.95134e-95 |
| 1.00000e-08 | 4.55509e-98  | 1.56588e-98  | 1.78862e-98  | 4.25784e-98  | 2.40005e-97 |
| 1.00000e-09 | 3.56032e-100 | 1.37704e-100 | 1.64992e-100 | 4.04753e-100 | 2.34415e-99 |

| Pa\K        | 70.0000     | 80.0000     | 90.0000     | 100.0000    | 110.0000    |
|-------------|-------------|-------------|-------------|-------------|-------------|
| 1.00000e+08 | 6.67140e-73 | 2.14368e-71 | 1.06779e-69 | 9.63943e-68 | 1.67193e-65 |
| 1.00000e+07 | 4.25390e-69 | 1.33408e-67 | 6.60475e-66 | 6.04300e-64 | 1.07659e-61 |
| 1.00000e+06 | 8.68409e-66 | 2.63798e-64 | 1.32626e-62 | 1.26718e-60 | 2.34213e-58 |
| 100000.     | 1.97693e-63 | 6.58975e-62 | 3.79473e-60 | 4.05294e-58 | 7.73255e-56 |
| 10000.0     | 3.54702e-62 | 1.42815e-60 | 9.41770e-59 | 1.03281e-56 | 1.78098e-54 |
| 1000.00     | 1.93395e-62 | 6.34195e-61 | 3.31218e-59 | 2.74429e-57 | 3.49170e-55 |
| 100.000     | 6.37825e-64 | 7.92231e-63 | 1.78079e-61 | 8.18161e-60 | 8.34527e-58 |
| 10.0000     | 1.21555e-67 | 7.09456e-67 | 9.71116e-66 | 4.04884e-64 | 5.52767e-62 |
| 1.00000     | 1.03398e-69 | 1.06938e-68 | 2.49511e-67 | 1.47199e-65 | 1.99904e-63 |
| 0.100000    | 4.85758e-71 | 3.73293e-70 | 6.70079e-69 | 3.11031e-67 | 3.39160e-65 |
| 0.0100000   | 3.30306e-75 | 1.85480e-74 | 2.62263e-73 | 1.02790e-71 | 1.06482e-69 |
| 0.00100000  | 1.73907e-80 | 1.07132e-79 | 1.90758e-78 | 2.10716e-76 | 2.83235e-73 |
| 0.000100000 | 4.03663e-85 | 3.99680e-84 | 5.79775e-82 | 8.14113e-79 | 2.43604e-75 |
| 1.00000e-05 | 1.15893e-89 | 4.21358e-87 | 3.95871e-84 | 7.64034e-81 | 2.40599e-77 |
| 1.00000e-06 | 7.29039e-91 | 3.07384e-89 | 3.81397e-86 | 7.59014e-83 | 2.40297e-79 |
| 1.00000e-07 | 9.42647e-94 | 2.96658e-91 | 3.79851e-88 | 7.58499e-85 | 2.40266e-81 |
| 1.00000e-08 | 9.08466e-96 | 2.95525e-93 | 3.79692e-90 | 7.58447e-87 | 2.40263e-83 |
| 1.00000e-09 | 9.05012e-98 | 2.95410e-95 | 3.79676e-92 | 7.58442e-89 | 2.40263e-85 |

| Pa\K        | 120.000     | 130.000     | 140.000     | 150.000     | 160.000     |
|-------------|-------------|-------------|-------------|-------------|-------------|
| 1.00000e+08 | 4.29912e-63 | 1.30545e-60 | 3.59504e-58 | 1.02500e-55 | 2.20755e-53 |
| 1.00000e+07 | 2.85691e-59 | 8.93466e-57 | 2.52401e-54 | 7.28239e-52 | 1.57628e-49 |
| 1.00000e+06 | 6.32396e-56 | 1.96869e-53 | 5.46397e-51 | 1.50165e-48 | 3.07177e-46 |
| 100000.     | 2.02119e-53 | 5.81635e-51 | 1.46297e-48 | 3.46698e-46 | 6.07405e-44 |
| 10000.0     | 3.92681e-52 | 9.24192e-50 | 1.90813e-47 | 3.61966e-45 | 5.16885e-43 |
| 1000.00     | 5.86642e-53 | 1.12438e-50 | 2.01837e-48 | 3.68957e-46 | 5.40051e-44 |
| 100.000     | 1.43057e-55 | 3.31768e-53 | 7.53182e-51 | 2.22422e-48 | 5.18666e-46 |
| 10.0000     | 1.42349e-59 | 5.67227e-57 | 2.30297e-54 | 1.51917e-51 | 7.36362e-49 |
| 1.00000     | 3.47340e-61 | 7.63211e-59 | 1.62105e-56 | 7.38226e-54 | 3.52080e-51 |
| 0.100000    | 4.83154e-63 | 8.90940e-61 | 1.61632e-58 | 6.72771e-56 | 3.19836e-53 |
| 0.0100000   | 2.07466e-67 | 1.37305e-64 | 1.34924e-61 | 2.25658e-58 | 2.06690e-55 |
| 0.00100000  | 5.29336e-70 | 1.02499e-66 | 1.27429e-63 | 2.22260e-60 | 2.05227e-57 |
| 0.000100000 | 5.11610e-72 | 1.01774e-68 | 1.27346e-65 | 2.22238e-62 | 2.05191e-59 |
| 1.00000e-05 | 5.10026e-74 | 1.01715e-70 | 1.27348e-67 | 2.22241e-64 | 2.05189e-61 |
| 1.00000e-06 | 5.09869e-76 | 1.01709e-72 | 1.27348e-69 | 2.22241e-66 | 2.05189e-63 |

|             |             |             |             |             |             |
|-------------|-------------|-------------|-------------|-------------|-------------|
| 1.00000e-07 | 5.09854e-78 | 1.01709e-74 | 1.27348e-71 | 2.22241e-68 | 2.05189e-65 |
| 1.00000e-08 | 5.09852e-80 | 1.01709e-76 | 1.27348e-73 | 2.22241e-70 | 2.05189e-67 |
| 1.00000e-09 | 5.09852e-82 | 1.01709e-78 | 1.27348e-75 | 2.22241e-72 | 2.05189e-69 |

| Pa\K        | 170.000     | 180.000     | 190.000     | 200.000     | 210.000     |
|-------------|-------------|-------------|-------------|-------------|-------------|
| 1.00000e+08 | 3.47712e-51 | 4.06624e-49 | 4.14487e-47 | 3.05690e-45 | 1.57992e-43 |
| 1.00000e+07 | 2.47920e-47 | 2.87173e-45 | 2.86126e-43 | 2.04975e-41 | 1.02543e-39 |
| 1.00000e+06 | 4.53359e-44 | 4.87539e-42 | 4.41524e-40 | 2.85920e-38 | 1.29250e-36 |
| 100000.     | 7.63017e-42 | 6.89774e-40 | 5.08463e-38 | 2.66711e-36 | 9.81252e-35 |
| 10000.0     | 5.37452e-41 | 4.06292e-39 | 2.50349e-37 | 1.11840e-35 | 3.58713e-34 |
| 1000.00     | 6.02338e-42 | 5.15665e-40 | 4.04911e-38 | 2.43350e-36 | 1.09690e-34 |
| 100.000     | 9.03848e-44 | 1.26187e-41 | 1.83615e-39 | 2.05032e-37 | 1.87827e-35 |
| 10.0000     | 2.42982e-46 | 6.32337e-44 | 1.75126e-41 | 3.54273e-39 | 7.21779e-37 |
| 1.00000     | 1.37010e-48 | 4.46592e-46 | 1.55988e-43 | 3.91302e-41 | 1.07028e-38 |
| 0.100000    | 1.28881e-50 | 4.41866e-48 | 1.68344e-45 | 5.36956e-43 | 2.63151e-40 |
| 0.0100000   | 1.05435e-52 | 3.88020e-50 | 1.47660e-47 | 4.93287e-45 | 3.95800e-42 |
| 0.00100000  | 1.04889e-54 | 3.85402e-52 | 1.45457e-49 | 4.81449e-47 | 4.18143e-44 |
| 0.000100000 | 1.04861e-56 | 3.85205e-54 | 1.45250e-51 | 4.80164e-49 | 4.20528e-46 |
| 1.00000e-05 | 1.04859e-58 | 3.85186e-56 | 1.45229e-53 | 4.80035e-51 | 4.20768e-48 |
| 1.00000e-06 | 1.04859e-60 | 3.85184e-58 | 1.45227e-55 | 4.80022e-53 | 4.20792e-50 |
| 1.00000e-07 | 1.04858e-62 | 3.85184e-60 | 1.45227e-57 | 4.80020e-55 | 4.20795e-52 |
| 1.00000e-08 | 1.04858e-64 | 3.85184e-62 | 1.45227e-59 | 4.80020e-57 | 4.20795e-54 |
| 1.00000e-09 | 1.04858e-66 | 3.85184e-64 | 1.45227e-61 | 4.80020e-59 | 4.20795e-56 |

| Pa\K        | 220.000     | 230.000     | 240.000     | 250.000     | 260.000     |
|-------------|-------------|-------------|-------------|-------------|-------------|
| 1.00000e+08 | 5.13473e-42 | 1.45079e-40 | 2.67992e-39 | 3.41346e-38 | 3.63316e-37 |
| 1.00000e+07 | 3.24929e-38 | 8.84295e-37 | 1.58633e-35 | 1.98715e-34 | 2.08065e-33 |
| 1.00000e+06 | 3.74896e-35 | 9.10376e-34 | 1.47008e-32 | 1.72357e-31 | 1.69890e-30 |
| 100000.     | 2.39297e-33 | 4.56973e-32 | 5.97028e-31 | 6.22366e-30 | 5.53432e-29 |
| 10000.0     | 7.90212e-33 | 1.22293e-31 | 1.36014e-30 | 1.25410e-29 | 9.91039e-29 |
| 1000.00     | 3.17150e-33 | 4.56815e-32 | 4.56617e-31 | 3.75707e-30 | 2.61961e-29 |
| 100.000     | 9.42294e-34 | 1.32570e-32 | 1.26647e-31 | 9.95222e-31 | 6.59625e-30 |
| 10.0000     | 1.38499e-34 | 1.88601e-33 | 1.75848e-32 | 1.35158e-31 | 8.75599e-31 |
| 1.00000     | 1.46558e-35 | 1.98387e-34 | 1.84347e-33 | 1.41258e-32 | 9.12261e-32 |
| 0.100000    | 1.48921e-36 | 2.01377e-35 | 1.87019e-34 | 1.43234e-33 | 9.24550e-33 |
| 0.0100000   | 1.49470e-37 | 2.02024e-36 | 1.87588e-35 | 1.43648e-34 | 9.27089e-34 |
| 0.00100000  | 1.49534e-38 | 2.02098e-37 | 1.87653e-36 | 1.43695e-35 | 9.27375e-35 |
| 0.000100000 | 1.49540e-39 | 2.02106e-38 | 1.87660e-37 | 1.43700e-36 | 9.27404e-36 |
| 1.00000e-05 | 1.49541e-40 | 2.02107e-39 | 1.87660e-38 | 1.43700e-37 | 9.27408e-37 |
| 1.00000e-06 | 1.49541e-41 | 2.02107e-40 | 1.87660e-39 | 1.43700e-38 | 9.27408e-38 |
| 1.00000e-07 | 1.49541e-42 | 2.02107e-41 | 1.87660e-40 | 1.43700e-39 | 9.27408e-39 |
| 1.00000e-08 | 1.49541e-43 | 2.02107e-42 | 1.87660e-41 | 1.43700e-40 | 9.27408e-40 |
| 1.00000e-09 | 1.49541e-44 | 2.02107e-43 | 1.87660e-42 | 1.43700e-41 | 9.27408e-41 |

| Pa\K        | 270.000     | 280.000     | 290.000     | 300.000     | 310.000     |
|-------------|-------------|-------------|-------------|-------------|-------------|
| 1.00000e+08 | 3.33903e-36 | 2.68492e-35 | 1.91541e-34 | 6.06868e-24 | 7.09586e-33 |
| 1.00000e+07 | 1.87957e-32 | 1.48467e-31 | 1.03981e-30 | 7.44854e-22 | 3.70694e-29 |
| 1.00000e+06 | 1.45034e-29 | 1.08771e-28 | 7.26528e-28 | 6.08216e-21 | 2.38260e-26 |
| 100000.     | 4.30180e-28 | 2.96905e-27 | 1.84354e-26 | 1.26335e-20 | 5.36085e-25 |
| 10000.0     | 6.85837e-28 | 4.22581e-27 | 2.35004e-26 | 4.05851e-21 | 5.55370e-25 |
| 1000.00     | 1.58118e-28 | 8.40182e-28 | 3.98950e-27 | 9.17555e-23 | 6.75445e-26 |
| 100.000     | 3.76464e-29 | 1.88044e-28 | 8.33892e-28 | 5.11343e-25 | 1.20429e-26 |
| 10.0000     | 4.88010e-30 | 2.37832e-29 | 1.02799e-28 | 2.24358e-27 | 1.40513e-27 |
| 1.00000     | 5.06820e-31 | 2.46192e-30 | 1.06055e-29 | 4.25669e-29 | 1.43935e-28 |
| 0.100000    | 5.13377e-32 | 2.49241e-31 | 1.07308e-30 | 2.57993e-30 | 1.45464e-29 |
| 0.0100000   | 5.14711e-33 | 2.49853e-32 | 1.07556e-31 | 2.42081e-31 | 1.45760e-30 |
| 0.00100000  | 5.14861e-34 | 2.49921e-33 | 1.07584e-32 | 2.40563e-32 | 1.45793e-31 |
| 0.000100000 | 5.14877e-35 | 2.49928e-34 | 1.07587e-33 | 2.40412e-33 | 1.45797e-32 |
| 1.00000e-05 | 5.14878e-36 | 2.49929e-35 | 1.07587e-34 | 2.40397e-34 | 1.45797e-33 |
| 1.00000e-06 | 5.14878e-37 | 2.49929e-36 | 1.07587e-35 | 2.40395e-35 | 1.45797e-34 |
| 1.00000e-07 | 5.14878e-38 | 2.49929e-37 | 1.07587e-36 | 2.40395e-36 | 1.45797e-35 |
| 1.00000e-08 | 5.14878e-39 | 2.49929e-38 | 1.07587e-37 | 2.40395e-37 | 1.45797e-36 |
| 1.00000e-09 | 5.14878e-40 | 2.49929e-39 | 1.07587e-38 | 2.40395e-38 | 1.45797e-37 |

| Pa\K        | 400.000     | 500.000     | 600.000     | 700.000     | 800.000     |
|-------------|-------------|-------------|-------------|-------------|-------------|
| 1.00000e+08 | 1.27583e-16 | 3.36262e-11 | 1.89024e-08 | 5.89137e-07 | 3.12842e-06 |
| 1.00000e+07 | 6.45273e-16 | 4.62412e-11 | 8.11547e-08 | 2.03357e-06 | 7.07851e-06 |
| 1.00000e+06 | 6.33043e-16 | 1.18245e-11 | 2.17908e-08 | 8.00100e-07 | 2.72551e-06 |
| 100000.     | 3.69534e-16 | 2.48660e-12 | 1.72222e-09 | 7.50371e-08 | 3.01774e-07 |
| 10000.0     | 4.47400e-17 | 1.16803e-13 | 5.16216e-11 | 3.25885e-09 | 1.89309e-08 |
| 1000.00     | 7.63901e-19 | 1.76867e-15 | 1.30282e-12 | 1.35424e-10 | 9.63907e-10 |
| 100.000     | 7.25770e-21 | 2.76125e-17 | 3.27192e-14 | 3.96468e-12 | 2.70972e-11 |
| 10.0000     | 8.81012e-23 | 4.08805e-19 | 4.85799e-16 | 5.61226e-14 | 3.60217e-13 |
| 1.00000     | 1.44813e-24 | 4.62531e-21 | 4.72414e-18 | 5.35650e-16 | 3.50950e-15 |
| 0.100000    | 6.29424e-26 | 7.32584e-23 | 4.72054e-20 | 5.10052e-18 | 3.41940e-17 |
| 0.0100000   | 5.46420e-27 | 3.47713e-24 | 6.85253e-22 | 5.43172e-20 | 3.89891e-19 |

|             |             |             |             |             |             |
|-------------|-------------|-------------|-------------|-------------|-------------|
| 0.00100000  | 5.38100e-28 | 3.09249e-25 | 2.87988e-23 | 1.01040e-21 | 9.51594e-21 |
| 0.000100000 | 5.37268e-29 | 3.05400e-26 | 2.48489e-24 | 5.75255e-23 | 6.61699e-22 |
| 1.00000e-05 | 5.37185e-30 | 3.05015e-27 | 2.44550e-25 | 5.32120e-24 | 6.32993e-23 |
| 1.00000e-06 | 5.37176e-31 | 3.04977e-28 | 2.44156e-26 | 5.27820e-25 | 6.30133e-24 |
| 1.00000e-07 | 5.37175e-32 | 3.04973e-29 | 2.44117e-27 | 5.27390e-26 | 6.29847e-25 |
| 1.00000e-08 | 5.37175e-33 | 3.04973e-30 | 2.44113e-28 | 5.27347e-27 | 6.29819e-26 |
| 1.00000e-09 | 5.37175e-34 | 3.04973e-31 | 2.44113e-29 | 5.27343e-28 | 6.29816e-27 |

| Pa\K        | 900.000     | 1000.00     | 1100.00     | 1200.00     | 1300.00     |
|-------------|-------------|-------------|-------------|-------------|-------------|
| 1.00000e+08 | 5.81224e-06 | 7.60745e-06 | 9.10410e-06 | 9.70033e-06 | 9.73336e-06 |
| 1.00000e+07 | 1.12336e-05 | 1.44793e-05 | 1.82489e-05 | 2.11634e-05 | 2.26481e-05 |
| 1.00000e+06 | 4.22756e-06 | 5.23513e-06 | 6.02728e-06 | 6.49327e-06 | 6.63785e-06 |
| 100000.     | 4.91169e-07 | 5.95609e-07 | 6.41600e-07 | 6.49018e-07 | 6.28287e-07 |
| 10000.0     | 3.42552e-08 | 4.03130e-08 | 3.98280e-08 | 3.61375e-08 | 3.10565e-08 |
| 1000.00     | 1.68124e-09 | 1.70466e-09 | 1.39816e-09 | 1.04647e-09 | 7.53998e-10 |
| 100.000     | 3.98762e-11 | 3.32168e-11 | 2.28769e-11 | 1.50982e-11 | 1.07024e-11 |
| 10.0000     | 4.82623e-13 | 3.72390e-13 | 2.51408e-13 | 1.95148e-13 | 2.38779e-13 |
| 1.00000     | 4.74440e-15 | 3.87012e-15 | 3.62048e-15 | 6.26183e-15 | 1.57554e-14 |
| 0.100000    | 5.03628e-17 | 6.40506e-17 | 1.55182e-16 | 4.99384e-16 | 1.49801e-15 |
| 0.0100000   | 9.45384e-19 | 3.28202e-18 | 1.35166e-17 | 4.87108e-17 | 1.49050e-16 |
| 0.00100000  | 5.46011e-20 | 2.97662e-19 | 1.33207e-18 | 4.85906e-18 | 1.48976e-17 |
| 0.000100000 | 5.06673e-21 | 2.94651e-20 | 1.33014e-19 | 4.85787e-19 | 1.48969e-18 |
| 1.00000e-05 | 5.02776e-22 | 2.94352e-21 | 1.32995e-20 | 4.85775e-20 | 1.48968e-19 |
| 1.00000e-06 | 5.02387e-23 | 2.94323e-22 | 1.32993e-21 | 4.85774e-21 | 1.48968e-20 |
| 1.00000e-07 | 5.02348e-24 | 2.94320e-23 | 1.32993e-22 | 4.85774e-22 | 1.48968e-21 |
| 1.00000e-08 | 5.02344e-25 | 2.94319e-24 | 1.32993e-23 | 4.85774e-23 | 1.48968e-22 |
| 1.00000e-09 | 5.02344e-26 | 2.94319e-25 | 1.32993e-24 | 4.85774e-24 | 1.48968e-23 |

| Pa\K        | 1400.00     | 1500.00     | 1750.00     | 2000.00     | 2250.00     |
|-------------|-------------|-------------|-------------|-------------|-------------|
| 1.00000e+08 | 9.84712e-06 | 1.00720e-05 | 0.00183066  | 0.00190674  | 0.00196190  |
| 1.00000e+07 | 2.34347e-05 | 2.38161e-05 | 0.000471618 | 0.000466767 | 0.000427940 |
| 1.00000e+06 | 6.88028e-06 | 6.38685e-06 | 6.49473e-05 | 5.40391e-05 | 4.16275e-05 |
| 100000.     | 5.89223e-07 | 5.39726e-07 | 4.53795e-06 | 3.01297e-06 | 1.89461e-06 |
| 10000.0     | 2.57231e-08 | 2.09338e-08 | 1.45730e-07 | 7.44042e-08 | 4.39366e-08 |
| 1000.00     | 5.49007e-10 | 4.37600e-10 | 2.27742e-09 | 1.35783e-09 | 1.51722e-09 |
| 100.000     | 9.74745e-12 | 1.29033e-11 | 3.73609e-11 | 5.89417e-11 | 1.19583e-10 |
| 10.0000     | 4.50240e-13 | 9.57828e-13 | 1.72640e-12 | 5.12020e-12 | 1.16418e-11 |
| 1.00000     | 4.00020e-14 | 9.26382e-14 | 1.52855e-13 | 5.04430e-13 | 1.16108e-12 |
| 0.100000    | 3.95230e-15 | 9.23382e-15 | 1.50906e-14 | 5.03682e-14 | 1.16077e-13 |
| 0.0100000   | 3.94765e-16 | 9.23091e-16 | 1.50713e-15 | 5.03608e-15 | 1.16074e-14 |
| 0.00100000  | 3.94720e-17 | 9.23062e-17 | 1.50694e-16 | 5.03600e-16 | 1.16074e-15 |
| 0.000100000 | 3.94715e-18 | 9.23060e-18 | 1.50692e-17 | 5.03600e-17 | 1.16074e-16 |
| 1.00000e-05 | 3.94715e-19 | 9.23059e-19 | 1.50692e-18 | 5.03600e-18 | 1.16074e-17 |
| 1.00000e-06 | 3.94715e-20 | 9.23059e-20 | 1.50692e-19 | 5.03600e-19 | 1.16074e-18 |
| 1.00000e-07 | 3.94715e-21 | 9.23059e-21 | 1.50692e-20 | 5.03600e-20 | 1.16074e-19 |
| 1.00000e-08 | 3.94715e-22 | 9.23059e-22 | 1.50692e-21 | 5.03600e-21 | 1.16074e-20 |
| 1.00000e-09 | 3.94715e-23 | 9.23059e-23 | 1.50692e-22 | 5.03600e-22 | 1.16074e-21 |

| Pa\K        | 2500.00     | 2750.00     | 3000.00     | 3250.00     | 3500.00     |
|-------------|-------------|-------------|-------------|-------------|-------------|
| 1.00000e+08 | 0.00194750  | 0.00184581  | 0.00167089  | 0.00145698  | 0.00123808  |
| 1.00000e+07 | 0.000362214 | 0.000288301 | 0.000221258 | 0.000167418 | 0.000126980 |
| 1.00000e+06 | 2.98476e-05 | 2.05940e-05 | 1.42375e-05 | 1.02139e-05 | 7.75864e-06 |
| 100000.     | 1.16251e-06 | 7.74827e-07 | 6.00108e-07 | 5.27579e-07 | 4.93795e-07 |
| 10000.0     | 3.45237e-08 | 3.54140e-08 | 3.93828e-08 | 4.29036e-08 | 4.47453e-08 |
| 1000.00     | 2.18117e-09 | 2.99229e-09 | 3.70071e-09 | 4.18684e-09 | 4.42930e-09 |
| 100.000     | 2.04959e-10 | 2.93797e-10 | 3.67786e-10 | 4.17709e-10 | 4.42512e-10 |
| 10.0000     | 2.03678e-11 | 2.93272e-11 | 3.67567e-11 | 4.17616e-11 | 4.42472e-11 |
| 1.00000     | 2.03553e-12 | 2.93221e-12 | 3.67545e-12 | 4.17607e-12 | 4.42469e-12 |
| 0.100000    | 2.03541e-13 | 2.93216e-13 | 3.67543e-13 | 4.17606e-13 | 4.42468e-13 |
| 0.0100000   | 2.03540e-14 | 2.93215e-14 | 3.67543e-14 | 4.17606e-14 | 4.42468e-14 |
| 0.00100000  | 2.03539e-15 | 2.93215e-15 | 3.67543e-15 | 4.17606e-15 | 4.42468e-15 |
| 0.000100000 | 2.03539e-16 | 2.93215e-16 | 3.67543e-16 | 4.17606e-16 | 4.42468e-16 |
| 1.00000e-05 | 2.03539e-17 | 2.93215e-17 | 3.67543e-17 | 4.17606e-17 | 4.42468e-17 |
| 1.00000e-06 | 2.03539e-18 | 2.93215e-18 | 3.67543e-18 | 4.17606e-18 | 4.42468e-18 |
| 1.00000e-07 | 2.03539e-19 | 2.93215e-19 | 3.67543e-19 | 4.17606e-19 | 4.42468e-19 |
| 1.00000e-08 | 2.03539e-20 | 2.93215e-20 | 3.67543e-20 | 4.17606e-20 | 4.42468e-20 |
| 1.00000e-09 | 2.03539e-21 | 2.93215e-21 | 3.67543e-21 | 4.17606e-21 | 4.42468e-21 |

| Pa\K        | 3750.00     | 4000.00     |
|-------------|-------------|-------------|
| 1.00000e+08 | 0.00103655  | 0.000862471 |
| 1.00000e+07 | 9.76096e-05 | 7.65393e-05 |
| 1.00000e+06 | 6.24782e-06 | 5.26790e-06 |
| 100000.     | 4.69504e-07 | 4.43948e-07 |
| 10000.0     | 4.48026e-08 | 4.34214e-08 |
| 1000.00     | 4.46068e-09 | 4.33393e-09 |
| 100.000     | 4.45891e-10 | 4.33322e-10 |



|             |             |             |
|-------------|-------------|-------------|
| 10.0000     | 4.45875e-11 | 4.33316e-11 |
| 1.00000     | 4.45873e-12 | 4.33315e-12 |
| 0.100000    | 4.45873e-13 | 4.33315e-13 |
| 0.0100000   | 4.45873e-14 | 4.33315e-14 |
| 0.00100000  | 4.45873e-15 | 4.33315e-15 |
| 0.000100000 | 4.45873e-16 | 4.33315e-16 |
| 1.00000e-05 | 4.45873e-17 | 4.33315e-17 |
| 1.00000e-06 | 4.45873e-18 | 4.33315e-18 |
| 1.00000e-07 | 4.45873e-19 | 4.33315e-19 |
| 1.00000e-08 | 4.45873e-20 | 4.33315e-20 |
| 1.00000e-09 | 4.45873e-21 | 4.33315e-21 |

PhCCCH3+H

=====

| Pa\K        | 20.0000     | 30.0000     | 40.0000     | 50.0000     | 60.0000     |
|-------------|-------------|-------------|-------------|-------------|-------------|
| 1.00000e+08 | 1.93006e-76 | 1.12773e-73 | 5.69331e-72 | 1.25140e-70 | 1.91241e-69 |
| 1.00000e+07 | 5.85778e-68 | 1.93410e-65 | 6.74546e-64 | 1.12352e-62 | 1.37204e-61 |
| 1.00000e+06 | 2.51609e-60 | 4.97219e-58 | 1.36133e-56 | 1.95371e-55 | 2.14933e-54 |
| 100000.     | 3.14717e-53 | 5.18349e-51 | 1.28988e-49 | 1.72207e-48 | 1.77941e-47 |
| 10000.0     | 2.04870e-46 | 2.29156e-44 | 4.19496e-43 | 4.31215e-42 | 3.54126e-41 |
| 1000.00     | 1.72645e-40 | 6.68593e-39 | 6.34287e-38 | 4.07360e-37 | 2.34920e-36 |
| 100.000     | 3.62638e-36 | 5.69547e-35 | 3.77594e-34 | 2.05241e-33 | 1.11848e-32 |
| 10.0000     | 1.25842e-32 | 1.78910e-31 | 1.10746e-30 | 5.65280e-30 | 2.92970e-29 |
| 1.00000     | 2.10896e-29 | 1.86225e-28 | 8.57159e-28 | 3.52920e-27 | 1.54933e-26 |
| 0.100000    | 6.93569e-27 | 3.98439e-26 | 1.47800e-25 | 5.28425e-25 | 2.09439e-24 |
| 0.0100000   | 7.77912e-25 | 3.66845e-24 | 1.20860e-23 | 3.92646e-23 | 1.42892e-22 |
| 0.00100000  | 4.07089e-23 | 1.30911e-22 | 3.34522e-22 | 8.94277e-22 | 2.76687e-21 |
| 0.000100000 | 5.44863e-22 | 1.18742e-21 | 2.43304e-21 | 5.50762e-21 | 1.48268e-20 |
| 1.00000e-05 | 1.75885e-21 | 1.85525e-21 | 2.31453e-21 | 3.61287e-21 | 7.28958e-21 |
| 1.00000e-06 | 2.84217e-22 | 1.18614e-22 | 9.88350e-23 | 1.25649e-22 | 2.34984e-22 |
| 1.00000e-07 | 6.12757e-24 | 2.57115e-24 | 2.40135e-24 | 3.57013e-24 | 8.49693e-24 |
| 1.00000e-08 | 2.21776e-25 | 1.26810e-25 | 1.42546e-25 | 2.45429e-25 | 6.72249e-25 |
| 1.00000e-09 | 1.74861e-26 | 1.11986e-26 | 1.31847e-26 | 2.33548e-26 | 6.53796e-26 |

| Pa\K        | 70.0000     | 80.0000     | 90.0000     | 100.000     | 110.000     |
|-------------|-------------|-------------|-------------|-------------|-------------|
| 1.00000e+08 | 2.55072e-68 | 3.49388e-67 | 5.67695e-66 | 1.20758e-64 | 3.32758e-63 |
| 1.00000e+07 | 1.51205e-60 | 1.75007e-59 | 2.44466e-58 | 4.54168e-57 | 1.10554e-55 |
| 1.00000e+06 | 2.18781e-53 | 2.37518e-52 | 3.14380e-51 | 5.56957e-50 | 1.29643e-48 |
| 100000.     | 1.70997e-46 | 1.75939e-45 | 2.21606e-44 | 3.74388e-43 | 8.25325e-42 |
| 10000.0     | 2.77805e-40 | 2.40271e-39 | 2.63928e-38 | 4.00150e-37 | 7.80742e-36 |
| 1000.00     | 1.42681e-35 | 1.06840e-34 | 1.16063e-33 | 1.86839e-32 | 3.67020e-31 |
| 100.000     | 7.08815e-32 | 6.16989e-31 | 8.31237e-30 | 1.55411e-28 | 3.12053e-27 |
| 10.0000     | 1.80202e-28 | 1.55701e-27 | 2.07460e-26 | 3.62423e-25 | 6.31750e-24 |
| 1.00000     | 8.40228e-26 | 6.67528e-25 | 8.38805e-24 | 1.34933e-22 | 2.07703e-21 |
| 0.100000    | 1.05428e-23 | 7.98980e-23 | 9.80795e-22 | 1.53771e-20 | 2.26093e-19 |
| 0.0100000   | 6.64885e-22 | 4.70536e-21 | 5.48505e-20 | 8.15328e-19 | 1.11138e-17 |
| 0.00100000  | 1.11994e-20 | 7.16341e-20 | 8.14382e-19 | 1.21487e-17 | 1.61129e-16 |
| 0.000100000 | 5.33179e-20 | 3.18576e-19 | 3.79320e-18 | 6.03871e-17 | 8.03481e-16 |
| 1.00000e-05 | 2.14910e-20 | 1.50371e-19 | 3.41446e-18 | 7.89089e-17 | 1.19021e-15 |
| 1.00000e-06 | 9.67562e-22 | 4.50367e-20 | 2.64016e-18 | 7.57576e-17 | 1.21479e-15 |
| 1.00000e-07 | 2.14667e-22 | 3.85868e-20 | 2.56667e-18 | 7.53407e-17 | 1.21643e-15 |
| 1.00000e-08 | 1.74449e-22 | 3.80555e-20 | 2.55964e-18 | 7.52989e-17 | 1.21659e-15 |
| 1.00000e-09 | 1.70825e-22 | 3.80037e-20 | 2.55894e-18 | 7.52947e-17 | 1.21661e-15 |

| Pa\K        | 120.000     | 130.000     | 140.000     | 150.000     | 160.000     |
|-------------|-------------|-------------|-------------|-------------|-------------|
| 1.00000e+08 | 1.05490e-61 | 3.42722e-60 | 1.05187e-58 | 2.99653e-57 | 7.68394e-56 |
| 1.00000e+07 | 3.10764e-54 | 8.94672e-53 | 2.43115e-51 | 6.11613e-50 | 1.38307e-48 |
| 1.00000e+06 | 3.48747e-47 | 9.60784e-46 | 2.49837e-44 | 6.00178e-43 | 1.29344e-41 |
| 100000.     | 2.06829e-40 | 5.19727e-39 | 1.20835e-37 | 2.53474e-36 | 4.68365e-35 |
| 10000.0     | 1.65216e-34 | 3.34111e-33 | 6.05621e-32 | 9.67041e-31 | 1.35001e-29 |
| 1000.00     | 7.14707e-30 | 1.25050e-28 | 1.90189e-27 | 2.50831e-26 | 2.87674e-25 |
| 100.000     | 5.65074e-26 | 8.66664e-25 | 1.11148e-23 | 1.19972e-22 | 1.10205e-21 |
| 10.0000     | 9.41156e-23 | 1.14759e-21 | 1.14877e-20 | 9.61153e-20 | 6.86099e-19 |
| 1.00000     | 2.66308e-20 | 2.76962e-19 | 2.36906e-18 | 1.70621e-17 | 1.05826e-16 |
| 0.100000    | 2.71838e-18 | 2.61381e-17 | 2.04245e-16 | 1.32878e-15 | 7.36576e-15 |
| 0.0100000   | 1.21023e-16 | 1.03528e-15 | 7.11046e-15 | 4.03689e-14 | 1.94687e-13 |
| 0.00100000  | 1.65413e-15 | 1.30779e-14 | 8.20425e-14 | 4.22306e-13 | 1.83714e-12 |
| 0.000100000 | 7.89132e-15 | 5.80824e-14 | 3.33993e-13 | 1.56238e-12 | 6.15137e-12 |
| 1.00000e-05 | 1.20077e-14 | 8.72868e-14 | 4.87657e-13 | 2.20220e-12 | 8.35704e-12 |
| 1.00000e-06 | 1.25014e-14 | 9.13520e-14 | 5.09997e-13 | 2.29562e-12 | 8.67492e-12 |
| 1.00000e-07 | 1.25483e-14 | 9.17616e-14 | 5.12294e-13 | 2.30530e-12 | 8.70794e-12 |
| 1.00000e-08 | 1.25530e-14 | 9.18025e-14 | 5.12524e-13 | 2.30627e-12 | 8.71125e-12 |
| 1.00000e-09 | 1.25534e-14 | 9.18066e-14 | 5.12547e-13 | 2.30637e-12 | 8.71158e-12 |

| Pa\K        | 170.000     | 180.000     | 190.000     | 200.000     | 210.000     |
|-------------|-------------|-------------|-------------|-------------|-------------|
| 1.00000e+08 | 1.76532e-54 | 3.62440e-53 | 6.85866e-52 | 1.17551e-50 | 1.81933e-49 |

|             |             |             |             |             |             |
|-------------|-------------|-------------|-------------|-------------|-------------|
| 1.00000e+07 | 2.79840e-47 | 5.05524e-46 | 8.37995e-45 | 1.25754e-43 | 1.70694e-42 |
| 1.00000e+06 | 2.48672e-40 | 4.25293e-39 | 6.62186e-38 | 9.27131e-37 | 1.16662e-35 |
| 100000.     | 7.59752e-34 | 1.08226e-32 | 1.37508e-31 | 1.55344e-30 | 1.56718e-29 |
| 10000.0     | 1.65463e-28 | 1.79163e-27 | 1.73340e-26 | 1.50479e-25 | 1.17932e-24 |
| 1000.00     | 2.88946e-24 | 2.55947e-23 | 2.01499e-22 | 1.41765e-21 | 8.96802e-21 |
| 100.000     | 8.72595e-21 | 6.03039e-20 | 3.68139e-19 | 2.00717e-18 | 9.87445e-18 |
| 10.0000     | 4.26046e-18 | 2.34099e-17 | 1.15474e-16 | 5.17464e-16 | 2.12718e-15 |
| 1.00000     | 5.76079e-16 | 2.79423e-15 | 1.22204e-14 | 4.86453e-14 | 1.77613e-13 |
| 0.100000    | 3.54905e-14 | 1.51152e-13 | 5.77085e-13 | 1.99871e-12 | 6.34371e-12 |
| 0.0100000   | 8.16248e-13 | 3.03223e-12 | 1.01358e-11 | 3.08709e-11 | 8.65481e-11 |
| 0.00100000  | 6.92164e-12 | 2.30404e-11 | 6.88736e-11 | 1.87377e-10 | 4.69158e-10 |
| 0.000100000 | 2.09556e-11 | 6.31628e-11 | 1.71510e-10 | 4.25763e-10 | 9.77977e-10 |
| 1.00000e-05 | 2.74649e-11 | 8.00338e-11 | 2.10691e-10 | 5.08608e-10 | 1.13954e-09 |
| 1.00000e-06 | 2.83836e-11 | 8.23576e-11 | 2.15952e-10 | 5.19456e-10 | 1.16018e-09 |
| 1.00000e-07 | 2.84790e-11 | 8.25984e-11 | 2.16496e-10 | 5.20575e-10 | 1.16231e-09 |
| 1.00000e-08 | 2.84885e-11 | 8.26226e-11 | 2.16551e-10 | 5.20687e-10 | 1.16252e-09 |
| 1.00000e-09 | 2.84895e-11 | 8.26250e-11 | 2.16556e-10 | 5.20698e-10 | 1.16254e-09 |

Pa\K | 220.000 230.000 240.000 250.000 260.000

|             |             |             |             |             |             |
|-------------|-------------|-------------|-------------|-------------|-------------|
| 1.00000e+08 | 2.53327e-48 | 3.30196e-47 | 3.82770e-46 | 3.83404e-45 | 3.40538e-44 |
| 1.00000e+07 | 2.09573e-41 | 2.41896e-40 | 2.52353e-39 | 2.30483e-38 | 1.88541e-37 |
| 1.00000e+06 | 1.32230e-34 | 1.38985e-33 | 1.31991e-32 | 1.11045e-31 | 8.41003e-31 |
| 100000.     | 1.42253e-28 | 1.17830e-27 | 8.87496e-27 | 6.07310e-26 | 3.80205e-25 |
| 10000.0     | 8.40091e-24 | 5.47623e-23 | 3.27594e-22 | 1.80499e-21 | 9.19703e-21 |
| 1000.00     | 5.13284e-20 | 2.67382e-19 | 1.27489e-18 | 5.59548e-18 | 2.27306e-17 |
| 100.000     | 4.42456e-17 | 1.82105e-16 | 6.93635e-16 | 2.46140e-15 | 8.18438e-15 |
| 10.0000     | 8.08438e-15 | 2.85845e-14 | 9.45053e-14 | 2.93393e-13 | 8.58364e-13 |
| 1.00000     | 5.98721e-13 | 1.87411e-12 | 5.47578e-12 | 1.50061e-11 | 3.87433e-11 |
| 0.100000    | 1.86115e-11 | 5.08504e-11 | 1.30217e-10 | 3.14273e-10 | 7.18280e-10 |
| 0.0100000   | 2.25232e-10 | 5.47912e-10 | 1.25338e-09 | 2.71007e-09 | 5.56360e-09 |
| 0.00100000  | 1.09129e-09 | 2.37706e-09 | 4.88202e-09 | 9.51024e-09 | 1.76628e-08 |
| 0.000100000 | 2.09940e-09 | 4.24684e-09 | 8.15180e-09 | 1.49348e-08 | 2.62453e-08 |
| 1.00000e-05 | 2.39307e-09 | 4.74881e-09 | 8.96453e-09 | 1.61889e-08 | 2.80996e-08 |
| 1.00000e-06 | 2.42976e-09 | 4.81019e-09 | 9.06198e-09 | 1.63366e-08 | 2.83144e-08 |
| 1.00000e-07 | 2.43352e-09 | 4.81647e-09 | 9.07193e-09 | 1.63516e-08 | 2.83362e-08 |
| 1.00000e-08 | 2.43390e-09 | 4.81710e-09 | 9.07292e-09 | 1.63532e-08 | 2.83384e-08 |
| 1.00000e-09 | 2.43394e-09 | 4.81717e-09 | 9.07302e-09 | 1.63533e-08 | 2.83386e-08 |

Pa\K | 270.000 280.000 290.000 300.000 310.000

|             |             |             |             |             |             |
|-------------|-------------|-------------|-------------|-------------|-------------|
| 1.00000e+08 | 2.69671e-43 | 1.90561e-42 | 1.20614e-41 | 6.75117e-29 | 3.53871e-40 |
| 1.00000e+07 | 1.38917e-36 | 9.22304e-36 | 5.53861e-35 | 5.59656e-25 | 1.50710e-33 |
| 1.00000e+06 | 5.76191e-30 | 3.57398e-29 | 2.01383e-28 | 2.84650e-20 | 4.87824e-27 |
| 100000.     | 2.18602e-24 | 1.15615e-23 | 5.63756e-23 | 4.07121e-17 | 1.06191e-21 |
| 10000.0     | 4.34827e-20 | 1.91250e-19 | 7.84492e-19 | 2.97678e-15 | 1.08108e-17 |
| 1000.00     | 8.59138e-17 | 3.03610e-16 | 1.00770e-15 | 1.81345e-13 | 9.34664e-15 |
| 100.000     | 2.56276e-14 | 7.58938e-14 | 2.13335e-13 | 9.60367e-12 | 1.45900e-12 |
| 10.0000     | 2.37413e-12 | 6.22618e-12 | 1.55245e-11 | 2.76672e-10 | 8.38246e-11 |
| 1.00000     | 9.46324e-11 | 2.19520e-10 | 4.85345e-10 | 4.12159e-09 | 2.08085e-09 |
| 0.100000    | 1.56114e-09 | 3.23848e-09 | 6.43273e-09 | 2.99247e-08 | 2.25346e-08 |
| 0.0100000   | 1.08881e-08 | 2.03862e-08 | 3.66377e-08 | 9.77261e-08 | 1.05883e-07 |
| 0.00100000  | 3.14174e-08 | 5.37343e-08 | 8.86810e-08 | 1.50040e-07 | 2.19657e-07 |
| 0.000100000 | 4.44272e-08 | 7.27046e-08 | 1.15384e-07 | 1.56910e-07 | 2.67832e-07 |
| 1.00000e-05 | 4.70658e-08 | 7.63323e-08 | 1.20219e-07 | 1.56136e-07 | 2.75745e-07 |
| 1.00000e-06 | 4.73669e-08 | 7.67406e-08 | 1.20756e-07 | 1.55991e-07 | 2.76606e-07 |
| 1.00000e-07 | 4.73975e-08 | 7.67820e-08 | 1.20811e-07 | 1.55975e-07 | 2.76693e-07 |
| 1.00000e-08 | 4.74005e-08 | 7.67862e-08 | 1.20816e-07 | 1.55974e-07 | 2.76702e-07 |
| 1.00000e-09 | 4.74008e-08 | 7.67866e-08 | 1.20817e-07 | 1.55974e-07 | 2.76703e-07 |

Pa\K | 400.000 500.000 600.000 700.000 800.000

|             |             |             |             |             |             |
|-------------|-------------|-------------|-------------|-------------|-------------|
| 1.00000e+08 | 5.38382e-19 | 2.75794e-13 | 6.86004e-11 | 1.16464e-08 | 2.89237e-07 |
| 1.00000e+07 | 1.15166e-14 | 9.98621e-10 | 5.99055e-08 | 4.19477e-07 | 1.67146e-06 |
| 1.00000e+06 | 3.58119e-12 | 3.08992e-08 | 9.54605e-07 | 3.29904e-06 | 5.69881e-06 |
| 100000.     | 4.62726e-11 | 4.83707e-08 | 1.14383e-06 | 4.33171e-06 | 7.51923e-06 |
| 10000.0     | 7.57374e-11 | 2.43653e-08 | 4.82717e-07 | 2.76533e-06 | 7.22912e-06 |
| 1000.00     | 2.67613e-10 | 3.34207e-08 | 6.18864e-07 | 4.51826e-06 | 1.76205e-05 |
| 100.000     | 4.81566e-09 | 2.68726e-07 | 3.66449e-06 | 2.13542e-05 | 6.65393e-05 |
| 10.0000     | 6.30733e-08 | 2.06191e-06 | 1.84700e-05 | 7.10372e-05 | 0.000154957 |
| 1.00000     | 4.75703e-07 | 8.82213e-06 | 4.88224e-05 | 0.000128972 | 0.000218868 |
| 0.100000    | 1.78059e-06 | 1.90833e-05 | 7.29773e-05 | 0.000155729 | 0.000238093 |
| 0.0100000   | 3.28409e-06 | 2.48398e-05 | 8.05841e-05 | 0.000161061 | 0.000240851 |
| 0.00100000  | 3.85643e-06 | 2.60999e-05 | 8.17039e-05 | 0.000161659 | 0.000241121 |
| 0.000100000 | 3.93513e-06 | 2.62436e-05 | 8.18170e-05 | 0.000161717 | 0.000241148 |
| 1.00000e-05 | 3.94168e-06 | 2.62573e-05 | 8.18282e-05 | 0.000161723 | 0.000241150 |
| 1.00000e-06 | 3.94227e-06 | 2.62587e-05 | 8.18293e-05 | 0.000161723 | 0.000241151 |
| 1.00000e-07 | 3.94233e-06 | 2.62588e-05 | 8.18295e-05 | 0.000161724 | 0.000241151 |
| 1.00000e-08 | 3.94234e-06 | 2.62588e-05 | 8.18295e-05 | 0.000161724 | 0.000241151 |
| 1.00000e-09 | 3.94234e-06 | 2.62588e-05 | 8.18295e-05 | 0.000161724 | 0.000241151 |

| Pa\K        | 900.000     | 1000.00     | 1100.00     | 1200.00     | 1300.00     |
|-------------|-------------|-------------|-------------|-------------|-------------|
| 1.00000e+08 | 8.65417e-07 | 1.35776e-06 | 1.84499e-06 | 2.10232e-06 | 2.11614e-06 |
| 1.00000e+07 | 4.76410e-06 | 1.12132e-05 | 2.18531e-05 | 3.18992e-05 | 3.77969e-05 |
| 1.00000e+06 | 9.62671e-06 | 2.01302e-05 | 4.18523e-05 | 6.44808e-05 | 7.83743e-05 |
| 100000.     | 1.16056e-05 | 2.04109e-05 | 3.72698e-05 | 5.86219e-05 | 7.62413e-05 |
| 10000.0     | 1.57868e-05 | 3.42631e-05 | 6.49937e-05 | 9.76665e-05 | 0.000117178 |
| 1000.00     | 4.81093e-05 | 9.71706e-05 | 0.000149572 | 0.000182995 | 0.000189456 |
| 100.000     | 0.000137625 | 0.000208997 | 0.000254447 | 0.000265424 | 0.000250898 |
| 10.0000     | 0.000239584 | 0.000294996 | 0.000313798 | 0.000303558 | 0.000276533 |
| 1.00000     | 0.000288194 | 0.000324296 | 0.000329564 | 0.000312264 | 0.000281981 |
| 0.100000    | 0.000298554 | 0.000329146 | 0.000331783 | 0.000313400 | 0.000282673 |
| 0.0100000   | 0.000299756 | 0.000329656 | 0.000332014 | 0.000313521 | 0.000282747 |
| 0.00100000  | 0.000299872 | 0.000329709 | 0.000332040 | 0.000313536 | 0.000282756 |
| 0.000100000 | 0.000299884 | 0.000329714 | 0.000332043 | 0.000313537 | 0.000282757 |
| 1.00000e-05 | 0.000299885 | 0.000329715 | 0.000332043 | 0.000313538 | 0.000282757 |
| 1.00000e-06 | 0.000299886 | 0.000329715 | 0.000332043 | 0.000313538 | 0.000282757 |
| 1.00000e-07 | 0.000299886 | 0.000329715 | 0.000332043 | 0.000313538 | 0.000282757 |
| 1.00000e-08 | 0.000299886 | 0.000329715 | 0.000332043 | 0.000313538 | 0.000282757 |
| 1.00000e-09 | 0.000299886 | 0.000329715 | 0.000332043 | 0.000313538 | 0.000282757 |

| Pa\K        | 1400.00     | 1500.00     | 1750.00     | 2000.00     | 2250.00     |
|-------------|-------------|-------------|-------------|-------------|-------------|
| 1.00000e+08 | 2.07049e-06 | 2.06707e-06 | 0.00143445  | 0.00149250  | 0.00152163  |
| 1.00000e+07 | 4.04460e-05 | 4.15968e-05 | 0.00133993  | 0.00122969  | 0.00112168  |
| 1.00000e+06 | 8.61644e-05 | 9.26808e-05 | 0.000558288 | 0.000544739 | 0.000604731 |
| 100000.     | 8.79985e-05 | 9.76022e-05 | 0.000244808 | 0.000327986 | 0.000464504 |
| 10000.0     | 0.000122378 | 0.000121887 | 0.000175306 | 0.000269786 | 0.000426941 |
| 1000.00     | 0.000179000 | 0.000164784 | 0.000177508 | 0.000265938 | 0.000423082 |
| 100.000     | 0.000225320 | 0.000199981 | 0.000191107 | 0.000269242 | 0.000423421 |
| 10.0000     | 0.000243759 | 0.000213560 | 0.000196276 | 0.000270304 | 0.000423555 |
| 1.00000     | 0.000247551 | 0.000216286 | 0.000197251 | 0.000270474 | 0.000423574 |
| 0.100000    | 0.000248025 | 0.000216621 | 0.000197369 | 0.000270493 | 0.000423576 |
| 0.0100000   | 0.000248076 | 0.000216656 | 0.000197381 | 0.000270495 | 0.000423577 |
| 0.00100000  | 0.000248081 | 0.000216659 | 0.000197382 | 0.000270495 | 0.000423577 |
| 0.000100000 | 0.000248082 | 0.000216660 | 0.000197382 | 0.000270495 | 0.000423577 |
| 1.00000e-05 | 0.000248082 | 0.000216660 | 0.000197382 | 0.000270495 | 0.000423577 |
| 1.00000e-06 | 0.000248082 | 0.000216660 | 0.000197382 | 0.000270495 | 0.000423577 |
| 1.00000e-07 | 0.000248082 | 0.000216660 | 0.000197382 | 0.000270495 | 0.000423577 |
| 1.00000e-08 | 0.000248082 | 0.000216660 | 0.000197382 | 0.000270495 | 0.000423577 |
| 1.00000e-09 | 0.000248082 | 0.000216660 | 0.000197382 | 0.000270495 | 0.000423577 |

| Pa\K        | 2500.00     | 2750.00     | 3000.00     | 3250.00     | 3500.00    |
|-------------|-------------|-------------|-------------|-------------|------------|
| 1.00000e+08 | 0.00151496  | 0.00147527  | 0.00141634  | 0.00135536  | 0.00130536 |
| 1.00000e+07 | 0.00105091  | 0.00102277  | 0.00102599  | 0.00104811  | 0.00108132 |
| 1.00000e+06 | 0.000703729 | 0.000808946 | 0.000902018 | 0.000979174 | 0.00104447 |
| 100000.     | 0.000622693 | 0.000767846 | 0.000883595 | 0.000971845 | 0.00104202 |
| 10000.0     | 0.000603650 | 0.000760006 | 0.000880965 | 0.000971216 | 0.00104204 |
| 1000.00     | 0.000601620 | 0.000759266 | 0.000880789 | 0.000971225 | 0.00104209 |
| 100.000     | 0.000601550 | 0.000759226 | 0.000880786 | 0.000971233 | 0.00104210 |
| 10.0000     | 0.000601556 | 0.000759224 | 0.000880786 | 0.000971235 | 0.00104210 |
| 1.00000     | 0.000601556 | 0.000759224 | 0.000880786 | 0.000971235 | 0.00104210 |
| 0.100000    | 0.000601557 | 0.000759224 | 0.000880786 | 0.000971235 | 0.00104210 |
| 0.0100000   | 0.000601557 | 0.000759224 | 0.000880786 | 0.000971235 | 0.00104210 |
| 0.00100000  | 0.000601557 | 0.000759224 | 0.000880786 | 0.000971235 | 0.00104210 |
| 0.000100000 | 0.000601557 | 0.000759224 | 0.000880786 | 0.000971235 | 0.00104210 |
| 1.00000e-05 | 0.000601557 | 0.000759224 | 0.000880786 | 0.000971235 | 0.00104210 |
| 1.00000e-06 | 0.000601557 | 0.000759224 | 0.000880786 | 0.000971235 | 0.00104210 |
| 1.00000e-07 | 0.000601557 | 0.000759224 | 0.000880786 | 0.000971235 | 0.00104210 |
| 1.00000e-08 | 0.000601557 | 0.000759224 | 0.000880786 | 0.000971235 | 0.00104210 |
| 1.00000e-09 | 0.000601557 | 0.000759224 | 0.000880786 | 0.000971235 | 0.00104210 |

| Pa\K        | 3750.00    | 4000.00    |
|-------------|------------|------------|
| 1.00000e+08 | 0.00127267 | 0.00125822 |
| 1.00000e+07 | 0.00112176 | 0.00116742 |
| 1.00000e+06 | 0.00110349 | 0.00116018 |
| 100000.     | 0.00110307 | 0.00116061 |
| 10000.0     | 0.00110325 | 0.00116082 |
| 1000.00     | 0.00110330 | 0.00116086 |
| 100.000     | 0.00110331 | 0.00116087 |
| 10.0000     | 0.00110331 | 0.00116087 |
| 1.00000     | 0.00110331 | 0.00116087 |
| 0.100000    | 0.00110331 | 0.00116087 |
| 0.0100000   | 0.00110331 | 0.00116087 |
| 0.00100000  | 0.00110331 | 0.00116087 |
| 0.000100000 | 0.00110331 | 0.00116087 |
| 1.00000e-05 | 0.00110331 | 0.00116087 |

|             |  |            |            |
|-------------|--|------------|------------|
| 1.00000e-06 |  | 0.00110331 | 0.00116087 |
| 1.00000e-07 |  | 0.00110331 | 0.00116087 |
| 1.00000e-08 |  | 0.00110331 | 0.00116087 |
| 1.00000e-09 |  | 0.00110331 | 0.00116087 |

PAH1+H  
=====

| Pa\K        |  | 20.0000     | 30.0000     | 40.0000     | 50.0000     | 60.0000     |
|-------------|--|-------------|-------------|-------------|-------------|-------------|
| 1.00000e+08 |  | 2.23264e-84 | 6.31872e-83 | 9.52252e-82 | 1.42648e-80 | 2.39109e-79 |
| 1.00000e+07 |  | 2.08315e-80 | 5.51061e-79 | 7.79492e-78 | 1.09854e-76 | 1.73441e-75 |
| 1.00000e+06 |  | 1.17286e-76 | 2.06655e-75 | 2.16032e-74 | 2.38223e-73 | 3.05011e-72 |
| 100000.     |  | 1.01615e-73 | 7.50580e-73 | 4.48499e-72 | 3.24124e-71 | 2.94350e-70 |
| 10000.0     |  | 2.73285e-72 | 5.12567e-72 | 1.69118e-71 | 1.02064e-70 | 1.03238e-69 |
| 1000.00     |  | 2.36764e-71 | 1.28412e-70 | 6.11344e-70 | 3.55154e-69 | 2.87838e-68 |
| 100.000     |  | 8.19878e-70 | 3.33882e-69 | 1.41704e-68 | 7.38356e-68 | 4.88361e-67 |
| 10.0000     |  | 2.57326e-68 | 1.24924e-67 | 5.60442e-67 | 2.90879e-66 | 1.85909e-65 |
| 1.00000     |  | 9.90485e-67 | 3.34628e-66 | 1.09754e-65 | 4.39383e-65 | 2.25923e-64 |
| 0.100000    |  | 5.69353e-66 | 7.19626e-66 | 1.18331e-65 | 2.72754e-65 | 8.83954e-65 |
| 0.0100000   |  | 3.00698e-67 | 4.23332e-68 | 2.07849e-68 | 2.21912e-68 | 4.23608e-68 |
| 0.00100000  |  | 2.80043e-71 | 1.83632e-72 | 7.82468e-73 | 8.41169e-73 | 1.70236e-72 |
| 0.000100000 |  | 1.43486e-75 | 1.55288e-76 | 9.18628e-77 | 1.26115e-76 | 3.12352e-76 |
| 1.00000e-05 |  | 4.57423e-79 | 8.83356e-80 | 7.20673e-80 | 1.24148e-79 | 3.73670e-79 |
| 1.00000e-06 |  | 8.73063e-82 | 2.74084e-82 | 2.93050e-82 | 6.17803e-82 | 2.32041e-81 |
| 1.00000e-07 |  | 7.43843e-84 | 3.58718e-84 | 4.99755e-84 | 1.33209e-83 | 6.80839e-83 |
| 1.00000e-08 |  | 2.40719e-85 | 1.67159e-85 | 2.85303e-85 | 8.88423e-85 | 5.28332e-84 |
| 1.00000e-09 |  | 1.87633e-86 | 1.46772e-86 | 2.62843e-86 | 8.42800e-86 | 5.12886e-85 |

| Pa\K        |  | 70.0000     | 80.0000     | 90.0000     | 100.000     | 110.000     |
|-------------|--|-------------|-------------|-------------|-------------|-------------|
| 1.00000e+08 |  | 4.75673e-78 | 1.21766e-76 | 4.59383e-75 | 3.03860e-73 | 3.93204e-71 |
| 1.00000e+07 |  | 3.25171e-74 | 7.84727e-73 | 2.79370e-71 | 1.74947e-69 | 2.15872e-67 |
| 1.00000e+06 |  | 4.75383e-71 | 9.71985e-70 | 2.98231e-68 | 1.64134e-66 | 1.82458e-64 |
| 100000.     |  | 3.43575e-69 | 5.51600e-68 | 1.41326e-66 | 7.20403e-65 | 8.44171e-63 |
| 10000.0     |  | 1.91964e-68 | 7.27765e-67 | 5.36292e-65 | 7.00647e-63 | 1.46676e-60 |
| 1000.00     |  | 4.10909e-67 | 1.24075e-65 | 7.31531e-64 | 7.33551e-62 | 1.15064e-59 |
| 100.000     |  | 4.41335e-66 | 6.34894e-65 | 1.85011e-63 | 1.28895e-61 | 2.14520e-59 |
| 10.0000     |  | 1.60386e-64 | 2.22604e-63 | 6.56496e-62 | 4.77292e-60 | 7.99786e-58 |
| 1.00000     |  | 1.62783e-63 | 1.96516e-62 | 5.25267e-61 | 3.50101e-59 | 5.31290e-57 |
| 0.100000    |  | 4.29881e-64 | 3.70295e-63 | 7.37166e-62 | 3.76527e-60 | 4.49072e-58 |
| 0.0100000   |  | 1.40695e-67 | 9.13726e-67 | 1.47470e-65 | 6.53154e-64 | 7.50667e-62 |
| 0.00100000  |  | 6.14221e-72 | 4.47787e-71 | 9.46148e-70 | 1.03972e-67 | 8.39058e-65 |
| 0.000100000 |  | 1.39404e-75 | 1.68771e-74 | 1.83508e-72 | 1.71862e-69 | 4.69718e-66 |
| 1.00000e-05 |  | 2.35843e-78 | 1.04612e-76 | 6.36655e-74 | 1.26950e-70 | 4.36522e-67 |
| 1.00000e-06 |  | 2.78287e-80 | 4.60078e-78 | 5.31828e-75 | 1.22260e-71 | 4.33121e-68 |
| 1.00000e-07 |  | 1.51052e-81 | 4.01714e-79 | 5.20430e-76 | 1.21776e-72 | 4.32780e-69 |
| 1.00000e-08 |  | 1.38412e-82 | 3.95478e-80 | 5.19254e-77 | 1.21728e-73 | 4.32746e-70 |
| 1.00000e-09 |  | 1.37134e-83 | 3.94845e-81 | 5.19136e-78 | 1.21723e-74 | 4.32743e-71 |

| Pa\K        |  | 120.000     | 130.000     | 140.000     | 150.000     | 160.000     |
|-------------|--|-------------|-------------|-------------|-------------|-------------|
| 1.00000e+08 |  | 7.77036e-69 | 1.90325e-66 | 4.34003e-64 | 1.19888e-61 | 2.61830e-59 |
| 1.00000e+07 |  | 4.09096e-65 | 9.66980e-63 | 2.13588e-60 | 5.80862e-58 | 1.25588e-55 |
| 1.00000e+06 |  | 3.17081e-62 | 6.99155e-60 | 1.45645e-57 | 3.85926e-55 | 8.22866e-53 |
| 100000.     |  | 1.70404e-60 | 4.51933e-58 | 1.14872e-55 | 3.14968e-53 | 6.63717e-51 |
| 10000.0     |  | 3.95526e-58 | 1.14637e-55 | 2.93661e-53 | 6.97958e-51 | 1.26146e-48 |
| 1000.00     |  | 2.38543e-57 | 5.66713e-55 | 1.26518e-52 | 2.94546e-50 | 5.58297e-48 |
| 100.000     |  | 5.14276e-57 | 1.63550e-54 | 4.85383e-52 | 1.97428e-49 | 5.85500e-47 |
| 10.0000     |  | 1.72315e-55 | 4.60062e-53 | 1.09526e-50 | 4.11336e-48 | 1.18915e-45 |
| 1.00000     |  | 1.02032e-54 | 2.42158e-52 | 5.13056e-50 | 1.80264e-47 | 4.98681e-45 |
| 0.100000    |  | 6.95741e-56 | 1.37757e-53 | 2.52933e-51 | 8.38664e-49 | 2.37837e-46 |
| 0.0100000   |  | 1.38627e-59 | 5.51200e-57 | 3.55452e-54 | 4.01653e-51 | 2.72133e-48 |
| 0.00100000  |  | 1.32906e-61 | 2.50833e-58 | 3.24658e-55 | 4.25847e-52 | 2.91819e-49 |
| 0.000100000 |  | 1.13223e-62 | 2.46501e-59 | 3.32909e-56 | 4.36149e-53 | 2.97041e-50 |
| 1.00000e-05 |  | 1.11329e-63 | 2.46348e-60 | 3.34074e-57 | 4.37399e-54 | 2.97643e-51 |
| 1.00000e-06 |  | 1.11143e-64 | 2.46343e-61 | 3.34201e-58 | 4.37530e-55 | 2.97705e-52 |
| 1.00000e-07 |  | 1.11125e-65 | 2.46343e-62 | 3.34214e-59 | 4.37543e-56 | 2.97711e-53 |
| 1.00000e-08 |  | 1.11123e-66 | 2.46343e-63 | 3.34215e-60 | 4.37544e-57 | 2.97712e-54 |
| 1.00000e-09 |  | 1.11123e-67 | 2.46343e-64 | 3.34215e-61 | 4.37544e-58 | 2.97712e-55 |

| Pa\K        |  | 170.000     | 180.000     | 190.000     | 200.000     | 210.000     |
|-------------|--|-------------|-------------|-------------|-------------|-------------|
| 1.00000e+08 |  | 4.35635e-57 | 5.89928e-55 | 8.43496e-53 | 9.41564e-51 | 7.65925e-49 |
| 1.00000e+07 |  | 2.07881e-53 | 2.83452e-51 | 4.17360e-49 | 4.86046e-47 | 4.16738e-45 |
| 1.00000e+06 |  | 1.35775e-50 | 1.89564e-48 | 3.01099e-46 | 3.94966e-44 | 3.99494e-42 |
| 100000.     |  | 1.04242e-48 | 1.29701e-46 | 1.73960e-44 | 2.32406e-42 | 3.08796e-40 |
| 10000.0     |  | 1.67914e-46 | 1.65009e-44 | 1.37169e-42 | 9.34986e-41 | 7.25122e-39 |
| 1000.00     |  | 8.24941e-46 | 9.97174e-44 | 1.37053e-41 | 2.12368e-39 | 3.86045e-37 |
| 100.000     |  | 1.25397e-44 | 2.29678e-42 | 5.49825e-40 | 1.34529e-37 | 3.17789e-35 |
| 10.0000     |  | 2.61548e-43 | 5.53306e-41 | 1.69473e-38 | 5.03138e-36 | 1.38074e-33 |

|             |             |             |             |             |             |
|-------------|-------------|-------------|-------------|-------------|-------------|
| 1.00000     | 1.07006e-42 | 2.30015e-40 | 7.57516e-38 | 2.59263e-35 | 9.41488e-33 |
| 0.100000    | 5.63890e-44 | 1.49672e-41 | 7.41529e-39 | 5.02730e-36 | 4.74956e-33 |
| 0.0100000   | 1.07310e-45 | 3.18395e-43 | 1.75124e-40 | 2.49271e-37 | 5.47269e-34 |
| 0.00100000  | 1.11519e-46 | 2.99224e-44 | 1.37645e-41 | 2.14498e-38 | 5.49706e-35 |
| 0.000100000 | 1.12766e-47 | 2.99053e-45 | 1.34401e-42 | 2.10990e-39 | 5.49850e-36 |
| 1.00000e-05 | 1.12909e-48 | 2.99068e-46 | 1.34083e-43 | 2.10640e-40 | 5.49864e-37 |
| 1.00000e-06 | 1.12924e-49 | 2.99070e-47 | 1.34052e-44 | 2.10605e-41 | 5.49865e-38 |
| 1.00000e-07 | 1.12925e-50 | 2.99070e-48 | 1.34049e-45 | 2.10601e-42 | 5.49865e-39 |
| 1.00000e-08 | 1.12925e-51 | 2.99070e-49 | 1.34048e-46 | 2.10601e-43 | 5.49865e-40 |
| 1.00000e-09 | 1.12925e-52 | 2.99070e-50 | 1.34048e-47 | 2.10601e-44 | 5.49865e-41 |

| Pa\K        | 220.000     | 230.000     | 240.000     | 250.000     | 260.000     |
|-------------|-------------|-------------|-------------|-------------|-------------|
| 1.00000e+08 | 3.15743e-47 | 1.35154e-45 | 3.01887e-44 | 3.53120e-43 | 3.35163e-42 |
| 1.00000e+07 | 1.75748e-43 | 7.80662e-42 | 1.75721e-40 | 2.01334e-39 | 1.86887e-38 |
| 1.00000e+06 | 1.85241e-40 | 9.23667e-39 | 2.13008e-37 | 2.34059e-36 | 2.07947e-35 |
| 100000.     | 1.85495e-38 | 1.14748e-36 | 2.71448e-35 | 2.85838e-34 | 2.43193e-33 |
| 10000.0     | 4.62986e-37 | 3.19841e-35 | 7.82039e-34 | 8.26569e-33 | 7.07143e-32 |
| 1000.00     | 2.93180e-35 | 2.17657e-33 | 5.53071e-32 | 5.88974e-31 | 5.05652e-30 |
| 100.000     | 2.63846e-33 | 1.97972e-31 | 4.83671e-30 | 5.09556e-29 | 4.33008e-28 |
| 10.0000     | 1.29134e-31 | 9.13155e-30 | 1.93178e-28 | 1.96289e-27 | 1.61400e-26 |
| 1.00000     | 1.35516e-30 | 9.13966e-29 | 1.61549e-27 | 1.56489e-26 | 1.23319e-25 |
| 0.100000    | 2.81734e-30 | 1.97031e-28 | 3.14023e-27 | 2.95239e-26 | 2.26664e-25 |
| 0.0100000   | 3.08012e-30 | 2.20772e-28 | 3.45308e-27 | 3.22848e-26 | 2.46672e-25 |
| 0.00100000  | 3.10707e-30 | 2.23440e-28 | 3.48770e-27 | 3.25887e-26 | 2.48863e-25 |
| 0.000100000 | 3.10977e-30 | 2.23710e-28 | 3.49120e-27 | 3.26194e-26 | 2.49084e-25 |
| 1.00000e-05 | 3.11004e-30 | 2.23737e-28 | 3.49155e-27 | 3.26225e-26 | 2.49107e-25 |
| 1.00000e-06 | 3.11007e-30 | 2.23740e-28 | 3.49158e-27 | 3.26228e-26 | 2.49109e-25 |
| 1.00000e-07 | 3.11007e-30 | 2.23740e-28 | 3.49159e-27 | 3.26228e-26 | 2.49109e-25 |
| 1.00000e-08 | 3.11007e-30 | 2.23740e-28 | 3.49159e-27 | 3.26228e-26 | 2.49109e-25 |
| 1.00000e-09 | 3.11007e-30 | 2.23740e-28 | 3.49159e-27 | 3.26228e-26 | 2.49109e-25 |

| Pa\K        | 270.000     | 280.000     | 290.000     | 300.000     | 310.000     |
|-------------|-------------|-------------|-------------|-------------|-------------|
| 1.00000e+08 | 2.70960e-41 | 1.88168e-40 | 1.13998e-39 | 4.02527e-29 | 2.92372e-38 |
| 1.00000e+07 | 1.47732e-37 | 1.00236e-36 | 5.92845e-36 | 9.96829e-25 | 1.44545e-34 |
| 1.00000e+06 | 1.57510e-34 | 1.02390e-33 | 5.80157e-33 | 2.69978e-21 | 1.29790e-31 |
| 100000.     | 1.76975e-32 | 1.10763e-31 | 6.05991e-31 | 1.94688e-19 | 1.27904e-29 |
| 10000.0     | 5.19354e-31 | 3.29291e-30 | 1.83368e-29 | 1.88174e-19 | 4.08104e-28 |
| 1000.00     | 3.71194e-29 | 2.33938e-28 | 1.28590e-27 | 5.86910e-21 | 2.71202e-26 |
| 100.000     | 3.14547e-27 | 1.96196e-26 | 1.06735e-25 | 1.45953e-21 | 2.20412e-24 |
| 10.0000     | 1.13449e-25 | 6.85858e-25 | 3.62154e-24 | 4.50836e-21 | 7.07181e-23 |
| 1.00000     | 8.31169e-25 | 4.83088e-24 | 2.45801e-23 | 1.66065e-21 | 4.48421e-22 |
| 0.100000    | 1.48946e-24 | 8.45648e-24 | 4.21042e-23 | 3.23163e-22 | 7.38962e-22 |
| 0.0100000   | 1.61349e-24 | 9.12238e-24 | 4.52462e-23 | 2.80088e-22 | 7.88828e-22 |
| 0.00100000  | 1.62702e-24 | 9.19466e-24 | 4.55859e-23 | 2.77184e-22 | 7.94180e-22 |
| 0.000100000 | 1.62838e-24 | 9.20196e-24 | 4.56202e-23 | 2.76901e-22 | 7.94720e-22 |
| 1.00000e-05 | 1.62852e-24 | 9.20269e-24 | 4.56236e-23 | 2.76872e-22 | 7.94774e-22 |
| 1.00000e-06 | 1.62853e-24 | 9.20276e-24 | 4.56240e-23 | 2.76869e-22 | 7.94779e-22 |
| 1.00000e-07 | 1.62853e-24 | 9.20277e-24 | 4.56240e-23 | 2.76869e-22 | 7.94780e-22 |
| 1.00000e-08 | 1.62853e-24 | 9.20277e-24 | 4.56240e-23 | 2.76869e-22 | 7.94780e-22 |
| 1.00000e-09 | 1.62853e-24 | 9.20277e-24 | 4.56240e-23 | 2.76869e-22 | 7.94780e-22 |

| Pa\K        | 400.000     | 500.000     | 600.000     | 700.000     | 800.000     |
|-------------|-------------|-------------|-------------|-------------|-------------|
| 1.00000e+08 | 5.57916e-18 | 2.08157e-12 | 4.03552e-10 | 9.44075e-09 | 1.04143e-07 |
| 1.00000e+07 | 1.86628e-14 | 2.02932e-09 | 1.23626e-07 | 7.81488e-07 | 1.80032e-06 |
| 1.00000e+06 | 1.33270e-12 | 3.63825e-08 | 1.57656e-06 | 5.81756e-06 | 9.73803e-06 |
| 100000.     | 2.22468e-12 | 1.44436e-08 | 1.17004e-06 | 6.35337e-06 | 1.18833e-05 |
| 10000.0     | 1.51823e-13 | 7.37975e-10 | 1.95365e-07 | 2.63841e-06 | 7.44270e-06 |
| 1000.00     | 2.42218e-15 | 3.96900e-11 | 4.37694e-08 | 1.08694e-06 | 3.78757e-06 |
| 100.000     | 1.45448e-16 | 5.69933e-12 | 1.13052e-08 | 3.19505e-07 | 1.06655e-06 |
| 10.0000     | 4.87801e-17 | 8.82654e-13 | 1.69546e-09 | 4.53634e-08 | 1.42869e-07 |
| 1.00000     | 2.96338e-17 | 1.16515e-13 | 1.66117e-10 | 4.40517e-09 | 1.47275e-08 |
| 0.100000    | 2.51724e-17 | 3.31048e-14 | 1.80084e-11 | 4.77496e-10 | 2.09212e-09 |
| 0.0100000   | 2.46823e-17 | 2.46228e-14 | 3.88471e-12 | 1.02699e-10 | 8.55434e-10 |
| 0.00100000  | 2.46253e-17 | 2.37331e-14 | 2.47995e-12 | 6.57422e-11 | 7.33009e-10 |
| 0.000100000 | 2.46188e-17 | 2.36405e-14 | 2.33934e-12 | 6.20813e-11 | 7.20920e-10 |
| 1.00000e-05 | 2.46181e-17 | 2.36311e-14 | 2.32530e-12 | 6.17188e-11 | 7.19725e-10 |
| 1.00000e-06 | 2.46180e-17 | 2.36301e-14 | 2.32390e-12 | 6.16827e-11 | 7.19607e-10 |
| 1.00000e-07 | 2.46180e-17 | 2.36300e-14 | 2.32376e-12 | 6.16791e-11 | 7.19595e-10 |
| 1.00000e-08 | 2.46180e-17 | 2.36300e-14 | 2.32374e-12 | 6.16787e-11 | 7.19593e-10 |
| 1.00000e-09 | 2.46180e-17 | 2.36300e-14 | 2.32374e-12 | 6.16787e-11 | 7.19593e-10 |

| Pa\K        | 900.000     | 1000.00     | 1100.00     | 1200.00     | 1300.00     |
|-------------|-------------|-------------|-------------|-------------|-------------|
| 1.00000e+08 | 5.61347e-07 | 1.11191e-06 | 1.60393e-06 | 1.92854e-06 | 2.07725e-06 |
| 1.00000e+07 | 2.90536e-06 | 5.13605e-06 | 9.29896e-06 | 1.35479e-05 | 1.63992e-05 |
| 1.00000e+06 | 1.30131e-05 | 1.65802e-05 | 2.18582e-05 | 2.74180e-05 | 3.14864e-05 |
| 100000.     | 1.62129e-05 | 1.95564e-05 | 2.24034e-05 | 2.47845e-05 | 2.64991e-05 |

|             |             |             |             |             |             |
|-------------|-------------|-------------|-------------|-------------|-------------|
| 10000.0     | 1.13418e-05 | 1.32445e-05 | 1.37475e-05 | 1.34841e-05 | 1.28494e-05 |
| 1000.00     | 5.57793e-06 | 5.62322e-06 | 4.87168e-06 | 4.02810e-06 | 3.44053e-06 |
| 100.000     | 1.32934e-06 | 1.11610e-06 | 8.59369e-07 | 7.48026e-07 | 8.66506e-07 |
| 10.0000     | 1.66109e-07 | 1.45007e-07 | 1.58568e-07 | 2.64547e-07 | 5.32188e-07 |
| 1.00000     | 2.08426e-08 | 3.42007e-08 | 8.38512e-08 | 2.15374e-07 | 4.99090e-07 |
| 0.100000    | 6.42210e-09 | 2.32709e-08 | 7.65661e-08 | 2.10622e-07 | 4.95901e-07 |
| 0.0100000   | 4.99634e-09 | 2.21946e-08 | 7.58540e-08 | 2.10160e-07 | 4.95591e-07 |
| 0.00100000  | 4.85535e-09 | 2.20887e-08 | 7.57842e-08 | 2.10114e-07 | 4.95560e-07 |
| 0.000100000 | 4.84145e-09 | 2.20783e-08 | 7.57773e-08 | 2.10110e-07 | 4.95557e-07 |
| 1.00000e-05 | 4.84008e-09 | 2.20772e-08 | 7.57767e-08 | 2.10109e-07 | 4.95557e-07 |
| 1.00000e-06 | 4.83994e-09 | 2.20771e-08 | 7.57766e-08 | 2.10109e-07 | 4.95557e-07 |
| 1.00000e-07 | 4.83993e-09 | 2.20771e-08 | 7.57766e-08 | 2.10109e-07 | 4.95557e-07 |
| 1.00000e-08 | 4.83992e-09 | 2.20771e-08 | 7.57766e-08 | 2.10109e-07 | 4.95557e-07 |
| 1.00000e-09 | 4.83992e-09 | 2.20771e-08 | 7.57766e-08 | 2.10109e-07 | 4.95557e-07 |

| Pa\K        | 1400.00     | 1500.00     | 1750.00     | 2000.00     | 2250.00     |
|-------------|-------------|-------------|-------------|-------------|-------------|
| 1.00000e+08 | 2.11426e-06 | 1.98715e-06 | 0.000953756 | 0.00106332  | 0.00114219  |
| 1.00000e+07 | 1.79900e-05 | 1.84951e-05 | 0.00150186  | 0.00149508  | 0.00138876  |
| 1.00000e+06 | 3.42102e-05 | 3.60604e-05 | 0.00133515  | 0.00119098  | 0.000997869 |
| 100000.     | 2.76885e-05 | 2.86319e-05 | 0.000814647 | 0.000616103 | 0.000442092 |
| 10000.0     | 1.22013e-05 | 1.19221e-05 | 0.000259839 | 0.000161257 | 0.000121453 |
| 1000.00     | 3.30385e-06 | 3.77685e-06 | 4.46830e-05 | 3.87928e-05 | 5.73181e-05 |
| 100.000     | 1.30105e-06 | 2.17796e-06 | 1.08909e-05 | 2.25170e-05 | 4.98413e-05 |
| 10.0000     | 1.06040e-06 | 1.98916e-06 | 7.22352e-06 | 2.07784e-05 | 4.90781e-05 |
| 1.00000     | 1.03667e-06 | 1.97005e-06 | 6.85482e-06 | 2.06020e-05 | 4.90022e-05 |
| 0.100000    | 1.03437e-06 | 1.96817e-06 | 6.81822e-06 | 2.05844e-05 | 4.89947e-05 |
| 0.0100000   | 1.03415e-06 | 1.96799e-06 | 6.81459e-06 | 2.05827e-05 | 4.89940e-05 |
| 0.00100000  | 1.03413e-06 | 1.96797e-06 | 6.81423e-06 | 2.05825e-05 | 4.89939e-05 |
| 0.000100000 | 1.03413e-06 | 1.96797e-06 | 6.81420e-06 | 2.05825e-05 | 4.89939e-05 |
| 1.00000e-05 | 1.03413e-06 | 1.96797e-06 | 6.81419e-06 | 2.05825e-05 | 4.89939e-05 |
| 1.00000e-06 | 1.03413e-06 | 1.96797e-06 | 6.81419e-06 | 2.05825e-05 | 4.89939e-05 |
| 1.00000e-07 | 1.03413e-06 | 1.96797e-06 | 6.81419e-06 | 2.05825e-05 | 4.89939e-05 |
| 1.00000e-08 | 1.03413e-06 | 1.96797e-06 | 6.81419e-06 | 2.05825e-05 | 4.89939e-05 |
| 1.00000e-09 | 1.03413e-06 | 1.96797e-06 | 6.81419e-06 | 2.05825e-05 | 4.89939e-05 |

| Pa\K        | 2500.00     | 2750.00     | 3000.00     | 3250.00     | 3500.00     |
|-------------|-------------|-------------|-------------|-------------|-------------|
| 1.00000e+08 | 0.00116700  | 0.00113132  | 0.00104855  | 0.000942570 | 0.000835563 |
| 1.00000e+07 | 0.00120775  | 0.00100814  | 0.000833594 | 0.000701938 | 0.000612676 |
| 1.00000e+06 | 0.000786535 | 0.000615001 | 0.000504612 | 0.000448314 | 0.000429482 |
| 100000.     | 0.000321526 | 0.000273043 | 0.000276409 | 0.000306566 | 0.000346237 |
| 10000.0     | 0.000127905 | 0.000167061 | 0.000221534 | 0.000279088 | 0.000332832 |
| 1000.00     | 9.76101e-05 | 0.000153210 | 0.000215216 | 0.000276203 | 0.000331524 |
| 100.000     | 9.44082e-05 | 0.000151828 | 0.000214606 | 0.000275931 | 0.000331404 |
| 10.0000     | 9.40925e-05 | 0.000151694 | 0.000214547 | 0.000275905 | 0.000331392 |
| 1.00000     | 9.40615e-05 | 0.000151681 | 0.000214542 | 0.000275902 | 0.000331391 |
| 0.100000    | 9.40584e-05 | 0.000151679 | 0.000214541 | 0.000275902 | 0.000331391 |
| 0.0100000   | 9.40581e-05 | 0.000151679 | 0.000214541 | 0.000275902 | 0.000331391 |
| 0.00100000  | 9.40581e-05 | 0.000151679 | 0.000214541 | 0.000275902 | 0.000331391 |
| 0.000100000 | 9.40581e-05 | 0.000151679 | 0.000214541 | 0.000275902 | 0.000331391 |
| 1.00000e-05 | 9.40581e-05 | 0.000151679 | 0.000214541 | 0.000275902 | 0.000331391 |
| 1.00000e-06 | 9.40581e-05 | 0.000151679 | 0.000214541 | 0.000275902 | 0.000331391 |
| 1.00000e-07 | 9.40581e-05 | 0.000151679 | 0.000214541 | 0.000275902 | 0.000331391 |
| 1.00000e-08 | 9.40581e-05 | 0.000151679 | 0.000214541 | 0.000275902 | 0.000331391 |
| 1.00000e-09 | 9.40581e-05 | 0.000151679 | 0.000214541 | 0.000275902 | 0.000331391 |

| Pa\K        | 3750.00     | 4000.00     |
|-------------|-------------|-------------|
| 1.00000e+08 | 0.000741465 | 0.000665987 |
| 1.00000e+07 | 0.000557552 | 0.000527000 |
| 1.00000e+06 | 0.000432531 | 0.000446291 |
| 100000.     | 0.000385997 | 0.000421611 |
| 10000.0     | 0.000379660 | 0.000418772 |
| 1000.00     | 0.000379085 | 0.000418538 |
| 100.000     | 0.000379034 | 0.000418519 |
| 10.0000     | 0.000379029 | 0.000418517 |
| 1.00000     | 0.000379028 | 0.000418517 |
| 0.100000    | 0.000379028 | 0.000418517 |
| 0.0100000   | 0.000379028 | 0.000418517 |
| 0.00100000  | 0.000379028 | 0.000418517 |
| 0.000100000 | 0.000379028 | 0.000418517 |
| 1.00000e-05 | 0.000379028 | 0.000418517 |
| 1.00000e-06 | 0.000379028 | 0.000418517 |
| 1.00000e-07 | 0.000379028 | 0.000418517 |
| 1.00000e-08 | 0.000379028 | 0.000418517 |
| 1.00000e-09 | 0.000379028 | 0.000418517 |

rad67  
=====



|             |     |     |     |     |     |
|-------------|-----|-----|-----|-----|-----|
| 1.00000e-07 | N/A | N/A | N/A | N/A | N/A |
| 1.00000e-08 | N/A | N/A | N/A | N/A | N/A |
| 1.00000e-09 | N/A | N/A | N/A | N/A | N/A |

Pa\K | 220.000 | 230.000 | 240.000 | 250.000 | 260.000

|             |     |     |     |     |     |
|-------------|-----|-----|-----|-----|-----|
| 1.00000e+08 | N/A | N/A | N/A | N/A | N/A |
| 1.00000e+07 | N/A | N/A | N/A | N/A | N/A |
| 1.00000e+06 | N/A | N/A | N/A | N/A | N/A |
| 100000.     | N/A | N/A | N/A | N/A | N/A |
| 10000.0     | N/A | N/A | N/A | N/A | N/A |
| 1000.00     | N/A | N/A | N/A | N/A | N/A |
| 100.000     | N/A | N/A | N/A | N/A | N/A |
| 10.0000     | N/A | N/A | N/A | N/A | N/A |
| 1.00000     | N/A | N/A | N/A | N/A | N/A |
| 0.100000    | N/A | N/A | N/A | N/A | N/A |
| 0.0100000   | N/A | N/A | N/A | N/A | N/A |
| 0.00100000  | N/A | N/A | N/A | N/A | N/A |
| 0.000100000 | N/A | N/A | N/A | N/A | N/A |
| 1.00000e-05 | N/A | N/A | N/A | N/A | N/A |
| 1.00000e-06 | N/A | N/A | N/A | N/A | N/A |
| 1.00000e-07 | N/A | N/A | N/A | N/A | N/A |
| 1.00000e-08 | N/A | N/A | N/A | N/A | N/A |
| 1.00000e-09 | N/A | N/A | N/A | N/A | N/A |

Pa\K | 270.000 | 280.000 | 290.000 | 300.000 | 310.000

|             |     |     |     |             |     |
|-------------|-----|-----|-----|-------------|-----|
| 1.00000e+08 | N/A | N/A | N/A | 1.97354e-25 | N/A |
| 1.00000e+07 | N/A | N/A | N/A | 1.24819e-22 | N/A |
| 1.00000e+06 | N/A | N/A | N/A | 1.92708e-20 | N/A |
| 100000.     | N/A | N/A | N/A | 2.65176e-19 | N/A |
| 10000.0     | N/A | N/A | N/A | 5.03868e-19 | N/A |
| 1000.00     | N/A | N/A | N/A | 2.53072e-19 | N/A |
| 100.000     | N/A | N/A | N/A | 5.56939e-19 | N/A |
| 10.0000     | N/A | N/A | N/A | 8.13111e-19 | N/A |
| 1.00000     | N/A | N/A | N/A | 1.29713e-18 | N/A |
| 0.100000    | N/A | N/A | N/A | 1.56563e-18 | N/A |
| 0.0100000   | N/A | N/A | N/A | 1.31217e-18 | N/A |
| 0.00100000  | N/A | N/A | N/A | 1.21566e-18 | N/A |
| 0.000100000 | N/A | N/A | N/A | 1.20489e-18 | N/A |
| 1.00000e-05 | N/A | N/A | N/A | 1.20385e-18 | N/A |
| 1.00000e-06 | N/A | N/A | N/A | 1.20374e-18 | N/A |
| 1.00000e-07 | N/A | N/A | N/A | 1.20373e-18 | N/A |
| 1.00000e-08 | N/A | N/A | N/A | 1.20373e-18 | N/A |
| 1.00000e-09 | N/A | N/A | N/A | 1.20373e-18 | N/A |

Pa\K | 400.000 | 500.000 | 600.000 | 700.000 | 800.000

|             |             |             |             |             |             |
|-------------|-------------|-------------|-------------|-------------|-------------|
| 1.00000e+08 | 1.19458e-19 | 6.35629e-14 | 2.01054e-11 | 1.23992e-08 | 3.57492e-07 |
| 1.00000e+07 | 1.76414e-15 | 2.66228e-10 | 1.83991e-08 | 1.69285e-07 | 1.21043e-06 |
| 1.00000e+06 | 2.80953e-13 | 8.43291e-09 | 3.54833e-07 | 1.31453e-06 | 2.51703e-06 |
| 100000.     | 8.65296e-13 | 4.86372e-09 | 3.08433e-07 | 1.54604e-06 | 2.89769e-06 |
| 10000.0     | 1.13535e-13 | 3.42924e-10 | 5.84292e-08 | 6.78870e-07 | 1.85005e-06 |
| 1000.00     | 3.94394e-15 | 2.11933e-11 | 1.33213e-08 | 2.82189e-07 | 9.42593e-07 |
| 100.000     | 1.20957e-15 | 3.22984e-12 | 3.43342e-09 | 8.29831e-08 | 2.66545e-07 |
| 10.0000     | 1.22902e-15 | 6.79378e-13 | 5.23268e-10 | 1.19783e-08 | 3.75415e-08 |
| 1.00000     | 1.58374e-15 | 2.96649e-13 | 6.05033e-11 | 1.34247e-09 | 5.47165e-09 |
| 0.100000    | 1.70814e-15 | 2.53169e-13 | 1.49817e-11 | 2.93705e-10 | 2.14920e-09 |
| 0.0100000   | 1.69496e-15 | 2.46391e-13 | 1.03689e-11 | 1.85793e-10 | 1.79401e-09 |
| 0.00100000  | 1.68903e-15 | 2.45273e-13 | 9.87013e-12 | 1.74328e-10 | 1.75663e-09 |
| 0.000100000 | 1.68822e-15 | 2.45124e-13 | 9.81769e-12 | 1.73160e-10 | 1.75289e-09 |
| 1.00000e-05 | 1.68813e-15 | 2.45108e-13 | 9.81241e-12 | 1.73045e-10 | 1.75252e-09 |
| 1.00000e-06 | 1.68812e-15 | 2.45106e-13 | 9.81188e-12 | 1.73033e-10 | 1.75249e-09 |
| 1.00000e-07 | 1.68812e-15 | 2.45106e-13 | 9.81183e-12 | 1.73032e-10 | 1.75248e-09 |
| 1.00000e-08 | 1.68812e-15 | 2.45106e-13 | 9.81183e-12 | 1.73032e-10 | 1.75248e-09 |
| 1.00000e-09 | 1.68812e-15 | 2.45106e-13 | 9.81183e-12 | 1.73032e-10 | 1.75248e-09 |

Pa\K | 900.000 | 1000.00 | 1100.00 | 1200.00 | 1300.00

|             |             |             |             |             |             |
|-------------|-------------|-------------|-------------|-------------|-------------|
| 1.00000e+08 | 1.06352e-06 | 1.84583e-06 | 3.00332e-06 | 3.75216e-06 | 3.63174e-06 |
| 1.00000e+07 | 4.13859e-06 | 9.95335e-06 | 1.98212e-05 | 2.97397e-05 | 3.61995e-05 |
| 1.00000e+06 | 5.16692e-06 | 1.30039e-05 | 3.11667e-05 | 5.13580e-05 | 6.42045e-05 |
| 100000.     | 4.49015e-06 | 7.70373e-06 | 1.45687e-05 | 2.34305e-05 | 3.18264e-05 |
| 10000.0     | 2.99336e-06 | 4.46569e-06 | 6.95335e-06 | 1.04132e-05 | 1.45929e-05 |
| 1000.00     | 1.44457e-06 | 1.88410e-06 | 2.60041e-06 | 3.66630e-06 | 5.46555e-06 |
| 100.000     | 3.51548e-07 | 4.25991e-07 | 6.58853e-07 | 1.26441e-06 | 2.80365e-06 |
| 10.0000     | 5.44175e-08 | 1.03956e-07 | 2.93108e-07 | 8.76619e-07 | 2.42844e-06 |
| 1.00000     | 1.64687e-08 | 6.54316e-08 | 2.51699e-07 | 8.35150e-07 | 2.39012e-06 |
| 0.100000    | 1.24503e-08 | 6.14485e-08 | 2.47577e-07 | 8.31118e-07 | 2.38644e-06 |
| 0.0100000   | 1.20212e-08 | 6.10424e-08 | 2.47172e-07 | 8.30728e-07 | 2.38609e-06 |



|             |             |             |             |             |             |
|-------------|-------------|-------------|-------------|-------------|-------------|
| 0.00100000  | 1.19772e-08 | 6.10021e-08 | 2.47133e-07 | 8.30690e-07 | 2.38605e-06 |
| 0.000100000 | 1.19728e-08 | 6.09981e-08 | 2.47129e-07 | 8.30686e-07 | 2.38605e-06 |
| 1.00000e-05 | 1.19724e-08 | 6.09977e-08 | 2.47128e-07 | 8.30686e-07 | 2.38605e-06 |
| 1.00000e-06 | 1.19724e-08 | 6.09977e-08 | 2.47128e-07 | 8.30686e-07 | 2.38605e-06 |
| 1.00000e-07 | 1.19724e-08 | 6.09977e-08 | 2.47128e-07 | 8.30686e-07 | 2.38605e-06 |
| 1.00000e-08 | 1.19724e-08 | 6.09977e-08 | 2.47128e-07 | 8.30686e-07 | 2.38605e-06 |
| 1.00000e-09 | 1.19724e-08 | 6.09977e-08 | 2.47128e-07 | 8.30686e-07 | 2.38605e-06 |

| Pa\K        | 1400.00     | 1500.00     | 1750.00     | 2000.00     | 2250.00     |
|-------------|-------------|-------------|-------------|-------------|-------------|
| 1.00000e+08 | 3.08542e-06 | 2.62618e-06 | 0.00116348  | 0.00126195  | 0.00132729  |
| 1.00000e+07 | 3.97290e-05 | 4.18891e-05 | 0.00128110  | 0.00126553  | 0.00123203  |
| 1.00000e+06 | 7.25871e-05 | 8.08047e-05 | 0.000586822 | 0.000632450 | 0.000728907 |
| 100000.     | 4.11507e-05 | 5.31862e-05 | 0.000231463 | 0.000331364 | 0.000481140 |
| 10000.0     | 2.01131e-05 | 2.83570e-05 | 0.000104927 | 0.000212293 | 0.000395238 |
| 1000.00     | 9.04494e-06 | 1.61555e-05 | 6.79792e-05 | 0.000186172 | 0.000380844 |
| 100.000     | 6.36152e-06 | 1.36586e-05 | 6.24195e-05 | 0.000182985 | 0.000379306 |
| 10.0000     | 6.02291e-06 | 1.33702e-05 | 6.18214e-05 | 0.000182667 | 0.000379158 |
| 1.00000     | 5.98946e-06 | 1.33424e-05 | 6.17619e-05 | 0.000182636 | 0.000379144 |
| 0.100000    | 5.98628e-06 | 1.33398e-05 | 6.17561e-05 | 0.000182633 | 0.000379142 |
| 0.0100000   | 5.98597e-06 | 1.33395e-05 | 6.17555e-05 | 0.000182633 | 0.000379142 |
| 0.00100000  | 5.98594e-06 | 1.33395e-05 | 6.17554e-05 | 0.000182633 | 0.000379142 |
| 0.000100000 | 5.98594e-06 | 1.33395e-05 | 6.17554e-05 | 0.000182633 | 0.000379142 |
| 1.00000e-05 | 5.98594e-06 | 1.33395e-05 | 6.17554e-05 | 0.000182633 | 0.000379142 |
| 1.00000e-06 | 5.98594e-06 | 1.33395e-05 | 6.17554e-05 | 0.000182633 | 0.000379142 |
| 1.00000e-07 | 5.98594e-06 | 1.33395e-05 | 6.17554e-05 | 0.000182633 | 0.000379142 |
| 1.00000e-08 | 5.98594e-06 | 1.33395e-05 | 6.17554e-05 | 0.000182633 | 0.000379142 |
| 1.00000e-09 | 5.98594e-06 | 1.33395e-05 | 6.17554e-05 | 0.000182633 | 0.000379142 |

| Pa\K        | 2500.00     | 2750.00     | 3000.00     | 3250.00    | 3500.00    |
|-------------|-------------|-------------|-------------|------------|------------|
| 1.00000e+08 | 0.00135772  | 0.00135674  | 0.00133305  | 0.00129623 | 0.00125283 |
| 1.00000e+07 | 0.00122209  | 0.00123211  | 0.00124484  | 0.00124852 | 0.00123847 |
| 1.00000e+06 | 0.000849684 | 0.000969806 | 0.00107093  | 0.00114185 | 0.00117894 |
| 100000.     | 0.000668100 | 0.000854768 | 0.00100717  | 0.00111044 | 0.00116530 |
| 10000.0     | 0.000618699 | 0.000830667 | 0.000996771 | 0.00110647 | 0.00116406 |
| 1000.00     | 0.000612044 | 0.000827946 | 0.000995776 | 0.00110617 | 0.00116401 |
| 100.000     | 0.000611392 | 0.000827698 | 0.000995694 | 0.00110615 | 0.00116401 |
| 10.0000     | 0.000611331 | 0.000827676 | 0.000995687 | 0.00110615 | 0.00116401 |
| 1.00000     | 0.000611325 | 0.000827674 | 0.000995687 | 0.00110614 | 0.00116401 |
| 0.100000    | 0.000611325 | 0.000827674 | 0.000995686 | 0.00110614 | 0.00116401 |
| 0.0100000   | 0.000611325 | 0.000827674 | 0.000995686 | 0.00110614 | 0.00116401 |
| 0.00100000  | 0.000611325 | 0.000827674 | 0.000995686 | 0.00110614 | 0.00116401 |
| 0.000100000 | 0.000611325 | 0.000827674 | 0.000995686 | 0.00110614 | 0.00116401 |
| 1.00000e-05 | 0.000611325 | 0.000827674 | 0.000995686 | 0.00110614 | 0.00116401 |
| 1.00000e-06 | 0.000611325 | 0.000827674 | 0.000995686 | 0.00110614 | 0.00116401 |
| 1.00000e-07 | 0.000611325 | 0.000827674 | 0.000995686 | 0.00110614 | 0.00116401 |
| 1.00000e-08 | 0.000611325 | 0.000827674 | 0.000995686 | 0.00110614 | 0.00116401 |
| 1.00000e-09 | 0.000611325 | 0.000827674 | 0.000995686 | 0.00110614 | 0.00116401 |

| Pa\K        | 3750.00    | 4000.00    |
|-------------|------------|------------|
| 1.00000e+08 | 0.00120595 | 0.00115672 |
| 1.00000e+07 | 0.00121414 | 0.00117717 |
| 1.00000e+06 | 0.00118473 | 0.00116523 |
| 100000.     | 0.00117988 | 0.00116431 |
| 10000.0     | 0.00117971 | 0.00116450 |
| 1000.00     | 0.00117974 | 0.00116455 |
| 100.000     | 0.00117975 | 0.00116456 |
| 10.0000     | 0.00117975 | 0.00116456 |
| 1.00000     | 0.00117975 | 0.00116456 |
| 0.100000    | 0.00117975 | 0.00116456 |
| 0.0100000   | 0.00117975 | 0.00116456 |
| 0.00100000  | 0.00117975 | 0.00116456 |
| 0.000100000 | 0.00117975 | 0.00116456 |
| 1.00000e-05 | 0.00117975 | 0.00116456 |
| 1.00000e-06 | 0.00117975 | 0.00116456 |
| 1.00000e-07 | 0.00117975 | 0.00116456 |
| 1.00000e-08 | 0.00117975 | 0.00116456 |
| 1.00000e-09 | 0.00117975 | 0.00116456 |

PAH10+CH3

=====

| Pa\K        | 20.0000     | 30.0000     | 40.0000     | 50.0000     | 60.0000     |
|-------------|-------------|-------------|-------------|-------------|-------------|
| 1.00000e+08 | 1.34523e-77 | 3.52815e-76 | 4.52042e-75 | 5.38234e-74 | 6.84361e-73 |
| 1.00000e+07 | 1.28382e-73 | 3.21552e-72 | 3.94451e-71 | 4.50317e-70 | 5.49403e-69 |
| 1.00000e+06 | 8.54552e-70 | 1.56486e-68 | 1.50537e-67 | 1.40538e-66 | 1.44130e-65 |
| 100000.     | 1.22227e-66 | 1.07717e-65 | 6.48445e-65 | 4.24871e-64 | 3.26902e-63 |
| 10000.0     | 9.16679e-65 | 2.19865e-64 | 5.59639e-64 | 1.92826e-63 | 9.49231e-63 |

|             |             |             |             |             |             |
|-------------|-------------|-------------|-------------|-------------|-------------|
| 1000.00     | 4.54408e-65 | 1.15091e-64 | 6.86880e-64 | 6.18699e-63 | 7.94094e-62 |
| 100.000     | 4.09277e-63 | 7.41399e-62 | 6.66828e-61 | 5.64962e-60 | 5.41655e-59 |
| 10.0000     | 8.04663e-60 | 9.07882e-59 | 6.17069e-58 | 4.21499e-57 | 3.36511e-56 |
| 1.00000     | 3.57750e-57 | 2.10684e-56 | 8.70854e-56 | 3.85488e-55 | 2.05062e-54 |
| 0.100000    | 1.12020e-55 | 2.68973e-55 | 6.89711e-55 | 2.17829e-54 | 8.81704e-54 |
| 0.0100000   | 2.44284e-55 | 1.92128e-55 | 2.20609e-55 | 3.73073e-55 | 9.11982e-55 |
| 0.00100000  | 3.39334e-57 | 4.43363e-58 | 2.22159e-58 | 2.36624e-58 | 4.38441e-58 |
| 0.000100000 | 7.41630e-61 | 8.43285e-62 | 4.64552e-62 | 5.65495e-62 | 1.24047e-61 |
| 1.00000e-05 | 2.83444e-64 | 5.25692e-65 | 3.89443e-65 | 5.98924e-65 | 1.75054e-64 |
| 1.00000e-06 | 5.49378e-67 | 1.64247e-67 | 1.59445e-67 | 3.06185e-67 | 1.27994e-66 |
| 1.00000e-07 | 4.68943e-69 | 2.15130e-69 | 2.72121e-69 | 6.70786e-69 | 4.22253e-68 |
| 1.00000e-08 | 1.51759e-70 | 1.00204e-70 | 1.55281e-70 | 4.49622e-70 | 3.37783e-69 |
| 1.00000e-09 | 1.18276e-71 | 8.79718e-72 | 1.43044e-71 | 4.26833e-71 | 3.29132e-70 |

| Pa\K        | 70.0000     | 80.0000     | 90.0000     | 100.000     | 110.000     |
|-------------|-------------|-------------|-------------|-------------|-------------|
| 1.00000e+08 | 9.99771e-72 | 1.83519e-70 | 4.86399e-69 | 2.20905e-67 | 1.90698e-65 |
| 1.00000e+07 | 7.70422e-68 | 1.35798e-66 | 3.46038e-65 | 1.51680e-63 | 1.27397e-61 |
| 1.00000e+06 | 1.73276e-64 | 2.65983e-63 | 5.99477e-62 | 2.37242e-60 | 1.85231e-58 |
| 100000.     | 3.08434e-62 | 3.84722e-61 | 7.28737e-60 | 2.52940e-58 | 1.83044e-56 |
| 10000.0     | 7.72698e-62 | 1.29032e-60 | 4.62503e-59 | 3.12415e-57 | 3.43792e-55 |
| 1000.00     | 1.45392e-60 | 3.90138e-59 | 1.59269e-57 | 1.02126e-55 | 1.05884e-53 |
| 100.000     | 6.79822e-58 | 1.37311e-56 | 5.95223e-55 | 6.33695e-53 | 1.42799e-50 |
| 10.0000     | 3.61693e-55 | 6.48405e-54 | 2.61184e-52 | 2.62932e-50 | 5.48730e-48 |
| 1.00000     | 1.47867e-53 | 1.76892e-52 | 4.72171e-51 | 3.16755e-49 | 4.71580e-47 |
| 0.100000    | 5.00122e-53 | 4.77059e-52 | 1.01035e-50 | 5.32163e-49 | 6.38951e-47 |
| 0.0100000   | 3.40888e-54 | 2.29114e-53 | 3.61607e-52 | 1.50410e-50 | 1.55685e-48 |
| 0.00100000  | 1.39689e-57 | 8.91987e-57 | 1.60890e-55 | 1.13385e-53 | 3.48562e-51 |
| 0.000100000 | 5.28815e-61 | 6.56324e-60 | 4.47997e-58 | 1.62866e-55 | 1.58688e-52 |
| 1.00000e-05 | 1.40348e-63 | 5.79416e-62 | 1.55868e-59 | 1.17044e-56 | 1.44695e-53 |
| 1.00000e-06 | 2.37279e-65 | 2.69500e-63 | 1.29980e-60 | 1.12422e-57 | 1.43291e-54 |
| 1.00000e-07 | 1.43887e-66 | 2.36266e-64 | 1.27178e-61 | 1.11947e-58 | 1.43150e-55 |
| 1.00000e-08 | 1.33783e-67 | 2.32668e-65 | 1.26889e-62 | 1.11900e-59 | 1.43136e-56 |
| 1.00000e-09 | 1.32746e-68 | 2.32302e-66 | 1.26860e-63 | 1.11895e-60 | 1.43134e-57 |

| Pa\K        | 120.000     | 130.000     | 140.000     | 150.000     | 160.000     |
|-------------|-------------|-------------|-------------|-------------|-------------|
| 1.00000e+08 | 2.46840e-63 | 3.89239e-61 | 5.66779e-59 | 9.55040e-57 | 1.25010e-54 |
| 1.00000e+07 | 1.61445e-59 | 2.50851e-57 | 3.61099e-55 | 6.10700e-53 | 8.04990e-51 |
| 1.00000e+06 | 2.22687e-56 | 3.34848e-54 | 4.71543e-52 | 8.16898e-50 | 1.11830e-47 |
| 100000.     | 2.11029e-54 | 3.13837e-52 | 4.44214e-50 | 8.33549e-48 | 1.27377e-45 |
| 10000.0     | 4.87382e-53 | 7.46382e-51 | 1.01969e-48 | 1.38370e-46 | 1.63034e-44 |
| 1000.00     | 1.58454e-51 | 3.07012e-49 | 5.81489e-47 | 1.30204e-44 | 2.15730e-42 |
| 100.000     | 3.80339e-48 | 1.04720e-45 | 2.25055e-43 | 5.20892e-41 | 8.19659e-39 |
| 10.0000     | 1.31145e-45 | 3.22900e-43 | 6.23485e-41 | 1.34983e-38 | 2.04129e-36 |
| 1.00000     | 8.64265e-45 | 1.84371e-42 | 3.37063e-40 | 8.84067e-38 | 1.74952e-35 |
| 0.100000    | 9.78973e-45 | 1.89035e-42 | 3.33430e-40 | 1.02030e-37 | 2.52022e-35 |
| 0.0100000   | 2.30648e-46 | 5.14265e-44 | 1.20337e-41 | 5.82429e-39 | 2.36518e-36 |
| 0.00100000  | 1.75693e-48 | 1.07557e-45 | 4.69068e-43 | 2.98488e-40 | 1.47817e-37 |
| 0.000100000 | 1.28631e-49 | 9.44820e-47 | 4.38930e-44 | 2.79417e-41 | 1.38466e-38 |
| 1.00000e-05 | 1.24640e-50 | 9.33652e-48 | 4.36375e-45 | 2.77668e-42 | 1.37541e-39 |
| 1.00000e-06 | 1.24243e-51 | 9.32550e-49 | 4.36124e-46 | 2.77494e-43 | 1.37448e-40 |
| 1.00000e-07 | 1.24203e-52 | 9.32440e-50 | 4.36099e-47 | 2.77477e-44 | 1.37439e-41 |
| 1.00000e-08 | 1.24199e-53 | 9.32429e-51 | 4.36097e-48 | 2.77475e-45 | 1.37438e-42 |
| 1.00000e-09 | 1.24199e-54 | 9.32428e-52 | 4.36096e-49 | 2.77475e-46 | 1.37438e-43 |

| Pa\K        | 170.000     | 180.000     | 190.000     | 200.000     | 210.000     |
|-------------|-------------|-------------|-------------|-------------|-------------|
| 1.00000e+08 | 1.22309e-52 | 9.18786e-51 | 6.21039e-49 | 2.78232e-47 | 8.38733e-46 |
| 1.00000e+07 | 7.94570e-49 | 6.05002e-47 | 4.15685e-45 | 1.85551e-43 | 5.48505e-42 |
| 1.00000e+06 | 1.15821e-45 | 9.48003e-44 | 7.10133e-42 | 3.19364e-40 | 9.01300e-39 |
| 100000.     | 1.51358e-43 | 1.52627e-41 | 1.46053e-39 | 6.81076e-38 | 1.80316e-36 |
| 10000.0     | 1.80887e-42 | 2.42733e-40 | 3.88510e-38 | 1.95473e-36 | 4.98692e-35 |
| 1000.00     | 2.52799e-40 | 2.23768e-38 | 1.94828e-36 | 9.59244e-35 | 2.91215e-33 |
| 100.000     | 8.83320e-37 | 6.92842e-35 | 4.62943e-33 | 1.84753e-31 | 4.59404e-30 |
| 10.0000     | 2.17622e-34 | 1.78990e-32 | 1.27253e-30 | 4.37405e-29 | 8.62035e-28 |
| 1.00000     | 2.57138e-33 | 3.37201e-31 | 3.67065e-29 | 1.12914e-27 | 1.88724e-26 |
| 0.100000    | 4.94293e-33 | 1.07290e-30 | 2.10668e-28 | 5.77959e-27 | 8.62717e-26 |
| 0.0100000   | 8.20903e-34 | 4.23255e-31 | 3.42878e-28 | 8.85959e-27 | 1.26503e-25 |
| 0.00100000  | 6.85818e-35 | 5.31584e-32 | 3.64837e-28 | 9.34581e-27 | 1.32655e-25 |
| 0.000100000 | 6.64714e-36 | 5.45023e-33 | 3.67171e-28 | 9.39717e-27 | 1.33302e-25 |
| 1.00000e-05 | 6.62517e-37 | 5.46399e-34 | 3.67405e-28 | 9.40234e-27 | 1.33367e-25 |
| 1.00000e-06 | 6.62297e-38 | 5.46537e-35 | 3.67429e-28 | 9.40285e-27 | 1.33374e-25 |
| 1.00000e-07 | 6.62274e-39 | 5.46551e-36 | 3.67431e-28 | 9.40291e-27 | 1.33375e-25 |
| 1.00000e-08 | 6.62272e-40 | 5.46553e-37 | 3.67432e-28 | 9.40291e-27 | 1.33375e-25 |
| 1.00000e-09 | 6.62272e-41 | 5.46553e-38 | 3.67432e-28 | 9.40291e-27 | 1.33375e-25 |

| Pa\K        | 220.000     | 230.000     | 240.000     | 250.000     | 260.000     |
|-------------|-------------|-------------|-------------|-------------|-------------|
| 1.00000e+08 | 1.73078e-44 | 3.27557e-43 | 4.60949e-42 | 4.68923e-41 | 4.00891e-40 |

|             |             |             |             |             |             |
|-------------|-------------|-------------|-------------|-------------|-------------|
| 1.00000e+07 | 1.10213e-40 | 2.02182e-39 | 2.76545e-38 | 2.73943e-37 | 2.28086e-36 |
| 1.00000e+06 | 1.69720e-37 | 2.87379e-36 | 3.66103e-35 | 3.41796e-34 | 2.68951e-33 |
| 100000.     | 3.11468e-35 | 4.70472e-34 | 5.41957e-33 | 4.70302e-32 | 3.46112e-31 |
| 10000.0     | 8.18166e-34 | 1.15425e-32 | 1.25668e-31 | 1.05438e-30 | 7.56243e-30 |
| 1000.00     | 5.91767e-32 | 1.06869e-30 | 1.43957e-29 | 1.43551e-28 | 1.20794e-27 |
| 100.000     | 7.81157e-29 | 1.11337e-27 | 1.21935e-26 | 1.05845e-25 | 7.82227e-25 |
| 10.0000     | 1.18996e-26 | 1.32616e-25 | 1.17958e-24 | 8.73785e-24 | 5.57293e-23 |
| 1.00000     | 2.28305e-25 | 2.21550e-24 | 1.75468e-23 | 1.17610e-22 | 6.82302e-22 |
| 0.100000    | 9.57009e-25 | 8.52459e-24 | 6.26826e-23 | 3.91996e-22 | 2.12642e-21 |
| 0.0100000   | 1.35882e-24 | 1.17536e-23 | 8.42321e-23 | 5.14348e-22 | 2.72848e-21 |
| 0.00100000  | 1.41874e-24 | 1.22239e-23 | 8.73014e-23 | 5.31397e-22 | 2.81062e-21 |
| 0.000100000 | 1.42503e-24 | 1.22731e-23 | 8.76216e-23 | 5.33171e-22 | 2.81914e-21 |
| 1.00000e-05 | 1.42566e-24 | 1.22781e-23 | 8.76538e-23 | 5.33349e-22 | 2.81999e-21 |
| 1.00000e-06 | 1.42572e-24 | 1.22786e-23 | 8.76570e-23 | 5.33367e-22 | 2.82008e-21 |
| 1.00000e-07 | 1.42573e-24 | 1.22786e-23 | 8.76573e-23 | 5.33368e-22 | 2.82009e-21 |
| 1.00000e-08 | 1.42573e-24 | 1.22786e-23 | 8.76573e-23 | 5.33369e-22 | 2.82009e-21 |
| 1.00000e-09 | 1.42573e-24 | 1.22786e-23 | 8.76573e-23 | 5.33369e-22 | 2.82009e-21 |

| Pa\K        | 270.000     | 280.000     | 290.000     | 300.000     | 310.000     |
|-------------|-------------|-------------|-------------|-------------|-------------|
| 1.00000e+08 | 2.96541e-39 | 1.91366e-38 | 1.09018e-37 | 9.69288e-29 | 2.53714e-36 |
| 1.00000e+07 | 1.64331e-35 | 1.03285e-34 | 5.72964e-34 | 1.90791e-24 | 1.26298e-32 |
| 1.00000e+06 | 1.83536e-32 | 1.09472e-31 | 5.77250e-31 | 6.02046e-21 | 1.15394e-29 |
| 100000.     | 2.21974e-30 | 1.25070e-29 | 6.26230e-29 | 5.46257e-19 | 1.14780e-27 |
| 10000.0     | 4.76293e-29 | 2.65924e-28 | 1.33304e-27 | 6.83705e-19 | 2.54087e-26 |
| 1000.00     | 8.81257e-27 | 5.62457e-26 | 3.17783e-25 | 5.75043e-20 | 7.33082e-24 |
| 100.000     | 5.03167e-24 | 2.84599e-23 | 1.43140e-22 | 3.42860e-19 | 2.64683e-21 |
| 10.0000     | 3.11505e-22 | 1.54358e-21 | 6.85413e-21 | 1.64675e-18 | 1.00850e-19 |
| 1.00000     | 3.48153e-21 | 1.58178e-20 | 6.46873e-20 | 2.57916e-18 | 8.18124e-19 |
| 0.100000    | 1.01650e-20 | 4.33753e-20 | 1.67069e-19 | 9.96416e-19 | 1.89202e-18 |
| 0.0100000   | 1.27733e-20 | 5.34574e-20 | 2.02246e-19 | 6.03110e-19 | 2.21934e-18 |
| 0.00100000  | 1.31220e-20 | 5.47793e-20 | 2.06774e-19 | 5.75845e-19 | 2.26006e-18 |
| 0.000100000 | 1.31581e-20 | 5.49157e-20 | 2.07240e-19 | 5.73219e-19 | 2.26424e-18 |
| 1.00000e-05 | 1.31617e-20 | 5.49294e-20 | 2.07287e-19 | 5.72953e-19 | 2.26466e-18 |
| 1.00000e-06 | 1.31620e-20 | 5.49308e-20 | 2.07291e-19 | 5.72926e-19 | 2.26470e-18 |
| 1.00000e-07 | 1.31621e-20 | 5.49309e-20 | 2.07292e-19 | 5.72924e-19 | 2.26470e-18 |
| 1.00000e-08 | 1.31621e-20 | 5.49309e-20 | 2.07292e-19 | 5.72924e-19 | 2.26470e-18 |
| 1.00000e-09 | 1.31621e-20 | 5.49309e-20 | 2.07292e-19 | 5.72924e-19 | 2.26470e-18 |

| Pa\K        | 400.000     | 500.000     | 600.000     | 700.000     | 800.000     |
|-------------|-------------|-------------|-------------|-------------|-------------|
| 1.00000e+08 | 6.40005e-18 | 2.46254e-12 | 4.93718e-10 | 1.26317e-08 | 1.53937e-07 |
| 1.00000e+07 | 3.15303e-14 | 3.60676e-09 | 2.22179e-07 | 1.41844e-06 | 3.38917e-06 |
| 1.00000e+06 | 2.87735e-12 | 7.27455e-08 | 3.02990e-06 | 1.10694e-05 | 1.84622e-05 |
| 100000.     | 5.51464e-12 | 3.30975e-08 | 2.38004e-06 | 1.23934e-05 | 2.28520e-05 |
| 10000.0     | 3.93249e-13 | 1.76801e-09 | 4.15513e-07 | 5.26838e-06 | 1.45382e-05 |
| 1000.00     | 7.02932e-15 | 9.27268e-11 | 9.32852e-08 | 2.17844e-06 | 7.43399e-06 |
| 100.000     | 2.18956e-15 | 1.39613e-11 | 2.41316e-08 | 6.42140e-07 | 2.10960e-06 |
| 10.0000     | 4.62659e-15 | 3.50003e-12 | 3.72647e-09 | 9.37969e-08 | 2.96836e-07 |
| 1.00000     | 6.28709e-15 | 1.80001e-12 | 4.51089e-10 | 1.06689e-08 | 3.65759e-08 |
| 0.100000    | 5.39385e-15 | 1.26618e-12 | 9.09533e-11 | 1.65525e-09 | 6.38186e-09 |
| 0.0100000   | 4.98029e-15 | 1.05872e-12 | 4.01367e-11 | 5.10494e-10 | 2.57546e-09 |
| 0.00100000  | 4.90160e-15 | 1.00981e-12 | 3.26549e-11 | 3.67747e-10 | 2.13591e-09 |
| 0.000100000 | 4.89048e-15 | 1.00246e-12 | 3.17531e-11 | 3.52429e-10 | 2.09110e-09 |
| 1.00000e-05 | 4.88920e-15 | 1.00162e-12 | 3.16604e-11 | 3.50927e-10 | 2.08675e-09 |
| 1.00000e-06 | 4.88907e-15 | 1.00154e-12 | 3.16514e-11 | 3.50782e-10 | 2.08632e-09 |
| 1.00000e-07 | 4.88906e-15 | 1.00153e-12 | 3.16505e-11 | 3.50767e-10 | 2.08628e-09 |
| 1.00000e-08 | 4.88906e-15 | 1.00153e-12 | 3.16504e-11 | 3.50766e-10 | 2.08627e-09 |
| 1.00000e-09 | 4.88906e-15 | 1.00153e-12 | 3.16504e-11 | 3.50766e-10 | 2.08627e-09 |

| Pa\K        | 900.000     | 1000.00     | 1100.00     | 1200.00     | 1300.00     |
|-------------|-------------|-------------|-------------|-------------|-------------|
| 1.00000e+08 | 7.72956e-07 | 1.50256e-06 | 2.17656e-06 | 2.64507e-06 | 2.80544e-06 |
| 1.00000e+07 | 5.74732e-06 | 1.00716e-05 | 1.74854e-05 | 2.46672e-05 | 2.90985e-05 |
| 1.00000e+06 | 2.48568e-05 | 3.24060e-05 | 4.39108e-05 | 5.55058e-05 | 6.28478e-05 |
| 100000.     | 3.10622e-05 | 3.76637e-05 | 4.36923e-05 | 4.87413e-05 | 5.18566e-05 |
| 10000.0     | 2.19733e-05 | 2.56944e-05 | 2.68717e-05 | 2.65124e-05 | 2.51555e-05 |
| 1000.00     | 1.08603e-05 | 1.09704e-05 | 9.55899e-06 | 7.85878e-06 | 6.47359e-06 |
| 100.000     | 2.62818e-06 | 2.21830e-06 | 1.67469e-06 | 1.31948e-06 | 1.29851e-06 |
| 10.0000     | 3.53180e-07 | 2.97669e-07 | 2.62439e-07 | 3.30123e-07 | 6.12702e-07 |
| 1.00000     | 4.99383e-08 | 5.91388e-08 | 9.92634e-08 | 2.23057e-07 | 5.41983e-07 |
| 0.100000    | 1.34792e-08 | 3.12123e-08 | 8.12876e-08 | 2.11897e-07 | 5.34872e-07 |
| 0.0100000   | 9.04266e-09 | 2.80487e-08 | 7.93872e-08 | 2.10768e-07 | 5.34169e-07 |
| 0.00100000  | 8.56135e-09 | 2.77234e-08 | 7.91982e-08 | 2.10658e-07 | 5.34100e-07 |
| 0.000100000 | 8.51364e-09 | 2.76916e-08 | 7.91798e-08 | 2.10647e-07 | 5.34094e-07 |
| 1.00000e-05 | 8.50900e-09 | 2.76885e-08 | 7.91780e-08 | 2.10646e-07 | 5.34093e-07 |
| 1.00000e-06 | 8.50854e-09 | 2.76882e-08 | 7.91778e-08 | 2.10646e-07 | 5.34093e-07 |
| 1.00000e-07 | 8.50850e-09 | 2.76882e-08 | 7.91778e-08 | 2.10646e-07 | 5.34093e-07 |
| 1.00000e-08 | 8.50849e-09 | 2.76882e-08 | 7.91778e-08 | 2.10646e-07 | 5.34093e-07 |
| 1.00000e-09 | 8.50849e-09 | 2.76882e-08 | 7.91778e-08 | 2.10646e-07 | 5.34093e-07 |

| Pa\K        | 1400.00     | 1500.00     | 1750.00     | 2000.00     | 2250.00     |
|-------------|-------------|-------------|-------------|-------------|-------------|
| 1.00000e+08 | 2.61817e-06 | 2.05390e-06 | 0.000826063 | 0.000900543 | 0.000956428 |
| 1.00000e+07 | 3.10097e-05 | 3.06790e-05 | 0.00121981  | 0.00120027  | 0.00112917  |
| 1.00000e+06 | 6.67658e-05 | 6.88383e-05 | 0.000971597 | 0.000894587 | 0.000808834 |
| 100000.     | 5.35493e-05 | 5.46517e-05 | 0.000576593 | 0.000474827 | 0.000413549 |
| 10000.0     | 2.34946e-05 | 2.23798e-05 | 0.000189759 | 0.000154015 | 0.000190050 |
| 1000.00     | 5.82510e-06 | 6.39102e-06 | 4.17894e-05 | 6.98183e-05 | 0.000146575 |
| 100.000     | 1.82629e-06 | 3.32406e-06 | 1.87783e-05 | 5.90749e-05 | 0.000141699 |
| 10.0000     | 1.34413e-06 | 2.97492e-06 | 1.63067e-05 | 5.79752e-05 | 0.000141217 |
| 1.00000     | 1.29566e-06 | 2.93998e-06 | 1.60598e-05 | 5.78663e-05 | 0.000141169 |
| 0.100000    | 1.29087e-06 | 2.93654e-06 | 1.60353e-05 | 5.78555e-05 | 0.000141165 |
| 0.0100000   | 1.29040e-06 | 2.93620e-06 | 1.60329e-05 | 5.78544e-05 | 0.000141164 |
| 0.00100000  | 1.29035e-06 | 2.93617e-06 | 1.60326e-05 | 5.78543e-05 | 0.000141164 |
| 0.000100000 | 1.29034e-06 | 2.93617e-06 | 1.60326e-05 | 5.78543e-05 | 0.000141164 |
| 1.00000e-05 | 1.29034e-06 | 2.93617e-06 | 1.60326e-05 | 5.78543e-05 | 0.000141164 |
| 1.00000e-06 | 1.29034e-06 | 2.93617e-06 | 1.60326e-05 | 5.78543e-05 | 0.000141164 |
| 1.00000e-07 | 1.29034e-06 | 2.93617e-06 | 1.60326e-05 | 5.78543e-05 | 0.000141164 |
| 1.00000e-08 | 1.29034e-06 | 2.93617e-06 | 1.60326e-05 | 5.78543e-05 | 0.000141164 |
| 1.00000e-09 | 1.29034e-06 | 2.93617e-06 | 1.60326e-05 | 5.78543e-05 | 0.000141164 |

| Pa\K        | 2500.00     | 2750.00     | 3000.00     | 3250.00     | 3500.00     |
|-------------|-------------|-------------|-------------|-------------|-------------|
| 1.00000e+08 | 0.000979006 | 0.000964194 | 0.000920491 | 0.000862172 | 0.000801440 |
| 1.00000e+07 | 0.00103391  | 0.000940180 | 0.000861890 | 0.000801954 | 0.000757020 |
| 1.00000e+06 | 0.000732073 | 0.000684255 | 0.000666408 | 0.000666720 | 0.000672090 |
| 100000.     | 0.000411819 | 0.000460268 | 0.000527502 | 0.000588515 | 0.000631702 |
| 10000.0     | 0.000279774 | 0.000390934 | 0.000493969 | 0.000573326 | 0.000625300 |
| 1000.00     | 0.000259485 | 0.000381980 | 0.000490168 | 0.000571784 | 0.000624723 |
| 100.000     | 0.000257389 | 0.000381101 | 0.000489808 | 0.000571644 | 0.000624674 |
| 10.0000     | 0.000257185 | 0.000381016 | 0.000489774 | 0.000571631 | 0.000624670 |
| 1.00000     | 0.000257165 | 0.000381008 | 0.000489771 | 0.000571630 | 0.000624669 |
| 0.100000    | 0.000257163 | 0.000381007 | 0.000489771 | 0.000571630 | 0.000624669 |
| 0.0100000   | 0.000257163 | 0.000381007 | 0.000489771 | 0.000571630 | 0.000624669 |
| 0.00100000  | 0.000257163 | 0.000381007 | 0.000489771 | 0.000571630 | 0.000624669 |
| 0.000100000 | 0.000257163 | 0.000381007 | 0.000489771 | 0.000571630 | 0.000624669 |
| 1.00000e-05 | 0.000257163 | 0.000381007 | 0.000489771 | 0.000571630 | 0.000624669 |
| 1.00000e-06 | 0.000257163 | 0.000381007 | 0.000489771 | 0.000571630 | 0.000624669 |
| 1.00000e-07 | 0.000257163 | 0.000381007 | 0.000489771 | 0.000571630 | 0.000624669 |
| 1.00000e-08 | 0.000257163 | 0.000381007 | 0.000489771 | 0.000571630 | 0.000624669 |
| 1.00000e-09 | 0.000257163 | 0.000381007 | 0.000489771 | 0.000571630 | 0.000624669 |

| Pa\K        | 3750.00     | 4000.00     |
|-------------|-------------|-------------|
| 1.00000e+08 | 0.000745207 | 0.000695897 |
| 1.00000e+07 | 0.000721909 | 0.000692133 |
| 1.00000e+06 | 0.000673988 | 0.000688880 |
| 100000.     | 0.000655055 | 0.000661258 |
| 10000.0     | 0.000652659 | 0.000660599 |
| 1000.00     | 0.000652482 | 0.000660580 |
| 100.000     | 0.000652469 | 0.000660582 |
| 10.0000     | 0.000652468 | 0.000660582 |
| 1.00000     | 0.000652468 | 0.000660582 |
| 0.100000    | 0.000652468 | 0.000660582 |
| 0.0100000   | 0.000652468 | 0.000660582 |
| 0.00100000  | 0.000652468 | 0.000660582 |
| 0.000100000 | 0.000652468 | 0.000660582 |
| 1.00000e-05 | 0.000652468 | 0.000660582 |
| 1.00000e-06 | 0.000652468 | 0.000660582 |
| 1.00000e-07 | 0.000652468 | 0.000660582 |
| 1.00000e-08 | 0.000652468 | 0.000660582 |
| 1.00000e-09 | 0.000652468 | 0.000660582 |

rad19syn

=====

| Pa\K        | 20.0000     | 30.0000     | 40.0000     | 50.0000     | 60.0000     |
|-------------|-------------|-------------|-------------|-------------|-------------|
| 1.00000e+08 | 1.26012e-78 | 1.05998e-76 | 2.37677e-75 | 3.87178e-74 | 5.89534e-73 |
| 1.00000e+07 | 3.96257e-73 | 2.27081e-71 | 4.07497e-70 | 5.64668e-69 | 7.54186e-68 |
| 1.00000e+06 | 4.88233e-68 | 2.41885e-66 | 4.03362e-65 | 5.29926e-64 | 6.76906e-63 |
| 100000.     | 3.85313e-63 | 1.49223e-61 | 2.02884e-60 | 2.22598e-59 | 2.41402e-58 |
| 10000.0     | 7.41848e-59 | 1.27997e-57 | 1.01696e-56 | 7.33057e-56 | 5.56831e-55 |
| 1000.00     | 6.55674e-56 | 3.78728e-55 | 1.56136e-54 | 6.85988e-54 | 3.47823e-53 |
| 100.000     | 1.78623e-54 | 3.96489e-54 | 1.04274e-53 | 3.53917e-53 | 1.55108e-52 |
| 10.0000     | 7.78663e-54 | 1.99534e-53 | 5.87443e-53 | 2.12552e-52 | 9.69270e-52 |
| 1.00000     | 6.23843e-53 | 1.73242e-52 | 5.13170e-52 | 1.82767e-51 | 8.15565e-51 |
| 0.100000    | 5.49864e-52 | 1.38307e-51 | 3.70026e-51 | 1.19631e-50 | 4.88365e-50 |
| 0.0100000   | 2.13895e-51 | 2.54529e-51 | 3.78147e-51 | 7.55454e-51 | 2.05755e-50 |
| 0.00100000  | 1.56362e-52 | 3.05790e-53 | 1.75728e-53 | 1.95235e-53 | 3.58545e-53 |

|             |             |             |             |             |             |
|-------------|-------------|-------------|-------------|-------------|-------------|
| 0.000100000 | 8.39169e-56 | 1.01022e-56 | 5.47954e-57 | 6.31388e-57 | 1.23979e-56 |
| 1.00000e-05 | 3.69811e-59 | 6.80421e-60 | 4.83742e-60 | 6.81475e-60 | 1.58429e-59 |
| 1.00000e-06 | 7.36790e-62 | 2.17235e-62 | 2.01616e-62 | 3.46758e-62 | 9.87451e-62 |
| 1.00000e-07 | 6.40504e-64 | 2.89357e-64 | 3.49198e-64 | 7.57694e-64 | 2.88579e-63 |
| 1.00000e-08 | 2.09081e-65 | 1.35551e-65 | 2.00119e-65 | 5.06782e-65 | 2.23412e-64 |
| 1.00000e-09 | 1.63192e-66 | 1.19103e-66 | 1.84453e-66 | 4.80920e-66 | 2.16809e-65 |

| Pa\K        | 70.0000     | 80.0000     | 90.0000     | 100.000     | 110.000     |
|-------------|-------------|-------------|-------------|-------------|-------------|
| 1.00000e+08 | 9.53629e-72 | 1.85202e-70 | 5.07102e-69 | 2.35508e-67 | 2.06148e-65 |
| 1.00000e+07 | 1.08610e-66 | 1.88432e-65 | 4.58562e-64 | 1.87518e-62 | 1.44034e-60 |
| 1.00000e+06 | 9.36308e-62 | 1.56384e-60 | 3.67032e-59 | 1.45207e-57 | 1.08555e-55 |
| 100000.     | 2.87134e-57 | 4.17305e-56 | 8.65514e-55 | 3.10715e-53 | 2.19738e-51 |
| 10000.0     | 4.84015e-54 | 5.33939e-53 | 8.89387e-52 | 2.85151e-50 | 2.09025e-48 |
| 1000.00     | 2.18426e-52 | 1.94606e-51 | 3.20993e-50 | 1.29654e-48 | 1.29470e-46 |
| 100.000     | 9.32597e-52 | 8.98108e-51 | 1.79756e-49 | 8.74219e-48 | 9.81996e-46 |
| 10.0000     | 6.03177e-51 | 6.07221e-50 | 1.30124e-48 | 6.85792e-47 | 8.28257e-45 |
| 1.00000     | 4.99216e-50 | 5.03440e-49 | 1.10927e-47 | 6.02999e-46 | 7.39845e-44 |
| 0.100000    | 2.76196e-49 | 2.60246e-48 | 5.39997e-47 | 2.76451e-45 | 3.19902e-43 |
| 0.0100000   | 8.22699e-50 | 5.73608e-49 | 9.15113e-48 | 3.74738e-46 | 3.68832e-44 |
| 0.00100000  | 1.08582e-52 | 6.20602e-52 | 8.80216e-51 | 3.73118e-49 | 5.34122e-47 |
| 0.000100000 | 4.08078e-56 | 2.65545e-55 | 5.84658e-54 | 7.64752e-52 | 4.69192e-49 |
| 1.00000e-05 | 6.31446e-59 | 6.90766e-58 | 7.33750e-56 | 3.22490e-53 | 3.27784e-50 |
| 1.00000e-06 | 5.89124e-61 | 1.98033e-59 | 5.43978e-57 | 2.93663e-54 | 3.15929e-51 |
| 1.00000e-07 | 2.84494e-62 | 1.64999e-60 | 5.27327e-58 | 2.90902e-55 | 3.14764e-52 |
| 1.00000e-08 | 2.55958e-63 | 1.61807e-61 | 5.25676e-59 | 2.90627e-56 | 3.14648e-53 |
| 1.00000e-09 | 2.53099e-64 | 1.61488e-62 | 5.25511e-60 | 2.90600e-57 | 3.14636e-54 |

| Pa\K        | 120.000     | 130.000     | 140.000     | 150.000     | 160.000     |
|-------------|-------------|-------------|-------------|-------------|-------------|
| 1.00000e+08 | 2.68907e-63 | 4.16523e-61 | 5.77362e-59 | 8.04811e-57 | 8.05494e-55 |
| 1.00000e+07 | 1.64968e-58 | 2.28966e-56 | 2.91753e-54 | 4.17610e-52 | 4.47971e-50 |
| 1.00000e+06 | 1.21453e-53 | 1.65355e-51 | 2.07136e-49 | 2.97104e-47 | 3.21950e-45 |
| 100000.     | 2.86878e-49 | 3.23032e-47 | 4.05886e-45 | 6.15833e-43 | 7.07115e-41 |
| 10000.0     | 2.46877e-46 | 3.75470e-44 | 5.26458e-42 | 9.90759e-40 | 1.38231e-37 |
| 1000.00     | 1.81071e-44 | 3.12695e-42 | 4.83392e-40 | 1.12340e-37 | 1.95817e-35 |
| 100.000     | 1.45084e-43 | 2.67443e-41 | 4.42845e-39 | 1.20321e-36 | 2.54738e-34 |
| 10.0000     | 1.27384e-42 | 2.41567e-40 | 4.07137e-38 | 1.12969e-35 | 2.44366e-33 |
| 1.00000     | 1.14034e-41 | 2.15903e-39 | 3.62921e-37 | 1.00891e-34 | 2.20069e-32 |
| 0.100000    | 4.67658e-41 | 8.51954e-39 | 1.40241e-36 | 4.04990e-34 | 9.70776e-32 |
| 0.0100000   | 4.92037e-42 | 9.23656e-40 | 1.76800e-37 | 8.43194e-35 | 3.90157e-32 |
| 0.00100000  | 1.31959e-44 | 5.88215e-42 | 2.61319e-39 | 3.69733e-36 | 3.77219e-33 |
| 0.000100000 | 2.93874e-46 | 2.44001e-43 | 1.56618e-40 | 3.04657e-37 | 3.67410e-34 |
| 1.00000e-05 | 2.43268e-47 | 2.19763e-44 | 1.47644e-41 | 2.98139e-38 | 3.66292e-35 |
| 1.00000e-06 | 2.38637e-48 | 2.17437e-45 | 1.46762e-42 | 2.97487e-39 | 3.66178e-36 |
| 1.00000e-07 | 2.38178e-49 | 2.17206e-46 | 1.46674e-43 | 2.97422e-40 | 3.66167e-37 |
| 1.00000e-08 | 2.38132e-50 | 2.17182e-47 | 1.46666e-44 | 2.97415e-41 | 3.66166e-38 |
| 1.00000e-09 | 2.38128e-51 | 2.17180e-48 | 1.46665e-45 | 2.97415e-42 | 3.66166e-39 |

| Pa\K        | 170.000     | 180.000     | 190.000     | 200.000     | 210.000     |
|-------------|-------------|-------------|-------------|-------------|-------------|
| 1.00000e+08 | 5.65285e-53 | 2.79225e-51 | 1.08978e-49 | 3.06702e-48 | 6.53659e-47 |
| 1.00000e+07 | 3.42416e-48 | 1.82471e-46 | 7.62065e-45 | 2.18613e-43 | 4.60573e-42 |
| 1.00000e+06 | 2.49473e-43 | 1.34019e-41 | 5.56981e-40 | 1.56154e-38 | 3.18031e-37 |
| 100000.     | 5.75164e-39 | 3.13575e-37 | 1.25098e-35 | 3.21835e-34 | 5.90223e-33 |
| 10000.0     | 1.33043e-35 | 7.86123e-34 | 2.97534e-32 | 6.75615e-31 | 1.07321e-29 |
| 1000.00     | 2.42696e-33 | 1.59670e-31 | 5.37725e-30 | 1.02999e-28 | 1.39230e-27 |
| 100.000     | 4.40371e-32 | 3.42389e-30 | 1.09035e-28 | 1.94633e-27 | 2.48247e-26 |
| 10.0000     | 4.57517e-31 | 3.73234e-29 | 1.17763e-27 | 2.07737e-26 | 2.62277e-25 |
| 1.00000     | 4.25677e-30 | 3.50958e-28 | 1.08802e-26 | 1.87849e-25 | 2.32108e-24 |
| 0.100000    | 2.39488e-29 | 2.09773e-27 | 6.00611e-26 | 9.57796e-25 | 1.10729e-23 |
| 0.0100000   | 3.76088e-29 | 4.16571e-27 | 1.10946e-25 | 1.67153e-24 | 1.85298e-23 |
| 0.00100000  | 3.69989e-29 | 4.60748e-27 | 1.21177e-25 | 1.80897e-24 | 1.99179e-23 |
| 0.000100000 | 3.67949e-29 | 4.65634e-27 | 1.22300e-25 | 1.82397e-24 | 2.00688e-23 |
| 1.00000e-05 | 3.67726e-29 | 4.66127e-27 | 1.22413e-25 | 1.82549e-24 | 2.00840e-23 |
| 1.00000e-06 | 3.67704e-29 | 4.66177e-27 | 1.22425e-25 | 1.82564e-24 | 2.00855e-23 |
| 1.00000e-07 | 3.67702e-29 | 4.66182e-27 | 1.22426e-25 | 1.82565e-24 | 2.00857e-23 |
| 1.00000e-08 | 3.67701e-29 | 4.66182e-27 | 1.22426e-25 | 1.82565e-24 | 2.00857e-23 |
| 1.00000e-09 | 3.67701e-29 | 4.66182e-27 | 1.22426e-25 | 1.82565e-24 | 2.00857e-23 |

| Pa\K        | 220.000     | 230.000     | 240.000     | 250.000     | 260.000     |
|-------------|-------------|-------------|-------------|-------------|-------------|
| 1.00000e+08 | 1.09998e-45 | 1.61807e-44 | 1.95643e-43 | 1.94248e-42 | 1.66419e-41 |
| 1.00000e+07 | 7.49012e-41 | 1.08276e-39 | 1.27553e-38 | 1.20320e-37 | 9.75853e-37 |
| 1.00000e+06 | 4.97883e-36 | 6.86976e-35 | 7.73122e-34 | 7.00332e-33 | 5.45760e-32 |
| 100000.     | 8.32766e-32 | 1.01121e-30 | 1.00949e-29 | 8.31494e-29 | 5.92882e-28 |
| 10000.0     | 1.31968e-28 | 1.35913e-27 | 1.16122e-26 | 8.40699e-26 | 5.30586e-25 |
| 1000.00     | 1.48135e-26 | 1.30778e-25 | 9.70617e-25 | 6.19833e-24 | 3.47452e-23 |
| 100.000     | 2.51175e-25 | 2.11199e-24 | 1.50051e-23 | 9.21226e-23 | 4.98015e-22 |
| 10.0000     | 2.62900e-24 | 2.18868e-23 | 1.53985e-22 | 9.36446e-22 | 5.01388e-21 |

|             |             |             |             |             |             |
|-------------|-------------|-------------|-------------|-------------|-------------|
| 1.00000     | 2.27593e-23 | 1.84508e-22 | 1.26217e-21 | 7.45301e-21 | 3.86493e-20 |
| 0.100000    | 1.02001e-22 | 7.75150e-22 | 4.97595e-21 | 2.75658e-20 | 1.34043e-19 |
| 0.0100000   | 1.64292e-22 | 1.20375e-21 | 7.46544e-21 | 4.00231e-20 | 1.88663e-19 |
| 0.00100000  | 1.75505e-22 | 1.27837e-21 | 7.88489e-21 | 4.20559e-20 | 1.97304e-19 |
| 0.000100000 | 1.76717e-22 | 1.28640e-21 | 7.92981e-21 | 4.22726e-20 | 1.98221e-19 |
| 1.00000e-05 | 1.76840e-22 | 1.28721e-21 | 7.93434e-21 | 4.22944e-20 | 1.98314e-19 |
| 1.00000e-06 | 1.76852e-22 | 1.28729e-21 | 7.93479e-21 | 4.22966e-20 | 1.98323e-19 |
| 1.00000e-07 | 1.76853e-22 | 1.28730e-21 | 7.93483e-21 | 4.22968e-20 | 1.98324e-19 |
| 1.00000e-08 | 1.76853e-22 | 1.28730e-21 | 7.93484e-21 | 4.22968e-20 | 1.98324e-19 |
| 1.00000e-09 | 1.76853e-22 | 1.28730e-21 | 7.93484e-21 | 4.22968e-20 | 1.98324e-19 |

| Pa\K        | 270.000     | 280.000     | 290.000     | 300.000     | 310.000     |
|-------------|-------------|-------------|-------------|-------------|-------------|
| 1.00000e+08 | 1.24777e-40 | 8.23604e-40 | 4.82036e-39 | 1.34387e-21 | 1.18272e-37 |
| 1.00000e+07 | 6.93697e-36 | 4.35078e-35 | 2.42907e-34 | 4.41430e-20 | 5.51720e-33 |
| 1.00000e+06 | 3.72910e-31 | 2.24940e-30 | 1.20858e-29 | 3.08326e-19 | 2.54754e-28 |
| 100000.     | 3.72285e-27 | 2.07405e-26 | 1.03404e-25 | 8.62320e-19 | 1.89967e-24 |
| 10000.0     | 2.96360e-24 | 1.47847e-23 | 6.64606e-23 | 2.91023e-18 | 1.01266e-21 |
| 1000.00     | 1.73435e-22 | 7.79066e-22 | 3.17839e-21 | 1.37324e-18 | 4.08501e-20 |
| 100.000     | 2.40439e-21 | 1.04780e-20 | 4.15949e-20 | 4.86541e-18 | 5.10408e-19 |
| 10.0000     | 2.39687e-20 | 1.03408e-19 | 4.06351e-19 | 3.03908e-17 | 4.88594e-18 |
| 1.00000     | 1.78480e-19 | 7.42276e-19 | 2.80727e-18 | 7.50034e-17 | 3.11834e-17 |
| 0.100000    | 5.80353e-19 | 2.26428e-18 | 8.04349e-18 | 4.57352e-17 | 7.92933e-17 |
| 0.0100000   | 7.93256e-19 | 3.01123e-18 | 1.04276e-17 | 2.84369e-17 | 9.82529e-17 |
| 0.00100000  | 8.25953e-19 | 3.12273e-18 | 1.07740e-17 | 2.71282e-17 | 1.00873e-16 |
| 0.000100000 | 8.29408e-19 | 3.13446e-18 | 1.08103e-17 | 2.69848e-17 | 1.01146e-16 |
| 1.00000e-05 | 8.29755e-19 | 3.13564e-18 | 1.08140e-17 | 2.69686e-17 | 1.01173e-16 |
| 1.00000e-06 | 8.29790e-19 | 3.13576e-18 | 1.08143e-17 | 2.69669e-17 | 1.01176e-16 |
| 1.00000e-07 | 8.29794e-19 | 3.13577e-18 | 1.08144e-17 | 2.69667e-17 | 1.01176e-16 |
| 1.00000e-08 | 8.29794e-19 | 3.13577e-18 | 1.08144e-17 | 2.69667e-17 | 1.01176e-16 |
| 1.00000e-09 | 8.29794e-19 | 3.13577e-18 | 1.08144e-17 | 2.69667e-17 | 1.01176e-16 |

| Pa\K        | 400.000     | 500.000     | 600.000     | 700.000     | 800.000     |
|-------------|-------------|-------------|-------------|-------------|-------------|
| 1.00000e+08 | 2.10041e-18 | 5.37097e-14 | 1.40200e-11 | 2.01935e-09 | 9.42209e-08 |
| 1.00000e+07 | 1.33227e-15 | 1.58346e-10 | 1.02655e-08 | 7.28344e-08 | 2.36901e-07 |
| 1.00000e+06 | 3.45844e-13 | 6.11312e-09 | 2.18252e-07 | 7.73359e-07 | 1.28437e-06 |
| 100000.     | 2.64330e-12 | 8.06851e-09 | 2.66871e-07 | 1.05907e-06 | 1.79312e-06 |
| 10000.0     | 8.93237e-13 | 1.57561e-09 | 8.26020e-08 | 5.77064e-07 | 1.32607e-06 |
| 1000.00     | 6.49575e-14 | 1.88446e-10 | 2.26771e-08 | 2.62654e-07 | 7.41123e-07 |
| 100.000     | 2.26061e-14 | 3.95844e-11 | 6.21195e-09 | 8.32498e-08 | 2.54282e-07 |
| 10.0000     | 6.87618e-14 | 2.09425e-11 | 1.50975e-09 | 1.95851e-08 | 8.71050e-08 |
| 1.00000     | 1.30155e-13 | 2.26068e-11 | 8.19090e-10 | 1.01874e-08 | 6.37442e-08 |
| 0.100000    | 1.33471e-13 | 2.28784e-11 | 7.51929e-10 | 9.27287e-09 | 6.14050e-08 |
| 0.0100000   | 1.30322e-13 | 2.28314e-11 | 7.44872e-10 | 9.18320e-09 | 6.11738e-08 |
| 0.00100000  | 1.29936e-13 | 2.28229e-11 | 7.44110e-10 | 9.17418e-09 | 6.11508e-08 |
| 0.000100000 | 1.29897e-13 | 2.28218e-11 | 7.44031e-10 | 9.17329e-09 | 6.11486e-08 |
| 1.00000e-05 | 1.29893e-13 | 2.28217e-11 | 7.44023e-10 | 9.17320e-09 | 6.11483e-08 |
| 1.00000e-06 | 1.29892e-13 | 2.28217e-11 | 7.44022e-10 | 9.17319e-09 | 6.11483e-08 |
| 1.00000e-07 | 1.29892e-13 | 2.28217e-11 | 7.44022e-10 | 9.17319e-09 | 6.11483e-08 |
| 1.00000e-08 | 1.29892e-13 | 2.28217e-11 | 7.44022e-10 | 9.17319e-09 | 6.11483e-08 |
| 1.00000e-09 | 1.29892e-13 | 2.28217e-11 | 7.44022e-10 | 9.17319e-09 | 6.11483e-08 |

| Pa\K        | 900.000     | 1000.00     | 1100.00     | 1200.00     | 1300.00     |
|-------------|-------------|-------------|-------------|-------------|-------------|
| 1.00000e+08 | 8.55185e-07 | 2.54232e-06 | 4.46313e-06 | 5.49037e-06 | 5.28115e-06 |
| 1.00000e+07 | 1.10012e-06 | 6.28260e-06 | 1.92891e-05 | 3.43937e-05 | 4.36489e-05 |
| 1.00000e+06 | 1.99097e-06 | 5.62227e-06 | 1.76490e-05 | 3.50887e-05 | 5.28967e-05 |
| 100000.     | 2.45837e-06 | 4.00051e-06 | 8.54397e-06 | 1.72717e-05 | 3.09667e-05 |
| 10000.0     | 1.96094e-06 | 2.82859e-06 | 5.04177e-06 | 9.87737e-06 | 1.80382e-05 |
| 1000.00     | 1.14787e-06 | 1.76575e-06 | 3.30771e-06 | 6.48326e-06 | 1.18228e-05 |
| 100.000     | 4.84402e-07 | 1.06505e-06 | 2.47629e-06 | 5.25183e-06 | 9.89711e-06 |
| 10.0000     | 2.95792e-07 | 8.98513e-07 | 2.30333e-06 | 5.01921e-06 | 9.54929e-06 |
| 1.00000     | 2.71407e-07 | 8.77741e-07 | 2.28179e-06 | 4.99023e-06 | 9.50574e-06 |
| 0.100000    | 2.68933e-07 | 8.75612e-07 | 2.27956e-06 | 4.98719e-06 | 9.50116e-06 |
| 0.0100000   | 2.68687e-07 | 8.75401e-07 | 2.27934e-06 | 4.98689e-06 | 9.50070e-06 |
| 0.00100000  | 2.68663e-07 | 8.75380e-07 | 2.27932e-06 | 4.98686e-06 | 9.50065e-06 |
| 0.000100000 | 2.68661e-07 | 8.75378e-07 | 2.27932e-06 | 4.98686e-06 | 9.50065e-06 |
| 1.00000e-05 | 2.68660e-07 | 8.75378e-07 | 2.27932e-06 | 4.98686e-06 | 9.50065e-06 |
| 1.00000e-06 | 2.68660e-07 | 8.75378e-07 | 2.27932e-06 | 4.98686e-06 | 9.50065e-06 |
| 1.00000e-07 | 2.68660e-07 | 8.75378e-07 | 2.27932e-06 | 4.98686e-06 | 9.50065e-06 |
| 1.00000e-08 | 2.68660e-07 | 8.75378e-07 | 2.27932e-06 | 4.98686e-06 | 9.50065e-06 |
| 1.00000e-09 | 2.68660e-07 | 8.75378e-07 | 2.27932e-06 | 4.98686e-06 | 9.50065e-06 |

| Pa\K        | 1400.00     | 1500.00     | 1750.00     | 2000.00     | 2250.00     |
|-------------|-------------|-------------|-------------|-------------|-------------|
| 1.00000e+08 | 4.54915e-06 | 4.02957e-06 | 0.00115572  | 0.00117456  | 0.00117256  |
| 1.00000e+07 | 4.51561e-05 | 4.15606e-05 | 0.000958327 | 0.000861911 | 0.000755312 |
| 1.00000e+06 | 6.84494e-05 | 8.03510e-05 | 0.000462041 | 0.000457235 | 0.000412813 |
| 100000.     | 4.84660e-05 | 6.68612e-05 | 0.000244009 | 0.000282631 | 0.000253327 |

|             |             |             |             |             |             |
|-------------|-------------|-------------|-------------|-------------|-------------|
| 10000.0     | 2.93714e-05 | 4.29591e-05 | 0.000124923 | 0.000155916 | 0.000165803 |
| 1000.00     | 1.96444e-05 | 2.98948e-05 | 6.89175e-05 | 0.000102460 | 0.000139891 |
| 100.000     | 1.67783e-05 | 2.60035e-05 | 5.32702e-05 | 8.98710e-05 | 0.000135266 |
| 10.0000     | 1.62605e-05 | 2.52860e-05 | 5.04679e-05 | 8.79161e-05 | 0.000134667 |
| 1.00000     | 1.61948e-05 | 2.51935e-05 | 5.01057e-05 | 8.76835e-05 | 0.000134602 |
| 0.100000    | 1.61878e-05 | 2.51836e-05 | 5.00669e-05 | 8.76593e-05 | 0.000134595 |
| 0.0100000   | 1.61871e-05 | 2.51826e-05 | 5.00630e-05 | 8.76569e-05 | 0.000134595 |
| 0.00100000  | 1.61870e-05 | 2.51825e-05 | 5.00626e-05 | 8.76566e-05 | 0.000134595 |
| 0.000100000 | 1.61870e-05 | 2.51825e-05 | 5.00626e-05 | 8.76566e-05 | 0.000134595 |
| 1.00000e-05 | 1.61870e-05 | 2.51825e-05 | 5.00626e-05 | 8.76566e-05 | 0.000134595 |
| 1.00000e-06 | 1.61870e-05 | 2.51825e-05 | 5.00626e-05 | 8.76566e-05 | 0.000134595 |
| 1.00000e-07 | 1.61870e-05 | 2.51825e-05 | 5.00626e-05 | 8.76566e-05 | 0.000134595 |
| 1.00000e-08 | 1.61870e-05 | 2.51825e-05 | 5.00626e-05 | 8.76566e-05 | 0.000134595 |
| 1.00000e-09 | 1.61870e-05 | 2.51825e-05 | 5.00626e-05 | 8.76566e-05 | 0.000134595 |

| Pa\K        | 2500.00     | 2750.00     | 3000.00     | 3250.00     | 3500.00     |
|-------------|-------------|-------------|-------------|-------------|-------------|
| 1.00000e+08 | 0.00114803  | 0.00110600  | 0.00105925  | 0.00102224  | 0.00100471  |
| 1.00000e+07 | 0.000664607 | 0.000610639 | 0.000603084 | 0.000640120 | 0.000712346 |
| 1.00000e+06 | 0.000372034 | 0.000375712 | 0.000429222 | 0.000521307 | 0.000637509 |
| 100000.     | 0.000250431 | 0.000298081 | 0.000384806 | 0.000497467 | 0.000625352 |
| 10000.0     | 0.000206112 | 0.000278643 | 0.000376658 | 0.000494037 | 0.000623898 |
| 1000.00     | 0.000196879 | 0.000275600 | 0.000375628 | 0.000493665 | 0.000623756 |
| 100.000     | 0.000195583 | 0.000275242 | 0.000375520 | 0.000493628 | 0.000623743 |
| 10.0000     | 0.000195437 | 0.000275204 | 0.000375509 | 0.000493625 | 0.000623742 |
| 1.00000     | 0.000195422 | 0.000275201 | 0.000375508 | 0.000493624 | 0.000623742 |
| 0.100000    | 0.000195420 | 0.000275200 | 0.000375508 | 0.000493624 | 0.000623742 |
| 0.0100000   | 0.000195420 | 0.000275200 | 0.000375508 | 0.000493624 | 0.000623742 |
| 0.00100000  | 0.000195420 | 0.000275200 | 0.000375508 | 0.000493624 | 0.000623742 |
| 0.000100000 | 0.000195420 | 0.000275200 | 0.000375508 | 0.000493624 | 0.000623742 |
| 1.00000e-05 | 0.000195420 | 0.000275200 | 0.000375508 | 0.000493624 | 0.000623742 |
| 1.00000e-06 | 0.000195420 | 0.000275200 | 0.000375508 | 0.000493624 | 0.000623742 |
| 1.00000e-07 | 0.000195420 | 0.000275200 | 0.000375508 | 0.000493624 | 0.000623742 |
| 1.00000e-08 | 0.000195420 | 0.000275200 | 0.000375508 | 0.000493624 | 0.000623742 |
| 1.00000e-09 | 0.000195420 | 0.000275200 | 0.000375508 | 0.000493624 | 0.000623742 |

| Pa\K        | 3750.00     | 4000.00     |
|-------------|-------------|-------------|
| 1.00000e+08 | 0.00100962  | 0.00103462  |
| 1.00000e+07 | 0.000807431 | 0.000913334 |
| 1.00000e+06 | 0.000764984 | 0.000893415 |
| 100000.     | 0.000759274 | 0.000891258 |
| 10000.0     | 0.000758689 | 0.000891080 |
| 1000.00     | 0.000758637 | 0.000891068 |
| 100.000     | 0.000758633 | 0.000891067 |
| 10.0000     | 0.000758633 | 0.000891067 |
| 1.00000     | 0.000758633 | 0.000891067 |
| 0.100000    | 0.000758633 | 0.000891067 |
| 0.0100000   | 0.000758633 | 0.000891067 |
| 0.00100000  | 0.000758633 | 0.000891067 |
| 0.000100000 | 0.000758633 | 0.000891067 |
| 1.00000e-05 | 0.000758633 | 0.000891067 |
| 1.00000e-06 | 0.000758633 | 0.000891067 |
| 1.00000e-07 | 0.000758633 | 0.000891067 |
| 1.00000e-08 | 0.000758633 | 0.000891067 |
| 1.00000e-09 | 0.000758633 | 0.000891067 |

rad7

====

| Pa\K        | 20.0000     | 30.0000     | 40.0000     | 50.0000     | 60.0000     |
|-------------|-------------|-------------|-------------|-------------|-------------|
| 1.00000e+08 | 6.35993e-38 | 1.91824e-36 | 1.38042e-35 | 5.87647e-35 | 1.92785e-34 |
| 1.00000e+07 | 2.46608e-33 | 5.15085e-32 | 3.03617e-31 | 1.13590e-30 | 3.39860e-30 |
| 1.00000e+06 | 3.42717e-29 | 6.15664e-28 | 3.43370e-27 | 1.24754e-26 | 3.66420e-26 |
| 100000.     | 3.54802e-25 | 6.22127e-24 | 3.43145e-23 | 1.23660e-22 | 3.60568e-22 |
| 10000.0     | 3.40787e-21 | 5.70924e-20 | 3.01734e-19 | 1.04203e-18 | 2.90751e-18 |
| 1000.00     | 2.36171e-17 | 3.02016e-16 | 1.29102e-15 | 3.71876e-15 | 8.80810e-15 |
| 100.000     | 4.53862e-14 | 3.26743e-13 | 9.89604e-13 | 2.21936e-12 | 4.30154e-12 |
| 10.0000     | 1.38215e-11 | 6.25280e-11 | 1.49699e-10 | 2.85791e-10 | 4.86659e-10 |
| 1.00000     | 1.16066e-09 | 3.48430e-09 | 6.15449e-09 | 9.01100e-09 | 1.19967e-08 |
| 0.100000    | 1.55700e-08 | 2.02840e-08 | 2.20499e-08 | 2.31633e-08 | 2.41279e-08 |
| 0.0100000   | 1.99084e-08 | 1.87829e-08 | 1.85623e-08 | 1.87629e-08 | 1.92054e-08 |
| 0.00100000  | 1.58326e-08 | 1.52270e-08 | 1.52762e-08 | 1.56159e-08 | 1.61272e-08 |
| 0.000100000 | 1.37424e-08 | 1.36484e-08 | 1.39354e-08 | 1.44113e-08 | 1.50071e-08 |
| 1.00000e-05 | 1.31185e-08 | 1.32179e-08 | 1.35272e-08 | 1.39604e-08 | 1.44676e-08 |
| 1.00000e-06 | 1.25266e-08 | 1.21136e-08 | 1.18440e-08 | 1.16102e-08 | 1.13488e-08 |
| 1.00000e-07 | 8.73047e-09 | 6.28399e-09 | 4.74359e-09 | 3.66256e-09 | 2.86500e-09 |
| 1.00000e-08 | 1.40148e-09 | 5.12632e-10 | 2.65069e-10 | 1.59408e-10 | 1.04407e-10 |
| 1.00000e-09 | 3.95632e-11 | 1.24274e-11 | 6.34866e-12 | 3.88041e-12 | 2.60400e-12 |

| Pa\K        | 70.0000     | 80.0000     | 90.0000     | 100.000     | 110.000     |
|-------------|-------------|-------------|-------------|-------------|-------------|
| 1.00000e+08 | 5.47975e-34 | 1.43966e-33 | 3.64120e-33 | 9.11204e-33 | 2.29818e-32 |
| 1.00000e+07 | 9.00629e-30 | 2.23728e-29 | 5.40131e-29 | 1.29886e-28 | 3.16337e-28 |
| 1.00000e+06 | 9.58445e-26 | 2.35737e-25 | 5.64542e-25 | 1.34815e-24 | 3.26276e-24 |
| 100000.     | 7.36276e-22 | 2.28479e-21 | 5.42264e-21 | 1.28115e-20 | 3.06013e-20 |
| 10000.0     | 7.20402e-18 | 1.66987e-17 | 3.74030e-17 | 8.26880e-17 | 1.82874e-16 |
| 1000.00     | 1.87026e-14 | 3.72931e-14 | 7.18237e-14 | 1.36039e-13 | 2.56372e-13 |
| 100.000     | 7.69601e-12 | 1.31639e-11 | 2.19839e-11 | 3.63259e-11 | 5.98875e-11 |
| 10.0000     | 7.75351e-10 | 1.18485e-09 | 1.76111e-09 | 2.56624e-09 | 3.68121e-09 |
| 1.00000     | 1.50936e-08 | 1.83030e-08 | 2.16356e-08 | 2.51066e-08 | 2.87353e-08 |
| 0.100000    | 2.51067e-08 | 2.61718e-08 | 2.73639e-08 | 2.87120e-08 | 3.02415e-08 |
| 0.0100000   | 1.98227e-08 | 2.05916e-08 | 2.15073e-08 | 2.25745e-08 | 2.38034e-08 |
| 0.00100000  | 1.67687e-08 | 1.75291e-08 | 1.84094e-08 | 1.94166e-08 | 2.05618e-08 |
| 0.000100000 | 1.57004e-08 | 1.64876e-08 | 1.73721e-08 | 1.83598e-08 | 1.94573e-08 |
| 1.00000e-05 | 1.50255e-08 | 1.56207e-08 | 1.62398e-08 | 1.68659e-08 | 1.74770e-08 |
| 1.00000e-06 | 1.10294e-08 | 1.06382e-08 | 1.01715e-08 | 9.63334e-09 | 9.03388e-09 |
| 1.00000e-07 | 2.26103e-09 | 1.79606e-09 | 1.43384e-09 | 1.14912e-09 | 9.23690e-10 |
| 1.00000e-08 | 7.22514e-11 | 5.19422e-11 | 3.83864e-11 | 2.89579e-11 | 2.21898e-11 |
| 1.00000e-09 | 1.85045e-12 | 1.36626e-12 | 1.03629e-12 | 8.01566e-13 | 6.29110e-13 |

| Pa\K        | 120.000     | 130.000     | 140.000     | 150.000     | 160.000     |
|-------------|-------------|-------------|-------------|-------------|-------------|
| 1.00000e+08 | 5.90817e-32 | 1.55640e-31 | 4.20376e-31 | 1.16105e-30 | 3.26448e-30 |
| 1.00000e+07 | 7.88269e-28 | 2.01894e-27 | 5.31547e-27 | 1.43422e-26 | 3.94705e-26 |
| 1.00000e+06 | 8.08175e-24 | 2.05765e-23 | 5.38424e-23 | 1.44332e-22 | 3.94380e-22 |
| 100000.     | 7.45687e-20 | 1.86022e-19 | 4.74630e-19 | 1.23368e-18 | 3.24823e-18 |
| 10000.0     | 4.07661e-16 | 9.18488e-16 | 2.08990e-15 | 4.78774e-15 | 1.09970e-14 |
| 1000.00     | 4.84079e-13 | 9.18920e-13 | 1.75491e-12 | 3.36765e-12 | 6.47805e-12 |
| 100.000     | 9.89585e-11 | 1.64145e-10 | 2.73058e-10 | 4.54304e-10 | 7.53090e-10 |
| 10.0000     | 5.20745e-09 | 7.26637e-09 | 9.99654e-09 | 1.35484e-08 | 1.80770e-08 |
| 1.00000     | 3.25452e-08 | 3.65641e-08 | 4.08251e-08 | 4.53659e-08 | 5.02295e-08 |
| 0.100000    | 3.19771e-08 | 3.39449e-08 | 3.61724e-08 | 3.86894e-08 | 4.15274e-08 |
| 0.0100000   | 2.52084e-08 | 2.68073e-08 | 2.86206e-08 | 3.06709e-08 | 3.29830e-08 |
| 0.00100000  | 2.18587e-08 | 2.33231e-08 | 2.49718e-08 | 2.68222e-08 | 2.88909e-08 |
| 0.000100000 | 2.06698e-08 | 2.19994e-08 | 2.34434e-08 | 2.49920e-08 | 2.66261e-08 |
| 1.00000e-05 | 1.80463e-08 | 1.85434e-08 | 1.89365e-08 | 1.91958e-08 | 1.92960e-08 |
| 1.00000e-06 | 8.38741e-09 | 7.71052e-09 | 7.02027e-09 | 6.33280e-09 | 5.66231e-09 |
| 1.00000e-07 | 7.44173e-10 | 6.00547e-10 | 4.85203e-10 | 3.92299e-10 | 3.17299e-10 |
| 1.00000e-08 | 1.72100e-11 | 1.34736e-11 | 1.06260e-11 | 8.42828e-12 | 6.71490e-12 |
| 1.00000e-09 | 4.99215e-13 | 3.99464e-13 | 3.21682e-13 | 2.60297e-13 | 2.11388e-13 |

| Pa\K        | 170.000     | 180.000     | 190.000     | 200.000     | 210.000     |
|-------------|-------------|-------------|-------------|-------------|-------------|
| 1.00000e+08 | 9.29549e-30 | 2.66676e-29 | 7.67179e-29 | 2.20409e-28 | 6.30214e-28 |
| 1.00000e+07 | 1.10189e-25 | 3.10359e-25 | 8.77589e-25 | 2.48049e-24 | 6.98254e-24 |
| 1.00000e+06 | 1.09223e-21 | 3.04866e-21 | 8.53175e-21 | 2.38293e-20 | 6.61642e-20 |
| 100000.     | 8.60981e-18 | 2.28360e-17 | 6.02793e-17 | 1.57623e-16 | 4.06736e-16 |
| 10000.0     | 2.52133e-14 | 5.74608e-14 | 1.29689e-13 | 2.88991e-13 | 6.34208e-13 |
| 1000.00     | 1.24532e-11 | 2.38448e-11 | 4.53248e-11 | 8.52572e-11 | 1.58237e-10 |
| 100.000     | 1.23857e-09 | 2.01277e-09 | 3.22048e-09 | 5.05896e-09 | 7.78599e-09 |
| 10.0000     | 2.37339e-08 | 3.06592e-08 | 3.89750e-08 | 4.87809e-08 | 6.01522e-08 |
| 1.00000     | 5.54634e-08 | 6.11193e-08 | 6.72529e-08 | 7.39233e-08 | 8.11922e-08 |
| 0.100000    | 4.47204e-08 | 4.83038e-08 | 5.23153e-08 | 5.67940e-08 | 6.17804e-08 |
| 0.0100000   | 3.55831e-08 | 3.84987e-08 | 4.17576e-08 | 4.53875e-08 | 4.94147e-08 |
| 0.00100000  | 3.11925e-08 | 3.37376e-08 | 3.65309e-08 | 3.95685e-08 | 4.28354e-08 |
| 0.000100000 | 2.83168e-08 | 3.00245e-08 | 3.16998e-08 | 3.32866e-08 | 3.47249e-08 |
| 1.00000e-05 | 1.92195e-08 | 1.89576e-08 | 1.85115e-08 | 1.78916e-08 | 1.71163e-08 |
| 1.00000e-06 | 5.02049e-09 | 4.41630e-09 | 3.85596e-09 | 3.34325e-09 | 2.87977e-09 |
| 1.00000e-07 | 2.56653e-10 | 2.07558e-10 | 1.67787e-10 | 1.35560e-10 | 1.09447e-10 |
| 1.00000e-08 | 5.36821e-12 | 4.30285e-12 | 3.45569e-12 | 2.77929e-12 | 2.23755e-12 |
| 1.00000e-09 | 1.72126e-13 | 1.40424e-13 | 1.14710e-13 | 9.37815e-14 | 7.67061e-14 |

| Pa\K        | 220.000     | 230.000     | 240.000     | 250.000     | 260.000     |
|-------------|-------------|-------------|-------------|-------------|-------------|
| 1.00000e+08 | 1.78834e-27 | 5.02512e-27 | 1.39578e-26 | 3.82724e-26 | 1.03498e-25 |
| 1.00000e+07 | 1.95165e-23 | 5.40309e-23 | 1.47871e-22 | 3.99446e-22 | 1.06378e-21 |
| 1.00000e+06 | 1.82033e-19 | 4.94890e-19 | 1.32660e-18 | 3.50002e-18 | 9.07567e-18 |
| 100000.     | 1.03258e-15 | 2.57296e-15 | 6.28157e-15 | 1.50064e-14 | 3.50491e-14 |
| 10000.0     | 1.36800e-12 | 2.89586e-12 | 6.00897e-12 | 1.22115e-11 | 2.42886e-11 |
| 1000.00     | 2.89029e-10 | 5.18398e-10 | 9.11333e-10 | 1.56807e-09 | 2.63802e-09 |
| 100.000     | 1.17245e-08 | 1.72623e-08 | 2.48459e-08 | 3.49676e-08 | 4.81480e-08 |
| 10.0000     | 7.31407e-08 | 8.77777e-08 | 1.04078e-07 | 1.22046e-07 | 1.41682e-07 |
| 1.00000     | 8.91239e-08 | 9.77845e-08 | 1.07241e-07 | 1.17562e-07 | 1.28815e-07 |
| 0.100000    | 6.73161e-08 | 7.34431e-08 | 8.02032e-08 | 8.76372e-08 | 9.57836e-08 |
| 0.0100000   | 5.38628e-08 | 5.87506e-08 | 6.40897e-08 | 6.98821e-08 | 7.61170e-08 |
| 0.00100000  | 4.63031e-08 | 4.99284e-08 | 5.36522e-08 | 5.74007e-08 | 6.10876e-08 |
| 0.000100000 | 3.59554e-08 | 3.69238e-08 | 3.75852e-08 | 3.79071e-08 | 3.78718e-08 |
| 1.00000e-05 | 1.62101e-08 | 1.52014e-08 | 1.41203e-08 | 1.29965e-08 | 1.18579e-08 |
| 1.00000e-06 | 2.46540e-09 | 2.09860e-09 | 1.77687e-09 | 1.49700e-09 | 1.25540e-09 |



|             |             |             |             |             |             |
|-------------|-------------|-------------|-------------|-------------|-------------|
| 1.00000e-07 | 8.82951e-11 | 7.11706e-11 | 5.73165e-11 | 4.61174e-11 | 3.70731e-11 |
| 1.00000e-08 | 1.80261e-12 | 1.45280e-12 | 1.17112e-12 | 9.44085e-13 | 7.61007e-13 |
| 1.00000e-09 | 6.27492e-14 | 5.13279e-14 | 4.19750e-14 | 3.43134e-14 | 2.80372e-14 |

| Pa\K        | 270.000     | 280.000     | 290.000     | 300.000     | 310.000     |
|-------------|-------------|-------------|-------------|-------------|-------------|
| 1.00000e+08 | 2.75840e-25 | 7.24155e-25 | 1.87180e-24 | 4.28554e-21 | 1.19082e-23 |
| 1.00000e+07 | 2.79043e-21 | 7.20441e-21 | 1.82963e-20 | 3.10286e-17 | 1.12010e-19 |
| 1.00000e+06 | 2.31037e-17 | 5.76889e-17 | 1.41191e-16 | 7.61616e-14 | 7.94545e-16 |
| 100000.     | 7.99881e-14 | 1.78314e-13 | 3.88246e-13 | 2.74327e-11 | 1.71514e-12 |
| 10000.0     | 4.72602e-11 | 8.99319e-11 | 1.67330e-10 | 1.83110e-09 | 5.41399e-10 |
| 1000.00     | 4.33640e-09 | 6.96267e-09 | 1.09195e-08 | 3.53658e-08 | 2.50518e-08 |
| 100.000     | 6.49136e-08 | 8.57725e-08 | 1.11192e-07 | 1.65055e-07 | 1.77250e-07 |
| 10.0000     | 1.62984e-07 | 1.85956e-07 | 2.10608e-07 | 2.21987e-07 | 2.65045e-07 |
| 1.00000     | 1.41067e-07 | 1.54386e-07 | 1.68836e-07 | 1.71795e-07 | 2.01367e-07 |
| 0.100000    | 1.04677e-07 | 1.14347e-07 | 1.24813e-07 | 1.30525e-07 | 1.48160e-07 |
| 0.0100000   | 8.27680e-08 | 8.97902e-08 | 9.71185e-08 | 1.02870e-07 | 1.12327e-07 |
| 0.00100000  | 6.46178e-08 | 6.78920e-08 | 7.08126e-08 | 7.10991e-08 | 7.52441e-08 |
| 0.000100000 | 3.74765e-08 | 3.67336e-08 | 3.56684e-08 | 3.23356e-08 | 3.27231e-08 |
| 1.00000e-05 | 1.07295e-08 | 9.63237e-09 | 8.58337e-09 | 7.48537e-09 | 6.67698e-09 |
| 1.00000e-06 | 1.04827e-09 | 8.71844e-10 | 7.22441e-10 | 7.41547e-10 | 4.91150e-10 |
| 1.00000e-07 | 2.97762e-11 | 2.38952e-11 | 1.91603e-11 | 3.34892e-11 | 1.22924e-11 |
| 1.00000e-08 | 6.13337e-13 | 4.94217e-13 | 3.98138e-13 | 1.24353e-12 | 2.58197e-13 |
| 1.00000e-09 | 2.28971e-14 | 1.86891e-14 | 1.52459e-14 | 5.74295e-14 | 1.01295e-14 |

| Pa\K        | 400.000     | 500.000     | 600.000     | 700.000     | 800.000     |
|-------------|-------------|-------------|-------------|-------------|-------------|
| 1.00000e+08 | 2.89289e-17 | 2.66546e-12 | 9.30026e-10 | 2.26799e-07 | 6.56643e-06 |
| 1.00000e+07 | 1.47582e-13 | 9.14869e-10 | 5.06962e-08 | 1.55453e-06 | 1.75693e-05 |
| 1.00000e+06 | 6.02235e-11 | 1.79279e-08 | 3.52713e-07 | 4.23222e-06 | 2.31508e-05 |
| 100000.     | 4.02632e-09 | 1.67787e-07 | 1.78427e-06 | 8.65154e-06 | 2.39258e-05 |
| 10000.0     | 8.77561e-08 | 1.06249e-06 | 4.66392e-06 | 1.12859e-05 | 2.03822e-05 |
| 1000.00     | 4.84362e-07 | 2.08090e-06 | 4.77522e-06 | 8.18414e-06 | 1.24909e-05 |
| 100.000     | 7.35365e-07 | 1.74578e-06 | 3.11659e-06 | 4.66937e-06 | 6.18918e-06 |
| 10.0000     | 5.72251e-07 | 1.14351e-06 | 1.80638e-06 | 2.22345e-06 | 2.29208e-06 |
| 1.00000     | 3.98310e-07 | 7.07108e-07 | 8.69250e-07 | 7.69850e-07 | 5.72167e-07 |
| 0.100000    | 2.73974e-07 | 3.63434e-07 | 2.99803e-07 | 1.79099e-07 | 9.47982e-08 |
| 0.0100000   | 1.59502e-07 | 1.32208e-07 | 6.86673e-08 | 2.77013e-08 | 1.07050e-08 |
| 0.00100000  | 6.43461e-08 | 3.08005e-08 | 1.01804e-08 | 2.88263e-09 | 8.51473e-10 |
| 0.000100000 | 1.51248e-08 | 4.27170e-09 | 9.55691e-10 | 2.03598e-10 | 4.93879e-11 |
| 1.00000e-05 | 1.86443e-09 | 3.41084e-10 | 5.69594e-11 | 1.00300e-11 | 2.20008e-12 |
| 1.00000e-06 | 1.15261e-10 | 1.59593e-11 | 2.28057e-12 | 3.75883e-13 | 8.48954e-14 |
| 1.00000e-07 | 4.31131e-12 | 5.59813e-13 | 8.06330e-14 | 1.42278e-14 | 3.77099e-15 |
| 1.00000e-08 | 1.63606e-13 | 2.24265e-14 | 3.49379e-15 | 6.93176e-16 | 2.24231e-16 |
| 1.00000e-09 | 8.11952e-15 | 1.19841e-15 | 2.02770e-16 | 4.48924e-17 | 1.70290e-17 |

| Pa\K        | 900.000     | 1000.00     | 1100.00     | 1200.00     | 1300.00     |
|-------------|-------------|-------------|-------------|-------------|-------------|
| 1.00000e+08 | 2.97728e-05 | 5.63124e-05 | 8.75560e-05 | 0.000142478 | 0.000228921 |
| 1.00000e+07 | 6.11937e-05 | 0.000109106 | 0.000168479 | 0.000275763 | 0.000478309 |
| 1.00000e+06 | 6.31951e-05 | 0.000117317 | 0.000197044 | 0.000328459 | 0.000493727 |
| 100000.     | 4.78032e-05 | 8.71623e-05 | 0.000166965 | 0.000313058 | 0.000478240 |
| 10000.0     | 3.34117e-05 | 5.74542e-05 | 0.000105701 | 0.000183396 | 0.000255168 |
| 1000.00     | 1.83135e-05 | 2.77779e-05 | 4.34422e-05 | 6.42064e-05 | 7.94322e-05 |
| 100.000     | 7.54357e-06 | 9.19502e-06 | 1.15390e-05 | 1.43791e-05 | 1.60200e-05 |
| 10.0000     | 2.12128e-06 | 1.97990e-06 | 1.98427e-06 | 2.13639e-06 | 2.20663e-06 |
| 1.00000     | 3.89771e-07 | 2.79328e-07 | 2.30588e-07 | 2.25423e-07 | 2.27262e-07 |
| 0.100000    | 4.81713e-08 | 2.73737e-08 | 1.96847e-08 | 1.89321e-08 | 2.00391e-08 |
| 0.0100000   | 4.20824e-09 | 1.99873e-09 | 1.37078e-09 | 1.45379e-09 | 1.72201e-09 |
| 0.00100000  | 2.73280e-10 | 1.17736e-10 | 8.88706e-11 | 1.15581e-10 | 1.54659e-10 |
| 0.000100000 | 1.40933e-11 | 6.34890e-12 | 6.26658e-12 | 1.01359e-11 | 1.46878e-11 |
| 1.00000e-05 | 6.36884e-13 | 3.70420e-13 | 5.15864e-13 | 9.60792e-13 | 1.44274e-12 |
| 1.00000e-06 | 3.01802e-14 | 2.64419e-14 | 4.73897e-14 | 9.41623e-14 | 1.43348e-13 |
| 1.00000e-07 | 1.87225e-15 | 2.27945e-15 | 4.59172e-15 | 9.34669e-15 | 1.42995e-14 |
| 1.00000e-08 | 1.48073e-16 | 2.14793e-16 | 4.53586e-16 | 9.31883e-16 | 1.42844e-15 |
| 1.00000e-09 | 1.33523e-17 | 2.09663e-17 | 4.51305e-17 | 9.30690e-17 | 1.42776e-16 |

| Pa\K        | 1400.00     | 1500.00     | 1750.00     | 2000.00     | 2250.00     |
|-------------|-------------|-------------|-------------|-------------|-------------|
| 1.00000e+08 | 0.000287563 | 0.000257701 | 4.88282e-05 | 4.62679e-05 | 4.54222e-05 |
| 1.00000e+07 | 0.000819242 | 0.00116345  | 4.58917e-05 | 3.84566e-05 | 4.20719e-05 |
| 1.00000e+06 | 0.000624222 | 0.000697671 | 0.000101622 | 6.10505e-05 | 4.79299e-05 |
| 100000.     | 0.000545492 | 0.000498053 | 8.88618e-05 | 3.90549e-05 | 2.10498e-05 |
| 10000.0     | 0.000263246 | 0.000213718 | 3.59372e-05 | 1.19929e-05 | 4.66080e-06 |
| 1000.00     | 7.53935e-05 | 5.68247e-05 | 8.60332e-06 | 2.20989e-06 | 6.71185e-07 |
| 100.000     | 1.42217e-05 | 1.01356e-05 | 1.36964e-06 | 2.89920e-07 | 7.63151e-08 |
| 10.0000     | 1.87862e-06 | 1.29667e-06 | 1.64549e-07 | 3.15757e-08 | 7.84486e-09 |
| 1.00000     | 1.93611e-07 | 1.34003e-07 | 1.71109e-08 | 3.19685e-09 | 7.83438e-10 |
| 0.100000    | 1.78797e-08 | 1.27546e-08 | 1.69964e-09 | 3.18229e-10 | 7.79492e-11 |
| 0.0100000   | 1.64005e-09 | 1.21104e-09 | 1.68009e-10 | 3.16618e-11 | 7.76605e-12 |

|             |             |             |             |             |             |
|-------------|-------------|-------------|-------------|-------------|-------------|
| 0.00100000  | 1.55081e-10 | 1.17238e-10 | 1.67053e-11 | 3.15961e-12 | 7.75637e-13 |
| 0.000100000 | 1.51230e-11 | 1.15573e-11 | 1.66662e-12 | 3.15729e-13 | 7.75363e-14 |
| 1.00000e-05 | 1.50005e-12 | 1.15043e-12 | 1.66475e-13 | 3.15620e-14 | 7.75246e-15 |
| 1.00000e-06 | 1.49561e-13 | 1.14840e-13 | 1.66378e-14 | 3.15562e-15 | 7.75184e-16 |
| 1.00000e-07 | 1.49380e-14 | 1.14752e-14 | 1.66330e-15 | 3.15533e-16 | 7.75152e-17 |
| 1.00000e-08 | 1.49298e-15 | 1.14709e-15 | 1.66293e-16 | 3.15509e-17 | 7.75126e-18 |
| 1.00000e-09 | 1.49259e-16 | 1.14689e-16 | 1.66278e-17 | 3.15500e-18 | 7.75117e-19 |

| Pa\K        | 2500.00     | 2750.00     | 3000.00     | 3250.00     | 3500.00     |
|-------------|-------------|-------------|-------------|-------------|-------------|
| 1.00000e+08 | 4.73782e-05 | 5.13594e-05 | 5.56282e-05 | 5.83922e-05 | 5.85930e-05 |
| 1.00000e+07 | 4.69048e-05 | 4.68849e-05 | 4.15795e-05 | 3.35662e-05 | 2.54047e-05 |
| 1.00000e+06 | 3.57186e-05 | 2.35626e-05 | 1.42593e-05 | 8.27677e-06 | 4.76926e-06 |
| 100000.     | 1.06783e-05 | 5.03358e-06 | 3.32491e-06 | 1.10130e-06 | 5.49615e-07 |
| 10000.0     | 1.77145e-06 | 6.71320e-07 | 2.67181e-07 | 1.15389e-07 | 5.46263e-08 |
| 1000.00     | 2.13456e-07 | 7.24550e-08 | 2.71565e-08 | 1.13908e-08 | 5.32279e-09 |
| 100.000     | 2.23488e-08 | 7.28897e-09 | 2.68657e-09 | 1.11993e-09 | 5.22220e-10 |
| 10.0000     | 2.23816e-09 | 7.22963e-10 | 2.65683e-10 | 1.10674e-10 | 5.16008e-11 |
| 1.00000     | 2.22420e-10 | 7.17557e-11 | 2.63663e-11 | 1.09844e-11 | 5.12189e-12 |
| 0.100000    | 2.21273e-11 | 7.13960e-12 | 2.62386e-12 | 1.09326e-12 | 5.09808e-13 |
| 0.0100000   | 2.20545e-12 | 7.11772e-13 | 2.61620e-13 | 1.09017e-13 | 5.08405e-14 |
| 0.00100000  | 2.20327e-13 | 7.11156e-14 | 2.61415e-14 | 1.08938e-14 | 5.08051e-15 |
| 0.000100000 | 2.20273e-14 | 7.11021e-15 | 2.61373e-15 | 1.08922e-15 | 5.07982e-16 |
| 1.00000e-05 | 2.20252e-15 | 7.10971e-16 | 2.61358e-16 | 1.08917e-16 | 5.07959e-17 |
| 1.00000e-06 | 2.20242e-16 | 7.10946e-17 | 2.61351e-17 | 1.08914e-17 | 5.07948e-18 |
| 1.00000e-07 | 2.20236e-17 | 7.10933e-18 | 2.61347e-18 | 1.08913e-18 | 5.07942e-19 |
| 1.00000e-08 | 2.20231e-18 | 7.10923e-19 | 2.61344e-19 | 1.08912e-19 | 5.07938e-20 |
| 1.00000e-09 | 2.20230e-19 | 7.10919e-20 | 2.61343e-20 | 1.08911e-20 | 5.07936e-21 |

| Pa\K        | 3750.00     | 4000.00     |
|-------------|-------------|-------------|
| 1.00000e+08 | 5.61490e-05 | 5.16693e-05 |
| 1.00000e+07 | 1.84802e-05 | 1.31702e-05 |
| 1.00000e+06 | 2.79078e-06 | 1.68024e-06 |
| 100000.     | 2.92057e-07 | 1.65250e-07 |
| 10000.0     | 2.82162e-08 | 1.57290e-08 |
| 1000.00     | 2.73394e-09 | 1.51998e-09 |
| 100.000     | 2.68015e-10 | 1.48939e-10 |
| 10.0000     | 2.64815e-11 | 1.47146e-11 |
| 1.00000     | 2.62865e-12 | 1.46059e-12 |
| 0.100000    | 2.61651e-13 | 1.45385e-13 |
| 0.0100000   | 2.60943e-14 | 1.44996e-14 |
| 0.00100000  | 2.60768e-15 | 1.44901e-15 |
| 0.000100000 | 2.60733e-16 | 1.44882e-16 |
| 1.00000e-05 | 2.60722e-17 | 1.44875e-17 |
| 1.00000e-06 | 2.60716e-18 | 1.44872e-18 |
| 1.00000e-07 | 2.60713e-19 | 1.44870e-19 |
| 1.00000e-08 | 2.60711e-20 | 1.44868e-20 |
| 1.00000e-09 | 2.60710e-21 | 1.44868e-21 |

rad60syn

=====

| Pa\K        | 20.0000     | 30.0000     | 40.0000     | 50.0000     | 60.0000     |
|-------------|-------------|-------------|-------------|-------------|-------------|
| 1.00000e+08 | 1.16287e-41 | 6.28489e-41 | 2.49800e-40 | 9.99456e-40 | 4.34426e-39 |
| 1.00000e+07 | 1.16230e-39 | 6.27876e-39 | 2.49437e-38 | 9.97538e-38 | 4.33392e-37 |
| 1.00000e+06 | 1.15671e-37 | 6.21819e-37 | 2.45877e-36 | 9.78812e-36 | 4.23354e-35 |
| 100000.     | 1.10405e-35 | 5.68000e-35 | 2.15864e-34 | 8.28507e-34 | 3.46407e-33 |
| 10000.0     | 7.76494e-34 | 3.19633e-33 | 1.02702e-32 | 3.41844e-32 | 1.25883e-31 |
| 1000.00     | 1.50520e-32 | 2.23885e-32 | 3.21196e-32 | 5.48417e-32 | 1.15120e-31 |
| 100.000     | 1.38837e-33 | 2.30452e-34 | 1.63915e-34 | 2.35230e-34 | 4.76316e-34 |
| 10.0000     | 1.88415e-35 | 6.14987e-36 | 4.33637e-36 | 5.87821e-36 | 1.28255e-35 |
| 1.00000     | 9.43295e-37 | 8.95965e-37 | 9.99999e-37 | 1.42222e-36 | 2.63861e-36 |
| 0.100000    | 5.09513e-38 | 5.93272e-38 | 1.43787e-37 | 4.09562e-37 | 1.40898e-36 |
| 0.0100000   | 2.08585e-37 | 5.32389e-37 | 1.32237e-36 | 3.70554e-36 | 1.24997e-35 |
| 0.00100000  | 1.65394e-36 | 3.41531e-36 | 7.05170e-36 | 1.67652e-35 | 4.87591e-35 |
| 0.000100000 | 3.07140e-36 | 2.30936e-36 | 2.42238e-36 | 3.50866e-36 | 6.96801e-36 |
| 1.00000e-05 | 1.07592e-37 | 2.80669e-38 | 1.93312e-38 | 2.27668e-38 | 4.06838e-38 |
| 1.00000e-06 | 4.83613e-40 | 1.37528e-40 | 1.08272e-40 | 1.45411e-40 | 3.03885e-40 |
| 1.00000e-07 | 4.60139e-42 | 1.91658e-42 | 1.93371e-42 | 3.25180e-42 | 9.01019e-42 |
| 1.00000e-08 | 1.51576e-43 | 9.01910e-44 | 1.11161e-43 | 2.17989e-43 | 6.97961e-43 |
| 1.00000e-09 | 1.18415e-44 | 7.92826e-45 | 1.02490e-44 | 2.06911e-44 | 6.77350e-44 |

| Pa\K        | 70.0000     | 80.0000     | 90.0000     | 100.000     | 110.000     |
|-------------|-------------|-------------|-------------|-------------|-------------|
| 1.00000e+08 | 2.17650e-38 | 1.36974e-37 | 1.23882e-36 | 1.87487e-35 | 4.77779e-34 |
| 1.00000e+07 | 2.17034e-36 | 1.36530e-35 | 1.23443e-34 | 1.86813e-33 | 4.76203e-32 |
| 1.00000e+06 | 2.11091e-34 | 1.32267e-33 | 1.19242e-32 | 1.80380e-31 | 4.61163e-30 |
| 100000.     | 1.67443e-32 | 1.02135e-31 | 9.04108e-31 | 1.36742e-29 | 3.58079e-28 |
| 10000.0     | 5.42757e-31 | 3.00106e-30 | 2.49086e-29 | 3.81361e-28 | 1.12756e-26 |

|             |             |             |             |             |             |
|-------------|-------------|-------------|-------------|-------------|-------------|
| 1000.00     | 3.12528e-31 | 1.25175e-30 | 1.04580e-29 | 3.08069e-28 | 2.92336e-26 |
| 100.000     | 1.30756e-33 | 6.11808e-33 | 1.53097e-31 | 2.69496e-29 | 2.73235e-26 |
| 10.0000     | 4.13029e-35 | 2.33760e-34 | 9.59410e-33 | 2.66288e-30 | 2.70256e-26 |
| 1.00000     | 6.89156e-36 | 3.29181e-35 | 1.06982e-33 | 2.77219e-31 | 2.69953e-26 |
| 0.100000    | 6.49475e-36 | 4.88946e-35 | 8.62252e-34 | 5.81805e-32 | 2.69943e-26 |
| 0.0100000   | 5.65186e-35 | 4.15989e-34 | 6.64531e-33 | 2.63110e-31 | 2.70129e-26 |
| 0.00100000  | 1.92630e-34 | 1.25584e-33 | 1.83999e-32 | 7.43958e-31 | 2.70753e-26 |
| 0.000100000 | 2.03736e-35 | 1.07119e-34 | 1.71345e-33 | 1.45538e-31 | 2.70864e-26 |
| 1.00000e-05 | 1.16358e-37 | 8.07992e-37 | 4.96175e-35 | 1.30389e-32 | 2.70850e-26 |
| 1.00000e-06 | 1.21840e-39 | 2.37616e-38 | 3.95475e-36 | 1.28404e-33 | 2.70848e-26 |
| 1.00000e-07 | 5.83055e-41 | 1.97557e-39 | 3.86512e-37 | 1.28207e-34 | 2.70848e-26 |
| 1.00000e-08 | 5.23224e-42 | 1.93742e-40 | 3.85628e-38 | 1.28188e-35 | 2.70848e-26 |
| 1.00000e-09 | 5.17233e-43 | 1.93362e-41 | 3.85540e-39 | 1.28186e-36 | 2.70848e-26 |

| Pa\K        | 120.000     | 130.000     | 140.000     | 150.000     | 160.000     |
|-------------|-------------|-------------|-------------|-------------|-------------|
| 1.00000e+08 | 1.37010e-32 | 3.26217e-31 | 5.80764e-30 | 7.73783e-29 | 7.94676e-28 |
| 1.00000e+07 | 1.36591e-30 | 3.25245e-29 | 5.78995e-28 | 7.71298e-27 | 7.91930e-26 |
| 1.00000e+06 | 1.32597e-28 | 3.15965e-27 | 5.62142e-26 | 7.47703e-25 | 7.65974e-24 |
| 100000.     | 1.04928e-26 | 2.51677e-25 | 4.46575e-24 | 5.88805e-23 | 5.95335e-22 |
| 10000.0     | 3.60183e-25 | 8.91924e-24 | 1.57652e-22 | 2.02599e-21 | 1.96802e-20 |
| 1000.00     | 1.41541e-24 | 4.09681e-23 | 7.57625e-22 | 9.66218e-21 | 9.05517e-20 |
| 100.000     | 1.62857e-24 | 5.09738e-23 | 9.71576e-22 | 1.24928e-20 | 1.16720e-19 |
| 10.0000     | 1.64960e-24 | 5.21395e-23 | 9.97855e-22 | 1.28476e-20 | 1.20019e-19 |
| 1.00000     | 1.65176e-24 | 5.22611e-23 | 1.00061e-21 | 1.28849e-20 | 1.20366e-19 |
| 0.100000    | 1.65209e-24 | 5.22769e-23 | 1.00096e-21 | 1.28898e-20 | 1.20412e-19 |
| 0.0100000   | 1.65305e-24 | 5.23068e-23 | 1.00156e-21 | 1.28981e-20 | 1.20497e-19 |
| 0.00100000  | 1.65632e-24 | 5.24058e-23 | 1.00344e-21 | 1.29224e-20 | 1.20728e-19 |
| 0.000100000 | 1.65770e-24 | 5.24553e-23 | 1.00442e-21 | 1.29349e-20 | 1.20841e-19 |
| 1.00000e-05 | 1.65781e-24 | 5.24610e-23 | 1.00454e-21 | 1.29366e-20 | 1.20857e-19 |
| 1.00000e-06 | 1.65782e-24 | 5.24616e-23 | 1.00456e-21 | 1.29367e-20 | 1.20858e-19 |
| 1.00000e-07 | 1.65782e-24 | 5.24617e-23 | 1.00456e-21 | 1.29368e-20 | 1.20858e-19 |
| 1.00000e-08 | 1.65782e-24 | 5.24617e-23 | 1.00456e-21 | 1.29368e-20 | 1.20858e-19 |
| 1.00000e-09 | 1.65782e-24 | 5.24617e-23 | 1.00456e-21 | 1.29368e-20 | 1.20858e-19 |

| Pa\K        | 170.000     | 180.000     | 190.000     | 200.000     | 210.000     |
|-------------|-------------|-------------|-------------|-------------|-------------|
| 1.00000e+08 | 6.51534e-27 | 4.40514e-26 | 2.52623e-25 | 1.25822e-24 | 5.55146e-24 |
| 1.00000e+07 | 6.49077e-25 | 4.38683e-24 | 2.51456e-23 | 1.25172e-22 | 5.51927e-22 |
| 1.00000e+06 | 6.25984e-23 | 4.21583e-22 | 2.40645e-21 | 1.19208e-20 | 5.22674e-20 |
| 100000.     | 4.78510e-21 | 3.15972e-20 | 1.76324e-19 | 8.51448e-19 | 3.62869e-18 |
| 10000.0     | 1.50360e-19 | 9.35695e-19 | 4.88486e-18 | 2.19248e-17 | 8.63401e-17 |
| 1000.00     | 6.56727e-19 | 3.84229e-18 | 1.87515e-17 | 7.84297e-17 | 2.87415e-16 |
| 100.000     | 8.38827e-19 | 4.84744e-18 | 2.33285e-17 | 9.61541e-17 | 3.47214e-16 |
| 10.0000     | 8.61737e-19 | 4.97313e-18 | 2.38960e-17 | 9.83307e-17 | 3.54484e-16 |
| 1.00000     | 8.64153e-19 | 4.98640e-18 | 2.39560e-17 | 9.85610e-17 | 3.55255e-16 |
| 0.100000    | 8.64490e-19 | 4.98836e-18 | 2.39656e-17 | 9.86020e-17 | 3.55410e-16 |
| 0.0100000   | 8.65168e-19 | 4.99274e-18 | 2.39892e-17 | 9.87107e-17 | 3.55849e-16 |
| 0.00100000  | 8.66853e-19 | 5.00260e-18 | 2.40371e-17 | 9.89089e-17 | 3.56563e-16 |
| 0.000100000 | 8.67627e-19 | 5.00683e-18 | 2.40562e-17 | 9.89821e-17 | 3.56807e-16 |
| 1.00000e-05 | 8.67732e-19 | 5.00740e-18 | 2.40587e-17 | 9.89916e-17 | 3.56839e-16 |
| 1.00000e-06 | 8.67743e-19 | 5.00745e-18 | 2.40589e-17 | 9.89926e-17 | 3.56842e-16 |
| 1.00000e-07 | 8.67744e-19 | 5.00746e-18 | 2.40590e-17 | 9.89927e-17 | 3.56842e-16 |
| 1.00000e-08 | 8.67744e-19 | 5.00746e-18 | 2.40590e-17 | 9.89927e-17 | 3.56842e-16 |
| 1.00000e-09 | 8.67744e-19 | 5.00746e-18 | 2.40590e-17 | 9.89927e-17 | 3.56842e-16 |

| Pa\K        | 220.000     | 230.000     | 240.000     | 250.000     | 260.000     |
|-------------|-------------|-------------|-------------|-------------|-------------|
| 1.00000e+08 | 2.20595e-23 | 8.00377e-23 | 2.68226e-22 | 8.38300e-22 | 2.46327e-21 |
| 1.00000e+07 | 2.19152e-21 | 7.94458e-21 | 2.65977e-20 | 8.30316e-20 | 2.43659e-19 |
| 1.00000e+06 | 2.06200e-19 | 7.42012e-19 | 2.46349e-18 | 7.61811e-18 | 2.21194e-17 |
| 100000.     | 1.38734e-17 | 4.82343e-17 | 1.54232e-16 | 4.57859e-16 | 1.27193e-15 |
| 10000.0     | 3.03404e-16 | 9.64906e-16 | 2.81025e-15 | 7.57084e-15 | 1.90272e-14 |
| 1000.00     | 9.39727e-16 | 2.78284e-15 | 7.55814e-15 | 1.90265e-14 | 4.47911e-14 |
| 100.000     | 1.11897e-15 | 3.26781e-15 | 8.75835e-15 | 2.17735e-14 | 5.06598e-14 |
| 10.0000     | 1.14054e-15 | 3.32557e-15 | 8.89993e-15 | 2.20946e-14 | 5.13397e-14 |
| 1.00000     | 1.14283e-15 | 3.33175e-15 | 8.91518e-15 | 2.21295e-14 | 5.14150e-14 |
| 0.100000    | 1.14337e-15 | 3.33346e-15 | 8.92025e-15 | 2.21437e-14 | 5.14526e-14 |
| 0.0100000   | 1.14494e-15 | 3.33855e-15 | 8.93526e-15 | 2.21845e-14 | 5.15551e-14 |
| 0.00100000  | 1.14722e-15 | 3.34512e-15 | 8.95249e-15 | 2.22261e-14 | 5.16484e-14 |
| 0.000100000 | 1.14795e-15 | 3.34705e-15 | 8.95721e-15 | 2.22367e-14 | 5.16707e-14 |
| 1.00000e-05 | 1.14804e-15 | 3.34729e-15 | 8.95778e-15 | 2.22379e-14 | 5.16734e-14 |
| 1.00000e-06 | 1.14805e-15 | 3.34731e-15 | 8.95784e-15 | 2.22381e-14 | 5.16736e-14 |
| 1.00000e-07 | 1.14805e-15 | 3.34732e-15 | 8.95784e-15 | 2.22381e-14 | 5.16737e-14 |
| 1.00000e-08 | 1.14805e-15 | 3.34732e-15 | 8.95784e-15 | 2.22381e-14 | 5.16737e-14 |
| 1.00000e-09 | 1.14805e-15 | 3.34732e-15 | 8.95784e-15 | 2.22381e-14 | 5.16737e-14 |

| Pa\K        | 270.000     | 280.000     | 290.000     | 300.000     | 310.000     |
|-------------|-------------|-------------|-------------|-------------|-------------|
| 1.00000e+08 | 6.85179e-21 | 1.81461e-20 | 4.59792e-20 | 1.36683e-17 | 2.62629e-19 |

|             |             |             |             |             |             |
|-------------|-------------|-------------|-------------|-------------|-------------|
| 1.00000e+07 | 6.76733e-19 | 1.78914e-18 | 4.52451e-18 | 1.20802e-15 | 2.57224e-17 |
| 1.00000e+06 | 6.07083e-17 | 1.58392e-16 | 3.94733e-16 | 6.23427e-14 | 2.16984e-15 |
| 100000.     | 3.32852e-15 | 8.25162e-15 | 1.94714e-14 | 7.60702e-13 | 9.49853e-14 |
| 10000.0     | 4.49362e-14 | 1.00352e-13 | 2.13070e-13 | 1.03796e-12 | 8.40724e-13 |
| 1000.00     | 9.93580e-14 | 2.09030e-13 | 4.19398e-13 | 7.51836e-13 | 1.49199e-12 |
| 100.000     | 1.11154e-13 | 2.31486e-13 | 4.60125e-13 | 7.10443e-13 | 1.61006e-12 |
| 10.0000     | 1.12510e-13 | 2.34048e-13 | 4.64740e-13 | 7.06075e-13 | 1.62329e-12 |
| 1.00000     | 1.12663e-13 | 2.34347e-13 | 4.65299e-13 | 7.06311e-13 | 1.62511e-12 |
| 0.100000    | 1.12758e-13 | 2.34573e-13 | 4.65818e-13 | 7.08286e-13 | 1.62748e-12 |
| 0.0100000   | 1.12999e-13 | 2.35107e-13 | 4.66934e-13 | 7.09547e-13 | 1.63168e-12 |
| 0.00100000  | 1.13195e-13 | 2.35495e-13 | 4.67663e-13 | 7.09290e-13 | 1.63391e-12 |
| 0.000100000 | 1.13239e-13 | 2.35577e-13 | 4.67808e-13 | 7.09160e-13 | 1.63431e-12 |
| 1.00000e-05 | 1.13244e-13 | 2.35587e-13 | 4.67824e-13 | 7.09145e-13 | 1.63435e-12 |
| 1.00000e-06 | 1.13244e-13 | 2.35588e-13 | 4.67826e-13 | 7.09144e-13 | 1.63436e-12 |
| 1.00000e-07 | 1.13245e-13 | 2.35588e-13 | 4.67826e-13 | 7.09144e-13 | 1.63436e-12 |
| 1.00000e-08 | 1.13245e-13 | 2.35588e-13 | 4.67826e-13 | 7.09144e-13 | 1.63436e-12 |
| 1.00000e-09 | 1.13245e-13 | 2.35588e-13 | 4.67826e-13 | 7.09144e-13 | 1.63436e-12 |

| Pa\K        | 400.000     | 500.000     | 600.000     | 700.000     | 800.000     |
|-------------|-------------|-------------|-------------|-------------|-------------|
| 1.00000e+08 | 7.24348e-15 | 3.01072e-12 | 9.33665e-10 | 1.06450e-07 | 2.08494e-06 |
| 1.00000e+07 | 5.25313e-13 | 4.53251e-10 | 2.84531e-08 | 3.64047e-07 | 2.32466e-06 |
| 1.00000e+06 | 1.65702e-11 | 1.01939e-08 | 3.01408e-07 | 1.16897e-06 | 2.62177e-06 |
| 100000.     | 9.47783e-11 | 1.39431e-08 | 3.30851e-07 | 1.34840e-06 | 2.59231e-06 |
| 10000.0     | 1.08888e-10 | 4.92230e-09 | 1.10394e-07 | 7.44183e-07 | 1.89900e-06 |
| 1000.00     | 9.7203e-11  | 2.59764e-09 | 4.48016e-08 | 3.91294e-07 | 1.20296e-06 |
| 100.000     | 9.51945e-11 | 2.29013e-09 | 2.69479e-08 | 1.93979e-07 | 6.40744e-07 |
| 10.0000     | 9.49899e-11 | 2.23959e-09 | 2.17478e-08 | 1.23460e-07 | 4.49294e-07 |
| 1.00000     | 9.51776e-11 | 2.23935e-09 | 2.09881e-08 | 1.13132e-07 | 4.23169e-07 |
| 0.100000    | 9.54596e-11 | 2.24343e-09 | 2.09322e-08 | 1.12184e-07 | 4.20685e-07 |
| 0.0100000   | 9.55630e-11 | 2.24444e-09 | 2.09288e-08 | 1.12098e-07 | 4.20452e-07 |
| 0.00100000  | 9.55727e-11 | 2.24456e-09 | 2.09285e-08 | 1.12090e-07 | 4.20430e-07 |
| 0.000100000 | 9.55731e-11 | 2.24457e-09 | 2.09285e-08 | 1.12089e-07 | 4.20427e-07 |
| 1.00000e-05 | 9.55731e-11 | 2.24457e-09 | 2.09285e-08 | 1.12089e-07 | 4.20427e-07 |
| 1.00000e-06 | 9.55731e-11 | 2.24457e-09 | 2.09285e-08 | 1.12089e-07 | 4.20427e-07 |
| 1.00000e-07 | 9.55731e-11 | 2.24457e-09 | 2.09285e-08 | 1.12089e-07 | 4.20427e-07 |
| 1.00000e-08 | 9.55731e-11 | 2.24457e-09 | 2.09285e-08 | 1.12089e-07 | 4.20427e-07 |
| 1.00000e-09 | 9.55731e-11 | 2.24457e-09 | 2.09285e-08 | 1.12089e-07 | 4.20427e-07 |

| Pa\K        | 900.000     | 1000.00     | 1100.00     | 1200.00     | 1300.00     |
|-------------|-------------|-------------|-------------|-------------|-------------|
| 1.00000e+08 | 1.13639e-05 | 3.32263e-05 | 6.71389e-05 | 9.22649e-05 | 9.66916e-05 |
| 1.00000e+07 | 8.86105e-06 | 2.61736e-05 | 6.30162e-05 | 0.000111538 | 0.000157969 |
| 1.00000e+06 | 5.79143e-06 | 1.37283e-05 | 3.10928e-05 | 5.52271e-05 | 8.49257e-05 |
| 100000.     | 4.37122e-06 | 7.70319e-06 | 1.40371e-05 | 2.35559e-05 | 3.72810e-05 |
| 10000.0     | 3.35936e-06 | 5.57343e-06 | 9.46942e-06 | 1.60580e-05 | 2.65881e-05 |
| 1000.00     | 2.29265e-06 | 4.09913e-06 | 7.56038e-06 | 1.37947e-05 | 2.40644e-05 |
| 100.000     | 1.48699e-06 | 3.26501e-06 | 6.80737e-06 | 1.31565e-05 | 2.35392e-05 |
| 10.0000     | 1.26784e-06 | 3.08914e-06 | 6.68147e-06 | 1.30686e-05 | 2.34783e-05 |
| 1.00000     | 1.24119e-06 | 3.06986e-06 | 6.66867e-06 | 1.30601e-05 | 2.34726e-05 |
| 0.100000    | 1.23866e-06 | 3.06804e-06 | 6.66746e-06 | 1.30593e-05 | 2.34721e-05 |
| 0.0100000   | 1.23842e-06 | 3.06787e-06 | 6.66735e-06 | 1.30592e-05 | 2.34720e-05 |
| 0.00100000  | 1.23839e-06 | 3.06785e-06 | 6.66734e-06 | 1.30592e-05 | 2.34720e-05 |
| 0.000100000 | 1.23839e-06 | 3.06785e-06 | 6.66734e-06 | 1.30592e-05 | 2.34720e-05 |
| 1.00000e-05 | 1.23839e-06 | 3.06785e-06 | 6.66734e-06 | 1.30592e-05 | 2.34720e-05 |
| 1.00000e-06 | 1.23839e-06 | 3.06785e-06 | 6.66734e-06 | 1.30592e-05 | 2.34720e-05 |
| 1.00000e-07 | 1.23839e-06 | 3.06785e-06 | 6.66734e-06 | 1.30592e-05 | 2.34720e-05 |
| 1.00000e-08 | 1.23839e-06 | 3.06785e-06 | 6.66734e-06 | 1.30592e-05 | 2.34720e-05 |
| 1.00000e-09 | 1.23839e-06 | 3.06785e-06 | 6.66734e-06 | 1.30592e-05 | 2.34720e-05 |

| Pa\K        | 1400.00     | 1500.00     | 1750.00     | 2000.00     | 2250.00     |
|-------------|-------------|-------------|-------------|-------------|-------------|
| 1.00000e+08 | 9.12068e-05 | 8.69456e-05 | 0.000775018 | 0.000878736 | 0.000926114 |
| 1.00000e+07 | 0.000195388 | 0.000220140 | 0.00103466  | 0.00103137  | 0.000930549 |
| 1.00000e+06 | 0.000118737 | 0.000145796 | 0.000527974 | 0.000529612 | 0.000561635 |
| 100000.     | 5.61818e-05 | 7.85250e-05 | 0.000223440 | 0.000334424 | 0.000462887 |
| 10000.0     | 4.23439e-05 | 6.42038e-05 | 0.000170630 | 0.000304389 | 0.000448886 |
| 1000.00     | 3.96712e-05 | 6.17594e-05 | 0.000163661 | 0.000300658 | 0.000447229 |
| 100.000     | 3.92512e-05 | 6.14612e-05 | 0.000162962 | 0.000300321 | 0.000447079 |
| 10.0000     | 3.92114e-05 | 6.14420e-05 | 0.000162912 | 0.000300297 | 0.000447067 |
| 1.00000     | 3.92080e-05 | 6.14411e-05 | 0.000162909 | 0.000300295 | 0.000447066 |
| 0.100000    | 3.92077e-05 | 6.14410e-05 | 0.000162908 | 0.000300295 | 0.000447066 |
| 0.0100000   | 3.92077e-05 | 6.14410e-05 | 0.000162908 | 0.000300295 | 0.000447066 |
| 0.00100000  | 3.92077e-05 | 6.14410e-05 | 0.000162908 | 0.000300295 | 0.000447066 |
| 0.000100000 | 3.92077e-05 | 6.14410e-05 | 0.000162908 | 0.000300295 | 0.000447066 |
| 1.00000e-05 | 3.92077e-05 | 6.14410e-05 | 0.000162908 | 0.000300295 | 0.000447066 |
| 1.00000e-06 | 3.92077e-05 | 6.14410e-05 | 0.000162908 | 0.000300295 | 0.000447066 |
| 1.00000e-07 | 3.92077e-05 | 6.14410e-05 | 0.000162908 | 0.000300295 | 0.000447066 |
| 1.00000e-08 | 3.92077e-05 | 6.14410e-05 | 0.000162908 | 0.000300295 | 0.000447066 |
| 1.00000e-09 | 3.92077e-05 | 6.14410e-05 | 0.000162908 | 0.000300295 | 0.000447066 |

| Pa\K        | 2500.00     | 2750.00     | 3000.00     | 3250.00     | 3500.00     |
|-------------|-------------|-------------|-------------|-------------|-------------|
| 1.00000e+08 | 0.000924618 | 0.000886560 | 0.000828449 | 0.000764508 | 0.000702951 |
| 1.00000e+07 | 0.000839775 | 0.000781303 | 0.000741419 | 0.000706077 | 0.000669170 |
| 1.00000e+06 | 0.000618015 | 0.00064507  | 0.000685051 | 0.000680721 | 0.000658696 |
| 100000.     | 0.000573917 | 0.000646094 | 0.000677825 | 0.000678157 | 0.000657983 |
| 10000.0     | 0.000568166 | 0.000643927 | 0.000677089 | 0.000677954 | 0.000657963 |
| 1000.00     | 0.000567536 | 0.000643712 | 0.000677026 | 0.000677943 | 0.000657967 |
| 100.000     | 0.000567479 | 0.000643693 | 0.000677022 | 0.000677943 | 0.000657968 |
| 10.0000     | 0.000567474 | 0.000643692 | 0.000677021 | 0.000677943 | 0.000657969 |
| 1.00000     | 0.000567474 | 0.000643692 | 0.000677021 | 0.000677943 | 0.000657969 |
| 0.100000    | 0.000567474 | 0.000643692 | 0.000677021 | 0.000677943 | 0.000657969 |
| 0.0100000   | 0.000567474 | 0.000643692 | 0.000677021 | 0.000677943 | 0.000657969 |
| 0.00100000  | 0.000567474 | 0.000643692 | 0.000677021 | 0.000677943 | 0.000657969 |
| 0.000100000 | 0.000567474 | 0.000643692 | 0.000677021 | 0.000677943 | 0.000657969 |
| 1.00000e-05 | 0.000567474 | 0.000643692 | 0.000677021 | 0.000677943 | 0.000657969 |
| 1.00000e-06 | 0.000567474 | 0.000643692 | 0.000677021 | 0.000677943 | 0.000657969 |
| 1.00000e-07 | 0.000567474 | 0.000643692 | 0.000677021 | 0.000677943 | 0.000657969 |
| 1.00000e-08 | 0.000567474 | 0.000643692 | 0.000677021 | 0.000677943 | 0.000657969 |
| 1.00000e-09 | 0.000567474 | 0.000643692 | 0.000677021 | 0.000677943 | 0.000657969 |

| Pa\K        | 3750.00     | 4000.00     |
|-------------|-------------|-------------|
| 1.00000e+08 | 0.000646855 | 0.000596617 |
| 1.00000e+07 | 0.000629947 | 0.000589724 |
| 1.00000e+06 | 0.000626255 | 0.000588938 |
| 100000.     | 0.000626221 | 0.000589113 |
| 10000.0     | 0.000626255 | 0.000589154 |
| 1000.00     | 0.000626262 | 0.000589160 |
| 100.000     | 0.000626263 | 0.000589161 |
| 10.0000     | 0.000626263 | 0.000589161 |
| 1.00000     | 0.000626263 | 0.000589161 |
| 0.100000    | 0.000626263 | 0.000589161 |
| 0.0100000   | 0.000626263 | 0.000589161 |
| 0.00100000  | 0.000626263 | 0.000589161 |
| 0.000100000 | 0.000626263 | 0.000589161 |
| 1.00000e-05 | 0.000626263 | 0.000589161 |
| 1.00000e-06 | 0.000626263 | 0.000589161 |
| 1.00000e-07 | 0.000626263 | 0.000589161 |
| 1.00000e-08 | 0.000626263 | 0.000589161 |
| 1.00000e-09 | 0.000626263 | 0.000589161 |

rad58  
=====

| Pa\K        | 20.0000     | 30.0000     | 40.0000     | 50.0000     | 60.0000     |
|-------------|-------------|-------------|-------------|-------------|-------------|
| 1.00000e+08 | 1.02444e-68 | 6.81730e-68 | 4.19346e-67 | 3.10879e-66 | 2.84179e-65 |
| 1.00000e+07 | 1.01999e-66 | 6.75761e-66 | 4.13868e-65 | 3.05483e-64 | 2.78021e-63 |
| 1.00000e+06 | 9.77452e-65 | 6.21239e-64 | 3.65914e-63 | 2.60147e-62 | 2.28321e-61 |
| 100000.     | 6.87835e-63 | 3.39344e-62 | 1.63830e-61 | 9.82079e-61 | 7.40060e-60 |
| 10000.0     | 1.05411e-61 | 1.45245e-61 | 2.42944e-61 | 5.83628e-61 | 1.96309e-60 |
| 1000.00     | 1.84763e-63 | 1.24371e-63 | 2.03140e-63 | 4.54916e-63 | 1.52790e-62 |
| 100.000     | 5.89441e-65 | 4.59907e-65 | 1.26872e-64 | 5.12005e-64 | 2.93899e-63 |
| 10.0000     | 2.24568e-65 | 1.15880e-65 | 1.17111e-65 | 2.40797e-65 | 8.96508e-65 |
| 1.00000     | 2.57607e-66 | 7.05405e-66 | 2.17696e-65 | 8.40771e-65 | 4.18391e-64 |
| 0.100000    | 1.44091e-65 | 2.43084e-65 | 4.90766e-65 | 1.30824e-64 | 4.69909e-64 |
| 0.0100000   | 3.56375e-66 | 8.99012e-67 | 5.67102e-67 | 6.81288e-67 | 1.36760e-66 |
| 0.00100000  | 1.45137e-69 | 1.09984e-70 | 4.77461e-71 | 5.00961e-71 | 9.67805e-71 |
| 0.000100000 | 1.01379e-73 | 1.10140e-74 | 6.32223e-75 | 8.26150e-75 | 1.92001e-74 |
| 1.00000e-05 | 3.37699e-77 | 6.43457e-78 | 5.06552e-78 | 8.28159e-78 | 2.32414e-77 |
| 1.00000e-06 | 6.53561e-80 | 2.02486e-80 | 2.09063e-80 | 4.18386e-80 | 1.45389e-79 |
| 1.00000e-07 | 5.66543e-82 | 2.69342e-82 | 3.61763e-82 | 9.13790e-82 | 4.28306e-81 |
| 1.00000e-08 | 1.84896e-83 | 1.26163e-83 | 2.07307e-83 | 6.11213e-83 | 3.32394e-82 |
| 1.00000e-09 | 1.44314e-84 | 1.10853e-84 | 1.91078e-84 | 5.80028e-84 | 3.22670e-83 |

| Pa\K        | 70.0000     | 80.0000     | 90.0000     | 100.000     | 110.000     |
|-------------|-------------|-------------|-------------|-------------|-------------|
| 1.00000e+08 | 3.27449e-64 | 5.07016e-63 | 1.20102e-61 | 5.19684e-60 | 4.62634e-58 |
| 1.00000e+07 | 3.18935e-62 | 4.91654e-61 | 1.15963e-59 | 4.99811e-58 | 4.43532e-56 |
| 1.00000e+06 | 2.52903e-60 | 3.77027e-59 | 8.62025e-58 | 3.61598e-56 | 3.14180e-54 |
| 100000.     | 7.13373e-59 | 9.35885e-58 | 1.90383e-56 | 7.20576e-55 | 5.76410e-53 |
| 10000.0     | 9.21585e-60 | 6.40592e-59 | 7.81944e-58 | 2.26303e-56 | 1.85607e-54 |
| 1000.00     | 1.14384e-61 | 2.54999e-60 | 1.21014e-58 | 9.60191e-57 | 1.17411e-54 |
| 100.000     | 2.49359e-62 | 3.35516e-61 | 7.95928e-60 | 3.77738e-58 | 3.90827e-56 |
| 10.0000     | 5.55817e-64 | 6.13517e-63 | 1.51363e-61 | 9.50531e-60 | 1.40160e-57 |
| 1.00000     | 2.91229e-63 | 3.38684e-62 | 8.69593e-61 | 5.55332e-59 | 8.05612e-57 |
| 0.100000    | 2.45505e-63 | 2.21892e-62 | 4.55050e-61 | 2.35945e-59 | 2.82240e-57 |
| 0.0100000   | 4.59139e-66 | 2.93843e-65 | 4.58912e-64 | 1.93345e-62 | 2.04710e-60 |
| 0.00100000  | 3.28364e-70 | 2.20375e-69 | 3.92924e-68 | 2.59464e-66 | 9.45807e-64 |

|             |             |             |             |             |             |
|-------------|-------------|-------------|-------------|-------------|-------------|
| 0.000100000 | 7.81616e-74 | 7.27802e-73 | 4.04703e-71 | 2.14894e-68 | 3.83218e-65 |
| 1.00000e-05 | 1.24392e-76 | 3.15290e-75 | 1.14069e-72 | 1.50898e-69 | 3.49653e-66 |
| 1.00000e-06 | 1.32692e-78 | 1.24492e-76 | 9.39292e-74 | 1.44757e-70 | 3.46331e-67 |
| 1.00000e-07 | 6.88603e-80 | 1.07662e-77 | 9.18206e-75 | 1.44129e-71 | 3.45999e-68 |
| 1.00000e-08 | 6.26655e-81 | 1.05909e-78 | 9.16045e-76 | 1.44066e-72 | 3.45966e-69 |
| 1.00000e-09 | 6.20410e-82 | 1.05731e-79 | 9.15827e-77 | 1.44060e-73 | 3.45962e-70 |

| Pa\K        | 120.000     | 130.000     | 140.000     | 150.000     | 160.000     |
|-------------|-------------|-------------|-------------|-------------|-------------|
| 1.00000e+08 | 6.51409e-56 | 1.17509e-53 | 2.01398e-51 | 4.46562e-49 | 8.01416e-47 |
| 1.00000e+07 | 6.22862e-54 | 1.12126e-51 | 1.91837e-49 | 4.25268e-47 | 7.63441e-45 |
| 1.00000e+06 | 4.33744e-52 | 7.70741e-50 | 1.30473e-47 | 2.89005e-45 | 5.20254e-43 |
| 100000.     | 7.43599e-51 | 1.25488e-48 | 2.03902e-46 | 4.51015e-44 | 8.24155e-42 |
| 10000.0     | 2.74704e-52 | 5.40254e-50 | 1.01605e-47 | 2.59464e-45 | 6.08951e-43 |
| 1000.00     | 1.89114e-52 | 3.47122e-50 | 5.97035e-48 | 1.05062e-45 | 1.49768e-43 |
| 100.000     | 6.68453e-54 | 1.52624e-51 | 3.37486e-49 | 9.64463e-47 | 2.16847e-44 |
| 10.0000     | 2.68916e-55 | 6.49532e-53 | 1.43938e-50 | 5.39630e-48 | 1.63440e-45 |
| 1.00000     | 1.47597e-54 | 3.33556e-52 | 6.71718e-50 | 2.24065e-47 | 5.88107e-45 |
| 0.100000    | 4.34090e-55 | 8.45144e-53 | 1.50893e-50 | 4.78925e-48 | 1.27510e-45 |
| 0.0100000   | 3.11217e-58 | 7.41105e-56 | 2.12050e-53 | 1.39768e-50 | 7.30048e-48 |
| 0.00100000  | 7.99580e-61 | 9.18595e-58 | 7.51625e-55 | 7.32946e-52 | 4.21571e-49 |
| 0.000100000 | 5.96454e-62 | 8.39423e-59 | 7.34187e-56 | 7.18870e-53 | 4.08618e-50 |
| 1.00000e-05 | 5.80559e-63 | 8.33300e-60 | 7.33217e-57 | 7.17912e-54 | 4.07496e-51 |
| 1.00000e-06 | 5.78997e-64 | 8.32713e-61 | 7.33134e-58 | 7.17823e-55 | 4.07386e-52 |
| 1.00000e-07 | 5.78842e-65 | 8.32654e-62 | 7.33126e-59 | 7.17814e-56 | 4.07375e-53 |
| 1.00000e-08 | 5.78826e-66 | 8.32649e-63 | 7.33125e-60 | 7.17813e-57 | 4.07374e-54 |
| 1.00000e-09 | 5.78825e-67 | 8.32648e-64 | 7.33125e-61 | 7.17813e-58 | 4.07374e-55 |

| Pa\K        | 170.000     | 180.000     | 190.000     | 200.000     | 210.000     |
|-------------|-------------|-------------|-------------|-------------|-------------|
| 1.00000e+08 | 1.11857e-44 | 1.33344e-42 | 1.82652e-40 | 2.03548e-38 | 1.50852e-36 |
| 1.00000e+07 | 1.06643e-42 | 1.27398e-40 | 1.75294e-38 | 1.96549e-36 | 1.46554e-34 |
| 1.00000e+06 | 7.31155e-41 | 8.86715e-39 | 1.25976e-36 | 1.47834e-34 | 1.15634e-32 |
| 100000.     | 1.19354e-39 | 1.55023e-37 | 2.53365e-35 | 3.65437e-33 | 3.62808e-31 |
| 10000.0     | 1.25685e-40 | 2.87780e-38 | 1.10759e-35 | 4.51041e-33 | 1.47033e-30 |
| 1000.00     | 1.69282e-41 | 1.88975e-39 | 6.93201e-37 | 6.65443e-34 | 1.81651e-30 |
| 100.000     | 3.65800e-42 | 5.19148e-40 | 1.16971e-37 | 7.67864e-35 | 1.85889e-30 |
| 10.0000     | 3.84114e-43 | 8.51305e-41 | 2.76838e-38 | 1.29193e-35 | 1.86423e-30 |
| 1.00000     | 1.19737e-42 | 2.44589e-40 | 7.68807e-38 | 2.55695e-35 | 1.87023e-30 |
| 0.100000    | 2.80801e-43 | 7.13677e-41 | 3.54586e-38 | 2.38213e-35 | 1.88076e-30 |
| 0.0100000   | 2.86550e-45 | 1.46530e-42 | 1.93653e-39 | 3.54846e-36 | 1.88398e-30 |
| 0.00100000  | 1.66756e-46 | 9.11177e-44 | 1.57093e-40 | 3.67111e-37 | 1.88436e-30 |
| 0.000100000 | 1.59062e-47 | 8.63601e-45 | 1.53270e-41 | 3.68283e-38 | 1.88440e-30 |
| 1.00000e-05 | 1.58338e-48 | 8.58936e-46 | 1.52886e-42 | 3.68399e-39 | 1.88441e-30 |
| 1.00000e-06 | 1.58266e-49 | 8.58471e-47 | 1.52848e-43 | 3.68411e-40 | 1.88441e-30 |
| 1.00000e-07 | 1.58258e-50 | 8.58424e-48 | 1.52844e-44 | 3.68412e-41 | 1.88441e-30 |
| 1.00000e-08 | 1.58258e-51 | 8.58420e-49 | 1.52844e-45 | 3.68412e-42 | 1.88441e-30 |
| 1.00000e-09 | 1.58258e-52 | 8.58419e-50 | 1.52844e-46 | 3.68412e-43 | 1.88441e-30 |

| Pa\K        | 220.000     | 230.000     | 240.000     | 250.000     | 260.000     |
|-------------|-------------|-------------|-------------|-------------|-------------|
| 1.00000e+08 | 4.18929e-35 | 9.15712e-34 | 1.24089e-32 | 1.17684e-31 | 9.28615e-31 |
| 1.00000e+07 | 4.06883e-33 | 8.87292e-32 | 1.19887e-30 | 1.13459e-29 | 8.93390e-29 |
| 1.00000e+06 | 3.20611e-31 | 6.87446e-30 | 9.10039e-29 | 8.49243e-28 | 6.59568e-27 |
| 100000.     | 1.00443e-29 | 2.01843e-28 | 2.48329e-27 | 2.21122e-26 | 1.64184e-25 |
| 10000.0     | 4.23752e-29 | 7.90215e-28 | 8.97038e-27 | 7.59409e-26 | 5.37985e-25 |
| 1000.00     | 5.37203e-29 | 9.85061e-28 | 1.09869e-26 | 9.19960e-26 | 6.45201e-25 |
| 100.000     | 5.51800e-29 | 1.00986e-27 | 1.12406e-26 | 9.40014e-26 | 6.58503e-25 |
| 10.0000     | 5.53654e-29 | 1.01319e-27 | 1.12767e-26 | 9.42969e-26 | 6.60530e-25 |
| 1.00000     | 5.55575e-29 | 1.01724e-27 | 1.13261e-26 | 9.47272e-26 | 6.63654e-25 |
| 0.100000    | 5.58710e-29 | 1.02281e-27 | 1.13856e-26 | 9.52137e-26 | 6.66984e-25 |
| 0.0100000   | 5.59643e-29 | 1.02427e-27 | 1.14001e-26 | 9.53269e-26 | 6.67727e-25 |
| 0.00100000  | 5.59755e-29 | 1.02444e-27 | 1.14018e-26 | 9.53398e-26 | 6.67812e-25 |
| 0.000100000 | 5.59766e-29 | 1.02446e-27 | 1.14020e-26 | 9.53411e-26 | 6.67820e-25 |
| 1.00000e-05 | 5.59767e-29 | 1.02446e-27 | 1.14020e-26 | 9.53413e-26 | 6.67821e-25 |
| 1.00000e-06 | 5.59767e-29 | 1.02446e-27 | 1.14020e-26 | 9.53413e-26 | 6.67822e-25 |
| 1.00000e-07 | 5.59768e-29 | 1.02446e-27 | 1.14020e-26 | 9.53413e-26 | 6.67822e-25 |
| 1.00000e-08 | 5.59768e-29 | 1.02446e-27 | 1.14020e-26 | 9.53413e-26 | 6.67822e-25 |
| 1.00000e-09 | 5.59768e-29 | 1.02446e-27 | 1.14020e-26 | 9.53413e-26 | 6.67822e-25 |

| Pa\K        | 270.000     | 280.000     | 290.000     | 300.000     | 310.000     |
|-------------|-------------|-------------|-------------|-------------|-------------|
| 1.00000e+08 | 6.30608e-30 | 3.72348e-29 | 1.93706e-28 | 7.85614e-23 | 3.74830e-27 |
| 1.00000e+07 | 6.05381e-28 | 3.56675e-27 | 1.85144e-26 | 4.88462e-21 | 3.56658e-25 |
| 1.00000e+06 | 4.40793e-26 | 2.56157e-25 | 1.31163e-24 | 7.06614e-20 | 2.45927e-23 |
| 100000.     | 1.04935e-24 | 5.83798e-24 | 2.86488e-23 | 2.65418e-19 | 4.94938e-22 |
| 10000.0     | 3.28658e-24 | 1.75212e-23 | 8.25977e-23 | 3.59371e-19 | 1.32626e-21 |
| 1000.00     | 3.90442e-24 | 2.06335e-23 | 9.64875e-23 | 1.63305e-20 | 1.52736e-21 |
| 100.000     | 3.98058e-24 | 2.10149e-23 | 9.81800e-23 | 5.70600e-22 | 1.55161e-21 |
| 10.0000     | 3.99261e-24 | 2.10774e-23 | 9.84684e-23 | 4.03177e-22 | 1.55608e-21 |

|             |             |             |             |             |             |
|-------------|-------------|-------------|-------------|-------------|-------------|
| 1.00000     | 4.01215e-24 | 2.11838e-23 | 9.89794e-23 | 3.79576e-22 | 1.56455e-21 |
| 0.100000    | 4.03178e-24 | 2.12849e-23 | 9.94395e-23 | 3.61411e-22 | 1.57145e-21 |
| 0.0100000   | 4.03600e-24 | 2.13058e-23 | 9.95314e-23 | 3.60529e-22 | 1.57275e-21 |
| 0.00100000  | 4.03647e-24 | 2.13081e-23 | 9.95416e-23 | 3.60473e-22 | 1.57289e-21 |
| 0.000100000 | 4.03652e-24 | 2.13083e-23 | 9.95427e-23 | 3.60468e-22 | 1.57290e-21 |
| 1.00000e-05 | 4.03653e-24 | 2.13084e-23 | 9.95428e-23 | 3.60468e-22 | 1.57291e-21 |
| 1.00000e-06 | 4.03653e-24 | 2.13084e-23 | 9.95428e-23 | 3.60468e-22 | 1.57291e-21 |
| 1.00000e-07 | 4.03653e-24 | 2.13084e-23 | 9.95428e-23 | 3.60468e-22 | 1.57291e-21 |
| 1.00000e-08 | 4.03653e-24 | 2.13084e-23 | 9.95428e-23 | 3.60468e-22 | 1.57291e-21 |
| 1.00000e-09 | 4.03653e-24 | 2.13084e-23 | 9.95428e-23 | 3.60468e-22 | 1.57291e-21 |

| Pa\K        | 400.000     | 500.000     | 600.000     | 700.000     | 800.000     |
|-------------|-------------|-------------|-------------|-------------|-------------|
| 1.00000e+08 | 8.20408e-19 | 5.32954e-14 | 1.62341e-11 | 2.91463e-09 | 1.22362e-07 |
| 1.00000e+07 | 8.08230e-16 | 6.30141e-11 | 3.78248e-09 | 2.53294e-08 | 8.78866e-08 |
| 1.00000e+06 | 8.33514e-14 | 1.30431e-09 | 5.14790e-08 | 1.86604e-07 | 3.12578e-07 |
| 100000.     | 2.49372e-13 | 7.26607e-10 | 4.24471e-08 | 2.12368e-07 | 3.87494e-07 |
| 10000.0     | 3.31007e-14 | 5.45518e-11 | 7.99401e-09 | 9.26366e-08 | 2.50015e-07 |
| 1000.00     | 7.69491e-16 | 3.34720e-12 | 1.82508e-09 | 3.85931e-08 | 1.28479e-07 |
| 100.000     | 4.95643e-17 | 4.82156e-13 | 4.69928e-10 | 1.13560e-08 | 3.64223e-08 |
| 10.0000     | 2.16237e-17 | 8.31852e-14 | 7.12082e-11 | 1.63233e-09 | 5.13559e-09 |
| 1.00000     | 1.85394e-17 | 2.03989e-14 | 7.86553e-12 | 1.80918e-10 | 8.05225e-10 |
| 0.100000    | 1.81728e-17 | 1.36364e-14 | 1.74073e-12 | 4.24179e-11 | 3.83302e-10 |
| 0.0100000   | 1.81355e-17 | 1.29684e-14 | 1.16087e-12 | 2.93982e-11 | 3.42941e-10 |
| 0.00100000  | 1.81318e-17 | 1.29017e-14 | 1.10383e-12 | 2.81353e-11 | 3.39014e-10 |
| 0.000100000 | 1.81314e-17 | 1.28950e-14 | 1.09816e-12 | 2.80110e-11 | 3.38627e-10 |
| 1.00000e-05 | 1.81314e-17 | 1.28943e-14 | 1.09759e-12 | 2.79986e-11 | 3.38589e-10 |
| 1.00000e-06 | 1.81314e-17 | 1.28943e-14 | 1.09754e-12 | 2.79974e-11 | 3.38585e-10 |
| 1.00000e-07 | 1.81314e-17 | 1.28942e-14 | 1.09753e-12 | 2.79973e-11 | 3.38585e-10 |
| 1.00000e-08 | 1.81314e-17 | 1.28942e-14 | 1.09753e-12 | 2.79973e-11 | 3.38585e-10 |
| 1.00000e-09 | 1.81314e-17 | 1.28942e-14 | 1.09753e-12 | 2.79973e-11 | 3.38585e-10 |

| Pa\K        | 900.000     | 1000.00     | 1100.00     | 1200.00     | 1300.00     |
|-------------|-------------|-------------|-------------|-------------|-------------|
| 1.00000e+08 | 1.11661e-06 | 4.55978e-06 | 1.10843e-05 | 1.66026e-05 | 1.80391e-05 |
| 1.00000e+07 | 3.94390e-07 | 1.99328e-06 | 7.04396e-06 | 1.51074e-05 | 2.38805e-05 |
| 1.00000e+06 | 4.51555e-07 | 8.92854e-07 | 2.55996e-06 | 5.34457e-06 | 9.08071e-06 |
| 100000.     | 5.28426e-07 | 6.86604e-07 | 1.04552e-06 | 1.61041e-06 | 2.45660e-06 |
| 10000.0     | 3.76393e-07 | 4.50595e-07 | 5.27598e-07 | 6.69836e-07 | 9.92358e-07 |
| 1000.00     | 1.87219e-07 | 1.97555e-07 | 2.11910e-07 | 3.01609e-07 | 5.82813e-07 |
| 100.000     | 4.63604e-08 | 4.89054e-08 | 7.79217e-08 | 1.88994e-07 | 4.90270e-07 |
| 10.0000     | 7.79984e-09 | 1.69742e-08 | 5.47845e-08 | 1.72791e-07 | 4.78790e-07 |
| 1.00000     | 3.01193e-09 | 1.33633e-08 | 5.23440e-08 | 1.71164e-07 | 4.77674e-07 |
| 0.100000    | 2.54536e-09 | 1.30139e-08 | 5.21095e-08 | 1.71008e-07 | 4.77568e-07 |
| 0.0100000   | 2.50035e-09 | 1.29802e-08 | 5.20868e-08 | 1.70993e-07 | 4.77557e-07 |
| 0.00100000  | 2.49595e-09 | 1.29769e-08 | 5.20846e-08 | 1.70991e-07 | 4.77556e-07 |
| 0.000100000 | 2.49552e-09 | 1.29765e-08 | 5.20844e-08 | 1.70991e-07 | 4.77556e-07 |
| 1.00000e-05 | 2.49548e-09 | 1.29765e-08 | 5.20844e-08 | 1.70991e-07 | 4.77556e-07 |
| 1.00000e-06 | 2.49547e-09 | 1.29765e-08 | 5.20844e-08 | 1.70991e-07 | 4.77556e-07 |
| 1.00000e-07 | 2.49547e-09 | 1.29765e-08 | 5.20844e-08 | 1.70991e-07 | 4.77556e-07 |
| 1.00000e-08 | 2.49547e-09 | 1.29765e-08 | 5.20844e-08 | 1.70991e-07 | 4.77556e-07 |
| 1.00000e-09 | 2.49547e-09 | 1.29765e-08 | 5.20844e-08 | 1.70991e-07 | 4.77556e-07 |

| Pa\K        | 1400.00     | 1500.00     | 1750.00     | 2000.00     | 2250.00     |
|-------------|-------------|-------------|-------------|-------------|-------------|
| 1.00000e+08 | 1.73138e-05 | 1.67101e-05 | 0.000765455 | 0.000885437 | 0.000918791 |
| 1.00000e+07 | 3.15458e-05 | 3.66609e-05 | 0.000885244 | 0.000871201 | 0.000701602 |
| 1.00000e+06 | 1.40026e-05 | 1.77753e-05 | 0.000352622 | 0.000280472 | 0.000219778 |
| 100000.     | 3.87579e-06 | 5.57702e-06 | 6.75900e-05 | 7.30385e-05 | 0.000101466 |
| 10000.0     | 1.70878e-06 | 3.06308e-06 | 1.95205e-05 | 4.20062e-05 | 8.48618e-05 |
| 1000.00     | 1.25385e-06 | 2.61435e-06 | 1.32169e-05 | 3.81540e-05 | 8.28683e-05 |
| 100.000     | 1.17615e-06 | 2.55191e-06 | 1.25081e-05 | 3.77520e-05 | 8.26671e-05 |
| 10.0000     | 1.16766e-06 | 2.54589e-06 | 1.24381e-05 | 3.77135e-05 | 8.26478e-05 |
| 1.00000     | 1.16686e-06 | 2.54535e-06 | 1.24313e-05 | 3.77097e-05 | 8.26460e-05 |
| 0.100000    | 1.16678e-06 | 2.54530e-06 | 1.24306e-05 | 3.77094e-05 | 8.26458e-05 |
| 0.0100000   | 1.16678e-06 | 2.54530e-06 | 1.24306e-05 | 3.77093e-05 | 8.26458e-05 |
| 0.00100000  | 1.16677e-06 | 2.54530e-06 | 1.24306e-05 | 3.77093e-05 | 8.26458e-05 |
| 0.000100000 | 1.16677e-06 | 2.54530e-06 | 1.24306e-05 | 3.77093e-05 | 8.26458e-05 |
| 1.00000e-05 | 1.16677e-06 | 2.54530e-06 | 1.24306e-05 | 3.77093e-05 | 8.26458e-05 |
| 1.00000e-06 | 1.16677e-06 | 2.54530e-06 | 1.24306e-05 | 3.77093e-05 | 8.26458e-05 |
| 1.00000e-07 | 1.16677e-06 | 2.54530e-06 | 1.24306e-05 | 3.77093e-05 | 8.26458e-05 |
| 1.00000e-08 | 1.16677e-06 | 2.54530e-06 | 1.24306e-05 | 3.77093e-05 | 8.26458e-05 |
| 1.00000e-09 | 1.16677e-06 | 2.54530e-06 | 1.24306e-05 | 3.77093e-05 | 8.26458e-05 |

| Pa\K        | 2500.00     | 2750.00     | 3000.00     | 3250.00     | 3500.00     |
|-------------|-------------|-------------|-------------|-------------|-------------|
| 1.00000e+08 | 0.000884520 | 0.000806339 | 0.000713775 | 0.000630511 | 0.000567394 |
| 1.00000e+07 | 0.000538932 | 0.000440685 | 0.000400380 | 0.000394733 | 0.000404729 |
| 1.00000e+06 | 0.000212981 | 0.000243514 | 0.000288102 | 0.000332730 | 0.000371100 |
| 100000.     | 0.000151945 | 0.000212809 | 0.000272704 | 0.000325017 | 0.000367262 |

|             |             |             |             |             |             |
|-------------|-------------|-------------|-------------|-------------|-------------|
| 10000.0     | 0.000143853 | 0.000208979 | 0.000270908 | 0.000324178 | 0.000366874 |
| 1000.00     | 0.000142941 | 0.000208575 | 0.000270729 | 0.000324098 | 0.000366839 |
| 100.000     | 0.000142852 | 0.000208536 | 0.000270712 | 0.000324091 | 0.000366836 |
| 10.0000     | 0.000142843 | 0.000208532 | 0.000270710 | 0.000324090 | 0.000366835 |
| 1.00000     | 0.000142842 | 0.000208532 | 0.000270710 | 0.000324090 | 0.000366835 |
| 0.100000    | 0.000142842 | 0.000208532 | 0.000270710 | 0.000324090 | 0.000366835 |
| 0.0100000   | 0.000142842 | 0.000208532 | 0.000270710 | 0.000324090 | 0.000366835 |
| 0.00100000  | 0.000142842 | 0.000208532 | 0.000270710 | 0.000324090 | 0.000366835 |
| 0.000100000 | 0.000142842 | 0.000208532 | 0.000270710 | 0.000324090 | 0.000366835 |
| 1.00000e-05 | 0.000142842 | 0.000208532 | 0.000270710 | 0.000324090 | 0.000366835 |
| 1.00000e-06 | 0.000142842 | 0.000208532 | 0.000270710 | 0.000324090 | 0.000366835 |
| 1.00000e-07 | 0.000142842 | 0.000208532 | 0.000270710 | 0.000324090 | 0.000366835 |
| 1.00000e-08 | 0.000142842 | 0.000208532 | 0.000270710 | 0.000324090 | 0.000366835 |
| 1.00000e-09 | 0.000142842 | 0.000208532 | 0.000270710 | 0.000324090 | 0.000366835 |

Pa\K | 3750.00 4000.00

|             |             |             |
|-------------|-------------|-------------|
| 1.00000e+08 | 0.000524724 | 0.000497926 |
| 1.00000e+07 | 0.000419230 | 0.000432869 |
| 1.00000e+06 | 0.000401313 | 0.000423590 |
| 100000.     | 0.000399438 | 0.000422712 |
| 10000.0     | 0.000399262 | 0.000422638 |
| 1000.00     | 0.000399247 | 0.000422632 |
| 100.000     | 0.000399246 | 0.000422632 |
| 10.0000     | 0.000399246 | 0.000422632 |
| 1.00000     | 0.000399246 | 0.000422632 |
| 0.100000    | 0.000399246 | 0.000422632 |
| 0.0100000   | 0.000399246 | 0.000422632 |
| 0.00100000  | 0.000399246 | 0.000422632 |
| 0.000100000 | 0.000399246 | 0.000422632 |
| 1.00000e-05 | 0.000399246 | 0.000422632 |
| 1.00000e-06 | 0.000399246 | 0.000422632 |
| 1.00000e-07 | 0.000399246 | 0.000422632 |
| 1.00000e-08 | 0.000399246 | 0.000422632 |
| 1.00000e-09 | 0.000399246 | 0.000422632 |

rad60anti

=====

Pa\K | 20.0000 30.0000 40.0000 50.0000 60.0000

|             |             |             |             |             |             |
|-------------|-------------|-------------|-------------|-------------|-------------|
| 1.00000e+08 | 5.37796e-43 | 2.93609e-42 | 1.19193e-41 | 4.91345e-41 | 2.21400e-40 |
| 1.00000e+07 | 5.37498e-41 | 2.93281e-40 | 1.18995e-39 | 4.90264e-39 | 2.20795e-38 |
| 1.00000e+06 | 5.34539e-39 | 2.90046e-38 | 1.17054e-37 | 4.79748e-37 | 2.14951e-36 |
| 100000.     | 5.06896e-37 | 2.61726e-36 | 1.01026e-35 | 3.97509e-35 | 1.71517e-34 |
| 10000.0     | 3.42910e-35 | 1.38997e-34 | 4.46426e-34 | 1.50023e-33 | 5.61710e-33 |
| 1000.00     | 5.54077e-34 | 7.20284e-34 | 9.50512e-34 | 1.54013e-33 | 3.13217e-33 |
| 100.000     | 2.77669e-35 | 4.87418e-36 | 4.42553e-36 | 7.07531e-36 | 1.47680e-35 |
| 10.0000     | 5.03110e-37 | 1.44759e-37 | 1.15351e-37 | 1.89945e-37 | 4.75250e-37 |
| 1.00000     | 3.46902e-38 | 2.90168e-38 | 2.97901e-38 | 4.05213e-38 | 7.43963e-38 |
| 0.100000    | 1.60587e-39 | 2.75992e-39 | 6.98223e-39 | 2.02926e-38 | 7.12225e-38 |
| 0.0100000   | 9.93805e-39 | 2.52330e-38 | 6.27841e-38 | 1.77206e-37 | 6.04419e-37 |
| 0.00100000  | 7.20130e-38 | 1.37351e-37 | 2.67728e-37 | 6.10500e-37 | 1.72272e-36 |
| 0.000100000 | 8.18125e-38 | 4.82404e-38 | 4.47126e-38 | 6.04523e-38 | 1.15505e-37 |
| 1.00000e-05 | 1.40236e-39 | 3.31641e-40 | 2.23084e-40 | 2.62803e-40 | 4.75210e-40 |
| 1.00000e-06 | 5.14823e-42 | 1.45425e-42 | 1.15609e-42 | 1.58038e-42 | 3.37862e-42 |
| 1.00000e-07 | 4.78085e-44 | 2.00202e-44 | 2.04769e-44 | 3.51191e-44 | 9.96757e-44 |
| 1.00000e-08 | 1.57098e-45 | 9.40956e-46 | 1.17614e-45 | 2.35277e-45 | 7.71757e-45 |
| 1.00000e-09 | 1.22699e-46 | 8.27047e-47 | 1.08432e-46 | 2.23307e-46 | 7.48932e-46 |

Pa\K | 70.0000 80.0000 90.0000 100.000 110.000

|             |             |             |             |             |             |
|-------------|-------------|-------------|-------------|-------------|-------------|
| 1.00000e+08 | 1.15508e-39 | 7.59924e-39 | 7.22424e-38 | 1.16444e-36 | 3.35015e-35 |
| 1.00000e+07 | 1.15132e-37 | 7.57088e-37 | 7.19460e-36 | 1.15954e-34 | 3.33723e-33 |
| 1.00000e+06 | 1.11527e-35 | 7.30015e-35 | 6.91303e-34 | 1.11318e-32 | 3.21473e-31 |
| 100000.     | 8.59741e-34 | 5.46092e-33 | 5.06249e-32 | 8.12818e-31 | 2.41116e-29 |
| 10000.0     | 2.47541e-32 | 1.40543e-31 | 1.20553e-30 | 1.93826e-29 | 6.61985e-28 |
| 1000.00     | 8.36152e-33 | 3.33382e-32 | 2.81940e-31 | 8.67370e-30 | 1.24753e-27 |
| 100.000     | 4.02941e-35 | 1.73152e-34 | 2.96957e-33 | 4.43705e-31 | 1.05286e-27 |
| 10.0000     | 1.64394e-36 | 8.79433e-36 | 1.83041e-34 | 3.86727e-32 | 1.02769e-27 |
| 1.00000     | 1.98715e-37 | 9.63949e-37 | 2.09949e-35 | 4.11655e-33 | 1.02511e-27 |
| 0.100000    | 3.35366e-37 | 2.57296e-36 | 4.36004e-35 | 2.09660e-33 | 1.02498e-27 |
| 0.0100000   | 2.77089e-36 | 2.07174e-35 | 3.36443e-34 | 1.34755e-32 | 1.02614e-27 |
| 0.00100000  | 6.66065e-36 | 4.27820e-35 | 6.20832e-34 | 2.49651e-32 | 1.02886e-27 |
| 0.000100000 | 3.31012e-37 | 1.72687e-36 | 2.76443e-35 | 2.36376e-33 | 1.02870e-27 |
| 1.00000e-05 | 1.38460e-39 | 9.83938e-39 | 6.19664e-37 | 1.67214e-34 | 1.02860e-27 |
| 1.00000e-06 | 1.39093e-41 | 2.79157e-40 | 4.78051e-38 | 1.59878e-35 | 1.02859e-27 |
| 1.00000e-07 | 6.63002e-43 | 2.31245e-41 | 4.65650e-39 | 1.59151e-36 | 1.02859e-27 |
| 1.00000e-08 | 5.94749e-44 | 2.26696e-42 | 4.64429e-40 | 1.59078e-37 | 1.02859e-27 |
| 1.00000e-09 | 5.87917e-45 | 2.26243e-43 | 4.64307e-41 | 1.59071e-38 | 1.02859e-27 |



| Pa\K        | 120.000     | 130.000     | 140.000     | 150.000     | 160.000     |
|-------------|-------------|-------------|-------------|-------------|-------------|
| 1.00000e+08 | 1.15981e-33 | 3.34537e-32 | 7.07654e-31 | 1.09804e-29 | 1.28835e-28 |
| 1.00000e+07 | 1.15575e-31 | 3.33408e-30 | 7.05235e-29 | 1.09411e-27 | 1.28341e-26 |
| 1.00000e+06 | 1.11718e-29 | 3.22692e-28 | 6.82306e-27 | 1.05697e-25 | 1.23701e-24 |
| 100000.     | 8.59952e-28 | 2.50927e-26 | 5.29991e-25 | 8.14384e-24 | 9.40909e-23 |
| 10000.0     | 2.66386e-26 | 8.14538e-25 | 1.72503e-23 | 2.59181e-22 | 2.88199e-21 |
| 1000.00     | 8.81120e-26 | 3.24874e-24 | 7.29738e-23 | 1.09790e-21 | 1.18650e-20 |
| 100.000     | 9.82008e-26 | 3.91355e-24 | 9.06269e-23 | 1.37639e-21 | 1.48551e-20 |
| 10.0000     | 9.91850e-26 | 3.98942e-24 | 9.27456e-23 | 1.41049e-21 | 1.52235e-20 |
| 1.00000     | 9.92876e-26 | 3.99735e-24 | 9.29683e-23 | 1.41408e-21 | 1.52623e-20 |
| 0.100000    | 9.93079e-26 | 3.99855e-24 | 9.30006e-23 | 1.41461e-21 | 1.52683e-20 |
| 0.0100000   | 9.93904e-26 | 4.00176e-24 | 9.30773e-23 | 1.41585e-21 | 1.52827e-20 |
| 0.00100000  | 9.96134e-26 | 4.01037e-24 | 9.32749e-23 | 1.41885e-21 | 1.53152e-20 |
| 0.000100000 | 9.96766e-26 | 4.01354e-24 | 9.33530e-23 | 1.42004e-21 | 1.53277e-20 |
| 1.00000e-05 | 9.96813e-26 | 4.01388e-24 | 9.33623e-23 | 1.42019e-21 | 1.53292e-20 |
| 1.00000e-06 | 9.96817e-26 | 4.01392e-24 | 9.33633e-23 | 1.42020e-21 | 1.53294e-20 |
| 1.00000e-07 | 9.96818e-26 | 4.01392e-24 | 9.33634e-23 | 1.42020e-21 | 1.53294e-20 |
| 1.00000e-08 | 9.96818e-26 | 4.01392e-24 | 9.33634e-23 | 1.42020e-21 | 1.53294e-20 |
| 1.00000e-09 | 9.96818e-26 | 4.01392e-24 | 9.33634e-23 | 1.42020e-21 | 1.53294e-20 |

| Pa\K        | 170.000     | 180.000     | 190.000     | 200.000     | 210.000     |
|-------------|-------------|-------------|-------------|-------------|-------------|
| 1.00000e+08 | 1.18669e-27 | 8.88361e-27 | 5.57028e-26 | 3.00068e-25 | 1.41861e-24 |
| 1.00000e+07 | 1.18175e-25 | 8.84311e-25 | 5.54221e-24 | 2.98386e-23 | 1.40972e-22 |
| 1.00000e+06 | 1.13563e-23 | 8.46698e-23 | 5.28356e-22 | 2.83029e-21 | 1.32941e-20 |
| 100000.     | 8.49561e-22 | 6.20971e-21 | 3.78746e-20 | 1.97727e-19 | 9.02482e-19 |
| 10000.0     | 2.47616e-20 | 1.70700e-19 | 9.74662e-19 | 4.73272e-18 | 1.99766e-17 |
| 1000.00     | 9.74110e-20 | 6.35316e-19 | 3.41191e-18 | 1.55321e-17 | 6.13706e-17 |
| 100.000     | 1.21097e-19 | 7.81758e-19 | 4.14891e-18 | 1.86513e-17 | 7.27628e-17 |
| 10.0000     | 1.24012e-19 | 7.99695e-19 | 4.23856e-18 | 1.90276e-17 | 7.41253e-17 |
| 1.00000     | 1.24320e-19 | 8.01593e-19 | 4.24806e-18 | 1.90676e-17 | 7.42706e-17 |
| 0.100000    | 1.24370e-19 | 8.01924e-19 | 4.24989e-18 | 1.90762e-17 | 7.43069e-17 |
| 0.0100000   | 1.24498e-19 | 8.02835e-19 | 4.25521e-18 | 1.91025e-17 | 7.44195e-17 |
| 0.00100000  | 1.24764e-19 | 8.04548e-19 | 4.26426e-18 | 1.91429e-17 | 7.45745e-17 |
| 0.000100000 | 1.24861e-19 | 8.05142e-19 | 4.26721e-18 | 1.91552e-17 | 7.46189e-17 |
| 1.00000e-05 | 1.24873e-19 | 8.05216e-19 | 4.26757e-18 | 1.91567e-17 | 7.46243e-17 |
| 1.00000e-06 | 1.24875e-19 | 8.05224e-19 | 4.26761e-18 | 1.91569e-17 | 7.46248e-17 |
| 1.00000e-07 | 1.24875e-19 | 8.05224e-19 | 4.26761e-18 | 1.91569e-17 | 7.46249e-17 |
| 1.00000e-08 | 1.24875e-19 | 8.05224e-19 | 4.26761e-18 | 1.91569e-17 | 7.46249e-17 |
| 1.00000e-09 | 1.24875e-19 | 8.05224e-19 | 4.26761e-18 | 1.91569e-17 | 7.46249e-17 |

| Pa\K        | 220.000     | 230.000     | 240.000     | 250.000     | 260.000     |
|-------------|-------------|-------------|-------------|-------------|-------------|
| 1.00000e+08 | 5.99148e-24 | 2.29451e-23 | 8.06740e-23 | 2.63153e-22 | 8.03412e-22 |
| 1.00000e+07 | 5.94934e-22 | 2.27633e-21 | 7.99523e-21 | 2.60489e-20 | 7.94196e-20 |
| 1.00000e+06 | 5.57319e-20 | 2.11630e-19 | 7.36959e-19 | 2.37791e-18 | 7.17152e-18 |
| 100000.     | 3.66546e-18 | 1.34434e-17 | 4.50715e-17 | 1.39557e-16 | 4.02531e-16 |
| 10000.0     | 7.46447e-17 | 2.50702e-16 | 7.66572e-16 | 2.15714e-15 | 5.63798e-15 |
| 1000.00     | 2.14605e-16 | 6.74942e-16 | 1.93503e-15 | 5.11466e-15 | 1.25838e-14 |
| 100.000     | 2.51266e-16 | 7.80689e-16 | 2.21230e-15 | 5.78339e-15 | 1.40821e-14 |
| 10.0000     | 2.55613e-16 | 7.93117e-16 | 2.24462e-15 | 5.86070e-15 | 1.42541e-14 |
| 1.00000     | 2.56079e-16 | 7.94459e-16 | 2.24814e-15 | 5.86927e-15 | 1.42735e-14 |
| 0.100000    | 2.56215e-16 | 7.94927e-16 | 2.24963e-15 | 5.87366e-15 | 1.42857e-14 |
| 0.0100000   | 2.56640e-16 | 7.96364e-16 | 2.25403e-15 | 5.88601e-15 | 1.43177e-14 |
| 0.00100000  | 2.57164e-16 | 7.97951e-16 | 2.25838e-15 | 5.89695e-15 | 1.43432e-14 |
| 0.000100000 | 2.57305e-16 | 7.98352e-16 | 2.25941e-15 | 5.89940e-15 | 1.43486e-14 |
| 1.00000e-05 | 2.57322e-16 | 7.98399e-16 | 2.25953e-15 | 5.89968e-15 | 1.43492e-14 |
| 1.00000e-06 | 2.57324e-16 | 7.98403e-16 | 2.25955e-15 | 5.89971e-15 | 1.43492e-14 |
| 1.00000e-07 | 2.57324e-16 | 7.98404e-16 | 2.25955e-15 | 5.89971e-15 | 1.43492e-14 |
| 1.00000e-08 | 2.57324e-16 | 7.98404e-16 | 2.25955e-15 | 5.89971e-15 | 1.43492e-14 |
| 1.00000e-09 | 2.57324e-16 | 7.98404e-16 | 2.25955e-15 | 5.89971e-15 | 1.43492e-14 |

| Pa\K        | 270.000     | 280.000     | 290.000     | 300.000     | 310.000     |
|-------------|-------------|-------------|-------------|-------------|-------------|
| 1.00000e+08 | 2.31286e-21 | 6.31784e-21 | 1.64625e-20 | 6.02022e-18 | 9.86929e-20 |
| 1.00000e+07 | 2.28277e-19 | 6.22455e-19 | 1.61867e-18 | 5.28239e-16 | 9.65734e-18 |
| 1.00000e+06 | 2.03643e-17 | 5.47839e-17 | 1.40354e-16 | 2.64122e-14 | 8.09229e-16 |
| 100000.     | 1.08940e-15 | 2.78344e-15 | 6.74913e-15 | 2.92712e-13 | 3.45032e-14 |
| 10000.0     | 1.37945e-14 | 3.18095e-14 | 6.95377e-14 | 3.32567e-13 | 2.88759e-13 |
| 1000.00     | 2.90541e-14 | 6.33920e-14 | 1.31490e-13 | 2.27030e-13 | 4.95879e-13 |
| 100.000     | 3.21994e-14 | 6.96224e-14 | 1.43208e-13 | 2.13989e-13 | 5.32106e-13 |
| 10.0000     | 3.25579e-14 | 7.03280e-14 | 1.44528e-13 | 2.12618e-13 | 5.36151e-13 |
| 1.00000     | 3.25995e-14 | 7.04131e-14 | 1.44695e-13 | 2.12755e-13 | 5.36742e-13 |
| 0.100000    | 3.26314e-14 | 7.04919e-14 | 1.44880e-13 | 2.13473e-13 | 5.37628e-13 |
| 0.0100000   | 3.27088e-14 | 7.06673e-14 | 1.45255e-13 | 2.13786e-13 | 5.39088e-13 |
| 0.00100000  | 3.27640e-14 | 7.07799e-14 | 1.45472e-13 | 2.13641e-13 | 5.39785e-13 |
| 0.000100000 | 3.27751e-14 | 7.08013e-14 | 1.45511e-13 | 2.13603e-13 | 5.39900e-13 |
| 1.00000e-05 | 3.27763e-14 | 7.08037e-14 | 1.45515e-13 | 2.13599e-13 | 5.39913e-13 |
| 1.00000e-06 | 3.27765e-14 | 7.08039e-14 | 1.45516e-13 | 2.13599e-13 | 5.39914e-13 |

|             |             |             |             |             |             |
|-------------|-------------|-------------|-------------|-------------|-------------|
| 1.00000e-07 | 3.27765e-14 | 7.08040e-14 | 1.45516e-13 | 2.13599e-13 | 5.39914e-13 |
| 1.00000e-08 | 3.27765e-14 | 7.08040e-14 | 1.45516e-13 | 2.13599e-13 | 5.39914e-13 |
| 1.00000e-09 | 3.27765e-14 | 7.08040e-14 | 1.45516e-13 | 2.13599e-13 | 5.39914e-13 |

| Pa\K        | 400.000     | 500.000     | 600.000     | 700.000     | 800.000     |
|-------------|-------------|-------------|-------------|-------------|-------------|
| 1.00000e+08 | 3.53058e-15 | 1.62703e-12 | 5.32126e-10 | 6.28441e-08 | 1.26359e-06 |
| 1.00000e+07 | 2.53757e-13 | 2.74524e-10 | 1.72316e-08 | 2.13947e-07 | 1.36544e-06 |
| 1.00000e+06 | 7.91409e-12 | 6.24414e-09 | 1.87930e-07 | 7.19702e-07 | 1.57550e-06 |
| 100000.     | 4.32424e-11 | 8.16617e-09 | 2.03781e-07 | 8.35273e-07 | 1.58755e-06 |
| 10000.0     | 4.55579e-11 | 2.58063e-09 | 6.50528e-08 | 4.52747e-07 | 1.15303e-06 |
| 1000.00     | 3.88107e-11 | 1.21164e-09 | 2.46602e-08 | 2.31334e-07 | 7.14401e-07 |
| 100.000     | 3.78617e-11 | 1.03708e-09 | 1.38027e-08 | 1.08192e-07 | 3.60803e-07 |
| 10.0000     | 3.77587e-11 | 1.00857e-09 | 1.06378e-08 | 6.41636e-08 | 2.40315e-07 |
| 1.00000     | 3.78393e-11 | 1.00762e-09 | 1.01670e-08 | 5.76883e-08 | 2.23825e-07 |
| 0.100000    | 3.79532e-11 | 1.00927e-09 | 1.01293e-08 | 5.70880e-08 | 2.22250e-07 |
| 0.0100000   | 3.79893e-11 | 1.00966e-09 | 1.01265e-08 | 5.70332e-08 | 2.22101e-07 |
| 0.00100000  | 3.79916e-11 | 1.00971e-09 | 1.01263e-08 | 5.70280e-08 | 2.22087e-07 |
| 0.000100000 | 3.79916e-11 | 1.00971e-09 | 1.01262e-08 | 5.70274e-08 | 2.22085e-07 |
| 1.00000e-05 | 3.79916e-11 | 1.00971e-09 | 1.01262e-08 | 5.70274e-08 | 2.22085e-07 |
| 1.00000e-06 | 3.79916e-11 | 1.00971e-09 | 1.01262e-08 | 5.70274e-08 | 2.22085e-07 |
| 1.00000e-07 | 3.79916e-11 | 1.00971e-09 | 1.01262e-08 | 5.70274e-08 | 2.22085e-07 |
| 1.00000e-08 | 3.79916e-11 | 1.00971e-09 | 1.01262e-08 | 5.70274e-08 | 2.22085e-07 |
| 1.00000e-09 | 3.79916e-11 | 1.00971e-09 | 1.01262e-08 | 5.70274e-08 | 2.22085e-07 |

| Pa\K        | 900.000     | 1000.00     | 1100.00     | 1200.00     | 1300.00     |
|-------------|-------------|-------------|-------------|-------------|-------------|
| 1.00000e+08 | 7.01336e-06 | 2.07671e-05 | 4.22714e-05 | 5.82924e-05 | 6.11755e-05 |
| 1.00000e+07 | 5.29541e-06 | 1.59647e-05 | 3.90142e-05 | 6.96104e-05 | 9.90450e-05 |
| 1.00000e+06 | 3.43558e-06 | 8.20478e-06 | 1.88685e-05 | 3.38138e-05 | 5.23041e-05 |
| 100000.     | 2.63198e-06 | 4.58919e-06 | 8.37041e-06 | 1.40967e-05 | 2.24186e-05 |
| 10000.0     | 2.01097e-06 | 3.28826e-06 | 5.55442e-06 | 9.43875e-06 | 1.57342e-05 |
| 1000.00     | 1.33909e-06 | 2.36125e-06 | 4.35504e-06 | 8.01633e-06 | 1.41460e-05 |
| 100.000     | 8.30886e-07 | 1.83455e-06 | 3.87944e-06 | 7.61317e-06 | 1.38139e-05 |
| 10.0000     | 6.92446e-07 | 1.72321e-06 | 3.79964e-06 | 7.55744e-06 | 1.37752e-05 |
| 1.00000     | 6.75548e-07 | 1.71095e-06 | 3.79149e-06 | 7.55201e-06 | 1.37716e-05 |
| 0.100000    | 6.73936e-07 | 1.70979e-06 | 3.79072e-06 | 7.55150e-06 | 1.37712e-05 |
| 0.0100000   | 6.73783e-07 | 1.70968e-06 | 3.79065e-06 | 7.55145e-06 | 1.37712e-05 |
| 0.00100000  | 6.73768e-07 | 1.70967e-06 | 3.79064e-06 | 7.55145e-06 | 1.37712e-05 |
| 0.000100000 | 6.73766e-07 | 1.70967e-06 | 3.79064e-06 | 7.55145e-06 | 1.37712e-05 |
| 1.00000e-05 | 6.73766e-07 | 1.70967e-06 | 3.79064e-06 | 7.55145e-06 | 1.37712e-05 |
| 1.00000e-06 | 6.73766e-07 | 1.70967e-06 | 3.79064e-06 | 7.55145e-06 | 1.37712e-05 |
| 1.00000e-07 | 6.73766e-07 | 1.70967e-06 | 3.79064e-06 | 7.55145e-06 | 1.37712e-05 |
| 1.00000e-08 | 6.73766e-07 | 1.70967e-06 | 3.79064e-06 | 7.55145e-06 | 1.37712e-05 |
| 1.00000e-09 | 6.73766e-07 | 1.70967e-06 | 3.79064e-06 | 7.55145e-06 | 1.37712e-05 |

| Pa\K        | 1400.00     | 1500.00     | 1750.00     | 2000.00     | 2250.00     |
|-------------|-------------|-------------|-------------|-------------|-------------|
| 1.00000e+08 | 5.77411e-05 | 5.50671e-05 | 0.000583628 | 0.000662251 | 0.000697022 |
| 1.00000e+07 | 0.000122833 | 0.000138560 | 0.000770543 | 0.000766248 | 0.000686221 |
| 1.00000e+06 | 7.34789e-05 | 9.04036e-05 | 0.000384241 | 0.000380364 | 0.000399975 |
| 100000.     | 3.39860e-05 | 4.77237e-05 | 0.000154813 | 0.000231846 | 0.000324056 |
| 10000.0     | 2.52769e-05 | 3.86619e-05 | 0.000115117 | 0.000209034 | 0.000313291 |
| 1000.00     | 2.35893e-05 | 3.71119e-05 | 0.000109873 | 0.000206194 | 0.000312013 |
| 100.000     | 2.33226e-05 | 3.69209e-05 | 0.000109338 | 0.000205933 | 0.000311896 |
| 10.0000     | 2.32970e-05 | 3.69081e-05 | 0.000109298 | 0.000205913 | 0.000311886 |
| 1.00000     | 2.32948e-05 | 3.69074e-05 | 0.000109295 | 0.000205912 | 0.000311885 |
| 0.100000    | 2.32946e-05 | 3.69074e-05 | 0.000109295 | 0.000205912 | 0.000311885 |
| 0.0100000   | 2.32946e-05 | 3.69074e-05 | 0.000109295 | 0.000205912 | 0.000311885 |
| 0.00100000  | 2.32946e-05 | 3.69074e-05 | 0.000109295 | 0.000205912 | 0.000311885 |
| 0.000100000 | 2.32946e-05 | 3.69074e-05 | 0.000109295 | 0.000205912 | 0.000311885 |
| 1.00000e-05 | 2.32946e-05 | 3.69074e-05 | 0.000109295 | 0.000205912 | 0.000311885 |
| 1.00000e-06 | 2.32946e-05 | 3.69074e-05 | 0.000109295 | 0.000205912 | 0.000311885 |
| 1.00000e-07 | 2.32946e-05 | 3.69074e-05 | 0.000109295 | 0.000205912 | 0.000311885 |
| 1.00000e-08 | 2.32946e-05 | 3.69074e-05 | 0.000109295 | 0.000205912 | 0.000311885 |
| 1.00000e-09 | 2.32946e-05 | 3.69074e-05 | 0.000109295 | 0.000205912 | 0.000311885 |

| Pa\K        | 2500.00     | 2750.00     | 3000.00     | 3250.00     | 3500.00     |
|-------------|-------------|-------------|-------------|-------------|-------------|
| 1.00000e+08 | 0.000694208 | 0.000663738 | 0.000618673 | 0.000570057 | 0.000524052 |
| 1.00000e+07 | 0.000614720 | 0.000569960 | 0.000541350 | 0.000517403 | 0.000492704 |
| 1.00000e+06 | 0.000440850 | 0.000477214 | 0.000495852 | 0.000496466 | 0.000483738 |
| 100000.     | 0.000406496 | 0.000462605 | 0.000489961 | 0.000494275 | 0.000483055 |
| 10000.0     | 0.000402002 | 0.000460870 | 0.000489348 | 0.000494089 | 0.000483023 |
| 1000.00     | 0.000401507 | 0.000460696 | 0.000489294 | 0.000494077 | 0.000483024 |
| 100.000     | 0.000401462 | 0.000460681 | 0.000489289 | 0.000494077 | 0.000483024 |
| 10.0000     | 0.000401458 | 0.000460680 | 0.000489289 | 0.000494077 | 0.000483025 |
| 1.00000     | 0.000401457 | 0.000460680 | 0.000489289 | 0.000494077 | 0.000483025 |
| 0.100000    | 0.000401457 | 0.000460680 | 0.000489289 | 0.000494077 | 0.000483025 |
| 0.0100000   | 0.000401457 | 0.000460680 | 0.000489289 | 0.000494077 | 0.000483025 |

|             |             |             |             |             |             |
|-------------|-------------|-------------|-------------|-------------|-------------|
| 0.00100000  | 0.000401457 | 0.000460680 | 0.000489289 | 0.000494077 | 0.000483025 |
| 0.000100000 | 0.000401457 | 0.000460680 | 0.000489289 | 0.000494077 | 0.000483025 |
| 1.00000e-05 | 0.000401457 | 0.000460680 | 0.000489289 | 0.000494077 | 0.000483025 |
| 1.00000e-06 | 0.000401457 | 0.000460680 | 0.000489289 | 0.000494077 | 0.000483025 |
| 1.00000e-07 | 0.000401457 | 0.000460680 | 0.000489289 | 0.000494077 | 0.000483025 |
| 1.00000e-08 | 0.000401457 | 0.000460680 | 0.000489289 | 0.000494077 | 0.000483025 |
| 1.00000e-09 | 0.000401457 | 0.000460680 | 0.000489289 | 0.000494077 | 0.000483025 |

| Pa\K        | 3750.00     | 4000.00     |
|-------------|-------------|-------------|
| 1.00000e+08 | 0.000482735 | 0.000446130 |
| 1.00000e+07 | 0.000466180 | 0.000438580 |
| 1.00000e+06 | 0.000462786 | 0.000437650 |
| 100000.     | 0.000462682 | 0.000437740 |
| 10000.0     | 0.000462697 | 0.000437767 |
| 1000.00     | 0.000462702 | 0.000437771 |
| 100.000     | 0.000462703 | 0.000437772 |
| 10.0000     | 0.000462703 | 0.000437772 |
| 1.00000     | 0.000462703 | 0.000437772 |
| 0.100000    | 0.000462703 | 0.000437772 |
| 0.0100000   | 0.000462703 | 0.000437772 |
| 0.00100000  | 0.000462703 | 0.000437772 |
| 0.000100000 | 0.000462703 | 0.000437772 |
| 1.00000e-05 | 0.000462703 | 0.000437772 |
| 1.00000e-06 | 0.000462703 | 0.000437772 |
| 1.00000e-07 | 0.000462703 | 0.000437772 |
| 1.00000e-08 | 0.000462703 | 0.000437772 |
| 1.00000e-09 | 0.000462703 | 0.000437772 |

PhcycC3H3\_A+H

=====

| Pa\K        | 20.0000     | 30.0000     | 40.0000     | 50.0000     | 60.0000     |
|-------------|-------------|-------------|-------------|-------------|-------------|
| 1.00000e+08 | 4.86150e-87 | 4.32542e-85 | 1.12571e-83 | 2.28201e-82 | 4.53919e-81 |
| 1.00000e+07 | 1.40392e-81 | 8.51269e-80 | 1.77077e-78 | 3.03998e-77 | 5.26588e-76 |
| 1.00000e+06 | 1.63887e-76 | 8.51314e-75 | 1.61892e-73 | 2.58768e-72 | 4.20703e-71 |
| 100000.     | 1.06658e-71 | 3.79894e-70 | 5.35086e-69 | 6.61487e-68 | 8.55262e-67 |
| 10000.0     | 1.01132e-67 | 1.36916e-66 | 1.02560e-65 | 7.70000e-65 | 6.46983e-64 |
| 1000.00     | 2.92210e-65 | 1.16009e-64 | 4.06829e-64 | 1.71040e-63 | 8.93551e-63 |
| 100.000     | 1.98217e-64 | 3.96312e-64 | 1.11098e-63 | 4.24257e-63 | 2.15569e-62 |
| 10.0000     | 7.16041e-64 | 1.89391e-63 | 6.04423e-63 | 2.46127e-62 | 1.29590e-61 |
| 1.00000     | 5.41672e-63 | 1.49092e-62 | 4.60089e-62 | 1.77456e-61 | 8.81112e-61 |
| 0.100000    | 3.11357e-62 | 5.36299e-62 | 1.09905e-61 | 2.96138e-61 | 1.07191e-60 |
| 0.0100000   | 8.70413e-63 | 2.32171e-63 | 1.50397e-63 | 1.83164e-63 | 3.70159e-63 |
| 0.00100000  | 4.13833e-66 | 3.19379e-67 | 1.39099e-67 | 1.45693e-67 | 2.80278e-67 |
| 0.000100000 | 3.00297e-70 | 3.26450e-71 | 1.86820e-71 | 2.42909e-71 | 5.60959e-71 |
| 1.00000e-05 | 1.00473e-73 | 1.91140e-74 | 1.49910e-74 | 2.43776e-74 | 6.79437e-74 |
| 1.00000e-06 | 1.94535e-76 | 6.01622e-77 | 6.18797e-77 | 1.23167e-76 | 4.24823e-76 |
| 1.00000e-07 | 1.68640e-78 | 8.00264e-79 | 1.07075e-78 | 2.68991e-78 | 1.25072e-77 |
| 1.00000e-08 | 5.50360e-80 | 3.74845e-80 | 6.13573e-80 | 1.79915e-79 | 9.70446e-79 |
| 1.00000e-09 | 4.29559e-81 | 3.29356e-81 | 5.65535e-81 | 1.70734e-80 | 9.42030e-80 |

| Pa\K        | 70.0000     | 80.0000     | 90.0000     | 100.000     | 110.000     |
|-------------|-------------|-------------|-------------|-------------|-------------|
| 1.00000e+08 | 9.93903e-80 | 2.69122e-78 | 1.06004e-76 | 7.39748e-75 | 1.04148e-72 |
| 1.00000e+07 | 1.01553e-74 | 2.41705e-73 | 8.24697e-72 | 4.85155e-70 | 5.54863e-68 |
| 1.00000e+06 | 7.64489e-70 | 1.71784e-68 | 5.54120e-67 | 3.08917e-65 | 3.36334e-63 |
| 100000.     | 1.26093e-65 | 2.33677e-64 | 6.32622e-63 | 3.03569e-61 | 2.95294e-59 |
| 10000.0     | 6.46739e-63 | 8.42888e-62 | 1.69447e-60 | 6.70326e-59 | 6.23653e-57 |
| 1000.00     | 6.08697e-62 | 6.15798e-61 | 1.21506e-59 | 6.03990e-58 | 7.25658e-56 |
| 100.000     | 1.53274e-61 | 1.76842e-60 | 4.26370e-59 | 2.50233e-57 | 3.40618e-55 |
| 10.0000     | 9.47497e-61 | 1.13458e-59 | 2.91900e-58 | 1.86140e-56 | 2.73869e-54 |
| 1.00000     | 6.11566e-60 | 7.08864e-59 | 1.81340e-57 | 1.15352e-55 | 1.66646e-53 |
| 0.100000    | 5.63062e-60 | 5.10764e-59 | 1.04982e-57 | 5.44946e-56 | 6.51988e-54 |
| 0.0100000   | 1.24589e-62 | 7.97212e-62 | 1.24245e-60 | 5.21553e-59 | 5.49161e-57 |
| 0.00100000  | 9.45474e-67 | 6.29863e-66 | 1.10953e-64 | 7.09377e-63 | 2.41551e-60 |
| 0.000100000 | 2.26448e-70 | 2.06878e-69 | 1.08842e-67 | 5.44513e-65 | 9.31152e-62 |
| 1.00000e-05 | 3.58846e-73 | 8.68936e-72 | 2.98193e-69 | 3.78819e-66 | 8.46733e-63 |
| 1.00000e-06 | 3.79568e-75 | 3.38558e-73 | 2.44840e-70 | 3.63099e-67 | 8.38422e-64 |
| 1.00000e-07 | 1.96118e-76 | 2.92334e-74 | 2.39281e-71 | 3.61496e-68 | 8.37591e-65 |
| 1.00000e-08 | 1.78351e-77 | 2.87532e-75 | 2.38712e-72 | 3.61335e-69 | 8.37508e-66 |
| 1.00000e-09 | 1.76560e-78 | 2.87046e-76 | 2.38655e-73 | 3.61319e-70 | 8.37499e-67 |

| Pa\K        | 120.000     | 130.000     | 140.000     | 150.000     | 160.000     |
|-------------|-------------|-------------|-------------|-------------|-------------|
| 1.00000e+08 | 2.35561e-70 | 6.93631e-68 | 1.97571e-65 | 6.26228e-63 | 1.46333e-60 |
| 1.00000e+07 | 9.69497e-66 | 2.11220e-63 | 4.32407e-61 | 1.09065e-58 | 2.19454e-56 |
| 1.00000e+06 | 5.60094e-61 | 1.16278e-58 | 2.25713e-56 | 5.44085e-54 | 1.04612e-51 |
| 100000.     | 4.49994e-57 | 8.74897e-55 | 1.60823e-52 | 3.88044e-50 | 7.56924e-48 |
| 10000.0     | 9.54943e-55 | 1.93199e-52 | 3.68412e-50 | 1.02752e-47 | 2.29923e-45 |

|             |             |             |             |             |             |
|-------------|-------------|-------------|-------------|-------------|-------------|
| 1000.00     | 1.22702e-53 | 2.58162e-51 | 4.96817e-49 | 1.48033e-46 | 3.58702e-44 |
| 100.000     | 6.14615e-53 | 1.38963e-50 | 2.83385e-48 | 9.47619e-46 | 2.49107e-43 |
| 10.0000     | 5.16328e-52 | 1.20458e-49 | 2.50254e-47 | 8.48576e-45 | 2.24261e-42 |
| 1.00000     | 3.03992e-51 | 6.83890e-49 | 1.37059e-46 | 4.54671e-44 | 1.18522e-41 |
| 0.100000    | 1.00215e-51 | 1.94848e-49 | 3.47144e-47 | 1.09836e-44 | 2.91158e-42 |
| 0.0100000   | 8.26524e-55 | 1.92294e-52 | 5.25142e-50 | 3.32220e-47 | 1.70436e-44 |
| 0.00100000  | 1.91199e-57 | 2.09357e-54 | 1.64355e-51 | 1.56136e-48 | 8.92390e-46 |
| 0.000100000 | 1.39423e-58 | 1.89030e-55 | 1.59299e-52 | 1.51852e-49 | 8.55782e-47 |
| 1.00000e-05 | 1.35493e-59 | 1.87471e-56 | 1.58981e-53 | 1.51533e-50 | 8.52546e-48 |
| 1.00000e-06 | 1.35108e-60 | 1.87321e-57 | 1.58952e-54 | 1.51502e-51 | 8.52227e-49 |
| 1.00000e-07 | 1.35069e-61 | 1.87306e-58 | 1.58950e-55 | 1.51499e-52 | 8.52195e-50 |
| 1.00000e-08 | 1.35065e-62 | 1.87305e-59 | 1.58949e-56 | 1.51499e-53 | 8.52192e-51 |
| 1.00000e-09 | 1.35065e-63 | 1.87305e-60 | 1.58949e-57 | 1.51499e-54 | 8.52192e-52 |

| Pa\K        | 170.000     | 180.000     | 190.000     | 200.000     | 210.000     |
|-------------|-------------|-------------|-------------|-------------|-------------|
| 1.00000e+08 | 2.40461e-58 | 2.81092e-56 | 2.71913e-54 | 1.82781e-52 | 8.42866e-51 |
| 1.00000e+07 | 3.37263e-54 | 4.15762e-52 | 5.15202e-50 | 4.70605e-48 | 2.89981e-46 |
| 1.00000e+06 | 1.54361e-49 | 1.87616e-47 | 2.43061e-45 | 2.39045e-43 | 1.57182e-41 |
| 100000.     | 1.14556e-45 | 1.48228e-43 | 2.18507e-41 | 2.49652e-39 | 1.82604e-37 |
| 10000.0     | 3.97636e-43 | 6.20707e-41 | 1.21479e-38 | 1.90410e-36 | 1.75285e-34 |
| 1000.00     | 6.8168e-42  | 1.26735e-39 | 3.36196e-37 | 8.10355e-35 | 1.11421e-32 |
| 100.000     | 5.04481e-41 | 1.00236e-38 | 2.92858e-36 | 8.30809e-34 | 1.51687e-31 |
| 10.0000     | 4.55222e-40 | 9.08175e-38 | 2.67965e-35 | 7.76893e-33 | 1.50974e-30 |
| 1.00000     | 2.39251e-39 | 4.84101e-37 | 1.50630e-34 | 4.88919e-32 | 1.10417e-29 |
| 0.100000    | 6.37857e-40 | 1.61439e-37 | 8.00331e-35 | 5.35895e-32 | 2.99093e-29 |
| 0.0100000   | 6.74223e-42 | 3.59715e-39 | 4.89356e-36 | 8.97514e-33 | 3.59678e-29 |
| 0.00100000  | 3.64728e-43 | 2.21147e-40 | 4.05402e-37 | 9.50294e-34 | 3.67016e-29 |
| 0.000100000 | 3.44135e-44 | 2.08990e-41 | 3.96428e-38 | 9.55767e-35 | 3.67765e-29 |
| 1.00000e-05 | 3.42185e-45 | 2.07795e-42 | 3.95526e-39 | 9.56316e-36 | 3.67840e-29 |
| 1.00000e-06 | 3.41991e-46 | 2.07675e-43 | 3.95435e-40 | 9.56371e-37 | 3.67847e-29 |
| 1.00000e-07 | 3.41972e-47 | 2.07663e-44 | 3.95426e-41 | 9.56376e-38 | 3.67848e-29 |
| 1.00000e-08 | 3.41970e-48 | 2.07662e-45 | 3.95426e-42 | 9.56377e-39 | 3.67848e-29 |
| 1.00000e-09 | 3.41970e-49 | 2.07662e-46 | 3.95425e-43 | 9.56377e-40 | 3.67848e-29 |

| Pa\K        | 220.000     | 230.000     | 240.000     | 250.000     | 260.000     |
|-------------|-------------|-------------|-------------|-------------|-------------|
| 1.00000e+08 | 2.49718e-49 | 6.36280e-48 | 1.11969e-46 | 1.37116e-45 | 1.38583e-44 |
| 1.00000e+07 | 9.56186e-45 | 3.04023e-43 | 5.93471e-42 | 6.90762e-41 | 6.58330e-40 |
| 1.00000e+06 | 5.19497e-40 | 1.67339e-38 | 3.24357e-37 | 3.66058e-36 | 3.37629e-35 |
| 100000.     | 5.90983e-36 | 1.79821e-34 | 3.25599e-33 | 3.46404e-32 | 3.01737e-31 |
| 10000.0     | 5.50744e-33 | 1.47163e-31 | 2.31050e-30 | 2.27368e-29 | 1.84244e-28 |
| 1000.00     | 3.35911e-31 | 7.69946e-30 | 1.04979e-28 | 9.67014e-28 | 7.39089e-27 |
| 100.000     | 4.54616e-30 | 1.00148e-28 | 1.32085e-27 | 1.19773e-26 | 9.03027e-26 |
| 10.0000     | 4.49928e-29 | 9.73178e-28 | 1.25976e-26 | 1.13294e-25 | 8.47694e-25 |
| 1.00000     | 3.17985e-28 | 6.33427e-27 | 7.59467e-26 | 6.59913e-25 | 4.78476e-24 |
| 0.100000    | 8.15051e-28 | 1.44587e-26 | 1.59770e-25 | 1.33324e-24 | 9.32739e-24 |
| 0.0100000   | 9.66930e-28 | 1.66569e-26 | 1.80848e-25 | 1.49492e-24 | 1.03728e-23 |
| 0.00100000  | 9.85251e-28 | 1.69153e-26 | 1.83292e-25 | 1.51349e-24 | 1.04918e-23 |
| 0.000100000 | 9.87121e-28 | 1.69416e-26 | 1.83541e-25 | 1.51538e-24 | 1.05039e-23 |
| 1.00000e-05 | 9.87309e-28 | 1.69442e-26 | 1.83566e-25 | 1.51557e-24 | 1.05051e-23 |
| 1.00000e-06 | 9.87327e-28 | 1.69445e-26 | 1.83568e-25 | 1.51558e-24 | 1.05052e-23 |
| 1.00000e-07 | 9.87329e-28 | 1.69445e-26 | 1.83568e-25 | 1.51559e-24 | 1.05052e-23 |
| 1.00000e-08 | 9.87329e-28 | 1.69445e-26 | 1.83568e-25 | 1.51559e-24 | 1.05052e-23 |
| 1.00000e-09 | 9.87329e-28 | 1.69445e-26 | 1.83568e-25 | 1.51559e-24 | 1.05052e-23 |

| Pa\K        | 270.000     | 280.000     | 290.000     | 300.000     | 310.000     |
|-------------|-------------|-------------|-------------|-------------|-------------|
| 1.00000e+08 | 1.18986e-43 | 8.76906e-43 | 5.61637e-42 | 6.94420e-32 | 1.57753e-40 |
| 1.00000e+07 | 5.35747e-39 | 3.75544e-38 | 2.29999e-37 | 7.60391e-27 | 6.03228e-36 |
| 1.00000e+06 | 2.65903e-34 | 1.80277e-33 | 1.06748e-32 | 1.97455e-22 | 2.61648e-31 |
| 100000.     | 2.24841e-30 | 1.44445e-29 | 8.11509e-29 | 5.72571e-20 | 1.79627e-27 |
| 10000.0     | 1.28085e-27 | 7.70367e-27 | 4.06457e-26 | 1.79196e-19 | 7.99960e-25 |
| 1000.00     | 4.86330e-26 | 2.78094e-25 | 1.40051e-24 | 2.06165e-20 | 2.53708e-23 |
| 100.000     | 5.86769e-25 | 3.31738e-24 | 1.65360e-23 | 1.89386e-20 | 2.94274e-22 |
| 10.0000     | 5.46608e-24 | 3.06747e-23 | 1.51808e-22 | 6.56216e-20 | 2.66486e-21 |
| 1.00000     | 2.98960e-23 | 1.62767e-22 | 7.82457e-22 | 4.20153e-20 | 1.30090e-20 |
| 0.100000    | 5.63218e-23 | 2.97098e-22 | 1.38715e-21 | 9.27826e-21 | 2.19039e-20 |
| 0.0100000   | 6.21574e-23 | 3.25624e-22 | 1.51090e-21 | 7.51814e-21 | 2.36059e-20 |
| 0.00100000  | 6.28164e-23 | 3.28820e-22 | 1.52467e-21 | 7.41293e-21 | 2.37928e-20 |
| 0.000100000 | 6.28832e-23 | 3.29144e-22 | 1.52606e-21 | 7.40285e-21 | 2.38117e-20 |
| 1.00000e-05 | 6.28899e-23 | 3.29176e-22 | 1.52620e-21 | 7.40185e-21 | 2.38136e-20 |
| 1.00000e-06 | 6.28905e-23 | 3.29180e-22 | 1.52621e-21 | 7.40175e-21 | 2.38138e-20 |
| 1.00000e-07 | 6.28906e-23 | 3.29180e-22 | 1.52622e-21 | 7.40174e-21 | 2.38138e-20 |
| 1.00000e-08 | 6.28906e-23 | 3.29180e-22 | 1.52622e-21 | 7.40173e-21 | 2.38138e-20 |
| 1.00000e-09 | 6.28906e-23 | 3.29180e-22 | 1.52622e-21 | 7.40173e-21 | 2.38138e-20 |

| Pa\K        | 400.000     | 500.000     | 600.000     | 700.000     | 800.000     |
|-------------|-------------|-------------|-------------|-------------|-------------|
| 1.00000e+08 | 2.06307e-20 | 1.30250e-14 | 4.14133e-12 | 6.90824e-10 | 2.66528e-08 |

|             |             |             |             |             |             |
|-------------|-------------|-------------|-------------|-------------|-------------|
| 1.00000e+07 | 7.06684e-16 | 1.06071e-10 | 7.09735e-09 | 5.12561e-08 | 1.62124e-07 |
| 1.00000e+06 | 1.65587e-13 | 4.06402e-09 | 1.58138e-07 | 5.70947e-07 | 9.53371e-07 |
| 100000.     | 8.04799e-13 | 3.81506e-09 | 1.69081e-07 | 7.42809e-07 | 1.29675e-06 |
| 10000.0     | 1.48181e-13 | 4.74042e-10 | 4.18719e-08 | 3.66726e-07 | 9.02735e-07 |
| 1000.00     | 5.50707e-15 | 4.03782e-11 | 1.03336e-08 | 1.58451e-07 | 4.77298e-07 |
| 100.000     | 6.01005e-16 | 6.55545e-12 | 2.66776e-09 | 4.68965e-08 | 1.38031e-07 |
| 10.0000     | 4.21852e-16 | 1.18762e-12 | 4.13060e-10 | 6.97942e-09 | 2.19133e-08 |
| 1.00000     | 3.72680e-16 | 3.19335e-13 | 5.50075e-11 | 1.01001e-09 | 5.76424e-09 |
| 0.100000    | 3.30535e-16 | 2.21234e-13 | 2.00405e-11 | 4.35294e-10 | 4.17364e-09 |
| 0.0100000   | 3.25375e-16 | 2.10906e-13 | 1.66612e-11 | 3.80391e-10 | 4.01906e-09 |
| 0.00100000  | 3.24825e-16 | 2.09785e-13 | 1.63211e-11 | 3.74988e-10 | 4.00386e-09 |
| 0.000100000 | 3.24765e-16 | 2.09666e-13 | 1.62869e-11 | 3.74454e-10 | 4.00236e-09 |
| 1.00000e-05 | 3.24759e-16 | 2.09654e-13 | 1.62835e-11 | 3.74401e-10 | 4.00222e-09 |
| 1.00000e-06 | 3.24758e-16 | 2.09653e-13 | 1.62832e-11 | 3.74396e-10 | 4.00220e-09 |
| 1.00000e-07 | 3.24758e-16 | 2.09652e-13 | 1.62831e-11 | 3.74395e-10 | 4.00220e-09 |
| 1.00000e-08 | 3.24758e-16 | 2.09652e-13 | 1.62831e-11 | 3.74395e-10 | 4.00220e-09 |
| 1.00000e-09 | 3.24758e-16 | 2.09652e-13 | 1.62831e-11 | 3.74395e-10 | 4.00220e-09 |

Pa\K | 900.000 1000.00 1100.00 1200.00 1300.00

|             |             |             |             |             |             |
|-------------|-------------|-------------|-------------|-------------|-------------|
| 1.00000e+08 | 2.69758e-07 | 9.21201e-07 | 1.81541e-06 | 2.28673e-06 | 1.92760e-06 |
| 1.00000e+07 | 6.65502e-07 | 3.95298e-06 | 1.28165e-05 | 2.37650e-05 | 3.08356e-05 |
| 1.00000e+06 | 1.39386e-06 | 3.41520e-06 | 1.08138e-05 | 2.24309e-05 | 3.55917e-05 |
| 100000.     | 1.75270e-06 | 2.51755e-06 | 4.72243e-06 | 8.99055e-06 | 1.63798e-05 |
| 10000.0     | 1.32046e-06 | 1.65191e-06 | 2.29615e-06 | 3.81212e-06 | 6.91400e-06 |
| 1000.00     | 6.78877e-07 | 7.70172e-07 | 1.01404e-06 | 1.74493e-06 | 3.37299e-06 |
| 100.000     | 1.81913e-07 | 2.42234e-07 | 4.83687e-07 | 1.13610e-06 | 2.51740e-06 |
| 10.0000     | 4.46058e-08 | 1.27441e-07 | 3.90618e-07 | 1.04390e-06 | 2.39355e-06 |
| 1.00000     | 2.74181e-08 | 1.14297e-07 | 3.80551e-07 | 1.03401e-06 | 2.37985e-06 |
| 0.100000    | 2.57225e-08 | 1.13010e-07 | 3.79567e-07 | 1.03303e-06 | 2.37846e-06 |
| 0.0100000   | 2.55568e-08 | 1.12884e-07 | 3.79471e-07 | 1.03293e-06 | 2.37832e-06 |
| 0.00100000  | 2.55405e-08 | 1.12872e-07 | 3.79461e-07 | 1.03292e-06 | 2.37831e-06 |
| 0.000100000 | 2.55389e-08 | 1.12871e-07 | 3.79460e-07 | 1.03292e-06 | 2.37831e-06 |
| 1.00000e-05 | 2.55387e-08 | 1.12871e-07 | 3.79460e-07 | 1.03292e-06 | 2.37831e-06 |
| 1.00000e-06 | 2.55387e-08 | 1.12871e-07 | 3.79460e-07 | 1.03292e-06 | 2.37831e-06 |
| 1.00000e-07 | 2.55387e-08 | 1.12871e-07 | 3.79460e-07 | 1.03292e-06 | 2.37831e-06 |
| 1.00000e-08 | 2.55387e-08 | 1.12871e-07 | 3.79460e-07 | 1.03292e-06 | 2.37831e-06 |
| 1.00000e-09 | 2.55387e-08 | 1.12871e-07 | 3.79460e-07 | 1.03292e-06 | 2.37831e-06 |

Pa\K | 1400.00 1500.00 1750.00 2000.00 2250.00

|             |             |             |             |             |             |
|-------------|-------------|-------------|-------------|-------------|-------------|
| 1.00000e+08 | 1.19249e-06 | 6.41902e-07 | 0.000203166 | 0.000203895 | 0.000212353 |
| 1.00000e+07 | 3.20287e-05 | 2.91406e-05 | 0.000275073 | 0.000354394 | 0.000430755 |
| 1.00000e+06 | 4.84791e-05 | 5.93151e-05 | 0.000395685 | 0.000583245 | 0.000578280 |
| 100000.     | 2.73623e-05 | 4.03280e-05 | 0.000311335 | 0.000434920 | 0.000347969 |
| 10000.0     | 1.22179e-05 | 1.96242e-05 | 0.000140844 | 0.000191486 | 0.000159553 |
| 1000.00     | 6.36309e-06 | 1.10244e-05 | 5.45960e-05 | 8.48100e-05 | 0.000102192 |
| 100.000     | 5.01061e-06 | 8.97026e-06 | 3.12593e-05 | 6.00317e-05 | 9.20079e-05 |
| 10.0000     | 4.80849e-06 | 8.64763e-06 | 2.72350e-05 | 5.62412e-05 | 9.06983e-05 |
| 1.00000     | 4.78519e-06 | 8.60923e-06 | 2.67269e-05 | 5.57936e-05 | 9.05565e-05 |
| 0.100000    | 4.78278e-06 | 8.60524e-06 | 2.66729e-05 | 5.57471e-05 | 9.05422e-05 |
| 0.0100000   | 4.78255e-06 | 8.60484e-06 | 2.66675e-05 | 5.57425e-05 | 9.05408e-05 |
| 0.00100000  | 4.78252e-06 | 8.60480e-06 | 2.66670e-05 | 5.57420e-05 | 9.05407e-05 |
| 0.000100000 | 4.78252e-06 | 8.60479e-06 | 2.66669e-05 | 5.57420e-05 | 9.05407e-05 |
| 1.00000e-05 | 4.78252e-06 | 8.60479e-06 | 2.66669e-05 | 5.57420e-05 | 9.05407e-05 |
| 1.00000e-06 | 4.78252e-06 | 8.60479e-06 | 2.66669e-05 | 5.57420e-05 | 9.05407e-05 |
| 1.00000e-07 | 4.78252e-06 | 8.60479e-06 | 2.66669e-05 | 5.57420e-05 | 9.05407e-05 |
| 1.00000e-08 | 4.78252e-06 | 8.60479e-06 | 2.66669e-05 | 5.57420e-05 | 9.05407e-05 |
| 1.00000e-09 | 4.78252e-06 | 8.60479e-06 | 2.66669e-05 | 5.57420e-05 | 9.05407e-05 |

Pa\K | 2500.00 2750.00 3000.00 3250.00 3500.00

|             |             |             |             |             |             |
|-------------|-------------|-------------|-------------|-------------|-------------|
| 1.00000e+08 | 0.000228781 | 0.000249549 | 0.000268142 | 0.000279165 | 0.000280960 |
| 1.00000e+07 | 0.000459854 | 0.000438623 | 0.000390386 | 0.000339222 | 0.000297683 |
| 1.00000e+06 | 0.000456385 | 0.000343349 | 0.000274308 | 0.000240800 | 0.000227301 |
| 100000.     | 0.000246495 | 0.000203188 | 0.000195147 | 0.000199924 | 0.000207149 |
| 10000.0     | 0.000148663 | 0.000160897 | 0.000178149 | 0.000193184 | 0.000204438 |
| 1000.00     | 0.000127689 | 0.000154041 | 0.000175910 | 0.000192417 | 0.000204160 |
| 100.000     | 0.000124741 | 0.000153225 | 0.000175670 | 0.000192341 | 0.000204134 |
| 10.0000     | 0.000124408 | 0.000153140 | 0.000175647 | 0.000192333 | 0.000204131 |
| 1.00000     | 0.000124374 | 0.000153131 | 0.000175644 | 0.000192333 | 0.000204131 |
| 0.100000    | 0.000124371 | 0.000153131 | 0.000175644 | 0.000192333 | 0.000204131 |
| 0.0100000   | 0.000124371 | 0.000153131 | 0.000175644 | 0.000192333 | 0.000204131 |
| 0.00100000  | 0.000124371 | 0.000153131 | 0.000175644 | 0.000192333 | 0.000204131 |
| 0.000100000 | 0.000124371 | 0.000153131 | 0.000175644 | 0.000192333 | 0.000204131 |
| 1.00000e-05 | 0.000124371 | 0.000153131 | 0.000175644 | 0.000192333 | 0.000204131 |
| 1.00000e-06 | 0.000124371 | 0.000153131 | 0.000175644 | 0.000192333 | 0.000204131 |
| 1.00000e-07 | 0.000124371 | 0.000153131 | 0.000175644 | 0.000192333 | 0.000204131 |
| 1.00000e-08 | 0.000124371 | 0.000153131 | 0.000175644 | 0.000192333 | 0.000204131 |
| 1.00000e-09 | 0.000124371 | 0.000153131 | 0.000175644 | 0.000192333 | 0.000204131 |

| Pa\K        | 3750.00     | 4000.00     |
|-------------|-------------|-------------|
| 1.00000e+08 | 0.000275186 | 0.000264884 |
| 1.00000e+07 | 0.000268373 | 0.000249174 |
| 1.00000e+06 | 0.000222915 | 0.000221836 |
| 100000.     | 0.000213225 | 0.000217269 |
| 10000.0     | 0.000212112 | 0.000216810 |
| 1000.00     | 0.000212007 | 0.000216770 |
| 100.000     | 0.000211997 | 0.000216766 |
| 10.0000     | 0.000211996 | 0.000216766 |
| 1.00000     | 0.000211996 | 0.000216766 |
| 0.100000    | 0.000211996 | 0.000216766 |
| 0.0100000   | 0.000211996 | 0.000216766 |
| 0.00100000  | 0.000211996 | 0.000216766 |
| 0.000100000 | 0.000211996 | 0.000216766 |
| 1.00000e-05 | 0.000211996 | 0.000216766 |
| 1.00000e-06 | 0.000211996 | 0.000216766 |
| 1.00000e-07 | 0.000211996 | 0.000216766 |
| 1.00000e-08 | 0.000211996 | 0.000216766 |
| 1.00000e-09 | 0.000211996 | 0.000216766 |

Benzyl+C2H2  
=====

| Pa\K        | 20.0000     | 30.0000     | 40.0000     | 50.0000     | 60.0000     |
|-------------|-------------|-------------|-------------|-------------|-------------|
| 1.00000e+08 | 8.63868e-13 | 2.02165e-12 | 3.92745e-12 | 7.12724e-12 | 1.23358e-11 |
| 1.00000e+07 | 8.63849e-12 | 2.02156e-11 | 3.92722e-11 | 7.12668e-11 | 1.23347e-10 |
| 1.00000e+06 | 8.63662e-11 | 2.02070e-10 | 3.92484e-10 | 7.12115e-10 | 1.23229e-09 |
| 100000.     | 8.61794e-10 | 2.01219e-09 | 3.90137e-09 | 7.06674e-09 | 1.22077e-08 |
| 10000.0     | 8.43911e-09 | 1.93401e-08 | 3.69331e-08 | 6.60017e-08 | 1.12517e-07 |
| 1000.00     | 7.17762e-08 | 1.49406e-07 | 2.68642e-07 | 4.58400e-07 | 7.49480e-07 |
| 100.000     | 3.79658e-07 | 6.31974e-07 | 1.00038e-06 | 1.55582e-06 | 2.34453e-06 |
| 10.0000     | 7.51988e-07 | 9.86783e-07 | 1.45221e-06 | 2.15879e-06 | 3.12530e-06 |
| 1.00000     | 8.07768e-07 | 1.03577e-06 | 1.52093e-06 | 2.25066e-06 | 3.24005e-06 |
| 0.100000    | 8.11542e-07 | 1.04051e-06 | 1.52819e-06 | 2.26046e-06 | 3.25224e-06 |
| 0.0100000   | 8.11881e-07 | 1.04098e-06 | 1.52893e-06 | 2.26146e-06 | 3.25348e-06 |
| 0.00100000  | 8.11914e-07 | 1.04103e-06 | 1.52900e-06 | 2.26156e-06 | 3.25360e-06 |
| 0.000100000 | 8.11917e-07 | 1.04104e-06 | 1.52901e-06 | 2.26157e-06 | 3.25362e-06 |
| 1.00000e-05 | 8.11918e-07 | 1.04104e-06 | 1.52902e-06 | 2.26158e-06 | 3.25364e-06 |
| 1.00000e-06 | 8.11928e-07 | 1.04106e-06 | 1.52906e-06 | 2.26165e-06 | 3.25378e-06 |
| 1.00000e-07 | 8.11973e-07 | 1.04113e-06 | 1.52917e-06 | 2.26183e-06 | 3.25405e-06 |
| 1.00000e-08 | 8.12017e-07 | 1.04117e-06 | 1.52923e-06 | 2.26191e-06 | 3.25416e-06 |
| 1.00000e-09 | 8.12023e-07 | 1.04118e-06 | 1.52923e-06 | 2.26192e-06 | 3.25417e-06 |

| Pa\K        | 70.0000     | 80.0000     | 90.0000     | 100.000     | 110.000     |
|-------------|-------------|-------------|-------------|-------------|-------------|
| 1.00000e+08 | 2.06313e-11 | 3.36684e-11 | 5.39888e-11 | 8.54966e-11 | 1.34180e-10 |
| 1.00000e+07 | 2.06289e-10 | 3.36638e-10 | 5.39800e-10 | 8.54801e-10 | 1.34150e-09 |
| 1.00000e+06 | 2.06052e-09 | 3.36177e-09 | 5.38923e-09 | 8.53154e-09 | 1.33843e-08 |
| 100000.     | 2.03744e-08 | 3.31709e-08 | 5.30464e-08 | 8.37379e-08 | 1.30930e-07 |
| 10000.0     | 1.85211e-07 | 2.97081e-07 | 4.67412e-07 | 7.24718e-07 | 1.11094e-06 |
| 1000.00     | 1.18404e-06 | 1.82101e-06 | 2.74193e-06 | 4.05863e-06 | 5.92276e-06 |
| 100.000     | 3.42695e-06 | 4.88503e-06 | 6.82706e-06 | 9.39467e-06 | 1.27718e-05 |
| 10.0000     | 4.40363e-06 | 6.07395e-06 | 8.24508e-06 | 1.10602e-05 | 1.47053e-05 |
| 1.00000     | 4.54101e-06 | 6.23426e-06 | 8.42918e-06 | 1.12694e-05 | 1.49413e-05 |
| 0.100000    | 4.55551e-06 | 6.25108e-06 | 8.44840e-06 | 1.12911e-05 | 1.49657e-05 |
| 0.0100000   | 4.55698e-06 | 6.25278e-06 | 8.45034e-06 | 1.12933e-05 | 1.49682e-05 |
| 0.00100000  | 4.55713e-06 | 6.25295e-06 | 8.45054e-06 | 1.12936e-05 | 1.49685e-05 |
| 0.000100000 | 4.55715e-06 | 6.25298e-06 | 8.45058e-06 | 1.12936e-05 | 1.49686e-05 |
| 1.00000e-05 | 4.55719e-06 | 6.25307e-06 | 8.45076e-06 | 1.12940e-05 | 1.49693e-05 |
| 1.00000e-06 | 4.55744e-06 | 6.25350e-06 | 8.45148e-06 | 1.12952e-05 | 1.49711e-05 |
| 1.00000e-07 | 4.55784e-06 | 6.25406e-06 | 8.45224e-06 | 1.12961e-05 | 1.49723e-05 |
| 1.00000e-08 | 4.55797e-06 | 6.25422e-06 | 8.45242e-06 | 1.12963e-05 | 1.49726e-05 |
| 1.00000e-09 | 4.55799e-06 | 6.25424e-06 | 8.45244e-06 | 1.12964e-05 | 1.49726e-05 |

| Pa\K        | 120.000     | 130.000     | 140.000     | 150.000     | 160.000     |
|-------------|-------------|-------------|-------------|-------------|-------------|
| 1.00000e+08 | 2.09193e-10 | 3.24450e-10 | 5.00981e-10 | 7.70343e-10 | 1.17955e-09 |
| 1.00000e+07 | 2.09136e-09 | 3.24345e-09 | 5.00788e-09 | 7.69988e-09 | 1.17891e-08 |
| 1.00000e+06 | 2.08569e-08 | 3.23301e-08 | 4.98871e-08 | 7.66485e-08 | 1.17253e-07 |
| 100000.     | 2.03230e-07 | 3.13575e-07 | 4.81257e-07 | 7.34786e-07 | 1.11589e-06 |
| 10000.0     | 1.68730e-06 | 2.54228e-06 | 3.80238e-06 | 5.64625e-06 | 8.32301e-06 |
| 1000.00     | 8.53738e-06 | 1.21705e-05 | 1.71706e-05 | 2.39845e-05 | 3.31767e-05 |
| 100.000     | 1.71954e-05 | 2.29673e-05 | 3.04687e-05 | 4.01756e-05 | 5.26776e-05 |
| 10.0000     | 1.94195e-05 | 2.55072e-05 | 3.33516e-05 | 4.34308e-05 | 5.63360e-05 |
| 1.00000     | 1.96844e-05 | 2.58034e-05 | 3.36818e-05 | 4.37980e-05 | 5.67432e-05 |
| 0.100000    | 1.97118e-05 | 2.58339e-05 | 3.37157e-05 | 4.38357e-05 | 5.67850e-05 |
| 0.0100000   | 1.97145e-05 | 2.58370e-05 | 3.37192e-05 | 4.38395e-05 | 5.67893e-05 |
| 0.00100000  | 1.97148e-05 | 2.58373e-05 | 3.37196e-05 | 4.38401e-05 | 5.67902e-05 |

|             |             |             |             |             |             |
|-------------|-------------|-------------|-------------|-------------|-------------|
| 0.000100000 | 1.97151e-05 | 2.58378e-05 | 3.37205e-05 | 4.38420e-05 | 5.67937e-05 |
| 1.00000e-05 | 1.97163e-05 | 2.58400e-05 | 3.37244e-05 | 4.38485e-05 | 5.68042e-05 |
| 1.00000e-06 | 1.97191e-05 | 2.58440e-05 | 3.37300e-05 | 4.38559e-05 | 5.68139e-05 |
| 1.00000e-07 | 1.97206e-05 | 2.58458e-05 | 3.37321e-05 | 4.38584e-05 | 5.68167e-05 |
| 1.00000e-08 | 1.97208e-05 | 2.58461e-05 | 3.37324e-05 | 4.38587e-05 | 5.68170e-05 |
| 1.00000e-09 | 1.97209e-05 | 2.58461e-05 | 3.37324e-05 | 4.38587e-05 | 5.68171e-05 |

| Pa\K        | 170.000     | 180.000     | 190.000     | 200.000     | 210.000     |
|-------------|-------------|-------------|-------------|-------------|-------------|
| 1.00000e+08 | 1.79813e-09 | 2.72808e-09 | 4.11785e-09 | 6.18178e-09 | 9.22675e-09 |
| 1.00000e+07 | 1.79696e-08 | 2.72596e-08 | 4.11406e-08 | 6.17502e-08 | 9.21480e-08 |
| 1.00000e+06 | 1.78542e-07 | 2.70520e-07 | 4.07695e-07 | 6.10919e-07 | 9.09897e-07 |
| 100000.     | 1.68501e-06 | 2.52881e-06 | 3.77017e-06 | 5.58139e-06 | 8.20134e-06 |
| 10000.0     | 1.21753e-05 | 1.76679e-05 | 2.54215e-05 | 3.62533e-05 | 5.12212e-05 |
| 1000.00     | 4.54518e-05 | 6.16779e-05 | 8.29126e-05 | 0.000110431 | 0.000145752 |
| 100.000     | 6.86976e-05 | 8.91151e-05 | 0.000114991 | 0.000147596 | 0.000188436 |
| 10.0000     | 7.27913e-05 | 9.36769e-05 | 0.000120054 | 0.000153192 | 0.000194598 |
| 1.00000     | 7.32419e-05 | 9.41743e-05 | 0.000120602 | 0.000153793 | 0.000195256 |
| 0.100000    | 7.32881e-05 | 9.42253e-05 | 0.000120658 | 0.000153855 | 0.000195323 |
| 0.0100000   | 7.32929e-05 | 9.42307e-05 | 0.000120664 | 0.000153862 | 0.000195333 |
| 0.00100000  | 7.32944e-05 | 9.42335e-05 | 0.000120669 | 0.000153872 | 0.000195350 |
| 0.000100000 | 7.33010e-05 | 9.42452e-05 | 0.000120689 | 0.000153906 | 0.000195403 |
| 1.00000e-05 | 7.33171e-05 | 9.42691e-05 | 0.000120724 | 0.000153953 | 0.000195467 |
| 1.00000e-06 | 7.33295e-05 | 9.42845e-05 | 0.000120742 | 0.000153975 | 0.000195492 |
| 1.00000e-07 | 7.33326e-05 | 9.42878e-05 | 0.000120746 | 0.000153979 | 0.000195496 |
| 1.00000e-08 | 7.33329e-05 | 9.42882e-05 | 0.000120746 | 0.000153979 | 0.000195497 |
| 1.00000e-09 | 7.33330e-05 | 9.42883e-05 | 0.000120746 | 0.000153979 | 0.000195497 |

| Pa\K        | 220.000     | 230.000     | 240.000     | 250.000     | 260.000     |
|-------------|-------------|-------------|-------------|-------------|-------------|
| 1.00000e+08 | 1.36886e-08 | 2.01812e-08 | 2.95620e-08 | 4.30192e-08 | 6.21857e-08 |
| 1.00000e+07 | 1.36676e-07 | 2.01447e-07 | 2.94991e-07 | 4.29115e-07 | 6.20033e-07 |
| 1.00000e+06 | 1.34656e-06 | 1.97955e-06 | 2.89014e-06 | 4.18986e-06 | 6.03041e-06 |
| 100000.     | 1.19574e-05 | 1.72931e-05 | 2.48023e-05 | 3.52709e-05 | 4.97274e-05 |
| 10000.0     | 7.16746e-05 | 9.93062e-05 | 0.000136206 | 0.000184917 | 0.000248482 |
| 1000.00     | 0.000190675 | 0.000247304 | 0.000318081 | 0.000405821 | 0.000513738 |
| 100.000     | 0.000239286 | 0.000302224 | 0.000379655 | 0.000474351 | 0.000589480 |
| 10.0000     | 0.000246044 | 0.000309606 | 0.000387687 | 0.000483056 | 0.000598878 |
| 1.00000     | 0.000246762 | 0.000310387 | 0.000388534 | 0.000483972 | 0.000599865 |
| 0.100000    | 0.000246837 | 0.000310468 | 0.000388623 | 0.000484070 | 0.000599974 |
| 0.0100000   | 0.000246849 | 0.000310486 | 0.000388650 | 0.000484113 | 0.000600044 |
| 0.00100000  | 0.000246879 | 0.000310538 | 0.000388738 | 0.000484256 | 0.000600268 |
| 0.000100000 | 0.000246962 | 0.000310661 | 0.000388915 | 0.000484502 | 0.000600601 |
| 1.00000e-05 | 0.000247044 | 0.000310766 | 0.000389043 | 0.000484657 | 0.000600783 |
| 1.00000e-06 | 0.000247073 | 0.000310798 | 0.000389079 | 0.000484695 | 0.000600824 |
| 1.00000e-07 | 0.000247078 | 0.000310802 | 0.000389083 | 0.000484700 | 0.000600829 |
| 1.00000e-08 | 0.000247078 | 0.000310803 | 0.000389084 | 0.000484700 | 0.000600830 |
| 1.00000e-09 | 0.000247078 | 0.000310803 | 0.000389084 | 0.000484700 | 0.000600830 |

| Pa\K        | 270.000     | 280.000     | 290.000     | 300.000     | 310.000     |
|-------------|-------------|-------------|-------------|-------------|-------------|
| 1.00000e+08 | 8.92885e-08 | 1.27341e-07 | 1.80388e-07 | 1.05339e-06 | 3.54785e-07 |
| 1.00000e+07 | 8.89822e-07 | 1.26831e-06 | 1.79548e-06 | 1.03274e-05 | 3.52564e-06 |
| 1.00000e+06 | 8.61615e-06 | 1.22198e-05 | 1.72020e-05 | 8.93208e-05 | 3.33323e-05 |
| 100000.     | 6.95010e-05 | 9.62908e-05 | 0.000132242 | 0.000503375 | 0.000242966 |
| 10000.0     | 0.000330492 | 0.000435124 | 0.000567170 | 0.00127802  | 0.000935862 |
| 1000.00     | 0.000645475 | 0.000805133 | 0.000997291 | 0.00160525  | 0.00149995  |
| 100.000     | 0.000728634 | 0.000895861 | 0.00109569  | 0.00165274  | 0.00161374  |
| 10.0000     | 0.000738741 | 0.000906689 | 0.00110724  | 0.00165790  | 0.00162676  |
| 1.00000     | 0.000739801 | 0.000907824 | 0.00110846  | 0.00165847  | 0.00162814  |
| 0.100000    | 0.000739925 | 0.000907969 | 0.00110863  | 0.00165874  | 0.00162843  |
| 0.0100000   | 0.000740040 | 0.000908155 | 0.00110893  | 0.00165951  | 0.00162914  |
| 0.00100000  | 0.000740380 | 0.000908656 | 0.00110964  | 0.00166067  | 0.00163049  |
| 0.000100000 | 0.000740818 | 0.000909217 | 0.00111035  | 0.00166137  | 0.00163152  |
| 1.00000e-05 | 0.000741028 | 0.000909456 | 0.00111061  | 0.00166156  | 0.00163184  |
| 1.00000e-06 | 0.000741072 | 0.000909501 | 0.00111066  | 0.00166158  | 0.00163188  |
| 1.00000e-07 | 0.000741077 | 0.000909507 | 0.00111066  | 0.00166158  | 0.00163189  |
| 1.00000e-08 | 0.000741077 | 0.000909507 | 0.00111067  | 0.00166158  | 0.00163189  |
| 1.00000e-09 | 0.000741078 | 0.000909507 | 0.00111067  | 0.00166158  | 0.00163189  |

| Pa\K        | 400.000     | 500.000     | 600.000     | 700.000   | 800.000  |
|-------------|-------------|-------------|-------------|-----------|----------|
| 1.00000e+08 | 2.00243e-05 | 0.000292689 | 0.000404484 | 0.0433217 | 0.174695 |
| 1.00000e+07 | 0.000187250 | 0.00234336  | 0.0208214   | 0.106108  | 0.257047 |
| 1.00000e+06 | 0.00132131  | 0.0113051   | 0.0552765   | 0.154650  | 0.282380 |
| 100000.     | 0.00490731  | 0.0249417   | 0.0758740   | 0.159793  | 0.264427 |
| 10000.0     | 0.00801313  | 0.0301247   | 0.0785005   | 0.156337  | 0.254973 |
| 1000.00     | 0.00871911  | 0.0308209   | 0.0783119   | 0.154779  | 0.252417 |
| 100.000     | 0.00880491  | 0.0308789   | 0.0780630   | 0.153809  | 0.251094 |
| 10.0000     | 0.00881426  | 0.0308915   | 0.0780845   | 0.153849  | 0.251309 |

|             |            |           |           |          |          |
|-------------|------------|-----------|-----------|----------|----------|
| 1.00000     | 0.00881797 | 0.0309393 | 0.0783007 | 0.154245 | 0.251723 |
| 0.100000    | 0.00882710 | 0.0310083 | 0.0784644 | 0.154426 | 0.251848 |
| 0.0100000   | 0.00883935 | 0.0310498 | 0.0785177 | 0.154464 | 0.251868 |
| 0.00100000  | 0.00884634 | 0.0310615 | 0.0785271 | 0.154469 | 0.251870 |
| 0.000100000 | 0.00884818 | 0.0310633 | 0.0785282 | 0.154470 | 0.251870 |
| 1.00000e-05 | 0.00884845 | 0.0310635 | 0.0785283 | 0.154470 | 0.251870 |
| 1.00000e-06 | 0.00884847 | 0.0310635 | 0.0785283 | 0.154470 | 0.251870 |
| 1.00000e-07 | 0.00884848 | 0.0310635 | 0.0785283 | 0.154470 | 0.251870 |
| 1.00000e-08 | 0.00884848 | 0.0310635 | 0.0785283 | 0.154470 | 0.251870 |
| 1.00000e-09 | 0.00884848 | 0.0310635 | 0.0785283 | 0.154470 | 0.251870 |

Pa\K | 900.000 | 1000.00 | 1100.00 | 1200.00 | 1300.00

|             |          |          |          |          |          |
|-------------|----------|----------|----------|----------|----------|
| 1.00000e+08 | 0.322413 | 0.449803 | 0.559364 | 0.613535 | 0.631145 |
| 1.00000e+07 | 0.396804 | 0.519820 | 0.631441 | 0.699349 | 0.731127 |
| 1.00000e+06 | 0.405330 | 0.517279 | 0.612974 | 0.677367 | 0.718514 |
| 100000.     | 0.374302 | 0.478163 | 0.568241 | 0.639337 | 0.694644 |
| 10000.0     | 0.360799 | 0.462442 | 0.552689 | 0.628031 | 0.688587 |
| 1000.00     | 0.357863 | 0.459728 | 0.550456 | 0.626539 | 0.687858 |
| 100.000     | 0.357010 | 0.459467 | 0.550438 | 0.626586 | 0.687975 |
| 10.0000     | 0.357448 | 0.459874 | 0.550684 | 0.626716 | 0.688063 |
| 1.00000     | 0.357742 | 0.460029 | 0.550749 | 0.626743 | 0.688078 |
| 0.100000    | 0.357804 | 0.460053 | 0.550758 | 0.626746 | 0.688080 |
| 0.0100000   | 0.357812 | 0.460056 | 0.550759 | 0.626747 | 0.688080 |
| 0.00100000  | 0.357813 | 0.460056 | 0.550759 | 0.626747 | 0.688080 |
| 0.000100000 | 0.357813 | 0.460056 | 0.550759 | 0.626747 | 0.688080 |
| 1.00000e-05 | 0.357813 | 0.460056 | 0.550759 | 0.626747 | 0.688080 |
| 1.00000e-06 | 0.357813 | 0.460056 | 0.550759 | 0.626747 | 0.688080 |
| 1.00000e-07 | 0.357813 | 0.460056 | 0.550759 | 0.626747 | 0.688080 |
| 1.00000e-08 | 0.357813 | 0.460056 | 0.550759 | 0.626747 | 0.688080 |
| 1.00000e-09 | 0.357813 | 0.460056 | 0.550759 | 0.626747 | 0.688080 |

Pa\K | 1400.00 | 1500.00 | 1750.00 | 2000.00 | 2250.00

|             |          |          |          |          |          |
|-------------|----------|----------|----------|----------|----------|
| 1.00000e+08 | 0.639707 | 0.648393 | 0.777821 | 0.795044 | 0.812866 |
| 1.00000e+07 | 0.750036 | 0.766195 | 0.813004 | 0.842311 | 0.860590 |
| 1.00000e+06 | 0.750281 | 0.777581 | 0.832067 | 0.861888 | 0.875258 |
| 100000.     | 0.738866 | 0.774297 | 0.836402 | 0.865581 | 0.877690 |
| 10000.0     | 0.736374 | 0.773676 | 0.837177 | 0.866213 | 0.878111 |
| 1000.00     | 0.736177 | 0.773775 | 0.837460 | 0.866372 | 0.878188 |
| 100.000     | 0.736360 | 0.773985 | 0.837599 | 0.866418 | 0.878201 |
| 10.0000     | 0.736437 | 0.774055 | 0.837634 | 0.866427 | 0.878203 |
| 1.00000     | 0.736449 | 0.774066 | 0.837639 | 0.866428 | 0.878204 |
| 0.100000    | 0.736450 | 0.774067 | 0.837640 | 0.866428 | 0.878204 |
| 0.0100000   | 0.736450 | 0.774067 | 0.837640 | 0.866428 | 0.878204 |
| 0.00100000  | 0.736450 | 0.774067 | 0.837640 | 0.866428 | 0.878204 |
| 0.000100000 | 0.736450 | 0.774067 | 0.837640 | 0.866428 | 0.878204 |
| 1.00000e-05 | 0.736450 | 0.774067 | 0.837640 | 0.866428 | 0.878204 |
| 1.00000e-06 | 0.736450 | 0.774067 | 0.837640 | 0.866428 | 0.878204 |
| 1.00000e-07 | 0.736450 | 0.774067 | 0.837640 | 0.866428 | 0.878204 |
| 1.00000e-08 | 0.736450 | 0.774067 | 0.837640 | 0.866428 | 0.878204 |
| 1.00000e-09 | 0.736450 | 0.774067 | 0.837640 | 0.866428 | 0.878204 |

Pa\K | 2500.00 | 2750.00 | 3000.00 | 3250.00 | 3500.00

|             |          |          |          |          |          |
|-------------|----------|----------|----------|----------|----------|
| 1.00000e+08 | 0.826889 | 0.835125 | 0.837523 | 0.835024 | 0.828853 |
| 1.00000e+07 | 0.868133 | 0.867648 | 0.861754 | 0.852414 | 0.840990 |
| 1.00000e+06 | 0.877996 | 0.874024 | 0.865827 | 0.855009 | 0.842637 |
| 100000.     | 0.879537 | 0.875005 | 0.866455 | 0.855410 | 0.842888 |
| 10000.0     | 0.879799 | 0.875165 | 0.866553 | 0.855468 | 0.842923 |
| 1000.00     | 0.879838 | 0.875186 | 0.866564 | 0.855475 | 0.842927 |
| 100.000     | 0.879843 | 0.875188 | 0.866566 | 0.855476 | 0.842928 |
| 10.0000     | 0.879843 | 0.875189 | 0.866566 | 0.855476 | 0.842928 |
| 1.00000     | 0.879843 | 0.875189 | 0.866566 | 0.855476 | 0.842928 |
| 0.100000    | 0.879843 | 0.875189 | 0.866566 | 0.855476 | 0.842928 |
| 0.0100000   | 0.879843 | 0.875189 | 0.866566 | 0.855476 | 0.842928 |
| 0.00100000  | 0.879843 | 0.875189 | 0.866566 | 0.855476 | 0.842928 |
| 0.000100000 | 0.879843 | 0.875189 | 0.866566 | 0.855476 | 0.842928 |
| 1.00000e-05 | 0.879843 | 0.875189 | 0.866566 | 0.855476 | 0.842928 |
| 1.00000e-06 | 0.879843 | 0.875189 | 0.866566 | 0.855476 | 0.842928 |
| 1.00000e-07 | 0.879843 | 0.875189 | 0.866566 | 0.855476 | 0.842928 |
| 1.00000e-08 | 0.879843 | 0.875189 | 0.866566 | 0.855476 | 0.842928 |
| 1.00000e-09 | 0.879843 | 0.875189 | 0.866566 | 0.855476 | 0.842928 |

Pa\K | 3750.00 | 4000.00

|             |          |          |
|-------------|----------|----------|
| 1.00000e+08 | 0.820144 | 0.809823 |
| 1.00000e+07 | 0.828404 | 0.815283 |
| 1.00000e+06 | 0.829436 | 0.815911 |
| 100000.     | 0.829590 | 0.816003 |



|             |          |          |
|-------------|----------|----------|
| 10000.0     | 0.829611 | 0.816015 |
| 1000.00     | 0.829613 | 0.816016 |
| 100.000     | 0.829614 | 0.816017 |
| 10.0000     | 0.829614 | 0.816017 |
| 1.00000     | 0.829614 | 0.816017 |
| 0.100000    | 0.829614 | 0.816017 |
| 0.0100000   | 0.829614 | 0.816017 |
| 0.00100000  | 0.829614 | 0.816017 |
| 0.000100000 | 0.829614 | 0.816017 |
| 1.00000e-05 | 0.829614 | 0.816017 |
| 1.00000e-06 | 0.829614 | 0.816017 |
| 1.00000e-07 | 0.829614 | 0.816017 |
| 1.00000e-08 | 0.829614 | 0.816017 |
| 1.00000e-09 | 0.829614 | 0.816017 |
